# Supplementary material for: Spaced functionalization of poly(ionic liquid)s for boosting the catalytic conversion of CO2 into cyclic carbonates
Source: Royal Society of Chemistry journal article supplement (doi:10.1039/d4su00661e), 2025-01-01
Supplement: d4su00661e1.pdf [file d4su00661e1.pdf]

```
Entering Gaussian System, Link 0=/opt/gaussian/g09/g09
Initial command:
/opt/gaussian/g09/l1.exe "/tmp/Gau-7246.inp" -scrdir="/tmp/"
Entering Link 1 = /opt/gaussian/g09/l1.exe PID=      7247.
```

Copyright (c) 1988,1990,1992,1993,1995,1998,2003,2009,2013,  
Gaussian, Inc. All Rights Reserved.

This is part of the Gaussian(R) 09 program. It is based on the Gaussian(R) 03 system (copyright 2003, Gaussian, Inc.), the Gaussian(R) 98 system (copyright 1998, Gaussian, Inc.), the Gaussian(R) 94 system (copyright 1995, Gaussian, Inc.), the Gaussian 92(TM) system (copyright 1992, Gaussian, Inc.), the Gaussian 90(TM) system (copyright 1990, Gaussian, Inc.), the Gaussian 88(TM) system (copyright 1988, Gaussian, Inc.), the Gaussian 86(TM) system (copyright 1986, Carnegie Mellon University), and the Gaussian 82(TM) system (copyright 1983, Carnegie Mellon University). Gaussian is a federally registered trademark of Gaussian, Inc.

This software contains proprietary and confidential information, including trade secrets, belonging to Gaussian, Inc.

This software is provided under written license and may be used, copied, transmitted, or stored only in accord with that written license.

The following legend is applicable only to US Government contracts under FAR:

#### RESTRICTED RIGHTS LEGEND

Use, reproduction and disclosure by the US Government is subject to restrictions as set forth in subparagraphs (a) and (c) of the Commercial Computer Software - Restricted Rights clause in FAR 52.227-19.

Gaussian, Inc.  
340 Quinnipiac St., Bldg. 40, Wallingford CT 06492

-----  
Warning -- This program may not be used in any manner that competes with the business of Gaussian, Inc. or will provide

assistance to any competitor of Gaussian, Inc. The licensee of this program is prohibited from giving any competitor of Gaussian, Inc. access to this program. By using this program, the user acknowledges that Gaussian, Inc. is engaged in the business of creating and licensing software in the field of computational chemistry and represents and warrants to the licensee that it is not a competitor of Gaussian, Inc. and that it will not use this program in any manner prohibited above.

-----

Cite this work as:

Gaussian 09, Revision D.01,  
M. J. Frisch, G. W. Trucks, H. B. Schlegel, G. E. Scuseria,  
M. A. Robb, J. R. Cheeseman, G. Scalmani, V. Barone, B. Mennucci,  
G. A. Petersson, H. Nakatsuji, M. Caricato, X. Li, H. P. Hratchian,  
A. F. Izmaylov, J. Bloino, G. Zheng, J. L. Sonnenberg, M. Hada,  
M. Ehara, K. Toyota, R. Fukuda, J. Hasegawa, M. Ishida, T. Nakajima,  
Y. Honda, O. Kitao, H. Nakai, T. Vreven, J. A. Montgomery, Jr.,  
J. E. Peralta, F. Ogliaro, M. Bearpark, J. J. Heyd, E. Brothers,  
K. N. Kudin, V. N. Staroverov, T. Keith, R. Kobayashi, J. Normand,  
K. Raghavachari, A. Rendell, J. C. Burant, S. S. Iyengar, J. Tomasi,  
M. Cossi, N. Rega, J. M. Millam, M. Klene, J. E. Knox, J. B. Cross,  
V. Bakken, C. Adamo, J. Jaramillo, R. Gomperts, R. E. Stratmann,  
O. Yazyev, A. J. Austin, R. Cammi, C. Pomelli, J. W. Ochterski,  
R. L. Martin, K. Morokuma, V. G. Zakrzewski, G. A. Voth,  
P. Salvador, J. J. Dannenberg, S. Dapprich, A. D. Daniels,  
O. Farkas, J. B. Foresman, J. V. Ortiz, J. Cioslowski,  
and D. J. Fox, Gaussian, Inc., Wallingford CT, 2013.

\*\*\*\*\*

Gaussian 09: EM64L-G09RevD.01 24-Apr-2013  
25-Jul-2024

\*\*\*\*\*

```
%chk=/home/suqian/liuwen/qianmengshijie/nh2po/nh2po.chk
%mem=1000MB
%nprocl=1
Will use up to 1 processors via Linda.
%nprocs=8
Will use up to 8 processors via shared memory.
```

-----  
# opt b3lyp/6-311++g(d,p)  
-----

1/14=-1,18=20,19=15,26=3,38=1/1,3;

2/9=110,12=2,17=6,18=5,40=1/2;  
 3/5=4,6=6,7=1111,11=2,16=1,25=1,30=1,71=1,74=-5/1,2,3;  
 4//1;  
 5/5=2,38=5/2;  
 6/7=2,8=2,9=2,10=2,28=1/1;  
 7//1,2,3,16;  
 1/14=-1,18=20,19=15,26=3/3(2);  
 2/9=110/2;  
 99//99;  
 2/9=110/2;  
 3/5=4,6=6,7=1111,11=2,16=1,25=1,30=1,71=1,74=-5/1,2,3;  
 4/5=5,16=3,69=1/1;  
 5/5=2,38=5/2;  
 7//1,2,3,16;  
 1/14=-1,18=20,19=15,26=3/3(-5);  
 2/9=110/2;  
 6/7=2,8=2,9=2,10=2,19=2,28=1/1;  
 99/9=1/99;

--

oh

--

Symbolic Z-matrix:

Charge = 0 Multiplicity = 1

|    |          |          |          |
|----|----------|----------|----------|
| C  | -2.91419 | 2.12334  | -0.2483  |
| C  | -3.85466 | 1.19291  | 0.05692  |
| N  | -3.20378 | -0.03601 | 0.10333  |
| C  | -1.8988  | 0.15629  | -0.16611 |
| N  | -1.70404 | 1.46193  | -0.38739 |
| C  | -0.39101 | 2.08624  | -0.67358 |
| C  | 0.29263  | 2.65867  | 0.572    |
| H  | -3.00293 | 3.18709  | -0.38792 |
| H  | -4.90946 | 1.30057  | 0.2336   |
| H  | 0.23352  | 1.30737  | -1.11469 |
| H  | -0.54793 | 2.8712   | -1.4148  |
| H  | -0.31528 | 3.47456  | 0.97603  |
| H  | 0.3334   | 1.86621  | 1.33419  |
| Br | 0.40516  | -2.15891 | -0.25456 |
| H  | -1.11029 | -0.63607 | -0.19638 |
| C  | -3.73494 | -1.32414 | 0.39304  |
| C  | -5.00632 | -1.55933 | 0.68646  |
| H  | -2.97118 | -2.09322 | 0.35453  |
| H  | -5.31826 | -2.57213 | 0.89926  |
| H  | -5.76501 | -0.78758 | 0.72962  |
| N  | 1.59467  | 3.18771  | 0.17116  |

|   |         |          |          |
|---|---------|----------|----------|
| H | 1.97543 | 3.79681  | 0.88553  |
| H | 2.25701 | 2.42642  | 0.0289   |
| C | 3.87516 | -0.19996 | -1.05837 |
| C | 3.86857 | -0.40772 | 0.39187  |
| O | 3.59583 | 0.90215  | -0.16751 |
| H | 4.82215 | -0.11736 | -1.58739 |
| H | 3.02604 | -0.55433 | -1.63527 |
| H | 2.98013 | -0.89124 | 0.7922   |
| C | 5.13104 | -0.53056 | 1.19865  |
| H | 4.99796 | -0.09798 | 2.19481  |
| H | 5.39202 | -1.58587 | 1.32476  |
| H | 5.96245 | -0.0197  | 0.70765  |

Add virtual bond connecting atoms O26 and H23 Dist= 3.85D+00.

Add virtual bond connecting atoms H15 and Br14 Dist= 4.06D+00.

GradGradGradGradGradGradGradGradGradGradGradGradGradGradGradGradGradGradGrad

Berny optimization.

Initialization pass.

-----  
! Initial Parameters !  
! (Angstroms and Degrees) !

| ! Name | Definition | Value  | Derivative Info. | ! |
|--------|------------|--------|------------------|---|
| ! R1   | R(1,2)     | 1.3577 | estimate D2E/DX2 | ! |
| ! R2   | R(1,5)     | 1.3861 | estimate D2E/DX2 | ! |
| ! R3   | R(1,8)     | 1.0765 | estimate D2E/DX2 | ! |
| ! R4   | R(2,3)     | 1.3914 | estimate D2E/DX2 | ! |
| ! R5   | R(2,9)     | 1.0749 | estimate D2E/DX2 | ! |
| ! R6   | R(3,4)     | 1.3463 | estimate D2E/DX2 | ! |
| ! R7   | R(3,16)    | 1.4231 | estimate D2E/DX2 | ! |
| ! R8   | R(4,5)     | 1.3385 | estimate D2E/DX2 | ! |
| ! R9   | R(4,15)    | 1.1183 | estimate D2E/DX2 | ! |
| ! R10  | R(5,6)     | 1.4818 | estimate D2E/DX2 | ! |
| ! R11  | R(6,7)     | 1.5318 | estimate D2E/DX2 | ! |
| ! R12  | R(6,10)    | 1.0915 | estimate D2E/DX2 | ! |
| ! R13  | R(6,11)    | 1.091  | estimate D2E/DX2 | ! |
| ! R14  | R(7,12)    | 1.0947 | estimate D2E/DX2 | ! |
| ! R15  | R(7,13)    | 1.1003 | estimate D2E/DX2 | ! |
| ! R16  | R(7,21)    | 1.4615 | estimate D2E/DX2 | ! |
| ! R17  | R(14,15)   | 2.1492 | estimate D2E/DX2 | ! |
| ! R18  | R(16,17)   | 1.3258 | estimate D2E/DX2 | ! |
| ! R19  | R(16,18)   | 1.0846 | estimate D2E/DX2 | ! |

|       |            |          |                  |   |
|-------|------------|----------|------------------|---|
| ! R20 | R(17,19)   | 1.0809   | estimate D2E/DX2 | ! |
| ! R21 | R(17,20)   | 1.0831   | estimate D2E/DX2 | ! |
| ! R22 | R(21,22)   | 1.0131   | estimate D2E/DX2 | ! |
| ! R23 | R(21,23)   | 1.0191   | estimate D2E/DX2 | ! |
| ! R24 | R(23,26)   | 2.0382   | estimate D2E/DX2 | ! |
| ! R25 | R(24,25)   | 1.4651   | estimate D2E/DX2 | ! |
| ! R26 | R(24,26)   | 1.4444   | estimate D2E/DX2 | ! |
| ! R27 | R(24,27)   | 1.0879   | estimate D2E/DX2 | ! |
| ! R28 | R(24,28)   | 1.086    | estimate D2E/DX2 | ! |
| ! R29 | R(25,26)   | 1.4502   | estimate D2E/DX2 | ! |
| ! R30 | R(25,29)   | 1.0878   | estimate D2E/DX2 | ! |
| ! R31 | R(25,30)   | 1.5033   | estimate D2E/DX2 | ! |
| ! R32 | R(30,31)   | 1.0942   | estimate D2E/DX2 | ! |
| ! R33 | R(30,32)   | 1.0944   | estimate D2E/DX2 | ! |
| ! R34 | R(30,33)   | 1.0924   | estimate D2E/DX2 | ! |
| ! A1  | A(2,1,5)   | 107.4764 | estimate D2E/DX2 | ! |
| ! A2  | A(2,1,8)   | 130.4828 | estimate D2E/DX2 | ! |
| ! A3  | A(5,1,8)   | 122.0364 | estimate D2E/DX2 | ! |
| ! A4  | A(1,2,3)   | 106.7822 | estimate D2E/DX2 | ! |
| ! A5  | A(1,2,9)   | 130.3946 | estimate D2E/DX2 | ! |
| ! A6  | A(3,2,9)   | 122.8214 | estimate D2E/DX2 | ! |
| ! A7  | A(2,3,4)   | 108.6988 | estimate D2E/DX2 | ! |
| ! A8  | A(2,3,16)  | 129.1699 | estimate D2E/DX2 | ! |
| ! A9  | A(4,3,16)  | 122.127  | estimate D2E/DX2 | ! |
| ! A10 | A(3,4,5)   | 108.2678 | estimate D2E/DX2 | ! |
| ! A11 | A(3,4,15)  | 125.993  | estimate D2E/DX2 | ! |
| ! A12 | A(5,4,15)  | 125.7388 | estimate D2E/DX2 | ! |
| ! A13 | A(1,5,4)   | 108.7737 | estimate D2E/DX2 | ! |
| ! A14 | A(1,5,6)   | 126.296  | estimate D2E/DX2 | ! |
| ! A15 | A(4,5,6)   | 124.8792 | estimate D2E/DX2 | ! |
| ! A16 | A(5,6,7)   | 113.3195 | estimate D2E/DX2 | ! |
| ! A17 | A(5,6,10)  | 106.5243 | estimate D2E/DX2 | ! |
| ! A18 | A(5,6,11)  | 107.8737 | estimate D2E/DX2 | ! |
| ! A19 | A(7,6,10)  | 109.8726 | estimate D2E/DX2 | ! |
| ! A20 | A(7,6,11)  | 110.3514 | estimate D2E/DX2 | ! |
| ! A21 | A(10,6,11) | 108.7338 | estimate D2E/DX2 | ! |
| ! A22 | A(6,7,12)  | 109.3158 | estimate D2E/DX2 | ! |
| ! A23 | A(6,7,13)  | 108.0997 | estimate D2E/DX2 | ! |
| ! A24 | A(6,7,21)  | 108.0509 | estimate D2E/DX2 | ! |
| ! A25 | A(12,7,13) | 107.5591 | estimate D2E/DX2 | ! |
| ! A26 | A(12,7,21) | 109.0362 | estimate D2E/DX2 | ! |
| ! A27 | A(13,7,21) | 114.6902 | estimate D2E/DX2 | ! |
| ! A28 | A(3,16,17) | 124.2993 | estimate D2E/DX2 | ! |
| ! A29 | A(3,16,18) | 111.8256 | estimate D2E/DX2 | ! |

|       |                  |           |                  |   |
|-------|------------------|-----------|------------------|---|
| ! A30 | A(17,16,18)      | 123.8726  | estimate D2E/DX2 | ! |
| ! A31 | A(16,17,19)      | 119.1122  | estimate D2E/DX2 | ! |
| ! A32 | A(16,17,20)      | 123.6512  | estimate D2E/DX2 | ! |
| ! A33 | A(19,17,20)      | 117.2365  | estimate D2E/DX2 | ! |
| ! A34 | A(7,21,22)       | 111.0438  | estimate D2E/DX2 | ! |
| ! A35 | A(7,21,23)       | 110.2983  | estimate D2E/DX2 | ! |
| ! A36 | A(22,21,23)      | 107.6569  | estimate D2E/DX2 | ! |
| ! A37 | A(25,24,27)      | 119.7389  | estimate D2E/DX2 | ! |
| ! A38 | A(25,24,28)      | 118.4277  | estimate D2E/DX2 | ! |
| ! A39 | A(26,24,27)      | 114.2259  | estimate D2E/DX2 | ! |
| ! A40 | A(26,24,28)      | 115.1767  | estimate D2E/DX2 | ! |
| ! A41 | A(27,24,28)      | 116.556   | estimate D2E/DX2 | ! |
| ! A42 | A(24,25,29)      | 115.5303  | estimate D2E/DX2 | ! |
| ! A43 | A(24,25,30)      | 122.6202  | estimate D2E/DX2 | ! |
| ! A44 | A(26,25,29)      | 112.9435  | estimate D2E/DX2 | ! |
| ! A45 | A(26,25,30)      | 116.0254  | estimate D2E/DX2 | ! |
| ! A46 | A(29,25,30)      | 116.8758  | estimate D2E/DX2 | ! |
| ! A47 | A(23,26,24)      | 139.2071  | estimate D2E/DX2 | ! |
| ! A48 | A(23,26,25)      | 139.6265  | estimate D2E/DX2 | ! |
| ! A49 | A(25,30,31)      | 110.7426  | estimate D2E/DX2 | ! |
| ! A50 | A(25,30,32)      | 109.9324  | estimate D2E/DX2 | ! |
| ! A51 | A(25,30,33)      | 111.0846  | estimate D2E/DX2 | ! |
| ! A52 | A(31,30,32)      | 107.7776  | estimate D2E/DX2 | ! |
| ! A53 | A(31,30,33)      | 108.4757  | estimate D2E/DX2 | ! |
| ! A54 | A(32,30,33)      | 108.7384  | estimate D2E/DX2 | ! |
| ! A55 | L(4,15,14,7,-1)  | 180.0     | estimate D2E/DX2 | ! |
| ! A56 | L(21,23,26,3,-1) | 180.3258  | estimate D2E/DX2 | ! |
| ! A57 | L(4,15,14,7,-2)  | 180.0     | estimate D2E/DX2 | ! |
| ! A58 | L(21,23,26,3,-2) | 182.599   | estimate D2E/DX2 | ! |
| ! D1  | D(5,1,2,3)       | 0.086     | estimate D2E/DX2 | ! |
| ! D2  | D(5,1,2,9)       | -179.4183 | estimate D2E/DX2 | ! |
| ! D3  | D(8,1,2,3)       | 179.3187  | estimate D2E/DX2 | ! |
| ! D4  | D(8,1,2,9)       | -0.1856   | estimate D2E/DX2 | ! |
| ! D5  | D(2,1,5,4)       | -0.2719   | estimate D2E/DX2 | ! |
| ! D6  | D(2,1,5,6)       | -177.7639 | estimate D2E/DX2 | ! |
| ! D7  | D(8,1,5,4)       | -179.5834 | estimate D2E/DX2 | ! |
| ! D8  | D(8,1,5,6)       | 2.9246    | estimate D2E/DX2 | ! |
| ! D9  | D(1,2,3,4)       | 0.1276    | estimate D2E/DX2 | ! |
| ! D10 | D(1,2,3,16)      | 179.3723  | estimate D2E/DX2 | ! |
| ! D11 | D(9,2,3,4)       | 179.6784  | estimate D2E/DX2 | ! |
| ! D12 | D(9,2,3,16)      | -1.0769   | estimate D2E/DX2 | ! |
| ! D13 | D(2,3,4,5)       | -0.2983   | estimate D2E/DX2 | ! |
| ! D14 | D(2,3,4,15)      | 179.4728  | estimate D2E/DX2 | ! |
| ! D15 | D(16,3,4,5)      | -179.6069 | estimate D2E/DX2 | ! |

|       |                |           |                  |   |
|-------|----------------|-----------|------------------|---|
| ! D16 | D(16,3,4,15)   | 0.1642    | estimate D2E/DX2 | ! |
| ! D17 | D(2,3,16,17)   | -0.3663   | estimate D2E/DX2 | ! |
| ! D18 | D(2,3,16,18)   | -179.8204 | estimate D2E/DX2 | ! |
| ! D19 | D(4,3,16,17)   | 178.789   | estimate D2E/DX2 | ! |
| ! D20 | D(4,3,16,18)   | -0.6651   | estimate D2E/DX2 | ! |
| ! D21 | D(3,4,5,1)     | 0.3523    | estimate D2E/DX2 | ! |
| ! D22 | D(3,4,5,6)     | 177.8884  | estimate D2E/DX2 | ! |
| ! D23 | D(15,4,5,1)    | -179.4195 | estimate D2E/DX2 | ! |
| ! D24 | D(15,4,5,6)    | -1.8835   | estimate D2E/DX2 | ! |
| ! D25 | D(1,5,6,7)     | 81.8758   | estimate D2E/DX2 | ! |
| ! D26 | D(1,5,6,10)    | -157.1934 | estimate D2E/DX2 | ! |
| ! D27 | D(1,5,6,11)    | -40.5992  | estimate D2E/DX2 | ! |
| ! D28 | D(4,5,6,7)     | -95.2293  | estimate D2E/DX2 | ! |
| ! D29 | D(4,5,6,10)    | 25.7014   | estimate D2E/DX2 | ! |
| ! D30 | D(4,5,6,11)    | 142.2957  | estimate D2E/DX2 | ! |
| ! D31 | D(5,6,7,12)    | -63.9732  | estimate D2E/DX2 | ! |
| ! D32 | D(5,6,7,13)    | 52.8274   | estimate D2E/DX2 | ! |
| ! D33 | D(5,6,7,21)    | 177.4888  | estimate D2E/DX2 | ! |
| ! D34 | D(10,6,7,12)   | 177.0048  | estimate D2E/DX2 | ! |
| ! D35 | D(10,6,7,13)   | -66.1945  | estimate D2E/DX2 | ! |
| ! D36 | D(10,6,7,21)   | 58.4669   | estimate D2E/DX2 | ! |
| ! D37 | D(11,6,7,12)   | 57.116    | estimate D2E/DX2 | ! |
| ! D38 | D(11,6,7,13)   | 173.9166  | estimate D2E/DX2 | ! |
| ! D39 | D(11,6,7,21)   | -61.422   | estimate D2E/DX2 | ! |
| ! D40 | D(6,7,21,22)   | 164.3645  | estimate D2E/DX2 | ! |
| ! D41 | D(6,7,21,23)   | -76.3727  | estimate D2E/DX2 | ! |
| ! D42 | D(12,7,21,22)  | 45.6484   | estimate D2E/DX2 | ! |
| ! D43 | D(12,7,21,23)  | 164.9112  | estimate D2E/DX2 | ! |
| ! D44 | D(13,7,21,22)  | -75.0074  | estimate D2E/DX2 | ! |
| ! D45 | D(13,7,21,23)  | 44.2554   | estimate D2E/DX2 | ! |
| ! D46 | D(3,16,17,19)  | -179.6078 | estimate D2E/DX2 | ! |
| ! D47 | D(3,16,17,20)  | 0.2359    | estimate D2E/DX2 | ! |
| ! D48 | D(18,16,17,19) | -0.2182   | estimate D2E/DX2 | ! |
| ! D49 | D(18,16,17,20) | 179.6255  | estimate D2E/DX2 | ! |
| ! D50 | D(7,21,26,24)  | 70.9474   | estimate D2E/DX2 | ! |
| ! D51 | D(7,21,26,25)  | -31.507   | estimate D2E/DX2 | ! |
| ! D52 | D(22,21,26,24) | -168.6831 | estimate D2E/DX2 | ! |
| ! D53 | D(22,21,26,25) | 88.8624   | estimate D2E/DX2 | ! |
| ! D54 | D(27,24,25,29) | -154.9563 | estimate D2E/DX2 | ! |
| ! D55 | D(27,24,25,30) | -0.7341   | estimate D2E/DX2 | ! |
| ! D56 | D(28,24,25,29) | -1.4815   | estimate D2E/DX2 | ! |
| ! D57 | D(28,24,25,30) | 152.7407  | estimate D2E/DX2 | ! |
| ! D58 | D(27,24,26,23) | 114.9389  | estimate D2E/DX2 | ! |
| ! D59 | D(28,24,26,23) | -23.9313  | estimate D2E/DX2 | ! |

|       |                |           |                  |   |
|-------|----------------|-----------|------------------|---|
| ! D60 | D(29,25,26,23) | 25.9221   | estimate D2E/DX2 | ! |
| ! D61 | D(30,25,26,23) | -112.9272 | estimate D2E/DX2 | ! |
| ! D62 | D(24,25,30,31) | 146.233   | estimate D2E/DX2 | ! |
| ! D63 | D(24,25,30,32) | -94.779   | estimate D2E/DX2 | ! |
| ! D64 | D(24,25,30,33) | 25.6225   | estimate D2E/DX2 | ! |
| ! D65 | D(26,25,30,31) | 77.3392   | estimate D2E/DX2 | ! |
| ! D66 | D(26,25,30,32) | -163.6728 | estimate D2E/DX2 | ! |
| ! D67 | D(26,25,30,33) | -43.2713  | estimate D2E/DX2 | ! |
| ! D68 | D(29,25,30,31) | -59.8669  | estimate D2E/DX2 | ! |
| ! D69 | D(29,25,30,32) | 59.1211   | estimate D2E/DX2 | ! |
| ! D70 | D(29,25,30,33) | 179.5225  | estimate D2E/DX2 | ! |

-----  
Trust Radius=3.00D-01 FncErr=1.00D-07 GrdErr=1.00D-06

Number of steps in this run= 172 maximum allowed number of steps= 198.

GradGradGradGradGradGradGradGradGradGradGradGradGradGradGradGradGradGradGrad

Input orientation:

| -----  |        |        |                         |           |           |  |
|--------|--------|--------|-------------------------|-----------|-----------|--|
| Center | Atomic | Atomic | Coordinates (Angstroms) |           |           |  |
| Number | Number | Type   | X                       | Y         | Z         |  |
| -----  |        |        |                         |           |           |  |
| 1      | 6      | 0      | -2.914191               | 2.123340  | -0.248301 |  |
| 2      | 6      | 0      | -3.854662               | 1.192906  | 0.056918  |  |
| 3      | 7      | 0      | -3.203779               | -0.036010 | 0.103331  |  |
| 4      | 6      | 0      | -1.898802               | 0.156293  | -0.166113 |  |
| 5      | 7      | 0      | -1.704037               | 1.461926  | -0.387385 |  |
| 6      | 6      | 0      | -0.391013               | 2.086245  | -0.673582 |  |
| 7      | 6      | 0      | 0.292634                | 2.658673  | 0.571997  |  |
| 8      | 1      | 0      | -3.002927               | 3.187087  | -0.387918 |  |
| 9      | 1      | 0      | -4.909460               | 1.300573  | 0.233596  |  |
| 10     | 1      | 0      | 0.233516                | 1.307365  | -1.114695 |  |
| 11     | 1      | 0      | -0.547932               | 2.871199  | -1.414796 |  |
| 12     | 1      | 0      | -0.315275               | 3.474564  | 0.976030  |  |
| 13     | 1      | 0      | 0.333399                | 1.866212  | 1.334193  |  |
| 14     | 35     | 0      | 0.405161                | -2.158911 | -0.254560 |  |
| 15     | 1      | 0      | -1.110291               | -0.636065 | -0.196383 |  |
| 16     | 6      | 0      | -3.734936               | -1.324139 | 0.393040  |  |
| 17     | 6      | 0      | -5.006323               | -1.559332 | 0.686458  |  |
| 18     | 1      | 0      | -2.971180               | -2.093223 | 0.354528  |  |
| 19     | 1      | 0      | -5.318257               | -2.572131 | 0.899258  |  |
| 20     | 1      | 0      | -5.765007               | -0.787576 | 0.729615  |  |
| 21     | 7      | 0      | 1.594674                | 3.187707  | 0.171156  |  |
| 22     | 1      | 0      | 1.975430                | 3.796807  | 0.885534  |  |
| 23     | 1      | 0      | 2.257006                | 2.426415  | 0.028904  |  |



|    |   |   |          |           |           |
|----|---|---|----------|-----------|-----------|
| 24 | 6 | 0 | 3.875163 | -0.199956 | -1.058367 |
| 25 | 6 | 0 | 3.868574 | -0.407715 | 0.391865  |
| 26 | 8 | 0 | 3.595834 | 0.902151  | -0.167513 |
| 27 | 1 | 0 | 4.822154 | -0.117360 | -1.587387 |
| 28 | 1 | 0 | 3.026036 | -0.554333 | -1.635271 |
| 29 | 1 | 0 | 2.980132 | -0.891236 | 0.792195  |
| 30 | 6 | 0 | 5.131040 | -0.530555 | 1.198646  |
| 31 | 1 | 0 | 4.997960 | -0.097979 | 2.194812  |
| 32 | 1 | 0 | 5.392020 | -1.585874 | 1.324758  |
| 33 | 1 | 0 | 5.962453 | -0.019700 | 0.707652  |

-----  
Distance matrix (angstroms):

|    |    | 1        | 2        | 3        | 4        | 5        |
|----|----|----------|----------|----------|----------|----------|
| 1  | C  | 0.000000 |          |          |          |          |
| 2  | C  | 1.357701 | 0.000000 |          |          |          |
| 3  | N  | 2.206875 | 1.391416 | 0.000000 |          |          |
| 4  | C  | 2.215185 | 2.224792 | 1.346308 | 0.000000 |          |
| 5  | N  | 1.386104 | 2.212457 | 2.175739 | 1.338496 | 0.000000 |
| 6  | C  | 2.559036 | 3.650829 | 3.608215 | 2.501133 | 1.481795 |
| 7  | C  | 3.353088 | 4.428752 | 4.439129 | 3.407213 | 2.517799 |
| 8  | H  | 1.076534 | 2.213615 | 3.266500 | 3.233265 | 2.159467 |
| 9  | H  | 2.211395 | 1.074898 | 2.170892 | 3.245490 | 3.269004 |
| 10 | H  | 3.365191 | 4.254289 | 3.886289 | 2.602221 | 2.075327 |
| 11 | H  | 2.742113 | 3.989621 | 4.220201 | 3.279447 | 2.092415 |
| 12 | H  | 3.174769 | 4.310219 | 4.629167 | 3.850061 | 2.799691 |
| 13 | H  | 3.621773 | 4.429969 | 4.200607 | 3.187077 | 2.697855 |
| 14 | Br | 5.418100 | 5.429345 | 4.202290 | 3.267451 | 4.192472 |
| 15 | H  | 3.297130 | 3.307698 | 2.198314 | 1.118256 | 2.188740 |
| 16 | C  | 3.601396 | 2.542209 | 1.423143 | 2.423988 | 3.534936 |
| 17 | C  | 4.337380 | 3.049173 | 2.430990 | 3.650607 | 4.602850 |
| 18 | H  | 4.259819 | 3.415810 | 2.085504 | 2.545856 | 3.846449 |
| 19 | H  | 5.398507 | 4.126397 | 3.396532 | 4.502442 | 5.567015 |
| 20 | H  | 4.190096 | 2.832710 | 2.741710 | 4.079309 | 4.774874 |
| 21 | N  | 4.651740 | 5.804097 | 5.781185 | 4.637628 | 3.764543 |
| 22 | H  | 5.290980 | 6.438702 | 6.490496 | 5.419315 | 4.539875 |
| 23 | H  | 5.187483 | 6.234967 | 5.990764 | 4.739433 | 4.097975 |
| 24 | C  | 7.221443 | 7.933103 | 7.175503 | 5.853350 | 5.859995 |
| 25 | C  | 7.267871 | 7.894463 | 7.087989 | 5.821690 | 5.929315 |
| 26 | O  | 6.624066 | 7.459544 | 6.869370 | 5.545028 | 5.333885 |
| 27 | H  | 8.164859 | 8.927915 | 8.202484 | 6.875039 | 6.820947 |
| 28 | H  | 6.661825 | 7.297969 | 6.488605 | 5.188202 | 5.291135 |
| 29 | H  | 6.701742 | 7.183223 | 6.280661 | 5.081306 | 5.373101 |
| 30 | C  | 8.594333 | 9.220450 | 8.421015 | 7.193956 | 7.294090 |
| 31 | H  | 8.573517 | 9.198146 | 8.464435 | 7.294104 | 7.349681 |

|    |    |          |          |          |           |          |
|----|----|----------|----------|----------|-----------|----------|
| 32 | H  | 9.231789 | 9.738078 | 8.819395 | 7.642900  | 7.910407 |
| 33 | H  | 9.181573 | 9.913103 | 9.186146 | 7.911622  | 7.884757 |
|    |    | 6        | 7        | 8        | 9         | 10       |
| 6  | C  | 0.000000 |          |          |           |          |
| 7  | C  | 1.531834 | 0.000000 |          |           |          |
| 8  | H  | 2.848781 | 3.472950 | 0.000000 |           |          |
| 9  | H  | 4.675106 | 5.387089 | 2.753195 | 0.000000  |          |
| 10 | H  | 1.091454 | 2.162050 | 3.812627 | 5.316779  | 0.000000 |
| 11 | H  | 1.090951 | 2.167733 | 2.679788 | 4.920060  | 1.773781 |
| 12 | H  | 2.157403 | 1.094748 | 3.027618 | 5.136534  | 3.060891 |
| 13 | H  | 2.145774 | 1.100272 | 3.980132 | 5.386913  | 2.513830 |
| 14 | Br | 4.339449 | 4.889271 | 6.341336 | 6.360151  | 3.575523 |
| 15 | H  | 2.855880 | 3.662500 | 4.270275 | 4.285923  | 2.534962 |
| 16 | C  | 4.893896 | 5.667110 | 4.636474 | 2.879938  | 4.994666 |
| 17 | C  | 6.036640 | 6.773744 | 5.262734 | 2.897158  | 6.238431 |
| 18 | H  | 5.018189 | 5.768907 | 5.332345 | 3.910167  | 4.898234 |
| 19 | H  | 6.960749 | 7.677923 | 6.339256 | 3.950703  | 7.066023 |
| 20 | H  | 6.253609 | 6.971118 | 4.967485 | 2.310490  | 6.616082 |
| 21 | N  | 2.422757 | 1.461458 | 4.631468 | 6.772661  | 2.653648 |
| 22 | H  | 3.310123 | 2.055592 | 5.174696 | 7.352409  | 3.637651 |
| 23 | H  | 2.760653 | 2.051256 | 5.330972 | 7.257248  | 2.579652 |
| 24 | C  | 4.855413 | 4.864603 | 7.696082 | 9.005018  | 3.941673 |
| 25 | C  | 5.049663 | 4.714078 | 7.794112 | 8.944114  | 4.292420 |
| 26 | O  | 4.189646 | 3.813578 | 6.986641 | 8.524063  | 3.516608 |
| 27 | H  | 5.733064 | 5.734619 | 8.578461 | 10.001541 | 4.827927 |
| 28 | H  | 4.424220 | 4.760980 | 7.204340 | 8.360947  | 3.396334 |
| 29 | H  | 4.730593 | 4.457913 | 7.336374 | 8.207419  | 4.001747 |
| 30 | C  | 6.391084 | 5.828725 | 9.082922 | 10.251634 | 5.719724 |
| 31 | H  | 6.483791 | 5.689706 | 9.026425 | 10.196043 | 5.968899 |
| 32 | H  | 7.135916 | 6.677317 | 9.807627 | 10.753730 | 6.397806 |
| 33 | H  | 6.834423 | 6.272076 | 9.584456 | 10.962041 | 6.156522 |
|    |    | 11       | 12       | 13       | 14        | 15       |
| 11 | H  | 0.000000 |          |          |           |          |
| 12 | H  | 2.476737 | 0.000000 |          |           |          |
| 13 | H  | 3.056744 | 1.770835 | 0.000000 |           |          |
| 14 | Br | 5.249432 | 5.811146 | 4.327921 | 0.000000  |          |
| 15 | H  | 3.755220 | 4.347858 | 3.269296 | 2.149195  | 0.000000 |
| 16 | C  | 5.570110 | 5.921276 | 5.255041 | 4.272778  | 2.776621 |
| 17 | C  | 6.627377 | 6.886936 | 6.377032 | 5.525321  | 4.100109 |
| 18 | H  | 5.800700 | 6.200028 | 5.249487 | 3.431469  | 2.426875 |
| 19 | H  | 7.598729 | 7.848455 | 7.199255 | 5.853167  | 4.759807 |
| 20 | H  | 6.723318 | 6.922871 | 6.678223 | 6.396885  | 4.748348 |
| 21 | N  | 2.684433 | 2.092370 | 2.165599 | 5.493860  | 4.698207 |
| 22 | H  | 3.537743 | 2.315029 | 2.573860 | 6.263875  | 5.508409 |

|    |   |          |           |          |           |           |
|----|---|----------|-----------|----------|-----------|-----------|
| 23 | H | 3.185872 | 2.934671  | 2.391207 | 4.953271  | 4.557217  |
| 24 | C | 5.396555 | 5.933013  | 4.747366 | 4.065037  | 5.078185  |
| 25 | C | 5.789717 | 5.737415  | 4.307689 | 3.934435  | 5.018693  |
| 26 | O | 4.754331 | 4.818897  | 3.718604 | 4.422451  | 4.951217  |
| 27 | H | 6.148097 | 6.772459  | 5.711314 | 5.045214  | 6.115378  |
| 28 | H | 4.955414 | 5.849381  | 4.682633 | 3.368979  | 4.380215  |
| 29 | H | 5.610166 | 5.472998  | 3.860373 | 3.055024  | 4.215917  |
| 30 | C | 7.117073 | 6.764088  | 5.364720 | 5.205505  | 6.396206  |
| 31 | H | 7.252738 | 6.517588  | 5.133891 | 5.598274  | 6.581647  |
| 32 | H | 7.915408 | 7.635631  | 6.124266 | 5.262260  | 6.745076  |
| 33 | H | 7.432846 | 7.189699  | 5.969545 | 6.032045  | 7.156877  |
|    |   | 16       | 17        | 18       | 19        | 20        |
| 16 | C | 0.000000 |           |          |           |           |
| 17 | C | 1.325834 | 0.000000  |          |           |           |
| 18 | H | 1.084572 | 2.130029  | 0.000000 |           |           |
| 19 | H | 2.078616 | 1.080902  | 2.456594 | 0.000000  |           |
| 20 | H | 2.126587 | 1.083084  | 3.106586 | 1.847431  | 0.000000  |
| 21 | N | 6.986468 | 8.146967  | 6.983471 | 9.027429  | 8.383296  |
| 22 | H | 7.686021 | 8.801860  | 7.709953 | 9.683049  | 8.997513  |
| 23 | H | 7.078320 | 8.311107  | 6.918604 | 9.117433  | 8.670261  |
| 24 | C | 7.828408 | 9.152765  | 7.242454 | 9.694250  | 9.822172  |
| 25 | C | 7.658538 | 8.954150  | 7.044471 | 9.451984  | 9.646982  |
| 26 | O | 7.681847 | 8.988063  | 7.236744 | 9.626508  | 9.554337  |
| 27 | H | 8.865788 | 10.190614 | 8.271102 | 10.725541 | 10.858438 |
| 28 | H | 7.100520 | 8.421356  | 6.503390 | 8.951121  | 9.106565  |
| 29 | H | 6.740836 | 8.015048  | 6.087236 | 8.467593  | 8.745977  |
| 30 | C | 8.937802 | 10.202296 | 8.294603 | 10.651079 | 10.909165 |
| 31 | H | 9.000740 | 10.222346 | 8.418719 | 10.687573 | 10.884108 |
| 32 | H | 9.178122 | 10.417949 | 8.434564 | 10.764004 | 11.201372 |
| 33 | H | 9.789785 | 11.076324 | 9.177908 | 11.567456 | 11.752593 |
|    |   | 21       | 22        | 23       | 24        | 25        |
| 21 | N | 0.000000 |           |          |           |           |
| 22 | H | 1.013072 | 0.000000  |          |           |           |
| 23 | H | 1.019061 | 1.640449  | 0.000000 |           |           |
| 24 | C | 4.264812 | 4.833410  | 3.270843 | 0.000000  |           |
| 25 | C | 4.259858 | 4.637425  | 3.280425 | 1.465053  | 0.000000  |
| 26 | O | 3.056649 | 3.480467  | 2.038240 | 1.444398  | 1.450186  |
| 27 | H | 4.942931 | 5.435060  | 3.957673 | 1.087877  | 2.216091  |
| 28 | H | 4.394865 | 5.137183  | 3.499392 | 1.086010  | 2.200147  |
| 29 | H | 4.352351 | 4.795403  | 3.480278 | 2.168762  | 1.087835  |
| 30 | C | 5.233268 | 5.364884  | 4.286262 | 2.603964  | 1.503265  |
| 31 | H | 5.145218 | 5.100907  | 4.310052 | 3.443000  | 2.149899  |
| 32 | H | 6.207875 | 6.390560  | 5.254142 | 3.146571  | 2.139915  |
| 33 | H | 5.445437 | 5.522112  | 4.491605 | 2.740090  | 2.152814  |

|    |   |          |          |          |          |          |
|----|---|----------|----------|----------|----------|----------|
|    |   | 26       | 27       | 28       | 29       | 30       |
| 26 | O | 0.000000 |          |          |          |          |
| 27 | H | 2.135253 | 0.000000 |          |          |          |
| 28 | H | 2.144838 | 1.849129 | 0.000000 |          |          |
| 29 | H | 2.125174 | 3.107143 | 2.451163 | 0.000000 |          |
| 30 | C | 2.505174 | 2.833394 | 3.530254 | 2.218490 | 0.000000 |
| 31 | H | 2.923491 | 3.786332 | 4.332006 | 2.582290 | 1.094157 |
| 32 | H | 3.412246 | 3.310871 | 3.927306 | 2.565804 | 1.094401 |
| 33 | H | 2.686375 | 2.564571 | 3.794426 | 3.108209 | 1.092381 |
|    |   | 31       | 32       | 33       |          |          |
| 31 | H | 0.000000 |          |          |          |          |
| 32 | H | 1.768081 | 0.000000 |          |          |          |
| 33 | H | 1.774266 | 1.777390 | 0.000000 |          |          |

Stoichiometry C10H18BrN3O

Framework group C1[X(C10H18BrN3O)]

Deg. of freedom 93

Full point group C1 NOp 1

Largest Abelian subgroup C1 NOp 1

Largest concise Abelian subgroup C1 NOp 1

Standard orientation:

| Center<br>Number | Atomic<br>Number | Atomic<br>Type | Coordinates (Angstroms) |           |           |
|------------------|------------------|----------------|-------------------------|-----------|-----------|
|                  |                  |                | X                       | Y         | Z         |
| 1                | 6                | 0              | -2.914191               | 2.123340  | -0.248301 |
| 2                | 6                | 0              | -3.854662               | 1.192906  | 0.056918  |
| 3                | 7                | 0              | -3.203779               | -0.036010 | 0.103331  |
| 4                | 6                | 0              | -1.898802               | 0.156293  | -0.166113 |
| 5                | 7                | 0              | -1.704037               | 1.461926  | -0.387385 |
| 6                | 6                | 0              | -0.391013               | 2.086245  | -0.673582 |
| 7                | 6                | 0              | 0.292634                | 2.658673  | 0.571997  |
| 8                | 1                | 0              | -3.002927               | 3.187087  | -0.387918 |
| 9                | 1                | 0              | -4.909460               | 1.300573  | 0.233596  |
| 10               | 1                | 0              | 0.233516                | 1.307365  | -1.114695 |
| 11               | 1                | 0              | -0.547932               | 2.871199  | -1.414796 |
| 12               | 1                | 0              | -0.315275               | 3.474564  | 0.976030  |
| 13               | 1                | 0              | 0.333399                | 1.866212  | 1.334193  |
| 14               | 35               | 0              | 0.405161                | -2.158911 | -0.254560 |
| 15               | 1                | 0              | -1.110291               | -0.636065 | -0.196383 |
| 16               | 6                | 0              | -3.734936               | -1.324139 | 0.393040  |
| 17               | 6                | 0              | -5.006323               | -1.559332 | 0.686458  |
| 18               | 1                | 0              | -2.971180               | -2.093223 | 0.354528  |
| 19               | 1                | 0              | -5.318257               | -2.572131 | 0.899258  |
| 20               | 1                | 0              | -5.765007               | -0.787576 | 0.729615  |

|    |   |   |          |           |           |
|----|---|---|----------|-----------|-----------|
| 21 | 7 | 0 | 1.594674 | 3.187707  | 0.171156  |
| 22 | 1 | 0 | 1.975430 | 3.796807  | 0.885534  |
| 23 | 1 | 0 | 2.257006 | 2.426415  | 0.028904  |
| 24 | 6 | 0 | 3.875163 | -0.199956 | -1.058367 |
| 25 | 6 | 0 | 3.868574 | -0.407715 | 0.391865  |
| 26 | 8 | 0 | 3.595834 | 0.902151  | -0.167513 |
| 27 | 1 | 0 | 4.822154 | -0.117360 | -1.587387 |
| 28 | 1 | 0 | 3.026036 | -0.554333 | -1.635271 |
| 29 | 1 | 0 | 2.980132 | -0.891236 | 0.792195  |
| 30 | 6 | 0 | 5.131040 | -0.530555 | 1.198646  |
| 31 | 1 | 0 | 4.997960 | -0.097979 | 2.194812  |
| 32 | 1 | 0 | 5.392020 | -1.585874 | 1.324758  |
| 33 | 1 | 0 | 5.962453 | -0.019700 | 0.707652  |

-----

Rotational constants (GHZ):      0.5219570      0.2258947      0.1659502

Standard basis: 6-311++G(d,p) (5D, 7F)

There are    499 symmetry adapted cartesian basis functions of A    symmetry.

There are    482 symmetry adapted basis functions of A    symmetry.

    482 basis functions,    760 primitive gaussians,    499 cartesian basis functions

    71 alpha electrons      71 beta electrons

        nuclear repulsion energy      1285.9057588528 Hartrees.

NAtoms=    33 NActive=    33 NUniq=    33 SFac= 1.00D+00 NAtFMM=    60 NAOKFM=F

Big=F

Integral buffers will be    131072 words long.

Raffenetti 2 integral format.

Two-electron integral symmetry is turned on.

One-electron integrals computed using PRISM.

NBasis=    482 RedAO= T EigKep=    3.82D-06    NBF=    482

NBsUse=    482 1.00D-06 EigRej= -1.00D+00    NBFU=    482

ExpMin= 3.50D-02 ExpMax= 4.40D+05 ExpMxC= 1.51D+04 IAcc=3 IRadAn=                    5 AccDes=

0.00D+00

Harris functional with IExCor=    402 and IRadAn=                    5 diagonalized for initial guess.

HarFok: IExCor=    402 AccDes= 0.00D+00 IRadAn=                    5 IDoV= 1 UseB2=F ITyADJ=14

ICtDFT= 3500011 ScaDFX= 1.000000 1.000000 1.000000 1.000000

FoFCou: FMM=F IPFlag=                    0 FMFlag=                    100000 FMFlg1=                    0

        NFXFlg=                    0 DoJE=T BraDBF=F KetDBF=T FulRan=T

        wScrn= 0.000000 ICntrl=                    500 IOpCl= 0 I1Cent=                    200000004 NGrid=

0

        NMat0=                    1 NMatS0=                    1 NMatT0=                    0 NMatD0=                    1 NMtDS0=                    0

NMtDT0=    0

Petite list used in FoFCou.

Requested convergence on RMS density matrix=1.00D-08 within 128 cycles.

Requested convergence on MAX density matrix=1.00D-06.

Requested convergence on                    energy=1.00D-06.



(A)  
 (A) (A) (A) (A) (A) (A) (A) (A) (A) (A) (A) (A)  
 (A) (A) (A) (A) (A) (A) (A) (A) (A) (A) (A) (A)  
 (A) (A) (A) (A) (A) (A) (A) (A) (A) (A) (A) (A)  
 (A) (A) (A) (A) (A) (A) (A) (A) (A) (A) (A) (A)  
 (A) (A) (A) (A) (A) (A) (A) (A) (A) (A) (A) (A)  
 (A) (A) (A) (A) (A) (A) (A) (A) (A) (A) (A) (A)  
 (A) (A) (A)

The electronic state is 1-A.

|       |                   |    |            |           |           |           |           |  |  |
|-------|-------------------|----|------------|-----------|-----------|-----------|-----------|--|--|
| Alpha | occ. eigenvalues  | -- | -482.69405 | -62.34740 | -56.16520 | -56.16509 | -56.16505 |  |  |
| Alpha | occ. eigenvalues  | -- | -19.12272  | -14.44894 | -14.43948 | -14.29523 | -10.29101 |  |  |
| Alpha | occ. eigenvalues  | -- | -10.27027  | -10.26951 | -10.26186 | -10.24549 | -10.21869 |  |  |
| Alpha | occ. eigenvalues  | -- | -10.21464  | -10.20913 | -10.20320 | -10.15674 | -8.55648  |  |  |
| Alpha | occ. eigenvalues  | -- | -6.37982   | -6.37916  | -6.37898  | -2.49222  | -2.49202  |  |  |
| Alpha | occ. eigenvalues  | -- | -2.49187   | -2.49135  | -2.49134  | -1.11202  | -1.05554  |  |  |
| Alpha | occ. eigenvalues  | -- | -0.99845   | -0.89509  | -0.84876  | -0.82022  | -0.77488  |  |  |
| Alpha | occ. eigenvalues  | -- | -0.73572   | -0.70884  | -0.68069  | -0.65124  | -0.64918  |  |  |
| Alpha | occ. eigenvalues  | -- | -0.63079   | -0.62878  | -0.58133  | -0.58072  | -0.54029  |  |  |
| Alpha | occ. eigenvalues  | -- | -0.53136   | -0.51933  | -0.50799  | -0.50163  | -0.49200  |  |  |
| Alpha | occ. eigenvalues  | -- | -0.48838   | -0.47792  | -0.45965  | -0.45183  | -0.44202  |  |  |
| Alpha | occ. eigenvalues  | -- | -0.43104   | -0.42931  | -0.41563  | -0.39579  | -0.38395  |  |  |
| Alpha | occ. eigenvalues  | -- | -0.37524   | -0.36316  | -0.35398  | -0.31406  | -0.29828  |  |  |
| Alpha | occ. eigenvalues  | -- | -0.29508   | -0.26654  | -0.25099  | -0.19819  | -0.19326  |  |  |
| Alpha | occ. eigenvalues  | -- | -0.19095   |           |           |           |           |  |  |
| Alpha | virt. eigenvalues | -- | -0.07862   | -0.04458  | -0.02992  | -0.01592  | -0.00371  |  |  |
| Alpha | virt. eigenvalues | -- | -0.00208   | 0.00258   | 0.00936   | 0.01015   | 0.01507   |  |  |
| Alpha | virt. eigenvalues | -- | 0.02294    | 0.02659   | 0.03464   | 0.03943   | 0.04336   |  |  |
| Alpha | virt. eigenvalues | -- | 0.04730    | 0.05133   | 0.05370   | 0.05884   | 0.06204   |  |  |
| Alpha | virt. eigenvalues | -- | 0.06316    | 0.07068   | 0.07395   | 0.07510   | 0.08244   |  |  |
| Alpha | virt. eigenvalues | -- | 0.08337    | 0.08704   | 0.08893   | 0.09104   | 0.09300   |  |  |
| Alpha | virt. eigenvalues | -- | 0.09518    | 0.09829   | 0.10510   | 0.10665   | 0.11102   |  |  |
| Alpha | virt. eigenvalues | -- | 0.11646    | 0.11785   | 0.12058   | 0.12422   | 0.12534   |  |  |
| Alpha | virt. eigenvalues | -- | 0.12725    | 0.13104   | 0.13200   | 0.13740   | 0.13836   |  |  |
| Alpha | virt. eigenvalues | -- | 0.14292    | 0.14456   | 0.14779   | 0.14813   | 0.15128   |  |  |
| Alpha | virt. eigenvalues | -- | 0.15774    | 0.15922   | 0.16152   | 0.16328   | 0.16805   |  |  |
| Alpha | virt. eigenvalues | -- | 0.17310    | 0.17468   | 0.17729   | 0.18027   | 0.18247   |  |  |
| Alpha | virt. eigenvalues | -- | 0.18586    | 0.18917   | 0.19493   | 0.19599   | 0.19774   |  |  |
| Alpha | virt. eigenvalues | -- | 0.20145    | 0.20301   | 0.21194   | 0.21407   | 0.21628   |  |  |
| Alpha | virt. eigenvalues | -- | 0.21791    | 0.22321   | 0.22751   | 0.23231   | 0.23409   |  |  |
| Alpha | virt. eigenvalues | -- | 0.23667    | 0.24075   | 0.24467   | 0.24976   | 0.25085   |  |  |
| Alpha | virt. eigenvalues | -- | 0.25782    | 0.26022   | 0.26341   | 0.26560   | 0.27264   |  |  |
| Alpha | virt. eigenvalues | -- | 0.27740    | 0.27964   | 0.28374   | 0.28640   | 0.28966   |  |  |
| Alpha | virt. eigenvalues | -- | 0.30063    | 0.30336   | 0.30961   | 0.31502   | 0.32181   |  |  |
| Alpha | virt. eigenvalues | -- | 0.32429    | 0.33006   | 0.33443   | 0.34101   | 0.34366   |  |  |

|                            |         |         |         |         |         |
|----------------------------|---------|---------|---------|---------|---------|
| Alpha virt. eigenvalues -- | 0.34756 | 0.35715 | 0.36059 | 0.37447 | 0.38151 |
| Alpha virt. eigenvalues -- | 0.38745 | 0.38937 | 0.39821 | 0.40895 | 0.41446 |
| Alpha virt. eigenvalues -- | 0.42276 | 0.44118 | 0.46257 | 0.47288 | 0.48285 |
| Alpha virt. eigenvalues -- | 0.49097 | 0.50157 | 0.50662 | 0.51059 | 0.51832 |
| Alpha virt. eigenvalues -- | 0.52498 | 0.53355 | 0.53884 | 0.54726 | 0.55493 |
| Alpha virt. eigenvalues -- | 0.55949 | 0.56033 | 0.57130 | 0.58128 | 0.58872 |
| Alpha virt. eigenvalues -- | 0.59131 | 0.60014 | 0.60465 | 0.61793 | 0.62009 |
| Alpha virt. eigenvalues -- | 0.63078 | 0.63465 | 0.63896 | 0.64697 | 0.65443 |
| Alpha virt. eigenvalues -- | 0.65909 | 0.66246 | 0.66553 | 0.67664 | 0.68302 |
| Alpha virt. eigenvalues -- | 0.68997 | 0.69429 | 0.69507 | 0.70127 | 0.70725 |
| Alpha virt. eigenvalues -- | 0.71383 | 0.71758 | 0.72273 | 0.73530 | 0.73831 |
| Alpha virt. eigenvalues -- | 0.75046 | 0.75418 | 0.75860 | 0.76350 | 0.76560 |
| Alpha virt. eigenvalues -- | 0.76981 | 0.78305 | 0.78439 | 0.79402 | 0.79981 |
| Alpha virt. eigenvalues -- | 0.81004 | 0.81504 | 0.82871 | 0.84378 | 0.85362 |
| Alpha virt. eigenvalues -- | 0.85423 | 0.88044 | 0.89306 | 0.89996 | 0.90400 |
| Alpha virt. eigenvalues -- | 0.90621 | 0.93168 | 0.93900 | 0.95544 | 0.96527 |
| Alpha virt. eigenvalues -- | 0.97163 | 0.98827 | 0.99624 | 1.00523 | 1.01389 |
| Alpha virt. eigenvalues -- | 1.02473 | 1.03824 | 1.04214 | 1.05595 | 1.08830 |
| Alpha virt. eigenvalues -- | 1.09318 | 1.10868 | 1.11481 | 1.12299 | 1.12840 |
| Alpha virt. eigenvalues -- | 1.15756 | 1.16806 | 1.19322 | 1.21474 | 1.21918 |
| Alpha virt. eigenvalues -- | 1.22425 | 1.26796 | 1.27766 | 1.27976 | 1.30492 |
| Alpha virt. eigenvalues -- | 1.32039 | 1.33701 | 1.36373 | 1.38933 | 1.40916 |
| Alpha virt. eigenvalues -- | 1.42215 | 1.43486 | 1.45527 | 1.46681 | 1.47883 |
| Alpha virt. eigenvalues -- | 1.49297 | 1.49536 | 1.50471 | 1.51251 | 1.53111 |
| Alpha virt. eigenvalues -- | 1.54097 | 1.55223 | 1.55641 | 1.56999 | 1.58625 |
| Alpha virt. eigenvalues -- | 1.58831 | 1.59450 | 1.59855 | 1.60442 | 1.61284 |
| Alpha virt. eigenvalues -- | 1.61390 | 1.62346 | 1.65549 | 1.66751 | 1.67248 |
| Alpha virt. eigenvalues -- | 1.67617 | 1.68336 | 1.69117 | 1.70538 | 1.71307 |
| Alpha virt. eigenvalues -- | 1.71608 | 1.72602 | 1.73511 | 1.73818 | 1.74257 |
| Alpha virt. eigenvalues -- | 1.74864 | 1.77421 | 1.78834 | 1.79854 | 1.80860 |
| Alpha virt. eigenvalues -- | 1.82526 | 1.83204 | 1.86103 | 1.86863 | 1.87667 |
| Alpha virt. eigenvalues -- | 1.89405 | 1.91100 | 1.91351 | 1.92424 | 1.94801 |
| Alpha virt. eigenvalues -- | 1.97473 | 1.99681 | 2.01169 | 2.03149 | 2.04145 |
| Alpha virt. eigenvalues -- | 2.05400 | 2.05847 | 2.07737 | 2.08213 | 2.09451 |
| Alpha virt. eigenvalues -- | 2.10947 | 2.11680 | 2.12932 | 2.13476 | 2.15530 |
| Alpha virt. eigenvalues -- | 2.16708 | 2.18009 | 2.18908 | 2.20483 | 2.20866 |
| Alpha virt. eigenvalues -- | 2.24070 | 2.25124 | 2.27430 | 2.28379 | 2.30800 |
| Alpha virt. eigenvalues -- | 2.33620 | 2.36023 | 2.38854 | 2.41960 | 2.42202 |
| Alpha virt. eigenvalues -- | 2.43409 | 2.45961 | 2.46398 | 2.46688 | 2.48294 |
| Alpha virt. eigenvalues -- | 2.50779 | 2.50870 | 2.52999 | 2.54297 | 2.54731 |
| Alpha virt. eigenvalues -- | 2.55118 | 2.55985 | 2.56596 | 2.57717 | 2.57912 |
| Alpha virt. eigenvalues -- | 2.60814 | 2.61349 | 2.62086 | 2.62429 | 2.65398 |
| Alpha virt. eigenvalues -- | 2.65732 | 2.67013 | 2.69009 | 2.70579 | 2.71400 |
| Alpha virt. eigenvalues -- | 2.71872 | 2.72613 | 2.73384 | 2.75838 | 2.76153 |



|                            |            |          |           |           |           |
|----------------------------|------------|----------|-----------|-----------|-----------|
| Alpha virt. eigenvalues -- | 2.76945    | 2.77455  | 2.79216   | 2.80482   | 2.81706   |
| Alpha virt. eigenvalues -- | 2.82262    | 2.82428  | 2.83094   | 2.83699   | 2.86532   |
| Alpha virt. eigenvalues -- | 2.87259    | 2.87994  | 2.88937   | 2.91915   | 2.93043   |
| Alpha virt. eigenvalues -- | 2.94284    | 2.96006  | 2.96887   | 3.03395   | 3.10235   |
| Alpha virt. eigenvalues -- | 3.10811    | 3.15009  | 3.15756   | 3.19875   | 3.21981   |
| Alpha virt. eigenvalues -- | 3.23339    | 3.26781  | 3.27908   | 3.37375   | 3.38129   |
| Alpha virt. eigenvalues -- | 3.50260    | 3.53923  | 3.57002   | 3.58795   | 3.64286   |
| Alpha virt. eigenvalues -- | 3.66864    | 3.71404  | 3.72987   | 3.75666   | 3.76433   |
| Alpha virt. eigenvalues -- | 3.78832    | 3.81488  | 3.82204   | 3.82354   | 3.84812   |
| Alpha virt. eigenvalues -- | 3.85917    | 3.87897  | 3.97025   | 4.05751   | 4.07874   |
| Alpha virt. eigenvalues -- | 4.08904    | 4.13101  | 4.25393   | 4.27440   | 4.28465   |
| Alpha virt. eigenvalues -- | 4.30145    | 4.32487  | 4.49713   | 4.52233   | 4.70048   |
| Alpha virt. eigenvalues -- | 4.77129    | 4.83195  | 4.93895   | 5.02848   | 5.14547   |
| Alpha virt. eigenvalues -- | 5.22433    | 5.50636  | 5.61917   | 6.77461   | 7.68843   |
| Alpha virt. eigenvalues -- | 7.74683    | 7.81410  | 23.70364  | 23.75330  | 23.83680  |
| Alpha virt. eigenvalues -- | 23.86655   | 23.87461 | 23.88208  | 23.91322  | 23.98852  |
| Alpha virt. eigenvalues -- | 24.13691   | 24.23292 | 35.43774  | 35.56628  | 35.62018  |
| Alpha virt. eigenvalues -- | 48.06131   | 49.92485 | 289.89608 | 289.95286 | 290.01078 |
| Alpha virt. eigenvalues -- | 1020.85099 |          |           |           |           |

Condensed to atoms (all electrons):

|    |    | 1         | 2         | 3         | 4         | 5         | 6         |
|----|----|-----------|-----------|-----------|-----------|-----------|-----------|
| 1  | C  | 6.985341  | -1.030300 | 0.281865  | -0.008115 | -0.086890 | -0.052381 |
| 2  | C  | -1.030300 | 6.548356  | -0.063346 | 0.089568  | 0.343199  | -0.272575 |
| 3  | N  | 0.281865  | -0.063346 | 6.750720  | 0.174471  | -0.419126 | -0.106615 |
| 4  | C  | -0.008115 | 0.089568  | 0.174471  | 7.762401  | 0.405960  | -0.440255 |
| 5  | N  | -0.086890 | 0.343199  | -0.419126 | 0.405960  | 7.023750  | 0.040340  |
| 6  | C  | -0.052381 | -0.272575 | -0.106615 | -0.440255 | 0.040340  | 6.983149  |
| 7  | C  | -0.002788 | 0.138376  | -0.045321 | -0.057770 | 0.144089  | -0.722483 |
| 8  | H  | 0.502331  | -0.101320 | 0.035049  | 0.018549  | -0.061732 | -0.058040 |
| 9  | H  | -0.123034 | 0.511779  | -0.079767 | 0.006334  | 0.029274  | 0.001797  |
| 10 | H  | 0.014544  | -0.030803 | -0.013164 | 0.046912  | -0.029633 | 0.393977  |
| 11 | H  | -0.054663 | 0.031270  | -0.011617 | -0.036385 | -0.048844 | 0.555347  |
| 12 | H  | 0.026925  | -0.052642 | 0.011369  | -0.009093 | -0.044968 | 0.010764  |
| 13 | H  | -0.021956 | 0.039029  | -0.013233 | -0.001453 | 0.060983  | -0.087333 |
| 14 | Br | -0.022378 | 0.003369  | -0.014260 | -0.090977 | -0.026462 | 0.049968  |
| 15 | H  | -0.248005 | 0.002606  | 0.048274  | -1.106165 | -0.122512 | 0.237790  |
| 16 | C  | 0.284528  | -0.295496 | 0.371830  | -0.267627 | -0.294988 | -0.163326 |
| 17 | C  | -0.178759 | 0.114541  | -0.019569 | -0.386384 | -0.053700 | -0.043766 |
| 18 | H  | -0.002424 | 0.017148  | -0.108817 | 0.215050  | 0.043638  | -0.004050 |
| 19 | H  | -0.002710 | 0.005428  | 0.023664  | -0.015340 | -0.000792 | 0.000172  |
| 20 | H  | 0.001267  | 0.007295  | -0.036639 | 0.005989  | -0.001045 | -0.003470 |
| 21 | N  | -0.019348 | -0.000011 | 0.006918  | 0.058922  | -0.015538 | -0.070530 |
| 22 | H  | 0.000038  | 0.000724  | 0.000088  | -0.003928 | -0.001055 | -0.001318 |
| 23 | H  | 0.006604  | -0.001606 | -0.000185 | -0.001371 | 0.004900  | -0.017587 |

|    |    |           |           |           |           |           |           |
|----|----|-----------|-----------|-----------|-----------|-----------|-----------|
| 24 | C  | -0.004143 | 0.000095  | -0.000208 | -0.037713 | -0.005787 | 0.025466  |
| 25 | C  | 0.002346  | 0.001271  | -0.000388 | 0.031635  | 0.007823  | -0.018516 |
| 26 | O  | -0.003115 | 0.000887  | -0.000072 | -0.006717 | -0.003055 | 0.010771  |
| 27 | H  | -0.000190 | 0.000029  | -0.000042 | -0.001403 | -0.000079 | 0.004221  |
| 28 | H  | 0.001719  | 0.000058  | 0.001584  | 0.016677  | -0.000923 | -0.015372 |
| 29 | H  | -0.000840 | -0.000145 | -0.000808 | -0.004024 | -0.000100 | 0.003000  |
| 30 | C  | -0.000308 | 0.000558  | -0.000056 | 0.005724  | 0.001075  | -0.013183 |
| 31 | H  | -0.000105 | 0.000027  | 0.000010  | 0.000024  | -0.000161 | -0.000039 |
| 32 | H  | 0.000046  | -0.000013 | 0.000007  | 0.000403  | 0.000038  | -0.000673 |
| 33 | H  | 0.000048  | -0.000013 | -0.000003 | 0.000013  | 0.000049  | 0.000151  |
|    |    | 7         | 8         | 9         | 10        | 11        | 12        |
| 1  | C  | -0.002788 | 0.502331  | -0.123034 | 0.014544  | -0.054663 | 0.026925  |
| 2  | C  | 0.138376  | -0.101320 | 0.511779  | -0.030803 | 0.031270  | -0.052642 |
| 3  | N  | -0.045321 | 0.035049  | -0.079767 | -0.013164 | -0.011617 | 0.011369  |
| 4  | C  | -0.057770 | 0.018549  | 0.006334  | 0.046912  | -0.036385 | -0.009093 |
| 5  | N  | 0.144089  | -0.061732 | 0.029274  | -0.029633 | -0.048844 | -0.044968 |
| 6  | C  | -0.722483 | -0.058040 | 0.001797  | 0.393977  | 0.555347  | 0.010764  |
| 7  | C  | 6.588580  | 0.022531  | 0.001883  | -0.061478 | -0.214198 | 0.425723  |
| 8  | H  | 0.022531  | 0.493124  | -0.010075 | 0.003577  | -0.014359 | -0.004369 |
| 9  | H  | 0.001883  | -0.010075 | 0.498287  | -0.000440 | 0.001708  | -0.000026 |
| 10 | H  | -0.061478 | 0.003577  | -0.000440 | 0.549232  | -0.044606 | 0.005463  |
| 11 | H  | -0.214198 | -0.014359 | 0.001708  | -0.044606 | 0.603684  | -0.016516 |
| 12 | H  | 0.425723  | -0.004369 | -0.000026 | 0.005463  | -0.016516 | 0.651377  |
| 13 | H  | 0.325762  | 0.001850  | 0.000037  | -0.002853 | 0.020537  | -0.103235 |
| 14 | Br | -0.046746 | -0.000919 | -0.000734 | -0.012288 | 0.005295  | 0.002205  |
| 15 | H  | -0.126307 | -0.011261 | -0.002547 | -0.073493 | 0.019443  | 0.016527  |
| 16 | C  | -0.041716 | 0.003510  | -0.003044 | -0.014870 | -0.005711 | 0.001908  |
| 17 | C  | -0.007713 | -0.000887 | -0.007663 | -0.001292 | -0.001849 | -0.000094 |
| 18 | H  | 0.012558  | 0.001071  | 0.001043  | 0.005977  | -0.002326 | -0.000749 |
| 19 | H  | -0.000315 | -0.000157 | -0.000801 | -0.000266 | 0.000088  | 0.000029  |
| 20 | H  | 0.000007  | 0.000660  | 0.005310  | 0.000147  | -0.000314 | -0.000154 |
| 21 | N  | 0.028238  | -0.001651 | -0.000061 | 0.024889  | 0.024241  | -0.060451 |
| 22 | H  | -0.015126 | -0.000326 | 0.000053  | -0.001543 | 0.000667  | -0.014826 |
| 23 | H  | -0.033322 | 0.000863  | -0.000070 | -0.006920 | -0.001641 | 0.008715  |
| 24 | C  | 0.072781  | -0.000306 | 0.000115  | -0.021299 | 0.004909  | 0.003365  |
| 25 | C  | -0.061720 | 0.000255  | -0.000090 | 0.024671  | -0.002458 | -0.003757 |
| 26 | O  | -0.010774 | -0.000219 | 0.000009  | 0.002177  | 0.005195  | -0.000752 |
| 27 | H  | -0.004385 | -0.000011 | 0.000002  | 0.003253  | 0.001169  | -0.000036 |
| 28 | H  | -0.001955 | 0.000057  | -0.000014 | -0.012892 | -0.003392 | -0.000171 |
| 29 | H  | -0.005282 | 0.000048  | -0.000045 | 0.004127  | -0.000213 | -0.000917 |
| 30 | C  | -0.003592 | -0.000014 | 0.000006  | -0.001429 | -0.000932 | -0.001183 |
| 31 | H  | 0.001207  | -0.000011 | 0.000001  | 0.000123  | 0.000083  | 0.000240  |
| 32 | H  | 0.000125  | 0.000003  | 0.000000  | -0.000026 | -0.000092 | -0.000034 |
| 33 | H  | 0.000013  | 0.000003  | 0.000000  | -0.000383 | -0.000029 | -0.000019 |

|    |    | 13        | 14        | 15        | 16        | 17        | 18        |
|----|----|-----------|-----------|-----------|-----------|-----------|-----------|
| 1  | C  | -0.021956 | -0.022378 | -0.248005 | 0.284528  | -0.178759 | -0.002424 |
| 2  | C  | 0.039029  | 0.003369  | 0.002606  | -0.295496 | 0.114541  | 0.017148  |
| 3  | N  | -0.013233 | -0.014260 | 0.048274  | 0.371830  | -0.019569 | -0.108817 |
| 4  | C  | -0.001453 | -0.090977 | -1.106165 | -0.267627 | -0.386384 | 0.215050  |
| 5  | N  | 0.060983  | -0.026462 | -0.122512 | -0.294988 | -0.053700 | 0.043638  |
| 6  | C  | -0.087333 | 0.049968  | 0.237790  | -0.163326 | -0.043766 | -0.004050 |
| 7  | C  | 0.325762  | -0.046746 | -0.126307 | -0.041716 | -0.007713 | 0.012558  |
| 8  | H  | 0.001850  | -0.000919 | -0.011261 | 0.003510  | -0.000887 | 0.001071  |
| 9  | H  | 0.000037  | -0.000734 | -0.002547 | -0.003044 | -0.007663 | 0.001043  |
| 10 | H  | -0.002853 | -0.012288 | -0.073493 | -0.014870 | -0.001292 | 0.005977  |
| 11 | H  | 0.020537  | 0.005295  | 0.019443  | -0.005711 | -0.001849 | -0.002326 |
| 12 | H  | -0.103235 | 0.002205  | 0.016527  | 0.001908  | -0.000094 | -0.000749 |
| 13 | H  | 0.720372  | -0.009079 | -0.064857 | -0.000402 | -0.001562 | 0.001566  |
| 14 | Br | -0.009079 | 35.637186 | 0.254848  | -0.042657 | 0.022578  | 0.034984  |
| 15 | H  | -0.064857 | 0.254848  | 2.064541  | -0.102996 | 0.200313  | -0.091777 |
| 16 | C  | -0.000402 | -0.042657 | -0.102996 | 6.584977  | -0.354335 | 0.244811  |
| 17 | C  | -0.001562 | 0.022578  | 0.200313  | -0.354335 | 6.449425  | -0.030688 |
| 18 | H  | 0.001566  | 0.034984  | -0.091777 | 0.244811  | -0.030688 | 0.479922  |
| 19 | H  | -0.000023 | -0.001673 | 0.007192  | -0.087374 | 0.446401  | -0.009700 |
| 20 | H  | 0.000198  | 0.000437  | -0.001322 | 0.100350  | 0.284848  | -0.000350 |
| 21 | N  | -0.063716 | -0.003264 | -0.021946 | 0.006099  | 0.000347  | -0.000204 |
| 22 | H  | 0.001173  | -0.001333 | -0.003600 | -0.000206 | -0.000042 | 0.000106  |
| 23 | H  | 0.012736  | 0.004497  | 0.007413  | 0.000385  | 0.000059  | -0.000181 |
| 24 | C  | -0.013159 | -0.015101 | 0.024291  | -0.005738 | -0.001126 | -0.000811 |
| 25 | C  | 0.011965  | 0.003149  | -0.031467 | 0.004206  | 0.000735  | 0.001250  |
| 26 | O  | 0.002950  | -0.000140 | -0.000182 | -0.000367 | -0.000017 | -0.000172 |
| 27 | H  | 0.000800  | 0.003053  | -0.000903 | -0.000221 | -0.000036 | -0.000049 |
| 28 | H  | 0.000416  | 0.009669  | 0.000058  | 0.003742  | 0.000265  | -0.000186 |
| 29 | H  | -0.001012 | -0.004247 | 0.009811  | 0.000111  | 0.000742  | -0.000018 |
| 30 | C  | 0.003208  | -0.015110 | -0.007962 | -0.000209 | -0.000074 | -0.000080 |
| 31 | H  | -0.001125 | 0.001253  | -0.000096 | -0.000003 | -0.000002 | -0.000017 |
| 32 | H  | 0.000069  | 0.000519  | -0.000451 | 0.000038  | 0.000001  | 0.000025  |
| 33 | H  | 0.000189  | 0.000080  | 0.000097  | 0.000008  | 0.000003  | 0.000011  |
|    |    | 19        | 20        | 21        | 22        | 23        | 24        |
| 1  | C  | -0.002710 | 0.001267  | -0.019348 | 0.000038  | 0.006604  | -0.004143 |
| 2  | C  | 0.005428  | 0.007295  | -0.000011 | 0.000724  | -0.001606 | 0.000095  |
| 3  | N  | 0.023664  | -0.036639 | 0.006918  | 0.000088  | -0.000185 | -0.000208 |
| 4  | C  | -0.015340 | 0.005989  | 0.058922  | -0.003928 | -0.001371 | -0.037713 |
| 5  | N  | -0.000792 | -0.001045 | -0.015538 | -0.001055 | 0.004900  | -0.005787 |
| 6  | C  | 0.000172  | -0.003470 | -0.070530 | -0.001318 | -0.017587 | 0.025466  |
| 7  | C  | -0.000315 | 0.000007  | 0.028238  | -0.015126 | -0.033322 | 0.072781  |
| 8  | H  | -0.000157 | 0.000660  | -0.001651 | -0.000326 | 0.000863  | -0.000306 |
| 9  | H  | -0.000801 | 0.005310  | -0.000061 | 0.000053  | -0.000070 | 0.000115  |

|    |    |           |           |           |           |           |           |
|----|----|-----------|-----------|-----------|-----------|-----------|-----------|
| 10 | H  | -0.000266 | 0.000147  | 0.024889  | -0.001543 | -0.006920 | -0.021299 |
| 11 | H  | 0.000088  | -0.000314 | 0.024241  | 0.000667  | -0.001641 | 0.004909  |
| 12 | H  | 0.000029  | -0.000154 | -0.060451 | -0.014826 | 0.008715  | 0.003365  |
| 13 | H  | -0.000023 | 0.000198  | -0.063716 | 0.001173  | 0.012736  | -0.013159 |
| 14 | Br | -0.001673 | 0.000437  | -0.003264 | -0.001333 | 0.004497  | -0.015101 |
| 15 | H  | 0.007192  | -0.001322 | -0.021946 | -0.003600 | 0.007413  | 0.024291  |
| 16 | C  | -0.087374 | 0.100350  | 0.006099  | -0.000206 | 0.000385  | -0.005738 |
| 17 | C  | 0.446401  | 0.284848  | 0.000347  | -0.000042 | 0.000059  | -0.001126 |
| 18 | H  | -0.009700 | -0.000350 | -0.000204 | 0.000106  | -0.000181 | -0.000811 |
| 19 | H  | 0.458770  | -0.019122 | -0.000001 | -0.000002 | 0.000004  | 0.000012  |
| 20 | H  | -0.019122 | 0.535345  | 0.000013  | -0.000003 | 0.000010  | -0.000037 |
| 21 | N  | -0.000001 | 0.000013  | 6.812545  | 0.379869  | 0.321696  | -0.002122 |
| 22 | H  | -0.000002 | -0.000003 | 0.379869  | 0.483858  | -0.054847 | 0.004887  |
| 23 | H  | 0.000004  | 0.000010  | 0.321696  | -0.054847 | 0.425002  | 0.000832  |
| 24 | C  | 0.000012  | -0.000037 | -0.002122 | 0.004887  | 0.000832  | 6.830382  |
| 25 | C  | -0.000012 | 0.000035  | -0.002092 | -0.007109 | -0.008563 | -1.263900 |
| 26 | O  | 0.000001  | -0.000002 | 0.018397  | 0.002598  | -0.018292 | 0.046100  |
| 27 | H  | 0.000001  | -0.000001 | 0.001099  | -0.000381 | -0.003671 | 0.251276  |
| 28 | H  | 0.000004  | 0.000014  | 0.001559  | 0.000182  | 0.006873  | 0.396674  |
| 29 | H  | -0.000006 | 0.000009  | -0.002680 | -0.000884 | 0.006025  | -0.028701 |
| 30 | C  | 0.000003  | -0.000001 | 0.013180  | 0.002783  | -0.012063 | -0.036568 |
| 31 | H  | 0.000000  | 0.000000  | 0.001396  | 0.000346  | -0.002697 | -0.001477 |
| 32 | H  | 0.000000  | 0.000000  | 0.000097  | 0.000014  | 0.000764  | 0.012027  |
| 33 | H  | 0.000000  | 0.000000  | -0.000409 | -0.000248 | 0.001213  | 0.015269  |
|    |    | 25        | 26        | 27        | 28        | 29        | 30        |
| 1  | C  | 0.002346  | -0.003115 | -0.000190 | 0.001719  | -0.000840 | -0.000308 |
| 2  | C  | 0.001271  | 0.000887  | 0.000029  | 0.000058  | -0.000145 | 0.000558  |
| 3  | N  | -0.000388 | -0.000072 | -0.000042 | 0.001584  | -0.000808 | -0.000056 |
| 4  | C  | 0.031635  | -0.006717 | -0.001403 | 0.016677  | -0.004024 | 0.005724  |
| 5  | N  | 0.007823  | -0.003055 | -0.000079 | -0.000923 | -0.000100 | 0.001075  |
| 6  | C  | -0.018516 | 0.010771  | 0.004221  | -0.015372 | 0.003000  | -0.013183 |
| 7  | C  | -0.061720 | -0.010774 | -0.004385 | -0.001955 | -0.005282 | -0.003592 |
| 8  | H  | 0.000255  | -0.000219 | -0.000011 | 0.000057  | 0.000048  | -0.000014 |
| 9  | H  | -0.000090 | 0.000009  | 0.000002  | -0.000014 | -0.000045 | 0.000006  |
| 10 | H  | 0.024671  | 0.002177  | 0.003253  | -0.012892 | 0.004127  | -0.001429 |
| 11 | H  | -0.002458 | 0.005195  | 0.001169  | -0.003392 | -0.000213 | -0.000932 |
| 12 | H  | -0.003757 | -0.000752 | -0.000036 | -0.000171 | -0.000917 | -0.001183 |
| 13 | H  | 0.011965  | 0.002950  | 0.000800  | 0.000416  | -0.001012 | 0.003208  |
| 14 | Br | 0.003149  | -0.000140 | 0.003053  | 0.009669  | -0.004247 | -0.015110 |
| 15 | H  | -0.031467 | -0.000182 | -0.000903 | 0.000058  | 0.009811  | -0.007962 |
| 16 | C  | 0.004206  | -0.000367 | -0.000221 | 0.003742  | 0.000111  | -0.000209 |
| 17 | C  | 0.000735  | -0.000017 | -0.000036 | 0.000265  | 0.000742  | -0.000074 |
| 18 | H  | 0.001250  | -0.000172 | -0.000049 | -0.000186 | -0.000018 | -0.000080 |
| 19 | H  | -0.000012 | 0.000001  | 0.000001  | 0.000004  | -0.000006 | 0.000003  |

|    |   |           |           |           |           |           |           |
|----|---|-----------|-----------|-----------|-----------|-----------|-----------|
| 20 | H | 0.000035  | -0.000002 | -0.000001 | 0.000014  | 0.000009  | -0.000001 |
| 21 | N | -0.002092 | 0.018397  | 0.001099  | 0.001559  | -0.002680 | 0.013180  |
| 22 | H | -0.007109 | 0.002598  | -0.000381 | 0.000182  | -0.000884 | 0.002783  |
| 23 | H | -0.008563 | -0.018292 | -0.003671 | 0.006873  | 0.006025  | -0.012063 |
| 24 | C | -1.263900 | 0.046100  | 0.251276  | 0.396674  | -0.028701 | -0.036568 |
| 25 | C | 6.748001  | 0.197634  | 0.076551  | -0.024008 | 0.379517  | -0.122728 |
| 26 | O | 0.197634  | 8.177929  | -0.053327 | -0.045010 | -0.006606 | -0.108456 |
| 27 | H | 0.076551  | -0.053327 | 0.614053  | -0.056170 | 0.001029  | 0.028157  |
| 28 | H | -0.024008 | -0.045010 | -0.056170 | 0.552735  | -0.001474 | 0.003873  |
| 29 | H | 0.379517  | -0.006606 | 0.001029  | -0.001474 | 0.467938  | -0.017278 |
| 30 | C | -0.122728 | -0.108456 | 0.028157  | 0.003873  | -0.017278 | 5.793314  |
| 31 | H | 0.003223  | -0.016496 | 0.000204  | -0.002633 | 0.000001  | 0.367639  |
| 32 | H | -0.073723 | 0.014704  | -0.006284 | 0.001854  | 0.001496  | 0.406783  |
| 33 | H | -0.049616 | 0.006866  | 0.003004  | 0.003676  | -0.005775 | 0.382833  |

|    |    | 31        | 32        | 33        |
|----|----|-----------|-----------|-----------|
| 1  | C  | -0.000105 | 0.000046  | 0.000048  |
| 2  | C  | 0.000027  | -0.000013 | -0.000013 |
| 3  | N  | 0.000010  | 0.000007  | -0.000003 |
| 4  | C  | 0.000024  | 0.000403  | 0.000013  |
| 5  | N  | -0.000161 | 0.000038  | 0.000049  |
| 6  | C  | -0.000039 | -0.000673 | 0.000151  |
| 7  | C  | 0.001207  | 0.000125  | 0.000013  |
| 8  | H  | -0.000011 | 0.000003  | 0.000003  |
| 9  | H  | 0.000001  | 0.000000  | 0.000000  |
| 10 | H  | 0.000123  | -0.000026 | -0.000383 |
| 11 | H  | 0.000083  | -0.000092 | -0.000029 |
| 12 | H  | 0.000240  | -0.000034 | -0.000019 |
| 13 | H  | -0.001125 | 0.000069  | 0.000189  |
| 14 | Br | 0.001253  | 0.000519  | 0.000080  |
| 15 | H  | -0.000096 | -0.000451 | 0.000097  |
| 16 | C  | -0.000003 | 0.000038  | 0.000008  |
| 17 | C  | -0.000002 | 0.000001  | 0.000003  |
| 18 | H  | -0.000017 | 0.000025  | 0.000011  |
| 19 | H  | 0.000000  | 0.000000  | 0.000000  |
| 20 | H  | 0.000000  | 0.000000  | 0.000000  |
| 21 | N  | 0.001396  | 0.000097  | -0.000409 |
| 22 | H  | 0.000346  | 0.000014  | -0.000248 |
| 23 | H  | -0.002697 | 0.000764  | 0.001213  |
| 24 | C  | -0.001477 | 0.012027  | 0.015269  |
| 25 | C  | 0.003223  | -0.073723 | -0.049616 |
| 26 | O  | -0.016496 | 0.014704  | 0.006866  |
| 27 | H  | 0.000204  | -0.006284 | 0.003004  |
| 28 | H  | -0.002633 | 0.001854  | 0.003676  |
| 29 | H  | 0.000001  | 0.001496  | -0.005775 |

|    |   |           |           |           |
|----|---|-----------|-----------|-----------|
| 30 | C | 0.367639  | 0.406783  | 0.382833  |
| 31 | H | 0.581207  | -0.041749 | -0.036230 |
| 32 | H | -0.041749 | 0.566857  | -0.024379 |
| 33 | H | -0.036230 | -0.024379 | 0.566624  |

Mulliken charges:

|    |    | 1         |
|----|----|-----------|
| 1  | C  | -0.245149 |
| 2  | C  | -0.007343 |
| 3  | N  | 0.227389  |
| 4  | C  | -0.363913 |
| 5  | N  | 0.112271  |
| 6  | C  | -0.225404 |
| 7  | C  | -0.298882 |
| 8  | H  | 0.182176  |
| 9  | H  | 0.170773  |
| 10 | H  | 0.250608  |
| 11 | H  | 0.186507  |
| 12 | H  | 0.149380  |
| 13 | H  | 0.181159  |
| 14 | Br | -0.725723 |
| 15 | H  | 0.124646  |
| 16 | C  | 0.074781  |
| 17 | C  | -0.430701 |
| 18 | H  | 0.193440  |
| 19 | H  | 0.196526  |
| 20 | H  | 0.120525  |
| 21 | N  | -0.435482 |
| 22 | H  | 0.229392  |
| 23 | H  | 0.354425  |
| 24 | C  | -0.250284 |
| 25 | C  | 0.175880  |
| 26 | O  | -0.212450 |
| 27 | H  | 0.139287  |
| 28 | H  | 0.162509  |
| 29 | H  | 0.207200  |
| 30 | C  | -0.667908 |
| 31 | H  | 0.145856  |
| 32 | H  | 0.141554  |
| 33 | H  | 0.136956  |

Sum of Mulliken charges = 0.00000

Mulliken charges with hydrogens summed into heavy atoms:

|   |   | 1         |
|---|---|-----------|
| 1 | C | -0.062974 |
| 2 | C | 0.163430  |

3 N 0.227389  
 4 C -0.239267  
 5 N 0.112271  
 6 C 0.211711  
 7 C 0.031657  
 14 Br -0.725723  
 16 C 0.268220  
 17 C -0.113650  
 21 N 0.148335  
 24 C 0.051512  
 25 C 0.383080  
 26 O -0.212450  
 30 C -0.243542

Electronic spatial extent (au):  $\langle R^2 \rangle =$  6328.0072

Charge= 0.0000 electrons

Dipole moment (field-independent basis, Debye):

X= -8.1116 Y= 6.8852 Z= 1.5298

Tot= 10.7491

Quadrupole moment (field-independent basis, Debye-Ang):

XX= -69.2255 YY= -115.2295 ZZ= -107.5025

XY= -6.5340 XZ= -0.4153 YZ= -0.1977

Traceless Quadrupole moment (field-independent basis, Debye-Ang):

XX= 28.0937 YY= -17.9103 ZZ= -10.1833

XY= -6.5340 XZ= -0.4153 YZ= -0.1977

Octapole moment (field-independent basis, Debye-Ang<sup>2</sup>):

XXX= -92.4505 YYY= 1.7368 ZZZ= -9.7030

XYY= -45.7128

XXY= -36.3692 XXZ= 15.9241 XZZ= 24.0764

YZZ= -8.2962

YYZ= 21.0358 XYZ= 16.3388

Hexadecapole moment (field-independent basis, Debye-Ang<sup>3</sup>):

XXXX= -4988.9611 YYYY= -2159.3864 ZZZZ= -373.3109

XXXY= -83.6550

XXXZ= -126.4542 YYYY= -37.6636 YYYZ= 55.2548

ZZZX= 4.2138

ZZZY= 18.4140 XXYY= -1225.7377 XXZZ= -1055.9766

YYZZ= -417.9380

XXYZ= -15.7205 YYXZ= 34.3250 ZZXY= -0.3541

N-N= 1.285905758853D+03 E-N=-1.019628611447D+04 KE= 3.199791014147D+03

Calling FoFJK, ICntrl= 2127 FMM=F ISym2X=0 l1Cent= 0 IOpCIX= 0 NMat=1 NMatS=1

NMatT=0.

\*\*\*\*\* Axes restored to original set \*\*\*\*\*

Center Atomic Forces (Hartrees/Bohr)

| Number | Number | X            | Y            | Z            |
|--------|--------|--------------|--------------|--------------|
| 1      | 6      | -0.000587707 | 0.000055784  | 0.000066059  |
| 2      | 6      | -0.000559395 | 0.000273170  | -0.000149321 |
| 3      | 7      | 0.001962007  | 0.002019520  | 0.000047253  |
| 4      | 6      | 0.003074858  | 0.004556492  | -0.000913392 |
| 5      | 7      | 0.000074727  | -0.002357739 | 0.001857963  |
| 6      | 6      | -0.000674640 | -0.002399798 | -0.002997924 |
| 7      | 6      | 0.000507255  | 0.000426351  | 0.001487299  |
| 8      | 1      | -0.000214802 | -0.000005270 | 0.000157441  |
| 9      | 1      | 0.000125306  | 0.000028709  | -0.000153381 |
| 10     | 1      | -0.000380137 | 0.000316730  | -0.000005002 |
| 11     | 1      | 0.000064139  | -0.000613079 | -0.000213023 |
| 12     | 1      | -0.000008393 | 0.000067937  | 0.000442074  |
| 13     | 1      | 0.000574632  | 0.000293418  | 0.000457683  |
| 14     | 35     | 0.000376837  | -0.000075329 | 0.000085210  |
| 15     | 1      | -0.000764419 | 0.000020415  | -0.000127384 |
| 16     | 6      | 0.000818959  | -0.000091995 | 0.000221936  |
| 17     | 6      | -0.000690649 | -0.000177086 | 0.000137986  |
| 18     | 1      | -0.000196502 | 0.000094812  | -0.000218886 |
| 19     | 1      | -0.000109128 | -0.000179676 | -0.000083696 |
| 20     | 1      | 0.000104057  | -0.000199469 | -0.000053359 |
| 21     | 7      | -0.004467821 | -0.001308588 | 0.000254890  |
| 22     | 1      | -0.000316673 | 0.000048565  | 0.000064089  |
| 23     | 1      | 0.001809951  | -0.000385056 | -0.000402204 |
| 24     | 6      | 0.000146283  | -0.000345690 | -0.000176241 |
| 25     | 6      | 0.000121191  | 0.000137409  | -0.000323606 |
| 26     | 8      | -0.000847817 | 0.000096871  | -0.000065934 |
| 27     | 1      | -0.000140240 | -0.000095394 | 0.000326553  |
| 28     | 1      | -0.000032763 | 0.000212063  | -0.000080247 |
| 29     | 1      | -0.000072988 | -0.000030618 | 0.000143338  |
| 30     | 6      | 0.000022950  | -0.000505971 | 0.000293215  |
| 31     | 1      | 0.000046951  | 0.000028978  | -0.000053339 |
| 32     | 1      | 0.000095146  | 0.000033489  | 0.000021839  |
| 33     | 1      | 0.000138825  | 0.000060044  | -0.000047889 |

-----  
Cartesian Forces: Max 0.004556492 RMS 0.000992421

GradGradGradGradGradGradGradGradGradGradGradGradGradGradGradGradGradGradGrad

Berny optimization.

FormGI is forming the generalized inverse of G from B-inverse, IUseBI=4.

GSVD: received Info= 1 from GESDD.

Internal Forces: Max 0.006211821 RMS 0.001033142

Search for a local minimum.



Step number 1 out of a maximum of 172

All quantities printed in internal units (Hartrees-Bohrs-Radians)

Mixed Optimization -- RFO/linear search

Second derivative matrix not updated -- first step.

ITU= 0

|                 |         |         |         |         |         |
|-----------------|---------|---------|---------|---------|---------|
| Eigenvalues --- | 0.00230 | 0.00230 | 0.00230 | 0.00230 | 0.00230 |
| Eigenvalues --- | 0.00345 | 0.00610 | 0.00723 | 0.00879 | 0.01386 |
| Eigenvalues --- | 0.01472 | 0.01855 | 0.01987 | 0.02083 | 0.02150 |
| Eigenvalues --- | 0.02267 | 0.02322 | 0.02357 | 0.02395 | 0.02455 |
| Eigenvalues --- | 0.03046 | 0.03070 | 0.03070 | 0.03192 | 0.03932 |
| Eigenvalues --- | 0.04045 | 0.04084 | 0.04617 | 0.04629 | 0.04653 |
| Eigenvalues --- | 0.05323 | 0.05690 | 0.05766 | 0.05905 | 0.08612 |
| Eigenvalues --- | 0.09523 | 0.11501 | 0.11968 | 0.12350 | 0.12513 |
| Eigenvalues --- | 0.12724 | 0.12870 | 0.15478 | 0.15998 | 0.15999 |
| Eigenvalues --- | 0.16000 | 0.16000 | 0.16000 | 0.16000 | 0.16000 |
| Eigenvalues --- | 0.16000 | 0.16000 | 0.16000 | 0.17091 | 0.21862 |
| Eigenvalues --- | 0.22000 | 0.22034 | 0.22817 | 0.23549 | 0.24962 |
| Eigenvalues --- | 0.24997 | 0.29255 | 0.29543 | 0.31741 | 0.32037 |
| Eigenvalues --- | 0.32534 | 0.33652 | 0.34270 | 0.34309 | 0.34337 |
| Eigenvalues --- | 0.34365 | 0.34539 | 0.34645 | 0.34703 | 0.35059 |
| Eigenvalues --- | 0.35064 | 0.35278 | 0.35448 | 0.35624 | 0.35886 |
| Eigenvalues --- | 0.36416 | 0.36618 | 0.36782 | 0.37950 | 0.41991 |
| Eigenvalues --- | 0.42640 | 0.44488 | 0.45462 | 0.45764 | 0.49182 |
| Eigenvalues --- | 0.54584 | 0.55852 | 0.60501 |         |         |

RFO step: Lambda=-2.45661923D-03 EMin= 2.30000000D-03

Linear search not attempted -- first point.

Maximum step size ( 0.300) exceeded in Quadratic search.

-- Step size scaled by 0.553

Iteration 1 RMS(Cart)= 0.26287808 RMS(Int)= 0.01154711

Iteration 2 RMS(Cart)= 0.14717316 RMS(Int)= 0.00231215

Iteration 3 RMS(Cart)= 0.00445979 RMS(Int)= 0.00114520

Iteration 4 RMS(Cart)= 0.00002865 RMS(Int)= 0.00114520

Iteration 5 RMS(Cart)= 0.00000021 RMS(Int)= 0.00114520

| Variable | Old X   | -DE/DX   | Delta X<br>(Linear) | Delta X<br>(Quad) | Delta X<br>(Total) | New X   |
|----------|---------|----------|---------------------|-------------------|--------------------|---------|
| R1       | 2.56568 | -0.00078 | 0.00000             | -0.00046          | -0.00046           | 2.56522 |
| R2       | 2.61936 | 0.00063  | 0.00000             | 0.00067           | 0.00068            | 2.62003 |
| R3       | 2.03435 | -0.00001 | 0.00000             | -0.00001          | -0.00001           | 2.03434 |
| R4       | 2.62939 | 0.00013  | 0.00000             | 0.00044           | 0.00044            | 2.62983 |
| R5       | 2.03126 | -0.00015 | 0.00000             | -0.00022          | -0.00022           | 2.03105 |
| R6       | 2.54415 | -0.00115 | 0.00000             | -0.00132          | -0.00133           | 2.54283 |
| R7       | 2.68935 | 0.00053  | 0.00000             | 0.00070           | 0.00070            | 2.69005 |
| R8       | 2.52939 | -0.00621 | 0.00000             | -0.00629          | -0.00630           | 2.52309 |
| R9       | 2.11320 | -0.00023 | 0.00000             | -0.00040          | -0.00040           | 2.11280 |

|     |         |          |         |          |          |         |
|-----|---------|----------|---------|----------|----------|---------|
| R10 | 2.80019 | -0.00453 | 0.00000 | -0.00723 | -0.00725 | 2.79294 |
| R11 | 2.89475 | 0.00036  | 0.00000 | 0.00068  | 0.00073  | 2.89548 |
| R12 | 2.06255 | -0.00044 | 0.00000 | -0.00070 | -0.00070 | 2.06185 |
| R13 | 2.06160 | -0.00031 | 0.00000 | -0.00048 | -0.00048 | 2.06111 |
| R14 | 2.06877 | 0.00022  | 0.00000 | 0.00035  | 0.00035  | 2.06913 |
| R15 | 2.07921 | 0.00013  | 0.00000 | 0.00021  | 0.00021  | 2.07942 |
| R16 | 2.76175 | -0.00385 | 0.00000 | -0.00575 | -0.00576 | 2.75599 |
| R17 | 4.06139 | 0.00032  | 0.00000 | 0.00361  | 0.00361  | 4.06500 |
| R18 | 2.50546 | 0.00077  | 0.00000 | 0.00070  | 0.00070  | 2.50616 |
| R19 | 2.04954 | -0.00020 | 0.00000 | -0.00031 | -0.00031 | 2.04924 |
| R20 | 2.04261 | 0.00018  | 0.00000 | 0.00028  | 0.00028  | 2.04289 |
| R21 | 2.04673 | -0.00022 | 0.00000 | -0.00034 | -0.00034 | 2.04640 |
| R22 | 1.91443 | -0.00004 | 0.00000 | -0.00005 | -0.00005 | 1.91437 |
| R23 | 1.92575 | 0.00148  | 0.00000 | 0.00183  | 0.00222  | 1.92796 |
| R24 | 3.85171 | -0.00005 | 0.00000 | -0.00061 | -0.00081 | 3.85091 |
| R25 | 2.76855 | 0.00020  | 0.00000 | 0.00095  | -0.00108 | 2.76747 |
| R26 | 2.72952 | -0.00006 | 0.00000 | -0.00031 | 0.00050  | 2.73002 |
| R27 | 2.05579 | -0.00029 | 0.00000 | -0.00045 | -0.00045 | 2.05534 |
| R28 | 2.05226 | 0.00000  | 0.00000 | 0.00000  | 0.00000  | 2.05226 |
| R29 | 2.74045 | 0.00030  | 0.00000 | 0.00005  | 0.00129  | 2.74175 |
| R30 | 2.05571 | 0.00013  | 0.00000 | 0.00020  | 0.00020  | 2.05591 |
| R31 | 2.84076 | 0.00040  | 0.00000 | 0.00069  | 0.00069  | 2.84145 |
| R32 | 2.06766 | -0.00004 | 0.00000 | -0.00007 | -0.00007 | 2.06759 |
| R33 | 2.06812 | -0.00001 | 0.00000 | -0.00001 | -0.00001 | 2.06811 |
| R34 | 2.06430 | 0.00016  | 0.00000 | 0.00025  | 0.00025  | 2.06455 |
| A1  | 1.87582 | -0.00113 | 0.00000 | -0.00199 | -0.00199 | 1.87383 |
| A2  | 2.27735 | 0.00032  | 0.00000 | 0.00015  | 0.00015  | 2.27750 |
| A3  | 2.12994 | 0.00081  | 0.00000 | 0.00182  | 0.00182  | 2.13175 |
| A4  | 1.86370 | -0.00122 | 0.00000 | -0.00155 | -0.00156 | 1.86214 |
| A5  | 2.27582 | 0.00055  | 0.00000 | 0.00057  | 0.00057  | 2.27639 |
| A6  | 2.14364 | 0.00067  | 0.00000 | 0.00099  | 0.00099  | 2.14463 |
| A7  | 1.89715 | 0.00076  | 0.00000 | 0.00193  | 0.00193  | 1.89908 |
| A8  | 2.25444 | 0.00034  | 0.00000 | 0.00065  | 0.00064  | 2.25508 |
| A9  | 2.13152 | -0.00110 | 0.00000 | -0.00252 | -0.00252 | 2.12899 |
| A10 | 1.88963 | -0.00033 | 0.00000 | -0.00191 | -0.00191 | 1.88771 |
| A11 | 2.19899 | 0.00024  | 0.00000 | 0.00120  | 0.00120  | 2.20019 |
| A12 | 2.19456 | 0.00009  | 0.00000 | 0.00071  | 0.00071  | 2.19527 |
| A13 | 1.89846 | 0.00192  | 0.00000 | 0.00351  | 0.00351  | 1.90197 |
| A14 | 2.20428 | 0.00279  | 0.00000 | 0.00644  | 0.00642  | 2.21070 |
| A15 | 2.17955 | -0.00472 | 0.00000 | -0.01005 | -0.01004 | 2.16952 |
| A16 | 1.97780 | -0.00383 | 0.00000 | -0.01005 | -0.00973 | 1.96807 |
| A17 | 1.85920 | 0.00086  | 0.00000 | -0.00170 | -0.00182 | 1.85738 |
| A18 | 1.88275 | 0.00130  | 0.00000 | 0.00489  | 0.00480  | 1.88755 |
| A19 | 1.91764 | 0.00086  | 0.00000 | 0.00002  | -0.00008 | 1.91756 |

|     |          |          |         |          |          |          |
|-----|----------|----------|---------|----------|----------|----------|
| A20 | 1.92599  | 0.00157  | 0.00000 | 0.00697  | 0.00688  | 1.93287  |
| A21 | 1.89776  | -0.00071 | 0.00000 | -0.00010 | -0.00006 | 1.89770  |
| A22 | 1.90792  | 0.00105  | 0.00000 | 0.00492  | 0.00500  | 1.91292  |
| A23 | 1.88670  | 0.00135  | 0.00000 | 0.00276  | 0.00289  | 1.88958  |
| A24 | 1.88584  | -0.00287 | 0.00000 | -0.00761 | -0.00801 | 1.87784  |
| A25 | 1.87726  | -0.00057 | 0.00000 | 0.00012  | 0.00005  | 1.87731  |
| A26 | 1.90304  | 0.00108  | 0.00000 | 0.00425  | 0.00437  | 1.90741  |
| A27 | 2.00172  | 0.00006  | 0.00000 | -0.00393 | -0.00381 | 1.99791  |
| A28 | 2.16943  | 0.00070  | 0.00000 | 0.00174  | 0.00174  | 2.17117  |
| A29 | 1.95173  | -0.00033 | 0.00000 | -0.00079 | -0.00079 | 1.95093  |
| A30 | 2.16199  | -0.00036 | 0.00000 | -0.00090 | -0.00091 | 2.16108  |
| A31 | 2.07890  | 0.00001  | 0.00000 | 0.00002  | 0.00002  | 2.07892  |
| A32 | 2.15812  | 0.00005  | 0.00000 | 0.00018  | 0.00018  | 2.15830  |
| A33 | 2.04616  | -0.00006 | 0.00000 | -0.00020 | -0.00020 | 2.04596  |
| A34 | 1.93808  | 0.00015  | 0.00000 | -0.00020 | 0.00650  | 1.94458  |
| A35 | 1.92507  | -0.00164 | 0.00000 | -0.00579 | -0.00388 | 1.92119  |
| A36 | 1.87897  | 0.00082  | 0.00000 | 0.00280  | 0.00074  | 1.87970  |
| A37 | 2.08984  | -0.00051 | 0.00000 | -0.00194 | -0.00004 | 2.08980  |
| A38 | 2.06695  | 0.00045  | 0.00000 | 0.00199  | -0.00008 | 2.06687  |
| A39 | 1.99362  | 0.00026  | 0.00000 | 0.00072  | -0.00026 | 1.99336  |
| A40 | 2.01021  | -0.00039 | 0.00000 | -0.00135 | -0.00076 | 2.00945  |
| A41 | 2.03429  | 0.00007  | 0.00000 | 0.00029  | 0.00034  | 2.03463  |
| A42 | 2.01638  | 0.00032  | 0.00000 | 0.00109  | -0.00071 | 2.01568  |
| A43 | 2.14013  | -0.00025 | 0.00000 | -0.00094 | 0.00077  | 2.14090  |
| A44 | 1.97124  | -0.00031 | 0.00000 | -0.00082 | -0.00017 | 1.97107  |
| A45 | 2.02503  | 0.00053  | 0.00000 | 0.00179  | 0.00069  | 2.02571  |
| A46 | 2.03987  | -0.00013 | 0.00000 | -0.00047 | -0.00035 | 2.03951  |
| A47 | 2.42962  | 0.00027  | 0.00000 | 0.00336  | 0.00201  | 2.43163  |
| A48 | 2.43694  | 0.00037  | 0.00000 | 0.00343  | 0.00182  | 2.43876  |
| A49 | 1.93282  | 0.00001  | 0.00000 | 0.00004  | 0.00004  | 1.93286  |
| A50 | 1.91868  | 0.00014  | 0.00000 | 0.00056  | 0.00056  | 1.91924  |
| A51 | 1.93879  | 0.00000  | 0.00000 | -0.00008 | -0.00008 | 1.93871  |
| A52 | 1.88107  | -0.00004 | 0.00000 | 0.00005  | 0.00005  | 1.88112  |
| A53 | 1.89326  | -0.00004 | 0.00000 | -0.00030 | -0.00030 | 1.89296  |
| A54 | 1.89784  | -0.00008 | 0.00000 | -0.00028 | -0.00028 | 1.89756  |
| A55 | 3.14159  | -0.00093 | 0.00000 | -0.10841 | -0.10841 | 3.03318  |
| A56 | 3.14728  | -0.00278 | 0.00000 | -0.27722 | -0.27898 | 2.86830  |
| A57 | 3.14159  | -0.00017 | 0.00000 | -0.01960 | -0.01960 | 3.12199  |
| A58 | 3.18695  | -0.00008 | 0.00000 | 0.00296  | 0.00029  | 3.18724  |
| D1  | 0.00150  | 0.00016  | 0.00000 | 0.00380  | 0.00379  | 0.00529  |
| D2  | -3.13144 | 0.00013  | 0.00000 | 0.00311  | 0.00311  | -3.12833 |
| D3  | 3.12970  | 0.00011  | 0.00000 | 0.00177  | 0.00175  | 3.13146  |
| D4  | -0.00324 | 0.00007  | 0.00000 | 0.00108  | 0.00107  | -0.00217 |
| D5  | -0.00475 | -0.00016 | 0.00000 | -0.00350 | -0.00352 | -0.00826 |

|     |          |          |         |          |          |          |
|-----|----------|----------|---------|----------|----------|----------|
| D6  | -3.10257 | 0.00006  | 0.00000 | -0.00085 | -0.00088 | -3.10345 |
| D7  | -3.13432 | -0.00011 | 0.00000 | -0.00167 | -0.00167 | -3.13600 |
| D8  | 0.05104  | 0.00011  | 0.00000 | 0.00098  | 0.00096  | 0.05200  |
| D9  | 0.00223  | -0.00013 | 0.00000 | -0.00283 | -0.00282 | -0.00060 |
| D10 | 3.13064  | 0.00008  | 0.00000 | 0.00236  | 0.00237  | 3.13301  |
| D11 | 3.13598  | -0.00010 | 0.00000 | -0.00221 | -0.00221 | 3.13377  |
| D12 | -0.01879 | 0.00011  | 0.00000 | 0.00299  | 0.00299  | -0.01580 |
| D13 | -0.00521 | 0.00003  | 0.00000 | 0.00068  | 0.00066  | -0.00454 |
| D14 | 3.13239  | 0.00004  | 0.00000 | 0.00055  | 0.00056  | 3.13295  |
| D15 | -3.13473 | -0.00017 | 0.00000 | -0.00410 | -0.00411 | -3.13884 |
| D16 | 0.00287  | -0.00016 | 0.00000 | -0.00423 | -0.00421 | -0.00135 |
| D17 | -0.00639 | 0.00003  | 0.00000 | 0.00049  | 0.00050  | -0.00590 |
| D18 | -3.13846 | -0.00023 | 0.00000 | -0.00494 | -0.00494 | 3.13979  |
| D19 | 3.12046  | 0.00027  | 0.00000 | 0.00634  | 0.00633  | 3.12679  |
| D20 | -0.01161 | 0.00002  | 0.00000 | 0.00090  | 0.00090  | -0.01071 |
| D21 | 0.00615  | 0.00008  | 0.00000 | 0.00172  | 0.00174  | 0.00789  |
| D22 | 3.10474  | 0.00010  | 0.00000 | -0.00038 | -0.00032 | 3.10442  |
| D23 | -3.13146 | 0.00006  | 0.00000 | 0.00185  | 0.00184  | -3.12962 |
| D24 | -0.03287 | 0.00008  | 0.00000 | -0.00026 | -0.00022 | -0.03309 |
| D25 | 1.42900  | 0.00047  | 0.00000 | 0.01175  | 0.01173  | 1.44073  |
| D26 | -2.74354 | -0.00020 | 0.00000 | 0.00455  | 0.00460  | -2.73894 |
| D27 | -0.70859 | 0.00005  | 0.00000 | 0.00599  | 0.00597  | -0.70261 |
| D28 | -1.66207 | 0.00052  | 0.00000 | 0.01440  | 0.01434  | -1.64773 |
| D29 | 0.44857  | -0.00015 | 0.00000 | 0.00720  | 0.00721  | 0.45578  |
| D30 | 2.48353  | 0.00011  | 0.00000 | 0.00864  | 0.00858  | 2.49211  |
| D31 | -1.11654 | -0.00063 | 0.00000 | -0.02034 | -0.02036 | -1.13690 |
| D32 | 0.92201  | 0.00001  | 0.00000 | -0.01599 | -0.01593 | 0.90608  |
| D33 | 3.09776  | -0.00087 | 0.00000 | -0.02382 | -0.02376 | 3.07400  |
| D34 | 3.08932  | 0.00019  | 0.00000 | -0.01164 | -0.01172 | 3.07759  |
| D35 | -1.15531 | 0.00083  | 0.00000 | -0.00729 | -0.00730 | -1.16261 |
| D36 | 1.02044  | -0.00005 | 0.00000 | -0.01512 | -0.01513 | 1.00531  |
| D37 | 0.99686  | -0.00046 | 0.00000 | -0.01593 | -0.01596 | 0.98091  |
| D38 | 3.03542  | 0.00018  | 0.00000 | -0.01157 | -0.01153 | 3.02389  |
| D39 | -1.07202 | -0.00070 | 0.00000 | -0.01941 | -0.01936 | -1.09137 |
| D40 | 2.86870  | 0.00026  | 0.00000 | 0.00855  | 0.00700  | 2.87570  |
| D41 | -1.33295 | 0.00033  | 0.00000 | 0.00816  | 0.00955  | -1.32340 |
| D42 | 0.79671  | 0.00004  | 0.00000 | 0.00462  | 0.00318  | 0.79989  |
| D43 | 2.87824  | 0.00010  | 0.00000 | 0.00423  | 0.00573  | 2.88397  |
| D44 | -1.30913 | -0.00006 | 0.00000 | 0.00398  | 0.00246  | -1.30667 |
| D45 | 0.77240  | 0.00000  | 0.00000 | 0.00359  | 0.00501  | 0.77741  |
| D46 | -3.13475 | -0.00026 | 0.00000 | -0.00496 | -0.00496 | -3.13971 |
| D47 | 0.00412  | -0.00009 | 0.00000 | -0.00219 | -0.00219 | 0.00193  |
| D48 | -0.00381 | 0.00003  | 0.00000 | 0.00111  | 0.00111  | -0.00269 |
| D49 | 3.13506  | 0.00019  | 0.00000 | 0.00389  | 0.00389  | 3.13894  |

|     |          |          |         |          |          |          |
|-----|----------|----------|---------|----------|----------|----------|
| D50 | 1.23827  | -0.00007 | 0.00000 | -0.06000 | -0.05313 | 1.18514  |
| D51 | -0.54990 | 0.00059  | 0.00000 | 0.09629  | 0.09681  | -0.45309 |
| D52 | -2.94408 | -0.00048 | 0.00000 | -0.08250 | -0.08313 | -3.02721 |
| D53 | 1.55094  | 0.00018  | 0.00000 | 0.07379  | 0.06680  | 1.61774  |
| D54 | -2.70450 | 0.00002  | 0.00000 | 0.00009  | 0.00021  | -2.70429 |
| D55 | -0.01281 | -0.00012 | 0.00000 | -0.00077 | -0.00061 | -0.01342 |
| D56 | -0.02586 | 0.00007  | 0.00000 | 0.00097  | 0.00083  | -0.02502 |
| D57 | 2.66583  | -0.00007 | 0.00000 | 0.00010  | 0.00002  | 2.66584  |
| D58 | 2.00606  | -0.00002 | 0.00000 | -0.00432 | -0.00285 | 2.00321  |
| D59 | -0.41768 | 0.00002  | 0.00000 | -0.00402 | -0.00217 | -0.41985 |
| D60 | 0.45243  | 0.00008  | 0.00000 | 0.00534  | 0.00358  | 0.45601  |
| D61 | -1.97095 | 0.00003  | 0.00000 | 0.00497  | 0.00354  | -1.96741 |
| D62 | 2.55225  | -0.00001 | 0.00000 | -0.00038 | -0.00007 | 2.55218  |
| D63 | -1.65421 | 0.00004  | 0.00000 | 0.00006  | 0.00038  | -1.65383 |
| D64 | 0.44720  | 0.00003  | 0.00000 | 0.00002  | 0.00034  | 0.44754  |
| D65 | 1.34982  | -0.00005 | 0.00000 | -0.00060 | -0.00083 | 1.34899  |
| D66 | -2.85663 | 0.00000  | 0.00000 | -0.00016 | -0.00039 | -2.85702 |
| D67 | -0.75523 | -0.00001 | 0.00000 | -0.00019 | -0.00043 | -0.75565 |
| D68 | -1.04487 | -0.00005 | 0.00000 | -0.00089 | -0.00097 | -1.04585 |
| D69 | 1.03186  | 0.00000  | 0.00000 | -0.00045 | -0.00053 | 1.03133  |
| D70 | 3.13326  | 0.00000  | 0.00000 | -0.00048 | -0.00057 | 3.13269  |

| Item                 | Value    | Threshold | Converged? |
|----------------------|----------|-----------|------------|
| Maximum Force        | 0.006212 | 0.000450  | NO         |
| RMS Force            | 0.001033 | 0.000300  | NO         |
| Maximum Displacement | 1.721010 | 0.001800  | NO         |
| RMS Displacement     | 0.406857 | 0.001200  | NO         |

Predicted change in Energy=-1.125349D-03

GradGradGradGradGradGradGradGradGradGradGradGradGradGradGradGradGradGradGrad

Input orientation:

| Center Number | Atomic Number | Atomic Type | Coordinates (Angstroms) |           |           |
|---------------|---------------|-------------|-------------------------|-----------|-----------|
|               |               |             | X                       | Y         | Z         |
| 1             | 6             | 0           | -2.765904               | 2.070912  | -0.269591 |
| 2             | 6             | 0           | -3.621789               | 1.068366  | 0.054519  |
| 3             | 7             | 0           | -2.864730               | -0.097392 | 0.121944  |
| 4             | 6             | 0           | -1.582615               | 0.201191  | -0.156773 |
| 5             | 7             | 0           | -1.504508               | 1.511125  | -0.402991 |
| 6             | 6             | 0           | -0.248045               | 2.228488  | -0.704740 |
| 7             | 6             | 0           | 0.389590                | 2.856228  | 0.539072  |
| 8             | 1             | 0           | -2.946325               | 3.120423  | -0.427342 |
| 9             | 1             | 0           | -4.681690               | 1.086811  | 0.231798  |
| 10            | 1             | 0           | 0.430883                | 1.492489  | -1.138125 |

|    |    |   |           |           |           |
|----|----|---|-----------|-----------|-----------|
| 11 | 1  | 0 | -0.463595 | 2.990494  | -1.454740 |
| 12 | 1  | 0 | -0.266408 | 3.639666  | 0.932482  |
| 13 | 1  | 0 | 0.477451  | 2.077734  | 1.311774  |
| 14 | 35 | 0 | 1.048560  | -1.731187 | -0.123782 |
| 15 | 1  | 0 | -0.728101 | -0.519555 | -0.175496 |
| 16 | 6  | 0 | -3.279580 | -1.422960 | 0.433645  |
| 17 | 6  | 0 | -4.525158 | -1.767820 | 0.730998  |
| 18 | 1  | 0 | -2.450795 | -2.121620 | 0.403077  |
| 19 | 1  | 0 | -4.745061 | -2.802012 | 0.956296  |
| 20 | 1  | 0 | -5.350491 | -1.067475 | 0.763078  |
| 21 | 7  | 0 | 1.658221  | 3.449554  | 0.132263  |
| 22 | 1  | 0 | 2.010705  | 4.087510  | 0.835843  |
| 23 | 1  | 0 | 2.358402  | 2.720071  | -0.003670 |
| 24 | 6  | 0 | 3.346493  | -0.212708 | -1.065515 |
| 25 | 6  | 0 | 3.276232  | -0.406680 | 0.384362  |
| 26 | 8  | 0 | 3.314082  | 0.929000  | -0.180925 |
| 27 | 1  | 0 | 4.293409  | -0.349405 | -1.582835 |
| 28 | 1  | 0 | 2.445670  | -0.367513 | -1.652005 |
| 29 | 1  | 0 | 2.296391  | -0.674523 | 0.773957  |
| 30 | 6  | 0 | 4.468008  | -0.809555 | 1.207928  |
| 31 | 1  | 0 | 4.424707  | -0.353208 | 2.201392  |
| 32 | 1  | 0 | 4.481301  | -1.895933 | 1.339480  |
| 33 | 1  | 0 | 5.399807  | -0.503147 | 0.726838  |

-----  
Distance matrix (angstroms):

|    |    | 1        | 2        | 3        | 4        | 5        |
|----|----|----------|----------|----------|----------|----------|
| 1  | C  | 0.000000 |          |          |          |          |
| 2  | C  | 1.357455 | 0.000000 |          |          |          |
| 3  | N  | 2.205586 | 1.391646 | 0.000000 |          |          |
| 4  | C  | 2.215572 | 2.225953 | 1.345605 | 0.000000 |          |
| 5  | N  | 1.386462 | 2.210934 | 2.170965 | 1.335160 | 0.000000 |
| 6  | C  | 2.560039 | 3.647534 | 3.597244 | 2.488228 | 1.477959 |
| 7  | C  | 3.350792 | 4.418417 | 4.414575 | 3.379796 | 2.506870 |
| 8  | H  | 1.076527 | 2.213454 | 3.265380 | 3.233393 | 2.160849 |
| 9  | H  | 2.211353 | 1.074783 | 2.171578 | 3.246471 | 3.267642 |
| 10 | H  | 3.362793 | 4.245755 | 3.869956 | 2.585475 | 2.070389 |
| 11 | H  | 2.747878 | 3.993323 | 4.217395 | 3.273704 | 2.092417 |
| 12 | H  | 3.186448 | 4.317520 | 4.623187 | 3.839530 | 2.801262 |
| 13 | H  | 3.608340 | 4.404916 | 4.161375 | 3.149907 | 2.681348 |
| 14 | Br | 5.387704 | 5.448069 | 4.247765 | 3.264698 | 4.136267 |
| 15 | H  | 3.297275 | 3.308751 | 2.198153 | 1.118043 | 2.185915 |
| 16 | C  | 3.600770 | 2.543137 | 1.423512 | 2.422013 | 3.529829 |
| 17 | C  | 4.339587 | 3.052483 | 2.432755 | 3.650164 | 4.600189 |
| 18 | H  | 4.257828 | 3.415953 | 2.085156 | 2.542168 | 3.839536 |

|    |    |          |          |          |           |          |
|----|----|----------|----------|----------|-----------|----------|
| 19 | H  | 5.400487 | 4.129743 | 3.398052 | 4.501024  | 5.563452 |
| 20 | H  | 4.194754 | 2.837654 | 2.744288 | 4.080750  | 4.774984 |
| 21 | N  | 4.651347 | 5.792634 | 5.747871 | 4.597654  | 3.747914 |
| 22 | H  | 5.301381 | 6.438220 | 6.464744 | 5.385230  | 4.530915 |
| 23 | H  | 5.172101 | 6.204369 | 5.935906 | 4.679723  | 4.067319 |
| 24 | C  | 6.573417 | 7.173045 | 6.324764 | 5.029238  | 5.190641 |
| 25 | C  | 6.563042 | 7.061675 | 6.154343 | 4.926533  | 5.210890 |
| 26 | O  | 6.186927 | 6.941265 | 6.270800 | 4.950549  | 4.858703 |
| 27 | H  | 7.577365 | 8.206179 | 7.362658 | 6.071612  | 6.202375 |
| 28 | H  | 5.917558 | 6.464367 | 5.605373 | 4.334308  | 4.548981 |
| 29 | H  | 5.852627 | 6.211289 | 5.234059 | 4.084094  | 4.539724 |
| 30 | C  | 7.925253 | 8.384614 | 7.446850 | 6.284429  | 6.606933 |
| 31 | H  | 7.980413 | 8.448433 | 7.584552 | 6.477362  | 6.739001 |
| 32 | H  | 8.417063 | 8.723432 | 7.660373 | 6.588458  | 7.104517 |
| 33 | H  | 8.619599 | 9.182094 | 8.296572 | 7.073265  | 7.280342 |
|    |    | 6        | 7        | 8        | 9         | 10       |
| 6  | C  | 0.000000 |          |          |           |          |
| 7  | C  | 1.532222 | 0.000000 |          |           |          |
| 8  | H  | 2.855383 | 3.483115 | 0.000000 |           |          |
| 9  | H  | 4.673086 | 5.379883 | 2.753459 | 0.000000  |          |
| 10 | H  | 1.091083 | 2.162055 | 3.815877 | 5.308453  | 0.000000 |
| 11 | H  | 1.090695 | 2.172841 | 2.690051 | 4.925520  | 1.773234 |
| 12 | H  | 2.161540 | 1.094934 | 3.049703 | 5.148081  | 3.063332 |
| 13 | H  | 2.148348 | 1.100382 | 3.979192 | 5.363303  | 2.519263 |
| 14 | Br | 4.206866 | 4.681666 | 6.292009 | 6.395570  | 3.435477 |
| 15 | H  | 2.839418 | 3.627086 | 4.270057 | 4.286860  | 2.513607 |
| 16 | C  | 4.880491 | 5.637852 | 4.636236 | 2.881944  | 4.973714 |
| 17 | C  | 6.027065 | 6.750808 | 5.265870 | 2.902175  | 6.219773 |
| 18 | H  | 5.000280 | 5.732822 | 5.330494 | 3.911555  | 4.872489 |
| 19 | H  | 6.948966 | 7.652085 | 6.342330 | 3.956243  | 7.044128 |
| 20 | H  | 6.249225 | 6.956591 | 4.973490 | 2.317434  | 6.602444 |
| 21 | N  | 2.413592 | 1.458408 | 4.650090 | 6.766604  | 2.636351 |
| 22 | H  | 3.306253 | 2.057216 | 5.206058 | 7.359158  | 3.623054 |
| 23 | H  | 2.743486 | 2.046784 | 5.336657 | 7.230897  | 2.551328 |
| 24 | C  | 4.360080 | 4.553717 | 7.149586 | 8.235502  | 3.378424 |
| 25 | C  | 4.533297 | 4.359267 | 7.198579 | 8.098291  | 3.744438 |
| 26 | O  | 3.827767 | 3.575647 | 6.637451 | 8.007972  | 3.089755 |
| 27 | H  | 5.295412 | 5.478903 | 8.111019 | 9.268658  | 4.302261 |
| 28 | H  | 3.859098 | 4.406902 | 6.537516 | 7.514189  | 2.789811 |
| 29 | H  | 4.133784 | 4.019610 | 6.582614 | 7.217330  | 3.439784 |
| 30 | C  | 5.926985 | 5.524384 | 8.549337 | 9.394999  | 5.205934 |
| 31 | H  | 6.078269 | 5.417190 | 8.562036 | 9.427588  | 5.523549 |
| 32 | H  | 6.599727 | 6.321849 | 9.135377 | 9.699697  | 5.833165 |
| 33 | H  | 6.435019 | 6.035141 | 9.171713 | 10.218102 | 5.670172 |

|    |    | 11       | 12        | 13       | 14        | 15        |
|----|----|----------|-----------|----------|-----------|-----------|
| 11 | H  | 0.000000 |           |          |           |           |
| 12 | H  | 2.481760 | 0.000000  |          |           |           |
| 13 | H  | 3.061421 | 1.771108  | 0.000000 |           |           |
| 14 | Br | 5.133453 | 5.629467  | 4.110336 | 0.000000  |           |
| 15 | H  | 3.745247 | 4.328960  | 3.226645 | 2.151104  | 0.000000  |
| 16 | C  | 5.565460 | 5.912548  | 5.209726 | 4.374760  | 2.774390  |
| 17 | C  | 6.626862 | 6.886106  | 6.336536 | 5.639000  | 4.098480  |
| 18 | H  | 5.790869 | 6.184192  | 5.199512 | 3.560267  | 2.422609  |
| 19 | H  | 7.595866 | 7.845644  | 7.156321 | 5.989932  | 4.756736  |
| 20 | H  | 6.728118 | 6.930640  | 6.645172 | 6.494219  | 4.748434  |
| 21 | N  | 2.689130 | 2.093010  | 2.160406 | 5.222769  | 4.641452  |
| 22 | H  | 3.545754 | 2.322745  | 2.572270 | 5.975269  | 5.454256  |
| 23 | H  | 3.184713 | 2.934563  | 2.383477 | 4.641531  | 4.477856  |
| 24 | C  | 4.992872 | 5.646754  | 4.373674 | 2.910865  | 4.181937  |
| 25 | C  | 5.376746 | 5.405891  | 3.855590 | 2.641032  | 4.044856  |
| 26 | O  | 4.488119 | 4.626802  | 3.405027 | 3.494632  | 4.293901  |
| 27 | H  | 5.813814 | 6.559836  | 5.369478 | 3.816701  | 5.217769  |
| 28 | H  | 4.447353 | 5.485656  | 4.317071 | 2.479312  | 3.503715  |
| 29 | H  | 5.100682 | 5.020488  | 3.342559 | 1.865357  | 3.173803  |
| 30 | C  | 6.771328 | 6.502779  | 4.926638 | 3.783580  | 5.384933  |
| 31 | H  | 6.960110 | 6.289653  | 4.720352 | 4.324769  | 5.677032  |
| 32 | H  | 7.492452 | 7.304057  | 5.641064 | 3.735236  | 5.597091  |
| 33 | H  | 7.165493 | 7.022192  | 5.588620 | 4.600542  | 6.194007  |
|    |    | 16       | 17        | 18       | 19        | 20        |
| 16 | C  | 0.000000 |           |          |           |           |
| 17 | C  | 1.326202 | 0.000000  |          |           |           |
| 18 | H  | 1.084411 | 2.129716  | 0.000000 |           |           |
| 19 | H  | 2.079083 | 1.081051  | 2.456144 | 0.000000  |           |
| 20 | H  | 2.126868 | 1.082906  | 3.106293 | 1.847295  | 0.000000  |
| 21 | N  | 6.943637 | 8.112561  | 6.927866 | 8.986831  | 8.362028  |
| 22 | H  | 7.649454 | 8.775726  | 7.658038 | 9.649891  | 8.987010  |
| 23 | H  | 7.010191 | 8.250109  | 6.836357 | 9.048432  | 8.623249  |
| 24 | C  | 6.900509 | 8.222452  | 6.277679 | 8.733010  | 8.928152  |
| 25 | C  | 6.634299 | 7.926824  | 5.978311 | 8.390820  | 8.660278  |
| 26 | O  | 7.027502 | 8.340152  | 6.548370 | 8.953408  | 8.941581  |
| 27 | H  | 7.910049 | 9.226747  | 7.250440 | 9.703423  | 9.951067  |
| 28 | H  | 6.184043 | 7.498801  | 5.592461 | 8.027244  | 8.191624  |
| 29 | H  | 5.636259 | 6.908739  | 4.976687 | 7.358091  | 7.656979  |
| 30 | C  | 7.810307 | 9.056642  | 7.087956 | 9.429414  | 9.831954  |
| 31 | H  | 7.976549 | 9.179502  | 7.323505 | 9.572437  | 9.906231  |
| 32 | H  | 7.827868 | 9.027899  | 6.998695 | 9.278662  | 9.883456  |
| 33 | H  | 8.732913 | 10.005216 | 8.022233 | 10.404604 | 10.765160 |
|    |    | 21       | 22        | 23       | 24        | 25        |



|    |   |          |          |          |          |          |
|----|---|----------|----------|----------|----------|----------|
| 21 | N | 0.000000 |          |          |          |          |
| 22 | H | 1.013043 | 0.000000 |          |          |          |
| 23 | H | 1.020233 | 1.641817 | 0.000000 |          |          |
| 24 | C | 4.206791 | 4.887879 | 3.271854 | 0.000000 |          |
| 25 | C | 4.189517 | 4.690750 | 3.281700 | 1.464481 | 0.000000 |
| 26 | O | 3.032021 | 3.564939 | 2.037812 | 1.444662 | 1.450870 |
| 27 | H | 4.931315 | 5.544994 | 3.957234 | 1.087638 | 2.215354 |
| 28 | H | 4.286454 | 5.121114 | 3.501113 | 1.086009 | 2.199581 |
| 29 | H | 4.222208 | 4.770996 | 3.483075 | 2.167866 | 1.087939 |
| 30 | C | 5.214591 | 5.491633 | 4.286802 | 2.604336 | 1.503629 |
| 31 | H | 5.137677 | 5.235656 | 4.310099 | 3.443104 | 2.150222 |
| 32 | H | 6.164526 | 6.493002 | 5.255306 | 3.147227 | 2.140634 |
| 33 | H | 5.475109 | 5.707190 | 4.491427 | 2.740982 | 2.153176 |
|    |   | 26       | 27       | 28       | 29       | 30       |
| 26 | O | 0.000000 |          |          |          |          |
| 27 | H | 2.135124 | 0.000000 |          |          |          |
| 28 | H | 2.144565 | 1.849122 | 0.000000 |          |          |
| 29 | H | 2.125742 | 3.106164 | 2.449863 | 0.000000 |          |
| 30 | C | 2.506598 | 2.833828 | 3.530505 | 2.218667 | 0.000000 |
| 31 | H | 2.924547 | 3.786506 | 4.331911 | 2.582739 | 1.094120 |
| 32 | H | 3.413836 | 3.311643 | 3.927956 | 2.566221 | 1.094394 |
| 33 | H | 2.687997 | 2.565608 | 3.795288 | 3.108501 | 1.092512 |
|    |   | 31       | 32       | 33       |          |          |
| 31 | H | 0.000000 |          |          |          |          |
| 32 | H | 1.768077 | 0.000000 |          |          |          |
| 33 | H | 1.774150 | 1.777311 | 0.000000 |          |          |

Stoichiometry C10H18BrN3O

Framework group C1[X(C10H18BrN3O)]

Deg. of freedom 93

Full point group C1 NOp 1

Largest Abelian subgroup C1 NOp 1

Largest concise Abelian subgroup C1 NOp 1

Standard orientation:

| Center<br>Number | Atomic<br>Number | Atomic<br>Type | Coordinates (Angstroms) |           |           |
|------------------|------------------|----------------|-------------------------|-----------|-----------|
|                  |                  |                | X                       | Y         | Z         |
| 1                | 6                | 0              | -3.008134               | 1.867739  | -0.215860 |
| 2                | 6                | 0              | -3.825724               | 0.816787  | 0.048207  |
| 3                | 7                | 0              | -3.023839               | -0.320548 | 0.059392  |
| 4                | 6                | 0              | -1.752950               | 0.042151  | -0.193480 |
| 5                | 7                | 0              | -1.725021               | 1.365389  | -0.369297 |
| 6                | 6                | 0              | -0.496087               | 2.146183  | -0.623154 |
| 7                | 6                | 0              | 0.109656                | 2.731109  | 0.656940  |

|    |    |   |           |           |           |
|----|----|---|-----------|-----------|-----------|
| 8  | 1  | 0 | -3.228780 | 2.916343  | -0.319084 |
| 9  | 1  | 0 | -4.886476 | 0.784482  | 0.218265  |
| 10 | 1  | 0 | 0.213562  | 1.461312  | -1.089856 |
| 11 | 1  | 0 | -0.737335 | 2.938097  | -1.333286 |
| 12 | 1  | 0 | -0.578727 | 3.466339  | 1.086412  |
| 13 | 1  | 0 | 0.223840  | 1.916562  | 1.387910  |
| 14 | 35 | 0 | 0.951874  | -1.785334 | -0.243283 |
| 15 | 1  | 0 | -0.870698 | -0.642758 | -0.243991 |
| 16 | 6  | 0 | -3.387987 | -1.675985 | 0.297244  |
| 17 | 6  | 0 | -4.620652 | -2.084430 | 0.566547  |
| 18 | 1  | 0 | -2.532247 | -2.339227 | 0.235885  |
| 19 | 1  | 0 | -4.800983 | -3.136934 | 0.735032  |
| 20 | 1  | 0 | -5.473016 | -1.419454 | 0.629531  |
| 21 | 7  | 0 | 1.356189  | 3.394208  | 0.291688  |
| 22 | 1  | 0 | 1.679529  | 4.007009  | 1.030730  |
| 23 | 1  | 0 | 2.085206  | 2.700818  | 0.122516  |
| 24 | 6  | 0 | 3.193460  | -0.130524 | -1.085917 |
| 25 | 6  | 0 | 3.123021  | -0.404059 | 0.351066  |
| 26 | 8  | 0 | 3.111442  | 0.960303  | -0.142297 |
| 27 | 1  | 0 | 4.147802  | -0.202494 | -1.602646 |
| 28 | 1  | 0 | 2.302602  | -0.288814 | -1.686527 |
| 29 | 1  | 0 | 2.152360  | -0.730223 | 0.718554  |
| 30 | 6  | 0 | 4.325223  | -0.803537 | 1.161020  |
| 31 | 1  | 0 | 4.258653  | -0.402802 | 2.176933  |
| 32 | 1  | 0 | 4.380462  | -1.894038 | 1.234876  |
| 33 | 1  | 0 | 5.246860  | -0.435886 | 0.703855  |

-----  
Rotational constants (GHZ):      0.5606114      0.2692082      0.1925052

Standard basis: 6-311++G(d,p) (5D, 7F)

There are 499 symmetry adapted cartesian basis functions of A symmetry.

There are 482 symmetry adapted basis functions of A symmetry.

482 basis functions, 760 primitive gaussians, 499 cartesian basis functions

71 alpha electrons      71 beta electrons

nuclear repulsion energy      1360.4068164194 Hartrees.

NAtoms= 33 NActive= 33 NUniq= 33 SFac= 1.00D+00 NATFMM= 60 NAOKFM=F

Big=F

Integral buffers will be 131072 words long.

Raffenetti 2 integral format.

Two-electron integral symmetry is turned on.

One-electron integrals computed using PRISM.

NBasis= 482 RedAO= T EigKep= 3.81D-06 NBF= 482

NBsUse= 482 1.00D-06 EigRej= -1.00D+00 NBFU= 482

Initial guess from the checkpoint file:

"/home/suqian/liuwen/qianmengshijie/nh2po/nh2po.chk"

B after Tr= 0.000000 0.000000 0.000000  
 Rot= 0.999061 -0.020329 0.006155 -0.037753 Ang= -4.97 deg.  
 ExpMin= 3.50D-02 ExpMax= 4.40D+05 ExpMxC= 1.51D+04 IAcc=3 IRadAn= 5 AccDes=  
 0.00D+00  
 Harris functional with IExCor= 402 and IRadAn= 5 diagonalized for initial guess.  
 HarFok: IExCor= 402 AccDes= 0.00D+00 IRadAn= 5 IDoV= 1 UseB2=F ITyADJ=14  
 ICtDFT= 3500011 ScaDFX= 1.000000 1.000000 1.000000 1.000000  
 FoFCou: FMM=F IPFlag= 0 FMFlag= 100000 FMFlg1= 0  
 NFxFlg= 0 DoJE=T BraDBF=F KetDBF=T FulRan=T  
 wScrn= 0.000000 ICntrl= 500 IOpCl= 0 I1Cent= 200000004 NGrid=  
 0  
 NMat0= 1 NMatS0= 1 NMatT0= 0 NMatD0= 1 NMtDS0= 0  
 NMtDT0= 0

Petite list used in FoFCou.

Requested convergence on RMS density matrix=1.00D-08 within 128 cycles.

Requested convergence on MAX density matrix=1.00D-06.

Requested convergence on energy=1.00D-06.

No special actions if energy rises.

SCF Done: E(RB3LYP) = -3205.58899522 A.U. after 13 cycles

NFock= 13 Conv=0.39D-08 -V/T= 2.0017

Calling FoFJK, ICntrl= 2127 FMM=F ISym2X=0 I1Cent= 0 IOpClX= 0 NMat=1 NMatS=1  
 NMatT=0.

\*\*\*\*\* Axes restored to original set \*\*\*\*\*

| Center<br>Number | Atomic<br>Number | Forces (Hartrees/Bohr) |              |              |
|------------------|------------------|------------------------|--------------|--------------|
|                  |                  | X                      | Y            | Z            |
| 1                | 6                | -0.000025924           | -0.000407442 | -0.000270628 |
| 2                | 6                | -0.000141644           | -0.000298377 | 0.000239676  |
| 3                | 7                | -0.000085869           | 0.000205728  | 0.000514613  |
| 4                | 6                | 0.001594701            | 0.001947172  | -0.001242721 |
| 5                | 7                | -0.000180504           | -0.000764364 | 0.000719707  |
| 6                | 6                | 0.000020360            | -0.001640552 | -0.001669958 |
| 7                | 6                | 0.002036129            | 0.000219340  | 0.000575917  |
| 8                | 1                | 0.000051849            | -0.000040660 | 0.000100671  |
| 9                | 1                | 0.000085700            | -0.000069878 | 0.000005950  |
| 10               | 1                | 0.000281657            | 0.000963512  | 0.000391193  |
| 11               | 1                | -0.000017674           | -0.000219099 | 0.000076468  |
| 12               | 1                | -0.000079401           | 0.000165660  | 0.000067399  |
| 13               | 1                | 0.000160590            | -0.000045250 | 0.000178920  |
| 14               | 35               | -0.076919862           | -0.053444292 | -0.016699409 |
| 15               | 1                | -0.002500044           | 0.001613144  | 0.000272783  |
| 16               | 6                | 0.000071804            | 0.000257217  | -0.000053901 |
| 17               | 6                | -0.000177319           | -0.000288476 | -0.000024321 |

|    |   |              |              |              |
|----|---|--------------|--------------|--------------|
| 18 | 1 | -0.000223780 | 0.000020942  | -0.000016913 |
| 19 | 1 | -0.000052592 | -0.000089982 | -0.000003722 |
| 20 | 1 | 0.000095817  | -0.000052515 | 0.000041254  |
| 21 | 7 | -0.001416445 | 0.000648887  | 0.000140739  |
| 22 | 1 | -0.000950901 | 0.000237208  | 0.000317852  |
| 23 | 1 | 0.000105404  | -0.001556439 | -0.000343172 |
| 24 | 6 | 0.007399900  | 0.003976953  | 0.000542228  |
| 25 | 6 | 0.029861960  | 0.016698051  | 0.011426177  |
| 26 | 8 | 0.002714725  | 0.012935484  | -0.002717922 |
| 27 | 1 | 0.001549812  | 0.000095349  | 0.000018716  |
| 28 | 1 | 0.005527422  | 0.001663647  | 0.000139437  |
| 29 | 1 | 0.026534596  | 0.016998375  | 0.009175826  |
| 30 | 6 | 0.003067638  | 0.000247701  | -0.002422418 |
| 31 | 1 | -0.000172884 | 0.000371396  | 0.000085807  |
| 32 | 1 | -0.000236071 | -0.000053520 | -0.000112932 |
| 33 | 1 | 0.002020850  | -0.000294921 | 0.000546682  |

-----  
Cartesian Forces: Max 0.076919862 RMS 0.010906056

GradGradGradGradGradGradGradGradGradGradGradGradGradGradGradGradGradGradGrad  
Berny optimization.

Using GEDIIS/GDIIS optimizer.

FormGI is forming the generalized inverse of G from B-inverse, IUseBI=4.

Internal Forces: Max 0.512398338 RMS 0.091708097

Search for a local minimum.

Step number 2 out of a maximum of 172

All quantities printed in internal units (Hartrees-Bohrs-Radians)

Mixed Optimization -- RFO/linear search

Update second derivatives using D2CorX and points 2 1

DE= 5.72D-02 DEPred=-1.13D-03 R=-5.09D+01

Trust test=-5.09D+01 RLast= 3.43D-01 DXMaxT set to 1.50D-01

ITU= -1 0

Use linear search instead of GDIIS.

Energy rises -- skip Quadratic/GDIIS search.

Quartic linear search produced a step of -0.86213.

Iteration 1 RMS(Cart)= 0.26964107 RMS(Int)= 0.00918628

Iteration 2 RMS(Cart)= 0.08749322 RMS(Int)= 0.00079809

Iteration 3 RMS(Cart)= 0.00242295 RMS(Int)= 0.00013539

Iteration 4 RMS(Cart)= 0.00000086 RMS(Int)= 0.00013539

| Variable | Old X   | -DE/DX   | Delta X<br>(Linear) | Delta X<br>(Quad) | Delta X<br>(Total) | New X   |
|----------|---------|----------|---------------------|-------------------|--------------------|---------|
| R1       | 2.56522 | -0.04482 | 0.00040             | 0.00000           | 0.00040            | 2.56562 |
| R2       | 2.62003 | 0.02700  | -0.00058            | 0.00000           | -0.00058           | 2.61945 |
| R3       | 2.03434 | -0.00006 | 0.00001             | 0.00000           | 0.00001            | 2.03435 |

|     |         |          |          |         |          |         |
|-----|---------|----------|----------|---------|----------|---------|
| R4  | 2.62983 | -0.05381 | -0.00038 | 0.00000 | -0.00037 | 2.62945 |
| R5  | 2.03105 | -0.00008 | 0.00019  | 0.00000 | 0.00019  | 2.03123 |
| R6  | 2.54283 | 0.01307  | 0.00115  | 0.00000 | 0.00115  | 2.54397 |
| R7  | 2.69005 | 0.00022  | -0.00060 | 0.00000 | -0.00060 | 2.68945 |
| R8  | 2.52309 | 0.11254  | 0.00544  | 0.00000 | 0.00544  | 2.52852 |
| R9  | 2.11280 | -0.02701 | 0.00035  | 0.00000 | 0.00035  | 2.11314 |
| R10 | 2.79294 | 0.08853  | 0.00625  | 0.00000 | 0.00625  | 2.79919 |
| R11 | 2.89548 | 0.06592  | -0.00063 | 0.00000 | -0.00063 | 2.89485 |
| R12 | 2.06185 | -0.00063 | 0.00060  | 0.00000 | 0.00060  | 2.06245 |
| R13 | 2.06111 | -0.00020 | 0.00042  | 0.00000 | 0.00042  | 2.06153 |
| R14 | 2.06913 | 0.00019  | -0.00030 | 0.00000 | -0.00030 | 2.06882 |
| R15 | 2.07942 | 0.00017  | -0.00018 | 0.00000 | -0.00018 | 2.07924 |
| R16 | 2.75599 | 0.08357  | 0.00497  | 0.00000 | 0.00497  | 2.76096 |
| R17 | 4.06500 | -0.03383 | -0.00311 | 0.00000 | -0.00311 | 4.06189 |
| R18 | 2.50616 | 0.00024  | -0.00060 | 0.00000 | -0.00060 | 2.50556 |
| R19 | 2.04924 | -0.00018 | 0.00026  | 0.00000 | 0.00026  | 2.04950 |
| R20 | 2.04289 | 0.00010  | -0.00024 | 0.00000 | -0.00024 | 2.04265 |
| R21 | 2.04640 | -0.00011 | 0.00029  | 0.00000 | 0.00029  | 2.04669 |
| R22 | 1.91437 | 0.00004  | 0.00005  | 0.00000 | 0.00005  | 1.91442 |
| R23 | 1.92796 | 0.02181  | -0.00191 | 0.00000 | -0.00192 | 1.92604 |
| R24 | 3.85091 | -0.01438 | 0.00070  | 0.00000 | 0.00070  | 3.85161 |
| R25 | 2.76747 | -0.04122 | 0.00093  | 0.00000 | 0.00114  | 2.76861 |
| R26 | 2.73002 | 0.01145  | -0.00043 | 0.00000 | -0.00051 | 2.72950 |
| R27 | 2.05534 | 0.00133  | 0.00039  | 0.00000 | 0.00039  | 2.05573 |
| R28 | 2.05226 | -0.00490 | 0.00000  | 0.00000 | 0.00000  | 2.05226 |
| R29 | 2.74175 | 0.00000  | -0.00111 | 0.00000 | -0.00124 | 2.74051 |
| R30 | 2.05591 | -0.02480 | -0.00017 | 0.00000 | -0.00017 | 2.05574 |
| R31 | 2.84145 | 0.00260  | -0.00059 | 0.00000 | -0.00059 | 2.84085 |
| R32 | 2.06759 | 0.00024  | 0.00006  | 0.00000 | 0.00006  | 2.06765 |
| R33 | 2.06811 | 0.00003  | 0.00001  | 0.00000 | 0.00001  | 2.06812 |
| R34 | 2.06455 | 0.00140  | -0.00021 | 0.00000 | -0.00021 | 2.06433 |
| A1  | 1.87383 | 0.06062  | 0.00172  | 0.00000 | 0.00172  | 1.87554 |
| A2  | 2.27750 | -0.03027 | -0.00013 | 0.00000 | -0.00013 | 2.27737 |
| A3  | 2.13175 | -0.03026 | -0.00157 | 0.00000 | -0.00157 | 2.13019 |
| A4  | 1.86214 | -0.01202 | 0.00134  | 0.00000 | 0.00135  | 1.86349 |
| A5  | 2.27639 | 0.00603  | -0.00049 | 0.00000 | -0.00049 | 2.27589 |
| A6  | 2.14463 | 0.00591  | -0.00086 | 0.00000 | -0.00086 | 2.14377 |
| A7  | 1.89908 | 0.04244  | -0.00167 | 0.00000 | -0.00167 | 1.89742 |
| A8  | 2.25508 | -0.02100 | -0.00055 | 0.00000 | -0.00055 | 2.25453 |
| A9  | 2.12899 | -0.02138 | 0.00218  | 0.00000 | 0.00218  | 2.13117 |
| A10 | 1.88771 | -0.02198 | 0.00165  | 0.00000 | 0.00165  | 1.88937 |
| A11 | 2.20019 | -0.24246 | -0.00103 | 0.00000 | -0.00103 | 2.19916 |
| A12 | 2.19527 | 0.26460  | -0.00062 | 0.00000 | -0.00062 | 2.19465 |
| A13 | 1.90197 | -0.06892 | -0.00303 | 0.00000 | -0.00303 | 1.89894 |

|     |         |          |          |         |          |         |
|-----|---------|----------|----------|---------|----------|---------|
| A14 | 2.21070 | -0.31015 | -0.00554 | 0.00000 | -0.00554 | 2.20517 |
| A15 | 2.16952 | 0.37957  | 0.00865  | 0.00000 | 0.00865  | 2.17817 |
| A16 | 1.96807 | -0.00752 | 0.00839  | 0.00000 | 0.00838  | 1.97645 |
| A17 | 1.85738 | 0.07427  | 0.00156  | 0.00000 | 0.00157  | 1.85895 |
| A18 | 1.88755 | -0.06701 | -0.00414 | 0.00000 | -0.00414 | 1.88341 |
| A19 | 1.91756 | 0.05426  | 0.00007  | 0.00000 | 0.00008  | 1.91763 |
| A20 | 1.93287 | -0.04902 | -0.00593 | 0.00000 | -0.00593 | 1.92694 |
| A21 | 1.89770 | -0.00163 | 0.00005  | 0.00000 | 0.00005  | 1.89775 |
| A22 | 1.91292 | -0.10746 | -0.00431 | 0.00000 | -0.00431 | 1.90861 |
| A23 | 1.88958 | 0.00620  | -0.00249 | 0.00000 | -0.00249 | 1.88709 |
| A24 | 1.87784 | 0.16714  | 0.00690  | 0.00000 | 0.00692  | 1.88475 |
| A25 | 1.87731 | 0.02403  | -0.00005 | 0.00000 | -0.00004 | 1.87727 |
| A26 | 1.90741 | -0.12173 | -0.00377 | 0.00000 | -0.00377 | 1.90364 |
| A27 | 1.99791 | 0.02418  | 0.00329  | 0.00000 | 0.00328  | 2.00119 |
| A28 | 2.17117 | 0.00050  | -0.00150 | 0.00000 | -0.00150 | 2.16967 |
| A29 | 1.95093 | -0.00013 | 0.00069  | 0.00000 | 0.00069  | 1.95162 |
| A30 | 2.16108 | -0.00037 | 0.00078  | 0.00000 | 0.00078  | 2.16186 |
| A31 | 2.07892 | 0.00004  | -0.00002 | 0.00000 | -0.00002 | 2.07890 |
| A32 | 2.15830 | -0.00003 | -0.00015 | 0.00000 | -0.00015 | 2.15814 |
| A33 | 2.04596 | -0.00001 | 0.00017  | 0.00000 | 0.00017  | 2.04614 |
| A34 | 1.94458 | -0.14069 | -0.00560 | 0.00000 | -0.00637 | 1.93821 |
| A35 | 1.92119 | 0.51240  | 0.00335  | 0.00000 | 0.00318  | 1.92437 |
| A36 | 1.87970 | -0.20127 | -0.00064 | 0.00000 | -0.00046 | 1.87924 |
| A37 | 2.08980 | 0.00388  | 0.00003  | 0.00000 | -0.00020 | 2.08960 |
| A38 | 2.06687 | -0.00386 | 0.00007  | 0.00000 | 0.00032  | 2.06719 |
| A39 | 1.99336 | -0.00754 | 0.00022  | 0.00000 | 0.00034  | 1.99370 |
| A40 | 2.00945 | 0.00423  | 0.00066  | 0.00000 | 0.00058  | 2.01003 |
| A41 | 2.03463 | -0.00054 | -0.00030 | 0.00000 | -0.00030 | 2.03433 |
| A42 | 2.01568 | -0.00805 | 0.00061  | 0.00000 | 0.00083  | 2.01651 |
| A43 | 2.14090 | 0.00895  | -0.00067 | 0.00000 | -0.00089 | 2.14001 |
| A44 | 1.97107 | 0.00114  | 0.00015  | 0.00000 | 0.00006  | 1.97113 |
| A45 | 2.02571 | -0.01043 | -0.00059 | 0.00000 | -0.00046 | 2.02525 |
| A46 | 2.03951 | -0.00062 | 0.00031  | 0.00000 | 0.00029  | 2.03981 |
| A47 | 2.43163 | -0.01745 | -0.00173 | 0.00000 | -0.00154 | 2.43009 |
| A48 | 2.43876 | 0.00940  | -0.00157 | 0.00000 | -0.00135 | 2.43740 |
| A49 | 1.93286 | -0.00081 | -0.00004 | 0.00000 | -0.00004 | 1.93283 |
| A50 | 1.91924 | -0.00072 | -0.00048 | 0.00000 | -0.00048 | 1.91876 |
| A51 | 1.93871 | 0.00252  | 0.00007  | 0.00000 | 0.00007  | 1.93878 |
| A52 | 1.88112 | 0.00038  | -0.00004 | 0.00000 | -0.00004 | 1.88108 |
| A53 | 1.89296 | -0.00073 | 0.00026  | 0.00000 | 0.00026  | 1.89322 |
| A54 | 1.89756 | -0.00071 | 0.00024  | 0.00000 | 0.00024  | 1.89780 |
| A55 | 3.03318 | 0.36127  | 0.09347  | 0.00000 | 0.09347  | 3.12665 |
| A56 | 2.86830 | 0.43109  | 0.24051  | 0.00000 | 0.24084  | 3.10914 |
| A57 | 3.12199 | -0.01148 | 0.01690  | 0.00000 | 0.01690  | 3.13889 |

|     |          |          |          |         |          |          |
|-----|----------|----------|----------|---------|----------|----------|
| A58 | 3.18724  | 0.08879  | -0.00025 | 0.00000 | 0.00011  | 3.18735  |
| D1  | 0.00529  | -0.01443 | -0.00327 | 0.00000 | -0.00327 | 0.00203  |
| D2  | -3.12833 | -0.00256 | -0.00268 | 0.00000 | -0.00268 | -3.13101 |
| D3  | 3.13146  | -0.00718 | -0.00151 | 0.00000 | -0.00151 | 3.12994  |
| D4  | -0.00217 | 0.00470  | -0.00092 | 0.00000 | -0.00092 | -0.00309 |
| D5  | -0.00826 | 0.01648  | 0.00303  | 0.00000 | 0.00303  | -0.00523 |
| D6  | -3.10345 | -0.00701 | 0.00076  | 0.00000 | 0.00076  | -3.10269 |
| D7  | -3.13600 | 0.01006  | 0.00144  | 0.00000 | 0.00144  | -3.13455 |
| D8  | 0.05200  | -0.01343 | -0.00083 | 0.00000 | -0.00083 | 0.05118  |
| D9  | -0.00060 | 0.00811  | 0.00243  | 0.00000 | 0.00243  | 0.00184  |
| D10 | 3.13301  | 0.01571  | -0.00205 | 0.00000 | -0.00205 | 3.13096  |
| D11 | 3.13377  | -0.00264 | 0.00190  | 0.00000 | 0.00190  | 3.13568  |
| D12 | -0.01580 | 0.00496  | -0.00258 | 0.00000 | -0.00258 | -0.01838 |
| D13 | -0.00454 | 0.00208  | -0.00057 | 0.00000 | -0.00057 | -0.00511 |
| D14 | 3.13295  | 0.04439  | -0.00048 | 0.00000 | -0.00049 | 3.13247  |
| D15 | -3.13884 | -0.00484 | 0.00354  | 0.00000 | 0.00354  | -3.13530 |
| D16 | -0.00135 | 0.03748  | 0.00363  | 0.00000 | 0.00363  | 0.00228  |
| D17 | -0.00590 | -0.00434 | -0.00043 | 0.00000 | -0.00043 | -0.00632 |
| D18 | 3.13979  | -0.00440 | 0.00426  | 0.00000 | 0.00426  | -3.13914 |
| D19 | 3.12679  | 0.00439  | -0.00546 | 0.00000 | -0.00546 | 3.12133  |
| D20 | -0.01071 | 0.00432  | -0.00077 | 0.00000 | -0.00077 | -0.01148 |
| D21 | 0.00789  | -0.01175 | -0.00150 | 0.00000 | -0.00150 | 0.00639  |
| D22 | 3.10442  | -0.01103 | 0.00027  | 0.00000 | 0.00027  | 3.10469  |
| D23 | -3.12962 | -0.05242 | -0.00158 | 0.00000 | -0.00158 | -3.13121 |
| D24 | -0.03309 | -0.05169 | 0.00019  | 0.00000 | 0.00019  | -0.03291 |
| D25 | 1.44073  | -0.11515 | -0.01011 | 0.00000 | -0.01011 | 1.43062  |
| D26 | -2.73894 | -0.00354 | -0.00397 | 0.00000 | -0.00397 | -2.74291 |
| D27 | -0.70261 | -0.00033 | -0.00515 | 0.00000 | -0.00515 | -0.70776 |
| D28 | -1.64773 | -0.12703 | -0.01236 | 0.00000 | -0.01236 | -1.66009 |
| D29 | 0.45578  | -0.01541 | -0.00621 | 0.00000 | -0.00622 | 0.44957  |
| D30 | 2.49211  | -0.01221 | -0.00740 | 0.00000 | -0.00740 | 2.48471  |
| D31 | -1.13690 | 0.11442  | 0.01755  | 0.00000 | 0.01755  | -1.11935 |
| D32 | 0.90608  | 0.08733  | 0.01374  | 0.00000 | 0.01373  | 0.91981  |
| D33 | 3.07400  | 0.22324  | 0.02049  | 0.00000 | 0.02048  | 3.09448  |
| D34 | 3.07759  | -0.01084 | 0.01011  | 0.00000 | 0.01011  | 3.08770  |
| D35 | -1.16261 | -0.03792 | 0.00629  | 0.00000 | 0.00629  | -1.15632 |
| D36 | 1.00531  | 0.09799  | 0.01304  | 0.00000 | 0.01304  | 1.01835  |
| D37 | 0.98091  | -0.01269 | 0.01376  | 0.00000 | 0.01376  | 0.99466  |
| D38 | 3.02389  | -0.03977 | 0.00994  | 0.00000 | 0.00994  | 3.03383  |
| D39 | -1.09137 | 0.09614  | 0.01669  | 0.00000 | 0.01669  | -1.07469 |
| D40 | 2.87570  | -0.13037 | -0.00604 | 0.00000 | -0.00584 | 2.86986  |
| D41 | -1.32340 | -0.13596 | -0.00823 | 0.00000 | -0.00842 | -1.33182 |
| D42 | 0.79989  | -0.03028 | -0.00274 | 0.00000 | -0.00255 | 0.79734  |
| D43 | 2.88397  | -0.03587 | -0.00494 | 0.00000 | -0.00513 | 2.87884  |

|     |          |          |          |         |          |          |
|-----|----------|----------|----------|---------|----------|----------|
| D44 | -1.30667 | 0.01205  | -0.00212 | 0.00000 | -0.00193 | -1.30860 |
| D45 | 0.77741  | 0.00646  | -0.00432 | 0.00000 | -0.00451 | 0.77290  |
| D46 | -3.13971 | -0.00006 | 0.00428  | 0.00000 | 0.00428  | -3.13543 |
| D47 | 0.00193  | -0.00008 | 0.00189  | 0.00000 | 0.00189  | 0.00382  |
| D48 | -0.00269 | 0.00002  | -0.00096 | 0.00000 | -0.00096 | -0.00365 |
| D49 | 3.13894  | 0.00000  | -0.00335 | 0.00000 | -0.00335 | 3.13559  |
| D50 | 1.18514  | -0.00448 | 0.04580  | 0.00000 | 0.04501  | 1.23015  |
| D51 | -0.45309 | -0.17284 | -0.08346 | 0.00000 | -0.08358 | -0.53667 |
| D52 | -3.02721 | 0.10183  | 0.07167  | 0.00000 | 0.07179  | -2.95542 |
| D53 | 1.61774  | -0.06654 | -0.05759 | 0.00000 | -0.05679 | 1.56096  |
| D54 | -2.70429 | 0.00194  | -0.00018 | 0.00000 | -0.00019 | -2.70448 |
| D55 | -0.01342 | 0.00212  | 0.00052  | 0.00000 | 0.00050  | -0.01292 |
| D56 | -0.02502 | 0.00055  | -0.00072 | 0.00000 | -0.00070 | -0.02573 |
| D57 | 2.66584  | 0.00073  | -0.00001 | 0.00000 | -0.00001 | 2.66584  |
| D58 | 2.00321  | 0.00288  | 0.00246  | 0.00000 | 0.00228  | 2.00549  |
| D59 | -0.41985 | 0.00785  | 0.00187  | 0.00000 | 0.00165  | -0.41820 |
| D60 | 0.45601  | -0.03958 | -0.00309 | 0.00000 | -0.00287 | 0.45314  |
| D61 | -1.96741 | -0.02741 | -0.00305 | 0.00000 | -0.00287 | -1.97028 |
| D62 | 2.55218  | 0.00525  | 0.00006  | 0.00000 | 0.00002  | 2.55220  |
| D63 | -1.65383 | 0.00476  | -0.00032 | 0.00000 | -0.00036 | -1.65419 |
| D64 | 0.44754  | 0.00503  | -0.00029 | 0.00000 | -0.00033 | 0.44721  |
| D65 | 1.34899  | -0.00843 | 0.00072  | 0.00000 | 0.00074  | 1.34973  |
| D66 | -2.85702 | -0.00892 | 0.00034  | 0.00000 | 0.00036  | -2.85666 |
| D67 | -0.75565 | -0.00866 | 0.00037  | 0.00000 | 0.00039  | -0.75526 |
| D68 | -1.04585 | 0.00371  | 0.00084  | 0.00000 | 0.00085  | -1.04500 |
| D69 | 1.03133  | 0.00322  | 0.00046  | 0.00000 | 0.00047  | 1.03180  |
| D70 | 3.13269  | 0.00349  | 0.00049  | 0.00000 | 0.00050  | 3.13319  |

| Item                 | Value    | Threshold | Converged? |
|----------------------|----------|-----------|------------|
| Maximum Force        | 0.512398 | 0.000450  | NO         |
| RMS Force            | 0.091708 | 0.000300  | NO         |
| Maximum Displacement | 1.503894 | 0.001800  | NO         |
| RMS Displacement     | 0.352974 | 0.001200  | NO         |

Predicted change in Energy=-5.041719D-02

GradGradGradGradGradGradGradGradGradGradGradGradGradGradGradGradGradGradGrad

Input orientation:

| Center Number | Atomic Number | Atomic Type | Coordinates (Angstroms) |           |           |
|---------------|---------------|-------------|-------------------------|-----------|-----------|
|               |               |             | X                       | Y         | Z         |
| 1             | 6             | 0           | -2.897530               | 2.117300  | -0.252093 |
| 2             | 6             | 0           | -3.826214               | 1.176022  | 0.055807  |
| 3             | 7             | 0           | -3.159673               | -0.044374 | 0.105626  |
| 4             | 6             | 0           | -1.857387               | 0.163386  | -0.164877 |



|    |    |   |           |           |           |
|----|----|---|-----------|-----------|-----------|
| 5  | 7  | 0 | -1.679415 | 1.470295  | -0.389944 |
| 6  | 6  | 0 | -0.374093 | 2.108404  | -0.678215 |
| 7  | 6  | 0 | 0.302888  | 2.689411  | 0.567097  |
| 8  | 1  | 0 | -2.999565 | 3.179476  | -0.394547 |
| 9  | 1  | 0 | -4.882256 | 1.270861  | 0.232308  |
| 10 | 1  | 0 | 0.258636  | 1.335440  | -1.117920 |
| 11 | 1  | 0 | -0.539537 | 2.890159  | -1.420904 |
| 12 | 1  | 0 | -0.312301 | 3.500764  | 0.969314  |
| 13 | 1  | 0 | 0.350545  | 1.898945  | 1.330986  |
| 14 | 35 | 0 | 0.496991  | -2.101378 | -0.235317 |
| 15 | 1  | 0 | -1.058954 | -0.619006 | -0.193147 |
| 16 | 6  | 0 | -3.674299 | -1.338510 | 0.398636  |
| 17 | 6  | 0 | -4.942619 | -1.589598 | 0.692384  |
| 18 | 1  | 0 | -2.900766 | -2.097802 | 0.361616  |
| 19 | 1  | 0 | -5.241436 | -2.605955 | 0.907139  |
| 20 | 1  | 0 | -5.711317 | -0.827745 | 0.733615  |
| 21 | 7  | 0 | 1.600273  | 3.228077  | 0.165526  |
| 22 | 1  | 0 | 1.976212  | 3.841399  | 0.878837  |
| 23 | 1  | 0 | 2.268312  | 2.471309  | 0.024700  |
| 24 | 6  | 0 | 3.806329  | -0.204625 | -1.058672 |
| 25 | 6  | 0 | 3.791480  | -0.411053 | 0.391720  |
| 26 | 8  | 0 | 3.559347  | 0.906090  | -0.168965 |
| 27 | 1  | 0 | 4.756198  | -0.151407 | -1.586234 |
| 28 | 1  | 0 | 2.947607  | -0.533134 | -1.636682 |
| 29 | 1  | 0 | 2.888204  | -0.866943 | 0.791313  |
| 30 | 6  | 0 | 5.048668  | -0.571937 | 1.200145  |
| 31 | 1  | 0 | 4.927731  | -0.134745 | 2.195839  |
| 32 | 1  | 0 | 5.277127  | -1.634644 | 1.327315  |
| 33 | 1  | 0 | 5.895929  | -0.087115 | 0.709808  |

-----  
Distance matrix (angstroms):

|    |   | 1        | 2        | 3        | 4        | 5        |
|----|---|----------|----------|----------|----------|----------|
| 1  | C | 0.000000 |          |          |          |          |
| 2  | C | 1.357667 | 0.000000 |          |          |          |
| 3  | N | 2.206698 | 1.391448 | 0.000000 |          |          |
| 4  | C | 2.215239 | 2.224952 | 1.346211 | 0.000000 |          |
| 5  | N | 1.386154 | 2.212247 | 2.175081 | 1.338036 | 0.000000 |
| 6  | C | 2.559178 | 3.650378 | 3.606705 | 2.499355 | 1.481266 |
| 7  | C | 3.352768 | 4.427329 | 4.435749 | 3.403436 | 2.516286 |
| 8  | H | 1.076533 | 2.213593 | 3.266346 | 3.233283 | 2.159657 |
| 9  | H | 2.211389 | 1.074882 | 2.170986 | 3.245626 | 3.268817 |
| 10 | H | 3.364868 | 4.253122 | 3.884043 | 2.599915 | 2.074650 |
| 11 | H | 2.742911 | 3.990136 | 4.219821 | 3.278662 | 2.092418 |
| 12 | H | 3.176353 | 4.311207 | 4.628336 | 3.848608 | 2.799891 |

|    |    |          |          |          |          |          |
|----|----|----------|----------|----------|----------|----------|
| 13 | H  | 3.619918 | 4.426513 | 4.195192 | 3.181940 | 2.695567 |
| 14 | Br | 5.414822 | 5.432882 | 4.209359 | 3.267601 | 4.185391 |
| 15 | H  | 3.297151 | 3.307844 | 2.198292 | 1.118227 | 2.188351 |
| 16 | C  | 3.601311 | 2.542338 | 1.423194 | 2.423717 | 3.534233 |
| 17 | C  | 4.337686 | 3.049631 | 2.431234 | 3.650548 | 4.602487 |
| 18 | H  | 4.259546 | 3.415831 | 2.085457 | 2.545349 | 3.845498 |
| 19 | H  | 5.398783 | 4.126860 | 3.396742 | 4.502250 | 5.566528 |
| 20 | H  | 4.190741 | 2.833394 | 2.742066 | 4.079510 | 4.774894 |
| 21 | N  | 4.651716 | 5.802563 | 5.776644 | 4.632162 | 3.762273 |
| 22 | H  | 5.291964 | 6.438149 | 6.486479 | 5.414204 | 4.538232 |
| 23 | H  | 5.185350 | 6.230729 | 5.983163 | 4.731157 | 4.093716 |
| 24 | C  | 7.140282 | 7.836068 | 7.064450 | 5.745606 | 5.774594 |
| 25 | C  | 7.179827 | 7.788511 | 6.966695 | 5.705215 | 5.837907 |
| 26 | O  | 6.570023 | 7.393910 | 6.791467 | 5.467416 | 5.273688 |
| 27 | H  | 8.093609 | 8.838334 | 8.095360 | 6.771917 | 6.743748 |
| 28 | H  | 6.565630 | 7.188211 | 6.369725 | 5.073393 | 5.193978 |
| 29 | H  | 6.593111 | 7.056776 | 6.141955 | 4.949395 | 5.265092 |
| 30 | C  | 8.513697 | 9.117477 | 8.297780 | 7.077964 | 7.208758 |
| 31 | H  | 8.502869 | 9.106558 | 8.353638 | 7.190250 | 7.274394 |
| 32 | H  | 9.132175 | 9.611836 | 8.671856 | 7.507386 | 7.809168 |
| 33 | H  | 9.116447 | 9.825645 | 9.075836 | 7.806519 | 7.811582 |
|    |    | 6        | 7        | 8        | 9        | 10       |
| 6  | C  | 0.000000 |          |          |          |          |
| 7  | C  | 1.531886 | 0.000000 |          |          |          |
| 8  | H  | 2.849696 | 3.474352 | 0.000000 |          |          |
| 9  | H  | 4.674833 | 5.386101 | 2.753232 | 0.000000 |          |
| 10 | H  | 1.091403 | 2.162054 | 3.813084 | 5.315642 | 0.000000 |
| 11 | H  | 1.090916 | 2.168439 | 2.681204 | 4.920818 | 1.773705 |
| 12 | H  | 2.157971 | 1.094774 | 3.030633 | 5.138107 | 3.061232 |
| 13 | H  | 2.146128 | 1.100287 | 3.980008 | 5.383660 | 2.514582 |
| 14 | Br | 4.321714 | 4.861399 | 6.335509 | 6.366079 | 3.556334 |
| 15 | H  | 2.853610 | 3.657623 | 4.270246 | 4.286052 | 2.532016 |
| 16 | C  | 4.892053 | 5.663085 | 4.636442 | 2.880215 | 4.991785 |
| 17 | C  | 6.035329 | 6.770595 | 5.263169 | 2.897851 | 6.235872 |
| 18 | H  | 5.015725 | 5.763942 | 5.332092 | 3.910359 | 4.894690 |
| 19 | H  | 6.959135 | 7.674377 | 6.339684 | 3.951469 | 7.063020 |
| 20 | H  | 6.253015 | 6.969130 | 4.968316 | 2.311449 | 6.614218 |
| 21 | N  | 2.421506 | 1.461037 | 4.634065 | 6.771879 | 2.651283 |
| 22 | H  | 3.309323 | 2.055304 | 5.178611 | 7.352840 | 3.635511 |
| 23 | H  | 2.758278 | 2.050526 | 5.331773 | 7.253606 | 2.575767 |
| 24 | C  | 4.792784 | 4.826248 | 7.629771 | 8.907031 | 3.868002 |
| 25 | C  | 4.984418 | 4.670536 | 7.721944 | 8.836738 | 4.220218 |
| 26 | O  | 4.144496 | 3.785043 | 6.945395 | 8.459004 | 3.461149 |
| 27 | H  | 5.679008 | 5.704301 | 8.524480 | 9.911091 | 4.760052 |

|    |    |          |           |          |           |           |
|----|----|----------|-----------|----------|-----------|-----------|
| 28 | H  | 4.350870 | 4.715504  | 7.120058 | 8.249501  | 3.315305  |
| 29 | H  | 4.653470 | 4.402474  | 7.241933 | 8.078536  | 3.925594  |
| 30 | C  | 6.333940 | 5.793062  | 9.021652 | 10.146716 | 5.652957  |
| 31 | H  | 6.434380 | 5.658430  | 8.974196 | 10.102823 | 5.911251  |
| 32 | H  | 7.068865 | 6.634639  | 9.728525 | 10.623279 | 6.323435  |
| 33 | H  | 6.786758 | 6.245924  | 9.540442 | 10.873885 | 6.094532  |
|    |    | 11       | 12        | 13       | 14        | 15        |
| 11 | H  | 0.000000 |           |          |           |           |
| 12 | H  | 2.477422 | 0.000000  |          |           |           |
| 13 | H  | 3.057392 | 1.770874  | 0.000000 |           |           |
| 14 | Br | 5.234065 | 5.787062  | 4.298527 | 0.000000  |           |
| 15 | H  | 3.753854 | 4.345263  | 3.263395 | 2.149458  | 0.000000  |
| 16 | C  | 5.569479 | 5.920074  | 5.248787 | 4.287602  | 2.776314  |
| 17 | C  | 6.627318 | 6.886823  | 6.371447 | 5.541833  | 4.099886  |
| 18 | H  | 5.799356 | 6.197854  | 5.242584 | 3.449797  | 2.426287  |
| 19 | H  | 7.598349 | 7.848074  | 7.193332 | 5.872764  | 4.759386  |
| 20 | H  | 6.723992 | 6.923939  | 6.673670 | 6.411245  | 4.748362  |
| 21 | N  | 2.685095 | 2.092456  | 2.164881 | 5.457197  | 4.690436  |
| 22 | H  | 3.538737 | 2.315493  | 2.573006 | 6.224631  | 5.500600  |
| 23 | H  | 3.185784 | 2.934559  | 2.389940 | 4.910667  | 4.546230  |
| 24 | C  | 5.347471 | 5.899640  | 4.698714 | 3.902217  | 4.959014  |
| 25 | C  | 5.739452 | 5.698855  | 4.249511 | 3.755533  | 4.889992  |
| 26 | O  | 4.722788 | 4.797674  | 3.678590 | 4.292701  | 4.863662  |
| 27 | H  | 6.109276 | 6.749730  | 5.667794 | 4.875264  | 5.997944  |
| 28 | H  | 4.891386 | 5.804356  | 4.633227 | 3.229354  | 4.259542  |
| 29 | H  | 5.546091 | 5.417728  | 3.792242 | 2.880225  | 4.075622  |
| 30 | C  | 7.077007 | 6.736480  | 5.309871 | 5.011736  | 6.264704  |
| 31 | H  | 7.219549 | 6.494553  | 5.082765 | 5.423063  | 6.463912  |
| 32 | H  | 7.865121 | 7.598834  | 6.062794 | 5.050679  | 6.594638  |
| 33 | H  | 7.404006 | 7.175119  | 5.922970 | 5.839438  | 7.033394  |
|    |    | 16       | 17        | 18       | 19        | 20        |
| 16 | C  | 0.000000 |           |          |           |           |
| 17 | C  | 1.325884 | 0.000000  |          |           |           |
| 18 | H  | 1.084550 | 2.129986  | 0.000000 |           |           |
| 19 | H  | 2.078681 | 1.080922  | 2.456533 | 0.000000  |           |
| 20 | H  | 2.126625 | 1.083060  | 3.106546 | 1.847412  | 0.000000  |
| 21 | N  | 6.980628 | 8.142298  | 6.975872 | 9.021913  | 8.380440  |
| 22 | H  | 7.680516 | 8.797768  | 7.702372 | 9.677997  | 8.995560  |
| 23 | H  | 7.068887 | 8.302668  | 6.907217 | 9.107888  | 8.663764  |
| 24 | C  | 7.705143 | 9.029310  | 7.112416 | 9.565189  | 9.704955  |
| 25 | C  | 7.523169 | 8.818381  | 6.901607 | 9.310039  | 9.518071  |
| 26 | O  | 7.595132 | 8.902461  | 7.144084 | 9.536574  | 9.474495  |
| 27 | H  | 8.741979 | 10.066158 | 8.137055 | 10.592186 | 10.742811 |
| 28 | H  | 6.974294 | 8.294355  | 6.375331 | 8.822020  | 8.982320  |

|    |   |          |           |          |           |           |
|----|---|----------|-----------|----------|-----------|-----------|
| 29 | H | 6.591132 | 7.864719  | 5.933955 | 8.314363  | 8.599804  |
| 30 | C | 8.793190 | 10.055807 | 8.137867 | 10.493299 | 10.773131 |
| 31 | H | 8.869831 | 10.089637 | 8.276674 | 10.544173 | 10.761398 |
| 32 | H | 9.004342 | 10.239550 | 8.247728 | 10.571668 | 11.034015 |
| 33 | H | 9.656711 | 10.942206 | 9.030279 | 11.420350 | 11.630875 |
|    |   | 21       | 22        | 23       | 24        | 25        |
| 21 | N | 0.000000 |           |          |           |           |
| 22 | H | 1.013068 | 0.000000  |          |           |           |
| 23 | H | 1.019218 | 1.640738  | 0.000000 |           |           |
| 24 | C | 4.260139 | 4.844954  | 3.271057 | 0.000000  |           |
| 25 | C | 4.253918 | 4.649283  | 3.280664 | 1.465083  | 0.000000  |
| 26 | O | 3.056384 | 3.495747  | 2.038183 | 1.444391  | 1.450213  |
| 27 | H | 4.944637 | 5.454117  | 3.957691 | 1.087844  | 2.215942  |
| 28 | H | 4.382918 | 5.138870  | 3.499758 | 1.086010  | 2.200327  |
| 29 | H | 4.338152 | 4.796652  | 3.480788 | 2.168885  | 1.087850  |
| 30 | C | 5.234689 | 5.387092  | 4.286420 | 2.603954  | 1.503315  |
| 31 | H | 5.148079 | 5.124030  | 4.310205 | 3.443002  | 2.149944  |
| 32 | H | 6.206050 | 6.409697  | 5.254391 | 3.146607  | 2.140014  |
| 33 | H | 5.453384 | 5.552115  | 4.491604 | 2.740029  | 2.152864  |
|    |   | 26       | 27        | 28       | 29        | 30        |
| 26 | O | 0.000000 |           |          |           |           |
| 27 | H | 2.135275 | 0.000000  |          |           |           |
| 28 | H | 2.144711 | 1.849125  | 0.000000 |           |           |
| 29 | H | 2.125138 | 3.107108  | 2.451554 | 0.000000  |           |
| 30 | C | 2.505414 | 2.833071  | 3.530376 | 2.218507  | 0.000000  |
| 31 | H | 2.923715 | 3.785997  | 4.332184 | 2.582339  | 1.094152  |
| 32 | H | 3.412470 | 3.310608  | 3.927502 | 2.565856  | 1.094400  |
| 33 | H | 2.686691 | 2.564162  | 3.794411 | 3.108244  | 1.092399  |
|    |   | 31       | 32        | 33       |           |           |
| 31 | H | 0.000000 |           |          |           |           |
| 32 | H | 1.768080 | 0.000000  |          |           |           |
| 33 | H | 1.774250 | 1.777379  | 0.000000 |           |           |

Stoichiometry C10H18BrN3O

Framework group C1[X(C10H18BrN3O)]

Deg. of freedom 93

Full point group C1 NOp 1

Largest Abelian subgroup C1 NOp 1

Largest concise Abelian subgroup C1 NOp 1

Standard orientation:

| Center Number | Atomic Number | Atomic Type | Coordinates (Angstroms) |          |           |
|---------------|---------------|-------------|-------------------------|----------|-----------|
|               |               |             | X                       | Y        | Z         |
| 1             | 6             | 0           | -2.935023               | 2.085935 | -0.242722 |

|    |    |   |           |           |           |
|----|----|---|-----------|-----------|-----------|
| 2  | 6  | 0 | -3.857630 | 1.136120  | 0.057127  |
| 3  | 7  | 0 | -3.182967 | -0.080134 | 0.098144  |
| 4  | 6  | 0 | -1.881882 | 0.138415  | -0.169621 |
| 5  | 7  | 0 | -1.712488 | 1.448179  | -0.384482 |
| 6  | 6  | 0 | -0.411236 | 2.097212  | -0.666705 |
| 7  | 6  | 0 | 0.260817  | 2.673142  | 0.583625  |
| 8  | 1  | 0 | -3.044058 | 3.148468  | -0.377096 |
| 9  | 1  | 0 | -4.914428 | 1.222526  | 0.233434  |
| 10 | 1  | 0 | 0.227018  | 1.331906  | -1.111787 |
| 11 | 1  | 0 | -0.581307 | 2.883530  | -1.403507 |
| 12 | 1  | 0 | -0.360124 | 3.477241  | 0.991531  |
| 13 | 1  | 0 | 0.313146  | 1.877161  | 1.341456  |
| 14 | 35 | 0 | 0.487678  | -2.109926 | -0.255420 |
| 15 | 1  | 0 | -1.078200 | -0.638373 | -0.203210 |
| 16 | 6  | 0 | -3.689148 | -1.379901 | 0.380751  |
| 17 | 6  | 0 | -4.955997 | -1.641727 | 0.671457  |
| 18 | 1  | 0 | -2.910514 | -2.133690 | 0.338569  |
| 19 | 1  | 0 | -5.248172 | -2.661684 | 0.878135  |
| 20 | 1  | 0 | -5.729817 | -0.885377 | 0.717874  |
| 21 | 7  | 0 | 1.554892  | 3.223555  | 0.187334  |
| 22 | 1  | 0 | 1.926128  | 3.833876  | 0.905664  |
| 23 | 1  | 0 | 2.228102  | 2.472382  | 0.041276  |
| 24 | 6  | 0 | 3.784903  | -0.184783 | -1.061293 |
| 25 | 6  | 0 | 3.770251  | -0.402456 | 0.387455  |
| 26 | 8  | 0 | 3.529755  | 0.917377  | -0.163291 |
| 27 | 1  | 0 | 4.734825  | -0.121150 | -1.587604 |
| 28 | 1  | 0 | 2.928874  | -0.514578 | -1.642558 |
| 29 | 1  | 0 | 2.869724  | -0.867442 | 0.782748  |
| 30 | 6  | 0 | 5.027827  | -0.561132 | 1.195714  |
| 31 | 1  | 0 | 4.903149  | -0.132431 | 2.194632  |
| 32 | 1  | 0 | 5.263299  | -1.623232 | 1.314910  |
| 33 | 1  | 0 | 5.872221  | -0.066891 | 0.709854  |

-----  
Rotational constants (GHZ):      0.5270100      0.2311934      0.1692755

Standard basis: 6-311++G(d,p) (5D, 7F)

There are 499 symmetry adapted cartesian basis functions of A symmetry.

There are 482 symmetry adapted basis functions of A symmetry.

482 basis functions, 760 primitive gaussians, 499 cartesian basis functions

71 alpha electrons      71 beta electrons

nuclear repulsion energy      1293.9050256023 Hartrees.

NAtoms= 33 NActive= 33 NUniq= 33 SFac= 1.00D+00 NAtFMM= 60 NAOKFM=F

Big=F

Integral buffers will be 131072 words long.

Raffenetti 2 integral format.

Two-electron integral symmetry is turned on.  
 One-electron integrals computed using PRISM.  
 NBasis= 482 RedAO= T EigKep= 3.82D-06 NBF= 482  
 NBsUse= 482 1.00D-06 EigRej= -1.00D+00 NBFU= 482  
 Lowest energy guess from the checkpoint file:

"/home/suqian/liuwen/qianmengshijie/nh2po/nh2po.chk"

B after Tr= 0.000000 0.000000 0.000000  
 Rot= 0.999979 -0.002890 0.000761 -0.005785 Ang= -0.75 deg.  
 B after Tr= 0.000000 0.000000 0.000000  
 Rot= 0.999324 0.017454 -0.005383 0.031905 Ang= 4.21 deg.

Requested convergence on RMS density matrix=1.00D-08 within 128 cycles.

Requested convergence on MAX density matrix=1.00D-06.

Requested convergence on energy=1.00D-06.

No special actions if energy rises.

SCF Done: E(RB3LYP) = -3205.64616933 A.U. after 11 cycles

NFock= 11 Conv=0.55D-08 -V/T= 2.0018

Calling FoFJK, ICntrl= 2127 FMM=F ISym2X=0 l1Cent= 0 IOpClX= 0 NMat=1 NMatS=1

NMatT=0.

\*\*\*\*\* Axes restored to original set \*\*\*\*\*

| Center<br>Number | Atomic<br>Number | Forces (Hartrees/Bohr) |              |              |
|------------------|------------------|------------------------|--------------|--------------|
|                  |                  | X                      | Y            | Z            |
| 1                | 6                | -0.000504791           | -0.000035385 | 0.000027109  |
| 2                | 6                | -0.000537499           | 0.000196113  | -0.000086177 |
| 3                | 7                | 0.001667621            | 0.001814721  | 0.000108114  |
| 4                | 6                | 0.002733428            | 0.004257931  | -0.001010440 |
| 5                | 7                | 0.000081470            | -0.002179724 | 0.001728356  |
| 6                | 6                | -0.000536956           | -0.002311271 | -0.002816884 |
| 7                | 6                | 0.000653755            | 0.000348224  | 0.001349803  |
| 8                | 1                | -0.000183940           | -0.000012388 | 0.000149792  |
| 9                | 1                | 0.000119869            | 0.000012933  | -0.000131197 |
| 10               | 1                | -0.000318554           | 0.000359775  | 0.000048570  |
| 11               | 1                | 0.000050775            | -0.000556818 | -0.000171408 |
| 12               | 1                | -0.000015738           | 0.000090165  | 0.000390041  |
| 13               | 1                | 0.000492882            | 0.000253542  | 0.000410429  |
| 14               | 35               | -0.000884300           | -0.000782058 | -0.000039662 |
| 15               | 1                | -0.000769443           | 0.000299847  | -0.000048665 |
| 16               | 6                | 0.000736539            | -0.000016686 | 0.000164052  |
| 17               | 6                | -0.000611082           | -0.000221521 | 0.000117326  |
| 18               | 1                | -0.000247522           | 0.000096871  | -0.000165744 |
| 19               | 1                | -0.000102415           | -0.000166271 | -0.000067925 |
| 20               | 1                | 0.000110825            | -0.000177829 | -0.000044790 |
| 21               | 7                | -0.004068442           | -0.001054218 | 0.000281324  |

|    |   |              |              |              |
|----|---|--------------|--------------|--------------|
| 22 | 1 | -0.000336628 | 0.000080070  | 0.000073448  |
| 23 | 1 | 0.001605551  | -0.000573470 | -0.000384640 |
| 24 | 6 | 0.000273749  | -0.000475172 | -0.000104332 |
| 25 | 6 | 0.000453871  | -0.000047940 | 0.000017431  |
| 26 | 8 | -0.000829244 | 0.001022609  | -0.000104100 |
| 27 | 1 | -0.000008183 | -0.000009950 | 0.000322316  |
| 28 | 1 | 0.000139322  | 0.000020340  | 0.000137331  |
| 29 | 1 | 0.000322983  | -0.000044550 | -0.000213436 |
| 30 | 6 | 0.000166054  | -0.000327038 | 0.000078280  |
| 31 | 1 | 0.000044329  | 0.000043208  | -0.000013816 |
| 32 | 1 | 0.000039289  | 0.000027333  | -0.000001973 |
| 33 | 1 | 0.000262424  | 0.000068606  | 0.000001467  |

-----  
Cartesian Forces: Max 0.004257931 RMS 0.000927987

GradGradGradGradGradGradGradGradGradGradGradGradGradGradGradGradGradGradGrad

Berny optimization.

Using GEDIIS/GDIIS optimizer.

FormGI is forming the generalized inverse of G from B-inverse, IUseBI=4.

GSVD: received Info= 1 from GESDD.

Internal Forces: Max 0.008090314 RMS 0.001324070

Search for a local minimum.

Step number 3 out of a maximum of 172

All quantities printed in internal units (Hartrees-Bohrs-Radians)

Mixed Optimization -- RFO/linear search

Update second derivatives using D2CorX and points 2 3 1

ITU= 0 -1 0

Use linear search instead of GDIIS.

Energy rises -- skip Quadratic/GDIIS search.

Quartic linear search produced a step of -0.58785.

Iteration 1 RMS(Cart)= 0.03194645 RMS(Int)= 0.00010107

Iteration 2 RMS(Cart)= 0.00024021 RMS(Int)= 0.00000511

Iteration 3 RMS(Cart)= 0.00000001 RMS(Int)= 0.00000511

| Variable | Old X   | -DE/DX   | Delta X<br>(Linear) | Delta X<br>(Quad) | Delta X<br>(Total) | New X   |
|----------|---------|----------|---------------------|-------------------|--------------------|---------|
| R1       | 2.56562 | -0.00139 | 0.00004             | 0.00000           | 0.00004            | 2.56566 |
| R2       | 2.61945 | 0.00099  | -0.00005            | 0.00000           | -0.00005           | 2.61940 |
| R3       | 2.03435 | -0.00001 | 0.00000             | 0.00000           | 0.00000            | 2.03435 |
| R4       | 2.62945 | -0.00082 | -0.00004            | 0.00000           | -0.00004           | 2.62942 |
| R5       | 2.03123 | -0.00014 | 0.00002             | 0.00000           | 0.00002            | 2.03125 |
| R6       | 2.54397 | -0.00072 | 0.00011             | 0.00000           | 0.00011            | 2.54408 |
| R7       | 2.68945 | 0.00048  | -0.00006            | 0.00000           | -0.00006           | 2.68939 |
| R8       | 2.52852 | -0.00407 | 0.00051             | 0.00000           | 0.00051            | 2.52903 |
| R9       | 2.11314 | -0.00084 | 0.00003             | 0.00000           | 0.00003            | 2.11318 |

|     |         |          |          |         |          |         |
|-----|---------|----------|----------|---------|----------|---------|
| R10 | 2.79919 | -0.00261 | 0.00059  | 0.00000 | 0.00059  | 2.79977 |
| R11 | 2.89485 | 0.00124  | -0.00006 | 0.00000 | -0.00006 | 2.89479 |
| R12 | 2.06245 | -0.00046 | 0.00006  | 0.00000 | 0.00006  | 2.06251 |
| R13 | 2.06153 | -0.00029 | 0.00004  | 0.00000 | 0.00004  | 2.06157 |
| R14 | 2.06882 | 0.00022  | -0.00003 | 0.00000 | -0.00003 | 2.06879 |
| R15 | 2.07924 | 0.00013  | -0.00002 | 0.00000 | -0.00002 | 2.07922 |
| R16 | 2.76096 | -0.00221 | 0.00047  | 0.00000 | 0.00047  | 2.76143 |
| R17 | 4.06189 | -0.00010 | -0.00029 | 0.00000 | -0.00029 | 4.06160 |
| R18 | 2.50556 | 0.00068  | -0.00006 | 0.00000 | -0.00006 | 2.50550 |
| R19 | 2.04950 | -0.00024 | 0.00002  | 0.00000 | 0.00002  | 2.04953 |
| R20 | 2.04265 | 0.00017  | -0.00002 | 0.00000 | -0.00002 | 2.04262 |
| R21 | 2.04669 | -0.00021 | 0.00003  | 0.00000 | 0.00003  | 2.04671 |
| R22 | 1.91442 | -0.00002 | 0.00000  | 0.00000 | 0.00000  | 1.91442 |
| R23 | 1.92604 | 0.00189  | -0.00018 | 0.00000 | -0.00018 | 1.92587 |
| R24 | 3.85161 | 0.00032  | 0.00006  | 0.00000 | 0.00006  | 3.85167 |
| R25 | 2.76861 | -0.00129 | -0.00003 | 0.00000 | -0.00003 | 2.76858 |
| R26 | 2.72950 | 0.00068  | 0.00001  | 0.00000 | 0.00000  | 2.72951 |
| R27 | 2.05573 | -0.00016 | 0.00004  | 0.00000 | 0.00004  | 2.05576 |
| R28 | 2.05226 | -0.00019 | 0.00000  | 0.00000 | 0.00000  | 2.05226 |
| R29 | 2.74051 | 0.00124  | -0.00003 | 0.00000 | -0.00003 | 2.74047 |
| R30 | 2.05574 | -0.00033 | -0.00002 | 0.00000 | -0.00002 | 2.05572 |
| R31 | 2.84085 | 0.00048  | -0.00006 | 0.00000 | -0.00006 | 2.84080 |
| R32 | 2.06765 | 0.00000  | 0.00001  | 0.00000 | 0.00001  | 2.06765 |
| R33 | 2.06812 | -0.00002 | 0.00000  | 0.00000 | 0.00000  | 2.06812 |
| R34 | 2.06433 | 0.00023  | -0.00002 | 0.00000 | -0.00002 | 2.06431 |
| A1  | 1.87554 | 0.00000  | 0.00016  | 0.00000 | 0.00016  | 1.87570 |
| A2  | 2.27737 | -0.00021 | -0.00001 | 0.00000 | -0.00001 | 2.27736 |
| A3  | 2.13019 | 0.00021  | -0.00015 | 0.00000 | -0.00015 | 2.13004 |
| A4  | 1.86349 | -0.00133 | 0.00013  | 0.00000 | 0.00013  | 1.86361 |
| A5  | 2.27589 | 0.00062  | -0.00005 | 0.00000 | -0.00005 | 2.27585 |
| A6  | 2.14377 | 0.00071  | -0.00008 | 0.00000 | -0.00008 | 2.14369 |
| A7  | 1.89742 | 0.00130  | -0.00016 | 0.00000 | -0.00016 | 1.89726 |
| A8  | 2.25453 | -0.00007 | -0.00005 | 0.00000 | -0.00005 | 2.25448 |
| A9  | 2.13117 | -0.00123 | 0.00020  | 0.00000 | 0.00020  | 2.13138 |
| A10 | 1.88937 | -0.00055 | 0.00015  | 0.00000 | 0.00015  | 1.88952 |
| A11 | 2.19916 | -0.00355 | -0.00010 | 0.00000 | -0.00010 | 2.19906 |
| A12 | 2.19465 | 0.00410  | -0.00006 | 0.00000 | -0.00006 | 2.19460 |
| A13 | 1.89894 | 0.00058  | -0.00028 | 0.00000 | -0.00028 | 1.89866 |
| A14 | 2.20517 | -0.00240 | -0.00052 | 0.00000 | -0.00052 | 2.20465 |
| A15 | 2.17817 | 0.00182  | 0.00081  | 0.00000 | 0.00081  | 2.17898 |
| A16 | 1.97645 | -0.00392 | 0.00079  | 0.00000 | 0.00079  | 1.97724 |
| A17 | 1.85895 | 0.00225  | 0.00014  | 0.00000 | 0.00014  | 1.85910 |
| A18 | 1.88341 | 0.00006  | -0.00039 | 0.00000 | -0.00039 | 1.88302 |
| A19 | 1.91763 | 0.00145  | 0.00000  | 0.00000 | 0.00000  | 1.91764 |



|     |          |          |          |         |          |          |
|-----|----------|----------|----------|---------|----------|----------|
| A20 | 1.92694  | 0.00095  | -0.00056 | 0.00000 | -0.00056 | 1.92639  |
| A21 | 1.89775  | -0.00070 | 0.00001  | 0.00000 | 0.00001  | 1.89776  |
| A22 | 1.90861  | -0.00071 | -0.00040 | 0.00000 | -0.00040 | 1.90820  |
| A23 | 1.88709  | 0.00104  | -0.00023 | 0.00000 | -0.00023 | 1.88686  |
| A24 | 1.88475  | 0.00040  | 0.00064  | 0.00000 | 0.00064  | 1.88539  |
| A25 | 1.87727  | -0.00008 | -0.00001 | 0.00000 | -0.00001 | 1.87726  |
| A26 | 1.90364  | -0.00120 | -0.00035 | 0.00000 | -0.00035 | 1.90329  |
| A27 | 2.00119  | 0.00051  | 0.00031  | 0.00000 | 0.00031  | 2.00150  |
| A28 | 2.16967  | 0.00067  | -0.00014 | 0.00000 | -0.00014 | 2.16953  |
| A29 | 1.95162  | -0.00027 | 0.00006  | 0.00000 | 0.00006  | 1.95168  |
| A30 | 2.16186  | -0.00039 | 0.00007  | 0.00000 | 0.00007  | 2.16193  |
| A31 | 2.07890  | 0.00002  | 0.00000  | 0.00000 | 0.00000  | 2.07890  |
| A32 | 2.15814  | 0.00003  | -0.00001 | 0.00000 | -0.00001 | 2.15813  |
| A33 | 2.04614  | -0.00005 | 0.00002  | 0.00000 | 0.00002  | 2.04615  |
| A34 | 1.93821  | -0.00216 | -0.00008 | 0.00000 | -0.00011 | 1.93810  |
| A35 | 1.92437  | 0.00809  | 0.00041  | 0.00000 | 0.00040  | 1.92477  |
| A36 | 1.87924  | -0.00275 | -0.00016 | 0.00000 | -0.00015 | 1.87909  |
| A37 | 2.08960  | -0.00026 | 0.00014  | 0.00000 | 0.00013  | 2.08973  |
| A38 | 2.06719  | -0.00006 | -0.00014 | 0.00000 | -0.00013 | 2.06706  |
| A39 | 1.99370  | -0.00037 | -0.00005 | 0.00000 | -0.00004 | 1.99366  |
| A40 | 2.01003  | -0.00001 | 0.00011  | 0.00000 | 0.00010  | 2.01013  |
| A41 | 2.03433  | 0.00019  | -0.00002 | 0.00000 | -0.00002 | 2.03430  |
| A42 | 2.01651  | -0.00028 | -0.00008 | 0.00000 | -0.00007 | 2.01644  |
| A43 | 2.14001  | 0.00007  | 0.00007  | 0.00000 | 0.00006  | 2.14007  |
| A44 | 1.97113  | 0.00004  | 0.00006  | 0.00000 | 0.00006  | 1.97119  |
| A45 | 2.02525  | -0.00018 | -0.00013 | 0.00000 | -0.00013 | 2.02512  |
| A46 | 2.03981  | 0.00012  | 0.00004  | 0.00000 | 0.00003  | 2.03984  |
| A47 | 2.43009  | 0.00014  | -0.00027 | 0.00000 | -0.00027 | 2.42982  |
| A48 | 2.43740  | 0.00061  | -0.00027 | 0.00000 | -0.00026 | 2.43714  |
| A49 | 1.93283  | 0.00000  | 0.00000  | 0.00000 | 0.00000  | 1.93282  |
| A50 | 1.91876  | 0.00002  | -0.00005 | 0.00000 | -0.00005 | 1.91871  |
| A51 | 1.93878  | 0.00018  | 0.00001  | 0.00000 | 0.00001  | 1.93879  |
| A52 | 1.88108  | -0.00001 | 0.00000  | 0.00000 | 0.00000  | 1.88108  |
| A53 | 1.89322  | -0.00010 | 0.00002  | 0.00000 | 0.00002  | 1.89324  |
| A54 | 1.89780  | -0.00010 | 0.00002  | 0.00000 | 0.00002  | 1.89783  |
| A55 | 3.12665  | 0.00470  | 0.00879  | 0.00000 | 0.00879  | 3.13543  |
| A56 | 3.10914  | 0.00555  | 0.02242  | 0.00000 | 0.02243  | 3.13157  |
| A57 | 3.13889  | -0.00080 | 0.00159  | 0.00000 | 0.00159  | 3.14048  |
| A58 | 3.18735  | 0.00052  | -0.00023 | 0.00000 | -0.00022 | 3.18713  |
| D1  | 0.00203  | -0.00003 | -0.00031 | 0.00000 | -0.00031 | 0.00172  |
| D2  | -3.13101 | 0.00008  | -0.00025 | 0.00000 | -0.00025 | -3.13126 |
| D3  | 3.12994  | 0.00000  | -0.00014 | 0.00000 | -0.00014 | 3.12980  |
| D4  | -0.00309 | 0.00012  | -0.00009 | 0.00000 | -0.00009 | -0.00318 |
| D5  | -0.00523 | 0.00006  | 0.00028  | 0.00000 | 0.00028  | -0.00494 |

|     |          |          |          |         |          |          |
|-----|----------|----------|----------|---------|----------|----------|
| D6  | -3.10269 | -0.00006 | 0.00007  | 0.00000 | 0.00007  | -3.10262 |
| D7  | -3.13455 | 0.00003  | 0.00014  | 0.00000 | 0.00014  | -3.13442 |
| D8  | 0.05118  | -0.00008 | -0.00008 | 0.00000 | -0.00008 | 0.05110  |
| D9  | 0.00184  | -0.00001 | 0.00023  | 0.00000 | 0.00023  | 0.00207  |
| D10 | 3.13096  | 0.00026  | -0.00019 | 0.00000 | -0.00019 | 3.13077  |
| D11 | 3.13568  | -0.00011 | 0.00018  | 0.00000 | 0.00018  | 3.13585  |
| D12 | -0.01838 | 0.00015  | -0.00024 | 0.00000 | -0.00024 | -0.01863 |
| D13 | -0.00511 | 0.00004  | -0.00005 | 0.00000 | -0.00005 | -0.00517 |
| D14 | 3.13247  | 0.00051  | -0.00005 | 0.00000 | -0.00005 | 3.13242  |
| D15 | -3.13530 | -0.00021 | 0.00033  | 0.00000 | 0.00033  | -3.13497 |
| D16 | 0.00228  | 0.00025  | 0.00034  | 0.00000 | 0.00034  | 0.00263  |
| D17 | -0.00632 | -0.00002 | -0.00004 | 0.00000 | -0.00004 | -0.00636 |
| D18 | -3.13914 | -0.00024 | 0.00040  | 0.00000 | 0.00040  | -3.13874 |
| D19 | 3.12133  | 0.00030  | -0.00051 | 0.00000 | -0.00051 | 3.12082  |
| D20 | -0.01148 | 0.00008  | -0.00007 | 0.00000 | -0.00007 | -0.01156 |
| D21 | 0.00639  | -0.00007 | -0.00014 | 0.00000 | -0.00014 | 0.00625  |
| D22 | 3.10469  | -0.00009 | 0.00003  | 0.00000 | 0.00003  | 3.10472  |
| D23 | -3.13121 | -0.00051 | -0.00015 | 0.00000 | -0.00015 | -3.13136 |
| D24 | -0.03291 | -0.00053 | 0.00002  | 0.00000 | 0.00002  | -0.03289 |
| D25 | 1.43062  | -0.00110 | -0.00095 | 0.00000 | -0.00095 | 1.42967  |
| D26 | -2.74291 | -0.00014 | -0.00037 | 0.00000 | -0.00037 | -2.74328 |
| D27 | -0.70776 | 0.00022  | -0.00048 | 0.00000 | -0.00048 | -0.70825 |
| D28 | -1.66009 | -0.00118 | -0.00116 | 0.00000 | -0.00116 | -1.66125 |
| D29 | 0.44957  | -0.00022 | -0.00058 | 0.00000 | -0.00058 | 0.44898  |
| D30 | 2.48471  | 0.00015  | -0.00070 | 0.00000 | -0.00070 | 2.48402  |
| D31 | -1.11935 | 0.00139  | 0.00165  | 0.00000 | 0.00165  | -1.11770 |
| D32 | 0.91981  | 0.00149  | 0.00129  | 0.00000 | 0.00129  | 0.92111  |
| D33 | 3.09448  | 0.00301  | 0.00193  | 0.00000 | 0.00193  | 3.09641  |
| D34 | 3.08770  | 0.00009  | 0.00095  | 0.00000 | 0.00095  | 3.08865  |
| D35 | -1.15632 | 0.00019  | 0.00059  | 0.00000 | 0.00059  | -1.15573 |
| D36 | 1.01835  | 0.00171  | 0.00123  | 0.00000 | 0.00123  | 1.01958  |
| D37 | 0.99466  | -0.00056 | 0.00129  | 0.00000 | 0.00129  | 0.99596  |
| D38 | 3.03383  | -0.00047 | 0.00094  | 0.00000 | 0.00094  | 3.03476  |
| D39 | -1.07469 | 0.00105  | 0.00157  | 0.00000 | 0.00157  | -1.07312 |
| D40 | 2.86986  | -0.00190 | -0.00068 | 0.00000 | -0.00067 | 2.86919  |
| D41 | -1.33182 | -0.00147 | -0.00066 | 0.00000 | -0.00067 | -1.33250 |
| D42 | 0.79734  | -0.00060 | -0.00037 | 0.00000 | -0.00036 | 0.79698  |
| D43 | 2.87884  | -0.00017 | -0.00035 | 0.00000 | -0.00036 | 2.87848  |
| D44 | -1.30860 | 0.00005  | -0.00031 | 0.00000 | -0.00030 | -1.30890 |
| D45 | 0.77290  | 0.00048  | -0.00029 | 0.00000 | -0.00030 | 0.77260  |
| D46 | -3.13543 | -0.00023 | 0.00040  | 0.00000 | 0.00040  | -3.13503 |
| D47 | 0.00382  | -0.00008 | 0.00018  | 0.00000 | 0.00018  | 0.00399  |
| D48 | -0.00365 | 0.00002  | -0.00009 | 0.00000 | -0.00009 | -0.00374 |
| D49 | 3.13559  | 0.00017  | -0.00031 | 0.00000 | -0.00031 | 3.13528  |

|     |          |          |          |         |          |          |
|-----|----------|----------|----------|---------|----------|----------|
| D50 | 1.23015  | 0.00056  | 0.00477  | 0.00000 | 0.00474  | 1.23489  |
| D51 | -0.53667 | -0.00179 | -0.00778 | 0.00000 | -0.00779 | -0.54445 |
| D52 | -2.95542 | 0.00127  | 0.00667  | 0.00000 | 0.00667  | -2.94874 |
| D53 | 1.56096  | -0.00108 | -0.00589 | 0.00000 | -0.00586 | 1.55510  |
| D54 | -2.70448 | 0.00025  | -0.00001 | 0.00000 | -0.00001 | -2.70449 |
| D55 | -0.01292 | 0.00006  | 0.00006  | 0.00000 | 0.00006  | -0.01286 |
| D56 | -0.02573 | 0.00000  | -0.00008 | 0.00000 | -0.00008 | -0.02580 |
| D57 | 2.66584  | -0.00018 | 0.00000  | 0.00000 | 0.00000  | 2.66583  |
| D58 | 2.00549  | -0.00001 | 0.00034  | 0.00000 | 0.00033  | 2.00582  |
| D59 | -0.41820 | 0.00014  | 0.00031  | 0.00000 | 0.00030  | -0.41790 |
| D60 | 0.45314  | -0.00035 | -0.00042 | 0.00000 | -0.00041 | 0.45273  |
| D61 | -1.97028 | -0.00038 | -0.00039 | 0.00000 | -0.00039 | -1.97067 |
| D62 | 2.55220  | 0.00018  | 0.00003  | 0.00000 | 0.00002  | 2.55223  |
| D63 | -1.65419 | 0.00019  | -0.00001 | 0.00000 | -0.00001 | -1.65420 |
| D64 | 0.44721  | 0.00020  | -0.00001 | 0.00000 | -0.00001 | 0.44720  |
| D65 | 1.34973  | -0.00011 | 0.00005  | 0.00000 | 0.00005  | 1.34979  |
| D66 | -2.85666 | -0.00011 | 0.00002  | 0.00000 | 0.00002  | -2.85664 |
| D67 | -0.75526 | -0.00010 | 0.00002  | 0.00000 | 0.00002  | -0.75524 |
| D68 | -1.04500 | -0.00010 | 0.00007  | 0.00000 | 0.00007  | -1.04493 |
| D69 | 1.03180  | -0.00010 | 0.00004  | 0.00000 | 0.00004  | 1.03183  |
| D70 | 3.13319  | -0.00009 | 0.00004  | 0.00000 | 0.00004  | 3.13323  |

| Item                 | Value    | Threshold | Converged? |
|----------------------|----------|-----------|------------|
| Maximum Force        | 0.008090 | 0.000450  | NO         |
| RMS Force            | 0.001324 | 0.000300  | NO         |
| Maximum Displacement | 0.128779 | 0.001800  | NO         |
| RMS Displacement     | 0.031862 | 0.001200  | NO         |

Predicted change in Energy=-5.705281D-05

GradGradGradGradGradGradGradGradGradGradGradGradGradGradGradGradGradGradGrad

Input orientation:

| Center<br>Number | Atomic<br>Number | Atomic<br>Type | Coordinates (Angstroms) |           |           |
|------------------|------------------|----------------|-------------------------|-----------|-----------|
|                  |                  |                | X                       | Y         | Z         |
| 1                | 6                | 0              | -2.907614               | 2.120587  | -0.250024 |
| 2                | 6                | 0              | -3.843143               | 1.185577  | 0.056334  |
| 3                | 7                | 0              | -3.185654               | -0.039775 | 0.104243  |
| 4                | 6                | 0              | -1.881780               | 0.159036  | -0.165616 |
| 5                | 7                | 0              | -1.694080               | 1.465230  | -0.388529 |
| 6                | 6                | 0              | -0.384278               | 2.095378  | -0.675587 |
| 7                | 6                | 0              | 0.296538                | 2.671505  | 0.569864  |
| 8                | 1                | 0              | -3.001953               | 3.183688  | -0.390878 |
| 9                | 1                | 0              | -4.898489               | 1.287848  | 0.232906  |
| 10               | 1                | 0              | 0.243738                | 1.318970  | -1.116057 |

|    |    |   |           |           |           |
|----|----|---|-----------|-----------|-----------|
| 11 | 1  | 0 | -0.544788 | 2.878961  | -1.417461 |
| 12 | 1  | 0 | -0.314479 | 3.485489  | 0.973083  |
| 13 | 1  | 0 | 0.340220  | 1.879911  | 1.332808  |
| 14 | 35 | 0 | 0.443381  | -2.135277 | -0.246440 |
| 15 | 1  | 0 | -1.089073 | -0.629141 | -0.194993 |
| 16 | 6  | 0 | -3.709865 | -1.330449 | 0.395379  |
| 17 | 6  | 0 | -4.979992 | -1.572325 | 0.688915  |
| 18 | 1  | 0 | -2.941976 | -2.095427 | 0.357549  |
| 19 | 1  | 0 | -5.286415 | -2.586634 | 0.902575  |
| 20 | 1  | 0 | -5.742909 | -0.804719 | 0.731211  |
| 21 | 7  | 0 | 1.596616  | 3.204639  | 0.168720  |
| 22 | 1  | 0 | 1.975283  | 3.815562  | 0.882650  |
| 23 | 1  | 0 | 2.261392  | 2.445270  | 0.027126  |
| 24 | 6  | 0 | 3.847051  | -0.201690 | -1.058369 |
| 25 | 6  | 0 | 3.837077  | -0.408845 | 0.391946  |
| 26 | 8  | 0 | 3.580867  | 0.904098  | -0.168058 |
| 27 | 1  | 0 | 4.795333  | -0.131101 | -1.586786 |
| 28 | 1  | 0 | 2.993922  | -0.545582 | -1.635714 |
| 29 | 1  | 0 | 2.942483  | -0.881123 | 0.792013  |
| 30 | 6  | 0 | 5.097532  | -0.547171 | 1.199403  |
| 31 | 1  | 0 | 4.969390  | -0.112602 | 2.195347  |
| 32 | 1  | 0 | 5.345274  | -1.605615 | 1.326019  |
| 33 | 1  | 0 | 5.935505  | -0.046908 | 0.708639  |

-----  
Distance matrix (angstroms):

|    |    | 1        | 2        | 3        | 4        | 5        |
|----|----|----------|----------|----------|----------|----------|
| 1  | C  | 0.000000 |          |          |          |          |
| 2  | C  | 1.357687 | 0.000000 |          |          |          |
| 3  | N  | 2.206802 | 1.391429 | 0.000000 |          |          |
| 4  | C  | 2.215207 | 2.224858 | 1.346268 | 0.000000 |          |
| 5  | N  | 1.386125 | 2.212370 | 2.175468 | 1.338307 | 0.000000 |
| 6  | C  | 2.559095 | 3.650643 | 3.607593 | 2.500400 | 1.481577 |
| 7  | C  | 3.352956 | 4.428166 | 4.437736 | 3.405657 | 2.517175 |
| 8  | H  | 1.076533 | 2.213606 | 3.266437 | 3.233273 | 2.159545 |
| 9  | H  | 2.211393 | 1.074892 | 2.170931 | 3.245546 | 3.268927 |
| 10 | H  | 3.365059 | 4.253808 | 3.885363 | 2.601271 | 2.075048 |
| 11 | H  | 2.742442 | 3.989833 | 4.220045 | 3.279124 | 2.092417 |
| 12 | H  | 3.175421 | 4.310626 | 4.628825 | 3.849462 | 2.799773 |
| 13 | H  | 3.621009 | 4.428545 | 4.198375 | 3.184960 | 2.696912 |
| 14 | Br | 5.416784 | 5.430840 | 4.205234 | 3.267533 | 4.189579 |
| 15 | H  | 3.297139 | 3.307758 | 2.198305 | 1.118244 | 2.188579 |
| 16 | C  | 3.601361 | 2.542262 | 1.423164 | 2.423876 | 3.534646 |
| 17 | C  | 4.337506 | 3.049362 | 2.431090 | 3.650583 | 4.602701 |
| 18 | H  | 4.259706 | 3.415818 | 2.085485 | 2.545647 | 3.846057 |

|    |    |          |          |          |           |          |
|----|----|----------|----------|----------|-----------|----------|
| 19 | H  | 5.398621 | 4.126588 | 3.396618 | 4.502363  | 5.566814 |
| 20 | H  | 4.190362 | 2.832992 | 2.741857 | 4.079392  | 4.774882 |
| 21 | N  | 4.651731 | 5.803467 | 5.779316 | 4.635377  | 3.763608 |
| 22 | H  | 5.291368 | 6.438455 | 6.488822 | 5.417193  | 4.539182 |
| 23 | H  | 5.186604 | 6.233220 | 5.987630 | 4.736021  | 4.096218 |
| 24 | C  | 7.188316 | 7.893424 | 7.129994 | 5.809185  | 5.825069 |
| 25 | C  | 7.231943 | 7.851152 | 7.038305 | 5.773966  | 5.891943 |
| 26 | O  | 6.602042 | 7.432733 | 6.837460 | 5.513224  | 5.309288 |
| 27 | H  | 8.135873 | 8.891386 | 8.158681 | 6.832843  | 6.789445 |
| 28 | H  | 6.622441 | 7.252957 | 6.439756 | 5.141025  | 5.251304 |
| 29 | H  | 6.657307 | 7.131423 | 6.223741 | 5.027176  | 5.328861 |
| 30 | C  | 8.561550 | 9.178491 | 8.370663 | 7.146524  | 7.259289 |
| 31 | H  | 8.544832 | 9.160861 | 8.419190 | 7.251652  | 7.319002 |
| 32 | H  | 9.191227 | 9.686582 | 8.759071 | 7.587442  | 7.869070 |
| 33 | H  | 9.155208 | 9.877575 | 9.141165 | 7.868716  | 7.854992 |
|    |    | 6        | 7        | 8        | 9         | 10       |
| 6  | C  | 0.000000 |          |          |           |          |
| 7  | C  | 1.531855 | 0.000000 |          |           |          |
| 8  | H  | 2.849158 | 3.473528 | 0.000000 |           |          |
| 9  | H  | 4.674994 | 5.386683 | 2.753210 | 0.000000  |          |
| 10 | H  | 1.091433 | 2.162051 | 3.812816 | 5.316311  | 0.000000 |
| 11 | H  | 1.090937 | 2.168024 | 2.680372 | 4.920372  | 1.773750 |
| 12 | H  | 2.157637 | 1.094759 | 3.028860 | 5.137182  | 3.061032 |
| 13 | H  | 2.145920 | 1.100278 | 3.980081 | 5.385573  | 2.514140 |
| 14 | Br | 4.332161 | 4.877813 | 6.338972 | 6.362635  | 3.567620 |
| 15 | H  | 2.854945 | 3.660490 | 4.270263 | 4.285976  | 2.533748 |
| 16 | C  | 4.893137 | 5.665452 | 4.636461 | 2.880052  | 4.993479 |
| 17 | C  | 6.036100 | 6.772447 | 5.262914 | 2.897443  | 6.237376 |
| 18 | H  | 5.017174 | 5.766861 | 5.332241 | 3.910246  | 4.896773 |
| 19 | H  | 6.960084 | 7.676462 | 6.339432 | 3.951019  | 7.064786 |
| 20 | H  | 6.253364 | 6.970300 | 4.967828 | 2.310885  | 6.615314 |
| 21 | N  | 2.422242 | 1.461285 | 4.632540 | 6.772341  | 2.652674 |
| 22 | H  | 3.309783 | 2.055453 | 5.176294 | 7.352567  | 3.636763 |
| 23 | H  | 2.759674 | 2.050951 | 5.331303 | 7.255747  | 2.578052 |
| 24 | C  | 4.829822 | 4.848972 | 7.669105 | 8.964964  | 3.911470 |
| 25 | C  | 5.023006 | 4.696342 | 7.764756 | 8.900234  | 4.262805 |
| 26 | O  | 4.171224 | 3.801984 | 6.969914 | 8.497501  | 3.493889 |
| 27 | H  | 5.711029 | 5.722316 | 8.556617 | 9.964681  | 4.800137 |
| 28 | H  | 4.394171 | 4.742373 | 7.169908 | 8.315248  | 3.363051 |
| 29 | H  | 4.699015 | 4.435261 | 7.297824 | 8.154623  | 3.970436 |
| 30 | C  | 6.367801 | 5.814270 | 9.058143 | 10.208910 | 5.692377 |
| 31 | H  | 6.463682 | 5.677058 | 9.005353 | 10.158123 | 5.945299 |
| 32 | H  | 7.108554 | 6.659975 | 9.775549 | 10.700547 | 6.367308 |
| 33 | H  | 6.815066 | 6.261548 | 9.566810 | 10.926268 | 6.131179 |

|    |    | 11       | 12        | 13       | 14        | 15        |
|----|----|----------|-----------|----------|-----------|-----------|
| 11 | H  | 0.000000 |           |          |           |           |
| 12 | H  | 2.477019 | 0.000000  |          |           |           |
| 13 | H  | 3.057011 | 1.770851  | 0.000000 |           |           |
| 14 | Br | 5.243123 | 5.801258  | 4.315831 | 0.000000  |           |
| 15 | H  | 3.754657 | 4.346789  | 3.266863 | 2.149304  | 0.000000  |
| 16 | C  | 5.569850 | 5.920781  | 5.252463 | 4.278917  | 2.776495  |
| 17 | C  | 6.627353 | 6.886890  | 6.374731 | 5.532158  | 4.100017  |
| 18 | H  | 5.800147 | 6.199133  | 5.246642 | 3.439045  | 2.426633  |
| 19 | H  | 7.598573 | 7.848298  | 7.196814 | 5.861272  | 4.759633  |
| 20 | H  | 6.723596 | 6.923311  | 6.676347 | 6.402840  | 4.748354  |
| 21 | N  | 2.684706 | 2.092406  | 2.165303 | 5.478778  | 4.695006  |
| 22 | H  | 3.538148 | 2.315197  | 2.573484 | 6.247723  | 5.505177  |
| 23 | H  | 3.185839 | 2.934621  | 2.390677 | 4.935728  | 4.552687  |
| 24 | C  | 5.376578 | 5.919494  | 4.727436 | 3.997869  | 5.029259  |
| 25 | C  | 5.769260 | 5.721798  | 4.283880 | 3.860735  | 4.965882  |
| 26 | O  | 4.741532 | 4.810354  | 3.702243 | 4.368954  | 4.915271  |
| 27 | H  | 6.132376 | 6.763345  | 5.693525 | 4.975213  | 6.067237  |
| 28 | H  | 4.929259 | 5.831027  | 4.662325 | 3.310963  | 4.330532  |
| 29 | H  | 5.584000 | 5.450494  | 3.832433 | 2.982750  | 4.158259  |
| 30 | C  | 7.100854 | 6.753031  | 5.342335 | 5.125785  | 6.342329  |
| 31 | H  | 7.239336 | 6.508414  | 5.113051 | 5.526146  | 6.533415  |
| 32 | H  | 7.894994 | 7.620808  | 6.099140 | 5.175107  | 6.683398  |
| 33 | H  | 7.421267 | 7.184014  | 5.950583 | 5.952890  | 7.106353  |
|    |    | 16       | 17        | 18       | 19        | 20        |
| 16 | C  | 0.000000 |           |          |           |           |
| 17 | C  | 1.325855 | 0.000000  |          |           |           |
| 18 | H  | 1.084563 | 2.130012  | 0.000000 |           |           |
| 19 | H  | 2.078643 | 1.080910  | 2.456569 | 0.000000  |           |
| 20 | H  | 2.126603 | 1.083074  | 3.106569 | 1.847423  | 0.000000  |
| 21 | N  | 6.984063 | 8.145046  | 6.980342 | 9.025159  | 8.382122  |
| 22 | H  | 7.683734 | 8.800154  | 7.706812 | 9.680948  | 8.996689  |
| 23 | H  | 7.074431 | 8.307628  | 6.913910 | 9.113499  | 8.667583  |
| 24 | C  | 7.777818 | 9.102106  | 7.189016 | 9.641237  | 9.774127  |
| 25 | C  | 7.603006 | 8.898460  | 6.985793 | 9.393700  | 9.594162  |
| 26 | O  | 7.646270 | 8.952955  | 7.198673 | 9.589586  | 9.521635  |
| 27 | H  | 8.815090 | 10.139671 | 8.216141 | 10.670904 | 10.811170 |
| 28 | H  | 7.048554 | 8.369075  | 6.450581 | 8.897909  | 9.055478  |
| 29 | H  | 6.679292 | 7.953238  | 6.024130 | 8.404507  | 8.685940  |
| 30 | C  | 8.878639 | 10.142388 | 8.230401 | 10.586494 | 10.853602 |
| 31 | H  | 8.947207 | 10.168104 | 8.360550 | 10.628905 | 10.834023 |
| 32 | H  | 9.106995 | 10.344957 | 8.358012 | 10.685247 | 11.132970 |
| 33 | H  | 9.735440 | 11.021587 | 9.117531 | 11.507359 | 11.702997 |
|    |    | 21       | 22        | 23       | 24        | 25        |

|    |   |          |          |          |          |          |
|----|---|----------|----------|----------|----------|----------|
| 21 | N | 0.000000 |          |          |          |          |
| 22 | H | 1.013070 | 0.000000 |          |          |          |
| 23 | H | 1.019126 | 1.640572 | 0.000000 |          |          |
| 24 | C | 4.263013 | 4.838323 | 3.270934 | 0.000000 |          |
| 25 | C | 4.257553 | 4.642486 | 3.280525 | 1.465069 | 0.000000 |
| 26 | O | 3.056659 | 3.486905 | 2.038216 | 1.444394 | 1.450195 |
| 27 | H | 4.943759 | 5.443063 | 3.957683 | 1.087863 | 2.216028 |
| 28 | H | 4.390057 | 5.138030 | 3.499548 | 1.086010 | 2.200231 |
| 29 | H | 4.346643 | 4.796096 | 3.480493 | 2.168822 | 1.087841 |
| 30 | C | 5.234004 | 5.374216 | 4.286330 | 2.603958 | 1.503286 |
| 31 | H | 5.146543 | 5.110608 | 4.310121 | 3.443000 | 2.149918 |
| 32 | H | 6.207280 | 6.398638 | 5.254248 | 3.146584 | 2.139956 |
| 33 | H | 5.448856 | 5.534646 | 4.491605 | 2.740058 | 2.152834 |
|    |   | 26       | 27       | 28       | 29       | 30       |
| 26 | O | 0.000000 |          |          |          |          |
| 27 | H | 2.135264 | 0.000000 |          |          |          |
| 28 | H | 2.144782 | 1.849127 | 0.000000 |          |          |
| 29 | H | 2.125155 | 3.107132 | 2.451345 | 0.000000 |          |
| 30 | C | 2.505274 | 2.833247 | 3.530307 | 2.218497 | 0.000000 |
| 31 | H | 2.923586 | 3.786181 | 4.332087 | 2.582310 | 1.094155 |
| 32 | H | 3.412339 | 3.310749 | 3.927390 | 2.565825 | 1.094400 |
| 33 | H | 2.686509 | 2.564382 | 3.794415 | 3.108223 | 1.092388 |
|    |   | 31       | 32       | 33       |          |          |
| 31 | H | 0.000000 |          |          |          |          |
| 32 | H | 1.768080 | 0.000000 |          |          |          |
| 33 | H | 1.774259 | 1.777385 | 0.000000 |          |          |

Stoichiometry C10H18BrN3O

Framework group C1[X(C10H18BrN3O)]

Deg. of freedom 93

Full point group C1 NOp 1

Largest Abelian subgroup C1 NOp 1

Largest concise Abelian subgroup C1 NOp 1

Standard orientation:

| Center<br>Number | Atomic<br>Number | Atomic<br>Type | Coordinates (Angstroms) |           |           |
|------------------|------------------|----------------|-------------------------|-----------|-----------|
|                  |                  |                | X                       | Y         | Z         |
| 1                | 6                | 0              | -2.923055               | 2.107908  | -0.245961 |
| 2                | 6                | 0              | -3.856156               | 1.169392  | 0.057063  |
| 3                | 7                | 0              | -3.195377               | -0.054329 | 0.101235  |
| 4                | 6                | 0              | -1.891957               | 0.148870  | -0.167545 |
| 5                | 7                | 0              | -1.707711               | 1.456280  | -0.386176 |
| 6                | 6                | 0              | -0.399522               | 2.090883  | -0.670760 |
| 7                | 6                | 0              | 0.279330                | 2.664820  | 0.576772  |

|    |    |   |           |           |           |
|----|----|---|-----------|-----------|-----------|
| 8  | 1  | 0 | -3.020218 | 3.171201  | -0.383412 |
| 9  | 1  | 0 | -4.911832 | 1.268244  | 0.233612  |
| 10 | 1  | 0 | 0.230730  | 1.317600  | -1.113525 |
| 11 | 1  | 0 | -0.561905 | 2.876423  | -1.410154 |
| 12 | 1  | 0 | -0.334013 | 3.475845  | 0.982414  |
| 13 | 1  | 0 | 0.324901  | 1.870886  | 1.337170  |
| 14 | 35 | 0 | 0.439415  | -2.138886 | -0.255001 |
| 15 | 1  | 0 | -1.097116 | -0.637065 | -0.199202 |
| 16 | 6  | 0 | -3.716197 | -1.347346 | 0.388026  |
| 17 | 6  | 0 | -4.985762 | -1.593597 | 0.680355  |
| 18 | 1  | 0 | -2.946233 | -2.110123 | 0.347982  |
| 19 | 1  | 0 | -5.289514 | -2.609413 | 0.890637  |
| 20 | 1  | 0 | -5.750761 | -0.828193 | 0.724875  |
| 21 | 7  | 0 | 1.578095  | 3.202754  | 0.177786  |
| 22 | 1  | 0 | 1.954880  | 3.812386  | 0.893812  |
| 23 | 1  | 0 | 2.244965  | 2.445643  | 0.033963  |
| 24 | 6  | 0 | 3.838117  | -0.193508 | -1.059545 |
| 25 | 6  | 0 | 3.828230  | -0.405373 | 0.390091  |
| 26 | 8  | 0 | 3.568660  | 0.908675  | -0.165756 |
| 27 | 1  | 0 | 4.786377  | -0.118654 | -1.587414 |
| 28 | 1  | 0 | 2.986107  | -0.537835 | -1.638282 |
| 29 | 1  | 0 | 2.934784  | -0.881354 | 0.788331  |
| 30 | 6  | 0 | 5.088792  | -0.542905 | 1.197518  |
| 31 | 1  | 0 | 4.959153  | -0.111903 | 2.194817  |
| 32 | 1  | 0 | 5.339349  | -1.601080 | 1.320798  |
| 33 | 1  | 0 | 5.925571  | -0.038800 | 0.708652  |

-----  
Rotational constants (GHZ):      0.5240208      0.2280547      0.1673077

Standard basis: 6-311++G(d,p) (5D, 7F)

There are 499 symmetry adapted cartesian basis functions of A symmetry.

There are 482 symmetry adapted basis functions of A symmetry.

482 basis functions, 760 primitive gaussians, 499 cartesian basis functions

71 alpha electrons      71 beta electrons

nuclear repulsion energy      1289.1323279052 Hartrees.

NAtoms= 33 NActive= 33 NUniq= 33 SFac= 1.00D+00 NAtFMM= 60 NAOKFM=F

Big=F

Integral buffers will be 131072 words long.

Raffenetti 2 integral format.

Two-electron integral symmetry is turned on.

One-electron integrals computed using PRISM.

NBasis= 482 RedAO= T EigKep= 3.82D-06 NBF= 482

NBsUse= 482 1.00D-06 EigRej= -1.00D+00 NBFU= 482

Lowest energy guess from the checkpoint file:

"/home/suqian/liuwen/qianmengshijie/nh2po/nh2po.chk"



B after Tr= 0.000000 0.000000 0.000000  
 Rot= 0.999996 -0.001192 0.000310 -0.002399 Ang= -0.31 deg.  
 B after Tr= 0.000000 0.000000 0.000000  
 Rot= 0.999993 0.001698 -0.000451 0.003386 Ang= 0.44 deg.

Requested convergence on RMS density matrix=1.00D-08 within 128 cycles.

Requested convergence on MAX density matrix=1.00D-06.

Requested convergence on energy=1.00D-06.

No special actions if energy rises.

SCF Done: E(RB3LYP) = -3205.64626919 A.U. after 7 cycles

NFock= 7 Conv=0.73D-08 -V/T= 2.0018

Calling FoFJK, ICntrl= 2127 FMM=F ISym2X=0 l1Cent= 0 IOpClX= 0 NMat=1 NMatS=1

NMatT=0.

\*\*\*\*\* Axes restored to original set \*\*\*\*\*

| Center<br>Number | Atomic<br>Number | Forces (Hartrees/Bohr) |              |              |
|------------------|------------------|------------------------|--------------|--------------|
|                  |                  | X                      | Y            | Z            |
| 1                | 6                | -0.000553284           | 0.000017766  | 0.000049816  |
| 2                | 6                | -0.000551015           | 0.000241252  | -0.000123036 |
| 3                | 7                | 0.001839891            | 0.001936538  | 0.000072908  |
| 4                | 6                | 0.002930776            | 0.004435403  | -0.000953947 |
| 5                | 7                | 0.000078673            | -0.002284660 | 0.001804858  |
| 6                | 6                | -0.000617265           | -0.002363866 | -0.002922783 |
| 7                | 6                | 0.000565284            | 0.000392773  | 0.001429799  |
| 8                | 1                | -0.000202664           | -0.000008283 | 0.000154180  |
| 9                | 1                | 0.000122603            | 0.000022626  | -0.000144290 |
| 10               | 1                | -0.000357034           | 0.000335715  | 0.000018410  |
| 11               | 1                | 0.000058965            | -0.000589950 | -0.000195791 |
| 12               | 1                | -0.000011487           | 0.000076865  | 0.000420574  |
| 13               | 1                | 0.000540182            | 0.000274534  | 0.000436409  |
| 14               | 35               | -0.000034448           | -0.000310926 | 0.000041950  |
| 15               | 1                | -0.000765393           | 0.000140966  | -0.000093678 |
| 16               | 6                | 0.000786564            | -0.000059704 | 0.000197426  |
| 17               | 6                | -0.000658378           | -0.000196133 | 0.000129534  |
| 18               | 1                | -0.000218557           | 0.000096101  | -0.000196344 |
| 19               | 1                | -0.000106428           | -0.000174142 | -0.000076991 |
| 20               | 1                | 0.000107358            | -0.000190824 | -0.000050253 |
| 21               | 7                | -0.004303580           | -0.001204794 | 0.000267482  |
| 22               | 1                | -0.000322221           | 0.000061761  | 0.000066945  |
| 23               | 1                | 0.001727804            | -0.000461274 | -0.000394919 |
| 24               | 6                | 0.000187401            | -0.000404622 | -0.000147067 |
| 25               | 6                | 0.000226021            | 0.000044086  | -0.000200835 |
| 26               | 8                | -0.000844186           | 0.000464106  | -0.000077623 |
| 27               | 1                | -0.000088481           | -0.000059399 | 0.000324911  |

|    |   |             |              |              |
|----|---|-------------|--------------|--------------|
| 28 | 1 | 0.000027252 | 0.000130801  | 0.000009490  |
| 29 | 1 | 0.000054341 | -0.000059175 | -0.000002712 |
| 30 | 6 | 0.000076066 | -0.000433245 | 0.000209564  |
| 31 | 1 | 0.000046219 | 0.000034405  | -0.000037121 |
| 32 | 1 | 0.000072358 | 0.000030899  | 0.000012051  |
| 33 | 1 | 0.000186665 | 0.000064399  | -0.000028915 |

-----  
Cartesian Forces: Max 0.004435403 RMS 0.000959952

GradGradGradGradGradGradGradGradGradGradGradGradGradGradGradGradGrad

Berny optimization.

Using GEDIIS/GDIIS optimizer.

FormGI is forming the generalized inverse of G from B-inverse, IUseBI=4.

GSVD: received Info= 1 from GESDD.

Internal Forces: Max 0.005480144 RMS 0.000845988

Search for a local minimum.

Step number 4 out of a maximum of 172

All quantities printed in internal units (Hartrees-Bohrs-Radians)

Mixed Optimization -- En-DIIS/RFO-DIIS

Update second derivatives using D2CorX and points 2 3 1 4

ITU= 0 0 -1 0

Use linear search instead of GDIIS.

|                 |         |         |         |         |         |
|-----------------|---------|---------|---------|---------|---------|
| Eigenvalues --- | 0.00217 | 0.00230 | 0.00230 | 0.00230 | 0.00334 |
| Eigenvalues --- | 0.00604 | 0.00723 | 0.00860 | 0.01385 | 0.01470 |
| Eigenvalues --- | 0.01842 | 0.01942 | 0.02083 | 0.02143 | 0.02260 |
| Eigenvalues --- | 0.02308 | 0.02354 | 0.02394 | 0.02407 | 0.02891 |
| Eigenvalues --- | 0.03061 | 0.03069 | 0.03070 | 0.03199 | 0.03933 |
| Eigenvalues --- | 0.04046 | 0.04352 | 0.04612 | 0.04654 | 0.05291 |
| Eigenvalues --- | 0.05679 | 0.05766 | 0.05904 | 0.07423 | 0.08562 |
| Eigenvalues --- | 0.09507 | 0.11238 | 0.12028 | 0.12319 | 0.12544 |
| Eigenvalues --- | 0.12758 | 0.12867 | 0.15453 | 0.15898 | 0.15998 |
| Eigenvalues --- | 0.15999 | 0.16000 | 0.16000 | 0.16000 | 0.16000 |
| Eigenvalues --- | 0.16000 | 0.16000 | 0.17091 | 0.17973 | 0.21393 |
| Eigenvalues --- | 0.22001 | 0.22598 | 0.23076 | 0.23504 | 0.24967 |
| Eigenvalues --- | 0.29127 | 0.29428 | 0.31679 | 0.31993 | 0.32200 |
| Eigenvalues --- | 0.33157 | 0.33653 | 0.34269 | 0.34309 | 0.34337 |
| Eigenvalues --- | 0.34537 | 0.34640 | 0.34701 | 0.35051 | 0.35058 |
| Eigenvalues --- | 0.35275 | 0.35445 | 0.35622 | 0.35883 | 0.36262 |
| Eigenvalues --- | 0.36416 | 0.36618 | 0.37912 | 0.41975 | 0.42368 |
| Eigenvalues --- | 0.44209 | 0.45340 | 0.45462 | 0.48939 | 0.53988 |
| Eigenvalues --- | 0.54677 | 0.60478 | 0.74071 |         |         |

RFO step: Lambda=-8.86502810D-04 EMin= 2.16561425D-03

Quartic linear search produced a step of 0.01307.

Maximum step size ( 0.150) exceeded in Quadratic search.

-- Step size scaled by 0.511

Iteration 1 RMS(Cart)= 0.07465542 RMS(Int)= 0.00194290  
Iteration 2 RMS(Cart)= 0.00382031 RMS(Int)= 0.00004629  
Iteration 3 RMS(Cart)= 0.00000879 RMS(Int)= 0.00004611  
Iteration 4 RMS(Cart)= 0.00000000 RMS(Int)= 0.00004611

| Variable | Old X   | -DE/DX   | Delta X<br>(Linear) | Delta X<br>(Quad) | Delta X<br>(Total) | New X   |
|----------|---------|----------|---------------------|-------------------|--------------------|---------|
| R1       | 2.56566 | -0.00097 | 0.00000             | -0.00088          | -0.00088           | 2.56477 |
| R2       | 2.61940 | 0.00075  | 0.00000             | 0.00108           | 0.00108            | 2.62048 |
| R3       | 2.03435 | -0.00001 | 0.00000             | -0.00002          | -0.00002           | 2.03433 |
| R4       | 2.62942 | -0.00019 | 0.00000             | 0.00022           | 0.00022            | 2.62964 |
| R5       | 2.03125 | -0.00014 | 0.00000             | -0.00030          | -0.00030           | 2.03095 |
| R6       | 2.54408 | -0.00099 | 0.00000             | -0.00169          | -0.00169           | 2.54239 |
| R7       | 2.68939 | 0.00051  | 0.00000             | 0.00096           | 0.00096            | 2.69035 |
| R8       | 2.52903 | -0.00548 | 0.00000             | -0.00815          | -0.00816           | 2.52088 |
| R9       | 2.11318 | -0.00045 | 0.00000             | -0.00091          | -0.00091           | 2.11227 |
| R10      | 2.79977 | -0.00386 | -0.00001            | -0.00920          | -0.00921           | 2.79057 |
| R11      | 2.89479 | 0.00064  | 0.00000             | 0.00147           | 0.00147            | 2.89626 |
| R12      | 2.06251 | -0.00045 | 0.00000             | -0.00100          | -0.00100           | 2.06151 |
| R13      | 2.06157 | -0.00030 | 0.00000             | -0.00067          | -0.00067           | 2.06090 |
| R14      | 2.06879 | 0.00022  | 0.00000             | 0.00049           | 0.00049            | 2.06929 |
| R15      | 2.07922 | 0.00013  | 0.00000             | 0.00029           | 0.00029            | 2.07952 |
| R16      | 2.76143 | -0.00328 | 0.00000             | -0.00732          | -0.00732           | 2.75411 |
| R17      | 4.06160 | 0.00019  | 0.00000             | 0.00381           | 0.00381            | 4.06540 |
| R18      | 2.50550 | 0.00073  | 0.00000             | 0.00095           | 0.00095            | 2.50645 |
| R19      | 2.04953 | -0.00022 | 0.00000             | -0.00046          | -0.00046           | 2.04907 |
| R20      | 2.04262 | 0.00018  | 0.00000             | 0.00039           | 0.00039            | 2.04301 |
| R21      | 2.04671 | -0.00021 | 0.00000             | -0.00047          | -0.00047           | 2.04625 |
| R22      | 1.91442 | -0.00004 | 0.00000             | -0.00007          | -0.00007           | 1.91436 |
| R23      | 1.92587 | 0.00162  | 0.00000             | 0.00292           | 0.00293            | 1.92879 |
| R24      | 3.85167 | 0.00010  | 0.00000             | 0.00082           | 0.00081            | 3.85248 |
| R25      | 2.76858 | -0.00034 | 0.00000             | -0.00109          | -0.00117           | 2.76741 |
| R26      | 2.72951 | 0.00022  | 0.00000             | 0.00066           | 0.00069            | 2.73020 |
| R27      | 2.05576 | -0.00024 | 0.00000             | -0.00056          | -0.00056           | 2.05520 |
| R28      | 2.05226 | -0.00007 | 0.00000             | -0.00010          | -0.00010           | 2.05216 |
| R29      | 2.74047 | 0.00067  | 0.00000             | 0.00148           | 0.00153            | 2.74200 |
| R30      | 2.05572 | -0.00002 | 0.00000             | 0.00007           | 0.00007            | 2.05579 |
| R31      | 2.84080 | 0.00043  | 0.00000             | 0.00102           | 0.00102            | 2.84181 |
| R32      | 2.06765 | -0.00003 | 0.00000             | -0.00007          | -0.00007           | 2.06758 |
| R33      | 2.06812 | -0.00001 | 0.00000             | -0.00002          | -0.00002           | 2.06809 |
| R34      | 2.06431 | 0.00019  | 0.00000             | 0.00039           | 0.00039            | 2.06471 |
| A1       | 1.87570 | -0.00075 | 0.00000             | -0.00203          | -0.00204           | 1.87367 |
| A2       | 2.27736 | 0.00014  | 0.00000             | -0.00013          | -0.00013           | 2.27723 |
| A3       | 2.13004 | 0.00061  | 0.00000             | 0.00214           | 0.00214            | 2.13218 |

|     |         |          |          |          |          |         |
|-----|---------|----------|----------|----------|----------|---------|
| A4  | 1.86361 | -0.00125 | 0.00000  | -0.00251 | -0.00251 | 1.86110 |
| A5  | 2.27585 | 0.00057  | 0.00000  | 0.00098  | 0.00098  | 2.27683 |
| A6  | 2.14369 | 0.00068  | 0.00000  | 0.00153  | 0.00153  | 2.14522 |
| A7  | 1.89726 | 0.00093  | 0.00000  | 0.00301  | 0.00300  | 1.90026 |
| A8  | 2.25448 | 0.00020  | 0.00000  | 0.00065  | 0.00064  | 2.25512 |
| A9  | 2.13138 | -0.00113 | 0.00000  | -0.00357 | -0.00358 | 2.12779 |
| A10 | 1.88952 | -0.00039 | 0.00000  | -0.00264 | -0.00264 | 1.88688 |
| A11 | 2.19906 | -0.00100 | 0.00000  | -0.00232 | -0.00233 | 2.19674 |
| A12 | 2.19460 | 0.00139  | 0.00000  | 0.00497  | 0.00497  | 2.19957 |
| A13 | 1.89866 | 0.00146  | 0.00000  | 0.00416  | 0.00417  | 1.90283 |
| A14 | 2.20465 | 0.00107  | 0.00000  | 0.00553  | 0.00553  | 2.21018 |
| A15 | 2.17898 | -0.00254 | -0.00001 | -0.00978 | -0.00978 | 2.16920 |
| A16 | 1.97724 | -0.00386 | -0.00001 | -0.01412 | -0.01411 | 1.96313 |
| A17 | 1.85910 | 0.00132  | 0.00000  | 0.00222  | 0.00221  | 1.86131 |
| A18 | 1.88302 | 0.00089  | 0.00000  | 0.00239  | 0.00241  | 1.88543 |
| A19 | 1.91764 | 0.00104  | 0.00000  | 0.00311  | 0.00308  | 1.92072 |
| A20 | 1.92639 | 0.00136  | 0.00001  | 0.00653  | 0.00652  | 1.93291 |
| A21 | 1.89776 | -0.00070 | 0.00000  | 0.00009  | 0.00006  | 1.89782 |
| A22 | 1.90820 | 0.00045  | 0.00000  | 0.00298  | 0.00298  | 1.91118 |
| A23 | 1.88686 | 0.00123  | 0.00000  | 0.00646  | 0.00646  | 1.89332 |
| A24 | 1.88539 | -0.00175 | -0.00001 | -0.00801 | -0.00802 | 1.87738 |
| A25 | 1.87726 | -0.00040 | 0.00000  | -0.00039 | -0.00041 | 1.87686 |
| A26 | 1.90329 | 0.00031  | 0.00000  | 0.00088  | 0.00089  | 1.90418 |
| A27 | 2.00150 | 0.00021  | 0.00000  | -0.00157 | -0.00156 | 1.99995 |
| A28 | 2.16953 | 0.00068  | 0.00000  | 0.00242  | 0.00242  | 2.17195 |
| A29 | 1.95168 | -0.00031 | 0.00000  | -0.00104 | -0.00105 | 1.95063 |
| A30 | 2.16193 | -0.00038 | 0.00000  | -0.00132 | -0.00133 | 2.16061 |
| A31 | 2.07890 | 0.00001  | 0.00000  | 0.00006  | 0.00005  | 2.07896 |
| A32 | 2.15813 | 0.00004  | 0.00000  | 0.00022  | 0.00022  | 2.15835 |
| A33 | 2.04615 | -0.00005 | 0.00000  | -0.00027 | -0.00027 | 2.04588 |
| A34 | 1.93810 | -0.00061 | 0.00000  | 0.00176  | 0.00199  | 1.94010 |
| A35 | 1.92477 | 0.00163  | 0.00000  | 0.00369  | 0.00373  | 1.92851 |
| A36 | 1.87909 | -0.00038 | 0.00000  | -0.00013 | -0.00020 | 1.87889 |
| A37 | 2.08973 | -0.00041 | 0.00000  | -0.00134 | -0.00126 | 2.08847 |
| A38 | 2.06706 | 0.00025  | 0.00000  | 0.00081  | 0.00071  | 2.06778 |
| A39 | 1.99366 | 0.00002  | 0.00000  | 0.00008  | 0.00004  | 1.99370 |
| A40 | 2.01013 | -0.00024 | 0.00000  | -0.00093 | -0.00090 | 2.00923 |
| A41 | 2.03430 | 0.00012  | 0.00000  | 0.00054  | 0.00054  | 2.03485 |
| A42 | 2.01644 | 0.00010  | 0.00000  | -0.00031 | -0.00039 | 2.01605 |
| A43 | 2.14007 | -0.00014 | 0.00000  | -0.00024 | -0.00016 | 2.13991 |
| A44 | 1.97119 | -0.00017 | 0.00000  | -0.00007 | -0.00004 | 1.97115 |
| A45 | 2.02512 | 0.00026  | 0.00000  | 0.00149  | 0.00144  | 2.02657 |
| A46 | 2.03984 | -0.00003 | 0.00000  | -0.00034 | -0.00034 | 2.03951 |
| A47 | 2.42982 | 0.00024  | 0.00000  | 0.00170  | 0.00163  | 2.43145 |

|     |          |          |          |          |          |          |
|-----|----------|----------|----------|----------|----------|----------|
| A48 | 2.43714  | 0.00046  | 0.00000  | 0.00267  | 0.00259  | 2.43973  |
| A49 | 1.93282  | 0.00001  | 0.00000  | 0.00004  | 0.00004  | 1.93286  |
| A50 | 1.91871  | 0.00009  | 0.00000  | 0.00062  | 0.00062  | 1.91933  |
| A51 | 1.93879  | 0.00007  | 0.00000  | 0.00014  | 0.00014  | 1.93892  |
| A52 | 1.88108  | -0.00003 | 0.00000  | 0.00005  | 0.00005  | 1.88112  |
| A53 | 1.89324  | -0.00007 | 0.00000  | -0.00046 | -0.00046 | 1.89278  |
| A54 | 1.89783  | -0.00009 | 0.00000  | -0.00040 | -0.00040 | 1.89743  |
| A55 | 3.13543  | 0.00093  | -0.00008 | 0.11004  | 0.10996  | 3.24539  |
| A56 | 3.13157  | 0.00006  | -0.00021 | -0.06783 | -0.06816 | 3.06341  |
| A57 | 3.14048  | -0.00037 | -0.00001 | -0.06575 | -0.06576 | 3.07472  |
| A58 | 3.18713  | 0.00011  | 0.00000  | 0.02316  | 0.02305  | 3.21018  |
| D1  | 0.00172  | 0.00010  | 0.00000  | 0.00411  | 0.00411  | 0.00583  |
| D2  | -3.13126 | 0.00011  | 0.00000  | 0.00402  | 0.00402  | -3.12725 |
| D3  | 3.12980  | 0.00007  | 0.00000  | 0.00213  | 0.00213  | 3.13193  |
| D4  | -0.00318 | 0.00009  | 0.00000  | 0.00203  | 0.00204  | -0.00114 |
| D5  | -0.00494 | -0.00009 | 0.00000  | -0.00341 | -0.00342 | -0.00837 |
| D6  | -3.10262 | 0.00003  | 0.00000  | -0.00107 | -0.00107 | -3.10368 |
| D7  | -3.13442 | -0.00006 | 0.00000  | -0.00161 | -0.00162 | -3.13604 |
| D8  | 0.05110  | 0.00005  | 0.00000  | 0.00073  | 0.00073  | 0.05183  |
| D9  | 0.00207  | -0.00009 | 0.00000  | -0.00345 | -0.00346 | -0.00139 |
| D10 | 3.13077  | 0.00013  | 0.00000  | 0.00478  | 0.00479  | 3.13556  |
| D11 | 3.13585  | -0.00010 | 0.00000  | -0.00336 | -0.00338 | 3.13248  |
| D12 | -0.01863 | 0.00012  | 0.00000  | 0.00486  | 0.00487  | -0.01375 |
| D13 | -0.00517 | 0.00003  | 0.00000  | 0.00136  | 0.00136  | -0.00380 |
| D14 | 3.13242  | 0.00019  | 0.00000  | 0.00414  | 0.00413  | 3.13656  |
| D15 | -3.13497 | -0.00018 | 0.00000  | -0.00620 | -0.00620 | -3.14116 |
| D16 | 0.00263  | -0.00002 | 0.00000  | -0.00343 | -0.00343 | -0.00080 |
| D17 | -0.00636 | 0.00001  | 0.00000  | 0.00033  | 0.00033  | -0.00603 |
| D18 | -3.13874 | -0.00023 | 0.00000  | -0.00725 | -0.00725 | 3.13719  |
| D19 | 3.12082  | 0.00028  | 0.00000  | 0.00957  | 0.00957  | 3.13039  |
| D20 | -0.01156 | 0.00004  | 0.00000  | 0.00199  | 0.00199  | -0.00957 |
| D21 | 0.00625  | 0.00003  | 0.00000  | 0.00124  | 0.00124  | 0.00749  |
| D22 | 3.10472  | 0.00003  | 0.00000  | -0.00059 | -0.00058 | 3.10414  |
| D23 | -3.13136 | -0.00012 | 0.00000  | -0.00151 | -0.00151 | -3.13287 |
| D24 | -0.03289 | -0.00012 | 0.00000  | -0.00334 | -0.00333 | -0.03622 |
| D25 | 1.42967  | -0.00005 | 0.00001  | 0.00166  | 0.00167  | 1.43134  |
| D26 | -2.74328 | -0.00018 | 0.00000  | -0.00148 | -0.00147 | -2.74476 |
| D27 | -0.70825 | 0.00011  | 0.00000  | 0.00093  | 0.00093  | -0.70732 |
| D28 | -1.66125 | -0.00003 | 0.00001  | 0.00394  | 0.00395  | -1.65730 |
| D29 | 0.44898  | -0.00017 | 0.00001  | 0.00080  | 0.00081  | 0.44979  |
| D30 | 2.48402  | 0.00013  | 0.00001  | 0.00321  | 0.00321  | 2.48723  |
| D31 | -1.11770 | 0.00004  | -0.00002 | 0.01212  | 0.01210  | -1.10560 |
| D32 | 0.92111  | 0.00050  | -0.00001 | 0.01689  | 0.01689  | 0.93800  |
| D33 | 3.09641  | 0.00042  | -0.00002 | 0.01400  | 0.01399  | 3.11040  |



Input orientation:

| Center<br>Number | Atomic<br>Number | Atomic<br>Type | Coordinates (Angstroms) |           |           |
|------------------|------------------|----------------|-------------------------|-----------|-----------|
|                  |                  |                | X                       | Y         | Z         |
| 1                | 6                | 0              | -2.875591               | 2.124570  | -0.243214 |
| 2                | 6                | 0              | -3.792830               | 1.173812  | 0.067881  |
| 3                | 7                | 0              | -3.111175               | -0.038608 | 0.110104  |
| 4                | 6                | 0              | -1.814084               | 0.181258  | -0.171409 |
| 5                | 7                | 0              | -1.653618               | 1.486680  | -0.394239 |
| 6                | 6                | 0              | -0.356225               | 2.126680  | -0.690597 |
| 7                | 6                | 0              | 0.314876                | 2.698783  | 0.562912  |
| 8                | 1                | 0              | -2.988763               | 3.186230  | -0.380944 |
| 9                | 1                | 0              | -4.848578               | 1.256852  | 0.251040  |
| 10               | 1                | 0              | 0.276888                | 1.358009  | -1.135998 |
| 11               | 1                | 0              | -0.527515               | 2.910689  | -1.429079 |
| 12               | 1                | 0              | -0.310101               | 3.494703  | 0.981225  |
| 13               | 1                | 0              | 0.383638                | 1.900289  | 1.316989  |
| 14               | 35               | 0              | 0.352296                | -2.259569 | -0.208634 |
| 15               | 1                | 0              | -1.011544               | -0.595804 | -0.210140 |
| 16               | 6                | 0              | -3.608572               | -1.341174 | 0.397773  |
| 17               | 6                | 0              | -4.872676               | -1.613135 | 0.693245  |
| 18               | 1                | 0              | -2.826203               | -2.090299 | 0.348132  |
| 19               | 1                | 0              | -5.156861               | -2.636092 | 0.897233  |
| 20               | 1                | 0              | -5.652179               | -0.863194 | 0.743031  |
| 21               | 7                | 0              | 1.596456                | 3.262030  | 0.157510  |
| 22               | 1                | 0              | 1.967748                | 3.877306  | 0.871525  |
| 23               | 1                | 0              | 2.279907                | 2.520000  | 0.002400  |
| 24               | 6                | 0              | 3.758022                | -0.200816 | -1.057079 |
| 25               | 6                | 0              | 3.732859                | -0.398058 | 0.393808  |
| 26               | 8                | 0              | 3.532498                | 0.921432  | -0.175587 |
| 27               | 1                | 0              | 4.711213                | -0.173132 | -1.580012 |
| 28               | 1                | 0              | 2.894350                | -0.512361 | -1.637006 |
| 29               | 1                | 0              | 2.817901                | -0.831441 | 0.791937  |
| 30               | 6                | 0              | 4.983299                | -0.584683 | 1.208090  |
| 31               | 1                | 0              | 4.869429                | -0.139008 | 2.200813  |
| 32               | 1                | 0              | 5.186293                | -1.651700 | 1.342078  |
| 33               | 1                | 0              | 5.843956                | -0.122879 | 0.718425  |

Distance matrix (angstroms):

|   |   | 1        | 2        | 3 | 4 | 5 |
|---|---|----------|----------|---|---|---|
| 1 | C | 0.000000 |          |   |   |   |
| 2 | C | 1.357220 | 0.000000 |   |   |   |

|    |    |          |          |          |          |          |
|----|----|----------|----------|----------|----------|----------|
| 3  | N  | 2.204466 | 1.391546 | 0.000000 |          |          |
| 4  | C  | 2.215494 | 2.226624 | 1.345375 | 0.000000 |          |
| 5  | N  | 1.386697 | 2.210806 | 2.169179 | 1.333990 | 0.000000 |
| 6  | C  | 2.558781 | 3.646025 | 3.594349 | 2.485875 | 1.476705 |
| 7  | C  | 3.340456 | 4.409517 | 4.408648 | 3.377815 | 2.502060 |
| 8  | H  | 1.076522 | 2.213095 | 3.264306 | 3.233207 | 2.161309 |
| 9  | H  | 2.211312 | 1.074732 | 2.171785 | 3.247079 | 3.267564 |
| 10 | H  | 3.364937 | 4.248041 | 3.870695 | 2.585989 | 2.072105 |
| 11 | H  | 2.745491 | 3.989976 | 4.212213 | 3.269066 | 2.089690 |
| 12 | H  | 3.155670 | 4.283705 | 4.592293 | 3.816994 | 2.780125 |
| 13 | H  | 3.620374 | 4.419381 | 4.174879 | 3.162338 | 2.692543 |
| 14 | Br | 5.444366 | 5.389493 | 4.126729 | 3.263775 | 4.253531 |
| 15 | H  | 3.297908 | 3.308230 | 2.195786 | 1.117764 | 2.186983 |
| 16 | C  | 3.599931 | 2.543214 | 1.423670 | 2.421147 | 3.527873 |
| 17 | C  | 4.340016 | 3.053559 | 2.433531 | 3.649994 | 4.599327 |
| 18 | H  | 4.256436 | 3.415748 | 2.085019 | 2.540527 | 3.836776 |
| 19 | H  | 5.400806 | 4.130832 | 3.398724 | 4.500401 | 5.562181 |
| 20 | H  | 4.196290 | 2.839437 | 2.745403 | 4.081427 | 4.775330 |
| 21 | N  | 4.631803 | 5.780405 | 5.749630 | 4.607725 | 3.744232 |
| 22 | H  | 5.269977 | 6.413967 | 6.458297 | 5.389874 | 4.520127 |
| 23 | H  | 5.176471 | 6.220502 | 5.968404 | 4.718124 | 4.086281 |
| 24 | C  | 7.076342 | 7.756965 | 6.969541 | 5.654977 | 5.707263 |
| 25 | C  | 7.102187 | 7.694998 | 6.859336 | 5.605681 | 5.760850 |
| 26 | O  | 6.520408 | 7.333717 | 6.718757 | 5.397575 | 5.221410 |
| 27 | H  | 8.039033 | 8.766331 | 8.004020 | 6.685003 | 6.683720 |
| 28 | H  | 6.495251 | 7.104097 | 6.272414 | 4.979803 | 5.121002 |
| 29 | H  | 6.498107 | 6.946010 | 6.020583 | 4.838273 | 5.174474 |
| 30 | C  | 8.438512 | 9.022905 | 8.186835 | 6.978116 | 7.134891 |
| 31 | H  | 8.431037 | 9.017074 | 8.250526 | 7.099250 | 7.206060 |
| 32 | H  | 9.042529 | 9.499038 | 8.542119 | 7.392946 | 7.723251 |
| 33 | H  | 9.055731 | 9.745371 | 8.976164 | 7.715561 | 7.748698 |
|    |    | 6        | 7        | 8        | 9        | 10       |
| 6  | C  | 0.000000 |          |          |          |          |
| 7  | C  | 1.532634 | 0.000000 |          |          |          |
| 8  | H  | 2.854608 | 3.470231 | 0.000000 |          |          |
| 9  | H  | 4.671672 | 5.370074 | 2.753327 | 0.000000 |          |
| 10 | H  | 1.090903 | 2.164582 | 3.817981 | 5.310792 | 0.000000 |
| 11 | H  | 1.090581 | 2.173145 | 2.689285 | 4.922354 | 1.773070 |
| 12 | H  | 2.160696 | 1.095020 | 3.020909 | 5.112624 | 3.064743 |
| 13 | H  | 2.151524 | 1.100433 | 3.988698 | 5.378322 | 2.514480 |
| 14 | Br | 4.469168 | 5.018161 | 6.391329 | 6.294887 | 3.735312 |
| 15 | H  | 2.841162 | 3.634736 | 4.271106 | 4.285774 | 2.516874 |
| 16 | C  | 4.877327 | 5.634002 | 4.635510 | 2.882514 | 4.973413 |
| 17 | C  | 6.024912 | 6.746876 | 5.266584 | 2.903955 | 6.220276 |



|    |    |          |          |          |           |          |
|----|----|----------|----------|----------|-----------|----------|
| 18 | H  | 4.996265 | 5.731302 | 5.329140 | 3.911886  | 4.870589 |
| 19 | H  | 6.946316 | 7.649351 | 6.343013 | 3.958234  | 7.043614 |
| 20 | H  | 6.248341 | 6.951681 | 4.975433 | 2.320006  | 6.604417 |
| 21 | N  | 2.412731 | 1.457410 | 4.617349 | 6.750404  | 2.653247 |
| 22 | H  | 3.302389 | 2.053325 | 5.158805 | 7.328989  | 3.638134 |
| 23 | H  | 2.753932 | 2.051215 | 5.324444 | 7.243802  | 2.580360 |
| 24 | C  | 4.741158 | 4.784068 | 7.579469 | 8.826638  | 3.815031 |
| 25 | C  | 4.926545 | 4.615368 | 7.656864 | 8.740719  | 4.167471 |
| 26 | O  | 4.103660 | 3.749326 | 6.906398 | 8.398628  | 3.422278 |
| 27 | H  | 5.635523 | 5.671666 | 8.486030 | 9.838049  | 4.712195 |
| 28 | H  | 4.292606 | 4.669558 | 7.061749 | 8.163809  | 3.255826 |
| 29 | H  | 4.585135 | 4.333598 | 7.157840 | 7.964198  | 3.868769 |
| 30 | C  | 6.282278 | 5.743829 | 8.960948 | 10.048532 | 5.605275 |
| 31 | H  | 6.387570 | 5.610679 | 8.914811 | 10.009481 | 5.870843 |
| 32 | H  | 7.009096 | 6.577575 | 9.654321 | 10.504698 | 6.269088 |
| 33 | H  | 6.744487 | 6.209403 | 9.496091 | 10.791311 | 6.051790 |
|    |    | 11       | 12       | 13       | 14        | 15       |
| 11 | H  | 0.000000 |          |          |           |          |
| 12 | H  | 2.489560 | 0.000000 |          |           |          |
| 13 | H  | 3.064637 | 1.770922 | 0.000000 |           |          |
| 14 | Br | 5.384712 | 5.913220 | 4.430906 | 0.000000  |          |
| 15 | H  | 3.743741 | 4.317826 | 3.241780 | 2.151319  | 0.000000 |
| 16 | C  | 5.559554 | 5.882689 | 5.223963 | 4.110918  | 2.769420 |
| 17 | C  | 6.621909 | 6.854928 | 6.353114 | 5.341497  | 4.093826 |
| 18 | H  | 5.783799 | 6.158232 | 5.212155 | 3.231330  | 2.416231 |
| 19 | H  | 7.590083 | 7.815675 | 7.173011 | 5.631653  | 4.751074 |
| 20 | H  | 6.724763 | 6.898246 | 6.663134 | 6.237727  | 4.745053 |
| 21 | N  | 2.674314 | 2.089881 | 2.160939 | 5.671865  | 4.671158 |
| 22 | H  | 3.528947 | 2.312361 | 2.572244 | 6.437209  | 5.482234 |
| 23 | H  | 3.175436 | 2.935351 | 2.389147 | 5.157955  | 4.537296 |
| 24 | C  | 5.309019 | 5.861840 | 4.630045 | 4.069066  | 4.860255 |
| 25 | C  | 5.693989 | 5.643063 | 4.165566 | 3.905940  | 4.786775 |
| 26 | O  | 4.691704 | 4.767127 | 3.619567 | 4.498172  | 4.790774 |
| 27 | H  | 6.080872 | 6.725068 | 5.605318 | 5.023351  | 5.899589 |
| 28 | H  | 4.844550 | 5.760226 | 4.566251 | 3.399269  | 4.159197 |
| 29 | H  | 5.488922 | 5.341886 | 3.696440 | 3.019918  | 3.965392 |
| 30 | C  | 7.038562 | 6.686773 | 5.229132 | 5.124309  | 6.160327 |
| 31 | H  | 7.183577 | 6.443506 | 5.006215 | 5.541364  | 6.372378 |
| 32 | H  | 7.819354 | 7.538303 | 5.973504 | 5.112899  | 6.475915 |
| 33 | H  | 7.376310 | 7.143415 | 5.853764 | 5.965167  | 6.934246 |
|    |    | 16       | 17       | 18       | 19        | 20       |
| 16 | C  | 0.000000 |          |          |           |          |
| 17 | C  | 1.326359 | 0.000000 |          |           |          |
| 18 | H  | 1.084322 | 2.129517 | 0.000000 |           |          |

|    |   |          |           |          |           |           |
|----|---|----------|-----------|----------|-----------|-----------|
| 19 | H | 2.079296 | 1.081116  | 2.455885 | 0.000000  |           |
| 20 | H | 2.126969 | 1.082827  | 3.106102 | 1.847237  | 0.000000  |
| 21 | N | 6.952664 | 8.118123  | 6.945767 | 8.996795  | 8.360802  |
| 22 | H | 7.651949 | 8.773148  | 7.672563 | 9.653241  | 8.975084  |
| 23 | H | 7.052600 | 8.289724  | 6.888160 | 9.093488  | 8.655202  |
| 24 | C | 7.594980 | 8.918926  | 6.992623 | 9.445901  | 9.603698  |
| 25 | C | 7.401763 | 8.696052  | 6.773999 | 9.180923  | 9.403044  |
| 26 | O | 7.512856 | 8.821897  | 7.055345 | 9.450497  | 9.401438  |
| 27 | H | 8.631036 | 9.954509  | 8.012859 | 10.468132 | 10.642960 |
| 28 | H | 6.864055 | 8.183427  | 6.257427 | 8.703712  | 8.878672  |
| 29 | H | 6.458696 | 7.730833  | 5.799793 | 8.177083  | 8.470281  |
| 30 | C | 8.663090 | 9.922854  | 7.999670 | 10.350254 | 10.649283 |
| 31 | H | 8.750580 | 9.967669  | 8.152467 | 10.414473 | 10.646774 |
| 32 | H | 8.850863 | 10.079947 | 8.085813 | 10.399411 | 10.883614 |
| 33 | H | 9.536107 | 10.819783 | 8.898287 | 11.285663 | 11.519973 |
|    |   | 21       | 22        | 23       | 24        | 25        |
| 21 | N | 0.000000 |           |          |           |           |
| 22 | H | 1.013035 | 0.000000  |          |           |           |
| 23 | H | 1.020674 | 1.641677  | 0.000000 |           |           |
| 24 | C | 4.258979 | 4.853419  | 3.272638 | 0.000000  |           |
| 25 | C | 4.244561 | 4.650007  | 3.283188 | 1.464449  | 0.000000  |
| 26 | O | 3.055751 | 3.504579  | 2.038647 | 1.444760  | 1.451003  |
| 27 | H | 4.951872 | 5.471991  | 3.958312 | 1.087565  | 2.214437  |
| 28 | H | 4.376168 | 5.140087  | 3.501486 | 1.085958  | 2.200084  |
| 29 | H | 4.318673 | 4.785540  | 3.484962 | 2.168035  | 1.087876  |
| 30 | C | 5.231791 | 5.395940  | 4.289647 | 2.603776  | 1.503823  |
| 31 | H | 5.143394 | 5.130062  | 4.313811 | 3.442806  | 2.150388  |
| 32 | H | 6.199587 | 6.414854  | 5.257841 | 3.146582  | 2.140865  |
| 33 | H | 5.460174 | 5.572245  | 4.494435 | 2.740367  | 2.153562  |
|    |   | 26       | 27        | 28       | 29        | 30        |
| 26 | O | 0.000000 |           |          |           |           |
| 27 | H | 2.135380 | 0.000000  |          |           |           |
| 28 | H | 2.144468 | 1.849139  | 0.000000 |           |           |
| 29 | H | 2.125868 | 3.105501  | 2.451004 | 0.000000  |           |
| 30 | C | 2.507543 | 2.831416  | 3.530370 | 2.218788  | 0.000000  |
| 31 | H | 2.925610 | 3.784288  | 4.332342 | 2.583246  | 1.094117  |
| 32 | H | 3.414580 | 3.309150  | 3.927599 | 2.566078  | 1.094387  |
| 33 | H | 2.689364 | 2.562897  | 3.794723 | 3.108773  | 1.092596  |
|    |   | 31       | 32        | 33       |           |           |
| 31 | H | 0.000000 |           |          |           |           |
| 32 | H | 1.768069 | 0.000000  |          |           |           |
| 33 | H | 1.774103 | 1.777290  | 0.000000 |           |           |

Stoichiometry C10H18BrN3O

Framework group C1[X(C10H18BrN3O)]

Deg. of freedom 93  
 Full point group C1 NOp 1  
 Largest Abelian subgroup C1 NOp 1  
 Largest concise Abelian subgroup C1 NOp 1

Standard orientation:

| Center<br>Number | Atomic<br>Number | Atomic<br>Type | Coordinates (Angstroms) |           |           |
|------------------|------------------|----------------|-------------------------|-----------|-----------|
|                  |                  |                | X                       | Y         | Z         |
| 1                | 6                | 0              | -2.851795               | 2.170804  | -0.229657 |
| 2                | 6                | 0              | -3.776764               | 1.224360  | 0.071543  |
| 3                | 7                | 0              | -3.105114               | 0.005983  | 0.100571  |
| 4                | 6                | 0              | -1.806322               | 0.218157  | -0.178992 |
| 5                | 7                | 0              | -1.635156               | 1.524523  | -0.387892 |
| 6                | 6                | 0              | -0.332602               | 2.156948  | -0.677804 |
| 7                | 6                | 0              | 0.343485                | 2.710056  | 0.581539  |
| 8                | 1                | 0              | -2.956247               | 3.234774  | -0.355982 |
| 9                | 1                | 0              | -4.831750               | 1.314129  | 0.255919  |
| 10               | 1                | 0              | 0.294051                | 1.387899  | -1.131608 |
| 11               | 1                | 0              | -0.497598               | 2.950201  | -1.407799 |
| 12               | 1                | 0              | -0.274815               | 3.506574  | 1.008546  |
| 13               | 1                | 0              | 0.405841                | 1.902998  | 1.327007  |
| 14               | 35               | 0              | 0.339862                | -2.239895 | -0.243030 |
| 15               | 1                | 0              | -1.010221               | -0.565031 | -0.226293 |
| 16               | 6                | 0              | -3.613161               | -1.295446 | 0.374446  |
| 17               | 6                | 0              | -4.879395               | -1.560130 | 0.667398  |
| 18               | 1                | 0              | -2.837003               | -2.050416 | 0.316540  |
| 19               | 1                | 0              | -5.171952               | -2.582836 | 0.860520  |
| 20               | 1                | 0              | -5.652679               | -0.804370 | 0.725457  |
| 21               | 7                | 0              | 1.629567                | 3.267033  | 0.181774  |
| 22               | 1                | 0              | 2.006084                | 3.871552  | 0.902213  |
| 23               | 1                | 0              | 2.306844                | 2.521100  | 0.018513  |
| 24               | 6                | 0              | 3.762239                | -0.200305 | -1.070495 |
| 25               | 6                | 0              | 3.735791                | -0.412849 | 0.378207  |
| 26               | 8                | 0              | 3.546177                | 0.914265  | -0.176972 |
| 27               | 1                | 0              | 4.715504                | -0.174879 | -1.593408 |
| 28               | 1                | 0              | 2.895894                | -0.498500 | -1.653444 |
| 29               | 1                | 0              | 2.817386                | -0.842917 | 0.771971  |
| 30               | 6                | 0              | 4.984841                | -0.618473 | 1.190043  |
| 31               | 1                | 0              | 4.874880                | -0.182525 | 2.187515  |
| 32               | 1                | 0              | 5.179066                | -1.688499 | 1.312540  |
| 33               | 1                | 0              | 5.849160                | -0.158561 | 0.705069  |

Rotational constants (GHZ): 0.4959602 0.2380749 0.1694121

Standard basis: 6-311++G(d,p) (5D, 7F)  
 There are 499 symmetry adapted cartesian basis functions of A symmetry.  
 There are 482 symmetry adapted basis functions of A symmetry.  
 482 basis functions, 760 primitive gaussians, 499 cartesian basis functions  
 71 alpha electrons 71 beta electrons  
 nuclear repulsion energy 1290.8056779431 Hartrees.  
 NAToms= 33 NActive= 33 NUniq= 33 SFac= 1.00D+00 NATFMM= 60 NAOKFM=F

Big=F

Integral buffers will be 131072 words long.

Raffenetti 2 integral format.

Two-electron integral symmetry is turned on.

One-electron integrals computed using PRISM.

NBasis= 482 RedAO= T EigKep= 3.81D-06 NBF= 482

NBsUse= 482 1.00D-06 EigRej= -1.00D+00 NBFU= 482

Initial guess from the checkpoint file:

"/home/suqian/liuwen/qianmengshijie/nh2po/nh2po.chk"

B after Tr= 0.000000 0.000000 0.000000

Rot= 0.999969 -0.000041 -0.000640 0.007806 Ang= -0.90 deg.

ExpMin= 3.50D-02 ExpMax= 4.40D+05 ExpMxC= 1.51D+04 IAcc=3 IRadAn= 5 AccDes= 0.00D+00

Harris functional with IExCor= 402 and IRadAn= 5 diagonalized for initial guess.

HarFok: IExCor= 402 AccDes= 0.00D+00 IRadAn= 5 IDoV= 1 UseB2=F ITyADJ=14

ICtDFT= 3500011 ScaDFX= 1.000000 1.000000 1.000000 1.000000

FoFCou: FMM=F IPFlag= 0 FMFlag= 100000 FMFlg1= 0

NFxFlg= 0 DoJE=T BraDBF=F KetDBF=T FulRan=T

wScrn= 0.000000 ICntrl= 500 IOpCl= 0 I1Cent= 200000004 NGrid=

0

NMat0= 1 NMatS0= 1 NMatT0= 0 NMatD0= 1 NMtDS0= 0

NMtDT0= 0

Petite list used in FoFCou.

Requested convergence on RMS density matrix=1.00D-08 within 128 cycles.

Requested convergence on MAX density matrix=1.00D-06.

Requested convergence on energy=1.00D-06.

No special actions if energy rises.

SCF Done: E(RB3LYP) = -3205.64650369 A.U. after 11 cycles

NFock= 11 Conv=0.91D-08 -V/T= 2.0018

Calling FoFJK, ICntrl= 2127 FMM=F ISym2X=0 I1Cent= 0 IOpClX= 0 NMat=1 NMatS=1

NMatT=0.

\*\*\*\*\* Axes restored to original set \*\*\*\*\*

```

-----
Center      Atomic      Forces (Hartrees/Bohr)
Number      Number      X            Y            Z
-----
1           6           -0.000274370  0.000479291  -0.000478093
  
```

|    |    |              |              |              |
|----|----|--------------|--------------|--------------|
| 2  | 6  | 0.000596692  | -0.000431779 | 0.000158155  |
| 3  | 7  | -0.000005289 | -0.000471426 | 0.000511137  |
| 4  | 6  | 0.001911080  | 0.003305777  | -0.000874952 |
| 5  | 7  | -0.000247827 | 0.000005487  | 0.000299488  |
| 6  | 6  | -0.001440158 | -0.001268937 | -0.000226590 |
| 7  | 6  | 0.001141062  | 0.000604387  | -0.000347907 |
| 8  | 1  | -0.000017052 | -0.000014575 | 0.000051176  |
| 9  | 1  | 0.000056735  | -0.000118809 | 0.000024763  |
| 10 | 1  | 0.000009762  | 0.000527164  | -0.000121115 |
| 11 | 1  | 0.000566190  | -0.000057651 | 0.000133345  |
| 12 | 1  | -0.000141981 | -0.000183815 | 0.000024940  |
| 13 | 1  | -0.000119913 | -0.000006228 | 0.000065906  |
| 14 | 35 | 0.000319316  | -0.000234152 | 0.000067486  |
| 15 | 1  | -0.002039259 | -0.001022323 | 0.000418724  |
| 16 | 6  | -0.000292569 | -0.000882994 | 0.000018327  |
| 17 | 6  | -0.000154905 | 0.000374605  | -0.000129101 |
| 18 | 1  | 0.000639357  | -0.000192363 | -0.000081760 |
| 19 | 1  | 0.000080180  | -0.000038407 | 0.000033086  |
| 20 | 1  | -0.000141376 | 0.000019143  | 0.000039810  |
| 21 | 7  | -0.000400497 | -0.000176446 | 0.000366443  |
| 22 | 1  | -0.000129792 | 0.000111353  | 0.000022327  |
| 23 | 1  | 0.000236129  | 0.000199013  | 0.000151352  |
| 24 | 6  | 0.000129259  | -0.000261477 | -0.000051813 |
| 25 | 6  | 0.000218897  | -0.000180076 | 0.000119951  |
| 26 | 8  | -0.000764045 | 0.000599041  | -0.000146521 |
| 27 | 1  | -0.000141025 | -0.000046258 | 0.000066506  |
| 28 | 1  | 0.000272014  | -0.000161682 | -0.000194781 |
| 29 | 1  | 0.000249255  | -0.000363602 | 0.000142628  |
| 30 | 6  | -0.000069413 | -0.000234721 | 0.000080995  |
| 31 | 1  | 0.000015504  | 0.000019252  | -0.000048653 |
| 32 | 1  | -0.000091770 | 0.000072654  | -0.000067928 |
| 33 | 1  | 0.000029810  | 0.000030555  | -0.000027330 |

-----  
Cartesian Forces: Max 0.003305777 RMS 0.000572913

GradGradGradGradGradGradGradGradGradGradGradGradGradGradGradGradGradGradGrad

Berny optimization.

Using GEDIIS/GDIIS optimizer.

FormGI is forming the generalized inverse of G from B-inverse, IUseBI=4.

Internal Forces: Max 0.002474948 RMS 0.000379785

Search for a local minimum.

Step number 5 out of a maximum of 172

All quantities printed in internal units (Hartrees-Bohrs-Radians)

Mixed Optimization -- En-DIIS/RFO-DIIS

Swapping is turned off.

Update second derivatives using D2CorX and points 2 3 1 4 5

DE= -2.34D-04 DEPred=-3.49D-04 R= 6.71D-01

TightC=F SS= 1.41D+00 RLast= 1.63D-01 DXNew= 2.5227D-01 4.9002D-01

Trust test= 6.71D-01 RLast= 1.63D-01 DXMaxT set to 2.52D-01

ITU= 1 0 0-1 0

|                 |         |         |         |         |         |
|-----------------|---------|---------|---------|---------|---------|
| Eigenvalues --- | 0.00222 | 0.00230 | 0.00230 | 0.00301 | 0.00404 |
| Eigenvalues --- | 0.00600 | 0.00723 | 0.00855 | 0.01385 | 0.01467 |
| Eigenvalues --- | 0.01816 | 0.01918 | 0.02083 | 0.02163 | 0.02265 |
| Eigenvalues --- | 0.02325 | 0.02367 | 0.02388 | 0.02393 | 0.02949 |
| Eigenvalues --- | 0.03060 | 0.03070 | 0.03075 | 0.03194 | 0.03937 |
| Eigenvalues --- | 0.04041 | 0.04419 | 0.04590 | 0.04659 | 0.05403 |
| Eigenvalues --- | 0.05743 | 0.05766 | 0.05900 | 0.07961 | 0.08593 |
| Eigenvalues --- | 0.09497 | 0.10987 | 0.11892 | 0.12202 | 0.12527 |
| Eigenvalues --- | 0.12787 | 0.12837 | 0.13853 | 0.15502 | 0.15998 |
| Eigenvalues --- | 0.16000 | 0.16000 | 0.16000 | 0.16000 | 0.16000 |
| Eigenvalues --- | 0.16000 | 0.16025 | 0.17134 | 0.19733 | 0.21548 |
| Eigenvalues --- | 0.22030 | 0.22946 | 0.23026 | 0.24884 | 0.26265 |
| Eigenvalues --- | 0.29115 | 0.29520 | 0.31653 | 0.32064 | 0.32120 |
| Eigenvalues --- | 0.33651 | 0.34050 | 0.34282 | 0.34327 | 0.34344 |
| Eigenvalues --- | 0.34538 | 0.34664 | 0.34720 | 0.35053 | 0.35059 |
| Eigenvalues --- | 0.35276 | 0.35591 | 0.35739 | 0.35891 | 0.36416 |
| Eigenvalues --- | 0.36576 | 0.36628 | 0.38317 | 0.41957 | 0.42455 |
| Eigenvalues --- | 0.44409 | 0.45182 | 0.45463 | 0.48741 | 0.54589 |
| Eigenvalues --- | 0.55564 | 0.60495 | 0.85942 |         |         |

En-DIIS/RFO-DIIS IScMMF= 0 using points: 5 4

RFO step: Lambda=-6.29234945D-05.

DidBck=F Rises=F RFO-DIIS coefs: 1.03290 -0.03290

Iteration 1 RMS(Cart)= 0.07636737 RMS(Int)= 0.00289663

Iteration 2 RMS(Cart)= 0.00567712 RMS(Int)= 0.00005864

Iteration 3 RMS(Cart)= 0.00003705 RMS(Int)= 0.00005441

Iteration 4 RMS(Cart)= 0.00000000 RMS(Int)= 0.00005441

| Variable | Old X   | -DE/DX   | Delta X<br>(Linear) | Delta X<br>(Quad) | Delta X<br>(Total) | New X   |
|----------|---------|----------|---------------------|-------------------|--------------------|---------|
| R1       | 2.56477 | 0.00049  | -0.00003            | 0.00062           | 0.00059            | 2.56537 |
| R2       | 2.62048 | 0.00021  | 0.00004             | 0.00119           | 0.00123            | 2.62171 |
| R3       | 2.03433 | -0.00002 | 0.00000             | -0.00006          | -0.00006           | 2.03427 |
| R4       | 2.62964 | -0.00030 | 0.00001             | -0.00059          | -0.00059           | 2.62905 |
| R5       | 2.03095 | -0.00006 | -0.00001            | -0.00034          | -0.00035           | 2.03060 |
| R6       | 2.54239 | -0.00052 | -0.00006            | -0.00205          | -0.00211           | 2.54028 |
| R7       | 2.69035 | 0.00058  | 0.00003             | 0.00194           | 0.00197            | 2.69232 |
| R8       | 2.52088 | -0.00101 | -0.00027            | -0.00627          | -0.00654           | 2.51433 |
| R9       | 2.11227 | -0.00038 | -0.00003            | -0.00178          | -0.00181           | 2.11046 |
| R10      | 2.79057 | -0.00070 | -0.00030            | -0.00696          | -0.00726           | 2.78331 |

|     |         |          |          |          |          |         |
|-----|---------|----------|----------|----------|----------|---------|
| R11 | 2.89626 | 0.00032  | 0.00005  | 0.00204  | 0.00209  | 2.89835 |
| R12 | 2.06151 | -0.00031 | -0.00003 | -0.00148 | -0.00151 | 2.05999 |
| R13 | 2.06090 | -0.00022 | -0.00002 | -0.00102 | -0.00104 | 2.05986 |
| R14 | 2.06929 | -0.00004 | 0.00002  | 0.00014  | 0.00016  | 2.06944 |
| R15 | 2.07952 | 0.00004  | 0.00001  | 0.00028  | 0.00029  | 2.07981 |
| R16 | 2.75411 | -0.00067 | -0.00024 | -0.00572 | -0.00596 | 2.74815 |
| R17 | 4.06540 | 0.00038  | 0.00013  | 0.01023  | 0.01035  | 4.07576 |
| R18 | 2.50645 | 0.00012  | 0.00003  | 0.00072  | 0.00076  | 2.50721 |
| R19 | 2.04907 | 0.00060  | -0.00001 | 0.00147  | 0.00145  | 2.05053 |
| R20 | 2.04301 | 0.00002  | 0.00001  | 0.00027  | 0.00028  | 2.04330 |
| R21 | 2.04625 | 0.00012  | -0.00002 | 0.00009  | 0.00007  | 2.04632 |
| R22 | 1.91436 | 0.00003  | 0.00000  | 0.00004  | 0.00004  | 1.91440 |
| R23 | 1.92879 | 0.00030  | 0.00010  | 0.00231  | 0.00241  | 1.93121 |
| R24 | 3.85248 | 0.00034  | 0.00003  | 0.00916  | 0.00918  | 3.86167 |
| R25 | 2.76741 | -0.00024 | -0.00004 | -0.00076 | -0.00092 | 2.76649 |
| R26 | 2.73020 | 0.00059  | 0.00002  | 0.00172  | 0.00180  | 2.73200 |
| R27 | 2.05520 | -0.00016 | -0.00002 | -0.00076 | -0.00078 | 2.05442 |
| R28 | 2.05216 | -0.00007 | 0.00000  | -0.00026 | -0.00026 | 2.05190 |
| R29 | 2.74200 | 0.00090  | 0.00005  | 0.00291  | 0.00303  | 2.74503 |
| R30 | 2.05579 | -0.00001 | 0.00000  | -0.00004 | -0.00004 | 2.05575 |
| R31 | 2.84181 | -0.00011 | 0.00003  | 0.00020  | 0.00023  | 2.84205 |
| R32 | 2.06758 | -0.00004 | 0.00000  | -0.00014 | -0.00015 | 2.06744 |
| R33 | 2.06809 | -0.00010 | 0.00000  | -0.00030 | -0.00030 | 2.06779 |
| R34 | 2.06471 | 0.00005  | 0.00001  | 0.00036  | 0.00037  | 2.06508 |
| A1  | 1.87367 | -0.00049 | -0.00007 | -0.00255 | -0.00262 | 1.87105 |
| A2  | 2.27723 | 0.00022  | 0.00000  | 0.00052  | 0.00051  | 2.27774 |
| A3  | 2.13218 | 0.00027  | 0.00007  | 0.00209  | 0.00215  | 2.13434 |
| A4  | 1.86110 | 0.00024  | -0.00008 | 0.00019  | 0.00011  | 1.86122 |
| A5  | 2.27683 | 0.00000  | 0.00003  | 0.00050  | 0.00053  | 2.27737 |
| A6  | 2.14522 | -0.00024 | 0.00005  | -0.00071 | -0.00066 | 2.14456 |
| A7  | 1.90026 | -0.00042 | 0.00010  | -0.00040 | -0.00031 | 1.89995 |
| A8  | 2.25512 | 0.00072  | 0.00002  | 0.00346  | 0.00347  | 2.25859 |
| A9  | 2.12779 | -0.00030 | -0.00012 | -0.00302 | -0.00315 | 2.12464 |
| A10 | 1.88688 | 0.00073  | -0.00009 | 0.00109  | 0.00100  | 1.88789 |
| A11 | 2.19674 | -0.00247 | -0.00008 | -0.01691 | -0.01699 | 2.17974 |
| A12 | 2.19957 | 0.00175  | 0.00016  | 0.01582  | 0.01598  | 2.21555 |
| A13 | 1.90283 | -0.00006 | 0.00014  | 0.00170  | 0.00183  | 1.90466 |
| A14 | 2.21018 | 0.00125  | 0.00018  | 0.00744  | 0.00761  | 2.21779 |
| A15 | 2.16920 | -0.00119 | -0.00032 | -0.00933 | -0.00966 | 2.15954 |
| A16 | 1.96313 | -0.00055 | -0.00046 | -0.00963 | -0.01009 | 1.95304 |
| A17 | 1.86131 | 0.00023  | 0.00007  | 0.00295  | 0.00301  | 1.86432 |
| A18 | 1.88543 | 0.00061  | 0.00008  | 0.00721  | 0.00729  | 1.89272 |
| A19 | 1.92072 | 0.00001  | 0.00010  | 0.00001  | 0.00011  | 1.92083 |
| A20 | 1.93291 | -0.00004 | 0.00021  | 0.00270  | 0.00293  | 1.93584 |

|     |          |          |          |          |          |          |
|-----|----------|----------|----------|----------|----------|----------|
| A21 | 1.89782  | -0.00022 | 0.00000  | -0.00304 | -0.00305 | 1.89477  |
| A22 | 1.91118  | -0.00027 | 0.00010  | -0.00038 | -0.00028 | 1.91089  |
| A23 | 1.89332  | -0.00017 | 0.00021  | 0.00253  | 0.00274  | 1.89605  |
| A24 | 1.87738  | 0.00054  | -0.00026 | -0.00074 | -0.00100 | 1.87638  |
| A25 | 1.87686  | 0.00001  | -0.00001 | -0.00202 | -0.00203 | 1.87482  |
| A26 | 1.90418  | 0.00009  | 0.00003  | 0.00221  | 0.00224  | 1.90642  |
| A27 | 1.99995  | -0.00023 | -0.00005 | -0.00156 | -0.00161 | 1.99834  |
| A28 | 2.17195  | -0.00024 | 0.00008  | 0.00020  | 0.00028  | 2.17222  |
| A29 | 1.95063  | -0.00019 | -0.00003 | -0.00203 | -0.00207 | 1.94856  |
| A30 | 2.16061  | 0.00043  | -0.00004 | 0.00184  | 0.00179  | 2.16240  |
| A31 | 2.07896  | -0.00017 | 0.00000  | -0.00105 | -0.00105 | 2.07791  |
| A32 | 2.15835  | 0.00018  | 0.00001  | 0.00123  | 0.00124  | 2.15959  |
| A33 | 2.04588  | -0.00001 | -0.00001 | -0.00019 | -0.00019 | 2.04569  |
| A34 | 1.94010  | -0.00005 | 0.00007  | -0.00101 | -0.00119 | 1.93891  |
| A35 | 1.92851  | -0.00026 | 0.00012  | 0.00221  | 0.00228  | 1.93078  |
| A36 | 1.87889  | 0.00019  | -0.00001 | 0.00078  | 0.00082  | 1.87971  |
| A37 | 2.08847  | -0.00029 | -0.00004 | -0.00268 | -0.00263 | 2.08584  |
| A38 | 2.06778  | 0.00032  | 0.00002  | 0.00216  | 0.00208  | 2.06985  |
| A39 | 1.99370  | -0.00016 | 0.00000  | 0.00006  | 0.00001  | 1.99370  |
| A40 | 2.00923  | 0.00017  | -0.00003 | 0.00218  | 0.00217  | 2.01140  |
| A41 | 2.03485  | -0.00013 | 0.00002  | -0.00102 | -0.00100 | 2.03385  |
| A42 | 2.01605  | 0.00034  | -0.00001 | 0.00076  | 0.00065  | 2.01670  |
| A43 | 2.13991  | -0.00023 | -0.00001 | -0.00176 | -0.00168 | 2.13823  |
| A44 | 1.97115  | 0.00025  | 0.00000  | 0.00347  | 0.00350  | 1.97465  |
| A45 | 2.02657  | -0.00006 | 0.00005  | 0.00211  | 0.00210  | 2.02867  |
| A46 | 2.03951  | -0.00021 | -0.00001 | -0.00193 | -0.00195 | 2.03756  |
| A47 | 2.43145  | 0.00045  | 0.00005  | 0.00677  | 0.00668  | 2.43813  |
| A48 | 2.43973  | 0.00046  | 0.00009  | 0.00758  | 0.00751  | 2.44724  |
| A49 | 1.93286  | 0.00002  | 0.00000  | 0.00020  | 0.00020  | 1.93307  |
| A50 | 1.91933  | -0.00013 | 0.00002  | -0.00056 | -0.00054 | 1.91879  |
| A51 | 1.93892  | 0.00000  | 0.00000  | 0.00011  | 0.00011  | 1.93904  |
| A52 | 1.88112  | 0.00006  | 0.00000  | 0.00047  | 0.00047  | 1.88159  |
| A53 | 1.89278  | -0.00001 | -0.00002 | -0.00026 | -0.00027 | 1.89251  |
| A54 | 1.89743  | 0.00006  | -0.00001 | 0.00005  | 0.00004  | 1.89747  |
| A55 | 3.24539  | -0.00045 | 0.00362  | -0.05556 | -0.05194 | 3.19345  |
| A56 | 3.06341  | -0.00023 | -0.00224 | 0.04533  | 0.04287  | 3.10628  |
| A57 | 3.07472  | -0.00016 | -0.00216 | -0.11273 | -0.11489 | 2.95983  |
| A58 | 3.21018  | -0.00022 | 0.00076  | -0.05313 | -0.05227 | 3.15791  |
| D1  | 0.00583  | -0.00008 | 0.00014  | -0.00157 | -0.00144 | 0.00439  |
| D2  | -3.12725 | -0.00005 | 0.00013  | 0.00012  | 0.00026  | -3.12698 |
| D3  | 3.13193  | 0.00005  | 0.00007  | 0.00263  | 0.00271  | 3.13464  |
| D4  | -0.00114 | 0.00008  | 0.00007  | 0.00433  | 0.00441  | 0.00327  |
| D5  | -0.00837 | 0.00011  | -0.00011 | 0.00278  | 0.00267  | -0.00570 |
| D6  | -3.10368 | 0.00020  | -0.00004 | 0.00781  | 0.00781  | -3.09588 |



|     |          |          |          |          |          |          |
|-----|----------|----------|----------|----------|----------|----------|
| D7  | -3.13604 | -0.00001 | -0.00005 | -0.00099 | -0.00105 | -3.13709 |
| D8  | 0.05183  | 0.00008  | 0.00002  | 0.00404  | 0.00409  | 0.05592  |
| D9  | -0.00139 | 0.00003  | -0.00011 | -0.00016 | -0.00027 | -0.00166 |
| D10 | 3.13556  | 0.00009  | 0.00016  | 0.00760  | 0.00778  | -3.13984 |
| D11 | 3.13248  | 0.00000  | -0.00011 | -0.00169 | -0.00180 | 3.13067  |
| D12 | -0.01375 | 0.00006  | 0.00016  | 0.00607  | 0.00625  | -0.00750 |
| D13 | -0.00380 | 0.00003  | 0.00004  | 0.00189  | 0.00193  | -0.00187 |
| D14 | 3.13656  | -0.00007 | 0.00014  | -0.00089 | -0.00072 | 3.13584  |
| D15 | -3.14116 | -0.00003 | -0.00020 | -0.00521 | -0.00540 | 3.13662  |
| D16 | -0.00080 | -0.00013 | -0.00011 | -0.00799 | -0.00806 | -0.00886 |
| D17 | -0.00603 | -0.00001 | 0.00001  | 0.00032  | 0.00032  | -0.00571 |
| D18 | 3.13719  | 0.00000  | -0.00024 | -0.00352 | -0.00376 | 3.13343  |
| D19 | 3.13039  | 0.00006  | 0.00031  | 0.00897  | 0.00929  | 3.13968  |
| D20 | -0.00957 | 0.00007  | 0.00007  | 0.00514  | 0.00521  | -0.00436 |
| D21 | 0.00749  | -0.00008 | 0.00004  | -0.00287 | -0.00283 | 0.00466  |
| D22 | 3.10414  | -0.00010 | -0.00002 | -0.00721 | -0.00721 | 3.09693  |
| D23 | -3.13287 | 0.00003  | -0.00005 | -0.00006 | -0.00008 | -3.13295 |
| D24 | -0.03622 | 0.00002  | -0.00011 | -0.00440 | -0.00446 | -0.04068 |
| D25 | 1.43134  | 0.00015  | 0.00005  | 0.01678  | 0.01683  | 1.44817  |
| D26 | -2.74476 | -0.00002 | -0.00005 | 0.01302  | 0.01297  | -2.73179 |
| D27 | -0.70732 | 0.00014  | 0.00003  | 0.01460  | 0.01464  | -0.69268 |
| D28 | -1.65730 | 0.00021  | 0.00013  | 0.02216  | 0.02229  | -1.63501 |
| D29 | 0.44979  | 0.00004  | 0.00003  | 0.01840  | 0.01842  | 0.46822  |
| D30 | 2.48723  | 0.00020  | 0.00011  | 0.01998  | 0.02010  | 2.50733  |
| D31 | -1.10560 | -0.00005 | 0.00040  | -0.00631 | -0.00591 | -1.11151 |
| D32 | 0.93800  | -0.00029 | 0.00056  | -0.00751 | -0.00695 | 0.93105  |
| D33 | 3.11040  | -0.00033 | 0.00046  | -0.00832 | -0.00786 | 3.10254  |
| D34 | 3.10499  | 0.00001  | 0.00054  | -0.00385 | -0.00331 | 3.10168  |
| D35 | -1.13460 | -0.00022 | 0.00070  | -0.00504 | -0.00435 | -1.13895 |
| D36 | 1.03781  | -0.00027 | 0.00060  | -0.00585 | -0.00526 | 1.03255  |
| D37 | 1.00608  | 0.00032  | 0.00033  | -0.00179 | -0.00146 | 1.00462  |
| D38 | 3.04967  | 0.00008  | 0.00049  | -0.00299 | -0.00250 | 3.04717  |
| D39 | -1.06111 | 0.00004  | 0.00040  | -0.00380 | -0.00341 | -1.06452 |
| D40 | 2.86265  | -0.00003 | -0.00022 | -0.00856 | -0.00872 | 2.85393  |
| D41 | -1.33557 | 0.00001  | -0.00010 | -0.00680 | -0.00696 | -1.34253 |
| D42 | 0.79096  | -0.00007 | -0.00020 | -0.00891 | -0.00904 | 0.78192  |
| D43 | 2.87593  | -0.00003 | -0.00008 | -0.00714 | -0.00729 | 2.86864  |
| D44 | -1.31401 | 0.00000  | -0.00017 | -0.00688 | -0.00698 | -1.32099 |
| D45 | 0.77096  | 0.00004  | -0.00005 | -0.00511 | -0.00523 | 0.76573  |
| D46 | 3.14125  | 0.00004  | -0.00023 | -0.00227 | -0.00250 | 3.13875  |
| D47 | 0.00092  | -0.00001 | -0.00010 | -0.00191 | -0.00201 | -0.00109 |
| D48 | -0.00217 | 0.00004  | 0.00005  | 0.00202  | 0.00207  | -0.00010 |
| D49 | 3.14068  | -0.00002 | 0.00018  | 0.00238  | 0.00256  | -3.13995 |
| D50 | 1.21774  | 0.00019  | -0.00056 | 0.00892  | 0.00837  | 1.22610  |

|     |          |          |          |          |          |          |
|-----|----------|----------|----------|----------|----------|----------|
| D51 | -0.52629 | -0.00009 | 0.00060  | -0.03255 | -0.03225 | -0.55854 |
| D52 | -2.97549 | 0.00012  | -0.00088 | 0.03185  | 0.03127  | -2.94422 |
| D53 | 1.56367  | -0.00016 | 0.00028  | -0.00962 | -0.00935 | 1.55432  |
| D54 | -2.70328 | 0.00025  | 0.00004  | 0.00574  | 0.00579  | -2.69749 |
| D55 | -0.01390 | -0.00001 | -0.00003 | -0.00184 | -0.00187 | -0.01577 |
| D56 | -0.02444 | -0.00002 | 0.00004  | 0.00184  | 0.00188  | -0.02256 |
| D57 | 2.66494  | -0.00028 | -0.00003 | -0.00574 | -0.00577 | 2.65917  |
| D58 | 2.00357  | -0.00023 | -0.00007 | -0.00984 | -0.00984 | 1.99372  |
| D59 | -0.41999 | -0.00003 | -0.00007 | -0.01089 | -0.01086 | -0.43086 |
| D60 | 0.45551  | 0.00009  | 0.00009  | 0.01261  | 0.01262  | 0.46813  |
| D61 | -1.96903 | 0.00019  | 0.00005  | 0.00896  | 0.00894  | -1.96008 |
| D62 | 2.55248  | 0.00005  | 0.00001  | 0.00137  | 0.00139  | 2.55387  |
| D63 | -1.65348 | 0.00006  | 0.00002  | 0.00172  | 0.00176  | -1.65172 |
| D64 | 0.44792  | 0.00005  | 0.00002  | 0.00148  | 0.00152  | 0.44944  |
| D65 | 1.34909  | 0.00001  | -0.00002 | 0.00046  | 0.00043  | 1.34952  |
| D66 | -2.85686 | 0.00002  | -0.00001 | 0.00081  | 0.00079  | -2.85607 |
| D67 | -0.75547 | 0.00000  | -0.00001 | 0.00058  | 0.00056  | -0.75491 |
| D68 | -1.04697 | -0.00008 | -0.00007 | -0.00566 | -0.00573 | -1.05270 |
| D69 | 1.03026  | -0.00007 | -0.00005 | -0.00530 | -0.00536 | 1.02490  |
| D70 | 3.13166  | -0.00009 | -0.00005 | -0.00554 | -0.00559 | 3.12606  |

| Item                 | Value    | Threshold | Converged? |
|----------------------|----------|-----------|------------|
| Maximum Force        | 0.002475 | 0.000450  | NO         |
| RMS Force            | 0.000380 | 0.000300  | NO         |
| Maximum Displacement | 0.634139 | 0.001800  | NO         |
| RMS Displacement     | 0.080596 | 0.001200  | NO         |

Predicted change in Energy=-1.224861D-04

GradGradGradGradGradGradGradGradGradGradGradGradGradGradGradGradGradGrad

Input orientation:

| Center Number | Atomic Number | Atomic Type | Coordinates (Angstroms) |           |           |
|---------------|---------------|-------------|-------------------------|-----------|-----------|
|               |               |             | X                       | Y         | Z         |
| 1             | 6             | 0           | -2.905959               | 2.139627  | -0.290771 |
| 2             | 6             | 0           | -3.827638               | 1.194321  | 0.025137  |
| 3             | 7             | 0           | -3.146760               | -0.016595 | 0.100125  |
| 4             | 6             | 0           | -1.846979               | 0.198479  | -0.166984 |
| 5             | 7             | 0           | -1.682520               | 1.496335  | -0.409531 |
| 6             | 6             | 0           | -0.376320               | 2.117239  | -0.688180 |
| 7             | 6             | 0           | 0.274434                | 2.675947  | 0.583324  |
| 8             | 1             | 0           | -3.016391               | 3.198811  | -0.448132 |
| 9             | 1             | 0           | -4.886004               | 1.279557  | 0.190223  |
| 10            | 1             | 0           | 0.255428                | 1.341824  | -1.121710 |
| 11            | 1             | 0           | -0.519257               | 2.903227  | -1.429773 |

|    |    |   |           |           |           |
|----|----|---|-----------|-----------|-----------|
| 12 | 1  | 0 | -0.347255 | 3.481442  | 0.988208  |
| 13 | 1  | 0 | 0.312046  | 1.877017  | 1.339360  |
| 14 | 35 | 0 | 0.305186  | -2.235748 | 0.126938  |
| 15 | 1  | 0 | -1.057184 | -0.591092 | -0.174441 |
| 16 | 6  | 0 | -3.645503 | -1.317806 | 0.396630  |
| 17 | 6  | 0 | -4.914784 | -1.591039 | 0.669683  |
| 18 | 1  | 0 | -2.858107 | -2.063936 | 0.369820  |
| 19 | 1  | 0 | -5.198401 | -2.612982 | 0.880227  |
| 20 | 1  | 0 | -5.698802 | -0.844509 | 0.694291  |
| 21 | 7  | 0 | 1.572705  | 3.214443  | 0.209994  |
| 22 | 1  | 0 | 1.933530  | 3.828497  | 0.930429  |
| 23 | 1  | 0 | 2.249986  | 2.460952  | 0.076116  |
| 24 | 6  | 0 | 3.810518  | -0.186870 | -1.075289 |
| 25 | 6  | 0 | 3.814962  | -0.422268 | 0.369620  |
| 26 | 8  | 0 | 3.551424  | 0.903576  | -0.162121 |
| 27 | 1  | 0 | 4.754975  | -0.107981 | -1.607907 |
| 28 | 1  | 0 | 2.954001  | -0.520156 | -1.653475 |
| 29 | 1  | 0 | 2.926671  | -0.907139 | 0.768706  |
| 30 | 6  | 0 | 5.085299  | -0.581650 | 1.158730  |
| 31 | 1  | 0 | 4.971133  | -0.167868 | 2.165047  |
| 32 | 1  | 0 | 5.331429  | -1.643085 | 1.259294  |
| 33 | 1  | 0 | 5.919252  | -0.073201 | 0.668626  |

-----  
Distance matrix (angstroms):

|    |    | 1        | 2        | 3        | 4        | 5        |
|----|----|----------|----------|----------|----------|----------|
| 1  | C  | 0.000000 |          |          |          |          |
| 2  | C  | 1.357533 | 0.000000 |          |          |          |
| 3  | N  | 2.204559 | 1.391236 | 0.000000 |          |          |
| 4  | C  | 2.214682 | 2.225224 | 1.344260 | 0.000000 |          |
| 5  | N  | 1.387347 | 2.209453 | 2.166266 | 1.330528 | 0.000000 |
| 6  | C  | 2.560763 | 3.643103 | 3.584692 | 2.473080 | 1.472863 |
| 7  | C  | 3.341643 | 4.397020 | 4.380392 | 3.346820 | 2.491368 |
| 8  | H  | 1.076488 | 2.213614 | 3.264417 | 3.232423 | 2.163128 |
| 9  | H  | 2.211708 | 1.074549 | 2.170966 | 3.245304 | 3.266344 |
| 10 | H  | 3.364716 | 4.243636 | 3.861744 | 2.576597 | 2.070438 |
| 11 | H  | 2.752591 | 3.997813 | 4.215415 | 3.266978 | 2.091272 |
| 12 | H  | 3.159623 | 4.274517 | 4.567515 | 3.789655 | 2.770787 |
| 13 | H  | 3.616883 | 4.396617 | 4.133378 | 3.122171 | 2.679894 |
| 14 | Br | 5.443330 | 5.371776 | 4.103814 | 3.262464 | 4.262302 |
| 15 | H  | 3.299747 | 3.301961 | 2.184436 | 1.116805 | 2.191726 |
| 16 | C  | 3.601845 | 2.545969 | 1.424713 | 2.418981 | 3.524568 |
| 17 | C  | 4.344620 | 3.058685 | 2.434990 | 3.648810 | 4.598272 |
| 18 | H  | 4.255422 | 3.416876 | 2.085105 | 2.535559 | 3.829481 |
| 19 | H  | 5.404981 | 4.135907 | 3.399855 | 4.498110 | 5.559800 |

|    |    |          |          |          |           |          |
|----|----|----------|----------|----------|-----------|----------|
| 20 | H  | 4.204211 | 2.847077 | 2.747979 | 4.082420  | 4.777917 |
| 21 | N  | 4.632971 | 5.768776 | 5.720579 | 4.575193  | 3.732586 |
| 22 | H  | 5.269180 | 6.399179 | 6.425223 | 5.354773  | 4.506694 |
| 23 | H  | 5.178959 | 6.208419 | 5.938323 | 4.686470  | 4.078105 |
| 24 | C  | 7.151163 | 7.839647 | 7.057926 | 5.742890  | 5.783588 |
| 25 | C  | 7.222894 | 7.819295 | 6.978737 | 5.721088  | 5.874557 |
| 26 | O  | 6.575877 | 7.387161 | 6.766177 | 5.444257  | 5.273210 |
| 27 | H  | 8.091755 | 8.833124 | 8.084747 | 6.764316  | 6.741756 |
| 28 | H  | 6.578035 | 7.193595 | 6.367730 | 5.076958  | 5.206819 |
| 29 | H  | 6.665196 | 7.112645 | 6.174677 | 4.988551  | 5.330063 |
| 30 | C  | 8.565431 | 9.158579 | 8.319059 | 7.100887  | 7.251265 |
| 31 | H  | 8.567622 | 9.157137 | 8.377767 | 7.215208  | 7.325921 |
| 32 | H  | 9.195987 | 9.667603 | 8.710272 | 7.546865  | 7.863614 |
| 33 | H  | 9.148846 | 9.850003 | 9.083995 | 7.815779  | 7.836632 |
|    |    | 6        | 7        | 8        | 9         | 10       |
| 6  | C  | 0.000000 |          |          |           |          |
| 7  | C  | 1.533739 | 0.000000 |          |           |          |
| 8  | H  | 2.863109 | 3.488096 | 0.000000 |           |          |
| 9  | H  | 4.670177 | 5.360461 | 2.754357 | 0.000000  |          |
| 10 | H  | 1.090102 | 2.165037 | 3.821897 | 5.306539  | 0.000000 |
| 11 | H  | 1.090031 | 2.175812 | 2.699382 | 4.932460  | 1.770034 |
| 12 | H  | 2.161520 | 1.095103 | 3.044214 | 5.107379  | 3.064791 |
| 13 | H  | 2.154640 | 1.100589 | 4.002594 | 5.356976  | 2.519226 |
| 14 | Br | 4.480778 | 4.932949 | 6.395155 | 6.269755  | 3.789541 |
| 15 | H  | 2.839465 | 3.608456 | 4.275132 | 4.276934  | 2.521196 |
| 16 | C  | 4.864556 | 5.599180 | 4.637804 | 2.885782  | 4.959460 |
| 17 | C  | 6.016043 | 6.718825 | 5.272197 | 2.910504  | 6.208209 |
| 18 | H  | 4.976028 | 5.685498 | 5.328283 | 3.914533  | 4.849532 |
| 19 | H  | 6.934505 | 7.616616 | 6.348436 | 3.965546  | 7.027979 |
| 20 | H  | 6.245958 | 6.934369 | 4.984867 | 2.329460  | 6.597784 |
| 21 | N  | 2.410242 | 1.454256 | 4.636073 | 6.742336  | 2.648651 |
| 22 | H  | 3.299046 | 2.049745 | 5.176741 | 7.317857  | 3.634672 |
| 23 | H  | 2.756768 | 2.050924 | 5.343594 | 7.234021  | 2.581762 |
| 24 | C  | 4.794621 | 4.842584 | 7.646100 | 8.909625  | 3.870108 |
| 25 | C  | 5.013470 | 4.709560 | 7.774851 | 8.867649  | 4.243391 |
| 26 | O  | 4.144501 | 3.799428 | 6.963195 | 8.453146  | 3.460702 |
| 27 | H  | 5.668129 | 5.712005 | 8.524909 | 9.904898  | 4.752289 |
| 28 | H  | 4.356454 | 4.732698 | 7.136466 | 8.252507  | 3.321452 |
| 29 | H  | 4.709472 | 4.461752 | 7.325264 | 8.133521  | 3.970774 |
| 30 | C  | 6.365875 | 5.838447 | 9.083571 | 10.189651 | 5.676955 |
| 31 | H  | 6.477489 | 5.713853 | 9.053384 | 10.156678 | 5.943048 |
| 32 | H  | 7.107116 | 6.684623 | 9.800273 | 10.680856 | 6.351744 |
| 33 | H  | 6.802439 | 6.279257 | 9.581175 | 10.900109 | 6.106267 |
|    |    | 11       | 12       | 13       | 14        | 15       |

|    |    |          |           |          |           |           |
|----|----|----------|-----------|----------|-----------|-----------|
| 11 | H  | 0.000000 |           |          |           |           |
| 12 | H  | 2.492097 | 0.000000  |          |           |           |
| 13 | H  | 3.067942 | 1.769793  | 0.000000 |           |           |
| 14 | Br | 5.432507 | 5.818396  | 4.287756 | 0.000000  |           |
| 15 | H  | 3.751731 | 4.294332  | 3.202803 | 2.156798  | 0.000000  |
| 16 | C  | 5.561140 | 5.853305  | 5.172796 | 4.064886  | 2.748387  |
| 17 | C  | 6.627730 | 6.833290  | 6.308378 | 5.287562  | 4.073514  |
| 18 | H  | 5.777670 | 6.118660  | 5.149853 | 3.177252  | 2.389312  |
| 19 | H  | 7.593356 | 7.790204  | 7.122915 | 5.567694  | 4.727583  |
| 20 | H  | 6.736829 | 6.887619  | 6.629714 | 6.189128  | 4.729010  |
| 21 | N  | 2.676190 | 2.088816  | 2.157183 | 5.596256  | 4.641788  |
| 22 | H  | 3.527441 | 2.307762  | 2.569963 | 6.330258  | 5.449575  |
| 23 | H  | 3.183082 | 2.935809  | 2.385870 | 5.083682  | 4.507230  |
| 24 | C  | 5.331165 | 5.916216  | 4.725407 | 4.234455  | 4.966835  |
| 25 | C  | 5.751712 | 5.739831  | 4.300875 | 3.958046  | 4.905335  |
| 26 | O  | 4.709139 | 4.813351  | 3.700757 | 4.525149  | 4.844940  |
| 27 | H  | 6.075906 | 6.756961  | 5.689131 | 5.228547  | 6.005781  |
| 28 | H  | 4.881918 | 5.821475  | 4.656547 | 3.623445  | 4.275767  |
| 29 | H  | 5.588078 | 5.479636  | 3.861791 | 3.008197  | 4.106155  |
| 30 | C  | 7.089130 | 6.786047  | 5.372301 | 5.162375  | 6.285502  |
| 31 | H  | 7.245601 | 6.556498  | 5.154649 | 5.495551  | 6.480195  |
| 32 | H  | 7.882295 | 7.653870  | 6.131210 | 5.186193  | 6.631491  |
| 33 | H  | 7.397081 | 7.211569  | 5.974445 | 6.040511  | 7.046249  |
|    |    | 16       | 17        | 18       | 19        | 20        |
| 16 | C  | 0.000000 |           |          |           |           |
| 17 | C  | 1.326759 | 0.000000  |          |           |           |
| 18 | H  | 1.085091 | 2.131542  | 0.000000 |           |           |
| 19 | H  | 2.079144 | 1.081265  | 2.457426 | 0.000000  |           |
| 20 | H  | 2.128062 | 1.082865  | 3.108349 | 1.847287  | 0.000000  |
| 21 | N  | 6.914174 | 8.086500  | 6.893397 | 8.958569  | 8.341729  |
| 22 | H  | 7.608875 | 8.737206  | 7.615434 | 9.610390  | 8.952387  |
| 23 | H  | 7.009888 | 8.252568  | 6.830335 | 9.048197  | 8.630842  |
| 24 | C  | 7.683607 | 9.008192  | 7.076883 | 9.532612  | 9.694899  |
| 25 | C  | 7.514071 | 8.812748  | 6.872039 | 9.289815  | 9.528662  |
| 26 | O  | 7.552648 | 8.865194  | 7.083161 | 9.487470  | 9.452826  |
| 27 | H  | 8.720658 | 10.044457 | 8.105318 | 10.561038 | 10.729587 |
| 28 | H  | 6.956482 | 8.274155  | 6.344886 | 8.789837  | 8.971522  |
| 29 | H  | 6.595495 | 7.871844  | 5.912777 | 8.302959  | 8.626021  |
| 30 | C  | 8.794864 | 10.062788 | 8.118944 | 10.486103 | 10.797298 |
| 31 | H  | 8.871081 | 10.099153 | 8.253175 | 10.537967 | 10.792056 |
| 32 | H  | 9.024152 | 10.263296 | 8.248441 | 10.581196 | 11.073525 |
| 33 | H  | 9.649226 | 10.939843 | 9.005239 | 11.406027 | 11.643657 |
|    |    | 21       | 22        | 23       | 24        | 25        |
| 21 | N  | 0.000000 |           |          |           |           |

|    |   |          |          |          |          |          |
|----|---|----------|----------|----------|----------|----------|
| 22 | H | 1.013057 | 0.000000 |          |          |          |
| 23 | H | 1.021950 | 1.643221 | 0.000000 |          |          |
| 24 | C | 4.269507 | 4.865096 | 3.282066 | 0.000000 |          |
| 25 | C | 4.275379 | 4.682232 | 3.293669 | 1.463965 | 0.000000 |
| 26 | O | 3.064947 | 3.516590 | 2.043506 | 1.445710 | 1.452606 |
| 27 | H | 4.946727 | 5.468049 | 3.963624 | 1.087154 | 2.212015 |
| 28 | H | 4.396331 | 5.160301 | 3.517687 | 1.085818 | 2.200852 |
| 29 | H | 4.374107 | 4.841356 | 3.504514 | 2.168016 | 1.087856 |
| 30 | C | 5.258207 | 5.425418 | 4.297497 | 2.602260 | 1.503946 |
| 31 | H | 5.177989 | 5.169356 | 4.321917 | 3.441971 | 2.150584 |
| 32 | H | 6.230940 | 6.449192 | 5.266718 | 3.143884 | 2.140464 |
| 33 | H | 5.469133 | 5.583706 | 4.498501 | 2.738780 | 2.153901 |
|    |   | 26       | 27       | 28       | 29       | 30       |
| 26 | O | 0.000000 |          |          |          |          |
| 27 | H | 2.135903 | 0.000000 |          |          |          |
| 28 | H | 2.146640 | 1.848099 | 0.000000 |          |          |
| 29 | H | 2.129658 | 3.103166 | 2.453052 | 0.000000 |          |
| 30 | C | 2.510641 | 2.826262 | 3.529123 | 2.217598 | 0.000000 |
| 31 | H | 2.929040 | 3.779615 | 4.332902 | 2.583818 | 1.094040 |
| 32 | H | 3.416771 | 3.302981 | 3.923947 | 2.562257 | 1.094229 |
| 33 | H | 2.692739 | 2.557216 | 3.792708 | 3.108216 | 1.092794 |
|    |   | 31       | 32       | 33       |          |          |
| 31 | H | 0.000000 |          |          |          |          |
| 32 | H | 1.768182 | 0.000000 |          |          |          |
| 33 | H | 1.774025 | 1.777346 | 0.000000 |          |          |

Stoichiometry C10H18BrN3O

Framework group C1[X(C10H18BrN3O)]

Deg. of freedom 93

Full point group C1 NOp 1

Largest Abelian subgroup C1 NOp 1

Largest concise Abelian subgroup C1 NOp 1

Standard orientation:

| Center Number | Atomic Number | Atomic Type | Coordinates (Angstroms) |          |           |
|---------------|---------------|-------------|-------------------------|----------|-----------|
|               |               |             | X                       | Y        | Z         |
| 1             | 6             | 0           | -2.881816               | 2.181154 | -0.211937 |
| 2             | 6             | 0           | -3.804354               | 1.218616 | 0.043682  |
| 3             | 7             | 0           | -3.126434               | 0.003784 | 0.031591  |
| 4             | 6             | 0           | -1.827559               | 0.233561 | -0.227565 |
| 5             | 7             | 0           | -1.660844               | 1.544597 | -0.381504 |
| 6             | 6             | 0           | -0.354488               | 2.180024 | -0.624387 |
| 7             | 6             | 0           | 0.304841                | 2.648675 | 0.678689  |
| 8             | 1             | 0           | -2.990178               | 3.248895 | -0.295683 |

|    |    |   |           |           |           |
|----|----|---|-----------|-----------|-----------|
| 9  | 1  | 0 | -4.861548 | 1.294860  | 0.220265  |
| 10 | 1  | 0 | 0.272696  | 1.434653  | -1.113656 |
| 11 | 1  | 0 | -0.499345 | 3.015351  | -1.309524 |
| 12 | 1  | 0 | -0.312360 | 3.425995  | 1.141385  |
| 13 | 1  | 0 | 0.344419  | 1.799697  | 1.377950  |
| 14 | 35 | 0 | 0.319435  | -2.220226 | -0.113507 |
| 15 | 1  | 0 | -1.040012 | -0.555524 | -0.293644 |
| 16 | 6  | 0 | -3.627138 | -1.313499 | 0.241038  |
| 17 | 6  | 0 | -4.895642 | -1.601779 | 0.501963  |
| 18 | 1  | 0 | -2.841976 | -2.057915 | 0.158645  |
| 19 | 1  | 0 | -5.180924 | -2.635073 | 0.643570  |
| 20 | 1  | 0 | -5.677436 | -0.856822 | 0.582168  |
| 21 | 7  | 0 | 1.602516  | 3.208398  | 0.335744  |
| 22 | 1  | 0 | 1.969025  | 3.770744  | 1.094508  |
| 23 | 1  | 0 | 2.276952  | 2.464245  | 0.146660  |
| 24 | 6  | 0 | 3.823733  | -0.102116 | -1.192448 |
| 25 | 6  | 0 | 3.835520  | -0.436046 | 0.232874  |
| 26 | 8  | 0 | 3.572724  | 0.923765  | -0.205210 |
| 27 | 1  | 0 | 4.765443  | 0.010851  | -1.723791 |
| 28 | 1  | 0 | 2.963108  | -0.392925 | -1.787221 |
| 29 | 1  | 0 | 2.948109  | -0.945016 | 0.602849  |
| 30 | 6  | 0 | 5.109758  | -0.652195 | 1.001934  |
| 31 | 1  | 0 | 5.002311  | -0.308117 | 2.034885  |
| 32 | 1  | 0 | 5.353494  | -1.718612 | 1.028088  |
| 33 | 1  | 0 | 5.942393  | -0.113331 | 0.543084  |

-----

Rotational constants (GHZ):      0.5060212      0.2336841      0.1673423

Standard basis: 6-311++G(d,p) (5D, 7F)

There are    499 symmetry adapted cartesian basis functions of A    symmetry.

There are    482 symmetry adapted basis functions of A    symmetry.

     482 basis functions,    760 primitive gaussians,    499 cartesian basis functions

     71 alpha electrons      71 beta electrons

     nuclear repulsion energy      1288.2292005792 Hartrees.

NAtoms=    33 NActive=    33 NUniq=    33 SFac= 1.00D+00 NAtFMM=    60 NAOKFM=F

Big=F

Integral buffers will be    131072 words long.

Raffenetti 2 integral format.

Two-electron integral symmetry is turned on.

One-electron integrals computed using PRISM.

NBasis=    482 RedAO= T EigKep=    3.83D-06    NBF=    482

NBsUse=    482 1.00D-06 EigRej= -1.00D+00    NBFU=    482

Initial      guess              from              the              checkpoint              file:

"/home/suqian/liuwen/qianmengshijie/nh2po/nh2po.chk"

B after Tr=    0.000000    0.000000    0.000000

Rot= 0.999981 -0.005951 -0.000727 -0.001357 Ang= -0.70 deg.  
 ExpMin= 3.50D-02 ExpMax= 4.40D+05 ExpMxC= 1.51D+04 IAcc=3 IRadAn= 5 AccDes= 0.00D+00  
 Harris functional with IExCor= 402 and IRadAn= 5 diagonalized for initial guess.  
 HarFok: IExCor= 402 AccDes= 0.00D+00 IRadAn= 5 IDoV= 1 UseB2=F ITyADJ=14  
 ICtDFT= 3500011 ScaDFX= 1.000000 1.000000 1.000000 1.000000  
 FoFCou: FMM=F IPFlag= 0 FMFlag= 100000 FMFlg1= 0  
 NFxFlg= 0 DoJE=T BraDBF=F KetDBF=T FulRan=T  
 wScrn= 0.000000 ICntrl= 500 IOpCl= 0 I1Cent= 20000004 NGrid= 0  
 NMat0= 1 NMatS0= 1 NMatT0= 0 NMatD0= 1 NMtDS0= 0  
 NMtDT0= 0

Petite list used in FoFCou.

Requested convergence on RMS density matrix=1.00D-08 within 128 cycles.

Requested convergence on MAX density matrix=1.00D-06.

Requested convergence on energy=1.00D-06.

No special actions if energy rises.

SCF Done: E(RB3LYP) = -3205.64644702 A.U. after 12 cycles

NFock= 12 Conv=0.79D-08 -V/T= 2.0018

Calling FoFJK, ICntrl= 2127 FMM=F ISym2X=0 I1Cent= 0 IOpClX= 0 NMat=1 NMatS=1  
 NMatT=0.

\*\*\*\*\* Axes restored to original set \*\*\*\*\*

| Center Number | Atomic Number | Forces (Hartrees/Bohr) |              |              |
|---------------|---------------|------------------------|--------------|--------------|
|               |               | X                      | Y            | Z            |
| 1             | 6             | -0.000101169           | -0.000060161 | 0.000102822  |
| 2             | 6             | 0.000442724            | -0.000461755 | 0.000241340  |
| 3             | 7             | -0.001533431           | -0.001064811 | 0.000660544  |
| 4             | 6             | 0.000201600            | -0.000847746 | -0.001803305 |
| 5             | 7             | -0.000153098           | 0.001151378  | -0.001295113 |
| 6             | 6             | -0.000567845           | 0.000151848  | 0.001281244  |
| 7             | 6             | 0.000533808            | 0.000060869  | -0.000522754 |
| 8             | 1             | 0.000166430            | -0.000028827 | 0.000049108  |
| 9             | 1             | -0.000084012           | -0.000011549 | 0.000131234  |
| 10            | 1             | 0.000297157            | 0.000084965  | -0.000045929 |
| 11            | 1             | 0.000175269            | 0.000385911  | 0.000245011  |
| 12            | 1             | -0.000159534           | -0.000061818 | -0.000212014 |
| 13            | 1             | -0.000382800           | -0.000212576 | -0.000416134 |
| 14            | 35            | 0.000516004            | -0.000286690 | -0.000221874 |
| 15            | 1             | -0.000553604           | 0.000435619  | 0.001510949  |
| 16            | 6             | -0.000727748           | -0.000659525 | -0.000449375 |
| 17            | 6             | 0.000349226            | 0.000327495  | -0.000244587 |
| 18            | 1             | 0.000358904            | 0.000048062  | 0.000553700  |



|    |   |              |              |              |
|----|---|--------------|--------------|--------------|
| 19 | 1 | 0.000095787  | 0.000054363  | 0.000088291  |
| 20 | 1 | -0.000052716 | 0.000111665  | 0.000077629  |
| 21 | 7 | 0.001928224  | 0.000061065  | 0.000404078  |
| 22 | 1 | 0.000216778  | 0.000078992  | -0.000132384 |
| 23 | 1 | -0.000222792 | 0.001257521  | -0.000072011 |
| 24 | 6 | 0.000463644  | 0.000483424  | 0.000470413  |
| 25 | 6 | 0.000016449  | -0.000413805 | 0.000297269  |
| 26 | 8 | -0.000548049 | -0.001577864 | -0.000288459 |
| 27 | 1 | -0.000085290 | 0.000073605  | -0.000342171 |
| 28 | 1 | -0.000025288 | 0.000299363  | -0.000371537 |
| 29 | 1 | -0.000437863 | 0.000362201  | 0.000457295  |
| 30 | 6 | 0.000031340  | 0.000363401  | -0.000108762 |
| 31 | 1 | -0.000061398 | -0.000073894 | -0.000070863 |
| 32 | 1 | -0.000097262 | -0.000026027 | 0.000006118  |
| 33 | 1 | 0.000000555  | -0.000004698 | 0.000020226  |

-----  
Cartesian Forces: Max 0.001928224 RMS 0.000554123

GradGradGradGradGradGradGradGradGradGradGradGradGradGradGradGradGradGradGrad

Berny optimization.

Using GEDIIS/GDIIS optimizer.

FormGI is forming the generalized inverse of G from B-inverse, IUseBI=4.

GSVD: received Info= 1 from GESDD.

Internal Forces: Max 0.004067941 RMS 0.000677391

Search for a local minimum.

Step number 6 out of a maximum of 172

All quantities printed in internal units (Hartrees-Bohrs-Radians)

Mixed Optimization -- En-DIIS/RFO-DIIS

Swapping is turned off.

Update second derivatives using D2CorX and points 2 3 1 4 5  
6

DE= 5.67D-05 DEPred=-1.22D-04 R=-4.63D-01

Trust test=-4.63D-01 RLast= 1.67D-01 DXMaxT set to 1.26D-01

ITU= -1 1 0 0-1 0

|                 |         |         |         |         |         |
|-----------------|---------|---------|---------|---------|---------|
| Eigenvalues --- | 0.00203 | 0.00230 | 0.00235 | 0.00374 | 0.00464 |
| Eigenvalues --- | 0.00721 | 0.00782 | 0.00838 | 0.01349 | 0.01449 |
| Eigenvalues --- | 0.01785 | 0.01869 | 0.02083 | 0.02163 | 0.02303 |
| Eigenvalues --- | 0.02333 | 0.02374 | 0.02382 | 0.02444 | 0.02988 |
| Eigenvalues --- | 0.03070 | 0.03076 | 0.03090 | 0.03243 | 0.03967 |
| Eigenvalues --- | 0.04080 | 0.04446 | 0.04500 | 0.04696 | 0.05420 |
| Eigenvalues --- | 0.05739 | 0.05766 | 0.05904 | 0.08233 | 0.08651 |
| Eigenvalues --- | 0.09286 | 0.10160 | 0.11418 | 0.12115 | 0.12384 |
| Eigenvalues --- | 0.12677 | 0.12773 | 0.13415 | 0.15515 | 0.15999 |
| Eigenvalues --- | 0.16000 | 0.16000 | 0.16000 | 0.16000 | 0.16000 |

|                 |         |         |         |         |         |
|-----------------|---------|---------|---------|---------|---------|
| Eigenvalues --- | 0.16009 | 0.16024 | 0.17193 | 0.21018 | 0.21458 |
| Eigenvalues --- | 0.22045 | 0.22997 | 0.23003 | 0.24933 | 0.27671 |
| Eigenvalues --- | 0.29072 | 0.29695 | 0.31621 | 0.32072 | 0.32553 |
| Eigenvalues --- | 0.33654 | 0.34272 | 0.34303 | 0.34332 | 0.34534 |
| Eigenvalues --- | 0.34594 | 0.34691 | 0.34912 | 0.35058 | 0.35112 |
| Eigenvalues --- | 0.35279 | 0.35596 | 0.35765 | 0.35893 | 0.36416 |
| Eigenvalues --- | 0.36618 | 0.37839 | 0.38851 | 0.41931 | 0.42568 |
| Eigenvalues --- | 0.44858 | 0.45459 | 0.45680 | 0.48846 | 0.54634 |
| Eigenvalues --- | 0.57768 | 0.60657 | 1.24802 |         |         |

En-DIIS/RFO-DIIS IScMMF= 0 using points: 6 5 4

RFO step: Lambda=-1.32273495D-04.

DidBck=T Rises=F RFO-DIIS coefs: 0.37035 0.98501 -0.35536

Iteration 1 RMS(Cart)= 0.12215716 RMS(Int)= 0.00355635

Iteration 2 RMS(Cart)= 0.01263961 RMS(Int)= 0.00005006

Iteration 3 RMS(Cart)= 0.00005853 RMS(Int)= 0.00003802

Iteration 4 RMS(Cart)= 0.00000001 RMS(Int)= 0.00003802

| Variable | Old X   | -DE/DX   | Delta X<br>(Linear) | Delta X<br>(Quad) | Delta X<br>(Total) | New X   |
|----------|---------|----------|---------------------|-------------------|--------------------|---------|
| R1       | 2.56537 | 0.00089  | -0.00069            | 0.00119           | 0.00050            | 2.56587 |
| R2       | 2.62171 | -0.00012 | -0.00039            | 0.00113           | 0.00074            | 2.62245 |
| R3       | 2.03427 | -0.00005 | 0.00003             | -0.00010          | -0.00007           | 2.03420 |
| R4       | 2.62905 | -0.00006 | 0.00045             | -0.00098          | -0.00053           | 2.62852 |
| R5       | 2.03060 | 0.00010  | 0.00011             | -0.00025          | -0.00014           | 2.03046 |
| R6       | 2.54028 | 0.00104  | 0.00073             | -0.00148          | -0.00075           | 2.53953 |
| R7       | 2.69232 | 0.00011  | -0.00090            | 0.00208           | 0.00118            | 2.69350 |
| R8       | 2.51433 | 0.00163  | 0.00122             | -0.00422          | -0.00300           | 2.51133 |
| R9       | 2.11046 | -0.00013 | 0.00082             | -0.00205          | -0.00123           | 2.10923 |
| R10      | 2.78331 | 0.00138  | 0.00130             | -0.00445          | -0.00316           | 2.78015 |
| R11      | 2.89835 | 0.00002  | -0.00079            | 0.00228           | 0.00149            | 2.89984 |
| R12      | 2.05999 | 0.00013  | 0.00060             | -0.00139          | -0.00079           | 2.05920 |
| R13      | 2.05986 | 0.00009  | 0.00041             | -0.00096          | -0.00054           | 2.05932 |
| R14      | 2.06944 | -0.00003 | 0.00008             | 0.00001           | 0.00009            | 2.06953 |
| R15      | 2.07981 | -0.00014 | -0.00008            | 0.00016           | 0.00008            | 2.07989 |
| R16      | 2.74815 | 0.00131  | 0.00115             | -0.00366          | -0.00250           | 2.74564 |
| R17      | 4.07576 | 0.00051  | -0.00517            | 0.01262           | 0.00745            | 4.08321 |
| R18      | 2.50721 | -0.00049 | -0.00014            | 0.00041           | 0.00027            | 2.50748 |
| R19      | 2.05053 | 0.00022  | -0.00108            | 0.00199           | 0.00091            | 2.05144 |
| R20      | 2.04330 | -0.00006 | -0.00004            | 0.00017           | 0.00013            | 2.04343 |
| R21      | 2.04632 | 0.00011  | -0.00021            | 0.00030           | 0.00009            | 2.04641 |
| R22      | 1.91440 | 0.00003  | -0.00005            | 0.00008           | 0.00004            | 1.91444 |
| R23      | 1.93121 | -0.00120 | -0.00048            | 0.00141           | 0.00093            | 1.93213 |
| R24      | 3.86167 | -0.00010 | -0.00549            | 0.00978           | 0.00428            | 3.86595 |
| R25      | 2.76649 | 0.00101  | 0.00016             | -0.00016          | 0.00001            | 2.76650 |
| R26      | 2.73200 | -0.00072 | -0.00088            | 0.00138           | 0.00049            | 2.73249 |

|     |         |          |          |          |          |         |
|-----|---------|----------|----------|----------|----------|---------|
| R27 | 2.05442 | 0.00010  | 0.00029  | -0.00067 | -0.00038 | 2.05404 |
| R28 | 2.05190 | 0.00012  | 0.00013  | -0.00022 | -0.00009 | 2.05181 |
| R29 | 2.74503 | -0.00081 | -0.00136 | 0.00274  | 0.00137  | 2.74640 |
| R30 | 2.05575 | 0.00036  | 0.00005  | 0.00008  | 0.00012  | 2.05587 |
| R31 | 2.84205 | -0.00021 | 0.00021  | -0.00018 | 0.00003  | 2.84208 |
| R32 | 2.06744 | -0.00009 | 0.00007  | -0.00020 | -0.00014 | 2.06730 |
| R33 | 2.06779 | 0.00000  | 0.00018  | -0.00034 | -0.00016 | 2.06763 |
| R34 | 2.06508 | -0.00001 | -0.00010 | 0.00032  | 0.00022  | 2.06530 |
| A1  | 1.87105 | 0.00021  | 0.00093  | -0.00203 | -0.00110 | 1.86995 |
| A2  | 2.27774 | 0.00005  | -0.00037 | 0.00066  | 0.00029  | 2.27803 |
| A3  | 2.13434 | -0.00026 | -0.00059 | 0.00144  | 0.00085  | 2.13519 |
| A4  | 1.86122 | 0.00066  | -0.00096 | 0.00127  | 0.00031  | 1.86153 |
| A5  | 2.27737 | -0.00029 | 0.00001  | 0.00021  | 0.00022  | 2.27759 |
| A6  | 2.14456 | -0.00037 | 0.00096  | -0.00149 | -0.00053 | 2.14403 |
| A7  | 1.89995 | -0.00079 | 0.00126  | -0.00186 | -0.00061 | 1.89935 |
| A8  | 2.25859 | 0.00020  | -0.00195 | 0.00398  | 0.00202  | 2.26061 |
| A9  | 2.12464 | 0.00059  | 0.00071  | -0.00213 | -0.00143 | 2.12321 |
| A10 | 1.88789 | 0.00058  | -0.00157 | 0.00265  | 0.00109  | 1.88897 |
| A11 | 2.17974 | 0.00000  | 0.00987  | -0.02111 | -0.01124 | 2.16850 |
| A12 | 2.21555 | -0.00058 | -0.00830 | 0.01843  | 0.01013  | 2.22568 |
| A13 | 1.90466 | -0.00066 | 0.00033  | 0.00000  | 0.00033  | 1.90498 |
| A14 | 2.21779 | 0.00155  | -0.00283 | 0.00702  | 0.00419  | 2.22197 |
| A15 | 2.15954 | -0.00090 | 0.00260  | -0.00736 | -0.00476 | 2.15478 |
| A16 | 1.95304 | 0.00160  | 0.00134  | -0.00570 | -0.00436 | 1.94868 |
| A17 | 1.86432 | -0.00085 | -0.00111 | 0.00294  | 0.00183  | 1.86614 |
| A18 | 1.89272 | 0.00024  | -0.00374 | 0.00808  | 0.00435  | 1.89708 |
| A19 | 1.92083 | -0.00062 | 0.00103  | -0.00114 | -0.00012 | 1.92071 |
| A20 | 1.93584 | -0.00068 | 0.00047  | -0.00021 | 0.00026  | 1.93610 |
| A21 | 1.89477 | 0.00030  | 0.00194  | -0.00375 | -0.00182 | 1.89295 |
| A22 | 1.91089 | -0.00021 | 0.00124  | -0.00236 | -0.00113 | 1.90977 |
| A23 | 1.89605 | -0.00088 | 0.00057  | -0.00003 | 0.00053  | 1.89659 |
| A24 | 1.87638 | 0.00093  | -0.00222 | 0.00330  | 0.00109  | 1.87746 |
| A25 | 1.87482 | 0.00023  | 0.00114  | -0.00234 | -0.00121 | 1.87362 |
| A26 | 1.90642 | 0.00041  | -0.00109 | 0.00267  | 0.00157  | 1.90799 |
| A27 | 1.99834 | -0.00049 | 0.00046  | -0.00138 | -0.00092 | 1.99742 |
| A28 | 2.17222 | -0.00049 | 0.00069  | -0.00093 | -0.00025 | 2.17198 |
| A29 | 1.94856 | 0.00010  | 0.00093  | -0.00205 | -0.00113 | 1.94744 |
| A30 | 2.16240 | 0.00040  | -0.00160 | 0.00298  | 0.00138  | 2.16377 |
| A31 | 2.07791 | -0.00007 | 0.00068  | -0.00135 | -0.00067 | 2.07724 |
| A32 | 2.15959 | 0.00001  | -0.00071 | 0.00141  | 0.00070  | 2.16029 |
| A33 | 2.04569 | 0.00006  | 0.00003  | -0.00006 | -0.00003 | 2.04566 |
| A34 | 1.93891 | 0.00142  | 0.00146  | 0.00083  | 0.00201  | 1.94092 |
| A35 | 1.93078 | -0.00407 | -0.00011 | 0.00017  | 0.00001  | 1.93079 |
| A36 | 1.87971 | 0.00118  | -0.00059 | 0.00040  | -0.00013 | 1.87958 |

|     |          |          |          |          |          |          |
|-----|----------|----------|----------|----------|----------|----------|
| A37 | 2.08584  | 0.00009  | 0.00121  | -0.00201 | -0.00081 | 2.08503  |
| A38 | 2.06985  | 0.00044  | -0.00105 | 0.00287  | 0.00183  | 2.07169  |
| A39 | 1.99370  | 0.00053  | 0.00001  | -0.00018 | -0.00017 | 1.99354  |
| A40 | 2.01140  | -0.00035 | -0.00169 | 0.00215  | 0.00046  | 2.01186  |
| A41 | 2.03385  | -0.00034 | 0.00082  | -0.00186 | -0.00104 | 2.03281  |
| A42 | 2.01670  | 0.00068  | -0.00055 | 0.00197  | 0.00143  | 2.01813  |
| A43 | 2.13823  | -0.00052 | 0.00100  | -0.00185 | -0.00086 | 2.13737  |
| A44 | 1.97465  | -0.00032 | -0.00222 | 0.00291  | 0.00068  | 1.97534  |
| A45 | 2.02867  | 0.00040  | -0.00081 | 0.00163  | 0.00083  | 2.02949  |
| A46 | 2.03756  | -0.00005 | 0.00111  | -0.00221 | -0.00110 | 2.03646  |
| A47 | 2.43813  | 0.00029  | -0.00363 | 0.00879  | 0.00517  | 2.44330  |
| A48 | 2.44724  | -0.00037 | -0.00381 | 0.00809  | 0.00428  | 2.45153  |
| A49 | 1.93307  | -0.00008 | -0.00012 | 0.00009  | -0.00002 | 1.93304  |
| A50 | 1.91879  | -0.00012 | 0.00056  | -0.00105 | -0.00049 | 1.91831  |
| A51 | 1.93904  | 0.00008  | -0.00002 | 0.00029  | 0.00027  | 1.93930  |
| A52 | 1.88159  | 0.00004  | -0.00028 | 0.00048  | 0.00019  | 1.88179  |
| A53 | 1.89251  | 0.00003  | 0.00001  | -0.00008 | -0.00007 | 1.89244  |
| A54 | 1.89747  | 0.00005  | -0.00017 | 0.00029  | 0.00012  | 1.89759  |
| A55 | 3.19345  | -0.00047 | 0.07178  | 0.04738  | 0.11916  | 3.31261  |
| A56 | 3.10628  | -0.00388 | -0.05121 | -0.01756 | -0.06879 | 3.03749  |
| A57 | 2.95983  | 0.00128  | 0.04897  | 0.00101  | 0.04998  | 3.00981  |
| A58 | 3.15791  | 0.00088  | 0.04111  | 0.04737  | 0.08859  | 3.24650  |
| D1  | 0.00439  | 0.00003  | 0.00237  | -0.00325 | -0.00089 | 0.00350  |
| D2  | -3.12698 | -0.00017 | 0.00126  | -0.00259 | -0.00133 | -3.12832 |
| D3  | 3.13464  | 0.00020  | -0.00095 | 0.00407  | 0.00312  | 3.13776  |
| D4  | 0.00327  | -0.00001 | -0.00205 | 0.00473  | 0.00267  | 0.00594  |
| D5  | -0.00570 | 0.00007  | -0.00290 | 0.00533  | 0.00243  | -0.00326 |
| D6  | -3.09588 | 0.00031  | -0.00529 | 0.01293  | 0.00765  | -3.08822 |
| D7  | -3.13709 | -0.00008 | 0.00008  | -0.00124 | -0.00117 | -3.13826 |
| D8  | 0.05592  | 0.00016  | -0.00231 | 0.00635  | 0.00405  | 0.05997  |
| D9  | -0.00166 | -0.00012 | -0.00106 | 0.00013  | -0.00094 | -0.00260 |
| D10 | -3.13984 | -0.00025 | -0.00320 | 0.00579  | 0.00261  | -3.13724 |
| D11 | 3.13067  | 0.00006  | -0.00006 | -0.00046 | -0.00053 | 3.13015  |
| D12 | -0.00750 | -0.00007 | -0.00220 | 0.00521  | 0.00301  | -0.00449 |
| D13 | -0.00187 | 0.00016  | -0.00073 | 0.00319  | 0.00246  | 0.00059  |
| D14 | 3.13584  | -0.00039 | 0.00192  | -0.00388 | -0.00195 | 3.13388  |
| D15 | 3.13662  | 0.00028  | 0.00120  | -0.00194 | -0.00074 | 3.13588  |
| D16 | -0.00886 | -0.00027 | 0.00385  | -0.00902 | -0.00516 | -0.01401 |
| D17 | -0.00571 | 0.00013  | -0.00008 | 0.00295  | 0.00287  | -0.00284 |
| D18 | 3.13343  | 0.00046  | -0.00021 | 0.00370  | 0.00349  | 3.13692  |
| D19 | 3.13968  | -0.00001 | -0.00245 | 0.00925  | 0.00680  | -3.13670 |
| D20 | -0.00436 | 0.00032  | -0.00257 | 0.01000  | 0.00742  | 0.00307  |
| D21 | 0.00466  | -0.00014 | 0.00222  | -0.00525 | -0.00302 | 0.00164  |
| D22 | 3.09693  | -0.00029 | 0.00433  | -0.01203 | -0.00769 | 3.08924  |

|     |          |          |          |          |          |          |
|-----|----------|----------|----------|----------|----------|----------|
| D23 | -3.13295 | 0.00042  | -0.00049 | 0.00212  | 0.00164  | -3.13131 |
| D24 | -0.04068 | 0.00027  | 0.00162  | -0.00466 | -0.00302 | -0.04370 |
| D25 | 1.44817  | 0.00023  | -0.01000 | 0.01331  | 0.00331  | 1.45147  |
| D26 | -2.73179 | -0.00014 | -0.00869 | 0.01046  | 0.00177  | -2.73002 |
| D27 | -0.69268 | -0.00011 | -0.00889 | 0.01172  | 0.00283  | -0.68985 |
| D28 | -1.63501 | 0.00049  | -0.01263 | 0.02166  | 0.00903  | -1.62598 |
| D29 | 0.46822  | 0.00011  | -0.01131 | 0.01880  | 0.00749  | 0.47571  |
| D30 | 2.50733  | 0.00014  | -0.01151 | 0.02006  | 0.00855  | 2.51588  |
| D31 | -1.11151 | -0.00050 | 0.00802  | -0.01799 | -0.00997 | -1.12147 |
| D32 | 0.93105  | -0.00084 | 0.01038  | -0.02213 | -0.01174 | 0.91931  |
| D33 | 3.10254  | -0.00140 | 0.00992  | -0.02177 | -0.01185 | 3.09069  |
| D34 | 3.10168  | -0.00004 | 0.00789  | -0.01730 | -0.00940 | 3.09228  |
| D35 | -1.13895 | -0.00038 | 0.01025  | -0.02144 | -0.01118 | -1.15013 |
| D36 | 1.03255  | -0.00095 | 0.00979  | -0.02108 | -0.01129 | 1.02126  |
| D37 | 1.00462  | 0.00043  | 0.00452  | -0.01173 | -0.00722 | 0.99740  |
| D38 | 3.04717  | 0.00009  | 0.00687  | -0.01587 | -0.00900 | 3.03818  |
| D39 | -1.06452 | -0.00047 | 0.00641  | -0.01551 | -0.00911 | -1.07362 |
| D40 | 2.85393  | 0.00067  | 0.00317  | -0.01236 | -0.00913 | 2.84480  |
| D41 | -1.34253 | 0.00041  | 0.00329  | -0.01120 | -0.00797 | -1.35050 |
| D42 | 0.78192  | 0.00016  | 0.00355  | -0.01289 | -0.00927 | 0.77264  |
| D43 | 2.86864  | -0.00010 | 0.00368  | -0.01173 | -0.00812 | 2.86053  |
| D44 | -1.32099 | -0.00010 | 0.00258  | -0.01091 | -0.00826 | -1.32925 |
| D45 | 0.76573  | -0.00036 | 0.00271  | -0.00975 | -0.00710 | 0.75863  |
| D46 | 3.13875  | 0.00028  | -0.00088 | 0.00171  | 0.00083  | 3.13958  |
| D47 | -0.00109 | 0.00011  | 0.00017  | -0.00013 | 0.00004  | -0.00105 |
| D48 | -0.00010 | -0.00009 | -0.00074 | 0.00088  | 0.00014  | 0.00004  |
| D49 | -3.13995 | -0.00025 | 0.00031  | -0.00096 | -0.00065 | -3.14060 |
| D50 | 1.22610  | 0.00011  | -0.01136 | 0.01556  | 0.00401  | 1.23012  |
| D51 | -0.55854 | 0.00090  | 0.02676  | 0.00114  | 0.02776  | -0.53078 |
| D52 | -2.94422 | -0.00057 | -0.02920 | -0.00232 | -0.03137 | -2.97559 |
| D53 | 1.55432  | 0.00023  | 0.00893  | -0.01673 | -0.00762 | 1.54670  |
| D54 | -2.69749 | -0.00041 | -0.00321 | 0.00369  | 0.00048  | -2.69701 |
| D55 | -0.01577 | -0.00014 | 0.00080  | -0.00182 | -0.00101 | -0.01678 |
| D56 | -0.02256 | -0.00005 | -0.00070 | 0.00087  | 0.00018  | -0.02239 |
| D57 | 2.65917  | 0.00022  | 0.00332  | -0.00463 | -0.00132 | 2.65785  |
| D58 | 1.99372  | -0.00011 | 0.00540  | -0.01300 | -0.00761 | 1.98611  |
| D59 | -0.43086 | 0.00021  | 0.00610  | -0.01234 | -0.00626 | -0.43711 |
| D60 | 0.46813  | 0.00031  | -0.00696 | 0.01514  | 0.00819  | 0.47632  |
| D61 | -1.96008 | 0.00029  | -0.00505 | 0.01318  | 0.00815  | -1.95193 |
| D62 | 2.55387  | -0.00023 | -0.00078 | 0.00058  | -0.00020 | 2.55366  |
| D63 | -1.65172 | -0.00031 | -0.00085 | 0.00056  | -0.00029 | -1.65201 |
| D64 | 0.44944  | -0.00027 | -0.00070 | 0.00042  | -0.00028 | 0.44916  |
| D65 | 1.34952  | 0.00014  | -0.00052 | 0.00024  | -0.00027 | 1.34925  |
| D66 | -2.85607 | 0.00006  | -0.00058 | 0.00022  | -0.00036 | -2.85642 |

|     |          |         |          |          |          |          |
|-----|----------|---------|----------|----------|----------|----------|
| D67 | -0.75491 | 0.00010 | -0.00043 | 0.00008  | -0.00035 | -0.75526 |
| D68 | -1.05270 | 0.00022 | 0.00288  | -0.00397 | -0.00109 | -1.05379 |
| D69 | 1.02490  | 0.00014 | 0.00281  | -0.00399 | -0.00117 | 1.02373  |
| D70 | 3.12606  | 0.00018 | 0.00296  | -0.00413 | -0.00117 | 3.12490  |

| Item                 | Value    | Threshold | Converged? |
|----------------------|----------|-----------|------------|
| Maximum Force        | 0.004068 | 0.000450  | NO         |
| RMS Force            | 0.000677 | 0.000300  | NO         |
| Maximum Displacement | 0.669288 | 0.001800  | NO         |
| RMS Displacement     | 0.133330 | 0.001200  | NO         |

Predicted change in Energy=-2.598906D-04

GradGradGradGradGradGradGradGradGradGradGradGradGradGradGradGradGradGradGrad

Input orientation:

| Center Number | Atomic Number | Atomic Type | Coordinates (Angstroms) |           |           |
|---------------|---------------|-------------|-------------------------|-----------|-----------|
|               |               |             | X                       | Y         | Z         |
| 1             | 6             | 0           | -2.884762               | 2.148819  | -0.227763 |
| 2             | 6             | 0           | -3.767102               | 1.172034  | 0.105377  |
| 3             | 7             | 0           | -3.054152               | -0.022253 | 0.117027  |
| 4             | 6             | 0           | -1.774750               | 0.233336  | -0.205105 |
| 5             | 7             | 0           | -1.652668               | 1.539360  | -0.418359 |
| 6             | 6             | 0           | -0.372806               | 2.194057  | -0.730988 |
| 7             | 6             | 0           | 0.317753                | 2.720517  | 0.534217  |
| 8             | 1             | 0           | -3.027822               | 3.208757  | -0.349480 |
| 9             | 1             | 0           | -4.818226               | 1.225363  | 0.321688  |
| 10            | 1             | 0           | 0.255248                | 1.447347  | -1.216150 |
| 11            | 1             | 0           | -0.557437               | 3.002008  | -1.438568 |
| 12            | 1             | 0           | -0.298350               | 3.505404  | 0.985569  |
| 13            | 1             | 0           | 0.389779                | 1.899563  | 1.263760  |
| 14            | 35            | 0           | 0.255390                | -2.318754 | -0.227234 |
| 15            | 1             | 0           | -0.975046               | -0.542975 | -0.265233 |
| 16            | 6             | 0           | -3.504610               | -1.344854 | 0.398805  |
| 17            | 6             | 0           | -4.753571               | -1.660547 | 0.716777  |
| 18            | 1             | 0           | -2.697802               | -2.066824 | 0.319491  |
| 19            | 1             | 0           | -4.999602               | -2.695287 | 0.911895  |
| 20            | 1             | 0           | -5.556197               | -0.937699 | 0.794126  |
| 21            | 7             | 0           | 1.596158                | 3.283300  | 0.134261  |
| 22            | 1             | 0           | 1.973397                | 3.885567  | 0.856263  |
| 23            | 1             | 0           | 2.277931                | 2.541314  | -0.039015 |
| 24            | 6             | 0           | 3.729710                | -0.230369 | -1.047790 |
| 25            | 6             | 0           | 3.666421                | -0.418460 | 0.402666  |
| 26            | 8             | 0           | 3.493281                | 0.901717  | -0.179855 |
| 27            | 1             | 0           | 4.696924                | -0.217841 | -1.543579 |

|    |   |   |          |           |           |
|----|---|---|----------|-----------|-----------|
| 28 | 1 | 0 | 2.880637 | -0.537342 | -1.650896 |
| 29 | 1 | 0 | 2.739821 | -0.843978 | 0.782035  |
| 30 | 6 | 0 | 4.896101 | -0.618546 | 1.245141  |
| 31 | 1 | 0 | 4.766962 | -0.166672 | 2.233016  |
| 32 | 1 | 0 | 5.080362 | -1.687627 | 1.387479  |
| 33 | 1 | 0 | 5.774140 | -0.171064 | 0.772636  |

-----  
Distance matrix (angstroms):

|    |    | 1        | 2        | 3        | 4        | 5        |
|----|----|----------|----------|----------|----------|----------|
| 1  | C  | 0.000000 |          |          |          |          |
| 2  | C  | 1.357798 | 0.000000 |          |          |          |
| 3  | N  | 2.204796 | 1.390954 | 0.000000 |          |          |
| 4  | C  | 2.213982 | 2.224189 | 1.343861 | 0.000000 |          |
| 5  | N  | 1.387741 | 2.209086 | 2.165509 | 1.328939 | 0.000000 |
| 6  | C  | 2.562266 | 3.642154 | 3.580610 | 2.467069 | 1.471194 |
| 7  | C  | 3.341190 | 4.389504 | 4.366529 | 3.333352 | 2.486984 |
| 8  | H  | 1.076452 | 2.213972 | 3.264620 | 3.231743 | 2.163950 |
| 9  | H  | 2.212001 | 1.074474 | 2.170343 | 3.244129 | 3.266041 |
| 10 | H  | 3.365804 | 4.242821 | 3.858654 | 2.572340 | 2.070044 |
| 11 | H  | 2.758699 | 4.004313 | 4.218959 | 3.266318 | 2.092773 |
| 12 | H  | 3.162597 | 4.272188 | 4.559952 | 3.782048 | 2.769570 |
| 13 | H  | 3.606852 | 4.376163 | 4.107192 | 3.101461 | 2.670366 |
| 14 | Br | 5.460748 | 5.336354 | 4.042957 | 3.261154 | 4.308394 |
| 15 | H  | 3.300633 | 3.297603 | 2.177144 | 1.116155 | 2.195162 |
| 16 | C  | 3.603131 | 2.547494 | 1.425337 | 2.418223 | 3.523654 |
| 17 | C  | 4.346939 | 3.061118 | 2.435515 | 3.648291 | 4.598210 |
| 18 | H  | 4.255125 | 3.417520 | 2.085245 | 2.533369 | 3.826394 |
| 19 | H  | 5.407101 | 4.138321 | 3.400251 | 4.497132 | 5.559117 |
| 20 | H  | 4.208018 | 2.850650 | 2.748952 | 4.082783 | 4.779485 |
| 21 | N  | 4.636458 | 5.763925 | 5.705467 | 4.558560 | 3.728482 |
| 22 | H  | 5.271917 | 6.393780 | 6.410442 | 5.339841 | 4.503076 |
| 23 | H  | 5.181031 | 6.199855 | 5.918389 | 4.666752 | 4.073993 |
| 24 | C  | 7.077021 | 7.713541 | 6.886283 | 5.587864 | 5.700712 |
| 25 | C  | 7.064444 | 7.607583 | 6.738299 | 5.513672 | 5.727115 |
| 26 | O  | 6.498999 | 7.271010 | 6.618968 | 5.310323 | 5.190786 |
| 27 | H  | 8.050740 | 8.734446 | 7.929378 | 6.624020 | 6.683651 |
| 28 | H  | 6.517714 | 7.085118 | 6.213903 | 4.935270 | 5.136409 |
| 29 | H  | 6.450772 | 6.845598 | 5.889617 | 4.745146 | 5.139572 |
| 30 | C  | 8.388658 | 8.919435 | 8.052001 | 6.879620 | 7.092965 |
| 31 | H  | 8.364557 | 8.896585 | 8.103584 | 6.992742 | 7.152061 |
| 32 | H  | 8.987243 | 9.386111 | 8.399871 | 7.295135 | 7.681679 |
| 33 | H  | 9.019936 | 9.658388 | 8.853852 | 7.622681 | 7.713721 |
|    |    | 6        | 7        | 8        | 9        | 10       |
| 6  | C  | 0.000000 |          |          |          |          |

|    |    |          |          |          |           |          |
|----|----|----------|----------|----------|-----------|----------|
| 7  | C  | 1.534528 | 0.000000 |          |           |          |
| 8  | H  | 2.867799 | 3.494591 | 0.000000 |           |          |
| 9  | H  | 4.669930 | 5.353403 | 2.754971 | 0.000000  |          |
| 10 | H  | 1.089683 | 2.165329 | 3.825210 | 5.306068  | 0.000000 |
| 11 | H  | 1.089745 | 2.176483 | 2.707704 | 4.940576  | 1.768304 |
| 12 | H  | 2.161421 | 1.095148 | 3.052928 | 5.105741  | 3.064251 |
| 13 | H  | 2.155756 | 1.100630 | 3.999565 | 5.335293  | 2.524391 |
| 14 | Br | 4.584088 | 5.096857 | 6.430225 | 6.213184  | 3.893774 |
| 15 | H  | 2.840944 | 3.600115 | 4.277438 | 4.271010  | 2.525718 |
| 16 | C  | 4.858860 | 5.581759 | 4.639248 | 2.887481  | 4.953887 |
| 17 | C  | 6.012079 | 6.704131 | 5.274963 | 2.913547  | 6.203506 |
| 18 | H  | 4.966308 | 5.662006 | 5.328056 | 3.915954  | 4.840258 |
| 19 | H  | 6.929069 | 7.599200 | 6.351120 | 3.968972  | 7.021642 |
| 20 | H  | 6.245111 | 6.924838 | 4.989350 | 2.333803  | 6.595646 |
| 21 | N  | 2.410793 | 1.452931 | 4.649811 | 6.739031  | 2.644309 |
| 22 | H  | 3.299279 | 2.049930 | 5.188842 | 7.313590  | 3.632058 |
| 23 | H  | 2.761489 | 2.050124 | 5.356574 | 7.226152  | 2.583342 |
| 24 | C  | 4.775861 | 4.780369 | 7.614425 | 8.778487  | 3.861990 |
| 25 | C  | 4.942244 | 4.591739 | 7.650838 | 8.642797  | 4.211639 |
| 26 | O  | 4.113456 | 3.728527 | 6.919247 | 8.332913  | 3.443323 |
| 27 | H  | 5.672717 | 5.668185 | 8.534585 | 9.803067  | 4.754844 |
| 28 | H  | 4.346454 | 4.685802 | 7.115956 | 8.140682  | 3.319739 |
| 29 | H  | 4.605143 | 4.316648 | 7.139376 | 7.849724  | 3.926324 |
| 30 | C  | 6.291041 | 5.711044 | 8.943132 | 9.930806  | 5.644766 |
| 31 | H  | 6.385576 | 5.569312 | 8.878145 | 9.872525  | 5.904013 |
| 32 | H  | 7.020856 | 6.545399 | 9.629863 | 10.373209 | 6.315748 |
| 33 | H  | 6.755711 | 6.179826 | 9.495097 | 10.693530 | 6.085449 |
|    |    | 11       | 12       | 13       | 14        | 15       |
| 11 | H  | 0.000000 |          |          |           |          |
| 12 | H  | 2.489372 | 0.000000 |          |           |          |
| 13 | H  | 3.068417 | 1.769078 | 0.000000 |           |          |
| 14 | Br | 5.517113 | 5.974808 | 4.476083 | 0.000000  |          |
| 15 | H  | 3.757395 | 4.290897 | 3.188504 | 2.160742  | 0.000000 |
| 16 | C  | 5.563900 | 5.843748 | 5.142047 | 3.934210  | 2.735444 |
| 17 | C  | 6.632682 | 6.827026 | 6.279141 | 5.139463  | 4.060857 |
| 18 | H  | 5.776244 | 6.103339 | 5.114393 | 3.013921  | 2.373164 |
| 19 | H  | 7.597150 | 7.781759 | 7.090972 | 5.390207  | 4.713293 |
| 20 | H  | 6.744910 | 6.886419 | 6.604940 | 6.060118  | 4.718579 |
| 21 | N  | 2.681583 | 2.088831 | 2.155423 | 5.771598  | 4.627209 |
| 22 | H  | 3.528746 | 2.306963 | 2.572569 | 6.528331  | 5.437191 |
| 23 | H  | 3.195357 | 2.935382 | 2.382055 | 5.267481  | 4.488415 |
| 24 | C  | 5.383364 | 5.857970 | 4.586394 | 4.135888  | 4.779628 |
| 25 | C  | 5.738530 | 5.608556 | 4.105009 | 3.955127  | 4.690928 |
| 26 | O  | 4.733276 | 4.744878 | 3.565312 | 4.567014  | 4.696847 |



|    |   |          |           |          |           |           |
|----|---|----------|-----------|----------|-----------|-----------|
| 27 | H | 6.163341 | 6.723980  | 5.560220 | 5.086632  | 5.823325  |
| 28 | H | 4.938870 | 5.779334  | 4.542918 | 3.477379  | 4.097119  |
| 29 | H | 5.531239 | 5.309335  | 3.644417 | 3.060390  | 3.871383  |
| 30 | C | 7.074728 | 6.637519  | 5.162185 | 5.157014  | 6.062780  |
| 31 | H | 7.202103 | 6.379471  | 4.936448 | 5.571227  | 6.273237  |
| 32 | H | 7.859008 | 7.487300  | 5.906337 | 5.126986  | 6.380412  |
| 33 | H | 7.419345 | 7.101894  | 5.789650 | 6.005741  | 6.838640  |
|    |   | 16       | 17        | 18       | 19        | 20        |
| 16 | C | 0.000000 |           |          |           |           |
| 17 | C | 1.326903 | 0.000000  |          |           |           |
| 18 | H | 1.085574 | 2.132857  | 0.000000 |           |           |
| 19 | H | 2.078926 | 1.081337  | 2.458494 | 0.000000  |           |
| 20 | H | 2.128629 | 1.082913  | 3.109762 | 1.847372  | 0.000000  |
| 21 | N | 6.892577 | 8.068457  | 6.862669 | 8.936010  | 8.331172  |
| 22 | H | 7.587827 | 8.719572  | 7.585458 | 9.588193  | 8.942177  |
| 23 | H | 6.980814 | 8.226109  | 6.791273 | 9.016026  | 8.612271  |
| 24 | C | 7.461240 | 8.782093  | 6.823118 | 9.279929  | 9.493210  |
| 25 | C | 7.230623 | 8.516907  | 6.574752 | 8.974588  | 9.245514  |
| 26 | O | 7.372408 | 8.682149  | 6.884119 | 9.287595  | 9.285749  |
| 27 | H | 8.503421 | 9.823566  | 7.846766 | 10.304839 | 10.540851 |
| 28 | H | 6.754608 | 8.071468  | 6.110706 | 8.562873  | 8.793098  |
| 29 | H | 6.276198 | 7.538034  | 5.592588 | 7.958824  | 8.296556  |
| 30 | C | 8.474417 | 9.720138  | 7.785994 | 10.116761 | 10.466890 |
| 31 | H | 8.554025 | 9.755572  | 7.936930 | 10.174725 | 10.451435 |
| 32 | H | 8.648510 | 9.856816  | 7.860295 | 10.141363 | 10.679459 |
| 33 | H | 9.360168 | 10.632703 | 8.693277 | 11.066374 | 11.356264 |
|    |   | 21       | 22        | 23       | 24        | 25        |
| 21 | N | 0.000000 |           |          |           |           |
| 22 | H | 1.013076 | 0.000000  |          |           |           |
| 23 | H | 1.022440 | 1.643557  | 0.000000 |           |           |
| 24 | C | 4.277284 | 4.863227  | 3.287478 | 0.000000  |           |
| 25 | C | 4.249831 | 4.647228  | 3.298977 | 1.463969  | 0.000000  |
| 26 | O | 3.060994 | 3.505274  | 2.045773 | 1.445970  | 1.453333  |
| 27 | H | 4.968691 | 5.478576  | 3.965876 | 1.086953  | 2.211347  |
| 28 | H | 4.408399 | 5.164402  | 3.526973 | 1.085769  | 2.201978  |
| 29 | H | 4.331512 | 4.791817  | 3.513924 | 2.169021  | 1.087922  |
| 30 | C | 5.229539 | 5.383349  | 4.299834 | 2.601668  | 1.503964  |
| 31 | H | 5.134304 | 5.110782  | 4.323261 | 3.441458  | 2.150527  |
| 32 | H | 6.198416 | 6.402805  | 5.269957 | 3.142992  | 2.140063  |
| 33 | H | 5.458543 | 5.559576  | 4.498805 | 2.738094  | 2.154196  |
|    |   | 26       | 27        | 28       | 29        | 30        |
| 26 | O | 0.000000 |           |          |           |           |
| 27 | H | 2.135863 | 0.000000  |          |           |           |
| 28 | H | 2.147134 | 1.847294  | 0.000000 |           |           |

```

29 H 2.130818 3.103350 2.456218 0.000000
30 C 2.511915 2.824392 3.529265 2.216941 0.000000
31 H 2.930131 3.777591 4.333635 2.583291 1.093967
32 H 3.417612 3.301272 3.923477 2.560555 1.094143
33 H 2.694516 2.554884 3.792100 3.108053 1.092911
      31      32      33
31 H 0.000000
32 H 1.768179 0.000000
33 H 1.774018 1.777449 0.000000

```

Stoichiometry C10H18BrN3O

Framework group C1[X(C10H18BrN3O)]

Deg. of freedom 93

Full point group C1 NOp 1

Largest Abelian subgroup C1 NOp 1

Largest concise Abelian subgroup C1 NOp 1

Standard orientation:

| -----  |        |        |                         |           |           |  |
|--------|--------|--------|-------------------------|-----------|-----------|--|
| Center | Atomic | Atomic | Coordinates (Angstroms) |           |           |  |
| Number | Number | Type   | X                       | Y         | Z         |  |
| -----  |        |        |                         |           |           |  |
| 1      | 6      | 0      | -2.834406               | 2.214057  | -0.201558 |  |
| 2      | 6      | 0      | -3.727417               | 1.242957  | 0.119551  |  |
| 3      | 7      | 0      | -3.027932               | 0.040687  | 0.114886  |  |
| 4      | 6      | 0      | -1.745985               | 0.286093  | -0.205038 |  |
| 5      | 7      | 0      | -1.609389               | 1.593350  | -0.401257 |  |
| 6      | 6      | 0      | -0.322487               | 2.237675  | -0.706446 |  |
| 7      | 6      | 0      | 0.374919                | 2.739695  | 0.564922  |  |
| 8      | 1      | 0      | -2.965631               | 3.277041  | -0.309233 |  |
| 9      | 1      | 0      | -4.777708               | 1.305247  | 0.337506  |  |
| 10     | 1      | 0      | 0.296759                | 1.490389  | -1.201933 |  |
| 11     | 1      | 0      | -0.498565               | 3.056866  | -1.403200 |  |
| 12     | 1      | 0      | -0.231973               | 3.525462  | 1.027092  |  |
| 13     | 1      | 0      | 0.438270                | 1.908480  | 1.283570  |  |
| 14     | 35     | 0      | 0.255313                | -2.288131 | -0.262492 |  |
| 15     | 1      | 0      | -0.955106               | -0.498296 | -0.276074 |  |
| 16     | 6      | 0      | -3.493017               | -1.280354 | 0.379707  |  |
| 17     | 6      | 0      | -4.745203               | -1.586144 | 0.694655  |  |
| 18     | 1      | 0      | -2.694439               | -2.010239 | 0.290193  |  |
| 19     | 1      | 0      | -5.002705               | -2.620526 | 0.876412  |  |
| 20     | 1      | 0      | -5.539591               | -0.855403 | 0.782211  |  |
| 21     | 7      | 0      | 1.659264                | 3.293282  | 0.171210  |  |
| 22     | 1      | 0      | 2.043806                | 3.881746  | 0.900703  |  |
| 23     | 1      | 0      | 2.332518                | 2.546022  | -0.012405 |  |
| 24     | 6      | 0      | 3.752265                | -0.228316 | -1.058770 |  |

|    |   |   |          |           |           |
|----|---|---|----------|-----------|-----------|
| 25 | 6 | 0 | 3.687979 | -0.434703 | 0.389152  |
| 26 | 8 | 0 | 3.529247 | 0.894867  | -0.175848 |
| 27 | 1 | 0 | 4.719177 | -0.220148 | -1.555238 |
| 28 | 1 | 0 | 2.899331 | -0.517791 | -1.665073 |
| 29 | 1 | 0 | 2.756944 | -0.854728 | 0.763756  |
| 30 | 6 | 0 | 4.915977 | -0.659629 | 1.227804  |
| 31 | 1 | 0 | 4.792686 | -0.219336 | 2.221638  |
| 32 | 1 | 0 | 5.088316 | -1.732488 | 1.355941  |
| 33 | 1 | 0 | 5.798630 | -0.215875 | 0.760404  |

-----

Rotational constants (GHZ):      0.4781678      0.2453740      0.1712129

Standard basis: 6-311++G(d,p) (5D, 7F)

There are    499 symmetry adapted cartesian basis functions of A    symmetry.

There are    482 symmetry adapted basis functions of A    symmetry.

482 basis functions,    760 primitive gaussians,    499 cartesian basis functions

71 alpha electrons      71 beta electrons

nuclear repulsion energy      1292.5325678868 Hartrees.

NAtoms=    33 NActive=    33 NUniq=    33 SFac= 1.00D+00 NAtFMM=    60 NAOKFM=F

Big=F

Integral buffers will be    131072 words long.

Raffenetti 2 integral format.

Two-electron integral symmetry is turned on.

One-electron integrals computed using PRISM.

NBasis=    482 RedAO= T EigKep=    3.86D-06    NBF=    482

NBsUse=    482 1.00D-06 EigRej= -1.00D+00    NBFU=    482

Initial      guess      from      the      checkpoint      file:

"/home/suqian/liuwen/qianmengshijie/nh2po/nh2po.chk"

B after Tr=    0.000000    0.000000    0.000000

Rot=    0.999974    0.004581    0.000066    0.005630 Ang=    0.83 deg.

ExpMin= 3.50D-02 ExpMax= 4.40D+05 ExpMxC= 1.51D+04 IAcc=3 IRadAn=      5 AccDes=

0.00D+00

Harris functional with IExCor=    402 and IRadAn=      5 diagonalized for initial guess.

HarFok: IExCor=    402 AccDes= 0.00D+00 IRadAn=      5 IDoV= 1 UseB2=F ITyADJ=14

ICtDFT= 3500011 ScaDFX= 1.000000 1.000000 1.000000 1.000000

FoFCou: FMM=F IPFlag=      0 FMFlag=      100000 FMFlg1=      0

NFxFlg=      0 DoJE=T BraDBF=F KetDBF=T FulRan=T

wScrn= 0.000000 ICntrl=      500 IOpCl= 0 I1Cent=    200000004 NGrid=

0

NMat0=    1 NMatS0=      1 NMatT0=    0 NMatD0=    1 NMtDS0=    0

NMtDT0=    0

Petite list used in FoFCou.

Requested convergence on RMS density matrix=1.00D-08 within 128 cycles.

Requested convergence on MAX density matrix=1.00D-06.

Requested convergence on      energy=1.00D-06.

No special actions if energy rises.

SCF Done: E(RB3LYP) = -3205.64659557 A.U. after 12 cycles

NFock= 12 Conv=0.73D-08 -V/T= 2.0018

Calling FoFJK, ICntrl= 2127 FMM=F ISym2X=0 l1Cent= 0 IOpClX= 0 NMat=1 NMatS=1

NMatT=0.

\*\*\*\*\* Axes restored to original set \*\*\*\*\*

| Center<br>Number | Atomic<br>Number | Forces (Hartrees/Bohr) |              |              |
|------------------|------------------|------------------------|--------------|--------------|
|                  |                  | X                      | Y            | Z            |
| 1                | 6                | -0.000033607           | -0.000075718 | 0.000272246  |
| 2                | 6                | 0.000587872            | -0.000496933 | 0.000017020  |
| 3                | 7                | -0.001850715           | -0.001214089 | 0.000336917  |
| 4                | 6                | 0.000398008            | -0.001997892 | 0.000631536  |
| 5                | 7                | -0.000494503           | 0.002083350  | -0.002200685 |
| 6                | 6                | -0.000086973           | 0.000809607  | 0.002170605  |
| 7                | 6                | 0.000489363            | 0.000218533  | -0.000957617 |
| 8                | 1                | 0.000188724            | -0.000027330 | -0.000086048 |
| 9                | 1                | -0.000156282           | -0.000000233 | 0.000084049  |
| 10               | 1                | 0.000339375            | -0.000138069 | -0.000265095 |
| 11               | 1                | -0.000069174           | 0.000480031  | 0.000190108  |
| 12               | 1                | -0.000033346           | -0.000069902 | -0.000205956 |
| 13               | 1                | -0.000491601           | -0.000347879 | -0.000332696 |
| 14               | 35               | 0.000708251            | -0.000405909 | 0.000132557  |
| 15               | 1                | -0.001036647           | 0.000205449  | 0.000067303  |
| 16               | 6                | -0.001151666           | -0.000958858 | 0.000033432  |
| 17               | 6                | 0.000474930            | 0.000716347  | -0.000200233 |
| 18               | 1                | 0.000647367            | -0.000135399 | 0.000055708  |
| 19               | 1                | 0.000119657            | 0.000073052  | 0.000039743  |
| 20               | 1                | -0.000160539           | 0.000130678  | 0.000020765  |
| 21               | 7                | 0.002913737            | 0.000468079  | -0.000168363 |
| 22               | 1                | 0.000153735            | 0.000037467  | -0.000186134 |
| 23               | 1                | -0.000992190           | 0.001249805  | 0.000807505  |
| 24               | 6                | 0.000112401            | 0.000072830  | 0.000274509  |
| 25               | 6                | 0.000221068            | -0.000154148 | -0.000273288 |
| 26               | 8                | -0.000670537           | -0.000997680 | -0.000019378 |
| 27               | 1                | 0.000137621            | 0.000113271  | -0.000271038 |
| 28               | 1                | -0.000011136           | -0.000034344 | -0.000083287 |
| 29               | 1                | -0.000019861           | 0.000079308  | 0.000097733  |
| 30               | 6                | -0.000042176           | 0.000432600  | -0.000043584 |
| 31               | 1                | 0.000028794            | -0.000019311 | 0.000058892  |
| 32               | 1                | -0.000092524           | -0.000038406 | -0.000047636 |
| 33               | 1                | -0.000127424           | -0.000058306 | 0.000050410  |

Cartesian Forces: Max 0.002913737 RMS 0.000686759

GradGradGradGradGradGradGradGradGradGradGradGradGradGradGradGradGradGradGrad  
Berny optimization.

Using GEDIIS/GDIIS optimizer.

FormGI is forming the generalized inverse of G from B-inverse, IUseBI=4.

Internal Forces: Max 0.003492240 RMS 0.000636916

Search for a local minimum.

Step number 7 out of a maximum of 172

All quantities printed in internal units (Hartrees-Bohrs-Radians)

Mixed Optimization -- En-DIIS/RFO-DIIS

Swapping is turned off.

Update second derivatives using D2CorX and points 2 3 1 4 5  
6 7

DE= -1.49D-04 DEPred=-2.60D-04 R= 5.72D-01

TightC=F SS= 1.41D+00 RLast= 1.84D-01 DXNew= 2.1213D-01 5.5149D-01

Trust test= 5.72D-01 RLast= 1.84D-01 DXMaxT set to 2.12D-01

ITU= 1 -1 1 0 0 -1 0

|                 |         |         |         |         |         |
|-----------------|---------|---------|---------|---------|---------|
| Eigenvalues --- | 0.00207 | 0.00230 | 0.00238 | 0.00373 | 0.00555 |
| Eigenvalues --- | 0.00723 | 0.00819 | 0.01307 | 0.01405 | 0.01487 |
| Eigenvalues --- | 0.01776 | 0.01868 | 0.02097 | 0.02163 | 0.02304 |
| Eigenvalues --- | 0.02348 | 0.02371 | 0.02393 | 0.02634 | 0.02997 |
| Eigenvalues --- | 0.03071 | 0.03079 | 0.03117 | 0.03253 | 0.03961 |
| Eigenvalues --- | 0.04087 | 0.04440 | 0.04452 | 0.04738 | 0.05426 |
| Eigenvalues --- | 0.05725 | 0.05765 | 0.05907 | 0.07785 | 0.08658 |
| Eigenvalues --- | 0.09345 | 0.10872 | 0.11460 | 0.12305 | 0.12372 |
| Eigenvalues --- | 0.12691 | 0.12768 | 0.13919 | 0.15526 | 0.15999 |
| Eigenvalues --- | 0.16000 | 0.16000 | 0.16000 | 0.16000 | 0.16009 |
| Eigenvalues --- | 0.16016 | 0.16030 | 0.17328 | 0.21192 | 0.21753 |
| Eigenvalues --- | 0.22373 | 0.22984 | 0.23234 | 0.25049 | 0.28114 |
| Eigenvalues --- | 0.29047 | 0.29670 | 0.31629 | 0.32069 | 0.32513 |
| Eigenvalues --- | 0.33657 | 0.34273 | 0.34310 | 0.34339 | 0.34540 |
| Eigenvalues --- | 0.34657 | 0.34708 | 0.35032 | 0.35067 | 0.35219 |
| Eigenvalues --- | 0.35283 | 0.35605 | 0.35815 | 0.35902 | 0.36416 |
| Eigenvalues --- | 0.36619 | 0.38048 | 0.39939 | 0.41901 | 0.42377 |
| Eigenvalues --- | 0.44938 | 0.45464 | 0.47084 | 0.49382 | 0.54476 |
| Eigenvalues --- | 0.59890 | 0.62463 | 0.91152 |         |         |

En-DIIS/RFO-DIIS IScMMF= 0 using points: 7 6 5 4

RFO step: Lambda=-9.53939483D-05.

DidBck=T Rises=F RFO-DIIS coefs: 0.69214 0.08680 0.00121 0.21984

Iteration 1 RMS(Cart)= 0.06201913 RMS(Int)= 0.00104858

Iteration 2 RMS(Cart)= 0.00253850 RMS(Int)= 0.00003860

Iteration 3 RMS(Cart)= 0.00000309 RMS(Int)= 0.00003858

Iteration 4 RMS(Cart)= 0.00000000 RMS(Int)= 0.00003858

| Variable | Old X   | -DE/DX   | Delta X<br>(Linear) | Delta X<br>(Quad) | Delta X<br>(Total) | New X   |
|----------|---------|----------|---------------------|-------------------|--------------------|---------|
| R1       | 2.56587 | 0.00079  | -0.00009            | 0.00034           | 0.00025            | 2.56612 |
| R2       | 2.62245 | -0.00024 | -0.00074            | 0.00067           | -0.00007           | 2.62238 |
| R3       | 2.03420 | -0.00004 | 0.00004             | -0.00011          | -0.00007           | 2.03412 |
| R4       | 2.62852 | -0.00010 | 0.00024             | -0.00082          | -0.00058           | 2.62795 |
| R5       | 2.03046 | 0.00017  | 0.00019             | 0.00009           | 0.00027            | 2.03074 |
| R6       | 2.53953 | 0.00141  | 0.00107             | 0.00071           | 0.00178            | 2.54131 |
| R7       | 2.69350 | 0.00016  | -0.00101            | 0.00121           | 0.00020            | 2.69370 |
| R8       | 2.51133 | 0.00349  | 0.00416             | -0.00037          | 0.00380            | 2.51513 |
| R9       | 2.10923 | -0.00011 | 0.00098             | -0.00145          | -0.00047           | 2.10876 |
| R10      | 2.78015 | 0.00230  | 0.00460             | -0.00055          | 0.00405            | 2.78420 |
| R11      | 2.89984 | -0.00004 | -0.00124            | 0.00174           | 0.00049            | 2.90033 |
| R12      | 2.05920 | 0.00041  | 0.00080             | -0.00010          | 0.00070            | 2.05990 |
| R13      | 2.05932 | 0.00024  | 0.00054             | -0.00012          | 0.00043            | 2.05975 |
| R14      | 2.06953 | -0.00012 | -0.00017            | 0.00004           | -0.00013           | 2.06940 |
| R15      | 2.07989 | 0.00000  | -0.00015            | 0.00017           | 0.00001            | 2.07990 |
| R16      | 2.74564 | 0.00179  | 0.00370             | -0.00069          | 0.00301            | 2.74865 |
| R17      | 4.08321 | 0.00074  | -0.00542            | 0.01361           | 0.00819            | 4.09140 |
| R18      | 2.50748 | -0.00066 | -0.00046            | -0.00015          | -0.00061           | 2.50688 |
| R19      | 2.05144 | 0.00056  | -0.00050            | 0.00123           | 0.00073            | 2.05217 |
| R20      | 2.04343 | -0.00009 | -0.00019            | 0.00007           | -0.00012           | 2.04331 |
| R21      | 2.04641 | 0.00021  | 0.00006             | 0.00022           | 0.00028            | 2.04669 |
| R22      | 1.91444 | -0.00006 | -0.00001            | -0.00008          | -0.00008           | 1.91435 |
| R23      | 1.93213 | -0.00153 | -0.00146            | -0.00040          | -0.00186           | 1.93027 |
| R24      | 3.86595 | 0.00024  | -0.00353            | 0.00655           | 0.00302            | 3.86897 |
| R25      | 2.76650 | 0.00007  | 0.00046             | 0.00037           | 0.00083            | 2.76733 |
| R26      | 2.73249 | -0.00002 | -0.00070            | 0.00020           | -0.00050           | 2.73198 |
| R27      | 2.05404 | 0.00025  | 0.00041             | 0.00004           | 0.00045            | 2.05449 |
| R28      | 2.05181 | 0.00006  | 0.00011             | -0.00003          | 0.00007            | 2.05188 |
| R29      | 2.74640 | -0.00035 | -0.00143            | 0.00029           | -0.00114           | 2.74526 |
| R30      | 2.05587 | 0.00002  | -0.00004            | -0.00005          | -0.00009           | 2.05578 |
| R31      | 2.84208 | -0.00022 | -0.00029            | 0.00005           | -0.00024           | 2.84184 |
| R32      | 2.06730 | 0.00004  | 0.00009             | -0.00001          | 0.00008            | 2.06738 |
| R33      | 2.06763 | 0.00002  | 0.00012             | -0.00007          | 0.00006            | 2.06769 |
| R34      | 2.06530 | -0.00015 | -0.00024            | 0.00003           | -0.00021           | 2.06510 |
| A1       | 1.86995 | 0.00053  | 0.00137             | 0.00010           | 0.00146            | 1.87141 |
| A2       | 2.27803 | -0.00006 | -0.00017            | 0.00014           | -0.00003           | 2.27800 |
| A3       | 2.13519 | -0.00047 | -0.00121            | -0.00024          | -0.00144           | 2.13374 |
| A4       | 1.86153 | 0.00096  | 0.00043             | 0.00051           | 0.00094            | 1.86246 |
| A5       | 2.27759 | -0.00047 | -0.00040            | -0.00011          | -0.00051           | 2.27708 |
| A6       | 2.14403 | -0.00049 | -0.00003            | -0.00039          | -0.00041           | 2.14362 |
| A7       | 1.89935 | -0.00076 | -0.00040            | -0.00076          | -0.00116           | 1.89819 |
| A8       | 2.26061 | -0.00022 | -0.00153            | 0.00060           | -0.00092           | 2.25969 |

|     |         |          |          |          |          |         |
|-----|---------|----------|----------|----------|----------|---------|
| A9  | 2.12321 | 0.00099  | 0.00192  | 0.00015  | 0.00209  | 2.12530 |
| A10 | 1.88897 | 0.00031  | 0.00002  | 0.00105  | 0.00107  | 1.89004 |
| A11 | 2.16850 | 0.00005  | 0.00773  | -0.01029 | -0.00256 | 2.16594 |
| A12 | 2.22568 | -0.00036 | -0.00774 | 0.00924  | 0.00150  | 2.22717 |
| A13 | 1.90498 | -0.00103 | -0.00142 | -0.00090 | -0.00232 | 1.90266 |
| A14 | 2.22197 | 0.00041  | -0.00419 | 0.00207  | -0.00211 | 2.21987 |
| A15 | 2.15478 | 0.00061  | 0.00575  | -0.00156 | 0.00419  | 2.15897 |
| A16 | 1.94868 | 0.00286  | 0.00667  | 0.00034  | 0.00700  | 1.95568 |
| A17 | 1.86614 | -0.00105 | -0.00171 | 0.00174  | 0.00004  | 1.86618 |
| A18 | 1.89708 | -0.00056 | -0.00348 | 0.00110  | -0.00238 | 1.89470 |
| A19 | 1.92071 | -0.00090 | -0.00066 | -0.00022 | -0.00088 | 1.91982 |
| A20 | 1.93610 | -0.00087 | -0.00216 | -0.00128 | -0.00346 | 1.93264 |
| A21 | 1.89295 | 0.00047  | 0.00122  | -0.00162 | -0.00039 | 1.89257 |
| A22 | 1.90977 | -0.00017 | -0.00024 | -0.00166 | -0.00191 | 1.90786 |
| A23 | 1.89659 | -0.00104 | -0.00219 | -0.00124 | -0.00343 | 1.89315 |
| A24 | 1.87746 | 0.00113  | 0.00165  | 0.00290  | 0.00455  | 1.88202 |
| A25 | 1.87362 | 0.00026  | 0.00091  | -0.00094 | -0.00003 | 1.87358 |
| A26 | 1.90799 | 0.00001  | -0.00118 | 0.00041  | -0.00076 | 1.90723 |
| A27 | 1.99742 | -0.00021 | 0.00098  | 0.00038  | 0.00135  | 1.99878 |
| A28 | 2.17198 | -0.00099 | -0.00052 | -0.00189 | -0.00240 | 2.16957 |
| A29 | 1.94744 | 0.00019  | 0.00103  | -0.00076 | 0.00028  | 1.94771 |
| A30 | 2.16377 | 0.00080  | -0.00053 | 0.00265  | 0.00213  | 2.16590 |
| A31 | 2.07724 | -0.00012 | 0.00043  | -0.00077 | -0.00034 | 2.07689 |
| A32 | 2.16029 | 0.00007  | -0.00054 | 0.00070  | 0.00016  | 2.16045 |
| A33 | 2.04566 | 0.00005  | 0.00011  | 0.00007  | 0.00018  | 2.04584 |
| A34 | 1.94092 | 0.00077  | -0.00079 | 0.00085  | -0.00021 | 1.94071 |
| A35 | 1.93079 | -0.00252 | -0.00133 | -0.00043 | -0.00182 | 1.92897 |
| A36 | 1.87958 | 0.00080  | -0.00010 | -0.00008 | -0.00011 | 1.87947 |
| A37 | 2.08503 | -0.00003 | 0.00111  | -0.00079 | 0.00035  | 2.08537 |
| A38 | 2.07169 | 0.00020  | -0.00118 | 0.00209  | 0.00089  | 2.07257 |
| A39 | 1.99354 | 0.00002  | 0.00004  | -0.00036 | -0.00033 | 1.99320 |
| A40 | 2.01186 | 0.00007  | -0.00042 | -0.00008 | -0.00049 | 2.01137 |
| A41 | 2.03281 | -0.00012 | 0.00042  | -0.00074 | -0.00032 | 2.03249 |
| A42 | 2.01813 | 0.00024  | -0.00050 | 0.00198  | 0.00146  | 2.01959 |
| A43 | 2.13737 | -0.00016 | 0.00067  | -0.00051 | 0.00019  | 2.13756 |
| A44 | 1.97534 | 0.00004  | -0.00098 | -0.00024 | -0.00120 | 1.97413 |
| A45 | 2.02949 | -0.00010 | -0.00104 | 0.00011  | -0.00094 | 2.02855 |
| A46 | 2.03646 | -0.00004 | 0.00084  | -0.00098 | -0.00013 | 2.03633 |
| A47 | 2.44330 | 0.00021  | -0.00343 | 0.00660  | 0.00319  | 2.44649 |
| A48 | 2.45153 | 0.00011  | -0.00355 | 0.00705  | 0.00352  | 2.45505 |
| A49 | 1.93304 | 0.00010  | -0.00005 | 0.00042  | 0.00037  | 1.93341 |
| A50 | 1.91831 | -0.00018 | 0.00013  | -0.00084 | -0.00071 | 1.91760 |
| A51 | 1.93930 | 0.00000  | -0.00014 | 0.00038  | 0.00024  | 1.93954 |
| A52 | 1.88179 | 0.00002  | -0.00017 | 0.00008  | -0.00009 | 1.88170 |

|     |          |          |          |          |          |          |
|-----|----------|----------|----------|----------|----------|----------|
| A53 | 1.89244  | -0.00001 | 0.00018  | -0.00009 | 0.00010  | 1.89253  |
| A54 | 1.89759  | 0.00007  | 0.00004  | 0.00005  | 0.00009  | 1.89768  |
| A55 | 3.31261  | -0.00151 | -0.04938 | 0.06457  | 0.01520  | 3.32781  |
| A56 | 3.03749  | -0.00164 | 0.02668  | -0.05196 | -0.02534 | 3.01215  |
| A57 | 3.00981  | -0.00008 | 0.02447  | -0.06323 | -0.03876 | 2.97105  |
| A58 | 3.24650  | -0.00064 | -0.02078 | -0.05616 | -0.07684 | 3.16965  |
| D1  | 0.00350  | 0.00007  | -0.00031 | 0.00229  | 0.00198  | 0.00548  |
| D2  | -3.12832 | 0.00002  | -0.00053 | 0.00120  | 0.00067  | -3.12765 |
| D3  | 3.13776  | -0.00002 | -0.00203 | 0.00216  | 0.00012  | 3.13788  |
| D4  | 0.00594  | -0.00007 | -0.00225 | 0.00107  | -0.00119 | 0.00475  |
| D5  | -0.00326 | -0.00014 | -0.00059 | -0.00325 | -0.00383 | -0.00709 |
| D6  | -3.08822 | -0.00002 | -0.00385 | 0.00445  | 0.00055  | -3.08768 |
| D7  | -3.13826 | -0.00006 | 0.00095  | -0.00313 | -0.00217 | -3.14042 |
| D8  | 0.05997  | 0.00005  | -0.00231 | 0.00457  | 0.00221  | 0.06218  |
| D9  | -0.00260 | 0.00003  | 0.00111  | -0.00059 | 0.00052  | -0.00208 |
| D10 | -3.13724 | -0.00009 | -0.00358 | 0.00179  | -0.00181 | -3.13905 |
| D11 | 3.13015  | 0.00007  | 0.00130  | 0.00039  | 0.00170  | 3.13185  |
| D12 | -0.00449 | -0.00005 | -0.00338 | 0.00277  | -0.00063 | -0.00512 |
| D13 | 0.00059  | -0.00011 | -0.00148 | -0.00143 | -0.00292 | -0.00233 |
| D14 | 3.13388  | -0.00024 | -0.00015 | -0.00211 | -0.00229 | 3.13159  |
| D15 | 3.13588  | -0.00001 | 0.00279  | -0.00358 | -0.00081 | 3.13507  |
| D16 | -0.01401 | -0.00014 | 0.00412  | -0.00426 | -0.00019 | -0.01420 |
| D17 | -0.00284 | 0.00003  | -0.00103 | 0.00329  | 0.00227  | -0.00057 |
| D18 | 3.13692  | 0.00018  | 0.00135  | 0.00420  | 0.00555  | -3.14071 |
| D19 | -3.13670 | -0.00009 | -0.00625 | 0.00594  | -0.00031 | -3.13701 |
| D20 | 0.00307  | 0.00005  | -0.00387 | 0.00684  | 0.00296  | 0.00603  |
| D21 | 0.00164  | 0.00015  | 0.00128  | 0.00288  | 0.00416  | 0.00580  |
| D22 | 3.08924  | 0.00004  | 0.00409  | -0.00431 | -0.00026 | 3.08898  |
| D23 | -3.13131 | 0.00028  | -0.00016 | 0.00371  | 0.00354  | -3.12777 |
| D24 | -0.04370 | 0.00017  | 0.00265  | -0.00348 | -0.00089 | -0.04460 |
| D25 | 1.45147  | 0.00031  | -0.00511 | 0.00825  | 0.00315  | 1.45462  |
| D26 | -2.73002 | 0.00021  | -0.00309 | 0.00929  | 0.00621  | -2.72381 |
| D27 | -0.68985 | -0.00008 | -0.00431 | 0.00888  | 0.00456  | -0.68530 |
| D28 | -1.62598 | 0.00049  | -0.00857 | 0.01692  | 0.00835  | -1.61763 |
| D29 | 0.47571  | 0.00039  | -0.00656 | 0.01796  | 0.01142  | 0.48713  |
| D30 | 2.51588  | 0.00010  | -0.00778 | 0.01755  | 0.00976  | 2.52564  |
| D31 | -1.12147 | -0.00019 | 0.00171  | -0.00275 | -0.00104 | -1.12252 |
| D32 | 0.91931  | -0.00057 | 0.00144  | -0.00551 | -0.00408 | 0.91523  |
| D33 | 3.09069  | -0.00076 | 0.00231  | -0.00400 | -0.00169 | 3.08900  |
| D34 | 3.09228  | -0.00011 | 0.00004  | -0.00499 | -0.00495 | 3.08732  |
| D35 | -1.15013 | -0.00049 | -0.00024 | -0.00775 | -0.00799 | -1.15811 |
| D36 | 1.02126  | -0.00068 | 0.00063  | -0.00624 | -0.00560 | 1.01566  |
| D37 | 0.99740  | 0.00045  | 0.00032  | -0.00200 | -0.00168 | 0.99571  |
| D38 | 3.03818  | 0.00007  | 0.00004  | -0.00476 | -0.00472 | 3.03346  |



|     |          |          |          |          |          |          |
|-----|----------|----------|----------|----------|----------|----------|
| D39 | -1.07362 | -0.00011 | 0.00092  | -0.00325 | -0.00233 | -1.07595 |
| D40 | 2.84480  | 0.00057  | 0.00617  | -0.01012 | -0.00388 | 2.84093  |
| D41 | -1.35050 | 0.00041  | 0.00467  | -0.00996 | -0.00535 | -1.35585 |
| D42 | 0.77264  | 0.00012  | 0.00618  | -0.01003 | -0.00379 | 0.76886  |
| D43 | 2.86053  | -0.00004 | 0.00467  | -0.00986 | -0.00526 | 2.85527  |
| D44 | -1.32925 | -0.00008 | 0.00521  | -0.00937 | -0.00410 | -1.33335 |
| D45 | 0.75863  | -0.00023 | 0.00370  | -0.00921 | -0.00557 | 0.75306  |
| D46 | 3.13958  | 0.00015  | 0.00181  | 0.00101  | 0.00282  | -3.14078 |
| D47 | -0.00105 | 0.00008  | 0.00111  | 0.00075  | 0.00186  | 0.00081  |
| D48 | 0.00004  | -0.00001 | -0.00085 | 0.00000  | -0.00085 | -0.00081 |
| D49 | -3.14060 | -0.00008 | -0.00155 | -0.00026 | -0.00181 | 3.14078  |
| D50 | 1.23012  | -0.00006 | 0.00069  | -0.02336 | -0.02280 | 1.20731  |
| D51 | -0.53078 | 0.00021  | -0.00541 | -0.00984 | -0.01543 | -0.54621 |
| D52 | -2.97559 | -0.00009 | 0.00862  | -0.01013 | -0.00133 | -2.97691 |
| D53 | 1.54670  | 0.00019  | 0.00253  | 0.00339  | 0.00605  | 1.55275  |
| D54 | -2.69701 | -0.00009 | -0.00169 | -0.00137 | -0.00306 | -2.70008 |
| D55 | -0.01678 | -0.00001 | 0.00095  | -0.00042 | 0.00054  | -0.01624 |
| D56 | -0.02239 | 0.00002  | -0.00077 | -0.00023 | -0.00100 | -0.02338 |
| D57 | 2.65785  | 0.00010  | 0.00188  | 0.00072  | 0.00260  | 2.66045  |
| D58 | 1.98611  | -0.00030 | 0.00502  | -0.01320 | -0.00817 | 1.97794  |
| D59 | -0.43711 | -0.00023 | 0.00479  | -0.01144 | -0.00664 | -0.44375 |
| D60 | 0.47632  | 0.00023  | -0.00592 | 0.01111  | 0.00516  | 0.48148  |
| D61 | -1.95193 | 0.00038  | -0.00485 | 0.01289  | 0.00803  | -1.94391 |
| D62 | 2.55366  | -0.00003 | -0.00030 | -0.00087 | -0.00116 | 2.55250  |
| D63 | -1.65201 | -0.00006 | -0.00046 | -0.00104 | -0.00149 | -1.65350 |
| D64 | 0.44916  | -0.00008 | -0.00041 | -0.00129 | -0.00169 | 0.44747  |
| D65 | 1.34925  | 0.00000  | 0.00014  | -0.00071 | -0.00057 | 1.34868  |
| D66 | -2.85642 | -0.00003 | -0.00002 | -0.00088 | -0.00090 | -2.85732 |
| D67 | -0.75526 | -0.00005 | 0.00003  | -0.00113 | -0.00110 | -0.75635 |
| D68 | -1.05379 | 0.00011  | 0.00205  | 0.00082  | 0.00286  | -1.05092 |
| D69 | 1.02373  | 0.00009  | 0.00189  | 0.00064  | 0.00253  | 1.02626  |
| D70 | 3.12490  | 0.00006  | 0.00194  | 0.00039  | 0.00233  | 3.12723  |

| Item                 | Value    | Threshold | Converged? |
|----------------------|----------|-----------|------------|
| Maximum Force        | 0.003492 | 0.000450  | NO         |
| RMS Force            | 0.000637 | 0.000300  | NO         |
| Maximum Displacement | 0.423735 | 0.001800  | NO         |
| RMS Displacement     | 0.063694 | 0.001200  | NO         |

Predicted change in Energy=-7.894560D-05

GradGradGradGradGradGradGradGradGradGradGradGradGradGradGradGradGradGradGrad

Input orientation:

| Center Number | Atomic Number | Atomic Type | Coordinates (Angstroms) |   |   |
|---------------|---------------|-------------|-------------------------|---|---|
|               |               |             | X                       | Y | Z |
| -----         |               |             |                         |   |   |

---

|    |    |   |           |           |           |
|----|----|---|-----------|-----------|-----------|
| 1  | 6  | 0 | -2.869902 | 2.131118  | -0.284461 |
| 2  | 6  | 0 | -3.757450 | 1.156978  | 0.043083  |
| 3  | 7  | 0 | -3.039893 | -0.032495 | 0.107681  |
| 4  | 6  | 0 | -1.750991 | 0.223950  | -0.177734 |
| 5  | 7  | 0 | -1.628479 | 1.526482  | -0.422321 |
| 6  | 6  | 0 | -0.343152 | 2.187004  | -0.709313 |
| 7  | 6  | 0 | 0.313060  | 2.746964  | 0.560098  |
| 8  | 1  | 0 | -3.014748 | 3.186845  | -0.436528 |
| 9  | 1  | 0 | -4.815400 | 1.209554  | 0.224149  |
| 10 | 1  | 0 | 0.304372  | 1.437219  | -1.164011 |
| 11 | 1  | 0 | -0.515576 | 2.980299  | -1.436629 |
| 12 | 1  | 0 | -0.320133 | 3.537382  | 0.976631  |
| 13 | 1  | 0 | 0.367886  | 1.941804  | 1.308505  |
| 14 | 35 | 0 | 0.245318  | -2.347316 | -0.003003 |
| 15 | 1  | 0 | -0.946942 | -0.549748 | -0.189620 |
| 16 | 6  | 0 | -3.494231 | -1.349604 | 0.408835  |
| 17 | 6  | 0 | -4.752495 | -1.660002 | 0.692110  |
| 18 | 1  | 0 | -2.681524 | -2.069284 | 0.379233  |
| 19 | 1  | 0 | -5.002372 | -2.689432 | 0.908873  |
| 20 | 1  | 0 | -5.559119 | -0.937822 | 0.720935  |
| 21 | 7  | 0 | 1.600212  | 3.310739  | 0.184544  |
| 22 | 1  | 0 | 1.950818  | 3.933471  | 0.902535  |
| 23 | 1  | 0 | 2.290758  | 2.569806  | 0.052137  |
| 24 | 6  | 0 | 3.665201  | -0.205906 | -1.058917 |
| 25 | 6  | 0 | 3.651493  | -0.419749 | 0.389729  |
| 26 | 8  | 0 | 3.472771  | 0.911956  | -0.162583 |
| 27 | 1  | 0 | 4.614300  | -0.193858 | -1.589060 |
| 28 | 1  | 0 | 2.791705  | -0.491389 | -1.637263 |
| 29 | 1  | 0 | 2.734100  | -0.840095 | 0.796137  |
| 30 | 6  | 0 | 4.907951  | -0.646570 | 1.184334  |
| 31 | 1  | 0 | 4.819075  | -0.210577 | 2.183769  |
| 32 | 1  | 0 | 5.084950  | -1.719910 | 1.301909  |
| 33 | 1  | 0 | 5.773554  | -0.200444 | 0.688432  |

---

Distance matrix (angstroms):

|   |   | 1        | 2        | 3        | 4        | 5        |
|---|---|----------|----------|----------|----------|----------|
| 1 | C | 0.000000 |          |          |          |          |
| 2 | C | 1.357931 | 0.000000 |          |          |          |
| 3 | N | 2.205424 | 1.390650 | 0.000000 |          |          |
| 4 | C | 2.213739 | 2.223776 | 1.344803 | 0.000000 |          |
| 5 | N | 1.387704 | 2.210352 | 2.168733 | 1.330948 | 0.000000 |
| 6 | C | 2.562828 | 3.644789 | 3.586930 | 2.473493 | 1.473336 |
| 7 | C | 3.350193 | 4.400502 | 4.378626 | 3.342200 | 2.494854 |

|    |    |          |          |          |          |          |
|----|----|----------|----------|----------|----------|----------|
| 8  | H  | 1.076413 | 2.214044 | 3.265110 | 3.231533 | 2.163042 |
| 9  | H  | 2.211995 | 1.074619 | 2.169948 | 3.243998 | 3.267236 |
| 10 | H  | 3.366173 | 4.246647 | 3.867993 | 2.582496 | 2.072193 |
| 11 | H  | 2.755259 | 4.002973 | 4.223032 | 3.272388 | 2.093073 |
| 12 | H  | 3.173209 | 4.284039 | 4.571235 | 3.789294 | 2.777148 |
| 13 | H  | 3.613399 | 4.385846 | 4.117377 | 3.106375 | 2.674644 |
| 14 | Br | 5.462617 | 5.320183 | 4.020356 | 3.259937 | 4.323570 |
| 15 | H  | 3.300578 | 3.296365 | 2.176324 | 1.115905 | 2.197584 |
| 16 | C  | 3.603592 | 2.546765 | 1.425445 | 2.420542 | 3.527567 |
| 17 | C  | 4.344011 | 3.057241 | 2.433791 | 3.648962 | 4.599469 |
| 18 | H  | 4.256684 | 3.417511 | 2.085828 | 2.536736 | 3.831570 |
| 19 | H  | 5.404551 | 4.134523 | 3.398903 | 4.498887 | 5.561399 |
| 20 | H  | 4.202511 | 2.844939 | 2.746306 | 4.081563 | 4.778050 |
| 21 | N  | 4.646869 | 5.776092 | 5.719588 | 4.570566 | 3.738488 |
| 22 | H  | 5.281740 | 6.405615 | 6.424008 | 5.350787 | 4.512228 |
| 23 | H  | 5.190198 | 6.211037 | 5.932191 | 4.678848 | 4.083387 |
| 24 | C  | 6.983484 | 7.626770 | 6.808033 | 5.504217 | 5.606199 |
| 25 | C  | 7.034917 | 7.582788 | 6.708515 | 5.470210 | 5.685538 |
| 26 | O  | 6.459931 | 7.237294 | 6.586336 | 5.268896 | 5.144691 |
| 27 | H  | 7.944858 | 8.635673 | 7.841660 | 6.533248 | 6.579752 |
| 28 | H  | 6.384466 | 6.959318 | 6.104338 | 4.824730 | 5.008583 |
| 29 | H  | 6.434333 | 6.833419 | 5.870706 | 4.711333 | 5.110520 |
| 30 | C  | 8.388558 | 8.924372 | 8.043910 | 6.852338 | 7.073076 |
| 31 | H  | 8.408095 | 8.944804 | 8.130512 | 6.995090 | 7.167986 |
| 32 | H  | 8.979235 | 9.383452 | 8.383712 | 7.259341 | 7.653898 |
| 33 | H  | 9.005112 | 9.648789 | 8.834157 | 7.586115 | 7.681545 |
|    |    | 6        | 7        | 8        | 9        | 10       |
| 6  | C  | 0.000000 |          |          |          |          |
| 7  | C  | 1.534788 | 0.000000 |          |          |          |
| 8  | H  | 2.865575 | 3.501581 | 0.000000 |          |          |
| 9  | H  | 4.672019 | 5.364475 | 2.754726 | 0.000000 |          |
| 10 | H  | 1.090053 | 2.165193 | 3.821909 | 5.309509 | 0.000000 |
| 11 | H  | 1.089970 | 2.174397 | 2.699764 | 4.937834 | 1.768539 |
| 12 | H  | 2.160198 | 1.095078 | 3.062816 | 5.117854 | 3.063175 |
| 13 | H  | 2.153436 | 1.100637 | 4.004682 | 5.345883 | 2.524277 |
| 14 | Br | 4.626579 | 5.125755 | 6.437617 | 6.189813 | 3.959057 |
| 15 | H  | 2.850343 | 3.608045 | 4.277723 | 4.269815 | 2.542294 |
| 16 | C  | 4.866945 | 5.594660 | 4.639387 | 2.885982 | 4.966852 |
| 17 | C  | 6.017121 | 6.715551 | 5.271196 | 2.908143 | 6.213684 |
| 18 | H  | 4.976837 | 5.674196 | 5.329484 | 3.915132 | 4.857237 |
| 19 | H  | 6.935883 | 7.611166 | 6.347548 | 3.963066 | 7.034744 |
| 20 | H  | 6.246315 | 6.934407 | 4.982611 | 2.326185 | 6.601089 |
| 21 | N  | 2.416283 | 1.454524 | 4.658212 | 6.751045 | 2.647240 |
| 22 | H  | 3.303105 | 2.051174 | 5.196863 | 7.325410 | 3.634924 |

|    |    |          |          |          |           |          |
|----|----|----------|----------|----------|-----------|----------|
| 23 | H  | 2.768361 | 2.049560 | 5.363574 | 7.237219  | 2.589884 |
| 24 | C  | 4.681361 | 4.751579 | 7.517969 | 8.693123  | 3.742469 |
| 25 | C  | 4.894921 | 4.604588 | 7.624237 | 8.623823  | 4.131060 |
| 26 | O  | 4.060287 | 3.724687 | 6.880267 | 8.302523  | 3.364151 |
| 27 | H  | 5.569451 | 5.636309 | 8.423767 | 9.704459  | 4.627802 |
| 28 | H  | 4.226370 | 4.632386 | 6.977540 | 8.014119  | 3.182816 |
| 29 | H  | 4.571563 | 4.334067 | 7.126357 | 7.843671  | 3.864184 |
| 30 | C  | 6.260122 | 5.746195 | 8.949381 | 9.945386  | 5.572238 |
| 31 | H  | 6.384897 | 5.629167 | 8.931809 | 9.933780  | 5.857082 |
| 32 | H  | 6.983788 | 6.578312 | 9.628267 | 10.380764 | 6.237159 |
| 33 | H  | 6.713248 | 6.206503 | 9.485438 | 10.692502 | 6.002120 |
|    |    | 11       | 12       | 13       | 14        | 15       |
| 11 | H  | 0.000000 |          |          |           |          |
| 12 | H  | 2.484425 | 0.000000 |          |           |          |
| 13 | H  | 3.065084 | 1.769006 | 0.000000 |           |          |
| 14 | Br | 5.569356 | 5.992420 | 4.486828 | 0.000000  |          |
| 15 | H  | 3.768599 | 4.296238 | 3.190764 | 2.165078  | 0.000000 |
| 16 | C  | 5.570115 | 5.854906 | 5.153515 | 3.892206  | 2.736166 |
| 17 | C  | 6.634410 | 6.836635 | 6.290568 | 5.092515  | 4.061077 |
| 18 | H  | 5.786793 | 6.112918 | 5.123600 | 2.964762  | 2.375155 |
| 19 | H  | 7.601220 | 7.791095 | 7.102655 | 5.337303  | 4.715023 |
| 20 | H  | 6.741222 | 6.894912 | 6.615653 | 6.016830  | 4.717191 |
| 21 | N  | 2.685880 | 2.089616 | 2.157753 | 5.821039  | 4.640188 |
| 22 | H  | 3.530344 | 2.306425 | 2.576281 | 6.570922  | 5.448767 |
| 23 | H  | 3.203192 | 2.933879 | 2.381235 | 5.325876  | 4.502528 |
| 24 | C  | 5.270054 | 5.834257 | 4.592345 | 4.170875  | 4.705929 |
| 25 | C  | 5.679822 | 5.637123 | 4.147669 | 3.933419  | 4.636610 |
| 26 | O  | 4.669920 | 4.751504 | 3.586781 | 4.589638  | 4.655230 |
| 27 | H  | 6.034413 | 6.697280 | 5.566773 | 5.122593  | 5.745650 |
| 28 | H  | 4.799060 | 5.722497 | 4.524695 | 3.549558  | 4.009558 |
| 29 | H  | 5.490086 | 5.340714 | 3.687879 | 3.017346  | 3.821791 |
| 30 | C  | 7.031235 | 6.699363 | 5.227551 | 5.103181  | 6.014723 |
| 31 | H  | 7.193572 | 6.474244 | 5.021147 | 5.501534  | 6.244594 |
| 32 | H  | 7.807526 | 7.547176 | 5.971507 | 5.051582  | 6.322789 |
| 33 | H  | 7.361126 | 7.154539 | 5.847646 | 5.970640  | 6.786609 |
|    |    | 16       | 17       | 18       | 19        | 20       |
| 16 | C  | 0.000000 |          |          |           |          |
| 17 | C  | 1.326582 | 0.000000 |          |           |          |
| 18 | H  | 1.085959 | 2.134086 | 0.000000 |           |          |
| 19 | H  | 2.078380 | 1.081272 | 2.459966 | 0.000000  |          |
| 20 | H  | 2.128552 | 1.083059 | 3.110871 | 1.847546  | 0.000000 |
| 21 | N  | 6.908144 | 8.082250 | 6.878649 | 8.951022  | 8.342302 |
| 22 | H  | 7.602840 | 8.733019 | 7.600363 | 9.602589  | 8.953303 |
| 23 | H  | 6.996792 | 8.240646 | 6.808211 | 9.032348  | 8.623880 |

|    |   |          |           |          |           |           |
|----|---|----------|-----------|----------|-----------|-----------|
| 24 | C | 7.397284 | 8.719983  | 6.769149 | 9.228592  | 9.422933  |
| 25 | C | 7.205996 | 8.500393  | 6.544325 | 8.961604  | 9.231115  |
| 26 | O | 7.347128 | 8.660280  | 6.859789 | 9.270709  | 9.261604  |
| 27 | H | 8.430635 | 9.751418  | 7.785914 | 10.244409 | 10.458872 |
| 28 | H | 6.666036 | 7.981640  | 6.042537 | 8.488924  | 8.688881  |
| 29 | H | 6.261127 | 7.532076  | 5.568995 | 7.955234  | 8.294136  |
| 30 | C | 8.467131 | 9.725921  | 7.763533 | 10.122433 | 10.481370 |
| 31 | H | 8.576644 | 9.794939  | 7.935372 | 10.209353 | 10.505983 |
| 32 | H | 8.633485 | 9.856509  | 7.828890 | 10.141426 | 10.688565 |
| 33 | H | 9.342943 | 10.626760 | 8.664671 | 11.061837 | 11.356684 |
|    |   | 21       | 22        | 23       | 24        | 25        |
| 21 | N | 0.000000 |           |          |           |           |
| 22 | H | 1.013031 | 0.000000  |          |           |           |
| 23 | H | 1.021453 | 1.642656  | 0.000000 |           |           |
| 24 | C | 4.263469 | 4.890895  | 3.290610 | 0.000000  |           |
| 25 | C | 4.262205 | 4.701679  | 3.301970 | 1.464408  | 0.000000  |
| 26 | O | 3.062864 | 3.546882  | 2.047371 | 1.445704  | 1.452731  |
| 27 | H | 4.951020 | 5.507906  | 3.966134 | 1.087191  | 2.212155  |
| 28 | H | 4.381188 | 5.170788  | 3.532128 | 1.085808  | 2.202967  |
| 29 | H | 4.346167 | 4.838572  | 3.518169 | 2.170339  | 1.087874  |
| 30 | C | 5.253666 | 5.459013  | 4.298446 | 2.602074  | 1.503839  |
| 31 | H | 5.172779 | 5.200153  | 4.320506 | 3.441869  | 2.150716  |
| 32 | H | 6.220879 | 6.476342  | 5.269830 | 3.143469  | 2.139461  |
| 33 | H | 5.477143 | 5.634572  | 4.495445 | 2.738323  | 2.154173  |
|    |   | 26       | 27        | 28       | 29        | 30        |
| 26 | O | 0.000000 |           |          |           |           |
| 27 | H | 2.135592 | 0.000000  |          |           |           |
| 28 | H | 2.146604 | 1.847349  | 0.000000 |           |           |
| 29 | H | 2.129427 | 3.105147  | 2.458932 | 0.000000  |           |
| 30 | C | 2.510564 | 2.825402  | 3.530438 | 2.216704  | 0.000000  |
| 31 | H | 2.928819 | 3.778420  | 4.334671 | 2.582428  | 1.094011  |
| 32 | H | 3.416223 | 3.302734  | 3.925171 | 2.560542  | 1.094172  |
| 33 | H | 2.693560 | 2.555560  | 3.792748 | 3.107899  | 1.092802  |
|    |   | 31       | 32        | 33       |           |           |
| 31 | H | 0.000000 |           |          |           |           |
| 32 | H | 1.768179 | 0.000000  |          |           |           |
| 33 | H | 1.774026 | 1.777444  | 0.000000 |           |           |

Stoichiometry C10H18BrN3O

Framework group C1[X(C10H18BrN3O)]

Deg. of freedom 93

Full point group C1 NOp 1

Largest Abelian subgroup C1 NOp 1

Largest concise Abelian subgroup C1 NOp 1

Standard orientation:

| Center<br>Number | Atomic<br>Number | Atomic<br>Type | Coordinates (Angstroms) |           |           |
|------------------|------------------|----------------|-------------------------|-----------|-----------|
|                  |                  |                | X                       | Y         | Z         |
| 1                | 6                | 0              | -2.808472               | 2.228636  | -0.219184 |
| 2                | 6                | 0              | -3.710443               | 1.254157  | 0.065096  |
| 3                | 7                | 0              | -3.012263               | 0.051475  | 0.067747  |
| 4                | 6                | 0              | -1.720613               | 0.300646  | -0.211620 |
| 5                | 7                | 0              | -1.577793               | 1.611424  | -0.392964 |
| 6                | 6                | 0              | -0.283078               | 2.264271  | -0.654158 |
| 7                | 6                | 0              | 0.387949                | 2.750771  | 0.637590  |
| 8                | 1                | 0              | -2.936616               | 3.292745  | -0.318757 |
| 9                | 1                | 0              | -4.766560               | 1.314957  | 0.254106  |
| 10               | 1                | 0              | 0.349979                | 1.527222  | -1.148340 |
| 11               | 1                | 0              | -0.445695               | 3.094875  | -1.340953 |
| 12               | 1                | 0              | -0.230282               | 3.530033  | 1.095561  |
| 13               | 1                | 0              | 0.432884                | 1.909192  | 1.345493  |
| 14               | 35               | 0              | 0.233900                | -2.308108 | -0.173196 |
| 15               | 1                | 0              | -0.929459               | -0.484475 | -0.265518 |
| 16               | 6                | 0              | -3.486846               | -1.271249 | 0.306634  |
| 17               | 6                | 0              | -4.748761               | -1.574693 | 0.581066  |
| 18               | 1                | 0              | -2.686228               | -2.001698 | 0.237632  |
| 19               | 1                | 0              | -5.014559               | -2.609306 | 0.748628  |
| 20               | 1                | 0              | -5.543260               | -0.841808 | 0.649381  |
| 21               | 7                | 0              | 1.682500                | 3.311301  | 0.283209  |
| 22               | 1                | 0              | 2.046521                | 3.892411  | 1.028884  |
| 23               | 1                | 0              | 2.360164                | 2.566635  | 0.111135  |
| 24               | 6                | 0              | 3.683766                | -0.173334 | -1.141370 |
| 25               | 6                | 0              | 3.673048                | -0.457515 | 0.295160  |
| 26               | 8                | 0              | 3.513774                | 0.902328  | -0.190520 |
| 27               | 1                | 0              | 4.630544                | -0.150759 | -1.675304 |
| 28               | 1                | 0              | 2.803104                | -0.415996 | -1.728336 |
| 29               | 1                | 0              | 2.750699                | -0.882308 | 0.685407  |
| 30               | 6                | 0              | 4.929159                | -0.743259 | 1.071088  |
| 31               | 1                | 0              | 4.851955                | -0.355281 | 2.091074  |
| 32               | 1                | 0              | 5.089008                | -1.823793 | 1.135180  |
| 33               | 1                | 0              | 5.799748                | -0.287504 | 0.592988  |

Rotational constants (GHZ):      0.4752983      0.2482848      0.1712578

Standard basis: 6-311++G(d,p) (5D, 7F)

There are 499 symmetry adapted cartesian basis functions of A symmetry.

There are 482 symmetry adapted basis functions of A symmetry.

482 basis functions, 760 primitive gaussians, 499 cartesian basis functions

71 alpha electrons      71 beta electrons

nuclear repulsion energy 1293.2998271317 Hartrees.  
 NAToms= 33 NActive= 33 NUniq= 33 SFac= 1.00D+00 NATFMM= 60 NAOKFM=F  
 Big=F  
 Integral buffers will be 131072 words long.  
 Raffenetti 2 integral format.  
 Two-electron integral symmetry is turned on.  
 One-electron integrals computed using PRISM.  
 NBasis= 482 RedAO= T EigKep= 3.83D-06 NBF= 482  
 NBsUse= 482 1.00D-06 EigRej= -1.00D+00 NBFU= 482  
 Initial guess from the checkpoint file:  
 "/home/suqian/liuwen/qianmengshijie/nh2po/nh2po.chk"  
 B after Tr= 0.000000 0.000000 0.000000  
 Rot= 0.999991 -0.003087 -0.000663 0.002685 Ang= -0.47 deg.  
 ExpMin= 3.50D-02 ExpMax= 4.40D+05 ExpMxC= 1.51D+04 IAcc=3 IRadAn= 5 AccDes=  
 0.00D+00  
 Harris functional with IExCor= 402 and IRadAn= 5 diagonalized for initial guess.  
 HarFok: IExCor= 402 AccDes= 0.00D+00 IRadAn= 5 IDoV= 1 UseB2=F ITyADJ=14  
 ICtDFT= 3500011 ScaDFX= 1.000000 1.000000 1.000000 1.000000  
 FoFCou: FMM=F IPFlag= 0 FMFlag= 100000 FMFlg1= 0  
 NFxFlg= 0 DoJE=T BraDBF=F KetDBF=T FulRan=T  
 wScrn= 0.000000 ICntrl= 500 IOpCl= 0 I1Cent= 200000004 NGrid=  
 0  
 NMat0= 1 NMatS0= 1 NMatT0= 0 NMatD0= 1 NMtDS0= 0  
 NMtDT0= 0  
 Petite list used in FoFCou.  
 Requested convergence on RMS density matrix=1.00D-08 within 128 cycles.  
 Requested convergence on MAX density matrix=1.00D-06.  
 Requested convergence on energy=1.00D-06.  
 No special actions if energy rises.  
 SCF Done: E(RB3LYP) = -3205.64670659 A.U. after 11 cycles  
 NFock= 11 Conv=0.68D-08 -V/T= 2.0018  
 Calling FoFJK, ICntrl= 2127 FMM=F ISym2X=0 I1Cent= 0 IOpClX= 0 NMat=1 NMatS=1  
 NMatT=0.

\*\*\*\*\* Axes restored to original set \*\*\*\*\*

| Center<br>Number | Atomic<br>Number | Forces (Hartrees/Bohr) |              |              |
|------------------|------------------|------------------------|--------------|--------------|
|                  |                  | X                      | Y            | Z            |
| 1                | 6                | -0.000117397           | 0.000096638  | -0.000027203 |
| 2                | 6                | 0.000509757            | -0.000188211 | 0.000127730  |
| 3                | 7                | -0.000438536           | -0.000244405 | 0.000013062  |
| 4                | 6                | 0.000653113            | -0.001208535 | -0.000197511 |
| 5                | 7                | -0.000227155           | 0.001191807  | -0.000792202 |
| 6                | 6                | -0.000097624           | 0.000565229  | 0.001056602  |

|    |    |              |              |              |
|----|----|--------------|--------------|--------------|
| 7  | 6  | -0.000063552 | -0.000046144 | -0.000171395 |
| 8  | 1  | 0.000072337  | 0.000006681  | -0.000079743 |
| 9  | 1  | -0.000042685 | 0.000037324  | 0.000042863  |
| 10 | 1  | 0.000086621  | 0.000059605  | -0.000157396 |
| 11 | 1  | -0.000105240 | 0.000194974  | 0.000032231  |
| 12 | 1  | 0.000033239  | -0.000071288 | -0.000083520 |
| 13 | 1  | -0.000149125 | -0.000094242 | -0.000159080 |
| 14 | 35 | 0.000700753  | -0.000447201 | 0.000072415  |
| 15 | 1  | -0.001329022 | 0.000224972  | 0.000286066  |
| 16 | 6  | -0.000750731 | -0.000894228 | 0.000121433  |
| 17 | 6  | 0.000120516  | 0.000586720  | -0.000129494 |
| 18 | 1  | 0.000590132  | -0.000081132 | 0.000104314  |
| 19 | 1  | 0.000063249  | 0.000023093  | 0.000004606  |
| 20 | 1  | -0.000111292 | 0.000035905  | 0.000020851  |
| 21 | 7  | 0.001628097  | 0.000003470  | 0.000208838  |
| 22 | 1  | -0.000138089 | 0.000191183  | -0.000079355 |
| 23 | 1  | -0.000564513 | 0.000683528  | -0.000198160 |
| 24 | 6  | 0.000398496  | 0.000235541  | 0.000625864  |
| 25 | 6  | 0.000157547  | -0.000139828 | 0.000041855  |
| 26 | 8  | -0.000803441 | -0.000452501 | -0.000209231 |
| 27 | 1  | -0.000080757 | 0.000010141  | -0.000246825 |
| 28 | 1  | 0.000114785  | -0.000143420 | -0.000150499 |
| 29 | 1  | 0.000071309  | -0.000240389 | 0.000034997  |
| 30 | 6  | 0.000026613  | 0.000144449  | -0.000073922 |
| 31 | 1  | -0.000064409 | -0.000030358 | -0.000038878 |
| 32 | 1  | -0.000074498 | 0.000002707  | -0.000005611 |
| 33 | 1  | -0.000068499 | -0.000012082 | 0.000006299  |

-----  
Cartesian Forces: Max 0.001628097 RMS 0.000406503

GradGradGradGradGradGradGradGradGradGradGradGradGradGradGradGradGradGradGradGrad

Berny optimization.

Using GEDIIS/GDIIS optimizer.

FormGI is forming the generalized inverse of G from B-inverse, IUseBI=4.

GSVD: received Info= 1 from GESDD.

Internal Forces: Max 0.001814661 RMS 0.000322409

Search for a local minimum.

Step number 8 out of a maximum of 172

All quantities printed in internal units (Hartrees-Bohrs-Radians)

Mixed Optimization -- En-DIIS/RFO-DIIS

Swapping is turned off.

Update second derivatives using D2CorX and points 2 3 1 4 5  
6 7 8

DE= -1.11D-04 DEPred=-7.89D-05 R= 1.41D+00



TightC=F SS= 1.41D+00 RLast= 1.02D-01 DXNew= 3.5676D-01 3.0687D-01

Trust test= 1.41D+00 RLast= 1.02D-01 DXMaxT set to 3.07D-01

ITU= 1 1 -1 1 0 0 -1 0

|                 |         |         |         |         |         |
|-----------------|---------|---------|---------|---------|---------|
| Eigenvalues --- | 0.00175 | 0.00231 | 0.00340 | 0.00424 | 0.00712 |
| Eigenvalues --- | 0.00724 | 0.01121 | 0.01292 | 0.01372 | 0.01471 |
| Eigenvalues --- | 0.01747 | 0.01910 | 0.02104 | 0.02173 | 0.02329 |
| Eigenvalues --- | 0.02364 | 0.02391 | 0.02453 | 0.02658 | 0.02895 |
| Eigenvalues --- | 0.03070 | 0.03077 | 0.03096 | 0.03207 | 0.03878 |
| Eigenvalues --- | 0.04142 | 0.04285 | 0.04426 | 0.04770 | 0.05403 |
| Eigenvalues --- | 0.05734 | 0.05762 | 0.05913 | 0.07789 | 0.08643 |
| Eigenvalues --- | 0.09434 | 0.10962 | 0.11365 | 0.12283 | 0.12371 |
| Eigenvalues --- | 0.12795 | 0.12866 | 0.13817 | 0.15594 | 0.16000 |
| Eigenvalues --- | 0.16000 | 0.16000 | 0.16000 | 0.16006 | 0.16011 |
| Eigenvalues --- | 0.16017 | 0.16089 | 0.17270 | 0.21213 | 0.21719 |
| Eigenvalues --- | 0.22517 | 0.22936 | 0.23402 | 0.25130 | 0.25632 |
| Eigenvalues --- | 0.29045 | 0.29824 | 0.31667 | 0.32070 | 0.32944 |
| Eigenvalues --- | 0.33659 | 0.34280 | 0.34310 | 0.34341 | 0.34542 |
| Eigenvalues --- | 0.34660 | 0.34712 | 0.34989 | 0.35064 | 0.35185 |
| Eigenvalues --- | 0.35285 | 0.35439 | 0.35637 | 0.35888 | 0.36418 |
| Eigenvalues --- | 0.36620 | 0.37530 | 0.38074 | 0.41822 | 0.42350 |
| Eigenvalues --- | 0.44668 | 0.45465 | 0.45727 | 0.49124 | 0.54932 |
| Eigenvalues --- | 0.56842 | 0.60550 | 1.35533 |         |         |

En-DIIS/RFO-DIIS IScMMF= 0 using points: 8 7 6 5 4

RFO step: Lambda=-4.38839261D-05.

DidBck=T Rises=F RFO-DIIS coefs: 0.75350 0.50269 -0.10524 -0.80373

0.65278

Iteration 1 RMS(Cart)= 0.05232949 RMS(Int)= 0.00082446

Iteration 2 RMS(Cart)= 0.00151481 RMS(Int)= 0.00011602

Iteration 3 RMS(Cart)= 0.00000140 RMS(Int)= 0.00011601

Iteration 4 RMS(Cart)= 0.00000000 RMS(Int)= 0.00011601

| Variable | Old X   | -DE/DX   | Delta X<br>(Linear) | Delta X<br>(Quad) | Delta X<br>(Total) | New X   |
|----------|---------|----------|---------------------|-------------------|--------------------|---------|
| R1       | 2.56612 | 0.00019  | 0.00073             | -0.00073          | 0.00000            | 2.56612 |
| R2       | 2.62238 | -0.00024 | -0.00031            | 0.00078           | 0.00047            | 2.62285 |
| R3       | 2.03412 | 0.00001  | 0.00000             | -0.00013          | -0.00013           | 2.03400 |
| R4       | 2.62795 | 0.00005  | -0.00023            | -0.00093          | -0.00117           | 2.62678 |
| R5       | 2.03074 | 0.00005  | 0.00004             | 0.00027           | 0.00031            | 2.03104 |
| R6       | 2.54131 | 0.00033  | 0.00015             | 0.00198           | 0.00213            | 2.54344 |
| R7       | 2.69370 | 0.00035  | -0.00008            | 0.00176           | 0.00168            | 2.69538 |
| R8       | 2.51513 | 0.00181  | 0.00263             | 0.00048           | 0.00312            | 2.51825 |
| R9       | 2.10876 | -0.00030 | 0.00012             | -0.00243          | -0.00231           | 2.10644 |
| R10      | 2.78420 | 0.00057  | 0.00311             | -0.00120          | 0.00190            | 2.78611 |
| R11      | 2.90033 | -0.00024 | -0.00038            | 0.00209           | 0.00170            | 2.90203 |
| R12      | 2.05990 | 0.00008  | 0.00005             | 0.00041           | 0.00046            | 2.06036 |

|     |         |          |          |          |          |         |
|-----|---------|----------|----------|----------|----------|---------|
| R13 | 2.05975 | 0.00014  | 0.00004  | 0.00036  | 0.00040  | 2.06015 |
| R14 | 2.06940 | -0.00010 | -0.00024 | 0.00014  | -0.00011 | 2.06929 |
| R15 | 2.07990 | -0.00005 | -0.00013 | 0.00024  | 0.00012  | 2.08002 |
| R16 | 2.74865 | 0.00064  | 0.00250  | -0.00103 | 0.00147  | 2.75012 |
| R17 | 4.09140 | 0.00076  | -0.00103 | 0.02753  | 0.02649  | 4.11790 |
| R18 | 2.50688 | -0.00024 | -0.00029 | -0.00032 | -0.00060 | 2.50627 |
| R19 | 2.05217 | 0.00049  | 0.00057  | 0.00144  | 0.00201  | 2.05418 |
| R20 | 2.04331 | -0.00004 | -0.00015 | 0.00014  | -0.00001 | 2.04330 |
| R21 | 2.04669 | 0.00011  | 0.00027  | 0.00013  | 0.00040  | 2.04709 |
| R22 | 1.91435 | 0.00001  | 0.00008  | -0.00021 | -0.00014 | 1.91422 |
| R23 | 1.93027 | -0.00060 | -0.00085 | -0.00104 | -0.00190 | 1.92837 |
| R24 | 3.86897 | 0.00033  | 0.00121  | 0.01094  | 0.01215  | 3.88112 |
| R25 | 2.76733 | -0.00032 | 0.00042  | 0.00022  | 0.00057  | 2.76790 |
| R26 | 2.73198 | 0.00006  | 0.00007  | -0.00056 | -0.00046 | 2.73153 |
| R27 | 2.05449 | 0.00005  | 0.00004  | 0.00036  | 0.00040  | 2.05489 |
| R28 | 2.05188 | 0.00003  | -0.00002 | 0.00006  | 0.00004  | 2.05192 |
| R29 | 2.74526 | 0.00036  | 0.00009  | -0.00025 | -0.00011 | 2.74516 |
| R30 | 2.05578 | 0.00005  | 0.00001  | -0.00011 | -0.00011 | 2.05568 |
| R31 | 2.84184 | -0.00022 | -0.00056 | 0.00033  | -0.00023 | 2.84161 |
| R32 | 2.06738 | -0.00004 | -0.00003 | 0.00002  | -0.00001 | 2.06737 |
| R33 | 2.06769 | -0.00001 | -0.00008 | 0.00008  | 0.00000  | 2.06768 |
| R34 | 2.06510 | -0.00006 | -0.00009 | -0.00006 | -0.00015 | 2.06495 |
| A1  | 1.87141 | 0.00001  | 0.00029  | 0.00071  | 0.00100  | 1.87241 |
| A2  | 2.27800 | 0.00009  | 0.00025  | 0.00002  | 0.00026  | 2.27826 |
| A3  | 2.13374 | -0.00010 | -0.00050 | -0.00077 | -0.00128 | 2.13247 |
| A4  | 1.86246 | 0.00058  | 0.00150  | -0.00033 | 0.00117  | 1.86363 |
| A5  | 2.27708 | -0.00032 | -0.00038 | -0.00044 | -0.00081 | 2.27626 |
| A6  | 2.14362 | -0.00026 | -0.00113 | 0.00079  | -0.00034 | 2.14328 |
| A7  | 1.89819 | -0.00029 | -0.00188 | 0.00088  | -0.00098 | 1.89720 |
| A8  | 2.25969 | -0.00022 | 0.00085  | -0.00205 | -0.00118 | 2.25850 |
| A9  | 2.12530 | 0.00051  | 0.00098  | 0.00116  | 0.00217  | 2.12747 |
| A10 | 1.89004 | -0.00008 | 0.00189  | -0.00118 | 0.00071  | 1.89075 |
| A11 | 2.16594 | -0.00001 | -0.00330 | -0.00744 | -0.01074 | 2.15520 |
| A12 | 2.22717 | 0.00008  | 0.00139  | 0.00862  | 0.01001  | 2.23718 |
| A13 | 1.90266 | -0.00023 | -0.00179 | -0.00016 | -0.00196 | 1.90070 |
| A14 | 2.21987 | 0.00018  | -0.00087 | 0.00016  | -0.00073 | 2.21913 |
| A15 | 2.15897 | 0.00004  | 0.00268  | -0.00068 | 0.00197  | 2.16094 |
| A16 | 1.95568 | 0.00096  | 0.00485  | 0.00008  | 0.00491  | 1.96059 |
| A17 | 1.86618 | -0.00043 | -0.00053 | 0.00209  | 0.00157  | 1.86776 |
| A18 | 1.89470 | -0.00014 | 0.00123  | -0.00314 | -0.00192 | 1.89278 |
| A19 | 1.91982 | -0.00036 | -0.00181 | 0.00139  | -0.00042 | 1.91940 |
| A20 | 1.93264 | -0.00019 | -0.00289 | 0.00028  | -0.00264 | 1.93001 |
| A21 | 1.89257 | 0.00013  | -0.00087 | -0.00072 | -0.00158 | 1.89099 |
| A22 | 1.90786 | 0.00000  | -0.00180 | -0.00084 | -0.00266 | 1.90520 |

|     |          |          |          |          |          |          |
|-----|----------|----------|----------|----------|----------|----------|
| A23 | 1.89315  | -0.00026 | -0.00282 | 0.00003  | -0.00280 | 1.89035  |
| A24 | 1.88202  | 0.00013  | 0.00424  | 0.00047  | 0.00472  | 1.88674  |
| A25 | 1.87358  | 0.00005  | -0.00034 | -0.00021 | -0.00056 | 1.87302  |
| A26 | 1.90723  | 0.00021  | 0.00035  | -0.00054 | -0.00019 | 1.90704  |
| A27 | 1.99878  | -0.00014 | 0.00021  | 0.00101  | 0.00120  | 1.99998  |
| A28 | 2.16957  | -0.00070 | -0.00101 | -0.00352 | -0.00452 | 2.16505  |
| A29 | 1.94771  | 0.00005  | 0.00002  | -0.00065 | -0.00063 | 1.94708  |
| A30 | 2.16590  | 0.00065  | 0.00097  | 0.00417  | 0.00514  | 2.17104  |
| A31 | 2.07689  | -0.00010 | -0.00028 | -0.00081 | -0.00109 | 2.07580  |
| A32 | 2.16045  | 0.00010  | 0.00019  | 0.00077  | 0.00096  | 2.16141  |
| A33 | 2.04584  | 0.00000  | 0.00009  | 0.00004  | 0.00014  | 2.04598  |
| A34 | 1.94071  | 0.00038  | -0.00091 | 0.00125  | -0.00048 | 1.94024  |
| A35 | 1.92897  | -0.00140 | -0.00164 | 0.00051  | -0.00130 | 1.92767  |
| A36 | 1.87947  | 0.00058  | 0.00025  | 0.00088  | 0.00136  | 1.88083  |
| A37 | 2.08537  | 0.00001  | 0.00013  | -0.00037 | -0.00033 | 2.08505  |
| A38 | 2.07257  | 0.00013  | 0.00010  | 0.00264  | 0.00281  | 2.07538  |
| A39 | 1.99320  | -0.00007 | 0.00001  | -0.00053 | -0.00050 | 1.99271  |
| A40 | 2.01137  | 0.00011  | 0.00116  | -0.00118 | -0.00006 | 2.01131  |
| A41 | 2.03249  | -0.00019 | -0.00069 | -0.00082 | -0.00151 | 2.03098  |
| A42 | 2.01959  | 0.00028  | 0.00036  | 0.00245  | 0.00288  | 2.02247  |
| A43 | 2.13756  | -0.00021 | -0.00042 | -0.00022 | -0.00072 | 2.13684  |
| A44 | 1.97413  | 0.00020  | 0.00103  | -0.00116 | -0.00017 | 1.97396  |
| A45 | 2.02855  | -0.00011 | -0.00018 | -0.00051 | -0.00067 | 2.02788  |
| A46 | 2.03633  | -0.00009 | -0.00033 | -0.00076 | -0.00107 | 2.03525  |
| A47 | 2.44649  | 0.00044  | 0.00048  | 0.01137  | 0.01166  | 2.45815  |
| A48 | 2.45505  | 0.00020  | -0.00033 | 0.01175  | 0.01121  | 2.46626  |
| A49 | 1.93341  | -0.00007 | -0.00009 | 0.00036  | 0.00027  | 1.93368  |
| A50 | 1.91760  | -0.00008 | -0.00044 | -0.00088 | -0.00132 | 1.91628  |
| A51 | 1.93954  | 0.00000  | -0.00006 | 0.00074  | 0.00068  | 1.94022  |
| A52 | 1.88170  | 0.00004  | 0.00011  | -0.00019 | -0.00008 | 1.88162  |
| A53 | 1.89253  | 0.00006  | 0.00022  | -0.00005 | 0.00017  | 1.89270  |
| A54 | 1.89768  | 0.00006  | 0.00028  | 0.00000  | 0.00028  | 1.89796  |
| A55 | 3.32781  | -0.00132 | -0.05284 | 0.00426  | -0.04858 | 3.27923  |
| A56 | 3.01215  | -0.00065 | 0.03959  | -0.03645 | 0.00305  | 3.01520  |
| A57 | 2.97105  | 0.00032  | 0.04795  | -0.08094 | -0.03299 | 2.93805  |
| A58 | 3.16965  | 0.00045  | 0.01870  | 0.04839  | 0.06740  | 3.23706  |
| D1  | 0.00548  | -0.00001 | -0.00361 | 0.00771  | 0.00408  | 0.00956  |
| D2  | -3.12765 | -0.00006 | -0.00309 | 0.00445  | 0.00135  | -3.12630 |
| D3  | 3.13788  | 0.00002  | -0.00021 | 0.00253  | 0.00230  | 3.14018  |
| D4  | 0.00475  | -0.00003 | 0.00032  | -0.00074 | -0.00042 | 0.00433  |
| D5  | -0.00709 | 0.00004  | 0.00421  | -0.00988 | -0.00565 | -0.01274 |
| D6  | -3.08768 | 0.00012  | 0.00370  | 0.00250  | 0.00616  | -3.08151 |
| D7  | -3.14042 | 0.00001  | 0.00114  | -0.00522 | -0.00406 | 3.13870  |
| D8  | 0.06218  | 0.00009  | 0.00063  | 0.00716  | 0.00775  | 0.06993  |

|     |          |          |          |          |          |          |
|-----|----------|----------|----------|----------|----------|----------|
| D9  | -0.00208 | -0.00001 | 0.00185  | -0.00303 | -0.00115 | -0.00324 |
| D10 | -3.13905 | -0.00010 | -0.00084 | -0.00066 | -0.00150 | -3.14055 |
| D11 | 3.13185  | 0.00003  | 0.00138  | -0.00008 | 0.00131  | 3.13316  |
| D12 | -0.00512 | -0.00005 | -0.00131 | 0.00229  | 0.00097  | -0.00415 |
| D13 | -0.00233 | 0.00004  | 0.00075  | -0.00311 | -0.00237 | -0.00470 |
| D14 | 3.13159  | -0.00019 | -0.00274 | -0.00226 | -0.00494 | 3.12665  |
| D15 | 3.13507  | 0.00011  | 0.00324  | -0.00528 | -0.00207 | 3.13299  |
| D16 | -0.01420 | -0.00011 | -0.00025 | -0.00442 | -0.00464 | -0.01884 |
| D17 | -0.00057 | 0.00008  | 0.00001  | 0.00805  | 0.00806  | 0.00749  |
| D18 | -3.14071 | 0.00018  | 0.00369  | 0.00795  | 0.01162  | -3.12909 |
| D19 | -3.13701 | -0.00001 | -0.00303 | 0.01070  | 0.00769  | -3.12932 |
| D20 | 0.00603  | 0.00009  | 0.00066  | 0.01059  | 0.01125  | 0.01728  |
| D21 | 0.00580  | -0.00005 | -0.00304 | 0.00799  | 0.00494  | 0.01074  |
| D22 | 3.08898  | -0.00011 | -0.00261 | -0.00383 | -0.00650 | 3.08247  |
| D23 | -3.12777 | 0.00019  | 0.00052  | 0.00719  | 0.00778  | -3.11999 |
| D24 | -0.04460 | 0.00012  | 0.00095  | -0.00463 | -0.00366 | -0.04825 |
| D25 | 1.45462  | 0.00027  | 0.00152  | 0.01405  | 0.01556  | 1.47018  |
| D26 | -2.72381 | 0.00012  | 0.00184  | 0.01716  | 0.01900  | -2.70481 |
| D27 | -0.68530 | -0.00002 | 0.00121  | 0.01583  | 0.01701  | -0.66829 |
| D28 | -1.61763 | 0.00036  | 0.00104  | 0.02810  | 0.02916  | -1.58847 |
| D29 | 0.48713  | 0.00021  | 0.00136  | 0.03122  | 0.03260  | 0.51973  |
| D30 | 2.52564  | 0.00007  | 0.00072  | 0.02988  | 0.03061  | 2.55625  |
| D31 | -1.12252 | -0.00023 | -0.01109 | 0.00488  | -0.00622 | -1.12874 |
| D32 | 0.91523  | -0.00031 | -0.01408 | 0.00418  | -0.00991 | 0.90533  |
| D33 | 3.08900  | -0.00055 | -0.01294 | 0.00573  | -0.00721 | 3.08179  |
| D34 | 3.08732  | -0.00006 | -0.01236 | 0.00129  | -0.01106 | 3.07626  |
| D35 | -1.15811 | -0.00014 | -0.01535 | 0.00059  | -0.01475 | -1.17286 |
| D36 | 1.01566  | -0.00039 | -0.01420 | 0.00214  | -0.01205 | 1.00360  |
| D37 | 0.99571  | 0.00013  | -0.00826 | 0.00111  | -0.00716 | 0.98855  |
| D38 | 3.03346  | 0.00005  | -0.01125 | 0.00041  | -0.01084 | 3.02262  |
| D39 | -1.07595 | -0.00020 | -0.01011 | 0.00196  | -0.00815 | -1.08411 |
| D40 | 2.84093  | 0.00016  | 0.00157  | -0.02035 | -0.01858 | 2.82235  |
| D41 | -1.35585 | 0.00022  | 0.00023  | -0.01809 | -0.01804 | -1.37389 |
| D42 | 0.76886  | -0.00004 | 0.00112  | -0.01931 | -0.01800 | 0.75086  |
| D43 | 2.85527  | 0.00002  | -0.00022 | -0.01705 | -0.01747 | 2.83780  |
| D44 | -1.33335 | -0.00016 | 0.00117  | -0.01932 | -0.01795 | -1.35129 |
| D45 | 0.75306  | -0.00011 | -0.00016 | -0.01706 | -0.01741 | 0.73565  |
| D46 | -3.14078 | 0.00007  | 0.00365  | -0.00109 | 0.00257  | -3.13821 |
| D47 | 0.00081  | 0.00005  | 0.00126  | 0.00126  | 0.00252  | 0.00333  |
| D48 | -0.00081 | -0.00004 | -0.00047 | -0.00097 | -0.00145 | -0.00227 |
| D49 | 3.14078  | -0.00006 | -0.00286 | 0.00137  | -0.00150 | 3.13927  |
| D50 | 1.20731  | 0.00029  | 0.01911  | 0.00423  | 0.02283  | 1.23015  |
| D51 | -0.54621 | 0.00019  | -0.00581 | -0.01062 | -0.01689 | -0.56310 |
| D52 | -2.97691 | -0.00002 | 0.01447  | -0.01511 | -0.00018 | -2.97710 |

|     |          |          |          |          |          |          |
|-----|----------|----------|----------|----------|----------|----------|
| D53 | 1.55275  | -0.00012 | -0.01045 | -0.02996 | -0.03990 | 1.51285  |
| D54 | -2.70008 | 0.00012  | 0.00096  | -0.00321 | -0.00224 | -2.70232 |
| D55 | -0.01624 | 0.00005  | 0.00001  | 0.00016  | 0.00017  | -0.01607 |
| D56 | -0.02338 | -0.00004 | -0.00031 | -0.00003 | -0.00034 | -0.02373 |
| D57 | 2.66045  | -0.00012 | -0.00127 | 0.00335  | 0.00207  | 2.66252  |
| D58 | 1.97794  | -0.00035 | 0.00005  | -0.02381 | -0.02384 | 1.95410  |
| D59 | -0.44375 | -0.00008 | -0.00024 | -0.02037 | -0.02067 | -0.46442 |
| D60 | 0.48148  | 0.00031  | 0.00092  | 0.02040  | 0.02137  | 0.50285  |
| D61 | -1.94391 | 0.00035  | 0.00039  | 0.02371  | 0.02416  | -1.91975 |
| D62 | 2.55250  | -0.00001 | 0.00028  | -0.00147 | -0.00119 | 2.55132  |
| D63 | -1.65350 | -0.00006 | 0.00009  | -0.00204 | -0.00195 | -1.65545 |
| D64 | 0.44747  | -0.00003 | 0.00010  | -0.00215 | -0.00204 | 0.44543  |
| D65 | 1.34868  | 0.00008  | 0.00059  | -0.00088 | -0.00030 | 1.34838  |
| D66 | -2.85732 | 0.00003  | 0.00040  | -0.00145 | -0.00107 | -2.85839 |
| D67 | -0.75635 | 0.00005  | 0.00041  | -0.00155 | -0.00115 | -0.75751 |
| D68 | -1.05092 | 0.00000  | -0.00051 | 0.00272  | 0.00221  | -1.04872 |
| D69 | 1.02626  | -0.00004 | -0.00071 | 0.00214  | 0.00144  | 1.02770  |
| D70 | 3.12723  | -0.00002 | -0.00069 | 0.00204  | 0.00136  | 3.12858  |

| Item                 | Value    | Threshold | Converged? |
|----------------------|----------|-----------|------------|
| Maximum Force        | 0.001815 | 0.000450  | NO         |
| RMS Force            | 0.000322 | 0.000300  | NO         |
| Maximum Displacement | 0.157367 | 0.001800  | NO         |
| RMS Displacement     | 0.052647 | 0.001200  | NO         |

Predicted change in Energy=-8.567497D-05

GradGradGradGradGradGradGradGradGradGradGradGradGradGradGradGradGradGradGrad

Input orientation:

| Center Number | Atomic Number | Atomic Type | Coordinates (Angstroms) |           |           |
|---------------|---------------|-------------|-------------------------|-----------|-----------|
|               |               |             | X                       | Y         | Z         |
| 1             | 6             | 0           | -2.894055               | 2.146127  | -0.234463 |
| 2             | 6             | 0           | -3.771144               | 1.162411  | 0.092645  |
| 3             | 7             | 0           | -3.052658               | -0.027452 | 0.106603  |
| 4             | 6             | 0           | -1.771730               | 0.238149  | -0.209950 |
| 5             | 7             | 0           | -1.656851               | 1.547692  | -0.428402 |
| 6             | 6             | 0           | -0.379900               | 2.220342  | -0.729443 |
| 7             | 6             | 0           | 0.328723                | 2.721212  | 0.537569  |
| 8             | 1             | 0           | -3.043410               | 3.205420  | -0.353253 |
| 9             | 1             | 0           | -4.823307               | 1.209765  | 0.306811  |
| 10            | 1             | 0           | 0.249027                | 1.494622  | -1.245707 |
| 11            | 1             | 0           | -0.578253               | 3.048324  | -1.410325 |
| 12            | 1             | 0           | -0.283671               | 3.496961  | 1.009010  |
| 13            | 1             | 0           | 0.400141                | 1.883445  | 1.247908  |

|    |    |   |           |           |           |
|----|----|---|-----------|-----------|-----------|
| 14 | 35 | 0 | 0.276285  | -2.311798 | -0.046889 |
| 15 | 1  | 0 | -0.975742 | -0.540746 | -0.257281 |
| 16 | 6  | 0 | -3.500192 | -1.352087 | 0.388535  |
| 17 | 6  | 0 | -4.753187 | -1.663851 | 0.691486  |
| 18 | 1  | 0 | -2.686133 | -2.069969 | 0.328728  |
| 19 | 1  | 0 | -5.001006 | -2.696714 | 0.893766  |
| 20 | 1  | 0 | -5.557386 | -0.940494 | 0.750612  |
| 21 | 7  | 0 | 1.608135  | 3.292448  | 0.144259  |
| 22 | 1  | 0 | 1.978854  | 3.893828  | 0.870204  |
| 23 | 1  | 0 | 2.290920  | 2.553624  | -0.026789 |
| 24 | 6  | 0 | 3.710124  | -0.247536 | -1.051815 |
| 25 | 6  | 0 | 3.664925  | -0.432197 | 0.400506  |
| 26 | 8  | 0 | 3.477336  | 0.884527  | -0.183711 |
| 27 | 1  | 0 | 4.671820  | -0.229410 | -1.559020 |
| 28 | 1  | 0 | 2.856684  | -0.557627 | -1.647220 |
| 29 | 1  | 0 | 2.745722  | -0.858272 | 0.796575  |
| 30 | 6  | 0 | 4.905964  | -0.620159 | 1.228548  |
| 31 | 1  | 0 | 4.786588  | -0.164749 | 2.216068  |
| 32 | 1  | 0 | 5.096685  | -1.687820 | 1.373245  |
| 33 | 1  | 0 | 5.775806  | -0.170648 | 0.743410  |

-----  
Distance matrix (angstroms):

|    |    | 1        | 2        | 3        | 4        | 5        |
|----|----|----------|----------|----------|----------|----------|
| 1  | C  | 0.000000 |          |          |          |          |
| 2  | C  | 1.357933 | 0.000000 |          |          |          |
| 3  | N  | 2.205885 | 1.390033 | 0.000000 |          |          |
| 4  | C  | 2.213729 | 2.223394 | 1.345929 | 0.000000 |          |
| 5  | N  | 1.387952 | 2.211372 | 2.171540 | 1.332600 | 0.000000 |
| 6  | C  | 2.563492 | 3.646311 | 3.590987 | 2.477126 | 1.474343 |
| 7  | C  | 3.363488 | 4.408710 | 4.378883 | 3.337108 | 2.500550 |
| 8  | H  | 1.076345 | 2.214116 | 3.265427 | 3.231471 | 2.162465 |
| 9  | H  | 2.211734 | 1.074782 | 2.169329 | 3.243948 | 3.268207 |
| 10 | H  | 3.365418 | 4.250097 | 3.878991 | 2.595184 | 2.074410 |
| 11 | H  | 2.749463 | 4.001267 | 4.228965 | 3.280605 | 2.092712 |
| 12 | H  | 3.191408 | 4.295616 | 4.571992 | 3.784183 | 2.784138 |
| 13 | H  | 3.621899 | 4.387954 | 4.108031 | 3.090206 | 2.674689 |
| 14 | Br | 5.473513 | 5.335849 | 4.040255 | 3.274627 | 4.333385 |
| 15 | H  | 3.301474 | 3.292030 | 2.170129 | 1.114681 | 2.203353 |
| 16 | C  | 3.604585 | 2.546305 | 1.426335 | 2.423761 | 3.531857 |
| 17 | C  | 4.339319 | 3.051356 | 2.431396 | 3.649558 | 4.599505 |
| 18 | H  | 4.258625 | 3.417786 | 2.086997 | 2.540416 | 3.836683 |
| 19 | H  | 5.400487 | 4.128826 | 3.397153 | 4.501092 | 5.562956 |
| 20 | H  | 4.194155 | 2.836510 | 2.742637 | 4.079591 | 4.774444 |
| 21 | N  | 4.661244 | 5.785876 | 5.722425 | 4.569212 | 3.745964 |

|    |    |          |          |          |           |          |
|----|----|----------|----------|----------|-----------|----------|
| 22 | H  | 5.293391 | 6.413089 | 6.424611 | 5.347673  | 4.517641 |
| 23 | H  | 5.205108 | 6.220801 | 5.935787 | 4.679754  | 4.093665 |
| 24 | C  | 7.071978 | 7.698514 | 6.864808 | 5.567347  | 5.693497 |
| 25 | C  | 7.076098 | 7.611352 | 6.736180 | 5.511737  | 5.738323 |
| 26 | O  | 6.495294 | 7.259068 | 6.599758 | 5.288780  | 5.182619 |
| 27 | H  | 8.039906 | 8.714861 | 7.904597 | 6.599844  | 6.669968 |
| 28 | H  | 6.509775 | 7.064968 | 6.186865 | 4.911336  | 5.127366 |
| 29 | H  | 6.472753 | 6.859170 | 5.898095 | 4.756322  | 5.164482 |
| 30 | C  | 8.404347 | 8.930848 | 8.059139 | 6.884590  | 7.107433 |
| 31 | H  | 8.386748 | 8.916561 | 8.119265 | 7.004244  | 7.172418 |
| 32 | H  | 9.007542 | 9.402242 | 8.412669 | 7.306914  | 7.702254 |
| 33 | H  | 9.027191 | 9.661511 | 8.852559 | 7.618485  | 7.718175 |
|    |    | 6        | 7        | 8        | 9         | 10       |
| 6  | C  | 0.000000 |          |          |           |          |
| 7  | C  | 1.535687 | 0.000000 |          |           |          |
| 8  | H  | 2.864644 | 3.521263 | 0.000000 |           |          |
| 9  | H  | 4.673217 | 5.374117 | 2.754335 | 0.000000  |          |
| 10 | H  | 1.090297 | 2.165859 | 3.816208 | 5.312253  | 0.000000 |
| 11 | H  | 1.090183 | 2.173453 | 2.686834 | 4.934505  | 1.767903 |
| 12 | H  | 2.158989 | 1.095020 | 3.091426 | 5.131535  | 3.062169 |
| 13 | H  | 2.152180 | 1.100698 | 4.021116 | 5.350132  | 2.528267 |
| 14 | Br | 4.629983 | 5.067102 | 6.446234 | 6.207443  | 3.990832 |
| 15 | H  | 2.863838 | 3.601914 | 4.279979 | 4.264533  | 2.572891 |
| 16 | C  | 4.873228 | 5.592367 | 4.640019 | 2.884510  | 4.983086 |
| 17 | C  | 6.019272 | 6.714035 | 5.265417 | 2.900096  | 6.225015 |
| 18 | H  | 4.984496 | 5.664661 | 5.331273 | 3.914670  | 4.878557 |
| 19 | H  | 6.940236 | 7.608338 | 6.342116 | 3.954323  | 7.050354 |
| 20 | H  | 6.244022 | 6.935398 | 4.972645 | 2.315047  | 6.605264 |
| 21 | N  | 2.421786 | 1.455300 | 4.678884 | 6.762207  | 2.647897 |
| 22 | H  | 3.305018 | 2.051489 | 5.214775 | 7.334235  | 3.636698 |
| 23 | H  | 2.781740 | 2.048610 | 5.383910 | 7.247722  | 2.603185 |
| 24 | C  | 4.787759 | 4.772157 | 7.617159 | 8.762935  | 3.879678 |
| 25 | C  | 4.967228 | 4.592714 | 7.668257 | 8.646092  | 4.253353 |
| 26 | O  | 4.118312 | 3.715834 | 6.923541 | 8.321483  | 3.452830 |
| 27 | H  | 5.675328 | 5.653702 | 8.530926 | 9.783148  | 4.757263 |
| 28 | H  | 4.362900 | 4.681311 | 7.116599 | 8.119370  | 3.342576 |
| 29 | H  | 4.645008 | 4.326855 | 7.165873 | 7.861733  | 3.992556 |
| 30 | C  | 6.312094 | 5.709059 | 8.962683 | 9.942683  | 5.681664 |
| 31 | H  | 6.407596 | 5.569443 | 8.903276 | 9.893667  | 5.943640 |
| 32 | H  | 7.048972 | 6.547624 | 9.653276 | 10.389395 | 6.362911 |
| 33 | H  | 6.766006 | 6.170570 | 9.506791 | 10.697540 | 6.105325 |
|    |    | 11       | 12       | 13       | 14        | 15       |
| 11 | H  | 0.000000 |          |          |           |          |
| 12 | H  | 2.478152 | 0.000000 |          |           |          |

|    |    |          |           |          |           |           |
|----|----|----------|-----------|----------|-----------|-----------|
| 13 | H  | 3.062744 | 1.768644  | 0.000000 |           |           |
| 14 | Br | 5.596436 | 5.930442  | 4.392255 | 0.000000  |           |
| 15 | H  | 3.790637 | 4.287835  | 3.167862 | 2.179097  | 0.000000  |
| 16 | C  | 5.580076 | 5.851860  | 5.140019 | 3.920768  | 2.729140  |
| 17 | C  | 6.637188 | 6.834572  | 6.280899 | 5.124512  | 4.053469  |
| 18 | H  | 5.802101 | 6.101255  | 5.098967 | 2.995913  | 2.367988  |
| 19 | H  | 7.607564 | 7.786407  | 7.090533 | 5.374272  | 4.709125  |
| 20 | H  | 6.735880 | 6.897090  | 6.611661 | 6.045511  | 4.708196  |
| 21 | N  | 2.693812 | 2.090107  | 2.159301 | 5.763500  | 4.640154  |
| 22 | H  | 3.529092 | 2.301258  | 2.583918 | 6.499968  | 5.446678  |
| 23 | H  | 3.223516 | 2.931089  | 2.376771 | 5.266069  | 4.505478  |
| 24 | C  | 5.420461 | 5.849671  | 4.559145 | 4.130654  | 4.761785  |
| 25 | C  | 5.779074 | 5.603567  | 4.091345 | 3.900762  | 4.688311  |
| 26 | O  | 4.757563 | 4.732079  | 3.537867 | 4.525698  | 4.676187  |
| 27 | H  | 6.191035 | 6.710999  | 5.530845 | 5.093487  | 5.804000  |
| 28 | H  | 4.985759 | 5.775558  | 4.513891 | 3.506655  | 4.076727  |
| 29 | H  | 5.583968 | 5.309463  | 3.636271 | 2.987019  | 3.880815  |
| 30 | C  | 7.106199 | 6.628060  | 5.154693 | 5.091395  | 6.066998  |
| 31 | H  | 7.228837 | 6.369665  | 4.936938 | 5.483943  | 6.281981  |
| 32 | H  | 7.898370 | 7.480832  | 5.901456 | 5.063831  | 6.391304  |
| 33 | H  | 7.441399 | 7.087958  | 5.776816 | 5.954311  | 6.835332  |
|    |    | 16       | 17        | 18       | 19        | 20        |
| 16 | C  | 0.000000 |           |          |           |           |
| 17 | C  | 1.326262 | 0.000000  |          |           |           |
| 18 | H  | 1.087025 | 2.137577  | 0.000000 |           |           |
| 19 | H  | 2.077431 | 1.081267  | 2.463882 | 0.000000  |           |
| 20 | H  | 2.128979 | 1.083271  | 3.114127 | 1.847799  | 0.000000  |
| 21 | N  | 6.908429 | 8.082745  | 6.872429 | 8.950562  | 8.344468  |
| 22 | H  | 7.600762 | 8.731558  | 7.590927 | 9.599700  | 8.954321  |
| 23 | H  | 6.997432 | 8.241508  | 6.802577 | 9.032478  | 8.626072  |
| 24 | C  | 7.435275 | 8.756294  | 6.792589 | 9.255676  | 9.466556  |
| 25 | C  | 7.223936 | 8.512711  | 6.559222 | 8.970491  | 9.242941  |
| 26 | O  | 7.349545 | 8.660353  | 6.854196 | 9.266528  | 9.264441  |
| 27 | H  | 8.475563 | 9.795568  | 7.816056 | 10.279461 | 10.510789 |
| 28 | H  | 6.722004 | 8.037625  | 6.075720 | 8.530861  | 8.757440  |
| 29 | H  | 6.278678 | 7.542787  | 5.584992 | 7.962481  | 8.303642  |
| 30 | C  | 8.479670 | 9.730207  | 7.781489 | 10.127794 | 10.479157 |
| 31 | H  | 8.568570 | 9.776450  | 7.939363 | 10.195898 | 10.476027 |
| 32 | H  | 8.659600 | 9.873467  | 7.861890 | 10.159288 | 10.698383 |
| 33 | H  | 9.357665 | 10.634474 | 8.682385 | 11.069927 | 11.359311 |
|    |    | 21       | 22        | 23       | 24        | 25        |
| 21 | N  | 0.000000 |           |          |           |           |
| 22 | H  | 1.012959 | 0.000000  |          |           |           |
| 23 | H  | 1.020449 | 1.642599  | 0.000000 |           |           |



|    |   |          |          |          |          |          |
|----|---|----------|----------|----------|----------|----------|
| 24 | C | 4.287242 | 4.882863 | 3.303227 | 0.000000 |          |
| 25 | C | 4.262515 | 4.666684 | 3.314452 | 1.464712 | 0.000000 |
| 26 | O | 3.065871 | 3.523078 | 2.053799 | 1.445462 | 1.452674 |
| 27 | H | 4.968985 | 5.491292 | 3.970099 | 1.087403 | 2.212397 |
| 28 | H | 4.426212 | 5.188783 | 3.553275 | 1.085829 | 2.205033 |
| 29 | H | 4.352941 | 4.814142 | 3.539181 | 2.172468 | 1.087817 |
| 30 | C | 5.230665 | 5.391889 | 4.299677 | 2.601718 | 1.503716 |
| 31 | H | 5.132950 | 5.115346 | 4.318370 | 3.441611 | 2.150795 |
| 32 | H | 6.203504 | 6.413168 | 5.274681 | 3.142911 | 2.138398 |
| 33 | H | 5.451743 | 5.563532 | 4.489910 | 2.737843 | 2.154486 |
|    |   | 26       | 27       | 28       | 29       | 30       |
| 26 | O | 0.000000 |          |          |          |          |
| 27 | H | 2.135209 | 0.000000 |          |          |          |
| 28 | H | 2.146364 | 1.846680 | 0.000000 |          |          |
| 29 | H | 2.129218 | 3.107113 | 2.464718 | 0.000000 |          |
| 30 | C | 2.509887 | 2.824543 | 3.531785 | 2.215840 | 0.000000 |
| 31 | H | 2.928150 | 3.777385 | 4.336344 | 2.580905 | 1.094004 |
| 32 | H | 3.415168 | 3.302370 | 3.926595 | 2.558853 | 1.094172 |
| 33 | H | 2.693680 | 2.554098 | 3.792906 | 3.107582 | 1.092724 |
|    |   | 31       | 32       | 33       |          |          |
| 31 | H | 0.000000 |          |          |          |          |
| 32 | H | 1.768123 | 0.000000 |          |          |          |
| 33 | H | 1.774066 | 1.777557 | 0.000000 |          |          |

Stoichiometry C10H18BrN3O

Framework group C1[X(C10H18BrN3O)]

Deg. of freedom 93

Full point group C1 NOp 1

Largest Abelian subgroup C1 NOp 1

Largest concise Abelian subgroup C1 NOp 1

Standard orientation:

| Center<br>Number | Atomic<br>Number | Atomic<br>Type | Coordinates (Angstroms) |          |           |
|------------------|------------------|----------------|-------------------------|----------|-----------|
|                  |                  |                | X                       | Y        | Z         |
| 1                | 6                | 0              | -2.857652               | 2.206329 | -0.171571 |
| 2                | 6                | 0              | -3.740525               | 1.215435 | 0.115914  |
| 3                | 7                | 0              | -3.030601               | 0.021071 | 0.074736  |
| 4                | 6                | 0              | -1.749048               | 0.291250 | -0.235346 |
| 5                | 7                | 0              | -1.625577               | 1.608261 | -0.396776 |
| 6                | 6                | 0              | -0.345000               | 2.284438 | -0.673533 |
| 7                | 6                | 0              | 0.372216                | 2.724350 | 0.611151  |
| 8                | 1                | 0              | -2.999821               | 3.270832 | -0.243260 |
| 9                | 1                | 0              | -4.791465               | 1.260774 | 0.336425  |
| 10               | 1                | 0              | 0.276627                | 1.577607 | -1.223730 |

|    |    |   |           |           |           |
|----|----|---|-----------|-----------|-----------|
| 11 | 1  | 0 | -0.540054 | 3.142814  | -1.316684 |
| 12 | 1  | 0 | -0.232693 | 3.483006  | 1.118688  |
| 13 | 1  | 0 | 0.440385  | 1.855803  | 1.283843  |
| 14 | 35 | 0 | 0.281127  | -2.277749 | -0.192737 |
| 15 | 1  | 0 | -0.958898 | -0.490411 | -0.320102 |
| 16 | 6  | 0 | -3.486574 | -1.311453 | 0.300342  |
| 17 | 6  | 0 | -4.740581 | -1.627351 | 0.594695  |
| 18 | 1  | 0 | -2.677962 | -2.031743 | 0.205715  |
| 19 | 1  | 0 | -4.995053 | -2.666310 | 0.752642  |
| 20 | 1  | 0 | -5.539296 | -0.901631 | 0.688840  |
| 21 | 7  | 0 | 1.654158  | 3.303235  | 0.237767  |
| 22 | 1  | 0 | 2.032073  | 3.869627  | 0.987745  |
| 23 | 1  | 0 | 2.330910  | 2.567818  | 0.031649  |
| 24 | 6  | 0 | 3.725791  | -0.195699 | -1.120995 |
| 25 | 6  | 0 | 3.684992  | -0.443449 | 0.322035  |
| 26 | 8  | 0 | 3.504613  | 0.898880  | -0.203206 |
| 27 | 1  | 0 | 4.685584  | -0.162156 | -1.631012 |
| 28 | 1  | 0 | 2.867790  | -0.473406 | -1.725758 |
| 29 | 1  | 0 | 2.764306  | -0.879974 | 0.702993  |
| 30 | 6  | 0 | 4.927899  | -0.676221 | 1.135767  |
| 31 | 1  | 0 | 4.815714  | -0.263656 | 2.142766  |
| 32 | 1  | 0 | 5.111475  | -1.750511 | 1.232796  |
| 33 | 1  | 0 | 5.799044  | -0.212036 | 0.667061  |

-----

Rotational constants (GHZ):      0.4802847      0.2461298      0.1711182

Standard basis: 6-311++G(d,p) (5D, 7F)

There are    499 symmetry adapted cartesian basis functions of A    symmetry.

There are    482 symmetry adapted basis functions of A    symmetry.

    482 basis functions,    760 primitive gaussians,    499 cartesian basis functions

    71 alpha electrons      71 beta electrons

        nuclear repulsion energy      1292.7653214568 Hartrees.

NAtoms=    33 NActive=    33 NUniq=    33 SFac= 1.00D+00 NAtFMM=    60 NAOKFM=F

Big=F

Integral buffers will be    131072 words long.

Raffenetti 2 integral format.

Two-electron integral symmetry is turned on.

One-electron integrals computed using PRISM.

NBasis=    482 RedAO= T EigKep=    3.84D-06    NBF=    482

NBsUse=    482 1.00D-06 EigRej= -1.00D+00    NBFU=    482

Initial      guess            from            the            checkpoint            file:

"/home/suqian/liuwen/qianmengshijie/nh2po/nh2po.chk"

B after Tr=    0.000000    0.000000    0.000000

        Rot=    0.999987    0.000131    0.000170    -0.005077 Ang=    0.58 deg.

ExpMin= 3.50D-02 ExpMax= 4.40D+05 ExpMxC= 1.51D+04 IAcc=3 IRadAn=            5 AccDes=

0.00D+00

Harris functional with IExCor= 402 and IRadAn= 5 diagonalized for initial guess.  
HarFok: IExCor= 402 AccDes= 0.00D+00 IRadAn= 5 IDoV= 1 UseB2=F ITyADJ=14  
ICtDFT= 3500011 ScaDFX= 1.000000 1.000000 1.000000 1.000000  
FoFCou: FMM=F IPFlag= 0 FMFlag= 100000 FMFlg1= 0  
NFxFlg= 0 DoJE=T BraDBF=F KetDBF=T FulRan=T  
wScrn= 0.000000 ICntrl= 500 IOpCl= 0 I1Cent= 200000004 NGrid=  
0  
NMat0= 1 NMatS0= 1 NMatT0= 0 NMatD0= 1 NMtDS0= 0  
NMtDT0= 0

Petite list used in FoFCou.

Requested convergence on RMS density matrix=1.00D-08 within 128 cycles.

Requested convergence on MAX density matrix=1.00D-06.

Requested convergence on energy=1.00D-06.

No special actions if energy rises.

SCF Done: E(RB3LYP) = -3205.64680635 A.U. after 12 cycles

NFock= 12 Conv=0.65D-08 -V/T= 2.0018

Calling FoFJK, ICntrl= 2127 FMM=F ISym2X=0 I1Cent= 0 IOpClX= 0 NMat=1 NMatS=1  
NMatT=0.

\*\*\*\*\* Axes restored to original set \*\*\*\*\*

| Center<br>Number | Atomic<br>Number | Forces (Hartrees/Bohr) |              |              |
|------------------|------------------|------------------------|--------------|--------------|
|                  |                  | X                      | Y            | Z            |
| 1                | 6                | 0.000076798            | -0.000038435 | -0.000480464 |
| 2                | 6                | 0.000067546            | 0.000154798  | 0.000445769  |
| 3                | 7                | 0.000656722            | 0.000507028  | -0.000421119 |
| 4                | 6                | -0.000922826           | -0.001803173 | -0.000895061 |
| 5                | 7                | 0.000194828            | -0.000189817 | 0.000787288  |
| 6                | 6                | 0.000520939            | 0.000873096  | 0.000115772  |
| 7                | 6                | -0.000773206           | -0.000386617 | 0.000451243  |
| 8                | 1                | 0.000014710            | 0.000043799  | -0.000124713 |
| 9                | 1                | 0.000099602            | 0.000109386  | 0.000065241  |
| 10               | 1                | -0.000066169           | -0.000063958 | 0.000021682  |
| 11               | 1                | -0.000203750           | -0.000013459 | -0.000038344 |
| 12               | 1                | 0.000082508            | 0.000010932  | 0.000020604  |
| 13               | 1                | 0.000275212            | 0.000102928  | -0.000174210 |
| 14               | 35               | -0.000198700           | -0.000000953 | -0.000069106 |
| 15               | 1                | 0.000310849            | 0.000964175  | 0.000406256  |
| 16               | 6                | 0.000276049            | 0.000015475  | -0.000044943 |
| 17               | 6                | -0.000046670           | -0.000199293 | -0.000030351 |
| 18               | 1                | -0.000206295           | 0.000225708  | 0.000277810  |
| 19               | 1                | -0.000071539           | 0.000012635  | 0.000011910  |
| 20               | 1                | 0.000117429            | -0.000089214 | 0.000002060  |

|    |   |              |              |              |
|----|---|--------------|--------------|--------------|
| 21 | 7 | 0.000065567  | -0.000117877 | -0.000372558 |
| 22 | 1 | -0.000062263 | 0.000006241  | -0.000094868 |
| 23 | 1 | 0.000084076  | 0.000203658  | 0.000337891  |
| 24 | 6 | 0.000339055  | 0.000244937  | 0.000446751  |
| 25 | 6 | 0.000164492  | 0.000176631  | -0.000004080 |
| 26 | 8 | -0.000680754 | -0.000269271 | -0.000307466 |
| 27 | 1 | -0.000036458 | -0.000035508 | -0.000121152 |
| 28 | 1 | -0.000054121 | -0.000203149 | 0.000172910  |
| 29 | 1 | -0.000085773 | -0.000208370 | -0.000321698 |
| 30 | 6 | 0.000069759  | 0.000010632  | -0.000087264 |
| 31 | 1 | -0.000064525 | -0.000012509 | -0.000017849 |
| 32 | 1 | 0.000058613  | -0.000021921 | 0.000050773  |
| 33 | 1 | -0.000001706 | -0.000008536 | -0.000008715 |

-----  
Cartesian Forces: Max 0.001803173 RMS 0.000353443

GradGradGradGradGradGradGradGradGradGradGradGradGradGradGradGradGradGradGrad

Berny optimization.

Using GEDIIS/GDIIS optimizer.

FormGI is forming the generalized inverse of G from B-inverse, IUseBI=4.

GSVD: received Info= 1 from GESDD.

Internal Forces: Max 0.000868554 RMS 0.000205630

Search for a local minimum.

Step number 9 out of a maximum of 172

All quantities printed in internal units (Hartrees-Bohrs-Radians)

Mixed Optimization -- En-DIIS/RFO-DIIS

Swapping is turned off.

Update second derivatives using D2CorX and points 2 3 1 4 5  
6 7 8 9

DE= -9.98D-05 DEPred=-8.57D-05 R= 1.16D+00

TightC=F SS= 1.41D+00 RLast= 1.46D-01 DXNew= 5.1608D-01 4.3848D-01

Trust test= 1.16D+00 RLast= 1.46D-01 DXMaxT set to 4.38D-01

ITU= 1 1 1-1 1 0 0-1 0

|                 |         |         |         |         |         |
|-----------------|---------|---------|---------|---------|---------|
| Eigenvalues --- | 0.00079 | 0.00232 | 0.00310 | 0.00395 | 0.00721 |
| Eigenvalues --- | 0.00724 | 0.01060 | 0.01319 | 0.01455 | 0.01484 |
| Eigenvalues --- | 0.01697 | 0.01888 | 0.02105 | 0.02177 | 0.02330 |
| Eigenvalues --- | 0.02373 | 0.02390 | 0.02465 | 0.02677 | 0.03066 |
| Eigenvalues --- | 0.03075 | 0.03096 | 0.03202 | 0.03322 | 0.04008 |
| Eigenvalues --- | 0.04093 | 0.04382 | 0.04679 | 0.04864 | 0.05428 |
| Eigenvalues --- | 0.05756 | 0.05868 | 0.05921 | 0.07945 | 0.08720 |
| Eigenvalues --- | 0.09556 | 0.10768 | 0.12114 | 0.12388 | 0.12519 |
| Eigenvalues --- | 0.12799 | 0.13166 | 0.14690 | 0.15587 | 0.16000 |
| Eigenvalues --- | 0.16000 | 0.16000 | 0.16001 | 0.16005 | 0.16021 |
| Eigenvalues --- | 0.16047 | 0.16125 | 0.17367 | 0.21194 | 0.22040 |

Eigenvalues --- 0.22608 0.22977 0.23792 0.25206 0.27567  
 Eigenvalues --- 0.29042 0.30307 0.31952 0.32106 0.33346  
 Eigenvalues --- 0.33751 0.34284 0.34312 0.34341 0.34543  
 Eigenvalues --- 0.34662 0.34705 0.35053 0.35064 0.35272  
 Eigenvalues --- 0.35303 0.35593 0.35885 0.36117 0.36428  
 Eigenvalues --- 0.36631 0.37989 0.39785 0.41826 0.42691  
 Eigenvalues --- 0.44637 0.45487 0.45564 0.49059 0.56412  
 Eigenvalues --- 0.57184 0.60617 0.98567  
 En-DIIS/RFO-DIIS IScMMF= 0 using points: 9 8 7 6 5  
 RFO step: Lambda=-2.63933681D-05.  
 DidBck=F Rises=F RFO-DIIS coefs: 1.19682 0.79565 -0.16673 -0.29816 -

0.52757

Iteration 1 RMS(Cart)= 0.10636688 RMS(Int)= 0.00362709  
 Iteration 2 RMS(Cart)= 0.00722812 RMS(Int)= 0.00029969  
 Iteration 3 RMS(Cart)= 0.00003541 RMS(Int)= 0.00029914  
 Iteration 4 RMS(Cart)= 0.00000002 RMS(Int)= 0.00029914

| Variable | Old X   | -DE/DX   | Delta X<br>(Linear) | Delta X<br>(Quad) | Delta X<br>(Total) | New X   |
|----------|---------|----------|---------------------|-------------------|--------------------|---------|
| R1       | 2.56612 | -0.00020 | 0.00098             | -0.00059          | 0.00036            | 2.56649 |
| R2       | 2.62285 | -0.00033 | 0.00129             | -0.00004          | 0.00126            | 2.62411 |
| R3       | 2.03400 | 0.00006  | -0.00019            | 0.00003           | -0.00016           | 2.03384 |
| R4       | 2.62678 | 0.00018  | -0.00155            | -0.00060          | -0.00218           | 2.62460 |
| R5       | 2.03104 | -0.00008 | 0.00003             | 0.00005           | 0.00008            | 2.03113 |
| R6       | 2.54344 | -0.00070 | 0.00045             | 0.00053           | 0.00098            | 2.54442 |
| R7       | 2.69538 | 0.00005  | 0.00255             | 0.00191           | 0.00446            | 2.69984 |
| R8       | 2.51825 | 0.00013  | -0.00155            | 0.00191           | 0.00039            | 2.51864 |
| R9       | 2.10644 | -0.00061 | -0.00289            | -0.00385          | -0.00675           | 2.09970 |
| R10      | 2.78611 | -0.00022 | -0.00204            | -0.00066          | -0.00270           | 2.78341 |
| R11      | 2.90203 | -0.00044 | 0.00315             | 0.00026           | 0.00341            | 2.90544 |
| R12      | 2.06036 | 0.00000  | -0.00067            | 0.00025           | -0.00042           | 2.05994 |
| R13      | 2.06015 | 0.00005  | -0.00049            | 0.00044           | -0.00005           | 2.06009 |
| R14      | 2.06929 | -0.00003 | 0.00000             | -0.00014          | -0.00014           | 2.06915 |
| R15      | 2.08002 | -0.00018 | 0.00025             | -0.00025          | 0.00000            | 2.08002 |
| R16      | 2.75012 | -0.00020 | -0.00194            | -0.00050          | -0.00244           | 2.74768 |
| R17      | 4.11790 | -0.00012 | 0.02496             | 0.02522           | 0.05018            | 4.16808 |
| R18      | 2.50627 | 0.00006  | -0.00010            | -0.00028          | -0.00038           | 2.50589 |
| R19      | 2.05418 | -0.00032 | 0.00264             | 0.00123           | 0.00387            | 2.05805 |
| R20      | 2.04330 | 0.00001  | 0.00014             | 0.00007           | 0.00020            | 2.04350 |
| R21      | 2.04709 | -0.00014 | 0.00047             | -0.00002          | 0.00044            | 2.04753 |
| R22      | 1.91422 | -0.00009 | -0.00006            | -0.00029          | -0.00035           | 1.91387 |
| R23      | 1.92837 | -0.00008 | -0.00019            | -0.00133          | -0.00153           | 1.92684 |
| R24      | 3.88112 | 0.00011  | 0.01377             | 0.01513           | 0.02890            | 3.91002 |
| R25      | 2.76790 | -0.00057 | 0.00046             | -0.00082          | -0.00102           | 2.76689 |
| R26      | 2.73153 | 0.00003  | 0.00076             | -0.00037          | 0.00068            | 2.73220 |

|     |         |          |          |          |          |         |
|-----|---------|----------|----------|----------|----------|---------|
| R27 | 2.05489 | 0.00002  | -0.00020 | 0.00030  | 0.00011  | 2.05500 |
| R28 | 2.05192 | 0.00000  | -0.00013 | 0.00002  | -0.00011 | 2.05180 |
| R29 | 2.74516 | 0.00020  | 0.00158  | 0.00077  | 0.00274  | 2.74789 |
| R30 | 2.05568 | 0.00004  | -0.00003 | -0.00004 | -0.00007 | 2.05560 |
| R31 | 2.84161 | 0.00003  | -0.00013 | -0.00005 | -0.00018 | 2.84143 |
| R32 | 2.06737 | -0.00001 | -0.00011 | -0.00005 | -0.00016 | 2.06720 |
| R33 | 2.06768 | 0.00004  | -0.00024 | 0.00008  | -0.00016 | 2.06753 |
| R34 | 2.06495 | 0.00000  | 0.00015  | -0.00012 | 0.00003  | 2.06498 |
| A1  | 1.87241 | -0.00014 | -0.00065 | -0.00008 | -0.00070 | 1.87171 |
| A2  | 2.27826 | 0.00012  | 0.00053  | 0.00082  | 0.00131  | 2.27957 |
| A3  | 2.13247 | 0.00002  | 0.00015  | -0.00069 | -0.00057 | 2.13190 |
| A4  | 1.86363 | -0.00006 | 0.00147  | 0.00064  | 0.00210  | 1.86573 |
| A5  | 2.27626 | -0.00007 | -0.00020 | -0.00119 | -0.00139 | 2.27487 |
| A6  | 2.14328 | 0.00013  | -0.00126 | 0.00057  | -0.00070 | 2.14258 |
| A7  | 1.89720 | 0.00017  | -0.00201 | 0.00032  | -0.00167 | 1.89553 |
| A8  | 2.25850 | 0.00017  | 0.00235  | -0.00079 | 0.00154  | 2.26005 |
| A9  | 2.12747 | -0.00034 | -0.00034 | 0.00048  | 0.00013  | 2.12760 |
| A10 | 1.89075 | -0.00019 | 0.00262  | -0.00095 | 0.00167  | 1.89242 |
| A11 | 2.15520 | 0.00049  | -0.02290 | -0.00683 | -0.02982 | 2.12539 |
| A12 | 2.23718 | -0.00030 | 0.02025  | 0.00762  | 0.02774  | 2.26492 |
| A13 | 1.90070 | 0.00022  | -0.00146 | 0.00015  | -0.00135 | 1.89935 |
| A14 | 2.21913 | -0.00047 | 0.00524  | -0.00136 | 0.00365  | 2.22279 |
| A15 | 2.16094 | 0.00025  | -0.00448 | 0.00066  | -0.00397 | 2.15697 |
| A16 | 1.96059 | -0.00020 | -0.00101 | 0.00110  | 0.00010  | 1.96069 |
| A17 | 1.86776 | -0.00002 | 0.00344  | -0.00041 | 0.00302  | 1.87078 |
| A18 | 1.89278 | -0.00003 | 0.00470  | -0.00120 | 0.00350  | 1.89628 |
| A19 | 1.91940 | -0.00002 | -0.00101 | -0.00100 | -0.00202 | 1.91738 |
| A20 | 1.93001 | 0.00027  | -0.00219 | 0.00212  | -0.00008 | 1.92993 |
| A21 | 1.89099 | 0.00000  | -0.00381 | -0.00076 | -0.00460 | 1.88639 |
| A22 | 1.90520 | 0.00030  | -0.00350 | 0.00096  | -0.00256 | 1.90264 |
| A23 | 1.89035 | 0.00035  | -0.00208 | -0.00061 | -0.00271 | 1.88764 |
| A24 | 1.88674 | -0.00087 | 0.00582  | -0.00183 | 0.00398  | 1.89072 |
| A25 | 1.87302 | -0.00006 | -0.00221 | 0.00110  | -0.00114 | 1.87188 |
| A26 | 1.90704 | 0.00031  | 0.00169  | 0.00222  | 0.00393  | 1.91096 |
| A27 | 1.99998 | 0.00000  | -0.00002 | -0.00172 | -0.00173 | 1.99825 |
| A28 | 2.16505 | 0.00029  | -0.00333 | -0.00305 | -0.00639 | 2.15866 |
| A29 | 1.94708 | -0.00012 | -0.00187 | -0.00120 | -0.00308 | 1.94401 |
| A30 | 2.17104 | -0.00018 | 0.00520  | 0.00423  | 0.00942  | 2.18046 |
| A31 | 2.07580 | 0.00011  | -0.00166 | -0.00050 | -0.00217 | 2.07363 |
| A32 | 2.16141 | -0.00007 | 0.00158  | 0.00069  | 0.00227  | 2.16368 |
| A33 | 2.04598 | -0.00004 | 0.00008  | -0.00019 | -0.00011 | 2.04587 |
| A34 | 1.94024 | 0.00010  | 0.00074  | -0.00001 | 0.00155  | 1.94179 |
| A35 | 1.92767 | -0.00054 | -0.00086 | -0.00394 | -0.00460 | 1.92306 |
| A36 | 1.88083 | 0.00019  | 0.00049  | 0.00248  | 0.00274  | 1.88357 |

|     |          |          |          |          |          |          |
|-----|----------|----------|----------|----------|----------|----------|
| A37 | 2.08505  | 0.00006  | -0.00178 | 0.00005  | -0.00242 | 2.08262  |
| A38 | 2.07538  | -0.00019 | 0.00404  | 0.00030  | 0.00498  | 2.08036  |
| A39 | 1.99271  | -0.00005 | -0.00056 | 0.00009  | -0.00031 | 1.99239  |
| A40 | 2.01131  | 0.00003  | 0.00102  | 0.00166  | 0.00238  | 2.01369  |
| A41 | 2.03098  | 0.00004  | -0.00199 | -0.00127 | -0.00325 | 2.02773  |
| A42 | 2.02247  | -0.00013 | 0.00354  | -0.00026 | 0.00387  | 2.02634  |
| A43 | 2.13684  | -0.00006 | -0.00155 | -0.00051 | -0.00278 | 2.13406  |
| A44 | 1.97396  | 0.00004  | 0.00118  | 0.00242  | 0.00336  | 1.97732  |
| A45 | 2.02788  | -0.00014 | 0.00072  | -0.00061 | 0.00029  | 2.02817  |
| A46 | 2.03525  | 0.00015  | -0.00228 | -0.00020 | -0.00244 | 2.03282  |
| A47 | 2.45815  | 0.00029  | 0.01326  | 0.01622  | 0.02768  | 2.48582  |
| A48 | 2.46626  | 0.00017  | 0.01320  | 0.01486  | 0.02624  | 2.49250  |
| A49 | 1.93368  | -0.00011 | 0.00051  | -0.00049 | 0.00002  | 1.93370  |
| A50 | 1.91628  | 0.00012  | -0.00165 | -0.00040 | -0.00205 | 1.91422  |
| A51 | 1.94022  | 0.00000  | 0.00065  | 0.00060  | 0.00125  | 1.94147  |
| A52 | 1.88162  | -0.00002 | 0.00030  | -0.00023 | 0.00007  | 1.88169  |
| A53 | 1.89270  | 0.00005  | -0.00007 | 0.00029  | 0.00021  | 1.89292  |
| A54 | 1.89796  | -0.00004 | 0.00027  | 0.00023  | 0.00050  | 1.89846  |
| A55 | 3.27923  | 0.00071  | 0.07652  | 0.04351  | 0.12003  | 3.39926  |
| A56 | 3.01520  | -0.00014 | -0.05874 | -0.01136 | -0.06963 | 2.94557  |
| A57 | 2.93805  | 0.00000  | -0.06430 | -0.05573 | -0.12003 | 2.81802  |
| A58 | 3.23706  | -0.00021 | -0.01742 | 0.01391  | -0.00379 | 3.23327  |
| D1  | 0.00956  | -0.00019 | 0.00127  | -0.00297 | -0.00178 | 0.00778  |
| D2  | -3.12630 | -0.00020 | -0.00003 | -0.00458 | -0.00462 | -3.13091 |
| D3  | 3.14018  | 0.00000  | 0.00458  | 0.00122  | 0.00583  | -3.13717 |
| D4  | 0.00433  | -0.00001 | 0.00327  | -0.00039 | 0.00299  | 0.00732  |
| D5  | -0.01274 | 0.00031  | -0.00149 | 0.00543  | 0.00401  | -0.00873 |
| D6  | -3.08151 | 0.00024  | 0.01219  | 0.01372  | 0.02618  | -3.05533 |
| D7  | 3.13870  | 0.00013  | -0.00447 | 0.00165  | -0.00283 | 3.13587  |
| D8  | 0.06993  | 0.00007  | 0.00922  | 0.00995  | 0.01934  | 0.08927  |
| D9  | -0.00324 | 0.00001  | -0.00063 | -0.00045 | -0.00099 | -0.00423 |
| D10 | -3.14055 | -0.00010 | 0.00416  | -0.00460 | -0.00027 | -3.14081 |
| D11 | 3.13316  | 0.00002  | 0.00056  | 0.00100  | 0.00157  | 3.13473  |
| D12 | -0.00415 | -0.00009 | 0.00535  | -0.00315 | 0.00230  | -0.00185 |
| D13 | -0.00470 | 0.00018  | -0.00031 | 0.00385  | 0.00350  | -0.00120 |
| D14 | 3.12665  | -0.00021 | -0.00524 | -0.01115 | -0.01577 | 3.11088  |
| D15 | 3.13299  | 0.00029  | -0.00468 | 0.00763  | 0.00284  | 3.13584  |
| D16 | -0.01884 | -0.00010 | -0.00961 | -0.00737 | -0.01643 | -0.03526 |
| D17 | 0.00749  | 0.00017  | 0.00638  | 0.01711  | 0.02346  | 0.03095  |
| D18 | -3.12909 | 0.00026  | 0.00869  | 0.02130  | 0.02991  | -3.09918 |
| D19 | -3.12932 | 0.00004  | 0.01172  | 0.01248  | 0.02427  | -3.10505 |
| D20 | 0.01728  | 0.00013  | 0.01403  | 0.01666  | 0.03073  | 0.04801  |
| D21 | 0.01074  | -0.00030 | 0.00111  | -0.00572 | -0.00463 | 0.00611  |
| D22 | 3.08247  | -0.00027 | -0.01169 | -0.01378 | -0.02540 | 3.05707  |

|     |          |          |          |          |          |          |
|-----|----------|----------|----------|----------|----------|----------|
| D23 | -3.11999 | 0.00011  | 0.00635  | 0.01031  | 0.01714  | -3.10285 |
| D24 | -0.04825 | 0.00014  | -0.00645 | 0.00225  | -0.00363 | -0.05188 |
| D25 | 1.47018  | 0.00024  | 0.01779  | 0.03601  | 0.05376  | 1.52394  |
| D26 | -2.70481 | 0.00008  | 0.01821  | 0.03517  | 0.05332  | -2.65149 |
| D27 | -0.66829 | 0.00005  | 0.01793  | 0.03345  | 0.05133  | -0.61696 |
| D28 | -1.58847 | 0.00017  | 0.03324  | 0.04550  | 0.07879  | -1.50968 |
| D29 | 0.51973  | 0.00002  | 0.03365  | 0.04465  | 0.07836  | 0.59808  |
| D30 | 2.55625  | -0.00001 | 0.03338  | 0.04293  | 0.07636  | 2.63261  |
| D31 | -1.12874 | -0.00018 | -0.01361 | -0.02005 | -0.03367 | -1.16241 |
| D32 | 0.90533  | 0.00011  | -0.01936 | -0.01856 | -0.03790 | 0.86743  |
| D33 | 3.08179  | -0.00021 | -0.01703 | -0.02220 | -0.03922 | 3.04257  |
| D34 | 3.07626  | -0.00001 | -0.01661 | -0.01957 | -0.03618 | 3.04008  |
| D35 | -1.17286 | 0.00027  | -0.02236 | -0.01807 | -0.04041 | -1.21327 |
| D36 | 1.00360  | -0.00005 | -0.02003 | -0.02172 | -0.04174 | 0.96186  |
| D37 | 0.98855  | -0.00017 | -0.00981 | -0.01932 | -0.02916 | 0.95939  |
| D38 | 3.02262  | 0.00011  | -0.01556 | -0.01783 | -0.03339 | 2.98923  |
| D39 | -1.08411 | -0.00020 | -0.01324 | -0.02147 | -0.03471 | -1.11882 |
| D40 | 2.82235  | 0.00008  | -0.01964 | -0.01577 | -0.03559 | 2.78675  |
| D41 | -1.37389 | 0.00003  | -0.01912 | -0.01526 | -0.03419 | -1.40808 |
| D42 | 0.75086  | 0.00005  | -0.01973 | -0.01713 | -0.03705 | 0.71380  |
| D43 | 2.83780  | 0.00000  | -0.01920 | -0.01661 | -0.03565 | 2.80215  |
| D44 | -1.35129 | -0.00010 | -0.01810 | -0.01902 | -0.03730 | -1.38859 |
| D45 | 0.73565  | -0.00014 | -0.01758 | -0.01851 | -0.03590 | 0.69976  |
| D46 | -3.13821 | 0.00005  | 0.00267  | 0.00213  | 0.00482  | -3.13339 |
| D47 | 0.00333  | 0.00004  | 0.00132  | 0.00300  | 0.00434  | 0.00767  |
| D48 | -0.00227 | -0.00005 | 0.00007  | -0.00261 | -0.00255 | -0.00482 |
| D49 | 3.13927  | -0.00006 | -0.00128 | -0.00173 | -0.00303 | 3.13624  |
| D50 | 1.23015  | -0.00001 | -0.01041 | 0.02580  | 0.01562  | 1.24577  |
| D51 | -0.56310 | 0.00005  | -0.01273 | -0.01573 | -0.02771 | -0.59080 |
| D52 | -2.97710 | -0.00002 | -0.01076 | 0.01874  | 0.00724  | -2.96985 |
| D53 | 1.51285  | 0.00004  | -0.01308 | -0.02279 | -0.03608 | 1.47676  |
| D54 | -2.70232 | 0.00014  | -0.00003 | 0.00336  | 0.00344  | -2.69887 |
| D55 | -0.01607 | 0.00010  | -0.00125 | 0.00096  | -0.00030 | -0.01637 |
| D56 | -0.02373 | -0.00007 | 0.00008  | 0.00087  | 0.00097  | -0.02276 |
| D57 | 2.66252  | -0.00010 | -0.00114 | -0.00154 | -0.00278 | 2.65974  |
| D58 | 1.95410  | -0.00022 | -0.02428 | -0.03218 | -0.05709 | 1.89701  |
| D59 | -0.46442 | -0.00025 | -0.02155 | -0.03222 | -0.05427 | -0.51869 |
| D60 | 0.50285  | 0.00036  | 0.02275  | 0.03545  | 0.05873  | 0.56158  |
| D61 | -1.91975 | 0.00023  | 0.02417  | 0.03354  | 0.05824  | -1.86151 |
| D62 | 2.55132  | 0.00004  | -0.00082 | 0.00076  | -0.00004 | 2.55128  |
| D63 | -1.65545 | 0.00003  | -0.00118 | -0.00009 | -0.00124 | -1.65669 |
| D64 | 0.44543  | 0.00006  | -0.00151 | 0.00032  | -0.00116 | 0.44427  |
| D65 | 1.34838  | 0.00002  | -0.00062 | 0.00137  | 0.00068  | 1.34906  |
| D66 | -2.85839 | 0.00000  | -0.00097 | 0.00053  | -0.00052 | -2.85890 |



|     |          |          |          |          |          |          |
|-----|----------|----------|----------|----------|----------|----------|
| D67 | -0.75751 | 0.00004  | -0.00131 | 0.00094  | -0.00044 | -0.75795 |
| D68 | -1.04872 | -0.00006 | -0.00065 | -0.00168 | -0.00227 | -1.05099 |
| D69 | 1.02770  | -0.00008 | -0.00100 | -0.00252 | -0.00347 | 1.02423  |
| D70 | 3.12858  | -0.00004 | -0.00133 | -0.00211 | -0.00340 | 3.12518  |

| Item                 | Value    | Threshold | Converged? |
|----------------------|----------|-----------|------------|
| Maximum Force        | 0.000869 | 0.000450  | NO         |
| RMS Force            | 0.000206 | 0.000300  | YES        |
| Maximum Displacement | 0.412620 | 0.001800  | NO         |
| RMS Displacement     | 0.111644 | 0.001200  | NO         |

Predicted change in Energy=-1.602675D-04

GradGradGradGradGradGradGradGradGradGradGradGradGradGradGradGradGradGradGrad

Input orientation:

| Center<br>Number | Atomic<br>Number | Atomic<br>Type | Coordinates (Angstroms) |           |           |
|------------------|------------------|----------------|-------------------------|-----------|-----------|
|                  |                  |                | X                       | Y         | Z         |
| 1                | 6                | 0              | -2.890011               | 2.148626  | -0.267105 |
| 2                | 6                | 0              | -3.719217               | 1.130383  | 0.079460  |
| 3                | 7                | 0              | -2.950704               | -0.026279 | 0.101927  |
| 4                | 6                | 0              | -1.685360               | 0.292154  | -0.230382 |
| 5                | 7                | 0              | -1.627964               | 1.603341  | -0.462470 |
| 6                | 6                | 0              | -0.377301               | 2.325626  | -0.751647 |
| 7                | 6                | 0              | 0.346998                | 2.775434  | 0.527787  |
| 8                | 1                | 0              | -3.085586               | 3.199470  | -0.392858 |
| 9                | 1                | 0              | -4.770239               | 1.134824  | 0.304367  |
| 10               | 1                | 0              | 0.261133                | 1.649378  | -1.320291 |
| 11               | 1                | 0              | -0.608350               | 3.183803  | -1.382983 |
| 12               | 1                | 0              | -0.260932               | 3.532047  | 1.034605  |
| 13               | 1                | 0              | 0.419959                | 1.909311  | 1.203101  |
| 14               | 35               | 0              | 0.133432                | -2.395587 | 0.115177  |
| 15               | 1                | 0              | -0.876793               | -0.469628 | -0.252273 |
| 16               | 6                | 0              | -3.337015               | -1.368079 | 0.404423  |
| 17               | 6                | 0              | -4.579561               | -1.727535 | 0.696491  |
| 18               | 1                | 0              | -2.483175               | -2.043460 | 0.374458  |
| 19               | 1                | 0              | -4.782657               | -2.765710 | 0.920806  |
| 20               | 1                | 0              | -5.417248               | -1.040970 | 0.726423  |
| 21               | 7                | 0              | 1.626059                | 3.354374  | 0.149666  |
| 22               | 1                | 0              | 1.989594                | 3.951808  | 0.882215  |
| 23               | 1                | 0              | 2.309103                | 2.616969  | -0.021661 |
| 24               | 6                | 0              | 3.598431                | -0.278845 | -1.053890 |
| 25               | 6                | 0              | 3.538763                | -0.465544 | 0.397105  |
| 26               | 8                | 0              | 3.385829                | 0.857760  | -0.185947 |
| 27               | 1                | 0              | 4.564988                | -0.283601 | -1.552199 |

|    |   |   |          |           |           |
|----|---|---|----------|-----------|-----------|
| 28 | 1 | 0 | 2.745307 | -0.567090 | -1.660509 |
| 29 | 1 | 0 | 2.609490 | -0.872737 | 0.789414  |
| 30 | 6 | 0 | 4.771352 | -0.685930 | 1.229587  |
| 31 | 1 | 0 | 4.659179 | -0.230218 | 2.217717  |
| 32 | 1 | 0 | 4.932708 | -1.758629 | 1.372094  |
| 33 | 1 | 0 | 5.654900 | -0.258100 | 0.749607  |

-----  
Distance matrix (angstroms):

|    |    | 1        | 2        | 3        | 4        | 5        |
|----|----|----------|----------|----------|----------|----------|
| 1  | C  | 0.000000 |          |          |          |          |
| 2  | C  | 1.358126 | 0.000000 |          |          |          |
| 3  | N  | 2.206825 | 1.388879 | 0.000000 |          |          |
| 4  | C  | 2.213373 | 2.221532 | 1.346449 | 0.000000 |          |
| 5  | N  | 1.388620 | 2.211496 | 2.173440 | 1.332805 | 0.000000 |
| 6  | C  | 2.565116 | 3.645236 | 3.589213 | 2.473408 | 1.472915 |
| 7  | C  | 3.391602 | 4.409228 | 4.348078 | 3.297268 | 2.500977 |
| 8  | H  | 1.076261 | 2.214880 | 3.266261 | 3.231025 | 2.162669 |
| 9  | H  | 2.211251 | 1.074826 | 2.167914 | 3.242303 | 3.268247 |
| 10 | H  | 3.359785 | 4.251099 | 3.891841 | 2.611282 | 2.075250 |
| 11 | H  | 2.742763 | 4.004093 | 4.242193 | 3.293945 | 2.093996 |
| 12 | H  | 3.243510 | 4.317410 | 4.557021 | 3.758470 | 2.798199 |
| 13 | H  | 3.629694 | 4.359137 | 4.039859 | 3.017025 | 2.657392 |
| 14 | Br | 5.471491 | 5.222705 | 3.889176 | 3.263643 | 4.407677 |
| 15 | H  | 3.302804 | 3.278636 | 2.150144 | 1.111112 | 2.214867 |
| 16 | C  | 3.608043 | 2.548332 | 1.428695 | 2.426379 | 3.535773 |
| 17 | C  | 4.336787 | 3.047724 | 2.429189 | 3.648923 | 4.598897 |
| 18 | H  | 4.260364 | 3.418787 | 2.088511 | 2.541148 | 3.838097 |
| 19 | H  | 5.398512 | 4.125325 | 3.395747 | 4.502112 | 5.563644 |
| 20 | H  | 4.188979 | 2.831368 | 2.739239 | 4.076724 | 4.771217 |
| 21 | N  | 4.692805 | 5.789908 | 5.690154 | 4.526270 | 3.745597 |
| 22 | H  | 5.327564 | 6.418362 | 6.390662 | 5.304359 | 4.517765 |
| 23 | H  | 5.225933 | 6.209735 | 5.887920 | 4.626453 | 4.089286 |
| 24 | C  | 6.972196 | 7.537797 | 6.655139 | 5.377978 | 5.586377 |
| 25 | C  | 6.971670 | 7.438155 | 6.511011 | 5.315948 | 5.631538 |
| 26 | O  | 6.407737 | 7.115226 | 6.404377 | 5.102827 | 5.076463 |
| 27 | H  | 7.946333 | 8.560941 | 7.699869 | 6.414479 | 6.565113 |
| 28 | H  | 6.408860 | 6.906444 | 5.986919 | 4.734382 | 5.027083 |
| 29 | H  | 6.363127 | 6.676006 | 5.666118 | 4.565379 | 5.064997 |
| 30 | C  | 8.304894 | 8.758512 | 7.831788 | 6.691582 | 7.003931 |
| 31 | H  | 8.295993 | 8.753336 | 7.901169 | 6.820500 | 7.076263 |
| 32 | H  | 8.896547 | 9.212660 | 8.170835 | 7.111432 | 7.596768 |
| 33 | H  | 8.935409 | 9.500056 | 8.633056 | 7.425805 | 7.614079 |
|    |    | 6        | 7        | 8        | 9        | 10       |
| 6  | C  | 0.000000 |          |          |          |          |

|    |    |          |          |          |           |          |
|----|----|----------|----------|----------|-----------|----------|
| 7  | C  | 1.537493 | 0.000000 |          |           |          |
| 8  | H  | 2.868300 | 3.579110 | 0.000000 |           |          |
| 9  | H  | 4.672374 | 5.378441 | 2.754440 | 0.000000  |          |
| 10 | H  | 1.090076 | 2.165817 | 3.803084 | 5.312154  | 0.000000 |
| 11 | H  | 1.090154 | 2.174971 | 2.667825 | 4.936272  | 1.764764 |
| 12 | H  | 2.158631 | 1.094946 | 3.182284 | 5.158854  | 3.059825 |
| 13 | H  | 2.151739 | 1.100700 | 4.062074 | 5.324069  | 2.541711 |
| 14 | Br | 4.827224 | 5.191851 | 6.474940 | 6.045294  | 4.294022 |
| 15 | H  | 2.883108 | 3.554797 | 4.284952 | 4.247709  | 2.631677 |
| 16 | C  | 4.872357 | 5.545797 | 4.643423 | 2.885943  | 5.002635 |
| 17 | C  | 6.015332 | 6.676539 | 5.262511 | 2.895379  | 6.237249 |
| 18 | H  | 4.979130 | 5.590628 | 5.332916 | 3.916257  | 4.903106 |
| 19 | H  | 6.937288 | 7.561223 | 6.339490 | 3.948964  | 7.067909 |
| 20 | H  | 6.238568 | 6.915990 | 4.966967 | 2.308859  | 6.608405 |
| 21 | N  | 2.425724 | 1.454010 | 4.745307 | 6.772220  | 2.632643 |
| 22 | H  | 3.303961 | 2.051243 | 5.286708 | 7.346063  | 3.624885 |
| 23 | H  | 2.799022 | 2.043737 | 5.438729 | 7.240175  | 2.610911 |
| 24 | C  | 4.762464 | 4.733090 | 7.563844 | 8.595229  | 3.863492 |
| 25 | C  | 4.944271 | 4.550646 | 7.611726 | 8.462227  | 4.262065 |
| 26 | O  | 4.078700 | 3.663521 | 6.885175 | 8.175489  | 3.417180 |
| 27 | H  | 5.645810 | 5.610301 | 8.485702 | 9.623161  | 4.723702 |
| 28 | H  | 4.352530 | 4.659720 | 7.056432 | 7.952401  | 3.346580 |
| 29 | H  | 4.639539 | 4.300753 | 7.100320 | 7.663287  | 4.040632 |
| 30 | C  | 6.285171 | 5.661136 | 8.914042 | 9.757721  | 5.683099 |
| 31 | H  | 6.380877 | 5.521296 | 8.863366 | 9.717930  | 5.949217 |
| 32 | H  | 7.027632 | 6.503792 | 9.591186 | 10.181321 | 6.378641 |
| 33 | H  | 6.731779 | 6.117627 | 9.468692 | 10.527203 | 6.084051 |
|    |    | 11       | 12       | 13       | 14        | 15       |
| 11 | H  | 0.000000 |          |          |           |          |
| 12 | H  | 2.467125 | 0.000000 |          |           |          |
| 13 | H  | 3.060977 | 1.767845 | 0.000000 |           |          |
| 14 | Br | 5.824459 | 6.011466 | 4.449475 | 0.000000  |          |
| 15 | H  | 3.833813 | 4.248381 | 3.075554 | 2.205651  | 0.000000 |
| 16 | C  | 5.600006 | 5.819850 | 5.049161 | 3.630900  | 2.700214 |
| 17 | C  | 6.649510 | 6.813816 | 6.203105 | 4.795469  | 4.024050 |
| 18 | H  | 5.824761 | 6.038248 | 4.973855 | 2.652894  | 2.334566 |
| 19 | H  | 7.624237 | 7.753753 | 7.000195 | 4.995393  | 4.680158 |
| 20 | H  | 6.739718 | 6.898917 | 6.557771 | 5.746186  | 4.679744 |
| 21 | N  | 2.714902 | 2.091750 | 2.156991 | 5.940638  | 4.587899 |
| 22 | H  | 3.531326 | 2.294403 | 2.595865 | 6.657561  | 5.390022 |
| 23 | H  | 3.268950 | 2.925431 | 2.360019 | 5.466077  | 4.441869 |
| 24 | C  | 5.458502 | 5.812004 | 4.470427 | 4.225345  | 4.550453 |
| 25 | C  | 5.803877 | 5.552010 | 4.002062 | 3.924389  | 4.463053 |
| 26 | O  | 4.774604 | 4.684061 | 3.439709 | 4.610101  | 4.465009 |

|    |   |          |           |          |           |           |
|----|---|----------|-----------|----------|-----------|-----------|
| 27 | H | 6.230165 | 6.673846  | 5.438916 | 5.184528  | 5.597982  |
| 28 | H | 5.039170 | 5.753610  | 4.442979 | 3.649433  | 3.887446  |
| 29 | H | 5.615098 | 5.263228  | 3.564404 | 2.984047  | 3.660845  |
| 30 | C | 7.123310 | 6.569111  | 5.066616 | 5.067064  | 5.843307  |
| 31 | H | 7.236535 | 6.305702  | 4.855720 | 5.439842  | 6.066725  |
| 32 | H | 7.919685 | 7.421526  | 5.817839 | 5.001861  | 6.168501  |
| 33 | H | 7.458079 | 7.031608  | 5.684007 | 5.954660  | 6.611470  |
|    |   | 16       | 17        | 18       | 19        | 20        |
| 16 | C | 0.000000 |           |          |           |           |
| 17 | C | 1.326060 | 0.000000  |          |           |           |
| 18 | H | 1.089073 | 2.144377  | 0.000000 |           |           |
| 19 | H | 2.076031 | 1.081375  | 2.471388 | 0.000000  |           |
| 20 | H | 2.130271 | 1.083506  | 3.120521 | 1.848031  | 0.000000  |
| 21 | N | 6.855550 | 8.039561  | 6.787706 | 8.895039  | 8.322251  |
| 22 | H | 7.543358 | 8.685806  | 7.497114 | 9.538863  | 8.933834  |
| 23 | H | 6.923930 | 8.175828  | 6.696450 | 8.952907  | 8.581180  |
| 24 | C | 7.170322 | 8.487762  | 6.491531 | 8.962508  | 9.221324  |
| 25 | C | 6.934763 | 8.221280  | 6.225276 | 8.649338  | 8.980517  |
| 26 | O | 7.106302 | 8.420801  | 6.570870 | 9.004365  | 9.051616  |
| 27 | H | 8.212558 | 9.527032  | 7.515698 | 9.982740  | 10.266974 |
| 28 | H | 6.473034 | 7.781760  | 5.801532 | 8.256353  | 8.517588  |
| 29 | H | 5.979507 | 7.240289  | 5.241948 | 7.631805  | 8.028748  |
| 30 | C | 8.178743 | 9.423837  | 7.429824 | 9.782633  | 10.207193 |
| 31 | H | 8.277794 | 9.482110  | 7.595963 | 9.861995  | 10.218397 |
| 32 | H | 8.335301 | 9.536282  | 7.488106 | 9.777842  | 10.394879 |
| 33 | H | 9.066739 | 10.339549 | 8.340055 | 10.735922 | 11.099815 |
|    |   | 21       | 22        | 23       | 24        | 25        |
| 21 | N | 0.000000 |           |          |           |           |
| 22 | H | 1.012775 | 0.000000  |          |           |           |
| 23 | H | 1.019641 | 1.643433  | 0.000000 |           |           |
| 24 | C | 4.305703 | 4.922935  | 3.333708 | 0.000000  |           |
| 25 | C | 4.279186 | 4.706193  | 3.345043 | 1.464173  | 0.000000  |
| 26 | O | 3.072867 | 3.558593  | 2.069093 | 1.445820  | 1.454122  |
| 27 | H | 4.976797 | 5.522474  | 3.980562 | 1.087459  | 2.210436  |
| 28 | H | 4.461763 | 5.239941  | 3.607538 | 1.085768  | 2.207636  |
| 29 | H | 4.386899 | 4.865092  | 3.595293 | 2.174507  | 1.087778  |
| 30 | C | 5.232891 | 5.419175  | 4.305512 | 2.599178  | 1.503620  |
| 31 | H | 5.130882 | 5.138054  | 4.317887 | 3.439616  | 2.150660  |
| 32 | H | 6.210560 | 6.442903  | 5.288829 | 3.139340  | 2.136763  |
| 33 | H | 5.444397 | 5.583492  | 4.478307 | 2.735342  | 2.155303  |
|    |   | 26       | 27        | 28       | 29        | 30        |
| 26 | O | 0.000000 |           |          |           |           |
| 27 | H | 2.135360 | 0.000000  |          |           |           |
| 28 | H | 2.148208 | 1.844814  | 0.000000 |           |           |

```

29 H 2.132757 3.107122 2.472648 0.000000
30 C 2.511252 2.818295 3.531520 2.214113 0.000000
31 H 2.929627 3.771470 4.337859 2.579555 1.093918
32 H 3.415526 3.295818 3.924433 2.553754 1.094088
33 H 2.696125 2.546934 3.790761 3.107070 1.092739
      31      32      33
31 H 0.000000
32 H 1.768031 0.000000
33 H 1.774144 1.777818 0.000000

```

Stoichiometry C10H18BrN3O

Framework group C1[X(C10H18BrN3O)]

Deg. of freedom 93

Full point group C1 NOp 1

Largest Abelian subgroup C1 NOp 1

Largest concise Abelian subgroup C1 NOp 1

Standard orientation:

| Center<br>Number | Atomic<br>Number | Atomic<br>Type | Coordinates (Angstroms) |           |           |
|------------------|------------------|----------------|-------------------------|-----------|-----------|
|                  |                  |                | X                       | Y         | Z         |
| 1                | 6                | 0              | -2.792872               | 2.277000  | -0.156081 |
| 2                | 6                | 0              | -3.642274               | 1.253793  | 0.119728  |
| 3                | 7                | 0              | -2.899663               | 0.082279  | 0.048541  |
| 4                | 6                | 0              | -1.629782               | 0.397268  | -0.269434 |
| 5                | 7                | 0              | -1.544665               | 1.720674  | -0.402551 |
| 6                | 6                | 0              | -0.280148               | 2.435330  | -0.646970 |
| 7                | 6                | 0              | 0.462604                | 2.771370  | 0.656595  |
| 8                | 1                | 0              | -2.965759               | 3.338348  | -0.200662 |
| 9                | 1                | 0              | -4.691399               | 1.264122  | 0.353139  |
| 10               | 1                | 0              | 0.339180                | 1.790209  | -1.270282 |
| 11               | 1                | 0              | -0.496203               | 3.343554  | -1.209897 |
| 12               | 1                | 0              | -0.124848               | 3.500612  | 1.224057  |
| 13               | 1                | 0              | 0.520732                | 1.855347  | 1.264101  |
| 14               | 35               | 0              | 0.130782                | -2.347855 | -0.142620 |
| 15               | 1                | 0              | -0.838604               | -0.378110 | -0.355437 |
| 16               | 6                | 0              | -3.313817               | -1.269802 | 0.252316  |
| 17               | 6                | 0              | -4.562093               | -1.623145 | 0.526885  |
| 18               | 1                | 0              | -2.475501               | -1.959422 | 0.164392  |
| 19               | 1                | 0              | -4.786822               | -2.670624 | 0.674042  |
| 20               | 1                | 0              | -5.384010               | -0.922724 | 0.615483  |
| 21               | 7                | 0              | 1.751711                | 3.349222  | 0.312451  |
| 22               | 1                | 0              | 2.133420                | 3.881581  | 1.084853  |
| 23               | 1                | 0              | 2.416942                | 2.612162  | 0.080331  |
| 24               | 6                | 0              | 3.634276                | -0.224830 | -1.177913 |

|    |   |   |          |           |           |
|----|---|---|----------|-----------|-----------|
| 25 | 6 | 0 | 3.580206 | -0.519212 | 0.255341  |
| 26 | 8 | 0 | 3.452962 | 0.847354  | -0.225052 |
| 27 | 1 | 0 | 4.597115 | -0.212990 | -1.683254 |
| 28 | 1 | 0 | 2.770866 | -0.447804 | -1.797347 |
| 29 | 1 | 0 | 2.644725 | -0.934535 | 0.623639  |
| 30 | 6 | 0 | 4.813131 | -0.828611 | 1.058485  |
| 31 | 1 | 0 | 4.717812 | -0.446477 | 2.079046  |
| 32 | 1 | 0 | 4.951433 | -1.912266 | 1.118412  |
| 33 | 1 | 0 | 5.702772 | -0.385100 | 0.604708  |

-----

Rotational constants (GHZ):      0.4566519      0.2609154      0.1744770

Standard basis: 6-311++G(d,p) (5D, 7F)

There are    499 symmetry adapted cartesian basis functions of A    symmetry.

There are    482 symmetry adapted basis functions of A    symmetry.

482 basis functions,    760 primitive gaussians,    499 cartesian basis functions

71 alpha electrons      71 beta electrons

nuclear repulsion energy      1298.4420681616 Hartrees.

NAtoms=    33 NActive=    33 NUniq=    33 SFac= 1.00D+00 NAtFMM=    60 NAOKFM=F

Big=F

Integral buffers will be    131072 words long.

Raffenetti 2 integral format.

Two-electron integral symmetry is turned on.

One-electron integrals computed using PRISM.

NBasis=    482 RedAO= T EigKep=    3.87D-06    NBF=    482

NBsUse=    482 1.00D-06 EigRej= -1.00D+00    NBFU=    482

Initial      guess      from      the      checkpoint      file:

"/home/suqian/liuwen/qianmengshijie/nh2po/nh2po.chk"

B after Tr=    0.000000    0.000000    0.000000

Rot=    0.999924    -0.004216    -0.001559    0.011446 Ang=    -1.41 deg.

ExpMin= 3.50D-02 ExpMax= 4.40D+05 ExpMxC= 1.51D+04 IAcc=3 IRadAn=      5 AccDes=

0.00D+00

Harris functional with IExCor=    402 and IRadAn=      5 diagonalized for initial guess.

HarFok: IExCor=    402 AccDes= 0.00D+00 IRadAn=      5 IDoV= 1 UseB2=F ITyADJ=14

ICtDFT= 3500011 ScaDFX= 1.000000 1.000000 1.000000 1.000000

FoFCou: FMM=F IPFlag=      0 FMFlag=      100000 FMFlg1=      0

NFxFlg=      0 DoJE=T BraDBF=F KetDBF=T FulRan=T

wScrn= 0.000000 ICntrl=      500 IOpCl= 0 I1Cent=    200000004 NGrid=

0

NMat0=    1 NMatS0=      1 NMatT0=    0 NMatD0=    1 NMtDS0=    0

NMtDT0=    0

Petite list used in FoFCou.

Requested convergence on RMS density matrix=1.00D-08 within 128 cycles.

Requested convergence on MAX density matrix=1.00D-06.

Requested convergence on      energy=1.00D-06.

No special actions if energy rises.

SCF Done: E(RB3LYP) = -3205.64656377 A.U. after 11 cycles

NFock= 11 Conv=0.75D-08 -V/T= 2.0018

Calling FoFJK, ICntrl= 2127 FMM=F ISym2X=0 l1Cent= 0 IOpClX= 0 NMat=1 NMatS=1

NMatT=0.

\*\*\*\*\* Axes restored to original set \*\*\*\*\*

```
-----
```

| Center<br>Number | Atomic<br>Number | Forces (Hartrees/Bohr) |              |              |
|------------------|------------------|------------------------|--------------|--------------|
|                  |                  | X                      | Y            | Z            |
| 1                | 6                | 0.000721879            | -0.000066901 | -0.000021336 |
| 2                | 6                | -0.000214349           | 0.000268962  | 0.000312615  |
| 3                | 7                | 0.000917832            | 0.001143361  | -0.001325738 |
| 4                | 6                | -0.002277820           | -0.003653364 | 0.001030649  |
| 5                | 7                | 0.000226795            | -0.000063820 | 0.000689042  |
| 6                | 6                | 0.001261704            | 0.001512800  | -0.000308636 |
| 7                | 6                | -0.002071632           | -0.000947951 | 0.000689229  |
| 8                | 1                | 0.000018941            | 0.000059393  | -0.000215517 |
| 9                | 1                | 0.000107027            | 0.000081099  | -0.000022646 |
| 10               | 1                | 0.000055139            | -0.000172164 | -0.000021945 |
| 11               | 1                | -0.000541889           | -0.000174707 | -0.000035535 |
| 12               | 1                | 0.000284478            | 0.000033013  | 0.000035726  |
| 13               | 1                | 0.000529604            | 0.000293783  | -0.000026656 |
| 14               | 35               | 0.001905207            | -0.000683723 | -0.000011794 |
| 15               | 1                | 0.000597599            | 0.001949642  | -0.000544944 |
| 16               | 6                | -0.000933194           | 0.000791551  | 0.000395732  |
| 17               | 6                | -0.000285534           | -0.000065599 | -0.000010523 |
| 18               | 1                | -0.000264930           | -0.000070006 | 0.000126953  |
| 19               | 1                | -0.000107422           | -0.000011448 | -0.000007047 |
| 20               | 1                | -0.000016843           | -0.000113735 | -0.000024560 |
| 21               | 7                | 0.000218063            | 0.000088606  | -0.000537231 |
| 22               | 1                | -0.000033850           | 0.000001801  | -0.000065949 |
| 23               | 1                | 0.000326727            | 0.000215763  | 0.000090775  |
| 24               | 6                | 0.000835502            | 0.000558218  | 0.000410481  |
| 25               | 6                | 0.000403500            | 0.000311331  | 0.000114492  |
| 26               | 8                | -0.001018909           | -0.000965993 | -0.000388520 |
| 27               | 1                | -0.000149049           | -0.000012625 | -0.000251577 |
| 28               | 1                | -0.000192555           | -0.000118906 | 0.000222607  |
| 29               | 1                | -0.000275388           | -0.000116184 | -0.000362697 |
| 30               | 6                | -0.000015364           | -0.000008533 | 0.000012022  |
| 31               | 1                | -0.000080198           | -0.000031778 | -0.000008423 |
| 32               | 1                | 0.000128844            | -0.000030347 | 0.000113131  |
| 33               | 1                | -0.000059917           | -0.000001537 | -0.000052182 |

```
-----
```

Cartesian Forces: Max 0.003653364 RMS 0.000712389

GradGradGradGradGradGradGradGradGradGradGradGradGradGradGradGradGradGradGradGrad

Berny optimization.

Using GEDIIS/GDIIS optimizer.

FormGI is forming the generalized inverse of G from B-inverse, IUseBI=4.

GSVD: received Info= 1 from GESDD.

Internal Forces: Max 0.006221746 RMS 0.000884202

Search for a local minimum.

Step number 10 out of a maximum of 172

All quantities printed in internal units (Hartrees-Bohrs-Radians)

Mixed Optimization -- En-DIIS/RFO-DIIS

Swapping is turned off.

Update second derivatives using D2CorX and points 6 7 8 9 10

DE= 2.43D-04 DEPred=-1.60D-04 R=-1.51D+00

Trust test=-1.51D+00 RLast= 3.29D-01 DXMaxT set to 2.19D-01

ITU= -1 1 1 1-1 1 0 0-1 0

|                 |         |         |         |         |         |
|-----------------|---------|---------|---------|---------|---------|
| Eigenvalues --- | 0.00191 | 0.00246 | 0.00389 | 0.00523 | 0.00716 |
| Eigenvalues --- | 0.00723 | 0.01059 | 0.01148 | 0.01435 | 0.01521 |
| Eigenvalues --- | 0.01880 | 0.01980 | 0.02102 | 0.02191 | 0.02328 |
| Eigenvalues --- | 0.02352 | 0.02401 | 0.02468 | 0.02571 | 0.03070 |
| Eigenvalues --- | 0.03074 | 0.03114 | 0.03254 | 0.03507 | 0.04018 |
| Eigenvalues --- | 0.04058 | 0.04371 | 0.04999 | 0.05105 | 0.05432 |
| Eigenvalues --- | 0.05749 | 0.05871 | 0.05936 | 0.07812 | 0.08711 |
| Eigenvalues --- | 0.09521 | 0.10500 | 0.12135 | 0.12423 | 0.12511 |
| Eigenvalues --- | 0.12826 | 0.13102 | 0.15600 | 0.15858 | 0.15997 |
| Eigenvalues --- | 0.16000 | 0.16000 | 0.16002 | 0.16007 | 0.16026 |
| Eigenvalues --- | 0.16083 | 0.17212 | 0.17361 | 0.20382 | 0.22015 |
| Eigenvalues --- | 0.22206 | 0.22972 | 0.23643 | 0.25823 | 0.28387 |
| Eigenvalues --- | 0.29043 | 0.30473 | 0.31981 | 0.32105 | 0.33459 |
| Eigenvalues --- | 0.33793 | 0.34282 | 0.34303 | 0.34339 | 0.34541 |
| Eigenvalues --- | 0.34576 | 0.34670 | 0.34897 | 0.35058 | 0.35065 |
| Eigenvalues --- | 0.35277 | 0.35588 | 0.35885 | 0.36151 | 0.36429 |
| Eigenvalues --- | 0.36610 | 0.36765 | 0.38403 | 0.41817 | 0.42407 |
| Eigenvalues --- | 0.44298 | 0.45473 | 0.46016 | 0.49131 | 0.54885 |
| Eigenvalues --- | 0.56374 | 0.60533 | 0.96729 |         |         |

En-DIIS/RFO-DIIS IScMMF= 0 using points: 10 9 8 7 6

RFO step: Lambda=-2.83274762D-04.

EnCoef did 100 forward-backward iterations

DidBck=T Rises=T En-DIIS coefs: 0.51259 0.01646 0.00064 0.00658

0.46373

|             |            |            |           |            |
|-------------|------------|------------|-----------|------------|
| Iteration 1 | RMS(Cart)= | 0.07965536 | RMS(Int)= | 0.01300464 |
| Iteration 2 | RMS(Cart)= | 0.04189335 | RMS(Int)= | 0.00280211 |
| Iteration 3 | RMS(Cart)= | 0.00340811 | RMS(Int)= | 0.00028753 |



| Iteration 4 | RMS(Cart)= | 0.00001836 | RMS(Int)=           | 0.00028742        |                    |         |
|-------------|------------|------------|---------------------|-------------------|--------------------|---------|
| Iteration 5 | RMS(Cart)= | 0.00000000 | RMS(Int)=           | 0.00028742        |                    |         |
| Variable    | Old X      | -DE/DX     | Delta X<br>(Linear) | Delta X<br>(Quad) | Delta X<br>(Total) | New X   |
| R1          | 2.56649    | -0.00081   | -0.00053            | 0.00029           | -0.00022           | 2.56626 |
| R2          | 2.62411    | -0.00122   | -0.00115            | 0.00037           | -0.00080           | 2.62331 |
| R3          | 2.03384    | 0.00008    | 0.00020             | -0.00024          | -0.00003           | 2.03380 |
| R4          | 2.62460    | 0.00038    | 0.00213             | -0.00282          | -0.00066           | 2.62394 |
| R5          | 2.03113    | -0.00011   | -0.00025            | 0.00042           | 0.00017            | 2.03130 |
| R6          | 2.54442    | 0.00096    | -0.00197            | 0.00459           | 0.00262            | 2.54704 |
| R7          | 2.69984    | 0.00003    | -0.00361            | 0.00371           | 0.00010            | 2.69994 |
| R8          | 2.51864    | 0.00090    | -0.00205            | 0.00663           | 0.00455            | 2.52318 |
| R9          | 2.09970    | 0.00102    | 0.00517             | -0.00521          | -0.00004           | 2.09966 |
| R10         | 2.78341    | -0.00005   | -0.00002            | 0.00513           | 0.00511            | 2.78852 |
| R11         | 2.90544    | -0.00084   | -0.00339            | 0.00358           | 0.00019            | 2.90563 |
| R12         | 2.05994    | 0.00015    | 0.00002             | 0.00084           | 0.00087            | 2.06081 |
| R13         | 2.06009    | 0.00000    | -0.00011            | 0.00050           | 0.00039            | 2.06048 |
| R14         | 2.06915    | -0.00012   | 0.00014             | -0.00031          | -0.00017           | 2.06898 |
| R15         | 2.08002    | -0.00021   | -0.00010            | -0.00024          | -0.00034           | 2.07968 |
| R16         | 2.74768    | 0.00020    | 0.00024             | 0.00373           | 0.00397            | 2.75165 |
| R17         | 4.16808    | 0.00147    | -0.04424            | 0.05836           | 0.01411            | 4.18219 |
| R18         | 2.50589    | 0.00043    | 0.00063             | -0.00111          | -0.00048           | 2.50541 |
| R19         | 2.05805    | -0.00017   | -0.00360            | 0.00373           | 0.00013            | 2.05818 |
| R20         | 2.04350    | 0.00003    | -0.00010            | 0.00000           | -0.00010           | 2.04340 |
| R21         | 2.04753    | -0.00006   | -0.00058            | 0.00071           | 0.00013            | 2.04766 |
| R22         | 1.91387    | -0.00006   | 0.00026             | -0.00043          | -0.00017           | 1.91370 |
| R23         | 1.92684    | 0.00010    | 0.00209             | -0.00420          | -0.00208           | 1.92476 |
| R24         | 3.91002    | 0.00015    | -0.02322            | 0.02565           | 0.00242            | 3.91244 |
| R25         | 2.76689    | -0.00031   | -0.00017            | 0.00116           | 0.00149            | 2.76837 |
| R26         | 2.73220    | -0.00030   | -0.00011            | -0.00108          | -0.00140           | 2.73080 |
| R27         | 2.05500    | -0.00002   | -0.00028            | 0.00081           | 0.00053            | 2.05553 |
| R28         | 2.05180    | 0.00006    | 0.00005             | 0.00009           | 0.00013            | 2.05194 |
| R29         | 2.74789    | -0.00005   | -0.00139            | -0.00037          | -0.00204           | 2.74586 |
| R30         | 2.05560    | 0.00015    | 0.00007             | 0.00003           | 0.00010            | 2.05570 |
| R31         | 2.84143    | 0.00003    | 0.00029             | -0.00036          | -0.00007           | 2.84136 |
| R32         | 2.06720    | -0.00001   | 0.00011             | -0.00004          | 0.00007            | 2.06727 |
| R33         | 2.06753    | 0.00006    | 0.00013             | 0.00002           | 0.00015            | 2.06768 |
| R34         | 2.06498    | -0.00003   | 0.00005             | -0.00020          | -0.00015           | 2.06482 |
| A1          | 1.87171    | -0.00006   | -0.00031            | 0.00219           | 0.00185            | 1.87356 |
| A2          | 2.27957    | 0.00011    | -0.00088            | 0.00096           | 0.00011            | 2.27968 |
| A3          | 2.13190    | -0.00005   | 0.00116             | -0.00314          | -0.00196           | 2.12995 |
| A4          | 1.86573    | 0.00032    | -0.00216            | 0.00301           | 0.00086            | 1.86659 |
| A5          | 2.27487    | -0.00024   | 0.00120             | -0.00182          | -0.00062           | 2.27425 |
| A6          | 2.14258    | -0.00008   | 0.00094             | -0.00118          | -0.00024           | 2.14234 |

|     |         |          |          |          |          |         |
|-----|---------|----------|----------|----------|----------|---------|
| A7  | 1.89553 | 0.00003  | 0.00211  | -0.00301 | -0.00092 | 1.89461 |
| A8  | 2.26005 | -0.00256 | -0.00070 | -0.00300 | -0.00369 | 2.25635 |
| A9  | 2.12760 | 0.00254  | -0.00141 | 0.00602  | 0.00462  | 2.13222 |
| A10 | 1.89242 | -0.00131 | -0.00215 | 0.00239  | 0.00022  | 1.89264 |
| A11 | 2.12539 | 0.00622  | 0.02601  | -0.02063 | 0.00544  | 2.13083 |
| A12 | 2.26492 | -0.00491 | -0.02363 | 0.01782  | -0.00571 | 2.25921 |
| A13 | 1.89935 | 0.00103  | 0.00252  | -0.00459 | -0.00202 | 1.89733 |
| A14 | 2.22279 | -0.00149 | -0.00238 | -0.00353 | -0.00571 | 2.21708 |
| A15 | 2.15697 | 0.00047  | 0.00124  | 0.00614  | 0.00754  | 2.16451 |
| A16 | 1.96069 | -0.00023 | -0.00363 | 0.01033  | 0.00666  | 1.96736 |
| A17 | 1.87078 | 0.00010  | -0.00308 | 0.00560  | 0.00251  | 1.87329 |
| A18 | 1.89628 | -0.00034 | -0.00170 | -0.00375 | -0.00544 | 1.89084 |
| A19 | 1.91738 | -0.00010 | 0.00166  | -0.00112 | 0.00054  | 1.91792 |
| A20 | 1.92993 | 0.00054  | 0.00278  | -0.00757 | -0.00476 | 1.92517 |
| A21 | 1.88639 | 0.00003  | 0.00401  | -0.00360 | 0.00043  | 1.88682 |
| A22 | 1.90264 | 0.00068  | 0.00392  | -0.00666 | -0.00271 | 1.89992 |
| A23 | 1.88764 | 0.00067  | 0.00401  | -0.00593 | -0.00192 | 1.88572 |
| A24 | 1.89072 | -0.00144 | -0.00681 | 0.01152  | 0.00475  | 1.89546 |
| A25 | 1.87188 | -0.00017 | 0.00139  | -0.00080 | 0.00063  | 1.87251 |
| A26 | 1.91096 | 0.00034  | -0.00219 | -0.00046 | -0.00268 | 1.90829 |
| A27 | 1.99825 | -0.00001 | 0.00007  | 0.00159  | 0.00163  | 1.99988 |
| A28 | 2.15866 | -0.00009 | 0.00649  | -0.00839 | -0.00189 | 2.15677 |
| A29 | 1.94401 | 0.00030  | 0.00219  | -0.00137 | 0.00082  | 1.94483 |
| A30 | 2.18046 | -0.00020 | -0.00865 | 0.00963  | 0.00099  | 2.18144 |
| A31 | 2.07363 | 0.00008  | 0.00204  | -0.00203 | 0.00002  | 2.07365 |
| A32 | 2.16368 | 0.00005  | -0.00196 | 0.00195  | -0.00001 | 2.16367 |
| A33 | 2.04587 | -0.00013 | -0.00008 | 0.00007  | -0.00001 | 2.04586 |
| A34 | 1.94179 | 0.00001  | -0.00137 | 0.00123  | -0.00113 | 1.94066 |
| A35 | 1.92306 | -0.00060 | 0.00371  | -0.00305 | 0.00037  | 1.92343 |
| A36 | 1.88357 | 0.00035  | -0.00186 | 0.00002  | -0.00156 | 1.88200 |
| A37 | 2.08262 | 0.00025  | 0.00155  | -0.00105 | 0.00120  | 2.08382 |
| A38 | 2.08036 | -0.00029 | -0.00502 | 0.00622  | 0.00053  | 2.08090 |
| A39 | 1.99239 | 0.00012  | 0.00062  | -0.00038 | 0.00005  | 1.99245 |
| A40 | 2.01369 | -0.00015 | -0.00111 | -0.00073 | -0.00154 | 2.01215 |
| A41 | 2.02773 | 0.00001  | 0.00293  | -0.00318 | -0.00026 | 2.02747 |
| A42 | 2.02634 | -0.00019 | -0.00459 | 0.00656  | 0.00134  | 2.02768 |
| A43 | 2.13406 | 0.00004  | 0.00200  | -0.00235 | 0.00036  | 2.13442 |
| A44 | 1.97732 | -0.00011 | -0.00131 | -0.00183 | -0.00290 | 1.97442 |
| A45 | 2.02817 | 0.00004  | 0.00023  | -0.00120 | -0.00117 | 2.02700 |
| A46 | 2.03282 | 0.00016  | 0.00226  | -0.00142 | 0.00080  | 2.03362 |
| A47 | 2.48582 | 0.00024  | -0.02288 | 0.02691  | 0.00554  | 2.49136 |
| A48 | 2.49250 | -0.00003 | -0.02171 | 0.02464  | 0.00448  | 2.49698 |
| A49 | 1.93370 | -0.00012 | -0.00030 | 0.00031  | 0.00001  | 1.93371 |
| A50 | 1.91422 | 0.00027  | 0.00218  | -0.00235 | -0.00017 | 1.91405 |

|     |          |          |          |          |          |          |
|-----|----------|----------|----------|----------|----------|----------|
| A51 | 1.94147  | -0.00012 | -0.00117 | 0.00150  | 0.00033  | 1.94180  |
| A52 | 1.88169  | -0.00008 | -0.00005 | -0.00031 | -0.00036 | 1.88133  |
| A53 | 1.89292  | 0.00010  | -0.00020 | 0.00035  | 0.00015  | 1.89307  |
| A54 | 1.89846  | -0.00005 | -0.00048 | 0.00049  | 0.00002  | 1.89848  |
| A55 | 3.39926  | -0.00477 | -0.09803 | 0.04879  | -0.04924 | 3.35002  |
| A56 | 2.94557  | -0.00045 | 0.07632  | -0.08666 | -0.01103 | 2.93455  |
| A57 | 2.81802  | 0.00265  | 0.06909  | 0.28265  | 0.35175  | 3.16977  |
| A58 | 3.23327  | -0.00028 | -0.03484 | -0.04935 | -0.08383 | 3.14944  |
| D1  | 0.00778  | -0.00002 | -0.00157 | 0.00046  | -0.00103 | 0.00675  |
| D2  | -3.13091 | 0.00006  | 0.00192  | -0.00353 | -0.00161 | -3.13252 |
| D3  | -3.13717 | -0.00020 | -0.00543 | 0.00441  | -0.00103 | -3.13820 |
| D4  | 0.00732  | -0.00013 | -0.00194 | 0.00042  | -0.00160 | 0.00572  |
| D5  | -0.00873 | -0.00008 | 0.00138  | -0.00154 | -0.00024 | -0.00897 |
| D6  | -3.05533 | -0.00027 | -0.01947 | 0.02109  | 0.00146  | -3.05388 |
| D7  | 3.13587  | 0.00008  | 0.00485  | -0.00509 | -0.00024 | 3.13563  |
| D8  | 0.08927  | -0.00011 | -0.01600 | 0.01754  | 0.00145  | 0.09072  |
| D9  | -0.00423 | 0.00011  | 0.00122  | 0.00081  | 0.00196  | -0.00227 |
| D10 | -3.14081 | -0.00004 | 0.00048  | -0.00301 | -0.00266 | 3.13971  |
| D11 | 3.13473  | 0.00004  | -0.00194 | 0.00443  | 0.00248  | 3.13721  |
| D12 | -0.00185 | -0.00010 | -0.00268 | 0.00061  | -0.00214 | -0.00399 |
| D13 | -0.00120 | -0.00016 | -0.00036 | -0.00180 | -0.00213 | -0.00333 |
| D14 | 3.11088  | -0.00022 | 0.01200  | -0.01512 | -0.00363 | 3.10726  |
| D15 | 3.13584  | -0.00004 | 0.00032  | 0.00164  | 0.00207  | 3.13791  |
| D16 | -0.03526 | -0.00010 | 0.01267  | -0.01167 | 0.00057  | -0.03469 |
| D17 | 0.03095  | 0.00024  | -0.01763 | 0.02805  | 0.01044  | 0.04139  |
| D18 | -3.09918 | 0.00018  | -0.02428 | 0.04006  | 0.01584  | -3.08334 |
| D19 | -3.10505 | 0.00009  | -0.01846 | 0.02381  | 0.00528  | -3.09977 |
| D20 | 0.04801  | 0.00003  | -0.02511 | 0.03582  | 0.01069  | 0.05870  |
| D21 | 0.00611  | 0.00015  | -0.00063 | 0.00207  | 0.00146  | 0.00757  |
| D22 | 3.05707  | 0.00020  | 0.01913  | -0.02013 | -0.00102 | 3.05605  |
| D23 | -3.10285 | -0.00004 | -0.01444 | 0.01770  | 0.00285  | -3.10000 |
| D24 | -0.05188 | 0.00001  | 0.00531  | -0.00451 | 0.00036  | -0.05152 |
| D25 | 1.52394  | 0.00038  | -0.03654 | 0.03128  | -0.00522 | 1.51872  |
| D26 | -2.65149 | 0.00019  | -0.03868 | 0.03985  | 0.00121  | -2.65028 |
| D27 | -0.61696 | 0.00010  | -0.03648 | 0.03667  | 0.00025  | -0.61672 |
| D28 | -1.50968 | 0.00016  | -0.06025 | 0.05764  | -0.00266 | -1.51234 |
| D29 | 0.59808  | -0.00003 | -0.06239 | 0.06621  | 0.00377  | 0.60185  |
| D30 | 2.63261  | -0.00012 | -0.06019 | 0.06303  | 0.00281  | 2.63541  |
| D31 | -1.16241 | -0.00017 | 0.02445  | -0.00208 | 0.02240  | -1.14001 |
| D32 | 0.86743  | 0.00037  | 0.03050  | -0.00983 | 0.02065  | 0.88808  |
| D33 | 3.04257  | -0.00013 | 0.02881  | -0.00438 | 0.02443  | 3.06699  |
| D34 | 3.04008  | -0.00008 | 0.02954  | -0.01501 | 0.01453  | 3.05461  |
| D35 | -1.21327 | 0.00046  | 0.03558  | -0.02277 | 0.01278  | -1.20049 |
| D36 | 0.96186  | -0.00004 | 0.03389  | -0.01732 | 0.01656  | 0.97842  |

|     |          |          |          |          |          |          |
|-----|----------|----------|----------|----------|----------|----------|
| D37 | 0.95939  | -0.00038 | 0.02173  | -0.00513 | 0.01662  | 0.97601  |
| D38 | 2.98923  | 0.00015  | 0.02777  | -0.01289 | 0.01487  | 3.00410  |
| D39 | -1.11882 | -0.00035 | 0.02608  | -0.00744 | 0.01864  | -1.10018 |
| D40 | 2.78675  | 0.00022  | 0.03215  | -0.04304 | -0.01066 | 2.77610  |
| D41 | -1.40808 | 0.00027  | 0.03137  | -0.04423 | -0.01309 | -1.42118 |
| D42 | 0.71380  | 0.00004  | 0.03262  | -0.04149 | -0.00863 | 0.70518  |
| D43 | 2.80215  | 0.00010  | 0.03184  | -0.04268 | -0.01106 | 2.79109  |
| D44 | -1.38859 | 0.00002  | 0.03239  | -0.04120 | -0.00857 | -1.39716 |
| D45 | 0.69976  | 0.00007  | 0.03161  | -0.04239 | -0.01101 | 0.68875  |
| D46 | -3.13339 | -0.00006 | -0.00527 | 0.00973  | 0.00444  | -3.12895 |
| D47 | 0.00767  | 0.00001  | -0.00420 | 0.00719  | 0.00297  | 0.01064  |
| D48 | -0.00482 | 0.00001  | 0.00227  | -0.00400 | -0.00171 | -0.00653 |
| D49 | 3.13624  | 0.00008  | 0.00334  | -0.00654 | -0.00317 | 3.13307  |
| D50 | 1.24577  | 0.00014  | -0.00950 | -0.00395 | -0.01365 | 1.23212  |
| D51 | -0.59080 | 0.00027  | 0.01584  | -0.03842 | -0.02354 | -0.61434 |
| D52 | -2.96985 | 0.00003  | 0.01172  | -0.00256 | 0.01011  | -2.95974 |
| D53 | 1.47676  | 0.00016  | 0.03707  | -0.03704 | 0.00023  | 1.47699  |
| D54 | -2.69887 | 0.00002  | 0.00059  | -0.00577 | -0.00527 | -2.70414 |
| D55 | -0.01637 | 0.00008  | 0.00028  | 0.00070  | 0.00100  | -0.01537 |
| D56 | -0.02276 | -0.00005 | 0.00008  | -0.00190 | -0.00185 | -0.02460 |
| D57 | 2.65974  | 0.00001  | -0.00023 | 0.00457  | 0.00442  | 2.66416  |
| D58 | 1.89701  | -0.00029 | 0.04643  | -0.06203 | -0.01497 | 1.88204  |
| D59 | -0.51869 | -0.00028 | 0.04221  | -0.05547 | -0.01274 | -0.53143 |
| D60 | 0.56158  | 0.00051  | -0.04492 | 0.05768  | 0.01221  | 0.57379  |
| D61 | -1.86151 | 0.00034  | -0.04732 | 0.06375  | 0.01588  | -1.84563 |
| D62 | 2.55128  | -0.00001 | 0.00122  | -0.00310 | -0.00189 | 2.54938  |
| D63 | -1.65669 | -0.00001 | 0.00236  | -0.00479 | -0.00244 | -1.65913 |
| D64 | 0.44427  | 0.00003  | 0.00245  | -0.00476 | -0.00232 | 0.44195  |
| D65 | 1.34906  | 0.00002  | 0.00020  | -0.00110 | -0.00084 | 1.34822  |
| D66 | -2.85890 | 0.00002  | 0.00134  | -0.00278 | -0.00139 | -2.86029 |
| D67 | -0.75795 | 0.00006  | 0.00144  | -0.00275 | -0.00126 | -0.75921 |
| D68 | -1.05099 | -0.00004 | -0.00077 | 0.00533  | 0.00452  | -1.04647 |
| D69 | 1.02423  | -0.00003 | 0.00037  | 0.00365  | 0.00397  | 1.02820  |
| D70 | 3.12518  | 0.00000  | 0.00046  | 0.00368  | 0.00410  | 3.12928  |

| Item                 | Value    | Threshold | Converged? |
|----------------------|----------|-----------|------------|
| Maximum Force        | 0.006222 | 0.000450  | NO         |
| RMS Force            | 0.000884 | 0.000300  | NO         |
| Maximum Displacement | 0.633493 | 0.001800  | NO         |
| RMS Displacement     | 0.097590 | 0.001200  | NO         |

Predicted change in Energy=-3.960116D-04

GradGradGradGradGradGradGradGradGradGradGradGradGradGradGradGradGradGradGrad

Input orientation:

-----

| Center<br>Number | Atomic<br>Number | Atomic<br>Type | Coordinates (Angstroms) |           |           |
|------------------|------------------|----------------|-------------------------|-----------|-----------|
|                  |                  |                | X                       | Y         | Z         |
| 1                | 6                | 0              | -2.885657               | 2.125923  | -0.329860 |
| 2                | 6                | 0              | -3.743778               | 1.135057  | 0.025103  |
| 3                | 7                | 0              | -2.997721               | -0.032277 | 0.118645  |
| 4                | 6                | 0              | -1.714508               | 0.253926  | -0.178189 |
| 5                | 7                | 0              | -1.626301               | 1.556310  | -0.458905 |
| 6                | 6                | 0              | -0.356870               | 2.258409  | -0.729191 |
| 7                | 6                | 0              | 0.329867                | 2.758353  | 0.552466  |
| 8                | 1                | 0              | -3.058642               | 3.174004  | -0.502778 |
| 9                | 1                | 0              | -4.801783               | 1.165536  | 0.212573  |
| 10               | 1                | 0              | 0.296548                | 1.558733  | -1.251460 |
| 11               | 1                | 0              | -0.562823               | 3.094007  | -1.398701 |
| 12               | 1                | 0              | -0.300253               | 3.524516  | 1.015776  |
| 13               | 1                | 0              | 0.391365                | 1.915387  | 1.257287  |
| 14               | 35               | 0              | 0.347097                | -2.332669 | -0.220053 |
| 15               | 1                | 0              | -0.914174               | -0.515865 | -0.140607 |
| 16               | 6                | 0              | -3.422991               | -1.352581 | 0.461087  |
| 17               | 6                | 0              | -4.684226               | -1.674401 | 0.713028  |
| 18               | 1                | 0              | -2.581887               | -2.043238 | 0.503091  |
| 19               | 1                | 0              | -4.918537               | -2.696574 | 0.976694  |
| 20               | 1                | 0              | -5.507901               | -0.971444 | 0.673661  |
| 21               | 7                | 0              | 1.614318                | 3.342807  | 0.193496  |
| 22               | 1                | 0              | 1.943313                | 3.974160  | 0.913696  |
| 23               | 1                | 0              | 2.313383                | 2.611279  | 0.076895  |
| 24               | 6                | 0              | 3.595928                | -0.260219 | -1.039779 |
| 25               | 6                | 0              | 3.593493                | -0.463918 | 0.410949  |
| 26               | 8                | 0              | 3.396409                | 0.861534  | -0.150896 |
| 27               | 1                | 0              | 4.542881                | -0.241429 | -1.574671 |
| 28               | 1                | 0              | 2.725187                | -0.554474 | -1.617937 |
| 29               | 1                | 0              | 2.685568                | -0.887753 | 0.834520  |
| 30               | 6                | 0              | 4.859670                | -0.669283 | 1.195413  |
| 31               | 1                | 0              | 4.775776                | -0.224902 | 2.191515  |
| 32               | 1                | 0              | 5.045081                | -1.740218 | 1.321608  |
| 33               | 1                | 0              | 5.717283                | -0.221328 | 0.687738  |

Distance matrix (angstroms):

|   |   | 1        | 2        | 3        | 4        | 5        |
|---|---|----------|----------|----------|----------|----------|
| 1 | C | 0.000000 |          |          |          |          |
| 2 | C | 1.358008 | 0.000000 |          |          |          |
| 3 | N | 2.207157 | 1.388531 | 0.000000 |          |          |
| 4 | C | 2.213361 | 2.221634 | 1.347834 | 0.000000 |          |
| 5 | N | 1.388196 | 2.212561 | 2.176687 | 1.335211 | 0.000000 |

|    |    |          |          |          |          |          |
|----|----|----------|----------|----------|----------|----------|
| 6  | C  | 2.563548 | 3.647194 | 3.597244 | 2.482889 | 1.475619 |
| 7  | C  | 3.393827 | 4.416762 | 4.364477 | 3.314436 | 2.508858 |
| 8  | H  | 1.076243 | 2.214808 | 3.266514 | 3.230930 | 2.161125 |
| 9  | H  | 2.210909 | 1.074918 | 2.167536 | 3.242683 | 3.269139 |
| 10 | H  | 3.361172 | 4.258327 | 3.906496 | 2.626553 | 2.079783 |
| 11 | H  | 2.734075 | 3.997897 | 4.243197 | 3.298802 | 2.092538 |
| 12 | H  | 3.232818 | 4.306833 | 4.553235 | 3.757982 | 2.794086 |
| 13 | H  | 3.647223 | 4.384815 | 4.071340 | 3.042326 | 2.673056 |
| 14 | Br | 5.508339 | 5.368471 | 4.073614 | 3.307936 | 4.367552 |
| 15 | H  | 3.301758 | 3.280193 | 2.154586 | 1.111092 | 2.214125 |
| 16 | C  | 3.607536 | 2.545845 | 1.428749 | 2.430730 | 3.540639 |
| 17 | C  | 4.331851 | 3.041503 | 2.427790 | 3.651292 | 4.600199 |
| 18 | H  | 4.262392 | 3.417605 | 2.089182 | 2.548225 | 3.846470 |
| 19 | H  | 5.394086 | 4.119099 | 3.394740 | 4.506107 | 5.566577 |
| 20 | H  | 4.180538 | 2.823137 | 2.736983 | 4.076396 | 4.768550 |
| 21 | N  | 4.690893 | 5.797561 | 5.715566 | 4.556361 | 3.757500 |
| 22 | H  | 5.318022 | 6.418186 | 6.410730 | 5.330292 | 4.524619 |
| 23 | H  | 5.237464 | 6.234670 | 5.932786 | 4.673980 | 4.113532 |
| 24 | C  | 6.943242 | 7.546659 | 6.698516 | 5.404389 | 5.559575 |
| 25 | C  | 7.016798 | 7.519385 | 6.611797 | 5.388624 | 5.664293 |
| 26 | O  | 6.410543 | 7.147592 | 6.461924 | 5.146981 | 5.079882 |
| 27 | H  | 7.895383 | 8.551182 | 7.731219 | 6.430432 | 6.521933 |
| 28 | H  | 6.350215 | 6.884882 | 6.003340 | 4.736801 | 4.973350 |
| 29 | H  | 6.440230 | 6.788476 | 5.791726 | 4.657218 | 5.122363 |
| 30 | C  | 8.374349 | 8.868178 | 7.956369 | 6.779301 | 7.053924 |
| 31 | H  | 8.401265 | 8.895259 | 8.047431 | 6.925934 | 7.154301 |
| 32 | H  | 8.976134 | 9.337675 | 8.309684 | 7.205418 | 7.651448 |
| 33 | H  | 8.975281 | 9.580738 | 8.735612 | 7.497148 | 7.642187 |
|    |    | 6        | 7        | 8        | 9        | 10       |
| 6  | C  | 0.000000 |          |          |          |          |
| 7  | C  | 1.537595 | 0.000000 |          |          |          |
| 8  | H  | 2.861669 | 3.573276 | 0.000000 |          |          |
| 9  | H  | 4.673173 | 5.383904 | 2.753945 | 0.000000 |          |
| 10 | H  | 1.090535 | 2.166645 | 3.798279 | 5.318926 | 0.000000 |
| 11 | H  | 1.090360 | 2.171776 | 2.652959 | 4.927879 | 1.765578 |
| 12 | H  | 2.156651 | 1.094856 | 3.168213 | 5.145260 | 3.059548 |
| 13 | H  | 2.150259 | 1.100521 | 4.072407 | 5.349999 | 2.535745 |
| 14 | Br | 4.672557 | 5.149329 | 6.480929 | 6.239837 | 4.026085 |
| 15 | H  | 2.890262 | 3.570503 | 4.283112 | 4.250335 | 2.646469 |
| 16 | C  | 4.884374 | 5.567052 | 4.642387 | 2.881620 | 5.024294 |
| 17 | C  | 6.022707 | 6.694492 | 5.256209 | 2.886090 | 6.254637 |
| 18 | H  | 4.997338 | 5.615695 | 5.334668 | 3.912616 | 4.933359 |
| 19 | H  | 6.947712 | 7.581685 | 6.333382 | 3.938706 | 7.090092 |
| 20 | H  | 6.239637 | 6.928608 | 4.956573 | 2.297365 | 6.618120 |

|    |    |          |          |          |           |          |
|----|----|----------|----------|----------|-----------|----------|
| 21 | N  | 2.431636 | 1.456111 | 4.727563 | 6.775487  | 2.647138 |
| 22 | H  | 3.306618 | 2.052287 | 5.259867 | 7.340045  | 3.637860 |
| 23 | H  | 2.811501 | 2.045026 | 5.432433 | 7.261829  | 2.634389 |
| 24 | C  | 4.697293 | 4.723789 | 7.507701 | 8.609455  | 3.773501 |
| 25 | C  | 4.931161 | 4.588499 | 7.636772 | 8.554246  | 4.210056 |
| 26 | O  | 4.046330 | 3.673734 | 6.865787 | 8.211874  | 3.362509 |
| 27 | H  | 5.565212 | 5.592217 | 8.402220 | 9.617512  | 4.623461 |
| 28 | H  | 4.266292 | 4.628502 | 6.971213 | 7.935016  | 3.240098 |
| 29 | H  | 4.647575 | 4.350054 | 7.161158 | 7.788660  | 4.005499 |
| 30 | C  | 6.283929 | 5.716746 | 8.964060 | 9.883127  | 5.636784 |
| 31 | H  | 6.406357 | 5.599321 | 8.954880 | 9.878216  | 5.924434 |
| 32 | H  | 7.026796 | 6.562161 | 9.651336 | 10.326378 | 6.328690 |
| 33 | H  | 6.712088 | 6.158008 | 9.484855 | 10.620731 | 6.026067 |
|    |    | 11       | 12       | 13       | 14        | 15       |
| 11 | H  | 0.000000 |          |          |           |          |
| 12 | H  | 2.466572 | 0.000000 |          |           |          |
| 13 | H  | 3.058413 | 1.768038 | 0.000000 |           |          |
| 14 | Br | 5.627254 | 6.021042 | 4.497830 | 0.000000  |          |
| 15 | H  | 3.838936 | 4.247210 | 3.093465 | 2.213118  | 0.000000 |
| 16 | C  | 5.604598 | 5.817667 | 5.085554 | 3.954502  | 2.712249 |
| 17 | C  | 6.647036 | 6.807321 | 6.240547 | 5.159280  | 4.035368 |
| 18 | H  | 5.838213 | 6.038923 | 5.007969 | 3.030784  | 2.351273 |
| 19 | H  | 7.625325 | 7.748034 | 7.038748 | 5.412164  | 4.694547 |
| 20 | H  | 6.728772 | 6.888418 | 6.593615 | 6.077224  | 4.687527 |
| 21 | N  | 2.708678 | 2.091588 | 2.159813 | 5.829914  | 4.625391 |
| 22 | H  | 3.521728 | 2.290456 | 2.600989 | 6.603741  | 5.425598 |
| 23 | H  | 3.268481 | 2.923455 | 2.360453 | 5.328891  | 4.499273 |
| 24 | C  | 5.354892 | 5.807732 | 4.503221 | 3.939785  | 4.605962 |
| 25 | C  | 5.762693 | 5.606664 | 4.078113 | 3.798616  | 4.541582 |
| 26 | O  | 4.713435 | 4.702967 | 3.481935 | 4.416563  | 4.525313 |
| 27 | H  | 6.101173 | 6.659482 | 5.468722 | 4.879844  | 5.649008 |
| 28 | H  | 4.916349 | 5.720829 | 4.451275 | 3.281977  | 3.927969 |
| 29 | H  | 5.603011 | 5.330674 | 3.646874 | 2.944207  | 3.747974 |
| 30 | C  | 7.091912 | 6.651693 | 5.162373 | 5.013354  | 5.928385 |
| 31 | H  | 7.239160 | 6.419233 | 4.967562 | 5.465487  | 6.156214 |
| 32 | H  | 7.887864 | 7.508897 | 5.918163 | 4.979836  | 6.256982 |
| 33 | H  | 7.401649 | 7.095752 | 5.766744 | 5.841297  | 6.689479 |
|    |    | 16       | 17       | 18       | 19        | 20       |
| 16 | C  | 0.000000 |          |          |           |          |
| 17 | C  | 1.325804 | 0.000000 |          |           |          |
| 18 | H  | 1.089141 | 2.144748 | 0.000000 |           |          |
| 19 | H  | 2.075771 | 1.081323 | 2.472059 | 0.000000  |          |
| 20 | H  | 2.130094 | 1.083576 | 3.120800 | 1.848040  | 0.000000 |
| 21 | N  | 6.891499 | 8.069321 | 6.834725 | 8.931165  | 8.340823 |

|    |   |          |           |          |           |           |
|----|---|----------|-----------|----------|-----------|-----------|
| 22 | H | 7.574711 | 8.710384  | 7.540233 | 9.570143  | 8.946352  |
| 23 | H | 6.983249 | 8.230325  | 6.768297 | 9.015741  | 8.623486  |
| 24 | C | 7.260240 | 8.580979  | 6.612489 | 9.082847  | 9.290932  |
| 25 | C | 7.072714 | 8.371210  | 6.374799 | 8.818133  | 9.119319  |
| 26 | O | 7.195905 | 8.513167  | 6.678730 | 9.114270  | 9.128332  |
| 27 | H | 8.296631 | 9.613869  | 7.637141 | 10.102258 | 10.325024 |
| 28 | H | 6.539068 | 7.847741  | 5.905947 | 8.351480  | 8.556227  |
| 29 | H | 6.137590 | 7.412654  | 5.402876 | 7.817573  | 8.195475  |
| 30 | C | 8.343177 | 9.608794  | 7.598937 | 9.988547  | 10.385088 |
| 31 | H | 8.454929 | 9.683936  | 7.764814 | 10.077929 | 10.421862 |
| 32 | H | 8.520505 | 9.748545  | 7.676746 | 10.015351 | 10.600767 |
| 33 | H | 9.212802 | 10.502546 | 8.498805 | 10.923873 | 11.250228 |
|    |   | 21       | 22        | 23       | 24        | 25        |
| 21 | N | 0.000000 |           |          |           |           |
| 22 | H | 1.012686 | 0.000000  |          |           |           |
| 23 | H | 1.018538 | 1.641534  | 0.000000 |           |           |
| 24 | C | 4.292964 | 4.947441  | 3.337272 | 0.000000  |           |
| 25 | C | 4.295996 | 4.761553  | 3.347703 | 1.464961  | 0.000000  |
| 26 | O | 3.074275 | 3.596288  | 2.070372 | 1.445078  | 1.453044  |
| 27 | H | 4.954760 | 5.542645  | 3.979482 | 1.087741  | 2.212131  |
| 28 | H | 4.438932 | 5.246810  | 3.614419 | 1.085838  | 2.208740  |
| 29 | H | 4.410910 | 4.918883  | 3.599408 | 2.176132  | 1.087831  |
| 30 | C | 5.256711 | 5.490543  | 4.300785 | 2.600088  | 1.503583  |
| 31 | H | 5.168698 | 5.223771  | 4.310327 | 3.440138  | 2.150660  |
| 32 | H | 6.235375 | 6.514712  | 5.286493 | 3.141112  | 2.136667  |
| 33 | H | 5.457257 | 5.647657  | 4.470272 | 2.736051  | 2.155446  |
|    |   | 26       | 27        | 28       | 29        | 30        |
| 26 | O | 0.000000 |           |          |           |           |
| 27 | H | 2.134961 | 0.000000  |          |           |           |
| 28 | H | 2.146585 | 1.844961  | 0.000000 |           |           |
| 29 | H | 2.129870 | 3.109911  | 2.475316 | 0.000000  |           |
| 30 | C | 2.509399 | 2.820776  | 3.533290 | 2.214654  | 0.000000  |
| 31 | H | 2.927437 | 3.773416  | 4.338832 | 2.578716  | 1.093953  |
| 32 | H | 3.414015 | 3.299545  | 3.927954 | 2.555632  | 1.094168  |
| 33 | H | 2.694876 | 2.549141  | 3.792066 | 3.107566  | 1.092657  |
|    |   | 31       | 32        | 33       |           |           |
| 31 | H | 0.000000 |           |          |           |           |
| 32 | H | 1.767893 | 0.000000  |          |           |           |
| 33 | H | 1.774203 | 1.777828  | 0.000000 |           |           |

Stoichiometry C10H18BrN3O

Framework group C1[X(C10H18BrN3O)]

Deg. of freedom 93

Full point group C1 NOp 1

Largest Abelian subgroup C1 NOp 1



Largest concise Abelian subgroup C1      NOp    1

Standard orientation:

| Center<br>Number | Atomic<br>Number | Atomic<br>Type | Coordinates (Angstroms) |           |           |
|------------------|------------------|----------------|-------------------------|-----------|-----------|
|                  |                  |                | X                       | Y         | Z         |
| 1                | 6                | 0              | -2.897872               | 2.147821  | -0.283231 |
| 2                | 6                | 0              | -3.747663               | 1.144985  | 0.057885  |
| 3                | 7                | 0              | -2.993367               | -0.018740 | 0.127177  |
| 4                | 6                | 0              | -1.713502               | 0.281410  | -0.170334 |
| 5                | 7                | 0              | -1.635341               | 1.589160  | -0.428151 |
| 6                | 6                | 0              | -0.371922               | 2.304564  | -0.691631 |
| 7                | 6                | 0              | 0.317424                | 2.786237  | 0.595611  |
| 8                | 1                | 0              | -3.078686               | 3.197619  | -0.436620 |
| 9                | 1                | 0              | -4.804961               | 1.164935  | 0.250680  |
| 10               | 1                | 0              | 0.283727                | 1.618759  | -1.229275 |
| 11               | 1                | 0              | -0.586597               | 3.150545  | -1.345172 |
| 12               | 1                | 0              | -0.315649               | 3.539726  | 1.075387  |
| 13               | 1                | 0              | 0.387863                | 1.931280  | 1.284982  |
| 14               | 35               | 0              | 0.365183                | -2.289975 | -0.267748 |
| 15               | 1                | 0              | -0.907856               | -0.483478 | -0.150142 |
| 16               | 6                | 0              | -3.408170               | -1.347794 | 0.447923  |
| 17               | 6                | 0              | -4.666029               | -1.682606 | 0.699813  |
| 18               | 1                | 0              | -2.562267               | -2.033365 | 0.473763  |
| 19               | 1                | 0              | -4.892247               | -2.710883 | 0.946250  |
| 20               | 1                | 0              | -5.494574               | -0.984667 | 0.676748  |
| 21               | 7                | 0              | 1.596237                | 3.385700  | 0.241294  |
| 22               | 1                | 0              | 1.924350                | 4.006336  | 0.971147  |
| 23               | 1                | 0              | 2.299639                | 2.661128  | 0.108473  |
| 24               | 6                | 0              | 3.596183                | -0.181240 | -1.065112 |
| 25               | 6                | 0              | 3.601887                | -0.410774 | 0.381744  |
| 26               | 8                | 0              | 3.393298                | 0.923113  | -0.155445 |
| 27               | 1                | 0              | 4.540480                | -0.146493 | -1.603885 |
| 28               | 1                | 0              | 2.724744                | -0.471047 | -1.644465 |
| 29               | 1                | 0              | 2.698811                | -0.848244 | 0.801806  |
| 30               | 6                | 0              | 4.873061                | -0.621488 | 1.156650  |
| 31               | 1                | 0              | 4.790840                | -0.195510 | 2.160898  |
| 32               | 1                | 0              | 5.066236                | -1.693219 | 1.262859  |
| 33               | 1                | 0              | 5.725272                | -0.158746 | 0.653157  |

Rotational constants (GHZ):      0.4704799      0.2524722      0.1735773

Standard basis: 6-311++G(d,p) (5D, 7F)

There are 499 symmetry adapted cartesian basis functions of A symmetry.

There are 482 symmetry adapted basis functions of A symmetry.

482 basis functions, 760 primitive gaussians, 499 cartesian basis functions  
 71 alpha electrons 71 beta electrons  
 nuclear repulsion energy 1296.0619349406 Hartrees.  
 NAToms= 33 NActive= 33 NUniq= 33 SFac= 1.00D+00 NATFMM= 60 NAOKFM=F  
 Big=F  
 Integral buffers will be 131072 words long.  
 Raffenetti 2 integral format.  
 Two-electron integral symmetry is turned on.  
 One-electron integrals computed using PRISM.  
 NBasis= 482 RedAO= T EigKep= 3.94D-06 NBF= 482  
 NBsUse= 482 1.00D-06 EigRej= -1.00D+00 NBFU= 482  
 Initial guess from the checkpoint file:  
 "/home/suqian/liuwen/qianmengshijie/nh2po/nh2po.chk"  
 B after Tr= 0.000000 0.000000 0.000000  
 Rot= 0.999786 0.005606 0.001482 -0.019880 Ang= 2.37 deg.  
 ExpMin= 3.50D-02 ExpMax= 4.40D+05 ExpMxC= 1.51D+04 IAcc=3 IRadAn= 5 AccDes=  
 0.00D+00  
 Harris functional with IExCor= 402 and IRadAn= 5 diagonalized for initial guess.  
 HarFok: IExCor= 402 AccDes= 0.00D+00 IRadAn= 5 IDoV= 1 UseB2=F ITyADJ=14  
 ICtDFT= 3500011 ScaDFX= 1.000000 1.000000 1.000000 1.000000  
 FoFCou: FMM=F IPFlag= 0 FMFlag= 100000 FMFlg1= 0  
 NFxFlg= 0 DoJE=T BraDBF=F KetDBF=T FulRan=T  
 wScrn= 0.000000 ICntrl= 500 IOpCl= 0 l1Cent= 200000004 NGrid=  
 0  
 NMat0= 1 NMatS0= 1 NMatT0= 0 NMatD0= 1 NMtDS0= 0  
 NMtDT0= 0  
 Petite list used in FoFCou.  
 Requested convergence on RMS density matrix=1.00D-08 within 128 cycles.  
 Requested convergence on MAX density matrix=1.00D-06.  
 Requested convergence on energy=1.00D-06.  
 No special actions if energy rises.  
 SCF Done: E(RB3LYP) = -3205.64611642 A.U. after 12 cycles  
 NFock= 12 Conv=0.84D-08 -V/T= 2.0018  
 Calling FoFJK, ICntrl= 2127 FMM=F ISym2X=0 l1Cent= 0 IOpClX= 0 NMat=1 NMatS=1  
 NMatT=0.  
 \*\*\*\*\* Axes restored to original set \*\*\*\*\*

| Center<br>Number | Atomic<br>Number | Forces (Hartrees/Bohr) |              |              |
|------------------|------------------|------------------------|--------------|--------------|
|                  |                  | X                      | Y            | Z            |
| 1                | 6                | 0.000593712            | -0.000311148 | -0.000174667 |
| 2                | 6                | -0.001320365           | 0.000750939  | -0.000111781 |
| 3                | 7                | 0.002228944            | 0.001814971  | -0.001633949 |
| 4                | 6                | -0.002799315           | -0.002171635 | 0.004590348  |

|    |    |              |              |              |
|----|----|--------------|--------------|--------------|
| 5  | 7  | 0.000745426  | -0.002489111 | 0.002041484  |
| 6  | 6  | 0.001997154  | 0.001201914  | -0.001774701 |
| 7  | 6  | -0.002283601 | -0.000608627 | 0.001119355  |
| 8  | 1  | -0.000134533 | 0.000051807  | -0.000278551 |
| 9  | 1  | 0.000139979  | 0.000192450  | -0.000242107 |
| 10 | 1  | -0.000445354 | -0.000425256 | 0.000286852  |
| 11 | 1  | -0.000573749 | -0.000325534 | -0.000169372 |
| 12 | 1  | 0.000230928  | 0.000056974  | 0.000292368  |
| 13 | 1  | 0.000758294  | 0.000340817  | 0.000138625  |
| 14 | 35 | -0.002114691 | 0.000827818  | 0.000873121  |
| 15 | 1  | 0.003019564  | 0.001239064  | -0.003916653 |
| 16 | 6  | 0.002352641  | 0.002228650  | 0.000979116  |
| 17 | 6  | -0.000092839 | -0.001532574 | 0.000432282  |
| 18 | 1  | -0.002075239 | 0.000283418  | -0.001257007 |
| 19 | 1  | -0.000294040 | -0.000018099 | -0.000094501 |
| 20 | 1  | 0.000475865  | -0.000266554 | -0.000263855 |
| 21 | 7  | -0.001386273 | -0.000505326 | 0.000146873  |
| 22 | 1  | -0.000345850 | 0.000236813  | 0.000066537  |
| 23 | 1  | 0.000877451  | -0.000826590 | -0.001151460 |
| 24 | 6  | 0.000378783  | 0.000057124  | -0.000259139 |
| 25 | 6  | 0.000536718  | 0.000794904  | -0.000322085 |
| 26 | 8  | -0.000775105 | 0.000617187  | 0.000480139  |
| 27 | 1  | 0.000133690  | -0.000016884 | 0.000218603  |
| 28 | 1  | -0.000160189 | -0.000691430 | 0.000924585  |
| 29 | 1  | 0.000130921  | -0.000280087 | -0.001138772 |
| 30 | 6  | -0.000005134 | -0.000242819 | 0.000087729  |
| 31 | 1  | 0.000001463  | 0.000070916  | 0.000091156  |
| 32 | 1  | 0.000242967  | -0.000046454 | 0.000067145  |
| 33 | 1  | -0.000038225 | -0.000007635 | -0.000047716 |

-----  
Cartesian Forces: Max 0.004590348 RMS 0.001183250

GradGradGradGradGradGradGradGradGradGradGradGradGradGradGradGradGradGradGrad

Berny optimization.

Using GEDIIS/GDIIS optimizer.

FormGI is forming the generalized inverse of G from B-inverse, IUseBI=4.

GSVD: received Info= 1 from GESDD.

Internal Forces: Max 0.006320774 RMS 0.001172322

Search for a local minimum.

Step number 11 out of a maximum of 172

All quantities printed in internal units (Hartrees-Bohrs-Radians)

Mixed Optimization -- RFO/linear search

Update second derivatives using D2CorX and points 2 3 1 4 5  
6 7 8 10 11

DE= 6.90D-04 DEPred=-3.96D-04 R=-1.74D+00

Trust test=-1.74D+00 RLast= 3.98D-01 DXMaxT set to 1.10D-01

ITU= -1 -1 1 1 1 -1 1 0 0 -1 0

Use linear search instead of GDIIIS.

Energy rises -- skip Quadratic/GDIIIS search.

Quartic linear search produced a step of -0.89542.

Iteration 1 RMS(Cart)= 0.07621021 RMS(Int)= 0.00276752

Iteration 2 RMS(Cart)= 0.00630514 RMS(Int)= 0.00004329

Iteration 3 RMS(Cart)= 0.00004934 RMS(Int)= 0.00002602

Iteration 4 RMS(Cart)= 0.00000000 RMS(Int)= 0.00002602

| Variable | Old X   | -DE/DX   | Delta X<br>(Linear) | Delta X<br>(Quad) | Delta X<br>(Total) | New X   |
|----------|---------|----------|---------------------|-------------------|--------------------|---------|
| R1       | 2.56626 | -0.00125 | -0.00013            | 0.00000           | -0.00012           | 2.56614 |
| R2       | 2.62331 | -0.00003 | -0.00041            | 0.00000           | -0.00041           | 2.62290 |
| R3       | 2.03380 | 0.00012  | 0.00017             | 0.00000           | 0.00017            | 2.03398 |
| R4       | 2.62394 | 0.00018  | 0.00254             | 0.00000           | 0.00254            | 2.62649 |
| R5       | 2.03130 | -0.00017 | -0.00023            | 0.00000           | -0.00023           | 2.03107 |
| R6       | 2.54704 | -0.00209 | -0.00322            | 0.00000           | -0.00322           | 2.54381 |
| R7       | 2.69994 | -0.00079 | -0.00408            | 0.00000           | -0.00408           | 2.69586 |
| R8       | 2.52318 | -0.00173 | -0.00442            | 0.00000           | -0.00442           | 2.51876 |
| R9       | 2.09966 | -0.00087 | 0.00607             | 0.00000           | 0.00607            | 2.10573 |
| R10      | 2.78852 | -0.00067 | -0.00216            | 0.00000           | -0.00216           | 2.78636 |
| R11      | 2.90563 | -0.00064 | -0.00323            | 0.00000           | -0.00323           | 2.90241 |
| R12      | 2.06081 | -0.00013 | -0.00040            | 0.00000           | -0.00040           | 2.06041 |
| R13      | 2.06048 | -0.00004 | -0.00030            | 0.00000           | -0.00030           | 2.06018 |
| R14      | 2.06898 | 0.00003  | 0.00028             | 0.00000           | 0.00028            | 2.06926 |
| R15      | 2.07968 | -0.00013 | 0.00030             | 0.00000           | 0.00030            | 2.07998 |
| R16      | 2.75165 | -0.00048 | -0.00137            | 0.00000           | -0.00137           | 2.75028 |
| R17      | 4.18219 | -0.00192 | -0.05757            | 0.00000           | -0.05757           | 4.12462 |
| R18      | 2.50541 | 0.00037  | 0.00077             | 0.00000           | 0.00077            | 2.50618 |
| R19      | 2.05818 | -0.00183 | -0.00358            | 0.00000           | -0.00358           | 2.05460 |
| R20      | 2.04340 | 0.00006  | -0.00009            | 0.00000           | -0.00009           | 2.04331 |
| R21      | 2.04766 | -0.00053 | -0.00052            | 0.00000           | -0.00052           | 2.04715 |
| R22      | 1.91370 | 0.00008  | 0.00046             | 0.00000           | 0.00046            | 1.91416 |
| R23      | 1.92476 | 0.00149  | 0.00323             | 0.00000           | 0.00323            | 1.92799 |
| R24      | 3.91244 | -0.00003 | -0.02804            | 0.00000           | -0.02804           | 3.88439 |
| R25      | 2.76837 | -0.00197 | -0.00042            | 0.00000           | -0.00036           | 2.76802 |
| R26      | 2.73080 | 0.00078  | 0.00065             | 0.00000           | 0.00062            | 2.73142 |
| R27      | 2.05553 | 0.00001  | -0.00057            | 0.00000           | -0.00057           | 2.05496 |
| R28      | 2.05194 | -0.00018 | -0.00002            | 0.00000           | -0.00002           | 2.05192 |
| R29      | 2.74586 | 0.00058  | -0.00063            | 0.00000           | -0.00066           | 2.74519 |
| R30      | 2.05570 | -0.00044 | -0.00002            | 0.00000           | -0.00002           | 2.05568 |
| R31      | 2.84136 | 0.00030  | 0.00022             | 0.00000           | 0.00022            | 2.84158 |

|     |         |          |          |         |          |         |
|-----|---------|----------|----------|---------|----------|---------|
| R32 | 2.06727 | 0.00011  | 0.00009  | 0.00000 | 0.00009  | 2.06736 |
| R33 | 2.06768 | 0.00009  | 0.00001  | 0.00000 | 0.00001  | 2.06768 |
| R34 | 2.06482 | -0.00001 | 0.00011  | 0.00000 | 0.00011  | 2.06494 |
| A1  | 1.87356 | 0.00027  | -0.00103 | 0.00000 | -0.00103 | 1.87253 |
| A2  | 2.27968 | -0.00020 | -0.00127 | 0.00000 | -0.00127 | 2.27841 |
| A3  | 2.12995 | -0.00007 | 0.00226  | 0.00000 | 0.00226  | 2.13221 |
| A4  | 1.86659 | -0.00145 | -0.00265 | 0.00000 | -0.00265 | 1.86394 |
| A5  | 2.27425 | 0.00049  | 0.00181  | 0.00000 | 0.00181  | 2.27605 |
| A6  | 2.14234 | 0.00096  | 0.00084  | 0.00000 | 0.00084  | 2.14318 |
| A7  | 1.89461 | 0.00149  | 0.00232  | 0.00000 | 0.00232  | 1.89693 |
| A8  | 2.25635 | 0.00044  | 0.00192  | 0.00000 | 0.00193  | 2.25828 |
| A9  | 2.13222 | -0.00193 | -0.00425 | 0.00000 | -0.00425 | 2.12797 |
| A10 | 1.89264 | -0.00073 | -0.00170 | 0.00000 | -0.00170 | 1.89095 |
| A11 | 2.13083 | 0.00038  | 0.02182  | 0.00000 | 0.02183  | 2.15266 |
| A12 | 2.25921 | 0.00039  | -0.01973 | 0.00000 | -0.01972 | 2.23950 |
| A13 | 1.89733 | 0.00042  | 0.00302  | 0.00000 | 0.00302  | 1.90035 |
| A14 | 2.21708 | -0.00383 | 0.00184  | 0.00000 | 0.00185  | 2.21893 |
| A15 | 2.16451 | 0.00345  | -0.00320 | 0.00000 | -0.00319 | 2.16132 |
| A16 | 1.96736 | -0.00110 | -0.00606 | 0.00000 | -0.00606 | 1.96130 |
| A17 | 1.87329 | 0.00092  | -0.00496 | 0.00000 | -0.00495 | 1.86834 |
| A18 | 1.89084 | -0.00099 | 0.00174  | 0.00000 | 0.00174  | 1.89257 |
| A19 | 1.91792 | 0.00066  | 0.00132  | 0.00000 | 0.00132  | 1.91925 |
| A20 | 1.92517 | 0.00057  | 0.00433  | 0.00000 | 0.00433  | 1.92950 |
| A21 | 1.88682 | -0.00004 | 0.00373  | 0.00000 | 0.00373  | 1.89055 |
| A22 | 1.89992 | 0.00034  | 0.00473  | 0.00000 | 0.00473  | 1.90465 |
| A23 | 1.88572 | 0.00129  | 0.00415  | 0.00000 | 0.00415  | 1.88987 |
| A24 | 1.89546 | -0.00155 | -0.00781 | 0.00000 | -0.00781 | 1.88765 |
| A25 | 1.87251 | -0.00023 | 0.00046  | 0.00000 | 0.00046  | 1.87297 |
| A26 | 1.90829 | -0.00059 | -0.00112 | 0.00000 | -0.00112 | 1.90717 |
| A27 | 1.99988 | 0.00079  | 0.00009  | 0.00000 | 0.00009  | 1.99997 |
| A28 | 2.15677 | 0.00181  | 0.00741  | 0.00000 | 0.00741  | 2.16419 |
| A29 | 1.94483 | -0.00011 | 0.00202  | 0.00000 | 0.00202  | 1.94685 |
| A30 | 2.18144 | -0.00169 | -0.00932 | 0.00000 | -0.00932 | 2.17213 |
| A31 | 2.07365 | 0.00049  | 0.00192  | 0.00000 | 0.00192  | 2.07558 |
| A32 | 2.16367 | -0.00042 | -0.00203 | 0.00000 | -0.00203 | 2.16164 |
| A33 | 2.04586 | -0.00007 | 0.00011  | 0.00000 | 0.00011  | 2.04597 |
| A34 | 1.94066 | -0.00226 | -0.00038 | 0.00000 | -0.00043 | 1.94023 |
| A35 | 1.92343 | 0.00632  | 0.00379  | 0.00000 | 0.00378  | 1.92721 |
| A36 | 1.88200 | -0.00170 | -0.00105 | 0.00000 | -0.00103 | 1.88097 |
| A37 | 2.08382 | 0.00029  | 0.00110  | 0.00000 | 0.00116  | 2.08499 |
| A38 | 2.08090 | -0.00117 | -0.00494 | 0.00000 | -0.00500 | 2.07590 |
| A39 | 1.99245 | -0.00061 | 0.00023  | 0.00000 | 0.00022  | 1.99266 |
| A40 | 2.01215 | 0.00039  | -0.00075 | 0.00000 | -0.00072 | 2.01142 |
| A41 | 2.02747 | 0.00058  | 0.00314  | 0.00000 | 0.00314  | 2.03061 |

|     |          |          |          |         |          |          |
|-----|----------|----------|----------|---------|----------|----------|
| A42 | 2.02768  | -0.00115 | -0.00466 | 0.00000 | -0.00472 | 2.02296  |
| A43 | 2.13442  | 0.00054  | 0.00217  | 0.00000 | 0.00223  | 2.13665  |
| A44 | 1.97442  | 0.00021  | -0.00041 | 0.00000 | -0.00039 | 1.97403  |
| A45 | 2.02700  | -0.00077 | 0.00079  | 0.00000 | 0.00077  | 2.02777  |
| A46 | 2.03362  | 0.00051  | 0.00146  | 0.00000 | 0.00146  | 2.03508  |
| A47 | 2.49136  | 0.00015  | -0.02974 | 0.00000 | -0.02957 | 2.46179  |
| A48 | 2.49698  | 0.00036  | -0.02751 | 0.00000 | -0.02733 | 2.46965  |
| A49 | 1.93371  | -0.00003 | -0.00002 | 0.00000 | -0.00002 | 1.93369  |
| A50 | 1.91405  | 0.00036  | 0.00199  | 0.00000 | 0.00199  | 1.91604  |
| A51 | 1.94180  | -0.00016 | -0.00142 | 0.00000 | -0.00142 | 1.94038  |
| A52 | 1.88133  | -0.00009 | 0.00026  | 0.00000 | 0.00026  | 1.88159  |
| A53 | 1.89307  | 0.00004  | -0.00033 | 0.00000 | -0.00033 | 1.89274  |
| A54 | 1.89848  | -0.00012 | -0.00046 | 0.00000 | -0.00046 | 1.89802  |
| A55 | 3.35002  | 0.00446  | -0.06338 | 0.00000 | -0.06338 | 3.28664  |
| A56 | 2.93455  | 0.00539  | 0.07222  | 0.00000 | 0.07219  | 3.00673  |
| A57 | 3.16977  | -0.00365 | -0.20748 | 0.00000 | -0.20748 | 2.96229  |
| A58 | 3.14944  | 0.00088  | 0.07845  | 0.00000 | 0.07847  | 3.22792  |
| D1  | 0.00675  | -0.00018 | 0.00252  | 0.00000 | 0.00252  | 0.00927  |
| D2  | -3.13252 | 0.00034  | 0.00557  | 0.00000 | 0.00557  | -3.12695 |
| D3  | -3.13820 | -0.00057 | -0.00430 | 0.00000 | -0.00430 | 3.14069  |
| D4  | 0.00572  | -0.00006 | -0.00124 | 0.00000 | -0.00125 | 0.00447  |
| D5  | -0.00897 | -0.00010 | -0.00338 | 0.00000 | -0.00338 | -0.01235 |
| D6  | -3.05388 | -0.00081 | -0.02474 | 0.00000 | -0.02475 | -3.07862 |
| D7  | 3.13563  | 0.00025  | 0.00275  | 0.00000 | 0.00275  | 3.13838  |
| D8  | 0.09072  | -0.00045 | -0.01862 | 0.00000 | -0.01862 | 0.07210  |
| D9  | -0.00227 | 0.00039  | -0.00086 | 0.00000 | -0.00087 | -0.00314 |
| D10 | 3.13971  | 0.00056  | 0.00262  | 0.00000 | 0.00261  | -3.14086 |
| D11 | 3.13721  | -0.00008 | -0.00363 | 0.00000 | -0.00363 | 3.13358  |
| D12 | -0.00399 | 0.00010  | -0.00015 | 0.00000 | -0.00015 | -0.00414 |
| D13 | -0.00333 | -0.00045 | -0.00123 | 0.00000 | -0.00123 | -0.00455 |
| D14 | 3.10726  | 0.00063  | 0.01737  | 0.00000 | 0.01734  | 3.12459  |
| D15 | 3.13791  | -0.00061 | -0.00440 | 0.00000 | -0.00439 | 3.13351  |
| D16 | -0.03469 | 0.00047  | 0.01420  | 0.00000 | 0.01417  | -0.02053 |
| D17 | 0.04139  | -0.00013 | -0.03035 | 0.00000 | -0.03035 | 0.01104  |
| D18 | -3.08334 | -0.00090 | -0.04097 | 0.00000 | -0.04096 | -3.12430 |
| D19 | -3.09977 | 0.00007  | -0.02647 | 0.00000 | -0.02647 | -3.12624 |
| D20 | 0.05870  | -0.00071 | -0.03708 | 0.00000 | -0.03708 | 0.02161  |
| D21 | 0.00757  | 0.00034  | 0.00283  | 0.00000 | 0.00284  | 0.01041  |
| D22 | 3.05605  | 0.00053  | 0.02366  | 0.00000 | 0.02367  | 3.07972  |
| D23 | -3.10000 | -0.00084 | -0.01790 | 0.00000 | -0.01793 | -3.11793 |
| D24 | -0.05152 | -0.00066 | 0.00292  | 0.00000 | 0.00290  | -0.04862 |
| D25 | 1.51872  | -0.00041 | -0.04346 | 0.00000 | -0.04346 | 1.47526  |
| D26 | -2.65028 | 0.00036  | -0.04883 | 0.00000 | -0.04883 | -2.69911 |
| D27 | -0.61672 | 0.00028  | -0.04618 | 0.00000 | -0.04618 | -0.66289 |

|     |          |          |          |         |          |          |
|-----|----------|----------|----------|---------|----------|----------|
| D28 | -1.51234 | -0.00097 | -0.06817 | 0.00000 | -0.06817 | -1.58051 |
| D29 | 0.60185  | -0.00020 | -0.07354 | 0.00000 | -0.07354 | 0.52831  |
| D30 | 2.63541  | -0.00028 | -0.07089 | 0.00000 | -0.07089 | 2.56452  |
| D31 | -1.14001 | 0.00093  | 0.01009  | 0.00000 | 0.01009  | -1.12992 |
| D32 | 0.88808  | 0.00153  | 0.01544  | 0.00000 | 0.01544  | 0.90352  |
| D33 | 3.06699  | 0.00234  | 0.01325  | 0.00000 | 0.01325  | 3.08024  |
| D34 | 3.05461  | 0.00003  | 0.01939  | 0.00000 | 0.01939  | 3.07400  |
| D35 | -1.20049 | 0.00063  | 0.02474  | 0.00000 | 0.02474  | -1.17575 |
| D36 | 0.97842  | 0.00144  | 0.02255  | 0.00000 | 0.02254  | 1.00097  |
| D37 | 0.97601  | -0.00068 | 0.01123  | 0.00000 | 0.01123  | 0.98724  |
| D38 | 3.00410  | -0.00008 | 0.01658  | 0.00000 | 0.01658  | 3.02068  |
| D39 | -1.10018 | 0.00073  | 0.01439  | 0.00000 | 0.01439  | -1.08579 |
| D40 | 2.77610  | -0.00115 | 0.04141  | 0.00000 | 0.04143  | 2.81752  |
| D41 | -1.42118 | -0.00059 | 0.04234  | 0.00000 | 0.04233  | -1.37885 |
| D42 | 0.70518  | -0.00031 | 0.04090  | 0.00000 | 0.04091  | 0.74609  |
| D43 | 2.79109  | 0.00025  | 0.04183  | 0.00000 | 0.04181  | 2.83290  |
| D44 | -1.39716 | -0.00010 | 0.04107  | 0.00000 | 0.04109  | -1.35608 |
| D45 | 0.68875  | 0.00045  | 0.04200  | 0.00000 | 0.04199  | 0.73073  |
| D46 | -3.12895 | -0.00057 | -0.00829 | 0.00000 | -0.00829 | -3.13725 |
| D47 | 0.01064  | -0.00024 | -0.00655 | 0.00000 | -0.00655 | 0.00409  |
| D48 | -0.00653 | 0.00033  | 0.00382  | 0.00000 | 0.00382  | -0.00271 |
| D49 | 3.13307  | 0.00066  | 0.00556  | 0.00000 | 0.00556  | 3.13863  |
| D50 | 1.23212  | 0.00007  | -0.00176 | 0.00000 | -0.00178 | 1.23034  |
| D51 | -0.61434 | -0.00142 | 0.04588  | 0.00000 | 0.04583  | -0.56851 |
| D52 | -2.95974 | 0.00118  | -0.01554 | 0.00000 | -0.01549 | -2.97523 |
| D53 | 1.47699  | -0.00031 | 0.03211  | 0.00000 | 0.03212  | 1.50911  |
| D54 | -2.70414 | 0.00040  | 0.00163  | 0.00000 | 0.00162  | -2.70252 |
| D55 | -0.01537 | 0.00025  | -0.00062 | 0.00000 | -0.00062 | -0.01600 |
| D56 | -0.02460 | -0.00017 | 0.00079  | 0.00000 | 0.00079  | -0.02382 |
| D57 | 2.66416  | -0.00032 | -0.00147 | 0.00000 | -0.00146 | 2.66270  |
| D58 | 1.88204  | 0.00006  | 0.06452  | 0.00000 | 0.06459  | 1.94662  |
| D59 | -0.53143 | -0.00061 | 0.06000  | 0.00000 | 0.06005  | -0.47138 |
| D60 | 0.57379  | 0.00026  | -0.06352 | 0.00000 | -0.06357 | 0.51022  |
| D61 | -1.84563 | 0.00009  | -0.06637 | 0.00000 | -0.06642 | -1.91205 |
| D62 | 2.54938  | 0.00031  | 0.00173  | 0.00000 | 0.00173  | 2.55111  |
| D63 | -1.65913 | 0.00040  | 0.00329  | 0.00000 | 0.00329  | -1.65584 |
| D64 | 0.44195  | 0.00039  | 0.00312  | 0.00000 | 0.00311  | 0.44507  |
| D65 | 1.34822  | -0.00022 | 0.00014  | 0.00000 | 0.00015  | 1.34837  |
| D66 | -2.86029 | -0.00013 | 0.00170  | 0.00000 | 0.00171  | -2.85858 |
| D67 | -0.75921 | -0.00014 | 0.00153  | 0.00000 | 0.00154  | -0.75768 |
| D68 | -1.04647 | -0.00025 | -0.00201 | 0.00000 | -0.00201 | -1.04849 |
| D69 | 1.02820  | -0.00015 | -0.00045 | 0.00000 | -0.00045 | 1.02775  |
| D70 | 3.12928  | -0.00017 | -0.00063 | 0.00000 | -0.00063 | 3.12865  |

Item Value Threshold Converged?

|                      |          |          |    |
|----------------------|----------|----------|----|
| Maximum Force        | 0.006321 | 0.000450 | NO |
| RMS Force            | 0.001172 | 0.000300 | NO |
| Maximum Displacement | 0.293637 | 0.001800 | NO |
| RMS Displacement     | 0.076928 | 0.001200 | NO |

Predicted change in Energy=-4.802810D-05

GradGradGradGradGradGradGradGradGradGradGradGradGradGradGradGradGradGrad

Input orientation:

| -----  |        |        |                         |           |           |
|--------|--------|--------|-------------------------|-----------|-----------|
| Center | Atomic | Atomic | Coordinates (Angstroms) |           |           |
| Number | Number | Type   | X                       | Y         | Z         |
| -----  |        |        |                         |           |           |
| 1      | 6      | 0      | -2.893635               | 2.144460  | -0.244677 |
| 2      | 6      | 0      | -3.768619               | 1.160018  | 0.085901  |
| 3      | 7      | 0      | -3.047103               | -0.027695 | 0.108473  |
| 4      | 6      | 0      | -1.765970               | 0.239904  | -0.206410 |
| 5      | 7      | 0      | -1.654035               | 1.548788  | -0.431884 |
| 6      | 6      | 0      | -0.377798               | 2.224286  | -0.730221 |
| 7      | 6      | 0      | 0.328841                | 2.725484  | 0.538010  |
| 8      | 1      | 0      | -3.045580               | 3.202681  | -0.369488 |
| 9      | 1      | 0      | -4.821387               | 1.205739  | 0.297504  |
| 10     | 1      | 0      | 0.253534                | 1.500985  | -1.246996 |
| 11     | 1      | 0      | -0.576961               | 3.052845  | -1.410194 |
| 12     | 1      | 0      | -0.285245               | 3.500486  | 1.008437  |
| 13     | 1      | 0      | 0.399256                | 1.887444  | 1.248098  |
| 14     | 35     | 0      | 0.286469                | -2.314390 | -0.064667 |
| 15     | 1      | 0      | -0.969368               | -0.538321 | -0.244755 |
| 16     | 6      | 0      | -3.492129               | -1.351950 | 0.397354  |
| 17     | 6      | 0      | -4.746055               | -1.664417 | 0.695476  |
| 18     | 1      | 0      | -2.674948               | -2.067429 | 0.348270  |
| 19     | 1      | 0      | -4.992246               | -2.696295 | 0.904686  |
| 20     | 1      | 0      | -5.552547               | -0.942793 | 0.744223  |
| 21     | 7      | 0      | 1.608812                | 3.297821  | 0.147816  |
| 22     | 1      | 0      | 1.975330                | 3.902618  | 0.873015  |
| 23     | 1      | 0      | 2.293332                | 2.559549  | -0.017399 |
| 24     | 6      | 0      | 3.698186                | -0.250145 | -1.050652 |
| 25     | 6      | 0      | 3.657503                | -0.435906 | 0.401724  |
| 26     | 8      | 0      | 3.469001                | 0.881379  | -0.180979 |
| 27     | 1      | 0      | 4.658330                | -0.232307 | -1.560875 |
| 28     | 1      | 0      | 2.842849                | -0.558918 | -1.644017 |
| 29     | 1      | 0      | 2.739398                | -0.861438 | 0.800917  |
| 30     | 6      | 0      | 4.901204                | -0.625263 | 1.225418  |
| 31     | 1      | 0      | 4.785517                | -0.170377 | 2.213612  |
| 32     | 1      | 0      | 5.091338                | -1.693201 | 1.368833  |



33            1            0            5.769843    -0.176275    0.737662

-----  
Distance matrix (angstroms):

|    |    | 1        | 2        | 3        | 4        | 5        |
|----|----|----------|----------|----------|----------|----------|
| 1  | C  | 0.000000 |          |          |          |          |
| 2  | C  | 1.357942 | 0.000000 |          |          |          |
| 3  | N  | 2.206020 | 1.389877 | 0.000000 |          |          |
| 4  | C  | 2.213691 | 2.223209 | 1.346128 | 0.000000 |          |
| 5  | N  | 1.387977 | 2.211495 | 2.172078 | 1.332872 | 0.000000 |
| 6  | C  | 2.563505 | 3.646422 | 3.591658 | 2.477735 | 1.474477 |
| 7  | C  | 3.366681 | 4.409565 | 4.377384 | 3.334742 | 2.501421 |
| 8  | H  | 1.076334 | 2.214190 | 3.265544 | 3.231415 | 2.162326 |
| 9  | H  | 2.211648 | 1.074796 | 2.169142 | 3.243816 | 3.268304 |
| 10 | H  | 3.365023 | 4.250952 | 3.881799 | 2.598374 | 2.074973 |
| 11 | H  | 2.747829 | 4.000971 | 4.230564 | 3.282602 | 2.092693 |
| 12 | H  | 3.195748 | 4.296832 | 4.570105 | 3.781508 | 2.785182 |
| 13 | H  | 3.624578 | 4.387600 | 4.104131 | 3.085156 | 2.674515 |
| 14 | Br | 5.479672 | 5.342090 | 4.046189 | 3.279788 | 4.338726 |
| 15 | H  | 3.301532 | 3.290820 | 2.168522 | 1.114306 | 2.204497 |
| 16 | C  | 3.604897 | 2.546259 | 1.426588 | 2.424490 | 3.532776 |
| 17 | C  | 4.338536 | 3.050310 | 2.431023 | 3.649759 | 4.599589 |
| 18 | H  | 4.259040 | 3.417802 | 2.087227 | 2.541200 | 3.837699 |
| 19 | H  | 5.399825 | 4.127810 | 3.396905 | 4.501628 | 5.563344 |
| 20 | H  | 4.192716 | 2.835066 | 2.742049 | 4.079294 | 4.773846 |
| 21 | N  | 4.664367 | 5.787123 | 5.721725 | 4.567876 | 3.747177 |
| 22 | H  | 5.295958 | 6.413607 | 6.423138 | 5.345836 | 4.518358 |
| 23 | H  | 5.208510 | 6.222267 | 5.935479 | 4.679147 | 4.095746 |
| 24 | C  | 7.059450 | 7.683326 | 6.847772 | 5.550666 | 5.680255 |
| 25 | C  | 7.070610 | 7.602237 | 6.723419 | 5.499146 | 5.731173 |
| 26 | O  | 6.487107 | 7.247897 | 6.585575 | 5.274188 | 5.172415 |
| 27 | H  | 8.025806 | 8.698501 | 7.886842 | 6.582491 | 6.655288 |
| 28 | H  | 6.494124 | 7.046905 | 6.168058 | 4.893469 | 5.112108 |
| 29 | H  | 6.469911 | 6.852140 | 5.887121 | 4.746157 | 5.160546 |
| 30 | C  | 8.401908 | 8.924772 | 8.048616 | 6.873853 | 7.102415 |
| 31 | H  | 8.388745 | 8.914615 | 8.111837 | 6.996201 | 7.170914 |
| 32 | H  | 9.005046 | 9.396042 | 8.402180 | 7.296640 | 7.697605 |
| 33 | H  | 9.022563 | 9.653638 | 8.840615 | 7.606113 | 7.710878 |
|    |    | 6        | 7        | 8        | 9        | 10       |
| 6  | C  | 0.000000 |          |          |          |          |
| 7  | C  | 1.535887 | 0.000000 |          |          |          |
| 8  | H  | 2.864340 | 3.526753 | 0.000000 |          |          |
| 9  | H  | 4.673237 | 5.375158 | 2.754297 | 0.000000 |          |
| 10 | H  | 1.090321 | 2.165944 | 3.814439 | 5.312954 | 0.000000 |
| 11 | H  | 1.090201 | 2.173278 | 2.683206 | 4.933881 | 1.767661 |

|    |    |          |          |          |           |          |
|----|----|----------|----------|----------|-----------|----------|
| 12 | H  | 2.158747 | 1.095003 | 3.099486 | 5.133019  | 3.061906 |
| 13 | H  | 2.151981 | 1.100679 | 4.026577 | 5.350090  | 2.529047 |
| 14 | Br | 4.635061 | 5.075958 | 6.452405 | 6.213909  | 3.994505 |
| 15 | H  | 2.866640 | 3.598679 | 4.280339 | 4.263078  | 2.580455 |
| 16 | C  | 4.874417 | 5.589728 | 4.640271 | 2.884210  | 4.987296 |
| 17 | C  | 6.019659 | 6.711974 | 5.264447 | 2.898594  | 6.228071 |
| 18 | H  | 4.985866 | 5.659573 | 5.331661 | 3.914512  | 4.884103 |
| 19 | H  | 6.941049 | 7.605531 | 6.341210 | 3.952686  | 7.054439 |
| 20 | H  | 6.243589 | 6.934660 | 4.970935 | 2.313080  | 6.606632 |
| 21 | N  | 2.422818 | 1.455385 | 4.684017 | 6.763629  | 2.647810 |
| 22 | H  | 3.305204 | 2.051535 | 5.219507 | 7.334830  | 3.636876 |
| 23 | H  | 2.784861 | 2.048227 | 5.389022 | 7.249220  | 2.606385 |
| 24 | C  | 4.779030 | 4.767672 | 7.606863 | 8.747586  | 3.869190 |
| 25 | C  | 4.964028 | 4.592706 | 7.665859 | 8.636981  | 4.249333 |
| 26 | O  | 4.111317 | 3.711909 | 6.918362 | 8.310517  | 3.443767 |
| 27 | H  | 5.664576 | 5.647859 | 8.518730 | 9.766606  | 4.743948 |
| 28 | H  | 4.353597 | 4.676406 | 7.102650 | 8.100866  | 3.332472 |
| 29 | H  | 4.645749 | 4.329655 | 7.166092 | 7.854433  | 3.994309 |
| 30 | C  | 6.309700 | 5.710213 | 8.963718 | 9.936919  | 5.677552 |
| 31 | H  | 6.407838 | 5.572757 | 8.909321 | 9.892309  | 5.942065 |
| 32 | H  | 7.047281 | 6.549536 | 9.654058 | 10.383338 | 6.360010 |
| 33 | H  | 6.760981 | 6.169649 | 9.505514 | 10.690082 | 6.097682 |
|    |    | 11       | 12       | 13       | 14        | 15       |
| 11 | H  | 0.000000 |          |          |           |          |
| 12 | H  | 2.476945 | 0.000000 |          |           |          |
| 13 | H  | 3.062299 | 1.768582 | 0.000000 |           |          |
| 14 | Br | 5.600282 | 5.940639 | 4.403576 | 0.000000  |          |
| 15 | H  | 3.795879 | 4.283745 | 3.160075 | 2.182654  | 0.000000 |
| 16 | C  | 5.582799 | 5.848390 | 5.134230 | 3.926520  | 2.727383 |
| 17 | C  | 6.638354 | 6.831764 | 6.276570 | 5.130944  | 4.051604 |
| 18 | H  | 5.806113 | 6.094931 | 5.089346 | 3.000250  | 2.366190 |
| 19 | H  | 7.609600 | 7.782462 | 7.084976 | 5.380551  | 4.707612 |
| 20 | H  | 6.735212 | 6.896159 | 6.609697 | 6.052247  | 4.706082 |
| 21 | N  | 2.695369 | 2.090261 | 2.159354 | 5.769805  | 4.638653 |
| 22 | H  | 3.528363 | 2.300053 | 2.585657 | 6.510198  | 5.444501 |
| 23 | H  | 3.228281 | 2.930317 | 2.375022 | 5.271149  | 4.504853 |
| 24 | C  | 5.414416 | 5.845922 | 4.553732 | 4.107687  | 4.745375 |
| 25 | C  | 5.777985 | 5.604332 | 4.090290 | 3.887171  | 4.672939 |
| 26 | O  | 4.753529 | 4.729566 | 3.532388 | 4.511649  | 4.660336 |
| 27 | H  | 6.182491 | 6.706268 | 5.524797 | 5.068222  | 5.787642 |
| 28 | H  | 4.979418 | 5.770549 | 4.507789 | 3.480102  | 4.060955 |
| 29 | H  | 5.586489 | 5.312053 | 3.637663 | 2.979457  | 3.866882 |
| 30 | C  | 7.105295 | 6.630847 | 5.155749 | 5.080674  | 6.052485 |
| 31 | H  | 7.230305 | 6.374975 | 4.940257 | 5.479853  | 6.268784 |

|    |   |          |           |          |           |           |
|----|---|----------|-----------|----------|-----------|-----------|
| 32 | H | 7.897946 | 7.484110  | 5.903493 | 5.052481  | 6.377270  |
| 33 | H | 7.437904 | 7.089145  | 5.776044 | 5.939921  | 6.820057  |
|    |   | 16       | 17        | 18       | 19        | 20        |
| 16 | C | 0.000000 |           |          |           |           |
| 17 | C | 1.326214 | 0.000000  |          |           |           |
| 18 | H | 1.087246 | 2.138330  | 0.000000 |           |           |
| 19 | H | 2.077258 | 1.081273  | 2.464739 | 0.000000  |           |
| 20 | H | 2.129096 | 1.083303  | 3.114829 | 1.847824  | 0.000000  |
| 21 | N | 6.906680 | 8.081341  | 6.868529 | 8.948533  | 8.344074  |
| 22 | H | 7.598015 | 8.729284  | 7.585638 | 9.596549  | 8.953408  |
| 23 | H | 6.995956 | 8.240331  | 6.799004 | 9.030713  | 8.625792  |
| 24 | C | 7.416962 | 8.738097  | 6.773208 | 9.237457  | 9.448672  |
| 25 | C | 7.208078 | 8.497960  | 6.539470 | 8.954356  | 9.230344  |
| 26 | O | 7.333454 | 8.645021  | 6.835472 | 9.250465  | 9.250509  |
| 27 | H | 8.456846 | 9.776734  | 7.796761 | 10.260791 | 10.491915 |
| 28 | H | 6.702838 | 8.017906  | 6.057301 | 8.511931  | 8.736917  |
| 29 | H | 6.263816 | 7.529137  | 5.565469 | 7.947061  | 8.292538  |
| 30 | C | 8.465329 | 9.717525  | 7.761914 | 10.112981 | 10.469636 |
| 31 | H | 8.556538 | 9.766666  | 7.920660 | 10.183232 | 10.470497 |
| 32 | H | 8.645006 | 9.860453  | 7.841989 | 10.143978 | 10.688570 |
| 33 | H | 9.342491 | 10.620756 | 8.662712 | 11.054454 | 11.348308 |
|    |   | 21       | 22        | 23       | 24        | 25        |
| 21 | N | 0.000000 |           |          |           |           |
| 22 | H | 1.012931 | 0.000000  |          |           |           |
| 23 | H | 1.020249 | 1.642496  | 0.000000 |           |           |
| 24 | C | 4.288342 | 4.890211  | 3.306903 | 0.000000  |           |
| 25 | C | 4.266418 | 4.677030  | 3.318038 | 1.464773  | 0.000000  |
| 26 | O | 3.067181 | 3.531266  | 2.055532 | 1.445407  | 1.452692  |
| 27 | H | 4.967996 | 5.497264  | 3.971145 | 1.087438  | 2.212443  |
| 28 | H | 4.428086 | 5.195511  | 3.559873 | 1.085830  | 2.205414  |
| 29 | H | 4.359381 | 4.825477  | 3.545669 | 2.172846  | 1.087818  |
| 30 | C | 5.233704 | 5.402465  | 4.299839 | 2.601626  | 1.503702  |
| 31 | H | 5.136864 | 5.126757  | 4.317510 | 3.441522  | 2.150781  |
| 32 | H | 6.207187 | 6.424059  | 5.276018 | 3.142799  | 2.138217  |
| 33 | H | 5.452655 | 5.572613  | 4.487870 | 2.737751  | 2.154586  |
|    |   | 26       | 27        | 28       | 29        | 30        |
| 26 | O | 0.000000 |           |          |           |           |
| 27 | H | 2.135161 | 0.000000  |          |           |           |
| 28 | H | 2.146392 | 1.846499  | 0.000000 |           |           |
| 29 | H | 2.129284 | 3.107437  | 2.465750 | 0.000000  |           |
| 30 | C | 2.509806 | 2.824328  | 3.531981 | 2.215713  | 0.000000  |
| 31 | H | 2.928049 | 3.777137  | 4.336615 | 2.580674  | 1.093998  |
| 32 | H | 3.415019 | 3.302256  | 3.926776 | 2.558511  | 1.094171  |
| 33 | H | 2.693772 | 2.553795  | 3.792902 | 3.107579  | 1.092717  |

```

          31      32      33
31 H    0.000000
32 H    1.768099  0.000000
33 H    1.774080  1.777586  0.000000
Stoichiometry  C10H18BrN3O
Framework group C1[X(C10H18BrN3O)]
Deg. of freedom  93
Full point group          C1      NOp  1
Largest Abelian subgroup  C1      NOp  1
Largest concise Abelian subgroup C1      NOp  1

```

Standard orientation:

| Center<br>Number | Atomic<br>Number | Atomic<br>Type | Coordinates (Angstroms) |           |           |
|------------------|------------------|----------------|-------------------------|-----------|-----------|
|                  |                  |                | X                       | Y         | Z         |
| 1                | 6                | 0              | -2.864100               | 2.199546  | -0.183318 |
| 2                | 6                | 0              | -3.742918               | 1.206718  | 0.109901  |
| 3                | 7                | 0              | -3.027543               | 0.015448  | 0.080359  |
| 4                | 6                | 0              | -1.746276               | 0.289348  | -0.228498 |
| 5                | 7                | 0              | -1.628379               | 1.605855  | -0.400127 |
| 6                | 6                | 0              | -0.349808               | 2.286641  | -0.675568 |
| 7                | 6                | 0              | 0.364424                | 2.731365  | 0.609361  |
| 8                | 1                | 0              | -3.010994               | 3.262780  | -0.263641 |
| 9                | 1                | 0              | -4.794592               | 1.248979  | 0.327574  |
| 10               | 1                | 0              | 0.275694                | 1.582147  | -1.224417 |
| 11               | 1                | 0              | -0.547304               | 3.143616  | -1.319872 |
| 12               | 1                | 0              | -0.243743               | 3.489346  | 1.113968  |
| 13               | 1                | 0              | 0.433243                | 1.864324  | 1.283896  |
| 14               | 35               | 0              | 0.293310                | -2.278987 | -0.200985 |
| 15               | 1                | 0              | -0.953914               | -0.490649 | -0.302284 |
| 16               | 6                | 0              | -3.478354               | -1.317352 | 0.316086  |
| 17               | 6                | 0              | -4.732717               | -1.635526 | 0.606229  |
| 18               | 1                | 0              | -2.665128               | -2.034319 | 0.234077  |
| 19               | 1                | 0              | -4.983480               | -2.673914 | 0.773617  |
| 20               | 1                | 0              | -5.535223               | -0.912460 | 0.688110  |
| 21               | 7                | 0              | 1.645829                | 3.312861  | 0.237862  |
| 22               | 1                | 0              | 2.018354                | 3.885278  | 0.985920  |
| 23               | 1                | 0              | 2.325821                | 2.578597  | 0.039431  |
| 24               | 6                | 0              | 3.711881                | -0.193034 | -1.114914 |
| 25               | 6                | 0              | 3.675935                | -0.438504 | 0.328696  |
| 26               | 8                | 0              | 3.492040                | 0.902694  | -0.198262 |
| 27               | 1                | 0              | 4.670091                | -0.158971 | -1.627938 |
| 28               | 1                | 0              | 2.852613                | -0.472661 | -1.716989 |
| 29               | 1                | 0              | 2.757193                | -0.875528 | 0.713755  |



|    |    |              |              |              |
|----|----|--------------|--------------|--------------|
| 6  | 6  | 0.000680597  | 0.000909018  | -0.000087726 |
| 7  | 6  | -0.000929979 | -0.000407590 | 0.000525725  |
| 8  | 1  | -0.000001705 | 0.000044973  | -0.000140450 |
| 9  | 1  | 0.000103383  | 0.000120212  | 0.000033025  |
| 10 | 1  | -0.000105404 | -0.000101662 | 0.000051651  |
| 11 | 1  | -0.000243586 | -0.000046446 | -0.000050012 |
| 12 | 1  | 0.000099651  | 0.000015182  | 0.000049327  |
| 13 | 1  | 0.000324638  | 0.000125802  | -0.000141382 |
| 14 | 35 | -0.000457470 | 0.000139396  | 0.000014207  |
| 15 | 1  | 0.000647883  | 0.000951084  | -0.000054278 |
| 16 | 6  | 0.000506216  | 0.000231353  | 0.000072049  |
| 17 | 6  | -0.000051209 | -0.000340895 | 0.000009890  |
| 18 | 1  | -0.000391378 | 0.000240430  | 0.000122715  |
| 19 | 1  | -0.000095129 | 0.000010400  | 0.000002103  |
| 20 | 1  | 0.000152800  | -0.000106964 | -0.000029887 |
| 21 | 7  | -0.000090708 | -0.000156674 | -0.000307080 |
| 22 | 1  | -0.000087155 | 0.000030052  | -0.000077870 |
| 23 | 1  | 0.000164942  | 0.000084716  | 0.000171008  |
| 24 | 6  | 0.000340868  | 0.000212203  | 0.000394458  |
| 25 | 6  | 0.000210172  | 0.000235133  | -0.000042216 |
| 26 | 8  | -0.000704757 | -0.000148627 | -0.000229923 |
| 27 | 1  | -0.000017781 | -0.000035706 | -0.000082577 |
| 28 | 1  | -0.000071736 | -0.000253039 | 0.000253391  |
| 29 | 1  | -0.000059679 | -0.000215318 | -0.000412195 |
| 30 | 6  | 0.000066727  | -0.000017128 | -0.000079441 |
| 31 | 1  | -0.000058703 | -0.000002917 | -0.000005802 |
| 32 | 1  | 0.000077688  | -0.000024196 | 0.000053543  |
| 33 | 1  | -0.000002458 | -0.000008363 | -0.000012290 |

-----  
Cartesian Forces: Max 0.001847140 RMS 0.000381798

GradGradGradGradGradGradGradGradGradGradGradGradGradGradGradGradGradGradGrad

Berny optimization.

Using GEDIIS/GDIIS optimizer.

FormGI is forming the generalized inverse of G from B-inverse, IUseBI=4.

GSVD: received Info= 1 from GESDD.

Internal Forces: Max 0.001090201 RMS 0.000245517

Search for a local minimum.

Step number 12 out of a maximum of 172

All quantities printed in internal units (Hartrees-Bohrs-Radians)

Mixed Optimization -- En-DIIS/RFO-DIIS

Update second derivatives using D2CorX and points

|   |   |   |    |   |    |    |
|---|---|---|----|---|----|----|
| 2 | 3 | 1 | 4  | 5 |    |    |
|   |   | 6 | 7  | 8 | 10 | 11 |
|   |   | 9 | 12 |   |    |    |

ITU= 0 -1 -1 1 1 1 -1 1 0 0 -1 0

Use linear search instead of GDIIIS.

|                 |         |         |         |         |         |
|-----------------|---------|---------|---------|---------|---------|
| Eigenvalues --- | 0.00225 | 0.00333 | 0.00397 | 0.00665 | 0.00723 |
| Eigenvalues --- | 0.00909 | 0.01108 | 0.01259 | 0.01458 | 0.01644 |
| Eigenvalues --- | 0.01886 | 0.02009 | 0.02108 | 0.02184 | 0.02347 |
| Eigenvalues --- | 0.02386 | 0.02421 | 0.02476 | 0.02950 | 0.03071 |
| Eigenvalues --- | 0.03076 | 0.03121 | 0.03335 | 0.03539 | 0.04003 |
| Eigenvalues --- | 0.04102 | 0.04365 | 0.04882 | 0.05243 | 0.05425 |
| Eigenvalues --- | 0.05755 | 0.05837 | 0.05923 | 0.07896 | 0.08720 |
| Eigenvalues --- | 0.09507 | 0.10731 | 0.12136 | 0.12422 | 0.12575 |
| Eigenvalues --- | 0.12795 | 0.13134 | 0.15579 | 0.15929 | 0.16000 |
| Eigenvalues --- | 0.16000 | 0.16002 | 0.16003 | 0.16008 | 0.16025 |
| Eigenvalues --- | 0.16082 | 0.17069 | 0.17456 | 0.21300 | 0.22139 |
| Eigenvalues --- | 0.23039 | 0.23094 | 0.24797 | 0.26061 | 0.27416 |
| Eigenvalues --- | 0.29086 | 0.30169 | 0.31823 | 0.32074 | 0.33005 |
| Eigenvalues --- | 0.33683 | 0.34282 | 0.34312 | 0.34341 | 0.34542 |
| Eigenvalues --- | 0.34658 | 0.34729 | 0.35053 | 0.35066 | 0.35276 |
| Eigenvalues --- | 0.35440 | 0.35585 | 0.35865 | 0.35913 | 0.36424 |
| Eigenvalues --- | 0.36626 | 0.38096 | 0.38815 | 0.41884 | 0.42481 |
| Eigenvalues --- | 0.44873 | 0.45471 | 0.46041 | 0.49358 | 0.55626 |
| Eigenvalues --- | 0.59271 | 0.60878 | 0.98028 |         |         |

RFO step: Lambda=-1.05213909D-04 EMin= 2.24578765D-03

Quartic linear search produced a step of 0.06074.

Iteration 1 RMS(Cart)= 0.02916008 RMS(Int)= 0.00031663

Iteration 2 RMS(Cart)= 0.00050034 RMS(Int)= 0.00002519

Iteration 3 RMS(Cart)= 0.00000013 RMS(Int)= 0.00002519

| Variable | Old X   | -DE/DX   | Delta X<br>(Linear) | Delta X<br>(Quad) | Delta X<br>(Total) | New X   |
|----------|---------|----------|---------------------|-------------------|--------------------|---------|
| R1       | 2.56614 | -0.00030 | 0.00000             | -0.00033          | -0.00033           | 2.56581 |
| R2       | 2.62290 | -0.00030 | 0.00000             | -0.00041          | -0.00041           | 2.62249 |
| R3       | 2.03398 | 0.00006  | 0.00000             | 0.00007           | 0.00007            | 2.03404 |
| R4       | 2.62649 | 0.00018  | -0.00002            | -0.00025          | -0.00027           | 2.62622 |
| R5       | 2.03107 | -0.00009 | 0.00000             | -0.00015          | -0.00014           | 2.03093 |
| R6       | 2.54381 | -0.00087 | 0.00002             | -0.00019          | -0.00017           | 2.54364 |
| R7       | 2.69586 | -0.00004 | 0.00003             | 0.00100           | 0.00103            | 2.69689 |
| R8       | 2.51876 | -0.00009 | 0.00003             | 0.00020           | 0.00023            | 2.51899 |
| R9       | 2.10573 | -0.00063 | -0.00004            | -0.00235          | -0.00239           | 2.10334 |
| R10      | 2.78636 | -0.00026 | 0.00002             | -0.00074          | -0.00073           | 2.78563 |
| R11      | 2.90241 | -0.00045 | 0.00002             | -0.00034          | -0.00032           | 2.90209 |
| R12      | 2.06041 | -0.00002 | 0.00000             | -0.00005          | -0.00005           | 2.06036 |
| R13      | 2.06018 | 0.00004  | 0.00000             | 0.00002           | 0.00002            | 2.06020 |
| R14      | 2.06926 | -0.00002 | 0.00000             | -0.00012          | -0.00012           | 2.06914 |
| R15      | 2.07998 | -0.00017 | 0.00000             | -0.00039          | -0.00039           | 2.07959 |
| R16      | 2.75028 | -0.00023 | 0.00001             | -0.00058          | -0.00057           | 2.74970 |

|     |         |          |          |          |          |         |
|-----|---------|----------|----------|----------|----------|---------|
| R17 | 4.12462 | -0.00037 | 0.00041  | 0.01212  | 0.01253  | 4.13715 |
| R18 | 2.50618 | 0.00009  | -0.00001 | 0.00004  | 0.00004  | 2.50622 |
| R19 | 2.05460 | -0.00046 | 0.00003  | -0.00001 | 0.00001  | 2.05461 |
| R20 | 2.04331 | 0.00001  | 0.00000  | 0.00008  | 0.00008  | 2.04339 |
| R21 | 2.04715 | -0.00018 | 0.00000  | -0.00022 | -0.00022 | 2.04693 |
| R22 | 1.91416 | -0.00007 | 0.00000  | -0.00017 | -0.00017 | 1.91399 |
| R23 | 1.92799 | 0.00008  | -0.00002 | -0.00033 | -0.00035 | 1.92764 |
| R24 | 3.88439 | 0.00010  | 0.00020  | 0.00875  | 0.00895  | 3.89334 |
| R25 | 2.76802 | -0.00074 | 0.00001  | -0.00088 | -0.00095 | 2.76707 |
| R26 | 2.73142 | 0.00012  | -0.00001 | -0.00005 | -0.00003 | 2.73140 |
| R27 | 2.05496 | 0.00002  | 0.00000  | 0.00008  | 0.00009  | 2.05505 |
| R28 | 2.05192 | -0.00001 | 0.00000  | -0.00002 | -0.00002 | 2.05190 |
| R29 | 2.74519 | 0.00026  | 0.00000  | 0.00061  | 0.00066  | 2.74585 |
| R30 | 2.05568 | -0.00002 | 0.00000  | 0.00005  | 0.00005  | 2.05573 |
| R31 | 2.84158 | 0.00006  | 0.00000  | 0.00008  | 0.00008  | 2.84167 |
| R32 | 2.06736 | 0.00000  | 0.00000  | -0.00003 | -0.00003 | 2.06733 |
| R33 | 2.06768 | 0.00004  | 0.00000  | 0.00007  | 0.00007  | 2.06775 |
| R34 | 2.06494 | 0.00000  | 0.00000  | -0.00001 | -0.00001 | 2.06493 |
| A1  | 1.87253 | -0.00010 | 0.00001  | -0.00033 | -0.00033 | 1.87220 |
| A2  | 2.27841 | 0.00009  | 0.00001  | 0.00069  | 0.00070  | 2.27911 |
| A3  | 2.13221 | 0.00001  | -0.00002 | -0.00033 | -0.00035 | 2.13186 |
| A4  | 1.86394 | -0.00022 | 0.00002  | 0.00019  | 0.00020  | 1.86414 |
| A5  | 2.27605 | -0.00001 | -0.00001 | -0.00064 | -0.00065 | 2.27540 |
| A6  | 2.14318 | 0.00023  | -0.00001 | 0.00044  | 0.00044  | 2.14362 |
| A7  | 1.89693 | 0.00031  | -0.00002 | 0.00028  | 0.00026  | 1.89719 |
| A8  | 2.25828 | 0.00023  | -0.00001 | -0.00054 | -0.00055 | 2.25773 |
| A9  | 2.12797 | -0.00054 | 0.00003  | 0.00026  | 0.00029  | 2.12826 |
| A10 | 1.89095 | -0.00023 | 0.00001  | -0.00065 | -0.00064 | 1.89030 |
| A11 | 2.15266 | 0.00046  | -0.00015 | -0.00046 | -0.00063 | 2.15204 |
| A12 | 2.23950 | -0.00023 | 0.00014  | 0.00101  | 0.00114  | 2.24064 |
| A13 | 1.90035 | 0.00024  | -0.00002 | 0.00059  | 0.00057  | 1.90092 |
| A14 | 2.21893 | -0.00079 | -0.00001 | -0.00146 | -0.00147 | 2.21746 |
| A15 | 2.16132 | 0.00055  | 0.00002  | 0.00082  | 0.00084  | 2.16217 |
| A16 | 1.96130 | -0.00030 | 0.00004  | -0.00057 | -0.00053 | 1.96077 |
| A17 | 1.86834 | 0.00008  | 0.00004  | 0.00053  | 0.00057  | 1.86890 |
| A18 | 1.89257 | -0.00013 | -0.00001 | -0.00065 | -0.00067 | 1.89191 |
| A19 | 1.91925 | 0.00005  | -0.00001 | -0.00060 | -0.00061 | 1.91863 |
| A20 | 1.92950 | 0.00030  | -0.00003 | 0.00148  | 0.00145  | 1.93096 |
| A21 | 1.89055 | -0.00001 | -0.00003 | -0.00022 | -0.00025 | 1.89031 |
| A22 | 1.90465 | 0.00031  | -0.00003 | 0.00123  | 0.00119  | 1.90584 |
| A23 | 1.88987 | 0.00046  | -0.00003 | 0.00057  | 0.00054  | 1.89041 |
| A24 | 1.88765 | -0.00096 | 0.00006  | -0.00237 | -0.00231 | 1.88534 |
| A25 | 1.87297 | -0.00009 | 0.00000  | 0.00099  | 0.00099  | 1.87396 |
| A26 | 1.90717 | 0.00022  | 0.00001  | 0.00155  | 0.00156  | 1.90872 |



|     |          |          |          |          |          |          |
|-----|----------|----------|----------|----------|----------|----------|
| A27 | 1.99997  | 0.00009  | 0.00000  | -0.00180 | -0.00180 | 1.99816  |
| A28 | 2.16419  | 0.00046  | -0.00005 | -0.00029 | -0.00034 | 2.16384  |
| A29 | 1.94685  | -0.00013 | -0.00001 | -0.00060 | -0.00062 | 1.94623  |
| A30 | 2.17213  | -0.00033 | 0.00007  | 0.00090  | 0.00096  | 2.17309  |
| A31 | 2.07558  | 0.00015  | -0.00001 | 0.00012  | 0.00011  | 2.07568  |
| A32 | 2.16164  | -0.00010 | 0.00001  | 0.00015  | 0.00016  | 2.16181  |
| A33 | 2.04597  | -0.00005 | 0.00000  | -0.00027 | -0.00027 | 2.04570  |
| A34 | 1.94023  | -0.00010 | 0.00000  | 0.00052  | 0.00052  | 1.94075  |
| A35 | 1.92721  | 0.00018  | -0.00003 | -0.00116 | -0.00119 | 1.92602  |
| A36 | 1.88097  | -0.00002 | 0.00001  | 0.00137  | 0.00138  | 1.88234  |
| A37 | 2.08499  | 0.00008  | 0.00000  | -0.00013 | -0.00020 | 2.08479  |
| A38 | 2.07590  | -0.00029 | 0.00003  | -0.00076 | -0.00067 | 2.07523  |
| A39 | 1.99266  | -0.00011 | 0.00000  | 0.00045  | 0.00045  | 1.99312  |
| A40 | 2.01142  | 0.00006  | 0.00001  | 0.00141  | 0.00139  | 2.01281  |
| A41 | 2.03061  | 0.00010  | -0.00002 | -0.00038 | -0.00040 | 2.03021  |
| A42 | 2.02296  | -0.00023 | 0.00003  | -0.00107 | -0.00099 | 2.02197  |
| A43 | 2.13665  | 0.00000  | -0.00001 | -0.00058 | -0.00065 | 2.13600  |
| A44 | 1.97403  | 0.00005  | 0.00000  | 0.00144  | 0.00142  | 1.97545  |
| A45 | 2.02777  | -0.00021 | -0.00001 | -0.00010 | -0.00009 | 2.02768  |
| A46 | 2.03508  | 0.00020  | -0.00001 | 0.00058  | 0.00057  | 2.03565  |
| A47 | 2.46179  | 0.00028  | 0.00022  | 0.01150  | 0.01154  | 2.47333  |
| A48 | 2.46965  | 0.00020  | 0.00021  | 0.00962  | 0.00963  | 2.47928  |
| A49 | 1.93369  | -0.00011 | 0.00000  | -0.00046 | -0.00046 | 1.93322  |
| A50 | 1.91604  | 0.00015  | -0.00001 | 0.00028  | 0.00027  | 1.91631  |
| A51 | 1.94038  | -0.00001 | 0.00001  | 0.00015  | 0.00016  | 1.94054  |
| A52 | 1.88159  | -0.00003 | 0.00000  | -0.00016 | -0.00016 | 1.88143  |
| A53 | 1.89274  | 0.00004  | 0.00000  | 0.00015  | 0.00015  | 1.89289  |
| A54 | 1.89802  | -0.00005 | 0.00000  | 0.00004  | 0.00004  | 1.89805  |
| A55 | 3.28664  | 0.00109  | 0.00045  | 0.03332  | 0.03377  | 3.32041  |
| A56 | 3.00673  | 0.00045  | -0.00051 | -0.01107 | -0.01157 | 2.99516  |
| A57 | 2.96229  | -0.00048 | 0.00147  | -0.01648 | -0.01501 | 2.94728  |
| A58 | 3.22792  | -0.00010 | -0.00056 | -0.01820 | -0.01876 | 3.20916  |
| D1  | 0.00927  | -0.00019 | -0.00002 | -0.00540 | -0.00541 | 0.00386  |
| D2  | -3.12695 | -0.00015 | -0.00004 | -0.00330 | -0.00334 | -3.13029 |
| D3  | 3.14069  | -0.00005 | 0.00003  | -0.00195 | -0.00192 | 3.13877  |
| D4  | 0.00447  | -0.00001 | 0.00001  | 0.00014  | 0.00015  | 0.00462  |
| D5  | -0.01235 | 0.00027  | 0.00002  | 0.00632  | 0.00635  | -0.00601 |
| D6  | -3.07862 | 0.00015  | 0.00018  | 0.00700  | 0.00718  | -3.07145 |
| D7  | 3.13838  | 0.00014  | -0.00002 | 0.00322  | 0.00321  | 3.14158  |
| D8  | 0.07210  | 0.00002  | 0.00013  | 0.00390  | 0.00404  | 0.07614  |
| D9  | -0.00314 | 0.00005  | 0.00001  | 0.00268  | 0.00269  | -0.00045 |
| D10 | -3.14086 | -0.00004 | -0.00002 | 0.00044  | 0.00042  | -3.14044 |
| D11 | 3.13358  | 0.00001  | 0.00003  | 0.00078  | 0.00081  | 3.13439  |
| D12 | -0.00414 | -0.00008 | 0.00000  | -0.00146 | -0.00146 | -0.00560 |

|     |          |          |          |          |          |          |
|-----|----------|----------|----------|----------|----------|----------|
| D13 | -0.00455 | 0.00012  | 0.00001  | 0.00125  | 0.00126  | -0.00330 |
| D14 | 3.12459  | -0.00012 | -0.00013 | -0.00634 | -0.00646 | 3.11813  |
| D15 | 3.13351  | 0.00020  | 0.00003  | 0.00329  | 0.00332  | 3.13683  |
| D16 | -0.02053 | -0.00005 | -0.00010 | -0.00430 | -0.00439 | -0.02492 |
| D17 | 0.01104  | 0.00014  | 0.00022  | 0.01199  | 0.01220  | 0.02324  |
| D18 | -3.12430 | 0.00013  | 0.00029  | 0.01183  | 0.01212  | -3.11218 |
| D19 | -3.12624 | 0.00004  | 0.00019  | 0.00948  | 0.00967  | -3.11657 |
| D20 | 0.02161  | 0.00004  | 0.00026  | 0.00933  | 0.00959  | 0.03120  |
| D21 | 0.01041  | -0.00024 | -0.00002 | -0.00465 | -0.00467 | 0.00574  |
| D22 | 3.07972  | -0.00019 | -0.00017 | -0.00542 | -0.00559 | 3.07413  |
| D23 | -3.11793 | 0.00001  | 0.00013  | 0.00344  | 0.00357  | -3.11436 |
| D24 | -0.04862 | 0.00006  | -0.00002 | 0.00267  | 0.00265  | -0.04597 |
| D25 | 1.47526  | 0.00017  | 0.00031  | 0.02525  | 0.02556  | 1.50082  |
| D26 | -2.69911 | 0.00011  | 0.00035  | 0.02451  | 0.02486  | -2.67425 |
| D27 | -0.66289 | 0.00008  | 0.00033  | 0.02420  | 0.02453  | -0.63836 |
| D28 | -1.58051 | 0.00006  | 0.00048  | 0.02606  | 0.02654  | -1.55397 |
| D29 | 0.52831  | -0.00001 | 0.00052  | 0.02532  | 0.02584  | 0.55415  |
| D30 | 2.56452  | -0.00004 | 0.00050  | 0.02501  | 0.02551  | 2.59003  |
| D31 | -1.12992 | -0.00007 | -0.00007 | -0.00312 | -0.00319 | -1.13310 |
| D32 | 0.90352  | 0.00025  | -0.00011 | -0.00096 | -0.00107 | 0.90246  |
| D33 | 3.08024  | 0.00005  | -0.00009 | -0.00430 | -0.00439 | 3.07585  |
| D34 | 3.07400  | -0.00001 | -0.00014 | -0.00301 | -0.00315 | 3.07085  |
| D35 | -1.17575 | 0.00031  | -0.00018 | -0.00085 | -0.00103 | -1.17678 |
| D36 | 1.00097  | 0.00011  | -0.00016 | -0.00420 | -0.00436 | 0.99661  |
| D37 | 0.98724  | -0.00023 | -0.00008 | -0.00329 | -0.00337 | 0.98387  |
| D38 | 3.02068  | 0.00009  | -0.00012 | -0.00113 | -0.00125 | 3.01943  |
| D39 | -1.08579 | -0.00011 | -0.00010 | -0.00447 | -0.00458 | -1.09036 |
| D40 | 2.81752  | -0.00006 | -0.00029 | -0.00817 | -0.00847 | 2.80906  |
| D41 | -1.37885 | -0.00003 | -0.00030 | -0.00689 | -0.00719 | -1.38604 |
| D42 | 0.74609  | 0.00000  | -0.00029 | -0.00915 | -0.00944 | 0.73665  |
| D43 | 2.83290  | 0.00003  | -0.00030 | -0.00786 | -0.00816 | 2.82474  |
| D44 | -1.35608 | -0.00011 | -0.00029 | -0.01035 | -0.01064 | -1.36672 |
| D45 | 0.73073  | -0.00008 | -0.00030 | -0.00906 | -0.00936 | 0.72137  |
| D46 | -3.13725 | -0.00002 | 0.00006  | 0.00005  | 0.00011  | -3.13714 |
| D47 | 0.00409  | 0.00001  | 0.00005  | 0.00082  | 0.00087  | 0.00496  |
| D48 | -0.00271 | -0.00001 | -0.00003 | 0.00022  | 0.00019  | -0.00252 |
| D49 | 3.13863  | 0.00002  | -0.00004 | 0.00099  | 0.00096  | 3.13958  |
| D50 | 1.23034  | -0.00001 | 0.00001  | 0.01968  | 0.01968  | 1.25002  |
| D51 | -0.56851 | -0.00010 | -0.00033 | -0.00560 | -0.00592 | -0.57443 |
| D52 | -2.97523 | 0.00008  | 0.00011  | 0.02478  | 0.02488  | -2.95035 |
| D53 | 1.50911  | -0.00002 | -0.00023 | -0.00050 | -0.00072 | 1.50839  |
| D54 | -2.70252 | 0.00017  | -0.00001 | 0.00311  | 0.00311  | -2.69940 |
| D55 | -0.01600 | 0.00012  | 0.00000  | 0.00066  | 0.00066  | -0.01533 |
| D56 | -0.02382 | -0.00008 | -0.00001 | 0.00002  | 0.00001  | -0.02381 |

|     |          |          |          |          |          |          |
|-----|----------|----------|----------|----------|----------|----------|
| D57 | 2.66270  | -0.00012 | 0.00001  | -0.00244 | -0.00244 | 2.66027  |
| D58 | 1.94662  | -0.00020 | -0.00045 | -0.02111 | -0.02162 | 1.92500  |
| D59 | -0.47138 | -0.00030 | -0.00042 | -0.02274 | -0.02321 | -0.49459 |
| D60 | 0.51022  | 0.00035  | 0.00045  | 0.02570  | 0.02619  | 0.53641  |
| D61 | -1.91205 | 0.00021  | 0.00047  | 0.02310  | 0.02360  | -1.88845 |
| D62 | 2.55111  | 0.00007  | -0.00001 | 0.00084  | 0.00083  | 2.55195  |
| D63 | -1.65584 | 0.00007  | -0.00002 | 0.00053  | 0.00052  | -1.65532 |
| D64 | 0.44507  | 0.00010  | -0.00002 | 0.00086  | 0.00085  | 0.44591  |
| D65 | 1.34837  | -0.00001 | 0.00000  | 0.00101  | 0.00100  | 1.34937  |
| D66 | -2.85858 | -0.00001 | -0.00001 | 0.00070  | 0.00068  | -2.85790 |
| D67 | -0.75768 | 0.00002  | -0.00001 | 0.00103  | 0.00101  | -0.75667 |
| D68 | -1.04849 | -0.00008 | 0.00001  | -0.00203 | -0.00201 | -1.05050 |
| D69 | 1.02775  | -0.00009 | 0.00000  | -0.00234 | -0.00233 | 1.02542  |
| D70 | 3.12865  | -0.00006 | 0.00000  | -0.00201 | -0.00200 | 3.12665  |

| Item                 | Value    | Threshold | Converged? |
|----------------------|----------|-----------|------------|
| Maximum Force        | 0.001090 | 0.000450  | NO         |
| RMS Force            | 0.000246 | 0.000300  | YES        |
| Maximum Displacement | 0.185340 | 0.001800  | NO         |
| RMS Displacement     | 0.029361 | 0.001200  | NO         |

Predicted change in Energy=-5.289023D-05

GradGradGradGradGradGradGradGradGradGradGradGradGradGradGradGradGradGradGrad

Input orientation:

| Center Number | Atomic Number | Atomic Type | Coordinates (Angstroms) |           |           |
|---------------|---------------|-------------|-------------------------|-----------|-----------|
|               |               |             | X                       | Y         | Z         |
| 1             | 6             | 0           | -2.895025               | 2.141153  | -0.280286 |
| 2             | 6             | 0           | -3.765152               | 1.155684  | 0.059215  |
| 3             | 7             | 0           | -3.034758               | -0.025568 | 0.109474  |
| 4             | 6             | 0           | -1.752113               | 0.246827  | -0.194572 |
| 5             | 7             | 0           | -1.647931               | 1.553208  | -0.438268 |
| 6             | 6             | 0           | -0.373760               | 2.236586  | -0.725379 |
| 7             | 6             | 0           | 0.324071                | 2.730764  | 0.550259  |
| 8             | 1             | 0           | -3.053766               | 3.195630  | -0.426751 |
| 9             | 1             | 0           | -4.820466               | 1.196943  | 0.258289  |
| 10            | 1             | 0           | 0.263931                | 1.520394  | -1.244190 |
| 11            | 1             | 0           | -0.574122               | 3.068686  | -1.400676 |
| 12            | 1             | 0           | -0.293469               | 3.501568  | 1.022911  |
| 13            | 1             | 0           | 0.394019                | 1.888179  | 1.254668  |
| 14            | 35            | 0           | 0.255339                | -2.336574 | 0.033411  |
| 15            | 1             | 0           | -0.949477               | -0.524229 | -0.204887 |
| 16            | 6             | 0           | -3.473227               | -1.348366 | 0.417143  |
| 17            | 6             | 0           | -4.730308               | -1.666690 | 0.695193  |

|    |   |   |           |           |           |
|----|---|---|-----------|-----------|-----------|
| 18 | 1 | 0 | -2.647902 | -2.055952 | 0.400389  |
| 19 | 1 | 0 | -4.971406 | -2.696257 | 0.921257  |
| 20 | 1 | 0 | -5.544504 | -0.952448 | 0.710657  |
| 21 | 7 | 0 | 1.605089  | 3.305786  | 0.168678  |
| 22 | 1 | 0 | 1.964586  | 3.913477  | 0.894845  |
| 23 | 1 | 0 | 2.291739  | 2.568373  | 0.009725  |
| 24 | 6 | 0 | 3.693331  | -0.240235 | -1.065367 |
| 25 | 6 | 0 | 3.647664  | -0.448133 | 0.383348  |
| 26 | 8 | 0 | 3.452442  | 0.876820  | -0.180312 |
| 27 | 1 | 0 | 4.655635  | -0.208895 | -1.570947 |
| 28 | 1 | 0 | 2.843285  | -0.548056 | -1.666754 |
| 29 | 1 | 0 | 2.731255  | -0.888045 | 0.770746  |
| 30 | 6 | 0 | 4.889647  | -0.641497 | 1.208782  |
| 31 | 1 | 0 | 4.766452  | -0.203042 | 2.203458  |
| 32 | 1 | 0 | 5.087114  | -1.710138 | 1.336453  |
| 33 | 1 | 0 | 5.756901  | -0.178587 | 0.731703  |

-----  
Distance matrix (angstroms):

|    |    | 1        | 2        | 3        | 4        | 5        |
|----|----|----------|----------|----------|----------|----------|
| 1  | C  | 0.000000 |          |          |          |          |
| 2  | C  | 1.357766 | 0.000000 |          |          |          |
| 3  | N  | 2.205928 | 1.389733 | 0.000000 |          |          |
| 4  | C  | 2.214061 | 2.223230 | 1.346039 | 0.000000 |          |
| 5  | N  | 1.387761 | 2.210913 | 2.171599 | 1.332993 | 0.000000 |
| 6  | C  | 2.562029 | 3.644924 | 3.590992 | 2.478054 | 1.474093 |
| 7  | C  | 3.376393 | 4.409506 | 4.367309 | 3.321936 | 2.500524 |
| 8  | H  | 1.076370 | 2.214409 | 3.265580 | 3.231663 | 2.161956 |
| 9  | H  | 2.211090 | 1.074719 | 2.169201 | 3.243855 | 3.267582 |
| 10 | H  | 3.360574 | 4.250339 | 3.886354 | 2.605399 | 2.075044 |
| 11 | H  | 2.739012 | 3.996690 | 4.231984 | 3.287132 | 2.091882 |
| 12 | H  | 3.212032 | 4.299356 | 4.559575 | 3.768719 | 2.786704 |
| 13 | H  | 3.638392 | 4.389118 | 4.090282 | 3.065977 | 2.673537 |
| 14 | Br | 5.483908 | 5.325494 | 4.021352 | 3.279604 | 4.356067 |
| 15 | H  | 3.300774 | 3.289359 | 2.166998 | 1.113041 | 2.204098 |
| 16 | C  | 3.605200 | 2.546292 | 1.427134 | 2.425092 | 3.533067 |
| 17 | C  | 4.338144 | 3.049884 | 2.431304 | 3.650051 | 4.599295 |
| 18 | H  | 4.259117 | 3.417492 | 2.087282 | 2.541497 | 3.837879 |
| 19 | H  | 5.399592 | 4.127422 | 3.397378 | 4.502296 | 5.563429 |
| 20 | H  | 4.191906 | 2.834554 | 2.742144 | 4.079207 | 4.773009 |
| 21 | N  | 4.670007 | 5.785707 | 5.712232 | 4.556312 | 3.744603 |
| 22 | H  | 5.304516 | 6.413547 | 6.412981 | 5.333385 | 4.516453 |
| 23 | H  | 5.212403 | 6.219651 | 5.925373 | 4.667338 | 4.092952 |
| 24 | C  | 7.049383 | 7.670870 | 6.833265 | 5.536097 | 5.669107 |
| 25 | C  | 7.067645 | 7.591254 | 6.701368 | 5.474902 | 5.720468 |

|    |    |          |          |          |           |          |
|----|----|----------|----------|----------|-----------|----------|
| 26 | O  | 6.472934 | 7.226949 | 6.556069 | 5.242565  | 5.151490 |
| 27 | H  | 8.012553 | 8.684996 | 7.873980 | 6.569728  | 6.642509 |
| 28 | H  | 6.487090 | 7.039398 | 6.162739 | 4.890484  | 5.108376 |
| 29 | H  | 6.475781 | 6.847365 | 5.867542 | 4.724443  | 5.157393 |
| 30 | C  | 8.400094 | 8.913860 | 8.023966 | 6.846276  | 7.090094 |
| 31 | H  | 8.388234 | 8.901245 | 8.079303 | 6.960216  | 7.155937 |
| 32 | H  | 9.008931 | 9.391852 | 8.384989 | 7.276591  | 7.691547 |
| 33 | H  | 9.014496 | 9.638569 | 8.814978 | 7.577879  | 7.694120 |
|    |    | 6        | 7        | 8        | 9         | 10       |
| 6  | C  | 0.000000 |          |          |           |          |
| 7  | C  | 1.535719 | 0.000000 |          |           |          |
| 8  | H  | 2.862058 | 3.546891 | 0.000000 |           |          |
| 9  | H  | 4.671365 | 5.376255 | 2.754135 | 0.000000  |          |
| 10 | H  | 1.090297 | 2.165332 | 3.805488 | 5.311606  | 0.000000 |
| 11 | H  | 1.090212 | 2.174187 | 2.667074 | 4.928187  | 1.767493 |
| 12 | H  | 2.159431 | 1.094940 | 3.132788 | 5.137086  | 3.061943 |
| 13 | H  | 2.152082 | 1.100470 | 4.052632 | 5.353638  | 2.529127 |
| 14 | Br | 4.678175 | 5.094092 | 6.462756 | 6.188708  | 4.063071 |
| 15 | H  | 2.867832 | 3.575913 | 4.279557 | 4.261634  | 2.594801 |
| 16 | C  | 4.874826 | 5.574630 | 4.640690 | 2.884248  | 4.995614 |
| 17 | C  | 6.019393 | 6.701146 | 5.264190 | 2.898173  | 6.233870 |
| 18 | H  | 4.986477 | 5.636288 | 5.331791 | 3.914275  | 4.896291 |
| 19 | H  | 6.941375 | 7.591592 | 6.341040 | 3.952127  | 7.062440 |
| 20 | H  | 6.242494 | 6.930509 | 4.970314 | 2.312736  | 6.608653 |
| 21 | N  | 2.420407 | 1.455081 | 4.698042 | 6.763358  | 2.642447 |
| 22 | H  | 3.302265 | 2.051545 | 5.238872 | 7.336327  | 3.632430 |
| 23 | H  | 2.784842 | 2.047013 | 5.399851 | 7.247487  | 2.604336 |
| 24 | C  | 4.774041 | 4.773782 | 7.598442 | 8.735118  | 3.859090 |
| 25 | C  | 4.960731 | 4.602121 | 7.670883 | 8.627349  | 4.239532 |
| 26 | O  | 4.097058 | 3.709117 | 6.911466 | 8.290709  | 3.422372 |
| 27 | H  | 5.655987 | 5.648324 | 8.504990 | 9.752896  | 4.731203 |
| 28 | H  | 4.357728 | 4.691721 | 7.094223 | 8.092211  | 3.333183 |
| 29 | H  | 4.652185 | 4.351888 | 7.181704 | 7.851005  | 3.993524 |
| 30 | C  | 6.302999 | 5.714042 | 8.971974 | 9.928222  | 5.664635 |
| 31 | H  | 6.399348 | 5.574498 | 8.923272 | 9.881935  | 5.926989 |
| 32 | H  | 7.046199 | 6.559443 | 9.666922 | 10.381411 | 6.352885 |
| 33 | H  | 6.748419 | 6.165459 | 9.505536 | 10.676933 | 6.079754 |
|    |    | 11       | 12       | 13       | 14        | 15       |
| 11 | H  | 0.000000 |          |          |           |          |
| 12 | H  | 2.477887 | 0.000000 |          |           |          |
| 13 | H  | 3.062964 | 1.769004 | 0.000000 |           |          |
| 14 | Br | 5.653446 | 5.946781 | 4.399914 | 0.000000  |          |
| 15 | H  | 3.805239 | 4.259681 | 3.123299 | 2.189283  | 0.000000 |
| 16 | C  | 5.587453 | 5.830924 | 5.111973 | 3.876340  | 2.726800 |

|    |   |          |           |          |           |           |
|----|---|----------|-----------|----------|-----------|-----------|
| 17 | C | 6.640055 | 6.819372  | 6.261695 | 5.073793  | 4.050931  |
| 18 | H | 5.814320 | 6.067694  | 5.053636 | 2.939768  | 2.365836  |
| 19 | H | 7.613281 | 7.765723  | 7.065125 | 5.313804  | 4.707634  |
| 20 | H | 6.732900 | 6.892687  | 6.605389 | 6.001054  | 4.704877  |
| 21 | N | 2.695931 | 2.091068  | 2.157701 | 5.803133  | 4.618915  |
| 22 | H | 3.525354 | 2.298887  | 2.588047 | 6.536569  | 5.421662  |
| 23 | H | 3.233064 | 2.929282  | 2.369364 | 5.310932  | 4.485056  |
| 24 | C | 5.410411 | 5.852911  | 4.560501 | 4.173936  | 4.730406  |
| 25 | C | 5.777044 | 5.616200  | 4.099239 | 3.898274  | 4.635248  |
| 26 | O | 4.744131 | 4.729576  | 3.526466 | 4.537956  | 4.619571  |
| 27 | H | 6.174293 | 6.707404  | 5.526590 | 5.144277  | 5.777788  |
| 28 | H | 4.983000 | 5.785583  | 4.524251 | 3.575866  | 4.064808  |
| 29 | H | 5.594311 | 5.336782  | 3.661184 | 2.961766  | 3.825181  |
| 30 | C | 7.101232 | 6.638088  | 5.158685 | 5.072632  | 6.008958  |
| 31 | H | 7.226044 | 6.381271  | 4.938782 | 5.441617  | 6.210888  |
| 32 | H | 7.898014 | 7.497390  | 5.914364 | 5.043450  | 6.342124  |
| 33 | H | 7.427898 | 7.087687  | 5.771093 | 5.950773  | 6.780278  |
|    |   | 16       | 17        | 18       | 19        | 20        |
| 16 | C | 0.000000 |           |          |           |           |
| 17 | C | 1.326233 | 0.000000  |          |           |           |
| 18 | H | 1.087253 | 2.138889  | 0.000000 |           |           |
| 19 | H | 2.077373 | 1.081314  | 2.465758 | 0.000000  |           |
| 20 | H | 2.129105 | 1.083188  | 3.115170 | 1.847609  | 0.000000  |
| 21 | N | 6.892906 | 8.070934  | 6.847616 | 8.935389  | 8.339243  |
| 22 | H | 7.581887 | 8.717782  | 7.560001 | 9.581089  | 8.949725  |
| 23 | H | 6.981523 | 8.228898  | 6.777688 | 9.016678  | 8.619408  |
| 24 | C | 7.401712 | 8.723075  | 6.756960 | 9.222602  | 9.433934  |
| 25 | C | 7.177650 | 8.471868  | 6.497656 | 8.923664  | 9.211809  |
| 26 | O | 7.298856 | 8.613556  | 6.793568 | 9.216374  | 9.224158  |
| 27 | H | 8.445667 | 9.765064  | 7.787133 | 10.250755 | 10.478618 |
| 28 | H | 6.699361 | 8.011831  | 6.058050 | 8.507759  | 8.727578  |
| 29 | H | 6.231575 | 7.502461  | 5.516929 | 7.913487  | 8.276228  |
| 30 | C | 8.429947 | 9.688050  | 7.711603 | 10.076957 | 10.450661 |
| 31 | H | 8.508525 | 9.726539  | 7.852195 | 10.133412 | 10.445375 |
| 32 | H | 8.617160 | 9.838438  | 7.799120 | 10.115268 | 10.676938 |
| 33 | H | 9.309274 | 10.592324 | 8.618293 | 11.021396 | 11.327888 |
|    |   | 21       | 22        | 23       | 24        | 25        |
| 21 | N | 0.000000 |           |          |           |           |
| 22 | H | 1.012840 | 0.000000  |          |           |           |
| 23 | H | 1.020064 | 1.643098  | 0.000000 |           |           |
| 24 | C | 4.296264 | 4.907577  | 3.317916 | 0.000000  |           |
| 25 | C | 4.279031 | 4.702981  | 3.328279 | 1.464269  | 0.000000  |
| 26 | O | 3.071544 | 3.548375  | 2.060267 | 1.445393  | 1.453040  |
| 27 | H | 4.968411 | 5.505981  | 3.974890 | 1.087485  | 2.211902  |

|    |   |          |          |          |          |          |
|----|---|----------|----------|----------|----------|----------|
| 28 | H | 4.444551 | 5.219116 | 3.581468 | 1.085817 | 2.204525 |
| 29 | H | 4.383943 | 4.863928 | 3.566392 | 2.171764 | 1.087844 |
| 30 | C | 5.239387 | 5.422391 | 4.300015 | 2.600757 | 1.503745 |
| 31 | H | 5.142608 | 5.148655 | 4.314790 | 3.440667 | 2.150478 |
| 32 | H | 6.216726 | 6.447499 | 5.280150 | 3.141971 | 2.138476 |
| 33 | H | 5.449348 | 5.581510 | 4.480446 | 2.737075 | 2.154735 |
|    |   | 26       | 27       | 28       | 29       | 30       |
| 26 | O | 0.000000 |          |          |          |          |
| 27 | H | 2.135490 | 0.000000 |          |          |          |
| 28 | H | 2.147290 | 1.846300 | 0.000000 |          |          |
| 29 | H | 2.130580 | 3.106124 | 2.463645 | 0.000000 |          |
| 30 | C | 2.510065 | 2.822906 | 3.530586 | 2.216149 | 0.000000 |
| 31 | H | 2.928324 | 3.776036 | 4.335452 | 2.581457 | 1.093984 |
| 32 | H | 3.415418 | 3.300436 | 3.924851 | 2.558502 | 1.094206 |
| 33 | H | 2.693731 | 2.552626 | 3.791868 | 3.107956 | 1.092712 |
|    |   | 31       | 32       | 33       |          |          |
| 31 | H | 0.000000 |          |          |          |          |
| 32 | H | 1.768010 | 0.000000 |          |          |          |
| 33 | H | 1.774162 | 1.777635 | 0.000000 |          |          |

Stoichiometry C10H18BrN3O

Framework group C1[X(C10H18BrN3O)]

Deg. of freedom 93

Full point group C1 NOp 1

Largest Abelian subgroup C1 NOp 1

Largest concise Abelian subgroup C1 NOp 1

Standard orientation:

| Center Number | Atomic Number | Atomic Type | Coordinates (Angstroms) |           |           |
|---------------|---------------|-------------|-------------------------|-----------|-----------|
|               |               |             | X                       | Y         | Z         |
| 1             | 6             | 0           | -2.855173               | 2.212372  | -0.200386 |
| 2             | 6             | 0           | -3.730638               | 1.214569  | 0.085059  |
| 3             | 7             | 0           | -3.008338               | 0.027504  | 0.062308  |
| 4             | 6             | 0           | -1.725216               | 0.308616  | -0.231622 |
| 5             | 7             | 0           | -1.612976               | 1.626314  | -0.398790 |
| 6             | 6             | 0           | -0.335363               | 2.316755  | -0.651667 |
| 7             | 6             | 0           | 0.371753                | 2.730502  | 0.647269  |
| 8             | 1             | 0           | -3.007171               | 3.274674  | -0.283958 |
| 9             | 1             | 0           | -4.784715               | 1.251189  | 0.291464  |
| 10            | 1             | 0           | 0.294900                | 1.627960  | -1.214762 |
| 11            | 1             | 0           | -0.532963               | 3.188385  | -1.275989 |
| 12            | 1             | 0           | -0.238187               | 3.476386  | 1.167387  |
| 13            | 1             | 0           | 0.439003                | 1.847576  | 1.300687  |
| 14            | 35            | 0           | 0.265061                | -2.297192 | -0.165558 |

|    |   |   |           |           |           |
|----|---|---|-----------|-----------|-----------|
| 15 | 1 | 0 | -0.928072 | -0.465902 | -0.291142 |
| 16 | 6 | 0 | -3.454676 | -1.308083 | 0.294041  |
| 17 | 6 | 0 | -4.712677 | -1.633691 | 0.559200  |
| 18 | 1 | 0 | -2.634428 | -2.019016 | 0.231704  |
| 19 | 1 | 0 | -4.959965 | -2.673100 | 0.725684  |
| 20 | 1 | 0 | -5.521756 | -0.916113 | 0.620585  |
| 21 | 7 | 0 | 1.655019  | 3.318273  | 0.293696  |
| 22 | 1 | 0 | 2.022096  | 3.879863  | 1.052456  |
| 23 | 1 | 0 | 2.335737  | 2.586846  | 0.088347  |
| 24 | 6 | 0 | 3.712630  | -0.163218 | -1.156596 |
| 25 | 6 | 0 | 3.672134  | -0.455464 | 0.277640  |
| 26 | 8 | 0 | 3.483647  | 0.901571  | -0.206357 |
| 27 | 1 | 0 | 4.672807  | -0.108752 | -1.664254 |
| 28 | 1 | 0 | 2.857699  | -0.429474 | -1.770761 |
| 29 | 1 | 0 | 2.754440  | -0.911163 | 0.643128  |
| 30 | 6 | 0 | 4.916492  | -0.705309 | 1.084115  |
| 31 | 1 | 0 | 4.800933  | -0.325163 | 2.103397  |
| 32 | 1 | 0 | 5.107029  | -1.780908 | 1.147903  |
| 33 | 1 | 0 | 5.784784  | -0.221058 | 0.630696  |

-----

Rotational constants (GHZ):      0.4750358      0.2485614      0.1714302

Standard basis: 6-311++G(d,p) (5D, 7F)

There are 499 symmetry adapted cartesian basis functions of A symmetry.

There are 482 symmetry adapted basis functions of A symmetry.

482 basis functions, 760 primitive gaussians, 499 cartesian basis functions

71 alpha electrons      71 beta electrons

nuclear repulsion energy      1293.0179738655 Hartrees.

NAtoms= 33 NActive= 33 NUniq= 33 SFac= 1.00D+00 NAtFMM= 60 NAOKFM=F

Big=F

Integral buffers will be 131072 words long.

Raffenetti 2 integral format.

Two-electron integral symmetry is turned on.

One-electron integrals computed using PRISM.

NBasis= 482 RedAO= T EigKep= 3.87D-06 NBF= 482

NBsUse= 482 1.00D-06 EigRej= -1.00D+00 NBFU= 482

Initial guess from the checkpoint file:

"/home/suqian/liuwen/qianmengshijie/nh2po/nh2po.chk"

B after Tr= 0.000000 0.000000 0.000000

Rot= 0.999996 -0.001967 -0.000125 0.001766 Ang= -0.30 deg.

ExpMin= 3.50D-02 ExpMax= 4.40D+05 ExpMxC= 1.51D+04 IAcc=3 IRadAn= 5 AccDes= 0.00D+00

Harris functional with IExCor= 402 and IRadAn= 5 diagonalized for initial guess.

HarFok: IExCor= 402 AccDes= 0.00D+00 IRadAn= 5 IDoV= 1 UseB2=F ITyADJ=14

ICtDFT= 3500011 ScaDFX= 1.000000 1.000000 1.000000 1.000000



FoFCou: FMM=F IPFlag= 0 FMFlag= 100000 FMFlg1= 0  
 NFxFlg= 0 DoJE=T BraDBF=F KetDBF=T FulRan=T  
 wScrn= 0.000000 ICntrl= 500 IOpCl= 0 l1Cent= 200000004 NGrid=  
 0  
 NMat0= 1 NMatS0= 1 NMatT0= 0 NMatD0= 1 NMtDS0= 0  
 NMtDT0= 0

Petite list used in FoFCou.

Requested convergence on RMS density matrix=1.00D-08 within 128 cycles.

Requested convergence on MAX density matrix=1.00D-06.

Requested convergence on energy=1.00D-06.

No special actions if energy rises.

SCF Done: E(RB3LYP) = -3205.64690000 A.U. after 11 cycles

NFock= 11 Conv=0.36D-08 -V/T= 2.0018

Calling FoFJK, ICntrl= 2127 FMM=F ISym2X=0 l1Cent= 0 IOpClX= 0 NMat=1 NMatS=1

NMatT=0.

\*\*\*\*\* Axes restored to original set \*\*\*\*\*

| Center<br>Number | Atomic<br>Number | Forces (Hartrees/Bohr) |              |              |
|------------------|------------------|------------------------|--------------|--------------|
|                  |                  | X                      | Y            | Z            |
| 1                | 6                | 0.000359837            | 0.000029993  | 0.000113243  |
| 2                | 6                | -0.000240144           | 0.000092618  | -0.000065254 |
| 3                | 7                | 0.000618316            | 0.000310925  | -0.000333269 |
| 4                | 6                | -0.001095455           | -0.001126418 | 0.000422975  |
| 5                | 7                | 0.000056724            | -0.000270261 | 0.000204149  |
| 6                | 6                | 0.000441309            | 0.000593694  | -0.000196837 |
| 7                | 6                | -0.000813338           | -0.000460361 | 0.000297197  |
| 8                | 1                | 0.000006241            | 0.000023776  | -0.000037344 |
| 9                | 1                | 0.000040113            | 0.000016582  | -0.000020110 |
| 10               | 1                | -0.000008975           | -0.000019832 | 0.000007323  |
| 11               | 1                | -0.000141751           | -0.000042824 | 0.000042843  |
| 12               | 1                | 0.000100485            | -0.000001255 | -0.000000967 |
| 13               | 1                | 0.000162451            | 0.000119042  | -0.000038724 |
| 14               | 35               | -0.000173833           | 0.000192609  | 0.000048083  |
| 15               | 1                | 0.000446229            | 0.000443615  | -0.000267298 |
| 16               | 6                | 0.000349518            | 0.000308665  | 0.000118270  |
| 17               | 6                | -0.000004440           | -0.000247798 | -0.000026071 |
| 18               | 1                | -0.000210330           | 0.000055198  | 0.000018639  |
| 19               | 1                | -0.000035478           | 0.000022417  | 0.000015581  |
| 20               | 1                | 0.000051643            | -0.000031040 | -0.000028612 |
| 21               | 7                | 0.000173571            | 0.000063954  | -0.000137651 |
| 22               | 1                | -0.000002404           | 0.000020274  | -0.000036050 |
| 23               | 1                | 0.000276638            | 0.000155867  | -0.000004304 |
| 24               | 6                | 0.000631409            | 0.000274035  | 0.000317366  |

|    |   |              |              |              |
|----|---|--------------|--------------|--------------|
| 25 | 6 | 0.000336508  | -0.000003940 | 0.000205202  |
| 26 | 8 | -0.000913929 | -0.000502337 | -0.000366789 |
| 27 | 1 | -0.000124486 | 0.000009224  | -0.000163275 |
| 28 | 1 | -0.000130140 | 0.000006263  | 0.000074312  |
| 29 | 1 | -0.000149116 | -0.000041100 | -0.000146123 |
| 30 | 6 | -0.000003421 | 0.000018288  | -0.000023115 |
| 31 | 1 | -0.000043527 | -0.000025301 | -0.000014716 |
| 32 | 1 | 0.000031578  | 0.000005421  | 0.000044251  |
| 33 | 1 | 0.000008197  | 0.000010008  | -0.000022926 |

-----  
Cartesian Forces: Max 0.001126418 RMS 0.000289681

GradGradGradGradGradGradGradGradGradGradGradGradGradGradGradGradGradGradGrad  
Berny optimization.

Using GEDIIS/GDIIS optimizer.

FormGI is forming the generalized inverse of G from B-inverse, IUseBI=4.

Internal Forces: Max 0.000737913 RMS 0.000155995

Search for a local minimum.

Step number 13 out of a maximum of 172

All quantities printed in internal units (Hartrees-Bohrs-Radians)

Mixed Optimization -- En-DIIS/RFO-DIIS

Swapping is turned off.

Update second derivatives using D2CorX and points

|   |   |    |    |    |    |
|---|---|----|----|----|----|
| 2 | 3 | 1  | 4  | 5  |    |
|   | 6 | 7  | 8  | 10 | 11 |
|   | 9 | 12 | 13 |    |    |

DE= -8.32D-05 DEPred=-5.29D-05 R= 1.57D+00

TightC=F SS= 1.41D+00 RLast= 1.05D-01 DXNew= 1.8436D-01 3.1404D-01

Trust test= 1.57D+00 RLast= 1.05D-01 DXMaxT set to 1.84D-01

ITU= 1 0 -1 -1 1 1 1 -1 1 0 0 -1 0

|                 |         |         |         |         |         |
|-----------------|---------|---------|---------|---------|---------|
| Eigenvalues --- | 0.00162 | 0.00231 | 0.00376 | 0.00663 | 0.00723 |
| Eigenvalues --- | 0.00889 | 0.00989 | 0.01376 | 0.01454 | 0.01577 |
| Eigenvalues --- | 0.01873 | 0.01920 | 0.02109 | 0.02249 | 0.02346 |
| Eigenvalues --- | 0.02394 | 0.02425 | 0.02532 | 0.03018 | 0.03074 |
| Eigenvalues --- | 0.03080 | 0.03131 | 0.03331 | 0.03750 | 0.04037 |
| Eigenvalues --- | 0.04244 | 0.04417 | 0.04886 | 0.05016 | 0.05409 |
| Eigenvalues --- | 0.05753 | 0.05777 | 0.05922 | 0.07776 | 0.08662 |
| Eigenvalues --- | 0.09504 | 0.10722 | 0.12120 | 0.12393 | 0.12600 |
| Eigenvalues --- | 0.12776 | 0.13235 | 0.15560 | 0.15719 | 0.15996 |
| Eigenvalues --- | 0.16000 | 0.16000 | 0.16003 | 0.16007 | 0.16019 |
| Eigenvalues --- | 0.16046 | 0.16249 | 0.17499 | 0.21425 | 0.22126 |
| Eigenvalues --- | 0.22775 | 0.22993 | 0.23899 | 0.25532 | 0.26272 |
| Eigenvalues --- | 0.29193 | 0.30070 | 0.31425 | 0.32067 | 0.32586 |
| Eigenvalues --- | 0.33655 | 0.34273 | 0.34312 | 0.34341 | 0.34544 |
| Eigenvalues --- | 0.34656 | 0.34735 | 0.35045 | 0.35075 | 0.35270 |

|                 |         |         |         |         |         |
|-----------------|---------|---------|---------|---------|---------|
| Eigenvalues --- | 0.35387 | 0.35561 | 0.35692 | 0.35890 | 0.36419 |
| Eigenvalues --- | 0.36620 | 0.38066 | 0.39184 | 0.41961 | 0.42420 |
| Eigenvalues --- | 0.44742 | 0.45473 | 0.45920 | 0.49279 | 0.54850 |
| Eigenvalues --- | 0.58620 | 0.60675 | 1.09145 |         |         |

En-DIIS/RFO-DIIS IScMMF= 0 using points: 13 12

RFO step: Lambda=-1.26837713D-05.

DidBck=F Rises=F RFO-DIIS coefs: 1.83487 -0.83487

Iteration 1 RMS(Cart)= 0.04536506 RMS(Int)= 0.00103379

Iteration 2 RMS(Cart)= 0.00181279 RMS(Int)= 0.00025057

Iteration 3 RMS(Cart)= 0.00000197 RMS(Int)= 0.00025057

Iteration 4 RMS(Cart)= 0.00000000 RMS(Int)= 0.00025057

| Variable | Old X   | -DE/DX   | Delta X<br>(Linear) | Delta X<br>(Quad) | Delta X<br>(Total) | New X   |
|----------|---------|----------|---------------------|-------------------|--------------------|---------|
| R1       | 2.56581 | 0.00001  | -0.00028            | 0.00004           | -0.00024           | 2.56557 |
| R2       | 2.62249 | -0.00028 | -0.00034            | -0.00079          | -0.00113           | 2.62136 |
| R3       | 2.03404 | 0.00003  | 0.00006             | 0.00002           | 0.00007            | 2.03412 |
| R4       | 2.62622 | 0.00019  | -0.00023            | -0.00070          | -0.00093           | 2.62529 |
| R5       | 2.03093 | -0.00004 | -0.00012            | -0.00013          | -0.00025           | 2.03068 |
| R6       | 2.54364 | -0.00074 | -0.00014            | -0.00051          | -0.00064           | 2.54300 |
| R7       | 2.69689 | -0.00013 | 0.00086             | 0.00141           | 0.00228            | 2.69917 |
| R8       | 2.51899 | -0.00004 | 0.00019             | 0.00120           | 0.00140            | 2.52039 |
| R9       | 2.10334 | -0.00025 | -0.00200            | -0.00373          | -0.00573           | 2.09762 |
| R10      | 2.78563 | -0.00003 | -0.00061            | 0.00070           | 0.00010            | 2.78573 |
| R11      | 2.90209 | -0.00032 | -0.00026            | 0.00025           | -0.00001           | 2.90207 |
| R12      | 2.06036 | 0.00001  | -0.00004            | 0.00018           | 0.00014            | 2.06050 |
| R13      | 2.06020 | -0.00003 | 0.00002             | -0.00025          | -0.00024           | 2.05996 |
| R14      | 2.06914 | -0.00006 | -0.00010            | -0.00041          | -0.00051           | 2.06862 |
| R15      | 2.07959 | -0.00011 | -0.00033            | -0.00065          | -0.00098           | 2.07861 |
| R16      | 2.74970 | 0.00014  | -0.00048            | 0.00124           | 0.00076            | 2.75046 |
| R17      | 4.13715 | -0.00025 | 0.01046             | 0.02145           | 0.03191            | 4.16905 |
| R18      | 2.50622 | 0.00004  | 0.00003             | -0.00009          | -0.00006           | 2.50616 |
| R19      | 2.05461 | -0.00020 | 0.00001             | 0.00071           | 0.00072            | 2.05533 |
| R20      | 2.04339 | -0.00001 | 0.00007             | 0.00003           | 0.00010            | 2.04349 |
| R21      | 2.04693 | -0.00006 | -0.00018            | -0.00001          | -0.00019           | 2.04674 |
| R22      | 1.91399 | -0.00002 | -0.00014            | -0.00027          | -0.00041           | 1.91358 |
| R23      | 1.92764 | 0.00003  | -0.00029            | -0.00099          | -0.00127           | 1.92637 |
| R24      | 3.89334 | 0.00001  | 0.00747             | 0.01386           | 0.02132            | 3.91466 |
| R25      | 2.76707 | -0.00016 | -0.00079            | 0.00122           | -0.00040           | 2.76667 |
| R26      | 2.73140 | -0.00018 | -0.00002            | -0.00213          | -0.00182           | 2.72958 |
| R27      | 2.05505 | -0.00004 | 0.00007             | 0.00002           | 0.00009            | 2.05514 |
| R28      | 2.05190 | 0.00006  | -0.00002            | 0.00029           | 0.00027            | 2.05217 |
| R29      | 2.74585 | 0.00012  | 0.00055             | 0.00026           | 0.00131            | 2.74716 |
| R30      | 2.05573 | 0.00009  | 0.00004             | 0.00046           | 0.00050            | 2.05623 |
| R31      | 2.84167 | -0.00001 | 0.00007             | 0.00003           | 0.00010            | 2.84176 |

|     |         |          |          |          |          |         |
|-----|---------|----------|----------|----------|----------|---------|
| R32 | 2.06733 | -0.00001 | -0.00002 | -0.00009 | -0.00012 | 2.06721 |
| R33 | 2.06775 | 0.00001  | 0.00005  | 0.00001  | 0.00007  | 2.06782 |
| R34 | 2.06493 | 0.00002  | -0.00001 | 0.00012  | 0.00011  | 2.06504 |
| A1  | 1.87220 | -0.00010 | -0.00027 | 0.00035  | 0.00007  | 1.87227 |
| A2  | 2.27911 | 0.00007  | 0.00059  | 0.00078  | 0.00136  | 2.28047 |
| A3  | 2.13186 | 0.00003  | -0.00029 | -0.00117 | -0.00146 | 2.13040 |
| A4  | 1.86414 | -0.00015 | 0.00017  | 0.00008  | 0.00024  | 1.86438 |
| A5  | 2.27540 | 0.00005  | -0.00054 | -0.00030 | -0.00084 | 2.27456 |
| A6  | 2.14362 | 0.00010  | 0.00037  | 0.00025  | 0.00062  | 2.14424 |
| A7  | 1.89719 | 0.00013  | 0.00022  | 0.00001  | 0.00024  | 1.89743 |
| A8  | 2.25773 | 0.00018  | -0.00046 | -0.00084 | -0.00131 | 2.25642 |
| A9  | 2.12826 | -0.00032 | 0.00025  | 0.00083  | 0.00107  | 2.12933 |
| A10 | 1.89030 | 0.00000  | -0.00054 | 0.00012  | -0.00043 | 1.88987 |
| A11 | 2.15204 | 0.00061  | -0.00052 | -0.00224 | -0.00279 | 2.14924 |
| A12 | 2.24064 | -0.00061 | 0.00095  | 0.00205  | 0.00297  | 2.24361 |
| A13 | 1.90092 | 0.00012  | 0.00047  | -0.00062 | -0.00015 | 1.90077 |
| A14 | 2.21746 | -0.00019 | -0.00123 | -0.00342 | -0.00467 | 2.21279 |
| A15 | 2.16217 | 0.00007  | 0.00070  | 0.00343  | 0.00411  | 2.16628 |
| A16 | 1.96077 | -0.00017 | -0.00044 | -0.00027 | -0.00070 | 1.96007 |
| A17 | 1.86890 | 0.00001  | 0.00047  | 0.00401  | 0.00449  | 1.87339 |
| A18 | 1.89191 | 0.00000  | -0.00056 | -0.00277 | -0.00333 | 1.88858 |
| A19 | 1.91863 | -0.00002 | -0.00051 | 0.00003  | -0.00048 | 1.91815 |
| A20 | 1.93096 | 0.00018  | 0.00121  | -0.00033 | 0.00088  | 1.93183 |
| A21 | 1.89031 | 0.00000  | -0.00021 | -0.00059 | -0.00079 | 1.88952 |
| A22 | 1.90584 | 0.00023  | 0.00100  | -0.00042 | 0.00058  | 1.90642 |
| A23 | 1.89041 | 0.00027  | 0.00045  | 0.00174  | 0.00219  | 1.89259 |
| A24 | 1.88534 | -0.00060 | -0.00193 | -0.00048 | -0.00243 | 1.88291 |
| A25 | 1.87396 | -0.00007 | 0.00082  | 0.00074  | 0.00157  | 1.87552 |
| A26 | 1.90872 | 0.00020  | 0.00130  | -0.00001 | 0.00129  | 1.91002 |
| A27 | 1.99816 | -0.00001 | -0.00151 | -0.00153 | -0.00304 | 1.99512 |
| A28 | 2.16384 | 0.00025  | -0.00029 | -0.00136 | -0.00165 | 2.16219 |
| A29 | 1.94623 | -0.00002 | -0.00052 | -0.00052 | -0.00104 | 1.94520 |
| A30 | 2.17309 | -0.00022 | 0.00081  | 0.00188  | 0.00269  | 2.17578 |
| A31 | 2.07568 | 0.00007  | 0.00009  | -0.00018 | -0.00009 | 2.07559 |
| A32 | 2.16181 | -0.00005 | 0.00014  | 0.00046  | 0.00060  | 2.16240 |
| A33 | 2.04570 | -0.00002 | -0.00022 | -0.00028 | -0.00050 | 2.04519 |
| A34 | 1.94075 | 0.00016  | 0.00043  | 0.00089  | 0.00147  | 1.94222 |
| A35 | 1.92602 | -0.00048 | -0.00099 | -0.00119 | -0.00215 | 1.92388 |
| A36 | 1.88234 | 0.00016  | 0.00115  | 0.00042  | 0.00152  | 1.88387 |
| A37 | 2.08479 | 0.00010  | -0.00016 | 0.00177  | 0.00112  | 2.08591 |
| A38 | 2.07523 | -0.00008 | -0.00056 | 0.00190  | 0.00175  | 2.07697 |
| A39 | 1.99312 | 0.00010  | 0.00038  | 0.00071  | 0.00112  | 1.99423 |
| A40 | 2.01281 | -0.00018 | 0.00116  | -0.00270 | -0.00174 | 2.01107 |
| A41 | 2.03021 | -0.00002 | -0.00033 | -0.00181 | -0.00212 | 2.02809 |

|     |          |          |          |          |          |          |
|-----|----------|----------|----------|----------|----------|----------|
| A42 | 2.02197  | 0.00000  | -0.00083 | 0.00149  | 0.00098  | 2.02294  |
| A43 | 2.13600  | -0.00006 | -0.00055 | -0.00057 | -0.00155 | 2.13445  |
| A44 | 1.97545  | -0.00010 | 0.00119  | -0.00139 | -0.00037 | 1.97509  |
| A45 | 2.02768  | 0.00008  | -0.00008 | -0.00044 | -0.00046 | 2.02722  |
| A46 | 2.03565  | 0.00007  | 0.00048  | 0.00058  | 0.00111  | 2.03676  |
| A47 | 2.47333  | 0.00021  | 0.00964  | 0.02388  | 0.03169  | 2.50502  |
| A48 | 2.47928  | 0.00005  | 0.00804  | 0.02035  | 0.02629  | 2.50557  |
| A49 | 1.93322  | -0.00007 | -0.00039 | -0.00070 | -0.00108 | 1.93214  |
| A50 | 1.91631  | 0.00009  | 0.00022  | 0.00012  | 0.00034  | 1.91665  |
| A51 | 1.94054  | -0.00001 | 0.00013  | 0.00061  | 0.00075  | 1.94129  |
| A52 | 1.88143  | -0.00003 | -0.00014 | -0.00067 | -0.00080 | 1.88062  |
| A53 | 1.89289  | 0.00004  | 0.00013  | 0.00036  | 0.00049  | 1.89338  |
| A54 | 1.89805  | -0.00002 | 0.00003  | 0.00026  | 0.00029  | 1.89834  |
| A55 | 3.32041  | 0.00005  | 0.02819  | 0.00964  | 0.03784  | 3.35824  |
| A56 | 2.99516  | -0.00038 | -0.00966 | -0.03148 | -0.04117 | 2.95399  |
| A57 | 2.94728  | -0.00031 | -0.01253 | -0.04323 | -0.05576 | 2.89152  |
| A58 | 3.20916  | 0.00010  | -0.01566 | 0.02112  | 0.00540  | 3.21456  |
| D1  | 0.00386  | 0.00008  | -0.00452 | 0.00835  | 0.00383  | 0.00768  |
| D2  | -3.13029 | 0.00002  | -0.00279 | 0.00316  | 0.00037  | -3.12992 |
| D3  | 3.13877  | 0.00000  | -0.00160 | 0.00147  | -0.00015 | 3.13862  |
| D4  | 0.00462  | -0.00006 | 0.00012  | -0.00372 | -0.00360 | 0.00102  |
| D5  | -0.00601 | -0.00006 | 0.00530  | -0.00892 | -0.00361 | -0.00962 |
| D6  | -3.07145 | -0.00007 | 0.00599  | -0.00030 | 0.00567  | -3.06578 |
| D7  | 3.14158  | 0.00001  | 0.00268  | -0.00275 | -0.00007 | 3.14151  |
| D8  | 0.07614  | -0.00001 | 0.00337  | 0.00586  | 0.00921  | 0.08535  |
| D9  | -0.00045 | -0.00007 | 0.00225  | -0.00501 | -0.00276 | -0.00321 |
| D10 | -3.14044 | -0.00010 | 0.00035  | -0.00633 | -0.00596 | 3.13678  |
| D11 | 3.13439  | -0.00002 | 0.00068  | -0.00031 | 0.00037  | 3.13476  |
| D12 | -0.00560 | -0.00005 | -0.00122 | -0.00162 | -0.00283 | -0.00843 |
| D13 | -0.00330 | 0.00003  | 0.00105  | -0.00051 | 0.00053  | -0.00277 |
| D14 | 3.11813  | -0.00003 | -0.00539 | -0.00401 | -0.00938 | 3.10875  |
| D15 | 3.13683  | 0.00006  | 0.00277  | 0.00068  | 0.00345  | 3.14028  |
| D16 | -0.02492 | 0.00000  | -0.00367 | -0.00281 | -0.00646 | -0.03138 |
| D17 | 0.02324  | 0.00008  | 0.01019  | 0.02257  | 0.03275  | 0.05599  |
| D18 | -3.11218 | 0.00005  | 0.01012  | 0.02225  | 0.03237  | -3.07981 |
| D19 | -3.11657 | 0.00005  | 0.00808  | 0.02110  | 0.02918  | -3.08739 |
| D20 | 0.03120  | 0.00002  | 0.00801  | 0.02079  | 0.02879  | 0.05999  |
| D21 | 0.00574  | 0.00002  | -0.00390 | 0.00579  | 0.00189  | 0.00762  |
| D22 | 3.07413  | 0.00002  | -0.00467 | -0.00285 | -0.00755 | 3.06657  |
| D23 | -3.11436 | 0.00006  | 0.00298  | 0.00958  | 0.01259  | -3.10178 |
| D24 | -0.04597 | 0.00006  | 0.00221  | 0.00094  | 0.00315  | -0.04282 |
| D25 | 1.50082  | 0.00015  | 0.02134  | 0.03144  | 0.05278  | 1.55360  |
| D26 | -2.67425 | 0.00003  | 0.02075  | 0.03398  | 0.05473  | -2.61951 |
| D27 | -0.63836 | 0.00004  | 0.02048  | 0.03398  | 0.05446  | -0.58391 |



|                      |          |          |     |
|----------------------|----------|----------|-----|
| Maximum Force        | 0.000738 | 0.000450 | NO  |
| RMS Force            | 0.000156 | 0.000300 | YES |
| Maximum Displacement | 0.313777 | 0.001800 | NO  |
| RMS Displacement     | 0.046265 | 0.001200 | NO  |

Predicted change in Energy=-7.087784D-05

GradGradGradGradGradGradGradGradGradGradGradGradGradGradGradGradGradGrad

Input orientation:

| -----  |        |        |                         |           |           |
|--------|--------|--------|-------------------------|-----------|-----------|
| Center | Atomic | Atomic | Coordinates (Angstroms) |           |           |
| Number | Number | Type   | X                       | Y         | Z         |
| -----  |        |        |                         |           |           |
| 1      | 6      | 0      | -2.899588               | 2.142011  | -0.305886 |
| 2      | 6      | 0      | -3.759855               | 1.149646  | 0.038116  |
| 3      | 7      | 0      | -3.014596               | -0.020372 | 0.113240  |
| 4      | 6      | 0      | -1.733295               | 0.264009  | -0.183917 |
| 5      | 7      | 0      | -1.644382               | 1.568567  | -0.446732 |
| 6      | 6      | 0      | -0.378934               | 2.271597  | -0.725103 |
| 7      | 6      | 0      | 0.333816                | 2.719351  | 0.559387  |
| 8      | 1      | 0      | -3.069637               | 3.192231  | -0.469526 |
| 9      | 1      | 0      | -4.817150               | 1.180581  | 0.227622  |
| 10     | 1      | 0      | 0.258297                | 1.584963  | -1.283115 |
| 11     | 1      | 0      | -0.598315               | 3.128343  | -1.362398 |
| 12     | 1      | 0      | -0.280886               | 3.466829  | 1.070970  |
| 13     | 1      | 0      | 0.422654                | 1.851010  | 1.228704  |
| 14     | 35     | 0      | 0.205895                | -2.354493 | 0.199454  |
| 15     | 1      | 0      | -0.923336               | -0.494782 | -0.165909 |
| 16     | 6      | 0      | -3.439630               | -1.343815 | 0.441861  |
| 17     | 6      | 0      | -4.700507               | -1.677099 | 0.682544  |
| 18     | 1      | 0      | -2.600210               | -2.034666 | 0.474181  |
| 19     | 1      | 0      | -4.931891               | -2.704011 | 0.930066  |
| 20     | 1      | 0      | -5.527454               | -0.978603 | 0.645939  |
| 21     | 7      | 0      | 1.605966                | 3.316018  | 0.179846  |
| 22     | 1      | 0      | 1.961357                | 3.919849  | 0.910932  |
| 23     | 1      | 0      | 2.299353                | 2.588641  | 0.008693  |
| 24     | 6      | 0      | 3.693341                | -0.247451 | -1.088299 |
| 25     | 6      | 0      | 3.625266                | -0.472521 | 0.356753  |
| 26     | 8      | 0      | 3.413917                | 0.854696  | -0.197470 |
| 27     | 1      | 0      | 4.663414                | -0.192304 | -1.576814 |
| 28     | 1      | 0      | 2.860618                | -0.562589 | -1.710049 |
| 29     | 1      | 0      | 2.710572                | -0.933878 | 0.723450  |
| 30     | 6      | 0      | 4.856902                | -0.649733 | 1.201188  |
| 31     | 1      | 0      | 4.707081                | -0.224149 | 2.197730  |
| 32     | 1      | 0      | 5.073223                | -1.715482 | 1.322623  |

33            1            0            5.723107    -0.165027    0.744135

-----  
Distance matrix (angstroms):

|    |    | 1        | 2        | 3        | 4        | 5        |
|----|----|----------|----------|----------|----------|----------|
| 1  | C  | 0.000000 |          |          |          |          |
| 2  | C  | 1.357639 | 0.000000 |          |          |          |
| 3  | N  | 2.205627 | 1.389243 | 0.000000 |          |          |
| 4  | C  | 2.214047 | 2.222745 | 1.345699 | 0.000000 |          |
| 5  | N  | 1.387163 | 2.210385 | 2.171585 | 1.333735 | 0.000000 |
| 6  | C  | 2.558561 | 3.643063 | 3.592026 | 2.481448 | 1.474144 |
| 7  | C  | 3.396604 | 4.415183 | 4.349367 | 3.294564 | 2.499969 |
| 8  | H  | 1.076409 | 2.215006 | 3.265495 | 3.231387 | 2.160592 |
| 9  | H  | 2.210434 | 1.074589 | 2.169002 | 3.243397 | 3.266763 |
| 10 | H  | 3.352241 | 4.252141 | 3.903683 | 2.630513 | 2.078459 |
| 11 | H  | 2.717523 | 3.983971 | 4.234422 | 3.298698 | 2.089403 |
| 12 | H  | 3.241679 | 4.305735 | 4.533320 | 3.733938 | 2.786744 |
| 13 | H  | 3.671095 | 4.404860 | 4.069523 | 3.026910 | 2.675723 |
| 14 | Br | 5.487982 | 5.294544 | 3.978332 | 3.280852 | 4.385371 |
| 15 | H  | 3.298157 | 3.285059 | 2.162489 | 1.110010 | 2.203673 |
| 16 | C  | 3.605794 | 2.546155 | 1.428338 | 2.426577 | 3.534754 |
| 17 | C  | 4.336577 | 3.048049 | 2.431285 | 3.650069 | 4.598860 |
| 18 | H  | 4.259432 | 3.416837 | 2.087912 | 2.543333 | 3.839919 |
| 19 | H  | 5.398311 | 4.125520 | 3.397815 | 4.503456 | 5.564011 |
| 20 | H  | 4.189257 | 2.832542 | 2.741611 | 4.077792 | 4.770771 |
| 21 | N  | 4.681265 | 5.788375 | 5.699607 | 4.538474 | 3.743119 |
| 22 | H  | 5.316968 | 6.416237 | 6.397012 | 5.311715 | 4.513661 |
| 23 | H  | 5.227565 | 6.227807 | 5.920805 | 4.658676 | 4.098903 |
| 24 | C  | 7.056091 | 7.666213 | 6.818481 | 5.525204 | 5.674576 |
| 25 | C  | 7.060353 | 7.567890 | 6.659692 | 5.435897 | 5.707960 |
| 26 | O  | 6.444322 | 7.183697 | 6.495234 | 5.181012 | 5.114501 |
| 27 | H  | 8.016439 | 8.681031 | 7.863694 | 6.562490 | 6.645753 |
| 28 | H  | 6.516633 | 7.058221 | 6.175477 | 4.910843 | 5.141285 |
| 29 | H  | 6.480319 | 6.832071 | 5.829615 | 4.691077 | 5.157245 |
| 30 | C  | 8.380230 | 8.879133 | 7.971212 | 6.795892 | 7.064219 |
| 31 | H  | 8.350343 | 8.845352 | 8.000683 | 6.883966 | 7.109718 |
| 32 | H  | 9.005444 | 9.374550 | 8.351577 | 7.246844 | 7.683867 |
| 33 | H  | 8.987538 | 9.599656 | 8.761644 | 7.526173 | 7.661814 |
|    |    | 6        | 7        | 8        | 9        | 10       |
| 6  | C  | 0.000000 |          |          |          |          |
| 7  | C  | 1.535712 | 0.000000 |          |          |          |
| 8  | H  | 2.855305 | 3.586888 | 0.000000 |          |          |
| 9  | H  | 4.668593 | 5.386124 | 2.754370 | 0.000000 |          |
| 10 | H  | 1.090370 | 2.165029 | 3.784228 | 5.310933 | 0.000000 |
| 11 | H  | 1.090086 | 2.174719 | 2.628447 | 4.911264 | 1.766944 |



|    |    |          |          |          |           |          |
|----|----|----------|----------|----------|-----------|----------|
| 12 | H  | 2.159646 | 1.094669 | 3.197759 | 5.149355  | 3.061675 |
| 13 | H  | 2.153322 | 1.099951 | 4.108400 | 5.376540  | 2.531211 |
| 14 | Br | 4.753687 | 5.088203 | 6.476325 | 6.142355  | 4.209522 |
| 15 | H  | 2.874356 | 3.526632 | 4.277014 | 4.257170  | 2.640028 |
| 16 | C  | 4.878614 | 5.546353 | 4.641469 | 2.883754  | 5.022744 |
| 17 | C  | 6.020769 | 6.684934 | 5.262829 | 2.896013  | 6.252568 |
| 18 | H  | 4.991618 | 5.587168 | 5.332110 | 3.913237  | 4.935673 |
| 19 | H  | 6.944471 | 7.568218 | 6.339757 | 3.949259  | 7.087420 |
| 20 | H  | 6.241058 | 6.930861 | 4.967995 | 2.311189  | 6.615742 |
| 21 | N  | 2.418589 | 1.455482 | 4.722104 | 6.768957  | 2.636857 |
| 22 | H  | 3.297015 | 2.052723 | 5.267446 | 7.342933  | 3.628491 |
| 23 | H  | 2.795030 | 2.045406 | 5.423935 | 7.257767  | 2.615731 |
| 24 | C  | 4.802180 | 4.775269 | 7.612631 | 8.729225  | 3.898104 |
| 25 | C  | 4.973349 | 4.589417 | 7.676904 | 8.603708  | 4.273041 |
| 26 | O  | 4.083102 | 3.679238 | 6.897430 | 8.248476  | 3.416116 |
| 27 | H  | 5.676398 | 5.637953 | 8.513591 | 9.747917  | 4.759201 |
| 28 | H  | 4.415588 | 4.722943 | 7.127796 | 8.108102  | 3.400930 |
| 29 | H  | 4.681711 | 4.361418 | 7.201304 | 7.834755  | 4.047779 |
| 30 | C  | 6.297519 | 5.676349 | 8.965600 | 9.893693  | 5.684435 |
| 31 | H  | 6.374892 | 5.520308 | 8.902990 | 9.826778  | 5.931344 |
| 32 | H  | 7.058045 | 6.535461 | 9.674896 | 10.363671 | 6.392677 |
| 33 | H  | 6.732807 | 6.115408 | 9.489809 | 10.638348 | 6.085749 |
|    |    | 11       | 12       | 13       | 14        | 15       |
| 11 | H  | 0.000000 |          |          |           |          |
| 12 | H  | 2.477219 | 0.000000 |          |           |          |
| 13 | H  | 3.063946 | 1.769384 | 0.000000 |           |          |
| 14 | Br | 5.757398 | 5.906292 | 4.335042 | 0.000000  |          |
| 15 | H  | 3.829394 | 4.199640 | 3.042921 | 2.206169  | 0.000000 |
| 16 | C  | 5.597199 | 5.789279 | 5.073782 | 3.790790  | 2.724331 |
| 17 | C  | 6.640937 | 6.792932 | 6.244407 | 4.976447  | 4.047810 |
| 18 | H  | 5.834148 | 6.000156 | 4.980511 | 2.837603  | 2.364924 |
| 19 | H  | 7.619163 | 7.728582 | 7.036231 | 5.201231  | 4.706418 |
| 20 | H  | 6.722859 | 6.889775 | 6.614386 | 5.913013  | 4.700115 |
| 21 | N  | 2.696774 | 2.092141 | 2.155593 | 5.840828  | 4.586841 |
| 22 | H  | 3.513749 | 2.293140 | 2.597823 | 6.554023  | 5.382379 |
| 23 | H  | 3.250792 | 2.925283 | 2.356804 | 5.371548  | 4.463598 |
| 24 | C  | 5.467122 | 5.852589 | 4.524316 | 4.273197  | 4.714412 |
| 25 | C  | 5.810364 | 5.593443 | 4.051643 | 3.906233  | 4.578586 |
| 26 | O  | 4.756525 | 4.699334 | 3.460385 | 4.554980  | 4.542449 |
| 27 | H  | 6.225629 | 6.696724 | 5.479974 | 5.263047  | 5.770089 |
| 28 | H  | 5.070311 | 5.817157 | 4.517233 | 3.728897  | 4.087453 |
| 29 | H  | 5.639250 | 5.332525 | 3.639430 | 2.926794  | 3.766836 |
| 30 | C  | 7.113735 | 6.584824 | 5.090877 | 5.053864  | 5.941727 |
| 31 | H  | 7.215327 | 6.306562 | 4.858149 | 5.365831  | 6.112416 |

|    |   |          |           |          |           |           |
|----|---|----------|-----------|----------|-----------|-----------|
| 32 | H | 7.927063 | 7.455613  | 5.861440 | 5.035943  | 6.297980  |
| 33 | H | 7.432640 | 7.024608  | 5.691573 | 5.960710  | 6.716555  |
|    |   | 16       | 17        | 18       | 19        | 20        |
| 16 | C | 0.000000 |           |          |           |           |
| 17 | C | 1.326204 | 0.000000  |          |           |           |
| 18 | H | 1.087633 | 2.140681  | 0.000000 |           |           |
| 19 | H | 2.077335 | 1.081367  | 2.468317 | 0.000000  |           |
| 20 | H | 2.129327 | 1.083087  | 3.116653 | 1.847284  | 0.000000  |
| 21 | N | 6.873190 | 8.059499  | 6.812369 | 8.918921  | 8.339465  |
| 22 | H | 7.556246 | 8.703932  | 7.513648 | 9.559956  | 8.952505  |
| 23 | H | 6.970493 | 8.224880  | 6.752582 | 9.008440  | 8.624976  |
| 24 | C | 7.377173 | 8.696923  | 6.726386 | 9.192558  | 9.410910  |
| 25 | C | 7.118929 | 8.418767  | 6.419551 | 8.861894  | 9.171260  |
| 26 | O | 7.225877 | 8.545659  | 6.705912 | 9.142661  | 9.166266  |
| 27 | H | 8.429731 | 9.746401  | 7.769242 | 10.230494 | 10.460052 |
| 28 | H | 6.703295 | 8.008573  | 6.062880 | 8.501711  | 8.722585  |
| 29 | H | 6.170278 | 7.448365  | 5.429390 | 7.847503  | 8.238512  |
| 30 | C | 8.360070 | 9.626450  | 7.619390 | 10.005700 | 10.404389 |
| 31 | H | 8.408664 | 9.638961  | 7.723024 | 10.033268 | 10.378967 |
| 32 | H | 8.566362 | 9.794742  | 7.726792 | 10.061491 | 10.647781 |
| 33 | H | 9.243195 | 10.532895 | 8.534988 | 10.954907 | 11.280366 |
|    |   | 21       | 22        | 23       | 24        | 25        |
| 21 | N | 0.000000 |           |          |           |           |
| 22 | H | 1.012622 | 0.000000  |          |           |           |
| 23 | H | 1.019390 | 1.643287  | 0.000000 |           |           |
| 24 | C | 4.320143 | 4.935898  | 3.345147 | 0.000000  |           |
| 25 | C | 4.296730 | 4.729548  | 3.354087 | 1.464059  | 0.000000  |
| 26 | O | 3.077200 | 3.568424  | 2.071550 | 1.444431  | 1.453732  |
| 27 | H | 4.974150 | 5.513601  | 3.979481 | 1.087534  | 2.212455  |
| 28 | H | 4.493266 | 5.269769  | 3.633090 | 1.085962  | 2.205554  |
| 29 | H | 4.424622 | 4.914788  | 3.617751 | 2.172430  | 1.088109  |
| 30 | C | 5.228662 | 5.417519  | 4.295366 | 2.599511  | 1.503796  |
| 31 | H | 5.120698 | 5.134936  | 4.301258 | 3.438924  | 2.149700  |
| 32 | H | 6.216415 | 6.450594  | 5.286421 | 3.141932  | 2.138794  |
| 33 | H | 5.420972 | 5.555609  | 4.454845 | 2.735792  | 2.155355  |
|    |   | 26       | 27        | 28       | 29        | 30        |
| 26 | O | 0.000000 |           |          |           |           |
| 27 | H | 2.135426 | 0.000000  |          |           |           |
| 28 | H | 2.145398 | 1.845247  | 0.000000 |           |           |
| 29 | H | 2.131146 | 3.107208  | 2.466229 | 0.000000  |           |
| 30 | C | 2.510331 | 2.822052  | 3.531012 | 2.217139  | 0.000000  |
| 31 | H | 2.927997 | 3.774931  | 4.335286 | 2.581330  | 1.093921  |
| 32 | H | 3.416109 | 3.300720  | 3.927071 | 2.559694  | 1.094241  |
| 33 | H | 2.694218 | 2.551567  | 3.791426 | 3.109168  | 1.092771  |

```

          31      32      33
31 H      0.000000
32 H      1.767470  0.000000
33 H      1.774470  1.777895  0.000000
Stoichiometry  C10H18BrN3O
Framework group C1[X(C10H18BrN3O)]
Deg. of freedom  93
Full point group          C1      NOp  1
Largest Abelian subgroup  C1      NOp  1
Largest concise Abelian subgroup C1      NOp  1

```

Standard orientation:

| Center<br>Number | Atomic<br>Number | Atomic<br>Type | Coordinates (Angstroms) |           |           |
|------------------|------------------|----------------|-------------------------|-----------|-----------|
|                  |                  |                | X                       | Y         | Z         |
| 1                | 6                | 0              | -2.842353               | 2.235929  | -0.194869 |
| 2                | 6                | 0              | -3.710647               | 1.225183  | 0.065211  |
| 3                | 7                | 0              | -2.976568               | 0.046174  | 0.032622  |
| 4                | 6                | 0              | -1.693996               | 0.343653  | -0.245626 |
| 5                | 7                | 0              | -1.593544               | 1.665420  | -0.392901 |
| 6                | 6                | 0              | -0.322618               | 2.378388  | -0.615434 |
| 7                | 6                | 0              | 0.400746                | 2.704388  | 0.699434  |
| 8                | 1                | 0              | -3.002864               | 3.298036  | -0.264301 |
| 9                | 1                | 0              | -4.766651               | 1.249176  | 0.262749  |
| 10               | 1                | 0              | 0.305108                | 1.737724  | -1.235447 |
| 11               | 1                | 0              | -0.536667               | 3.290032  | -1.173445 |
| 12               | 1                | 0              | -0.204080               | 3.409542  | 1.278435  |
| 13               | 1                | 0              | 0.484303                | 1.779592  | 1.289065  |
| 14               | 35               | 0              | 0.221205                | -2.316500 | -0.105711 |
| 15               | 1                | 0              | -0.891457               | -0.421318 | -0.299221 |
| 16               | 6                | 0              | -3.412986               | -1.297063 | 0.245703  |
| 17               | 6                | 0              | -4.675890               | -1.638461 | 0.463269  |
| 18               | 1                | 0              | -2.580249               | -1.995900 | 0.212186  |
| 19               | 1                | 0              | -4.916150               | -2.680994 | 0.620605  |
| 20               | 1                | 0              | -5.496100               | -0.931747 | 0.493121  |
| 21               | 7                | 0              | 1.676836                | 3.320275  | 0.366710  |
| 22               | 1                | 0              | 2.041702                | 3.853903  | 1.146144  |
| 23               | 1                | 0              | 2.362198                | 2.604373  | 0.128131  |
| 24               | 6                | 0              | 3.722882                | -0.136811 | -1.222595 |
| 25               | 6                | 0              | 3.659635                | -0.487837 | 0.197351  |
| 26               | 8                | 0              | 3.458646                | 0.885018  | -0.236478 |
| 27               | 1                | 0              | 4.691060                | -0.047866 | -1.709884 |
| 28               | 1                | 0              | 2.884083                | -0.388060 | -1.864937 |
| 29               | 1                | 0              | 2.742248                | -0.971162 | 0.527167  |

|    |   |   |          |           |          |
|----|---|---|----------|-----------|----------|
| 30 | 6 | 0 | 4.893568 | -0.750377 | 1.015817 |
| 31 | 1 | 0 | 4.752793 | -0.412981 | 2.046841 |
| 32 | 1 | 0 | 5.099992 | -1.824662 | 1.041575 |
| 33 | 1 | 0 | 5.762259 | -0.235370 | 0.598333 |

-----

Rotational constants (GHZ):      0.4699518      0.2516522      0.1719668

Standard basis: 6-311++G(d,p) (5D, 7F)

There are    499 symmetry adapted cartesian basis functions of A    symmetry.

There are    482 symmetry adapted basis functions of A    symmetry.

    482 basis functions,    760 primitive gaussians,    499 cartesian basis functions

    71 alpha electrons      71 beta electrons

        nuclear repulsion energy      1293.7998133377 Hartrees.

NAtoms=    33 NActive=    33 NUniq=    33 SFac= 1.00D+00 NAtFMM=    60 NAOKFM=F

Big=F

Integral buffers will be    131072 words long.

Raffenetti 2 integral format.

Two-electron integral symmetry is turned on.

One-electron integrals computed using PRISM.

NBasis=    482 RedAO= T EigKep=    3.93D-06    NBF=    482

NBsUse=    482 1.00D-06 EigRej= -1.00D+00 NBFU=    482

Initial            guess            from            the            checkpoint            file:

"/home/suqian/liuwen/qianmengshijie/nh2po/nh2po.chk"

B after Tr=    0.000000    0.000000    0.000000

    Rot=    0.999990    -0.003274    -0.000160    0.002953 Ang=    -0.51 deg.

ExpMin= 3.50D-02 ExpMax= 4.40D+05 ExpMxC= 1.51D+04 IAcc=3 IRadAn=            5 AccDes=

0.00D+00

Harris functional with IExCor=    402 and IRadAn=            5 diagonalized for initial guess.

HarFok: IExCor=    402 AccDes= 0.00D+00 IRadAn=            5 IDoV= 1 UseB2=F ITyADJ=14

ICtDFT=    3500011 ScaDFX=    1.000000    1.000000    1.000000    1.000000

FoFCou: FMM=F IPFlag=            0 FMFlag=            100000 FMFlg1=            0

    NxFFlg=            0 DoJE=T BraDBF=F KetDBF=T FulRan=T

    wScrn=    0.000000 ICntrl=            500 IOpCl=    0 I1Cent=    200000004 NGrid=

0

    NMat0=    1 NMatS0=            1 NMatT0=    0 NMatD0=    1 NMtDS0=    0

NMtDT0=    0

Petite list used in FoFCou.

Requested convergence on RMS density matrix=1.00D-08 within 128 cycles.

Requested convergence on MAX density matrix=1.00D-06.

Requested convergence on            energy=1.00D-06.

No special actions if energy rises.

SCF Done: E(RB3LYP) = -3205.64698246      A.U. after    11 cycles

    NFock= 11    Conv=0.56D-08      -V/T= 2.0018

Calling FoFJK, ICntrl=            2127 FMM=F ISym2X=0 I1Cent= 0 IOpClX= 0 NMat=1 NMatS=1

NMatT=0.

\*\*\*\*\* Axes restored to original set \*\*\*\*\*

| Center<br>Number | Atomic<br>Number | Forces (Hartrees/Bohr) |              |              |
|------------------|------------------|------------------------|--------------|--------------|
|                  |                  | X                      | Y            | Z            |
| 1                | 6                | 0.000193498            | 0.000028753  | -0.000423597 |
| 2                | 6                | -0.000283773           | 0.000281454  | 0.000181705  |
| 3                | 7                | 0.000200161            | -0.000278546 | -0.000299058 |
| 4                | 6                | -0.001020442           | -0.000024109 | 0.000388740  |
| 5                | 7                | 0.000188462            | -0.000195001 | 0.000525098  |
| 6                | 6                | 0.000153683            | 0.000078399  | -0.000145880 |
| 7                | 6                | -0.000334466           | -0.000196965 | -0.000039920 |
| 8                | 1                | -0.000075574           | -0.000018020 | 0.000026746  |
| 9                | 1                | -0.000019475           | -0.000099276 | 0.000091635  |
| 10               | 1                | -0.000085284           | -0.000064456 | 0.000053618  |
| 11               | 1                | 0.000021919            | -0.000028350 | 0.000068925  |
| 12               | 1                | -0.000003680           | 0.000014955  | -0.000019686 |
| 13               | 1                | 0.000014778            | 0.000092149  | 0.000038978  |
| 14               | 35               | 0.000186314            | 0.000171294  | 0.000074944  |
| 15               | 1                | 0.000565991            | -0.000270669 | -0.000358640 |
| 16               | 6                | 0.000189009            | 0.000583085  | 0.000074324  |
| 17               | 6                | 0.000016316            | -0.000172008 | -0.000027802 |
| 18               | 1                | -0.000055074           | -0.000138983 | -0.000071152 |
| 19               | 1                | 0.000033706            | 0.000019679  | 0.000014488  |
| 20               | 1                | -0.000061458           | 0.000063291  | -0.000039226 |
| 21               | 7                | 0.000166229            | 0.000276042  | -0.000061088 |
| 22               | 1                | 0.000052252            | -0.000024036 | 0.000101868  |
| 23               | 1                | 0.000424560            | 0.000039931  | -0.000059617 |
| 24               | 6                | 0.000553401            | 0.000481536  | -0.000110295 |
| 25               | 6                | 0.000239570            | -0.000069436 | 0.000332316  |
| 26               | 8                | -0.000804824           | -0.000581888 | -0.000255943 |
| 27               | 1                | -0.000115980           | -0.000035077 | -0.000151417 |
| 28               | 1                | -0.000082780           | -0.000018403 | -0.000006482 |
| 29               | 1                | -0.000119163           | 0.000063392  | 0.000049100  |
| 30               | 6                | -0.000122239           | 0.000000243  | 0.000077113  |
| 31               | 1                | -0.000001844           | -0.000013588 | -0.000008643 |
| 32               | 1                | 0.000004012            | 0.000027854  | 0.000002953  |
| 33               | 1                | -0.000017803           | 0.000006755  | -0.000024106 |

Cartesian Forces: Max 0.001020442 RMS 0.000238508

GradGradGradGradGradGradGradGradGradGradGradGradGradGradGradGradGradGradGradGrad

Berny optimization.

Using GEDIIS/GDIIS optimizer.

FormGI is forming the generalized inverse of G from B-inverse, IUseBI=4.

GSVD: received Info= 1 from GESDD.

Internal Forces: Max 0.001083465 RMS 0.000234791

Search for a local minimum.

Step number 14 out of a maximum of 172

All quantities printed in internal units (Hartrees-Bohrs-Radians)

Mixed Optimization -- En-DIIS/RFO-DIIS

Swapping is turned off.

Update second derivatives using D2CorX and points 6 7 8 10 11  
9 12 13 14

DE= -8.25D-05 DEPred=-7.09D-05 R= 1.16D+00

TightC=F SS= 1.41D+00 RLast= 2.60D-01 DXNew= 3.1006D-01 7.7949D-01

Trust test= 1.16D+00 RLast= 2.60D-01 DXMaxT set to 3.10D-01

ITU= 1 1 0 -1 -1 1 1 1 -1 1 0 0 -1 0

|                 |         |         |         |         |         |
|-----------------|---------|---------|---------|---------|---------|
| Eigenvalues --- | 0.00117 | 0.00236 | 0.00394 | 0.00614 | 0.00723 |
| Eigenvalues --- | 0.00835 | 0.00894 | 0.01405 | 0.01440 | 0.01554 |
| Eigenvalues --- | 0.01809 | 0.01881 | 0.02117 | 0.02321 | 0.02351 |
| Eigenvalues --- | 0.02389 | 0.02438 | 0.02569 | 0.02994 | 0.03073 |
| Eigenvalues --- | 0.03083 | 0.03149 | 0.03350 | 0.03644 | 0.04045 |
| Eigenvalues --- | 0.04226 | 0.04413 | 0.04925 | 0.05323 | 0.05399 |
| Eigenvalues --- | 0.05752 | 0.05797 | 0.05924 | 0.07851 | 0.08609 |
| Eigenvalues --- | 0.09500 | 0.10561 | 0.12096 | 0.12365 | 0.12614 |
| Eigenvalues --- | 0.12845 | 0.13351 | 0.14476 | 0.15608 | 0.15998 |
| Eigenvalues --- | 0.16001 | 0.16001 | 0.16005 | 0.16012 | 0.16025 |
| Eigenvalues --- | 0.16104 | 0.16121 | 0.17580 | 0.20975 | 0.22123 |
| Eigenvalues --- | 0.22816 | 0.22899 | 0.23528 | 0.25531 | 0.26241 |
| Eigenvalues --- | 0.29164 | 0.30228 | 0.31942 | 0.32088 | 0.32498 |
| Eigenvalues --- | 0.33648 | 0.34275 | 0.34313 | 0.34341 | 0.34544 |
| Eigenvalues --- | 0.34662 | 0.34735 | 0.35030 | 0.35067 | 0.35258 |
| Eigenvalues --- | 0.35365 | 0.35574 | 0.35771 | 0.35891 | 0.36418 |
| Eigenvalues --- | 0.36620 | 0.38101 | 0.39459 | 0.41971 | 0.42564 |
| Eigenvalues --- | 0.44661 | 0.45481 | 0.45948 | 0.49191 | 0.54661 |
| Eigenvalues --- | 0.57691 | 0.60610 | 1.12005 |         |         |

En-DIIS/RFO-DIIS IScMMF= 0 using points: 14 13 12

RFO step: Lambda=-1.47560402D-05.

DidBck=F Rises=F RFO-DIIS coefs: 1.15149 -0.16356 0.01206

Iteration 1 RMS(Cart)= 0.02967456 RMS(Int)= 0.00046323

Iteration 2 RMS(Cart)= 0.00116837 RMS(Int)= 0.00014507

Iteration 3 RMS(Cart)= 0.00000091 RMS(Int)= 0.00014507

| Variable | Old X   | -DE/DX   | Delta X<br>(Linear) | Delta X<br>(Quad) | Delta X<br>(Total) | New X   |
|----------|---------|----------|---------------------|-------------------|--------------------|---------|
| R1       | 2.56557 | 0.00019  | -0.00003            | 0.00009           | 0.00005            | 2.56562 |
| R2       | 2.62136 | -0.00003 | -0.00017            | -0.00049          | -0.00066           | 2.62070 |
| R3       | 2.03412 | -0.00001 | 0.00001             | 0.00002           | 0.00003            | 2.03414 |

|     |         |          |          |          |          |         |
|-----|---------|----------|----------|----------|----------|---------|
| R4  | 2.62529 | 0.00030  | -0.00014 | 0.00024  | 0.00010  | 2.62539 |
| R5  | 2.03068 | 0.00003  | -0.00004 | 0.00002  | -0.00002 | 2.03066 |
| R6  | 2.54300 | -0.00028 | -0.00010 | -0.00074 | -0.00083 | 2.54218 |
| R7  | 2.69917 | -0.00038 | 0.00033  | -0.00044 | -0.00011 | 2.69906 |
| R8  | 2.52039 | -0.00023 | 0.00021  | 0.00095  | 0.00116  | 2.52155 |
| R9  | 2.09762 | 0.00061  | -0.00084 | -0.00029 | -0.00113 | 2.09649 |
| R10 | 2.78573 | 0.00001  | 0.00002  | 0.00135  | 0.00138  | 2.78710 |
| R11 | 2.90207 | -0.00016 | 0.00000  | -0.00040 | -0.00040 | 2.90167 |
| R12 | 2.06050 | -0.00004 | 0.00002  | 0.00005  | 0.00007  | 2.06057 |
| R13 | 2.05996 | -0.00007 | -0.00004 | -0.00021 | -0.00025 | 2.05972 |
| R14 | 2.06862 | 0.00000  | -0.00008 | -0.00016 | -0.00023 | 2.06839 |
| R15 | 2.07861 | -0.00005 | -0.00014 | -0.00066 | -0.00080 | 2.07781 |
| R16 | 2.75046 | 0.00023  | 0.00012  | 0.00201  | 0.00213  | 2.75259 |
| R17 | 4.16905 | -0.00004 | 0.00468  | 0.00786  | 0.01254  | 4.18160 |
| R18 | 2.50616 | 0.00002  | -0.00001 | -0.00004 | -0.00005 | 2.50611 |
| R19 | 2.05533 | 0.00004  | 0.00011  | 0.00006  | 0.00017  | 2.05550 |
| R20 | 2.04349 | -0.00002 | 0.00001  | -0.00006 | -0.00004 | 2.04344 |
| R21 | 2.04674 | 0.00009  | -0.00003 | 0.00015  | 0.00013  | 2.04686 |
| R22 | 1.91358 | 0.00008  | -0.00006 | 0.00000  | -0.00006 | 1.91352 |
| R23 | 1.92637 | 0.00007  | -0.00019 | -0.00045 | -0.00064 | 1.92573 |
| R24 | 3.91466 | -0.00012 | 0.00312  | 0.00457  | 0.00769  | 3.92235 |
| R25 | 2.76667 | 0.00040  | -0.00005 | 0.00164  | 0.00111  | 2.76778 |
| R26 | 2.72958 | -0.00021 | -0.00028 | -0.00189 | -0.00197 | 2.72761 |
| R27 | 2.05514 | -0.00004 | 0.00001  | 0.00006  | 0.00007  | 2.05521 |
| R28 | 2.05217 | 0.00007  | 0.00004  | 0.00030  | 0.00034  | 2.05251 |
| R29 | 2.74716 | -0.00013 | 0.00019  | -0.00040 | 0.00008  | 2.74724 |
| R30 | 2.05623 | 0.00009  | 0.00008  | 0.00030  | 0.00038  | 2.05661 |
| R31 | 2.84176 | -0.00009 | 0.00001  | -0.00019 | -0.00018 | 2.84159 |
| R32 | 2.06721 | -0.00001 | -0.00002 | -0.00005 | -0.00006 | 2.06715 |
| R33 | 2.06782 | -0.00002 | 0.00001  | -0.00001 | 0.00000  | 2.06782 |
| R34 | 2.06504 | 0.00000  | 0.00002  | 0.00003  | 0.00004  | 2.06508 |
| A1  | 1.87227 | -0.00013 | 0.00001  | 0.00043  | 0.00043  | 1.87271 |
| A2  | 2.28047 | -0.00002 | 0.00020  | -0.00017 | 0.00003  | 2.28050 |
| A3  | 2.13040 | 0.00015  | -0.00022 | -0.00021 | -0.00043 | 2.12997 |
| A4  | 1.86438 | -0.00010 | 0.00003  | -0.00056 | -0.00053 | 1.86385 |
| A5  | 2.27456 | 0.00016  | -0.00012 | 0.00073  | 0.00062  | 2.27518 |
| A6  | 2.14424 | -0.00006 | 0.00009  | -0.00019 | -0.00010 | 2.14413 |
| A7  | 1.89743 | 0.00000  | 0.00003  | 0.00067  | 0.00069  | 1.89813 |
| A8  | 2.25642 | -0.00003 | -0.00019 | -0.00098 | -0.00118 | 2.25524 |
| A9  | 2.12933 | 0.00003  | 0.00016  | 0.00031  | 0.00047  | 2.12980 |
| A10 | 1.88987 | 0.00008  | -0.00006 | -0.00039 | -0.00045 | 1.88942 |
| A11 | 2.14924 | 0.00096  | -0.00042 | 0.00385  | 0.00343  | 2.15267 |
| A12 | 2.24361 | -0.00104 | 0.00044  | -0.00355 | -0.00312 | 2.24049 |
| A13 | 1.90077 | 0.00015  | -0.00003 | -0.00006 | -0.00010 | 1.90067 |

|     |         |          |          |          |          |         |
|-----|---------|----------|----------|----------|----------|---------|
| A14 | 2.21279 | 0.00050  | -0.00069 | -0.00325 | -0.00395 | 2.20884 |
| A15 | 2.16628 | -0.00064 | 0.00061  | 0.00390  | 0.00451  | 2.17080 |
| A16 | 1.96007 | 0.00008  | -0.00010 | 0.00049  | 0.00039  | 1.96046 |
| A17 | 1.87339 | -0.00024 | 0.00067  | 0.00124  | 0.00191  | 1.87530 |
| A18 | 1.88858 | 0.00014  | -0.00050 | -0.00273 | -0.00323 | 1.88535 |
| A19 | 1.91815 | -0.00003 | -0.00007 | 0.00112  | 0.00105  | 1.91920 |
| A20 | 1.93183 | -0.00001 | 0.00012  | -0.00092 | -0.00081 | 1.93102 |
| A21 | 1.88952 | 0.00004  | -0.00012 | 0.00084  | 0.00072  | 1.89024 |
| A22 | 1.90642 | 0.00014  | 0.00007  | -0.00028 | -0.00020 | 1.90621 |
| A23 | 1.89259 | -0.00004 | 0.00032  | 0.00117  | 0.00150  | 1.89409 |
| A24 | 1.88291 | -0.00008 | -0.00034 | 0.00073  | 0.00039  | 1.88330 |
| A25 | 1.87552 | -0.00003 | 0.00023  | 0.00052  | 0.00074  | 1.87627 |
| A26 | 1.91002 | 0.00015  | 0.00018  | -0.00099 | -0.00081 | 1.90921 |
| A27 | 1.99512 | -0.00013 | -0.00044 | -0.00114 | -0.00158 | 1.99355 |
| A28 | 2.16219 | 0.00004  | -0.00025 | -0.00010 | -0.00035 | 2.16184 |
| A29 | 1.94520 | 0.00010  | -0.00015 | 0.00056  | 0.00041  | 1.94561 |
| A30 | 2.17578 | -0.00014 | 0.00040  | -0.00044 | -0.00005 | 2.17573 |
| A31 | 2.07559 | -0.00002 | -0.00002 | 0.00003  | 0.00001  | 2.07560 |
| A32 | 2.16240 | -0.00001 | 0.00009  | -0.00006 | 0.00002  | 2.16243 |
| A33 | 2.04519 | 0.00003  | -0.00007 | 0.00003  | -0.00004 | 2.04515 |
| A34 | 1.94222 | 0.00025  | 0.00022  | -0.00097 | -0.00068 | 1.94154 |
| A35 | 1.92388 | -0.00104 | -0.00031 | -0.00042 | -0.00071 | 1.92317 |
| A36 | 1.88387 | 0.00040  | 0.00021  | -0.00022 | -0.00003 | 1.88384 |
| A37 | 2.08591 | 0.00008  | 0.00017  | 0.00131  | 0.00122  | 2.08713 |
| A38 | 2.07697 | 0.00002  | 0.00027  | 0.00000  | 0.00050  | 2.07747 |
| A39 | 1.99423 | 0.00024  | 0.00016  | 0.00175  | 0.00191  | 1.99614 |
| A40 | 2.01107 | -0.00015 | -0.00028 | -0.00133 | -0.00171 | 2.00936 |
| A41 | 2.02809 | -0.00008 | -0.00032 | -0.00111 | -0.00142 | 2.02668 |
| A42 | 2.02294 | 0.00018  | 0.00016  | 0.00130  | 0.00157  | 2.02452 |
| A43 | 2.13445 | -0.00008 | -0.00023 | -0.00018 | -0.00059 | 2.13386 |
| A44 | 1.97509 | -0.00011 | -0.00007 | -0.00203 | -0.00219 | 1.97289 |
| A45 | 2.02722 | 0.00020  | -0.00007 | -0.00034 | -0.00039 | 2.02683 |
| A46 | 2.03676 | -0.00007 | 0.00016  | 0.00063  | 0.00082  | 2.03758 |
| A47 | 2.50502 | 0.00013  | 0.00466  | 0.01738  | 0.02103  | 2.52605 |
| A48 | 2.50557 | -0.00016 | 0.00387  | 0.01222  | 0.01479  | 2.52036 |
| A49 | 1.93214 | 0.00000  | -0.00016 | -0.00045 | -0.00061 | 1.93153 |
| A50 | 1.91665 | 0.00002  | 0.00005  | 0.00037  | 0.00042  | 1.91708 |
| A51 | 1.94129 | -0.00004 | 0.00011  | 0.00012  | 0.00023  | 1.94152 |
| A52 | 1.88062 | -0.00001 | -0.00012 | -0.00044 | -0.00056 | 1.88006 |
| A53 | 1.89338 | 0.00002  | 0.00007  | 0.00031  | 0.00038  | 1.89376 |
| A54 | 1.89834 | 0.00001  | 0.00004  | 0.00008  | 0.00012  | 1.89846 |
| A55 | 3.35824 | -0.00108 | 0.00532  | -0.01280 | -0.00747 | 3.35077 |
| A56 | 2.95399 | -0.00108 | -0.00610 | -0.02422 | -0.03037 | 2.92363 |
| A57 | 2.89152 | 0.00005  | -0.00827 | -0.02836 | -0.03663 | 2.85490 |



|     |          |          |          |          |          |          |
|-----|----------|----------|----------|----------|----------|----------|
| A58 | 3.21456  | -0.00003 | 0.00104  | 0.00819  | 0.00920  | 3.22376  |
| D1  | 0.00768  | -0.00010 | 0.00064  | -0.00980 | -0.00915 | -0.00146 |
| D2  | -3.12992 | -0.00005 | 0.00010  | -0.00589 | -0.00579 | -3.13571 |
| D3  | 3.13862  | -0.00004 | 0.00000  | -0.00402 | -0.00402 | 3.13461  |
| D4  | 0.00102  | 0.00001  | -0.00055 | -0.00012 | -0.00066 | 0.00036  |
| D5  | -0.00962 | 0.00006  | -0.00062 | 0.00930  | 0.00867  | -0.00094 |
| D6  | -3.06578 | -0.00001 | 0.00077  | 0.00155  | 0.00234  | -3.06344 |
| D7  | 3.14151  | 0.00001  | -0.00005 | 0.00413  | 0.00408  | -3.13760 |
| D8  | 0.08535  | -0.00006 | 0.00135  | -0.00362 | -0.00226 | 0.08309  |
| D9  | -0.00321 | 0.00010  | -0.00045 | 0.00703  | 0.00658  | 0.00336  |
| D10 | 3.13678  | 0.00006  | -0.00091 | 0.00245  | 0.00154  | 3.13832  |
| D11 | 3.13476  | 0.00006  | 0.00005  | 0.00349  | 0.00354  | 3.13830  |
| D12 | -0.00843 | 0.00001  | -0.00041 | -0.00109 | -0.00150 | -0.00993 |
| D13 | -0.00277 | -0.00007 | 0.00007  | -0.00128 | -0.00122 | -0.00398 |
| D14 | 3.10875  | -0.00007 | -0.00134 | -0.00418 | -0.00553 | 3.10323  |
| D15 | 3.14028  | -0.00002 | 0.00048  | 0.00290  | 0.00339  | -3.13951 |
| D16 | -0.03138 | -0.00002 | -0.00093 | 0.00000  | -0.00092 | -0.03230 |
| D17 | 0.05599  | 0.00007  | 0.00481  | 0.01889  | 0.02371  | 0.07969  |
| D18 | -3.07981 | 0.00000  | 0.00476  | 0.01624  | 0.02099  | -3.05882 |
| D19 | -3.08739 | 0.00002  | 0.00430  | 0.01377  | 0.01808  | -3.06931 |
| D20 | 0.05999  | -0.00005 | 0.00425  | 0.01112  | 0.01536  | 0.07536  |
| D21 | 0.00762  | 0.00001  | 0.00034  | -0.00491 | -0.00456 | 0.00306  |
| D22 | 3.06657  | 0.00014  | -0.00108 | 0.00216  | 0.00110  | 3.06768  |
| D23 | -3.10178 | -0.00004 | 0.00186  | -0.00197 | -0.00012 | -3.10189 |
| D24 | -0.04282 | 0.00009  | 0.00045  | 0.00510  | 0.00555  | -0.03728 |
| D25 | 1.55360  | 0.00019  | 0.00769  | 0.01553  | 0.02322  | 1.57683  |
| D26 | -2.61951 | 0.00005  | 0.00799  | 0.01805  | 0.02604  | -2.59347 |
| D27 | -0.58391 | 0.00005  | 0.00795  | 0.01828  | 0.02623  | -0.55768 |
| D28 | -1.49033 | 0.00007  | 0.00932  | 0.00694  | 0.01626  | -1.47407 |
| D29 | 0.61974  | -0.00007 | 0.00962  | 0.00945  | 0.01908  | 0.63881  |
| D30 | 2.65535  | -0.00008 | 0.00959  | 0.00968  | 0.01926  | 2.67461  |
| D31 | -1.13389 | -0.00021 | -0.00008 | 0.01196  | 0.01188  | -1.12201 |
| D32 | 0.90507  | -0.00019 | 0.00041  | 0.01309  | 0.01350  | 0.91857  |
| D33 | 3.07459  | -0.00042 | -0.00014 | 0.01288  | 0.01274  | 3.08733  |
| D34 | 3.06519  | 0.00005  | -0.00082 | 0.00933  | 0.00851  | 3.07370  |
| D35 | -1.17904 | 0.00008  | -0.00033 | 0.01045  | 0.01012  | -1.16891 |
| D36 | 0.99048  | -0.00016 | -0.00088 | 0.01024  | 0.00936  | 0.99985  |
| D37 | 0.97895  | 0.00003  | -0.00070 | 0.00815  | 0.00745  | 0.98640  |
| D38 | 3.01791  | 0.00005  | -0.00022 | 0.00928  | 0.00906  | 3.02697  |
| D39 | -1.09576 | -0.00019 | -0.00076 | 0.00906  | 0.00830  | -1.08745 |
| D40 | 2.77910  | 0.00028  | -0.00444 | -0.00678 | -0.01123 | 2.76787  |
| D41 | -1.41454 | 0.00025  | -0.00423 | -0.00796 | -0.01217 | -1.42672 |
| D42 | 0.70669  | 0.00007  | -0.00443 | -0.00632 | -0.01076 | 0.69593  |
| D43 | 2.79623  | 0.00005  | -0.00422 | -0.00749 | -0.01170 | 2.78453  |

|     |          |          |          |          |          |          |
|-----|----------|----------|----------|----------|----------|----------|
| D44 | -1.39759 | 0.00008  | -0.00455 | -0.00549 | -0.01006 | -1.40765 |
| D45 | 0.69194  | 0.00006  | -0.00435 | -0.00667 | -0.01100 | 0.68094  |
| D46 | -3.13543 | -0.00003 | 0.00026  | -0.00006 | 0.00020  | -3.13524 |
| D47 | 0.00762  | -0.00001 | 0.00039  | 0.00068  | 0.00107  | 0.00869  |
| D48 | -0.00039 | 0.00006  | 0.00032  | 0.00295  | 0.00327  | 0.00287  |
| D49 | -3.14053 | 0.00007  | 0.00045  | 0.00369  | 0.00414  | -3.13639 |
| D50 | 1.29983  | 0.00015  | 0.00731  | 0.04756  | 0.05495  | 1.35478  |
| D51 | -0.60311 | 0.00030  | -0.00427 | 0.00121  | -0.00307 | -0.60619 |
| D52 | -2.90701 | -0.00012 | 0.00627  | 0.03979  | 0.04606  | -2.86095 |
| D53 | 1.47323  | 0.00003  | -0.00532 | -0.00656 | -0.01196 | 1.46127  |
| D54 | -2.69936 | -0.00006 | -0.00003 | -0.00200 | -0.00195 | -2.70132 |
| D55 | -0.01366 | 0.00000  | 0.00025  | 0.00238  | 0.00265  | -0.01100 |
| D56 | -0.02257 | -0.00004 | 0.00019  | -0.00181 | -0.00160 | -0.02417 |
| D57 | 2.66314  | 0.00002  | 0.00046  | 0.00258  | 0.00301  | 2.66615  |
| D58 | 1.85463  | -0.00013 | -0.01040 | -0.04000 | -0.05067 | 1.80396  |
| D59 | -0.56073 | -0.00011 | -0.00974 | -0.03870 | -0.04861 | -0.60934 |
| D60 | 0.61080  | 0.00025  | 0.01095  | 0.04241  | 0.05344  | 0.66423  |
| D61 | -1.81487 | 0.00025  | 0.01086  | 0.04431  | 0.05527  | -1.75961 |
| D62 | 2.55111  | -0.00007 | -0.00014 | -0.00149 | -0.00158 | 2.54953  |
| D63 | -1.65760 | -0.00007 | -0.00035 | -0.00208 | -0.00238 | -1.65999 |
| D64 | 0.44470  | -0.00007 | -0.00019 | -0.00165 | -0.00180 | 0.44289  |
| D65 | 1.35035  | 0.00003  | 0.00014  | 0.00000  | 0.00008  | 1.35042  |
| D66 | -2.85837 | 0.00003  | -0.00008 | -0.00059 | -0.00073 | -2.85910 |
| D67 | -0.75607 | 0.00003  | 0.00008  | -0.00016 | -0.00015 | -0.75622 |
| D68 | -1.04973 | 0.00005  | 0.00014  | 0.00309  | 0.00324  | -1.04649 |
| D69 | 1.02474  | 0.00005  | -0.00007 | 0.00250  | 0.00244  | 1.02718  |
| D70 | 3.12704  | 0.00005  | 0.00008  | 0.00292  | 0.00302  | 3.13006  |

| Item                 | Value    | Threshold | Converged? |
|----------------------|----------|-----------|------------|
| Maximum Force        | 0.001083 | 0.000450  | NO         |
| RMS Force            | 0.000235 | 0.000300  | YES        |
| Maximum Displacement | 0.175911 | 0.001800  | NO         |
| RMS Displacement     | 0.030336 | 0.001200  | NO         |

Predicted change in Energy=-3.700924D-05

GradGradGradGradGradGradGradGradGradGradGradGradGradGradGradGradGradGradGrad

Input orientation:

| Center Number | Atomic Number | Atomic Type | Coordinates (Angstroms) |           |           |
|---------------|---------------|-------------|-------------------------|-----------|-----------|
|               |               |             | X                       | Y         | Z         |
| 1             | 6             | 0           | -2.895756               | 2.138621  | -0.308066 |
| 2             | 6             | 0           | -3.755881               | 1.149129  | 0.044569  |
| 3             | 7             | 0           | -3.011583               | -0.021525 | 0.120322  |
| 4             | 6             | 0           | -1.730199               | 0.260656  | -0.176591 |

|    |    |   |           |           |           |
|----|----|---|-----------|-----------|-----------|
| 5  | 7  | 0 | -1.640084 | 1.565302  | -0.441658 |
| 6  | 6  | 0 | -0.376820 | 2.272648  | -0.722855 |
| 7  | 6  | 0 | 0.348067  | 2.704298  | 0.560100  |
| 8  | 1  | 0 | -3.065459 | 3.187868  | -0.478265 |
| 9  | 1  | 0 | -4.812588 | 1.181494  | 0.237040  |
| 10 | 1  | 0 | 0.255734  | 1.595942  | -1.298124 |
| 11 | 1  | 0 | -0.606103 | 3.138202  | -1.344346 |
| 12 | 1  | 0 | -0.267472 | 3.435877  | 1.092955  |
| 13 | 1  | 0 | 0.456656  | 1.825831  | 1.212378  |
| 14 | 35 | 0 | 0.203708  | -2.349339 | 0.292542  |
| 15 | 1  | 0 | -0.918414 | -0.495184 | -0.154071 |
| 16 | 6  | 0 | -3.438278 | -1.342838 | 0.455065  |
| 17 | 6  | 0 | -4.702340 | -1.677372 | 0.676384  |
| 18 | 1  | 0 | -2.597910 | -2.031467 | 0.507181  |
| 19 | 1  | 0 | -4.935262 | -2.702265 | 0.930640  |
| 20 | 1  | 0 | -5.530631 | -0.981975 | 0.616548  |
| 21 | 7  | 0 | 1.609599  | 3.322502  | 0.175299  |
| 22 | 1  | 0 | 1.962087  | 3.924479  | 0.909273  |
| 23 | 1  | 0 | 2.311097  | 2.606174  | -0.007036 |
| 24 | 6  | 0 | 3.719331  | -0.236416 | -1.111678 |
| 25 | 6  | 0 | 3.612063  | -0.479907 | 0.328596  |
| 26 | 8  | 0 | 3.397397  | 0.850109  | -0.217702 |
| 27 | 1  | 0 | 4.701897  | -0.162672 | -1.572047 |
| 28 | 1  | 0 | 2.909331  | -0.554269 | -1.761735 |
| 29 | 1  | 0 | 2.692830  | -0.955727 | 0.664783  |
| 30 | 6  | 0 | 4.821284  | -0.648000 | 1.206465  |
| 31 | 1  | 0 | 4.635810  | -0.235188 | 2.202344  |
| 32 | 1  | 0 | 5.049856  | -1.711617 | 1.324108  |
| 33 | 1  | 0 | 5.693149  | -0.146003 | 0.779794  |

-----  
Distance matrix (angstroms):

|    |   | 1        | 2        | 3        | 4        | 5        |
|----|---|----------|----------|----------|----------|----------|
| 1  | C | 0.000000 |          |          |          |          |
| 2  | C | 1.357668 | 0.000000 |          |          |          |
| 3  | N | 2.205258 | 1.389298 | 0.000000 |          |          |
| 4  | C | 2.214173 | 2.222989 | 1.345261 | 0.000000 |          |
| 5  | N | 1.386814 | 2.210478 | 2.171371 | 1.334347 | 0.000000 |
| 6  | C | 2.556375 | 3.642704 | 3.593906 | 2.485589 | 1.474872 |
| 7  | C | 3.405303 | 4.418904 | 4.348651 | 3.291397 | 2.500715 |
| 8  | H | 1.076423 | 2.215061 | 3.265182 | 3.231485 | 2.160036 |
| 9  | H | 2.210764 | 1.074579 | 2.168985 | 3.243478 | 3.266912 |
| 10 | H | 3.347627 | 4.253883 | 3.911975 | 2.642869 | 2.080529 |
| 11 | H | 2.704728 | 3.975752 | 4.232666 | 3.302653 | 2.087577 |
| 12 | H | 3.248631 | 4.300852 | 4.519933 | 3.719320 | 2.781753 |

|    |    |          |          |          |          |          |
|----|----|----------|----------|----------|----------|----------|
| 13 | H  | 3.694354 | 4.423479 | 4.078479 | 3.026771 | 2.683287 |
| 14 | Br | 5.487184 | 5.289529 | 3.973219 | 3.282096 | 4.388968 |
| 15 | H  | 3.297048 | 3.285489 | 2.163562 | 1.109413 | 2.202071 |
| 16 | C  | 3.605170 | 2.545442 | 1.428281 | 2.426461 | 3.534811 |
| 17 | C  | 4.335285 | 3.046979 | 2.430986 | 3.649266 | 4.598083 |
| 18 | H  | 4.259457 | 3.416299 | 2.088218 | 2.544463 | 3.841155 |
| 19 | H  | 5.397050 | 4.124233 | 3.397576 | 4.503031 | 5.563589 |
| 20 | H  | 4.187553 | 2.831696 | 2.741224 | 4.076332 | 4.769148 |
| 21 | N  | 4.683315 | 5.790425 | 5.704460 | 4.544555 | 3.745508 |
| 22 | H  | 5.316939 | 6.414471 | 6.397717 | 5.313725 | 4.512911 |
| 23 | H  | 5.236463 | 6.239701 | 5.937335 | 4.675712 | 4.109032 |
| 24 | C  | 7.074318 | 7.689957 | 6.846109 | 5.551473 | 5.693720 |
| 25 | C  | 7.043702 | 7.551228 | 6.642754 | 5.416957 | 5.688693 |
| 26 | O  | 6.424345 | 7.164328 | 6.476808 | 5.161530 | 5.092924 |
| 27 | H  | 8.038528 | 8.710240 | 7.898216 | 6.595330 | 6.669663 |
| 28 | H  | 6.562305 | 7.112619 | 6.235638 | 4.970113 | 5.189640 |
| 29 | H  | 6.461711 | 6.811825 | 5.805988 | 4.663763 | 5.133609 |
| 30 | C  | 8.343367 | 8.840104 | 7.932590 | 6.757250 | 7.025973 |
| 31 | H  | 8.286230 | 8.774554 | 7.928625 | 6.814049 | 7.044101 |
| 32 | H  | 8.978924 | 9.346769 | 8.324200 | 7.218802 | 7.655810 |
| 33 | H  | 8.953895 | 9.565673 | 8.730565 | 7.495742 | 7.628684 |
|    |    | 6        | 7        | 8        | 9        | 10       |
| 6  | C  | 0.000000 |          |          |          |          |
| 7  | C  | 1.535499 | 0.000000 |          |          |          |
| 8  | H  | 2.850655 | 3.600584 | 0.000000 |          |          |
| 9  | H  | 4.667767 | 5.390330 | 2.754933 | 0.000000 |          |
| 10 | H  | 1.090408 | 2.165636 | 3.773158 | 5.311909 | 0.000000 |
| 11 | H  | 1.089956 | 2.173852 | 2.607872 | 4.901429 | 1.767333 |
| 12 | H  | 2.159219 | 1.094546 | 3.218535 | 5.145183 | 3.062085 |
| 13 | H  | 2.153939 | 1.099528 | 4.137476 | 5.397349 | 2.529000 |
| 14 | Br | 4.767684 | 5.062774 | 6.476285 | 6.134581 | 4.254194 |
| 15 | H  | 2.877105 | 3.514357 | 4.275486 | 4.257793 | 2.657120 |
| 16 | C  | 4.881778 | 5.543171 | 4.640840 | 2.882449 | 5.035456 |
| 17 | C  | 6.022513 | 6.687240 | 5.261479 | 2.894528 | 6.260652 |
| 18 | H  | 4.997163 | 5.577549 | 5.332089 | 3.911636 | 4.955856 |
| 19 | H  | 6.947172 | 7.568473 | 6.338363 | 3.947115 | 7.098479 |
| 20 | H  | 6.240861 | 6.939084 | 4.966214 | 2.310890 | 6.617677 |
| 21 | N  | 2.419656 | 1.456609 | 4.722440 | 6.769949 | 2.642903 |
| 22 | H  | 3.295887 | 2.053246 | 5.267264 | 7.339760 | 3.634051 |
| 23 | H  | 2.801524 | 2.045668 | 5.428423 | 7.268849 | 2.629068 |
| 24 | C  | 4.819237 | 4.775779 | 7.626291 | 8.753465 | 3.922857 |
| 25 | C  | 4.959163 | 4.565789 | 7.661130 | 8.587397 | 4.268526 |
| 26 | O  | 4.064912 | 3.652589 | 6.877610 | 8.229244 | 3.404942 |
| 27 | H  | 5.696076 | 5.632176 | 8.529613 | 9.777781 | 4.789167 |

|    |    |          |          |          |           |           |
|----|----|----------|----------|----------|-----------|-----------|
| 28 | H  | 4.457524 | 4.750710 | 7.165822 | 8.163088  | 3.446726  |
| 29 | H  | 4.665908 | 4.347948 | 7.185668 | 7.815495  | 4.037754  |
| 30 | C  | 6.266797 | 5.627198 | 8.930449 | 9.853848  | 5.670317  |
| 31 | H  | 6.322380 | 5.451814 | 8.843784 | 9.754057  | 5.898422  |
| 32 | H  | 7.036564 | 6.495447 | 9.649448 | 10.335357 | 6.387461  |
| 33 | H  | 6.704651 | 6.061549 | 9.455719 | 10.603175 | 6.075985  |
|    |    | 11       | 12       | 13       | 14        | 15        |
| 11 | H  | 0.000000 |          |          |           |           |
| 12 | H  | 2.478653 | 0.000000 |          |           |           |
| 13 | H  | 3.064084 | 1.769427 | 0.000000 |           |           |
| 14 | Br | 5.783451 | 5.859300 | 4.282771 | 0.000000  |           |
| 15 | H  | 3.836116 | 4.175170 | 3.024089 | 2.212807  | 0.000000  |
| 16 | C  | 5.598108 | 5.770357 | 5.077843 | 3.781999  | 2.727504  |
| 17 | C  | 6.637188 | 6.781364 | 6.258991 | 4.966707  | 4.050348  |
| 18 | H  | 5.841312 | 5.972095 | 4.970556 | 2.827750  | 2.370258  |
| 19 | H  | 7.617627 | 7.713066 | 7.046688 | 5.190447  | 4.709869  |
| 20 | H  | 6.713564 | 6.888049 | 6.639759 | 5.904007  | 4.701421  |
| 21 | N  | 2.693070 | 2.092449 | 2.155187 | 5.844661  | 4.590649  |
| 22 | H  | 3.506085 | 2.289848 | 2.600484 | 6.544696  | 5.381580  |
| 23 | H  | 3.252923 | 2.923595 | 2.352628 | 5.393324  | 4.479931  |
| 24 | C  | 5.491044 | 5.851559 | 4.505458 | 4.335422  | 4.742642  |
| 25 | C  | 5.803652 | 5.564927 | 4.006757 | 3.887540  | 4.556142  |
| 26 | O  | 4.746863 | 4.672824 | 3.412495 | 4.549338  | 4.521072  |
| 27 | H  | 6.254797 | 6.689277 | 5.452453 | 5.337782  | 5.805956  |
| 28 | H  | 5.115352 | 5.844878 | 4.530545 | 3.842230  | 4.152073  |
| 29 | H  | 5.628482 | 5.313465 | 3.610734 | 2.876882  | 3.731448  |
| 30 | C  | 7.092143 | 6.525824 | 5.016957 | 5.005179  | 5.900724  |
| 31 | H  | 7.171919 | 6.224921 | 4.763734 | 5.268824  | 6.039015  |
| 32 | H  | 7.913992 | 7.404330 | 5.798578 | 4.995595  | 6.267773  |
| 33 | H  | 7.414752 | 6.961102 | 5.612140 | 5.935156  | 6.686314  |
|    |    | 16       | 17       | 18       | 19        | 20        |
| 16 | C  | 0.000000 |          |          |           |           |
| 17 | C  | 1.326178 | 0.000000 |          |           |           |
| 18 | H  | 1.087725 | 2.140710 | 0.000000 |           |           |
| 19 | H  | 2.077300 | 1.081343 | 2.468300 | 0.000000  |           |
| 20 | H  | 2.129375 | 1.083154 | 3.116769 | 1.847299  | 0.000000  |
| 21 | N  | 6.879297 | 8.067862 | 6.817497 | 8.927685  | 8.349019  |
| 22 | H  | 7.557438 | 8.709165 | 7.511893 | 9.564915  | 8.961015  |
| 23 | H  | 6.990246 | 8.246462 | 6.772775 | 9.031527  | 8.646177  |
| 24 | C  | 7.410143 | 8.729151 | 6.763908 | 9.227863  | 9.439514  |
| 25 | C  | 7.104080 | 8.407389 | 6.403358 | 8.852011  | 9.160996  |
| 26 | O  | 7.210277 | 8.531899 | 6.691236 | 9.130787  | 9.152169  |
| 27 | H  | 8.471389 | 9.787208 | 7.816826 | 10.275593 | 10.495992 |
| 28 | H  | 6.769652 | 8.071141 | 6.136758 | 8.567404  | 8.779073  |

|    |   |          |           |          |           |           |
|----|---|----------|-----------|----------|-----------|-----------|
| 29 | H | 6.146895 | 7.430306  | 5.401294 | 7.829998  | 8.223644  |
| 30 | C | 8.322726 | 9.593748  | 7.579407 | 9.974281  | 10.374087 |
| 31 | H | 8.334913 | 9.571285  | 7.643749 | 9.965396  | 10.316442 |
| 32 | H | 8.540471 | 9.773743  | 7.697921 | 10.041851 | 10.629192 |
| 33 | H | 9.215249 | 10.508187 | 8.507112 | 10.932537 | 11.256053 |
|    |   | 21       | 22        | 23       | 24        | 25        |
| 21 | N | 0.000000 |           |          |           |           |
| 22 | H | 1.012591 | 0.000000  |          |           |           |
| 23 | H | 1.019054 | 1.642972  | 0.000000 |           |           |
| 24 | C | 4.332802 | 4.948252  | 3.359118 | 0.000000  |           |
| 25 | C | 4.300195 | 4.739011  | 3.365867 | 1.464644  | 0.000000  |
| 26 | O | 3.076263 | 3.575183  | 2.075618 | 1.443389  | 1.453777  |
| 27 | H | 4.976139 | 5.510745  | 3.978906 | 1.087572  | 2.213779  |
| 28 | H | 4.524462 | 5.300069  | 3.664049 | 1.086142  | 2.206546  |
| 29 | H | 4.440295 | 4.940665  | 3.644749 | 2.174150  | 1.088309  |
| 30 | C | 5.209905 | 5.401009  | 4.285239 | 2.599517  | 1.503703  |
| 31 | H | 5.091563 | 5.111130  | 4.284738 | 3.438411  | 2.149157  |
| 32 | H | 6.204634 | 6.439874  | 5.283566 | 3.143178  | 2.139019  |
| 33 | H | 5.391782 | 5.523261  | 4.430785 | 2.735287  | 2.155456  |
|    |   | 26       | 27        | 28       | 29        | 30        |
| 26 | O | 0.000000 |           |          |           |           |
| 27 | H | 2.135813 | 0.000000  |          |           |           |
| 28 | H | 2.143484 | 1.844620  | 0.000000 |           |           |
| 29 | H | 2.129845 | 3.109453  | 2.469014 | 0.000000  |           |
| 30 | C | 2.509987 | 2.823106  | 3.531934 | 2.217754  | 0.000000  |
| 31 | H | 2.927141 | 3.775666  | 4.335489 | 2.580396  | 1.093887  |
| 32 | H | 3.416174 | 3.302730  | 3.929851 | 2.561572  | 1.094242  |
| 33 | H | 2.694014 | 2.552256  | 3.791529 | 3.109790  | 1.092794  |
|    |   | 31       | 32        | 33       |           |           |
| 31 | H | 0.000000 |           |          |           |           |
| 32 | H | 1.767081 | 0.000000  |          |           |           |
| 33 | H | 1.774702 | 1.777992  | 0.000000 |           |           |

Stoichiometry C10H18BrN3O

Framework group C1[X(C10H18BrN3O)]

Deg. of freedom 93

Full point group C1 NOp 1

Largest Abelian subgroup C1 NOp 1

Largest concise Abelian subgroup C1 NOp 1

Standard orientation:

| Center Number | Atomic Number | Atomic Type | Coordinates (Angstroms) |          |           |
|---------------|---------------|-------------|-------------------------|----------|-----------|
|               |               |             | X                       | Y        | Z         |
| 1             | 6             | 0           | -2.831356               | 2.245180 | -0.186164 |

|    |    |   |           |           |           |
|----|----|---|-----------|-----------|-----------|
| 2  | 6  | 0 | -3.702734 | 1.234590  | 0.064171  |
| 3  | 7  | 0 | -2.972797 | 0.053570  | 0.013843  |
| 4  | 6  | 0 | -1.688809 | 0.349885  | -0.256892 |
| 5  | 7  | 0 | -1.583242 | 1.673956  | -0.384070 |
| 6  | 6  | 0 | -0.312062 | 2.391630  | -0.594531 |
| 7  | 6  | 0 | 0.421518  | 2.677581  | 0.723744  |
| 8  | 1  | 0 | -2.988498 | 3.308459  | -0.244752 |
| 9  | 1  | 0 | -4.758445 | 1.259313  | 0.263134  |
| 10 | 1  | 0 | 0.310532  | 1.771423  | -1.240062 |
| 11 | 1  | 0 | -0.532253 | 3.320290  | -1.120944 |
| 12 | 1  | 0 | -0.183496 | 3.356597  | 1.332781  |
| 13 | 1  | 0 | 0.520945  | 1.734304  | 1.279896  |
| 14 | 35 | 0 | 0.213855  | -2.318016 | -0.071596 |
| 15 | 1  | 0 | -0.886392 | -0.413868 | -0.316935 |
| 16 | 6  | 0 | -3.414939 | -1.290329 | 0.209892  |
| 17 | 6  | 0 | -4.682457 | -1.630985 | 0.399893  |
| 18 | 1  | 0 | -2.583030 | -1.990696 | 0.186215  |
| 19 | 1  | 0 | -4.927382 | -2.674012 | 0.546213  |
| 20 | 1  | 0 | -5.502225 | -0.923224 | 0.416555  |
| 21 | 7  | 0 | 1.689586  | 3.317497  | 0.400913  |
| 22 | 1  | 0 | 2.051450  | 3.834886  | 1.192561  |
| 23 | 1  | 0 | 2.381670  | 2.615849  | 0.141722  |
| 24 | 6  | 0 | 3.751646  | -0.111958 | -1.260388 |
| 25 | 6  | 0 | 3.645192  | -0.503854 | 0.146832  |
| 26 | 8  | 0 | 3.445570  | 0.878612  | -0.256166 |
| 27 | 1  | 0 | 4.733826  | -0.002173 | -1.714353 |
| 28 | 1  | 0 | 2.936049  | -0.350101 | -1.936992 |
| 29 | 1  | 0 | 2.721029  | -1.001205 | 0.434898  |
| 30 | 6  | 0 | 4.854561  | -0.777641 | 0.997472  |
| 31 | 1  | 0 | 4.676858  | -0.469351 | 2.031865  |
| 32 | 1  | 0 | 5.070251  | -1.850405 | 1.002056  |
| 33 | 1  | 0 | 5.731443  | -0.244197 | 0.622352  |

-----  
Rotational constants (GHZ):      0.4698819      0.2524838      0.1723171

Standard basis: 6-311++G(d,p) (5D, 7F)

There are 499 symmetry adapted cartesian basis functions of A symmetry.

There are 482 symmetry adapted basis functions of A symmetry.

482 basis functions, 760 primitive gaussians, 499 cartesian basis functions

71 alpha electrons      71 beta electrons

nuclear repulsion energy      1294.3305866551 Hartrees.

NAtoms= 33 NActive= 33 NUniq= 33 SFac= 1.00D+00 NAtFMM= 60 NAOKFM=F

Big=F

Integral buffers will be 131072 words long.

Raffenetti 2 integral format.

Two-electron integral symmetry is turned on.  
 One-electron integrals computed using PRISM.  
 NBasis= 482 RedAO= T EigKep= 4.04D-06 NBF= 482  
 NBsUse= 482 1.00D-06 EigRej= -1.00D+00 NBFU= 482  
 Initial guess from the checkpoint file:  
 "/home/suqian/liuwen/qianmengshijie/nh2po/nh2po.chk"  
 B after Tr= 0.000000 0.000000 0.000000  
 Rot= 0.999997 -0.001871 0.000640 0.001469 Ang= -0.28 deg.  
 ExpMin= 3.50D-02 ExpMax= 4.40D+05 ExpMxC= 1.51D+04 IAcc=3 IRadAn= 5 AccDes=  
 0.00D+00  
 Harris functional with IExCor= 402 and IRadAn= 5 diagonalized for initial guess.  
 HarFok: IExCor= 402 AccDes= 0.00D+00 IRadAn= 5 IDoV= 1 UseB2=F ITyADJ=14  
 ICtDFT= 3500011 ScaDFX= 1.000000 1.000000 1.000000 1.000000  
 FoFCou: FMM=F IPFlag= 0 FMFlag= 100000 FMFlg1= 0  
 NFxFlg= 0 DoJE=T BraDBF=F KetDBF=T FulRan=T  
 wScrn= 0.000000 ICntrl= 500 IOpCl= 0 I1Cent= 200000004 NGrid=  
 0  
 NMat0= 1 NMatS0= 1 NMatT0= 0 NMatD0= 1 NMtDS0= 0  
 NMtDT0= 0  
 Petite list used in FoFCou.  
 Requested convergence on RMS density matrix=1.00D-08 within 128 cycles.  
 Requested convergence on MAX density matrix=1.00D-06.  
 Requested convergence on energy=1.00D-06.  
 No special actions if energy rises.  
 SCF Done: E(RB3LYP) = -3205.64702174 A.U. after 11 cycles  
 NFock= 11 Conv=0.62D-08 -V/T= 2.0018  
 Calling FoFJK, ICntrl= 2127 FMM=F ISym2X=0 I1Cent= 0 IOpClX= 0 NMat=1 NMatS=1  
 NMatT=0.

\*\*\*\*\* Axes restored to original set \*\*\*\*\*

| Center<br>Number | Atomic<br>Number | Forces (Hartrees/Bohr) |              |              |
|------------------|------------------|------------------------|--------------|--------------|
|                  |                  | X                      | Y            | Z            |
| 1                | 6                | 0.000141261            | 0.000171038  | 0.000521061  |
| 2                | 6                | -0.000227026           | 0.000142890  | -0.000669805 |
| 3                | 7                | 0.000009743            | -0.000453247 | 0.000415487  |
| 4                | 6                | -0.000182992           | 0.000877019  | -0.000006486 |
| 5                | 7                | 0.000078880            | -0.000272939 | -0.000203401 |
| 6                | 6                | -0.000103206           | -0.000296478 | -0.000201761 |
| 7                | 6                | 0.000145782            | 0.000073051  | -0.000052453 |
| 8                | 1                | -0.000059129           | 0.000005445  | 0.000201086  |
| 9                | 1                | -0.000023741           | -0.000129799 | 0.000005079  |
| 10               | 1                | -0.000070858           | -0.000046129 | 0.000105133  |
| 11               | 1                | 0.000175314            | 0.000014004  | -0.000027607 |



|    |    |              |              |              |
|----|----|--------------|--------------|--------------|
| 12 | 1  | -0.000096167 | 0.000017465  | -0.000031805 |
| 13 | 1  | -0.000051298 | 0.000015788  | 0.000069100  |
| 14 | 35 | 0.000026061  | 0.000113153  | 0.000007170  |
| 15 | 1  | 0.000260671  | -0.000495044 | 0.000035020  |
| 16 | 6  | 0.000176287  | 0.000379971  | -0.000105194 |
| 17 | 6  | -0.000059537 | -0.000124032 | -0.000018518 |
| 18 | 1  | -0.000005766 | -0.000076919 | 0.000034589  |
| 19 | 1  | 0.000036635  | 0.000003611  | 0.000029595  |
| 20 | 1  | -0.000031944 | 0.000045581  | -0.000013180 |
| 21 | 7  | -0.000214721 | 0.000198800  | -0.000068196 |
| 22 | 1  | 0.000051173  | -0.000042697 | 0.000128354  |
| 23 | 1  | 0.000358137  | -0.000097111 | -0.000038032 |
| 24 | 6  | 0.000300214  | 0.000299369  | -0.000011905 |
| 25 | 6  | 0.000073620  | -0.000058875 | 0.000268362  |
| 26 | 8  | -0.000569775 | -0.000178043 | -0.000339262 |
| 27 | 1  | -0.000097752 | 0.000011794  | -0.000102623 |
| 28 | 1  | 0.000050353  | -0.000031015 | -0.000096598 |
| 29 | 1  | 0.000020399  | -0.000064228 | 0.000136339  |
| 30 | 6  | -0.000102799 | -0.000038374 | 0.000087275  |
| 31 | 1  | 0.000003908  | -0.000005039 | -0.000016136 |
| 32 | 1  | -0.000023877 | 0.000032731  | -0.000023236 |
| 33 | 1  | 0.000012149  | 0.000008259  | -0.000017452 |

-----  
Cartesian Forces: Max 0.000877019 RMS 0.000202260

GradGradGradGradGradGradGradGradGradGradGradGradGradGradGradGradGradGradGrad

Berny optimization.

Using GEDIIS/GDIIS optimizer.

FormGI is forming the generalized inverse of G from B-inverse, IUseBI=4.

GSVD: received Info= 1 from GESDD.

Internal Forces: Max 0.000508378 RMS 0.000136007

Search for a local minimum.

Step number 15 out of a maximum of 172

All quantities printed in internal units (Hartrees-Bohrs-Radians)

Mixed Optimization -- En-DIIS/RFO-DIIS

Swapping is turned off.

Update second derivatives using D2CorX and points 10 11 9 12 13  
14 15

DE= -3.93D-05 DEPred=-3.70D-05 R= 1.06D+00

TightC=F SS= 1.41D+00 RLast= 1.62D-01 DXNew= 5.2145D-01 4.8553D-01

Trust test= 1.06D+00 RLast= 1.62D-01 DXMaxT set to 4.86D-01

ITU= 1 1 1 0 -1 -1 1 1 1 -1 1 0 0 -1 0

Eigenvalues --- 0.00067 0.00256 0.00394 0.00604 0.00723

Eigenvalues --- 0.00809 0.00840 0.01408 0.01463 0.01537

|                 |         |         |         |         |         |
|-----------------|---------|---------|---------|---------|---------|
| Eigenvalues --- | 0.01851 | 0.01896 | 0.02121 | 0.02336 | 0.02389 |
| Eigenvalues --- | 0.02400 | 0.02441 | 0.02938 | 0.03071 | 0.03086 |
| Eigenvalues --- | 0.03161 | 0.03289 | 0.03357 | 0.03728 | 0.04048 |
| Eigenvalues --- | 0.04297 | 0.04416 | 0.04907 | 0.05411 | 0.05598 |
| Eigenvalues --- | 0.05751 | 0.05827 | 0.05925 | 0.07892 | 0.08677 |
| Eigenvalues --- | 0.09549 | 0.10441 | 0.12156 | 0.12388 | 0.12639 |
| Eigenvalues --- | 0.12852 | 0.13440 | 0.15182 | 0.15772 | 0.16000 |
| Eigenvalues --- | 0.16001 | 0.16001 | 0.16005 | 0.16013 | 0.16032 |
| Eigenvalues --- | 0.16104 | 0.16630 | 0.18005 | 0.21348 | 0.22126 |
| Eigenvalues --- | 0.22881 | 0.22928 | 0.23939 | 0.25411 | 0.27079 |
| Eigenvalues --- | 0.29164 | 0.30413 | 0.32042 | 0.32434 | 0.32463 |
| Eigenvalues --- | 0.33659 | 0.34285 | 0.34319 | 0.34342 | 0.34546 |
| Eigenvalues --- | 0.34674 | 0.34736 | 0.35031 | 0.35069 | 0.35257 |
| Eigenvalues --- | 0.35374 | 0.35576 | 0.35843 | 0.35902 | 0.36421 |
| Eigenvalues --- | 0.36624 | 0.38196 | 0.39620 | 0.41942 | 0.42728 |
| Eigenvalues --- | 0.44653 | 0.45484 | 0.46372 | 0.49206 | 0.54768 |
| Eigenvalues --- | 0.57788 | 0.60628 | 1.09730 |         |         |

En-DIIS/RFO-DIIS IScMMF= 0 using points: 15 14 13 12

RFO step: Lambda=-7.81607635D-06.

DidBck=F Rises=F RFO-DIIS coefs: 1.23298 0.13394 -0.52728 0.16035

Iteration 1 RMS(Cart)= 0.05441108 RMS(Int)= 0.00120220

Iteration 2 RMS(Cart)= 0.00285264 RMS(Int)= 0.00039156

Iteration 3 RMS(Cart)= 0.00000563 RMS(Int)= 0.00039156

Iteration 4 RMS(Cart)= 0.00000000 RMS(Int)= 0.00039156

| Variable | Old X   | -DE/DX   | Delta X<br>(Linear) | Delta X<br>(Quad) | Delta X<br>(Total) | New X   |
|----------|---------|----------|---------------------|-------------------|--------------------|---------|
| R1       | 2.56562 | 0.00011  | -0.00002            | 0.00003           | 0.00000            | 2.56562 |
| R2       | 2.62070 | 0.00016  | -0.00050            | -0.00016          | -0.00067           | 2.62003 |
| R3       | 2.03414 | -0.00002 | 0.00002             | 0.00002           | 0.00004            | 2.03419 |
| R4       | 2.62539 | 0.00016  | -0.00027            | 0.00053           | 0.00026            | 2.62565 |
| R5       | 2.03066 | 0.00002  | -0.00007            | -0.00001          | -0.00008           | 2.03058 |
| R6       | 2.54218 | -0.00004 | -0.00040            | -0.00071          | -0.00111           | 2.54107 |
| R7       | 2.69906 | -0.00027 | 0.00064             | -0.00085          | -0.00020           | 2.69886 |
| R8       | 2.52155 | -0.00040 | 0.00075             | 0.00010           | 0.00085            | 2.52240 |
| R9       | 2.09649 | 0.00047  | -0.00198            | 0.00073           | -0.00125           | 2.09523 |
| R10      | 2.78710 | -0.00017 | 0.00047             | 0.00032           | 0.00079            | 2.78790 |
| R11      | 2.90167 | -0.00010 | -0.00005            | -0.00103          | -0.00107           | 2.90060 |
| R12      | 2.06057 | -0.00007 | 0.00008             | -0.00019          | -0.00012           | 2.06045 |
| R13      | 2.05972 | -0.00001 | -0.00015            | -0.00008          | -0.00023           | 2.05949 |
| R14      | 2.06839 | 0.00005  | -0.00022            | 0.00004           | -0.00019           | 2.06821 |
| R15      | 2.07781 | 0.00003  | -0.00048            | -0.00049          | -0.00097           | 2.07683 |
| R16      | 2.75259 | -0.00010 | 0.00087             | 0.00095           | 0.00182            | 2.75441 |
| R17      | 4.18160 | -0.00008 | 0.01262             | 0.00293           | 0.01555            | 4.19715 |
| R18      | 2.50611 | 0.00007  | -0.00004            | 0.00014           | 0.00010            | 2.50621 |

|     |         |          |          |          |          |         |
|-----|---------|----------|----------|----------|----------|---------|
| R19 | 2.05550 | 0.00004  | 0.00030  | -0.00020 | 0.00011  | 2.05561 |
| R20 | 2.04344 | -0.00001 | 0.00001  | -0.00004 | -0.00002 | 2.04342 |
| R21 | 2.04686 | 0.00006  | -0.00001 | 0.00009  | 0.00009  | 2.04695 |
| R22 | 1.91352 | 0.00009  | -0.00014 | 0.00017  | 0.00003  | 1.91355 |
| R23 | 1.92573 | 0.00014  | -0.00056 | 0.00008  | -0.00047 | 1.92526 |
| R24 | 3.92235 | -0.00013 | 0.00818  | 0.00099  | 0.00917  | 3.93152 |
| R25 | 2.76778 | 0.00027  | 0.00026  | 0.00140  | 0.00040  | 2.76818 |
| R26 | 2.72761 | -0.00010 | -0.00112 | -0.00159 | -0.00221 | 2.72540 |
| R27 | 2.05521 | -0.00004 | 0.00004  | -0.00004 | -0.00001 | 2.05521 |
| R28 | 2.05251 | 0.00003  | 0.00018  | 0.00021  | 0.00040  | 2.05291 |
| R29 | 2.74724 | 0.00009  | 0.00039  | 0.00024  | 0.00141  | 2.74865 |
| R30 | 2.05661 | 0.00005  | 0.00026  | 0.00028  | 0.00054  | 2.05715 |
| R31 | 2.84159 | -0.00007 | -0.00002 | -0.00032 | -0.00034 | 2.84125 |
| R32 | 2.06715 | -0.00002 | -0.00005 | -0.00009 | -0.00014 | 2.06701 |
| R33 | 2.06782 | -0.00004 | 0.00001  | -0.00007 | -0.00005 | 2.06776 |
| R34 | 2.06508 | 0.00002  | 0.00005  | 0.00006  | 0.00011  | 2.06519 |
| A1  | 1.87271 | -0.00009 | 0.00018  | 0.00002  | 0.00020  | 1.87291 |
| A2  | 2.28050 | -0.00006 | 0.00039  | -0.00051 | -0.00012 | 2.28038 |
| A3  | 2.12997 | 0.00014  | -0.00058 | 0.00048  | -0.00010 | 2.12987 |
| A4  | 1.86385 | -0.00004 | -0.00007 | -0.00041 | -0.00048 | 1.86337 |
| A5  | 2.27518 | 0.00015  | -0.00006 | 0.00105  | 0.00099  | 2.27617 |
| A6  | 2.14413 | -0.00011 | 0.00013  | -0.00061 | -0.00049 | 2.14365 |
| A7  | 1.89813 | -0.00008 | 0.00021  | 0.00040  | 0.00061  | 1.89874 |
| A8  | 2.25524 | 0.00009  | -0.00066 | -0.00048 | -0.00115 | 2.25409 |
| A9  | 2.12980 | -0.00001 | 0.00045  | 0.00008  | 0.00053  | 2.13032 |
| A10 | 1.88942 | 0.00016  | -0.00016 | -0.00023 | -0.00040 | 1.88903 |
| A11 | 2.15267 | -0.00002 | -0.00013 | 0.00316  | 0.00302  | 2.15570 |
| A12 | 2.24049 | -0.00014 | 0.00018  | -0.00297 | -0.00280 | 2.23769 |
| A13 | 1.90067 | 0.00005  | -0.00017 | 0.00022  | 0.00005  | 1.90072 |
| A14 | 2.20884 | 0.00046  | -0.00240 | -0.00195 | -0.00435 | 2.20449 |
| A15 | 2.17080 | -0.00051 | 0.00243  | 0.00204  | 0.00447  | 2.17527 |
| A16 | 1.96046 | -0.00004 | -0.00008 | -0.00016 | -0.00024 | 1.96022 |
| A17 | 1.87530 | -0.00011 | 0.00200  | -0.00025 | 0.00175  | 1.87705 |
| A18 | 1.88535 | 0.00020  | -0.00187 | -0.00055 | -0.00243 | 1.88292 |
| A19 | 1.91920 | 0.00002  | 0.00017  | 0.00058  | 0.00074  | 1.91994 |
| A20 | 1.93102 | -0.00007 | -0.00010 | -0.00046 | -0.00057 | 1.93046 |
| A21 | 1.89024 | 0.00000  | -0.00008 | 0.00087  | 0.00080  | 1.89104 |
| A22 | 1.90621 | 0.00007  | -0.00003 | 0.00052  | 0.00050  | 1.90671 |
| A23 | 1.89409 | -0.00007 | 0.00107  | 0.00047  | 0.00154  | 1.89563 |
| A24 | 1.88330 | -0.00008 | -0.00043 | -0.00080 | -0.00124 | 1.88206 |
| A25 | 1.87627 | -0.00002 | 0.00059  | 0.00062  | 0.00120  | 1.87747 |
| A26 | 1.90921 | 0.00008  | 0.00004  | -0.00003 | 0.00001  | 1.90922 |
| A27 | 1.99355 | 0.00003  | -0.00119 | -0.00072 | -0.00191 | 1.99164 |
| A28 | 2.16184 | 0.00005  | -0.00063 | 0.00058  | -0.00005 | 2.16179 |

|     |          |          |          |          |          |          |
|-----|----------|----------|----------|----------|----------|----------|
| A29 | 1.94561  | 0.00004  | -0.00019 | 0.00058  | 0.00040  | 1.94600  |
| A30 | 2.17573  | -0.00010 | 0.00082  | -0.00116 | -0.00034 | 2.17539  |
| A31 | 2.07560  | -0.00003 | -0.00005 | 0.00008  | 0.00003  | 2.07563  |
| A32 | 2.16243  | 0.00000  | 0.00020  | -0.00021 | -0.00001 | 2.16242  |
| A33 | 2.04515  | 0.00003  | -0.00015 | 0.00013  | -0.00002 | 2.04513  |
| A34 | 1.94154  | 0.00002  | 0.00030  | -0.00199 | -0.00146 | 1.94008  |
| A35 | 1.92317  | -0.00038 | -0.00076 | -0.00050 | -0.00120 | 1.92197  |
| A36 | 1.88384  | 0.00020  | 0.00033  | 0.00090  | 0.00116  | 1.88500  |
| A37 | 2.08713  | 0.00002  | 0.00073  | 0.00085  | 0.00085  | 2.08798  |
| A38 | 2.07747  | 0.00009  | 0.00087  | 0.00004  | 0.00153  | 2.07900  |
| A39 | 1.99614  | 0.00007  | 0.00078  | 0.00129  | 0.00203  | 1.99817  |
| A40 | 2.00936  | -0.00001 | -0.00126 | 0.00035  | -0.00113 | 2.00824  |
| A41 | 2.02668  | -0.00011 | -0.00104 | -0.00146 | -0.00248 | 2.02420  |
| A42 | 2.02452  | 0.00023  | 0.00088  | 0.00120  | 0.00232  | 2.02683  |
| A43 | 2.13386  | -0.00007 | -0.00060 | -0.00049 | -0.00148 | 2.13238  |
| A44 | 1.97289  | 0.00006  | -0.00087 | -0.00018 | -0.00128 | 1.97162  |
| A45 | 2.02683  | 0.00011  | -0.00024 | 0.00006  | -0.00013 | 2.02670  |
| A46 | 2.03758  | -0.00016 | 0.00051  | -0.00014 | 0.00046  | 2.03803  |
| A47 | 2.52605  | 0.00014  | 0.01468  | 0.01554  | 0.02752  | 2.55357  |
| A48 | 2.52036  | -0.00011 | 0.01155  | 0.00912  | 0.01712  | 2.53748  |
| A49 | 1.93153  | 0.00001  | -0.00047 | -0.00044 | -0.00091 | 1.93062  |
| A50 | 1.91708  | -0.00004 | 0.00018  | 0.00019  | 0.00037  | 1.91745  |
| A51 | 1.94152  | 0.00000  | 0.00030  | 0.00005  | 0.00035  | 1.94187  |
| A52 | 1.88006  | 0.00001  | -0.00040 | -0.00022 | -0.00062 | 1.87944  |
| A53 | 1.89376  | 0.00001  | 0.00024  | 0.00036  | 0.00060  | 1.89436  |
| A54 | 1.89846  | 0.00002  | 0.00013  | 0.00006  | 0.00019  | 1.89865  |
| A55 | 3.35077  | -0.00034 | 0.00673  | 0.00049  | 0.00722  | 3.35799  |
| A56 | 2.92363  | -0.00050 | -0.02032 | -0.01616 | -0.03649 | 2.88714  |
| A57 | 2.85490  | 0.00004  | -0.02659 | -0.00263 | -0.02921 | 2.82568  |
| A58 | 3.22376  | -0.00017 | 0.00713  | -0.01755 | -0.01051 | 3.21325  |
| D1  | -0.00146 | 0.00031  | 0.00014  | 0.00484  | 0.00498  | 0.00352  |
| D2  | -3.13571 | 0.00011  | -0.00068 | -0.00063 | -0.00131 | -3.13702 |
| D3  | 3.13461  | 0.00013  | -0.00068 | 0.00270  | 0.00202  | 3.13663  |
| D4  | 0.00036  | -0.00006 | -0.00150 | -0.00277 | -0.00427 | -0.00391 |
| D5  | -0.00094 | -0.00031 | -0.00032 | -0.00415 | -0.00447 | -0.00542 |
| D6  | -3.06344 | -0.00024 | 0.00147  | -0.00861 | -0.00714 | -3.07058 |
| D7  | -3.13760 | -0.00015 | 0.00041  | -0.00224 | -0.00183 | -3.13942 |
| D8  | 0.08309  | -0.00008 | 0.00221  | -0.00669 | -0.00449 | 0.07860  |
| D9  | 0.00336  | -0.00020 | 0.00009  | -0.00391 | -0.00382 | -0.00046 |
| D10 | 3.13832  | -0.00013 | -0.00190 | -0.00409 | -0.00599 | 3.13234  |
| D11 | 3.13830  | -0.00003 | 0.00083  | 0.00106  | 0.00188  | 3.14018  |
| D12 | -0.00993 | 0.00005  | -0.00116 | 0.00088  | -0.00028 | -0.01021 |
| D13 | -0.00398 | 0.00001  | -0.00029 | 0.00135  | 0.00106  | -0.00292 |
| D14 | 3.10323  | 0.00008  | -0.00369 | 0.00009  | -0.00362 | 3.09961  |

|     |          |          |          |          |          |          |
|-----|----------|----------|----------|----------|----------|----------|
| D15 | -3.13951 | -0.00006 | 0.00152  | 0.00152  | 0.00305  | -3.13646 |
| D16 | -0.03230 | 0.00001  | -0.00188 | 0.00026  | -0.00163 | -0.03393 |
| D17 | 0.07969  | -0.00001 | 0.01558  | 0.01464  | 0.03022  | 0.10992  |
| D18 | -3.05882 | -0.00001 | 0.01482  | 0.01307  | 0.02790  | -3.03093 |
| D19 | -3.06931 | 0.00007  | 0.01337  | 0.01444  | 0.02780  | -3.04151 |
| D20 | 0.07536  | 0.00007  | 0.01261  | 0.01287  | 0.02548  | 0.10084  |
| D21 | 0.00306  | 0.00018  | 0.00038  | 0.00170  | 0.00208  | 0.00514  |
| D22 | 3.06768  | 0.00017  | -0.00162 | 0.00582  | 0.00420  | 3.07188  |
| D23 | -3.10189 | 0.00011  | 0.00402  | 0.00289  | 0.00690  | -3.09500 |
| D24 | -0.03728 | 0.00009  | 0.00202  | 0.00700  | 0.00902  | -0.02826 |
| D25 | 1.57683  | -0.00003 | 0.02068  | 0.00455  | 0.02523  | 1.60205  |
| D26 | -2.59347 | -0.00009 | 0.02216  | 0.00501  | 0.02717  | -2.56630 |
| D27 | -0.55768 | -0.00005 | 0.02216  | 0.00561  | 0.02777  | -0.52991 |
| D28 | -1.47407 | 0.00002  | 0.02288  | -0.00044 | 0.02244  | -1.45163 |
| D29 | 0.63881  | -0.00005 | 0.02437  | 0.00001  | 0.02438  | 0.66320  |
| D30 | 2.67461  | 0.00000  | 0.02436  | 0.00062  | 0.02498  | 2.69959  |
| D31 | -1.12201 | -0.00009 | 0.00299  | 0.01427  | 0.01726  | -1.10474 |
| D32 | 0.91857  | -0.00012 | 0.00428  | 0.01557  | 0.01984  | 0.93841  |
| D33 | 3.08733  | -0.00017 | 0.00321  | 0.01448  | 0.01769  | 3.10501  |
| D34 | 3.07370  | 0.00006  | 0.00041  | 0.01430  | 0.01471  | 3.08841  |
| D35 | -1.16891 | 0.00003  | 0.00170  | 0.01559  | 0.01729  | -1.15162 |
| D36 | 0.99985  | -0.00003 | 0.00063  | 0.01450  | 0.01513  | 1.01498  |
| D37 | 0.98640  | 0.00009  | 0.00047  | 0.01314  | 0.01361  | 1.00000  |
| D38 | 3.02697  | 0.00006  | 0.00175  | 0.01443  | 0.01618  | 3.04316  |
| D39 | -1.08745 | 0.00000  | 0.00069  | 0.01334  | 0.01403  | -1.07343 |
| D40 | 2.76787  | 0.00019  | -0.01225 | 0.00716  | -0.00514 | 2.76273  |
| D41 | -1.42672 | 0.00021  | -0.01214 | 0.00668  | -0.00542 | -1.43213 |
| D42 | 0.69593  | 0.00011  | -0.01199 | 0.00701  | -0.00503 | 0.69090  |
| D43 | 2.78453  | 0.00013  | -0.01188 | 0.00653  | -0.00530 | 2.77923  |
| D44 | -1.40765 | 0.00006  | -0.01197 | 0.00672  | -0.00530 | -1.41295 |
| D45 | 0.68094  | 0.00008  | -0.01186 | 0.00624  | -0.00557 | 0.67537  |
| D46 | -3.13524 | 0.00002  | 0.00065  | 0.00066  | 0.00132  | -3.13392 |
| D47 | 0.00869  | 0.00001  | 0.00108  | 0.00086  | 0.00195  | 0.01063  |
| D48 | 0.00287  | 0.00003  | 0.00151  | 0.00244  | 0.00395  | 0.00682  |
| D49 | -3.13639 | 0.00001  | 0.00194  | 0.00263  | 0.00458  | -3.13181 |
| D50 | 1.35478  | 0.00015  | 0.02792  | 0.06597  | 0.09406  | 1.44884  |
| D51 | -0.60619 | 0.00012  | -0.01029 | 0.01871  | 0.00851  | -0.59768 |
| D52 | -2.86095 | 0.00001  | 0.02264  | 0.06651  | 0.08905  | -2.77190 |
| D53 | 1.46127  | -0.00001 | -0.01557 | 0.01924  | 0.00350  | 1.46476  |
| D54 | -2.70132 | -0.00001 | -0.00094 | 0.00008  | -0.00064 | -2.70196 |
| D55 | -0.01100 | -0.00003 | 0.00113  | 0.00147  | 0.00269  | -0.00831 |
| D56 | -0.02417 | -0.00003 | 0.00008  | -0.00166 | -0.00152 | -0.02569 |
| D57 | 2.66615  | -0.00005 | 0.00215  | -0.00027 | 0.00181  | 2.66796  |
| D58 | 1.80396  | -0.00012 | -0.03416 | -0.03687 | -0.07180 | 1.73216  |

|     |          |          |          |          |          |          |
|-----|----------|----------|----------|----------|----------|----------|
| D59 | -0.60934 | 0.00000  | -0.03187 | -0.03647 | -0.06885 | -0.67819 |
| D60 | 0.66423  | 0.00014  | 0.03555  | 0.04103  | 0.07670  | 0.74093  |
| D61 | -1.75961 | 0.00020  | 0.03609  | 0.04140  | 0.07768  | -1.68193 |
| D62 | 2.54953  | -0.00006 | -0.00081 | -0.00053 | -0.00121 | 2.54833  |
| D63 | -1.65999 | -0.00006 | -0.00148 | -0.00095 | -0.00230 | -1.66229 |
| D64 | 0.44289  | -0.00007 | -0.00100 | -0.00072 | -0.00159 | 0.44131  |
| D65 | 1.35042  | 0.00005  | 0.00022  | 0.00079  | 0.00084  | 1.35126  |
| D66 | -2.85910 | 0.00005  | -0.00045 | 0.00037  | -0.00025 | -2.85935 |
| D67 | -0.75622 | 0.00004  | 0.00002  | 0.00061  | 0.00046  | -0.75576 |
| D68 | -1.04649 | 0.00002  | 0.00136  | 0.00119  | 0.00259  | -1.04390 |
| D69 | 1.02718  | 0.00001  | 0.00069  | 0.00077  | 0.00150  | 1.02868  |
| D70 | 3.13006  | 0.00000  | 0.00117  | 0.00100  | 0.00221  | 3.13227  |

| Item                 | Value    | Threshold | Converged? |
|----------------------|----------|-----------|------------|
| Maximum Force        | 0.000508 | 0.000450  | NO         |
| RMS Force            | 0.000136 | 0.000300  | YES        |
| Maximum Displacement | 0.324546 | 0.001800  | NO         |
| RMS Displacement     | 0.056200 | 0.001200  | NO         |

Predicted change in Energy=-3.710198D-05

GradGradGradGradGradGradGradGradGradGradGradGradGradGradGradGradGradGradGrad

Input orientation:

| Center Number | Atomic Number | Atomic Type | Coordinates (Angstroms) |           |           |
|---------------|---------------|-------------|-------------------------|-----------|-----------|
|               |               |             | X                       | Y         | Z         |
| 1             | 6             | 0           | -2.883358               | 2.128254  | -0.327874 |
| 2             | 6             | 0           | -3.748279               | 1.143276  | 0.025675  |
| 3             | 7             | 0           | -3.002705               | -0.023903 | 0.136790  |
| 4             | 6             | 0           | -1.717649               | 0.254586  | -0.144686 |
| 5             | 7             | 0           | -1.625531               | 1.554600  | -0.433066 |
| 6             | 6             | 0           | -0.362620               | 2.263822  | -0.713321 |
| 7             | 6             | 0           | 0.360953                | 2.694649  | 0.569973  |
| 8             | 1             | 0           | -3.051602               | 3.174230  | -0.518569 |
| 9             | 1             | 0           | -4.807709               | 1.176665  | 0.202095  |
| 10            | 1             | 0           | 0.271349                | 1.590495  | -1.290873 |
| 11            | 1             | 0           | -0.595581               | 3.130464  | -1.331710 |
| 12            | 1             | 0           | -0.263033               | 3.411581  | 1.112621  |
| 13            | 1             | 0           | 0.489159                | 1.812846  | 1.213257  |
| 14            | 35            | 0           | 0.188397                | -2.348398 | 0.464285  |
| 15            | 1             | 0           | -0.902894               | -0.495533 | -0.091569 |
| 16            | 6             | 0           | -3.433005               | -1.338212 | 0.493320  |
| 17            | 6             | 0           | -4.702790               | -1.677262 | 0.671031  |
| 18            | 1             | 0           | -2.590710               | -2.018265 | 0.599785  |
| 19            | 1             | 0           | -4.938389               | -2.695740 | 0.947569  |

|    |   |   |           |           |           |
|----|---|---|-----------|-----------|-----------|
| 20 | 1 | 0 | -5.533250 | -0.991847 | 0.553279  |
| 21 | 7 | 0 | 1.611169  | 3.336594  | 0.183471  |
| 22 | 1 | 0 | 1.954618  | 3.940927  | 0.919814  |
| 23 | 1 | 0 | 2.323341  | 2.632558  | -0.003891 |
| 24 | 6 | 0 | 3.760624  | -0.197220 | -1.156271 |
| 25 | 6 | 0 | 3.588648  | -0.489883 | 0.268712  |
| 26 | 8 | 0 | 3.373423  | 0.853055  | -0.246877 |
| 27 | 1 | 0 | 4.762323  | -0.091737 | -1.566492 |
| 28 | 1 | 0 | 2.989909  | -0.507122 | -1.856357 |
| 29 | 1 | 0 | 2.663372  | -0.991417 | 0.546862  |
| 30 | 6 | 0 | 4.758335  | -0.662836 | 1.197426  |
| 31 | 1 | 0 | 4.516985  | -0.285279 | 2.195238  |
| 32 | 1 | 0 | 5.002423  | -1.725094 | 1.294040  |
| 33 | 1 | 0 | 5.639189  | -0.131483 | 0.828530  |

-----  
Distance matrix (angstroms):

|    |    | 1        | 2        | 3        | 4        | 5        |
|----|----|----------|----------|----------|----------|----------|
| 1  | C  | 0.000000 |          |          |          |          |
| 2  | C  | 1.357670 | 0.000000 |          |          |          |
| 3  | N  | 2.204980 | 1.389436 | 0.000000 |          |          |
| 4  | C  | 2.214287 | 2.223117 | 1.344676 | 0.000000 |          |
| 5  | N  | 1.386461 | 2.210359 | 2.170948 | 1.334798 | 0.000000 |
| 6  | C  | 2.553638 | 3.642036 | 3.595334 | 2.489273 | 1.475291 |
| 7  | C  | 3.413574 | 4.425925 | 4.346536 | 3.284088 | 2.500384 |
| 8  | H  | 1.076446 | 2.215024 | 3.264956 | 3.231646 | 2.159673 |
| 9  | H  | 2.211225 | 1.074537 | 2.168793 | 3.243294 | 3.266882 |
| 10 | H  | 3.341965 | 4.253318 | 3.919686 | 2.656033 | 2.082132 |
| 11 | H  | 2.691846 | 3.966221 | 4.230930 | 3.307376 | 2.086074 |
| 12 | H  | 3.253930 | 4.298093 | 4.501178 | 3.696397 | 2.773793 |
| 13 | H  | 3.721349 | 4.451354 | 4.089687 | 3.023605 | 2.692394 |
| 14 | Br | 5.486675 | 5.280301 | 3.961522 | 3.283197 | 4.396472 |
| 15 | H  | 3.295806 | 3.285674 | 2.164206 | 1.108749 | 2.200425 |
| 16 | C  | 3.604561 | 2.544774 | 1.428174 | 2.426212 | 3.534617 |
| 17 | C  | 4.334755 | 3.046804 | 2.430905 | 3.648081 | 4.597117 |
| 18 | H  | 4.259086 | 3.415393 | 2.088440 | 2.546041 | 3.842358 |
| 19 | H  | 5.396372 | 4.123627 | 3.397491 | 4.502289 | 5.562964 |
| 20 | H  | 4.187289 | 2.832532 | 2.741174 | 4.074256 | 4.767341 |
| 21 | N  | 4.682129 | 5.793033 | 5.708148 | 4.548351 | 3.745911 |
| 22 | H  | 5.314934 | 6.414777 | 6.395940 | 5.311103 | 4.510245 |
| 23 | H  | 5.241087 | 6.251672 | 5.953431 | 4.690861 | 4.115795 |
| 24 | C  | 7.087776 | 7.718650 | 6.888009 | 5.589178 | 5.709866 |
| 25 | C  | 7.006956 | 7.520424 | 6.609121 | 5.374191 | 5.644473 |
| 26 | O  | 6.385922 | 7.132822 | 6.447578 | 5.127146 | 5.051373 |
| 27 | H  | 8.057231 | 8.745890 | 7.949932 | 6.643155 | 6.693262 |

|    |    |          |          |          |           |          |
|----|----|----------|----------|----------|-----------|----------|
| 28 | H  | 6.616399 | 7.188118 | 6.333843 | 5.066668  | 5.251547 |
| 29 | H  | 6.423685 | 6.777745 | 5.762697 | 4.606964  | 5.083026 |
| 30 | C  | 8.277210 | 8.774823 | 7.859194 | 6.676923  | 6.951926 |
| 31 | H  | 8.182684 | 8.663854 | 7.800722 | 6.681120  | 6.929909 |
| 32 | H  | 8.925494 | 9.295756 | 8.265310 | 7.151813  | 7.594015 |
| 33 | H  | 8.892553 | 9.507583 | 8.670203 | 7.430967  | 7.563773 |
|    |    | 6        | 7        | 8        | 9         | 10       |
| 6  | C  | 0.000000 |          |          |           |          |
| 7  | C  | 1.534931 | 0.000000 |          |           |          |
| 8  | H  | 2.845593 | 3.613925 | 0.000000 |           |          |
| 9  | H  | 4.666767 | 5.399507 | 2.755636 | 0.000000  |          |
| 10 | H  | 1.090345 | 2.165625 | 3.761206 | 5.310088  | 0.000000 |
| 11 | H  | 1.089836 | 2.172852 | 2.587499 | 4.889980  | 1.767693 |
| 12 | H  | 2.159012 | 1.094448 | 3.239327 | 5.145676  | 3.062466 |
| 13 | H  | 2.154207 | 1.099013 | 4.170081 | 5.429915  | 2.523400 |
| 14 | Br | 4.791967 | 5.047105 | 6.477886 | 6.120121  | 4.313043 |
| 15 | H  | 2.879672 | 3.494597 | 4.273925 | 4.257941  | 2.677441 |
| 16 | C  | 4.884455 | 5.537506 | 4.640207 | 2.880838  | 5.048060 |
| 17 | C  | 6.023757 | 6.690689 | 5.261040 | 2.894099  | 6.266527 |
| 18 | H  | 5.002490 | 5.561004 | 5.331523 | 3.909068  | 4.978868 |
| 19 | H  | 6.949351 | 7.568481 | 6.337671 | 3.945672  | 7.108010 |
| 20 | H  | 6.240118 | 6.952134 | 4.966249 | 2.313479  | 6.615343 |
| 21 | N  | 2.418867 | 1.457572 | 4.718120 | 6.772565  | 2.649089 |
| 22 | H  | 3.293843 | 2.053135 | 5.264885 | 7.340662  | 3.639376 |
| 23 | H  | 2.802434 | 2.045517 | 5.426630 | 7.281066  | 2.636833 |
| 24 | C  | 4.822248 | 4.785456 | 7.627566 | 8.783453  | 3.922893 |
| 25 | C  | 4.915262 | 4.544229 | 7.624858 | 8.560411  | 4.214826 |
| 26 | O  | 4.020678 | 3.624043 | 6.836857 | 8.199830  | 3.355087 |
| 27 | H  | 5.704524 | 5.630318 | 8.533587 | 9.814389  | 4.803615 |
| 28 | H  | 4.497123 | 4.801023 | 7.200131 | 8.238641  | 3.479991 |
| 29 | H  | 4.619662 | 4.346119 | 7.151831 | 7.786944  | 3.970557 |
| 30 | C  | 6.200037 | 5.568067 | 8.869207 | 9.792019  | 5.603765 |
| 31 | H  | 6.226409 | 5.366009 | 8.753083 | 9.646751  | 5.804905 |
| 32 | H  | 6.980303 | 6.449934 | 9.599804 | 10.288403 | 6.329136 |
| 33 | H  | 6.643531 | 5.992800 | 9.395332 | 10.547101 | 6.022523 |
|    |    | 11       | 12       | 13       | 14        | 15       |
| 11 | H  | 0.000000 |          |          |           |          |
| 12 | H  | 2.482814 | 0.000000 |          |           |          |
| 13 | H  | 3.064250 | 1.769710 | 0.000000 |           |          |
| 14 | Br | 5.818775 | 5.813904 | 4.238792 | 0.000000  |          |
| 15 | H  | 3.844508 | 4.138240 | 2.994828 | 2.221035  | 0.000000 |
| 16 | C  | 5.599176 | 5.743935 | 5.082405 | 3.759770  | 2.730140 |
| 17 | C  | 6.632825 | 6.767774 | 6.279426 | 4.941343  | 4.051820 |
| 18 | H  | 5.849839 | 5.929950 | 4.953721 | 2.801925  | 2.376006 |



|    |   |          |           |          |           |           |
|----|---|----------|-----------|----------|-----------|-----------|
| 19 | H | 7.615756 | 7.693216  | 7.060893 | 5.161215  | 4.712317  |
| 20 | H | 6.702776 | 6.890445  | 6.676173 | 5.880934  | 4.701314  |
| 21 | N | 2.684773 | 2.093221  | 2.154339 | 5.867049  | 4.591444  |
| 22 | H | 3.497102 | 2.288090  | 2.600463 | 6.548484  | 5.373122  |
| 23 | H | 3.245168 | 2.922807  | 2.348957 | 5.439402  | 4.494578  |
| 24 | C | 5.484595 | 5.861837  | 4.511930 | 4.473765  | 4.792806  |
| 25 | C | 5.759864 | 5.546986  | 3.975117 | 3.879953  | 4.505973  |
| 26 | O | 4.702813 | 4.649527  | 3.372264 | 4.571591  | 4.486613  |
| 27 | H | 6.256583 | 6.686185  | 5.441908 | 5.489751  | 5.867975  |
| 28 | H | 5.134494 | 5.895141  | 4.588957 | 4.077272  | 4.274170  |
| 29 | H | 5.580297 | 5.316984  | 3.610426 | 2.823778  | 3.656741  |
| 30 | C | 7.032074 | 6.467009  | 4.935090 | 4.925743  | 5.808530  |
| 31 | H | 7.088370 | 6.139006  | 4.646482 | 5.097974  | 5.886322  |
| 32 | H | 7.861848 | 7.358217  | 5.735250 | 4.924617  | 6.189063  |
| 33 | H | 7.360658 | 6.889864  | 5.518264 | 5.895636  | 6.616492  |
|    |   | 16       | 17        | 18       | 19        | 20        |
| 16 | C | 0.000000 |           |          |           |           |
| 17 | C | 1.326231 | 0.000000  |          |           |           |
| 18 | H | 1.087781 | 2.140616  | 0.000000 |           |           |
| 19 | H | 2.077355 | 1.081331  | 2.468100 | 0.000000  |           |
| 20 | H | 2.129458 | 1.083201  | 3.116767 | 1.847316  | 0.000000  |
| 21 | N | 6.884295 | 8.077286  | 6.819357 | 8.936980  | 8.361512  |
| 22 | H | 7.554978 | 8.714759  | 7.501626 | 9.568681  | 8.974117  |
| 23 | H | 7.010688 | 8.270223  | 6.792826 | 9.056973  | 8.670223  |
| 24 | C | 7.468020 | 8.784016  | 6.836621 | 9.292017  | 9.483148  |
| 25 | C | 7.076279 | 8.385683  | 6.374170 | 8.833856  | 9.140130  |
| 26 | O | 7.188672 | 8.512947  | 6.673245 | 9.116296  | 9.130867  |
| 27 | H | 8.541658 | 9.854377  | 7.903882 | 10.353991 | 10.549997 |
| 28 | H | 6.889522 | 8.181353  | 6.281680 | 8.689646  | 8.870487  |
| 29 | H | 6.106468 | 7.399064  | 5.353747 | 7.800773  | 8.196625  |
| 30 | C | 8.249239 | 9.529902  | 7.496855 | 9.910680  | 10.316971 |
| 31 | H | 8.198020 | 9.448019  | 7.487860 | 9.837230  | 10.207962 |
| 32 | H | 8.482174 | 9.725306  | 7.630440 | 9.994095  | 10.587104 |
| 33 | H | 9.158235 | 10.458048 | 8.446509 | 10.884610 | 11.208897 |
|    |   | 21       | 22        | 23       | 24        | 25        |
| 21 | N | 0.000000 |           |          |           |           |
| 22 | H | 1.012608 | 0.000000  |          |           |           |
| 23 | H | 1.018803 | 1.643476  | 0.000000 |           |           |
| 24 | C | 4.347748 | 4.969512  | 3.376598 | 0.000000  |           |
| 25 | C | 4.308088 | 4.767186  | 3.380083 | 1.464856  | 0.000000  |
| 26 | O | 3.075501 | 3.592927  | 2.080468 | 1.442221  | 1.454523  |
| 27 | H | 4.974494 | 5.507022  | 3.976448 | 1.087569  | 2.214499  |
| 28 | H | 4.564644 | 5.344538  | 3.705878 | 1.086352  | 2.207873  |
| 29 | H | 4.468878 | 4.996943  | 3.681325 | 2.176091  | 1.088595  |

|    |   |          |          |          |          |          |
|----|---|----------|----------|----------|----------|----------|
| 30 | C | 5.189239 | 5.397456 | 4.269893 | 2.598483 | 1.503526 |
| 31 | H | 5.060527 | 5.104238 | 4.261692 | 3.436924 | 2.148296 |
| 32 | H | 6.193113 | 6.444606 | 5.277428 | 3.143324 | 2.139112 |
| 33 | H | 5.354307 | 5.492624 | 4.396328 | 2.733635 | 2.155589 |
|    |   | 26       | 27       | 28       | 29       | 30       |
| 26 | O | 0.000000 |          |          |          |          |
| 27 | H | 2.136132 | 0.000000 |          |          |          |
| 28 | H | 2.141866 | 1.843371 | 0.000000 |          |          |
| 29 | H | 2.129852 | 3.111476 | 2.473182 | 0.000000 |          |
| 30 | C | 2.510362 | 2.822306 | 3.532303 | 2.218122 | 0.000000 |
| 31 | H | 2.927023 | 3.774687 | 4.335504 | 2.579080 | 1.093814 |
| 32 | H | 3.416858 | 3.302748 | 3.931751 | 2.562755 | 1.094214 |
| 33 | H | 2.694348 | 2.550805 | 3.790568 | 3.110355 | 1.092851 |
|    |   | 31       | 32       | 33       |          |          |
| 31 | H | 0.000000 |          |          |          |          |
| 32 | H | 1.766600 | 0.000000 |          |          |          |
| 33 | H | 1.775073 | 1.778135 | 0.000000 |          |          |

Stoichiometry C10H18BrN3O

Framework group C1[X(C10H18BrN3O)]

Deg. of freedom 93

Full point group C1 NOp 1

Largest Abelian subgroup C1 NOp 1

Largest concise Abelian subgroup C1 NOp 1

Standard orientation:

| Center<br>Number | Atomic<br>Number | Atomic<br>Type | Coordinates (Angstroms) |           |           |
|------------------|------------------|----------------|-------------------------|-----------|-----------|
|                  |                  |                | X                       | Y         | Z         |
| 1                | 6                | 0              | -2.797845               | 2.269503  | -0.187313 |
| 2                | 6                | 0              | -3.682660               | 1.262978  | 0.030117  |
| 3                | 7                | 0              | -2.960338               | 0.077037  | -0.018124 |
| 4                | 6                | 0              | -1.669466               | 0.365678  | -0.259968 |
| 5                | 7                | 0              | -1.551272               | 1.690688  | -0.369804 |
| 6                | 6                | 0              | -0.274104               | 2.406287  | -0.552133 |
| 7                | 6                | 0              | 0.454985                | 2.645158  | 0.777296  |
| 8                | 1                | 0              | -2.945151               | 3.334772  | -0.234612 |
| 9                | 1                | 0              | -4.741613               | 1.293055  | 0.209965  |
| 10               | 1                | 0              | 0.347803                | 1.804947  | -1.215815 |
| 11               | 1                | 0              | -0.488701               | 3.353057  | -1.047429 |
| 12               | 1                | 0              | -0.156011               | 3.294219  | 1.412291  |
| 13               | 1                | 0              | 0.564496                | 1.682063  | 1.295258  |
| 14               | 35               | 0              | 0.183896                | -2.332815 | -0.009831 |
| 15               | 1                | 0              | -0.869679               | -0.400636 | -0.309266 |
| 16               | 6                | 0              | -3.417075               | -1.264693 | 0.157470  |

|    |   |   |           |           |           |
|----|---|---|-----------|-----------|-----------|
| 17 | 6 | 0 | -4.693641 | -1.599586 | 0.288300  |
| 18 | 1 | 0 | -2.588498 | -1.969360 | 0.170497  |
| 19 | 1 | 0 | -4.949746 | -2.641275 | 0.424576  |
| 20 | 1 | 0 | -5.510257 | -0.888312 | 0.264808  |
| 21 | 7 | 0 | 1.718372  | 3.308739  | 0.480599  |
| 22 | 1 | 0 | 2.071997  | 3.800987  | 1.291781  |
| 23 | 1 | 0 | 2.417019  | 2.622638  | 0.199322  |
| 24 | 6 | 0 | 3.801086  | -0.052941 | -1.326145 |
| 25 | 6 | 0 | 3.620320  | -0.532292 | 0.046207  |
| 26 | 8 | 0 | 3.432563  | 0.872040  | -0.282784 |
| 27 | 1 | 0 | 4.805546  | 0.087325  | -1.718820 |
| 28 | 1 | 0 | 3.025968  | -0.250011 | -2.061343 |
| 29 | 1 | 0 | 2.684795  | -1.048522 | 0.254389  |
| 30 | 6 | 0 | 4.784377  | -0.852339 | 0.942382  |
| 31 | 1 | 0 | 4.548307  | -0.608595 | 1.982232  |
| 32 | 1 | 0 | 5.007398  | -1.922501 | 0.894224  |
| 33 | 1 | 0 | 5.676270  | -0.293415 | 0.648348  |

-----

Rotational constants (GHZ):      0.4670743      0.2541811      0.1727811

Standard basis: 6-311++G(d,p) (5D, 7F)

There are    499 symmetry adapted cartesian basis functions of A    symmetry.

There are    482 symmetry adapted basis functions of A    symmetry.

482 basis functions,    760 primitive gaussians,    499 cartesian basis functions

71 alpha electrons      71 beta electrons

nuclear repulsion energy      1294.7259171817 Hartrees.

NAtoms=    33 NActive=    33 NUniq=    33 SFac= 1.00D+00 NAtFMM=    60 NAOKFM=F

Big=F

Integral buffers will be    131072 words long.

Raffenetti 2 integral format.

Two-electron integral symmetry is turned on.

One-electron integrals computed using PRISM.

NBasis=    482 RedAO= T EigKep= 4.11D-06    NBF=    482

NBsUse=    482 1.00D-06 EigRej= -1.00D+00    NBFU=    482

Initial      guess      from      the      checkpoint      file:

"/home/suqian/liuwen/qianmengshijie/nh2po/nh2po.chk"

B after Tr=    0.000000    0.000000    0.000000

Rot=    0.999984    -0.003677    0.001307    0.004175 Ang=    -0.65 deg.

ExpMin= 3.50D-02 ExpMax= 4.40D+05 ExpMxC= 1.51D+04 IAcc=3 IRadAn=      5 AccDes=

0.00D+00

Harris functional with IExCor=    402 and IRadAn=      5 diagonalized for initial guess.

HarFok: IExCor=    402 AccDes= 0.00D+00 IRadAn=      5 IDoV= 1 UseB2=F ITyADJ=14

ICtDFT= 3500011 ScaDFX= 1.000000 1.000000 1.000000 1.000000

FoFCou: FMM=F IPFlag=      0 FMFlag=    100000 FMFlg1=      0

NFxFlg=      0 DoJE=T BraDBF=F KetDBF=T FulRan=T

wScrn= 0.000000 ICntrl= 500 IOpCl= 0 l1Cent= 20000004 NGrid= 0  
 NMat0= 1 NMatS0= 1 NMatT0= 0 NMatD0= 1 NMtDS0= 0  
 NMtDT0= 0

Petite list used in FoFCou.

Requested convergence on RMS density matrix=1.00D-08 within 128 cycles.

Requested convergence on MAX density matrix=1.00D-06.

Requested convergence on energy=1.00D-06.

No special actions if energy rises.

SCF Done: E(RB3LYP) = -3205.64704663 A.U. after 11 cycles

NFock= 11 Conv=0.58D-08 -V/T= 2.0018

Calling FoFJK, ICntrl= 2127 FMM=F ISym2X=0 l1Cent= 0 IOpClX= 0 NMat=1 NMatS=1  
 NMatT=0.

\*\*\*\*\* Axes restored to original set \*\*\*\*\*

| Center<br>Number | Atomic<br>Number | Forces (Hartrees/Bohr) |              |              |
|------------------|------------------|------------------------|--------------|--------------|
|                  |                  | X                      | Y            | Z            |
| 1                | 6                | -0.000242758           | -0.000014852 | -0.000009166 |
| 2                | 6                | 0.000096447            | 0.000127414  | -0.000185961 |
| 3                | 7                | -0.000482882           | -0.000686179 | 0.000415167  |
| 4                | 6                | 0.000797570            | 0.001646129  | -0.000399995 |
| 5                | 7                | 0.000034671            | 0.000050909  | -0.000031556 |
| 6                | 6                | -0.000405815           | -0.000706798 | 0.000037159  |
| 7                | 6                | 0.000719785            | 0.000313981  | -0.000299448 |
| 8                | 1                | -0.000054195           | -0.000017093 | 0.000155580  |
| 9                | 1                | -0.000030680           | -0.000115319 | 0.000065619  |
| 10               | 1                | 0.000013982            | -0.000035100 | 0.000083401  |
| 11               | 1                | 0.000257799            | 0.000038047  | -0.000071640 |
| 12               | 1                | -0.000144313           | 0.000030594  | -0.000078153 |
| 13               | 1                | -0.000213854           | -0.000091218 | 0.000202398  |
| 14               | 35               | 0.000048439            | 0.000055748  | -0.000013280 |
| 15               | 1                | -0.000208381           | -0.000787323 | 0.000198483  |
| 16               | 6                | -0.000013334           | 0.000059687  | -0.000141414 |
| 17               | 6                | -0.000069294           | 0.000048072  | 0.000000620  |
| 18               | 1                | 0.000125030            | -0.000092002 | -0.000019349 |
| 19               | 1                | 0.000049445            | -0.000013622 | 0.000020055  |
| 20               | 1                | -0.000047812           | 0.000049127  | -0.000008905 |
| 21               | 7                | -0.000405525           | 0.000231803  | 0.000157304  |
| 22               | 1                | 0.000175229            | -0.000089407 | 0.000103062  |
| 23               | 1                | 0.000294750            | -0.000062777 | -0.000080890 |
| 24               | 6                | 0.000253182            | 0.000280801  | -0.000141468 |
| 25               | 6                | -0.000063796           | -0.000164955 | 0.000179588  |
| 26               | 8                | -0.000434055           | -0.000167683 | -0.000357877 |

|    |   |              |              |              |
|----|---|--------------|--------------|--------------|
| 27 | 1 | -0.000081659 | 0.000091531  | -0.000140703 |
| 28 | 1 | 0.000160166  | 0.000032585  | -0.000284364 |
| 29 | 1 | 0.000073353  | -0.000021139 | 0.000576929  |
| 30 | 6 | -0.000133335 | 0.000004164  | 0.000176891  |
| 31 | 1 | 0.000006700  | -0.000046001 | -0.000016842 |
| 32 | 1 | -0.000075947 | 0.000035284  | -0.000042952 |
| 33 | 1 | 0.000001086  | 0.000015592  | -0.000048292 |

-----  
Cartesian Forces: Max 0.001646129 RMS 0.000291372

GradGradGradGradGradGradGradGradGradGradGradGradGradGradGradGradGradGradGradGrad

Berny optimization.

Using GEDIIS/GDIIS optimizer.

FormGI is forming the generalized inverse of G from B-inverse, IUseBI=4.

Internal Forces: Max 0.000687435 RMS 0.000176275

Search for a local minimum.

Step number 16 out of a maximum of 172

All quantities printed in internal units (Hartrees-Bohrs-Radians)

Mixed Optimization -- En-DIIS/RFO-DIIS

Swapping is turned off.

Update second derivatives using D2CorX and points 10 14 15 16

DE= -2.49D-05 DEPred=-3.71D-05 R= 6.71D-01

TightC=F SS= 1.41D+00 RLast= 2.29D-01 DXNew= 8.1657D-01 6.8753D-01

Trust test= 6.71D-01 RLast= 2.29D-01 DXMaxT set to 6.88D-01

ITU= 1 1 1 1 0 -1 -1 1 1 1 -1 1 0 0 -1 0

|                 |         |         |         |         |         |
|-----------------|---------|---------|---------|---------|---------|
| Eigenvalues --- | 0.00061 | 0.00258 | 0.00391 | 0.00557 | 0.00723 |
| Eigenvalues --- | 0.00780 | 0.00892 | 0.01402 | 0.01466 | 0.01542 |
| Eigenvalues --- | 0.01880 | 0.01985 | 0.02121 | 0.02350 | 0.02390 |
| Eigenvalues --- | 0.02434 | 0.02492 | 0.02967 | 0.03070 | 0.03100 |
| Eigenvalues --- | 0.03179 | 0.03282 | 0.03368 | 0.03900 | 0.04070 |
| Eigenvalues --- | 0.04326 | 0.04414 | 0.05147 | 0.05422 | 0.05749 |
| Eigenvalues --- | 0.05803 | 0.05928 | 0.06059 | 0.07766 | 0.08678 |
| Eigenvalues --- | 0.09540 | 0.10320 | 0.12228 | 0.12389 | 0.12691 |
| Eigenvalues --- | 0.12810 | 0.13521 | 0.15230 | 0.15961 | 0.16000 |
| Eigenvalues --- | 0.16001 | 0.16002 | 0.16010 | 0.16018 | 0.16054 |
| Eigenvalues --- | 0.16122 | 0.16909 | 0.18781 | 0.22088 | 0.22241 |
| Eigenvalues --- | 0.22875 | 0.22931 | 0.24282 | 0.25750 | 0.27713 |
| Eigenvalues --- | 0.29164 | 0.30775 | 0.31916 | 0.32137 | 0.32891 |
| Eigenvalues --- | 0.33767 | 0.34286 | 0.34323 | 0.34351 | 0.34550 |
| Eigenvalues --- | 0.34664 | 0.34734 | 0.35040 | 0.35068 | 0.35253 |
| Eigenvalues --- | 0.35417 | 0.35584 | 0.35856 | 0.35899 | 0.36425 |
| Eigenvalues --- | 0.36625 | 0.38377 | 0.39000 | 0.41854 | 0.42534 |
| Eigenvalues --- | 0.44633 | 0.45478 | 0.46286 | 0.49298 | 0.55305 |
| Eigenvalues --- | 0.57894 | 0.60613 | 1.03632 |         |         |

En-DIIS/RFO-DIIS IScMMF= 0 using points: 16 15 14 13 12  
RFO step: Lambda=-1.11067829D-05.  
DidBck=F Rises=F RFO-DIIS coefs: 1.38287 -0.13115 -0.53933 0.25667  
0.03094

Iteration 1 RMS(Cart)= 0.04404319 RMS(Int)= 0.00067192  
Iteration 2 RMS(Cart)= 0.00202185 RMS(Int)= 0.00005605  
Iteration 3 RMS(Cart)= 0.00000249 RMS(Int)= 0.00005604  
Iteration 4 RMS(Cart)= 0.00000000 RMS(Int)= 0.00005604

| Variable | Old X   | -DE/DX   | Delta X<br>(Linear) | Delta X<br>(Quad) | Delta X<br>(Total) | New X   |
|----------|---------|----------|---------------------|-------------------|--------------------|---------|
| R1       | 2.56562 | 0.00010  | 0.00009             | -0.00016          | -0.00006           | 2.56556 |
| R2       | 2.62003 | 0.00033  | -0.00008            | 0.00004           | -0.00004           | 2.61999 |
| R3       | 2.03419 | -0.00003 | 0.00000             | -0.00001          | -0.00001           | 2.03417 |
| R4       | 2.62565 | -0.00001 | 0.00040             | -0.00001          | 0.00039            | 2.62604 |
| R5       | 2.03058 | 0.00004  | 0.00004             | -0.00003          | 0.00001            | 2.03059 |
| R6       | 2.54107 | 0.00042  | -0.00044            | 0.00012           | -0.00033           | 2.54074 |
| R7       | 2.69886 | -0.00011 | -0.00079            | 0.00010           | -0.00069           | 2.69817 |
| R8       | 2.52240 | -0.00040 | 0.00021             | -0.00008          | 0.00013            | 2.52253 |
| R9       | 2.09523 | 0.00039  | 0.00096             | -0.00065          | 0.00031            | 2.09554 |
| R10      | 2.78790 | -0.00015 | 0.00064             | -0.00033          | 0.00031            | 2.78821 |
| R11      | 2.90060 | 0.00011  | -0.00050            | -0.00039          | -0.00089           | 2.89971 |
| R12      | 2.06045 | -0.00002 | -0.00007            | 0.00003           | -0.00004           | 2.06041 |
| R13      | 2.05949 | 0.00002  | -0.00008            | 0.00004           | -0.00004           | 2.05945 |
| R14      | 2.06821 | 0.00006  | 0.00002             | 0.00001           | 0.00003            | 2.06824 |
| R15      | 2.07683 | 0.00017  | -0.00028            | 0.00004           | -0.00024           | 2.07659 |
| R16      | 2.75441 | -0.00017 | 0.00103             | 0.00002           | 0.00105            | 2.75546 |
| R17      | 4.19715 | -0.00003 | -0.00045            | 0.00632           | 0.00586            | 4.20301 |
| R18      | 2.50621 | 0.00005  | 0.00004             | 0.00014           | 0.00018            | 2.50639 |
| R19      | 2.05561 | 0.00015  | -0.00012            | 0.00014           | 0.00001            | 2.05562 |
| R20      | 2.04342 | 0.00000  | -0.00005            | 0.00004           | -0.00001           | 2.04341 |
| R21      | 2.04695 | 0.00007  | 0.00013             | 0.00001           | 0.00013            | 2.04709 |
| R22      | 1.91355 | 0.00009  | 0.00012             | 0.00007           | 0.00019            | 1.91374 |
| R23      | 1.92526 | 0.00006  | 0.00004             | -0.00017          | -0.00013           | 1.92513 |
| R24      | 3.93152 | -0.00018 | -0.00097            | 0.00206           | 0.00109            | 3.93260 |
| R25      | 2.76818 | 0.00067  | 0.00058             | 0.00179           | 0.00226            | 2.77043 |
| R26      | 2.72540 | -0.00009 | -0.00082            | -0.00142          | -0.00221           | 2.72320 |
| R27      | 2.05521 | -0.00001 | -0.00001            | 0.00002           | 0.00001            | 2.05521 |
| R28      | 2.05291 | 0.00006  | 0.00016             | 0.00031           | 0.00047            | 2.05338 |
| R29      | 2.74865 | 0.00001  | 0.00016             | 0.00069           | 0.00093            | 2.74958 |
| R30      | 2.05715 | 0.00010  | 0.00016             | 0.00047           | 0.00063            | 2.05777 |
| R31      | 2.84125 | -0.00012 | -0.00020            | -0.00038          | -0.00058           | 2.84067 |
| R32      | 2.06701 | -0.00003 | -0.00003            | -0.00015          | -0.00019           | 2.06682 |
| R33      | 2.06776 | -0.00005 | -0.00004            | -0.00010          | -0.00014           | 2.06762 |
| R34      | 2.06519 | 0.00002  | 0.00002             | 0.00010           | 0.00012            | 2.06531 |

|     |         |          |          |          |          |         |
|-----|---------|----------|----------|----------|----------|---------|
| A1  | 1.87291 | -0.00001 | 0.00018  | 0.00000  | 0.00018  | 1.87309 |
| A2  | 2.28038 | -0.00008 | -0.00045 | -0.00014 | -0.00059 | 2.27979 |
| A3  | 2.12987 | 0.00009  | 0.00028  | 0.00015  | 0.00043  | 2.13030 |
| A4  | 1.86337 | 0.00007  | -0.00039 | 0.00012  | -0.00028 | 1.86309 |
| A5  | 2.27617 | 0.00009  | 0.00080  | 0.00042  | 0.00122  | 2.27739 |
| A6  | 2.14365 | -0.00016 | -0.00040 | -0.00054 | -0.00094 | 2.14271 |
| A7  | 1.89874 | -0.00020 | 0.00033  | -0.00015 | 0.00018  | 1.89892 |
| A8  | 2.25409 | 0.00007  | -0.00034 | -0.00043 | -0.00078 | 2.25332 |
| A9  | 2.13032 | 0.00013  | 0.00000  | 0.00058  | 0.00059  | 2.13091 |
| A10 | 1.88903 | 0.00022  | -0.00012 | 0.00007  | -0.00004 | 1.88898 |
| A11 | 2.15570 | -0.00067 | 0.00284  | -0.00192 | 0.00094  | 2.15663 |
| A12 | 2.23769 | 0.00045  | -0.00274 | 0.00187  | -0.00087 | 2.23683 |
| A13 | 1.90072 | -0.00008 | 0.00002  | -0.00004 | -0.00003 | 1.90069 |
| A14 | 2.20449 | 0.00069  | -0.00127 | -0.00048 | -0.00177 | 2.20272 |
| A15 | 2.17527 | -0.00061 | 0.00164  | 0.00075  | 0.00237  | 2.17764 |
| A16 | 1.96022 | 0.00021  | 0.00023  | 0.00066  | 0.00088  | 1.96110 |
| A17 | 1.87705 | -0.00014 | -0.00016 | 0.00053  | 0.00037  | 1.87742 |
| A18 | 1.88292 | 0.00017  | -0.00076 | -0.00018 | -0.00094 | 1.88198 |
| A19 | 1.91994 | -0.00002 | 0.00071  | -0.00003 | 0.00067  | 1.92062 |
| A20 | 1.93046 | -0.00023 | -0.00072 | -0.00079 | -0.00151 | 1.92895 |
| A21 | 1.89104 | 0.00001  | 0.00072  | -0.00018 | 0.00054  | 1.89158 |
| A22 | 1.90671 | -0.00003 | -0.00006 | 0.00010  | 0.00003  | 1.90674 |
| A23 | 1.89563 | -0.00018 | 0.00032  | 0.00051  | 0.00084  | 1.89647 |
| A24 | 1.88206 | 0.00011  | 0.00039  | -0.00163 | -0.00124 | 1.88082 |
| A25 | 1.87747 | -0.00002 | 0.00017  | 0.00020  | 0.00037  | 1.87784 |
| A26 | 1.90922 | 0.00000  | -0.00062 | 0.00001  | -0.00061 | 1.90861 |
| A27 | 1.99164 | 0.00012  | -0.00020 | 0.00082  | 0.00062  | 1.99225 |
| A28 | 2.16179 | -0.00011 | 0.00038  | -0.00028 | 0.00010  | 2.16189 |
| A29 | 1.94600 | 0.00004  | 0.00057  | 0.00002  | 0.00059  | 1.94660 |
| A30 | 2.17539 | 0.00007  | -0.00095 | 0.00026  | -0.00069 | 2.17470 |
| A31 | 2.07563 | -0.00006 | 0.00004  | -0.00006 | -0.00002 | 2.07561 |
| A32 | 2.16242 | 0.00002  | -0.00017 | 0.00002  | -0.00016 | 2.16226 |
| A33 | 2.04513 | 0.00004  | 0.00014  | 0.00004  | 0.00017  | 2.04530 |
| A34 | 1.94008 | 0.00012  | -0.00117 | 0.00053  | -0.00063 | 1.93944 |
| A35 | 1.92197 | -0.00027 | 0.00002  | -0.00052 | -0.00050 | 1.92147 |
| A36 | 1.88500 | 0.00008  | -0.00004 | 0.00081  | 0.00076  | 1.88576 |
| A37 | 2.08798 | -0.00001 | 0.00031  | 0.00077  | 0.00091  | 2.08889 |
| A38 | 2.07900 | 0.00030  | 0.00023  | 0.00281  | 0.00321  | 2.08222 |
| A39 | 1.99817 | 0.00008  | 0.00092  | -0.00016 | 0.00072  | 1.99889 |
| A40 | 2.00824 | 0.00005  | -0.00040 | -0.00012 | -0.00051 | 2.00773 |
| A41 | 2.02420 | -0.00023 | -0.00068 | -0.00255 | -0.00323 | 2.02098 |
| A42 | 2.02683 | 0.00057  | 0.00103  | 0.00501  | 0.00593  | 2.03276 |
| A43 | 2.13238 | -0.00014 | -0.00025 | -0.00103 | -0.00118 | 2.13119 |
| A44 | 1.97162 | 0.00017  | -0.00098 | -0.00038 | -0.00140 | 1.97022 |

|     |          |          |          |          |          |          |
|-----|----------|----------|----------|----------|----------|----------|
| A45 | 2.02670  | 0.00016  | -0.00001 | -0.00005 | -0.00004 | 2.02666  |
| A46 | 2.03803  | -0.00041 | 0.00004  | -0.00234 | -0.00230 | 2.03574  |
| A47 | 2.55357  | 0.00010  | 0.00636  | 0.01449  | 0.02081  | 2.57438  |
| A48 | 2.53748  | -0.00024 | 0.00242  | 0.00834  | 0.01023  | 2.54771  |
| A49 | 1.93062  | 0.00005  | -0.00017 | -0.00023 | -0.00040 | 1.93022  |
| A50 | 1.91745  | -0.00012 | 0.00014  | -0.00046 | -0.00032 | 1.91713  |
| A51 | 1.94187  | -0.00004 | -0.00003 | -0.00003 | -0.00005 | 1.94182  |
| A52 | 1.87944  | 0.00002  | -0.00014 | -0.00041 | -0.00055 | 1.87889  |
| A53 | 1.89436  | 0.00003  | 0.00018  | 0.00080  | 0.00098  | 1.89534  |
| A54 | 1.89865  | 0.00006  | 0.00002  | 0.00034  | 0.00036  | 1.89901  |
| A55 | 3.35799  | -0.00024 | -0.01104 | 0.00792  | -0.00312 | 3.35486  |
| A56 | 2.88714  | -0.00054 | -0.00942 | -0.02161 | -0.03104 | 2.85610  |
| A57 | 2.82568  | 0.00014  | -0.00390 | 0.00096  | -0.00294 | 2.82274  |
| A58 | 3.21325  | -0.00011 | -0.00268 | -0.00934 | -0.01203 | 3.20123  |
| D1  | 0.00352  | 0.00002  | -0.00133 | -0.00127 | -0.00260 | 0.00092  |
| D2  | -3.13702 | 0.00001  | -0.00196 | -0.00151 | -0.00348 | -3.14050 |
| D3  | 3.13663  | 0.00005  | -0.00014 | 0.00008  | -0.00004 | 3.13658  |
| D4  | -0.00391 | 0.00004  | -0.00077 | -0.00016 | -0.00093 | -0.00484 |
| D5  | -0.00542 | -0.00006 | 0.00131  | 0.00016  | 0.00147  | -0.00395 |
| D6  | -3.07058 | -0.00005 | -0.00400 | -0.00312 | -0.00708 | -3.07766 |
| D7  | -3.13942 | -0.00008 | 0.00025  | -0.00105 | -0.00081 | -3.14024 |
| D8  | 0.07860  | -0.00007 | -0.00506 | -0.00433 | -0.00936 | 0.06924  |
| D9  | -0.00046 | 0.00002  | 0.00090  | 0.00196  | 0.00285  | 0.00240  |
| D10 | 3.13234  | 0.00008  | -0.00020 | 0.00225  | 0.00204  | 3.13438  |
| D11 | 3.14018  | 0.00003  | 0.00148  | 0.00217  | 0.00365  | -3.13935 |
| D12 | -0.01021 | 0.00008  | 0.00037  | 0.00247  | 0.00284  | -0.00737 |
| D13 | -0.00292 | -0.00006 | -0.00009 | -0.00187 | -0.00196 | -0.00488 |
| D14 | 3.09961  | 0.00005  | 0.00012  | -0.00141 | -0.00128 | 3.09833  |
| D15 | -3.13646 | -0.00011 | 0.00093  | -0.00214 | -0.00121 | -3.13767 |
| D16 | -0.03393 | 0.00001  | 0.00114  | -0.00167 | -0.00053 | -0.03447 |
| D17 | 0.10992  | -0.00004 | 0.00774  | 0.01085  | 0.01860  | 0.12851  |
| D18 | -3.03093 | -0.00005 | 0.00628  | 0.00926  | 0.01554  | -3.01539 |
| D19 | -3.04151 | 0.00001  | 0.00650  | 0.01118  | 0.01769  | -3.02382 |
| D20 | 0.10084  | 0.00000  | 0.00504  | 0.00959  | 0.01463  | 0.11547  |
| D21 | 0.00514  | 0.00008  | -0.00075 | 0.00107  | 0.00032  | 0.00546  |
| D22 | 3.07188  | 0.00014  | 0.00423  | 0.00422  | 0.00849  | 3.08037  |
| D23 | -3.09500 | -0.00001 | -0.00112 | 0.00069  | -0.00045 | -3.09545 |
| D24 | -0.02826 | 0.00004  | 0.00386  | 0.00383  | 0.00772  | -0.02054 |
| D25 | 1.60205  | -0.00011 | -0.00047 | 0.00020  | -0.00027 | 1.60179  |
| D26 | -2.56630 | -0.00010 | 0.00045  | 0.00092  | 0.00136  | -2.56494 |
| D27 | -0.52991 | -0.00007 | 0.00081  | 0.00089  | 0.00170  | -0.52821 |
| D28 | -1.45163 | -0.00013 | -0.00644 | -0.00353 | -0.00997 | -1.46161 |
| D29 | 0.66320  | -0.00012 | -0.00553 | -0.00281 | -0.00834 | 0.65486  |
| D30 | 2.69959  | -0.00009 | -0.00516 | -0.00284 | -0.00800 | 2.69159  |



|     |          |          |          |          |          |          |
|-----|----------|----------|----------|----------|----------|----------|
| D31 | -1.10474 | -0.00004 | 0.00993  | 0.00836  | 0.01829  | -1.08645 |
| D32 | 0.93841  | -0.00018 | 0.01028  | 0.00894  | 0.01922  | 0.95763  |
| D33 | 3.10501  | -0.00008 | 0.01048  | 0.00923  | 0.01971  | 3.12473  |
| D34 | 3.08841  | 0.00002  | 0.00950  | 0.00729  | 0.01678  | 3.10519  |
| D35 | -1.15162 | -0.00012 | 0.00985  | 0.00787  | 0.01771  | -1.13391 |
| D36 | 1.01498  | -0.00002 | 0.01005  | 0.00816  | 0.01821  | 1.03319  |
| D37 | 1.00000  | 0.00016  | 0.00860  | 0.00803  | 0.01663  | 1.01664  |
| D38 | 3.04316  | 0.00001  | 0.00895  | 0.00861  | 0.01756  | 3.06072  |
| D39 | -1.07343 | 0.00012  | 0.00915  | 0.00890  | 0.01806  | -1.05537 |
| D40 | 2.76273  | 0.00018  | 0.00408  | 0.00752  | 0.01160  | 2.77432  |
| D41 | -1.43213 | 0.00018  | 0.00328  | 0.00853  | 0.01182  | -1.42032 |
| D42 | 0.69090  | 0.00015  | 0.00428  | 0.00834  | 0.01261  | 0.70351  |
| D43 | 2.77923  | 0.00016  | 0.00348  | 0.00935  | 0.01283  | 2.79206  |
| D44 | -1.41295 | 0.00011  | 0.00465  | 0.00753  | 0.01217  | -1.40078 |
| D45 | 0.67537  | 0.00011  | 0.00385  | 0.00854  | 0.01239  | 0.68776  |
| D46 | -3.13392 | 0.00001  | 0.00006  | -0.00003 | 0.00003  | -3.13389 |
| D47 | 0.01063  | 0.00000  | 0.00022  | 0.00065  | 0.00088  | 0.01151  |
| D48 | 0.00682  | 0.00001  | 0.00172  | 0.00177  | 0.00348  | 0.01030  |
| D49 | -3.13181 | 0.00001  | 0.00188  | 0.00245  | 0.00433  | -3.12748 |
| D50 | 1.44884  | 0.00015  | 0.03491  | 0.04734  | 0.08227  | 1.53111  |
| D51 | -0.59768 | -0.00004 | 0.01092  | -0.00105 | 0.00986  | -0.58782 |
| D52 | -2.77190 | 0.00011  | 0.03245  | 0.04708  | 0.07954  | -2.69236 |
| D53 | 1.46476  | -0.00008 | 0.00846  | -0.00131 | 0.00713  | 1.47189  |
| D54 | -2.70196 | -0.00009 | -0.00085 | -0.00386 | -0.00466 | -2.70662 |
| D55 | -0.00831 | -0.00013 | 0.00120  | -0.00032 | 0.00093  | -0.00738 |
| D56 | -0.02569 | -0.00001 | -0.00134 | -0.00204 | -0.00336 | -0.02905 |
| D57 | 2.66796  | -0.00005 | 0.00070  | 0.00149  | 0.00223  | 2.67019  |
| D58 | 1.73216  | -0.00012 | -0.01933 | -0.04285 | -0.06238 | 1.66978  |
| D59 | -0.67819 | 0.00011  | -0.01885 | -0.03836 | -0.05738 | -0.73557 |
| D60 | 0.74093  | -0.00007 | 0.02061  | 0.04017  | 0.06064  | 0.80157  |
| D61 | -1.68193 | 0.00019  | 0.02176  | 0.04452  | 0.06615  | -1.61578 |
| D62 | 2.54833  | -0.00010 | -0.00065 | -0.00113 | -0.00174 | 2.54658  |
| D63 | -1.66229 | -0.00012 | -0.00084 | -0.00206 | -0.00287 | -1.66516 |
| D64 | 0.44131  | -0.00015 | -0.00074 | -0.00197 | -0.00267 | 0.43863  |
| D65 | 1.35126  | 0.00008  | 0.00003  | 0.00052  | 0.00052  | 1.35179  |
| D66 | -2.85935 | 0.00006  | -0.00016 | -0.00041 | -0.00060 | -2.85995 |
| D67 | -0.75576 | 0.00004  | -0.00006 | -0.00031 | -0.00040 | -0.75616 |
| D68 | -1.04390 | 0.00009  | 0.00165  | 0.00419  | 0.00583  | -1.03807 |
| D69 | 1.02868  | 0.00008  | 0.00145  | 0.00325  | 0.00470  | 1.03338  |
| D70 | 3.13227  | 0.00005  | 0.00156  | 0.00335  | 0.00490  | 3.13717  |

| Item                 | Value    | Threshold | Converged? |
|----------------------|----------|-----------|------------|
| Maximum Force        | 0.000687 | 0.000450  | NO         |
| RMS Force            | 0.000176 | 0.000300  | YES        |
| Maximum Displacement | 0.209822 | 0.001800  | NO         |

RMS      Displacement      0.045366      0.001200      NO

Predicted change in Energy=-3.083209D-05

GradGradGradGradGradGradGradGradGradGradGradGradGradGradGradGradGradGrad

Input orientation:

| Center<br>Number | Atomic<br>Number | Atomic<br>Type | Coordinates (Angstroms) |           |           |
|------------------|------------------|----------------|-------------------------|-----------|-----------|
|                  |                  |                | X                       | Y         | Z         |
| 1                | 6                | 0              | -2.861917               | 2.115617  | -0.334795 |
| 2                | 6                | 0              | -3.733579               | 1.137763  | 0.021839  |
| 3                | 7                | 0              | -2.992705               | -0.030488 | 0.153748  |
| 4                | 6                | 0              | -1.703662               | 0.241254  | -0.114977 |
| 5                | 7                | 0              | -1.604486               | 1.537524  | -0.417813 |
| 6                | 6                | 0              | -0.338857               | 2.240915  | -0.701361 |
| 7                | 6                | 0              | 0.374777                | 2.697262  | 0.578111  |
| 8                | 1                | 0              | -3.025336               | 3.159750  | -0.539250 |
| 9                | 1                | 0              | -4.794434               | 1.175618  | 0.188553  |
| 10               | 1                | 0              | 0.299356                | 1.557071  | -1.261583 |
| 11               | 1                | 0              | -0.567542               | 3.096110  | -1.337003 |
| 12               | 1                | 0              | -0.261198               | 3.411022  | 1.110966  |
| 13               | 1                | 0              | 0.515813                | 1.825466  | 1.232041  |
| 14               | 35               | 0              | 0.195875                | -2.354673 | 0.558145  |
| 15               | 1                | 0              | -0.890954               | -0.509807 | -0.043566 |
| 16               | 6                | 0              | -3.431879               | -1.338995 | 0.519228  |
| 17               | 6                | 0              | -4.706013               | -1.676824 | 0.666168  |
| 18               | 1                | 0              | -2.592980               | -2.017431 | 0.657992  |
| 19               | 1                | 0              | -4.948500               | -2.690951 | 0.952536  |
| 20               | 1                | 0              | -5.533349               | -0.994581 | 0.512749  |
| 21               | 7                | 0              | 1.615345                | 3.355030  | 0.185080  |
| 22               | 1                | 0              | 1.953562                | 3.964903  | 0.919414  |
| 23               | 1                | 0              | 2.335380                | 2.659681  | -0.004277 |
| 24               | 6                | 0              | 3.785544                | -0.160936 | -1.190478 |
| 25               | 6                | 0              | 3.558377                | -0.490050 | 0.219976  |
| 26               | 8                | 0              | 3.348677                | 0.862198  | -0.274520 |
| 27               | 1                | 0              | 4.801613                | -0.034697 | -1.557196 |
| 28               | 1                | 0              | 3.049105                | -0.459586 | -1.931536 |
| 29               | 1                | 0              | 2.627613                | -1.004263 | 0.454552  |
| 30               | 6                | 0              | 4.691731                | -0.671386 | 1.190690  |
| 31               | 1                | 0              | 4.405952                | -0.319098 | 2.185896  |
| 32               | 1                | 0              | 4.943108                | -1.732991 | 1.274029  |
| 33               | 1                | 0              | 5.580677                | -0.123060 | 0.868859  |

Distance matrix (angstroms):

|    |    | 1        | 2        | 3        | 4        | 5        |
|----|----|----------|----------|----------|----------|----------|
| 1  | C  | 0.000000 |          |          |          |          |
| 2  | C  | 1.357638 | 0.000000 |          |          |          |
| 3  | N  | 2.204891 | 1.389641 | 0.000000 |          |          |
| 4  | C  | 2.214297 | 2.223288 | 1.344503 | 0.000000 |          |
| 5  | N  | 1.386440 | 2.210462 | 2.170828 | 1.334864 | 0.000000 |
| 6  | C  | 2.552626 | 3.641991 | 3.596303 | 2.491021 | 1.475458 |
| 7  | C  | 3.412901 | 4.429454 | 4.354381 | 3.291239 | 2.500868 |
| 8  | H  | 1.076439 | 2.214692 | 3.264801 | 3.231787 | 2.159903 |
| 9  | H  | 2.211812 | 1.074541 | 2.168439 | 3.243152 | 3.267173 |
| 10 | H  | 3.341340 | 4.252946 | 3.919333 | 2.656720 | 2.082533 |
| 11 | H  | 2.688856 | 3.963000 | 4.228400 | 3.306709 | 2.085510 |
| 12 | H  | 3.245310 | 4.290843 | 4.496820 | 3.692028 | 2.766150 |
| 13 | H  | 3.734732 | 4.471561 | 4.113026 | 3.041423 | 2.701962 |
| 14 | Br | 5.489164 | 5.284443 | 3.966411 | 3.286361 | 4.398067 |
| 15 | H  | 3.295809 | 3.286226 | 2.164726 | 1.108912 | 2.200170 |
| 16 | C  | 3.603963 | 2.544159 | 1.427809 | 2.426135 | 3.534369 |
| 17 | C  | 4.334193 | 3.046750 | 2.430725 | 3.647372 | 4.596359 |
| 18 | H  | 4.259112 | 3.414807 | 2.088537 | 2.547552 | 3.843459 |
| 19 | H  | 5.395753 | 4.123261 | 3.397244 | 4.501820 | 5.562400 |
| 20 | H  | 4.186671 | 2.833206 | 2.741027 | 4.072816 | 4.765865 |
| 21 | N  | 4.674643 | 5.792574 | 5.718115 | 4.560860 | 3.746214 |
| 22 | H  | 5.308647 | 6.414198 | 6.404291 | 5.320791 | 4.509995 |
| 23 | H  | 5.236138 | 6.256930 | 5.970801 | 4.709024 | 4.117377 |
| 24 | C  | 7.078391 | 7.726160 | 6.911485 | 5.608016 | 5.703876 |
| 25 | C  | 6.951075 | 7.474065 | 6.567515 | 5.323162 | 5.583277 |
| 26 | O  | 6.336101 | 7.093809 | 6.418211 | 5.092854 | 5.001042 |
| 27 | H  | 8.052813 | 8.758854 | 7.979896 | 6.668939 | 6.693891 |
| 28 | H  | 6.642397 | 7.236851 | 6.405936 | 5.136133 | 5.285425 |
| 29 | H  | 6.363305 | 6.726089 | 5.711978 | 4.542644 | 5.013218 |
| 30 | C  | 8.194638 | 8.696268 | 7.780524 | 6.590806 | 6.863593 |
| 31 | H  | 8.068683 | 8.547371 | 7.678089 | 6.552511 | 6.808209 |
| 32 | H  | 8.849774 | 9.224646 | 8.193331 | 7.071530 | 7.511962 |
| 33 | H  | 8.816907 | 9.437292 | 8.603652 | 7.359501 | 7.485962 |
|    |    | 6        | 7        | 8        | 9        | 10       |
| 6  | C  | 0.000000 |          |          |          |          |
| 7  | C  | 1.534462 | 0.000000 |          |          |          |
| 8  | H  | 2.843889 | 3.608761 | 0.000000 |          |          |
| 9  | H  | 4.666794 | 5.402582 | 2.756117 | 0.000000 |          |
| 10 | H  | 1.090324 | 2.165686 | 3.760840 | 5.309905 | 0.000000 |
| 11 | H  | 1.089814 | 2.171337 | 2.584804 | 4.886944 | 1.768005 |
| 12 | H  | 2.158637 | 1.094465 | 3.229057 | 5.137908 | 3.062735 |
| 13 | H  | 2.154322 | 1.098883 | 4.178220 | 5.450678 | 2.517350 |
| 14 | Br | 4.794969 | 5.055141 | 6.479918 | 6.123948 | 4.315537 |

|    |    |          |          |          |           |          |
|----|----|----------|----------|----------|-----------|----------|
| 15 | H  | 2.881662 | 3.503405 | 4.273983 | 4.258132  | 2.678131 |
| 16 | C  | 4.885936 | 5.548465 | 4.639434 | 2.879093  | 5.047830 |
| 17 | C  | 6.024191 | 6.704835 | 5.260242 | 2.893503  | 6.263228 |
| 18 | H  | 5.006239 | 5.571561 | 5.331371 | 3.906704  | 4.982714 |
| 19 | H  | 6.950359 | 7.583555 | 6.336772 | 3.944333  | 7.105491 |
| 20 | H  | 6.239010 | 6.967060 | 4.965410 | 2.315354  | 6.609056 |
| 21 | N  | 2.417837 | 1.458129 | 4.700927 | 6.770163  | 2.656561 |
| 22 | H  | 3.294576 | 2.053281 | 5.250276 | 7.338236  | 3.645655 |
| 23 | H  | 2.795145 | 2.045617 | 5.410503 | 7.285181  | 2.634760 |
| 24 | C  | 4.797792 | 4.788584 | 7.605205 | 8.792276  | 3.887173 |
| 25 | C  | 4.847212 | 4.519129 | 7.565893 | 8.517328  | 4.123947 |
| 26 | O  | 3.959920 | 3.597016 | 6.780625 | 8.162287  | 3.279559 |
| 27 | H  | 5.686413 | 5.623167 | 8.514801 | 9.828357  | 4.784499 |
| 28 | H  | 4.503813 | 4.839013 | 7.206726 | 8.287929  | 3.475179 |
| 29 | H  | 4.546126 | 4.334954 | 7.091014 | 7.740117  | 3.863461 |
| 30 | C  | 6.112951 | 5.509913 | 8.787686 | 9.716122  | 5.502056 |
| 31 | H  | 6.115811 | 5.285242 | 8.645973 | 9.532610  | 5.680604 |
| 32 | H  | 6.898786 | 6.401648 | 9.524862 | 10.220469 | 6.230431 |
| 33 | H  | 6.564667 | 5.927912 | 9.317890 | 10.478182 | 5.937506 |
|    |    | 11       | 12       | 13       | 14        | 15       |
| 11 | H  | 0.000000 |          |          |           |          |
| 12 | H  | 2.487080 | 0.000000 |          |           |          |
| 13 | H  | 3.064014 | 1.769857 | 0.000000 |           |          |
| 14 | Br | 5.821119 | 5.810144 | 4.246182 | 0.000000  |          |
| 15 | H  | 3.844504 | 4.135509 | 3.009928 | 2.224137  | 0.000000 |
| 16 | C  | 5.596442 | 5.741605 | 5.109421 | 3.767455  | 2.731407 |
| 17 | C  | 6.627257 | 6.770554 | 6.312980 | 4.949713  | 4.052201 |
| 18 | H  | 5.850701 | 5.925411 | 4.976142 | 2.810946  | 2.379497 |
| 19 | H  | 7.610838 | 7.696101 | 7.094707 | 5.170418  | 4.713098 |
| 20 | H  | 6.694369 | 6.896577 | 6.712854 | 5.888626  | 4.700672 |
| 21 | N  | 2.673719 | 2.093278 | 2.155148 | 5.895318  | 4.612025 |
| 22 | H  | 3.493162 | 2.290991 | 2.596545 | 6.569400  | 5.389029 |
| 23 | H  | 3.223908 | 2.924123 | 2.352704 | 5.480652  | 4.522878 |
| 24 | C  | 5.438674 | 5.867849 | 4.528303 | 4.555863  | 4.827707 |
| 25 | C  | 5.684007 | 5.531851 | 3.955134 | 3.859740  | 4.457173 |
| 26 | O  | 4.632063 | 4.631120 | 3.350035 | 4.580585  | 4.462086 |
| 27 | H  | 6.219185 | 6.680129 | 5.441335 | 5.574027  | 5.909495 |
| 28 | H  | 5.106524 | 5.932667 | 4.652661 | 4.234476  | 4.369327 |
| 29 | H  | 5.498340 | 5.317034 | 3.615460 | 2.783467  | 3.587886 |
| 30 | C  | 6.945733 | 6.419028 | 4.865621 | 4.842137  | 5.719779 |
| 31 | H  | 6.986423 | 6.070549 | 4.543366 | 4.951554  | 5.750138 |
| 32 | H  | 7.778494 | 7.319307 | 5.680257 | 4.840991  | 6.104795 |
| 33 | H  | 7.282134 | 6.831973 | 5.438888 | 5.837185  | 6.547068 |
|    |    | 16       | 17       | 18       | 19        | 20       |

|    |   |          |           |          |           |           |
|----|---|----------|-----------|----------|-----------|-----------|
| 16 | C | 0.000000 |           |          |           |           |
| 17 | C | 1.326326 | 0.000000  |          |           |           |
| 18 | H | 1.087788 | 2.140325  | 0.000000 |           |           |
| 19 | H | 2.077422 | 1.081324  | 2.467562 | 0.000000  |           |
| 20 | H | 2.129516 | 1.083271  | 3.116582 | 1.847466  | 0.000000  |
| 21 | N | 6.900723 | 8.093860  | 6.840832 | 8.956949  | 8.374384  |
| 22 | H | 7.569310 | 8.731733  | 7.518491 | 9.588532  | 8.989755  |
| 23 | H | 7.037381 | 8.296746  | 6.826617 | 9.088435  | 8.691250  |
| 24 | C | 7.510133 | 8.823355  | 6.895577 | 9.342217  | 9.509874  |
| 25 | C | 7.047973 | 8.361080  | 6.353262 | 8.817458  | 9.110419  |
| 26 | O | 7.172951 | 8.497622  | 6.668219 | 9.108990  | 9.108118  |
| 27 | H | 8.590874 | 9.901257  | 7.969837 | 10.412452 | 10.583831 |
| 28 | H | 6.984465 | 8.268712  | 6.400443 | 8.789685  | 8.939758  |
| 29 | H | 6.069075 | 7.367442  | 5.321888 | 7.777557  | 8.161175  |
| 30 | C | 8.178606 | 9.465919  | 7.427154 | 9.852381  | 10.252625 |
| 31 | H | 8.077720 | 9.337072  | 7.362328 | 9.728959  | 10.101752 |
| 32 | H | 8.418156 | 9.668412  | 7.566573 | 9.943086  | 10.530002 |
| 33 | H | 9.100928 | 10.405347 | 8.392960 | 10.838110 | 11.153830 |
|    |   | 21       | 22        | 23       | 24        | 25        |
| 21 | N | 0.000000 |           |          |           |           |
| 22 | H | 1.012710 | 0.000000  |          |           |           |
| 23 | H | 1.018733 | 1.643957  | 0.000000 |           |           |
| 24 | C | 4.354761 | 4.983006  | 3.386138 | 0.000000  |           |
| 25 | C | 4.308274 | 4.786569  | 3.386268 | 1.466050  | 0.000000  |
| 26 | O | 3.070811 | 3.605357  | 2.081045 | 1.441054  | 1.455017  |
| 27 | H | 4.967703 | 5.499253  | 3.969072 | 1.087573  | 2.216151  |
| 28 | H | 4.592062 | 5.376266  | 3.735446 | 1.086600  | 2.211174  |
| 29 | H | 4.483384 | 5.036174  | 3.704107 | 2.181313  | 1.088927  |
| 30 | C | 5.165987 | 5.391320  | 4.251628 | 2.598402  | 1.503216  |
| 31 | H | 5.028914 | 5.096161  | 4.237600 | 3.436543  | 2.147662  |
| 32 | H | 6.176388 | 6.444310  | 5.265917 | 3.144059  | 2.138553  |
| 33 | H | 5.318695 | 5.465341  | 4.363251 | 2.732180  | 2.155325  |
|    |   | 26       | 27        | 28       | 29        | 30        |
| 26 | O | 0.000000 |           |          |           |           |
| 27 | H | 2.135580 | 0.000000  |          |           |           |
| 28 | H | 2.140691 | 1.841723  | 0.000000 |           |           |
| 29 | H | 2.129591 | 3.116643  | 2.483494 | 0.000000  |           |
| 30 | C | 2.510481 | 2.822822  | 3.534313 | 2.216594  | 0.000000  |
| 31 | H | 2.926934 | 3.774676  | 4.337513 | 2.574781  | 1.093715  |
| 32 | H | 3.416902 | 3.304552  | 3.935029 | 2.562051  | 1.094139  |
| 33 | H | 2.694415 | 2.549606  | 3.790028 | 3.109462  | 1.092914  |
|    |   | 31       | 32        | 33       |           |           |
| 31 | H | 0.000000 |           |          |           |           |
| 32 | H | 1.766106 | 0.000000  |          |           |           |

33 H 1.775668 1.778352 0.000000  
 Stoichiometry C10H18BrN3O  
 Framework group C1[X(C10H18BrN3O)]  
 Deg. of freedom 93  
 Full point group C1 NOp 1  
 Largest Abelian subgroup C1 NOp 1  
 Largest concise Abelian subgroup C1 NOp 1

Standard orientation:

| Center<br>Number | Atomic<br>Number | Atomic<br>Type | Coordinates (Angstroms) |           |           |
|------------------|------------------|----------------|-------------------------|-----------|-----------|
|                  |                  |                | X                       | Y         | Z         |
| 1                | 6                | 0              | -2.759274               | 2.288893  | -0.192400 |
| 2                | 6                | 0              | -3.659888               | 1.293268  | 0.009607  |
| 3                | 7                | 0              | -2.952125               | 0.098167  | -0.034058 |
| 4                | 6                | 0              | -1.654191               | 0.371068  | -0.254469 |
| 5                | 7                | 0              | -1.517478               | 1.694893  | -0.357706 |
| 6                | 6                | 0              | -0.231077               | 2.397224  | -0.527646 |
| 7                | 6                | 0              | 0.485181                | 2.635065  | 0.808386  |
| 8                | 1                | 0              | -2.892655               | 3.356091  | -0.237322 |
| 9                | 1                | 0              | -4.720529               | 1.335285  | 0.176682  |
| 10               | 1                | 0              | 0.392418                | 1.788113  | -1.182660 |
| 11               | 1                | 0              | -0.431636               | 3.344621  | -1.027556 |
| 12               | 1                | 0              | -0.135058               | 3.277805  | 1.440874  |
| 13               | 1                | 0              | 0.597538                | 1.670963  | 1.323583  |
| 14               | 35               | 0              | 0.168842                | -2.348974 | 0.024975  |
| 15               | 1                | 0              | -0.862804               | -0.404673 | -0.294689 |
| 16               | 6                | 0              | -3.429499               | -1.237663 | 0.128151  |
| 17               | 6                | 0              | -4.713424               | -1.557910 | 0.218242  |
| 18               | 1                | 0              | -2.610454               | -1.952540 | 0.165567  |
| 19               | 1                | 0              | -4.985579               | -2.596430 | 0.347352  |
| 20               | 1                | 0              | -5.520697               | -0.837386 | 0.166952  |
| 21               | 7                | 0              | 1.746103                | 3.309537  | 0.523248  |
| 22               | 1                | 0              | 2.095337                | 3.791881  | 1.342371  |
| 23               | 1                | 0              | 2.448313                | 2.630797  | 0.233369  |
| 24               | 6                | 0              | 3.829873                | -0.018090 | -1.360564 |
| 25               | 6                | 0              | 3.583328                | -0.549768 | -0.016750 |
| 26               | 8                | 0              | 3.414240                | 0.866961  | -0.301993 |
| 27               | 1                | 0              | 4.851706                | 0.133481  | -1.700707 |
| 28               | 1                | 0              | 3.091107                | -0.180710 | -2.140616 |
| 29               | 1                | 0              | 2.637178                | -1.067168 | 0.134441  |
| 30               | 6                | 0              | 4.704062                | -0.907240 | 0.919107  |
| 31               | 1                | 0              | 4.420587                | -0.701285 | 1.955176  |
| 32               | 1                | 0              | 4.925791                | -1.975895 | 0.841951  |

```

33          1          0          5.609990  -0.341790  0.686680
-----
Rotational constants (GHZ):      0.4640402      0.2561703      0.1734129
Standard basis: 6-311++G(d,p) (5D, 7F)
There are 499 symmetry adapted cartesian basis functions of A symmetry.
There are 482 symmetry adapted basis functions of A symmetry.
482 basis functions, 760 primitive gaussians, 499 cartesian basis functions
71 alpha electrons      71 beta electrons
nuclear repulsion energy      1295.4284080454 Hartrees.
NAtoms= 33 NActive= 33 NUniq= 33 SFac= 1.00D+00 NAtFMM= 60 NAOKFM=F
Big=F
Integral buffers will be 131072 words long.
Raffenetti 2 integral format.
Two-electron integral symmetry is turned on.
One-electron integrals computed using PRISM.
NBasis= 482 RedAO= T EigKep= 4.19D-06 NBF= 482
NBsUse= 482 1.00D-06 EigRej= -1.00D+00 NBFU= 482
Initial guess from the checkpoint file:
"/home/suqian/liuwen/qianmengshijie/nh2po/nh2po.chk"
B after Tr= 0.000000 0.000000 0.000000
Rot= 0.999990 -0.001799 0.001225 0.003798 Ang= -0.50 deg.
ExpMin= 3.50D-02 ExpMax= 4.40D+05 ExpMxC= 1.51D+04 IAcc=3 IRadAn= 5 AccDes=
0.00D+00
Harris functional with IExCor= 402 and IRadAn= 5 diagonalized for initial guess.
HarFok: IExCor= 402 AccDes= 0.00D+00 IRadAn= 5 IDoV= 1 UseB2=F ITyADJ=14
ICtDFT= 3500011 ScaDFX= 1.000000 1.000000 1.000000 1.000000
FoFCou: FMM=F IPFlag= 0 FMFlag= 100000 FMFlg1= 0
NFxFlg= 0 DoJE=T BraDBF=F KetDBF=T FulRan=T
wScrn= 0.000000 ICntrl= 500 IOpCl= 0 I1Cent= 200000004 NGrid=
0
NMat0= 1 NMatS0= 1 NMatT0= 0 NMatD0= 1 NMtDS0= 0
NMtDT0= 0
Petite list used in FoFCou.
Requested convergence on RMS density matrix=1.00D-08 within 128 cycles.
Requested convergence on MAX density matrix=1.00D-06.
Requested convergence on energy=1.00D-06.
No special actions if energy rises.
SCF Done: E(RB3LYP) = -3205.64708368 A.U. after 11 cycles
NFOck= 11 Conv=0.61D-08 -V/T= 2.0018
Calling FoFJK, ICntrl= 2127 FMM=F ISym2X=0 I1Cent= 0 IOpCIX= 0 NMat=1 NMatS=1
NMatT=0.
**** Axes restored to original set ****
-----
Center Atomic Forces (Hartrees/Bohr)

```

| Number | Number | X            | Y            | Z            |
|--------|--------|--------------|--------------|--------------|
| 1      | 6      | -0.000345146 | 0.000005259  | 0.000236287  |
| 2      | 6      | 0.000198673  | -0.000116309 | -0.000388104 |
| 3      | 7      | -0.000582484 | -0.000449078 | 0.000743899  |
| 4      | 6      | 0.001221465  | 0.001611420  | -0.000645314 |
| 5      | 7      | -0.000052143 | 0.000044109  | -0.000267454 |
| 6      | 6      | -0.000533658 | -0.000760469 | 0.000115674  |
| 7      | 6      | 0.000895556  | 0.000428441  | -0.000441415 |
| 8      | 1      | 0.000005328  | -0.000001371 | 0.000147110  |
| 9      | 1      | -0.000038054 | -0.000043549 | 0.000000082  |
| 10     | 1      | 0.000065390  | -0.000013169 | 0.000095140  |
| 11     | 1      | 0.000257058  | 0.000058019  | -0.000081440 |
| 12     | 1      | -0.000118932 | 0.000063678  | -0.000090672 |
| 13     | 1      | -0.000235798 | -0.000132229 | 0.000242272  |
| 14     | 35     | -0.000221687 | 0.000057380  | -0.000045044 |
| 15     | 1      | -0.000365136 | -0.000732123 | 0.000259738  |
| 16     | 6      | -0.000045593 | -0.000245281 | -0.000122794 |
| 17     | 6      | -0.000015621 | 0.000126020  | 0.000020566  |
| 18     | 1      | 0.000124521  | -0.000040122 | -0.000036231 |
| 19     | 1      | 0.000035491  | -0.000015999 | 0.000011800  |
| 20     | 1      | -0.000011533 | 0.000027625  | 0.000022410  |
| 21     | 7      | -0.000449914 | 0.000212430  | 0.000312527  |
| 22     | 1      | 0.000182423  | -0.000141625 | 0.000082715  |
| 23     | 1      | 0.000178643  | -0.000018950 | -0.000069457 |
| 24     | 6      | 0.000024714  | 0.000042666  | 0.000069623  |
| 25     | 6      | -0.000154262 | 0.000009060  | -0.000252927 |
| 26     | 8      | -0.000390905 | 0.000160999  | -0.000242846 |
| 27     | 1      | 0.000002875  | 0.000030774  | -0.000030936 |
| 28     | 1      | 0.000155428  | -0.000044832 | -0.000200645 |
| 29     | 1      | 0.000273431  | -0.000117018 | 0.000443151  |
| 30     | 6      | -0.000011210 | 0.000013252  | 0.000130127  |
| 31     | 1      | -0.000009093 | -0.000048832 | -0.000010325 |
| 32     | 1      | -0.000067332 | 0.000013669  | -0.000034938 |
| 33     | 1      | 0.000027505  | 0.000016153  | 0.000027421  |

-----  
Cartesian Forces: Max 0.001611420 RMS 0.000324840

GradGradGradGradGradGradGradGradGradGradGradGradGradGradGradGradGradGradGrad

Berny optimization.

Using GEDIIS/GDIIS optimizer.

FormGI is forming the generalized inverse of G from B-inverse, IUseBI=4.

GSVD: received Info= 1 from GESDD.

Internal Forces: Max 0.001388982 RMS 0.000208372



Search for a local minimum.

Step number 17 out of a maximum of 172

All quantities printed in internal units (Hartrees-Bohrs-Radians)

Mixed Optimization -- En-DIIS/RFO-DIIS

Swapping is turned off.

Update second derivatives using D2CorX and points 14 15 16 17

DE= -3.71D-05 DEPred=-3.08D-05 R= 1.20D+00

TightC=F SS= 1.41D+00 RLast= 1.90D-01 DXNew= 1.1563D+00 5.6898D-01

Trust test= 1.20D+00 RLast= 1.90D-01 DXMaxT set to 6.88D-01

ITU= 1 1 1 1 1 0 -1 -1 1 1 1 -1 1 0 0 -1 0

|                 |         |         |         |         |         |
|-----------------|---------|---------|---------|---------|---------|
| Eigenvalues --- | 0.00052 | 0.00256 | 0.00360 | 0.00463 | 0.00708 |
| Eigenvalues --- | 0.00725 | 0.00858 | 0.01412 | 0.01512 | 0.01554 |
| Eigenvalues --- | 0.01891 | 0.02107 | 0.02117 | 0.02355 | 0.02398 |
| Eigenvalues --- | 0.02438 | 0.02486 | 0.02986 | 0.03074 | 0.03104 |
| Eigenvalues --- | 0.03200 | 0.03361 | 0.03484 | 0.03980 | 0.04077 |
| Eigenvalues --- | 0.04338 | 0.04409 | 0.05112 | 0.05421 | 0.05750 |
| Eigenvalues --- | 0.05786 | 0.05940 | 0.06527 | 0.07734 | 0.08655 |
| Eigenvalues --- | 0.09543 | 0.10232 | 0.12266 | 0.12363 | 0.12593 |
| Eigenvalues --- | 0.12795 | 0.13512 | 0.15408 | 0.15994 | 0.16000 |
| Eigenvalues --- | 0.16001 | 0.16005 | 0.16015 | 0.16024 | 0.16089 |
| Eigenvalues --- | 0.16091 | 0.17294 | 0.18903 | 0.22114 | 0.22451 |
| Eigenvalues --- | 0.22887 | 0.22988 | 0.24422 | 0.25578 | 0.28939 |
| Eigenvalues --- | 0.29534 | 0.30646 | 0.31746 | 0.32094 | 0.32652 |
| Eigenvalues --- | 0.33797 | 0.34280 | 0.34314 | 0.34344 | 0.34546 |
| Eigenvalues --- | 0.34664 | 0.34737 | 0.35038 | 0.35070 | 0.35259 |
| Eigenvalues --- | 0.35410 | 0.35583 | 0.35765 | 0.35892 | 0.36422 |
| Eigenvalues --- | 0.36624 | 0.38150 | 0.39275 | 0.41976 | 0.42469 |
| Eigenvalues --- | 0.44621 | 0.45471 | 0.46227 | 0.49314 | 0.55102 |
| Eigenvalues --- | 0.58379 | 0.60603 | 1.22273 |         |         |

En-DIIS/RFO-DIIS IScMMF= 0 using points: 17 16 15 14 13

RFO step: Lambda=-1.34759419D-05.

DidBck=F Rises=F RFO-DIIS coefs: 1.97759 -0.74275 -0.48933 0.19460

0.05989

Iteration 1 RMS(Cart)= 0.07375512 RMS(Int)= 0.00180517

Iteration 2 RMS(Cart)= 0.00566882 RMS(Int)= 0.00049291

Iteration 3 RMS(Cart)= 0.00002522 RMS(Int)= 0.00049286

Iteration 4 RMS(Cart)= 0.00000002 RMS(Int)= 0.00049286

| Variable | Old X   | -DE/DX   | Delta X<br>(Linear) | Delta X<br>(Quad) | Delta X<br>(Total) | New X   |
|----------|---------|----------|---------------------|-------------------|--------------------|---------|
| R1       | 2.56556 | 0.00003  | -0.00006            | -0.00014          | -0.00019           | 2.56537 |
| R2       | 2.61999 | 0.00037  | 0.00004             | 0.00015           | 0.00019            | 2.62018 |
| R3       | 2.03417 | -0.00003 | -0.00001            | -0.00003          | -0.00004           | 2.03414 |
| R4       | 2.62604 | -0.00020 | 0.00047             | -0.00006          | 0.00040            | 2.62644 |
| R5       | 2.03059 | 0.00004  | 0.00001             | 0.00005           | 0.00005            | 2.03064 |

|     |         |          |          |          |          |         |
|-----|---------|----------|----------|----------|----------|---------|
| R6  | 2.54074 | 0.00048  | -0.00033 | 0.00038  | 0.00004  | 2.54078 |
| R7  | 2.69817 | 0.00007  | -0.00083 | 0.00007  | -0.00076 | 2.69741 |
| R8  | 2.52253 | -0.00027 | -0.00006 | -0.00027 | -0.00032 | 2.52221 |
| R9  | 2.09554 | 0.00004  | 0.00064  | -0.00018 | 0.00046  | 2.09600 |
| R10 | 2.78821 | -0.00006 | 0.00014  | -0.00024 | -0.00011 | 2.78810 |
| R11 | 2.89971 | 0.00026  | -0.00101 | -0.00003 | -0.00104 | 2.89867 |
| R12 | 2.06041 | 0.00000  | -0.00009 | -0.00001 | -0.00010 | 2.06031 |
| R13 | 2.05945 | 0.00004  | -0.00002 | 0.00000  | -0.00002 | 2.05943 |
| R14 | 2.06824 | 0.00007  | 0.00008  | 0.00008  | 0.00016  | 2.06840 |
| R15 | 2.07659 | 0.00022  | -0.00021 | 0.00023  | 0.00003  | 2.07662 |
| R16 | 2.75546 | -0.00022 | 0.00087  | 0.00007  | 0.00094  | 2.75641 |
| R17 | 4.20301 | -0.00017 | 0.00428  | 0.00499  | 0.00927  | 4.21228 |
| R18 | 2.50639 | -0.00004 | 0.00021  | 0.00003  | 0.00024  | 2.50663 |
| R19 | 2.05562 | 0.00011  | -0.00005 | 0.00025  | 0.00020  | 2.05583 |
| R20 | 2.04341 | 0.00001  | -0.00001 | 0.00002  | 0.00000  | 2.04341 |
| R21 | 2.04709 | 0.00003  | 0.00013  | 0.00007  | 0.00020  | 2.04728 |
| R22 | 1.91374 | 0.00004  | 0.00024  | 0.00008  | 0.00031  | 1.91406 |
| R23 | 1.92513 | 0.00005  | 0.00000  | -0.00009 | -0.00011 | 1.92501 |
| R24 | 3.93260 | -0.00012 | -0.00002 | 0.00097  | 0.00097  | 3.93357 |
| R25 | 2.77043 | 0.00008  | 0.00204  | 0.00054  | 0.00122  | 2.77165 |
| R26 | 2.72320 | 0.00011  | -0.00206 | -0.00112 | -0.00269 | 2.72051 |
| R27 | 2.05521 | 0.00002  | -0.00002 | 0.00005  | 0.00003  | 2.05525 |
| R28 | 2.05338 | 0.00004  | 0.00045  | 0.00046  | 0.00091  | 2.05429 |
| R29 | 2.74958 | 0.00018  | 0.00114  | 0.00100  | 0.00302  | 2.75261 |
| R30 | 2.05777 | -0.00008 | 0.00061  | 0.00004  | 0.00065  | 2.05842 |
| R31 | 2.84067 | 0.00003  | -0.00061 | 0.00004  | -0.00057 | 2.84010 |
| R32 | 2.06682 | -0.00002 | -0.00019 | -0.00018 | -0.00037 | 2.06645 |
| R33 | 2.06762 | -0.00003 | -0.00016 | -0.00007 | -0.00022 | 2.06740 |
| R34 | 2.06531 | 0.00002  | 0.00012  | 0.00011  | 0.00023  | 2.06554 |
| A1  | 1.87309 | 0.00008  | 0.00011  | 0.00006  | 0.00017  | 1.87326 |
| A2  | 2.27979 | -0.00006 | -0.00070 | -0.00006 | -0.00076 | 2.27902 |
| A3  | 2.13030 | -0.00002 | 0.00059  | 0.00002  | 0.00060  | 2.13090 |
| A4  | 1.86309 | 0.00007  | -0.00027 | 0.00003  | -0.00024 | 1.86285 |
| A5  | 2.27739 | 0.00000  | 0.00132  | 0.00036  | 0.00167  | 2.27906 |
| A6  | 2.14271 | -0.00008 | -0.00104 | -0.00040 | -0.00145 | 2.14126 |
| A7  | 1.89892 | -0.00015 | 0.00013  | -0.00008 | 0.00005  | 1.89896 |
| A8  | 2.25332 | 0.00019  | -0.00065 | -0.00067 | -0.00132 | 2.25200 |
| A9  | 2.13091 | -0.00003 | 0.00052  | 0.00077  | 0.00129  | 2.13220 |
| A10 | 1.88898 | 0.00021  | 0.00001  | 0.00002  | 0.00003  | 1.88901 |
| A11 | 2.15663 | -0.00139 | 0.00092  | -0.00206 | -0.00114 | 2.15549 |
| A12 | 2.23683 | 0.00118  | -0.00089 | 0.00187  | 0.00098  | 2.23781 |
| A13 | 1.90069 | -0.00021 | 0.00001  | -0.00001 | -0.00001 | 1.90068 |
| A14 | 2.20272 | 0.00028  | -0.00147 | -0.00052 | -0.00202 | 2.20070 |
| A15 | 2.17764 | -0.00007 | 0.00197  | 0.00072  | 0.00266  | 2.18029 |

|     |         |          |          |          |          |         |
|-----|---------|----------|----------|----------|----------|---------|
| A16 | 1.96110 | 0.00023  | 0.00075  | 0.00088  | 0.00163  | 1.96273 |
| A17 | 1.87742 | -0.00001 | 0.00001  | 0.00054  | 0.00055  | 1.87797 |
| A18 | 1.88198 | 0.00006  | -0.00047 | 0.00017  | -0.00030 | 1.88168 |
| A19 | 1.92062 | -0.00001 | 0.00059  | -0.00008 | 0.00052  | 1.92113 |
| A20 | 1.92895 | -0.00029 | -0.00145 | -0.00157 | -0.00302 | 1.92594 |
| A21 | 1.89158 | 0.00002  | 0.00058  | 0.00010  | 0.00068  | 1.89226 |
| A22 | 1.90674 | -0.00014 | 0.00017  | 0.00007  | 0.00023  | 1.90697 |
| A23 | 1.89647 | -0.00020 | 0.00067  | 0.00045  | 0.00112  | 1.89759 |
| A24 | 1.88082 | 0.00035  | -0.00146 | -0.00039 | -0.00185 | 1.87897 |
| A25 | 1.87784 | 0.00002  | 0.00036  | -0.00018 | 0.00018  | 1.87802 |
| A26 | 1.90861 | -0.00021 | -0.00047 | -0.00113 | -0.00160 | 1.90701 |
| A27 | 1.99225 | 0.00018  | 0.00074  | 0.00117  | 0.00191  | 1.99416 |
| A28 | 2.16189 | -0.00013 | 0.00027  | -0.00062 | -0.00035 | 2.16154 |
| A29 | 1.94660 | 0.00000  | 0.00063  | 0.00034  | 0.00097  | 1.94756 |
| A30 | 2.17470 | 0.00012  | -0.00090 | 0.00027  | -0.00063 | 2.17407 |
| A31 | 2.07561 | -0.00004 | -0.00001 | -0.00014 | -0.00015 | 2.07547 |
| A32 | 2.16226 | 0.00001  | -0.00020 | 0.00003  | -0.00017 | 2.16209 |
| A33 | 2.04530 | 0.00003  | 0.00020  | 0.00011  | 0.00031  | 2.04562 |
| A34 | 1.93944 | -0.00011 | -0.00088 | 0.00039  | -0.00024 | 1.93920 |
| A35 | 1.92147 | 0.00055  | -0.00046 | -0.00002 | -0.00040 | 1.92107 |
| A36 | 1.88576 | -0.00022 | 0.00093  | 0.00036  | 0.00121  | 1.88698 |
| A37 | 2.08889 | -0.00008 | 0.00071  | -0.00069 | -0.00122 | 2.08767 |
| A38 | 2.08222 | 0.00020  | 0.00327  | 0.00257  | 0.00696  | 2.08917 |
| A39 | 1.99889 | -0.00010 | 0.00063  | 0.00109  | 0.00148  | 2.00037 |
| A40 | 2.00773 | 0.00016  | -0.00022 | 0.00054  | 0.00025  | 2.00798 |
| A41 | 2.02098 | -0.00013 | -0.00325 | -0.00231 | -0.00552 | 2.01545 |
| A42 | 2.03276 | 0.00040  | 0.00588  | 0.00461  | 0.01017  | 2.04292 |
| A43 | 2.13119 | -0.00004 | -0.00126 | -0.00051 | -0.00162 | 2.12957 |
| A44 | 1.97022 | 0.00029  | -0.00108 | 0.00094  | -0.00047 | 1.96975 |
| A45 | 2.02666 | -0.00003 | 0.00005  | -0.00008 | 0.00006  | 2.02672 |
| A46 | 2.03574 | -0.00037 | -0.00241 | -0.00312 | -0.00545 | 2.03029 |
| A47 | 2.57438 | 0.00012  | 0.01955  | 0.01633  | 0.03312  | 2.60750 |
| A48 | 2.54771 | -0.00002 | 0.00869  | 0.00874  | 0.01278  | 2.56049 |
| A49 | 1.93022 | 0.00001  | -0.00039 | -0.00082 | -0.00121 | 1.92902 |
| A50 | 1.91713 | -0.00012 | -0.00035 | -0.00048 | -0.00083 | 1.91630 |
| A51 | 1.94182 | 0.00008  | -0.00008 | 0.00101  | 0.00094  | 1.94275 |
| A52 | 1.87889 | 0.00002  | -0.00049 | -0.00078 | -0.00127 | 1.87762 |
| A53 | 1.89534 | -0.00001 | 0.00097  | 0.00061  | 0.00158  | 1.89692 |
| A54 | 1.89901 | 0.00003  | 0.00034  | 0.00043  | 0.00077  | 1.89978 |
| A55 | 3.35486 | 0.00064  | -0.00172 | 0.00055  | -0.00118 | 3.35369 |
| A56 | 2.85610 | 0.00025  | -0.02872 | -0.02343 | -0.05189 | 2.80421 |
| A57 | 2.82274 | -0.00022 | 0.00292  | -0.02752 | -0.02460 | 2.79814 |
| A58 | 3.20123 | -0.00008 | -0.01689 | -0.00817 | -0.02510 | 3.17613 |
| D1  | 0.00092 | 0.00009  | 0.00073  | 0.00035  | 0.00108  | 0.00200 |

|     |          |          |          |          |          |          |
|-----|----------|----------|----------|----------|----------|----------|
| D2  | -3.14050 | 0.00003  | -0.00226 | -0.00272 | -0.00499 | 3.13770  |
| D3  | 3.13658  | 0.00010  | 0.00146  | 0.00323  | 0.00470  | 3.14128  |
| D4  | -0.00484 | 0.00003  | -0.00152 | 0.00017  | -0.00136 | -0.00620 |
| D5  | -0.00395 | -0.00007 | -0.00161 | 0.00211  | 0.00050  | -0.00345 |
| D6  | -3.07766 | -0.00003 | -0.00953 | -0.00094 | -0.01045 | -3.08811 |
| D7  | -3.14024 | -0.00007 | -0.00226 | -0.00047 | -0.00274 | 3.14021  |
| D8  | 0.06924  | -0.00003 | -0.01018 | -0.00352 | -0.01369 | 0.05555  |
| D9  | 0.00240  | -0.00009 | 0.00038  | -0.00267 | -0.00229 | 0.00011  |
| D10 | 3.13438  | 0.00001  | 0.00056  | -0.00020 | 0.00035  | 3.13473  |
| D11 | -3.13935 | -0.00003 | 0.00309  | 0.00010  | 0.00319  | -3.13617 |
| D12 | -0.00737 | 0.00007  | 0.00327  | 0.00257  | 0.00583  | -0.00154 |
| D13 | -0.00488 | 0.00005  | -0.00139 | 0.00401  | 0.00262  | -0.00226 |
| D14 | 3.09833  | 0.00013  | -0.00013 | -0.00057 | -0.00069 | 3.09764  |
| D15 | -3.13767 | -0.00005 | -0.00154 | 0.00176  | 0.00021  | -3.13746 |
| D16 | -0.03447 | 0.00003  | -0.00028 | -0.00282 | -0.00310 | -0.03756 |
| D17 | 0.12851  | -0.00014 | 0.01728  | 0.00625  | 0.02353  | 0.15204  |
| D18 | -3.01539 | -0.00012 | 0.01446  | 0.00499  | 0.01945  | -2.99593 |
| D19 | -3.02382 | -0.00002 | 0.01747  | 0.00900  | 0.02647  | -2.99735 |
| D20 | 0.11547  | 0.00000  | 0.01465  | 0.00774  | 0.02240  | 0.13787  |
| D21 | 0.00546  | 0.00001  | 0.00185  | -0.00379 | -0.00194 | 0.00352  |
| D22 | 3.08037  | -0.00001 | 0.00946  | -0.00085 | 0.00863  | 3.08900  |
| D23 | -3.09545 | 0.00000  | 0.00045  | 0.00118  | 0.00164  | -3.09382 |
| D24 | -0.02054 | -0.00002 | 0.00806  | 0.00412  | 0.01220  | -0.00834 |
| D25 | 1.60179  | -0.00027 | -0.00341 | -0.01038 | -0.01379 | 1.58799  |
| D26 | -2.56494 | -0.00015 | -0.00219 | -0.00957 | -0.01177 | -2.57670 |
| D27 | -0.52821 | -0.00010 | -0.00175 | -0.00909 | -0.01084 | -0.53905 |
| D28 | -1.46161 | -0.00023 | -0.01243 | -0.01386 | -0.02629 | -1.48789 |
| D29 | 0.65486  | -0.00010 | -0.01121 | -0.01305 | -0.02426 | 0.63060  |
| D30 | 2.69159  | -0.00006 | -0.01077 | -0.01256 | -0.02333 | 2.66825  |
| D31 | -1.08645 | 0.00011  | 0.01895  | 0.00800  | 0.02695  | -1.05950 |
| D32 | 0.95763  | -0.00007 | 0.01985  | 0.00808  | 0.02793  | 0.98556  |
| D33 | 3.12473  | 0.00024  | 0.02026  | 0.00954  | 0.02980  | -3.12866 |
| D34 | 3.10519  | -0.00002 | 0.01804  | 0.00679  | 0.02483  | 3.13002  |
| D35 | -1.13391 | -0.00019 | 0.01894  | 0.00687  | 0.02581  | -1.10810 |
| D36 | 1.03319  | 0.00011  | 0.01934  | 0.00834  | 0.02768  | 1.06087  |
| D37 | 1.01664  | 0.00014  | 0.01785  | 0.00771  | 0.02556  | 1.04220  |
| D38 | 3.06072  | -0.00003 | 0.01875  | 0.00779  | 0.02654  | 3.08726  |
| D39 | -1.05537 | 0.00027  | 0.01916  | 0.00926  | 0.02841  | -1.02696 |
| D40 | 2.77432  | 0.00003  | 0.01478  | 0.01640  | 0.03112  | 2.80545  |
| D41 | -1.42032 | 0.00004  | 0.01508  | 0.01708  | 0.03222  | -1.38809 |
| D42 | 0.70351  | 0.00012  | 0.01568  | 0.01718  | 0.03280  | 0.73631  |
| D43 | 2.79206  | 0.00013  | 0.01598  | 0.01786  | 0.03390  | 2.82596  |
| D44 | -1.40078 | 0.00013  | 0.01506  | 0.01744  | 0.03245  | -1.36833 |
| D45 | 0.68776  | 0.00014  | 0.01537  | 0.01813  | 0.03355  | 0.72131  |

|     |          |          |          |          |          |          |
|-----|----------|----------|----------|----------|----------|----------|
| D46 | -3.13389 | 0.00001  | 0.00019  | 0.00019  | 0.00038  | -3.13351 |
| D47 | 0.01151  | -0.00001 | 0.00088  | 0.00015  | 0.00103  | 0.01254  |
| D48 | 0.01030  | -0.00001 | 0.00337  | 0.00161  | 0.00498  | 0.01528  |
| D49 | -3.12748 | -0.00003 | 0.00407  | 0.00157  | 0.00563  | -3.12185 |
| D50 | 1.53111  | 0.00006  | 0.08555  | 0.05089  | 0.13647  | 1.66759  |
| D51 | -0.58782 | -0.00031 | 0.01414  | -0.01158 | 0.00282  | -0.58500 |
| D52 | -2.69236 | 0.00024  | 0.08436  | 0.04936  | 0.13346  | -2.55889 |
| D53 | 1.47189  | -0.00014 | 0.01294  | -0.01311 | -0.00019 | 1.47171  |
| D54 | -2.70662 | 0.00007  | -0.00421 | 0.00044  | -0.00341 | -2.71003 |
| D55 | -0.00738 | -0.00005 | 0.00077  | 0.00217  | 0.00326  | -0.00412 |
| D56 | -0.02905 | 0.00002  | -0.00331 | -0.00120 | -0.00434 | -0.03339 |
| D57 | 2.67019  | -0.00011 | 0.00167  | 0.00053  | 0.00232  | 2.67252  |
| D58 | 1.66978  | -0.00007 | -0.06073 | -0.05237 | -0.11443 | 1.55535  |
| D59 | -0.73557 | 0.00007  | -0.05593 | -0.05057 | -0.10753 | -0.84310 |
| D60 | 0.80157  | -0.00012 | 0.05923  | 0.05222  | 0.11093  | 0.91249  |
| D61 | -1.61578 | 0.00017  | 0.06444  | 0.05626  | 0.12027  | -1.49551 |
| D62 | 2.54658  | 0.00001  | -0.00154 | 0.00188  | 0.00057  | 2.54715  |
| D63 | -1.66516 | -0.00004 | -0.00260 | 0.00011  | -0.00226 | -1.66742 |
| D64 | 0.43863  | -0.00003 | -0.00245 | 0.00098  | -0.00124 | 0.43739  |
| D65 | 1.35179  | 0.00005  | 0.00063  | 0.00300  | 0.00340  | 1.35518  |
| D66 | -2.85995 | 0.00000  | -0.00043 | 0.00124  | 0.00056  | -2.85939 |
| D67 | -0.75616 | 0.00000  | -0.00028 | 0.00211  | 0.00159  | -0.75458 |
| D68 | -1.03807 | 0.00007  | 0.00543  | 0.00544  | 0.01089  | -1.02718 |
| D69 | 1.03338  | 0.00002  | 0.00437  | 0.00367  | 0.00805  | 1.04143  |
| D70 | 3.13717  | 0.00002  | 0.00452  | 0.00455  | 0.00908  | -3.13694 |

| Item                 | Value    | Threshold | Converged? |
|----------------------|----------|-----------|------------|
| Maximum Force        | 0.001389 | 0.000450  | NO         |
| RMS Force            | 0.000208 | 0.000300  | YES        |
| Maximum Displacement | 0.359412 | 0.001800  | NO         |
| RMS Displacement     | 0.077602 | 0.001200  | NO         |

Predicted change in Energy=-4.514719D-05

GradGradGradGradGradGradGradGradGradGradGradGradGradGradGradGradGradGrad

Input orientation:

| Center Number | Atomic Number | Atomic Type | Coordinates (Angstroms) |           |           |
|---------------|---------------|-------------|-------------------------|-----------|-----------|
|               |               |             | X                       | Y         | Z         |
| 1             | 6             | 0           | -2.818083               | 2.092464  | -0.347672 |
| 2             | 6             | 0           | -3.700513               | 1.124452  | 0.008944  |
| 3             | 7             | 0           | -2.966528               | -0.043654 | 0.177739  |
| 4             | 6             | 0           | -1.671652               | 0.218258  | -0.072157 |
| 5             | 7             | 0           | -1.561409               | 1.508519  | -0.395395 |
| 6             | 6             | 0           | -0.290696               | 2.202658  | -0.678711 |

|    |    |   |           |           |           |
|----|----|---|-----------|-----------|-----------|
| 7  | 6  | 0 | 0.396224  | 2.710528  | 0.595295  |
| 8  | 1  | 0 | -2.973597 | 3.133921  | -0.570962 |
| 9  | 1  | 0 | -4.763765 | 1.168365  | 0.158166  |
| 10 | 1  | 0 | 0.359815  | 1.499818  | -1.199808 |
| 11 | 1  | 0 | -0.507203 | 3.033784  | -1.349552 |
| 12 | 1  | 0 | -0.262687 | 3.423235  | 1.101184  |
| 13 | 1  | 0 | 0.551332  | 1.861103  | 1.274997  |
| 14 | 35 | 0 | 0.185929  | -2.371177 | 0.733536  |
| 15 | 1  | 0 | -0.863888 | -0.534903 | 0.030247  |
| 16 | 6  | 0 | -3.419433 | -1.342824 | 0.557903  |
| 17 | 6  | 0 | -4.698578 | -1.679043 | 0.659015  |
| 18 | 1  | 0 | -2.587148 | -2.017647 | 0.746141  |
| 19 | 1  | 0 | -4.952244 | -2.685777 | 0.961344  |
| 20 | 1  | 0 | -5.519020 | -1.002556 | 0.451792  |
| 21 | 7  | 0 | 1.623472  | 3.389922  | 0.195448  |
| 22 | 1  | 0 | 1.954464  | 4.006240  | 0.927920  |
| 23 | 1  | 0 | 2.354048  | 2.706881  | 0.002038  |
| 24 | 6  | 0 | 3.808474  | -0.103276 | -1.243654 |
| 25 | 6  | 0 | 3.497281  | -0.486550 | 0.137451  |
| 26 | 8  | 0 | 3.296553  | 0.879995  | -0.325146 |
| 27 | 1  | 0 | 4.844149  | 0.048545  | -1.538912 |
| 28 | 1  | 0 | 3.129508  | -0.381330 | -2.045798 |
| 29 | 1  | 0 | 2.561506  | -1.018264 | 0.305124  |
| 30 | 6  | 0 | 4.570733  | -0.684496 | 1.170539  |
| 31 | 1  | 0 | 4.215759  | -0.373007 | 2.156821  |
| 32 | 1  | 0 | 4.833365  | -1.744655 | 1.233528  |
| 33 | 1  | 0 | 5.468943  | -0.112166 | 0.924808  |

-----  
Distance matrix (angstroms):

|    |    | 1        | 2        | 3        | 4        | 5        |
|----|----|----------|----------|----------|----------|----------|
| 1  | C  | 0.000000 |          |          |          |          |
| 2  | C  | 1.357537 | 0.000000 |          |          |          |
| 3  | N  | 2.204788 | 1.389855 | 0.000000 |          |          |
| 4  | C  | 2.214240 | 2.223520 | 1.344525 | 0.000000 |          |
| 5  | N  | 1.386542 | 2.210603 | 2.170733 | 1.334695 | 0.000000 |
| 6  | C  | 2.551356 | 3.641738 | 3.597152 | 2.492548 | 1.475401 |
| 7  | C  | 3.406311 | 4.432008 | 4.366688 | 3.306511 | 2.501723 |
| 8  | H  | 1.076418 | 2.214197 | 3.264596 | 3.231866 | 2.160331 |
| 9  | H  | 2.212580 | 1.074570 | 2.167817 | 3.242979 | 3.267601 |
| 10 | H  | 3.343112 | 4.253028 | 3.917206 | 2.653461 | 2.082849 |
| 11 | H  | 2.688869 | 3.960845 | 4.225106 | 3.303766 | 2.085234 |
| 12 | H  | 3.224931 | 4.277387 | 4.492530 | 3.692396 | 2.755460 |
| 13 | H  | 3.746937 | 4.497080 | 4.148181 | 3.074967 | 2.716283 |
| 14 | Br | 5.487912 | 5.277204 | 3.957810 | 3.287084 | 4.402240 |

|    |    |          |          |          |          |          |
|----|----|----------|----------|----------|----------|----------|
| 15 | H  | 3.296173 | 3.286389 | 2.164295 | 1.109153 | 2.200745 |
| 16 | C  | 3.603178 | 2.543189 | 1.427407 | 2.426662 | 3.534288 |
| 17 | C  | 4.332891 | 3.046032 | 2.430252 | 3.646456 | 4.595015 |
| 18 | H  | 4.259433 | 3.414063 | 2.088937 | 2.550884 | 3.845659 |
| 19 | H  | 5.394419 | 4.122104 | 3.396751 | 4.501535 | 5.561530 |
| 20 | H  | 4.184896 | 2.833239 | 2.740404 | 4.070276 | 4.762973 |
| 21 | N  | 4.658946 | 5.788951 | 5.732177 | 4.581366 | 3.745963 |
| 22 | H  | 5.297818 | 6.413111 | 6.417209 | 5.338322 | 4.511223 |
| 23 | H  | 5.220224 | 6.257942 | 5.992065 | 4.733394 | 4.113979 |
| 24 | C  | 7.038133 | 7.711109 | 6.922757 | 5.613161 | 5.670368 |
| 25 | C  | 6.838895 | 7.376997 | 6.479090 | 5.220974 | 5.463934 |
| 26 | O  | 6.233728 | 7.009302 | 6.350764 | 5.018463 | 4.898956 |
| 27 | H  | 8.019131 | 8.750125 | 7.997629 | 6.681006 | 6.668608 |
| 28 | H  | 6.661616 | 7.289618 | 6.497676 | 5.225505 | 5.319780 |
| 29 | H  | 6.248419 | 6.625091 | 5.614735 | 4.426167 | 4.886081 |
| 30 | C  | 8.038101 | 8.546058 | 7.629328 | 6.428580 | 6.698107 |
| 31 | H  | 7.862949 | 8.338053 | 7.457244 | 6.322939 | 6.590115 |
| 32 | H  | 8.704500 | 9.086168 | 8.052728 | 6.919038 | 7.357286 |
| 33 | H  | 8.669164 | 9.297686 | 8.468765 | 7.217425 | 7.334535 |
|    |    | 6        | 7        | 8        | 9        | 10       |
| 6  | C  | 0.000000 |          |          |          |          |
| 7  | C  | 1.533910 | 0.000000 |          |          |          |
| 8  | H  | 2.841974 | 3.590976 | 0.000000 |          |          |
| 9  | H  | 4.666741 | 5.403224 | 2.756763 | 0.000000 |          |
| 10 | H  | 1.090271 | 2.165535 | 3.765285 | 5.310840 | 0.000000 |
| 11 | H  | 1.089804 | 2.168664 | 2.588306 | 4.885829 | 1.768388 |
| 12 | H  | 2.158383 | 1.094549 | 3.198250 | 5.121857 | 3.062941 |
| 13 | H  | 2.154680 | 1.098898 | 4.177649 | 5.475166 | 2.508359 |
| 14 | Br | 4.810569 | 5.087933 | 6.480002 | 6.112190 | 4.330434 |
| 15 | H  | 2.885379 | 3.527036 | 4.274645 | 4.257525 | 2.674056 |
| 16 | C  | 4.887602 | 5.566893 | 4.638357 | 2.876298 | 5.045085 |
| 17 | C  | 6.023832 | 6.725281 | 5.258615 | 2.891856 | 6.256815 |
| 18 | H  | 5.011474 | 5.592754 | 5.331300 | 3.903082 | 4.984363 |
| 19 | H  | 6.951015 | 7.606589 | 6.334974 | 3.941450 | 7.099842 |
| 20 | H  | 6.235929 | 6.985534 | 4.963431 | 2.317223 | 6.599270 |
| 21 | N  | 2.416151 | 1.458627 | 4.667543 | 6.762654 | 2.667595 |
| 22 | H  | 3.297713 | 2.053685 | 5.224306 | 7.333530 | 3.654078 |
| 23 | H  | 2.777108 | 2.045738 | 5.375360 | 7.283863 | 2.622670 |
| 24 | C  | 4.737055 | 4.789852 | 7.545094 | 8.778693 | 3.803299 |
| 25 | C  | 4.716644 | 4.477442 | 7.448619 | 8.425204 | 3.946849 |
| 26 | O  | 3.839635 | 3.551053 | 6.667487 | 8.079943 | 3.126283 |
| 27 | H  | 5.634428 | 5.605804 | 8.460120 | 9.820697 | 4.725509 |
| 28 | H  | 4.499302 | 4.899572 | 7.195834 | 8.340429 | 3.453349 |
| 29 | H  | 4.413312 | 4.321636 | 6.974635 | 7.646080 | 3.667834 |

|    |    |          |          |          |           |           |
|----|----|----------|----------|----------|-----------|-----------|
| 30 | C  | 5.948855 | 5.411435 | 8.633079 | 9.570311  | 5.302981  |
| 31 | H  | 5.914594 | 5.151252 | 8.451401 | 9.327503  | 5.444515  |
| 32 | H  | 6.744919 | 6.320144 | 9.381116 | 10.086971 | 6.038243  |
| 33 | H  | 6.411172 | 5.814522 | 9.167927 | 10.340977 | 5.763305  |
|    |    | 11       | 12       | 13       | 14        | 15        |
| 11 | H  | 0.000000 |          |          |           |           |
| 12 | H  | 2.493504 | 0.000000 |          |           |           |
| 13 | H  | 3.063321 | 1.770055 | 0.000000 |           |           |
| 14 | Br | 5.833806 | 5.823369 | 4.282393 | 0.000000  |           |
| 15 | H  | 3.842733 | 4.144297 | 3.048457 | 2.229043  | 0.000000  |
| 16 | C  | 5.592331 | 5.742431 | 5.152314 | 3.753264  | 2.731660  |
| 17 | C  | 6.619117 | 6.775388 | 6.361888 | 4.933864  | 4.050834  |
| 18 | H  | 5.851073 | 5.927256 | 5.017414 | 2.795549  | 2.383413  |
| 19 | H  | 7.603421 | 7.702696 | 7.145757 | 5.152833  | 4.712521  |
| 20 | H  | 6.682454 | 6.902055 | 6.762202 | 5.873580  | 4.697516  |
| 21 | N  | 2.655868 | 2.092621 | 2.156895 | 5.962074  | 4.649570  |
| 22 | H  | 3.491755 | 2.299060 | 2.586669 | 6.620948  | 5.419493  |
| 23 | H  | 3.181260 | 2.927215 | 2.363377 | 5.569784  | 4.567830  |
| 24 | C  | 5.336425 | 5.874428 | 4.561947 | 4.709086  | 4.862108  |
| 25 | C  | 5.535325 | 5.509316 | 3.934985 | 3.856448  | 4.362755  |
| 26 | O  | 4.489629 | 4.601161 | 3.325548 | 4.622436  | 4.408799  |
| 27 | H  | 6.130618 | 6.666215 | 5.443504 | 5.719973  | 5.948476  |
| 28 | H  | 5.037205 | 5.990426 | 4.764785 | 4.510969  | 4.503416  |
| 29 | H  | 5.345467 | 5.323222 | 3.643104 | 2.767179  | 3.470233  |
| 30 | C  | 6.779521 | 6.343518 | 4.758842 | 4.718302  | 5.554976  |
| 31 | H  | 6.797591 | 5.965091 | 4.381425 | 4.717834  | 5.509205  |
| 32 | H  | 7.617575 | 7.259087 | 5.598126 | 4.716056  | 5.947275  |
| 33 | H  | 7.126292 | 6.736599 | 5.310304 | 5.748909  | 6.409656  |
|    |    | 16       | 17       | 18       | 19        | 20        |
| 16 | C  | 0.000000 |          |          |           |           |
| 17 | C  | 1.326454 | 0.000000 |          |           |           |
| 18 | H  | 1.087896 | 2.140183 | 0.000000 |           |           |
| 19 | H  | 2.077450 | 1.081324 | 2.467061 | 0.000000  |           |
| 20 | H  | 2.129627 | 1.083375 | 3.116557 | 1.847732  | 0.000000  |
| 21 | N  | 6.925399 | 8.116503 | 6.875637 | 8.985586  | 8.388967  |
| 22 | H  | 7.591322 | 8.755440 | 7.546290 | 9.617007  | 9.009312  |
| 23 | H  | 7.074050 | 8.331116 | 6.876792 | 9.131425  | 8.714781  |
| 24 | C  | 7.551472 | 8.858506 | 6.966210 | 9.395824  | 9.522888  |
| 25 | C  | 6.982186 | 8.298565 | 6.303573 | 8.769828  | 9.036524  |
| 26 | O  | 7.129178 | 8.452182 | 6.645444 | 9.078130  | 9.047760  |
| 27 | H  | 8.638248 | 9.943797 | 8.044550 | 10.473639 | 10.604857 |
| 28 | H  | 7.112830 | 8.383257 | 6.569064 | 8.925698  | 9.023354  |
| 29 | H  | 5.995070 | 7.298678 | 5.263259 | 7.724485  | 8.081873  |
| 30 | C  | 8.040614 | 9.336537 | 7.293330 | 9.733241  | 10.120320 |



|    |   |          |           |          |           |           |
|----|---|----------|-----------|----------|-----------|-----------|
| 31 | H | 7.860868 | 9.133158  | 7.139636 | 9.530496  | 9.902999  |
| 32 | H | 8.290151 | 9.549467  | 7.441510 | 9.834528  | 10.408347 |
| 33 | H | 8.980666 | 10.290979 | 8.280301 | 10.734335 | 11.034123 |
|    |   | 21       | 22        | 23       | 24        | 25        |
| 21 | N | 0.000000 |           |          |           |           |
| 22 | H | 1.012877 | 0.000000  |          |           |           |
| 23 | H | 1.018673 | 1.644767  | 0.000000 |           |           |
| 24 | C | 4.364365 | 5.004119  | 3.400601 | 0.000000  |           |
| 25 | C | 4.305991 | 4.815630  | 3.394602 | 1.466694  | 0.000000  |
| 26 | O | 3.061038 | 3.625574  | 2.081556 | 1.439632  | 1.456618  |
| 27 | H | 4.954349 | 5.486246  | 3.954982 | 1.087589  | 2.215982  |
| 28 | H | 4.638283 | 5.429042  | 3.785765 | 1.087081  | 2.216507  |
| 29 | H | 4.508219 | 5.099217  | 3.743208 | 2.188800  | 1.089270  |
| 30 | C | 5.122307 | 5.376498  | 4.216696 | 2.597534  | 1.502915  |
| 31 | H | 4.972582 | 5.079513  | 4.194611 | 3.435384  | 2.146382  |
| 32 | H | 6.143688 | 6.438498  | 5.242113 | 3.143399  | 2.137599  |
| 33 | H | 5.252070 | 5.414134  | 4.301291 | 2.731202  | 2.155816  |
|    |   | 26       | 27        | 28       | 29        | 30        |
| 26 | O | 0.000000 |           |          |           |           |
| 27 | H | 2.135320 | 0.000000  |          |           |           |
| 28 | H | 2.139974 | 1.838946  | 0.000000 |           |           |
| 29 | H | 2.130944 | 3.122341  | 2.501029 | 0.000000  |           |
| 30 | C | 2.511622 | 2.820148  | 3.537494 | 2.212993  | 0.000000  |
| 31 | H | 2.928330 | 3.772403  | 4.340739 | 2.565481  | 1.093519  |
| 32 | H | 3.417608 | 3.301834  | 3.939005 | 2.559476  | 1.094020  |
| 33 | H | 2.695561 | 2.546785  | 3.790766 | 3.107766  | 1.093035  |
|    |   | 31       | 32        | 33       |           |           |
| 31 | H | 0.000000 |           |          |           |           |
| 32 | H | 1.765028 | 0.000000  |          |           |           |
| 33 | H | 1.776616 | 1.778844  | 0.000000 |           |           |

Stoichiometry C10H18BrN3O

Framework group C1[X(C10H18BrN3O)]

Deg. of freedom 93

Full point group C1 NOp 1

Largest Abelian subgroup C1 NOP 1

Largest concise Abelian subgroup C1 NOp 1

Standard orientation:

| Center<br>Number | Atomic<br>Number | Atomic<br>Type | Coordinates (Angstroms) |          |           |
|------------------|------------------|----------------|-------------------------|----------|-----------|
|                  |                  |                | X                       | Y        | Z         |
| 1                | 6                | 0              | -2.665840               | 2.339732 | -0.198868 |
| 2                | 6                | 0              | -3.598508               | 1.367983 | -0.029339 |
| 3                | 7                | 0              | -2.922833               | 0.153986 | -0.066348 |

|    |    |   |           |           |           |
|----|----|---|-----------|-----------|-----------|
| 4  | 6  | 0 | -1.613009 | 0.392586  | -0.253912 |
| 5  | 7  | 0 | -1.437124 | 1.712866  | -0.339559 |
| 6  | 6  | 0 | -0.130697 | 2.383365  | -0.482702 |
| 7  | 6  | 0 | 0.556932  | 2.621132  | 0.867674  |
| 8  | 1  | 0 | -2.768721 | 3.410674  | -0.233128 |
| 9  | 1  | 0 | -4.660987 | 1.436556  | 0.116050  |
| 10 | 1  | 0 | 0.495282  | 1.753947  | -1.115689 |
| 11 | 1  | 0 | -0.296532 | 3.330582  | -0.995492 |
| 12 | 1  | 0 | -0.076714 | 3.263376  | 1.487395  |
| 13 | 1  | 0 | 0.660436  | 1.657358  | 1.385363  |
| 14 | 35 | 0 | 0.107535  | -2.386980 | 0.090558  |
| 15 | 1  | 0 | -0.843144 | -0.405402 | -0.281179 |
| 16 | 6  | 0 | -3.442359 | -1.168436 | 0.070712  |
| 17 | 6  | 0 | -4.737353 | -1.454240 | 0.098721  |
| 18 | 1  | 0 | -2.645840 | -1.905981 | 0.142145  |
| 19 | 1  | 0 | -5.042899 | -2.485140 | 0.213391  |
| 20 | 1  | 0 | -5.521636 | -0.712246 | 0.009013  |
| 21 | 7  | 0 | 1.821283  | 3.300094  | 0.606870  |
| 22 | 1  | 0 | 2.167886  | 3.758637  | 1.440851  |
| 23 | 1  | 0 | 2.522462  | 2.627653  | 0.300495  |
| 24 | 6  | 0 | 3.865678  | 0.017508  | -1.416188 |
| 25 | 6  | 0 | 3.513017  | -0.590682 | -0.128971 |
| 26 | 8  | 0 | 3.384292  | 0.844698  | -0.340750 |
| 27 | 1  | 0 | 4.912276  | 0.168728  | -1.670381 |
| 28 | 1  | 0 | 3.188515  | -0.079132 | -2.261087 |
| 29 | 1  | 0 | 2.550695  | -1.097310 | -0.067542 |
| 30 | 6  | 0 | 4.557970  | -1.022392 | 0.861206  |
| 31 | 1  | 0 | 4.200835  | -0.875151 | 1.884220  |
| 32 | 1  | 0 | 4.769747  | -2.088315 | 0.735352  |
| 33 | 1  | 0 | 5.486022  | -0.460062 | 0.729942  |

-----  
Rotational constants (GHZ):      0.4563733      0.2607749      0.1748102

Standard basis: 6-311++G(d,p) (5D, 7F)

There are 499 symmetry adapted cartesian basis functions of A symmetry.

There are 482 symmetry adapted basis functions of A symmetry.

482 basis functions, 760 primitive gaussians, 499 cartesian basis functions

71 alpha electrons      71 beta electrons

nuclear repulsion energy      1297.0556510587 Hartrees.

NAtoms= 33 NActive= 33 NUniq= 33 SFac= 1.00D+00 NAtFMM= 60 NAOKFM=F

Big=F

Integral buffers will be 131072 words long.

Raffenetti 2 integral format.

Two-electron integral symmetry is turned on.

One-electron integrals computed using PRISM.

NBasis= 482 RedAO= T EigKep= 4.23D-06 NBF= 482  
 NBsUse= 482 1.00D-06 EigRej= -1.00D+00 NBFU= 482  
 Initial guess from the checkpoint file:  
 "/home/suqian/liuwen/qianmengshijie/nh2po/nh2po.chk"  
 B after Tr= 0.000000 0.000000 0.000000  
 Rot= 0.999941 -0.003079 0.001933 0.010273 Ang= -1.25 deg.  
 ExpMin= 3.50D-02 ExpMax= 4.40D+05 ExpMxC= 1.51D+04 IAcc=3 IRadAn= 5 AccDes=  
 0.00D+00  
 Harris functional with IExCor= 402 and IRadAn= 5 diagonalized for initial guess.  
 HarFok: IExCor= 402 AccDes= 0.00D+00 IRadAn= 5 IDoV= 1 UseB2=F ITyADJ=14  
 ICtDFT= 3500011 ScaDFX= 1.000000 1.000000 1.000000 1.000000  
 FoFCou: FMM=F IPFlag= 0 FMFlag= 100000 FMFlg1= 0  
 NFXFlg= 0 DoJE=T BraDBF=F KetDBF=T FulRan=T  
 wScrn= 0.000000 ICntrl= 500 IOpCl= 0 I1Cent= 20000004 NGrid=  
 0  
 NMat0= 1 NMatS0= 1 NMatT0= 0 NMatD0= 1 NMtDS0= 0  
 NMtDT0= 0  
 Petite list used in FoFCou.  
 Requested convergence on RMS density matrix=1.00D-08 within 128 cycles.  
 Requested convergence on MAX density matrix=1.00D-06.  
 Requested convergence on energy=1.00D-06.  
 No special actions if energy rises.  
 SCF Done: E(RB3LYP) = -3205.64713984 A.U. after 11 cycles  
 NFock= 11 Conv=0.85D-08 -V/T= 2.0018  
 Calling FoFJK, ICntrl= 2127 FMM=F ISym2X=0 I1Cent= 0 IOpClX= 0 NMat=1 NMatS=1  
 NMatT=0.

\*\*\*\*\* Axes restored to original set \*\*\*\*\*

| Center<br>Number | Atomic<br>Number | Forces (Hartrees/Bohr) |              |              |
|------------------|------------------|------------------------|--------------|--------------|
|                  |                  | X                      | Y            | Z            |
| 1                | 6                | -0.000469280           | 0.000067366  | 0.000319649  |
| 2                | 6                | 0.000453099            | -0.000350305 | -0.000023452 |
| 3                | 7                | -0.000697852           | -0.000191501 | 0.000438455  |
| 4                | 6                | 0.001597456            | 0.001133647  | -0.000445495 |
| 5                | 7                | -0.000098340           | 0.000177960  | -0.000599376 |
| 6                | 6                | -0.000617217           | -0.000654561 | 0.000203371  |
| 7                | 6                | 0.000988662            | 0.000492412  | -0.000556593 |
| 8                | 1                | 0.000079455            | -0.000000070 | 0.000027048  |
| 9                | 1                | -0.000033581           | 0.000078876  | -0.000070611 |
| 10               | 1                | 0.000119585            | 0.000016361  | 0.000107539  |
| 11               | 1                | 0.000184273            | 0.000074893  | -0.000123922 |
| 12               | 1                | -0.000073649           | 0.000089649  | -0.000109561 |
| 13               | 1                | -0.000255352           | -0.000172406 | 0.000232803  |

|    |    |              |              |              |
|----|----|--------------|--------------|--------------|
| 14 | 35 | -0.000202014 | 0.000045458  | -0.000139001 |
| 15 | 1  | -0.000684443 | -0.000418625 | 0.000372322  |
| 16 | 6  | -0.000251330 | -0.000688885 | -0.000200594 |
| 17 | 6  | 0.000036834  | 0.000281059  | 0.000070649  |
| 18 | 1  | 0.000209661  | 0.000057406  | -0.000013276 |
| 19 | 1  | 0.000013390  | -0.000018000 | 0.000000698  |
| 20 | 1  | 0.000018957  | -0.000003848 | 0.000067177  |
| 21 | 7  | -0.000338120 | 0.000207182  | 0.000406981  |
| 22 | 1  | 0.000134326  | -0.000213240 | 0.000083153  |
| 23 | 1  | -0.000035433 | 0.000110557  | 0.000007171  |
| 24 | 6  | 0.000087247  | -0.000190493 | -0.000279090 |
| 25 | 6  | -0.000298842 | 0.000320165  | -0.000543133 |
| 26 | 8  | -0.000433464 | -0.000009801 | -0.000003000 |
| 27 | 1  | 0.000089820  | 0.000099236  | 0.000057853  |
| 28 | 1  | 0.000086531  | -0.000123722 | 0.000102298  |
| 29 | 1  | 0.000503254  | -0.000151820 | 0.000414974  |
| 30 | 6  | 0.000000183  | 0.000011877  | 0.000210569  |
| 31 | 1  | -0.000026249 | -0.000052402 | -0.000010718 |
| 32 | 1  | -0.000049219 | -0.000013011 | -0.000031787 |
| 33 | 1  | -0.000038351 | -0.000011415 | 0.000026897  |

-----  
Cartesian Forces: Max 0.001597456 RMS 0.000345009

GradGradGradGradGradGradGradGradGradGradGradGradGradGradGradGradGradGradGrad

Berny optimization.

Using GEDIIS/GDIIS optimizer.

FormGI is forming the generalized inverse of G from B-inverse, IUseBI=4.

GSVD: received Info= 1 from GESDD.

Internal Forces: Max 0.001337835 RMS 0.000231980

Search for a local minimum.

Step number 18 out of a maximum of 172

All quantities printed in internal units (Hartrees-Bohrs-Radians)

Mixed Optimization -- En-DIIS/RFO-DIIS

Swapping is turned off.

Update second derivatives using D2CorX and points 16 17 18

DE= -5.62D-05 DEPred=-4.51D-05 R= 1.24D+00

TightC=F SS= 1.41D+00 RLast= 3.35D-01 DXNew= 1.1563D+00 1.0036D+00

Trust test= 1.24D+00 RLast= 3.35D-01 DXMaxT set to 1.00D+00

ITU= 1 1 1 1 1 1 0 -1 -1 1 1 1 -1 1 0 0 -1 0

|                 |         |         |         |         |         |
|-----------------|---------|---------|---------|---------|---------|
| Eigenvalues --- | 0.00045 | 0.00267 | 0.00329 | 0.00484 | 0.00694 |
| Eigenvalues --- | 0.00724 | 0.00859 | 0.01481 | 0.01541 | 0.01752 |
| Eigenvalues --- | 0.01886 | 0.02098 | 0.02126 | 0.02369 | 0.02398 |
| Eigenvalues --- | 0.02451 | 0.02502 | 0.02987 | 0.03074 | 0.03105 |
| Eigenvalues --- | 0.03221 | 0.03364 | 0.03533 | 0.04000 | 0.04083 |

|                 |         |         |         |         |         |
|-----------------|---------|---------|---------|---------|---------|
| Eigenvalues --- | 0.04387 | 0.04422 | 0.05084 | 0.05429 | 0.05745 |
| Eigenvalues --- | 0.05779 | 0.05953 | 0.07507 | 0.07713 | 0.08632 |
| Eigenvalues --- | 0.09542 | 0.10139 | 0.12260 | 0.12359 | 0.12541 |
| Eigenvalues --- | 0.12811 | 0.13668 | 0.15360 | 0.15998 | 0.16000 |
| Eigenvalues --- | 0.16001 | 0.16003 | 0.16018 | 0.16024 | 0.16060 |
| Eigenvalues --- | 0.16208 | 0.17412 | 0.18592 | 0.22084 | 0.22418 |
| Eigenvalues --- | 0.22860 | 0.23166 | 0.24258 | 0.25457 | 0.28564 |
| Eigenvalues --- | 0.29474 | 0.30287 | 0.32028 | 0.32191 | 0.32722 |
| Eigenvalues --- | 0.33751 | 0.34275 | 0.34313 | 0.34341 | 0.34548 |
| Eigenvalues --- | 0.34664 | 0.34742 | 0.35059 | 0.35145 | 0.35261 |
| Eigenvalues --- | 0.35408 | 0.35579 | 0.35730 | 0.35891 | 0.36420 |
| Eigenvalues --- | 0.36621 | 0.38059 | 0.39526 | 0.42137 | 0.42512 |
| Eigenvalues --- | 0.44581 | 0.45478 | 0.46213 | 0.49317 | 0.54895 |
| Eigenvalues --- | 0.58226 | 0.60615 | 1.24582 |         |         |

En-DIIS/RFO-DIIS IScMMF= 0 using points: 18 17 16 15 14

RFO step: Lambda=-1.76159987D-05.

DidBck=F Rises=F RFO-DIIS coefs: 0.93843 1.14691 -1.53595 0.02320

0.42740

Iteration 1 RMS(Cart)= 0.03840524 RMS(Int)= 0.00050668

Iteration 2 RMS(Cart)= 0.00150413 RMS(Int)= 0.00016422

Iteration 3 RMS(Cart)= 0.00000141 RMS(Int)= 0.00016422

Iteration 4 RMS(Cart)= 0.00000000 RMS(Int)= 0.00016422

| Variable | Old X   | -DE/DX   | Delta X<br>(Linear) | Delta X<br>(Quad) | Delta X<br>(Total) | New X   |
|----------|---------|----------|---------------------|-------------------|--------------------|---------|
| R1       | 2.56537 | 0.00004  | -0.00008            | 0.00002           | -0.00006           | 2.56532 |
| R2       | 2.62018 | 0.00027  | 0.00053             | 0.00020           | 0.00073            | 2.62092 |
| R3       | 2.03414 | -0.00002 | -0.00004            | -0.00002          | -0.00006           | 2.03407 |
| R4       | 2.62644 | -0.00028 | 0.00023             | 0.00007           | 0.00029            | 2.62674 |
| R5       | 2.03064 | 0.00003  | 0.00005             | 0.00006           | 0.00011            | 2.03075 |
| R6       | 2.54078 | 0.00051  | 0.00049             | 0.00017           | 0.00066            | 2.54145 |
| R7       | 2.69741 | 0.00031  | -0.00056            | -0.00005          | -0.00062           | 2.69679 |
| R8       | 2.52221 | -0.00009 | -0.00072            | -0.00078          | -0.00150           | 2.52071 |
| R9       | 2.09600 | -0.00036 | 0.00135             | -0.00016          | 0.00119            | 2.09719 |
| R10      | 2.78810 | -0.00011 | -0.00060            | -0.00069          | -0.00128           | 2.78682 |
| R11      | 2.89867 | 0.00029  | -0.00024            | -0.00008          | -0.00032           | 2.89835 |
| R12      | 2.06031 | 0.00001  | -0.00001            | -0.00009          | -0.00011           | 2.06021 |
| R13      | 2.05943 | 0.00010  | 0.00016             | 0.00005           | 0.00021            | 2.05964 |
| R14      | 2.06840 | 0.00005  | 0.00021             | 0.00017           | 0.00037            | 2.06877 |
| R15      | 2.07662 | 0.00024  | 0.00051             | 0.00029           | 0.00080            | 2.07742 |
| R16      | 2.75641 | -0.00040 | -0.00065            | -0.00051          | -0.00115           | 2.75525 |
| R17      | 4.21228 | -0.00018 | -0.00658            | 0.00176           | -0.00482           | 4.20746 |
| R18      | 2.50663 | -0.00012 | 0.00015             | -0.00001          | 0.00014            | 2.50678 |
| R19      | 2.05583 | 0.00012  | -0.00012            | 0.00012           | 0.00000            | 2.05583 |
| R20      | 2.04341 | 0.00001  | 0.00001             | 0.00002           | 0.00003            | 2.04344 |

|     |         |          |          |          |          |         |
|-----|---------|----------|----------|----------|----------|---------|
| R21 | 2.04728 | -0.00003 | 0.00004  | 0.00001  | 0.00005  | 2.04733 |
| R22 | 1.91406 | -0.00003 | 0.00020  | 0.00006  | 0.00026  | 1.91432 |
| R23 | 1.92501 | -0.00002 | 0.00035  | 0.00009  | 0.00044  | 1.92545 |
| R24 | 3.93357 | 0.00007  | -0.00629 | 0.00241  | -0.00388 | 3.92969 |
| R25 | 2.77165 | -0.00012 | 0.00172  | -0.00077 | 0.00146  | 2.77311 |
| R26 | 2.72051 | 0.00029  | -0.00039 | -0.00022 | -0.00083 | 2.71968 |
| R27 | 2.05525 | 0.00008  | -0.00002 | 0.00015  | 0.00013  | 2.05537 |
| R28 | 2.05429 | -0.00010 | 0.00013  | 0.00021  | 0.00034  | 2.05463 |
| R29 | 2.75261 | 0.00009  | 0.00016  | 0.00126  | 0.00112  | 2.75372 |
| R30 | 2.05842 | -0.00029 | 0.00023  | -0.00047 | -0.00024 | 2.05818 |
| R31 | 2.84010 | 0.00006  | -0.00037 | 0.00017  | -0.00020 | 2.83989 |
| R32 | 2.06645 | -0.00002 | -0.00009 | -0.00015 | -0.00024 | 2.06621 |
| R33 | 2.06740 | 0.00000  | -0.00012 | -0.00003 | -0.00015 | 2.06725 |
| R34 | 2.06554 | -0.00004 | 0.00005  | -0.00002 | 0.00003  | 2.06557 |
| A1  | 1.87326 | 0.00004  | -0.00010 | -0.00015 | -0.00024 | 1.87302 |
| A2  | 2.27902 | 0.00005  | -0.00056 | 0.00011  | -0.00045 | 2.27857 |
| A3  | 2.13090 | -0.00010 | 0.00066  | 0.00004  | 0.00070  | 2.13160 |
| A4  | 1.86285 | 0.00018  | 0.00015  | -0.00004 | 0.00012  | 1.86297 |
| A5  | 2.27906 | -0.00018 | 0.00051  | 0.00017  | 0.00068  | 2.27974 |
| A6  | 2.14126 | 0.00001  | -0.00067 | -0.00014 | -0.00081 | 2.14045 |
| A7  | 1.89896 | -0.00019 | -0.00038 | -0.00009 | -0.00047 | 1.89850 |
| A8  | 2.25200 | 0.00026  | 0.00026  | -0.00017 | 0.00010  | 2.25210 |
| A9  | 2.13220 | -0.00007 | 0.00012  | 0.00026  | 0.00039  | 2.13259 |
| A10 | 1.88901 | 0.00017  | 0.00032  | 0.00008  | 0.00042  | 1.88943 |
| A11 | 2.15549 | -0.00134 | -0.00174 | -0.00074 | -0.00248 | 2.15301 |
| A12 | 2.23781 | 0.00117  | 0.00159  | 0.00059  | 0.00219  | 2.23999 |
| A13 | 1.90068 | -0.00019 | -0.00002 | 0.00019  | 0.00017  | 1.90085 |
| A14 | 2.20070 | 0.00031  | 0.00185  | 0.00024  | 0.00207  | 2.20277 |
| A15 | 2.18029 | -0.00012 | -0.00153 | -0.00044 | -0.00200 | 2.17830 |
| A16 | 1.96273 | -0.00016 | 0.00080  | -0.00095 | -0.00015 | 1.96258 |
| A17 | 1.87797 | 0.00008  | -0.00124 | -0.00034 | -0.00157 | 1.87639 |
| A18 | 1.88168 | 0.00020  | 0.00147  | 0.00162  | 0.00310  | 1.88478 |
| A19 | 1.92113 | 0.00009  | -0.00008 | 0.00002  | -0.00005 | 1.92108 |
| A20 | 1.92594 | -0.00018 | -0.00085 | -0.00095 | -0.00179 | 1.92415 |
| A21 | 1.89226 | -0.00003 | -0.00012 | 0.00069  | 0.00057  | 1.89283 |
| A22 | 1.90697 | -0.00029 | -0.00011 | 0.00018  | 0.00006  | 1.90703 |
| A23 | 1.89759 | -0.00024 | -0.00050 | 0.00017  | -0.00033 | 1.89726 |
| A24 | 1.87897 | 0.00065  | -0.00084 | 0.00050  | -0.00033 | 1.87865 |
| A25 | 1.87802 | 0.00007  | -0.00047 | -0.00028 | -0.00075 | 1.87727 |
| A26 | 1.90701 | -0.00026 | -0.00023 | -0.00091 | -0.00114 | 1.90587 |
| A27 | 1.99416 | 0.00004  | 0.00209  | 0.00035  | 0.00243  | 1.99659 |
| A28 | 2.16154 | -0.00016 | 0.00030  | -0.00020 | 0.00010  | 2.16164 |
| A29 | 1.94756 | -0.00010 | 0.00023  | 0.00012  | 0.00035  | 1.94791 |
| A30 | 2.17407 | 0.00027  | -0.00054 | 0.00007  | -0.00046 | 2.17360 |

|     |          |          |          |          |          |          |
|-----|----------|----------|----------|----------|----------|----------|
| A31 | 2.07547  | -0.00003 | -0.00003 | -0.00004 | -0.00007 | 2.07540  |
| A32 | 2.16209  | 0.00002  | -0.00017 | -0.00008 | -0.00025 | 2.16185  |
| A33 | 2.04562  | 0.00001  | 0.00019  | 0.00013  | 0.00032  | 2.04594  |
| A34 | 1.93920  | -0.00007 | 0.00028  | -0.00018 | -0.00015 | 1.93906  |
| A35 | 1.92107  | 0.00049  | 0.00033  | -0.00144 | -0.00119 | 1.91988  |
| A36 | 1.88698  | -0.00031 | 0.00024  | -0.00069 | -0.00037 | 1.88661  |
| A37 | 2.08767  | -0.00001 | 0.00016  | -0.00157 | -0.00140 | 2.08627  |
| A38 | 2.08917  | -0.00007 | 0.00215  | 0.00137  | 0.00355  | 2.09272  |
| A39 | 2.00037  | -0.00025 | -0.00104 | 0.00112  | 0.00007  | 2.00044  |
| A40 | 2.00798  | 0.00024  | 0.00067  | 0.00105  | 0.00183  | 2.00981  |
| A41 | 2.01545  | 0.00005  | -0.00144 | -0.00111 | -0.00257 | 2.01288  |
| A42 | 2.04292  | 0.00029  | 0.00409  | 0.00384  | 0.00774  | 2.05066  |
| A43 | 2.12957  | 0.00010  | -0.00026 | 0.00029  | 0.00028  | 2.12986  |
| A44 | 1.96975  | 0.00042  | 0.00003  | 0.00184  | 0.00187  | 1.97162  |
| A45 | 2.02672  | -0.00019 | 0.00017  | -0.00012 | 0.00009  | 2.02681  |
| A46 | 2.03029  | -0.00042 | -0.00271 | -0.00373 | -0.00650 | 2.02380  |
| A47 | 2.60750  | 0.00011  | -0.00084 | 0.01552  | 0.01611  | 2.62361  |
| A48 | 2.56049  | 0.00002  | -0.00372 | 0.00624  | 0.00376  | 2.56425  |
| A49 | 1.92902  | -0.00001 | 0.00031  | -0.00082 | -0.00052 | 1.92850  |
| A50 | 1.91630  | -0.00010 | -0.00065 | -0.00032 | -0.00096 | 1.91534  |
| A51 | 1.94275  | 0.00004  | -0.00037 | 0.00090  | 0.00053  | 1.94328  |
| A52 | 1.87762  | 0.00002  | 0.00000  | -0.00074 | -0.00074 | 1.87688  |
| A53 | 1.89692  | 0.00001  | 0.00053  | 0.00060  | 0.00113  | 1.89805  |
| A54 | 1.89978  | 0.00004  | 0.00020  | 0.00035  | 0.00056  | 1.90033  |
| A55 | 3.35369  | 0.00074  | -0.00338 | 0.00092  | -0.00246 | 3.35123  |
| A56 | 2.80421  | 0.00058  | -0.00107 | -0.01669 | -0.01782 | 2.78639  |
| A57 | 2.79814  | 0.00006  | 0.02714  | -0.01651 | 0.01062  | 2.80877  |
| A58 | 3.17613  | 0.00023  | -0.01071 | 0.00014  | -0.01048 | 3.16565  |
| D1  | 0.00200  | -0.00001 | -0.00122 | 0.00235  | 0.00112  | 0.00312  |
| D2  | 3.13770  | 0.00002  | -0.00040 | -0.00093 | -0.00134 | 3.13636  |
| D3  | 3.14128  | 0.00004  | 0.00047  | 0.00336  | 0.00381  | -3.13809 |
| D4  | -0.00620 | 0.00007  | 0.00128  | 0.00008  | 0.00135  | -0.00485 |
| D5  | -0.00345 | 0.00001  | -0.00013 | -0.00127 | -0.00139 | -0.00484 |
| D6  | -3.08811 | 0.00012  | -0.00482 | -0.00110 | -0.00596 | -3.09406 |
| D7  | 3.14021  | -0.00004 | -0.00163 | -0.00218 | -0.00381 | 3.13640  |
| D8  | 0.05555  | 0.00008  | -0.00633 | -0.00201 | -0.00837 | 0.04718  |
| D9  | 0.00011  | 0.00001  | 0.00215  | -0.00263 | -0.00048 | -0.00037 |
| D10 | 3.13473  | 0.00005  | 0.00423  | -0.00094 | 0.00330  | 3.13803  |
| D11 | -3.13617 | -0.00002 | 0.00141  | 0.00032  | 0.00173  | -3.13444 |
| D12 | -0.00154 | 0.00002  | 0.00350  | 0.00202  | 0.00550  | 0.00396  |
| D13 | -0.00226 | -0.00001 | -0.00225 | 0.00186  | -0.00039 | -0.00265 |
| D14 | 3.09764  | 0.00010  | 0.00264  | 0.00013  | 0.00278  | 3.10041  |
| D15 | -3.13746 | -0.00004 | -0.00415 | 0.00031  | -0.00385 | -3.14131 |
| D16 | -0.03756 | 0.00006  | 0.00074  | -0.00142 | -0.00068 | -0.03825 |

|     |          |          |          |          |          |          |
|-----|----------|----------|----------|----------|----------|----------|
| D17 | 0.15204  | -0.00021 | -0.00502 | 0.00259  | -0.00242 | 0.14962  |
| D18 | -2.99593 | -0.00011 | -0.00587 | 0.00216  | -0.00371 | -2.99965 |
| D19 | -2.99735 | -0.00016 | -0.00269 | 0.00449  | 0.00180  | -2.99555 |
| D20 | 0.13787  | -0.00007 | -0.00354 | 0.00405  | 0.00051  | 0.13837  |
| D21 | 0.00352  | 0.00000  | 0.00148  | -0.00038 | 0.00110  | 0.00462  |
| D22 | 3.08900  | -0.00010 | 0.00632  | -0.00052 | 0.00574  | 3.09475  |
| D23 | -3.09382 | -0.00003 | -0.00365 | 0.00150  | -0.00213 | -3.09594 |
| D24 | -0.00834 | -0.00013 | 0.00119  | 0.00136  | 0.00252  | -0.00582 |
| D25 | 1.58799  | -0.00037 | -0.02074 | -0.02156 | -0.04229 | 1.54570  |
| D26 | -2.57670 | -0.00029 | -0.02117 | -0.02235 | -0.04352 | -2.62022 |
| D27 | -0.53905 | -0.00018 | -0.02120 | -0.02087 | -0.04207 | -0.58112 |
| D28 | -1.48789 | -0.00023 | -0.02627 | -0.02138 | -0.04765 | -1.53554 |
| D29 | 0.63060  | -0.00016 | -0.02670 | -0.02217 | -0.04888 | 0.58172  |
| D30 | 2.66825  | -0.00004 | -0.02673 | -0.02070 | -0.04743 | 2.62083  |
| D31 | -1.05950 | 0.00005  | 0.00533  | -0.00386 | 0.00148  | -1.05803 |
| D32 | 0.98556  | -0.00016 | 0.00443  | -0.00400 | 0.00043  | 0.98599  |
| D33 | -3.12866 | 0.00015  | 0.00615  | -0.00316 | 0.00299  | -3.12567 |
| D34 | 3.13002  | -0.00001 | 0.00642  | -0.00282 | 0.00361  | 3.13363  |
| D35 | -1.10810 | -0.00022 | 0.00552  | -0.00296 | 0.00256  | -1.10554 |
| D36 | 1.06087  | 0.00008  | 0.00724  | -0.00212 | 0.00512  | 1.06599  |
| D37 | 1.04220  | 0.00007  | 0.00716  | -0.00309 | 0.00407  | 1.04627  |
| D38 | 3.08726  | -0.00014 | 0.00626  | -0.00323 | 0.00302  | 3.09028  |
| D39 | -1.02696 | 0.00017  | 0.00798  | -0.00239 | 0.00558  | -1.02138 |
| D40 | 2.80545  | -0.00003 | 0.01779  | 0.01948  | 0.03732  | 2.84277  |
| D41 | -1.38809 | -0.00015 | 0.01848  | 0.01756  | 0.03600  | -1.35210 |
| D42 | 0.73631  | 0.00008  | 0.01853  | 0.01949  | 0.03807  | 0.77438  |
| D43 | 2.82596  | -0.00004 | 0.01923  | 0.01757  | 0.03674  | 2.86270  |
| D44 | -1.36833 | 0.00015  | 0.01790  | 0.02028  | 0.03823  | -1.33011 |
| D45 | 0.72131  | 0.00003  | 0.01859  | 0.01836  | 0.03690  | 0.75821  |
| D46 | -3.13351 | 0.00005  | -0.00067 | 0.00083  | 0.00017  | -3.13335 |
| D47 | 0.01254  | 0.00000  | -0.00045 | 0.00023  | -0.00022 | 0.01232  |
| D48 | 0.01528  | -0.00006 | 0.00030  | 0.00133  | 0.00162  | 0.01691  |
| D49 | -3.12185 | -0.00011 | 0.00052  | 0.00072  | 0.00124  | -3.12061 |
| D50 | 1.66759  | 0.00006  | 0.01502  | 0.05675  | 0.07164  | 1.73922  |
| D51 | -0.58500 | -0.00038 | 0.00801  | -0.02762 | -0.01974 | -0.60474 |
| D52 | -2.55889 | 0.00018  | 0.01830  | 0.05119  | 0.06963  | -2.48927 |
| D53 | 1.47171  | -0.00027 | 0.01129  | -0.03317 | -0.02175 | 1.44995  |
| D54 | -2.71003 | 0.00012  | -0.00372 | 0.00268  | -0.00110 | -2.71113 |
| D55 | -0.00412 | -0.00008 | -0.00153 | 0.00282  | 0.00133  | -0.00278 |
| D56 | -0.03339 | 0.00009  | -0.00200 | -0.00079 | -0.00278 | -0.03617 |
| D57 | 2.67252  | -0.00011 | 0.00018  | -0.00064 | -0.00035 | 2.67217  |
| D58 | 1.55535  | -0.00003 | -0.00665 | -0.06366 | -0.07029 | 1.48506  |
| D59 | -0.84310 | -0.00012 | -0.00386 | -0.06444 | -0.06838 | -0.91148 |
| D60 | 0.91249  | -0.00018 | 0.00158  | 0.06255  | 0.06393  | 0.97643  |



|     |          |          |          |         |         |          |
|-----|----------|----------|----------|---------|---------|----------|
| D61 | -1.49551 | 0.00023  | 0.00577  | 0.06652 | 0.07208 | -1.42342 |
| D62 | 2.54715  | 0.00008  | -0.00071 | 0.00319 | 0.00246 | 2.54961  |
| D63 | -1.66742 | 0.00004  | -0.00092 | 0.00157 | 0.00064 | -1.66678 |
| D64 | 0.43739  | 0.00005  | -0.00134 | 0.00239 | 0.00103 | 0.43843  |
| D65 | 1.35518  | -0.00001 | -0.00005 | 0.00339 | 0.00340 | 1.35858  |
| D66 | -2.85939 | -0.00005 | -0.00026 | 0.00178 | 0.00157 | -2.85781 |
| D67 | -0.75458 | -0.00005 | -0.00068 | 0.00260 | 0.00197 | -0.75260 |
| D68 | -1.02718 | 0.00005  | 0.00310  | 0.00509 | 0.00816 | -1.01902 |
| D69 | 1.04143  | 0.00000  | 0.00289  | 0.00348 | 0.00633 | 1.04777  |
| D70 | -3.13694 | 0.00001  | 0.00247  | 0.00430 | 0.00673 | -3.13021 |

| Item                 | Value    | Threshold | Converged? |
|----------------------|----------|-----------|------------|
| Maximum Force        | 0.001338 | 0.000450  | NO         |
| RMS Force            | 0.000232 | 0.000300  | YES        |
| Maximum Displacement | 0.194442 | 0.001800  | NO         |
| RMS Displacement     | 0.039523 | 0.001200  | NO         |

Predicted change in Energy=-5.124742D-05

GradGradGradGradGradGradGradGradGradGradGradGradGradGradGradGradGradGradGrad

Input orientation:

| Center<br>Number | Atomic<br>Number | Atomic<br>Type | Coordinates (Angstroms) |           |           |
|------------------|------------------|----------------|-------------------------|-----------|-----------|
|                  |                  |                | X                       | Y         | Z         |
| 1                | 6                | 0              | -2.790285               | 2.086787  | -0.324904 |
| 2                | 6                | 0              | -3.674534               | 1.119231  | 0.028310  |
| 3                | 7                | 0              | -2.943605               | -0.052281 | 0.187785  |
| 4                | 6                | 0              | -1.648545               | 0.207712  | -0.065032 |
| 5                | 7                | 0              | -1.535501               | 1.498644  | -0.381286 |
| 6                | 6                | 0              | -0.263384               | 2.186083  | -0.671031 |
| 7                | 6                | 0              | 0.403984                | 2.740509  | 0.593720  |
| 8                | 1                | 0              | -2.943365               | 3.130661  | -0.538204 |
| 9                | 1                | 0              | -4.736978               | 1.165098  | 0.183027  |
| 10               | 1                | 0              | 0.395443                | 1.465882  | -1.156650 |
| 11               | 1                | 0              | -0.469469               | 2.993461  | -1.373586 |
| 12               | 1                | 0              | -0.264650               | 3.467468  | 1.065873  |
| 13               | 1                | 0              | 0.552040                | 1.915351  | 1.304848  |
| 14               | 35               | 0              | 0.213781                | -2.393423 | 0.694882  |
| 15               | 1                | 0              | -0.844218               | -0.551192 | 0.028477  |
| 16               | 6                | 0              | -3.399739               | -1.352937 | 0.557643  |
| 17               | 6                | 0              | -4.679768               | -1.686029 | 0.658903  |
| 18               | 1                | 0              | -2.569477               | -2.032691 | 0.736865  |
| 19               | 1                | 0              | -4.935819               | -2.694542 | 0.953248  |
| 20               | 1                | 0              | -5.498404               | -1.004933 | 0.459655  |
| 21               | 7                | 0              | 1.632247                | 3.412510  | 0.186783  |

|    |   |   |          |           |           |
|----|---|---|----------|-----------|-----------|
| 22 | 1 | 0 | 1.969505 | 4.029105  | 0.916350  |
| 23 | 1 | 0 | 2.358328 | 2.724369  | -0.006693 |
| 24 | 6 | 0 | 3.795296 | -0.098607 | -1.256477 |
| 25 | 6 | 0 | 3.450525 | -0.487812 | 0.115787  |
| 26 | 8 | 0 | 3.252880 | 0.878753  | -0.349928 |
| 27 | 1 | 0 | 4.837819 | 0.059968  | -1.522926 |
| 28 | 1 | 0 | 3.142169 | -0.378175 | -2.079522 |
| 29 | 1 | 0 | 2.515087 | -1.025023 | 0.266100  |
| 30 | 6 | 0 | 4.497480 | -0.680591 | 1.176519  |
| 31 | 1 | 0 | 4.112865 | -0.376416 | 2.153788  |
| 32 | 1 | 0 | 4.765836 | -1.739033 | 1.242776  |
| 33 | 1 | 0 | 5.397569 | -0.100537 | 0.957116  |

-----  
Distance matrix (angstroms):

|    |    | 1        | 2        | 3        | 4        | 5        |
|----|----|----------|----------|----------|----------|----------|
| 1  | C  | 0.000000 |          |          |          |          |
| 2  | C  | 1.357506 | 0.000000 |          |          |          |
| 3  | N  | 2.204987 | 1.390010 | 0.000000 |          |          |
| 4  | C  | 2.214052 | 2.223558 | 1.344877 | 0.000000 |          |
| 5  | N  | 1.386929 | 2.210698 | 2.170706 | 1.333904 | 0.000000 |
| 6  | C  | 2.552429 | 3.641868 | 3.596028 | 2.489951 | 1.474723 |
| 7  | C  | 3.387414 | 4.425217 | 4.378448 | 3.325941 | 2.500894 |
| 8  | H  | 1.076384 | 2.213911 | 3.264687 | 3.231730 | 2.161061 |
| 9  | H  | 2.212943 | 1.074629 | 2.167538 | 3.242921 | 3.267897 |
| 10 | H  | 3.350550 | 4.253118 | 3.906605 | 2.636761 | 2.081059 |
| 11 | H  | 2.703327 | 3.968689 | 4.223241 | 3.295895 | 2.086998 |
| 12 | H  | 3.196775 | 4.268262 | 4.509598 | 3.717542 | 2.754197 |
| 13 | H  | 3.722448 | 4.486344 | 4.164005 | 3.104058 | 2.715607 |
| 14 | Br | 5.489687 | 5.282239 | 3.963228 | 3.288105 | 4.400717 |
| 15 | H  | 3.297119 | 3.286488 | 2.163728 | 1.109785 | 2.201728 |
| 16 | C  | 3.603058 | 2.543092 | 1.427081 | 2.426939 | 3.533905 |
| 17 | C  | 4.332686 | 3.045920 | 2.430093 | 3.646732 | 4.594622 |
| 18 | H  | 4.259837 | 3.414353 | 2.088895 | 2.551580 | 3.845737 |
| 19 | H  | 5.394266 | 4.122040 | 3.396527 | 4.501794 | 5.561110 |
| 20 | H  | 4.184277 | 2.832778 | 2.740156 | 4.070285 | 4.762318 |
| 21 | N  | 4.645229 | 5.783266 | 5.739616 | 4.593227 | 3.744358 |
| 22 | H  | 5.288564 | 6.411799 | 6.428621 | 5.353171 | 4.513554 |
| 23 | H  | 5.197690 | 6.242846 | 5.988163 | 4.732018 | 4.099345 |
| 24 | C  | 7.000975 | 7.676729 | 6.892084 | 5.581109 | 5.633345 |
| 25 | C  | 6.765389 | 7.304568 | 6.409351 | 5.149463 | 5.390135 |
| 26 | O  | 6.162777 | 6.941899 | 6.289069 | 4.955343 | 4.828441 |
| 27 | H  | 7.983184 | 8.717140 | 7.968042 | 6.649827 | 6.632673 |
| 28 | H  | 6.659485 | 7.290585 | 6.502579 | 5.229950 | 5.318558 |
| 29 | H  | 6.178966 | 6.554829 | 5.545239 | 4.354896 | 4.816147 |

|    |    |          |          |          |           |          |
|----|----|----------|----------|----------|-----------|----------|
| 30 | C  | 7.938777 | 8.446275 | 7.532736 | 6.332784  | 6.600961 |
| 31 | H  | 7.737232 | 8.209641 | 7.332394 | 6.201469  | 6.468887 |
| 32 | H  | 8.613332 | 8.993578 | 7.962011 | 6.829675  | 7.268217 |
| 33 | H  | 8.571401 | 9.200738 | 8.376717 | 7.126537  | 7.239901 |
|    |    | 6        | 7        | 8        | 9         | 10       |
| 6  | C  | 0.000000 |          |          |           |          |
| 7  | C  | 1.533741 | 0.000000 |          |           |          |
| 8  | H  | 2.844674 | 3.555026 | 0.000000 |           |          |
| 9  | H  | 4.667426 | 5.392595 | 2.756930 | 0.000000  |          |
| 10 | H  | 1.090214 | 2.165304 | 3.781746 | 5.312904  | 0.000000 |
| 11 | H  | 1.089915 | 2.167302 | 2.614736 | 4.896691  | 1.768793 |
| 12 | H  | 2.158422 | 1.094747 | 3.140384 | 5.107058  | 3.062952 |
| 13 | H  | 2.154601 | 1.099322 | 4.134208 | 5.458486  | 2.507093 |
| 14 | Br | 4.802632 | 5.138450 | 6.481017 | 6.118421  | 4.284321 |
| 15 | H  | 2.884329 | 3.565502 | 4.275932 | 4.257126  | 2.647617 |
| 16 | C  | 4.885798 | 5.588015 | 4.638083 | 2.875595  | 5.028712 |
| 17 | C  | 6.022161 | 6.741144 | 5.258201 | 2.891134  | 6.244081 |
| 18 | H  | 5.009819 | 5.625424 | 5.331585 | 3.902646  | 4.961468 |
| 19 | H  | 6.949132 | 7.627748 | 6.334611 | 3.940761  | 7.084007 |
| 20 | H  | 6.234298 | 6.991744 | 4.962569 | 2.316318  | 6.592025 |
| 21 | N  | 2.415240 | 1.458017 | 4.641257 | 6.754102  | 2.669055 |
| 22 | H  | 3.301864 | 2.053151 | 5.201848 | 7.329203  | 3.653096 |
| 23 | H  | 2.757620 | 2.044558 | 5.343737 | 7.267096  | 2.599828 |
| 24 | C  | 4.694192 | 4.794247 | 7.506906 | 8.744645  | 3.743874 |
| 25 | C  | 4.643481 | 4.464515 | 7.375831 | 8.352954  | 3.843117 |
| 26 | O  | 3.765146 | 3.531687 | 6.595452 | 8.012731  | 3.026626 |
| 27 | H  | 5.591812 | 5.596819 | 8.422925 | 9.788173  | 4.673913 |
| 28 | H  | 4.489661 | 4.936605 | 7.191754 | 8.341569  | 3.434639 |
| 29 | H  | 4.348484 | 4.329356 | 6.907338 | 7.576013  | 3.566752 |
| 30 | C  | 5.856371 | 5.366590 | 8.534172 | 9.469362  | 5.184374 |
| 31 | H  | 5.804959 | 5.089679 | 8.326872 | 9.196732  | 5.307758 |
| 32 | H  | 6.660498 | 6.285962 | 9.290726 | 9.993023  | 5.926978 |
| 33 | H  | 6.318693 | 5.756691 | 9.069057 | 10.242562 | 5.651809 |
|    |    | 11       | 12       | 13       | 14        | 15       |
| 11 | H  | 0.000000 |          |          |           |          |
| 12 | H  | 2.493511 | 0.000000 |          |           |          |
| 13 | H  | 3.062648 | 1.770074 | 0.000000 |           |          |
| 14 | Br | 5.810672 | 5.892077 | 4.364860 | 0.000000  |          |
| 15 | H  | 3.830246 | 4.190671 | 3.108455 | 2.226493  | 0.000000 |
| 16 | C  | 5.586349 | 5.772641 | 5.182333 | 3.762841  | 2.730110 |
| 17 | C  | 6.614776 | 6.798340 | 6.384278 | 4.944545  | 4.049289 |
| 18 | H  | 5.841766 | 5.972623 | 5.064929 | 2.806852  | 2.381842 |
| 19 | H  | 7.597092 | 7.733232 | 7.175746 | 5.164863  | 4.710664 |
| 20 | H  | 6.681176 | 6.911009 | 6.771284 | 5.883221  | 4.696088 |

|    |   |          |           |          |           |           |
|----|---|----------|-----------|----------|-----------|-----------|
| 21 | N | 2.650955 | 2.091420  | 2.158333 | 5.998255  | 4.676416  |
| 22 | H | 3.502137 | 2.308515  | 2.574509 | 6.661867  | 5.448347  |
| 23 | H | 3.152340 | 2.929610  | 2.374305 | 5.593128  | 4.581139  |
| 24 | C | 5.269043 | 5.881612  | 4.597295 | 4.679876  | 4.835393  |
| 25 | C | 5.450124 | 5.509032  | 3.948452 | 3.800423  | 4.296098  |
| 26 | O | 4.401789 | 4.591183  | 3.332770 | 4.586380  | 4.355932  |
| 27 | H | 6.065888 | 6.659440  | 5.459547 | 5.685027  | 5.921648  |
| 28 | H | 4.991012 | 6.024027  | 4.839730 | 4.509324  | 4.512746  |
| 29 | H | 5.267291 | 5.343131  | 3.684881 | 2.711528  | 3.400869  |
| 30 | C | 6.683733 | 6.316369  | 4.724603 | 4.638517  | 5.465206  |
| 31 | H | 6.692998 | 5.926352  | 4.318839 | 4.625968  | 5.396310  |
| 32 | H | 7.526637 | 7.241874  | 5.578033 | 4.631373  | 5.861586  |
| 33 | H | 7.030444 | 6.693520  | 5.259645 | 5.674306  | 6.326560  |
|    |   | 16       | 17        | 18       | 19        | 20        |
| 16 | C | 0.000000 |           |          |           |           |
| 17 | C | 1.326529 | 0.000000  |          |           |           |
| 18 | H | 1.087897 | 2.139995  | 0.000000 |           |           |
| 19 | H | 2.077486 | 1.081341  | 2.466666 | 0.000000  |           |
| 20 | H | 2.129578 | 1.083400  | 3.116367 | 1.847949  | 0.000000  |
| 21 | N | 6.940310 | 8.127702  | 6.899803 | 9.001280  | 8.392523  |
| 22 | H | 7.610771 | 8.771652  | 7.574955 | 9.638065  | 9.017748  |
| 23 | H | 7.078011 | 8.332433  | 6.889540 | 9.137323  | 8.709386  |
| 24 | C | 7.525484 | 8.832628  | 6.944381 | 9.373054  | 9.494177  |
| 25 | C | 6.918801 | 8.236041  | 6.246024 | 8.712162  | 8.970451  |
| 26 | O | 7.075413 | 8.397783  | 6.599808 | 9.028926  | 8.988252  |
| 27 | H | 8.612923 | 9.919343  | 8.022089 | 10.451927 | 10.578381 |
| 28 | H | 7.120489 | 8.390004  | 6.579693 | 8.934044  | 9.027721  |
| 29 | H | 5.931079 | 7.235825  | 5.204787 | 7.666516  | 8.015853  |
| 30 | C | 7.949914 | 9.246660  | 7.208561 | 9.648471  | 10.026804 |
| 31 | H | 7.742125 | 9.014442  | 7.028842 | 9.417733  | 9.779653  |
| 32 | H | 8.203358 | 9.463781  | 7.358600 | 9.752894  | 10.320213 |
| 33 | H | 8.894982 | 10.205657 | 8.200948 | 10.654003 | 10.944753 |
|    |   | 21       | 22        | 23       | 24        | 25        |
| 21 | N | 0.000000 |           |          |           |           |
| 22 | H | 1.013016 | 0.000000  |          |           |           |
| 23 | H | 1.018904 | 1.644850  | 0.000000 |           |           |
| 24 | C | 4.369178 | 5.009261  | 3.405294 | 0.000000  |           |
| 25 | C | 4.303915 | 4.820463  | 3.394997 | 1.467466  | 0.000000  |
| 26 | O | 3.055231 | 3.629770  | 2.079502 | 1.439194  | 1.457208  |
| 27 | H | 4.943515 | 5.470955  | 3.942825 | 1.087656  | 2.215858  |
| 28 | H | 4.667472 | 5.456603  | 3.812716 | 1.087261  | 2.219569  |
| 29 | H | 4.525195 | 5.124909  | 3.762569 | 2.194407  | 1.089144  |
| 30 | C | 5.093389 | 5.351596  | 4.191624 | 2.598315  | 1.502808  |
| 31 | H | 4.937462 | 5.053104  | 4.166646 | 3.436268  | 2.145822  |

|    |   |          |          |          |          |          |
|----|---|----------|----------|----------|----------|----------|
| 32 | H | 6.121511 | 6.418523 | 5.222951 | 3.143122 | 2.136750 |
| 33 | H | 5.206972 | 5.367237 | 4.259813 | 2.732632 | 2.156107 |
|    |   | 26       | 27       | 28       | 29       | 30       |
| 26 | O | 0.000000 |          |          |          |          |
| 27 | H | 2.135033 | 0.000000 |          |          |          |
| 28 | H | 2.140939 | 1.837661 | 0.000000 |          |          |
| 29 | H | 2.132649 | 3.126164 | 2.512686 | 0.000000 |          |
| 30 | C | 2.512096 | 2.819799 | 3.539792 | 2.208479 | 0.000000 |
| 31 | H | 2.929781 | 3.772826 | 4.343175 | 2.556746 | 1.093392 |
| 32 | H | 3.417389 | 3.300106 | 3.940291 | 2.555304 | 1.093940 |
| 33 | H | 2.695750 | 2.547488 | 3.792768 | 3.104976 | 1.093051 |
|    |   | 31       | 32       | 33       |          |          |
| 31 | H | 0.000000 |          |          |          |          |
| 32 | H | 1.764381 | 0.000000 |          |          |          |
| 33 | H | 1.777244 | 1.779145 | 0.000000 |          |          |

Stoichiometry C10H18BrN3O

Framework group C1[X(C10H18BrN3O)]

Deg. of freedom 93

Full point group C1 NOp 1

Largest Abelian subgroup C1 NOp 1

Largest concise Abelian subgroup C1 NOp 1

Standard orientation:

| Center<br>Number | Atomic<br>Number | Atomic<br>Type | Coordinates (Angstroms) |           |           |
|------------------|------------------|----------------|-------------------------|-----------|-----------|
|                  |                  |                | X                       | Y         | Z         |
| 1                | 6                | 0              | -2.632314               | 2.346468  | -0.198280 |
| 2                | 6                | 0              | -3.572737               | 1.382819  | -0.025626 |
| 3                | 7                | 0              | -2.906899               | 0.163106  | -0.058624 |
| 4                | 6                | 0              | -1.595019               | 0.391061  | -0.247568 |
| 5                | 7                | 0              | -1.408677               | 1.708762  | -0.338342 |
| 6                | 6                | 0              | -0.096826               | 2.364858  | -0.491291 |
| 7                | 6                | 0              | 0.571061                | 2.660191  | 0.857437  |
| 8                | 1                | 0              | -2.726650               | 3.418152  | -0.232889 |
| 9                | 1                | 0              | -4.634460               | 1.459756  | 0.121518  |
| 10               | 1                | 0              | 0.534155                | 1.702291  | -1.084110 |
| 11               | 1                | 0              | -0.245828               | 3.289431  | -1.048855 |
| 12               | 1                | 0              | -0.069075               | 3.332221  | 1.438016  |
| 13               | 1                | 0              | 0.661022                | 1.719836  | 1.419709  |
| 14               | 35               | 0              | 0.113718                | -2.398783 | 0.082010  |
| 15               | 1                | 0              | -0.833166               | -0.415460 | -0.274518 |
| 16               | 6                | 0              | -3.437444               | -1.154512 | 0.079085  |
| 17               | 6                | 0              | -4.734849               | -1.429596 | 0.106448  |
| 18               | 1                | 0              | -2.647443               | -1.899050 | 0.150368  |

|    |   |   |           |           |           |
|----|---|---|-----------|-----------|-----------|
| 19 | 1 | 0 | -5.048912 | -2.457866 | 0.221881  |
| 20 | 1 | 0 | -5.512744 | -0.680985 | 0.015802  |
| 21 | 7 | 0 | 1.840838  | 3.323303  | 0.585846  |
| 22 | 1 | 0 | 2.193805  | 3.788322  | 1.413718  |
| 23 | 1 | 0 | 2.534369  | 2.639216  | 0.287174  |
| 24 | 6 | 0 | 3.849986  | -0.005902 | -1.406499 |
| 25 | 6 | 0 | 3.456260  | -0.602150 | -0.124733 |
| 26 | 8 | 0 | 3.339507  | 0.832205  | -0.353756 |
| 27 | 1 | 0 | 4.904776  | 0.138330  | -1.629232 |
| 28 | 1 | 0 | 3.201060  | -0.106218 | -2.273084 |
| 29 | 1 | 0 | 2.491309  | -1.105197 | -0.079484 |
| 30 | 6 | 0 | 4.468900  | -1.028342 | 0.900620  |
| 31 | 1 | 0 | 4.079678  | -0.873276 | 1.910554  |
| 32 | 1 | 0 | 4.680727  | -2.095787 | 0.789284  |
| 33 | 1 | 0 | 5.402250  | -0.469522 | 0.794140  |

-----

Rotational constants (GHZ):      0.4530948      0.2649974      0.1762204

Standard basis: 6-311++G(d,p) (5D, 7F)

There are    499 symmetry adapted cartesian basis functions of A    symmetry.

There are    482 symmetry adapted basis functions of A    symmetry.

482 basis functions,    760 primitive gaussians,    499 cartesian basis functions

71 alpha electrons      71 beta electrons

     nuclear repulsion energy      1299.7981977026 Hartrees.

NAtoms=    33 NActive=    33 NUniq=    33 SFac= 1.00D+00 NAtFMM=    60 NAOKFM=F

Big=F

Integral buffers will be    131072 words long.

Raffenetti 2 integral format.

Two-electron integral symmetry is turned on.

One-electron integrals computed using PRISM.

NBasis=    482 RedAO= T EigKep= 4.18D-06 NBF=    482

NBsUse=    482 1.00D-06 EigRej= -1.00D+00 NBFU=    482

Initial            guess            from            the            checkpoint            file:

"/home/suqian/liuwen/qianmengshijie/nh2po/nh2po.chk"

B after Tr=    0.000000    0.000000    0.000000

     Rot=    0.999996    0.001707    0.000616    0.001981 Ang=    0.31 deg.

ExpMin= 3.50D-02 ExpMax= 4.40D+05 ExpMxC= 1.51D+04 IAcc=3 IRadAn=            5 AccDes=

0.00D+00

Harris functional with IExCor= 402 and IRadAn=            5 diagonalized for initial guess.

HarFok: IExCor= 402 AccDes= 0.00D+00 IRadAn=            5 IDoV= 1 UseB2=F ITyADJ=14

ICtDFT= 3500011 ScaDFX= 1.000000 1.000000 1.000000 1.000000

FoFCou: FMM=F IPFlag=            0 FMFlag=            100000 FMFlg1=            0

     NFxFlg=            0 DoJE=T BraDBF=F KetDBF=T FulRan=T

     wScrn= 0.000000 ICntrl=            500 IOpCl=    0 I1Cent=    200000004 NGrid=

NMat0= 1 NMatS0= 1 NMatT0= 0 NMatD0= 1 NMtDS0= 0  
 NMtDT0= 0

Petite list used in FoFCou.

Requested convergence on RMS density matrix=1.00D-08 within 128 cycles.

Requested convergence on MAX density matrix=1.00D-06.

Requested convergence on energy=1.00D-06.

No special actions if energy rises.

SCF Done: E(RB3LYP) = -3205.64720242 A.U. after 11 cycles

NFock= 11 Conv=0.41D-08 -V/T= 2.0018

Calling FoFJK, ICntrl= 2127 FMM=F ISym2X=0 l1Cent= 0 IOpClX= 0 NMat=1 NMatS=1

NMatT=0.

\*\*\*\*\* Axes restored to original set \*\*\*\*\*

| Center<br>Number | Atomic<br>Number | Forces (Hartrees/Bohr) |              |              |
|------------------|------------------|------------------------|--------------|--------------|
|                  |                  | X                      | Y            | Z            |
| 1                | 6                | -0.000387141           | 0.000047255  | 0.000309111  |
| 2                | 6                | 0.000497990            | -0.000474199 | 0.000178936  |
| 3                | 7                | -0.000519062           | 0.000173307  | 0.000226309  |
| 4                | 6                | 0.001139582            | 0.000057058  | -0.000264795 |
| 5                | 7                | -0.000178636           | 0.000398874  | -0.000629707 |
| 6                | 6                | -0.000329145           | -0.000222389 | 0.000315408  |
| 7                | 6                | 0.000622511            | 0.000292218  | -0.000453113 |
| 8                | 1                | 0.000120626            | -0.000001527 | -0.000113644 |
| 9                | 1                | -0.000006887           | 0.000172144  | -0.000124903 |
| 10               | 1                | 0.000199542            | 0.000055307  | 0.000157252  |
| 11               | 1                | -0.000007865           | 0.000002135  | -0.000173731 |
| 12               | 1                | -0.000010607           | 0.000087999  | -0.000074994 |
| 13               | 1                | -0.000182792           | -0.000150418 | 0.000130548  |
| 14               | 35               | -0.000703425           | -0.000240012 | -0.000029995 |
| 15               | 1                | -0.000594955           | -0.000034555 | 0.000245074  |
| 16               | 6                | -0.000265166           | -0.000814009 | -0.000153713 |
| 17               | 6                | 0.000106343            | 0.000282681  | 0.000126289  |
| 18               | 1                | 0.000154464            | 0.000117811  | -0.000000994 |
| 19               | 1                | -0.000006741           | -0.000003804 | -0.000039897 |
| 20               | 1                | 0.000035663            | -0.000037273 | 0.000090182  |
| 21               | 7                | 0.000022807            | 0.000158750  | 0.000314699  |
| 22               | 1                | 0.000058132            | -0.000156678 | 0.000063584  |
| 23               | 1                | -0.000103451           | 0.000267259  | 0.000067686  |
| 24               | 6                | 0.000148369            | -0.000673975 | -0.000000780 |
| 25               | 6                | 0.000138631            | 0.000536914  | -0.000413531 |
| 26               | 8                | -0.000669789           | 0.000190784  | 0.000016614  |
| 27               | 1                | 0.000130276            | 0.000148804  | 0.000109984  |
| 28               | 1                | -0.000101051           | -0.000123324 | 0.000381496  |

|    |   |              |              |              |
|----|---|--------------|--------------|--------------|
| 29 | 1 | 0.000425632  | -0.000118673 | -0.000344403 |
| 30 | 6 | 0.000259775  | 0.000109411  | -0.000016446 |
| 31 | 1 | -0.000019940 | 0.000027665  | 0.000042265  |
| 32 | 1 | 0.000002030  | -0.000049161 | -0.000031182 |
| 33 | 1 | 0.000024278  | -0.000026381 | 0.000090390  |

-----  
Cartesian Forces: Max 0.001139582 RMS 0.000292204

GradGradGradGradGradGradGradGradGradGradGradGradGradGradGradGradGradGradGrad

Berny optimization.

Using GEDIIS/GDIIS optimizer.

FormGI is forming the generalized inverse of G from B-inverse, IUseBI=4.

Internal Forces: Max 0.003850386 RMS 0.000715627

Search for a local minimum.

Step number 19 out of a maximum of 172

All quantities printed in internal units (Hartrees-Bohrs-Radians)

Mixed Optimization -- En-DIIS/RFO-DIIS

Swapping is turned off.

Update second derivatives using D2CorX and points 17 18 19

DE= -6.26D-05 DEPred=-5.12D-05 R= 1.22D+00

TightC=F SS= 1.41D+00 RLast= 2.28D-01 DXNew= 1.6878D+00 6.8444D-01

Trust test= 1.22D+00 RLast= 2.28D-01 DXMaxT set to 1.00D+00

ITU= 1 1 1 1 1 1 1 0 -1 -1 1 1 1 -1 1 0 0 -1 0

|                 |         |         |         |         |         |
|-----------------|---------|---------|---------|---------|---------|
| Eigenvalues --- | 0.00033 | 0.00256 | 0.00291 | 0.00470 | 0.00689 |
| Eigenvalues --- | 0.00724 | 0.00866 | 0.01475 | 0.01581 | 0.01874 |
| Eigenvalues --- | 0.01919 | 0.02124 | 0.02198 | 0.02374 | 0.02393 |
| Eigenvalues --- | 0.02490 | 0.02887 | 0.02998 | 0.03078 | 0.03107 |
| Eigenvalues --- | 0.03232 | 0.03436 | 0.03670 | 0.03979 | 0.04087 |
| Eigenvalues --- | 0.04390 | 0.04413 | 0.05101 | 0.05425 | 0.05742 |
| Eigenvalues --- | 0.05778 | 0.05960 | 0.07683 | 0.08282 | 0.08612 |
| Eigenvalues --- | 0.09506 | 0.10088 | 0.12155 | 0.12392 | 0.12660 |
| Eigenvalues --- | 0.13200 | 0.13708 | 0.15773 | 0.15967 | 0.15998 |
| Eigenvalues --- | 0.16001 | 0.16002 | 0.16016 | 0.16026 | 0.16086 |
| Eigenvalues --- | 0.16203 | 0.16870 | 0.17810 | 0.21461 | 0.22157 |
| Eigenvalues --- | 0.22890 | 0.23209 | 0.23878 | 0.25522 | 0.27347 |
| Eigenvalues --- | 0.29267 | 0.30239 | 0.31997 | 0.32146 | 0.32702 |
| Eigenvalues --- | 0.33665 | 0.34272 | 0.34314 | 0.34342 | 0.34548 |
| Eigenvalues --- | 0.34664 | 0.34741 | 0.35062 | 0.35133 | 0.35262 |
| Eigenvalues --- | 0.35404 | 0.35574 | 0.35722 | 0.35890 | 0.36418 |
| Eigenvalues --- | 0.36619 | 0.38141 | 0.39443 | 0.42053 | 0.42571 |
| Eigenvalues --- | 0.44559 | 0.45478 | 0.46171 | 0.49335 | 0.54684 |
| Eigenvalues --- | 0.57798 | 0.60615 | 2.01433 |         |         |

En-DIIS/RFO-DIIS IScMMF= 0 using points: 19 18 17 16 15

RFO step: Lambda=-6.68441756D-05.



DidBck=F Rises=F RFO-DIIS coefs: 0.94169 1.21365 -2.23981 0.10562

0.97885

Iteration 1 RMS(Cart)= 0.03904241 RMS(Int)= 0.00146790

Iteration 2 RMS(Cart)= 0.00161293 RMS(Int)= 0.00124230

Iteration 3 RMS(Cart)= 0.00000219 RMS(Int)= 0.00124230

Iteration 4 RMS(Cart)= 0.00000001 RMS(Int)= 0.00124230

| Variable | Old X   | -DE/DX   | Delta X<br>(Linear) | Delta X<br>(Quad) | Delta X<br>(Total) | New X   |
|----------|---------|----------|---------------------|-------------------|--------------------|---------|
| R1       | 2.56532 | -0.00028 | -0.00016            | 0.00008           | -0.00007           | 2.56524 |
| R2       | 2.62092 | 0.00024  | 0.00087             | 0.00019           | 0.00106            | 2.62197 |
| R3       | 2.03407 | 0.00000  | -0.00007            | -0.00001          | -0.00008           | 2.03400 |
| R4       | 2.62674 | -0.00065 | -0.00023            | 0.00016           | -0.00006           | 2.62668 |
| R5       | 2.03075 | 0.00000  | 0.00013             | 0.00001           | 0.00014            | 2.03089 |
| R6       | 2.54145 | 0.00037  | 0.00145             | -0.00020          | 0.00125            | 2.54270 |
| R7       | 2.69679 | 0.00041  | 0.00010             | -0.00025          | -0.00014           | 2.69665 |
| R8       | 2.52071 | 0.00106  | -0.00125            | -0.00051          | -0.00176           | 2.51895 |
| R9       | 2.09719 | -0.00075 | 0.00135             | -0.00003          | 0.00132            | 2.09851 |
| R10      | 2.78682 | 0.00062  | -0.00116            | -0.00091          | -0.00207           | 2.78475 |
| R11      | 2.89835 | 0.00048  | 0.00083             | -0.00070          | 0.00013            | 2.89848 |
| R12      | 2.06021 | 0.00001  | 0.00005             | -0.00030          | -0.00025           | 2.05995 |
| R13      | 2.05964 | 0.00011  | 0.00023             | 0.00021           | 0.00045            | 2.06009 |
| R14      | 2.06877 | 0.00003  | 0.00031             | 0.00023           | 0.00054            | 2.06932 |
| R15      | 2.07742 | 0.00017  | 0.00120             | 0.00023           | 0.00143            | 2.07885 |
| R16      | 2.75525 | 0.00032  | -0.00177            | -0.00042          | -0.00219           | 2.75307 |
| R17      | 4.20746 | -0.00015 | -0.01059            | 0.00190           | -0.00868           | 4.19878 |
| R18      | 2.50678 | -0.00018 | -0.00002            | 0.00003           | 0.00001            | 2.50678 |
| R19      | 2.05583 | 0.00004  | 0.00012             | 0.00006           | 0.00018            | 2.05600 |
| R20      | 2.04344 | -0.00001 | 0.00004             | -0.00002          | 0.00002            | 2.04346 |
| R21      | 2.04733 | -0.00007 | -0.00001            | -0.00003          | -0.00003           | 2.04730 |
| R22      | 1.91432 | -0.00003 | 0.00011             | 0.00023           | 0.00034            | 1.91466 |
| R23      | 1.92545 | 0.00011  | 0.00045             | 0.00038           | 0.00092            | 1.92637 |
| R24      | 3.92969 | 0.00011  | -0.00881            | 0.00244           | -0.00641           | 3.92328 |
| R25      | 2.77311 | -0.00111 | -0.00152            | 0.00036           | 0.00233            | 2.77543 |
| R26      | 2.71968 | 0.00051  | 0.00150             | -0.00051          | -0.00028           | 2.71940 |
| R27      | 2.05537 | 0.00012  | 0.00003             | 0.00019           | 0.00022            | 2.05559 |
| R28      | 2.05463 | -0.00019 | 0.00013             | -0.00028          | -0.00015           | 2.05448 |
| R29      | 2.75372 | 0.00026  | 0.00104             | 0.00055           | -0.00067           | 2.75306 |
| R30      | 2.05818 | -0.00035 | -0.00045            | -0.00032          | -0.00077           | 2.05742 |
| R31      | 2.83989 | 0.00023  | 0.00032             | -0.00015          | 0.00016            | 2.84006 |
| R32      | 2.06621 | 0.00005  | -0.00008            | -0.00014          | -0.00022           | 2.06599 |
| R33      | 2.06725 | 0.00005  | -0.00005            | -0.00003          | -0.00007           | 2.06717 |
| R34      | 2.06557 | -0.00001 | 0.00003             | -0.00009          | -0.00006           | 2.06551 |
| A1       | 1.87302 | 0.00045  | -0.00018            | -0.00037          | -0.00056           | 1.87246 |
| A2       | 2.27857 | -0.00008 | -0.00010            | 0.00019           | 0.00009            | 2.27866 |

|     |         |          |          |          |          |         |
|-----|---------|----------|----------|----------|----------|---------|
| A3  | 2.13160 | -0.00037 | 0.00029  | 0.00018  | 0.00047  | 2.13207 |
| A4  | 1.86297 | 0.00013  | 0.00049  | 0.00019  | 0.00070  | 1.86367 |
| A5  | 2.27974 | -0.00026 | -0.00040 | -0.00017 | -0.00055 | 2.27919 |
| A6  | 2.14045 | 0.00014  | -0.00013 | -0.00004 | -0.00015 | 2.14029 |
| A7  | 1.89850 | 0.00016  | -0.00071 | -0.00025 | -0.00097 | 1.89753 |
| A8  | 2.25210 | 0.00016  | 0.00044  | 0.00045  | 0.00089  | 2.25298 |
| A9  | 2.13259 | -0.00032 | 0.00031  | -0.00021 | 0.00009  | 2.13268 |
| A10 | 1.88943 | -0.00008 | 0.00044  | 0.00022  | 0.00066  | 1.89009 |
| A11 | 2.15301 | -0.00261 | -0.00515 | -0.00028 | -0.00543 | 2.14758 |
| A12 | 2.23999 | 0.00268  | 0.00468  | 0.00011  | 0.00480  | 2.24479 |
| A13 | 1.90085 | -0.00066 | -0.00003 | 0.00016  | 0.00015  | 1.90100 |
| A14 | 2.20277 | -0.00197 | 0.00372  | 0.00013  | 0.00390  | 2.20667 |
| A15 | 2.17830 | 0.00263  | -0.00376 | -0.00051 | -0.00424 | 2.17406 |
| A16 | 1.96258 | 0.00028  | 0.00117  | -0.00229 | -0.00113 | 1.96144 |
| A17 | 1.87639 | 0.00061  | -0.00138 | -0.00044 | -0.00181 | 1.87458 |
| A18 | 1.88478 | -0.00066 | 0.00287  | 0.00214  | 0.00502  | 1.88980 |
| A19 | 1.92108 | -0.00009 | -0.00086 | -0.00118 | -0.00204 | 1.91904 |
| A20 | 1.92415 | -0.00017 | -0.00120 | 0.00079  | -0.00041 | 1.92374 |
| A21 | 1.89283 | 0.00004  | -0.00062 | 0.00112  | 0.00050  | 1.89333 |
| A22 | 1.90703 | -0.00047 | -0.00026 | 0.00065  | 0.00039  | 1.90742 |
| A23 | 1.89726 | -0.00026 | -0.00110 | -0.00082 | -0.00193 | 1.89533 |
| A24 | 1.87865 | 0.00104  | 0.00044  | 0.00015  | 0.00061  | 1.87926 |
| A25 | 1.87727 | 0.00016  | -0.00132 | -0.00011 | -0.00142 | 1.87586 |
| A26 | 1.90587 | -0.00095 | -0.00113 | -0.00061 | -0.00175 | 1.90412 |
| A27 | 1.99659 | 0.00044  | 0.00327  | 0.00075  | 0.00401  | 2.00060 |
| A28 | 2.16164 | -0.00010 | -0.00047 | 0.00040  | -0.00006 | 2.16158 |
| A29 | 1.94791 | -0.00014 | 0.00007  | -0.00044 | -0.00037 | 1.94754 |
| A30 | 2.17360 | 0.00024  | 0.00038  | 0.00006  | 0.00045  | 2.17405 |
| A31 | 2.07540 | 0.00000  | -0.00017 | -0.00003 | -0.00021 | 2.07519 |
| A32 | 2.16185 | 0.00002  | 0.00000  | -0.00006 | -0.00007 | 2.16178 |
| A33 | 2.04594 | -0.00002 | 0.00018  | 0.00010  | 0.00028  | 2.04622 |
| A34 | 1.93906 | -0.00135 | 0.00185  | -0.00105 | -0.00008 | 1.93897 |
| A35 | 1.91988 | 0.00385  | 0.00132  | -0.00070 | 0.00031  | 1.92018 |
| A36 | 1.88661 | -0.00123 | -0.00054 | 0.00047  | 0.00023  | 1.88684 |
| A37 | 2.08627 | 0.00021  | -0.00315 | 0.00085  | 0.00038  | 2.08664 |
| A38 | 2.09272 | -0.00051 | 0.00285  | 0.00038  | 0.00086  | 2.09358 |
| A39 | 2.00044 | -0.00048 | -0.00106 | -0.00037 | -0.00078 | 1.99966 |
| A40 | 2.00981 | 0.00022  | 0.00183  | -0.00063 | 0.00134  | 2.01115 |
| A41 | 2.01288 | 0.00025  | -0.00031 | -0.00052 | -0.00091 | 2.01197 |
| A42 | 2.05066 | -0.00052 | 0.00260  | 0.00323  | 0.00669  | 2.05735 |
| A43 | 2.12986 | 0.00026  | 0.00085  | -0.00008 | 0.00033  | 2.13019 |
| A44 | 1.97162 | 0.00026  | 0.00211  | 0.00140  | 0.00417  | 1.97579 |
| A45 | 2.02681 | -0.00052 | 0.00024  | 0.00009  | 0.00021  | 2.02702 |
| A46 | 2.02380 | 0.00019  | -0.00387 | -0.00285 | -0.00696 | 2.01684 |

|     |          |          |          |          |          |          |
|-----|----------|----------|----------|----------|----------|----------|
| A47 | 2.62361  | -0.00019 | -0.01217 | 0.01344  | 0.00975  | 2.63336  |
| A48 | 2.56425  | 0.00066  | -0.01331 | 0.00498  | 0.00266  | 2.56691  |
| A49 | 1.92850  | -0.00003 | -0.00004 | -0.00057 | -0.00061 | 1.92789  |
| A50 | 1.91534  | -0.00007 | -0.00092 | -0.00031 | -0.00123 | 1.91411  |
| A51 | 1.94328  | 0.00015  | 0.00077  | -0.00002 | 0.00075  | 1.94403  |
| A52 | 1.87688  | 0.00003  | -0.00023 | -0.00026 | -0.00049 | 1.87638  |
| A53 | 1.89805  | -0.00005 | 0.00011  | 0.00091  | 0.00102  | 1.89907  |
| A54 | 1.90033  | -0.00003 | 0.00029  | 0.00026  | 0.00055  | 1.90088  |
| A55 | 3.35123  | 0.00279  | -0.00490 | 0.00073  | -0.00416 | 3.34707  |
| A56 | 2.78639  | 0.00306  | 0.01046  | -0.01086 | -0.00144 | 2.78495  |
| A57 | 2.80877  | -0.00108 | 0.00275  | -0.00224 | 0.00051  | 2.80927  |
| A58 | 3.16565  | -0.00040 | -0.00506 | -0.02410 | -0.02905 | 3.13660  |
| D1  | 0.00312  | -0.00010 | -0.00088 | 0.00277  | 0.00188  | 0.00499  |
| D2  | 3.13636  | 0.00001  | -0.00063 | 0.00155  | 0.00095  | 3.13731  |
| D3  | -3.13809 | -0.00006 | 0.00328  | 0.00074  | 0.00398  | -3.13411 |
| D4  | -0.00485 | 0.00005  | 0.00353  | -0.00047 | 0.00305  | -0.00179 |
| D5  | -0.00484 | 0.00012  | 0.00345  | -0.00668 | -0.00322 | -0.00807 |
| D6  | -3.09406 | 0.00009  | 0.00294  | -0.00215 | 0.00071  | -3.09336 |
| D7  | 3.13640  | 0.00008  | -0.00028 | -0.00486 | -0.00511 | 3.13129  |
| D8  | 0.04718  | 0.00006  | -0.00078 | -0.00033 | -0.00118 | 0.04600  |
| D9  | -0.00037 | 0.00005  | -0.00197 | 0.00203  | 0.00008  | -0.00029 |
| D10 | 3.13803  | 0.00006  | 0.00386  | -0.00186 | 0.00200  | 3.14003  |
| D11 | -3.13444 | -0.00004 | -0.00223 | 0.00312  | 0.00092  | -3.13352 |
| D12 | 0.00396  | -0.00003 | 0.00360  | -0.00076 | 0.00284  | 0.00680  |
| D13 | -0.00265 | 0.00002  | 0.00413  | -0.00622 | -0.00209 | -0.00475 |
| D14 | 3.10041  | 0.00010  | 0.00397  | -0.00498 | -0.00104 | 3.09938  |
| D15 | -3.14131 | 0.00001  | -0.00120 | -0.00266 | -0.00386 | 3.13801  |
| D16 | -0.03825 | 0.00009  | -0.00137 | -0.00142 | -0.00280 | -0.04105 |
| D17 | 0.14962  | -0.00021 | -0.02242 | 0.00268  | -0.01974 | 0.12988  |
| D18 | -2.99965 | -0.00010 | -0.02147 | 0.00589  | -0.01558 | -3.01522 |
| D19 | -2.99555 | -0.00019 | -0.01591 | -0.00166 | -0.01759 | -3.01313 |
| D20 | 0.13837  | -0.00009 | -0.01496 | 0.00154  | -0.01343 | 0.12495  |
| D21 | 0.00462  | -0.00009 | -0.00469 | 0.00797  | 0.00328  | 0.00790  |
| D22 | 3.09475  | -0.00023 | -0.00369 | 0.00354  | -0.00026 | 3.09449  |
| D23 | -3.09594 | -0.00001 | -0.00424 | 0.00666  | 0.00245  | -3.09350 |
| D24 | -0.00582 | -0.00015 | -0.00325 | 0.00223  | -0.00109 | -0.00691 |
| D25 | 1.54570  | -0.00057 | -0.03787 | -0.02641 | -0.06428 | 1.48142  |
| D26 | -2.62022 | -0.00010 | -0.03913 | -0.02960 | -0.06873 | -2.68895 |
| D27 | -0.58112 | -0.00008 | -0.03910 | -0.02740 | -0.06650 | -0.64762 |
| D28 | -1.53554 | -0.00048 | -0.03874 | -0.02121 | -0.05994 | -1.59548 |
| D29 | 0.58172  | -0.00001 | -0.04000 | -0.02440 | -0.06440 | 0.51733  |
| D30 | 2.62083  | 0.00002  | -0.03996 | -0.02220 | -0.06216 | 2.55866  |
| D31 | -1.05803 | 0.00080  | -0.00568 | -0.00018 | -0.00586 | -1.06389 |
| D32 | 0.98599  | 0.00058  | -0.00802 | -0.00041 | -0.00842 | 0.97756  |

|     |          |          |          |          |          |          |
|-----|----------|----------|----------|----------|----------|----------|
| D33 | -3.12567 | 0.00160  | -0.00444 | 0.00010  | -0.00433 | -3.13000 |
| D34 | 3.13363  | -0.00009 | -0.00413 | 0.00269  | -0.00143 | 3.13220  |
| D35 | -1.10554 | -0.00031 | -0.00647 | 0.00246  | -0.00400 | -1.10954 |
| D36 | 1.06599  | 0.00072  | -0.00288 | 0.00297  | 0.00009  | 1.06608  |
| D37 | 1.04627  | 0.00002  | -0.00206 | 0.00155  | -0.00051 | 1.04576  |
| D38 | 3.09028  | -0.00020 | -0.00440 | 0.00133  | -0.00308 | 3.08721  |
| D39 | -1.02138 | 0.00083  | -0.00081 | 0.00183  | 0.00102  | -1.02036 |
| D40 | 2.84277  | -0.00055 | 0.02624  | 0.02797  | 0.05441  | 2.89718  |
| D41 | -1.35210 | -0.00044 | 0.02762  | 0.02743  | 0.05485  | -1.29725 |
| D42 | 0.77438  | -0.00006 | 0.02692  | 0.02744  | 0.05456  | 0.82894  |
| D43 | 2.86270  | 0.00005  | 0.02830  | 0.02690  | 0.05500  | 2.91769  |
| D44 | -1.33011 | 0.00015  | 0.02725  | 0.02753  | 0.05498  | -1.27513 |
| D45 | 0.75821  | 0.00025  | 0.02862  | 0.02698  | 0.05541  | 0.81362  |
| D46 | -3.13335 | 0.00002  | -0.00090 | 0.00281  | 0.00191  | -3.13144 |
| D47 | 0.01232  | -0.00001 | -0.00165 | 0.00163  | -0.00002 | 0.01230  |
| D48 | 0.01691  | -0.00009 | -0.00198 | -0.00081 | -0.00279 | 0.01412  |
| D49 | -3.12061 | -0.00012 | -0.00274 | -0.00199 | -0.00472 | -3.12533 |
| D50 | 1.73922  | -0.00028 | -0.02780 | 0.04838  | 0.02049  | 1.75972  |
| D51 | -0.60474 | -0.00153 | -0.01460 | -0.04917 | -0.06473 | -0.66947 |
| D52 | -2.48927 | 0.00093  | -0.02330 | 0.05123  | 0.02885  | -2.46042 |
| D53 | 1.44995  | -0.00031 | -0.01010 | -0.04633 | -0.05637 | 1.39358  |
| D54 | -2.71113 | 0.00017  | 0.00181  | -0.00080 | 0.00012  | -2.71101 |
| D55 | -0.00278 | 0.00002  | 0.00004  | -0.00068 | -0.00135 | -0.00414 |
| D56 | -0.03617 | 0.00012  | 0.00028  | 0.00076  | 0.00065  | -0.03553 |
| D57 | 2.67217  | -0.00002 | -0.00149 | 0.00089  | -0.00082 | 2.67134  |
| D58 | 1.48506  | 0.00002  | 0.00981  | -0.07806 | -0.06532 | 1.41975  |
| D59 | -0.91148 | -0.00009 | 0.00937  | -0.07603 | -0.06449 | -0.97597 |
| D60 | 0.97643  | -0.00019 | -0.01640 | 0.07031  | 0.05520  | 1.03163  |
| D61 | -1.42342 | -0.00019 | -0.01303 | 0.07314  | 0.06120  | -1.36223 |
| D62 | 2.54961  | 0.00022  | 0.00359  | 0.00147  | 0.00450  | 2.55412  |
| D63 | -1.66678 | 0.00019  | 0.00271  | 0.00061  | 0.00277  | -1.66402 |
| D64 | 0.43843  | 0.00020  | 0.00296  | 0.00071  | 0.00312  | 0.44155  |
| D65 | 1.35858  | -0.00007 | 0.00234  | 0.00193  | 0.00487  | 1.36345  |
| D66 | -2.85781 | -0.00010 | 0.00146  | 0.00107  | 0.00313  | -2.85468 |
| D67 | -0.75260 | -0.00009 | 0.00171  | 0.00118  | 0.00349  | -0.74912 |
| D68 | -1.01902 | -0.00009 | 0.00325  | 0.00299  | 0.00618  | -1.01284 |
| D69 | 1.04777  | -0.00011 | 0.00237  | 0.00213  | 0.00444  | 1.05221  |
| D70 | -3.13021 | -0.00011 | 0.00262  | 0.00223  | 0.00480  | -3.12541 |

| Item                 | Value    | Threshold | Converged? |
|----------------------|----------|-----------|------------|
| Maximum Force        | 0.003850 | 0.000450  | NO         |
| RMS Force            | 0.000716 | 0.000300  | NO         |
| Maximum Displacement | 0.148541 | 0.001800  | NO         |
| RMS Displacement     | 0.038964 | 0.001200  | NO         |

Predicted change in Energy=-4.380417D-05

GradGradGradGradGradGradGradGradGradGradGradGradGradGradGradGradGradGradGrad

Input orientation:

| Center<br>Number | Atomic<br>Number | Atomic<br>Type | Coordinates (Angstroms) |           |           |
|------------------|------------------|----------------|-------------------------|-----------|-----------|
|                  |                  |                | X                       | Y         | Z         |
| 1                | 6                | 0              | -2.763080               | 2.081660  | -0.321296 |
| 2                | 6                | 0              | -3.655379               | 1.118298  | 0.022877  |
| 3                | 7                | 0              | -2.933803               | -0.059215 | 0.180456  |
| 4                | 6                | 0              | -1.635259               | 0.193933  | -0.064853 |
| 5                | 7                | 0              | -1.512102               | 1.484066  | -0.376620 |
| 6                | 6                | 0              | -0.231806               | 2.158126  | -0.656015 |
| 7                | 6                | 0              | 0.390344                | 2.775096  | 0.602890  |
| 8                | 1                | 0              | -2.907663               | 3.128198  | -0.527134 |
| 9                | 1                | 0              | -4.718196               | 1.171176  | 0.173232  |
| 10               | 1                | 0              | 0.443385                | 1.413624  | -1.078046 |
| 11               | 1                | 0              | -0.408025               | 2.929400  | -1.406023 |
| 12               | 1                | 0              | -0.292005               | 3.527487  | 1.012046  |
| 13               | 1                | 0              | 0.504625                | 1.985806  | 1.360609  |
| 14               | 35               | 0              | 0.201261                | -2.422884 | 0.693210  |
| 15               | 1                | 0              | -0.839694               | -0.574816 | 0.031480  |
| 16               | 6                | 0              | -3.400343               | -1.359102 | 0.539585  |
| 17               | 6                | 0              | -4.682844               | -1.679050 | 0.651457  |
| 18               | 1                | 0              | -2.575392               | -2.048918 | 0.704918  |
| 19               | 1                | 0              | -4.946725               | -2.687768 | 0.938125  |
| 20               | 1                | 0              | -5.495841               | -0.986363 | 0.469973  |
| 21               | 7                | 0              | 1.634197                | 3.423449  | 0.209308  |
| 22               | 1                | 0              | 1.972707                | 4.037440  | 0.940737  |
| 23               | 1                | 0              | 2.351090                | 2.721889  | 0.027550  |
| 24               | 6                | 0              | 3.751211                | -0.101385 | -1.264677 |
| 25               | 6                | 0              | 3.435602                | -0.491552 | 0.115624  |
| 26               | 8                | 0              | 3.208573                | 0.869541  | -0.351610 |
| 27               | 1                | 0              | 4.786288                | 0.074313  | -1.549269 |
| 28               | 1                | 0              | 3.089949                | -0.394525 | -2.076323 |
| 29               | 1                | 0              | 2.514116                | -1.044449 | 0.290316  |
| 30               | 6                | 0              | 4.502918                | -0.663863 | 1.159577  |
| 31               | 1                | 0              | 4.127639                | -0.366645 | 2.142471  |
| 32               | 1                | 0              | 4.790380                | -1.717477 | 1.221873  |
| 33               | 1                | 0              | 5.388984                | -0.068120 | 0.925764  |

Distance matrix (angstroms):

|     | 1        | 2 | 3 | 4 | 5 |
|-----|----------|---|---|---|---|
| 1 C | 0.000000 |   |   |   |   |

|    |    |          |          |          |          |          |
|----|----|----------|----------|----------|----------|----------|
| 2  | C  | 1.357467 | 0.000000 |          |          |          |
| 3  | N  | 2.205503 | 1.389978 | 0.000000 |          |          |
| 4  | C  | 2.213878 | 2.223293 | 1.345539 | 0.000000 |          |
| 5  | N  | 1.387489 | 2.210660 | 2.171010 | 1.332971 | 0.000000 |
| 6  | C  | 2.554454 | 3.641838 | 3.594033 | 2.485399 | 1.473627 |
| 7  | C  | 3.358431 | 4.410132 | 4.388818 | 3.348336 | 2.499100 |
| 8  | H  | 1.076344 | 2.213886 | 3.265114 | 3.231506 | 2.161808 |
| 9  | H  | 2.212695 | 1.074702 | 2.167481 | 3.242867 | 3.267916 |
| 10 | H  | 3.361601 | 4.254305 | 3.893389 | 2.614377 | 2.078675 |
| 11 | H  | 2.727927 | 3.983359 | 4.222356 | 3.284452 | 2.089892 |
| 12 | H  | 3.158232 | 4.253813 | 4.531563 | 3.751883 | 2.755467 |
| 13 | H  | 3.676397 | 4.455079 | 4.171051 | 3.133985 | 2.708671 |
| 14 | Br | 5.487027 | 5.278541 | 3.959606 | 3.285605 | 4.398229 |
| 15 | H  | 3.298594 | 3.285542 | 2.161788 | 1.110485 | 2.204013 |
| 16 | C  | 3.603618 | 2.543530 | 1.427004 | 2.427505 | 3.533906 |
| 17 | C  | 4.332975 | 3.045645 | 2.429990 | 3.648141 | 4.595198 |
| 18 | H  | 4.260283 | 3.415085 | 2.088644 | 2.550838 | 3.844774 |
| 19 | H  | 5.394616 | 4.122062 | 3.396352 | 4.502884 | 5.561420 |
| 20 | H  | 4.184119 | 2.831395 | 2.739975 | 4.072251 | 4.763394 |
| 21 | N  | 4.627957 | 5.773048 | 5.744250 | 4.603725 | 3.742154 |
| 22 | H  | 5.276882 | 6.406184 | 6.436959 | 5.366673 | 4.516530 |
| 23 | H  | 5.165881 | 6.216847 | 5.973944 | 4.721237 | 4.076740 |
| 24 | C  | 6.934814 | 7.615970 | 6.839562 | 5.526378 | 5.568193 |
| 25 | C  | 6.725770 | 7.272017 | 6.384391 | 5.120166 | 5.350248 |
| 26 | O  | 6.093504 | 6.878659 | 6.234939 | 4.899121 | 4.760571 |
| 27 | H  | 7.907612 | 8.650046 | 7.912622 | 6.591971 | 6.559896 |
| 28 | H  | 6.593145 | 7.224591 | 6.441356 | 5.169128 | 5.253282 |
| 29 | H  | 6.164043 | 6.543063 | 5.537380 | 4.344773 | 4.800899 |
| 30 | C  | 7.907314 | 8.427692 | 7.525231 | 6.317615 | 6.569168 |
| 31 | H  | 7.716629 | 8.202018 | 7.335392 | 6.196574 | 6.448072 |
| 32 | H  | 8.594741 | 8.989441 | 7.968525 | 6.826272 | 7.247506 |
| 33 | H  | 8.522491 | 9.166421 | 8.356096 | 7.098590 | 7.192390 |
|    |    | 6        | 7        | 8        | 9        | 10       |
| 6  | C  | 0.000000 |          |          |          |          |
| 7  | C  | 1.533808 | 0.000000 |          |          |          |
| 8  | H  | 2.849186 | 3.504067 | 0.000000 |          |          |
| 9  | H  | 4.667914 | 5.371625 | 2.756534 | 0.000000 |          |
| 10 | H  | 1.090080 | 2.163785 | 3.804312 | 5.316615 | 0.000000 |
| 11 | H  | 1.090151 | 2.167242 | 2.657096 | 4.915585 | 1.769194 |
| 12 | H  | 2.158982 | 1.095034 | 3.061074 | 5.083993 | 3.062303 |
| 13 | H  | 2.153787 | 1.100080 | 4.063538 | 5.417689 | 2.505629 |
| 14 | Br | 4.795165 | 5.202202 | 6.478362 | 6.114631 | 4.232584 |
| 15 | H  | 2.882906 | 3.614057 | 4.277950 | 4.255744 | 2.613662 |
| 16 | C  | 4.882620 | 5.609359 | 4.638587 | 2.876327 | 5.007892 |

|    |    |          |          |          |           |          |
|----|----|----------|----------|----------|-----------|----------|
| 17 | C  | 6.020394 | 6.751222 | 5.258325 | 2.890283  | 6.231696 |
| 18 | H  | 5.004373 | 5.663665 | 5.332062 | 3.904267  | 4.927592 |
| 19 | H  | 6.946541 | 7.644578 | 6.334842 | 3.940651  | 7.066799 |
| 20 | H  | 6.234239 | 6.986660 | 4.962107 | 2.312522  | 6.590198 |
| 21 | N  | 2.414911 | 1.456859 | 4.610641 | 6.739951  | 2.667341 |
| 22 | H  | 3.307766 | 2.052200 | 5.176811 | 7.319339  | 3.646741 |
| 23 | H  | 2.730648 | 2.044107 | 5.303512 | 7.238836  | 2.563833 |
| 24 | C  | 4.619554 | 4.801810 | 7.437391 | 8.684346  | 3.643048 |
| 25 | C  | 4.589782 | 4.492440 | 7.331626 | 8.321804  | 3.742714 |
| 26 | O  | 3.686369 | 3.533358 | 6.522321 | 7.949849  | 2.910326 |
| 27 | H  | 5.506491 | 5.590201 | 8.340735 | 9.721386  | 4.569093 |
| 28 | H  | 4.423500 | 4.951015 | 7.126073 | 8.275207  | 3.357121 |
| 29 | H  | 4.323438 | 4.381442 | 6.890203 | 7.564988  | 3.493203 |
| 30 | C  | 5.803241 | 5.389768 | 8.493611 | 9.453528  | 5.079637 |
| 31 | H  | 5.762877 | 5.119396 | 8.296758 | 9.191931  | 5.207188 |
| 32 | H  | 6.615823 | 6.318755 | 9.262800 | 9.992847  | 5.830076 |
| 33 | H  | 6.249117 | 5.759733 | 9.008979 | 10.210644 | 5.538029 |
|    |    | 11       | 12       | 13       | 14        | 15       |
| 11 | H  | 0.000000 |          |          |           |          |
| 12 | H  | 2.493637 | 0.000000 |          |           |          |
| 13 | H  | 3.062279 | 1.769998 | 0.000000 |           |          |
| 14 | Br | 5.781433 | 5.979288 | 4.469229 | 0.000000  |          |
| 15 | H  | 3.812123 | 4.253276 | 3.182855 | 2.221899  | 0.000000 |
| 16 | C  | 5.579482 | 5.810657 | 5.206849 | 3.758562  | 2.725839 |
| 17 | C  | 6.614009 | 6.820375 | 6.390923 | 4.940599  | 4.046418 |
| 18 | H  | 5.825565 | 6.033612 | 5.118148 | 2.801748  | 2.374688 |
| 19 | H  | 7.592589 | 7.765390 | 7.192914 | 5.160611  | 4.706832 |
| 20 | H  | 6.688680 | 6.910036 | 6.755192 | 5.879661  | 4.694822 |
| 21 | N  | 2.650292 | 2.089369 | 2.160612 | 6.038798  | 4.705091 |
| 22 | H  | 3.521778 | 2.322511 | 2.557490 | 6.703363  | 5.478070 |
| 23 | H  | 3.116233 | 2.933287 | 2.393386 | 5.615475  | 4.587960 |
| 24 | C  | 5.148290 | 5.890651 | 4.667849 | 4.671705  | 4.793806 |
| 25 | C  | 5.365799 | 5.554395 | 4.034591 | 3.811117  | 4.276935 |
| 26 | O  | 4.293552 | 4.601986 | 3.389553 | 4.579917  | 4.315251 |
| 27 | H  | 5.928991 | 6.653856 | 5.518499 | 5.682181  | 5.879781 |
| 28 | H  | 4.871715 | 6.029744 | 4.915524 | 4.486543  | 4.462896 |
| 29 | H  | 5.216125 | 5.412745 | 3.790255 | 2.722445  | 3.396410 |
| 30 | C  | 6.603878 | 6.370280 | 4.800782 | 4.670750  | 5.461139 |
| 31 | H  | 6.635358 | 5.997948 | 4.389939 | 4.663144  | 5.401298 |
| 32 | H  | 7.451357 | 7.306457 | 5.665796 | 4.673017  | 5.866894 |
| 33 | H  | 6.930200 | 6.723798 | 5.316452 | 5.701882  | 6.312916 |
|    |    | 16       | 17       | 18       | 19        | 20       |
| 16 | C  | 0.000000 |          |          |           |          |
| 17 | C  | 1.326533 | 0.000000 |          |           |          |

|    |   |          |           |          |           |           |
|----|---|----------|-----------|----------|-----------|-----------|
| 18 | H | 1.087991 | 2.140330  | 0.000000 |           |           |
| 19 | H | 2.077374 | 1.081353  | 2.466928 | 0.000000  |           |
| 20 | H | 2.129529 | 1.083382  | 3.116608 | 1.848101  | 0.000000  |
| 21 | N | 6.951868 | 8.132404  | 6.921926 | 9.010365  | 8.387600  |
| 22 | H | 7.625828 | 8.778285  | 7.601616 | 9.649195  | 9.013292  |
| 23 | H | 7.070760 | 8.320682  | 6.891273 | 9.129712  | 8.690294  |
| 24 | C | 7.482108 | 8.791694  | 6.906381 | 9.337870  | 9.449877  |
| 25 | C | 6.903806 | 8.222313  | 6.237364 | 8.704211  | 8.952156  |
| 26 | O | 7.031276 | 8.353198  | 6.564137 | 8.990369  | 8.937908  |
| 27 | H | 8.569651 | 9.878357  | 7.986476 | 10.418626 | 10.532073 |
| 28 | H | 7.063800 | 8.337091  | 6.524447 | 8.884480  | 8.974948  |
| 29 | H | 5.928066 | 7.233904  | 5.204224 | 7.667092  | 8.012183  |
| 30 | C | 7.957970 | 9.255647  | 7.226864 | 9.666488  | 10.027699 |
| 31 | H | 7.760459 | 9.031619  | 7.058840 | 9.443630  | 9.787373  |
| 32 | H | 8.226900 | 9.490459  | 7.391325 | 9.789442  | 10.339547 |
| 33 | H | 8.892021 | 10.203531 | 8.209970 | 10.662531 | 10.932993 |
|    |   | 21       | 22        | 23       | 24        | 25        |
| 21 | N | 0.000000 |           |          |           |           |
| 22 | H | 1.013194 | 0.000000  |          |           |           |
| 23 | H | 1.019391 | 1.645527  | 0.000000 |           |           |
| 24 | C | 4.367933 | 5.015656  | 3.406034 | 0.000000  |           |
| 25 | C | 4.310577 | 4.830388  | 3.392658 | 1.468697  | 0.000000  |
| 26 | O | 3.052169 | 3.637734  | 2.076109 | 1.439043  | 1.456855  |
| 27 | H | 4.923920 | 5.461021  | 3.927621 | 1.087771  | 2.217301  |
| 28 | H | 4.681907 | 5.476605  | 3.832001 | 1.087184  | 2.221153  |
| 29 | H | 4.554441 | 5.151871  | 3.779011 | 2.199495  | 1.088737  |
| 30 | C | 5.083177 | 5.343417  | 4.168352 | 2.599702  | 1.502894  |
| 31 | H | 4.931449 | 5.048155  | 4.143436 | 3.438126  | 2.145373  |
| 32 | H | 6.116854 | 6.413844  | 5.204278 | 3.142380  | 2.135907  |
| 33 | H | 5.177141 | 5.341048  | 4.221342 | 2.735221  | 2.156692  |
|    |   | 26       | 27        | 28       | 29        | 30        |
| 26 | O | 0.000000 |           |          |           |           |
| 27 | H | 2.134470 | 0.000000  |          |           |           |
| 28 | H | 2.141628 | 1.837162  | 0.000000 |           |           |
| 29 | H | 2.134877 | 3.130251  | 2.520906 | 0.000000  |           |
| 30 | C | 2.512040 | 2.821887  | 3.541196 | 2.203586  | 0.000000  |
| 31 | H | 2.931429 | 3.775871  | 4.344628 | 2.548205  | 1.093276  |
| 32 | H | 3.416230 | 3.299963  | 3.939513 | 2.549929  | 1.093901  |
| 33 | H | 2.695382 | 2.551336  | 3.795342 | 3.101915  | 1.093019  |
|    |   | 31       | 32        | 33       |           |           |
| 31 | H | 0.000000 |           |          |           |           |
| 32 | H | 1.763936 | 0.000000  |          |           |           |
| 33 | H | 1.777774 | 1.779434  | 0.000000 |           |           |

Stoichiometry C10H18BrN3O



Framework group C1[X(C10H18BrN3O)]

Deg. of freedom 93

Full point group C1 NOp 1

Largest Abelian subgroup C1 NOp 1

Largest concise Abelian subgroup C1 NOp 1

Standard orientation:

---

| Center<br>Number | Atomic<br>Number | Atomic<br>Type | Coordinates (Angstroms) |           |           |
|------------------|------------------|----------------|-------------------------|-----------|-----------|
|                  |                  |                | X                       | Y         | Z         |
| 1                | 6                | 0              | -2.585783               | 2.363949  | -0.205050 |
| 2                | 6                | 0              | -3.540380               | 1.414033  | -0.034402 |
| 3                | 7                | 0              | -2.892763               | 0.184492  | -0.063721 |
| 4                | 6                | 0              | -1.576555               | 0.393970  | -0.248628 |
| 5                | 7                | 0              | -1.371121               | 1.707643  | -0.342827 |
| 6                | 6                | 0              | -0.047679               | 2.338269  | -0.492458 |
| 7                | 6                | 0              | 0.581966                | 2.702112  | 0.857998  |
| 8                | 1                | 0              | -2.664172               | 3.436931  | -0.237957 |
| 9                | 1                | 0              | -4.601293               | 1.506896  | 0.109908  |
| 10               | 1                | 0              | 0.591712                | 1.632537  | -1.022927 |
| 11               | 1                | 0              | -0.161913               | 3.230947  | -1.107687 |
| 12               | 1                | 0              | -0.063825               | 3.418153  | 1.376978  |
| 13               | 1                | 0              | 0.633158                | 1.794245  | 1.477135  |
| 14               | 35               | 0              | 0.086242                | -2.419347 | 0.091300  |
| 15               | 1                | 0              | -0.829769               | -0.427622 | -0.270354 |
| 16               | 6                | 0              | -3.442513               | -1.125406 | 0.071497  |
| 17               | 6                | 0              | -4.743716               | -1.379873 | 0.114011  |
| 18               | 1                | 0              | -2.663272               | -1.882341 | 0.131141  |
| 19               | 1                | 0              | -5.072535               | -2.403695 | 0.227985  |
| 20               | 1                | 0              | -5.510506               | -0.618209 | 0.039050  |
| 21               | 7                | 0              | 1.870021                | 3.328299  | 0.591082  |
| 22               | 1                | 0              | 2.227926                | 3.792719  | 1.417388  |
| 23               | 1                | 0              | 2.548306                | 2.623080  | 0.305155  |
| 24               | 6                | 0              | 3.808215                | -0.032135 | -1.416334 |
| 25               | 6                | 0              | 3.440188                | -0.622165 | -0.122700 |
| 26               | 8                | 0              | 3.303681                | 0.808276  | -0.362768 |
| 27               | 1                | 0              | 4.857787                | 0.123687  | -1.655848 |
| 28               | 1                | 0              | 3.148771                | -0.147691 | -2.272926 |
| 29               | 1                | 0              | 2.484249                | -1.138454 | -0.052169 |
| 30               | 6                | 0              | 4.472501                | -1.027797 | 0.891442  |
| 31               | 1                | 0              | 4.093938                | -0.872455 | 1.905252  |
| 32               | 1                | 0              | 4.696208                | -2.093104 | 0.783308  |
| 33               | 1                | 0              | 5.396894                | -0.457493 | 0.769210  |

---

Rotational constants (GHZ):      0.4492969      0.2671271      0.1766495  
 Standard basis: 6-311++G(d,p) (5D, 7F)  
 There are    499 symmetry adapted cartesian basis functions of A    symmetry.  
 There are    482 symmetry adapted basis functions of A    symmetry.  
           482 basis functions,    760 primitive gaussians,    499 cartesian basis functions  
           71 alpha electrons      71 beta electrons  
           nuclear repulsion energy      1300.4489983210 Hartrees.  
 NAtoms=    33 NActive=    33 NUniq=    33 SFac= 1.00D+00 NAtFMM=    60 NAOKFM=F  
 Big=F  
 Integral buffers will be    131072 words long.  
 Raffenetti 2 integral format.  
 Two-electron integral symmetry is turned on.  
 One-electron integrals computed using PRISM.  
 NBasis=    482 RedAO= T EigKep= 4.02D-06 NBF=    482  
 NBsUse=    482 1.00D-06 EigRej= -1.00D+00 NBFU=    482  
 Initial      guess      from      the      checkpoint      file:  
 "/home/suqian/liuwen/qianmengshijie/nh2po/nh2po.chk"  
 B after Tr=    0.000000    0.000000    0.000000  
           Rot=    0.999991    0.001860    -0.000303    0.003887 Ang=    0.50 deg.  
 ExpMin= 3.50D-02 ExpMax= 4.40D+05 ExpMxC= 1.51D+04 IAcc=3 IRadAn=      5 AccDes=  
 0.00D+00  
 Harris functional with IExCor= 402 and IRadAn=      5 diagonalized for initial guess.  
 HarFok: IExCor= 402 AccDes= 0.00D+00 IRadAn=      5 IDoV= 1 UseB2=F ITyADJ=14  
 ICtDFT= 3500011 ScaDFX= 1.000000 1.000000 1.000000 1.000000  
 FoFCou: FMM=F IPFlag=      0 FMFlag=      100000 FMFlg1=      0  
           NFxFlg=      0 DoJE=T BraDBF=F KetDBF=T FulRan=T  
           wScrn= 0.000000 ICntrl=      500 IOpCl= 0 I1Cent=    200000004 NGrid=  
 0  
           NMat0=    1 NMatS0=      1 NMatT0=    0 NMatD0=    1 NMtDS0=    0  
 NMtDT0=    0  
 Petite list used in FoFCou.  
 Requested convergence on RMS density matrix=1.00D-08 within 128 cycles.  
 Requested convergence on MAX density matrix=1.00D-06.  
 Requested convergence on      energy=1.00D-06.  
 No special actions if energy rises.  
 SCF Done: E(RB3LYP) = -3205.64731900    A.U. after    11 cycles  
           NFock= 11 Conv=0.46D-08    -V/T= 2.0018  
 Calling FoFJK, ICntrl=      2127 FMM=F ISym2X=0 I1Cent= 0 IOpClX= 0 NMat=1 NMatS=1  
 NMatT=0.  
 \*\*\*\*\* Axes restored to original set \*\*\*\*\*

```

-----
Center      Atomic                              Forces (Hartrees/Bohr)
Number      Number                              X                              Y                              Z
-----
  
```

|    |    |              |              |              |
|----|----|--------------|--------------|--------------|
| 1  | 6  | -0.000149374 | -0.000008018 | 0.000154353  |
| 2  | 6  | 0.000329153  | -0.000448427 | 0.000330156  |
| 3  | 7  | -0.000116020 | 0.000635556  | -0.000025006 |
| 4  | 6  | 0.000135903  | -0.001499546 | -0.000179714 |
| 5  | 7  | -0.000077827 | 0.000578872  | -0.000203275 |
| 6  | 6  | 0.000146658  | 0.000434780  | 0.000394606  |
| 7  | 6  | -0.000084557 | -0.000041075 | -0.000214890 |
| 8  | 1  | 0.000098214  | -0.000014637 | -0.000276790 |
| 9  | 1  | 0.000023042  | 0.000216027  | -0.000174420 |
| 10 | 1  | 0.000284715  | 0.000024297  | 0.000143742  |
| 11 | 1  | -0.000243874 | -0.000072212 | -0.000152214 |
| 12 | 1  | 0.000052602  | 0.000033026  | -0.000019572 |
| 13 | 1  | -0.000027515 | -0.000039809 | -0.000018518 |
| 14 | 35 | -0.000517156 | -0.000322983 | -0.000043610 |
| 15 | 1  | -0.000322972 | 0.000516441  | 0.000047065  |
| 16 | 6  | -0.000243826 | -0.000632081 | 0.000058000  |
| 17 | 6  | 0.000141235  | 0.000221759  | 0.000136905  |
| 18 | 1  | 0.000083125  | 0.000140513  | 0.000030823  |
| 19 | 1  | -0.000032381 | -0.000000779 | -0.000106868 |
| 20 | 1  | 0.000021917  | -0.000072649 | 0.000075310  |
| 21 | 7  | 0.000610243  | 0.000017220  | 0.000104667  |
| 22 | 1  | -0.000015930 | -0.000078357 | -0.000017849 |
| 23 | 1  | -0.000242603 | 0.000601765  | 0.000163579  |
| 24 | 6  | 0.000134727  | -0.001114611 | 0.000637075  |
| 25 | 6  | 0.001014326  | 0.000632798  | -0.000363823 |
| 26 | 8  | -0.001215623 | 0.000159782  | 0.000058733  |
| 27 | 1  | 0.000090933  | 0.000024271  | 0.000235752  |
| 28 | 1  | -0.000261553 | -0.000099557 | 0.000450304  |
| 29 | 1  | -0.000263031 | 0.000017727  | -0.001256940 |
| 30 | 6  | 0.000438363  | 0.000175078  | -0.000232706 |
| 31 | 1  | 0.000020924  | 0.000143465  | 0.000118554  |
| 32 | 1  | 0.000118903  | -0.000074448 | -0.000017190 |
| 33 | 1  | 0.000069259  | -0.000054186 | 0.000163764  |

-----  
Cartesian Forces: Max 0.001499546 RMS 0.000371048

GradGradGradGradGradGradGradGradGradGradGradGradGradGradGradGradGradGradGrad

Berny optimization.

Using GEDIIS/GDIIS optimizer.

FormGI is forming the generalized inverse of G from B-inverse, IUseBI=4.

Internal Forces: Max 0.002756678 RMS 0.000615051

Search for a local minimum.

Step number 20 out of a maximum of 172

All quantities printed in internal units (Hartrees-Bohrs-Radians)

Mixed Optimization -- En-DIIS/RFO-DIIS

Swapping is turned off.

Update second derivatives using D2CorX and points 18 19 20

DE= -1.17D-04 DEPred=-4.38D-05 R= 2.66D+00

TightC=F SS= 1.41D+00 RLast= 2.64D-01 DXNew= 1.6878D+00 7.9238D-01

Trust test= 2.66D+00 RLast= 2.64D-01 DXMaxT set to 1.00D+00

ITU= 1 1 1 1 1 1 1 1 0 -1 -1 1 1 1 -1 1 0 0 -1 0

|                 |         |         |         |         |         |
|-----------------|---------|---------|---------|---------|---------|
| Eigenvalues --- | 0.00026 | 0.00183 | 0.00307 | 0.00410 | 0.00688 |
| Eigenvalues --- | 0.00726 | 0.00859 | 0.01329 | 0.01506 | 0.01875 |
| Eigenvalues --- | 0.01934 | 0.02133 | 0.02238 | 0.02390 | 0.02413 |
| Eigenvalues --- | 0.02486 | 0.02856 | 0.02997 | 0.03083 | 0.03103 |
| Eigenvalues --- | 0.03241 | 0.03362 | 0.03674 | 0.03991 | 0.04080 |
| Eigenvalues --- | 0.04345 | 0.04456 | 0.05121 | 0.05445 | 0.05739 |
| Eigenvalues --- | 0.05783 | 0.05977 | 0.07664 | 0.08621 | 0.08917 |
| Eigenvalues --- | 0.09479 | 0.10120 | 0.12254 | 0.12353 | 0.12746 |
| Eigenvalues --- | 0.13469 | 0.13791 | 0.15221 | 0.15983 | 0.15999 |
| Eigenvalues --- | 0.16001 | 0.16002 | 0.16015 | 0.16024 | 0.16080 |
| Eigenvalues --- | 0.16257 | 0.17453 | 0.18085 | 0.22091 | 0.22646 |
| Eigenvalues --- | 0.22879 | 0.22964 | 0.24228 | 0.25545 | 0.26981 |
| Eigenvalues --- | 0.29201 | 0.31112 | 0.31810 | 0.32164 | 0.33639 |
| Eigenvalues --- | 0.34179 | 0.34278 | 0.34324 | 0.34518 | 0.34588 |
| Eigenvalues --- | 0.34697 | 0.34863 | 0.35066 | 0.35224 | 0.35387 |
| Eigenvalues --- | 0.35522 | 0.35573 | 0.35890 | 0.35900 | 0.36425 |
| Eigenvalues --- | 0.36628 | 0.38819 | 0.39377 | 0.41964 | 0.42582 |
| Eigenvalues --- | 0.44805 | 0.45476 | 0.46487 | 0.49358 | 0.54841 |
| Eigenvalues --- | 0.58416 | 0.60621 | 1.93582 |         |         |

En-DIIS/RFO-DIIS IScMMF= 0 using points: 20 19 18 17 16

RFO step: Lambda=-5.57957979D-05.

DidBck=F Rises=F RFO-DIIS coefs: 1.48588 0.35108 0.45018 -3.22229

1.93516

Iteration 1 RMS(Cart)= 0.10456664 RMS(Int)= 0.00786247

Iteration 2 RMS(Cart)= 0.02322052 RMS(Int)= 0.00170190

Iteration 3 RMS(Cart)= 0.00020480 RMS(Int)= 0.00169991

Iteration 4 RMS(Cart)= 0.00000299 RMS(Int)= 0.00169991

Iteration 5 RMS(Cart)= 0.00000004 RMS(Int)= 0.00169991

| Variable | Old X   | -DE/DX   | Delta X<br>(Linear) | Delta X<br>(Quad) | Delta X<br>(Total) | New X   |
|----------|---------|----------|---------------------|-------------------|--------------------|---------|
| R1       | 2.56524 | -0.00031 | -0.00021            | -0.00023          | -0.00045           | 2.56479 |
| R2       | 2.62197 | -0.00002 | 0.00145             | 0.00054           | 0.00197            | 2.62395 |
| R3       | 2.03400 | 0.00003  | -0.00012            | -0.00002          | -0.00014           | 2.03385 |
| R4       | 2.62668 | -0.00053 | -0.00001            | -0.00035          | -0.00035           | 2.62633 |
| R5       | 2.03089 | -0.00004 | 0.00022             | 0.00002           | 0.00023            | 2.03112 |
| R6       | 2.54270 | 0.00008  | 0.00185             | 0.00068           | 0.00254            | 2.54524 |
| R7       | 2.69665 | 0.00037  | -0.00023            | 0.00021           | -0.00002           | 2.69663 |

|     |         |          |          |          |          |         |
|-----|---------|----------|----------|----------|----------|---------|
| R8  | 2.51895 | 0.00152  | -0.00276 | 0.00031  | -0.00246 | 2.51649 |
| R9  | 2.09851 | -0.00074 | 0.00164  | -0.00018 | 0.00146  | 2.09997 |
| R10 | 2.78475 | 0.00079  | -0.00283 | -0.00097 | -0.00380 | 2.78096 |
| R11 | 2.89848 | 0.00019  | 0.00016  | -0.00094 | -0.00077 | 2.89771 |
| R12 | 2.05995 | 0.00010  | -0.00027 | -0.00006 | -0.00033 | 2.05963 |
| R13 | 2.06009 | 0.00009  | 0.00045  | 0.00055  | 0.00100  | 2.06109 |
| R14 | 2.06932 | -0.00002 | 0.00072  | 0.00039  | 0.00111  | 2.07042 |
| R15 | 2.07885 | 0.00001  | 0.00188  | 0.00099  | 0.00287  | 2.08172 |
| R16 | 2.75307 | 0.00057  | -0.00285 | -0.00058 | -0.00344 | 2.74963 |
| R17 | 4.19878 | 0.00001  | -0.00766 | 0.00516  | -0.00250 | 4.19628 |
| R18 | 2.50678 | -0.00015 | 0.00009  | -0.00001 | 0.00007  | 2.50686 |
| R19 | 2.05600 | -0.00002 | 0.00033  | 0.00051  | 0.00083  | 2.05684 |
| R20 | 2.04346 | -0.00002 | 0.00007  | -0.00004 | 0.00003  | 2.04349 |
| R21 | 2.04730 | -0.00008 | 0.00002  | -0.00002 | 0.00000  | 2.04729 |
| R22 | 1.91466 | -0.00007 | 0.00042  | 0.00038  | 0.00080  | 1.91546 |
| R23 | 1.92637 | -0.00026 | 0.00092  | -0.00007 | 0.00119  | 1.92756 |
| R24 | 3.92328 | 0.00023  | -0.00723 | 0.00425  | -0.00315 | 3.92013 |
| R25 | 2.77543 | -0.00195 | -0.00045 | -0.00124 | -0.00630 | 2.76913 |
| R26 | 2.71940 | 0.00061  | -0.00002 | 0.00035  | 0.00181  | 2.72120 |
| R27 | 2.05559 | 0.00003  | 0.00024  | 0.00017  | 0.00041  | 2.05600 |
| R28 | 2.05448 | -0.00015 | 0.00048  | -0.00043 | 0.00005  | 2.05453 |
| R29 | 2.75306 | 0.00024  | 0.00269  | 0.00045  | 0.00631  | 2.75937 |
| R30 | 2.05742 | 0.00001  | -0.00095 | 0.00037  | -0.00058 | 2.05684 |
| R31 | 2.84006 | 0.00046  | 0.00031  | 0.00062  | 0.00092  | 2.84098 |
| R32 | 2.06599 | 0.00014  | -0.00042 | 0.00003  | -0.00040 | 2.06560 |
| R33 | 2.06717 | 0.00010  | -0.00018 | 0.00008  | -0.00010 | 2.06707 |
| R34 | 2.06551 | -0.00001 | 0.00006  | -0.00013 | -0.00007 | 2.06543 |
| A1  | 1.87246 | 0.00044  | -0.00060 | -0.00029 | -0.00090 | 1.87155 |
| A2  | 2.27866 | -0.00008 | -0.00017 | 0.00038  | 0.00022  | 2.27888 |
| A3  | 2.13207 | -0.00036 | 0.00075  | -0.00009 | 0.00067  | 2.13273 |
| A4  | 1.86367 | 0.00010  | 0.00068  | 0.00082  | 0.00150  | 1.86517 |
| A5  | 2.27919 | -0.00030 | 0.00009  | -0.00123 | -0.00116 | 2.27803 |
| A6  | 2.14029 | 0.00020  | -0.00080 | 0.00048  | -0.00033 | 2.13996 |
| A7  | 1.89753 | 0.00029  | -0.00115 | -0.00057 | -0.00172 | 1.89580 |
| A8  | 2.25298 | 0.00004  | 0.00032  | 0.00045  | 0.00074  | 2.25373 |
| A9  | 2.13268 | -0.00033 | 0.00089  | 0.00011  | 0.00097  | 2.13365 |
| A10 | 1.89009 | -0.00027 | 0.00079  | 0.00021  | 0.00099  | 1.89108 |
| A11 | 2.14758 | -0.00155 | -0.00799 | -0.00401 | -0.01200 | 2.13559 |
| A12 | 2.24479 | 0.00182  | 0.00710  | 0.00398  | 0.01109  | 2.25588 |
| A13 | 1.90100 | -0.00056 | 0.00027  | -0.00018 | 0.00011  | 1.90110 |
| A14 | 2.20667 | -0.00218 | 0.00445  | -0.00018 | 0.00434  | 2.21101 |
| A15 | 2.17406 | 0.00274  | -0.00490 | 0.00041  | -0.00441 | 2.16965 |
| A16 | 1.96144 | 0.00021  | -0.00029 | -0.00211 | -0.00235 | 1.95910 |
| A17 | 1.87458 | 0.00060  | -0.00220 | 0.00124  | -0.00099 | 1.87359 |

|     |          |          |          |          |          |          |
|-----|----------|----------|----------|----------|----------|----------|
| A18 | 1.88980  | -0.00074 | 0.00647  | 0.00173  | 0.00818  | 1.89797  |
| A19 | 1.91904  | -0.00018 | -0.00167 | -0.00309 | -0.00479 | 1.91425  |
| A20 | 1.92374  | 0.00004  | -0.00267 | 0.00093  | -0.00176 | 1.92198  |
| A21 | 1.89333  | 0.00006  | 0.00054  | 0.00148  | 0.00201  | 1.89534  |
| A22 | 1.90742  | -0.00028 | 0.00047  | 0.00128  | 0.00176  | 1.90918  |
| A23 | 1.89533  | -0.00019 | -0.00139 | -0.00261 | -0.00399 | 1.89134  |
| A24 | 1.87926  | 0.00076  | 0.00004  | 0.00102  | 0.00098  | 1.88024  |
| A25 | 1.87586  | 0.00013  | -0.00179 | -0.00116 | -0.00295 | 1.87291  |
| A26 | 1.90412  | -0.00072 | -0.00268 | -0.00204 | -0.00469 | 1.89943  |
| A27 | 2.00060  | 0.00027  | 0.00525  | 0.00348  | 0.00876  | 2.00936  |
| A28 | 2.16158  | 0.00000  | -0.00058 | -0.00010 | -0.00068 | 2.16090  |
| A29 | 1.94754  | -0.00015 | 0.00021  | -0.00123 | -0.00101 | 1.94653  |
| A30 | 2.17405  | 0.00016  | 0.00035  | 0.00134  | 0.00170  | 2.17575  |
| A31 | 2.07519  | 0.00001  | -0.00032 | -0.00036 | -0.00067 | 2.07452  |
| A32 | 2.16178  | 0.00005  | -0.00015 | 0.00041  | 0.00025  | 2.16203  |
| A33 | 2.04622  | -0.00006 | 0.00047  | -0.00005 | 0.00042  | 2.04664  |
| A34 | 1.93897  | -0.00102 | 0.00075  | -0.00041 | 0.00074  | 1.93971  |
| A35 | 1.92018  | 0.00276  | -0.00040 | -0.00010 | -0.00035 | 1.91983  |
| A36 | 1.88684  | -0.00082 | -0.00010 | 0.00212  | 0.00187  | 1.88872  |
| A37 | 2.08664  | 0.00006  | -0.00433 | 0.00023  | -0.00636 | 2.08028  |
| A38 | 2.09358  | -0.00054 | 0.00612  | 0.00202  | 0.00998  | 2.10356  |
| A39 | 1.99966  | -0.00032 | 0.00020  | -0.00086 | -0.00298 | 1.99668  |
| A40 | 2.01115  | -0.00006 | 0.00348  | -0.00219 | 0.00248  | 2.01363  |
| A41 | 2.01197  | 0.00039  | -0.00346 | -0.00037 | -0.00368 | 2.00829  |
| A42 | 2.05735  | -0.00104 | 0.01135  | 0.00309  | 0.00969  | 2.06704  |
| A43 | 2.13019  | -0.00003 | 0.00060  | -0.00163 | 0.00338  | 2.13357  |
| A44 | 1.97579  | -0.00035 | 0.00568  | 0.00038  | 0.00566  | 1.98146  |
| A45 | 2.02702  | -0.00054 | 0.00034  | 0.00050  | 0.00016  | 2.02719  |
| A46 | 2.01684  | 0.00099  | -0.01138 | -0.00156 | -0.01250 | 2.00434  |
| A47 | 2.63336  | 0.00011  | 0.02059  | 0.01984  | 0.02813  | 2.66149  |
| A48 | 2.56691  | 0.00082  | 0.00108  | 0.00543  | -0.00517 | 2.56174  |
| A49 | 1.92789  | 0.00000  | -0.00151 | -0.00028 | -0.00179 | 1.92610  |
| A50 | 1.91411  | 0.00003  | -0.00185 | -0.00080 | -0.00266 | 1.91146  |
| A51 | 1.94403  | 0.00023  | 0.00211  | 0.00044  | 0.00256  | 1.94659  |
| A52 | 1.87638  | 0.00002  | -0.00144 | -0.00001 | -0.00147 | 1.87491  |
| A53 | 1.89907  | -0.00015 | 0.00159  | 0.00082  | 0.00240  | 1.90147  |
| A54 | 1.90088  | -0.00014 | 0.00104  | -0.00017 | 0.00087  | 1.90175  |
| A55 | 3.34707  | 0.00242  | 0.00045  | 0.01640  | 0.01686  | 3.36392  |
| A56 | 2.78495  | 0.00222  | -0.02234 | -0.03846 | -0.06272 | 2.72224  |
| A57 | 2.80927  | -0.00071 | -0.01683 | 0.03077  | 0.01394  | 2.82322  |
| A58 | 3.13660  | -0.00027 | -0.03192 | -0.05122 | -0.08391 | 3.05269  |
| D1  | 0.00499  | -0.00015 | 0.00826  | -0.00789 | 0.00036  | 0.00535  |
| D2  | 3.13731  | -0.00001 | -0.00034 | 0.00132  | 0.00098  | 3.13829  |
| D3  | -3.13411 | -0.00013 | 0.01125  | -0.00661 | 0.00463  | -3.12949 |

|     |          |          |          |          |          |          |
|-----|----------|----------|----------|----------|----------|----------|
| D4  | -0.00179 | 0.00001  | 0.00265  | 0.00260  | 0.00525  | 0.00345  |
| D5  | -0.00807 | 0.00025  | -0.00493 | 0.00269  | -0.00223 | -0.01030 |
| D6  | -3.09336 | 0.00010  | -0.00439 | 0.00169  | -0.00276 | -3.09612 |
| D7  | 3.13129  | 0.00023  | -0.00762 | 0.00154  | -0.00606 | 3.12523  |
| D8  | 0.04600  | 0.00008  | -0.00709 | 0.00054  | -0.00659 | 0.03941  |
| D9  | -0.00029 | 0.00001  | -0.00882 | 0.01042  | 0.00160  | 0.00131  |
| D10 | 3.14003  | 0.00003  | 0.00023  | 0.00689  | 0.00712  | -3.13604 |
| D11 | -3.13352 | -0.00011 | -0.00108 | 0.00212  | 0.00105  | -3.13247 |
| D12 | 0.00680  | -0.00009 | 0.00798  | -0.00140 | 0.00656  | 0.01336  |
| D13 | -0.00475 | 0.00014  | 0.00582  | -0.00883 | -0.00302 | -0.00777 |
| D14 | 3.09938  | 0.00013  | 0.00341  | -0.00398 | -0.00060 | 3.09878  |
| D15 | 3.13801  | 0.00013  | -0.00248 | -0.00560 | -0.00808 | 3.12993  |
| D16 | -0.04105 | 0.00011  | -0.00489 | -0.00075 | -0.00565 | -0.04670 |
| D17 | 0.12988  | -0.00011 | -0.01731 | -0.00689 | -0.02421 | 0.10568  |
| D18 | -3.01522 | -0.00006 | -0.01571 | -0.00373 | -0.01944 | -3.03466 |
| D19 | -3.01313 | -0.00009 | -0.00719 | -0.01084 | -0.01803 | -3.03116 |
| D20 | 0.12495  | -0.00004 | -0.00559 | -0.00767 | -0.01326 | 0.11168  |
| D21 | 0.00790  | -0.00024 | -0.00060 | 0.00385  | 0.00325  | 0.01115  |
| D22 | 3.09449  | -0.00030 | -0.00065 | 0.00481  | 0.00411  | 3.09860  |
| D23 | -3.09350 | -0.00012 | 0.00240  | -0.00112 | 0.00128  | -3.09221 |
| D24 | -0.00691 | -0.00018 | 0.00235  | -0.00017 | 0.00214  | -0.00477 |
| D25 | 1.48142  | -0.00034 | -0.08386 | -0.06252 | -0.14639 | 1.33503  |
| D26 | -2.68895 | -0.00003 | -0.08760 | -0.06683 | -0.15443 | -2.84338 |
| D27 | -0.64762 | -0.00002 | -0.08477 | -0.06353 | -0.14831 | -0.79593 |
| D28 | -1.59548 | -0.00037 | -0.08354 | -0.06365 | -0.14720 | -1.74268 |
| D29 | 0.51733  | -0.00006 | -0.08728 | -0.06796 | -0.15523 | 0.36209  |
| D30 | 2.55866  | -0.00005 | -0.08445 | -0.06466 | -0.14912 | 2.40954  |
| D31 | -1.06389 | 0.00071  | -0.00231 | 0.00919  | 0.00688  | -1.05700 |
| D32 | 0.97756  | 0.00060  | -0.00497 | 0.00704  | 0.00209  | 0.97965  |
| D33 | -3.13000 | 0.00129  | 0.00061  | 0.01033  | 0.01096  | -3.11905 |
| D34 | 3.13220  | -0.00007 | 0.00180  | 0.01109  | 0.01288  | -3.13811 |
| D35 | -1.10954 | -0.00018 | -0.00086 | 0.00895  | 0.00809  | -1.10145 |
| D36 | 1.06608  | 0.00051  | 0.00472  | 0.01224  | 0.01695  | 1.08303  |
| D37 | 1.04576  | -0.00006 | 0.00388  | 0.01062  | 0.01449  | 1.06025  |
| D38 | 3.08721  | -0.00017 | 0.00122  | 0.00848  | 0.00970  | 3.09690  |
| D39 | -1.02036 | 0.00052  | 0.00679  | 0.01176  | 0.01856  | -1.00180 |
| D40 | 2.89718  | -0.00039 | 0.07530  | 0.06399  | 0.13918  | 3.03636  |
| D41 | -1.29725 | -0.00028 | 0.07539  | 0.06631  | 0.14176  | -1.15549 |
| D42 | 0.82894  | -0.00009 | 0.07618  | 0.06300  | 0.13910  | 0.96804  |
| D43 | 2.91769  | 0.00002  | 0.07627  | 0.06532  | 0.14168  | 3.05938  |
| D44 | -1.27513 | 0.00009  | 0.07692  | 0.06366  | 0.14049  | -1.13463 |
| D45 | 0.81362  | 0.00021  | 0.07701  | 0.06598  | 0.14308  | 0.95670  |
| D46 | -3.13144 | -0.00006 | 0.00149  | -0.00016 | 0.00133  | -3.13011 |
| D47 | 0.01230  | -0.00002 | -0.00056 | 0.00078  | 0.00022  | 0.01251  |

|     |          |          |          |          |          |          |
|-----|----------|----------|----------|----------|----------|----------|
| D48 | 0.01412  | -0.00012 | -0.00032 | -0.00374 | -0.00406 | 0.01006  |
| D49 | -3.12533 | -0.00008 | -0.00238 | -0.00279 | -0.00517 | -3.13050 |
| D50 | 1.75972  | -0.00022 | 0.08637  | 0.07489  | 0.16243  | 1.92215  |
| D51 | -0.66947 | -0.00103 | -0.06342 | -0.07826 | -0.14252 | -0.81199 |
| D52 | -2.46042 | 0.00067  | 0.09015  | 0.08146  | 0.17240  | -2.28801 |
| D53 | 1.39358  | -0.00015 | -0.05964 | -0.07170 | -0.13255 | 1.26103  |
| D54 | -2.71101 | 0.00011  | 0.00376  | -0.00197 | 0.00332  | -2.70769 |
| D55 | -0.00414 | 0.00013  | 0.00285  | -0.00255 | 0.00184  | -0.00229 |
| D56 | -0.03553 | 0.00001  | -0.00111 | 0.00248  | 0.00216  | -0.03336 |
| D57 | 2.67134  | 0.00002  | -0.00203 | 0.00190  | 0.00069  | 2.67203  |
| D58 | 1.41975  | 0.00008  | -0.11714 | -0.13714 | -0.25748 | 1.16227  |
| D59 | -0.97597 | -0.00010 | -0.11593 | -0.13294 | -0.25092 | -1.22689 |
| D60 | 1.03163  | 0.00036  | 0.10577  | 0.12336  | 0.22366  | 1.25529  |
| D61 | -1.36223 | -0.00019 | 0.11686  | 0.12484  | 0.23685  | -1.12537 |
| D62 | 2.55412  | 0.00027  | 0.00835  | 0.00294  | 0.01234  | 2.56646  |
| D63 | -1.66402 | 0.00032  | 0.00451  | 0.00226  | 0.00783  | -1.65618 |
| D64 | 0.44155  | 0.00031  | 0.00595  | 0.00179  | 0.00880  | 0.45035  |
| D65 | 1.36345  | -0.00020 | 0.00857  | 0.00278  | 0.01039  | 1.37384  |
| D66 | -2.85468 | -0.00015 | 0.00473  | 0.00210  | 0.00588  | -2.84880 |
| D67 | -0.74912 | -0.00016 | 0.00617  | 0.00163  | 0.00685  | -0.74227 |
| D68 | -1.01284 | -0.00018 | 0.01256  | 0.00344  | 0.01590  | -0.99694 |
| D69 | 1.05221  | -0.00013 | 0.00872  | 0.00276  | 0.01139  | 1.06360  |
| D70 | -3.12541 | -0.00014 | 0.01016  | 0.00230  | 0.01236  | -3.11305 |

| Item                 | Value    | Threshold | Converged? |
|----------------------|----------|-----------|------------|
| Maximum Force        | 0.002757 | 0.000450  | NO         |
| RMS Force            | 0.000615 | 0.000300  | NO         |
| Maximum Displacement | 0.443798 | 0.001800  | NO         |
| RMS Displacement     | 0.118806 | 0.001200  | NO         |

Predicted change in Energy=-9.167136D-05

GradGradGradGradGradGradGradGradGradGradGradGradGradGradGradGradGradGrad

Input orientation:

| Center Number | Atomic Number | Atomic Type | Coordinates (Angstroms) |           |           |
|---------------|---------------|-------------|-------------------------|-----------|-----------|
|               |               |             | X                       | Y         | Z         |
| 1             | 6             | 0           | -2.654017               | 2.048069  | -0.317037 |
| 2             | 6             | 0           | -3.566964               | 1.098534  | 0.010049  |
| 3             | 7             | 0           | -2.867182               | -0.088676 | 0.189958  |
| 4             | 6             | 0           | -1.558439               | 0.146840  | -0.024080 |
| 5             | 7             | 0           | -1.409956               | 1.431806  | -0.340548 |
| 6             | 6             | 0           | -0.112976               | 2.079020  | -0.594745 |
| 7             | 6             | 0           | 0.390695                | 2.867047  | 0.620429  |
| 8             | 1             | 0           | -2.778807               | 3.096258  | -0.526995 |



|    |    |   |           |           |           |
|----|----|---|-----------|-----------|-----------|
| 9  | 1  | 0 | -4.632343 | 1.167497  | 0.134375  |
| 10 | 1  | 0 | 0.599534  | 1.292573  | -0.843198 |
| 11 | 1  | 0 | -0.214362 | 2.741101  | -1.455534 |
| 12 | 1  | 0 | -0.330510 | 3.653736  | 0.868155  |
| 13 | 1  | 0 | 0.438312  | 2.182783  | 1.482423  |
| 14 | 35 | 0 | 0.187023  | -2.528642 | 0.749959  |
| 15 | 1  | 0 | -0.784461 | -0.641059 | 0.098644  |
| 16 | 6  | 0 | -3.361531 | -1.381834 | 0.535894  |
| 17 | 6  | 0 | -4.651057 | -1.676832 | 0.635358  |
| 18 | 1  | 0 | -2.550226 | -2.086961 | 0.706962  |
| 19 | 1  | 0 | -4.936600 | -2.681975 | 0.913762  |
| 20 | 1  | 0 | -5.448767 | -0.966950 | 0.452493  |
| 21 | 7  | 0 | 1.654676  | 3.487361  | 0.253406  |
| 22 | 1  | 0 | 1.986551  | 4.102710  | 0.987315  |
| 23 | 1  | 0 | 2.362192  | 2.769979  | 0.094589  |
| 24 | 6  | 0 | 3.640353  | -0.068073 | -1.315259 |
| 25 | 6  | 0 | 3.312976  | -0.485401 | 0.050738  |
| 26 | 8  | 0 | 3.052565  | 0.878008  | -0.402551 |
| 27 | 1  | 0 | 4.676813  | 0.139949  | -1.572548 |
| 28 | 1  | 0 | 3.009251  | -0.364494 | -2.149446 |
| 29 | 1  | 0 | 2.409034  | -1.069994 | 0.211427  |
| 30 | 6  | 0 | 4.362968  | -0.640457 | 1.115461  |
| 31 | 1  | 0 | 3.952963  | -0.379904 | 2.094645  |
| 32 | 1  | 0 | 4.684449  | -1.684944 | 1.162352  |
| 33 | 1  | 0 | 5.232957  | -0.009707 | 0.915761  |

-----  
Distance matrix (angstroms):

|    |    | 1        | 2        | 3        | 4        | 5        |
|----|----|----------|----------|----------|----------|----------|
| 1  | C  | 0.000000 |          |          |          |          |
| 2  | C  | 1.357231 | 0.000000 |          |          |          |
| 3  | N  | 2.206391 | 1.389794 | 0.000000 |          |          |
| 4  | C  | 2.213772 | 2.222849 | 1.346882 | 0.000000 |          |
| 5  | N  | 1.388532 | 2.210582 | 2.171822 | 1.331667 | 0.000000 |
| 6  | C  | 2.556359 | 3.641039 | 3.591701 | 2.479585 | 1.471618 |
| 7  | C  | 3.289352 | 4.377587 | 4.419883 | 3.407937 | 2.495142 |
| 8  | H  | 1.076269 | 2.213710 | 3.265828 | 3.231298 | 2.163081 |
| 9  | H  | 2.212003 | 1.074824 | 2.167222 | 3.242798 | 3.267903 |
| 10 | H  | 3.381303 | 4.257392 | 3.872129 | 2.576917 | 2.076076 |
| 11 | H  | 2.779998 | 4.010724 | 4.213400 | 3.253582 | 2.094491 |
| 12 | H  | 3.062929 | 4.211893 | 4.571685 | 3.821284 | 2.750116 |
| 13 | H  | 3.580322 | 4.402921 | 4.213820 | 3.225155 | 2.702459 |
| 14 | Br | 5.491473 | 5.272218 | 3.949077 | 3.286940 | 4.407346 |
| 15 | H  | 3.301430 | 3.282736 | 2.156663 | 1.111255 | 2.209277 |
| 16 | C  | 3.604484 | 2.543804 | 1.426994 | 2.429312 | 3.534595 |

|    |    |          |          |          |          |          |
|----|----|----------|----------|----------|----------|----------|
| 17 | C  | 4.332449 | 3.044491 | 2.429574 | 3.650333 | 4.595733 |
| 18 | H  | 4.261199 | 3.415672 | 2.088276 | 2.551065 | 3.844374 |
| 19 | H  | 5.394291 | 4.121268 | 3.395819 | 4.504855 | 5.561808 |
| 20 | H  | 4.182481 | 2.828986 | 2.739502 | 4.074593 | 4.763921 |
| 21 | N  | 4.578406 | 5.747281 | 5.765350 | 4.643294 | 3.737653 |
| 22 | H  | 5.240015 | 6.389183 | 6.462369 | 5.407289 | 4.520311 |
| 23 | H  | 5.084579 | 6.160825 | 5.960483 | 4.718716 | 4.026059 |
| 24 | C  | 6.715177 | 7.420433 | 6.679380 | 5.361041 | 5.357734 |
| 25 | C  | 6.492976 | 7.060034 | 6.194444 | 4.912841 | 5.112228 |
| 26 | O  | 5.825928 | 6.636041 | 6.027350 | 4.683930 | 4.497180 |
| 27 | H  | 7.678431 | 8.448867 | 7.750520 | 6.424652 | 6.343144 |
| 28 | H  | 6.422677 | 7.074635 | 6.330983 | 5.063835 | 5.101783 |
| 29 | H  | 5.969596 | 6.360472 | 5.366740 | 4.156559 | 4.598734 |
| 30 | C  | 7.649726 | 8.193281 | 7.310000 | 6.081238 | 6.304037 |
| 31 | H  | 7.440662 | 7.942331 | 7.087103 | 5.928069 | 6.162252 |
| 32 | H  | 8.365230 | 8.784154 | 7.779509 | 6.613373 | 7.008182 |
| 33 | H  | 8.243701 | 8.915555 | 8.132975 | 6.857905 | 6.912638 |
|    |    | 6        | 7        | 8        | 9        | 10       |
| 6  | C  | 0.000000 |          |          |          |          |
| 7  | C  | 1.533401 | 0.000000 |          |          |          |
| 8  | H  | 2.854124 | 3.378589 | 0.000000 |          |          |
| 9  | H  | 4.667674 | 5.325001 | 2.755563 | 0.000000 |          |
| 10 | H  | 1.089907 | 2.159811 | 3.842714 | 5.323893 | 0.000000 |
| 11 | H  | 1.090682 | 2.166005 | 2.750401 | 4.952030 | 1.770767 |
| 12 | H  | 2.160354 | 1.095621 | 2.872522 | 5.022508 | 3.060850 |
| 13 | H  | 2.151584 | 1.101597 | 3.901545 | 5.344117 | 2.495391 |
| 14 | Br | 4.809239 | 5.401085 | 6.485851 | 6.104644 | 4.160529 |
| 15 | H  | 2.886263 | 3.736316 | 4.282100 | 4.251865 | 2.557624 |
| 16 | C  | 4.879443 | 5.669156 | 4.639247 | 2.876677 | 4.974373 |
| 17 | C  | 6.017787 | 6.787217 | 5.257259 | 2.888173 | 6.210652 |
| 18 | H  | 4.999003 | 5.761830 | 5.332978 | 3.905709 | 4.872908 |
| 19 | H  | 6.943344 | 7.697906 | 6.334022 | 3.939347 | 7.037949 |
| 20 | H  | 6.232601 | 6.987636 | 4.959611 | 2.307295 | 6.585302 |
| 21 | N  | 2.413996 | 1.455041 | 4.518602 | 6.702429 | 2.670759 |
| 22 | H  | 3.317567 | 2.051396 | 5.100463 | 7.290593 | 3.629251 |
| 23 | H  | 2.660651 | 2.042727 | 5.188709 | 7.175867 | 2.483774 |
| 24 | C  | 4.383677 | 4.787703 | 7.199998 | 8.489145 | 3.364637 |
| 25 | C  | 4.327823 | 4.483658 | 7.090267 | 8.115859 | 3.364979 |
| 26 | O  | 3.391168 | 3.476826 | 6.240275 | 7.709080 | 2.526539 |
| 27 | H  | 5.259104 | 5.533265 | 8.088215 | 9.519970 | 4.299384 |
| 28 | H  | 4.258657 | 4.997190 | 6.936193 | 8.121379 | 3.202951 |
| 29 | H  | 4.114211 | 4.443114 | 6.694521 | 7.388727 | 3.157253 |
| 30 | C  | 5.509486 | 5.322274 | 8.225914 | 9.227506 | 4.662230 |
| 31 | H  | 5.459944 | 5.040412 | 8.017071 | 8.941174 | 4.761679 |

|    |    |          |          |          |           |           |
|----|----|----------|----------|----------|-----------|-----------|
| 32 | H  | 6.345873 | 6.280974 | 9.022970 | 9.797743  | 5.438233  |
| 33 | H  | 5.934932 | 5.640075 | 8.713033 | 9.965969  | 5.124303  |
|    |    | 11       | 12       | 13       | 14        | 15        |
| 11 | H  | 0.000000 |          |          |           |           |
| 12 | H  | 2.499185 | 0.000000 |          |           |           |
| 13 | H  | 3.060930 | 1.769779 | 0.000000 |           |           |
| 14 | Br | 5.726736 | 6.205128 | 4.774639 | 0.000000  |           |
| 15 | H  | 3.765567 | 4.386740 | 3.374034 | 2.220577  | 0.000000  |
| 16 | C  | 5.555993 | 5.886803 | 5.295396 | 3.735402  | 2.716841  |
| 17 | C  | 6.601078 | 6.865587 | 6.443277 | 4.913831  | 4.038744  |
| 18 | H  | 5.782978 | 6.157006 | 5.269099 | 2.772988  | 2.361908  |
| 19 | H  | 7.571186 | 7.833223 | 7.271790 | 5.128533  | 4.697873  |
| 20 | H  | 6.692475 | 6.907972 | 6.755685 | 5.855724  | 4.689048  |
| 21 | N  | 2.640205 | 2.084841 | 2.166090 | 6.212315  | 4.797623  |
| 22 | H  | 3.558863 | 2.363165 | 2.515610 | 6.875280  | 5.565213  |
| 23 | H  | 3.007049 | 2.937700 | 2.443808 | 5.765089  | 4.640757  |
| 24 | C  | 4.771788 | 5.864036 | 4.811074 | 4.716462  | 4.680428  |
| 25 | C  | 5.012114 | 5.574551 | 4.175239 | 3.799385  | 4.100673  |
| 26 | O  | 3.905471 | 4.556815 | 3.477051 | 4.598355  | 4.157106  |
| 27 | H  | 5.541054 | 6.586123 | 5.609893 | 5.716085  | 5.764405  |
| 28 | H  | 4.529671 | 6.033746 | 5.127262 | 4.588578  | 4.418443  |
| 29 | H  | 4.917866 | 5.500002 | 4.009954 | 2.712011  | 3.224145  |
| 30 | C  | 6.244750 | 6.366317 | 4.848533 | 4.597538  | 5.246899  |
| 31 | H  | 6.301669 | 6.010214 | 4.392602 | 4.539555  | 5.147369  |
| 32 | H  | 7.102222 | 7.330612 | 5.752516 | 4.594424  | 5.668346  |
| 33 | H  | 6.547005 | 6.661475 | 5.302522 | 5.642160  | 6.105375  |
|    |    | 16       | 17       | 18       | 19        | 20        |
| 16 | C  | 0.000000 |          |          |           |           |
| 17 | C  | 1.326573 | 0.000000 |          |           |           |
| 18 | H  | 1.088432 | 2.141687 | 0.000000 |           |           |
| 19 | H  | 2.077016 | 1.081368 | 2.468115 | 0.000000  |           |
| 20 | H  | 2.129704 | 1.083381 | 3.117807 | 1.848349  | 0.000000  |
| 21 | N  | 6.996512 | 8.159476 | 6.997140 | 9.052165  | 8.386860  |
| 22 | H  | 7.673720 | 8.808225 | 7.679386 | 9.693678  | 9.015068  |
| 23 | H  | 7.084723 | 8.321792 | 6.935179 | 9.146978  | 8.666246  |
| 24 | C  | 7.360646 | 8.668361 | 6.818251 | 9.239326  | 9.302958  |
| 25 | C  | 6.751890 | 8.073854 | 6.113326 | 8.580516  | 8.784159  |
| 26 | O  | 6.864997 | 8.182314 | 6.435318 | 8.844937  | 8.741145  |
| 27 | H  | 8.448451 | 9.756264 | 7.898441 | 10.322921 | 10.385249 |
| 28 | H  | 6.988053 | 8.255766 | 6.483343 | 8.825559  | 8.869673  |
| 29 | H  | 5.788086 | 7.098792 | 5.086652 | 7.553151  | 7.862173  |
| 30 | C  | 7.781608 | 9.086101 | 7.074708 | 9.523153  | 9.839526  |
| 31 | H  | 7.545554 | 8.822738 | 6.865214 | 9.258420  | 9.562103  |
| 32 | H  | 8.076021 | 9.350372 | 7.260132 | 9.675766  | 10.183393 |

|    |   |          |           |          |           |           |
|----|---|----------|-----------|----------|-----------|-----------|
| 33 | H | 8.711616 | 10.027545 | 8.058319 | 10.514795 | 10.734532 |
|    |   | 21       | 22        | 23       | 24        | 25        |
| 21 | N | 0.000000 |           |          |           |           |
| 22 | H | 1.013617 | 0.000000  |          |           |           |
| 23 | H | 1.020019 | 1.647495  | 0.000000 |           |           |
| 24 | C | 4.364027 | 5.043049  | 3.417002 | 0.000000  |           |
| 25 | C | 4.309741 | 4.866965  | 3.391668 | 1.465362  | 0.000000  |
| 26 | O | 3.032012 | 3.669717  | 2.074444 | 1.440000  | 1.460195  |
| 27 | H | 4.865448 | 5.430827  | 3.879932 | 1.087989  | 2.210468  |
| 28 | H | 4.737653 | 5.553477  | 3.908874 | 1.087209  | 2.224337  |
| 29 | H | 4.619556 | 5.247605  | 3.842035 | 2.202444  | 1.088431  |
| 30 | C | 5.011673 | 5.306733  | 4.083669 | 2.599653  | 1.503383  |
| 31 | H | 4.860866 | 5.018643  | 4.056172 | 3.438372  | 2.144357  |
| 32 | H | 6.062874 | 6.387976  | 5.136081 | 3.137350  | 2.134368  |
| 33 | H | 5.047009 | 5.239871  | 4.079494 | 2.741759  | 2.158906  |
|    |   | 26       | 27        | 28       | 29        | 30        |
| 26 | O | 0.000000 |           |          |           |           |
| 27 | H | 2.133496 | 0.000000  |          |           |           |
| 28 | H | 2.144138 | 1.835221  | 0.000000 |           |           |
| 29 | H | 2.141450 | 3.128793  | 2.536081 | 0.000000  |           |
| 30 | C | 2.515403 | 2.816545  | 3.545183 | 2.195368  | 0.000000  |
| 31 | H | 2.937523 | 3.773925  | 4.347773 | 2.531097  | 1.093066  |
| 32 | H | 3.417702 | 3.287852  | 3.939274 | 2.541641  | 1.093847  |
| 33 | H | 2.698165 | 2.554090  | 3.803451 | 3.097554  | 1.092980  |
|    |   | 31       | 32        | 33       |           |           |
| 31 | H | 0.000000 |           |          |           |           |
| 32 | H | 1.762774 | 0.000000  |          |           |           |
| 33 | H | 1.779100 | 1.779912  | 0.000000 |           |           |

Stoichiometry C10H18BrN3O

Framework group C1[X(C10H18BrN3O)]

Deg. of freedom 93

Full point group C1 NOp 1

Largest Abelian subgroup C1 NOp 1

Largest concise Abelian subgroup C1 NOp 1

Standard orientation:

| Center<br>Number | Atomic<br>Number | Atomic<br>Type | Coordinates (Angstroms) |          |           |
|------------------|------------------|----------------|-------------------------|----------|-----------|
|                  |                  |                | X                       | Y        | Z         |
| 1                | 6                | 0              | -2.370662               | 2.457880 | -0.232873 |
| 2                | 6                | 0              | -3.385331               | 1.569833 | -0.078299 |
| 3                | 7                | 0              | -2.815539               | 0.302213 | -0.080089 |
| 4                | 6                | 0              | -1.483272               | 0.429747 | -0.231380 |
| 5                | 7                | 0              | -1.195173               | 1.725793 | -0.334343 |

|    |    |   |           |           |           |
|----|----|---|-----------|-----------|-----------|
| 6  | 6  | 0 | 0.168352  | 2.265117  | -0.459192 |
| 7  | 6  | 0 | 0.708178  | 2.793407  | 0.875281  |
| 8  | 1  | 0 | -2.381777 | 3.533327  | -0.273440 |
| 9  | 1  | 0 | -4.441842 | 1.729850  | 0.037566  |
| 10 | 1  | 0 | 0.805630  | 1.457447  | -0.818973 |
| 11 | 1  | 0 | 0.163245  | 3.062093  | -1.203766 |
| 12 | 1  | 0 | 0.062303  | 3.602345  | 1.234238  |
| 13 | 1  | 0 | 0.657541  | 1.980114  | 1.616569  |
| 14 | 35 | 0 | -0.044036 | -2.503023 | 0.131158  |
| 15 | 1  | 0 | -0.797433 | -0.444587 | -0.224078 |
| 16 | 6  | 0 | -3.449351 | -0.970183 | 0.044816  |
| 17 | 6  | 0 | -4.764691 | -1.139993 | 0.073792  |
| 18 | 1  | 0 | -2.719647 | -1.774833 | 0.113777  |
| 19 | 1  | 0 | -5.159515 | -2.140881 | 0.181929  |
| 20 | 1  | 0 | -5.480002 | -0.330236 | -0.005816 |
| 21 | 7  | 0 | 2.039946  | 3.327656  | 0.634208  |
| 22 | 1  | 0 | 2.407592  | 3.780685  | 1.463075  |
| 23 | 1  | 0 | 2.676243  | 2.574122  | 0.373913  |
| 24 | 6  | 0 | 3.707425  | -0.123310 | -1.452674 |
| 25 | 6  | 0 | 3.294052  | -0.714921 | -0.177368 |
| 26 | 8  | 0 | 3.188084  | 0.722788  | -0.409600 |
| 27 | 1  | 0 | 4.767623  | 0.012704  | -1.655651 |
| 28 | 1  | 0 | 3.077841  | -0.215890 | -2.334194 |
| 29 | 1  | 0 | 2.330786  | -1.219276 | -0.128104 |
| 30 | 6  | 0 | 4.286804  | -1.146130 | 0.866023  |
| 31 | 1  | 0 | 3.872723  | -1.002279 | 1.867340  |
| 32 | 1  | 0 | 4.499318  | -2.212798 | 0.749578  |
| 33 | 1  | 0 | 5.222278  | -0.586713 | 0.785120  |

-----  
Rotational constants (GHZ): 0.4329555 0.2796700 0.1796875

Standard basis: 6-311++G(d,p) (5D, 7F)

There are 499 symmetry adapted cartesian basis functions of A symmetry.

There are 482 symmetry adapted basis functions of A symmetry.

482 basis functions, 760 primitive gaussians, 499 cartesian basis functions

71 alpha electrons 71 beta electrons

nuclear repulsion energy 1305.7725679068 Hartrees.

NAtoms= 33 NActive= 33 NUniq= 33 SFac= 1.00D+00 NATFMM= 60 NAOKFM=F

Big=F

Integral buffers will be 131072 words long.

Raffenetti 2 integral format.

Two-electron integral symmetry is turned on.

One-electron integrals computed using PRISM.

NBasis= 482 RedAO= T EigKep= 3.73D-06 NBF= 482

NBsUse= 482 1.00D-06 EigRej= -1.00D+00 NBFU= 482

Initial guess from the checkpoint file:  
"/home/suqian/liuwen/qianmengshijie/nh2po/nh2po.chk"

B after Tr= 0.000000 0.000000 0.000000  
Rot= 0.999753 0.002593 0.000810 0.022040 Ang= 2.54 deg.  
ExpMin= 3.50D-02 ExpMax= 4.40D+05 ExpMxC= 1.51D+04 IAcc=3 IRadAn= 5 AccDes=  
0.00D+00

Harris functional with IExCor= 402 and IRadAn= 5 diagonalized for initial guess.  
HarFok: IExCor= 402 AccDes= 0.00D+00 IRadAn= 5 IDoV= 1 UseB2=F ITyADJ=14  
ICtDFT= 3500011 ScaDFX= 1.000000 1.000000 1.000000 1.000000  
FoFCou: FMM=F IPFlag= 0 FMFlag= 100000 FMFlg1= 0  
NFxFlg= 0 DoJE=T BraDBF=F KetDBF=T FulRan=T  
wScrn= 0.000000 ICntrl= 500 IOpCl= 0 I1Cent= 200000004 NGrid=

0  
NMat0= 1 NMatS0= 1 NMatT0= 0 NMatD0= 1 NMtDS0= 0  
NMtDT0= 0

Petite list used in FoFCou.

Requested convergence on RMS density matrix=1.00D-08 within 128 cycles.

Requested convergence on MAX density matrix=1.00D-06.

Requested convergence on energy=1.00D-06.

No special actions if energy rises.

SCF Done: E(RB3LYP) = -3205.64737507 A.U. after 12 cycles

NFock= 12 Conv=0.74D-08 -V/T= 2.0018

Calling FoFJK, ICntrl= 2127 FMM=F ISym2X=0 I1Cent= 0 IOpClX= 0 NMat=1 NMatS=1  
NMatT=0.

\*\*\*\*\* Axes restored to original set \*\*\*\*\*

| Center<br>Number | Atomic<br>Number | Forces (Hartrees/Bohr) |              |              |
|------------------|------------------|------------------------|--------------|--------------|
|                  |                  | X                      | Y            | Z            |
| 1                | 6                | 0.000381371            | -0.000159279 | 0.000023171  |
| 2                | 6                | -0.000152333           | -0.000534481 | 0.000265923  |
| 3                | 7                | 0.000557897            | 0.001564957  | -0.000473950 |
| 4                | 6                | -0.001721722           | -0.003817419 | 0.000421110  |
| 5                | 7                | -0.000147435           | 0.000866826  | 0.000508800  |
| 6                | 6                | 0.000628629            | 0.001416052  | 0.000415006  |
| 7                | 6                | -0.001637904           | -0.000547489 | -0.000030737 |
| 8                | 1                | 0.000101417            | -0.000058379 | -0.000452824 |
| 9                | 1                | 0.000090399            | 0.000220588  | -0.000206511 |
| 10               | 1                | 0.000472310            | 0.000232173  | -0.000180429 |
| 11               | 1                | -0.000650926           | -0.000138610 | -0.000194204 |
| 12               | 1                | 0.000014349            | -0.000050600 | 0.000276990  |
| 13               | 1                | 0.000526959            | 0.000144933  | -0.000277299 |
| 14               | 35               | -0.000304758           | -0.000525295 | 0.000018963  |
| 15               | 1                | 0.000151294            | 0.001531397  | -0.000577244 |

|    |   |              |              |              |
|----|---|--------------|--------------|--------------|
| 16 | 6 | -0.000123398 | -0.000315927 | 0.000505724  |
| 17 | 6 | 0.000257743  | 0.000086412  | 0.000119523  |
| 18 | 1 | -0.000160223 | 0.000132465  | -0.000055140 |
| 19 | 1 | -0.000081782 | 0.000008923  | -0.000147392 |
| 20 | 1 | -0.000034125 | -0.000126535 | 0.000055236  |
| 21 | 7 | 0.001984634  | -0.000410938 | -0.000109832 |
| 22 | 1 | -0.000217426 | 0.000061207  | -0.000247036 |
| 23 | 1 | -0.000453756 | 0.001460156  | 0.000485199  |
| 24 | 6 | 0.002030468  | -0.000301965 | -0.000694028 |
| 25 | 6 | 0.001118920  | 0.000347626  | 0.001991053  |
| 26 | 8 | -0.001739100 | -0.001517313 | 0.000158671  |
| 27 | 1 | -0.000066473 | 0.000151715  | -0.000057178 |
| 28 | 1 | -0.000667222 | -0.000294225 | 0.000823305  |
| 29 | 1 | -0.000945781 | 0.000256714  | -0.001887361 |
| 30 | 6 | 0.000450267  | 0.000183276  | -0.000707964 |
| 31 | 1 | 0.000062651  | 0.000247190  | 0.000122502  |
| 32 | 1 | 0.000200262  | -0.000067948 | 0.000026958  |
| 33 | 1 | 0.000074792  | -0.000046206 | 0.000080993  |

-----  
Cartesian Forces: Max 0.003817419 RMS 0.000790449

GradGradGradGradGradGradGradGradGradGradGradGradGradGradGradGradGradGradGrad

Berny optimization.

Using GEDIIS/GDIIS optimizer.

FormGI is forming the generalized inverse of G from B-inverse, IUseBI=4.

Internal Forces: Max 0.003821949 RMS 0.000791099

Search for a local minimum.

Step number 21 out of a maximum of 172

All quantities printed in internal units (Hartrees-Bohrs-Radians)

Mixed Optimization -- En-DIIS/RFO-DIIS

Swapping is turned off.

Update second derivatives using D2CorX and points 20 21

DE= -5.61D-05 DEPred=-9.17D-05 R= 6.12D-01

TightC=F SS= 1.41D+00 RLast= 7.76D-01 DXNew= 1.6878D+00 2.3267D+00

Trust test= 6.12D-01 RLast= 7.76D-01 DXMaxT set to 1.69D+00

ITU= 1 1 1 1 1 1 1 1 1 0 -1 -1 1 1 1 -1 1 0 0 -1

ITU= 0

|                 |         |         |         |         |         |
|-----------------|---------|---------|---------|---------|---------|
| Eigenvalues --- | 0.00079 | 0.00198 | 0.00333 | 0.00409 | 0.00724 |
| Eigenvalues --- | 0.00733 | 0.00862 | 0.01307 | 0.01528 | 0.01874 |
| Eigenvalues --- | 0.01937 | 0.02151 | 0.02282 | 0.02390 | 0.02404 |
| Eigenvalues --- | 0.02496 | 0.02938 | 0.02991 | 0.03083 | 0.03097 |
| Eigenvalues --- | 0.03273 | 0.03325 | 0.03666 | 0.03984 | 0.04150 |
| Eigenvalues --- | 0.04343 | 0.04452 | 0.05118 | 0.05468 | 0.05727 |
| Eigenvalues --- | 0.05781 | 0.06002 | 0.07631 | 0.08643 | 0.09440 |

|                 |         |         |         |         |         |
|-----------------|---------|---------|---------|---------|---------|
| Eigenvalues --- | 0.09756 | 0.10051 | 0.12222 | 0.12510 | 0.12736 |
| Eigenvalues --- | 0.13428 | 0.13859 | 0.15172 | 0.15956 | 0.15998 |
| Eigenvalues --- | 0.16000 | 0.16002 | 0.16012 | 0.16016 | 0.16028 |
| Eigenvalues --- | 0.16103 | 0.17231 | 0.18576 | 0.22091 | 0.22840 |
| Eigenvalues --- | 0.22949 | 0.22962 | 0.24221 | 0.25529 | 0.27209 |
| Eigenvalues --- | 0.29188 | 0.31061 | 0.31796 | 0.32087 | 0.33639 |
| Eigenvalues --- | 0.33974 | 0.34278 | 0.34322 | 0.34476 | 0.34555 |
| Eigenvalues --- | 0.34693 | 0.34764 | 0.35063 | 0.35222 | 0.35389 |
| Eigenvalues --- | 0.35440 | 0.35577 | 0.35843 | 0.35890 | 0.36423 |
| Eigenvalues --- | 0.36629 | 0.38810 | 0.39456 | 0.41915 | 0.42545 |
| Eigenvalues --- | 0.44706 | 0.45477 | 0.46440 | 0.49360 | 0.54856 |
| Eigenvalues --- | 0.58463 | 0.60617 | 1.77402 |         |         |

En-DIIS/RFO-DIIS IScMMF= 0 using points: 21 20 19 18 17  
RFO step: Lambda=-1.18324848D-04.

DidBck=T Rises=F RFO-DIIS coefs: 0.53121 0.01185 -0.32815 -0.49055

1.27565

|             |            |            |           |            |
|-------------|------------|------------|-----------|------------|
| Iteration 1 | RMS(Cart)= | 0.16388587 | RMS(Int)= | 0.02117994 |
| Iteration 2 | RMS(Cart)= | 0.04010223 | RMS(Int)= | 0.00370975 |
| Iteration 3 | RMS(Cart)= | 0.00147545 | RMS(Int)= | 0.00359846 |
| Iteration 4 | RMS(Cart)= | 0.00003662 | RMS(Int)= | 0.00359846 |
| Iteration 5 | RMS(Cart)= | 0.00000051 | RMS(Int)= | 0.00359846 |

| Variable | Old X   | -DE/DX   | Delta X<br>(Linear) | Delta X<br>(Quad) | Delta X<br>(Total) | New X   |
|----------|---------|----------|---------------------|-------------------|--------------------|---------|
| R1       | 2.56479 | -0.00031 | 0.00053             | -0.00005          | 0.00049            | 2.56528 |
| R2       | 2.62395 | -0.00043 | -0.00223            | 0.00032           | -0.00191           | 2.62204 |
| R3       | 2.03385 | 0.00002  | 0.00020             | -0.00009          | 0.00011            | 2.03397 |
| R4       | 2.62633 | -0.00054 | -0.00055            | -0.00025          | -0.00080           | 2.62553 |
| R5       | 2.03112 | -0.00010 | -0.00033            | -0.00003          | -0.00036           | 2.03077 |
| R6       | 2.54524 | -0.00039 | -0.00234            | 0.00053           | -0.00181           | 2.54342 |
| R7       | 2.69663 | 0.00036  | 0.00153             | 0.00007           | 0.00160            | 2.69823 |
| R8       | 2.51649 | 0.00223  | 0.00354             | -0.00030          | 0.00324            | 2.51973 |
| R9       | 2.09997 | -0.00088 | -0.00281            | 0.00028           | -0.00253           | 2.09744 |
| R10      | 2.78096 | 0.00152  | 0.00387             | 0.00017           | 0.00404            | 2.78500 |
| R11      | 2.89771 | 0.00006  | 0.00188             | -0.00010          | 0.00175            | 2.89946 |
| R12      | 2.05963 | 0.00018  | 0.00048             | 0.00016           | 0.00064            | 2.06027 |
| R13      | 2.06109 | 0.00013  | -0.00081            | 0.00021           | -0.00060           | 2.06049 |
| R14      | 2.07042 | 0.00002  | -0.00126            | 0.00039           | -0.00088           | 2.06954 |
| R15      | 2.08172 | -0.00028 | -0.00266            | 0.00026           | -0.00240           | 2.07931 |
| R16      | 2.74963 | 0.00163  | 0.00232             | 0.00045           | 0.00277            | 2.75240 |
| R17      | 4.19628 | 0.00032  | -0.00290            | 0.00473           | 0.00182            | 4.19810 |
| R18      | 2.50686 | -0.00013 | -0.00046            | 0.00008           | -0.00038           | 2.50648 |
| R19      | 2.05684 | -0.00021 | -0.00073            | 0.00002           | -0.00071           | 2.05612 |
| R20      | 2.04349 | -0.00002 | -0.00005            | 0.00002           | -0.00003           | 2.04346 |
| R21      | 2.04729 | -0.00007 | -0.00027            | 0.00007           | -0.00020           | 2.04709 |



|     |         |          |          |          |          |         |
|-----|---------|----------|----------|----------|----------|---------|
| R22 | 1.91546 | -0.00021 | -0.00114 | -0.00001 | -0.00115 | 1.91431 |
| R23 | 1.92756 | -0.00007 | -0.00118 | 0.00003  | -0.00153 | 1.92603 |
| R24 | 3.92013 | 0.00103  | 0.00622  | 0.00796  | 0.01437  | 3.93450 |
| R25 | 2.76913 | -0.00065 | -0.00081 | -0.00031 | 0.00956  | 2.77869 |
| R26 | 2.72120 | 0.00083  | 0.00336  | 0.00064  | 0.00019  | 2.72139 |
| R27 | 2.05600 | -0.00002 | -0.00043 | -0.00011 | -0.00054 | 2.05546 |
| R28 | 2.05453 | -0.00016 | -0.00138 | 0.00032  | -0.00107 | 2.05346 |
| R29 | 2.75937 | -0.00021 | -0.00739 | 0.00156  | -0.01285 | 2.74652 |
| R30 | 2.05684 | 0.00037  | -0.00002 | 0.00102  | 0.00101  | 2.05784 |
| R31 | 2.84098 | 0.00018  | 0.00038  | 0.00008  | 0.00046  | 2.84144 |
| R32 | 2.06560 | 0.00015  | 0.00095  | 0.00000  | 0.00095  | 2.06654 |
| R33 | 2.06707 | 0.00012  | 0.00049  | 0.00000  | 0.00049  | 2.06756 |
| R34 | 2.06543 | 0.00002  | -0.00025 | 0.00017  | -0.00008 | 2.06535 |
| A1  | 1.87155 | 0.00059  | 0.00065  | 0.00028  | 0.00092  | 1.87248 |
| A2  | 2.27888 | -0.00013 | 0.00118  | -0.00038 | 0.00081  | 2.27970 |
| A3  | 2.13273 | -0.00046 | -0.00184 | 0.00011  | -0.00173 | 2.13100 |
| A4  | 1.86517 | -0.00006 | -0.00081 | -0.00013 | -0.00095 | 1.86422 |
| A5  | 2.27803 | -0.00024 | -0.00187 | 0.00030  | -0.00155 | 2.27648 |
| A6  | 2.13996 | 0.00030  | 0.00271  | -0.00020 | 0.00253  | 2.14249 |
| A7  | 1.89580 | 0.00059  | 0.00156  | 0.00003  | 0.00158  | 1.89738 |
| A8  | 2.25373 | -0.00024 | 0.00085  | -0.00015 | 0.00074  | 2.25446 |
| A9  | 2.13365 | -0.00035 | -0.00244 | 0.00009  | -0.00231 | 2.13134 |
| A10 | 1.89108 | -0.00051 | -0.00113 | 0.00014  | -0.00102 | 1.89006 |
| A11 | 2.13559 | -0.00005 | 0.01151  | -0.00109 | 0.01042  | 2.14601 |
| A12 | 2.25588 | 0.00055  | -0.01036 | 0.00076  | -0.00959 | 2.24629 |
| A13 | 1.90110 | -0.00061 | -0.00024 | -0.00025 | -0.00049 | 1.90061 |
| A14 | 2.21101 | -0.00293 | -0.00286 | 0.00081  | -0.00201 | 2.20899 |
| A15 | 2.16965 | 0.00356  | 0.00218  | -0.00015 | 0.00205  | 2.17170 |
| A16 | 1.95910 | -0.00025 | -0.00034 | 0.00015  | -0.00034 | 1.95876 |
| A17 | 1.87359 | 0.00100  | 0.00183  | 0.00152  | 0.00339  | 1.87698 |
| A18 | 1.89797 | -0.00097 | -0.00817 | 0.00025  | -0.00788 | 1.89010 |
| A19 | 1.91425 | -0.00009 | 0.00256  | -0.00127 | 0.00133  | 1.91558 |
| A20 | 1.92198 | 0.00038  | 0.00627  | -0.00012 | 0.00620  | 1.92818 |
| A21 | 1.89534 | -0.00007 | -0.00249 | -0.00051 | -0.00299 | 1.89235 |
| A22 | 1.90918 | -0.00082 | -0.00134 | -0.00001 | -0.00139 | 1.90780 |
| A23 | 1.89134 | 0.00020  | 0.00158  | 0.00013  | 0.00165  | 1.89300 |
| A24 | 1.88024 | 0.00146  | 0.00188  | 0.00088  | 0.00294  | 1.88318 |
| A25 | 1.87291 | 0.00023  | 0.00238  | -0.00077 | 0.00163  | 1.87454 |
| A26 | 1.89943 | -0.00066 | 0.00594  | 0.00091  | 0.00679  | 1.90622 |
| A27 | 2.00936 | -0.00047 | -0.01028 | -0.00112 | -0.01146 | 1.99790 |
| A28 | 2.16090 | 0.00017  | 0.00071  | 0.00012  | 0.00083  | 2.16173 |
| A29 | 1.94653 | -0.00008 | -0.00087 | 0.00020  | -0.00068 | 1.94586 |
| A30 | 2.17575 | -0.00009 | 0.00017  | -0.00031 | -0.00015 | 2.17560 |
| A31 | 2.07452 | 0.00004  | 0.00065  | -0.00025 | 0.00040  | 2.07492 |

|     |          |          |          |          |          |          |
|-----|----------|----------|----------|----------|----------|----------|
| A32 | 2.16203  | 0.00011  | 0.00032  | 0.00038  | 0.00070  | 2.16273  |
| A33 | 2.04664  | -0.00015 | -0.00098 | -0.00013 | -0.00111 | 2.04553  |
| A34 | 1.93971  | -0.00138 | 0.00012  | 0.00108  | -0.00020 | 1.93951  |
| A35 | 1.91983  | 0.00382  | 0.00147  | 0.00090  | 0.00193  | 1.92176  |
| A36 | 1.88872  | -0.00144 | -0.00225 | -0.00101 | -0.00279 | 1.88592  |
| A37 | 2.08028  | 0.00089  | 0.00547  | -0.00018 | 0.01180  | 2.09208  |
| A38 | 2.10356  | -0.00137 | -0.01673 | 0.00164  | -0.02063 | 2.08292  |
| A39 | 1.99668  | 0.00010  | -0.00019 | -0.00012 | 0.00289  | 1.99957  |
| A40 | 2.01363  | -0.00030 | -0.00353 | -0.00040 | -0.00467 | 2.00896  |
| A41 | 2.00829  | 0.00048  | 0.01121  | -0.00103 | 0.00987  | 2.01816  |
| A42 | 2.06704  | -0.00159 | -0.02664 | 0.00027  | -0.02086 | 2.04619  |
| A43 | 2.13357  | -0.00017 | 0.00011  | -0.00149 | -0.00585 | 2.12772  |
| A44 | 1.98146  | -0.00077 | -0.00543 | -0.00205 | -0.00593 | 1.97552  |
| A45 | 2.02719  | -0.00055 | -0.00032 | 0.00064  | 0.00082  | 2.02801  |
| A46 | 2.00434  | 0.00173  | 0.02109  | 0.00151  | 0.02176  | 2.02610  |
| A47 | 2.66149  | -0.00037 | -0.07254 | 0.00186  | -0.04970 | 2.61179  |
| A48 | 2.56174  | 0.00081  | -0.01804 | -0.00294 | 0.01216  | 2.57390  |
| A49 | 1.92610  | 0.00004  | 0.00307  | 0.00008  | 0.00316  | 1.92925  |
| A50 | 1.91146  | 0.00019  | 0.00362  | -0.00026 | 0.00337  | 1.91482  |
| A51 | 1.94659  | 0.00008  | -0.00315 | 0.00050  | -0.00265 | 1.94393  |
| A52 | 1.87491  | 0.00000  | 0.00312  | -0.00001 | 0.00313  | 1.87804  |
| A53 | 1.90147  | -0.00015 | -0.00450 | -0.00009 | -0.00459 | 1.89689  |
| A54 | 1.90175  | -0.00017 | -0.00208 | -0.00024 | -0.00232 | 1.89943  |
| A55 | 3.36392  | 0.00208  | -0.00257 | -0.00503 | -0.00759 | 3.35633  |
| A56 | 2.72224  | 0.00315  | 0.11024  | -0.00975 | 0.10340  | 2.82564  |
| A57 | 2.82322  | -0.00049 | 0.01627  | -0.01851 | -0.00224 | 2.82097  |
| A58 | 3.05269  | 0.00075  | 0.09285  | 0.00679  | 0.10073  | 3.15342  |
| D1  | 0.00535  | -0.00014 | -0.00328 | 0.00438  | 0.00111  | 0.00646  |
| D2  | 3.13829  | -0.00003 | 0.00652  | 0.00001  | 0.00653  | -3.13837 |
| D3  | -3.12949 | -0.00020 | -0.01297 | 0.00294  | -0.01000 | -3.13949 |
| D4  | 0.00345  | -0.00008 | -0.00318 | -0.00143 | -0.00459 | -0.00114 |
| D5  | -0.01030 | 0.00034  | 0.00297  | 0.00167  | 0.00463  | -0.00566 |
| D6  | -3.09612 | 0.00000  | 0.01898  | -0.00624 | 0.01282  | -3.08330 |
| D7  | 3.12523  | 0.00039  | 0.01166  | 0.00296  | 0.01461  | 3.13984  |
| D8  | 0.03941  | 0.00005  | 0.02766  | -0.00495 | 0.02279  | 0.06220  |
| D9  | 0.00131  | -0.00009 | 0.00250  | -0.00889 | -0.00641 | -0.00510 |
| D10 | -3.13604 | -0.00006 | -0.00729 | -0.00221 | -0.00950 | 3.13764  |
| D11 | -3.13247 | -0.00019 | -0.00633 | -0.00495 | -0.01129 | 3.13942  |
| D12 | 0.01336  | -0.00017 | -0.01613 | 0.00173  | -0.01438 | -0.00102 |
| D13 | -0.00777 | 0.00031  | -0.00066 | 0.01002  | 0.00938  | 0.00161  |
| D14 | 3.09878  | 0.00023  | -0.00055 | 0.00481  | 0.00425  | 3.10303  |
| D15 | 3.12993  | 0.00028  | 0.00830  | 0.00389  | 0.01221  | -3.14104 |
| D16 | -0.04670 | 0.00021  | 0.00842  | -0.00132 | 0.00708  | -0.03962 |
| D17 | 0.10568  | -0.00002 | -0.00775 | -0.00058 | -0.00832 | 0.09735  |

|     |          |          |          |          |          |          |
|-----|----------|----------|----------|----------|----------|----------|
| D18 | -3.03466 | -0.00008 | -0.00567 | -0.00289 | -0.00856 | -3.04322 |
| D19 | -3.03116 | 0.00001  | -0.01869 | 0.00691  | -0.01179 | -3.04295 |
| D20 | 0.11168  | -0.00005 | -0.01661 | 0.00459  | -0.01202 | 0.09966  |
| D21 | 0.01115  | -0.00041 | -0.00141 | -0.00726 | -0.00868 | 0.00247  |
| D22 | 3.09860  | -0.00033 | -0.01732 | 0.00045  | -0.01681 | 3.08179  |
| D23 | -3.09221 | -0.00030 | -0.00214 | -0.00153 | -0.00371 | -3.09593 |
| D24 | -0.00477 | -0.00022 | -0.01805 | 0.00619  | -0.01184 | -0.01661 |
| D25 | 1.33503  | -0.00019 | 0.14880  | -0.01236 | 0.13645  | 1.47148  |
| D26 | -2.84338 | 0.00020  | 0.15298  | -0.01283 | 0.14014  | -2.70324 |
| D27 | -0.79593 | 0.00016  | 0.14677  | -0.01248 | 0.13430  | -0.66163 |
| D28 | -1.74268 | -0.00042 | 0.16734  | -0.02142 | 0.14594  | -1.59674 |
| D29 | 0.36209  | -0.00002 | 0.17152  | -0.02189 | 0.14963  | 0.51172  |
| D30 | 2.40954  | -0.00006 | 0.16531  | -0.02154 | 0.14379  | 2.55334  |
| D31 | -1.05700 | 0.00093  | -0.03609 | -0.00156 | -0.03765 | -1.09465 |
| D32 | 0.97965  | 0.00086  | -0.03310 | -0.00241 | -0.03554 | 0.94412  |
| D33 | -3.11905 | 0.00133  | -0.04352 | -0.00314 | -0.04669 | 3.11745  |
| D34 | -3.13811 | -0.00011 | -0.03989 | -0.00273 | -0.04259 | 3.10249  |
| D35 | -1.10145 | -0.00017 | -0.03690 | -0.00358 | -0.04048 | -1.14193 |
| D36 | 1.08303  | 0.00029  | -0.04732 | -0.00431 | -0.05163 | 1.03140  |
| D37 | 1.06025  | -0.00021 | -0.04237 | -0.00123 | -0.04358 | 1.01667  |
| D38 | 3.09690  | -0.00027 | -0.03937 | -0.00208 | -0.04147 | 3.05543  |
| D39 | -1.00180 | 0.00020  | -0.04979 | -0.00281 | -0.05262 | -1.05442 |
| D40 | 3.03636  | -0.00098 | -0.15911 | 0.01361  | -0.14517 | 2.89119  |
| D41 | -1.15549 | -0.00116 | -0.16088 | 0.01363  | -0.14752 | -1.30301 |
| D42 | 0.96804  | -0.00047 | -0.16187 | 0.01263  | -0.14894 | 0.81910  |
| D43 | 3.05938  | -0.00064 | -0.16364 | 0.01265  | -0.15130 | 2.90808  |
| D44 | -1.13463 | 0.00005  | -0.16239 | 0.01370  | -0.14837 | -1.28300 |
| D45 | 0.95670  | -0.00013 | -0.16416 | 0.01372  | -0.15072 | 0.80598  |
| D46 | -3.13011 | -0.00016 | -0.00211 | -0.00256 | -0.00467 | -3.13478 |
| D47 | 0.01251  | -0.00005 | -0.00123 | -0.00106 | -0.00229 | 0.01022  |
| D48 | 0.01006  | -0.00009 | -0.00445 | 0.00005  | -0.00440 | 0.00566  |
| D49 | -3.13050 | 0.00002  | -0.00358 | 0.00156  | -0.00202 | -3.13252 |
| D50 | 1.92215  | -0.00012 | -0.31584 | 0.03277  | -0.28553 | 1.63661  |
| D51 | -0.81199 | -0.00171 | 0.10829  | -0.04142 | 0.06800  | -0.74399 |
| D52 | -2.28801 | 0.00106  | -0.31892 | 0.02880  | -0.29113 | -2.57914 |
| D53 | 1.26103  | -0.00052 | 0.10521  | -0.04539 | 0.06241  | 1.32344  |
| D54 | -2.70769 | -0.00027 | 0.00360  | -0.00249 | -0.00178 | -2.70947 |
| D55 | -0.00229 | 0.00003  | -0.00545 | -0.00133 | -0.00936 | -0.01165 |
| D56 | -0.03336 | -0.00012 | 0.00641  | -0.00173 | 0.00332  | -0.03005 |
| D57 | 2.67203  | 0.00018  | -0.00264 | -0.00057 | -0.00426 | 2.66777  |
| D58 | 1.16227  | 0.00027  | 0.35171  | -0.05414 | 0.30539  | 1.46766  |
| D59 | -1.22689 | -0.00027 | 0.33795  | -0.05186 | 0.29150  | -0.93539 |
| D60 | 1.25529  | 0.00041  | -0.32177 | 0.04402  | -0.27076 | 0.98453  |
| D61 | -1.12537 | -0.00081 | -0.34901 | 0.04327  | -0.29977 | -1.42514 |

|     |          |          |          |          |          |          |
|-----|----------|----------|----------|----------|----------|----------|
| D62 | 2.56646  | 0.00014  | -0.01050 | -0.00014 | -0.01260 | 2.55386  |
| D63 | -1.65618 | 0.00029  | -0.00255 | -0.00026 | -0.00478 | -1.66097 |
| D64 | 0.45035  | 0.00025  | -0.00478 | -0.00041 | -0.00716 | 0.44319  |
| D65 | 1.37384  | -0.00017 | -0.01410 | -0.00005 | -0.01220 | 1.36163  |
| D66 | -2.84880 | -0.00003 | -0.00614 | -0.00018 | -0.00438 | -2.85319 |
| D67 | -0.74227 | -0.00007 | -0.00838 | -0.00033 | -0.00676 | -0.74903 |
| D68 | -0.99694 | -0.00031 | -0.03057 | 0.00074  | -0.02980 | -1.02675 |
| D69 | 1.06360  | -0.00017 | -0.02262 | 0.00061  | -0.02198 | 1.04162  |
| D70 | -3.11305 | -0.00021 | -0.02485 | 0.00046  | -0.02436 | -3.13741 |

| Item                 | Value    | Threshold | Converged? |
|----------------------|----------|-----------|------------|
| Maximum Force        | 0.003822 | 0.000450  | NO         |
| RMS Force            | 0.000791 | 0.000300  | NO         |
| Maximum Displacement | 0.785971 | 0.001800  | NO         |
| RMS Displacement     | 0.181234 | 0.001200  | NO         |

Predicted change in Energy=-5.541715D-05

GradGradGradGradGradGradGradGradGradGradGradGradGradGradGradGradGradGrad

Input orientation:

| Center Number | Atomic Number | Atomic Type | Coordinates (Angstroms) |           |           |
|---------------|---------------|-------------|-------------------------|-----------|-----------|
|               |               |             | X                       | Y         | Z         |
| 1             | 6             | 0           | -2.798105               | 2.104984  | -0.313433 |
| 2             | 6             | 0           | -3.684414               | 1.134043  | 0.024962  |
| 3             | 7             | 0           | -2.960616               | -0.045456 | 0.148456  |
| 4             | 6             | 0           | -1.666572               | 0.212199  | -0.117191 |
| 5             | 7             | 0           | -1.547916               | 1.509556  | -0.401264 |
| 6             | 6             | 0           | -0.269145               | 2.188981  | -0.675287 |
| 7             | 6             | 0           | 0.358905                | 2.778119  | 0.594610  |
| 8             | 1             | 0           | -2.946163               | 3.154493  | -0.500763 |
| 9             | 1             | 0           | -4.745565               | 1.184719  | 0.186923  |
| 10            | 1             | 0           | 0.406269                | 1.453849  | -1.113508 |
| 11            | 1             | 0           | -0.449076               | 2.973318  | -1.411039 |
| 12            | 1             | 0           | -0.307166               | 3.543741  | 1.006361  |
| 13            | 1             | 0           | 0.443833                | 1.977756  | 1.344891  |
| 14            | 35            | 0           | 0.169744                | -2.437704 | 0.516684  |
| 15            | 1             | 0           | -0.871533               | -0.559547 | -0.052094 |
| 16            | 6             | 0           | -3.419332               | -1.353396 | 0.491385  |
| 17            | 6             | 0           | -4.697225               | -1.669259 | 0.654129  |
| 18            | 1             | 0           | -2.590930               | -2.050140 | 0.601660  |
| 19            | 1             | 0           | -4.954330               | -2.685298 | 0.920375  |
| 20            | 1             | 0           | -5.513459               | -0.967357 | 0.533388  |
| 21            | 7             | 0           | 1.625529                | 3.393932  | 0.223330  |
| 22            | 1             | 0           | 1.969519                | 3.995451  | 0.962268  |

|    |   |   |          |           |           |
|----|---|---|----------|-----------|-----------|
| 23 | 1 | 0 | 2.326789 | 2.675183  | 0.048912  |
| 24 | 6 | 0 | 3.700349 | -0.174226 | -1.207117 |
| 25 | 6 | 0 | 3.504004 | -0.508819 | 0.211203  |
| 26 | 8 | 0 | 3.225182 | 0.827393  | -0.287955 |
| 27 | 1 | 0 | 4.703801 | 0.001451  | -1.588324 |
| 28 | 1 | 0 | 2.971520 | -0.510792 | -1.939462 |
| 29 | 1 | 0 | 2.605085 | -1.065300 | 0.472192  |
| 30 | 6 | 0 | 4.659113 | -0.633195 | 1.165741  |
| 31 | 1 | 0 | 4.368881 | -0.297125 | 2.165095  |
| 32 | 1 | 0 | 4.961789 | -1.681673 | 1.244143  |
| 33 | 1 | 0 | 5.516352 | -0.042515 | 0.832943  |

-----  
Distance matrix (angstroms):

|    |    | 1        | 2        | 3        | 4        | 5        |
|----|----|----------|----------|----------|----------|----------|
| 1  | C  | 0.000000 |          |          |          |          |
| 2  | C  | 1.357490 | 0.000000 |          |          |          |
| 3  | N  | 2.205480 | 1.389371 | 0.000000 |          |          |
| 4  | C  | 2.213936 | 2.222991 | 1.345922 | 0.000000 |          |
| 5  | N  | 1.387524 | 2.210725 | 2.171630 | 1.333384 | 0.000000 |
| 6  | C  | 2.556098 | 3.642431 | 3.593783 | 2.484339 | 1.473757 |
| 7  | C  | 3.353262 | 4.401808 | 4.380736 | 3.345618 | 2.497395 |
| 8  | H  | 1.076328 | 2.214411 | 3.265174 | 3.231342 | 2.161206 |
| 9  | H  | 2.211299 | 1.074636 | 2.168145 | 3.243221 | 3.267483 |
| 10 | H  | 3.366320 | 4.258178 | 3.895688 | 2.613621 | 2.080681 |
| 11 | H  | 2.734352 | 3.989040 | 4.225264 | 3.283309 | 2.090381 |
| 12 | H  | 3.164910 | 4.263284 | 4.545232 | 3.769552 | 2.767449 |
| 13 | H  | 3.643678 | 4.415483 | 4.137042 | 3.115876 | 2.689857 |
| 14 | Br | 5.489375 | 5.277661 | 3.956969 | 3.285703 | 4.401574 |
| 15 | H  | 3.298439 | 3.284278 | 2.160736 | 1.109917 | 2.204677 |
| 16 | C  | 3.604725 | 2.544636 | 1.427840 | 2.427678 | 3.534900 |
| 17 | C  | 4.334483 | 3.046332 | 2.430689 | 3.649613 | 4.597485 |
| 18 | H  | 4.259738 | 3.415744 | 2.088257 | 2.547423 | 3.842548 |
| 19 | H  | 5.396145 | 4.123326 | 3.396987 | 4.503486 | 5.563020 |
| 20 | H  | 4.186829 | 2.831923 | 2.741365 | 4.075923 | 4.768041 |
| 21 | N  | 4.638754 | 5.774248 | 5.733038 | 4.591002 | 3.743225 |
| 22 | H  | 5.285028 | 6.405713 | 6.426309 | 5.357180 | 4.517880 |
| 23 | H  | 5.169232 | 6.205662 | 5.947137 | 4.694764 | 4.071201 |
| 24 | C  | 6.944305 | 7.600283 | 6.798721 | 5.490091 | 5.570350 |
| 25 | C  | 6.842791 | 7.376112 | 6.481509 | 5.230924 | 5.474563 |
| 26 | O  | 6.157343 | 6.923472 | 6.262301 | 4.933242 | 4.822929 |
| 27 | H  | 7.894858 | 8.616705 | 7.858874 | 6.541429 | 6.539683 |
| 28 | H  | 6.540246 | 7.132033 | 6.306043 | 5.035403 | 5.183932 |
| 29 | H  | 6.313665 | 6.677943 | 5.667620 | 4.497380 | 4.963892 |
| 30 | C  | 8.080575 | 8.604589 | 7.709772 | 6.509601 | 6.750859 |

|    |    |          |          |          |           |          |
|----|----|----------|----------|----------|-----------|----------|
| 31 | H  | 7.954805 | 8.454820 | 7.606031 | 6.472630  | 6.697670 |
| 32 | H  | 8.773869 | 9.174502 | 8.163470 | 7.026746  | 7.434216 |
| 33 | H  | 8.663494 | 9.310812 | 8.504559 | 7.249968  | 7.337307 |
|    |    | 6        | 7        | 8        | 9         | 10       |
| 6  | C  | 0.000000 |          |          |           |          |
| 7  | C  | 1.534330 | 0.000000 |          |           |          |
| 8  | H  | 2.851157 | 3.502138 | 0.000000 |           |          |
| 9  | H  | 4.668007 | 5.362905 | 2.755135 | 0.000000  |          |
| 10 | H  | 1.090248 | 2.161851 | 3.808733 | 5.320240  | 0.000000 |
| 11 | H  | 1.090363 | 2.171075 | 2.663995 | 4.920609  | 1.768877 |
| 12 | H  | 2.159805 | 1.095155 | 3.063860 | 5.092725  | 3.061124 |
| 13 | H  | 2.152689 | 1.100325 | 4.035247 | 5.375839  | 2.513884 |
| 14 | Br | 4.797878 | 5.219834 | 6.482032 | 6.114815  | 4.225832 |
| 15 | H  | 2.881952 | 3.615552 | 4.277789 | 4.255316  | 2.610200 |
| 16 | C  | 4.881930 | 5.599567 | 4.639968 | 2.879865  | 5.009145 |
| 17 | C  | 6.021732 | 6.734030 | 5.260092 | 2.892371  | 6.238910 |
| 18 | H  | 4.999142 | 5.658061 | 5.331953 | 3.908807  | 4.919649 |
| 19 | H  | 6.946632 | 7.627943 | 6.336838 | 3.944435  | 7.071438 |
| 20 | H  | 6.239087 | 6.965415 | 4.964889 | 2.311089  | 6.604369 |
| 21 | N  | 2.418513 | 1.456507 | 4.634868 | 6.743351  | 2.652856 |
| 22 | H  | 3.310066 | 2.052108 | 5.197268 | 7.320774  | 3.634877 |
| 23 | H  | 2.738563 | 2.044737 | 5.323148 | 7.229019  | 2.555635 |
| 24 | C  | 4.650211 | 4.809138 | 7.466955 | 8.667384  | 3.675643 |
| 25 | C  | 4.722355 | 4.565371 | 7.451939 | 8.421642  | 3.899088 |
| 26 | O  | 3.770181 | 3.577680 | 6.598952 | 7.992872  | 3.003373 |
| 27 | H  | 5.509002 | 5.599393 | 8.345442 | 9.687216  | 4.561106 |
| 28 | H  | 4.403273 | 4.905529 | 7.107962 | 8.182278  | 3.335045 |
| 29 | H  | 4.490907 | 4.453334 | 7.040571 | 7.692595  | 3.700723 |
| 30 | C  | 5.970074 | 5.518609 | 8.658177 | 9.628649  | 5.257129 |
| 31 | H  | 5.979948 | 5.291829 | 8.516474 | 9.443631  | 5.432995 |
| 32 | H  | 6.784456 | 6.441909 | 9.432333 | 10.176770 | 6.011887 |
| 33 | H  | 6.381716 | 5.883200 | 9.144057 | 10.355211 | 5.669279 |
|    |    | 11       | 12       | 13       | 14        | 15       |
| 11 | H  | 0.000000 |          |          |           |          |
| 12 | H  | 2.487839 | 0.000000 |          |           |          |
| 13 | H  | 3.063263 | 1.769438 | 0.000000 |           |          |
| 14 | Br | 5.777388 | 6.020374 | 4.500815 | 0.000000  |          |
| 15 | H  | 3.808718 | 4.275021 | 3.181142 | 2.221541  | 0.000000 |
| 16 | C  | 5.582302 | 5.825180 | 5.171952 | 3.749378  | 2.723389 |
| 17 | C  | 6.623082 | 6.824372 | 6.341005 | 4.929177  | 4.045507 |
| 18 | H  | 5.820105 | 6.055647 | 5.097659 | 2.789041  | 2.367612 |
| 19 | H  | 7.599522 | 7.772030 | 7.145939 | 5.145911  | 4.704651 |
| 20 | H  | 6.705050 | 6.905013 | 6.694890 | 5.870349  | 4.696443 |
| 21 | N  | 2.674334 | 2.090667 | 2.158671 | 6.017752  | 4.684140 |

|    |   |          |           |          |           |           |
|----|---|----------|-----------|----------|-----------|-----------|
| 22 | H | 3.539342 | 2.321482  | 2.558361 | 6.695014  | 5.463379  |
| 23 | H | 3.150519 | 2.934079  | 2.389872 | 5.568955  | 4.550049  |
| 24 | C | 5.212134 | 5.897706  | 4.663547 | 4.534313  | 4.731242  |
| 25 | C | 5.512149 | 5.619656  | 4.102798 | 3.864092  | 4.383745  |
| 26 | O | 4.400737 | 4.640181  | 3.424241 | 4.543567  | 4.331548  |
| 27 | H | 5.951097 | 6.662581  | 5.536864 | 5.562213  | 5.810256  |
| 28 | H | 4.911082 | 5.988897  | 4.834154 | 4.194710  | 4.281774  |
| 29 | H | 5.402305 | 5.478120  | 3.833119 | 2.795775  | 3.552117  |
| 30 | C | 6.763160 | 6.491234  | 4.961628 | 4.881799  | 5.663621  |
| 31 | H | 6.833538 | 6.161195  | 4.610187 | 4.993204  | 5.696204  |
| 32 | H | 7.615537 | 7.424512  | 5.814938 | 4.905556  | 6.080054  |
| 33 | H | 7.051031 | 6.841393  | 5.483980 | 5.867126  | 6.469598  |
|    |   | 16       | 17        | 18       | 19        | 20        |
| 16 | C | 0.000000 |           |          |           |           |
| 17 | C | 1.326373 | 0.000000  |          |           |           |
| 18 | H | 1.088054 | 2.141098  | 0.000000 |           |           |
| 19 | H | 2.077068 | 1.081353  | 2.467927 | 0.000000  |           |
| 20 | H | 2.129826 | 1.083274  | 3.117411 | 1.847621  | 0.000000  |
| 21 | N | 6.932503 | 8.111640  | 6.896345 | 8.985402  | 8.371507  |
| 22 | H | 7.607339 | 8.753820  | 7.581352 | 9.621530  | 8.989347  |
| 23 | H | 7.031581 | 8.281137  | 6.842380 | 9.083440  | 8.658655  |
| 24 | C | 7.413852 | 8.730326  | 6.809619 | 9.259328  | 9.410243  |
| 25 | C | 6.980286 | 8.294755  | 6.298917 | 8.762614  | 9.034860  |
| 26 | O | 7.036531 | 8.359744  | 6.549715 | 8.983511  | 8.958771  |
| 27 | H | 8.493885 | 9.808117  | 7.887849 | 10.334006 | 10.480108 |
| 28 | H | 6.889266 | 8.177922  | 6.306167 | 8.702082  | 8.849763  |
| 29 | H | 6.031332 | 7.329502  | 5.290108 | 7.744031  | 8.119365  |
| 30 | C | 8.138472 | 9.427420  | 7.408715 | 9.833088  | 10.197685 |
| 31 | H | 8.035750 | 9.293011  | 7.345500 | 9.704378  | 10.038542 |
| 32 | H | 8.421259 | 9.677026  | 7.588948 | 9.972036  | 10.523605 |
| 33 | H | 9.037783 | 10.343859 | 8.355362 | 10.799404 | 11.072570 |
|    |   | 21       | 22        | 23       | 24        | 25        |
| 21 | N | 0.000000 |           |          |           |           |
| 22 | H | 1.013008 | 0.000000  |          |           |           |
| 23 | H | 1.019209 | 1.644679  | 0.000000 |           |           |
| 24 | C | 4.368387 | 5.008813  | 3.403440 | 0.000000  |           |
| 25 | C | 4.331314 | 4.817384  | 3.398535 | 1.470420  | 0.000000  |
| 26 | O | 3.067152 | 3.629923  | 2.082046 | 1.440098  | 1.453397  |
| 27 | H | 4.926131 | 5.471184  | 3.934408 | 1.087703  | 2.222203  |
| 28 | H | 4.662212 | 5.452547  | 3.810478 | 1.086645  | 2.215604  |
| 29 | H | 4.572331 | 5.123994  | 3.774629 | 2.194014  | 1.088964  |
| 30 | C | 5.129183 | 5.357208  | 4.199096 | 2.600065  | 1.503626  |
| 31 | H | 4.992027 | 5.062602  | 4.181266 | 3.440037  | 2.147213  |
| 32 | H | 6.159096 | 6.423618  | 5.230105 | 3.142023  | 2.137216  |

|    |   |          |          |          |          |          |
|----|---|----------|----------|----------|----------|----------|
| 33 | H | 5.226787 | 5.376050 | 4.263085 | 2.734422 | 2.157208 |
|    |   | 26       | 27       | 28       | 29       | 30       |
| 26 | O | 0.000000 |          |          |          |          |
| 27 | H | 2.135288 | 0.000000 |          |          |          |
| 28 | H | 2.140691 | 1.840242 | 0.000000 |          |          |
| 29 | H | 2.131814 | 3.128625 | 2.501566 | 0.000000 |          |
| 30 | C | 2.510519 | 2.826596 | 3.536275 | 2.210601 | 0.000000 |
| 31 | H | 2.930878 | 3.780142 | 4.341159 | 2.562614 | 1.093566 |
| 32 | H | 3.414461 | 3.304896 | 3.932872 | 2.555363 | 1.094105 |
| 33 | H | 2.694924 | 2.554351 | 3.792320 | 3.106720 | 1.092939 |
|    |   | 31       | 32       | 33       |          |          |
| 31 | H | 0.000000 |          |          |          |          |
| 32 | H | 1.765408 | 0.000000 |          |          |          |
| 33 | H | 1.776554 | 1.778613 | 0.000000 |          |          |

Stoichiometry C10H18BrN3O

Framework group C1[X(C10H18BrN3O)]

Deg. of freedom 93

Full point group C1 NOp 1

Largest Abelian subgroup C1 NOp 1

Largest concise Abelian subgroup C1 NOp 1

Standard orientation:

| Center<br>Number | Atomic<br>Number | Atomic<br>Type | Coordinates (Angstroms) |           |           |
|------------------|------------------|----------------|-------------------------|-----------|-----------|
|                  |                  |                | X                       | Y         | Z         |
| 1                | 6                | 0              | -2.653571               | 2.331141  | -0.206883 |
| 2                | 6                | 0              | -3.583574               | 1.363454  | -0.003275 |
| 3                | 7                | 0              | -2.911638               | 0.147733  | -0.032891 |
| 4                | 6                | 0              | -1.605215               | 0.381781  | -0.256460 |
| 5                | 7                | 0              | -1.428873               | 1.698847  | -0.366706 |
| 6                | 6                | 0              | -0.119772               | 2.352372  | -0.543114 |
| 7                | 6                | 0              | 0.519703                | 2.741858  | 0.796117  |
| 8                | 1                | 0              | -2.755164               | 3.401580  | -0.255064 |
| 9                | 1                | 0              | -4.643222               | 1.438310  | 0.159160  |
| 10               | 1                | 0              | 0.528344                | 1.652624  | -1.071260 |
| 11               | 1                | 0              | -0.258856               | 3.233603  | -1.169995 |
| 12               | 1                | 0              | -0.117519               | 3.474876  | 1.302080  |
| 13               | 1                | 0              | 0.563048                | 1.846960  | 1.434862  |
| 14               | 35               | 0              | 0.110763                | -2.405417 | 0.031274  |
| 15               | 1                | 0              | -0.844254               | -0.425519 | -0.289957 |
| 16               | 6                | 0              | -3.428763               | -1.172823 | 0.132769  |
| 17               | 6                | 0              | -4.720468               | -1.451702 | 0.246741  |
| 18               | 1                | 0              | -2.631756               | -1.913220 | 0.154083  |
| 19               | 1                | 0              | -5.023039               | -2.481818 | 0.375730  |



|    |   |   |           |           |           |
|----|---|---|-----------|-----------|-----------|
| 20 | 1 | 0 | -5.504994 | -0.705349 | 0.215786  |
| 21 | 7 | 0 | 1.814966  | 3.345684  | 0.514868  |
| 22 | 1 | 0 | 2.176574  | 3.829471  | 1.328117  |
| 23 | 1 | 0 | 2.486915  | 2.626392  | 0.250500  |
| 24 | 6 | 0 | 3.751347  | -0.090122 | -1.363553 |
| 25 | 6 | 0 | 3.526606  | -0.599295 | -0.002536 |
| 26 | 8 | 0 | 3.309676  | 0.801712  | -0.322668 |
| 27 | 1 | 0 | 4.765160  | 0.090496  | -1.713780 |
| 28 | 1 | 0 | 3.016411  | -0.295707 | -2.137117 |
| 29 | 1 | 0 | 2.602332  | -1.145792 | 0.178855  |
| 30 | 6 | 0 | 4.665650  | -0.897862 | 0.932518  |
| 31 | 1 | 0 | 4.379755  | -0.683722 | 1.966101  |
| 32 | 1 | 0 | 4.922867  | -1.959667 | 0.873554  |
| 33 | 1 | 0 | 5.550460  | -0.306259 | 0.684260  |

-----

Rotational constants (GHZ):      0.4521714      0.2627628      0.1747797

Standard basis: 6-311++G(d,p) (5D, 7F)

There are    499 symmetry adapted cartesian basis functions of A    symmetry.

There are    482 symmetry adapted basis functions of A    symmetry.

482 basis functions,    760 primitive gaussians,    499 cartesian basis functions

71 alpha electrons      71 beta electrons

nuclear repulsion energy      1297.3845601449 Hartrees.

NAtoms=    33 NActive=    33 NUniq=    33 SFac= 1.00D+00 NAtFMM=    60 NAOKFM=F

Big=F

Integral buffers will be    131072 words long.

Raffenetti 2 integral format.

Two-electron integral symmetry is turned on.

One-electron integrals computed using PRISM.

NBasis=    482 RedAO= T EigKep=    3.91D-06    NBF=    482

NBsUse=    482 1.00D-06 EigRej= -1.00D+00    NBFU=    482

Initial      guess      from      the      checkpoint      file:

"/home/suqian/liuwen/qianmengshijie/nh2po/nh2po.chk"

B after Tr=    0.000000    0.000000    0.000000

Rot=    0.999558    0.001452    -0.003614    -0.029486 Ang=    3.41 deg.

ExpMin= 3.50D-02 ExpMax= 4.40D+05 ExpMxC= 1.51D+04 IAcc=3 IRadAn=      5 AccDes=

0.00D+00

Harris functional with IExCor=    402 and IRadAn=      5 diagonalized for initial guess.

HarFok: IExCor=    402 AccDes= 0.00D+00 IRadAn=      5 IDoV= 1 UseB2=F ITyADJ=14

ICtDFT=    3500011 ScaDFX=    1.000000    1.000000    1.000000    1.000000

FoFCou: FMM=F IPFlag=      0 FMFlag=      100000 FMFlg1=      0

NFxFlg=      0 DoJE=T BraDBF=F KetDBF=T FulRan=T

wScrn=    0.000000 ICntrl=      500 IOpCl=    0 I1Cent=    200000004 NGrid=

0

NMat0=    1 NMatS0=    1 NMatT0=    0 NMatD0=    1 NMtDS0=    0

NMtDT0= 0

Petite list used in FoFCou.

Requested convergence on RMS density matrix=1.00D-08 within 128 cycles.

Requested convergence on MAX density matrix=1.00D-06.

Requested convergence on energy=1.00D-06.

No special actions if energy rises.

SCF Done: E(RB3LYP) = -3205.64731882 A.U. after 12 cycles

NFock= 12 Conv=0.98D-08 -V/T= 2.0018

Calling FoFJK, ICntrl= 2127 FMM=F ISym2X=0 l1Cent= 0 IOpCIX= 0 NMat=1 NMatS=1

NMatT=0.

\*\*\*\*\* Axes restored to original set \*\*\*\*\*

| Center<br>Number | Atomic<br>Number | Forces (Hartrees/Bohr) |              |              |
|------------------|------------------|------------------------|--------------|--------------|
|                  |                  | X                      | Y            | Z            |
| 1                | 6                | 0.000189659            | 0.000110115  | -0.000106102 |
| 2                | 6                | 0.000121073            | 0.000055658  | 0.000370816  |
| 3                | 7                | 0.000147437            | 0.000087962  | -0.000614161 |
| 4                | 6                | -0.000433553           | -0.000914056 | 0.000748613  |
| 5                | 7                | 0.000191792            | -0.000186828 | -0.000490765 |
| 6                | 6                | 0.000440876            | 0.000797454  | 0.000317737  |
| 7                | 6                | -0.000077587           | -0.000296889 | 0.000372950  |
| 8                | 1                | -0.000025023           | 0.000025950  | -0.000094375 |
| 9                | 1                | -0.000004294           | 0.000055141  | 0.000012650  |
| 10               | 1                | -0.000275631           | -0.000301869 | 0.000074047  |
| 11               | 1                | -0.000095141           | -0.000057441 | 0.000010918  |
| 12               | 1                | 0.000224497            | 0.000062560  | -0.000091294 |
| 13               | 1                | -0.000096873           | -0.000064684 | -0.000107541 |
| 14               | 35               | -0.000075643           | -0.000041099 | -0.000081776 |
| 15               | 1                | 0.000126552            | 0.000278118  | -0.000000318 |
| 16               | 6                | -0.000052269           | -0.000055712 | -0.000035849 |
| 17               | 6                | 0.000061699            | 0.000033295  | -0.000033081 |
| 18               | 1                | 0.000011978            | -0.000009913 | 0.000028994  |
| 19               | 1                | -0.000006077           | 0.000016730  | 0.000030606  |
| 20               | 1                | 0.000009921            | 0.000002936  | 0.000014846  |
| 21               | 7                | 0.000081455            | 0.000174346  | -0.000361953 |
| 22               | 1                | -0.000041317           | 0.000058485  | 0.000016750  |
| 23               | 1                | -0.000039870           | 0.000290082  | 0.000184225  |
| 24               | 6                | -0.000855390           | -0.001357038 | 0.001825423  |
| 25               | 6                | 0.001766425            | 0.000108173  | -0.001534428 |
| 26               | 8                | -0.001209400           | 0.000934880  | 0.000051596  |
| 27               | 1                | 0.000107942            | -0.000200948 | 0.000470279  |
| 28               | 1                | -0.000086287           | 0.000024163  | 0.000041730  |
| 29               | 1                | -0.000306687           | 0.000128945  | -0.001208893 |

|    |   |              |              |              |
|----|---|--------------|--------------|--------------|
| 30 | 6 | 0.000023036  | 0.000149960  | 0.000006406  |
| 31 | 1 | 0.000098723  | 0.000111818  | 0.000126847  |
| 32 | 1 | 0.000086754  | -0.000003571 | -0.000015139 |
| 33 | 1 | -0.000008777 | -0.000016727 | 0.000070247  |

-----  
Cartesian Forces: Max 0.001825423 RMS 0.000449978

GradGradGradGradGradGradGradGradGradGradGradGradGradGradGradGradGradGradGradGrad  
Berny optimization.

Using GEDIIS/GDIIS optimizer.

FormGI is forming the generalized inverse of G from B-inverse, IUseBI=4.

GSVD: received Info= 1 from GESDD.

Internal Forces: Max 0.002585937 RMS 0.000315013

Search for a local minimum.

Step number 22 out of a maximum of 172

All quantities printed in internal units (Hartrees-Bohrs-Radians)

Mixed Optimization -- En-DIIS/RFO-DIIS

Swapping is turned off.

Update second derivatives using D2CorX and points 18 19 20 21 22

DE= 5.62D-05 DEPred=-5.54D-05 R=-1.01D+00

Trust test=-1.01D+00 RLast= 9.05D-01 DXMaxT set to 8.44D-01

ITU= -1 1 1 1 1 1 1 1 1 1 0 -1 -1 1 1 1 -1 1 0 0

ITU= -1 0

|                 |         |         |         |         |         |
|-----------------|---------|---------|---------|---------|---------|
| Eigenvalues --- | 0.00063 | 0.00158 | 0.00307 | 0.00411 | 0.00717 |
| Eigenvalues --- | 0.00728 | 0.00890 | 0.01269 | 0.01522 | 0.01881 |
| Eigenvalues --- | 0.02009 | 0.02165 | 0.02313 | 0.02390 | 0.02406 |
| Eigenvalues --- | 0.02476 | 0.02956 | 0.03003 | 0.03090 | 0.03115 |
| Eigenvalues --- | 0.03267 | 0.03398 | 0.03796 | 0.03961 | 0.04118 |
| Eigenvalues --- | 0.04324 | 0.04472 | 0.05114 | 0.05450 | 0.05741 |
| Eigenvalues --- | 0.05803 | 0.05964 | 0.07566 | 0.08011 | 0.08667 |
| Eigenvalues --- | 0.09580 | 0.10241 | 0.12288 | 0.12508 | 0.12846 |
| Eigenvalues --- | 0.13386 | 0.13772 | 0.15062 | 0.15985 | 0.15998 |
| Eigenvalues --- | 0.16001 | 0.16001 | 0.16017 | 0.16043 | 0.16140 |
| Eigenvalues --- | 0.16272 | 0.17438 | 0.18032 | 0.22096 | 0.22818 |
| Eigenvalues --- | 0.22933 | 0.23109 | 0.25294 | 0.25525 | 0.27188 |
| Eigenvalues --- | 0.29199 | 0.30953 | 0.31758 | 0.32143 | 0.33640 |
| Eigenvalues --- | 0.34230 | 0.34310 | 0.34320 | 0.34539 | 0.34664 |
| Eigenvalues --- | 0.34733 | 0.34987 | 0.35083 | 0.35285 | 0.35395 |
| Eigenvalues --- | 0.35570 | 0.35704 | 0.35890 | 0.36348 | 0.36505 |
| Eigenvalues --- | 0.36636 | 0.39037 | 0.41881 | 0.41915 | 0.42968 |
| Eigenvalues --- | 0.45247 | 0.45478 | 0.46922 | 0.49397 | 0.55321 |
| Eigenvalues --- | 0.59065 | 0.60632 | 1.46132 |         |         |

En-DIIS/RFO-DIIS IScMMF= 0 using points: 22 21 20 19 18

RFO step: Lambda=-3.22172409D-05.

DidBck=F Rises=F RFO-DIIS coefs: 1.08977 0.42790 -1.16727 0.67347 -  
 0.02387

Iteration 1 RMS(Cart)= 0.03479537 RMS(Int)= 0.00085433  
 Iteration 2 RMS(Cart)= 0.00168791 RMS(Int)= 0.00075778  
 Iteration 3 RMS(Cart)= 0.00000098 RMS(Int)= 0.00075778

| Variable | Old X   | -DE/DX   | Delta X<br>(Linear) | Delta X<br>(Quad) | Delta X<br>(Total) | New X   |
|----------|---------|----------|---------------------|-------------------|--------------------|---------|
| R1       | 2.56528 | -0.00009 | -0.00014            | 0.00002           | -0.00012           | 2.56517 |
| R2       | 2.62204 | -0.00020 | 0.00018             | -0.00004          | 0.00014            | 2.62218 |
| R3       | 2.03397 | 0.00005  | -0.00002            | 0.00001           | -0.00001           | 2.03396 |
| R4       | 2.62553 | 0.00005  | -0.00021            | -0.00040          | -0.00061           | 2.62493 |
| R5       | 2.03077 | 0.00001  | 0.00000             | 0.00004           | 0.00004            | 2.03081 |
| R6       | 2.54342 | -0.00024 | 0.00035             | 0.00026           | 0.00061            | 2.54404 |
| R7       | 2.69823 | 0.00000  | 0.00021             | 0.00073           | 0.00094            | 2.69917 |
| R8       | 2.51973 | 0.00059  | 0.00012             | 0.00007           | 0.00019            | 2.51992 |
| R9       | 2.09744 | -0.00013 | -0.00030            | -0.00122          | -0.00152           | 2.09592 |
| R10      | 2.78500 | -0.00005 | -0.00029            | -0.00086          | -0.00114           | 2.78385 |
| R11      | 2.89946 | -0.00020 | -0.00033            | 0.00014           | -0.00019           | 2.89927 |
| R12      | 2.06027 | 0.00000  | 0.00005             | -0.00013          | -0.00008           | 2.06019 |
| R13      | 2.06049 | -0.00003 | 0.00018             | 0.00012           | 0.00030            | 2.06079 |
| R14      | 2.06954 | -0.00013 | 0.00015             | -0.00003          | 0.00012            | 2.06967 |
| R15      | 2.07931 | -0.00003 | 0.00036             | 0.00026           | 0.00062            | 2.07993 |
| R16      | 2.75240 | -0.00009 | -0.00014            | -0.00073          | -0.00087           | 2.75153 |
| R17      | 4.19810 | -0.00002 | 0.00439             | 0.00800           | 0.01240            | 4.21050 |
| R18      | 2.50648 | -0.00007 | 0.00000             | -0.00016          | -0.00015           | 2.50633 |
| R19      | 2.05612 | 0.00002  | 0.00025             | 0.00044           | 0.00069            | 2.05682 |
| R20      | 2.04346 | -0.00001 | 0.00000             | 0.00006           | 0.00005            | 2.04352 |
| R21      | 2.04709 | -0.00001 | 0.00000             | 0.00003           | 0.00003            | 2.04712 |
| R22      | 1.91431 | 0.00003  | 0.00010             | -0.00002          | 0.00008            | 1.91439 |
| R23      | 1.92603 | -0.00044 | -0.00011            | -0.00023          | -0.00039           | 1.92563 |
| R24      | 3.93450 | -0.00001 | 0.00373             | 0.01037           | 0.01413            | 3.94863 |
| R25      | 2.77869 | -0.00259 | -0.00388            | -0.00357          | -0.00564           | 2.77305 |
| R26      | 2.72139 | 0.00041  | 0.00112             | 0.00156           | 0.00212            | 2.72351 |
| R27      | 2.05546 | -0.00010 | 0.00003             | -0.00003          | -0.00001           | 2.05545 |
| R28      | 2.05346 | 0.00002  | 0.00003             | -0.00008          | -0.00005           | 2.05342 |
| R29      | 2.74652 | 0.00053  | 0.00257             | 0.00122           | 0.00251            | 2.74903 |
| R30      | 2.05784 | -0.00010 | 0.00028             | -0.00060          | -0.00032           | 2.05752 |
| R31      | 2.84144 | 0.00025  | 0.00041             | -0.00008          | 0.00032            | 2.84176 |
| R32      | 2.06654 | 0.00012  | 0.00002             | 0.00010           | 0.00011            | 2.06665 |
| R33      | 2.06756 | 0.00003  | 0.00004             | -0.00003          | 0.00000            | 2.06756 |
| R34      | 2.06535 | -0.00004 | 0.00000             | -0.00010          | -0.00011           | 2.06525 |
| A1       | 1.87248 | -0.00002 | -0.00002            | -0.00029          | -0.00031           | 1.87216 |
| A2       | 2.27970 | 0.00000  | 0.00012             | 0.00035           | 0.00047            | 2.28016 |
| A3       | 2.13100 | 0.00001  | -0.00010            | -0.00006          | -0.00015           | 2.13085 |

|     |         |          |          |          |          |         |
|-----|---------|----------|----------|----------|----------|---------|
| A4  | 1.86422 | 0.00008  | 0.00024  | 0.00052  | 0.00075  | 1.86497 |
| A5  | 2.27648 | -0.00009 | -0.00036 | -0.00051 | -0.00087 | 2.27560 |
| A6  | 2.14249 | 0.00001  | 0.00013  | -0.00001 | 0.00013  | 2.14261 |
| A7  | 1.89738 | 0.00009  | -0.00013 | -0.00036 | -0.00050 | 1.89688 |
| A8  | 2.25446 | -0.00009 | -0.00012 | -0.00014 | -0.00026 | 2.25420 |
| A9  | 2.13134 | -0.00001 | 0.00025  | 0.00051  | 0.00077  | 2.13210 |
| A10 | 1.89006 | -0.00018 | 0.00000  | 0.00013  | 0.00012  | 1.89018 |
| A11 | 2.14601 | 0.00016  | -0.00181 | -0.00221 | -0.00402 | 2.14199 |
| A12 | 2.24629 | 0.00003  | 0.00181  | 0.00232  | 0.00413  | 2.25043 |
| A13 | 1.90061 | 0.00003  | -0.00008 | 0.00000  | -0.00008 | 1.90053 |
| A14 | 2.20899 | -0.00074 | -0.00042 | -0.00027 | -0.00067 | 2.20832 |
| A15 | 2.17170 | 0.00072  | 0.00061  | -0.00011 | 0.00050  | 2.17220 |
| A16 | 1.95876 | 0.00041  | -0.00051 | 0.00052  | -0.00002 | 1.95874 |
| A17 | 1.87698 | -0.00037 | 0.00093  | -0.00210 | -0.00115 | 1.87583 |
| A18 | 1.89010 | -0.00018 | 0.00034  | 0.00077  | 0.00112  | 1.89121 |
| A19 | 1.91558 | 0.00012  | -0.00104 | 0.00065  | -0.00037 | 1.91521 |
| A20 | 1.92818 | -0.00010 | -0.00013 | 0.00028  | 0.00015  | 1.92834 |
| A21 | 1.89235 | 0.00011  | 0.00046  | -0.00020 | 0.00026  | 1.89261 |
| A22 | 1.90780 | 0.00031  | 0.00053  | -0.00010 | 0.00043  | 1.90822 |
| A23 | 1.89300 | -0.00003 | -0.00067 | 0.00006  | -0.00062 | 1.89238 |
| A24 | 1.88318 | -0.00052 | 0.00037  | -0.00067 | -0.00027 | 1.88291 |
| A25 | 1.87454 | -0.00002 | -0.00048 | 0.00041  | -0.00007 | 1.87447 |
| A26 | 1.90622 | -0.00009 | -0.00071 | -0.00114 | -0.00186 | 1.90436 |
| A27 | 1.99790 | 0.00036  | 0.00096  | 0.00141  | 0.00236  | 2.00026 |
| A28 | 2.16173 | -0.00009 | -0.00024 | -0.00108 | -0.00132 | 2.16041 |
| A29 | 1.94586 | 0.00005  | -0.00034 | -0.00009 | -0.00042 | 1.94543 |
| A30 | 2.17560 | 0.00004  | 0.00056  | 0.00117  | 0.00173  | 2.17734 |
| A31 | 2.07492 | 0.00002  | -0.00018 | -0.00021 | -0.00039 | 2.07452 |
| A32 | 2.16273 | -0.00002 | 0.00023  | 0.00028  | 0.00051  | 2.16324 |
| A33 | 2.04553 | 0.00000  | -0.00005 | -0.00006 | -0.00011 | 2.04541 |
| A34 | 1.93951 | 0.00011  | 0.00041  | 0.00049  | 0.00062  | 1.94013 |
| A35 | 1.92176 | -0.00066 | -0.00024 | -0.00214 | -0.00247 | 1.91929 |
| A36 | 1.88592 | 0.00030  | 0.00056  | -0.00078 | -0.00013 | 1.88580 |
| A37 | 2.09208 | -0.00058 | -0.00251 | -0.00186 | -0.00239 | 2.08968 |
| A38 | 2.08292 | 0.00011  | 0.00284  | 0.00024  | 0.00128  | 2.08421 |
| A39 | 1.99957 | -0.00030 | -0.00078 | -0.00044 | -0.00033 | 1.99924 |
| A40 | 2.00896 | -0.00013 | 0.00004  | 0.00029  | -0.00008 | 2.00887 |
| A41 | 2.01816 | 0.00031  | -0.00049 | 0.00093  | 0.00038  | 2.01854 |
| A42 | 2.04619 | -0.00077 | -0.00102 | -0.00331 | -0.00240 | 2.04379 |
| A43 | 2.12772 | -0.00013 | 0.00102  | 0.00133  | 0.00058  | 2.12830 |
| A44 | 1.97552 | -0.00051 | -0.00027 | 0.00011  | 0.00028  | 1.97580 |
| A45 | 2.02801 | -0.00034 | 0.00002  | -0.00091 | -0.00091 | 2.02710 |
| A46 | 2.02610 | 0.00085  | -0.00015 | 0.00144  | 0.00112  | 2.02721 |
| A47 | 2.61179 | 0.00064  | 0.00415  | 0.00687  | 0.01473  | 2.62652 |

|     |          |          |          |          |          |          |
|-----|----------|----------|----------|----------|----------|----------|
| A48 | 2.57390  | 0.00075  | -0.00323 | 0.00628  | 0.00912  | 2.58301  |
| A49 | 1.92925  | 0.00015  | -0.00026 | 0.00095  | 0.00069  | 1.92995  |
| A50 | 1.91482  | 0.00005  | -0.00030 | -0.00022 | -0.00052 | 1.91431  |
| A51 | 1.94393  | 0.00002  | 0.00061  | -0.00065 | -0.00004 | 1.94390  |
| A52 | 1.87804  | -0.00003 | -0.00018 | 0.00008  | -0.00009 | 1.87795  |
| A53 | 1.89689  | -0.00012 | 0.00020  | -0.00011 | 0.00008  | 1.89697  |
| A54 | 1.89943  | -0.00006 | -0.00010 | -0.00005 | -0.00015 | 1.89928  |
| A55 | 3.35633  | 0.00047  | 0.01069  | 0.00846  | 0.01915  | 3.37548  |
| A56 | 2.82564  | -0.00022 | -0.02268 | -0.01460 | -0.03696 | 2.78868  |
| A57 | 2.82097  | 0.00013  | 0.00694  | -0.00037 | 0.00657  | 2.82755  |
| A58 | 3.15342  | -0.00003 | -0.01577 | 0.00882  | -0.00678 | 3.14664  |
| D1  | 0.00646  | -0.00014 | -0.00091 | -0.00133 | -0.00224 | 0.00423  |
| D2  | -3.13837 | 0.00000  | 0.00045  | 0.00105  | 0.00149  | -3.13688 |
| D3  | -3.13949 | -0.00012 | -0.00100 | -0.00184 | -0.00284 | 3.14086  |
| D4  | -0.00114 | 0.00001  | 0.00035  | 0.00054  | 0.00089  | -0.00025 |
| D5  | -0.00566 | 0.00004  | 0.00132  | -0.00475 | -0.00344 | -0.00910 |
| D6  | -3.08330 | 0.00001  | -0.00088 | 0.00154  | 0.00065  | -3.08265 |
| D7  | 3.13984  | 0.00003  | 0.00140  | -0.00430 | -0.00290 | 3.13694  |
| D8  | 0.06220  | 0.00000  | -0.00080 | 0.00200  | 0.00119  | 0.06338  |
| D9  | -0.00510 | 0.00019  | 0.00019  | 0.00692  | 0.00711  | 0.00200  |
| D10 | 3.13764  | 0.00010  | 0.00161  | 0.00260  | 0.00421  | -3.14133 |
| D11 | 3.13942  | 0.00007  | -0.00102 | 0.00476  | 0.00373  | -3.14003 |
| D12 | -0.00102 | -0.00003 | 0.00039  | 0.00045  | 0.00084  | -0.00018 |
| D13 | 0.00161  | -0.00017 | 0.00063  | -0.00995 | -0.00932 | -0.00771 |
| D14 | 3.10303  | 0.00000  | 0.00081  | -0.00381 | -0.00301 | 3.10002  |
| D15 | -3.14104 | -0.00008 | -0.00067 | -0.00600 | -0.00667 | 3.13548  |
| D16 | -0.03962 | 0.00009  | -0.00049 | 0.00014  | -0.00035 | -0.03997 |
| D17 | 0.09735  | 0.00003  | -0.00052 | -0.00125 | -0.00177 | 0.09558  |
| D18 | -3.04322 | 0.00007  | -0.00080 | 0.00141  | 0.00061  | -3.04262 |
| D19 | -3.04295 | -0.00008 | 0.00108  | -0.00608 | -0.00501 | -3.04796 |
| D20 | 0.09966  | -0.00004 | 0.00079  | -0.00342 | -0.00263 | 0.09703  |
| D21 | 0.00247  | 0.00008  | -0.00120 | 0.00911  | 0.00791  | 0.01038  |
| D22 | 3.08179  | 0.00004  | 0.00093  | 0.00297  | 0.00388  | 3.08567  |
| D23 | -3.09593 | -0.00011 | -0.00131 | 0.00265  | 0.00134  | -3.09459 |
| D24 | -0.01661 | -0.00015 | 0.00081  | -0.00349 | -0.00270 | -0.01930 |
| D25 | 1.47148  | -0.00009 | -0.02279 | -0.01092 | -0.03370 | 1.43777  |
| D26 | -2.70324 | 0.00005  | -0.02375 | -0.01118 | -0.03494 | -2.73818 |
| D27 | -0.66163 | -0.00011 | -0.02253 | -0.01213 | -0.03466 | -0.69629 |
| D28 | -1.59674 | -0.00009 | -0.02530 | -0.00369 | -0.02899 | -1.62573 |
| D29 | 0.51172  | 0.00006  | -0.02626 | -0.00396 | -0.03022 | 0.48150  |
| D30 | 2.55334  | -0.00010 | -0.02504 | -0.00491 | -0.02994 | 2.52339  |
| D31 | -1.09465 | -0.00011 | 0.00403  | -0.00643 | -0.00241 | -1.09706 |
| D32 | 0.94412  | 0.00003  | 0.00338  | -0.00597 | -0.00260 | 0.94152  |
| D33 | 3.11745  | 0.00012  | 0.00437  | -0.00462 | -0.00026 | 3.11719  |



Input orientation:

| Center<br>Number | Atomic<br>Number | Atomic<br>Type | Coordinates (Angstroms) |           |           |
|------------------|------------------|----------------|-------------------------|-----------|-----------|
|                  |                  |                | X                       | Y         | Z         |
| 1                | 6                | 0              | -2.771046               | 2.103415  | -0.294214 |
| 2                | 6                | 0              | -3.657133               | 1.131027  | 0.040338  |
| 3                | 7                | 0              | -2.936263               | -0.051570 | 0.146502  |
| 4                | 6                | 0              | -1.641688               | 0.207370  | -0.116950 |
| 5                | 7                | 0              | -1.522524               | 1.506245  | -0.394271 |
| 6                | 6                | 0              | -0.244763               | 2.186204  | -0.668424 |
| 7                | 6                | 0              | 0.367342                | 2.803131  | 0.595926  |
| 8                | 1                | 0              | -2.917879               | 3.154782  | -0.471820 |
| 9                | 1                | 0              | -4.717480               | 1.182756  | 0.207301  |
| 10               | 1                | 0              | 0.438082                | 1.444845  | -1.083941 |
| 11               | 1                | 0              | -0.419489               | 2.954856  | -1.422005 |
| 12               | 1                | 0              | -0.305141               | 3.575201  | 0.984747  |
| 13               | 1                | 0              | 0.445609                | 2.017974  | 1.363284  |
| 14               | 35               | 0              | 0.159995                | -2.483876 | 0.463142  |
| 15               | 1                | 0              | -0.851287               | -0.568598 | -0.059791 |
| 16               | 6                | 0              | -3.397833               | -1.362817 | 0.474732  |
| 17               | 6                | 0              | -4.676326               | -1.674878 | 0.639420  |
| 18               | 1                | 0              | -2.570502               | -2.063053 | 0.574000  |
| 19               | 1                | 0              | -4.936336               | -2.692705 | 0.895950  |
| 20               | 1                | 0              | -5.490263               | -0.968261 | 0.531165  |
| 21               | 7                | 0              | 1.634503                | 3.417192  | 0.225384  |
| 22               | 1                | 0              | 1.979928                | 4.017600  | 0.964617  |
| 23               | 1                | 0              | 2.333171                | 2.695952  | 0.052067  |
| 24               | 6                | 0              | 3.641123                | -0.202158 | -1.202904 |
| 25               | 6                | 0              | 3.464627                | -0.518013 | 0.219225  |
| 26               | 8                | 0              | 3.157172                | 0.807458  | -0.295388 |
| 27               | 1                | 0              | 4.638827                | -0.016962 | -1.594538 |
| 28               | 1                | 0              | 2.911947                | -0.561575 | -1.923923 |
| 29               | 1                | 0              | 2.578439                | -1.087522 | 0.494557  |
| 30               | 6                | 0              | 4.630379                | -0.607669 | 1.164946  |
| 31               | 1                | 0              | 4.343110                | -0.264481 | 2.162802  |
| 32               | 1                | 0              | 4.953659                | -1.649155 | 1.253653  |
| 33               | 1                | 0              | 5.473155                | -0.005346 | 0.816626  |

Distance matrix (angstroms):

|   |   | 1        | 2        | 3 | 4 | 5 |
|---|---|----------|----------|---|---|---|
| 1 | C | 0.000000 |          |   |   |   |
| 2 | C | 1.357429 | 0.000000 |   |   |   |



|    |    |          |          |          |          |          |
|----|----|----------|----------|----------|----------|----------|
| 3  | N  | 2.205785 | 1.389051 | 0.000000 |          |          |
| 4  | C  | 2.214015 | 2.222589 | 1.346247 | 0.000000 |          |
| 5  | N  | 1.387599 | 2.210482 | 2.172069 | 1.333486 | 0.000000 |
| 6  | C  | 2.555189 | 3.641429 | 3.593871 | 2.484212 | 1.473152 |
| 7  | C  | 3.336380 | 4.393291 | 4.389204 | 3.358924 | 2.496798 |
| 8  | H  | 1.076325 | 2.214584 | 3.265479 | 3.231383 | 2.161181 |
| 9  | H  | 2.210822 | 1.074657 | 2.167947 | 3.242994 | 3.267152 |
| 10 | H  | 3.369849 | 4.258318 | 3.890945 | 2.606120 | 2.079276 |
| 11 | H  | 2.743481 | 3.993387 | 4.222910 | 3.278052 | 2.090789 |
| 12 | H  | 3.143657 | 4.254614 | 4.558391 | 3.787134 | 2.768446 |
| 13 | H  | 3.619595 | 4.401062 | 4.147364 | 3.134675 | 2.687827 |
| 14 | Br | 5.496165 | 5.274159 | 3.950086 | 3.290193 | 4.414418 |
| 15 | H  | 3.298497 | 3.282000 | 2.158008 | 1.109111 | 2.206221 |
| 16 | C  | 3.605399 | 2.544640 | 1.428338 | 2.428912 | 3.536024 |
| 17 | C  | 4.333273 | 3.044791 | 2.430208 | 3.650202 | 4.597230 |
| 18 | H  | 4.260689 | 3.415803 | 2.088684 | 2.548514 | 3.843917 |
| 19 | H  | 5.395159 | 4.121816 | 3.396698 | 4.504565 | 5.563270 |
| 20 | H  | 4.184565 | 2.829892 | 2.740657 | 4.075989 | 4.766819 |
| 21 | N  | 4.626539 | 5.767339 | 5.738505 | 4.599302 | 3.741993 |
| 22 | H  | 5.274516 | 6.400238 | 6.434003 | 5.366912 | 4.518921 |
| 23 | H  | 5.150150 | 6.191354 | 5.943461 | 4.692666 | 4.059680 |
| 24 | C  | 6.874394 | 7.522471 | 6.716069 | 5.408799 | 5.498707 |
| 25 | C  | 6.783740 | 7.312373 | 6.418274 | 5.168524 | 5.417164 |
| 26 | O  | 6.068218 | 6.830238 | 6.169533 | 4.839525 | 4.732613 |
| 27 | H  | 7.816205 | 8.533091 | 7.772670 | 6.455886 | 6.459338 |
| 28 | H  | 6.484947 | 7.062297 | 6.224815 | 4.959034 | 5.126426 |
| 29 | H  | 6.278633 | 6.634051 | 5.621946 | 4.456474 | 4.933106 |
| 30 | C  | 8.016247 | 8.542287 | 7.655099 | 6.453400 | 6.690142 |
| 31 | H  | 7.890188 | 8.393818 | 7.556458 | 6.421660 | 6.639258 |
| 32 | H  | 8.726324 | 9.129473 | 8.125818 | 6.987405 | 7.390070 |
| 33 | H  | 8.581824 | 9.233425 | 8.436203 | 7.178984 | 7.258836 |
|    |    | 6        | 7        | 8        | 9        | 10       |
| 6  | C  | 0.000000 |          |          |          |          |
| 7  | C  | 1.534227 | 0.000000 |          |          |          |
| 8  | H  | 2.849972 | 3.472236 | 0.000000 |          |          |
| 9  | H  | 4.666797 | 5.350894 | 2.754752 | 0.000000 |          |
| 10 | H  | 1.090204 | 2.161457 | 3.815894 | 5.321260 | 0.000000 |
| 11 | H  | 1.090523 | 2.171214 | 2.680443 | 4.926226 | 1.769138 |
| 12 | H  | 2.160077 | 1.095221 | 3.020718 | 5.079070 | 3.061089 |
| 13 | H  | 2.152383 | 1.100652 | 3.996622 | 5.356433 | 2.513452 |
| 14 | Br | 4.822232 | 5.292737 | 6.491681 | 6.107324 | 4.231506 |
| 15 | H  | 2.885696 | 3.644664 | 4.278332 | 4.252767 | 2.601021 |
| 16 | C  | 4.883052 | 5.616614 | 4.640583 | 2.879744 | 5.002666 |
| 17 | C  | 6.021391 | 6.744853 | 5.258574 | 2.890413 | 6.233763 |

|    |    |          |          |          |           |          |
|----|----|----------|----------|----------|-----------|----------|
| 18 | H  | 5.000886 | 5.684290 | 5.332937 | 3.908869  | 4.909755 |
| 19 | H  | 6.947077 | 7.643509 | 6.335461 | 3.942250  | 7.065668 |
| 20 | H  | 6.237381 | 6.967003 | 4.962118 | 2.308452  | 6.601282 |
| 21 | N  | 2.417823 | 1.456046 | 4.612932 | 6.733552  | 2.652528 |
| 22 | H  | 3.312112 | 2.052146 | 5.176516 | 7.311986  | 3.632209 |
| 23 | H  | 2.724829 | 2.042487 | 5.297028 | 7.212873  | 2.539123 |
| 24 | C  | 4.592391 | 4.794287 | 7.404325 | 8.589116  | 3.603643 |
| 25 | C  | 4.675499 | 4.556871 | 7.396171 | 8.357011  | 3.835496 |
| 26 | O  | 3.689615 | 3.544051 | 6.515159 | 7.899600  | 2.901987 |
| 27 | H  | 5.437011 | 5.567462 | 8.271896 | 9.603459  | 4.477036 |
| 28 | H  | 4.369369 | 4.913847 | 7.064473 | 8.111286  | 3.294132 |
| 29 | H  | 4.476637 | 4.476204 | 7.010031 | 7.646379  | 3.672284 |
| 30 | C  | 5.910498 | 5.489155 | 8.591347 | 9.565834  | 5.181280 |
| 31 | H  | 5.922016 | 5.260425 | 8.447162 | 9.381512  | 5.358393 |
| 32 | H  | 6.740026 | 6.425710 | 9.381693 | 10.131411 | 5.952110 |
| 33 | H  | 6.301020 | 5.831430 | 9.058474 | 10.277739 | 5.573793 |
|    |    | 11       | 12       | 13       | 14        | 15       |
| 11 | H  | 0.000000 |          |          |           |          |
| 12 | H  | 2.488043 | 0.000000 |          |           |          |
| 13 | H  | 3.063328 | 1.769709 | 0.000000 |           |          |
| 14 | Br | 5.785273 | 6.099249 | 4.599835 | 0.000000  |          |
| 15 | H  | 3.802211 | 4.308179 | 3.224505 | 2.228102  | 0.000000 |
| 16 | C  | 5.577674 | 5.848835 | 5.195316 | 3.730287  | 2.720550 |
| 17 | C  | 6.618502 | 6.840309 | 6.355733 | 4.906684  | 4.042731 |
| 18 | H  | 5.812943 | 6.090196 | 5.135628 | 2.764958  | 2.364485 |
| 19 | H  | 7.594062 | 7.793748 | 7.167582 | 5.118937  | 4.702436 |
| 20 | H  | 6.702124 | 6.908999 | 6.696611 | 5.850396  | 4.693512 |
| 21 | N  | 2.673300 | 2.088976 | 2.160115 | 6.087142  | 4.706060 |
| 22 | H  | 3.547195 | 2.327588 | 2.551779 | 6.769994  | 5.486201 |
| 23 | H  | 3.133219 | 2.933200 | 2.396212 | 5.632255  | 4.561860 |
| 24 | C  | 5.148137 | 5.884493 | 4.661075 | 4.483325  | 4.650025 |
| 25 | C  | 5.462675 | 5.617079 | 4.105432 | 3.852882  | 4.325219 |
| 26 | O  | 4.321237 | 4.613758 | 3.401340 | 4.515674  | 4.244617 |
| 27 | H  | 5.869245 | 6.633187 | 5.520213 | 5.511773  | 5.727224 |
| 28 | H  | 4.869875 | 5.993574 | 4.852074 | 4.119048  | 4.199639 |
| 29 | H  | 5.385314 | 5.504208 | 3.866232 | 2.792788  | 3.512777 |
| 30 | C  | 6.699632 | 6.472112 | 4.944253 | 4.898675  | 5.616953 |
| 31 | H  | 6.774756 | 6.143062 | 4.586866 | 5.031204  | 5.658106 |
| 32 | H  | 7.564839 | 7.417626 | 5.812260 | 4.929593  | 6.048978 |
| 33 | H  | 6.964016 | 6.799801 | 5.446915 | 5.873478  | 6.409675 |
|    |    | 16       | 17       | 18       | 19        | 20       |
| 16 | C  | 0.000000 |          |          |           |          |
| 17 | C  | 1.326291 | 0.000000 |          |           |          |
| 18 | H  | 1.088421 | 2.142301 | 0.000000 |           |          |

|    |   |          |           |          |           |           |
|----|---|----------|-----------|----------|-----------|-----------|
| 19 | H | 2.076782 | 1.081382  | 2.469268 | 0.000000  |           |
| 20 | H | 2.130053 | 1.083292  | 3.118559 | 1.847597  | 0.000000  |
| 21 | N | 6.945146 | 8.119554  | 6.916407 | 8.997579  | 8.371857  |
| 22 | H | 7.622938 | 8.764460  | 7.604823 | 9.636785  | 8.991687  |
| 23 | H | 7.035386 | 8.281435  | 6.853215 | 9.088207  | 8.652289  |
| 24 | C | 7.328607 | 8.645404  | 6.723437 | 9.175011  | 9.326099  |
| 25 | C | 6.918983 | 8.233468  | 6.239855 | 8.704218  | 8.971626  |
| 26 | O | 6.947752 | 8.270401  | 6.465440 | 8.898050  | 8.866481  |
| 27 | H | 8.407205 | 9.721693  | 7.801504 | 10.249189 | 10.393365 |
| 28 | H | 6.797709 | 8.086535  | 6.208969 | 8.607493  | 8.762989  |
| 29 | H | 5.982642 | 7.279944  | 5.241142 | 7.694776  | 8.069667  |
| 30 | C | 8.093134 | 9.382423  | 7.370213 | 9.794987  | 10.146876 |
| 31 | H | 7.998632 | 9.255275  | 7.318277 | 9.675190  | 9.992635  |
| 32 | H | 8.392623 | 9.649587  | 7.566124 | 9.951329  | 10.491001 |
| 33 | H | 8.980760 | 10.287405 | 8.306230 | 10.751080 | 11.009325 |
|    |   | 21       | 22        | 23       | 24        | 25        |
| 21 | N | 0.000000 |           |          |           |           |
| 22 | H | 1.013051 | 0.000000  |          |           |           |
| 23 | H | 1.019001 | 1.644470  | 0.000000 |           |           |
| 24 | C | 4.377924 | 5.026338  | 3.418294 | 0.000000  |           |
| 25 | C | 4.339957 | 4.830292  | 3.411408 | 1.467436  | 0.000000  |
| 26 | O | 3.066013 | 3.643971  | 2.089524 | 1.441221  | 1.454726  |
| 27 | H | 4.912381 | 5.467788  | 3.922660 | 1.087698  | 2.218003  |
| 28 | H | 4.699146 | 5.493739  | 3.853699 | 1.086621  | 2.213693  |
| 29 | H | 4.610413 | 5.161534  | 3.817149 | 2.189644  | 1.088795  |
| 30 | C | 5.104660 | 5.334616  | 4.174874 | 2.598034  | 1.503797  |
| 31 | H | 4.964358 | 5.035523  | 4.154421 | 3.438699  | 2.147906  |
| 32 | H | 6.143451 | 6.406147  | 5.214472 | 3.138666  | 2.136993  |
| 33 | H | 5.176734 | 5.329974  | 4.212014 | 2.733785  | 2.157291  |
|    |   | 26       | 27        | 28       | 29        | 30        |
| 26 | O | 0.000000 |           |          |           |           |
| 27 | H | 2.136062 | 0.000000  |          |           |           |
| 28 | H | 2.141614 | 1.840438  | 0.000000 |           |           |
| 29 | H | 2.133047 | 3.123398  | 2.497377 | 0.000000  |           |
| 30 | C | 2.511075 | 2.822013  | 3.535003 | 2.211365  | 0.000000  |
| 31 | H | 2.932269 | 3.777078  | 4.340255 | 2.564078  | 1.093626  |
| 32 | H | 3.414943 | 3.297782  | 3.930446 | 2.556037  | 1.094107  |
| 33 | H | 2.694625 | 2.551460  | 3.792069 | 3.107123  | 1.092883  |
|    |   | 31       | 32        | 33       |           |           |
| 31 | H | 0.000000 |           |          |           |           |
| 32 | H | 1.765401 | 0.000000  |          |           |           |
| 33 | H | 1.776611 | 1.778476  | 0.000000 |           |           |

Stoichiometry C10H18BrN3O

Framework group C1[X(C10H18BrN3O)]

Deg. of freedom 93  
 Full point group C1 NOp 1  
 Largest Abelian subgroup C1 NOp 1  
 Largest concise Abelian subgroup C1 NOp 1

Standard orientation:

| Center<br>Number | Atomic<br>Number | Atomic<br>Type | Coordinates (Angstroms) |           |           |
|------------------|------------------|----------------|-------------------------|-----------|-----------|
|                  |                  |                | X                       | Y         | Z         |
| 1                | 6                | 0              | -2.606387               | 2.353267  | -0.206364 |
| 2                | 6                | 0              | -3.543409               | 1.394755  | 0.007776  |
| 3                | 7                | 0              | -2.883694               | 0.172736  | -0.022323 |
| 4                | 6                | 0              | -1.575117               | 0.394535  | -0.247736 |
| 5                | 7                | 0              | -1.388296               | 1.709180  | -0.370183 |
| 6                | 6                | 0              | -0.075356               | 2.350667  | -0.556894 |
| 7                | 6                | 0              | 0.553592                | 2.783534  | 0.773859  |
| 8                | 1                | 0              | -2.698627               | 3.424289  | -0.260028 |
| 9                | 1                | 0              | -4.601530               | 1.480460  | 0.174879  |
| 10               | 1                | 0              | 0.573880                | 1.629237  | -1.053456 |
| 11               | 1                | 0              | -0.203574               | 3.210073  | -1.215848 |
| 12               | 1                | 0              | -0.083483               | 3.538020  | 1.247562  |
| 13               | 1                | 0              | 0.584507                | 1.911052  | 1.444124  |
| 14               | 35               | 0              | 0.083654                | -2.434214 | 0.020645  |
| 15               | 1                | 0              | -0.825126               | -0.421979 | -0.278471 |
| 16               | 6                | 0              | -3.413623               | -1.142719 | 0.147686  |
| 17               | 6                | 0              | -4.707764               | -1.406471 | 0.268858  |
| 18               | 1                | 0              | -2.623405               | -1.890925 | 0.167822  |
| 19               | 1                | 0              | -5.020983               | -2.432768 | 0.403002  |
| 20               | 1                | 0              | -5.484193               | -0.651567 | 0.240606  |
| 21               | 7                | 0              | 1.853658                | 3.371475  | 0.483646  |
| 22               | 1                | 0              | 2.220927                | 3.862944  | 1.289775  |
| 23               | 1                | 0              | 2.517175                | 2.640865  | 0.230039  |
| 24               | 6                | 0              | 3.691667                | -0.153303 | -1.350444 |
| 25               | 6                | 0              | 3.484775                | -0.623947 | 0.023986  |
| 26               | 8                | 0              | 3.249339                | 0.766529  | -0.332911 |
| 27               | 1                | 0              | 4.701413                | 0.025447  | -1.713143 |
| 28               | 1                | 0              | 2.953002                | -0.388362 | -2.111934 |
| 29               | 1                | 0              | 2.568407                | -1.175938 | 0.226592  |
| 30               | 6                | 0              | 4.634658                | -0.882779 | 0.957892  |
| 31               | 1                | 0              | 4.354504                | -0.644502 | 1.987822  |
| 32               | 1                | 0              | 4.904536                | -1.942576 | 0.925226  |
| 33               | 1                | 0              | 5.510074                | -0.287496 | 0.686458  |

Rotational constants (GHZ): 0.4456761 0.2674696 0.1758086

Standard basis: 6-311++G(d,p) (5D, 7F)  
 There are 499 symmetry adapted cartesian basis functions of A symmetry.  
 There are 482 symmetry adapted basis functions of A symmetry.  
 482 basis functions, 760 primitive gaussians, 499 cartesian basis functions  
 71 alpha electrons 71 beta electrons  
 nuclear repulsion energy 1299.2684158959 Hartrees.  
 NAToms= 33 NActive= 33 NUniq= 33 SFac= 1.00D+00 NATFMM= 60 NAOKFM=F  
 Big=F  
 Integral buffers will be 131072 words long.  
 Raffenetti 2 integral format.  
 Two-electron integral symmetry is turned on.  
 One-electron integrals computed using PRISM.  
 NBasis= 482 RedAO= T EigKep= 3.88D-06 NBF= 482  
 NBsUse= 482 1.00D-06 EigRej= -1.00D+00 NBFU= 482  
 Initial guess from the checkpoint file:  
 "/home/suqian/liuwen/qianmengshijie/nh2po/nh2po.chk"  
 B after Tr= 0.000000 0.000000 0.000000  
 Rot= 0.999986 0.002869 -0.000533 0.004309 Ang= 0.60 deg.  
 ExpMin= 3.50D-02 ExpMax= 4.40D+05 ExpMxC= 1.51D+04 IAcc=3 IRadAn= 5 AccDes=  
 0.00D+00  
 Harris functional with IExCor= 402 and IRadAn= 5 diagonalized for initial guess.  
 HarFok: IExCor= 402 AccDes= 0.00D+00 IRadAn= 5 IDoV= 1 UseB2=F ITyADJ=14  
 ICtDFT= 3500011 ScaDFX= 1.000000 1.000000 1.000000 1.000000  
 FoFCou: FMM=F IPFlag= 0 FMFlag= 100000 FMFlg1= 0  
 NFxFlg= 0 DoJE=T BraDBF=F KetDBF=T FulRan=T  
 wScrn= 0.000000 ICntrl= 500 IOpCl= 0 I1Cent= 200000004 NGrid=  
 0  
 NMat0= 1 NMatS0= 1 NMatT0= 0 NMatD0= 1 NMtDS0= 0  
 NMtDT0= 0  
 Petite list used in FoFCou.  
 Requested convergence on RMS density matrix=1.00D-08 within 128 cycles.  
 Requested convergence on MAX density matrix=1.00D-06.  
 Requested convergence on energy=1.00D-06.  
 No special actions if energy rises.  
 EnCoef did 1 forward-backward iterations  
 SCF Done: E(RB3LYP) = -3205.64746097 A.U. after 11 cycles  
 NFock= 11 Conv=0.38D-08 -V/T= 2.0018  
 Calling FoFJK, ICntrl= 2127 FMM=F ISym2X=0 I1Cent= 0 IOpClX= 0 NMat=1 NMatS=1  
 NMatT=0.  
 \*\*\*\*\* Axes restored to original set \*\*\*\*\*

```

-----
Center      Atomic      Forces (Hartrees/Bohr)
Number      Number      X              Y              Z
-----

```

|    |    |              |              |              |
|----|----|--------------|--------------|--------------|
| 1  | 6  | 0.000279738  | -0.000016035 | -0.000233778 |
| 2  | 6  | -0.000248231 | 0.000084571  | -0.000170078 |
| 3  | 7  | 0.000503051  | 0.000355059  | 0.000100167  |
| 4  | 6  | -0.001159097 | -0.001263146 | 0.000061478  |
| 5  | 7  | 0.000205600  | -0.000239603 | 0.000333687  |
| 6  | 6  | 0.000657528  | 0.000808079  | 0.000217785  |
| 7  | 6  | -0.000518677 | -0.000207964 | 0.000381353  |
| 8  | 1  | -0.000057197 | 0.000014749  | -0.000082197 |
| 9  | 1  | -0.000010487 | 0.000016790  | -0.000027225 |
| 10 | 1  | -0.000072263 | -0.000263546 | 0.000174237  |
| 11 | 1  | -0.000141950 | -0.000060095 | 0.000078725  |
| 12 | 1  | 0.000137838  | -0.000023867 | -0.000006058 |
| 13 | 1  | 0.000048875  | 0.000048380  | -0.000185928 |
| 14 | 35 | -0.000082843 | 0.000001547  | -0.000064037 |
| 15 | 1  | 0.000500086  | 0.000270437  | -0.000309805 |
| 16 | 6  | 0.000126151  | 0.000305668  | 0.000279743  |
| 17 | 6  | 0.000014421  | -0.000097322 | 0.000060724  |
| 18 | 1  | -0.000119097 | -0.000018720 | -0.000089021 |
| 19 | 1  | -0.000025478 | 0.000002100  | -0.000058296 |
| 20 | 1  | 0.000030097  | -0.000001493 | -0.000018841 |
| 21 | 7  | 0.000397606  | -0.000027286 | -0.000408650 |
| 22 | 1  | -0.000120594 | 0.000127592  | 0.000039442  |
| 23 | 1  | 0.000141009  | 0.000314050  | 0.000159531  |
| 24 | 6  | -0.000299125 | -0.000738454 | 0.000510699  |
| 25 | 6  | 0.001456456  | 0.000094078  | -0.000129686 |
| 26 | 8  | -0.001297271 | 0.000188435  | -0.000105702 |
| 27 | 1  | 0.000069505  | -0.000029482 | 0.000291624  |
| 28 | 1  | -0.000103927 | -0.000019120 | 0.000166295  |
| 29 | 1  | -0.000468188 | 0.000212308  | -0.001054880 |
| 30 | 6  | -0.000081636 | 0.000051985  | -0.000035960 |
| 31 | 1  | 0.000086320  | 0.000128660  | 0.000066912  |
| 32 | 1  | 0.000127300  | -0.000017145 | 0.000002799  |
| 33 | 1  | 0.000024480  | -0.000001209 | 0.000054939  |

-----  
Cartesian Forces: Max 0.001456456 RMS 0.000363328

GradGradGradGradGradGradGradGradGradGradGradGradGradGradGradGradGradGrad

Berny optimization.

Using GEDIIS/GDIIS optimizer.

FormGI is forming the generalized inverse of G from B-inverse, IUseBI=4.

Internal Forces: Max 0.001131095 RMS 0.000246808

Search for a local minimum.

Step number 23 out of a maximum of 172

All quantities printed in internal units (Hartrees-Bohrs-Radians)

Mixed Optimization -- En-DIIS/RFO-DIIS

Swapping is turned off.

Update second derivatives using D2CorX and points 19 20 22 23

DE= -1.42D-04 DEPred=-7.28D-05 R= 1.95D+00

TightC=F SS= 1.41D+00 RLast= 2.77D-01 DXNew= 1.4193D+00 8.3106D-01

Trust test= 1.95D+00 RLast= 2.77D-01 DXMaxT set to 8.44D-01

ITU= 1 -1 1 1 1 1 1 1 1 1 0 -1 -1 1 1 1 -1 1 0

ITU= 0 -1 0

|                 |         |         |         |         |         |
|-----------------|---------|---------|---------|---------|---------|
| Eigenvalues --- | 0.00002 | 0.00149 | 0.00277 | 0.00426 | 0.00701 |
| Eigenvalues --- | 0.00727 | 0.00817 | 0.01295 | 0.01601 | 0.01882 |
| Eigenvalues --- | 0.02072 | 0.02157 | 0.02295 | 0.02389 | 0.02440 |
| Eigenvalues --- | 0.02772 | 0.02881 | 0.03073 | 0.03098 | 0.03214 |
| Eigenvalues --- | 0.03321 | 0.03586 | 0.03890 | 0.04023 | 0.04206 |
| Eigenvalues --- | 0.04375 | 0.04780 | 0.05441 | 0.05701 | 0.05753 |
| Eigenvalues --- | 0.05934 | 0.06160 | 0.07550 | 0.08667 | 0.08779 |
| Eigenvalues --- | 0.09656 | 0.10166 | 0.12225 | 0.12342 | 0.12637 |
| Eigenvalues --- | 0.13549 | 0.13773 | 0.15332 | 0.15984 | 0.16000 |
| Eigenvalues --- | 0.16000 | 0.16003 | 0.16024 | 0.16046 | 0.16074 |
| Eigenvalues --- | 0.16139 | 0.17342 | 0.18775 | 0.22125 | 0.22579 |
| Eigenvalues --- | 0.22883 | 0.23418 | 0.24818 | 0.26200 | 0.28099 |
| Eigenvalues --- | 0.29530 | 0.30470 | 0.31782 | 0.32412 | 0.33621 |
| Eigenvalues --- | 0.34273 | 0.34312 | 0.34359 | 0.34537 | 0.34668 |
| Eigenvalues --- | 0.34728 | 0.35020 | 0.35078 | 0.35269 | 0.35329 |
| Eigenvalues --- | 0.35561 | 0.35726 | 0.35890 | 0.36420 | 0.36622 |
| Eigenvalues --- | 0.37598 | 0.38822 | 0.41814 | 0.42417 | 0.44653 |
| Eigenvalues --- | 0.45466 | 0.46218 | 0.49343 | 0.54686 | 0.57952 |
| Eigenvalues --- | 0.60218 | 0.62137 | 1.34174 |         |         |

Eigenvalue 1 is 2.07D-05 Eigenvector:

|   |          |          |         |          |          |
|---|----------|----------|---------|----------|----------|
|   | D58      | D59      | D60     | D61      | D53      |
| 1 | -0.38498 | -0.38422 | 0.37778 | 0.37557  | -0.31151 |
|   | D51      | D50      | D52     | D26      | D27      |
| 1 | -0.28929 | 0.16964  | 0.14742 | -0.13675 | -0.13456 |

En-DIIS/RFO-DIIS IScMMF= 0 using points: 23 22 21 20 19

RFO step: Lambda=-4.58228039D-05.

DidBck=T Rises=F En-DIIS coefs: 0.54140 0.00000 0.45860 0.00000

0.00000

Iteration 1 RMS(Cart)= 0.19505645 RMS(Int)= 0.18158199

Iteration 2 RMS(Cart)= 0.15220175 RMS(Int)= 0.13265683

Iteration 3 RMS(Cart)= 0.08708963 RMS(Int)= 0.09345085

Iteration 4 RMS(Cart)= 0.06538485 RMS(Int)= 0.05981154

Iteration 5 RMS(Cart)= 0.07065393 RMS(Int)= 0.03678227

Iteration 6 RMS(Cart)= 0.03218262 RMS(Int)= 0.03264382

Iteration 7 RMS(Cart)= 0.00491446 RMS(Int)= 0.03266040

Iteration 8 RMS(Cart)= 0.00143511 RMS(Int)= 0.03268196

Iteration 9 RMS(Cart)= 0.00040040 RMS(Int)= 0.03268958  
 Iteration 10 RMS(Cart)= 0.00013006 RMS(Int)= 0.03269210  
 Iteration 11 RMS(Cart)= 0.00004082 RMS(Int)= 0.03269291  
 Iteration 12 RMS(Cart)= 0.00001295 RMS(Int)= 0.03269316  
 Iteration 13 RMS(Cart)= 0.00000410 RMS(Int)= 0.03269325  
 Iteration 14 RMS(Cart)= 0.00000130 RMS(Int)= 0.03269327  
 Iteration 15 RMS(Cart)= 0.00000041 RMS(Int)= 0.03269328

| Variable | Old X   | -DE/DX   | Delta X<br>(Linear) | Delta X<br>(Quad) | Delta X<br>(Total) | New X   |
|----------|---------|----------|---------------------|-------------------|--------------------|---------|
| R1       | 2.56517 | -0.00013 | -0.00017            | -0.00110          | -0.00130           | 2.56387 |
| R2       | 2.62218 | -0.00017 | 0.00081             | 0.00115           | 0.00200            | 2.62419 |
| R3       | 2.03396 | 0.00004  | -0.00005            | -0.00006          | -0.00010           | 2.03386 |
| R4       | 2.62493 | 0.00011  | 0.00064             | -0.00627          | -0.00568           | 2.61925 |
| R5       | 2.03081 | 0.00001  | 0.00014             | 0.00032           | 0.00047            | 2.03128 |
| R6       | 2.54404 | -0.00033 | 0.00055             | 0.00547           | 0.00596            | 2.54999 |
| R7       | 2.69917 | -0.00014 | -0.00116            | 0.00927           | 0.00810            | 2.70727 |
| R8       | 2.51992 | 0.00048  | -0.00158            | 0.00268           | 0.00106            | 2.52099 |
| R9       | 2.09592 | 0.00009  | 0.00186             | -0.01435          | -0.01249           | 2.08342 |
| R10      | 2.78385 | 0.00025  | -0.00133            | -0.00929          | -0.01067           | 2.77318 |
| R11      | 2.89927 | -0.00030 | -0.00072            | -0.00307          | -0.00357           | 2.89570 |
| R12      | 2.06019 | 0.00007  | -0.00026            | -0.00038          | -0.00063           | 2.05955 |
| R13      | 2.06079 | -0.00007 | 0.00014             | 0.00309           | 0.00323            | 2.06402 |
| R14      | 2.06967 | -0.00010 | 0.00035             | 0.00138           | 0.00173            | 2.07139 |
| R15      | 2.07993 | -0.00016 | 0.00082             | 0.00577           | 0.00659            | 2.08652 |
| R16      | 2.75153 | 0.00017  | -0.00087            | -0.00711          | -0.00805           | 2.74348 |
| R17      | 4.21050 | -0.00005 | -0.00652            | 0.11620           | 0.10968            | 4.32018 |
| R18      | 2.50633 | 0.00000  | 0.00024             | -0.00158          | -0.00134           | 2.50499 |
| R19      | 2.05682 | -0.00009 | 0.00001             | 0.00626           | 0.00627            | 2.06309 |
| R20      | 2.04352 | -0.00001 | -0.00001            | 0.00047           | 0.00046            | 2.04398 |
| R21      | 2.04712 | -0.00002 | 0.00008             | 0.00017           | 0.00024            | 2.04737 |
| R22      | 1.91439 | 0.00006  | 0.00049             | 0.00087           | 0.00136            | 1.91575 |
| R23      | 1.92563 | -0.00039 | 0.00088             | -0.00397          | 0.00859            | 1.93422 |
| R24      | 3.94863 | -0.00002 | -0.01307            | 0.15390           | 0.13532            | 4.08395 |
| R25      | 2.77305 | -0.00113 | -0.00180            | -0.05603          | -0.14091           | 2.63214 |
| R26      | 2.72351 | 0.00029  | -0.00106            | 0.02502           | 0.05428            | 2.77780 |
| R27      | 2.05545 | -0.00005 | 0.00025             | -0.00015          | 0.00010            | 2.05555 |
| R28      | 2.05342 | -0.00003 | 0.00051             | -0.00146          | -0.00095           | 2.05246 |
| R29      | 2.74903 | 0.00012  | 0.00474             | 0.02395           | 0.07629            | 2.82532 |
| R30      | 2.05752 | 0.00000  | -0.00032            | -0.00255          | -0.00287           | 2.05466 |
| R31      | 2.84176 | 0.00017  | -0.00036            | 0.00345           | 0.00310            | 2.84486 |
| R32      | 2.06665 | 0.00008  | -0.00049            | 0.00139           | 0.00090            | 2.06756 |
| R33      | 2.06756 | 0.00006  | -0.00023            | 0.00042           | 0.00019            | 2.06775 |
| R34      | 2.06525 | 0.00000  | 0.00008             | -0.00101          | -0.00093           | 2.06432 |
| A1       | 1.87216 | 0.00007  | -0.00028            | -0.00262          | -0.00306           | 1.86910 |



|     |         |          |          |          |          |         |
|-----|---------|----------|----------|----------|----------|---------|
| A2  | 2.28016 | -0.00007 | -0.00059 | 0.00444  | 0.00393  | 2.28410 |
| A3  | 2.13085 | 0.00001  | 0.00086  | -0.00187 | -0.00092 | 2.12993 |
| A4  | 1.86497 | -0.00009 | 0.00009  | 0.00659  | 0.00631  | 1.87128 |
| A5  | 2.27560 | 0.00002  | 0.00111  | -0.00952 | -0.00839 | 2.26722 |
| A6  | 2.14261 | 0.00007  | -0.00122 | 0.00292  | 0.00171  | 2.14432 |
| A7  | 1.89688 | 0.00022  | -0.00049 | -0.00399 | -0.00480 | 1.89208 |
| A8  | 2.25420 | -0.00018 | -0.00022 | -0.00208 | -0.00217 | 2.25203 |
| A9  | 2.13210 | -0.00004 | 0.00071  | 0.00605  | 0.00690  | 2.13900 |
| A10 | 1.89018 | -0.00022 | 0.00041  | 0.00046  | 0.00010  | 1.89028 |
| A11 | 2.14199 | 0.00056  | -0.00294 | -0.03346 | -0.03663 | 2.10536 |
| A12 | 2.25043 | -0.00034 | 0.00250  | 0.03478  | 0.03699  | 2.28741 |
| A13 | 1.90053 | 0.00002  | 0.00026  | -0.00094 | -0.00090 | 1.89963 |
| A14 | 2.20832 | -0.00085 | 0.00123  | -0.00758 | -0.00641 | 2.20191 |
| A15 | 2.17220 | 0.00084  | -0.00117 | 0.00686  | 0.00584  | 2.17804 |
| A16 | 1.95874 | 0.00058  | 0.00016  | -0.00012 | 0.00118  | 1.95992 |
| A17 | 1.87583 | -0.00022 | -0.00103 | -0.00864 | -0.00988 | 1.86595 |
| A18 | 1.89121 | -0.00032 | 0.00310  | 0.00894  | 0.01148  | 1.90270 |
| A19 | 1.91521 | -0.00011 | -0.00044 | -0.00730 | -0.00799 | 1.90722 |
| A20 | 1.92834 | -0.00012 | -0.00292 | 0.00318  | -0.00018 | 1.92816 |
| A21 | 1.89261 | 0.00018  | 0.00125  | 0.00396  | 0.00540  | 1.89801 |
| A22 | 1.90822 | 0.00039  | 0.00044  | 0.00645  | 0.00695  | 1.91518 |
| A23 | 1.89238 | 0.00007  | -0.00048 | -0.00690 | -0.00672 | 1.88566 |
| A24 | 1.88291 | -0.00074 | -0.00122 | -0.00305 | -0.00574 | 1.87717 |
| A25 | 1.87447 | -0.00007 | -0.00072 | -0.00105 | -0.00188 | 1.87259 |
| A26 | 1.90436 | 0.00006  | -0.00226 | -0.01593 | -0.01794 | 1.88642 |
| A27 | 2.00026 | 0.00031  | 0.00417  | 0.02044  | 0.02526  | 2.02552 |
| A28 | 2.16041 | 0.00004  | 0.00023  | -0.01165 | -0.01146 | 2.14895 |
| A29 | 1.94543 | 0.00005  | 0.00050  | -0.00453 | -0.00407 | 1.94136 |
| A30 | 2.17734 | -0.00009 | -0.00073 | 0.01612  | 0.01535  | 2.19269 |
| A31 | 2.07452 | 0.00005  | 0.00000  | -0.00359 | -0.00361 | 2.07091 |
| A32 | 2.16324 | -0.00005 | -0.00056 | 0.00520  | 0.00462  | 2.16786 |
| A33 | 2.04541 | 0.00000  | 0.00056  | -0.00159 | -0.00105 | 2.04436 |
| A34 | 1.94013 | 0.00000  | -0.00019 | 0.00734  | 0.03386  | 1.97399 |
| A35 | 1.91929 | -0.00052 | 0.00025  | -0.02224 | -0.00839 | 1.91090 |
| A36 | 1.88580 | 0.00038  | 0.00134  | -0.00014 | -0.01195 | 1.87384 |
| A37 | 2.08968 | -0.00033 | -0.00431 | -0.02123 | 0.05555  | 2.14523 |
| A38 | 2.08421 | 0.00002  | 0.00887  | 0.00658  | -0.07233 | 2.01188 |
| A39 | 1.99924 | -0.00007 | -0.00118 | -0.00595 | -0.04876 | 1.95048 |
| A40 | 2.00887 | -0.00015 | 0.00218  | -0.00350 | 0.02580  | 2.03468 |
| A41 | 2.01854 | 0.00025  | -0.00470 | 0.00933  | 0.00742  | 2.02596 |
| A42 | 2.04379 | -0.00066 | 0.01067  | -0.03494 | -0.11070 | 1.93309 |
| A43 | 2.12830 | -0.00011 | 0.00242  | 0.00541  | 0.09379  | 2.22209 |
| A44 | 1.97580 | -0.00054 | 0.00259  | -0.00327 | 0.02567  | 2.00147 |
| A45 | 2.02710 | -0.00014 | 0.00004  | -0.00816 | -0.04981 | 1.97729 |

|     |          |          |          |          |          |          |
|-----|----------|----------|----------|----------|----------|----------|
| A46 | 2.02721  | 0.00076  | -0.01049 | 0.02120  | 0.01475  | 2.04196  |
| A47 | 2.62652  | 0.00038  | 0.01604  | 0.11531  | -0.12266 | 2.50386  |
| A48 | 2.58301  | 0.00023  | -0.00976 | 0.07008  | -0.13365 | 2.44936  |
| A49 | 1.92995  | 0.00009  | -0.00177 | 0.00802  | 0.00625  | 1.93620  |
| A50 | 1.91431  | 0.00012  | -0.00131 | -0.00330 | -0.00461 | 1.90970  |
| A51 | 1.94390  | 0.00001  | 0.00123  | -0.00158 | -0.00036 | 1.94353  |
| A52 | 1.87795  | -0.00003 | -0.00139 | 0.00078  | -0.00060 | 1.87736  |
| A53 | 1.89697  | -0.00011 | 0.00207  | -0.00111 | 0.00095  | 1.89792  |
| A54 | 1.89928  | -0.00009 | 0.00113  | -0.00286 | -0.00173 | 1.89755  |
| A55 | 3.37548  | 0.00037  | -0.00530 | 0.19140  | 0.18610  | 3.56158  |
| A56 | 2.78868  | -0.00040 | -0.03047 | -0.36730 | -0.41675 | 2.37193  |
| A57 | 2.82755  | 0.00007  | -0.00199 | 0.07444  | 0.07245  | 2.90000  |
| A58 | 3.14664  | -0.00032 | -0.04309 | -0.08281 | -0.13348 | 3.01316  |
| D1  | 0.00423  | -0.00003 | 0.00052  | -0.01500 | -0.01435 | -0.01012 |
| D2  | -3.13688 | -0.00005 | -0.00368 | 0.01782  | 0.01406  | -3.12282 |
| D3  | 3.14086  | 0.00000  | 0.00589  | -0.02656 | -0.02078 | 3.12008  |
| D4  | -0.00025 | -0.00002 | 0.00170  | 0.00626  | 0.00763  | 0.00738  |
| D5  | -0.00910 | 0.00017  | -0.00055 | -0.02094 | -0.02174 | -0.03084 |
| D6  | -3.08265 | 0.00000  | -0.00618 | 0.00501  | -0.00180 | -3.08446 |
| D7  | 3.13694  | 0.00014  | -0.00537 | -0.01061 | -0.01602 | 3.12091  |
| D8  | 0.06338  | -0.00002 | -0.01100 | 0.01534  | 0.00391  | 0.06730  |
| D9  | 0.00200  | -0.00012 | -0.00032 | 0.04557  | 0.04510  | 0.04711  |
| D10 | -3.14133 | -0.00004 | 0.00243  | 0.03201  | 0.03415  | -3.10718 |
| D11 | -3.14003 | -0.00010 | 0.00347  | 0.01584  | 0.01915  | -3.12088 |
| D12 | -0.00018 | -0.00003 | 0.00621  | 0.00228  | 0.00820  | 0.00802  |
| D13 | -0.00771 | 0.00022  | -0.00003 | -0.05908 | -0.05902 | -0.06673 |
| D14 | 3.10002  | 0.00018  | -0.00057 | -0.00710 | -0.00903 | 3.09099  |
| D15 | 3.13548  | 0.00016  | -0.00254 | -0.04665 | -0.04892 | 3.08656  |
| D16 | -0.03997 | 0.00011  | -0.00309 | 0.00533  | 0.00107  | -0.03890 |
| D17 | 0.09558  | -0.00002 | 0.00463  | -0.05082 | -0.04601 | 0.04957  |
| D18 | -3.04262 | -0.00010 | 0.00365  | -0.03329 | -0.02958 | -3.07220 |
| D19 | -3.04796 | 0.00006  | 0.00770  | -0.06600 | -0.05835 | -3.10631 |
| D20 | 0.09703  | -0.00002 | 0.00672  | -0.04847 | -0.04192 | 0.05510  |
| D21 | 0.01038  | -0.00024 | 0.00035  | 0.04963  | 0.05013  | 0.06051  |
| D22 | 3.08567  | -0.00016 | 0.00593  | 0.02365  | 0.02995  | 3.11561  |
| D23 | -3.09459 | -0.00021 | 0.00109  | -0.00477 | -0.00490 | -3.09949 |
| D24 | -0.01930 | -0.00013 | 0.00667  | -0.03075 | -0.02508 | -0.04439 |
| D25 | 1.43777  | 0.00001  | -0.04712 | -0.35400 | -0.40117 | 1.03661  |
| D26 | -2.73818 | 0.00008  | -0.04824 | -0.36885 | -0.41679 | 3.12821  |
| D27 | -0.69629 | 0.00001  | -0.04569 | -0.36412 | -0.40977 | -1.10606 |
| D28 | -1.62573 | -0.00013 | -0.05363 | -0.32380 | -0.37783 | -2.00355 |
| D29 | 0.48150  | -0.00006 | -0.05476 | -0.33865 | -0.39345 | 0.08805  |
| D30 | 2.52339  | -0.00014 | -0.05221 | -0.33392 | -0.38643 | 2.13696  |
| D31 | -1.09706 | 0.00001  | 0.01837  | -0.02667 | -0.00821 | -1.10527 |

|     |          |          |          |          |          |          |
|-----|----------|----------|----------|----------|----------|----------|
| D32 | 0.94152  | 0.00019  | 0.01749  | -0.02825 | -0.01043 | 0.93108  |
| D33 | 3.11719  | 0.00015  | 0.02153  | -0.00944 | 0.01268  | 3.12987  |
| D34 | 3.10179  | -0.00001 | 0.01985  | -0.01084 | 0.00871  | 3.11050  |
| D35 | -1.14282 | 0.00017  | 0.01897  | -0.01242 | 0.00648  | -1.13634 |
| D36 | 1.03285  | 0.00013  | 0.02301  | 0.00640  | 0.02960  | 1.06245  |
| D37 | 1.01579  | -0.00009 | 0.02039  | -0.01310 | 0.00719  | 1.02298  |
| D38 | 3.05436  | 0.00009  | 0.01951  | -0.01468 | 0.00497  | 3.05933  |
| D39 | -1.05316 | 0.00004  | 0.02355  | 0.00413  | 0.02808  | -1.02508 |
| D40 | 2.91515  | 0.00013  | 0.05559  | 0.24360  | 0.29406  | -3.07397 |
| D41 | -1.28043 | 0.00028  | 0.05730  | 0.23362  | 0.29521  | -0.98523 |
| D42 | 0.84374  | 0.00005  | 0.05701  | 0.24651  | 0.29880  | 1.14254  |
| D43 | 2.93134  | 0.00019  | 0.05872  | 0.23652  | 0.29995  | -3.05190 |
| D44 | -1.25849 | -0.00012 | 0.05680  | 0.24585  | 0.29774  | -0.96075 |
| D45 | 0.82911  | 0.00003  | 0.05851  | 0.23587  | 0.29889  | 1.12799  |
| D46 | -3.13232 | -0.00010 | 0.00101  | 0.01348  | 0.01454  | -3.11777 |
| D47 | 0.01094  | -0.00003 | 0.00072  | 0.00160  | 0.00237  | 0.01331  |
| D48 | 0.00543  | -0.00001 | 0.00212  | -0.00642 | -0.00435 | 0.00108  |
| D49 | -3.13450 | 0.00006  | 0.00184  | -0.01830 | -0.01652 | 3.13216  |
| D50 | 1.68484  | -0.00003 | 0.10883  | 0.40972  | 0.55022  | 2.23505  |
| D51 | -0.82362 | 0.00025  | 0.00533  | -0.88515 | -0.88383 | -1.70745 |
| D52 | -2.53858 | -0.00013 | 0.11491  | 0.33749  | 0.45747  | -2.08112 |
| D53 | 1.23614  | 0.00015  | 0.01141  | -0.95738 | -0.97658 | 0.25957  |
| D54 | -2.70576 | -0.00004 | -0.00089 | 0.03048  | 0.03499  | -2.67077 |
| D55 | -0.00946 | 0.00013  | 0.00328  | 0.01443  | 0.02762  | 0.01817  |
| D56 | -0.02800 | -0.00012 | -0.00246 | 0.02017  | 0.01374  | -0.01425 |
| D57 | 2.66831  | 0.00005  | 0.00171  | 0.00411  | 0.00638  | 2.67468  |
| D58 | 1.35979  | 0.00003  | -0.09058 | -1.09577 | -1.12244 | 0.23736  |
| D59 | -1.04339 | -0.00011 | -0.08416 | -1.09964 | -1.10674 | -2.15013 |
| D60 | 1.09201  | 0.00074  | 0.07488  | 1.08308  | 1.07391  | 2.16591  |
| D61 | -1.31874 | 0.00032  | 0.08868  | 1.06220  | 1.07836  | -0.24038 |
| D62 | 2.55664  | 0.00010  | 0.00450  | 0.02422  | 0.03994  | 2.59657  |
| D63 | -1.65819 | 0.00019  | 0.00092  | 0.02803  | 0.04014  | -1.61805 |
| D64 | 0.44541  | 0.00017  | 0.00226  | 0.02123  | 0.03469  | 0.48011  |
| D65 | 1.36281  | -0.00020 | 0.00506  | 0.00571  | 0.00357  | 1.36638  |
| D66 | -2.85202 | -0.00011 | 0.00148  | 0.00952  | 0.00378  | -2.84824 |
| D67 | -0.74842 | -0.00014 | 0.00282  | 0.00272  | -0.00167 | -0.75009 |
| D68 | -1.02630 | -0.00007 | 0.01346  | -0.00503 | 0.00444  | -1.02186 |
| D69 | 1.04206  | 0.00002  | 0.00988  | -0.00123 | 0.00465  | 1.04670  |
| D70 | -3.13752 | -0.00001 | 0.01122  | -0.00803 | -0.00080 | -3.13833 |

| Item                 | Value    | Threshold | Converged? |
|----------------------|----------|-----------|------------|
| Maximum Force        | 0.001131 | 0.000450  | NO         |
| RMS Force            | 0.000247 | 0.000300  | YES        |
| Maximum Displacement | 1.663191 | 0.001800  | NO         |
| RMS Displacement     | 0.425641 | 0.001200  | NO         |

Predicted change in Energy=-3.894017D-03

GradGradGradGradGradGradGradGradGradGradGradGradGradGradGradGradGradGradGrad

Input orientation:

| Center<br>Number | Atomic<br>Number | Atomic<br>Type | Coordinates (Angstroms) |           |           |
|------------------|------------------|----------------|-------------------------|-----------|-----------|
|                  |                  |                | X                       | Y         | Z         |
| 1                | 6                | 0              | -2.384655               | 2.023759  | -0.165888 |
| 2                | 6                | 0              | -3.299726               | 1.061256  | 0.111565  |
| 3                | 7                | 0              | -2.625589               | -0.149442 | 0.141061  |
| 4                | 6                | 0              | -1.312208               | 0.089226  | -0.056282 |
| 5                | 7                | 0              | -1.153867               | 1.392929  | -0.290744 |
| 6                | 6                | 0              | 0.136987                | 2.051282  | -0.522776 |
| 7                | 6                | 0              | 0.489479                | 3.047176  | 0.587182  |
| 8                | 1                | 0              | -2.497054               | 3.086499  | -0.293593 |
| 9                | 1                | 0              | -4.360836               | 1.141816  | 0.263139  |
| 10               | 1                | 0              | 0.892122                | 1.266068  | -0.554755 |
| 11               | 1                | 0              | 0.111256                | 2.553278  | -1.492469 |
| 12               | 1                | 0              | -0.248242               | 3.857704  | 0.605122  |
| 13               | 1                | 0              | 0.420787                | 2.519415  | 1.554585  |
| 14               | 35               | 0              | 0.038674                | -2.928813 | 0.147801  |
| 15               | 1                | 0              | -0.580486               | -0.734805 | -0.023711 |
| 16               | 6                | 0              | -3.146284               | -1.467063 | 0.353593  |
| 17               | 6                | 0              | -4.438307               | -1.718902 | 0.509878  |
| 18               | 1                | 0              | -2.345222               | -2.208039 | 0.387434  |
| 19               | 1                | 0              | -4.749986               | -2.739139 | 0.688449  |
| 20               | 1                | 0              | -5.214137               | -0.963254 | 0.480136  |
| 21               | 7                | 0              | 1.783007                | 3.622196  | 0.264961  |
| 22               | 1                | 0              | 2.128143                | 4.251330  | 0.981065  |
| 23               | 1                | 0              | 2.472513                | 2.873320  | 0.158143  |
| 24               | 6                | 0              | 2.906050                | -0.286746 | -1.169250 |
| 25               | 6                | 0              | 2.970345                | -0.537110 | 0.199424  |
| 26               | 8                | 0              | 2.389449                | 0.757161  | -0.272520 |
| 27               | 1                | 0              | 3.758704                | 0.063572  | -1.746712 |
| 28               | 1                | 0              | 2.167982                | -0.869188 | -1.713003 |
| 29               | 1                | 0              | 2.236458                | -1.285175 | 0.489224  |
| 30               | 6                | 0              | 4.160258                | -0.360595 | 1.104566  |
| 31               | 1                | 0              | 3.844785                | -0.091463 | 2.117042  |
| 32               | 1                | 0              | 4.710660                | -1.304029 | 1.170006  |
| 33               | 1                | 0              | 4.834054                | 0.413145  | 0.729538  |

Distance matrix (angstroms):

1 2 3 4 5

|    |    |          |          |          |          |          |
|----|----|----------|----------|----------|----------|----------|
| 1  | C  | 0.000000 |          |          |          |          |
| 2  | C  | 1.356741 | 0.000000 |          |          |          |
| 3  | N  | 2.207956 | 1.386045 | 0.000000 |          |          |
| 4  | C  | 2.214628 | 2.218838 | 1.349398 | 0.000000 |          |
| 5  | N  | 1.388659 | 2.208296 | 2.175162 | 1.334049 | 0.000000 |
| 6  | C  | 2.546921 | 3.632291 | 3.593841 | 2.483435 | 1.467506 |
| 7  | C  | 3.142474 | 4.304436 | 4.485648 | 3.522725 | 2.491560 |
| 8  | H  | 1.076270 | 2.215862 | 3.267531 | 3.231690 | 2.161559 |
| 9  | H  | 2.206169 | 1.074905 | 2.166410 | 3.241005 | 3.264123 |
| 10 | H  | 3.385644 | 4.249414 | 3.855142 | 2.548039 | 2.066850 |
| 11 | H  | 2.875723 | 4.053869 | 4.178928 | 3.187544 | 2.095493 |
| 12 | H  | 2.919258 | 4.168366 | 4.682344 | 3.971260 | 2.774499 |
| 13 | H  | 3.328094 | 4.248618 | 4.289668 | 3.391753 | 2.674648 |
| 14 | Br | 5.522580 | 5.202584 | 3.850097 | 3.312867 | 4.504656 |
| 15 | H  | 3.299230 | 3.261657 | 2.133600 | 1.102500 | 2.219758 |
| 16 | C  | 3.610510 | 2.544507 | 1.432627 | 2.440055 | 3.544637 |
| 17 | C  | 4.322229 | 3.030561 | 2.425939 | 3.655456 | 4.594784 |
| 18 | H  | 4.268001 | 3.416939 | 2.092159 | 2.557621 | 3.853080 |
| 19 | H  | 5.386083 | 4.108413 | 3.393999 | 4.513601 | 5.564610 |
| 20 | H  | 4.164801 | 2.810598 | 2.734565 | 4.076826 | 4.757274 |
| 21 | N  | 4.484422 | 5.693516 | 5.803130 | 4.708018 | 3.728762 |
| 22 | H  | 5.161678 | 6.355656 | 6.532255 | 5.498656 | 4.534263 |
| 23 | H  | 4.941542 | 6.050165 | 5.926890 | 4.703326 | 3.942549 |
| 24 | C  | 5.859755 | 6.478368 | 5.686369 | 4.378784 | 4.480626 |
| 25 | C  | 5.947060 | 6.471188 | 5.609649 | 4.335659 | 4.579786 |
| 26 | O  | 4.940416 | 5.710228 | 5.113080 | 3.767647 | 3.599948 |
| 27 | H  | 6.639443 | 7.366818 | 6.660950 | 5.345312 | 5.293429 |
| 28 | H  | 5.611525 | 6.078773 | 5.189788 | 3.971775 | 4.263176 |
| 29 | H  | 5.721268 | 6.024757 | 5.005058 | 3.844423 | 4.390319 |
| 30 | C  | 7.080614 | 7.658921 | 6.857160 | 5.612290 | 5.767293 |
| 31 | H  | 6.963609 | 7.509643 | 6.765618 | 5.599157 | 5.743463 |
| 32 | H  | 7.949987 | 8.419095 | 7.497489 | 6.302371 | 6.618161 |
| 33 | H  | 7.450210 | 8.182928 | 7.503937 | 6.204754 | 6.152735 |
|    |    | 6        | 7        | 8        | 9        | 10       |
| 6  | C  | 0.000000 |          |          |          |          |
| 7  | C  | 1.532338 | 0.000000 |          |          |          |
| 8  | H  | 2.839432 | 3.113951 | 0.000000 |          |          |
| 9  | H  | 4.655664 | 5.221203 | 2.750532 | 0.000000 |          |
| 10 | H  | 1.089868 | 2.153714 | 3.855994 | 5.317703 | 0.000000 |
| 11 | H  | 1.092230 | 2.170699 | 2.919745 | 5.007394 | 1.773688 |
| 12 | H  | 2.164190 | 1.096135 | 2.541574 | 4.940286 | 3.059791 |
| 13 | H  | 2.148283 | 1.104137 | 3.500163 | 5.140966 | 2.498469 |
| 14 | Br | 5.026000 | 6.009053 | 6.542837 | 5.994916 | 4.338085 |
| 15 | H  | 2.919951 | 3.977612 | 4.283507 | 4.230253 | 2.540487 |

|    |    |          |          |          |          |          |
|----|----|----------|----------|----------|----------|----------|
| 16 | C  | 4.891487 | 5.801008 | 4.644919 | 2.879161 | 4.960225 |
| 17 | C  | 6.017806 | 6.855987 | 5.244608 | 2.872384 | 6.201369 |
| 18 | H  | 5.013148 | 5.974337 | 5.340316 | 3.911480 | 4.841233 |
| 19 | H  | 6.949656 | 7.806644 | 6.322829 | 3.923537 | 7.029981 |
| 20 | H  | 6.223166 | 6.973253 | 4.937783 | 2.281782 | 6.582346 |
| 21 | N  | 2.407838 | 1.451788 | 4.349469 | 6.625640 | 2.648953 |
| 22 | H  | 3.326627 | 2.071316 | 4.937006 | 7.231276 | 3.577468 |
| 23 | H  | 2.567894 | 2.036351 | 4.994608 | 7.050092 | 2.364131 |
| 24 | C  | 3.681305 | 4.476594 | 6.429548 | 7.543220 | 2.616245 |
| 25 | C  | 3.905030 | 4.376317 | 6.577694 | 7.521241 | 2.852936 |
| 26 | O  | 2.609782 | 3.097279 | 5.413333 | 6.782422 | 1.606434 |
| 27 | H  | 4.308810 | 5.003677 | 7.098180 | 8.433804 | 3.329272 |
| 28 | H  | 3.751096 | 4.842119 | 6.278912 | 7.111592 | 2.743843 |
| 29 | H  | 4.069873 | 4.672343 | 6.490799 | 7.033185 | 3.066916 |
| 30 | C  | 4.965088 | 5.035395 | 7.626081 | 8.693348 | 4.009999 |
| 31 | H  | 5.030682 | 4.842479 | 7.491964 | 8.502361 | 4.207090 |
| 32 | H  | 5.919637 | 6.090241 | 8.565629 | 9.439100 | 4.915428 |
| 33 | H  | 5.129738 | 5.082687 | 7.870118 | 9.235502 | 4.232695 |
|    |    | 11       | 12       | 13       | 14       | 15       |
| 11 | H  | 0.000000 |          |          |          |          |
| 12 | H  | 2.496128 | 0.000000 |          |          |          |
| 13 | H  | 3.062922 | 1.772032 | 0.000000 |          |          |
| 14 | Br | 5.722681 | 6.807956 | 5.639879 | 0.000000 |          |
| 15 | H  | 3.667049 | 4.647253 | 3.752801 | 2.286141 | 0.000000 |
| 16 | C  | 5.493875 | 6.067541 | 5.482553 | 3.510417 | 2.694788 |
| 17 | C  | 6.554346 | 6.975977 | 6.531887 | 4.651704 | 4.016958 |
| 18 | H  | 5.677892 | 6.421678 | 5.600167 | 2.501979 | 2.335327 |
| 19 | H  | 7.509844 | 7.986926 | 7.425596 | 4.822815 | 4.680733 |
| 20 | H  | 6.679595 | 6.922238 | 6.710872 | 5.618354 | 4.666560 |
| 21 | N  | 2.650641 | 2.072957 | 2.175983 | 6.780276 | 4.965168 |
| 22 | H  | 3.615188 | 2.437926 | 2.498703 | 7.524271 | 5.762620 |
| 23 | H  | 2.898704 | 2.927681 | 2.506966 | 6.291933 | 4.729952 |
| 24 | C  | 3.997634 | 5.502220 | 4.633611 | 4.115456 | 3.697154 |
| 25 | C  | 4.537333 | 5.462443 | 4.204646 | 3.783860 | 3.563323 |
| 26 | O  | 3.147138 | 4.164257 | 3.212395 | 4.391949 | 3.332924 |
| 27 | H  | 4.423477 | 5.998515 | 5.298247 | 5.136357 | 4.736529 |
| 28 | H  | 3.999003 | 5.792698 | 5.021200 | 3.498370 | 3.228906 |
| 29 | H  | 4.814282 | 5.712825 | 4.348167 | 2.765568 | 2.915679 |
| 30 | C  | 5.624026 | 6.121958 | 4.741373 | 4.949605 | 4.887504 |
| 31 | H  | 5.827732 | 5.885125 | 4.342442 | 5.139546 | 4.957795 |
| 32 | H  | 6.566743 | 7.180063 | 5.759309 | 5.050968 | 5.453916 |
| 33 | H  | 5.641126 | 6.140863 | 4.959234 | 5.873905 | 5.585912 |
|    |    | 16       | 17       | 18       | 19       | 20       |
| 16 | C  | 0.000000 |          |          |          |          |

|    |   |          |          |          |           |           |
|----|---|----------|----------|----------|-----------|-----------|
| 17 | C | 1.325584 | 0.000000 |          |           |           |
| 18 | H | 1.091738 | 2.152964 | 0.000000 |           |           |
| 19 | H | 2.074166 | 1.081626 | 2.481042 | 0.000000  |           |
| 20 | H | 2.132101 | 1.083421 | 3.128699 | 1.847322  | 0.000000  |
| 21 | N | 7.085642 | 8.203175 | 7.144852 | 9.128304  | 8.368554  |
| 22 | H | 7.804698 | 8.887292 | 7.879520 | 9.811266  | 9.019529  |
| 23 | H | 7.102676 | 8.304918 | 7.005951 | 9.162173  | 8.596952  |
| 24 | C | 6.351610 | 7.668776 | 5.804350 | 8.251071  | 8.313578  |
| 25 | C | 6.188839 | 7.508738 | 5.575177 | 8.043108  | 8.200375  |
| 26 | O | 5.998628 | 7.304882 | 5.625394 | 8.007441  | 7.832040  |
| 27 | H | 7.377872 | 8.686795 | 6.853664 | 9.283480  | 9.301888  |
| 28 | H | 5.733210 | 7.021842 | 5.154936 | 7.557908  | 7.701584  |
| 29 | H | 5.387522 | 6.688874 | 4.674808 | 7.138915  | 7.457553  |
| 30 | C | 7.427907 | 8.725479 | 6.800632 | 9.231635  | 9.414479  |
| 31 | H | 7.340100 | 8.593087 | 6.766655 | 9.106105  | 9.246813  |
| 32 | H | 7.900929 | 9.182129 | 7.156474 | 9.580985  | 9.954580  |
| 33 | H | 8.207455 | 9.516856 | 7.650466 | 10.089222 | 10.145089 |
|    |   | 21       | 22       | 23       | 24        | 25        |
| 21 | N | 0.000000 |          |          |           |           |
| 22 | H | 1.013772 | 0.000000 |          |           |           |
| 23 | H | 1.023545 | 1.641555 | 0.000000 |           |           |
| 24 | C | 4.312542 | 5.081646 | 3.454843 | 0.000000  |           |
| 25 | C | 4.325956 | 4.924370 | 3.446820 | 1.392869  | 0.000000  |
| 26 | O | 2.977429 | 3.721420 | 2.161133 | 1.469947  | 1.495095  |
| 27 | H | 4.540266 | 5.257073 | 3.630075 | 1.087752  | 2.183981  |
| 28 | H | 4.922710 | 5.786129 | 4.195270 | 1.086117  | 2.100342  |
| 29 | H | 4.933376 | 5.559364 | 4.178327 | 2.048353  | 1.087279  |
| 30 | C | 4.713691 | 5.041289 | 3.768607 | 2.597833  | 1.505435  |
| 31 | H | 4.633832 | 4.805950 | 3.809245 | 3.423314  | 2.154184  |
| 32 | H | 5.801548 | 6.129201 | 4.845968 | 3.124677  | 2.135157  |
| 33 | H | 4.452272 | 4.702859 | 3.457719 | 2.795075  | 2.158105  |
|    |   | 26       | 27       | 28       | 29        | 30        |
| 26 | O | 0.000000 |          |          |           |           |
| 27 | H | 2.128185 | 0.000000 |          |           |           |
| 28 | H | 2.183816 | 1.844336 | 0.000000 |           |           |
| 29 | H | 2.185131 | 3.022543 | 2.242217 | 0.000000  |           |
| 30 | C | 2.506294 | 2.910490 | 3.488055 | 2.221373  | 0.000000  |
| 31 | H | 2.923726 | 3.867822 | 4.252737 | 2.580979  | 1.094104  |
| 32 | H | 3.423070 | 3.359137 | 3.868597 | 2.566222  | 1.094209  |
| 33 | H | 2.664312 | 2.722204 | 3.836447 | 3.112803  | 1.092392  |
|    |   | 31       | 32       | 33       |           |           |
| 31 | H | 0.000000 |          |          |           |           |
| 32 | H | 1.765484 | 0.000000 |          |           |           |
| 33 | H | 1.777203 | 1.777055 | 0.000000 |           |           |

Stoichiometry C10H18BrN3O  
 Framework group C1[X(C10H18BrN3O)]  
 Deg. of freedom 93  
 Full point group C1 NOp 1  
 Largest Abelian subgroup C1 NOp 1  
 Largest concise Abelian subgroup C1 NOp 1

Standard orientation:

| Center<br>Number | Atomic<br>Number | Atomic<br>Type | Coordinates (Angstroms) |           |           |
|------------------|------------------|----------------|-------------------------|-----------|-----------|
|                  |                  |                | X                       | Y         | Z         |
| 1                | 6                | 0              | -1.346487               | 2.913409  | -0.215712 |
| 2                | 6                | 0              | -2.553313               | 2.345759  | 0.033472  |
| 3                | 7                | 0              | -2.367878               | 0.972177  | 0.036180  |
| 4                | 6                | 0              | -1.055435               | 0.719005  | -0.148952 |
| 5                | 7                | 0              | -0.429174               | 1.879583  | -0.350303 |
| 6                | 6                | 0              | 1.015900                | 2.025986  | -0.559827 |
| 7                | 6                | 0              | 1.692496                | 2.800530  | 0.576113  |
| 8                | 1                | 0              | -1.061633               | 3.946286  | -0.317594 |
| 9                | 1                | 0              | -3.513806               | 2.804916  | 0.181952  |
| 10               | 1                | 0              | 1.432819                | 1.020151  | -0.607653 |
| 11               | 1                | 0              | 1.188168                | 2.523275  | -1.516904 |
| 12               | 1                | 0              | 1.301213                | 3.823868  | 0.610614  |
| 13               | 1                | 0              | 1.422953                | 2.313785  | 1.529813  |
| 14               | 35               | 0              | -0.901794               | -2.587514 | -0.013252 |
| 15               | 1                | 0              | -0.675345               | -0.315786 | -0.133321 |
| 16               | 6                | 0              | -3.336259               | -0.068591 | 0.213544  |
| 17               | 6                | 0              | -4.633072               | 0.165399  | 0.357406  |
| 18               | 1                | 0              | -2.861328               | -1.051424 | 0.232830  |
| 19               | 1                | 0              | -5.297901               | -0.674175 | 0.509175  |
| 20               | 1                | 0              | -5.079214               | 1.152588  | 0.342700  |
| 21               | 7                | 0              | 3.110866                | 2.870321  | 0.274378  |
| 22               | 1                | 0              | 3.652091                | 3.314596  | 1.007473  |
| 23               | 1                | 0              | 3.480954                | 1.923863  | 0.152325  |
| 24               | 6                | 0              | 2.749378                | -1.147272 | -1.250840 |
| 25               | 6                | 0              | 2.699456                | -1.432946 | 0.111505  |
| 26               | 8                | 0              | 2.637276                | -0.006190 | -0.330998 |
| 27               | 1                | 0              | 3.678761                | -1.120214 | -1.815393 |
| 28               | 1                | 0              | 1.857067                | -1.408305 | -1.812348 |
| 29               | 1                | 0              | 1.739383                | -1.867426 | 0.379204  |
| 30               | 6                | 0              | 3.859436                | -1.722392 | 1.026383  |
| 31               | 1                | 0              | 3.650315                | -1.378312 | 2.043703  |
| 32               | 1                | 0              | 4.026714                | -2.802816 | 1.071054  |
| 33               | 1                | 0              | 4.774082                | -1.240259 | 0.673835  |



```

-----
Rotational constants (GHZ):      0.4054808      0.3259130      0.1896908
Standard basis: 6-311++G(d,p) (5D, 7F)
There are 499 symmetry adapted cartesian basis functions of A symmetry.
There are 482 symmetry adapted basis functions of A symmetry.
482 basis functions, 760 primitive gaussians, 499 cartesian basis functions
71 alpha electrons      71 beta electrons
nuclear repulsion energy      1334.1921026612 Hartrees.
NAtoms= 33 NActive= 33 NUniq= 33 SFac= 1.00D+00 NAtFMM= 60 NAOKFM=F
Big=F
Integral buffers will be 131072 words long.
Raffenetti 2 integral format.
Two-electron integral symmetry is turned on.
One-electron integrals computed using PRISM.
NBasis= 482 RedAO= T EigKep= 3.32D-06 NBF= 482
NBsUse= 482 1.00D-06 EigRej= -1.00D+00 NBFU= 482
Initial guess from the checkpoint file:
"/home/suqian/liuwen/qianmengshijie/nh2po/nh2po.chk"
B after Tr= 0.000000 0.000000 0.000000
Rot= 0.986109 0.018100 -0.006976 0.164962 Ang= 19.12 deg.
ExpMin= 3.50D-02 ExpMax= 4.40D+05 ExpMxC= 1.51D+04 IAcc=3 IRadAn= 5 AccDes=
0.00D+00
Harris functional with IExCor= 402 and IRadAn= 5 diagonalized for initial guess.
HarFok: IExCor= 402 AccDes= 0.00D+00 IRadAn= 5 IDoV= 1 UseB2=F ITyADJ=14
ICtDFT= 3500011 ScaDFX= 1.000000 1.000000 1.000000 1.000000
FoFCou: FMM=F IPFlag= 0 FMFlag= 100000 FMFlg1= 0
NFxFlg= 0 DoJE=T BraDBF=F KetDBF=T FulRan=T
wScrn= 0.000000 ICntrl= 500 IOpCl= 0 l1Cent= 200000004 NGrid=
0
NMat0= 1 NMatS0= 1 NMatT0= 0 NMatD0= 1 NMtDS0= 0
NMtDT0= 0
Petite list used in FoFCou.
Requested convergence on RMS density matrix=1.00D-08 within 128 cycles.
Requested convergence on MAX density matrix=1.00D-06.
Requested convergence on energy=1.00D-06.
No special actions if energy rises.
SCF Done: E(RB3LYP) = -3205.62489385 A.U. after 13 cycles
NFOck= 13 Conv=0.51D-08 -V/T= 2.0017
Calling FoFJK, ICntrl= 2127 FMM=F ISym2X=0 l1Cent= 0 IOpClX= 0 NMat=1 NMatS=1
NMatT=0.
***** Axes restored to original set *****

```

```

-----
Center      Atomic      Forces (Hartrees/Bohr)
Number      Number      X          Y          Z

```

|    |    |              |              |              |
|----|----|--------------|--------------|--------------|
| 1  | 6  | 0.000856756  | -0.002829628 | -0.001556658 |
| 2  | 6  | -0.004132245 | 0.001042822  | -0.003749954 |
| 3  | 7  | 0.001814558  | 0.000838382  | 0.004395249  |
| 4  | 6  | -0.006312206 | -0.002680190 | -0.004568418 |
| 5  | 7  | -0.002453818 | 0.003122856  | 0.007312550  |
| 6  | 6  | -0.011315715 | 0.006599315  | -0.004518103 |
| 7  | 6  | -0.006064659 | -0.000462434 | -0.000573295 |
| 8  | 1  | -0.000186169 | -0.000430147 | 0.000087689  |
| 9  | 1  | -0.000001990 | -0.000573739 | -0.000059898 |
| 10 | 1  | -0.009656143 | 0.005327820  | -0.000775690 |
| 11 | 1  | -0.002185704 | 0.001494440  | 0.000134521  |
| 12 | 1  | -0.000422789 | -0.000028133 | 0.001802899  |
| 13 | 1  | 0.002262166  | 0.000976663  | -0.000397554 |
| 14 | 35 | 0.004034558  | -0.001060930 | -0.000430426 |
| 15 | 1  | 0.001975828  | 0.002702517  | -0.002288539 |
| 16 | 6  | 0.000911041  | 0.004191220  | 0.002806663  |
| 17 | 6  | -0.000789131 | -0.001408293 | 0.000642222  |
| 18 | 1  | -0.002050383 | -0.000022463 | -0.000857343 |
| 19 | 1  | -0.000231390 | -0.000048752 | -0.000647345 |
| 20 | 1  | 0.000117057  | 0.000011649  | -0.000253630 |
| 21 | 7  | 0.010730670  | -0.004608910 | -0.001669950 |
| 22 | 1  | -0.003236019 | 0.000686856  | 0.000586891  |
| 23 | 1  | -0.003148349 | 0.004641199  | 0.000832671  |
| 24 | 6  | 0.010438021  | 0.018195304  | -0.047904332 |
| 25 | 6  | 0.006415211  | -0.000621459 | 0.050015149  |
| 26 | 8  | 0.018645710  | -0.036636120 | 0.000642998  |
| 27 | 1  | 0.000737096  | -0.002751922 | 0.000314884  |
| 28 | 1  | -0.003104218 | 0.004774582  | -0.003836722 |
| 29 | 1  | -0.004984386 | 0.004249379  | 0.010086815  |
| 30 | 6  | 0.001441926  | -0.004286126 | -0.004281761 |
| 31 | 1  | -0.000974116 | -0.000270988 | -0.001470874 |
| 32 | 1  | 0.000733094  | -0.000023522 | 0.000733917  |
| 33 | 1  | 0.000135739  | -0.000111248 | -0.000554625 |

-----  
Cartesian Forces: Max 0.050015149 RMS 0.009009349

GradGradGradGradGradGradGradGradGradGradGradGradGradGradGradGradGradGradGrad

Berny optimization.

Using GEDIIS/GDIIS optimizer.

FormGI is forming the generalized inverse of G from B-inverse, IUseBI=4.

Internal Forces: Max 0.090024104 RMS 0.014898505

Search for a local minimum.

Step number 24 out of a maximum of 172

All quantities printed in internal units (Hartrees-Bohrs-Radians)

Mixed Optimization -- RFO/linear search

Update second derivatives using D2CorX and points 19 20 22 24 23

DE= 2.26D-02 DEPred=-3.89D-03 R=-5.80D+00

Trust test=-5.80D+00 RLast= 2.99D+00 DXMaxT set to 4.22D-01

ITU= -1 1 -1 1 1 1 1 1 1 1 1 0 -1 -1 1 1 1 -1 1

ITU= 0 0 -1 0

Use linear search instead of GDIIIS.

Energy rises -- skip Quadratic/GDIIIS search.

Quartic linear search produced a step of -0.55511.

Iteration 1 RMS(Cart)= 0.20278358 RMS(Int)= 0.07150473

Iteration 2 RMS(Cart)= 0.05470826 RMS(Int)= 0.03149642

Iteration 3 RMS(Cart)= 0.05231080 RMS(Int)= 0.00798626

Iteration 4 RMS(Cart)= 0.00365118 RMS(Int)= 0.00781480

Iteration 5 RMS(Cart)= 0.00020840 RMS(Int)= 0.00781477

Iteration 6 RMS(Cart)= 0.00000586 RMS(Int)= 0.00781477

Iteration 7 RMS(Cart)= 0.00000021 RMS(Int)= 0.00781477

| Variable | Old X   | -DE/DX   | Delta X<br>(Linear) | Delta X<br>(Quad) | Delta X<br>(Total) | New X   |
|----------|---------|----------|---------------------|-------------------|--------------------|---------|
| R1       | 2.56387 | 0.00075  | 0.00072             | 0.00000           | 0.00074            | 2.56461 |
| R2       | 2.62419 | -0.00068 | -0.00111            | 0.00000           | -0.00113           | 2.62306 |
| R3       | 2.03386 | -0.00042 | 0.00006             | 0.00000           | 0.00006            | 2.03391 |
| R4       | 2.61925 | 0.00141  | 0.00315             | 0.00000           | 0.00318            | 2.62242 |
| R5       | 2.03128 | -0.00005 | -0.00026            | 0.00000           | -0.00026           | 2.03102 |
| R6       | 2.54999 | 0.00262  | -0.00331            | 0.00000           | -0.00328           | 2.54671 |
| R7       | 2.70727 | -0.00151 | -0.00450            | 0.00000           | -0.00450           | 2.70277 |
| R8       | 2.52099 | -0.00225 | -0.00059            | 0.00000           | -0.00056           | 2.52042 |
| R9       | 2.08342 | 0.00282  | 0.00694             | 0.00000           | 0.00694            | 2.09036 |
| R10      | 2.77318 | 0.00471  | 0.00592             | 0.00000           | 0.00595            | 2.77914 |
| R11      | 2.89570 | -0.00203 | 0.00198             | 0.00000           | 0.00185            | 2.89755 |
| R12      | 2.05955 | -0.01051 | 0.00035             | 0.00000           | 0.00035            | 2.05990 |
| R13      | 2.06402 | 0.00062  | -0.00179            | 0.00000           | -0.00179           | 2.06223 |
| R14      | 2.07139 | 0.00029  | -0.00096            | 0.00000           | -0.00096           | 2.07044 |
| R15      | 2.08652 | -0.00096 | -0.00366            | 0.00000           | -0.00366           | 2.08286 |
| R16      | 2.74348 | 0.02318  | 0.00447             | 0.00000           | 0.00451            | 2.74799 |
| R17      | 4.32018 | 0.00208  | -0.06088            | 0.00000           | -0.06088           | 4.25930 |
| R18      | 2.50499 | 0.00113  | 0.00074             | 0.00000           | 0.00074            | 2.50573 |
| R19      | 2.06309 | -0.00152 | -0.00348            | 0.00000           | -0.00348           | 2.05961 |
| R20      | 2.04398 | 0.00001  | -0.00026            | 0.00000           | -0.00026           | 2.04372 |
| R21      | 2.04737 | -0.00007 | -0.00014            | 0.00000           | -0.00014           | 2.04723 |
| R22      | 1.91575 | -0.00026 | -0.00076            | 0.00000           | -0.00076           | 1.91500 |
| R23      | 1.93422 | 0.03190  | -0.00477            | 0.00000           | -0.00992           | 1.92430 |
| R24      | 4.08395 | 0.01264  | -0.07512            | 0.00000           | -0.07265           | 4.01130 |
| R25      | 2.63214 | 0.05132  | 0.07822             | 0.00000           | 0.10276            | 2.73491 |

|     |         |          |          |         |          |         |
|-----|---------|----------|----------|---------|----------|---------|
| R26 | 2.77780 | -0.00221 | -0.03013 | 0.00000 | -0.04051 | 2.73729 |
| R27 | 2.05555 | -0.00048 | -0.00006 | 0.00000 | -0.00006 | 2.05550 |
| R28 | 2.05246 | 0.00147  | 0.00053  | 0.00000 | 0.00053  | 2.05299 |
| R29 | 2.82532 | -0.00691 | -0.04235 | 0.00000 | -0.05633 | 2.76899 |
| R30 | 2.05466 | 0.00313  | 0.00159  | 0.00000 | 0.00159  | 2.05625 |
| R31 | 2.84486 | -0.00285 | -0.00172 | 0.00000 | -0.00172 | 2.84314 |
| R32 | 2.06756 | -0.00115 | -0.00050 | 0.00000 | -0.00050 | 2.06706 |
| R33 | 2.06775 | 0.00043  | -0.00011 | 0.00000 | -0.00011 | 2.06765 |
| R34 | 2.06432 | 0.00020  | 0.00052  | 0.00000 | 0.00052  | 2.06484 |
| A1  | 1.86910 | 0.00085  | 0.00170  | 0.00000 | 0.00174  | 1.87084 |
| A2  | 2.28410 | -0.00065 | -0.00218 | 0.00000 | -0.00220 | 2.28190 |
| A3  | 2.12993 | -0.00020 | 0.00051  | 0.00000 | 0.00049  | 2.13042 |
| A4  | 1.87128 | -0.00091 | -0.00351 | 0.00000 | -0.00340 | 1.86788 |
| A5  | 2.26722 | 0.00106  | 0.00466  | 0.00000 | 0.00465  | 2.27186 |
| A6  | 2.14432 | -0.00011 | -0.00095 | 0.00000 | -0.00095 | 2.14337 |
| A7  | 1.89208 | -0.00062 | 0.00266  | 0.00000 | 0.00273  | 1.89481 |
| A8  | 2.25203 | -0.00387 | 0.00120  | 0.00000 | 0.00118  | 2.25321 |
| A9  | 2.13900 | 0.00451  | -0.00383 | 0.00000 | -0.00386 | 2.13515 |
| A10 | 1.89028 | 0.00032  | -0.00005 | 0.00000 | 0.00015  | 1.89042 |
| A11 | 2.10536 | 0.01346  | 0.02034  | 0.00000 | 0.02040  | 2.12576 |
| A12 | 2.28741 | -0.01375 | -0.02053 | 0.00000 | -0.02048 | 2.26694 |
| A13 | 1.89963 | 0.00061  | 0.00050  | 0.00000 | 0.00055  | 1.90018 |
| A14 | 2.20191 | 0.00632  | 0.00356  | 0.00000 | 0.00361  | 2.20552 |
| A15 | 2.17804 | -0.00692 | -0.00324 | 0.00000 | -0.00331 | 2.17474 |
| A16 | 1.95992 | -0.00949 | -0.00066 | 0.00000 | -0.00138 | 1.95854 |
| A17 | 1.86595 | -0.00009 | 0.00548  | 0.00000 | 0.00566  | 1.87161 |
| A18 | 1.90270 | 0.00332  | -0.00637 | 0.00000 | -0.00608 | 1.89661 |
| A19 | 1.90722 | 0.00504  | 0.00443  | 0.00000 | 0.00458  | 1.91181 |
| A20 | 1.92816 | 0.00201  | 0.00010  | 0.00000 | 0.00035  | 1.92851 |
| A21 | 1.89801 | -0.00067 | -0.00300 | 0.00000 | -0.00310 | 1.89491 |
| A22 | 1.91518 | -0.02750 | -0.00386 | 0.00000 | -0.00397 | 1.91121 |
| A23 | 1.88566 | -0.00359 | 0.00373  | 0.00000 | 0.00336  | 1.88902 |
| A24 | 1.87717 | 0.05488  | 0.00318  | 0.00000 | 0.00408  | 1.88125 |
| A25 | 1.87259 | 0.00712  | 0.00104  | 0.00000 | 0.00115  | 1.87373 |
| A26 | 1.88642 | -0.01332 | 0.00996  | 0.00000 | 0.00976  | 1.89618 |
| A27 | 2.02552 | -0.01983 | -0.01402 | 0.00000 | -0.01435 | 2.01117 |
| A28 | 2.14895 | 0.00072  | 0.00636  | 0.00000 | 0.00637  | 2.15532 |
| A29 | 1.94136 | 0.00095  | 0.00226  | 0.00000 | 0.00227  | 1.94363 |
| A30 | 2.19269 | -0.00166 | -0.00852 | 0.00000 | -0.00851 | 2.18418 |
| A31 | 2.07091 | 0.00033  | 0.00201  | 0.00000 | 0.00201  | 2.07292 |
| A32 | 2.16786 | -0.00030 | -0.00256 | 0.00000 | -0.00256 | 2.16530 |
| A33 | 2.04436 | -0.00003 | 0.00058  | 0.00000 | 0.00059  | 2.04495 |
| A34 | 1.97399 | -0.05714 | -0.01880 | 0.00000 | -0.02785 | 1.94614 |
| A35 | 1.91090 | 0.09002  | 0.00466  | 0.00000 | 0.00106  | 1.91196 |

|     |          |          |          |         |          |          |
|-----|----------|----------|----------|---------|----------|----------|
| A36 | 1.87384  | -0.02923 | 0.00664  | 0.00000 | 0.01025  | 1.88409  |
| A37 | 2.14523  | 0.01021  | -0.03084 | 0.00000 | -0.04712 | 2.09811  |
| A38 | 2.01188  | -0.00491 | 0.04015  | 0.00000 | 0.05802  | 2.06990  |
| A39 | 1.95048  | 0.00997  | 0.02707  | 0.00000 | 0.03626  | 1.98674  |
| A40 | 2.03468  | -0.00358 | -0.01432 | 0.00000 | -0.01955 | 2.01513  |
| A41 | 2.02596  | -0.00229 | -0.00412 | 0.00000 | -0.00473 | 2.02122  |
| A42 | 1.93309  | -0.00131 | 0.06145  | 0.00000 | 0.07837  | 2.01146  |
| A43 | 2.22209  | 0.00581  | -0.05207 | 0.00000 | -0.06860 | 2.15348  |
| A44 | 2.00147  | -0.00421 | -0.01425 | 0.00000 | -0.01958 | 1.98189  |
| A45 | 1.97729  | 0.00989  | 0.02765  | 0.00000 | 0.03674  | 2.01403  |
| A46 | 2.04196  | -0.00317 | -0.00819 | 0.00000 | -0.00922 | 2.03274  |
| A47 | 2.50386  | -0.00195 | 0.06809  | 0.00000 | 0.11934  | 2.62320  |
| A48 | 2.44936  | -0.00260 | 0.07419  | 0.00000 | 0.12675  | 2.57612  |
| A49 | 1.93620  | -0.00217 | -0.00347 | 0.00000 | -0.00347 | 1.93273  |
| A50 | 1.90970  | 0.00177  | 0.00256  | 0.00000 | 0.00256  | 1.91226  |
| A51 | 1.94353  | -0.00035 | 0.00020  | 0.00000 | 0.00020  | 1.94374  |
| A52 | 1.87736  | 0.00017  | 0.00033  | 0.00000 | 0.00033  | 1.87769  |
| A53 | 1.89792  | 0.00106  | -0.00053 | 0.00000 | -0.00052 | 1.89739  |
| A54 | 1.89755  | -0.00044 | 0.00096  | 0.00000 | 0.00097  | 1.89851  |
| A55 | 3.56158  | -0.01335 | -0.10331 | 0.00000 | -0.10331 | 3.45827  |
| A56 | 2.37193  | 0.08389  | 0.23134  | 0.00000 | 0.25346  | 2.62539  |
| A57 | 2.90000  | 0.00467  | -0.04022 | 0.00000 | -0.04022 | 2.85978  |
| A58 | 3.01316  | 0.04352  | 0.07410  | 0.00000 | 0.07998  | 3.09314  |
| D1  | -0.01012 | 0.00064  | 0.00797  | 0.00000 | 0.00794  | -0.00219 |
| D2  | -3.12282 | -0.00077 | -0.00781 | 0.00000 | -0.00780 | -3.13062 |
| D3  | 3.12008  | 0.00145  | 0.01153  | 0.00000 | 0.01159  | 3.13167  |
| D4  | 0.00738  | 0.00005  | -0.00424 | 0.00000 | -0.00415 | 0.00324  |
| D5  | -0.03084 | 0.00142  | 0.01207  | 0.00000 | 0.01214  | -0.01869 |
| D6  | -3.08446 | 0.00172  | 0.00100  | 0.00000 | 0.00122  | -3.08323 |
| D7  | 3.12091  | 0.00069  | 0.00889  | 0.00000 | 0.00890  | 3.12982  |
| D8  | 0.06730  | 0.00099  | -0.00217 | 0.00000 | -0.00202 | 0.06528  |
| D9  | 0.04711  | -0.00254 | -0.02504 | 0.00000 | -0.02502 | 0.02208  |
| D10 | -3.10718 | -0.00111 | -0.01896 | 0.00000 | -0.01890 | -3.12608 |
| D11 | -3.12088 | -0.00123 | -0.01063 | 0.00000 | -0.01060 | -3.13148 |
| D12 | 0.00802  | 0.00020  | -0.00455 | 0.00000 | -0.00448 | 0.00354  |
| D13 | -0.06673 | 0.00341  | 0.03276  | 0.00000 | 0.03277  | -0.03396 |
| D14 | 3.09099  | 0.00165  | 0.00501  | 0.00000 | 0.00534  | 3.09633  |
| D15 | 3.08656  | 0.00217  | 0.02716  | 0.00000 | 0.02711  | 3.11367  |
| D16 | -0.03890 | 0.00041  | -0.00059 | 0.00000 | -0.00032 | -0.03923 |
| D17 | 0.04957  | -0.00045 | 0.02554  | 0.00000 | 0.02549  | 0.07506  |
| D18 | -3.07220 | -0.00137 | 0.01642  | 0.00000 | 0.01640  | -3.05580 |
| D19 | -3.10631 | 0.00111  | 0.03239  | 0.00000 | 0.03241  | -3.07390 |
| D20 | 0.05510  | 0.00019  | 0.02327  | 0.00000 | 0.02332  | 0.07842  |
| D21 | 0.06051  | -0.00299 | -0.02783 | 0.00000 | -0.02789 | 0.03262  |

|     |          |          |          |         |          |          |
|-----|----------|----------|----------|---------|----------|----------|
| D22 | 3.11561  | -0.00247 | -0.01662 | 0.00000 | -0.01678 | 3.09883  |
| D23 | -3.09949 | -0.00062 | 0.00272  | 0.00000 | 0.00304  | -3.09645 |
| D24 | -0.04439 | -0.00010 | 0.01392  | 0.00000 | 0.01415  | -0.03024 |
| D25 | 1.03661  | -0.00013 | 0.22269  | 0.00000 | 0.22272  | 1.25933  |
| D26 | 3.12821  | 0.00045  | 0.23137  | 0.00000 | 0.23124  | -2.92374 |
| D27 | -1.10606 | 0.00134  | 0.22747  | 0.00000 | 0.22748  | -0.87858 |
| D28 | -2.00355 | -0.00030 | 0.20974  | 0.00000 | 0.20990  | -1.79365 |
| D29 | 0.08805  | 0.00029  | 0.21841  | 0.00000 | 0.21841  | 0.30646  |
| D30 | 2.13696  | 0.00118  | 0.21451  | 0.00000 | 0.21466  | 2.35162  |
| D31 | -1.10527 | 0.00170  | 0.00456  | 0.00000 | 0.00456  | -1.10071 |
| D32 | 0.93108  | -0.00681 | 0.00579  | 0.00000 | 0.00565  | 0.93674  |
| D33 | 3.12987  | 0.00134  | -0.00704 | 0.00000 | -0.00725 | 3.12262  |
| D34 | 3.11050  | 0.00438  | -0.00483 | 0.00000 | -0.00466 | 3.10583  |
| D35 | -1.13634 | -0.00413 | -0.00360 | 0.00000 | -0.00357 | -1.13991 |
| D36 | 1.06245  | 0.00403  | -0.01643 | 0.00000 | -0.01647 | 1.04597  |
| D37 | 1.02298  | 0.00080  | -0.00399 | 0.00000 | -0.00395 | 1.01903  |
| D38 | 3.05933  | -0.00771 | -0.00276 | 0.00000 | -0.00286 | 3.05647  |
| D39 | -1.02508 | 0.00045  | -0.01559 | 0.00000 | -0.01576 | -1.04083 |
| D40 | -3.07397 | -0.01839 | -0.16324 | 0.00000 | -0.16127 | 3.04795  |
| D41 | -0.98523 | -0.03024 | -0.16387 | 0.00000 | -0.16550 | -1.15073 |
| D42 | 1.14254  | -0.00853 | -0.16587 | 0.00000 | -0.16410 | 0.97844  |
| D43 | -3.05190 | -0.02038 | -0.16650 | 0.00000 | -0.16834 | 3.06295  |
| D44 | -0.96075 | 0.00558  | -0.16528 | 0.00000 | -0.16335 | -1.12410 |
| D45 | 1.12799  | -0.00626 | -0.16592 | 0.00000 | -0.16758 | 0.96041  |
| D46 | -3.11777 | -0.00114 | -0.00807 | 0.00000 | -0.00808 | -3.12586 |
| D47 | 0.01331  | -0.00034 | -0.00132 | 0.00000 | -0.00133 | 0.01198  |
| D48 | 0.00108  | -0.00005 | 0.00242  | 0.00000 | 0.00243  | 0.00351  |
| D49 | 3.13216  | 0.00074  | 0.00917  | 0.00000 | 0.00918  | 3.14135  |
| D50 | 2.23505  | -0.00022 | -0.30543 | 0.00000 | -0.32156 | 1.91349  |
| D51 | -1.70745 | -0.02589 | 0.49062  | 0.00000 | 0.49780  | -1.20965 |
| D52 | -2.08112 | 0.02682  | -0.25395 | 0.00000 | -0.26087 | -2.34198 |
| D53 | 0.25957  | 0.00114  | 0.54211  | 0.00000 | 0.55850  | 0.81806  |
| D54 | -2.67077 | -0.00556 | -0.01942 | 0.00000 | -0.02101 | -2.69178 |
| D55 | 0.01817  | -0.00341 | -0.01533 | 0.00000 | -0.01724 | 0.00092  |
| D56 | -0.01425 | 0.00029  | -0.00763 | 0.00000 | -0.00673 | -0.02098 |
| D57 | 2.67468  | 0.00244  | -0.00354 | 0.00000 | -0.00296 | 2.67173  |
| D58 | 0.23736  | 0.01661  | 0.62308  | 0.00000 | 0.61089  | 0.84825  |
| D59 | -2.15013 | 0.01271  | 0.61437  | 0.00000 | 0.59836  | -1.55177 |
| D60 | 2.16591  | -0.01656 | -0.59614 | 0.00000 | -0.57944 | 1.58647  |
| D61 | -0.24038 | -0.01815 | -0.59861 | 0.00000 | -0.58472 | -0.82510 |
| D62 | 2.59657  | -0.00263 | -0.02217 | 0.00000 | -0.02472 | 2.57185  |
| D63 | -1.61805 | -0.00264 | -0.02228 | 0.00000 | -0.02483 | -1.64288 |
| D64 | 0.48011  | -0.00225 | -0.01926 | 0.00000 | -0.02181 | 0.45830  |
| D65 | 1.36638  | 0.00159  | -0.00198 | 0.00000 | -0.00013 | 1.36624  |

|     |          |         |          |         |          |          |
|-----|----------|---------|----------|---------|----------|----------|
| D66 | -2.84824 | 0.00158 | -0.00210 | 0.00000 | -0.00025 | -2.84849 |
| D67 | -0.75009 | 0.00197 | 0.00093  | 0.00000 | 0.00278  | -0.74731 |
| D68 | -1.02186 | 0.00023 | -0.00247 | 0.00000 | -0.00177 | -1.02363 |
| D69 | 1.04670  | 0.00023 | -0.00258 | 0.00000 | -0.00188 | 1.04483  |
| D70 | -3.13833 | 0.00062 | 0.00045  | 0.00000 | 0.00115  | -3.13718 |

| Item                 | Value    | Threshold | Converged? |
|----------------------|----------|-----------|------------|
| Maximum Force        | 0.090024 | 0.000450  | NO         |
| RMS Force            | 0.014899 | 0.000300  | NO         |
| Maximum Displacement | 1.009735 | 0.001800  | NO         |
| RMS Displacement     | 0.259707 | 0.001200  | NO         |

Predicted change in Energy=-2.369415D-02

GradGradGradGradGradGradGradGradGradGradGradGradGradGradGradGradGradGrad

Input orientation:

| -----  |        |        |                         |           |           |  |
|--------|--------|--------|-------------------------|-----------|-----------|--|
| Center | Atomic | Atomic | Coordinates (Angstroms) |           |           |  |
| Number | Number | Type   | X                       | Y         | Z         |  |
| -----  |        |        |                         |           |           |  |
| 1      | 6      | 0      | -2.622105               | 2.076205  | -0.239330 |  |
| 2      | 6      | 0      | -3.521833               | 1.108623  | 0.070643  |  |
| 3      | 7      | 0      | -2.823918               | -0.089026 | 0.136519  |  |
| 4      | 6      | 0      | -1.521128               | 0.159875  | -0.102176 |  |
| 5      | 7      | 0      | -1.383042               | 1.461735  | -0.357098 |  |
| 6      | 6      | 0      | -0.099017               | 2.130579  | -0.615466 |  |
| 7      | 6      | 0      | 0.399856                | 2.917924  | 0.602021  |  |
| 8      | 1      | 0      | -2.752148               | 3.133784  | -0.391118 |  |
| 9      | 1      | 0      | -4.581886               | 1.174658  | 0.235114  |  |
| 10     | 1      | 0      | 0.623781                | 1.355099  | -0.869262 |  |
| 11     | 1      | 0      | -0.216309               | 2.791397  | -1.475965 |  |
| 12     | 1      | 0      | -0.309031               | 3.720394  | 0.834230  |  |
| 13     | 1      | 0      | 0.420731                | 2.236758  | 1.468292  |  |
| 14     | 35     | 0      | 0.090289                | -2.698674 | 0.287655  |  |
| 15     | 1      | 0      | -0.757874               | -0.639719 | -0.060904 |  |
| 16     | 6      | 0      | -3.313562               | -1.404401 | 0.411547  |  |
| 17     | 6      | 0      | -4.598525               | -1.687245 | 0.576114  |  |
| 18     | 1      | 0      | -2.499052               | -2.125656 | 0.476668  |  |
| 19     | 1      | 0      | -4.882966               | -2.707213 | 0.796067  |  |
| 20     | 1      | 0      | -5.394504               | -0.955552 | 0.507649  |  |
| 21     | 7      | 0      | 1.678884                | 3.514508  | 0.251601  |  |
| 22     | 1      | 0      | 2.019872                | 4.121495  | 0.987955  |  |
| 23     | 1      | 0      | 2.368874                | 2.779973  | 0.105672  |  |
| 24     | 6      | 0      | 3.347539                | -0.274642 | -1.181604 |  |
| 25     | 6      | 0      | 3.293325                | -0.541566 | 0.239784  |  |
| 26     | 8      | 0      | 2.844691                | 0.749278  | -0.288901 |  |

|    |   |   |          |           |           |
|----|---|---|----------|-----------|-----------|
| 27 | 1 | 0 | 4.293033 | -0.019390 | -1.654920 |
| 28 | 1 | 0 | 2.605675 | -0.737554 | -1.826281 |
| 29 | 1 | 0 | 2.478171 | -1.187318 | 0.559996  |
| 30 | 6 | 0 | 4.498348 | -0.486914 | 1.138968  |
| 31 | 1 | 0 | 4.218827 | -0.149096 | 2.141081  |
| 32 | 1 | 0 | 4.928962 | -1.488096 | 1.235789  |
| 33 | 1 | 0 | 5.261157 | 0.187144  | 0.741874  |

-----  
Distance matrix (angstroms):

|    |    | 1        | 2        | 3        | 4        | 5        |
|----|----|----------|----------|----------|----------|----------|
| 1  | C  | 0.000000 |          |          |          |          |
| 2  | C  | 1.357133 | 0.000000 |          |          |          |
| 3  | N  | 2.206857 | 1.387727 | 0.000000 |          |          |
| 4  | C  | 2.214335 | 2.220992 | 1.347661 | 0.000000 |          |
| 5  | N  | 1.388063 | 2.209542 | 2.173624 | 1.333751 | 0.000000 |
| 6  | C  | 2.551550 | 3.637418 | 3.594053 | 2.483856 | 1.470655 |
| 7  | C  | 3.247862 | 4.351503 | 4.432963 | 3.434080 | 2.493817 |
| 8  | H  | 1.076301 | 2.215156 | 3.266505 | 3.231567 | 2.161332 |
| 9  | H  | 2.208762 | 1.074767 | 2.167272 | 3.242189 | 3.265843 |
| 10 | H  | 3.384166 | 4.257967 | 3.870881 | 2.572473 | 2.073891 |
| 11 | H  | 2.797967 | 4.018733 | 4.206729 | 3.242647 | 2.093115 |
| 12 | H  | 3.034171 | 4.210286 | 4.617698 | 3.875994 | 2.770253 |
| 13 | H  | 3.492936 | 4.332427 | 4.208401 | 3.248174 | 2.680730 |
| 14 | Br | 5.516726 | 5.252621 | 3.914806 | 3.304533 | 4.460427 |
| 15 | H  | 3.299005 | 3.273144 | 2.147272 | 1.106170 | 2.212391 |
| 16 | C  | 3.607821 | 2.544579 | 1.430246 | 2.433863 | 3.540121 |
| 17 | C  | 4.328365 | 3.038362 | 2.428328 | 3.652712 | 4.596334 |
| 18 | H  | 4.264204 | 3.416357 | 2.090240 | 2.552460 | 3.848379 |
| 19 | H  | 5.391163 | 4.115766 | 3.395525 | 4.508769 | 5.564116 |
| 20 | H  | 4.175611 | 2.821115 | 2.737977 | 4.076654 | 4.762656 |
| 21 | N  | 4.561604 | 5.733104 | 5.768356 | 4.649602 | 3.736280 |
| 22 | H  | 5.218945 | 6.374116 | 6.474236 | 5.424159 | 4.523640 |
| 23 | H  | 5.052146 | 6.123321 | 5.932722 | 4.694702 | 4.003596 |
| 24 | C  | 6.484675 | 7.118273 | 6.313381 | 5.005785 | 5.106193 |
| 25 | C  | 6.486493 | 7.014136 | 6.134829 | 4.877286 | 5.122294 |
| 26 | O  | 5.625749 | 6.386785 | 5.746030 | 4.409381 | 4.287887 |
| 27 | H  | 7.363052 | 8.082209 | 7.339284 | 6.020599 | 6.007986 |
| 28 | H  | 6.145351 | 6.674807 | 5.809790 | 4.561625 | 4.785942 |
| 29 | H  | 6.107562 | 6.442892 | 5.431181 | 4.271744 | 4.771531 |
| 30 | C  | 7.692212 | 8.246839 | 7.401270 | 6.180037 | 6.373868 |
| 31 | H  | 7.577378 | 8.110880 | 7.322713 | 6.170474 | 6.341657 |
| 32 | H  | 8.479318 | 8.917200 | 7.954430 | 6.790407 | 7.147041 |
| 33 | H  | 8.165606 | 8.856669 | 8.112408 | 6.834658 | 6.854028 |
|    |    | 6        | 7        | 8        | 9        | 10       |



|    |    |          |          |          |          |          |
|----|----|----------|----------|----------|----------|----------|
| 6  | C  | 0.000000 |          |          |          |          |
| 7  | C  | 1.533316 | 0.000000 |          |          |          |
| 8  | H  | 2.845322 | 3.311804 | 0.000000 |          |          |
| 9  | H  | 4.661908 | 5.290685 | 2.752868 | 0.000000 |          |
| 10 | H  | 1.090054 | 2.158063 | 3.845678 | 5.324582 | 0.000000 |
| 11 | H  | 1.091282 | 2.171104 | 2.779317 | 4.959829 | 1.771099 |
| 12 | H  | 2.161767 | 1.095627 | 2.795427 | 5.009691 | 3.060497 |
| 13 | H  | 2.150223 | 1.102202 | 3.785396 | 5.260700 | 2.506534 |
| 14 | Br | 4.916620 | 5.633900 | 6.523630 | 6.069158 | 4.249252 |
| 15 | H  | 2.901066 | 3.799557 | 4.280829 | 4.242954 | 2.557677 |
| 16 | C  | 4.887140 | 5.701600 | 4.642691 | 2.879465 | 4.975739 |
| 17 | C  | 6.020068 | 6.796474 | 5.252329 | 2.882194 | 6.214294 |
| 18 | H  | 5.006842 | 5.818684 | 5.336555 | 3.910066 | 4.866135 |
| 19 | H  | 6.948585 | 7.719329 | 6.329853 | 3.933731 | 7.042725 |
| 20 | H  | 6.231194 | 6.970462 | 4.951009 | 2.296175 | 6.592022 |
| 21 | N  | 2.414124 | 1.454173 | 4.493560 | 6.683742 | 2.651909 |
| 22 | H  | 3.320300 | 2.054746 | 5.064543 | 7.268688 | 3.612654 |
| 23 | H  | 2.651836 | 2.035294 | 5.157213 | 7.134904 | 2.454813 |
| 24 | C  | 4.240795 | 4.697088 | 7.031957 | 8.184335 | 3.189431 |
| 25 | C  | 4.402249 | 4.524539 | 7.103097 | 8.060049 | 3.457425 |
| 26 | O  | 3.268035 | 3.387328 | 6.084482 | 7.457184 | 2.374085 |
| 27 | H  | 4.999293 | 5.373865 | 7.821399 | 9.152167 | 3.996234 |
| 28 | H  | 4.124030 | 4.911702 | 6.764113 | 7.717963 | 3.036938 |
| 29 | H  | 4.362573 | 4.601540 | 6.850750 | 7.451771 | 3.456215 |
| 30 | C  | 5.573604 | 5.355266 | 8.247442 | 9.275150 | 4.736904 |
| 31 | H  | 5.607070 | 5.134185 | 8.110723 | 9.101515 | 4.924339 |
| 32 | H  | 6.465488 | 6.350393 | 9.110876 | 9.927127 | 5.572215 |
| 33 | H  | 5.860953 | 5.577541 | 8.612747 | 9.905427 | 5.046299 |
|    |    | 11       | 12       | 13       | 14       | 15       |
| 11 | H  | 0.000000 |          |          |          |          |
| 12 | H  | 2.491713 | 0.000000 |          |          |          |
| 13 | H  | 3.063020 | 1.770809 | 0.000000 |          |          |
| 14 | Br | 5.774534 | 6.454660 | 5.085429 | 0.000000 |          |
| 15 | H  | 3.750767 | 4.473624 | 3.464344 | 2.253923 | 0.000000 |
| 16 | C  | 5.546206 | 5.955618 | 5.321625 | 3.643719 | 2.709149 |
| 17 | C  | 6.593412 | 6.907165 | 6.433250 | 4.805327 | 4.031588 |
| 18 | H  | 5.762041 | 6.253027 | 5.342201 | 2.658714 | 2.351318 |
| 19 | H  | 7.561385 | 7.889009 | 7.281754 | 4.999182 | 4.693114 |
| 20 | H  | 6.692389 | 6.916152 | 6.703033 | 5.759325 | 4.682023 |
| 21 | N  | 2.664419 | 2.081743 | 2.167009 | 6.413156 | 4.826288 |
| 22 | H  | 3.583373 | 2.368186 | 2.517977 | 7.122388 | 5.611162 |
| 23 | H  | 3.030656 | 2.930250 | 2.438662 | 5.936382 | 4.636657 |
| 24 | C  | 4.710441 | 5.778789 | 4.679240 | 4.317908 | 4.271261 |
| 25 | C  | 5.135170 | 5.612009 | 4.180923 | 3.861974 | 4.063529 |

|    |   |          |           |          |           |           |
|----|---|----------|-----------|----------|-----------|-----------|
| 26 | O | 3.866405 | 4.476038  | 3.343039 | 4.450564  | 3.867786  |
| 27 | H | 5.316645 | 6.431240  | 5.462543 | 5.349319  | 5.332669  |
| 28 | H | 4.532087 | 5.953750  | 4.947194 | 3.826472  | 3.799947  |
| 29 | H | 5.218767 | 5.650605  | 4.096628 | 2.839075  | 3.340265  |
| 30 | C | 6.309769 | 6.395717  | 4.914652 | 5.004757  | 5.393599  |
| 31 | H | 6.434279 | 6.097730  | 4.535468 | 5.194262  | 5.464156  |
| 32 | H | 7.220907 | 7.397716  | 5.852585 | 5.077127  | 5.894172  |
| 33 | H | 6.457830 | 6.596922  | 5.306442 | 5.939035  | 6.128368  |
|    |   | 16       | 17        | 18       | 19        | 20        |
| 16 | C | 0.000000 |           |          |           |           |
| 17 | C | 1.325976 | 0.000000  |          |           |           |
| 18 | H | 1.089897 | 2.147063  | 0.000000 |           |           |
| 19 | H | 2.075622 | 1.081490  | 2.474524 | 0.000000  |           |
| 20 | H | 2.130968 | 1.083349  | 3.123099 | 1.847477  | 0.000000  |
| 21 | N | 7.010404 | 8.159007  | 7.022625 | 9.058926  | 8.371369  |
| 22 | H | 7.701512 | 8.815568  | 7.727159 | 9.711707  | 8.998893  |
| 23 | H | 7.063470 | 8.289872  | 6.920949 | 9.120035  | 8.624718  |
| 24 | C | 6.941523 | 8.259840  | 6.352854 | 8.807372  | 8.929756  |
| 25 | C | 6.665204 | 7.981666  | 6.009750 | 8.476510  | 8.701811  |
| 26 | O | 6.561481 | 7.879489  | 6.116121 | 8.534704  | 8.451348  |
| 27 | H | 8.003051 | 9.317674  | 7.423775 | 9.870699  | 9.970029  |
| 28 | H | 6.363170 | 7.653360  | 5.769632 | 8.175330  | 8.336524  |
| 29 | H | 5.797701 | 7.094351  | 5.065587 | 7.520117  | 7.876260  |
| 30 | C | 7.899167 | 9.192969  | 7.217182 | 9.646572  | 9.924047  |
| 31 | H | 7.829684 | 9.086292  | 7.197705 | 9.549642  | 9.784406  |
| 32 | H | 8.284056 | 9.552374  | 7.493874 | 9.897148  | 10.362806 |
| 33 | H | 8.727424 | 10.037636 | 8.101865 | 10.549098 | 10.719316 |
|    |   | 21       | 22        | 23       | 24        | 25        |
| 21 | N | 0.000000 |           |          |           |           |
| 22 | H | 1.013372 | 0.000000  |          |           |           |
| 23 | H | 1.018295 | 1.643140  | 0.000000 |           |           |
| 24 | C | 4.381340 | 5.078947  | 3.456231 | 0.000000  |           |
| 25 | C | 4.365581 | 4.891378  | 3.450393 | 1.447250  | 0.000000  |
| 26 | O | 3.049221 | 3.698991  | 2.122690 | 1.448512  | 1.465285  |
| 27 | H | 4.791350 | 5.412853  | 3.826030 | 1.087722  | 2.204991  |
| 28 | H | 4.822507 | 5.645658  | 4.020139 | 1.086397  | 2.186298  |
| 29 | H | 4.779240 | 5.345716  | 3.994715 | 2.149872  | 1.088121  |
| 30 | C | 4.974754 | 5.234795  | 4.034217 | 2.598937  | 1.504526  |
| 31 | H | 4.841842 | 4.939944  | 4.018041 | 3.437316  | 2.150701  |
| 32 | H | 6.046296 | 6.323903  | 5.103688 | 3.133235  | 2.136178  |
| 33 | H | 4.913695 | 5.103489  | 3.936091 | 2.752263  | 2.157655  |
|    |   | 26       | 27        | 28       | 29        | 30        |
| 26 | O | 0.000000 |           |          |           |           |
| 27 | H | 2.134139 | 0.000000  |          |           |           |

|    |   |          |          |          |          |          |
|----|---|----------|----------|----------|----------|----------|
| 28 | H | 2.152054 | 1.841820 | 0.000000 |          |          |
| 29 | H | 2.146011 | 3.092511 | 2.431638 | 0.000000 |          |
| 30 | C | 2.510291 | 2.840165 | 3.526717 | 2.215149 | 0.000000 |
| 31 | H | 2.932599 | 3.798940 | 4.323020 | 2.570528 | 1.093839 |
| 32 | H | 3.416828 | 3.304195 | 3.916280 | 2.559989 | 1.094152 |
| 33 | H | 2.686596 | 2.593172 | 3.808158 | 3.109217 | 1.092664 |
|    |   | 31       | 32       | 33       |          |          |
| 31 | H | 0.000000 |          |          |          |          |
| 32 | H | 1.765437 | 0.000000 |          |          |          |
| 33 | H | 1.776876 | 1.777846 | 0.000000 |          |          |

Stoichiometry C10H18BrN3O

Framework group C1[X(C10H18BrN3O)]

Deg. of freedom 93

Full point group C1 NOp 1

Largest Abelian subgroup C1 NOp 1

Largest concise Abelian subgroup C1 NOp 1

Standard orientation:

| Center<br>Number | Atomic<br>Number | Atomic<br>Type | Coordinates (Angstroms) |           |           |
|------------------|------------------|----------------|-------------------------|-----------|-----------|
|                  |                  |                | X                       | Y         | Z         |
| 1                | 6                | 0              | -2.268029               | 2.523879  | -0.219035 |
| 2                | 6                | 0              | -3.282233               | 1.655378  | 0.023672  |
| 3                | 7                | 0              | -2.736262               | 0.379622  | 0.011475  |
| 4                | 6                | 0              | -1.410393               | 0.482411  | -0.206916 |
| 5                | 7                | 0              | -1.111940               | 1.771513  | -0.374346 |
| 6                | 6                | 0              | 0.246708                | 2.293764  | -0.584481 |
| 7                | 6                | 0              | 0.824926                | 2.932451  | 0.683904  |
| 8                | 1                | 0              | -2.266563               | 3.597093  | -0.300471 |
| 9                | 1                | 0              | -4.328011               | 1.839654  | 0.189549  |
| 10               | 1                | 0              | 0.872224                | 1.454047  | -0.887503 |
| 11               | 1                | 0              | 0.219965                | 3.019070  | -1.399413 |
| 12               | 1                | 0              | 0.216735                | 3.798613  | 0.967217  |
| 13               | 1                | 0              | 0.753436                | 2.198410  | 1.503004  |
| 14               | 35               | 0              | -0.163689               | -2.571198 | -0.004081 |
| 15               | 1                | 0              | -0.750788               | -0.405525 | -0.217027 |
| 16               | 6                | 0              | -3.385491               | -0.881177 | 0.197198  |
| 17               | 6                | 0              | -4.697020               | -1.014890 | 0.339412  |
| 18               | 1                | 0              | -2.665718               | -1.699370 | 0.216220  |
| 19               | 1                | 0              | -5.105994               | -2.004629 | 0.490337  |
| 20               | 1                | 0              | -5.397095               | -0.188407 | 0.317793  |
| 21               | 7                | 0              | 2.170780                | 3.389802  | 0.377103  |
| 22               | 1                | 0              | 2.575406                | 3.900807  | 1.153037  |
| 23               | 1                | 0              | 2.767584                | 2.587558  | 0.184351  |

|    |   |   |          |           |           |
|----|---|---|----------|-----------|-----------|
| 24 | 6 | 0 | 3.380143 | -0.472607 | -1.300809 |
| 25 | 6 | 0 | 3.278750 | -0.823708 | 0.099541  |
| 26 | 8 | 0 | 2.996446 | 0.544254  | -0.343229 |
| 27 | 1 | 0 | 4.354659 | -0.304400 | -1.753760 |
| 28 | 1 | 0 | 2.594246 | -0.797914 | -1.976679 |
| 29 | 1 | 0 | 2.387610 | -1.384516 | 0.374079  |
| 30 | 6 | 0 | 4.471860 | -0.976091 | 1.003347  |
| 31 | 1 | 0 | 4.225014 | -0.673195 | 2.025014  |
| 32 | 1 | 0 | 4.776163 | -2.026617 | 1.034431  |
| 33 | 1 | 0 | 5.315313 | -0.375795 | 0.653851  |

```

-----
Rotational constants (GHZ):      0.4188060      0.2901875      0.1801801
Standard basis: 6-311++G(d,p) (5D, 7F)
There are 499 symmetry adapted cartesian basis functions of A symmetry.
There are 482 symmetry adapted basis functions of A symmetry.
482 basis functions, 760 primitive gaussians, 499 cartesian basis functions
71 alpha electrons      71 beta electrons
nuclear repulsion energy      1308.6593068680 Hartrees.
NAtoms= 33 NActive= 33 NUniq= 33 SFac= 1.00D+00 NAtFMM= 60 NAOKFM=F
Big=F
Integral buffers will be 131072 words long.
Raffenetti 2 integral format.
Two-electron integral symmetry is turned on.
One-electron integrals computed using PRISM.
NBasis= 482 RedAO= T EigKep= 3.64D-06 NBF= 482
NBsUse= 482 1.00D-06 EigRej= -1.00D+00 NBFU= 482
Lowest energy guess from the checkpoint file:
"/home/suqian/liuwen/qianmengshijie/nh2po/nh2po.chk"
B after Tr= 0.000000 0.000000 0.000000
Rot= 0.999202 0.010789 -0.002635 0.038362 Ang= 4.58 deg.
B after Tr= 0.000000 0.000000 0.000000
Rot= 0.991861 -0.007953 0.003199 -0.127036 Ang= -14.63 deg.
Requested convergence on RMS density matrix=1.00D-08 within 128 cycles.
Requested convergence on MAX density matrix=1.00D-06.
Requested convergence on energy=1.00D-06.
No special actions if energy rises.
SCF Done: E(RB3LYP) = -3205.64724950 A.U. after 12 cycles
NFOck= 12 Conv=0.69D-08 -V/T= 2.0018
Calling FoFJK, ICntrl= 2127 FMM=F ISym2X=0 l1Cent= 0 IOpClX= 0 NMat=1 NMatS=1
NMatT=0.
***** Axes restored to original set *****

```

```

-----
Center Atomic Forces (Hartrees/Bohr)
Number Number X Y Z

```

|    |    |              |              |              |
|----|----|--------------|--------------|--------------|
| 1  | 6  | 0.000651025  | -0.000654896 | -0.000801301 |
| 2  | 6  | -0.001693760 | 0.000444569  | -0.001800315 |
| 3  | 7  | 0.001528001  | 0.000968423  | 0.001956263  |
| 4  | 6  | -0.003765859 | -0.002412079 | -0.001700970 |
| 5  | 7  | -0.000017299 | -0.000150866 | 0.003284316  |
| 6  | 6  | 0.000919774  | 0.000992330  | -0.000655557 |
| 7  | 6  | -0.002527470 | -0.000281046 | 0.000187799  |
| 8  | 1  | -0.000119959 | -0.000095039 | -0.000006317 |
| 9  | 1  | 0.000025315  | -0.000189873 | -0.000073802 |
| 10 | 1  | 0.000320177  | 0.000149883  | 0.000454229  |
| 11 | 1  | -0.000560643 | 0.000158807  | 0.000256923  |
| 12 | 1  | -0.000183378 | -0.000223878 | 0.000527555  |
| 13 | 1  | 0.000830918  | 0.000393213  | -0.000459970 |
| 14 | 35 | 0.001013451  | 0.000147668  | -0.000101231 |
| 15 | 1  | 0.001669287  | 0.000825380  | -0.001342280 |
| 16 | 6  | 0.000689109  | 0.001773846  | 0.001321566  |
| 17 | 6  | -0.000192635 | -0.000630811 | 0.000330907  |
| 18 | 1  | -0.000814978 | -0.000114557 | -0.000477474 |
| 19 | 1  | -0.000112371 | -0.000029808 | -0.000313691 |
| 20 | 1  | 0.000008187  | -0.000021327 | -0.000122690 |
| 21 | 7  | 0.002380684  | -0.000759998 | -0.000659175 |
| 22 | 1  | -0.000793174 | 0.000419780  | 0.000073964  |
| 23 | 1  | 0.000618204  | 0.000531681  | 0.000288305  |
| 24 | 6  | 0.004146626  | 0.004212666  | -0.009909283 |
| 25 | 6  | 0.000724426  | 0.001032912  | 0.010728907  |
| 26 | 8  | -0.002853040 | -0.006993809 | -0.000600051 |
| 27 | 1  | 0.000080608  | -0.000604235 | -0.000015775 |
| 28 | 1  | -0.000547615 | 0.000884692  | -0.000298071 |
| 29 | 1  | -0.001660882 | 0.001586101  | 0.001563002  |
| 30 | 6  | -0.000007579 | -0.001451110 | -0.001297635 |
| 31 | 1  | -0.000232947 | 0.000118184  | -0.000417010 |
| 32 | 1  | 0.000398677  | -0.000026609 | 0.000235618  |
| 33 | 1  | 0.000079119  | -0.000000190 | -0.000156757 |

-----  
Cartesian Forces: Max 0.010728907 RMS 0.002014816

GradGradGradGradGradGradGradGradGradGradGradGradGradGradGradGradGradGradGrad

Berny optimization.

Using GEDIIS/GDIIS optimizer.

FormGI is forming the generalized inverse of G from B-inverse, IUseBI=4.

Internal Forces: Max 0.009748918 RMS 0.001327523

Search for a local minimum.

Step number 25 out of a maximum of 172

All quantities printed in internal units (Hartrees-Bohrs-Radians)

Mixed Optimization -- RFO/linear search

Update second derivatives using D2CorX and points 19 20 22 25 23

ITU= 0 -1 1 -1 1 1 1 1 1 1 1 1 0 -1 -1 1 1 1 -1

ITU= 1 0 0 -1 0

Use linear search instead of GDIIIS.

Energy rises -- skip Quadratic/GDIIIS search.

Quartic linear search produced a step of -0.45594.

Iteration 1 RMS(Cart)= 0.07486364 RMS(Int)= 0.00440451

Iteration 2 RMS(Cart)= 0.00912038 RMS(Int)= 0.00143169

Iteration 3 RMS(Cart)= 0.00009294 RMS(Int)= 0.00143142

Iteration 4 RMS(Cart)= 0.00000039 RMS(Int)= 0.00143142

| Variable | Old X   | -DE/DX   | Delta X<br>(Linear) | Delta X<br>(Quad) | Delta X<br>(Total) | New X   |
|----------|---------|----------|---------------------|-------------------|--------------------|---------|
| R1       | 2.56461 | 0.00009  | 0.00025             | 0.00000           | 0.00026            | 2.56487 |
| R2       | 2.62306 | -0.00042 | -0.00040            | 0.00000           | -0.00040           | 2.62266 |
| R3       | 2.03391 | -0.00008 | 0.00002             | 0.00000           | 0.00002            | 2.03393 |
| R4       | 2.62242 | 0.00075  | 0.00114             | 0.00000           | 0.00115            | 2.62357 |
| R5       | 2.03102 | -0.00005 | -0.00009            | 0.00000           | -0.00009           | 2.03092 |
| R6       | 2.54671 | -0.00005 | -0.00122            | 0.00000           | -0.00121           | 2.54550 |
| R7       | 2.70277 | -0.00061 | -0.00164            | 0.00000           | -0.00164           | 2.70113 |
| R8       | 2.52042 | -0.00076 | -0.00023            | 0.00000           | -0.00022           | 2.52020 |
| R9       | 2.09036 | 0.00113  | 0.00253             | 0.00000           | 0.00253            | 2.09289 |
| R10      | 2.77914 | 0.00108  | 0.00215             | 0.00000           | 0.00216            | 2.78129 |
| R11      | 2.89755 | -0.00069 | 0.00078             | 0.00000           | 0.00076            | 2.89831 |
| R12      | 2.05990 | 0.00000  | 0.00013             | 0.00000           | 0.00013            | 2.06003 |
| R13      | 2.06223 | -0.00005 | -0.00065            | 0.00000           | -0.00065           | 2.06157 |
| R14      | 2.07044 | 0.00007  | -0.00035            | 0.00000           | -0.00035           | 2.07009 |
| R15      | 2.08286 | -0.00059 | -0.00134            | 0.00000           | -0.00134           | 2.08152 |
| R16      | 2.74799 | 0.00175  | 0.00161             | 0.00000           | 0.00162            | 2.74961 |
| R17      | 4.25930 | 0.00023  | -0.02225            | 0.00000           | -0.02225           | 4.23705 |
| R18      | 2.50573 | 0.00042  | 0.00027             | 0.00000           | 0.00027            | 2.50600 |
| R19      | 2.05961 | -0.00056 | -0.00127            | 0.00000           | -0.00127           | 2.05834 |
| R20      | 2.04372 | 0.00000  | -0.00009            | 0.00000           | -0.00009           | 2.04363 |
| R21      | 2.04723 | -0.00001 | -0.00005            | 0.00000           | -0.00005           | 2.04718 |
| R22      | 1.91500 | 0.00004  | -0.00028            | 0.00000           | -0.00028           | 1.91472 |
| R23      | 1.92430 | 0.00155  | 0.00061             | 0.00000           | -0.00004           | 1.92425 |
| R24      | 4.01130 | 0.00097  | -0.02858            | 0.00000           | -0.02826           | 3.98304 |
| R25      | 2.73491 | 0.00975  | 0.01739             | 0.00000           | 0.02209            | 2.75700 |
| R26      | 2.73729 | -0.00023 | -0.00628            | 0.00000           | -0.00820           | 2.72909 |
| R27      | 2.05550 | -0.00006 | -0.00002            | 0.00000           | -0.00002           | 2.05548 |
| R28      | 2.05299 | 0.00017  | 0.00019             | 0.00000           | 0.00019            | 2.05319 |
| R29      | 2.76899 | -0.00254 | -0.00910            | 0.00000           | -0.01190           | 2.75708 |
| R30      | 2.05625 | 0.00076  | 0.00058             | 0.00000           | 0.00058            | 2.05683 |

|     |         |          |          |         |          |         |
|-----|---------|----------|----------|---------|----------|---------|
| R31 | 2.84314 | -0.00083 | -0.00063 | 0.00000 | -0.00063 | 2.84251 |
| R32 | 2.06706 | -0.00028 | -0.00018 | 0.00000 | -0.00018 | 2.06687 |
| R33 | 2.06765 | 0.00020  | -0.00004 | 0.00000 | -0.00004 | 2.06761 |
| R34 | 2.06484 | 0.00011  | 0.00019  | 0.00000 | 0.00019  | 2.06502 |
| A1  | 1.87084 | 0.00005  | 0.00060  | 0.00000 | 0.00061  | 1.87145 |
| A2  | 2.28190 | -0.00015 | -0.00079 | 0.00000 | -0.00079 | 2.28110 |
| A3  | 2.13042 | 0.00010  | 0.00019  | 0.00000 | 0.00019  | 2.13061 |
| A4  | 1.86788 | -0.00051 | -0.00133 | 0.00000 | -0.00131 | 1.86657 |
| A5  | 2.27186 | 0.00044  | 0.00170  | 0.00000 | 0.00170  | 2.27357 |
| A6  | 2.14337 | 0.00007  | -0.00034 | 0.00000 | -0.00034 | 2.14302 |
| A7  | 1.89481 | 0.00016  | 0.00094  | 0.00000 | 0.00096  | 1.89577 |
| A8  | 2.25321 | -0.00105 | 0.00045  | 0.00000 | 0.00045  | 2.25366 |
| A9  | 2.13515 | 0.00089  | -0.00139 | 0.00000 | -0.00139 | 2.13375 |
| A10 | 1.89042 | -0.00021 | -0.00011 | 0.00000 | -0.00007 | 1.89035 |
| A11 | 2.12576 | 0.00513  | 0.00740  | 0.00000 | 0.00742  | 2.13317 |
| A12 | 2.26694 | -0.00493 | -0.00753 | 0.00000 | -0.00752 | 2.25942 |
| A13 | 1.90018 | 0.00056  | 0.00016  | 0.00000 | 0.00017  | 1.90035 |
| A14 | 2.20552 | 0.00124  | 0.00128  | 0.00000 | 0.00129  | 2.20680 |
| A15 | 2.17474 | -0.00176 | -0.00116 | 0.00000 | -0.00117 | 2.17357 |
| A16 | 1.95854 | 0.00074  | 0.00009  | 0.00000 | -0.00004 | 1.95850 |
| A17 | 1.87161 | -0.00021 | 0.00193  | 0.00000 | 0.00196  | 1.87357 |
| A18 | 1.89661 | -0.00019 | -0.00246 | 0.00000 | -0.00241 | 1.89420 |
| A19 | 1.91181 | -0.00070 | 0.00155  | 0.00000 | 0.00158  | 1.91339 |
| A20 | 1.92851 | -0.00004 | -0.00008 | 0.00000 | -0.00003 | 1.92847 |
| A21 | 1.89491 | 0.00039  | -0.00105 | 0.00000 | -0.00107 | 1.89384 |
| A22 | 1.91121 | -0.00033 | -0.00136 | 0.00000 | -0.00138 | 1.90982 |
| A23 | 1.88902 | 0.00078  | 0.00153  | 0.00000 | 0.00147  | 1.89049 |
| A24 | 1.88125 | -0.00008 | 0.00076  | 0.00000 | 0.00092  | 1.88217 |
| A25 | 1.87373 | -0.00007 | 0.00034  | 0.00000 | 0.00035  | 1.87409 |
| A26 | 1.89618 | 0.00087  | 0.00373  | 0.00000 | 0.00369  | 1.89987 |
| A27 | 2.01117 | -0.00116 | -0.00497 | 0.00000 | -0.00503 | 2.00614 |
| A28 | 2.15532 | 0.00047  | 0.00232  | 0.00000 | 0.00232  | 2.15764 |
| A29 | 1.94363 | 0.00032  | 0.00082  | 0.00000 | 0.00082  | 1.94446 |
| A30 | 2.18418 | -0.00078 | -0.00312 | 0.00000 | -0.00312 | 2.18106 |
| A31 | 2.07292 | 0.00013  | 0.00073  | 0.00000 | 0.00073  | 2.07365 |
| A32 | 2.16530 | -0.00008 | -0.00094 | 0.00000 | -0.00094 | 2.16437 |
| A33 | 2.04495 | -0.00005 | 0.00021  | 0.00000 | 0.00021  | 2.04516 |
| A34 | 1.94614 | -0.00035 | -0.00274 | 0.00000 | -0.00405 | 1.94209 |
| A35 | 1.91196 | 0.00053  | 0.00334  | 0.00000 | 0.00287  | 1.91482 |
| A36 | 1.88409 | -0.00015 | 0.00078  | 0.00000 | 0.00126  | 1.88535 |
| A37 | 2.09811 | -0.00035 | -0.00384 | 0.00000 | -0.00568 | 2.09243 |
| A38 | 2.06990 | 0.00124  | 0.00652  | 0.00000 | 0.00874  | 2.07863 |
| A39 | 1.98674 | 0.00343  | 0.00570  | 0.00000 | 0.00712  | 1.99385 |
| A40 | 2.01513 | -0.00195 | -0.00285 | 0.00000 | -0.00336 | 2.01177 |

|     |          |          |          |         |          |          |
|-----|----------|----------|----------|---------|----------|----------|
| A41 | 2.02122  | -0.00031 | -0.00122 | 0.00000 | -0.00134 | 2.01988  |
| A42 | 2.01146  | 0.00159  | 0.01474  | 0.00000 | 0.01692  | 2.02838  |
| A43 | 2.15348  | -0.00152 | -0.01148 | 0.00000 | -0.01340 | 2.14008  |
| A44 | 1.98189  | -0.00244 | -0.00278 | 0.00000 | -0.00341 | 1.97848  |
| A45 | 2.01403  | 0.00314  | 0.00596  | 0.00000 | 0.00740  | 2.02143  |
| A46 | 2.03274  | 0.00005  | -0.00252 | 0.00000 | -0.00278 | 2.02996  |
| A47 | 2.62320  | -0.00245 | 0.00151  | 0.00000 | 0.01210  | 2.63529  |
| A48 | 2.57612  | -0.00270 | 0.00314  | 0.00000 | 0.01398  | 2.59010  |
| A49 | 1.93273  | -0.00060 | -0.00127 | 0.00000 | -0.00127 | 1.93146  |
| A50 | 1.91226  | 0.00075  | 0.00093  | 0.00000 | 0.00093  | 1.91319  |
| A51 | 1.94374  | -0.00016 | 0.00007  | 0.00000 | 0.00007  | 1.94381  |
| A52 | 1.87769  | 0.00002  | 0.00012  | 0.00000 | 0.00012  | 1.87781  |
| A53 | 1.89739  | 0.00023  | -0.00019 | 0.00000 | -0.00019 | 1.89720  |
| A54 | 1.89851  | -0.00024 | 0.00035  | 0.00000 | 0.00035  | 1.89887  |
| A55 | 3.45827  | -0.00362 | -0.03775 | 0.00000 | -0.03775 | 3.42052  |
| A56 | 2.62539  | -0.00201 | 0.07445  | 0.00000 | 0.07792  | 2.70331  |
| A57 | 2.85978  | 0.00159  | -0.01470 | 0.00000 | -0.01470 | 2.84508  |
| A58 | 3.09314  | 0.00102  | 0.02439  | 0.00000 | 0.02538  | 3.11852  |
| D1  | -0.00219 | 0.00030  | 0.00292  | 0.00000 | 0.00292  | 0.00073  |
| D2  | -3.13062 | -0.00022 | -0.00286 | 0.00000 | -0.00285 | -3.13347 |
| D3  | 3.13167  | 0.00041  | 0.00419  | 0.00000 | 0.00420  | 3.13587  |
| D4  | 0.00324  | -0.00011 | -0.00159 | 0.00000 | -0.00157 | 0.00167  |
| D5  | -0.01869 | 0.00052  | 0.00438  | 0.00000 | 0.00439  | -0.01431 |
| D6  | -3.08323 | 0.00009  | 0.00026  | 0.00000 | 0.00031  | -3.08293 |
| D7  | 3.12982  | 0.00042  | 0.00325  | 0.00000 | 0.00325  | 3.13306  |
| D8  | 0.06528  | -0.00001 | -0.00086 | 0.00000 | -0.00083 | 0.06444  |
| D9  | 0.02208  | -0.00101 | -0.00916 | 0.00000 | -0.00915 | 0.01293  |
| D10 | -3.12608 | -0.00045 | -0.00695 | 0.00000 | -0.00694 | -3.13302 |
| D11 | -3.13148 | -0.00054 | -0.00390 | 0.00000 | -0.00389 | -3.13537 |
| D12 | 0.00354  | 0.00002  | -0.00170 | 0.00000 | -0.00168 | 0.00186  |
| D13 | -0.03396 | 0.00135  | 0.01197  | 0.00000 | 0.01197  | -0.02199 |
| D14 | 3.09633  | 0.00072  | 0.00168  | 0.00000 | 0.00175  | 3.09808  |
| D15 | 3.11367  | 0.00084  | 0.00994  | 0.00000 | 0.00993  | 3.12360  |
| D16 | -0.03923 | 0.00021  | -0.00034 | 0.00000 | -0.00029 | -0.03951 |
| D17 | 0.07506  | -0.00017 | 0.00936  | 0.00000 | 0.00935  | 0.08441  |
| D18 | -3.05580 | -0.00064 | 0.00601  | 0.00000 | 0.00601  | -3.04979 |
| D19 | -3.07390 | 0.00045  | 0.01183  | 0.00000 | 0.01183  | -3.06207 |
| D20 | 0.07842  | -0.00002 | 0.00848  | 0.00000 | 0.00849  | 0.08691  |
| D21 | 0.03262  | -0.00115 | -0.01014 | 0.00000 | -0.01015 | 0.02247  |
| D22 | 3.09883  | -0.00057 | -0.00600 | 0.00000 | -0.00603 | 3.09280  |
| D23 | -3.09645 | -0.00055 | 0.00085  | 0.00000 | 0.00091  | -3.09554 |
| D24 | -0.03024 | 0.00003  | 0.00499  | 0.00000 | 0.00503  | -0.02521 |
| D25 | 1.25933  | 0.00065  | 0.08136  | 0.00000 | 0.08136  | 1.34069  |
| D26 | -2.92374 | 0.00009  | 0.08460  | 0.00000 | 0.08458  | -2.83916 |



|     |          |          |          |         |          |          |
|-----|----------|----------|----------|---------|----------|----------|
| D27 | -0.87858 | 0.00034  | 0.08311  | 0.00000 | 0.08312  | -0.79546 |
| D28 | -1.79365 | 0.00003  | 0.07656  | 0.00000 | 0.07659  | -1.71706 |
| D29 | 0.30646  | -0.00053 | 0.07981  | 0.00000 | 0.07981  | 0.38627  |
| D30 | 2.35162  | -0.00028 | 0.07832  | 0.00000 | 0.07835  | 2.42997  |
| D31 | -1.10071 | -0.00026 | 0.00166  | 0.00000 | 0.00167  | -1.09904 |
| D32 | 0.93674  | -0.00009 | 0.00218  | 0.00000 | 0.00216  | 0.93889  |
| D33 | 3.12262  | -0.00107 | -0.00248 | 0.00000 | -0.00251 | 3.12011  |
| D34 | 3.10583  | -0.00001 | -0.00184 | 0.00000 | -0.00181 | 3.10402  |
| D35 | -1.13991 | 0.00017  | -0.00133 | 0.00000 | -0.00132 | -1.14123 |
| D36 | 1.04597  | -0.00082 | -0.00598 | 0.00000 | -0.00599 | 1.03999  |
| D37 | 1.01903  | -0.00002 | -0.00148 | 0.00000 | -0.00147 | 1.01756  |
| D38 | 3.05647  | 0.00015  | -0.00096 | 0.00000 | -0.00098 | 3.05549  |
| D39 | -1.04083 | -0.00084 | -0.00562 | 0.00000 | -0.00565 | -1.04648 |
| D40 | 3.04795  | -0.00056 | -0.06055 | 0.00000 | -0.06025 | 2.98769  |
| D41 | -1.15073 | -0.00061 | -0.05914 | 0.00000 | -0.05938 | -1.21011 |
| D42 | 0.97844  | -0.00060 | -0.06142 | 0.00000 | -0.06116 | 0.91728  |
| D43 | 3.06295  | -0.00066 | -0.06000 | 0.00000 | -0.06028 | 3.00267  |
| D44 | -1.12410 | -0.00038 | -0.06128 | 0.00000 | -0.06099 | -1.18509 |
| D45 | 0.96041  | -0.00043 | -0.05987 | 0.00000 | -0.06011 | 0.90030  |
| D46 | -3.12586 | -0.00056 | -0.00294 | 0.00000 | -0.00295 | -3.12881 |
| D47 | 0.01198  | -0.00017 | -0.00048 | 0.00000 | -0.00048 | 0.01150  |
| D48 | 0.00351  | -0.00002 | 0.00088  | 0.00000 | 0.00088  | 0.00439  |
| D49 | 3.14135  | 0.00038  | 0.00334  | 0.00000 | 0.00335  | -3.13849 |
| D50 | 1.91349  | 0.00194  | -0.10425 | 0.00000 | -0.10671 | 1.80678  |
| D51 | -1.20965 | -0.00060 | 0.17601  | 0.00000 | 0.17722  | -1.03243 |
| D52 | -2.34198 | 0.00089  | -0.08964 | 0.00000 | -0.09077 | -2.43275 |
| D53 | 0.81806  | -0.00165 | 0.19062  | 0.00000 | 0.19316  | 1.01122  |
| D54 | -2.69178 | -0.00131 | -0.00637 | 0.00000 | -0.00680 | -2.69858 |
| D55 | 0.00092  | -0.00094 | -0.00473 | 0.00000 | -0.00508 | -0.00415 |
| D56 | -0.02098 | -0.00004 | -0.00320 | 0.00000 | -0.00306 | -0.02404 |
| D57 | 2.67173  | 0.00034  | -0.00156 | 0.00000 | -0.00134 | 2.67039  |
| D58 | 0.84825  | 0.00128  | 0.23323  | 0.00000 | 0.23205  | 1.08030  |
| D59 | -1.55177 | 0.00000  | 0.23179  | 0.00000 | 0.22972  | -1.32205 |
| D60 | 1.58647  | -0.00138 | -0.22545 | 0.00000 | -0.22318 | 1.36329  |
| D61 | -0.82510 | -0.00226 | -0.22507 | 0.00000 | -0.22335 | -1.04844 |
| D62 | 2.57185  | -0.00063 | -0.00694 | 0.00000 | -0.00750 | 2.56435  |
| D63 | -1.64288 | -0.00050 | -0.00698 | 0.00000 | -0.00754 | -1.65042 |
| D64 | 0.45830  | -0.00040 | -0.00587 | 0.00000 | -0.00644 | 0.45186  |
| D65 | 1.36624  | 0.00001  | -0.00157 | 0.00000 | -0.00107 | 1.36517  |
| D66 | -2.84849 | 0.00014  | -0.00161 | 0.00000 | -0.00112 | -2.84961 |
| D67 | -0.74731 | 0.00024  | -0.00050 | 0.00000 | -0.00001 | -0.74732 |
| D68 | -1.02363 | 0.00010  | -0.00122 | 0.00000 | -0.00115 | -1.02478 |
| D69 | 1.04483  | 0.00023  | -0.00126 | 0.00000 | -0.00119 | 1.04363  |
| D70 | -3.13718 | 0.00033  | -0.00016 | 0.00000 | -0.00009 | -3.13727 |

| Item                 | Value    | Threshold | Converged? |
|----------------------|----------|-----------|------------|
| Maximum Force        | 0.009749 | 0.000450  | NO         |
| RMS Force            | 0.001328 | 0.000300  | NO         |
| Maximum Displacement | 0.317610 | 0.001800  | NO         |
| RMS Displacement     | 0.081258 | 0.001200  | NO         |

Predicted change in Energy=-5.568426D-04

GradGradGradGradGradGradGradGradGradGradGradGradGradGradGradGradGradGrad

Input orientation:

| Center Number | Atomic Number | Atomic Type | Coordinates (Angstroms) |           |           |
|---------------|---------------|-------------|-------------------------|-----------|-----------|
|               |               |             | X                       | Y         | Z         |
| 1             | 6             | 0           | -2.694656               | 2.089504  | -0.265152 |
| 2             | 6             | 0           | -3.588149               | 1.119755  | 0.056463  |
| 3             | 7             | 0           | -2.880086               | -0.071576 | 0.139200  |
| 4             | 6             | 0           | -1.581199               | 0.181763  | -0.112137 |
| 5             | 7             | 0           | -1.451591               | 1.482467  | -0.376612 |
| 6             | 6             | 0           | -0.170460               | 2.156135  | -0.643183 |
| 7             | 6             | 0           | 0.381156                | 2.865704  | 0.599607  |
| 8             | 1             | 0           | -2.832175               | 3.144514  | -0.427912 |
| 9             | 1             | 0           | -4.648155               | 1.179532  | 0.223293  |
| 10            | 1             | 0           | 0.535308                | 1.393581  | -0.972988 |
| 11            | 1             | 0           | -0.315948               | 2.868388  | -1.456613 |
| 12            | 1             | 0           | -0.312262               | 3.656705  | 0.905354  |
| 13            | 1             | 0           | 0.430033                | 2.134946  | 1.422344  |
| 14            | 35            | 0           | 0.119400                | -2.605255 | 0.359900  |
| 15            | 1             | 0           | -0.805709               | -0.607517 | -0.064900 |
| 16            | 6             | 0           | -3.357075               | -1.385411 | 0.438256  |
| 17            | 6             | 0           | -4.639132               | -1.681135 | 0.603997  |
| 18            | 1             | 0           | -2.536845               | -2.097681 | 0.517655  |
| 19            | 1             | 0           | -4.912568               | -2.700403 | 0.840300  |
| 20            | 1             | 0           | -5.443214               | -0.960195 | 0.518640  |
| 21            | 7             | 0           | 1.654701                | 3.470191  | 0.239339  |
| 22            | 1             | 0           | 1.997552                | 4.073006  | 0.978050  |
| 23            | 1             | 0           | 2.347915                | 2.741508  | 0.080117  |
| 24            | 6             | 0           | 3.489895                | -0.247572 | -1.190153 |
| 25            | 6             | 0           | 3.380906                | -0.532347 | 0.236570  |
| 26            | 8             | 0           | 2.992027                | 0.769827  | -0.294238 |
| 27            | 1             | 0           | 4.461105                | -0.022945 | -1.625365 |
| 28            | 1             | 0           | 2.753813                | -0.667026 | -1.870390 |
| 29            | 1             | 0           | 2.534124                | -1.144482 | 0.541410  |
| 30            | 6             | 0           | 4.571466                | -0.536082 | 1.155890  |
| 31            | 1             | 0           | 4.289043                | -0.190934 | 2.154580  |

|    |   |   |          |           |          |
|----|---|---|----------|-----------|----------|
| 32 | 1 | 0 | 4.955970 | -1.555634 | 1.254852 |
| 33 | 1 | 0 | 5.369925 | 0.106034  | 0.776043 |

-----  
Distance matrix (angstroms):

|    |    | 1        | 2        | 3        | 4        | 5        |
|----|----|----------|----------|----------|----------|----------|
| 1  | C  | 0.000000 |          |          |          |          |
| 2  | C  | 1.357269 | 0.000000 |          |          |          |
| 3  | N  | 2.206389 | 1.388333 | 0.000000 |          |          |
| 4  | C  | 2.214198 | 2.221735 | 1.347018 | 0.000000 |          |
| 5  | N  | 1.387850 | 2.209977 | 2.172950 | 1.333632 | 0.000000 |
| 6  | C  | 2.553216 | 3.639257 | 3.594008 | 2.484016 | 1.471796 |
| 7  | C  | 3.287995 | 4.370209 | 4.413081 | 3.400140 | 2.495056 |
| 8  | H  | 1.076312 | 2.214895 | 3.266059 | 3.231493 | 2.161260 |
| 9  | H  | 2.209703 | 1.074717 | 2.167581 | 3.242572 | 3.266447 |
| 10 | H  | 3.379054 | 4.258832 | 3.879248 | 2.586343 | 2.076374 |
| 11 | H  | 2.772092 | 4.006797 | 4.214833 | 3.259821 | 2.092096 |
| 12 | H  | 3.082532 | 4.229441 | 4.591382 | 3.836758 | 2.769263 |
| 13 | H  | 3.551533 | 4.363718 | 4.179962 | 3.196031 | 2.683743 |
| 14 | Br | 5.509116 | 5.264380 | 3.932576 | 3.298837 | 4.440713 |
| 15 | H  | 3.298810 | 3.277220 | 2.152192 | 1.107511 | 2.209607 |
| 16 | C  | 3.606746 | 2.544606 | 1.429376 | 2.431605 | 3.538305 |
| 17 | C  | 4.330604 | 3.041273 | 2.429189 | 3.651601 | 4.596780 |
| 18 | H  | 4.262653 | 3.416114 | 2.089532 | 2.550640 | 3.846421 |
| 19 | H  | 5.392993 | 4.118507 | 3.396065 | 4.506888 | 5.563780 |
| 20 | H  | 4.179662 | 2.825078 | 2.739205 | 4.076409 | 4.764571 |
| 21 | N  | 4.591047 | 5.748519 | 5.754862 | 4.626915 | 3.738916 |
| 22 | H  | 5.243724 | 6.385223 | 6.455430 | 5.397939 | 4.521348 |
| 23 | H  | 5.096257 | 6.153658 | 5.937081 | 4.693313 | 4.028651 |
| 24 | C  | 6.675794 | 7.315897 | 6.509594 | 5.202158 | 5.298412 |
| 25 | C  | 6.636134 | 7.164468 | 6.278679 | 5.025339 | 5.271479 |
| 26 | O  | 5.837872 | 6.598800 | 5.947902 | 4.614475 | 4.501153 |
| 27 | H  | 7.584031 | 8.302096 | 7.550440 | 6.232271 | 6.227810 |
| 28 | H  | 6.313562 | 6.864826 | 6.011143 | 4.754390 | 4.953496 |
| 29 | H  | 6.200754 | 6.545546 | 5.534128 | 4.372864 | 4.861023 |
| 30 | C  | 7.855545 | 8.398206 | 7.534922 | 6.322854 | 6.534548 |
| 31 | H  | 7.734827 | 8.256522 | 7.447980 | 6.303701 | 6.493233 |
| 32 | H  | 8.609851 | 9.033041 | 8.053005 | 6.900855 | 7.276577 |
| 33 | H  | 8.369928 | 9.043922 | 8.276460 | 7.008047 | 7.053811 |
|    |    | 6        | 7        | 8        | 9        | 10       |
| 6  | C  | 0.000000 |          |          |          |          |
| 7  | C  | 1.533719 | 0.000000 |          |          |          |
| 8  | H  | 2.847449 | 3.385118 | 0.000000 |          |          |
| 9  | H  | 4.664149 | 5.317777 | 2.753725 | 0.000000 |          |
| 10 | H  | 1.090122 | 2.159621 | 3.834425 | 5.324020 | 0.000000 |

|    |    |          |          |          |           |          |
|----|----|----------|----------|----------|-----------|----------|
| 11 | H  | 1.090936 | 2.171175 | 2.732375 | 4.943919  | 1.770193 |
| 12 | H  | 2.160969 | 1.095442 | 2.896533 | 5.039996  | 3.060764 |
| 13 | H  | 2.151148 | 1.101495 | 3.883899 | 5.304576  | 2.509645 |
| 14 | Br | 4.874528 | 5.482460 | 6.510936 | 6.088748  | 4.235594 |
| 15 | H  | 2.894084 | 3.730078 | 4.279729 | 4.247469  | 2.574363 |
| 16 | C  | 4.885342 | 5.663248 | 4.641765 | 2.879588  | 4.986487 |
| 17 | C  | 6.020725 | 6.773260 | 5.255170 | 2.885902  | 6.222185 |
| 18 | H  | 5.004226 | 5.758180 | 5.334972 | 3.909527  | 4.883549 |
| 19 | H  | 6.947969 | 7.685245 | 6.332413 | 3.937577  | 7.051814 |
| 20 | H  | 6.234042 | 6.969028 | 4.956018 | 2.301691  | 6.596055 |
| 21 | N  | 2.415947 | 1.455031 | 4.547895 | 6.706219  | 2.652374 |
| 22 | H  | 3.317087 | 2.052690 | 5.115183 | 7.287474  | 3.622710 |
| 23 | H  | 2.684778 | 2.037998 | 5.220521 | 7.169746  | 2.492284 |
| 24 | C  | 4.413070 | 4.749736 | 7.214973 | 8.382262  | 3.386759 |
| 25 | C  | 4.540274 | 4.547202 | 7.250049 | 8.209538  | 3.642754 |
| 26 | O  | 3.470581 | 3.465300 | 6.291132 | 7.668642  | 2.623974 |
| 27 | H  | 5.211954 | 5.471816 | 8.041059 | 9.372412  | 4.224219 |
| 28 | H  | 4.245898 | 4.920423 | 6.914611 | 7.910905  | 3.158037 |
| 29 | H  | 4.428555 | 4.551950 | 6.937740 | 7.555618  | 3.567973 |
| 30 | C  | 5.741999 | 5.425891 | 8.418380 | 9.424143  | 4.954422 |
| 31 | H  | 5.763971 | 5.199284 | 8.276848 | 9.245623  | 5.136428 |
| 32 | H  | 6.607575 | 6.395819 | 9.250854 | 10.039147 | 5.762239 |
| 33 | H  | 6.075605 | 5.703922 | 8.829287 | 10.090582 | 5.300039 |
|    |    | 11       | 12       | 13       | 14        | 15       |
| 11 | H  | 0.000000 |          |          |           |          |
| 12 | H  | 2.490050 | 0.000000 |          |           |          |
| 13 | H  | 3.063139 | 1.770319 | 0.000000 |           |          |
| 14 | Br | 5.783599 | 6.300476 | 4.867729 | 0.000000  |          |
| 15 | H  | 3.776063 | 4.400963 | 3.355601 | 2.242150  | 0.000000 |
| 16 | C  | 5.561815 | 5.908638 | 5.263414 | 3.685110  | 2.714360 |
| 17 | C  | 6.605619 | 6.877875 | 6.397546 | 4.853577  | 4.036732 |
| 18 | H  | 5.787224 | 6.181589 | 5.247472 | 2.708903  | 2.357285 |
| 19 | H  | 7.577346 | 7.847285 | 7.229299 | 5.055743  | 4.697430 |
| 20 | H  | 6.696905 | 6.913175 | 6.700120 | 5.802939  | 4.687361 |
| 21 | N  | 2.668685 | 2.085020 | 2.163837 | 6.267593  | 4.772199 |
| 22 | H  | 3.568049 | 2.348155 | 2.531914 | 6.964821  | 5.554576 |
| 23 | H  | 3.077954 | 2.931748 | 2.418215 | 5.799347  | 4.602428 |
| 24 | C  | 4.925916 | 5.838744 | 4.675927 | 4.395630  | 4.455106 |
| 25 | C  | 5.300810 | 5.624493 | 4.150682 | 3.866468  | 4.198128 |
| 26 | O  | 4.086291 | 4.548782 | 3.372539 | 4.480073  | 4.046291 |
| 27 | H  | 5.586458 | 6.536773 | 5.494958 | 5.427707  | 5.524139 |
| 28 | H  | 4.700404 | 5.983329 | 4.908472 | 3.958668  | 3.991683 |
| 29 | H  | 5.312074 | 5.593368 | 3.994733 | 2.828020  | 3.436630 |
| 30 | C  | 6.504030 | 6.441508 | 4.935267 | 4.973527  | 5.514476 |

|    |   |          |           |          |           |           |
|----|---|----------|-----------|----------|-----------|-----------|
| 31 | H | 6.603492 | 6.126736  | 4.564849 | 5.141570  | 5.572802  |
| 32 | H | 7.397103 | 7.419225  | 5.842307 | 5.029419  | 5.986453  |
| 33 | H | 6.704066 | 6.701584  | 5.379286 | 5.923873  | 6.273340  |
|    |   | 16       | 17        | 18       | 19        | 20        |
| 16 | C | 0.000000 |           |          |           |           |
| 17 | C | 1.326120 | 0.000000  |          |           |           |
| 18 | H | 1.089224 | 2.144895  | 0.000000 |           |           |
| 19 | H | 2.076151 | 1.081441  | 2.472131 | 0.000000  |           |
| 20 | H | 2.130551 | 1.083323  | 3.121035 | 1.847532  | 0.000000  |
| 21 | N | 6.980998 | 8.141343  | 6.974792 | 9.031413  | 8.371782  |
| 22 | H | 7.665359 | 8.791793  | 7.671382 | 9.677180  | 8.994953  |
| 23 | H | 7.050293 | 8.285713  | 6.889853 | 9.105322  | 8.636932  |
| 24 | C | 7.129333 | 8.447198  | 6.531547 | 8.985572  | 9.122952  |
| 25 | C | 6.794761 | 8.110223  | 6.127728 | 8.593408  | 8.838988  |
| 26 | O | 6.744827 | 8.065273  | 6.280939 | 8.707026  | 8.649106  |
| 27 | H | 8.199925 | 9.514934  | 7.607126 | 10.055548 | 10.176971 |
| 28 | H | 6.571824 | 7.861720  | 5.978344 | 8.381877  | 8.543107  |
| 29 | H | 5.897025 | 7.193575  | 5.159833 | 7.613373  | 7.979499  |
| 30 | C | 8.006130 | 9.297895  | 7.305753 | 9.732974  | 10.043893 |
| 31 | H | 7.926894 | 9.183535  | 7.273785 | 9.627794  | 9.898732  |
| 32 | H | 8.354790 | 9.617970  | 7.548480 | 9.943360  | 10.442203 |
| 33 | H | 8.859968 | 10.168815 | 8.212194 | 10.658794 | 10.868628 |
|    |   | 21       | 22        | 23       | 24        | 25        |
| 21 | N | 0.000000 |           |          |           |           |
| 22 | H | 1.013226 | 0.000000  |          |           |           |
| 23 | H | 1.018272 | 1.643754  | 0.000000 |           |           |
| 24 | C | 4.385562 | 5.059209  | 3.442717 | 0.000000  |           |
| 25 | C | 4.358910 | 4.865464  | 3.436520 | 1.458942  | 0.000000  |
| 26 | O | 3.060247 | 3.676777  | 2.107735 | 1.444174  | 1.458986  |
| 27 | H | 4.853352 | 5.442764  | 3.875105 | 1.087711  | 2.212041  |
| 28 | H | 4.772376 | 5.581527  | 3.948079 | 1.086499  | 2.202422  |
| 29 | H | 4.707424 | 5.263150  | 3.917701 | 2.171694  | 1.088428  |
| 30 | C | 5.039623 | 5.282079  | 4.104151 | 2.599413  | 1.504193  |
| 31 | H | 4.900177 | 4.981600  | 4.082963 | 3.439343  | 2.149427  |
| 32 | H | 6.098243 | 6.364782  | 5.162110 | 3.136630  | 2.136550  |
| 33 | H | 5.040683 | 5.210621  | 4.069714 | 2.743260  | 2.157489  |
|    |   | 26       | 27        | 28       | 29        | 30        |
| 26 | O | 0.000000 |           |          |           |           |
| 27 | H | 2.135082 | 0.000000  |          |           |           |
| 28 | H | 2.146054 | 1.841120  | 0.000000 |           |           |
| 29 | H | 2.138355 | 3.109022  | 2.468401 | 0.000000  |           |
| 30 | C | 2.510557 | 2.830348  | 3.532616 | 2.213255  | 0.000000  |
| 31 | H | 2.932920 | 3.787586  | 4.334048 | 2.567355  | 1.093742  |
| 32 | H | 3.415337 | 3.299952  | 3.925080 | 2.558004  | 1.094132  |

|    |   |          |          |          |          |          |
|----|---|----------|----------|----------|----------|----------|
| 33 | H | 2.690822 | 2.570866 | 3.800693 | 3.108152 | 1.092764 |
|    |   | 31       | 32       | 33       |          |          |
| 31 | H | 0.000000 |          |          |          |          |
| 32 | H | 1.765421 | 0.000000 |          |          |          |
| 33 | H | 1.776755 | 1.778134 | 0.000000 |          |          |

Stoichiometry C10H18BrN3O

Framework group C1[X(C10H18BrN3O)]

Deg. of freedom 93

Full point group C1 NOp 1

Largest Abelian subgroup C1 NOp 1

Largest concise Abelian subgroup C1 NOp 1

Standard orientation:

| Center Number | Atomic Number | Atomic Type | Coordinates (Angstroms) |           |           |
|---------------|---------------|-------------|-------------------------|-----------|-----------|
|               |               |             | X                       | Y         | Z         |
| 1             | 6             | 0           | -2.444427               | 2.435023  | -0.214220 |
| 2             | 6             | 0           | -3.417870               | 1.518251  | 0.018413  |
| 3             | 7             | 0           | -2.811080               | 0.269706  | -0.001806 |
| 4             | 6             | 0           | -1.493282               | 0.435560  | -0.226213 |
| 5             | 7             | 0           | -1.254448               | 1.739165  | -0.375031 |
| 6             | 6             | 0           | 0.080386                | 2.325093  | -0.577738 |
| 7             | 6             | 0           | 0.675914                | 2.875305  | 0.724148  |
| 8             | 1             | 0           | -2.493042               | 3.507966  | -0.284062 |
| 9             | 1             | 0           | -4.470998               | 1.650829  | 0.186827  |
| 10            | 1             | 0           | 0.724330                | 1.538419  | -0.971244 |
| 11            | 1             | 0           | 0.002211                | 3.115242  | -1.325866 |
| 12            | 1             | 0           | 0.046861                | 3.691299  | 1.096222  |
| 13            | 1             | 0           | 0.656194                | 2.073977  | 1.479645  |
| 14            | 35            | 0           | -0.032569               | -2.513277 | 0.004013  |
| 15            | 1             | 0           | -0.785865               | -0.416343 | -0.246284 |
| 16            | 6             | 0           | -3.397528               | -1.021181 | 0.179315  |
| 17            | 6             | 0           | -4.701176               | -1.223032 | 0.314781  |
| 18            | 1             | 0           | -2.639515               | -1.803147 | 0.198174  |
| 19            | 1             | 0           | -5.059907               | -2.232875 | 0.459850  |
| 20            | 1             | 0           | -5.442324               | -0.433277 | 0.290795  |
| 21            | 7             | 0           | 1.998444                | 3.401365  | 0.422008  |
| 22            | 1             | 0           | 2.382238                | 3.906903  | 1.211793  |
| 23            | 1             | 0           | 2.630940                | 2.634460  | 0.201365  |
| 24            | 6             | 0           | 3.535943                | -0.316577 | -1.323316 |
| 25            | 6             | 0           | 3.389483                | -0.714822 | 0.072558  |
| 26            | 8             | 0           | 3.114426                | 0.656443  | -0.342912 |
| 27            | 1             | 0           | 4.526688                | -0.136030 | -1.734342 |
| 28            | 1             | 0           | 2.774764                | -0.612620 | -2.039866 |

|    |   |   |          |           |          |
|----|---|---|----------|-----------|----------|
| 29 | 1 | 0 | 2.492179 | -1.278984 | 0.320030 |
| 30 | 6 | 0 | 4.566349 | -0.897412 | 0.991386 |
| 31 | 1 | 0 | 4.303196 | -0.618576 | 2.015726 |
| 32 | 1 | 0 | 4.864660 | -1.950043 | 1.001496 |
| 33 | 1 | 0 | 5.418721 | -0.292935 | 0.671694 |

-----  
Rotational constants (GHZ):      0.4300776      0.2787576      0.1778572  
Standard basis: 6-311++G(d,p) (5D, 7F)  
There are    499 symmetry adapted cartesian basis functions of A    symmetry.  
There are    482 symmetry adapted basis functions of A    symmetry.  
482 basis functions,    760 primitive gaussians,    499 cartesian basis functions  
71 alpha electrons      71 beta electrons  
nuclear repulsion energy      1303.3155608166 Hartrees.  
NAtoms=    33 NActive=    33 NUniq=    33 SFac= 1.00D+00 NAtFMM=    60 NAOKFM=F  
Big=F

Integral buffers will be    131072 words long.  
Raffenetti 2 integral format.  
Two-electron integral symmetry is turned on.  
One-electron integrals computed using PRISM.  
NBasis=    482 RedAO= T EigKep=    3.75D-06    NBF=    482  
NBsUse=    482 1.00D-06 EigRej= -1.00D+00    NBFU=    482  
Lowest      energy      guess      from      the      checkpoint      file:  
"/home/suqian/liuwen/qianmengshijie/nh2po/nh2po.chk"  
B after Tr=    0.000000    0.000000    0.000000  
Rot=    0.999827    0.006416    -0.001390    0.017381 Ang=    2.13 deg.  
B after Tr=    0.000000    0.000000    0.000000  
Rot=    0.999769    -0.004423    0.001181    -0.020989 Ang=    -2.46 deg.  
Requested convergence on RMS density matrix=1.00D-08 within 128 cycles.  
Requested convergence on MAX density matrix=1.00D-06.  
Requested convergence on      energy=1.00D-06.  
No special actions if energy rises.  
SCF Done:    E(RB3LYP) =    -3205.64769885      A.U. after    10 cycles  
              NFOck= 10    Conv=0.89D-08      -V/T= 2.0018  
Calling FoFJK, ICntrl=      2127 FMM=F ISym2X=0 l1Cent= 0 IOpCIX= 0 NMat=1 NMatS=1  
NMatT=0.

\*\*\*\*\* Axes restored to original set \*\*\*\*\*

| Center<br>Number | Atomic<br>Number | Forces (Hartrees/Bohr) |              |              |
|------------------|------------------|------------------------|--------------|--------------|
|                  |                  | X                      | Y            | Z            |
| 1                | 6                | 0.000484883            | -0.000297775 | -0.000521967 |
| 2                | 6                | -0.000990936           | 0.000256408  | -0.001053099 |
| 3                | 7                | 0.001124322            | 0.000740741  | 0.001106649  |
| 4                | 6                | -0.002614211           | -0.001925857 | -0.000834124 |

|    |    |              |              |              |
|----|----|--------------|--------------|--------------|
| 5  | 7  | 0.000193553  | -0.000342137 | 0.001868894  |
| 6  | 6  | 0.000942929  | 0.000883509  | -0.000121040 |
| 7  | 6  | -0.001601110 | -0.000180432 | 0.000339891  |
| 8  | 1  | -0.000092268 | -0.000023946 | -0.000036378 |
| 9  | 1  | -0.000003018 | -0.000074637 | -0.000064713 |
| 10 | 1  | 0.000278638  | -0.000150306 | 0.000286653  |
| 11 | 1  | -0.000311726 | -0.000000398 | 0.000164942  |
| 12 | 1  | -0.000044769 | -0.000165503 | 0.000235205  |
| 13 | 1  | 0.000446301  | 0.000233263  | -0.000356337 |
| 14 | 35 | 0.000403683  | 0.000126608  | -0.000063845 |
| 15 | 1  | 0.001206838  | 0.000507860  | -0.000899038 |
| 16 | 6  | 0.000468717  | 0.001074074  | 0.000827727  |
| 17 | 6  | -0.000097855 | -0.000380556 | 0.000215730  |
| 18 | 1  | -0.000452070 | -0.000059161 | -0.000308467 |
| 19 | 1  | -0.000070290 | -0.000015963 | -0.000196416 |
| 20 | 1  | 0.000031111  | -0.000014197 | -0.000080415 |
| 21 | 7  | 0.001122987  | -0.000255416 | -0.000477113 |
| 22 | 1  | -0.000378272 | 0.000297033  | 0.000033940  |
| 23 | 1  | 0.000649306  | 0.000261879  | 0.000179481  |
| 24 | 6  | 0.002051083  | 0.001303330  | -0.003598195 |
| 25 | 6  | 0.000898367  | 0.000499622  | 0.004217316  |
| 26 | 8  | -0.002533535 | -0.002685876 | -0.000354467 |
| 27 | 1  | 0.000068118  | -0.000239677 | 0.000121997  |
| 28 | 1  | -0.000298101 | 0.000336564  | 0.000076872  |
| 29 | 1  | -0.001076806 | 0.000835995  | 0.000064156  |
| 30 | 6  | -0.000077291 | -0.000686583 | -0.000683397 |
| 31 | 1  | -0.000065798 | 0.000155343  | -0.000170725 |
| 32 | 1  | 0.000276966  | -0.000021159 | 0.000122072  |
| 33 | 1  | 0.000060255  | 0.000007349  | -0.000041789 |

-----  
Cartesian Forces: Max 0.004217316 RMS 0.000943845

GradGradGradGradGradGradGradGradGradGradGradGradGradGradGradGradGradGradGrad

Berny optimization.

Using GEDIIS/GDIIS optimizer.

FormGI is forming the generalized inverse of G from B-inverse, IUseBI=4.

GSVD: received Info= 1 from GESDD.

Internal Forces: Max 0.003299743 RMS 0.000652114

Search for a local minimum.

Step number 26 out of a maximum of 172

All quantities printed in internal units (Hartrees-Bohrs-Radians)

Mixed Optimization -- En-DIIS/RFO-DIIS

Update second derivatives using D2CorX and points 21 23 26

ITU= 0 0 -1 1 -1 1 1 1 1 1 1 1 1 1 0 -1 -1 1 1 1



ITU= -1 1 0 0-1 0

Use linear search instead of GDIIIS.

|                 |         |         |         |         |         |
|-----------------|---------|---------|---------|---------|---------|
| Eigenvalues --- | 0.00042 | 0.00123 | 0.00241 | 0.00416 | 0.00687 |
| Eigenvalues --- | 0.00726 | 0.00799 | 0.01289 | 0.01579 | 0.01858 |
| Eigenvalues --- | 0.01964 | 0.02140 | 0.02306 | 0.02326 | 0.02388 |
| Eigenvalues --- | 0.02647 | 0.02838 | 0.03010 | 0.03084 | 0.03132 |
| Eigenvalues --- | 0.03267 | 0.03521 | 0.03668 | 0.03958 | 0.04058 |
| Eigenvalues --- | 0.04303 | 0.04509 | 0.05251 | 0.05440 | 0.05737 |
| Eigenvalues --- | 0.05816 | 0.05950 | 0.06717 | 0.07537 | 0.08662 |
| Eigenvalues --- | 0.09318 | 0.09691 | 0.10828 | 0.12114 | 0.12479 |
| Eigenvalues --- | 0.12763 | 0.13168 | 0.14579 | 0.15794 | 0.15982 |
| Eigenvalues --- | 0.15999 | 0.16001 | 0.16006 | 0.16021 | 0.16072 |
| Eigenvalues --- | 0.16186 | 0.16763 | 0.19007 | 0.22024 | 0.22174 |
| Eigenvalues --- | 0.22847 | 0.23354 | 0.24693 | 0.25932 | 0.27593 |
| Eigenvalues --- | 0.29148 | 0.29924 | 0.31661 | 0.32245 | 0.32637 |
| Eigenvalues --- | 0.33808 | 0.34280 | 0.34338 | 0.34357 | 0.34550 |
| Eigenvalues --- | 0.34681 | 0.34730 | 0.35064 | 0.35179 | 0.35315 |
| Eigenvalues --- | 0.35515 | 0.35644 | 0.35888 | 0.35986 | 0.36419 |
| Eigenvalues --- | 0.36629 | 0.38743 | 0.41576 | 0.42118 | 0.43216 |
| Eigenvalues --- | 0.45475 | 0.46197 | 0.47367 | 0.49386 | 0.54809 |
| Eigenvalues --- | 0.58203 | 0.60602 | 1.30416 |         |         |

RFO step: Lambda=-2.27429776D-04 EMin= 4.23981144D-04

Quartic linear search produced a step of -0.02650.

|             |            |            |           |            |
|-------------|------------|------------|-----------|------------|
| Iteration 1 | RMS(Cart)= | 0.03443882 | RMS(Int)= | 0.00050477 |
| Iteration 2 | RMS(Cart)= | 0.00148199 | RMS(Int)= | 0.00022172 |
| Iteration 3 | RMS(Cart)= | 0.00000116 | RMS(Int)= | 0.00022172 |
| Iteration 4 | RMS(Cart)= | 0.00000000 | RMS(Int)= | 0.00022172 |

| Variable | Old X   | -DE/DX   | Delta X  |          |          | New X   |
|----------|---------|----------|----------|----------|----------|---------|
|          |         |          | (Linear) | (Quad)   | (Total)  |         |
| R1       | 2.56487 | -0.00002 | 0.00001  | -0.00021 | -0.00020 | 2.56467 |
| R2       | 2.62266 | -0.00029 | -0.00001 | -0.00045 | -0.00046 | 2.62220 |
| R3       | 2.03393 | -0.00001 | 0.00000  | 0.00007  | 0.00007  | 2.03401 |
| R4       | 2.62357 | 0.00048  | 0.00004  | -0.00003 | 0.00000  | 2.62357 |
| R5       | 2.03092 | -0.00001 | 0.00000  | -0.00003 | -0.00003 | 2.03089 |
| R6       | 2.54550 | -0.00035 | -0.00004 | -0.00027 | -0.00031 | 2.54519 |
| R7       | 2.70113 | -0.00041 | -0.00005 | 0.00016  | 0.00011  | 2.70124 |
| R8       | 2.52020 | -0.00021 | -0.00001 | 0.00086  | 0.00085  | 2.52105 |
| R9       | 2.09289 | 0.00065  | 0.00008  | -0.00057 | -0.00049 | 2.09240 |
| R10      | 2.78129 | 0.00054  | 0.00007  | 0.00008  | 0.00015  | 2.78144 |
| R11      | 2.89831 | -0.00057 | 0.00003  | -0.00156 | -0.00153 | 2.89678 |
| R12      | 2.06003 | 0.00020  | 0.00000  | 0.00008  | 0.00009  | 2.06012 |
| R13      | 2.06157 | -0.00008 | -0.00002 | 0.00032  | 0.00029  | 2.06186 |
| R14      | 2.07009 | -0.00002 | -0.00001 | -0.00003 | -0.00005 | 2.07004 |
| R15      | 2.08152 | -0.00040 | -0.00004 | 0.00019  | 0.00014  | 2.08167 |

|     |         |          |          |          |          |         |
|-----|---------|----------|----------|----------|----------|---------|
| R16 | 2.74961 | 0.00066  | 0.00005  | 0.00034  | 0.00039  | 2.75000 |
| R17 | 4.23705 | 0.00004  | -0.00070 | 0.00175  | 0.00104  | 4.23809 |
| R18 | 2.50600 | 0.00022  | 0.00001  | -0.00006 | -0.00005 | 2.50595 |
| R19 | 2.05834 | -0.00032 | -0.00004 | -0.00017 | -0.00021 | 2.05812 |
| R20 | 2.04363 | -0.00001 | 0.00000  | -0.00003 | -0.00003 | 2.04360 |
| R21 | 2.04718 | -0.00003 | 0.00000  | -0.00010 | -0.00010 | 2.04708 |
| R22 | 1.91472 | 0.00007  | -0.00001 | 0.00019  | 0.00018  | 1.91490 |
| R23 | 1.92425 | 0.00023  | 0.00004  | -0.00150 | -0.00134 | 1.92291 |
| R24 | 3.98304 | 0.00024  | -0.00091 | 0.01679  | 0.01583  | 3.99887 |
| R25 | 2.75700 | 0.00330  | 0.00043  | -0.00424 | -0.00451 | 2.75249 |
| R26 | 2.72909 | 0.00009  | -0.00015 | 0.00312  | 0.00324  | 2.73233 |
| R27 | 2.05548 | -0.00004 | 0.00000  | -0.00022 | -0.00022 | 2.05525 |
| R28 | 2.05319 | 0.00002  | 0.00001  | -0.00017 | -0.00016 | 2.05302 |
| R29 | 2.75708 | -0.00109 | -0.00021 | 0.00136  | 0.00157  | 2.75866 |
| R30 | 2.05683 | 0.00038  | 0.00002  | -0.00019 | -0.00017 | 2.05666 |
| R31 | 2.84251 | -0.00032 | -0.00002 | 0.00012  | 0.00010  | 2.84261 |
| R32 | 2.06687 | -0.00009 | -0.00001 | 0.00019  | 0.00018  | 2.06705 |
| R33 | 2.06761 | 0.00013  | 0.00000  | 0.00026  | 0.00026  | 2.06787 |
| R34 | 2.06502 | 0.00006  | 0.00001  | -0.00011 | -0.00011 | 2.06492 |
| A1  | 1.87145 | 0.00000  | 0.00002  | -0.00022 | -0.00020 | 1.87125 |
| A2  | 2.28110 | -0.00009 | -0.00002 | 0.00032  | 0.00029  | 2.28139 |
| A3  | 2.13061 | 0.00009  | 0.00001  | -0.00010 | -0.00009 | 2.13052 |
| A4  | 1.86657 | -0.00033 | -0.00004 | 0.00023  | 0.00019  | 1.86676 |
| A5  | 2.27357 | 0.00023  | 0.00005  | -0.00096 | -0.00090 | 2.27266 |
| A6  | 2.14302 | 0.00010  | -0.00001 | 0.00070  | 0.00069  | 2.14371 |
| A7  | 1.89577 | 0.00023  | 0.00003  | 0.00019  | 0.00023  | 1.89599 |
| A8  | 2.25366 | -0.00050 | 0.00001  | -0.00041 | -0.00039 | 2.25327 |
| A9  | 2.13375 | 0.00027  | -0.00004 | 0.00021  | 0.00017  | 2.13392 |
| A10 | 1.89035 | -0.00023 | 0.00000  | -0.00053 | -0.00054 | 1.88981 |
| A11 | 2.13317 | 0.00283  | 0.00023  | 0.00374  | 0.00397  | 2.13714 |
| A12 | 2.25942 | -0.00261 | -0.00024 | -0.00309 | -0.00333 | 2.25608 |
| A13 | 1.90035 | 0.00034  | 0.00000  | 0.00038  | 0.00038  | 1.90073 |
| A14 | 2.20680 | 0.00020  | 0.00004  | -0.00265 | -0.00262 | 2.20418 |
| A15 | 2.17357 | -0.00052 | -0.00004 | 0.00254  | 0.00251  | 2.17608 |
| A16 | 1.95850 | 0.00070  | 0.00001  | 0.00139  | 0.00142  | 1.95992 |
| A17 | 1.87357 | -0.00024 | 0.00006  | -0.00255 | -0.00250 | 1.87107 |
| A18 | 1.89420 | -0.00022 | -0.00008 | -0.00078 | -0.00087 | 1.89334 |
| A19 | 1.91339 | -0.00048 | 0.00005  | -0.00112 | -0.00108 | 1.91231 |
| A20 | 1.92847 | -0.00005 | 0.00000  | 0.00099  | 0.00098  | 1.92945 |
| A21 | 1.89384 | 0.00028  | -0.00003 | 0.00203  | 0.00200  | 1.89584 |
| A22 | 1.90982 | 0.00046  | -0.00004 | 0.00208  | 0.00204  | 1.91186 |
| A23 | 1.89049 | 0.00044  | 0.00005  | -0.00030 | -0.00024 | 1.89025 |
| A24 | 1.88217 | -0.00121 | 0.00002  | -0.00271 | -0.00272 | 1.87946 |
| A25 | 1.87409 | -0.00017 | 0.00001  | 0.00097  | 0.00097  | 1.87506 |

|     |          |          |          |          |          |          |
|-----|----------|----------|----------|----------|----------|----------|
| A26 | 1.89987  | 0.00077  | 0.00012  | -0.00159 | -0.00147 | 1.89840  |
| A27 | 2.00614  | -0.00024 | -0.00016 | 0.00169  | 0.00155  | 2.00768  |
| A28 | 2.15764  | 0.00029  | 0.00007  | 0.00009  | 0.00016  | 2.15781  |
| A29 | 1.94446  | 0.00014  | 0.00003  | 0.00014  | 0.00017  | 1.94462  |
| A30 | 2.18106  | -0.00043 | -0.00010 | -0.00023 | -0.00033 | 2.18073  |
| A31 | 2.07365  | 0.00010  | 0.00002  | 0.00018  | 0.00020  | 2.07386  |
| A32 | 2.16437  | -0.00007 | -0.00003 | 0.00009  | 0.00006  | 2.16443  |
| A33 | 2.04516  | -0.00002 | 0.00001  | -0.00027 | -0.00026 | 2.04490  |
| A34 | 1.94209  | 0.00054  | -0.00005 | -0.00303 | -0.00284 | 1.93925  |
| A35 | 1.91482  | -0.00175 | 0.00012  | -0.00336 | -0.00315 | 1.91168  |
| A36 | 1.88535  | 0.00080  | 0.00001  | 0.00175  | 0.00166  | 1.88701  |
| A37 | 2.09243  | -0.00067 | -0.00007 | -0.01533 | -0.01518 | 2.07725  |
| A38 | 2.07863  | 0.00083  | 0.00015  | 0.01089  | 0.01079  | 2.08942  |
| A39 | 1.99385  | 0.00160  | 0.00014  | 0.00460  | 0.00447  | 1.99833  |
| A40 | 2.01177  | -0.00111 | -0.00008 | -0.00544 | -0.00535 | 2.00641  |
| A41 | 2.01988  | 0.00005  | -0.00004 | 0.00327  | 0.00325  | 2.02313  |
| A42 | 2.02838  | 0.00058  | 0.00041  | -0.00178 | -0.00192 | 2.02646  |
| A43 | 2.14008  | -0.00110 | -0.00031 | -0.00593 | -0.00572 | 2.13436  |
| A44 | 1.97848  | -0.00155 | -0.00007 | -0.00925 | -0.00924 | 1.96924  |
| A45 | 2.02143  | 0.00142  | 0.00015  | 0.00587  | 0.00581  | 2.02725  |
| A46 | 2.02996  | 0.00054  | -0.00007 | 0.00642  | 0.00638  | 2.03635  |
| A47 | 2.63529  | -0.00051 | -0.00023 | -0.00083 | -0.00271 | 2.63258  |
| A48 | 2.59010  | -0.00124 | -0.00019 | -0.00626 | -0.00789 | 2.58221  |
| A49 | 1.93146  | -0.00025 | -0.00004 | -0.00009 | -0.00013 | 1.93133  |
| A50 | 1.91319  | 0.00045  | 0.00003  | 0.00173  | 0.00176  | 1.91495  |
| A51 | 1.94381  | -0.00007 | 0.00000  | -0.00064 | -0.00064 | 1.94317  |
| A52 | 1.87781  | 0.00000  | 0.00000  | 0.00070  | 0.00070  | 1.87851  |
| A53 | 1.89720  | 0.00005  | -0.00001 | -0.00080 | -0.00080 | 1.89639  |
| A54 | 1.89887  | -0.00018 | 0.00001  | -0.00089 | -0.00088 | 1.89799  |
| A55 | 3.42052  | -0.00149 | -0.00119 | 0.01898  | 0.01778  | 3.43830  |
| A56 | 2.70331  | -0.00258 | 0.00226  | -0.03676 | -0.03505 | 2.66826  |
| A57 | 2.84508  | 0.00077  | -0.00046 | 0.02461  | 0.02415  | 2.86923  |
| A58 | 3.11852  | -0.00031 | 0.00075  | -0.02251 | -0.02193 | 3.09660  |
| D1  | 0.00073  | 0.00016  | 0.00009  | -0.00275 | -0.00265 | -0.00192 |
| D2  | -3.13347 | -0.00013 | -0.00009 | 0.00087  | 0.00078  | -3.13270 |
| D3  | 3.13587  | 0.00022  | 0.00013  | -0.00363 | -0.00350 | 3.13237  |
| D4  | 0.00167  | -0.00007 | -0.00005 | -0.00002 | -0.00007 | 0.00160  |
| D5  | -0.01431 | 0.00034  | 0.00014  | 0.00345  | 0.00359  | -0.01072 |
| D6  | -3.08293 | 0.00003  | 0.00001  | -0.00060 | -0.00058 | -3.08351 |
| D7  | 3.13306  | 0.00029  | 0.00010  | 0.00424  | 0.00434  | 3.13740  |
| D8  | 0.06444  | -0.00002 | -0.00003 | 0.00019  | 0.00017  | 0.06461  |
| D9  | 0.01293  | -0.00060 | -0.00029 | 0.00114  | 0.00085  | 0.01378  |
| D10 | -3.13302 | -0.00027 | -0.00022 | 0.00123  | 0.00102  | -3.13200 |
| D11 | -3.13537 | -0.00034 | -0.00012 | -0.00215 | -0.00227 | -3.13764 |

|     |          |          |          |          |          |          |
|-----|----------|----------|----------|----------|----------|----------|
| D12 | 0.00186  | -0.00001 | -0.00005 | -0.00205 | -0.00211 | -0.00025 |
| D13 | -0.02199 | 0.00082  | 0.00038  | 0.00102  | 0.00140  | -0.02060 |
| D14 | 3.09808  | 0.00044  | 0.00005  | 0.00618  | 0.00625  | 3.10433  |
| D15 | 3.12360  | 0.00052  | 0.00031  | 0.00094  | 0.00124  | 3.12485  |
| D16 | -0.03951 | 0.00015  | -0.00001 | 0.00609  | 0.00610  | -0.03342 |
| D17 | 0.08441  | -0.00009 | 0.00030  | -0.01349 | -0.01320 | 0.07121  |
| D18 | -3.04979 | -0.00039 | 0.00019  | -0.01408 | -0.01389 | -3.06368 |
| D19 | -3.06207 | 0.00027  | 0.00037  | -0.01339 | -0.01301 | -3.07508 |
| D20 | 0.08691  | -0.00002 | 0.00027  | -0.01398 | -0.01371 | 0.07321  |
| D21 | 0.02247  | -0.00072 | -0.00032 | -0.00275 | -0.00307 | 0.01940  |
| D22 | 3.09280  | -0.00038 | -0.00019 | 0.00094  | 0.00076  | 3.09356  |
| D23 | -3.09554 | -0.00040 | 0.00003  | -0.00852 | -0.00848 | -3.10402 |
| D24 | -0.02521 | -0.00006 | 0.00016  | -0.00483 | -0.00465 | -0.02986 |
| D25 | 1.34069  | 0.00039  | 0.00257  | -0.03831 | -0.03574 | 1.30495  |
| D26 | -2.83916 | 0.00007  | 0.00268  | -0.04054 | -0.03786 | -2.87703 |
| D27 | -0.79546 | 0.00015  | 0.00263  | -0.03993 | -0.03730 | -0.83277 |
| D28 | -1.71706 | 0.00000  | 0.00242  | -0.04283 | -0.04041 | -1.75747 |
| D29 | 0.38627  | -0.00033 | 0.00252  | -0.04506 | -0.04253 | 0.34374  |
| D30 | 2.42997  | -0.00024 | 0.00248  | -0.04444 | -0.04197 | 2.38800  |
| D31 | -1.09904 | -0.00021 | 0.00005  | 0.00233  | 0.00238  | -1.09666 |
| D32 | 0.93889  | 0.00009  | 0.00007  | 0.00446  | 0.00453  | 0.94342  |
| D33 | 3.12011  | -0.00069 | -0.00008 | 0.00464  | 0.00457  | 3.12468  |
| D34 | 3.10402  | -0.00003 | -0.00006 | 0.00539  | 0.00533  | 3.10935  |
| D35 | -1.14123 | 0.00027  | -0.00004 | 0.00752  | 0.00748  | -1.13376 |
| D36 | 1.03999  | -0.00052 | -0.00019 | 0.00770  | 0.00751  | 1.04750  |
| D37 | 1.01756  | -0.00004 | -0.00005 | 0.00298  | 0.00293  | 1.02049  |
| D38 | 3.05549  | 0.00025  | -0.00003 | 0.00511  | 0.00508  | 3.06057  |
| D39 | -1.04648 | -0.00053 | -0.00018 | 0.00529  | 0.00512  | -1.04136 |
| D40 | 2.98769  | 0.00018  | -0.00192 | 0.02191  | 0.01993  | 3.00762  |
| D41 | -1.21011 | 0.00037  | -0.00186 | 0.01999  | 0.01818  | -1.19193 |
| D42 | 0.91728  | -0.00012 | -0.00195 | 0.02184  | 0.01984  | 0.93712  |
| D43 | 3.00267  | 0.00007  | -0.00189 | 0.01993  | 0.01809  | 3.02076  |
| D44 | -1.18509 | -0.00031 | -0.00195 | 0.02064  | 0.01864  | -1.16645 |
| D45 | 0.90030  | -0.00012 | -0.00189 | 0.01873  | 0.01689  | 0.91719  |
| D46 | -3.12881 | -0.00035 | -0.00009 | -0.00164 | -0.00173 | -3.13054 |
| D47 | 0.01150  | -0.00010 | -0.00001 | -0.00150 | -0.00152 | 0.00998  |
| D48 | 0.00439  | -0.00001 | 0.00003  | -0.00097 | -0.00094 | 0.00345  |
| D49 | -3.13849 | 0.00024  | 0.00011  | -0.00083 | -0.00072 | -3.13921 |
| D50 | 1.80678  | 0.00076  | -0.00323 | 0.06082  | 0.05801  | 1.86479  |
| D51 | -1.03243 | 0.00031  | 0.00553  | -0.07876 | -0.07340 | -1.10583 |
| D52 | -2.43275 | -0.00006 | -0.00281 | 0.05114  | 0.04850  | -2.38425 |
| D53 | 1.01122  | -0.00052 | 0.00596  | -0.08844 | -0.08291 | 0.92831  |
| D54 | -2.69858 | -0.00059 | -0.00019 | 0.00336  | 0.00326  | -2.69533 |
| D55 | -0.00415 | -0.00036 | -0.00014 | 0.00185  | 0.00181  | -0.00234 |

|     |          |          |          |          |          |          |
|-----|----------|----------|----------|----------|----------|----------|
| D56 | -0.02404 | -0.00008 | -0.00010 | 0.00149  | 0.00140  | -0.02264 |
| D57 | 2.67039  | 0.00014  | -0.00006 | -0.00003 | -0.00004 | 2.67035  |
| D58 | 1.08030  | 0.00020  | 0.00741  | -0.09217 | -0.08466 | 0.99563  |
| D59 | -1.32205 | -0.00047 | 0.00739  | -0.09650 | -0.08892 | -1.41097 |
| D60 | 1.36329  | 0.00003  | -0.00719 | 0.09985  | 0.09207  | 1.45536  |
| D61 | -1.04844 | -0.00067 | -0.00716 | 0.09360  | 0.08596  | -0.96249 |
| D62 | 2.56435  | -0.00024 | -0.00020 | -0.00038 | -0.00048 | 2.56387  |
| D63 | -1.65042 | -0.00011 | -0.00021 | 0.00150  | 0.00140  | -1.64902 |
| D64 | 0.45186  | -0.00007 | -0.00017 | 0.00112  | 0.00106  | 0.45292  |
| D65 | 1.36517  | -0.00014 | -0.00006 | -0.00402 | -0.00415 | 1.36102  |
| D66 | -2.84961 | -0.00002 | -0.00006 | -0.00213 | -0.00227 | -2.85187 |
| D67 | -0.74732 | 0.00002  | -0.00003 | -0.00251 | -0.00261 | -0.74993 |
| D68 | -1.02478 | 0.00000  | -0.00004 | -0.00385 | -0.00392 | -1.02870 |
| D69 | 1.04363  | 0.00013  | -0.00004 | -0.00196 | -0.00203 | 1.04160  |
| D70 | -3.13727 | 0.00016  | -0.00001 | -0.00234 | -0.00238 | -3.13965 |

| Item                 | Value    | Threshold | Converged? |
|----------------------|----------|-----------|------------|
| Maximum Force        | 0.003300 | 0.000450  | NO         |
| RMS Force            | 0.000652 | 0.000300  | NO         |
| Maximum Displacement | 0.141079 | 0.001800  | NO         |
| RMS Displacement     | 0.034849 | 0.001200  | NO         |

Predicted change in Energy=-1.178546D-04

GradGradGradGradGradGradGradGradGradGradGradGradGradGradGradGradGradGradGrad

Input orientation:

| Center Number | Atomic Number | Atomic Type | Coordinates (Angstroms) |           |           |
|---------------|---------------|-------------|-------------------------|-----------|-----------|
|               |               |             | X                       | Y         | Z         |
| 1             | 6             | 0           | -2.663413               | 2.081051  | -0.259313 |
| 2             | 6             | 0           | -3.562183               | 1.114561  | 0.056916  |
| 3             | 7             | 0           | -2.860262               | -0.080582 | 0.136996  |
| 4             | 6             | 0           | -1.559504               | 0.166982  | -0.109498 |
| 5             | 7             | 0           | -1.422795               | 1.468864  | -0.366763 |
| 6             | 6             | 0           | -0.139479               | 2.140728  | -0.627748 |
| 7             | 6             | 0           | 0.385643                | 2.889572  | 0.602413  |
| 8             | 1             | 0           | -2.795662               | 3.136867  | -0.421455 |
| 9             | 1             | 0           | -4.622649               | 1.179331  | 0.218776  |
| 10            | 1             | 0           | 0.574699                | 1.370074  | -0.918453 |
| 11            | 1             | 0           | -0.272347               | 2.826638  | -1.465814 |
| 12            | 1             | 0           | -0.316391               | 3.685292  | 0.874291  |
| 13            | 1             | 0           | 0.426332                | 2.182792  | 1.446373  |
| 14            | 35            | 0           | 0.122408                | -2.643914 | 0.285244  |
| 15            | 1             | 0           | -0.786197               | -0.624487 | -0.069815 |
| 16            | 6             | 0           | -3.345181               | -1.393086 | 0.429350  |

|    |   |   |           |           |           |
|----|---|---|-----------|-----------|-----------|
| 17 | 6 | 0 | -4.627971 | -1.680117 | 0.604221  |
| 18 | 1 | 0 | -2.530326 | -2.112743 | 0.494703  |
| 19 | 1 | 0 | -4.907697 | -2.699416 | 0.832835  |
| 20 | 1 | 0 | -5.426929 | -0.952008 | 0.533559  |
| 21 | 7 | 0 | 1.660182  | 3.492495  | 0.242197  |
| 22 | 1 | 0 | 1.994975  | 4.104691  | 0.977010  |
| 23 | 1 | 0 | 2.353669  | 2.761816  | 0.098613  |
| 24 | 6 | 0 | 3.434158  | -0.255784 | -1.181505 |
| 25 | 6 | 0 | 3.342326  | -0.531585 | 0.245748  |
| 26 | 8 | 0 | 2.927093  | 0.761987  | -0.288408 |
| 27 | 1 | 0 | 4.406645  | -0.032272 | -1.614137 |
| 28 | 1 | 0 | 2.698349  | -0.678216 | -1.860054 |
| 29 | 1 | 0 | 2.502330  | -1.147380 | 0.561469  |
| 30 | 6 | 0 | 4.547877  | -0.521357 | 1.145358  |
| 31 | 1 | 0 | 4.279681  | -0.170283 | 2.146007  |
| 32 | 1 | 0 | 4.942663  | -1.537034 | 1.245219  |
| 33 | 1 | 0 | 5.335072  | 0.123891  | 0.747879  |

-----  
Distance matrix (angstroms):

|    |    | 1        | 2        | 3        | 4        | 5        |
|----|----|----------|----------|----------|----------|----------|
| 1  | C  | 0.000000 |          |          |          |          |
| 2  | C  | 1.357163 | 0.000000 |          |          |          |
| 3  | N  | 2.206460 | 1.388334 | 0.000000 |          |          |
| 4  | C  | 2.214660 | 2.221783 | 1.346855 | 0.000000 |          |
| 5  | N  | 1.387606 | 2.209528 | 2.172756 | 1.334081 | 0.000000 |
| 6  | C  | 2.551381 | 3.638226 | 3.594678 | 2.486108 | 1.471875 |
| 7  | C  | 3.270019 | 4.362747 | 4.424288 | 3.420952 | 2.495629 |
| 8  | H  | 1.076350 | 2.214976 | 3.266193 | 3.231969 | 2.161016 |
| 9  | H  | 2.209134 | 1.074701 | 2.167966 | 3.242756 | 3.265846 |
| 10 | H  | 3.380137 | 4.257984 | 3.875221 | 2.580051 | 2.074634 |
| 11 | H  | 2.780062 | 4.009107 | 4.209303 | 3.251175 | 2.091649 |
| 12 | H  | 3.060581 | 4.220417 | 4.603986 | 3.858973 | 2.770721 |
| 13 | H  | 3.530756 | 4.356600 | 4.199885 | 3.229206 | 2.686341 |
| 14 | Br | 5.512044 | 5.268252 | 3.935604 | 3.299362 | 4.441589 |
| 15 | H  | 3.298452 | 3.278177 | 2.154148 | 1.107250 | 2.208066 |
| 16 | C  | 3.606756 | 2.544423 | 1.429435 | 2.431627 | 3.538379 |
| 17 | C  | 4.330308 | 3.040670 | 2.429323 | 3.651939 | 4.596961 |
| 18 | H  | 4.263116 | 3.416412 | 2.089615 | 2.550431 | 3.846642 |
| 19 | H  | 5.392815 | 4.118115 | 3.396244 | 4.507174 | 5.564003 |
| 20 | H  | 4.179128 | 2.824035 | 2.739420 | 4.077086 | 4.764902 |
| 21 | N  | 4.575714 | 5.741254 | 5.763017 | 4.642102 | 3.737735 |
| 22 | H  | 5.227255 | 6.377261 | 6.464941 | 5.414830 | 4.520450 |
| 23 | H  | 5.075693 | 6.141050 | 5.938499 | 4.699936 | 4.018704 |
| 24 | C  | 6.594817 | 7.236043 | 6.433418 | 5.124900 | 5.218066 |

|    |    |          |          |          |           |          |
|----|----|----------|----------|----------|-----------|----------|
| 25 | C  | 6.568854 | 7.100542 | 6.219914 | 4.964084  | 5.204166 |
| 26 | O  | 5.744086 | 6.508015 | 5.863819 | 4.529414  | 4.407646 |
| 27 | H  | 7.502492 | 8.222521 | 7.475074 | 6.156182  | 6.147497 |
| 28 | H  | 6.238943 | 6.788452 | 5.936626 | 4.680611  | 4.880952 |
| 29 | H  | 6.146653 | 6.492247 | 5.484126 | 4.321602  | 4.807594 |
| 30 | C  | 7.794121 | 8.344699 | 7.489433 | 6.272845  | 6.472744 |
| 31 | H  | 7.685090 | 8.216444 | 7.417746 | 6.268742  | 6.443528 |
| 32 | H  | 8.556082 | 8.987515 | 8.014677 | 6.856902  | 7.221701 |
| 33 | H  | 8.295822 | 8.978864 | 8.220613 | 6.947815  | 6.979982 |
|    |    | 6        | 7        | 8        | 9         | 10       |
| 6  | C  | 0.000000 |          |          |           |          |
| 7  | C  | 1.532910 | 0.000000 |          |           |          |
| 8  | H  | 2.844320 | 3.351144 | 0.000000 |           |          |
| 9  | H  | 4.662585 | 5.306137 | 2.753130 | 0.000000  |          |
| 10 | H  | 1.090169 | 2.158158 | 3.837695 | 5.323730  | 0.000000 |
| 11 | H  | 1.091092 | 2.171284 | 2.748462 | 4.947382  | 1.771630 |
| 12 | H  | 2.161734 | 1.095418 | 2.850703 | 5.025275  | 3.060752 |
| 13 | H  | 2.150322 | 1.101572 | 3.844513 | 5.292082  | 2.504980 |
| 14 | Br | 4.878006 | 5.548816 | 6.513984 | 6.094029  | 4.214920 |
| 15 | H  | 2.894123 | 3.764799 | 4.278947 | 4.249166  | 2.559394 |
| 16 | C  | 4.886903 | 5.682443 | 4.641802 | 2.879861  | 4.981675 |
| 17 | C  | 6.021891 | 6.783686 | 5.254780 | 2.885315  | 6.220127 |
| 18 | H  | 5.006802 | 5.791168 | 5.335556 | 3.910461  | 4.875265 |
| 19 | H  | 6.949547 | 7.701255 | 6.332151 | 3.937385  | 7.048718 |
| 20 | H  | 6.234643 | 6.967674 | 4.955252 | 2.299687  | 6.596965 |
| 21 | N  | 2.413060 | 1.455239 | 4.519010 | 6.695165  | 2.651425 |
| 22 | H  | 3.314859 | 2.051045 | 5.083561 | 7.274998  | 3.617747 |
| 23 | H  | 2.670044 | 2.035500 | 5.189098 | 7.154558  | 2.477116 |
| 24 | C  | 4.338295 | 4.729595 | 7.134312 | 8.302559  | 3.299866 |
| 25 | C  | 4.475178 | 4.535801 | 7.181754 | 8.146704  | 3.554072 |
| 26 | O  | 3.379341 | 3.432076 | 6.197393 | 7.578259  | 2.510076 |
| 27 | H  | 5.134407 | 5.442308 | 7.958590 | 9.292776  | 4.139367 |
| 28 | H  | 4.185486 | 4.913395 | 6.841679 | 7.833838  | 3.097094 |
| 29 | H  | 4.382356 | 4.558401 | 6.884013 | 7.503089  | 3.499072 |
| 30 | C  | 5.674673 | 5.408642 | 8.352549 | 9.372803  | 4.860346 |
| 31 | H  | 5.706440 | 5.187381 | 8.221288 | 9.207994  | 5.048812 |
| 32 | H  | 6.546916 | 6.385488 | 9.192650 | 9.996370  | 5.675549 |
| 33 | H  | 5.994221 | 5.671595 | 8.749525 | 10.027467 | 5.195265 |
|    |    | 11       | 12       | 13       | 14        | 15       |
| 11 | H  | 0.000000 |          |          |           |          |
| 12 | H  | 2.493053 | 0.000000 |          |           |          |
| 13 | H  | 3.063253 | 1.770994 | 0.000000 |           |          |
| 14 | Br | 5.757515 | 6.371685 | 4.973699 | 0.000000  |          |
| 15 | H  | 3.758074 | 4.436919 | 3.413191 | 2.242703  | 0.000000 |

|    |   |          |           |          |           |           |
|----|---|----------|-----------|----------|-----------|-----------|
| 16 | C | 5.553380 | 5.929710  | 5.295805 | 3.689107  | 2.718145  |
| 17 | C | 6.600557 | 6.888416  | 6.416952 | 4.857649  | 4.040781  |
| 18 | H | 5.774044 | 6.217942  | 5.300861 | 2.713488  | 2.361265  |
| 19 | H | 7.570174 | 7.864242  | 7.257014 | 5.060128  | 4.701794  |
| 20 | H | 6.696669 | 6.909287  | 6.702303 | 5.806837  | 4.691239  |
| 21 | N | 2.663707 | 2.084120  | 2.165120 | 6.326304  | 4.799131  |
| 22 | H | 3.569532 | 2.351353  | 2.524804 | 7.037664  | 5.585328  |
| 23 | H | 3.057383 | 2.929796  | 2.422055 | 5.851092  | 4.621058  |
| 24 | C | 4.829113 | 5.815926  | 4.679681 | 4.338457  | 4.379862  |
| 25 | C | 5.222353 | 5.618125  | 4.160813 | 3.851151  | 4.141607  |
| 26 | O | 3.985660 | 4.518602  | 3.358862 | 4.449213  | 3.969712  |
| 27 | H | 5.485283 | 6.505353  | 5.487815 | 5.364980  | 5.449885  |
| 28 | H | 4.611340 | 5.967034  | 4.927462 | 3.886096  | 3.917895  |
| 29 | H | 5.253716 | 5.603370  | 4.022794 | 2.824879  | 3.389151  |
| 30 | C | 6.423539 | 6.436651  | 4.938640 | 4.982953  | 5.471712  |
| 31 | H | 6.538176 | 6.132421  | 4.568889 | 5.183069  | 5.547908  |
| 32 | H | 7.320359 | 7.420776  | 5.854470 | 5.038014  | 5.948268  |
| 33 | H | 6.606695 | 6.681211  | 5.368677 | 5.920020  | 6.220822  |
|    |   | 16       | 17        | 18       | 19        | 20        |
| 16 | C | 0.000000 |           |          |           |           |
| 17 | C | 1.326091 | 0.000000  |          |           |           |
| 18 | H | 1.089112 | 2.144592  | 0.000000 |           |           |
| 19 | H | 2.076235 | 1.081425  | 2.471924 | 0.000000  |           |
| 20 | H | 2.130513 | 1.083268  | 3.120757 | 1.847323  | 0.000000  |
| 21 | N | 6.996970 | 8.150328  | 7.003057 | 9.045753  | 8.370522  |
| 22 | H | 7.683928 | 8.801500  | 7.705028 | 9.693479  | 8.991747  |
| 23 | H | 7.060417 | 8.290338  | 6.911702 | 9.115458  | 8.632460  |
| 24 | C | 7.060294 | 8.379468  | 6.467847 | 8.922749  | 9.052350  |
| 25 | C | 6.745268 | 8.060600  | 6.086878 | 8.550265  | 8.784044  |
| 26 | O | 6.670902 | 7.989972  | 6.217777 | 8.638427  | 8.567560  |
| 27 | H | 8.131326 | 9.447793  | 7.543019 | 9.992912  | 10.107309 |
| 28 | H | 6.502051 | 7.794320  | 5.911158 | 8.317982  | 8.474933  |
| 29 | H | 5.854162 | 7.150303  | 5.124843 | 7.575682  | 7.931715  |
| 30 | C | 7.973264 | 9.264543  | 7.284012 | 9.708218  | 10.002826 |
| 31 | H | 7.910795 | 9.165313  | 7.271599 | 9.619191  | 9.870631  |
| 32 | H | 8.329149 | 9.593143  | 7.532615 | 9.927275  | 10.410435 |
| 33 | H | 8.817566 | 10.126071 | 8.181144 | 10.625092 | 10.817770 |
|    |   | 21       | 22        | 23       | 24        | 25        |
| 21 | N | 0.000000 |           |          |           |           |
| 22 | H | 1.013322 | 0.000000  |          |           |           |
| 23 | H | 1.017561 | 1.644249  | 0.000000 |           |           |
| 24 | C | 4.384462 | 5.073871  | 3.451387 | 0.000000  |           |
| 25 | C | 4.361518 | 4.883150  | 3.441741 | 1.456555  | 0.000000  |
| 26 | O | 3.056514 | 3.693751  | 2.116109 | 1.445889  | 1.459818  |



|    |   |          |          |          |          |          |
|----|---|----------|----------|----------|----------|----------|
| 27 | H | 4.838699 | 5.444690 | 3.867189 | 1.087593 | 2.200287 |
| 28 | H | 4.784566 | 5.605342 | 3.973538 | 1.086413 | 2.206946 |
| 29 | H | 4.726477 | 5.292856 | 3.939308 | 2.168226 | 1.088336 |
| 30 | C | 5.026479 | 5.286394 | 4.085272 | 2.593297 | 1.504246 |
| 31 | H | 4.888988 | 4.986164 | 4.061840 | 3.434320 | 2.149455 |
| 32 | H | 6.089080 | 6.371017 | 5.147592 | 3.131481 | 2.137977 |
| 33 | H | 5.010790 | 5.201491 | 4.033479 | 2.734986 | 2.157040 |
|    |   | 26       | 27       | 28       | 29       | 30       |
| 26 | O | 0.000000 |          |          |          |          |
| 27 | H | 2.139504 | 0.000000 |          |          |          |
| 28 | H | 2.143963 | 1.842822 | 0.000000 |          |          |
| 29 | H | 2.132697 | 3.098894 | 2.474331 | 0.000000 |          |
| 30 | C | 2.515869 | 2.806058 | 3.532402 | 2.217452 | 0.000000 |
| 31 | H | 2.936834 | 3.764817 | 4.336719 | 2.573802 | 1.093837 |
| 32 | H | 3.420530 | 3.275292 | 3.926479 | 2.564092 | 1.094270 |
| 33 | H | 2.698040 | 2.542731 | 3.794338 | 3.110515 | 1.092708 |
|    |   | 31       | 32       | 33       |          |          |
| 31 | H | 0.000000 |          |          |          |          |
| 32 | H | 1.766062 | 0.000000 |          |          |          |
| 33 | H | 1.776274 | 1.777640 | 0.000000 |          |          |

Stoichiometry C10H18BrN3O

Framework group C1[X(C10H18BrN3O)]

Deg. of freedom 93

Full point group C1 NOp 1

Largest Abelian subgroup C1 NOp 1

Largest concise Abelian subgroup C1 NOp 1

Standard orientation:

| Center<br>Number | Atomic<br>Number | Atomic<br>Type | Coordinates (Angstroms) |          |           |
|------------------|------------------|----------------|-------------------------|----------|-----------|
|                  |                  |                | X                       | Y        | Z         |
| 1                | 6                | 0              | -2.386837               | 2.455767 | -0.228925 |
| 2                | 6                | 0              | -3.375063               | 1.557881 | 0.014181  |
| 3                | 7                | 0              | -2.788674               | 0.299467 | 0.010577  |
| 4                | 6                | 0              | -1.468083               | 0.440732 | -0.213256 |
| 5                | 7                | 0              | -1.207811               | 1.739021 | -0.375974 |
| 6                | 6                | 0              | 0.135191                | 2.304302 | -0.583865 |
| 7                | 6                | 0              | 0.715649                | 2.911114 | 0.698578  |
| 8                | 1                | 0              | -2.418267               | 3.528185 | -0.315306 |
| 9                | 1                | 0              | -4.426407               | 1.710239 | 0.176801  |
| 10               | 1                | 0              | 0.777134                | 1.492650 | -0.926791 |
| 11               | 1                | 0              | 0.075345                | 3.057535 | -1.370974 |
| 12               | 1                | 0              | 0.088324                | 3.747857 | 1.024564  |
| 13               | 1                | 0              | 0.681714                | 2.145391 | 1.489766  |

|    |    |   |           |           |           |
|----|----|---|-----------|-----------|-----------|
| 14 | 35 | 0 | -0.060093 | -2.536573 | -0.015765 |
| 15 | 1  | 0 | -0.772516 | -0.420646 | -0.227948 |
| 16 | 6  | 0 | -3.396959 | -0.979178 | 0.206392  |
| 17 | 6  | 0 | -4.702633 | -1.156227 | 0.356013  |
| 18 | 1  | 0 | -2.653577 | -1.774970 | 0.222593  |
| 19 | 1  | 0 | -5.078609 | -2.158435 | 0.509966  |
| 20 | 1  | 0 | -5.429346 | -0.353155 | 0.335174  |
| 21 | 7  | 0 | 2.044464  | 3.415818  | 0.386736  |
| 22 | 1  | 0 | 2.427618  | 3.940044  | 1.164682  |
| 23 | 1  | 0 | 2.668071  | 2.635339  | 0.193352  |
| 24 | 6  | 0 | 3.474719  | -0.371612 | -1.296492 |
| 25 | 6  | 0 | 3.343277  | -0.738416 | 0.106978  |
| 26 | 8  | 0 | 3.056037  | 0.623135  | -0.334318 |
| 27 | 1  | 0 | 4.468102  | -0.210170 | -1.708782 |
| 28 | 1  | 0 | 2.709483  | -0.673751 | -2.006013 |
| 29 | 1  | 0 | 2.446326  | -1.293529 | 0.374939  |
| 30 | 6  | 0 | 4.535469  | -0.905436 | 1.008943  |
| 31 | 1  | 0 | 4.291256  | -0.602821 | 2.031324  |
| 32 | 1  | 0 | 4.832646  | -1.958209 | 1.036943  |
| 33 | 1  | 0 | 5.383420  | -0.310301 | 0.661376  |

-----

Rotational constants (GHZ):      0.4257458      0.2831825      0.1787776

Standard basis: 6-311++G(d,p) (5D, 7F)

There are    499 symmetry adapted cartesian basis functions of A    symmetry.

There are    482 symmetry adapted basis functions of A    symmetry.

    482 basis functions,    760 primitive gaussians,    499 cartesian basis functions

    71 alpha electrons      71 beta electrons

        nuclear repulsion energy      1305.5254000361 Hartrees.

NAtoms=    33 NActive=    33 NUniq=    33 SFac= 1.00D+00 NAtFMM=    60 NAOKFM=F

Big=F

Integral buffers will be    131072 words long.

Raffenetti 2 integral format.

Two-electron integral symmetry is turned on.

One-electron integrals computed using PRISM.

NBasis=    482 RedAO= T EigKep=    3.67D-06    NBF=    482

NBsUse=    482 1.00D-06 EigRej= -1.00D+00    NBFU=    482

Initial      guess            from            the            checkpoint            file:

"/home/suqian/liuwen/qianmengshijie/nh2po/nh2po.chk"

B after Tr=    0.000000    0.000000    0.000000

        Rot=    0.999982    0.002510    -0.000414    0.005524 Ang=    0.70 deg.

ExpMin= 3.50D-02 ExpMax= 4.40D+05 ExpMxC= 1.51D+04 IAcc=3 IRadAn=            5 AccDes=

0.00D+00

Harris functional with IExCor=    402 and IRadAn=            5 diagonalized for initial guess.

HarFok: IExCor=    402 AccDes= 0.00D+00 IRadAn=            5 IDoV= 1 UseB2=F ITyADJ=14

ICtDFT= 3500011 ScaDFX= 1.000000 1.000000 1.000000 1.000000  
 FoFCou: FMM=F IPFlag= 0 FMFlag= 100000 FMFlg1= 0  
 NFXFlg= 0 DoJE=T BraDBF=F KetDBF=T FulRan=T  
 wScrn= 0.000000 ICntrl= 500 IOpCl= 0 l1Cent= 20000004 NGrid= 0  
 NMat0= 1 NMatS0= 1 NMatT0= 0 NMatD0= 1 NMtDS0= 0

NMtDT0= 0

Petite list used in FoFCou.

Requested convergence on RMS density matrix=1.00D-08 within 128 cycles.

Requested convergence on MAX density matrix=1.00D-06.

Requested convergence on energy=1.00D-06.

No special actions if energy rises.

SCF Done: E(RB3LYP) = -3205.64781609 A.U. after 11 cycles

NFock= 11 Conv=0.62D-08 -V/T= 2.0018

Calling FoFJK, ICntrl= 2127 FMM=F ISym2X=0 l1Cent= 0 IOpClX= 0 NMat=1 NMatS=1  
 NMatT=0.

\*\*\*\*\* Axes restored to original set \*\*\*\*\*

| Center<br>Number | Atomic<br>Number | Forces (Hartrees/Bohr) |              |              |
|------------------|------------------|------------------------|--------------|--------------|
|                  |                  | X                      | Y            | Z            |
| 1                | 6                | 0.000474024            | -0.000422684 | -0.000298922 |
| 2                | 6                | -0.001173519           | 0.000317983  | -0.001297529 |
| 3                | 7                | 0.000967685            | 0.000432039  | 0.001209819  |
| 4                | 6                | -0.002117393           | -0.000764211 | -0.000733883 |
| 5                | 7                | -0.000053457           | -0.000269051 | 0.001875200  |
| 6                | 6                | 0.000450790            | 0.000191272  | -0.000585996 |
| 7                | 6                | -0.001833182           | -0.000213985 | -0.000130835 |
| 8                | 1                | -0.000100602           | -0.000059339 | 0.000078433  |
| 9                | 1                | -0.000009954           | -0.000182830 | -0.000042721 |
| 10               | 1                | 0.000420494            | 0.000131260  | 0.000198969  |
| 11               | 1                | -0.000186840           | 0.000096949  | 0.000230861  |
| 12               | 1                | -0.000143303           | -0.000188306 | 0.000354205  |
| 13               | 1                | 0.000521682            | 0.000309624  | -0.000280216 |
| 14               | 35               | 0.000377293            | 0.000095043  | -0.000012019 |
| 15               | 1                | 0.000906439            | 0.000222715  | -0.000836736 |
| 16               | 6                | 0.000535691            | 0.001103451  | 0.000786944  |
| 17               | 6                | -0.000127183           | -0.000400759 | 0.000198395  |
| 18               | 1                | -0.000414844           | -0.000075783 | -0.000359125 |
| 19               | 1                | -0.000050409           | -0.000024468 | -0.000166398 |
| 20               | 1                | -0.000003437           | 0.000005485  | -0.000086956 |
| 21               | 7                | 0.000774679            | -0.000033926 | 0.000129928  |
| 22               | 1                | -0.000104417           | 0.000322397  | -0.000106672 |
| 23               | 1                | 0.001259550            | 0.000103360  | 0.000062025  |

|    |   |              |              |              |
|----|---|--------------|--------------|--------------|
| 24 | 6 | 0.001887956  | 0.001718113  | -0.004488832 |
| 25 | 6 | -0.001121225 | -0.000576570 | 0.004665356  |
| 26 | 8 | -0.000060686 | -0.002535639 | -0.000253979 |
| 27 | 1 | -0.000331846 | 0.000750645  | -0.000701603 |
| 28 | 1 | 0.000038335  | -0.000406769 | 0.000493462  |
| 29 | 1 | -0.000438513 | 0.000269044  | 0.000453447  |
| 30 | 6 | -0.000523068 | -0.000086312 | -0.000139553 |
| 31 | 1 | 0.000060773  | 0.000053947  | -0.000135090 |
| 32 | 1 | 0.000005594  | 0.000044506  | -0.000020316 |
| 33 | 1 | 0.000112895  | 0.000072798  | -0.000059661 |

-----  
Cartesian Forces: Max 0.004665356 RMS 0.000932727

GradGradGradGradGradGradGradGradGradGradGradGradGradGradGradGradGradGradGradGrad

Berny optimization.

Using GEDIIS/GDIIS optimizer.

FormGI is forming the generalized inverse of G from B-inverse, IUseBI=4.

GSVD: received Info= 1 from GESDD.

Internal Forces: Max 0.004750345 RMS 0.000593233

Search for a local minimum.

Step number 27 out of a maximum of 172

All quantities printed in internal units (Hartrees-Bohrs-Radians)

Mixed Optimization -- En-DIIS/RFO-DIIS

Swapping is turned off.

Update second derivatives using D2CorX and points 25 26 27

DE= -1.17D-04 DEPred=-1.18D-04 R= 9.95D-01

TightC=F SS= 1.41D+00 RLast= 2.55D-01 DXNew= 7.0965D-01 7.6649D-01

Trust test= 9.95D-01 RLast= 2.55D-01 DXMaxT set to 7.10D-01

ITU= 1 0 0-1 1-1 1 1 1 1 1 1 1 1 1 0-1-1 1 1

ITU= 1-1 1 0 0-1 0

|                 |         |         |         |         |         |
|-----------------|---------|---------|---------|---------|---------|
| Eigenvalues --- | 0.00103 | 0.00123 | 0.00247 | 0.00416 | 0.00679 |
| Eigenvalues --- | 0.00727 | 0.00785 | 0.01326 | 0.01557 | 0.01874 |
| Eigenvalues --- | 0.01957 | 0.02175 | 0.02355 | 0.02387 | 0.02455 |
| Eigenvalues --- | 0.02603 | 0.02908 | 0.03031 | 0.03092 | 0.03136 |
| Eigenvalues --- | 0.03336 | 0.03510 | 0.03723 | 0.03961 | 0.04069 |
| Eigenvalues --- | 0.04388 | 0.04488 | 0.05148 | 0.05443 | 0.05741 |
| Eigenvalues --- | 0.05810 | 0.05936 | 0.07263 | 0.08615 | 0.08890 |
| Eigenvalues --- | 0.09257 | 0.09639 | 0.10790 | 0.12201 | 0.12367 |
| Eigenvalues --- | 0.12653 | 0.13353 | 0.15240 | 0.15692 | 0.15973 |
| Eigenvalues --- | 0.16000 | 0.16002 | 0.16004 | 0.16019 | 0.16082 |
| Eigenvalues --- | 0.16323 | 0.18174 | 0.20975 | 0.22071 | 0.22228 |
| Eigenvalues --- | 0.22933 | 0.23221 | 0.24865 | 0.25731 | 0.27226 |
| Eigenvalues --- | 0.29037 | 0.30148 | 0.31580 | 0.31738 | 0.32748 |
| Eigenvalues --- | 0.33675 | 0.34283 | 0.34343 | 0.34365 | 0.34551 |

|                 |         |         |         |         |         |
|-----------------|---------|---------|---------|---------|---------|
| Eigenvalues --- | 0.34686 | 0.34732 | 0.35076 | 0.35208 | 0.35350 |
| Eigenvalues --- | 0.35522 | 0.35588 | 0.35755 | 0.35892 | 0.36419 |
| Eigenvalues --- | 0.36625 | 0.38793 | 0.41277 | 0.41989 | 0.42668 |
| Eigenvalues --- | 0.45408 | 0.45498 | 0.46567 | 0.49517 | 0.54812 |
| Eigenvalues --- | 0.58025 | 0.60601 | 1.14647 |         |         |

En-DIIS/RFO-DIIS IScMMF= 0 using points: 27 26

RFO step: Lambda=-1.07111597D-04.

DidBck=F Rises=F RFO-DIIS coefs: 0.97842 0.02158

|             |            |            |           |            |
|-------------|------------|------------|-----------|------------|
| Iteration 1 | RMS(Cart)= | 0.05934864 | RMS(Int)= | 0.00137937 |
| Iteration 2 | RMS(Cart)= | 0.00302897 | RMS(Int)= | 0.00017517 |
| Iteration 3 | RMS(Cart)= | 0.00000417 | RMS(Int)= | 0.00017516 |
| Iteration 4 | RMS(Cart)= | 0.00000000 | RMS(Int)= | 0.00017516 |

| Variable | Old X   | -DE/DX   | Delta X  | Delta X  | Delta X  | New X   |
|----------|---------|----------|----------|----------|----------|---------|
|          |         |          | (Linear) | (Quad)   | (Total)  |         |
| R1       | 2.56467 | 0.00011  | 0.00000  | 0.00001  | 0.00003  | 2.56469 |
| R2       | 2.62220 | -0.00008 | 0.00001  | -0.00069 | -0.00066 | 2.62153 |
| R3       | 2.03401 | -0.00006 | 0.00000  | -0.00008 | -0.00008 | 2.03392 |
| R4       | 2.62357 | 0.00038  | 0.00000  | 0.00121  | 0.00120  | 2.62477 |
| R5       | 2.03089 | -0.00001 | 0.00000  | -0.00002 | -0.00002 | 2.03087 |
| R6       | 2.54519 | -0.00027 | 0.00001  | -0.00122 | -0.00124 | 2.54395 |
| R7       | 2.70124 | -0.00045 | 0.00000  | -0.00160 | -0.00161 | 2.69964 |
| R8       | 2.52105 | -0.00063 | -0.00002 | -0.00032 | -0.00034 | 2.52071 |
| R9       | 2.09240 | 0.00065  | 0.00001  | 0.00056  | 0.00057  | 2.09297 |
| R10      | 2.78144 | 0.00076  | 0.00000  | 0.00288  | 0.00288  | 2.78432 |
| R11      | 2.89678 | -0.00031 | 0.00003  | -0.00182 | -0.00178 | 2.89500 |
| R12      | 2.06012 | 0.00013  | 0.00000  | 0.00040  | 0.00039  | 2.06052 |
| R13      | 2.06186 | -0.00009 | -0.00001 | -0.00030 | -0.00030 | 2.06156 |
| R14      | 2.07004 | 0.00004  | 0.00000  | -0.00016 | -0.00016 | 2.06988 |
| R15      | 2.08167 | -0.00039 | 0.00000  | -0.00145 | -0.00146 | 2.08021 |
| R16      | 2.75000 | 0.00128  | -0.00001 | 0.00484  | 0.00483  | 2.75483 |
| R17      | 4.23809 | 0.00007  | -0.00002 | 0.00288  | 0.00285  | 4.24095 |
| R18      | 2.50595 | 0.00026  | 0.00000  | 0.00048  | 0.00048  | 2.50643 |
| R19      | 2.05812 | -0.00028 | 0.00000  | -0.00112 | -0.00112 | 2.05701 |
| R20      | 2.04360 | 0.00000  | 0.00000  | -0.00002 | -0.00002 | 2.04358 |
| R21      | 2.04708 | 0.00001  | 0.00000  | 0.00002  | 0.00002  | 2.04710 |
| R22      | 1.91490 | 0.00008  | 0.00000  | 0.00034  | 0.00034  | 1.91524 |
| R23      | 1.92291 | 0.00103  | 0.00003  | 0.00175  | 0.00195  | 1.92487 |
| R24      | 3.99887 | 0.00058  | -0.00034 | 0.01677  | 0.01635  | 4.01521 |
| R25      | 2.75249 | 0.00475  | 0.00010  | 0.00565  | 0.00532  | 2.75781 |
| R26      | 2.73233 | -0.00002 | -0.00007 | -0.00066 | -0.00057 | 2.73177 |
| R27      | 2.05525 | 0.00014  | 0.00000  | 0.00030  | 0.00031  | 2.05556 |
| R28      | 2.05302 | -0.00018 | 0.00000  | 0.00038  | 0.00038  | 2.05341 |
| R29      | 2.75866 | -0.00134 | -0.00003 | 0.00237  | 0.00259  | 2.76125 |
| R30      | 2.05666 | 0.00032  | 0.00000  | 0.00058  | 0.00058  | 2.05724 |

|     |         |          |          |          |          |         |
|-----|---------|----------|----------|----------|----------|---------|
| R31 | 2.84261 | -0.00049 | 0.00000  | -0.00203 | -0.00203 | 2.84058 |
| R32 | 2.06705 | -0.00012 | 0.00000  | -0.00048 | -0.00049 | 2.06656 |
| R33 | 2.06787 | -0.00004 | -0.00001 | -0.00019 | -0.00020 | 2.06768 |
| R34 | 2.06492 | 0.00015  | 0.00000  | 0.00057  | 0.00057  | 2.06549 |
| A1  | 1.87125 | 0.00013  | 0.00000  | 0.00126  | 0.00126  | 1.87250 |
| A2  | 2.28139 | -0.00018 | -0.00001 | -0.00143 | -0.00143 | 2.27996 |
| A3  | 2.13052 | 0.00006  | 0.00000  | 0.00019  | 0.00019  | 2.13071 |
| A4  | 1.86676 | -0.00047 | 0.00000  | -0.00188 | -0.00194 | 1.86482 |
| A5  | 2.27266 | 0.00042  | 0.00002  | 0.00299  | 0.00300  | 2.27566 |
| A6  | 2.14371 | 0.00006  | -0.00001 | -0.00099 | -0.00101 | 2.14270 |
| A7  | 1.89599 | 0.00019  | 0.00000  | 0.00132  | 0.00124  | 1.89723 |
| A8  | 2.25327 | -0.00034 | 0.00001  | -0.00204 | -0.00202 | 2.25125 |
| A9  | 2.13392 | 0.00015  | 0.00000  | 0.00076  | 0.00077  | 2.13469 |
| A10 | 1.88981 | 0.00005  | 0.00001  | -0.00012 | -0.00017 | 1.88964 |
| A11 | 2.13714 | 0.00213  | -0.00009 | 0.01005  | 0.00998  | 2.14713 |
| A12 | 2.25608 | -0.00218 | 0.00007  | -0.01007 | -0.00998 | 2.24610 |
| A13 | 1.90073 | 0.00013  | -0.00001 | -0.00007 | -0.00016 | 1.90057 |
| A14 | 2.20418 | 0.00061  | 0.00006  | -0.00351 | -0.00352 | 2.20066 |
| A15 | 2.17608 | -0.00072 | -0.00005 | 0.00492  | 0.00481  | 2.18088 |
| A16 | 1.95992 | 0.00023  | -0.00003 | 0.00509  | 0.00509  | 1.96501 |
| A17 | 1.87107 | 0.00015  | 0.00005  | 0.00066  | 0.00071  | 1.87178 |
| A18 | 1.89334 | -0.00004 | 0.00002  | -0.00369 | -0.00368 | 1.88965 |
| A19 | 1.91231 | -0.00046 | 0.00002  | -0.00117 | -0.00116 | 1.91115 |
| A20 | 1.92945 | -0.00003 | -0.00002 | -0.00371 | -0.00374 | 1.92571 |
| A21 | 1.89584 | 0.00018  | -0.00004 | 0.00294  | 0.00290  | 1.89874 |
| A22 | 1.91186 | -0.00005 | -0.00004 | 0.00164  | 0.00160  | 1.91346 |
| A23 | 1.89025 | 0.00037  | 0.00001  | 0.00328  | 0.00329  | 1.89354 |
| A24 | 1.87946 | -0.00008 | 0.00006  | -0.00422 | -0.00420 | 1.87525 |
| A25 | 1.87506 | -0.00007 | -0.00002 | 0.00174  | 0.00171  | 1.87677 |
| A26 | 1.89840 | 0.00050  | 0.00003  | 0.00088  | 0.00093  | 1.89933 |
| A27 | 2.00768 | -0.00066 | -0.00003 | -0.00308 | -0.00310 | 2.00458 |
| A28 | 2.15781 | 0.00035  | 0.00000  | 0.00163  | 0.00161  | 2.15941 |
| A29 | 1.94462 | 0.00009  | 0.00000  | 0.00195  | 0.00192  | 1.94655 |
| A30 | 2.18073 | -0.00044 | 0.00001  | -0.00351 | -0.00352 | 2.17721 |
| A31 | 2.07386 | 0.00006  | 0.00000  | 0.00074  | 0.00073  | 2.07459 |
| A32 | 2.16443 | -0.00005 | 0.00000  | -0.00085 | -0.00085 | 2.16358 |
| A33 | 2.04490 | -0.00001 | 0.00001  | 0.00012  | 0.00012  | 2.04502 |
| A34 | 1.93925 | 0.00009  | 0.00006  | -0.00051 | -0.00031 | 1.93894 |
| A35 | 1.91168 | -0.00009 | 0.00007  | 0.00243  | 0.00255  | 1.91422 |
| A36 | 1.88701 | 0.00004  | -0.00004 | -0.00022 | -0.00031 | 1.88671 |
| A37 | 2.07725 | 0.00110  | 0.00033  | 0.00568  | 0.00649  | 2.08374 |
| A38 | 2.08942 | -0.00055 | -0.00023 | -0.00160 | -0.00235 | 2.08707 |
| A39 | 1.99833 | 0.00028  | -0.00010 | -0.00302 | -0.00337 | 1.99496 |
| A40 | 2.00641 | 0.00042  | 0.00012  | 0.00132  | 0.00160  | 2.00801 |

|     |          |          |          |          |          |          |
|-----|----------|----------|----------|----------|----------|----------|
| A41 | 2.02313  | -0.00020 | -0.00007 | -0.00215 | -0.00221 | 2.02091  |
| A42 | 2.02646  | 0.00013  | 0.00004  | 0.00346  | 0.00296  | 2.02942  |
| A43 | 2.13436  | 0.00021  | 0.00012  | 0.00215  | 0.00276  | 2.13711  |
| A44 | 1.96924  | 0.00023  | 0.00020  | -0.00693 | -0.00656 | 1.96268  |
| A45 | 2.02725  | 0.00007  | -0.00013 | -0.00086 | -0.00126 | 2.02598  |
| A46 | 2.03635  | -0.00016 | -0.00014 | 0.00005  | -0.00011 | 2.03624  |
| A47 | 2.63258  | -0.00109 | 0.00006  | -0.00611 | -0.00673 | 2.62585  |
| A48 | 2.58221  | -0.00116 | 0.00017  | -0.00821 | -0.00877 | 2.57344  |
| A49 | 1.93133  | 0.00002  | 0.00000  | -0.00137 | -0.00137 | 1.92997  |
| A50 | 1.91495  | 0.00002  | -0.00004 | 0.00102  | 0.00098  | 1.91593  |
| A51 | 1.94317  | -0.00002 | 0.00001  | 0.00038  | 0.00040  | 1.94357  |
| A52 | 1.87851  | 0.00003  | -0.00002 | -0.00029 | -0.00030 | 1.87821  |
| A53 | 1.89639  | -0.00003 | 0.00002  | 0.00021  | 0.00023  | 1.89663  |
| A54 | 1.89799  | -0.00002 | 0.00002  | 0.00003  | 0.00005  | 1.89803  |
| A55 | 3.43830  | -0.00145 | -0.00038 | -0.01595 | -0.01633 | 3.42197  |
| A56 | 2.66826  | -0.00045 | 0.00076  | -0.03129 | -0.03139 | 2.63686  |
| A57 | 2.86923  | 0.00054  | -0.00052 | -0.01757 | -0.01809 | 2.85114  |
| A58 | 3.09660  | 0.00047  | 0.00047  | -0.00198 | -0.00176 | 3.09484  |
| D1  | -0.00192 | 0.00028  | 0.00006  | 0.00594  | 0.00601  | 0.00408  |
| D2  | -3.13270 | -0.00006 | -0.00002 | -0.00708 | -0.00712 | -3.13981 |
| D3  | 3.13237  | 0.00026  | 0.00008  | 0.00906  | 0.00915  | 3.14152  |
| D4  | 0.00160  | -0.00008 | 0.00000  | -0.00396 | -0.00398 | -0.00238 |
| D5  | -0.01072 | 0.00017  | -0.00008 | 0.00823  | 0.00814  | -0.00258 |
| D6  | -3.08351 | -0.00009 | 0.00001  | -0.01292 | -0.01287 | -3.09638 |
| D7  | 3.13740  | 0.00019  | -0.00009 | 0.00545  | 0.00533  | -3.14045 |
| D8  | 0.06461  | -0.00007 | 0.00000  | -0.01570 | -0.01567 | 0.04894  |
| D9  | 0.01378  | -0.00064 | -0.00002 | -0.01796 | -0.01799 | -0.00421 |
| D10 | -3.13200 | -0.00030 | -0.00002 | -0.00738 | -0.00741 | -3.13942 |
| D11 | -3.13764 | -0.00032 | 0.00005  | -0.00610 | -0.00607 | 3.13947  |
| D12 | -0.00025 | 0.00003  | 0.00005  | 0.00449  | 0.00451  | 0.00426  |
| D13 | -0.02060 | 0.00074  | -0.00003 | 0.02324  | 0.02323  | 0.00263  |
| D14 | 3.10433  | 0.00045  | -0.00013 | 0.01525  | 0.01508  | 3.11941  |
| D15 | 3.12485  | 0.00043  | -0.00003 | 0.01354  | 0.01351  | 3.13836  |
| D16 | -0.03342 | 0.00014  | -0.00013 | 0.00554  | 0.00536  | -0.02806 |
| D17 | 0.07121  | -0.00012 | 0.00028  | 0.01334  | 0.01364  | 0.08485  |
| D18 | -3.06368 | -0.00043 | 0.00030  | 0.00101  | 0.00131  | -3.06238 |
| D19 | -3.07508 | 0.00026  | 0.00028  | 0.02520  | 0.02549  | -3.04959 |
| D20 | 0.07321  | -0.00004 | 0.00030  | 0.01288  | 0.01316  | 0.08637  |
| D21 | 0.01940  | -0.00057 | 0.00007  | -0.01953 | -0.01946 | -0.00006 |
| D22 | 3.09356  | -0.00025 | -0.00002 | 0.00079  | 0.00085  | 3.09441  |
| D23 | -3.10402 | -0.00031 | 0.00018  | -0.01108 | -0.01097 | -3.11499 |
| D24 | -0.02986 | 0.00001  | 0.00010  | 0.00924  | 0.00934  | -0.02052 |
| D25 | 1.30495  | 0.00036  | 0.00077  | 0.01780  | 0.01857  | 1.32353  |
| D26 | -2.87703 | 0.00002  | 0.00082  | 0.01984  | 0.02067  | -2.85636 |

|     |          |          |          |          |          |          |
|-----|----------|----------|----------|----------|----------|----------|
| D27 | -0.83277 | 0.00028  | 0.00081  | 0.02174  | 0.02254  | -0.81022 |
| D28 | -1.75747 | 0.00002  | 0.00087  | -0.00628 | -0.00542 | -1.76289 |
| D29 | 0.34374  | -0.00032 | 0.00092  | -0.00424 | -0.00332 | 0.34042  |
| D30 | 2.38800  | -0.00006 | 0.00091  | -0.00234 | -0.00145 | 2.38655  |
| D31 | -1.09666 | 0.00000  | -0.00005 | 0.02710  | 0.02705  | -1.06961 |
| D32 | 0.94342  | 0.00009  | -0.00010 | 0.03194  | 0.03186  | 0.97528  |
| D33 | 3.12468  | -0.00053 | -0.00010 | 0.02756  | 0.02747  | -3.13104 |
| D34 | 3.10935  | -0.00002 | -0.00011 | 0.02383  | 0.02370  | 3.13305  |
| D35 | -1.13376 | 0.00008  | -0.00016 | 0.02867  | 0.02851  | -1.10525 |
| D36 | 1.04750  | -0.00055 | -0.00016 | 0.02429  | 0.02413  | 1.07162  |
| D37 | 1.02049  | 0.00008  | -0.00006 | 0.02324  | 0.02317  | 1.04366  |
| D38 | 3.06057  | 0.00017  | -0.00011 | 0.02808  | 0.02798  | 3.08855  |
| D39 | -1.04136 | -0.00045 | -0.00011 | 0.02370  | 0.02359  | -1.01777 |
| D40 | 3.00762  | -0.00013 | -0.00043 | -0.01755 | -0.01802 | 2.98961  |
| D41 | -1.19193 | -0.00008 | -0.00039 | -0.01658 | -0.01695 | -1.20888 |
| D42 | 0.93712  | -0.00031 | -0.00043 | -0.01762 | -0.01807 | 0.91905  |
| D43 | 3.02076  | -0.00026 | -0.00039 | -0.01665 | -0.01701 | 3.00375  |
| D44 | -1.16645 | -0.00015 | -0.00040 | -0.01846 | -0.01889 | -1.18533 |
| D45 | 0.91719  | -0.00010 | -0.00036 | -0.01748 | -0.01782 | 0.89937  |
| D46 | -3.13054 | -0.00033 | 0.00004  | -0.00700 | -0.00696 | -3.13750 |
| D47 | 0.00998  | -0.00010 | 0.00003  | -0.00261 | -0.00257 | 0.00742  |
| D48 | 0.00345  | 0.00002  | 0.00002  | 0.00702  | 0.00703  | 0.01048  |
| D49 | -3.13921 | 0.00025  | 0.00002  | 0.01142  | 0.01142  | -3.12779 |
| D50 | 1.86479  | 0.00018  | -0.00125 | 0.14331  | 0.14253  | 2.00732  |
| D51 | -1.10583 | 0.00024  | 0.00158  | 0.05261  | 0.05380  | -1.05203 |
| D52 | -2.38425 | -0.00002 | -0.00105 | 0.13716  | 0.13647  | -2.24778 |
| D53 | 0.92831  | 0.00003  | 0.00179  | 0.04645  | 0.04774  | 0.97605  |
| D54 | -2.69533 | -0.00089 | -0.00007 | -0.01722 | -0.01727 | -2.71260 |
| D55 | -0.00234 | -0.00047 | -0.00004 | -0.00326 | -0.00324 | -0.00558 |
| D56 | -0.02264 | -0.00011 | -0.00003 | -0.01320 | -0.01326 | -0.03590 |
| D57 | 2.67035  | 0.00031  | 0.00000  | 0.00076  | 0.00077  | 2.67112  |
| D58 | 0.99563  | -0.00035 | 0.00183  | -0.07909 | -0.07689 | 0.91874  |
| D59 | -1.41097 | -0.00087 | 0.00192  | -0.07355 | -0.07118 | -1.48215 |
| D60 | 1.45536  | -0.00021 | -0.00199 | 0.05762  | 0.05515  | 1.51051  |
| D61 | -0.96249 | -0.00032 | -0.00186 | 0.06701  | 0.06471  | -0.89777 |
| D62 | 2.56387  | -0.00047 | 0.00001  | -0.00776 | -0.00768 | 2.55619  |
| D63 | -1.64902 | -0.00041 | -0.00003 | -0.00832 | -0.00827 | -1.65730 |
| D64 | 0.45292  | -0.00043 | -0.00002 | -0.00736 | -0.00731 | 0.44561  |
| D65 | 1.36102  | 0.00030  | 0.00009  | -0.00559 | -0.00555 | 1.35547  |
| D66 | -2.85187 | 0.00036  | 0.00005  | -0.00615 | -0.00615 | -2.85802 |
| D67 | -0.74993 | 0.00034  | 0.00006  | -0.00519 | -0.00518 | -0.75512 |
| D68 | -1.02870 | 0.00002  | 0.00008  | 0.00708  | 0.00714  | -1.02155 |
| D69 | 1.04160  | 0.00008  | 0.00004  | 0.00653  | 0.00655  | 1.04814  |
| D70 | -3.13965 | 0.00006  | 0.00005  | 0.00749  | 0.00751  | -3.13213 |



| Item                 | Value    | Threshold | Converged? |
|----------------------|----------|-----------|------------|
| Maximum Force        | 0.004750 | 0.000450  | NO         |
| RMS Force            | 0.000593 | 0.000300  | NO         |
| Maximum Displacement | 0.322839 | 0.001800  | NO         |
| RMS Displacement     | 0.059929 | 0.001200  | NO         |

Predicted change in Energy=-1.755809D-04

GradGradGradGradGradGradGradGradGradGradGradGradGradGradGradGradGradGradGrad

Input orientation:

| Center Number | Atomic Number | Atomic Type | Coordinates (Angstroms) |           |           |
|---------------|---------------|-------------|-------------------------|-----------|-----------|
|               |               |             | X                       | Y         | Z         |
| 1             | 6             | 0           | -2.652909               | 2.071245  | -0.247517 |
| 2             | 6             | 0           | -3.557708               | 1.109306  | 0.065441  |
| 3             | 7             | 0           | -2.857518               | -0.086556 | 0.159675  |
| 4             | 6             | 0           | -1.557915               | 0.152740  | -0.097279 |
| 5             | 7             | 0           | -1.413871               | 1.455226  | -0.346428 |
| 6             | 6             | 0           | -0.130219               | 2.126074  | -0.616804 |
| 7             | 6             | 0           | 0.413000                | 2.871844  | 0.606168  |
| 8             | 1             | 0           | -2.780767               | 3.127496  | -0.410067 |
| 9             | 1             | 0           | -4.618044               | 1.176779  | 0.226976  |
| 10            | 1             | 0           | 0.579956                | 1.355595  | -0.918365 |
| 11            | 1             | 0           | -0.273879               | 2.816668  | -1.449014 |
| 12            | 1             | 0           | -0.294817               | 3.652251  | 0.905691  |
| 13            | 1             | 0           | 0.494457                | 2.159689  | 1.441610  |
| 14            | 35            | 0           | 0.154359                | -2.638838 | 0.322243  |
| 15            | 1             | 0           | -0.781247               | -0.636232 | -0.065963 |
| 16            | 6             | 0           | -3.347794               | -1.393638 | 0.463030  |
| 17            | 6             | 0           | -4.633231               | -1.679587 | 0.621367  |
| 18            | 1             | 0           | -2.537397               | -2.116229 | 0.540470  |
| 19            | 1             | 0           | -4.916958               | -2.696902 | 0.853802  |
| 20            | 1             | 0           | -5.430802               | -0.952331 | 0.529318  |
| 21            | 7             | 0           | 1.667859                | 3.500840  | 0.212648  |
| 22            | 1             | 0           | 2.005008                | 4.125926  | 0.935686  |
| 23            | 1             | 0           | 2.376134                | 2.785488  | 0.057234  |
| 24            | 6             | 0           | 3.503192                | -0.219769 | -1.225927 |
| 25            | 6             | 0           | 3.315781                | -0.528646 | 0.188016  |
| 26            | 8             | 0           | 2.926921                | 0.773802  | -0.348171 |
| 27            | 1             | 0           | 4.497448                | 0.028051  | -1.590963 |
| 28            | 1             | 0           | 2.819833                | -0.636067 | -1.961081 |
| 29            | 1             | 0           | 2.456624                | -1.149552 | 0.435946  |
| 30            | 6             | 0           | 4.452382                | -0.525721 | 1.171708  |
| 31            | 1             | 0           | 4.108842                | -0.192631 | 2.155042  |

|    |   |   |          |           |          |
|----|---|---|----------|-----------|----------|
| 32 | 1 | 0 | 4.846647 | -1.540096 | 1.284848 |
| 33 | 1 | 0 | 5.261743 | 0.131143  | 0.842874 |

-----  
Distance matrix (angstroms):

|    |    | 1        | 2        | 3        | 4        | 5        |
|----|----|----------|----------|----------|----------|----------|
| 1  | C  | 0.000000 |          |          |          |          |
| 2  | C  | 1.357178 | 0.000000 |          |          |          |
| 3  | N  | 2.205397 | 1.388968 | 0.000000 |          |          |
| 4  | C  | 2.214102 | 2.222761 | 1.346201 | 0.000000 |          |
| 5  | N  | 1.387256 | 2.210279 | 2.171946 | 1.333901 | 0.000000 |
| 6  | C  | 2.550165 | 3.639637 | 3.596778 | 2.490435 | 1.473398 |
| 7  | C  | 3.281697 | 4.377836 | 4.432581 | 3.431162 | 2.500341 |
| 8  | H  | 1.076307 | 2.214235 | 3.265062 | 3.231467 | 2.160774 |
| 9  | H  | 2.210649 | 1.074690 | 2.167948 | 3.243176 | 3.266964 |
| 10 | H  | 3.378403 | 4.260140 | 3.880489 | 2.586799 | 2.076627 |
| 11 | H  | 2.767496 | 3.999024 | 4.206160 | 3.251530 | 2.090168 |
| 12 | H  | 3.064321 | 4.221261 | 4.593762 | 3.853303 | 2.765322 |
| 13 | H  | 3.573078 | 4.406494 | 4.233759 | 3.257032 | 2.708333 |
| 14 | Br | 5.512737 | 5.281474 | 3.951199 | 3.301634 | 4.434842 |
| 15 | H  | 3.296440 | 3.282210 | 2.159620 | 1.107552 | 2.202968 |
| 16 | C  | 3.604602 | 2.543003 | 1.428586 | 2.430822 | 3.537132 |
| 17 | C  | 4.329594 | 3.040350 | 2.429828 | 3.651225 | 4.596516 |
| 18 | H  | 4.262535 | 3.416249 | 2.089749 | 2.552318 | 3.847621 |
| 19 | H  | 5.392036 | 4.117802 | 3.396618 | 4.506460 | 5.563483 |
| 20 | H  | 4.178777 | 2.823829 | 2.740072 | 4.075913 | 4.764347 |
| 21 | N  | 4.574333 | 5.748709 | 5.775054 | 4.659554 | 3.740877 |
| 22 | H  | 5.226650 | 6.387577 | 6.480074 | 5.435774 | 4.523847 |
| 23 | H  | 5.088643 | 6.166046 | 5.970782 | 4.736240 | 4.036914 |
| 24 | C  | 6.641055 | 7.300026 | 6.511242 | 5.198789 | 5.268456 |
| 25 | C  | 6.524905 | 7.067019 | 6.189173 | 4.929360 | 5.156645 |
| 26 | O  | 5.729572 | 6.506462 | 5.870082 | 4.534580 | 4.393952 |
| 27 | H  | 7.556924 | 8.294475 | 7.561309 | 6.238113 | 6.207204 |
| 28 | H  | 6.341668 | 6.915645 | 6.085383 | 4.822930 | 4.990477 |
| 29 | H  | 6.078486 | 6.435208 | 5.426453 | 4.254035 | 4.730508 |
| 30 | C  | 7.696986 | 8.249769 | 7.392680 | 6.180155 | 6.375093 |
| 31 | H  | 7.524540 | 8.052170 | 7.247269 | 6.107730 | 6.282765 |
| 32 | H  | 8.463644 | 8.896036 | 7.920414 | 6.767155 | 7.129313 |
| 33 | H  | 8.221598 | 8.907521 | 8.150862 | 6.884191 | 6.908796 |
|    |    | 6        | 7        | 8        | 9        | 10       |
| 6  | C  | 0.000000 |          |          |          |          |
| 7  | C  | 1.531966 | 0.000000 |          |          |          |
| 8  | H  | 2.840949 | 3.361286 | 0.000000 |          |          |
| 9  | H  | 4.664086 | 5.322447 | 2.754398 | 0.000000 |          |
| 10 | H  | 1.090378 | 2.156637 | 3.833074 | 5.325691 | 0.000000 |

|    |    |          |          |          |          |          |
|----|----|----------|----------|----------|----------|----------|
| 11 | H  | 1.090932 | 2.167631 | 2.731394 | 4.936593 | 1.773515 |
| 12 | H  | 2.162013 | 1.095333 | 2.861212 | 5.027813 | 3.060561 |
| 13 | H  | 2.151376 | 1.100801 | 3.884901 | 5.345944 | 2.494666 |
| 14 | Br | 4.864893 | 5.524050 | 6.511671 | 6.110961 | 4.204253 |
| 15 | H  | 2.890951 | 3.766243 | 4.275762 | 4.253685 | 2.558678 |
| 16 | C  | 4.889499 | 5.688444 | 4.639447 | 2.876856 | 4.989363 |
| 17 | C  | 6.024387 | 6.795602 | 5.253906 | 2.883505 | 6.225787 |
| 18 | H  | 5.013075 | 5.795691 | 5.334735 | 3.907847 | 4.888726 |
| 19 | H  | 6.952456 | 7.712374 | 6.331215 | 3.935437 | 7.055449 |
| 20 | H  | 6.235893 | 6.984286 | 4.954808 | 2.298934 | 6.599357 |
| 21 | N  | 2.410613 | 1.457794 | 4.507486 | 6.701794 | 2.657969 |
| 22 | H  | 3.311922 | 2.053239 | 5.070657 | 7.284543 | 3.625329 |
| 23 | H  | 2.677864 | 2.040264 | 5.189313 | 7.178808 | 2.494522 |
| 24 | C  | 4.367572 | 4.739613 | 7.166446 | 8.367541 | 3.334918 |
| 25 | C  | 4.423821 | 4.490470 | 7.133931 | 8.115145 | 3.501312 |
| 26 | O  | 3.353641 | 3.410622 | 6.174254 | 7.577578 | 2.484322 |
| 27 | H  | 5.173586 | 5.440336 | 7.998343 | 9.365718 | 4.190646 |
| 28 | H  | 4.259027 | 4.968808 | 6.923639 | 7.962162 | 3.173489 |
| 29 | H  | 4.304621 | 4.514089 | 6.814627 | 7.450263 | 3.410544 |
| 30 | C  | 5.588473 | 5.308474 | 8.256298 | 9.277050 | 4.785755 |
| 31 | H  | 5.570382 | 5.044726 | 8.066581 | 9.041640 | 4.929084 |
| 32 | H  | 6.467324 | 6.291506 | 9.101461 | 9.903579 | 5.607480 |
| 33 | H  | 5.931582 | 5.574745 | 8.673521 | 9.954039 | 5.149795 |
|    |    | 11       | 12       | 13       | 14       | 15       |
| 11 | H  | 0.000000 |          |          |          |          |
| 12 | H  | 2.498655 | 0.000000 |          |          |          |
| 13 | H  | 3.062299 | 1.771414 | 0.000000 |          |          |
| 14 | Br | 5.751807 | 6.334033 | 4.939080 | 0.000000 |          |
| 15 | H  | 3.754034 | 4.424004 | 3.423065 | 2.244214 | 0.000000 |
| 16 | C  | 5.552615 | 5.914187 | 5.324157 | 3.719599 | 2.727757 |
| 17 | C  | 6.595964 | 6.879765 | 6.458020 | 4.891897 | 4.049543 |
| 18 | H  | 5.780573 | 6.199831 | 5.318615 | 2.750690 | 2.375335 |
| 19 | H  | 7.567073 | 7.853574 | 7.294889 | 5.099429 | 4.711309 |
| 20 | H  | 6.686779 | 6.908124 | 6.754676 | 5.837911 | 4.698153 |
| 21 | N  | 2.645668 | 2.086943 | 2.164695 | 6.324425 | 4.815715 |
| 22 | H  | 3.548842 | 2.348290 | 2.530575 | 7.040117 | 5.607554 |
| 23 | H  | 3.048331 | 2.933451 | 2.418435 | 5.867694 | 4.657509 |
| 24 | C  | 4.851389 | 5.827625 | 4.672265 | 4.411736 | 4.458180 |
| 25 | C  | 5.172683 | 5.570581 | 4.093716 | 3.803357 | 4.106302 |
| 26 | O  | 3.953515 | 4.498582 | 3.322782 | 4.447771 | 3.977229 |
| 27 | H  | 5.528299 | 6.506452 | 5.455669 | 5.443811 | 5.534575 |
| 28 | H  | 4.664188 | 6.025704 | 4.980154 | 4.040967 | 4.069306 |
| 29 | H  | 5.171037 | 5.554134 | 3.976498 | 2.744326 | 3.316507 |
| 30 | C  | 6.354313 | 6.329465 | 4.790558 | 4.864140 | 5.379119 |

|    |   |          |           |          |           |           |
|----|---|----------|-----------|----------|-----------|-----------|
| 31 | H | 6.422876 | 5.977977  | 4.371060 | 4.998101  | 5.389120  |
| 32 | H | 7.257767 | 7.317027  | 5.714415 | 4.914409  | 5.857888  |
| 33 | H | 6.565662 | 6.578565  | 5.215410 | 5.833457  | 6.158943  |
|    |   | 16       | 17        | 18       | 19        | 20        |
| 16 | C | 0.000000 |           |          |           |           |
| 17 | C | 1.326343 | 0.000000  |          |           |           |
| 18 | H | 1.088521 | 2.142363  | 0.000000 |           |           |
| 19 | H | 2.076891 | 1.081414  | 2.469346 | 0.000000  |           |
| 20 | H | 2.130274 | 1.083279  | 3.118746 | 1.847391  | 0.000000  |
| 21 | N | 7.012516 | 8.167473  | 7.024465 | 9.065478  | 8.385821  |
| 22 | H | 7.703342 | 8.824341  | 7.730080 | 9.719635  | 9.013607  |
| 23 | H | 7.098810 | 8.329846  | 6.957235 | 9.158619  | 8.668472  |
| 24 | C | 7.153080 | 8.470239  | 6.573084 | 9.019999  | 9.134210  |
| 25 | C | 6.725108 | 8.043585  | 6.074894 | 8.539473  | 8.763488  |
| 26 | O | 6.687891 | 8.007186  | 6.245057 | 8.661233  | 8.579106  |
| 27 | H | 8.233341 | 9.548808  | 7.657022 | 10.101153 | 10.199358 |
| 28 | H | 6.670071 | 7.956515  | 6.094961 | 8.486963  | 8.624100  |
| 29 | H | 5.809611 | 7.112057  | 5.087793 | 7.545767  | 7.890444  |
| 30 | C | 7.880244 | 9.175110  | 7.196193 | 9.622870  | 9.913223  |
| 31 | H | 7.739944 | 8.999279  | 7.104897 | 9.456725  | 9.706952  |
| 32 | H | 8.236850 | 9.504092  | 7.443799 | 9.841341  | 10.321931 |
| 33 | H | 8.751764 | 10.061726 | 8.122113 | 10.564275 | 10.751872 |
|    |   | 21       | 22        | 23       | 24        | 25        |
| 21 | N | 0.000000 |           |          |           |           |
| 22 | H | 1.013501 | 0.000000  |          |           |           |
| 23 | H | 1.018595 | 1.645049  | 0.000000 |           |           |
| 24 | C | 4.391000 | 5.079585  | 3.456636 | 0.000000  |           |
| 25 | C | 4.353506 | 4.893074  | 3.447249 | 1.459371  | 0.000000  |
| 26 | O | 3.055568 | 3.706069  | 2.124759 | 1.445588  | 1.461191  |
| 27 | H | 4.829064 | 5.421143  | 3.849674 | 1.087755  | 2.207038  |
| 28 | H | 4.813123 | 5.633096  | 3.997187 | 1.086616  | 2.208195  |
| 29 | H | 4.722093 | 5.318305  | 3.954041 | 2.172930  | 1.088644  |
| 30 | C | 4.988644 | 5.261479  | 4.064107 | 2.596772  | 1.503170  |
| 31 | H | 4.834565 | 4.956095  | 4.033890 | 3.434895  | 2.147333  |
| 32 | H | 6.055192 | 6.348277  | 5.130414 | 3.138810  | 2.137667  |
| 33 | H | 4.966695 | 5.154923  | 3.998690 | 2.737806  | 2.156601  |
|    |   | 26       | 27        | 28       | 29        | 30        |
| 26 | O | 0.000000 |           |          |           |           |
| 27 | H | 2.137108 | 0.000000  |          |           |           |
| 28 | H | 2.144919 | 1.841856  | 0.000000 |           |           |
| 29 | H | 2.129627 | 3.108066  | 2.478170 | 0.000000  |           |
| 30 | C | 2.515119 | 2.817987  | 3.534369 | 2.216656  | 0.000000  |
| 31 | H | 2.932065 | 3.772569  | 4.335972 | 2.569205  | 1.093579  |
| 32 | H | 3.421435 | 3.294133  | 3.932086 | 2.566198  | 1.094167  |

|    |   |          |          |          |          |          |
|----|---|----------|----------|----------|----------|----------|
| 33 | H | 2.698702 | 2.553104 | 3.796538 | 3.110380 | 1.093008 |
|    |   | 31       | 32       | 33       |          |          |
| 31 | H | 0.000000 |          |          |          |          |
| 32 | H | 1.765576 | 0.000000 |          |          |          |
| 33 | H | 1.776456 | 1.777831 | 0.000000 |          |          |

Stoichiometry C10H18BrN3O

Framework group C1[X(C10H18BrN3O)]

Deg. of freedom 93

Full point group C1 NOp 1

Largest Abelian subgroup C1 NOp 1

Largest concise Abelian subgroup C1 NOp 1

Standard orientation:

| Center Number | Atomic Number | Atomic Type | Coordinates (Angstroms) |           |           |
|---------------|---------------|-------------|-------------------------|-----------|-----------|
|               |               |             | X                       | Y         | Z         |
| 1             | 6             | 0           | -2.370025               | 2.460123  | -0.225476 |
| 2             | 6             | 0           | -3.370680               | 1.571251  | -0.000693 |
| 3             | 7             | 0           | -2.793297               | 0.307988  | 0.004594  |
| 4             | 6             | 0           | -1.471889               | 0.436377  | -0.218237 |
| 5             | 7             | 0           | -1.195896               | 1.733665  | -0.360240 |
| 6             | 6             | 0           | 0.152305                | 2.292759  | -0.561906 |
| 7             | 6             | 0           | 0.743217                | 2.881877  | 0.722883  |
| 8             | 1             | 0           | -2.390390               | 3.533375  | -0.303906 |
| 9             | 1             | 0           | -4.422087               | 1.730884  | 0.154293  |
| 10            | 1             | 0           | 0.788833                | 1.481699  | -0.916784 |
| 11            | 1             | 0           | 0.092806                | 3.057772  | -1.337372 |
| 12            | 1             | 0           | 0.110048                | 3.702711  | 1.076552  |
| 13            | 1             | 0           | 0.738646                | 2.101408  | 1.499163  |
| 14            | 35            | 0           | -0.050416               | -2.536034 | -0.006168 |
| 15            | 1             | 0           | -0.777246               | -0.425928 | -0.242105 |
| 16            | 6             | 0           | -3.415251               | -0.963702 | 0.196517  |
| 17            | 6             | 0           | -4.725304               | -1.131988 | 0.317458  |
| 18            | 1             | 0           | -2.681386               | -1.767162 | 0.224324  |
| 19            | 1             | 0           | -5.111939               | -2.131201 | 0.464233  |
| 20            | 1             | 0           | -5.445676               | -0.324023 | 0.275603  |
| 21            | 7             | 0           | 2.060960                | 3.412046  | 0.394800  |
| 22            | 1             | 0           | 2.444328                | 3.941435  | 1.169372  |
| 23            | 1             | 0           | 2.698282                | 2.644313  | 0.190001  |
| 24            | 6             | 0           | 3.548326                | -0.347371 | -1.318501 |
| 25            | 6             | 0           | 3.305049                | -0.746772 | 0.063910  |
| 26            | 8             | 0           | 3.056178                | 0.626151  | -0.369939 |
| 27            | 1             | 0           | 4.568779                | -0.171621 | -1.651668 |
| 28            | 1             | 0           | 2.841233                | -0.634272 | -2.092092 |

|    |   |   |          |           |          |
|----|---|---|----------|-----------|----------|
| 29 | 1 | 0 | 2.384541 | -1.296776 | 0.251804 |
| 30 | 6 | 0 | 4.417834 | -0.934606 | 1.056859 |
| 31 | 1 | 0 | 4.090359 | -0.647702 | 2.060035 |
| 32 | 1 | 0 | 4.708310 | -1.988916 | 1.092286 |
| 33 | 1 | 0 | 5.293843 | -0.337593 | 0.790682 |

-----

Rotational constants (GHZ):      0.4261750      0.2839037      0.1794350

Standard basis: 6-311++G(d,p) (5D, 7F)

There are    499 symmetry adapted cartesian basis functions of A    symmetry.

There are    482 symmetry adapted basis functions of A    symmetry.

482 basis functions,    760 primitive gaussians,    499 cartesian basis functions

71 alpha electrons      71 beta electrons

nuclear repulsion energy      1306.1534209191 Hartrees.

NAtoms=    33 NActive=    33 NUniq=    33 SFac= 1.00D+00 NAtFMM=    60 NAOKFM=F

Big=F

Integral buffers will be    131072 words long.

Raffenetti 2 integral format.

Two-electron integral symmetry is turned on.

One-electron integrals computed using PRISM.

NBasis=    482 RedAO= T EigKep=    3.70D-06    NBF=    482

NBsUse=    482 1.00D-06 EigRej= -1.00D+00    NBFU=    482

Initial      guess                  from                  the                  checkpoint                  file:

"/home/suqian/liuwen/qianmengshijie/nh2po/nh2po.chk"

B after Tr=    0.000000    0.000000    0.000000

Rot=    0.999995    -0.001232    0.002337    0.001712 Ang=    -0.36 deg.

ExpMin= 3.50D-02 ExpMax= 4.40D+05 ExpMxC= 1.51D+04 IAcc=3 IRadAn=      5 AccDes=

0.00D+00

Harris functional with IExCor=    402 and IRadAn=      5 diagonalized for initial guess.

HarFok: IExCor=    402 AccDes= 0.00D+00 IRadAn=      5 IDoV= 1 UseB2=F ITyADJ=14

ICtDFT= 3500011 ScaDFX= 1.000000 1.000000 1.000000 1.000000

FoFCou: FMM=F IPFlag=                  0 FMFlag=      100000 FMFlg1=      0

NFxFlg=                  0 DoJE=T BraDBF=F KetDBF=T FulRan=T

wScrn= 0.000000 ICntrl=                  500 IOpCl=    0 I1Cent=    200000004 NGrid=

0

NMat0=    1 NMatS0=      1 NMatT0=    0 NMatD0=    1 NMtDS0=    0

NMtDT0=    0

Petite list used in FoFCou.

Requested convergence on RMS density matrix=1.00D-08 within 128 cycles.

Requested convergence on MAX density matrix=1.00D-06.

Requested convergence on                  energy=1.00D-06.

No special actions if energy rises.

SCF Done: E(RB3LYP) = -3205.64799771      A.U. after    11 cycles

NFock= 11 Conv=0.68D-08    -V/T= 2.0018

Calling FoFJK, ICntrl=      2127 FMM=F ISym2X=0 I1Cent= 0 IOpClX= 0 NMat=1 NMtS=1



Using GEDIIS/GDIIS optimizer.

FormGI is forming the generalized inverse of G from B-inverse, IUseBI=4.

GSVD: received Info= 1 from GESDD.

Internal Forces: Max 0.002979551 RMS 0.000466069

Search for a local minimum.

Step number 28 out of a maximum of 172

All quantities printed in internal units (Hartrees-Bohrs-Radians)

Mixed Optimization -- En-DIIS/RFO-DIIS

Swapping is turned off.

Update second derivatives using D2CorX and points 25 26 27 28

DE= -1.82D-04 DEPred=-1.76D-04 R= 1.03D+00

TightC=F SS= 1.41D+00 RLast= 2.82D-01 DXNew= 1.1935D+00 8.4493D-01

Trust test= 1.03D+00 RLast= 2.82D-01 DXMaxT set to 8.45D-01

ITU= 1 1 0 0-1 1-1 1 1 1 1 1 1 1 1 0-1-1 1

ITU= 1 1-1 1 0 0-1 0

|                 |         |         |         |         |         |
|-----------------|---------|---------|---------|---------|---------|
| Eigenvalues --- | 0.00102 | 0.00140 | 0.00251 | 0.00435 | 0.00644 |
| Eigenvalues --- | 0.00725 | 0.00745 | 0.01337 | 0.01512 | 0.01878 |
| Eigenvalues --- | 0.01946 | 0.02170 | 0.02351 | 0.02386 | 0.02466 |
| Eigenvalues --- | 0.02644 | 0.02843 | 0.03057 | 0.03085 | 0.03209 |
| Eigenvalues --- | 0.03298 | 0.03708 | 0.03725 | 0.03873 | 0.04073 |
| Eigenvalues --- | 0.04372 | 0.04468 | 0.05093 | 0.05442 | 0.05739 |
| Eigenvalues --- | 0.05830 | 0.05932 | 0.07146 | 0.08498 | 0.08533 |
| Eigenvalues --- | 0.08878 | 0.09655 | 0.10799 | 0.12079 | 0.12353 |
| Eigenvalues --- | 0.12631 | 0.13311 | 0.15022 | 0.15749 | 0.15976 |
| Eigenvalues --- | 0.16000 | 0.16001 | 0.16005 | 0.16020 | 0.16080 |
| Eigenvalues --- | 0.16300 | 0.17820 | 0.19838 | 0.22022 | 0.22228 |
| Eigenvalues --- | 0.22909 | 0.23416 | 0.24161 | 0.26409 | 0.27084 |
| Eigenvalues --- | 0.29097 | 0.30507 | 0.31699 | 0.32065 | 0.33632 |
| Eigenvalues --- | 0.33943 | 0.34282 | 0.34351 | 0.34522 | 0.34564 |
| Eigenvalues --- | 0.34707 | 0.34828 | 0.35075 | 0.35213 | 0.35373 |
| Eigenvalues --- | 0.35538 | 0.35573 | 0.35784 | 0.35892 | 0.36419 |
| Eigenvalues --- | 0.36623 | 0.38883 | 0.40201 | 0.41887 | 0.42488 |
| Eigenvalues --- | 0.44404 | 0.45484 | 0.46614 | 0.49661 | 0.54826 |
| Eigenvalues --- | 0.58172 | 0.60599 | 1.26486 |         |         |

En-DIIS/RFO-DIIS IScMMF= 0 using points: 28 27 26

RFO step: Lambda=-6.29188193D-05.

DidBck=F Rises=F RFO-DIIS coefs: 1.01682 0.20922 -0.22604

Iteration 1 RMS(Cart)= 0.03967156 RMS(Int)= 0.00072354

Iteration 2 RMS(Cart)= 0.00188226 RMS(Int)= 0.00029126

Iteration 3 RMS(Cart)= 0.00000211 RMS(Int)= 0.00029126

Iteration 4 RMS(Cart)= 0.00000000 RMS(Int)= 0.00029126

| Variable | Old X   | -DE/DX   | Delta X<br>(Linear) | Delta X<br>(Quad) | Delta X<br>(Total) | New X   |
|----------|---------|----------|---------------------|-------------------|--------------------|---------|
| R1       | 2.56469 | -0.00003 | -0.00005            | 0.00003           | -0.00002           | 2.56467 |



|     |         |          |          |          |          |         |
|-----|---------|----------|----------|----------|----------|---------|
| R2  | 2.62153 | 0.00017  | -0.00012 | -0.00024 | -0.00035 | 2.62118 |
| R3  | 2.03392 | 0.00000  | 0.00001  | 0.00006  | 0.00008  | 2.03400 |
| R4  | 2.62477 | -0.00004 | 0.00002  | 0.00049  | 0.00051  | 2.62527 |
| R5  | 2.03087 | -0.00005 | -0.00001 | -0.00019 | -0.00020 | 2.03067 |
| R6  | 2.54395 | -0.00031 | -0.00009 | -0.00112 | -0.00121 | 2.54274 |
| R7  | 2.69964 | -0.00019 | 0.00000  | -0.00060 | -0.00060 | 2.69903 |
| R8  | 2.52071 | 0.00019  | 0.00019  | 0.00010  | 0.00029  | 2.52100 |
| R9  | 2.09297 | 0.00000  | -0.00010 | 0.00065  | 0.00055  | 2.09352 |
| R10 | 2.78432 | 0.00049  | 0.00008  | 0.00130  | 0.00138  | 2.78570 |
| R11 | 2.89500 | 0.00035  | -0.00038 | -0.00088 | -0.00125 | 2.89375 |
| R12 | 2.06052 | 0.00002  | 0.00003  | 0.00039  | 0.00041  | 2.06093 |
| R13 | 2.06156 | -0.00004 | 0.00006  | 0.00003  | 0.00009  | 2.06165 |
| R14 | 2.06988 | -0.00003 | -0.00001 | -0.00016 | -0.00017 | 2.06971 |
| R15 | 2.08021 | -0.00017 | 0.00001  | -0.00067 | -0.00066 | 2.07955 |
| R16 | 2.75483 | 0.00042  | 0.00017  | 0.00144  | 0.00160  | 2.75644 |
| R17 | 4.24095 | -0.00006 | 0.00028  | -0.00468 | -0.00439 | 4.23656 |
| R18 | 2.50643 | 0.00002  | 0.00000  | 0.00013  | 0.00012  | 2.50655 |
| R19 | 2.05701 | -0.00008 | -0.00007 | -0.00083 | -0.00090 | 2.05611 |
| R20 | 2.04358 | -0.00002 | -0.00001 | -0.00008 | -0.00009 | 2.04349 |
| R21 | 2.04710 | 0.00000  | -0.00002 | -0.00018 | -0.00020 | 2.04690 |
| R22 | 1.91524 | -0.00008 | 0.00005  | 0.00003  | 0.00007  | 1.91531 |
| R23 | 1.92487 | 0.00040  | -0.00027 | -0.00112 | -0.00125 | 1.92362 |
| R24 | 4.01521 | 0.00034  | 0.00385  | 0.02231  | 0.02609  | 4.04130 |
| R25 | 2.75781 | 0.00298  | -0.00093 | 0.01430  | 0.01244  | 2.77026 |
| R26 | 2.73177 | -0.00035 | 0.00072  | -0.00197 | -0.00082 | 2.73095 |
| R27 | 2.05556 | -0.00003 | -0.00005 | -0.00026 | -0.00030 | 2.05526 |
| R28 | 2.05341 | -0.00018 | -0.00003 | -0.00092 | -0.00095 | 2.05246 |
| R29 | 2.76125 | -0.00096 | 0.00040  | -0.00718 | -0.00628 | 2.75497 |
| R30 | 2.05724 | 0.00019  | -0.00003 | 0.00069  | 0.00066  | 2.05790 |
| R31 | 2.84058 | -0.00007 | -0.00001 | -0.00008 | -0.00009 | 2.84049 |
| R32 | 2.06656 | 0.00003  | 0.00003  | 0.00032  | 0.00035  | 2.06692 |
| R33 | 2.06768 | -0.00001 | 0.00006  | 0.00020  | 0.00025  | 2.06793 |
| R34 | 2.06549 | 0.00002  | -0.00001 | 0.00011  | 0.00010  | 2.06558 |
| A1  | 1.87250 | 0.00015  | -0.00002 | 0.00016  | 0.00013  | 1.87264 |
| A2  | 2.27996 | -0.00012 | 0.00004  | -0.00036 | -0.00033 | 2.27964 |
| A3  | 2.13071 | -0.00004 | -0.00002 | 0.00019  | 0.00017  | 2.13089 |
| A4  | 1.86482 | -0.00012 | 0.00001  | -0.00063 | -0.00062 | 1.86420 |
| A5  | 2.27566 | 0.00010  | -0.00015 | -0.00018 | -0.00033 | 2.27533 |
| A6  | 2.14270 | 0.00002  | 0.00014  | 0.00082  | 0.00096  | 2.14366 |
| A7  | 1.89723 | 0.00013  | 0.00007  | 0.00058  | 0.00065  | 1.89788 |
| A8  | 2.25125 | 0.00032  | -0.00012 | 0.00117  | 0.00105  | 2.25230 |
| A9  | 2.13469 | -0.00045 | 0.00005  | -0.00175 | -0.00170 | 2.13299 |
| A10 | 1.88964 | 0.00012  | -0.00012 | -0.00018 | -0.00032 | 1.88933 |
| A11 | 2.14713 | -0.00084 | 0.00107  | 0.00572  | 0.00677  | 2.15390 |

|     |         |          |          |          |          |         |
|-----|---------|----------|----------|----------|----------|---------|
| A12 | 2.24610 | 0.00073  | -0.00092 | -0.00531 | -0.00625 | 2.23985 |
| A13 | 1.90057 | -0.00028 | 0.00008  | 0.00008  | 0.00015  | 1.90072 |
| A14 | 2.20066 | -0.00045 | -0.00065 | 0.00003  | -0.00065 | 2.20001 |
| A15 | 2.18088 | 0.00073  | 0.00065  | 0.00023  | 0.00085  | 2.18174 |
| A16 | 1.96501 | -0.00115 | 0.00041  | -0.00346 | -0.00303 | 1.96198 |
| A17 | 1.87178 | 0.00094  | -0.00055 | 0.00282  | 0.00225  | 1.87403 |
| A18 | 1.88965 | 0.00014  | -0.00026 | 0.00058  | 0.00032  | 1.88997 |
| A19 | 1.91115 | 0.00006  | -0.00026 | -0.00415 | -0.00441 | 1.90674 |
| A20 | 1.92571 | 0.00021  | 0.00016  | 0.00209  | 0.00224  | 1.92795 |
| A21 | 1.89874 | -0.00016 | 0.00050  | 0.00236  | 0.00286  | 1.90161 |
| A22 | 1.91346 | -0.00054 | 0.00049  | 0.00333  | 0.00382  | 1.91728 |
| A23 | 1.89354 | -0.00001 | 0.00000  | 0.00011  | 0.00012  | 1.89366 |
| A24 | 1.87525 | 0.00130  | -0.00069 | 0.00060  | -0.00012 | 1.87513 |
| A25 | 1.87677 | 0.00011  | 0.00025  | -0.00050 | -0.00026 | 1.87651 |
| A26 | 1.89933 | -0.00045 | -0.00032 | 0.00111  | 0.00079  | 1.90012 |
| A27 | 2.00458 | -0.00044 | 0.00030  | -0.00431 | -0.00400 | 2.00058 |
| A28 | 2.15941 | 0.00032  | 0.00006  | 0.00238  | 0.00244  | 2.16186 |
| A29 | 1.94655 | -0.00017 | 0.00007  | -0.00060 | -0.00053 | 1.94601 |
| A30 | 2.17721 | -0.00014 | -0.00013 | -0.00178 | -0.00191 | 2.17530 |
| A31 | 2.07459 | -0.00002 | 0.00006  | 0.00025  | 0.00031  | 2.07490 |
| A32 | 2.16358 | 0.00004  | 0.00000  | 0.00016  | 0.00016  | 2.16374 |
| A33 | 2.04502 | -0.00002 | -0.00006 | -0.00042 | -0.00048 | 2.04454 |
| A34 | 1.93894 | -0.00078 | -0.00065 | -0.00318 | -0.00365 | 1.93529 |
| A35 | 1.91422 | 0.00224  | -0.00067 | 0.00157  | 0.00098  | 1.91520 |
| A36 | 1.88671 | -0.00073 | 0.00037  | 0.00268  | 0.00298  | 1.88969 |
| A37 | 2.08374 | 0.00078  | -0.00332 | 0.00060  | -0.00191 | 2.08183 |
| A38 | 2.08707 | -0.00049 | 0.00240  | -0.00313 | -0.00162 | 2.08546 |
| A39 | 1.99496 | 0.00026  | 0.00095  | 0.00112  | 0.00184  | 1.99679 |
| A40 | 2.00801 | 0.00021  | -0.00118 | -0.00247 | -0.00360 | 2.00441 |
| A41 | 2.02091 | -0.00010 | 0.00070  | 0.00440  | 0.00512  | 2.02603 |
| A42 | 2.02942 | 0.00021  | -0.00038 | -0.00311 | -0.00374 | 2.02568 |
| A43 | 2.13711 | 0.00006  | -0.00125 | -0.00609 | -0.00712 | 2.12999 |
| A44 | 1.96268 | 0.00042  | -0.00220 | -0.00361 | -0.00561 | 1.95708 |
| A45 | 2.02598 | 0.00006  | 0.00129  | 0.00394  | 0.00484  | 2.03082 |
| A46 | 2.03624 | -0.00024 | 0.00144  | 0.00733  | 0.00879  | 2.04503 |
| A47 | 2.62585 | -0.00088 | -0.00073 | -0.01900 | -0.02134 | 2.60450 |
| A48 | 2.57344 | -0.00054 | -0.00193 | -0.00038 | -0.00469 | 2.56875 |
| A49 | 1.92997 | 0.00005  | -0.00005 | 0.00071  | 0.00066  | 1.93062 |
| A50 | 1.91593 | -0.00006 | 0.00041  | 0.00136  | 0.00177  | 1.91771 |
| A51 | 1.94357 | 0.00004  | -0.00014 | -0.00006 | -0.00020 | 1.94337 |
| A52 | 1.87821 | 0.00000  | 0.00015  | 0.00116  | 0.00131  | 1.87952 |
| A53 | 1.89663 | -0.00004 | -0.00018 | -0.00186 | -0.00204 | 1.89459 |
| A54 | 1.89803 | 0.00000  | -0.00020 | -0.00133 | -0.00153 | 1.89650 |
| A55 | 3.42197 | 0.00098  | 0.00374  | 0.01614  | 0.01988  | 3.44185 |

|     |          |          |          |          |          |          |
|-----|----------|----------|----------|----------|----------|----------|
| A56 | 2.63686  | 0.00127  | -0.00845 | -0.00224 | -0.01133 | 2.62553  |
| A57 | 2.85114  | -0.00026 | 0.00515  | 0.02449  | 0.02965  | 2.88079  |
| A58 | 3.09484  | 0.00029  | -0.00499 | -0.01048 | -0.01567 | 3.07917  |
| D1  | 0.00408  | -0.00008 | -0.00050 | -0.00069 | -0.00120 | 0.00288  |
| D2  | -3.13981 | 0.00007  | 0.00006  | 0.00311  | 0.00316  | -3.13665 |
| D3  | 3.14152  | -0.00015 | -0.00064 | -0.00463 | -0.00527 | 3.13625  |
| D4  | -0.00238 | 0.00000  | -0.00008 | -0.00083 | -0.00090 | -0.00328 |
| D5  | -0.00258 | -0.00008 | 0.00095  | 0.00233  | 0.00328  | 0.00070  |
| D6  | -3.09638 | -0.00013 | -0.00035 | -0.00513 | -0.00545 | -3.10182 |
| D7  | -3.14045 | -0.00002 | 0.00107  | 0.00586  | 0.00692  | -3.13353 |
| D8  | 0.04894  | -0.00008 | -0.00023 | -0.00160 | -0.00180 | 0.04714  |
| D9  | -0.00421 | 0.00021  | -0.00011 | -0.00115 | -0.00126 | -0.00547 |
| D10 | -3.13942 | 0.00013  | 0.00011  | -0.00050 | -0.00038 | -3.13979 |
| D11 | 3.13947  | 0.00008  | -0.00062 | -0.00460 | -0.00521 | 3.13426  |
| D12 | 0.00426  | -0.00001 | -0.00040 | -0.00394 | -0.00433 | -0.00007 |
| D13 | 0.00263  | -0.00026 | 0.00071  | 0.00262  | 0.00332  | 0.00595  |
| D14 | 3.11941  | 0.00008  | 0.00167  | 0.01142  | 0.01314  | 3.13255  |
| D15 | 3.13836  | -0.00018 | 0.00051  | 0.00202  | 0.00252  | 3.14087  |
| D16 | -0.02806 | 0.00016  | 0.00147  | 0.01082  | 0.01234  | -0.01572 |
| D17 | 0.08485  | -0.00009 | -0.00275 | -0.02759 | -0.03035 | 0.05450  |
| D18 | -3.06238 | -0.00003 | -0.00312 | -0.02754 | -0.03067 | -3.09305 |
| D19 | -3.04959 | -0.00018 | -0.00251 | -0.02686 | -0.02937 | -3.07896 |
| D20 | 0.08637  | -0.00012 | -0.00288 | -0.02681 | -0.02969 | 0.05668  |
| D21 | -0.00006 | 0.00021  | -0.00102 | -0.00306 | -0.00408 | -0.00413 |
| D22 | 3.09441  | 0.00023  | 0.00019  | 0.00428  | 0.00449  | 3.09890  |
| D23 | -3.11499 | -0.00012 | -0.00210 | -0.01272 | -0.01478 | -3.12977 |
| D24 | -0.02052 | -0.00011 | -0.00089 | -0.00538 | -0.00622 | -0.02674 |
| D25 | 1.32353  | -0.00017 | -0.00777 | -0.01700 | -0.02477 | 1.29876  |
| D26 | -2.85636 | -0.00016 | -0.00821 | -0.02236 | -0.03057 | -2.88693 |
| D27 | -0.81022 | 0.00022  | -0.00805 | -0.01779 | -0.02584 | -0.83607 |
| D28 | -1.76289 | -0.00020 | -0.00922 | -0.02560 | -0.03482 | -1.79771 |
| D29 | 0.34042  | -0.00019 | -0.00967 | -0.03096 | -0.04062 | 0.29979  |
| D30 | 2.38655  | 0.00019  | -0.00951 | -0.02639 | -0.03590 | 2.35066  |
| D31 | -1.06961 | 0.00049  | 0.00099  | -0.00423 | -0.00323 | -1.07284 |
| D32 | 0.97528  | 0.00032  | 0.00156  | -0.00290 | -0.00133 | 0.97395  |
| D33 | -3.13104 | 0.00059  | 0.00149  | -0.00771 | -0.00621 | -3.13725 |
| D34 | 3.13305  | 0.00001  | 0.00160  | -0.00277 | -0.00118 | 3.13187  |
| D35 | -1.10525 | -0.00017 | 0.00217  | -0.00144 | 0.00072  | -1.10452 |
| D36 | 1.07162  | 0.00010  | 0.00210  | -0.00626 | -0.00416 | 1.06747  |
| D37 | 1.04366  | 0.00004  | 0.00105  | -0.00436 | -0.00331 | 1.04035  |
| D38 | 3.08855  | -0.00014 | 0.00162  | -0.00303 | -0.00141 | 3.08714  |
| D39 | -1.01777 | 0.00013  | 0.00155  | -0.00785 | -0.00629 | -1.02406 |
| D40 | 2.98961  | -0.00057 | 0.00420  | -0.00274 | 0.00143  | 2.99103  |
| D41 | -1.20888 | -0.00053 | 0.00382  | -0.00039 | 0.00346  | -1.20542 |

|     |          |          |          |          |          |          |
|-----|----------|----------|----------|----------|----------|----------|
| D42 | 0.91905  | -0.00041 | 0.00418  | -0.00763 | -0.00349 | 0.91557  |
| D43 | 3.00375  | -0.00037 | 0.00380  | -0.00529 | -0.00145 | 3.00230  |
| D44 | -1.18533 | 0.00008  | 0.00390  | -0.00492 | -0.00107 | -1.18640 |
| D45 | 0.89937  | 0.00012  | 0.00352  | -0.00258 | 0.00097  | 0.90033  |
| D46 | -3.13750 | 0.00005  | -0.00051 | -0.00322 | -0.00373 | -3.14123 |
| D47 | 0.00742  | 0.00001  | -0.00039 | -0.00239 | -0.00277 | 0.00465  |
| D48 | 0.01048  | -0.00002 | -0.00009 | -0.00328 | -0.00338 | 0.00710  |
| D49 | -3.12779 | -0.00006 | 0.00003  | -0.00244 | -0.00241 | -3.13021 |
| D50 | 2.00732  | 0.00013  | 0.01551  | 0.01476  | 0.03068  | 2.03800  |
| D51 | -1.05203 | -0.00106 | -0.01569 | -0.06998 | -0.08593 | -1.13796 |
| D52 | -2.24778 | 0.00072  | 0.01326  | 0.01480  | 0.02831  | -2.21947 |
| D53 | 0.97605  | -0.00046 | -0.01794 | -0.06994 | -0.08830 | 0.88775  |
| D54 | -2.71260 | -0.00028 | 0.00045  | -0.00516 | -0.00474 | -2.71734 |
| D55 | -0.00558 | -0.00024 | 0.00036  | -0.00807 | -0.00774 | -0.01332 |
| D56 | -0.03590 | 0.00016  | 0.00009  | 0.00047  | 0.00042  | -0.03547 |
| D57 | 2.67112  | 0.00019  | 0.00000  | -0.00245 | -0.00258 | 2.66854  |
| D58 | 0.91874  | 0.00014  | -0.02043 | -0.04252 | -0.06226 | 0.85648  |
| D59 | -1.48215 | -0.00026 | -0.02130 | -0.04804 | -0.06846 | -1.55062 |
| D60 | 1.51051  | -0.00035 | 0.02174  | 0.05100  | 0.07251  | 1.58301  |
| D61 | -0.89777 | -0.00055 | 0.02052  | 0.03893  | 0.05937  | -0.83841 |
| D62 | 2.55619  | -0.00026 | -0.00024 | -0.00468 | -0.00485 | 2.55134  |
| D63 | -1.65730 | -0.00026 | 0.00018  | -0.00196 | -0.00172 | -1.65901 |
| D64 | 0.44561  | -0.00028 | 0.00012  | -0.00277 | -0.00259 | 0.44303  |
| D65 | 1.35547  | 0.00037  | -0.00103 | -0.00215 | -0.00321 | 1.35226  |
| D66 | -2.85802 | 0.00037  | -0.00062 | 0.00057  | -0.00007 | -2.85810 |
| D67 | -0.75512 | 0.00036  | -0.00068 | -0.00023 | -0.00094 | -0.75606 |
| D68 | -1.02155 | -0.00012 | -0.00077 | -0.01004 | -0.01084 | -1.03239 |
| D69 | 1.04814  | -0.00012 | -0.00035 | -0.00732 | -0.00770 | 1.04044  |
| D70 | -3.13213 | -0.00013 | -0.00041 | -0.00813 | -0.00857 | -3.14071 |

| Item                 | Value    | Threshold | Converged? |
|----------------------|----------|-----------|------------|
| Maximum Force        | 0.002980 | 0.000450  | NO         |
| RMS Force            | 0.000466 | 0.000300  | NO         |
| Maximum Displacement | 0.250908 | 0.001800  | NO         |
| RMS Displacement     | 0.038516 | 0.001200  | NO         |

Predicted change in Energy=-1.029538D-04

GradGradGradGradGradGradGradGradGradGradGradGradGradGradGradGradGradGrad

Input orientation:

| Center Number | Atomic Number | Atomic Type | Coordinates (Angstroms) |          |           |
|---------------|---------------|-------------|-------------------------|----------|-----------|
|               |               |             | X                       | Y        | Z         |
| 1             | 6             | 0           | -2.647715               | 2.073739 | -0.239469 |
| 2             | 6             | 0           | -3.558862               | 1.115424 | 0.066060  |

|    |    |   |           |           |           |
|----|----|---|-----------|-----------|-----------|
| 3  | 7  | 0 | -2.865843 | -0.085668 | 0.150183  |
| 4  | 6  | 0 | -1.565618 | 0.146537  | -0.106775 |
| 5  | 7  | 0 | -1.412722 | 1.450702  | -0.342315 |
| 6  | 6  | 0 | -0.125450 | 2.115758  | -0.613767 |
| 7  | 6  | 0 | 0.403207  | 2.882728  | 0.601622  |
| 8  | 1  | 0 | -2.769532 | 3.131419  | -0.397567 |
| 9  | 1  | 0 | -4.619112 | 1.188505  | 0.224994  |
| 10 | 1  | 0 | 0.590264  | 1.340108  | -0.888581 |
| 11 | 1  | 0 | -0.260298 | 2.789748  | -1.460990 |
| 12 | 1  | 0 | -0.303955 | 3.671317  | 0.880196  |
| 13 | 1  | 0 | 0.473671  | 2.186032  | 1.450528  |
| 14 | 35 | 0 | 0.127291  | -2.670476 | 0.189468  |
| 15 | 1  | 0 | -0.790838 | -0.645242 | -0.096080 |
| 16 | 6  | 0 | -3.362429 | -1.392358 | 0.443289  |
| 17 | 6  | 0 | -4.645394 | -1.669953 | 0.633809  |
| 18 | 1  | 0 | -2.558682 | -2.124626 | 0.483520  |
| 19 | 1  | 0 | -4.932424 | -2.689464 | 0.851913  |
| 20 | 1  | 0 | -5.438249 | -0.933828 | 0.581250  |
| 21 | 7  | 0 | 1.667519  | 3.498260  | 0.213967  |
| 22 | 1  | 0 | 1.994906  | 4.134227  | 0.932039  |
| 23 | 1  | 0 | 2.373770  | 2.777565  | 0.079806  |
| 24 | 6  | 0 | 3.481566  | -0.238197 | -1.205007 |
| 25 | 6  | 0 | 3.331274  | -0.539357 | 0.221787  |
| 26 | 8  | 0 | 2.896825  | 0.742737  | -0.319387 |
| 27 | 1  | 0 | 4.461602  | 0.032518  | -1.591150 |
| 28 | 1  | 0 | 2.791221  | -0.676837 | -1.919614 |
| 29 | 1  | 0 | 2.490615  | -1.177470 | 0.490140  |
| 30 | 6  | 0 | 4.495791  | -0.502714 | 1.171487  |
| 31 | 1  | 0 | 4.175739  | -0.162055 | 2.160344  |
| 32 | 1  | 0 | 4.914767  | -1.507196 | 1.285359  |
| 33 | 1  | 0 | 5.282208  | 0.165485  | 0.811156  |

-----  
Distance matrix (angstroms):

|    |   | 1        | 2        | 3        | 4        | 5        |
|----|---|----------|----------|----------|----------|----------|
| 1  | C | 0.000000 |          |          |          |          |
| 2  | C | 1.357167 | 0.000000 |          |          |          |
| 3  | N | 2.205095 | 1.389235 | 0.000000 |          |          |
| 4  | C | 2.214193 | 2.222979 | 1.345560 | 0.000000 |          |
| 5  | N | 1.387069 | 2.210226 | 2.171301 | 1.334055 | 0.000000 |
| 6  | C | 2.550233 | 3.640213 | 3.597173 | 2.491778 | 1.474129 |
| 7  | C | 3.266501 | 4.371291 | 4.438678 | 3.444538 | 2.497862 |
| 8  | H | 1.076346 | 2.214097 | 3.264805 | 3.231639 | 2.160739 |
| 9  | H | 2.210378 | 1.074584 | 2.168655 | 3.243393 | 3.266730 |
| 10 | H | 3.382908 | 4.263457 | 3.880276 | 2.585277 | 2.079083 |

|    |    |          |          |          |          |          |
|----|----|----------|----------|----------|----------|----------|
| 11 | H  | 2.775707 | 4.001971 | 4.201519 | 3.244122 | 2.091067 |
| 12 | H  | 3.049446 | 4.217798 | 4.605554 | 3.871690 | 2.766772 |
| 13 | H  | 3.551302 | 4.395938 | 4.243097 | 3.277718 | 2.704343 |
| 14 | Br | 5.512914 | 5.285451 | 3.954950 | 3.299888 | 4.431540 |
| 15 | H  | 3.295665 | 3.284539 | 2.163196 | 1.107841 | 2.200080 |
| 16 | C  | 3.604275 | 2.543592 | 1.428267 | 2.428847 | 3.535749 |
| 17 | C  | 4.332270 | 3.043225 | 2.431185 | 3.651455 | 4.597987 |
| 18 | H  | 4.261092 | 3.416513 | 2.088735 | 2.548099 | 3.844243 |
| 19 | H  | 5.394359 | 4.120851 | 3.397490 | 4.505260 | 5.563763 |
| 20 | H  | 4.184031 | 2.827888 | 2.742711 | 4.078950 | 4.769049 |
| 21 | N  | 4.566849 | 5.745854 | 5.779271 | 4.667986 | 3.740297 |
| 22 | H  | 5.212675 | 6.380237 | 6.484265 | 5.445929 | 4.520753 |
| 23 | H  | 5.080612 | 6.161089 | 5.971315 | 4.740875 | 4.034386 |
| 24 | C  | 6.621586 | 7.281177 | 6.492258 | 5.179595 | 5.248874 |
| 25 | C  | 6.541356 | 7.087773 | 6.214114 | 4.955598 | 5.175330 |
| 26 | O  | 5.702621 | 6.477913 | 5.840813 | 4.507112 | 4.367372 |
| 27 | H  | 7.519043 | 8.261166 | 7.532440 | 6.208361 | 6.170779 |
| 28 | H  | 6.322230 | 6.890476 | 6.052761 | 4.790238 | 4.968645 |
| 29 | H  | 6.124142 | 6.483315 | 5.477157 | 4.308402 | 4.778735 |
| 30 | C  | 7.723897 | 8.289618 | 7.443833 | 6.228656 | 6.404526 |
| 31 | H  | 7.570826 | 8.114310 | 7.323282 | 6.180472 | 6.332075 |
| 32 | H  | 8.505253 | 8.953615 | 7.990448 | 6.831417 | 7.171862 |
| 33 | H  | 8.223680 | 8.923120 | 8.178673 | 6.909100 | 6.914069 |
|    |    | 6        | 7        | 8        | 9        | 10       |
| 6  | C  | 0.000000 |          |          |          |          |
| 7  | C  | 1.531304 | 0.000000 |          |          |          |
| 8  | H  | 2.840682 | 3.335641 | 0.000000 |          |          |
| 9  | H  | 4.664367 | 5.313750 | 2.753805 | 0.000000 |          |
| 10 | H  | 1.090597 | 2.152992 | 3.839025 | 5.329224 | 0.000000 |
| 11 | H  | 1.090978 | 2.168699 | 2.746610 | 4.940221 | 1.775546 |
| 12 | H  | 2.164152 | 1.095242 | 2.828999 | 5.021377 | 3.059859 |
| 13 | H  | 2.150627 | 1.100451 | 3.850658 | 5.332301 | 2.490103 |
| 14 | Br | 4.859743 | 5.575310 | 6.511388 | 6.117298 | 4.178675 |
| 15 | H  | 2.886843 | 3.789341 | 4.274259 | 4.256924 | 2.545018 |
| 16 | C  | 4.888996 | 5.699250 | 4.639302 | 2.878847 | 4.986384 |
| 17 | C  | 6.026438 | 6.798259 | 5.256973 | 2.887664 | 6.228183 |
| 18 | H  | 5.010541 | 5.818964 | 5.333552 | 3.910121 | 4.878822 |
| 19 | H  | 6.953084 | 7.718869 | 6.334191 | 3.940791 | 7.054563 |
| 20 | H  | 6.241304 | 6.977759 | 4.960480 | 2.302651 | 6.608642 |
| 21 | N  | 2.410641 | 1.458643 | 4.493992 | 6.697523 | 2.652114 |
| 22 | H  | 3.310535 | 2.051567 | 5.047112 | 7.274780 | 3.618671 |
| 23 | H  | 2.676776 | 2.041193 | 5.177514 | 7.172628 | 2.486956 |
| 24 | C  | 4.347555 | 4.741348 | 7.147202 | 8.348735 | 3.309200 |
| 25 | C  | 4.438099 | 4.519792 | 7.146889 | 8.135979 | 3.504061 |

|    |    |          |          |          |          |          |
|----|----|----------|----------|----------|----------|----------|
| 26 | O  | 3.332566 | 3.412617 | 6.149757 | 7.548800 | 2.449706 |
| 27 | H  | 5.131882 | 5.422408 | 7.957205 | 9.332419 | 4.146161 |
| 28 | H  | 4.243913 | 4.972902 | 6.909516 | 7.936743 | 3.158372 |
| 29 | H  | 4.348305 | 4.566717 | 6.857382 | 7.497757 | 3.442442 |
| 30 | C  | 5.603516 | 5.341835 | 8.273679 | 9.318665 | 4.784665 |
| 31 | H  | 5.602174 | 5.092378 | 8.101028 | 9.105987 | 4.940453 |
| 32 | H  | 6.491246 | 6.331912 | 9.132220 | 9.964238 | 5.615558 |
| 33 | H  | 5.922561 | 5.588556 | 8.665349 | 9.971273 | 5.126713 |
|    |    | 11       | 12       | 13       | 14       | 15       |
| 11 | H  | 0.000000 |          |          |          |          |
| 12 | H  | 2.502044 | 0.000000 |          |          |          |
| 13 | H  | 3.062698 | 1.770890 | 0.000000 |          |          |
| 14 | Br | 5.717367 | 6.393858 | 5.029505 | 0.000000 |          |
| 15 | H  | 3.734114 | 4.452286 | 3.465125 | 2.241890 | 0.000000 |
| 16 | C  | 5.544322 | 5.931775 | 5.341822 | 3.725071 | 2.731699 |
| 17 | C  | 6.595923 | 6.887523 | 6.460687 | 4.896632 | 4.054674 |
| 18 | H  | 5.763226 | 6.231702 | 5.358362 | 2.756604 | 2.376928 |
| 19 | H  | 7.563072 | 7.866579 | 7.304428 | 5.102931 | 4.714899 |
| 20 | H  | 6.696786 | 6.903456 | 6.740917 | 5.843344 | 4.705368 |
| 21 | N  | 2.650273 | 2.088186 | 2.162475 | 6.358160 | 4.827862 |
| 22 | H  | 3.552486 | 2.345578 | 2.525560 | 7.095307 | 5.626786 |
| 23 | H  | 3.051641 | 2.934218 | 2.416437 | 5.894052 | 4.664899 |
| 24 | C  | 4.820324 | 5.827740 | 4.687877 | 4.371694 | 4.432701 |
| 25 | C  | 5.178230 | 5.601622 | 4.135631 | 3.848145 | 4.135705 |
| 26 | O  | 3.932040 | 4.501176 | 3.329772 | 4.424848 | 3.946544 |
| 27 | H  | 5.469515 | 6.485287 | 5.458299 | 5.409532 | 5.502973 |
| 28 | H  | 4.641047 | 6.027064 | 4.992487 | 3.939461 | 4.019629 |
| 29 | H  | 5.207038 | 5.610036 | 4.037766 | 2.811543 | 3.375626 |
| 30 | C  | 6.355361 | 6.367492 | 4.846099 | 4.974671 | 5.438334 |
| 31 | H  | 6.442486 | 6.033339 | 4.441020 | 5.154266 | 5.476477 |
| 32 | H  | 7.265498 | 7.363167 | 5.778456 | 5.047190 | 5.933403 |
| 33 | H  | 6.539783 | 6.595517 | 5.254849 | 5.916278 | 6.193725 |
|    |    | 16       | 17       | 18       | 19       | 20       |
| 16 | C  | 0.000000 |          |          |          |          |
| 17 | C  | 1.326408 | 0.000000 |          |          |          |
| 18 | H  | 1.088046 | 2.140954 | 0.000000 |          |          |
| 19 | H  | 2.077100 | 1.081369 | 2.467672 | 0.000000 |          |
| 20 | H  | 2.130331 | 1.083171 | 3.117604 | 1.846991 | 0.000000 |
| 21 | N  | 7.019338 | 8.169429 | 7.039196 | 9.069407 | 8.382734 |
| 22 | H  | 7.712526 | 8.824457 | 7.753037 | 9.724047 | 9.003334 |
| 23 | H  | 7.101011 | 8.328025 | 6.965884 | 9.157785 | 8.663344 |
| 24 | C  | 7.133669 | 8.454506 | 6.549377 | 9.001937 | 9.123471 |
| 25 | C  | 6.751468 | 8.066923 | 6.105175 | 8.562051 | 8.785746 |
| 26 | O  | 6.657219 | 7.975885 | 6.215222 | 8.628389 | 8.549589 |

|    |   |          |           |          |           |           |
|----|---|----------|-----------|----------|-----------|-----------|
| 27 | H | 8.208816 | 9.528181  | 7.631639 | 10.080945 | 10.181364 |
| 28 | H | 6.630437 | 7.925245  | 6.040912 | 8.449066  | 8.604914  |
| 29 | H | 5.857174 | 7.154426  | 5.137368 | 7.584096  | 7.933129  |
| 30 | C | 7.941873 | 9.231079  | 7.271140 | 9.683762  | 9.960893  |
| 31 | H | 7.828530 | 9.078351  | 7.212201 | 9.542453  | 9.773327  |
| 32 | H | 8.320712 | 9.583720  | 7.541658 | 9.927376  | 10.392760 |
| 33 | H | 8.791583 | 10.097404 | 8.175054 | 10.606182 | 10.779125 |
|    |   | 21       | 22        | 23       | 24        | 25        |
| 21 | N | 0.000000 |           |          |           |           |
| 22 | H | 1.013540 | 0.000000  |          |           |           |
| 23 | H | 1.017935 | 1.646321  | 0.000000 |           |           |
| 24 | C | 4.389233 | 5.088734  | 3.460170 | 0.000000  |           |
| 25 | C | 4.366977 | 4.912507  | 3.455277 | 1.465956  | 0.000000  |
| 26 | O | 3.064077 | 3.725820  | 2.138566 | 1.445156  | 1.457868  |
| 27 | H | 4.803822 | 5.410646  | 3.832286 | 1.087595  | 2.211657  |
| 28 | H | 4.821443 | 5.649105  | 4.013083 | 1.086114  | 2.212726  |
| 29 | H | 4.755650 | 5.353048  | 3.977980 | 2.176635  | 1.088994  |
| 30 | C | 4.992370 | 5.273801  | 4.056472 | 2.597372  | 1.503121  |
| 31 | H | 4.845354 | 4.972203  | 4.027046 | 3.437042  | 2.147901  |
| 32 | H | 6.061938 | 6.362082  | 5.125349 | 3.141074  | 2.139007  |
| 33 | H | 4.952776 | 5.154791  | 3.977039 | 2.733163  | 2.156456  |
|    |   | 26       | 27        | 28       | 29        | 30        |
| 26 | O | 0.000000 |           |          |           |           |
| 27 | H | 2.137830 | 0.000000  |          |           |           |
| 28 | H | 2.141744 | 1.844246  | 0.000000 |           |           |
| 29 | H | 2.123096 | 3.111371  | 2.479498 | 0.000000  |           |
| 30 | C | 2.516057 | 2.814215  | 3.534229 | 2.222669  | 0.000000  |
| 31 | H | 2.933144 | 3.767398  | 4.339118 | 2.580754  | 1.093764  |
| 32 | H | 3.421915 | 3.293993  | 3.933293 | 2.572471  | 1.094301  |
| 33 | H | 2.702109 | 2.542076  | 3.790992 | 3.114413  | 1.093060  |
|    |   | 31       | 32        | 33       |           |           |
| 31 | H | 0.000000 |           |          |           |           |
| 32 | H | 1.766682 | 0.000000  |          |           |           |
| 33 | H | 1.775350 | 1.777005  | 0.000000 |           |           |

Stoichiometry C10H18BrN3O

Framework group C1[X(C10H18BrN3O)]

Deg. of freedom 93

Full point group C1 NOp 1

Largest Abelian subgroup C1 NOp 1

Largest concise Abelian subgroup C1 NOp 1

Standard orientation:

-----

| Center Number | Atomic Number | Atomic Type | Coordinates (Angstroms) |   |   |
|---------------|---------------|-------------|-------------------------|---|---|
|               |               |             | X                       | Y | Z |



|    |    |   |           |           |           |
|----|----|---|-----------|-----------|-----------|
| 1  | 6  | 0 | -2.352213 | 2.466630  | -0.240193 |
| 2  | 6  | 0 | -3.359600 | 1.590170  | 0.002485  |
| 3  | 7  | 0 | -2.792084 | 0.322367  | 0.026440  |
| 4  | 6  | 0 | -1.471300 | 0.435533  | -0.204333 |
| 5  | 7  | 0 | -1.184590 | 1.728424  | -0.365366 |
| 6  | 6  | 0 | 0.167000  | 2.273677  | -0.586636 |
| 7  | 6  | 0 | 0.751172  | 2.915995  | 0.674737  |
| 8  | 1  | 0 | -2.364742 | 3.538233  | -0.340347 |
| 9  | 1  | 0 | -4.409479 | 1.761336  | 0.154761  |
| 10 | 1  | 0 | 0.805360  | 1.445733  | -0.897130 |
| 11 | 1  | 0 | 0.113618  | 3.002935  | -1.396306 |
| 12 | 1  | 0 | 0.122559  | 3.755723  | 0.989790  |
| 13 | 1  | 0 | 0.738196  | 2.170600  | 1.484187  |
| 14 | 35 | 0 | -0.074621 | -2.550154 | -0.048697 |
| 15 | 1  | 0 | -0.780208 | -0.429938 | -0.230089 |
| 16 | 6  | 0 | -3.421848 | -0.941410 | 0.241413  |
| 17 | 6  | 0 | -4.728994 | -1.097797 | 0.403497  |
| 18 | 1  | 0 | -2.696419 | -1.752300 | 0.248745  |
| 19 | 1  | 0 | -5.120289 | -2.093405 | 0.561648  |
| 20 | 1  | 0 | -5.443010 | -0.283507 | 0.384179  |
| 21 | 7  | 0 | 2.076741  | 3.420694  | 0.334466  |
| 22 | 1  | 0 | 2.455210  | 3.980285  | 1.090035  |
| 23 | 1  | 0 | 2.709035  | 2.640647  | 0.167366  |
| 24 | 6  | 0 | 3.528089  | -0.397293 | -1.272371 |
| 25 | 6  | 0 | 3.326295  | -0.758884 | 0.133886  |
| 26 | 8  | 0 | 3.031205  | 0.588103  | -0.339324 |
| 27 | 1  | 0 | 4.536202  | -0.206465 | -1.633141 |
| 28 | 1  | 0 | 2.808304  | -0.724347 | -2.017078 |
| 29 | 1  | 0 | 2.421762  | -1.322365 | 0.357974  |
| 30 | 6  | 0 | 4.473799  | -0.891907 | 1.095610  |
| 31 | 1  | 0 | 4.174341  | -0.574933 | 2.098692  |
| 32 | 1  | 0 | 4.787975  | -1.938308 | 1.157508  |
| 33 | 1  | 0 | 5.328814  | -0.288049 | 0.780831  |

Rotational constants (GHZ): 0.4240164 0.2832030 0.1787006

Standard basis: 6-311++G(d,p) (5D, 7F)

There are 499 symmetry adapted cartesian basis functions of A symmetry.

There are 482 symmetry adapted basis functions of A symmetry.

482 basis functions, 760 primitive gaussians, 499 cartesian basis functions

71 alpha electrons 71 beta electrons

nuclear repulsion energy 1304.8155087600 Hartrees.

NAtoms= 33 NActive= 33 NUniq= 33 SFac= 1.00D+00 NAtFMM= 60 NAOKFM=F

Big=F

Integral buffers will be 131072 words long.  
 Raffenetti 2 integral format.  
 Two-electron integral symmetry is turned on.  
 One-electron integrals computed using PRISM.  
 NBasis= 482 RedAO= T EigKep= 3.60D-06 NBF= 482  
 NBsUse= 482 1.00D-06 EigRej= -1.00D+00 NBFU= 482  
 Initial guess from the checkpoint file:  
 "/home/suqian/liuwen/qianmengshijie/nh2po/nh2po.chk"  
 B after Tr= 0.000000 0.000000 0.000000  
 Rot= 0.999993 0.003150 -0.000969 0.002021 Ang= 0.44 deg.  
 ExpMin= 3.50D-02 ExpMax= 4.40D+05 ExpMxC= 1.51D+04 IAcc=3 IRadAn= 5 AccDes= 0.00D+00  
 Harris functional with IExCor= 402 and IRadAn= 5 diagonalized for initial guess.  
 HarFok: IExCor= 402 AccDes= 0.00D+00 IRadAn= 5 IDoV= 1 UseB2=F ITyADJ=14  
 ICtDFT= 3500011 ScaDFX= 1.000000 1.000000 1.000000 1.000000  
 FoFCou: FMM=F IPFlag= 0 FMFlag= 100000 FMFlg1= 0  
 NFXFlg= 0 DoJE=T BraDBF=F KetDBF=T FulRan=T  
 wScrn= 0.000000 ICntrl= 500 IOpCl= 0 I1Cent= 200000004 NGrid= 0  
 NMat0= 1 NMatS0= 1 NMatT0= 0 NMatD0= 1 NMtDS0= 0  
 NMtDT0= 0  
 Petite list used in FoFCou.  
 Requested convergence on RMS density matrix=1.00D-08 within 128 cycles.  
 Requested convergence on MAX density matrix=1.00D-06.  
 Requested convergence on energy=1.00D-06.  
 No special actions if energy rises.  
 SCF Done: E(RB3LYP) = -3205.64808784 A.U. after 11 cycles  
 NFock= 11 Conv=0.86D-08 -V/T= 2.0018  
 Calling FoFJK, ICntrl= 2127 FMM=F ISym2X=0 I1Cent= 0 IOpClX= 0 NMat=1 NMatS=1  
 NMatT=0.

\*\*\*\*\* Axes restored to original set \*\*\*\*\*

| Center Number | Atomic Number | Forces (Hartrees/Bohr) |              |              |
|---------------|---------------|------------------------|--------------|--------------|
|               |               | X                      | Y            | Z            |
| 1             | 6             | -0.000062482           | 0.000050914  | 0.000064979  |
| 2             | 6             | 0.000156036            | 0.000165464  | 0.000121025  |
| 3             | 7             | -0.000504086           | -0.000784006 | -0.000510272 |
| 4             | 6             | 0.000985402            | 0.001366148  | 0.000954526  |
| 5             | 7             | -0.000188788           | 0.000382616  | -0.000411852 |
| 6             | 6             | -0.000612261           | -0.000825302 | -0.000464355 |
| 7             | 6             | 0.000371540            | 0.000071743  | -0.000461454 |
| 8             | 1             | -0.000038214           | -0.000017258 | 0.000112761  |
| 9             | 1             | -0.000013114           | -0.000132591 | 0.000068187  |

|    |    |              |              |              |
|----|----|--------------|--------------|--------------|
| 10 | 1  | -0.000115873 | 0.000167174  | -0.000301224 |
| 11 | 1  | 0.000160558  | 0.000039123  | 0.000089878  |
| 12 | 1  | 0.000053586  | -0.000009902 | 0.000089038  |
| 13 | 1  | -0.000094792 | -0.000040527 | 0.000072404  |
| 14 | 35 | 0.000144876  | 0.000167819  | -0.000008007 |
| 15 | 1  | -0.000514366 | -0.000592146 | 0.000245344  |
| 16 | 6  | -0.000087889 | -0.000057107 | -0.000356271 |
| 17 | 6  | 0.000062845  | 0.000101521  | -0.000022313 |
| 18 | 1  | 0.000206810  | -0.000112581 | -0.000007399 |
| 19 | 1  | 0.000071019  | -0.000001137 | 0.000079417  |
| 20 | 1  | -0.000070563 | 0.000075993  | 0.000045620  |
| 21 | 7  | -0.000418129 | 0.000386515  | 0.000840099  |
| 22 | 1  | 0.000233851  | 0.000043865  | -0.000320057 |
| 23 | 1  | 0.000565621  | 0.000124293  | 0.000181346  |
| 24 | 6  | 0.000299729  | 0.000393618  | 0.000796787  |
| 25 | 6  | -0.001199580 | 0.000048593  | -0.001407147 |
| 26 | 8  | 0.000507511  | -0.000677767 | -0.000201818 |
| 27 | 1  | -0.000232930 | 0.000202105  | -0.000278483 |
| 28 | 1  | 0.000047212  | -0.000333312 | 0.000195220  |
| 29 | 1  | 0.000706938  | -0.000542439 | 0.000405131  |
| 30 | 6  | -0.000210831 | 0.000389790  | 0.000403252  |
| 31 | 1  | 0.000101149  | -0.000102169 | 0.000126655  |
| 32 | 1  | -0.000232062 | 0.000068361  | -0.000069633 |
| 33 | 1  | -0.000078725 | -0.000017410 | -0.000071382 |

-----  
Cartesian Forces: Max 0.001407147 RMS 0.000408139

GradGradGradGradGradGradGradGradGradGradGradGradGradGradGradGradGradGradGradGrad

Berny optimization.

Using GEDIIS/GDIIS optimizer.

FormGI is forming the generalized inverse of G from B-inverse, IUseBI=4.

Internal Forces: Max 0.001432187 RMS 0.000310676

Search for a local minimum.

Step number 29 out of a maximum of 172

All quantities printed in internal units (Hartrees-Bohrs-Radians)

Mixed Optimization -- En-DIIS/RFO-DIIS

Swapping is turned off.

Update second derivatives using D2CorX and points 25 27 28 29

DE= -9.01D-05 DEPred=-1.03D-04 R= 8.75D-01

TightC=F SS= 1.41D+00 RLast= 2.22D-01 DXNew= 1.4210D+00 6.6495D-01

Trust test= 8.75D-01 RLast= 2.22D-01 DXMaxT set to 8.45D-01

ITU= 1 1 1 0 0-1 1-1 1 1 1 1 1 1 1 1 0-1-1

ITU= 1 1 1-1 1 0 0-1 0

Eigenvalues --- 0.00075 0.00145 0.00238 0.00431 0.00652

|                 |         |         |         |         |         |
|-----------------|---------|---------|---------|---------|---------|
| Eigenvalues --- | 0.00729 | 0.00771 | 0.01336 | 0.01488 | 0.01878 |
| Eigenvalues --- | 0.01965 | 0.02178 | 0.02353 | 0.02386 | 0.02447 |
| Eigenvalues --- | 0.02731 | 0.02787 | 0.03056 | 0.03097 | 0.03222 |
| Eigenvalues --- | 0.03273 | 0.03692 | 0.03798 | 0.03848 | 0.04111 |
| Eigenvalues --- | 0.04376 | 0.04572 | 0.05293 | 0.05462 | 0.05743 |
| Eigenvalues --- | 0.05853 | 0.05945 | 0.07478 | 0.07837 | 0.08572 |
| Eigenvalues --- | 0.09108 | 0.09576 | 0.10668 | 0.12201 | 0.12462 |
| Eigenvalues --- | 0.12621 | 0.13744 | 0.15066 | 0.15795 | 0.15976 |
| Eigenvalues --- | 0.16000 | 0.16003 | 0.16005 | 0.16021 | 0.16078 |
| Eigenvalues --- | 0.16273 | 0.18553 | 0.20941 | 0.22074 | 0.22227 |
| Eigenvalues --- | 0.23072 | 0.23404 | 0.25840 | 0.26862 | 0.28896 |
| Eigenvalues --- | 0.29739 | 0.30407 | 0.31213 | 0.31755 | 0.32720 |
| Eigenvalues --- | 0.33659 | 0.34282 | 0.34359 | 0.34419 | 0.34547 |
| Eigenvalues --- | 0.34698 | 0.34744 | 0.35076 | 0.35202 | 0.35342 |
| Eigenvalues --- | 0.35556 | 0.35652 | 0.35892 | 0.36105 | 0.36423 |
| Eigenvalues --- | 0.36625 | 0.38924 | 0.40038 | 0.41890 | 0.42439 |
| Eigenvalues --- | 0.43999 | 0.45498 | 0.46463 | 0.49515 | 0.54829 |
| Eigenvalues --- | 0.58097 | 0.60614 | 1.26845 |         |         |

En-DIIS/RFO-DIIS IScMMF= 0 using points: 29 28 27 26

RFO step: Lambda=-3.06126635D-05.

DidBck=F Rises=F RFO-DIIS coefs: 0.93154 0.30500 -0.27208 0.03554

Iteration 1 RMS(Cart)= 0.03481188 RMS(Int)= 0.00063065

Iteration 2 RMS(Cart)= 0.00145363 RMS(Int)= 0.00028188

Iteration 3 RMS(Cart)= 0.00000149 RMS(Int)= 0.00028188

Iteration 4 RMS(Cart)= 0.00000000 RMS(Int)= 0.00028188

| Variable | Old X   | -DE/DX   | Delta X<br>(Linear) | Delta X<br>(Quad) | Delta X<br>(Total) | New X   |
|----------|---------|----------|---------------------|-------------------|--------------------|---------|
| R1       | 2.56467 | 0.00032  | 0.00002             | 0.00015           | 0.00017            | 2.56484 |
| R2       | 2.62118 | 0.00012  | -0.00012            | -0.00037          | -0.00048           | 2.62070 |
| R3       | 2.03400 | -0.00003 | -0.00003            | 0.00002           | -0.00001           | 2.03399 |
| R4       | 2.62527 | 0.00013  | 0.00025             | 0.00017           | 0.00041            | 2.62569 |
| R5       | 2.03067 | 0.00001  | 0.00001             | -0.00014          | -0.00013           | 2.03054 |
| R6       | 2.54274 | -0.00002 | -0.00020            | -0.00091          | -0.00111           | 2.54163 |
| R7       | 2.69903 | -0.00011 | -0.00034            | 0.00002           | -0.00033           | 2.69871 |
| R8       | 2.52100 | -0.00042 | -0.00013            | 0.00042           | 0.00029            | 2.52129 |
| R9       | 2.09352 | 0.00005  | 0.00012             | -0.00143          | -0.00132           | 2.09220 |
| R10      | 2.78570 | -0.00032 | 0.00058             | 0.00067           | 0.00125            | 2.78695 |
| R11      | 2.89375 | 0.00037  | -0.00028            | 0.00021           | -0.00006           | 2.89368 |
| R12      | 2.06093 | -0.00012 | 0.00006             | 0.00002           | 0.00008            | 2.06101 |
| R13      | 2.06165 | -0.00007 | -0.00009            | -0.00025          | -0.00033           | 2.06132 |
| R14      | 2.06971 | -0.00002 | -0.00002            | -0.00035          | -0.00037           | 2.06934 |
| R15      | 2.07955 | 0.00007  | -0.00030            | -0.00089          | -0.00119           | 2.07836 |
| R16      | 2.75644 | -0.00007 | 0.00102             | 0.00140           | 0.00242            | 2.75885 |
| R17      | 4.23656 | -0.00009 | 0.00094             | 0.01063           | 0.01157            | 4.24812 |

|     |         |          |          |          |          |         |
|-----|---------|----------|----------|----------|----------|---------|
| R18 | 2.50655 | -0.00009 | 0.00011  | -0.00004 | 0.00006  | 2.50661 |
| R19 | 2.05611 | 0.00023  | -0.00020 | 0.00000  | -0.00020 | 2.05591 |
| R20 | 2.04349 | 0.00000  | 0.00000  | -0.00001 | -0.00001 | 2.04348 |
| R21 | 2.04690 | 0.00010  | 0.00002  | 0.00002  | 0.00004  | 2.04694 |
| R22 | 1.91531 | -0.00012 | 0.00007  | -0.00027 | -0.00020 | 1.91512 |
| R23 | 1.92362 | 0.00041  | 0.00060  | 0.00058  | 0.00137  | 1.92499 |
| R24 | 4.04130 | 0.00050  | 0.00152  | 0.03131  | 0.03273  | 4.07404 |
| R25 | 2.77026 | -0.00029 | 0.00057  | -0.00168 | -0.00193 | 2.76832 |
| R26 | 2.73095 | -0.00031 | -0.00019 | 0.00188  | 0.00201  | 2.73296 |
| R27 | 2.05526 | -0.00006 | 0.00010  | -0.00039 | -0.00029 | 2.05497 |
| R28 | 2.05246 | -0.00003 | 0.00016  | -0.00025 | -0.00009 | 2.05237 |
| R29 | 2.75497 | -0.00035 | 0.00099  | 0.00083  | 0.00232  | 2.75729 |
| R30 | 2.05790 | -0.00013 | 0.00010  | 0.00049  | 0.00059  | 2.05849 |
| R31 | 2.84049 | -0.00007 | -0.00048 | -0.00008 | -0.00056 | 2.83993 |
| R32 | 2.06692 | 0.00005  | -0.00015 | 0.00034  | 0.00020  | 2.06711 |
| R33 | 2.06793 | -0.00016 | -0.00007 | 0.00001  | -0.00006 | 2.06787 |
| R34 | 2.06558 | -0.00004 | 0.00013  | 0.00001  | 0.00014  | 2.06573 |
| A1  | 1.87264 | -0.00020 | 0.00030  | 0.00011  | 0.00041  | 1.87304 |
| A2  | 2.27964 | 0.00004  | -0.00033 | -0.00024 | -0.00057 | 2.27907 |
| A3  | 2.13089 | 0.00016  | 0.00004  | 0.00011  | 0.00015  | 2.13103 |
| A4  | 1.86420 | 0.00011  | -0.00042 | -0.00025 | -0.00069 | 1.86351 |
| A5  | 2.27533 | 0.00009  | 0.00076  | 0.00038  | 0.00115  | 2.27648 |
| A6  | 2.14366 | -0.00020 | -0.00033 | -0.00014 | -0.00047 | 2.14319 |
| A7  | 1.89788 | -0.00029 | 0.00024  | 0.00023  | 0.00044  | 1.89832 |
| A8  | 2.25230 | 0.00038  | -0.00053 | 0.00040  | -0.00013 | 2.25217 |
| A9  | 2.13299 | -0.00009 | 0.00029  | -0.00060 | -0.00030 | 2.13269 |
| A10 | 1.88933 | 0.00036  | 0.00000  | 0.00009  | 0.00008  | 1.88940 |
| A11 | 2.15390 | -0.00039 | 0.00176  | 0.00182  | 0.00359  | 2.15748 |
| A12 | 2.23985 | 0.00004  | -0.00181 | -0.00178 | -0.00359 | 2.23626 |
| A13 | 1.90072 | 0.00002  | -0.00006 | -0.00014 | -0.00023 | 1.90049 |
| A14 | 2.20001 | 0.00141  | -0.00069 | -0.00060 | -0.00133 | 2.19868 |
| A15 | 2.18174 | -0.00143 | 0.00099  | 0.00084  | 0.00180  | 2.18353 |
| A16 | 1.96198 | -0.00041 | 0.00136  | -0.00081 | 0.00059  | 1.96257 |
| A17 | 1.87403 | -0.00013 | 0.00010  | 0.00105  | 0.00114  | 1.87517 |
| A18 | 1.88997 | 0.00046  | -0.00086 | -0.00071 | -0.00159 | 1.88838 |
| A19 | 1.90674 | 0.00020  | 0.00007  | -0.00168 | -0.00162 | 1.90511 |
| A20 | 1.92795 | 0.00004  | -0.00107 | 0.00125  | 0.00016  | 1.92811 |
| A21 | 1.90161 | -0.00016 | 0.00042  | 0.00097  | 0.00139  | 1.90300 |
| A22 | 1.91728 | -0.00023 | 0.00004  | 0.00191  | 0.00196  | 1.91925 |
| A23 | 1.89366 | -0.00017 | 0.00078  | 0.00083  | 0.00162  | 1.89528 |
| A24 | 1.87513 | 0.00074  | -0.00089 | 0.00050  | -0.00044 | 1.87470 |
| A25 | 1.87651 | 0.00005  | 0.00039  | 0.00002  | 0.00039  | 1.87690 |
| A26 | 1.90012 | 0.00000  | 0.00022  | 0.00061  | 0.00084  | 1.90096 |
| A27 | 2.00058 | -0.00041 | -0.00051 | -0.00367 | -0.00417 | 1.99642 |

|     |          |          |          |          |          |          |
|-----|----------|----------|----------|----------|----------|----------|
| A28 | 2.16186  | -0.00008 | 0.00021  | 0.00060  | 0.00080  | 2.16266  |
| A29 | 1.94601  | -0.00002 | 0.00049  | -0.00028 | 0.00020  | 1.94621  |
| A30 | 2.17530  | 0.00010  | -0.00069 | -0.00032 | -0.00102 | 2.17428  |
| A31 | 2.07490  | -0.00009 | 0.00014  | -0.00016 | -0.00002 | 2.07488  |
| A32 | 2.16374  | 0.00005  | -0.00021 | 0.00036  | 0.00015  | 2.16389  |
| A33 | 2.04454  | 0.00004  | 0.00007  | -0.00020 | -0.00013 | 2.04441  |
| A34 | 1.93529  | 0.00059  | 0.00028  | 0.00129  | 0.00175  | 1.93704  |
| A35 | 1.91520  | -0.00070 | 0.00065  | 0.00038  | 0.00110  | 1.91629  |
| A36 | 1.88969  | -0.00006 | -0.00034 | 0.00039  | -0.00002 | 1.88967  |
| A37 | 2.08183  | 0.00043  | 0.00221  | -0.00041 | 0.00253  | 2.08436  |
| A38 | 2.08546  | -0.00038 | -0.00083 | -0.00196 | -0.00360 | 2.08185  |
| A39 | 1.99679  | -0.00061 | -0.00108 | 0.00101  | -0.00044 | 1.99635  |
| A40 | 2.00441  | 0.00067  | 0.00082  | -0.00289 | -0.00188 | 2.00253  |
| A41 | 2.02603  | -0.00005 | -0.00099 | 0.00250  | 0.00153  | 2.02757  |
| A42 | 2.02568  | 0.00019  | 0.00102  | -0.00482 | -0.00444 | 2.02124  |
| A43 | 2.12999  | 0.00040  | 0.00134  | -0.00164 | 0.00030  | 2.13030  |
| A44 | 1.95708  | 0.00103  | -0.00084 | -0.00244 | -0.00301 | 1.95406  |
| A45 | 2.03082  | -0.00069 | -0.00084 | -0.00006 | -0.00133 | 2.02949  |
| A46 | 2.04503  | -0.00057 | -0.00086 | 0.00553  | 0.00472  | 2.04975  |
| A47 | 2.60450  | 0.00007  | -0.00004 | -0.01242 | -0.01411 | 2.59040  |
| A48 | 2.56875  | 0.00000  | -0.00147 | -0.01071 | -0.01403 | 2.55472  |
| A49 | 1.93062  | 0.00028  | -0.00036 | 0.00118  | 0.00082  | 1.93144  |
| A50 | 1.91771  | -0.00029 | 0.00005  | 0.00068  | 0.00073  | 1.91843  |
| A51 | 1.94337  | -0.00011 | 0.00013  | -0.00050 | -0.00037 | 1.94300  |
| A52 | 1.87952  | -0.00004 | -0.00019 | 0.00024  | 0.00005  | 1.87958  |
| A53 | 1.89459  | 0.00000  | 0.00022  | -0.00084 | -0.00062 | 1.89397  |
| A54 | 1.89650  | 0.00017  | 0.00015  | -0.00078 | -0.00064 | 1.89587  |
| A55 | 3.44185  | -0.00080 | -0.00586 | 0.01598  | 0.01013  | 3.45198  |
| A56 | 2.62553  | 0.00006  | -0.00540 | -0.02276 | -0.02901 | 2.59652  |
| A57 | 2.88079  | 0.00022  | -0.00717 | 0.00804  | 0.00088  | 2.88167  |
| A58 | 3.07917  | 0.00063  | 0.00144  | 0.00433  | 0.00549  | 3.08465  |
| D1  | 0.00288  | 0.00001  | 0.00160  | -0.00269 | -0.00109 | 0.00179  |
| D2  | -3.13665 | 0.00009  | -0.00193 | 0.00100  | -0.00093 | -3.13758 |
| D3  | 3.13625  | -0.00006 | 0.00265  | -0.00508 | -0.00242 | 3.13383  |
| D4  | -0.00328 | 0.00001  | -0.00088 | -0.00139 | -0.00226 | -0.00554 |
| D5  | 0.00070  | -0.00026 | 0.00157  | -0.00161 | -0.00004 | 0.00066  |
| D6  | -3.10182 | -0.00011 | -0.00265 | -0.00442 | -0.00704 | -3.10887 |
| D7  | -3.13353 | -0.00019 | 0.00063  | 0.00053  | 0.00115  | -3.13237 |
| D8  | 0.04714  | -0.00004 | -0.00359 | -0.00228 | -0.00585 | 0.04129  |
| D9  | -0.00547 | 0.00023  | -0.00420 | 0.00606  | 0.00186  | -0.00361 |
| D10 | -3.13979 | 0.00010  | -0.00176 | 0.00166  | -0.00010 | -3.13990 |
| D11 | 3.13426  | 0.00016  | -0.00100 | 0.00271  | 0.00171  | 3.13597  |
| D12 | -0.00007 | 0.00003  | 0.00144  | -0.00169 | -0.00025 | -0.00032 |
| D13 | 0.00595  | -0.00039 | 0.00522  | -0.00712 | -0.00190 | 0.00405  |

|     |          |          |          |          |          |          |
|-----|----------|----------|----------|----------|----------|----------|
| D14 | 3.13255  | -0.00012 | 0.00245  | 0.00180  | 0.00426  | 3.13681  |
| D15 | 3.14087  | -0.00027 | 0.00298  | -0.00307 | -0.00010 | 3.14078  |
| D16 | -0.01572 | 0.00000  | 0.00021  | 0.00584  | 0.00606  | -0.00966 |
| D17 | 0.05450  | -0.00007 | 0.00577  | -0.00338 | 0.00239  | 0.05690  |
| D18 | -3.09305 | 0.00003  | 0.00290  | -0.00289 | 0.00001  | -3.09304 |
| D19 | -3.07896 | -0.00022 | 0.00850  | -0.00831 | 0.00020  | -3.07876 |
| D20 | 0.05668  | -0.00012 | 0.00563  | -0.00782 | -0.00219 | 0.05449  |
| D21 | -0.00413 | 0.00040  | -0.00421 | 0.00542  | 0.00121  | -0.00292 |
| D22 | 3.09890  | 0.00034  | -0.00013 | 0.00814  | 0.00805  | 3.10694  |
| D23 | -3.12977 | 0.00012  | -0.00128 | -0.00411 | -0.00540 | -3.13516 |
| D24 | -0.02674 | 0.00005  | 0.00280  | -0.00139 | 0.00144  | -0.02529 |
| D25 | 1.29876  | 0.00012  | 0.00736  | 0.01946  | 0.02681  | 1.32557  |
| D26 | -2.88693 | 0.00003  | 0.00833  | 0.01758  | 0.02591  | -2.86102 |
| D27 | -0.83607 | 0.00001  | 0.00843  | 0.01890  | 0.02733  | -0.80874 |
| D28 | -1.79771 | 0.00024  | 0.00254  | 0.01625  | 0.01878  | -1.77893 |
| D29 | 0.29979  | 0.00015  | 0.00351  | 0.01437  | 0.01787  | 0.31767  |
| D30 | 2.35066  | 0.00014  | 0.00361  | 0.01570  | 0.01929  | 2.36995  |
| D31 | -1.07284 | -0.00025 | 0.00654  | -0.00654 | -0.00001 | -1.07285 |
| D32 | 0.97395  | -0.00041 | 0.00747  | -0.00496 | 0.00251  | 0.97646  |
| D33 | -3.13725 | -0.00055 | 0.00676  | -0.00861 | -0.00184 | -3.13909 |
| D34 | 3.13187  | 0.00004  | 0.00550  | -0.00622 | -0.00073 | 3.13114  |
| D35 | -1.10452 | -0.00012 | 0.00643  | -0.00464 | 0.00180  | -1.10273 |
| D36 | 1.06747  | -0.00026 | 0.00572  | -0.00829 | -0.00256 | 1.06490  |
| D37 | 1.04035  | 0.00009  | 0.00560  | -0.00712 | -0.00152 | 1.03883  |
| D38 | 3.08714  | -0.00007 | 0.00653  | -0.00554 | 0.00100  | 3.08814  |
| D39 | -1.02406 | -0.00021 | 0.00583  | -0.00919 | -0.00336 | -1.02741 |
| D40 | 2.99103  | -0.00001 | -0.00507 | -0.02500 | -0.03011 | 2.96092  |
| D41 | -1.20542 | -0.00017 | -0.00489 | -0.02346 | -0.02833 | -1.23375 |
| D42 | 0.91557  | -0.00016 | -0.00474 | -0.02789 | -0.03266 | 0.88291  |
| D43 | 3.00230  | -0.00031 | -0.00457 | -0.02635 | -0.03088 | 2.97142  |
| D44 | -1.18640 | 0.00005  | -0.00506 | -0.02591 | -0.03101 | -1.21741 |
| D45 | 0.90033  | -0.00011 | -0.00488 | -0.02437 | -0.02923 | 0.87111  |
| D46 | -3.14123 | 0.00013  | -0.00133 | 0.00042  | -0.00091 | 3.14105  |
| D47 | 0.00465  | 0.00001  | -0.00036 | -0.00027 | -0.00063 | 0.00402  |
| D48 | 0.00710  | 0.00002  | 0.00193  | -0.00014 | 0.00178  | 0.00889  |
| D49 | -3.13021 | -0.00010 | 0.00289  | -0.00082 | 0.00206  | -3.12814 |
| D50 | 2.03800  | -0.00003 | 0.02955  | 0.08045  | 0.11050  | 2.14850  |
| D51 | -1.13796 | 0.00030  | 0.02122  | -0.04638 | -0.02555 | -1.16351 |
| D52 | -2.21947 | -0.00013 | 0.02862  | 0.07348  | 0.10245  | -2.11702 |
| D53 | 0.88775  | 0.00021  | 0.02028  | -0.05335 | -0.03360 | 0.85415  |
| D54 | -2.71734 | 0.00021  | -0.00388 | 0.00141  | -0.00241 | -2.71975 |
| D55 | -0.01332 | 0.00010  | -0.00030 | 0.00042  | 0.00017  | -0.01316 |
| D56 | -0.03547 | 0.00018  | -0.00322 | 0.00237  | -0.00090 | -0.03637 |
| D57 | 2.66854  | 0.00007  | 0.00036  | 0.00138  | 0.00168  | 2.67022  |

|     |          |          |          |          |          |          |
|-----|----------|----------|----------|----------|----------|----------|
| D58 | 0.85648  | -0.00049 | -0.01092 | -0.07881 | -0.08915 | 0.76734  |
| D59 | -1.55062 | -0.00047 | -0.00899 | -0.08063 | -0.08888 | -1.63950 |
| D60 | 1.58301  | -0.00001 | 0.00481  | 0.08039  | 0.08458  | 1.66759  |
| D61 | -0.83841 | 0.00048  | 0.00819  | 0.07445  | 0.08213  | -0.75627 |
| D62 | 2.55134  | -0.00003 | -0.00147 | -0.00320 | -0.00455 | 2.54679  |
| D63 | -1.65901 | -0.00009 | -0.00189 | -0.00175 | -0.00352 | -1.66253 |
| D64 | 0.44303  | -0.00015 | -0.00159 | -0.00261 | -0.00407 | 0.43895  |
| D65 | 1.35226  | 0.00018  | -0.00095 | -0.00387 | -0.00492 | 1.34733  |
| D66 | -2.85810 | 0.00012  | -0.00137 | -0.00242 | -0.00390 | -2.86199 |
| D67 | -0.75606 | 0.00006  | -0.00107 | -0.00328 | -0.00445 | -0.76051 |
| D68 | -1.03239 | 0.00004  | 0.00257  | -0.00666 | -0.00411 | -1.03650 |
| D69 | 1.04044  | -0.00002 | 0.00215  | -0.00521 | -0.00308 | 1.03736  |
| D70 | -3.14071 | -0.00008 | 0.00245  | -0.00606 | -0.00363 | 3.13885  |

| Item                 | Value    | Threshold | Converged? |
|----------------------|----------|-----------|------------|
| Maximum Force        | 0.001432 | 0.000450  | NO         |
| RMS Force            | 0.000311 | 0.000300  | NO         |
| Maximum Displacement | 0.163845 | 0.001800  | NO         |
| RMS Displacement     | 0.034906 | 0.001200  | NO         |

Predicted change in Energy=-7.364320D-05

GradGradGradGradGradGradGradGradGradGradGradGradGradGradGradGradGradGrad

Input orientation:

| Center Number | Atomic Number | Atomic Type | Coordinates (Angstroms) |           |           |
|---------------|---------------|-------------|-------------------------|-----------|-----------|
|               |               |             | X                       | Y         | Z         |
| 1             | 6             | 0           | -2.651492               | 2.079089  | -0.220457 |
| 2             | 6             | 0           | -3.556483               | 1.115412  | 0.086889  |
| 3             | 7             | 0           | -2.857529               | -0.083413 | 0.156626  |
| 4             | 6             | 0           | -1.560735               | 0.155787  | -0.108059 |
| 5             | 7             | 0           | -1.414996               | 1.462070  | -0.337191 |
| 6             | 6             | 0           | -0.134473               | 2.135244  | -0.623722 |
| 7             | 6             | 0           | 0.423019                | 2.874749  | 0.595755  |
| 8             | 1             | 0           | -2.779422               | 3.136966  | -0.372259 |
| 9             | 1             | 0           | -4.615513               | 1.182344  | 0.255867  |
| 10            | 1             | 0           | 0.576275                | 1.367849  | -0.932651 |
| 11            | 1             | 0           | -0.291692               | 2.828341  | -1.451217 |
| 12            | 1             | 0           | -0.276194               | 3.656346  | 0.910925  |
| 13            | 1             | 0           | 0.517474                | 2.159997  | 1.426303  |
| 14            | 35            | 0           | 0.137351                | -2.666685 | 0.137737  |
| 15            | 1             | 0           | -0.781214               | -0.630393 | -0.113865 |
| 16            | 6             | 0           | -3.345978               | -1.393919 | 0.445499  |
| 17            | 6             | 0           | -4.626073               | -1.679602 | 0.643466  |
| 18            | 1             | 0           | -2.539117               | -2.123168 | 0.473542  |



|    |   |   |           |           |           |
|----|---|---|-----------|-----------|-----------|
| 19 | 1 | 0 | -4.906123 | -2.702076 | 0.856702  |
| 20 | 1 | 0 | -5.423296 | -0.947495 | 0.601481  |
| 21 | 7 | 0 | 1.679502  | 3.498653  | 0.191573  |
| 22 | 1 | 0 | 2.011298  | 4.140206  | 0.902469  |
| 23 | 1 | 0 | 2.390403  | 2.782840  | 0.050516  |
| 24 | 6 | 0 | 3.500130  | -0.255961 | -1.208786 |
| 25 | 6 | 0 | 3.311687  | -0.554870 | 0.212894  |
| 26 | 8 | 0 | 2.870319  | 0.718738  | -0.345741 |
| 27 | 1 | 0 | 4.485129  | 0.032531  | -1.568068 |
| 28 | 1 | 0 | 2.838017  | -0.711025 | -1.939585 |
| 29 | 1 | 0 | 2.472786  | -1.206814 | 0.453302  |
| 30 | 6 | 0 | 4.444772  | -0.492381 | 1.198132  |
| 31 | 1 | 0 | 4.089036  | -0.150290 | 2.174336  |
| 32 | 1 | 0 | 4.877519  | -1.488455 | 1.332257  |
| 33 | 1 | 0 | 5.230724  | 0.186755  | 0.857546  |

-----  
Distance matrix (angstroms):

|    |    | 1        | 2        | 3        | 4        | 5        |
|----|----|----------|----------|----------|----------|----------|
| 1  | C  | 0.000000 |          |          |          |          |
| 2  | C  | 1.357257 | 0.000000 |          |          |          |
| 3  | N  | 2.204781 | 1.389454 | 0.000000 |          |          |
| 4  | C  | 2.213927 | 2.223037 | 1.344971 | 0.000000 |          |
| 5  | N  | 1.386816 | 2.210426 | 2.171007 | 1.334210 | 0.000000 |
| 6  | C  | 2.549737 | 3.640767 | 3.598113 | 2.493669 | 1.474790 |
| 7  | C  | 3.279008 | 4.380714 | 4.439093 | 3.438516 | 2.498870 |
| 8  | H  | 1.076343 | 2.213893 | 3.264454 | 3.231475 | 2.160593 |
| 9  | H  | 2.210977 | 1.074513 | 2.168525 | 3.243136 | 3.266998 |
| 10 | H  | 3.381059 | 4.264138 | 3.883773 | 2.591498 | 2.080532 |
| 11 | H  | 2.764924 | 3.994842 | 4.200832 | 3.249168 | 2.090350 |
| 12 | H  | 3.067540 | 4.230329 | 4.606306 | 3.865525 | 2.769388 |
| 13 | H  | 3.572213 | 4.413878 | 4.246835 | 3.269568 | 2.707665 |
| 14 | Br | 5.516187 | 5.286895 | 3.955118 | 3.303069 | 4.436436 |
| 15 | H  | 3.294024 | 3.284853 | 2.164125 | 1.107143 | 2.197716 |
| 16 | C  | 3.603831 | 2.543552 | 1.428095 | 2.427984 | 3.535246 |
| 17 | C  | 4.332792 | 3.043994 | 2.431580 | 3.650991 | 4.598130 |
| 18 | H  | 4.260661 | 3.416568 | 2.088642 | 2.547376 | 3.843809 |
| 19 | H  | 5.394735 | 4.121571 | 3.397681 | 4.504415 | 5.563583 |
| 20 | H  | 4.185534 | 2.829378 | 2.743665 | 4.079222 | 4.770071 |
| 21 | N  | 4.576291 | 5.753811 | 5.780750 | 4.665155 | 3.742083 |
| 22 | H  | 5.220228 | 6.388642 | 6.488507 | 5.445749 | 4.522020 |
| 23 | H  | 5.097979 | 6.176334 | 5.980590 | 4.747425 | 4.046704 |
| 24 | C  | 6.653699 | 7.304467 | 6.504918 | 5.195527 | 5.279184 |
| 25 | C  | 6.533378 | 7.069475 | 6.187460 | 4.934425 | 5.168383 |
| 26 | O  | 5.688290 | 6.453550 | 5.805520 | 4.472991 | 4.349315 |

|    |    |          |          |          |          |          |
|----|----|----------|----------|----------|----------|----------|
| 27 | H  | 7.545582 | 8.281247 | 7.543384 | 6.220876 | 6.194362 |
| 28 | H  | 6.393343 | 6.952129 | 6.101413 | 4.843023 | 5.037671 |
| 29 | H  | 6.124486 | 6.471404 | 5.455483 | 4.294310 | 4.781492 |
| 30 | C  | 7.679961 | 8.236501 | 7.387529 | 6.179998 | 6.365059 |
| 31 | H  | 7.492654 | 8.025796 | 7.233974 | 6.101059 | 6.261137 |
| 32 | H  | 8.474922 | 8.914228 | 7.949039 | 6.799203 | 7.147616 |
| 33 | H  | 8.177551 | 8.869686 | 8.123061 | 6.859831 | 6.871640 |
|    |    | 6        | 7        | 8        | 9        | 10       |
| 6  | C  | 0.000000 |          |          |          |          |
| 7  | C  | 1.531270 | 0.000000 |          |          |          |
| 8  | H  | 2.839443 | 3.355807 | 0.000000 |          |          |
| 9  | H  | 4.664914 | 5.326027 | 2.754328 | 0.000000 |          |
| 10 | H  | 1.090640 | 2.151804 | 3.834647 | 5.329320 | 0.000000 |
| 11 | H  | 1.090802 | 2.168655 | 2.729140 | 4.931417 | 1.776320 |
| 12 | H  | 2.165404 | 1.095045 | 2.860501 | 5.037805 | 3.059851 |
| 13 | H  | 2.151336 | 1.099818 | 3.880569 | 5.354744 | 2.489100 |
| 14 | Br | 4.869521 | 5.567664 | 6.515369 | 6.117083 | 4.197124 |
| 15 | H  | 2.885650 | 3.773560 | 4.272306 | 4.257296 | 2.550717 |
| 16 | C  | 4.889989 | 5.696441 | 4.638818 | 2.878335 | 4.991065 |
| 17 | C  | 6.027710 | 6.799832 | 5.257484 | 2.888092 | 6.231815 |
| 18 | H  | 5.012024 | 5.811055 | 5.333117 | 3.909631 | 4.885719 |
| 19 | H  | 6.954133 | 7.718084 | 6.334636 | 3.941341 | 7.058524 |
| 20 | H  | 6.243081 | 6.984911 | 4.961961 | 2.303948 | 6.611296 |
| 21 | N  | 2.411244 | 1.459921 | 4.508961 | 6.707954 | 2.649777 |
| 22 | H  | 3.309602 | 2.053798 | 5.057907 | 7.285717 | 3.621177 |
| 23 | H  | 2.692392 | 2.043608 | 5.199157 | 7.189341 | 2.501975 |
| 24 | C  | 4.389818 | 4.746191 | 7.186412 | 8.371237 | 3.355882 |
| 25 | C  | 4.451142 | 4.500363 | 7.146585 | 8.115434 | 3.534346 |
| 26 | O  | 3.333547 | 3.394713 | 6.145576 | 7.524264 | 2.455289 |
| 27 | H  | 5.162743 | 5.409351 | 7.990068 | 9.352567 | 4.179231 |
| 28 | H  | 4.320699 | 5.011780 | 6.987072 | 7.997498 | 3.232818 |
| 29 | H  | 4.373458 | 4.569572 | 6.865541 | 7.482716 | 3.485184 |
| 30 | C  | 5.585074 | 5.279670 | 8.235731 | 9.261821 | 4.792281 |
| 31 | H  | 5.557951 | 5.008238 | 8.029129 | 9.012525 | 4.929260 |
| 32 | H  | 6.486688 | 6.278738 | 9.106517 | 9.920154 | 5.638172 |
| 33 | H  | 5.897127 | 5.514333 | 8.624304 | 9.914717 | 5.124811 |
|    |    | 11       | 12       | 13       | 14       | 15       |
| 11 | H  | 0.000000 |          |          |          |          |
| 12 | H  | 2.503107 | 0.000000 |          |          |          |
| 13 | H  | 3.062932 | 1.770475 | 0.000000 |          |          |
| 14 | Br | 5.736215 | 6.383538 | 5.010165 | 0.000000 |          |
| 15 | H  | 3.740452 | 4.436369 | 3.441654 | 2.248011 | 0.000000 |
| 16 | C  | 5.545600 | 5.928353 | 5.340276 | 3.721321 | 2.733839 |
| 17 | C  | 6.595157 | 6.889508 | 6.466176 | 4.890839 | 4.056764 |

|    |   |          |           |          |           |           |
|----|---|----------|-----------|----------|-----------|-----------|
| 18 | H | 5.768281 | 6.222130  | 5.347523 | 2.751664  | 2.379842  |
| 19 | H | 7.563397 | 7.865666  | 7.306134 | 5.094585  | 4.716858  |
| 20 | H | 6.693569 | 6.912580  | 6.754967 | 5.838791  | 4.707569  |
| 21 | N | 2.652110 | 2.089756  | 2.160293 | 6.355511  | 4.816372  |
| 22 | H | 3.544657 | 2.338122  | 2.535181 | 7.101427  | 5.620469  |
| 23 | H | 3.074233 | 2.934971  | 2.405948 | 5.897556  | 4.662224  |
| 24 | C | 4.893834 | 5.836090  | 4.655834 | 4.351206  | 4.434970  |
| 25 | C | 5.215335 | 5.576242  | 4.080501 | 3.813374  | 4.106618  |
| 26 | O | 3.958638 | 4.484338  | 3.279214 | 4.377666  | 3.899694  |
| 27 | H | 5.536084 | 6.476700  | 5.406908 | 5.394322  | 5.503503  |
| 28 | H | 4.749810 | 6.074343  | 4.995686 | 3.928545  | 4.054452  |
| 29 | H | 5.249000 | 5.605053  | 4.013152 | 2.772194  | 3.352977  |
| 30 | C | 6.362416 | 6.291418  | 4.744559 | 4.940234  | 5.389927  |
| 31 | H | 6.419318 | 5.928061  | 4.318915 | 5.108404  | 5.402378  |
| 32 | H | 7.287194 | 7.294331  | 5.685952 | 5.028349  | 5.903287  |
| 33 | H | 6.542587 | 6.508998  | 5.141196 | 5.882406  | 6.144491  |
|    |   | 16       | 17        | 18       | 19        | 20        |
| 16 | C | 0.000000 |           |          |           |           |
| 17 | C | 1.326442 | 0.000000  |          |           |           |
| 18 | H | 1.087941 | 2.140330  | 0.000000 |           |           |
| 19 | H | 2.077117 | 1.081365  | 2.466711 | 0.000000  |           |
| 20 | H | 2.130464 | 1.083193  | 3.117221 | 1.846932  | 0.000000  |
| 21 | N | 7.018347 | 8.171830  | 7.034282 | 9.069834  | 8.389637  |
| 22 | H | 7.715942 | 8.831305  | 7.753716 | 9.729832  | 9.013794  |
| 23 | H | 7.106855 | 8.336421  | 6.967642 | 9.163707  | 8.675993  |
| 24 | C | 7.134480 | 8.455340  | 6.541345 | 8.995266  | 9.131420  |
| 25 | C | 6.714358 | 8.028602  | 6.062953 | 8.518062  | 8.752433  |
| 26 | O | 6.612997 | 7.932620  | 6.165197 | 8.580262  | 8.512204  |
| 27 | H | 8.210691 | 9.530807  | 7.625958 | 10.077361 | 10.190402 |
| 28 | H | 6.663089 | 7.957571  | 6.060602 | 8.470845  | 8.646515  |
| 29 | H | 5.821776 | 7.117126  | 5.095025 | 7.539684  | 7.901728  |
| 30 | C | 7.878769 | 9.165008  | 7.208273 | 9.614497  | 9.896559  |
| 31 | H | 7.734010 | 8.979726  | 7.121611 | 9.442491  | 9.674392  |
| 32 | H | 8.271709 | 9.530438  | 7.493113 | 9.870090  | 10.340864 |
| 33 | H | 8.730872 | 10.034220 | 8.115025 | 10.540446 | 10.717287 |
|    |   | 21       | 22        | 23       | 24        | 25        |
| 21 | N | 0.000000 |           |          |           |           |
| 22 | H | 1.013435 | 0.000000  |          |           |           |
| 23 | H | 1.018659 | 1.646811  | 0.000000 |           |           |
| 24 | C | 4.401457 | 5.099049  | 3.471548 | 0.000000  |           |
| 25 | C | 4.369844 | 4.920393  | 3.466329 | 1.464934  | 0.000000  |
| 26 | O | 3.071592 | 3.741976  | 2.155888 | 1.446218  | 1.459095  |
| 27 | H | 4.793942 | 5.394107  | 3.817315 | 1.087444  | 2.212201  |
| 28 | H | 4.858537 | 5.682884  | 4.045732 | 1.086068  | 2.209505  |

|    |   |          |          |          |          |          |
|----|---|----------|----------|----------|----------|----------|
| 29 | H | 4.779039 | 5.385661 | 4.010780 | 2.173038 | 1.089304 |
| 30 | C | 4.958652 | 5.241190 | 4.032930 | 2.596439 | 1.502824 |
| 31 | H | 4.801248 | 4.933861 | 3.999901 | 3.435621 | 2.148304 |
| 32 | H | 6.033218 | 6.331016 | 5.106130 | 3.142156 | 2.139249 |
| 33 | H | 4.901364 | 5.098676 | 3.931714 | 2.731425 | 2.155989 |
|    |   | 26       | 27       | 28       | 29       | 30       |
| 26 | O | 0.000000 |          |          |          |          |
| 27 | H | 2.138358 | 0.000000 |          |          |          |
| 28 | H | 2.141402 | 1.844960 | 0.000000 |          |          |
| 29 | H | 2.122323 | 3.109894 | 2.470852 | 0.000000 |          |
| 30 | C | 2.515801 | 2.815852 | 3.531958 | 2.225739 | 0.000000 |
| 31 | H | 2.931087 | 3.767745 | 4.336336 | 2.586593 | 1.093869 |
| 32 | H | 3.422899 | 3.298371 | 3.933054 | 2.575777 | 1.094269 |
| 33 | H | 2.702299 | 2.542302 | 3.788799 | 3.116356 | 1.093135 |
|    |   | 31       | 32       | 33       |          |          |
| 31 | H | 0.000000 |          |          |          |          |
| 32 | H | 1.766774 | 0.000000 |          |          |          |
| 33 | H | 1.775102 | 1.776635 | 0.000000 |          |          |

Stoichiometry C10H18BrN3O

Framework group C1[X(C10H18BrN3O)]

Deg. of freedom 93

Full point group C1 NOp 1

Largest Abelian subgroup C1 NOp 1

Largest concise Abelian subgroup C1 NOp 1

Standard orientation:

| Center Number | Atomic Number | Atomic Type | Coordinates (Angstroms) |           |           |
|---------------|---------------|-------------|-------------------------|-----------|-----------|
|               |               |             | X                       | Y         | Z         |
| 1             | 6             | 0           | -2.361145               | 2.465254  | -0.233390 |
| 2             | 6             | 0           | -3.362136               | 1.583073  | 0.015446  |
| 3             | 7             | 0           | -2.786275               | 0.318746  | 0.036472  |
| 4             | 6             | 0           | -1.467725               | 0.439883  | -0.199537 |
| 5             | 7             | 0           | -1.189724               | 1.734451  | -0.363623 |
| 6             | 6             | 0           | 0.155862                | 2.289574  | -0.600777 |
| 7             | 6             | 0           | 0.761970                | 2.912336  | 0.660013  |
| 8             | 1             | 0           | -2.381322               | 3.536528  | -0.335750 |
| 9             | 1             | 0           | -4.412210               | 1.747034  | 0.173688  |
| 10            | 1             | 0           | 0.792741                | 1.470541  | -0.937029 |
| 11            | 1             | 0           | 0.082488                | 3.032677  | -1.395927 |
| 12            | 1             | 0           | 0.137858                | 3.744046  | 1.003330  |
| 13            | 1             | 0           | 0.770704                | 2.153807  | 1.456354  |
| 14            | 35            | 0           | -0.061154               | -2.545830 | -0.067845 |
| 15            | 1             | 0           | -0.769635               | -0.418787 | -0.233055 |

|    |   |   |           |           |           |
|----|---|---|-----------|-----------|-----------|
| 16 | 6 | 0 | -3.406732 | -0.948726 | 0.255574  |
| 17 | 6 | 0 | -4.712076 | -1.114615 | 0.422927  |
| 18 | 1 | 0 | -2.676419 | -1.755105 | 0.258958  |
| 19 | 1 | 0 | -5.095414 | -2.112995 | 0.583053  |
| 20 | 1 | 0 | -5.432271 | -0.305705 | 0.405881  |
| 21 | 7 | 0 | 2.080854  | 3.426360  | 0.302671  |
| 22 | 1 | 0 | 2.461731  | 3.997908  | 1.047867  |
| 23 | 1 | 0 | 2.720008  | 2.650758  | 0.136566  |
| 24 | 6 | 0 | 3.546455  | -0.421324 | -1.253017 |
| 25 | 6 | 0 | 3.304309  | -0.765943 | 0.150064  |
| 26 | 8 | 0 | 3.000766  | 0.569886  | -0.352310 |
| 27 | 1 | 0 | 4.561321  | -0.215780 | -1.585181 |
| 28 | 1 | 0 | 2.855687  | -0.773737 | -2.013403 |
| 29 | 1 | 0 | 2.401030  | -1.341728 | 0.347906  |
| 30 | 6 | 0 | 4.420423  | -0.862421 | 1.151793  |
| 31 | 1 | 0 | 4.082980  | -0.532520 | 2.138630  |
| 32 | 1 | 0 | 4.750293  | -1.901753 | 1.243430  |
| 33 | 1 | 0 | 5.275475  | -0.249674 | 0.854519  |

-----

Rotational constants (GHZ):      0.4236257      0.2850398      0.1795482

Standard basis: 6-311++G(d,p) (5D, 7F)

There are    499 symmetry adapted cartesian basis functions of A    symmetry.

There are    482 symmetry adapted basis functions of A    symmetry.

482 basis functions,    760 primitive gaussians,    499 cartesian basis functions

71 alpha electrons      71 beta electrons

nuclear repulsion energy      1306.1799186928 Hartrees.

NAtoms=    33 NActive=    33 NUniq=    33 SFac= 1.00D+00 NAtFMM=    60 NAOKFM=F

Big=F

Integral buffers will be    131072 words long.

Raffenetti 2 integral format.

Two-electron integral symmetry is turned on.

One-electron integrals computed using PRISM.

NBasis=    482 RedAO= T EigKep=    3.63D-06    NBF=    482

NBsUse=    482 1.00D-06 EigRej= -1.00D+00    NBFU=    482

Initial            guess            from            the            checkpoint            file:

"/home/suqian/liuwen/qianmengshijie/nh2po/nh2po.chk"

B after Tr=    0.000000    0.000000    0.000000

Rot=    0.999999    0.000729    0.000553    -0.000805 Ang=    0.14 deg.

ExpMin= 3.50D-02 ExpMax= 4.40D+05 ExpMxC= 1.51D+04 IAcc=3 IRadAn=            5 AccDes=

0.00D+00

Harris functional with IExCor=    402 and IRadAn=            5 diagonalized for initial guess.

HarFok: IExCor=    402 AccDes= 0.00D+00 IRadAn=            5 IDoV= 1 UseB2=F ITyADJ=14

ICtDFT= 3500011 ScaDFX= 1.000000 1.000000 1.000000 1.000000

FoFCou: FMM=F IPFlag=            0 FMFlag=            100000 FMFlg1=            0

NFxFIlg= 0 DoJE=T BraDBF=F KetDBF=T FulRan=T  
wScrn= 0.000000 ICntrl= 500 IOpCl= 0 I1Cent= 200000004 NGrid=  
0  
NMat0= 1 NMatS0= 1 NMatT0= 0 NMatD0= 1 NMtDS0= 0  
NMtDT0= 0

Petite list used in FoFCou.

Requested convergence on RMS density matrix=1.00D-08 within 128 cycles.

Requested convergence on MAX density matrix=1.00D-06.

Requested convergence on energy=1.00D-06.

No special actions if energy rises.

SCF Done: E(RB3LYP) = -3205.64817135 A.U. after 11 cycles

NFock= 11 Conv=0.46D-08 -V/T= 2.0018

Calling FoFJK, ICntrl= 2127 FMM=F ISym2X=0 I1Cent= 0 IOpClX= 0 NMat=1 NMatS=1  
NMatT=0.

\*\*\*\*\* Axes restored to original set \*\*\*\*\*

| Center<br>Number | Atomic<br>Number | Forces (Hartrees/Bohr) |              |              |
|------------------|------------------|------------------------|--------------|--------------|
|                  |                  | X                      | Y            | Z            |
| 1                | 6                | -0.000296597           | 0.000107076  | 0.000133431  |
| 2                | 6                | 0.000467709            | 0.000012229  | 0.000026936  |
| 3                | 7                | -0.000854045           | -0.000926360 | -0.000018080 |
| 4                | 6                | 0.001707586            | 0.001903173  | 0.000372853  |
| 5                | 7                | -0.000164094           | 0.000554783  | -0.000695488 |
| 6                | 6                | -0.000638464           | -0.001077711 | -0.000105224 |
| 7                | 6                | 0.001369736            | 0.000434169  | -0.000418707 |
| 8                | 1                | 0.000008130            | 0.000016671  | 0.000154959  |
| 9                | 1                | -0.000052486           | -0.000085319 | 0.000035579  |
| 10               | 1                | -0.000205911           | 0.000108608  | -0.000324963 |
| 11               | 1                | 0.000225945            | 0.000014692  | 0.000018093  |
| 12               | 1                | 0.000014801            | 0.000041178  | -0.000102955 |
| 13               | 1                | -0.000367045           | -0.000257225 | 0.000194391  |
| 14               | 35               | -0.000058928           | 0.000041121  | -0.000021321 |
| 15               | 1                | -0.000733258           | -0.000942560 | 0.000422973  |
| 16               | 6                | -0.000242485           | -0.000297362 | -0.000417387 |
| 17               | 6                | 0.000045863            | 0.000249932  | -0.000019721 |
| 18               | 1                | 0.000328775            | -0.000138465 | 0.000010398  |
| 19               | 1                | 0.000089060            | -0.000006255 | 0.000075052  |
| 20               | 1                | -0.000063387           | 0.000086537  | 0.000061762  |
| 21               | 7                | -0.000350853           | -0.000014482 | 0.000659710  |
| 22               | 1                | 0.000133013            | -0.000055996 | -0.000178821 |
| 23               | 1                | -0.000144032           | 0.000373880  | 0.000197860  |
| 24               | 6                | -0.000177363           | 0.000917057  | 0.000515297  |
| 25               | 6                | -0.001495926           | 0.000343258  | -0.001338636 |

|    |   |              |              |              |
|----|---|--------------|--------------|--------------|
| 26 | 8 | 0.000838556  | -0.001105646 | -0.000355929 |
| 27 | 1 | -0.000126264 | 0.000129301  | -0.000277089 |
| 28 | 1 | 0.000163101  | -0.000222748 | -0.000017899 |
| 29 | 1 | 0.001002380  | -0.000398664 | 0.000926214  |
| 30 | 6 | -0.000141746 | 0.000376186  | 0.000529087  |
| 31 | 1 | 0.000054686  | -0.000189194 | 0.000086875  |
| 32 | 1 | -0.000250321 | 0.000019246  | -0.000062960 |
| 33 | 1 | -0.000086137 | -0.000011109 | -0.000066291 |

-----  
Cartesian Forces: Max 0.001903173 RMS 0.000520441

GradGradGradGradGradGradGradGradGradGradGradGradGradGradGradGradGradGradGrad

Berny optimization.

Using GEDIIS/GDIIS optimizer.

FormGI is forming the generalized inverse of G from B-inverse, IUseBI=4.

Internal Forces: Max 0.001510965 RMS 0.000319538

Search for a local minimum.

Step number 30 out of a maximum of 172

All quantities printed in internal units (Hartrees-Bohrs-Radians)

Mixed Optimization -- En-DIIS/RFO-DIIS

Swapping is turned off.

Update second derivatives using D2CorX and points 25 28 29 30

DE= -8.35D-05 DEPred=-7.36D-05 R= 1.13D+00

TightC=F SS= 1.41D+00 RLast= 2.57D-01 DXNew= 1.4210D+00 7.7183D-01

Trust test= 1.13D+00 RLast= 2.57D-01 DXMaxT set to 8.45D-01

ITU= 1 1 1 1 0 0-1 1-1 1 1 1 1 1 1 1 1 1 1 0-1

ITU= -1 1 1 1-1 1 0 0-1 0

|                 |         |         |         |         |         |
|-----------------|---------|---------|---------|---------|---------|
| Eigenvalues --- | 0.00051 | 0.00174 | 0.00234 | 0.00429 | 0.00653 |
| Eigenvalues --- | 0.00729 | 0.00767 | 0.01309 | 0.01516 | 0.01886 |
| Eigenvalues --- | 0.01961 | 0.02176 | 0.02355 | 0.02390 | 0.02473 |
| Eigenvalues --- | 0.02690 | 0.02871 | 0.03052 | 0.03096 | 0.03246 |
| Eigenvalues --- | 0.03340 | 0.03661 | 0.03795 | 0.03868 | 0.04065 |
| Eigenvalues --- | 0.04374 | 0.04551 | 0.05263 | 0.05460 | 0.05741 |
| Eigenvalues --- | 0.05796 | 0.05922 | 0.06908 | 0.07594 | 0.08653 |
| Eigenvalues --- | 0.08988 | 0.09560 | 0.10479 | 0.12209 | 0.12566 |
| Eigenvalues --- | 0.12735 | 0.13741 | 0.14888 | 0.15883 | 0.15991 |
| Eigenvalues --- | 0.16001 | 0.16004 | 0.16011 | 0.16024 | 0.16088 |
| Eigenvalues --- | 0.16264 | 0.20047 | 0.21167 | 0.22148 | 0.22454 |
| Eigenvalues --- | 0.23132 | 0.23472 | 0.25356 | 0.26336 | 0.27827 |
| Eigenvalues --- | 0.28933 | 0.29447 | 0.30824 | 0.31748 | 0.32446 |
| Eigenvalues --- | 0.33783 | 0.34281 | 0.34351 | 0.34372 | 0.34547 |
| Eigenvalues --- | 0.34688 | 0.34727 | 0.35079 | 0.35223 | 0.35364 |
| Eigenvalues --- | 0.35546 | 0.35633 | 0.35892 | 0.36236 | 0.36425 |
| Eigenvalues --- | 0.36670 | 0.39268 | 0.40585 | 0.41848 | 0.42446 |

Eigenvalues --- 0.44982 0.45490 0.46265 0.49474 0.55082  
 Eigenvalues --- 0.58071 0.60619 1.29170  
 En-DIIS/RFO-DIIS IScMMF= 0 using points: 30 29 28 27 26  
 RFO step: Lambda=-3.33224649D-05.  
 DidBck=F Rises=F RFO-DIIS coefs: 1.47887 -0.23407 -0.34979 -0.04551

0.15051

Iteration 1 RMS(Cart)= 0.04116671 RMS(Int)= 0.00110425  
 Iteration 2 RMS(Cart)= 0.00193604 RMS(Int)= 0.00043125  
 Iteration 3 RMS(Cart)= 0.00000355 RMS(Int)= 0.00043124  
 Iteration 4 RMS(Cart)= 0.00000001 RMS(Int)= 0.00043124

| Variable | Old X   | -DE/DX   | Delta X<br>(Linear) | Delta X<br>(Quad) | Delta X<br>(Total) | New X   |
|----------|---------|----------|---------------------|-------------------|--------------------|---------|
| R1       | 2.56484 | 0.00014  | 0.00010             | -0.00008          | 0.00001            | 2.56486 |
| R2       | 2.62070 | 0.00025  | -0.00018            | 0.00024           | 0.00006            | 2.62076 |
| R3       | 2.03399 | -0.00001 | 0.00001             | -0.00001          | 0.00001            | 2.03400 |
| R4       | 2.62569 | -0.00010 | 0.00020             | -0.00015          | 0.00005            | 2.62573 |
| R5       | 2.03054 | 0.00005  | -0.00011            | 0.00008           | -0.00003           | 2.03050 |
| R6       | 2.54163 | 0.00038  | -0.00065            | 0.00072           | 0.00008            | 2.54170 |
| R7       | 2.69871 | -0.00001 | -0.00015            | 0.00008           | -0.00007           | 2.69864 |
| R8       | 2.52129 | -0.00006 | 0.00012             | 0.00027           | 0.00039            | 2.52168 |
| R9       | 2.09220 | 0.00008  | -0.00048            | -0.00020          | -0.00068           | 2.09152 |
| R10      | 2.78695 | -0.00039 | 0.00061             | -0.00071          | -0.00010           | 2.78684 |
| R11      | 2.89368 | 0.00056  | 0.00008             | 0.00099           | 0.00108            | 2.89476 |
| R12      | 2.06101 | -0.00012 | 0.00009             | -0.00020          | -0.00011           | 2.06090 |
| R13      | 2.06132 | -0.00004 | -0.00015            | 0.00001           | -0.00014           | 2.06117 |
| R14      | 2.06934 | -0.00001 | -0.00020            | -0.00003          | -0.00022           | 2.06911 |
| R15      | 2.07836 | 0.00028  | -0.00060            | 0.00053           | -0.00008           | 2.07828 |
| R16      | 2.75885 | -0.00059 | 0.00098             | -0.00084          | 0.00014            | 2.75899 |
| R17      | 4.24812 | -0.00006 | 0.00401             | 0.00676           | 0.01077            | 4.25889 |
| R18      | 2.50661 | -0.00012 | 0.00002             | -0.00014          | -0.00012           | 2.50649 |
| R19      | 2.05591 | 0.00034  | -0.00017            | 0.00061           | 0.00045            | 2.05636 |
| R20      | 2.04348 | 0.00000  | -0.00002            | 0.00000           | -0.00001           | 2.04347 |
| R21      | 2.04694 | 0.00010  | -0.00002            | 0.00014           | 0.00012            | 2.04706 |
| R22      | 1.91512 | -0.00012 | -0.00014            | -0.00026          | -0.00040           | 1.91471 |
| R23      | 1.92499 | -0.00042 | 0.00035             | -0.00091          | -0.00038           | 1.92461 |
| R24      | 4.07404 | 0.00008  | 0.01796             | 0.02336           | 0.04124            | 4.11527 |
| R25      | 2.76832 | 0.00036  | 0.00224             | -0.00133          | -0.00038           | 2.76795 |
| R26      | 2.73296 | -0.00075 | 0.00033             | 0.00055           | 0.00144            | 2.73439 |
| R27      | 2.05497 | 0.00001  | -0.00021            | -0.00009          | -0.00030           | 2.05467 |
| R28      | 2.05237 | 0.00001  | -0.00029            | -0.00010          | -0.00039           | 2.05198 |
| R29      | 2.75729 | -0.00074 | -0.00094            | -0.00062          | -0.00081           | 2.75648 |
| R30      | 2.05849 | -0.00033 | 0.00041             | -0.00050          | -0.00009           | 2.05839 |
| R31      | 2.83993 | 0.00001  | -0.00009            | 0.00033           | 0.00024            | 2.84016 |
| R32      | 2.06711 | 0.00000  | 0.00020             | 0.00015           | 0.00036            | 2.06747 |



|     |         |          |          |          |          |         |
|-----|---------|----------|----------|----------|----------|---------|
| R33 | 2.06787 | -0.00013 | 0.00001  | -0.00006 | -0.00005 | 2.06782 |
| R34 | 2.06573 | -0.00005 | 0.00005  | -0.00009 | -0.00004 | 2.06568 |
| A1  | 1.87304 | -0.00007 | 0.00013  | -0.00015 | -0.00003 | 1.87302 |
| A2  | 2.27907 | 0.00001  | -0.00024 | -0.00003 | -0.00028 | 2.27879 |
| A3  | 2.13103 | 0.00005  | 0.00011  | 0.00018  | 0.00029  | 2.13132 |
| A4  | 1.86351 | 0.00025  | -0.00031 | 0.00067  | 0.00036  | 1.86387 |
| A5  | 2.27648 | -0.00003 | 0.00029  | -0.00023 | 0.00006  | 2.27654 |
| A6  | 2.14319 | -0.00022 | 0.00001  | -0.00043 | -0.00042 | 2.14277 |
| A7  | 1.89832 | -0.00029 | 0.00021  | -0.00064 | -0.00041 | 1.89791 |
| A8  | 2.25217 | 0.00029  | 0.00046  | 0.00015  | 0.00060  | 2.25277 |
| A9  | 2.13269 | 0.00001  | -0.00067 | 0.00048  | -0.00020 | 2.13249 |
| A10 | 1.88940 | 0.00025  | 0.00006  | 0.00029  | 0.00034  | 1.88974 |
| A11 | 2.15748 | -0.00151 | 0.00173  | -0.00413 | -0.00244 | 2.15505 |
| A12 | 2.23626 | 0.00126  | -0.00170 | 0.00386  | 0.00213  | 2.23839 |
| A13 | 1.90049 | -0.00014 | -0.00011 | -0.00017 | -0.00026 | 1.90023 |
| A14 | 2.19868 | 0.00064  | -0.00004 | 0.00100  | 0.00097  | 2.19964 |
| A15 | 2.18353 | -0.00051 | 0.00019  | -0.00080 | -0.00061 | 2.18293 |
| A16 | 1.96257 | -0.00058 | -0.00121 | -0.00082 | -0.00198 | 1.96059 |
| A17 | 1.87517 | 0.00003  | 0.00140  | -0.00035 | 0.00103  | 1.87620 |
| A18 | 1.88838 | 0.00035  | -0.00017 | -0.00003 | -0.00022 | 1.88816 |
| A19 | 1.90511 | 0.00045  | -0.00157 | 0.00052  | -0.00106 | 1.90405 |
| A20 | 1.92811 | -0.00004 | 0.00087  | 0.00034  | 0.00120  | 1.92931 |
| A21 | 1.90300 | -0.00022 | 0.00076  | 0.00034  | 0.00111  | 1.90411 |
| A22 | 1.91925 | -0.00038 | 0.00140  | -0.00027 | 0.00114  | 1.92038 |
| A23 | 1.89528 | -0.00041 | 0.00050  | -0.00164 | -0.00111 | 1.89417 |
| A24 | 1.87470 | 0.00100  | 0.00061  | 0.00256  | 0.00311  | 1.87780 |
| A25 | 1.87690 | 0.00013  | -0.00020 | -0.00068 | -0.00089 | 1.87601 |
| A26 | 1.90096 | -0.00038 | 0.00072  | -0.00215 | -0.00143 | 1.89954 |
| A27 | 1.99642 | 0.00001  | -0.00288 | 0.00212  | -0.00074 | 1.99568 |
| A28 | 2.16266 | -0.00027 | 0.00079  | -0.00077 | 0.00002  | 2.16268 |
| A29 | 1.94621 | 0.00002  | -0.00026 | 0.00003  | -0.00023 | 1.94598 |
| A30 | 2.17428 | 0.00026  | -0.00054 | 0.00076  | 0.00022  | 2.17450 |
| A31 | 2.07488 | -0.00011 | -0.00004 | -0.00054 | -0.00058 | 2.07430 |
| A32 | 2.16389 | 0.00005  | 0.00019  | 0.00042  | 0.00061  | 2.16450 |
| A33 | 2.04441 | 0.00006  | -0.00015 | 0.00012  | -0.00003 | 2.04438 |
| A34 | 1.93704 | 0.00022  | 0.00040  | 0.00124  | 0.00183  | 1.93887 |
| A35 | 1.91629 | 0.00005  | 0.00097  | 0.00011  | 0.00115  | 1.91745 |
| A36 | 1.88967 | -0.00020 | 0.00050  | 0.00042  | 0.00084  | 1.89051 |
| A37 | 2.08436 | 0.00040  | 0.00235  | 0.00243  | 0.00605  | 2.09041 |
| A38 | 2.08185 | -0.00019 | -0.00350 | -0.00436 | -0.00923 | 2.07262 |
| A39 | 1.99635 | -0.00049 | -0.00008 | -0.00094 | -0.00145 | 1.99490 |
| A40 | 2.00253 | 0.00073  | -0.00114 | 0.00065  | -0.00032 | 2.00221 |
| A41 | 2.02757 | -0.00018 | 0.00173  | 0.00158  | 0.00335  | 2.03092 |
| A42 | 2.02124 | 0.00052  | -0.00306 | -0.00200 | -0.00568 | 2.01557 |

|     |          |          |          |          |          |          |
|-----|----------|----------|----------|----------|----------|----------|
| A43 | 2.13030  | 0.00052  | -0.00103 | 0.00341  | 0.00294  | 2.13324  |
| A44 | 1.95406  | 0.00118  | -0.00074 | 0.00238  | 0.00204  | 1.95610  |
| A45 | 2.02949  | -0.00045 | -0.00019 | -0.00239 | -0.00324 | 2.02625  |
| A46 | 2.04975  | -0.00100 | 0.00347  | -0.00122 | 0.00230  | 2.05205  |
| A47 | 2.59040  | -0.00016 | -0.01087 | -0.01880 | -0.03191 | 2.55849  |
| A48 | 2.55472  | -0.00019 | -0.00576 | -0.01592 | -0.02524 | 2.52949  |
| A49 | 1.93144  | 0.00021  | 0.00071  | 0.00116  | 0.00187  | 1.93331  |
| A50 | 1.91843  | -0.00033 | 0.00041  | -0.00090 | -0.00048 | 1.91795  |
| A51 | 1.94300  | -0.00008 | -0.00017 | -0.00003 | -0.00020 | 1.94280  |
| A52 | 1.87958  | -0.00003 | 0.00027  | -0.00049 | -0.00022 | 1.87936  |
| A53 | 1.89397  | 0.00004  | -0.00070 | 0.00032  | -0.00038 | 1.89360  |
| A54 | 1.89587  | 0.00019  | -0.00055 | -0.00008 | -0.00063 | 1.89524  |
| A55 | 3.45198  | 0.00016  | 0.00875  | 0.00691  | 0.01567  | 3.46765  |
| A56 | 2.59652  | 0.00035  | -0.00809 | -0.02867 | -0.03749 | 2.55903  |
| A57 | 2.88167  | 0.00000  | 0.00594  | 0.01307  | 0.01901  | 2.90068  |
| A58 | 3.08465  | 0.00034  | 0.00228  | -0.00062 | 0.00138  | 3.08604  |
| D1  | 0.00179  | 0.00001  | -0.00105 | 0.00110  | 0.00005  | 0.00184  |
| D2  | -3.13758 | 0.00007  | 0.00096  | 0.00103  | 0.00199  | -3.13559 |
| D3  | 3.13383  | 0.00000  | -0.00288 | 0.00120  | -0.00169 | 3.13214  |
| D4  | -0.00554 | 0.00006  | -0.00088 | 0.00113  | 0.00025  | -0.00529 |
| D5  | 0.00066  | -0.00019 | -0.00061 | 0.00010  | -0.00052 | 0.00014  |
| D6  | -3.10887 | -0.00004 | -0.00327 | -0.00051 | -0.00381 | -3.11268 |
| D7  | -3.13237 | -0.00018 | 0.00103  | 0.00001  | 0.00105  | -3.13132 |
| D8  | 0.04129  | -0.00003 | -0.00162 | -0.00060 | -0.00224 | 0.03905  |
| D9  | -0.00361 | 0.00017  | 0.00234  | -0.00193 | 0.00042  | -0.00319 |
| D10 | -3.13990 | 0.00009  | 0.00048  | 0.00036  | 0.00085  | -3.13905 |
| D11 | 3.13597  | 0.00012  | 0.00052  | -0.00186 | -0.00133 | 3.13463  |
| D12 | -0.00032 | 0.00004  | -0.00134 | 0.00043  | -0.00091 | -0.00122 |
| D13 | 0.00405  | -0.00029 | -0.00275 | 0.00200  | -0.00075 | 0.00331  |
| D14 | 3.13681  | -0.00008 | 0.00273  | 0.00450  | 0.00723  | -3.13915 |
| D15 | 3.14078  | -0.00022 | -0.00104 | -0.00010 | -0.00114 | 3.13964  |
| D16 | -0.00966 | 0.00000  | 0.00444  | 0.00240  | 0.00684  | -0.00282 |
| D17 | 0.05690  | -0.00013 | -0.00573 | -0.01928 | -0.02501 | 0.03188  |
| D18 | -3.09304 | -0.00001 | -0.00555 | -0.01787 | -0.02342 | -3.11646 |
| D19 | -3.07876 | -0.00022 | -0.00781 | -0.01672 | -0.02454 | -3.10330 |
| D20 | 0.05449  | -0.00009 | -0.00763 | -0.01531 | -0.02294 | 0.03155  |
| D21 | -0.00292 | 0.00030  | 0.00209  | -0.00131 | 0.00078  | -0.00214 |
| D22 | 3.10694  | 0.00017  | 0.00475  | -0.00066 | 0.00407  | 3.11101  |
| D23 | -3.13516 | 0.00009  | -0.00377 | -0.00389 | -0.00766 | 3.14037  |
| D24 | -0.02529 | -0.00004 | -0.00111 | -0.00325 | -0.00437 | -0.02966 |
| D25 | 1.32557  | -0.00022 | 0.01021  | -0.01212 | -0.00191 | 1.32366  |
| D26 | -2.86102 | 0.00001  | 0.00845  | -0.01219 | -0.00374 | -2.86475 |
| D27 | -0.80874 | -0.00004 | 0.01001  | -0.01200 | -0.00199 | -0.81073 |
| D28 | -1.77893 | -0.00006 | 0.00712  | -0.01284 | -0.00573 | -1.78466 |

|     |          |          |          |          |          |          |
|-----|----------|----------|----------|----------|----------|----------|
| D29 | 0.31767  | 0.00017  | 0.00536  | -0.01292 | -0.00756 | 0.31011  |
| D30 | 2.36995  | 0.00012  | 0.00692  | -0.01272 | -0.00581 | 2.36414  |
| D31 | -1.07285 | 0.00004  | -0.00399 | -0.00073 | -0.00471 | -1.07757 |
| D32 | 0.97646  | -0.00026 | -0.00315 | -0.00266 | -0.00580 | 0.97066  |
| D33 | -3.13909 | 0.00012  | -0.00597 | 0.00051  | -0.00545 | 3.13864  |
| D34 | 3.13114  | 0.00006  | -0.00393 | -0.00012 | -0.00406 | 3.12709  |
| D35 | -1.10273 | -0.00024 | -0.00308 | -0.00206 | -0.00514 | -1.10787 |
| D36 | 1.06490  | 0.00014  | -0.00591 | 0.00112  | -0.00479 | 1.06011  |
| D37 | 1.03883  | 0.00007  | -0.00441 | -0.00109 | -0.00550 | 1.03333  |
| D38 | 3.08814  | -0.00023 | -0.00357 | -0.00302 | -0.00658 | 3.08156  |
| D39 | -1.02741 | 0.00015  | -0.00640 | 0.00015  | -0.00624 | -1.03365 |
| D40 | 2.96092  | -0.00013 | -0.01518 | 0.00055  | -0.01467 | 2.94625  |
| D41 | -1.23375 | -0.00021 | -0.01368 | 0.00194  | -0.01171 | -1.24546 |
| D42 | 0.88291  | -0.00004 | -0.01758 | 0.00061  | -0.01700 | 0.86591  |
| D43 | 2.97142  | -0.00012 | -0.01608 | 0.00200  | -0.01404 | 2.95738  |
| D44 | -1.21741 | 0.00007  | -0.01593 | 0.00164  | -0.01434 | -1.23175 |
| D45 | 0.87111  | -0.00001 | -0.01443 | 0.00303  | -0.01138 | 0.85973  |
| D46 | 3.14105  | 0.00015  | -0.00036 | -0.00062 | -0.00097 | 3.14008  |
| D47 | 0.00402  | 0.00001  | -0.00048 | -0.00148 | -0.00196 | 0.00206  |
| D48 | 0.00889  | 0.00000  | -0.00057 | -0.00221 | -0.00277 | 0.00611  |
| D49 | -3.12814 | -0.00013 | -0.00069 | -0.00307 | -0.00376 | -3.13190 |
| D50 | 2.14850  | -0.00004 | 0.03673  | 0.08333  | 0.12053  | 2.26903  |
| D51 | -1.16351 | -0.00015 | -0.02787 | -0.06107 | -0.08931 | -1.25282 |
| D52 | -2.11702 | 0.00008  | 0.03436  | 0.07430  | 0.10899  | -2.00804 |
| D53 | 0.85415  | -0.00003 | -0.03024 | -0.07010 | -0.10085 | 0.75330  |
| D54 | -2.71975 | 0.00020  | -0.00099 | 0.00185  | 0.00085  | -2.71890 |
| D55 | -0.01316 | 0.00003  | -0.00175 | 0.00195  | 0.00020  | -0.01296 |
| D56 | -0.03637 | 0.00021  | 0.00086  | 0.00142  | 0.00210  | -0.03427 |
| D57 | 2.67022  | 0.00004  | 0.00010  | 0.00152  | 0.00145  | 2.67167  |
| D58 | 0.76734  | -0.00027 | -0.03712 | -0.09159 | -0.12764 | 0.63970  |
| D59 | -1.63950 | -0.00025 | -0.03847 | -0.09380 | -0.13095 | -1.77045 |
| D60 | 1.66759  | -0.00032 | 0.03860  | 0.08888  | 0.12692  | 1.79451  |
| D61 | -0.75627 | 0.00040  | 0.03413  | 0.09078  | 0.12454  | -0.63174 |
| D62 | 2.54679  | -0.00008 | -0.00249 | 0.00070  | -0.00164 | 2.54515  |
| D63 | -1.66253 | -0.00019 | -0.00145 | 0.00025  | -0.00105 | -1.66359 |
| D64 | 0.43895  | -0.00022 | -0.00198 | -0.00047 | -0.00230 | 0.43665  |
| D65 | 1.34733  | 0.00027  | -0.00194 | 0.00010  | -0.00194 | 1.34540  |
| D66 | -2.86199 | 0.00016  | -0.00090 | -0.00035 | -0.00135 | -2.86334 |
| D67 | -0.76051 | 0.00013  | -0.00142 | -0.00107 | -0.00259 | -0.76310 |
| D68 | -1.03650 | 0.00011  | -0.00478 | 0.00065  | -0.00417 | -1.04067 |
| D69 | 1.03736  | 0.00000  | -0.00374 | 0.00020  | -0.00358 | 1.03378  |
| D70 | 3.13885  | -0.00003 | -0.00427 | -0.00052 | -0.00483 | 3.13402  |

| Item          | Value    | Threshold | Converged? |
|---------------|----------|-----------|------------|
| Maximum Force | 0.001511 | 0.000450  | NO         |

RMS Force 0.000320 0.000300 NO  
 Maximum Displacement 0.255559 0.001800 NO  
 RMS Displacement 0.042182 0.001200 NO

Predicted change in Energy=-6.612525D-05

GradGradGradGradGradGradGradGradGradGradGradGradGradGradGradGradGradGradGrad

Input orientation:

| -----  |        |        |                         |           |           |  |
|--------|--------|--------|-------------------------|-----------|-----------|--|
| Center | Atomic | Atomic | Coordinates (Angstroms) |           |           |  |
| Number | Number | Type   | X                       | Y         | Z         |  |
| -----  |        |        |                         |           |           |  |
| 1      | 6      | 0      | -2.642885               | 2.085253  | -0.195214 |  |
| 2      | 6      | 0      | -3.543926               | 1.117226  | 0.110102  |  |
| 3      | 7      | 0      | -2.844700               | -0.082704 | 0.153658  |  |
| 4      | 6      | 0      | -1.551316               | 0.160467  | -0.123977 |  |
| 5      | 7      | 0      | -1.408106               | 1.469969  | -0.336964 |  |
| 6      | 6      | 0      | -0.131461               | 2.145407  | -0.634963 |  |
| 7      | 6      | 0      | 0.440909                | 2.872971  | 0.585522  |  |
| 8      | 1      | 0      | -2.773171               | 3.144960  | -0.331469 |  |
| 9      | 1      | 0      | -4.600917               | 1.181396  | 0.292295  |  |
| 10     | 1      | 0      | 0.575986                | 1.381274  | -0.958980 |  |
| 11     | 1      | 0      | -0.300026               | 2.845902  | -1.453850 |  |
| 12     | 1      | 0      | -0.251504               | 3.654548  | 0.915017  |  |
| 13     | 1      | 0      | 0.539524                | 2.150337  | 1.408679  |  |
| 14     | 35     | 0      | 0.123753                | -2.688464 | 0.002500  |  |
| 15     | 1      | 0      | -0.775313               | -0.628013 | -0.156966 |  |
| 16     | 6      | 0      | -3.329354               | -1.397458 | 0.429137  |  |
| 17     | 6      | 0      | -4.603046               | -1.682190 | 0.665596  |  |
| 18     | 1      | 0      | -2.525165               | -2.130367 | 0.413187  |  |
| 19     | 1      | 0      | -4.880153               | -2.708466 | 0.863853  |  |
| 20     | 1      | 0      | -5.397734               | -0.946058 | 0.670727  |  |
| 21     | 7      | 0      | 1.696674                | 3.496698  | 0.178569  |  |
| 22     | 1      | 0      | 2.029874                | 4.140883  | 0.886117  |  |
| 23     | 1      | 0      | 2.407911                | 2.781774  | 0.036149  |  |
| 24     | 6      | 0      | 3.489254                | -0.283952 | -1.200381 |  |
| 25     | 6      | 0      | 3.290110                | -0.573388 | 0.221595  |  |
| 26     | 8      | 0      | 2.815017                | 0.678779  | -0.356400 |  |
| 27     | 1      | 0      | 4.465722                | 0.037681  | -1.554286 |  |
| 28     | 1      | 0      | 2.850656                | -0.775799 | -1.927960 |  |
| 29     | 1      | 0      | 2.471893                | -1.254819 | 0.451049  |  |
| 30     | 6      | 0      | 4.401861                | -0.457915 | 1.226347  |  |
| 31     | 1      | 0      | 4.017820                | -0.117284 | 2.192497  |  |
| 32     | 1      | 0      | 4.867791                | -1.435996 | 1.380086  |  |
| 33     | 1      | 0      | 5.169136                | 0.244716  | 0.890944  |  |

-----

Distance matrix (angstroms):

|    |    | 1        | 2        | 3        | 4        | 5        |
|----|----|----------|----------|----------|----------|----------|
| 1  | C  | 0.000000 |          |          |          |          |
| 2  | C  | 1.357265 | 0.000000 |          |          |          |
| 3  | N  | 2.205103 | 1.389477 | 0.000000 |          |          |
| 4  | C  | 2.213910 | 2.222763 | 1.345011 | 0.000000 |          |
| 5  | N  | 1.386848 | 2.210435 | 2.171476 | 1.334417 | 0.000000 |
| 6  | C  | 2.550343 | 3.641043 | 3.598343 | 2.493408 | 1.474734 |
| 7  | C  | 3.277169 | 4.380362 | 4.440468 | 3.439481 | 2.497649 |
| 8  | H  | 1.076346 | 2.213764 | 3.264703 | 3.231592 | 2.160793 |
| 9  | H  | 2.210998 | 1.074496 | 2.168287 | 3.242783 | 3.266999 |
| 10 | H  | 3.382316 | 4.264544 | 3.883593 | 2.590949 | 2.081200 |
| 11 | H  | 2.766178 | 3.994640 | 4.199545 | 3.247438 | 2.090087 |
| 12 | H  | 3.068225 | 4.233902 | 4.612091 | 3.870093 | 2.770842 |
| 13 | H  | 3.564328 | 4.407741 | 4.244352 | 3.268062 | 2.702486 |
| 14 | Br | 5.521028 | 5.286466 | 3.952789 | 3.307304 | 4.444592 |
| 15 | H  | 3.294101 | 3.283657 | 2.162455 | 1.106784 | 2.198717 |
| 16 | C  | 3.604209 | 2.543906 | 1.428060 | 2.427856 | 3.535568 |
| 17 | C  | 4.333227 | 3.044182 | 2.431505 | 3.651283 | 4.598792 |
| 18 | H  | 4.260922 | 3.417103 | 2.088631 | 2.546536 | 3.843562 |
| 19 | H  | 5.395065 | 4.121840 | 3.397362 | 4.504191 | 5.563847 |
| 20 | H  | 4.186633 | 2.829850 | 2.744216 | 4.080549 | 4.771767 |
| 21 | N  | 4.578610 | 5.755907 | 5.782458 | 4.665985 | 3.743402 |
| 22 | H  | 5.218196 | 6.388423 | 6.491276 | 5.448755 | 4.522103 |
| 23 | H  | 5.103843 | 6.180659 | 5.984060 | 4.751039 | 4.052410 |
| 24 | C  | 6.650309 | 7.290149 | 6.480192 | 5.173345 | 5.273126 |
| 25 | C  | 6.514793 | 7.040927 | 6.154777 | 4.908907 | 5.153690 |
| 26 | O  | 5.638514 | 6.391089 | 5.733447 | 4.403128 | 4.296641 |
| 27 | H  | 7.521431 | 8.251671 | 7.508251 | 6.185920 | 6.167267 |
| 28 | H  | 6.431720 | 6.973372 | 6.103326 | 4.848537 | 5.070680 |
| 29 | H  | 6.142856 | 6.475563 | 5.452380 | 4.303475 | 4.806227 |
| 30 | C  | 7.623450 | 8.176956 | 7.335128 | 6.135641 | 6.317943 |
| 31 | H  | 7.410622 | 7.939797 | 7.159067 | 6.038085 | 6.193401 |
| 32 | H  | 8.443401 | 8.881936 | 7.925783 | 6.783497 | 7.125993 |
| 33 | H  | 8.099073 | 8.791384 | 8.054338 | 6.797178 | 6.802140 |
|    |    | 6        | 7        | 8        | 9        | 10       |
| 6  | C  | 0.000000 |          |          |          |          |
| 7  | C  | 1.531842 | 0.000000 |          |          |          |
| 8  | H  | 2.840748 | 3.353381 | 0.000000 |          |          |
| 9  | H  | 4.665315 | 5.326107 | 2.754146 | 0.000000 |          |
| 10 | H  | 1.090581 | 2.151486 | 3.836824 | 5.329725 | 0.000000 |
| 11 | H  | 1.090726 | 2.169967 | 2.732329 | 4.931254 | 1.776915 |
| 12 | H  | 2.166646 | 1.094927 | 2.858708 | 5.041989 | 3.060127 |

|    |    |          |          |          |          |          |
|----|----|----------|----------|----------|----------|----------|
| 13 | H  | 2.150980 | 1.099778 | 3.871865 | 5.348766 | 2.489698 |
| 14 | Br | 4.882397 | 5.600899 | 6.521698 | 6.114107 | 4.206154 |
| 15 | H  | 2.887020 | 3.779864 | 4.272847 | 4.255707 | 2.550779 |
| 16 | C  | 4.889859 | 5.698763 | 4.639119 | 2.878556 | 4.989981 |
| 17 | C  | 6.028021 | 6.796867 | 5.257753 | 2.887817 | 6.232692 |
| 18 | H  | 5.011056 | 5.818994 | 5.333395 | 3.910388 | 4.881763 |
| 19 | H  | 6.953892 | 7.716451 | 6.334885 | 3.941533 | 7.058198 |
| 20 | H  | 6.244647 | 6.977249 | 4.962777 | 2.303083 | 6.614965 |
| 21 | N  | 2.414518 | 1.459997 | 4.512580 | 6.710679 | 2.650467 |
| 22 | H  | 3.311643 | 2.054938 | 5.054070 | 7.285505 | 3.624033 |
| 23 | H  | 2.702548 | 2.044315 | 5.206790 | 7.193781 | 2.511500 |
| 24 | C  | 4.396709 | 4.737933 | 7.192385 | 8.356206 | 3.364280 |
| 25 | C  | 4.453390 | 4.486399 | 7.134099 | 8.084093 | 3.546960 |
| 26 | O  | 3.303079 | 3.367207 | 6.108234 | 7.461200 | 2.422780 |
| 27 | H  | 5.140210 | 5.368125 | 7.971954 | 9.323191 | 4.158086 |
| 28 | H  | 4.370161 | 5.043609 | 7.039074 | 8.017860 | 3.281159 |
| 29 | H  | 4.417964 | 4.602350 | 6.890652 | 7.482311 | 3.540004 |
| 30 | C  | 5.549124 | 5.214845 | 8.178545 | 9.198359 | 4.774473 |
| 31 | H  | 5.507343 | 4.931357 | 7.945451 | 8.920760 | 4.901398 |
| 32 | H  | 6.471429 | 6.228628 | 9.071873 | 9.883848 | 5.641616 |
| 33 | H  | 5.834153 | 5.418222 | 8.543181 | 9.833091 | 5.080453 |
|    |    | 11       | 12       | 13       | 14       | 15       |
| 11 | H  | 0.000000 |          |          |          |          |
| 12 | H  | 2.503556 | 0.000000 |          |          |          |
| 13 | H  | 3.063124 | 1.769768 | 0.000000 |          |          |
| 14 | Br | 5.738445 | 6.419292 | 5.056105 | 0.000000 |          |
| 15 | H  | 3.738434 | 4.445655 | 3.449531 | 2.253710 | 0.000000 |
| 16 | C  | 5.543335 | 5.935655 | 5.339903 | 3.711154 | 2.731060 |
| 17 | C  | 6.596337 | 6.890494 | 6.456506 | 4.878003 | 4.054559 |
| 18 | H  | 5.761972 | 6.235912 | 5.357961 | 2.738047 | 2.375737 |
| 19 | H  | 7.563089 | 7.868605 | 7.299157 | 5.077539 | 4.713817 |
| 20 | H  | 6.699210 | 6.907165 | 6.736710 | 5.828321 | 4.706698 |
| 21 | N  | 2.659913 | 2.088701 | 2.159827 | 6.384459 | 4.820430 |
| 22 | H  | 3.546950 | 2.332819 | 2.540962 | 7.145213 | 5.630228 |
| 23 | H  | 3.091461 | 2.933706 | 2.402794 | 5.928071 | 4.668710 |
| 24 | C  | 4.921267 | 5.829233 | 4.629671 | 4.307575 | 4.403819 |
| 25 | C  | 5.233329 | 5.558714 | 4.048897 | 3.814101 | 4.083375 |
| 26 | O  | 3.950229 | 4.458167 | 3.234015 | 4.325510 | 3.825957 |
| 27 | H  | 5.532499 | 6.436724 | 5.353271 | 5.357999 | 5.464805 |
| 28 | H  | 4.823721 | 6.110146 | 5.003675 | 3.849801 | 4.038058 |
| 29 | H  | 5.303591 | 5.633297 | 4.030656 | 2.787525 | 3.362575 |
| 30 | C  | 6.340852 | 6.217965 | 4.664105 | 4.977486 | 5.361494 |
| 31 | H  | 6.381231 | 5.838304 | 4.225520 | 5.154688 | 5.362363 |
| 32 | H  | 7.285065 | 7.234439 | 5.621076 | 5.096304 | 5.904234 |

|    |   |          |          |          |           |           |
|----|---|----------|----------|----------|-----------|-----------|
| 33 | H | 6.494301 | 6.403973 | 5.033164 | 5.903285  | 6.098872  |
|    |   | 16       | 17       | 18       | 19        | 20        |
| 16 | C | 0.000000 |          |          |           |           |
| 17 | C | 1.326378 | 0.000000 |          |           |           |
| 18 | H | 1.088178 | 2.140599 | 0.000000 |           |           |
| 19 | H | 2.076704 | 1.081358 | 2.466428 | 0.000000  |           |
| 20 | H | 2.130803 | 1.083257 | 3.117782 | 1.846962  | 0.000000  |
| 21 | N | 7.019722 | 8.169734 | 7.038667 | 9.067984  | 8.385161  |
| 22 | H | 7.720323 | 8.829069 | 7.765348 | 9.729469  | 9.005150  |
| 23 | H | 7.108912 | 8.335269 | 6.971838 | 9.162080  | 8.673380  |
| 24 | C | 7.098495 | 8.421536 | 6.495082 | 8.954680  | 9.105931  |
| 25 | C | 6.673790 | 7.983013 | 6.023148 | 8.469017  | 8.707424  |
| 26 | O | 6.533079 | 7.851517 | 6.082854 | 8.495769  | 8.434712  |
| 27 | H | 8.170484 | 9.493598 | 7.579175 | 10.036638 | 10.159045 |
| 28 | H | 6.643410 | 7.943913 | 6.017913 | 8.443627  | 8.649746  |
| 29 | H | 5.803042 | 7.091082 | 5.073323 | 7.505736  | 7.878745  |
| 30 | C | 7.828792 | 9.105035 | 7.172309 | 9.557833  | 9.827465  |
| 31 | H | 7.663501 | 8.893801 | 7.073125 | 9.362341  | 9.573678  |
| 32 | H | 8.252211 | 9.500940 | 7.488180 | 9.844190  | 10.301662 |
| 33 | H | 8.668006 | 9.962896 | 8.066693 | 10.474265 | 10.636032 |
|    |   | 21       | 22       | 23       | 24        | 25        |
| 21 | N | 0.000000 |          |          |           |           |
| 22 | H | 1.013223 | 0.000000 |          |           |           |
| 23 | H | 1.018458 | 1.646977 | 0.000000 |           |           |
| 24 | C | 4.405469 | 5.105137 | 3.478072 | 0.000000  |           |
| 25 | C | 4.371096 | 4.924848 | 3.474158 | 1.464734  | 0.000000  |
| 26 | O | 3.078563 | 3.761178 | 2.177709 | 1.446979  | 1.458668  |
| 27 | H | 4.757648 | 5.359589 | 3.780757 | 1.087284  | 2.215676  |
| 28 | H | 4.901364 | 5.724201 | 4.087796 | 1.085860  | 2.203333  |
| 29 | H | 4.822045 | 5.431230 | 4.058364 | 2.169061  | 1.089255  |
| 30 | C | 4.904573 | 5.185656 | 3.985975 | 2.598485  | 1.502948  |
| 31 | H | 4.743889 | 4.877555 | 3.955525 | 3.437845  | 2.149895  |
| 32 | H | 5.985908 | 6.276891 | 5.064263 | 3.144262  | 2.138989  |
| 33 | H | 4.810494 | 5.003509 | 3.845997 | 2.734069  | 2.155936  |
|    |   | 26       | 27       | 28       | 29        | 30        |
| 26 | O | 0.000000 |          |          |           |           |
| 27 | H | 2.137935 | 0.000000 |          |           |           |
| 28 | H | 2.141698 | 1.846570 | 0.000000 |           |           |
| 29 | H | 2.123325 | 3.109225 | 2.456136 | 0.000000  |           |
| 30 | C | 2.513013 | 2.825175 | 3.529440 | 2.227313  | 0.000000  |
| 31 | H | 2.928707 | 3.776641 | 4.332907 | 2.591625  | 1.094058  |
| 32 | H | 3.420751 | 3.308160 | 3.930377 | 2.576095  | 1.094243  |
| 33 | H | 2.699287 | 2.552803 | 3.789858 | 3.117248  | 1.093113  |
|    |   | 31       | 32       | 33       |           |           |

31 H 0.000000  
 32 H 1.766767 0.000000  
 33 H 1.774997 1.776193 0.000000  
 Stoichiometry C10H18BrN3O  
 Framework group C1[X(C10H18BrN3O)]  
 Deg. of freedom 93  
 Full point group C1 NOp 1  
 Largest Abelian subgroup C1 NOP 1  
 Largest concise Abelian subgroup C1 NOp 1  
 Standard orientation:

| Center Number | Atomic Number | Atomic Type | Coordinates (Angstroms) |           |           |
|---------------|---------------|-------------|-------------------------|-----------|-----------|
|               |               |             | X                       | Y         | Z         |
| 1             | 6             | 0           | -2.332223               | 2.484678  | -0.235196 |
| 2             | 6             | 0           | -3.335448               | 1.610544  | 0.032380  |
| 3             | 7             | 0           | -2.767247               | 0.342802  | 0.057381  |
| 4             | 6             | 0           | -1.450681               | 0.454259  | -0.194187 |
| 5             | 7             | 0           | -1.166687               | 1.745809  | -0.372840 |
| 6             | 6             | 0           | 0.179081                | 2.289233  | -0.634450 |
| 7             | 6             | 0           | 0.802813                | 2.924396  | 0.612172  |
| 8             | 1             | 0           | -2.347823               | 3.555036  | -0.347488 |
| 9             | 1             | 0           | -4.382922               | 1.781831  | 0.199719  |
| 10            | 1             | 0           | 0.807909                | 1.462211  | -0.966081 |
| 11            | 1             | 0           | 0.099885                | 3.022013  | -1.438467 |
| 12            | 1             | 0           | 0.190670                | 3.767047  | 0.949937  |
| 13            | 1             | 0           | 0.810052                | 2.176896  | 1.418834  |
| 14            | 35            | 0           | -0.087197               | -2.557774 | -0.111541 |
| 15            | 1             | 0           | -0.761476               | -0.410811 | -0.234447 |
| 16            | 6             | 0           | -3.392409               | -0.919326 | 0.293091  |
| 17            | 6             | 0           | -4.693029               | -1.073247 | 0.502790  |
| 18            | 1             | 0           | -2.669639               | -1.732514 | 0.271659  |
| 19            | 1             | 0           | -5.080090               | -2.068752 | 0.671575  |
| 20            | 1             | 0           | -5.405818               | -0.257612 | 0.513634  |
| 21            | 7             | 0           | 2.124337                | 3.421089  | 0.240066  |
| 22            | 1             | 0           | 2.510705                | 4.010261  | 0.968227  |
| 23            | 1             | 0           | 2.758849                | 2.638468  | 0.091218  |
| 24            | 6             | 0           | 3.533666                | -0.495458 | -1.203058 |
| 25            | 6             | 0           | 3.279672                | -0.794438 | 0.208163  |
| 26            | 8             | 0           | 2.949417                | 0.513692  | -0.346309 |
| 27            | 1             | 0           | 4.544752                | -0.270799 | -1.533846 |
| 28            | 1             | 0           | 2.860033                | -0.900475 | -1.952239 |
| 29            | 1             | 0           | 2.390313                | -1.390678 | 0.408200  |
| 30            | 6             | 0           | 4.379179                | -0.819852 | 1.232513  |



|    |   |   |          |           |          |
|----|---|---|----------|-----------|----------|
| 31 | 1 | 0 | 4.015820 | -0.462580 | 2.200650 |
| 32 | 1 | 0 | 4.736779 | -1.844904 | 1.369470 |
| 33 | 1 | 0 | 5.222019 | -0.194750 | 0.926302 |

```

-----
Rotational constants (GHZ):      0.4205321      0.2879179      0.1804496
Standard basis: 6-311++G(d,p) (5D, 7F)
There are 499 symmetry adapted cartesian basis functions of A symmetry.
There are 482 symmetry adapted basis functions of A symmetry.
482 basis functions, 760 primitive gaussians, 499 cartesian basis functions
71 alpha electrons      71 beta electrons
nuclear repulsion energy      1307.5355431886 Hartrees.
NAtoms= 33 NActive= 33 NUniq= 33 SFac= 1.00D+00 NAtFMM= 60 NAOKFM=F
Big=F
Integral buffers will be 131072 words long.
Raffenetti 2 integral format.
Two-electron integral symmetry is turned on.
One-electron integrals computed using PRISM.
NBasis= 482 RedAO= T EigKep= 3.60D-06 NBF= 482
NBsUse= 482 1.00D-06 EigRej= -1.00D+00 NBFU= 482
Initial guess from the checkpoint file:
"/home/suqian/liuwen/qianmengshijie/nh2po/nh2po.chk"
B after Tr= 0.000000 0.000000 0.000000
Rot= 0.999987 0.003032 -0.000058 0.004111 Ang= 0.59 deg.
ExpMin= 3.50D-02 ExpMax= 4.40D+05 ExpMxC= 1.51D+04 IAcc=3 IRadAn= 5 AccDes=
0.00D+00
Harris functional with IExCor= 402 and IRadAn= 5 diagonalized for initial guess.
HarFok: IExCor= 402 AccDes= 0.00D+00 IRadAn= 5 IDoV= 1 UseB2=F ITyADJ=14
ICtDFT= 3500011 ScaDFX= 1.000000 1.000000 1.000000 1.000000
FoFCou: FMM=F IPFlag= 0 FMFlag= 100000 FMFlg1= 0
NfxFlg= 0 DoJE=T BraDBF=F KetDBF=T FulRan=T
wScrn= 0.000000 ICntrl= 500 IOpCl= 0 I1Cent= 200000004 NGrid=
0
NMat0= 1 NMatS0= 1 NMatT0= 0 NMatD0= 1 NMtDS0= 0
NMtDT0= 0
Petite list used in FoFCou.
Requested convergence on RMS density matrix=1.00D-08 within 128 cycles.
Requested convergence on MAX density matrix=1.00D-06.
Requested convergence on energy=1.00D-06.
No special actions if energy rises.
SCF Done: E(RB3LYP) = -3205.64826304 A.U. after 11 cycles
NFOck= 11 Conv=0.60D-08 -V/T= 2.0018
Calling FoFJK, ICntrl= 2127 FMM=F ISym2X=0 I1Cent= 0 IOpClX= 0 NMat=1 NMatS=1
NMatT=0.
***** Axes restored to original set *****

```

| Center<br>Number | Atomic<br>Number | Forces (Hartrees/Bohr) |              |              |
|------------------|------------------|------------------------|--------------|--------------|
|                  |                  | X                      | Y            | Z            |
| 1                | 6                | -0.000263866           | 0.000043598  | 0.000098035  |
| 2                | 6                | 0.000368712            | -0.000081698 | 0.000067928  |
| 3                | 7                | -0.000741978           | -0.000614462 | 0.000010396  |
| 4                | 6                | 0.001580922            | 0.001750950  | 0.000234856  |
| 5                | 7                | -0.000111083           | 0.000107522  | -0.000739047 |
| 6                | 6                | -0.000435467           | -0.000646566 | 0.000209968  |
| 7                | 6                | 0.001466830            | 0.000508148  | -0.000236477 |
| 8                | 1                | 0.000038102            | 0.000009374  | 0.000156975  |
| 9                | 1                | -0.000065978           | -0.000050972 | 0.000020655  |
| 10               | 1                | -0.000336465           | -0.000018492 | -0.000273146 |
| 11               | 1                | 0.000243926            | 0.000089163  | -0.000011067 |
| 12               | 1                | -0.000131475           | 0.000037045  | -0.000201176 |
| 13               | 1                | -0.000321445           | -0.000281966 | 0.000179601  |
| 14               | 35               | 0.000028784            | 0.000118289  | -0.000035456 |
| 15               | 1                | -0.000508782           | -0.000816476 | 0.000381528  |
| 16               | 6                | -0.000222293           | -0.000272037 | -0.000352742 |
| 17               | 6                | -0.000043863           | 0.000221756  | -0.000010269 |
| 18               | 1                | 0.000262232            | -0.000123612 | -0.000001404 |
| 19               | 1                | 0.000060474            | -0.000016274 | 0.000068656  |
| 20               | 1                | -0.000024361           | 0.000069546  | 0.000048083  |
| 21               | 7                | -0.000402696           | -0.000181051 | 0.000253424  |
| 22               | 1                | 0.000080568            | -0.000060805 | -0.000025857 |
| 23               | 1                | -0.000291350           | 0.000201344  | 0.000189592  |
| 24               | 6                | -0.000410240           | 0.000955235  | 0.000661930  |
| 25               | 6                | -0.000812406           | 0.000721777  | -0.001133872 |
| 26               | 8                | 0.000435950            | -0.001460504 | -0.000548708 |
| 27               | 1                | 0.000033433            | -0.000149163 | -0.000087936 |
| 28               | 1                | 0.000123554            | 0.000156631  | -0.000442939 |
| 29               | 1                | 0.000685243            | 0.000047118  | 0.001209154  |
| 30               | 6                | -0.000006658           | -0.000018992 | 0.000441553  |
| 31               | 1                | -0.000052990           | -0.000221627 | -0.000058975 |
| 32               | 1                | -0.000137911           | -0.000014261 | 0.000016445  |
| 33               | 1                | -0.000087421           | -0.000008535 | -0.000089708 |

Cartesian Forces: Max 0.001750950 RMS 0.000471862

GradGradGradGradGradGradGradGradGradGradGradGradGradGradGradGradGradGradGrad

Berny optimization.

Using GEDIIS/GDIIS optimizer.

FormGI is forming the generalized inverse of G from B-inverse, IUseBI=4.

Internal Forces: Max 0.001041616 RMS 0.000289476

Search for a local minimum.

Step number 31 out of a maximum of 172

All quantities printed in internal units (Hartrees-Bohrs-Radians)

Mixed Optimization -- En-DIIS/RFO-DIIS

Swapping is turned off.

Update second derivatives using D2CorX and points 29 30 31

DE= -9.17D-05 DEPred=-6.61D-05 R= 1.39D+00

TightC=F SS= 1.41D+00 RLast= 3.46D-01 DXNew= 1.4210D+00 1.0374D+00

Trust test= 1.39D+00 RLast= 3.46D-01 DXMaxT set to 1.04D+00

ITU= 1 1 1 1 1 0 0-1 1-1 1 1 1 1 1 1 1 1 1 1 0

ITU= -1-1 1 1 1-1 1 0 0-1 0

|                 |         |         |         |         |         |
|-----------------|---------|---------|---------|---------|---------|
| Eigenvalues --- | 0.00057 | 0.00173 | 0.00223 | 0.00407 | 0.00658 |
| Eigenvalues --- | 0.00728 | 0.00773 | 0.01272 | 0.01520 | 0.01887 |
| Eigenvalues --- | 0.01977 | 0.02175 | 0.02357 | 0.02388 | 0.02480 |
| Eigenvalues --- | 0.02636 | 0.02862 | 0.03045 | 0.03086 | 0.03232 |
| Eigenvalues --- | 0.03331 | 0.03601 | 0.03767 | 0.03852 | 0.03985 |
| Eigenvalues --- | 0.04379 | 0.04506 | 0.05216 | 0.05459 | 0.05717 |
| Eigenvalues --- | 0.05731 | 0.05900 | 0.06089 | 0.07548 | 0.08663 |
| Eigenvalues --- | 0.09029 | 0.09554 | 0.10647 | 0.12212 | 0.12553 |
| Eigenvalues --- | 0.12746 | 0.13824 | 0.15026 | 0.15864 | 0.15993 |
| Eigenvalues --- | 0.16001 | 0.16004 | 0.16010 | 0.16023 | 0.16106 |
| Eigenvalues --- | 0.16323 | 0.20372 | 0.21549 | 0.22115 | 0.22381 |
| Eigenvalues --- | 0.23011 | 0.23424 | 0.23897 | 0.26035 | 0.27332 |
| Eigenvalues --- | 0.29077 | 0.29513 | 0.31367 | 0.31747 | 0.32403 |
| Eigenvalues --- | 0.33790 | 0.34283 | 0.34342 | 0.34412 | 0.34546 |
| Eigenvalues --- | 0.34688 | 0.34737 | 0.35079 | 0.35219 | 0.35446 |
| Eigenvalues --- | 0.35594 | 0.35620 | 0.35890 | 0.36038 | 0.36421 |
| Eigenvalues --- | 0.36658 | 0.39338 | 0.40496 | 0.41899 | 0.42446 |
| Eigenvalues --- | 0.45005 | 0.45485 | 0.46363 | 0.49542 | 0.55135 |
| Eigenvalues --- | 0.58065 | 0.60612 | 1.30414 |         |         |

En-DIIS/RFO-DIIS IScMMF= 0 using points: 31 30 29 28 27

RFO step: Lambda=-2.61146919D-05.

DidBck=F Rises=F RFO-DIIS coefs: 1.33982 -0.32456 -0.07314 -0.10094

0.15882

Iteration 1 RMS(Cart)= 0.02017681 RMS(Int)= 0.00020486

Iteration 2 RMS(Cart)= 0.00035472 RMS(Int)= 0.00004352

Iteration 3 RMS(Cart)= 0.00000011 RMS(Int)= 0.00004352

| Variable | Old X   | -DE/DX   | Delta X<br>(Linear) | Delta X<br>(Quad) | Delta X<br>(Total) | New X   |
|----------|---------|----------|---------------------|-------------------|--------------------|---------|
| R1       | 2.56486 | 0.00013  | 0.00000             | -0.00007          | -0.00007           | 2.56479 |
| R2       | 2.62076 | 0.00016  | 0.00014             | 0.00022           | 0.00035            | 2.62112 |
| R3       | 2.03400 | -0.00002 | 0.00001             | -0.00005          | -0.00004           | 2.03396 |
| R4       | 2.62573 | -0.00010 | -0.00020            | -0.00012          | -0.00031           | 2.62542 |

|     |         |          |          |          |          |         |
|-----|---------|----------|----------|----------|----------|---------|
| R5  | 2.03050 | 0.00007  | 0.00000  | 0.00008  | 0.00008  | 2.03059 |
| R6  | 2.54170 | 0.00049  | 0.00028  | 0.00056  | 0.00084  | 2.54254 |
| R7  | 2.69864 | 0.00006  | 0.00026  | -0.00008 | 0.00018  | 2.69882 |
| R8  | 2.52168 | -0.00036 | 0.00017  | -0.00036 | -0.00018 | 2.52150 |
| R9  | 2.09152 | 0.00016  | -0.00037 | 0.00047  | 0.00009  | 2.09161 |
| R10 | 2.78684 | -0.00047 | -0.00055 | -0.00031 | -0.00087 | 2.78598 |
| R11 | 2.89476 | 0.00026  | 0.00072  | 0.00078  | 0.00150  | 2.89626 |
| R12 | 2.06090 | -0.00012 | -0.00012 | -0.00023 | -0.00035 | 2.06055 |
| R13 | 2.06117 | 0.00003  | -0.00001 | -0.00001 | -0.00003 | 2.06115 |
| R14 | 2.06911 | 0.00005  | -0.00005 | 0.00012  | 0.00008  | 2.06919 |
| R15 | 2.07828 | 0.00029  | 0.00023  | 0.00023  | 0.00046  | 2.07874 |
| R16 | 2.75899 | -0.00083 | -0.00077 | -0.00093 | -0.00170 | 2.75729 |
| R17 | 4.25889 | -0.00010 | 0.00364  | 0.00010  | 0.00374  | 4.26263 |
| R18 | 2.50649 | -0.00003 | -0.00012 | 0.00010  | -0.00002 | 2.50647 |
| R19 | 2.05636 | 0.00028  | 0.00038  | 0.00038  | 0.00076  | 2.05712 |
| R20 | 2.04347 | 0.00001  | 0.00000  | 0.00004  | 0.00004  | 2.04351 |
| R21 | 2.04706 | 0.00006  | 0.00005  | 0.00007  | 0.00012  | 2.04718 |
| R22 | 1.91471 | -0.00003 | -0.00020 | -0.00012 | -0.00031 | 1.91440 |
| R23 | 1.92461 | -0.00048 | -0.00035 | -0.00035 | -0.00074 | 1.92387 |
| R24 | 4.11527 | -0.00008 | 0.01041  | 0.00813  | 0.01855  | 4.13383 |
| R25 | 2.76795 | 0.00044  | -0.00172 | 0.00345  | 0.00168  | 2.76963 |
| R26 | 2.73439 | -0.00096 | 0.00066  | -0.00266 | -0.00198 | 2.73241 |
| R27 | 2.05467 | 0.00002  | -0.00014 | 0.00009  | -0.00005 | 2.05462 |
| R28 | 2.05198 | 0.00015  | -0.00014 | 0.00015  | 0.00001  | 2.05199 |
| R29 | 2.75648 | -0.00075 | -0.00029 | -0.00306 | -0.00332 | 2.75316 |
| R30 | 2.05839 | -0.00029 | -0.00015 | -0.00036 | -0.00051 | 2.05788 |
| R31 | 2.84016 | -0.00003 | 0.00040  | 0.00014  | 0.00054  | 2.84070 |
| R32 | 2.06747 | -0.00010 | 0.00018  | -0.00022 | -0.00003 | 2.06744 |
| R33 | 2.06782 | -0.00005 | 0.00000  | -0.00007 | -0.00007 | 2.06775 |
| R34 | 2.06568 | -0.00004 | -0.00011 | 0.00003  | -0.00008 | 2.06561 |
| A1  | 1.87302 | -0.00009 | -0.00021 | 0.00019  | -0.00003 | 1.87299 |
| A2  | 2.27879 | 0.00005  | 0.00014  | -0.00019 | -0.00004 | 2.27875 |
| A3  | 2.13132 | 0.00004  | 0.00006  | 0.00000  | 0.00006  | 2.13138 |
| A4  | 1.86387 | 0.00017  | 0.00046  | -0.00008 | 0.00038  | 1.86425 |
| A5  | 2.27654 | -0.00003 | -0.00042 | 0.00036  | -0.00006 | 2.27648 |
| A6  | 2.14277 | -0.00015 | -0.00005 | -0.00029 | -0.00033 | 2.14243 |
| A7  | 1.89791 | -0.00026 | -0.00037 | -0.00004 | -0.00040 | 1.89751 |
| A8  | 2.25277 | 0.00008  | 0.00046  | -0.00021 | 0.00025  | 2.25302 |
| A9  | 2.13249 | 0.00018  | -0.00009 | 0.00025  | 0.00015  | 2.13265 |
| A10 | 1.88974 | 0.00016  | 0.00016  | 0.00005  | 0.00020  | 1.88995 |
| A11 | 2.15505 | -0.00086 | -0.00275 | -0.00323 | -0.00600 | 2.14904 |
| A12 | 2.23839 | 0.00069  | 0.00262  | 0.00318  | 0.00578  | 2.24418 |
| A13 | 1.90023 | 0.00002  | -0.00008 | -0.00011 | -0.00017 | 1.90006 |
| A14 | 2.19964 | 0.00085  | 0.00091  | 0.00127  | 0.00221  | 2.20185 |

|     |         |          |          |          |          |         |
|-----|---------|----------|----------|----------|----------|---------|
| A15 | 2.18293 | -0.00087 | -0.00099 | -0.00120 | -0.00217 | 2.18076 |
| A16 | 1.96059 | -0.00013 | -0.00130 | -0.00052 | -0.00182 | 1.95876 |
| A17 | 1.87620 | -0.00035 | 0.00012  | -0.00024 | -0.00012 | 1.87609 |
| A18 | 1.88816 | 0.00038  | 0.00047  | 0.00067  | 0.00115  | 1.88931 |
| A19 | 1.90405 | 0.00039  | 0.00006  | 0.00140  | 0.00146  | 1.90551 |
| A20 | 1.92931 | -0.00018 | 0.00087  | -0.00056 | 0.00032  | 1.92963 |
| A21 | 1.90411 | -0.00013 | -0.00023 | -0.00077 | -0.00100 | 1.90311 |
| A22 | 1.92038 | -0.00022 | -0.00006 | -0.00154 | -0.00160 | 1.91878 |
| A23 | 1.89417 | -0.00024 | -0.00088 | -0.00087 | -0.00175 | 1.89241 |
| A24 | 1.87780 | 0.00025  | 0.00172  | 0.00138  | 0.00312  | 1.88092 |
| A25 | 1.87601 | 0.00006  | -0.00055 | -0.00020 | -0.00075 | 1.87526 |
| A26 | 1.89954 | 0.00004  | -0.00066 | 0.00104  | 0.00037  | 1.89991 |
| A27 | 1.99568 | 0.00010  | 0.00041  | 0.00007  | 0.00048  | 1.99615 |
| A28 | 2.16268 | -0.00031 | -0.00038 | -0.00044 | -0.00081 | 2.16187 |
| A29 | 1.94598 | 0.00007  | -0.00035 | 0.00002  | -0.00033 | 1.94565 |
| A30 | 2.17450 | 0.00024  | 0.00073  | 0.00043  | 0.00116  | 2.17566 |
| A31 | 2.07430 | -0.00006 | -0.00033 | -0.00022 | -0.00055 | 2.07375 |
| A32 | 2.16450 | 0.00001  | 0.00034  | 0.00004  | 0.00038  | 2.16488 |
| A33 | 2.04438 | 0.00005  | 0.00000  | 0.00018  | 0.00017  | 2.04455 |
| A34 | 1.93887 | 0.00055  | 0.00091  | 0.00109  | 0.00197  | 1.94084 |
| A35 | 1.91745 | -0.00084 | -0.00005 | 0.00009  | 0.00003  | 1.91747 |
| A36 | 1.89051 | 0.00011  | 0.00016  | 0.00094  | 0.00112  | 1.89163 |
| A37 | 2.09041 | -0.00021 | 0.00118  | -0.00056 | 0.00045  | 2.09087 |
| A38 | 2.07262 | 0.00053  | -0.00273 | 0.00274  | 0.00017  | 2.07279 |
| A39 | 1.99490 | 0.00013  | -0.00007 | 0.00040  | 0.00035  | 1.99525 |
| A40 | 2.00221 | 0.00011  | -0.00018 | -0.00035 | -0.00056 | 2.00165 |
| A41 | 2.03092 | -0.00028 | 0.00122  | -0.00113 | 0.00009  | 2.03101 |
| A42 | 2.01557 | 0.00089  | -0.00225 | 0.00707  | 0.00486  | 2.02042 |
| A43 | 2.13324 | 0.00016  | 0.00098  | -0.00104 | -0.00010 | 2.13314 |
| A44 | 1.95610 | 0.00047  | 0.00201  | 0.00180  | 0.00376  | 1.95986 |
| A45 | 2.02625 | 0.00037  | -0.00120 | 0.00068  | -0.00048 | 2.02578 |
| A46 | 2.05205 | -0.00104 | 0.00036  | -0.00513 | -0.00477 | 2.04728 |
| A47 | 2.55849 | -0.00027 | -0.00875 | -0.00374 | -0.01280 | 2.54569 |
| A48 | 2.52949 | -0.00049 | -0.00713 | -0.00913 | -0.01631 | 2.51318 |
| A49 | 1.93331 | -0.00006 | 0.00083  | -0.00049 | 0.00034  | 1.93365 |
| A50 | 1.91795 | -0.00010 | -0.00041 | -0.00060 | -0.00101 | 1.91694 |
| A51 | 1.94280 | -0.00010 | -0.00013 | 0.00027  | 0.00014  | 1.94294 |
| A52 | 1.87936 | -0.00001 | -0.00010 | -0.00064 | -0.00074 | 1.87862 |
| A53 | 1.89360 | 0.00015  | -0.00006 | 0.00093  | 0.00087  | 1.89447 |
| A54 | 1.89524 | 0.00013  | -0.00014 | 0.00053  | 0.00039  | 1.89563 |
| A55 | 3.46765 | -0.00026 | 0.00692  | 0.00535  | 0.01228  | 3.47993 |
| A56 | 2.55903 | -0.00075 | -0.00754 | -0.00592 | -0.01328 | 2.54575 |
| A57 | 2.90068 | 0.00016  | 0.00763  | 0.00954  | 0.01718  | 2.91786 |
| A58 | 3.08604 | 0.00004  | 0.00174  | -0.00629 | -0.00448 | 3.08155 |

|     |          |          |          |          |          |          |
|-----|----------|----------|----------|----------|----------|----------|
| D1  | 0.00184  | 0.00002  | -0.00088 | 0.00111  | 0.00023  | 0.00207  |
| D2  | -3.13559 | 0.00006  | 0.00161  | 0.00152  | 0.00313  | -3.13245 |
| D3  | 3.13214  | 0.00002  | -0.00176 | 0.00101  | -0.00075 | 3.13138  |
| D4  | -0.00529 | 0.00006  | 0.00073  | 0.00142  | 0.00215  | -0.00314 |
| D5  | 0.00014  | -0.00017 | -0.00166 | -0.00251 | -0.00417 | -0.00403 |
| D6  | -3.11268 | -0.00001 | 0.00096  | -0.00092 | 0.00001  | -3.11266 |
| D7  | -3.13132 | -0.00017 | -0.00087 | -0.00242 | -0.00329 | -3.13461 |
| D8  | 0.03905  | -0.00001 | 0.00174  | -0.00083 | 0.00089  | 0.03994  |
| D9  | -0.00319 | 0.00014  | 0.00310  | 0.00066  | 0.00375  | 0.00056  |
| D10 | -3.13905 | 0.00007  | 0.00149  | 0.00084  | 0.00231  | -3.13674 |
| D11 | 3.13463  | 0.00010  | 0.00084  | 0.00028  | 0.00112  | 3.13576  |
| D12 | -0.00122 | 0.00004  | -0.00078 | 0.00046  | -0.00032 | -0.00155 |
| D13 | 0.00331  | -0.00025 | -0.00416 | -0.00223 | -0.00639 | -0.00309 |
| D14 | -3.13915 | -0.00010 | -0.00063 | 0.00091  | 0.00021  | -3.13894 |
| D15 | 3.13964  | -0.00019 | -0.00268 | -0.00240 | -0.00507 | 3.13457  |
| D16 | -0.00282 | -0.00004 | 0.00085  | 0.00074  | 0.00154  | -0.00128 |
| D17 | 0.03188  | -0.00011 | -0.00887 | -0.01014 | -0.01901 | 0.01288  |
| D18 | -3.11646 | 0.00000  | -0.00639 | -0.00907 | -0.01546 | -3.13192 |
| D19 | -3.10330 | -0.00018 | -0.01068 | -0.00993 | -0.02062 | -3.12392 |
| D20 | 0.03155  | -0.00007 | -0.00820 | -0.00887 | -0.01707 | 0.01447  |
| D21 | -0.00214 | 0.00026  | 0.00361  | 0.00293  | 0.00653  | 0.00439  |
| D22 | 3.11101  | 0.00013  | 0.00111  | 0.00140  | 0.00251  | 3.11352  |
| D23 | 3.14037  | 0.00010  | -0.00009 | -0.00040 | -0.00053 | 3.13983  |
| D24 | -0.02966 | -0.00002 | -0.00259 | -0.00192 | -0.00456 | -0.03422 |
| D25 | 1.32366  | -0.00014 | -0.00176 | 0.01273  | 0.01097  | 1.33463  |
| D26 | -2.86475 | 0.00003  | -0.00239 | 0.01399  | 0.01160  | -2.85315 |
| D27 | -0.81073 | -0.00010 | -0.00234 | 0.01330  | 0.01096  | -0.79976 |
| D28 | -1.78466 | 0.00003  | 0.00121  | 0.01454  | 0.01575  | -1.76891 |
| D29 | 0.31011  | 0.00020  | 0.00058  | 0.01580  | 0.01638  | 0.32649  |
| D30 | 2.36414  | 0.00007  | 0.00063  | 0.01511  | 0.01574  | 2.37988  |
| D31 | -1.07757 | -0.00019 | -0.00571 | -0.00292 | -0.00863 | -1.08619 |
| D32 | 0.97066  | -0.00038 | -0.00691 | -0.00453 | -0.01145 | 0.95922  |
| D33 | 3.13864  | -0.00026 | -0.00588 | -0.00412 | -0.01001 | 3.12864  |
| D34 | 3.12709  | 0.00007  | -0.00509 | -0.00322 | -0.00831 | 3.11878  |
| D35 | -1.10787 | -0.00012 | -0.00629 | -0.00484 | -0.01113 | -1.11900 |
| D36 | 1.06011  | 0.00000  | -0.00526 | -0.00443 | -0.00969 | 1.05042  |
| D37 | 1.03333  | 0.00008  | -0.00538 | -0.00281 | -0.00818 | 1.02514  |
| D38 | 3.08156  | -0.00011 | -0.00658 | -0.00442 | -0.01101 | 3.07055  |
| D39 | -1.03365 | 0.00001  | -0.00555 | -0.00401 | -0.00957 | -1.04321 |
| D40 | 2.94625  | 0.00004  | -0.00267 | -0.00872 | -0.01138 | 2.93487  |
| D41 | -1.24546 | -0.00002 | -0.00192 | -0.00679 | -0.00871 | -1.25417 |
| D42 | 0.86591  | 0.00013  | -0.00320 | -0.00825 | -0.01145 | 0.85446  |
| D43 | 2.95738  | 0.00008  | -0.00246 | -0.00631 | -0.00877 | 2.94861  |
| D44 | -1.23175 | -0.00004 | -0.00228 | -0.00880 | -0.01108 | -1.24282 |

|     |          |          |          |          |          |          |
|-----|----------|----------|----------|----------|----------|----------|
| D45 | 0.85973  | -0.00009 | -0.00154 | -0.00686 | -0.00840 | 0.85133  |
| D46 | 3.14008  | 0.00013  | 0.00098  | 0.00004  | 0.00102  | 3.14109  |
| D47 | 0.00206  | 0.00001  | -0.00011 | -0.00058 | -0.00069 | 0.00138  |
| D48 | 0.00611  | 0.00001  | -0.00184 | -0.00115 | -0.00299 | 0.00312  |
| D49 | -3.13190 | -0.00011 | -0.00292 | -0.00177 | -0.00469 | -3.13659 |
| D50 | 2.26903  | 0.00024  | 0.01823  | 0.02868  | 0.04680  | 2.31583  |
| D51 | -1.25282 | 0.00001  | -0.03431 | -0.00446 | -0.03867 | -1.29149 |
| D52 | -2.00804 | -0.00004 | 0.01529  | 0.02960  | 0.04480  | -1.96324 |
| D53 | 0.75330  | -0.00027 | -0.03725 | -0.00354 | -0.04068 | 0.71262  |
| D54 | -2.71890 | 0.00016  | 0.00327  | -0.00174 | 0.00154  | -2.71735 |
| D55 | -0.01296 | -0.00006 | 0.00103  | -0.00064 | 0.00041  | -0.01254 |
| D56 | -0.03427 | 0.00019  | 0.00278  | 0.00049  | 0.00328  | -0.03099 |
| D57 | 2.67167  | -0.00002 | 0.00054  | 0.00159  | 0.00215  | 2.67382  |
| D58 | 0.63970  | -0.00004 | -0.02892 | -0.01951 | -0.04859 | 0.59111  |
| D59 | -1.77045 | 0.00012  | -0.03059 | -0.01775 | -0.04848 | -1.81892 |
| D60 | 1.79451  | -0.00054 | 0.03147  | 0.00808  | 0.03956  | 1.83407  |
| D61 | -0.63174 | 0.00015  | 0.02986  | 0.01343  | 0.04330  | -0.58843 |
| D62 | 2.54515  | -0.00006 | 0.00087  | 0.00035  | 0.00123  | 2.54639  |
| D63 | -1.66359 | -0.00017 | 0.00100  | -0.00112 | -0.00010 | -1.66369 |
| D64 | 0.43665  | -0.00014 | 0.00047  | -0.00067 | -0.00020 | 0.43646  |
| D65 | 1.34540  | 0.00013  | 0.00033  | 0.00177  | 0.00210  | 1.34749  |
| D66 | -2.86334 | 0.00002  | 0.00046  | 0.00030  | 0.00076  | -2.86258 |
| D67 | -0.76310 | 0.00005  | -0.00007 | 0.00075  | 0.00067  | -0.76243 |
| D68 | -1.04067 | 0.00018  | -0.00199 | 0.00436  | 0.00237  | -1.03830 |
| D69 | 1.03378  | 0.00007  | -0.00186 | 0.00289  | 0.00103  | 1.03481  |
| D70 | 3.13402  | 0.00010  | -0.00239 | 0.00333  | 0.00094  | 3.13496  |

| Item                 | Value    | Threshold | Converged? |
|----------------------|----------|-----------|------------|
| Maximum Force        | 0.001042 | 0.000450  | NO         |
| RMS Force            | 0.000289 | 0.000300  | YES        |
| Maximum Displacement | 0.086235 | 0.001800  | NO         |
| RMS Displacement     | 0.020312 | 0.001200  | NO         |

Predicted change in Energy=-3.852278D-05

GradGradGradGradGradGradGradGradGradGradGradGradGradGradGradGradGrad

Input orientation:

| Center Number | Atomic Number | Atomic Type | Coordinates (Angstroms) |           |           |
|---------------|---------------|-------------|-------------------------|-----------|-----------|
|               |               |             | X                       | Y         | Z         |
| 1             | 6             | 0           | -2.643585               | 2.089164  | -0.194447 |
| 2             | 6             | 0           | -3.538293               | 1.115838  | 0.112482  |
| 3             | 7             | 0           | -2.833192               | -0.080642 | 0.150718  |
| 4             | 6             | 0           | -1.540941               | 0.170621  | -0.127146 |
| 5             | 7             | 0           | -1.406121               | 1.480465  | -0.342888 |

|    |    |   |           |           |           |
|----|----|---|-----------|-----------|-----------|
| 6  | 6  | 0 | -0.133082 | 2.160039  | -0.644620 |
| 7  | 6  | 0 | 0.447960  | 2.873607  | 0.581014  |
| 8  | 1  | 0 | -2.780088 | 3.148350  | -0.328487 |
| 9  | 1  | 0 | -4.595312 | 1.173843  | 0.296832  |
| 10 | 1  | 0 | 0.571513  | 1.400333  | -0.984264 |
| 11 | 1  | 0 | -0.308328 | 2.870009  | -1.453870 |
| 12 | 1  | 0 | -0.239967 | 3.655697  | 0.918717  |
| 13 | 1  | 0 | 0.541880  | 2.142108  | 1.397183  |
| 14 | 35 | 0 | 0.119356  | -2.689725 | -0.043133 |
| 15 | 1  | 0 | -0.765346 | -0.618218 | -0.162678 |
| 16 | 6  | 0 | -3.310531 | -1.398852 | 0.422919  |
| 17 | 6  | 0 | -4.579183 | -1.686838 | 0.681435  |
| 18 | 1  | 0 | -2.504636 | -2.129801 | 0.387516  |
| 19 | 1  | 0 | -4.851019 | -2.715228 | 0.876117  |
| 20 | 1  | 0 | -5.374285 | -0.951588 | 0.709781  |
| 21 | 7  | 0 | 1.706578  | 3.493481  | 0.180263  |
| 22 | 1  | 0 | 2.039895  | 4.136836  | 0.888272  |
| 23 | 1  | 0 | 2.415483  | 2.776671  | 0.038500  |
| 24 | 6  | 0 | 3.479762  | -0.297316 | -1.198268 |
| 25 | 6  | 0 | 3.273018  | -0.584048 | 0.224087  |
| 26 | 8  | 0 | 2.788890  | 0.658793  | -0.362048 |
| 27 | 1  | 0 | 4.454851  | 0.034578  | -1.546370 |
| 28 | 1  | 0 | 2.851615  | -0.798039 | -1.928893 |
| 29 | 1  | 0 | 2.463403  | -1.274811 | 0.454860  |
| 30 | 6  | 0 | 4.375752  | -0.451157 | 1.237020  |
| 31 | 1  | 0 | 3.980352  | -0.112857 | 2.199380  |
| 32 | 1  | 0 | 4.851647  | -1.423314 | 1.397400  |
| 33 | 1  | 0 | 5.137070  | 0.259371  | 0.904827  |

-----  
Distance matrix (angstroms):

|    |   | 1        | 2        | 3        | 4        | 5        |
|----|---|----------|----------|----------|----------|----------|
| 1  | C | 0.000000 |          |          |          |          |
| 2  | C | 1.357229 | 0.000000 |          |          |          |
| 3  | N | 2.205254 | 1.389314 | 0.000000 |          |          |
| 4  | C | 2.213856 | 2.222672 | 1.345457 | 0.000000 |          |
| 5  | N | 1.387036 | 2.210537 | 2.171920 | 1.334321 | 0.000000 |
| 6  | C | 2.551530 | 3.641294 | 3.597750 | 2.491512 | 1.474276 |
| 7  | C | 3.282429 | 4.381721 | 4.436068 | 3.429773 | 2.496408 |
| 8  | H | 1.076325 | 2.213692 | 3.264788 | 3.231546 | 2.160980 |
| 9  | H | 2.210974 | 1.074541 | 2.167982 | 3.242744 | 3.267139 |
| 10 | H | 3.381591 | 4.263132 | 3.882459 | 2.590233 | 2.080582 |
| 11 | H | 2.765735 | 3.995403 | 4.201902 | 3.250573 | 2.090517 |
| 12 | H | 3.077424 | 4.240266 | 4.612469 | 3.864210 | 2.771858 |
| 13 | H | 3.561359 | 4.399034 | 4.229114 | 3.247843 | 2.694499 |



|    |    |          |          |          |          |          |
|----|----|----------|----------|----------|----------|----------|
| 14 | Br | 5.522184 | 5.280618 | 3.944925 | 3.308357 | 4.450552 |
| 15 | H  | 3.295255 | 3.282057 | 2.159443 | 1.106832 | 2.201712 |
| 16 | C  | 3.604471 | 2.543996 | 1.428154 | 2.428429 | 3.536058 |
| 17 | C  | 4.332655 | 3.043379 | 2.431052 | 3.651694 | 4.598845 |
| 18 | H  | 4.261180 | 3.417348 | 2.088798 | 2.546670 | 3.843729 |
| 19 | H  | 5.394538 | 4.121098 | 3.396891 | 4.504584 | 5.563913 |
| 20 | H  | 4.185752 | 2.828760 | 2.743766 | 4.080971 | 4.771721 |
| 21 | N  | 4.586549 | 5.759032 | 5.777953 | 4.656423 | 3.743636 |
| 22 | H  | 5.224963 | 6.390968 | 6.486763 | 5.439147 | 4.521846 |
| 23 | H  | 5.110881 | 6.181528 | 5.977075 | 4.740488 | 4.053426 |
| 24 | C  | 6.648182 | 7.277923 | 6.459110 | 5.154971 | 5.269158 |
| 25 | C  | 6.505953 | 7.021113 | 6.127365 | 4.885396 | 5.145679 |
| 26 | O  | 5.620128 | 6.361392 | 5.693637 | 4.363591 | 4.274766 |
| 27 | H  | 7.512445 | 8.234760 | 7.483913 | 6.162973 | 6.155481 |
| 28 | H  | 6.445268 | 6.975749 | 6.095612 | 4.845529 | 5.082845 |
| 29 | H  | 6.149736 | 6.469373 | 5.438057 | 4.296834 | 4.816759 |
| 30 | C  | 7.600883 | 8.145684 | 7.299741 | 6.103673 | 6.297407 |
| 31 | H  | 7.379420 | 7.899041 | 7.114945 | 5.998146 | 6.165702 |
| 32 | H  | 8.429116 | 8.859425 | 7.900237 | 6.762400 | 7.114787 |
| 33 | H  | 8.068156 | 8.753472 | 8.013075 | 6.757860 | 6.772090 |
|    |    | 6        | 7        | 8        | 9        | 10       |
| 6  | C  | 0.000000 |          |          |          |          |
| 7  | C  | 1.532634 | 0.000000 |          |          |          |
| 8  | H  | 2.843122 | 3.364962 | 0.000000 |          |          |
| 9  | H  | 4.665877 | 5.329591 | 2.754041 | 0.000000 |          |
| 10 | H  | 1.090397 | 2.153113 | 3.836514 | 5.328094 | 0.000000 |
| 11 | H  | 1.090712 | 2.170884 | 2.730121 | 4.931548 | 1.776119 |
| 12 | H  | 2.166205 | 1.094967 | 2.874914 | 5.051274 | 3.060475 |
| 13 | H  | 2.150548 | 1.100020 | 3.876329 | 5.342195 | 2.494474 |
| 14 | Br | 4.893436 | 5.607869 | 6.524670 | 6.104984 | 4.221225 |
| 15 | H  | 2.889764 | 3.770680 | 4.274776 | 4.253383 | 2.556706 |
| 16 | C  | 4.888919 | 5.692552 | 4.639291 | 2.878423 | 4.988574 |
| 17 | C  | 6.026998 | 6.788218 | 5.256969 | 2.886464 | 6.231761 |
| 18 | H  | 5.009222 | 5.812861 | 5.333612 | 3.910654 | 4.879172 |
| 19 | H  | 6.952682 | 7.707226 | 6.334143 | 3.940282 | 7.057103 |
| 20 | H  | 6.243944 | 6.967584 | 4.961587 | 2.301039 | 6.614669 |
| 21 | N  | 2.417199 | 1.459097 | 4.528589 | 6.716258 | 2.650616 |
| 22 | H  | 3.313505 | 2.055338 | 5.068516 | 7.290755 | 3.626429 |
| 23 | H  | 2.709626 | 2.043249 | 5.221761 | 7.196322 | 2.518051 |
| 24 | C  | 4.404289 | 4.734176 | 7.198254 | 8.343048 | 3.374273 |
| 25 | C  | 4.459393 | 4.479255 | 7.132757 | 8.062635 | 3.563146 |
| 26 | O  | 3.297197 | 3.357785 | 6.100208 | 7.431409 | 2.419461 |
| 27 | H  | 5.136134 | 5.351731 | 7.970142 | 9.305954 | 4.154704 |
| 28 | H  | 4.394087 | 5.055510 | 7.060551 | 8.018659 | 3.305152 |

|    |    |          |          |          |           |           |
|----|----|----------|----------|----------|-----------|-----------|
| 29 | H  | 4.443961 | 4.613816 | 6.904505 | 7.473041  | 3.578648  |
| 30 | C  | 5.539720 | 5.187673 | 8.161698 | 9.165401  | 4.778531  |
| 31 | H  | 5.493153 | 4.900598 | 7.920172 | 8.877910  | 4.903622  |
| 32 | H  | 6.469760 | 6.206648 | 9.062129 | 9.859083  | 5.653747  |
| 33 | H  | 5.812730 | 5.378367 | 8.517550 | 9.794139  | 5.070973  |
|    |    | 11       | 12       | 13       | 14        | 15        |
| 11 | H  | 0.000000 |          |          |           |           |
| 12 | H  | 2.500230 | 0.000000 |          |           |           |
| 13 | H  | 3.062874 | 1.769510 | 0.000000 |           |           |
| 14 | Br | 5.751845 | 6.427959 | 5.059609 | 0.000000  |           |
| 15 | H  | 3.747501 | 4.439796 | 3.429490 | 2.255689  | 0.000000  |
| 16 | C  | 5.546055 | 5.934867 | 5.322467 | 3.694277  | 2.725854  |
| 17 | C  | 6.600347 | 6.886783 | 6.434160 | 4.858709  | 4.049670  |
| 18 | H  | 5.763035 | 6.235615 | 5.343210 | 2.717408  | 2.369119  |
| 19 | H  | 7.567016 | 7.864623 | 7.276577 | 5.054730  | 4.708425  |
| 20 | H  | 6.704469 | 6.901591 | 6.711519 | 5.811032  | 4.702621  |
| 21 | N  | 2.668137 | 2.088221 | 2.159543 | 6.387582  | 4.809790  |
| 22 | H  | 3.550301 | 2.330278 | 2.545973 | 7.152476  | 5.620001  |
| 23 | H  | 3.107255 | 2.932386 | 2.399808 | 5.929616  | 4.656546  |
| 24 | C  | 4.944381 | 5.826176 | 4.617175 | 4.283723  | 4.381366  |
| 25 | C  | 5.250913 | 5.549686 | 4.033261 | 3.801429  | 4.056987  |
| 26 | O  | 3.959080 | 4.449244 | 3.216236 | 4.294262  | 3.781944  |
| 27 | H  | 5.544015 | 6.421097 | 5.330810 | 5.336484  | 5.439780  |
| 28 | H  | 4.864717 | 6.123932 | 5.004211 | 3.820969  | 4.029177  |
| 29 | H  | 5.339033 | 5.642100 | 4.031819 | 2.782900  | 3.352207  |
| 30 | C  | 6.341265 | 6.186472 | 4.631334 | 4.976634  | 5.330850  |
| 31 | H  | 6.374676 | 5.801137 | 4.189448 | 5.155230  | 5.325069  |
| 32 | H  | 7.292990 | 7.207637 | 5.593419 | 5.106223  | 5.884950  |
| 33 | H  | 6.483151 | 6.359855 | 4.990279 | 5.896884  | 6.062033  |
|    |    | 16       | 17       | 18       | 19        | 20        |
| 16 | C  | 0.000000 |          |          |           |           |
| 17 | C  | 1.326365 | 0.000000 |          |           |           |
| 18 | H  | 1.088581 | 2.141577 | 0.000000 |           |           |
| 19 | H  | 2.076375 | 1.081379 | 2.467178 | 0.000000  |           |
| 20 | H  | 2.131060 | 1.083321 | 3.118803 | 1.847133  | 0.000000  |
| 21 | N  | 7.011789 | 8.160740 | 7.028412 | 9.057281  | 8.377210  |
| 22 | H  | 7.712811 | 8.818739 | 7.757207 | 9.717799  | 8.994109  |
| 23 | H  | 7.097183 | 8.322358 | 6.957216 | 9.146836  | 8.662045  |
| 24 | C  | 7.067511 | 8.391105 | 6.456448 | 8.919152  | 9.080907  |
| 25 | C  | 6.636758 | 7.942441 | 5.983088 | 8.424194  | 8.668728  |
| 26 | O  | 6.484830 | 7.802522 | 6.029886 | 8.443061  | 8.389254  |
| 27 | H  | 8.138426 | 9.462566 | 7.540485 | 10.001454 | 10.132851 |
| 28 | H  | 6.622994 | 7.925941 | 5.985714 | 8.418685  | 8.640117  |
| 29 | H  | 5.775355 | 7.058266 | 5.041523 | 7.466795  | 7.848492  |

|    |   |          |          |          |           |           |
|----|---|----------|----------|----------|-----------|-----------|
| 30 | C | 7.787158 | 9.056845 | 7.132969 | 9.507343  | 9.777098  |
| 31 | H | 7.613578 | 8.834433 | 7.028939 | 9.301423  | 9.509553  |
| 32 | H | 8.220180 | 9.461639 | 7.458813 | 9.802168  | 10.259875 |
| 33 | H | 8.622291 | 9.911771 | 8.023180 | 10.421659 | 10.582677 |
|    |   | 21       | 22       | 23       | 24        | 25        |
| 21 | N | 0.000000 |          |          |           |           |
| 22 | H | 1.013056 | 0.000000 |          |           |           |
| 23 | H | 1.018067 | 1.647188 | 0.000000 |           |           |
| 24 | C | 4.406208 | 5.107697 | 3.480184 | 0.000000  |           |
| 25 | C | 4.368283 | 4.924274 | 3.473361 | 1.465623  | 0.000000  |
| 26 | O | 3.082362 | 3.771084 | 2.187527 | 1.445930  | 1.456910  |
| 27 | H | 4.743235 | 5.346776 | 3.766949 | 1.087257  | 2.216742  |
| 28 | H | 4.916991 | 5.740062 | 4.103584 | 1.085866  | 2.204245  |
| 29 | H | 4.835783 | 5.445469 | 4.073102 | 2.172858  | 1.088984  |
| 30 | C | 4.878667 | 5.160187 | 3.962067 | 2.599441  | 1.503235  |
| 31 | H | 4.717260 | 4.852243 | 3.932885 | 3.439277  | 2.150377  |
| 32 | H | 5.962194 | 6.251434 | 5.041962 | 3.144429  | 2.138481  |
| 33 | H | 4.769982 | 4.962610 | 3.807145 | 2.734882  | 2.156259  |
|    |   | 26       | 27       | 28       | 29        | 30        |
| 26 | O | 0.000000 |          |          |           |           |
| 27 | H | 2.137216 | 0.000000 |          |           |           |
| 28 | H | 2.140397 | 1.846602 | 0.000000 |           |           |
| 29 | H | 2.124172 | 3.112119 | 2.461768 | 0.000000  |           |
| 30 | C | 2.511402 | 2.826563 | 3.530769 | 2.224244  | 0.000000  |
| 31 | H | 2.928470 | 3.778562 | 4.334301 | 2.587397  | 1.094040  |
| 32 | H | 3.418449 | 3.308878 | 3.931326 | 2.571798  | 1.094206  |
| 33 | H | 2.697862 | 2.554275 | 3.790962 | 3.115233  | 1.093072  |
|    |   | 31       | 32       | 33       |           |           |
| 31 | H | 0.000000 |          |          |           |           |
| 32 | H | 1.766247 | 0.000000 |          |           |           |
| 33 | H | 1.775504 | 1.776379 | 0.000000 |           |           |

Stoichiometry C10H18BrN3O

Framework group C1[X(C10H18BrN3O)]

Deg. of freedom 93

Full point group C1 NOp 1

Largest Abelian subgroup C1 NOp 1

Largest concise Abelian subgroup C1 NOp 1

Standard orientation:

| Center Number | Atomic Number | Atomic Type | Coordinates (Angstroms) |          |           |
|---------------|---------------|-------------|-------------------------|----------|-----------|
|               |               |             | X                       | Y        | Z         |
| 1             | 6             | 0           | -2.329171               | 2.489711 | -0.240641 |
| 2             | 6             | 0           | -3.327553               | 1.612548 | 0.034837  |

|    |    |   |           |           |           |
|----|----|---|-----------|-----------|-----------|
| 3  | 7  | 0 | -2.754333 | 0.347327  | 0.063619  |
| 4  | 6  | 0 | -1.437941 | 0.463830  | -0.188950 |
| 5  | 7  | 0 | -1.160909 | 1.755066  | -0.379669 |
| 6  | 6  | 0 | 0.182307  | 2.299809  | -0.648960 |
| 7  | 6  | 0 | 0.813839  | 2.928248  | 0.598116  |
| 8  | 1  | 0 | -2.349971 | 3.559370  | -0.358417 |
| 9  | 1  | 0 | -4.375558 | 1.779920  | 0.203095  |
| 10 | 1  | 0 | 0.808179  | 1.474766  | -0.990360 |
| 11 | 1  | 0 | 0.097972  | 3.036928  | -1.448457 |
| 12 | 1  | 0 | 0.206950  | 3.773800  | 0.938234  |
| 13 | 1  | 0 | 0.814910  | 2.178279  | 1.402844  |
| 14 | 35 | 0 | -0.092643 | -2.558037 | -0.127943 |
| 15 | 1  | 0 | -0.750016 | -0.402477 | -0.225686 |
| 16 | 6  | 0 | -3.373789 | -0.916627 | 0.305112  |
| 17 | 6  | 0 | -4.670275 | -1.071851 | 0.538081  |
| 18 | 1  | 0 | -2.649593 | -1.728610 | 0.270001  |
| 19 | 1  | 0 | -5.053250 | -2.068348 | 0.710432  |
| 20 | 1  | 0 | -5.383157 | -0.256632 | 0.566386  |
| 21 | 7  | 0 | 2.138149  | 3.416717  | 0.228564  |
| 22 | 1  | 0 | 2.525200  | 4.009802  | 0.952943  |
| 23 | 1  | 0 | 2.769323  | 2.630779  | 0.085804  |
| 24 | 6  | 0 | 3.523004  | -0.519427 | -1.186928 |
| 25 | 6  | 0 | 3.261561  | -0.804638 | 0.226704  |
| 26 | 8  | 0 | 2.922754  | 0.491678  | -0.345453 |
| 27 | 1  | 0 | 4.533902  | -0.287889 | -1.513430 |
| 28 | 1  | 0 | 2.858395  | -0.938955 | -1.936191 |
| 29 | 1  | 0 | 2.379153  | -1.408756 | 0.432335  |
| 30 | 6  | 0 | 4.353874  | -0.805750 | 1.259451  |
| 31 | 1  | 0 | 3.979494  | -0.442299 | 2.221047  |
| 32 | 1  | 0 | 4.720865  | -1.825443 | 1.410548  |
| 33 | 1  | 0 | 5.192179  | -0.175257 | 0.951993  |

-----  
Rotational constants (GHZ):      0.4194888      0.2900321      0.1812828

Standard basis: 6-311++G(d,p) (5D, 7F)

There are 499 symmetry adapted cartesian basis functions of A symmetry.

There are 482 symmetry adapted basis functions of A symmetry.

482 basis functions, 760 primitive gaussians, 499 cartesian basis functions

71 alpha electrons      71 beta electrons

nuclear repulsion energy      1309.0142633472 Hartrees.

NAtoms= 33 NActive= 33 NUniq= 33 SFac= 1.00D+00 NAtFMM= 60 NAOKFM=F

Big=F

Integral buffers will be 131072 words long.

Raffenetti 2 integral format.

Two-electron integral symmetry is turned on.

One-electron integrals computed using PRISM.

NBasis= 482 RedAO= T EigKep= 3.60D-06 NBF= 482  
 NBsUse= 482 1.00D-06 EigRej= -1.00D+00 NBFU= 482  
 Initial guess from the checkpoint file:  
 "/home/suqian/liuwen/qianmengshijie/nh2po/nh2po.chk"  
 B after Tr= 0.000000 0.000000 0.000000  
 Rot= 0.999999 0.000664 -0.000048 0.000880 Ang= 0.13 deg.  
 ExpMin= 3.50D-02 ExpMax= 4.40D+05 ExpMxC= 1.51D+04 IAcc=3 IRadAn= 5 AccDes= 0.00D+00  
 Harris functional with IExCor= 402 and IRadAn= 5 diagonalized for initial guess.  
 HarFok: IExCor= 402 AccDes= 0.00D+00 IRadAn= 5 IDoV= 1 UseB2=F ITyADJ=14  
 ICtDFT= 3500011 ScaDFX= 1.000000 1.000000 1.000000 1.000000  
 FoFCou: FMM=F IPFlag= 0 FMFlag= 100000 FMFlg1= 0  
 NFXFlg= 0 DoJE=T BraDBF=F KetDBF=T FulRan=T  
 wScrn= 0.000000 ICntrl= 500 IOpCl= 0 I1Cent= 200000004 NGrid= 0  
 NMat0= 1 NMatS0= 1 NMatT0= 0 NMatD0= 1 NMtDS0= 0  
 NMtDT0= 0  
 Petite list used in FoFCou.  
 Requested convergence on RMS density matrix=1.00D-08 within 128 cycles.  
 Requested convergence on MAX density matrix=1.00D-06.  
 Requested convergence on energy=1.00D-06.  
 No special actions if energy rises.  
 SCF Done: E(RB3LYP) = -3205.64831655 A.U. after 11 cycles  
 NFock= 11 Conv=0.35D-08 -V/T= 2.0018  
 Calling FoFJK, ICntrl= 2127 FMM=F ISym2X=0 I1Cent= 0 IOpClX= 0 NMat=1 NMatS=1  
 NMatT=0.

\*\*\*\*\* Axes restored to original set \*\*\*\*\*

| Center Number | Atomic Number | Forces (Hartrees/Bohr) |              |              |
|---------------|---------------|------------------------|--------------|--------------|
|               |               | X                      | Y            | Z            |
| 1             | 6             | -0.000129670           | 0.000050722  | -0.000114004 |
| 2             | 6             | 0.000181234            | -0.000165575 | -0.000092460 |
| 3             | 7             | -0.000341803           | -0.000172088 | 0.000383186  |
| 4             | 6             | 0.000658519            | 0.000818039  | -0.000216366 |
| 5             | 7             | 0.000005152            | -0.000133694 | -0.000300693 |
| 6             | 6             | -0.000085941           | -0.000099449 | 0.000402173  |
| 7             | 6             | 0.000950606            | 0.000243597  | -0.000014898 |
| 8             | 1             | 0.000049297            | 0.000018433  | 0.000092670  |
| 9             | 1             | -0.000042374           | -0.000007594 | -0.000012578 |
| 10            | 1             | -0.000230832           | -0.000106518 | -0.000087584 |
| 11            | 1             | 0.000093274            | 0.000076033  | -0.000008376 |
| 12            | 1             | -0.000098495           | 0.000033487  | -0.000193780 |

|    |    |              |              |              |
|----|----|--------------|--------------|--------------|
| 13 | 1  | -0.000214046 | -0.000167713 | 0.000121018  |
| 14 | 35 | 0.000051314  | 0.000021917  | -0.000033799 |
| 15 | 1  | -0.000165397 | -0.000365070 | 0.000071370  |
| 16 | 6  | -0.000164577 | -0.000135661 | -0.000057424 |
| 17 | 6  | -0.000047720 | 0.000126447  | 0.000006788  |
| 18 | 1  | 0.000078739  | -0.000084355 | -0.000046530 |
| 19 | 1  | 0.000014780  | -0.000010551 | 0.000017713  |
| 20 | 1  | -0.000000210 | 0.000033026  | 0.000020030  |
| 21 | 7  | -0.000354017 | -0.000111910 | -0.000095199 |
| 22 | 1  | 0.000035732  | -0.000070397 | 0.000084019  |
| 23 | 1  | -0.000108477 | 0.000035651  | 0.000089105  |
| 24 | 6  | -0.000541293 | 0.000380868  | 0.000871244  |
| 25 | 6  | -0.000012823 | 0.000546891  | -0.000872068 |
| 26 | 8  | -0.000061629 | -0.000536319 | -0.000374999 |
| 27 | 1  | 0.000111024  | -0.000184227 | -0.000020802 |
| 28 | 1  | 0.000115853  | 0.000091919  | -0.000374352 |
| 29 | 1  | 0.000285049  | 0.000134994  | 0.000581589  |
| 30 | 6  | 0.000101699  | -0.000126695 | 0.000238455  |
| 31 | 1  | -0.000086043 | -0.000121850 | -0.000077856 |
| 32 | 1  | -0.000019949 | -0.000016838 | 0.000029839  |
| 33 | 1  | -0.000026978 | 0.000004479  | -0.000015430 |

-----  
Cartesian Forces: Max 0.000950606 RMS 0.000264331

GradGradGradGradGradGradGradGradGradGradGradGradGradGradGradGradGradGradGrad  
Berny optimization.

Using GEDIIS/GDIIS optimizer.

FormGI is forming the generalized inverse of G from B-inverse, IUseBI=4.

Internal Forces: Max 0.000516091 RMS 0.000150445

Search for a local minimum.

Step number 32 out of a maximum of 172

All quantities printed in internal units (Hartrees-Bohrs-Radians)

Mixed Optimization -- En-DIIS/RFO-DIIS

Swapping is turned off.

Update second derivatives using D2CorX and points 30 31 32

DE= -5.35D-05 DEPred=-3.85D-05 R= 1.39D+00

TightC=F SS= 1.41D+00 RLast= 1.46D-01 DXNew= 1.7446D+00 4.3819D-01

Trust test= 1.39D+00 RLast= 1.46D-01 DXMaxT set to 1.04D+00

ITU= 1 1 1 1 1 1 0 0-1 1-1 1 1 1 1 1 1 1 1 1

ITU= 0-1-1 1 1 1-1 1 0 0-1 0

Eigenvalues --- 0.00051 0.00175 0.00229 0.00440 0.00656

Eigenvalues --- 0.00727 0.00762 0.01222 0.01516 0.01889

Eigenvalues --- 0.01953 0.02176 0.02360 0.02381 0.02480

Eigenvalues --- 0.02648 0.02854 0.03037 0.03073 0.03208

|                 |         |         |         |         |         |
|-----------------|---------|---------|---------|---------|---------|
| Eigenvalues --- | 0.03320 | 0.03698 | 0.03755 | 0.03903 | 0.04083 |
| Eigenvalues --- | 0.04391 | 0.04466 | 0.05126 | 0.05461 | 0.05592 |
| Eigenvalues --- | 0.05730 | 0.05871 | 0.05947 | 0.07572 | 0.08643 |
| Eigenvalues --- | 0.08994 | 0.09561 | 0.10898 | 0.12103 | 0.12317 |
| Eigenvalues --- | 0.12742 | 0.13949 | 0.14193 | 0.15814 | 0.15972 |
| Eigenvalues --- | 0.16001 | 0.16002 | 0.16005 | 0.16020 | 0.16098 |
| Eigenvalues --- | 0.16153 | 0.18545 | 0.21454 | 0.21874 | 0.22185 |
| Eigenvalues --- | 0.22985 | 0.23454 | 0.24602 | 0.26351 | 0.27615 |
| Eigenvalues --- | 0.28655 | 0.29515 | 0.31016 | 0.31827 | 0.32313 |
| Eigenvalues --- | 0.33677 | 0.34282 | 0.34338 | 0.34407 | 0.34546 |
| Eigenvalues --- | 0.34674 | 0.34741 | 0.35080 | 0.35195 | 0.35394 |
| Eigenvalues --- | 0.35579 | 0.35673 | 0.35736 | 0.35894 | 0.36418 |
| Eigenvalues --- | 0.36630 | 0.39290 | 0.39858 | 0.41893 | 0.42455 |
| Eigenvalues --- | 0.44497 | 0.45492 | 0.46483 | 0.49542 | 0.54860 |
| Eigenvalues --- | 0.58050 | 0.60618 | 1.29387 |         |         |

En-DIIS/RFO-DIIS IScMMF= 0 using points: 32 31 30 29 28

RFO step: Lambda=-8.80450647D-06.

DidBck=F Rises=F RFO-DIIS coefs: 1.27324 -0.08583 -0.59649 0.35333

0.05574

Iteration 1 RMS(Cart)= 0.01469056 RMS(Int)= 0.00035523

Iteration 2 RMS(Cart)= 0.00016817 RMS(Int)= 0.00034321

Iteration 3 RMS(Cart)= 0.00000019 RMS(Int)= 0.00034321

| Variable | Old X   | -DE/DX   | Delta X<br>(Linear) | Delta X<br>(Quad) | Delta X<br>(Total) | New X   |
|----------|---------|----------|---------------------|-------------------|--------------------|---------|
| R1       | 2.56479 | 0.00003  | -0.00008            | 0.00007           | -0.00001           | 2.56478 |
| R2       | 2.62112 | 0.00002  | 0.00032             | -0.00008          | 0.00025            | 2.62136 |
| R3       | 2.03396 | 0.00000  | -0.00001            | -0.00001          | -0.00002           | 2.03394 |
| R4       | 2.62542 | -0.00012 | -0.00027            | -0.00013          | -0.00040           | 2.62503 |
| R5       | 2.03059 | 0.00004  | 0.00008             | 0.00003           | 0.00011            | 2.03070 |
| R6       | 2.54254 | 0.00047  | 0.00077             | 0.00037           | 0.00114            | 2.54368 |
| R7       | 2.69882 | 0.00010  | 0.00020             | 0.00003           | 0.00023            | 2.69905 |
| R8       | 2.52150 | -0.00014 | -0.00011            | -0.00022          | -0.00033           | 2.52117 |
| R9       | 2.09161 | 0.00017  | 0.00041             | 0.00030           | 0.00071            | 2.09232 |
| R10      | 2.78598 | -0.00018 | -0.00084            | 0.00012           | -0.00072           | 2.78526 |
| R11      | 2.89626 | 0.00006  | 0.00071             | -0.00013          | 0.00057            | 2.89683 |
| R12      | 2.06055 | -0.00005 | -0.00017            | -0.00010          | -0.00027           | 2.06028 |
| R13      | 2.06115 | 0.00004  | 0.00010             | 0.00013           | 0.00023            | 2.06138 |
| R14      | 2.06919 | 0.00003  | 0.00014             | 0.00007           | 0.00021            | 2.06939 |
| R15      | 2.07874 | 0.00018  | 0.00064             | 0.00016           | 0.00079            | 2.07953 |
| R16      | 2.75729 | -0.00048 | -0.00152            | -0.00024          | -0.00176           | 2.75554 |
| R17      | 4.26263 | 0.00000  | -0.00145            | -0.00110          | -0.00255           | 4.26009 |
| R18      | 2.50647 | 0.00001  | -0.00006            | 0.00006           | -0.00001           | 2.50646 |
| R19      | 2.05712 | 0.00012  | 0.00042             | -0.00002          | 0.00040            | 2.05752 |
| R20      | 2.04351 | 0.00001  | 0.00002             | 0.00002           | 0.00003            | 2.04354 |

|     |         |          |          |          |          |         |
|-----|---------|----------|----------|----------|----------|---------|
| R21 | 2.04718 | 0.00002  | 0.00005  | -0.00001 | 0.00004  | 2.04722 |
| R22 | 1.91440 | 0.00002  | -0.00008 | 0.00006  | -0.00003 | 1.91437 |
| R23 | 1.92387 | -0.00028 | -0.00076 | 0.00033  | -0.00062 | 1.92325 |
| R24 | 4.13383 | -0.00022 | -0.00205 | 0.00406  | 0.00210  | 4.13593 |
| R25 | 2.76963 | -0.00018 | 0.00048  | -0.00263 | -0.00117 | 2.76846 |
| R26 | 2.73241 | -0.00052 | -0.00105 | 0.00000  | -0.00145 | 2.73096 |
| R27 | 2.05462 | 0.00005  | 0.00006  | 0.00008  | 0.00014  | 2.05476 |
| R28 | 2.05199 | 0.00014  | 0.00002  | 0.00022  | 0.00024  | 2.05223 |
| R29 | 2.75316 | -0.00025 | -0.00166 | 0.00020  | -0.00204 | 2.75112 |
| R30 | 2.05788 | -0.00018 | -0.00043 | -0.00013 | -0.00057 | 2.05731 |
| R31 | 2.84070 | 0.00007  | 0.00043  | 0.00043  | 0.00085  | 2.84156 |
| R32 | 2.06744 | -0.00008 | -0.00004 | -0.00006 | -0.00010 | 2.06734 |
| R33 | 2.06775 | 0.00001  | -0.00002 | 0.00004  | 0.00002  | 2.06777 |
| R34 | 2.06561 | -0.00001 | -0.00009 | 0.00003  | -0.00006 | 2.06554 |
| A1  | 1.87299 | -0.00002 | -0.00019 | 0.00005  | -0.00014 | 1.87285 |
| A2  | 2.27875 | 0.00004  | 0.00019  | 0.00008  | 0.00027  | 2.27902 |
| A3  | 2.13138 | -0.00002 | 0.00000  | -0.00012 | -0.00011 | 2.13126 |
| A4  | 1.86425 | 0.00012  | 0.00049  | 0.00004  | 0.00053  | 1.86478 |
| A5  | 2.27648 | -0.00005 | -0.00046 | 0.00001  | -0.00045 | 2.27603 |
| A6  | 2.14243 | -0.00007 | -0.00003 | -0.00005 | -0.00008 | 2.14235 |
| A7  | 1.89751 | -0.00015 | -0.00040 | -0.00015 | -0.00055 | 1.89696 |
| A8  | 2.25302 | -0.00021 | 0.00018  | -0.00049 | -0.00031 | 2.25271 |
| A9  | 2.13265 | 0.00035  | 0.00022  | 0.00063  | 0.00085  | 2.13350 |
| A10 | 1.88995 | 0.00000  | 0.00011  | 0.00007  | 0.00018  | 1.89013 |
| A11 | 2.14904 | -0.00022 | -0.00394 | 0.00032  | -0.00360 | 2.14544 |
| A12 | 2.24418 | 0.00022  | 0.00380  | -0.00040 | 0.00341  | 2.24759 |
| A13 | 1.90006 | 0.00004  | -0.00001 | -0.00001 | -0.00002 | 1.90004 |
| A14 | 2.20185 | 0.00008  | 0.00137  | -0.00008 | 0.00130  | 2.20315 |
| A15 | 2.18076 | -0.00013 | -0.00149 | 0.00009  | -0.00139 | 2.17937 |
| A16 | 1.95876 | 0.00020  | -0.00094 | 0.00101  | 0.00003  | 1.95879 |
| A17 | 1.87609 | -0.00028 | -0.00043 | -0.00149 | -0.00191 | 1.87418 |
| A18 | 1.88931 | 0.00006  | 0.00090  | 0.00019  | 0.00111  | 1.89043 |
| A19 | 1.90551 | 0.00021  | 0.00111  | 0.00052  | 0.00164  | 1.90715 |
| A20 | 1.92963 | -0.00020 | 0.00012  | -0.00066 | -0.00052 | 1.92911 |
| A21 | 1.90311 | 0.00000  | -0.00080 | 0.00039  | -0.00042 | 1.90269 |
| A22 | 1.91878 | -0.00013 | -0.00124 | -0.00132 | -0.00257 | 1.91621 |
| A23 | 1.89241 | -0.00009 | -0.00136 | 0.00025  | -0.00115 | 1.89127 |
| A24 | 1.88092 | -0.00002 | 0.00162  | -0.00009 | 0.00159  | 1.88251 |
| A25 | 1.87526 | 0.00003  | -0.00052 | 0.00023  | -0.00028 | 1.87498 |
| A26 | 1.89991 | -0.00001 | -0.00055 | -0.00022 | -0.00078 | 1.89914 |
| A27 | 1.99615 | 0.00021  | 0.00192  | 0.00105  | 0.00295  | 1.99910 |
| A28 | 2.16187 | -0.00024 | -0.00068 | -0.00018 | -0.00087 | 2.16100 |
| A29 | 1.94565 | 0.00012  | -0.00019 | 0.00039  | 0.00020  | 1.94585 |
| A30 | 2.17566 | 0.00012  | 0.00088  | -0.00020 | 0.00067  | 2.17633 |



|     |          |          |          |          |          |          |
|-----|----------|----------|----------|----------|----------|----------|
| A31 | 2.07375  | -0.00001 | -0.00027 | 0.00008  | -0.00019 | 2.07356  |
| A32 | 2.16488  | -0.00001 | 0.00015  | -0.00010 | 0.00005  | 2.16493  |
| A33 | 2.04455  | 0.00002  | 0.00012  | 0.00002  | 0.00014  | 2.04469  |
| A34 | 1.94084  | 0.00016  | 0.00037  | 0.00057  | 0.00074  | 1.94158  |
| A35 | 1.91747  | -0.00021 | -0.00028 | 0.00072  | 0.00036  | 1.91783  |
| A36 | 1.89163  | 0.00000  | 0.00030  | -0.00081 | -0.00041 | 1.89121  |
| A37 | 2.09087  | -0.00030 | 0.00033  | -0.00191 | -0.00257 | 2.08830  |
| A38 | 2.07279  | 0.00046  | -0.00012 | 0.00185  | 0.00280  | 2.07558  |
| A39 | 1.99525  | 0.00016  | -0.00010 | 0.00076  | 0.00111  | 1.99636  |
| A40 | 2.00165  | -0.00003 | 0.00075  | -0.00015 | 0.00035  | 2.00200  |
| A41 | 2.03101  | -0.00019 | -0.00026 | -0.00046 | -0.00075 | 2.03026  |
| A42 | 2.02042  | 0.00041  | 0.00229  | 0.00010  | 0.00318  | 2.02360  |
| A43 | 2.13314  | 0.00008  | 0.00080  | 0.00048  | 0.00052  | 2.13366  |
| A44 | 1.95986  | 0.00005  | 0.00295  | -0.00048 | 0.00214  | 1.96200  |
| A45 | 2.02578  | 0.00035  | -0.00046 | 0.00085  | 0.00092  | 2.02670  |
| A46 | 2.04728  | -0.00050 | -0.00329 | -0.00076 | -0.00410 | 2.04318  |
| A47 | 2.54569  | 0.00003  | -0.00252 | -0.00472 | -0.00525 | 2.54044  |
| A48 | 2.51318  | -0.00029 | -0.00319 | -0.00817 | -0.00895 | 2.50423  |
| A49 | 1.93365  | -0.00016 | 0.00007  | -0.00086 | -0.00079 | 1.93286  |
| A50 | 1.91694  | 0.00002  | -0.00076 | 0.00032  | -0.00045 | 1.91649  |
| A51 | 1.94294  | 0.00000  | 0.00016  | 0.00045  | 0.00062  | 1.94355  |
| A52 | 1.87862  | 0.00002  | -0.00034 | -0.00008 | -0.00041 | 1.87821  |
| A53 | 1.89447  | 0.00010  | 0.00053  | 0.00017  | 0.00070  | 1.89517  |
| A54 | 1.89563  | 0.00002  | 0.00033  | 0.00000  | 0.00033  | 1.89596  |
| A55 | 3.47993  | -0.00018 | 0.00104  | -0.00390 | -0.00286 | 3.47707  |
| A56 | 2.54575  | -0.00042 | 0.00184  | -0.00948 | -0.00698 | 2.53877  |
| A57 | 2.91786  | 0.00015  | 0.00624  | 0.00707  | 0.01332  | 2.93117  |
| A58 | 3.08155  | -0.00002 | -0.00234 | 0.00253  | 0.00045  | 3.08200  |
| D1  | 0.00207  | 0.00001  | 0.00059  | -0.00030 | 0.00029  | 0.00236  |
| D2  | -3.13245 | -0.00001 | 0.00144  | 0.00015  | 0.00158  | -3.13087 |
| D3  | 3.13138  | 0.00007  | 0.00076  | 0.00097  | 0.00174  | 3.13312  |
| D4  | -0.00314 | 0.00005  | 0.00161  | 0.00142  | 0.00303  | -0.00012 |
| D5  | -0.00403 | 0.00002  | -0.00140 | 0.00092  | -0.00048 | -0.00451 |
| D6  | -3.11266 | 0.00007  | 0.00247  | 0.00071  | 0.00319  | -3.10947 |
| D7  | -3.13461 | -0.00004 | -0.00156 | -0.00022 | -0.00178 | -3.13639 |
| D8  | 0.03994  | 0.00001  | 0.00232  | -0.00043 | 0.00189  | 0.04184  |
| D9  | 0.00056  | -0.00003 | 0.00042  | -0.00041 | -0.00001 | 0.00055  |
| D10 | -3.13674 | 0.00001  | 0.00085  | 0.00043  | 0.00127  | -3.13547 |
| D11 | 3.13576  | -0.00001 | -0.00035 | -0.00082 | -0.00118 | 3.13458  |
| D12 | -0.00155 | 0.00003  | 0.00009  | 0.00002  | 0.00010  | -0.00144 |
| D13 | -0.00309 | 0.00004  | -0.00130 | 0.00099  | -0.00030 | -0.00338 |
| D14 | -3.13894 | 0.00003  | -0.00106 | 0.00264  | 0.00154  | -3.13740 |
| D15 | 3.13457  | 0.00001  | -0.00170 | 0.00022  | -0.00147 | 3.13310  |
| D16 | -0.00128 | -0.00001 | -0.00146 | 0.00186  | 0.00036  | -0.00091 |

|     |          |          |          |          |          |          |
|-----|----------|----------|----------|----------|----------|----------|
| D17 | 0.01288  | -0.00010 | -0.00917 | -0.00947 | -0.01863 | -0.00576 |
| D18 | -3.13192 | -0.00008 | -0.00691 | -0.00887 | -0.01577 | 3.13549  |
| D19 | -3.12392 | -0.00005 | -0.00868 | -0.00852 | -0.01720 | -3.14112 |
| D20 | 0.01447  | -0.00003 | -0.00641 | -0.00792 | -0.01434 | 0.00013  |
| D21 | 0.00439  | -0.00004 | 0.00166  | -0.00118 | 0.00048  | 0.00487  |
| D22 | 3.11352  | -0.00008 | -0.00209 | -0.00098 | -0.00307 | 3.11045  |
| D23 | 3.13983  | -0.00003 | 0.00145  | -0.00294 | -0.00153 | 3.13831  |
| D24 | -0.03422 | -0.00007 | -0.00231 | -0.00274 | -0.00508 | -0.03930 |
| D25 | 1.33463  | -0.00015 | -0.00695 | -0.00183 | -0.00878 | 1.32585  |
| D26 | -2.85315 | 0.00005  | -0.00643 | -0.00156 | -0.00798 | -2.86114 |
| D27 | -0.79976 | -0.00006 | -0.00712 | -0.00180 | -0.00891 | -0.80867 |
| D28 | -1.76891 | -0.00010 | -0.00251 | -0.00207 | -0.00458 | -1.77349 |
| D29 | 0.32649  | 0.00010  | -0.00199 | -0.00179 | -0.00378 | 0.32271  |
| D30 | 2.37988  | -0.00001 | -0.00268 | -0.00203 | -0.00471 | 2.37517  |
| D31 | -1.08619 | -0.00006 | -0.00306 | 0.00087  | -0.00219 | -1.08838 |
| D32 | 0.95922  | -0.00015 | -0.00517 | 0.00055  | -0.00463 | 0.95459  |
| D33 | 3.12864  | 0.00004  | -0.00266 | 0.00192  | -0.00074 | 3.12789  |
| D34 | 3.11878  | 0.00003  | -0.00267 | 0.00175  | -0.00091 | 3.11787  |
| D35 | -1.11900 | -0.00006 | -0.00478 | 0.00143  | -0.00335 | -1.12235 |
| D36 | 1.05042  | 0.00012  | -0.00227 | 0.00280  | 0.00054  | 1.05096  |
| D37 | 1.02514  | 0.00002  | -0.00246 | 0.00135  | -0.00111 | 1.02403  |
| D38 | 3.07055  | -0.00007 | -0.00457 | 0.00103  | -0.00355 | 3.06700  |
| D39 | -1.04321 | 0.00011  | -0.00206 | 0.00240  | 0.00033  | -1.04288 |
| D40 | 2.93487  | -0.00001 | 0.00638  | -0.00112 | 0.00530  | 2.94017  |
| D41 | -1.25417 | -0.00005 | 0.00682  | -0.00129 | 0.00549  | -1.24867 |
| D42 | 0.85446  | 0.00016  | 0.00724  | 0.00063  | 0.00790  | 0.86236  |
| D43 | 2.94861  | 0.00012  | 0.00768  | 0.00046  | 0.00810  | 2.95670  |
| D44 | -1.24282 | -0.00001 | 0.00703  | -0.00020 | 0.00688  | -1.23594 |
| D45 | 0.85133  | -0.00005 | 0.00747  | -0.00037 | 0.00707  | 0.85840  |
| D46 | 3.14109  | 0.00003  | 0.00067  | 0.00026  | 0.00094  | -3.14115 |
| D47 | 0.00138  | -0.00001 | -0.00014 | -0.00068 | -0.00082 | 0.00055  |
| D48 | 0.00312  | 0.00001  | -0.00188 | -0.00042 | -0.00230 | 0.00083  |
| D49 | -3.13659 | -0.00003 | -0.00270 | -0.00136 | -0.00406 | -3.14065 |
| D50 | 2.31583  | 0.00013  | -0.01154 | 0.01491  | 0.00290  | 2.31874  |
| D51 | -1.29149 | -0.00010 | -0.01206 | -0.02393 | -0.03566 | -1.32715 |
| D52 | -1.96324 | 0.00002  | -0.01082 | 0.01166  | 0.00054  | -1.96269 |
| D53 | 0.71262  | -0.00020 | -0.01135 | -0.02718 | -0.03802 | 0.67460  |
| D54 | -2.71735 | 0.00016  | 0.00183  | 0.00167  | 0.00346  | -2.71389 |
| D55 | -0.01254 | 0.00002  | 0.00051  | 0.00101  | 0.00147  | -0.01107 |
| D56 | -0.03099 | 0.00004  | 0.00163  | 0.00030  | 0.00202  | -0.02897 |
| D57 | 2.67382  | -0.00010 | 0.00031  | -0.00035 | 0.00003  | 2.67385  |
| D58 | 0.59111  | -0.00001 | 0.00274  | -0.02243 | -0.02047 | 0.57065  |
| D59 | -1.81892 | 0.00015  | 0.00239  | -0.02241 | -0.02100 | -1.83993 |
| D60 | 1.83407  | -0.00031 | -0.00404 | 0.02002  | 0.01674  | 1.85082  |

|     |          |          |          |         |         |          |
|-----|----------|----------|----------|---------|---------|----------|
| D61 | -0.58843 | 0.00004  | -0.00173 | 0.02084 | 0.01971 | -0.56872 |
| D62 | 2.54639  | 0.00003  | 0.00216  | 0.00187 | 0.00389 | 2.55027  |
| D63 | -1.66369 | -0.00003 | 0.00131  | 0.00144 | 0.00260 | -1.66109 |
| D64 | 0.43646  | 0.00001  | 0.00133  | 0.00194 | 0.00312 | 0.43958  |
| D65 | 1.34749  | 0.00000  | 0.00240  | 0.00071 | 0.00322 | 1.35072  |
| D66 | -2.86258 | -0.00007 | 0.00155  | 0.00028 | 0.00194 | -2.86064 |
| D67 | -0.76243 | -0.00002 | 0.00157  | 0.00078 | 0.00245 | -0.75998 |
| D68 | -1.03830 | 0.00011  | 0.00215  | 0.00141 | 0.00360 | -1.03470 |
| D69 | 1.03481  | 0.00004  | 0.00130  | 0.00098 | 0.00231 | 1.03712  |
| D70 | 3.13496  | 0.00009  | 0.00131  | 0.00148 | 0.00283 | 3.13779  |

| Item                 | Value    | Threshold | Converged? |
|----------------------|----------|-----------|------------|
| Maximum Force        | 0.000516 | 0.000450  | NO         |
| RMS Force            | 0.000150 | 0.000300  | YES        |
| Maximum Displacement | 0.072957 | 0.001800  | NO         |
| RMS Displacement     | 0.014643 | 0.001200  | NO         |

Predicted change in Energy=-1.609249D-05

GradGradGradGradGradGradGradGradGradGradGradGradGradGradGradGradGradGrad

Input orientation:

| Center Number | Atomic Number | Atomic Type | Coordinates (Angstroms) |           |           |
|---------------|---------------|-------------|-------------------------|-----------|-----------|
|               |               |             | X                       | Y         | Z         |
| 1             | 6             | 0           | -2.639671               | 2.089376  | -0.195922 |
| 2             | 6             | 0           | -3.535025               | 1.116091  | 0.109219  |
| 3             | 7             | 0           | -2.831770               | -0.081345 | 0.143703  |
| 4             | 6             | 0           | -1.538971               | 0.169570  | -0.134845 |
| 5             | 7             | 0           | -1.402972               | 1.479610  | -0.347544 |
| 6             | 6             | 0           | -0.128255               | 2.157113  | -0.644956 |
| 7             | 6             | 0           | 0.448200                | 2.872816  | 0.581976  |
| 8             | 1             | 0           | -2.774744               | 3.149272  | -0.325633 |
| 9             | 1             | 0           | -4.592042               | 1.174950  | 0.293643  |
| 10            | 1             | 0           | 0.575279                | 1.394761  | -0.980380 |
| 11            | 1             | 0           | -0.298013               | 2.865874  | -1.456595 |
| 12            | 1             | 0           | -0.241221               | 3.657194  | 0.911588  |
| 13            | 1             | 0           | 0.532871                | 2.142867  | 1.401106  |
| 14            | 35            | 0           | 0.120112                | -2.693547 | -0.081740 |
| 15            | 1             | 0           | -0.766913               | -0.623095 | -0.173770 |
| 16            | 6             | 0           | -3.311518               | -1.399697 | 0.411584  |
| 17            | 6             | 0           | -4.577404               | -1.682426 | 0.688767  |
| 18            | 1             | 0           | -2.509701               | -2.134370 | 0.358501  |
| 19            | 1             | 0           | -4.851940               | -2.710887 | 0.879330  |
| 20            | 1             | 0           | -5.367265               | -0.942615 | 0.738034  |
| 21            | 7             | 0           | 1.709173                | 3.490153  | 0.188154  |

|    |   |   |          |           |           |
|----|---|---|----------|-----------|-----------|
| 22 | 1 | 0 | 2.042054 | 4.130668  | 0.898917  |
| 23 | 1 | 0 | 2.416697 | 2.772369  | 0.046756  |
| 24 | 6 | 0 | 3.460853 | -0.305439 | -1.191111 |
| 25 | 6 | 0 | 3.271175 | -0.584054 | 0.234595  |
| 26 | 8 | 0 | 2.771973 | 0.650296  | -0.354145 |
| 27 | 1 | 0 | 4.431442 | 0.029101  | -1.549346 |
| 28 | 1 | 0 | 2.829641 | -0.813627 | -1.914087 |
| 29 | 1 | 0 | 2.470834 | -1.279514 | 0.481622  |
| 30 | 6 | 0 | 4.383533 | -0.437507 | 1.235723  |
| 31 | 1 | 0 | 3.994387 | -0.099370 | 2.200625  |
| 32 | 1 | 0 | 4.868760 | -1.405213 | 1.395140  |
| 33 | 1 | 0 | 5.135556 | 0.277995  | 0.893305  |

-----  
Distance matrix (angstroms):

|    |    | 1        | 2        | 3        | 4        | 5        |
|----|----|----------|----------|----------|----------|----------|
| 1  | C  | 0.000000 |          |          |          |          |
| 2  | C  | 1.357223 | 0.000000 |          |          |          |
| 3  | N  | 2.205511 | 1.389104 | 0.000000 |          |          |
| 4  | C  | 2.213803 | 2.222543 | 1.346059 | 0.000000 |          |
| 5  | N  | 1.387165 | 2.210526 | 2.172410 | 1.334144 | 0.000000 |
| 6  | C  | 2.552142 | 3.641234 | 3.597453 | 2.490112 | 1.473895 |
| 7  | C  | 3.279307 | 4.379003 | 4.435916 | 3.430776 | 2.496371 |
| 8  | H  | 1.076313 | 2.213808 | 3.265029 | 3.231433 | 2.161020 |
| 9  | H  | 2.210792 | 1.074598 | 2.167791 | 3.242782 | 3.267125 |
| 10 | H  | 3.381385 | 4.261394 | 3.879488 | 2.585744 | 2.078739 |
| 11 | H  | 2.770489 | 3.998970 | 4.203211 | 3.249162 | 2.091090 |
| 12 | H  | 3.072002 | 4.236761 | 4.612728 | 3.865579 | 2.770731 |
| 13 | H  | 3.552236 | 4.389876 | 4.224806 | 3.247395 | 2.691686 |
| 14 | Br | 5.523205 | 5.282975 | 3.948168 | 3.309504 | 4.450357 |
| 15 | H  | 3.296242 | 3.281355 | 2.158220 | 1.107206 | 2.203664 |
| 16 | C  | 3.604729 | 2.543731 | 1.428275 | 2.429631 | 3.536839 |
| 17 | C  | 4.331740 | 3.042060 | 2.430595 | 3.652438 | 4.598851 |
| 18 | H  | 4.261961 | 3.417444 | 2.089205 | 2.548303 | 3.845023 |
| 19 | H  | 5.393776 | 4.119841 | 3.396576 | 4.505702 | 5.564249 |
| 20 | H  | 4.183899 | 2.826797 | 2.742946 | 4.081018 | 4.770878 |
| 21 | N  | 4.584990 | 5.757084 | 5.777346 | 4.656290 | 3.743622 |
| 22 | H  | 5.223418 | 6.388670 | 6.485796 | 5.438998 | 4.522165 |
| 23 | H  | 5.108056 | 6.178200 | 5.974904 | 4.738655 | 4.051737 |
| 24 | C  | 6.628872 | 7.256302 | 6.436540 | 5.132210 | 5.249267 |
| 25 | C  | 6.501590 | 7.016450 | 6.124288 | 4.882821 | 5.142494 |
| 26 | O  | 5.601953 | 6.341127 | 5.673190 | 4.343205 | 4.256521 |
| 27 | H  | 7.488466 | 8.209566 | 7.458744 | 6.137294 | 6.130962 |
| 28 | H  | 6.425954 | 6.951729 | 6.068138 | 4.818417 | 5.062411 |
| 29 | H  | 6.158389 | 6.476723 | 5.446779 | 4.307948 | 4.827697 |

|    |    |          |          |          |          |          |
|----|----|----------|----------|----------|----------|----------|
| 30 | C  | 7.600009 | 8.147775 | 7.306158 | 6.109260 | 6.298072 |
| 31 | H  | 7.385443 | 7.908436 | 7.129352 | 6.012054 | 6.173963 |
| 32 | H  | 8.433278 | 8.867591 | 7.913083 | 6.773464 | 7.119956 |
| 33 | H  | 8.057398 | 8.746208 | 8.010574 | 6.754121 | 6.762834 |
|    |    | 6        | 7        | 8        | 9        | 10       |
| 6  | C  | 0.000000 |          |          |          |          |
| 7  | C  | 1.532937 | 0.000000 |          |          |          |
| 8  | H  | 2.844336 | 3.359695 | 0.000000 |          |          |
| 9  | H  | 4.665941 | 5.326342 | 2.753910 | 0.000000 |          |
| 10 | H  | 1.090253 | 2.154473 | 3.837923 | 5.326599 | 0.000000 |
| 11 | H  | 1.090834 | 2.170865 | 2.737441 | 4.935711 | 1.775836 |
| 12 | H  | 2.164678 | 1.095077 | 2.864863 | 5.047082 | 3.060199 |
| 13 | H  | 2.150269 | 1.100440 | 3.864556 | 5.331798 | 2.496584 |
| 14 | Br | 4.889560 | 5.615386 | 6.525198 | 6.108238 | 4.210580 |
| 15 | H  | 2.891272 | 3.777439 | 4.276119 | 4.252417 | 2.554181 |
| 16 | C  | 4.888797 | 5.693758 | 4.639475 | 2.877926 | 4.985353 |
| 17 | C  | 6.026259 | 6.783681 | 5.255844 | 2.884603 | 6.229387 |
| 18 | H  | 5.009495 | 5.819883 | 5.334338 | 3.910492 | 4.874882 |
| 19 | H  | 6.952271 | 7.704391 | 6.333098 | 3.938312 | 7.054755 |
| 20 | H  | 6.242452 | 6.957119 | 4.959444 | 2.298377 | 6.612874 |
| 21 | N  | 2.418101 | 1.458168 | 4.526112 | 6.713911 | 2.653650 |
| 22 | H  | 3.314921 | 2.054996 | 5.065985 | 7.287925 | 3.628825 |
| 23 | H  | 2.708097 | 2.042433 | 5.218409 | 7.192713 | 2.518657 |
| 24 | C  | 4.386816 | 4.724535 | 7.180999 | 8.321368 | 3.355835 |
| 25 | C  | 4.454631 | 4.476585 | 7.127742 | 8.057776 | 3.558051 |
| 26 | O  | 3.281218 | 3.349006 | 6.083729 | 7.411046 | 2.402471 |
| 27 | H  | 5.112455 | 5.338115 | 7.947456 | 9.280778 | 4.130223 |
| 28 | H  | 4.380084 | 5.048906 | 7.045344 | 7.994366 | 3.291038 |
| 29 | H  | 4.453634 | 4.619845 | 6.912445 | 7.479568 | 3.589196 |
| 30 | C  | 5.534008 | 5.183867 | 8.157435 | 9.167795 | 4.771909 |
| 31 | H  | 5.494108 | 4.901974 | 7.921918 | 8.887476 | 4.903215 |
| 32 | H  | 6.467018 | 6.205169 | 9.062425 | 9.867994 | 5.649507 |
| 33 | H  | 5.796985 | 5.366687 | 8.503110 | 9.787251 | 5.055095 |
|    |    | 11       | 12       | 13       | 14       | 15       |
| 11 | H  | 0.000000 |          |          |          |          |
| 12 | H  | 2.497540 | 0.000000 |          |          |          |
| 13 | H  | 3.062607 | 1.769755 | 0.000000 |          |          |
| 14 | Br | 5.742144 | 6.438103 | 5.075440 | 0.000000 |          |
| 15 | H  | 3.746787 | 4.446934 | 3.438054 | 2.254341 | 0.000000 |
| 16 | C  | 5.546747 | 5.937076 | 5.320548 | 3.700473 | 2.724107 |
| 17 | C  | 6.603242 | 6.882127 | 6.423021 | 4.866488 | 4.047961 |
| 18 | H  | 5.760954 | 6.244527 | 5.351544 | 2.724410 | 2.367399 |
| 19 | H  | 7.569350 | 7.862075 | 7.268243 | 5.064115 | 4.706946 |
| 20 | H  | 6.709568 | 6.889462 | 6.691148 | 5.817998 | 4.700715 |

|    |   |          |          |          |           |           |
|----|---|----------|----------|----------|-----------|-----------|
| 21 | N | 2.669030 | 2.086935 | 2.161045 | 6.390313  | 4.814644  |
| 22 | H | 3.553034 | 2.331883 | 2.545816 | 7.157196  | 5.624874  |
| 23 | H | 3.104587 | 2.931787 | 2.404025 | 5.930181  | 4.659740  |
| 24 | C | 4.925118 | 5.816284 | 4.613770 | 4.253741  | 4.360034  |
| 25 | C | 5.244162 | 5.548282 | 4.036726 | 3.805157  | 4.058872  |
| 26 | O | 3.943222 | 4.441042 | 3.212826 | 4.276430  | 3.765339  |
| 27 | H | 5.515762 | 6.407264 | 5.326540 | 5.306057  | 5.416684  |
| 28 | H | 4.850798 | 6.115788 | 5.000650 | 3.772683  | 4.000026  |
| 29 | H | 5.348593 | 5.649000 | 4.039040 | 2.800492  | 3.368001  |
| 30 | C | 6.330701 | 6.185466 | 4.638241 | 5.000218  | 5.343052  |
| 31 | H | 6.371234 | 5.806355 | 4.201065 | 5.191238  | 5.346215  |
| 32 | H | 7.284925 | 7.209278 | 5.602575 | 5.137182  | 5.902034  |
| 33 | H | 6.460868 | 6.350515 | 4.992025 | 5.910622  | 6.065456  |
|    |   | 16       | 17       | 18       | 19        | 20        |
| 16 | C | 0.000000 |          |          |           |           |
| 17 | C | 1.326361 | 0.000000 |          |           |           |
| 18 | H | 1.088794 | 2.142130 | 0.000000 |           |           |
| 19 | H | 2.076273 | 1.081395 | 2.467735 | 0.000000  |           |
| 20 | H | 2.131101 | 1.083342 | 3.119295 | 1.847244  | 0.000000  |
| 21 | N | 7.011981 | 8.156423 | 7.033006 | 9.054216  | 8.368260  |
| 22 | H | 7.712532 | 8.812119 | 7.762810 | 9.712590  | 8.981207  |
| 23 | H | 7.095891 | 8.317140 | 6.960077 | 9.142886  | 8.652690  |
| 24 | C | 7.044930 | 8.369206 | 6.433802 | 8.898058  | 9.058878  |
| 25 | C | 6.635393 | 7.938065 | 5.986431 | 8.421645  | 8.660523  |
| 26 | O | 6.465112 | 7.780913 | 6.013179 | 8.422771  | 8.365251  |
| 27 | H | 8.114193 | 9.439162 | 7.516645 | 9.979338  | 10.108957 |
| 28 | H | 6.592879 | 7.898985 | 5.951268 | 8.391035  | 8.616244  |
| 29 | H | 5.784024 | 7.062783 | 5.054866 | 7.471949  | 7.849525  |
| 30 | C | 7.798642 | 9.063518 | 7.153009 | 9.517838  | 9.776548  |
| 31 | H | 7.633332 | 8.846885 | 7.059590 | 9.317904  | 9.512663  |
| 32 | H | 8.239197 | 9.476593 | 7.486520 | 9.821551  | 10.267522 |
| 33 | H | 8.625529 | 9.910937 | 8.034642 | 10.425147 | 10.574651 |
|    |   | 21       | 22       | 23       | 24        | 25        |
| 21 | N | 0.000000 |          |          |           |           |
| 22 | H | 1.013041 | 0.000000 |          |           |           |
| 23 | H | 1.017741 | 1.646667 | 0.000000 |           |           |
| 24 | C | 4.401962 | 5.104924 | 3.477856 | 0.000000  |           |
| 25 | C | 4.363619 | 4.917384 | 3.468572 | 1.465006  | 0.000000  |
| 26 | O | 3.080328 | 3.770402 | 2.188638 | 1.445164  | 1.455829  |
| 27 | H | 4.733765 | 5.340975 | 3.759289 | 1.087332  | 2.214639  |
| 28 | H | 4.919083 | 5.742763 | 4.107894 | 1.085991  | 2.205558  |
| 29 | H | 4.839005 | 5.443166 | 4.075512 | 2.174166  | 1.088684  |
| 30 | C | 4.865811 | 5.144335 | 3.947833 | 2.599674  | 1.503687  |
| 31 | H | 4.707112 | 4.837278 | 3.921114 | 3.439622  | 2.150170  |

|    |   |          |          |          |          |          |
|----|---|----------|----------|----------|----------|----------|
| 32 | H | 5.950161 | 6.235582 | 5.028215 | 3.143311 | 2.138562 |
| 33 | H | 4.749241 | 4.940938 | 3.785596 | 2.736753 | 2.157069 |
|    |   | 26       | 27       | 28       | 29       | 30       |
| 26 | O | 0.000000 |          |          |          |          |
| 27 | H | 2.137341 | 0.000000 |          |          |          |
| 28 | H | 2.140050 | 1.846346 | 0.000000 |          |          |
| 29 | H | 2.124467 | 3.111477 | 2.466823 | 0.000000 |          |
| 30 | C | 2.511597 | 2.824293 | 3.532329 | 2.221725 | 0.000000 |
| 31 | H | 2.929700 | 3.777540 | 4.335625 | 2.582426 | 1.093987 |
| 32 | H | 3.417840 | 3.304316 | 3.931789 | 2.569118 | 1.094218 |
| 33 | H | 2.698381 | 2.554265 | 3.793459 | 3.113850 | 1.093038 |
|    |   | 31       | 32       | 33       |          |          |
| 31 | H | 0.000000 |          |          |          |          |
| 32 | H | 1.765945 | 0.000000 |          |          |          |
| 33 | H | 1.775882 | 1.776572 | 0.000000 |          |          |

Stoichiometry C10H18BrN3O

Framework group C1[X(C10H18BrN3O)]

Deg. of freedom 93

Full point group C1 NOp 1

Largest Abelian subgroup C1 NOp 1

Largest concise Abelian subgroup C1 NOp 1

Standard orientation:

| Center Number | Atomic Number | Atomic Type | Coordinates (Angstroms) |           |           |
|---------------|---------------|-------------|-------------------------|-----------|-----------|
|               |               |             | X                       | Y         | Z         |
| 1             | 6             | 0           | -2.324344               | 2.489916  | -0.247429 |
| 2             | 6             | 0           | -3.323236               | 1.615329  | 0.034290  |
| 3             | 7             | 0           | -2.752355               | 0.349393  | 0.067596  |
| 4             | 6             | 0           | -1.435813               | 0.463100  | -0.188651 |
| 5             | 7             | 0           | -1.157431               | 1.752837  | -0.386196 |
| 6             | 6             | 0           | 0.186938                | 2.292766  | -0.657334 |
| 7             | 6             | 0           | 0.816414                | 2.932645  | 0.585328  |
| 8             | 1             | 0           | -2.343480               | 3.559212  | -0.368631 |
| 9             | 1             | 0           | -4.370804               | 1.785211  | 0.203116  |
| 10            | 1             | 0           | 0.810512                | 1.462437  | -0.989540 |
| 11            | 1             | 0           | 0.106957                | 3.022288  | -1.464377 |
| 12            | 1             | 0           | 0.209314                | 3.783413  | 0.912157  |
| 13            | 1             | 0           | 0.809423                | 2.191081  | 1.398349  |
| 14            | 35            | 0           | -0.092635               | -2.561167 | -0.138702 |
| 15            | 1             | 0           | -0.752168               | -0.407135 | -0.223662 |
| 16            | 6             | 0           | -3.374263               | -0.912353 | 0.314978  |
| 17            | 6             | 0           | -4.667421               | -1.060555 | 0.569955  |
| 18            | 1             | 0           | -2.654619               | -1.727992 | 0.266844  |

|    |   |   |           |           |           |
|----|---|---|-----------|-----------|-----------|
| 19 | 1 | 0 | -5.053141 | -2.055354 | 0.746053  |
| 20 | 1 | 0 | -5.374571 | -0.241053 | 0.614508  |
| 21 | 7 | 0 | 2.142270  | 3.415018  | 0.216987  |
| 22 | 1 | 0 | 2.529965  | 4.010422  | 0.939094  |
| 23 | 1 | 0 | 2.771410  | 2.626971  | 0.079280  |
| 24 | 6 | 0 | 3.501341  | -0.534408 | -1.173063 |
| 25 | 6 | 0 | 3.259876  | -0.802948 | 0.246734  |
| 26 | 8 | 0 | 2.904806  | 0.482480  | -0.337250 |
| 27 | 1 | 0 | 4.507768  | -0.302486 | -1.513076 |
| 28 | 1 | 0 | 2.831366  | -0.966284 | -1.910623 |
| 29 | 1 | 0 | 2.386018  | -1.410976 | 0.474566  |
| 30 | 6 | 0 | 4.365096  | -0.784316 | 1.266153  |
| 31 | 1 | 0 | 3.998598  | -0.414541 | 2.228313  |
| 32 | 1 | 0 | 4.741692  | -1.799593 | 1.423326  |
| 33 | 1 | 0 | 5.194607  | -0.150413 | 0.942407  |

-----

Rotational constants (GHZ):      0.4192324      0.2905085      0.1814994

Standard basis: 6-311++G(d,p) (5D, 7F)

There are    499 symmetry adapted cartesian basis functions of A    symmetry.

There are    482 symmetry adapted basis functions of A    symmetry.

482 basis functions,    760 primitive gaussians,    499 cartesian basis functions

71 alpha electrons      71 beta electrons

          nuclear repulsion energy      1309.4800706457 Hartrees.

NAtoms=    33 NActive=    33 NUniq=    33 SFac= 1.00D+00 NAtFMM=    60 NAOKFM=F

Big=F

Integral buffers will be    131072 words long.

Raffenetti 2 integral format.

Two-electron integral symmetry is turned on.

One-electron integrals computed using PRISM.

NBasis=    482 RedAO= T EigKep=    3.59D-06 NBF=    482

NBsUse=    482 1.00D-06 EigRej= -1.00D+00 NBFU=    482

Initial            guess            from            the            checkpoint            file:

"/home/suqian/liuwen/qianmengshijie/nh2po/nh2po.chk"

B after Tr=    0.000000    0.000000    0.000000

          Rot=    0.999999    0.001086    -0.000438    0.000252 Ang=    0.14 deg.

ExpMin= 3.50D-02 ExpMax= 4.40D+05 ExpMxC= 1.51D+04 IAcc=3 IRadAn=            5 AccDes=

0.00D+00

Harris functional with IExCor=    402 and IRadAn=            5 diagonalized for initial guess.

HarFok: IExCor=    402 AccDes= 0.00D+00 IRadAn=            5 IDoV= 1 UseB2=F ITyADJ=14

ICtDFT= 3500011 ScaDFX= 1.000000 1.000000 1.000000 1.000000

FoFCou: FMM=F IPFlag=            0 FMFlag=            100000 FMFlg1=            0

          NFxFlg=            0 DoJE=T BraDBF=F KetDBF=T FulRan=T

          wScrn= 0.000000 ICntrl=            500 IOpCl=    0 I1Cent=    200000004 NGrid=

0



NMat0= 1 NMatS0= 1 NMatT0= 0 NMatD0= 1 NMatDS0= 0  
NMatDT0= 0

Petite list used in FoFCou.

Requested convergence on RMS density matrix=1.00D-08 within 128 cycles.

Requested convergence on MAX density matrix=1.00D-06.

Requested convergence on energy=1.00D-06.

No special actions if energy rises.

SCF Done: E(RB3LYP) = -3205.64833838 A.U. after 10 cycles

NFock= 10 Conv=0.84D-08 -V/T= 2.0018

Calling FoFJK, ICntrl= 2127 FMM=F ISym2X=0 l1Cent= 0 IOpClX= 0 NMat=1 NMatS=1

NMatT=0.

\*\*\*\*\* Axes restored to original set \*\*\*\*\*

| Center<br>Number | Atomic<br>Number | Forces (Hartrees/Bohr) |              |              |
|------------------|------------------|------------------------|--------------|--------------|
|                  |                  | X                      | Y            | Z            |
| 1                | 6                | -0.000030972           | 0.000023189  | -0.000060804 |
| 2                | 6                | -0.000053688           | -0.000048359 | -0.000068124 |
| 3                | 7                | 0.000065681            | 0.000109187  | 0.000138981  |
| 4                | 6                | -0.000003943           | 0.000034970  | -0.000035895 |
| 5                | 7                | -0.000046243           | -0.000205096 | -0.000011853 |
| 6                | 6                | 0.000098821            | 0.000076329  | 0.000095235  |
| 7                | 6                | 0.000103810            | 0.000018906  | 0.000074586  |
| 8                | 1                | 0.000020345            | 0.000004467  | 0.000026828  |
| 9                | 1                | -0.000010353           | 0.000007394  | -0.000028436 |
| 10               | 1                | -0.000045753           | -0.000046144 | -0.000008698 |
| 11               | 1                | -0.000004451           | 0.000042230  | 0.000029853  |
| 12               | 1                | -0.000036323           | 0.000020233  | -0.000028353 |
| 13               | 1                | 0.000020071            | 0.000017245  | 0.000000348  |
| 14               | 35               | -0.000011934           | 0.000096266  | -0.000030696 |
| 15               | 1                | 0.000125110            | -0.000041417 | -0.000044493 |
| 16               | 6                | 0.000041754            | 0.000012383  | 0.000012540  |
| 17               | 6                | -0.000018545           | -0.000023749 | 0.000039848  |
| 18               | 1                | -0.000053588           | 0.000022618  | -0.000023790 |
| 19               | 1                | -0.000017112           | -0.000000722 | -0.000023612 |
| 20               | 1                | 0.000022501            | 0.000003080  | 0.000000893  |
| 21               | 7                | -0.000107530           | -0.000013523 | -0.000177450 |
| 22               | 1                | -0.000044776           | -0.000020638 | 0.000102205  |
| 23               | 1                | 0.000044122            | -0.000172305 | 0.000041158  |
| 24               | 6                | -0.000181780           | 0.000010945  | 0.000244035  |
| 25               | 6                | 0.000162383            | 0.000083634  | -0.000080482 |
| 26               | 8                | -0.000102623           | 0.000017230  | -0.000159498 |
| 27               | 1                | 0.000059572            | -0.000007580 | -0.000074453 |
| 28               | 1                | 0.000069195            | -0.000019950 | -0.000097844 |

|    |   |              |              |              |
|----|---|--------------|--------------|--------------|
| 29 | 1 | -0.000042741 | 0.000134438  | 0.000127023  |
| 30 | 6 | 0.000012989  | -0.000107754 | 0.000071747  |
| 31 | 1 | -0.000038368 | -0.000025427 | -0.000040473 |
| 32 | 1 | 0.000022767  | -0.000003346 | 0.000002024  |
| 33 | 1 | -0.000018397 | 0.000001266  | -0.000012350 |

-----  
Cartesian Forces: Max 0.000244035 RMS 0.000073214

GradGradGradGradGradGradGradGradGradGradGradGradGradGradGradGradGradGradGrad

Berny optimization.

Using GEDIIS/GDIIS optimizer.

FormGI is forming the generalized inverse of G from B-inverse, IUseBI=4.

GSVD: received Info= 1 from GESDD.

Internal Forces: Max 0.000300065 RMS 0.000073288

Search for a local minimum.

Step number 33 out of a maximum of 172

All quantities printed in internal units (Hartrees-Bohrs-Radians)

Mixed Optimization -- En-DIIS/RFO-DIIS

Swapping is turned off.

Update second derivatives using D2CorX and points 30 31 32 33

DE= -2.18D-05 DEPred=-1.61D-05 R= 1.36D+00

TightC=F SS= 1.41D+00 RLast= 8.15D-02 DXNew= 1.7446D+00 2.4453D-01

Trust test= 1.36D+00 RLast= 8.15D-02 DXMaxT set to 1.04D+00

ITU= 1 1 1 1 1 1 1 0 0-1 1-1 1 1 1 1 1 1 1 1 1

ITU= 1 0-1-1 1 1 1-1 1 0 0-1 0

|                 |         |         |         |         |         |
|-----------------|---------|---------|---------|---------|---------|
| Eigenvalues --- | 0.00059 | 0.00161 | 0.00226 | 0.00435 | 0.00643 |
| Eigenvalues --- | 0.00720 | 0.00733 | 0.01180 | 0.01513 | 0.01888 |
| Eigenvalues --- | 0.01983 | 0.02176 | 0.02363 | 0.02377 | 0.02463 |
| Eigenvalues --- | 0.02684 | 0.02855 | 0.03011 | 0.03082 | 0.03192 |
| Eigenvalues --- | 0.03448 | 0.03666 | 0.03743 | 0.03876 | 0.04089 |
| Eigenvalues --- | 0.04400 | 0.04419 | 0.05265 | 0.05436 | 0.05462 |
| Eigenvalues --- | 0.05740 | 0.05848 | 0.05957 | 0.07605 | 0.08641 |
| Eigenvalues --- | 0.08889 | 0.09535 | 0.10383 | 0.11505 | 0.12316 |
| Eigenvalues --- | 0.12836 | 0.13162 | 0.14362 | 0.15861 | 0.15940 |
| Eigenvalues --- | 0.16001 | 0.16003 | 0.16005 | 0.16020 | 0.16058 |
| Eigenvalues --- | 0.16149 | 0.18790 | 0.21298 | 0.21938 | 0.22182 |
| Eigenvalues --- | 0.23003 | 0.23502 | 0.25325 | 0.26022 | 0.27635 |
| Eigenvalues --- | 0.28114 | 0.29441 | 0.30395 | 0.31802 | 0.32310 |
| Eigenvalues --- | 0.33655 | 0.34282 | 0.34336 | 0.34371 | 0.34546 |
| Eigenvalues --- | 0.34665 | 0.34733 | 0.35083 | 0.35128 | 0.35311 |
| Eigenvalues --- | 0.35562 | 0.35644 | 0.35881 | 0.35895 | 0.36417 |
| Eigenvalues --- | 0.36622 | 0.39161 | 0.39604 | 0.41867 | 0.42467 |
| Eigenvalues --- | 0.44633 | 0.45498 | 0.46378 | 0.49487 | 0.54737 |
| Eigenvalues --- | 0.58051 | 0.60622 | 1.29107 |         |         |

En-DIIS/RFO-DIIS IScMMF= 0 using points: 33 32 31 30 29  
 RFO step: Lambda=-1.73085268D-06.  
 DidBck=F Rises=F RFO-DIIS coefs: 1.16039 -0.07202 -0.12518 0.02955  
 0.00726

Iteration 1 RMS(Cart)= 0.01305436 RMS(Int)= 0.00006355  
 Iteration 2 RMS(Cart)= 0.00008839 RMS(Int)= 0.00003094  
 Iteration 3 RMS(Cart)= 0.00000001 RMS(Int)= 0.00003094

| Variable | Old X   | -DE/DX   | Delta X<br>(Linear) | Delta X<br>(Quad) | Delta X<br>(Total) | New X   |
|----------|---------|----------|---------------------|-------------------|--------------------|---------|
| R1       | 2.56478 | 0.00001  | -0.00001            | 0.00001           | 0.00000            | 2.56478 |
| R2       | 2.62136 | 0.00000  | 0.00007             | 0.00000           | 0.00007            | 2.62144 |
| R3       | 2.03394 | 0.00000  | -0.00001            | 0.00000           | -0.00001           | 2.03393 |
| R4       | 2.62503 | 0.00002  | -0.00010            | -0.00002          | -0.00012           | 2.62491 |
| R5       | 2.03070 | 0.00001  | 0.00003             | 0.00001           | 0.00003            | 2.03073 |
| R6       | 2.54368 | 0.00002  | 0.00026             | 0.00001           | 0.00027            | 2.54395 |
| R7       | 2.69905 | 0.00000  | 0.00006             | 0.00004           | 0.00010            | 2.69915 |
| R8       | 2.52117 | -0.00020 | -0.00009            | -0.00016          | -0.00025           | 2.52092 |
| R9       | 2.09232 | 0.00005  | 0.00016             | 0.00013           | 0.00029            | 2.09261 |
| R10      | 2.78526 | -0.00004 | -0.00020            | 0.00000           | -0.00020           | 2.78506 |
| R11      | 2.89683 | -0.00007 | 0.00018             | -0.00010          | 0.00008            | 2.89691 |
| R12      | 2.06028 | 0.00001  | -0.00007            | 0.00001           | -0.00006           | 2.06022 |
| R13      | 2.06138 | 0.00001  | 0.00004             | 0.00000           | 0.00004            | 2.06142 |
| R14      | 2.06939 | 0.00003  | 0.00005             | 0.00005           | 0.00010            | 2.06950 |
| R15      | 2.07953 | -0.00001 | 0.00018             | -0.00001          | 0.00017            | 2.07970 |
| R16      | 2.75554 | -0.00017 | -0.00045            | -0.00039          | -0.00085           | 2.75469 |
| R17      | 4.26009 | -0.00009 | -0.00056            | -0.00182          | -0.00238           | 4.25771 |
| R18      | 2.50646 | 0.00002  | 0.00000             | 0.00002           | 0.00002            | 2.50648 |
| R19      | 2.05752 | -0.00005 | 0.00012             | -0.00008          | 0.00004            | 2.05756 |
| R20      | 2.04354 | 0.00000  | 0.00001             | 0.00000           | 0.00001            | 2.04355 |
| R21      | 2.04722 | -0.00002 | 0.00001             | -0.00003          | -0.00002           | 2.04720 |
| R22      | 1.91437 | 0.00004  | -0.00002            | 0.00007           | 0.00006            | 1.91443 |
| R23      | 1.92325 | 0.00005  | -0.00016            | 0.00020           | 0.00003            | 1.92328 |
| R24      | 4.13593 | -0.00010 | 0.00022             | 0.00030           | 0.00053            | 4.13645 |
| R25      | 2.76846 | -0.00001 | -0.00001            | -0.00082          | -0.00074           | 2.76772 |
| R26      | 2.73096 | -0.00006 | -0.00047            | 0.00037           | -0.00014           | 2.73082 |
| R27      | 2.05476 | 0.00008  | 0.00003             | 0.00021           | 0.00024            | 2.05500 |
| R28      | 2.05223 | 0.00003  | 0.00005             | -0.00003          | 0.00003            | 2.05225 |
| R29      | 2.75112 | -0.00001 | -0.00061            | -0.00020          | -0.00086           | 2.75026 |
| R30      | 2.05731 | -0.00003 | -0.00014            | -0.00016          | -0.00029           | 2.05702 |
| R31      | 2.84156 | -0.00001 | 0.00018             | 0.00012           | 0.00030            | 2.84186 |
| R32      | 2.06734 | -0.00003 | -0.00003            | 0.00002           | -0.00002           | 2.06732 |
| R33      | 2.06777 | 0.00001  | 0.00000             | 0.00003           | 0.00003            | 2.06780 |
| R34      | 2.06554 | -0.00001 | -0.00002            | -0.00003          | -0.00005           | 2.06550 |
| A1       | 1.87285 | -0.00005 | -0.00003            | -0.00014          | -0.00017           | 1.87268 |

|     |         |          |          |          |          |         |
|-----|---------|----------|----------|----------|----------|---------|
| A2  | 2.27902 | 0.00004  | 0.00005  | 0.00018  | 0.00023  | 2.27925 |
| A3  | 2.13126 | 0.00001  | -0.00002 | -0.00003 | -0.00006 | 2.13121 |
| A4  | 1.86478 | -0.00003 | 0.00011  | -0.00002 | 0.00009  | 1.86487 |
| A5  | 2.27603 | 0.00001  | -0.00009 | -0.00014 | -0.00022 | 2.27580 |
| A6  | 2.14235 | 0.00003  | -0.00002 | 0.00015  | 0.00013  | 2.14248 |
| A7  | 1.89696 | 0.00002  | -0.00011 | 0.00012  | 0.00001  | 1.89697 |
| A8  | 2.25271 | -0.00005 | -0.00005 | -0.00015 | -0.00020 | 2.25252 |
| A9  | 2.13350 | 0.00003  | 0.00016  | 0.00002  | 0.00018  | 2.13368 |
| A10 | 1.89013 | -0.00003 | 0.00003  | -0.00019 | -0.00016 | 1.88997 |
| A11 | 2.14544 | 0.00022  | -0.00104 | 0.00055  | -0.00049 | 2.14495 |
| A12 | 2.24759 | -0.00019 | 0.00101  | -0.00038 | 0.00063  | 2.24821 |
| A13 | 1.90004 | 0.00010  | -0.00001 | 0.00024  | 0.00023  | 1.90027 |
| A14 | 2.20315 | 0.00014  | 0.00038  | 0.00006  | 0.00044  | 2.20359 |
| A15 | 2.17937 | -0.00024 | -0.00041 | -0.00032 | -0.00073 | 2.17864 |
| A16 | 1.95879 | 0.00012  | -0.00009 | 0.00045  | 0.00036  | 1.95915 |
| A17 | 1.87418 | -0.00014 | -0.00036 | -0.00070 | -0.00106 | 1.87312 |
| A18 | 1.89043 | 0.00003  | 0.00030  | -0.00001 | 0.00029  | 1.89071 |
| A19 | 1.90715 | 0.00002  | 0.00044  | 0.00014  | 0.00058  | 1.90773 |
| A20 | 1.92911 | -0.00007 | -0.00010 | -0.00013 | -0.00023 | 1.92888 |
| A21 | 1.90269 | 0.00003  | -0.00021 | 0.00024  | 0.00003  | 1.90272 |
| A22 | 1.91621 | 0.00003  | -0.00061 | 0.00004  | -0.00058 | 1.91563 |
| A23 | 1.89127 | 0.00009  | -0.00031 | 0.00030  | -0.00001 | 1.89126 |
| A24 | 1.88251 | -0.00023 | 0.00042  | -0.00064 | -0.00022 | 1.88229 |
| A25 | 1.87498 | -0.00002 | -0.00008 | 0.00022  | 0.00014  | 1.87512 |
| A26 | 1.89914 | 0.00013  | -0.00004 | 0.00007  | 0.00002  | 1.89916 |
| A27 | 1.99910 | 0.00000  | 0.00057  | 0.00002  | 0.00059  | 1.99970 |
| A28 | 2.16100 | 0.00000  | -0.00022 | -0.00001 | -0.00023 | 2.16077 |
| A29 | 1.94585 | 0.00002  | 0.00001  | 0.00000  | 0.00001  | 1.94586 |
| A30 | 2.17633 | -0.00001 | 0.00021  | 0.00001  | 0.00022  | 2.17655 |
| A31 | 2.07356 | 0.00003  | -0.00006 | 0.00010  | 0.00005  | 2.07361 |
| A32 | 2.16493 | -0.00003 | 0.00002  | -0.00009 | -0.00007 | 2.16486 |
| A33 | 2.04469 | 0.00000  | 0.00004  | -0.00002 | 0.00002  | 2.04472 |
| A34 | 1.94158 | 0.00009  | 0.00021  | -0.00072 | -0.00053 | 1.94105 |
| A35 | 1.91783 | -0.00030 | 0.00001  | -0.00063 | -0.00063 | 1.91720 |
| A36 | 1.89121 | 0.00008  | 0.00000  | -0.00032 | -0.00031 | 1.89091 |
| A37 | 2.08830 | -0.00008 | -0.00061 | -0.00004 | -0.00075 | 2.08755 |
| A38 | 2.07558 | 0.00015  | 0.00083  | -0.00035 | 0.00058  | 2.07616 |
| A39 | 1.99636 | 0.00008  | 0.00027  | 0.00001  | 0.00031  | 1.99667 |
| A40 | 2.00200 | -0.00003 | 0.00003  | 0.00053  | 0.00054  | 2.00255 |
| A41 | 2.03026 | -0.00008 | -0.00025 | 0.00003  | -0.00022 | 2.03004 |
| A42 | 2.02360 | 0.00005  | 0.00118  | -0.00042 | 0.00082  | 2.02442 |
| A43 | 2.13366 | 0.00004  | -0.00004 | 0.00015  | 0.00006  | 2.13372 |
| A44 | 1.96200 | -0.00009 | 0.00062  | -0.00083 | -0.00023 | 1.96177 |
| A45 | 2.02670 | 0.00015  | 0.00023  | 0.00039  | 0.00067  | 2.02737 |

|     |          |          |          |          |          |          |
|-----|----------|----------|----------|----------|----------|----------|
| A46 | 2.04318  | -0.00009 | -0.00120 | 0.00027  | -0.00094 | 2.04225  |
| A47 | 2.54044  | 0.00007  | -0.00070 | -0.00082 | -0.00135 | 2.53909  |
| A48 | 2.50423  | -0.00015 | -0.00185 | -0.00240 | -0.00401 | 2.50022  |
| A49 | 1.93286  | -0.00007 | -0.00017 | -0.00010 | -0.00027 | 1.93259  |
| A50 | 1.91649  | 0.00004  | -0.00015 | 0.00017  | 0.00003  | 1.91652  |
| A51 | 1.94355  | -0.00002 | 0.00012  | -0.00015 | -0.00003 | 1.94352  |
| A52 | 1.87821  | 0.00002  | -0.00012 | 0.00023  | 0.00011  | 1.87832  |
| A53 | 1.89517  | 0.00004  | 0.00021  | -0.00005 | 0.00016  | 1.89533  |
| A54 | 1.89596  | 0.00000  | 0.00012  | -0.00010 | 0.00002  | 1.89597  |
| A55 | 3.47707  | -0.00008 | -0.00002 | 0.00576  | 0.00574  | 3.48280  |
| A56 | 2.53877  | -0.00023 | -0.00070 | -0.00223 | -0.00289 | 2.53588  |
| A57 | 2.93117  | 0.00010  | 0.00295  | 0.00731  | 0.01026  | 2.94143  |
| A58 | 3.08200  | 0.00009  | -0.00042 | 0.00540  | 0.00501  | 3.08701  |
| D1  | 0.00236  | 0.00002  | 0.00007  | 0.00053  | 0.00060  | 0.00296  |
| D2  | -3.13087 | 0.00000  | 0.00046  | 0.00111  | 0.00157  | -3.12930 |
| D3  | 3.13312  | 0.00004  | 0.00029  | 0.00028  | 0.00057  | 3.13369  |
| D4  | -0.00012 | 0.00002  | 0.00068  | 0.00086  | 0.00154  | 0.00143  |
| D5  | -0.00451 | 0.00002  | -0.00043 | 0.00000  | -0.00042 | -0.00494 |
| D6  | -3.10947 | 0.00003  | 0.00070  | 0.00055  | 0.00125  | -3.10822 |
| D7  | -3.13639 | 0.00000  | -0.00062 | 0.00022  | -0.00040 | -3.13679 |
| D8  | 0.04184  | 0.00001  | 0.00051  | 0.00076  | 0.00127  | 0.04311  |
| D9  | 0.00055  | -0.00005 | 0.00030  | -0.00088 | -0.00058 | -0.00002 |
| D10 | -3.13547 | -0.00001 | 0.00038  | 0.00038  | 0.00076  | -3.13471 |
| D11 | 3.13458  | -0.00003 | -0.00005 | -0.00140 | -0.00146 | 3.13313  |
| D12 | -0.00144 | 0.00000  | 0.00002  | -0.00014 | -0.00012 | -0.00156 |
| D13 | -0.00338 | 0.00006  | -0.00057 | 0.00089  | 0.00032  | -0.00306 |
| D14 | -3.13740 | 0.00005  | -0.00003 | 0.00257  | 0.00253  | -3.13486 |
| D15 | 3.13310  | 0.00003  | -0.00064 | -0.00027 | -0.00091 | 3.13219  |
| D16 | -0.00091 | 0.00002  | -0.00010 | 0.00141  | 0.00130  | 0.00039  |
| D17 | -0.00576 | -0.00004 | -0.00376 | -0.00658 | -0.01034 | -0.01610 |
| D18 | 3.13549  | -0.00005 | -0.00303 | -0.00670 | -0.00973 | 3.12576  |
| D19 | -3.14112 | 0.00000  | -0.00368 | -0.00517 | -0.00885 | 3.13322  |
| D20 | 0.00013  | -0.00001 | -0.00295 | -0.00528 | -0.00823 | -0.00810 |
| D21 | 0.00487  | -0.00005 | 0.00062  | -0.00056 | 0.00006  | 0.00493  |
| D22 | 3.11045  | -0.00005 | -0.00048 | -0.00108 | -0.00155 | 3.10889  |
| D23 | 3.13831  | -0.00003 | 0.00003  | -0.00236 | -0.00233 | 3.13598  |
| D24 | -0.03930 | -0.00003 | -0.00107 | -0.00288 | -0.00395 | -0.04325 |
| D25 | 1.32585  | 0.00000  | -0.00056 | -0.00054 | -0.00110 | 1.32475  |
| D26 | -2.86114 | 0.00001  | -0.00031 | -0.00055 | -0.00086 | -2.86200 |
| D27 | -0.80867 | -0.00001 | -0.00059 | -0.00066 | -0.00124 | -0.80992 |
| D28 | -1.77349 | 0.00000  | 0.00073  | 0.00008  | 0.00081  | -1.77268 |
| D29 | 0.32271  | 0.00001  | 0.00099  | 0.00006  | 0.00105  | 0.32376  |
| D30 | 2.37517  | -0.00001 | 0.00071  | -0.00005 | 0.00067  | 2.37584  |
| D31 | -1.08838 | -0.00009 | -0.00094 | -0.00285 | -0.00379 | -1.09218 |

|     |          |          |          |          |          |          |
|-----|----------|----------|----------|----------|----------|----------|
| D32 | 0.95459  | -0.00005 | -0.00156 | -0.00239 | -0.00395 | 0.95064  |
| D33 | 3.12789  | -0.00014 | -0.00079 | -0.00258 | -0.00337 | 3.12452  |
| D34 | 3.11787  | -0.00001 | -0.00073 | -0.00235 | -0.00307 | 3.11479  |
| D35 | -1.12235 | 0.00003  | -0.00134 | -0.00189 | -0.00323 | -1.12558 |
| D36 | 1.05096  | -0.00005 | -0.00057 | -0.00208 | -0.00265 | 1.04831  |
| D37 | 1.02403  | -0.00002 | -0.00069 | -0.00265 | -0.00334 | 1.02069  |
| D38 | 3.06700  | 0.00003  | -0.00131 | -0.00219 | -0.00350 | 3.06350  |
| D39 | -1.04288 | -0.00006 | -0.00054 | -0.00238 | -0.00292 | -1.04580 |
| D40 | 2.94017  | 0.00003  | 0.00060  | -0.00007 | 0.00054  | 2.94071  |
| D41 | -1.24867 | -0.00001 | 0.00075  | -0.00134 | -0.00060 | -1.24927 |
| D42 | 0.86236  | 0.00005  | 0.00112  | 0.00021  | 0.00134  | 0.86370  |
| D43 | 2.95670  | 0.00001  | 0.00126  | -0.00106 | 0.00020  | 2.95690  |
| D44 | -1.23594 | -0.00001 | 0.00088  | -0.00014 | 0.00075  | -1.23519 |
| D45 | 0.85840  | -0.00006 | 0.00102  | -0.00141 | -0.00039 | 0.85801  |
| D46 | -3.14115 | -0.00003 | 0.00028  | -0.00105 | -0.00077 | 3.14127  |
| D47 | 0.00055  | -0.00001 | -0.00012 | -0.00077 | -0.00088 | -0.00033 |
| D48 | 0.00083  | -0.00001 | -0.00054 | -0.00092 | -0.00146 | -0.00063 |
| D49 | -3.14065 | 0.00000  | -0.00094 | -0.00064 | -0.00158 | 3.14096  |
| D50 | 2.31874  | 0.00008  | -0.00064 | -0.00182 | -0.00250 | 2.31624  |
| D51 | -1.32715 | 0.00010  | -0.00566 | -0.01200 | -0.01764 | -1.34479 |
| D52 | -1.96269 | -0.00010 | -0.00071 | -0.00581 | -0.00654 | -1.96923 |
| D53 | 0.67460  | -0.00009 | -0.00574 | -0.01599 | -0.02168 | 0.65292  |
| D54 | -2.71389 | 0.00000  | 0.00068  | -0.00062 | 0.00005  | -2.71384 |
| D55 | -0.01107 | -0.00001 | 0.00026  | -0.00058 | -0.00031 | -0.01139 |
| D56 | -0.02897 | -0.00005 | 0.00054  | -0.00148 | -0.00093 | -0.02989 |
| D57 | 2.67385  | -0.00006 | 0.00013  | -0.00144 | -0.00130 | 2.67256  |
| D58 | 0.57065  | -0.00008 | -0.00223 | -0.00643 | -0.00873 | 0.56191  |
| D59 | -1.83993 | -0.00001 | -0.00219 | -0.00712 | -0.00940 | -1.84933 |
| D60 | 1.85082  | -0.00011 | 0.00090  | 0.00464  | 0.00559  | 1.85641  |
| D61 | -0.56872 | -0.00004 | 0.00181  | 0.00475  | 0.00660  | -0.56212 |
| D62 | 2.55027  | 0.00001  | 0.00083  | 0.00085  | 0.00166  | 2.55194  |
| D63 | -1.66109 | 0.00001  | 0.00047  | 0.00119  | 0.00165  | -1.65944 |
| D64 | 0.43958  | 0.00002  | 0.00060  | 0.00108  | 0.00166  | 0.44124  |
| D65 | 1.35072  | -0.00004 | 0.00081  | 0.00017  | 0.00099  | 1.35170  |
| D66 | -2.86064 | -0.00004 | 0.00046  | 0.00051  | 0.00097  | -2.85967 |
| D67 | -0.75998 | -0.00003 | 0.00058  | 0.00040  | 0.00099  | -0.75899 |
| D68 | -1.03470 | 0.00004  | 0.00097  | 0.00073  | 0.00171  | -1.03300 |
| D69 | 1.03712  | 0.00004  | 0.00062  | 0.00107  | 0.00169  | 1.03881  |
| D70 | 3.13779  | 0.00005  | 0.00074  | 0.00096  | 0.00171  | 3.13949  |

| Item                 | Value    | Threshold | Converged? |
|----------------------|----------|-----------|------------|
| Maximum Force        | 0.000300 | 0.000450  | YES        |
| RMS Force            | 0.000073 | 0.000300  | YES        |
| Maximum Displacement | 0.086072 | 0.001800  | NO         |
| RMS Displacement     | 0.013033 | 0.001200  | NO         |

Predicted change in Energy=-3.969900D-06

GradGradGradGradGradGradGradGradGradGradGradGradGradGradGradGradGradGradGrad

Input orientation:

| Center<br>Number | Atomic<br>Number | Atomic<br>Type | Coordinates (Angstroms) |           |           |
|------------------|------------------|----------------|-------------------------|-----------|-----------|
|                  |                  |                | X                       | Y         | Z         |
| 1                | 6                | 0              | -2.639462               | 2.091002  | -0.193641 |
| 2                | 6                | 0              | -3.533029               | 1.115743  | 0.110448  |
| 3                | 7                | 0              | -2.828443               | -0.080974 | 0.139797  |
| 4                | 6                | 0              | -1.536510               | 0.172103  | -0.141488 |
| 5                | 7                | 0              | -1.402596               | 1.482816  | -0.350503 |
| 6                | 6                | 0              | -0.128751               | 2.161969  | -0.647367 |
| 7                | 6                | 0              | 0.449563                | 2.873856  | 0.580965  |
| 8                | 1                | 0              | -2.775720               | 3.151217  | -0.319417 |
| 9                | 1                | 0              | -4.589868               | 1.172934  | 0.296510  |
| 10               | 1                | 0              | 0.573775                | 1.400408  | -0.986573 |
| 11               | 1                | 0              | -0.299718               | 2.873476  | -1.456375 |
| 12               | 1                | 0              | -0.238244               | 3.659293  | 0.911603  |
| 13               | 1                | 0              | 0.532159                | 2.142106  | 1.398817  |
| 14               | 35               | 0              | 0.116390                | -2.693334 | -0.127288 |
| 15               | 1                | 0              | -0.764432               | -0.620417 | -0.186792 |
| 16               | 6                | 0              | -3.306623               | -1.400709 | 0.403920  |
| 17               | 6                | 0              | -4.569760               | -1.683799 | 0.693059  |
| 18               | 1                | 0              | -2.506087               | -2.135731 | 0.337590  |
| 19               | 1                | 0              | -4.843692               | -2.713283 | 0.878927  |
| 20               | 1                | 0              | -5.357877               | -0.943245 | 0.756782  |
| 21               | 7                | 0              | 1.711439                | 3.488831  | 0.188008  |
| 22               | 1                | 0              | 2.045900                | 4.126710  | 0.900440  |
| 23               | 1                | 0              | 2.416971                | 2.769255  | 0.045654  |
| 24               | 6                | 0              | 3.444973                | -0.317694 | -1.181539 |
| 25               | 6                | 0              | 3.267143                | -0.585023 | 0.247448  |
| 26               | 8                | 0              | 2.761294                | 0.643490  | -0.346677 |
| 27               | 1                | 0              | 4.412714                | 0.014878  | -1.549557 |
| 28               | 1                | 0              | 2.809344                | -0.832623 | -1.895843 |
| 29               | 1                | 0              | 2.469856                | -1.279071 | 0.507304  |
| 30               | 6                | 0              | 4.387581                | -0.429855 | 1.238458  |
| 31               | 1                | 0              | 4.005541                | -0.085930 | 2.204142  |
| 32               | 1                | 0              | 4.875831                | -1.395645 | 1.400356  |
| 33               | 1                | 0              | 5.135453                | 0.284614  | 0.885046  |

Distance matrix (angstroms):

1 2 3 4 5

|    |    |          |          |          |          |          |
|----|----|----------|----------|----------|----------|----------|
| 1  | C  | 0.000000 |          |          |          |          |
| 2  | C  | 1.357225 | 0.000000 |          |          |          |
| 3  | N  | 2.205533 | 1.389042 | 0.000000 |          |          |
| 4  | C  | 2.213910 | 2.222614 | 1.346201 | 0.000000 |          |
| 5  | N  | 1.387204 | 2.210421 | 2.172296 | 1.334013 | 0.000000 |
| 6  | C  | 2.552367 | 3.641151 | 3.597048 | 2.489431 | 1.473791 |
| 7  | C  | 3.279474 | 4.378742 | 4.435197 | 3.430145 | 2.496621 |
| 8  | H  | 1.076310 | 2.213923 | 3.265076 | 3.231474 | 2.161018 |
| 9  | H  | 2.210696 | 1.074616 | 2.167825 | 3.242915 | 3.267010 |
| 10 | H  | 3.380910 | 4.260319 | 3.877923 | 2.583836 | 2.077840 |
| 11 | H  | 2.771492 | 3.999857 | 4.203688 | 3.249000 | 2.091227 |
| 12 | H  | 3.073589 | 4.238762 | 4.614587 | 3.867169 | 2.772307 |
| 13 | H  | 3.549326 | 4.386236 | 4.221476 | 3.245434 | 2.690365 |
| 14 | Br | 5.521684 | 5.280516 | 3.945605 | 3.308022 | 4.449423 |
| 15 | H  | 3.296601 | 3.281422 | 2.158193 | 1.107359 | 2.204006 |
| 16 | C  | 3.604751 | 2.543604 | 1.428327 | 2.429919 | 3.536833 |
| 17 | C  | 4.331445 | 3.041659 | 2.430501 | 3.652594 | 4.598630 |
| 18 | H  | 4.262073 | 3.417351 | 2.089273 | 2.548664 | 3.845133 |
| 19 | H  | 5.393532 | 4.119447 | 3.396556 | 4.506013 | 5.564161 |
| 20 | H  | 4.183269 | 2.826173 | 2.742667 | 4.080898 | 4.770335 |
| 21 | N  | 4.585839 | 5.756909 | 5.775497 | 4.653862 | 3.743168 |
| 22 | H  | 5.224341 | 6.388619 | 6.484011 | 5.436745 | 4.521854 |
| 23 | H  | 5.107328 | 6.175823 | 5.970513 | 4.733945 | 4.049810 |
| 24 | C  | 6.618014 | 7.239923 | 6.415428 | 5.112415 | 5.237498 |
| 25 | C  | 6.499512 | 7.010971 | 6.117338 | 4.878483 | 5.141981 |
| 26 | O  | 5.593468 | 6.328545 | 5.657443 | 4.328445 | 4.247642 |
| 27 | H  | 7.475425 | 8.191602 | 7.436226 | 6.115607 | 6.116404 |
| 28 | H  | 6.413623 | 6.931596 | 6.040980 | 4.793087 | 5.048739 |
| 29 | H  | 6.160669 | 6.475125 | 5.444489 | 4.310198 | 4.833191 |
| 30 | C  | 7.601642 | 8.148457 | 7.307515 | 6.112403 | 6.301529 |
| 31 | H  | 7.392189 | 7.915655 | 7.138968 | 6.023528 | 6.183455 |
| 32 | H  | 8.436655 | 8.870166 | 7.916640 | 6.778881 | 7.125285 |
| 33 | H  | 8.054558 | 8.742617 | 8.007039 | 6.751409 | 6.760795 |
|    |    | 6        | 7        | 8        | 9        | 10       |
| 6  | C  | 0.000000 |          |          |          |          |
| 7  | C  | 1.532980 | 0.000000 |          |          |          |
| 8  | H  | 2.844752 | 3.360069 | 0.000000 |          |          |
| 9  | H  | 4.665904 | 5.326341 | 2.753925 | 0.000000 |          |
| 10 | H  | 1.090219 | 2.154914 | 3.837909 | 5.325528 | 0.000000 |
| 11 | H  | 1.090856 | 2.170755 | 2.738686 | 4.936581 | 1.775846 |
| 12 | H  | 2.164337 | 1.095131 | 2.865717 | 5.049450 | 3.060230 |
| 13 | H  | 2.150364 | 1.100528 | 3.861696 | 5.328182 | 2.498387 |
| 14 | Br | 4.889227 | 5.621942 | 6.523802 | 6.105448 | 4.207885 |
| 15 | H  | 2.891002 | 3.777986 | 4.276458 | 4.252487 | 2.552290 |



|    |    |          |          |          |          |          |
|----|----|----------|----------|----------|----------|----------|
| 16 | C  | 4.888430 | 5.693170 | 4.639516 | 2.877828 | 4.983695 |
| 17 | C  | 6.025715 | 6.780736 | 5.255576 | 2.884195 | 6.228118 |
| 18 | H  | 5.009201 | 5.821602 | 5.334434 | 3.910383 | 4.872703 |
| 19 | H  | 6.951858 | 7.702172 | 6.332843 | 3.937806 | 7.053474 |
| 20 | H  | 6.241614 | 6.951800 | 4.958867 | 2.297804 | 6.611845 |
| 21 | N  | 2.417584 | 1.457718 | 4.528362 | 6.714285 | 2.652439 |
| 22 | H  | 3.314366 | 2.054264 | 5.068299 | 7.288548 | 3.627767 |
| 23 | H  | 2.707355 | 2.041615 | 5.219503 | 7.190755 | 2.517262 |
| 24 | C  | 4.382416 | 4.718569 | 7.174512 | 8.304533 | 3.351667 |
| 25 | C  | 4.458559 | 4.473683 | 7.127203 | 8.051425 | 3.566368 |
| 26 | O  | 3.278498 | 3.343524 | 6.078484 | 7.398215 | 2.401590 |
| 27 | H  | 5.103807 | 5.330989 | 7.938731 | 9.262588 | 4.119964 |
| 28 | H  | 4.377062 | 5.043920 | 7.039108 | 7.973519 | 3.288004 |
| 29 | H  | 4.463941 | 4.618854 | 6.915706 | 7.476393 | 3.606439 |
| 30 | C  | 5.538153 | 5.182161 | 8.158673 | 9.167922 | 4.779723 |
| 31 | H  | 5.502410 | 4.903062 | 7.926725 | 8.894090 | 4.915983 |
| 32 | H  | 6.472682 | 6.204183 | 9.065197 | 9.869930 | 5.658890 |
| 33 | H  | 5.795221 | 5.362295 | 8.500283 | 9.783524 | 5.055380 |
|    |    | 11       | 12       | 13       | 14       | 15       |
| 11 | H  | 0.000000 |          |          |          |          |
| 12 | H  | 2.495718 | 0.000000 |          |          |          |
| 13 | H  | 3.062522 | 1.769959 | 0.000000 |          |          |
| 14 | Br | 5.738379 | 6.446777 | 5.087567 | 0.000000 |          |
| 15 | H  | 3.746343 | 4.449637 | 3.439017 | 2.253081 | 0.000000 |
| 16 | C  | 5.547147 | 5.939387 | 5.317669 | 3.697307 | 2.724065 |
| 17 | C  | 6.604702 | 6.881746 | 6.416013 | 4.863346 | 4.047893 |
| 18 | H  | 5.760081 | 6.249393 | 5.353226 | 2.721106 | 2.367386 |
| 19 | H  | 7.570549 | 7.862630 | 7.262566 | 5.061154 | 4.707038 |
| 20 | H  | 6.711960 | 6.886071 | 6.680129 | 5.814808 | 4.700456 |
| 21 | N  | 2.669720 | 2.086603 | 2.161118 | 6.392399 | 4.812103 |
| 22 | H  | 3.553462 | 2.331505 | 2.545280 | 7.161860 | 5.622745 |
| 23 | H  | 3.106018 | 2.931246 | 2.403515 | 5.929794 | 4.654593 |
| 24 | C  | 4.927658 | 5.810659 | 4.603623 | 4.223100 | 4.335926 |
| 25 | C  | 5.252306 | 5.544643 | 4.030263 | 3.809547 | 4.055048 |
| 26 | O  | 3.946398 | 4.435715 | 3.203380 | 4.263572 | 3.748836 |
| 27 | H  | 5.512465 | 6.400819 | 5.317586 | 5.274056 | 5.391064 |
| 28 | H  | 4.857424 | 6.111208 | 4.988925 | 3.720488 | 3.967085 |
| 29 | H  | 5.363787 | 5.646654 | 4.031614 | 2.818093 | 3.372864 |
| 30 | C  | 6.336000 | 6.182737 | 4.637346 | 5.023114 | 5.348915 |
| 31 | H  | 6.379084 | 5.805778 | 4.204411 | 5.230641 | 5.362358 |
| 32 | H  | 7.291955 | 7.207291 | 5.602068 | 5.164297 | 5.910379 |
| 33 | H  | 6.459531 | 6.345533 | 4.990446 | 5.923173 | 6.064368 |
|    |    | 16       | 17       | 18       | 19       | 20       |
| 16 | C  | 0.000000 |          |          |          |          |

|    |   |          |          |          |           |           |
|----|---|----------|----------|----------|-----------|-----------|
| 17 | C | 1.326370 | 0.000000 |          |           |           |
| 18 | H | 1.088813 | 2.142276 | 0.000000 |           |           |
| 19 | H | 2.076310 | 1.081398 | 2.467997 | 0.000000  |           |
| 20 | H | 2.131063 | 1.083333 | 3.119367 | 1.847252  | 0.000000  |
| 21 | N | 7.009648 | 8.152585 | 7.031757 | 9.050599  | 8.363136  |
| 22 | H | 7.710279 | 8.807496 | 7.762445 | 9.708370  | 8.974464  |
| 23 | H | 7.090591 | 8.310429 | 6.955617 | 9.136181  | 8.645034  |
| 24 | C | 7.019306 | 8.343639 | 6.405321 | 8.870532  | 9.035407  |
| 25 | C | 6.626027 | 7.926092 | 5.978546 | 8.409157  | 8.647469  |
| 26 | O | 6.446842 | 7.761552 | 5.994798 | 8.402729  | 8.346035  |
| 27 | H | 8.087529 | 9.412740 | 7.487072 | 9.950953  | 10.084724 |
| 28 | H | 6.558710 | 7.866263 | 5.911017 | 8.354950  | 8.587908  |
| 29 | H | 5.778684 | 7.053687 | 5.051997 | 7.462108  | 7.838904  |
| 30 | C | 7.799987 | 9.061115 | 7.158508 | 9.516287  | 9.770852  |
| 31 | H | 7.644422 | 8.852815 | 7.077216 | 9.325669  | 9.513329  |
| 32 | H | 8.242903 | 9.476417 | 7.494658 | 9.822280  | 10.263899 |
| 33 | H | 8.622090 | 9.904679 | 8.034358 | 10.419729 | 10.565702 |
|    |   | 21       | 22       | 23       | 24        | 25        |
| 21 | N | 0.000000 |          |          |           |           |
| 22 | H | 1.013071 | 0.000000 |          |           |           |
| 23 | H | 1.017757 | 1.646523 | 0.000000 |           |           |
| 24 | C | 4.401185 | 5.103408 | 3.477362 | 0.000000  |           |
| 25 | C | 4.361197 | 4.911035 | 3.466222 | 1.464613  | 0.000000  |
| 26 | O | 3.079618 | 3.768277 | 2.188917 | 1.445090  | 1.455374  |
| 27 | H | 4.731212 | 5.339612 | 3.756898 | 1.087458  | 2.213920  |
| 28 | H | 4.921666 | 5.744304 | 4.110583 | 1.086005  | 2.205580  |
| 29 | H | 4.838392 | 5.436613 | 4.074906 | 2.174233  | 1.088529  |
| 30 | C | 4.860174 | 5.134201 | 3.942131 | 2.599514  | 1.503848  |
| 31 | H | 4.701768 | 4.825574 | 3.915955 | 3.439591  | 2.150110  |
| 32 | H | 5.944852 | 6.225338 | 5.022708 | 3.142533  | 2.138733  |
| 33 | H | 4.740964 | 4.930241 | 3.777323 | 2.737018  | 2.157169  |
|    |   | 26       | 27       | 28       | 29        | 30        |
| 26 | O | 0.000000 |          |          |           |           |
| 27 | H | 2.137583 | 0.000000 |          |           |           |
| 28 | H | 2.140358 | 1.846339 | 0.000000 |           |           |
| 29 | H | 2.123785 | 3.111219 | 2.467728 | 0.000000  |           |
| 30 | C | 2.511879 | 2.823375 | 3.532265 | 2.221132  | 0.000000  |
| 31 | H | 2.930338 | 3.777064 | 4.335702 | 2.580925  | 1.093977  |
| 32 | H | 3.417815 | 3.302430 | 3.930940 | 2.569017  | 1.094234  |
| 33 | H | 2.698622 | 2.553899 | 3.793724 | 3.113391  | 1.093013  |
|    |   | 31       | 32       | 33       |           |           |
| 31 | H | 0.000000 |          |          |           |           |
| 32 | H | 1.766021 | 0.000000 |          |           |           |
| 33 | H | 1.775956 | 1.776574 | 0.000000 |           |           |

Stoichiometry C10H18BrN3O  
 Framework group C1[X(C10H18BrN3O)]  
 Deg. of freedom 93  
 Full point group C1 NOp 1  
 Largest Abelian subgroup C1 NOp 1  
 Largest concise Abelian subgroup C1 NOp 1

Standard orientation:

| Center<br>Number | Atomic<br>Number | Atomic<br>Type | Coordinates (Angstroms) |           |           |
|------------------|------------------|----------------|-------------------------|-----------|-----------|
|                  |                  |                | X                       | Y         | Z         |
| 1                | 6                | 0              | -2.321874               | 2.490988  | -0.250683 |
| 2                | 6                | 0              | -3.319294               | 1.617115  | 0.038385  |
| 3                | 7                | 0              | -2.747679               | 0.351686  | 0.075589  |
| 4                | 6                | 0              | -1.432056               | 0.464790  | -0.186327 |
| 5                | 7                | 0              | -1.155228               | 1.753656  | -0.390728 |
| 6                | 6                | 0              | 0.188358                | 2.292324  | -0.667626 |
| 7                | 6                | 0              | 0.821585                | 2.937503  | 0.570435  |
| 8                | 1                | 0              | -2.341731               | 3.559758  | -0.376296 |
| 9                | 1                | 0              | -4.366517               | 1.787301  | 0.209141  |
| 10               | 1                | 0              | 0.810032                | 1.459923  | -0.998092 |
| 11               | 1                | 0              | 0.106631                | 3.018424  | -1.477605 |
| 12               | 1                | 0              | 0.217231                | 3.792068  | 0.892596  |
| 13               | 1                | 0              | 0.813158                | 2.200756  | 1.387928  |
| 14               | 35               | 0              | -0.096518               | -2.561476 | -0.153812 |
| 15               | 1                | 0              | -0.748881               | -0.405984 | -0.221971 |
| 16               | 6                | 0              | -3.368526               | -0.909231 | 0.330056  |
| 17               | 6                | 0              | -4.658860               | -1.055269 | 0.600185  |
| 18               | 1                | 0              | -2.650584               | -1.725884 | 0.273920  |
| 19               | 1                | 0              | -5.044368               | -2.049494 | 0.779966  |
| 20               | 1                | 0              | -5.363825               | -0.234447 | 0.653906  |
| 21               | 7                | 0              | 2.147800                | 3.413691  | 0.197149  |
| 22               | 1                | 0              | 2.538255                | 4.011683  | 0.915664  |
| 23               | 1                | 0              | 2.774072                | 2.622622  | 0.063644  |
| 24               | 6                | 0              | 3.482876                | -0.556276 | -1.154653 |
| 25               | 6                | 0              | 3.256396                | -0.803606 | 0.271049  |
| 26               | 8                | 0              | 2.894066                | 0.472356  | -0.327909 |
| 27               | 1                | 0              | 4.486019                | -0.329309 | -1.507858 |
| 28               | 1                | 0              | 2.806243                | -0.999710 | -1.879181 |
| 29               | 1                | 0              | 2.385511                | -1.408205 | 0.517859  |
| 30               | 6                | 0              | 4.372319                | -0.770002 | 1.278593  |
| 31               | 1                | 0              | 4.015224                | -0.387490 | 2.239298  |
| 32               | 1                | 0              | 4.751696                | -1.782679 | 1.445644  |
| 33               | 1                | 0              | 5.197645                | -0.139756 | 0.937558  |

```

-----
Rotational constants (GHZ):      0.4188780      0.2910954      0.1817645
Standard basis: 6-311++G(d,p) (5D, 7F)
There are 499 symmetry adapted cartesian basis functions of A symmetry.
There are 482 symmetry adapted basis functions of A symmetry.
482 basis functions, 760 primitive gaussians, 499 cartesian basis functions
71 alpha electrons      71 beta electrons
nuclear repulsion energy      1310.0092143609 Hartrees.
NAtoms= 33 NActive= 33 NUniq= 33 SFac= 1.00D+00 NAtFMM= 60 NAOKFM=F
Big=F
Integral buffers will be 131072 words long.
Raffenetti 2 integral format.
Two-electron integral symmetry is turned on.
One-electron integrals computed using PRISM.
NBasis= 482 RedAO= T EigKep= 3.59D-06 NBF= 482
NBsUse= 482 1.00D-06 EigRej= -1.00D+00 NBFU= 482
Initial guess from the checkpoint file:
"/home/suqian/liuwen/qianmengshijie/nh2po/nh2po.chk"
B after Tr= 0.000000 0.000000 0.000000
Rot= 0.999999 0.000901 -0.000457 0.000465 Ang= 0.13 deg.
ExpMin= 3.50D-02 ExpMax= 4.40D+05 ExpMxC= 1.51D+04 IAcc=3 IRadAn= 5 AccDes=
0.00D+00
Harris functional with IExCor= 402 and IRadAn= 5 diagonalized for initial guess.
HarFok: IExCor= 402 AccDes= 0.00D+00 IRadAn= 5 IDoV= 1 UseB2=F ITyADJ=14
ICtDFT= 3500011 ScaDFX= 1.000000 1.000000 1.000000 1.000000
FoFCou: FMM=F IPFlag= 0 FMFlag= 100000 FMFlg1= 0
NFxFlg= 0 DoJE=T BraDBF=F KetDBF=T FulRan=T
wScrn= 0.000000 ICntrl= 500 IOpCl= 0 I1Cent= 200000004 NGrid=
0
NMat0= 1 NMatS0= 1 NMatT0= 0 NMatD0= 1 NMtDS0= 0
NMtDT0= 0
Petite list used in FoFCou.
Requested convergence on RMS density matrix=1.00D-08 within 128 cycles.
Requested convergence on MAX density matrix=1.00D-06.
Requested convergence on energy=1.00D-06.
No special actions if energy rises.
SCF Done: E(RB3LYP) = -3205.64834267 A.U. after 10 cycles
NFOck= 10 Conv=0.88D-08 -V/T= 2.0018
Calling FoFJK, ICntrl= 2127 FMM=F ISym2X=0 I1Cent= 0 IOpClX= 0 NMat=1 NMatS=1
NMatT=0.
***** Axes restored to original set *****

```

```

-----
Center Atomic Forces (Hartrees/Bohr)
Number Number X Y Z

```

|    |    |              |              |              |
|----|----|--------------|--------------|--------------|
| 1  | 6  | 0.000014211  | -0.000013986 | -0.000079823 |
| 2  | 6  | -0.000079356 | 0.000009492  | -0.000030526 |
| 3  | 7  | 0.000098379  | 0.000076199  | 0.000033614  |
| 4  | 6  | -0.000173202 | -0.000127048 | 0.000064425  |
| 5  | 7  | -0.000001070 | -0.000067881 | 0.000080478  |
| 6  | 6  | 0.000086883  | 0.000070662  | -0.000013893 |
| 7  | 6  | -0.000232826 | -0.000104593 | 0.000060843  |
| 8  | 1  | 0.000003735  | -0.000002332 | 0.000001475  |
| 9  | 1  | 0.000002396  | -0.000005680 | -0.000012351 |
| 10 | 1  | 0.000017603  | 0.000000938  | 0.000036116  |
| 11 | 1  | -0.000022241 | 0.000018522  | 0.000024826  |
| 12 | 1  | -0.000016635 | -0.000006170 | 0.000012655  |
| 13 | 1  | 0.000058349  | 0.000052587  | -0.000031713 |
| 14 | 35 | 0.000086492  | 0.000080276  | -0.000018391 |
| 15 | 1  | 0.000097748  | 0.000031203  | -0.000073292 |
| 16 | 6  | 0.000027158  | 0.000057742  | 0.000039238  |
| 17 | 6  | -0.000005334 | -0.000041589 | 0.000020917  |
| 18 | 1  | -0.000057910 | 0.000019129  | -0.000035795 |
| 19 | 1  | -0.000012634 | 0.000003126  | -0.000012334 |
| 20 | 1  | 0.000009716  | 0.000002018  | -0.000002859 |
| 21 | 7  | 0.000112161  | 0.000042024  | -0.000120196 |
| 22 | 1  | -0.000009980 | 0.000008358  | 0.000059237  |
| 23 | 1  | 0.000067592  | -0.000150863 | 0.000037272  |
| 24 | 6  | -0.000070403 | -0.000143110 | -0.000104181 |
| 25 | 6  | 0.000165163  | -0.000019677 | 0.000245317  |
| 26 | 8  | -0.000035333 | 0.000228110  | -0.000123887 |
| 27 | 1  | 0.000002931  | 0.000035204  | -0.000023849 |
| 28 | 1  | -0.000009995 | -0.000027463 | 0.000015855  |
| 29 | 1  | -0.000077071 | 0.000034677  | -0.000069869 |
| 30 | 6  | -0.000055930 | -0.000066268 | 0.000049917  |
| 31 | 1  | 0.000002535  | 0.000003271  | -0.000009113 |
| 32 | 1  | 0.000022459  | 0.000004041  | -0.000007539 |
| 33 | 1  | -0.000015593 | -0.000000919 | -0.000012576 |

-----  
Cartesian Forces: Max 0.000245317 RMS 0.000071632

GradGradGradGradGradGradGradGradGradGradGradGradGradGradGradGradGradGradGradGrad

Berny optimization.

Using GEDIIS/GDIIS optimizer.

FormGI is forming the generalized inverse of G from B-inverse, IUseBI=4.

GSVD: received Info= 1 from GESDD.

Internal Forces: Max 0.000501123 RMS 0.000108980

Search for a local minimum.

Step number 34 out of a maximum of 172

All quantities printed in internal units (Hartrees-Bohrs-Radians)

Mixed Optimization -- En-DIIS/RFO-DIIS

Swapping is turned off.

Update second derivatives using D2CorX and points 30 31 32 33 34

DE= -4.29D-06 DEPred=-3.97D-06 R= 1.08D+00

TightC=F SS= 1.41D+00 RLast= 4.25D-02 DXNew= 1.7446D+00 1.2749D-01

Trust test= 1.08D+00 RLast= 4.25D-02 DXMaxT set to 1.04D+00

ITU= 1 1 1 1 1 1 1 1 0 0-1 1-1 1 1 1 1 1 1 1

ITU= 1 1 0-1-1 1 1 1-1 1 0 0-1 0

|                 |         |         |         |         |         |
|-----------------|---------|---------|---------|---------|---------|
| Eigenvalues --- | 0.00052 | 0.00116 | 0.00221 | 0.00450 | 0.00605 |
| Eigenvalues --- | 0.00693 | 0.00729 | 0.01186 | 0.01522 | 0.01888 |
| Eigenvalues --- | 0.02004 | 0.02175 | 0.02352 | 0.02375 | 0.02478 |
| Eigenvalues --- | 0.02674 | 0.02859 | 0.02869 | 0.03086 | 0.03123 |
| Eigenvalues --- | 0.03464 | 0.03526 | 0.03715 | 0.03900 | 0.04060 |
| Eigenvalues --- | 0.04408 | 0.04425 | 0.05187 | 0.05329 | 0.05460 |
| Eigenvalues --- | 0.05736 | 0.05762 | 0.05938 | 0.07639 | 0.08668 |
| Eigenvalues --- | 0.08902 | 0.09562 | 0.10308 | 0.11827 | 0.12286 |
| Eigenvalues --- | 0.12762 | 0.13230 | 0.14732 | 0.15886 | 0.15986 |
| Eigenvalues --- | 0.16001 | 0.16005 | 0.16019 | 0.16035 | 0.16106 |
| Eigenvalues --- | 0.16148 | 0.20193 | 0.21797 | 0.22056 | 0.22497 |
| Eigenvalues --- | 0.22987 | 0.23428 | 0.24258 | 0.26034 | 0.27722 |
| Eigenvalues --- | 0.28274 | 0.29306 | 0.30353 | 0.31809 | 0.32353 |
| Eigenvalues --- | 0.33721 | 0.34278 | 0.34345 | 0.34357 | 0.34546 |
| Eigenvalues --- | 0.34661 | 0.34731 | 0.35055 | 0.35096 | 0.35313 |
| Eigenvalues --- | 0.35590 | 0.35664 | 0.35843 | 0.35899 | 0.36419 |
| Eigenvalues --- | 0.36631 | 0.39429 | 0.41445 | 0.41882 | 0.42630 |
| Eigenvalues --- | 0.44809 | 0.45508 | 0.46388 | 0.49486 | 0.54742 |
| Eigenvalues --- | 0.58350 | 0.60618 | 1.37231 |         |         |

En-DIIS/RFO-DIIS IScMMF= 0 using points: 34 33 32 31 30

RFO step: Lambda=-2.27693625D-06.

DidBck=F Rises=F RFO-DIIS coefs: 1.33369 -0.19436 -0.13079 -0.06294

0.05440

Iteration 1 RMS(Cart)= 0.01569011 RMS(Int)= 0.00010077

Iteration 2 RMS(Cart)= 0.00014070 RMS(Int)= 0.00005570

Iteration 3 RMS(Cart)= 0.00000001 RMS(Int)= 0.00005570

| Variable | Old X   | -DE/DX   | Delta X<br>(Linear) | Delta X<br>(Quad) | Delta X<br>(Total) | New X   |
|----------|---------|----------|---------------------|-------------------|--------------------|---------|
| R1       | 2.56478 | 0.00004  | 0.00000             | 0.00004           | 0.00004            | 2.56482 |
| R2       | 2.62144 | -0.00004 | 0.00006             | 0.00001           | 0.00007            | 2.62151 |
| R3       | 2.03393 | 0.00000  | -0.00001            | 0.00000           | -0.00001           | 2.03392 |
| R4       | 2.62491 | 0.00007  | -0.00010            | 0.00003           | -0.00007           | 2.62484 |
| R5       | 2.03073 | 0.00000  | 0.00003             | -0.00001          | 0.00002            | 2.03075 |
| R6       | 2.54395 | -0.00003 | 0.00025             | -0.00003          | 0.00022            | 2.54417 |

|     |         |          |          |          |          |         |
|-----|---------|----------|----------|----------|----------|---------|
| R7  | 2.69915 | -0.00002 | 0.00007  | -0.00005 | 0.00002  | 2.69916 |
| R8  | 2.52092 | -0.00014 | -0.00015 | -0.00010 | -0.00025 | 2.52067 |
| R9  | 2.09261 | 0.00006  | 0.00023  | 0.00012  | 0.00035  | 2.09296 |
| R10 | 2.78506 | -0.00002 | -0.00017 | 0.00010  | -0.00007 | 2.78499 |
| R11 | 2.89691 | -0.00011 | 0.00006  | -0.00011 | -0.00005 | 2.89687 |
| R12 | 2.06022 | 0.00000  | -0.00006 | -0.00005 | -0.00010 | 2.06011 |
| R13 | 2.06142 | 0.00000  | 0.00005  | -0.00001 | 0.00005  | 2.06147 |
| R14 | 2.06950 | 0.00001  | 0.00008  | 0.00004  | 0.00012  | 2.06961 |
| R15 | 2.07970 | -0.00006 | 0.00017  | -0.00010 | 0.00007  | 2.07977 |
| R16 | 2.75469 | 0.00009  | -0.00055 | 0.00015  | -0.00040 | 2.75429 |
| R17 | 4.25771 | -0.00004 | -0.00170 | -0.00286 | -0.00456 | 4.25315 |
| R18 | 2.50648 | 0.00002  | 0.00001  | 0.00000  | 0.00002  | 2.50649 |
| R19 | 2.05756 | -0.00005 | 0.00005  | -0.00015 | -0.00010 | 2.05746 |
| R20 | 2.04355 | 0.00000  | 0.00001  | -0.00001 | 0.00000  | 2.04354 |
| R21 | 2.04720 | -0.00001 | -0.00001 | -0.00002 | -0.00003 | 2.04717 |
| R22 | 1.91443 | 0.00004  | 0.00003  | 0.00011  | 0.00014  | 1.91457 |
| R23 | 1.92328 | 0.00003  | -0.00006 | 0.00017  | 0.00009  | 1.92337 |
| R24 | 4.13645 | -0.00004 | -0.00162 | -0.00061 | -0.00222 | 4.13424 |
| R25 | 2.76772 | 0.00009  | -0.00038 | -0.00066 | -0.00087 | 2.76685 |
| R26 | 2.73082 | 0.00006  | -0.00034 | 0.00042  | 0.00001  | 2.73084 |
| R27 | 2.05500 | 0.00002  | 0.00011  | 0.00013  | 0.00025  | 2.05525 |
| R28 | 2.05225 | 0.00001  | 0.00006  | -0.00002 | 0.00005  | 2.05230 |
| R29 | 2.75026 | 0.00009  | -0.00056 | 0.00012  | -0.00054 | 2.74972 |
| R30 | 2.05702 | 0.00002  | -0.00018 | -0.00014 | -0.00032 | 2.05670 |
| R31 | 2.84186 | -0.00003 | 0.00021  | 0.00011  | 0.00033  | 2.84219 |
| R32 | 2.06732 | -0.00001 | -0.00004 | 0.00003  | -0.00001 | 2.06730 |
| R33 | 2.06780 | 0.00000  | 0.00001  | 0.00001  | 0.00003  | 2.06783 |
| R34 | 2.06550 | -0.00001 | -0.00002 | -0.00003 | -0.00006 | 2.06544 |
| A1  | 1.87268 | -0.00006 | -0.00007 | -0.00005 | -0.00012 | 1.87256 |
| A2  | 2.27925 | 0.00003  | 0.00013  | 0.00008  | 0.00021  | 2.27946 |
| A3  | 2.13121 | 0.00003  | -0.00005 | -0.00003 | -0.00009 | 2.13112 |
| A4  | 1.86487 | -0.00002 | 0.00009  | -0.00005 | 0.00004  | 1.86490 |
| A5  | 2.27580 | 0.00001  | -0.00014 | -0.00002 | -0.00016 | 2.27564 |
| A6  | 2.14248 | 0.00000  | 0.00005  | 0.00006  | 0.00011  | 2.14259 |
| A7  | 1.89697 | -0.00002 | -0.00006 | 0.00007  | 0.00001  | 1.89698 |
| A8  | 2.25252 | -0.00004 | -0.00014 | -0.00002 | -0.00016 | 2.25236 |
| A9  | 2.13368 | 0.00006  | 0.00019  | -0.00005 | 0.00014  | 2.13382 |
| A10 | 1.88997 | 0.00000  | -0.00004 | -0.00006 | -0.00010 | 1.88987 |
| A11 | 2.14495 | 0.00047  | -0.00059 | 0.00060  | 0.00002  | 2.14497 |
| A12 | 2.24821 | -0.00047 | 0.00062  | -0.00057 | 0.00005  | 2.24827 |
| A13 | 1.90027 | 0.00009  | 0.00009  | 0.00009  | 0.00018  | 1.90045 |
| A14 | 2.20359 | 0.00029  | 0.00029  | 0.00020  | 0.00050  | 2.20409 |
| A15 | 2.17864 | -0.00038 | -0.00042 | -0.00030 | -0.00072 | 2.17792 |
| A16 | 1.95915 | 0.00013  | 0.00022  | 0.00061  | 0.00082  | 1.95997 |

|     |          |          |          |          |          |          |
|-----|----------|----------|----------|----------|----------|----------|
| A17 | 1.87312  | -0.00010 | -0.00068 | -0.00044 | -0.00112 | 1.87200  |
| A18 | 1.89071  | 0.00003  | 0.00027  | -0.00005 | 0.00022  | 1.89094  |
| A19 | 1.90773  | -0.00009 | 0.00049  | -0.00029 | 0.00020  | 1.90794  |
| A20 | 1.92888  | -0.00001 | -0.00021 | -0.00012 | -0.00033 | 1.92855  |
| A21 | 1.90272  | 0.00004  | -0.00012 | 0.00029  | 0.00017  | 1.90289  |
| A22 | 1.91563  | 0.00010  | -0.00063 | 0.00018  | -0.00045 | 1.91518  |
| A23 | 1.89126  | 0.00009  | -0.00012 | 0.00024  | 0.00012  | 1.89138  |
| A24 | 1.88229  | -0.00028 | 0.00000  | -0.00072 | -0.00071 | 1.88157  |
| A25 | 1.87512  | -0.00004 | 0.00005  | 0.00022  | 0.00027  | 1.87539  |
| A26 | 1.89916  | 0.00019  | -0.00002 | 0.00029  | 0.00026  | 1.89942  |
| A27 | 1.99970  | -0.00006 | 0.00065  | -0.00018 | 0.00047  | 2.00016  |
| A28 | 2.16077  | 0.00003  | -0.00021 | 0.00015  | -0.00006 | 2.16071  |
| A29 | 1.94586  | 0.00000  | 0.00004  | -0.00002 | 0.00002  | 1.94588  |
| A30 | 2.17655  | -0.00003 | 0.00016  | -0.00013 | 0.00004  | 2.17659  |
| A31 | 2.07361  | 0.00002  | 0.00002  | 0.00012  | 0.00013  | 2.07374  |
| A32 | 2.16486  | -0.00002 | -0.00005 | -0.00013 | -0.00017 | 2.16469  |
| A33 | 2.04472  | 0.00000  | 0.00003  | 0.00001  | 0.00004  | 2.04476  |
| A34 | 1.94105  | 0.00021  | -0.00016 | -0.00009 | -0.00029 | 1.94076  |
| A35 | 1.91720  | -0.00050 | -0.00022 | -0.00040 | -0.00064 | 1.91656  |
| A36 | 1.89091  | 0.00015  | -0.00020 | -0.00026 | -0.00044 | 1.89047  |
| A37 | 2.08755  | -0.00005 | -0.00093 | -0.00003 | -0.00111 | 2.08645  |
| A38 | 2.07616  | 0.00005  | 0.00109  | -0.00034 | 0.00090  | 2.07706  |
| A39 | 1.99667  | 0.00001  | 0.00034  | -0.00031 | 0.00010  | 1.99677  |
| A40 | 2.00255  | -0.00002 | 0.00024  | 0.00030  | 0.00051  | 2.00306  |
| A41 | 2.03004  | 0.00001  | -0.00036 | 0.00024  | -0.00012 | 2.02992  |
| A42 | 2.02442  | -0.00010 | 0.00107  | -0.00106 | 0.00012  | 2.02454  |
| A43 | 2.13372  | 0.00008  | -0.00007 | 0.00048  | 0.00031  | 2.13402  |
| A44 | 1.96177  | -0.00009 | 0.00014  | -0.00028 | -0.00019 | 1.96158  |
| A45 | 2.02737  | 0.00006  | 0.00053  | 0.00022  | 0.00082  | 2.02819  |
| A46 | 2.04225  | 0.00003  | -0.00105 | 0.00035  | -0.00071 | 2.04154  |
| A47 | 2.53909  | 0.00009  | 0.00044  | 0.00023  | 0.00103  | 2.54012  |
| A48 | 2.50022  | -0.00013 | -0.00135 | -0.00314 | -0.00407 | 2.49614  |
| A49 | 1.93259  | 0.00000  | -0.00030 | 0.00019  | -0.00011 | 1.93248  |
| A50 | 1.91652  | 0.00003  | -0.00004 | 0.00007  | 0.00003  | 1.91655  |
| A51 | 1.94352  | -0.00004 | 0.00009  | -0.00025 | -0.00017 | 1.94336  |
| A52 | 1.87832  | 0.00000  | -0.00002 | 0.00019  | 0.00018  | 1.87849  |
| A53 | 1.89533  | 0.00001  | 0.00018  | -0.00006 | 0.00012  | 1.89545  |
| A54 | 1.89597  | 0.00000  | 0.00009  | -0.00013 | -0.00004 | 1.89593  |
| A55 | 3.48280  | -0.00043 | 0.00077  | 0.00117  | 0.00194  | 3.48474  |
| A56 | 2.53588  | -0.00033 | -0.00001 | -0.00222 | -0.00217 | 2.53371  |
| A57 | 2.94143  | 0.00015  | 0.00439  | 0.00886  | 0.01325  | 2.95468  |
| A58 | 3.08701  | 0.00003  | 0.00162  | 0.00411  | 0.00576  | 3.09276  |
| D1  | 0.00296  | 0.00000  | 0.00024  | -0.00010 | 0.00014  | 0.00310  |
| D2  | -3.12930 | 0.00000  | 0.00066  | 0.00094  | 0.00160  | -3.12771 |



|     |          |          |          |          |          |          |
|-----|----------|----------|----------|----------|----------|----------|
| D3  | 3.13369  | 0.00001  | 0.00052  | -0.00018 | 0.00034  | 3.13403  |
| D4  | 0.00143  | 0.00001  | 0.00094  | 0.00086  | 0.00180  | 0.00323  |
| D5  | -0.00494 | 0.00002  | -0.00022 | 0.00000  | -0.00022 | -0.00516 |
| D6  | -3.10822 | 0.00001  | 0.00107  | -0.00001 | 0.00106  | -3.10716 |
| D7  | -3.13679 | 0.00001  | -0.00047 | 0.00006  | -0.00040 | -3.13719 |
| D8  | 0.04311  | 0.00001  | 0.00082  | 0.00006  | 0.00088  | 0.04399  |
| D9  | -0.00002 | -0.00002 | -0.00018 | 0.00017  | -0.00001 | -0.00003 |
| D10 | -3.13471 | 0.00000  | 0.00040  | 0.00093  | 0.00133  | -3.13338 |
| D11 | 3.13313  | -0.00002 | -0.00057 | -0.00077 | -0.00134 | 3.13179  |
| D12 | -0.00156 | 0.00000  | 0.00002  | -0.00001 | 0.00001  | -0.00155 |
| D13 | -0.00306 | 0.00003  | 0.00005  | -0.00018 | -0.00013 | -0.00319 |
| D14 | -3.13486 | 0.00002  | 0.00067  | 0.00229  | 0.00296  | -3.13191 |
| D15 | 3.13219  | 0.00002  | -0.00049 | -0.00087 | -0.00136 | 3.13083  |
| D16 | 0.00039  | 0.00001  | 0.00013  | 0.00159  | 0.00172  | 0.00211  |
| D17 | -0.01610 | -0.00002 | -0.00485 | -0.00658 | -0.01143 | -0.02753 |
| D18 | 3.12576  | -0.00004 | -0.00430 | -0.00664 | -0.01094 | 3.11482  |
| D19 | 3.13322  | 0.00000  | -0.00419 | -0.00573 | -0.00992 | 3.12330  |
| D20 | -0.00810 | -0.00002 | -0.00364 | -0.00579 | -0.00944 | -0.01754 |
| D21 | 0.00493  | -0.00003 | 0.00010  | 0.00011  | 0.00021  | 0.00515  |
| D22 | 3.10889  | -0.00001 | -0.00115 | 0.00013  | -0.00101 | 3.10788  |
| D23 | 3.13598  | -0.00001 | -0.00058 | -0.00253 | -0.00311 | 3.13287  |
| D24 | -0.04325 | 0.00001  | -0.00183 | -0.00251 | -0.00433 | -0.04758 |
| D25 | 1.32475  | 0.00010  | -0.00139 | 0.00082  | -0.00057 | 1.32418  |
| D26 | -2.86200 | 0.00000  | -0.00110 | 0.00054  | -0.00056 | -2.86256 |
| D27 | -0.80992 | 0.00001  | -0.00145 | 0.00061  | -0.00084 | -0.81076 |
| D28 | -1.77268 | 0.00009  | 0.00008  | 0.00080  | 0.00088  | -1.77179 |
| D29 | 0.32376  | -0.00002 | 0.00037  | 0.00052  | 0.00089  | 0.32465  |
| D30 | 2.37584  | -0.00001 | 0.00002  | 0.00059  | 0.00061  | 2.37645  |
| D31 | -1.09218 | -0.00012 | -0.00139 | -0.00180 | -0.00319 | -1.09537 |
| D32 | 0.95064  | -0.00006 | -0.00175 | -0.00130 | -0.00305 | 0.94759  |
| D33 | 3.12452  | -0.00025 | -0.00102 | -0.00183 | -0.00284 | 3.12168  |
| D34 | 3.11479  | -0.00001 | -0.00100 | -0.00144 | -0.00244 | 3.11235  |
| D35 | -1.12558 | 0.00005  | -0.00136 | -0.00094 | -0.00230 | -1.12788 |
| D36 | 1.04831  | -0.00014 | -0.00063 | -0.00146 | -0.00209 | 1.04621  |
| D37 | 1.02069  | 0.00000  | -0.00104 | -0.00154 | -0.00258 | 1.01811  |
| D38 | 3.06350  | 0.00006  | -0.00140 | -0.00103 | -0.00243 | 3.06107  |
| D39 | -1.04580 | -0.00012 | -0.00067 | -0.00156 | -0.00223 | -1.04803 |
| D40 | 2.94071  | 0.00010  | 0.00162  | 0.00012  | 0.00175  | 2.94245  |
| D41 | -1.24927 | 0.00009  | 0.00113  | -0.00052 | 0.00060  | -1.24867 |
| D42 | 0.86370  | 0.00003  | 0.00237  | 0.00016  | 0.00254  | 0.86624  |
| D43 | 2.95690  | 0.00002  | 0.00188  | -0.00048 | 0.00139  | 2.95830  |
| D44 | -1.23519 | -0.00003 | 0.00189  | -0.00021 | 0.00169  | -1.23351 |
| D45 | 0.85801  | -0.00003 | 0.00140  | -0.00085 | 0.00054  | 0.85856  |
| D46 | 3.14127  | -0.00002 | -0.00006 | -0.00061 | -0.00067 | 3.14059  |

|     |          |          |          |          |          |          |
|-----|----------|----------|----------|----------|----------|----------|
| D47 | -0.00033 | -0.00001 | -0.00031 | -0.00073 | -0.00104 | -0.00137 |
| D48 | -0.00063 | 0.00000  | -0.00068 | -0.00054 | -0.00122 | -0.00186 |
| D49 | 3.14096  | 0.00001  | -0.00093 | -0.00066 | -0.00159 | 3.13937  |
| D50 | 2.31624  | 0.00001  | -0.00659 | -0.00684 | -0.01348 | 2.30275  |
| D51 | -1.34479 | 0.00021  | -0.00633 | -0.01508 | -0.02138 | -1.36617 |
| D52 | -1.96923 | -0.00019 | -0.00765 | -0.00929 | -0.01696 | -1.98619 |
| D53 | 0.65292  | 0.00002  | -0.00739 | -0.01753 | -0.02485 | 0.62807  |
| D54 | -2.71384 | -0.00002 | 0.00047  | -0.00002 | 0.00044  | -2.71340 |
| D55 | -0.01139 | 0.00000  | 0.00009  | -0.00052 | -0.00044 | -0.01182 |
| D56 | -0.02989 | -0.00001 | -0.00011 | -0.00028 | -0.00038 | -0.03027 |
| D57 | 2.67256  | 0.00001  | -0.00049 | -0.00078 | -0.00126 | 2.67130  |
| D58 | 0.56191  | -0.00010 | 0.00076  | -0.00697 | -0.00632 | 0.55560  |
| D59 | -1.84933 | -0.00010 | 0.00065  | -0.00736 | -0.00685 | -1.85618 |
| D60 | 1.85641  | 0.00002  | -0.00237 | 0.00426  | 0.00201  | 1.85841  |
| D61 | -0.56212 | 0.00000  | -0.00146 | 0.00378  | 0.00240  | -0.55971 |
| D62 | 2.55194  | 0.00001  | 0.00120  | 0.00125  | 0.00242  | 2.55436  |
| D63 | -1.65944 | 0.00003  | 0.00097  | 0.00165  | 0.00259  | -1.65685 |
| D64 | 0.44124  | 0.00002  | 0.00111  | 0.00137  | 0.00246  | 0.44370  |
| D65 | 1.35170  | -0.00003 | 0.00090  | 0.00066  | 0.00158  | 1.35328  |
| D66 | -2.85967 | -0.00001 | 0.00067  | 0.00105  | 0.00175  | -2.85792 |
| D67 | -0.75899 | -0.00002 | 0.00082  | 0.00077  | 0.00161  | -0.75738 |
| D68 | -1.03300 | 0.00000  | 0.00132  | 0.00041  | 0.00174  | -1.03126 |
| D69 | 1.03881  | 0.00002  | 0.00109  | 0.00081  | 0.00191  | 1.04072  |
| D70 | 3.13949  | 0.00001  | 0.00123  | 0.00053  | 0.00177  | 3.14126  |

| Item                 | Value    | Threshold | Converged? |
|----------------------|----------|-----------|------------|
| Maximum Force        | 0.000501 | 0.000450  | NO         |
| RMS Force            | 0.000109 | 0.000300  | YES        |
| Maximum Displacement | 0.078081 | 0.001800  | NO         |
| RMS Displacement     | 0.015667 | 0.001200  | NO         |

Predicted change in Energy=-3.813876D-06

GradGradGradGradGradGradGradGradGradGradGradGradGradGradGradGradGradGradGrad

Input orientation:

| Center Number | Atomic Number | Atomic Type | Coordinates (Angstroms) |           |           |
|---------------|---------------|-------------|-------------------------|-----------|-----------|
|               |               |             | X                       | Y         | Z         |
| 1             | 6             | 0           | -2.639879               | 2.092411  | -0.194000 |
| 2             | 6             | 0           | -3.532581               | 1.115719  | 0.108110  |
| 3             | 7             | 0           | -2.827091               | -0.080494 | 0.134458  |
| 4             | 6             | 0           | -1.535330               | 0.174228  | -0.146686 |
| 5             | 7             | 0           | -1.402650               | 1.485386  | -0.352824 |
| 6             | 6             | 0           | -0.128830               | 2.165536  | -0.647328 |
| 7             | 6             | 0           | 0.449885                | 2.874490  | 0.582480  |

|    |    |   |           |           |           |
|----|----|---|-----------|-----------|-----------|
| 8  | 1  | 0 | -2.776753 | 3.152863  | -0.317037 |
| 9  | 1  | 0 | -4.589626 | 1.171635  | 0.293459  |
| 10 | 1  | 0 | 0.573043  | 1.404210  | -0.988233 |
| 11 | 1  | 0 | -0.299313 | 2.879131  | -1.454631 |
| 12 | 1  | 0 | -0.236606 | 3.661265  | 0.912872  |
| 13 | 1  | 0 | 0.529809  | 2.141619  | 1.399647  |
| 14 | 35 | 0 | 0.119778  | -2.688166 | -0.168606 |
| 15 | 1  | 0 | -0.763044 | -0.618060 | -0.196766 |
| 16 | 6  | 0 | -3.304664 | -1.401317 | 0.394256  |
| 17 | 6  | 0 | -4.565382 | -1.684487 | 0.693729  |
| 18 | 1  | 0 | -2.505864 | -2.136939 | 0.315651  |
| 19 | 1  | 0 | -4.839364 | -2.714832 | 0.874674  |
| 20 | 1  | 0 | -5.351367 | -0.942978 | 0.770981  |
| 21 | 7  | 0 | 1.713282  | 3.486579  | 0.190677  |
| 22 | 1  | 0 | 2.049661  | 4.121697  | 0.904776  |
| 23 | 1  | 0 | 2.416507  | 2.764838  | 0.047534  |
| 24 | 6  | 0 | 3.422478  | -0.332542 | -1.169882 |
| 25 | 6  | 0 | 3.265726  | -0.585013 | 0.263797  |
| 26 | 8  | 0 | 2.750330  | 0.636846  | -0.335133 |
| 27 | 1  | 0 | 4.385240  | -0.003797 | -1.554415 |
| 28 | 1  | 0 | 2.777446  | -0.854951 | -1.870225 |
| 29 | 1  | 0 | 2.472862  | -1.276531 | 0.542539  |
| 30 | 6  | 0 | 4.400563  | -0.420272 | 1.236979  |
| 31 | 1  | 0 | 4.032240  | -0.068680 | 2.205220  |
| 32 | 1  | 0 | 4.892469  | -1.384092 | 1.399646  |
| 33 | 1  | 0 | 5.142137  | 0.292065  | 0.866496  |

-----  
Distance matrix (angstroms):

|    |    | 1        | 2        | 3        | 4        | 5        |
|----|----|----------|----------|----------|----------|----------|
| 1  | C  | 0.000000 |          |          |          |          |
| 2  | C  | 1.357244 | 0.000000 |          |          |          |
| 3  | N  | 2.205549 | 1.389005 | 0.000000 |          |          |
| 4  | C  | 2.213976 | 2.222687 | 1.346318 | 0.000000 |          |
| 5  | N  | 1.387242 | 2.210367 | 2.172201 | 1.333879 | 0.000000 |
| 6  | C  | 2.552689 | 3.641198 | 3.596728 | 2.488813 | 1.473754 |
| 7  | C  | 3.280429 | 4.379308 | 4.435226 | 3.429894 | 2.497256 |
| 8  | H  | 1.076305 | 2.214042 | 3.265115 | 3.231473 | 2.161000 |
| 9  | H  | 2.210645 | 1.074628 | 2.167864 | 3.243034 | 3.266946 |
| 10 | H  | 3.380428 | 4.259265 | 3.876298 | 2.581916 | 2.076943 |
| 11 | H  | 2.772431 | 4.000725 | 4.204075 | 3.248840 | 2.091377 |
| 12 | H  | 3.076068 | 4.241568 | 4.617067 | 3.868950 | 2.774184 |
| 13 | H  | 3.548106 | 4.384467 | 4.219866 | 3.244468 | 2.690017 |
| 14 | Br | 5.519988 | 5.280705 | 3.946624 | 3.306534 | 4.446376 |
| 15 | H  | 3.296842 | 3.281658 | 2.158467 | 1.107544 | 2.204073 |

|    |    |          |          |          |          |          |
|----|----|----------|----------|----------|----------|----------|
| 16 | C  | 3.604735 | 2.543481 | 1.428337 | 2.430125 | 3.536784 |
| 17 | C  | 4.331348 | 3.041510 | 2.430480 | 3.652716 | 4.598505 |
| 18 | H  | 4.262053 | 3.417163 | 2.089254 | 2.548958 | 3.845150 |
| 19 | H  | 5.393457 | 4.119275 | 3.396601 | 4.506272 | 5.564134 |
| 20 | H  | 4.182933 | 2.825883 | 2.742445 | 4.080735 | 4.769932 |
| 21 | N  | 4.587122 | 5.757331 | 5.774266 | 4.651769 | 3.742885 |
| 22 | H  | 5.226576 | 6.389992 | 6.483403 | 5.435093 | 4.522183 |
| 23 | H  | 5.106617 | 6.173727 | 5.966472 | 4.729270 | 4.047621 |
| 24 | C  | 6.601888 | 7.218280 | 6.389206 | 5.087593 | 5.220566 |
| 25 | C  | 6.500334 | 7.009544 | 6.115038 | 4.878020 | 5.143977 |
| 26 | O  | 5.585064 | 6.316704 | 5.642935 | 4.314673 | 4.238817 |
| 27 | H  | 7.456348 | 8.167569 | 7.407827 | 6.088230 | 6.095995 |
| 28 | H  | 6.390938 | 6.900275 | 6.002448 | 4.757082 | 5.025225 |
| 29 | H  | 6.167039 | 6.478960 | 5.448535 | 4.318024 | 4.842463 |
| 30 | C  | 7.611117 | 8.158945 | 7.319152 | 6.123951 | 6.311599 |
| 31 | H  | 7.412405 | 7.938966 | 7.165097 | 6.048826 | 6.204574 |
| 32 | H  | 8.447606 | 8.882487 | 7.930427 | 6.792356 | 7.136776 |
| 33 | H  | 8.057647 | 8.746673 | 8.011447 | 6.754923 | 6.763504 |
|    |    | 6        | 7        | 8        | 9        | 10       |
| 6  | C  | 0.000000 |          |          |          |          |
| 7  | C  | 1.532956 | 0.000000 |          |          |          |
| 8  | H  | 2.845242 | 3.361223 | 0.000000 |          |          |
| 9  | H  | 4.666006 | 5.327281 | 2.753993 | 0.000000 |          |
| 10 | H  | 1.090165 | 2.155002 | 3.837893 | 5.324469 | 0.000000 |
| 11 | H  | 1.090881 | 2.170517 | 2.739846 | 4.937423 | 1.775929 |
| 12 | H  | 2.164035 | 1.095192 | 2.867664 | 5.052793 | 3.060071 |
| 13 | H  | 2.150461 | 1.100568 | 3.860437 | 5.326644 | 2.499522 |
| 14 | Br | 4.883585 | 5.622832 | 6.521468 | 6.106558 | 4.198187 |
| 15 | H  | 2.890266 | 3.778402 | 4.276605 | 4.252771 | 2.549729 |
| 16 | C  | 4.888073 | 5.693382 | 4.639524 | 2.877737 | 4.981854 |
| 17 | C  | 6.025289 | 6.778610 | 5.255549 | 2.884135 | 6.226753 |
| 18 | H  | 5.008883 | 5.824265 | 5.334386 | 3.910143 | 4.870268 |
| 19 | H  | 6.951519 | 7.700783 | 6.332803 | 3.937614 | 7.052026 |
| 20 | H  | 6.240941 | 6.947166 | 4.958662 | 2.297796 | 6.610805 |
| 21 | N  | 2.416771 | 1.457509 | 4.530955 | 6.715368 | 2.650704 |
| 22 | H  | 3.313822 | 2.053943 | 5.072054 | 7.290864 | 3.626103 |
| 23 | H  | 2.705686 | 2.041027 | 5.220481 | 7.189205 | 2.514455 |
| 24 | C  | 4.373242 | 4.710853 | 7.162811 | 8.282374 | 3.341944 |
| 25 | C  | 4.463035 | 4.471988 | 7.128859 | 8.049425 | 3.574231 |
| 26 | O  | 3.274740 | 3.337830 | 6.072834 | 7.386208 | 2.399159 |
| 27 | H  | 5.089759 | 5.323333 | 7.923998 | 9.238208 | 4.103157 |
| 28 | H  | 4.366379 | 5.034087 | 7.023111 | 7.941179 | 3.277364 |
| 29 | H  | 4.475758 | 4.617900 | 6.922200 | 7.478923 | 3.624768 |
| 30 | C  | 5.545486 | 5.185719 | 8.166770 | 9.178665 | 4.788550 |

|    |    |          |          |          |          |           |
|----|----|----------|----------|----------|----------|-----------|
| 31 | H  | 5.517540 | 4.912107 | 7.943708 | 8.917947 | 4.932909  |
| 32 | H  | 6.481003 | 6.208045 | 9.074575 | 9.882586 | 5.668689  |
| 33 | H  | 5.795226 | 5.363470 | 8.502572 | 9.788218 | 5.055048  |
|    |    | 11       | 12       | 13       | 14       | 15        |
| 11 | H  | 0.000000 |          |          |          |           |
| 12 | H  | 2.494141 | 0.000000 |          |          |           |
| 13 | H  | 3.062397 | 1.770217 | 0.000000 |          |           |
| 14 | Br | 5.729249 | 6.450727 | 5.094543 | 0.000000 |           |
| 15 | H  | 3.745346 | 4.452085 | 3.440324 | 2.250668 | 0.000000  |
| 16 | C  | 5.547320 | 5.942364 | 5.316615 | 3.701297 | 2.724451  |
| 17 | C  | 6.606164 | 6.882107 | 6.410802 | 4.868441 | 4.048213  |
| 18 | H  | 5.758795 | 6.255028 | 5.356903 | 2.726235 | 2.367908  |
| 19 | H  | 7.571668 | 7.863934 | 7.258700 | 5.067764 | 4.707528  |
| 20 | H  | 6.714545 | 6.883311 | 6.670696 | 5.819101 | 4.700512  |
| 21 | N  | 2.669563 | 2.086659 | 2.161281 | 6.387160 | 4.809403  |
| 22 | H  | 3.553653 | 2.332183 | 2.544712 | 7.158969 | 5.620498  |
| 23 | H  | 3.105678 | 2.931109 | 2.403381 | 5.920889 | 4.649002  |
| 24 | C  | 4.924191 | 5.803211 | 4.592547 | 4.178438 | 4.306631  |
| 25 | C  | 5.259543 | 5.542428 | 4.026154 | 3.808833 | 4.055144  |
| 26 | O  | 3.947333 | 4.430171 | 3.194450 | 4.243022 | 3.733326  |
| 27 | H  | 5.501479 | 6.393876 | 5.309768 | 5.226898 | 5.359604  |
| 28 | H  | 4.856185 | 6.101341 | 4.972260 | 3.649573 | 3.923219  |
| 29 | H  | 5.379885 | 5.644483 | 4.024156 | 2.834685 | 3.383968  |
| 30 | C  | 6.341897 | 6.186060 | 4.644619 | 5.044217 | 5.362609  |
| 31 | H  | 6.391123 | 5.814267 | 4.219169 | 5.272961 | 5.391298  |
| 32 | H  | 7.299080 | 7.211102 | 5.609228 | 5.190240 | 5.926226  |
| 33 | H  | 6.456773 | 6.347010 | 4.997866 | 5.931045 | 6.068773  |
|    |    | 16       | 17       | 18       | 19       | 20        |
| 16 | C  | 0.000000 |          |          |          |           |
| 17 | C  | 1.326378 | 0.000000 |          |          |           |
| 18 | H  | 1.088761 | 2.142258 | 0.000000 |          |           |
| 19 | H  | 2.076397 | 1.081396 | 2.468135 | 0.000000 |           |
| 20 | H  | 2.130959 | 1.083317 | 3.119255 | 1.847259 | 0.000000  |
| 21 | N  | 7.008049 | 8.149515 | 7.031412 | 9.047790 | 8.358647  |
| 22 | H  | 7.709287 | 8.804266 | 7.763401 | 9.705550 | 8.969060  |
| 23 | H  | 7.085821 | 8.304266 | 6.951909 | 9.130093 | 8.637774  |
| 24 | C  | 6.988795 | 8.313045 | 6.372433 | 8.838187 | 9.006660  |
| 25 | C  | 6.622190 | 7.919592 | 5.976823 | 8.402486 | 8.639424  |
| 26 | O  | 6.430324 | 7.743822 | 5.978710 | 8.384559 | 8.328074  |
| 27 | H  | 8.055123 | 9.380432 | 7.452165 | 9.916829 | 10.054404 |
| 28 | H  | 6.512945 | 7.821708 | 5.859600 | 8.307191 | 8.547591  |
| 29 | H  | 5.780775 | 7.051678 | 5.057617 | 7.459736 | 7.834666  |
| 30 | C  | 7.813012 | 9.070917 | 7.175968 | 9.527461 | 9.777040  |
| 31 | H  | 7.673700 | 8.877756 | 7.113014 | 9.352958 | 9.532760  |

|    |   |          |          |          |           |           |
|----|---|----------|----------|----------|-----------|-----------|
| 32 | H | 8.258577 | 9.488914 | 7.515128 | 9.836413  | 10.272583 |
| 33 | H | 8.627804 | 9.908205 | 8.043345 | 10.424579 | 10.566365 |
|    |   | 21       | 22       | 23       | 24        | 25        |
| 21 | N | 0.000000 |          |          |           |           |
| 22 | H | 1.013146 | 0.000000 |          |           |           |
| 23 | H | 1.017804 | 1.646362 | 0.000000 |           |           |
| 24 | C | 4.399791 | 5.101870 | 3.476758 | 0.000000  |           |
| 25 | C | 4.358129 | 4.903344 | 3.462578 | 1.464155  | 0.000000  |
| 26 | O | 3.077811 | 3.764638 | 2.187744 | 1.445096  | 1.455091  |
| 27 | H | 4.729422 | 5.340623 | 3.755994 | 1.087589  | 2.212921  |
| 28 | H | 4.922260 | 5.744331 | 4.112293 | 1.086029  | 2.205751  |
| 29 | H | 4.836112 | 5.426894 | 4.071961 | 2.173769  | 1.088360  |
| 30 | C | 4.855895 | 5.125094 | 3.936520 | 2.599485  | 1.504020  |
| 31 | H | 4.698491 | 4.814669 | 3.910886 | 3.439876  | 2.150178  |
| 32 | H | 5.940730 | 6.216122 | 5.017192 | 3.141512  | 2.138918  |
| 33 | H | 4.734839 | 4.922495 | 3.770195 | 2.737553  | 2.157181  |
|    |   | 26       | 27       | 28       | 29        | 30        |
| 26 | O | 0.000000 |          |          |           |           |
| 27 | H | 2.137757 | 0.000000 |          |           |           |
| 28 | H | 2.140725 | 1.846402 | 0.000000 |           |           |
| 29 | H | 2.123277 | 3.110347 | 2.468184 | 0.000000  |           |
| 30 | C | 2.512430 | 2.822334 | 3.532446 | 2.220689  | 0.000000  |
| 31 | H | 2.931629 | 3.776728 | 4.336126 | 2.579743  | 1.093970  |
| 32 | H | 3.417953 | 3.299844 | 3.930059 | 2.569183  | 1.094249  |
| 33 | H | 2.698801 | 2.553672 | 3.794345 | 3.112952  | 1.092984  |
|    |   | 31       | 32       | 33       |           |           |
| 31 | H | 0.000000 |          |          |           |           |
| 32 | H | 1.766141 | 0.000000 |          |           |           |
| 33 | H | 1.776003 | 1.776537 | 0.000000 |           |           |

Stoichiometry C10H18BrN3O

Framework group C1[X(C10H18BrN3O)]

Deg. of freedom 93

Full point group C1 NOp 1

Largest Abelian subgroup C1 NOp 1

Largest concise Abelian subgroup C1 NOp 1

Standard orientation:

| Center<br>Number | Atomic<br>Number | Atomic<br>Type | Coordinates (Angstroms) |          |           |
|------------------|------------------|----------------|-------------------------|----------|-----------|
|                  |                  |                | X                       | Y        | Z         |
| 1                | 6                | 0              | -2.327521               | 2.485615 | -0.255213 |
| 2                | 6                | 0              | -3.322044               | 1.610664 | 0.040583  |
| 3                | 7                | 0              | -2.747161               | 0.346919 | 0.082906  |
| 4                | 6                | 0              | -1.432316               | 0.461997 | -0.182636 |

|    |    |   |           |           |           |
|----|----|---|-----------|-----------|-----------|
| 5  | 7  | 0 | -1.159398 | 1.750379  | -0.394344 |
| 6  | 6  | 0 | 0.182684  | 2.290301  | -0.675861 |
| 7  | 6  | 0 | 0.817595  | 2.942787  | 0.557469  |
| 8  | 1  | 0 | -2.350134 | 3.553709  | -0.385973 |
| 9  | 1  | 0 | -4.369513 | 1.779058  | 0.211691  |
| 10 | 1  | 0 | 0.804469  | 1.456833  | -1.003236 |
| 11 | 1  | 0 | 0.098586  | 3.012268  | -1.489319 |
| 12 | 1  | 0 | 0.213922  | 3.799866  | 0.874391  |
| 13 | 1  | 0 | 0.809490  | 2.211274  | 1.379705  |
| 14 | 35 | 0 | -0.088483 | -2.559100 | -0.166758 |
| 15 | 1  | 0 | -0.747418 | -0.407665 | -0.218115 |
| 16 | 6  | 0 | -3.364708 | -0.914320 | 0.343784  |
| 17 | 6  | 0 | -4.651917 | -1.060834 | 0.628221  |
| 18 | 1  | 0 | -2.647108 | -1.730628 | 0.279815  |
| 19 | 1  | 0 | -5.035377 | -2.055247 | 0.811308  |
| 20 | 1  | 0 | -5.356135 | -0.240033 | 0.690973  |
| 21 | 7  | 0 | 2.143344  | 3.415452  | 0.178905  |
| 22 | 1  | 0 | 2.535942  | 4.016494  | 0.893804  |
| 23 | 1  | 0 | 2.768182  | 2.622581  | 0.049069  |
| 24 | 6  | 0 | 3.456687  | -0.572023 | -1.137653 |
| 25 | 6  | 0 | 3.256257  | -0.796576 | 0.295230  |
| 26 | 8  | 0 | 2.880251  | 0.468639  | -0.317258 |
| 27 | 1  | 0 | 4.453503  | -0.349351 | -1.511317 |
| 28 | 1  | 0 | 2.768912  | -1.028333 | -1.843489 |
| 29 | 1  | 0 | 2.391402  | -1.398645 | 0.567379  |
| 30 | 6  | 0 | 4.389895  | -0.745700 | 1.282323  |
| 31 | 1  | 0 | 4.048677  | -0.350493 | 2.243651  |
| 32 | 1  | 0 | 4.775235  | -1.754877 | 1.456840  |
| 33 | 1  | 0 | 5.207095  | -0.118156 | 0.917651  |

-----  
Rotational constants (GHZ):      0.4192423      0.2914536      0.1820355

Standard basis: 6-311++G(d,p) (5D, 7F)

There are 499 symmetry adapted cartesian basis functions of A symmetry.

There are 482 symmetry adapted basis functions of A symmetry.

482 basis functions, 760 primitive gaussians, 499 cartesian basis functions

71 alpha electrons      71 beta electrons

nuclear repulsion energy      1310.6758441008 Hartrees.

NAtoms= 33 NActive= 33 NUniq= 33 SFac= 1.00D+00 NATFMM= 60 NAOKFM=F

Big=F

Integral buffers will be 131072 words long.

Raffenetti 2 integral format.

Two-electron integral symmetry is turned on.

One-electron integrals computed using PRISM.

NBasis= 482 RedAO= T EigKep= 3.60D-06 NBF= 482

NBsUse= 482 1.00D-06 EigRej= -1.00D+00 NBFU= 482  
 Initial guess from the checkpoint file:  
 "/home/suqian/liuwen/qianmengshijie/nh2po/nh2po.chk"  
 B after Tr= 0.000000 0.000000 0.000000  
 Rot= 0.999999 0.000920 -0.000638 -0.000930 Ang= 0.17 deg.  
 ExpMin= 3.50D-02 ExpMax= 4.40D+05 ExpMxC= 1.51D+04 IAcc=3 IRadAn= 5 AccDes=  
 0.00D+00  
 Harris functional with IExCor= 402 and IRadAn= 5 diagonalized for initial guess.  
 HarFok: IExCor= 402 AccDes= 0.00D+00 IRadAn= 5 IDoV= 1 UseB2=F ITyADJ=14  
 ICtDFT= 3500011 ScaDFX= 1.000000 1.000000 1.000000 1.000000  
 FoFCou: FMM=F IPFlag= 0 FMFlag= 100000 FMFlg1= 0  
 NFxFlg= 0 DoJE=T BraDBF=F KetDBF=T FulRan=T  
 wScrn= 0.000000 ICntrl= 500 IOpCl= 0 l1Cent= 200000004 NGrid=  
 0  
 NMat0= 1 NMatS0= 1 NMatT0= 0 NMatD0= 1 NMtDS0= 0  
 NMtDT0= 0  
 Petite list used in FoFCou.  
 Requested convergence on RMS density matrix=1.00D-08 within 128 cycles.  
 Requested convergence on MAX density matrix=1.00D-06.  
 Requested convergence on energy=1.00D-06.  
 No special actions if energy rises.  
 SCF Done: E(RB3LYP) = -3205.64834599 A.U. after 10 cycles  
 NFock= 10 Conv=0.97D-08 -V/T= 2.0018  
 Calling FoFJK, ICntrl= 2127 FMM=F ISym2X=0 l1Cent= 0 IOpClX= 0 NMat=1 NMatS=1  
 NMatT=0.  
 \*\*\*\*\* Axes restored to original set \*\*\*\*\*

| Center<br>Number | Atomic<br>Number | Forces (Hartrees/Bohr) |              |              |
|------------------|------------------|------------------------|--------------|--------------|
|                  |                  | X                      | Y            | Z            |
| 1                | 6                | 0.000055110            | -0.000043016 | -0.000053346 |
| 2                | 6                | -0.000104242           | 0.000067679  | -0.000046619 |
| 3                | 7                | 0.000131999            | 0.000051278  | -0.000019014 |
| 4                | 6                | -0.000312083           | -0.000248264 | 0.000074301  |
| 5                | 7                | 0.000027023            | 0.000072517  | 0.000202020  |
| 6                | 6                | 0.000056037            | 0.000044485  | -0.000137453 |
| 7                | 6                | -0.000462067           | -0.000180294 | 0.000017037  |
| 8                | 1                | -0.000015480           | -0.000005725 | -0.000017828 |
| 9                | 1                | 0.000009539            | -0.000013443 | 0.000000134  |
| 10               | 1                | 0.000072277            | 0.000035918  | 0.000048462  |
| 11               | 1                | -0.000041111           | -0.000012688 | 0.000019385  |
| 12               | 1                | 0.000028655            | -0.000017787 | 0.000054058  |
| 13               | 1                | 0.000088242            | 0.000074804  | -0.000049142 |
| 14               | 35               | 0.000083454            | 0.000046927  | -0.000003752 |



|    |   |              |              |              |
|----|---|--------------|--------------|--------------|
| 15 | 1 | 0.000101816  | 0.000064966  | -0.000071407 |
| 16 | 6 | 0.000059947  | 0.000093637  | 0.000048157  |
| 17 | 6 | 0.000012381  | -0.000057719 | 0.000011786  |
| 18 | 1 | -0.000050034 | 0.000018684  | -0.000028420 |
| 19 | 1 | -0.000008389 | 0.000004567  | -0.000010543 |
| 20 | 1 | 0.000000397  | 0.000001905  | -0.000004992 |
| 21 | 7 | 0.000260961  | 0.000093970  | -0.000018962 |
| 22 | 1 | -0.000019075 | 0.000013680  | 0.000007521  |
| 23 | 1 | 0.000065365  | -0.000127294 | 0.000041146  |
| 24 | 6 | 0.000121801  | -0.000230332 | -0.000495916 |
| 25 | 6 | 0.000114432  | -0.000117633 | 0.000520398  |
| 26 | 8 | 0.000069144  | 0.000343640  | -0.000032839 |
| 27 | 1 | -0.000052476 | 0.000089095  | 0.000006093  |
| 28 | 1 | -0.000088067 | -0.000067375 | 0.000177572  |
| 29 | 1 | -0.000122478 | -0.000030111 | -0.000222398 |
| 30 | 6 | -0.000130869 | -0.000004253 | -0.000007226 |
| 31 | 1 | 0.000036823  | 0.000030855  | 0.000013223  |
| 32 | 1 | 0.000016063  | 0.000006232  | -0.000014285 |
| 33 | 1 | -0.000005095 | 0.000001097  | -0.000007150 |

-----  
Cartesian Forces: Max 0.000520398 RMS 0.000126574

GradGradGradGradGradGradGradGradGradGradGradGradGradGradGradGradGradGradGrad

Berny optimization.

Using GEDIIS/GDIIS optimizer.

FormGI is forming the generalized inverse of G from B-inverse, IUseBI=4.

Internal Forces: Max 0.000447039 RMS 0.000108356

Search for a local minimum.

Step number 35 out of a maximum of 172

All quantities printed in internal units (Hartrees-Bohrs-Radians)

Mixed Optimization -- En-DIIS/RFO-DIIS

Swapping is turned off.

Update second derivatives using D2CorX and points 30 31 32 33 34

35

DE= -3.32D-06 DEPred=-3.81D-06 R= 8.71D-01

TightC=F SS= 1.41D+00 RLast= 5.03D-02 DXNew= 1.7446D+00 1.5083D-01

Trust test= 8.71D-01 RLast= 5.03D-02 DXMaxT set to 1.04D+00

ITU= 1 1 1 1 1 1 1 1 1 0 0 -1 1 -1 1 1 1 1 1 1

ITU= 1 1 1 0 -1 -1 1 1 1 -1 1 0 0 -1 0

|                 |         |         |         |         |         |
|-----------------|---------|---------|---------|---------|---------|
| Eigenvalues --- | 0.00056 | 0.00085 | 0.00220 | 0.00450 | 0.00606 |
| Eigenvalues --- | 0.00692 | 0.00729 | 0.01196 | 0.01537 | 0.01888 |
| Eigenvalues --- | 0.02020 | 0.02175 | 0.02335 | 0.02377 | 0.02438 |
| Eigenvalues --- | 0.02621 | 0.02783 | 0.02862 | 0.03073 | 0.03101 |
| Eigenvalues --- | 0.03491 | 0.03511 | 0.03727 | 0.03926 | 0.04061 |

|                 |         |         |         |         |         |
|-----------------|---------|---------|---------|---------|---------|
| Eigenvalues --- | 0.04406 | 0.04424 | 0.05110 | 0.05320 | 0.05463 |
| Eigenvalues --- | 0.05702 | 0.05754 | 0.05933 | 0.07682 | 0.08675 |
| Eigenvalues --- | 0.08935 | 0.09573 | 0.10672 | 0.12148 | 0.12308 |
| Eigenvalues --- | 0.12675 | 0.13267 | 0.15347 | 0.15818 | 0.15992 |
| Eigenvalues --- | 0.16001 | 0.16006 | 0.16015 | 0.16030 | 0.16150 |
| Eigenvalues --- | 0.16447 | 0.18973 | 0.21840 | 0.22052 | 0.22260 |
| Eigenvalues --- | 0.22987 | 0.23446 | 0.24999 | 0.26747 | 0.27600 |
| Eigenvalues --- | 0.28097 | 0.29333 | 0.31125 | 0.31806 | 0.32315 |
| Eigenvalues --- | 0.33757 | 0.34287 | 0.34340 | 0.34379 | 0.34547 |
| Eigenvalues --- | 0.34672 | 0.34738 | 0.35081 | 0.35116 | 0.35333 |
| Eigenvalues --- | 0.35595 | 0.35731 | 0.35856 | 0.35927 | 0.36421 |
| Eigenvalues --- | 0.36634 | 0.39436 | 0.41823 | 0.42333 | 0.44202 |
| Eigenvalues --- | 0.44961 | 0.45486 | 0.46653 | 0.49544 | 0.55183 |
| Eigenvalues --- | 0.58957 | 0.60670 | 1.25408 |         |         |

En-DIIS/RFO-DIIS IScMMF= 0 using points: 35 34 33 32 31

RFO step: Lambda=-2.42264282D-06.

DidBck=F Rises=F RFO-DIIS coefs: 2.39427 -1.92218 0.23292 0.31339 -  
0.01839

Iteration 1 RMS(Cart)= 0.02368568 RMS(Int)= 0.00022460

Iteration 2 RMS(Cart)= 0.00035223 RMS(Int)= 0.00001232

Iteration 3 RMS(Cart)= 0.00000007 RMS(Int)= 0.00001232

| Variable | Old X   | -DE/DX   | Delta X<br>(Linear) | Delta X<br>(Quad) | Delta X<br>(Total) | New X   |
|----------|---------|----------|---------------------|-------------------|--------------------|---------|
| R1       | 2.56482 | 0.00005  | 0.00005             | 0.00002           | 0.00007            | 2.56489 |
| R2       | 2.62151 | -0.00005 | 0.00000             | 0.00000           | 0.00000            | 2.62151 |
| R3       | 2.03392 | 0.00000  | 0.00000             | 0.00001           | 0.00000            | 2.03392 |
| R4       | 2.62484 | 0.00010  | 0.00008             | -0.00002          | 0.00006            | 2.62490 |
| R5       | 2.03075 | -0.00001 | -0.00002            | 0.00002           | 0.00000            | 2.03076 |
| R6       | 2.54417 | -0.00013 | -0.00015            | 0.00004           | -0.00012           | 2.54406 |
| R7       | 2.69916 | -0.00005 | -0.00009            | 0.00000           | -0.00009           | 2.69907 |
| R8       | 2.52067 | -0.00005 | -0.00013            | 0.00007           | -0.00006           | 2.52061 |
| R9       | 2.09296 | 0.00006  | 0.00013             | 0.00030           | 0.00043            | 2.09339 |
| R10      | 2.78499 | 0.00000  | 0.00021             | -0.00012          | 0.00009            | 2.78508 |
| R11      | 2.89687 | -0.00010 | -0.00025            | 0.00007           | -0.00018           | 2.89669 |
| R12      | 2.06011 | 0.00001  | -0.00003            | -0.00004          | -0.00007           | 2.06004 |
| R13      | 2.06147 | -0.00002 | -0.00002            | -0.00001          | -0.00003           | 2.06143 |
| R14      | 2.06961 | -0.00001 | 0.00005             | -0.00005          | -0.00001           | 2.06961 |
| R15      | 2.07977 | -0.00008 | -0.00021            | 0.00002           | -0.00019           | 2.07958 |
| R16      | 2.75429 | 0.00025  | 0.00038             | 0.00010           | 0.00048            | 2.75477 |
| R17      | 4.25315 | -0.00001 | -0.00428            | -0.00124          | -0.00552           | 4.24763 |
| R18      | 2.50649 | 0.00001  | 0.00001             | -0.00002          | -0.00001           | 2.50649 |
| R19      | 2.05746 | -0.00005 | -0.00026            | 0.00005           | -0.00021           | 2.05725 |
| R20      | 2.04354 | 0.00000  | -0.00002            | 0.00000           | -0.00001           | 2.04353 |
| R21      | 2.04717 | 0.00000  | -0.00004            | 0.00002           | -0.00002           | 2.04715 |

|     |         |          |          |          |          |         |
|-----|---------|----------|----------|----------|----------|---------|
| R22 | 1.91457 | 0.00001  | 0.00017  | -0.00003 | 0.00013  | 1.91470 |
| R23 | 1.92337 | 0.00003  | 0.00028  | -0.00006 | 0.00021  | 1.92358 |
| R24 | 4.13424 | 0.00000  | -0.00365 | -0.00358 | -0.00722 | 4.12702 |
| R25 | 2.76685 | 0.00022  | -0.00044 | 0.00035  | -0.00007 | 2.76678 |
| R26 | 2.73084 | 0.00018  | 0.00048  | 0.00027  | 0.00075  | 2.73158 |
| R27 | 2.05525 | -0.00002 | 0.00018  | -0.00001 | 0.00017  | 2.05542 |
| R28 | 2.05230 | -0.00003 | -0.00002 | -0.00002 | -0.00004 | 2.05226 |
| R29 | 2.74972 | 0.00008  | 0.00025  | -0.00070 | -0.00047 | 2.74925 |
| R30 | 2.05670 | 0.00005  | -0.00013 | -0.00018 | -0.00031 | 2.05639 |
| R31 | 2.84219 | -0.00007 | 0.00005  | -0.00011 | -0.00006 | 2.84213 |
| R32 | 2.06730 | 0.00001  | 0.00002  | -0.00001 | 0.00001  | 2.06731 |
| R33 | 2.06783 | 0.00000  | 0.00002  | 0.00002  | 0.00003  | 2.06786 |
| R34 | 2.06544 | 0.00000  | -0.00003 | -0.00002 | -0.00005 | 2.06539 |
| A1  | 1.87256 | -0.00004 | -0.00004 | -0.00003 | -0.00007 | 1.87249 |
| A2  | 2.27946 | 0.00001  | 0.00009  | 0.00003  | 0.00012  | 2.27958 |
| A3  | 2.13112 | 0.00003  | -0.00005 | 0.00000  | -0.00005 | 2.13107 |
| A4  | 1.86490 | -0.00003 | -0.00014 | 0.00006  | -0.00008 | 1.86483 |
| A5  | 2.27564 | 0.00003  | 0.00003  | -0.00002 | 0.00001  | 2.27566 |
| A6  | 2.14259 | 0.00000  | 0.00010  | -0.00005 | 0.00005  | 2.14264 |
| A7  | 1.89698 | 0.00000  | 0.00017  | -0.00005 | 0.00012  | 1.89710 |
| A8  | 2.25236 | 0.00004  | -0.00003 | 0.00010  | 0.00007  | 2.25243 |
| A9  | 2.13382 | -0.00004 | -0.00014 | -0.00006 | -0.00021 | 2.13361 |
| A10 | 1.88987 | 0.00002  | -0.00011 | 0.00002  | -0.00010 | 1.88977 |
| A11 | 2.14497 | 0.00042  | 0.00124  | -0.00050 | 0.00074  | 2.14570 |
| A12 | 2.24827 | -0.00044 | -0.00116 | 0.00047  | -0.00069 | 2.24757 |
| A13 | 1.90045 | 0.00005  | 0.00013  | 0.00000  | 0.00013  | 1.90058 |
| A14 | 2.20409 | 0.00029  | 0.00012  | 0.00028  | 0.00040  | 2.20449 |
| A15 | 2.17792 | -0.00034 | -0.00025 | -0.00027 | -0.00052 | 2.17740 |
| A16 | 1.95997 | 0.00004  | 0.00091  | 0.00022  | 0.00113  | 1.96110 |
| A17 | 1.87200 | -0.00001 | -0.00044 | -0.00034 | -0.00078 | 1.87122 |
| A18 | 1.89094 | 0.00002  | -0.00015 | -0.00006 | -0.00021 | 1.89073 |
| A19 | 1.90794 | -0.00014 | -0.00048 | 0.00009  | -0.00040 | 1.90754 |
| A20 | 1.92855 | 0.00007  | -0.00017 | 0.00013  | -0.00004 | 1.92851 |
| A21 | 1.90289 | 0.00003  | 0.00032  | -0.00005 | 0.00027  | 1.90317 |
| A22 | 1.91518 | 0.00013  | 0.00041  | -0.00008 | 0.00032  | 1.91551 |
| A23 | 1.89138 | 0.00007  | 0.00048  | 0.00004  | 0.00052  | 1.89190 |
| A24 | 1.88157 | -0.00018 | -0.00129 | 0.00011  | -0.00117 | 1.88040 |
| A25 | 1.87539 | -0.00003 | 0.00037  | 0.00006  | 0.00043  | 1.87582 |
| A26 | 1.89942 | 0.00014  | 0.00059  | -0.00027 | 0.00032  | 1.89974 |
| A27 | 2.00016 | -0.00011 | -0.00052 | 0.00013  | -0.00039 | 1.99978 |
| A28 | 2.16071 | 0.00007  | 0.00028  | -0.00012 | 0.00016  | 2.16087 |
| A29 | 1.94588 | -0.00002 | -0.00004 | -0.00001 | -0.00005 | 1.94583 |
| A30 | 2.17659 | -0.00005 | -0.00024 | 0.00013  | -0.00011 | 2.17648 |
| A31 | 2.07374 | 0.00001  | 0.00021  | 0.00001  | 0.00022  | 2.07397 |

|     |          |          |          |          |          |          |
|-----|----------|----------|----------|----------|----------|----------|
| A32 | 2.16469  | -0.00001 | -0.00021 | -0.00006 | -0.00027 | 2.16441  |
| A33 | 2.04476  | 0.00000  | 0.00000  | 0.00004  | 0.00005  | 2.04481  |
| A34 | 1.94076  | 0.00019  | -0.00030 | -0.00015 | -0.00047 | 1.94030  |
| A35 | 1.91656  | -0.00045 | -0.00067 | -0.00035 | -0.00102 | 1.91554  |
| A36 | 1.89047  | 0.00015  | -0.00030 | -0.00003 | -0.00032 | 1.89015  |
| A37 | 2.08645  | 0.00004  | -0.00038 | -0.00016 | -0.00055 | 2.08590  |
| A38 | 2.07706  | -0.00013 | 0.00012  | -0.00092 | -0.00080 | 2.07626  |
| A39 | 1.99677  | -0.00006 | -0.00035 | 0.00016  | -0.00017 | 1.99660  |
| A40 | 2.00306  | 0.00001  | 0.00032  | 0.00009  | 0.00038  | 2.00344  |
| A41 | 2.02992  | 0.00010  | 0.00017  | 0.00082  | 0.00099  | 2.03091  |
| A42 | 2.02454  | -0.00024 | -0.00111 | -0.00060 | -0.00166 | 2.02288  |
| A43 | 2.13402  | 0.00011  | 0.00024  | 0.00036  | 0.00054  | 2.13457  |
| A44 | 1.96158  | -0.00006 | -0.00070 | -0.00005 | -0.00075 | 1.96083  |
| A45 | 2.02819  | -0.00006 | 0.00051  | 0.00010  | 0.00062  | 2.02882  |
| A46 | 2.04154  | 0.00014  | 0.00063  | 0.00009  | 0.00072  | 2.04227  |
| A47 | 2.54012  | 0.00010  | 0.00346  | 0.00408  | 0.00764  | 2.54776  |
| A48 | 2.49614  | -0.00010 | -0.00122 | 0.00024  | -0.00100 | 2.49515  |
| A49 | 1.93248  | 0.00006  | 0.00023  | 0.00015  | 0.00038  | 1.93286  |
| A50 | 1.91655  | 0.00001  | 0.00014  | 0.00002  | 0.00016  | 1.91671  |
| A51 | 1.94336  | -0.00003 | -0.00039 | -0.00016 | -0.00055 | 1.94280  |
| A52 | 1.87849  | -0.00001 | 0.00030  | 0.00011  | 0.00041  | 1.87890  |
| A53 | 1.89545  | -0.00002 | -0.00011 | -0.00009 | -0.00019 | 1.89526  |
| A54 | 1.89593  | 0.00000  | -0.00015 | -0.00002 | -0.00017 | 1.89576  |
| A55 | 3.48474  | -0.00038 | 0.00074  | 0.00119  | 0.00193  | 3.48667  |
| A56 | 2.53371  | -0.00021 | 0.00032  | -0.00080 | -0.00046 | 2.53325  |
| A57 | 2.95468  | 0.00010  | 0.00945  | 0.00578  | 0.01522  | 2.96990  |
| A58 | 3.09276  | 0.00001  | 0.00517  | 0.00532  | 0.01050  | 3.10327  |
| D1  | 0.00310  | 0.00001  | -0.00021 | 0.00047  | 0.00026  | 0.00336  |
| D2  | -3.12771 | 0.00000  | 0.00099  | 0.00054  | 0.00153  | -3.12617 |
| D3  | 3.13403  | 0.00000  | -0.00035 | 0.00025  | -0.00010 | 3.13393  |
| D4  | 0.00323  | -0.00001 | 0.00084  | 0.00033  | 0.00117  | 0.00440  |
| D5  | -0.00516 | 0.00001  | -0.00002 | 0.00004  | 0.00003  | -0.00513 |
| D6  | -3.10716 | -0.00001 | -0.00012 | -0.00021 | -0.00033 | -3.10749 |
| D7  | -3.13719 | 0.00002  | 0.00011  | 0.00024  | 0.00035  | -3.13684 |
| D8  | 0.04399  | 0.00000  | 0.00001  | -0.00002 | -0.00001 | 0.04398  |
| D9  | -0.00003 | -0.00002 | 0.00036  | -0.00082 | -0.00046 | -0.00049 |
| D10 | -3.13338 | -0.00001 | 0.00113  | 0.00035  | 0.00148  | -3.13190 |
| D11 | 3.13179  | -0.00001 | -0.00073 | -0.00089 | -0.00161 | 3.13018  |
| D12 | -0.00155 | 0.00000  | 0.00004  | 0.00028  | 0.00032  | -0.00123 |
| D13 | -0.00319 | 0.00003  | -0.00037 | 0.00085  | 0.00048  | -0.00271 |
| D14 | -3.13191 | 0.00001  | 0.00234  | 0.00162  | 0.00397  | -3.12794 |
| D15 | 3.13083  | 0.00002  | -0.00108 | -0.00022 | -0.00130 | 3.12953  |
| D16 | 0.00211  | 0.00000  | 0.00163  | 0.00055  | 0.00219  | 0.00430  |
| D17 | -0.02753 | -0.00001 | -0.00533 | -0.00473 | -0.01006 | -0.03759 |

|     |          |          |          |          |          |          |
|-----|----------|----------|----------|----------|----------|----------|
| D18 | 3.11482  | -0.00003 | -0.00575 | -0.00463 | -0.01039 | 3.10443  |
| D19 | 3.12330  | 0.00000  | -0.00447 | -0.00342 | -0.00789 | 3.11541  |
| D20 | -0.01754 | -0.00002 | -0.00489 | -0.00332 | -0.00822 | -0.02576 |
| D21 | 0.00515  | -0.00002 | 0.00024  | -0.00056 | -0.00032 | 0.00483  |
| D22 | 3.10788  | 0.00001  | 0.00036  | -0.00029 | 0.00006  | 3.10795  |
| D23 | 3.13287  | 0.00000  | -0.00266 | -0.00140 | -0.00405 | 3.12881  |
| D24 | -0.04758 | 0.00004  | -0.00255 | -0.00113 | -0.00367 | -0.05126 |
| D25 | 1.32418  | 0.00015  | 0.00258  | 0.00342  | 0.00600  | 1.33019  |
| D26 | -2.86256 | -0.00001 | 0.00224  | 0.00344  | 0.00568  | -2.85688 |
| D27 | -0.81076 | 0.00003  | 0.00231  | 0.00316  | 0.00547  | -0.80529 |
| D28 | -1.77179 | 0.00011  | 0.00245  | 0.00312  | 0.00557  | -1.76623 |
| D29 | 0.32465  | -0.00004 | 0.00211  | 0.00313  | 0.00524  | 0.32989  |
| D30 | 2.37645  | -0.00001 | 0.00218  | 0.00286  | 0.00504  | 2.38148  |
| D31 | -1.09537 | -0.00010 | -0.00196 | -0.00118 | -0.00314 | -1.09850 |
| D32 | 0.94759  | -0.00003 | -0.00101 | -0.00113 | -0.00214 | 0.94545  |
| D33 | 3.12168  | -0.00024 | -0.00215 | -0.00087 | -0.00302 | 3.11866  |
| D34 | 3.11235  | -0.00001 | -0.00167 | -0.00094 | -0.00261 | 3.10974  |
| D35 | -1.12788 | 0.00005  | -0.00071 | -0.00090 | -0.00161 | -1.12949 |
| D36 | 1.04621  | -0.00015 | -0.00186 | -0.00064 | -0.00249 | 1.04372  |
| D37 | 1.01811  | 0.00000  | -0.00165 | -0.00102 | -0.00267 | 1.01544  |
| D38 | 3.06107  | 0.00007  | -0.00070 | -0.00097 | -0.00167 | 3.05940  |
| D39 | -1.04803 | -0.00014 | -0.00184 | -0.00071 | -0.00255 | -1.05058 |
| D40 | 2.94245  | 0.00010  | 0.00038  | -0.00089 | -0.00051 | 2.94195  |
| D41 | -1.24867 | 0.00012  | -0.00063 | -0.00125 | -0.00188 | -1.25054 |
| D42 | 0.86624  | -0.00003 | 0.00029  | -0.00070 | -0.00041 | 0.86583  |
| D43 | 2.95830  | -0.00001 | -0.00071 | -0.00106 | -0.00178 | 2.95652  |
| D44 | -1.23351 | -0.00002 | -0.00027 | -0.00066 | -0.00094 | -1.23444 |
| D45 | 0.85856  | 0.00000  | -0.00128 | -0.00102 | -0.00230 | 0.85625  |
| D46 | 3.14059  | -0.00002 | -0.00079 | -0.00021 | -0.00101 | 3.13959  |
| D47 | -0.00137 | -0.00001 | -0.00075 | -0.00042 | -0.00117 | -0.00254 |
| D48 | -0.00186 | 0.00000  | -0.00031 | -0.00032 | -0.00063 | -0.00249 |
| D49 | 3.13937  | 0.00002  | -0.00027 | -0.00053 | -0.00080 | 3.13857  |
| D50 | 2.30275  | -0.00007 | -0.01748 | -0.02362 | -0.04112 | 2.26163  |
| D51 | -1.36617 | 0.00024  | -0.01068 | -0.00794 | -0.01861 | -1.38478 |
| D52 | -1.98619 | -0.00022 | -0.01954 | -0.02587 | -0.04541 | -2.03161 |
| D53 | 0.62807  | 0.00010  | -0.01274 | -0.01019 | -0.02290 | 0.60517  |
| D54 | -2.71340 | -0.00006 | -0.00041 | 0.00039  | -0.00003 | -2.71343 |
| D55 | -0.01182 | 0.00000  | -0.00087 | 0.00002  | -0.00086 | -0.01269 |
| D56 | -0.03027 | 0.00001  | -0.00058 | -0.00003 | -0.00062 | -0.03089 |
| D57 | 2.67130  | 0.00007  | -0.00104 | -0.00041 | -0.00145 | 2.66985  |
| D58 | 0.55560  | -0.00010 | 0.00095  | 0.00538  | 0.00633  | 0.56193  |
| D59 | -1.85618 | -0.00021 | 0.00071  | 0.00375  | 0.00446  | -1.85172 |
| D60 | 1.85841  | 0.00010  | -0.00437 | -0.00777 | -0.01208 | 1.84634  |
| D61 | -0.55971 | 0.00000  | -0.00515 | -0.00798 | -0.01308 | -0.57279 |

|     |          |          |         |         |         |          |
|-----|----------|----------|---------|---------|---------|----------|
| D62 | 2.55436  | 0.00000  | 0.00138 | 0.00076 | 0.00213 | 2.55649  |
| D63 | -1.65685 | 0.00003  | 0.00197 | 0.00100 | 0.00296 | -1.65389 |
| D64 | 0.44370  | 0.00001  | 0.00162 | 0.00088 | 0.00249 | 0.44619  |
| D65 | 1.35328  | -0.00002 | 0.00077 | 0.00039 | 0.00116 | 1.35444  |
| D66 | -2.85792 | 0.00001  | 0.00136 | 0.00062 | 0.00199 | -2.85593 |
| D67 | -0.75738 | -0.00001 | 0.00101 | 0.00050 | 0.00152 | -0.75586 |
| D68 | -1.03126 | -0.00003 | 0.00050 | 0.00022 | 0.00073 | -1.03054 |
| D69 | 1.04072  | 0.00000  | 0.00110 | 0.00046 | 0.00156 | 1.04228  |
| D70 | 3.14126  | -0.00002 | 0.00075 | 0.00034 | 0.00109 | -3.14083 |

| Item                 | Value    | Threshold | Converged? |
|----------------------|----------|-----------|------------|
| Maximum Force        | 0.000447 | 0.000450  | YES        |
| RMS Force            | 0.000108 | 0.000300  | YES        |
| Maximum Displacement | 0.104283 | 0.001800  | NO         |
| RMS Displacement     | 0.023776 | 0.001200  | NO         |

Predicted change in Energy=-2.021874D-06

GradGradGradGradGradGradGradGradGradGradGradGradGradGradGradGradGradGrad

Input orientation:

| Center Number | Atomic Number | Atomic Type | Coordinates (Angstroms) |           |           |
|---------------|---------------|-------------|-------------------------|-----------|-----------|
|               |               |             | X                       | Y         | Z         |
| 1             | 6             | 0           | -2.643222               | 2.094488  | -0.197813 |
| 2             | 6             | 0           | -3.534811               | 1.115687  | 0.100912  |
| 3             | 7             | 0           | -2.827024               | -0.079205 | 0.127292  |
| 4             | 6             | 0           | -1.535245               | 0.178180  | -0.151040 |
| 5             | 7             | 0           | -1.404589               | 1.489871  | -0.354865 |
| 6             | 6             | 0           | -0.131081               | 2.172156  | -0.645993 |
| 7             | 6             | 0           | 0.449687                | 2.873949  | 0.586833  |
| 8             | 1             | 0           | -2.781691               | 3.154849  | -0.319863 |
| 9             | 1             | 0           | -4.592575               | 1.169210  | 0.282846  |
| 10            | 1             | 0           | 0.570178                | 1.412522  | -0.991780 |
| 11            | 1             | 0           | -0.302390               | 2.890336  | -1.449019 |
| 12            | 1             | 0           | -0.234474               | 3.661058  | 0.921227  |
| 13            | 1             | 0           | 0.529058                | 2.137380  | 1.400589  |
| 14            | 35            | 0           | 0.126922                | -2.677449 | -0.207385 |
| 15            | 1             | 0           | -0.761373               | -0.612674 | -0.204263 |
| 16            | 6             | 0           | -3.302786               | -1.401511 | 0.382571  |
| 17            | 6             | 0           | -4.561655               | -1.686848 | 0.687697  |
| 18            | 1             | 0           | -2.504396               | -2.136404 | 0.295052  |
| 19            | 1             | 0           | -4.834626               | -2.718318 | 0.863647  |
| 20            | 1             | 0           | -5.347046               | -0.945782 | 0.774490  |
| 21            | 7             | 0           | 1.714519                | 3.484203  | 0.195853  |
| 22            | 1             | 0           | 2.052965                | 4.115796  | 0.912200  |

|    |   |   |          |           |           |
|----|---|---|----------|-----------|-----------|
| 23 | 1 | 0 | 2.415399 | 2.760399  | 0.050869  |
| 24 | 6 | 0 | 3.387930 | -0.353862 | -1.152177 |
| 25 | 6 | 0 | 3.267120 | -0.582712 | 0.288888  |
| 26 | 8 | 0 | 2.742701 | 0.632412  | -0.315287 |
| 27 | 1 | 0 | 4.342397 | -0.036609 | -1.566168 |
| 28 | 1 | 0 | 2.722262 | -0.884486 | -1.826522 |
| 29 | 1 | 0 | 2.477819 | -1.265404 | 0.597273  |
| 30 | 6 | 0 | 4.427426 | -0.410182 | 1.230114  |
| 31 | 1 | 0 | 4.086261 | -0.043189 | 2.202586  |
| 32 | 1 | 0 | 4.919412 | -1.373924 | 1.393115  |
| 33 | 1 | 0 | 5.162043 | 0.293430  | 0.830338  |

-----  
Distance matrix (angstroms):

|    |    | 1        | 2        | 3        | 4        | 5        |
|----|----|----------|----------|----------|----------|----------|
| 1  | C  | 0.000000 |          |          |          |          |
| 2  | C  | 1.357283 | 0.000000 |          |          |          |
| 3  | N  | 2.205543 | 1.389038 | 0.000000 |          |          |
| 4  | C  | 2.214055 | 2.222760 | 1.346257 | 0.000000 |          |
| 5  | N  | 1.387242 | 2.210338 | 2.172050 | 1.333848 | 0.000000 |
| 6  | C  | 2.552989 | 3.641342 | 3.596485 | 2.488493 | 1.473801 |
| 7  | C  | 3.284709 | 4.382217 | 4.434990 | 3.428058 | 2.498160 |
| 8  | H  | 1.076306 | 2.214141 | 3.265135 | 3.231515 | 2.160969 |
| 9  | H  | 2.210690 | 1.074630 | 2.167927 | 3.243095 | 3.266919 |
| 10 | H  | 3.379556 | 4.258288 | 3.875378 | 2.581327 | 2.076378 |
| 11 | H  | 2.770991 | 4.000027 | 4.204369 | 3.249689 | 2.091248 |
| 12 | H  | 3.083579 | 4.247829 | 4.619656 | 3.869393 | 2.776982 |
| 13 | H  | 3.552476 | 4.387260 | 4.218747 | 3.241506 | 2.690701 |
| 14 | Br | 5.517714 | 5.281213 | 3.948250 | 3.304631 | 4.442278 |
| 15 | H  | 3.296987 | 3.282121 | 2.159035 | 1.107773 | 2.203884 |
| 16 | C  | 3.604702 | 2.543512 | 1.428289 | 2.429890 | 3.536532 |
| 17 | C  | 4.331630 | 3.041863 | 2.430538 | 3.652529 | 4.598429 |
| 18 | H  | 4.261764 | 3.416949 | 2.089090 | 2.548637 | 3.844716 |
| 19 | H  | 5.393704 | 4.119573 | 3.396704 | 4.506129 | 5.564062 |
| 20 | H  | 4.183213 | 2.826227 | 2.742322 | 4.080407 | 4.769782 |
| 21 | N  | 4.590881 | 5.759717 | 5.773058 | 4.648773 | 3.742924 |
| 22 | H  | 5.231825 | 6.393910 | 6.482933 | 5.432362 | 4.522788 |
| 23 | H  | 5.108320 | 6.173539 | 5.962566 | 4.724004 | 4.046130 |
| 24 | C  | 6.578756 | 7.187082 | 6.351231 | 5.052029 | 5.196470 |
| 25 | C  | 6.506644 | 7.013284 | 6.117044 | 4.882131 | 5.151202 |
| 26 | O  | 5.582081 | 6.309828 | 5.632416 | 4.305128 | 4.235187 |
| 27 | H  | 7.430535 | 8.133717 | 7.366833 | 6.049413 | 6.068381 |
| 28 | H  | 6.349441 | 6.845922 | 5.938050 | 4.697112 | 4.983397 |
| 29 | H  | 6.176253 | 6.485961 | 5.456126 | 4.329964 | 4.855018 |
| 30 | C  | 7.635864 | 8.185389 | 7.345258 | 6.148757 | 6.335200 |

|    |    |          |          |          |          |          |
|----|----|----------|----------|----------|----------|----------|
| 31 | H  | 7.457715 | 7.990042 | 7.218148 | 6.098351 | 6.248220 |
| 32 | H  | 8.470795 | 8.907404 | 7.955242 | 6.815867 | 7.158893 |
| 33 | H  | 8.076080 | 8.766038 | 8.028594 | 6.769789 | 6.779146 |
|    |    | 6        | 7        | 8        | 9        | 10       |
| 6  | C  | 0.000000 |          |          |          |          |
| 7  | C  | 1.532862 | 0.000000 |          |          |          |
| 8  | H  | 2.845660 | 3.367909 | 0.000000 |          |          |
| 9  | H  | 4.666216 | 5.331318 | 2.754146 | 0.000000 |          |
| 10 | H  | 1.090126 | 2.154601 | 3.836952 | 5.323334 | 0.000000 |
| 11 | H  | 1.090863 | 2.170388 | 2.737133 | 4.936327 | 1.776056 |
| 12 | H  | 2.164186 | 1.095188 | 2.878345 | 5.060621 | 3.059897 |
| 13 | H  | 2.150695 | 1.100469 | 3.867332 | 5.330838 | 2.500107 |
| 14 | Br | 4.876229 | 5.617203 | 6.518311 | 6.108254 | 4.188032 |
| 15 | H  | 2.889234 | 3.774790 | 4.276596 | 4.253292 | 2.548457 |
| 16 | C  | 4.887612 | 5.692304 | 4.639544 | 2.877865 | 4.980710 |
| 17 | C  | 6.025000 | 6.776769 | 5.255994 | 2.884775 | 6.225950 |
| 18 | H  | 5.008181 | 5.823691 | 5.334076 | 3.909952 | 4.868656 |
| 19 | H  | 6.951193 | 7.698963 | 6.333192 | 3.938120 | 7.051124 |
| 20 | H  | 6.240641 | 6.944614 | 4.959216 | 2.298724 | 6.610207 |
| 21 | N  | 2.415867 | 1.457764 | 4.537659 | 6.719092 | 2.647989 |
| 22 | H  | 3.312969 | 2.053911 | 5.080876 | 7.296688 | 3.623739 |
| 23 | H  | 2.704849 | 2.040632 | 5.225207 | 7.190091 | 2.511719 |
| 24 | C  | 4.361242 | 4.698531 | 7.146190 | 8.250303 | 3.329500 |
| 25 | C  | 4.473373 | 4.469362 | 7.136389 | 8.052582 | 3.590900 |
| 26 | O  | 3.277011 | 3.331099 | 6.073023 | 7.379173 | 2.405425 |
| 27 | H  | 5.073201 | 5.316009 | 7.905145 | 9.203618 | 4.081610 |
| 28 | H  | 4.344914 | 5.011458 | 6.991405 | 7.885046 | 3.256456 |
| 29 | H  | 4.490978 | 4.609519 | 6.931250 | 7.484430 | 3.651777 |
| 30 | C  | 5.564911 | 5.198244 | 8.190437 | 9.206097 | 4.810139 |
| 31 | H  | 5.550507 | 4.934067 | 7.984921 | 8.970926 | 4.968492 |
| 32 | H  | 6.499240 | 6.218758 | 9.096762 | 9.908488 | 5.689275 |
| 33 | H  | 5.807437 | 5.378166 | 8.521361 | 9.809144 | 5.065343 |
|    |    | 11       | 12       | 13       | 14       | 15       |
| 11 | H  | 0.000000 |          |          |          |          |
| 12 | H  | 2.493329 | 0.000000 |          |          |          |
| 13 | H  | 3.062436 | 1.770414 | 0.000000 |          |          |
| 14 | Br | 5.720681 | 6.448337 | 5.092138 | 0.000000 |          |
| 15 | H  | 3.745820 | 4.450746 | 3.435630 | 2.247749 | 0.000000 |
| 16 | C  | 5.547707 | 5.944266 | 5.314427 | 3.706611 | 2.724962 |
| 17 | C  | 6.607384 | 6.883251 | 6.406894 | 4.874958 | 4.048652 |
| 18 | H  | 5.758362 | 6.257412 | 5.356237 | 2.732948 | 2.368374 |
| 19 | H  | 7.572753 | 7.865186 | 7.255013 | 5.075996 | 4.708031 |
| 20 | H  | 6.716275 | 6.883524 | 6.665319 | 5.824695 | 4.700778 |
| 21 | N  | 2.669495 | 2.087108 | 2.161166 | 6.375658 | 4.803596 |



|    |   |          |          |          |           |           |
|----|---|----------|----------|----------|-----------|-----------|
| 22 | H | 3.553140 | 2.332219 | 2.544592 | 7.149216  | 5.614750  |
| 23 | H | 3.106916 | 2.930962 | 2.401704 | 5.905422  | 4.640538  |
| 24 | C | 4.922540 | 5.791408 | 4.571220 | 4.114105  | 4.264064  |
| 25 | C | 5.274825 | 5.538104 | 4.016436 | 3.807237  | 4.058676  |
| 26 | O | 3.956785 | 4.423261 | 3.179523 | 4.220085  | 3.720363  |
| 27 | H | 5.491337 | 6.388085 | 5.298059 | 5.156604  | 5.313672  |
| 28 | H | 4.851836 | 6.079012 | 4.935186 | 3.545717  | 3.852443  |
| 29 | H | 5.402504 | 5.633073 | 4.002739 | 2.857983  | 3.400130  |
| 30 | C | 6.359429 | 6.197074 | 4.660087 | 5.069639  | 5.387215  |
| 31 | H | 6.418726 | 5.833702 | 4.248738 | 5.331384  | 5.442131  |
| 32 | H | 7.316342 | 7.220545 | 5.621790 | 5.218117  | 5.949995  |
| 33 | H | 6.465246 | 6.361727 | 5.018952 | 5.937629  | 6.080977  |
|    |   | 16       | 17       | 18       | 19        | 20        |
| 16 | C | 0.000000 |          |          |           |           |
| 17 | C | 1.326375 | 0.000000 |          |           |           |
| 18 | H | 1.088648 | 2.142099 | 0.000000 |           |           |
| 19 | H | 2.076523 | 1.081389 | 2.468177 | 0.000000  |           |
| 20 | H | 2.130795 | 1.083306 | 3.118991 | 1.847270  | 0.000000  |
| 21 | N | 7.005598 | 8.146904 | 7.028535 | 9.044806  | 8.356152  |
| 22 | H | 7.707480 | 8.801948 | 7.761470 | 9.702906  | 8.966532  |
| 23 | H | 7.080195 | 8.298364 | 6.945695 | 9.123585  | 8.632205  |
| 24 | C | 6.943969 | 8.267883 | 6.323878 | 8.790030  | 8.964498  |
| 25 | C | 6.621395 | 7.916305 | 5.976988 | 8.398181  | 8.635478  |
| 26 | O | 6.416522 | 7.729072 | 5.964132 | 8.368581  | 8.313983  |
| 27 | H | 8.006833 | 9.331953 | 7.399450 | 9.864751  | 10.009525 |
| 28 | H | 6.438059 | 7.747292 | 5.778090 | 8.228396  | 8.478369  |
| 29 | H | 5.786192 | 7.052659 | 5.066798 | 7.460146  | 7.833395  |
| 30 | C | 7.839467 | 9.095476 | 7.204467 | 9.552351  | 9.799733  |
| 31 | H | 7.730169 | 8.932131 | 7.173353 | 9.409107  | 9.583393  |
| 32 | H | 8.284111 | 9.512422 | 7.543211 | 9.860476  | 10.293987 |
| 33 | H | 8.644457 | 9.924321 | 8.060081 | 10.440552 | 10.582047 |
|    |   | 21       | 22       | 23       | 24        | 25        |
| 21 | N | 0.000000 |          |          |           |           |
| 22 | H | 1.013217 | 0.000000 |          |           |           |
| 23 | H | 1.017912 | 1.646315 | 0.000000 |           |           |
| 24 | C | 4.398662 | 5.101140 | 3.477320 | 0.000000  |           |
| 25 | C | 4.354195 | 4.892716 | 3.458101 | 1.464116  | 0.000000  |
| 26 | O | 3.074269 | 3.757183 | 2.183924 | 1.445491  | 1.454843  |
| 27 | H | 4.733558 | 5.350353 | 3.761832 | 1.087679  | 2.212619  |
| 28 | H | 4.918434 | 5.740329 | 4.111441 | 1.086010  | 2.205198  |
| 29 | H | 4.827269 | 5.407124 | 4.063193 | 2.172506  | 1.088193  |
| 30 | C | 4.857550 | 5.120900 | 3.935918 | 2.599815  | 1.503990  |
| 31 | H | 4.700492 | 4.805887 | 3.909190 | 3.440730  | 2.150423  |
| 32 | H | 5.941899 | 6.211669 | 5.016406 | 3.140777  | 2.139020  |

|    |   |          |          |          |          |          |
|----|---|----------|----------|----------|----------|----------|
| 33 | H | 4.740149 | 4.927834 | 3.773268 | 2.738034 | 2.156740 |
|    |   | 26       | 27       | 28       | 29       | 30       |
| 26 | O | 0.000000 |          |          |          |          |
| 27 | H | 2.138065 | 0.000000 |          |          |          |
| 28 | H | 2.141315 | 1.847030 | 0.000000 |          |          |
| 29 | H | 2.122412 | 3.109190 | 2.465691 | 0.000000 |          |
| 30 | C | 2.512681 | 2.822407 | 3.532079 | 2.221004 | 0.000000 |
| 31 | H | 2.932793 | 3.777454 | 4.336126 | 2.580296 | 1.093974 |
| 32 | H | 3.417908 | 3.298290 | 3.928497 | 2.570315 | 1.094266 |
| 33 | H | 2.698255 | 2.554210 | 3.794592 | 3.112770 | 1.092956 |
|    |   | 31       | 32       | 33       |          |          |
| 31 | H | 0.000000 |          |          |          |          |
| 32 | H | 1.766420 | 0.000000 |          |          |          |
| 33 | H | 1.775861 | 1.776417 | 0.000000 |          |          |

Stoichiometry C10H18BrN3O

Framework group C1[X(C10H18BrN3O)]

Deg. of freedom 93

Full point group C1 NOp 1

Largest Abelian subgroup C1 NOp 1

Largest concise Abelian subgroup C1 NOp 1

Standard orientation:

| Center<br>Number | Atomic<br>Number | Atomic<br>Type | Coordinates (Angstroms) |           |           |
|------------------|------------------|----------------|-------------------------|-----------|-----------|
|                  |                  |                | X                       | Y         | Z         |
| 1                | 6                | 0              | -2.342031               | 2.475218  | -0.260131 |
| 2                | 6                | 0              | -3.331318               | 1.596469  | 0.042074  |
| 3                | 7                | 0              | -2.749182               | 0.336263  | 0.091319  |
| 4                | 6                | 0              | -1.435464               | 0.456987  | -0.176969 |
| 5                | 7                | 0              | -1.170065               | 1.745601  | -0.396487 |
| 6                | 6                | 0              | 0.168870                | 2.290657  | -0.683290 |
| 7                | 6                | 0              | 0.807029                | 2.946922  | 0.546237  |
| 8                | 1                | 0              | -2.370679               | 3.542351  | -0.397396 |
| 9                | 1                | 0              | -4.379717               | 1.759855  | 0.212351  |
| 10               | 1                | 0              | 0.792180                | 1.458863  | -1.011892 |
| 11               | 1                | 0              | 0.078804                | 3.011225  | -1.497323 |
| 12               | 1                | 0              | 0.203629                | 3.804148  | 0.863267  |
| 13               | 1                | 0              | 0.803671                | 2.217565  | 1.370287  |
| 14               | 35               | 0              | -0.072361               | -2.553418 | -0.178957 |
| 15               | 1                | 0              | -0.745723               | -0.409153 | -0.211891 |
| 16               | 6                | 0              | -3.359420               | -0.927083 | 0.358855  |
| 17               | 6                | 0              | -4.643488               | -1.078584 | 0.654638  |
| 18               | 1                | 0              | -2.639282               | -1.740532 | 0.289167  |
| 19               | 1                | 0              | -5.021664               | -2.074371 | 0.841166  |

|    |   |   |           |           |           |
|----|---|---|-----------|-----------|-----------|
| 20 | 1 | 0 | -5.350060 | -0.260327 | 0.723654  |
| 21 | 7 | 0 | 2.130893  | 3.419813  | 0.160444  |
| 22 | 1 | 0 | 2.525477  | 4.023669  | 0.871971  |
| 23 | 1 | 0 | 2.755676  | 2.626509  | 0.032146  |
| 24 | 6 | 0 | 3.416688  | -0.587062 | -1.120148 |
| 25 | 6 | 0 | 3.260290  | -0.782237 | 0.322448  |
| 26 | 8 | 0 | 2.867798  | 0.471351  | -0.302879 |
| 27 | 1 | 0 | 4.402175  | -0.374373 | -1.528343 |
| 28 | 1 | 0 | 2.706504  | -1.056607 | -1.794375 |
| 29 | 1 | 0 | 2.402829  | -1.376713 | 0.631515  |
| 30 | 6 | 0 | 4.423656  | -0.715473 | 1.273294  |
| 31 | 1 | 0 | 4.112945  | -0.302101 | 2.237329  |
| 32 | 1 | 0 | 4.813441  | -1.721886 | 1.453902  |
| 33 | 1 | 0 | 5.229669  | -0.095905 | 0.872010  |

-----

Rotational constants (GHZ):      0.4202721      0.2915859      0.1822805  
Standard basis: 6-311++G(d,p) (5D, 7F)  
There are    499 symmetry adapted cartesian basis functions of A    symmetry.  
There are    482 symmetry adapted basis functions of A    symmetry.  
482 basis functions,    760 primitive gaussians,    499 cartesian basis functions  
71 alpha electrons      71 beta electrons  
nuclear repulsion energy      1311.4676974975 Hartrees.  
NAtoms=    33 NActive=    33 NUniq=    33 SFac= 1.00D+00 NAtFMM=    60 NAOKFM=F  
Big=F  
Integral buffers will be    131072 words long.  
Raffenetti 2 integral format.  
Two-electron integral symmetry is turned on.  
One-electron integrals computed using PRISM.  
NBasis=    482 RedAO= T EigKep=    3.61D-06    NBF=    482  
NBsUse=    482 1.00D-06 EigRej= -1.00D+00    NBFU=    482  
Initial      guess      from      the      checkpoint      file:  
"/home/suqian/liuwen/qianmengshijie/nh2po/nh2po.chk"  
B after Tr=    0.000000    0.000000    0.000000  
Rot=    0.999997    0.000847    -0.001053    -0.002055 Ang=    0.28 deg.  
ExpMin= 3.50D-02 ExpMax= 4.40D+05 ExpMxC= 1.51D+04 IAcc=3 IRadAn=      5 AccDes=  
0.00D+00  
Harris functional with IExCor=    402 and IRadAn=      5 diagonalized for initial guess.  
HarFok: IExCor=    402 AccDes= 0.00D+00 IRadAn=      5 IDoV= 1 UseB2=F ITyADJ=14  
ICtDFT=    3500011 ScaDFX=    1.000000    1.000000    1.000000    1.000000  
FoFCou: FMM=F IPFlag=      0 FMFlag=      100000 FMFlg1=      0  
NFxFlg=      0 DoJE=T BraDBF=F KetDBF=T FulRan=T  
wScrn=    0.000000 ICntrl=      500 IOpCl=    0 I1Cent=    200000004 NGrid=  
0  
NMat0=    1 NMatS0=    1 NMatT0=    0 NMatD0=    1 NMtDS0=    0

NMtDT0= 0

Petite list used in FoFCou.

Requested convergence on RMS density matrix=1.00D-08 within 128 cycles.

Requested convergence on MAX density matrix=1.00D-06.

Requested convergence on energy=1.00D-06.

No special actions if energy rises.

SCF Done: E(RB3LYP) = -3205.64835349 A.U. after 11 cycles

NFock= 11 Conv=0.58D-08 -V/T= 2.0018

Calling FoFJK, ICntrl= 2127 FMM=F ISym2X=0 l1Cent= 0 IOpCIX= 0 NMat=1 NMatS=1

NMatT=0.

\*\*\*\*\* Axes restored to original set \*\*\*\*\*

| Center<br>Number | Atomic<br>Number | Forces (Hartrees/Bohr) |              |              |
|------------------|------------------|------------------------|--------------|--------------|
|                  |                  | X                      | Y            | Z            |
| 1                | 6                | 0.000066458            | -0.000070291 | -0.000029723 |
| 2                | 6                | -0.000081777           | 0.000097407  | -0.000023928 |
| 3                | 7                | 0.000069430            | -0.000009921 | -0.000085002 |
| 4                | 6                | -0.000237056           | -0.000177532 | 0.000080566  |
| 5                | 7                | 0.000042919            | 0.000137902  | 0.000233666  |
| 6                | 6                | 0.000013419            | -0.000023820 | -0.000178149 |
| 7                | 6                | -0.000377200           | -0.000114838 | -0.000054162 |
| 8                | 1                | -0.000026588           | -0.000004572 | -0.000019776 |
| 9                | 1                | 0.000011200            | -0.000013751 | 0.000019625  |
| 10               | 1                | 0.000075694            | 0.000061439  | 0.000043395  |
| 11               | 1                | -0.000025483           | -0.000030755 | 0.000006141  |
| 12               | 1                | 0.000025493            | -0.000021345 | 0.000047702  |
| 13               | 1                | 0.000063707            | 0.000043064  | -0.000049160 |
| 14               | 35               | 0.000061704            | 0.000003769  | 0.000009098  |
| 15               | 1                | 0.000046176            | 0.000067956  | -0.000041158 |
| 16               | 6                | 0.000057778            | 0.000096037  | 0.000025902  |
| 17               | 6                | 0.000011608            | -0.000041279 | 0.000009076  |
| 18               | 1                | -0.000017947           | -0.000002617 | -0.000017904 |
| 19               | 1                | 0.000000597            | 0.000003507  | -0.000003436 |
| 20               | 1                | -0.000007973           | 0.000000743  | -0.000003035 |
| 21               | 7                | 0.000217426            | 0.000061484  | 0.000101240  |
| 22               | 1                | -0.000015967           | 0.000005259  | -0.000040464 |
| 23               | 1                | 0.000044252            | -0.000054726 | 0.000070784  |
| 24               | 6                | 0.000221821            | -0.000307414 | -0.000544989 |
| 25               | 6                | 0.000003355            | -0.000043924 | 0.000374759  |
| 26               | 8                | 0.000144995            | 0.000334312  | -0.000043129 |
| 27               | 1                | -0.000087846           | 0.000119927  | 0.000062375  |
| 28               | 1                | -0.000148374           | -0.000081239 | 0.000283733  |
| 29               | 1                | -0.000067265           | -0.000113733 | -0.000245706 |

|    |   |              |             |              |
|----|---|--------------|-------------|--------------|
| 30 | 6 | -0.000145180 | 0.000033212 | -0.000019165 |
| 31 | 1 | 0.000047826  | 0.000038439 | 0.000027178  |
| 32 | 1 | 0.000004064  | 0.000005994 | -0.000003171 |
| 33 | 1 | 0.000008735  | 0.000001306 | 0.000006817  |

-----  
Cartesian Forces: Max 0.000544989 RMS 0.000122499

GradGradGradGradGradGradGradGradGradGradGradGradGradGradGradGradGradGradGradGrad  
Berny optimization.

Using GEDIIS/GDIIS optimizer.

FormGI is forming the generalized inverse of G from B-inverse, IUseBI=4.

Internal Forces: Max 0.000286273 RMS 0.000087720

Search for a local minimum.

Step number 36 out of a maximum of 172

All quantities printed in internal units (Hartrees-Bohrs-Radians)

Mixed Optimization -- En-DIIS/RFO-DIIS

Swapping is turned off.

Update second derivatives using D2CorX and points 30 31 32 33 34  
35 36

DE= -7.49D-06 DEPred=-2.02D-06 R= 3.71D+00

TightC=F SS= 1.41D+00 RLast= 7.87D-02 DXNew= 1.7446D+00 2.3612D-01

Trust test= 3.71D+00 RLast= 7.87D-02 DXMaxT set to 1.04D+00

ITU= 1 1 1 1 1 1 1 1 1 1 0 0-1 1-1 1 1 1 1 1

ITU= 1 1 1 1 0-1-1 1 1 1-1 1 0 0-1 0

|                 |         |         |         |         |         |
|-----------------|---------|---------|---------|---------|---------|
| Eigenvalues --- | 0.00055 | 0.00056 | 0.00218 | 0.00455 | 0.00617 |
| Eigenvalues --- | 0.00697 | 0.00729 | 0.01214 | 0.01472 | 0.01894 |
| Eigenvalues --- | 0.02026 | 0.02159 | 0.02258 | 0.02379 | 0.02393 |
| Eigenvalues --- | 0.02574 | 0.02742 | 0.02886 | 0.03061 | 0.03102 |
| Eigenvalues --- | 0.03493 | 0.03534 | 0.03801 | 0.03953 | 0.04084 |
| Eigenvalues --- | 0.04408 | 0.04425 | 0.05027 | 0.05332 | 0.05465 |
| Eigenvalues --- | 0.05692 | 0.05757 | 0.05921 | 0.07742 | 0.08644 |
| Eigenvalues --- | 0.08886 | 0.09569 | 0.10878 | 0.11887 | 0.12385 |
| Eigenvalues --- | 0.12708 | 0.13220 | 0.15287 | 0.15717 | 0.15963 |
| Eigenvalues --- | 0.16001 | 0.16002 | 0.16008 | 0.16030 | 0.16150 |
| Eigenvalues --- | 0.16462 | 0.18250 | 0.21517 | 0.21913 | 0.22161 |
| Eigenvalues --- | 0.22988 | 0.23484 | 0.25734 | 0.27028 | 0.28006 |
| Eigenvalues --- | 0.29151 | 0.29575 | 0.31792 | 0.32328 | 0.33174 |
| Eigenvalues --- | 0.33793 | 0.34290 | 0.34339 | 0.34470 | 0.34552 |
| Eigenvalues --- | 0.34669 | 0.34755 | 0.35097 | 0.35251 | 0.35489 |
| Eigenvalues --- | 0.35579 | 0.35715 | 0.35889 | 0.36412 | 0.36603 |
| Eigenvalues --- | 0.37085 | 0.39452 | 0.41590 | 0.42458 | 0.42634 |
| Eigenvalues --- | 0.44766 | 0.45761 | 0.46839 | 0.49598 | 0.55273 |
| Eigenvalues --- | 0.58668 | 0.60672 | 1.09396 |         |         |

En-DIIS/RFO-DIIS IScMMF= 0 using points: 36 35 34 33 32

RFO step: Lambda=-2.41459807D-06.

DidBck=F Rises=F RFO-DIIS coefs: 1.81197 -0.16558 -1.23681 0.42678

0.16364

Iteration 1 RMS(Cart)= 0.03319820 RMS(Int)= 0.00041965

Iteration 2 RMS(Cart)= 0.00065640 RMS(Int)= 0.00001701

Iteration 3 RMS(Cart)= 0.00000009 RMS(Int)= 0.00001701

| Variable | Old X   | -DE/DX   | Delta X<br>(Linear) | Delta X<br>(Quad) | Delta X<br>(Total) | New X   |
|----------|---------|----------|---------------------|-------------------|--------------------|---------|
| R1       | 2.56489 | 0.00003  | 0.00008             | 0.00001           | 0.00009            | 2.56498 |
| R2       | 2.62151 | -0.00004 | -0.00004            | -0.00001          | -0.00005           | 2.62146 |
| R3       | 2.03392 | 0.00000  | 0.00000             | 0.00001           | 0.00001            | 2.03394 |
| R4       | 2.62490 | 0.00009  | 0.00014             | 0.00004           | 0.00018            | 2.62508 |
| R5       | 2.03076 | -0.00001 | -0.00002            | 0.00002           | 0.00000            | 2.03076 |
| R6       | 2.54406 | -0.00013 | -0.00029            | 0.00003           | -0.00026           | 2.54380 |
| R7       | 2.69907 | -0.00006 | -0.00016            | -0.00008          | -0.00024           | 2.69884 |
| R8       | 2.52061 | -0.00002 | -0.00001            | -0.00008          | -0.00008           | 2.52052 |
| R9       | 2.09339 | 0.00003  | 0.00029             | 0.00028           | 0.00057            | 2.09395 |
| R10      | 2.78508 | 0.00000  | 0.00026             | -0.00017          | 0.00009            | 2.78517 |
| R11      | 2.89669 | -0.00008 | -0.00032            | -0.00016          | -0.00048           | 2.89621 |
| R12      | 2.06004 | -0.00001 | -0.00004            | -0.00014          | -0.00018           | 2.05986 |
| R13      | 2.06143 | -0.00002 | -0.00006            | -0.00002          | -0.00008           | 2.06135 |
| R14      | 2.06961 | -0.00002 | -0.00003            | -0.00001          | -0.00004           | 2.06957 |
| R15      | 2.07958 | -0.00006 | -0.00033            | 0.00001           | -0.00032           | 2.07927 |
| R16      | 2.75477 | 0.00019  | 0.00092             | -0.00012          | 0.00081            | 2.75558 |
| R17      | 4.24763 | 0.00002  | -0.00560            | -0.00090          | -0.00650           | 4.24113 |
| R18      | 2.50649 | 0.00000  | 0.00000             | 0.00001           | 0.00001            | 2.50649 |
| R19      | 2.05725 | -0.00001 | -0.00032            | 0.00008           | -0.00024           | 2.05700 |
| R20      | 2.04353 | 0.00000  | -0.00002            | 0.00000           | -0.00002           | 2.04351 |
| R21      | 2.04715 | 0.00000  | -0.00003            | 0.00002           | -0.00002           | 2.04713 |
| R22      | 1.91470 | -0.00003 | 0.00017             | -0.00007          | 0.00010            | 1.91480 |
| R23      | 1.92358 | 0.00000  | 0.00031             | 0.00006           | 0.00035            | 1.92393 |
| R24      | 4.12702 | 0.00005  | -0.00795            | 0.00118           | -0.00676           | 4.12025 |
| R25      | 2.76678 | 0.00013  | 0.00001             | -0.00089          | -0.00087           | 2.76590 |
| R26      | 2.73158 | 0.00019  | 0.00093             | 0.00099           | 0.00192            | 2.73350 |
| R27      | 2.05542 | -0.00007 | 0.00014             | -0.00011          | 0.00002            | 2.05544 |
| R28      | 2.05226 | -0.00005 | -0.00005            | -0.00005          | -0.00011           | 2.05215 |
| R29      | 2.74925 | 0.00004  | 0.00012             | -0.00040          | -0.00029           | 2.74897 |
| R30      | 2.05639 | 0.00005  | -0.00020            | -0.00019          | -0.00039           | 2.05600 |
| R31      | 2.84213 | -0.00005 | -0.00016            | -0.00002          | -0.00018           | 2.84195 |
| R32      | 2.06731 | 0.00002  | 0.00003             | 0.00002           | 0.00005            | 2.06736 |
| R33      | 2.06786 | 0.00000  | 0.00002             | 0.00004           | 0.00006            | 2.06793 |
| R34      | 2.06539 | 0.00001  | -0.00004            | -0.00001          | -0.00005           | 2.06533 |
| A1       | 1.87249 | -0.00001 | -0.00002            | 0.00002           | 0.00001            | 1.87249 |
| A2       | 2.27958 | -0.00002 | 0.00006             | -0.00008          | -0.00002           | 2.27956 |

|     |         |          |          |          |          |         |
|-----|---------|----------|----------|----------|----------|---------|
| A3  | 2.13107 | 0.00003  | -0.00005 | 0.00006  | 0.00001  | 2.13108 |
| A4  | 1.86483 | -0.00003 | -0.00018 | -0.00004 | -0.00022 | 1.86461 |
| A5  | 2.27566 | 0.00003  | 0.00011  | 0.00004  | 0.00016  | 2.27581 |
| A6  | 2.14264 | 0.00000  | 0.00005  | -0.00001 | 0.00004  | 2.14268 |
| A7  | 1.89710 | 0.00000  | 0.00019  | 0.00000  | 0.00019  | 1.89729 |
| A8  | 2.25243 | 0.00008  | 0.00012  | 0.00018  | 0.00030  | 2.25273 |
| A9  | 2.13361 | -0.00008 | -0.00032 | -0.00019 | -0.00051 | 2.13310 |
| A10 | 1.88977 | 0.00004  | -0.00009 | 0.00001  | -0.00008 | 1.88969 |
| A11 | 2.14570 | 0.00024  | 0.00149  | -0.00029 | 0.00120  | 2.14690 |
| A12 | 2.24757 | -0.00027 | -0.00146 | 0.00024  | -0.00123 | 2.24635 |
| A13 | 1.90058 | 0.00001  | 0.00009  | 0.00001  | 0.00010  | 1.90069 |
| A14 | 2.20449 | 0.00022  | 0.00017  | 0.00050  | 0.00068  | 2.20517 |
| A15 | 2.17740 | -0.00022 | -0.00023 | -0.00048 | -0.00071 | 2.17669 |
| A16 | 1.96110 | -0.00010 | 0.00123  | -0.00032 | 0.00091  | 1.96200 |
| A17 | 1.87122 | 0.00007  | -0.00042 | -0.00043 | -0.00085 | 1.87037 |
| A18 | 1.89073 | 0.00004  | -0.00038 | 0.00029  | -0.00009 | 1.89064 |
| A19 | 1.90754 | -0.00010 | -0.00080 | -0.00018 | -0.00098 | 1.90656 |
| A20 | 1.92851 | 0.00011  | -0.00003 | 0.00036  | 0.00034  | 1.92884 |
| A21 | 1.90317 | -0.00001 | 0.00038  | 0.00027  | 0.00065  | 1.90382 |
| A22 | 1.91551 | 0.00008  | 0.00073  | 0.00000  | 0.00073  | 1.91624 |
| A23 | 1.89190 | -0.00001 | 0.00070  | -0.00034 | 0.00035  | 1.89225 |
| A24 | 1.88040 | -0.00002 | -0.00154 | 0.00030  | -0.00123 | 1.87917 |
| A25 | 1.87582 | -0.00001 | 0.00049  | 0.00015  | 0.00064  | 1.87646 |
| A26 | 1.89974 | 0.00007  | 0.00054  | -0.00002 | 0.00052  | 1.90026 |
| A27 | 1.99978 | -0.00010 | -0.00085 | -0.00009 | -0.00094 | 1.99884 |
| A28 | 2.16087 | 0.00007  | 0.00037  | 0.00001  | 0.00038  | 2.16125 |
| A29 | 1.94583 | -0.00003 | -0.00007 | 0.00001  | -0.00005 | 1.94578 |
| A30 | 2.17648 | -0.00005 | -0.00030 | -0.00002 | -0.00033 | 2.17616 |
| A31 | 2.07397 | -0.00001 | 0.00027  | -0.00003 | 0.00024  | 2.07421 |
| A32 | 2.16441 | 0.00001  | -0.00030 | -0.00001 | -0.00031 | 2.16411 |
| A33 | 2.04481 | 0.00000  | 0.00003  | 0.00004  | 0.00007  | 2.04487 |
| A34 | 1.94030 | 0.00012  | -0.00037 | -0.00013 | -0.00054 | 1.93976 |
| A35 | 1.91554 | -0.00027 | -0.00093 | -0.00021 | -0.00116 | 1.91437 |
| A36 | 1.89015 | 0.00011  | -0.00030 | 0.00005  | -0.00023 | 1.88992 |
| A37 | 2.08590 | 0.00007  | -0.00030 | 0.00054  | 0.00024  | 2.08614 |
| A38 | 2.07626 | -0.00023 | -0.00087 | -0.00255 | -0.00341 | 2.07285 |
| A39 | 1.99660 | -0.00014 | -0.00044 | -0.00059 | -0.00100 | 1.99560 |
| A40 | 2.00344 | 0.00004  | 0.00026  | -0.00032 | -0.00009 | 2.00336 |
| A41 | 2.03091 | 0.00018  | 0.00098  | 0.00195  | 0.00293  | 2.03384 |
| A42 | 2.02288 | -0.00029 | -0.00227 | -0.00226 | -0.00446 | 2.01842 |
| A43 | 2.13457 | 0.00016  | 0.00052  | 0.00167  | 0.00211  | 2.13668 |
| A44 | 1.96083 | 0.00002  | -0.00094 | 0.00011  | -0.00083 | 1.96000 |
| A45 | 2.02882 | -0.00015 | 0.00049  | -0.00024 | 0.00026  | 2.02908 |
| A46 | 2.04227 | 0.00013  | 0.00136  | 0.00027  | 0.00162  | 2.04389 |

|     |          |          |          |          |          |          |
|-----|----------|----------|----------|----------|----------|----------|
| A47 | 2.54776  | 0.00015  | 0.00853  | 0.00010  | 0.00871  | 2.55647  |
| A48 | 2.49515  | -0.00006 | 0.00039  | -0.00612 | -0.00580 | 2.48934  |
| A49 | 1.93286  | 0.00008  | 0.00052  | 0.00015  | 0.00067  | 1.93353  |
| A50 | 1.91671  | 0.00000  | 0.00021  | 0.00022  | 0.00042  | 1.91713  |
| A51 | 1.94280  | -0.00001 | -0.00064 | -0.00008 | -0.00072 | 1.94208  |
| A52 | 1.87890  | -0.00002 | 0.00045  | 0.00004  | 0.00049  | 1.87939  |
| A53 | 1.89526  | -0.00004 | -0.00029 | -0.00020 | -0.00049 | 1.89477  |
| A54 | 1.89576  | -0.00001 | -0.00023 | -0.00013 | -0.00036 | 1.89540  |
| A55 | 3.48667  | -0.00025 | -0.00010 | 0.00493  | 0.00483  | 3.49150  |
| A56 | 2.53325  | -0.00004 | 0.00107  | -0.00507 | -0.00396 | 2.52929  |
| A57 | 2.96990  | 0.00003  | 0.01269  | 0.01030  | 0.02299  | 2.99290  |
| A58 | 3.10327  | -0.00002 | 0.00922  | 0.00289  | 0.01213  | 3.11539  |
| D1  | 0.00336  | 0.00000  | -0.00010 | 0.00002  | -0.00009 | 0.00328  |
| D2  | -3.12617 | -0.00001 | 0.00109  | 0.00057  | 0.00167  | -3.12451 |
| D3  | 3.13393  | -0.00002 | -0.00049 | -0.00010 | -0.00059 | 3.13334  |
| D4  | 0.00440  | -0.00002 | 0.00071  | 0.00046  | 0.00117  | 0.00556  |
| D5  | -0.00513 | 0.00000  | 0.00021  | 0.00004  | 0.00025  | -0.00488 |
| D6  | -3.10749 | -0.00002 | -0.00085 | -0.00086 | -0.00170 | -3.10920 |
| D7  | -3.13684 | 0.00001  | 0.00055  | 0.00014  | 0.00070  | -3.13614 |
| D8  | 0.04398  | -0.00001 | -0.00050 | -0.00075 | -0.00126 | 0.04272  |
| D9  | -0.00049 | 0.00000  | -0.00004 | -0.00007 | -0.00011 | -0.00060 |
| D10 | -3.13190 | -0.00001 | 0.00141  | 0.00062  | 0.00203  | -3.12987 |
| D11 | 3.13018  | 0.00001  | -0.00112 | -0.00057 | -0.00169 | 3.12849  |
| D12 | -0.00123 | 0.00000  | 0.00033  | 0.00012  | 0.00044  | -0.00079 |
| D13 | -0.00271 | 0.00000  | 0.00017  | 0.00009  | 0.00026  | -0.00245 |
| D14 | -3.12794 | -0.00001 | 0.00338  | 0.00264  | 0.00604  | -3.12191 |
| D15 | 3.12953  | 0.00001  | -0.00116 | -0.00053 | -0.00169 | 3.12784  |
| D16 | 0.00430  | 0.00000  | 0.00206  | 0.00201  | 0.00408  | 0.00838  |
| D17 | -0.03759 | 0.00000  | -0.00640 | -0.00909 | -0.01549 | -0.05308 |
| D18 | 3.10443  | -0.00001 | -0.00718 | -0.00879 | -0.01597 | 3.08846  |
| D19 | 3.11541  | -0.00001 | -0.00478 | -0.00832 | -0.01310 | 3.10231  |
| D20 | -0.02576 | -0.00002 | -0.00556 | -0.00802 | -0.01359 | -0.03934 |
| D21 | 0.00483  | 0.00000  | -0.00023 | -0.00008 | -0.00032 | 0.00451  |
| D22 | 3.10795  | 0.00003  | 0.00082  | 0.00082  | 0.00164  | 3.10958  |
| D23 | 3.12881  | 0.00001  | -0.00368 | -0.00283 | -0.00649 | 3.12232  |
| D24 | -0.05126 | 0.00005  | -0.00262 | -0.00192 | -0.00454 | -0.05579 |
| D25 | 1.33019  | 0.00013  | 0.00659  | 0.00084  | 0.00744  | 1.33763  |
| D26 | -2.85688 | -0.00002 | 0.00606  | 0.00015  | 0.00621  | -2.85067 |
| D27 | -0.80529 | 0.00003  | 0.00609  | 0.00039  | 0.00648  | -0.79881 |
| D28 | -1.76623 | 0.00009  | 0.00536  | -0.00020 | 0.00516  | -1.76106 |
| D29 | 0.32989  | -0.00005 | 0.00483  | -0.00090 | 0.00394  | 0.33383  |
| D30 | 2.38148  | 0.00000  | 0.00486  | -0.00066 | 0.00420  | 2.38569  |
| D31 | -1.09850 | -0.00004 | -0.00201 | -0.00359 | -0.00560 | -1.10410 |
| D32 | 0.94545  | -0.00002 | -0.00062 | -0.00361 | -0.00422 | 0.94123  |



|     |          |          |          |          |          |          |
|-----|----------|----------|----------|----------|----------|----------|
| D33 | 3.11866  | -0.00016 | -0.00218 | -0.00373 | -0.00591 | 3.11274  |
| D34 | 3.10974  | 0.00000  | -0.00173 | -0.00272 | -0.00446 | 3.10529  |
| D35 | -1.12949 | 0.00003  | -0.00033 | -0.00275 | -0.00308 | -1.13257 |
| D36 | 1.04372  | -0.00011 | -0.00190 | -0.00287 | -0.00477 | 1.03895  |
| D37 | 1.01544  | 0.00001  | -0.00168 | -0.00317 | -0.00485 | 1.01059  |
| D38 | 3.05940  | 0.00004  | -0.00028 | -0.00319 | -0.00347 | 3.05592  |
| D39 | -1.05058 | -0.00011 | -0.00184 | -0.00332 | -0.00516 | -1.05574 |
| D40 | 2.94195  | 0.00008  | -0.00047 | -0.00002 | -0.00048 | 2.94147  |
| D41 | -1.25054 | 0.00011  | -0.00168 | -0.00018 | -0.00186 | -1.25241 |
| D42 | 0.86583  | -0.00004 | -0.00077 | -0.00018 | -0.00094 | 0.86489  |
| D43 | 2.95652  | -0.00001 | -0.00198 | -0.00034 | -0.00233 | 2.95419  |
| D44 | -1.23444 | -0.00001 | -0.00124 | -0.00029 | -0.00152 | -1.23596 |
| D45 | 0.85625  | 0.00002  | -0.00245 | -0.00045 | -0.00290 | 0.85335  |
| D46 | 3.13959  | -0.00001 | -0.00095 | -0.00053 | -0.00148 | 3.13810  |
| D47 | -0.00254 | 0.00000  | -0.00097 | -0.00074 | -0.00171 | -0.00426 |
| D48 | -0.00249 | 0.00000  | -0.00007 | -0.00086 | -0.00093 | -0.00342 |
| D49 | 3.13857  | 0.00001  | -0.00008 | -0.00108 | -0.00116 | 3.13741  |
| D50 | 2.26163  | -0.00011 | -0.04111 | -0.00605 | -0.04720 | 2.21444  |
| D51 | -1.38478 | 0.00020  | -0.01268 | -0.02182 | -0.03449 | -1.41927 |
| D52 | -2.03161 | -0.00017 | -0.04407 | -0.00935 | -0.05342 | -2.08503 |
| D53 | 0.60517  | 0.00014  | -0.01564 | -0.02512 | -0.04072 | 0.56445  |
| D54 | -2.71343 | -0.00004 | -0.00034 | 0.00047  | 0.00012  | -2.71331 |
| D55 | -0.01269 | 0.00000  | -0.00104 | -0.00034 | -0.00140 | -0.01408 |
| D56 | -0.03089 | 0.00006  | -0.00053 | 0.00083  | 0.00029  | -0.03060 |
| D57 | 2.66985  | 0.00010  | -0.00123 | 0.00002  | -0.00123 | 2.66863  |
| D58 | 0.56193  | -0.00010 | 0.00956  | -0.01430 | -0.00473 | 0.55720  |
| D59 | -1.85172 | -0.00027 | 0.00818  | -0.01639 | -0.00820 | -1.85992 |
| D60 | 1.84634  | 0.00011  | -0.01455 | 0.00915  | -0.00533 | 1.84101  |
| D61 | -0.57279 | 0.00004  | -0.01619 | 0.00886  | -0.00726 | -0.58005 |
| D62 | 2.55649  | 0.00001  | 0.00168  | 0.00085  | 0.00252  | 2.55900  |
| D63 | -1.65389 | 0.00003  | 0.00268  | 0.00113  | 0.00380  | -1.65008 |
| D64 | 0.44619  | 0.00002  | 0.00212  | 0.00106  | 0.00317  | 0.44936  |
| D65 | 1.35444  | -0.00002 | 0.00085  | -0.00034 | 0.00052  | 1.35496  |
| D66 | -2.85593 | 0.00000  | 0.00185  | -0.00006 | 0.00180  | -2.85413 |
| D67 | -0.75586 | -0.00001 | 0.00129  | -0.00013 | 0.00117  | -0.75469 |
| D68 | -1.03054 | -0.00004 | 0.00012  | -0.00056 | -0.00045 | -1.03098 |
| D69 | 1.04228  | -0.00002 | 0.00112  | -0.00028 | 0.00084  | 1.04312  |
| D70 | -3.14083 | -0.00003 | 0.00056  | -0.00035 | 0.00020  | -3.14063 |

| Item                 | Value    | Threshold | Converged? |
|----------------------|----------|-----------|------------|
| Maximum Force        | 0.000286 | 0.000450  | YES        |
| RMS Force            | 0.000088 | 0.000300  | YES        |
| Maximum Displacement | 0.147610 | 0.001800  | NO         |
| RMS Displacement     | 0.033255 | 0.001200  | NO         |

Predicted change in Energy=-6.479419D-06

GradGradGradGradGradGradGradGradGradGradGradGradGradGradGradGradGradGradGrad

Input orientation:

| Center<br>Number | Atomic<br>Number | Atomic<br>Type | Coordinates (Angstroms) |           |           |
|------------------|------------------|----------------|-------------------------|-----------|-----------|
|                  |                  |                | X                       | Y         | Z         |
| 1                | 6                | 0              | -2.645383               | 2.097429  | -0.201097 |
| 2                | 6                | 0              | -3.535268               | 1.115462  | 0.092490  |
| 3                | 7                | 0              | -2.824185               | -0.077615 | 0.117272  |
| 4                | 6                | 0              | -1.532507               | 0.183866  | -0.157016 |
| 5                | 7                | 0              | -1.404788               | 1.496472  | -0.356484 |
| 6                | 6                | 0              | -0.132102               | 2.181812  | -0.644251 |
| 7                | 6                | 0              | 0.450953                | 2.874950  | 0.592075  |
| 8                | 1                | 0              | -2.786365               | 3.157714  | -0.320954 |
| 9                | 1                | 0              | -4.593894               | 1.165391  | 0.270404  |
| 10               | 1                | 0              | 0.568827                | 1.424499  | -0.995455 |
| 11               | 1                | 0              | -0.304889               | 2.905199  | -1.442212 |
| 12               | 1                | 0              | -0.229614               | 3.663315  | 0.930750  |
| 13               | 1                | 0              | 0.528485                | 2.134050  | 1.401838  |
| 14               | 35               | 0              | 0.136015                | -2.663326 | -0.269741 |
| 15               | 1                | 0              | -0.756365               | -0.604753 | -0.216252 |
| 16               | 6                | 0              | -3.296875               | -1.402281 | 0.365212  |
| 17               | 6                | 0              | -4.552409               | -1.691419 | 0.680357  |
| 18               | 1                | 0              | -2.499321               | -2.135924 | 0.262508  |
| 19               | 1                | 0              | -4.823419               | -2.724738 | 0.848224  |
| 20               | 1                | 0              | -5.336844               | -0.951419 | 0.783290  |
| 21               | 7                | 0              | 1.718764                | 3.481200  | 0.202925  |
| 22               | 1                | 0              | 2.059853                | 4.108403  | 0.921943  |
| 23               | 1                | 0              | 2.416017                | 2.753943  | 0.056428  |
| 24               | 6                | 0              | 3.336398                | -0.385938 | -1.126269 |
| 25               | 6                | 0              | 3.265260                | -0.580608 | 0.322636  |
| 26               | 8                | 0              | 2.725569                | 0.623594  | -0.289539 |
| 27               | 1                | 0              | 4.276805                | -0.082499 | -1.580834 |
| 28               | 1                | 0              | 2.644150                | -0.930687 | -1.761353 |
| 29               | 1                | 0              | 2.483652                | -1.253241 | 0.669586  |
| 30               | 6                | 0              | 4.456920                | -0.393672 | 1.220802  |
| 31               | 1                | 0              | 4.150477                | -0.005149 | 2.196495  |
| 32               | 1                | 0              | 4.951666                | -1.355567 | 1.386565  |
| 33               | 1                | 0              | 5.179531                | 0.298906  | 0.781873  |

Distance matrix (angstroms):

|     | 1        | 2 | 3 | 4 | 5 |
|-----|----------|---|---|---|---|
| 1 C | 0.000000 |   |   |   |   |

|    |    |          |          |          |          |          |
|----|----|----------|----------|----------|----------|----------|
| 2  | C  | 1.357331 | 0.000000 |          |          |          |
| 3  | N  | 2.205480 | 1.389132 | 0.000000 |          |          |
| 4  | C  | 2.214081 | 2.222875 | 1.346119 | 0.000000 |          |
| 5  | N  | 1.387217 | 2.210360 | 2.171838 | 1.333804 | 0.000000 |
| 6  | C  | 2.553446 | 3.641625 | 3.596142 | 2.488036 | 1.473849 |
| 7  | C  | 3.289522 | 4.385811 | 4.435042 | 3.425957 | 2.498747 |
| 8  | H  | 1.076312 | 2.214178 | 3.265092 | 3.231533 | 2.160959 |
| 9  | H  | 2.210815 | 1.074632 | 2.168037 | 3.243172 | 3.266956 |
| 10 | H  | 3.378607 | 4.257080 | 3.873892 | 2.580263 | 2.075722 |
| 11 | H  | 2.769616 | 3.999228 | 4.204286 | 3.250297 | 2.091195 |
| 12 | H  | 3.093383 | 4.256945 | 4.624727 | 3.871348 | 2.780866 |
| 13 | H  | 3.555865 | 4.389305 | 4.216866 | 3.237426 | 2.689934 |
| 14 | Br | 5.514134 | 5.280982 | 3.949489 | 3.301996 | 4.436836 |
| 15 | H  | 3.297030 | 3.282798 | 2.159859 | 1.108073 | 2.203466 |
| 16 | C  | 3.604596 | 2.543666 | 1.428164 | 2.429317 | 3.536044 |
| 17 | C  | 4.332329 | 3.042818 | 2.430677 | 3.652081 | 4.598391 |
| 18 | H  | 4.261167 | 3.416666 | 2.088844 | 2.547971 | 3.843885 |
| 19 | H  | 5.394275 | 4.120389 | 3.396836 | 4.505617 | 5.563899 |
| 20 | H  | 4.184310 | 2.827522 | 2.742366 | 4.079954 | 4.769939 |
| 21 | N  | 4.596067 | 5.763138 | 5.771558 | 4.644646 | 3.742815 |
| 22 | H  | 5.238749 | 6.399303 | 6.482597 | 5.428738 | 4.523306 |
| 23 | H  | 5.110293 | 6.172820 | 5.956604 | 4.716110 | 4.043548 |
| 24 | C  | 6.542535 | 7.138584 | 6.292395 | 4.997036 | 5.158961 |
| 25 | C  | 6.510137 | 7.012618 | 6.113634 | 4.881912 | 5.156046 |
| 26 | O  | 5.570201 | 6.291738 | 5.608650 | 4.282773 | 4.222114 |
| 27 | H  | 7.387317 | 8.078590 | 7.301208 | 5.987180 | 6.022680 |
| 28 | H  | 6.291506 | 6.768211 | 5.844626 | 4.610921 | 4.925308 |
| 29 | H  | 6.188059 | 6.493935 | 5.464456 | 4.344892 | 4.871725 |
| 30 | C  | 7.659640 | 8.211312 | 7.371035 | 6.172939 | 6.357680 |
| 31 | H  | 7.506863 | 8.046942 | 7.278346 | 6.153946 | 6.295517 |
| 32 | H  | 8.494645 | 8.933570 | 7.981737 | 6.840833 | 7.181702 |
| 33 | H  | 8.088893 | 8.780077 | 8.040083 | 6.778363 | 6.788467 |
|    |    | 6        | 7        | 8        | 9        | 10       |
| 6  | C  | 0.000000 |          |          |          |          |
| 7  | C  | 1.532610 | 0.000000 |          |          |          |
| 8  | H  | 2.846405 | 3.375471 | 0.000000 |          |          |
| 9  | H  | 4.666615 | 5.336342 | 2.754309 | 0.000000 |          |
| 10 | H  | 1.090032 | 2.153591 | 3.836184 | 5.321957 | 0.000000 |
| 11 | H  | 1.090819 | 2.170377 | 2.734723 | 4.935135 | 1.776357 |
| 12 | H  | 2.164483 | 1.095168 | 2.891257 | 5.071747 | 3.059424 |
| 13 | H  | 2.150613 | 1.100300 | 3.873516 | 5.334529 | 2.500421 |
| 14 | Br | 4.866981 | 5.613770 | 6.513635 | 6.109244 | 4.174242 |
| 15 | H  | 2.887530 | 3.770854 | 4.276450 | 4.254042 | 2.545812 |
| 16 | C  | 4.886771 | 5.691431 | 4.639504 | 2.878225 | 4.978530 |

|    |    |          |          |          |          |          |
|----|----|----------|----------|----------|----------|----------|
| 17 | C  | 6.024584 | 6.774448 | 5.256960 | 2.886371 | 6.224496 |
| 18 | H  | 5.006874 | 5.824225 | 5.333426 | 3.909729 | 4.865452 |
| 19 | H  | 6.950552 | 7.696825 | 6.334020 | 3.939500 | 7.049230 |
| 20 | H  | 6.240541 | 6.940912 | 4.960774 | 2.301284 | 6.609529 |
| 21 | N  | 2.414916 | 1.458191 | 4.547008 | 6.724372 | 2.643575 |
| 22 | H  | 3.312006 | 2.053967 | 5.092587 | 7.304668 | 3.619795 |
| 23 | H  | 2.703922 | 2.040352 | 5.231656 | 7.190836 | 2.507187 |
| 24 | C  | 4.342370 | 4.681014 | 7.119989 | 8.200418 | 3.309720 |
| 25 | C  | 4.484184 | 4.464729 | 7.142229 | 8.050934 | 3.609511 |
| 26 | O  | 3.274164 | 3.319597 | 6.066644 | 7.360817 | 2.406512 |
| 27 | H  | 5.044081 | 5.301432 | 7.872398 | 9.147328 | 4.045097 |
| 28 | H  | 4.317771 | 4.983133 | 6.948401 | 7.804541 | 3.231171 |
| 29 | H  | 4.513084 | 4.602156 | 6.943398 | 7.490046 | 3.689066 |
| 30 | C  | 5.583069 | 5.208355 | 8.213071 | 9.233156 | 4.830612 |
| 31 | H  | 5.585080 | 4.955362 | 8.028763 | 9.030172 | 5.006062 |
| 32 | H  | 6.517819 | 6.227753 | 9.119345 | 9.935731 | 5.710697 |
| 33 | H  | 5.813141 | 5.388087 | 8.534900 | 9.825082 | 5.067982 |
|    |    | 11       | 12       | 13       | 14       | 15       |
| 11 | H  | 0.000000 |          |          |          |          |
| 12 | H  | 2.492259 | 0.000000 |          |          |          |
| 13 | H  | 3.062320 | 1.770675 | 0.000000 |          |          |
| 14 | Br | 5.707675 | 6.449903 | 5.095392 | 0.000000 |          |
| 15 | H  | 3.745207 | 4.450785 | 3.430757 | 2.244309 | 0.000000 |
| 16 | C  | 5.547355 | 5.948797 | 5.311648 | 3.711891 | 2.725499 |
| 17 | C  | 6.608754 | 6.886395 | 6.400799 | 4.881456 | 4.049037 |
| 18 | H  | 5.756260 | 6.263330 | 5.357085 | 2.739788 | 2.368880 |
| 19 | H  | 7.573599 | 7.868741 | 7.249633 | 5.084251 | 4.708331 |
| 20 | H  | 6.719147 | 6.884861 | 6.656185 | 5.830239 | 4.701069 |
| 21 | N  | 2.670847 | 2.087839 | 2.160780 | 6.362681 | 4.795517 |
| 22 | H  | 3.553722 | 2.332347 | 2.544300 | 7.139858 | 5.607175 |
| 23 | H  | 3.110005 | 2.931000 | 2.399410 | 5.886560 | 4.628088 |
| 24 | C  | 4.918371 | 5.774446 | 4.541590 | 4.020272 | 4.198419 |
| 25 | C  | 5.292589 | 5.531260 | 4.002997 | 3.805365 | 4.057641 |
| 26 | O  | 3.964600 | 4.411589 | 3.157438 | 4.184498 | 3.692976 |
| 27 | H  | 5.471515 | 6.375499 | 5.278194 | 5.052304 | 5.240957 |
| 28 | H  | 4.848990 | 6.050686 | 4.886147 | 3.393771 | 3.749276 |
| 29 | H  | 5.433993 | 5.621615 | 3.979022 | 2.895181 | 3.420958 |
| 30 | C  | 6.375658 | 6.205392 | 4.674907 | 5.103260 | 5.411841 |
| 31 | H  | 6.446751 | 5.851918 | 4.280944 | 5.409633 | 5.500724 |
| 32 | H  | 7.333995 | 7.227905 | 5.634021 | 5.257763 | 5.976149 |
| 33 | H  | 6.466698 | 6.371834 | 5.038288 | 5.942875 | 6.086684 |
|    |    | 16       | 17       | 18       | 19       | 20       |
| 16 | C  | 0.000000 |          |          |          |          |
| 17 | C  | 1.326379 | 0.000000 |          |          |          |

|    |   |          |          |          |           |           |
|----|---|----------|----------|----------|-----------|-----------|
| 18 | H | 1.088519 | 2.141811 | 0.000000 |           |           |
| 19 | H | 2.076663 | 1.081376 | 2.468035 | 0.000000  |           |
| 20 | H | 2.130619 | 1.083297 | 3.118622 | 1.847290  | 0.000000  |
| 21 | N | 7.002240 | 8.143190 | 7.024804 | 9.040478  | 8.352637  |
| 22 | H | 7.705331 | 8.798768 | 7.759675 | 9.699314  | 8.962821  |
| 23 | H | 7.071540 | 8.289118 | 6.936412 | 9.113304  | 8.623508  |
| 24 | C | 6.874430 | 8.197650 | 6.248742 | 8.715000  | 8.898950  |
| 25 | C | 6.613515 | 7.904292 | 5.971015 | 8.384526  | 8.622407  |
| 26 | O | 6.387700 | 7.698633 | 5.934575 | 8.336250  | 8.284573  |
| 27 | H | 7.930294 | 9.255087 | 7.316444 | 9.782425  | 9.938127  |
| 28 | H | 6.327754 | 7.637482 | 5.657200 | 8.111295  | 8.376868  |
| 29 | H | 5.790454 | 7.049701 | 5.076895 | 7.455904  | 7.827144  |
| 30 | C | 7.865791 | 9.118347 | 7.234850 | 9.575875  | 9.819385  |
| 31 | H | 7.795424 | 8.993465 | 7.245710 | 9.473374  | 9.638560  |
| 32 | H | 8.311665 | 9.536193 | 7.575597 | 9.885177  | 10.314103 |
| 33 | H | 8.655467 | 9.933900 | 8.072355 | 10.450160 | 10.590442 |
|    |   | 21       | 22       | 23       | 24        | 25        |
| 21 | N | 0.000000 |          |          |           |           |
| 22 | H | 1.013268 | 0.000000 |          |           |           |
| 23 | H | 1.018099 | 1.646369 | 0.000000 |           |           |
| 24 | C | 4.397528 | 5.101357 | 3.479185 | 0.000000  |           |
| 25 | C | 4.347903 | 4.878422 | 3.451276 | 1.463654  | 0.000000  |
| 26 | O | 3.069542 | 3.748968 | 2.180344 | 1.446507  | 1.454692  |
| 27 | H | 4.735538 | 5.361197 | 3.766771 | 1.087690  | 2.212360  |
| 28 | H | 4.917264 | 5.738808 | 4.114957 | 1.085952  | 2.202577  |
| 29 | H | 4.818481 | 5.384284 | 4.054388 | 2.168982  | 1.087989  |
| 30 | C | 4.852650 | 5.109200 | 3.927917 | 2.600840  | 1.503895  |
| 31 | H | 4.694910 | 4.787118 | 3.898823 | 3.442162  | 2.150839  |
| 32 | H | 5.936916 | 6.199470 | 5.008678 | 3.140638  | 2.139269  |
| 33 | H | 4.736991 | 4.925878 | 3.767026 | 2.739919  | 2.156125  |
|    |   | 26       | 27       | 28       | 29        | 30        |
| 26 | O | 0.000000 |          |          |           |           |
| 27 | H | 2.138304 | 0.000000 |          |           |           |
| 28 | H | 2.142115 | 1.848668 | 0.000000 |           |           |
| 29 | H | 2.121546 | 3.106513 | 2.457492 | 0.000000  |           |
| 30 | C | 2.512675 | 2.824612 | 3.530973 | 2.221820  | 0.000000  |
| 31 | H | 2.933606 | 3.780232 | 4.334767 | 2.582148  | 1.093999  |
| 32 | H | 3.417881 | 3.298727 | 3.926136 | 2.572085  | 1.094300  |
| 33 | H | 2.697272 | 2.557883 | 3.795795 | 3.112802  | 1.092928  |
|    |   | 31       | 32       | 33       |           |           |
| 31 | H | 0.000000 |          |          |           |           |
| 32 | H | 1.766782 | 0.000000 |          |           |           |
| 33 | H | 1.775545 | 1.776192 | 0.000000 |           |           |

Stoichiometry C10H18BrN3O

Framework group C1[X(C10H18BrN3O)]

Deg. of freedom 93

Full point group C1 NOp 1

Largest Abelian subgroup C1 NOp 1

Largest concise Abelian subgroup C1 NOp 1

Standard orientation:

---

| Center<br>Number | Atomic<br>Number | Atomic<br>Type | Coordinates (Angstroms) |           |           |
|------------------|------------------|----------------|-------------------------|-----------|-----------|
|                  |                  |                | X                       | Y         | Z         |
| 1                | 6                | 0              | -2.355318               | 2.464434  | -0.267438 |
| 2                | 6                | 0              | -3.338716               | 1.582419  | 0.044532  |
| 3                | 7                | 0              | -2.748533               | 0.326295  | 0.103893  |
| 4                | 6                | 0              | -1.436238               | 0.452574  | -0.168084 |
| 5                | 7                | 0              | -1.179188               | 1.740775  | -0.399378 |
| 6                | 6                | 0              | 0.155953                | 2.290248  | -0.695535 |
| 7                | 6                | 0              | 0.799050                | 2.954072  | 0.527027  |
| 8                | 1                | 0              | -2.390821               | 3.530037  | -0.414670 |
| 9                | 1                | 0              | -4.388051               | 1.740595  | 0.213973  |
| 10               | 1                | 0              | 0.780499                | 1.459049  | -1.022978 |
| 11               | 1                | 0              | 0.058570                | 3.006523  | -1.512452 |
| 12               | 1                | 0              | 0.197875                | 3.813845  | 0.841307  |
| 13               | 1                | 0              | 0.799868                | 2.230031  | 1.355533  |
| 14               | 35               | 0              | -0.055362               | -2.546665 | -0.198423 |
| 15               | 1                | 0              | -0.741174               | -0.409711 | -0.202365 |
| 16               | 6                | 0              | -3.350273               | -0.938788 | 0.381608  |
| 17               | 6                | 0              | -4.629495               | -1.095089 | 0.695363  |
| 18               | 1                | 0              | -2.628307               | -1.749593 | 0.302646  |
| 19               | 1                | 0              | -5.001536               | -2.092179 | 0.887126  |
| 20               | 1                | 0              | -5.337781               | -0.279244 | 0.774484  |
| 21               | 7                | 0              | 2.121995                | 3.422757  | 0.131461  |
| 22               | 1                | 0              | 2.520034                | 4.031559  | 0.836895  |
| 23               | 1                | 0              | 2.744962                | 2.627039  | 0.007882  |
| 24               | 6                | 0              | 3.357128                | -0.617187 | -1.089831 |
| 25               | 6                | 0              | 3.260983                | -0.766918 | 0.362966  |
| 26               | 8                | 0              | 2.844971                | 0.468462  | -0.282710 |
| 27               | 1                | 0              | 4.324758                | -0.419264 | -1.545450 |
| 28               | 1                | 0              | 2.617387                | -1.107333 | -1.715795 |
| 29               | 1                | 0              | 2.415531                | -1.350470 | 0.721294  |
| 30               | 6                | 0              | 4.461392                | -0.675079 | 1.264234  |
| 31               | 1                | 0              | 4.190469                | -0.233585 | 2.227830  |
| 32               | 1                | 0              | 4.858421                | -1.676372 | 1.457295  |
| 33               | 1                | 0              | 5.250489                | -0.068237 | 0.813059  |

---

Rotational constants (GHZ):      0.4213554      0.2923053      0.1828017  
 Standard basis: 6-311++G(d,p) (5D, 7F)  
 There are    499 symmetry adapted cartesian basis functions of A    symmetry.  
 There are    482 symmetry adapted basis functions of A    symmetry.  
     482 basis functions,    760 primitive gaussians,    499 cartesian basis functions  
     71 alpha electrons      71 beta electrons  
     nuclear repulsion energy      1312.9464195282 Hartrees.  
 NAToms=    33 NActive=    33 NUniq=    33 SFac= 1.00D+00 NATFMM=    60 NAOKFM=F  
 Big=F  
 Integral buffers will be    131072 words long.  
 Raffanetti 2 integral format.  
 Two-electron integral symmetry is turned on.  
 One-electron integrals computed using PRISM.  
 NBasis=    482 RedAO= T EigKep=    3.64D-06    NBF=    482  
 NBsUse=    482 1.00D-06 EigRej= -1.00D+00    NBFU=    482  
 Initial      guess      from      the      checkpoint      file:  
 "/home/suqian/liuwen/qianmengshijie/nh2po/nh2po.chk"  
 B after Tr=    0.000000    0.000000    0.000000  
     Rot=    0.999996    0.001416    -0.001402    -0.001936 Ang=    0.32 deg.  
 ExpMin= 3.50D-02 ExpMax= 4.40D+05 ExpMxC= 1.51D+04 IAcc=3 IRadAn=      5 AccDes=  
 0.00D+00  
 Harris functional with IExCor=    402 and IRadAn=      5 diagonalized for initial guess.  
 HarFok: IExCor=    402 AccDes= 0.00D+00 IRadAn=      5 IDoV= 1 UseB2=F ITyADJ=14  
 ICtDFT= 3500011 ScaDFX= 1.000000 1.000000 1.000000 1.000000  
 FoFCou: FMM=F IPFlag=      0 FMFlag=      100000 FMFlg1=      0  
     NFxFlg=      0 DoJE=T BraDBF=F KetDBF=T FulRan=T  
     wScrn= 0.000000 ICntrl=      500 IOpCl= 0 I1Cent=    200000004 NGrid=  
 0  
     NMat0=    1 NMatS0=      1 NMatT0=    0 NMatD0=    1 NMtDS0=    0  
 NMtDT0=    0  
 Petite list used in FoFCou.  
 Requested convergence on RMS density matrix=1.00D-08 within 128 cycles.  
 Requested convergence on MAX density matrix=1.00D-06.  
 Requested convergence on      energy=1.00D-06.  
 No special actions if energy rises.  
 SCF Done: E(RB3LYP) = -3205.64835914    A.U. after    11 cycles  
     NFock= 11 Conv=0.85D-08    -V/T= 2.0018  
 Calling FoFJK, ICntrl=      2127 FMM=F ISym2X=0 I1Cent= 0 IOpClX= 0 NMat=1 NMatS=1  
 NMatT=0.  
 \*\*\*\*\* Axes restored to original set \*\*\*\*\*

```

-----
Center      Atomic                              Forces (Hartrees/Bohr)
Number      Number                              X                              Y                              Z
-----
  
```

|    |    |              |              |              |
|----|----|--------------|--------------|--------------|
| 1  | 6  | 0.000063391  | -0.000055847 | 0.000023756  |
| 2  | 6  | -0.000019873 | 0.000079514  | -0.000020789 |
| 3  | 7  | -0.000023127 | -0.000083819 | -0.000093871 |
| 4  | 6  | -0.000047985 | -0.000068190 | 0.000020843  |
| 5  | 7  | 0.000018672  | 0.000199034  | 0.000186360  |
| 6  | 6  | -0.000052089 | -0.000088754 | -0.000165769 |
| 7  | 6  | -0.000130367 | -0.000010170 | -0.000105954 |
| 8  | 1  | -0.000029325 | -0.000003607 | -0.000017725 |
| 9  | 1  | 0.000009528  | -0.000015439 | 0.000030334  |
| 10 | 1  | 0.000052627  | 0.000066643  | 0.000000272  |
| 11 | 1  | -0.000012335 | -0.000048281 | -0.000020354 |
| 12 | 1  | 0.000026484  | -0.000012781 | 0.000034935  |
| 13 | 1  | 0.000009714  | -0.000004911 | -0.000013546 |
| 14 | 35 | 0.000018424  | -0.000100532 | 0.000008223  |
| 15 | 1  | -0.000064543 | 0.000088649  | 0.000000761  |
| 16 | 6  | 0.000009595  | 0.000046874  | 0.000011406  |
| 17 | 6  | 0.000008680  | 0.000004877  | -0.000002077 |
| 18 | 1  | 0.000025363  | -0.000023493 | -0.000002195 |
| 19 | 1  | 0.000010227  | -0.000000088 | 0.000003674  |
| 20 | 1  | -0.000016200 | 0.000005439  | 0.000002160  |
| 21 | 7  | 0.000118783  | 0.000000679  | 0.000206066  |
| 22 | 1  | -0.000001882 | 0.000008799  | -0.000079769 |
| 23 | 1  | -0.000041968 | 0.000061576  | 0.000115447  |
| 24 | 6  | 0.000378035  | -0.000201253 | -0.000710505 |
| 25 | 6  | -0.000184790 | 0.000112079  | 0.000281914  |
| 26 | 8  | 0.000196563  | 0.000048331  | -0.000086244 |
| 27 | 1  | -0.000068787 | 0.000103817  | 0.000122085  |
| 28 | 1  | -0.000182200 | -0.000031974 | 0.000292435  |
| 29 | 1  | 0.000002473  | -0.000114156 | -0.000049495 |
| 30 | 6  | -0.000104533 | 0.000009939  | -0.000018671 |
| 31 | 1  | 0.000031008  | 0.000025795  | 0.000029033  |
| 32 | 1  | -0.000011229 | 0.000007329  | 0.000017120  |
| 33 | 1  | 0.000011664  | -0.000006080 | 0.000000139  |

-----  
Cartesian Forces: Max 0.000710505 RMS 0.000116609

GradGradGradGradGradGradGradGradGradGradGradGradGradGradGradGradGradGradGradGrad

Berny optimization.

Using GEDIIS/GDIIS optimizer.

FormGI is forming the generalized inverse of G from B-inverse, IUseBI=4.

Internal Forces: Max 0.000330247 RMS 0.000075256

Search for a local minimum.

Step number 37 out of a maximum of 172

All quantities printed in internal units (Hartrees-Bohrs-Radians)



Mixed Optimization -- En-DIIS/RFO-DIIS

Swapping is turned off.

Update second derivatives using D2CorX and points 31 32 33 34 35  
36 37

DE= -5.66D-06 DEPred=-6.48D-06 R= 8.73D-01

TightC=F SS= 1.41D+00 RLast= 1.03D-01 DXNew= 1.7446D+00 3.0791D-01

Trust test= 8.73D-01 RLast= 1.03D-01 DXMaxT set to 1.04D+00

ITU= 1 1 1 1 1 1 1 1 1 1 1 0 0-1 1-1 1 1 1 1

ITU= 1 1 1 1 1 0-1-1 1 1 1-1 1 0 0-1 0

|                 |         |         |         |         |         |
|-----------------|---------|---------|---------|---------|---------|
| Eigenvalues --- | 0.00057 | 0.00094 | 0.00217 | 0.00456 | 0.00617 |
| Eigenvalues --- | 0.00698 | 0.00729 | 0.01180 | 0.01432 | 0.01895 |
| Eigenvalues --- | 0.02053 | 0.02118 | 0.02230 | 0.02379 | 0.02385 |
| Eigenvalues --- | 0.02592 | 0.02753 | 0.02896 | 0.03062 | 0.03106 |
| Eigenvalues --- | 0.03496 | 0.03570 | 0.03844 | 0.03974 | 0.04146 |
| Eigenvalues --- | 0.04414 | 0.04423 | 0.04982 | 0.05402 | 0.05482 |
| Eigenvalues --- | 0.05705 | 0.05773 | 0.05914 | 0.07820 | 0.08622 |
| Eigenvalues --- | 0.08787 | 0.09540 | 0.10434 | 0.11222 | 0.12289 |
| Eigenvalues --- | 0.12922 | 0.13176 | 0.13841 | 0.15746 | 0.15933 |
| Eigenvalues --- | 0.16000 | 0.16001 | 0.16009 | 0.16033 | 0.16087 |
| Eigenvalues --- | 0.16158 | 0.18498 | 0.21415 | 0.22021 | 0.22170 |
| Eigenvalues --- | 0.23006 | 0.23473 | 0.25924 | 0.27329 | 0.28142 |
| Eigenvalues --- | 0.29173 | 0.29663 | 0.31723 | 0.32175 | 0.33121 |
| Eigenvalues --- | 0.33622 | 0.34289 | 0.34338 | 0.34426 | 0.34549 |
| Eigenvalues --- | 0.34669 | 0.34745 | 0.35104 | 0.35281 | 0.35498 |
| Eigenvalues --- | 0.35569 | 0.35668 | 0.35891 | 0.36415 | 0.36621 |
| Eigenvalues --- | 0.36802 | 0.39465 | 0.40184 | 0.41886 | 0.42469 |
| Eigenvalues --- | 0.44883 | 0.45709 | 0.46503 | 0.49524 | 0.54811 |
| Eigenvalues --- | 0.58395 | 0.60652 | 1.14319 |         |         |

En-DIIS/RFO-DIIS IScMMF= 0 using points: 37 36 35 34 33

RFO step: Lambda=-1.66401386D-06.

DidBck=T Rises=F RFO-DIIS coefs: 0.78843 0.38759 -0.76676 0.47156

0.11918

Iteration 1 RMS(Cart)= 0.01162737 RMS(Int)= 0.00005472

Iteration 2 RMS(Cart)= 0.00010950 RMS(Int)= 0.00001188

Iteration 3 RMS(Cart)= 0.00000001 RMS(Int)= 0.00001188

| Variable | Old X   | -DE/DX   | Delta X<br>(Linear) | Delta X<br>(Quad) | Delta X<br>(Total) | New X   |
|----------|---------|----------|---------------------|-------------------|--------------------|---------|
| R1       | 2.56498 | 0.00000  | -0.00003            | 0.00000           | -0.00002           | 2.56496 |
| R2       | 2.62146 | -0.00001 | -0.00004            | -0.00002          | -0.00006           | 2.62140 |
| R3       | 2.03394 | 0.00000  | 0.00000             | 0.00000           | 0.00001            | 2.03394 |
| R4       | 2.62508 | 0.00001  | 0.00003             | 0.00005           | 0.00007            | 2.62515 |
| R5       | 2.03076 | 0.00000  | -0.00002            | 0.00000           | -0.00002           | 2.03075 |
| R6       | 2.54380 | -0.00004 | -0.00013            | 0.00003           | -0.00010           | 2.54370 |
| R7       | 2.69884 | -0.00004 | 0.00001             | -0.00009          | -0.00008           | 2.69876 |

|     |         |          |          |          |          |         |
|-----|---------|----------|----------|----------|----------|---------|
| R8  | 2.52052 | 0.00011  | 0.00019  | -0.00004 | 0.00014  | 2.52067 |
| R9  | 2.09395 | -0.00002 | -0.00029 | 0.00016  | -0.00012 | 2.09383 |
| R10 | 2.78517 | 0.00003  | 0.00006  | 0.00001  | 0.00007  | 2.78524 |
| R11 | 2.89621 | 0.00004  | 0.00009  | -0.00004 | 0.00005  | 2.89627 |
| R12 | 2.05986 | -0.00001 | 0.00009  | -0.00008 | 0.00002  | 2.05988 |
| R13 | 2.06135 | -0.00002 | -0.00002 | -0.00002 | -0.00004 | 2.06131 |
| R14 | 2.06957 | -0.00001 | -0.00007 | 0.00002  | -0.00005 | 2.06951 |
| R15 | 2.07927 | -0.00001 | -0.00003 | -0.00001 | -0.00004 | 2.07922 |
| R16 | 2.75558 | 0.00011  | 0.00025  | -0.00003 | 0.00022  | 2.75580 |
| R17 | 4.24113 | 0.00010  | 0.00338  | -0.00064 | 0.00274  | 4.24387 |
| R18 | 2.50649 | 0.00000  | -0.00001 | 0.00002  | 0.00001  | 2.50650 |
| R19 | 2.05700 | 0.00004  | 0.00007  | 0.00000  | 0.00007  | 2.05707 |
| R20 | 2.04351 | 0.00000  | 0.00000  | 0.00000  | 0.00000  | 2.04351 |
| R21 | 2.04713 | 0.00001  | 0.00002  | 0.00001  | 0.00003  | 2.04716 |
| R22 | 1.91480 | -0.00005 | -0.00009 | -0.00001 | -0.00010 | 1.91470 |
| R23 | 1.92393 | -0.00003 | -0.00009 | 0.00005  | -0.00004 | 1.92389 |
| R24 | 4.12025 | 0.00008  | 0.00141  | -0.00067 | 0.00073  | 4.12099 |
| R25 | 2.76590 | 0.00028  | 0.00077  | 0.00035  | 0.00110  | 2.76701 |
| R26 | 2.73350 | 0.00014  | -0.00027 | 0.00032  | 0.00007  | 2.73357 |
| R27 | 2.05544 | -0.00008 | -0.00015 | -0.00006 | -0.00021 | 2.05523 |
| R28 | 2.05215 | -0.00004 | -0.00001 | -0.00002 | -0.00003 | 2.05212 |
| R29 | 2.74897 | -0.00012 | 0.00040  | -0.00057 | -0.00017 | 2.74880 |
| R30 | 2.05600 | 0.00005  | 0.00025  | -0.00004 | 0.00021  | 2.05621 |
| R31 | 2.84195 | -0.00004 | -0.00020 | 0.00001  | -0.00019 | 2.84176 |
| R32 | 2.06736 | 0.00003  | 0.00000  | 0.00002  | 0.00002  | 2.06738 |
| R33 | 2.06793 | -0.00001 | -0.00003 | 0.00000  | -0.00002 | 2.06790 |
| R34 | 2.06533 | 0.00001  | 0.00004  | -0.00001 | 0.00003  | 2.06536 |
| A1  | 1.87249 | 0.00004  | 0.00008  | 0.00003  | 0.00011  | 1.87260 |
| A2  | 2.27956 | -0.00005 | -0.00012 | -0.00008 | -0.00021 | 2.27935 |
| A3  | 2.13108 | 0.00001  | 0.00004  | 0.00006  | 0.00010  | 2.13118 |
| A4  | 1.86461 | 0.00000  | 0.00000  | -0.00003 | -0.00003 | 1.86458 |
| A5  | 2.27581 | 0.00002  | 0.00009  | 0.00009  | 0.00018  | 2.27599 |
| A6  | 2.14268 | -0.00002 | -0.00008 | -0.00006 | -0.00014 | 2.14254 |
| A7  | 1.89729 | 0.00000  | -0.00003 | -0.00001 | -0.00003 | 1.89725 |
| A8  | 2.25273 | 0.00005  | 0.00007  | 0.00000  | 0.00007  | 2.25280 |
| A9  | 2.13310 | -0.00005 | -0.00003 | 0.00001  | -0.00003 | 2.13308 |
| A10 | 1.88969 | 0.00003  | 0.00008  | 0.00000  | 0.00009  | 1.88978 |
| A11 | 2.14690 | -0.00010 | -0.00008 | 0.00011  | 0.00005  | 2.14695 |
| A12 | 2.24635 | 0.00008  | 0.00003  | -0.00014 | -0.00010 | 2.24624 |
| A13 | 1.90069 | -0.00006 | -0.00013 | 0.00001  | -0.00013 | 1.90056 |
| A14 | 2.20517 | -0.00002 | -0.00042 | 0.00022  | -0.00019 | 2.20497 |
| A15 | 2.17669 | 0.00008  | 0.00057  | -0.00023 | 0.00035  | 2.17704 |
| A16 | 1.96200 | -0.00029 | -0.00052 | -0.00054 | -0.00105 | 1.96095 |
| A17 | 1.87037 | 0.00016  | 0.00083  | 0.00008  | 0.00091  | 1.87128 |

|     |          |          |          |          |          |          |
|-----|----------|----------|----------|----------|----------|----------|
| A18 | 1.89064  | 0.00005  | -0.00019 | 0.00014  | -0.00005 | 1.89059  |
| A19 | 1.90656  | 0.00002  | -0.00005 | 0.00002  | -0.00003 | 1.90653  |
| A20 | 1.92884  | 0.00012  | 0.00014  | 0.00019  | 0.00033  | 1.92917  |
| A21 | 1.90382  | -0.00005 | -0.00019 | 0.00012  | -0.00007 | 1.90375  |
| A22 | 1.91624  | -0.00007 | 0.00024  | -0.00012 | 0.00011  | 1.91635  |
| A23 | 1.89225  | -0.00010 | -0.00005 | -0.00021 | -0.00026 | 1.89199  |
| A24 | 1.87917  | 0.00033  | 0.00050  | 0.00048  | 0.00097  | 1.88015  |
| A25 | 1.87646  | 0.00004  | -0.00024 | -0.00001 | -0.00024 | 1.87622  |
| A26 | 1.90026  | -0.00010 | -0.00021 | 0.00007  | -0.00014 | 1.90012  |
| A27 | 1.99884  | -0.00010 | -0.00022 | -0.00022 | -0.00043 | 1.99841  |
| A28 | 2.16125  | 0.00002  | 0.00001  | 0.00006  | 0.00007  | 2.16132  |
| A29 | 1.94578  | -0.00001 | -0.00001 | 0.00005  | 0.00004  | 1.94581  |
| A30 | 2.17616  | -0.00001 | 0.00000  | -0.00011 | -0.00010 | 2.17605  |
| A31 | 2.07421  | -0.00002 | -0.00010 | 0.00000  | -0.00009 | 2.07411  |
| A32 | 2.16411  | 0.00002  | 0.00013  | -0.00004 | 0.00009  | 2.16420  |
| A33 | 2.04487  | 0.00000  | -0.00003 | 0.00003  | 0.00000  | 2.04487  |
| A34 | 1.93976  | -0.00006 | 0.00026  | -0.00037 | -0.00006 | 1.93970  |
| A35 | 1.91437  | 0.00015  | 0.00052  | -0.00005 | 0.00049  | 1.91487  |
| A36 | 1.88992  | -0.00003 | 0.00029  | 0.00001  | 0.00028  | 1.89020  |
| A37 | 2.08614  | 0.00007  | 0.00060  | 0.00001  | 0.00065  | 2.08679  |
| A38 | 2.07285  | -0.00024 | -0.00002 | -0.00104 | -0.00111 | 2.07174  |
| A39 | 1.99560  | -0.00010 | 0.00009  | -0.00035 | -0.00026 | 1.99534  |
| A40 | 2.00336  | 0.00002  | -0.00028 | -0.00045 | -0.00073 | 2.00263  |
| A41 | 2.03384  | 0.00021  | -0.00035 | 0.00125  | 0.00090  | 2.03474  |
| A42 | 2.01842  | -0.00016 | 0.00048  | -0.00039 | 0.00008  | 2.01850  |
| A43 | 2.13668  | 0.00016  | -0.00054 | 0.00066  | 0.00013  | 2.13681  |
| A44 | 1.96000  | 0.00007  | 0.00018  | 0.00026  | 0.00045  | 1.96045  |
| A45 | 2.02908  | -0.00010 | -0.00051 | 0.00020  | -0.00033 | 2.02875  |
| A46 | 2.04389  | 0.00001  | 0.00031  | -0.00046 | -0.00015 | 2.04374  |
| A47 | 2.55647  | 0.00010  | -0.00095 | 0.00234  | 0.00142  | 2.55789  |
| A48 | 2.48934  | -0.00010 | 0.00394  | -0.00300 | 0.00086  | 2.49021  |
| A49 | 1.93353  | 0.00005  | 0.00002  | 0.00002  | 0.00004  | 1.93357  |
| A50 | 1.91713  | 0.00000  | -0.00008 | 0.00017  | 0.00009  | 1.91722  |
| A51 | 1.94208  | 0.00000  | 0.00016  | -0.00009 | 0.00006  | 1.94215  |
| A52 | 1.87939  | -0.00002 | -0.00015 | -0.00002 | -0.00017 | 1.87922  |
| A53 | 1.89477  | -0.00003 | -0.00002 | -0.00004 | -0.00006 | 1.89471  |
| A54 | 1.89540  | 0.00000  | 0.00007  | -0.00004 | 0.00002  | 1.89542  |
| A55 | 3.49150  | 0.00008  | -0.00251 | 0.00163  | -0.00088 | 3.49061  |
| A56 | 2.52929  | 0.00022  | 0.00238  | 0.00003  | 0.00239  | 2.53168  |
| A57 | 2.99290  | -0.00005 | -0.01123 | 0.00427  | -0.00696 | 2.98593  |
| A58 | 3.11539  | 0.00002  | -0.00471 | 0.00081  | -0.00392 | 3.11147  |
| D1  | 0.00328  | -0.00001 | -0.00009 | -0.00025 | -0.00034 | 0.00293  |
| D2  | -3.12451 | -0.00002 | -0.00121 | -0.00011 | -0.00132 | -3.12582 |
| D3  | 3.13334  | -0.00001 | -0.00016 | 0.00014  | -0.00003 | 3.13332  |

|     |          |          |          |          |          |          |
|-----|----------|----------|----------|----------|----------|----------|
| D4  | 0.00556  | -0.00002 | -0.00129 | 0.00029  | -0.00100 | 0.00456  |
| D5  | -0.00488 | 0.00001  | 0.00013  | 0.00032  | 0.00045  | -0.00443 |
| D6  | -3.10920 | -0.00001 | -0.00048 | 0.00012  | -0.00035 | -3.10955 |
| D7  | -3.13614 | 0.00001  | 0.00020  | -0.00003 | 0.00017  | -3.13598 |
| D8  | 0.04272  | -0.00001 | -0.00041 | -0.00023 | -0.00063 | 0.04209  |
| D9  | -0.00060 | 0.00001  | 0.00002  | 0.00011  | 0.00013  | -0.00047 |
| D10 | -3.12987 | -0.00001 | -0.00105 | -0.00001 | -0.00106 | -3.13093 |
| D11 | 3.12849  | 0.00002  | 0.00104  | -0.00002 | 0.00101  | 3.12950  |
| D12 | -0.00079 | -0.00001 | -0.00003 | -0.00014 | -0.00017 | -0.00096 |
| D13 | -0.00245 | -0.00001 | 0.00006  | 0.00009  | 0.00015  | -0.00229 |
| D14 | -3.12191 | -0.00001 | -0.00263 | 0.00128  | -0.00135 | -3.12325 |
| D15 | 3.12784  | 0.00002  | 0.00104  | 0.00020  | 0.00124  | 3.12908  |
| D16 | 0.00838  | 0.00001  | -0.00165 | 0.00139  | -0.00026 | 0.00812  |
| D17 | -0.05308 | 0.00001  | 0.00949  | -0.00483 | 0.00466  | -0.04841 |
| D18 | 3.08846  | 0.00001  | 0.00918  | -0.00455 | 0.00463  | 3.09308  |
| D19 | 3.10231  | -0.00002 | 0.00830  | -0.00496 | 0.00334  | 3.10565  |
| D20 | -0.03934 | -0.00001 | 0.00798  | -0.00468 | 0.00330  | -0.03604 |
| D21 | 0.00451  | 0.00000  | -0.00012 | -0.00025 | -0.00037 | 0.00414  |
| D22 | 3.10958  | 0.00001  | 0.00045  | -0.00005 | 0.00040  | 3.10998  |
| D23 | 3.12232  | 0.00000  | 0.00277  | -0.00153 | 0.00124  | 3.12357  |
| D24 | -0.05579 | 0.00001  | 0.00334  | -0.00133 | 0.00201  | -0.05378 |
| D25 | 1.33763  | 0.00001  | -0.00005 | -0.00036 | -0.00041 | 1.33721  |
| D26 | -2.85067 | -0.00003 | 0.00012  | -0.00060 | -0.00048 | -2.85115 |
| D27 | -0.79881 | 0.00002  | 0.00024  | -0.00035 | -0.00011 | -0.79892 |
| D28 | -1.76106 | 0.00000  | -0.00073 | -0.00059 | -0.00132 | -1.76239 |
| D29 | 0.33383  | -0.00004 | -0.00056 | -0.00083 | -0.00139 | 0.33244  |
| D30 | 2.38569  | 0.00000  | -0.00044 | -0.00058 | -0.00102 | 2.38467  |
| D31 | -1.10410 | 0.00006  | 0.00297  | -0.00177 | 0.00120  | -1.10291 |
| D32 | 0.94123  | 0.00001  | 0.00279  | -0.00197 | 0.00082  | 0.94204  |
| D33 | 3.11274  | 0.00003  | 0.00280  | -0.00206 | 0.00074  | 3.11348  |
| D34 | 3.10529  | 0.00003  | 0.00229  | -0.00155 | 0.00074  | 3.10603  |
| D35 | -1.13257 | -0.00002 | 0.00211  | -0.00175 | 0.00036  | -1.13221 |
| D36 | 1.03895  | 0.00000  | 0.00212  | -0.00185 | 0.00028  | 1.03923  |
| D37 | 1.01059  | 0.00001  | 0.00248  | -0.00183 | 0.00064  | 1.01124  |
| D38 | 3.05592  | -0.00004 | 0.00229  | -0.00203 | 0.00027  | 3.05619  |
| D39 | -1.05574 | -0.00002 | 0.00231  | -0.00212 | 0.00019  | -1.05556 |
| D40 | 2.94147  | -0.00002 | -0.00108 | -0.00010 | -0.00120 | 2.94027  |
| D41 | -1.25241 | -0.00001 | -0.00022 | -0.00035 | -0.00056 | -1.25297 |
| D42 | 0.86489  | -0.00007 | -0.00153 | -0.00026 | -0.00180 | 0.86308  |
| D43 | 2.95419  | -0.00005 | -0.00067 | -0.00051 | -0.00117 | 2.95303  |
| D44 | -1.23596 | 0.00002  | -0.00093 | -0.00016 | -0.00110 | -1.23706 |
| D45 | 0.85335  | 0.00004  | -0.00006 | -0.00041 | -0.00047 | 0.85288  |
| D46 | 3.13810  | 0.00001  | 0.00063  | -0.00013 | 0.00050  | 3.13860  |
| D47 | -0.00426 | 0.00000  | 0.00087  | -0.00037 | 0.00050  | -0.00375 |

|     |          |          |          |          |          |          |
|-----|----------|----------|----------|----------|----------|----------|
| D48 | -0.00342 | 0.00000  | 0.00098  | -0.00044 | 0.00054  | -0.00288 |
| D49 | 3.13741  | 0.00000  | 0.00123  | -0.00069 | 0.00055  | 3.13795  |
| D50 | 2.21444  | -0.00005 | 0.01101  | 0.00194  | 0.01299  | 2.22743  |
| D51 | -1.41927 | 0.00006  | 0.01875  | 0.00013  | 0.01888  | -1.40039 |
| D52 | -2.08503 | 0.00000  | 0.01411  | 0.00110  | 0.01520  | -2.06982 |
| D53 | 0.56445  | 0.00011  | 0.02185  | -0.00071 | 0.02110  | 0.58555  |
| D54 | -2.71331 | -0.00004 | -0.00029 | -0.00003 | -0.00033 | -2.71364 |
| D55 | -0.01408 | -0.00003 | 0.00044  | -0.00065 | -0.00021 | -0.01430 |
| D56 | -0.03060 | 0.00011  | 0.00017  | 0.00080  | 0.00096  | -0.02964 |
| D57 | 2.66863  | 0.00012  | 0.00090  | 0.00018  | 0.00108  | 2.66970  |
| D58 | 0.55720  | 0.00000  | 0.00689  | -0.00351 | 0.00342  | 0.56062  |
| D59 | -1.85992 | -0.00023 | 0.00769  | -0.00459 | 0.00315  | -1.85677 |
| D60 | 1.84101  | -0.00004 | -0.00285 | -0.00131 | -0.00416 | 1.83685  |
| D61 | -0.58005 | -0.00003 | -0.00297 | -0.00111 | -0.00408 | -0.58413 |
| D62 | 2.55900  | 0.00001  | -0.00179 | 0.00026  | -0.00153 | 2.55748  |
| D63 | -1.65008 | 0.00001  | -0.00201 | 0.00035  | -0.00166 | -1.65174 |
| D64 | 0.44936  | 0.00001  | -0.00188 | 0.00035  | -0.00153 | 0.44783  |
| D65 | 1.35496  | -0.00002 | -0.00096 | -0.00024 | -0.00120 | 1.35376  |
| D66 | -2.85413 | -0.00001 | -0.00118 | -0.00015 | -0.00133 | -2.85545 |
| D67 | -0.75469 | -0.00002 | -0.00105 | -0.00015 | -0.00120 | -0.75589 |
| D68 | -1.03098 | -0.00003 | -0.00101 | -0.00035 | -0.00136 | -1.03234 |
| D69 | 1.04312  | -0.00002 | -0.00123 | -0.00025 | -0.00148 | 1.04163  |
| D70 | -3.14063 | -0.00003 | -0.00110 | -0.00025 | -0.00136 | 3.14120  |

| Item                 | Value    | Threshold | Converged? |
|----------------------|----------|-----------|------------|
| Maximum Force        | 0.000330 | 0.000450  | YES        |
| RMS Force            | 0.000075 | 0.000300  | YES        |
| Maximum Displacement | 0.051171 | 0.001800  | NO         |
| RMS Displacement     | 0.011646 | 0.001200  | NO         |

Predicted change in Energy=-1.572917D-06

GradGradGradGradGradGradGradGradGradGradGradGradGradGradGradGradGradGrad

Input orientation:

| Center Number | Atomic Number | Atomic Type | Coordinates (Angstroms) |           |           |
|---------------|---------------|-------------|-------------------------|-----------|-----------|
|               |               |             | X                       | Y         | Z         |
| 1             | 6             | 0           | -2.645171               | 2.096974  | -0.198070 |
| 2             | 6             | 0           | -3.534886               | 1.115452  | 0.097455  |
| 3             | 7             | 0           | -2.824285               | -0.077991 | 0.120628  |
| 4             | 6             | 0           | -1.533126               | 0.182953  | -0.156346 |
| 5             | 7             | 0           | -1.405104               | 1.495608  | -0.355794 |
| 6             | 6             | 0           | -0.132946               | 2.180720  | -0.646616 |
| 7             | 6             | 0           | 0.451288                | 2.874370  | 0.588900  |
| 8             | 1             | 0           | -2.786111               | 3.157310  | -0.317570 |

|    |    |   |           |           |           |
|----|----|---|-----------|-----------|-----------|
| 9  | 1  | 0 | -4.592949 | 1.165820  | 0.278513  |
| 10 | 1  | 0 | 0.568019  | 1.423792  | -0.998607 |
| 11 | 1  | 0 | -0.307405 | 2.903644  | -1.444601 |
| 12 | 1  | 0 | -0.229580 | 3.661870  | 0.928887  |
| 13 | 1  | 0 | 0.530547  | 2.133342  | 1.398348  |
| 14 | 35 | 0 | 0.134339  | -2.666539 | -0.258689 |
| 15 | 1  | 0 | -0.757225 | -0.605776 | -0.216084 |
| 16 | 6  | 0 | -3.296729 | -1.402298 | 0.370700  |
| 17 | 6  | 0 | -4.552506 | -1.691382 | 0.684939  |
| 18 | 1  | 0 | -2.498769 | -2.135887 | 0.270415  |
| 19 | 1  | 0 | -4.823036 | -2.724465 | 0.855020  |
| 20 | 1  | 0 | -5.337580 | -0.951649 | 0.785026  |
| 21 | 7  | 0 | 1.718321  | 3.482203  | 0.199247  |
| 22 | 1  | 0 | 2.058538  | 4.110255  | 0.917863  |
| 23 | 1  | 0 | 2.416734  | 2.756157  | 0.052410  |
| 24 | 6  | 0 | 3.355173  | -0.377613 | -1.135584 |
| 25 | 6  | 0 | 3.263837  | -0.580285 | 0.311681  |
| 26 | 8  | 0 | 2.734255  | 0.627863  | -0.301338 |
| 27 | 1  | 0 | 4.301547  | -0.072264 | -1.576002 |
| 28 | 1  | 0 | 2.670213  | -0.918040 | -1.782132 |
| 29 | 1  | 0 | 2.476895  | -1.254163 | 0.644207  |
| 30 | 6  | 0 | 4.442914  | -0.399310 | 1.227335  |
| 31 | 1  | 0 | 4.123398  | -0.014480 | 2.200308  |
| 32 | 1  | 0 | 4.933642  | -1.362736 | 1.396043  |
| 33 | 1  | 0 | 5.172862  | 0.293912  | 0.801725  |

-----  
Distance matrix (angstroms):

|    |    | 1        | 2        | 3        | 4        | 5        |
|----|----|----------|----------|----------|----------|----------|
| 1  | C  | 0.000000 |          |          |          |          |
| 2  | C  | 1.357319 | 0.000000 |          |          |          |
| 3  | N  | 2.205475 | 1.389171 | 0.000000 |          |          |
| 4  | C  | 2.214016 | 2.222839 | 1.346068 | 0.000000 |          |
| 5  | N  | 1.387186 | 2.210413 | 2.171926 | 1.333879 | 0.000000 |
| 6  | C  | 2.553328 | 3.641653 | 3.596352 | 2.488362 | 1.473887 |
| 7  | C  | 3.288120 | 4.384621 | 4.434534 | 3.425934 | 2.497924 |
| 8  | H  | 1.076316 | 2.214068 | 3.265064 | 3.231527 | 2.160994 |
| 9  | H  | 2.210886 | 1.074624 | 2.167987 | 3.243093 | 3.267026 |
| 10 | H  | 3.379146 | 4.257964 | 3.875018 | 2.581452 | 2.076435 |
| 11 | H  | 2.769424 | 3.999025 | 4.204138 | 3.250255 | 2.091174 |
| 12 | H  | 3.090956 | 4.254476 | 4.623022 | 3.870378 | 2.779379 |
| 13 | H  | 3.554583 | 4.388185 | 4.216332 | 3.237257 | 2.688952 |
| 14 | Br | 5.515470 | 5.281430 | 3.949420 | 3.303107 | 4.438781 |
| 15 | H  | 3.296897 | 3.282733 | 2.159785 | 1.108009 | 2.203425 |
| 16 | C  | 3.604571 | 2.543707 | 1.428121 | 2.429217 | 3.536085 |

|    |    |          |          |          |          |          |
|----|----|----------|----------|----------|----------|----------|
| 17 | C  | 4.332352 | 3.042861 | 2.430684 | 3.652061 | 4.598496 |
| 18 | H  | 4.261224 | 3.416820 | 2.088860 | 2.547864 | 3.843956 |
| 19 | H  | 5.394290 | 4.120461 | 3.396787 | 4.505491 | 5.563932 |
| 20 | H  | 4.184453 | 2.827608 | 2.742509 | 4.080120 | 4.770210 |
| 21 | N  | 4.595300 | 5.762643 | 5.772038 | 4.645794 | 3.743048 |
| 22 | H  | 5.236744 | 6.397524 | 6.482202 | 5.429335 | 4.522764 |
| 23 | H  | 5.110787 | 6.173793 | 5.958634 | 4.718723 | 4.045004 |
| 24 | C  | 6.557946 | 7.156993 | 6.312967 | 5.016833 | 5.174676 |
| 25 | C  | 6.507223 | 7.010282 | 6.111795 | 4.879799 | 5.153044 |
| 26 | O  | 5.577381 | 6.300707 | 5.619044 | 4.292961 | 4.229686 |
| 27 | H  | 7.406833 | 8.100667 | 7.325030 | 6.010321 | 6.042598 |
| 28 | H  | 6.312913 | 6.794939 | 5.875005 | 4.639335 | 4.946549 |
| 29 | H  | 6.178601 | 6.485023 | 5.455275 | 4.334334 | 4.861189 |
| 30 | C  | 7.648802 | 8.198562 | 7.358004 | 6.161709 | 6.347939 |
| 31 | H  | 7.484918 | 8.021724 | 7.252545 | 6.130992 | 6.275218 |
| 32 | H  | 8.482288 | 8.918728 | 7.966347 | 6.827749 | 7.170688 |
| 33 | H  | 8.085312 | 8.774725 | 8.034710 | 6.774990 | 6.786278 |
|    |    | 6        | 7        | 8        | 9        | 10       |
| 6  | C  | 0.000000 |          |          |          |          |
| 7  | C  | 1.532638 | 0.000000 |          |          |          |
| 8  | H  | 2.846276 | 3.373796 | 0.000000 |          |          |
| 9  | H  | 4.666639 | 5.334774 | 2.754271 | 0.000000 |          |
| 10 | H  | 1.090041 | 2.153597 | 3.836546 | 5.322892 | 0.000000 |
| 11 | H  | 1.090796 | 2.170621 | 2.734690 | 4.935083 | 1.776300 |
| 12 | H  | 2.164567 | 1.095139 | 2.888613 | 5.068751 | 3.059475 |
| 13 | H  | 2.150429 | 1.100278 | 3.872093 | 5.332949 | 2.500051 |
| 14 | Br | 4.870097 | 5.614315 | 6.515344 | 6.109240 | 4.179278 |
| 15 | H  | 2.887845 | 3.770932 | 4.276389 | 4.253935 | 2.547109 |
| 16 | C  | 4.886971 | 5.690795 | 4.639448 | 2.878180 | 4.979766 |
| 17 | C  | 6.024843 | 6.774458 | 5.256899 | 2.886247 | 6.225626 |
| 18 | H  | 5.007112 | 5.822968 | 5.333501 | 3.909851 | 4.866922 |
| 19 | H  | 6.950734 | 7.696511 | 6.333981 | 3.939495 | 7.050350 |
| 20 | H  | 6.240958 | 6.941750 | 4.960772 | 2.301023 | 6.610611 |
| 21 | N  | 2.415891 | 1.458308 | 4.545609 | 6.723395 | 2.644825 |
| 22 | H  | 3.312597 | 2.053991 | 5.089698 | 7.302106 | 3.620993 |
| 23 | H  | 2.705666 | 2.040777 | 5.231387 | 7.191380 | 2.509498 |
| 24 | C  | 4.353290 | 4.688474 | 7.133036 | 8.219155 | 3.321454 |
| 25 | C  | 4.481028 | 4.463398 | 7.139149 | 8.048545 | 3.605637 |
| 26 | O  | 3.278936 | 3.324343 | 6.072299 | 7.369773 | 2.410864 |
| 27 | H  | 5.060081 | 5.309797 | 7.889784 | 9.169740 | 4.063348 |
| 28 | H  | 4.330059 | 4.992774 | 6.965981 | 7.832130 | 3.243040 |
| 29 | H  | 4.502878 | 4.599014 | 6.934359 | 7.481494 | 3.676151 |
| 30 | C  | 5.577342 | 5.201698 | 8.203358 | 9.219367 | 4.826317 |
| 31 | H  | 5.571386 | 4.942316 | 8.008825 | 9.003395 | 4.994237 |

|    |    |          |          |          |          |           |
|----|----|----------|----------|----------|----------|-----------|
| 32 | H  | 6.511440 | 6.220615 | 9.108341 | 9.919598 | 5.705940  |
| 33 | H  | 5.814579 | 5.384916 | 8.532123 | 9.818608 | 5.071726  |
|    |    | 11       | 12       | 13       | 14       | 15        |
| 11 | H  | 0.000000 |          |          |          |           |
| 12 | H  | 2.492871 | 0.000000 |          |          |           |
| 13 | H  | 3.062334 | 1.770476 | 0.000000 |          |           |
| 14 | Br | 5.712133 | 6.449149 | 5.093290 | 0.000000 |           |
| 15 | H  | 3.745347 | 4.449963 | 3.430381 | 2.245761 | 0.000000  |
| 16 | C  | 5.547298 | 5.946829 | 5.310824 | 3.710345 | 2.725408  |
| 17 | C  | 6.608335 | 6.885093 | 6.401163 | 4.879331 | 4.049017  |
| 18 | H  | 5.756756 | 6.260734 | 5.354933 | 2.737663 | 2.368733  |
| 19 | H  | 7.573295 | 7.867056 | 7.249437 | 5.081266 | 4.708176  |
| 20 | H  | 6.718421 | 6.884542 | 6.657946 | 5.828558 | 4.701224  |
| 21 | N  | 2.672177 | 2.087816 | 2.160573 | 6.365982 | 4.797124  |
| 22 | H  | 3.554551 | 2.331664 | 2.544368 | 7.142251 | 5.608504  |
| 23 | H  | 3.111869 | 2.931127 | 2.399406 | 5.891667 | 4.631274  |
| 24 | C  | 4.927132 | 5.781861 | 4.550189 | 4.047456 | 4.220113  |
| 25 | C  | 5.289240 | 5.529989 | 4.001936 | 3.804148 | 4.055629  |
| 26 | O  | 3.967106 | 4.416217 | 3.164132 | 4.196960 | 3.703994  |
| 27 | H  | 5.487781 | 6.383520 | 5.285063 | 5.082440 | 5.265470  |
| 28 | H  | 4.856481 | 6.060858 | 4.899444 | 3.436392 | 3.781183  |
| 29 | H  | 5.422435 | 5.619023 | 3.978968 | 2.880555 | 3.408817  |
| 30 | C  | 6.372934 | 6.197940 | 4.663710 | 5.090424 | 5.400697  |
| 31 | H  | 6.436834 | 5.837849 | 4.262025 | 5.384485 | 5.478053  |
| 32 | H  | 7.330746 | 7.219679 | 5.622261 | 5.241312 | 5.963045  |
| 33 | H  | 6.472249 | 6.367550 | 5.028971 | 5.939316 | 6.083692  |
|    |    | 16       | 17       | 18       | 19       | 20        |
| 16 | C  | 0.000000 |          |          |          |           |
| 17 | C  | 1.326382 | 0.000000 |          |          |           |
| 18 | H  | 1.088554 | 2.141787 | 0.000000 |          |           |
| 19 | H  | 2.076608 | 1.081376 | 2.467874 | 0.000000 |           |
| 20 | H  | 2.130686 | 1.083312 | 3.118669 | 1.847305 | 0.000000  |
| 21 | N  | 7.002748 | 8.144025 | 7.025087 | 9.041134 | 8.353916  |
| 22 | H  | 7.704967 | 8.798815 | 7.759029 | 9.699145 | 8.963430  |
| 23 | H  | 7.073734 | 8.291622 | 6.938428 | 9.115682 | 8.626351  |
| 24 | C  | 6.896860 | 8.220200 | 6.271922 | 8.738039 | 8.920887  |
| 25 | C  | 6.612127 | 7.903738 | 5.969023 | 8.383928 | 8.622433  |
| 26 | O  | 6.398904 | 7.710287 | 5.945567 | 8.347929 | 8.296359  |
| 27 | H  | 7.955654 | 9.280498 | 7.342485 | 9.808263 | 9.962958  |
| 28 | H  | 6.361886 | 7.671517 | 5.693372 | 8.146565 | 8.409292  |
| 29 | H  | 5.781997 | 7.043103 | 5.066990 | 7.449511 | 7.821596  |
| 30 | C  | 7.851235 | 9.103912 | 7.219305 | 9.560480 | 9.806059  |
| 31 | H  | 7.767355 | 8.965470 | 7.216506 | 9.444178 | 9.612046  |
| 32 | H  | 8.294089 | 9.518439 | 7.556821 | 9.866092 | 10.297589 |



|    |   |          |          |          |           |           |
|----|---|----------|----------|----------|-----------|-----------|
| 33 | H | 8.648520 | 9.926622 | 8.064747 | 10.441811 | 10.584002 |
|    |   | 21       | 22       | 23       | 24        | 25        |
| 21 | N | 0.000000 |          |          |           |           |
| 22 | H | 1.013217 | 0.000000 |          |           |           |
| 23 | H | 1.018079 | 1.646480 | 0.000000 |           |           |
| 24 | C | 4.399913 | 5.102830 | 3.480304 | 0.000000  |           |
| 25 | C | 4.347995 | 4.880714 | 3.452049 | 1.464238  | 0.000000  |
| 26 | O | 3.070824 | 3.751013 | 2.180731 | 1.446544  | 1.454604  |
| 27 | H | 4.739071 | 5.361336 | 3.768847 | 1.087579  | 2.213204  |
| 28 | H | 4.918749 | 5.740024 | 4.114550 | 1.085935  | 2.202390  |
| 29 | H | 4.817321 | 5.387661 | 4.054196 | 2.169647  | 1.088101  |
| 30 | C | 4.852475 | 5.110499 | 3.929736 | 2.601353  | 1.503794  |
| 31 | H | 4.692061 | 4.787667 | 3.899050 | 3.442414  | 2.150789  |
| 32 | H | 5.936669 | 6.200687 | 5.010534 | 3.141841  | 2.139233  |
| 33 | H | 4.739413 | 4.927167 | 3.770990 | 2.740092  | 2.156094  |
|    |   | 26       | 27       | 28       | 29        | 30        |
| 26 | O | 0.000000 |          |          |           |           |
| 27 | H | 2.138071 | 0.000000 |          |           |           |
| 28 | H | 2.141651 | 1.849074 | 0.000000 |           |           |
| 29 | H | 2.121865 | 3.107340 | 2.457127 | 0.000000  |           |
| 30 | C | 2.512258 | 2.825887 | 3.531068 | 2.221721  | 0.000000  |
| 31 | H | 2.932671 | 3.780951 | 4.334512 | 2.582487  | 1.094012  |
| 32 | H | 3.417732 | 3.301198 | 3.927042 | 2.571508  | 1.094288  |
| 33 | H | 2.697235 | 2.558683 | 3.795839 | 3.112810  | 1.092944  |
|    |   | 31       | 32       | 33       |           |           |
| 31 | H | 0.000000 |          |          |           |           |
| 32 | H | 1.766673 | 0.000000 |          |           |           |
| 33 | H | 1.775533 | 1.776210 | 0.000000 |           |           |

Stoichiometry C10H18BrN3O

Framework group C1[X(C10H18BrN3O)]

Deg. of freedom 93

Full point group C1 NOp 1

Largest Abelian subgroup C1 NOp 1

Largest concise Abelian subgroup C1 NOp 1

Standard orientation:

| Center<br>Number | Atomic<br>Number | Atomic<br>Type | Coordinates (Angstroms) |          |           |
|------------------|------------------|----------------|-------------------------|----------|-----------|
|                  |                  |                | X                       | Y        | Z         |
| 1                | 6                | 0              | -2.352549               | 2.467261 | -0.264824 |
| 2                | 6                | 0              | -3.337068               | 1.585854 | 0.045267  |
| 3                | 7                | 0              | -2.748603               | 0.328720 | 0.101108  |
| 4                | 6                | 0              | -1.436273               | 0.453933 | -0.170937 |
| 5                | 7                | 0              | -1.177377               | 1.742467 | -0.398724 |

|    |    |   |           |           |           |
|----|----|---|-----------|-----------|-----------|
| 6  | 6  | 0 | 0.158238  | 2.291209  | -0.694290 |
| 7  | 6  | 0 | 0.800991  | 2.951963  | 0.530149  |
| 8  | 1  | 0 | -2.386810 | 3.533292  | -0.409254 |
| 9  | 1  | 0 | -4.385977 | 1.745014  | 0.216370  |
| 10 | 1  | 0 | 0.782707  | 1.460592  | -1.023382 |
| 11 | 1  | 0 | 0.061215  | 3.009193  | -1.509717 |
| 12 | 1  | 0 | 0.199625  | 3.810723  | 0.846720  |
| 13 | 1  | 0 | 0.801418  | 2.225668  | 1.356653  |
| 14 | 35 | 0 | -0.059328 | -2.548388 | -0.195478 |
| 15 | 1  | 0 | -0.742156 | -0.408980 | -0.206525 |
| 16 | 6  | 0 | -3.351676 | -0.936099 | 0.376910  |
| 17 | 6  | 0 | -4.631817 | -1.091950 | 0.687135  |
| 18 | 1  | 0 | -2.629891 | -1.747284 | 0.299734  |
| 19 | 1  | 0 | -5.004584 | -2.088920 | 0.878108  |
| 20 | 1  | 0 | -5.340169 | -0.275934 | 0.764084  |
| 21 | 7  | 0 | 2.124429  | 3.422046  | 0.137472  |
| 22 | 1  | 0 | 2.520977  | 4.029758  | 0.844610  |
| 23 | 1  | 0 | 2.748189  | 2.627153  | 0.012763  |
| 24 | 6  | 0 | 3.378043  | -0.610857 | -1.096783 |
| 25 | 6  | 0 | 3.258322  | -0.769914 | 0.353858  |
| 26 | 8  | 0 | 2.854992  | 0.470252  | -0.290489 |
| 27 | 1  | 0 | 4.352690  | -0.411082 | -1.536081 |
| 28 | 1  | 0 | 2.646726  | -1.095563 | -1.736698 |
| 29 | 1  | 0 | 2.406382  | -1.354603 | 0.694887  |
| 30 | 6  | 0 | 4.444003  | -0.685533 | 1.274965  |
| 31 | 1  | 0 | 4.158412  | -0.248507 | 2.236374  |
| 32 | 1  | 0 | 4.835642  | -1.688684 | 1.469314  |
| 33 | 1  | 0 | 5.241712  | -0.078107 | 0.839972  |

-----  
Rotational constants (GHZ): 0.4208885 0.2921400 0.1826970

Standard basis: 6-311++G(d,p) (5D, 7F)

There are 499 symmetry adapted cartesian basis functions of A symmetry.

There are 482 symmetry adapted basis functions of A symmetry.

482 basis functions, 760 primitive gaussians, 499 cartesian basis functions

71 alpha electrons 71 beta electrons

nuclear repulsion energy 1312.4911343448 Hartrees.

NAtoms= 33 NActive= 33 NUniq= 33 SFac= 1.00D+00 NATFMM= 60 NAOKFM=F

Big=F

Integral buffers will be 131072 words long.

Raffenetti 2 integral format.

Two-electron integral symmetry is turned on.

One-electron integrals computed using PRISM.

NBasis= 482 RedAO= T EigKep= 3.63D-06 NBF= 482

NBsUse= 482 1.00D-06 EigRej= -1.00D+00 NBFU= 482

Initial guess from the checkpoint file:  
"/home/suqian/liuwen/qianmengshijie/nh2po/nh2po.chk"

B after Tr= 0.000000 0.000000 0.000000  
Rot= 1.000000 -0.000360 0.000527 0.000467 Ang= -0.09 deg.  
ExpMin= 3.50D-02 ExpMax= 4.40D+05 ExpMxC= 1.51D+04 IAcc=3 IRadAn= 5 AccDes=  
0.00D+00

Harris functional with IExCor= 402 and IRadAn= 5 diagonalized for initial guess.  
HarFok: IExCor= 402 AccDes= 0.00D+00 IRadAn= 5 IDoV= 1 UseB2=F ITyADJ=14  
ICtDFT= 3500011 ScaDFX= 1.000000 1.000000 1.000000 1.000000  
FoFCou: FMM=F IPFlag= 0 FMFlag= 100000 FMFlg1= 0  
NFxFlg= 0 DoJE=T BraDBF=F KetDBF=T FulRan=T  
wScrn= 0.000000 ICntrl= 500 IOpCl= 0 I1Cent= 200000004 NGrid=

0  
NMat0= 1 NMatS0= 1 NMatT0= 0 NMatD0= 1 NMtDS0= 0  
NMtDT0= 0

Petite list used in FoFCou.

Requested convergence on RMS density matrix=1.00D-08 within 128 cycles.

Requested convergence on MAX density matrix=1.00D-06.

Requested convergence on energy=1.00D-06.

No special actions if energy rises.

SCF Done: E(RB3LYP) = -3205.64836331 A.U. after 10 cycles

NFock= 10 Conv=0.69D-08 -V/T= 2.0018

Calling FoFJK, ICntrl= 2127 FMM=F ISym2X=0 I1Cent= 0 IOpClX= 0 NMat=1 NMatS=1  
NMatT=0.

\*\*\*\*\* Axes restored to original set \*\*\*\*\*

| Center<br>Number | Atomic<br>Number | Forces (Hartrees/Bohr) |              |              |
|------------------|------------------|------------------------|--------------|--------------|
|                  |                  | X                      | Y            | Z            |
| 1                | 6                | 0.000033978            | -0.000010636 | 0.000049649  |
| 2                | 6                | 0.000007454            | 0.000023504  | -0.000016382 |
| 3                | 7                | -0.000022420           | -0.000033048 | -0.000058417 |
| 4                | 6                | 0.000042915            | -0.000024958 | 0.000015825  |
| 5                | 7                | 0.000000508            | 0.000073851  | 0.000042362  |
| 6                | 6                | -0.000025799           | -0.000024903 | -0.000047250 |
| 7                | 6                | 0.000025411            | 0.000032859  | -0.000057897 |
| 8                | 1                | -0.000014441           | -0.000002459 | -0.000012027 |
| 9                | 1                | 0.000002853            | -0.000002708 | 0.000007407  |
| 10               | 1                | 0.000022465            | 0.000010091  | -0.000013789 |
| 11               | 1                | -0.000001001           | -0.000028682 | -0.000025003 |
| 12               | 1                | 0.000009607            | -0.000003877 | 0.000014538  |
| 13               | 1                | -0.000015630           | -0.000024754 | 0.000006401  |
| 14               | 35               | 0.000024387            | -0.000053476 | 0.000006422  |
| 15               | 1                | -0.000092945           | 0.000068914  | 0.000012090  |

|    |   |              |              |              |
|----|---|--------------|--------------|--------------|
| 16 | 6 | -0.000011190 | -0.000004262 | 0.000005122  |
| 17 | 6 | 0.000005941  | 0.000021027  | 0.000004150  |
| 18 | 1 | 0.000023503  | -0.000013588 | -0.000002068 |
| 19 | 1 | 0.000004776  | -0.000000525 | -0.000002620 |
| 20 | 1 | -0.000009672 | -0.000000017 | 0.000002992  |
| 21 | 7 | -0.000005159 | -0.000035963 | 0.000125750  |
| 22 | 1 | 0.000018542  | 0.000014804  | -0.000055538 |
| 23 | 1 | -0.000047305 | 0.000046780  | 0.000107328  |
| 24 | 6 | 0.000161796  | -0.000161654 | -0.000173515 |
| 25 | 6 | -0.000103438 | 0.000095548  | 0.000081660  |
| 26 | 8 | 0.000088569  | 0.000051689  | -0.000156465 |
| 27 | 1 | -0.000052423 | 0.000037761  | 0.000055064  |
| 28 | 1 | -0.000082447 | -0.000002489 | 0.000137867  |
| 29 | 1 | 0.000009059  | -0.000077468 | -0.000049018 |
| 30 | 6 | -0.000012920 | 0.000008620  | -0.000036705 |
| 31 | 1 | 0.000010963  | 0.000018425  | 0.000015701  |
| 32 | 1 | -0.000013358 | 0.000003469  | 0.000009869  |
| 33 | 1 | 0.000017421  | -0.000001876 | 0.000006498  |

-----  
Cartesian Forces: Max 0.000173515 RMS 0.000052773

GradGradGradGradGradGradGradGradGradGradGradGradGradGradGradGradGradGradGrad

Berny optimization.

Using GEDIIS/GDIIS optimizer.

FormGI is forming the generalized inverse of G from B-inverse, IUseBI=4.

GSVD: received Info= 1 from GESDD.

Internal Forces: Max 0.000137892 RMS 0.000031583

Search for a local minimum.

Step number 38 out of a maximum of 172

All quantities printed in internal units (Hartrees-Bohrs-Radians)

Mixed Optimization -- En-DIIS/RFO-DIIS

Swapping is turned off.

Update second derivatives using D2CorX and points 31 32 33 34 35  
36 37 38

DE= -4.16D-06 DEPred=-1.57D-06 R= 2.65D+00

TightC=F SS= 1.41D+00 RLast= 3.83D-02 DXNew= 1.7446D+00 1.1486D-01

Trust test= 2.65D+00 RLast= 3.83D-02 DXMaxT set to 1.04D+00

ITU= 1 1 1 1 1 1 1 1 1 1 1 1 0 0 -1 1 -1 1 1 1

ITU= 1 1 1 1 1 1 0 -1 -1 1 1 1 -1 1 0 0 -1 0

|                 |         |         |         |         |         |
|-----------------|---------|---------|---------|---------|---------|
| Eigenvalues --- | 0.00055 | 0.00108 | 0.00217 | 0.00484 | 0.00613 |
| Eigenvalues --- | 0.00676 | 0.00729 | 0.01145 | 0.01334 | 0.01750 |
| Eigenvalues --- | 0.01905 | 0.02078 | 0.02218 | 0.02371 | 0.02387 |
| Eigenvalues --- | 0.02600 | 0.02741 | 0.02893 | 0.03064 | 0.03107 |
| Eigenvalues --- | 0.03445 | 0.03533 | 0.03829 | 0.03916 | 0.04040 |

|                 |         |         |         |         |         |
|-----------------|---------|---------|---------|---------|---------|
| Eigenvalues --- | 0.04234 | 0.04437 | 0.04575 | 0.05449 | 0.05521 |
| Eigenvalues --- | 0.05742 | 0.05760 | 0.05909 | 0.07801 | 0.08695 |
| Eigenvalues --- | 0.08770 | 0.09563 | 0.10365 | 0.10972 | 0.12332 |
| Eigenvalues --- | 0.12766 | 0.13143 | 0.13590 | 0.15792 | 0.15964 |
| Eigenvalues --- | 0.16001 | 0.16002 | 0.16006 | 0.16016 | 0.16079 |
| Eigenvalues --- | 0.16175 | 0.19230 | 0.21330 | 0.21986 | 0.22171 |
| Eigenvalues --- | 0.23061 | 0.23450 | 0.25697 | 0.26182 | 0.28008 |
| Eigenvalues --- | 0.29068 | 0.29632 | 0.30289 | 0.31897 | 0.32456 |
| Eigenvalues --- | 0.33697 | 0.34286 | 0.34344 | 0.34361 | 0.34547 |
| Eigenvalues --- | 0.34682 | 0.34746 | 0.35041 | 0.35137 | 0.35309 |
| Eigenvalues --- | 0.35573 | 0.35713 | 0.35886 | 0.35943 | 0.36419 |
| Eigenvalues --- | 0.36628 | 0.39512 | 0.40652 | 0.41878 | 0.42487 |
| Eigenvalues --- | 0.44751 | 0.45489 | 0.46453 | 0.49514 | 0.54846 |
| Eigenvalues --- | 0.58303 | 0.60635 | 1.13457 |         |         |

En-DIIS/RFO-DIIS IScMMF= 0 using points: 38 37 36 35 34

RFO step: Lambda=-8.24443588D-07.

DidBck=F Rises=F RFO-DIIS coefs: 1.39925 0.07012 -0.56855 -0.35577

0.45495

Iteration 1 RMS(Cart)= 0.00997301 RMS(Int)= 0.00004634

Iteration 2 RMS(Cart)= 0.00009253 RMS(Int)= 0.00001105

Iteration 3 RMS(Cart)= 0.00000001 RMS(Int)= 0.00001105

| Variable | Old X   | -DE/DX   | Delta X<br>(Linear) | Delta X<br>(Quad) | Delta X<br>(Total) | New X   |
|----------|---------|----------|---------------------|-------------------|--------------------|---------|
| R1       | 2.56496 | 0.00000  | 0.00001             | 0.00000           | 0.00001            | 2.56497 |
| R2       | 2.62140 | -0.00001 | -0.00008            | -0.00002          | -0.00010           | 2.62130 |
| R3       | 2.03394 | 0.00000  | 0.00001             | 0.00000           | 0.00001            | 2.03396 |
| R4       | 2.62515 | 0.00000  | 0.00014             | -0.00002          | 0.00012            | 2.62527 |
| R5       | 2.03075 | 0.00000  | -0.00002            | 0.00000           | -0.00001           | 2.03073 |
| R6       | 2.54370 | -0.00002 | -0.00025            | 0.00006           | -0.00019           | 2.54351 |
| R7       | 2.69876 | 0.00000  | -0.00014            | 0.00003           | -0.00012           | 2.69864 |
| R8       | 2.52067 | 0.00003  | 0.00014             | 0.00002           | 0.00016            | 2.52082 |
| R9       | 2.09383 | -0.00006 | 0.00002             | -0.00017          | -0.00015           | 2.09369 |
| R10      | 2.78524 | 0.00000  | 0.00009             | -0.00005          | 0.00004            | 2.78528 |
| R11      | 2.89627 | 0.00003  | -0.00016            | 0.00019           | 0.00003            | 2.89629 |
| R12      | 2.05988 | 0.00001  | -0.00002            | 0.00000           | -0.00002           | 2.05986 |
| R13      | 2.06131 | 0.00000  | -0.00007            | 0.00001           | -0.00006           | 2.06125 |
| R14      | 2.06951 | 0.00000  | -0.00009            | 0.00003           | -0.00006           | 2.06945 |
| R15      | 2.07922 | 0.00002  | -0.00018            | 0.00014           | -0.00004           | 2.07918 |
| R16      | 2.75580 | -0.00002 | 0.00060             | -0.00038          | 0.00022            | 2.75602 |
| R17      | 4.24387 | 0.00006  | 0.00067             | 0.00042           | 0.00108            | 4.24495 |
| R18      | 2.50650 | -0.00001 | 0.00000             | -0.00001          | -0.00001           | 2.50649 |
| R19      | 2.05707 | 0.00003  | -0.00002            | 0.00009           | 0.00007            | 2.05714 |
| R20      | 2.04351 | 0.00000  | -0.00001            | 0.00000           | -0.00001           | 2.04350 |
| R21      | 2.04716 | 0.00001  | 0.00002             | 0.00001           | 0.00003            | 2.04719 |

|     |         |          |          |          |          |         |
|-----|---------|----------|----------|----------|----------|---------|
| R22 | 1.91470 | -0.00002 | -0.00007 | -0.00002 | -0.00010 | 1.91461 |
| R23 | 1.92389 | -0.00005 | 0.00009  | -0.00011 | -0.00002 | 1.92387 |
| R24 | 4.12099 | 0.00005  | -0.00116 | -0.00111 | -0.00227 | 4.11872 |
| R25 | 2.76701 | 0.00001  | 0.00043  | 0.00006  | 0.00048  | 2.76748 |
| R26 | 2.73357 | 0.00005  | 0.00085  | 0.00034  | 0.00120  | 2.73477 |
| R27 | 2.05523 | -0.00006 | -0.00020 | -0.00016 | -0.00036 | 2.05486 |
| R28 | 2.05212 | -0.00003 | -0.00008 | -0.00009 | -0.00017 | 2.05195 |
| R29 | 2.74880 | -0.00004 | 0.00009  | -0.00079 | -0.00069 | 2.74811 |
| R30 | 2.05621 | 0.00003  | 0.00008  | 0.00001  | 0.00008  | 2.05630 |
| R31 | 2.84176 | 0.00000  | -0.00030 | 0.00012  | -0.00018 | 2.84158 |
| R32 | 2.06738 | 0.00002  | 0.00004  | 0.00007  | 0.00010  | 2.06749 |
| R33 | 2.06790 | -0.00001 | 0.00001  | -0.00002 | -0.00002 | 2.06789 |
| R34 | 2.06536 | 0.00001  | 0.00002  | 0.00001  | 0.00003  | 2.06539 |
| A1  | 1.87260 | 0.00001  | 0.00011  | -0.00003 | 0.00008  | 1.87267 |
| A2  | 2.27935 | -0.00002 | -0.00020 | -0.00005 | -0.00025 | 2.27910 |
| A3  | 2.13118 | 0.00001  | 0.00009  | 0.00008  | 0.00017  | 2.13135 |
| A4  | 1.86458 | 0.00001  | -0.00012 | 0.00008  | -0.00004 | 1.86454 |
| A5  | 2.27599 | 0.00000  | 0.00022  | -0.00005 | 0.00017  | 2.27616 |
| A6  | 2.14254 | -0.00001 | -0.00009 | -0.00004 | -0.00013 | 2.14242 |
| A7  | 1.89725 | -0.00001 | 0.00006  | -0.00009 | -0.00003 | 1.89722 |
| A8  | 2.25280 | 0.00003  | 0.00024  | 0.00006  | 0.00030  | 2.25310 |
| A9  | 2.13308 | -0.00002 | -0.00030 | 0.00003  | -0.00026 | 2.13281 |
| A10 | 1.88978 | 0.00002  | 0.00005  | 0.00003  | 0.00009  | 1.88987 |
| A11 | 2.14695 | -0.00005 | 0.00050  | -0.00044 | 0.00006  | 2.14701 |
| A12 | 2.24624 | 0.00003  | -0.00057 | 0.00038  | -0.00019 | 2.24606 |
| A13 | 1.90056 | -0.00002 | -0.00010 | 0.00000  | -0.00010 | 1.90046 |
| A14 | 2.20497 | 0.00001  | -0.00003 | 0.00021  | 0.00018  | 2.20516 |
| A15 | 2.17704 | 0.00001  | 0.00019  | -0.00023 | -0.00004 | 2.17699 |
| A16 | 1.96095 | -0.00008 | -0.00048 | -0.00036 | -0.00084 | 1.96012 |
| A17 | 1.87128 | 0.00004  | 0.00055  | -0.00012 | 0.00043  | 1.87171 |
| A18 | 1.89059 | 0.00000  | -0.00014 | 0.00001  | -0.00013 | 1.89046 |
| A19 | 1.90653 | 0.00001  | -0.00053 | 0.00034  | -0.00019 | 1.90634 |
| A20 | 1.92917 | 0.00005  | 0.00044  | 0.00035  | 0.00080  | 1.92997 |
| A21 | 1.90375 | -0.00002 | 0.00017  | -0.00024 | -0.00007 | 1.90368 |
| A22 | 1.91635 | 0.00000  | 0.00056  | -0.00024 | 0.00032  | 1.91667 |
| A23 | 1.89199 | -0.00004 | -0.00004 | -0.00033 | -0.00037 | 1.89162 |
| A24 | 1.88015 | 0.00006  | 0.00025  | 0.00034  | 0.00059  | 1.88074 |
| A25 | 1.87622 | 0.00000  | 0.00004  | -0.00008 | -0.00004 | 1.87617 |
| A26 | 1.90012 | -0.00002 | 0.00004  | -0.00006 | -0.00003 | 1.90010 |
| A27 | 1.99841 | 0.00000  | -0.00079 | 0.00034  | -0.00044 | 1.99797 |
| A28 | 2.16132 | 0.00000  | 0.00021  | -0.00010 | 0.00012  | 2.16144 |
| A29 | 1.94581 | -0.00001 | -0.00001 | -0.00002 | -0.00003 | 1.94578 |
| A30 | 2.17605 | 0.00001  | -0.00020 | 0.00012  | -0.00008 | 2.17597 |
| A31 | 2.07411 | -0.00001 | -0.00001 | -0.00008 | -0.00008 | 2.07403 |

|     |          |          |          |          |          |          |
|-----|----------|----------|----------|----------|----------|----------|
| A32 | 2.16420  | 0.00002  | 0.00000  | 0.00006  | 0.00006  | 2.16425  |
| A33 | 2.04487  | 0.00000  | 0.00001  | 0.00002  | 0.00003  | 2.04490  |
| A34 | 1.93970  | 0.00004  | -0.00010 | 0.00060  | 0.00052  | 1.94022  |
| A35 | 1.91487  | 0.00000  | 0.00005  | -0.00013 | -0.00007 | 1.91479  |
| A36 | 1.89020  | 0.00000  | 0.00023  | 0.00016  | 0.00039  | 1.89059  |
| A37 | 2.08679  | -0.00001 | 0.00093  | -0.00047 | 0.00049  | 2.08728  |
| A38 | 2.07174  | -0.00007 | -0.00237 | -0.00057 | -0.00297 | 2.06877  |
| A39 | 1.99534  | -0.00006 | -0.00060 | -0.00021 | -0.00081 | 1.99453  |
| A40 | 2.00263  | 0.00000  | -0.00060 | -0.00076 | -0.00137 | 2.00126  |
| A41 | 2.03474  | 0.00009  | 0.00169  | 0.00134  | 0.00303  | 2.03778  |
| A42 | 2.01850  | -0.00010 | -0.00195 | -0.00027 | -0.00220 | 2.01630  |
| A43 | 2.13681  | 0.00006  | 0.00085  | -0.00004 | 0.00079  | 2.13760  |
| A44 | 1.96045  | 0.00002  | -0.00005 | 0.00062  | 0.00058  | 1.96103  |
| A45 | 2.02875  | -0.00005 | -0.00045 | 0.00035  | -0.00010 | 2.02865  |
| A46 | 2.04374  | 0.00003  | 0.00095  | -0.00031 | 0.00064  | 2.04438  |
| A47 | 2.55789  | 0.00013  | 0.00343  | 0.00562  | 0.00906  | 2.56695  |
| A48 | 2.49021  | -0.00009 | -0.00043 | -0.00273 | -0.00325 | 2.48695  |
| A49 | 1.93357  | 0.00002  | 0.00034  | -0.00002 | 0.00033  | 1.93390  |
| A50 | 1.91722  | -0.00001 | 0.00020  | 0.00005  | 0.00025  | 1.91747  |
| A51 | 1.94215  | 0.00002  | -0.00018 | 0.00009  | -0.00009 | 1.94206  |
| A52 | 1.87922  | -0.00001 | 0.00004  | -0.00003 | 0.00001  | 1.87923  |
| A53 | 1.89471  | -0.00002 | -0.00029 | -0.00008 | -0.00037 | 1.89434  |
| A54 | 1.89542  | 0.00000  | -0.00012 | -0.00002 | -0.00014 | 1.89528  |
| A55 | 3.49061  | -0.00002 | 0.00084  | -0.00046 | 0.00038  | 3.49100  |
| A56 | 2.53168  | 0.00005  | 0.00013  | 0.00055  | 0.00069  | 2.53237  |
| A57 | 2.98593  | -0.00002 | 0.00047  | 0.00278  | 0.00326  | 2.98919  |
| A58 | 3.11147  | 0.00000  | 0.00047  | 0.00281  | 0.00328  | 3.11475  |
| D1  | 0.00293  | 0.00000  | -0.00027 | 0.00001  | -0.00026 | 0.00267  |
| D2  | -3.12582 | 0.00000  | -0.00062 | 0.00035  | -0.00028 | -3.12610 |
| D3  | 3.13332  | -0.00001 | -0.00043 | -0.00037 | -0.00080 | 3.13251  |
| D4  | 0.00456  | -0.00001 | -0.00079 | -0.00003 | -0.00082 | 0.00374  |
| D5  | -0.00443 | -0.00001 | 0.00039  | -0.00044 | -0.00005 | -0.00448 |
| D6  | -3.10955 | -0.00002 | -0.00139 | 0.00009  | -0.00130 | -3.11085 |
| D7  | -3.13598 | 0.00000  | 0.00054  | -0.00010 | 0.00044  | -3.13553 |
| D8  | 0.04209  | 0.00000  | -0.00124 | 0.00043  | -0.00081 | 0.04128  |
| D9  | -0.00047 | 0.00001  | 0.00005  | 0.00043  | 0.00048  | 0.00001  |
| D10 | -3.13093 | -0.00001 | -0.00022 | -0.00031 | -0.00053 | -3.13146 |
| D11 | 3.12950  | 0.00001  | 0.00038  | 0.00012  | 0.00050  | 3.12999  |
| D12 | -0.00096 | -0.00001 | 0.00010  | -0.00062 | -0.00051 | -0.00147 |
| D13 | -0.00229 | -0.00001 | 0.00019  | -0.00071 | -0.00051 | -0.00281 |
| D14 | -3.12325 | -0.00001 | 0.00056  | 0.00038  | 0.00094  | -3.12232 |
| D15 | 3.12908  | 0.00000  | 0.00045  | -0.00003 | 0.00042  | 3.12950  |
| D16 | 0.00812  | 0.00000  | 0.00081  | 0.00105  | 0.00187  | 0.00999  |
| D17 | -0.04841 | 0.00000  | 0.00079  | -0.00390 | -0.00311 | -0.05152 |

|     |          |          |          |          |          |          |
|-----|----------|----------|----------|----------|----------|----------|
| D18 | 3.09308  | 0.00001  | 0.00036  | -0.00324 | -0.00288 | 3.09020  |
| D19 | 3.10565  | -0.00001 | 0.00048  | -0.00472 | -0.00424 | 3.10141  |
| D20 | -0.03604 | -0.00001 | 0.00005  | -0.00406 | -0.00401 | -0.04006 |
| D21 | 0.00414  | 0.00002  | -0.00036 | 0.00071  | 0.00035  | 0.00449  |
| D22 | 3.10998  | 0.00002  | 0.00138  | 0.00020  | 0.00159  | 3.11157  |
| D23 | 3.12357  | 0.00001  | -0.00073 | -0.00047 | -0.00120 | 3.12236  |
| D24 | -0.05378 | 0.00002  | 0.00101  | -0.00098 | 0.00003  | -0.05375 |
| D25 | 1.33721  | 0.00001  | 0.00299  | -0.00152 | 0.00146  | 1.33868  |
| D26 | -2.85115 | 0.00000  | 0.00241  | -0.00140 | 0.00101  | -2.85014 |
| D27 | -0.79892 | -0.00001 | 0.00284  | -0.00174 | 0.00110  | -0.79782 |
| D28 | -1.76239 | 0.00000  | 0.00094  | -0.00092 | 0.00002  | -1.76237 |
| D29 | 0.33244  | -0.00001 | 0.00036  | -0.00080 | -0.00043 | 0.33200  |
| D30 | 2.38467  | -0.00001 | 0.00079  | -0.00114 | -0.00035 | 2.38432  |
| D31 | -1.10291 | 0.00002  | -0.00039 | -0.00150 | -0.00189 | -1.10479 |
| D32 | 0.94204  | 0.00000  | -0.00006 | -0.00192 | -0.00197 | 0.94007  |
| D33 | 3.11348  | 0.00001  | -0.00089 | -0.00149 | -0.00238 | 3.11110  |
| D34 | 3.10603  | 0.00001  | -0.00043 | -0.00134 | -0.00177 | 3.10426  |
| D35 | -1.13221 | -0.00001 | -0.00010 | -0.00176 | -0.00186 | -1.13407 |
| D36 | 1.03923  | 0.00000  | -0.00093 | -0.00133 | -0.00226 | 1.03697  |
| D37 | 1.01124  | 0.00000  | -0.00058 | -0.00148 | -0.00206 | 1.00917  |
| D38 | 3.05619  | -0.00001 | -0.00025 | -0.00190 | -0.00215 | 3.05404  |
| D39 | -1.05556 | 0.00000  | -0.00108 | -0.00147 | -0.00256 | -1.05811 |
| D40 | 2.94027  | 0.00000  | -0.00145 | -0.00096 | -0.00241 | 2.93786  |
| D41 | -1.25297 | 0.00002  | -0.00119 | -0.00047 | -0.00165 | -1.25462 |
| D42 | 0.86308  | -0.00002 | -0.00228 | -0.00084 | -0.00312 | 0.85997  |
| D43 | 2.95303  | 0.00000  | -0.00202 | -0.00034 | -0.00235 | 2.95067  |
| D44 | -1.23706 | -0.00001 | -0.00183 | -0.00092 | -0.00275 | -1.23981 |
| D45 | 0.85288  | 0.00001  | -0.00157 | -0.00042 | -0.00199 | 0.85089  |
| D46 | 3.13860  | 0.00000  | -0.00009 | -0.00002 | -0.00011 | 3.13850  |
| D47 | -0.00375 | 0.00000  | -0.00001 | -0.00021 | -0.00022 | -0.00398 |
| D48 | -0.00288 | 0.00000  | 0.00040  | -0.00076 | -0.00036 | -0.00324 |
| D49 | 3.13795  | 0.00000  | 0.00048  | -0.00095 | -0.00048 | 3.13747  |
| D50 | 2.22743  | -0.00006 | -0.00675 | -0.01080 | -0.01754 | 2.20989  |
| D51 | -1.40039 | 0.00000  | 0.00292  | -0.00153 | 0.00140  | -1.39899 |
| D52 | -2.06982 | -0.00001 | -0.00678 | -0.01059 | -0.01739 | -2.08721 |
| D53 | 0.58555  | 0.00005  | 0.00289  | -0.00133 | 0.00155  | 0.58710  |
| D54 | -2.71364 | 0.00000  | -0.00027 | 0.00077  | 0.00049  | -2.71315 |
| D55 | -0.01430 | 0.00000  | -0.00046 | -0.00084 | -0.00131 | -0.01560 |
| D56 | -0.02964 | 0.00007  | 0.00075  | 0.00185  | 0.00259  | -0.02705 |
| D57 | 2.66970  | 0.00006  | 0.00057  | 0.00023  | 0.00079  | 2.67049  |
| D58 | 0.56062  | -0.00006 | 0.00139  | 0.00118  | 0.00260  | 0.56322  |
| D59 | -1.85677 | -0.00014 | 0.00008  | 0.00016  | 0.00028  | -1.85649 |
| D60 | 1.83685  | -0.00004 | -0.00388 | -0.00775 | -0.01160 | 1.82525  |
| D61 | -0.58413 | -0.00005 | -0.00483 | -0.00842 | -0.01323 | -0.59736 |



|     |          |          |          |          |          |          |
|-----|----------|----------|----------|----------|----------|----------|
| D62 | 2.55748  | 0.00001  | -0.00074 | -0.00021 | -0.00096 | 2.55652  |
| D63 | -1.65174 | 0.00001  | -0.00035 | -0.00023 | -0.00058 | -1.65232 |
| D64 | 0.44783  | 0.00001  | -0.00049 | -0.00016 | -0.00065 | 0.44718  |
| D65 | 1.35376  | -0.00001 | -0.00107 | -0.00073 | -0.00179 | 1.35197  |
| D66 | -2.85545 | -0.00001 | -0.00068 | -0.00074 | -0.00142 | -2.85687 |
| D67 | -0.75589 | -0.00001 | -0.00081 | -0.00068 | -0.00149 | -0.75737 |
| D68 | -1.03234 | -0.00002 | -0.00161 | -0.00184 | -0.00345 | -1.03579 |
| D69 | 1.04163  | -0.00002 | -0.00122 | -0.00186 | -0.00308 | 1.03855  |
| D70 | 3.14120  | -0.00002 | -0.00136 | -0.00179 | -0.00315 | 3.13805  |

| Item                 | Value    | Threshold | Converged? |
|----------------------|----------|-----------|------------|
| Maximum Force        | 0.000138 | 0.000450  | YES        |
| RMS Force            | 0.000032 | 0.000300  | YES        |
| Maximum Displacement | 0.046586 | 0.001800  | NO         |
| RMS Displacement     | 0.010028 | 0.001200  | NO         |

Predicted change in Energy=-3.227581D-06

GradGradGradGradGradGradGradGradGradGradGradGradGradGradGradGradGradGradGrad

Input orientation:

| Center Number | Atomic Number | Atomic Type | Coordinates (Angstroms) |           |           |
|---------------|---------------|-------------|-------------------------|-----------|-----------|
|               |               |             | X                       | Y         | Z         |
| 1             | 6             | 0           | -2.645876               | 2.098551  | -0.194150 |
| 2             | 6             | 0           | -3.534524               | 1.115559  | 0.099731  |
| 3             | 7             | 0           | -2.823230               | -0.077637 | 0.117263  |
| 4             | 6             | 0           | -1.532762               | 0.185052  | -0.160799 |
| 5             | 7             | 0           | -1.405784               | 1.498505  | -0.356173 |
| 6             | 6             | 0           | -0.134706               | 2.184999  | -0.648564 |
| 7             | 6             | 0           | 0.452135                | 2.874190  | 0.588227  |
| 8             | 1             | 0           | -2.787950               | 3.159123  | -0.310229 |
| 9             | 1             | 0           | -4.592238               | 1.164601  | 0.283143  |
| 10            | 1             | 0           | 0.565855                | 1.429746  | -1.004900 |
| 11            | 1             | 0           | -0.311875               | 2.910271  | -1.443774 |
| 12            | 1             | 0           | -0.227153               | 3.661380  | 0.931962  |
| 13            | 1             | 0           | 0.531614                | 2.130306  | 1.394998  |
| 14            | 35            | 0           | 0.136539                | -2.663295 | -0.283341 |
| 15            | 1             | 0           | -0.756694               | -0.603000 | -0.225628 |
| 16            | 6             | 0           | -3.293959               | -1.403087 | 0.364145  |
| 17            | 6             | 0           | -4.547903               | -1.694025 | 0.683921  |
| 18            | 1             | 0           | -2.496265               | -2.135988 | 0.256586  |
| 19            | 1             | 0           | -4.817066               | -2.727975 | 0.850851  |
| 20            | 1             | 0           | -5.332702               | -0.955054 | 0.791688  |
| 21            | 7             | 0           | 1.719737                | 3.481689  | 0.199471  |
| 22            | 1             | 0           | 2.060622                | 4.108797  | 0.918525  |

|    |   |   |          |           |           |
|----|---|---|----------|-----------|-----------|
| 23 | 1 | 0 | 2.417460 | 2.755267  | 0.051276  |
| 24 | 6 | 0 | 3.344841 | -0.389158 | -1.128712 |
| 25 | 6 | 0 | 3.262006 | -0.577545 | 0.321246  |
| 26 | 8 | 0 | 2.734952 | 0.627614  | -0.298929 |
| 27 | 1 | 0 | 4.289181 | -0.091990 | -1.578515 |
| 28 | 1 | 0 | 2.650981 | -0.932776 | -1.762826 |
| 29 | 1 | 0 | 2.474106 | -1.245731 | 0.663011  |
| 30 | 6 | 0 | 4.447322 | -0.394474 | 1.228230  |
| 31 | 1 | 0 | 4.136050 | 0.002118  | 2.199213  |
| 32 | 1 | 0 | 4.933642 | -1.358906 | 1.403758  |
| 33 | 1 | 0 | 5.178758 | 0.290241  | 0.791512  |

-----  
Distance matrix (angstroms):

|    |    | 1        | 2        | 3        | 4        | 5        |
|----|----|----------|----------|----------|----------|----------|
| 1  | C  | 0.000000 |          |          |          |          |
| 2  | C  | 1.357326 | 0.000000 |          |          |          |
| 3  | N  | 2.205499 | 1.389232 | 0.000000 |          |          |
| 4  | C  | 2.213959 | 2.222785 | 1.345968 | 0.000000 |          |
| 5  | N  | 1.387132 | 2.210436 | 2.171984 | 1.333962 | 0.000000 |
| 6  | C  | 2.553418 | 3.641760 | 3.596411 | 2.488426 | 1.473909 |
| 7  | C  | 3.288070 | 4.384616 | 4.434310 | 3.425248 | 2.497251 |
| 8  | H  | 1.076324 | 2.213954 | 3.265059 | 3.231552 | 2.161052 |
| 9  | H  | 2.210971 | 1.074618 | 2.167962 | 3.242991 | 3.267063 |
| 10 | H  | 3.379325 | 4.258173 | 3.875223 | 2.581853 | 2.076762 |
| 11 | H  | 2.769118 | 3.998608 | 4.203729 | 3.250140 | 2.091076 |
| 12 | H  | 3.092052 | 4.255880 | 4.624240 | 3.870866 | 2.779657 |
| 13 | H  | 3.552864 | 4.386446 | 4.214569 | 3.235146 | 2.686873 |
| 14 | Br | 5.515884 | 5.282348 | 3.950487 | 3.303735 | 4.438992 |
| 15 | H  | 3.296723 | 3.282628 | 2.159664 | 1.107930 | 2.203335 |
| 16 | C  | 3.604605 | 2.543888 | 1.428060 | 2.428902 | 3.536000 |
| 17 | C  | 4.332707 | 3.043350 | 2.430702 | 3.651788 | 4.598582 |
| 18 | H  | 4.261087 | 3.416891 | 2.088809 | 2.547503 | 3.843717 |
| 19 | H  | 5.394575 | 4.120904 | 3.396737 | 4.505087 | 5.563890 |
| 20 | H  | 4.185141 | 2.828372 | 2.742656 | 4.080026 | 4.770557 |
| 21 | N  | 4.596367 | 5.763313 | 5.771837 | 4.645036 | 3.743080 |
| 22 | H  | 5.237391 | 6.398090 | 6.482303 | 5.428916 | 4.522660 |
| 23 | H  | 5.111642 | 6.173905 | 5.957728 | 4.717545 | 4.045078 |
| 24 | C  | 6.553686 | 7.148350 | 6.300364 | 5.005755 | 5.169964 |
| 25 | C  | 6.506166 | 7.007745 | 6.109141 | 4.878906 | 5.153363 |
| 26 | O  | 5.579243 | 6.301060 | 5.618183 | 4.292822 | 4.231717 |
| 27 | H  | 7.403375 | 8.092283 | 7.311789 | 5.998474 | 6.037916 |
| 28 | H  | 6.301301 | 6.776819 | 5.850896 | 4.617330 | 4.934283 |
| 29 | H  | 6.175206 | 6.480480 | 5.451977 | 4.333681 | 4.860362 |
| 30 | C  | 7.651915 | 8.201438 | 7.361763 | 6.166576 | 6.352366 |

|    |    |          |          |          |          |          |
|----|----|----------|----------|----------|----------|----------|
| 31 | H  | 7.491178 | 8.030273 | 7.264465 | 6.143171 | 6.283398 |
| 32 | H  | 8.482713 | 8.918144 | 7.966541 | 6.829789 | 7.172899 |
| 33 | H  | 8.091132 | 8.779579 | 8.038766 | 6.779562 | 6.792149 |
|    |    | 6        | 7        | 8        | 9        | 10       |
| 6  | C  | 0.000000 |          |          |          |          |
| 7  | C  | 1.532651 | 0.000000 |          |          |          |
| 8  | H  | 2.846594 | 3.374398 | 0.000000 |          |          |
| 9  | H  | 4.666785 | 5.334929 | 2.754208 | 0.000000 |          |
| 10 | H  | 1.090031 | 2.153463 | 3.836838 | 5.323090 | 0.000000 |
| 11 | H  | 1.090765 | 2.171184 | 2.734556 | 4.934684 | 1.776225 |
| 12 | H  | 2.164789 | 1.095105 | 2.890152 | 5.070388 | 3.059491 |
| 13 | H  | 2.150145 | 1.100255 | 3.871146 | 5.331291 | 2.500293 |
| 14 | Br | 4.869591 | 5.614533 | 6.515667 | 6.110240 | 4.178271 |
| 15 | H  | 2.887678 | 3.770209 | 4.276299 | 4.253782 | 2.547246 |
| 16 | C  | 4.886801 | 5.690214 | 4.639460 | 2.878387 | 4.979698 |
| 17 | C  | 6.024837 | 6.773339 | 5.257263 | 2.886924 | 6.225801 |
| 18 | H  | 5.006714 | 5.822794 | 5.333344 | 3.909948 | 4.866456 |
| 19 | H  | 6.950543 | 7.695304 | 6.334299 | 3.940176 | 7.050269 |
| 20 | H  | 6.241268 | 6.940378 | 4.961495 | 2.302138 | 6.611201 |
| 21 | N  | 2.416512 | 1.458424 | 4.547866 | 6.724353 | 2.644319 |
| 22 | H  | 3.313040 | 2.054405 | 5.091205 | 7.302913 | 3.620939 |
| 23 | H  | 2.707126 | 2.040823 | 5.233553 | 7.191651 | 2.510169 |
| 24 | C  | 4.354775 | 4.686690 | 7.132414 | 8.210037 | 3.323628 |
| 25 | C  | 4.484399 | 4.458826 | 7.138867 | 8.045226 | 3.613462 |
| 26 | O  | 3.283691 | 3.323463 | 6.075452 | 7.369862 | 2.418014 |
| 27 | H  | 5.061646 | 5.311866 | 7.890758 | 9.161025 | 4.062988 |
| 28 | H  | 4.326910 | 4.985516 | 6.959573 | 7.813399 | 3.240944 |
| 29 | H  | 4.505112 | 4.589958 | 6.931030 | 7.475775 | 3.685313 |
| 30 | C  | 5.583101 | 5.201470 | 8.206343 | 9.221581 | 4.835332 |
| 31 | H  | 5.578006 | 4.941184 | 8.012850 | 9.011420 | 5.005072 |
| 32 | H  | 6.516090 | 6.218368 | 9.108969 | 9.917976 | 5.714523 |
| 33 | H  | 5.822098 | 5.390648 | 8.538897 | 9.823203 | 5.079807 |
|    |    | 11       | 12       | 13       | 14       | 15       |
| 11 | H  | 0.000000 |          |          |          |          |
| 12 | H  | 2.493084 | 0.000000 |          |          |          |
| 13 | H  | 3.062425 | 1.770401 | 0.000000 |          |          |
| 14 | Br | 5.710720 | 6.450640 | 5.094263 | 0.000000 |          |
| 15 | H  | 3.744972 | 4.450322 | 3.428867 | 2.246333 | 0.000000 |
| 16 | C  | 5.546752 | 5.947818 | 5.308722 | 3.711560 | 2.725011 |
| 17 | C  | 6.608371 | 6.885548 | 6.397861 | 4.880480 | 4.048566 |
| 18 | H  | 5.755650 | 6.262146 | 5.353998 | 2.738838 | 2.368267 |
| 19 | H  | 7.573101 | 7.867511 | 7.246196 | 5.082202 | 4.707541 |
| 20 | H  | 6.719131 | 6.884603 | 6.653843 | 5.829784 | 4.700928 |
| 21 | N  | 2.674738 | 2.087873 | 2.160360 | 6.363997 | 4.795634 |

|    |   |          |          |          |           |           |
|----|---|----------|----------|----------|-----------|-----------|
| 22 | H | 3.556075 | 2.331154 | 2.545450 | 7.141975  | 5.607797  |
| 23 | H | 3.115842 | 2.930977 | 2.398454 | 5.888580  | 4.629242  |
| 24 | C | 4.935288 | 5.780344 | 4.542142 | 4.022381  | 4.205220  |
| 25 | C | 5.296488 | 5.524101 | 3.992548 | 3.805840  | 4.055819  |
| 26 | O | 3.975469 | 4.415077 | 3.159457 | 4.193098  | 3.702887  |
| 27 | H | 5.495584 | 6.386514 | 5.282015 | 5.053070  | 5.249027  |
| 28 | H | 4.863057 | 6.054074 | 4.883241 | 3.392048  | 3.752863  |
| 29 | H | 5.428866 | 5.607930 | 3.963169 | 2.892972  | 3.411869  |
| 30 | C | 6.380510 | 6.195841 | 4.662091 | 5.100514  | 5.407307  |
| 31 | H | 6.443039 | 5.833838 | 4.262382 | 5.409583  | 5.494084  |
| 32 | H | 7.338239 | 7.215239 | 5.617163 | 5.249755  | 5.967094  |
| 33 | H | 6.481367 | 6.372455 | 5.034479 | 5.941604  | 6.087861  |
|    |   | 16       | 17       | 18       | 19        | 20        |
| 16 | C | 0.000000 |          |          |           |           |
| 17 | C | 1.326378 | 0.000000 |          |           |           |
| 18 | H | 1.088589 | 2.141767 | 0.000000 |           |           |
| 19 | H | 2.076551 | 1.081373 | 2.467735 | 0.000000  |           |
| 20 | H | 2.130728 | 1.083329 | 3.118704 | 1.847331  | 0.000000  |
| 21 | N | 7.001807 | 8.142851 | 7.023975 | 9.039580  | 8.352982  |
| 22 | H | 7.704527 | 8.797749 | 7.758912 | 9.697866  | 8.962138  |
| 23 | H | 7.071782 | 8.289313 | 6.936225 | 9.112827  | 8.624366  |
| 24 | C | 6.879704 | 8.202666 | 6.252118 | 8.718110  | 8.905499  |
| 25 | C | 6.607877 | 7.897642 | 5.965787 | 8.377125  | 8.615848  |
| 26 | O | 6.396185 | 7.706879 | 5.942367 | 8.343557  | 8.293451  |
| 27 | H | 7.937059 | 9.261705 | 7.320369 | 9.786417  | 9.947028  |
| 28 | H | 6.331470 | 7.641336 | 5.658612 | 8.113308  | 8.382436  |
| 29 | H | 5.777946 | 7.036336 | 5.065800 | 7.442682  | 7.813278  |
| 30 | C | 7.854386 | 9.104899 | 7.224290 | 9.561199  | 9.805799  |
| 31 | H | 7.781202 | 8.976862 | 7.234148 | 9.456731  | 9.620529  |
| 32 | H | 8.293139 | 9.514734 | 7.558001 | 9.861864  | 10.292499 |
| 33 | H | 8.650835 | 9.927580 | 8.067138 | 10.441726 | 10.584968 |
|    |   | 21       | 22       | 23       | 24        | 25        |
| 21 | N | 0.000000 |          |          |           |           |
| 22 | H | 1.013166 | 0.000000 |          |           |           |
| 23 | H | 1.018070 | 1.646663 | 0.000000 |           |           |
| 24 | C | 4.403236 | 5.106074 | 3.484223 | 0.000000  |           |
| 25 | C | 4.344053 | 4.874614 | 3.448736 | 1.464490  | 0.000000  |
| 26 | O | 3.069985 | 3.749073 | 2.179530 | 1.447179  | 1.454239  |
| 27 | H | 4.747047 | 5.371061 | 3.777093 | 1.087386  | 2.213582  |
| 28 | H | 4.919891 | 5.740699 | 4.116693 | 1.085847  | 2.200659  |
| 29 | H | 4.809620 | 5.376544 | 4.047890 | 2.168448  | 1.088146  |
| 30 | C | 4.850020 | 5.106045 | 3.927649 | 2.602051  | 1.503699  |
| 31 | H | 4.684543 | 4.776229 | 3.891916 | 3.442992  | 2.150981  |
| 32 | H | 5.933872 | 6.195600 | 5.008672 | 3.142945  | 2.139328  |

|    |   |          |          |          |          |          |
|----|---|----------|----------|----------|----------|----------|
| 33 | H | 4.743488 | 4.931559 | 3.774794 | 2.740821 | 2.155955 |
|    |   | 26       | 27       | 28       | 29       | 30       |
| 26 | O | 0.000000 |          |          |          |          |
| 27 | H | 2.137942 | 0.000000 |          |          |          |
| 28 | H | 2.141229 | 1.850565 | 0.000000 |          |          |
| 29 | H | 2.121978 | 3.106453 | 2.452328 | 0.000000 |          |
| 30 | C | 2.511790 | 2.827423 | 3.530301 | 2.222092 | 0.000000 |
| 31 | H | 2.931729 | 3.782001 | 4.333268 | 2.584396 | 1.094067 |
| 32 | H | 3.417549 | 3.303688 | 3.926752 | 2.571153 | 1.094279 |
| 33 | H | 2.697234 | 2.560171 | 3.796060 | 3.113016 | 1.092957 |
|    |   | 31       | 32       | 33       |          |          |
| 31 | H | 0.000000 |          |          |          |          |
| 32 | H | 1.766716 | 0.000000 |          |          |          |
| 33 | H | 1.775352 | 1.776123 | 0.000000 |          |          |

Stoichiometry C10H18BrN3O

Framework group C1[X(C10H18BrN3O)]

Deg. of freedom 93

Full point group C1 NOp 1

Largest Abelian subgroup C1 NOp 1

Largest concise Abelian subgroup C1 NOp 1

Standard orientation:

| Center<br>Number | Atomic<br>Number | Atomic<br>Type | Coordinates (Angstroms) |           |           |
|------------------|------------------|----------------|-------------------------|-----------|-----------|
|                  |                  |                | X                       | Y         | Z         |
| 1                | 6                | 0              | -2.355614               | 2.465689  | -0.263811 |
| 2                | 6                | 0              | -3.338344               | 1.583452  | 0.049610  |
| 3                | 7                | 0              | -2.748303               | 0.326959  | 0.104774  |
| 4                | 6                | 0              | -1.436843               | 0.453542  | -0.170325 |
| 5                | 7                | 0              | -1.179958               | 1.742220  | -0.400049 |
| 6                | 6                | 0              | 0.154081                | 2.291901  | -0.701045 |
| 7                | 6                | 0              | 0.799841                | 2.953814  | 0.521200  |
| 8                | 1                | 0              | -2.391805               | 3.531489  | -0.409527 |
| 9                | 1                | 0              | -4.386967               | 1.741437  | 0.223485  |
| 10               | 1                | 0              | 0.778507                | 1.461801  | -1.031490 |
| 11               | 1                | 0              | 0.053293                | 3.008882  | -1.516857 |
| 12               | 1                | 0              | 0.199796                | 3.813242  | 0.838352  |
| 13               | 1                | 0              | 0.801522                | 2.228256  | 1.348318  |
| 14               | 35               | 0              | -0.056031               | -2.547615 | -0.203191 |
| 15               | 1                | 0              | -0.741973               | -0.408579 | -0.207912 |
| 16               | 6                | 0              | -3.348700               | -0.938387 | 0.383662  |
| 17               | 6                | 0              | -4.626811               | -1.095516 | 0.701502  |
| 18               | 1                | 0              | -2.626656               | -1.748953 | 0.302042  |
| 19               | 1                | 0              | -4.997474               | -2.092941 | 0.894164  |

|    |   |   |           |           |           |
|----|---|---|-----------|-----------|-----------|
| 20 | 1 | 0 | -5.335425 | -0.280175 | 0.783265  |
| 21 | 7 | 0 | 2.123111  | 3.422598  | 0.125981  |
| 22 | 1 | 0 | 2.520585  | 4.032689  | 0.830473  |
| 23 | 1 | 0 | 2.746515  | 2.627198  | 0.002795  |
| 24 | 6 | 0 | 3.365122  | -0.624602 | -1.084831 |
| 25 | 6 | 0 | 3.256855  | -0.763853 | 0.368998  |
| 26 | 8 | 0 | 2.854350  | 0.469777  | -0.287476 |
| 27 | 1 | 0 | 4.336407  | -0.434378 | -1.535197 |
| 28 | 1 | 0 | 2.624209  | -1.114545 | -1.709384 |
| 29 | 1 | 0 | 2.405192  | -1.341533 | 0.722574  |
| 30 | 6 | 0 | 4.449895  | -0.673429 | 1.279816  |
| 31 | 1 | 0 | 4.174403  | -0.221486 | 2.237330  |
| 32 | 1 | 0 | 4.837834  | -1.675848 | 1.485015  |
| 33 | 1 | 0 | 5.247476  | -0.076366 | 0.830444  |

-----

Rotational constants (GHZ):      0.4208092      0.2922874      0.1828021  
Standard basis: 6-311++G(d,p) (5D, 7F)  
There are    499 symmetry adapted cartesian basis functions of A    symmetry.  
There are    482 symmetry adapted basis functions of A    symmetry.  
482 basis functions,    760 primitive gaussians,    499 cartesian basis functions  
71 alpha electrons      71 beta electrons  
nuclear repulsion energy      1312.6906816393 Hartrees.  
NAtoms=    33 NActive=    33 NUniq=    33 SFac= 1.00D+00 NAtFMM=    60 NAOKFM=F  
Big=F  
Integral buffers will be    131072 words long.  
Raffenetti 2 integral format.  
Two-electron integral symmetry is turned on.  
One-electron integrals computed using PRISM.  
NBasis=    482 RedAO= T EigKep=    3.64D-06    NBF=    482  
NBsUse=    482 1.00D-06 EigRej= -1.00D+00    NBFU=    482  
Initial      guess      from      the      checkpoint      file:  
"/home/suqian/liuwen/qianmengshijie/nh2po/nh2po.chk"  
B after Tr=    0.000000    0.000000    0.000000  
Rot=    1.000000    0.000535    -0.000301    -0.000378 Ang=    0.08 deg.  
ExpMin= 3.50D-02 ExpMax= 4.40D+05 ExpMxC= 1.51D+04 IAcc=3 IRadAn=      5 AccDes=  
0.00D+00  
Harris functional with IExCor=    402 and IRadAn=      5 diagonalized for initial guess.  
HarFok: IExCor=    402 AccDes= 0.00D+00 IRadAn=      5 IDoV= 1 UseB2=F ITyADJ=14  
ICtDFT=    3500011 ScaDFX=    1.000000    1.000000    1.000000    1.000000  
FoFCou: FMM=F IPFlag=      0 FMFlag=      100000 FMFlg1=      0  
NFXFlg=      0 DoJE=T BraDBF=F KetDBF=T FulRan=T  
wScrn=    0.000000 ICntrl=      500 IOpCl=    0 I1Cent=    200000004 NGrid=  
0  
NMat0=    1 NMatS0=    1 NMatT0=    0 NMatD0=    1 NMtDS0=    0

NMtDT0= 0

Petite list used in FoFCou.

Requested convergence on RMS density matrix=1.00D-08 within 128 cycles.

Requested convergence on MAX density matrix=1.00D-06.

Requested convergence on energy=1.00D-06.

No special actions if energy rises.

SCF Done: E(RB3LYP) = -3205.64836636 A.U. after 10 cycles

NFock= 10 Conv=0.68D-08 -V/T= 2.0018

Calling FoFJK, ICntrl= 2127 FMM=F ISym2X=0 l1Cent= 0 IOpCIX= 0 NMat=1 NMatS=1

NMatT=0.

\*\*\*\*\* Axes restored to original set \*\*\*\*\*

| Center<br>Number | Atomic<br>Number | Forces (Hartrees/Bohr) |              |              |
|------------------|------------------|------------------------|--------------|--------------|
|                  |                  | X                      | Y            | Z            |
| 1                | 6                | -0.000008713           | 0.000020730  | 0.000042790  |
| 2                | 6                | 0.000016567            | -0.000042977 | -0.000019474 |
| 3                | 7                | -0.000022401           | 0.000032259  | 0.000043634  |
| 4                | 6                | 0.000100191            | 0.000053872  | -0.000101344 |
| 5                | 7                | -0.000001392           | -0.000084487 | -0.000043675 |
| 6                | 6                | -0.000001043           | 0.000021059  | 0.000074363  |
| 7                | 6                | 0.000202089            | 0.000116572  | -0.000009244 |
| 8                | 1                | 0.000004849            | -0.000001513 | 0.000000531  |
| 9                | 1                | -0.000006700           | 0.000008072  | -0.000011513 |
| 10               | 1                | -0.000017737           | -0.000027837 | -0.000008034 |
| 11               | 1                | 0.000020668            | 0.000003413  | -0.000018861 |
| 12               | 1                | -0.000021702           | -0.000001080 | -0.000009393 |
| 13               | 1                | -0.000030571           | -0.000030428 | 0.000018441  |
| 14               | 35               | -0.000007427           | -0.000023307 | 0.000005660  |
| 15               | 1                | -0.000058068           | 0.000047395  | 0.000020737  |
| 16               | 6                | -0.000021859           | -0.000049323 | 0.000008651  |
| 17               | 6                | -0.000003263           | 0.000026984  | -0.000001705 |
| 18               | 1                | 0.000007866            | 0.000000780  | 0.000004337  |
| 19               | 1                | -0.000002469           | -0.000002101 | -0.000004160 |
| 20               | 1                | 0.000002427            | -0.000001665 | 0.000002107  |
| 21               | 7                | -0.000122226           | -0.000105016 | 0.000020738  |
| 22               | 1                | 0.000005498            | 0.000003872  | -0.000017698 |
| 23               | 1                | -0.000035816           | 0.000065477  | 0.000111550  |
| 24               | 6                | -0.000052682           | -0.000036239 | 0.000235393  |
| 25               | 6                | -0.000060894           | 0.000071255  | -0.000157611 |
| 26               | 8                | -0.000011285           | -0.000044552 | -0.000202168 |
| 27               | 1                | 0.000011629            | -0.000020973 | -0.000021629 |
| 28               | 1                | 0.000030877            | 0.000001420  | -0.000046820 |
| 29               | 1                | 0.000055646            | 0.000012445  | 0.000064773  |

|    |   |              |              |              |
|----|---|--------------|--------------|--------------|
| 30 | 6 | 0.000051381  | 0.000000624  | 0.000017004  |
| 31 | 1 | -0.000007841 | 0.000000558  | -0.000002115 |
| 32 | 1 | -0.000012893 | -0.000006207 | 0.000007376  |
| 33 | 1 | -0.000002705 | -0.000009082 | -0.000002640 |

-----  
Cartesian Forces: Max 0.000235393 RMS 0.000056175

GradGradGradGradGradGradGradGradGradGradGradGradGradGradGradGradGradGradGradGrad

Berny optimization.

Using GEDIIS/GDIIS optimizer.

FormGI is forming the generalized inverse of G from B-inverse, IUseBI=4.

GSVD: received Info= 1 from GESDD.

Internal Forces: Max 0.000154856 RMS 0.000033387

Search for a local minimum.

Step number 39 out of a maximum of 172

All quantities printed in internal units (Hartrees-Bohrs-Radians)

Mixed Optimization -- En-DIIS/RFO-DIIS

Swapping is turned off.

Update second derivatives using D2CorX and points 30 31 32 33 34  
35 36 37 38 39

DE= -3.06D-06 DEPred=-3.23D-06 R= 9.47D-01

TightC=F SS= 1.41D+00 RLast= 3.58D-02 DXNew= 1.7446D+00 1.0738D-01

Trust test= 9.47D-01 RLast= 3.58D-02 DXMaxT set to 1.04D+00

ITU= 1 1 1 1 1 1 1 1 1 1 1 1 1 0 0 -1 1 -1 1 1

ITU= 1 1 1 1 1 1 1 0 -1 -1 1 1 1 -1 1 0 0 -1 0

|                 |         |         |         |         |         |
|-----------------|---------|---------|---------|---------|---------|
| Eigenvalues --- | 0.00060 | 0.00097 | 0.00221 | 0.00478 | 0.00589 |
| Eigenvalues --- | 0.00661 | 0.00742 | 0.01053 | 0.01331 | 0.01635 |
| Eigenvalues --- | 0.01901 | 0.02070 | 0.02207 | 0.02372 | 0.02385 |
| Eigenvalues --- | 0.02597 | 0.02711 | 0.02914 | 0.03066 | 0.03101 |
| Eigenvalues --- | 0.03315 | 0.03547 | 0.03691 | 0.03942 | 0.04011 |
| Eigenvalues --- | 0.04209 | 0.04449 | 0.04561 | 0.05383 | 0.05488 |
| Eigenvalues --- | 0.05739 | 0.05753 | 0.05905 | 0.07786 | 0.08662 |
| Eigenvalues --- | 0.08933 | 0.09556 | 0.10804 | 0.11024 | 0.12323 |
| Eigenvalues --- | 0.12657 | 0.13194 | 0.13584 | 0.15749 | 0.15952 |
| Eigenvalues --- | 0.15996 | 0.16002 | 0.16008 | 0.16013 | 0.16091 |
| Eigenvalues --- | 0.16190 | 0.18551 | 0.21289 | 0.21987 | 0.22156 |
| Eigenvalues --- | 0.23071 | 0.23459 | 0.25775 | 0.26784 | 0.27853 |
| Eigenvalues --- | 0.29000 | 0.29969 | 0.30208 | 0.32048 | 0.32588 |
| Eigenvalues --- | 0.33701 | 0.34288 | 0.34340 | 0.34368 | 0.34549 |
| Eigenvalues --- | 0.34688 | 0.34758 | 0.35077 | 0.35169 | 0.35318 |
| Eigenvalues --- | 0.35567 | 0.35719 | 0.35868 | 0.35953 | 0.36422 |
| Eigenvalues --- | 0.36627 | 0.39533 | 0.41606 | 0.42078 | 0.42670 |
| Eigenvalues --- | 0.44563 | 0.45472 | 0.46470 | 0.49509 | 0.54865 |
| Eigenvalues --- | 0.58526 | 0.60638 | 1.14573 |         |         |



En-DIIS/RFO-DIIS IScMMF= 0 using points: 39 38 37 36 35  
RFO step: Lambda=-4.92627711D-07.  
DidBck=F Rises=F RFO-DIIS coefs: 1.24121 -0.53385 0.38162 -0.48184  
0.39287

Iteration 1 RMS(Cart)= 0.00324786 RMS(Int)= 0.00001389  
Iteration 2 RMS(Cart)= 0.00001410 RMS(Int)= 0.00001291  
Iteration 3 RMS(Cart)= 0.00000000 RMS(Int)= 0.00001291

| Variable | Old X   | -DE/DX   | Delta X<br>(Linear) | Delta X<br>(Quad) | Delta X<br>(Total) | New X   |
|----------|---------|----------|---------------------|-------------------|--------------------|---------|
| R1       | 2.56497 | -0.00001 | -0.00001            | 0.00002           | 0.00001            | 2.56498 |
| R2       | 2.62130 | 0.00001  | -0.00001            | 0.00001           | 0.00000            | 2.62130 |
| R3       | 2.03396 | 0.00000  | 0.00000             | -0.00001          | -0.00001           | 2.03395 |
| R4       | 2.62527 | -0.00004 | 0.00000             | 0.00000           | -0.00001           | 2.62526 |
| R5       | 2.03073 | 0.00001  | 0.00000             | 0.00001           | 0.00001            | 2.03074 |
| R6       | 2.54351 | 0.00004  | 0.00001             | 0.00004           | 0.00005            | 2.54356 |
| R7       | 2.69864 | 0.00004  | 0.00001             | -0.00001          | 0.00000            | 2.69865 |
| R8       | 2.52082 | -0.00004 | 0.00001             | -0.00010          | -0.00009           | 2.52074 |
| R9       | 2.09369 | -0.00006 | -0.00012            | -0.00006          | -0.00018           | 2.09350 |
| R10      | 2.78528 | 0.00000  | -0.00004            | 0.00000           | -0.00004           | 2.78525 |
| R11      | 2.89629 | 0.00002  | 0.00002             | 0.00006           | 0.00007            | 2.89636 |
| R12      | 2.05986 | 0.00001  | 0.00000             | -0.00003          | -0.00003           | 2.05983 |
| R13      | 2.06125 | 0.00001  | 0.00001             | 0.00001           | 0.00002            | 2.06126 |
| R14      | 2.06945 | 0.00001  | 0.00000             | 0.00002           | 0.00002            | 2.06947 |
| R15      | 2.07918 | 0.00003  | 0.00005             | 0.00005           | 0.00009            | 2.07927 |
| R16      | 2.75602 | -0.00015 | -0.00013            | -0.00027          | -0.00040           | 2.75562 |
| R17      | 4.24495 | 0.00002  | 0.00105             | 0.00027           | 0.00131            | 4.24627 |
| R18      | 2.50649 | 0.00000  | 0.00000             | 0.00000           | 0.00000            | 2.50649 |
| R19      | 2.05714 | 0.00001  | 0.00006             | 0.00000           | 0.00006            | 2.05720 |
| R20      | 2.04350 | 0.00000  | 0.00000             | 0.00001           | 0.00001            | 2.04351 |
| R21      | 2.04719 | 0.00000  | 0.00001             | 0.00000           | 0.00001            | 2.04720 |
| R22      | 1.91461 | -0.00001 | -0.00004            | -0.00002          | -0.00006           | 1.91454 |
| R23      | 1.92387 | -0.00005 | -0.00004            | -0.00006          | -0.00009           | 1.92378 |
| R24      | 4.11872 | 0.00003  | 0.00147             | 0.00009           | 0.00156            | 4.12028 |
| R25      | 2.76748 | -0.00010 | -0.00026            | 0.00005           | -0.00018           | 2.76730 |
| R26      | 2.73477 | -0.00002 | 0.00015             | 0.00020           | 0.00034            | 2.73511 |
| R27      | 2.05486 | 0.00001  | -0.00009            | 0.00002           | -0.00007           | 2.05479 |
| R28      | 2.05195 | 0.00001  | -0.00003            | 0.00002           | -0.00001           | 2.05195 |
| R29      | 2.74811 | -0.00003 | 0.00004             | -0.00028          | -0.00025           | 2.74786 |
| R30      | 2.05630 | -0.00003 | 0.00005             | -0.00007          | -0.00003           | 2.05627 |
| R31      | 2.84158 | 0.00003  | 0.00002             | 0.00004           | 0.00006            | 2.84163 |
| R32      | 2.06749 | 0.00000  | 0.00002             | 0.00001           | 0.00003            | 2.06751 |
| R33      | 2.06789 | 0.00000  | 0.00000             | -0.00002          | -0.00002           | 2.06787 |
| R34      | 2.06539 | -0.00001 | 0.00001             | -0.00003          | -0.00002           | 2.06537 |
| A1       | 1.87267 | 0.00001  | 0.00002             | -0.00001          | 0.00000            | 1.87268 |

|     |         |          |          |          |          |         |
|-----|---------|----------|----------|----------|----------|---------|
| A2  | 2.27910 | 0.00000  | -0.00005 | -0.00003 | -0.00008 | 2.27902 |
| A3  | 2.13135 | -0.00001 | 0.00003  | 0.00004  | 0.00007  | 2.13143 |
| A4  | 1.86454 | 0.00000  | 0.00001  | 0.00000  | 0.00001  | 1.86455 |
| A5  | 2.27616 | -0.00001 | 0.00000  | 0.00006  | 0.00006  | 2.27622 |
| A6  | 2.14242 | 0.00001  | -0.00001 | -0.00006 | -0.00007 | 2.14235 |
| A7  | 1.89722 | 0.00000  | -0.00003 | -0.00003 | -0.00006 | 1.89716 |
| A8  | 2.25310 | -0.00002 | 0.00005  | -0.00006 | -0.00001 | 2.25309 |
| A9  | 2.13281 | 0.00002  | -0.00002 | 0.00009  | 0.00007  | 2.13289 |
| A10 | 1.88987 | 0.00000  | 0.00003  | 0.00003  | 0.00006  | 1.88993 |
| A11 | 2.14701 | -0.00007 | -0.00018 | -0.00011 | -0.00029 | 2.14672 |
| A12 | 2.24606 | 0.00007  | 0.00015  | 0.00008  | 0.00023  | 2.24629 |
| A13 | 1.90046 | 0.00000  | -0.00003 | 0.00001  | -0.00002 | 1.90044 |
| A14 | 2.20516 | -0.00004 | 0.00000  | 0.00017  | 0.00017  | 2.20533 |
| A15 | 2.17699 | 0.00005  | 0.00003  | -0.00017 | -0.00014 | 2.17685 |
| A16 | 1.96012 | 0.00009  | -0.00026 | 0.00001  | -0.00025 | 1.95987 |
| A17 | 1.87171 | -0.00004 | 0.00007  | -0.00019 | -0.00013 | 1.87158 |
| A18 | 1.89046 | -0.00003 | 0.00006  | 0.00015  | 0.00021  | 1.89067 |
| A19 | 1.90634 | 0.00001  | 0.00003  | 0.00005  | 0.00008  | 1.90642 |
| A20 | 1.92997 | -0.00004 | 0.00014  | 0.00005  | 0.00019  | 1.93016 |
| A21 | 1.90368 | 0.00001  | -0.00004 | -0.00008 | -0.00012 | 1.90356 |
| A22 | 1.91667 | 0.00001  | -0.00002 | -0.00010 | -0.00012 | 1.91655 |
| A23 | 1.89162 | 0.00000  | -0.00019 | -0.00007 | -0.00026 | 1.89136 |
| A24 | 1.88074 | -0.00009 | 0.00021  | 0.00000  | 0.00020  | 1.88094 |
| A25 | 1.87617 | -0.00001 | -0.00005 | -0.00006 | -0.00011 | 1.87606 |
| A26 | 1.90010 | 0.00001  | -0.00004 | 0.00011  | 0.00007  | 1.90016 |
| A27 | 1.99797 | 0.00007  | 0.00009  | 0.00012  | 0.00021  | 1.99817 |
| A28 | 2.16144 | -0.00003 | -0.00002 | -0.00005 | -0.00007 | 2.16136 |
| A29 | 1.94578 | 0.00001  | 0.00000  | 0.00003  | 0.00003  | 1.94581 |
| A30 | 2.17597 | 0.00002  | 0.00002  | 0.00002  | 0.00004  | 2.17601 |
| A31 | 2.07403 | 0.00000  | -0.00006 | 0.00000  | -0.00006 | 2.07397 |
| A32 | 2.16425 | 0.00000  | 0.00007  | -0.00003 | 0.00004  | 2.16429 |
| A33 | 2.04490 | 0.00000  | -0.00001 | 0.00003  | 0.00002  | 2.04493 |
| A34 | 1.94022 | -0.00001 | 0.00028  | 0.00013  | 0.00043  | 1.94065 |
| A35 | 1.91479 | 0.00005  | 0.00014  | 0.00022  | 0.00037  | 1.91516 |
| A36 | 1.89059 | 0.00000  | 0.00012  | 0.00024  | 0.00035  | 1.89094 |
| A37 | 2.08728 | -0.00007 | 0.00016  | -0.00035 | -0.00021 | 2.08707 |
| A38 | 2.06877 | 0.00010  | -0.00038 | 0.00005  | -0.00031 | 2.06846 |
| A39 | 1.99453 | 0.00000  | -0.00014 | -0.00014 | -0.00029 | 1.99424 |
| A40 | 2.00126 | 0.00002  | -0.00028 | 0.00003  | -0.00024 | 2.00102 |
| A41 | 2.03778 | -0.00004 | 0.00034  | 0.00032  | 0.00066  | 2.03844 |
| A42 | 2.01630 | 0.00003  | -0.00030 | 0.00052  | 0.00019  | 2.01648 |
| A43 | 2.13760 | 0.00000  | 0.00013  | 0.00038  | 0.00054  | 2.13814 |
| A44 | 1.96103 | 0.00001  | 0.00023  | 0.00029  | 0.00052  | 1.96155 |
| A45 | 2.02865 | 0.00001  | -0.00015 | 0.00010  | -0.00004 | 2.02861 |

|     |          |          |          |          |          |          |
|-----|----------|----------|----------|----------|----------|----------|
| A46 | 2.04438  | -0.00004 | 0.00006  | -0.00088 | -0.00082 | 2.04356  |
| A47 | 2.56695  | 0.00011  | -0.00046 | 0.00370  | 0.00323  | 2.57018  |
| A48 | 2.48695  | -0.00010 | -0.00116 | -0.00393 | -0.00497 | 2.48198  |
| A49 | 1.93390  | -0.00001 | -0.00002 | 0.00003  | 0.00000  | 1.93390  |
| A50 | 1.91747  | -0.00001 | 0.00001  | -0.00006 | -0.00005 | 1.91742  |
| A51 | 1.94206  | 0.00000  | 0.00011  | -0.00012 | -0.00001 | 1.94205  |
| A52 | 1.87923  | 0.00000  | -0.00006 | -0.00004 | -0.00010 | 1.87913  |
| A53 | 1.89434  | 0.00001  | -0.00004 | 0.00011  | 0.00007  | 1.89441  |
| A54 | 1.89528  | 0.00001  | -0.00001 | 0.00008  | 0.00008  | 1.89536  |
| A55 | 3.49100  | 0.00005  | 0.00002  | 0.00075  | 0.00077  | 3.49177  |
| A56 | 2.53237  | -0.00002 | -0.00070 | -0.00095 | -0.00166 | 2.53071  |
| A57 | 2.98919  | -0.00003 | -0.00111 | 0.00171  | 0.00059  | 2.98978  |
| A58 | 3.11475  | -0.00006 | -0.00111 | -0.00095 | -0.00207 | 3.11268  |
| D1  | 0.00267  | 0.00001  | -0.00007 | 0.00025  | 0.00018  | 0.00285  |
| D2  | -3.12610 | 0.00001  | -0.00014 | 0.00019  | 0.00006  | -3.12604 |
| D3  | 3.13251  | 0.00001  | -0.00020 | 0.00012  | -0.00008 | 3.13243  |
| D4  | 0.00374  | 0.00000  | -0.00026 | 0.00006  | -0.00020 | 0.00354  |
| D5  | -0.00448 | -0.00001 | -0.00013 | -0.00011 | -0.00024 | -0.00472 |
| D6  | -3.11085 | 0.00000  | -0.00023 | -0.00032 | -0.00055 | -3.11140 |
| D7  | -3.13553 | 0.00000  | -0.00002 | 0.00001  | -0.00001 | -3.13554 |
| D8  | 0.04128  | 0.00000  | -0.00012 | -0.00020 | -0.00032 | 0.04096  |
| D9  | 0.00001  | -0.00002 | 0.00025  | -0.00030 | -0.00005 | -0.00005 |
| D10 | -3.13146 | -0.00001 | -0.00022 | -0.00033 | -0.00055 | -3.13201 |
| D11 | 3.12999  | -0.00001 | 0.00031  | -0.00025 | 0.00005  | 3.13005  |
| D12 | -0.00147 | 0.00000  | -0.00016 | -0.00028 | -0.00044 | -0.00192 |
| D13 | -0.00281 | 0.00001  | -0.00033 | 0.00024  | -0.00010 | -0.00290 |
| D14 | -3.12232 | 0.00000  | -0.00040 | 0.00030  | -0.00011 | -3.12242 |
| D15 | 3.12950  | 0.00001  | 0.00010  | 0.00026  | 0.00036  | 3.12986  |
| D16 | 0.00999  | -0.00001 | 0.00003  | 0.00032  | 0.00035  | 0.01034  |
| D17 | -0.05152 | 0.00000  | 0.00046  | -0.00213 | -0.00167 | -0.05319 |
| D18 | 3.09020  | 0.00000  | 0.00061  | -0.00190 | -0.00129 | 3.08891  |
| D19 | 3.10141  | 0.00001  | -0.00007 | -0.00216 | -0.00223 | 3.09918  |
| D20 | -0.04006 | 0.00001  | 0.00009  | -0.00193 | -0.00185 | -0.04190 |
| D21 | 0.00449  | -0.00001 | 0.00029  | -0.00008 | 0.00021  | 0.00470  |
| D22 | 3.11157  | -0.00001 | 0.00038  | 0.00013  | 0.00052  | 3.11209  |
| D23 | 3.12236  | 0.00001  | 0.00036  | -0.00015 | 0.00021  | 3.12257  |
| D24 | -0.05375 | 0.00001  | 0.00046  | 0.00007  | 0.00052  | -0.05323 |
| D25 | 1.33868  | -0.00002 | -0.00122 | 0.00037  | -0.00085 | 1.33782  |
| D26 | -2.85014 | 0.00001  | -0.00129 | 0.00031  | -0.00098 | -2.85112 |
| D27 | -0.79782 | -0.00002 | -0.00128 | 0.00020  | -0.00108 | -0.79890 |
| D28 | -1.76237 | -0.00002 | -0.00134 | 0.00012  | -0.00121 | -1.76358 |
| D29 | 0.33200  | 0.00001  | -0.00141 | 0.00007  | -0.00134 | 0.33066  |
| D30 | 2.38432  | -0.00001 | -0.00139 | -0.00005 | -0.00144 | 2.38288  |
| D31 | -1.10479 | 0.00001  | -0.00007 | -0.00041 | -0.00048 | -1.10527 |

|     |          |          |          |          |          |          |
|-----|----------|----------|----------|----------|----------|----------|
| D32 | 0.94007  | 0.00000  | -0.00025 | -0.00058 | -0.00083 | 0.93924  |
| D33 | 3.11110  | 0.00004  | -0.00013 | -0.00048 | -0.00061 | 3.11049  |
| D34 | 3.10426  | 0.00000  | -0.00002 | -0.00021 | -0.00022 | 3.10403  |
| D35 | -1.13407 | -0.00001 | -0.00020 | -0.00038 | -0.00057 | -1.13464 |
| D36 | 1.03697  | 0.00003  | -0.00007 | -0.00028 | -0.00035 | 1.03661  |
| D37 | 1.00917  | 0.00001  | -0.00007 | -0.00017 | -0.00024 | 1.00893  |
| D38 | 3.05404  | 0.00001  | -0.00025 | -0.00034 | -0.00059 | 3.05345  |
| D39 | -1.05811 | 0.00004  | -0.00013 | -0.00025 | -0.00037 | -1.05849 |
| D40 | 2.93786  | -0.00001 | -0.00008 | 0.00004  | -0.00004 | 2.93782  |
| D41 | -1.25462 | 0.00001  | 0.00034  | 0.00056  | 0.00090  | -1.25372 |
| D42 | 0.85997  | 0.00002  | -0.00015 | 0.00010  | -0.00005 | 0.85991  |
| D43 | 2.95067  | 0.00004  | 0.00026  | 0.00063  | 0.00089  | 2.95156  |
| D44 | -1.23981 | -0.00002 | -0.00011 | 0.00002  | -0.00009 | -1.23991 |
| D45 | 0.85089  | 0.00000  | 0.00030  | 0.00055  | 0.00085  | 0.85175  |
| D46 | 3.13850  | 0.00000  | 0.00009  | -0.00002 | 0.00007  | 3.13857  |
| D47 | -0.00398 | 0.00000  | 0.00011  | -0.00023 | -0.00012 | -0.00410 |
| D48 | -0.00324 | 0.00000  | -0.00008 | -0.00028 | -0.00036 | -0.00360 |
| D49 | 3.13747  | 0.00000  | -0.00006 | -0.00049 | -0.00055 | 3.13692  |
| D50 | 2.20989  | -0.00002 | 0.00392  | 0.00014  | 0.00409  | 2.21398  |
| D51 | -1.39899 | -0.00006 | -0.00094 | 0.00040  | -0.00055 | -1.39954 |
| D52 | -2.08721 | 0.00004  | 0.00444  | 0.00039  | 0.00484  | -2.08237 |
| D53 | 0.58710  | -0.00001 | -0.00043 | 0.00065  | 0.00020  | 0.58730  |
| D54 | -2.71315 | 0.00004  | 0.00024  | 0.00005  | 0.00029  | -2.71286 |
| D55 | -0.01560 | 0.00002  | -0.00004 | -0.00012 | -0.00015 | -0.01575 |
| D56 | -0.02705 | 0.00002  | 0.00061  | 0.00020  | 0.00082  | -0.02623 |
| D57 | 2.67049  | -0.00001 | 0.00034  | 0.00004  | 0.00038  | 2.67088  |
| D58 | 0.56322  | -0.00007 | -0.00328 | -0.00381 | -0.00712 | 0.55611  |
| D59 | -1.85649 | -0.00003 | -0.00334 | -0.00420 | -0.00756 | -1.86405 |
| D60 | 1.82525  | -0.00010 | 0.00269  | -0.00370 | -0.00105 | 1.82420  |
| D61 | -0.59736 | -0.00006 | 0.00250  | -0.00274 | -0.00029 | -0.59765 |
| D62 | 2.55652  | 0.00001  | -0.00040 | -0.00046 | -0.00085 | 2.55566  |
| D63 | -1.65232 | 0.00000  | -0.00048 | -0.00052 | -0.00100 | -1.65333 |
| D64 | 0.44718  | 0.00001  | -0.00041 | -0.00054 | -0.00094 | 0.44623  |
| D65 | 1.35197  | -0.00002 | -0.00049 | -0.00078 | -0.00127 | 1.35070  |
| D66 | -2.85687 | -0.00002 | -0.00057 | -0.00084 | -0.00142 | -2.85829 |
| D67 | -0.75737 | -0.00002 | -0.00050 | -0.00086 | -0.00136 | -0.75873 |
| D68 | -1.03579 | 0.00000  | -0.00076 | -0.00029 | -0.00105 | -1.03684 |
| D69 | 1.03855  | 0.00000  | -0.00085 | -0.00036 | -0.00120 | 1.03735  |
| D70 | 3.13805  | 0.00000  | -0.00077 | -0.00037 | -0.00114 | 3.13691  |

| Item                 | Value    | Threshold | Converged? |
|----------------------|----------|-----------|------------|
| Maximum Force        | 0.000155 | 0.000450  | YES        |
| RMS Force            | 0.000033 | 0.000300  | YES        |
| Maximum Displacement | 0.012834 | 0.001800  | NO         |
| RMS Displacement     | 0.003255 | 0.001200  | NO         |

Predicted change in Energy=-1.065494D-06

GradGradGradGradGradGradGradGradGradGradGradGradGradGradGradGradGradGradGrad

Input orientation:

| Center<br>Number | Atomic<br>Number | Atomic<br>Type | Coordinates (Angstroms) |           |           |
|------------------|------------------|----------------|-------------------------|-----------|-----------|
|                  |                  |                | X                       | Y         | Z         |
| 1                | 6                | 0              | -2.644190               | 2.098476  | -0.192704 |
| 2                | 6                | 0              | -3.532681               | 1.115064  | 0.100267  |
| 3                | 7                | 0              | -2.821237               | -0.078056 | 0.116559  |
| 4                | 6                | 0              | -1.530831               | 0.185144  | -0.161420 |
| 5                | 7                | 0              | -1.404069               | 1.498741  | -0.355650 |
| 6                | 6                | 0              | -0.133133               | 2.185403  | -0.648175 |
| 7                | 6                | 0              | 0.453349                | 2.874769  | 0.588738  |
| 8                | 1                | 0              | -2.786517               | 3.159121  | -0.307761 |
| 9                | 1                | 0              | -4.590377               | 1.163727  | 0.283915  |
| 10               | 1                | 0              | 0.567482                | 1.430112  | -1.004280 |
| 11               | 1                | 0              | -0.310177               | 2.910436  | -1.443644 |
| 12               | 1                | 0              | -0.226039               | 3.662116  | 0.931954  |
| 13               | 1                | 0              | 0.531953                | 2.130890  | 1.395667  |
| 14               | 35               | 0              | 0.137188                | -2.664311 | -0.287651 |
| 15               | 1                | 0              | -0.754897               | -0.602847 | -0.226948 |
| 16               | 6                | 0              | -3.291686               | -1.403735 | 0.362759  |
| 17               | 6                | 0              | -4.545032               | -1.694760 | 0.684802  |
| 18               | 1                | 0              | -2.494261               | -2.136646 | 0.252978  |
| 19               | 1                | 0              | -4.814028               | -2.728865 | 0.851062  |
| 20               | 1                | 0              | -5.329422               | -0.955742 | 0.795248  |
| 21               | 7                | 0              | 1.721140                | 3.481844  | 0.200730  |
| 22               | 1                | 0              | 2.062034                | 4.109093  | 0.919610  |
| 23               | 1                | 0              | 2.418785                | 2.755492  | 0.052170  |
| 24               | 6                | 0              | 3.342475                | -0.392051 | -1.129952 |
| 25               | 6                | 0              | 3.257985                | -0.576629 | 0.320303  |
| 26               | 8                | 0              | 2.732299                | 0.627257  | -0.303184 |
| 27               | 1                | 0              | 4.287466                | -0.096344 | -1.579261 |
| 28               | 1                | 0              | 2.648689                | -0.936861 | -1.763117 |
| 29               | 1                | 0              | 2.469754                | -1.243871 | 0.663104  |
| 30               | 6                | 0              | 4.441953                | -0.391918 | 1.228764  |
| 31               | 1                | 0              | 4.129422                | 0.008041  | 2.197975  |
| 32               | 1                | 0              | 4.926850                | -1.356326 | 1.408242  |
| 33               | 1                | 0              | 5.174867                | 0.290602  | 0.791114  |

Distance matrix (angstroms):

1 2 3 4 5

|    |    |          |          |          |          |          |
|----|----|----------|----------|----------|----------|----------|
| 1  | C  | 0.000000 |          |          |          |          |
| 2  | C  | 1.357330 | 0.000000 |          |          |          |
| 3  | N  | 2.205511 | 1.389228 | 0.000000 |          |          |
| 4  | C  | 2.213908 | 2.222755 | 1.345992 | 0.000000 |          |
| 5  | N  | 1.387132 | 2.210444 | 2.172012 | 1.333916 | 0.000000 |
| 6  | C  | 2.553512 | 3.641802 | 3.596383 | 2.488278 | 1.473891 |
| 7  | C  | 3.287557 | 4.384472 | 4.434528 | 3.425461 | 2.497062 |
| 8  | H  | 1.076319 | 2.213914 | 3.265053 | 3.231517 | 2.161092 |
| 9  | H  | 2.211009 | 1.074623 | 2.167923 | 3.242957 | 3.267084 |
| 10 | H  | 3.379379 | 4.258006 | 3.874825 | 2.581332 | 2.076642 |
| 11 | H  | 2.769793 | 3.998944 | 4.203658 | 3.249817 | 2.091222 |
| 12 | H  | 3.091485 | 4.255944 | 4.624804 | 3.871341 | 2.779545 |
| 13 | H  | 3.551318 | 4.385341 | 4.214196 | 3.235046 | 2.686058 |
| 14 | Br | 5.516269 | 5.282244 | 3.950238 | 3.304182 | 4.439718 |
| 15 | H  | 3.296626 | 3.282434 | 2.159435 | 1.107834 | 2.203329 |
| 16 | C  | 3.604618 | 2.543881 | 1.428062 | 2.428973 | 3.536040 |
| 17 | C  | 4.332649 | 3.043295 | 2.430658 | 3.651786 | 4.598547 |
| 18 | H  | 4.261146 | 3.416908 | 2.088855 | 2.547672 | 3.843825 |
| 19 | H  | 5.394521 | 4.120842 | 3.396689 | 4.505103 | 5.563869 |
| 20 | H  | 4.185064 | 2.828342 | 2.742616 | 4.079967 | 4.770478 |
| 21 | N  | 4.596151 | 5.763192 | 5.771756 | 4.644857 | 3.742885 |
| 22 | H  | 5.237210 | 6.398154 | 6.482549 | 5.429059 | 4.522620 |
| 23 | H  | 5.111297 | 6.173594 | 5.957430 | 4.717178 | 4.044743 |
| 24 | C  | 6.551436 | 7.145110 | 6.296326 | 5.002031 | 5.167621 |
| 25 | C  | 6.500387 | 7.001670 | 6.103034 | 4.872895 | 5.147700 |
| 26 | O  | 5.575243 | 6.296881 | 5.613859 | 4.288337 | 4.227502 |
| 27 | H  | 7.401867 | 8.089687 | 7.308201 | 5.995172 | 6.036148 |
| 28 | H  | 6.300321 | 6.774358 | 5.847291 | 4.614403 | 4.933352 |
| 29 | H  | 6.168963 | 6.473838 | 5.445403 | 4.327424 | 4.854511 |
| 30 | C  | 7.644348 | 8.193857 | 7.354552 | 6.159526 | 6.345150 |
| 31 | H  | 7.481116 | 8.020830 | 7.256127 | 6.134865 | 6.273971 |
| 32 | H  | 8.474629 | 8.909671 | 7.958346 | 6.822141 | 7.165421 |
| 33 | H  | 8.085417 | 8.773734 | 8.032970 | 6.773834 | 6.786535 |
|    |    | 6        | 7        | 8        | 9        | 10       |
| 6  | C  | 0.000000 |          |          |          |          |
| 7  | C  | 1.532690 | 0.000000 |          |          |          |
| 8  | H  | 2.846833 | 3.373617 | 0.000000 |          |          |
| 9  | H  | 4.666866 | 5.334768 | 2.754194 | 0.000000 |          |
| 10 | H  | 1.090016 | 2.153547 | 3.837176 | 5.322961 | 0.000000 |
| 11 | H  | 1.090774 | 2.171364 | 2.735752 | 4.935135 | 1.776143 |
| 12 | H  | 2.164744 | 1.095116 | 2.888935 | 5.070438 | 3.059496 |
| 13 | H  | 2.150024 | 1.100304 | 3.869259 | 5.330071 | 2.500420 |
| 14 | Br | 4.870603 | 5.616887 | 6.516197 | 6.109864 | 4.178877 |
| 15 | H  | 2.887622 | 3.770811 | 4.276261 | 4.253548 | 2.546734 |

|    |    |          |          |          |          |          |
|----|----|----------|----------|----------|----------|----------|
| 16 | C  | 4.886753 | 5.690514 | 4.639445 | 2.878312 | 4.979223 |
| 17 | C  | 6.024728 | 6.773007 | 5.257158 | 2.886817 | 6.225401 |
| 18 | H  | 5.006707 | 5.823695 | 5.333385 | 3.909875 | 4.865874 |
| 19 | H  | 6.950433 | 7.695114 | 6.334197 | 3.940045 | 7.049825 |
| 20 | H  | 6.241129 | 6.939445 | 4.961360 | 2.302130 | 6.610906 |
| 21 | N  | 2.416552 | 1.458213 | 4.547712 | 6.724272 | 2.644349 |
| 22 | H  | 3.313199 | 2.054483 | 5.090907 | 7.303003 | 3.621046 |
| 23 | H  | 2.706985 | 2.040851 | 5.233320 | 7.191368 | 2.509988 |
| 24 | C  | 4.353760 | 4.687543 | 7.131014 | 8.206680 | 3.322147 |
| 25 | C  | 4.479559 | 4.455355 | 7.133463 | 8.039089 | 3.608371 |
| 26 | O  | 3.279868 | 3.322717 | 6.071877 | 7.365736 | 2.412995 |
| 27 | H  | 5.061125 | 5.313021 | 7.890247 | 9.158346 | 4.061891 |
| 28 | H  | 4.327835 | 4.987912 | 6.959640 | 7.810690 | 3.241885 |
| 29 | H  | 4.500487 | 4.586351 | 6.925121 | 7.468986 | 3.680896 |
| 30 | C  | 5.576459 | 5.195175 | 8.198876 | 9.213889 | 4.828852 |
| 31 | H  | 5.568738 | 4.931662 | 8.002389 | 9.001896 | 4.996413 |
| 32 | H  | 6.509695 | 6.211761 | 9.101097 | 9.909207 | 5.708642 |
| 33 | H  | 5.816931 | 5.386243 | 8.533438 | 9.817311 | 5.074438 |
|    |    | 11       | 12       | 13       | 14       | 15       |
| 11 | H  | 0.000000 |          |          |          |          |
| 12 | H  | 2.493104 | 0.000000 |          |          |          |
| 13 | H  | 3.062444 | 1.770377 | 0.000000 |          |          |
| 14 | Br | 5.710889 | 6.453142 | 5.097387 | 0.000000 |          |
| 15 | H  | 3.744500 | 4.451141 | 3.429604 | 2.247028 | 0.000000 |
| 16 | C  | 5.546581 | 5.948531 | 5.308548 | 3.710695 | 2.724788 |
| 17 | C  | 6.608487 | 6.885557 | 6.396616 | 4.879434 | 4.048294 |
| 18 | H  | 5.755153 | 6.263504 | 5.354958 | 2.737743 | 2.368176 |
| 19 | H  | 7.573115 | 7.867708 | 7.245228 | 5.080884 | 4.707292 |
| 20 | H  | 6.719583 | 6.883881 | 6.651580 | 5.828868 | 4.700606 |
| 21 | N  | 2.675205 | 2.087748 | 2.160352 | 6.365740 | 4.795662 |
| 22 | H  | 3.556562 | 2.331356 | 2.545794 | 7.144334 | 5.608215 |
| 23 | H  | 3.115879 | 2.931054 | 2.399010 | 5.890282 | 4.629104 |
| 24 | C  | 4.934236 | 5.781177 | 4.543459 | 4.018271 | 4.200989 |
| 25 | C  | 5.291778 | 5.520824 | 3.989777 | 3.803603 | 4.050111 |
| 26 | O  | 3.971173 | 4.414487 | 3.160464 | 4.191571 | 3.698582 |
| 27 | H  | 5.495220 | 6.387797 | 5.283432 | 5.048517 | 5.245067 |
| 28 | H  | 4.864015 | 6.056241 | 4.885651 | 3.386549 | 3.749104 |
| 29 | H  | 5.424451 | 5.604309 | 3.959890 | 2.891790 | 3.406094 |
| 30 | C  | 6.374170 | 6.189785 | 4.656234 | 5.098459 | 5.401004 |
| 31 | H  | 6.433920 | 5.824527 | 4.253466 | 5.409042 | 5.487260 |
| 32 | H  | 7.332460 | 7.208597 | 5.610344 | 5.246689 | 5.960188 |
| 33 | H  | 6.476371 | 6.368416 | 5.030785 | 5.939146 | 6.082500 |
|    |    | 16       | 17       | 18       | 19       | 20       |
| 16 | C  | 0.000000 |          |          |          |          |

|    |   |          |          |          |           |           |
|----|---|----------|----------|----------|-----------|-----------|
| 17 | C | 1.326380 | 0.000000 |          |           |           |
| 18 | H | 1.088621 | 2.141821 | 0.000000 |           |           |
| 19 | H | 2.076520 | 1.081377 | 2.467741 | 0.000000  |           |
| 20 | H | 2.130754 | 1.083334 | 3.118770 | 1.847352  | 0.000000  |
| 21 | N | 7.001683 | 8.142264 | 7.024228 | 9.039041  | 8.352009  |
| 22 | H | 7.704782 | 8.797338 | 7.759735 | 9.697556  | 8.961119  |
| 23 | H | 7.071429 | 8.288529 | 6.936235 | 9.112079  | 8.623232  |
| 24 | C | 6.874866 | 8.197752 | 6.246887 | 8.712844  | 8.900895  |
| 25 | C | 6.601825 | 7.891143 | 5.960413 | 8.370855  | 8.608882  |
| 26 | O | 6.391933 | 7.702430 | 5.938469 | 8.339238  | 8.288775  |
| 27 | H | 7.932481 | 9.257102 | 7.315173 | 9.781300  | 9.942907  |
| 28 | H | 6.326561 | 7.636513 | 5.652792 | 8.107857  | 8.378296  |
| 29 | H | 5.771477 | 7.029295 | 5.060306 | 7.435994  | 7.805615  |
| 30 | C | 7.847478 | 9.097208 | 7.218539 | 9.553908  | 9.797224  |
| 31 | H | 7.773929 | 8.968577 | 7.228823 | 9.449346  | 9.610737  |
| 32 | H | 8.284903 | 9.505496 | 7.550922 | 9.852869  | 10.282381 |
| 33 | H | 8.645044 | 9.921159 | 8.062050 | 10.435459 | 10.577972 |
|    |   | 21       | 22       | 23       | 24        | 25        |
| 21 | N | 0.000000 |          |          |           |           |
| 22 | H | 1.013133 | 0.000000 |          |           |           |
| 23 | H | 1.018021 | 1.646803 | 0.000000 |           |           |
| 24 | C | 4.405281 | 5.108868 | 3.486781 | 0.000000  |           |
| 25 | C | 4.341359 | 4.872931 | 3.446619 | 1.464394  | 0.000000  |
| 26 | O | 3.070023 | 3.750688 | 2.180356 | 1.447359  | 1.454106  |
| 27 | H | 4.749508 | 5.374254 | 3.779749 | 1.087350  | 2.213335  |
| 28 | H | 4.923617 | 5.744810 | 4.120873 | 1.085843  | 2.200375  |
| 29 | H | 4.806932 | 5.374593 | 4.046077 | 2.168477  | 1.088132  |
| 30 | C | 4.844142 | 5.100852 | 3.922215 | 2.602382  | 1.503728  |
| 31 | H | 4.675053 | 4.767278 | 3.883201 | 3.443030  | 2.151022  |
| 32 | H | 5.928116 | 6.190052 | 5.003636 | 3.143645  | 2.139311  |
| 33 | H | 4.739284 | 4.928196 | 3.770638 | 2.741199  | 2.155966  |
|    |   | 26       | 27       | 28       | 29        | 30        |
| 26 | O | 0.000000 |          |          |           |           |
| 27 | H | 2.137876 | 0.000000 |          |           |           |
| 28 | H | 2.141229 | 1.850909 | 0.000000 |           |           |
| 29 | H | 2.122207 | 3.106300 | 2.452106 | 0.000000  |           |
| 30 | C | 2.511673 | 2.827761 | 3.530455 | 2.221568  | 0.000000  |
| 31 | H | 2.931071 | 3.781982 | 4.333089 | 2.584108  | 1.094081  |
| 32 | H | 3.417549 | 3.304776 | 3.927275 | 2.570059  | 1.094267  |
| 33 | H | 2.697585 | 2.560446 | 3.796358 | 3.112657  | 1.092947  |
|    |   | 31       | 32       | 33       |           |           |
| 31 | H | 0.000000 |          |          |           |           |
| 32 | H | 1.766654 | 0.000000 |          |           |           |
| 33 | H | 1.775402 | 1.776157 | 0.000000 |           |           |



Stoichiometry C10H18BrN3O  
 Framework group C1[X(C10H18BrN3O)]  
 Deg. of freedom 93  
 Full point group C1 NOp 1  
 Largest Abelian subgroup C1 NOp 1  
 Largest concise Abelian subgroup C1 NOp 1

Standard orientation:

| Center Number | Atomic Number | Atomic Type | Coordinates (Angstroms) |           |           |
|---------------|---------------|-------------|-------------------------|-----------|-----------|
|               |               |             | X                       | Y         | Z         |
| 1             | 6             | 0           | -2.351903               | 2.467716  | -0.264188 |
| 2             | 6             | 0           | -3.335384               | 1.586256  | 0.049083  |
| 3             | 7             | 0           | -2.746350               | 0.329304  | 0.104434  |
| 4             | 6             | 0           | -1.434734               | 0.454905  | -0.170490 |
| 5             | 7             | 0           | -1.176825               | 1.743301  | -0.400383 |
| 6             | 6             | 0           | 0.157651                | 2.291612  | -0.701852 |
| 7             | 6             | 0           | 0.803458                | 2.954425  | 0.519930  |
| 8             | 1             | 0           | -2.387333               | 3.533523  | -0.410011 |
| 9             | 1             | 0           | -4.383914               | 1.745020  | 0.222847  |
| 10            | 1             | 0           | 0.781419                | 1.460553  | -1.031078 |
| 11            | 1             | 0           | 0.057774                | 3.007570  | -1.518685 |
| 12            | 1             | 0           | 0.204069                | 3.814890  | 0.835545  |
| 13            | 1             | 0           | 0.803449                | 2.229832  | 1.347960  |
| 14            | 35            | 0           | -0.058054               | -2.548637 | -0.203618 |
| 15            | 1             | 0           | -0.740777               | -0.407842 | -0.207747 |
| 16            | 6             | 0           | -3.347705               | -0.935469 | 0.383869  |
| 17            | 6             | 0           | -4.625443               | -1.091166 | 0.703913  |
| 18            | 1             | 0           | -2.626652               | -1.746834 | 0.301009  |
| 19            | 1             | 0           | -4.996908               | -2.088236 | 0.896892  |
| 20            | 1             | 0           | -5.332922               | -0.275004 | 0.787370  |
| 21            | 7             | 0           | 2.127374                | 3.421155  | 0.125220  |
| 22            | 1             | 0           | 2.525307                | 4.031753  | 0.828966  |
| 23            | 1             | 0           | 2.749998                | 2.625118  | 0.002618  |
| 24            | 6             | 0           | 3.361830                | -0.631189 | -1.083555 |
| 25            | 6             | 0           | 3.251901                | -0.764850 | 0.370577  |
| 26            | 8             | 0           | 2.851906                | 0.466963  | -0.290531 |
| 27            | 1             | 0           | 4.333872                | -0.443837 | -1.533403 |
| 28            | 1             | 0           | 2.620528                | -1.122269 | -1.706745 |
| 29            | 1             | 0           | 2.399400                | -1.340371 | 0.725611  |
| 30            | 6             | 0           | 4.443673                | -0.672763 | 1.282936  |
| 31            | 1             | 0           | 4.167516                | -0.216137 | 2.238051  |
| 32            | 1             | 0           | 4.829216                | -1.675045 | 1.493196  |
| 33            | 1             | 0           | 5.243143                | -0.079265 | 0.832225  |

```

-----
Rotational constants (GHZ):      0.4205672      0.2926751      0.1829329
Standard basis: 6-311++G(d,p) (5D, 7F)
There are 499 symmetry adapted cartesian basis functions of A symmetry.
There are 482 symmetry adapted basis functions of A symmetry.
482 basis functions, 760 primitive gaussians, 499 cartesian basis functions
71 alpha electrons      71 beta electrons
nuclear repulsion energy      1312.9288715160 Hartrees.
NAtoms= 33 NActive= 33 NUniq= 33 SFac= 1.00D+00 NAtFMM= 60 NAOKFM=F
Big=F
Integral buffers will be 131072 words long.
Raffenetti 2 integral format.
Two-electron integral symmetry is turned on.
One-electron integrals computed using PRISM.
NBasis= 482 RedAO= T EigKep= 3.65D-06 NBF= 482
NBsUse= 482 1.00D-06 EigRej= -1.00D+00 NBFU= 482
Initial guess from the checkpoint file:
"/home/suqian/liuwen/qianmengshijie/nh2po/nh2po.chk"
B after Tr= 0.000000 0.000000 0.000000
Rot= 1.000000 0.000216 0.000050 0.000453 Ang= 0.06 deg.
Requested convergence on RMS density matrix=1.00D-08 within 128 cycles.
Requested convergence on MAX density matrix=1.00D-06.
Requested convergence on energy=1.00D-06.
No special actions if energy rises.
SCF Done: E(RB3LYP) = -3205.64836835 A.U. after 8 cycles
NFock= 8 Conv=0.64D-08 -V/T= 2.0018
Calling FoFJK, ICntrl= 2127 FMM=F ISym2X=0 I1Cent= 0 IOpClX= 0 NMat=1 NMatS=1
NMatT=0.
***** Axes restored to original set *****

```

```

-----

```

| Center<br>Number | Atomic<br>Number | Forces (Hartrees/Bohr) |              |              |
|------------------|------------------|------------------------|--------------|--------------|
|                  |                  | X                      | Y            | Z            |
| 1                | 6                | -0.000024993           | 0.000019376  | 0.000016661  |
| 2                | 6                | 0.000017517            | -0.000052856 | 0.000001212  |
| 3                | 7                | -0.000003387           | 0.000064719  | 0.000056943  |
| 4                | 6                | 0.000041764            | -0.000010976 | -0.000097591 |
| 5                | 7                | -0.000008964           | -0.000062770 | -0.000053089 |
| 6                | 6                | 0.000004579            | 0.000033244  | 0.000078399  |
| 7                | 6                | 0.000119847            | 0.000062975  | 0.000006084  |
| 8                | 1                | 0.000012416            | 0.000000946  | -0.000004728 |
| 9                | 1                | -0.000003534           | 0.000014101  | -0.000016715 |
| 10               | 1                | 0.000000805            | -0.000026023 | 0.000003714  |
| 11               | 1                | -0.000000057           | 0.000012346  | -0.000002191 |

|    |    |              |              |              |
|----|----|--------------|--------------|--------------|
| 12 | 1  | -0.000010255 | 0.000001936  | -0.000002762 |
| 13 | 1  | -0.000018515 | -0.000013986 | 0.000017358  |
| 14 | 35 | -0.000024056 | -0.000021601 | 0.000003979  |
| 15 | 1  | -0.000025663 | 0.000045383  | -0.000000873 |
| 16 | 6  | -0.000020233 | -0.000050555 | 0.000017974  |
| 17 | 6  | -0.000000369 | 0.000017857  | -0.000001508 |
| 18 | 1  | -0.000003978 | 0.000009313  | 0.000001833  |
| 19 | 1  | -0.000006815 | 0.000000476  | -0.000006387 |
| 20 | 1  | 0.000004189  | -0.000004193 | -0.000002184 |
| 21 | 7  | -0.000070025 | -0.000050421 | -0.000031717 |
| 22 | 1  | 0.000002560  | 0.000000534  | 0.000003151  |
| 23 | 1  | -0.000025281 | 0.000047559  | 0.000100793  |
| 24 | 6  | -0.000056690 | 0.000012070  | 0.000278094  |
| 25 | 6  | -0.000026228 | 0.000014100  | 0.000014349  |
| 26 | 8  | -0.000030693 | -0.000063133 | -0.000226364 |
| 27 | 1  | 0.000009844  | -0.000031361 | -0.000063616 |
| 28 | 1  | 0.000060224  | 0.000005765  | -0.000067215 |
| 29 | 1  | 0.000009995  | 0.000030068  | 0.000015657  |
| 30 | 6  | 0.000077711  | 0.000001912  | -0.000035155 |
| 31 | 1  | -0.000014418 | 0.000004074  | -0.000013979 |
| 32 | 1  | -0.000000964 | -0.000008433 | 0.000000911  |
| 33 | 1  | 0.000013664  | -0.000002449 | 0.000008961  |

-----  
Cartesian Forces: Max 0.000278094 RMS 0.000050037

GradGradGradGradGradGradGradGradGradGradGradGradGradGradGradGradGradGradGradGrad

Berny optimization.

Using GEDIIS/GDIIS optimizer.

FormGI is forming the generalized inverse of G from B-inverse, IUseBI=4.

GSVD: received Info= 1 from GESDD.

Internal Forces: Max 0.000235610 RMS 0.000045839

Search for a local minimum.

Step number 40 out of a maximum of 172

All quantities printed in internal units (Hartrees-Bohrs-Radians)

Mixed Optimization -- En-DIIS/RFO-DIIS

Swapping is turned off.

Update second derivatives using D2CorX and points 31 32 33 34 35  
36 37 38 39 40

DE= -1.99D-06 DEPred=-1.07D-06 R= 1.87D+00

TightC=F SS= 1.41D+00 RLast= 1.55D-02 DXNew= 1.7446D+00 4.6609D-02

Trust test= 1.87D+00 RLast= 1.55D-02 DXMaxT set to 1.04D+00

ITU= 1 1 1 1 1 1 1 1 1 1 1 1 1 1 0 0-1 1-1 1

ITU= 1 1 1 1 1 1 1 1 0-1-1 1 1 1-1 1 0 0-1 0

Eigenvalues --- 0.00060 0.00082 0.00217 0.00375 0.00511

|                 |         |         |         |         |         |
|-----------------|---------|---------|---------|---------|---------|
| Eigenvalues --- | 0.00662 | 0.00749 | 0.00850 | 0.01344 | 0.01510 |
| Eigenvalues --- | 0.01899 | 0.02056 | 0.02188 | 0.02362 | 0.02381 |
| Eigenvalues --- | 0.02600 | 0.02700 | 0.02908 | 0.03059 | 0.03077 |
| Eigenvalues --- | 0.03160 | 0.03589 | 0.03622 | 0.03966 | 0.04132 |
| Eigenvalues --- | 0.04228 | 0.04479 | 0.04591 | 0.05405 | 0.05503 |
| Eigenvalues --- | 0.05733 | 0.05754 | 0.05906 | 0.07991 | 0.08616 |
| Eigenvalues --- | 0.08869 | 0.09527 | 0.10230 | 0.11164 | 0.12473 |
| Eigenvalues --- | 0.13025 | 0.13295 | 0.13798 | 0.15735 | 0.15948 |
| Eigenvalues --- | 0.15999 | 0.16002 | 0.16014 | 0.16014 | 0.16102 |
| Eigenvalues --- | 0.16260 | 0.18738 | 0.21622 | 0.22015 | 0.22269 |
| Eigenvalues --- | 0.23170 | 0.23656 | 0.25850 | 0.27083 | 0.28707 |
| Eigenvalues --- | 0.28928 | 0.29936 | 0.30323 | 0.32000 | 0.32637 |
| Eigenvalues --- | 0.33662 | 0.34287 | 0.34340 | 0.34389 | 0.34550 |
| Eigenvalues --- | 0.34697 | 0.34775 | 0.35104 | 0.35176 | 0.35322 |
| Eigenvalues --- | 0.35535 | 0.35669 | 0.35880 | 0.35958 | 0.36420 |
| Eigenvalues --- | 0.36624 | 0.39354 | 0.40993 | 0.41934 | 0.42482 |
| Eigenvalues --- | 0.44636 | 0.45476 | 0.46454 | 0.49511 | 0.54847 |
| Eigenvalues --- | 0.58433 | 0.60638 | 1.35802 |         |         |

En-DIIS/RFO-DIIS IScMMF= 0 using points: 40 39 38 37 36

RFO step: Lambda=-6.55696513D-07.

DidBck=F Rises=F RFO-DIIS coefs: 2.01772 -0.21641 -1.58764 0.49181

0.29453

Iteration 1 RMS(Cart)= 0.01110854 RMS(Int)= 0.00005156

Iteration 2 RMS(Cart)= 0.00008456 RMS(Int)= 0.00001070

Iteration 3 RMS(Cart)= 0.00000000 RMS(Int)= 0.00001070

| Variable | Old X   | -DE/DX   | Delta X<br>(Linear) | Delta X<br>(Quad) | Delta X<br>(Total) | New X   |
|----------|---------|----------|---------------------|-------------------|--------------------|---------|
| R1       | 2.56498 | -0.00002 | 0.00001             | 0.00003           | 0.00005            | 2.56503 |
| R2       | 2.62130 | 0.00002  | -0.00002            | 0.00003           | 0.00001            | 2.62131 |
| R3       | 2.03395 | 0.00000  | -0.00001            | -0.00001          | -0.00001           | 2.03394 |
| R4       | 2.62526 | -0.00005 | -0.00002            | -0.00001          | -0.00003           | 2.62523 |
| R5       | 2.03074 | 0.00000  | 0.00001             | 0.00001           | 0.00002            | 2.03077 |
| R6       | 2.54356 | 0.00004  | 0.00005             | 0.00005           | 0.00010            | 2.54365 |
| R7       | 2.69865 | 0.00004  | 0.00004             | 0.00000           | 0.00005            | 2.69869 |
| R8       | 2.52074 | 0.00001  | -0.00005            | -0.00014          | -0.00019           | 2.52054 |
| R9       | 2.09350 | -0.00005 | -0.00038            | 0.00006           | -0.00032           | 2.09318 |
| R10      | 2.78525 | 0.00004  | -0.00009            | 0.00002           | -0.00007           | 2.78518 |
| R11      | 2.89636 | 0.00003  | 0.00019             | -0.00005          | 0.00014            | 2.89650 |
| R12      | 2.05983 | 0.00002  | 0.00000             | -0.00004          | -0.00005           | 2.05979 |
| R13      | 2.06126 | 0.00001  | 0.00003             | -0.00001          | 0.00002            | 2.06129 |
| R14      | 2.06947 | 0.00001  | 0.00003             | 0.00001           | 0.00004            | 2.06951 |
| R15      | 2.07927 | 0.00002  | 0.00019             | 0.00002           | 0.00020            | 2.07948 |
| R16      | 2.75562 | -0.00005 | -0.00064            | -0.00015          | -0.00078           | 2.75484 |
| R17      | 4.24627 | 0.00001  | 0.00196             | -0.00006          | 0.00190            | 4.24817 |

|     |         |          |          |          |          |         |
|-----|---------|----------|----------|----------|----------|---------|
| R18 | 2.50649 | 0.00000  | -0.00001 | 0.00000  | -0.00001 | 2.50649 |
| R19 | 2.05720 | -0.00001 | 0.00013  | -0.00004 | 0.00009  | 2.05729 |
| R20 | 2.04351 | 0.00000  | 0.00001  | 0.00000  | 0.00001  | 2.04352 |
| R21 | 2.04720 | -0.00001 | 0.00002  | -0.00001 | 0.00001  | 2.04721 |
| R22 | 1.91454 | 0.00000  | -0.00009 | -0.00003 | -0.00013 | 1.91442 |
| R23 | 1.92378 | 0.00002  | -0.00018 | 0.00000  | -0.00020 | 1.92358 |
| R24 | 4.12028 | 0.00004  | 0.00119  | 0.00128  | 0.00247  | 4.12274 |
| R25 | 2.76730 | -0.00007 | -0.00042 | 0.00025  | -0.00015 | 2.76715 |
| R26 | 2.73511 | -0.00003 | 0.00069  | 0.00005  | 0.00073  | 2.73584 |
| R27 | 2.05479 | 0.00003  | -0.00020 | 0.00009  | -0.00011 | 2.05468 |
| R28 | 2.05195 | 0.00000  | -0.00008 | 0.00001  | -0.00007 | 2.05187 |
| R29 | 2.74786 | 0.00001  | -0.00059 | -0.00037 | -0.00097 | 2.74689 |
| R30 | 2.05627 | -0.00002 | -0.00001 | -0.00012 | -0.00013 | 2.05614 |
| R31 | 2.84163 | 0.00004  | 0.00012  | 0.00010  | 0.00021  | 2.84185 |
| R32 | 2.06751 | -0.00001 | 0.00008  | -0.00002 | 0.00006  | 2.06758 |
| R33 | 2.06787 | 0.00001  | -0.00004 | 0.00002  | -0.00002 | 2.06785 |
| R34 | 2.06537 | 0.00001  | -0.00001 | -0.00002 | -0.00003 | 2.06534 |
| A1  | 1.87268 | 0.00002  | -0.00002 | 0.00001  | -0.00001 | 1.87266 |
| A2  | 2.27902 | 0.00000  | -0.00012 | 0.00002  | -0.00010 | 2.27892 |
| A3  | 2.13143 | -0.00002 | 0.00013  | -0.00002 | 0.00011  | 2.13154 |
| A4  | 1.86455 | 0.00000  | 0.00007  | -0.00003 | 0.00005  | 1.86460 |
| A5  | 2.27622 | -0.00001 | 0.00001  | 0.00002  | 0.00003  | 2.27625 |
| A6  | 2.14235 | 0.00001  | -0.00008 | 0.00000  | -0.00008 | 2.14227 |
| A7  | 1.89716 | 0.00002  | -0.00011 | -0.00002 | -0.00013 | 1.89703 |
| A8  | 2.25309 | -0.00004 | 0.00008  | -0.00005 | 0.00003  | 2.25313 |
| A9  | 2.13289 | 0.00002  | 0.00004  | 0.00006  | 0.00010  | 2.13299 |
| A10 | 1.88993 | -0.00002 | 0.00009  | 0.00004  | 0.00013  | 1.89006 |
| A11 | 2.14672 | -0.00007 | -0.00063 | 0.00027  | -0.00036 | 2.14635 |
| A12 | 2.24629 | 0.00009  | 0.00053  | -0.00030 | 0.00023  | 2.24652 |
| A13 | 1.90044 | -0.00002 | -0.00003 | 0.00000  | -0.00003 | 1.90041 |
| A14 | 2.20533 | -0.00013 | 0.00027  | 0.00026  | 0.00053  | 2.20586 |
| A15 | 2.17685 | 0.00015  | -0.00024 | -0.00025 | -0.00049 | 2.17636 |
| A16 | 1.95987 | 0.00011  | -0.00036 | 0.00018  | -0.00019 | 1.95968 |
| A17 | 1.87158 | -0.00001 | -0.00025 | -0.00020 | -0.00045 | 1.87113 |
| A18 | 1.89067 | -0.00006 | 0.00018  | 0.00019  | 0.00036  | 1.89104 |
| A19 | 1.90642 | 0.00000  | 0.00025  | -0.00025 | 0.00000  | 1.90642 |
| A20 | 1.93016 | -0.00005 | 0.00047  | -0.00010 | 0.00037  | 1.93053 |
| A21 | 1.90356 | 0.00002  | -0.00031 | 0.00019  | -0.00012 | 1.90344 |
| A22 | 1.91655 | -0.00002 | -0.00017 | -0.00004 | -0.00020 | 1.91635 |
| A23 | 1.89136 | 0.00002  | -0.00046 | -0.00004 | -0.00051 | 1.89085 |
| A24 | 1.88094 | -0.00003 | 0.00027  | -0.00003 | 0.00024  | 1.88118 |
| A25 | 1.87606 | -0.00001 | -0.00015 | -0.00007 | -0.00022 | 1.87584 |
| A26 | 1.90016 | -0.00003 | 0.00001  | 0.00010  | 0.00011  | 1.90028 |
| A27 | 1.99817 | 0.00006  | 0.00047  | 0.00007  | 0.00055  | 1.99872 |

|     |          |          |          |          |          |          |
|-----|----------|----------|----------|----------|----------|----------|
| A28 | 2.16136  | -0.00002 | -0.00014 | -0.00001 | -0.00016 | 2.16121  |
| A29 | 1.94581  | 0.00001  | -0.00001 | 0.00005  | 0.00004  | 1.94584  |
| A30 | 2.17601  | 0.00001  | 0.00016  | -0.00004 | 0.00012  | 2.17613  |
| A31 | 2.07397  | 0.00001  | -0.00012 | 0.00005  | -0.00007 | 2.07390  |
| A32 | 2.16429  | 0.00000  | 0.00010  | -0.00008 | 0.00002  | 2.16431  |
| A33 | 2.04493  | 0.00000  | 0.00002  | 0.00002  | 0.00005  | 2.04497  |
| A34 | 1.94065  | -0.00010 | 0.00106  | -0.00032 | 0.00075  | 1.94140  |
| A35 | 1.91516  | 0.00024  | 0.00027  | 0.00032  | 0.00059  | 1.91575  |
| A36 | 1.89094  | -0.00007 | 0.00051  | 0.00016  | 0.00067  | 1.89161  |
| A37 | 2.08707  | -0.00003 | -0.00040 | -0.00006 | -0.00051 | 2.08657  |
| A38 | 2.06846  | 0.00009  | -0.00082 | -0.00009 | -0.00086 | 2.06760  |
| A39 | 1.99424  | 0.00002  | -0.00044 | -0.00006 | -0.00049 | 1.99375  |
| A40 | 2.00102  | 0.00001  | -0.00075 | 0.00025  | -0.00050 | 2.00052  |
| A41 | 2.03844  | -0.00007 | 0.00154  | 0.00009  | 0.00162  | 2.04007  |
| A42 | 2.01648  | 0.00000  | -0.00032 | 0.00011  | -0.00020 | 2.01629  |
| A43 | 2.13814  | -0.00002 | 0.00046  | 0.00021  | 0.00065  | 2.13879  |
| A44 | 1.96155  | -0.00002 | 0.00088  | 0.00006  | 0.00092  | 1.96247  |
| A45 | 2.02861  | 0.00002  | 0.00006  | 0.00010  | 0.00018  | 2.02879  |
| A46 | 2.04356  | 0.00002  | -0.00068 | -0.00032 | -0.00100 | 2.04256  |
| A47 | 2.57018  | 0.00010  | 0.00687  | 0.00422  | 0.01107  | 2.58125  |
| A48 | 2.48198  | -0.00008 | -0.00663 | -0.00436 | -0.01093 | 2.47105  |
| A49 | 1.93390  | -0.00003 | 0.00004  | 0.00002  | 0.00005  | 1.93396  |
| A50 | 1.91742  | 0.00000  | -0.00004 | -0.00002 | -0.00006 | 1.91736  |
| A51 | 1.94205  | 0.00003  | 0.00008  | -0.00003 | 0.00005  | 1.94210  |
| A52 | 1.87913  | 0.00001  | -0.00010 | 0.00006  | -0.00004 | 1.87908  |
| A53 | 1.89441  | 0.00000  | -0.00003 | -0.00001 | -0.00005 | 1.89437  |
| A54 | 1.89536  | -0.00001 | 0.00005  | -0.00001 | 0.00004  | 1.89540  |
| A55 | 3.49177  | 0.00012  | 0.00036  | 0.00009  | 0.00045  | 3.49221  |
| A56 | 2.53071  | 0.00014  | -0.00186 | 0.00095  | -0.00086 | 2.52985  |
| A57 | 2.98978  | -0.00004 | 0.00192  | 0.00088  | 0.00280  | 2.99258  |
| A58 | 3.11268  | 0.00001  | 0.00003  | 0.00028  | 0.00031  | 3.11299  |
| D1  | 0.00285  | 0.00000  | 0.00027  | -0.00002 | 0.00025  | 0.00310  |
| D2  | -3.12604 | 0.00000  | 0.00038  | 0.00005  | 0.00044  | -3.12561 |
| D3  | 3.13243  | 0.00000  | -0.00053 | 0.00027  | -0.00026 | 3.13218  |
| D4  | 0.00354  | 0.00000  | -0.00041 | 0.00034  | -0.00007 | 0.00347  |
| D5  | -0.00472 | 0.00001  | -0.00071 | 0.00056  | -0.00015 | -0.00487 |
| D6  | -3.11140 | 0.00000  | -0.00082 | 0.00024  | -0.00058 | -3.11198 |
| D7  | -3.13554 | 0.00001  | 0.00001  | 0.00030  | 0.00031  | -3.13523 |
| D8  | 0.04096  | 0.00000  | -0.00011 | -0.00001 | -0.00012 | 0.04084  |
| D9  | -0.00005 | -0.00002 | 0.00026  | -0.00053 | -0.00027 | -0.00032 |
| D10 | -3.13201 | 0.00000  | -0.00076 | -0.00015 | -0.00091 | -3.13292 |
| D11 | 3.13005  | -0.00002 | 0.00015  | -0.00059 | -0.00044 | 3.12961  |
| D12 | -0.00192 | 0.00000  | -0.00086 | -0.00022 | -0.00107 | -0.00299 |
| D13 | -0.00290 | 0.00002  | -0.00071 | 0.00089  | 0.00018  | -0.00272 |

|     |          |          |          |          |          |          |
|-----|----------|----------|----------|----------|----------|----------|
| D14 | -3.12242 | 0.00001  | -0.00008 | 0.00026  | 0.00018  | -3.12224 |
| D15 | 3.12986  | 0.00001  | 0.00023  | 0.00054  | 0.00077  | 3.13062  |
| D16 | 0.01034  | -0.00001 | 0.00085  | -0.00009 | 0.00077  | 0.01110  |
| D17 | -0.05319 | 0.00000  | -0.00330 | -0.00215 | -0.00545 | -0.05864 |
| D18 | 3.08891  | -0.00001 | -0.00256 | -0.00211 | -0.00466 | 3.08425  |
| D19 | 3.09918  | 0.00002  | -0.00444 | -0.00173 | -0.00616 | 3.09301  |
| D20 | -0.04190 | 0.00001  | -0.00369 | -0.00169 | -0.00538 | -0.04728 |
| D21 | 0.00470  | -0.00002 | 0.00087  | -0.00090 | -0.00002 | 0.00468  |
| D22 | 3.11209  | -0.00002 | 0.00100  | -0.00057 | 0.00043  | 3.11251  |
| D23 | 3.12257  | -0.00001 | 0.00018  | -0.00021 | -0.00003 | 3.12254  |
| D24 | -0.05323 | -0.00001 | 0.00031  | 0.00011  | 0.00042  | -0.05281 |
| D25 | 1.33782  | -0.00004 | -0.00156 | -0.00022 | -0.00178 | 1.33604  |
| D26 | -2.85112 | 0.00001  | -0.00164 | -0.00056 | -0.00219 | -2.85331 |
| D27 | -0.79890 | -0.00001 | -0.00205 | -0.00034 | -0.00238 | -0.80129 |
| D28 | -1.76358 | -0.00005 | -0.00170 | -0.00060 | -0.00229 | -1.76587 |
| D29 | 0.33066  | 0.00001  | -0.00177 | -0.00093 | -0.00270 | 0.32796  |
| D30 | 2.38288  | -0.00001 | -0.00218 | -0.00071 | -0.00289 | 2.37999  |
| D31 | -1.10527 | 0.00004  | -0.00129 | -0.00092 | -0.00222 | -1.10749 |
| D32 | 0.93924  | 0.00004  | -0.00183 | -0.00105 | -0.00288 | 0.93636  |
| D33 | 3.11049  | 0.00011  | -0.00137 | -0.00101 | -0.00238 | 3.10812  |
| D34 | 3.10403  | -0.00001 | -0.00091 | -0.00062 | -0.00153 | 3.10250  |
| D35 | -1.13464 | -0.00002 | -0.00145 | -0.00075 | -0.00220 | -1.13684 |
| D36 | 1.03661  | 0.00005  | -0.00099 | -0.00070 | -0.00169 | 1.03492  |
| D37 | 1.00893  | 0.00000  | -0.00098 | -0.00064 | -0.00162 | 1.00732  |
| D38 | 3.05345  | -0.00001 | -0.00151 | -0.00077 | -0.00228 | 3.05117  |
| D39 | -1.05849 | 0.00006  | -0.00105 | -0.00072 | -0.00178 | -1.06026 |
| D40 | 2.93782  | -0.00005 | -0.00090 | 0.00037  | -0.00053 | 2.93729  |
| D41 | -1.25372 | -0.00005 | 0.00059  | 0.00058  | 0.00117  | -1.25255 |
| D42 | 0.85991  | 0.00001  | -0.00086 | 0.00037  | -0.00049 | 0.85943  |
| D43 | 2.95156  | 0.00001  | 0.00063  | 0.00058  | 0.00121  | 2.95278  |
| D44 | -1.23991 | 0.00000  | -0.00099 | 0.00034  | -0.00065 | -1.24056 |
| D45 | 0.85175  | -0.00001 | 0.00050  | 0.00055  | 0.00105  | 0.85279  |
| D46 | 3.13857  | -0.00001 | 0.00003  | -0.00011 | -0.00009 | 3.13848  |
| D47 | -0.00410 | 0.00000  | -0.00019 | -0.00028 | -0.00047 | -0.00457 |
| D48 | -0.00360 | 0.00000  | -0.00081 | -0.00016 | -0.00098 | -0.00458 |
| D49 | 3.13692  | 0.00000  | -0.00103 | -0.00033 | -0.00136 | 3.13556  |
| D50 | 2.21398  | -0.00002 | -0.00620 | -0.00142 | -0.00764 | 2.20634  |
| D51 | -1.39954 | -0.00014 | -0.00413 | -0.00240 | -0.00650 | -1.40604 |
| D52 | -2.08237 | 0.00009  | -0.00523 | -0.00129 | -0.00654 | -2.08891 |
| D53 | 0.58730  | -0.00003 | -0.00315 | -0.00227 | -0.00539 | 0.58190  |
| D54 | -2.71286 | 0.00002  | 0.00091  | -0.00011 | 0.00081  | -2.71205 |
| D55 | -0.01575 | 0.00002  | -0.00062 | -0.00020 | -0.00082 | -0.01657 |
| D56 | -0.02623 | -0.00002 | 0.00207  | -0.00023 | 0.00185  | -0.02438 |
| D57 | 2.67088  | -0.00002 | 0.00054  | -0.00031 | 0.00023  | 2.67110  |

|     |          |          |          |          |          |          |
|-----|----------|----------|----------|----------|----------|----------|
| D58 | 0.55611  | -0.00006 | -0.00646 | -0.00423 | -0.01073 | 0.54538  |
| D59 | -1.86405 | 0.00001  | -0.00753 | -0.00460 | -0.01218 | -1.87624 |
| D60 | 1.82420  | -0.00009 | -0.00552 | -0.00408 | -0.00959 | 1.81461  |
| D61 | -0.59765 | -0.00012 | -0.00555 | -0.00375 | -0.00929 | -0.60694 |
| D62 | 2.55566  | 0.00000  | -0.00118 | -0.00069 | -0.00187 | 2.55379  |
| D63 | -1.65333 | 0.00000  | -0.00130 | -0.00063 | -0.00193 | -1.65526 |
| D64 | 0.44623  | 0.00000  | -0.00121 | -0.00067 | -0.00189 | 0.44435  |
| D65 | 1.35070  | 0.00000  | -0.00194 | -0.00086 | -0.00280 | 1.34790  |
| D66 | -2.85829 | 0.00000  | -0.00207 | -0.00079 | -0.00286 | -2.86115 |
| D67 | -0.75873 | 0.00000  | -0.00198 | -0.00083 | -0.00281 | -0.76154 |
| D68 | -1.03684 | -0.00001 | -0.00264 | -0.00068 | -0.00332 | -1.04016 |
| D69 | 1.03735  | -0.00001 | -0.00277 | -0.00061 | -0.00338 | 1.03398  |
| D70 | 3.13691  | -0.00001 | -0.00268 | -0.00066 | -0.00333 | 3.13358  |

| Item                 | Value    | Threshold | Converged? |
|----------------------|----------|-----------|------------|
| Maximum Force        | 0.000236 | 0.000450  | YES        |
| RMS Force            | 0.000046 | 0.000300  | YES        |
| Maximum Displacement | 0.046506 | 0.001800  | NO         |
| RMS Displacement     | 0.011111 | 0.001200  | NO         |

Predicted change in Energy=-2.406745D-06

GradGradGradGradGradGradGradGradGradGradGradGradGradGradGradGradGrad

Input orientation:

| Center Number | Atomic Number | Atomic Type | Coordinates (Angstroms) |           |           |
|---------------|---------------|-------------|-------------------------|-----------|-----------|
|               |               |             | X                       | Y         | Z         |
| 1             | 6             | 0           | -2.643407               | 2.099848  | -0.188460 |
| 2             | 6             | 0           | -3.531402               | 1.115055  | 0.101472  |
| 3             | 7             | 0           | -2.819794               | -0.078012 | 0.112012  |
| 4             | 6             | 0           | -1.529797               | 0.186648  | -0.166726 |
| 5             | 7             | 0           | -1.403438               | 1.500955  | -0.355649 |
| 6             | 6             | 0           | -0.132746               | 2.188236  | -0.647589 |
| 7             | 6             | 0           | 0.454412                | 2.874883  | 0.590607  |
| 8             | 1             | 0           | -2.786192               | 3.160890  | -0.299144 |
| 9             | 1             | 0           | -4.588931               | 1.162717  | 0.286405  |
| 10            | 1             | 0           | 0.567386                | 1.433319  | -1.005357 |
| 11            | 1             | 0           | -0.309842               | 2.914662  | -1.441792 |
| 12            | 1             | 0           | -0.223911               | 3.662895  | 0.934464  |
| 13            | 1             | 0           | 0.530519                | 2.129444  | 1.396481  |
| 14            | 35            | 0           | 0.138166                | -2.663035 | -0.311293 |
| 15            | 1             | 0           | -0.754183               | -0.601050 | -0.236578 |
| 16            | 6             | 0           | -3.289569               | -1.404684 | 0.354258  |
| 17            | 6             | 0           | -4.540906               | -1.696314 | 0.683467  |
| 18            | 1             | 0           | -2.493320               | -2.137572 | 0.235669  |



|    |   |   |           |           |           |
|----|---|---|-----------|-----------|-----------|
| 19 | 1 | 0 | -4.809663 | -2.731098 | 0.845895  |
| 20 | 1 | 0 | -5.323729 | -0.957173 | 0.803815  |
| 21 | 7 | 0 | 1.723218  | 3.480051  | 0.204502  |
| 22 | 1 | 0 | 2.065067  | 4.106131  | 0.923853  |
| 23 | 1 | 0 | 2.419693  | 2.753083  | 0.054188  |
| 24 | 6 | 0 | 3.330640  | -0.407178 | -1.124569 |
| 25 | 6 | 0 | 3.255228  | -0.573865 | 0.328272  |
| 26 | 8 | 0 | 2.728409  | 0.623533  | -0.305474 |
| 27 | 1 | 0 | 4.273433  | -0.118825 | -1.583041 |
| 28 | 1 | 0 | 2.630739  | -0.957923 | -1.745690 |
| 29 | 1 | 0 | 2.468479  | -1.235940 | 0.684025  |
| 30 | 6 | 0 | 4.445191  | -0.381585 | 1.227469  |
| 31 | 1 | 0 | 4.139832  | 0.032651  | 2.193000  |
| 32 | 1 | 0 | 4.927286  | -1.345422 | 1.417203  |
| 33 | 1 | 0 | 5.178245  | 0.292044  | 0.776521  |

-----  
Distance matrix (angstroms):

|    |    | 1        | 2        | 3        | 4        | 5        |
|----|----|----------|----------|----------|----------|----------|
| 1  | C  | 0.000000 |          |          |          |          |
| 2  | C  | 1.357354 | 0.000000 |          |          |          |
| 3  | N  | 2.205553 | 1.389210 | 0.000000 |          |          |
| 4  | C  | 2.213805 | 2.222677 | 1.346043 | 0.000000 |          |
| 5  | N  | 1.387137 | 2.210454 | 2.172074 | 1.333815 | 0.000000 |
| 6  | C  | 2.553827 | 3.641932 | 3.596262 | 2.487838 | 1.473853 |
| 7  | C  | 3.286960 | 4.384399 | 4.434981 | 3.425966 | 2.496935 |
| 8  | H  | 1.076313 | 2.213881 | 3.265067 | 3.231436 | 2.161154 |
| 9  | H  | 2.211057 | 1.074635 | 2.167872 | 3.242891 | 3.267110 |
| 10 | H  | 3.379463 | 4.257514 | 3.873709 | 2.579858 | 2.076257 |
| 11 | H  | 2.771333 | 3.999837 | 4.203601 | 3.249022 | 2.091465 |
| 12 | H  | 3.091607 | 4.257330 | 4.627031 | 3.873274 | 2.780226 |
| 13 | H  | 3.547776 | 4.382377 | 4.212756 | 3.234652 | 2.684240 |
| 14 | Br | 5.517000 | 5.282998 | 3.951083 | 3.305101 | 4.440419 |
| 15 | H  | 3.296412 | 3.282109 | 2.159127 | 1.107666 | 2.203210 |
| 16 | C  | 3.604693 | 2.543909 | 1.428087 | 2.429108 | 3.536128 |
| 17 | C  | 4.332621 | 3.043290 | 2.430575 | 3.651733 | 4.598478 |
| 18 | H  | 4.261237 | 3.416900 | 2.088939 | 2.547999 | 3.844006 |
| 19 | H  | 5.394496 | 4.120802 | 3.396620 | 4.505126 | 5.563843 |
| 20 | H  | 4.184986 | 2.828401 | 2.742482 | 4.079730 | 4.770265 |
| 21 | N  | 4.596389 | 5.763233 | 5.771249 | 4.643966 | 3.742535 |
| 22 | H  | 5.237571 | 6.398696 | 6.482901 | 5.429066 | 4.522676 |
| 23 | H  | 5.110830 | 6.172593 | 5.955725 | 4.715280 | 4.043776 |
| 24 | C  | 6.546046 | 7.134983 | 6.282143 | 4.989382 | 5.161754 |
| 25 | C  | 6.496896 | 6.997302 | 6.099060 | 4.870305 | 5.145464 |
| 26 | O  | 5.572218 | 6.292252 | 5.607942 | 4.282807 | 4.224281 |

|    |    |          |          |          |          |          |
|----|----|----------|----------|----------|----------|----------|
| 27 | H  | 7.396624 | 8.079325 | 7.293061 | 5.981366 | 6.029681 |
| 28 | H  | 6.292181 | 6.758789 | 5.825256 | 4.594913 | 4.924721 |
| 29 | H  | 6.166043 | 6.470326 | 5.443696 | 4.328250 | 4.854200 |
| 30 | C  | 7.642681 | 8.193524 | 7.356385 | 6.161748 | 6.344815 |
| 31 | H  | 7.480440 | 8.024582 | 7.264925 | 6.143021 | 6.275298 |
| 32 | H  | 8.471330 | 8.906992 | 7.957832 | 6.822755 | 7.164003 |
| 33 | H  | 8.085641 | 8.774451 | 8.034123 | 6.774854 | 6.786887 |
|    |    | 6        | 7        | 8        | 9        | 10       |
| 6  | C  | 0.000000 |          |          |          |          |
| 7  | C  | 1.532764 | 0.000000 |          |          |          |
| 8  | H  | 2.847498 | 3.372680 | 0.000000 |          |          |
| 9  | H  | 4.667079 | 5.334731 | 2.754166 | 0.000000 |          |
| 10 | H  | 1.089992 | 2.153594 | 3.837932 | 5.322544 | 0.000000 |
| 11 | H  | 1.090787 | 2.171707 | 2.738354 | 4.936252 | 1.776058 |
| 12 | H  | 2.164676 | 1.095136 | 2.887747 | 5.071910 | 3.059422 |
| 13 | H  | 2.149790 | 1.100411 | 3.865178 | 5.326875 | 2.500954 |
| 14 | Br | 4.870454 | 5.619784 | 6.516910 | 6.110570 | 4.176850 |
| 15 | H  | 2.887081 | 3.771876 | 4.276116 | 4.253196 | 2.544843 |
| 16 | C  | 4.886544 | 5.691041 | 4.639482 | 2.878280 | 4.977843 |
| 17 | C  | 6.024394 | 6.771829 | 5.257088 | 2.886871 | 6.224258 |
| 18 | H  | 5.006503 | 5.825788 | 5.333432 | 3.909740 | 4.864086 |
| 19 | H  | 6.950100 | 7.694327 | 6.334119 | 3.939993 | 7.048557 |
| 20 | H  | 6.240711 | 6.936643 | 4.961255 | 2.302515 | 6.610052 |
| 21 | N  | 2.416495 | 1.457798 | 4.548660 | 6.724580 | 2.643637 |
| 22 | H  | 3.313327 | 2.054565 | 5.091554 | 7.303816 | 3.620611 |
| 23 | H  | 2.706749 | 2.040812 | 5.233775 | 7.190550 | 2.509074 |
| 24 | C  | 4.354162 | 4.688970 | 7.129381 | 8.196037 | 3.322231 |
| 25 | C  | 4.478826 | 4.450534 | 7.130274 | 8.034196 | 3.609966 |
| 26 | O  | 3.278956 | 3.323041 | 6.070342 | 7.361013 | 2.411558 |
| 27 | H  | 5.060832 | 5.317138 | 7.889439 | 9.147606 | 4.059269 |
| 28 | H  | 4.329087 | 4.988495 | 6.957029 | 7.794239 | 3.244003 |
| 29 | H  | 4.501617 | 4.578652 | 6.921727 | 7.464496 | 3.686884 |
| 30 | C  | 5.574704 | 5.190038 | 8.195888 | 9.213351 | 4.828743 |
| 31 | H  | 5.565107 | 4.922221 | 7.997904 | 9.005746 | 4.995371 |
| 32 | H  | 6.507998 | 6.204904 | 9.096727 | 9.905951 | 5.709547 |
| 33 | H  | 5.816379 | 5.387042 | 8.533440 | 9.818148 | 5.073226 |
|    |    | 11       | 12       | 13       | 14       | 15       |
| 11 | H  | 0.000000 |          |          |          |          |
| 12 | H  | 2.492755 | 0.000000 |          |          |          |
| 13 | H  | 3.062444 | 1.770338 | 0.000000 |          |          |
| 14 | Br | 5.708717 | 6.457585 | 5.102772 | 0.000000 |          |
| 15 | H  | 3.743022 | 4.453511 | 3.431172 | 2.248033 | 0.000000 |
| 16 | C  | 5.546289 | 5.951072 | 5.307482 | 3.711573 | 2.724536 |
| 17 | C  | 6.609065 | 6.886260 | 6.392509 | 4.880350 | 4.047883 |

|    |   |          |          |          |           |           |
|----|---|----------|----------|----------|-----------|-----------|
| 18 | H | 5.753827 | 6.267691 | 5.357099 | 2.738612  | 2.368230  |
| 19 | H | 7.573408 | 7.868933 | 7.241930 | 5.081803  | 4.706991  |
| 20 | H | 6.721080 | 6.882604 | 6.644597 | 5.829727  | 4.699998  |
| 21 | N | 2.676430 | 2.087484 | 2.160437 | 6.365214  | 4.794524  |
| 22 | H | 3.557537 | 2.331521 | 2.546666 | 7.145638  | 5.608238  |
| 23 | H | 3.116797 | 2.931090 | 2.399929 | 5.888402  | 4.626905  |
| 24 | C | 4.938457 | 5.782728 | 4.542116 | 3.992769  | 4.184722  |
| 25 | C | 5.292700 | 5.515616 | 3.984092 | 3.806541  | 4.049096  |
| 26 | O | 3.971330 | 4.414902 | 3.161509 | 4.184605  | 3.692262  |
| 27 | H | 5.498037 | 6.392601 | 5.285989 | 5.019042  | 5.227087  |
| 28 | H | 4.871990 | 6.056749 | 4.880163 | 3.343325  | 3.723235  |
| 29 | H | 5.428228 | 5.595558 | 3.948302 | 2.908199  | 3.411180  |
| 30 | C | 6.371855 | 6.184188 | 4.653868 | 5.111092  | 5.406024  |
| 31 | H | 6.427853 | 5.814193 | 4.249485 | 5.436132  | 5.500528  |
| 32 | H | 7.331417 | 7.200772 | 5.604167 | 5.259227  | 5.963906  |
| 33 | H | 6.474422 | 6.369527 | 5.036045 | 5.942914  | 6.084217  |
|    |   | 16       | 17       | 18       | 19        | 20        |
| 16 | C | 0.000000 |          |          |           |           |
| 17 | C | 1.326375 | 0.000000 |          |           |           |
| 18 | H | 1.088669 | 2.141924 | 0.000000 |           |           |
| 19 | H | 2.076478 | 1.081383 | 2.467811 | 0.000000  |           |
| 20 | H | 2.130768 | 1.083339 | 3.118869 | 1.847388  | 0.000000  |
| 21 | N | 7.000793 | 8.140235 | 7.024091 | 9.037051  | 8.349107  |
| 22 | H | 7.704911 | 8.795740 | 7.761207 | 9.696169  | 8.958000  |
| 23 | H | 7.069141 | 8.285112 | 6.934634 | 9.108602  | 8.619079  |
| 24 | C | 6.856320 | 8.178760 | 6.225996 | 8.691827  | 8.883651  |
| 25 | C | 6.597372 | 7.884527 | 5.958151 | 8.364452  | 8.600673  |
| 26 | O | 6.384746 | 7.694325 | 5.931526 | 8.330770  | 8.280464  |
| 27 | H | 7.912369 | 9.236781 | 7.291914 | 9.758398  | 9.924990  |
| 28 | H | 6.297574 | 7.607794 | 5.619016 | 8.075892  | 8.353055  |
| 29 | H | 5.769952 | 7.024488 | 5.062946 | 7.431894  | 7.798113  |
| 30 | C | 7.850843 | 9.098043 | 7.225655 | 9.556051  | 9.795028  |
| 31 | H | 7.787355 | 8.979044 | 7.248429 | 9.462899  | 9.616057  |
| 32 | H | 8.285534 | 9.503061 | 7.555721 | 9.851632  | 10.276686 |
| 33 | H | 8.646449 | 9.920894 | 8.065263 | 10.435636 | 10.576046 |
|    |   | 21       | 22       | 23       | 24        | 25        |
| 21 | N | 0.000000 |          |          |           |           |
| 22 | H | 1.013067 | 0.000000 |          |           |           |
| 23 | H | 1.017917 | 1.647063 | 0.000000 |           |           |
| 24 | C | 4.411438 | 5.115434 | 3.493785 | 0.000000  |           |
| 25 | C | 4.335506 | 4.865549 | 3.441195 | 1.464315  | 0.000000  |
| 26 | O | 3.070860 | 3.752301 | 2.181661 | 1.447744  | 1.453593  |
| 27 | H | 4.759288 | 5.386247 | 3.790083 | 1.087292  | 2.212898  |
| 28 | H | 4.931780 | 5.752485 | 4.129850 | 1.085805  | 2.199728  |

|    |   |          |          |          |          |          |
|----|---|----------|----------|----------|----------|----------|
| 29 | H | 4.798534 | 5.362647 | 4.038734 | 2.168220 | 1.088061 |
| 30 | C | 4.834029 | 5.088886 | 3.912208 | 2.602875 | 1.503841 |
| 31 | H | 4.656041 | 4.744325 | 3.864472 | 3.443036 | 2.151185 |
| 32 | H | 5.917930 | 6.176983 | 4.994354 | 3.144867 | 2.139357 |
| 33 | H | 4.735801 | 4.925530 | 3.766708 | 2.741660 | 2.156089 |
|    |   | 26       | 27       | 28       | 29       | 30       |
| 26 | O | 0.000000 |          |          |          |          |
| 27 | H | 2.137843 | 0.000000 |          |          |          |
| 28 | H | 2.141206 | 1.851751 | 0.000000 |          |          |
| 29 | H | 2.122336 | 3.105703 | 2.450946 | 0.000000 |          |
| 30 | C | 2.511476 | 2.827987 | 3.530449 | 2.220955 | 0.000000 |
| 31 | H | 2.929782 | 3.781439 | 4.332652 | 2.584520 | 1.094114 |
| 32 | H | 3.417522 | 3.306589 | 3.927872 | 2.568125 | 1.094257 |
| 33 | H | 2.698573 | 2.560280 | 3.796545 | 3.112253 | 1.092931 |
|    |   | 31       | 32       | 33       |          |          |
| 31 | H | 0.000000 |          |          |          |          |
| 32 | H | 1.766644 | 0.000000 |          |          |          |
| 33 | H | 1.775387 | 1.776161 | 0.000000 |          |          |

Stoichiometry C10H18BrN3O

Framework group C1[X(C10H18BrN3O)]

Deg. of freedom 93

Full point group C1 NOp 1

Largest Abelian subgroup C1 NOp 1

Largest concise Abelian subgroup C1 NOp 1

Standard orientation:

| Center<br>Number | Atomic<br>Number | Atomic<br>Type | Coordinates (Angstroms) |           |           |
|------------------|------------------|----------------|-------------------------|-----------|-----------|
|                  |                  |                | X                       | Y         | Z         |
| 1                | 6                | 0              | -2.350947               | 2.468350  | -0.264447 |
| 2                | 6                | 0              | -3.333957               | 1.587163  | 0.051166  |
| 3                | 7                | 0              | -2.744957               | 0.330213  | 0.106490  |
| 4                | 6                | 0              | -1.433833               | 0.455610  | -0.171110 |
| 5                | 7                | 0              | -1.176209               | 1.743707  | -0.402402 |
| 6                | 6                | 0              | 0.157918                | 2.290864  | -0.707307 |
| 7                | 6                | 0              | 0.805426                | 2.956898  | 0.511913  |
| 8                | 1                | 0              | -2.386715               | 3.534010  | -0.411207 |
| 9                | 1                | 0              | -4.382227               | 1.746061  | 0.226446  |
| 10               | 1                | 0              | 0.780754                | 1.458394  | -1.034646 |
| 11               | 1                | 0              | 0.057508                | 3.004188  | -1.526394 |
| 12               | 1                | 0              | 0.207650                | 3.819642  | 0.824419  |
| 13               | 1                | 0              | 0.803405                | 2.235112  | 1.342530  |
| 14               | 35               | 0              | -0.057850               | -2.549209 | -0.208852 |
| 15               | 1                | 0              | -0.740373               | -0.407291 | -0.209046 |

|    |   |   |           |           |           |
|----|---|---|-----------|-----------|-----------|
| 16 | 6 | 0 | -3.345739 | -0.934200 | 0.388895  |
| 17 | 6 | 0 | -4.621299 | -1.088569 | 0.718118  |
| 18 | 1 | 0 | -2.626075 | -1.746288 | 0.300595  |
| 19 | 1 | 0 | -4.992615 | -2.085406 | 0.912622  |
| 20 | 1 | 0 | -5.326987 | -0.271540 | 0.808072  |
| 21 | 7 | 0 | 2.129882  | 3.419417  | 0.115596  |
| 22 | 1 | 0 | 2.529449  | 4.032192  | 0.816423  |
| 23 | 1 | 0 | 2.750996  | 2.622082  | -0.005358 |
| 24 | 6 | 0 | 3.347116  | -0.651014 | -1.072140 |
| 25 | 6 | 0 | 3.249342  | -0.760409 | 0.384806  |
| 26 | 8 | 0 | 2.847261  | 0.461492  | -0.292115 |
| 27 | 1 | 0 | 4.315890  | -0.473535 | -1.532770 |
| 28 | 1 | 0 | 2.598388  | -1.149922 | -1.679981 |
| 29 | 1 | 0 | 2.398986  | -1.328531 | 0.756302  |
| 30 | 6 | 0 | 4.448756  | -0.657416 | 1.286102  |
| 31 | 1 | 0 | 4.182181  | -0.182602 | 2.235088  |
| 32 | 1 | 0 | 4.831502  | -1.657531 | 1.511212  |
| 33 | 1 | 0 | 5.247239  | -0.075661 | 0.818680  |

-----

Rotational constants (GHZ):      0.4203897      0.2929806      0.1830727

Standard basis: 6-311++G(d,p) (5D, 7F)

There are    499 symmetry adapted cartesian basis functions of A    symmetry.

There are    482 symmetry adapted basis functions of A    symmetry.

482 basis functions,    760 primitive gaussians,    499 cartesian basis functions

71 alpha electrons      71 beta electrons

nuclear repulsion energy      1313.2194569955 Hartrees.

NAtoms=    33 NActive=    33 NUniq=    33 SFac= 1.00D+00 NAtFMM=    60 NAOKFM=F

Big=F

Integral buffers will be    131072 words long.

Raffenetti 2 integral format.

Two-electron integral symmetry is turned on.

One-electron integrals computed using PRISM.

NBasis=    482 RedAO= T EigKep=    3.66D-06    NBF=    482

NBsUse=    482 1.00D-06 EigRej= -1.00D+00    NBFU=    482

Initial      guess      from      the      checkpoint      file:

"/home/suqian/liuwen/qianmengshijie/nh2po/nh2po.chk"

B after Tr=    0.000000    0.000000    0.000000

Rot=    1.000000    0.000837    -0.000293    0.000111 Ang=    0.10 deg.

ExpMin= 3.50D-02 ExpMax= 4.40D+05 ExpMxC= 1.51D+04 IAcc=3 IRadAn=      5 AccDes=

0.00D+00

Harris functional with IExCor=    402 and IRadAn=      5 diagonalized for initial guess.

HarFok: IExCor=    402 AccDes= 0.00D+00 IRadAn=      5 IDoV= 1 UseB2=F ITyADJ=14

ICtDFT= 3500011 ScaDFX= 1.000000 1.000000 1.000000 1.000000

FoFCou: FMM=F IPFlag=      0 FMFlag=    100000 FMFlg1=      0

NFxFIlg= 0 DoJE=T BraDBF=F KetDBF=T FulRan=T  
wScrn= 0.000000 ICntrl= 500 IOpCl= 0 I1Cent= 20000004 NGrid=  
0  
NMat0= 1 NMatS0= 1 NMatT0= 0 NMatD0= 1 NMtDS0= 0  
NMtDT0= 0

Petite list used in FoFCou.

Requested convergence on RMS density matrix=1.00D-08 within 128 cycles.

Requested convergence on MAX density matrix=1.00D-06.

Requested convergence on energy=1.00D-06.

No special actions if energy rises.

SCF Done: E(RB3LYP) = -3205.64837096 A.U. after 10 cycles

NFock= 10 Conv=0.66D-08 -V/T= 2.0018

Calling FoFJK, ICntrl= 2127 FMM=F ISym2X=0 I1Cent= 0 IOpClX= 0 NMat=1 NMatS=1  
NMatT=0.

\*\*\*\*\* Axes restored to original set \*\*\*\*\*

| Center<br>Number | Atomic<br>Number | Forces (Hartrees/Bohr) |              |              |
|------------------|------------------|------------------------|--------------|--------------|
|                  |                  | X                      | Y            | Z            |
| 1                | 6                | -0.000043662           | 0.000021684  | -0.000012211 |
| 2                | 6                | 0.000011717            | -0.000048203 | 0.000034152  |
| 3                | 7                | 0.000048061            | 0.000110457  | 0.000044029  |
| 4                | 6                | -0.000071595           | -0.000133777 | -0.000041215 |
| 5                | 7                | -0.000019441           | -0.000039760 | -0.000075901 |
| 6                | 6                | 0.000036747            | 0.000050045  | 0.000075687  |
| 7                | 6                | -0.000074260           | -0.000037275 | 0.000054302  |
| 8                | 1                | 0.000019920            | 0.000004620  | -0.000008747 |
| 9                | 1                | 0.000002511            | 0.000021401  | -0.000020779 |
| 10               | 1                | 0.000030771            | -0.000020947 | 0.000006275  |
| 11               | 1                | -0.000020503           | 0.000019528  | 0.000016891  |
| 12               | 1                | 0.000004026            | 0.000005834  | 0.000008607  |
| 13               | 1                | 0.000023143            | 0.000025782  | 0.000004136  |
| 14               | 35               | -0.000060538           | 0.000009693  | 0.000010005  |
| 15               | 1                | 0.000062654            | 0.000018911  | -0.000032902 |
| 16               | 6                | 0.000002563            | -0.000036526 | 0.000014815  |
| 17               | 6                | 0.000001182            | -0.000009473 | -0.000004595 |
| 18               | 1                | -0.000025275           | 0.000027523  | 0.000007979  |
| 19               | 1                | -0.000012834           | 0.000005711  | -0.000006590 |
| 20               | 1                | 0.000007679            | -0.000006217 | -0.000010325 |
| 21               | 7                | 0.000005710            | 0.000041094  | -0.000125288 |
| 22               | 1                | 0.000007440            | -0.000004371 | 0.000038848  |
| 23               | 1                | 0.000019819            | 0.000007519  | 0.000088760  |
| 24               | 6                | -0.000072474           | 0.000063014  | 0.000336981  |
| 25               | 6                | 0.000075038            | -0.000086381 | 0.000131100  |

|    |   |              |              |              |
|----|---|--------------|--------------|--------------|
| 26 | 8 | -0.000087185 | -0.000019090 | -0.000231634 |
| 27 | 1 | 0.000018726  | -0.000034637 | -0.000107061 |
| 28 | 1 | 0.000086306  | -0.000004884 | -0.000089523 |
| 29 | 1 | -0.000057422 | 0.000057657  | -0.000027953 |
| 30 | 6 | 0.000065911  | -0.000005936 | -0.000061975 |
| 31 | 1 | -0.000016982 | 0.000003541  | -0.000018871 |
| 32 | 1 | 0.000019810  | -0.000008893 | -0.000007763 |
| 33 | 1 | 0.000012435  | 0.000002358  | 0.000010767  |

-----  
Cartesian Forces: Max 0.000336981 RMS 0.000061965

GradGradGradGradGradGradGradGradGradGradGradGradGradGradGradGradGradGradGrad

Berny optimization.

Using GEDIIS/GDIIS optimizer.

FormGI is forming the generalized inverse of G from B-inverse, IUseBI=4.

GSVD: received Info= 1 from GESDD.

Internal Forces: Max 0.000286236 RMS 0.000058975

Search for a local minimum.

Step number 41 out of a maximum of 172

All quantities printed in internal units (Hartrees-Bohrs-Radians)

Mixed Optimization -- En-DIIS/RFO-DIIS

Swapping is turned off.

Update second derivatives using D2CorX and points 31 32 33 34 35  
36 37 38 39 40  
41

DE= -2.60D-06 DEPred=-2.41D-06 R= 1.08D+00

TightC=F SS= 1.41D+00 RLast= 3.41D-02 DXNew= 1.7446D+00 1.0242D-01

Trust test= 1.08D+00 RLast= 3.41D-02 DXMaxT set to 1.04D+00

ITU= 1 1 1 1 1 1 1 1 1 1 1 1 1 1 0 0-1 1-1

ITU= 1 1 1 1 1 1 1 1 1 0-1-1 1 1 1-1 1 0 0-1

ITU= 0

|                 |         |         |         |         |         |
|-----------------|---------|---------|---------|---------|---------|
| Eigenvalues --- | 0.00064 | 0.00110 | 0.00216 | 0.00291 | 0.00496 |
| Eigenvalues --- | 0.00646 | 0.00754 | 0.00803 | 0.01351 | 0.01483 |
| Eigenvalues --- | 0.01898 | 0.02057 | 0.02180 | 0.02352 | 0.02382 |
| Eigenvalues --- | 0.02608 | 0.02689 | 0.02913 | 0.03053 | 0.03086 |
| Eigenvalues --- | 0.03142 | 0.03573 | 0.03625 | 0.03967 | 0.04162 |
| Eigenvalues --- | 0.04259 | 0.04477 | 0.04623 | 0.05487 | 0.05594 |
| Eigenvalues --- | 0.05744 | 0.05795 | 0.05911 | 0.07972 | 0.08688 |
| Eigenvalues --- | 0.08890 | 0.09527 | 0.10213 | 0.11291 | 0.12478 |
| Eigenvalues --- | 0.13024 | 0.13191 | 0.14271 | 0.15758 | 0.15954 |
| Eigenvalues --- | 0.16001 | 0.16002 | 0.16014 | 0.16019 | 0.16107 |
| Eigenvalues --- | 0.16272 | 0.19106 | 0.21542 | 0.21940 | 0.22258 |
| Eigenvalues --- | 0.23169 | 0.23634 | 0.26064 | 0.27245 | 0.28305 |
| Eigenvalues --- | 0.29154 | 0.30072 | 0.30373 | 0.31934 | 0.32543 |

Eigenvalues --- 0.33634 0.34286 0.34344 0.34393 0.34550  
 Eigenvalues --- 0.34712 0.34768 0.35120 0.35192 0.35329  
 Eigenvalues --- 0.35527 0.35654 0.35892 0.35990 0.36418  
 Eigenvalues --- 0.36629 0.39325 0.40566 0.41908 0.42454  
 Eigenvalues --- 0.44753 0.45497 0.46438 0.49514 0.54883  
 Eigenvalues --- 0.58281 0.60634 1.30574  
 En-DIIS/RFO-DIIS IScMMF= 0 using points: 41 40 39 38 37  
 RFO step: Lambda=-7.07608998D-07.  
 DidBck=F Rises=F RFO-DIIS coefs: 1.37083 -0.24221 -0.33907 0.27549 -

0.06505

Iteration 1 RMS(Cart)= 0.00360974 RMS(Int)= 0.00001175  
 Iteration 2 RMS(Cart)= 0.00001714 RMS(Int)= 0.00000618  
 Iteration 3 RMS(Cart)= 0.00000000 RMS(Int)= 0.00000618

| Variable | Old X   | -DE/DX   | Delta X<br>(Linear) | Delta X<br>(Quad) | Delta X<br>(Total) | New X   |
|----------|---------|----------|---------------------|-------------------|--------------------|---------|
| R1       | 2.56503 | -0.00004 | 0.00001             | -0.00002          | -0.00001           | 2.56502 |
| R2       | 2.62131 | 0.00002  | 0.00002             | -0.00002          | 0.00000            | 2.62130 |
| R3       | 2.03394 | 0.00000  | -0.00001            | 0.00001           | 0.00000            | 2.03393 |
| R4       | 2.62523 | -0.00004 | -0.00003            | 0.00000           | -0.00003           | 2.62520 |
| R5       | 2.03077 | 0.00000  | 0.00001             | -0.00001          | 0.00000            | 2.03077 |
| R6       | 2.54365 | 0.00000  | 0.00007             | -0.00006          | 0.00002            | 2.54367 |
| R7       | 2.69869 | 0.00003  | 0.00004             | 0.00003           | 0.00007            | 2.69876 |
| R8       | 2.52054 | 0.00008  | -0.00011            | 0.00009           | -0.00002           | 2.52053 |
| R9       | 2.09318 | -0.00002 | -0.00012            | -0.00008          | -0.00020           | 2.09299 |
| R10      | 2.78518 | 0.00008  | -0.00003            | 0.00007           | 0.00003            | 2.78521 |
| R11      | 2.89650 | 0.00002  | 0.00006             | -0.00001          | 0.00005            | 2.89656 |
| R12      | 2.05979 | 0.00003  | -0.00002            | 0.00007           | 0.00005            | 2.05984 |
| R13      | 2.06129 | 0.00000  | 0.00002             | -0.00001          | 0.00001            | 2.06130 |
| R14      | 2.06951 | 0.00000  | 0.00003             | -0.00001          | 0.00002            | 2.06953 |
| R15      | 2.07948 | -0.00001 | 0.00009             | -0.00003          | 0.00006            | 2.07954 |
| R16      | 2.75484 | 0.00010  | -0.00037            | 0.00016           | -0.00022           | 2.75462 |
| R17      | 4.24817 | -0.00003 | 0.00082             | 0.00077           | 0.00159            | 4.24976 |
| R18      | 2.50649 | 0.00000  | 0.00000             | 0.00001           | 0.00001            | 2.50649 |
| R19      | 2.05729 | -0.00004 | 0.00003             | -0.00003          | 0.00000            | 2.05729 |
| R20      | 2.04352 | 0.00000  | 0.00001             | 0.00000           | 0.00000            | 2.04352 |
| R21      | 2.04721 | -0.00001 | 0.00000             | -0.00001          | -0.00001           | 2.04721 |
| R22      | 1.91442 | 0.00003  | -0.00004            | 0.00002           | -0.00002           | 1.91440 |
| R23      | 1.92358 | 0.00008  | -0.00008            | 0.00003           | -0.00006           | 1.92353 |
| R24      | 4.12274 | 0.00003  | 0.00164             | 0.00076           | 0.00240            | 4.12515 |
| R25      | 2.76715 | -0.00007 | -0.00011            | -0.00012          | -0.00022           | 2.76693 |
| R26      | 2.73584 | -0.00003 | 0.00007             | -0.00001          | 0.00005            | 2.73589 |
| R27      | 2.05468 | 0.00005  | 0.00001             | 0.00004           | 0.00005            | 2.05474 |
| R28      | 2.05187 | 0.00000  | 0.00001             | 0.00000           | 0.00001            | 2.05188 |
| R29      | 2.74689 | 0.00008  | -0.00026            | 0.00032           | 0.00006            | 2.74695 |



|     |         |          |          |          |          |         |
|-----|---------|----------|----------|----------|----------|---------|
| R30 | 2.05614 | 0.00000  | -0.00006 | 0.00004  | -0.00001 | 2.05612 |
| R31 | 2.84185 | 0.00002  | 0.00011  | -0.00004 | 0.00007  | 2.84192 |
| R32 | 2.06758 | -0.00001 | 0.00001  | -0.00002 | -0.00001 | 2.06756 |
| R33 | 2.06785 | 0.00001  | -0.00001 | 0.00001  | 0.00000  | 2.06784 |
| R34 | 2.06534 | 0.00001  | -0.00002 | 0.00002  | 0.00000  | 2.06534 |
| A1  | 1.87266 | 0.00002  | -0.00001 | -0.00003 | -0.00004 | 1.87262 |
| A2  | 2.27892 | 0.00001  | -0.00001 | 0.00005  | 0.00005  | 2.27896 |
| A3  | 2.13154 | -0.00003 | 0.00002  | -0.00003 | -0.00001 | 2.13153 |
| A4  | 1.86460 | 0.00000  | 0.00002  | 0.00001  | 0.00004  | 1.86464 |
| A5  | 2.27625 | -0.00002 | 0.00000  | -0.00001 | -0.00002 | 2.27623 |
| A6  | 2.14227 | 0.00003  | -0.00002 | 0.00000  | -0.00002 | 2.14225 |
| A7  | 1.89703 | 0.00005  | -0.00005 | 0.00004  | -0.00001 | 1.89702 |
| A8  | 2.25313 | -0.00004 | -0.00005 | -0.00011 | -0.00015 | 2.25298 |
| A9  | 2.13299 | -0.00001 | 0.00010  | 0.00007  | 0.00017  | 2.13316 |
| A10 | 1.89006 | -0.00004 | 0.00004  | -0.00006 | -0.00002 | 1.89004 |
| A11 | 2.14635 | -0.00006 | -0.00018 | 0.00032  | 0.00013  | 2.14649 |
| A12 | 2.24652 | 0.00010  | 0.00015  | -0.00025 | -0.00010 | 2.24643 |
| A13 | 1.90041 | -0.00002 | 0.00000  | 0.00003  | 0.00003  | 1.90044 |
| A14 | 2.20586 | -0.00022 | 0.00017  | -0.00025 | -0.00008 | 2.20578 |
| A15 | 2.17636 | 0.00024  | -0.00017 | 0.00022  | 0.00005  | 2.17641 |
| A16 | 1.95968 | 0.00012  | 0.00001  | 0.00011  | 0.00011  | 1.95979 |
| A17 | 1.87113 | 0.00003  | -0.00021 | 0.00025  | 0.00003  | 1.87116 |
| A18 | 1.89104 | -0.00009 | 0.00019  | -0.00027 | -0.00009 | 1.89095 |
| A19 | 1.90642 | -0.00003 | 0.00005  | 0.00004  | 0.00009  | 1.90651 |
| A20 | 1.93053 | -0.00005 | 0.00002  | -0.00015 | -0.00014 | 1.93040 |
| A21 | 1.90344 | 0.00003  | -0.00005 | 0.00005  | -0.00001 | 1.90343 |
| A22 | 1.91635 | -0.00001 | -0.00015 | 0.00011  | -0.00004 | 1.91631 |
| A23 | 1.89085 | 0.00005  | -0.00016 | 0.00023  | 0.00007  | 1.89093 |
| A24 | 1.88118 | -0.00003 | 0.00006  | -0.00015 | -0.00010 | 1.88108 |
| A25 | 1.87584 | -0.00001 | -0.00010 | 0.00000  | -0.00010 | 1.87574 |
| A26 | 1.90028 | -0.00004 | 0.00005  | -0.00011 | -0.00006 | 1.90022 |
| A27 | 1.99872 | 0.00004  | 0.00029  | -0.00007 | 0.00022  | 1.99894 |
| A28 | 2.16121 | 0.00000  | -0.00009 | -0.00003 | -0.00012 | 2.16109 |
| A29 | 1.94584 | 0.00000  | 0.00003  | 0.00002  | 0.00004  | 1.94589 |
| A30 | 2.17613 | 0.00000  | 0.00006  | 0.00001  | 0.00008  | 2.17621 |
| A31 | 2.07390 | 0.00002  | -0.00002 | 0.00005  | 0.00002  | 2.07392 |
| A32 | 2.16431 | -0.00001 | 0.00001  | -0.00003 | -0.00002 | 2.16429 |
| A33 | 2.04497 | -0.00001 | 0.00001  | -0.00001 | 0.00000  | 2.04497 |
| A34 | 1.94140 | -0.00014 | 0.00022  | 0.00000  | 0.00022  | 1.94162 |
| A35 | 1.91575 | 0.00029  | 0.00031  | 0.00003  | 0.00034  | 1.91609 |
| A36 | 1.89161 | -0.00009 | 0.00023  | -0.00004 | 0.00019  | 1.89180 |
| A37 | 2.08657 | 0.00001  | -0.00028 | 0.00008  | -0.00022 | 2.08635 |
| A38 | 2.06760 | 0.00008  | 0.00020  | 0.00019  | 0.00041  | 2.06802 |
| A39 | 1.99375 | 0.00005  | -0.00007 | -0.00004 | -0.00011 | 1.99364 |

|     |          |          |          |          |          |          |
|-----|----------|----------|----------|----------|----------|----------|
| A40 | 2.00052  | 0.00000  | 0.00003  | 0.00007  | 0.00010  | 2.00062  |
| A41 | 2.04007  | -0.00010 | 0.00011  | -0.00026 | -0.00015 | 2.03991  |
| A42 | 2.01629  | -0.00002 | 0.00042  | 0.00007  | 0.00049  | 2.01678  |
| A43 | 2.13879  | -0.00005 | 0.00015  | -0.00011 | 0.00005  | 2.13884  |
| A44 | 1.96247  | -0.00007 | 0.00032  | -0.00024 | 0.00007  | 1.96253  |
| A45 | 2.02879  | 0.00003  | 0.00006  | 0.00011  | 0.00018  | 2.02897  |
| A46 | 2.04256  | 0.00007  | -0.00062 | 0.00010  | -0.00053 | 2.04203  |
| A47 | 2.58125  | 0.00007  | 0.00271  | 0.00366  | 0.00633  | 2.58758  |
| A48 | 2.47105  | -0.00003 | -0.00395 | -0.00277 | -0.00668 | 2.46437  |
| A49 | 1.93396  | -0.00004 | -0.00005 | -0.00014 | -0.00019 | 1.93377  |
| A50 | 1.91736  | 0.00001  | -0.00008 | 0.00008  | 0.00000  | 1.91737  |
| A51 | 1.94210  | 0.00002  | 0.00004  | 0.00005  | 0.00009  | 1.94219  |
| A52 | 1.87908  | 0.00002  | -0.00004 | 0.00004  | 0.00000  | 1.87908  |
| A53 | 1.89437  | 0.00000  | 0.00007  | -0.00001 | 0.00006  | 1.89443  |
| A54 | 1.89540  | -0.00002 | 0.00006  | -0.00002 | 0.00004  | 1.89544  |
| A55 | 3.49221  | 0.00020  | 0.00013  | -0.00029 | -0.00016 | 3.49205  |
| A56 | 2.52985  | 0.00017  | -0.00052 | -0.00068 | -0.00119 | 2.52866  |
| A57 | 2.99258  | -0.00007 | -0.00002 | -0.00259 | -0.00261 | 2.98996  |
| A58 | 3.11299  | -0.00001 | -0.00109 | -0.00005 | -0.00114 | 3.11185  |
| D1  | 0.00310  | -0.00001 | 0.00015  | -0.00013 | 0.00001  | 0.00312  |
| D2  | -3.12561 | 0.00000  | 0.00014  | -0.00010 | 0.00004  | -3.12557 |
| D3  | 3.13218  | 0.00000  | 0.00006  | -0.00005 | 0.00001  | 3.13219  |
| D4  | 0.00347  | 0.00001  | 0.00005  | -0.00002 | 0.00004  | 0.00351  |
| D5  | -0.00487 | 0.00002  | -0.00005 | 0.00007  | 0.00002  | -0.00484 |
| D6  | -3.11198 | 0.00001  | -0.00003 | 0.00010  | 0.00007  | -3.11191 |
| D7  | -3.13523 | 0.00001  | 0.00003  | -0.00001 | 0.00002  | -3.13521 |
| D8  | 0.04084  | 0.00000  | 0.00004  | 0.00003  | 0.00007  | 0.04091  |
| D9  | -0.00032 | -0.00001 | -0.00020 | 0.00015  | -0.00005 | -0.00037 |
| D10 | -3.13292 | 0.00001  | -0.00037 | -0.00001 | -0.00038 | -3.13330 |
| D11 | 3.12961  | -0.00002 | -0.00019 | 0.00012  | -0.00007 | 3.12954  |
| D12 | -0.00299 | 0.00000  | -0.00036 | -0.00004 | -0.00040 | -0.00339 |
| D13 | -0.00272 | 0.00002  | 0.00017  | -0.00011 | 0.00006  | -0.00266 |
| D14 | -3.12224 | 0.00001  | -0.00023 | -0.00059 | -0.00082 | -3.12307 |
| D15 | 3.13062  | 0.00000  | 0.00032  | 0.00004  | 0.00037  | 3.13099  |
| D16 | 0.01110  | -0.00001 | -0.00008 | -0.00044 | -0.00052 | 0.01058  |
| D17 | -0.05864 | 0.00001  | -0.00128 | 0.00209  | 0.00081  | -0.05783 |
| D18 | 3.08425  | 0.00000  | -0.00099 | 0.00195  | 0.00096  | 3.08521  |
| D19 | 3.09301  | 0.00003  | -0.00146 | 0.00191  | 0.00044  | 3.09346  |
| D20 | -0.04728 | 0.00002  | -0.00117 | 0.00176  | 0.00059  | -0.04669 |
| D21 | 0.00468  | -0.00002 | -0.00008 | 0.00002  | -0.00005 | 0.00462  |
| D22 | 3.11251  | -0.00002 | -0.00008 | -0.00002 | -0.00010 | 3.11241  |
| D23 | 3.12254  | -0.00002 | 0.00035  | 0.00055  | 0.00090  | 3.12344  |
| D24 | -0.05281 | -0.00002 | 0.00035  | 0.00051  | 0.00085  | -0.05196 |
| D25 | 1.33604  | -0.00004 | -0.00111 | 0.00084  | -0.00027 | 1.33577  |

|     |          |          |          |          |          |          |
|-----|----------|----------|----------|----------|----------|----------|
| D26 | -2.85331 | 0.00001  | -0.00118 | 0.00111  | -0.00007 | -2.85339 |
| D27 | -0.80129 | 0.00001  | -0.00126 | 0.00115  | -0.00011 | -0.80140 |
| D28 | -1.76587 | -0.00005 | -0.00110 | 0.00088  | -0.00022 | -1.76609 |
| D29 | 0.32796  | 0.00001  | -0.00117 | 0.00115  | -0.00002 | 0.32794  |
| D30 | 2.37999  | 0.00001  | -0.00125 | 0.00120  | -0.00006 | 2.37993  |
| D31 | -1.10749 | 0.00006  | -0.00041 | 0.00126  | 0.00085  | -1.10664 |
| D32 | 0.93636  | 0.00008  | -0.00071 | 0.00145  | 0.00075  | 0.93711  |
| D33 | 3.10812  | 0.00014  | -0.00041 | 0.00141  | 0.00100  | 3.10912  |
| D34 | 3.10250  | -0.00003 | -0.00018 | 0.00086  | 0.00068  | 3.10318  |
| D35 | -1.13684 | -0.00001 | -0.00047 | 0.00105  | 0.00058  | -1.13626 |
| D36 | 1.03492  | 0.00005  | -0.00018 | 0.00101  | 0.00083  | 1.03575  |
| D37 | 1.00732  | -0.00001 | -0.00015 | 0.00087  | 0.00072  | 1.00803  |
| D38 | 3.05117  | 0.00000  | -0.00045 | 0.00107  | 0.00061  | 3.05178  |
| D39 | -1.06026 | 0.00006  | -0.00016 | 0.00103  | 0.00087  | -1.05939 |
| D40 | 2.93729  | -0.00005 | 0.00023  | -0.00025 | -0.00002 | 2.93726  |
| D41 | -1.25255 | -0.00006 | 0.00086  | -0.00028 | 0.00058  | -1.25197 |
| D42 | 0.85943  | 0.00001  | 0.00035  | -0.00024 | 0.00011  | 0.85954  |
| D43 | 2.95278  | -0.00001 | 0.00098  | -0.00026 | 0.00072  | 2.95349  |
| D44 | -1.24056 | 0.00002  | 0.00025  | -0.00011 | 0.00014  | -1.24041 |
| D45 | 0.85279  | 0.00000  | 0.00089  | -0.00014 | 0.00075  | 0.85354  |
| D46 | 3.13848  | -0.00001 | 0.00003  | 0.00003  | 0.00006  | 3.13855  |
| D47 | -0.00457 | 0.00000  | -0.00011 | 0.00017  | 0.00006  | -0.00450 |
| D48 | -0.00458 | 0.00000  | -0.00030 | 0.00019  | -0.00010 | -0.00468 |
| D49 | 3.13556  | 0.00001  | -0.00044 | 0.00033  | -0.00011 | 3.13545  |
| D50 | 2.20634  | -0.00001 | 0.00223  | -0.00064 | 0.00158  | 2.20791  |
| D51 | -1.40604 | -0.00015 | -0.00155 | 0.00239  | 0.00085  | -1.40518 |
| D52 | -2.08891 | 0.00009  | 0.00285  | -0.00084 | 0.00200  | -2.08691 |
| D53 | 0.58190  | -0.00004 | -0.00093 | 0.00219  | 0.00127  | 0.58317  |
| D54 | -2.71205 | 0.00000  | 0.00021  | -0.00037 | -0.00015 | -2.71221 |
| D55 | -0.01657 | 0.00003  | -0.00006 | -0.00019 | -0.00025 | -0.01681 |
| D56 | -0.02438 | -0.00006 | 0.00031  | -0.00041 | -0.00010 | -0.02448 |
| D57 | 2.67110  | -0.00004 | 0.00004  | -0.00024 | -0.00019 | 2.67091  |
| D58 | 0.54538  | -0.00007 | -0.00522 | -0.00226 | -0.00750 | 0.53787  |
| D59 | -1.87624 | 0.00005  | -0.00534 | -0.00187 | -0.00724 | -1.88347 |
| D60 | 1.81461  | -0.00005 | -0.00152 | -0.00418 | -0.00572 | 1.80890  |
| D61 | -0.60694 | -0.00013 | -0.00096 | -0.00418 | -0.00516 | -0.61209 |
| D62 | 2.55379  | -0.00001 | -0.00070 | -0.00046 | -0.00116 | 2.55263  |
| D63 | -1.65526 | 0.00000  | -0.00083 | -0.00045 | -0.00128 | -1.65654 |
| D64 | 0.44435  | 0.00000  | -0.00078 | -0.00039 | -0.00117 | 0.44317  |
| D65 | 1.34790  | 0.00001  | -0.00090 | -0.00044 | -0.00134 | 1.34656  |
| D66 | -2.86115 | 0.00002  | -0.00103 | -0.00043 | -0.00146 | -2.86261 |
| D67 | -0.76154 | 0.00002  | -0.00098 | -0.00037 | -0.00135 | -0.76289 |
| D68 | -1.04016 | -0.00001 | -0.00073 | -0.00029 | -0.00102 | -1.04118 |
| D69 | 1.03398  | 0.00000  | -0.00086 | -0.00028 | -0.00114 | 1.03284  |

D70            3.13358    0.00000   -0.00081   -0.00022   -0.00103    3.13255

| Item                 | Value    | Threshold | Converged? |
|----------------------|----------|-----------|------------|
| Maximum Force        | 0.000286 | 0.000450  | YES        |
| RMS Force            | 0.000059 | 0.000300  | YES        |
| Maximum Displacement | 0.020954 | 0.001800  | NO         |
| RMS Displacement     | 0.003614 | 0.001200  | NO         |

Predicted change in Energy=-1.013123D-06

GradGradGradGradGradGradGradGradGradGradGradGradGradGradGradGradGradGradGrad

Input orientation:

| Center Number | Atomic Number | Atomic Type | Coordinates (Angstroms) |           |           |
|---------------|---------------|-------------|-------------------------|-----------|-----------|
|               |               |             | X                       | Y         | Z         |
| 1             | 6             | 0           | -2.642352               | 2.099769  | -0.187155 |
| 2             | 6             | 0           | -3.530684               | 1.114984  | 0.101750  |
| 3             | 7             | 0           | -2.819520               | -0.078338 | 0.111170  |
| 4             | 6             | 0           | -1.529415               | 0.186137  | -0.167287 |
| 5             | 7             | 0           | -1.402597               | 1.500583  | -0.354865 |
| 6             | 6             | 0           | -0.131663               | 2.187806  | -0.645976 |
| 7             | 6             | 0           | 0.455551                | 2.873345  | 0.592840  |
| 8             | 1             | 0           | -2.784733               | 3.160972  | -0.296801 |
| 9             | 1             | 0           | -4.588211               | 1.162827  | 0.286644  |
| 10            | 1             | 0           | 0.568340                | 1.433055  | -1.004433 |
| 11            | 1             | 0           | -0.308549               | 2.915029  | -1.439503 |
| 12            | 1             | 0           | -0.223040               | 3.660693  | 0.937718  |
| 13            | 1             | 0           | 0.532120                | 2.127110  | 1.397978  |
| 14            | 35            | 0           | 0.137941                | -2.664751 | -0.308557 |
| 15            | 1             | 0           | -0.753903               | -0.601512 | -0.237153 |
| 16            | 6             | 0           | -3.289937               | -1.404984 | 0.352532  |
| 17            | 6             | 0           | -4.541593               | -1.696146 | 0.680951  |
| 18            | 1             | 0           | -2.493901               | -2.138137 | 0.234149  |
| 19            | 1             | 0           | -4.810957               | -2.730861 | 0.842825  |
| 20            | 1             | 0           | -5.324106               | -0.956661 | 0.801169  |
| 21            | 7             | 0           | 1.723783                | 3.479551  | 0.206906  |
| 22            | 1             | 0           | 2.065776                | 4.105062  | 0.926668  |
| 23            | 1             | 0           | 2.420635                | 2.753342  | 0.054880  |
| 24            | 6             | 0           | 3.328978                | -0.411772 | -1.125595 |
| 25            | 6             | 0           | 3.253966                | -0.571565 | 0.327921  |
| 26            | 8             | 0           | 2.727950                | 0.623375  | -0.311176 |
| 27            | 1             | 0           | 4.271985                | -0.126399 | -1.585557 |
| 28            | 1             | 0           | 2.628505                | -0.964585 | -1.744236 |
| 29            | 1             | 0           | 2.466827                | -1.231056 | 0.687569  |
| 30            | 6             | 0           | 4.444490                | -0.376441 | 1.225823  |

|    |   |   |          |           |          |
|----|---|---|----------|-----------|----------|
| 31 | 1 | 0 | 4.139890 | 0.043740  | 2.189014 |
| 32 | 1 | 0 | 4.924789 | -1.340099 | 1.420947 |
| 33 | 1 | 0 | 5.178750 | 0.293294  | 0.771056 |

-----  
Distance matrix (angstroms):

|    |    | 1        | 2        | 3        | 4        | 5        |
|----|----|----------|----------|----------|----------|----------|
| 1  | C  | 0.000000 |          |          |          |          |
| 2  | C  | 1.357350 | 0.000000 |          |          |          |
| 3  | N  | 2.205569 | 1.389194 | 0.000000 |          |          |
| 4  | C  | 2.213823 | 2.222660 | 1.346052 | 0.000000 |          |
| 5  | N  | 1.387135 | 2.210416 | 2.172062 | 1.333806 | 0.000000 |
| 6  | C  | 2.553787 | 3.641893 | 3.596283 | 2.487877 | 1.473870 |
| 7  | C  | 3.286916 | 4.384413 | 4.435147 | 3.426218 | 2.497065 |
| 8  | H  | 1.076312 | 2.213899 | 3.265085 | 3.231446 | 2.161149 |
| 9  | H  | 2.211043 | 1.074635 | 2.167845 | 3.242871 | 3.267071 |
| 10 | H  | 3.379496 | 4.257558 | 3.873819 | 2.579960 | 2.076316 |
| 11 | H  | 2.771221 | 3.999722 | 4.203547 | 3.248984 | 2.091420 |
| 12 | H  | 3.091099 | 4.256757 | 4.626579 | 3.873008 | 2.779964 |
| 13 | H  | 3.548332 | 4.383033 | 4.213474 | 3.235329 | 2.684795 |
| 14 | Br | 5.517737 | 5.283329 | 3.951239 | 3.305692 | 4.441330 |
| 15 | H  | 3.296309 | 3.282031 | 2.159124 | 1.107560 | 2.203058 |
| 16 | C  | 3.604708 | 2.543834 | 1.428124 | 2.429263 | 3.536211 |
| 17 | C  | 4.332401 | 3.043003 | 2.430533 | 3.651810 | 4.598402 |
| 18 | H  | 4.261382 | 3.416906 | 2.089001 | 2.548261 | 3.844238 |
| 19 | H  | 5.394320 | 4.120536 | 3.396619 | 4.505299 | 5.563857 |
| 20 | H  | 4.184537 | 2.827944 | 2.742353 | 4.079654 | 4.769979 |
| 21 | N  | 4.595891 | 5.762955 | 5.771424 | 4.644340 | 3.742479 |
| 22 | H  | 5.237201 | 6.398548 | 6.483208 | 5.429559 | 4.522748 |
| 23 | H  | 5.110731 | 6.172893 | 5.956577 | 4.716227 | 4.044057 |
| 24 | C  | 6.545632 | 7.133886 | 6.280510 | 4.987969 | 5.161292 |
| 25 | C  | 6.493681 | 6.994789 | 6.097334 | 4.868272 | 5.142331 |
| 26 | O  | 5.570930 | 6.291477 | 5.607603 | 4.282177 | 4.222893 |
| 27 | H  | 7.397257 | 8.078965 | 7.291820 | 5.980419 | 6.030137 |
| 28 | H  | 6.292591 | 6.757802 | 5.823139 | 4.593390 | 4.925159 |
| 29 | H  | 6.161432 | 6.466624 | 5.441182 | 4.325410 | 4.849842 |
| 30 | C  | 7.638812 | 8.190927 | 7.355077 | 6.159934 | 6.341153 |
| 31 | H  | 7.474774 | 8.021343 | 7.264003 | 6.141128 | 6.269998 |
| 32 | H  | 8.466422 | 8.902962 | 7.954991 | 6.819724 | 7.159525 |
| 33 | H  | 8.084006 | 8.773675 | 8.034045 | 6.774322 | 6.785231 |
|    |    | 6        | 7        | 8        | 9        | 10       |
| 6  | C  | 0.000000 |          |          |          |          |
| 7  | C  | 1.532792 | 0.000000 |          |          |          |
| 8  | H  | 2.847413 | 3.372482 | 0.000000 |          |          |
| 9  | H  | 4.667032 | 5.334714 | 2.754183 | 0.000000 |          |

|    |    |          |          |          |          |          |
|----|----|----------|----------|----------|----------|----------|
| 10 | H  | 1.090020 | 2.153703 | 3.837908 | 5.322586 | 0.000000 |
| 11 | H  | 1.090792 | 2.171636 | 2.738201 | 4.936123 | 1.776081 |
| 12 | H  | 2.164679 | 1.095146 | 2.887218 | 5.071287 | 3.059510 |
| 13 | H  | 2.149893 | 1.100444 | 3.865573 | 5.327541 | 2.500920 |
| 14 | Br | 4.871740 | 5.619956 | 6.517762 | 6.110740 | 4.178697 |
| 15 | H  | 2.886973 | 3.771776 | 4.275993 | 4.253137 | 2.544898 |
| 16 | C  | 4.886702 | 5.691268 | 4.639485 | 2.878109 | 4.978165 |
| 17 | C  | 6.024393 | 6.771962 | 5.256820 | 2.886413 | 6.224455 |
| 18 | H  | 5.006852 | 5.826052 | 5.333578 | 3.909636 | 4.864650 |
| 19 | H  | 6.950223 | 7.694526 | 6.333879 | 3.939513 | 7.048929 |
| 20 | H  | 6.240462 | 6.936627 | 4.960731 | 2.301849 | 6.609982 |
| 21 | N  | 2.416339 | 1.457684 | 4.547739 | 6.724198 | 2.643962 |
| 22 | H  | 3.313279 | 2.054602 | 5.090738 | 7.303555 | 3.620923 |
| 23 | H  | 2.706521 | 2.040920 | 5.233135 | 7.190784 | 2.509243 |
| 24 | C  | 4.354753 | 4.690586 | 7.129437 | 8.194857 | 3.322528 |
| 25 | C  | 4.474940 | 4.446202 | 7.126570 | 8.031785 | 3.606419 |
| 26 | O  | 3.276724 | 3.323162 | 6.068714 | 7.360341 | 2.408341 |
| 27 | H  | 5.062654 | 5.320624 | 7.890816 | 9.147148 | 4.060368 |
| 28 | H  | 4.331544 | 4.991329 | 6.958336 | 7.793033 | 3.246578 |
| 29 | H  | 4.496567 | 4.571686 | 6.916486 | 7.460897 | 3.683017 |
| 30 | C  | 5.569575 | 5.183957 | 8.191052 | 9.210923 | 4.824195 |
| 31 | H  | 5.557010 | 4.912107 | 7.990421 | 9.002840 | 4.988414 |
| 32 | H  | 6.502768 | 6.197819 | 9.091041 | 9.901942 | 5.705392 |
| 33 | H  | 5.813573 | 5.384889 | 8.531175 | 9.817549 | 5.070236 |
|    |    | 11       | 12       | 13       | 14       | 15       |
| 11 | H  | 0.000000 |          |          |          |          |
| 12 | H  | 2.492891 | 0.000000 |          |          |          |
| 13 | H  | 3.062488 | 1.770305 | 0.000000 |          |          |
| 14 | Br | 5.710721 | 6.457147 | 5.101919 | 0.000000 |          |
| 15 | H  | 3.742999 | 4.452923 | 3.431163 | 2.248876 | 0.000000 |
| 16 | C  | 5.546402 | 5.950578 | 5.308179 | 3.711388 | 2.724842 |
| 17 | C  | 6.608928 | 6.885605 | 6.393276 | 4.880099 | 4.048177 |
| 18 | H  | 5.754247 | 6.267236 | 5.357577 | 2.738329 | 2.368742 |
| 19 | H  | 7.573426 | 7.868287 | 7.242689 | 5.081500 | 4.707459 |
| 20 | H  | 6.720596 | 6.881822 | 6.645390 | 5.829497 | 4.700107 |
| 21 | N  | 2.675765 | 2.087347 | 2.160512 | 6.366557 | 4.794913 |
| 22 | H  | 3.557016 | 2.331580 | 2.546867 | 7.146517 | 5.608645 |
| 23 | H  | 3.115729 | 2.931161 | 2.400535 | 5.890545 | 4.627961 |
| 24 | C  | 4.939407 | 5.784381 | 4.542770 | 3.990762 | 4.182732 |
| 25 | C  | 5.288821 | 5.511209 | 3.979487 | 3.807380 | 4.047619 |
| 26 | O  | 3.968013 | 4.415130 | 3.162925 | 4.185682 | 3.691765 |
| 27 | H  | 5.500264 | 6.396423 | 5.288324 | 5.016401 | 5.225273 |
| 28 | H  | 4.875505 | 6.059487 | 4.881283 | 3.339858 | 3.720727 |
| 29 | H  | 5.423759 | 5.588128 | 3.940185 | 2.910577 | 3.409478 |

|    |   |          |          |          |           |           |
|----|---|----------|----------|----------|-----------|-----------|
| 30 | C | 6.366248 | 6.177968 | 4.648015 | 5.112440  | 5.405020  |
| 31 | H | 6.418648 | 5.803728 | 4.240540 | 5.439612  | 5.500168  |
| 32 | H | 7.326398 | 7.193161 | 5.596214 | 5.259258  | 5.961740  |
| 33 | H | 6.470742 | 6.367612 | 5.034589 | 5.943513  | 6.083874  |
|    |   | 16       | 17       | 18       | 19        | 20        |
| 16 | C | 0.000000 |          |          |           |           |
| 17 | C | 1.326378 | 0.000000 |          |           |           |
| 18 | H | 1.088670 | 2.141969 | 0.000000 |           |           |
| 19 | H | 2.076497 | 1.081385 | 2.467905 | 0.000000  |           |
| 20 | H | 2.130754 | 1.083337 | 3.118888 | 1.847389  | 0.000000  |
| 21 | N | 7.001234 | 8.140485 | 7.024815 | 9.037502  | 8.349004  |
| 22 | H | 7.705446 | 8.796120 | 7.761944 | 9.696717  | 8.958077  |
| 23 | H | 7.070425 | 8.286286 | 6.936236 | 9.110064  | 8.619866  |
| 24 | C | 6.854296 | 8.176743 | 6.223758 | 8.689729  | 8.881734  |
| 25 | C | 6.596807 | 7.884165 | 5.958264 | 8.364847  | 8.599743  |
| 26 | O | 6.385117 | 7.694853 | 5.932206 | 8.331731  | 8.280667  |
| 27 | H | 7.910350 | 9.234735 | 7.289419 | 9.756029  | 9.923244  |
| 28 | H | 6.294311 | 7.604409 | 5.615183 | 8.072064  | 8.350041  |
| 29 | H | 5.769128 | 7.023839 | 5.063320 | 7.432339  | 7.796592  |
| 30 | C | 7.851235 | 9.098802 | 7.226912 | 9.557891  | 9.795022  |
| 31 | H | 7.789339 | 8.981627 | 7.251846 | 9.467223  | 9.617388  |
| 32 | H | 8.284169 | 9.501935 | 7.555284 | 9.851558  | 10.274775 |
| 33 | H | 8.647425 | 9.922251 | 8.066579 | 10.437667 | 10.577016 |
|    |   | 21       | 22       | 23       | 24        | 25        |
| 21 | N | 0.000000 |          |          |           |           |
| 22 | H | 1.013055 | 0.000000 |          |           |           |
| 23 | H | 1.017887 | 1.647145 | 0.000000 |           |           |
| 24 | C | 4.415270 | 5.119498 | 3.498079 | 0.000000  |           |
| 25 | C | 4.332164 | 4.862215 | 3.438605 | 1.464196  | 0.000000  |
| 26 | O | 3.071563 | 3.754048 | 2.182934 | 1.447772  | 1.453623  |
| 27 | H | 4.765410 | 5.392949 | 3.796240 | 1.087320  | 2.212676  |
| 28 | H | 4.937188 | 5.757753 | 4.135579 | 1.085809  | 2.199886  |
| 29 | H | 4.793013 | 5.356507 | 4.034583 | 2.168431  | 1.088054  |
| 30 | C | 4.827952 | 5.082484 | 3.906743 | 2.602841  | 1.503878  |
| 31 | H | 4.644473 | 4.731787 | 3.853870 | 3.442630  | 2.151077  |
| 32 | H | 5.911798 | 6.169931 | 4.989307 | 3.145358  | 2.139392  |
| 33 | H | 4.733634 | 4.923860 | 3.764564 | 2.741543  | 2.156187  |
|    |   | 26       | 27       | 28       | 29        | 30        |
| 26 | O | 0.000000 |          |          |           |           |
| 27 | H | 2.137815 | 0.000000 |          |           |           |
| 28 | H | 2.141301 | 1.851691 | 0.000000 |           |           |
| 29 | H | 2.122403 | 3.105795 | 2.451698 | 0.000000  |           |
| 30 | C | 2.511674 | 2.827745 | 3.530576 | 2.220638  | 0.000000  |
| 31 | H | 2.929249 | 3.780712 | 4.332605 | 2.584295  | 1.094107  |

```

32 H  3.417832  3.307308  3.928398  2.567355  1.094256
33 H  2.699369  2.559686  3.796406  3.112095  1.092930
      31      32      33
31 H  0.000000
32 H  1.766636  0.000000
33 H  1.775418  1.776183  0.000000

```

Stoichiometry C10H18BrN3O

Framework group C1[X(C10H18BrN3O)]

Deg. of freedom 93

Full point group C1 NOp 1

Largest Abelian subgroup C1 NOp 1

Largest concise Abelian subgroup C1 NOp 1

Standard orientation:

| Center<br>Number | Atomic<br>Number | Atomic<br>Type | Coordinates (Angstroms) |           |           |
|------------------|------------------|----------------|-------------------------|-----------|-----------|
|                  |                  |                | X                       | Y         | Z         |
| 1                | 6                | 0              | -2.347698               | 2.470637  | -0.264148 |
| 2                | 6                | 0              | -3.331816               | 1.590370  | 0.050560  |
| 3                | 7                | 0              | -2.744368               | 0.332676  | 0.105050  |
| 4                | 6                | 0              | -1.433034               | 0.456698  | -0.172219 |
| 5                | 7                | 0              | -1.173820               | 1.744665  | -0.402412 |
| 6                | 6                | 0              | 0.161027                | 2.290552  | -0.706524 |
| 7                | 6                | 0              | 0.808990                | 2.955183  | 0.513254  |
| 8                | 1                | 0              | -2.382123               | 3.536454  | -0.410085 |
| 9                | 1                | 0              | -4.379937               | 1.750388  | 0.225709  |
| 10               | 1                | 0              | 0.783051                | 1.457634  | -1.034360 |
| 11               | 1                | 0              | 0.061563                | 3.004595  | -1.525106 |
| 12               | 1                | 0              | 0.211605                | 3.817906  | 0.826599  |
| 13               | 1                | 0              | 0.806684                | 2.232702  | 1.343310  |
| 14               | 35               | 0              | -0.060386               | -2.550343 | -0.205963 |
| 15               | 1                | 0              | -0.740415               | -0.406750 | -0.209963 |
| 16               | 6                | 0              | -3.346890               | -0.931100 | 0.386786  |
| 17               | 6                | 0              | -4.622867               | -1.083831 | 0.715167  |
| 18               | 1                | 0              | -2.628162               | -1.744063 | 0.298898  |
| 19               | 1                | 0              | -4.995649               | -2.080197 | 0.909289  |
| 20               | 1                | 0              | -5.327510               | -0.265867 | 0.804782  |
| 21               | 7                | 0              | 2.133398                | 3.417574  | 0.117047  |
| 22               | 1                | 0              | 2.533541                | 4.029576  | 0.818202  |
| 23               | 1                | 0              | 2.754286                | 2.620337  | -0.005451 |
| 24               | 6                | 0              | 3.344560                | -0.658108 | -1.073127 |
| 25               | 6                | 0              | 3.247705                | -0.760291 | 0.384284  |
| 26               | 8                | 0              | 2.847290                | 0.459118  | -0.298160 |
| 27               | 1                | 0              | 4.313430                | -0.484592 | -1.535131 |



|    |   |   |          |           |           |
|----|---|---|----------|-----------|-----------|
| 28 | 1 | 0 | 2.594645 | -1.158404 | -1.678365 |
| 29 | 1 | 0 | 2.396694 | -1.324863 | 0.759653  |
| 30 | 6 | 0 | 4.448011 | -0.655428 | 1.284238  |
| 31 | 1 | 0 | 4.183162 | -0.174439 | 2.230585  |
| 32 | 1 | 0 | 4.828090 | -1.655286 | 1.514932  |
| 33 | 1 | 0 | 5.247845 | -0.078578 | 0.813062  |

-----

Rotational constants (GHZ): 0.4203458 0.2930674 0.1830775  
Standard basis: 6-311++G(d,p) (5D, 7F)  
There are 499 symmetry adapted cartesian basis functions of A symmetry.  
There are 482 symmetry adapted basis functions of A symmetry.  
482 basis functions, 760 primitive gaussians, 499 cartesian basis functions  
71 alpha electrons 71 beta electrons  
nuclear repulsion energy 1313.2470813779 Hartrees.  
NAtoms= 33 NActive= 33 NUniq= 33 SFac= 1.00D+00 NATFMM= 60 NAOKFM=F  
Big=F  
Integral buffers will be 131072 words long.  
Raffenetti 2 integral format.  
Two-electron integral symmetry is turned on.  
One-electron integrals computed using PRISM.  
NBasis= 482 RedAO= T EigKep= 3.66D-06 NBF= 482  
NBsUse= 482 1.00D-06 EigRej= -1.00D+00 NBFU= 482  
Initial guess from the checkpoint file:  
"/home/suqian/liuwen/qianmengshijie/nh2po/nh2po.chk"  
B after Tr= 0.000000 0.000000 0.000000  
Rot= 1.000000 0.000238 -0.000008 0.000443 Ang= 0.06 deg.  
ExpMin= 3.50D-02 ExpMax= 4.40D+05 ExpMxC= 1.51D+04 IAcc=3 IRadAn= 5 AccDes=  
0.00D+00  
Harris functional with IExCor= 402 and IRadAn= 5 diagonalized for initial guess.  
HarFok: IExCor= 402 AccDes= 0.00D+00 IRadAn= 5 IDoV= 1 UseB2=F ITyADJ=14  
ICtDFT= 3500011 ScaDFX= 1.000000 1.000000 1.000000 1.000000  
FoFCou: FMM=F IPFlag= 0 FMFlag= 100000 FMFlg1= 0  
NFxFlg= 0 DoJE=T BraDBF=F KetDBF=T FulRan=T  
wScrn= 0.000000 ICntrl= 500 IOpCl= 0 I1Cent= 20000004 NGrid=  
0  
NMat0= 1 NMatS0= 1 NMatT0= 0 NMatD0= 1 NMtDS0= 0  
NMtDT0= 0  
Petite list used in FoFCou.  
Requested convergence on RMS density matrix=1.00D-08 within 128 cycles.  
Requested convergence on MAX density matrix=1.00D-06.  
Requested convergence on energy=1.00D-06.  
No special actions if energy rises.  
SCF Done: E(RB3LYP) = -3205.64837289 A.U. after 9 cycles  
NFock= 9 Conv=0.38D-08 -V/T= 2.0018



Berny optimization.

Using GEDIIS/GDIIS optimizer.

FormGI is forming the generalized inverse of G from B-inverse, IUseBI=4.

GSVD: received Info= 1 from GESDD.

Internal Forces: Max 0.000305971 RMS 0.000058429

Search for a local minimum.

Step number 42 out of a maximum of 172

All quantities printed in internal units (Hartrees-Bohrs-Radians)

Mixed Optimization -- En-DIIS/RFO-DIIS

Swapping is turned off.

Update second derivatives using D2CorX and points 31 32 33 34 35  
36 37 38 39 40  
41 42

DE= -1.93D-06 DEPred=-1.01D-06 R= 1.91D+00

TightC=F SS= 1.41D+00 RLast= 1.75D-02 DXNew= 1.7446D+00 5.2538D-02

Trust test= 1.91D+00 RLast= 1.75D-02 DXMaxT set to 1.04D+00

ITU= 1 1 1 1 1 1 1 1 1 1 1 1 1 1 0 0-1 1

ITU=-1 1 1 1 1 1 1 1 1 0-1-1 1 1 1-1 1 0 0

ITU=-1 0

|                 |         |         |         |         |         |
|-----------------|---------|---------|---------|---------|---------|
| Eigenvalues --- | 0.00064 | 0.00097 | 0.00203 | 0.00221 | 0.00483 |
| Eigenvalues --- | 0.00657 | 0.00750 | 0.00767 | 0.01315 | 0.01439 |
| Eigenvalues --- | 0.01895 | 0.02056 | 0.02169 | 0.02353 | 0.02380 |
| Eigenvalues --- | 0.02632 | 0.02734 | 0.02875 | 0.03060 | 0.03091 |
| Eigenvalues --- | 0.03166 | 0.03545 | 0.03634 | 0.03973 | 0.04224 |
| Eigenvalues --- | 0.04294 | 0.04508 | 0.04672 | 0.05498 | 0.05606 |
| Eigenvalues --- | 0.05744 | 0.05774 | 0.05916 | 0.07770 | 0.08690 |
| Eigenvalues --- | 0.08900 | 0.09548 | 0.10018 | 0.11325 | 0.12484 |
| Eigenvalues --- | 0.12794 | 0.13100 | 0.14602 | 0.15766 | 0.15995 |
| Eigenvalues --- | 0.16001 | 0.16002 | 0.16011 | 0.16027 | 0.16130 |
| Eigenvalues --- | 0.16396 | 0.19591 | 0.21335 | 0.21791 | 0.22358 |
| Eigenvalues --- | 0.23153 | 0.23463 | 0.25141 | 0.26202 | 0.28016 |
| Eigenvalues --- | 0.29103 | 0.30044 | 0.30363 | 0.31943 | 0.32471 |
| Eigenvalues --- | 0.33684 | 0.34286 | 0.34345 | 0.34398 | 0.34550 |
| Eigenvalues --- | 0.34701 | 0.34729 | 0.35102 | 0.35212 | 0.35341 |
| Eigenvalues --- | 0.35568 | 0.35763 | 0.35846 | 0.35905 | 0.36419 |
| Eigenvalues --- | 0.36631 | 0.39567 | 0.40776 | 0.41882 | 0.42477 |
| Eigenvalues --- | 0.44864 | 0.45509 | 0.46485 | 0.49591 | 0.54878 |
| Eigenvalues --- | 0.58212 | 0.60633 | 1.18260 |         |         |

En-DIIS/RFO-DIIS IScMMF= 0 using points: 42 41 40 39 38

RFO step: Lambda=-8.37715819D-07.

DidBck=F Rises=F RFO-DIIS coefs: 2.59493 -1.31482 -0.89041 0.49039

0.11991

Iteration 1 RMS(Cart)= 0.00848796 RMS(Int)= 0.00004075

Iteration 2 RMS(Cart)= 0.00008762 RMS(Int)= 0.00001359

| Iteration | 3 RMS(Cart)= | 0.00000001 | RMS(Int)= | 0.00001359 |          |         |
|-----------|--------------|------------|-----------|------------|----------|---------|
| Variable  | Old X        | -DE/DX     | Delta X   | Delta X    | Delta X  | New X   |
|           |              |            | (Linear)  | (Quad)     | (Total)  |         |
| R1        | 2.56502      | -0.00003   | -0.00001  | 0.00001    | 0.00000  | 2.56502 |
| R2        | 2.62130      | 0.00002    | 0.00001   | 0.00001    | 0.00002  | 2.62132 |
| R3        | 2.03393      | 0.00000    | 0.00000   | 0.00000    | 0.00000  | 2.03393 |
| R4        | 2.62520      | -0.00003   | -0.00007  | 0.00002    | -0.00005 | 2.62514 |
| R5        | 2.03077      | -0.00001   | 0.00000   | -0.00001   | -0.00001 | 2.03075 |
| R6        | 2.54367      | -0.00002   | 0.00005   | -0.00007   | -0.00002 | 2.54365 |
| R7        | 2.69876      | 0.00002    | 0.00014   | -0.00001   | 0.00013  | 2.69889 |
| R8        | 2.52053      | 0.00008    | -0.00005  | -0.00003   | -0.00008 | 2.52045 |
| R9        | 2.09299      | 0.00000    | -0.00028  | 0.00000    | -0.00028 | 2.09271 |
| R10       | 2.78521      | 0.00007    | 0.00005   | -0.00004   | 0.00001  | 2.78522 |
| R11       | 2.89656      | 0.00000    | 0.00007   | -0.00011   | -0.00004 | 2.89652 |
| R12       | 2.05984      | 0.00001    | 0.00009   | -0.00004   | 0.00005  | 2.05989 |
| R13       | 2.06130      | 0.00000    | 0.00002   | 0.00000    | 0.00001  | 2.06131 |
| R14       | 2.06953      | 0.00000    | 0.00003   | -0.00001   | 0.00003  | 2.06955 |
| R15       | 2.07954      | -0.00003   | 0.00010   | -0.00006   | 0.00004  | 2.07958 |
| R16       | 2.75462      | 0.00015    | -0.00035  | 0.00022    | -0.00013 | 2.75449 |
| R17       | 4.24976      | -0.00006   | 0.00214   | -0.00073   | 0.00141  | 4.25117 |
| R18       | 2.50649      | 0.00000    | 0.00000   | 0.00000    | 0.00000  | 2.50649 |
| R19       | 2.05729      | -0.00003   | -0.00002  | -0.00004   | -0.00006 | 2.05723 |
| R20       | 2.04352      | 0.00000    | 0.00001   | -0.00001   | 0.00000  | 2.04352 |
| R21       | 2.04721      | -0.00001   | -0.00002  | -0.00001   | -0.00003 | 2.04718 |
| R22       | 1.91440      | 0.00003    | -0.00002  | 0.00004    | 0.00002  | 1.91442 |
| R23       | 1.92353      | 0.00010    | -0.00009  | 0.00004    | -0.00006 | 1.92347 |
| R24       | 4.12515      | 0.00004    | 0.00385   | 0.00160    | 0.00546  | 4.13060 |
| R25       | 2.76693      | -0.00003   | -0.00035  | -0.00003   | -0.00036 | 2.76657 |
| R26       | 2.73589      | -0.00002   | -0.00006  | -0.00010   | -0.00017 | 2.73572 |
| R27       | 2.05474      | 0.00004    | 0.00014   | 0.00002    | 0.00016  | 2.05490 |
| R28       | 2.05188      | -0.00001   | 0.00002   | 0.00001    | 0.00002  | 2.05190 |
| R29       | 2.74695      | 0.00008    | 0.00005   | 0.00026    | 0.00031  | 2.74726 |
| R30       | 2.05612      | 0.00000    | -0.00005  | 0.00001    | -0.00005 | 2.05608 |
| R31       | 2.84192      | 0.00001    | 0.00016   | -0.00002   | 0.00014  | 2.84206 |
| R32       | 2.06756      | 0.00000    | -0.00003  | 0.00003    | 0.00000  | 2.06756 |
| R33       | 2.06784      | 0.00001    | 0.00001   | -0.00001   | 0.00000  | 2.06784 |
| R34       | 2.06534      | 0.00001    | 0.00000   | -0.00001   | -0.00001 | 2.06533 |
| A1        | 1.87262      | 0.00003    | -0.00008  | 0.00003    | -0.00005 | 1.87257 |
| A2        | 2.27896      | 0.00001    | 0.00013   | 0.00003    | 0.00016  | 2.27912 |
| A3        | 2.13153      | -0.00004   | -0.00004  | -0.00006   | -0.00010 | 2.13143 |
| A4        | 1.86464      | -0.00001   | 0.00007   | -0.00005   | 0.00002  | 1.86466 |
| A5        | 2.27623      | -0.00002   | -0.00008  | -0.00002   | -0.00010 | 2.27613 |
| A6        | 2.14225      | 0.00003    | 0.00000   | 0.00007    | 0.00008  | 2.14232 |
| A7        | 1.89702      | 0.00004    | -0.00002  | 0.00002    | 0.00000  | 1.89702 |

|     |         |          |          |          |          |         |
|-----|---------|----------|----------|----------|----------|---------|
| A8  | 2.25298 | 0.00000  | -0.00027 | 0.00011  | -0.00015 | 2.25282 |
| A9  | 2.13316 | -0.00004 | 0.00029  | -0.00014 | 0.00015  | 2.13331 |
| A10 | 1.89004 | -0.00003 | -0.00004 | 0.00003  | -0.00001 | 1.89004 |
| A11 | 2.14649 | -0.00006 | 0.00028  | 0.00021  | 0.00049  | 2.14698 |
| A12 | 2.24643 | 0.00009  | -0.00021 | -0.00022 | -0.00044 | 2.24599 |
| A13 | 1.90044 | -0.00003 | 0.00007  | -0.00003 | 0.00003  | 1.90048 |
| A14 | 2.20578 | -0.00019 | -0.00011 | 0.00001  | -0.00010 | 2.20568 |
| A15 | 2.17641 | 0.00022  | 0.00003  | 0.00001  | 0.00005  | 2.17646 |
| A16 | 1.95979 | 0.00009  | 0.00038  | -0.00006 | 0.00031  | 1.96010 |
| A17 | 1.87116 | 0.00004  | -0.00005 | 0.00003  | -0.00002 | 1.87114 |
| A18 | 1.89095 | -0.00008 | -0.00015 | 0.00018  | 0.00002  | 1.89097 |
| A19 | 1.90651 | -0.00004 | 0.00011  | -0.00027 | -0.00016 | 1.90635 |
| A20 | 1.93040 | -0.00004 | -0.00033 | 0.00003  | -0.00030 | 1.93010 |
| A21 | 1.90343 | 0.00003  | 0.00004  | 0.00010  | 0.00014  | 1.90357 |
| A22 | 1.91631 | -0.00002 | -0.00008 | 0.00018  | 0.00009  | 1.91641 |
| A23 | 1.89093 | 0.00004  | 0.00018  | 0.00004  | 0.00021  | 1.89114 |
| A24 | 1.88108 | 0.00000  | -0.00028 | -0.00015 | -0.00043 | 1.88065 |
| A25 | 1.87574 | 0.00000  | -0.00015 | 0.00007  | -0.00008 | 1.87566 |
| A26 | 1.90022 | -0.00004 | -0.00010 | 0.00011  | 0.00001  | 1.90022 |
| A27 | 1.99894 | 0.00002  | 0.00044  | -0.00024 | 0.00020  | 1.99914 |
| A28 | 2.16109 | 0.00003  | -0.00020 | 0.00017  | -0.00003 | 2.16106 |
| A29 | 1.94589 | -0.00002 | 0.00007  | -0.00007 | -0.00001 | 1.94588 |
| A30 | 2.17621 | -0.00001 | 0.00014  | -0.00010 | 0.00004  | 2.17625 |
| A31 | 2.07392 | 0.00001  | 0.00006  | 0.00001  | 0.00008  | 2.07400 |
| A32 | 2.16429 | 0.00000  | -0.00006 | 0.00002  | -0.00004 | 2.16425 |
| A33 | 2.04497 | -0.00001 | 0.00000  | -0.00003 | -0.00004 | 2.04494 |
| A34 | 1.94162 | -0.00016 | 0.00023  | -0.00025 | -0.00003 | 1.94159 |
| A35 | 1.91609 | 0.00031  | 0.00049  | -0.00008 | 0.00040  | 1.91649 |
| A36 | 1.89180 | -0.00010 | 0.00024  | -0.00010 | 0.00014  | 1.89194 |
| A37 | 2.08635 | 0.00004  | -0.00043 | 0.00012  | -0.00037 | 2.08598 |
| A38 | 2.06802 | 0.00003  | 0.00096  | -0.00005 | 0.00097  | 2.06899 |
| A39 | 1.99364 | 0.00003  | -0.00004 | 0.00015  | 0.00012  | 1.99376 |
| A40 | 2.00062 | 0.00001  | 0.00033  | 0.00014  | 0.00046  | 2.00108 |
| A41 | 2.03991 | -0.00009 | -0.00056 | -0.00023 | -0.00079 | 2.03912 |
| A42 | 2.01678 | -0.00006 | 0.00087  | -0.00037 | 0.00052  | 2.01730 |
| A43 | 2.13884 | -0.00004 | -0.00016 | 0.00004  | -0.00015 | 2.13870 |
| A44 | 1.96253 | -0.00006 | -0.00002 | -0.00017 | -0.00021 | 1.96233 |
| A45 | 2.02897 | 0.00000  | 0.00037  | -0.00008 | 0.00032  | 2.02929 |
| A46 | 2.04203 | 0.00011  | -0.00069 | 0.00038  | -0.00031 | 2.04172 |
| A47 | 2.58758 | 0.00006  | 0.01014  | 0.00383  | 0.01395  | 2.60153 |
| A48 | 2.46437 | -0.00001 | -0.01030 | -0.00386 | -0.01410 | 2.45027 |
| A49 | 1.93377 | -0.00001 | -0.00033 | 0.00016  | -0.00017 | 1.93360 |
| A50 | 1.91737 | 0.00000  | -0.00001 | -0.00006 | -0.00008 | 1.91729 |
| A51 | 1.94219 | 0.00002  | 0.00018  | -0.00003 | 0.00015  | 1.94234 |

|     |          |          |          |          |          |          |
|-----|----------|----------|----------|----------|----------|----------|
| A52 | 1.87908  | 0.00001  | 0.00004  | 0.00003  | 0.00007  | 1.87915  |
| A53 | 1.89443  | -0.00001 | 0.00008  | -0.00003 | 0.00005  | 1.89448  |
| A54 | 1.89544  | -0.00001 | 0.00004  | -0.00006 | -0.00003 | 1.89541  |
| A55 | 3.49205  | 0.00017  | -0.00064 | -0.00059 | -0.00124 | 3.49082  |
| A56 | 2.52866  | 0.00023  | -0.00121 | 0.00195  | 0.00080  | 2.52946  |
| A57 | 2.98996  | -0.00007 | -0.00414 | -0.00244 | -0.00658 | 2.98339  |
| A58 | 3.11185  | 0.00000  | -0.00086 | -0.00213 | -0.00298 | 3.10886  |
| D1  | 0.00312  | 0.00000  | 0.00002  | 0.00017  | 0.00018  | 0.00330  |
| D2  | -3.12557 | 0.00000  | 0.00018  | 0.00002  | 0.00020  | -3.12537 |
| D3  | 3.13219  | 0.00000  | 0.00009  | 0.00021  | 0.00030  | 3.13249  |
| D4  | 0.00351  | 0.00001  | 0.00026  | 0.00006  | 0.00031  | 0.00382  |
| D5  | -0.00484 | 0.00001  | 0.00015  | -0.00004 | 0.00011  | -0.00473 |
| D6  | -3.11191 | 0.00001  | 0.00044  | 0.00025  | 0.00069  | -3.11122 |
| D7  | -3.13521 | 0.00001  | 0.00008  | -0.00008 | 0.00000  | -3.13520 |
| D8  | 0.04091  | 0.00000  | 0.00037  | 0.00021  | 0.00058  | 0.04149  |
| D9  | -0.00037 | -0.00001 | -0.00018 | -0.00024 | -0.00041 | -0.00078 |
| D10 | -3.13330 | 0.00001  | -0.00046 | 0.00005  | -0.00041 | -3.13371 |
| D11 | 3.12954  | -0.00001 | -0.00032 | -0.00010 | -0.00043 | 3.12912  |
| D12 | -0.00339 | 0.00000  | -0.00061 | 0.00018  | -0.00042 | -0.00381 |
| D13 | -0.00266 | 0.00002  | 0.00027  | 0.00021  | 0.00049  | -0.00217 |
| D14 | -3.12307 | 0.00001  | -0.00131 | -0.00043 | -0.00174 | -3.12480 |
| D15 | 3.13099  | 0.00000  | 0.00053  | -0.00005 | 0.00048  | 3.13147  |
| D16 | 0.01058  | -0.00001 | -0.00105 | -0.00069 | -0.00174 | 0.00884  |
| D17 | -0.05783 | 0.00001  | 0.00116  | 0.00193  | 0.00309  | -0.05474 |
| D18 | 3.08521  | 0.00000  | 0.00136  | 0.00178  | 0.00314  | 3.08834  |
| D19 | 3.09346  | 0.00003  | 0.00085  | 0.00225  | 0.00309  | 3.09655  |
| D20 | -0.04669 | 0.00002  | 0.00105  | 0.00209  | 0.00314  | -0.04355 |
| D21 | 0.00462  | -0.00002 | -0.00026 | -0.00011 | -0.00037 | 0.00425  |
| D22 | 3.11241  | -0.00002 | -0.00055 | -0.00039 | -0.00094 | 3.11147  |
| D23 | 3.12344  | -0.00002 | 0.00144  | 0.00059  | 0.00203  | 3.12548  |
| D24 | -0.05196 | -0.00002 | 0.00116  | 0.00031  | 0.00147  | -0.05049 |
| D25 | 1.33577  | -0.00003 | -0.00059 | 0.00119  | 0.00060  | 1.33637  |
| D26 | -2.85339 | 0.00001  | -0.00026 | 0.00084  | 0.00058  | -2.85281 |
| D27 | -0.80140 | 0.00002  | -0.00031 | 0.00106  | 0.00075  | -0.80065 |
| D28 | -1.76609 | -0.00003 | -0.00025 | 0.00151  | 0.00126  | -1.76482 |
| D29 | 0.32794  | 0.00000  | 0.00008  | 0.00117  | 0.00125  | 0.32919  |
| D30 | 2.37993  | 0.00002  | 0.00002  | 0.00139  | 0.00142  | 2.38135  |
| D31 | -1.10664 | 0.00006  | 0.00125  | -0.00023 | 0.00102  | -1.10562 |
| D32 | 0.93711  | 0.00007  | 0.00113  | -0.00002 | 0.00111  | 0.93821  |
| D33 | 3.10912  | 0.00012  | 0.00159  | -0.00038 | 0.00121  | 3.11033  |
| D34 | 3.10318  | -0.00002 | 0.00101  | -0.00005 | 0.00095  | 3.10413  |
| D35 | -1.13626 | -0.00001 | 0.00088  | 0.00016  | 0.00103  | -1.13522 |
| D36 | 1.03575  | 0.00004  | 0.00134  | -0.00020 | 0.00114  | 1.03689  |
| D37 | 1.00803  | -0.00001 | 0.00109  | -0.00002 | 0.00106  | 1.00910  |

|     |          |          |          |          |          |          |
|-----|----------|----------|----------|----------|----------|----------|
| D38 | 3.05178  | 0.00001  | 0.00096  | 0.00019  | 0.00114  | 3.05292  |
| D39 | -1.05939 | 0.00005  | 0.00142  | -0.00017 | 0.00125  | -1.05815 |
| D40 | 2.93726  | -0.00004 | 0.00013  | 0.00191  | 0.00205  | 2.93931  |
| D41 | -1.25197 | -0.00007 | 0.00090  | 0.00157  | 0.00247  | -1.24950 |
| D42 | 0.85954  | 0.00000  | 0.00045  | 0.00172  | 0.00217  | 0.86171  |
| D43 | 2.95349  | -0.00002 | 0.00122  | 0.00138  | 0.00260  | 2.95609  |
| D44 | -1.24041 | 0.00003  | 0.00043  | 0.00170  | 0.00214  | -1.23828 |
| D45 | 0.85354  | 0.00000  | 0.00120  | 0.00136  | 0.00256  | 0.85610  |
| D46 | 3.13855  | -0.00001 | 0.00005  | 0.00002  | 0.00007  | 3.13862  |
| D47 | -0.00450 | 0.00000  | 0.00007  | 0.00018  | 0.00025  | -0.00425 |
| D48 | -0.00468 | 0.00000  | -0.00018 | 0.00019  | 0.00002  | -0.00467 |
| D49 | 3.13545  | 0.00001  | -0.00015 | 0.00035  | 0.00020  | 3.13565  |
| D50 | 2.20791  | -0.00003 | -0.00002 | 0.00075  | 0.00070  | 2.20861  |
| D51 | -1.40518 | -0.00015 | -0.00029 | -0.00129 | -0.00156 | -1.40674 |
| D52 | -2.08691 | 0.00009  | 0.00049  | 0.00151  | 0.00197  | -2.08494 |
| D53 | 0.58317  | -0.00003 | 0.00021  | -0.00053 | -0.00028 | 0.58289  |
| D54 | -2.71221 | 0.00000  | -0.00025 | 0.00014  | -0.00011 | -2.71231 |
| D55 | -0.01681 | 0.00004  | -0.00037 | 0.00035  | -0.00002 | -0.01683 |
| D56 | -0.02448 | -0.00006 | -0.00045 | -0.00030 | -0.00075 | -0.02523 |
| D57 | 2.67091  | -0.00002 | -0.00057 | -0.00009 | -0.00066 | 2.67026  |
| D58 | 0.53787  | -0.00005 | -0.01094 | -0.00435 | -0.01534 | 0.52253  |
| D59 | -1.88347 | 0.00004  | -0.01037 | -0.00432 | -0.01475 | -1.89822 |
| D60 | 1.80890  | -0.00001 | -0.00977 | -0.00294 | -0.01269 | 1.79620  |
| D61 | -0.61209 | -0.00012 | -0.00906 | -0.00327 | -0.01231 | -0.62441 |
| D62 | 2.55263  | -0.00001 | -0.00175 | 0.00028  | -0.00147 | 2.55115  |
| D63 | -1.65654 | 0.00000  | -0.00190 | 0.00037  | -0.00154 | -1.65808 |
| D64 | 0.44317  | -0.00001 | -0.00175 | 0.00023  | -0.00152 | 0.44165  |
| D65 | 1.34656  | 0.00003  | -0.00193 | 0.00041  | -0.00152 | 1.34504  |
| D66 | -2.86261 | 0.00003  | -0.00209 | 0.00051  | -0.00158 | -2.86419 |
| D67 | -0.76289 | 0.00003  | -0.00193 | 0.00036  | -0.00157 | -0.76446 |
| D68 | -1.04118 | -0.00001 | -0.00150 | 0.00031  | -0.00118 | -1.04236 |
| D69 | 1.03284  | -0.00001 | -0.00165 | 0.00041  | -0.00125 | 1.03159  |
| D70 | 3.13255  | -0.00001 | -0.00150 | 0.00027  | -0.00123 | 3.13132  |

| Item                 | Value    | Threshold | Converged? |
|----------------------|----------|-----------|------------|
| Maximum Force        | 0.000306 | 0.000450  | YES        |
| RMS Force            | 0.000058 | 0.000300  | YES        |
| Maximum Displacement | 0.041010 | 0.001800  | NO         |
| RMS Displacement     | 0.008517 | 0.001200  | NO         |

Predicted change in Energy=-2.057825D-06

GradGradGradGradGradGradGradGradGradGradGradGradGradGradGradGradGradGrad

Input orientation:

-----  
Center      Atomic      Atomic      Coordinates (Angstroms)

| Number | Number | Type | X         | Y         | Z         |
|--------|--------|------|-----------|-----------|-----------|
| 1      | 6      | 0    | -2.642092 | 2.100100  | -0.187288 |
| 2      | 6      | 0    | -3.531430 | 1.115667  | 0.099722  |
| 3      | 7      | 0    | -2.820982 | -0.078045 | 0.109686  |
| 4      | 6      | 0    | -1.530391 | 0.185752  | -0.167107 |
| 5      | 7      | 0    | -1.402473 | 1.500211  | -0.353554 |
| 6      | 6      | 0    | -0.130597 | 2.186990  | -0.641597 |
| 7      | 6      | 0    | 0.455677  | 2.870062  | 0.599003  |
| 8      | 1      | 0    | -2.783499 | 3.161484  | -0.296427 |
| 9      | 1      | 0    | -4.589216 | 1.164111  | 0.282939  |
| 10     | 1      | 0    | 0.569378  | 1.432309  | -1.000341 |
| 11     | 1      | 0    | -0.305784 | 2.915857  | -1.434002 |
| 12     | 1      | 0    | -0.223123 | 3.656750  | 0.945021  |
| 13     | 1      | 0    | 0.531821  | 2.122355  | 1.402846  |
| 14     | 35     | 0    | 0.137712  | -2.665918 | -0.292916 |
| 15     | 1      | 0    | -0.754678 | -0.601687 | -0.234761 |
| 16     | 6      | 0    | -3.292690 | -1.404471 | 0.350134  |
| 17     | 6      | 0    | -4.545762 | -1.695082 | 0.673613  |
| 18     | 1      | 0    | -2.496332 | -2.137846 | 0.235642  |
| 19     | 1      | 0    | -4.816101 | -2.729578 | 0.835254  |
| 20     | 1      | 0    | -5.328600 | -0.955317 | 0.789799  |
| 21     | 7      | 0    | 1.723931  | 3.477027  | 0.214598  |
| 22     | 1      | 0    | 2.066604  | 4.099752  | 0.936466  |
| 23     | 1      | 0    | 2.420498  | 2.751329  | 0.059072  |
| 24     | 6      | 0    | 3.326937  | -0.422099 | -1.128080 |
| 25     | 6      | 0    | 3.255777  | -0.568024 | 0.326897  |
| 26     | 8      | 0    | 2.728656  | 0.621200  | -0.322242 |
| 27     | 1      | 0    | 4.269198  | -0.142004 | -1.592987 |
| 28     | 1      | 0    | 2.625040  | -0.980100 | -1.740438 |
| 29     | 1      | 0    | 2.469106  | -1.223092 | 0.695466  |
| 30     | 6      | 0    | 4.449147  | -0.365566 | 1.219505  |
| 31     | 1      | 0    | 4.147762  | 0.065441  | 2.178914  |
| 32     | 1      | 0    | 4.928089  | -1.328037 | 1.423618  |
| 33     | 1      | 0    | 5.183531  | 0.297835  | 0.755759  |

Distance matrix (angstroms):

|   |   | 1        | 2        | 3        | 4        | 5        |
|---|---|----------|----------|----------|----------|----------|
| 1 | C | 0.000000 |          |          |          |          |
| 2 | C | 1.357352 | 0.000000 |          |          |          |
| 3 | N | 2.205564 | 1.389166 | 0.000000 |          |          |
| 4 | C | 2.213824 | 2.222633 | 1.346043 | 0.000000 |          |
| 5 | N | 1.387144 | 2.210382 | 2.172016 | 1.333764 | 0.000000 |
| 6 | C | 2.553734 | 3.641834 | 3.596246 | 2.487874 | 1.473874 |



|    |    |          |          |          |          |          |
|----|----|----------|----------|----------|----------|----------|
| 7  | C  | 3.287441 | 4.384541 | 4.434779 | 3.425917 | 2.497314 |
| 8  | H  | 1.076310 | 2.213978 | 3.265100 | 3.231406 | 2.161094 |
| 9  | H  | 2.210991 | 1.074629 | 2.167860 | 3.242860 | 3.267020 |
| 10 | H  | 3.379429 | 4.257585 | 3.873999 | 2.580157 | 2.076329 |
| 11 | H  | 2.770937 | 3.999723 | 4.203884 | 3.249331 | 2.091446 |
| 12 | H  | 3.091390 | 4.256351 | 4.625511 | 3.872157 | 2.779896 |
| 13 | H  | 3.550035 | 4.384240 | 4.213706 | 3.235414 | 2.685796 |
| 14 | Br | 5.518460 | 5.283669 | 3.951336 | 3.306119 | 4.442126 |
| 15 | H  | 3.296094 | 3.282001 | 2.159273 | 1.107415 | 2.202663 |
| 16 | C  | 3.604736 | 2.543777 | 1.428191 | 2.429413 | 3.536280 |
| 17 | C  | 4.332265 | 3.042784 | 2.430574 | 3.651960 | 4.598395 |
| 18 | H  | 4.261490 | 3.416906 | 2.089029 | 2.548403 | 3.844364 |
| 19 | H  | 5.394228 | 4.120351 | 3.396700 | 4.505526 | 5.563922 |
| 20 | H  | 4.184208 | 2.827543 | 2.742317 | 4.079718 | 4.769837 |
| 21 | N  | 4.595606 | 5.762641 | 5.771116 | 4.644222 | 3.742326 |
| 22 | H  | 5.237676 | 6.398663 | 6.482751 | 5.429147 | 4.522860 |
| 23 | H  | 5.110245 | 6.172721 | 5.956596 | 4.716233 | 4.043595 |
| 24 | C  | 6.547968 | 7.135083 | 6.280712 | 4.988645 | 5.163573 |
| 25 | C  | 6.493700 | 6.996614 | 6.100350 | 4.870280 | 5.141975 |
| 26 | O  | 5.572279 | 6.293745 | 5.610169 | 4.284059 | 4.223727 |
| 27 | H  | 7.400605 | 8.080643 | 7.292040 | 5.981286 | 6.033317 |
| 28 | H  | 6.296236 | 6.758738 | 5.822012 | 4.593711 | 4.929122 |
| 29 | H  | 6.160131 | 6.467699 | 5.444200 | 4.327222 | 4.848293 |
| 30 | C  | 7.638340 | 8.193752 | 7.359969 | 6.162914 | 6.340118 |
| 31 | H  | 7.472675 | 8.024712 | 7.270880 | 6.144893 | 6.267142 |
| 32 | H  | 8.464914 | 8.904372 | 7.958455 | 6.821577 | 7.157746 |
| 33 | H  | 8.085658 | 8.777800 | 8.039336 | 6.777977 | 6.786142 |
|    |    | 6        | 7        | 8        | 9        | 10       |
| 6  | C  | 0.000000 |          |          |          |          |
| 7  | C  | 1.532773 | 0.000000 |          |          |          |
| 8  | H  | 2.847222 | 3.373276 | 0.000000 |          |          |
| 9  | H  | 4.666941 | 5.334896 | 2.754229 | 0.000000 |          |
| 10 | H  | 1.090049 | 2.153594 | 3.837621 | 5.322578 | 0.000000 |
| 11 | H  | 1.090799 | 2.171412 | 2.737423 | 4.936020 | 1.776199 |
| 12 | H  | 2.164742 | 1.095161 | 2.888253 | 5.070934 | 3.059515 |
| 13 | H  | 2.150052 | 1.100466 | 3.867644 | 5.328926 | 2.500577 |
| 14 | Br | 4.872812 | 5.616378 | 6.518597 | 6.111022 | 4.181178 |
| 15 | H  | 2.886471 | 3.770034 | 4.275672 | 4.253203 | 2.544872 |
| 16 | C  | 4.886815 | 5.690679 | 4.639533 | 2.878039 | 4.978622 |
| 17 | C  | 6.024446 | 6.772038 | 5.256689 | 2.886087 | 6.224737 |
| 18 | H  | 5.007041 | 5.824563 | 5.333710 | 3.909644 | 4.865412 |
| 19 | H  | 6.950372 | 7.694376 | 6.333781 | 3.939205 | 7.049404 |
| 20 | H  | 6.240370 | 6.937419 | 4.960391 | 2.301210 | 6.609955 |
| 21 | N  | 2.415893 | 1.457615 | 4.547268 | 6.723845 | 2.643850 |

|    |    |          |          |          |          |          |
|----|----|----------|----------|----------|----------|----------|
| 22 | H  | 3.313100 | 2.054533 | 5.091550 | 7.303769 | 3.620520 |
| 23 | H  | 2.705087 | 2.041113 | 5.232226 | 7.190652 | 2.507751 |
| 24 | C  | 4.358733 | 4.697368 | 7.132401 | 8.195884 | 3.325549 |
| 25 | C  | 4.471646 | 4.442414 | 7.125351 | 8.034062 | 3.602726 |
| 26 | O  | 3.275517 | 3.327537 | 6.069396 | 7.362897 | 2.404204 |
| 27 | H  | 5.068289 | 5.331069 | 7.895229 | 9.148581 | 4.064278 |
| 28 | H  | 4.339521 | 5.000286 | 6.963489 | 7.793406 | 3.254720 |
| 29 | H  | 4.491643 | 4.562577 | 6.913626 | 7.462495 | 3.679114 |
| 30 | C  | 5.563569 | 5.177075 | 8.188364 | 9.214612 | 4.817954 |
| 31 | H  | 5.546225 | 4.898317 | 7.984684 | 9.007585 | 4.978034 |
| 32 | H  | 6.496986 | 6.189223 | 9.087516 | 9.904092 | 5.700302 |
| 33 | H  | 5.810461 | 5.384563 | 8.531187 | 9.822453 | 5.065700 |
|    |    | 11       | 12       | 13       | 14       | 15       |
| 11 | H  | 0.000000 |          |          |          |          |
| 12 | H  | 2.493091 | 0.000000 |          |          |          |
| 13 | H  | 3.062505 | 1.770286 | 0.000000 |          |          |
| 14 | Br | 5.714454 | 6.452815 | 5.094948 | 0.000000 |          |
| 15 | H  | 3.743367 | 4.450699 | 3.428884 | 2.249621 | 0.000000 |
| 16 | C  | 5.547070 | 5.949125 | 5.307881 | 3.711122 | 2.725448 |
| 17 | C  | 6.609101 | 6.884837 | 6.394252 | 4.879717 | 4.048824 |
| 18 | H  | 5.755530 | 6.264825 | 5.355501 | 2.737960 | 2.369477 |
| 19 | H  | 7.573864 | 7.867190 | 7.243182 | 5.081052 | 4.708291 |
| 20 | H  | 6.720116 | 6.881944 | 6.647739 | 5.829150 | 4.700589 |
| 21 | N  | 2.674423 | 2.087304 | 2.160601 | 6.364703 | 4.793885 |
| 22 | H  | 3.556536 | 2.332204 | 2.546207 | 7.141870 | 5.606687 |
| 23 | H  | 3.112708 | 2.931454 | 2.401757 | 5.889107 | 4.627180 |
| 24 | C  | 4.942893 | 5.791173 | 4.548901 | 3.987904 | 4.182087 |
| 25 | C  | 5.284213 | 5.507590 | 3.976902 | 3.808892 | 4.049734 |
| 26 | O  | 3.963494 | 4.419674 | 3.171038 | 4.185570 | 3.692793 |
| 27 | H  | 5.505111 | 6.407259 | 5.298143 | 5.012933 | 5.224501 |
| 28 | H  | 4.884886 | 6.068286 | 4.887435 | 3.335281 | 3.719241 |
| 29 | H  | 5.418999 | 5.578820 | 3.930073 | 2.914454 | 3.412367 |
| 30 | C  | 6.357531 | 6.171262 | 4.644223 | 5.115418 | 5.408367 |
| 31 | H  | 6.404069 | 5.790046 | 4.231809 | 5.445252 | 5.504980 |
| 32 | H  | 7.319156 | 7.184159 | 5.588631 | 5.261570 | 5.964196 |
| 33 | H  | 6.463873 | 6.367891 | 5.038452 | 5.945068 | 6.087084 |
|    |    | 16       | 17       | 18       | 19       | 20       |
| 16 | C  | 0.000000 |          |          |          |          |
| 17 | C  | 1.326380 | 0.000000 |          |          |          |
| 18 | H  | 1.088638 | 2.141966 | 0.000000 |          |          |
| 19 | H  | 2.076543 | 1.081384 | 2.467997 | 0.000000 |          |
| 20 | H  | 2.130721 | 1.083322 | 3.118846 | 1.847355 | 0.000000 |
| 21 | N  | 7.000992 | 8.140667 | 7.024092 | 9.037653 | 8.349534 |
| 22 | H  | 7.704693 | 8.796169 | 7.760101 | 9.696475 | 8.959033 |

|    |   |          |          |          |           |           |
|----|---|----------|----------|----------|-----------|-----------|
| 23 | H | 7.070778 | 8.287159 | 6.936168 | 9.111046  | 8.621003  |
| 24 | C | 6.853439 | 8.175938 | 6.222057 | 8.688395  | 8.881491  |
| 25 | C | 6.601713 | 7.890151 | 5.963173 | 8.371736  | 8.605568  |
| 26 | O | 6.388431 | 7.698964 | 5.934987 | 8.336118  | 8.285011  |
| 27 | H | 7.908963 | 9.233257 | 7.286952 | 9.753694  | 9.922543  |
| 28 | H | 6.290478 | 7.599950 | 5.610144 | 8.066315  | 8.346442  |
| 29 | H | 5.774985 | 7.030763 | 5.069891 | 7.440651  | 7.802873  |
| 30 | C | 7.859464 | 9.109006 | 7.235236 | 9.569797  | 9.804936  |
| 31 | H | 7.801629 | 8.996818 | 7.264625 | 9.485167  | 9.631875  |
| 32 | H | 8.290923 | 9.510577 | 7.562348 | 9.862034  | 10.283010 |
| 33 | H | 8.654981 | 9.931646 | 8.073621 | 10.448166 | 10.586616 |
|    |   | 21       | 22       | 23       | 24        | 25        |
| 21 | N | 0.000000 |          |          |           |           |
| 22 | H | 1.013067 | 0.000000 |          |           |           |
| 23 | H | 1.017856 | 1.647211 | 0.000000 |           |           |
| 24 | C | 4.424431 | 5.128150 | 3.507365 | 0.000000  |           |
| 25 | C | 4.326847 | 4.855291 | 3.433298 | 1.464006  | 0.000000  |
| 26 | O | 3.074641 | 3.758056 | 2.185821 | 1.447683  | 1.453786  |
| 27 | H | 4.779449 | 5.407592 | 3.810298 | 1.087404  | 2.212345  |
| 28 | H | 4.949762 | 5.769104 | 4.147727 | 1.085821  | 2.200343  |
| 29 | H | 4.783058 | 5.343478 | 4.025343 | 2.168590  | 1.088030  |
| 30 | C | 4.816862 | 5.069092 | 3.895775 | 2.602634  | 1.503951  |
| 31 | H | 4.623031 | 4.706439 | 3.832906 | 3.442043  | 2.151019  |
| 32 | H | 5.900592 | 6.155185 | 4.979079 | 3.145722  | 2.139402  |
| 33 | H | 4.729582 | 4.919599 | 3.760234 | 2.741184  | 2.156355  |
|    |   | 26       | 27       | 28       | 29        | 30        |
| 26 | O | 0.000000 |          |          |           |           |
| 27 | H | 2.137882 | 0.000000 |          |           |           |
| 28 | H | 2.141536 | 1.851324 | 0.000000 |           |           |
| 29 | H | 2.122383 | 3.105817 | 2.452955 | 0.000000  |           |
| 30 | C | 2.512127 | 2.827097 | 3.530762 | 2.220479  | 0.000000  |
| 31 | H | 2.928910 | 3.779553 | 4.332800 | 2.584342  | 1.094105  |
| 32 | H | 3.418341 | 3.307675 | 3.928911 | 2.566673  | 1.094256  |
| 33 | H | 2.700566 | 2.558529 | 3.796049 | 3.112066  | 1.092923  |
|    |   | 31       | 32       | 33       |           |           |
| 31 | H | 0.000000 |          |          |           |           |
| 32 | H | 1.766681 | 0.000000 |          |           |           |
| 33 | H | 1.775442 | 1.776160 | 0.000000 |           |           |

Stoichiometry C10H18BrN3O

Framework group C1[X(C10H18BrN3O)]

Deg. of freedom 93

Full point group C1 NOp 1

Largest Abelian subgroup C1 NOp 1

Largest concise Abelian subgroup C1 NOp 1

Standard orientation:

| Center<br>Number | Atomic<br>Number | Atomic<br>Type | Coordinates (Angstroms) |           |           |
|------------------|------------------|----------------|-------------------------|-----------|-----------|
|                  |                  |                | X                       | Y         | Z         |
| 1                | 6                | 0              | -2.346761               | 2.471957  | -0.264412 |
| 2                | 6                | 0              | -3.331973               | 1.591889  | 0.047425  |
| 3                | 7                | 0              | -2.745500               | 0.333729  | 0.100966  |
| 4                | 6                | 0              | -1.433752               | 0.457172  | -0.174552 |
| 5                | 7                | 0              | -1.173233               | 1.745297  | -0.402128 |
| 6                | 6                | 0              | 0.162572                | 2.290865  | -0.702603 |
| 7                | 6                | 0              | 0.809539                | 2.951663  | 0.519760  |
| 8                | 1                | 0              | -2.380021               | 3.538046  | -0.408601 |
| 9                | 1                | 0              | -4.380244               | 1.752457  | 0.221129  |
| 10               | 1                | 0              | 0.784408                | 1.458280  | -1.031736 |
| 11               | 1                | 0              | 0.065034                | 3.007375  | -1.519269 |
| 12               | 1                | 0              | 0.212048                | 3.813530  | 0.835302  |
| 13               | 1                | 0              | 0.806593                | 2.226756  | 1.347726  |
| 14               | 35               | 0              | -0.061041               | -2.550420 | -0.196392 |
| 15               | 1                | 0              | -0.741077               | -0.406095 | -0.211138 |
| 16               | 6                | 0              | -3.349486               | -0.929948 | 0.380344  |
| 17               | 6                | 0              | -4.626801               | -1.082303 | 0.703663  |
| 18               | 1                | 0              | -2.630627               | -1.743061 | 0.295364  |
| 19               | 1                | 0              | -5.000696               | -2.078519 | 0.896404  |
| 20               | 1                | 0              | -5.331572               | -0.264140 | 0.790231  |
| 21               | 7                | 0              | 2.134096                | 3.415081  | 0.125509  |
| 22               | 1                | 0              | 2.534780                | 4.023427  | 0.829548  |
| 23               | 1                | 0              | 2.754617                | 2.618299  | -0.001471 |
| 24               | 6                | 0              | 3.341535                | -0.667303 | -1.079411 |
| 25               | 6                | 0              | 3.249979                | -0.757711 | 0.378930  |
| 26               | 8                | 0              | 2.848104                | 0.456660  | -0.311934 |
| 27               | 1                | 0              | 4.309153                | -0.498759 | -1.546054 |
| 28               | 1                | 0              | 2.589527                | -1.171573 | -1.678746 |
| 29               | 1                | 0              | 2.399766                | -1.317924 | 0.762475  |
| 30               | 6                | 0              | 4.453954                | -0.647273 | 1.273423  |
| 31               | 1                | 0              | 4.193555                | -0.157017 | 2.216242  |
| 32               | 1                | 0              | 4.832601                | -1.645855 | 1.511868  |
| 33               | 1                | 0              | 5.253382                | -0.076622 | 0.794097  |

Rotational constants (GHZ): 0.4207628 0.2929034 0.1830007

Standard basis: 6-311++G(d,p) (5D, 7F)

There are 499 symmetry adapted cartesian basis functions of A symmetry.

There are 482 symmetry adapted basis functions of A symmetry.

482 basis functions, 760 primitive gaussians, 499 cartesian basis functions

```

71 alpha electrons      71 beta electrons
nuclear repulsion energy      1313.2079729428 Hartrees.
NAtoms=   33 NActive=   33 NUniq=   33 SFac= 1.00D+00 NAtFMM=   60 NAOKFM=F
Big=F
Integral buffers will be   131072 words long.
Raffenetti 2 integral format.
Two-electron integral symmetry is turned on.
One-electron integrals computed using PRISM.
NBasis=   482 RedAO= T EigKep=  3.65D-06 NBF=   482
NBsUse=   482 1.00D-06 EigRej= -1.00D+00 NBFU=   482
Initial      guess      from      the      checkpoint      file:
"/home/suqian/liuwen/qianmengshijie/nh2po/nh2po.chk"
B after Tr=   0.000000   0.000000   0.000000
      Rot=   1.000000   0.000337  -0.000082   0.000120 Ang=   0.04 deg.
ExpMin= 3.50D-02 ExpMax= 4.40D+05 ExpMxC= 1.51D+04 IAcc=3 IRadAn=       5 AccDes=
0.00D+00
Harris functional with IExCor=  402 and IRadAn=       5 diagonalized for initial guess.
HarFok: IExCor=  402 AccDes= 0.00D+00 IRadAn=       5 IDoV= 1 UseB2=F ITyADJ=14
ICtDFT= 3500011 ScaDFX=  1.000000  1.000000  1.000000  1.000000
FoFCou: FMM=F IPFlag=       0 FMFlag=   100000 FMFlg1=       0
      NFxFlg=       0 DoJE=T BraDBF=F KetDBF=T FulRan=T
      wScrn=  0.000000 ICntrl=       500 IOpCl=  0 I1Cent=  200000004 NGrid=
0
      NMat0=   1 NMatS0=       1 NMatT0=   0 NMatD0=   1 NMtDS0=   0
NMtDT0=   0
Petite list used in FoFCou.
Requested convergence on RMS density matrix=1.00D-08 within 128 cycles.
Requested convergence on MAX density matrix=1.00D-06.
Requested convergence on          energy=1.00D-06.
No special actions if energy rises.
SCF Done: E(RB3LYP) = -3205.64837590      A.U. after   9 cycles
      NFock=  9 Conv=0.83D-08      -V/T= 2.0018
Calling FoFJK, ICntrl=       2127 FMM=F ISym2X=0 I1Cent= 0 IOpClX= 0 NMat=1 NMatS=1
NMatT=0.
***** Axes restored to original set *****

```

```

-----
Center      Atomic      Forces (Hartrees/Bohr)
Number      Number      X          Y          Z
-----
1          6          -0.000019953  -0.000012127  -0.000020365
2          6           0.000003832   0.000001310   0.000035909
3          7           0.000007383   0.000020652   0.000007116
4          6          -0.000077496  -0.000063871   0.000054603
5          7          -0.000009201   0.000072688  -0.000058079

```

|    |    |              |              |              |
|----|----|--------------|--------------|--------------|
| 6  | 6  | 0.000004771  | -0.000003580 | 0.000022368  |
| 7  | 6  | -0.000187250 | -0.000096352 | 0.000044966  |
| 8  | 1  | 0.000007452  | 0.000003475  | -0.000011742 |
| 9  | 1  | 0.000004492  | 0.000014255  | -0.000002284 |
| 10 | 1  | 0.000035258  | 0.000021433  | -0.000003400 |
| 11 | 1  | -0.000018035 | 0.000003478  | 0.000015010  |
| 12 | 1  | 0.000014154  | -0.000002936 | 0.000003826  |
| 13 | 1  | 0.000027795  | 0.000027627  | -0.000016669 |
| 14 | 35 | -0.000060808 | 0.000048613  | 0.000015411  |
| 15 | 1  | 0.000064037  | -0.000107854 | -0.000040652 |
| 16 | 6  | 0.000012449  | 0.000009287  | -0.000005393 |
| 17 | 6  | 0.000014329  | -0.000009823 | -0.000015504 |
| 18 | 1  | -0.000002807 | 0.000010555  | 0.000007790  |
| 19 | 1  | -0.000001793 | 0.000005548  | 0.000001039  |
| 20 | 1  | -0.000006028 | -0.000004931 | -0.000009286 |
| 21 | 7  | 0.000096560  | 0.000121721  | -0.000084905 |
| 22 | 1  | 0.000019743  | -0.000015072 | 0.000035377  |
| 23 | 1  | 0.000036105  | -0.000014942 | 0.000035896  |
| 24 | 6  | 0.000026849  | 0.000069328  | 0.000047687  |
| 25 | 6  | 0.000021822  | -0.000115844 | 0.000291628  |
| 26 | 8  | 0.000020244  | -0.000017942 | -0.000107559 |
| 27 | 1  | -0.000021500 | -0.000007353 | -0.000064412 |
| 28 | 1  | 0.000021200  | -0.000015464 | 0.000024070  |
| 29 | 1  | -0.000067352 | 0.000003804  | -0.000122436 |
| 30 | 6  | 0.000000166  | 0.000046440  | -0.000085346 |
| 31 | 1  | 0.000014338  | 0.000000220  | 0.000012323  |
| 32 | 1  | 0.000014654  | -0.000004202 | -0.000019559 |
| 33 | 1  | 0.000004589  | 0.000011856  | 0.000012572  |

-----  
Cartesian Forces: Max 0.000291628 RMS 0.000054347

GradGradGradGradGradGradGradGradGradGradGradGradGradGradGradGradGradGradGrad

Berny optimization.

Using GEDIIS/GDIIS optimizer.

FormGI is forming the generalized inverse of G from B-inverse, IUseBI=4.

GSVD: received Info= 1 from GESDD.

Internal Forces: Max 0.000224635 RMS 0.000050946

Search for a local minimum.

Step number 43 out of a maximum of 172

All quantities printed in internal units (Hartrees-Bohrs-Radians)

Mixed Optimization -- En-DIIS/RFO-DIIS

Swapping is turned off.

Update second derivatives using D2CorX and points 31 32 33 34 35  
36 37 38 39 40

DE= -3.00D-06 DEPred=-2.06D-06 R= 1.46D+00

TightC=F SS= 1.41D+00 RLast= 3.72D-02 DXNew= 1.7446D+00 1.1147D-01

Trust test= 1.46D+00 RLast= 3.72D-02 DXMaxT set to 1.04D+00

ITU= 1 1 1 1 1 1 1 1 1 1 1 1 1 1 1 1 0 0-1

ITU= 1-1 1 1 1 1 1 1 1 1 1 0-1-1 1 1 1-1 1 0

ITU= 0-1 0

|                 |         |         |         |         |         |
|-----------------|---------|---------|---------|---------|---------|
| Eigenvalues --- | 0.00065 | 0.00102 | 0.00154 | 0.00243 | 0.00482 |
| Eigenvalues --- | 0.00663 | 0.00729 | 0.00757 | 0.01275 | 0.01431 |
| Eigenvalues --- | 0.01892 | 0.02030 | 0.02167 | 0.02365 | 0.02382 |
| Eigenvalues --- | 0.02631 | 0.02707 | 0.02878 | 0.03068 | 0.03096 |
| Eigenvalues --- | 0.03209 | 0.03526 | 0.03632 | 0.03980 | 0.04151 |
| Eigenvalues --- | 0.04301 | 0.04483 | 0.04717 | 0.05498 | 0.05560 |
| Eigenvalues --- | 0.05720 | 0.05746 | 0.05914 | 0.07722 | 0.08670 |
| Eigenvalues --- | 0.08955 | 0.09560 | 0.10227 | 0.11312 | 0.12206 |
| Eigenvalues --- | 0.12642 | 0.13101 | 0.14616 | 0.15791 | 0.15998 |
| Eigenvalues --- | 0.16001 | 0.16002 | 0.16012 | 0.16035 | 0.16156 |
| Eigenvalues --- | 0.16386 | 0.18861 | 0.21275 | 0.21722 | 0.22175 |
| Eigenvalues --- | 0.23167 | 0.23351 | 0.25225 | 0.26321 | 0.28479 |
| Eigenvalues --- | 0.29022 | 0.30103 | 0.30422 | 0.32031 | 0.32485 |
| Eigenvalues --- | 0.33705 | 0.34289 | 0.34340 | 0.34399 | 0.34550 |
| Eigenvalues --- | 0.34705 | 0.34730 | 0.35105 | 0.35226 | 0.35345 |
| Eigenvalues --- | 0.35568 | 0.35749 | 0.35874 | 0.35969 | 0.36421 |
| Eigenvalues --- | 0.36628 | 0.39683 | 0.41497 | 0.41875 | 0.42542 |
| Eigenvalues --- | 0.44754 | 0.45501 | 0.46515 | 0.49579 | 0.54914 |
| Eigenvalues --- | 0.58317 | 0.60653 | 1.07706 |         |         |

En-DIIS/RFO-DIIS IScMMF= 0 using points: 43 42 41 40 39

RFO step: Lambda=-6.14267780D-07.

DidBck=F Rises=F RFO-DIIS coefs: 1.65903 -0.57939 -0.39030 0.00679

0.30388

Iteration 1 RMS(Cart)= 0.00814373 RMS(Int)= 0.00002320

Iteration 2 RMS(Cart)= 0.00004088 RMS(Int)= 0.00000418

Iteration 3 RMS(Cart)= 0.00000000 RMS(Int)= 0.00000418

| Variable | Old X   | -DE/DX   | Delta X<br>(Linear) | Delta X<br>(Quad) | Delta X<br>(Total) | New X   |
|----------|---------|----------|---------------------|-------------------|--------------------|---------|
| R1       | 2.56502 | -0.00002 | -0.00001            | -0.00002          | -0.00003           | 2.56499 |
| R2       | 2.62132 | 0.00001  | 0.00001             | -0.00001          | 0.00000            | 2.62132 |
| R3       | 2.03393 | 0.00000  | 0.00000             | 0.00001           | 0.00001            | 2.03394 |
| R4       | 2.62514 | -0.00001 | -0.00002            | 0.00000           | -0.00002           | 2.62512 |
| R5       | 2.03075 | 0.00000  | -0.00002            | 0.00000           | -0.00001           | 2.03074 |
| R6       | 2.54365 | -0.00003 | -0.00005            | 0.00000           | -0.00005           | 2.54360 |
| R7       | 2.69889 | -0.00001 | 0.00007             | -0.00002          | 0.00005            | 2.69894 |
| R8       | 2.52045 | 0.00012  | 0.00003             | 0.00012           | 0.00015            | 2.52060 |
| R9       | 2.09271 | 0.00005  | -0.00004            | 0.00007           | 0.00003            | 2.09274 |

|     |         |          |          |          |          |         |
|-----|---------|----------|----------|----------|----------|---------|
| R10 | 2.78522 | 0.00006  | 0.00004  | 0.00002  | 0.00006  | 2.78528 |
| R11 | 2.89652 | 0.00001  | -0.00009 | 0.00004  | -0.00005 | 2.89647 |
| R12 | 2.05989 | 0.00001  | 0.00006  | 0.00002  | 0.00008  | 2.05998 |
| R13 | 2.06131 | -0.00001 | 0.00000  | -0.00002 | -0.00002 | 2.06129 |
| R14 | 2.06955 | -0.00001 | 0.00000  | -0.00003 | -0.00003 | 2.06952 |
| R15 | 2.07958 | -0.00003 | -0.00006 | -0.00004 | -0.00010 | 2.07948 |
| R16 | 2.75449 | 0.00020  | 0.00026  | 0.00021  | 0.00048  | 2.75497 |
| R17 | 4.25117 | -0.00007 | 0.00007  | 0.00010  | 0.00017  | 4.25133 |
| R18 | 2.50649 | -0.00001 | 0.00000  | -0.00001 | -0.00001 | 2.50649 |
| R19 | 2.05723 | -0.00001 | -0.00009 | 0.00005  | -0.00004 | 2.05719 |
| R20 | 2.04352 | 0.00000  | -0.00001 | 0.00000  | 0.00000  | 2.04352 |
| R21 | 2.04718 | 0.00000  | -0.00003 | 0.00001  | -0.00001 | 2.04717 |
| R22 | 1.91442 | 0.00002  | 0.00007  | 0.00000  | 0.00007  | 1.91449 |
| R23 | 1.92347 | 0.00008  | 0.00005  | 0.00001  | 0.00006  | 1.92353 |
| R24 | 4.13060 | 0.00002  | 0.00255  | 0.00124  | 0.00378  | 4.13439 |
| R25 | 2.76657 | 0.00003  | -0.00015 | 0.00008  | -0.00007 | 2.76650 |
| R26 | 2.73572 | -0.00002 | -0.00044 | -0.00006 | -0.00049 | 2.73523 |
| R27 | 2.05490 | 0.00001  | 0.00016  | -0.00004 | 0.00012  | 2.05502 |
| R28 | 2.05190 | -0.00002 | 0.00004  | -0.00001 | 0.00002  | 2.05193 |
| R29 | 2.74726 | 0.00004  | 0.00059  | 0.00010  | 0.00069  | 2.74794 |
| R30 | 2.05608 | 0.00000  | 0.00002  | 0.00000  | 0.00002  | 2.05610 |
| R31 | 2.84206 | -0.00001 | 0.00001  | -0.00010 | -0.00008 | 2.84197 |
| R32 | 2.06756 | 0.00001  | -0.00003 | 0.00002  | -0.00001 | 2.06755 |
| R33 | 2.06784 | 0.00001  | 0.00001  | 0.00000  | 0.00002  | 2.06786 |
| R34 | 2.06533 | 0.00001  | 0.00001  | 0.00000  | 0.00001  | 2.06533 |
| A1  | 1.87257 | 0.00003  | -0.00003 | 0.00005  | 0.00002  | 1.87259 |
| A2  | 2.27912 | -0.00001 | 0.00016  | -0.00003 | 0.00013  | 2.27925 |
| A3  | 2.13143 | -0.00003 | -0.00013 | -0.00002 | -0.00015 | 2.13128 |
| A4  | 1.86466 | -0.00001 | 0.00000  | -0.00001 | -0.00001 | 1.86464 |
| A5  | 2.27613 | -0.00001 | -0.00009 | 0.00001  | -0.00008 | 2.27605 |
| A6  | 2.14232 | 0.00002  | 0.00010  | 0.00001  | 0.00010  | 2.14243 |
| A7  | 1.89702 | 0.00003  | 0.00006  | 0.00002  | 0.00008  | 1.89710 |
| A8  | 2.25282 | 0.00003  | -0.00012 | 0.00005  | -0.00007 | 2.25275 |
| A9  | 2.13331 | -0.00007 | 0.00006  | -0.00007 | -0.00001 | 2.13330 |
| A10 | 1.89004 | -0.00002 | -0.00006 | -0.00001 | -0.00007 | 1.88996 |
| A11 | 2.14698 | -0.00010 | 0.00053  | -0.00029 | 0.00024  | 2.14722 |
| A12 | 2.24599 | 0.00012  | -0.00044 | 0.00030  | -0.00014 | 2.24585 |
| A13 | 1.90048 | -0.00005 | 0.00004  | -0.00005 | -0.00001 | 1.90047 |
| A14 | 2.20568 | -0.00014 | -0.00029 | -0.00015 | -0.00044 | 2.20524 |
| A15 | 2.17646 | 0.00018  | 0.00023  | 0.00019  | 0.00042  | 2.17688 |
| A16 | 1.96010 | 0.00001  | 0.00035  | -0.00012 | 0.00023  | 1.96034 |
| A17 | 1.87114 | 0.00007  | 0.00017  | 0.00035  | 0.00052  | 1.87166 |
| A18 | 1.89097 | -0.00006 | -0.00017 | -0.00021 | -0.00038 | 1.89060 |
| A19 | 1.90635 | -0.00003 | -0.00012 | 0.00009  | -0.00003 | 1.90632 |



|     |          |          |          |          |          |          |
|-----|----------|----------|----------|----------|----------|----------|
| A20 | 1.93010  | 0.00000  | -0.00038 | 0.00001  | -0.00037 | 1.92974  |
| A21 | 1.90357  | 0.00000  | 0.00017  | -0.00012 | 0.00005  | 1.90362  |
| A22 | 1.91641  | -0.00002 | 0.00016  | -0.00003 | 0.00013  | 1.91653  |
| A23 | 1.89114  | 0.00001  | 0.00038  | -0.00004 | 0.00034  | 1.89148  |
| A24 | 1.88065  | 0.00007  | -0.00043 | 0.00015  | -0.00027 | 1.88038  |
| A25 | 1.87566  | 0.00001  | 0.00004  | 0.00004  | 0.00008  | 1.87574  |
| A26 | 1.90022  | -0.00006 | -0.00006 | -0.00005 | -0.00011 | 1.90011  |
| A27 | 1.99914  | -0.00001 | -0.00009 | -0.00006 | -0.00015 | 1.99899  |
| A28 | 2.16106  | 0.00003  | 0.00004  | -0.00001 | 0.00003  | 2.16109  |
| A29 | 1.94588  | -0.00002 | -0.00002 | -0.00002 | -0.00004 | 1.94583  |
| A30 | 2.17625  | -0.00001 | -0.00002 | 0.00003  | 0.00001  | 2.17626  |
| A31 | 2.07400  | 0.00000  | 0.00009  | -0.00006 | 0.00003  | 2.07403  |
| A32 | 2.16425  | 0.00001  | -0.00005 | 0.00008  | 0.00003  | 2.16428  |
| A33 | 2.04494  | -0.00001 | -0.00004 | -0.00001 | -0.00006 | 2.04488  |
| A34 | 1.94159  | -0.00011 | -0.00036 | 0.00001  | -0.00035 | 1.94125  |
| A35 | 1.91649  | 0.00022  | 0.00000  | 0.00001  | 0.00001  | 1.91651  |
| A36 | 1.89194  | -0.00008 | -0.00021 | -0.00012 | -0.00033 | 1.89161  |
| A37 | 2.08598  | 0.00008  | -0.00004 | 0.00039  | 0.00037  | 2.08635  |
| A38 | 2.06899  | -0.00006 | 0.00103  | -0.00052 | 0.00050  | 2.06948  |
| A39 | 1.99376  | 0.00000  | 0.00031  | -0.00001 | 0.00030  | 1.99406  |
| A40 | 2.00108  | 0.00001  | 0.00054  | -0.00013 | 0.00041  | 2.00148  |
| A41 | 2.03912  | -0.00003 | -0.00124 | 0.00014  | -0.00109 | 2.03803  |
| A42 | 2.01730  | -0.00009 | 0.00039  | -0.00041 | -0.00002 | 2.01728  |
| A43 | 2.13870  | -0.00003 | -0.00046 | 0.00000  | -0.00047 | 2.13823  |
| A44 | 1.96233  | -0.00002 | -0.00058 | 0.00005  | -0.00052 | 1.96180  |
| A45 | 2.02929  | -0.00005 | 0.00018  | -0.00021 | -0.00003 | 2.02926  |
| A46 | 2.04172  | 0.00012  | 0.00031  | 0.00040  | 0.00072  | 2.04244  |
| A47 | 2.60153  | 0.00002  | 0.00528  | 0.00300  | 0.00830  | 2.60982  |
| A48 | 2.45027  | 0.00002  | -0.00492 | -0.00305 | -0.00799 | 2.44227  |
| A49 | 1.93360  | 0.00003  | -0.00014 | 0.00019  | 0.00005  | 1.93364  |
| A50 | 1.91729  | -0.00001 | -0.00002 | -0.00002 | -0.00004 | 1.91726  |
| A51 | 1.94234  | 0.00001  | 0.00010  | -0.00009 | 0.00000  | 1.94235  |
| A52 | 1.87915  | 0.00000  | 0.00009  | -0.00004 | 0.00005  | 1.87920  |
| A53 | 1.89448  | -0.00002 | 0.00003  | -0.00002 | 0.00001  | 1.89448  |
| A54 | 1.89541  | -0.00001 | -0.00005 | -0.00002 | -0.00007 | 1.89534  |
| A55 | 3.49082  | 0.00013  | -0.00120 | -0.00091 | -0.00211 | 3.48871  |
| A56 | 2.52946  | 0.00020  | 0.00120  | -0.00107 | 0.00012  | 2.52958  |
| A57 | 2.98339  | -0.00007 | -0.00559 | -0.00260 | -0.00819 | 2.97519  |
| A58 | 3.10886  | 0.00001  | -0.00153 | 0.00066  | -0.00086 | 3.10800  |
| D1  | 0.00330  | -0.00001 | -0.00001 | -0.00010 | -0.00011 | 0.00319  |
| D2  | -3.12537 | 0.00000  | -0.00002 | -0.00027 | -0.00029 | -3.12566 |
| D3  | 3.13249  | -0.00001 | 0.00030  | 0.00001  | 0.00032  | 3.13281  |
| D4  | 0.00382  | 0.00000  | 0.00029  | -0.00016 | 0.00014  | 0.00396  |
| D5  | -0.00473 | 0.00001  | 0.00019  | -0.00003 | 0.00016  | -0.00457 |

|     |          |          |          |          |          |          |
|-----|----------|----------|----------|----------|----------|----------|
| D6  | -3.11122 | 0.00000  | 0.00081  | 0.00035  | 0.00116  | -3.11007 |
| D7  | -3.13520 | 0.00001  | -0.00009 | -0.00013 | -0.00022 | -3.13543 |
| D8  | 0.04149  | 0.00000  | 0.00052  | 0.00025  | 0.00077  | 0.04226  |
| D9  | -0.00078 | 0.00001  | -0.00018 | 0.00020  | 0.00002  | -0.00076 |
| D10 | -3.13371 | 0.00001  | 0.00015  | 0.00007  | 0.00022  | -3.13349 |
| D11 | 3.12912  | 0.00000  | -0.00017 | 0.00035  | 0.00018  | 3.12930  |
| D12 | -0.00381 | 0.00001  | 0.00016  | 0.00023  | 0.00039  | -0.00343 |
| D13 | -0.00217 | 0.00000  | 0.00030  | -0.00022 | 0.00008  | -0.00209 |
| D14 | -3.12480 | 0.00000  | -0.00123 | -0.00041 | -0.00164 | -3.12645 |
| D15 | 3.13147  | -0.00001 | 0.00000  | -0.00010 | -0.00011 | 3.13137  |
| D16 | 0.00884  | 0.00000  | -0.00153 | -0.00030 | -0.00183 | 0.00701  |
| D17 | -0.05474 | 0.00002  | 0.00430  | 0.00216  | 0.00646  | -0.04828 |
| D18 | 3.08834  | 0.00001  | 0.00398  | 0.00221  | 0.00619  | 3.09454  |
| D19 | 3.09655  | 0.00002  | 0.00467  | 0.00202  | 0.00669  | 3.10324  |
| D20 | -0.04355 | 0.00002  | 0.00435  | 0.00207  | 0.00642  | -0.03713 |
| D21 | 0.00425  | 0.00000  | -0.00031 | 0.00015  | -0.00015 | 0.00410  |
| D22 | 3.11147  | -0.00001 | -0.00092 | -0.00023 | -0.00115 | 3.11032  |
| D23 | 3.12548  | -0.00001 | 0.00136  | 0.00035  | 0.00171  | 3.12718  |
| D24 | -0.05049 | -0.00002 | 0.00075  | -0.00003 | 0.00071  | -0.04978 |
| D25 | 1.33637  | -0.00001 | 0.00119  | 0.00234  | 0.00353  | 1.33989  |
| D26 | -2.85281 | 0.00001  | 0.00136  | 0.00261  | 0.00397  | -2.84884 |
| D27 | -0.80065 | 0.00002  | 0.00156  | 0.00255  | 0.00410  | -0.79655 |
| D28 | -1.76482 | -0.00001 | 0.00190  | 0.00279  | 0.00468  | -1.76014 |
| D29 | 0.32919  | 0.00001  | 0.00207  | 0.00306  | 0.00512  | 0.33431  |
| D30 | 2.38135  | 0.00002  | 0.00227  | 0.00299  | 0.00526  | 2.38660  |
| D31 | -1.10562 | 0.00006  | 0.00158  | 0.00125  | 0.00283  | -1.10279 |
| D32 | 0.93821  | 0.00006  | 0.00194  | 0.00126  | 0.00319  | 0.94141  |
| D33 | 3.11033  | 0.00010  | 0.00180  | 0.00125  | 0.00305  | 3.11338  |
| D34 | 3.10413  | -0.00001 | 0.00122  | 0.00083  | 0.00206  | 3.10619  |
| D35 | -1.13522 | -0.00001 | 0.00158  | 0.00084  | 0.00242  | -1.13280 |
| D36 | 1.03689  | 0.00002  | 0.00145  | 0.00083  | 0.00228  | 1.03917  |
| D37 | 1.00910  | -0.00001 | 0.00133  | 0.00091  | 0.00224  | 1.01134  |
| D38 | 3.05292  | 0.00000  | 0.00169  | 0.00092  | 0.00261  | 3.05553  |
| D39 | -1.05815 | 0.00003  | 0.00156  | 0.00091  | 0.00247  | -1.05568 |
| D40 | 2.93931  | -0.00002 | 0.00153  | -0.00011 | 0.00142  | 2.94073  |
| D41 | -1.24950 | -0.00005 | 0.00104  | -0.00024 | 0.00079  | -1.24870 |
| D42 | 0.86171  | 0.00000  | 0.00161  | -0.00013 | 0.00148  | 0.86319  |
| D43 | 2.95609  | -0.00003 | 0.00112  | -0.00026 | 0.00086  | 2.95695  |
| D44 | -1.23828 | 0.00003  | 0.00165  | -0.00010 | 0.00155  | -1.23672 |
| D45 | 0.85610  | 0.00001  | 0.00116  | -0.00023 | 0.00093  | 0.85703  |
| D46 | 3.13862  | 0.00000  | 0.00006  | 0.00029  | 0.00035  | 3.13896  |
| D47 | -0.00425 | 0.00001  | 0.00036  | 0.00029  | 0.00064  | -0.00361 |
| D48 | -0.00467 | 0.00000  | 0.00042  | 0.00024  | 0.00065  | -0.00402 |
| D49 | 3.13565  | 0.00001  | 0.00072  | 0.00023  | 0.00095  | 3.13660  |

|     |          |          |          |          |          |          |
|-----|----------|----------|----------|----------|----------|----------|
| D50 | 2.20861  | -0.00004 | 0.00172  | -0.00139 | 0.00033  | 2.20894  |
| D51 | -1.40674 | -0.00009 | 0.00123  | -0.00067 | 0.00055  | -1.40619 |
| D52 | -2.08494 | 0.00005  | 0.00202  | -0.00207 | -0.00005 | -2.08499 |
| D53 | 0.58289  | 0.00000  | 0.00153  | -0.00136 | 0.00016  | 0.58306  |
| D54 | -2.71231 | -0.00002 | -0.00042 | 0.00007  | -0.00036 | -2.71267 |
| D55 | -0.01683 | 0.00003  | 0.00027  | 0.00012  | 0.00039  | -0.01645 |
| D56 | -0.02523 | -0.00004 | -0.00132 | 0.00014  | -0.00118 | -0.02641 |
| D57 | 2.67026  | 0.00001  | -0.00064 | 0.00020  | -0.00044 | 2.66982  |
| D58 | 0.52253  | -0.00003 | -0.00521 | -0.00382 | -0.00902 | 0.51351  |
| D59 | -1.89822 | 0.00000  | -0.00421 | -0.00389 | -0.00809 | -1.90631 |
| D60 | 1.79620  | 0.00005  | -0.00552 | -0.00211 | -0.00763 | 1.78858  |
| D61 | -0.62441 | -0.00007 | -0.00555 | -0.00257 | -0.00812 | -0.63253 |
| D62 | 2.55115  | -0.00001 | -0.00022 | 0.00054  | 0.00032  | 2.55147  |
| D63 | -1.65808 | 0.00000  | -0.00021 | 0.00060  | 0.00039  | -1.65769 |
| D64 | 0.44165  | -0.00001 | -0.00022 | 0.00050  | 0.00028  | 0.44193  |
| D65 | 1.34504  | 0.00004  | 0.00015  | 0.00073  | 0.00087  | 1.34592  |
| D66 | -2.86419 | 0.00005  | 0.00016  | 0.00078  | 0.00094  | -2.86325 |
| D67 | -0.76446 | 0.00004  | 0.00015  | 0.00069  | 0.00083  | -0.76363 |
| D68 | -1.04236 | -0.00001 | 0.00049  | 0.00040  | 0.00089  | -1.04147 |
| D69 | 1.03159  | -0.00001 | 0.00050  | 0.00046  | 0.00096  | 1.03256  |
| D70 | 3.13132  | -0.00001 | 0.00049  | 0.00037  | 0.00085  | 3.13218  |

| Item                 | Value    | Threshold | Converged? |
|----------------------|----------|-----------|------------|
| Maximum Force        | 0.000225 | 0.000450  | YES        |
| RMS Force            | 0.000051 | 0.000300  | YES        |
| Maximum Displacement | 0.053075 | 0.001800  | NO         |
| RMS Displacement     | 0.008153 | 0.001200  | NO         |

Predicted change in Energy=-1.004469D-06

GradGradGradGradGradGradGradGradGradGradGradGradGradGradGradGradGradGradGrad

Input orientation:

| Center Number | Atomic Number | Atomic Type | Coordinates (Angstroms) |           |           |
|---------------|---------------|-------------|-------------------------|-----------|-----------|
|               |               |             | X                       | Y         | Z         |
| 1             | 6             | 0           | -2.642568               | 2.099997  | -0.190370 |
| 2             | 6             | 0           | -3.533090               | 1.116618  | 0.096494  |
| 3             | 7             | 0           | -2.823383               | -0.077486 | 0.110008  |
| 4             | 6             | 0           | -1.532061               | 0.184959  | -0.164514 |
| 5             | 7             | 0           | -1.402935               | 1.499109  | -0.352872 |
| 6             | 6             | 0           | -0.130095               | 2.185359  | -0.638062 |
| 7             | 6             | 0           | 0.455882                | 2.865059  | 0.604498  |
| 8             | 1             | 0           | -2.782918               | 3.161328  | -0.301422 |
| 9             | 1             | 0           | -4.591192               | 1.166131  | 0.277552  |
| 10            | 1             | 0           | 0.569797                | 1.431294  | -0.998395 |

|    |    |   |           |           |           |
|----|----|---|-----------|-----------|-----------|
| 11 | 1  | 0 | -0.304335 | 2.916544  | -1.428522 |
| 12 | 1  | 0 | -0.223666 | 3.649743  | 0.953537  |
| 13 | 1  | 0 | 0.533855  | 2.114997  | 1.405896  |
| 14 | 35 | 0 | 0.136602  | -2.667389 | -0.264830 |
| 15 | 1  | 0 | -0.756258 | -0.602780 | -0.227727 |
| 16 | 6  | 0 | -3.296529 | -1.403232 | 0.351551  |
| 17 | 6  | 0 | -4.552103 | -1.693217 | 0.665737  |
| 18 | 1  | 0 | -2.498992 | -2.136661 | 0.246153  |
| 19 | 1  | 0 | -4.823270 | -2.727182 | 0.829355  |
| 20 | 1  | 0 | -5.336347 | -0.953472 | 0.772095  |
| 21 | 7  | 0 | 1.723196  | 3.475156  | 0.220994  |
| 22 | 1  | 0 | 2.065972  | 4.094932  | 0.945402  |
| 23 | 1  | 0 | 2.420477  | 2.750898  | 0.061801  |
| 24 | 6  | 0 | 3.328287  | -0.425857 | -1.131737 |
| 25 | 6  | 0 | 3.259428  | -0.565414 | 0.323936  |
| 26 | 8  | 0 | 2.731139  | 0.621012  | -0.330172 |
| 27 | 1  | 0 | 4.269752  | -0.148040 | -1.599763 |
| 28 | 1  | 0 | 2.625983  | -0.986735 | -1.741016 |
| 29 | 1  | 0 | 2.472945  | -1.218396 | 0.696615  |
| 30 | 6  | 0 | 4.454529  | -0.358768 | 1.213188  |
| 31 | 1  | 0 | 4.155019  | 0.076189  | 2.171392  |
| 32 | 1  | 0 | 4.934251  | -1.320217 | 1.420308  |
| 33 | 1  | 0 | 5.187740  | 0.302889  | 0.745106  |

-----  
Distance matrix (angstroms):

|    |    | 1        | 2        | 3        | 4        | 5        |
|----|----|----------|----------|----------|----------|----------|
| 1  | C  | 0.000000 |          |          |          |          |
| 2  | C  | 1.357334 | 0.000000 |          |          |          |
| 3  | N  | 2.205528 | 1.389155 | 0.000000 |          |          |
| 4  | C  | 2.213881 | 2.222664 | 1.346014 | 0.000000 |          |
| 5  | N  | 1.387143 | 2.210383 | 2.172000 | 1.333845 | 0.000000 |
| 6  | C  | 2.553476 | 3.641725 | 3.596370 | 2.488244 | 1.473904 |
| 7  | C  | 3.289001 | 4.384862 | 4.433585 | 3.424359 | 2.497514 |
| 8  | H  | 1.076315 | 2.214031 | 3.265092 | 3.231433 | 2.161012 |
| 9  | H  | 2.210926 | 1.074622 | 2.167903 | 3.242900 | 3.267001 |
| 10 | H  | 3.379254 | 4.258108 | 3.875390 | 2.581960 | 2.076768 |
| 11 | H  | 2.768953 | 3.998783 | 4.204390 | 3.250629 | 2.091188 |
| 12 | H  | 3.092139 | 4.254825 | 4.621938 | 3.868678 | 2.778958 |
| 13 | H  | 3.554990 | 4.387635 | 4.213948 | 3.234076 | 2.687701 |
| 14 | Br | 5.518814 | 5.283551 | 3.950901 | 3.306114 | 4.442705 |
| 15 | H  | 3.296144 | 3.282110 | 2.159399 | 1.107429 | 2.202677 |
| 16 | C  | 3.604714 | 2.543750 | 1.428220 | 2.429407 | 3.536311 |
| 17 | C  | 4.332172 | 3.042630 | 2.430615 | 3.652056 | 4.598453 |
| 18 | H  | 4.261507 | 3.416956 | 2.089011 | 2.548239 | 3.844346 |

|    |    |          |          |          |          |          |
|----|----|----------|----------|----------|----------|----------|
| 19 | H  | 5.394160 | 4.120249 | 3.396748 | 4.505596 | 5.563981 |
| 20 | H  | 4.184072 | 2.827268 | 2.742389 | 4.079933 | 4.769952 |
| 21 | N  | 4.595670 | 5.762530 | 5.771046 | 4.644429 | 3.742563 |
| 22 | H  | 5.238329 | 6.398476 | 6.481725 | 5.428227 | 4.522956 |
| 23 | H  | 5.110938 | 6.173900 | 5.958201 | 4.717820 | 4.044429 |
| 24 | C  | 6.551124 | 7.139068 | 6.285407 | 4.993156 | 5.166874 |
| 25 | C  | 6.496344 | 7.001376 | 6.106098 | 4.874424 | 5.143729 |
| 26 | O  | 5.575273 | 6.298273 | 5.615548 | 4.288643 | 4.226362 |
| 27 | H  | 7.404069 | 8.084615 | 7.296634 | 5.985973 | 6.037153 |
| 28 | H  | 6.300004 | 6.762746 | 5.826545 | 4.598648 | 4.933411 |
| 29 | H  | 6.161733 | 6.471854 | 5.449484 | 4.330245 | 4.848577 |
| 30 | C  | 7.640961 | 8.199136 | 7.366419 | 6.167087 | 6.341461 |
| 31 | H  | 7.475354 | 8.030861 | 7.278119 | 6.149079 | 6.267971 |
| 32 | H  | 8.467605 | 8.909912 | 7.965059 | 6.825717 | 7.159098 |
| 33 | H  | 8.088167 | 8.782696 | 8.045256 | 6.782112 | 6.787746 |
|    |    | 6        | 7        | 8        | 9        | 10       |
| 6  | C  | 0.000000 |          |          |          |          |
| 7  | C  | 1.532748 | 0.000000 |          |          |          |
| 8  | H  | 2.846632 | 3.376135 | 0.000000 |          |          |
| 9  | H  | 4.666751 | 5.335373 | 2.754247 | 0.000000 |          |
| 10 | H  | 1.090092 | 2.153584 | 3.836598 | 5.322984 | 0.000000 |
| 11 | H  | 1.090788 | 2.171117 | 2.733797 | 4.934752 | 1.776255 |
| 12 | H  | 2.164802 | 1.095145 | 2.891927 | 5.069573 | 3.059598 |
| 13 | H  | 2.150243 | 1.100414 | 3.874367 | 5.332880 | 2.499871 |
| 14 | Br | 4.874381 | 5.609426 | 6.519116 | 6.110818 | 4.186285 |
| 15 | H  | 2.886897 | 3.766668 | 4.275662 | 4.253360 | 2.547510 |
| 16 | C  | 4.887087 | 5.688838 | 4.639545 | 2.878064 | 4.980499 |
| 17 | C  | 6.024732 | 6.772115 | 5.256616 | 2.885842 | 6.226216 |
| 18 | H  | 5.007331 | 5.820386 | 5.333773 | 3.909824 | 4.867923 |
| 19 | H  | 6.950702 | 7.693710 | 6.333738 | 3.939065 | 7.051153 |
| 20 | H  | 6.240662 | 6.939682 | 4.960244 | 2.300553 | 6.610921 |
| 21 | N  | 2.415832 | 1.457868 | 4.547139 | 6.723562 | 2.644733 |
| 22 | H  | 3.313086 | 2.054554 | 5.092929 | 7.303542 | 3.621029 |
| 23 | H  | 2.704637 | 2.041368 | 5.232179 | 7.191769 | 2.508065 |
| 24 | C  | 4.361487 | 4.700569 | 7.134714 | 8.199919 | 3.328072 |
| 25 | C  | 4.470017 | 4.439226 | 7.126683 | 8.039442 | 3.601322 |
| 26 | O  | 3.275460 | 3.329587 | 6.071149 | 7.367700 | 2.403015 |
| 27 | H  | 5.072305 | 5.336960 | 7.897960 | 9.152469 | 4.067630 |
| 28 | H  | 4.344497 | 5.004707 | 6.966711 | 7.797247 | 3.259794 |
| 29 | H  | 4.488064 | 4.555396 | 6.913910 | 7.467504 | 3.676396 |
| 30 | C  | 5.560439 | 5.172305 | 8.189368 | 9.220943 | 4.815243 |
| 31 | H  | 5.541104 | 4.890457 | 7.985478 | 9.015032 | 4.973699 |
| 32 | H  | 6.494117 | 6.183678 | 9.088636 | 9.910695 | 5.698193 |
| 33 | H  | 5.808289 | 5.382840 | 8.532132 | 9.828088 | 5.063447 |

|    |    | 11       | 12       | 13       | 14        | 15        |
|----|----|----------|----------|----------|-----------|-----------|
| 11 | H  | 0.000000 |          |          |           |           |
| 12 | H  | 2.493651 | 0.000000 |          |           |           |
| 13 | H  | 3.062509 | 1.770285 | 0.000000 |           |           |
| 14 | Br | 5.720919 | 6.443630 | 5.081374 | 0.000000  |           |
| 15 | H  | 3.745902 | 4.445559 | 3.423365 | 2.249709  | 0.000000  |
| 16 | C  | 5.548184 | 5.944530 | 5.306734 | 3.710041  | 2.725667  |
| 17 | C  | 6.609035 | 6.882254 | 6.396663 | 4.878414  | 4.049169  |
| 18 | H  | 5.758119 | 6.257793 | 5.349744 | 2.736628  | 2.369488  |
| 19 | H  | 7.574327 | 7.863647 | 7.244162 | 5.079483  | 4.708619  |
| 20 | H  | 6.718697 | 6.882007 | 6.654058 | 5.828027  | 4.701047  |
| 21 | N  | 2.672795 | 2.087432 | 2.160684 | 6.362717  | 4.793601  |
| 22 | H  | 3.555625 | 2.332531 | 2.545501 | 7.135553  | 5.604437  |
| 23 | H  | 3.110162 | 2.931656 | 2.402145 | 5.889025  | 4.628459  |
| 24 | C  | 4.945268 | 5.794416 | 4.550206 | 3.995353  | 4.187129  |
| 25 | C  | 5.281624 | 5.504170 | 3.972907 | 3.810117  | 4.053575  |
| 26 | O  | 3.961054 | 4.421763 | 3.173953 | 4.189209  | 3.697310  |
| 27 | H  | 5.508474 | 6.413525 | 5.302099 | 5.021165  | 5.229728  |
| 28 | H  | 4.890808 | 6.072729 | 4.888844 | 3.346752  | 3.725188  |
| 29 | H  | 5.415461 | 5.571040 | 3.921053 | 2.912466  | 3.414842  |
| 30 | C  | 6.352408 | 6.166124 | 4.639864 | 5.114563  | 5.411846  |
| 31 | H  | 6.396315 | 5.781552 | 4.225583 | 5.441514  | 5.507942  |
| 32 | H  | 7.314969 | 7.177916 | 5.582508 | 5.260418  | 5.967632  |
| 33 | H  | 6.459005 | 6.366175 | 5.037760 | 5.946135  | 6.090793  |
|    |    | 16       | 17       | 18       | 19        | 20        |
| 16 | C  | 0.000000 |          |          |           |           |
| 17 | C  | 1.326375 | 0.000000 |          |           |           |
| 18 | H  | 1.088619 | 2.141952 | 0.000000 |           |           |
| 19 | H  | 2.076554 | 1.081382 | 2.468017 | 0.000000  |           |
| 20 | H  | 2.130728 | 1.083316 | 3.118836 | 1.847315  | 0.000000  |
| 21 | N  | 7.000954 | 8.141822 | 7.022820 | 9.038546  | 8.351863  |
| 22 | H  | 7.703174 | 8.796579 | 7.756326 | 9.696203  | 8.961627  |
| 23 | H  | 7.072829 | 8.290463 | 6.937103 | 9.114295  | 8.625265  |
| 24 | C  | 6.858833 | 8.181544 | 6.227569 | 8.694243  | 8.887005  |
| 25 | C  | 6.609332 | 7.899923 | 5.969445 | 8.382046  | 8.616194  |
| 26 | O  | 6.394927 | 7.706692 | 5.940638 | 8.344100  | 8.293270  |
| 27 | H  | 7.914022 | 9.238246 | 7.292319 | 9.758875  | 9.927315  |
| 28 | H  | 6.295114 | 7.603716 | 5.615741 | 8.070151  | 8.349584  |
| 29 | H  | 5.782738 | 7.041144 | 5.076050 | 7.451766  | 7.814149  |
| 30 | C  | 7.868432 | 9.121396 | 7.242065 | 9.583019  | 9.818833  |
| 31 | H  | 7.811919 | 9.011757 | 7.271803 | 9.501033  | 9.649055  |
| 32 | H  | 8.300294 | 9.523625 | 7.569566 | 9.876133  | 10.297566 |
| 33 | H  | 8.663057 | 9.942600 | 8.079989 | 10.459864 | 10.598849 |
|    |    | 21       | 22       | 23       | 24        | 25        |

|    |   |          |          |          |          |          |
|----|---|----------|----------|----------|----------|----------|
| 21 | N | 0.000000 |          |          |          |          |
| 22 | H | 1.013106 | 0.000000 |          |          |          |
| 23 | H | 1.017886 | 1.647073 | 0.000000 |          |          |
| 24 | C | 4.429910 | 5.132785 | 3.512895 | 0.000000 |          |
| 25 | C | 4.323981 | 4.850709 | 3.430813 | 1.463967 | 0.000000 |
| 26 | O | 3.076666 | 3.760007 | 2.187823 | 1.447421 | 1.454150 |
| 27 | H | 4.788284 | 5.416394 | 3.818961 | 1.087468 | 2.212594 |
| 28 | H | 4.957114 | 5.775274 | 4.154790 | 1.085834 | 2.200634 |
| 29 | H | 4.776795 | 5.334695 | 4.020079 | 2.168547 | 1.088040 |
| 30 | C | 4.810780 | 5.060865 | 3.890126 | 2.602228 | 1.503907 |
| 31 | H | 4.612027 | 4.692277 | 3.822706 | 3.441831 | 2.151008 |
| 32 | H | 5.894475 | 6.146251 | 4.973789 | 3.145144 | 2.139344 |
| 33 | H | 4.726631 | 4.915805 | 3.757313 | 2.740653 | 2.156322 |
|    |   | 26       | 27       | 28       | 29       | 30       |
| 26 | O | 0.000000 |          |          |          |          |
| 27 | H | 2.137904 | 0.000000 |          |          |          |
| 28 | H | 2.141585 | 1.850767 | 0.000000 |          |          |
| 29 | H | 2.122351 | 3.106047 | 2.453392 | 0.000000 |          |
| 30 | C | 2.512370 | 2.826879 | 3.530615 | 2.220919 | 0.000000 |
| 31 | H | 2.929521 | 3.779558 | 4.332978 | 2.584626 | 1.094098 |
| 32 | H | 3.418516 | 3.307021 | 3.928522 | 2.567514 | 1.094265 |
| 33 | H | 2.700429 | 2.558213 | 3.795594 | 3.112358 | 1.092927 |
|    |   | 31       | 32       | 33       |          |          |
| 31 | H | 0.000000 |          |          |          |          |
| 32 | H | 1.766714 | 0.000000 |          |          |          |
| 33 | H | 1.775443 | 1.776127 | 0.000000 |          |          |

Stoichiometry C10H18BrN3O

Framework group C1[X(C10H18BrN3O)]

Deg. of freedom 93

Full point group C1 NOp 1

Largest Abelian subgroup C1 NOp 1

Largest concise Abelian subgroup C1 NOp 1

Standard orientation:

| Center<br>Number | Atomic<br>Number | Atomic<br>Type | Coordinates (Angstroms) |          |           |
|------------------|------------------|----------------|-------------------------|----------|-----------|
|                  |                  |                | X                       | Y        | Z         |
| 1                | 6                | 0              | -2.346526               | 2.473177 | -0.264478 |
| 2                | 6                | 0              | -3.332917               | 1.593183 | 0.043743  |
| 3                | 7                | 0              | -2.747352               | 0.334563 | 0.096117  |
| 4                | 6                | 0              | -1.434988               | 0.457581 | -0.176500 |
| 5                | 7                | 0              | -1.173153               | 1.746053 | -0.401054 |
| 6                | 6                | 0              | 0.163621                | 2.292097 | -0.696462 |
| 7                | 6                | 0              | 0.809892                | 2.944927 | 0.530511  |

|    |    |   |           |           |           |
|----|----|---|-----------|-----------|-----------|
| 8  | 1  | 0 | -2.378623 | 3.539593  | -0.406526 |
| 9  | 1  | 0 | -4.381385 | 1.754218  | 0.215770  |
| 10 | 1  | 0 | 0.785398  | 1.461287  | -1.030301 |
| 11 | 1  | 0 | 0.067388  | 3.013977  | -1.508526 |
| 12 | 1  | 0 | 0.211490  | 3.803812  | 0.852341  |
| 13 | 1  | 0 | 0.808398  | 2.214286  | 1.353355  |
| 14 | 35 | 0 | -0.062163 | -2.550023 | -0.184125 |
| 15 | 1  | 0 | -0.742346 | -0.405782 | -0.211851 |
| 16 | 6  | 0 | -3.352843 | -0.929257 | 0.371706  |
| 17 | 6  | 0 | -4.632589 | -1.082118 | 0.685004  |
| 18 | 1  | 0 | -2.632921 | -1.742017 | 0.292806  |
| 19 | 1  | 0 | -5.007368 | -2.078356 | 0.875884  |
| 20 | 1  | 0 | -5.338654 | -0.264388 | 0.764780  |
| 21 | 7  | 0 | 2.133903  | 3.412954  | 0.138948  |
| 22 | 1  | 0 | 2.534372  | 4.015717  | 0.847951  |
| 23 | 1  | 0 | 2.755236  | 2.617858  | 0.005301  |
| 24 | 6  | 0 | 3.343015  | -0.667313 | -1.091329 |
| 25 | 6  | 0 | 3.254246  | -0.757125 | 0.367182  |
| 26 | 8  | 0 | 2.851118  | 0.457086  | -0.324000 |
| 27 | 1  | 0 | 4.309682  | -0.499361 | -1.560300 |
| 28 | 1  | 0 | 2.590308  | -1.171968 | -1.689485 |
| 29 | 1  | 0 | 2.404328  | -1.316539 | 0.752571  |
| 30 | 6  | 0 | 4.460308  | -0.646297 | 1.258736  |
| 31 | 1  | 0 | 4.202136  | -0.155895 | 2.202083  |
| 32 | 1  | 0 | 4.839711  | -1.644787 | 1.496407  |
| 33 | 1  | 0 | 5.258507  | -0.075645 | 0.777359  |

-----  
Rotational constants (GHZ):      0.4213572      0.2925557      0.1828560

Standard basis: 6-311++G(d,p) (5D, 7F)

There are 499 symmetry adapted cartesian basis functions of A symmetry.

There are 482 symmetry adapted basis functions of A symmetry.

482 basis functions, 760 primitive gaussians, 499 cartesian basis functions

71 alpha electrons      71 beta electrons

nuclear repulsion energy      1313.0441780097 Hartrees.

NAtoms= 33 NActive= 33 NUniq= 33 SFac= 1.00D+00 NATFMM= 60 NAOKFM=F

Big=F

Integral buffers will be 131072 words long.

Raffenetti 2 integral format.

Two-electron integral symmetry is turned on.

One-electron integrals computed using PRISM.

NBasis= 482 RedAO= T EigKep= 3.64D-06 NBF= 482

NBsUse= 482 1.00D-06 EigRej= -1.00D+00 NBFU= 482

Initial guess from the checkpoint file:

"/home/suqian/liuwen/qianmengshijie/nh2po/nh2po.chk"



B after Tr= 0.000000 0.000000 0.000000  
 Rot= 1.000000 -0.000099 -0.000032 0.000090 Ang= -0.02 deg.  
 ExpMin= 3.50D-02 ExpMax= 4.40D+05 ExpMxC= 1.51D+04 IAcc=3 IRadAn= 5 AccDes=  
 0.00D+00  
 Harris functional with IExCor= 402 and IRadAn= 5 diagonalized for initial guess.  
 HarFok: IExCor= 402 AccDes= 0.00D+00 IRadAn= 5 IDoV= 1 UseB2=F ITyADJ=14  
 ICtDFT= 3500011 ScaDFX= 1.000000 1.000000 1.000000 1.000000  
 FoFCou: FMM=F IPFlag= 0 FMFlag= 100000 FMFlg1= 0  
 NFxFlg= 0 DoJE=T BraDBF=F KetDBF=T FulRan=T  
 wScrn= 0.000000 ICntrl= 500 IOpCl= 0 I1Cent= 200000004 NGrid=  
 0  
 NMat0= 1 NMatS0= 1 NMatT0= 0 NMatD0= 1 NMtDS0= 0  
 NMtDT0= 0

Petite list used in FoFCou.

Requested convergence on RMS density matrix=1.00D-08 within 128 cycles.

Requested convergence on MAX density matrix=1.00D-06.

Requested convergence on energy=1.00D-06.

No special actions if energy rises.

SCF Done: E(RB3LYP) = -3205.64837802 A.U. after 9 cycles

NFock= 9 Conv=0.83D-08 -V/T= 2.0018

Calling FoFJK, ICntrl= 2127 FMM=F ISym2X=0 I1Cent= 0 IOpClX= 0 NMat=1 NMatS=1  
 NMatT=0.

\*\*\*\*\* Axes restored to original set \*\*\*\*\*

| Center<br>Number | Atomic<br>Number | Forces (Hartrees/Bohr) |              |              |
|------------------|------------------|------------------------|--------------|--------------|
|                  |                  | X                      | Y            | Z            |
| 1                | 6                | 0.000004678            | -0.000014000 | -0.000002250 |
| 2                | 6                | 0.000000788            | 0.000016132  | 0.000011788  |
| 3                | 7                | -0.000027267           | -0.000033104 | -0.000005922 |
| 4                | 6                | -0.000017412           | 0.000038105  | 0.000048169  |
| 5                | 7                | -0.000000446           | 0.000055562  | -0.000027599 |
| 6                | 6                | -0.000017945           | -0.000026230 | -0.000006400 |
| 7                | 6                | -0.000085192           | -0.000047734 | 0.000007358  |
| 8                | 1                | -0.000001798           | 0.000001966  | -0.000008450 |
| 9                | 1                | 0.000003174            | 0.000005454  | 0.000007212  |
| 10               | 1                | 0.000007108            | 0.000028323  | -0.000000183 |
| 11               | 1                | -0.000000999           | -0.000001244 | 0.000002914  |
| 12               | 1                | 0.000005008            | -0.000005507 | -0.000007995 |
| 13               | 1                | 0.000010371            | 0.000008994  | -0.000014062 |
| 14               | 35               | -0.000029755           | 0.000053019  | 0.000013377  |
| 15               | 1                | 0.000033388            | -0.000122304 | -0.000020507 |
| 16               | 6                | 0.000015110            | 0.000024605  | -0.000004374 |
| 17               | 6                | 0.000007650            | -0.000002913 | -0.000013260 |

|    |   |              |              |              |
|----|---|--------------|--------------|--------------|
| 18 | 1 | 0.000006533  | -0.000003540 | 0.000003841  |
| 19 | 1 | 0.000002945  | 0.000002296  | 0.000002168  |
| 20 | 1 | -0.000008340 | -0.000002312 | -0.000006251 |
| 21 | 7 | 0.000056775  | 0.000072244  | -0.000012962 |
| 22 | 1 | 0.000014652  | -0.000015005 | 0.000015894  |
| 23 | 1 | 0.000011991  | -0.000005500 | 0.000012916  |
| 24 | 6 | 0.000062047  | 0.000028768  | -0.000096828 |
| 25 | 6 | -0.000040631 | -0.000030981 | 0.000187382  |
| 26 | 8 | 0.000057285  | -0.000043742 | -0.000019284 |
| 27 | 1 | -0.000024639 | 0.000003051  | -0.000004497 |
| 28 | 1 | -0.000022468 | -0.000008852 | 0.000057899  |
| 29 | 1 | -0.000028552 | -0.000022704 | -0.000087522 |
| 30 | 6 | -0.000015665 | 0.000043004  | -0.000046633 |
| 31 | 1 | 0.000019842  | -0.000004806 | 0.000019926  |
| 32 | 1 | 0.000006377  | -0.000000987 | -0.000012238 |
| 33 | 1 | -0.000004610 | 0.000009943  | 0.000006371  |

-----  
Cartesian Forces: Max 0.000187382 RMS 0.000036273

GradGradGradGradGradGradGradGradGradGradGradGradGradGradGradGradGradGradGrad

Berny optimization.

Using GEDIIS/GDIIS optimizer.

FormGI is forming the generalized inverse of G from B-inverse, IUseBI=4.

GSVD: received Info= 1 from GESDD.

Internal Forces: Max 0.000093502 RMS 0.000025315

Search for a local minimum.

Step number 44 out of a maximum of 172

All quantities printed in internal units (Hartrees-Bohrs-Radians)

Mixed Optimization -- En-DIIS/RFO-DIIS

Swapping is turned off.

Update second derivatives using D2CorX and points

|    |    |    |    |    |    |    |  |  |  |
|----|----|----|----|----|----|----|--|--|--|
| 31 | 32 | 33 | 34 | 35 |    |    |  |  |  |
|    |    | 36 | 37 | 38 | 39 | 40 |  |  |  |
|    |    | 41 | 42 | 43 | 44 |    |  |  |  |

DE= -2.12D-06 DEPred=-1.00D-06 R= 2.11D+00

TightC=F SS= 1.41D+00 RLast= 2.96D-02 DXNew= 1.7446D+00 8.8738D-02

Trust test= 2.11D+00 RLast= 2.96D-02 DXMaxT set to 1.04D+00

ITU= 1 1 1 1 1 1 1 1 1 1 1 1 1 1 1 1 0 0

ITU= -1 1 -1 1 1 1 1 1 1 1 1 0 -1 -1 1 1 1 -1 1

ITU= 0 0 -1 0

|                 |         |         |         |         |         |
|-----------------|---------|---------|---------|---------|---------|
| Eigenvalues --- | 0.00064 | 0.00100 | 0.00129 | 0.00240 | 0.00452 |
| Eigenvalues --- | 0.00585 | 0.00705 | 0.00759 | 0.01266 | 0.01420 |
| Eigenvalues --- | 0.01885 | 0.02000 | 0.02173 | 0.02366 | 0.02382 |
| Eigenvalues --- | 0.02583 | 0.02695 | 0.02895 | 0.03066 | 0.03098 |
| Eigenvalues --- | 0.03226 | 0.03519 | 0.03648 | 0.03981 | 0.04057 |

|                 |         |         |         |         |         |
|-----------------|---------|---------|---------|---------|---------|
| Eigenvalues --- | 0.04278 | 0.04462 | 0.04717 | 0.05489 | 0.05552 |
| Eigenvalues --- | 0.05724 | 0.05748 | 0.05909 | 0.07933 | 0.08668 |
| Eigenvalues --- | 0.08944 | 0.09569 | 0.10669 | 0.11478 | 0.11673 |
| Eigenvalues --- | 0.12697 | 0.13109 | 0.13714 | 0.15769 | 0.15971 |
| Eigenvalues --- | 0.16001 | 0.16002 | 0.16013 | 0.16028 | 0.16169 |
| Eigenvalues --- | 0.16209 | 0.19165 | 0.21472 | 0.21700 | 0.22127 |
| Eigenvalues --- | 0.23171 | 0.23450 | 0.25833 | 0.26573 | 0.28954 |
| Eigenvalues --- | 0.29191 | 0.30335 | 0.30628 | 0.32130 | 0.32686 |
| Eigenvalues --- | 0.33696 | 0.34290 | 0.34336 | 0.34408 | 0.34550 |
| Eigenvalues --- | 0.34715 | 0.34767 | 0.35131 | 0.35227 | 0.35339 |
| Eigenvalues --- | 0.35557 | 0.35702 | 0.35889 | 0.36162 | 0.36423 |
| Eigenvalues --- | 0.36626 | 0.39418 | 0.41496 | 0.41902 | 0.42508 |
| Eigenvalues --- | 0.44697 | 0.45473 | 0.46520 | 0.49578 | 0.54904 |
| Eigenvalues --- | 0.58328 | 0.60646 | 1.01552 |         |         |

En-DIIS/RFO-DIIS IScMMF= 0 using points: 44 43 42 41 40

RFO step: Lambda=-2.63972698D-07.

DidBck=F Rises=F RFO-DIIS coefs: 1.97065 -0.95064 -0.83282 0.89632 -  
0.08352

Iteration 1 RMS(Cart)= 0.00944589 RMS(Int)= 0.00003520

Iteration 2 RMS(Cart)= 0.00005094 RMS(Int)= 0.00000812

Iteration 3 RMS(Cart)= 0.00000000 RMS(Int)= 0.00000812

| Variable | Old X   | -DE/DX   | Delta X<br>(Linear) | Delta X<br>(Quad) | Delta X<br>(Total) | New X   |
|----------|---------|----------|---------------------|-------------------|--------------------|---------|
| R1       | 2.56499 | 0.00000  | -0.00002            | -0.00001          | -0.00003           | 2.56496 |
| R2       | 2.62132 | 0.00000  | 0.00000             | 0.00000           | 0.00000            | 2.62132 |
| R3       | 2.03394 | 0.00000  | 0.00001             | 0.00001           | 0.00002            | 2.03396 |
| R4       | 2.62512 | 0.00001  | 0.00000             | 0.00002           | 0.00002            | 2.62514 |
| R5       | 2.03074 | 0.00000  | -0.00001            | 0.00000           | -0.00001           | 2.03073 |
| R6       | 2.54360 | -0.00001 | -0.00006            | 0.00004           | -0.00002           | 2.54358 |
| R7       | 2.69894 | -0.00002 | 0.00000             | -0.00004          | -0.00003           | 2.69891 |
| R8       | 2.52060 | 0.00004  | 0.00014             | -0.00002          | 0.00012            | 2.52072 |
| R9       | 2.09274 | 0.00005  | 0.00015             | 0.00011           | 0.00026            | 2.09300 |
| R10      | 2.78528 | 0.00001  | 0.00002             | -0.00006          | -0.00003           | 2.78524 |
| R11      | 2.89647 | 0.00000  | -0.00008            | 0.00003           | -0.00005           | 2.89643 |
| R12      | 2.05998 | -0.00002 | 0.00003             | -0.00003          | 0.00001            | 2.05998 |
| R13      | 2.06129 | 0.00000  | -0.00003            | 0.00000           | -0.00002           | 2.06127 |
| R14      | 2.06952 | -0.00001 | -0.00004            | -0.00001          | -0.00005           | 2.06948 |
| R15      | 2.07948 | -0.00002 | -0.00013            | 0.00002           | -0.00011           | 2.07937 |
| R16      | 2.75497 | 0.00009  | 0.00057             | -0.00011          | 0.00046            | 2.75543 |
| R17      | 4.25133 | -0.00006 | -0.00095            | -0.00046          | -0.00140           | 4.24993 |
| R18      | 2.50649 | -0.00001 | -0.00001            | 0.00001           | -0.00001           | 2.50648 |
| R19      | 2.05719 | 0.00001  | -0.00003            | 0.00002           | -0.00001           | 2.05718 |
| R20      | 2.04352 | 0.00000  | -0.00001            | 0.00001           | 0.00000            | 2.04351 |
| R21      | 2.04717 | 0.00000  | -0.00001            | 0.00000           | 0.00000            | 2.04717 |

|     |         |          |          |          |          |         |
|-----|---------|----------|----------|----------|----------|---------|
| R22 | 1.91449 | 0.00001  | 0.00008  | -0.00001 | 0.00007  | 1.91457 |
| R23 | 1.92353 | 0.00003  | 0.00008  | -0.00004 | 0.00006  | 1.92358 |
| R24 | 4.13439 | 0.00002  | 0.00203  | 0.00042  | 0.00245  | 4.13683 |
| R25 | 2.76650 | 0.00005  | 0.00009  | 0.00018  | 0.00026  | 2.76676 |
| R26 | 2.73523 | -0.00001 | -0.00047 | -0.00016 | -0.00062 | 2.73461 |
| R27 | 2.05502 | -0.00002 | 0.00007  | -0.00004 | 0.00003  | 2.05504 |
| R28 | 2.05193 | -0.00001 | 0.00001  | 0.00002  | 0.00003  | 2.05196 |
| R29 | 2.74794 | -0.00002 | 0.00055  | -0.00007 | 0.00048  | 2.74843 |
| R30 | 2.05610 | 0.00000  | 0.00002  | 0.00004  | 0.00006  | 2.05616 |
| R31 | 2.84197 | -0.00001 | -0.00012 | -0.00001 | -0.00012 | 2.84185 |
| R32 | 2.06755 | 0.00001  | 0.00000  | -0.00001 | -0.00001 | 2.06753 |
| R33 | 2.06786 | 0.00000  | 0.00002  | 0.00000  | 0.00002  | 2.06788 |
| R34 | 2.06533 | 0.00000  | 0.00001  | 0.00001  | 0.00001  | 2.06535 |
| A1  | 1.87259 | 0.00001  | 0.00005  | 0.00000  | 0.00005  | 1.87264 |
| A2  | 2.27925 | -0.00001 | 0.00008  | -0.00003 | 0.00005  | 2.27930 |
| A3  | 2.13128 | -0.00001 | -0.00013 | 0.00003  | -0.00010 | 2.13119 |
| A4  | 1.86464 | 0.00000  | -0.00004 | 0.00001  | -0.00003 | 1.86461 |
| A5  | 2.27605 | 0.00000  | -0.00007 | 0.00002  | -0.00004 | 2.27600 |
| A6  | 2.14243 | 0.00000  | 0.00011  | -0.00003 | 0.00008  | 2.14251 |
| A7  | 1.89710 | 0.00000  | 0.00008  | -0.00002 | 0.00006  | 1.89716 |
| A8  | 2.25275 | 0.00005  | 0.00006  | 0.00003  | 0.00008  | 2.25283 |
| A9  | 2.13330 | -0.00005 | -0.00014 | -0.00001 | -0.00014 | 2.13316 |
| A10 | 1.88996 | 0.00001  | -0.00005 | 0.00000  | -0.00005 | 1.88992 |
| A11 | 2.14722 | -0.00006 | 0.00011  | -0.00024 | -0.00013 | 2.14708 |
| A12 | 2.24585 | 0.00006  | -0.00004 | 0.00025  | 0.00021  | 2.24606 |
| A13 | 1.90047 | -0.00002 | -0.00004 | 0.00001  | -0.00002 | 1.90044 |
| A14 | 2.20524 | -0.00001 | -0.00032 | -0.00003 | -0.00035 | 2.20489 |
| A15 | 2.17688 | 0.00004  | 0.00033  | 0.00000  | 0.00033  | 2.17720 |
| A16 | 1.96034 | -0.00004 | 0.00013  | -0.00024 | -0.00011 | 1.96023 |
| A17 | 1.87166 | 0.00004  | 0.00044  | 0.00013  | 0.00057  | 1.87223 |
| A18 | 1.89060 | 0.00000  | -0.00027 | 0.00008  | -0.00019 | 1.89041 |
| A19 | 1.90632 | -0.00001 | -0.00010 | 0.00008  | -0.00002 | 1.90630 |
| A20 | 1.92974 | 0.00002  | -0.00022 | 0.00004  | -0.00018 | 1.92955 |
| A21 | 1.90362 | -0.00001 | 0.00004  | -0.00008 | -0.00004 | 1.90358 |
| A22 | 1.91653 | -0.00002 | 0.00014  | -0.00014 | 0.00000  | 1.91654 |
| A23 | 1.89148 | -0.00002 | 0.00023  | -0.00011 | 0.00012  | 1.89160 |
| A24 | 1.88038 | 0.00007  | -0.00017 | 0.00024  | 0.00006  | 1.88044 |
| A25 | 1.87574 | 0.00001  | 0.00014  | -0.00002 | 0.00013  | 1.87587 |
| A26 | 1.90011 | -0.00002 | -0.00005 | -0.00002 | -0.00007 | 1.90004 |
| A27 | 1.99899 | -0.00002 | -0.00027 | 0.00003  | -0.00024 | 1.99875 |
| A28 | 2.16109 | 0.00002  | 0.00011  | 0.00000  | 0.00011  | 2.16120 |
| A29 | 1.94583 | -0.00001 | -0.00007 | 0.00004  | -0.00003 | 1.94580 |
| A30 | 2.17626 | -0.00001 | -0.00004 | -0.00004 | -0.00008 | 2.17618 |
| A31 | 2.07403 | -0.00001 | 0.00001  | -0.00004 | -0.00003 | 2.07399 |

|     |          |          |          |          |          |          |
|-----|----------|----------|----------|----------|----------|----------|
| A32 | 2.16428  | 0.00001  | 0.00005  | 0.00003  | 0.00008  | 2.16436  |
| A33 | 2.04488  | 0.00000  | -0.00005 | 0.00001  | -0.00005 | 2.04483  |
| A34 | 1.94125  | -0.00003 | -0.00045 | 0.00002  | -0.00043 | 1.94081  |
| A35 | 1.91651  | 0.00006  | -0.00020 | 0.00007  | -0.00014 | 1.91637  |
| A36 | 1.89161  | -0.00003 | -0.00042 | 0.00001  | -0.00041 | 1.89120  |
| A37 | 2.08635  | 0.00006  | 0.00049  | 0.00003  | 0.00056  | 2.08691  |
| A38 | 2.06948  | -0.00008 | 0.00010  | 0.00002  | 0.00008  | 2.06957  |
| A39 | 1.99406  | -0.00001 | 0.00035  | 0.00003  | 0.00037  | 1.99443  |
| A40 | 2.00148  | 0.00001  | 0.00028  | -0.00015 | 0.00013  | 2.00162  |
| A41 | 2.03803  | 0.00002  | -0.00082 | 0.00003  | -0.00079 | 2.03724  |
| A42 | 2.01728  | -0.00006 | -0.00042 | 0.00029  | -0.00014 | 2.01714  |
| A43 | 2.13823  | -0.00001 | -0.00044 | -0.00015 | -0.00059 | 2.13764  |
| A44 | 1.96180  | 0.00001  | -0.00049 | 0.00021  | -0.00027 | 1.96154  |
| A45 | 2.02926  | -0.00005 | -0.00016 | -0.00009 | -0.00026 | 2.02900  |
| A46 | 2.04244  | 0.00008  | 0.00103  | -0.00013 | 0.00091  | 2.04334  |
| A47 | 2.60982  | -0.00001 | 0.00411  | 0.00190  | 0.00604  | 2.61587  |
| A48 | 2.44227  | 0.00001  | -0.00352 | -0.00147 | -0.00503 | 2.43724  |
| A49 | 1.93364  | 0.00004  | 0.00020  | 0.00002  | 0.00022  | 1.93386  |
| A50 | 1.91726  | -0.00001 | -0.00005 | 0.00001  | -0.00003 | 1.91722  |
| A51 | 1.94235  | -0.00001 | -0.00007 | -0.00004 | -0.00010 | 1.94224  |
| A52 | 1.87920  | -0.00001 | 0.00005  | -0.00010 | -0.00005 | 1.87915  |
| A53 | 1.89448  | -0.00002 | -0.00005 | 0.00006  | 0.00001  | 1.89449  |
| A54 | 1.89534  | 0.00000  | -0.00009 | 0.00005  | -0.00004 | 1.89530  |
| A55 | 3.48871  | 0.00001  | -0.00190 | -0.00159 | -0.00349 | 3.48522  |
| A56 | 2.52958  | 0.00009  | 0.00103  | 0.00105  | 0.00205  | 2.53163  |
| A57 | 2.97519  | -0.00004 | -0.00573 | -0.00329 | -0.00902 | 2.96617  |
| A58 | 3.10800  | -0.00001 | 0.00006  | -0.00163 | -0.00158 | 3.10643  |
| D1  | 0.00319  | 0.00000  | -0.00009 | 0.00004  | -0.00005 | 0.00314  |
| D2  | -3.12566 | 0.00000  | -0.00027 | -0.00037 | -0.00065 | -3.12631 |
| D3  | 3.13281  | -0.00001 | 0.00028  | 0.00014  | 0.00042  | 3.13323  |
| D4  | 0.00396  | 0.00000  | 0.00010  | -0.00028 | -0.00017 | 0.00378  |
| D5  | -0.00457 | 0.00000  | 0.00013  | -0.00016 | -0.00003 | -0.00460 |
| D6  | -3.11007 | 0.00000  | 0.00103  | 0.00028  | 0.00131  | -3.10875 |
| D7  | -3.13543 | 0.00000  | -0.00021 | -0.00025 | -0.00046 | -3.13588 |
| D8  | 0.04226  | 0.00000  | 0.00069  | 0.00019  | 0.00089  | 0.04315  |
| D9  | -0.00076 | 0.00001  | 0.00003  | 0.00009  | 0.00011  | -0.00065 |
| D10 | -3.13349 | 0.00001  | 0.00044  | -0.00022 | 0.00022  | -3.13327 |
| D11 | 3.12930  | 0.00001  | 0.00019  | 0.00047  | 0.00065  | 3.12995  |
| D12 | -0.00343 | 0.00000  | 0.00060  | 0.00016  | 0.00076  | -0.00267 |
| D13 | -0.00209 | -0.00001 | 0.00005  | -0.00019 | -0.00014 | -0.00222 |
| D14 | -3.12645 | -0.00001 | -0.00095 | -0.00084 | -0.00179 | -3.12824 |
| D15 | 3.13137  | -0.00001 | -0.00033 | 0.00010  | -0.00023 | 3.13114  |
| D16 | 0.00701  | 0.00000  | -0.00132 | -0.00056 | -0.00189 | 0.00512  |
| D17 | -0.04828 | 0.00002  | 0.00522  | 0.00263  | 0.00785  | -0.04043 |

|     |          |          |          |          |          |          |
|-----|----------|----------|----------|----------|----------|----------|
| D18 | 3.09454  | 0.00001  | 0.00490  | 0.00249  | 0.00739  | 3.10193  |
| D19 | 3.10324  | 0.00001  | 0.00568  | 0.00228  | 0.00796  | 3.11121  |
| D20 | -0.03713 | 0.00001  | 0.00536  | 0.00215  | 0.00751  | -0.02962 |
| D21 | 0.00410  | 0.00001  | -0.00011 | 0.00021  | 0.00010  | 0.00421  |
| D22 | 3.11032  | 0.00000  | -0.00101 | -0.00022 | -0.00123 | 3.10909  |
| D23 | 3.12718  | 0.00000  | 0.00096  | 0.00091  | 0.00188  | 3.12906  |
| D24 | -0.04978 | 0.00000  | 0.00006  | 0.00048  | 0.00054  | -0.04924 |
| D25 | 1.33989  | 0.00002  | 0.00351  | 0.00100  | 0.00451  | 1.34440  |
| D26 | -2.84884 | 0.00000  | 0.00374  | 0.00104  | 0.00478  | -2.84406 |
| D27 | -0.79655 | 0.00001  | 0.00389  | 0.00105  | 0.00494  | -0.79161 |
| D28 | -1.76014 | 0.00002  | 0.00455  | 0.00151  | 0.00607  | -1.75408 |
| D29 | 0.33431  | 0.00001  | 0.00479  | 0.00155  | 0.00634  | 0.34065  |
| D30 | 2.38660  | 0.00002  | 0.00494  | 0.00156  | 0.00650  | 2.39310  |
| D31 | -1.10279 | 0.00002  | 0.00189  | 0.00049  | 0.00238  | -1.10041 |
| D32 | 0.94141  | 0.00001  | 0.00227  | 0.00033  | 0.00260  | 0.94401  |
| D33 | 3.11338  | 0.00002  | 0.00197  | 0.00045  | 0.00243  | 3.11581  |
| D34 | 3.10619  | 0.00000  | 0.00133  | 0.00043  | 0.00176  | 3.10795  |
| D35 | -1.13280 | 0.00000  | 0.00172  | 0.00027  | 0.00198  | -1.13082 |
| D36 | 1.03917  | 0.00000  | 0.00142  | 0.00039  | 0.00181  | 1.04098  |
| D37 | 1.01134  | 0.00000  | 0.00148  | 0.00045  | 0.00194  | 1.01328  |
| D38 | 3.05553  | 0.00000  | 0.00186  | 0.00029  | 0.00216  | 3.05769  |
| D39 | -1.05568 | 0.00000  | 0.00156  | 0.00042  | 0.00198  | -1.05370 |
| D40 | 2.94073  | 0.00001  | 0.00139  | 0.00114  | 0.00253  | 2.94326  |
| D41 | -1.24870 | 0.00000  | 0.00044  | 0.00121  | 0.00165  | -1.24705 |
| D42 | 0.86319  | 0.00000  | 0.00135  | 0.00118  | 0.00253  | 0.86572  |
| D43 | 2.95695  | -0.00001 | 0.00040  | 0.00125  | 0.00165  | 2.95860  |
| D44 | -1.23672 | 0.00002  | 0.00138  | 0.00120  | 0.00258  | -1.23415 |
| D45 | 0.85703  | 0.00001  | 0.00043  | 0.00127  | 0.00170  | 0.85873  |
| D46 | 3.13896  | 0.00000  | 0.00028  | 0.00008  | 0.00036  | 3.13932  |
| D47 | -0.00361 | 0.00000  | 0.00054  | 0.00022  | 0.00076  | -0.00284 |
| D48 | -0.00402 | 0.00000  | 0.00064  | 0.00023  | 0.00087  | -0.00314 |
| D49 | 3.13660  | 0.00001  | 0.00090  | 0.00038  | 0.00128  | 3.13788  |
| D50 | 2.20894  | -0.00003 | -0.00158 | 0.00109  | -0.00048 | 2.20846  |
| D51 | -1.40619 | -0.00002 | -0.00073 | 0.00196  | 0.00121  | -1.40498 |
| D52 | -2.08499 | 0.00000  | -0.00218 | 0.00188  | -0.00029 | -2.08528 |
| D53 | 0.58306  | 0.00001  | -0.00133 | 0.00275  | 0.00140  | 0.58446  |
| D54 | -2.71267 | -0.00001 | -0.00016 | 0.00008  | -0.00008 | -2.71276 |
| D55 | -0.01645 | 0.00001  | 0.00051  | 0.00009  | 0.00060  | -0.01585 |
| D56 | -0.02641 | 0.00000  | -0.00093 | 0.00029  | -0.00064 | -0.02705 |
| D57 | 2.66982  | 0.00003  | -0.00026 | 0.00030  | 0.00003  | 2.66985  |
| D58 | 0.51351  | 0.00000  | -0.00386 | -0.00088 | -0.00471 | 0.50881  |
| D59 | -1.90631 | -0.00003 | -0.00328 | -0.00078 | -0.00403 | -1.91034 |
| D60 | 1.78858  | 0.00005  | -0.00381 | -0.00247 | -0.00628 | 1.78230  |
| D61 | -0.63253 | -0.00002 | -0.00471 | -0.00241 | -0.00712 | -0.63965 |

|     |          |          |         |         |         |          |
|-----|----------|----------|---------|---------|---------|----------|
| D62 | 2.55147  | 0.00000  | 0.00107 | 0.00058 | 0.00165 | 2.55312  |
| D63 | -1.65769 | 0.00000  | 0.00122 | 0.00048 | 0.00170 | -1.65599 |
| D64 | 0.44193  | -0.00001 | 0.00104 | 0.00052 | 0.00156 | 0.44349  |
| D65 | 1.34592  | 0.00003  | 0.00167 | 0.00077 | 0.00245 | 1.34836  |
| D66 | -2.86325 | 0.00004  | 0.00183 | 0.00067 | 0.00250 | -2.86075 |
| D67 | -0.76363 | 0.00003  | 0.00164 | 0.00072 | 0.00236 | -0.76127 |
| D68 | -1.04147 | -0.00001 | 0.00140 | 0.00069 | 0.00208 | -1.03939 |
| D69 | 1.03256  | 0.00000  | 0.00155 | 0.00058 | 0.00213 | 1.03469  |
| D70 | 3.13218  | -0.00001 | 0.00136 | 0.00063 | 0.00199 | 3.13417  |

| Item                 | Value    | Threshold | Converged? |
|----------------------|----------|-----------|------------|
| Maximum Force        | 0.000094 | 0.000450  | YES        |
| RMS Force            | 0.000025 | 0.000300  | YES        |
| Maximum Displacement | 0.073142 | 0.001800  | NO         |
| RMS Displacement     | 0.009453 | 0.001200  | NO         |

Predicted change in Energy=-7.542515D-07

GradGradGradGradGradGradGradGradGradGradGradGradGradGradGradGradGradGrad

Input orientation:

| Center Number | Atomic Number | Atomic Type | Coordinates (Angstroms) |           |           |
|---------------|---------------|-------------|-------------------------|-----------|-----------|
|               |               |             | X                       | Y         | Z         |
| 1             | 6             | 0           | -2.643879               | 2.099875  | -0.196032 |
| 2             | 6             | 0           | -3.535584               | 1.117805  | 0.091567  |
| 3             | 7             | 0           | -2.826307               | -0.076480 | 0.111240  |
| 4             | 6             | 0           | -1.534064               | 0.184557  | -0.160232 |
| 5             | 7             | 0           | -1.403949               | 1.498066  | -0.352782 |
| 6             | 6             | 0           | -0.130054               | 2.183543  | -0.635018 |
| 7             | 6             | 0           | 0.454689                | 2.860513  | 0.609581  |
| 8             | 1             | 0           | -2.783405               | 3.160927  | -0.310798 |
| 9             | 1             | 0           | -4.594105               | 1.168416  | 0.269812  |
| 10            | 1             | 0           | 0.569961                | 1.429881  | -0.995963 |
| 11            | 1             | 0           | -0.302761               | 2.916475  | -1.424181 |
| 12            | 1             | 0           | -0.225766               | 3.643587  | 0.960386  |
| 13            | 1             | 0           | 0.533301                | 2.108487  | 1.408992  |
| 14            | 35            | 0           | 0.136913                | -2.666890 | -0.226125 |
| 15            | 1             | 0           | -0.758076               | -0.603699 | -0.216787 |
| 16            | 6             | 0           | -3.300520               | -1.401298 | 0.355658  |
| 17            | 6             | 0           | -4.558948               | -1.690982 | 0.658487  |
| 18            | 1             | 0           | -2.501228               | -2.134457 | 0.262426  |
| 19            | 1             | 0           | -4.830487               | -2.724279 | 0.825672  |
| 20            | 1             | 0           | -5.345320               | -0.951725 | 0.751705  |
| 21            | 7             | 0           | 1.721770                | 3.473053  | 0.228273  |
| 22            | 1             | 0           | 2.064400                | 4.089332  | 0.955781  |

|    |   |   |          |           |           |
|----|---|---|----------|-----------|-----------|
| 23 | 1 | 0 | 2.419377 | 2.749759  | 0.065967  |
| 24 | 6 | 0 | 3.332799 | -0.425726 | -1.137535 |
| 25 | 6 | 0 | 3.264391 | -0.564175 | 0.318404  |
| 26 | 8 | 0 | 2.735290 | 0.621397  | -0.337162 |
| 27 | 1 | 0 | 4.273798 | -0.148031 | -1.606601 |
| 28 | 1 | 0 | 2.630847 | -0.987659 | -1.746277 |
| 29 | 1 | 0 | 2.478081 | -1.217069 | 0.691694  |
| 30 | 6 | 0 | 4.459962 | -0.355599 | 1.206460  |
| 31 | 1 | 0 | 4.160845 | 0.078439  | 2.165197  |
| 32 | 1 | 0 | 4.941730 | -1.316232 | 1.412674  |
| 33 | 1 | 0 | 5.191414 | 0.307558  | 0.737733  |

-----  
Distance matrix (angstroms):

|    |    | 1        | 2        | 3        | 4        | 5        |
|----|----|----------|----------|----------|----------|----------|
| 1  | C  | 0.000000 |          |          |          |          |
| 2  | C  | 1.357317 | 0.000000 |          |          |          |
| 3  | N  | 2.205497 | 1.389165 | 0.000000 |          |          |
| 4  | C  | 2.213914 | 2.222710 | 1.346005 | 0.000000 |          |
| 5  | N  | 1.387145 | 2.210410 | 2.172008 | 1.333909 | 0.000000 |
| 6  | C  | 2.553238 | 3.641614 | 3.596441 | 2.488496 | 1.473887 |
| 7  | C  | 3.290701 | 4.384934 | 4.431615 | 3.421768 | 2.497386 |
| 8  | H  | 1.076323 | 2.214050 | 3.265083 | 3.231456 | 2.160965 |
| 9  | H  | 2.210884 | 1.074617 | 2.167953 | 3.242957 | 3.267016 |
| 10 | H  | 3.378987 | 4.258593 | 3.876811 | 2.583835 | 2.077174 |
| 11 | H  | 2.766951 | 3.997980 | 4.205185 | 3.252238 | 2.091027 |
| 12 | H  | 3.093157 | 4.253153 | 4.617658 | 3.864236 | 2.777730 |
| 13 | H  | 3.559586 | 4.390089 | 4.212506 | 3.230785 | 2.688754 |
| 14 | Br | 5.518673 | 5.283188 | 3.950279 | 3.305639 | 4.442652 |
| 15 | H  | 3.296361 | 3.282257 | 2.159431 | 1.107566 | 2.202967 |
| 16 | C  | 3.604685 | 2.543793 | 1.428202 | 2.429289 | 3.536267 |
| 17 | C  | 4.332239 | 3.042690 | 2.430667 | 3.652105 | 4.598556 |
| 18 | H  | 4.261466 | 3.417059 | 2.088971 | 2.547914 | 3.844181 |
| 19 | H  | 5.394218 | 4.120351 | 3.396761 | 4.505522 | 5.564001 |
| 20 | H  | 4.184286 | 2.827346 | 2.742567 | 4.080250 | 4.770302 |
| 21 | N  | 4.596145 | 5.762434 | 5.770432 | 4.643878 | 3.742769 |
| 22 | H  | 5.239514 | 6.398176 | 6.479680 | 5.426020 | 4.522879 |
| 23 | H  | 5.111512 | 6.174583 | 5.958765 | 4.718169 | 4.044738 |
| 24 | C  | 6.556353 | 7.146178 | 6.294124 | 5.001391 | 5.172387 |
| 25 | C  | 6.501497 | 7.008579 | 6.113703 | 4.880047 | 5.147497 |
| 26 | O  | 5.580437 | 6.305084 | 5.623118 | 4.295290 | 4.231086 |
| 27 | H  | 7.409254 | 8.091512 | 7.305312 | 5.994486 | 6.043054 |
| 28 | H  | 6.305463 | 6.770193 | 5.836193 | 4.608265 | 4.939659 |
| 29 | H  | 6.166413 | 6.478885 | 5.456592 | 4.334471 | 4.851087 |
| 30 | C  | 7.645973 | 8.206258 | 7.373408 | 6.171545 | 6.344507 |



|    |    |          |          |          |          |          |
|----|----|----------|----------|----------|----------|----------|
| 31 | H  | 7.481034 | 8.038360 | 7.284438 | 6.152306 | 6.270764 |
| 32 | H  | 8.473440 | 8.918223 | 7.973275 | 6.830981 | 7.162733 |
| 33 | H  | 8.091733 | 8.788317 | 8.051325 | 6.786275 | 6.790092 |
|    |    | 6        | 7        | 8        | 9        | 10       |
| 6  | C  | 0.000000 |          |          |          |          |
| 7  | C  | 1.532723 | 0.000000 |          |          |          |
| 8  | H  | 2.846168 | 3.379734 | 0.000000 |          |          |
| 9  | H  | 4.666579 | 5.335632 | 2.754241 | 0.000000 |          |
| 10 | H  | 1.090096 | 2.153547 | 3.835498 | 5.323358 | 0.000000 |
| 11 | H  | 1.090777 | 2.170956 | 2.730014 | 4.933656 | 1.776225 |
| 12 | H  | 2.164764 | 1.095121 | 2.896617 | 5.068111 | 3.059572 |
| 13 | H  | 2.150268 | 1.100355 | 3.881475 | 5.335894 | 2.499132 |
| 14 | Br | 4.874953 | 5.599247 | 6.519116 | 6.110487 | 4.190909 |
| 15 | H  | 2.887568 | 3.762240 | 4.275887 | 4.253503 | 2.550735 |
| 16 | C  | 4.887165 | 5.685870 | 4.639555 | 2.878222 | 4.982277 |
| 17 | C  | 6.024965 | 6.771637 | 5.256719 | 2.885907 | 6.227577 |
| 18 | H  | 5.007294 | 5.814438 | 5.333788 | 3.910135 | 4.870344 |
| 19 | H  | 6.950856 | 7.692183 | 6.333858 | 3.939280 | 7.052676 |
| 20 | H  | 6.241146 | 6.942152 | 4.960466 | 2.300335 | 6.611879 |
| 21 | N  | 2.416063 | 1.458113 | 4.548036 | 6.723345 | 2.645746 |
| 22 | H  | 3.313352 | 2.054512 | 5.095819 | 7.303287 | 3.621509 |
| 23 | H  | 2.703993 | 2.041514 | 5.232586 | 7.192436 | 2.508009 |
| 24 | C  | 4.364878 | 4.704816 | 7.138314 | 8.207175 | 3.331154 |
| 25 | C  | 4.470037 | 4.439335 | 7.130787 | 8.047372 | 3.600524 |
| 26 | O  | 3.277075 | 3.333332 | 6.075023 | 7.374801 | 2.403396 |
| 27 | H  | 5.076822 | 5.343069 | 7.901420 | 9.159349 | 4.071988 |
| 28 | H  | 4.349022 | 5.009407 | 6.970330 | 7.804692 | 3.264157 |
| 29 | H  | 4.486279 | 4.552750 | 6.917737 | 7.475583 | 3.673616 |
| 30 | C  | 5.559365 | 5.171252 | 8.193559 | 9.229089 | 4.813597 |
| 31 | H  | 5.539358 | 4.888299 | 7.990926 | 9.023840 | 4.971295 |
| 32 | H  | 6.493417 | 6.182531 | 9.093571 | 9.920270 | 5.696932 |
| 33 | H  | 5.807047 | 5.382431 | 8.534570 | 9.834451 | 5.061930 |
|    |    | 11       | 12       | 13       | 14       | 15       |
| 11 | H  | 0.000000 |          |          |          |          |
| 12 | H  | 2.494150 | 0.000000 |          |          |          |
| 13 | H  | 3.062469 | 1.770300 | 0.000000 |          |          |
| 14 | Br | 5.727356 | 6.431288 | 5.063097 | 0.000000 |          |
| 15 | H  | 3.749232 | 4.439429 | 3.415665 | 2.248966 | 0.000000 |
| 16 | C  | 5.549554 | 5.938912 | 5.303422 | 3.708927 | 2.725414 |
| 17 | C  | 6.609183 | 6.879334 | 6.397674 | 4.877094 | 4.049064 |
| 18 | H  | 5.761059 | 6.249053 | 5.340931 | 2.735316 | 2.368848 |
| 19 | H  | 7.574974 | 7.859473 | 7.243349 | 5.077856 | 4.708302 |
| 20 | H  | 6.717503 | 6.882606 | 6.659963 | 5.826905 | 4.701266 |
| 21 | N  | 2.671912 | 2.087575 | 2.160694 | 6.357448 | 4.792455 |

|    |   |          |          |          |           |           |
|----|---|----------|----------|----------|-----------|-----------|
| 22 | H | 3.555737 | 2.333146 | 2.544290 | 7.124510  | 5.600520  |
| 23 | H | 3.107792 | 2.931842 | 2.402547 | 5.885154  | 4.628373  |
| 24 | C | 4.946692 | 5.798618 | 4.554583 | 4.008387  | 4.196988  |
| 25 | C | 5.279782 | 5.504417 | 3.973835 | 3.807761  | 4.058107  |
| 26 | O | 3.959640 | 4.425508 | 3.179505 | 4.192460  | 3.703911  |
| 27 | H | 5.510840 | 6.419647 | 5.308201 | 5.036287  | 5.240131  |
| 28 | H | 4.894084 | 6.077393 | 4.893010 | 3.369033  | 3.737856  |
| 29 | H | 5.412596 | 5.568569 | 3.918675 | 2.902661  | 3.416763  |
| 30 | C | 6.349037 | 6.165233 | 4.640195 | 5.107164  | 5.414343  |
| 31 | H | 6.392328 | 5.779637 | 4.225165 | 5.426535  | 5.507717  |
| 32 | H | 7.312198 | 7.176865 | 5.582380 | 5.253209  | 5.970815  |
| 33 | H | 6.454942 | 6.365886 | 5.039043 | 5.943429  | 6.094090  |
|    |   | 16       | 17       | 18       | 19        | 20        |
| 16 | C | 0.000000 |          |          |           |           |
| 17 | C | 1.326372 | 0.000000 |          |           |           |
| 18 | H | 1.088615 | 2.141903 | 0.000000 |           |           |
| 19 | H | 2.076532 | 1.081381 | 2.467911 | 0.000000  |           |
| 20 | H | 2.130769 | 1.083315 | 3.118831 | 1.847288  | 0.000000  |
| 21 | N | 6.999923 | 8.142467 | 7.019903 | 9.038577  | 8.354424  |
| 22 | H | 7.699970 | 8.795974 | 7.749918 | 9.694415  | 8.964254  |
| 23 | H | 7.073360 | 8.292664 | 6.935885 | 9.116071  | 8.629121  |
| 24 | C | 6.868936 | 8.191840 | 6.238230 | 8.704984  | 8.896946  |
| 25 | C | 6.618174 | 7.911384 | 5.975891 | 8.393474  | 8.629315  |
| 26 | O | 6.403304 | 7.716497 | 5.947718 | 8.353844  | 8.304011  |
| 27 | H | 7.924105 | 9.248174 | 7.303432 | 9.769391  | 9.936547  |
| 28 | H | 6.306373 | 7.613850 | 5.629229 | 8.080982  | 8.358256  |
| 29 | H | 5.791295 | 7.053048 | 5.081278 | 7.463564  | 7.828130  |
| 30 | C | 7.876703 | 9.133689 | 7.246634 | 9.595212  | 9.833907  |
| 31 | H | 7.818953 | 9.024180 | 7.273284 | 9.512812  | 9.665732  |
| 32 | H | 8.310187 | 9.537931 | 7.575631 | 9.890570  | 10.314705 |
| 33 | H | 8.670590 | 9.953392 | 8.084930 | 10.470829 | 10.611727 |
|    |   | 21       | 22       | 23       | 24        | 25        |
| 21 | N | 0.000000 |          |          |           |           |
| 22 | H | 1.013145 | 0.000000 |          |           |           |
| 23 | H | 1.017916 | 1.646886 | 0.000000 |           |           |
| 24 | C | 4.434109 | 5.135811 | 3.516598 | 0.000000  |           |
| 25 | C | 4.322848 | 4.847820 | 3.429276 | 1.464106  | 0.000000  |
| 26 | O | 3.078780 | 3.761432 | 2.189118 | 1.447094  | 1.454406  |
| 27 | H | 4.794983 | 5.422406 | 3.825382 | 1.087482  | 2.213080  |
| 28 | H | 4.962179 | 5.779084 | 4.158995 | 1.085850  | 2.200824  |
| 29 | H | 4.773260 | 5.329049 | 4.016305 | 2.168604  | 1.088071  |
| 30 | C | 4.807611 | 5.055588 | 3.886896 | 2.601871  | 1.503841  |
| 31 | H | 4.606969 | 4.684552 | 3.817778 | 3.442076  | 2.151099  |
| 32 | H | 5.891366 | 6.140676 | 4.970731 | 3.144078  | 2.139271  |

|    |   |          |          |          |          |          |
|----|---|----------|----------|----------|----------|----------|
| 33 | H | 4.724229 | 4.911983 | 3.754971 | 2.740217 | 2.156194 |
|    |   | 26       | 27       | 28       | 29       | 30       |
| 26 | O | 0.000000 |          |          |          |          |
| 27 | H | 2.137873 | 0.000000 |          |          |          |
| 28 | H | 2.141395 | 1.850344 | 0.000000 |          |          |
| 29 | H | 2.122418 | 3.106381 | 2.453501 | 0.000000 |          |
| 30 | C | 2.512327 | 2.826846 | 3.530414 | 2.221479 | 0.000000 |
| 31 | H | 2.930667 | 3.780279 | 4.333254 | 2.584811 | 1.094091 |
| 32 | H | 3.418290 | 3.305579 | 3.927736 | 2.568893 | 1.094276 |
| 33 | H | 2.699341 | 2.558414 | 3.795313 | 3.112681 | 1.092934 |
|    |   | 31       | 32       | 33       |          |          |
| 31 | H | 0.000000 |          |          |          |          |
| 32 | H | 1.766686 | 0.000000 |          |          |          |
| 33 | H | 1.775450 | 1.776114 | 0.000000 |          |          |

Stoichiometry C10H18BrN3O

Framework group C1[X(C10H18BrN3O)]

Deg. of freedom 93

Full point group C1 NOp 1

Largest Abelian subgroup C1 NOp 1

Largest concise Abelian subgroup C1 NOp 1

Standard orientation:

| Center<br>Number | Atomic<br>Number | Atomic<br>Type | Coordinates (Angstroms) |           |           |
|------------------|------------------|----------------|-------------------------|-----------|-----------|
|                  |                  |                | X                       | Y         | Z         |
| 1                | 6                | 0              | -2.350195               | 2.471818  | -0.264854 |
| 2                | 6                | 0              | -3.336828               | 1.590446  | 0.038543  |
| 3                | 7                | 0              | -2.750464               | 0.332143  | 0.089816  |
| 4                | 6                | 0              | -1.437380               | 0.456691  | -0.178566 |
| 5                | 7                | 0              | -1.175858               | 1.745904  | -0.399584 |
| 6                | 6                | 0              | 0.161406                | 2.294246  | -0.688358 |
| 7                | 6                | 0              | 0.805117                | 2.937923  | 0.544750  |
| 8                | 1                | 0              | -2.382532               | 3.538579  | -0.404305 |
| 9                | 1                | 0              | -4.385810               | 1.750457  | 0.208348  |
| 10               | 1                | 0              | 0.784304                | 1.466435  | -1.027528 |
| 11               | 1                | 0              | 0.066379                | 3.022430  | -1.494900 |
| 12               | 1                | 0              | 0.204664                | 3.792807  | 0.873259  |
| 13               | 1                | 0              | 0.804565                | 2.200364  | 1.361321  |
| 14               | 35               | 0              | -0.059237               | -2.547953 | -0.169133 |
| 15               | 1                | 0              | -0.743741               | -0.406119 | -0.212134 |
| 16               | 6                | 0              | -3.355728               | -0.932809 | 0.360582  |
| 17               | 6                | 0              | -4.638171               | -1.088506 | 0.661186  |
| 18               | 1                | 0              | -2.633230               | -1.743977 | 0.289273  |
| 19               | 1                | 0              | -5.012307               | -2.085454 | 0.849601  |

|    |   |   |           |           |           |
|----|---|---|-----------|-----------|-----------|
| 20 | 1 | 0 | -5.347203 | -0.272560 | 0.732433  |
| 21 | 7 | 0 | 2.128772  | 3.412115  | 0.158519  |
| 22 | 1 | 0 | 2.527893  | 4.007692  | 0.874377  |
| 23 | 1 | 0 | 2.751395  | 2.619315  | 0.017236  |
| 24 | 6 | 0 | 3.348636  | -0.658235 | -1.108566 |
| 25 | 6 | 0 | 3.260066  | -0.755699 | 0.349606  |
| 26 | 8 | 0 | 2.855022  | 0.461363  | -0.335957 |
| 27 | 1 | 0 | 4.314806  | -0.486622 | -1.577270 |
| 28 | 1 | 0 | 2.596875  | -1.161187 | -1.709370 |
| 29 | 1 | 0 | 2.410781  | -1.318168 | 0.732021  |
| 30 | 6 | 0 | 4.466404  | -0.647066 | 1.240945  |
| 31 | 1 | 0 | 4.207733  | -0.163457 | 2.187649  |
| 32 | 1 | 0 | 4.848877  | -1.645969 | 1.471916  |
| 33 | 1 | 0 | 5.262569  | -0.071108 | 0.762512  |

-----

Rotational constants (GHZ):      0.4222383      0.2920996      0.1827110

Standard basis: 6-311++G(d,p) (5D, 7F)

There are    499 symmetry adapted cartesian basis functions of A    symmetry.

There are    482 symmetry adapted basis functions of A    symmetry.

482 basis functions,    760 primitive gaussians,    499 cartesian basis functions

71 alpha electrons      71 beta electrons

nuclear repulsion energy      1312.8918944969 Hartrees.

NAtoms=    33 NActive=    33 NUniq=    33 SFac= 1.00D+00 NAtFMM=    60 NAOKFM=F

Big=F

Integral buffers will be    131072 words long.

Raffenetti 2 integral format.

Two-electron integral symmetry is turned on.

One-electron integrals computed using PRISM.

NBasis=    482 RedAO= T EigKep=    3.63D-06    NBF=    482

NBsUse=    482 1.00D-06 EigRej= -1.00D+00    NBFU=    482

Initial      guess      from      the      checkpoint      file:

"/home/suqian/liuwen/qianmengshijie/nh2po/nh2po.chk"

B after Tr=    0.000000    0.000000    0.000000

Rot=    1.000000    -0.000436    0.000045    -0.000508 Ang=    -0.08 deg.

ExpMin= 3.50D-02 ExpMax= 4.40D+05 ExpMxC= 1.51D+04 IAcc=3 IRadAn=      5 AccDes=

0.00D+00

Harris functional with IExCor=    402 and IRadAn=      5 diagonalized for initial guess.

HarFok: IExCor=    402 AccDes= 0.00D+00 IRadAn=      5 IDoV= 1 UseB2=F ITyADJ=14

ICtDFT=    3500011 ScaDFX=    1.000000    1.000000    1.000000    1.000000

FoFCou: FMM=F IPFlag=      0 FMFlag=      100000 FMFlg1=      0

NFxFlg=      0 DoJE=T BraDBF=F KetDBF=T FulRan=T

wScrn=    0.000000 ICntrl=      500 IOpCl=    0 I1Cent=    200000004 NGrid=

0

NMat0=    1 NMatS0=    1 NMatT0=    0 NMatD0=    1 NMtDS0=    0

NMtDT0= 0

Petite list used in FoFCou.

Requested convergence on RMS density matrix=1.00D-08 within 128 cycles.

Requested convergence on MAX density matrix=1.00D-06.

Requested convergence on energy=1.00D-06.

No special actions if energy rises.

SCF Done: E(RB3LYP) = -3205.64837887 A.U. after 10 cycles

NFock= 10 Conv=0.63D-08 -V/T= 2.0018

Calling FoFJK, ICntrl= 2127 FMM=F ISym2X=0 l1Cent= 0 IOpCIX= 0 NMat=1 NMatS=1

NMatT=0.

\*\*\*\*\* Axes restored to original set \*\*\*\*\*

| Center<br>Number | Atomic<br>Number | Forces (Hartrees/Bohr) |              |              |
|------------------|------------------|------------------------|--------------|--------------|
|                  |                  | X                      | Y            | Z            |
| 1                | 6                | 0.000013785            | -0.000005685 | 0.000006186  |
| 2                | 6                | 0.000001572            | 0.000010055  | 0.000000812  |
| 3                | 7                | -0.000032227           | -0.000036688 | -0.000007605 |
| 4                | 6                | 0.000019133            | 0.000059722  | 0.000010410  |
| 5                | 7                | -0.000004471           | 0.000026768  | -0.000004346 |
| 6                | 6                | -0.000010685           | -0.000018758 | -0.000003072 |
| 7                | 6                | 0.000024811            | 0.000005705  | -0.000016006 |
| 8                | 1                | -0.000004873           | -0.000000803 | -0.000006968 |
| 9                | 1                | 0.000000510            | 0.000000328  | 0.000008494  |
| 10               | 1                | -0.000002084           | 0.000008660  | -0.000009299 |
| 11               | 1                | 0.000001620            | -0.000005429 | -0.000004200 |
| 12               | 1                | -0.000004218           | -0.000002223 | -0.000008347 |
| 13               | 1                | -0.000010317           | -0.000009504 | 0.000001198  |
| 14               | 35               | -0.000008435           | 0.000022354  | 0.000004006  |
| 15               | 1                | 0.000005836            | -0.000072006 | 0.000000907  |
| 16               | 6                | 0.000007543            | 0.000017830  | -0.000006134 |
| 17               | 6                | -0.000003420           | 0.000002696  | -0.000011043 |
| 18               | 1                | 0.000007765            | -0.000005692 | 0.000005590  |
| 19               | 1                | 0.000003459            | 0.000001049  | 0.000005116  |
| 20               | 1                | -0.000004726           | 0.000000916  | -0.000002814 |
| 21               | 7                | -0.000005102           | 0.000008878  | 0.000029417  |
| 22               | 1                | 0.000007531            | -0.000006751 | -0.000003435 |
| 23               | 1                | 0.000007684            | 0.000003777  | -0.000008124 |
| 24               | 6                | 0.000047371            | -0.000023168 | -0.000092572 |
| 25               | 6                | -0.000046346           | 0.000033775  | 0.000031452  |
| 26               | 8                | 0.000029908            | -0.000024481 | 0.000040299  |
| 27               | 1                | -0.000014689           | 0.000005347  | 0.000027682  |
| 28               | 1                | -0.000027338           | 0.000000802  | 0.000045986  |
| 29               | 1                | -0.000001184           | -0.000019520 | -0.000036538 |

|    |   |              |              |              |
|----|---|--------------|--------------|--------------|
| 30 | 6 | -0.000003085 | 0.000018555  | -0.000011139 |
| 31 | 1 | 0.000008807  | -0.000004720 | 0.000012850  |
| 32 | 1 | -0.000000048 | 0.000001326  | -0.000002226 |
| 33 | 1 | -0.000004088 | 0.000006884  | 0.000003465  |

-----  
Cartesian Forces: Max 0.000092572 RMS 0.000020738

GradGradGradGradGradGradGradGradGradGradGradGradGradGradGradGradGradGradGradGrad

Berny optimization.

Using GEDIIS/GDIIS optimizer.

FormGI is forming the generalized inverse of G from B-inverse, IUseBI=4.

GSVD: received Info= 1 from GESDD.

Internal Forces: Max 0.000047551 RMS 0.000012387

Search for a local minimum.

Step number 45 out of a maximum of 172

All quantities printed in internal units (Hartrees-Bohrs-Radians)

Mixed Optimization -- En-DIIS/RFO-DIIS

Swapping is turned off.

Update second derivatives using D2CorX and points 31 32 33 34 35  
36 37 38 39 40  
41 42 43 44 45

DE= -8.55D-07 DEPred=-7.54D-07 R= 1.13D+00

Trust test= 1.13D+00 RLast= 2.93D-02 DXMaxT set to 1.04D+00

ITU= 0 1 1 1 1 1 1 1 1 1 1 1 1 1 1 1 1 1 0

ITU= 0-1 1-1 1 1 1 1 1 1 1 1 0-1-1 1 1 1-1

ITU= 1 0 0-1 0

|                 |         |         |         |         |         |
|-----------------|---------|---------|---------|---------|---------|
| Eigenvalues --- | 0.00065 | 0.00103 | 0.00119 | 0.00239 | 0.00386 |
| Eigenvalues --- | 0.00532 | 0.00707 | 0.00762 | 0.01275 | 0.01419 |
| Eigenvalues --- | 0.01892 | 0.02044 | 0.02174 | 0.02352 | 0.02383 |
| Eigenvalues --- | 0.02547 | 0.02683 | 0.02891 | 0.03065 | 0.03103 |
| Eigenvalues --- | 0.03226 | 0.03519 | 0.03628 | 0.03980 | 0.04087 |
| Eigenvalues --- | 0.04263 | 0.04465 | 0.04680 | 0.05490 | 0.05599 |
| Eigenvalues --- | 0.05741 | 0.05750 | 0.05906 | 0.07921 | 0.08693 |
| Eigenvalues --- | 0.08889 | 0.09568 | 0.10230 | 0.11101 | 0.12019 |
| Eigenvalues --- | 0.12668 | 0.13060 | 0.13237 | 0.15737 | 0.15940 |
| Eigenvalues --- | 0.16002 | 0.16002 | 0.16013 | 0.16015 | 0.16130 |
| Eigenvalues --- | 0.16217 | 0.19181 | 0.21422 | 0.21791 | 0.22141 |
| Eigenvalues --- | 0.23168 | 0.23452 | 0.26010 | 0.26444 | 0.28298 |
| Eigenvalues --- | 0.29135 | 0.30273 | 0.30504 | 0.32029 | 0.32546 |
| Eigenvalues --- | 0.33666 | 0.34286 | 0.34337 | 0.34401 | 0.34550 |
| Eigenvalues --- | 0.34720 | 0.34771 | 0.35126 | 0.35177 | 0.35335 |
| Eigenvalues --- | 0.35557 | 0.35690 | 0.35890 | 0.35989 | 0.36419 |
| Eigenvalues --- | 0.36628 | 0.39248 | 0.41203 | 0.41939 | 0.42509 |
| Eigenvalues --- | 0.44769 | 0.45487 | 0.46484 | 0.49557 | 0.54935 |

Eigenvalues --- 0.58273 0.60635 1.04765  
 En-DIIS/RFO-DIIS IScMMF= 0 using points: 45 44 43 42 41  
 RFO step: Lambda=-6.25948570D-08.  
 DidBck=F Rises=F RFO-DIIS coefs: 1.26029 -0.14199 -0.30657 0.11854  
 0.06974

Iteration 1 RMS(Cart)= 0.00258223 RMS(Int)= 0.00000774  
 Iteration 2 RMS(Cart)= 0.00000297 RMS(Int)= 0.00000746  
 Iteration 3 RMS(Cart)= 0.00000000 RMS(Int)= 0.00000746

| Variable | Old X   | -DE/DX   | Delta X<br>(Linear) | Delta X<br>(Quad) | Delta X<br>(Total) | New X   |
|----------|---------|----------|---------------------|-------------------|--------------------|---------|
| R1       | 2.56496 | 0.00001  | -0.00001            | 0.00000           | -0.00001           | 2.56495 |
| R2       | 2.62132 | 0.00000  | 0.00000             | -0.00001          | -0.00001           | 2.62131 |
| R3       | 2.03396 | 0.00000  | 0.00001             | 0.00000           | 0.00000            | 2.03396 |
| R4       | 2.62514 | 0.00000  | 0.00001             | -0.00001          | 0.00000            | 2.62514 |
| R5       | 2.03073 | 0.00000  | 0.00000             | 0.00000           | 0.00000            | 2.03073 |
| R6       | 2.54358 | 0.00001  | -0.00001            | 0.00004           | 0.00004            | 2.54362 |
| R7       | 2.69891 | -0.00002 | -0.00003            | -0.00001          | -0.00004           | 2.69887 |
| R8       | 2.52072 | 0.00001  | 0.00007             | -0.00001          | 0.00006            | 2.52078 |
| R9       | 2.09300 | 0.00003  | 0.00014             | 0.00007           | 0.00020            | 2.09320 |
| R10      | 2.78524 | -0.00001 | -0.00001            | -0.00001          | -0.00002           | 2.78522 |
| R11      | 2.89643 | 0.00001  | -0.00001            | 0.00002           | 0.00001            | 2.89644 |
| R12      | 2.05998 | 0.00000  | 0.00000             | -0.00001          | -0.00001           | 2.05997 |
| R13      | 2.06127 | 0.00000  | -0.00001            | 0.00001           | -0.00001           | 2.06126 |
| R14      | 2.06948 | 0.00000  | -0.00002            | 0.00001           | -0.00001           | 2.06947 |
| R15      | 2.07937 | 0.00001  | -0.00005            | 0.00004           | -0.00002           | 2.07935 |
| R16      | 2.75543 | 0.00000  | 0.00022             | -0.00009          | 0.00012            | 2.75556 |
| R17      | 4.24993 | -0.00002 | -0.00072            | -0.00028          | -0.00100           | 4.24893 |
| R18      | 2.50648 | 0.00000  | 0.00000             | 0.00001           | 0.00000            | 2.50648 |
| R19      | 2.05718 | 0.00001  | 0.00000             | 0.00001           | 0.00001            | 2.05720 |
| R20      | 2.04351 | 0.00000  | 0.00000             | 0.00000           | 0.00000            | 2.04352 |
| R21      | 2.04717 | 0.00000  | 0.00000             | 0.00000           | 0.00000            | 2.04717 |
| R22      | 1.91457 | 0.00000  | 0.00003             | -0.00001          | 0.00002            | 1.91458 |
| R23      | 1.92358 | -0.00001 | 0.00004             | -0.00002          | 0.00003            | 1.92361 |
| R24      | 4.13683 | 0.00000  | -0.00011            | 0.00049           | 0.00038            | 4.13721 |
| R25      | 2.76676 | 0.00001  | 0.00014             | -0.00014          | -0.00001           | 2.76675 |
| R26      | 2.73461 | 0.00001  | -0.00019            | 0.00016           | -0.00003           | 2.73458 |
| R27      | 2.05504 | -0.00002 | -0.00001            | -0.00004          | -0.00005           | 2.05499 |
| R28      | 2.05196 | -0.00001 | 0.00001             | -0.00002          | -0.00001           | 2.05195 |
| R29      | 2.74843 | -0.00005 | 0.00015             | -0.00014          | 0.00001            | 2.74844 |
| R30      | 2.05616 | 0.00000  | 0.00003             | -0.00002          | 0.00000            | 2.05616 |
| R31      | 2.84185 | 0.00000  | -0.00007            | 0.00005           | -0.00002           | 2.84182 |
| R32      | 2.06753 | 0.00001  | 0.00000             | 0.00001           | 0.00001            | 2.06754 |
| R33      | 2.06788 | 0.00000  | 0.00001             | 0.00000           | 0.00001            | 2.06789 |
| R34      | 2.06535 | 0.00000  | 0.00001             | 0.00000           | 0.00001            | 2.06535 |

|     |         |          |          |          |          |         |
|-----|---------|----------|----------|----------|----------|---------|
| A1  | 1.87264 | 0.00001  | 0.00003  | 0.00001  | 0.00004  | 1.87268 |
| A2  | 2.27930 | -0.00001 | 0.00000  | -0.00002 | -0.00002 | 2.27928 |
| A3  | 2.13119 | 0.00000  | -0.00002 | 0.00001  | -0.00002 | 2.13117 |
| A4  | 1.86461 | 0.00000  | -0.00002 | 0.00000  | -0.00002 | 1.86460 |
| A5  | 2.27600 | 0.00000  | 0.00000  | 0.00000  | 0.00000  | 2.27600 |
| A6  | 2.14251 | 0.00000  | 0.00002  | 0.00000  | 0.00002  | 2.14253 |
| A7  | 1.89716 | -0.00001 | 0.00002  | -0.00001 | 0.00002  | 1.89717 |
| A8  | 2.25283 | 0.00002  | 0.00005  | 0.00000  | 0.00005  | 2.25289 |
| A9  | 2.13316 | -0.00001 | -0.00008 | 0.00001  | -0.00007 | 2.13309 |
| A10 | 1.88992 | 0.00001  | -0.00002 | 0.00000  | -0.00002 | 1.88990 |
| A11 | 2.14708 | -0.00004 | -0.00011 | -0.00014 | -0.00024 | 2.14684 |
| A12 | 2.24606 | 0.00003  | 0.00013  | 0.00013  | 0.00026  | 2.24632 |
| A13 | 1.90044 | -0.00001 | -0.00002 | 0.00000  | -0.00002 | 1.90042 |
| A14 | 2.20489 | 0.00001  | -0.00012 | 0.00002  | -0.00010 | 2.20479 |
| A15 | 2.17720 | 0.00000  | 0.00012  | -0.00002 | 0.00010  | 2.17731 |
| A16 | 1.96023 | -0.00004 | -0.00007 | -0.00007 | -0.00014 | 1.96009 |
| A17 | 1.87223 | 0.00001  | 0.00021  | -0.00004 | 0.00017  | 1.87239 |
| A18 | 1.89041 | 0.00001  | -0.00009 | -0.00001 | -0.00010 | 1.89030 |
| A19 | 1.90630 | 0.00001  | 0.00001  | 0.00006  | 0.00008  | 1.90638 |
| A20 | 1.92955 | 0.00002  | -0.00003 | 0.00005  | 0.00003  | 1.92958 |
| A21 | 1.90358 | -0.00001 | -0.00003 | 0.00000  | -0.00003 | 1.90355 |
| A22 | 1.91654 | -0.00001 | 0.00000  | -0.00012 | -0.00012 | 1.91642 |
| A23 | 1.89160 | -0.00002 | 0.00003  | -0.00009 | -0.00007 | 1.89153 |
| A24 | 1.88044 | 0.00004  | 0.00007  | 0.00011  | 0.00018  | 1.88062 |
| A25 | 1.87587 | 0.00001  | 0.00006  | -0.00002 | 0.00005  | 1.87592 |
| A26 | 1.90004 | -0.00001 | -0.00003 | -0.00001 | -0.00004 | 1.90000 |
| A27 | 1.99875 | 0.00000  | -0.00013 | 0.00011  | -0.00002 | 1.99873 |
| A28 | 2.16120 | 0.00001  | 0.00005  | -0.00001 | 0.00004  | 2.16124 |
| A29 | 1.94580 | 0.00000  | -0.00001 | 0.00001  | -0.00001 | 1.94580 |
| A30 | 2.17618 | 0.00000  | -0.00003 | 0.00000  | -0.00003 | 2.17615 |
| A31 | 2.07399 | -0.00001 | -0.00002 | -0.00001 | -0.00003 | 2.07396 |
| A32 | 2.16436 | 0.00001  | 0.00003  | 0.00001  | 0.00004  | 2.16440 |
| A33 | 2.04483 | 0.00000  | -0.00001 | 0.00000  | -0.00001 | 2.04482 |
| A34 | 1.94081 | 0.00001  | -0.00016 | 0.00008  | -0.00008 | 1.94074 |
| A35 | 1.91637 | 0.00000  | -0.00013 | 0.00007  | -0.00006 | 1.91631 |
| A36 | 1.89120 | 0.00000  | -0.00018 | 0.00000  | -0.00019 | 1.89101 |
| A37 | 2.08691 | 0.00001  | 0.00027  | -0.00010 | 0.00020  | 2.08711 |
| A38 | 2.06957 | -0.00004 | -0.00013 | -0.00021 | -0.00038 | 2.06919 |
| A39 | 1.99443 | -0.00001 | 0.00012  | -0.00004 | 0.00007  | 1.99449 |
| A40 | 2.00162 | 0.00000  | -0.00001 | -0.00012 | -0.00013 | 2.00149 |
| A41 | 2.03724 | 0.00003  | -0.00018 | 0.00033  | 0.00015  | 2.03740 |
| A42 | 2.01714 | -0.00003 | -0.00017 | -0.00034 | -0.00052 | 2.01661 |
| A43 | 2.13764 | 0.00000  | -0.00018 | 0.00009  | -0.00008 | 2.13756 |
| A44 | 1.96154 | 0.00001  | -0.00010 | 0.00007  | -0.00001 | 1.96152 |



|     |          |          |          |          |          |          |
|-----|----------|----------|----------|----------|----------|----------|
| A45 | 2.02900  | -0.00003 | -0.00015 | -0.00005 | -0.00021 | 2.02879  |
| A46 | 2.04334  | 0.00003  | 0.00042  | 0.00013  | 0.00055  | 2.04389  |
| A47 | 2.61587  | -0.00001 | -0.00051 | 0.00046  | -0.00004 | 2.61583  |
| A48 | 2.43724  | 0.00000  | 0.00087  | -0.00150 | -0.00066 | 2.43658  |
| A49 | 1.93386  | 0.00002  | 0.00011  | 0.00005  | 0.00016  | 1.93402  |
| A50 | 1.91722  | 0.00000  | 0.00000  | 0.00003  | 0.00004  | 1.91726  |
| A51 | 1.94224  | 0.00000  | -0.00006 | -0.00004 | -0.00011 | 1.94214  |
| A52 | 1.87915  | -0.00001 | -0.00002 | -0.00001 | -0.00003 | 1.87912  |
| A53 | 1.89449  | -0.00001 | -0.00001 | -0.00003 | -0.00004 | 1.89446  |
| A54 | 1.89530  | 0.00000  | -0.00002 | -0.00001 | -0.00002 | 1.89528  |
| A55 | 3.48522  | -0.00001 | -0.00091 | -0.00002 | -0.00094 | 3.48428  |
| A56 | 2.53163  | 0.00001  | 0.00048  | -0.00103 | -0.00059 | 2.53104  |
| A57 | 2.96617  | -0.00001 | -0.00190 | 0.00047  | -0.00142 | 2.96475  |
| A58 | 3.10643  | 0.00000  | 0.00013  | 0.00087  | 0.00099  | 3.10741  |
| D1  | 0.00314  | 0.00000  | -0.00006 | -0.00001 | -0.00007 | 0.00307  |
| D2  | -3.12631 | 0.00000  | -0.00024 | -0.00003 | -0.00027 | -3.12658 |
| D3  | 3.13323  | 0.00000  | 0.00009  | -0.00009 | 0.00000  | 3.13323  |
| D4  | 0.00378  | 0.00000  | -0.00009 | -0.00011 | -0.00020 | 0.00358  |
| D5  | -0.00460 | 0.00000  | -0.00001 | -0.00002 | -0.00003 | -0.00463 |
| D6  | -3.10875 | 0.00000  | 0.00034  | 0.00014  | 0.00048  | -3.10827 |
| D7  | -3.13588 | 0.00000  | -0.00015 | 0.00006  | -0.00009 | -3.13597 |
| D8  | 0.04315  | 0.00000  | 0.00021  | 0.00021  | 0.00042  | 0.04357  |
| D9  | -0.00065 | 0.00000  | 0.00011  | 0.00003  | 0.00015  | -0.00050 |
| D10 | -3.13327 | 0.00000  | 0.00019  | -0.00003 | 0.00016  | -3.13311 |
| D11 | 3.12995  | 0.00001  | 0.00028  | 0.00005  | 0.00033  | 3.13028  |
| D12 | -0.00267 | 0.00000  | 0.00035  | -0.00001 | 0.00034  | -0.00233 |
| D13 | -0.00222 | -0.00001 | -0.00012 | -0.00004 | -0.00017 | -0.00239 |
| D14 | -3.12824 | 0.00000  | -0.00028 | 0.00010  | -0.00018 | -3.12841 |
| D15 | 3.13114  | 0.00000  | -0.00019 | 0.00001  | -0.00018 | 3.13096  |
| D16 | 0.00512  | 0.00000  | -0.00034 | 0.00016  | -0.00019 | 0.00494  |
| D17 | -0.04043 | 0.00001  | 0.00217  | -0.00013 | 0.00204  | -0.03840 |
| D18 | 3.10193  | 0.00001  | 0.00200  | -0.00004 | 0.00196  | 3.10389  |
| D19 | 3.11121  | 0.00000  | 0.00225  | -0.00020 | 0.00205  | 3.11325  |
| D20 | -0.02962 | 0.00001  | 0.00208  | -0.00011 | 0.00198  | -0.02764 |
| D21 | 0.00421  | 0.00001  | 0.00008  | 0.00004  | 0.00012  | 0.00433  |
| D22 | 3.10909  | 0.00000  | -0.00027 | -0.00011 | -0.00039 | 3.10871  |
| D23 | 3.12906  | 0.00000  | 0.00024  | -0.00012 | 0.00012  | 3.12919  |
| D24 | -0.04924 | 0.00000  | -0.00011 | -0.00027 | -0.00038 | -0.04962 |
| D25 | 1.34440  | 0.00001  | 0.00150  | 0.00011  | 0.00161  | 1.34601  |
| D26 | -2.84406 | 0.00000  | 0.00161  | 0.00012  | 0.00173  | -2.84233 |
| D27 | -0.79161 | 0.00000  | 0.00164  | 0.00010  | 0.00173  | -0.78987 |
| D28 | -1.75408 | 0.00001  | 0.00191  | 0.00029  | 0.00220  | -1.75188 |
| D29 | 0.34065  | 0.00001  | 0.00202  | 0.00030  | 0.00232  | 0.34297  |
| D30 | 2.39310  | 0.00001  | 0.00205  | 0.00027  | 0.00232  | 2.39543  |

|     |          |          |          |          |          |          |
|-----|----------|----------|----------|----------|----------|----------|
| D31 | -1.10041 | 0.00001  | 0.00070  | -0.00006 | 0.00064  | -1.09977 |
| D32 | 0.94401  | -0.00001 | 0.00080  | -0.00020 | 0.00059  | 0.94460  |
| D33 | 3.11581  | 0.00000  | 0.00069  | -0.00005 | 0.00064  | 3.11645  |
| D34 | 3.10795  | 0.00001  | 0.00047  | -0.00001 | 0.00047  | 3.10842  |
| D35 | -1.13082 | -0.00001 | 0.00057  | -0.00015 | 0.00042  | -1.13040 |
| D36 | 1.04098  | 0.00000  | 0.00047  | 0.00000  | 0.00047  | 1.04145  |
| D37 | 1.01328  | 0.00000  | 0.00052  | -0.00008 | 0.00043  | 1.01371  |
| D38 | 3.05769  | -0.00001 | 0.00061  | -0.00022 | 0.00039  | 3.05808  |
| D39 | -1.05370 | 0.00000  | 0.00051  | -0.00008 | 0.00044  | -1.05326 |
| D40 | 2.94326  | 0.00000  | 0.00044  | 0.00009  | 0.00053  | 2.94378  |
| D41 | -1.24705 | 0.00001  | 0.00002  | 0.00019  | 0.00020  | -1.24684 |
| D42 | 0.86572  | 0.00000  | 0.00042  | 0.00017  | 0.00059  | 0.86631  |
| D43 | 2.95860  | 0.00000  | -0.00001 | 0.00027  | 0.00026  | 2.95886  |
| D44 | -1.23415 | 0.00000  | 0.00044  | 0.00012  | 0.00057  | -1.23358 |
| D45 | 0.85873  | 0.00000  | 0.00002  | 0.00022  | 0.00024  | 0.85897  |
| D46 | 3.13932  | 0.00001  | 0.00012  | 0.00013  | 0.00025  | 3.13957  |
| D47 | -0.00284 | 0.00000  | 0.00022  | 0.00003  | 0.00025  | -0.00260 |
| D48 | -0.00314 | 0.00000  | 0.00031  | 0.00002  | 0.00033  | -0.00282 |
| D49 | 3.13788  | 0.00000  | 0.00041  | -0.00008 | 0.00033  | 3.13821  |
| D50 | 2.20846  | -0.00002 | -0.00033 | -0.00068 | -0.00098 | 2.20748  |
| D51 | -1.40498 | 0.00000  | 0.00061  | -0.00345 | -0.00286 | -1.40784 |
| D52 | -2.08528 | -0.00001 | -0.00059 | -0.00120 | -0.00177 | -2.08706 |
| D53 | 0.58446  | 0.00001  | 0.00035  | -0.00398 | -0.00365 | 0.58081  |
| D54 | -2.71276 | 0.00000  | -0.00003 | 0.00027  | 0.00023  | -2.71252 |
| D55 | -0.01585 | 0.00000  | 0.00022  | 0.00001  | 0.00023  | -0.01562 |
| D56 | -0.02705 | 0.00002  | -0.00016 | 0.00038  | 0.00022  | -0.02683 |
| D57 | 2.66985  | 0.00002  | 0.00009  | 0.00012  | 0.00021  | 2.67007  |
| D58 | 0.50881  | 0.00001  | 0.00112  | -0.00294 | -0.00179 | 0.50702  |
| D59 | -1.91034 | -0.00003 | 0.00128  | -0.00327 | -0.00196 | -1.91230 |
| D60 | 1.78230  | 0.00003  | 0.00025  | 0.00106  | 0.00130  | 1.78359  |
| D61 | -0.63965 | 0.00001  | -0.00014 | 0.00082  | 0.00067  | -0.63898 |
| D62 | 2.55312  | 0.00001  | 0.00083  | 0.00055  | 0.00138  | 2.55450  |
| D63 | -1.65599 | 0.00001  | 0.00087  | 0.00059  | 0.00146  | -1.65453 |
| D64 | 0.44349  | 0.00000  | 0.00081  | 0.00058  | 0.00139  | 0.44488  |
| D65 | 1.34836  | 0.00001  | 0.00112  | 0.00040  | 0.00152  | 1.34988  |
| D66 | -2.86075 | 0.00001  | 0.00116  | 0.00044  | 0.00160  | -2.85914 |
| D67 | -0.76127 | 0.00001  | 0.00110  | 0.00043  | 0.00153  | -0.75974 |
| D68 | -1.03939 | 0.00000  | 0.00094  | 0.00017  | 0.00111  | -1.03827 |
| D69 | 1.03469  | 0.00000  | 0.00098  | 0.00022  | 0.00120  | 1.03588  |
| D70 | 3.13417  | 0.00000  | 0.00092  | 0.00020  | 0.00112  | 3.13529  |

| Item                 | Value    | Threshold | Converged? |
|----------------------|----------|-----------|------------|
| Maximum Force        | 0.000048 | 0.000450  | YES        |
| RMS Force            | 0.000012 | 0.000300  | YES        |
| Maximum Displacement | 0.013829 | 0.001800  | NO         |

RMS Displacement 0.002583 0.001200 NO

Predicted change in Energy=-1.874583D-07

GradGradGradGradGradGradGradGradGradGradGradGradGradGradGradGradGradGrad

Input orientation:

| Center Number | Atomic Number | Atomic Type | Coordinates (Angstroms) |           |           |
|---------------|---------------|-------------|-------------------------|-----------|-----------|
|               |               |             | X                       | Y         | Z         |
| 1             | 6             | 0           | -2.644100               | 2.099981  | -0.197798 |
| 2             | 6             | 0           | -3.536075               | 1.118257  | 0.090122  |
| 3             | 7             | 0           | -2.826914               | -0.076074 | 0.111255  |
| 4             | 6             | 0           | -1.534431               | 0.184621  | -0.159492 |
| 5             | 7             | 0           | -1.404104               | 1.497970  | -0.353199 |
| 6             | 6             | 0           | -0.129977               | 2.183306  | -0.634673 |
| 7             | 6             | 0           | 0.454693                | 2.858874  | 0.610727  |
| 8             | 1             | 0           | -2.783473               | 3.160946  | -0.313571 |
| 9             | 1             | 0           | -4.594670               | 1.169157  | 0.267850  |
| 10            | 1             | 0           | 0.569926                | 1.429915  | -0.996383 |
| 11            | 1             | 0           | -0.302513               | 2.917079  | -1.423086 |
| 12            | 1             | 0           | -0.226002               | 3.641319  | 0.962453  |
| 13            | 1             | 0           | 0.533465                | 2.105844  | 1.409165  |
| 14            | 35            | 0           | 0.136734                | -2.666497 | -0.218807 |
| 15            | 1             | 0           | -0.758562               | -0.604002 | -0.214648 |
| 16            | 6             | 0           | -3.301341               | -1.400665 | 0.356356  |
| 17            | 6             | 0           | -4.560455               | -1.690362 | 0.656318  |
| 18            | 1             | 0           | -2.501580               | -2.133710 | 0.266206  |
| 19            | 1             | 0           | -4.831981               | -2.723499 | 0.824508  |
| 20            | 1             | 0           | -5.347407               | -0.951308 | 0.746207  |
| 21            | 7             | 0           | 1.721689                | 3.472306  | 0.230325  |
| 22            | 1             | 0           | 2.064270                | 4.087321  | 0.958937  |
| 23            | 1             | 0           | 2.419431                | 2.749365  | 0.066940  |
| 24            | 6             | 0           | 3.331610                | -0.426282 | -1.137557 |
| 25            | 6             | 0           | 3.265693                | -0.564107 | 0.318554  |
| 26            | 8             | 0           | 2.734712                | 0.620800  | -0.336703 |
| 27            | 1             | 0           | 4.271524                | -0.148172 | -1.608485 |
| 28            | 1             | 0           | 2.628891                | -0.989144 | -1.744540 |
| 29            | 1             | 0           | 2.480421                | -1.217652 | 0.692893  |
| 30            | 6             | 0           | 4.462572                | -0.353997 | 1.204462  |
| 31            | 1             | 0           | 4.164683                | 0.078944  | 2.164082  |
| 32            | 1             | 0           | 4.946470                | -1.313894 | 1.409134  |
| 33            | 1             | 0           | 5.191913                | 0.310729  | 0.734664  |

Distance matrix (angstroms):

|    |    | 1        | 2        | 3        | 4        | 5        |
|----|----|----------|----------|----------|----------|----------|
| 1  | C  | 0.000000 |          |          |          |          |
| 2  | C  | 1.357313 | 0.000000 |          |          |          |
| 3  | N  | 2.205482 | 1.389166 | 0.000000 |          |          |
| 4  | C  | 2.213919 | 2.222738 | 1.346024 | 0.000000 |          |
| 5  | N  | 1.387140 | 2.210433 | 2.172032 | 1.333939 | 0.000000 |
| 6  | C  | 2.553159 | 3.641588 | 3.596482 | 2.488580 | 1.473877 |
| 7  | C  | 3.291224 | 4.384861 | 4.430840 | 3.420743 | 2.497267 |
| 8  | H  | 1.076325 | 2.214036 | 3.265067 | 3.231464 | 2.160953 |
| 9  | H  | 2.210879 | 1.074617 | 2.167967 | 3.242992 | 3.267037 |
| 10 | H  | 3.378860 | 4.258740 | 3.877292 | 2.584466 | 2.077285 |
| 11 | H  | 2.766227 | 3.997685 | 4.205446 | 3.252787 | 2.090941 |
| 12 | H  | 3.093396 | 4.252456 | 4.616090 | 3.862578 | 2.777194 |
| 13 | H  | 3.560799 | 4.390485 | 4.211590 | 3.229239 | 2.688794 |
| 14 | Br | 5.518405 | 5.282928 | 3.949993 | 3.305327 | 4.442413 |
| 15 | H  | 3.296523 | 3.282322 | 2.159398 | 1.107673 | 2.203226 |
| 16 | C  | 3.604660 | 2.543806 | 1.428179 | 2.429239 | 3.536249 |
| 17 | C  | 4.332277 | 3.042741 | 2.430675 | 3.652113 | 4.598601 |
| 18 | H  | 4.261426 | 3.417085 | 2.088951 | 2.547794 | 3.844114 |
| 19 | H  | 5.394246 | 4.120411 | 3.396746 | 4.505470 | 5.564003 |
| 20 | H  | 4.184421 | 2.827450 | 2.742642 | 4.080370 | 4.770461 |
| 21 | N  | 4.596377 | 5.762403 | 5.770179 | 4.643614 | 3.742871 |
| 22 | H  | 5.239877 | 6.397972 | 6.478897 | 5.425182 | 4.522838 |
| 23 | H  | 5.111862 | 6.174877 | 5.958961 | 4.718284 | 4.044988 |
| 24 | C  | 6.555476 | 7.145480 | 6.293616 | 5.000816 | 5.171552 |
| 25 | C  | 6.503048 | 7.010461 | 6.115636 | 4.881629 | 5.148826 |
| 26 | O  | 5.580223 | 6.304951 | 5.622987 | 4.295024 | 4.230779 |
| 27 | H  | 7.407435 | 8.089976 | 7.304145 | 5.993283 | 6.041381 |
| 28 | H  | 6.303931 | 6.768599 | 5.834680 | 4.606881 | 4.938281 |
| 29 | H  | 6.169338 | 6.482131 | 5.459790 | 4.337276 | 4.853704 |
| 30 | C  | 7.648080 | 8.208997 | 7.376242 | 6.173696 | 6.346178 |
| 31 | H  | 7.484825 | 8.042584 | 7.288386 | 6.155491 | 6.273893 |
| 32 | H  | 8.476646 | 8.922372 | 7.977605 | 6.834340 | 7.165346 |
| 33 | H  | 8.091601 | 8.788931 | 8.052319 | 6.786687 | 6.789729 |
|    |    | 6        | 7        | 8        | 9        | 10       |
| 6  | C  | 0.000000 |          |          |          |          |
| 7  | C  | 1.532728 | 0.000000 |          |          |          |
| 8  | H  | 2.846037 | 3.381020 | 0.000000 |          |          |
| 9  | H  | 4.666534 | 5.335614 | 2.754217 | 0.000000 |          |
| 10 | H  | 1.090090 | 2.153604 | 3.835099 | 5.323470 | 0.000000 |
| 11 | H  | 1.090774 | 2.170978 | 2.728673 | 4.933266 | 1.776199 |
| 12 | H  | 2.164678 | 1.095115 | 2.898215 | 5.067476 | 3.059550 |
| 13 | H  | 2.150217 | 1.100346 | 3.883702 | 5.336456 | 2.498975 |
| 14 | Br | 4.874903 | 5.596334 | 6.518872 | 6.110259 | 4.192001 |

|    |    |          |          |          |          |          |
|----|----|----------|----------|----------|----------|----------|
| 15 | H  | 2.888015 | 3.760950 | 4.276083 | 4.253542 | 2.552021 |
| 16 | C  | 4.887181 | 5.684731 | 4.639535 | 2.878284 | 4.982850 |
| 17 | C  | 6.025040 | 6.771214 | 5.256761 | 2.885987 | 6.228030 |
| 18 | H  | 5.007266 | 5.812413 | 5.333759 | 3.910237 | 4.871110 |
| 19 | H  | 6.950884 | 7.691392 | 6.333901 | 3.939410 | 7.053162 |
| 20 | H  | 6.241332 | 6.942637 | 4.960597 | 2.300393 | 6.612237 |
| 21 | N  | 2.416280 | 1.458178 | 4.548544 | 6.723265 | 2.646268 |
| 22 | H  | 3.313546 | 2.054524 | 5.096868 | 7.303066 | 3.621899 |
| 23 | H  | 2.704101 | 2.041542 | 5.233011 | 7.192708 | 2.508440 |
| 24 | C  | 4.364106 | 4.703764 | 7.137324 | 8.206492 | 3.330510 |
| 25 | C  | 4.470737 | 4.438905 | 7.132181 | 8.049352 | 3.601713 |
| 26 | O  | 3.276683 | 3.332430 | 6.074804 | 7.374688 | 2.403361 |
| 27 | H  | 5.075166 | 5.341856 | 7.899370 | 9.157805 | 4.070240 |
| 28 | H  | 4.348287 | 5.008160 | 6.968831 | 7.803065 | 3.263575 |
| 29 | H  | 4.488109 | 4.552844 | 6.920525 | 7.478932 | 3.676038 |
| 30 | C  | 5.559841 | 5.170895 | 8.195390 | 9.232056 | 4.814432 |
| 31 | H  | 5.541252 | 4.889269 | 7.994647 | 9.028318 | 4.973524 |
| 32 | H  | 6.494449 | 6.182678 | 9.096369 | 9.924788 | 5.698170 |
| 33 | H  | 5.805526 | 5.380488 | 8.534009 | 9.835244 | 5.060816 |
|    |    | 11       | 12       | 13       | 14       | 15       |
| 11 | H  | 0.000000 |          |          |          |          |
| 12 | H  | 2.494228 | 0.000000 |          |          |          |
| 13 | H  | 3.062452 | 1.770318 | 0.000000 |          |          |
| 14 | Br | 5.728835 | 6.427713 | 5.057958 | 0.000000 |          |
| 15 | H  | 3.750509 | 4.437560 | 3.413118 | 2.248435 | 0.000000 |
| 16 | C  | 5.549982 | 5.936890 | 5.301863 | 3.708572 | 2.725150 |
| 17 | C  | 6.609274 | 6.878082 | 6.397342 | 4.876707 | 4.048845 |
| 18 | H  | 5.761951 | 6.246117 | 5.337760 | 2.734923 | 2.368404 |
| 19 | H  | 7.575215 | 7.857797 | 7.242403 | 5.077390 | 4.707956 |
| 20 | H  | 6.717233 | 6.882425 | 6.661108 | 5.826571 | 4.701209 |
| 21 | N  | 2.671973 | 2.087601 | 2.160731 | 6.355998 | 4.792279 |
| 22 | H  | 3.556004 | 2.333298 | 2.544075 | 7.121555 | 5.599482 |
| 23 | H  | 3.107617 | 2.931867 | 2.402614 | 5.884209 | 4.628607 |
| 24 | C  | 4.946356 | 5.797587 | 4.552699 | 4.008728 | 4.196767 |
| 25 | C  | 5.280536 | 5.503830 | 3.972800 | 3.807779 | 4.059621 |
| 26 | O  | 3.959528 | 4.424610 | 3.177877 | 4.191624 | 3.703782 |
| 27 | H  | 5.509261 | 6.418544 | 5.306589 | 5.036830 | 5.239497 |
| 28 | H  | 4.894389 | 6.076135 | 4.890360 | 3.369306 | 3.736810 |
| 29 | H  | 5.414618 | 5.568391 | 3.917819 | 2.902278 | 3.419241 |
| 30 | C  | 6.349014 | 6.164726 | 4.640108 | 5.107467 | 5.416328 |
| 31 | H  | 6.393640 | 5.780359 | 4.226579 | 5.425863 | 5.510274 |
| 32 | H  | 7.312621 | 7.176917 | 5.582940 | 5.254834 | 5.973944 |
| 33 | H  | 6.452725 | 6.363845 | 5.037710 | 5.943721 | 6.094758 |
|    |    | 16       | 17       | 18       | 19       | 20       |

|    |   |          |          |          |           |           |
|----|---|----------|----------|----------|-----------|-----------|
| 16 | C | 0.000000 |          |          |           |           |
| 17 | C | 1.326375 | 0.000000 |          |           |           |
| 18 | H | 1.088623 | 2.141894 | 0.000000 |           |           |
| 19 | H | 2.076515 | 1.081382 | 2.467857 | 0.000000  |           |
| 20 | H | 2.130796 | 1.083316 | 3.118847 | 1.847283  | 0.000000  |
| 21 | N | 6.999469 | 8.142478 | 7.018882 | 9.038343  | 8.355036  |
| 22 | H | 7.698758 | 8.795464 | 7.747780 | 9.693484  | 8.964709  |
| 23 | H | 7.073454 | 8.293211 | 6.935451 | 9.116421  | 8.630189  |
| 24 | C | 6.868569 | 8.191494 | 6.237946 | 8.704661  | 8.896604  |
| 25 | C | 6.620210 | 7.913982 | 5.977276 | 8.395909  | 8.632398  |
| 26 | O | 6.403170 | 7.716672 | 5.947233 | 8.353897  | 8.304509  |
| 27 | H | 7.923233 | 9.247245 | 7.302861 | 9.768601  | 9.935464  |
| 28 | H | 6.304821 | 7.611999 | 5.628043 | 8.079147  | 8.356231  |
| 29 | H | 5.794439 | 7.056821 | 5.083459 | 7.467002  | 7.832539  |
| 30 | C | 7.879920 | 9.137907 | 7.248939 | 9.599355  | 9.838824  |
| 31 | H | 7.822956 | 9.029498 | 7.275771 | 9.517779  | 9.672211  |
| 32 | H | 8.315182 | 9.544112 | 7.579699 | 9.896811  | 10.321572 |
| 33 | H | 8.672217 | 9.955862 | 8.086073 | 10.473445 | 10.614619 |
|    |   | 21       | 22       | 23       | 24        | 25        |
| 21 | N | 0.000000 |          |          |           |           |
| 22 | H | 1.013154 | 0.000000 |          |           |           |
| 23 | H | 1.017931 | 1.646792 | 0.000000 |           |           |
| 24 | C | 4.434178 | 5.135567 | 3.516762 | 0.000000  |           |
| 25 | C | 4.322541 | 4.846575 | 3.429076 | 1.464104  | 0.000000  |
| 26 | O | 3.078770 | 3.760977 | 2.189319 | 1.447078  | 1.454409  |
| 27 | H | 4.794867 | 5.422456 | 3.825313 | 1.087455  | 2.213183  |
| 28 | H | 4.962625 | 5.779108 | 4.159541 | 1.085844  | 2.200575  |
| 29 | H | 4.773400 | 5.327917 | 4.016560 | 2.168257  | 1.088073  |
| 30 | C | 4.806452 | 5.053458 | 3.885774 | 2.601798  | 1.503828  |
| 31 | H | 4.606793 | 4.683075 | 3.817729 | 3.442396  | 2.151203  |
| 32 | H | 5.890375 | 6.138638 | 4.969656 | 3.143447  | 2.139289  |
| 33 | H | 4.721481 | 4.908675 | 3.752260 | 2.740278  | 2.156110  |
|    |   | 26       | 27       | 28       | 29        | 30        |
| 26 | O | 0.000000 |          |          |           |           |
| 27 | H | 2.137882 | 0.000000 |          |           |           |
| 28 | H | 2.141290 | 1.850402 | 0.000000 |           |           |
| 29 | H | 2.122413 | 3.106152 | 2.452620 | 0.000000  |           |
| 30 | C | 2.512155 | 2.826931 | 3.530214 | 2.221829  | 0.000000  |
| 31 | H | 2.931272 | 3.780908 | 4.333221 | 2.585014  | 1.094096  |
| 32 | H | 3.418020 | 3.304616 | 3.927123 | 2.569759  | 1.094281  |
| 33 | H | 2.698482 | 2.558917 | 3.795419 | 3.112857  | 1.092937  |
|    |   | 31       | 32       | 33       |           |           |
| 31 | H | 0.000000 |          |          |           |           |
| 32 | H | 1.766674 | 0.000000 |          |           |           |

33 H 1.775433 1.776106 0.000000  
 Stoichiometry C10H18BrN3O  
 Framework group C1[X(C10H18BrN3O)]  
 Deg. of freedom 93  
 Full point group C1 NOp 1  
 Largest Abelian subgroup C1 NOp 1  
 Largest concise Abelian subgroup C1 NOp 1

Standard orientation:

| Center<br>Number | Atomic<br>Number | Atomic<br>Type | Coordinates (Angstroms) |           |           |
|------------------|------------------|----------------|-------------------------|-----------|-----------|
|                  |                  |                | X                       | Y         | Z         |
| 1                | 6                | 0              | -2.350820               | 2.471581  | -0.265207 |
| 2                | 6                | 0              | -3.337459               | 1.590049  | 0.037685  |
| 3                | 7                | 0              | -2.750955               | 0.331808  | 0.088934  |
| 4                | 6                | 0              | -1.437738               | 0.456574  | -0.178786 |
| 5                | 7                | 0              | -1.176316               | 1.745879  | -0.399571 |
| 6                | 6                | 0              | 0.161003                | 2.294668  | -0.687185 |
| 7                | 6                | 0              | 0.804562                | 2.935744  | 0.547363  |
| 8                | 1                | 0              | -2.383250               | 3.538365  | -0.404476 |
| 9                | 1                | 0              | -4.386489               | 1.749940  | 0.207310  |
| 10               | 1                | 0              | 0.783936                | 1.467625  | -1.028140 |
| 11               | 1                | 0              | 0.065950                | 3.024561  | -1.492174 |
| 12               | 1                | 0              | 0.203681                | 3.789559  | 0.877843  |
| 13               | 1                | 0              | 0.804356                | 2.196246  | 1.362167  |
| 14               | 35               | 0              | -0.058785               | -2.547343 | -0.166324 |
| 15               | 1                | 0              | -0.744089               | -0.406378 | -0.212012 |
| 16               | 6                | 0              | -3.356109               | -0.933304 | 0.359073  |
| 17               | 6                | 0              | -4.639143               | -1.089604 | 0.656838  |
| 18               | 1                | 0              | -2.632993               | -1.744111 | 0.289834  |
| 19               | 1                | 0              | -5.013021               | -2.086658 | 0.845212  |
| 20               | 1                | 0              | -5.348915               | -0.274101 | 0.725772  |
| 21               | 7                | 0              | 2.128058                | 3.411551  | 0.162331  |
| 22               | 1                | 0              | 2.526993                | 4.005189  | 0.879913  |
| 23               | 1                | 0              | 2.750997                | 2.619349  | 0.018988  |
| 24               | 6                | 0              | 3.347483                | -0.656890 | -1.111532 |
| 25               | 6                | 0              | 3.261705                | -0.755608 | 0.346719  |
| 26               | 8                | 0              | 2.854364                | 0.461660  | -0.337122 |
| 27               | 1                | 0              | 4.312513                | -0.484081 | -1.582077 |
| 28               | 1                | 0              | 2.594867                | -1.160142 | -1.711000 |
| 29               | 1                | 0              | 2.413559                | -1.319402 | 0.729718  |
| 30               | 6                | 0              | 4.469626                | -0.646364 | 1.235816  |
| 31               | 1                | 0              | 4.212116                | -0.165049 | 2.184009  |
| 32               | 1                | 0              | 4.854541                | -1.644957 | 1.464078  |

```

33      1      0      5.263657  -0.067966  0.756775
-----
Rotational constants (GHZ):      0.4225000      0.2920279      0.1827001
Standard basis: 6-311++G(d,p) (5D, 7F)
There are 499 symmetry adapted cartesian basis functions of A symmetry.
There are 482 symmetry adapted basis functions of A symmetry.
482 basis functions, 760 primitive gaussians, 499 cartesian basis functions
71 alpha electrons      71 beta electrons
nuclear repulsion energy      1312.9285256524 Hartrees.
NAtoms= 33 NActive= 33 NUniq= 33 SFac= 1.00D+00 NATFMM= 60 NAOKFM=F
Big=F
Integral buffers will be 131072 words long.
Raffenetti 2 integral format.
Two-electron integral symmetry is turned on.
One-electron integrals computed using PRISM.
NBasis= 482 RedAO= T EigKep= 3.63D-06 NBF= 482
NBsUse= 482 1.00D-06 EigRej= -1.00D+00 NBFU= 482
Initial guess from the checkpoint file:
"/home/suqian/liuwen/qianmengshijie/nh2po/nh2po.chk"
B after Tr= 0.000000 0.000000 0.000000
Rot= 1.000000 -0.000074 -0.000057 -0.000086 Ang= -0.01 deg.
Requested convergence on RMS density matrix=1.00D-08 within 128 cycles.
Requested convergence on MAX density matrix=1.00D-06.
Requested convergence on energy=1.00D-06.
No special actions if energy rises.
SCF Done: E(RB3LYP) = -3205.64837896 A.U. after 9 cycles
NFOck= 9 Conv=0.25D-08 -V/T= 2.0018
Calling FoFJK, ICntrl= 2127 FMM=F ISym2X=0 I1Cent= 0 IOpClX= 0 NMat=1 NMatS=1
NMatT=0.
**** Axes restored to original set ****

```

```

-----
Center      Atomic      Forces (Hartrees/Bohr)
Number      Number      X      Y      Z
-----
1      6      0.000008156  0.000002781  0.000009801
2      6      -0.000000593  0.000004528  -0.000006868
3      7      -0.000014501  -0.000017893  -0.000004419
4      6      0.000018855  0.000034484  -0.000015043
5      7      -0.000004443  -0.000005522  0.000007678
6      6      -0.000003265  -0.000008207  -0.000009415
7      6      0.000045776  0.000020699  -0.000015531
8      1      -0.000002766  -0.000000140  -0.000003273
9      1      0.000000202  -0.000000535  0.000004433
10     1      -0.000007438  0.000001903  -0.000000157

```



|    |    |              |              |              |
|----|----|--------------|--------------|--------------|
| 11 | 1  | 0.000004108  | -0.000001577 | -0.000003773 |
| 12 | 1  | -0.000004710 | 0.000000063  | -0.000004524 |
| 13 | 1  | -0.000006650 | -0.000006846 | 0.000001903  |
| 14 | 35 | 0.000003144  | 0.000007188  | 0.000002024  |
| 15 | 1  | 0.000000172  | -0.000020278 | 0.000007257  |
| 16 | 6  | 0.000004539  | 0.000010320  | 0.000006072  |
| 17 | 6  | -0.000003572 | 0.000001406  | -0.000005407 |
| 18 | 1  | 0.000000866  | -0.000002899 | 0.000001487  |
| 19 | 1  | 0.000000883  | 0.000000888  | 0.000000543  |
| 20 | 1  | -0.000001813 | 0.000002178  | -0.000002998 |
| 21 | 7  | -0.000015918 | -0.000019806 | 0.000024468  |
| 22 | 1  | -0.000002671 | -0.000001302 | -0.000005652 |
| 23 | 1  | -0.000007406 | 0.000003625  | -0.000003947 |
| 24 | 6  | 0.000039688  | -0.000017818 | -0.000086751 |
| 25 | 6  | -0.000038147 | 0.000049138  | -0.000011156 |
| 26 | 8  | 0.000008186  | -0.000035490 | 0.000035829  |
| 27 | 1  | -0.000000702 | 0.000006584  | 0.000022194  |
| 28 | 1  | -0.000018331 | 0.000004875  | 0.000017584  |
| 29 | 1  | 0.000005119  | 0.000000094  | 0.000022825  |
| 30 | 6  | -0.000000886 | -0.000010398 | 0.000010150  |
| 31 | 1  | -0.000000085 | -0.000004154 | 0.000003546  |
| 32 | 1  | -0.000000057 | 0.000001219  | 0.000002899  |
| 33 | 1  | -0.000005739 | 0.000000893  | -0.000001778 |

-----  
Cartesian Forces: Max 0.000086751 RMS 0.000016227

GradGradGradGradGradGradGradGradGradGradGradGradGradGradGradGradGradGradGradGrad

Berny optimization.

Using GEDIIS/GDIIS optimizer.

FormGI is forming the generalized inverse of G from B-inverse, IUseBI=4.

GSVD: received Info= 1 from GESDD.

Internal Forces: Max 0.000045320 RMS 0.000010809

Search for a local minimum.

Step number 46 out of a maximum of 172

All quantities printed in internal units (Hartrees-Bohrs-Radians)

Mixed Optimization -- En-DIIS/RFO-DIIS

Swapping is turned off.

Update second derivatives using D2CorX and points

|    |    |    |    |    |    |    |  |  |  |
|----|----|----|----|----|----|----|--|--|--|
| 31 | 32 | 33 | 34 | 35 |    |    |  |  |  |
|    |    | 36 | 37 | 38 | 39 | 40 |  |  |  |
|    |    | 41 | 42 | 43 | 44 | 45 |  |  |  |
|    |    | 46 |    |    |    |    |  |  |  |

DE= -8.11D-08 DEPred=-1.87D-07 R= 4.33D-01

Trust test= 4.33D-01 RLast= 1.02D-02 DXMaxT set to 1.04D+00

ITU= 0 0 1 1 1 1 1 1 1 1 1 1 1 1 1 1 1 1 1 1

ITU= 0 0-1 1-1 1 1 1 1 1 1 1 1 1 0-1-1 1 1 1

ITU= -1 1 0 0-1 0

|                 |         |         |         |         |         |
|-----------------|---------|---------|---------|---------|---------|
| Eigenvalues --- | 0.00062 | 0.00090 | 0.00148 | 0.00235 | 0.00358 |
| Eigenvalues --- | 0.00521 | 0.00697 | 0.00765 | 0.01265 | 0.01416 |
| Eigenvalues --- | 0.01892 | 0.02051 | 0.02169 | 0.02349 | 0.02380 |
| Eigenvalues --- | 0.02530 | 0.02675 | 0.02841 | 0.03062 | 0.03103 |
| Eigenvalues --- | 0.03234 | 0.03499 | 0.03616 | 0.03969 | 0.04078 |
| Eigenvalues --- | 0.04291 | 0.04467 | 0.04669 | 0.05495 | 0.05599 |
| Eigenvalues --- | 0.05735 | 0.05744 | 0.05901 | 0.07719 | 0.08683 |
| Eigenvalues --- | 0.08885 | 0.09563 | 0.09827 | 0.11011 | 0.12320 |
| Eigenvalues --- | 0.12435 | 0.13058 | 0.13345 | 0.15726 | 0.15929 |
| Eigenvalues --- | 0.16001 | 0.16002 | 0.16004 | 0.16015 | 0.16125 |
| Eigenvalues --- | 0.16275 | 0.18608 | 0.21382 | 0.21727 | 0.22140 |
| Eigenvalues --- | 0.23170 | 0.23386 | 0.25562 | 0.26078 | 0.27475 |
| Eigenvalues --- | 0.29133 | 0.30090 | 0.30383 | 0.31866 | 0.32455 |
| Eigenvalues --- | 0.33666 | 0.34288 | 0.34337 | 0.34401 | 0.34550 |
| Eigenvalues --- | 0.34724 | 0.34745 | 0.35086 | 0.35184 | 0.35328 |
| Eigenvalues --- | 0.35556 | 0.35710 | 0.35879 | 0.35969 | 0.36419 |
| Eigenvalues --- | 0.36627 | 0.39659 | 0.41156 | 0.41904 | 0.42508 |
| Eigenvalues --- | 0.44699 | 0.45484 | 0.46483 | 0.49556 | 0.54930 |
| Eigenvalues --- | 0.58290 | 0.60637 | 1.08911 |         |         |

En-DIIS/RFO-DIIS IScMMF= 0 using points: 46 45 44 43 42

RFO step: Lambda=-3.04256018D-08.

DidBck=F Rises=F RFO-DIIS coefs: 0.84890 0.42398 -0.47573 0.16308

0.03976

Iteration 1 RMS(Cart)= 0.00151351 RMS(Int)= 0.00000321

Iteration 2 RMS(Cart)= 0.00000124 RMS(Int)= 0.00000310

Iteration 3 RMS(Cart)= 0.00000000 RMS(Int)= 0.00000310

| Variable | Old X   | -DE/DX   | Delta X<br>(Linear) | Delta X<br>(Quad) | Delta X<br>(Total) | New X   |
|----------|---------|----------|---------------------|-------------------|--------------------|---------|
| R1       | 2.56495 | 0.00000  | 0.00000             | 0.00000           | 0.00000            | 2.56495 |
| R2       | 2.62131 | 0.00000  | 0.00000             | 0.00000           | 0.00000            | 2.62132 |
| R3       | 2.03396 | 0.00000  | 0.00000             | 0.00000           | 0.00000            | 2.03396 |
| R4       | 2.62514 | 0.00000  | 0.00001             | -0.00001          | 0.00000            | 2.62515 |
| R5       | 2.03073 | 0.00000  | 0.00000             | 0.00000           | 0.00000            | 2.03073 |
| R6       | 2.54362 | 0.00001  | 0.00000             | 0.00003           | 0.00003            | 2.54365 |
| R7       | 2.69887 | -0.00001 | -0.00002            | -0.00001          | -0.00002           | 2.69884 |
| R8       | 2.52078 | -0.00002 | 0.00000             | 0.00000           | 0.00000            | 2.52078 |
| R9       | 2.09320 | 0.00001  | 0.00005             | 0.00002           | 0.00007            | 2.09326 |
| R10      | 2.78522 | -0.00001 | -0.00002            | 0.00000           | -0.00001           | 2.78521 |
| R11      | 2.89644 | 0.00000  | 0.00000             | 0.00003           | 0.00003            | 2.89646 |
| R12      | 2.05997 | -0.00001 | -0.00001            | 0.00000           | -0.00001           | 2.05996 |
| R13      | 2.06126 | 0.00000  | 0.00000             | 0.00000           | 0.00000            | 2.06126 |
| R14      | 2.06947 | 0.00000  | -0.00001            | 0.00001           | 0.00000            | 2.06947 |

|     |         |          |          |          |          |         |
|-----|---------|----------|----------|----------|----------|---------|
| R15 | 2.07935 | 0.00001  | -0.00001 | 0.00003  | 0.00002  | 2.07937 |
| R16 | 2.75556 | -0.00004 | 0.00002  | -0.00009 | -0.00007 | 2.75548 |
| R17 | 4.24893 | -0.00001 | -0.00032 | 0.00007  | -0.00025 | 4.24868 |
| R18 | 2.50648 | 0.00000  | 0.00000  | 0.00000  | 0.00000  | 2.50649 |
| R19 | 2.05720 | 0.00000  | 0.00001  | 0.00001  | 0.00001  | 2.05721 |
| R20 | 2.04352 | 0.00000  | 0.00000  | 0.00000  | 0.00000  | 2.04352 |
| R21 | 2.04717 | 0.00000  | 0.00000  | 0.00000  | 0.00000  | 2.04717 |
| R22 | 1.91458 | -0.00001 | 0.00000  | -0.00001 | -0.00001 | 1.91457 |
| R23 | 1.92361 | -0.00002 | 0.00000  | -0.00003 | -0.00002 | 1.92359 |
| R24 | 4.13721 | 0.00000  | -0.00037 | 0.00001  | -0.00036 | 4.13685 |
| R25 | 2.76675 | 0.00004  | 0.00010  | 0.00004  | 0.00014  | 2.76689 |
| R26 | 2.73458 | 0.00001  | -0.00006 | 0.00002  | -0.00003 | 2.73455 |
| R27 | 2.05499 | -0.00001 | -0.00002 | -0.00002 | -0.00003 | 2.05496 |
| R28 | 2.05195 | 0.00000  | 0.00000  | -0.00001 | 0.00000  | 2.05195 |
| R29 | 2.74844 | -0.00005 | -0.00002 | -0.00010 | -0.00012 | 2.74832 |
| R30 | 2.05616 | 0.00000  | 0.00001  | 0.00001  | 0.00002  | 2.05618 |
| R31 | 2.84182 | 0.00000  | -0.00002 | 0.00002  | 0.00000  | 2.84182 |
| R32 | 2.06754 | 0.00000  | 0.00000  | 0.00000  | 0.00000  | 2.06754 |
| R33 | 2.06789 | 0.00000  | 0.00000  | 0.00000  | 0.00000  | 2.06789 |
| R34 | 2.06535 | 0.00000  | 0.00000  | 0.00000  | 0.00000  | 2.06535 |
| A1  | 1.87268 | 0.00000  | 0.00001  | 0.00000  | 0.00001  | 1.87268 |
| A2  | 2.27928 | 0.00000  | -0.00001 | -0.00001 | -0.00003 | 2.27926 |
| A3  | 2.13117 | 0.00001  | 0.00001  | 0.00001  | 0.00002  | 2.13119 |
| A4  | 1.86460 | 0.00000  | 0.00000  | 0.00000  | 0.00000  | 1.86460 |
| A5  | 2.27600 | 0.00000  | 0.00001  | 0.00001  | 0.00002  | 2.27601 |
| A6  | 2.14253 | 0.00000  | 0.00000  | -0.00001 | -0.00001 | 2.14251 |
| A7  | 1.89717 | -0.00001 | 0.00000  | 0.00000  | -0.00001 | 1.89717 |
| A8  | 2.25289 | 0.00000  | 0.00004  | -0.00003 | 0.00001  | 2.25290 |
| A9  | 2.13309 | 0.00000  | -0.00003 | 0.00003  | 0.00000  | 2.13309 |
| A10 | 1.88990 | 0.00000  | 0.00000  | -0.00001 | 0.00000  | 1.88989 |
| A11 | 2.14684 | 0.00000  | -0.00007 | -0.00009 | -0.00016 | 2.14668 |
| A12 | 2.24632 | -0.00001 | 0.00006  | 0.00010  | 0.00016  | 2.24649 |
| A13 | 1.90042 | 0.00001  | 0.00000  | 0.00000  | 0.00000  | 1.90042 |
| A14 | 2.20479 | 0.00003  | 0.00001  | -0.00003 | -0.00002 | 2.20477 |
| A15 | 2.17731 | -0.00004 | -0.00001 | 0.00003  | 0.00001  | 2.17732 |
| A16 | 1.96009 | -0.00002 | -0.00007 | -0.00006 | -0.00013 | 1.95996 |
| A17 | 1.87239 | -0.00001 | 0.00002  | 0.00004  | 0.00007  | 1.87246 |
| A18 | 1.89030 | 0.00001  | 0.00004  | -0.00003 | 0.00001  | 1.89032 |
| A19 | 1.90638 | 0.00001  | -0.00001 | 0.00008  | 0.00008  | 1.90645 |
| A20 | 1.92958 | 0.00001  | 0.00003  | -0.00001 | 0.00003  | 1.92961 |
| A21 | 1.90355 | 0.00000  | -0.00002 | -0.00003 | -0.00005 | 1.90351 |
| A22 | 1.91642 | 0.00000  | -0.00001 | -0.00009 | -0.00010 | 1.91632 |
| A23 | 1.89153 | -0.00001 | -0.00003 | -0.00004 | -0.00008 | 1.89146 |
| A24 | 1.88062 | 0.00001  | 0.00006  | 0.00009  | 0.00015  | 1.88077 |

|     |          |          |          |          |          |          |
|-----|----------|----------|----------|----------|----------|----------|
| A25 | 1.87592  | 0.00000  | 0.00001  | -0.00004 | -0.00002 | 1.87589  |
| A26 | 1.90000  | 0.00001  | 0.00001  | -0.00001 | 0.00000  | 1.90000  |
| A27 | 1.99873  | 0.00000  | -0.00004 | 0.00009  | 0.00005  | 1.99878  |
| A28 | 2.16124  | 0.00000  | 0.00002  | -0.00002 | 0.00000  | 2.16124  |
| A29 | 1.94580  | 0.00000  | 0.00000  | 0.00001  | 0.00001  | 1.94581  |
| A30 | 2.17615  | 0.00000  | -0.00002 | 0.00001  | -0.00001 | 2.17614  |
| A31 | 2.07396  | 0.00000  | -0.00001 | -0.00001 | -0.00002 | 2.07394  |
| A32 | 2.16440  | 0.00000  | 0.00001  | 0.00001  | 0.00002  | 2.16442  |
| A33 | 2.04482  | 0.00000  | 0.00000  | 0.00000  | 0.00001  | 2.04483  |
| A34 | 1.94074  | 0.00002  | -0.00003 | 0.00006  | 0.00003  | 1.94076  |
| A35 | 1.91631  | -0.00004 | -0.00005 | 0.00009  | 0.00004  | 1.91636  |
| A36 | 1.89101  | 0.00002  | -0.00002 | 0.00003  | 0.00001  | 1.89102  |
| A37 | 2.08711  | -0.00001 | 0.00006  | -0.00006 | 0.00002  | 2.08713  |
| A38 | 2.06919  | -0.00001 | -0.00006 | 0.00004  | -0.00003 | 2.06915  |
| A39 | 1.99449  | 0.00001  | 0.00002  | -0.00002 | 0.00000  | 1.99449  |
| A40 | 2.00149  | -0.00001 | -0.00005 | -0.00006 | -0.00010 | 2.00138  |
| A41 | 2.03740  | 0.00002  | 0.00002  | 0.00007  | 0.00008  | 2.03748  |
| A42 | 2.01661  | 0.00002  | 0.00003  | 0.00015  | 0.00017  | 2.01678  |
| A43 | 2.13756  | -0.00001 | -0.00005 | -0.00007 | -0.00011 | 2.13745  |
| A44 | 1.96152  | 0.00000  | 0.00004  | 0.00006  | 0.00010  | 1.96163  |
| A45 | 2.02879  | 0.00000  | -0.00004 | 0.00001  | -0.00004 | 2.02875  |
| A46 | 2.04389  | -0.00001 | 0.00003  | -0.00010 | -0.00007 | 2.04383  |
| A47 | 2.61583  | -0.00002 | -0.00058 | 0.00037  | -0.00020 | 2.61563  |
| A48 | 2.43658  | -0.00001 | 0.00091  | -0.00035 | 0.00055  | 2.43712  |
| A49 | 1.93402  | 0.00000  | 0.00003  | -0.00002 | 0.00001  | 1.93403  |
| A50 | 1.91726  | 0.00000  | 0.00000  | 0.00002  | 0.00001  | 1.91727  |
| A51 | 1.94214  | -0.00001 | -0.00002 | -0.00001 | -0.00003 | 1.94211  |
| A52 | 1.87912  | 0.00000  | -0.00002 | -0.00002 | -0.00004 | 1.87908  |
| A53 | 1.89446  | 0.00000  | 0.00001  | 0.00002  | 0.00002  | 1.89448  |
| A54 | 1.89528  | 0.00000  | 0.00001  | 0.00002  | 0.00003  | 1.89531  |
| A55 | 3.48428  | -0.00003 | -0.00033 | -0.00036 | -0.00069 | 3.48359  |
| A56 | 2.53104  | -0.00004 | 0.00059  | -0.00028 | 0.00030  | 2.53134  |
| A57 | 2.96475  | 0.00000  | -0.00032 | -0.00093 | -0.00125 | 2.96349  |
| A58 | 3.10741  | -0.00001 | -0.00029 | 0.00008  | -0.00020 | 3.10721  |
| D1  | 0.00307  | 0.00000  | 0.00001  | 0.00000  | 0.00002  | 0.00308  |
| D2  | -3.12658 | 0.00000  | -0.00008 | -0.00014 | -0.00022 | -3.12680 |
| D3  | 3.13323  | 0.00000  | 0.00004  | -0.00002 | 0.00002  | 3.13325  |
| D4  | 0.00358  | 0.00000  | -0.00006 | -0.00016 | -0.00022 | 0.00336  |
| D5  | -0.00463 | 0.00000  | -0.00004 | -0.00002 | -0.00006 | -0.00469 |
| D6  | -3.10827 | 0.00000  | 0.00002  | 0.00008  | 0.00011  | -3.10816 |
| D7  | -3.13597 | 0.00000  | -0.00007 | 0.00000  | -0.00007 | -3.13604 |
| D8  | 0.04357  | 0.00000  | 0.00000  | 0.00010  | 0.00010  | 0.04367  |
| D9  | -0.00050 | 0.00000  | 0.00002  | 0.00001  | 0.00003  | -0.00046 |
| D10 | -3.13311 | 0.00000  | 0.00001  | -0.00012 | -0.00011 | -3.13322 |

|     |          |          |          |          |          |          |
|-----|----------|----------|----------|----------|----------|----------|
| D11 | 3.13028  | 0.00000  | 0.00011  | 0.00014  | 0.00025  | 3.13053  |
| D12 | -0.00233 | 0.00000  | 0.00009  | 0.00001  | 0.00010  | -0.00222 |
| D13 | -0.00239 | 0.00000  | -0.00005 | -0.00003 | -0.00007 | -0.00246 |
| D14 | -3.12841 | 0.00000  | -0.00006 | -0.00028 | -0.00034 | -3.12875 |
| D15 | 3.13096  | 0.00000  | -0.00003 | 0.00010  | 0.00006  | 3.13102  |
| D16 | 0.00494  | 0.00000  | -0.00005 | -0.00016 | -0.00021 | 0.00473  |
| D17 | -0.03840 | 0.00001  | 0.00040  | 0.00099  | 0.00139  | -0.03700 |
| D18 | 3.10389  | 0.00001  | 0.00034  | 0.00098  | 0.00132  | 3.10521  |
| D19 | 3.11325  | 0.00000  | 0.00038  | 0.00085  | 0.00123  | 3.11448  |
| D20 | -0.02764 | 0.00000  | 0.00032  | 0.00083  | 0.00115  | -0.02649 |
| D21 | 0.00433  | 0.00000  | 0.00006  | 0.00003  | 0.00008  | 0.00441  |
| D22 | 3.10871  | 0.00000  | -0.00001 | -0.00007 | -0.00008 | 3.10862  |
| D23 | 3.12919  | 0.00001  | 0.00007  | 0.00030  | 0.00037  | 3.12955  |
| D24 | -0.04962 | 0.00001  | 0.00000  | 0.00020  | 0.00020  | -0.04942 |
| D25 | 1.34601  | 0.00001  | 0.00025  | 0.00002  | 0.00027  | 1.34628  |
| D26 | -2.84233 | 0.00000  | 0.00022  | 0.00011  | 0.00033  | -2.84200 |
| D27 | -0.78987 | 0.00000  | 0.00022  | 0.00009  | 0.00031  | -0.78956 |
| D28 | -1.75188 | 0.00001  | 0.00032  | 0.00014  | 0.00046  | -1.75142 |
| D29 | 0.34297  | 0.00000  | 0.00029  | 0.00023  | 0.00052  | 0.34349  |
| D30 | 2.39543  | 0.00000  | 0.00030  | 0.00021  | 0.00051  | 2.39593  |
| D31 | -1.09977 | -0.00001 | -0.00006 | 0.00037  | 0.00030  | -1.09946 |
| D32 | 0.94460  | -0.00001 | -0.00007 | 0.00025  | 0.00018  | 0.94478  |
| D33 | 3.11645  | -0.00002 | -0.00010 | 0.00038  | 0.00028  | 3.11673  |
| D34 | 3.10842  | 0.00001  | -0.00005 | 0.00030  | 0.00025  | 3.10867  |
| D35 | -1.13040 | 0.00000  | -0.00005 | 0.00018  | 0.00012  | -1.13028 |
| D36 | 1.04145  | 0.00000  | -0.00009 | 0.00031  | 0.00023  | 1.04167  |
| D37 | 1.01371  | 0.00000  | -0.00004 | 0.00028  | 0.00025  | 1.01396  |
| D38 | 3.05808  | 0.00000  | -0.00004 | 0.00016  | 0.00012  | 3.05820  |
| D39 | -1.05326 | -0.00001 | -0.00008 | 0.00030  | 0.00022  | -1.05304 |
| D40 | 2.94378  | 0.00001  | 0.00024  | -0.00005 | 0.00019  | 2.94398  |
| D41 | -1.24684 | 0.00001  | 0.00016  | 0.00009  | 0.00025  | -1.24659 |
| D42 | 0.86631  | 0.00000  | 0.00021  | 0.00002  | 0.00023  | 0.86654  |
| D43 | 2.95886  | 0.00001  | 0.00013  | 0.00016  | 0.00029  | 2.95915  |
| D44 | -1.23358 | 0.00000  | 0.00022  | 0.00002  | 0.00023  | -1.23335 |
| D45 | 0.85897  | 0.00000  | 0.00014  | 0.00016  | 0.00029  | 0.85927  |
| D46 | 3.13957  | 0.00000  | -0.00001 | 0.00010  | 0.00009  | 3.13966  |
| D47 | -0.00260 | 0.00000  | 0.00003  | 0.00010  | 0.00013  | -0.00247 |
| D48 | -0.00282 | 0.00000  | 0.00005  | 0.00012  | 0.00018  | -0.00264 |
| D49 | 3.13821  | 0.00000  | 0.00010  | 0.00011  | 0.00021  | 3.13842  |
| D50 | 2.20748  | 0.00001  | -0.00008 | 0.00028  | 0.00021  | 2.20769  |
| D51 | -1.40784 | 0.00002  | 0.00071  | 0.00066  | 0.00137  | -1.40647 |
| D52 | -2.08706 | -0.00001 | 0.00012  | 0.00029  | 0.00042  | -2.08664 |
| D53 | 0.58081  | 0.00000  | 0.00091  | 0.00067  | 0.00158  | 0.58239  |
| D54 | -2.71252 | -0.00001 | 0.00002  | -0.00003 | -0.00001 | -2.71253 |

|     |          |          |         |          |          |          |
|-----|----------|----------|---------|----------|----------|----------|
| D55 | -0.01562 | -0.00001 | 0.00005 | -0.00008 | -0.00003 | -0.01565 |
| D56 | -0.02683 | 0.00002  | 0.00006 | 0.00012  | 0.00018  | -0.02666 |
| D57 | 2.67007  | 0.00001  | 0.00009 | 0.00007  | 0.00016  | 2.67022  |
| D58 | 0.50702  | 0.00002  | 0.00143 | -0.00023 | 0.00121  | 0.50823  |
| D59 | -1.91230 | -0.00001 | 0.00143 | -0.00024 | 0.00120  | -1.91110 |
| D60 | 1.78359  | -0.00001 | 0.00014 | -0.00055 | -0.00042 | 1.78318  |
| D61 | -0.63898 | 0.00001  | 0.00009 | -0.00047 | -0.00039 | -0.63937 |
| D62 | 2.55450  | 0.00000  | 0.00024 | 0.00021  | 0.00044  | 2.55494  |
| D63 | -1.65453 | 0.00000  | 0.00023 | 0.00018  | 0.00041  | -1.65412 |
| D64 | 0.44488  | 0.00000  | 0.00022 | 0.00021  | 0.00043  | 0.44531  |
| D65 | 1.34988  | 0.00000  | 0.00032 | 0.00020  | 0.00052  | 1.35040  |
| D66 | -2.85914 | 0.00000  | 0.00031 | 0.00017  | 0.00048  | -2.85866 |
| D67 | -0.75974 | 0.00000  | 0.00031 | 0.00020  | 0.00051  | -0.75923 |
| D68 | -1.03827 | 0.00000  | 0.00026 | 0.00021  | 0.00048  | -1.03779 |
| D69 | 1.03588  | 0.00000  | 0.00026 | 0.00019  | 0.00044  | 1.03633  |
| D70 | 3.13529  | 0.00000  | 0.00025 | 0.00022  | 0.00047  | 3.13576  |

| Item                 | Value    | Threshold | Converged? |
|----------------------|----------|-----------|------------|
| Maximum Force        | 0.000045 | 0.000450  | YES        |
| RMS Force            | 0.000011 | 0.000300  | YES        |
| Maximum Displacement | 0.010304 | 0.001800  | NO         |
| RMS Displacement     | 0.001514 | 0.001200  | NO         |

Predicted change in Energy=-5.420873D-08

GradGradGradGradGradGradGradGradGradGradGradGradGradGradGradGradGradGrad

Input orientation:

| Center Number | Atomic Number | Atomic Type | Coordinates (Angstroms) |           |           |
|---------------|---------------|-------------|-------------------------|-----------|-----------|
|               |               |             | X                       | Y         | Z         |
| 1             | 6             | 0           | -2.644127               | 2.099866  | -0.198346 |
| 2             | 6             | 0           | -3.536189               | 1.118317  | 0.089889  |
| 3             | 7             | 0           | -2.827082               | -0.076035 | 0.111706  |
| 4             | 6             | 0           | -1.534521               | 0.184493  | -0.158909 |
| 5             | 7             | 0           | -1.404128               | 1.497737  | -0.353276 |
| 6             | 6             | 0           | -0.129932               | 2.182931  | -0.634744 |
| 7             | 6             | 0           | 0.454549                | 2.858557  | 0.610730  |
| 8             | 1             | 0           | -2.783460               | 3.160782  | -0.314622 |
| 9             | 1             | 0           | -4.594780               | 1.169354  | 0.267609  |
| 10            | 1             | 0           | 0.569967                | 1.429500  | -0.996365 |
| 11            | 1             | 0           | -0.302348               | 2.916650  | -1.423234 |
| 12            | 1             | 0           | -0.226388               | 3.640829  | 0.962378  |
| 13            | 1             | 0           | 0.533275                | 2.105470  | 1.409132  |
| 14            | 35            | 0           | 0.137039                | -2.666452 | -0.213355 |
| 15            | 1             | 0           | -0.758709               | -0.604293 | -0.213209 |

|    |   |   |           |           |           |
|----|---|---|-----------|-----------|-----------|
| 16 | 6 | 0 | -3.301568 | -1.400468 | 0.357471  |
| 17 | 6 | 0 | -4.561033 | -1.690126 | 0.656004  |
| 18 | 1 | 0 | -2.501556 | -2.133461 | 0.269067  |
| 19 | 1 | 0 | -4.832537 | -2.723149 | 0.824928  |
| 20 | 1 | 0 | -5.348294 | -0.951169 | 0.743981  |
| 21 | 7 | 0 | 1.721454  | 3.472282  | 0.230644  |
| 22 | 1 | 0 | 2.063879  | 4.087151  | 0.959444  |
| 23 | 1 | 0 | 2.419337  | 2.749535  | 0.067067  |
| 24 | 6 | 0 | 3.333170  | -0.424784 | -1.138807 |
| 25 | 6 | 0 | 3.265883  | -0.564067 | 0.317175  |
| 26 | 8 | 0 | 2.735629  | 0.621472  | -0.337387 |
| 27 | 1 | 0 | 4.273511  | -0.146239 | -1.608587 |
| 28 | 1 | 0 | 2.630875  | -0.986896 | -1.746974 |
| 29 | 1 | 0 | 2.480282  | -1.217927 | 0.690304  |
| 30 | 6 | 0 | 4.462037  | -0.354883 | 1.204279  |
| 31 | 1 | 0 | 4.163330  | 0.076721  | 2.164246  |
| 32 | 1 | 0 | 4.945966  | -1.314946 | 1.408084  |
| 33 | 1 | 0 | 5.191584  | 0.310615  | 0.735891  |

-----  
Distance matrix (angstroms):

|    |    | 1        | 2        | 3        | 4        | 5        |
|----|----|----------|----------|----------|----------|----------|
| 1  | C  | 0.000000 |          |          |          |          |
| 2  | C  | 1.357311 | 0.000000 |          |          |          |
| 3  | N  | 2.205482 | 1.389167 | 0.000000 |          |          |
| 4  | C  | 2.213918 | 2.222746 | 1.346039 | 0.000000 |          |
| 5  | N  | 1.387140 | 2.210438 | 2.172041 | 1.333938 | 0.000000 |
| 6  | C  | 2.553139 | 3.641577 | 3.596489 | 2.488582 | 1.473870 |
| 7  | C  | 3.291202 | 4.384713 | 4.430571 | 3.420433 | 2.497163 |
| 8  | H  | 1.076325 | 2.214022 | 3.265064 | 3.231468 | 2.160964 |
| 9  | H  | 2.210886 | 1.074618 | 2.167961 | 3.243001 | 3.267046 |
| 10 | H  | 3.378850 | 4.258791 | 3.877422 | 2.584617 | 2.077324 |
| 11 | H  | 2.766119 | 3.997658 | 4.205530 | 3.252914 | 2.090943 |
| 12 | H  | 3.093106 | 4.251951 | 4.615445 | 3.861962 | 2.776844 |
| 13 | H  | 3.560884 | 4.390377 | 4.211208 | 3.228727 | 2.688671 |
| 14 | Br | 5.518414 | 5.282900 | 3.949929 | 3.305294 | 4.442437 |
| 15 | H  | 3.296589 | 3.282324 | 2.159350 | 1.107708 | 2.203342 |
| 16 | C  | 3.604649 | 2.543801 | 1.428166 | 2.429240 | 3.536245 |
| 17 | C  | 4.332260 | 3.042719 | 2.430665 | 3.652130 | 4.598604 |
| 18 | H  | 4.261438 | 3.417108 | 2.088954 | 2.547790 | 3.844120 |
| 19 | H  | 5.394229 | 4.120396 | 3.396726 | 4.505467 | 5.563994 |
| 20 | H  | 4.184413 | 2.827425 | 2.742652 | 4.080417 | 4.770488 |
| 21 | N  | 4.596287 | 5.762271 | 5.770085 | 4.643563 | 3.742867 |
| 22 | H  | 5.239761 | 6.397724 | 6.478602 | 5.424936 | 4.522762 |
| 23 | H  | 5.111867 | 6.174924 | 5.959090 | 4.718421 | 4.045068 |

|    |    |          |          |          |          |          |
|----|----|----------|----------|----------|----------|----------|
| 24 | C  | 6.556402 | 7.146954 | 6.295563 | 5.002583 | 5.172538 |
| 25 | C  | 6.503116 | 7.010724 | 6.115931 | 4.881688 | 5.148742 |
| 26 | O  | 5.580928 | 6.305959 | 5.624229 | 4.296159 | 4.231511 |
| 27 | H  | 7.408608 | 8.091683 | 7.306350 | 5.995347 | 6.042686 |
| 28 | H  | 6.304918 | 6.770426 | 5.837264 | 4.609189 | 4.939336 |
| 29 | H  | 6.169037 | 6.482010 | 5.459561 | 4.336656 | 4.853096 |
| 30 | C  | 7.647922 | 8.208763 | 7.375820 | 6.173161 | 6.345870 |
| 31 | H  | 7.484412 | 8.041795 | 7.287120 | 6.154199 | 6.273261 |
| 32 | H  | 8.476501 | 8.922184 | 7.977203 | 6.833777 | 7.165004 |
| 33 | H  | 8.091513 | 8.788841 | 8.052211 | 6.786535 | 6.789622 |
|    |    | 6        | 7        | 8        | 9        | 10       |
| 6  | C  | 0.000000 |          |          |          |          |
| 7  | C  | 1.532741 | 0.000000 |          |          |          |
| 8  | H  | 2.846029 | 3.381171 | 0.000000 |          |          |
| 9  | H  | 4.666525 | 5.335435 | 2.754208 | 0.000000 |          |
| 10 | H  | 1.090085 | 2.153667 | 3.835046 | 5.323525 | 0.000000 |
| 11 | H  | 1.090774 | 2.171009 | 2.728468 | 4.933251 | 1.776166 |
| 12 | H  | 2.164618 | 1.095117 | 2.898238 | 5.066926 | 3.059547 |
| 13 | H  | 2.150179 | 1.100356 | 3.884036 | 5.336322 | 2.498939 |
| 14 | Br | 4.874972 | 5.595146 | 6.518913 | 6.110225 | 4.192536 |
| 15 | H  | 2.888195 | 3.760612 | 4.276177 | 4.253522 | 2.552456 |
| 16 | C  | 4.887178 | 5.684352 | 4.639520 | 2.878273 | 4.983009 |
| 17 | C  | 6.025052 | 6.771162 | 5.256728 | 2.885934 | 6.228126 |
| 18 | H  | 5.007266 | 5.811673 | 5.333776 | 3.910265 | 4.871372 |
| 19 | H  | 6.950882 | 7.691204 | 6.333872 | 3.939380 | 7.053273 |
| 20 | H  | 6.241376 | 6.942965 | 4.960560 | 2.300289 | 6.612277 |
| 21 | N  | 2.416392 | 1.458139 | 4.548471 | 6.723069 | 2.646588 |
| 22 | H  | 3.313653 | 2.054504 | 5.096871 | 7.302734 | 3.622164 |
| 23 | H  | 2.704136 | 2.041530 | 5.232963 | 7.192707 | 2.508695 |
| 24 | C  | 4.364325 | 4.704006 | 7.137838 | 8.208025 | 3.330758 |
| 25 | C  | 4.470313 | 4.438933 | 7.132195 | 8.049672 | 3.601063 |
| 26 | O  | 3.276890 | 3.332687 | 6.075274 | 7.375710 | 2.403591 |
| 27 | H  | 5.075796 | 5.342157 | 7.900099 | 9.159557 | 4.071118 |
| 28 | H  | 4.348207 | 5.008260 | 6.969209 | 7.805001 | 3.263391 |
| 29 | H  | 4.487182 | 4.552763 | 6.920256 | 7.478923 | 3.674647 |
| 30 | C  | 5.559557 | 5.170923 | 8.195375 | 9.231824 | 4.814048 |
| 31 | H  | 5.540989 | 4.889486 | 7.994630 | 9.027490 | 4.973101 |
| 32 | H  | 6.494076 | 6.182777 | 9.096366 | 9.924630 | 5.697608 |
| 33 | H  | 5.805406 | 5.380258 | 8.533953 | 9.835123 | 5.060826 |
|    |    | 11       | 12       | 13       | 14       | 15       |
| 11 | H  | 0.000000 |          |          |          |          |
| 12 | H  | 2.494263 | 0.000000 |          |          |          |
| 13 | H  | 3.062446 | 1.770312 | 0.000000 |          |          |
| 14 | Br | 5.729563 | 6.426214 | 5.055760 | 0.000000 |          |



|    |   |          |          |          |           |           |
|----|---|----------|----------|----------|-----------|-----------|
| 15 | H | 3.750929 | 4.436939 | 3.412335 | 2.248303  | 0.000000  |
| 16 | C | 5.550111 | 5.936103 | 5.301284 | 3.708447  | 2.725014  |
| 17 | C | 6.609237 | 6.877651 | 6.397321 | 4.876564  | 4.048731  |
| 18 | H | 5.762293 | 6.244957 | 5.336523 | 2.734775  | 2.368219  |
| 19 | H | 7.575235 | 7.857208 | 7.242154 | 5.077197  | 4.707797  |
| 20 | H | 6.717024 | 6.882446 | 6.661705 | 5.826454  | 4.701151  |
| 21 | N | 2.672043 | 2.087566 | 2.160736 | 6.355436  | 4.792356  |
| 22 | H | 3.556158 | 2.333353 | 2.544018 | 7.120346  | 5.599265  |
| 23 | H | 3.107490 | 2.931868 | 2.402746 | 5.883914  | 4.628898  |
| 24 | C | 4.946016 | 5.797814 | 4.553416 | 4.012081  | 4.199099  |
| 25 | C | 5.279837 | 5.503943 | 3.973153 | 3.806724  | 4.059589  |
| 26 | O | 3.959319 | 4.424867 | 3.178513 | 4.192673  | 3.705175  |
| 27 | H | 5.509458 | 6.418788 | 5.307183 | 5.040689  | 5.242150  |
| 28 | H | 4.893493 | 6.076214 | 4.891181 | 3.375221  | 3.740067  |
| 29 | H | 5.413391 | 5.568447 | 3.918229 | 2.899243  | 3.418179  |
| 30 | C | 6.348710 | 6.164865 | 4.640094 | 5.104767  | 5.415502  |
| 31 | H | 6.393551 | 5.780742 | 4.226502 | 5.421163  | 5.508407  |
| 32 | H | 7.312152 | 7.177159 | 5.583108 | 5.251801  | 5.973018  |
| 33 | H | 6.452637 | 6.363651 | 5.037321 | 5.942426  | 6.094574  |
|    |   | 16       | 17       | 18       | 19        | 20        |
| 16 | C | 0.000000 |          |          |           |           |
| 17 | C | 1.326376 | 0.000000 |          |           |           |
| 18 | H | 1.088629 | 2.141894 | 0.000000 |           |           |
| 19 | H | 2.076504 | 1.081382 | 2.467830 | 0.000000  |           |
| 20 | H | 2.130809 | 1.083318 | 3.118858 | 1.847288  | 0.000000  |
| 21 | N | 6.999323 | 8.142544 | 7.018521 | 9.038326  | 8.355344  |
| 22 | H | 7.698335 | 8.795366 | 7.746989 | 9.693237  | 8.965010  |
| 23 | H | 7.073586 | 8.293551 | 6.935391 | 9.116705  | 8.630731  |
| 24 | C | 6.870995 | 8.193954 | 6.240651 | 8.707326  | 8.898865  |
| 25 | C | 6.620619 | 7.914759 | 5.977346 | 8.396657  | 8.633427  |
| 26 | O | 6.404594 | 7.718263 | 5.948576 | 8.355514  | 8.306165  |
| 27 | H | 7.925926 | 9.249925 | 7.305900 | 9.771518  | 9.937888  |
| 28 | H | 6.308218 | 7.615272 | 5.632129 | 8.082807  | 8.359023  |
| 29 | H | 5.794298 | 7.057213 | 5.082751 | 7.467338  | 7.833303  |
| 30 | C | 7.879333 | 9.137793 | 7.247730 | 9.599047  | 9.839208  |
| 31 | H | 7.821204 | 9.028347 | 7.273055 | 9.516232  | 9.671851  |
| 32 | H | 8.314621 | 9.544077 | 7.578451 | 9.896577  | 10.322072 |
| 33 | H | 8.672061 | 9.956047 | 8.085533 | 10.473522 | 10.615140 |
|    |   | 21       | 22       | 23       | 24        | 25        |
| 21 | N | 0.000000 |          |          |           |           |
| 22 | H | 1.013148 | 0.000000 |          |           |           |
| 23 | H | 1.017921 | 1.646786 | 0.000000 |           |           |
| 24 | C | 4.433977 | 5.135301 | 3.516465 | 0.000000  |           |
| 25 | C | 4.322599 | 4.846767 | 3.429162 | 1.464176  | 0.000000  |

|    |   |          |          |          |          |          |
|----|---|----------|----------|----------|----------|----------|
| 26 | O | 3.078689 | 3.760845 | 2.189126 | 1.447060 | 1.454346 |
| 27 | H | 4.794733 | 5.422071 | 3.825086 | 1.087437 | 2.213245 |
| 28 | H | 4.962085 | 5.778593 | 4.158895 | 1.085843 | 2.200620 |
| 29 | H | 4.773382 | 5.328198 | 4.016578 | 2.168443 | 1.088085 |
| 30 | C | 4.806865 | 5.053986 | 3.886294 | 2.601784 | 1.503827 |
| 31 | H | 4.607756 | 4.684314 | 3.818849 | 3.442504 | 2.151208 |
| 32 | H | 5.890790 | 6.139248 | 4.970130 | 3.143272 | 2.139295 |
| 33 | H | 4.721570 | 4.908640 | 3.752467 | 2.740257 | 2.156088 |
|    |   | 26       | 27       | 28       | 29       | 30       |
| 26 | O | 0.000000 |          |          |          |          |
| 27 | H | 2.137852 | 0.000000 |          |          |          |
| 28 | H | 2.141204 | 1.850434 | 0.000000 |          |          |
| 29 | H | 2.122438 | 3.106298 | 2.452830 | 0.000000 |          |
| 30 | C | 2.512068 | 2.826888 | 3.530225 | 2.221794 | 0.000000 |
| 31 | H | 2.931425 | 3.781022 | 4.333283 | 2.584816 | 1.094095 |
| 32 | H | 3.417891 | 3.304297 | 3.927042 | 2.569868 | 1.094279 |
| 33 | H | 2.698198 | 2.558936 | 3.795442 | 3.112825 | 1.092938 |
|    |   | 31       | 32       | 33       |          |          |
| 31 | H | 0.000000 |          |          |          |          |
| 32 | H | 1.766646 | 0.000000 |          |          |          |
| 33 | H | 1.775447 | 1.776125 | 0.000000 |          |          |

Stoichiometry C10H18BrN3O

Framework group C1[X(C10H18BrN3O)]

Deg. of freedom 93

Full point group C1 NOp 1

Largest Abelian subgroup C1 NOp 1

Largest concise Abelian subgroup C1 NOp 1

Standard orientation:

| Center Number | Atomic Number | Atomic Type | Coordinates (Angstroms) |          |           |
|---------------|---------------|-------------|-------------------------|----------|-----------|
|               |               |             | X                       | Y        | Z         |
| 1             | 6             | 0           | -2.351202               | 2.471386 | -0.264925 |
| 2             | 6             | 0           | -3.337857               | 1.589633 | 0.037264  |
| 3             | 7             | 0           | -2.751273               | 0.331410 | 0.088061  |
| 4             | 6             | 0           | -1.437970               | 0.456419 | -0.179198 |
| 5             | 7             | 0           | -1.176605               | 1.745843 | -0.399344 |
| 6             | 6             | 0           | 0.160750                | 2.294919 | -0.686205 |
| 7             | 6             | 0           | 0.803861                | 2.934944 | 0.549137  |
| 8             | 1             | 0           | -2.383697               | 3.538237 | -0.403662 |
| 9             | 1             | 0           | -4.386914               | 1.749374 | 0.206871  |
| 10            | 1             | 0           | 0.783823                | 1.468244 | -1.027781 |
| 11            | 1             | 0           | 0.065850                | 3.025518 | -1.490573 |
| 12            | 1             | 0           | 0.202572                | 3.788217 | 0.880281  |

|    |    |   |           |           |           |
|----|----|---|-----------|-----------|-----------|
| 13 | 1  | 0 | 0.803563  | 2.194599  | 1.363184  |
| 14 | 35 | 0 | -0.058283 | -2.547115 | -0.164585 |
| 15 | 1  | 0 | -0.744292 | -0.406559 | -0.212300 |
| 16 | 6  | 0 | -3.356369 | -0.933858 | 0.357533  |
| 17 | 6  | 0 | -4.639769 | -1.090553 | 0.653516  |
| 18 | 1  | 0 | -2.632900 | -1.744450 | 0.289362  |
| 19 | 1  | 0 | -5.013531 | -2.087708 | 0.841591  |
| 20 | 1  | 0 | -5.349954 | -0.275305 | 0.721223  |
| 21 | 7  | 0 | 2.127298  | 3.411586  | 0.165083  |
| 22 | 1  | 0 | 2.525882  | 4.004446  | 0.883497  |
| 23 | 1  | 0 | 2.750512  | 2.619772  | 0.020870  |
| 24 | 6  | 0 | 3.349338  | -0.654166 | -1.114145 |
| 25 | 6  | 0 | 3.261837  | -0.755632 | 0.343888  |
| 26 | 8  | 0 | 2.855244  | 0.462826  | -0.338142 |
| 27 | 1  | 0 | 4.314882  | -0.480372 | -1.583230 |
| 28 | 1  | 0 | 2.597373  | -1.156240 | -1.715415 |
| 29 | 1  | 0 | 2.413345  | -1.320205 | 0.725000  |
| 30 | 6  | 0 | 4.468789  | -0.647939 | 1.234486  |
| 31 | 1  | 0 | 4.210128  | -0.168821 | 2.183477  |
| 32 | 1  | 0 | 4.853803  | -1.646896 | 1.460972  |
| 33 | 1  | 0 | 5.263103  | -0.068206 | 0.757528  |

-----

Rotational constants (GHZ):      0.4225782      0.2919931      0.1826904

Standard basis: 6-311++G(d,p) (5D, 7F)

There are    499 symmetry adapted cartesian basis functions of A    symmetry.

There are    482 symmetry adapted basis functions of A    symmetry.

482 basis functions,    760 primitive gaussians,    499 cartesian basis functions

71 alpha electrons      71 beta electrons

nuclear repulsion energy      1312.9135586379 Hartrees.

NAtoms=    33 NActive=    33 NUniq=    33 SFac= 1.00D+00 NAtFMM=    60 NAOKFM=F

Big=F

Integral buffers will be    131072 words long.

Raffenetti 2 integral format.

Two-electron integral symmetry is turned on.

One-electron integrals computed using PRISM.

NBasis=    482 RedAO= T EigKep=    3.63D-06    NBF=    482

NBsUse=    482 1.00D-06 EigRej= -1.00D+00    NBFU=    482

Initial      guess      from      the      checkpoint      file:

"/home/suqian/liuwen/qianmengshijie/nh2po/nh2po.chk"

B after Tr=    0.000000    0.000000    0.000000

Rot=    1.000000    -0.000121    0.000046    -0.000070 Ang=    -0.02 deg.

Requested convergence on RMS density matrix=1.00D-08 within 128 cycles.

Requested convergence on MAX density matrix=1.00D-06.

Requested convergence on      energy=1.00D-06.

No special actions if energy rises.

SCF Done: E(RB3LYP) = -3205.64837892 A.U. after 8 cycles

NFock= 8 Conv=0.89D-08 -V/T= 2.0018

Calling FoFJK, ICntrl= 2127 FMM=F ISym2X=0 l1Cent= 0 IOpClX= 0 NMat=1 NMatS=1

NMatT=0.

\*\*\*\*\* Axes restored to original set \*\*\*\*\*

---

| Center<br>Number | Atomic<br>Number | Forces (Hartrees/Bohr) |              |              |
|------------------|------------------|------------------------|--------------|--------------|
|                  |                  | X                      | Y            | Z            |
| 1                | 6                | 0.000002419            | 0.000003471  | 0.000004120  |
| 2                | 6                | -0.000000733           | -0.000000874 | -0.000003011 |
| 3                | 7                | -0.000002051           | -0.000000610 | 0.000000769  |
| 4                | 6                | 0.000002233            | 0.000007168  | -0.000019033 |
| 5                | 7                | -0.000001214           | -0.000012114 | 0.000005940  |
| 6                | 6                | 0.000001957            | 0.000002134  | -0.000004069 |
| 7                | 6                | 0.000026766            | 0.000013917  | -0.000007489 |
| 8                | 1                | 0.000000132            | 0.000000204  | -0.000002681 |
| 9                | 1                | 0.000000459            | 0.000001492  | 0.000000565  |
| 10               | 1                | -0.000003323           | -0.000002395 | 0.000003073  |
| 11               | 1                | 0.000001806            | 0.000000286  | -0.000001804 |
| 12               | 1                | -0.000002776           | 0.000000641  | -0.000001487 |
| 13               | 1                | -0.000002670           | -0.000002654 | 0.000001241  |
| 14               | 35               | 0.000000798            | 0.000002473  | 0.000000084  |
| 15               | 1                | 0.000002404            | 0.000001107  | 0.000004893  |
| 16               | 6                | 0.000002443            | 0.000004550  | 0.000005181  |
| 17               | 6                | -0.000002835           | -0.000000574 | -0.000003598 |
| 18               | 1                | -0.000002477           | 0.000000738  | 0.000001576  |
| 19               | 1                | -0.000000954           | 0.000001405  | 0.000000036  |
| 20               | 1                | -0.000000246           | 0.000001093  | -0.000002742 |
| 21               | 7                | -0.000011173           | -0.000014838 | 0.000008012  |
| 22               | 1                | -0.000003346           | 0.000000511  | -0.000002480 |
| 23               | 1                | -0.000001193           | -0.000002575 | -0.000002556 |
| 24               | 6                | 0.000011103            | -0.000019887 | -0.000024049 |
| 25               | 6                | -0.000009982           | 0.000029623  | -0.000016147 |
| 26               | 8                | -0.000010038           | -0.000008421 | 0.000019886  |
| 27               | 1                | 0.000001937            | 0.000001166  | 0.000010356  |
| 28               | 1                | -0.000003170           | 0.000001587  | 0.000004100  |
| 29               | 1                | 0.000002143            | 0.000001547  | 0.000009962  |
| 30               | 6                | 0.000005231            | -0.000009568 | 0.000007724  |
| 31               | 1                | -0.000002357           | -0.000000902 | 0.000000473  |
| 32               | 1                | 0.000000069            | 0.000000088  | 0.000001861  |
| 33               | 1                | -0.000001362           | 0.000000213  | 0.000001296  |

---

Cartesian Forces: Max 0.000029623 RMS 0.000007541

GradGradGradGradGradGradGradGradGradGradGradGradGradGradGradGradGradGrad

Berny optimization.

Using GEDIIS/GDIIS optimizer.

FormGI is forming the generalized inverse of G from B-inverse, IUseBI=4.

GSVD: received Info= 1 from GESDD.

Internal Forces: Max 0.000025430 RMS 0.000004429

Search for a local minimum.

Step number 47 out of a maximum of 172

All quantities printed in internal units (Hartrees-Bohrs-Radians)

Mixed Optimization -- En-DIIS/RFO-DIIS

Swapping is turned off.

|                                                   |    |    |    |    |    |    |    |    |    |    |
|---------------------------------------------------|----|----|----|----|----|----|----|----|----|----|
| Update second derivatives using D2CorX and points | 31 | 32 | 33 | 34 | 35 |    |    |    |    |    |
|                                                   |    |    |    |    |    | 36 | 37 | 38 | 39 | 40 |
|                                                   |    |    |    |    |    | 41 | 42 | 43 | 44 | 45 |
|                                                   |    |    |    |    |    | 46 | 47 |    |    |    |

DE= 3.01D-08 DEPred=-5.42D-08 R=-5.56D-01

Trust test=-5.56D-01 RLast= 4.67D-03 DXMaxT set to 5.19D-01

ITU= -1 0 0 1 1 1 1 1 1 1 1 1 1 1 1 1 1 1 1 1 1

ITU= 1 0 0-1 1-1 1 1 1 1 1 1 1 1 1 0-1-1 1 1

ITU= 1-1 1 0 0-1 0

|                 |         |         |         |         |         |
|-----------------|---------|---------|---------|---------|---------|
| Eigenvalues --- | 0.00066 | 0.00109 | 0.00140 | 0.00254 | 0.00313 |
| Eigenvalues --- | 0.00537 | 0.00697 | 0.00765 | 0.01257 | 0.01432 |
| Eigenvalues --- | 0.01873 | 0.02045 | 0.02166 | 0.02338 | 0.02376 |
| Eigenvalues --- | 0.02544 | 0.02680 | 0.02730 | 0.03058 | 0.03098 |
| Eigenvalues --- | 0.03241 | 0.03522 | 0.03607 | 0.03968 | 0.04067 |
| Eigenvalues --- | 0.04290 | 0.04472 | 0.04734 | 0.05498 | 0.05564 |
| Eigenvalues --- | 0.05686 | 0.05743 | 0.05904 | 0.07821 | 0.08553 |
| Eigenvalues --- | 0.08884 | 0.09550 | 0.09861 | 0.10804 | 0.11535 |
| Eigenvalues --- | 0.12468 | 0.13106 | 0.13377 | 0.15748 | 0.15929 |
| Eigenvalues --- | 0.15992 | 0.16001 | 0.16005 | 0.16015 | 0.16133 |
| Eigenvalues --- | 0.16245 | 0.18425 | 0.21464 | 0.21690 | 0.22147 |
| Eigenvalues --- | 0.23187 | 0.23418 | 0.25078 | 0.26111 | 0.27462 |
| Eigenvalues --- | 0.28942 | 0.29728 | 0.30604 | 0.31846 | 0.32595 |
| Eigenvalues --- | 0.33662 | 0.34290 | 0.34335 | 0.34404 | 0.34550 |
| Eigenvalues --- | 0.34720 | 0.34730 | 0.35090 | 0.35205 | 0.35337 |
| Eigenvalues --- | 0.35542 | 0.35679 | 0.35883 | 0.36009 | 0.36419 |
| Eigenvalues --- | 0.36625 | 0.39463 | 0.41324 | 0.41878 | 0.42535 |
| Eigenvalues --- | 0.44665 | 0.45473 | 0.46482 | 0.49549 | 0.54904 |
| Eigenvalues --- | 0.58381 | 0.60645 | 1.05328 |         |         |

En-DIIS/RFO-DIIS IScMMF= 0 using points: 47 46 45 44 43

RFO step: Lambda=-6.29098378D-09.

DidBck=F Rises=F RFO-DIIS coefs: 1.05300 0.03756 -0.10887 -0.02734

0.04565

Iteration 1 RMS(Cart)= 0.00050150 RMS(Int)= 0.00000049

Iteration 2 RMS(Cart)= 0.00000014 RMS(Int)= 0.00000049

| Variable | Old X   | -DE/DX   | Delta X<br>(Linear) | Delta X<br>(Quad) | Delta X<br>(Total) | New X   |
|----------|---------|----------|---------------------|-------------------|--------------------|---------|
| R1       | 2.56495 | 0.00000  | 0.00000             | 0.00000           | 0.00000            | 2.56495 |
| R2       | 2.62132 | 0.00000  | 0.00000             | 0.00000           | 0.00000            | 2.62132 |
| R3       | 2.03396 | 0.00000  | 0.00000             | 0.00000           | 0.00000            | 2.03396 |
| R4       | 2.62515 | 0.00000  | 0.00000             | 0.00000           | 0.00000            | 2.62515 |
| R5       | 2.03073 | 0.00000  | 0.00000             | 0.00000           | 0.00000            | 2.03073 |
| R6       | 2.54365 | 0.00000  | 0.00001             | 0.00001           | 0.00001            | 2.54366 |
| R7       | 2.69884 | 0.00000  | -0.00001            | -0.00001          | -0.00001           | 2.69883 |
| R8       | 2.52078 | -0.00001 | 0.00000             | -0.00002          | -0.00002           | 2.52076 |
| R9       | 2.09326 | 0.00000  | 0.00002             | 0.00001           | 0.00003            | 2.09329 |
| R10      | 2.78521 | 0.00000  | 0.00000             | 0.00000           | 0.00000            | 2.78521 |
| R11      | 2.89646 | 0.00000  | 0.00001             | 0.00000           | 0.00001            | 2.89647 |
| R12      | 2.05996 | 0.00000  | -0.00001            | -0.00001          | -0.00001           | 2.05995 |
| R13      | 2.06126 | 0.00000  | 0.00000             | 0.00000           | 0.00000            | 2.06127 |
| R14      | 2.06947 | 0.00000  | 0.00000             | 0.00001           | 0.00001            | 2.06948 |
| R15      | 2.07937 | 0.00000  | 0.00001             | 0.00001           | 0.00002            | 2.07939 |
| R16      | 2.75548 | -0.00003 | -0.00002            | -0.00006          | -0.00008           | 2.75540 |
| R17      | 4.24868 | 0.00000  | -0.00009            | -0.00015          | -0.00023           | 4.24844 |
| R18      | 2.50649 | 0.00000  | 0.00000             | 0.00000           | 0.00000            | 2.50649 |
| R19      | 2.05721 | 0.00000  | 0.00000             | -0.00001          | 0.00000            | 2.05721 |
| R20      | 2.04352 | 0.00000  | 0.00000             | 0.00000           | 0.00000            | 2.04352 |
| R21      | 2.04717 | 0.00000  | 0.00000             | 0.00000           | 0.00000            | 2.04717 |
| R22      | 1.91457 | 0.00000  | 0.00000             | 0.00000           | -0.00001           | 1.91457 |
| R23      | 1.92359 | 0.00000  | 0.00000             | -0.00001          | -0.00001           | 1.92358 |
| R24      | 4.13685 | 0.00000  | -0.00020            | -0.00009          | -0.00029           | 4.13656 |
| R25      | 2.76689 | 0.00001  | 0.00001             | 0.00000           | 0.00001            | 2.76690 |
| R26      | 2.73455 | 0.00001  | 0.00003             | 0.00005           | 0.00008            | 2.73463 |
| R27      | 2.05496 | 0.00000  | -0.00001            | 0.00000           | -0.00002           | 2.05494 |
| R28      | 2.05195 | 0.00000  | 0.00000             | -0.00001          | -0.00001           | 2.05194 |
| R29      | 2.74832 | -0.00002 | -0.00005            | -0.00007          | -0.00012           | 2.74820 |
| R30      | 2.05618 | 0.00000  | 0.00000             | 0.00000           | 0.00000            | 2.05618 |
| R31      | 2.84182 | 0.00000  | 0.00000             | 0.00002           | 0.00002            | 2.84185 |
| R32      | 2.06754 | 0.00000  | 0.00000             | 0.00000           | 0.00000            | 2.06754 |
| R33      | 2.06789 | 0.00000  | 0.00000             | 0.00000           | 0.00000            | 2.06789 |
| R34      | 2.06535 | 0.00000  | 0.00000             | 0.00000           | 0.00000            | 2.06535 |
| A1       | 1.87268 | 0.00000  | 0.00000             | -0.00001          | -0.00001           | 1.87268 |
| A2       | 2.27926 | 0.00000  | -0.00001            | 0.00000           | -0.00001           | 2.27925 |
| A3       | 2.13119 | 0.00000  | 0.00001             | 0.00001           | 0.00001            | 2.13120 |
| A4       | 1.86460 | 0.00000  | 0.00000             | 0.00000           | 0.00000            | 1.86460 |
| A5       | 2.27601 | 0.00000  | 0.00001             | 0.00000           | 0.00000            | 2.27602 |

|     |         |          |          |          |          |         |
|-----|---------|----------|----------|----------|----------|---------|
| A6  | 2.14251 | 0.00000  | 0.00000  | 0.00000  | 0.00000  | 2.14251 |
| A7  | 1.89717 | 0.00000  | 0.00000  | 0.00000  | 0.00000  | 1.89716 |
| A8  | 2.25290 | 0.00000  | 0.00001  | 0.00000  | 0.00001  | 2.25290 |
| A9  | 2.13309 | 0.00000  | 0.00000  | 0.00000  | 0.00000  | 2.13308 |
| A10 | 1.88989 | 0.00000  | 0.00000  | 0.00000  | 0.00000  | 1.88989 |
| A11 | 2.14668 | 0.00001  | -0.00004 | 0.00002  | -0.00002 | 2.14667 |
| A12 | 2.24649 | -0.00001 | 0.00003  | -0.00002 | 0.00002  | 2.24651 |
| A13 | 1.90042 | 0.00000  | 0.00000  | 0.00001  | 0.00001  | 1.90043 |
| A14 | 2.20477 | 0.00001  | 0.00002  | 0.00001  | 0.00002  | 2.20479 |
| A15 | 2.17732 | -0.00001 | -0.00001 | -0.00002 | -0.00003 | 2.17729 |
| A16 | 1.95996 | 0.00000  | -0.00003 | -0.00001 | -0.00004 | 1.95992 |
| A17 | 1.87246 | -0.00001 | -0.00002 | -0.00004 | -0.00005 | 1.87241 |
| A18 | 1.89032 | 0.00000  | 0.00001  | 0.00002  | 0.00004  | 1.89035 |
| A19 | 1.90645 | 0.00000  | 0.00001  | -0.00001 | 0.00001  | 1.90646 |
| A20 | 1.92961 | 0.00000  | 0.00002  | 0.00001  | 0.00003  | 1.92964 |
| A21 | 1.90351 | 0.00000  | -0.00001 | 0.00002  | 0.00001  | 1.90352 |
| A22 | 1.91632 | 0.00000  | -0.00002 | -0.00002 | -0.00004 | 1.91628 |
| A23 | 1.89146 | 0.00000  | -0.00003 | -0.00002 | -0.00004 | 1.89142 |
| A24 | 1.88077 | 0.00000  | 0.00004  | 0.00000  | 0.00003  | 1.88081 |
| A25 | 1.87589 | 0.00000  | 0.00000  | -0.00001 | -0.00001 | 1.87588 |
| A26 | 1.90000 | 0.00000  | 0.00000  | 0.00001  | 0.00002  | 1.90002 |
| A27 | 1.99878 | 0.00000  | 0.00001  | 0.00002  | 0.00003  | 1.99881 |
| A28 | 2.16124 | 0.00000  | 0.00000  | 0.00001  | 0.00001  | 2.16125 |
| A29 | 1.94581 | 0.00000  | 0.00000  | 0.00000  | 0.00001  | 1.94582 |
| A30 | 2.17614 | 0.00000  | 0.00000  | -0.00002 | -0.00002 | 2.17612 |
| A31 | 2.07394 | 0.00000  | 0.00000  | 0.00000  | 0.00000  | 2.07394 |
| A32 | 2.16442 | 0.00000  | 0.00000  | 0.00000  | 0.00000  | 2.16442 |
| A33 | 2.04483 | 0.00000  | 0.00000  | 0.00000  | 0.00000  | 2.04483 |
| A34 | 1.94076 | 0.00001  | 0.00002  | 0.00001  | 0.00003  | 1.94079 |
| A35 | 1.91636 | -0.00001 | 0.00000  | 0.00001  | 0.00001  | 1.91637 |
| A36 | 1.89102 | 0.00000  | 0.00001  | 0.00002  | 0.00003  | 1.89105 |
| A37 | 2.08713 | -0.00001 | -0.00001 | -0.00005 | -0.00006 | 2.08707 |
| A38 | 2.06915 | 0.00000  | -0.00006 | 0.00000  | -0.00006 | 2.06909 |
| A39 | 1.99449 | 0.00000  | -0.00001 | -0.00003 | -0.00004 | 1.99445 |
| A40 | 2.00138 | 0.00000  | -0.00004 | -0.00003 | -0.00007 | 2.00132 |
| A41 | 2.03748 | 0.00001  | 0.00008  | 0.00008  | 0.00016  | 2.03764 |
| A42 | 2.01678 | 0.00001  | -0.00003 | 0.00002  | -0.00002 | 2.01676 |
| A43 | 2.13745 | 0.00000  | 0.00002  | -0.00001 | 0.00001  | 2.13745 |
| A44 | 1.96163 | 0.00000  | 0.00003  | 0.00000  | 0.00004  | 1.96166 |
| A45 | 2.02875 | 0.00000  | -0.00001 | 0.00004  | 0.00003  | 2.02877 |
| A46 | 2.04383 | -0.00001 | 0.00000  | -0.00003 | -0.00004 | 2.04379 |
| A47 | 2.61563 | 0.00000  | -0.00050 | 0.00036  | -0.00014 | 2.61548 |
| A48 | 2.43712 | 0.00000  | 0.00043  | -0.00033 | 0.00009  | 2.43722 |
| A49 | 1.93403 | 0.00000  | 0.00001  | -0.00001 | 0.00000  | 1.93403 |

|     |          |          |          |          |          |          |
|-----|----------|----------|----------|----------|----------|----------|
| A50 | 1.91727  | 0.00000  | 0.00001  | 0.00001  | 0.00002  | 1.91729  |
| A51 | 1.94211  | 0.00000  | -0.00001 | -0.00001 | -0.00002 | 1.94208  |
| A52 | 1.87908  | 0.00000  | -0.00001 | 0.00001  | 0.00000  | 1.87908  |
| A53 | 1.89448  | 0.00000  | 0.00000  | 0.00000  | -0.00001 | 1.89447  |
| A54 | 1.89531  | 0.00000  | 0.00000  | 0.00000  | 0.00000  | 1.89531  |
| A55 | 3.48359  | -0.00001 | 0.00004  | -0.00018 | -0.00015 | 3.48345  |
| A56 | 2.53134  | -0.00001 | -0.00008 | 0.00013  | 0.00005  | 2.53139  |
| A57 | 2.96349  | 0.00001  | 0.00034  | -0.00028 | 0.00007  | 2.96356  |
| A58 | 3.10721  | 0.00000  | 0.00015  | 0.00010  | 0.00025  | 3.10746  |
| D1  | 0.00308  | 0.00000  | 0.00000  | 0.00002  | 0.00002  | 0.00310  |
| D2  | -3.12680 | 0.00000  | -0.00001 | -0.00005 | -0.00006 | -3.12686 |
| D3  | 3.13325  | 0.00000  | -0.00002 | 0.00000  | -0.00002 | 3.13322  |
| D4  | 0.00336  | 0.00000  | -0.00003 | -0.00007 | -0.00010 | 0.00326  |
| D5  | -0.00469 | 0.00000  | -0.00001 | 0.00000  | -0.00001 | -0.00470 |
| D6  | -3.10816 | 0.00000  | -0.00003 | 0.00003  | 0.00000  | -3.10816 |
| D7  | -3.13604 | 0.00000  | 0.00001  | 0.00002  | 0.00003  | -3.13601 |
| D8  | 0.04367  | 0.00000  | -0.00001 | 0.00005  | 0.00004  | 0.04371  |
| D9  | -0.00046 | 0.00000  | 0.00001  | -0.00003 | -0.00002 | -0.00048 |
| D10 | -3.13322 | 0.00000  | -0.00001 | -0.00005 | -0.00005 | -3.13327 |
| D11 | 3.13053  | 0.00000  | 0.00002  | 0.00003  | 0.00005  | 3.13058  |
| D12 | -0.00222 | 0.00000  | 0.00000  | 0.00001  | 0.00001  | -0.00221 |
| D13 | -0.00246 | 0.00000  | -0.00002 | 0.00003  | 0.00001  | -0.00245 |
| D14 | -3.12875 | 0.00000  | 0.00007  | -0.00009 | -0.00002 | -3.12877 |
| D15 | 3.13102  | 0.00000  | 0.00000  | 0.00005  | 0.00004  | 3.13106  |
| D16 | 0.00473  | 0.00000  | 0.00009  | -0.00008 | 0.00001  | 0.00474  |
| D17 | -0.03700 | 0.00000  | -0.00018 | 0.00039  | 0.00021  | -0.03679 |
| D18 | 3.10521  | 0.00000  | -0.00017 | 0.00032  | 0.00015  | 3.10536  |
| D19 | 3.11448  | 0.00000  | -0.00020 | 0.00037  | 0.00017  | 3.11466  |
| D20 | -0.02649 | 0.00000  | -0.00019 | 0.00030  | 0.00011  | -0.02638 |
| D21 | 0.00441  | 0.00000  | 0.00002  | -0.00002 | 0.00000  | 0.00441  |
| D22 | 3.10862  | 0.00000  | 0.00004  | -0.00005 | -0.00001 | 3.10861  |
| D23 | 3.12955  | 0.00000  | -0.00008 | 0.00011  | 0.00003  | 3.12959  |
| D24 | -0.04942 | 0.00000  | -0.00007 | 0.00009  | 0.00002  | -0.04939 |
| D25 | 1.34628  | 0.00000  | -0.00008 | -0.00025 | -0.00033 | 1.34594  |
| D26 | -2.84200 | 0.00000  | -0.00009 | -0.00029 | -0.00038 | -2.84238 |
| D27 | -0.78956 | 0.00000  | -0.00010 | -0.00027 | -0.00037 | -0.78993 |
| D28 | -1.75142 | 0.00000  | -0.00010 | -0.00022 | -0.00032 | -1.75174 |
| D29 | 0.34349  | 0.00000  | -0.00011 | -0.00026 | -0.00037 | 0.34312  |
| D30 | 2.39593  | 0.00000  | -0.00012 | -0.00024 | -0.00036 | 2.39557  |
| D31 | -1.09946 | 0.00000  | -0.00010 | -0.00010 | -0.00020 | -1.09966 |
| D32 | 0.94478  | -0.00001 | -0.00013 | -0.00013 | -0.00026 | 0.94452  |
| D33 | 3.11673  | -0.00001 | -0.00011 | -0.00011 | -0.00022 | 3.11650  |
| D34 | 3.10867  | 0.00000  | -0.00007 | -0.00005 | -0.00012 | 3.10855  |
| D35 | -1.13028 | 0.00000  | -0.00010 | -0.00008 | -0.00018 | -1.13045 |



|     |          |          |          |          |          |          |
|-----|----------|----------|----------|----------|----------|----------|
| D36 | 1.04167  | 0.00000  | -0.00008 | -0.00006 | -0.00014 | 1.04153  |
| D37 | 1.01396  | 0.00000  | -0.00009 | -0.00007 | -0.00016 | 1.01380  |
| D38 | 3.05820  | 0.00000  | -0.00012 | -0.00010 | -0.00022 | 3.05798  |
| D39 | -1.05304 | 0.00000  | -0.00010 | -0.00008 | -0.00018 | -1.05322 |
| D40 | 2.94398  | 0.00000  | -0.00005 | 0.00012  | 0.00007  | 2.94404  |
| D41 | -1.24659 | 0.00000  | -0.00003 | 0.00016  | 0.00013  | -1.24646 |
| D42 | 0.86654  | 0.00000  | -0.00005 | 0.00013  | 0.00008  | 0.86662  |
| D43 | 2.95915  | 0.00000  | -0.00003 | 0.00017  | 0.00014  | 2.95930  |
| D44 | -1.23335 | 0.00000  | -0.00005 | 0.00011  | 0.00006  | -1.23329 |
| D45 | 0.85927  | 0.00000  | -0.00004 | 0.00016  | 0.00012  | 0.85939  |
| D46 | 3.13966  | 0.00000  | 0.00000  | -0.00003 | -0.00002 | 3.13963  |
| D47 | -0.00247 | 0.00000  | -0.00001 | 0.00001  | 0.00000  | -0.00247 |
| D48 | -0.00264 | 0.00000  | -0.00001 | 0.00006  | 0.00005  | -0.00259 |
| D49 | 3.13842  | 0.00000  | -0.00003 | 0.00010  | 0.00007  | 3.13849  |
| D50 | 2.20769  | 0.00000  | -0.00008 | -0.00047 | -0.00055 | 2.20714  |
| D51 | -1.40647 | 0.00000  | -0.00023 | -0.00048 | -0.00071 | -1.40718 |
| D52 | -2.08664 | 0.00000  | -0.00013 | -0.00041 | -0.00054 | -2.08718 |
| D53 | 0.58239  | 0.00000  | -0.00028 | -0.00042 | -0.00070 | 0.58169  |
| D54 | -2.71253 | 0.00000  | 0.00004  | -0.00002 | 0.00002  | -2.71251 |
| D55 | -0.01565 | -0.00001 | -0.00001 | -0.00011 | -0.00012 | -0.01577 |
| D56 | -0.02666 | 0.00001  | 0.00010  | 0.00006  | 0.00016  | -0.02650 |
| D57 | 2.67022  | 0.00000  | 0.00005  | -0.00003 | 0.00002  | 2.67024  |
| D58 | 0.50823  | 0.00001  | 0.00040  | -0.00028 | 0.00013  | 0.50835  |
| D59 | -1.91110 | 0.00000  | 0.00033  | -0.00033 | 0.00000  | -1.91111 |
| D60 | 1.78318  | -0.00001 | 0.00056  | -0.00037 | 0.00019  | 1.78337  |
| D61 | -0.63937 | 0.00000  | 0.00054  | -0.00037 | 0.00017  | -0.63920 |
| D62 | 2.55494  | 0.00000  | 0.00010  | 0.00017  | 0.00027  | 2.55521  |
| D63 | -1.65412 | 0.00000  | 0.00010  | 0.00018  | 0.00029  | -1.65383 |
| D64 | 0.44531  | 0.00000  | 0.00011  | 0.00018  | 0.00029  | 0.44560  |
| D65 | 1.35040  | 0.00000  | 0.00008  | 0.00010  | 0.00018  | 1.35058  |
| D66 | -2.85866 | 0.00000  | 0.00008  | 0.00012  | 0.00020  | -2.85846 |
| D67 | -0.75923 | 0.00000  | 0.00008  | 0.00012  | 0.00021  | -0.75903 |
| D68 | -1.03779 | 0.00000  | 0.00005  | 0.00009  | 0.00013  | -1.03766 |
| D69 | 1.03633  | 0.00000  | 0.00005  | 0.00010  | 0.00015  | 1.03648  |
| D70 | 3.13576  | 0.00000  | 0.00005  | 0.00011  | 0.00016  | 3.13591  |

| Item                 | Value    | Threshold | Converged? |
|----------------------|----------|-----------|------------|
| Maximum Force        | 0.000025 | 0.000450  | YES        |
| RMS Force            | 0.000004 | 0.000300  | YES        |
| Maximum Displacement | 0.002339 | 0.001800  | NO         |
| RMS Displacement     | 0.000501 | 0.001200  | YES        |

Predicted change in Energy=-1.482386D-08

GradGradGradGradGradGradGradGradGradGradGradGradGradGradGradGradGradGradGrad

Input orientation:

| Center<br>Number | Atomic<br>Number | Atomic<br>Type | Coordinates (Angstroms) |           |           |
|------------------|------------------|----------------|-------------------------|-----------|-----------|
|                  |                  |                | X                       | Y         | Z         |
| 1                | 6                | 0              | -2.644108               | 2.099961  | -0.197992 |
| 2                | 6                | 0              | -3.536140               | 1.118369  | 0.090198  |
| 3                | 7                | 0              | -2.827058               | -0.076007 | 0.111609  |
| 4                | 6                | 0              | -1.534543               | 0.184553  | -0.159225 |
| 5                | 7                | 0              | -1.404162               | 1.497827  | -0.353321 |
| 6                | 6                | 0              | -0.129986               | 2.183010  | -0.634891 |
| 7                | 6                | 0              | 0.454512                | 2.858696  | 0.610546  |
| 8                | 1                | 0              | -2.783450               | 3.160903  | -0.314022 |
| 9                | 1                | 0              | -4.594684               | 1.169400  | 0.268196  |
| 10               | 1                | 0              | 0.569870                | 1.429519  | -0.996451 |
| 11               | 1                | 0              | -0.302400               | 2.916665  | -1.423444 |
| 12               | 1                | 0              | -0.226360               | 3.641106  | 0.962025  |
| 13               | 1                | 0              | 0.532995                | 2.105666  | 1.409037  |
| 14               | 35               | 0              | 0.137195                | -2.666196 | -0.214592 |
| 15               | 1                | 0              | -0.758757               | -0.604260 | -0.213838 |
| 16               | 6                | 0              | -3.301510               | -1.400472 | 0.357226  |
| 17               | 6                | 0              | -4.560953               | -1.690205 | 0.655782  |
| 18               | 1                | 0              | -2.501509               | -2.133452 | 0.268631  |
| 19               | 1                | 0              | -4.832421               | -2.723261 | 0.824564  |
| 20               | 1                | 0              | -5.348230               | -0.951282 | 0.743892  |
| 21               | 7                | 0              | 1.721518                | 3.472160  | 0.230540  |
| 22               | 1                | 0              | 2.064017                | 4.087011  | 0.959316  |
| 23               | 1                | 0              | 2.419274                | 2.749288  | 0.066997  |
| 24               | 6                | 0              | 3.332593                | -0.425193 | -1.138331 |
| 25               | 6                | 0              | 3.265917                | -0.564086 | 0.317719  |
| 26               | 8                | 0              | 2.735340                | 0.621233  | -0.336838 |
| 27               | 1                | 0              | 4.272731                | -0.146680 | -1.608514 |
| 28               | 1                | 0              | 2.629994                | -0.987464 | -1.745991 |
| 29               | 1                | 0              | 2.480541                | -1.217942 | 0.691328  |
| 30               | 6                | 0              | 4.462454                | -0.354684 | 1.204277  |
| 31               | 1                | 0              | 4.164125                | 0.076929  | 2.164359  |
| 32               | 1                | 0              | 4.946639                | -1.314654 | 1.407910  |
| 33               | 1                | 0              | 5.191669                | 0.310914  | 0.735512  |

Distance matrix (angstroms):

|     | 1        | 2        | 3        | 4        | 5 |
|-----|----------|----------|----------|----------|---|
| 1 C | 0.000000 |          |          |          |   |
| 2 C | 1.357312 | 0.000000 |          |          |   |
| 3 N | 2.205484 | 1.389168 | 0.000000 |          |   |
| 4 C | 2.213917 | 2.222750 | 1.346046 | 0.000000 |   |

|    |    |          |          |          |          |          |
|----|----|----------|----------|----------|----------|----------|
| 5  | N  | 1.387140 | 2.210435 | 2.172037 | 1.333927 | 0.000000 |
| 6  | C  | 2.553153 | 3.641579 | 3.596474 | 2.488548 | 1.473867 |
| 7  | C  | 3.291028 | 4.384610 | 4.430590 | 3.420516 | 2.497134 |
| 8  | H  | 1.076325 | 2.214019 | 3.265065 | 3.231469 | 2.160972 |
| 9  | H  | 2.210887 | 1.074618 | 2.167962 | 3.243005 | 3.267044 |
| 10 | H  | 3.378859 | 4.258748 | 3.877309 | 2.584461 | 2.077279 |
| 11 | H  | 2.766286 | 3.997756 | 4.205517 | 3.252824 | 2.090968 |
| 12 | H  | 3.092940 | 4.251932 | 4.615601 | 3.862163 | 2.776869 |
| 13 | H  | 3.560417 | 4.389983 | 4.211055 | 3.228752 | 2.688486 |
| 14 | Br | 5.518349 | 5.282917 | 3.949972 | 3.305229 | 4.442309 |
| 15 | H  | 3.296606 | 3.282338 | 2.159360 | 1.107723 | 2.203354 |
| 16 | C  | 3.604646 | 2.543799 | 1.428159 | 2.429238 | 3.536232 |
| 17 | C  | 4.332272 | 3.042731 | 2.430668 | 3.652138 | 4.598604 |
| 18 | H  | 4.261439 | 3.417109 | 2.088951 | 2.547790 | 3.844110 |
| 19 | H  | 5.394238 | 4.120408 | 3.396725 | 4.505466 | 5.563987 |
| 20 | H  | 4.184436 | 2.827444 | 2.742662 | 4.080436 | 4.770501 |
| 21 | N  | 4.596223 | 5.762204 | 5.770025 | 4.643513 | 3.742828 |
| 22 | H  | 5.239674 | 6.397653 | 6.478576 | 5.424938 | 4.522738 |
| 23 | H  | 5.111721 | 6.174738 | 5.958883 | 4.718232 | 4.044934 |
| 24 | C  | 6.556035 | 7.146422 | 6.294885 | 5.001944 | 5.172146 |
| 25 | C  | 6.503192 | 7.010734 | 6.115967 | 4.881839 | 5.148924 |
| 26 | O  | 5.580715 | 6.305629 | 5.623836 | 4.295828 | 4.231332 |
| 27 | H  | 7.408079 | 8.091009 | 7.305534 | 5.994546 | 6.042105 |
| 28 | H  | 6.304337 | 6.769589 | 5.836168 | 4.608125 | 4.938687 |
| 29 | H  | 6.169392 | 6.482295 | 5.459918 | 4.337203 | 4.853618 |
| 30 | C  | 7.648194 | 8.209053 | 7.376217 | 6.173644 | 6.346266 |
| 31 | H  | 7.485012 | 8.042438 | 7.287922 | 6.155114 | 6.274032 |
| 32 | H  | 8.476908 | 8.922639 | 7.977782 | 6.834416 | 7.165519 |
| 33 | H  | 8.091448 | 8.788803 | 8.052263 | 6.786637 | 6.789647 |
|    |    | 6        | 7        | 8        | 9        | 10       |
| 6  | C  | 0.000000 |          |          |          |          |
| 7  | C  | 1.532744 | 0.000000 |          |          |          |
| 8  | H  | 2.846068 | 3.380910 | 0.000000 |          |          |
| 9  | H  | 4.666531 | 5.335290 | 2.754203 | 0.000000 |          |
| 10 | H  | 1.090079 | 2.153669 | 3.835121 | 5.323497 | 0.000000 |
| 11 | H  | 1.090776 | 2.171035 | 2.728751 | 4.933385 | 1.776170 |
| 12 | H  | 2.164596 | 1.095121 | 2.897861 | 5.066852 | 3.059530 |
| 13 | H  | 2.150156 | 1.100364 | 3.883460 | 5.335843 | 2.498981 |
| 14 | Br | 4.874714 | 5.595174 | 6.518829 | 6.110283 | 4.192063 |
| 15 | H  | 2.888167 | 3.760810 | 4.276197 | 4.253535 | 2.552252 |
| 16 | C  | 4.887147 | 5.684398 | 4.639515 | 2.878275 | 4.982858 |
| 17 | C  | 6.025040 | 6.771221 | 5.256737 | 2.885949 | 6.227993 |
| 18 | H  | 5.007227 | 5.811756 | 5.333776 | 3.910270 | 4.871198 |
| 19 | H  | 6.950857 | 7.691275 | 6.333881 | 3.939400 | 7.053115 |

|    |    |          |          |          |          |          |
|----|----|----------|----------|----------|----------|----------|
| 20 | H  | 6.241387 | 6.943021 | 4.960579 | 2.300306 | 6.612180 |
| 21 | N  | 2.416391 | 1.458097 | 4.548424 | 6.722986 | 2.646541 |
| 22 | H  | 3.313664 | 2.054484 | 5.096764 | 7.302631 | 3.622121 |
| 23 | H  | 2.704079 | 2.041496 | 5.232871 | 7.192506 | 2.508587 |
| 24 | C  | 4.364130 | 4.703812 | 7.137615 | 8.207483 | 3.330574 |
| 25 | C  | 4.470588 | 4.439052 | 7.132284 | 8.049626 | 3.601413 |
| 26 | O  | 3.276900 | 3.332559 | 6.075153 | 7.375352 | 2.403680 |
| 27 | H  | 5.075363 | 5.341845 | 7.899715 | 9.158884 | 4.070652 |
| 28 | H  | 4.347866 | 5.007888 | 6.968850 | 7.804166 | 3.263087 |
| 29 | H  | 4.487782 | 4.553053 | 6.920593 | 7.479121 | 3.675366 |
| 30 | C  | 5.559940 | 5.171259 | 8.195590 | 9.232055 | 4.814436 |
| 31 | H  | 5.541729 | 4.890173 | 7.995127 | 9.028049 | 4.973820 |
| 32 | H  | 6.494522 | 6.183190 | 9.096699 | 9.925035 | 5.698030 |
| 33 | H  | 5.805408 | 5.380284 | 8.533843 | 9.835044 | 5.060830 |
|    |    | 11       | 12       | 13       | 14       | 15       |
| 11 | H  | 0.000000 |          |          |          |          |
| 12 | H  | 2.494206 | 0.000000 |          |          |          |
| 13 | H  | 3.062443 | 1.770315 | 0.000000 |          |          |
| 14 | Br | 5.729127 | 6.426404 | 5.056036 | 0.000000 |          |
| 15 | H  | 3.750776 | 4.437255 | 3.412630 | 2.248180 | 0.000000 |
| 16 | C  | 5.550056 | 5.936315 | 5.301202 | 3.708601 | 2.725006 |
| 17 | C  | 6.609214 | 6.877889 | 6.397214 | 4.876751 | 4.048729 |
| 18 | H  | 5.762194 | 6.245208 | 5.336560 | 2.734974 | 2.368204 |
| 19 | H  | 7.575183 | 7.857472 | 7.242089 | 5.077420 | 4.707780 |
| 20 | H  | 6.717050 | 6.882671 | 6.661544 | 5.826621 | 4.701163 |
| 21 | N  | 2.672169 | 2.087545 | 2.160728 | 6.355127 | 4.792330 |
| 22 | H  | 3.556289 | 2.333381 | 2.544013 | 7.120148 | 5.599318 |
| 23 | H  | 3.107562 | 2.931859 | 2.402783 | 5.883421 | 4.628718 |
| 24 | C  | 4.945955 | 5.797623 | 4.553250 | 4.010730 | 4.198321 |
| 25 | C  | 5.280167 | 5.504069 | 3.973338 | 3.806721 | 4.059824 |
| 26 | O  | 3.959493 | 4.424743 | 3.178356 | 4.191956 | 3.704818 |
| 27 | H  | 5.509097 | 6.418475 | 5.307005 | 5.039210 | 5.241219 |
| 28 | H  | 4.893383 | 6.075836 | 4.890713 | 3.373036 | 3.738713 |
| 29 | H  | 5.414055 | 5.568747 | 3.918471 | 2.899897 | 3.418915 |
| 30 | C  | 6.349053 | 6.165225 | 4.640678 | 5.105306 | 5.416122 |
| 31 | H  | 6.394238 | 5.781464 | 4.227456 | 5.422205 | 5.509501 |
| 32 | H  | 7.312526 | 7.177624 | 5.583802 | 5.252612 | 5.973798 |
| 33 | H  | 6.452582 | 6.363688 | 5.037659 | 5.942523 | 6.094782 |
|    |    | 16       | 17       | 18       | 19       | 20       |
| 16 | C  | 0.000000 |          |          |          |          |
| 17 | C  | 1.326378 | 0.000000 |          |          |          |
| 18 | H  | 1.088627 | 2.141883 | 0.000000 |          |          |
| 19 | H  | 2.076504 | 1.081382 | 2.467810 | 0.000000 |          |
| 20 | H  | 2.130809 | 1.083318 | 3.118849 | 1.847289 | 0.000000 |

|    |   |          |          |          |           |           |
|----|---|----------|----------|----------|-----------|-----------|
| 21 | N | 6.999243 | 8.142499 | 7.018425 | 9.038265  | 8.355340  |
| 22 | H | 7.698302 | 8.795373 | 7.746950 | 9.693236  | 8.965055  |
| 23 | H | 7.073338 | 8.293331 | 6.935122 | 9.116457  | 8.630558  |
| 24 | C | 6.870166 | 8.193117 | 6.239747 | 8.706408  | 8.898102  |
| 25 | C | 6.620589 | 7.914690 | 5.977334 | 8.396548  | 8.633370  |
| 26 | O | 6.404106 | 7.717767 | 5.948065 | 8.354969  | 8.305714  |
| 27 | H | 7.924976 | 9.248971 | 7.304880 | 9.770488  | 9.937006  |
| 28 | H | 6.306888 | 7.613940 | 5.630659 | 8.081361  | 8.357805  |
| 29 | H | 5.794571 | 7.057402 | 5.083075 | 7.467473  | 7.833488  |
| 30 | C | 7.879740 | 9.138180 | 7.248188 | 9.599430  | 9.839584  |
| 31 | H | 7.822029 | 9.029149 | 7.273942 | 9.517035  | 9.672633  |
| 32 | H | 8.315242 | 9.544686 | 7.579135 | 9.897196  | 10.322659 |
| 33 | H | 8.672140 | 9.956127 | 8.085659 | 10.473611 | 10.615210 |
|    |   | 21       | 22       | 23       | 24        | 25        |
| 21 | N | 0.000000 |          |          |           |           |
| 22 | H | 1.013144 | 0.000000 |          |           |           |
| 23 | H | 1.017916 | 1.646798 | 0.000000 |           |           |
| 24 | C | 4.433817 | 5.135114 | 3.516291 | 0.000000  |           |
| 25 | C | 4.322505 | 4.846536 | 3.429011 | 1.464179  | 0.000000  |
| 26 | O | 3.078561 | 3.760626 | 2.188972 | 1.447104  | 1.454283  |
| 27 | H | 4.794456 | 5.421836 | 3.824823 | 1.087429  | 2.213205  |
| 28 | H | 4.961880 | 5.778349 | 4.158684 | 1.085838  | 2.200579  |
| 29 | H | 4.773416 | 5.328023 | 4.016523 | 2.168432  | 1.088084  |
| 30 | C | 4.806831 | 5.053825 | 3.886210 | 2.601801  | 1.503840  |
| 31 | H | 4.607990 | 4.684372 | 3.819023 | 3.442577  | 2.151222  |
| 32 | H | 5.890772 | 6.139114 | 4.970035 | 3.143188  | 2.139321  |
| 33 | H | 4.721273 | 4.908279 | 3.752166 | 2.740311  | 2.156083  |
|    |   | 26       | 27       | 28       | 29        | 30        |
| 26 | O | 0.000000 |          |          |           |           |
| 27 | H | 2.137854 | 0.000000 |          |           |           |
| 28 | H | 2.141195 | 1.850514 | 0.000000 |           |           |
| 29 | H | 2.122408 | 3.106255 | 2.452750 | 0.000000  |           |
| 30 | C | 2.512046 | 2.826845 | 3.530213 | 2.221781  | 0.000000  |
| 31 | H | 2.931498 | 3.781053 | 4.333281 | 2.584756  | 1.094096  |
| 32 | H | 3.417843 | 3.304108 | 3.926956 | 2.569919  | 1.094278  |
| 33 | H | 2.698107 | 2.558964 | 3.795500 | 3.112807  | 1.092938  |
|    |   | 31       | 32       | 33       |           |           |
| 31 | H | 0.000000 |          |          |           |           |
| 32 | H | 1.766648 | 0.000000 |          |           |           |
| 33 | H | 1.775444 | 1.776128 | 0.000000 |           |           |

Stoichiometry C10H18BrN3O

Framework group C1[X(C10H18BrN3O)]

Deg. of freedom 93

Full point group C1 NOp 1

Largest Abelian subgroup C1 NOp 1

Largest concise Abelian subgroup C1 NOp 1

Standard orientation:

| Center<br>Number | Atomic<br>Number | Atomic<br>Type | Coordinates (Angstroms) |           |           |
|------------------|------------------|----------------|-------------------------|-----------|-----------|
|                  |                  |                | X                       | Y         | Z         |
| 1                | 6                | 0              | -2.351417               | 2.471198  | -0.264707 |
| 2                | 6                | 0              | -3.337957               | 1.589387  | 0.037692  |
| 3                | 7                | 0              | -2.751298               | 0.331191  | 0.088321  |
| 4                | 6                | 0              | -1.438061               | 0.456276  | -0.179266 |
| 5                | 7                | 0              | -1.176822               | 1.745710  | -0.399438 |
| 6                | 6                | 0              | 0.160451                | 2.294818  | -0.686605 |
| 7                | 6                | 0              | 0.803612                | 2.935219  | 0.548521  |
| 8                | 1                | 0              | -2.384011               | 3.538049  | -0.403428 |
| 9                | 1                | 0              | -4.386972               | 1.749078  | 0.207608  |
| 10               | 1                | 0              | 0.783519                | 1.468063  | -1.027975 |
| 11               | 1                | 0              | 0.065441                | 3.025169  | -1.491186 |
| 12               | 1                | 0              | 0.202355                | 3.788645  | 0.879346  |
| 13               | 1                | 0              | 0.803186                | 2.195135  | 1.362817  |
| 14               | 35               | 0              | -0.057937               | -2.546987 | -0.165007 |
| 15               | 1                | 0              | -0.744345               | -0.406684 | -0.212535 |
| 16               | 6                | 0              | -3.356245               | -0.934104 | 0.357959  |
| 17               | 6                | 0              | -4.639601               | -1.090912 | 0.654080  |
| 18               | 1                | 0              | -2.632726               | -1.744644 | 0.289729  |
| 19               | 1                | 0              | -5.013240               | -2.088094 | 0.842255  |
| 20               | 1                | 0              | -5.349866               | -0.275734 | 0.721787  |
| 21               | 7                | 0              | 2.127062                | 3.411614  | 0.164369  |
| 22               | 1                | 0              | 2.525716                | 4.004635  | 0.882604  |
| 23               | 1                | 0              | 2.750190                | 2.619707  | 0.020325  |
| 24               | 6                | 0              | 3.348672                | -0.654531 | -1.113467 |
| 25               | 6                | 0              | 3.261917                | -0.755358 | 0.344657  |
| 26               | 8                | 0              | 2.854842                | 0.462734  | -0.337606 |
| 27               | 1                | 0              | 4.313971                | -0.480784 | -1.583053 |
| 28               | 1                | 0              | 2.596391                | -1.156913 | -1.714075 |
| 29               | 1                | 0              | 2.413714                | -1.319921 | 0.726425  |
| 30               | 6                | 0              | 4.469320                | -0.647208 | 1.234610  |
| 31               | 1                | 0              | 4.211056                | -0.167930 | 2.183629  |
| 32               | 1                | 0              | 4.854691                | -1.646022 | 1.461117  |
| 33               | 1                | 0              | 5.263240                | -0.067392 | 0.757095  |

Rotational constants (GHZ): 0.4225985 0.2920003 0.1826974

Standard basis: 6-311++G(d,p) (5D, 7F)

There are 499 symmetry adapted cartesian basis functions of A symmetry.

There are 482 symmetry adapted basis functions of A symmetry.  
 482 basis functions, 760 primitive gaussians, 499 cartesian basis functions  
 71 alpha electrons 71 beta electrons  
 nuclear repulsion energy 1312.9364638488 Hartrees.  
 NAtoms= 33 NActive= 33 NUniq= 33 SFac= 1.00D+00 NATFMM= 60 NAOKFM=F

Big=F

Integral buffers will be 131072 words long.

Raffenetti 2 integral format.

Two-electron integral symmetry is turned on.

One-electron integrals computed using PRISM.

NBasis= 482 RedAO= T EigKep= 3.63D-06 NBF= 482

NBsUse= 482 1.00D-06 EigRej= -1.00D+00 NBFU= 482

Initial guess from the checkpoint file:

"/home/suqian/liuwen/qianmengshijie/nh2po/nh2po.chk"

B after Tr= 0.000000 0.000000 0.000000

Rot= 1.000000 0.000024 -0.000017 -0.000042 Ang= 0.01 deg.

Requested convergence on RMS density matrix=1.00D-08 within 128 cycles.

Requested convergence on MAX density matrix=1.00D-06.

Requested convergence on energy=1.00D-06.

No special actions if energy rises.

SCF Done: E(RB3LYP) = -3205.64837894 A.U. after 7 cycles

NFock= 7 Conv=0.75D-08 -V/T= 2.0018

Calling FoFJK, ICntrl= 2127 FMM=F ISym2X=0 l1Cent= 0 IOpCIX= 0 NMat=1 NMatS=1

NMatT=0.

\*\*\*\*\* Axes restored to original set \*\*\*\*\*

| Center<br>Number | Atomic<br>Number | Forces (Hartrees/Bohr) |              |              |
|------------------|------------------|------------------------|--------------|--------------|
|                  |                  | X                      | Y            | Z            |
| 1                | 6                | -0.000000877           | 0.000002041  | 0.000000878  |
| 2                | 6                | 0.000000094            | -0.000000899 | 0.000000218  |
| 3                | 7                | 0.000001995            | 0.000003952  | 0.000000341  |
| 4                | 6                | -0.000003559           | -0.000004814 | -0.000014126 |
| 5                | 7                | 0.000000133            | -0.000005354 | 0.000002356  |
| 6                | 6                | 0.000002447            | 0.000002874  | -0.000001837 |
| 7                | 6                | 0.000005524            | 0.000004681  | -0.000000887 |
| 8                | 1                | 0.000001109            | 0.000000242  | -0.000001664 |
| 9                | 1                | 0.000000262            | 0.000001663  | -0.000000606 |
| 10               | 1                | 0.000000789            | -0.000002735 | 0.000001517  |
| 11               | 1                | 0.000000890            | -0.000000061 | -0.000001156 |
| 12               | 1                | -0.000000138           | 0.000000653  | 0.000000377  |
| 13               | 1                | -0.000000135           | 0.000000134  | -0.000000084 |
| 14               | 35               | -0.000000537           | -0.000000788 | 0.000000206  |
| 15               | 1                | 0.000002127            | 0.000005981  | 0.000004162  |

|    |   |              |              |              |
|----|---|--------------|--------------|--------------|
| 16 | 6 | 0.000000309  | 0.000000840  | 0.000001596  |
| 17 | 6 | -0.000001628 | -0.000000057 | -0.000003731 |
| 18 | 1 | -0.000001745 | 0.000001877  | 0.000002176  |
| 19 | 1 | -0.000001159 | 0.000001585  | 0.000000596  |
| 20 | 1 | -0.000000226 | 0.000001199  | -0.000002269 |
| 21 | 7 | -0.000000504 | -0.000005826 | -0.000001501 |
| 22 | 1 | -0.000002301 | 0.000001260  | -0.000001118 |
| 23 | 1 | 0.000002404  | -0.000004343 | 0.000000038  |
| 24 | 6 | 0.000002788  | -0.000009784 | -0.000006133 |
| 25 | 6 | -0.000001097 | 0.000012105  | -0.000006461 |
| 26 | 8 | -0.000010613 | -0.000001168 | 0.000007657  |
| 27 | 1 | 0.000002572  | -0.000000059 | 0.000002744  |
| 28 | 1 | 0.000001656  | -0.000000177 | -0.000000697 |
| 29 | 1 | 0.000000610  | 0.000003705  | 0.000008675  |
| 30 | 6 | 0.000001836  | -0.000007091 | 0.000006278  |
| 31 | 1 | -0.000002258 | -0.000000431 | -0.000000277 |
| 32 | 1 | -0.000000340 | -0.000000493 | 0.000001450  |
| 33 | 1 | -0.000000425 | -0.000000710 | 0.000001280  |

-----  
Cartesian Forces: Max 0.000014126 RMS 0.000003582

GradGradGradGradGradGradGradGradGradGradGradGradGradGradGradGradGradGradGrad

Berny optimization.

Using GEDIIS/GDIIS optimizer.

FormGI is forming the generalized inverse of G from B-inverse, IUseBI=4.

Internal Forces: Max 0.000007395 RMS 0.000002248

Search for a local minimum.

Step number 48 out of a maximum of 172

All quantities printed in internal units (Hartrees-Bohrs-Radians)

Mixed Optimization -- En-DIIS/RFO-DIIS

Swapping is turned off.

Update second derivatives using D2CorX and points

|    |    |    |    |    |    |    |  |  |  |
|----|----|----|----|----|----|----|--|--|--|
| 31 | 32 | 33 | 34 | 35 |    |    |  |  |  |
|    |    | 36 | 37 | 38 | 39 | 40 |  |  |  |
|    |    | 41 | 42 | 43 | 44 | 45 |  |  |  |
|    |    | 46 | 47 | 48 |    |    |  |  |  |

DE= -1.56D-08 DEPred=-1.48D-08 R= 1.05D+00

Trust test= 1.05D+00 RLast= 1.95D-03 DXMaxT set to 5.19D-01

ITU= 0 -1 0 0 1 1 1 1 1 1 1 1 1 1 1 1 1 1

ITU= 1 1 0 0 -1 1 -1 1 1 1 1 1 1 1 0 -1 -1 1

ITU= 1 1 -1 1 0 0 -1 0

|                 |         |         |         |         |         |
|-----------------|---------|---------|---------|---------|---------|
| Eigenvalues --- | 0.00068 | 0.00111 | 0.00145 | 0.00232 | 0.00275 |
| Eigenvalues --- | 0.00533 | 0.00616 | 0.00765 | 0.01237 | 0.01387 |
| Eigenvalues --- | 0.01787 | 0.01937 | 0.02171 | 0.02362 | 0.02378 |
| Eigenvalues --- | 0.02537 | 0.02683 | 0.02722 | 0.03052 | 0.03097 |



|                 |         |         |         |         |         |
|-----------------|---------|---------|---------|---------|---------|
| Eigenvalues --- | 0.03280 | 0.03562 | 0.03637 | 0.03981 | 0.04083 |
| Eigenvalues --- | 0.04261 | 0.04489 | 0.04740 | 0.05501 | 0.05657 |
| Eigenvalues --- | 0.05705 | 0.05762 | 0.05905 | 0.07946 | 0.08691 |
| Eigenvalues --- | 0.08996 | 0.09557 | 0.10136 | 0.10628 | 0.11361 |
| Eigenvalues --- | 0.12546 | 0.13116 | 0.13226 | 0.15745 | 0.15936 |
| Eigenvalues --- | 0.15997 | 0.16002 | 0.16012 | 0.16019 | 0.16129 |
| Eigenvalues --- | 0.16253 | 0.18891 | 0.21304 | 0.21712 | 0.22135 |
| Eigenvalues --- | 0.23181 | 0.23446 | 0.26080 | 0.26175 | 0.27297 |
| Eigenvalues --- | 0.28426 | 0.29595 | 0.30790 | 0.31975 | 0.32724 |
| Eigenvalues --- | 0.33660 | 0.34283 | 0.34336 | 0.34407 | 0.34549 |
| Eigenvalues --- | 0.34726 | 0.34798 | 0.35129 | 0.35186 | 0.35368 |
| Eigenvalues --- | 0.35551 | 0.35661 | 0.35891 | 0.35976 | 0.36418 |
| Eigenvalues --- | 0.36627 | 0.39264 | 0.41374 | 0.41976 | 0.42741 |
| Eigenvalues --- | 0.44762 | 0.45483 | 0.46481 | 0.49550 | 0.54989 |
| Eigenvalues --- | 0.58388 | 0.60641 | 1.06066 |         |         |

En-DIIS/RFO-DIIS IScMMF= 0 using points: 48 47 46 45 44

RFO step: Lambda=-2.57817862D-09.

DidBck=F Rises=F RFO-DIIS coefs: 1.56443 -0.45108 -0.13509 0.01103

0.01072

Iteration 1 RMS(Cart)= 0.00042766 RMS(Int)= 0.00000006

Iteration 2 RMS(Cart)= 0.00000012 RMS(Int)= 0.00000003

| Variable | Old X   | -DE/DX   | Delta X<br>(Linear) | Delta X<br>(Quad) | Delta X<br>(Total) | New X   |
|----------|---------|----------|---------------------|-------------------|--------------------|---------|
| R1       | 2.56495 | 0.00000  | 0.00000             | 0.00000           | 0.00000            | 2.56495 |
| R2       | 2.62132 | 0.00000  | 0.00000             | 0.00000           | 0.00000            | 2.62132 |
| R3       | 2.03396 | 0.00000  | 0.00000             | 0.00000           | 0.00000            | 2.03396 |
| R4       | 2.62515 | 0.00000  | 0.00000             | 0.00000           | 0.00000            | 2.62515 |
| R5       | 2.03073 | 0.00000  | 0.00000             | 0.00000           | 0.00000            | 2.03073 |
| R6       | 2.54366 | 0.00000  | 0.00001             | 0.00000           | 0.00001            | 2.54367 |
| R7       | 2.69883 | 0.00000  | -0.00001            | 0.00000           | -0.00001           | 2.69882 |
| R8       | 2.52076 | 0.00000  | -0.00001            | 0.00000           | -0.00001           | 2.52074 |
| R9       | 2.09329 | 0.00000  | 0.00002             | 0.00000           | 0.00001            | 2.09331 |
| R10      | 2.78521 | 0.00000  | 0.00000             | 0.00001           | 0.00000            | 2.78521 |
| R11      | 2.89647 | 0.00000  | 0.00001             | 0.00000           | 0.00001            | 2.89648 |
| R12      | 2.05995 | 0.00000  | -0.00001            | 0.00000           | 0.00000            | 2.05995 |
| R13      | 2.06127 | 0.00000  | 0.00000             | 0.00000           | 0.00000            | 2.06127 |
| R14      | 2.06948 | 0.00000  | 0.00001             | 0.00000           | 0.00001            | 2.06949 |
| R15      | 2.07939 | 0.00000  | 0.00001             | 0.00000           | 0.00001            | 2.07940 |
| R16      | 2.75540 | -0.00001 | -0.00006            | -0.00001          | -0.00007           | 2.75533 |
| R17      | 4.24844 | 0.00000  | -0.00012            | 0.00007           | -0.00005           | 4.24840 |
| R18      | 2.50649 | 0.00000  | 0.00000             | 0.00000           | 0.00000            | 2.50649 |
| R19      | 2.05721 | 0.00000  | 0.00000             | 0.00000           | 0.00000            | 2.05720 |
| R20      | 2.04352 | 0.00000  | 0.00000             | 0.00000           | 0.00000            | 2.04352 |
| R21      | 2.04717 | 0.00000  | 0.00000             | 0.00000           | 0.00000            | 2.04717 |

|     |         |          |          |          |          |         |
|-----|---------|----------|----------|----------|----------|---------|
| R22 | 1.91457 | 0.00000  | -0.00001 | 0.00000  | -0.00001 | 1.91456 |
| R23 | 1.92358 | 0.00000  | -0.00001 | 0.00000  | -0.00001 | 1.92357 |
| R24 | 4.13656 | 0.00000  | -0.00024 | 0.00007  | -0.00017 | 4.13639 |
| R25 | 2.76690 | 0.00000  | 0.00002  | -0.00002 | -0.00001 | 2.76689 |
| R26 | 2.73463 | 0.00001  | 0.00005  | 0.00003  | 0.00008  | 2.73471 |
| R27 | 2.05494 | 0.00000  | -0.00001 | 0.00000  | -0.00001 | 2.05493 |
| R28 | 2.05194 | 0.00000  | -0.00001 | 0.00000  | -0.00001 | 2.05193 |
| R29 | 2.74820 | -0.00001 | -0.00009 | 0.00000  | -0.00009 | 2.74811 |
| R30 | 2.05618 | 0.00000  | 0.00000  | 0.00000  | 0.00000  | 2.05618 |
| R31 | 2.84185 | 0.00000  | 0.00002  | 0.00001  | 0.00002  | 2.84187 |
| R32 | 2.06754 | 0.00000  | 0.00000  | 0.00000  | 0.00000  | 2.06754 |
| R33 | 2.06789 | 0.00000  | 0.00000  | 0.00000  | 0.00000  | 2.06788 |
| R34 | 2.06535 | 0.00000  | 0.00000  | 0.00000  | 0.00000  | 2.06536 |
| A1  | 1.87268 | 0.00000  | 0.00000  | 0.00000  | 0.00000  | 1.87268 |
| A2  | 2.27925 | 0.00000  | -0.00001 | 0.00000  | -0.00001 | 2.27924 |
| A3  | 2.13120 | 0.00000  | 0.00001  | 0.00000  | 0.00001  | 2.13121 |
| A4  | 1.86460 | 0.00000  | 0.00000  | 0.00000  | 0.00000  | 1.86460 |
| A5  | 2.27602 | 0.00000  | 0.00000  | 0.00000  | 0.00000  | 2.27602 |
| A6  | 2.14251 | 0.00000  | 0.00000  | 0.00000  | 0.00000  | 2.14251 |
| A7  | 1.89716 | 0.00000  | 0.00000  | 0.00000  | 0.00000  | 1.89716 |
| A8  | 2.25290 | 0.00000  | 0.00000  | -0.00001 | -0.00001 | 2.25290 |
| A9  | 2.13308 | 0.00000  | 0.00000  | 0.00001  | 0.00001  | 2.13309 |
| A10 | 1.88989 | 0.00000  | 0.00000  | 0.00000  | 0.00000  | 1.88989 |
| A11 | 2.14667 | 0.00000  | -0.00002 | 0.00001  | -0.00001 | 2.14666 |
| A12 | 2.24651 | 0.00000  | 0.00002  | -0.00001 | 0.00001  | 2.24652 |
| A13 | 1.90043 | 0.00000  | 0.00001  | 0.00000  | 0.00001  | 1.90044 |
| A14 | 2.20479 | 0.00000  | 0.00002  | -0.00002 | 0.00000  | 2.20479 |
| A15 | 2.17729 | 0.00000  | -0.00002 | 0.00002  | 0.00000  | 2.17728 |
| A16 | 1.95992 | 0.00000  | -0.00003 | 0.00000  | -0.00003 | 1.95990 |
| A17 | 1.87241 | 0.00000  | -0.00003 | 0.00001  | -0.00002 | 1.87238 |
| A18 | 1.89035 | 0.00000  | 0.00003  | -0.00001 | 0.00002  | 1.89037 |
| A19 | 1.90646 | 0.00000  | 0.00001  | 0.00000  | 0.00001  | 1.90647 |
| A20 | 1.92964 | 0.00000  | 0.00002  | -0.00001 | 0.00001  | 1.92965 |
| A21 | 1.90352 | 0.00000  | 0.00000  | 0.00001  | 0.00001  | 1.90353 |
| A22 | 1.91628 | 0.00000  | -0.00003 | 0.00000  | -0.00003 | 1.91625 |
| A23 | 1.89142 | 0.00000  | -0.00003 | 0.00000  | -0.00003 | 1.89139 |
| A24 | 1.88081 | 0.00000  | 0.00003  | 0.00000  | 0.00003  | 1.88084 |
| A25 | 1.87588 | 0.00000  | -0.00001 | -0.00001 | -0.00002 | 1.87586 |
| A26 | 1.90002 | 0.00000  | 0.00001  | 0.00000  | 0.00001  | 1.90003 |
| A27 | 1.99881 | 0.00000  | 0.00003  | 0.00001  | 0.00004  | 1.99885 |
| A28 | 2.16125 | 0.00000  | 0.00001  | 0.00000  | 0.00001  | 2.16126 |
| A29 | 1.94582 | 0.00000  | 0.00001  | 0.00000  | 0.00001  | 1.94582 |
| A30 | 2.17612 | 0.00000  | -0.00001 | 0.00000  | -0.00002 | 2.17610 |
| A31 | 2.07394 | 0.00000  | 0.00000  | 0.00000  | 0.00000  | 2.07393 |

|     |          |          |          |          |          |          |
|-----|----------|----------|----------|----------|----------|----------|
| A32 | 2.16442  | 0.00000  | 0.00000  | 0.00000  | 0.00000  | 2.16442  |
| A33 | 2.04483  | 0.00000  | 0.00000  | 0.00000  | 0.00000  | 2.04483  |
| A34 | 1.94079  | 0.00000  | 0.00003  | 0.00001  | 0.00004  | 1.94083  |
| A35 | 1.91637  | 0.00000  | 0.00001  | 0.00002  | 0.00004  | 1.91640  |
| A36 | 1.89105  | 0.00000  | 0.00003  | 0.00001  | 0.00004  | 1.89109  |
| A37 | 2.08707  | 0.00000  | -0.00004 | -0.00001 | -0.00005 | 2.08702  |
| A38 | 2.06909  | 0.00001  | -0.00003 | 0.00002  | -0.00001 | 2.06908  |
| A39 | 1.99445  | 0.00000  | -0.00003 | -0.00002 | -0.00005 | 1.99440  |
| A40 | 2.00132  | 0.00000  | -0.00005 | 0.00000  | -0.00005 | 2.00127  |
| A41 | 2.03764  | 0.00000  | 0.00010  | 0.00001  | 0.00011  | 2.03775  |
| A42 | 2.01676  | 0.00001  | 0.00002  | 0.00002  | 0.00004  | 2.01680  |
| A43 | 2.13745  | 0.00000  | 0.00000  | 0.00000  | 0.00000  | 2.13746  |
| A44 | 1.96166  | 0.00000  | 0.00004  | 0.00000  | 0.00003  | 1.96170  |
| A45 | 2.02877  | 0.00000  | 0.00002  | 0.00002  | 0.00003  | 2.02880  |
| A46 | 2.04379  | 0.00000  | -0.00005 | -0.00003 | -0.00008 | 2.04371  |
| A47 | 2.61548  | 0.00000  | -0.00017 | 0.00008  | -0.00009 | 2.61540  |
| A48 | 2.43722  | 0.00000  | 0.00018  | -0.00034 | -0.00016 | 2.43706  |
| A49 | 1.93403  | 0.00000  | 0.00000  | -0.00001 | -0.00001 | 1.93402  |
| A50 | 1.91729  | 0.00000  | 0.00001  | 0.00000  | 0.00001  | 1.91730  |
| A51 | 1.94208  | 0.00000  | -0.00001 | 0.00000  | -0.00002 | 1.94207  |
| A52 | 1.87908  | 0.00000  | 0.00000  | 0.00000  | 0.00000  | 1.87909  |
| A53 | 1.89447  | 0.00000  | 0.00000  | 0.00000  | 0.00000  | 1.89447  |
| A54 | 1.89531  | 0.00000  | 0.00001  | 0.00000  | 0.00001  | 1.89532  |
| A55 | 3.48345  | 0.00000  | -0.00010 | -0.00012 | -0.00022 | 3.48323  |
| A56 | 2.53139  | -0.00001 | 0.00005  | -0.00022 | -0.00016 | 2.53122  |
| A57 | 2.96356  | 0.00000  | 0.00002  | -0.00061 | -0.00058 | 2.96298  |
| A58 | 3.10746  | 0.00000  | 0.00011  | -0.00002 | 0.00009  | 3.10755  |
| D1  | 0.00310  | 0.00000  | 0.00001  | -0.00002 | 0.00000  | 0.00310  |
| D2  | -3.12686 | 0.00000  | -0.00005 | -0.00008 | -0.00012 | -3.12699 |
| D3  | 3.13322  | 0.00000  | -0.00002 | 0.00000  | -0.00001 | 3.13321  |
| D4  | 0.00326  | 0.00000  | -0.00007 | -0.00006 | -0.00013 | 0.00313  |
| D5  | -0.00470 | 0.00000  | -0.00001 | 0.00002  | 0.00000  | -0.00470 |
| D6  | -3.10816 | 0.00000  | -0.00001 | 0.00002  | 0.00001  | -3.10815 |
| D7  | -3.13601 | 0.00000  | 0.00002  | 0.00000  | 0.00001  | -3.13600 |
| D8  | 0.04371  | 0.00000  | 0.00001  | 0.00001  | 0.00002  | 0.04373  |
| D9  | -0.00048 | 0.00000  | -0.00001 | 0.00001  | 0.00000  | -0.00048 |
| D10 | -3.13327 | 0.00000  | -0.00005 | -0.00003 | -0.00008 | -3.13335 |
| D11 | 3.13058  | 0.00000  | 0.00004  | 0.00007  | 0.00011  | 3.13069  |
| D12 | -0.00221 | 0.00000  | 0.00000  | 0.00003  | 0.00003  | -0.00218 |
| D13 | -0.00245 | 0.00000  | 0.00000  | 0.00000  | 0.00000  | -0.00245 |
| D14 | -3.12877 | 0.00000  | -0.00003 | -0.00016 | -0.00019 | -3.12897 |
| D15 | 3.13106  | 0.00000  | 0.00004  | 0.00003  | 0.00007  | 3.13114  |
| D16 | 0.00474  | 0.00000  | 0.00001  | -0.00013 | -0.00012 | 0.00462  |
| D17 | -0.03679 | 0.00000  | 0.00015  | 0.00066  | 0.00081  | -0.03598 |

|     |          |          |          |          |          |          |
|-----|----------|----------|----------|----------|----------|----------|
| D18 | 3.10536  | 0.00000  | 0.00011  | 0.00063  | 0.00074  | 3.10610  |
| D19 | 3.11466  | 0.00000  | 0.00011  | 0.00062  | 0.00073  | 3.11538  |
| D20 | -0.02638 | 0.00000  | 0.00007  | 0.00059  | 0.00066  | -0.02572 |
| D21 | 0.00441  | 0.00000  | 0.00000  | -0.00001 | 0.00000  | 0.00440  |
| D22 | 3.10861  | 0.00000  | 0.00001  | -0.00002 | -0.00001 | 3.10860  |
| D23 | 3.12959  | 0.00000  | 0.00004  | 0.00017  | 0.00020  | 3.12979  |
| D24 | -0.04939 | 0.00000  | 0.00004  | 0.00016  | 0.00020  | -0.04920 |
| D25 | 1.34594  | 0.00000  | -0.00024 | -0.00024 | -0.00048 | 1.34547  |
| D26 | -2.84238 | 0.00000  | -0.00027 | -0.00023 | -0.00050 | -2.84287 |
| D27 | -0.78993 | 0.00000  | -0.00027 | -0.00022 | -0.00048 | -0.79042 |
| D28 | -1.75174 | 0.00000  | -0.00024 | -0.00023 | -0.00047 | -1.75221 |
| D29 | 0.34312  | 0.00000  | -0.00027 | -0.00022 | -0.00049 | 0.34264  |
| D30 | 2.39557  | 0.00000  | -0.00027 | -0.00021 | -0.00048 | 2.39509  |
| D31 | -1.09966 | 0.00000  | -0.00012 | 0.00008  | -0.00004 | -1.09970 |
| D32 | 0.94452  | 0.00000  | -0.00017 | 0.00007  | -0.00010 | 0.94442  |
| D33 | 3.11650  | 0.00000  | -0.00013 | 0.00008  | -0.00005 | 3.11645  |
| D34 | 3.10855  | 0.00000  | -0.00007 | 0.00007  | 0.00000  | 3.10855  |
| D35 | -1.13045 | 0.00000  | -0.00012 | 0.00006  | -0.00006 | -1.13051 |
| D36 | 1.04153  | 0.00000  | -0.00008 | 0.00007  | -0.00001 | 1.04152  |
| D37 | 1.01380  | 0.00000  | -0.00009 | 0.00006  | -0.00003 | 1.01377  |
| D38 | 3.05798  | 0.00000  | -0.00014 | 0.00005  | -0.00009 | 3.05789  |
| D39 | -1.05322 | 0.00000  | -0.00011 | 0.00006  | -0.00005 | -1.05326 |
| D40 | 2.94404  | 0.00000  | 0.00002  | -0.00007 | -0.00005 | 2.94399  |
| D41 | -1.24646 | 0.00000  | 0.00008  | -0.00003 | 0.00004  | -1.24642 |
| D42 | 0.86662  | 0.00000  | 0.00003  | -0.00007 | -0.00004 | 0.86658  |
| D43 | 2.95930  | 0.00000  | 0.00009  | -0.00003 | 0.00006  | 2.95936  |
| D44 | -1.23329 | 0.00000  | 0.00002  | -0.00006 | -0.00004 | -1.23333 |
| D45 | 0.85939  | 0.00000  | 0.00008  | -0.00002 | 0.00005  | 0.85944  |
| D46 | 3.13963  | 0.00000  | -0.00001 | 0.00006  | 0.00005  | 3.13969  |
| D47 | -0.00247 | 0.00000  | 0.00000  | 0.00006  | 0.00006  | -0.00240 |
| D48 | -0.00259 | 0.00000  | 0.00003  | 0.00010  | 0.00013  | -0.00247 |
| D49 | 3.13849  | 0.00000  | 0.00004  | 0.00010  | 0.00014  | 3.13863  |
| D50 | 2.20714  | 0.00000  | -0.00026 | 0.00070  | 0.00044  | 2.20758  |
| D51 | -1.40718 | 0.00000  | -0.00020 | -0.00004 | -0.00024 | -1.40742 |
| D52 | -2.08718 | 0.00000  | -0.00022 | 0.00066  | 0.00045  | -2.08673 |
| D53 | 0.58169  | 0.00000  | -0.00015 | -0.00008 | -0.00024 | 0.58145  |
| D54 | -2.71251 | 0.00000  | 0.00000  | -0.00003 | -0.00003 | -2.71254 |
| D55 | -0.01577 | 0.00000  | -0.00008 | -0.00005 | -0.00013 | -0.01591 |
| D56 | -0.02650 | 0.00000  | 0.00011  | 0.00001  | 0.00012  | -0.02638 |
| D57 | 2.67024  | 0.00000  | 0.00003  | -0.00002 | 0.00001  | 2.67025  |
| D58 | 0.50835  | 0.00000  | 0.00030  | -0.00072 | -0.00042 | 0.50793  |
| D59 | -1.91111 | 0.00000  | 0.00022  | -0.00070 | -0.00048 | -1.91159 |
| D60 | 1.78337  | -0.00001 | 0.00010  | 0.00017  | 0.00026  | 1.78363  |
| D61 | -0.63920 | 0.00000  | 0.00012  | 0.00019  | 0.00031  | -0.63889 |

|     |          |         |         |         |         |          |
|-----|----------|---------|---------|---------|---------|----------|
| D62 | 2.55521  | 0.00000 | 0.00015 | 0.00011 | 0.00027 | 2.55548  |
| D63 | -1.65383 | 0.00000 | 0.00016 | 0.00011 | 0.00027 | -1.65356 |
| D64 | 0.44560  | 0.00000 | 0.00017 | 0.00011 | 0.00028 | 0.44588  |
| D65 | 1.35058  | 0.00000 | 0.00010 | 0.00008 | 0.00018 | 1.35077  |
| D66 | -2.85846 | 0.00000 | 0.00011 | 0.00008 | 0.00019 | -2.85827 |
| D67 | -0.75903 | 0.00000 | 0.00012 | 0.00008 | 0.00020 | -0.75883 |
| D68 | -1.03766 | 0.00000 | 0.00008 | 0.00010 | 0.00018 | -1.03748 |
| D69 | 1.03648  | 0.00000 | 0.00009 | 0.00010 | 0.00019 | 1.03667  |
| D70 | 3.13591  | 0.00000 | 0.00010 | 0.00010 | 0.00020 | 3.13611  |

| Item                 | Value    | Threshold | Converged? |
|----------------------|----------|-----------|------------|
| Maximum Force        | 0.000007 | 0.000450  | YES        |
| RMS Force            | 0.000002 | 0.000300  | YES        |
| Maximum Displacement | 0.002236 | 0.001800  | NO         |
| RMS Displacement     | 0.000428 | 0.001200  | YES        |

Predicted change in Energy=-1.178840D-08

GradGradGradGradGradGradGradGradGradGradGradGradGradGradGradGradGradGrad

Input orientation:

| Center Number | Atomic Number | Atomic Type | Coordinates (Angstroms) |           |           |
|---------------|---------------|-------------|-------------------------|-----------|-----------|
|               |               |             | X                       | Y         | Z         |
| 1             | 6             | 0           | -2.643910               | 2.100004  | -0.197286 |
| 2             | 6             | 0           | -3.535938               | 1.118408  | 0.090901  |
| 3             | 7             | 0           | -2.826969               | -0.076045 | 0.111687  |
| 4             | 6             | 0           | -1.534515               | 0.184477  | -0.159513 |
| 5             | 7             | 0           | -1.404078               | 1.497794  | -0.353232 |
| 6             | 6             | 0           | -0.129928               | 2.182947  | -0.635012 |
| 7             | 6             | 0           | 0.454689                | 2.858727  | 0.610325  |
| 8             | 1             | 0           | -2.783195               | 3.160993  | -0.312939 |
| 9             | 1             | 0           | -4.594399               | 1.169499  | 0.269380  |
| 10            | 1             | 0           | 0.569865                | 1.429400  | -0.996569 |
| 11            | 1             | 0           | -0.302413               | 2.916535  | -1.423614 |
| 12            | 1             | 0           | -0.226157               | 3.641186  | 0.961759  |
| 13            | 1             | 0           | 0.533139                | 2.105754  | 1.408883  |
| 14            | 35            | 0           | 0.137173                | -2.666287 | -0.214848 |
| 15            | 1             | 0           | -0.758793               | -0.604384 | -0.214471 |
| 16            | 6             | 0           | -3.301460               | -1.400522 | 0.357130  |
| 17            | 6             | 0           | -4.560995               | -1.690310 | 0.655255  |
| 18            | 1             | 0           | -2.501426               | -2.133487 | 0.268739  |
| 19            | 1             | 0           | -4.832466               | -2.723374 | 0.823981  |
| 20            | 1             | 0           | -5.348346               | -0.951428 | 0.743050  |
| 21            | 7             | 0           | 1.721668                | 3.472098  | 0.230225  |
| 22            | 1             | 0           | 2.064226                | 4.087037  | 0.958892  |

|    |   |   |          |           |           |
|----|---|---|----------|-----------|-----------|
| 23 | 1 | 0 | 2.419402 | 2.749217  | 0.066660  |
| 24 | 6 | 0 | 3.332409 | -0.425434 | -1.138213 |
| 25 | 6 | 0 | 3.265708 | -0.563974 | 0.317867  |
| 26 | 8 | 0 | 2.735069 | 0.621142  | -0.336901 |
| 27 | 1 | 0 | 4.272545 | -0.146916 | -1.608383 |
| 28 | 1 | 0 | 2.629810 | -0.987845 | -1.745734 |
| 29 | 1 | 0 | 2.480400 | -1.217812 | 0.691652  |
| 30 | 6 | 0 | 4.462238 | -0.354363 | 1.204405  |
| 31 | 1 | 0 | 4.163849 | 0.077232  | 2.164476  |
| 32 | 1 | 0 | 4.946584 | -1.314246 | 1.408061  |
| 33 | 1 | 0 | 5.191329 | 0.311344  | 0.735601  |

-----  
Distance matrix (angstroms):

|    |    | 1        | 2        | 3        | 4        | 5        |
|----|----|----------|----------|----------|----------|----------|
| 1  | C  | 0.000000 |          |          |          |          |
| 2  | C  | 1.357312 | 0.000000 |          |          |          |
| 3  | N  | 2.205484 | 1.389168 | 0.000000 |          |          |
| 4  | C  | 2.213917 | 2.222753 | 1.346052 | 0.000000 |          |
| 5  | N  | 1.387141 | 2.210433 | 2.172035 | 1.333921 | 0.000000 |
| 6  | C  | 2.553153 | 3.641579 | 3.596475 | 2.488543 | 1.473870 |
| 7  | C  | 3.290777 | 4.384474 | 4.430666 | 3.420701 | 2.497117 |
| 8  | H  | 1.076325 | 2.214015 | 3.265063 | 3.231469 | 2.160976 |
| 9  | H  | 2.210887 | 1.074618 | 2.167962 | 3.243009 | 3.267043 |
| 10 | H  | 3.378892 | 4.258747 | 3.877251 | 2.584359 | 2.077260 |
| 11 | H  | 2.766445 | 3.997838 | 4.205481 | 3.252718 | 2.090983 |
| 12 | H  | 3.092598 | 4.251760 | 4.615697 | 3.862369 | 2.776838 |
| 13 | H  | 3.559980 | 4.389683 | 4.211091 | 3.228989 | 2.688397 |
| 14 | Br | 5.518357 | 5.282911 | 3.949952 | 3.305217 | 4.442317 |
| 15 | H  | 3.296616 | 3.282347 | 2.159368 | 1.107730 | 2.203362 |
| 16 | C  | 3.604640 | 2.543790 | 1.428154 | 2.429246 | 3.536228 |
| 17 | C  | 4.332264 | 3.042717 | 2.430671 | 3.652157 | 4.598606 |
| 18 | H  | 4.261446 | 3.417113 | 2.088950 | 2.547797 | 3.844115 |
| 19 | H  | 5.394232 | 4.120398 | 3.396724 | 4.505478 | 5.563986 |
| 20 | H  | 4.184428 | 2.827426 | 2.742674 | 4.080466 | 4.770511 |
| 21 | N  | 4.596051 | 5.762091 | 5.770049 | 4.643606 | 3.742805 |
| 22 | H  | 5.239427 | 6.397500 | 6.478641 | 5.425103 | 4.522718 |
| 23 | H  | 5.111582 | 6.174641 | 5.958904 | 4.718316 | 4.044918 |
| 24 | C  | 6.555881 | 7.146213 | 6.294621 | 5.001679 | 5.171974 |
| 25 | C  | 6.502749 | 7.010301 | 6.115660 | 4.881620 | 5.148608 |
| 26 | O  | 5.580317 | 6.305221 | 5.623483 | 4.295520 | 4.230995 |
| 27 | H  | 7.407915 | 8.090799 | 7.305255 | 5.994247 | 6.041898 |
| 28 | H  | 6.304334 | 6.769489 | 5.835908 | 4.607823 | 4.938594 |
| 29 | H  | 6.169009 | 6.481910 | 5.459685 | 4.337101 | 4.853398 |
| 30 | C  | 7.647614 | 8.208518 | 7.375909 | 6.173465 | 6.345895 |

|    |    |          |          |          |          |          |
|----|----|----------|----------|----------|----------|----------|
| 31 | H  | 7.484324 | 8.041796 | 7.287590 | 6.154980 | 6.273648 |
| 32 | H  | 8.476429 | 8.922214 | 7.977584 | 6.834333 | 7.165238 |
| 33 | H  | 8.090769 | 8.788184 | 8.051859 | 6.786332 | 6.789154 |
|    |    | 6        | 7        | 8        | 9        | 10       |
| 6  | C  | 0.000000 |          |          |          |          |
| 7  | C  | 1.532750 | 0.000000 |          |          |          |
| 8  | H  | 2.846073 | 3.380484 | 0.000000 |          |          |
| 9  | H  | 4.666530 | 5.335075 | 2.754197 | 0.000000 |          |
| 10 | H  | 1.090076 | 2.153682 | 3.835202 | 5.323514 | 0.000000 |
| 11 | H  | 1.090777 | 2.171049 | 2.729037 | 4.933509 | 1.776177 |
| 12 | H  | 2.164579 | 1.095125 | 2.897221 | 5.066574 | 3.059526 |
| 13 | H  | 2.150146 | 1.100372 | 3.882818 | 5.335419 | 2.499000 |
| 14 | Br | 4.874726 | 5.595311 | 6.518848 | 6.110280 | 4.192012 |
| 15 | H  | 2.888173 | 3.761112 | 4.276210 | 4.253545 | 2.552115 |
| 16 | C  | 4.887148 | 5.684537 | 4.639506 | 2.878264 | 4.982782 |
| 17 | C  | 6.025052 | 6.771472 | 5.256721 | 2.885918 | 6.227908 |
| 18 | H  | 5.007232 | 5.811841 | 5.333786 | 3.910276 | 4.871139 |
| 19 | H  | 6.950864 | 7.691522 | 6.333867 | 3.939381 | 7.053022 |
| 20 | H  | 6.241414 | 6.943350 | 4.960556 | 2.300246 | 6.612098 |
| 21 | N  | 2.416393 | 1.458059 | 4.548143 | 6.722812 | 2.646561 |
| 22 | H  | 3.313670 | 2.054472 | 5.096332 | 7.302379 | 3.622151 |
| 23 | H  | 2.704087 | 2.041485 | 5.232654 | 7.192357 | 2.508616 |
| 24 | C  | 4.364017 | 4.703655 | 7.137518 | 8.207279 | 3.330484 |
| 25 | C  | 4.470335 | 4.438721 | 7.131797 | 8.049135 | 3.601229 |
| 26 | O  | 3.276631 | 3.332290 | 6.074755 | 7.374915 | 2.403445 |
| 27 | H  | 5.075183 | 5.341590 | 7.899615 | 9.158692 | 4.070495 |
| 28 | H  | 4.347847 | 5.007822 | 6.968959 | 7.804102 | 3.263081 |
| 29 | H  | 4.487652 | 4.552833 | 6.920158 | 7.478660 | 3.675319 |
| 30 | C  | 5.559622 | 5.170815 | 8.194899 | 9.231420 | 4.814215 |
| 31 | H  | 5.541452 | 4.889782 | 7.994285 | 9.027256 | 4.973659 |
| 32 | H  | 6.494266 | 6.182816 | 9.096103 | 9.924513 | 5.697851 |
| 33 | H  | 5.804933 | 5.379648 | 8.533051 | 9.834341 | 5.060473 |
|    |    | 11       | 12       | 13       | 14       | 15       |
| 11 | H  | 0.000000 |          |          |          |          |
| 12 | H  | 2.494182 | 0.000000 |          |          |          |
| 13 | H  | 3.062443 | 1.770312 | 0.000000 |          |          |
| 14 | Br | 5.729071 | 6.426557 | 5.056251 | 0.000000 |          |
| 15 | H  | 3.750625 | 4.437577 | 3.413095 | 2.248155 | 0.000000 |
| 16 | C  | 5.549984 | 5.936488 | 5.301350 | 3.708574 | 2.725017 |
| 17 | C  | 6.609103 | 6.878199 | 6.397519 | 4.876720 | 4.048752 |
| 18 | H  | 5.762156 | 6.245317 | 5.336636 | 2.734947 | 2.368209 |
| 19 | H  | 7.575067 | 7.857779 | 7.242396 | 5.077375 | 4.707792 |
| 20 | H  | 6.716920 | 6.883078 | 6.661949 | 5.826597 | 4.701200 |
| 21 | N  | 2.672216 | 2.087524 | 2.160725 | 6.355194 | 4.792510 |

|    |   |          |          |          |           |           |
|----|---|----------|----------|----------|-----------|-----------|
| 22 | H | 3.556317 | 2.333376 | 2.544052 | 7.120294  | 5.599612  |
| 23 | H | 3.107601 | 2.931858 | 2.402830 | 5.883494  | 4.628887  |
| 24 | C | 4.945922 | 5.797472 | 4.553078 | 4.010431  | 4.198007  |
| 25 | C | 5.279980 | 5.503734 | 3.972996 | 3.806736  | 4.059757  |
| 26 | O | 3.959301 | 4.424482 | 3.178101 | 4.191796  | 3.704588  |
| 27 | H | 5.509003 | 6.418230 | 5.306748 | 5.038895  | 5.240862  |
| 28 | H | 4.893452 | 6.075771 | 4.890602 | 3.372538  | 3.738240  |
| 29 | H | 5.413985 | 5.568508 | 3.918206 | 2.900092  | 3.419024  |
| 30 | C | 6.348792 | 6.164766 | 4.640237 | 5.105435  | 5.416169  |
| 31 | H | 6.394022 | 5.781042 | 4.227040 | 5.422379  | 5.509664  |
| 32 | H | 7.312309 | 7.177238 | 5.583448 | 5.252836  | 5.973931  |
| 33 | H | 6.452164 | 6.363029 | 5.037057 | 5.942569  | 6.094682  |
|    |   | 16       | 17       | 18       | 19        | 20        |
| 16 | C | 0.000000 |          |          |           |           |
| 17 | C | 1.326380 | 0.000000 |          |           |           |
| 18 | H | 1.088626 | 2.141875 | 0.000000 |           |           |
| 19 | H | 2.076503 | 1.081382 | 2.467795 | 0.000000  |           |
| 20 | H | 2.130812 | 1.083317 | 3.118845 | 1.847289  | 0.000000  |
| 21 | N | 6.999311 | 8.142663 | 7.018447 | 9.038423  | 8.355577  |
| 22 | H | 7.698442 | 8.795651 | 7.747026 | 9.693516  | 8.965430  |
| 23 | H | 7.073399 | 8.293478 | 6.935141 | 9.116599  | 8.630769  |
| 24 | C | 6.869867 | 8.192818 | 6.239438 | 8.706085  | 8.897827  |
| 25 | C | 6.620352 | 7.914527 | 5.977091 | 8.396403  | 8.633240  |
| 26 | O | 6.403787 | 7.717495 | 5.947744 | 8.354700  | 8.305472  |
| 27 | H | 7.924666 | 9.248651 | 7.304569 | 9.770146  | 9.936701  |
| 28 | H | 6.306529 | 7.613532 | 5.630290 | 8.080907  | 8.357412  |
| 29 | H | 5.794411 | 7.057324 | 5.082903 | 7.467412  | 7.833446  |
| 30 | C | 7.879552 | 9.138110 | 7.247991 | 9.599399  | 9.839558  |
| 31 | H | 7.821835 | 9.029111 | 7.273719 | 9.517037  | 9.672665  |
| 32 | H | 8.315175 | 9.544747 | 7.579054 | 9.897303  | 10.322765 |
| 33 | H | 8.671862 | 9.955947 | 8.085396 | 10.473480 | 10.615055 |
|    |   | 21       | 22       | 23       | 24        | 25        |
| 21 | N | 0.000000 |          |          |           |           |
| 22 | H | 1.013140 | 0.000000 |          |           |           |
| 23 | H | 1.017911 | 1.646813 | 0.000000 |           |           |
| 24 | C | 4.433719 | 5.135030 | 3.516207 | 0.000000  |           |
| 25 | C | 4.322224 | 4.846275 | 3.428786 | 1.464175  | 0.000000  |
| 26 | O | 3.078403 | 3.760524 | 2.188883 | 1.447148  | 1.454235  |
| 27 | H | 4.794238 | 5.421618 | 3.824591 | 1.087422  | 2.213164  |
| 28 | H | 4.961878 | 5.778349 | 4.158687 | 1.085834  | 2.200564  |
| 29 | H | 4.773243 | 5.327856 | 4.016423 | 2.168453  | 1.088085  |
| 30 | C | 4.806408 | 5.053392 | 3.885853 | 2.601811  | 1.503852  |
| 31 | H | 4.607677 | 4.684056 | 3.818826 | 3.442632  | 2.151225  |
| 32 | H | 5.890371 | 6.138697 | 4.969682 | 3.143097  | 2.139340  |



|    |   |          |          |          |          |          |
|----|---|----------|----------|----------|----------|----------|
| 33 | H | 4.720627 | 4.907595 | 3.751571 | 2.740365 | 2.156084 |
|    |   | 26       | 27       | 28       | 29       | 30       |
| 26 | O | 0.000000 |          |          |          |          |
| 27 | H | 2.137853 | 0.000000 |          |          |          |
| 28 | H | 2.141198 | 1.850569 | 0.000000 |          |          |
| 29 | H | 2.122388 | 3.106246 | 2.452765 | 0.000000 |          |
| 30 | C | 2.512041 | 2.826800 | 3.530215 | 2.221743 | 0.000000 |
| 31 | H | 2.931576 | 3.781075 | 4.333290 | 2.584637 | 1.094096 |
| 32 | H | 3.417810 | 3.303926 | 3.926882 | 2.569943 | 1.094277 |
| 33 | H | 2.698045 | 2.558990 | 3.795562 | 3.112777 | 1.092939 |
|    |   | 31       | 32       | 33       |          |          |
| 31 | H | 0.000000 |          |          |          |          |
| 32 | H | 1.766649 | 0.000000 |          |          |          |
| 33 | H | 1.775446 | 1.776132 | 0.000000 |          |          |

Stoichiometry C10H18BrN3O

Framework group C1[X(C10H18BrN3O)]

Deg. of freedom 93

Full point group C1 NOp 1

Largest Abelian subgroup C1 NOp 1

Largest concise Abelian subgroup C1 NOp 1

Standard orientation:

| Center<br>Number | Atomic<br>Number | Atomic<br>Type | Coordinates (Angstroms) |           |           |
|------------------|------------------|----------------|-------------------------|-----------|-----------|
|                  |                  |                | X                       | Y         | Z         |
| 1                | 6                | 0              | -2.350956               | 2.471492  | -0.264145 |
| 2                | 6                | 0              | -3.337586               | 1.589803  | 0.038313  |
| 3                | 7                | 0              | -2.751173               | 0.331471  | 0.088415  |
| 4                | 6                | 0              | -1.437987               | 0.456360  | -0.179542 |
| 5                | 7                | 0              | -1.176553               | 1.745796  | -0.399433 |
| 6                | 6                | 0              | 0.160750                | 2.294711  | -0.686844 |
| 7                | 6                | 0              | 0.804100                | 2.935217  | 0.548135  |
| 8                | 1                | 0              | -2.383379               | 3.538386  | -0.402570 |
| 9                | 1                | 0              | -4.386497               | 1.749677  | 0.208692  |
| 10               | 1                | 0              | 0.783665                | 1.467817  | -1.028147 |
| 11               | 1                | 0              | 0.065742                | 3.024952  | -1.491529 |
| 12               | 1                | 0              | 0.202962                | 3.788776  | 0.878848  |
| 13               | 1                | 0              | 0.803567                | 2.195255  | 1.362551  |
| 14               | 35               | 0              | -0.058224               | -2.547056 | -0.165020 |
| 15               | 1                | 0              | -0.744426               | -0.406725 | -0.213088 |
| 16               | 6                | 0              | -3.356293               | -0.933753 | 0.357971  |
| 17               | 6                | 0              | -4.639761               | -1.090460 | 0.653668  |
| 18               | 1                | 0              | -2.632824               | -1.744358 | 0.290008  |
| 19               | 1                | 0              | -5.013508               | -2.087598 | 0.841860  |

|    |   |   |           |           |           |
|----|---|---|-----------|-----------|-----------|
| 20 | 1 | 0 | -5.350018 | -0.275244 | 0.720996  |
| 21 | 7 | 0 | 2.127566  | 3.411355  | 0.163859  |
| 22 | 1 | 0 | 2.526345  | 4.004468  | 0.881943  |
| 23 | 1 | 0 | 2.750588  | 2.619364  | 0.019855  |
| 24 | 6 | 0 | 3.348408  | -0.655149 | -1.113232 |
| 25 | 6 | 0 | 3.261646  | -0.755503 | 0.344921  |
| 26 | 8 | 0 | 2.854618  | 0.462379  | -0.337641 |
| 27 | 1 | 0 | 4.313724  | -0.481531 | -1.582814 |
| 28 | 1 | 0 | 2.596060  | -1.157634 | -1.713662 |
| 29 | 1 | 0 | 2.413451  | -1.319935 | 0.726905  |
| 30 | 6 | 0 | 4.469071  | -0.647204 | 1.234847  |
| 31 | 1 | 0 | 4.210790  | -0.167839 | 2.183819  |
| 32 | 1 | 0 | 4.854506  | -1.645969 | 1.461453  |
| 33 | 1 | 0 | 5.262940  | -0.067386 | 0.757250  |

-----

Rotational constants (GHZ):      0.4225934      0.2920206      0.1827031  
Standard basis: 6-311++G(d,p) (5D, 7F)  
There are    499 symmetry adapted cartesian basis functions of A    symmetry.  
There are    482 symmetry adapted basis functions of A    symmetry.  
482 basis functions,    760 primitive gaussians,    499 cartesian basis functions  
71 alpha electrons      71 beta electrons  
nuclear repulsion energy      1312.9524977008 Hartrees.  
NAtoms=    33 NActive=    33 NUniq=    33 SFac= 1.00D+00 NAtFMM=    60 NAOKFM=F  
Big=F  
Integral buffers will be    131072 words long.  
Raffenetti 2 integral format.  
Two-electron integral symmetry is turned on.  
One-electron integrals computed using PRISM.  
NBasis=    482 RedAO= T EigKep=    3.62D-06    NBF=    482  
NBsUse=    482 1.00D-06 EigRej= -1.00D+00    NBFU=    482  
Initial      guess      from      the      checkpoint      file:  
"/home/suqian/liuwen/qianmengshijie/nh2po/nh2po.chk"  
B after Tr=    0.000000    0.000000    0.000000  
Rot=    1.000000    0.000019    -0.000001    0.000054 Ang=    0.01 deg.  
Requested convergence on RMS density matrix=1.00D-08 within 128 cycles.  
Requested convergence on MAX density matrix=1.00D-06.  
Requested convergence on      energy=1.00D-06.  
No special actions if energy rises.  
SCF Done: E(RB3LYP) = -3205.64837898    A.U. after    7 cycles  
NFOck= 7 Conv=0.57D-08    -V/T= 2.0018  
Calling FoFJK, ICntrl=      2127 FMM=F ISym2X=0 I1Cent= 0 IOpCIX= 0 NMat=1 NMatS=1  
NMatT=0.  
\*\*\*\*\* Axes restored to original set \*\*\*\*\*  
-----

| Center<br>Number | Atomic<br>Number | Forces (Hartrees/Bohr) |              |              |
|------------------|------------------|------------------------|--------------|--------------|
|                  |                  | X                      | Y            | Z            |
| 1                | 6                | -0.000002979           | 0.000001016  | -0.000001894 |
| 2                | 6                | 0.000000860            | -0.000000646 | 0.000001030  |
| 3                | 7                | 0.000004482            | 0.000006324  | 0.000001184  |
| 4                | 6                | -0.000006829           | -0.000011249 | -0.000009004 |
| 5                | 7                | 0.000002068            | 0.000000033  | -0.000000498 |
| 6                | 6                | 0.000000698            | 0.000002908  | -0.000001276 |
| 7                | 6                | -0.000013363           | -0.000004818 | 0.000004320  |
| 8                | 1                | 0.000001841            | 0.000000554  | -0.000000366 |
| 9                | 1                | 0.000000159            | 0.000001655  | -0.000002032 |
| 10               | 1                | 0.000002540            | -0.000001688 | 0.000001873  |
| 11               | 1                | 0.000000918            | -0.000000047 | -0.000000709 |
| 12               | 1                | 0.000002643            | 0.000000642  | 0.000001018  |
| 13               | 1                | 0.000002315            | 0.000002587  | -0.000001781 |
| 14               | 35               | 0.000000531            | -0.000001608 | 0.000000420  |
| 15               | 1                | -0.000000312           | 0.000008530  | 0.000003113  |
| 16               | 6                | -0.000001731           | -0.000002326 | -0.000000108 |
| 17               | 6                | 0.000000084            | 0.000001021  | -0.000002230 |
| 18               | 1                | -0.000000769           | 0.000002002  | 0.000001494  |
| 19               | 1                | -0.000001398           | 0.000001550  | -0.000000212 |
| 20               | 1                | -0.000000467           | 0.000001264  | -0.000001795 |
| 21               | 7                | 0.000009687            | 0.000003756  | -0.000009661 |
| 22               | 1                | -0.000001232           | 0.000001428  | 0.000000886  |
| 23               | 1                | 0.000003220            | -0.000006578 | 0.000001879  |
| 24               | 6                | -0.000005657           | 0.000004028  | 0.000009038  |
| 25               | 6                | 0.000007022            | -0.000005060 | 0.000010849  |
| 26               | 8                | -0.000007403           | 0.000000965  | -0.000005009 |
| 27               | 1                | 0.000001843            | -0.000002556 | -0.000004186 |
| 28               | 1                | 0.000005372            | -0.000001803 | -0.000004299 |
| 29               | 1                | -0.000001499           | 0.000003331  | 0.000003255  |
| 30               | 6                | -0.000001057           | -0.000002794 | 0.000001785  |
| 31               | 1                | -0.000001437           | 0.000000374  | -0.000000181 |
| 32               | 1                | -0.000000825           | -0.000001169 | 0.000001177  |
| 33               | 1                | 0.000000674            | -0.000001626 | 0.000001919  |

-----  
Cartesian Forces: Max 0.000013363 RMS 0.000003924

GradGradGradGradGradGradGradGradGradGradGradGradGradGradGradGradGradGradGrad

Berny optimization.

Using GEDIIS/GDIIS optimizer.

FormGI is forming the generalized inverse of G from B-inverse, IUseBI=4.

GSVD: received Info= 1 from GESDD.

Internal Forces: Max 0.000010123 RMS 0.000002271

Search for a local minimum.

Step number 49 out of a maximum of 172

All quantities printed in internal units (Hartrees-Bohrs-Radians)

Mixed Optimization -- En-DIIS/RFO-DIIS

Swapping is turned off.

Update second derivatives using D2CorX and points

|    |    |    |    |    |    |    |  |  |  |
|----|----|----|----|----|----|----|--|--|--|
| 31 | 32 | 33 | 34 | 35 |    |    |  |  |  |
|    |    | 36 | 37 | 38 | 39 | 40 |  |  |  |
|    |    | 41 | 42 | 43 | 44 | 45 |  |  |  |
|    |    | 46 | 47 | 48 | 49 |    |  |  |  |

DE= -4.14D-08 DEPred=-1.18D-08 R= 3.51D+00

Trust test= 3.51D+00 RLast= 2.44D-03 DXMaxT set to 5.19D-01

ITU= 0 0 -1 0 0 1 1 1 1 1 1 1 1 1 1 1 1 1 1 1 1

ITU= 1 1 1 0 0 -1 1 -1 1 1 1 1 1 1 1 1 1 0 -1 -1

ITU= 1 1 1 -1 1 0 0 -1 0

|                 |         |         |         |         |         |
|-----------------|---------|---------|---------|---------|---------|
| Eigenvalues --- | 0.00071 | 0.00105 | 0.00140 | 0.00185 | 0.00266 |
| Eigenvalues --- | 0.00509 | 0.00535 | 0.00772 | 0.01207 | 0.01368 |
| Eigenvalues --- | 0.01829 | 0.01913 | 0.02168 | 0.02352 | 0.02392 |
| Eigenvalues --- | 0.02488 | 0.02654 | 0.02689 | 0.03053 | 0.03102 |
| Eigenvalues --- | 0.03307 | 0.03550 | 0.03613 | 0.03992 | 0.04131 |
| Eigenvalues --- | 0.04297 | 0.04482 | 0.04721 | 0.05512 | 0.05652 |
| Eigenvalues --- | 0.05731 | 0.05765 | 0.05902 | 0.07705 | 0.08795 |
| Eigenvalues --- | 0.08964 | 0.09564 | 0.09746 | 0.11188 | 0.12036 |
| Eigenvalues --- | 0.12610 | 0.13083 | 0.13236 | 0.15754 | 0.15932 |
| Eigenvalues --- | 0.15999 | 0.16002 | 0.16013 | 0.16022 | 0.16128 |
| Eigenvalues --- | 0.16345 | 0.19365 | 0.21190 | 0.21980 | 0.22134 |
| Eigenvalues --- | 0.23168 | 0.23387 | 0.25628 | 0.26102 | 0.27521 |
| Eigenvalues --- | 0.28619 | 0.29784 | 0.30809 | 0.32099 | 0.32709 |
| Eigenvalues --- | 0.33703 | 0.34290 | 0.34337 | 0.34407 | 0.34549 |
| Eigenvalues --- | 0.34725 | 0.34806 | 0.35105 | 0.35173 | 0.35365 |
| Eigenvalues --- | 0.35579 | 0.35778 | 0.35854 | 0.35919 | 0.36419 |
| Eigenvalues --- | 0.36628 | 0.39714 | 0.41591 | 0.42211 | 0.43612 |
| Eigenvalues --- | 0.45259 | 0.45953 | 0.46533 | 0.49566 | 0.55062 |
| Eigenvalues --- | 0.58620 | 0.60696 | 1.06659 |         |         |

En-DIIS/RFO-DIIS IScMMF= 0 using points: 49 48 47 46 45

RFO step: Lambda=-1.99887632D-09.

DidBck=F Rises=F RFO-DIIS coefs: 1.57464 -0.53204 -0.18947 0.11390  
0.03297

Iteration 1 RMS(Cart)= 0.00055328 RMS(Int)= 0.00000008

Iteration 2 RMS(Cart)= 0.00000018 RMS(Int)= 0.00000001

| Variable | Old X   | -DE/DX  | Delta X<br>(Linear) | Delta X<br>(Quad) | Delta X<br>(Total) | New X   |
|----------|---------|---------|---------------------|-------------------|--------------------|---------|
| R1       | 2.56495 | 0.00000 | 0.00000             | 0.00000           | 0.00000            | 2.56495 |
| R2       | 2.62132 | 0.00000 | 0.00000             | 0.00000           | 0.00000            | 2.62132 |

|     |         |          |          |          |          |         |
|-----|---------|----------|----------|----------|----------|---------|
| R3  | 2.03396 | 0.00000  | 0.00000  | 0.00000  | 0.00000  | 2.03396 |
| R4  | 2.62515 | 0.00000  | 0.00000  | 0.00000  | 0.00000  | 2.62515 |
| R5  | 2.03073 | 0.00000  | 0.00000  | 0.00000  | 0.00000  | 2.03073 |
| R6  | 2.54367 | 0.00000  | 0.00000  | 0.00000  | 0.00000  | 2.54367 |
| R7  | 2.69882 | 0.00000  | 0.00000  | 0.00000  | 0.00000  | 2.69882 |
| R8  | 2.52074 | 0.00000  | -0.00001 | 0.00000  | -0.00001 | 2.52074 |
| R9  | 2.09331 | 0.00000  | -0.00001 | 0.00000  | -0.00001 | 2.09330 |
| R10 | 2.78521 | 0.00000  | 0.00001  | 0.00000  | 0.00001  | 2.78522 |
| R11 | 2.89648 | 0.00000  | 0.00000  | 0.00000  | 0.00000  | 2.89648 |
| R12 | 2.05995 | 0.00000  | 0.00000  | 0.00000  | 0.00000  | 2.05994 |
| R13 | 2.06127 | 0.00000  | 0.00000  | 0.00000  | 0.00000  | 2.06127 |
| R14 | 2.06949 | 0.00000  | 0.00000  | 0.00000  | 0.00000  | 2.06949 |
| R15 | 2.07940 | 0.00000  | 0.00001  | -0.00001 | 0.00000  | 2.07940 |
| R16 | 2.75533 | 0.00001  | -0.00004 | 0.00002  | -0.00001 | 2.75532 |
| R17 | 4.24840 | 0.00000  | 0.00003  | -0.00001 | 0.00002  | 4.24842 |
| R18 | 2.50649 | 0.00000  | 0.00000  | 0.00000  | 0.00000  | 2.50649 |
| R19 | 2.05720 | 0.00000  | 0.00000  | 0.00000  | -0.00001 | 2.05720 |
| R20 | 2.04352 | 0.00000  | 0.00000  | 0.00000  | 0.00000  | 2.04352 |
| R21 | 2.04717 | 0.00000  | 0.00000  | 0.00000  | 0.00000  | 2.04717 |
| R22 | 1.91456 | 0.00000  | 0.00000  | 0.00000  | 0.00000  | 1.91456 |
| R23 | 1.92357 | 0.00000  | 0.00000  | 0.00000  | 0.00000  | 1.92357 |
| R24 | 4.13639 | 0.00000  | -0.00007 | -0.00010 | -0.00017 | 4.13622 |
| R25 | 2.76689 | 0.00001  | -0.00002 | 0.00002  | 0.00000  | 2.76689 |
| R26 | 2.73471 | 0.00000  | 0.00006  | -0.00001 | 0.00005  | 2.73476 |
| R27 | 2.05493 | 0.00000  | 0.00000  | 0.00000  | 0.00000  | 2.05493 |
| R28 | 2.05193 | 0.00000  | 0.00000  | 0.00000  | 0.00000  | 2.05192 |
| R29 | 2.74811 | 0.00001  | -0.00004 | 0.00000  | -0.00004 | 2.74807 |
| R30 | 2.05618 | 0.00000  | 0.00000  | 0.00000  | 0.00000  | 2.05618 |
| R31 | 2.84187 | 0.00000  | 0.00002  | -0.00001 | 0.00001  | 2.84188 |
| R32 | 2.06754 | 0.00000  | 0.00000  | 0.00000  | 0.00000  | 2.06754 |
| R33 | 2.06788 | 0.00000  | 0.00000  | 0.00000  | 0.00000  | 2.06788 |
| R34 | 2.06536 | 0.00000  | 0.00000  | 0.00000  | 0.00000  | 2.06536 |
| A1  | 1.87268 | 0.00000  | 0.00000  | 0.00000  | 0.00000  | 1.87267 |
| A2  | 2.27924 | 0.00000  | 0.00000  | 0.00000  | 0.00000  | 2.27924 |
| A3  | 2.13121 | 0.00000  | 0.00000  | 0.00000  | 0.00000  | 2.13121 |
| A4  | 1.86460 | 0.00000  | 0.00000  | 0.00000  | 0.00000  | 1.86460 |
| A5  | 2.27602 | 0.00000  | 0.00000  | 0.00000  | 0.00000  | 2.27601 |
| A6  | 2.14251 | 0.00000  | 0.00000  | 0.00000  | 0.00000  | 2.14252 |
| A7  | 1.89716 | 0.00000  | 0.00000  | 0.00000  | 0.00000  | 1.89716 |
| A8  | 2.25290 | 0.00000  | -0.00001 | 0.00000  | 0.00000  | 2.25289 |
| A9  | 2.13309 | 0.00000  | 0.00001  | -0.00001 | 0.00000  | 2.13310 |
| A10 | 1.88989 | 0.00000  | 0.00000  | 0.00000  | 0.00000  | 1.88989 |
| A11 | 2.14666 | 0.00001  | 0.00003  | 0.00001  | 0.00004  | 2.14670 |
| A12 | 2.24652 | -0.00001 | -0.00002 | -0.00001 | -0.00003 | 2.24648 |

|     |         |          |          |          |          |         |
|-----|---------|----------|----------|----------|----------|---------|
| A13 | 1.90044 | 0.00000  | 0.00000  | 0.00000  | 0.00000  | 1.90044 |
| A14 | 2.20479 | 0.00000  | 0.00000  | 0.00000  | 0.00000  | 2.20479 |
| A15 | 2.17728 | 0.00000  | -0.00001 | 0.00000  | 0.00000  | 2.17728 |
| A16 | 1.95990 | 0.00001  | 0.00001  | 0.00002  | 0.00002  | 1.95992 |
| A17 | 1.87238 | 0.00000  | -0.00003 | 0.00000  | -0.00003 | 1.87235 |
| A18 | 1.89037 | 0.00000  | 0.00001  | 0.00000  | 0.00001  | 1.89038 |
| A19 | 1.90647 | 0.00000  | -0.00001 | -0.00001 | -0.00002 | 1.90645 |
| A20 | 1.92965 | 0.00000  | 0.00000  | 0.00000  | 0.00000  | 1.92965 |
| A21 | 1.90353 | 0.00000  | 0.00002  | 0.00000  | 0.00002  | 1.90355 |
| A22 | 1.91625 | 0.00000  | 0.00000  | 0.00002  | 0.00002  | 1.91626 |
| A23 | 1.89139 | 0.00000  | 0.00000  | 0.00001  | 0.00001  | 1.89140 |
| A24 | 1.88084 | -0.00001 | -0.00001 | -0.00002 | -0.00003 | 1.88081 |
| A25 | 1.87586 | 0.00000  | -0.00001 | 0.00001  | 0.00000  | 1.87586 |
| A26 | 1.90003 | 0.00000  | 0.00001  | 0.00000  | 0.00001  | 1.90004 |
| A27 | 1.99885 | 0.00000  | 0.00002  | -0.00001 | 0.00000  | 1.99885 |
| A28 | 2.16126 | 0.00000  | 0.00000  | 0.00000  | 0.00001  | 2.16127 |
| A29 | 1.94582 | 0.00000  | 0.00000  | 0.00000  | 0.00000  | 1.94582 |
| A30 | 2.17610 | 0.00000  | -0.00001 | 0.00000  | -0.00001 | 2.17610 |
| A31 | 2.07393 | 0.00000  | 0.00000  | 0.00000  | 0.00000  | 2.07394 |
| A32 | 2.16442 | 0.00000  | 0.00000  | 0.00000  | 0.00000  | 2.16442 |
| A33 | 2.04483 | 0.00000  | 0.00000  | 0.00000  | 0.00000  | 2.04483 |
| A34 | 1.94083 | 0.00000  | 0.00002  | -0.00002 | 0.00001  | 1.94084 |
| A35 | 1.91640 | 0.00000  | 0.00002  | -0.00002 | 0.00000  | 1.91640 |
| A36 | 1.89109 | 0.00000  | 0.00003  | 0.00000  | 0.00002  | 1.89112 |
| A37 | 2.08702 | 0.00000  | -0.00004 | 0.00001  | -0.00003 | 2.08699 |
| A38 | 2.06908 | 0.00001  | 0.00001  | 0.00000  | 0.00001  | 2.06909 |
| A39 | 1.99440 | 0.00000  | -0.00003 | 0.00001  | -0.00003 | 1.99437 |
| A40 | 2.00127 | 0.00000  | -0.00001 | 0.00001  | 0.00000  | 2.00126 |
| A41 | 2.03775 | -0.00001 | 0.00005  | -0.00002 | 0.00004  | 2.03779 |
| A42 | 2.01680 | 0.00000  | 0.00001  | 0.00001  | 0.00002  | 2.01682 |
| A43 | 2.13746 | 0.00000  | 0.00002  | -0.00002 | 0.00000  | 2.13746 |
| A44 | 1.96170 | 0.00000  | 0.00001  | -0.00002 | -0.00001 | 1.96169 |
| A45 | 2.02880 | 0.00001  | 0.00003  | 0.00002  | 0.00005  | 2.02885 |
| A46 | 2.04371 | 0.00000  | -0.00005 | 0.00001  | -0.00005 | 2.04367 |
| A47 | 2.61540 | 0.00000  | -0.00002 | 0.00023  | 0.00020  | 2.61560 |
| A48 | 2.43706 | 0.00000  | -0.00015 | -0.00013 | -0.00027 | 2.43679 |
| A49 | 1.93402 | 0.00000  | -0.00001 | 0.00001  | -0.00001 | 1.93401 |
| A50 | 1.91730 | 0.00000  | 0.00001  | -0.00001 | 0.00000  | 1.91730 |
| A51 | 1.94207 | 0.00000  | 0.00000  | 0.00000  | 0.00000  | 1.94207 |
| A52 | 1.87909 | 0.00000  | 0.00001  | 0.00000  | 0.00001  | 1.87910 |
| A53 | 1.89447 | 0.00000  | 0.00000  | 0.00000  | 0.00000  | 1.89447 |
| A54 | 1.89532 | 0.00000  | 0.00000  | 0.00000  | 0.00000  | 1.89531 |
| A55 | 3.48323 | 0.00000  | 0.00000  | -0.00023 | -0.00023 | 3.48300 |
| A56 | 2.53122 | 0.00000  | -0.00012 | 0.00011  | 0.00000  | 2.53122 |

|     |          |         |          |          |          |          |
|-----|----------|---------|----------|----------|----------|----------|
| A57 | 2.96298  | 0.00000 | -0.00010 | -0.00048 | -0.00058 | 2.96240  |
| A58 | 3.10755  | 0.00000 | 0.00006  | 0.00000  | 0.00006  | 3.10761  |
| D1  | 0.00310  | 0.00000 | 0.00000  | 0.00000  | 0.00000  | 0.00310  |
| D2  | -3.12699 | 0.00000 | -0.00003 | -0.00005 | -0.00008 | -3.12707 |
| D3  | 3.13321  | 0.00000 | -0.00001 | 0.00004  | 0.00003  | 3.13324  |
| D4  | 0.00313  | 0.00000 | -0.00004 | -0.00001 | -0.00006 | 0.00307  |
| D5  | -0.00470 | 0.00000 | 0.00001  | 0.00000  | 0.00001  | -0.00468 |
| D6  | -3.10815 | 0.00000 | -0.00003 | 0.00001  | -0.00001 | -3.10817 |
| D7  | -3.13600 | 0.00000 | 0.00002  | -0.00003 | -0.00001 | -3.13601 |
| D8  | 0.04373  | 0.00000 | -0.00002 | -0.00002 | -0.00003 | 0.04370  |
| D9  | -0.00048 | 0.00000 | -0.00001 | -0.00001 | -0.00002 | -0.00050 |
| D10 | -3.13335 | 0.00000 | -0.00003 | 0.00000  | -0.00004 | -3.13338 |
| D11 | 3.13069  | 0.00000 | 0.00002  | 0.00004  | 0.00006  | 3.13075  |
| D12 | -0.00218 | 0.00000 | -0.00001 | 0.00005  | 0.00004  | -0.00214 |
| D13 | -0.00245 | 0.00000 | 0.00002  | 0.00001  | 0.00003  | -0.00242 |
| D14 | -3.12897 | 0.00000 | -0.00005 | -0.00012 | -0.00018 | -3.12914 |
| D15 | 3.13114  | 0.00000 | 0.00004  | 0.00000  | 0.00004  | 3.13118  |
| D16 | 0.00462  | 0.00000 | -0.00003 | -0.00013 | -0.00016 | 0.00446  |
| D17 | -0.03598 | 0.00000 | 0.00020  | 0.00047  | 0.00068  | -0.03531 |
| D18 | 3.10610  | 0.00000 | 0.00018  | 0.00044  | 0.00062  | 3.10672  |
| D19 | 3.11538  | 0.00000 | 0.00018  | 0.00048  | 0.00066  | 3.11604  |
| D20 | -0.02572 | 0.00000 | 0.00015  | 0.00045  | 0.00060  | -0.02512 |
| D21 | 0.00440  | 0.00000 | -0.00002 | -0.00001 | -0.00003 | 0.00438  |
| D22 | 3.10860  | 0.00000 | 0.00002  | -0.00002 | 0.00000  | 3.10860  |
| D23 | 3.12979  | 0.00000 | 0.00006  | 0.00014  | 0.00020  | 3.12999  |
| D24 | -0.04920 | 0.00000 | 0.00010  | 0.00013  | 0.00022  | -0.04897 |
| D25 | 1.34547  | 0.00000 | -0.00038 | -0.00008 | -0.00046 | 1.34501  |
| D26 | -2.84287 | 0.00000 | -0.00041 | -0.00008 | -0.00049 | -2.84336 |
| D27 | -0.79042 | 0.00000 | -0.00040 | -0.00008 | -0.00048 | -0.79090 |
| D28 | -1.75221 | 0.00000 | -0.00042 | -0.00007 | -0.00049 | -1.75270 |
| D29 | 0.34264  | 0.00000 | -0.00045 | -0.00007 | -0.00052 | 0.34212  |
| D30 | 2.39509  | 0.00000 | -0.00044 | -0.00007 | -0.00051 | 2.39458  |
| D31 | -1.09970 | 0.00000 | -0.00010 | -0.00002 | -0.00012 | -1.09982 |
| D32 | 0.94442  | 0.00000 | -0.00011 | 0.00001  | -0.00011 | 0.94431  |
| D33 | 3.11645  | 0.00000 | -0.00010 | -0.00001 | -0.00012 | 3.11633  |
| D34 | 3.10855  | 0.00000 | -0.00006 | -0.00002 | -0.00008 | 3.10847  |
| D35 | -1.13051 | 0.00000 | -0.00007 | 0.00000  | -0.00007 | -1.13058 |
| D36 | 1.04152  | 0.00000 | -0.00006 | -0.00002 | -0.00008 | 1.04144  |
| D37 | 1.01377  | 0.00000 | -0.00008 | -0.00001 | -0.00009 | 1.01368  |
| D38 | 3.05789  | 0.00000 | -0.00009 | 0.00002  | -0.00008 | 3.05781  |
| D39 | -1.05326 | 0.00000 | -0.00008 | -0.00001 | -0.00009 | -1.05335 |
| D40 | 2.94399  | 0.00000 | -0.00007 | -0.00004 | -0.00011 | 2.94388  |
| D41 | -1.24642 | 0.00000 | -0.00001 | -0.00007 | -0.00008 | -1.24650 |
| D42 | 0.86658  | 0.00000 | -0.00007 | -0.00005 | -0.00012 | 0.86647  |

|     |          |         |          |          |          |          |
|-----|----------|---------|----------|----------|----------|----------|
| D43 | 2.95936  | 0.00000 | -0.00001 | -0.00007 | -0.00008 | 2.95928  |
| D44 | -1.23333 | 0.00000 | -0.00007 | -0.00005 | -0.00012 | -1.23345 |
| D45 | 0.85944  | 0.00000 | -0.00001 | -0.00007 | -0.00009 | 0.85936  |
| D46 | 3.13969  | 0.00000 | 0.00001  | 0.00001  | 0.00002  | 3.13971  |
| D47 | -0.00240 | 0.00000 | 0.00001  | 0.00004  | 0.00005  | -0.00235 |
| D48 | -0.00247 | 0.00000 | 0.00004  | 0.00005  | 0.00009  | -0.00238 |
| D49 | 3.13863  | 0.00000 | 0.00004  | 0.00008  | 0.00012  | 3.13875  |
| D50 | 2.20758  | 0.00000 | 0.00023  | -0.00021 | 0.00003  | 2.20761  |
| D51 | -1.40742 | 0.00000 | -0.00027 | 0.00007  | -0.00020 | -1.40762 |
| D52 | -2.08673 | 0.00000 | 0.00023  | -0.00019 | 0.00004  | -2.08669 |
| D53 | 0.58145  | 0.00000 | -0.00028 | 0.00009  | -0.00019 | 0.58126  |
| D54 | -2.71254 | 0.00000 | -0.00002 | -0.00003 | -0.00005 | -2.71258 |
| D55 | -0.01591 | 0.00000 | -0.00009 | -0.00002 | -0.00011 | -0.01601 |
| D56 | -0.02638 | 0.00000 | 0.00004  | -0.00004 | 0.00001  | -0.02637 |
| D57 | 2.67025  | 0.00000 | -0.00002 | -0.00003 | -0.00006 | 2.67020  |
| D58 | 0.50793  | 0.00000 | -0.00036 | -0.00002 | -0.00037 | 0.50756  |
| D59 | -1.91159 | 0.00000 | -0.00039 | 0.00000  | -0.00039 | -1.91198 |
| D60 | 1.78363  | 0.00000 | 0.00018  | -0.00032 | -0.00014 | 1.78349  |
| D61 | -0.63889 | 0.00000 | 0.00022  | -0.00033 | -0.00011 | -0.63900 |
| D62 | 2.55548  | 0.00000 | 0.00005  | 0.00005  | 0.00010  | 2.55558  |
| D63 | -1.65356 | 0.00000 | 0.00006  | 0.00005  | 0.00011  | -1.65345 |
| D64 | 0.44588  | 0.00000 | 0.00006  | 0.00005  | 0.00011  | 0.44599  |
| D65 | 1.35077  | 0.00000 | -0.00001 | 0.00006  | 0.00004  | 1.35081  |
| D66 | -2.85827 | 0.00000 | -0.00001 | 0.00006  | 0.00005  | -2.85822 |
| D67 | -0.75883 | 0.00000 | 0.00000  | 0.00005  | 0.00005  | -0.75878 |
| D68 | -1.03748 | 0.00000 | 0.00000  | 0.00005  | 0.00006  | -1.03742 |
| D69 | 1.03667  | 0.00000 | 0.00001  | 0.00006  | 0.00007  | 1.03673  |
| D70 | 3.13611  | 0.00000 | 0.00001  | 0.00005  | 0.00006  | 3.13617  |

| Item                 | Value    | Threshold | Converged? |
|----------------------|----------|-----------|------------|
| Maximum Force        | 0.000010 | 0.000450  | YES        |
| RMS Force            | 0.000002 | 0.000300  | YES        |
| Maximum Displacement | 0.002436 | 0.001800  | NO         |
| RMS Displacement     | 0.000553 | 0.001200  | YES        |

Predicted change in Energy=-6.556588D-09

GradGradGradGradGradGradGradGradGradGradGradGradGradGradGradGradGradGradGrad

Input orientation:

| Center Number | Atomic Number | Atomic Type | Coordinates (Angstroms) |           |           |
|---------------|---------------|-------------|-------------------------|-----------|-----------|
|               |               |             | X                       | Y         | Z         |
| 1             | 6             | 0           | -2.643833               | 2.100090  | -0.196483 |
| 2             | 6             | 0           | -3.535839               | 1.118451  | 0.091626  |
| 3             | 7             | 0           | -2.826959               | -0.076066 | 0.111699  |



|    |    |   |           |           |           |
|----|----|---|-----------|-----------|-----------|
| 4  | 6  | 0 | -1.534584 | 0.184455  | -0.159868 |
| 5  | 7  | 0 | -1.404105 | 1.497837  | -0.353097 |
| 6  | 6  | 0 | -0.129993 | 2.182991  | -0.635066 |
| 7  | 6  | 0 | 0.454821  | 2.858803  | 0.610163  |
| 8  | 1  | 0 | -2.783067 | 3.161139  | -0.311650 |
| 9  | 1  | 0 | -4.594223 | 1.169570  | 0.270556  |
| 10 | 1  | 0 | 0.569739  | 1.429414  | -0.996675 |
| 11 | 1  | 0 | -0.302572 | 2.916557  | -1.423669 |
| 12 | 1  | 0 | -0.225901 | 3.641357  | 0.961628  |
| 13 | 1  | 0 | 0.533298  | 2.105883  | 1.408769  |
| 14 | 35 | 0 | 0.137249  | -2.666237 | -0.215408 |
| 15 | 1  | 0 | -0.758889 | -0.604397 | -0.215255 |
| 16 | 6  | 0 | -3.301469 | -1.400595 | 0.356825  |
| 17 | 6  | 0 | -4.561067 | -1.690476 | 0.654590  |
| 18 | 1  | 0 | -2.501402 | -2.133525 | 0.268470  |
| 19 | 1  | 0 | -4.832539 | -2.723573 | 0.823113  |
| 20 | 1  | 0 | -5.348478 | -0.951642 | 0.742251  |
| 21 | 7  | 0 | 1.721808  | 3.472008  | 0.229847  |
| 22 | 1  | 0 | 2.064476  | 4.087055  | 0.958370  |
| 23 | 1  | 0 | 2.419466  | 2.749044  | 0.066323  |
| 24 | 6  | 0 | 3.332072  | -0.426001 | -1.137894 |
| 25 | 6  | 0 | 3.265647  | -0.563846 | 0.318261  |
| 26 | 8  | 0 | 2.734901  | 0.620968  | -0.336923 |
| 27 | 1  | 0 | 4.272130  | -0.147694 | -1.608348 |
| 28 | 1  | 0 | 2.629340  | -0.988669 | -1.745020 |
| 29 | 1  | 0 | 2.480398  | -1.217477 | 0.692530  |
| 30 | 6  | 0 | 4.462374  | -0.353930 | 1.204471  |
| 31 | 1  | 0 | 4.164193  | 0.078048  | 2.164433  |
| 32 | 1  | 0 | 4.946735  | -1.313749 | 1.408389  |
| 33 | 1  | 0 | 5.191386  | 0.311575  | 0.735257  |

-----  
Distance matrix (angstroms):

|    |   | 1        | 2        | 3        | 4        | 5        |
|----|---|----------|----------|----------|----------|----------|
| 1  | C | 0.000000 |          |          |          |          |
| 2  | C | 1.357312 | 0.000000 |          |          |          |
| 3  | N | 2.205485 | 1.389168 | 0.000000 |          |          |
| 4  | C | 2.213918 | 2.222752 | 1.346051 | 0.000000 |          |
| 5  | N | 1.387142 | 2.210431 | 2.172031 | 1.333917 | 0.000000 |
| 6  | C | 2.553159 | 3.641582 | 3.596474 | 2.488541 | 1.473874 |
| 7  | C | 3.290591 | 4.384413 | 4.430801 | 3.420938 | 2.497139 |
| 8  | H | 1.076324 | 2.214016 | 3.265064 | 3.231470 | 2.160978 |
| 9  | H | 2.210885 | 1.074618 | 2.167964 | 3.243009 | 3.267041 |
| 10 | H | 3.378929 | 4.258741 | 3.877179 | 2.584249 | 2.077242 |
| 11 | H | 2.766606 | 3.997915 | 4.205434 | 3.252603 | 2.090996 |

|    |    |          |          |          |          |          |
|----|----|----------|----------|----------|----------|----------|
| 12 | H  | 3.092430 | 4.251782 | 4.615963 | 3.862716 | 2.776930 |
| 13 | H  | 3.559639 | 4.389506 | 4.211248 | 3.229341 | 2.688386 |
| 14 | Br | 5.518392 | 5.282964 | 3.950001 | 3.305231 | 4.442324 |
| 15 | H  | 3.296607 | 3.282352 | 2.159385 | 1.107726 | 2.203337 |
| 16 | C  | 3.604640 | 2.543787 | 1.428154 | 2.429246 | 3.536225 |
| 17 | C  | 4.332262 | 3.042711 | 2.430675 | 3.652165 | 4.598607 |
| 18 | H  | 4.261451 | 3.417117 | 2.088948 | 2.547792 | 3.844113 |
| 19 | H  | 5.394231 | 4.120395 | 3.396727 | 4.505484 | 5.563986 |
| 20 | H  | 4.184423 | 2.827412 | 2.742679 | 4.080481 | 4.770515 |
| 21 | N  | 4.595948 | 5.762047 | 5.770101 | 4.643702 | 3.742793 |
| 22 | H  | 5.239265 | 6.397452 | 6.478778 | 5.425309 | 4.522726 |
| 23 | H  | 5.111478 | 6.174555 | 5.958882 | 4.718345 | 4.044888 |
| 24 | C  | 6.555825 | 7.145997 | 6.294251 | 5.001353 | 5.171889 |
| 25 | C  | 6.502575 | 7.010115 | 6.115590 | 4.881678 | 5.148577 |
| 26 | O  | 5.580171 | 6.305024 | 5.623291 | 4.295392 | 4.230902 |
| 27 | H  | 7.407864 | 8.090577 | 7.304845 | 5.993859 | 6.041777 |
| 28 | H  | 6.304344 | 6.769244 | 5.835361 | 4.607297 | 4.938506 |
| 29 | H  | 6.168820 | 6.481725 | 5.459691 | 4.337289 | 4.853415 |
| 30 | C  | 7.647423 | 8.208395 | 7.376024 | 6.173717 | 6.345915 |
| 31 | H  | 7.484103 | 8.041732 | 7.287912 | 6.155465 | 6.273731 |
| 32 | H  | 8.476240 | 8.922082 | 7.977693 | 6.834584 | 7.165265 |
| 33 | H  | 8.090586 | 8.788047 | 8.051890 | 6.786463 | 6.789126 |
|    |    | 6        | 7        | 8        | 9        | 10       |
| 6  | C  | 0.000000 |          |          |          |          |
| 7  | C  | 1.532750 | 0.000000 |          |          |          |
| 8  | H  | 2.846081 | 3.380099 | 0.000000 |          |          |
| 9  | H  | 4.666532 | 5.334950 | 2.754196 | 0.000000 |          |
| 10 | H  | 1.090076 | 2.153669 | 3.835289 | 5.323523 | 0.000000 |
| 11 | H  | 1.090778 | 2.171049 | 2.729335 | 4.933623 | 1.776188 |
| 12 | H  | 2.164592 | 1.095126 | 2.896713 | 5.066513 | 3.059524 |
| 13 | H  | 2.150153 | 1.100372 | 3.882227 | 5.335136 | 2.499020 |
| 14 | Br | 4.874684 | 5.595398 | 6.518881 | 6.110352 | 4.191871 |
| 15 | H  | 2.888129 | 3.761404 | 4.276196 | 4.253558 | 2.551913 |
| 16 | C  | 4.887146 | 5.684748 | 4.639505 | 2.878263 | 4.982686 |
| 17 | C  | 6.025063 | 6.771783 | 5.256716 | 2.885904 | 6.227805 |
| 18 | H  | 5.007222 | 5.812001 | 5.333792 | 3.910286 | 4.871040 |
| 19 | H  | 6.950871 | 7.691843 | 6.333865 | 3.939375 | 7.052910 |
| 20 | H  | 6.241435 | 6.943718 | 4.960545 | 2.300204 | 6.612003 |
| 21 | N  | 2.416361 | 1.458052 | 4.547940 | 6.722732 | 2.646471 |
| 22 | H  | 3.313637 | 2.054469 | 5.095974 | 7.302266 | 3.622085 |
| 23 | H  | 2.704089 | 2.041479 | 5.232498 | 7.192237 | 2.508561 |
| 24 | C  | 4.364123 | 4.703638 | 7.137590 | 8.207054 | 3.330615 |
| 25 | C  | 4.470383 | 4.438522 | 7.131567 | 8.048886 | 3.601398 |
| 26 | O  | 3.276648 | 3.332212 | 6.074626 | 7.374690 | 2.403494 |

|    |    |          |          |          |          |          |
|----|----|----------|----------|----------|----------|----------|
| 27 | H  | 5.075240 | 5.341597 | 7.899723 | 9.158476 | 4.070518 |
| 28 | H  | 4.348028 | 5.007840 | 6.969190 | 7.803871 | 3.263296 |
| 29 | H  | 4.487743 | 4.552560 | 6.919879 | 7.478390 | 3.675604 |
| 30 | C  | 5.559649 | 5.170622 | 8.194556 | 9.231208 | 4.814350 |
| 31 | H  | 5.541481 | 4.889559 | 7.993801 | 9.027072 | 4.973821 |
| 32 | H  | 6.494311 | 6.182608 | 9.095769 | 9.924284 | 5.698015 |
| 33 | H  | 5.804917 | 5.379504 | 8.532757 | 9.834137 | 5.060512 |
|    |    | 11       | 12       | 13       | 14       | 15       |
| 11 | H  | 0.000000 |          |          |          |          |
| 12 | H  | 2.494164 | 0.000000 |          |          |          |
| 13 | H  | 3.062446 | 1.770311 | 0.000000 |          |          |
| 14 | Br | 5.728955 | 6.426744 | 5.056474 | 0.000000 |          |
| 15 | H  | 3.750414 | 4.437968 | 3.413622 | 2.248165 | 0.000000 |
| 16 | C  | 5.549896 | 5.936850 | 5.301641 | 3.708649 | 2.725053 |
| 17 | C  | 6.608986 | 6.878690 | 6.397943 | 4.876800 | 4.048796 |
| 18 | H  | 5.762076 | 6.245610 | 5.336878 | 2.735032 | 2.368243 |
| 19 | H  | 7.574939 | 7.858285 | 7.242848 | 5.077461 | 4.707838 |
| 20 | H  | 6.716796 | 6.883645 | 6.662431 | 5.826675 | 4.701246 |
| 21 | N  | 2.672219 | 2.087523 | 2.160720 | 6.355087 | 4.792604 |
| 22 | H  | 3.556275 | 2.333342 | 2.544094 | 7.120317 | 5.599867 |
| 23 | H  | 3.107672 | 2.931852 | 2.402800 | 5.883294 | 4.628908 |
| 24 | C  | 4.946211 | 5.797462 | 4.552919 | 4.009555 | 4.197506 |
| 25 | C  | 5.280124 | 5.503505 | 3.972706 | 3.806800 | 4.059948 |
| 26 | O  | 3.959417 | 4.424402 | 3.177966 | 4.191453 | 3.704442 |
| 27 | H  | 5.509232 | 6.418253 | 5.306644 | 5.037915 | 5.240272 |
| 28 | H  | 4.893890 | 6.075811 | 4.890401 | 3.371122 | 3.737371 |
| 29 | H  | 5.414190 | 5.568190 | 3.917769 | 2.900622 | 3.419492 |
| 30 | C  | 6.348851 | 6.164513 | 4.640049 | 5.105833 | 5.416636 |
| 31 | H  | 6.394028 | 5.780729 | 4.226883 | 5.423193 | 5.510479 |
| 32 | H  | 7.312405 | 7.176966 | 5.583217 | 5.253294 | 5.974408 |
| 33 | H  | 6.452167 | 6.362836 | 5.036958 | 5.942679 | 6.094937 |
|    |    | 16       | 17       | 18       | 19       | 20       |
| 16 | C  | 0.000000 |          |          |          |          |
| 17 | C  | 1.326380 | 0.000000 |          |          |          |
| 18 | H  | 1.088623 | 2.141869 | 0.000000 |          |          |
| 19 | H  | 2.076505 | 1.081382 | 2.467790 | 0.000000 |          |
| 20 | H  | 2.130811 | 1.083317 | 3.118839 | 1.847287 | 0.000000 |
| 21 | N  | 6.999406 | 8.142860 | 7.018476 | 9.038620 | 8.355847 |
| 22 | H  | 7.698670 | 8.796020 | 7.747182 | 9.693904 | 8.965884 |
| 23 | H  | 7.073399 | 8.293565 | 6.935076 | 9.116679 | 8.630927 |
| 24 | C  | 6.869344 | 8.192286 | 6.238824 | 8.705473 | 8.897370 |
| 25 | C  | 6.620321 | 7.914535 | 5.977059 | 8.396423 | 8.633267 |
| 26 | O  | 6.403574 | 7.717319 | 5.947487 | 8.354507 | 8.305343 |
| 27 | H  | 7.924082 | 9.248051 | 7.303884 | 9.769451 | 9.936184 |

|    |   |          |          |          |           |           |
|----|---|----------|----------|----------|-----------|-----------|
| 28 | H | 6.305706 | 7.612661 | 5.629329 | 8.079903  | 8.356642  |
| 29 | H | 5.794499 | 7.057436 | 5.083041 | 7.467559  | 7.833546  |
| 30 | C | 7.879801 | 9.138447 | 7.248258 | 9.599795  | 9.839905  |
| 31 | H | 7.822399 | 9.029810 | 7.274331 | 9.517847  | 9.673353  |
| 32 | H | 8.315419 | 9.545074 | 7.579327 | 9.897695  | 10.323094 |
| 33 | H | 8.671985 | 9.956157 | 8.085506 | 10.473725 | 10.615296 |
|    |   | 21       | 22       | 23       | 24        | 25        |
| 21 | N | 0.000000 |          |          |           |           |
| 22 | H | 1.013139 | 0.000000 |          |           |           |
| 23 | H | 1.017912 | 1.646827 | 0.000000 |           |           |
| 24 | C | 4.433751 | 5.135056 | 3.516234 | 0.000000  |           |
| 25 | C | 4.321965 | 4.845971 | 3.428518 | 1.464173  | 0.000000  |
| 26 | O | 3.078314 | 3.760454 | 2.188792 | 1.447174  | 1.454216  |
| 27 | H | 4.794304 | 5.421704 | 3.824654 | 1.087424  | 2.213146  |
| 28 | H | 4.961991 | 5.778439 | 4.158786 | 1.085831  | 2.200566  |
| 29 | H | 4.772924 | 5.327450 | 4.016109 | 2.168464  | 1.088084  |
| 30 | C | 4.806079 | 5.053002 | 3.885524 | 2.601817  | 1.503858  |
| 31 | H | 4.607259 | 4.683539 | 3.818423 | 3.442653  | 2.151224  |
| 32 | H | 5.890042 | 6.138291 | 4.969358 | 3.143054  | 2.139343  |
| 33 | H | 4.720355 | 4.907300 | 3.751302 | 2.740395  | 2.156089  |
|    |   | 26       | 27       | 28       | 29        | 30        |
| 26 | O | 0.000000 |          |          |           |           |
| 27 | H | 2.137858 | 0.000000 |          |           |           |
| 28 | H | 2.141217 | 1.850589 | 0.000000 |           |           |
| 29 | H | 2.122363 | 3.106249 | 2.452792 | 0.000000  |           |
| 30 | C | 2.512068 | 2.826779 | 3.530213 | 2.221716  | 0.000000  |
| 31 | H | 2.931624 | 3.781070 | 4.333299 | 2.584578  | 1.094096  |
| 32 | H | 3.417815 | 3.303858 | 3.926829 | 2.569930  | 1.094276  |
| 33 | H | 2.698076 | 2.558993 | 3.795588 | 3.112761  | 1.092940  |
|    |   | 31       | 32       | 33       |           |           |
| 31 | H | 0.000000 |          |          |           |           |
| 32 | H | 1.766657 | 0.000000 |          |           |           |
| 33 | H | 1.775445 | 1.776130 | 0.000000 |           |           |

Stoichiometry C10H18BrN3O

Framework group C1[X(C10H18BrN3O)]

Deg. of freedom 93

Full point group C1 NOp 1

Largest Abelian subgroup C1 NOp 1

Largest concise Abelian subgroup C1 NOp 1

Standard orientation:

---

| Center | Atomic | Atomic | Coordinates (Angstroms) |   |   |
|--------|--------|--------|-------------------------|---|---|
| Number | Number | Type   | X                       | Y | Z |

---

|    |    |   |           |           |           |
|----|----|---|-----------|-----------|-----------|
| 1  | 6  | 0 | -2.350821 | 2.471620  | -0.263515 |
| 2  | 6  | 0 | -3.337450 | 1.589954  | 0.039015  |
| 3  | 7  | 0 | -2.751163 | 0.331543  | 0.088567  |
| 4  | 6  | 0 | -1.438056 | 0.456356  | -0.179808 |
| 5  | 7  | 0 | -1.176546 | 1.745825  | -0.399398 |
| 6  | 6  | 0 | 0.160728  | 2.294663  | -0.687108 |
| 7  | 6  | 0 | 0.804327  | 2.935334  | 0.547657  |
| 8  | 1  | 0 | -2.383164 | 3.538559  | -0.401604 |
| 9  | 1  | 0 | -4.386275 | 1.749910  | 0.209848  |
| 10 | 1  | 0 | 0.783548  | 1.467677  | -1.028363 |
| 11 | 1  | 0 | 0.065625  | 3.024780  | -1.491895 |
| 12 | 1  | 0 | 0.203353  | 3.789039  | 0.878294  |
| 13 | 1  | 0 | 0.803823  | 2.195538  | 1.362224  |
| 14 | 35 | 0 | -0.058227 | -2.547043 | -0.165102 |
| 15 | 1  | 0 | -0.744546 | -0.406750 | -0.213678 |
| 16 | 6  | 0 | -3.356335 | -0.933683 | 0.358001  |
| 17 | 6  | 0 | -4.639871 | -1.090406 | 0.653392  |
| 18 | 1  | 0 | -2.632855 | -1.744285 | 0.290169  |
| 19 | 1  | 0 | -5.013644 | -2.087544 | 0.841531  |
| 20 | 1  | 0 | -5.350167 | -0.275206 | 0.720490  |
| 21 | 7  | 0 | 2.127788  | 3.411209  | 0.163069  |
| 22 | 1  | 0 | 2.526724  | 4.004506  | 0.880913  |
| 23 | 1  | 0 | 2.750701  | 2.619107  | 0.019204  |
| 24 | 6  | 0 | 3.347959  | -0.655920 | -1.112777 |
| 25 | 6  | 0 | 3.261573  | -0.755401 | 0.345456  |
| 26 | 8  | 0 | 2.854429  | 0.462098  | -0.337679 |
| 27 | 1  | 0 | 4.313172  | -0.482604 | -1.582687 |
| 28 | 1  | 0 | 2.595423  | -1.158702 | -1.712718 |
| 29 | 1  | 0 | 2.413450  | -1.319545 | 0.728020  |
| 30 | 6  | 0 | 4.469251  | -0.646735 | 1.235003  |
| 31 | 1  | 0 | 4.211253  | -0.166871 | 2.183799  |
| 32 | 1  | 0 | 4.854684  | -1.645411 | 1.462000  |
| 33 | 1  | 0 | 5.263028  | -0.067207 | 0.756899  |

-----  
Rotational constants (GHZ):      0.4225993      0.2920272      0.1827045

Standard basis: 6-311++G(d,p) (5D, 7F)

There are 499 symmetry adapted cartesian basis functions of A symmetry.

There are 482 symmetry adapted basis functions of A symmetry.

482 basis functions, 760 primitive gaussians, 499 cartesian basis functions

71 alpha electrons      71 beta electrons

nuclear repulsion energy      1312.9617022014 Hartrees.

NAtoms= 33 NActive= 33 NUniq= 33 SFac= 1.00D+00 NATFMM= 60 NAOKFM=F

Big=F

Integral buffers will be 131072 words long.

Raffenetti 2 integral format.

Two-electron integral symmetry is turned on.

One-electron integrals computed using PRISM.

NBasis= 482 RedAO= T EigKep= 3.62D-06 NBF= 482

NBsUse= 482 1.00D-06 EigRej= -1.00D+00 NBFU= 482

Initial guess from the checkpoint file:

"/home/suqian/liuwen/qianmengshijie/nh2po/nh2po.chk"

B after Tr= 0.000000 0.000000 0.000000

Rot= 1.000000 0.000029 -0.000010 0.000013 Ang= 0.00 deg.

Requested convergence on RMS density matrix=1.00D-08 within 128 cycles.

Requested convergence on MAX density matrix=1.00D-06.

Requested convergence on energy=1.00D-06.

No special actions if energy rises.

SCF Done: E(RB3LYP) = -3205.64837901 A.U. after 7 cycles

NFock= 7 Conv=0.68D-08 -V/T= 2.0018

Calling FoFJK, ICntrl= 2127 FMM=F ISym2X=0 l1Cent= 0 IOpClX= 0 NMat=1 NMatS=1

NMatT=0.

\*\*\*\*\* Axes restored to original set \*\*\*\*\*

| Center | Atomic | Forces (Hartrees/Bohr) |              |              |
|--------|--------|------------------------|--------------|--------------|
| Number | Number | X                      | Y            | Z            |
| 1      | 6      | -0.000002171           | -0.000000303 | -0.000003074 |
| 2      | 6      | 0.000001424            | 0.000000685  | 0.000002020  |
| 3      | 7      | 0.000002211            | 0.000003628  | -0.000000678 |
| 4      | 6      | -0.000004302           | -0.000006503 | -0.000003533 |
| 5      | 7      | 0.000002307            | 0.000004316  | -0.000001701 |
| 6      | 6      | -0.000000784           | 0.000000480  | -0.000000791 |
| 7      | 6      | -0.000017055           | -0.000007457 | 0.000004122  |
| 8      | 1      | 0.000001403            | 0.000000585  | -0.000000167 |
| 9      | 1      | 0.000000054            | 0.000001331  | -0.000002063 |
| 10     | 1      | 0.000002729            | -0.000000489 | 0.000000648  |
| 11     | 1      | 0.000001470            | -0.000000602 | -0.000001046 |
| 12     | 1      | 0.000002953            | 0.000000423  | 0.000000240  |
| 13     | 1      | 0.000002039            | 0.000002291  | -0.000002155 |
| 14     | 35     | -0.000000333           | -0.000001681 | 0.000000801  |
| 15     | 1      | -0.000001369           | 0.000004074  | 0.000002988  |
| 16     | 6      | -0.000002170           | -0.000002875 | -0.000002490 |
| 17     | 6      | 0.000000253            | 0.000001783  | -0.000001708 |
| 18     | 1      | 0.000000596            | 0.000001325  | 0.000001418  |
| 19     | 1      | -0.000001086           | 0.000001433  | -0.000000057 |
| 20     | 1      | -0.000000713           | 0.000001393  | -0.000001257 |
| 21     | 7      | 0.000011887            | 0.000006857  | -0.000008853 |
| 22     | 1      | 0.000000289            | 0.000000739  | 0.000000996  |

|    |   |              |              |              |
|----|---|--------------|--------------|--------------|
| 23 | 1 | 0.000003305  | -0.000005026 | 0.000001784  |
| 24 | 6 | -0.000007744 | 0.000010098  | 0.000012310  |
| 25 | 6 | 0.000007270  | -0.000011863 | 0.000014653  |
| 26 | 8 | -0.000001740 | 0.000001046  | -0.000008704 |
| 27 | 1 | 0.000000666  | -0.000003332 | -0.000004141 |
| 28 | 1 | 0.000004058  | -0.000002253 | -0.000002793 |
| 29 | 1 | -0.000001217 | 0.000000900  | -0.000001253 |
| 30 | 6 | -0.000003373 | 0.000001779  | 0.000000002  |
| 31 | 1 | -0.000000134 | 0.000000356  | 0.000001081  |
| 32 | 1 | -0.000001267 | -0.000001274 | 0.000001558  |
| 33 | 1 | 0.000000541  | -0.000001864 | 0.000001842  |

-----  
Cartesian Forces: Max 0.000017055 RMS 0.000004282

GradGradGradGradGradGradGradGradGradGradGradGradGradGradGradGradGradGradGradGrad  
Berny optimization.

Using GEDIIS/GDIIS optimizer.

FormGI is forming the generalized inverse of G from B-inverse, IUseBI=4.

GSVD: received Info= 1 from GESDD.

Internal Forces: Max 0.000014821 RMS 0.000001944

Search for a local minimum.

Step number 50 out of a maximum of 172

All quantities printed in internal units (Hartrees-Bohrs-Radians)

Mixed Optimization -- En-DIIS/RFO-DIIS

Swapping is turned off.

Update second derivatives using D2CorX and points

|    |    |    |    |    |    |
|----|----|----|----|----|----|
| 31 | 32 | 33 | 34 | 35 |    |
|    | 36 | 37 | 38 | 39 | 40 |
|    | 41 | 42 | 43 | 44 | 45 |
|    | 46 | 47 | 48 | 49 | 50 |

DE= -2.44D-08 DEPred=-6.56D-09 R= 3.72D+00

Trust test= 3.72D+00 RLast= 2.11D-03 DXMaxT set to 5.19D-01

ITU= 0 0 0-1 0 0 1 1 1 1 1 1 1 1 1 1 1 1 1

ITU= 1 1 1 1 0 0-1 1-1 1 1 1 1 1 1 1 1 1 1 0-1

ITU= -1 1 1 1-1 1 0 0-1 0

|                 |         |         |         |         |         |
|-----------------|---------|---------|---------|---------|---------|
| Eigenvalues --- | 0.00066 | 0.00091 | 0.00139 | 0.00174 | 0.00283 |
| Eigenvalues --- | 0.00442 | 0.00535 | 0.00775 | 0.01181 | 0.01367 |
| Eigenvalues --- | 0.01868 | 0.01906 | 0.02169 | 0.02315 | 0.02387 |
| Eigenvalues --- | 0.02489 | 0.02682 | 0.02701 | 0.03054 | 0.03103 |
| Eigenvalues --- | 0.03331 | 0.03475 | 0.03649 | 0.03974 | 0.04089 |
| Eigenvalues --- | 0.04350 | 0.04486 | 0.04721 | 0.05526 | 0.05622 |
| Eigenvalues --- | 0.05712 | 0.05761 | 0.05908 | 0.07611 | 0.08721 |
| Eigenvalues --- | 0.08997 | 0.09568 | 0.09801 | 0.11069 | 0.12147 |
| Eigenvalues --- | 0.12448 | 0.13072 | 0.13483 | 0.15782 | 0.15938 |
| Eigenvalues --- | 0.15999 | 0.16001 | 0.16002 | 0.16019 | 0.16143 |

|                 |         |         |         |         |         |
|-----------------|---------|---------|---------|---------|---------|
| Eigenvalues --- | 0.16390 | 0.18787 | 0.21379 | 0.21838 | 0.22125 |
| Eigenvalues --- | 0.23241 | 0.23361 | 0.25167 | 0.26129 | 0.27405 |
| Eigenvalues --- | 0.29059 | 0.30059 | 0.30843 | 0.32013 | 0.32731 |
| Eigenvalues --- | 0.33716 | 0.34300 | 0.34338 | 0.34413 | 0.34551 |
| Eigenvalues --- | 0.34726 | 0.34790 | 0.35107 | 0.35186 | 0.35360 |
| Eigenvalues --- | 0.35567 | 0.35737 | 0.35881 | 0.36128 | 0.36421 |
| Eigenvalues --- | 0.36627 | 0.40158 | 0.41683 | 0.42302 | 0.44392 |
| Eigenvalues --- | 0.44967 | 0.45797 | 0.46562 | 0.49582 | 0.55059 |
| Eigenvalues --- | 0.58997 | 0.60777 | 1.06570 |         |         |

En-DIIS/RFO-DIIS IScMMF= 0 using points: 50 49 48 47 46  
RFO step: Lambda=-1.27103698D-09.

DidBck=F Rises=F RFO-DIIS coefs: 1.65604 -0.50523 -0.48365 0.31235

0.02049

Iteration 1 RMS(Cart)= 0.00039600 RMS(Int)= 0.00000004

Iteration 2 RMS(Cart)= 0.00000010 RMS(Int)= 0.00000001

| Variable | Old X   | -DE/DX   | Delta X<br>(Linear) | Delta X<br>(Quad) | Delta X<br>(Total) | New X   |
|----------|---------|----------|---------------------|-------------------|--------------------|---------|
| R1       | 2.56495 | 0.00000  | 0.00000             | 0.00000           | 0.00000            | 2.56495 |
| R2       | 2.62132 | 0.00000  | 0.00000             | 0.00000           | 0.00000            | 2.62132 |
| R3       | 2.03396 | 0.00000  | 0.00000             | 0.00000           | 0.00000            | 2.03396 |
| R4       | 2.62515 | 0.00000  | 0.00000             | 0.00000           | 0.00000            | 2.62515 |
| R5       | 2.03073 | 0.00000  | 0.00000             | 0.00000           | 0.00000            | 2.03073 |
| R6       | 2.54367 | 0.00000  | 0.00000             | 0.00000           | -0.00001           | 2.54366 |
| R7       | 2.69882 | 0.00000  | 0.00000             | 0.00000           | 0.00001            | 2.69882 |
| R8       | 2.52074 | 0.00000  | 0.00000             | 0.00000           | 0.00000            | 2.52074 |
| R9       | 2.09330 | 0.00000  | -0.00001            | 0.00000           | -0.00001           | 2.09329 |
| R10      | 2.78522 | 0.00000  | 0.00001             | 0.00000           | 0.00000            | 2.78522 |
| R11      | 2.89648 | 0.00000  | 0.00000             | 0.00000           | 0.00000            | 2.89648 |
| R12      | 2.05994 | 0.00000  | 0.00000             | 0.00000           | 0.00000            | 2.05995 |
| R13      | 2.06127 | 0.00000  | 0.00000             | 0.00000           | 0.00000            | 2.06127 |
| R14      | 2.06949 | 0.00000  | 0.00000             | 0.00000           | 0.00000            | 2.06949 |
| R15      | 2.07940 | 0.00000  | 0.00000             | 0.00000           | -0.00001           | 2.07939 |
| R16      | 2.75532 | 0.00001  | 0.00001             | 0.00002           | 0.00003            | 2.75535 |
| R17      | 4.24842 | 0.00000  | 0.00009             | 0.00000           | 0.00009            | 4.24851 |
| R18      | 2.50649 | 0.00000  | 0.00000             | 0.00000           | 0.00000            | 2.50649 |
| R19      | 2.05720 | 0.00000  | 0.00000             | 0.00000           | 0.00000            | 2.05720 |
| R20      | 2.04352 | 0.00000  | 0.00000             | 0.00000           | 0.00000            | 2.04352 |
| R21      | 2.04717 | 0.00000  | 0.00000             | 0.00000           | 0.00000            | 2.04717 |
| R22      | 1.91456 | 0.00000  | 0.00000             | 0.00000           | 0.00000            | 1.91456 |
| R23      | 1.92357 | 0.00000  | 0.00000             | 0.00000           | 0.00001            | 1.92358 |
| R24      | 4.13622 | 0.00000  | -0.00003            | -0.00007          | -0.00010           | 4.13611 |
| R25      | 2.76689 | 0.00000  | -0.00001            | 0.00000           | -0.00001           | 2.76688 |
| R26      | 2.73476 | -0.00001 | 0.00002             | -0.00002          | 0.00000            | 2.73476 |
| R27      | 2.05493 | 0.00000  | 0.00001             | 0.00000           | 0.00001            | 2.05494 |



|     |         |         |          |          |          |         |
|-----|---------|---------|----------|----------|----------|---------|
| R28 | 2.05192 | 0.00000 | 0.00000  | 0.00000  | 0.00000  | 2.05192 |
| R29 | 2.74807 | 0.00001 | 0.00000  | 0.00001  | 0.00002  | 2.74809 |
| R30 | 2.05618 | 0.00000 | 0.00000  | 0.00000  | 0.00000  | 2.05618 |
| R31 | 2.84188 | 0.00000 | 0.00000  | 0.00000  | 0.00000  | 2.84188 |
| R32 | 2.06754 | 0.00000 | 0.00000  | 0.00000  | 0.00000  | 2.06754 |
| R33 | 2.06788 | 0.00000 | 0.00000  | 0.00000  | 0.00000  | 2.06788 |
| R34 | 2.06536 | 0.00000 | 0.00000  | 0.00000  | 0.00000  | 2.06536 |
| A1  | 1.87267 | 0.00000 | 0.00000  | 0.00000  | 0.00000  | 1.87267 |
| A2  | 2.27924 | 0.00000 | 0.00000  | 0.00000  | 0.00000  | 2.27925 |
| A3  | 2.13121 | 0.00000 | 0.00000  | 0.00000  | 0.00000  | 2.13121 |
| A4  | 1.86460 | 0.00000 | 0.00000  | 0.00000  | 0.00000  | 1.86460 |
| A5  | 2.27601 | 0.00000 | 0.00000  | 0.00000  | 0.00000  | 2.27601 |
| A6  | 2.14252 | 0.00000 | 0.00000  | 0.00000  | 0.00000  | 2.14252 |
| A7  | 1.89716 | 0.00000 | 0.00000  | 0.00000  | 0.00000  | 1.89716 |
| A8  | 2.25289 | 0.00000 | -0.00001 | 0.00001  | 0.00000  | 2.25289 |
| A9  | 2.13310 | 0.00000 | 0.00000  | 0.00000  | 0.00000  | 2.13310 |
| A10 | 1.88989 | 0.00000 | 0.00000  | 0.00000  | 0.00000  | 1.88989 |
| A11 | 2.14670 | 0.00000 | 0.00003  | -0.00001 | 0.00002  | 2.14672 |
| A12 | 2.24648 | 0.00000 | -0.00003 | 0.00001  | -0.00002 | 2.24646 |
| A13 | 1.90044 | 0.00000 | 0.00000  | 0.00000  | 0.00000  | 1.90044 |
| A14 | 2.20479 | 0.00000 | -0.00001 | 0.00001  | 0.00000  | 2.20479 |
| A15 | 2.17728 | 0.00000 | 0.00001  | 0.00000  | 0.00000  | 2.17728 |
| A16 | 1.95992 | 0.00000 | 0.00002  | 0.00000  | 0.00002  | 1.95994 |
| A17 | 1.87235 | 0.00000 | -0.00001 | -0.00001 | -0.00002 | 1.87234 |
| A18 | 1.89038 | 0.00000 | 0.00000  | 0.00001  | 0.00001  | 1.89039 |
| A19 | 1.90645 | 0.00000 | -0.00001 | -0.00001 | -0.00003 | 1.90643 |
| A20 | 1.92965 | 0.00000 | -0.00001 | 0.00001  | 0.00000  | 1.92964 |
| A21 | 1.90355 | 0.00000 | 0.00001  | 0.00000  | 0.00001  | 1.90356 |
| A22 | 1.91626 | 0.00000 | 0.00002  | 0.00001  | 0.00003  | 1.91629 |
| A23 | 1.89140 | 0.00000 | 0.00002  | 0.00000  | 0.00002  | 1.89141 |
| A24 | 1.88081 | 0.00000 | -0.00003 | 0.00000  | -0.00003 | 1.88078 |
| A25 | 1.87586 | 0.00000 | 0.00000  | 0.00001  | 0.00001  | 1.87586 |
| A26 | 1.90004 | 0.00000 | 0.00000  | 0.00000  | 0.00000  | 1.90003 |
| A27 | 1.99885 | 0.00000 | -0.00001 | -0.00001 | -0.00002 | 1.99883 |
| A28 | 2.16127 | 0.00000 | 0.00000  | 0.00000  | 0.00000  | 2.16127 |
| A29 | 1.94582 | 0.00000 | 0.00000  | 0.00000  | 0.00000  | 1.94582 |
| A30 | 2.17610 | 0.00000 | 0.00000  | 0.00000  | 0.00000  | 2.17610 |
| A31 | 2.07394 | 0.00000 | 0.00000  | 0.00000  | 0.00000  | 2.07394 |
| A32 | 2.16442 | 0.00000 | 0.00000  | 0.00000  | 0.00000  | 2.16442 |
| A33 | 2.04483 | 0.00000 | 0.00000  | 0.00000  | 0.00000  | 2.04482 |
| A34 | 1.94084 | 0.00000 | 0.00000  | -0.00001 | -0.00001 | 1.94082 |
| A35 | 1.91640 | 0.00000 | 0.00000  | -0.00001 | -0.00001 | 1.91639 |
| A36 | 1.89112 | 0.00000 | 0.00001  | -0.00001 | 0.00001  | 1.89112 |
| A37 | 2.08699 | 0.00000 | -0.00001 | 0.00001  | 0.00000  | 2.08700 |

|     |          |         |          |          |          |          |
|-----|----------|---------|----------|----------|----------|----------|
| A38 | 2.06909  | 0.00000 | 0.00003  | 0.00000  | 0.00003  | 2.06912  |
| A39 | 1.99437  | 0.00000 | -0.00001 | 0.00001  | 0.00000  | 1.99437  |
| A40 | 2.00126  | 0.00000 | 0.00001  | 0.00000  | 0.00002  | 2.00128  |
| A41 | 2.03779  | 0.00000 | -0.00001 | -0.00002 | -0.00003 | 2.03776  |
| A42 | 2.01682  | 0.00000 | 0.00002  | -0.00002 | 0.00000  | 2.01682  |
| A43 | 2.13746  | 0.00000 | 0.00000  | 0.00000  | 0.00001  | 2.13747  |
| A44 | 1.96169  | 0.00000 | -0.00002 | 0.00000  | -0.00002 | 1.96167  |
| A45 | 2.02885  | 0.00000 | 0.00003  | -0.00001 | 0.00002  | 2.02887  |
| A46 | 2.04367  | 0.00000 | -0.00003 | 0.00002  | -0.00001 | 2.04366  |
| A47 | 2.61560  | 0.00000 | 0.00017  | -0.00022 | -0.00005 | 2.61554  |
| A48 | 2.43679  | 0.00000 | -0.00024 | 0.00009  | -0.00015 | 2.43664  |
| A49 | 1.93401  | 0.00000 | -0.00001 | 0.00001  | 0.00000  | 1.93401  |
| A50 | 1.91730  | 0.00000 | -0.00001 | -0.00001 | -0.00001 | 1.91729  |
| A51 | 1.94207  | 0.00000 | 0.00001  | 0.00000  | 0.00001  | 1.94207  |
| A52 | 1.87910  | 0.00000 | 0.00001  | 0.00000  | 0.00001  | 1.87911  |
| A53 | 1.89447  | 0.00000 | 0.00000  | 0.00000  | 0.00000  | 1.89447  |
| A54 | 1.89531  | 0.00000 | 0.00000  | 0.00000  | -0.00001 | 1.89531  |
| A55 | 3.48300  | 0.00000 | -0.00012 | -0.00003 | -0.00015 | 3.48284  |
| A56 | 2.53122  | 0.00000 | -0.00005 | -0.00001 | -0.00006 | 2.53116  |
| A57 | 2.96240  | 0.00000 | -0.00047 | -0.00010 | -0.00057 | 2.96183  |
| A58 | 3.10761  | 0.00000 | -0.00003 | -0.00005 | -0.00007 | 3.10753  |
| D1  | 0.00310  | 0.00000 | 0.00000  | -0.00001 | -0.00001 | 0.00309  |
| D2  | -3.12707 | 0.00000 | -0.00005 | -0.00002 | -0.00007 | -3.12713 |
| D3  | 3.13324  | 0.00000 | 0.00002  | 0.00002  | 0.00004  | 3.13328  |
| D4  | 0.00307  | 0.00000 | -0.00002 | 0.00001  | -0.00001 | 0.00306  |
| D5  | -0.00468 | 0.00000 | 0.00001  | 0.00000  | 0.00001  | -0.00467 |
| D6  | -3.10817 | 0.00000 | -0.00001 | 0.00000  | -0.00001 | -3.10818 |
| D7  | -3.13601 | 0.00000 | -0.00001 | -0.00002 | -0.00004 | -3.13604 |
| D8  | 0.04370  | 0.00000 | -0.00003 | -0.00003 | -0.00006 | 0.04363  |
| D9  | -0.00050 | 0.00000 | -0.00001 | 0.00001  | 0.00001  | -0.00050 |
| D10 | -3.13338 | 0.00000 | -0.00001 | 0.00002  | 0.00000  | -3.13338 |
| D11 | 3.13075  | 0.00000 | 0.00003  | 0.00002  | 0.00006  | 3.13080  |
| D12 | -0.00214 | 0.00000 | 0.00002  | 0.00003  | 0.00005  | -0.00209 |
| D13 | -0.00242 | 0.00000 | 0.00002  | -0.00001 | 0.00000  | -0.00242 |
| D14 | -3.12914 | 0.00000 | -0.00013 | -0.00006 | -0.00019 | -3.12933 |
| D15 | 3.13118  | 0.00000 | 0.00002  | -0.00001 | 0.00001  | 3.13119  |
| D16 | 0.00446  | 0.00000 | -0.00013 | -0.00006 | -0.00018 | 0.00427  |
| D17 | -0.03531 | 0.00000 | 0.00047  | 0.00016  | 0.00063  | -0.03467 |
| D18 | 3.10672  | 0.00000 | 0.00044  | 0.00016  | 0.00060  | 3.10732  |
| D19 | 3.11604  | 0.00000 | 0.00046  | 0.00017  | 0.00063  | 3.11667  |
| D20 | -0.02512 | 0.00000 | 0.00043  | 0.00016  | 0.00059  | -0.02452 |
| D21 | 0.00438  | 0.00000 | -0.00002 | 0.00001  | -0.00001 | 0.00437  |
| D22 | 3.10860  | 0.00000 | 0.00000  | 0.00001  | 0.00002  | 3.10862  |
| D23 | 3.12999  | 0.00000 | 0.00014  | 0.00005  | 0.00019  | 3.13018  |

|     |          |         |          |          |          |          |
|-----|----------|---------|----------|----------|----------|----------|
| D24 | -0.04897 | 0.00000 | 0.00016  | 0.00006  | 0.00022  | -0.04875 |
| D25 | 1.34501  | 0.00000 | -0.00027 | -0.00013 | -0.00040 | 1.34460  |
| D26 | -2.84336 | 0.00000 | -0.00028 | -0.00015 | -0.00043 | -2.84379 |
| D27 | -0.79090 | 0.00000 | -0.00027 | -0.00015 | -0.00042 | -0.79132 |
| D28 | -1.75270 | 0.00000 | -0.00029 | -0.00014 | -0.00043 | -1.75313 |
| D29 | 0.34212  | 0.00000 | -0.00030 | -0.00016 | -0.00046 | 0.34166  |
| D30 | 2.39458  | 0.00000 | -0.00030 | -0.00016 | -0.00045 | 2.39413  |
| D31 | -1.09982 | 0.00000 | -0.00002 | -0.00005 | -0.00007 | -1.09990 |
| D32 | 0.94431  | 0.00000 | 0.00000  | -0.00004 | -0.00004 | 0.94427  |
| D33 | 3.11633  | 0.00000 | -0.00002 | -0.00005 | -0.00007 | 3.11626  |
| D34 | 3.10847  | 0.00000 | -0.00002 | -0.00003 | -0.00005 | 3.10841  |
| D35 | -1.13058 | 0.00000 | 0.00000  | -0.00002 | -0.00002 | -1.13061 |
| D36 | 1.04144  | 0.00000 | -0.00001 | -0.00004 | -0.00005 | 1.04139  |
| D37 | 1.01368  | 0.00000 | -0.00001 | -0.00003 | -0.00005 | 1.01363  |
| D38 | 3.05781  | 0.00000 | 0.00001  | -0.00002 | -0.00001 | 3.05780  |
| D39 | -1.05335 | 0.00000 | -0.00001 | -0.00003 | -0.00004 | -1.05339 |
| D40 | 2.94388  | 0.00000 | -0.00011 | -0.00001 | -0.00012 | 2.94376  |
| D41 | -1.24650 | 0.00000 | -0.00009 | -0.00003 | -0.00012 | -1.24662 |
| D42 | 0.86647  | 0.00000 | -0.00011 | -0.00002 | -0.00013 | 0.86633  |
| D43 | 2.95928  | 0.00000 | -0.00010 | -0.00004 | -0.00014 | 2.95913  |
| D44 | -1.23345 | 0.00000 | -0.00011 | -0.00002 | -0.00013 | -1.23358 |
| D45 | 0.85936  | 0.00000 | -0.00010 | -0.00004 | -0.00013 | 0.85922  |
| D46 | 3.13971  | 0.00000 | 0.00003  | 0.00001  | 0.00003  | 3.13974  |
| D47 | -0.00235 | 0.00000 | 0.00004  | 0.00002  | 0.00006  | -0.00229 |
| D48 | -0.00238 | 0.00000 | 0.00006  | 0.00001  | 0.00007  | -0.00231 |
| D49 | 3.13875  | 0.00000 | 0.00007  | 0.00002  | 0.00010  | 3.13884  |
| D50 | 2.20761  | 0.00000 | 0.00026  | 0.00027  | 0.00053  | 2.20814  |
| D51 | -1.40762 | 0.00000 | 0.00004  | -0.00013 | -0.00009 | -1.40772 |
| D52 | -2.08669 | 0.00000 | 0.00027  | 0.00026  | 0.00052  | -2.08617 |
| D53 | 0.58126  | 0.00000 | 0.00004  | -0.00015 | -0.00011 | 0.58116  |
| D54 | -2.71258 | 0.00000 | -0.00004 | 0.00002  | -0.00002 | -2.71261 |
| D55 | -0.01601 | 0.00000 | -0.00005 | 0.00003  | -0.00002 | -0.01603 |
| D56 | -0.02637 | 0.00000 | -0.00003 | -0.00001 | -0.00004 | -0.02641 |
| D57 | 2.67020  | 0.00000 | -0.00005 | 0.00001  | -0.00004 | 2.67016  |
| D58 | 0.50756  | 0.00000 | -0.00037 | -0.00006 | -0.00043 | 0.50713  |
| D59 | -1.91198 | 0.00000 | -0.00035 | -0.00004 | -0.00040 | -1.91238 |
| D60 | 1.78349  | 0.00000 | -0.00011 | 0.00034  | 0.00023  | 1.78372  |
| D61 | -0.63900 | 0.00000 | -0.00008 | 0.00032  | 0.00024  | -0.63876 |
| D62 | 2.55558  | 0.00000 | 0.00001  | 0.00001  | 0.00002  | 2.55560  |
| D63 | -1.65345 | 0.00000 | 0.00001  | 0.00001  | 0.00002  | -1.65343 |
| D64 | 0.44599  | 0.00000 | 0.00001  | 0.00000  | 0.00001  | 0.44600  |
| D65 | 1.35081  | 0.00000 | -0.00002 | 0.00003  | 0.00001  | 1.35082  |
| D66 | -2.85822 | 0.00000 | -0.00001 | 0.00003  | 0.00001  | -2.85821 |
| D67 | -0.75878 | 0.00000 | -0.00002 | 0.00002  | 0.00000  | -0.75878 |

|     |          |         |         |         |         |          |
|-----|----------|---------|---------|---------|---------|----------|
| D68 | -1.03742 | 0.00000 | 0.00001 | 0.00001 | 0.00002 | -1.03740 |
| D69 | 1.03673  | 0.00000 | 0.00001 | 0.00002 | 0.00003 | 1.03676  |
| D70 | 3.13617  | 0.00000 | 0.00001 | 0.00001 | 0.00002 | 3.13619  |

| Item                 | Value    | Threshold | Converged? |
|----------------------|----------|-----------|------------|
| Maximum Force        | 0.000015 | 0.000450  | YES        |
| RMS Force            | 0.000002 | 0.000300  | YES        |
| Maximum Displacement | 0.002033 | 0.001800  | NO         |
| RMS Displacement     | 0.000396 | 0.001200  | YES        |

Predicted change in Energy=-3.905885D-09

GradGradGradGradGradGradGradGradGradGradGradGradGradGradGradGradGradGradGrad

Input orientation:

| Center Number | Atomic Number | Atomic Type | Coordinates (Angstroms) |           |           |
|---------------|---------------|-------------|-------------------------|-----------|-----------|
|               |               |             | X                       | Y         | Z         |
| 1             | 6             | 0           | -2.643732               | 2.100134  | -0.195797 |
| 2             | 6             | 0           | -3.535720               | 1.118474  | 0.092297  |
| 3             | 7             | 0           | -2.826920               | -0.076100 | 0.111801  |
| 4             | 6             | 0           | -1.534611               | 0.184407  | -0.160078 |
| 5             | 7             | 0           | -1.404091               | 1.497839  | -0.352952 |
| 6             | 6             | 0           | -0.130015               | 2.182984  | -0.635119 |
| 7             | 6             | 0           | 0.454967                | 2.858902  | 0.609971  |
| 8             | 1             | 0           | -2.782916               | 3.161231  | -0.310574 |
| 9             | 1             | 0           | -4.594037               | 1.169626  | 0.271608  |
| 10            | 1             | 0           | 0.569678                | 1.429370  | -0.996727 |
| 11            | 1             | 0           | -0.302675               | 2.916482  | -1.423769 |
| 12            | 1             | 0           | -0.225652               | 3.641541  | 0.961443  |
| 13            | 1             | 0           | 0.533521                | 2.106075  | 1.408652  |
| 14            | 35            | 0           | 0.137223                | -2.666323 | -0.215507 |
| 15            | 1             | 0           | -0.758947               | -0.604443 | -0.215767 |
| 16            | 6             | 0           | -3.301452               | -1.400669 | 0.356682  |
| 17            | 6             | 0           | -4.561123               | -1.690622 | 0.654069  |
| 18            | 1             | 0           | -2.501340               | -2.133564 | 0.268455  |
| 19            | 1             | 0           | -4.832600               | -2.723739 | 0.822458  |
| 20            | 1             | 0           | -5.348597               | -0.951832 | 0.741523  |
| 21            | 7             | 0           | 1.721953                | 3.471989  | 0.229408  |
| 22            | 1             | 0           | 2.064692                | 4.087188  | 0.957772  |
| 23            | 1             | 0           | 2.419571                | 2.748955  | 0.066000  |
| 24            | 6             | 0           | 3.332004                | -0.426216 | -1.137783 |
| 25            | 6             | 0           | 3.265528                | -0.563819 | 0.318389  |
| 26            | 8             | 0           | 2.734723                | 0.620854  | -0.337027 |
| 27            | 1             | 0           | 4.272065                | -0.147922 | -1.608248 |
| 28            | 1             | 0           | 2.629358                | -0.989036 | -1.744867 |

|    |   |   |          |           |          |
|----|---|---|----------|-----------|----------|
| 29 | 1 | 0 | 2.480296 | -1.217422 | 0.692738 |
| 30 | 6 | 0 | 4.462201 | -0.353697 | 1.204621 |
| 31 | 1 | 0 | 4.163954 | 0.078408  | 2.164505 |
| 32 | 1 | 0 | 4.946603 | -1.313462 | 1.408697 |
| 33 | 1 | 0 | 5.191203 | 0.311773  | 0.735341 |

-----  
Distance matrix (angstroms):

|    |    | 1        | 2        | 3        | 4        | 5        |
|----|----|----------|----------|----------|----------|----------|
| 1  | C  | 0.000000 |          |          |          |          |
| 2  | C  | 1.357312 | 0.000000 |          |          |          |
| 3  | N  | 2.205485 | 1.389167 | 0.000000 |          |          |
| 4  | C  | 2.213918 | 2.222748 | 1.346048 | 0.000000 |          |
| 5  | N  | 1.387144 | 2.210431 | 2.172032 | 1.333918 | 0.000000 |
| 6  | C  | 2.553163 | 3.641585 | 3.596477 | 2.488546 | 1.473876 |
| 7  | C  | 3.290430 | 4.384365 | 4.430936 | 3.421157 | 2.497160 |
| 8  | H  | 1.076324 | 2.214017 | 3.265064 | 3.231469 | 2.160979 |
| 9  | H  | 2.210882 | 1.074618 | 2.167965 | 3.243007 | 3.267041 |
| 10 | H  | 3.378967 | 4.258746 | 3.877132 | 2.584172 | 2.077233 |
| 11 | H  | 2.766747 | 3.997983 | 4.205394 | 3.252509 | 2.091008 |
| 12 | H  | 3.092289 | 4.251803 | 4.616204 | 3.863024 | 2.777015 |
| 13 | H  | 3.559386 | 4.389404 | 4.211446 | 3.229689 | 2.688409 |
| 14 | Br | 5.518443 | 5.282986 | 3.950004 | 3.305263 | 4.442385 |
| 15 | H  | 3.296597 | 3.282349 | 2.159389 | 1.107719 | 2.203320 |
| 16 | C  | 3.604642 | 2.543789 | 1.428156 | 2.429246 | 3.536228 |
| 17 | C  | 4.332261 | 3.042706 | 2.430678 | 3.652170 | 4.598611 |
| 18 | H  | 4.261455 | 3.417123 | 2.088948 | 2.547783 | 3.844111 |
| 19 | H  | 5.394232 | 4.120393 | 3.396731 | 4.505489 | 5.563990 |
| 20 | H  | 4.184418 | 2.827399 | 2.742683 | 4.080492 | 4.770523 |
| 21 | N  | 4.595867 | 5.762027 | 5.770183 | 4.643824 | 3.742801 |
| 22 | H  | 5.239118 | 6.397414 | 6.478927 | 5.425519 | 4.522740 |
| 23 | H  | 5.111413 | 6.174516 | 5.958918 | 4.718429 | 4.044898 |
| 24 | C  | 6.555853 | 7.145964 | 6.294155 | 5.001271 | 5.171899 |
| 25 | C  | 6.502337 | 7.009864 | 6.115429 | 4.881609 | 5.148443 |
| 26 | O  | 5.579963 | 6.304791 | 5.623083 | 4.295231 | 4.230737 |
| 27 | H  | 7.407903 | 8.090557 | 7.304746 | 5.993757 | 6.041775 |
| 28 | H  | 6.304607 | 6.769413 | 5.835378 | 4.607295 | 4.938693 |
| 29 | H  | 6.168576 | 6.481465 | 5.459546 | 4.337268 | 4.853305 |
| 30 | C  | 7.647009 | 8.208002 | 7.375812 | 6.173631 | 6.345676 |
| 31 | H  | 7.483514 | 8.041191 | 7.287646 | 6.155369 | 6.273396 |
| 32 | H  | 8.475861 | 8.921717 | 7.977510 | 6.834530 | 7.165063 |
| 33 | H  | 8.090207 | 8.787687 | 8.051679 | 6.786351 | 6.788890 |
|    |    | 6        | 7        | 8        | 9        | 10       |
| 6  | C  | 0.000000 |          |          |          |          |
| 7  | C  | 1.532749 | 0.000000 |          |          |          |

|    |    |          |          |          |          |          |
|----|----|----------|----------|----------|----------|----------|
| 8  | H  | 2.846082 | 3.379748 | 0.000000 |          |          |
| 9  | H  | 4.666534 | 5.334846 | 2.754193 | 0.000000 |          |
| 10 | H  | 1.090076 | 2.153648 | 3.835367 | 5.323541 | 0.000000 |
| 11 | H  | 1.090779 | 2.171045 | 2.729598 | 4.933720 | 1.776195 |
| 12 | H  | 2.164612 | 1.095125 | 2.896261 | 5.066460 | 3.059523 |
| 13 | H  | 2.150162 | 1.100368 | 3.881733 | 5.334947 | 2.499017 |
| 14 | Br | 4.874759 | 5.595577 | 6.518944 | 6.110369 | 4.191899 |
| 15 | H  | 2.888107 | 3.761674 | 4.276183 | 4.253560 | 2.551772 |
| 16 | C  | 4.887152 | 5.684961 | 4.639508 | 2.878268 | 4.982618 |
| 17 | C  | 6.025076 | 6.772095 | 5.256713 | 2.885893 | 6.227728 |
| 18 | H  | 5.007217 | 5.812151 | 5.333799 | 3.910301 | 4.870969 |
| 19 | H  | 6.950883 | 7.692165 | 6.333865 | 3.939371 | 7.052826 |
| 20 | H  | 6.241459 | 6.944088 | 4.960535 | 2.300166 | 6.611930 |
| 21 | N  | 2.416345 | 1.458066 | 4.547747 | 6.722677 | 2.646400 |
| 22 | H  | 3.313612 | 2.054474 | 5.095626 | 7.302167 | 3.622033 |
| 23 | H  | 2.704123 | 2.041485 | 5.232366 | 7.192166 | 2.508545 |
| 24 | C  | 4.364192 | 4.703614 | 7.137668 | 8.207023 | 3.330697 |
| 25 | C  | 4.470326 | 4.438388 | 7.131288 | 8.048588 | 3.601380 |
| 26 | O  | 3.276558 | 3.332109 | 6.074418 | 7.374436 | 2.403398 |
| 27 | H  | 5.075275 | 5.341510 | 7.899824 | 9.158469 | 4.070562 |
| 28 | H  | 4.348264 | 5.007981 | 6.969550 | 7.804065 | 3.263538 |
| 29 | H  | 4.487727 | 4.552496 | 6.919584 | 7.478070 | 3.675630 |
| 30 | C  | 5.559483 | 5.170331 | 8.194038 | 9.230735 | 4.814249 |
| 31 | H  | 5.541237 | 4.889203 | 7.993048 | 9.026418 | 4.973661 |
| 32 | H  | 6.494180 | 6.182344 | 9.095287 | 9.923835 | 5.697952 |
| 33 | H  | 5.804735 | 5.379174 | 8.532287 | 9.833711 | 5.060392 |
|    |    | 11       | 12       | 13       | 14       | 15       |
| 11 | H  | 0.000000 |          |          |          |          |
| 12 | H  | 2.494169 | 0.000000 |          |          |          |
| 13 | H  | 3.062449 | 1.770310 | 0.000000 |          |          |
| 14 | Br | 5.728972 | 6.426978 | 5.056751 | 0.000000 |          |
| 15 | H  | 3.750249 | 4.438312 | 3.414106 | 2.248215 | 0.000000 |
| 16 | C  | 5.549817 | 5.937185 | 5.301973 | 3.708608 | 2.725070 |
| 17 | C  | 6.608873 | 6.879153 | 6.398414 | 4.876742 | 4.048820 |
| 18 | H  | 5.762006 | 6.245865 | 5.337132 | 2.734971 | 2.368251 |
| 19 | H  | 7.574817 | 7.858759 | 7.243341 | 5.077382 | 4.707863 |
| 20 | H  | 6.716671 | 6.884185 | 6.662970 | 5.826630 | 4.701273 |
| 21 | N  | 2.672209 | 2.087532 | 2.160719 | 6.355170 | 4.792739 |
| 22 | H  | 3.556221 | 2.333300 | 2.544127 | 7.120507 | 5.600136 |
| 23 | H  | 3.107748 | 2.931848 | 2.402747 | 5.883332 | 4.629001 |
| 24 | C  | 4.946343 | 5.797440 | 4.552839 | 4.009401 | 4.197352 |
| 25 | C  | 5.280121 | 5.503354 | 3.972514 | 3.806817 | 4.059972 |
| 26 | O  | 3.959382 | 4.424296 | 3.177824 | 4.191336 | 3.704293 |
| 27 | H  | 5.509342 | 6.418162 | 5.306496 | 5.037756 | 5.240086 |

|    |   |          |          |          |           |           |
|----|---|----------|----------|----------|-----------|-----------|
| 28 | H | 4.894179 | 6.075973 | 4.890494 | 3.370900  | 3.737201  |
| 29 | H | 5.414212 | 5.568113 | 3.917665 | 2.900727  | 3.419623  |
| 30 | C | 6.348744 | 6.164173 | 4.639680 | 5.105922  | 5.416712  |
| 31 | H | 6.393837 | 5.780304 | 4.226439 | 5.423336  | 5.510620  |
| 32 | H | 7.312333 | 7.176651 | 5.582878 | 5.253418  | 5.974520  |
| 33 | H | 6.452050 | 6.362452 | 5.036553 | 5.942716  | 6.094944  |
|    |   | 16       | 17       | 18       | 19        | 20        |
| 16 | C | 0.000000 |          |          |           |           |
| 17 | C | 1.326379 | 0.000000 |          |           |           |
| 18 | H | 1.088623 | 2.141869 | 0.000000 |           |           |
| 19 | H | 2.076506 | 1.081382 | 2.467793 | 0.000000  |           |
| 20 | H | 2.130812 | 1.083316 | 3.118839 | 1.847285  | 0.000000  |
| 21 | N | 6.999542 | 8.143091 | 7.018543 | 9.038856  | 8.356143  |
| 22 | H | 7.698920 | 8.796405 | 7.747358 | 9.694311  | 8.966344  |
| 23 | H | 7.073471 | 8.293718 | 6.935081 | 9.116831  | 8.631141  |
| 24 | C | 6.869187 | 8.192125 | 6.238625 | 8.705281  | 8.897241  |
| 25 | C | 6.620197 | 7.914470 | 5.976902 | 8.396369  | 8.633235  |
| 26 | O | 6.403374 | 7.717160 | 5.947250 | 8.354345  | 8.305219  |
| 27 | H | 7.923919 | 9.247876 | 7.303684 | 9.769242  | 9.936037  |
| 28 | H | 6.305590 | 7.612499 | 5.629163 | 8.079677  | 8.356512  |
| 29 | H | 5.794405 | 7.057407 | 5.082915 | 7.467548  | 7.833549  |
| 30 | C | 7.879687 | 9.138428 | 7.248120 | 9.599817  | 9.839918  |
| 31 | H | 7.822288 | 9.029831 | 7.274199 | 9.517936  | 9.673412  |
| 32 | H | 8.315333 | 9.545081 | 7.579220 | 9.897746  | 10.323132 |
| 33 | H | 8.671853 | 9.956106 | 8.085349 | 10.473707 | 10.615277 |
|    |   | 21       | 22       | 23       | 24        | 25        |
| 21 | N | 0.000000 |          |          |           |           |
| 22 | H | 1.013140 | 0.000000 |          |           |           |
| 23 | H | 1.017914 | 1.646833 | 0.000000 |           |           |
| 24 | C | 4.433675 | 5.135002 | 3.516154 | 0.000000  |           |
| 25 | C | 4.321838 | 4.845893 | 3.428384 | 1.464169  | 0.000000  |
| 26 | O | 3.078233 | 3.760441 | 2.188737 | 1.447173  | 1.454226  |
| 27 | H | 4.794143 | 5.421542 | 3.824493 | 1.087428  | 2.213147  |
| 28 | H | 4.962045 | 5.778508 | 4.158826 | 1.085831  | 2.200579  |
| 29 | H | 4.772874 | 5.327462 | 4.016047 | 2.168461  | 1.088082  |
| 30 | C | 4.805816 | 5.052766 | 3.885260 | 2.601819  | 1.503857  |
| 31 | H | 4.606990 | 4.683313 | 3.818169 | 3.442658  | 2.151226  |
| 32 | H | 5.889790 | 6.138059 | 4.969100 | 3.143039  | 2.139334  |
| 33 | H | 4.720024 | 4.906965 | 3.750975 | 2.740409  | 2.156092  |
|    |   | 26       | 27       | 28       | 29        | 30        |
| 26 | O | 0.000000 |          |          |           |           |
| 27 | H | 2.137859 | 0.000000 |          |           |           |
| 28 | H | 2.141229 | 1.850574 | 0.000000 |           |           |
| 29 | H | 2.122358 | 3.106253 | 2.452815 | 0.000000  |           |

```

30 C 2.512092 2.826788 3.530220 2.221710 0.000000
31 H 2.931657 3.781082 4.333315 2.584565 1.094095
32 H 3.417827 3.303853 3.926811 2.569921 1.094277
33 H 2.698110 2.559013 3.795601 3.112759 1.092940

```

```

          31          32          33
31 H 0.000000
32 H 1.766661 0.000000
33 H 1.775446 1.776127 0.000000

```

Stoichiometry C10H18BrN3O

Framework group C1[X(C10H18BrN3O)]

Deg. of freedom 93

Full point group C1 NOp 1

Largest Abelian subgroup C1 NOp 1

Largest concise Abelian subgroup C1 NOp 1

Standard orientation:

| Center<br>Number | Atomic<br>Number | Atomic<br>Type | Coordinates (Angstroms) |           |           |
|------------------|------------------|----------------|-------------------------|-----------|-----------|
|                  |                  |                | X                       | Y         | Z         |
| 1                | 6                | 0              | -2.350512               | 2.471870  | -0.262938 |
| 2                | 6                | 0              | -3.337196               | 1.590271  | 0.039607  |
| 3                | 7                | 0              | -2.751091               | 0.331756  | 0.088650  |
| 4                | 6                | 0              | -1.438038               | 0.456441  | -0.180032 |
| 5                | 7                | 0              | -1.176382               | 1.745932  | -0.399322 |
| 6                | 6                | 0              | 0.160901                | 2.294645  | -0.687244 |
| 7                | 6                | 0              | 0.804719                | 2.935405  | 0.547358  |
| 8                | 1                | 0              | -2.382718               | 3.538857  | -0.400684 |
| 9                | 1                | 0              | -4.385942               | 1.750351  | 0.210808  |
| 10               | 1                | 0              | 0.783618                | 1.467563  | -1.028457 |
| 11               | 1                | 0              | 0.065774                | 3.024674  | -1.492109 |
| 12               | 1                | 0              | 0.203921                | 3.789245  | 0.877959  |
| 13               | 1                | 0              | 0.804239                | 2.195731  | 1.362031  |
| 14               | 35               | 0              | -0.058446               | -2.547101 | -0.165076 |
| 15               | 1                | 0              | -0.744623               | -0.406722 | -0.214163 |
| 16               | 6                | 0              | -3.356388               | -0.933455 | 0.357890  |
| 17               | 6                | 0              | -4.640016               | -1.090138 | 0.652902  |
| 18               | 1                | 0              | -2.632922               | -1.744083 | 0.290225  |
| 19               | 1                | 0              | -5.013874               | -2.087261 | 0.840948  |
| 20               | 1                | 0              | -5.350315               | -0.274920 | 0.719753  |
| 21               | 7                | 0              | 2.128210                | 3.411037  | 0.162515  |
| 22               | 1                | 0              | 2.527272                | 4.004474  | 0.880174  |
| 23               | 1                | 0              | 2.751015                | 2.618818  | 0.018805  |
| 24               | 6                | 0              | 3.347838                | -0.656404 | -1.112595 |
| 25               | 6                | 0              | 3.261408                | -0.755569 | 0.345653  |



|    |   |   |          |           |           |
|----|---|---|----------|-----------|-----------|
| 26 | 8 | 0 | 2.854292 | 0.461792  | -0.337766 |
| 27 | 1 | 0 | 4.313070 | -0.483197 | -1.582517 |
| 28 | 1 | 0 | 2.595338 | -1.159312 | -1.712475 |
| 29 | 1 | 0 | 2.413257 | -1.319602 | 0.728315  |
| 30 | 6 | 0 | 4.469055 | -0.646747 | 1.235221  |
| 31 | 1 | 0 | 4.211035 | -0.166692 | 2.183913  |
| 32 | 1 | 0 | 4.854453 | -1.645391 | 1.462421  |
| 33 | 1 | 0 | 5.262867 | -0.067338 | 0.757032  |

-----  
Rotational constants (GHZ): 0.4225892 0.2920386 0.1827051  
Standard basis: 6-311++G(d,p) (5D, 7F)  
There are 499 symmetry adapted cartesian basis functions of A symmetry.  
There are 482 symmetry adapted basis functions of A symmetry.  
482 basis functions, 760 primitive gaussians, 499 cartesian basis functions  
71 alpha electrons 71 beta electrons  
nuclear repulsion energy 1312.9653576991 Hartrees.  
NAtoms= 33 NActive= 33 NUniq= 33 SFac= 1.00D+00 NAtFMM= 60 NAOKFM=F  
Big=F

Integral buffers will be 131072 words long.  
Raffenetti 2 integral format.  
Two-electron integral symmetry is turned on.  
One-electron integrals computed using PRISM.  
NBasis= 482 RedAO= T EigKep= 3.62D-06 NBF= 482  
NBsUse= 482 1.00D-06 EigRej= -1.00D+00 NBFU= 482  
Initial guess from the checkpoint file:  
"/home/suqian/liuwen/qianmengshijie/nh2po/nh2po.chk"  
B after Tr= 0.000000 0.000000 0.000000  
Rot= 1.000000 0.000014 0.000000 0.000041 Ang= 0.00 deg.  
Requested convergence on RMS density matrix=1.00D-08 within 128 cycles.  
Requested convergence on MAX density matrix=1.00D-06.  
Requested convergence on energy=1.00D-06.  
No special actions if energy rises.  
SCF Done: E(RB3LYP) = -3205.64837903 A.U. after 7 cycles  
NFock= 7 Conv=0.51D-08 -V/T= 2.0018  
Calling FoFJK, ICntrl= 2127 FMM=F ISym2X=0 l1Cent= 0 IOpCIX= 0 NMat=1 NMatS=1  
NMatT=0.  
\*\*\*\*\* Axes restored to original set \*\*\*\*\*

-----

| Center Number | Atomic Number | Forces (Hartrees/Bohr) |              |              |
|---------------|---------------|------------------------|--------------|--------------|
|               |               | X                      | Y            | Z            |
| 1             | 6             | -0.000000415           | -0.000000512 | -0.000002393 |
| 2             | 6             | 0.000001134            | 0.000001331  | 0.000000386  |
| 3             | 7             | -0.000000175           | 0.000000697  | -0.000000957 |

|    |    |              |              |              |
|----|----|--------------|--------------|--------------|
| 4  | 6  | -0.000000496 | -0.000001203 | -0.000000726 |
| 5  | 7  | 0.000001165  | 0.000005204  | -0.000001226 |
| 6  | 6  | -0.000000666 | -0.000001175 | -0.000000916 |
| 7  | 6  | -0.000010035 | -0.000005077 | 0.000001693  |
| 8  | 1  | 0.000000786  | 0.000000576  | -0.000000670 |
| 9  | 1  | 0.000000007  | 0.000000962  | -0.000001929 |
| 10 | 1  | 0.000001752  | 0.000000061  | -0.000000410 |
| 11 | 1  | 0.000001305  | -0.000000922 | -0.000001180 |
| 12 | 1  | 0.000002081  | 0.000000407  | -0.000000754 |
| 13 | 1  | 0.000000754  | 0.000001033  | -0.000001428 |
| 14 | 35 | 0.000000048  | -0.000001117 | 0.000001102  |
| 15 | 1  | -0.000002310 | 0.000000559  | 0.000001881  |
| 16 | 6  | -0.000001952 | -0.000001564 | -0.000002400 |
| 17 | 6  | 0.000000010  | 0.000002149  | -0.000001179 |
| 18 | 1  | 0.000000893  | 0.000000576  | 0.000000735  |
| 19 | 1  | -0.000000782 | 0.000001337  | -0.000000156 |
| 20 | 1  | -0.000000820 | 0.000001528  | -0.000000972 |
| 21 | 7  | 0.000007714  | 0.000005166  | -0.000004364 |
| 22 | 1  | 0.000000862  | -0.000000013 | 0.000000332  |
| 23 | 1  | 0.000001743  | -0.000003000 | 0.000000750  |
| 24 | 6  | -0.000004007 | 0.000010408  | 0.000006656  |
| 25 | 6  | 0.000003846  | -0.000010285 | 0.000013773  |
| 26 | 8  | 0.000001865  | -0.000001703 | -0.000006156 |
| 27 | 1  | -0.000000097 | -0.000003128 | -0.000001768 |
| 28 | 1  | 0.000001387  | -0.000001972 | 0.000000049  |
| 29 | 1  | -0.000001417 | -0.000000413 | -0.000001899 |
| 30 | 6  | -0.000003248 | 0.000002540  | -0.000001441 |
| 31 | 1  | 0.000000069  | 0.000000194  | 0.000001580  |
| 32 | 1  | -0.000001290 | -0.000001026 | 0.000002307  |
| 33 | 1  | 0.000000289  | -0.000001619 | 0.000001681  |

-----  
Cartesian Forces: Max 0.000013773 RMS 0.000003075

GradGradGradGradGradGradGradGradGradGradGradGradGradGradGradGradGradGradGrad

Berny optimization.

Using GEDIIS/GDIIS optimizer.

FormGI is forming the generalized inverse of G from B-inverse, IUseBI=4.

Internal Forces: Max 0.000009397 RMS 0.000001359

Search for a local minimum.

Step number 51 out of a maximum of 172

All quantities printed in internal units (Hartrees-Bohrs-Radians)

Mixed Optimization -- En-DIIS/RFO-DIIS

Swapping is turned off.

Update second derivatives using D2CorX and points 31 32 33 34 35

36 37 38 39 40  
 41 42 43 44 45  
 46 47 48 49 50  
 51

DE= -2.49D-08 DEPred=-3.91D-09 R= 6.38D+00

Trust test= 6.38D+00 RLast= 2.10D-03 DXMaxT set to 5.19D-01

ITU= 0 0 0 0-1 0 0 1 1 1 1 1 1 1 1 1 1 1 1 1

ITU= 1 1 1 1 1 0 0-1 1-1 1 1 1 1 1 1 1 1 1 1 0

ITU= -1-1 1 1 1-1 1 0 0-1 0

|                 |         |         |         |         |         |
|-----------------|---------|---------|---------|---------|---------|
| Eigenvalues --- | 0.00070 | 0.00094 | 0.00141 | 0.00151 | 0.00277 |
| Eigenvalues --- | 0.00411 | 0.00537 | 0.00769 | 0.01191 | 0.01361 |
| Eigenvalues --- | 0.01840 | 0.01905 | 0.02174 | 0.02249 | 0.02380 |
| Eigenvalues --- | 0.02485 | 0.02678 | 0.02712 | 0.03059 | 0.03100 |
| Eigenvalues --- | 0.03328 | 0.03373 | 0.03699 | 0.03929 | 0.04072 |
| Eigenvalues --- | 0.04325 | 0.04488 | 0.04734 | 0.05518 | 0.05632 |
| Eigenvalues --- | 0.05707 | 0.05754 | 0.05913 | 0.07683 | 0.08527 |
| Eigenvalues --- | 0.08978 | 0.09569 | 0.09612 | 0.10692 | 0.11594 |
| Eigenvalues --- | 0.12568 | 0.13053 | 0.13412 | 0.15786 | 0.15936 |
| Eigenvalues --- | 0.15988 | 0.16002 | 0.16005 | 0.16022 | 0.16151 |
| Eigenvalues --- | 0.16290 | 0.19021 | 0.21411 | 0.21669 | 0.22146 |
| Eigenvalues --- | 0.23235 | 0.23454 | 0.25491 | 0.26119 | 0.27488 |
| Eigenvalues --- | 0.29021 | 0.29925 | 0.30851 | 0.31866 | 0.32970 |
| Eigenvalues --- | 0.33676 | 0.34300 | 0.34335 | 0.34411 | 0.34550 |
| Eigenvalues --- | 0.34727 | 0.34772 | 0.35108 | 0.35198 | 0.35372 |
| Eigenvalues --- | 0.35546 | 0.35684 | 0.35886 | 0.36246 | 0.36423 |
| Eigenvalues --- | 0.36626 | 0.39981 | 0.41699 | 0.42043 | 0.42691 |
| Eigenvalues --- | 0.44708 | 0.45486 | 0.46492 | 0.49557 | 0.54970 |
| Eigenvalues --- | 0.58789 | 0.60696 | 1.07281 |         |         |

En-DIIS/RFO-DIIS IScMMF= 0 using points: 51 50 49 48 47

RFO step: Lambda=-6.28858268D-10.

DidBck=F Rises=F RFO-DIIS coefs: 1.79909 -1.05163 0.01004 0.36681 -

0.12430

Iteration 1 RMS(Cart)= 0.00016491 RMS(Int)= 0.00000001

Iteration 2 RMS(Cart)= 0.00000003 RMS(Int)= 0.00000001

| Variable | Old X   | -DE/DX  | Delta X<br>(Linear) | Delta X<br>(Quad) | Delta X<br>(Total) | New X   |
|----------|---------|---------|---------------------|-------------------|--------------------|---------|
| R1       | 2.56495 | 0.00000 | 0.00000             | 0.00000           | 0.00000            | 2.56495 |
| R2       | 2.62132 | 0.00000 | 0.00000             | 0.00000           | 0.00000            | 2.62132 |
| R3       | 2.03396 | 0.00000 | 0.00000             | 0.00000           | 0.00000            | 2.03396 |
| R4       | 2.62515 | 0.00000 | 0.00000             | 0.00000           | 0.00000            | 2.62514 |
| R5       | 2.03073 | 0.00000 | 0.00000             | 0.00000           | 0.00000            | 2.03073 |
| R6       | 2.54366 | 0.00000 | -0.00001            | 0.00000           | 0.00000            | 2.54366 |
| R7       | 2.69882 | 0.00000 | 0.00000             | 0.00000           | 0.00001            | 2.69883 |
| R8       | 2.52074 | 0.00000 | 0.00000             | 0.00000           | 0.00001            | 2.52075 |

|     |         |          |          |          |          |         |
|-----|---------|----------|----------|----------|----------|---------|
| R9  | 2.09329 | 0.00000  | -0.00001 | 0.00000  | -0.00001 | 2.09328 |
| R10 | 2.78522 | 0.00000  | 0.00000  | 0.00000  | 0.00000  | 2.78522 |
| R11 | 2.89648 | 0.00000  | 0.00000  | 0.00000  | 0.00000  | 2.89647 |
| R12 | 2.05995 | 0.00000  | 0.00000  | 0.00000  | 0.00000  | 2.05995 |
| R13 | 2.06127 | 0.00000  | 0.00000  | 0.00000  | 0.00000  | 2.06127 |
| R14 | 2.06949 | 0.00000  | 0.00000  | 0.00000  | 0.00000  | 2.06948 |
| R15 | 2.07939 | 0.00000  | -0.00001 | 0.00000  | -0.00001 | 2.07939 |
| R16 | 2.75535 | 0.00001  | 0.00003  | 0.00000  | 0.00004  | 2.75538 |
| R17 | 4.24851 | 0.00000  | 0.00005  | 0.00002  | 0.00007  | 4.24858 |
| R18 | 2.50649 | 0.00000  | 0.00000  | 0.00000  | 0.00000  | 2.50649 |
| R19 | 2.05720 | 0.00000  | 0.00000  | 0.00000  | 0.00000  | 2.05720 |
| R20 | 2.04352 | 0.00000  | 0.00000  | 0.00000  | 0.00000  | 2.04352 |
| R21 | 2.04717 | 0.00000  | 0.00000  | 0.00000  | 0.00000  | 2.04717 |
| R22 | 1.91456 | 0.00000  | 0.00000  | 0.00000  | 0.00000  | 1.91456 |
| R23 | 1.92358 | 0.00000  | 0.00000  | 0.00000  | 0.00000  | 1.92358 |
| R24 | 4.13611 | 0.00000  | -0.00004 | -0.00008 | -0.00012 | 4.13599 |
| R25 | 2.76688 | 0.00000  | 0.00000  | 0.00001  | 0.00001  | 2.76689 |
| R26 | 2.73476 | -0.00001 | -0.00002 | -0.00001 | -0.00004 | 2.73473 |
| R27 | 2.05494 | 0.00000  | 0.00001  | 0.00000  | 0.00000  | 2.05495 |
| R28 | 2.05192 | 0.00000  | 0.00000  | 0.00000  | 0.00000  | 2.05193 |
| R29 | 2.74809 | 0.00000  | 0.00003  | 0.00000  | 0.00003  | 2.74812 |
| R30 | 2.05618 | 0.00000  | 0.00000  | 0.00000  | 0.00000  | 2.05618 |
| R31 | 2.84188 | 0.00000  | -0.00001 | -0.00001 | -0.00001 | 2.84187 |
| R32 | 2.06754 | 0.00000  | 0.00000  | 0.00000  | 0.00000  | 2.06754 |
| R33 | 2.06788 | 0.00000  | 0.00000  | 0.00000  | 0.00000  | 2.06788 |
| R34 | 2.06536 | 0.00000  | 0.00000  | 0.00000  | 0.00000  | 2.06536 |
| A1  | 1.87267 | 0.00000  | 0.00000  | 0.00000  | 0.00000  | 1.87267 |
| A2  | 2.27925 | 0.00000  | 0.00000  | 0.00000  | 0.00000  | 2.27925 |
| A3  | 2.13121 | 0.00000  | 0.00000  | 0.00000  | 0.00000  | 2.13121 |
| A4  | 1.86460 | 0.00000  | 0.00000  | 0.00000  | 0.00000  | 1.86460 |
| A5  | 2.27601 | 0.00000  | 0.00000  | 0.00000  | 0.00000  | 2.27601 |
| A6  | 2.14252 | 0.00000  | 0.00000  | 0.00000  | 0.00000  | 2.14252 |
| A7  | 1.89716 | 0.00000  | 0.00000  | 0.00000  | 0.00000  | 1.89716 |
| A8  | 2.25289 | 0.00000  | 0.00000  | 0.00000  | 0.00001  | 2.25290 |
| A9  | 2.13310 | 0.00000  | 0.00000  | 0.00000  | 0.00000  | 2.13309 |
| A10 | 1.88989 | 0.00000  | 0.00000  | 0.00000  | 0.00000  | 1.88990 |
| A11 | 2.14672 | 0.00000  | 0.00001  | -0.00001 | -0.00001 | 2.14671 |
| A12 | 2.24646 | 0.00000  | -0.00001 | 0.00001  | 0.00000  | 2.24647 |
| A13 | 1.90044 | 0.00000  | 0.00000  | 0.00000  | -0.00001 | 1.90043 |
| A14 | 2.20479 | 0.00000  | 0.00000  | 0.00000  | 0.00001  | 2.20480 |
| A15 | 2.17728 | 0.00000  | 0.00000  | 0.00000  | 0.00000  | 2.17728 |
| A16 | 1.95994 | 0.00000  | 0.00002  | -0.00001 | 0.00001  | 1.95995 |
| A17 | 1.87234 | 0.00000  | -0.00001 | 0.00001  | 0.00000  | 1.87234 |
| A18 | 1.89039 | 0.00000  | 0.00001  | -0.00001 | 0.00000  | 1.89039 |

|     |          |         |          |          |          |          |
|-----|----------|---------|----------|----------|----------|----------|
| A19 | 1.90643  | 0.00000 | -0.00002 | 0.00001  | -0.00001 | 1.90642  |
| A20 | 1.92964  | 0.00000 | 0.00000  | 0.00000  | 0.00000  | 1.92964  |
| A21 | 1.90356  | 0.00000 | 0.00000  | -0.00001 | 0.00000  | 1.90355  |
| A22 | 1.91629  | 0.00000 | 0.00002  | 0.00000  | 0.00002  | 1.91631  |
| A23 | 1.89141  | 0.00000 | 0.00001  | 0.00000  | 0.00001  | 1.89142  |
| A24 | 1.88078  | 0.00000 | -0.00002 | 0.00001  | -0.00001 | 1.88077  |
| A25 | 1.87586  | 0.00000 | 0.00001  | 0.00000  | 0.00001  | 1.87587  |
| A26 | 1.90003  | 0.00000 | -0.00001 | 0.00000  | -0.00001 | 1.90002  |
| A27 | 1.99883  | 0.00000 | -0.00002 | 0.00000  | -0.00002 | 1.99882  |
| A28 | 2.16127  | 0.00000 | 0.00000  | 0.00000  | 0.00000  | 2.16126  |
| A29 | 1.94582  | 0.00000 | 0.00000  | 0.00000  | 0.00000  | 1.94582  |
| A30 | 2.17610  | 0.00000 | 0.00000  | 0.00000  | 0.00001  | 2.17611  |
| A31 | 2.07394  | 0.00000 | 0.00000  | 0.00000  | 0.00000  | 2.07394  |
| A32 | 2.16442  | 0.00000 | 0.00000  | 0.00000  | 0.00000  | 2.16442  |
| A33 | 2.04482  | 0.00000 | 0.00000  | 0.00000  | 0.00000  | 2.04482  |
| A34 | 1.94082  | 0.00000 | -0.00002 | 0.00000  | -0.00002 | 1.94081  |
| A35 | 1.91639  | 0.00000 | -0.00002 | 0.00000  | -0.00002 | 1.91637  |
| A36 | 1.89112  | 0.00000 | -0.00001 | 0.00000  | -0.00001 | 1.89111  |
| A37 | 2.08700  | 0.00000 | 0.00001  | 0.00000  | 0.00002  | 2.08701  |
| A38 | 2.06912  | 0.00000 | 0.00001  | -0.00001 | 0.00000  | 2.06912  |
| A39 | 1.99437  | 0.00000 | 0.00001  | 0.00001  | 0.00002  | 1.99439  |
| A40 | 2.00128  | 0.00000 | 0.00002  | 0.00000  | 0.00002  | 2.00130  |
| A41 | 2.03776  | 0.00000 | -0.00004 | 0.00000  | -0.00004 | 2.03772  |
| A42 | 2.01682  | 0.00000 | -0.00002 | 0.00001  | -0.00001 | 2.01681  |
| A43 | 2.13747  | 0.00000 | 0.00001  | -0.00001 | 0.00000  | 2.13747  |
| A44 | 1.96167  | 0.00000 | -0.00002 | 0.00000  | -0.00002 | 1.96165  |
| A45 | 2.02887  | 0.00000 | 0.00000  | -0.00001 | -0.00001 | 2.02887  |
| A46 | 2.04366  | 0.00000 | 0.00002  | 0.00001  | 0.00003  | 2.04369  |
| A47 | 2.61554  | 0.00000 | -0.00009 | 0.00001  | -0.00008 | 2.61546  |
| A48 | 2.43664  | 0.00000 | 0.00000  | 0.00004  | 0.00004  | 2.43668  |
| A49 | 1.93401  | 0.00000 | 0.00001  | 0.00000  | 0.00001  | 1.93402  |
| A50 | 1.91729  | 0.00000 | -0.00001 | 0.00000  | -0.00001 | 1.91728  |
| A51 | 1.94207  | 0.00000 | 0.00001  | 0.00000  | 0.00000  | 1.94208  |
| A52 | 1.87911  | 0.00000 | 0.00000  | 0.00000  | 0.00000  | 1.87911  |
| A53 | 1.89447  | 0.00000 | 0.00000  | 0.00000  | 0.00000  | 1.89447  |
| A54 | 1.89531  | 0.00000 | -0.00001 | 0.00000  | 0.00000  | 1.89530  |
| A55 | 3.48284  | 0.00000 | -0.00003 | -0.00007 | -0.00010 | 3.48274  |
| A56 | 2.53116  | 0.00000 | 0.00000  | 0.00000  | 0.00000  | 2.53115  |
| A57 | 2.96183  | 0.00000 | -0.00016 | -0.00012 | -0.00028 | 2.96155  |
| A58 | 3.10753  | 0.00000 | -0.00006 | 0.00005  | -0.00001 | 3.10752  |
| D1  | 0.00309  | 0.00000 | -0.00001 | 0.00000  | -0.00001 | 0.00308  |
| D2  | -3.12713 | 0.00000 | -0.00001 | -0.00001 | -0.00002 | -3.12716 |
| D3  | 3.13328  | 0.00000 | 0.00003  | 0.00001  | 0.00004  | 3.13332  |
| D4  | 0.00306  | 0.00000 | 0.00003  | -0.00001 | 0.00002  | 0.00308  |

|     |          |         |          |          |          |          |
|-----|----------|---------|----------|----------|----------|----------|
| D5  | -0.00467 | 0.00000 | 0.00001  | 0.00000  | 0.00000  | -0.00467 |
| D6  | -3.10818 | 0.00000 | -0.00001 | -0.00001 | -0.00002 | -3.10820 |
| D7  | -3.13604 | 0.00000 | -0.00003 | -0.00001 | -0.00003 | -3.13608 |
| D8  | 0.04363  | 0.00000 | -0.00004 | -0.00001 | -0.00005 | 0.04358  |
| D9  | -0.00050 | 0.00000 | 0.00001  | 0.00000  | 0.00001  | -0.00049 |
| D10 | -3.13338 | 0.00000 | 0.00002  | -0.00001 | 0.00001  | -3.13337 |
| D11 | 3.13080  | 0.00000 | 0.00001  | 0.00001  | 0.00002  | 3.13082  |
| D12 | -0.00209 | 0.00000 | 0.00002  | 0.00000  | 0.00003  | -0.00206 |
| D13 | -0.00242 | 0.00000 | 0.00000  | 0.00000  | -0.00001 | -0.00243 |
| D14 | -3.12933 | 0.00000 | -0.00006 | -0.00004 | -0.00010 | -3.12943 |
| D15 | 3.13119  | 0.00000 | -0.00002 | 0.00001  | -0.00001 | 3.13118  |
| D16 | 0.00427  | 0.00000 | -0.00007 | -0.00003 | -0.00010 | 0.00417  |
| D17 | -0.03467 | 0.00000 | 0.00016  | 0.00010  | 0.00027  | -0.03441 |
| D18 | 3.10732  | 0.00000 | 0.00016  | 0.00012  | 0.00028  | 3.10760  |
| D19 | 3.11667  | 0.00000 | 0.00018  | 0.00009  | 0.00027  | 3.11694  |
| D20 | -0.02452 | 0.00000 | 0.00018  | 0.00011  | 0.00028  | -0.02424 |
| D21 | 0.00437  | 0.00000 | 0.00000  | 0.00000  | 0.00000  | 0.00437  |
| D22 | 3.10862  | 0.00000 | 0.00001  | 0.00001  | 0.00002  | 3.10864  |
| D23 | 3.13018  | 0.00000 | 0.00006  | 0.00004  | 0.00010  | 3.13028  |
| D24 | -0.04875 | 0.00000 | 0.00008  | 0.00004  | 0.00012  | -0.04863 |
| D25 | 1.34460  | 0.00000 | -0.00013 | 0.00000  | -0.00013 | 1.34447  |
| D26 | -2.84379 | 0.00000 | -0.00015 | 0.00001  | -0.00014 | -2.84393 |
| D27 | -0.79132 | 0.00000 | -0.00014 | 0.00000  | -0.00014 | -0.79146 |
| D28 | -1.75313 | 0.00000 | -0.00015 | -0.00001 | -0.00016 | -1.75329 |
| D29 | 0.34166  | 0.00000 | -0.00016 | 0.00000  | -0.00016 | 0.34149  |
| D30 | 2.39413  | 0.00000 | -0.00016 | 0.00000  | -0.00017 | 2.39396  |
| D31 | -1.09990 | 0.00000 | -0.00005 | 0.00001  | -0.00003 | -1.09993 |
| D32 | 0.94427  | 0.00000 | -0.00001 | 0.00001  | 0.00000  | 0.94427  |
| D33 | 3.11626  | 0.00000 | -0.00004 | 0.00002  | -0.00003 | 3.11624  |
| D34 | 3.10841  | 0.00000 | -0.00004 | 0.00000  | -0.00003 | 3.10838  |
| D35 | -1.13061 | 0.00000 | -0.00001 | 0.00000  | 0.00000  | -1.13061 |
| D36 | 1.04139  | 0.00000 | -0.00003 | 0.00001  | -0.00003 | 1.04136  |
| D37 | 1.01363  | 0.00000 | -0.00003 | 0.00001  | -0.00002 | 1.01361  |
| D38 | 3.05780  | 0.00000 | 0.00000  | 0.00000  | 0.00001  | 3.05781  |
| D39 | -1.05339 | 0.00000 | -0.00002 | 0.00001  | -0.00001 | -1.05341 |
| D40 | 2.94376  | 0.00000 | -0.00004 | -0.00003 | -0.00007 | 2.94369  |
| D41 | -1.24662 | 0.00000 | -0.00007 | -0.00003 | -0.00011 | -1.24673 |
| D42 | 0.86633  | 0.00000 | -0.00006 | -0.00003 | -0.00009 | 0.86625  |
| D43 | 2.95913  | 0.00000 | -0.00009 | -0.00003 | -0.00012 | 2.95901  |
| D44 | -1.23358 | 0.00000 | -0.00005 | -0.00003 | -0.00008 | -1.23366 |
| D45 | 0.85922  | 0.00000 | -0.00008 | -0.00003 | -0.00012 | 0.85911  |
| D46 | 3.13974  | 0.00000 | 0.00001  | 0.00003  | 0.00003  | 3.13977  |
| D47 | -0.00229 | 0.00000 | 0.00002  | 0.00002  | 0.00003  | -0.00226 |
| D48 | -0.00231 | 0.00000 | 0.00001  | 0.00001  | 0.00002  | -0.00228 |

|     |          |         |          |          |          |          |
|-----|----------|---------|----------|----------|----------|----------|
| D49 | 3.13884  | 0.00000 | 0.00002  | 0.00000  | 0.00002  | 3.13886  |
| D50 | 2.20814  | 0.00000 | 0.00024  | -0.00015 | 0.00010  | 2.20824  |
| D51 | -1.40772 | 0.00000 | -0.00005 | 0.00006  | 0.00000  | -1.40772 |
| D52 | -2.08617 | 0.00000 | 0.00023  | -0.00016 | 0.00007  | -2.08610 |
| D53 | 0.58116  | 0.00000 | -0.00007 | 0.00004  | -0.00002 | 0.58113  |
| D54 | -2.71261 | 0.00000 | 0.00000  | 0.00000  | 0.00000  | -2.71260 |
| D55 | -0.01603 | 0.00000 | 0.00003  | 0.00002  | 0.00005  | -0.01599 |
| D56 | -0.02641 | 0.00000 | -0.00004 | -0.00001 | -0.00005 | -0.02647 |
| D57 | 2.67016  | 0.00000 | -0.00001 | 0.00000  | -0.00001 | 2.67015  |
| D58 | 0.50713  | 0.00000 | -0.00013 | 0.00013  | -0.00001 | 0.50712  |
| D59 | -1.91238 | 0.00000 | -0.00010 | 0.00011  | 0.00001  | -1.91237 |
| D60 | 1.78372  | 0.00000 | 0.00018  | -0.00007 | 0.00011  | 1.78383  |
| D61 | -0.63876 | 0.00000 | 0.00017  | -0.00008 | 0.00009  | -0.63866 |
| D62 | 2.55560  | 0.00000 | -0.00004 | -0.00003 | -0.00008 | 2.55553  |
| D63 | -1.65343 | 0.00000 | -0.00004 | -0.00004 | -0.00008 | -1.65350 |
| D64 | 0.44600  | 0.00000 | -0.00005 | -0.00003 | -0.00009 | 0.44591  |
| D65 | 1.35082  | 0.00000 | -0.00002 | -0.00002 | -0.00004 | 1.35078  |
| D66 | -2.85821 | 0.00000 | -0.00002 | -0.00002 | -0.00005 | -2.85825 |
| D67 | -0.75878 | 0.00000 | -0.00003 | -0.00002 | -0.00005 | -0.75883 |
| D68 | -1.03740 | 0.00000 | -0.00002 | -0.00002 | -0.00004 | -1.03744 |
| D69 | 1.03676  | 0.00000 | -0.00002 | -0.00002 | -0.00004 | 1.03672  |
| D70 | 3.13619  | 0.00000 | -0.00003 | -0.00002 | -0.00005 | 3.13614  |

| Item                 | Value    | Threshold | Converged? |
|----------------------|----------|-----------|------------|
| Maximum Force        | 0.000009 | 0.000450  | YES        |
| RMS Force            | 0.000001 | 0.000300  | YES        |
| Maximum Displacement | 0.000851 | 0.001800  | YES        |
| RMS Displacement     | 0.000165 | 0.001200  | YES        |

Predicted change in Energy=-1.191704D-09

Optimization completed.

-- Stationary point found.

-----  
! Optimized Parameters !  
! (Angstroms and Degrees) !

| ! Name | Definition | Value  | Derivative Info. | ! |
|--------|------------|--------|------------------|---|
| ! R1   | R(1,2)     | 1.3573 | -DE/DX = 0.0     | ! |
| ! R2   | R(1,5)     | 1.3871 | -DE/DX = 0.0     | ! |
| ! R3   | R(1,8)     | 1.0763 | -DE/DX = 0.0     | ! |
| ! R4   | R(2,3)     | 1.3892 | -DE/DX = 0.0     | ! |
| ! R5   | R(2,9)     | 1.0746 | -DE/DX = 0.0     | ! |
| ! R6   | R(3,4)     | 1.346  | -DE/DX = 0.0     | ! |
| ! R7   | R(3,16)    | 1.4282 | -DE/DX = 0.0     | ! |
| ! R8   | R(4,5)     | 1.3339 | -DE/DX = 0.0     | ! |

|       |           |          |          |     |   |
|-------|-----------|----------|----------|-----|---|
| ! R9  | R(4,15)   | 1.1077   | -DE/DX = | 0.0 | ! |
| ! R10 | R(5,6)    | 1.4739   | -DE/DX = | 0.0 | ! |
| ! R11 | R(6,7)    | 1.5327   | -DE/DX = | 0.0 | ! |
| ! R12 | R(6,10)   | 1.0901   | -DE/DX = | 0.0 | ! |
| ! R13 | R(6,11)   | 1.0908   | -DE/DX = | 0.0 | ! |
| ! R14 | R(7,12)   | 1.0951   | -DE/DX = | 0.0 | ! |
| ! R15 | R(7,13)   | 1.1004   | -DE/DX = | 0.0 | ! |
| ! R16 | R(7,21)   | 1.4581   | -DE/DX = | 0.0 | ! |
| ! R17 | R(14,15)  | 2.2482   | -DE/DX = | 0.0 | ! |
| ! R18 | R(16,17)  | 1.3264   | -DE/DX = | 0.0 | ! |
| ! R19 | R(16,18)  | 1.0886   | -DE/DX = | 0.0 | ! |
| ! R20 | R(17,19)  | 1.0814   | -DE/DX = | 0.0 | ! |
| ! R21 | R(17,20)  | 1.0833   | -DE/DX = | 0.0 | ! |
| ! R22 | R(21,22)  | 1.0131   | -DE/DX = | 0.0 | ! |
| ! R23 | R(21,23)  | 1.0179   | -DE/DX = | 0.0 | ! |
| ! R24 | R(23,26)  | 2.1887   | -DE/DX = | 0.0 | ! |
| ! R25 | R(24,25)  | 1.4642   | -DE/DX = | 0.0 | ! |
| ! R26 | R(24,26)  | 1.4472   | -DE/DX = | 0.0 | ! |
| ! R27 | R(24,27)  | 1.0874   | -DE/DX = | 0.0 | ! |
| ! R28 | R(24,28)  | 1.0858   | -DE/DX = | 0.0 | ! |
| ! R29 | R(25,26)  | 1.4542   | -DE/DX = | 0.0 | ! |
| ! R30 | R(25,29)  | 1.0881   | -DE/DX = | 0.0 | ! |
| ! R31 | R(25,30)  | 1.5039   | -DE/DX = | 0.0 | ! |
| ! R32 | R(30,31)  | 1.0941   | -DE/DX = | 0.0 | ! |
| ! R33 | R(30,32)  | 1.0943   | -DE/DX = | 0.0 | ! |
| ! R34 | R(30,33)  | 1.0929   | -DE/DX = | 0.0 | ! |
| ! A1  | A(2,1,5)  | 107.2961 | -DE/DX = | 0.0 | ! |
| ! A2  | A(2,1,8)  | 130.5913 | -DE/DX = | 0.0 | ! |
| ! A3  | A(5,1,8)  | 122.1094 | -DE/DX = | 0.0 | ! |
| ! A4  | A(1,2,3)  | 106.8338 | -DE/DX = | 0.0 | ! |
| ! A5  | A(1,2,9)  | 130.4056 | -DE/DX = | 0.0 | ! |
| ! A6  | A(3,2,9)  | 122.7574 | -DE/DX = | 0.0 | ! |
| ! A7  | A(2,3,4)  | 108.6994 | -DE/DX = | 0.0 | ! |
| ! A8  | A(2,3,16) | 129.0813 | -DE/DX = | 0.0 | ! |
| ! A9  | A(4,3,16) | 122.2175 | -DE/DX = | 0.0 | ! |
| ! A10 | A(3,4,5)  | 108.2829 | -DE/DX = | 0.0 | ! |
| ! A11 | A(3,4,15) | 122.998  | -DE/DX = | 0.0 | ! |
| ! A12 | A(5,4,15) | 128.7128 | -DE/DX = | 0.0 | ! |
| ! A13 | A(1,5,4)  | 108.8871 | -DE/DX = | 0.0 | ! |
| ! A14 | A(1,5,6)  | 126.3252 | -DE/DX = | 0.0 | ! |
| ! A15 | A(4,5,6)  | 124.7491 | -DE/DX = | 0.0 | ! |
| ! A16 | A(5,6,7)  | 112.2964 | -DE/DX = | 0.0 | ! |
| ! A17 | A(5,6,10) | 107.2771 | -DE/DX = | 0.0 | ! |
| ! A18 | A(5,6,11) | 108.3114 | -DE/DX = | 0.0 | ! |



|       |                  |           |          |     |   |
|-------|------------------|-----------|----------|-----|---|
| ! A19 | A(7,6,10)        | 109.2302  | -DE/DX = | 0.0 | ! |
| ! A20 | A(7,6,11)        | 110.5604  | -DE/DX = | 0.0 | ! |
| ! A21 | A(10,6,11)       | 109.0658  | -DE/DX = | 0.0 | ! |
| ! A22 | A(6,7,12)        | 109.7954  | -DE/DX = | 0.0 | ! |
| ! A23 | A(6,7,13)        | 108.3701  | -DE/DX = | 0.0 | ! |
| ! A24 | A(6,7,21)        | 107.7607  | -DE/DX = | 0.0 | ! |
| ! A25 | A(12,7,13)       | 107.4791  | -DE/DX = | 0.0 | ! |
| ! A26 | A(12,7,21)       | 108.8638  | -DE/DX = | 0.0 | ! |
| ! A27 | A(13,7,21)       | 114.5248  | -DE/DX = | 0.0 | ! |
| ! A28 | A(3,16,17)       | 123.8314  | -DE/DX = | 0.0 | ! |
| ! A29 | A(3,16,18)       | 111.4873  | -DE/DX = | 0.0 | ! |
| ! A30 | A(17,16,18)      | 124.6813  | -DE/DX = | 0.0 | ! |
| ! A31 | A(16,17,19)      | 118.828   | -DE/DX = | 0.0 | ! |
| ! A32 | A(16,17,20)      | 124.0122  | -DE/DX = | 0.0 | ! |
| ! A33 | A(19,17,20)      | 117.1598  | -DE/DX = | 0.0 | ! |
| ! A34 | A(7,21,22)       | 111.2011  | -DE/DX = | 0.0 | ! |
| ! A35 | A(7,21,23)       | 109.8011  | -DE/DX = | 0.0 | ! |
| ! A36 | A(22,21,23)      | 108.3534  | -DE/DX = | 0.0 | ! |
| ! A37 | A(25,24,27)      | 119.576   | -DE/DX = | 0.0 | ! |
| ! A38 | A(25,24,28)      | 118.5516  | -DE/DX = | 0.0 | ! |
| ! A39 | A(26,24,27)      | 114.2688  | -DE/DX = | 0.0 | ! |
| ! A40 | A(26,24,28)      | 114.6651  | -DE/DX = | 0.0 | ! |
| ! A41 | A(27,24,28)      | 116.7548  | -DE/DX = | 0.0 | ! |
| ! A42 | A(24,25,29)      | 115.5555  | -DE/DX = | 0.0 | ! |
| ! A43 | A(24,25,30)      | 122.468   | -DE/DX = | 0.0 | ! |
| ! A44 | A(26,25,29)      | 112.3953  | -DE/DX = | 0.0 | ! |
| ! A45 | A(26,25,30)      | 116.246   | -DE/DX = | 0.0 | ! |
| ! A46 | A(29,25,30)      | 117.0931  | -DE/DX = | 0.0 | ! |
| ! A47 | A(23,26,24)      | 149.8596  | -DE/DX = | 0.0 | ! |
| ! A48 | A(23,26,25)      | 139.609   | -DE/DX = | 0.0 | ! |
| ! A49 | A(25,30,31)      | 110.8108  | -DE/DX = | 0.0 | ! |
| ! A50 | A(25,30,32)      | 109.8526  | -DE/DX = | 0.0 | ! |
| ! A51 | A(25,30,33)      | 111.2726  | -DE/DX = | 0.0 | ! |
| ! A52 | A(31,30,32)      | 107.6649  | -DE/DX = | 0.0 | ! |
| ! A53 | A(31,30,33)      | 108.5454  | -DE/DX = | 0.0 | ! |
| ! A54 | A(32,30,33)      | 108.5932  | -DE/DX = | 0.0 | ! |
| ! A55 | L(4,15,14,7,-1)  | 199.5523  | -DE/DX = | 0.0 | ! |
| ! A56 | L(21,23,26,3,-1) | 145.0246  | -DE/DX = | 0.0 | ! |
| ! A57 | L(4,15,14,7,-2)  | 169.7002  | -DE/DX = | 0.0 | ! |
| ! A58 | L(21,23,26,3,-2) | 178.0485  | -DE/DX = | 0.0 | ! |
| ! D1  | D(5,1,2,3)       | 0.177     | -DE/DX = | 0.0 | ! |
| ! D2  | D(5,1,2,9)       | -179.1715 | -DE/DX = | 0.0 | ! |
| ! D3  | D(8,1,2,3)       | 179.5238  | -DE/DX = | 0.0 | ! |
| ! D4  | D(8,1,2,9)       | 0.1753    | -DE/DX = | 0.0 | ! |

|       |                |           |          |     |   |
|-------|----------------|-----------|----------|-----|---|
| ! D5  | D(2,1,5,4)     | -0.2675   | -DE/DX = | 0.0 | ! |
| ! D6  | D(2,1,5,6)     | -178.0855 | -DE/DX = | 0.0 | ! |
| ! D7  | D(8,1,5,4)     | -179.6819 | -DE/DX = | 0.0 | ! |
| ! D8  | D(8,1,5,6)     | 2.5001    | -DE/DX = | 0.0 | ! |
| ! D9  | D(1,2,3,4)     | -0.0284   | -DE/DX = | 0.0 | ! |
| ! D10 | D(1,2,3,16)    | -179.5296 | -DE/DX = | 0.0 | ! |
| ! D11 | D(9,2,3,4)     | 179.3817  | -DE/DX = | 0.0 | ! |
| ! D12 | D(9,2,3,16)    | -0.1195   | -DE/DX = | 0.0 | ! |
| ! D13 | D(2,3,4,5)     | -0.1385   | -DE/DX = | 0.0 | ! |
| ! D14 | D(2,3,4,15)    | -179.2975 | -DE/DX = | 0.0 | ! |
| ! D15 | D(16,3,4,5)    | 179.4038  | -DE/DX = | 0.0 | ! |
| ! D16 | D(16,3,4,15)   | 0.2449    | -DE/DX = | 0.0 | ! |
| ! D17 | D(2,3,16,17)   | -1.9866   | -DE/DX = | 0.0 | ! |
| ! D18 | D(2,3,16,18)   | 178.0364  | -DE/DX = | 0.0 | ! |
| ! D19 | D(4,3,16,17)   | 178.5718  | -DE/DX = | 0.0 | ! |
| ! D20 | D(4,3,16,18)   | -1.4052   | -DE/DX = | 0.0 | ! |
| ! D21 | D(3,4,5,1)     | 0.2503    | -DE/DX = | 0.0 | ! |
| ! D22 | D(3,4,5,6)     | 178.1108  | -DE/DX = | 0.0 | ! |
| ! D23 | D(15,4,5,1)    | 179.3463  | -DE/DX = | 0.0 | ! |
| ! D24 | D(15,4,5,6)    | -2.7933   | -DE/DX = | 0.0 | ! |
| ! D25 | D(1,5,6,7)     | 77.0402   | -DE/DX = | 0.0 | ! |
| ! D26 | D(1,5,6,10)    | -162.9374 | -DE/DX = | 0.0 | ! |
| ! D27 | D(1,5,6,11)    | -45.3393  | -DE/DX = | 0.0 | ! |
| ! D28 | D(4,5,6,7)     | -100.447  | -DE/DX = | 0.0 | ! |
| ! D29 | D(4,5,6,10)    | 19.5755   | -DE/DX = | 0.0 | ! |
| ! D30 | D(4,5,6,11)    | 137.1735  | -DE/DX = | 0.0 | ! |
| ! D31 | D(5,6,7,12)    | -63.0194  | -DE/DX = | 0.0 | ! |
| ! D32 | D(5,6,7,13)    | 54.1026   | -DE/DX = | 0.0 | ! |
| ! D33 | D(5,6,7,21)    | 178.5488  | -DE/DX = | 0.0 | ! |
| ! D34 | D(10,6,7,12)   | 178.099   | -DE/DX = | 0.0 | ! |
| ! D35 | D(10,6,7,13)   | -64.7789  | -DE/DX = | 0.0 | ! |
| ! D36 | D(10,6,7,21)   | 59.6672   | -DE/DX = | 0.0 | ! |
| ! D37 | D(11,6,7,12)   | 58.0769   | -DE/DX = | 0.0 | ! |
| ! D38 | D(11,6,7,13)   | 175.199   | -DE/DX = | 0.0 | ! |
| ! D39 | D(11,6,7,21)   | -60.3549  | -DE/DX = | 0.0 | ! |
| ! D40 | D(6,7,21,22)   | 168.6652  | -DE/DX = | 0.0 | ! |
| ! D41 | D(6,7,21,23)   | -71.4262  | -DE/DX = | 0.0 | ! |
| ! D42 | D(12,7,21,22)  | 49.6372   | -DE/DX = | 0.0 | ! |
| ! D43 | D(12,7,21,23)  | 169.5459  | -DE/DX = | 0.0 | ! |
| ! D44 | D(13,7,21,22)  | -70.6788  | -DE/DX = | 0.0 | ! |
| ! D45 | D(13,7,21,23)  | 49.2298   | -DE/DX = | 0.0 | ! |
| ! D46 | D(3,16,17,19)  | 179.8938  | -DE/DX = | 0.0 | ! |
| ! D47 | D(3,16,17,20)  | -0.1315   | -DE/DX = | 0.0 | ! |
| ! D48 | D(18,16,17,19) | -0.1322   | -DE/DX = | 0.0 | ! |

|       |                |           |          |     |   |
|-------|----------------|-----------|----------|-----|---|
| ! D49 | D(18,16,17,20) | 179.8425  | -DE/DX = | 0.0 | ! |
| ! D50 | D(7,21,26,24)  | 126.5172  | -DE/DX = | 0.0 | ! |
| ! D51 | D(7,21,26,25)  | -80.6563  | -DE/DX = | 0.0 | ! |
| ! D52 | D(22,21,26,24) | -119.5285 | -DE/DX = | 0.0 | ! |
| ! D53 | D(22,21,26,25) | 33.2979   | -DE/DX = | 0.0 | ! |
| ! D54 | D(27,24,25,29) | -155.4209 | -DE/DX = | 0.0 | ! |
| ! D55 | D(27,24,25,30) | -0.9186   | -DE/DX = | 0.0 | ! |
| ! D56 | D(28,24,25,29) | -1.5134   | -DE/DX = | 0.0 | ! |
| ! D57 | D(28,24,25,30) | 152.9889  | -DE/DX = | 0.0 | ! |
| ! D58 | D(27,24,26,23) | 29.0562   | -DE/DX = | 0.0 | ! |
| ! D59 | D(28,24,26,23) | -109.5714 | -DE/DX = | 0.0 | ! |
| ! D60 | D(29,25,26,23) | 102.1997  | -DE/DX = | 0.0 | ! |
| ! D61 | D(30,25,26,23) | -36.598   | -DE/DX = | 0.0 | ! |
| ! D62 | D(24,25,30,31) | 146.4252  | -DE/DX = | 0.0 | ! |
| ! D63 | D(24,25,30,32) | -94.7344  | -DE/DX = | 0.0 | ! |
| ! D64 | D(24,25,30,33) | 25.5539   | -DE/DX = | 0.0 | ! |
| ! D65 | D(26,25,30,31) | 77.3963   | -DE/DX = | 0.0 | ! |
| ! D66 | D(26,25,30,32) | -163.7633 | -DE/DX = | 0.0 | ! |
| ! D67 | D(26,25,30,33) | -43.4749  | -DE/DX = | 0.0 | ! |
| ! D68 | D(29,25,30,31) | -59.4384  | -DE/DX = | 0.0 | ! |
| ! D69 | D(29,25,30,32) | 59.402    | -DE/DX = | 0.0 | ! |
| ! D70 | D(29,25,30,33) | 179.6904  | -DE/DX = | 0.0 | ! |

-----  
GradGradGradGradGradGradGradGradGradGradGradGradGradGradGradGradGradGradGrad

Input orientation:

| Center<br>Number | Atomic<br>Number | Atomic<br>Type | Coordinates (Angstroms) |           |           |
|------------------|------------------|----------------|-------------------------|-----------|-----------|
|                  |                  |                | X                       | Y         | Z         |
| 1                | 6                | 0              | -2.643732               | 2.100134  | -0.195797 |
| 2                | 6                | 0              | -3.535720               | 1.118474  | 0.092297  |
| 3                | 7                | 0              | -2.826920               | -0.076100 | 0.111801  |
| 4                | 6                | 0              | -1.534611               | 0.184407  | -0.160078 |
| 5                | 7                | 0              | -1.404091               | 1.497839  | -0.352952 |
| 6                | 6                | 0              | -0.130015               | 2.182984  | -0.635119 |
| 7                | 6                | 0              | 0.454967                | 2.858902  | 0.609971  |
| 8                | 1                | 0              | -2.782916               | 3.161231  | -0.310574 |
| 9                | 1                | 0              | -4.594037               | 1.169626  | 0.271608  |
| 10               | 1                | 0              | 0.569678                | 1.429370  | -0.996727 |
| 11               | 1                | 0              | -0.302675               | 2.916482  | -1.423769 |
| 12               | 1                | 0              | -0.225652               | 3.641541  | 0.961443  |
| 13               | 1                | 0              | 0.533521                | 2.106075  | 1.408652  |
| 14               | 35               | 0              | 0.137223                | -2.666323 | -0.215507 |

|    |   |   |           |           |           |
|----|---|---|-----------|-----------|-----------|
| 15 | 1 | 0 | -0.758947 | -0.604443 | -0.215767 |
| 16 | 6 | 0 | -3.301452 | -1.400669 | 0.356682  |
| 17 | 6 | 0 | -4.561123 | -1.690622 | 0.654069  |
| 18 | 1 | 0 | -2.501340 | -2.133564 | 0.268455  |
| 19 | 1 | 0 | -4.832600 | -2.723739 | 0.822458  |
| 20 | 1 | 0 | -5.348597 | -0.951832 | 0.741523  |
| 21 | 7 | 0 | 1.721953  | 3.471989  | 0.229408  |
| 22 | 1 | 0 | 2.064692  | 4.087188  | 0.957772  |
| 23 | 1 | 0 | 2.419571  | 2.748955  | 0.066000  |
| 24 | 6 | 0 | 3.332004  | -0.426216 | -1.137783 |
| 25 | 6 | 0 | 3.265528  | -0.563819 | 0.318389  |
| 26 | 8 | 0 | 2.734723  | 0.620854  | -0.337027 |
| 27 | 1 | 0 | 4.272065  | -0.147922 | -1.608248 |
| 28 | 1 | 0 | 2.629358  | -0.989036 | -1.744867 |
| 29 | 1 | 0 | 2.480296  | -1.217422 | 0.692738  |
| 30 | 6 | 0 | 4.462201  | -0.353697 | 1.204621  |
| 31 | 1 | 0 | 4.163954  | 0.078408  | 2.164505  |
| 32 | 1 | 0 | 4.946603  | -1.313462 | 1.408697  |
| 33 | 1 | 0 | 5.191203  | 0.311773  | 0.735341  |

-----  
Distance matrix (angstroms):

|    |    | 1        | 2        | 3        | 4        | 5        |
|----|----|----------|----------|----------|----------|----------|
| 1  | C  | 0.000000 |          |          |          |          |
| 2  | C  | 1.357312 | 0.000000 |          |          |          |
| 3  | N  | 2.205485 | 1.389167 | 0.000000 |          |          |
| 4  | C  | 2.213918 | 2.222748 | 1.346048 | 0.000000 |          |
| 5  | N  | 1.387144 | 2.210431 | 2.172032 | 1.333918 | 0.000000 |
| 6  | C  | 2.553163 | 3.641585 | 3.596477 | 2.488546 | 1.473876 |
| 7  | C  | 3.290430 | 4.384365 | 4.430936 | 3.421157 | 2.497160 |
| 8  | H  | 1.076324 | 2.214017 | 3.265064 | 3.231469 | 2.160979 |
| 9  | H  | 2.210882 | 1.074618 | 2.167965 | 3.243007 | 3.267041 |
| 10 | H  | 3.378967 | 4.258746 | 3.877132 | 2.584172 | 2.077233 |
| 11 | H  | 2.766747 | 3.997983 | 4.205394 | 3.252509 | 2.091008 |
| 12 | H  | 3.092289 | 4.251803 | 4.616204 | 3.863024 | 2.777015 |
| 13 | H  | 3.559386 | 4.389404 | 4.211446 | 3.229689 | 2.688409 |
| 14 | Br | 5.518443 | 5.282986 | 3.950004 | 3.305263 | 4.442385 |
| 15 | H  | 3.296597 | 3.282349 | 2.159389 | 1.107719 | 2.203320 |
| 16 | C  | 3.604642 | 2.543789 | 1.428156 | 2.429246 | 3.536228 |
| 17 | C  | 4.332261 | 3.042706 | 2.430678 | 3.652170 | 4.598611 |
| 18 | H  | 4.261455 | 3.417123 | 2.088948 | 2.547783 | 3.844111 |
| 19 | H  | 5.394232 | 4.120393 | 3.396731 | 4.505489 | 5.563990 |
| 20 | H  | 4.184418 | 2.827399 | 2.742683 | 4.080492 | 4.770523 |
| 21 | N  | 4.595867 | 5.762027 | 5.770183 | 4.643824 | 3.742801 |
| 22 | H  | 5.239118 | 6.397414 | 6.478927 | 5.425519 | 4.522740 |

|    |    |          |          |          |          |          |
|----|----|----------|----------|----------|----------|----------|
| 23 | H  | 5.111413 | 6.174516 | 5.958918 | 4.718429 | 4.044898 |
| 24 | C  | 6.555853 | 7.145964 | 6.294155 | 5.001271 | 5.171899 |
| 25 | C  | 6.502337 | 7.009864 | 6.115429 | 4.881609 | 5.148443 |
| 26 | O  | 5.579963 | 6.304791 | 5.623083 | 4.295231 | 4.230737 |
| 27 | H  | 7.407903 | 8.090557 | 7.304746 | 5.993757 | 6.041775 |
| 28 | H  | 6.304607 | 6.769413 | 5.835378 | 4.607295 | 4.938693 |
| 29 | H  | 6.168576 | 6.481465 | 5.459546 | 4.337268 | 4.853305 |
| 30 | C  | 7.647009 | 8.208002 | 7.375812 | 6.173631 | 6.345676 |
| 31 | H  | 7.483514 | 8.041191 | 7.287646 | 6.155369 | 6.273396 |
| 32 | H  | 8.475861 | 8.921717 | 7.977510 | 6.834530 | 7.165063 |
| 33 | H  | 8.090207 | 8.787687 | 8.051679 | 6.786351 | 6.788890 |
|    |    | 6        | 7        | 8        | 9        | 10       |
| 6  | C  | 0.000000 |          |          |          |          |
| 7  | C  | 1.532749 | 0.000000 |          |          |          |
| 8  | H  | 2.846082 | 3.379748 | 0.000000 |          |          |
| 9  | H  | 4.666534 | 5.334846 | 2.754193 | 0.000000 |          |
| 10 | H  | 1.090076 | 2.153648 | 3.835367 | 5.323541 | 0.000000 |
| 11 | H  | 1.090779 | 2.171045 | 2.729598 | 4.933720 | 1.776195 |
| 12 | H  | 2.164612 | 1.095125 | 2.896261 | 5.066460 | 3.059523 |
| 13 | H  | 2.150162 | 1.100368 | 3.881733 | 5.334947 | 2.499017 |
| 14 | Br | 4.874759 | 5.595577 | 6.518944 | 6.110369 | 4.191899 |
| 15 | H  | 2.888107 | 3.761674 | 4.276183 | 4.253560 | 2.551772 |
| 16 | C  | 4.887152 | 5.684961 | 4.639508 | 2.878268 | 4.982618 |
| 17 | C  | 6.025076 | 6.772095 | 5.256713 | 2.885893 | 6.227728 |
| 18 | H  | 5.007217 | 5.812151 | 5.333799 | 3.910301 | 4.870969 |
| 19 | H  | 6.950883 | 7.692165 | 6.333865 | 3.939371 | 7.052826 |
| 20 | H  | 6.241459 | 6.944088 | 4.960535 | 2.300166 | 6.611930 |
| 21 | N  | 2.416345 | 1.458066 | 4.547747 | 6.722677 | 2.646400 |
| 22 | H  | 3.313612 | 2.054474 | 5.095626 | 7.302167 | 3.622033 |
| 23 | H  | 2.704123 | 2.041485 | 5.232366 | 7.192166 | 2.508545 |
| 24 | C  | 4.364192 | 4.703614 | 7.137668 | 8.207023 | 3.330697 |
| 25 | C  | 4.470326 | 4.438388 | 7.131288 | 8.048588 | 3.601380 |
| 26 | O  | 3.276558 | 3.332109 | 6.074418 | 7.374436 | 2.403398 |
| 27 | H  | 5.075275 | 5.341510 | 7.899824 | 9.158469 | 4.070562 |
| 28 | H  | 4.348264 | 5.007981 | 6.969550 | 7.804065 | 3.263538 |
| 29 | H  | 4.487727 | 4.552496 | 6.919584 | 7.478070 | 3.675630 |
| 30 | C  | 5.559483 | 5.170331 | 8.194038 | 9.230735 | 4.814249 |
| 31 | H  | 5.541237 | 4.889203 | 7.993048 | 9.026418 | 4.973661 |
| 32 | H  | 6.494180 | 6.182344 | 9.095287 | 9.923835 | 5.697952 |
| 33 | H  | 5.804735 | 5.379174 | 8.532287 | 9.833711 | 5.060392 |
|    |    | 11       | 12       | 13       | 14       | 15       |
| 11 | H  | 0.000000 |          |          |          |          |
| 12 | H  | 2.494169 | 0.000000 |          |          |          |
| 13 | H  | 3.062449 | 1.770310 | 0.000000 |          |          |

|    |    |          |          |          |           |           |
|----|----|----------|----------|----------|-----------|-----------|
| 14 | Br | 5.728972 | 6.426978 | 5.056751 | 0.000000  |           |
| 15 | H  | 3.750249 | 4.438312 | 3.414106 | 2.248215  | 0.000000  |
| 16 | C  | 5.549817 | 5.937185 | 5.301973 | 3.708608  | 2.725070  |
| 17 | C  | 6.608873 | 6.879153 | 6.398414 | 4.876742  | 4.048820  |
| 18 | H  | 5.762006 | 6.245865 | 5.337132 | 2.734971  | 2.368251  |
| 19 | H  | 7.574817 | 7.858759 | 7.243341 | 5.077382  | 4.707863  |
| 20 | H  | 6.716671 | 6.884185 | 6.662970 | 5.826630  | 4.701273  |
| 21 | N  | 2.672209 | 2.087532 | 2.160719 | 6.355170  | 4.792739  |
| 22 | H  | 3.556221 | 2.333300 | 2.544127 | 7.120507  | 5.600136  |
| 23 | H  | 3.107748 | 2.931848 | 2.402747 | 5.883332  | 4.629001  |
| 24 | C  | 4.946343 | 5.797440 | 4.552839 | 4.009401  | 4.197352  |
| 25 | C  | 5.280121 | 5.503354 | 3.972514 | 3.806817  | 4.059972  |
| 26 | O  | 3.959382 | 4.424296 | 3.177824 | 4.191336  | 3.704293  |
| 27 | H  | 5.509342 | 6.418162 | 5.306496 | 5.037756  | 5.240086  |
| 28 | H  | 4.894179 | 6.075973 | 4.890494 | 3.370900  | 3.737201  |
| 29 | H  | 5.414212 | 5.568113 | 3.917665 | 2.900727  | 3.419623  |
| 30 | C  | 6.348744 | 6.164173 | 4.639680 | 5.105922  | 5.416712  |
| 31 | H  | 6.393837 | 5.780304 | 4.226439 | 5.423336  | 5.510620  |
| 32 | H  | 7.312333 | 7.176651 | 5.582878 | 5.253418  | 5.974520  |
| 33 | H  | 6.452050 | 6.362452 | 5.036553 | 5.942716  | 6.094944  |
|    |    | 16       | 17       | 18       | 19        | 20        |
| 16 | C  | 0.000000 |          |          |           |           |
| 17 | C  | 1.326379 | 0.000000 |          |           |           |
| 18 | H  | 1.088623 | 2.141869 | 0.000000 |           |           |
| 19 | H  | 2.076506 | 1.081382 | 2.467793 | 0.000000  |           |
| 20 | H  | 2.130812 | 1.083316 | 3.118839 | 1.847285  | 0.000000  |
| 21 | N  | 6.999542 | 8.143091 | 7.018543 | 9.038856  | 8.356143  |
| 22 | H  | 7.698920 | 8.796405 | 7.747358 | 9.694311  | 8.966344  |
| 23 | H  | 7.073471 | 8.293718 | 6.935081 | 9.116831  | 8.631141  |
| 24 | C  | 6.869187 | 8.192125 | 6.238625 | 8.705281  | 8.897241  |
| 25 | C  | 6.620197 | 7.914470 | 5.976902 | 8.396369  | 8.633235  |
| 26 | O  | 6.403374 | 7.717160 | 5.947250 | 8.354345  | 8.305219  |
| 27 | H  | 7.923919 | 9.247876 | 7.303684 | 9.769242  | 9.936037  |
| 28 | H  | 6.305590 | 7.612499 | 5.629163 | 8.079677  | 8.356512  |
| 29 | H  | 5.794405 | 7.057407 | 5.082915 | 7.467548  | 7.833549  |
| 30 | C  | 7.879687 | 9.138428 | 7.248120 | 9.599817  | 9.839918  |
| 31 | H  | 7.822288 | 9.029831 | 7.274199 | 9.517936  | 9.673412  |
| 32 | H  | 8.315333 | 9.545081 | 7.579220 | 9.897746  | 10.323132 |
| 33 | H  | 8.671853 | 9.956106 | 8.085349 | 10.473707 | 10.615277 |
|    |    | 21       | 22       | 23       | 24        | 25        |
| 21 | N  | 0.000000 |          |          |           |           |
| 22 | H  | 1.013140 | 0.000000 |          |           |           |
| 23 | H  | 1.017914 | 1.646833 | 0.000000 |           |           |
| 24 | C  | 4.433675 | 5.135002 | 3.516154 | 0.000000  |           |

|    |   |          |          |          |          |          |
|----|---|----------|----------|----------|----------|----------|
| 25 | C | 4.321838 | 4.845893 | 3.428384 | 1.464169 | 0.000000 |
| 26 | O | 3.078233 | 3.760441 | 2.188737 | 1.447173 | 1.454226 |
| 27 | H | 4.794143 | 5.421542 | 3.824493 | 1.087428 | 2.213147 |
| 28 | H | 4.962045 | 5.778508 | 4.158826 | 1.085831 | 2.200579 |
| 29 | H | 4.772874 | 5.327462 | 4.016047 | 2.168461 | 1.088082 |
| 30 | C | 4.805816 | 5.052766 | 3.885260 | 2.601819 | 1.503857 |
| 31 | H | 4.606990 | 4.683313 | 3.818169 | 3.442658 | 2.151226 |
| 32 | H | 5.889790 | 6.138059 | 4.969100 | 3.143039 | 2.139334 |
| 33 | H | 4.720024 | 4.906965 | 3.750975 | 2.740409 | 2.156092 |
|    |   | 26       | 27       | 28       | 29       | 30       |
| 26 | O | 0.000000 |          |          |          |          |
| 27 | H | 2.137859 | 0.000000 |          |          |          |
| 28 | H | 2.141229 | 1.850574 | 0.000000 |          |          |
| 29 | H | 2.122358 | 3.106253 | 2.452815 | 0.000000 |          |
| 30 | C | 2.512092 | 2.826788 | 3.530220 | 2.221710 | 0.000000 |
| 31 | H | 2.931657 | 3.781082 | 4.333315 | 2.584565 | 1.094095 |
| 32 | H | 3.417827 | 3.303853 | 3.926811 | 2.569921 | 1.094277 |
| 33 | H | 2.698110 | 2.559013 | 3.795601 | 3.112759 | 1.092940 |
|    |   | 31       | 32       | 33       |          |          |
| 31 | H | 0.000000 |          |          |          |          |
| 32 | H | 1.766661 | 0.000000 |          |          |          |
| 33 | H | 1.775446 | 1.776127 | 0.000000 |          |          |

Stoichiometry C10H18BrN3O

Framework group C1[X(C10H18BrN3O)]

Deg. of freedom 93

Full point group C1 NOp 1

Largest Abelian subgroup C1 NOp 1

Largest concise Abelian subgroup C1 NOp 1

Standard orientation:

| Center Number | Atomic Number | Atomic Type | Coordinates (Angstroms) |          |           |
|---------------|---------------|-------------|-------------------------|----------|-----------|
|               |               |             | X                       | Y        | Z         |
| 1             | 6             | 0           | -2.350512               | 2.471870 | -0.262938 |
| 2             | 6             | 0           | -3.337196               | 1.590271 | 0.039607  |
| 3             | 7             | 0           | -2.751091               | 0.331756 | 0.088650  |
| 4             | 6             | 0           | -1.438038               | 0.456441 | -0.180032 |
| 5             | 7             | 0           | -1.176382               | 1.745932 | -0.399322 |
| 6             | 6             | 0           | 0.160901                | 2.294645 | -0.687244 |
| 7             | 6             | 0           | 0.804719                | 2.935405 | 0.547358  |
| 8             | 1             | 0           | -2.382718               | 3.538857 | -0.400684 |
| 9             | 1             | 0           | -4.385942               | 1.750351 | 0.210808  |
| 10            | 1             | 0           | 0.783618                | 1.467563 | -1.028457 |
| 11            | 1             | 0           | 0.065774                | 3.024674 | -1.492109 |

|    |    |   |           |           |           |
|----|----|---|-----------|-----------|-----------|
| 12 | 1  | 0 | 0.203921  | 3.789245  | 0.877959  |
| 13 | 1  | 0 | 0.804239  | 2.195731  | 1.362031  |
| 14 | 35 | 0 | -0.058446 | -2.547101 | -0.165076 |
| 15 | 1  | 0 | -0.744623 | -0.406722 | -0.214163 |
| 16 | 6  | 0 | -3.356388 | -0.933455 | 0.357890  |
| 17 | 6  | 0 | -4.640016 | -1.090138 | 0.652902  |
| 18 | 1  | 0 | -2.632922 | -1.744083 | 0.290225  |
| 19 | 1  | 0 | -5.013874 | -2.087261 | 0.840948  |
| 20 | 1  | 0 | -5.350315 | -0.274920 | 0.719753  |
| 21 | 7  | 0 | 2.128210  | 3.411037  | 0.162515  |
| 22 | 1  | 0 | 2.527272  | 4.004474  | 0.880174  |
| 23 | 1  | 0 | 2.751015  | 2.618818  | 0.018805  |
| 24 | 6  | 0 | 3.347838  | -0.656404 | -1.112595 |
| 25 | 6  | 0 | 3.261408  | -0.755569 | 0.345653  |
| 26 | 8  | 0 | 2.854292  | 0.461792  | -0.337766 |
| 27 | 1  | 0 | 4.313070  | -0.483197 | -1.582517 |
| 28 | 1  | 0 | 2.595338  | -1.159312 | -1.712475 |
| 29 | 1  | 0 | 2.413257  | -1.319602 | 0.728315  |
| 30 | 6  | 0 | 4.469055  | -0.646747 | 1.235221  |
| 31 | 1  | 0 | 4.211035  | -0.166692 | 2.183913  |
| 32 | 1  | 0 | 4.854453  | -1.645391 | 1.462421  |
| 33 | 1  | 0 | 5.262867  | -0.067338 | 0.757032  |

-----  
Rotational constants (GHZ):      0.4225892      0.2920386      0.1827051

\*\*\*\*\*

Population analysis using the SCF density.

\*\*\*\*\*

Orbital symmetries:

Occupied (A)  
(A) (A) (A) (A) (A) (A) (A) (A) (A) (A) (A) (A)  
(A) (A) (A) (A) (A) (A) (A) (A) (A) (A) (A) (A)  
(A) (A) (A) (A) (A) (A) (A) (A) (A) (A) (A) (A)  
(A) (A) (A) (A) (A) (A) (A) (A) (A) (A) (A) (A)  
(A) (A) (A) (A) (A) (A) (A) (A) (A) (A) (A) (A)  
Virtual (A)  
(A) (A) (A) (A) (A) (A) (A) (A) (A) (A) (A) (A)  
(A) (A) (A) (A) (A) (A) (A) (A) (A) (A) (A) (A)  
(A) (A) (A) (A) (A) (A) (A) (A) (A) (A) (A) (A)  
(A) (A) (A) (A) (A) (A) (A) (A) (A) (A) (A) (A)



(A) (A) (A) (A) (A) (A) (A) (A) (A) (A) (A) (A)  
 (A) (A) (A) (A) (A) (A) (A) (A) (A) (A) (A) (A)  
 (A) (A) (A) (A) (A) (A) (A) (A) (A) (A) (A) (A)  
 (A) (A) (A) (A) (A) (A) (A) (A) (A) (A) (A) (A)  
 (A) (A) (A) (A) (A) (A) (A) (A) (A) (A) (A) (A)  
 (A) (A) (A) (A) (A) (A) (A) (A) (A) (A) (A) (A)  
 (A) (A) (A) (A) (A) (A) (A) (A) (A) (A) (A) (A)  
 (A) (A) (A) (A) (A) (A) (A) (A) (A) (A) (A) (A)  
 (A) (A) (A) (A) (A) (A) (A) (A) (A) (A) (A) (A)  
 (A) (A) (A) (A) (A) (A) (A) (A) (A) (A) (A) (A)  
 (A) (A) (A) (A) (A) (A) (A) (A) (A) (A) (A) (A)  
 (A) (A) (A) (A) (A) (A) (A) (A) (A) (A) (A) (A)  
 (A) (A) (A) (A) (A) (A) (A) (A) (A) (A) (A) (A)  
 (A) (A) (A) (A) (A) (A) (A) (A) (A) (A) (A) (A)  
 (A) (A) (A) (A) (A) (A) (A) (A) (A) (A) (A) (A)  
 (A) (A) (A) (A) (A) (A) (A) (A) (A) (A) (A) (A)  
 (A) (A) (A) (A) (A) (A) (A) (A) (A) (A) (A) (A)  
 (A) (A) (A) (A) (A) (A) (A) (A) (A) (A) (A) (A)  
 (A) (A) (A) (A) (A) (A) (A) (A) (A) (A) (A) (A)  
 (A) (A) (A) (A) (A) (A) (A) (A) (A) (A) (A) (A)  
 (A) (A) (A) (A) (A) (A) (A) (A) (A) (A) (A) (A)  
 (A) (A) (A) (A) (A) (A) (A) (A) (A) (A) (A) (A)  
 (A) (A) (A) (A) (A) (A) (A) (A) (A) (A) (A) (A)  
 (A) (A) (A) (A) (A) (A) (A) (A) (A) (A) (A) (A)  
 (A) (A) (A) (A) (A) (A) (A) (A) (A) (A) (A) (A)  
 (A) (A) (A) (A) (A) (A) (A) (A) (A) (A) (A) (A)  
 (A) (A) (A)

The electronic state is 1-A.

Alpha occ. eigenvalues -- -482.69206 -62.34546 -56.16322 -56.16316 -56.16311  
 Alpha occ. eigenvalues -- -19.13089 -14.44359 -14.43854 -14.30468 -10.29053  
 Alpha occ. eigenvalues -- -10.26756 -10.26653 -10.24700 -10.24396 -10.22275  
 Alpha occ. eigenvalues -- -10.21501 -10.21034 -10.20378 -10.16394 -8.55458  
 Alpha occ. eigenvalues -- -6.37776 -6.37738 -6.37710 -2.49022 -2.49010  
 Alpha occ. eigenvalues -- -2.48986 -2.48957 -2.48954 -1.11023 -1.06171  
 Alpha occ. eigenvalues -- -0.99546 -0.90293 -0.84486 -0.81501 -0.77289  
 Alpha occ. eigenvalues -- -0.74277 -0.70338 -0.68061 -0.65917 -0.64782  
 Alpha occ. eigenvalues -- -0.62983 -0.62526 -0.58794 -0.57523 -0.53595  
 Alpha occ. eigenvalues -- -0.53235 -0.51714 -0.50743 -0.49932 -0.49863  
 Alpha occ. eigenvalues -- -0.48991 -0.46914 -0.46458 -0.45526 -0.44483  
 Alpha occ. eigenvalues -- -0.43382 -0.42258 -0.41752 -0.40308 -0.38521  
 Alpha occ. eigenvalues -- -0.37556 -0.37024 -0.35994 -0.31177 -0.30329  
 Alpha occ. eigenvalues -- -0.28999 -0.27406 -0.25909 -0.19584 -0.19275

|                            |          |          |          |          |          |
|----------------------------|----------|----------|----------|----------|----------|
| Alpha occ. eigenvalues --  | -0.18951 |          |          |          |          |
| Alpha virt. eigenvalues -- | -0.07253 | -0.04265 | -0.02812 | -0.01540 | -0.00618 |
| Alpha virt. eigenvalues -- | 0.00386  | 0.00544  | 0.00687  | 0.00986  | 0.01665  |
| Alpha virt. eigenvalues -- | 0.02265  | 0.02715  | 0.03462  | 0.03717  | 0.04405  |
| Alpha virt. eigenvalues -- | 0.04878  | 0.05060  | 0.05485  | 0.05666  | 0.06186  |
| Alpha virt. eigenvalues -- | 0.06688  | 0.07035  | 0.07339  | 0.07737  | 0.08270  |
| Alpha virt. eigenvalues -- | 0.08428  | 0.08663  | 0.09078  | 0.09142  | 0.09655  |
| Alpha virt. eigenvalues -- | 0.09957  | 0.10111  | 0.10539  | 0.10865  | 0.11188  |
| Alpha virt. eigenvalues -- | 0.11543  | 0.11745  | 0.12116  | 0.12275  | 0.12506  |
| Alpha virt. eigenvalues -- | 0.13023  | 0.13052  | 0.13360  | 0.13542  | 0.13946  |
| Alpha virt. eigenvalues -- | 0.14594  | 0.14684  | 0.14812  | 0.15282  | 0.15633  |
| Alpha virt. eigenvalues -- | 0.15995  | 0.16026  | 0.16272  | 0.16371  | 0.16767  |
| Alpha virt. eigenvalues -- | 0.17035  | 0.17431  | 0.17813  | 0.18140  | 0.18545  |
| Alpha virt. eigenvalues -- | 0.18762  | 0.19136  | 0.19503  | 0.20066  | 0.20191  |
| Alpha virt. eigenvalues -- | 0.20434  | 0.20727  | 0.20793  | 0.21351  | 0.21671  |
| Alpha virt. eigenvalues -- | 0.21896  | 0.22308  | 0.22535  | 0.22864  | 0.22973  |
| Alpha virt. eigenvalues -- | 0.23802  | 0.24146  | 0.24509  | 0.24947  | 0.24960  |
| Alpha virt. eigenvalues -- | 0.25475  | 0.26001  | 0.26311  | 0.26815  | 0.27221  |
| Alpha virt. eigenvalues -- | 0.27570  | 0.28057  | 0.28388  | 0.28993  | 0.29372  |
| Alpha virt. eigenvalues -- | 0.30018  | 0.30216  | 0.30415  | 0.31004  | 0.31992  |
| Alpha virt. eigenvalues -- | 0.33085  | 0.33821  | 0.34477  | 0.34567  | 0.34631  |
| Alpha virt. eigenvalues -- | 0.35632  | 0.35787  | 0.36595  | 0.37215  | 0.38514  |
| Alpha virt. eigenvalues -- | 0.38755  | 0.39305  | 0.40577  | 0.41697  | 0.42255  |
| Alpha virt. eigenvalues -- | 0.43270  | 0.44203  | 0.45178  | 0.47466  | 0.47940  |
| Alpha virt. eigenvalues -- | 0.48734  | 0.50204  | 0.50883  | 0.51448  | 0.52254  |
| Alpha virt. eigenvalues -- | 0.53324  | 0.53614  | 0.54737  | 0.55793  | 0.56020  |
| Alpha virt. eigenvalues -- | 0.56629  | 0.57149  | 0.57462  | 0.58034  | 0.58722  |
| Alpha virt. eigenvalues -- | 0.59183  | 0.60343  | 0.60897  | 0.61614  | 0.62311  |
| Alpha virt. eigenvalues -- | 0.63047  | 0.63252  | 0.63750  | 0.64287  | 0.64863  |
| Alpha virt. eigenvalues -- | 0.66290  | 0.66461  | 0.66837  | 0.67501  | 0.68668  |
| Alpha virt. eigenvalues -- | 0.69344  | 0.69704  | 0.70020  | 0.70535  | 0.71067  |
| Alpha virt. eigenvalues -- | 0.71417  | 0.72182  | 0.73010  | 0.74092  | 0.74649  |
| Alpha virt. eigenvalues -- | 0.74815  | 0.75459  | 0.75943  | 0.76978  | 0.77035  |
| Alpha virt. eigenvalues -- | 0.77937  | 0.78614  | 0.79184  | 0.79323  | 0.80388  |
| Alpha virt. eigenvalues -- | 0.81671  | 0.82492  | 0.84321  | 0.85149  | 0.86497  |
| Alpha virt. eigenvalues -- | 0.87282  | 0.88181  | 0.89128  | 0.90265  | 0.91622  |
| Alpha virt. eigenvalues -- | 0.92287  | 0.93669  | 0.94919  | 0.95753  | 0.97054  |
| Alpha virt. eigenvalues -- | 0.97483  | 0.99474  | 1.01456  | 1.01968  | 1.02546  |
| Alpha virt. eigenvalues -- | 1.04253  | 1.04893  | 1.05425  | 1.06317  | 1.07956  |
| Alpha virt. eigenvalues -- | 1.10891  | 1.11433  | 1.11898  | 1.12390  | 1.14143  |
| Alpha virt. eigenvalues -- | 1.15721  | 1.17186  | 1.19284  | 1.19973  | 1.21048  |
| Alpha virt. eigenvalues -- | 1.23370  | 1.25953  | 1.27722  | 1.29666  | 1.30543  |
| Alpha virt. eigenvalues -- | 1.32464  | 1.33330  | 1.37739  | 1.39154  | 1.40271  |
| Alpha virt. eigenvalues -- | 1.42669  | 1.43699  | 1.46111  | 1.46659  | 1.47824  |

|                            |            |          |           |           |           |
|----------------------------|------------|----------|-----------|-----------|-----------|
| Alpha virt. eigenvalues -- | 1.49443    | 1.50303  | 1.50421   | 1.52481   | 1.53292   |
| Alpha virt. eigenvalues -- | 1.54628    | 1.54782  | 1.55945   | 1.57311   | 1.59018   |
| Alpha virt. eigenvalues -- | 1.59114    | 1.59789  | 1.60274   | 1.60586   | 1.61172   |
| Alpha virt. eigenvalues -- | 1.62206    | 1.63520  | 1.65967   | 1.67347   | 1.67557   |
| Alpha virt. eigenvalues -- | 1.67849    | 1.69390  | 1.69875   | 1.70945   | 1.71415   |
| Alpha virt. eigenvalues -- | 1.72281    | 1.72836  | 1.73581   | 1.74640   | 1.75329   |
| Alpha virt. eigenvalues -- | 1.75592    | 1.77553  | 1.79412   | 1.80099   | 1.81031   |
| Alpha virt. eigenvalues -- | 1.81742    | 1.83727  | 1.85945   | 1.86307   | 1.88313   |
| Alpha virt. eigenvalues -- | 1.89637    | 1.90358  | 1.92349   | 1.93015   | 1.95489   |
| Alpha virt. eigenvalues -- | 1.97463    | 1.99010  | 2.00882   | 2.03034   | 2.05012   |
| Alpha virt. eigenvalues -- | 2.05207    | 2.06100  | 2.08019   | 2.08800   | 2.09334   |
| Alpha virt. eigenvalues -- | 2.10765    | 2.11973  | 2.12869   | 2.13156   | 2.14933   |
| Alpha virt. eigenvalues -- | 2.17433    | 2.19265  | 2.19846   | 2.21351   | 2.21565   |
| Alpha virt. eigenvalues -- | 2.23549    | 2.26971  | 2.28763   | 2.28949   | 2.31126   |
| Alpha virt. eigenvalues -- | 2.33819    | 2.35298  | 2.37746   | 2.40916   | 2.42198   |
| Alpha virt. eigenvalues -- | 2.43644    | 2.47115  | 2.47702   | 2.48152   | 2.48253   |
| Alpha virt. eigenvalues -- | 2.50504    | 2.52300  | 2.52817   | 2.53865   | 2.55233   |
| Alpha virt. eigenvalues -- | 2.55652    | 2.56571  | 2.57517   | 2.58687   | 2.59452   |
| Alpha virt. eigenvalues -- | 2.61173    | 2.61470  | 2.62659   | 2.63582   | 2.65575   |
| Alpha virt. eigenvalues -- | 2.66446    | 2.67344  | 2.69516   | 2.71096   | 2.72319   |
| Alpha virt. eigenvalues -- | 2.72957    | 2.73225  | 2.75003   | 2.76658   | 2.77013   |
| Alpha virt. eigenvalues -- | 2.77331    | 2.78519  | 2.79418   | 2.80453   | 2.81351   |
| Alpha virt. eigenvalues -- | 2.82593    | 2.82969  | 2.83433   | 2.85098   | 2.86270   |
| Alpha virt. eigenvalues -- | 2.87593    | 2.88158  | 2.89541   | 2.92799   | 2.93624   |
| Alpha virt. eigenvalues -- | 2.95073    | 2.96529  | 2.98449   | 3.02974   | 3.09241   |
| Alpha virt. eigenvalues -- | 3.10497    | 3.15016  | 3.15813   | 3.19226   | 3.21153   |
| Alpha virt. eigenvalues -- | 3.22911    | 3.27196  | 3.27915   | 3.37625   | 3.38844   |
| Alpha virt. eigenvalues -- | 3.51150    | 3.53229  | 3.56428   | 3.59910   | 3.65417   |
| Alpha virt. eigenvalues -- | 3.68051    | 3.71003  | 3.73581   | 3.75462   | 3.76963   |
| Alpha virt. eigenvalues -- | 3.78619    | 3.81189  | 3.81692   | 3.82953   | 3.84013   |
| Alpha virt. eigenvalues -- | 3.87034    | 3.89022  | 3.97525   | 4.06390   | 4.08181   |
| Alpha virt. eigenvalues -- | 4.09498    | 4.13602  | 4.24770   | 4.26979   | 4.29150   |
| Alpha virt. eigenvalues -- | 4.32078    | 4.35350  | 4.44858   | 4.51722   | 4.69668   |
| Alpha virt. eigenvalues -- | 4.74623    | 4.82852  | 4.93862   | 5.03320   | 5.12971   |
| Alpha virt. eigenvalues -- | 5.23144    | 5.49425  | 5.60822   | 6.78298   | 7.68794   |
| Alpha virt. eigenvalues -- | 7.75715    | 7.78479  | 23.71034  | 23.75946  | 23.83544  |
| Alpha virt. eigenvalues -- | 23.87168   | 23.88045 | 23.88680  | 23.92717  | 23.98184  |
| Alpha virt. eigenvalues -- | 24.14256   | 24.24320 | 35.44307  | 35.57421  | 35.61300  |
| Alpha virt. eigenvalues -- | 48.06721   | 49.92510 | 289.89583 | 289.96089 | 289.99392 |
| Alpha virt. eigenvalues -- | 1020.85736 |          |           |           |           |

Condensed to atoms (all electrons):

|   |   | 1         | 2         | 3        | 4         | 5         | 6         |
|---|---|-----------|-----------|----------|-----------|-----------|-----------|
| 1 | C | 6.943726  | -1.103967 | 0.211967 | -0.036279 | -0.062971 | 0.083868  |
| 2 | C | -1.103967 | 6.687210  | 0.063888 | 0.091145  | 0.254014  | -0.435799 |

|    |    |           |           |           |           |           |           |
|----|----|-----------|-----------|-----------|-----------|-----------|-----------|
| 3  | N  | 0.211967  | 0.063888  | 6.651186  | 0.458523  | -0.394890 | -0.163127 |
| 4  | C  | -0.036279 | 0.091145  | 0.458523  | 7.467643  | 0.165096  | -0.895217 |
| 5  | N  | -0.062971 | 0.254014  | -0.394890 | 0.165096  | 7.068269  | 0.097217  |
| 6  | C  | 0.083868  | -0.435799 | -0.163127 | -0.895217 | 0.097217  | 7.602303  |
| 7  | C  | -0.064864 | 0.197870  | -0.011329 | 0.111771  | 0.069517  | -0.949982 |
| 8  | H  | 0.503337  | -0.114770 | 0.036043  | 0.012429  | -0.072689 | -0.026554 |
| 9  | H  | -0.138056 | 0.531122  | -0.075406 | 0.003416  | 0.026590  | -0.008227 |
| 10 | H  | 0.057307  | -0.078612 | -0.005979 | -0.022571 | -0.048417 | 0.480798  |
| 11 | H  | -0.013412 | 0.003347  | -0.013890 | -0.057939 | -0.009845 | 0.520496  |
| 12 | H  | 0.017508  | -0.037212 | 0.009858  | 0.007606  | -0.042062 | -0.003912 |
| 13 | H  | -0.002775 | 0.020097  | -0.006983 | -0.016712 | 0.075041  | -0.117667 |
| 14 | Br | -0.002217 | -0.014434 | -0.025508 | -0.074326 | 0.010305  | 0.014646  |
| 15 | H  | -0.220017 | 0.064946  | -0.084964 | -0.853215 | 0.039957  | 0.276918  |
| 16 | C  | 0.213689  | -0.209571 | 0.268703  | 0.086283  | -0.257175 | -0.198066 |
| 17 | C  | -0.165919 | 0.144071  | 0.045738  | -0.392997 | -0.098830 | -0.064206 |
| 18 | H  | 0.042574  | -0.044401 | -0.126438 | 0.169305  | 0.081181  | 0.065977  |
| 19 | H  | -0.007267 | 0.010783  | 0.026822  | -0.018091 | -0.003241 | -0.003000 |
| 20 | H  | 0.009394  | -0.000778 | -0.044024 | 0.014315  | 0.001044  | 0.000583  |
| 21 | N  | -0.006404 | -0.009777 | 0.007143  | 0.067049  | -0.017541 | -0.047392 |
| 22 | H  | -0.000349 | 0.000663  | 0.000385  | -0.001157 | -0.004830 | 0.018439  |
| 23 | H  | -0.000802 | -0.000713 | -0.001047 | -0.010528 | 0.000164  | 0.021416  |
| 24 | C  | -0.012259 | 0.004032  | -0.003350 | -0.034240 | -0.014291 | 0.079694  |
| 25 | C  | 0.011753  | -0.002346 | 0.005201  | 0.046237  | 0.013618  | -0.066396 |
| 26 | O  | -0.001249 | 0.003635  | 0.001832  | -0.020552 | 0.001133  | 0.036877  |
| 27 | H  | -0.000397 | 0.000569  | 0.000416  | 0.000755  | 0.000447  | 0.003194  |
| 28 | H  | 0.000448  | 0.000073  | -0.002301 | 0.021342  | 0.001377  | -0.021097 |
| 29 | H  | 0.000006  | 0.000064  | 0.002034  | 0.007793  | 0.000384  | -0.021036 |
| 30 | C  | 0.000975  | 0.000433  | 0.001364  | 0.016094  | -0.003005 | -0.014988 |
| 31 | H  | -0.000153 | 0.000054  | 0.000119  | 0.000172  | -0.000813 | 0.001948  |
| 32 | H  | -0.000043 | -0.000006 | -0.000108 | 0.000449  | 0.000113  | -0.001366 |
| 33 | H  | 0.000277  | -0.000118 | 0.000001  | 0.000410  | 0.000157  | -0.000313 |
|    |    | 7         | 8         | 9         | 10        | 11        | 12        |
| 1  | C  | -0.064864 | 0.503337  | -0.138056 | 0.057307  | -0.013412 | 0.017508  |
| 2  | C  | 0.197870  | -0.114770 | 0.531122  | -0.078612 | 0.003347  | -0.037212 |
| 3  | N  | -0.011329 | 0.036043  | -0.075406 | -0.005979 | -0.013890 | 0.009858  |
| 4  | C  | 0.111771  | 0.012429  | 0.003416  | -0.022571 | -0.057939 | 0.007606  |
| 5  | N  | 0.069517  | -0.072689 | 0.026590  | -0.048417 | -0.009845 | -0.042062 |
| 6  | C  | -0.949982 | -0.026554 | -0.008227 | 0.480798  | 0.520496  | -0.003912 |
| 7  | C  | 6.636703  | -0.003450 | 0.003449  | -0.112750 | -0.157026 | 0.411698  |
| 8  | H  | -0.003450 | 0.492135  | -0.011184 | 0.007217  | -0.005576 | -0.004124 |
| 9  | H  | 0.003449  | -0.011184 | 0.499434  | -0.001371 | 0.001023  | -0.000035 |
| 10 | H  | -0.112750 | 0.007217  | -0.001371 | 0.576475  | -0.033062 | 0.004454  |
| 11 | H  | -0.157026 | -0.005576 | 0.001023  | -0.033062 | 0.536948  | -0.015492 |
| 12 | H  | 0.411698  | -0.004124 | -0.000035 | 0.004454  | -0.015492 | 0.631191  |

|    |    |           |           |           |           |           |           |
|----|----|-----------|-----------|-----------|-----------|-----------|-----------|
| 13 | H  | 0.367327  | 0.001329  | 0.000193  | -0.012840 | 0.020816  | -0.088528 |
| 14 | Br | -0.008237 | -0.000420 | -0.001498 | -0.007025 | -0.000467 | 0.000407  |
| 15 | H  | -0.089899 | -0.000503 | 0.000185  | -0.050063 | 0.006635  | 0.004172  |
| 16 | C  | 0.004387  | 0.002573  | -0.009973 | -0.017368 | -0.009422 | 0.004174  |
| 17 | C  | -0.003977 | 0.000791  | 0.013314  | -0.007163 | -0.001092 | -0.000250 |
| 18 | H  | -0.000900 | 0.001325  | -0.005587 | 0.013402  | -0.000008 | 0.000130  |
| 19 | H  | 0.000139  | -0.000144 | 0.000170  | -0.000481 | -0.000028 | -0.000022 |
| 20 | H  | -0.000208 | 0.000609  | 0.005251  | 0.000292  | -0.000120 | 0.000012  |
| 21 | N  | 0.042863  | 0.000524  | -0.000120 | 0.020889  | 0.008432  | -0.049274 |
| 22 | H  | -0.023385 | -0.000862 | 0.000040  | -0.006102 | 0.003865  | -0.010135 |
| 23 | H  | -0.088057 | 0.000388  | -0.000058 | 0.002705  | 0.000535  | 0.007171  |
| 24 | C  | 0.061415  | -0.001284 | 0.000072  | -0.081116 | 0.006533  | 0.002782  |
| 25 | C  | -0.076439 | 0.001356  | -0.000071 | 0.059367  | -0.006083 | -0.004712 |
| 26 | O  | -0.028035 | 0.000296  | 0.000012  | -0.013464 | 0.004302  | 0.000275  |
| 27 | H  | -0.010558 | 0.000005  | 0.000004  | -0.000203 | -0.000335 | -0.000355 |
| 28 | H  | 0.025121  | -0.000258 | 0.000058  | -0.013566 | 0.000739  | 0.000494  |
| 29 | H  | -0.008226 | 0.000146  | 0.000007  | 0.009654  | -0.000542 | -0.000420 |
| 30 | C  | 0.016918  | -0.000019 | 0.000058  | -0.003890 | -0.000301 | 0.000353  |
| 31 | H  | -0.001921 | -0.000002 | 0.000002  | -0.000451 | -0.000084 | 0.000307  |
| 32 | H  | 0.001325  | -0.000006 | 0.000000  | 0.000201  | -0.000002 | -0.000055 |
| 33 | H  | 0.001287  | 0.000016  | 0.000000  | 0.000695  | 0.000031  | -0.000007 |
|    |    | 13        | 14        | 15        | 16        | 17        | 18        |
| 1  | C  | -0.002775 | -0.002217 | -0.220017 | 0.213689  | -0.165919 | 0.042574  |
| 2  | C  | 0.020097  | -0.014434 | 0.064946  | -0.209571 | 0.144071  | -0.044401 |
| 3  | N  | -0.006983 | -0.025508 | -0.084964 | 0.268703  | 0.045738  | -0.126438 |
| 4  | C  | -0.016712 | -0.074326 | -0.853215 | 0.086283  | -0.392997 | 0.169305  |
| 5  | N  | 0.075041  | 0.010305  | 0.039957  | -0.257175 | -0.098830 | 0.081181  |
| 6  | C  | -0.117667 | 0.014646  | 0.276918  | -0.198066 | -0.064206 | 0.065977  |
| 7  | C  | 0.367327  | -0.008237 | -0.089899 | 0.004387  | -0.003977 | -0.000900 |
| 8  | H  | 0.001329  | -0.000420 | -0.000503 | 0.002573  | 0.000791  | 0.001325  |
| 9  | H  | 0.000193  | -0.001498 | 0.000185  | -0.009973 | 0.013314  | -0.005587 |
| 10 | H  | -0.012840 | -0.007025 | -0.050063 | -0.017368 | -0.007163 | 0.013402  |
| 11 | H  | 0.020816  | -0.000467 | 0.006635  | -0.009422 | -0.001092 | -0.000008 |
| 12 | H  | -0.088528 | 0.000407  | 0.004172  | 0.004174  | -0.000250 | 0.000130  |
| 13 | H  | 0.712332  | -0.004064 | -0.042802 | -0.003200 | -0.002323 | -0.001874 |
| 14 | Br | -0.004064 | 35.588779 | 0.233571  | -0.156268 | -0.038647 | 0.169794  |
| 15 | H  | -0.042802 | 0.233571  | 1.834981  | -0.231326 | 0.117390  | -0.066577 |
| 16 | C  | -0.003200 | -0.156268 | -0.231326 | 6.327542  | -0.050734 | 0.023056  |
| 17 | C  | -0.002323 | -0.038647 | 0.117390  | -0.050734 | 6.239804  | -0.130209 |
| 18 | H  | -0.001874 | 0.169794  | -0.066577 | 0.023056  | -0.130209 | 0.778177  |
| 19 | H  | 0.000099  | -0.007577 | 0.004230  | -0.091717 | 0.476755  | -0.032590 |
| 20 | H  | -0.000021 | 0.001780  | -0.001459 | 0.125963  | 0.240956  | 0.004633  |
| 21 | N  | -0.081666 | 0.002065  | -0.020514 | 0.006256  | 0.000433  | -0.000364 |
| 22 | H  | -0.005281 | 0.000069  | -0.000801 | 0.000222  | 0.000015  | -0.000040 |

|    |    |           |           |           |           |           |           |
|----|----|-----------|-----------|-----------|-----------|-----------|-----------|
| 23 | H  | 0.007984  | -0.000352 | 0.007049  | -0.001129 | -0.000089 | 0.000274  |
| 24 | C  | -0.006861 | -0.031249 | 0.037863  | -0.007264 | -0.000970 | 0.002186  |
| 25 | C  | 0.017771  | -0.021776 | -0.043065 | 0.008518  | 0.000960  | 0.002881  |
| 26 | O  | -0.000959 | -0.004053 | 0.025590  | 0.001152  | 0.000253  | -0.000306 |
| 27 | H  | 0.002129  | 0.004648  | 0.006638  | 0.000905  | 0.000102  | -0.000407 |
| 28 | H  | 0.000345  | 0.007543  | -0.025862 | 0.000088  | -0.000827 | -0.002241 |
| 29 | H  | 0.003914  | 0.033127  | -0.004572 | 0.008612  | 0.000887  | -0.007713 |
| 30 | C  | -0.007109 | 0.020964  | -0.008906 | 0.003692  | 0.000148  | -0.004910 |
| 31 | H  | -0.003497 | 0.001336  | 0.002164  | 0.000211  | 0.000060  | 0.000002  |
| 32 | H  | 0.000444  | 0.000209  | -0.001584 | -0.000160 | -0.000026 | 0.000027  |
| 33 | H  | 0.000068  | 0.000641  | -0.001359 | -0.000032 | -0.000008 | 0.000040  |
|    |    | 19        | 20        | 21        | 22        | 23        | 24        |
| 1  | C  | -0.007267 | 0.009394  | -0.006404 | -0.000349 | -0.000802 | -0.012259 |
| 2  | C  | 0.010783  | -0.000778 | -0.009777 | 0.000663  | -0.000713 | 0.004032  |
| 3  | N  | 0.026822  | -0.044024 | 0.007143  | 0.000385  | -0.001047 | -0.003350 |
| 4  | C  | -0.018091 | 0.014315  | 0.067049  | -0.001157 | -0.010528 | -0.034240 |
| 5  | N  | -0.003241 | 0.001044  | -0.017541 | -0.004830 | 0.000164  | -0.014291 |
| 6  | C  | -0.003000 | 0.000583  | -0.047392 | 0.018439  | 0.021416  | 0.079694  |
| 7  | C  | 0.000139  | -0.000208 | 0.042863  | -0.023385 | -0.088057 | 0.061415  |
| 8  | H  | -0.000144 | 0.000609  | 0.000524  | -0.000862 | 0.000388  | -0.001284 |
| 9  | H  | 0.000170  | 0.005251  | -0.000120 | 0.000040  | -0.000058 | 0.000072  |
| 10 | H  | -0.000481 | 0.000292  | 0.020889  | -0.006102 | 0.002705  | -0.081116 |
| 11 | H  | -0.000028 | -0.000120 | 0.008432  | 0.003865  | 0.000535  | 0.006533  |
| 12 | H  | -0.000022 | 0.000012  | -0.049274 | -0.010135 | 0.007171  | 0.002782  |
| 13 | H  | 0.000099  | -0.000021 | -0.081666 | -0.005281 | 0.007984  | -0.006861 |
| 14 | Br | -0.007577 | 0.001780  | 0.002065  | 0.000069  | -0.000352 | -0.031249 |
| 15 | H  | 0.004230  | -0.001459 | -0.020514 | -0.000801 | 0.007049  | 0.037863  |
| 16 | C  | -0.091717 | 0.125963  | 0.006256  | 0.000222  | -0.001129 | -0.007264 |
| 17 | C  | 0.476755  | 0.240956  | 0.000433  | 0.000015  | -0.000089 | -0.000970 |
| 18 | H  | -0.032590 | 0.004633  | -0.000364 | -0.000040 | 0.000274  | 0.002186  |
| 19 | H  | 0.461803  | -0.022205 | 0.000001  | 0.000001  | -0.000005 | -0.000041 |
| 20 | H  | -0.022205 | 0.549154  | 0.000007  | -0.000004 | 0.000005  | -0.000014 |
| 21 | N  | 0.000001  | 0.000007  | 6.730564  | 0.359707  | 0.401154  | -0.009821 |
| 22 | H  | 0.000001  | -0.000004 | 0.359707  | 0.481032  | -0.043990 | 0.003633  |
| 23 | H  | -0.000005 | 0.000005  | 0.401154  | -0.043990 | 0.397746  | 0.005717  |
| 24 | C  | -0.000041 | -0.000014 | -0.009821 | 0.003633  | 0.005717  | 7.164062  |
| 25 | C  | 0.000018  | 0.000024  | 0.006830  | -0.005913 | -0.000686 | -1.568205 |
| 26 | O  | 0.000008  | -0.000001 | -0.021254 | -0.000502 | 0.012441  | 0.078128  |
| 27 | H  | 0.000006  | 0.000000  | -0.000679 | -0.000334 | -0.000207 | 0.175007  |
| 28 | H  | 0.000033  | -0.000024 | -0.000224 | 0.000290  | -0.000692 | 0.474201  |
| 29 | H  | 0.000172  | -0.000016 | 0.002313  | -0.000521 | -0.000626 | -0.093052 |
| 30 | C  | 0.000062  | -0.000023 | 0.005096  | 0.000806  | -0.004946 | -0.048554 |
| 31 | H  | 0.000000  | -0.000001 | 0.001053  | 0.000124  | 0.000520  | -0.012773 |
| 32 | H  | -0.000001 | 0.000000  | -0.000007 | 0.000053  | -0.000463 | 0.021915  |

|    |    |           |           |           |           |           |           |
|----|----|-----------|-----------|-----------|-----------|-----------|-----------|
| 33 | H  | 0.000000  | 0.000000  | -0.000826 | -0.000246 | 0.000112  | 0.028350  |
|    |    | 25        | 26        | 27        | 28        | 29        | 30        |
| 1  | C  | 0.011753  | -0.001249 | -0.000397 | 0.000448  | 0.000006  | 0.000975  |
| 2  | C  | -0.002346 | 0.003635  | 0.000569  | 0.000073  | 0.000064  | 0.000433  |
| 3  | N  | 0.005201  | 0.001832  | 0.000416  | -0.002301 | 0.002034  | 0.001364  |
| 4  | C  | 0.046237  | -0.020552 | 0.000755  | 0.021342  | 0.007793  | 0.016094  |
| 5  | N  | 0.013618  | 0.001133  | 0.000447  | 0.001377  | 0.000384  | -0.003005 |
| 6  | C  | -0.066396 | 0.036877  | 0.003194  | -0.021097 | -0.021036 | -0.014988 |
| 7  | C  | -0.076439 | -0.028035 | -0.010558 | 0.025121  | -0.008226 | 0.016918  |
| 8  | H  | 0.001356  | 0.000296  | 0.000005  | -0.000258 | 0.000146  | -0.000019 |
| 9  | H  | -0.000071 | 0.000012  | 0.000004  | 0.000058  | 0.000007  | 0.000058  |
| 10 | H  | 0.059367  | -0.013464 | -0.000203 | -0.013566 | 0.009654  | -0.003890 |
| 11 | H  | -0.006083 | 0.004302  | -0.000335 | 0.000739  | -0.000542 | -0.000301 |
| 12 | H  | -0.004712 | 0.000275  | -0.000355 | 0.000494  | -0.000420 | 0.000353  |
| 13 | H  | 0.017771  | -0.000959 | 0.002129  | 0.000345  | 0.003914  | -0.007109 |
| 14 | Br | -0.021776 | -0.004053 | 0.004648  | 0.007543  | 0.033127  | 0.020964  |
| 15 | H  | -0.043065 | 0.025590  | 0.006638  | -0.025862 | -0.004572 | -0.008906 |
| 16 | C  | 0.008518  | 0.001152  | 0.000905  | 0.000088  | 0.008612  | 0.003692  |
| 17 | C  | 0.000960  | 0.000253  | 0.000102  | -0.000827 | 0.000887  | 0.000148  |
| 18 | H  | 0.002881  | -0.000306 | -0.000407 | -0.002241 | -0.007713 | -0.004910 |
| 19 | H  | 0.000018  | 0.000008  | 0.000006  | 0.000033  | 0.000172  | 0.000062  |
| 20 | H  | 0.000024  | -0.000001 | 0.000000  | -0.000024 | -0.000016 | -0.000023 |
| 21 | N  | 0.006830  | -0.021254 | -0.000679 | -0.000224 | 0.002313  | 0.005096  |
| 22 | H  | -0.005913 | -0.000502 | -0.000334 | 0.000290  | -0.000521 | 0.000806  |
| 23 | H  | -0.000686 | 0.012441  | -0.000207 | -0.000692 | -0.000626 | -0.004946 |
| 24 | C  | -1.568205 | 0.078128  | 0.175007  | 0.474201  | -0.093052 | -0.048554 |
| 25 | C  | 7.240425  | 0.128340  | 0.158258  | -0.103058 | 0.413993  | -0.246838 |
| 26 | O  | 0.128340  | 8.207364  | -0.059080 | -0.051218 | -0.003800 | -0.087894 |
| 27 | H  | 0.158258  | -0.059080 | 0.628770  | -0.063381 | 0.003477  | 0.010188  |
| 28 | H  | -0.103058 | -0.051218 | -0.063381 | 0.562680  | 0.006980  | -0.001997 |
| 29 | H  | 0.413993  | -0.003800 | 0.003477  | 0.006980  | 0.457140  | 0.010480  |
| 30 | C  | -0.246838 | -0.087894 | 0.010188  | -0.001997 | 0.010480  | 5.890774  |
| 31 | H  | 0.013564  | -0.016478 | -0.000495 | -0.002600 | 0.002499  | 0.367532  |
| 32 | H  | -0.087860 | 0.011512  | -0.005875 | 0.003240  | 0.005286  | 0.409097  |
| 33 | H  | -0.074631 | 0.013510  | -0.001248 | 0.004510  | -0.009557 | 0.390415  |
|    |    | 31        | 32        | 33        |           |           |           |
| 1  | C  | -0.000153 | -0.000043 | 0.000277  |           |           |           |
| 2  | C  | 0.000054  | -0.000006 | -0.000118 |           |           |           |
| 3  | N  | 0.000119  | -0.000108 | 0.000001  |           |           |           |
| 4  | C  | 0.000172  | 0.000449  | 0.000410  |           |           |           |
| 5  | N  | -0.000813 | 0.000113  | 0.000157  |           |           |           |
| 6  | C  | 0.001948  | -0.001366 | -0.000313 |           |           |           |
| 7  | C  | -0.001921 | 0.001325  | 0.001287  |           |           |           |
| 8  | H  | -0.000002 | -0.000006 | 0.000016  |           |           |           |

|    |    |           |           |           |
|----|----|-----------|-----------|-----------|
| 9  | H  | 0.000002  | 0.000000  | 0.000000  |
| 10 | H  | -0.000451 | 0.000201  | 0.000695  |
| 11 | H  | -0.000084 | -0.000002 | 0.000031  |
| 12 | H  | 0.000307  | -0.000055 | -0.000007 |
| 13 | H  | -0.003497 | 0.000444  | 0.000068  |
| 14 | Br | 0.001336  | 0.000209  | 0.000641  |
| 15 | H  | 0.002164  | -0.001584 | -0.001359 |
| 16 | C  | 0.000211  | -0.000160 | -0.000032 |
| 17 | C  | 0.000060  | -0.000026 | -0.000008 |
| 18 | H  | 0.000002  | 0.000027  | 0.000040  |
| 19 | H  | 0.000000  | -0.000001 | 0.000000  |
| 20 | H  | -0.000001 | 0.000000  | 0.000000  |
| 21 | N  | 0.001053  | -0.000007 | -0.000826 |
| 22 | H  | 0.000124  | 0.000053  | -0.000246 |
| 23 | H  | 0.000520  | -0.000463 | 0.000112  |
| 24 | C  | -0.012773 | 0.021915  | 0.028350  |
| 25 | C  | 0.013564  | -0.087860 | -0.074631 |
| 26 | O  | -0.016478 | 0.011512  | 0.013510  |
| 27 | H  | -0.000495 | -0.005875 | -0.001248 |
| 28 | H  | -0.002600 | 0.003240  | 0.004510  |
| 29 | H  | 0.002499  | 0.005286  | -0.009557 |
| 30 | C  | 0.367532  | 0.409097  | 0.390415  |
| 31 | H  | 0.579110  | -0.039615 | -0.038038 |
| 32 | H  | -0.039615 | 0.555000  | -0.020563 |
| 33 | H  | -0.038038 | -0.020563 | 0.573415  |

Mulliken charges:

|    |    |           |
|----|----|-----------|
|    |    | 1         |
| 1  | C  | -0.257428 |
| 2  | C  | -0.025509 |
| 3  | N  | 0.168124  |
| 4  | C  | -0.314010 |
| 5  | N  | 0.124976  |
| 6  | C  | -0.266028 |
| 7  | C  | -0.312548 |
| 8  | H  | 0.181322  |
| 9  | H  | 0.167185  |
| 10 | H  | 0.283037  |
| 11 | H  | 0.211023  |
| 12 | H  | 0.154005  |
| 13 | H  | 0.175272  |
| 14 | Br | -0.691764 |
| 15 | H  | 0.085201  |
| 16 | C  | 0.157379  |
| 17 | C  | -0.323411 |



|    |   |           |
|----|---|-----------|
| 18 | H | 0.069599  |
| 19 | H | 0.205308  |
| 20 | H | 0.114874  |
| 21 | N | -0.396517 |
| 22 | H | 0.235109  |
| 23 | H | 0.289011  |
| 24 | C | -0.220248 |
| 25 | C | 0.178965  |
| 26 | O | -0.217816 |
| 27 | H | 0.148035  |
| 28 | H | 0.179788  |
| 29 | H | 0.181116  |
| 30 | C | -0.712069 |
| 31 | H | 0.146143  |
| 32 | H | 0.148869  |
| 33 | H | 0.133008  |

Sum of Mulliken charges = 0.00000

Mulliken charges with hydrogens summed into heavy atoms:

| 1  |    |           |
|----|----|-----------|
| 1  | C  | -0.076106 |
| 2  | C  | 0.141676  |
| 3  | N  | 0.168124  |
| 4  | C  | -0.228809 |
| 5  | N  | 0.124976  |
| 6  | C  | 0.228031  |
| 7  | C  | 0.016729  |
| 14 | Br | -0.691764 |
| 16 | C  | 0.226978  |
| 17 | C  | -0.003229 |
| 21 | N  | 0.127604  |
| 24 | C  | 0.107575  |
| 25 | C  | 0.360082  |
| 26 | O  | -0.217816 |
| 30 | C  | -0.284049 |

Electronic spatial extent (au):  $\langle R^2 \rangle =$  5752.8926

Charge= 0.0000 electrons

Dipole moment (field-independent basis, Debye):

|    |         |    |        |    |        |
|----|---------|----|--------|----|--------|
| X= | -4.3752 | Y= | 9.3760 | Z= | 1.3047 |
|----|---------|----|--------|----|--------|

Tot= 10.4285

Quadrupole moment (field-independent basis, Debye-Ang):

|     |          |     |           |     |           |
|-----|----------|-----|-----------|-----|-----------|
| XX= | -74.4078 | YY= | -118.7914 | ZZ= | -107.4286 |
| XY= | -10.0634 | XZ= | 0.4371    | YZ= | 1.1965    |

Traceless Quadrupole moment (field-independent basis, Debye-Ang):

|     |         |     |          |     |         |
|-----|---------|-----|----------|-----|---------|
| XX= | 25.8015 | YY= | -18.5821 | ZZ= | -7.2194 |
|-----|---------|-----|----------|-----|---------|

|                                                              |            |       |            |       |           |
|--------------------------------------------------------------|------------|-------|------------|-------|-----------|
| XY=                                                          | -10.0634   | XZ=   | 0.4371     | YZ=   | 1.1965    |
| Octapole moment (field-independent basis, Debye-Ang**2):     |            |       |            |       |           |
| XXX=                                                         | -54.5552   | YYY=  | 28.6230    | ZZZ=  | -9.0884   |
| XYY=                                                         | -28.7173   |       |            |       |           |
| XXY=                                                         | -22.4836   | XXZ=  | 17.6718    | XZZ=  | 19.6578   |
| YZZ=                                                         | -13.3733   |       |            |       |           |
| YYZ=                                                         | 20.4913    | XYZ=  | 18.2442    |       |           |
| Hexadecapole moment (field-independent basis, Debye-Ang**3): |            |       |            |       |           |
| XXXX=                                                        | -3930.0041 | YYYY= | -2677.5264 | ZZZZ= | -375.0517 |
| XXXY=                                                        | -47.7286   |       |            |       |           |
| XXXZ=                                                        | -81.5090   | YYYY= | -64.2762   | YYYY= | 65.3550   |
| ZZZX=                                                        | 3.6786     |       |            |       |           |
| ZZZY=                                                        | 15.5056    | XXYY= | -1088.5570 | XXZZ= | -839.0831 |
| YYZZ=                                                        | -494.4729  |       |            |       |           |
| XXYZ=                                                        | 15.4446    | YYXZ= | 52.7584    | ZZXY= | 4.1953    |

N-N= 1.312965357699D+03 E-N=-1.025042093304D+04 KE= 3.199826207045D+03

1\1\GINC-NODE12\FOpt\RB3LYP\6-311++G(d,p)\C10H18Br1N3O1\SUQIAN\25-Jul-2024\0\# opt b3lyp/6-311++g(d,p)\oh\0,1\C,-2.6437319714,2.1001336706,-0.1957968334\C,-3.5357196916,1.118474492,0.0922967896\N,-2.8269201213,-0.0760997348,0.1118008106\C,-1.5346108679,0.1844074801,-0.160077938\N,-1.4040906803,1.4978389249,-0.3529521214\C,-0.1300151494,2.1829844081,-0.6351188294\C,0.4549671306,2.8589020616,0.6099714112\H,-2.782916387,3.161230884,-0.3105737018\H,-4.5940366158,1.1696263686,0.2716080265\H,0.5696782172,1.4293698196,-0.9967265536\H,-0.3026746801,2.9164821488,-1.423768713\H,-0.2256519313,3.6415413838,0.9614426919\H,0.5335213614,2.1060752983,1.4086521908\Br,0.1372232984,-2.6663228028,-0.2155074815\H,-0.7589469703,-0.6044431828,-0.2157667194\C,-3.3014522846,-1.4006687603,0.3566821935\C,-4.561123082,-1.6906216693,0.6540689913\H,-2.5013398905,-2.1335641692,0.2684546807\H,-4.8325999692,-2.7237393977,0.8224583098\H,-5.3485970089,-0.9518315044,0.7415227729\N,1.7219532752,3.4719885811,0.2294080036\H,2.0646917396,4.087187503,0.9577715733\H,2.4195712147,2.7489553289,0.0660004313\C,3.3320042699,-0.4262157644,-1.1377833284\C,3.2655277897,-0.5638190728,0.3183888028\O,2.7347229019,0.620853666,-0.3370267756\H,4.2720650913,-0.1479224523,-1.6082484784\H,2.6293579956,-0.9890360456,-1.7448674801\H,2.4802959374,-1.2174216409,0.6927382572\C,4.4622012262,-0.3536968612,1.2046212078\H,4.1639539953,0.0784082343,2.1645052581\H,4.9466031687,-1.313462184,1.4086966065\H,5.1912026886,0.311772989,0.7353409445\Version=EM64L-G09RevD.01\State=1-A\HF=-3205.648379\RMSD=5.094e-09\RMSF=3.075e-06\Dipole=-2.0766096,3.4873639,0.5997317\Quadrupole=20.3400652,-15.0057745,-5.3342907,-4.0588622,-0.0198161,0.7438296\PG=C01 [X(C10H18Br1N3O1)]\@\

"THE ACADEMIC HIERARCHY"

THE PRESIDENT:

LEAPS TALL BUILDINGS IN A SINGLE BOUND,  
IS MORE POWERFUL THAN A LOCOMOTIVE,  
IS FASTER THAN A SPEEDING BULLET,  
WALKS ON WATER,  
GIVES POLICY TO GOD.

THE VICE PRESIDENT FOR ACADEMIC AFFAIRS:

LEAPS SHORT BUILDINGS IN A SINGLE BOUND,  
IS MORE POWERFUL THAN A SWITCH ENGINE,  
IS JUST AS FAST AS A SPEEDING BULLET,  
WALKS ON WATER IF SEA IS CALM,  
TALKS WITH GOD.

PROFESSOR:

LEAPS SHORT BUILDINGS WITH A RUNNING START AND FAVORABLE WINDS,  
IS ALMOST AS POWERFUL AS A SWITCH ENGINE,  
CAN FIRE A SPEEDING BULLET,  
WALKS ON WATER IN AN INDOOR SWIMMING POOL,  
TALKS WITH GOD IF SPECIAL REQUEST IS APPROVED.

ASSOCIATE PROFESSOR:

BARELY CLEARS A QUONSET HUT,  
LOSES TUG OF WAR WITH LOCOMOTIVE,  
MISFIRES FREQUENTLY,  
SWIMS WELL,  
IS OCCASIONALLY ADDRESSED BY GOD.

ASSISTANT PROFESSOR:

MAKES HIGH MARKS ON WALLS WHEN TRYING TO LEAP TALL BUILDINGS,  
IS RUN OVER BY LOCOMOTIVES,  
CAN SOMETIMES HANDLE A GUN WITHOUT INFLECTING SELF INJURY,  
DOG PADDLES,  
TALKS TO ANIMALS.

GRADUATE STUDENT:

RUNS INTO BUILDINGS,  
RECOGNIZES LOCOMOTIVES TWO OUT OF THREE TIMES,  
IS NOT ISSUED AMMUNITION,  
CAN STAY AFLOAT WITH A LIFE JACKET,  
TALKS TO WALLS.

UNDERGRADUATE AND WORK STUDY STUDENT:

FALLS OVER DOORSTEP WHEN TRYING TO ENTER BUILDINGS,  
SAYS, "LOOK AT THE CHOO-CHOO,"  
WETS HIMSELF WITH A WATER PISTOL,  
PLAYS IN MUD PUDDLES,  
MUMBLES TO HIMSELF.

DEPARTMENT SECRETARY:

LIFTS TALL BUILDINGS AND WALKS UNDER THEM,  
KICKS LOCOMOTIVES OFF THE TRACKS,  
CATCHES SPEEDING BULLETS IN HER TEETH AND EATS THEM,  
FREEZES WATER WITH A SINGLE GLANCE,  
IS GOD.

Job cpu time: 1 days 9 hours 35 minutes 1.9 seconds.

File lengths (MBytes): RWF= 138 Int= 0 D2E= 0 Chk= 17 Scr= 1

Normal termination of Gaussian 09 at Thu Jul 25 16:02:10 2024.

Entering Gaussian System, Link 0=/opt/gaussian/g09/g09

Initial command:

/opt/gaussian/g09/l1.exe "/tmp/Gau-29071.inp" -scrdir="/tmp/"

Entering Link 1 = /opt/gaussian/g09/l1.exe PID= 29072.

Copyright (c) 1988,1990,1992,1993,1995,1998,2003,2009,2013,  
Gaussian, Inc. All Rights Reserved.

This is part of the Gaussian(R) 09 program. It is based on the Gaussian(R) 03 system (copyright 2003, Gaussian, Inc.), the Gaussian(R) 98 system (copyright 1998, Gaussian, Inc.), the Gaussian(R) 94 system (copyright 1995, Gaussian, Inc.), the Gaussian 92(TM) system (copyright 1992, Gaussian, Inc.), the Gaussian 90(TM) system (copyright 1990, Gaussian, Inc.), the Gaussian 88(TM) system (copyright 1988, Gaussian, Inc.), the Gaussian 86(TM) system (copyright 1986, Carnegie Mellon University), and the Gaussian 82(TM) system (copyright 1983, Carnegie Mellon University). Gaussian is a federally registered trademark of Gaussian, Inc.

This software contains proprietary and confidential information, including trade secrets, belonging to Gaussian, Inc.

This software is provided under written license and may be used, copied, transmitted, or stored only in accord with that written license.

The following legend is applicable only to US Government contracts under FAR:

#### RESTRICTED RIGHTS LEGEND

Use, reproduction and disclosure by the US Government is subject to restrictions as set forth in subparagraphs (a) and (c) of the Commercial Computer Software - Restricted Rights clause in FAR 52.227-19.

Gaussian, Inc.  
340 Quinnipiac St., Bldg. 40, Wallingford CT 06492

-----  
Warning -- This program may not be used in any manner that competes with the business of Gaussian, Inc. or will provide assistance to any competitor of Gaussian, Inc. The licensee of this program is prohibited from giving any competitor of Gaussian, Inc. access to this program. By using this program, the user acknowledges that Gaussian, Inc. is engaged in the business of creating and licensing software in the field of computational chemistry and represents and warrants to the licensee that it is not a competitor of Gaussian, Inc. and that it will not use this program in any manner prohibited above.  
-----

Cite this work as:

Gaussian 09, Revision D.01,  
M. J. Frisch, G. W. Trucks, H. B. Schlegel, G. E. Scuseria,  
M. A. Robb, J. R. Cheeseman, G. Scalmani, V. Barone, B. Mennucci,  
G. A. Petersson, H. Nakatsuji, M. Caricato, X. Li, H. P. Hratchian,  
A. F. Izmaylov, J. Bloino, G. Zheng, J. L. Sonnenberg, M. Hada,  
M. Ehara, K. Toyota, R. Fukuda, J. Hasegawa, M. Ishida, T. Nakajima,  
Y. Honda, O. Kitao, H. Nakai, T. Vreven, J. A. Montgomery, Jr.,  
J. E. Peralta, F. Ogliaro, M. Bearpark, J. J. Heyd, E. Brothers,  
K. N. Kudin, V. N. Staroverov, T. Keith, R. Kobayashi, J. Normand,  
K. Raghavachari, A. Rendell, J. C. Burant, S. S. Iyengar, J. Tomasi,  
M. Cossi, N. Rega, J. M. Millam, M. Klene, J. E. Knox, J. B. Cross,  
V. Bakken, C. Adamo, J. Jaramillo, R. Gomperts, R. E. Stratmann,  
O. Yazyev, A. J. Austin, R. Cammi, C. Pomelli, J. W. Ochterski,  
R. L. Martin, K. Morokuma, V. G. Zakrzewski, G. A. Voth,  
P. Salvador, J. J. Dannenberg, S. Dapprich, A. D. Daniels,

O. Farkas, J. B. Foresman, J. V. Ortiz, J. Cioslowski,  
and D. J. Fox, Gaussian, Inc., Wallingford CT, 2013.

\*\*\*\*\*

Gaussian 09: EM64L-G09RevD.01 24-Apr-2013

20-Jul-2024

\*\*\*\*\*

%chk=/home/suqian/liuwen/qianmengshijie/nh2/nh2.chk

%mem=1000MB

%nprocl=1

Will use up to 1 processors via Linda.

%nprocs=8

Will use up to 8 processors via shared memory.

-----  
# opt b3lyp/6-311++g(d,p)  
-----

1/14=-1,18=20,19=15,26=3,38=1/1,3;

2/9=110,12=2,17=6,18=5,40=1/2;

3/5=4,6=6,7=1111,11=2,16=1,25=1,30=1,71=1,74=-5/1,2,3;

4//1;

5/5=2,38=5/2;

6/7=2,8=2,9=2,10=2,28=1/1;

7//1,2,3,16;

1/14=-1,18=20,19=15,26=3/3(2);

2/9=110/2;

99//99;

2/9=110/2;

3/5=4,6=6,7=1111,11=2,16=1,25=1,30=1,71=1,74=-5/1,2,3;

4/5=5,16=3,69=1/1;

5/5=2,38=5/2;

7//1,2,3,16;

1/14=-1,18=20,19=15,26=3/3(-5);

2/9=110/2;

6/7=2,8=2,9=2,10=2,19=2,28=1/1;

99/9=1/99;

--

oh

--

Symbolic Z-matrix:

Charge = 0 Multiplicity = 1

|   |          |          |         |
|---|----------|----------|---------|
| C | -1.85298 | -2.00477 | 0.26195 |
| C | -2.84494 | -1.10868 | 0.02227 |
| N | -2.2526  | 0.1497   | 0.01266 |
| C | -0.93264 | 0.00637  | 0.24353 |

|    |          |          |          |
|----|----------|----------|----------|
| N  | -0.67446 | -1.292   | 0.4013   |
| C  | 0.68899  | -1.82956 | 0.59657  |
| C  | 1.47835  | -1.92564 | -0.73551 |
| H  | -1.88574 | -3.07712 | 0.34901  |
| H  | -3.89688 | -1.25872 | -0.13791 |
| H  | 1.21191  | -1.1335  | 1.25067  |
| H  | 0.59178  | -2.79327 | 1.09741  |
| H  | 1.34487  | -2.9108  | -1.19079 |
| H  | 1.08962  | -1.16668 | -1.42475 |
| Br | 2.0255   | 1.47738  | 0.09935  |
| H  | -0.1445  | 0.78154  | 0.25732  |
| C  | -2.86233 | 1.41676  | -0.19872 |
| C  | -4.16281 | 1.61048  | -0.37392 |
| H  | -2.13902 | 2.2222   | -0.2043  |
| H  | -4.52894 | 2.61515  | -0.53341 |
| H  | -4.89412 | 0.81234  | -0.36723 |
| N  | 2.91644  | -1.74142 | -0.49289 |
| H  | 3.35148  | -2.63397 | -0.3742  |
| H  | 3.32852  | -1.27085 | -1.27311 |

Add virtual bond connecting atoms H15 and Br14 Dist= 4.32D+00.

GradGradGradGradGradGradGradGradGradGradGradGradGradGradGradGradGradGradGradGrad

Berny optimization.

Initialization pass.

```

-----
!   Initial Parameters   !
! (Angstroms and Degrees) !
-----
! Name  Definition          Value      Derivative Info.      !
-----
! R1    R(1,2)              1.3581    estimate D2E/DX2     !
! R2    R(1,5)              1.3843    estimate D2E/DX2     !
! R3    R(1,8)              1.0764    estimate D2E/DX2     !
! R4    R(2,3)              1.3909    estimate D2E/DX2     !
! R5    R(2,9)              1.0746    estimate D2E/DX2     !
! R6    R(3,4)              1.3476    estimate D2E/DX2     !
! R7    R(3,16)             1.4219    estimate D2E/DX2     !
! R8    R(4,5)              1.3332    estimate D2E/DX2     !
! R9    R(4,15)             1.1056    estimate D2E/DX2     !
! R10   R(5,6)              1.4785    estimate D2E/DX2     !
! R11   R(6,7)              1.5514    estimate D2E/DX2     !
! R12   R(6,10)            1.0889    estimate D2E/DX2     !
! R13   R(6,11)            1.0904    estimate D2E/DX2     !

```

|       |             |          |                  |   |
|-------|-------------|----------|------------------|---|
| ! R14 | R(7,12)     | 1.0935   | estimate D2E/DX2 | ! |
| ! R15 | R(7,13)     | 1.0964   | estimate D2E/DX2 | ! |
| ! R16 | R(7,21)     | 1.47     | estimate D2E/DX2 | ! |
| ! R17 | R(14,15)    | 2.2843   | estimate D2E/DX2 | ! |
| ! R18 | R(16,17)    | 1.3265   | estimate D2E/DX2 | ! |
| ! R19 | R(16,18)    | 1.0826   | estimate D2E/DX2 | ! |
| ! R20 | R(17,19)    | 1.0811   | estimate D2E/DX2 | ! |
| ! R21 | R(17,20)    | 1.0825   | estimate D2E/DX2 | ! |
| ! R22 | R(21,22)    | 1.0      | estimate D2E/DX2 | ! |
| ! R23 | R(21,23)    | 1.0      | estimate D2E/DX2 | ! |
| ! A1  | A(2,1,5)    | 107.4487 | estimate D2E/DX2 | ! |
| ! A2  | A(2,1,8)    | 130.4957 | estimate D2E/DX2 | ! |
| ! A3  | A(5,1,8)    | 122.0547 | estimate D2E/DX2 | ! |
| ! A4  | A(1,2,3)    | 106.6857 | estimate D2E/DX2 | ! |
| ! A5  | A(1,2,9)    | 130.4812 | estimate D2E/DX2 | ! |
| ! A6  | A(3,2,9)    | 122.8331 | estimate D2E/DX2 | ! |
| ! A7  | A(2,3,4)    | 108.6462 | estimate D2E/DX2 | ! |
| ! A8  | A(2,3,16)   | 128.6538 | estimate D2E/DX2 | ! |
| ! A9  | A(4,3,16)   | 122.6999 | estimate D2E/DX2 | ! |
| ! A10 | A(3,4,5)    | 108.2726 | estimate D2E/DX2 | ! |
| ! A11 | A(3,4,15)   | 128.7417 | estimate D2E/DX2 | ! |
| ! A12 | A(5,4,15)   | 122.9107 | estimate D2E/DX2 | ! |
| ! A13 | A(1,5,4)    | 108.9455 | estimate D2E/DX2 | ! |
| ! A14 | A(1,5,6)    | 127.6728 | estimate D2E/DX2 | ! |
| ! A15 | A(4,5,6)    | 123.2506 | estimate D2E/DX2 | ! |
| ! A16 | A(5,6,7)    | 112.2301 | estimate D2E/DX2 | ! |
| ! A17 | A(5,6,10)   | 106.8437 | estimate D2E/DX2 | ! |
| ! A18 | A(5,6,11)   | 107.4442 | estimate D2E/DX2 | ! |
| ! A19 | A(7,6,10)   | 108.1204 | estimate D2E/DX2 | ! |
| ! A20 | A(7,6,11)   | 112.6443 | estimate D2E/DX2 | ! |
| ! A21 | A(10,6,11)  | 109.3802 | estimate D2E/DX2 | ! |
| ! A22 | A(6,7,12)   | 110.5609 | estimate D2E/DX2 | ! |
| ! A23 | A(6,7,13)   | 108.4511 | estimate D2E/DX2 | ! |
| ! A24 | A(6,7,21)   | 110.3829 | estimate D2E/DX2 | ! |
| ! A25 | A(12,7,13)  | 108.5799 | estimate D2E/DX2 | ! |
| ! A26 | A(12,7,21)  | 107.5209 | estimate D2E/DX2 | ! |
| ! A27 | A(13,7,21)  | 111.3365 | estimate D2E/DX2 | ! |
| ! A28 | A(4,15,14)  | 152.8661 | estimate D2E/DX2 | ! |
| ! A29 | A(3,16,17)  | 124.7632 | estimate D2E/DX2 | ! |
| ! A30 | A(3,16,18)  | 112.1624 | estimate D2E/DX2 | ! |
| ! A31 | A(17,16,18) | 123.0742 | estimate D2E/DX2 | ! |
| ! A32 | A(16,17,19) | 119.1583 | estimate D2E/DX2 | ! |
| ! A33 | A(16,17,20) | 123.6301 | estimate D2E/DX2 | ! |
| ! A34 | A(19,17,20) | 117.2116 | estimate D2E/DX2 | ! |



|       |              |           |                  |   |
|-------|--------------|-----------|------------------|---|
| ! A35 | A(7,21,22)   | 109.4712  | estimate D2E/DX2 | ! |
| ! A36 | A(7,21,23)   | 109.4712  | estimate D2E/DX2 | ! |
| ! A37 | A(22,21,23)  | 109.4713  | estimate D2E/DX2 | ! |
| ! D1  | D(5,1,2,3)   | 0.2541    | estimate D2E/DX2 | ! |
| ! D2  | D(5,1,2,9)   | -179.7257 | estimate D2E/DX2 | ! |
| ! D3  | D(8,1,2,3)   | 179.9213  | estimate D2E/DX2 | ! |
| ! D4  | D(8,1,2,9)   | -0.0585   | estimate D2E/DX2 | ! |
| ! D5  | D(2,1,5,4)   | -0.3687   | estimate D2E/DX2 | ! |
| ! D6  | D(2,1,5,6)   | -176.2729 | estimate D2E/DX2 | ! |
| ! D7  | D(8,1,5,4)   | 179.9299  | estimate D2E/DX2 | ! |
| ! D8  | D(8,1,5,6)   | 4.0256    | estimate D2E/DX2 | ! |
| ! D9  | D(1,2,3,4)   | -0.0562   | estimate D2E/DX2 | ! |
| ! D10 | D(1,2,3,16)  | 179.8446  | estimate D2E/DX2 | ! |
| ! D11 | D(9,2,3,4)   | 179.9255  | estimate D2E/DX2 | ! |
| ! D12 | D(9,2,3,16)  | -0.1737   | estimate D2E/DX2 | ! |
| ! D13 | D(2,3,4,5)   | -0.1729   | estimate D2E/DX2 | ! |
| ! D14 | D(2,3,4,15)  | 176.707   | estimate D2E/DX2 | ! |
| ! D15 | D(16,3,4,5)  | 179.9192  | estimate D2E/DX2 | ! |
| ! D16 | D(16,3,4,15) | -3.2009   | estimate D2E/DX2 | ! |
| ! D17 | D(2,3,16,17) | 3.0504    | estimate D2E/DX2 | ! |
| ! D18 | D(2,3,16,18) | -176.7973 | estimate D2E/DX2 | ! |
| ! D19 | D(4,3,16,17) | -177.0614 | estimate D2E/DX2 | ! |
| ! D20 | D(4,3,16,18) | 3.0909    | estimate D2E/DX2 | ! |
| ! D21 | D(3,4,5,1)   | 0.3336    | estimate D2E/DX2 | ! |
| ! D22 | D(3,4,5,6)   | 176.4574  | estimate D2E/DX2 | ! |
| ! D23 | D(15,4,5,1)  | -176.7678 | estimate D2E/DX2 | ! |
| ! D24 | D(15,4,5,6)  | -0.644    | estimate D2E/DX2 | ! |
| ! D25 | D(3,4,15,14) | -157.7623 | estimate D2E/DX2 | ! |
| ! D26 | D(5,4,15,14) | 18.7081   | estimate D2E/DX2 | ! |
| ! D27 | D(1,5,6,7)   | 96.5542   | estimate D2E/DX2 | ! |
| ! D28 | D(1,5,6,10)  | -145.1004 | estimate D2E/DX2 | ! |
| ! D29 | D(1,5,6,11)  | -27.8065  | estimate D2E/DX2 | ! |
| ! D30 | D(4,5,6,7)   | -78.8125  | estimate D2E/DX2 | ! |
| ! D31 | D(4,5,6,10)  | 39.5329   | estimate D2E/DX2 | ! |
| ! D32 | D(4,5,6,11)  | 156.8268  | estimate D2E/DX2 | ! |
| ! D33 | D(5,6,7,12)  | -91.7943  | estimate D2E/DX2 | ! |
| ! D34 | D(5,6,7,13)  | 27.1459   | estimate D2E/DX2 | ! |
| ! D35 | D(5,6,7,21)  | 149.3646  | estimate D2E/DX2 | ! |
| ! D36 | D(10,6,7,12) | 150.6177  | estimate D2E/DX2 | ! |
| ! D37 | D(10,6,7,13) | -90.4421  | estimate D2E/DX2 | ! |
| ! D38 | D(10,6,7,21) | 31.7765   | estimate D2E/DX2 | ! |
| ! D39 | D(11,6,7,12) | 29.6316   | estimate D2E/DX2 | ! |
| ! D40 | D(11,6,7,13) | 148.5719  | estimate D2E/DX2 | ! |
| ! D41 | D(11,6,7,21) | -89.2095  | estimate D2E/DX2 | ! |

```

! D42  D(6,7,21,22)          93.8039      estimate D2E/DX2      !
! D43  D(6,7,21,23)        -146.1961     estimate D2E/DX2      !
! D44  D(12,7,21,22)       -26.8726      estimate D2E/DX2      !
! D45  D(12,7,21,23)       93.1274       estimate D2E/DX2      !
! D46  D(13,7,21,22)      -145.6908     estimate D2E/DX2      !
! D47  D(13,7,21,23)      -25.6908     estimate D2E/DX2      !
! D48  D(3,16,17,19)      -179.6544     estimate D2E/DX2      !
! D49  D(3,16,17,20)         0.3485       estimate D2E/DX2      !
! D50  D(18,16,17,19)       0.1773       estimate D2E/DX2      !
! D51  D(18,16,17,20)     -179.8198     estimate D2E/DX2      !

```

-----  
Trust Radius=3.00D-01 FncErr=1.00D-07 GrdErr=1.00D-06

Number of steps in this run= 121 maximum allowed number of steps= 138.

GradGradGradGradGradGradGradGradGradGradGradGradGradGradGradGradGradGradGrad

Input orientation:

```

-----
Center   Atomic   Atomic   Coordinates (Angstroms)
Number   Number   Type      X           Y           Z
-----
  1         6         0      -1.852977  -2.004770   0.261946
  2         6         0      -2.844936  -1.108684   0.022270
  3         7         0      -2.252596   0.149697   0.012664
  4         6         0      -0.932640   0.006366   0.243529
  5         7         0      -0.674460  -1.291997   0.401298
  6         6         0         0.688990  -1.829559   0.596565
  7         6         0         1.478350  -1.925642  -0.735506
  8         1         0      -1.885737  -3.077123   0.349012
  9         1         0      -3.896876  -1.258715  -0.137907
 10         1         0         1.211914  -1.133502   1.250666
 11         1         0         0.591782  -2.793267   1.097412
 12         1         0         1.344868  -2.910804  -1.190791
 13         1         0         1.089622  -1.166684  -1.424751
 14        35         0         2.025502   1.477383   0.099347
 15         1         0      -0.144502   0.781540   0.257320
 16         6         0      -2.862333   1.416758  -0.198718
 17         6         0      -4.162812   1.610481  -0.373924
 18         1         0      -2.139017   2.222199  -0.204304
 19         1         0      -4.528939   2.615146  -0.533412
 20         1         0      -4.894120   0.812340  -0.367232
 21         7         0         2.916438  -1.741420  -0.492886
 22         1         0         3.351482  -2.633973  -0.374200
 23         1         0         3.328520  -1.270853  -1.273113
-----

```

## Distance matrix (angstroms):

|    |    | 1        | 2        | 3        | 4        | 5        |
|----|----|----------|----------|----------|----------|----------|
| 1  | C  | 0.000000 |          |          |          |          |
| 2  | C  | 1.358086 | 0.000000 |          |          |          |
| 3  | N  | 2.205349 | 1.390856 | 0.000000 |          |          |
| 4  | C  | 2.211793 | 2.224673 | 1.347637 | 0.000000 |          |
| 5  | N  | 1.384329 | 2.210935 | 2.172563 | 1.333152 | 0.000000 |
| 6  | C  | 2.569876 | 3.652138 | 3.593233 | 2.474861 | 1.478546 |
| 7  | C  | 3.478349 | 4.464577 | 4.334368 | 3.240993 | 2.515635 |
| 8  | H  | 1.076380 | 2.213950 | 3.264978 | 3.229152 | 2.157916 |
| 9  | H  | 2.212240 | 1.074590 | 2.170243 | 3.245400 | 3.267387 |
| 10 | H  | 3.336200 | 4.238821 | 3.896419 | 2.629208 | 2.074838 |
| 11 | H  | 2.701218 | 3.975523 | 4.234171 | 3.300140 | 2.083688 |
| 12 | H  | 3.627334 | 4.719493 | 4.874086 | 3.969156 | 3.038580 |
| 13 | H  | 3.493741 | 4.192610 | 3.869036 | 2.872063 | 2.542075 |
| 14 | Br | 5.214828 | 5.514966 | 4.480222 | 3.306854 | 3.879489 |
| 15 | H  | 3.268399 | 3.304624 | 2.214304 | 1.105553 | 2.145027 |
| 16 | C  | 3.596924 | 2.535152 | 1.421937 | 2.430741 | 3.533293 |
| 17 | C  | 4.337016 | 3.047561 | 2.435624 | 3.659022 | 4.603688 |
| 18 | H  | 4.262215 | 3.412395 | 2.086921 | 2.562385 | 3.855030 |
| 19 | H  | 5.397869 | 4.124507 | 3.399761 | 4.510292 | 5.567446 |
| 20 | H  | 4.192914 | 2.835701 | 2.749739 | 4.088514 | 4.777489 |
| 21 | N  | 4.835953 | 5.818864 | 5.527280 | 4.290975 | 3.727747 |
| 22 | H  | 5.280812 | 6.393692 | 6.269304 | 5.070176 | 4.313990 |
| 23 | H  | 5.453710 | 6.309982 | 5.900851 | 4.699891 | 4.339118 |
|    |    | 6        | 7        | 8        | 9        | 10       |
| 6  | C  | 0.000000 |          |          |          |          |
| 7  | C  | 1.551365 | 0.000000 |          |          |          |
| 8  | H  | 2.871745 | 3.717414 | 0.000000 |          |          |
| 9  | H  | 4.679261 | 5.449309 | 2.754701 | 0.000000 |          |
| 10 | H  | 1.088941 | 2.154844 | 3.766442 | 5.295616 | 0.000000 |
| 11 | H  | 1.090427 | 2.213225 | 2.603608 | 4.901930 | 1.778446 |
| 12 | H  | 2.189500 | 1.093456 | 3.582662 | 5.595877 | 3.022779 |
| 13 | H  | 2.164631 | 1.096442 | 3.955853 | 5.150689 | 2.678416 |
| 14 | Br | 3.601299 | 3.546397 | 6.008631 | 6.528176 | 2.967184 |
| 15 | H  | 2.761817 | 3.308804 | 4.234334 | 4.289424 | 2.548330 |
| 16 | C  | 4.876776 | 5.504662 | 4.631276 | 2.869169 | 5.020361 |
| 17 | C  | 6.026251 | 6.667654 | 5.261306 | 2.891144 | 6.249513 |
| 18 | H  | 5.005573 | 5.529205 | 5.334147 | 3.900159 | 4.960484 |
| 19 | H  | 6.946872 | 7.533068 | 6.337753 | 3.944962 | 7.084680 |
| 20 | H  | 6.251372 | 6.945541 | 4.969034 | 2.310055 | 6.609656 |
| 21 | N  | 2.481168 | 1.470000 | 5.055075 | 6.839610 | 2.512954 |
| 22 | H  | 2.945901 | 2.034920 | 5.305458 | 7.381454 | 3.077232 |
| 23 | H  | 3.282525 | 2.034920 | 5.751728 | 7.314040 | 3.296718 |

|    |    |          |          |          |          |          |
|----|----|----------|----------|----------|----------|----------|
|    |    | 11       | 12       | 13       | 14       | 15       |
| 11 | H  | 0.000000 |          |          |          |          |
| 12 | H  | 2.411810 | 0.000000 |          |          |          |
| 13 | H  | 3.042191 | 1.778157 | 0.000000 |          |          |
| 14 | Br | 4.614124 | 4.624273 | 3.192152 | 0.000000 |          |
| 15 | H  | 3.745279 | 4.236585 | 2.854470 | 2.284310 | 0.000000 |
| 16 | C  | 5.597783 | 6.116579 | 4.878040 | 4.897290 | 2.828087 |
| 17 | C  | 6.645599 | 7.172435 | 6.033651 | 6.207812 | 4.151196 |
| 18 | H  | 5.857186 | 6.281587 | 4.837161 | 4.241482 | 2.503335 |
| 19 | H  | 7.624454 | 8.091346 | 6.831175 | 6.682483 | 4.817744 |
| 20 | H  | 6.726121 | 7.311978 | 6.390622 | 6.967148 | 4.790604 |
| 21 | N  | 3.006569 | 2.079510 | 2.129778 | 3.391932 | 4.037015 |
| 22 | H  | 3.131607 | 2.184023 | 2.893546 | 4.345770 | 4.928129 |
| 23 | H  | 3.927705 | 2.575090 | 2.246444 | 3.336811 | 4.314676 |
|    |    | 16       | 17       | 18       | 19       | 20       |
| 16 | C  | 0.000000 |          |          |          |          |
| 17 | C  | 1.326451 | 0.000000 |          |          |          |
| 18 | H  | 1.082568 | 2.121018 | 0.000000 |          |          |
| 19 | H  | 2.079839 | 1.081128 | 2.444268 | 0.000000 |          |
| 20 | H  | 2.126470 | 1.082536 | 3.099168 | 1.846912 | 0.000000 |
| 21 | N  | 6.592027 | 7.833593 | 6.430489 | 8.626410 | 8.218412 |
| 22 | H  | 7.419617 | 8.630180 | 7.331907 | 9.469933 | 8.936838 |
| 23 | H  | 6.834050 | 8.076551 | 6.575540 | 8.797034 | 8.530658 |
|    |    | 21       | 22       | 23       |          |          |
| 21 | N  | 0.000000 |          |          |          |          |
| 22 | H  | 1.000000 | 0.000000 |          |          |          |
| 23 | H  | 1.000000 | 1.632993 | 0.000000 |          |          |

Stoichiometry C7H12BrN3

Framework group C1[X(C7H12BrN3)]

Deg. of freedom 63

Full point group C1 NOp 1

Largest Abelian subgroup C1 NOp 1

Largest concise Abelian subgroup C1 NOp 1

Standard orientation:

| Center<br>Number | Atomic<br>Number | Atomic<br>Type | Coordinates (Angstroms) |           |           |
|------------------|------------------|----------------|-------------------------|-----------|-----------|
|                  |                  |                | X                       | Y         | Z         |
| 1                | 6                | 0              | -1.826300               | 2.028395  | -0.268732 |
| 2                | 6                | 0              | -2.834594               | 1.153500  | -0.019135 |
| 3                | 7                | 0              | -2.267411               | -0.116390 | -0.006277 |
| 4                | 6                | 0              | -0.946147               | -0.000593 | -0.244976 |
| 5                | 7                | 0              | -0.663007               | 1.291551  | -0.410777 |
| 6                | 6                | 0              | 0.709796                | 1.800805  | -0.616131 |

|    |    |   |           |           |           |
|----|----|---|-----------|-----------|-----------|
| 7  | 6  | 0 | 1.508209  | 1.887786  | 0.711161  |
| 8  | 1  | 0 | -1.838155 | 3.100738  | -0.361109 |
| 9  | 1  | 0 | -3.882440 | 1.325299  | 0.145933  |
| 10 | 1  | 0 | 1.215146  | 1.091180  | -1.269467 |
| 11 | 1  | 0 | 0.629072  | 2.763740  | -1.121374 |
| 12 | 1  | 0 | 1.396890  | 2.877685  | 1.162110  |
| 13 | 1  | 0 | 1.108216  | 1.140201  | 1.406365  |
| 14 | 35 | 0 | 1.982832  | -1.529623 | -0.109195 |
| 15 | 1  | 0 | -0.173704 | -0.791404 | -0.259042 |
| 16 | 6  | 0 | -2.901115 | -1.369953 | 0.214867  |
| 17 | 6  | 0 | -4.204217 | -1.536799 | 0.398062  |
| 18 | 1  | 0 | -2.193978 | -2.189633 | 0.220682  |
| 19 | 1  | 0 | -4.589417 | -2.533144 | 0.564660  |
| 20 | 1  | 0 | -4.919495 | -0.724263 | 0.391222  |
| 21 | 7  | 0 | 2.940987  | 1.673682  | 0.461748  |
| 22 | 1  | 0 | 3.393079  | 2.556768  | 0.336155  |
| 23 | 1  | 0 | 3.347880  | 1.198899  | 1.242144  |

-----

Rotational constants (GHZ):      0.9756806      0.4464398      0.3176721

Standard basis: 6-311++G(d,p) (5D, 7F)

There are    365 symmetry adapted cartesian basis functions of A    symmetry.

There are    352 symmetry adapted basis functions of A    symmetry.

     352 basis functions,    562 primitive gaussians,    365 cartesian basis functions

     55 alpha electrons      55 beta electrons

     nuclear repulsion energy      847.8093262862 Hartrees.

NAtoms=    23 NActive=    23 NUniq=    23 SFac= 1.00D+00 NAtFMM=    60 NAOKFM=F

Big=F

Integral buffers will be    131072 words long.

Raffenetti 2 integral format.

Two-electron integral symmetry is turned on.

One-electron integrals computed using PRISM.

NBasis=    352 RedAO= T EigKep= 4.36D-06    NBF=    352

NBsUse=    352 1.00D-06 EigRej= -1.00D+00    NBFU=    352

ExpMin= 3.50D-02 ExpMax= 4.40D+05 ExpMxC= 1.51D+04 IAcc=3 IRadAn=      5 AccDes=

0.00D+00

Harris functional with IExCor=    402 and IRadAn=      5 diagonalized for initial guess.

HarFok: IExCor=    402 AccDes= 0.00D+00 IRadAn=      5 IDoV= 1 UseB2=F ITyADJ=14

ICtDFT= 3500011 ScaDFX= 1.000000 1.000000 1.000000 1.000000

FoFCou: FMM=F IPFlag=              0 FMFlag=      100000 FMFlg1=              0

     NFXFlg=              0 DoJE=T BraDBF=F KetDBF=T FulRan=T

     wScrn= 0.000000 ICntrl=            500 IOpCl=    0 I1Cent=    20000004 NGrid=

0

     NMat0=      1 NMatS0=            1 NMatT0=      0 NMatD0=      1 NMatDS0=      0

NMtDT0=    0



(A) (A)

(A) (A) (A) (A) (A) (A) (A) (A) (A)

The electronic state is 1-A.

|       |                   |    |            |           |           |           |           |  |  |
|-------|-------------------|----|------------|-----------|-----------|-----------|-----------|--|--|
| Alpha | occ. eigenvalues  | -- | -482.67888 | -62.33222 | -56.15006 | -56.15001 | -56.14973 |  |  |
| Alpha | occ. eigenvalues  | -- | -14.45342  | -14.43968 | -14.28546 | -10.29441 | -10.27247 |  |  |
| Alpha | occ. eigenvalues  | -- | -10.27173  | -10.27051 | -10.23716 | -10.22176 | -10.21057 |  |  |
| Alpha | occ. eigenvalues  | -- | -8.54128   | -6.36467  | -6.36424  | -6.36344  | -2.47716  |  |  |
| Alpha | occ. eigenvalues  | -- | -2.47707   | -2.47645  | -2.47610  | -2.47598  | -1.11582  |  |  |
| Alpha | occ. eigenvalues  | -- | -1.00147   | -0.88843  | -0.85228  | -0.82471  | -0.77316  |  |  |
| Alpha | occ. eigenvalues  | -- | -0.71356   | -0.67850  | -0.64781  | -0.63119  | -0.61670  |  |  |
| Alpha | occ. eigenvalues  | -- | -0.58467   | -0.54157  | -0.52944  | -0.52213  | -0.51182  |  |  |
| Alpha | occ. eigenvalues  | -- | -0.49340   | -0.49021  | -0.48346  | -0.46186  | -0.44462  |  |  |
| Alpha | occ. eigenvalues  | -- | -0.43731   | -0.41237  | -0.38164  | -0.36994  | -0.31642  |  |  |
| Alpha | occ. eigenvalues  | -- | -0.30360   | -0.24100  | -0.18386  | -0.17772  | -0.17314  |  |  |
| Alpha | virt. eigenvalues | -- | -0.08425   | -0.04557  | -0.03256  | -0.02036  | -0.00835  |  |  |
| Alpha | virt. eigenvalues | -- | -0.00687   | 0.00006   | 0.00617   | 0.01124   | 0.01608   |  |  |
| Alpha | virt. eigenvalues | -- | 0.03401    | 0.03613   | 0.04427   | 0.04961   | 0.05212   |  |  |
| Alpha | virt. eigenvalues | -- | 0.05516    | 0.06343   | 0.07098   | 0.07630   | 0.07817   |  |  |
| Alpha | virt. eigenvalues | -- | 0.08125    | 0.08518   | 0.09024   | 0.09280   | 0.09362   |  |  |
| Alpha | virt. eigenvalues | -- | 0.10149    | 0.10822   | 0.11123   | 0.11478   | 0.12117   |  |  |
| Alpha | virt. eigenvalues | -- | 0.12465    | 0.12648   | 0.12957   | 0.13305   | 0.13421   |  |  |
| Alpha | virt. eigenvalues | -- | 0.13823    | 0.14070   | 0.14818   | 0.15278   | 0.15509   |  |  |
| Alpha | virt. eigenvalues | -- | 0.15964    | 0.16516   | 0.16765   | 0.17235   | 0.17572   |  |  |
| Alpha | virt. eigenvalues | -- | 0.18814    | 0.19004   | 0.19262   | 0.19807   | 0.20739   |  |  |
| Alpha | virt. eigenvalues | -- | 0.21162    | 0.21286   | 0.22060   | 0.22429   | 0.22699   |  |  |
| Alpha | virt. eigenvalues | -- | 0.23379    | 0.23873   | 0.24291   | 0.24669   | 0.25217   |  |  |
| Alpha | virt. eigenvalues | -- | 0.25949    | 0.26104   | 0.26990   | 0.27212   | 0.27909   |  |  |
| Alpha | virt. eigenvalues | -- | 0.28979    | 0.29240   | 0.29813   | 0.30538   | 0.31106   |  |  |
| Alpha | virt. eigenvalues | -- | 0.31538    | 0.33492   | 0.33580   | 0.34725   | 0.35809   |  |  |
| Alpha | virt. eigenvalues | -- | 0.36278    | 0.36649   | 0.39065   | 0.40039   | 0.40923   |  |  |
| Alpha | virt. eigenvalues | -- | 0.43144    | 0.46311   | 0.46903   | 0.49410   | 0.49543   |  |  |
| Alpha | virt. eigenvalues | -- | 0.51477    | 0.51954   | 0.53191   | 0.53658   | 0.54721   |  |  |
| Alpha | virt. eigenvalues | -- | 0.54836    | 0.56024   | 0.56807   | 0.56869   | 0.57768   |  |  |
| Alpha | virt. eigenvalues | -- | 0.59934    | 0.60993   | 0.61926   | 0.62533   | 0.63360   |  |  |
| Alpha | virt. eigenvalues | -- | 0.64008    | 0.65204   | 0.65802   | 0.66191   | 0.66430   |  |  |
| Alpha | virt. eigenvalues | -- | 0.67984    | 0.69334   | 0.69444   | 0.70855   | 0.72814   |  |  |
| Alpha | virt. eigenvalues | -- | 0.73352    | 0.74691   | 0.75477   | 0.75637   | 0.77001   |  |  |
| Alpha | virt. eigenvalues | -- | 0.77372    | 0.78585   | 0.79492   | 0.79873   | 0.80979   |  |  |
| Alpha | virt. eigenvalues | -- | 0.81564    | 0.81839   | 0.83347   | 0.85288   | 0.86363   |  |  |
| Alpha | virt. eigenvalues | -- | 0.87505    | 0.89674   | 0.89869   | 0.90173   | 0.92919   |  |  |
| Alpha | virt. eigenvalues | -- | 0.93778    | 0.95624   | 0.98592   | 0.99527   | 0.99709   |  |  |
| Alpha | virt. eigenvalues | -- | 1.01227    | 1.03389   | 1.04131   | 1.05882   | 1.08829   |  |  |
| Alpha | virt. eigenvalues | -- | 1.09186    | 1.10726   | 1.11750   | 1.12940   | 1.14620   |  |  |
| Alpha | virt. eigenvalues | -- | 1.21020    | 1.25842   | 1.27157   | 1.27890   | 1.32218   |  |  |

|                            |           |            |          |           |           |
|----------------------------|-----------|------------|----------|-----------|-----------|
| Alpha virt. eigenvalues -- | 1.33372   | 1.37794    | 1.39113  | 1.43960   | 1.44460   |
| Alpha virt. eigenvalues -- | 1.47059   | 1.48037    | 1.48959  | 1.50729   | 1.53710   |
| Alpha virt. eigenvalues -- | 1.54714   | 1.54878    | 1.57692  | 1.58899   | 1.59973   |
| Alpha virt. eigenvalues -- | 1.60732   | 1.61963    | 1.65614  | 1.67161   | 1.68292   |
| Alpha virt. eigenvalues -- | 1.69021   | 1.69946    | 1.70720  | 1.71222   | 1.72030   |
| Alpha virt. eigenvalues -- | 1.73338   | 1.75687    | 1.76183  | 1.77549   | 1.79517   |
| Alpha virt. eigenvalues -- | 1.83800   | 1.83841    | 1.85965  | 1.87369   | 1.89379   |
| Alpha virt. eigenvalues -- | 1.89882   | 1.94749    | 1.97374  | 2.00781   | 2.03354   |
| Alpha virt. eigenvalues -- | 2.03698   | 2.05576    | 2.07067  | 2.09464   | 2.10090   |
| Alpha virt. eigenvalues -- | 2.10467   | 2.12212    | 2.12505  | 2.15704   | 2.16480   |
| Alpha virt. eigenvalues -- | 2.18513   | 2.19750    | 2.21852  | 2.26146   | 2.28911   |
| Alpha virt. eigenvalues -- | 2.29890   | 2.35985    | 2.39141  | 2.42382   | 2.44266   |
| Alpha virt. eigenvalues -- | 2.44891   | 2.45146    | 2.47195  | 2.50683   | 2.53511   |
| Alpha virt. eigenvalues -- | 2.53880   | 2.56244    | 2.56418  | 2.57501   | 2.60020   |
| Alpha virt. eigenvalues -- | 2.61263   | 2.63239    | 2.64109  | 2.65469   | 2.69363   |
| Alpha virt. eigenvalues -- | 2.70377   | 2.70976    | 2.71736  | 2.73233   | 2.73892   |
| Alpha virt. eigenvalues -- | 2.75392   | 2.76971    | 2.77637  | 2.79521   | 2.81370   |
| Alpha virt. eigenvalues -- | 2.83026   | 2.84047    | 2.86220  | 2.87859   | 2.90772   |
| Alpha virt. eigenvalues -- | 2.93754   | 2.96174    | 2.97212  | 3.03191   | 3.08613   |
| Alpha virt. eigenvalues -- | 3.13969   | 3.16667    | 3.19535  | 3.25970   | 3.37112   |
| Alpha virt. eigenvalues -- | 3.48880   | 3.49156    | 3.54507  | 3.59470   | 3.63225   |
| Alpha virt. eigenvalues -- | 3.64181   | 3.71286    | 3.75325  | 3.76663   | 3.81941   |
| Alpha virt. eigenvalues -- | 3.84496   | 3.86893    | 3.87771  | 4.04996   | 4.05355   |
| Alpha virt. eigenvalues -- | 4.08335   | 4.26125    | 4.28591  | 4.31367   | 4.32971   |
| Alpha virt. eigenvalues -- | 4.36757   | 4.42934    | 4.68876  | 4.81740   | 4.85213   |
| Alpha virt. eigenvalues -- | 4.91740   | 5.02232    | 5.22555  | 6.78956   | 7.70185   |
| Alpha virt. eigenvalues -- | 7.74225   | 7.75848    | 23.69327 | 23.74245  | 23.82586  |
| Alpha virt. eigenvalues -- | 23.87606  | 23.88574   | 24.13337 | 24.22214  | 35.43696  |
| Alpha virt. eigenvalues -- | 35.56750  | 35.63382   | 48.07473 | 289.91010 | 289.94885 |
| Alpha virt. eigenvalues -- | 289.96370 | 1020.86357 |          |           |           |

Condensed to atoms (all electrons):

|    |   | 1         | 2         | 3         | 4         | 5         | 6         |
|----|---|-----------|-----------|-----------|-----------|-----------|-----------|
| 1  | C | 7.529670  | -1.774388 | 0.508591  | -0.503132 | -0.408430 | 0.328875  |
| 2  | C | -1.774388 | 7.461129  | -0.267506 | 0.449499  | 0.610601  | -0.483667 |
| 3  | N | 0.508591  | -0.267506 | 6.950461  | -0.157916 | -0.478005 | -0.099104 |
| 4  | C | -0.503132 | 0.449499  | -0.157916 | 7.201866  | 0.883688  | -0.494917 |
| 5  | N | -0.408430 | 0.610601  | -0.478005 | 0.883688  | 7.025985  | -0.071339 |
| 6  | C | 0.328875  | -0.483667 | -0.099104 | -0.494917 | -0.071339 | 7.136808  |
| 7  | C | -0.139490 | 0.165371  | -0.021827 | 0.017494  | 0.076015  | -0.608939 |
| 8  | H | 0.474859  | -0.098166 | 0.035409  | 0.027183  | -0.062079 | -0.028250 |
| 9  | H | -0.135256 | 0.539073  | -0.077976 | -0.006365 | 0.026378  | -0.010174 |
| 10 | H | 0.032271  | -0.037128 | 0.013681  | 0.009520  | -0.020958 | 0.448869  |
| 11 | H | -0.046640 | 0.065881  | 0.008521  | 0.018790  | -0.086310 | 0.285207  |
| 12 | H | 0.091108  | -0.099395 | 0.022037  | -0.045186 | -0.043672 | 0.063538  |



|    |    |           |           |           |           |           |           |
|----|----|-----------|-----------|-----------|-----------|-----------|-----------|
| 13 | H  | -0.120213 | 0.114551  | -0.031106 | 0.076777  | 0.052754  | -0.163098 |
| 14 | Br | -0.002198 | -0.010110 | -0.003068 | -0.142105 | -0.026051 | 0.008522  |
| 15 | H  | 0.139806  | -0.292710 | 0.120211  | -0.641201 | -0.234510 | 0.122464  |
| 16 | C  | 0.310060  | -0.286887 | 0.367830  | -0.487610 | -0.189456 | -0.116897 |
| 17 | C  | -0.078570 | 0.007509  | 0.015778  | -0.282996 | -0.107805 | -0.041568 |
| 18 | H  | -0.028040 | 0.042948  | -0.092454 | 0.145742  | 0.029977  | 0.004724  |
| 19 | H  | -0.000635 | 0.002347  | 0.022658  | -0.012269 | -0.001047 | -0.000217 |
| 20 | H  | -0.003518 | 0.008357  | -0.033662 | 0.005930  | -0.000291 | -0.001478 |
| 21 | N  | -0.028437 | 0.024638  | -0.013178 | 0.045002  | 0.020414  | -0.078126 |
| 22 | H  | -0.001561 | 0.004518  | -0.001208 | 0.001263  | 0.000124  | -0.015161 |
| 23 | H  | -0.001141 | -0.000096 | 0.000382  | 0.004178  | 0.003091  | -0.025167 |
|    |    | 7         | 8         | 9         | 10        | 11        | 12        |
| 1  | C  | -0.139490 | 0.474859  | -0.135256 | 0.032271  | -0.046640 | 0.091108  |
| 2  | C  | 0.165371  | -0.098166 | 0.539073  | -0.037128 | 0.065881  | -0.099395 |
| 3  | N  | -0.021827 | 0.035409  | -0.077976 | 0.013681  | 0.008521  | 0.022037  |
| 4  | C  | 0.017494  | 0.027183  | -0.006365 | 0.009520  | 0.018790  | -0.045186 |
| 5  | N  | 0.076015  | -0.062079 | 0.026378  | -0.020958 | -0.086310 | -0.043672 |
| 6  | C  | -0.608939 | -0.028250 | -0.010174 | 0.448869  | 0.285207  | 0.063538  |
| 7  | C  | 6.534791  | 0.005661  | 0.003929  | -0.126068 | -0.058827 | 0.414267  |
| 8  | H  | 0.005661  | 0.493000  | -0.011026 | 0.005356  | -0.020772 | 0.002032  |
| 9  | H  | 0.003929  | -0.011026 | 0.502089  | -0.000223 | 0.003133  | -0.000490 |
| 10 | H  | -0.126068 | 0.005356  | -0.000223 | 0.441891  | -0.053636 | 0.009188  |
| 11 | H  | -0.058827 | -0.020772 | 0.003133  | -0.053636 | 0.693538  | -0.021021 |
| 12 | H  | 0.414267  | 0.002032  | -0.000490 | 0.009188  | -0.021021 | 0.789213  |
| 13 | H  | 0.386729  | -0.003896 | 0.001145  | -0.011742 | 0.019936  | -0.129546 |
| 14 | Br | 0.103146  | -0.001552 | -0.000906 | -0.025030 | 0.018478  | 0.017013  |
| 15 | H  | -0.058306 | -0.001034 | -0.005805 | -0.001802 | 0.016136  | 0.029018  |
| 16 | C  | -0.011837 | 0.002340  | 0.004059  | 0.003545  | 0.010896  | 0.004683  |
| 17 | C  | -0.000980 | 0.002496  | 0.001339  | -0.003600 | 0.002027  | 0.000544  |
| 18 | H  | -0.002648 | -0.000196 | 0.001536  | 0.000414  | -0.001331 | -0.001338 |
| 19 | H  | 0.000107  | -0.000095 | -0.000594 | -0.000032 | 0.000089  | 0.000043  |
| 20 | H  | -0.000280 | 0.000680  | 0.005729  | -0.000053 | -0.000112 | -0.000098 |
| 21 | N  | -0.066086 | -0.002737 | 0.000121  | 0.018324  | 0.005295  | -0.208814 |
| 22 | H  | -0.043104 | -0.000289 | 0.000034  | -0.011020 | 0.007030  | -0.026610 |
| 23 | H  | 0.006326  | 0.000365  | 0.000044  | 0.012863  | -0.004353 | 0.021904  |
|    |    | 13        | 14        | 15        | 16        | 17        | 18        |
| 1  | C  | -0.120213 | -0.002198 | 0.139806  | 0.310060  | -0.078570 | -0.028040 |
| 2  | C  | 0.114551  | -0.010110 | -0.292710 | -0.286887 | 0.007509  | 0.042948  |
| 3  | N  | -0.031106 | -0.003068 | 0.120211  | 0.367830  | 0.015778  | -0.092454 |
| 4  | C  | 0.076777  | -0.142105 | -0.641201 | -0.487610 | -0.282996 | 0.145742  |
| 5  | N  | 0.052754  | -0.026051 | -0.234510 | -0.189456 | -0.107805 | 0.029977  |
| 6  | C  | -0.163098 | 0.008522  | 0.122464  | -0.116897 | -0.041568 | 0.004724  |
| 7  | C  | 0.386729  | 0.103146  | -0.058306 | -0.011837 | -0.000980 | -0.002648 |
| 8  | H  | -0.003896 | -0.001552 | -0.001034 | 0.002340  | 0.002496  | -0.000196 |

|    |    |           |           |           |           |           |           |
|----|----|-----------|-----------|-----------|-----------|-----------|-----------|
| 9  | H  | 0.001145  | -0.000906 | -0.005805 | 0.004059  | 0.001339  | 0.001536  |
| 10 | H  | -0.011742 | -0.025030 | -0.001802 | 0.003545  | -0.003600 | 0.000414  |
| 11 | H  | 0.019936  | 0.018478  | 0.016136  | 0.010896  | 0.002027  | -0.001331 |
| 12 | H  | -0.129546 | 0.017013  | 0.029018  | 0.004683  | 0.000544  | -0.001338 |
| 13 | H  | 0.616509  | -0.033579 | -0.081378 | -0.006044 | -0.002179 | 0.003939  |
| 14 | Br | -0.033579 | 35.576258 | 0.285770  | -0.006997 | 0.015508  | -0.005084 |
| 15 | H  | -0.081378 | 0.285770  | 1.545526  | 0.028331  | 0.134679  | -0.074775 |
| 16 | C  | -0.006044 | -0.006997 | 0.028331  | 5.983603  | -0.052335 | 0.413354  |
| 17 | C  | -0.002179 | 0.015508  | 0.134679  | -0.052335 | 6.153130  | -0.117786 |
| 18 | H  | 0.003939  | -0.005084 | -0.074775 | 0.413354  | -0.117786 | 0.464057  |
| 19 | H  | -0.000102 | -0.000271 | 0.004919  | -0.095990 | 0.457431  | -0.009437 |
| 20 | H  | 0.000102  | 0.000078  | 0.002139  | 0.080512  | 0.294496  | 0.003183  |
| 21 | N  | 0.059250  | -0.093932 | -0.040447 | -0.004936 | -0.001325 | 0.001550  |
| 22 | H  | 0.019997  | 0.002574  | -0.006290 | -0.000519 | -0.000147 | 0.000115  |
| 23 | H  | -0.025250 | -0.003031 | -0.001556 | 0.000118  | -0.000039 | 0.000019  |

|    |    | 19        | 20        | 21        | 22        | 23        |
|----|----|-----------|-----------|-----------|-----------|-----------|
| 1  | C  | -0.000635 | -0.003518 | -0.028437 | -0.001561 | -0.001141 |
| 2  | C  | 0.002347  | 0.008357  | 0.024638  | 0.004518  | -0.000096 |
| 3  | N  | 0.022658  | -0.033662 | -0.013178 | -0.001208 | 0.000382  |
| 4  | C  | -0.012269 | 0.005930  | 0.045002  | 0.001263  | 0.004178  |
| 5  | N  | -0.001047 | -0.000291 | 0.020414  | 0.000124  | 0.003091  |
| 6  | C  | -0.000217 | -0.001478 | -0.078126 | -0.015161 | -0.025167 |
| 7  | C  | 0.000107  | -0.000280 | -0.066086 | -0.043104 | 0.006326  |
| 8  | H  | -0.000095 | 0.000680  | -0.002737 | -0.000289 | 0.000365  |
| 9  | H  | -0.000594 | 0.005729  | 0.000121  | 0.000034  | 0.000044  |
| 10 | H  | -0.000032 | -0.000053 | 0.018324  | -0.011020 | 0.012863  |
| 11 | H  | 0.000089  | -0.000112 | 0.005295  | 0.007030  | -0.004353 |
| 12 | H  | 0.000043  | -0.000098 | -0.208814 | -0.026610 | 0.021904  |
| 13 | H  | -0.000102 | 0.000102  | 0.059250  | 0.019997  | -0.025250 |
| 14 | Br | -0.000271 | 0.000078  | -0.093932 | 0.002574  | -0.003031 |
| 15 | H  | 0.004919  | 0.002139  | -0.040447 | -0.006290 | -0.001556 |
| 16 | C  | -0.095990 | 0.080512  | -0.004936 | -0.000519 | 0.000118  |
| 17 | C  | 0.457431  | 0.294496  | -0.001325 | -0.000147 | -0.000039 |
| 18 | H  | -0.009437 | 0.003183  | 0.001550  | 0.000115  | 0.000019  |
| 19 | H  | 0.464131  | -0.021019 | -0.000031 | -0.000002 | -0.000002 |
| 20 | H  | -0.021019 | 0.534171  | -0.000014 | -0.000001 | -0.000002 |
| 21 | N  | -0.000031 | -0.000014 | 6.774210  | 0.402452  | 0.390255  |
| 22 | H  | -0.000002 | -0.000001 | 0.402452  | 0.509593  | -0.057064 |
| 23 | H  | -0.000002 | -0.000002 | 0.390255  | -0.057064 | 0.433833  |

Mulliken charges:

|   | 1 |           |
|---|---|-----------|
| 1 | C | -0.143590 |
| 2 | C | -0.146369 |
| 3 | N | 0.211452  |

|    |    |           |
|----|----|-----------|
| 4  | C  | -0.113236 |
| 5  | N  | 0.000929  |
| 6  | C  | -0.160906 |
| 7  | C  | -0.575443 |
| 8  | H  | 0.180713  |
| 9  | H  | 0.160208  |
| 10 | H  | 0.295369  |
| 11 | H  | 0.138044  |
| 12 | H  | 0.111583  |
| 13 | H  | 0.256446  |
| 14 | Br | -0.673434 |
| 15 | H  | 0.010814  |
| 16 | C  | 0.050177  |
| 17 | C  | -0.395606 |
| 18 | H  | 0.221530  |
| 19 | H  | 0.190020  |
| 20 | H  | 0.125150  |
| 21 | N  | -0.203448 |
| 22 | H  | 0.215274  |
| 23 | H  | 0.244323  |

Sum of Mulliken charges = 0.00000

Mulliken charges with hydrogens summed into heavy atoms:

|    |    |           |
|----|----|-----------|
| 1  |    |           |
| 1  | C  | 0.037123  |
| 2  | C  | 0.013840  |
| 3  | N  | 0.211452  |
| 4  | C  | -0.102421 |
| 5  | N  | 0.000929  |
| 6  | C  | 0.272507  |
| 7  | C  | -0.207414 |
| 14 | Br | -0.673434 |
| 16 | C  | 0.271707  |
| 17 | C  | -0.080437 |
| 21 | N  | 0.256148  |

Electronic spatial extent (au):  $\langle R^2 \rangle = 3249.7365$

Charge= 0.0000 electrons

Dipole moment (field-independent basis, Debye):

|      |          |    |        |    |        |
|------|----------|----|--------|----|--------|
| X=   | -11.0054 | Y= | 8.0897 | Z= | 0.9463 |
| Tot= | 13.6915  |    |        |    |        |

Quadrupole moment (field-independent basis, Debye-Ang):

|     |          |     |          |     |          |
|-----|----------|-----|----------|-----|----------|
| XX= | -72.8182 | YY= | -75.4590 | ZZ= | -83.7358 |
| XY= | 15.8709  | XZ= | 2.7620   | YZ= | -2.0155  |

Traceless Quadrupole moment (field-independent basis, Debye-Ang):

|     |        |     |        |     |         |
|-----|--------|-----|--------|-----|---------|
| XX= | 4.5195 | YY= | 1.8787 | ZZ= | -6.3982 |
|-----|--------|-----|--------|-----|---------|

```

XY=          15.8709  XZ=          2.7620  YZ=          -2.0155
Octapole moment (field-independent basis, Debye-Ang**2):
XXX=         -47.9584  YYY=          11.9079  ZZZ=          -2.1368
XYY=         -14.3038
XXY=          19.6521  XXZ=          23.2949  XZZ=          27.5983
YZZ=         -6.3772
YYZ=         -2.1578  XYZ=          5.8929
Hexadecapole moment (field-independent basis, Debye-Ang**3):
XXXX=        -2360.3628  YYYY=         -1154.7652  ZZZZ=         -196.2757
XXXXY=         55.8759
XXXZ=          6.4048  YYYYX=          20.4644  YYYZ=         -22.2358
ZZZX=          8.7697
ZZZY=          4.7528  XXYY=         -581.0423  XXZZ=         -508.8367
YYZZ=        -253.4576
XXYZ=         -1.9872  YYXZ=         -3.9241  ZZXY=         -16.5449
N-N= 8.478093262862D+02 E-N=-8.869220074409D+03 KE= 3.007500483407D+03
Calling FoFJK, ICntrl=          2127 FMM=F ISym2X=0 l1Cent= 0 IOpClX= 0 NMat=1 NMatS=1
NMatT=0.
***** Axes restored to original set *****

```

| Center<br>Number | Atomic<br>Number | Forces (Hartrees/Bohr) |              |              |
|------------------|------------------|------------------------|--------------|--------------|
|                  |                  | X                      | Y            | Z            |
| 1                | 6                | -0.000257627           | 0.000042709  | -0.000080648 |
| 2                | 6                | -0.000530682           | -0.000388920 | 0.000052937  |
| 3                | 7                | -0.000312578           | -0.000113566 | -0.000170000 |
| 4                | 6                | 0.000092517            | 0.000076739  | 0.000702379  |
| 5                | 7                | -0.000456123           | -0.001143191 | -0.000781594 |
| 6                | 6                | 0.003726615            | 0.002630660  | -0.001865437 |
| 7                | 6                | 0.006202833            | -0.004756327 | 0.001679991  |
| 8                | 1                | -0.000054020           | 0.000049586  | -0.000029458 |
| 9                | 1                | -0.000017511           | -0.000028311 | -0.000012081 |
| 10               | 1                | 0.001912272            | 0.001083458  | -0.001152964 |
| 11               | 1                | -0.000949463           | -0.000458320 | -0.000012598 |
| 12               | 1                | -0.011190958           | -0.001705931 | -0.002248394 |
| 13               | 1                | 0.005553131            | -0.001005651 | 0.003711516  |
| 14               | 35               | -0.005594546           | 0.004703429  | -0.000490633 |
| 15               | 1                | 0.002893715            | 0.001807329  | -0.000115642 |
| 16               | 6                | 0.000397015            | -0.000290832 | 0.000110760  |
| 17               | 6                | -0.000217664           | -0.000007875 | -0.000046106 |
| 18               | 1                | 0.000215784            | -0.000037522 | 0.000050253  |
| 19               | 1                | 0.000012655            | 0.000002474  | 0.000001965  |
| 20               | 1                | -0.000028765           | -0.000023435 | 0.000033730  |
| 21               | 7                | -0.017533973           | 0.000479410  | 0.005542242  |

|    |   |             |              |              |
|----|---|-------------|--------------|--------------|
| 22 | 1 | 0.008329080 | -0.009843925 | -0.000779043 |
| 23 | 1 | 0.007808292 | 0.008928012  | -0.004101173 |

-----  
Cartesian Forces: Max 0.017533973 RMS 0.003818412

GradGradGradGradGradGradGradGradGradGradGradGradGradGradGradGradGradGradGradGrad  
Berny optimization.

FormGI is forming the generalized inverse of G from B-inverse, IUseBI=4.

Internal Forces: Max 0.025835512 RMS 0.005760474

Search for a local minimum.

Step number 1 out of a maximum of 121

All quantities printed in internal units (Hartrees-Bohrs-Radians)

Mixed Optimization -- RFO/linear search

Second derivative matrix not updated -- first step.

ITU= 0

|                 |         |         |         |         |         |
|-----------------|---------|---------|---------|---------|---------|
| Eigenvalues --- | 0.00230 | 0.00230 | 0.00653 | 0.00766 | 0.01402 |
| Eigenvalues --- | 0.01512 | 0.01860 | 0.01898 | 0.02144 | 0.02169 |
| Eigenvalues --- | 0.02314 | 0.02385 | 0.02431 | 0.03062 | 0.03062 |
| Eigenvalues --- | 0.03704 | 0.04129 | 0.04248 | 0.04363 | 0.05307 |
| Eigenvalues --- | 0.05451 | 0.09016 | 0.09375 | 0.12569 | 0.12750 |
| Eigenvalues --- | 0.15965 | 0.16000 | 0.16000 | 0.16000 | 0.16000 |
| Eigenvalues --- | 0.16000 | 0.16000 | 0.16000 | 0.21960 | 0.22000 |
| Eigenvalues --- | 0.22034 | 0.22817 | 0.23539 | 0.24903 | 0.25000 |
| Eigenvalues --- | 0.25000 | 0.27535 | 0.33075 | 0.34079 | 0.34416 |
| Eigenvalues --- | 0.34737 | 0.34763 | 0.34935 | 0.35686 | 0.35690 |
| Eigenvalues --- | 0.35740 | 0.35858 | 0.36435 | 0.36656 | 0.42170 |
| Eigenvalues --- | 0.42774 | 0.45890 | 0.47688 | 0.47688 | 0.49289 |
| Eigenvalues --- | 0.54376 | 0.56818 | 0.60352 |         |         |

RFO step: Lambda=-2.18576896D-02 EMin= 2.30000000D-03

Linear search not attempted -- first point.

Iteration 1 RMS(Cart)= 0.21045399 RMS(Int)= 0.01638783

Iteration 2 RMS(Cart)= 0.02983508 RMS(Int)= 0.00062105

Iteration 3 RMS(Cart)= 0.00055827 RMS(Int)= 0.00053974

Iteration 4 RMS(Cart)= 0.00000036 RMS(Int)= 0.00053974

| Variable | Old X   | -DE/DX   | Delta X<br>(Linear) | Delta X<br>(Quad) | Delta X<br>(Total) | New X   |
|----------|---------|----------|---------------------|-------------------|--------------------|---------|
| R1       | 2.56641 | -0.00335 | 0.00000             | -0.00752          | -0.00755           | 2.55886 |
| R2       | 2.61600 | 0.00206  | 0.00000             | 0.00443           | 0.00445            | 2.62045 |
| R3       | 2.03406 | -0.00005 | 0.00000             | -0.00013          | -0.00013           | 2.03394 |
| R4       | 2.62834 | -0.00319 | 0.00000             | -0.00781          | -0.00785           | 2.62049 |
| R5       | 2.03068 | 0.00002  | 0.00000             | 0.00006           | 0.00006            | 2.03074 |
| R6       | 2.54667 | 0.00140  | 0.00000             | 0.00314           | 0.00315            | 2.54982 |
| R7       | 2.68707 | -0.00051 | 0.00000             | -0.00114          | -0.00114           | 2.68593 |
| R8       | 2.51929 | 0.01058  | 0.00000             | 0.01888           | 0.01893            | 2.53822 |

|     |         |          |         |          |          |         |
|-----|---------|----------|---------|----------|----------|---------|
| R9  | 2.08919 | 0.00263  | 0.00000 | 0.00746  | 0.00746  | 2.09665 |
| R10 | 2.79405 | 0.00536  | 0.00000 | 0.01451  | 0.01451  | 2.80855 |
| R11 | 2.93166 | -0.00321 | 0.00000 | -0.01080 | -0.01080 | 2.92086 |
| R12 | 2.05780 | 0.00092  | 0.00000 | 0.00247  | 0.00247  | 2.06027 |
| R13 | 2.06061 | 0.00048  | 0.00000 | 0.00131  | 0.00131  | 2.06192 |
| R14 | 2.06633 | 0.00384  | 0.00000 | 0.01048  | 0.01048  | 2.07681 |
| R15 | 2.07198 | -0.00500 | 0.00000 | -0.01378 | -0.01378 | 2.05819 |
| R16 | 2.77790 | -0.00130 | 0.00000 | -0.00343 | -0.00343 | 2.77447 |
| R17 | 4.31672 | -0.00385 | 0.00000 | -0.06537 | -0.06537 | 4.25135 |
| R18 | 2.50663 | 0.00023  | 0.00000 | 0.00037  | 0.00037  | 2.50699 |
| R19 | 2.04576 | 0.00011  | 0.00000 | 0.00030  | 0.00030  | 2.04606 |
| R20 | 2.04304 | 0.00000  | 0.00000 | -0.00001 | -0.00001 | 2.04303 |
| R21 | 2.04570 | 0.00004  | 0.00000 | 0.00010  | 0.00010  | 2.04580 |
| R22 | 1.88973 | 0.01232  | 0.00000 | 0.02469  | 0.02469  | 1.91442 |
| R23 | 1.88973 | 0.01062  | 0.00000 | 0.02129  | 0.02129  | 1.91101 |
| A1  | 1.87533 | 0.00421  | 0.00000 | 0.01481  | 0.01482  | 1.89016 |
| A2  | 2.27758 | -0.00217 | 0.00000 | -0.00775 | -0.00776 | 2.26982 |
| A3  | 2.13026 | -0.00204 | 0.00000 | -0.00706 | -0.00707 | 2.12319 |
| A4  | 1.86202 | -0.00083 | 0.00000 | -0.00924 | -0.00928 | 1.85273 |
| A5  | 2.27733 | 0.00039  | 0.00000 | 0.00447  | 0.00448  | 2.28181 |
| A6  | 2.14384 | 0.00044  | 0.00000 | 0.00476  | 0.00477  | 2.14861 |
| A7  | 1.89623 | 0.00406  | 0.00000 | 0.01405  | 0.01405  | 1.91029 |
| A8  | 2.24543 | -0.00166 | 0.00000 | -0.00566 | -0.00567 | 2.23977 |
| A9  | 2.14152 | -0.00240 | 0.00000 | -0.00838 | -0.00838 | 2.13313 |
| A10 | 1.88971 | -0.00331 | 0.00000 | -0.00848 | -0.00848 | 1.88123 |
| A11 | 2.24697 | -0.01844 | 0.00000 | -0.10589 | -0.10606 | 2.14090 |
| A12 | 2.14520 | 0.02179  | 0.00000 | 0.11551  | 0.11545  | 2.26065 |
| A13 | 1.90146 | -0.00414 | 0.00000 | -0.01111 | -0.01112 | 1.89034 |
| A14 | 2.22831 | -0.02043 | 0.00000 | -0.07674 | -0.07692 | 2.15139 |
| A15 | 2.15113 | 0.02462  | 0.00000 | 0.08947  | 0.08939  | 2.24052 |
| A16 | 1.95878 | 0.00784  | 0.00000 | 0.03199  | 0.03064  | 1.98943 |
| A17 | 1.86477 | 0.00317  | 0.00000 | 0.05593  | 0.05482  | 1.91959 |
| A18 | 1.87525 | -0.00736 | 0.00000 | -0.06554 | -0.06526 | 1.80999 |
| A19 | 1.88706 | -0.00252 | 0.00000 | 0.00964  | 0.00757  | 1.89462 |
| A20 | 1.96601 | -0.00252 | 0.00000 | -0.03324 | -0.03340 | 1.93261 |
| A21 | 1.90904 | 0.00171  | 0.00000 | 0.00604  | 0.00707  | 1.91611 |
| A22 | 1.92965 | -0.00183 | 0.00000 | -0.01230 | -0.01215 | 1.91750 |
| A23 | 1.89283 | 0.00124  | 0.00000 | -0.00844 | -0.00876 | 1.88407 |
| A24 | 1.92654 | -0.00523 | 0.00000 | -0.02090 | -0.02099 | 1.90555 |
| A25 | 1.89508 | -0.00115 | 0.00000 | -0.00623 | -0.00648 | 1.88860 |
| A26 | 1.87659 | 0.00672  | 0.00000 | 0.05580  | 0.05583  | 1.93242 |
| A27 | 1.94319 | 0.00026  | 0.00000 | -0.00775 | -0.00815 | 1.93504 |
| A28 | 2.66802 | 0.02584  | 0.00000 | 0.09503  | 0.09503  | 2.76305 |
| A29 | 2.17753 | 0.00003  | 0.00000 | 0.00012  | 0.00012  | 2.17765 |

|     |          |          |         |          |          |          |
|-----|----------|----------|---------|----------|----------|----------|
| A30 | 1.95760  | -0.00021 | 0.00000 | -0.00114 | -0.00114 | 1.95647  |
| A31 | 2.14805  | 0.00018  | 0.00000 | 0.00102  | 0.00102  | 2.14907  |
| A32 | 2.07971  | -0.00001 | 0.00000 | -0.00008 | -0.00008 | 2.07962  |
| A33 | 2.15775  | 0.00001  | 0.00000 | 0.00004  | 0.00004  | 2.15779  |
| A34 | 2.04573  | 0.00001  | 0.00000 | 0.00004  | 0.00004  | 2.04577  |
| A35 | 1.91063  | 0.00376  | 0.00000 | 0.02874  | 0.02780  | 1.93843  |
| A36 | 1.91063  | 0.00750  | 0.00000 | 0.04927  | 0.04835  | 1.95898  |
| A37 | 1.91063  | -0.00323 | 0.00000 | -0.00169 | -0.00334 | 1.90729  |
| D1  | 0.00444  | -0.00052 | 0.00000 | -0.00864 | -0.00818 | -0.00375 |
| D2  | -3.13680 | 0.00010  | 0.00000 | 0.00108  | 0.00102  | -3.13578 |
| D3  | 3.14022  | -0.00072 | 0.00000 | -0.01001 | -0.00950 | 3.13072  |
| D4  | -0.00102 | -0.00009 | 0.00000 | -0.00028 | -0.00030 | -0.00132 |
| D5  | -0.00643 | 0.00036  | 0.00000 | 0.00620  | 0.00589  | -0.00055 |
| D6  | -3.07654 | -0.00167 | 0.00000 | -0.02348 | -0.02256 | -3.09910 |
| D7  | 3.14037  | 0.00053  | 0.00000 | 0.00743  | 0.00709  | -3.13573 |
| D8  | 0.07026  | -0.00149 | 0.00000 | -0.02225 | -0.02136 | 0.04890  |
| D9  | -0.00098 | 0.00054  | 0.00000 | 0.00823  | 0.00776  | 0.00678  |
| D10 | 3.13888  | 0.00063  | 0.00000 | 0.01132  | 0.01074  | -3.13356 |
| D11 | 3.14029  | -0.00003 | 0.00000 | -0.00058 | -0.00056 | 3.13973  |
| D12 | -0.00303 | 0.00007  | 0.00000 | 0.00252  | 0.00242  | -0.00061 |
| D13 | -0.00302 | -0.00032 | 0.00000 | -0.00443 | -0.00418 | -0.00720 |
| D14 | 3.08412  | 0.00126  | 0.00000 | 0.02384  | 0.02247  | 3.10659  |
| D15 | 3.14018  | -0.00040 | 0.00000 | -0.00730 | -0.00695 | 3.13324  |
| D16 | -0.05587 | 0.00117  | 0.00000 | 0.02097  | 0.01970  | -0.03616 |
| D17 | 0.05324  | -0.00004 | 0.00000 | -0.00146 | -0.00138 | 0.05185  |
| D18 | -3.08570 | -0.00006 | 0.00000 | -0.00178 | -0.00170 | -3.08740 |
| D19 | -3.09031 | 0.00007  | 0.00000 | 0.00204  | 0.00196  | -3.08835 |
| D20 | 0.05395  | 0.00005  | 0.00000 | 0.00172  | 0.00164  | 0.05559  |
| D21 | 0.00582  | -0.00004 | 0.00000 | -0.00110 | -0.00106 | 0.00476  |
| D22 | 3.07976  | -0.00028 | 0.00000 | 0.01899  | 0.02069  | 3.10045  |
| D23 | -3.08518 | -0.00004 | 0.00000 | -0.01928 | -0.02130 | -3.10648 |
| D24 | -0.01124 | -0.00028 | 0.00000 | 0.00081  | 0.00045  | -0.01079 |
| D25 | -2.75347 | 0.00130  | 0.00000 | 0.05743  | 0.05740  | -2.69607 |
| D26 | 0.32652  | 0.00214  | 0.00000 | 0.08464  | 0.08468  | 0.41119  |
| D27 | 1.68519  | -0.00270 | 0.00000 | -0.06307 | -0.06362 | 1.62157  |
| D28 | -2.53248 | 0.00064  | 0.00000 | 0.00184  | 0.00308  | -2.52940 |
| D29 | -0.48532 | 0.00054  | 0.00000 | 0.00442  | 0.00406  | -0.48126 |
| D30 | -1.37554 | -0.00357 | 0.00000 | -0.09160 | -0.09236 | -1.46790 |
| D31 | 0.68998  | -0.00023 | 0.00000 | -0.02668 | -0.02566 | 0.66432  |
| D32 | 2.73714  | -0.00033 | 0.00000 | -0.02410 | -0.02469 | 2.71246  |
| D33 | -1.60211 | 0.00935  | 0.00000 | 0.21929  | 0.21934  | -1.38277 |
| D34 | 0.47379  | 0.00763  | 0.00000 | 0.19928  | 0.19933  | 0.67311  |
| D35 | 2.60690  | 0.00547  | 0.00000 | 0.17106  | 0.17122  | 2.77812  |
| D36 | 2.62877  | 0.00248  | 0.00000 | 0.12590  | 0.12575  | 2.75452  |

|     |          |          |         |          |          |          |
|-----|----------|----------|---------|----------|----------|----------|
| D37 | -1.57851 | 0.00077  | 0.00000 | 0.10590  | 0.10573  | -1.47278 |
| D38 | 0.55460  | -0.00139 | 0.00000 | 0.07768  | 0.07762  | 0.63223  |
| D39 | 0.51717  | 0.00366  | 0.00000 | 0.13276  | 0.13277  | 0.64994  |
| D40 | 2.59307  | 0.00194  | 0.00000 | 0.11275  | 0.11275  | 2.70582  |
| D41 | -1.55700 | -0.00022 | 0.00000 | 0.08453  | 0.08464  | -1.47236 |
| D42 | 1.63719  | 0.00091  | 0.00000 | 0.06304  | 0.06248  | 1.69967  |
| D43 | -2.55160 | 0.00385  | 0.00000 | 0.10875  | 0.10904  | -2.44257 |
| D44 | -0.46901 | 0.00205  | 0.00000 | 0.05574  | 0.05545  | -0.41357 |
| D45 | 1.62538  | 0.00499  | 0.00000 | 0.10144  | 0.10200  | 1.72739  |
| D46 | -2.54278 | -0.00086 | 0.00000 | 0.03322  | 0.03279  | -2.50999 |
| D47 | -0.44839 | 0.00208  | 0.00000 | 0.07892  | 0.07935  | -0.36904 |
| D48 | -3.13556 | -0.00001 | 0.00000 | -0.00019 | -0.00019 | -3.13575 |
| D49 | 0.00608  | 0.00002  | 0.00000 | 0.00028  | 0.00028  | 0.00637  |
| D50 | 0.00309  | 0.00001  | 0.00000 | 0.00016  | 0.00016  | 0.00325  |
| D51 | -3.13845 | 0.00003  | 0.00000 | 0.00063  | 0.00063  | -3.13782 |

| Item                 | Value    | Threshold | Converged? |
|----------------------|----------|-----------|------------|
| Maximum Force        | 0.025836 | 0.000450  | NO         |
| RMS Force            | 0.005760 | 0.000300  | NO         |
| Maximum Displacement | 1.406316 | 0.001800  | NO         |
| RMS Displacement     | 0.230894 | 0.001200  | NO         |

Predicted change in Energy=-1.448524D-02

GradGradGradGradGradGradGradGradGradGradGradGradGradGradGradGradGradGradGrad

Input orientation:

| Center Number | Atomic Number | Atomic Type | Coordinates (Angstroms) |           |           |
|---------------|---------------|-------------|-------------------------|-----------|-----------|
|               |               |             | X                       | Y         | Z         |
| 1             | 6             | 0           | -1.756456               | -1.937466 | 0.207214  |
| 2             | 6             | 0           | -2.788868               | -1.088670 | -0.010105 |
| 3             | 7             | 0           | -2.249119               | 0.188516  | 0.010220  |
| 4             | 6             | 0           | -0.919483               | 0.111019  | 0.226286  |
| 5             | 7             | 0           | -0.599453               | -1.187247 | 0.353518  |
| 6             | 6             | 0           | 0.743721                | -1.791002 | 0.554067  |
| 7             | 6             | 0           | 1.536029                | -2.009855 | -0.754896 |
| 8             | 1             | 0           | -1.745653               | -3.011504 | 0.276321  |
| 9             | 1             | 0           | -3.834591               | -1.281551 | -0.165267 |
| 10            | 1             | 0           | 1.338485                | -1.164210 | 1.218920  |
| 11            | 1             | 0           | 0.528789                | -2.744303 | 1.039419  |
| 12            | 1             | 0           | 1.176839                | -2.916464 | -1.261697 |
| 13            | 1             | 0           | 1.348228                | -1.158189 | -1.407310 |
| 14            | 35            | 0           | 1.621115                | 2.221573  | 0.078548  |
| 15            | 1             | 0           | -0.263781               | 1.005670  | 0.251657  |
| 16            | 6             | 0           | -2.918204               | 1.431035  | -0.159068 |



|    |   |   |           |           |           |
|----|---|---|-----------|-----------|-----------|
| 17 | 6 | 0 | -4.228189 | 1.569644  | -0.316270 |
| 18 | 1 | 0 | -2.231619 | 2.268160  | -0.148144 |
| 19 | 1 | 0 | -4.641460 | 2.560542  | -0.443370 |
| 20 | 1 | 0 | -4.922264 | 0.738870  | -0.325095 |
| 21 | 7 | 0 | 2.965680  | -2.122473 | -0.440284 |
| 22 | 1 | 0 | 3.250419  | -3.092978 | -0.382422 |
| 23 | 1 | 0 | 3.545357  | -1.644203 | -1.116958 |

-----  
Distance matrix (angstroms):

|    |    | 1        | 2        | 3        | 4        | 5        |
|----|----|----------|----------|----------|----------|----------|
| 1  | C  | 0.000000 |          |          |          |          |
| 2  | C  | 1.354089 | 0.000000 |          |          |          |
| 3  | N  | 2.191192 | 1.386704 | 0.000000 |          |          |
| 4  | C  | 2.212957 | 2.233772 | 1.349305 | 0.000000 |          |
| 5  | N  | 1.386683 | 2.221593 | 2.175311 | 1.343169 | 0.000000 |
| 6  | C  | 2.528368 | 3.645647 | 3.629236 | 2.547817 | 1.486222 |
| 7  | C  | 3.430940 | 4.484197 | 4.443600 | 3.389744 | 2.542744 |
| 8  | H  | 1.076314 | 2.206270 | 3.250295 | 3.230358 | 2.155840 |
| 9  | H  | 2.210794 | 1.074623 | 2.169243 | 3.254293 | 3.277827 |
| 10 | H  | 3.346660 | 4.307116 | 4.020165 | 2.776680 | 2.122512 |
| 11 | H  | 2.562400 | 3.853501 | 4.168627 | 3.303262 | 2.041522 |
| 12 | H  | 3.423500 | 4.542482 | 4.795400 | 3.971689 | 2.958770 |
| 13 | H  | 3.585111 | 4.367216 | 4.094375 | 3.069534 | 2.625799 |
| 14 | Br | 5.359305 | 5.514845 | 4.372265 | 3.306191 | 4.077571 |
| 15 | H  | 3.300319 | 3.291025 | 2.160463 | 1.109499 | 2.220797 |
| 16 | C  | 3.581985 | 2.527416 | 1.421332 | 2.426072 | 3.534791 |
| 17 | C  | 4.322421 | 3.038423 | 2.435329 | 3.656431 | 4.606169 |
| 18 | H  | 4.247276 | 3.405568 | 2.085738 | 2.552480 | 3.854280 |
| 19 | H  | 5.383176 | 4.115406 | 3.399345 | 4.505743 | 5.569451 |
| 20 | H  | 4.179530 | 2.826748 | 2.749733 | 4.089068 | 4.780914 |
| 21 | N  | 4.769911 | 5.862476 | 5.721692 | 4.530706 | 3.770271 |
| 22 | H  | 5.172202 | 6.374077 | 6.416174 | 5.293790 | 4.358318 |
| 23 | H  | 5.472537 | 6.454158 | 6.181047 | 4.981958 | 4.421601 |
|    |    | 6        | 7        | 8        | 9        | 10       |
| 6  | C  | 0.000000 |          |          |          |          |
| 7  | C  | 1.545650 | 0.000000 |          |          |          |
| 8  | H  | 2.786351 | 3.582757 | 0.000000 |          |          |
| 9  | H  | 4.662394 | 5.451756 | 2.747981 | 0.000000 |          |
| 10 | H  | 1.090249 | 2.156407 | 3.716571 | 5.356347 | 0.000000 |
| 11 | H  | 1.091121 | 2.184837 | 2.413877 | 4.757099 | 1.784523 |
| 12 | H  | 2.179738 | 1.099001 | 3.303860 | 5.384192 | 3.041379 |
| 13 | H  | 2.147762 | 1.089150 | 3.980137 | 5.330994 | 2.626255 |
| 14 | Br | 4.134815 | 4.313566 | 6.225700 | 6.488147 | 3.583832 |
| 15 | H  | 2.987957 | 3.653198 | 4.281851 | 4.260973 | 2.865525 |

|    |    |          |          |          |          |          |
|----|----|----------|----------|----------|----------|----------|
| 16 | C  | 4.929480 | 5.659940 | 4.615256 | 2.863202 | 5.172383 |
| 17 | C  | 6.063936 | 6.799368 | 5.244146 | 2.882193 | 6.388945 |
| 18 | H  | 5.081589 | 5.732777 | 5.318947 | 3.894902 | 5.137672 |
| 19 | H  | 6.995069 | 7.690705 | 6.320709 | 3.935742 | 7.238559 |
| 20 | H  | 6.267102 | 7.032053 | 4.951552 | 2.300148 | 6.723293 |
| 21 | N  | 2.456768 | 1.468185 | 4.847737 | 6.857585 | 2.513760 |
| 22 | H  | 2.975851 | 2.061802 | 5.039972 | 7.316132 | 3.152767 |
| 23 | H  | 3.265431 | 2.074173 | 5.639639 | 7.449890 | 3.249155 |
|    |    | 11       | 12       | 13       | 14       | 15       |
| 11 | H  | 0.000000 |          |          |          |          |
| 12 | H  | 2.396820 | 0.000000 |          |          |          |
| 13 | H  | 3.028815 | 1.772599 | 0.000000 |          |          |
| 14 | Br | 5.174589 | 5.328514 | 3.702031 | 0.000000 |          |
| 15 | H  | 3.912932 | 4.443958 | 3.167496 | 2.249715 | 0.000000 |
| 16 | C  | 5.545410 | 6.073377 | 5.144378 | 4.613765 | 2.719484 |
| 17 | C  | 6.563297 | 7.087547 | 6.303004 | 5.898750 | 4.044396 |
| 18 | H  | 5.844223 | 6.303801 | 5.112795 | 3.859678 | 2.371942 |
| 19 | H  | 7.554570 | 8.032426 | 7.115793 | 6.293421 | 4.697315 |
| 20 | H  | 6.611231 | 7.172012 | 6.639962 | 6.721394 | 4.701627 |
| 21 | N  | 2.917984 | 2.122520 | 2.116869 | 4.576875 | 4.549009 |
| 22 | H  | 3.090385 | 2.259207 | 2.900369 | 5.577776 | 5.436044 |
| 23 | H  | 3.867799 | 2.692485 | 2.268896 | 4.480644 | 4.837816 |
|    |    | 16       | 17       | 18       | 19       | 20       |
| 16 | C  | 0.000000 |          |          |          |          |
| 17 | C  | 1.326645 | 0.000000 |          |          |          |
| 18 | H  | 1.082727 | 2.121906 | 0.000000 |          |          |
| 19 | H  | 2.079959 | 1.081123 | 2.445400 | 0.000000 |          |
| 20 | H  | 2.126714 | 1.082591 | 3.099937 | 1.846978 | 0.000000 |
| 21 | N  | 6.879432 | 8.086956 | 6.809914 | 8.933041 | 8.391676 |
| 22 | H  | 7.653005 | 8.813286 | 7.671338 | 9.708129 | 9.026578 |
| 23 | H  | 7.221652 | 8.449730 | 7.044050 | 9.228087 | 8.832140 |
|    |    | 21       | 22       | 23       |          |          |
| 21 | N  | 0.000000 |          |          |          |          |
| 22 | H  | 1.013067 | 0.000000 |          |          |          |
| 23 | H  | 1.011265 | 1.650904 | 0.000000 |          |          |

Stoichiometry C7H12BrN3

Framework group C1[X(C7H12BrN3)]

Deg. of freedom 63

Full point group C1 NOp 1

Largest Abelian subgroup C1 NOp 1

Largest concise Abelian subgroup C1 NOp 1

Standard orientation:

-----  
Center Atomic Atomic Coordinates (Angstroms)

| Number | Number | Type | X         | Y         | Z         |
|--------|--------|------|-----------|-----------|-----------|
| 1      | 6      | 0    | -1.637778 | 2.159343  | -0.258318 |
| 2      | 6      | 0    | -2.676335 | 1.327150  | -0.008493 |
| 3      | 7      | 0    | -2.150017 | 0.044221  | -0.002987 |
| 4      | 6      | 0    | -0.822192 | 0.102286  | -0.235646 |
| 5      | 7      | 0    | -0.490288 | 1.393546  | -0.398712 |
| 6      | 6      | 0    | 0.856663  | 1.977919  | -0.629116 |
| 7      | 6      | 0    | 1.665982  | 2.220768  | 0.665125  |
| 8      | 1      | 0    | -1.616712 | 3.231164  | -0.354268 |
| 9      | 1      | 0    | -3.718190 | 1.534856  | 0.153402  |
| 10     | 1      | 0    | 1.437366  | 1.328590  | -1.284706 |
| 11     | 1      | 0    | 0.646055  | 2.921114  | -1.135647 |
| 12     | 1      | 0    | 1.321911  | 3.143405  | 1.153141  |
| 13     | 1      | 0    | 1.476845  | 1.387568  | 1.340590  |
| 14     | 35     | 0    | 1.698074  | -2.030682 | -0.063568 |
| 15     | 1      | 0    | -0.176057 | -0.799597 | -0.245996 |
| 16     | 6      | 0    | -2.829884 | -1.186581 | 0.204602  |
| 17     | 6      | 0    | -4.139358 | -1.307403 | 0.379723  |
| 18     | 1      | 0    | -2.152115 | -2.030927 | 0.206918  |
| 19     | 1      | 0    | -4.561331 | -2.290424 | 0.536035  |
| 20     | 1      | 0    | -4.824705 | -0.469379 | 0.375549  |
| 21     | 7      | 0    | 3.093054  | 2.310442  | 0.331974  |
| 22     | 1      | 0    | 3.387086  | 3.276152  | 0.246805  |
| 23     | 1      | 0    | 3.675422  | 1.842994  | 1.013881  |

Rotational constants (GHZ): 0.7052309 0.4890493 0.2975302  
Standard basis: 6-311++G(d,p) (5D, 7F)  
There are 365 symmetry adapted cartesian basis functions of A symmetry.  
There are 352 symmetry adapted basis functions of A symmetry.  
352 basis functions, 562 primitive gaussians, 365 cartesian basis functions  
55 alpha electrons 55 beta electrons  
nuclear repulsion energy 822.5646007602 Hartrees.  
NAtoms= 23 NActive= 23 NUniq= 23 SFac= 1.00D+00 NAtFMM= 60 NAOKFM=F  
Big=F  
Integral buffers will be 131072 words long.  
Raffenetti 2 integral format.  
Two-electron integral symmetry is turned on.  
One-electron integrals computed using PRISM.  
NBasis= 352 RedAO= T EigKep= 4.28D-06 NBF= 352  
NBsUse= 352 1.00D-06 EigRej= -1.00D+00 NBFU= 352  
Initial guess from the checkpoint file: "/home/suqian/liuwen/qianmengshijie/nh2/nh2.chk"  
B after Tr= 0.000000 0.000000 0.000000  
Rot= 0.999278 0.016830 -0.002035 0.033988 Ang= 4.35 deg.

ExpMin= 3.50D-02 ExpMax= 4.40D+05 ExpMxC= 1.51D+04 IAcc=3 IRadAn= 5 AccDes= 0.00D+00

Harris functional with IExCor= 402 and IRadAn= 5 diagonalized for initial guess.

HarFok: IExCor= 402 AccDes= 0.00D+00 IRadAn= 5 IDoV= 1 UseB2=F ITyADJ=14

ICtDFT= 3500011 ScaDFX= 1.000000 1.000000 1.000000 1.000000

FoFCou: FMM=F IPFlag= 0 FMFlag= 100000 FMFlg1= 0

NFxFlg= 0 DoJE=T BraDBF=F KetDBF=T FulRan=T

wScr= 0.000000 ICntrl= 500 IOpCl= 0 l1Cent= 200000004 NGrid=

0

NMat0= 1 NMatS0= 1 NMatT0= 0 NMatD0= 1 NMtDS0= 0

NMtDT0= 0

Petite list used in FoFCou.

Requested convergence on RMS density matrix=1.00D-08 within 128 cycles.

Requested convergence on MAX density matrix=1.00D-06.

Requested convergence on energy=1.00D-06.

No special actions if energy rises.

SCF Done: E(RB3LYP) = -3012.45662646 A.U. after 15 cycles

NFock= 15 Conv=0.23D-08 -V/T= 2.0017

Calling FoFJK, ICntrl= 2127 FMM=F ISym2X=0 l1Cent= 0 IOpClX= 0 NMat=1 NMatS=1

NMatT=0.

\*\*\*\*\* Axes restored to original set \*\*\*\*\*

-----

| Center | Atomic | Forces (Hartrees/Bohr) |              |              |
|--------|--------|------------------------|--------------|--------------|
| Number | Number | X                      | Y            | Z            |
| 1      | 6      | -0.000161671           | -0.003506160 | -0.000287235 |
| 2      | 6      | 0.000204294            | 0.000005544  | 0.000714355  |
| 3      | 7      | -0.000262473           | 0.000620060  | -0.000632683 |
| 4      | 6      | -0.004521975           | -0.001426711 | 0.000470926  |
| 5      | 7      | -0.000209261           | 0.004074086  | -0.002730994 |
| 6      | 6      | -0.001540889           | 0.000924643  | 0.000637187  |
| 7      | 6      | 0.002113177            | -0.001934367 | 0.001373624  |
| 8      | 1      | 0.000186047            | -0.000136985 | -0.000169609 |
| 9      | 1      | 0.000153583            | -0.000114738 | -0.000032860 |
| 10     | 1      | -0.002977128           | 0.002351444  | -0.001335065 |
| 11     | 1      | 0.004286484            | 0.000224098  | 0.003154698  |
| 12     | 1      | -0.003670995           | 0.002786553  | -0.000878851 |
| 13     | 1      | 0.003117954            | 0.002029588  | -0.000568108 |
| 14     | 35     | -0.003943423           | -0.002162519 | -0.000569902 |
| 15     | 1      | 0.010830624            | -0.004951907 | 0.000946157  |
| 16     | 6      | 0.000189928            | 0.001503132  | -0.000158042 |
| 17     | 6      | 0.000107653            | -0.000464263 | 0.000051973  |
| 18     | 1      | 0.000463458            | 0.000279437  | -0.000023552 |
| 19     | 1      | 0.000074063            | 0.000009018  | 0.000024962  |

-----

|    |   |              |              |              |
|----|---|--------------|--------------|--------------|
| 20 | 1 | -0.000153895 | -0.000004245 | -0.000013471 |
| 21 | 7 | -0.006603934 | -0.002790739 | 0.000168090  |
| 22 | 1 | 0.002224259  | 0.001553486  | -0.001143151 |
| 23 | 1 | 0.000094120  | 0.001131547  | 0.001001552  |

-----  
Cartesian Forces: Max 0.010830624 RMS 0.002358223

GradGradGradGradGradGradGradGradGradGradGradGradGradGradGradGradGradGradGrad  
Berny optimization.

Using GEDIIS/GDIIS optimizer.

FormGI is forming the generalized inverse of G from B-inverse, IUseBI=4.

Internal Forces: Max 0.011803741 RMS 0.002674747

Search for a local minimum.

Step number 2 out of a maximum of 121

All quantities printed in internal units (Hartrees-Bohrs-Radians)

Mixed Optimization -- RFO/linear search

Update second derivatives using D2CorX and points 1 2

DE= -6.37D-03 DEPred=-1.45D-02 R= 4.40D-01

Trust test= 4.40D-01 RLast= 5.69D-01 DXMaxT set to 3.00D-01

ITU= 0 0

Use linear search instead of GDIIS.

|                 |         |         |         |         |         |
|-----------------|---------|---------|---------|---------|---------|
| Eigenvalues --- | 0.00230 | 0.00265 | 0.00665 | 0.00787 | 0.01402 |
| Eigenvalues --- | 0.01532 | 0.01866 | 0.01908 | 0.02144 | 0.02173 |
| Eigenvalues --- | 0.02315 | 0.02385 | 0.02430 | 0.03062 | 0.03062 |
| Eigenvalues --- | 0.03595 | 0.03749 | 0.04406 | 0.04481 | 0.05295 |
| Eigenvalues --- | 0.05555 | 0.08737 | 0.09578 | 0.12279 | 0.12916 |
| Eigenvalues --- | 0.15710 | 0.15999 | 0.16000 | 0.16000 | 0.16000 |
| Eigenvalues --- | 0.16000 | 0.16000 | 0.17743 | 0.21602 | 0.22000 |
| Eigenvalues --- | 0.22286 | 0.22929 | 0.23555 | 0.24062 | 0.24999 |
| Eigenvalues --- | 0.27438 | 0.29194 | 0.33125 | 0.34088 | 0.34405 |
| Eigenvalues --- | 0.34762 | 0.34920 | 0.35138 | 0.35687 | 0.35690 |
| Eigenvalues --- | 0.35858 | 0.36095 | 0.36436 | 0.36656 | 0.42176 |
| Eigenvalues --- | 0.43012 | 0.46393 | 0.47366 | 0.47698 | 0.49570 |
| Eigenvalues --- | 0.54374 | 0.57986 | 0.60352 |         |         |

RFO step: Lambda=-2.66525463D-03 EMin= 2.29999493D-03

Quartic linear search produced a step of -0.24226.

Iteration 1 RMS(Cart)= 0.10476797 RMS(Int)= 0.00380722

Iteration 2 RMS(Cart)= 0.00467106 RMS(Int)= 0.00013428

Iteration 3 RMS(Cart)= 0.00001405 RMS(Int)= 0.00013394

Iteration 4 RMS(Cart)= 0.00000000 RMS(Int)= 0.00013394

| Variable | Old X   | -DE/DX  | Delta X<br>(Linear) | Delta X<br>(Quad) | Delta X<br>(Total) | New X   |
|----------|---------|---------|---------------------|-------------------|--------------------|---------|
| R1       | 2.55886 | 0.00219 | 0.00183             | 0.00196           | 0.00375            | 2.56261 |
| R2       | 2.62045 | 0.00052 | -0.00108            | 0.00193           | 0.00083            | 2.62128 |

|     |         |          |          |          |          |         |
|-----|---------|----------|----------|----------|----------|---------|
| R3  | 2.03394 | 0.00013  | 0.00003  | 0.00022  | 0.00026  | 2.03419 |
| R4  | 2.62049 | 0.00276  | 0.00190  | 0.00295  | 0.00484  | 2.62533 |
| R5  | 2.03074 | -0.00012 | -0.00002 | -0.00023 | -0.00024 | 2.03050 |
| R6  | 2.54982 | -0.00109 | -0.00076 | -0.00113 | -0.00186 | 2.54795 |
| R7  | 2.68593 | 0.00084  | 0.00028  | 0.00114  | 0.00142  | 2.68735 |
| R8  | 2.53822 | -0.01044 | -0.00459 | -0.00870 | -0.01325 | 2.52497 |
| R9  | 2.09665 | -0.00166 | -0.00181 | -0.00158 | -0.00338 | 2.09327 |
| R10 | 2.80855 | -0.00489 | -0.00351 | -0.00624 | -0.00975 | 2.79880 |
| R11 | 2.92086 | -0.00175 | 0.00262  | -0.00769 | -0.00507 | 2.91578 |
| R12 | 2.06027 | -0.00109 | -0.00060 | -0.00159 | -0.00218 | 2.05809 |
| R13 | 2.06192 | 0.00036  | -0.00032 | 0.00114  | 0.00082  | 2.06274 |
| R14 | 2.07681 | -0.00070 | -0.00254 | 0.00148  | -0.00106 | 2.07575 |
| R15 | 2.05819 | 0.00139  | 0.00334  | -0.00090 | 0.00244  | 2.06063 |
| R16 | 2.77447 | -0.00415 | 0.00083  | -0.00951 | -0.00868 | 2.76579 |
| R17 | 4.25135 | -0.00443 | 0.01584  | -0.09329 | -0.07745 | 4.17390 |
| R18 | 2.50699 | -0.00008 | -0.00009 | 0.00001  | -0.00008 | 2.50692 |
| R19 | 2.04606 | 0.00051  | -0.00007 | 0.00113  | 0.00106  | 2.04711 |
| R20 | 2.04303 | -0.00002 | 0.00000  | -0.00005 | -0.00005 | 2.04298 |
| R21 | 2.04580 | 0.00011  | -0.00002 | 0.00025  | 0.00022  | 2.04602 |
| R22 | 1.91442 | -0.00093 | -0.00598 | 0.00566  | -0.00032 | 1.91410 |
| R23 | 1.91101 | -0.00008 | -0.00516 | 0.00600  | 0.00084  | 1.91186 |
| A1  | 1.89016 | -0.00360 | -0.00359 | -0.00558 | -0.00921 | 1.88094 |
| A2  | 2.26982 | 0.00196  | 0.00188  | 0.00339  | 0.00528  | 2.27510 |
| A3  | 2.12319 | 0.00164  | 0.00171  | 0.00215  | 0.00387  | 2.12706 |
| A4  | 1.85273 | 0.00010  | 0.00225  | 0.00220  | 0.00438  | 1.85711 |
| A5  | 2.28181 | -0.00019 | -0.00109 | -0.00171 | -0.00282 | 2.27899 |
| A6  | 2.14861 | 0.00009  | -0.00115 | -0.00036 | -0.00154 | 2.14707 |
| A7  | 1.91029 | -0.00248 | -0.00340 | -0.00293 | -0.00630 | 1.90399 |
| A8  | 2.23977 | 0.00264  | 0.00137  | 0.00595  | 0.00730  | 2.24707 |
| A9  | 2.13313 | -0.00016 | 0.00203  | -0.00302 | -0.00101 | 2.13212 |
| A10 | 1.88123 | 0.00248  | 0.00205  | 0.00189  | 0.00383  | 1.88507 |
| A11 | 2.14090 | 0.00797  | 0.02569  | 0.01125  | 0.03666  | 2.17757 |
| A12 | 2.26065 | -0.01048 | -0.02797 | -0.01400 | -0.04215 | 2.21849 |
| A13 | 1.89034 | 0.00350  | 0.00269  | 0.00448  | 0.00719  | 1.89753 |
| A14 | 2.15139 | 0.00830  | 0.01864  | 0.00400  | 0.02261  | 2.17400 |
| A15 | 2.24052 | -0.01180 | -0.02166 | -0.00892 | -0.03063 | 2.20989 |
| A16 | 1.98943 | -0.00638 | -0.00742 | -0.01288 | -0.02047 | 1.96896 |
| A17 | 1.91959 | -0.00002 | -0.01328 | -0.01158 | -0.02518 | 1.89441 |
| A18 | 1.80999 | 0.00382  | 0.01581  | 0.01838  | 0.03421  | 1.84420 |
| A19 | 1.89462 | 0.00168  | -0.00183 | -0.00926 | -0.01130 | 1.88332 |
| A20 | 1.93261 | 0.00248  | 0.00809  | 0.01866  | 0.02683  | 1.95944 |
| A21 | 1.91611 | -0.00152 | -0.00171 | -0.00212 | -0.00375 | 1.91236 |
| A22 | 1.91750 | -0.00006 | 0.00294  | 0.00090  | 0.00377  | 1.92127 |
| A23 | 1.88407 | 0.00101  | 0.00212  | -0.00405 | -0.00199 | 1.88208 |

|     |          |          |          |          |          |          |
|-----|----------|----------|----------|----------|----------|----------|
| A24 | 1.90555  | -0.00199 | 0.00509  | -0.01210 | -0.00709 | 1.89846  |
| A25 | 1.88860  | -0.00059 | 0.00157  | -0.00463 | -0.00292 | 1.88568  |
| A26 | 1.93242  | 0.00281  | -0.01352 | 0.03666  | 0.02315  | 1.95557  |
| A27 | 1.93504  | -0.00121 | 0.00197  | -0.01763 | -0.01560 | 1.91944  |
| A28 | 2.76305  | 0.00035  | -0.02302 | 0.02738  | 0.00436  | 2.76741  |
| A29 | 2.17765  | -0.00041 | -0.00003 | -0.00132 | -0.00135 | 2.17630  |
| A30 | 1.95647  | 0.00002  | 0.00028  | -0.00044 | -0.00017 | 1.95630  |
| A31 | 2.14907  | 0.00038  | -0.00025 | 0.00176  | 0.00152  | 2.15058  |
| A32 | 2.07962  | -0.00017 | 0.00002  | -0.00081 | -0.00079 | 2.07883  |
| A33 | 2.15779  | 0.00020  | -0.00001 | 0.00094  | 0.00093  | 2.15872  |
| A34 | 2.04577  | -0.00003 | -0.00001 | -0.00013 | -0.00014 | 2.04563  |
| A35 | 1.93843  | 0.00360  | -0.00674 | 0.02543  | 0.01887  | 1.95730  |
| A36 | 1.95898  | -0.00025 | -0.01171 | 0.01328  | 0.00174  | 1.96072  |
| A37 | 1.90729  | -0.00140 | 0.00081  | -0.00485 | -0.00374 | 1.90355  |
| D1  | -0.00375 | 0.00058  | 0.00198  | 0.01568  | 0.01773  | 0.01398  |
| D2  | -3.13578 | 0.00004  | -0.00025 | 0.00113  | 0.00086  | -3.13492 |
| D3  | 3.13072  | 0.00037  | 0.00230  | 0.00894  | 0.01124  | -3.14122 |
| D4  | -0.00132 | -0.00017 | 0.00007  | -0.00560 | -0.00563 | -0.00694 |
| D5  | -0.00055 | -0.00055 | -0.00143 | -0.01448 | -0.01597 | -0.01652 |
| D6  | -3.09910 | 0.00005  | 0.00546  | -0.00400 | 0.00132  | -3.09778 |
| D7  | -3.13573 | -0.00037 | -0.00172 | -0.00843 | -0.01016 | 3.13729  |
| D8  | 0.04890  | 0.00023  | 0.00517  | 0.00205  | 0.00713  | 0.05603  |
| D9  | 0.00678  | -0.00043 | -0.00188 | -0.01159 | -0.01360 | -0.00681 |
| D10 | -3.13356 | -0.00058 | -0.00260 | -0.01734 | -0.02015 | 3.12947  |
| D11 | 3.13973  | 0.00006  | 0.00014  | 0.00156  | 0.00167  | 3.14140  |
| D12 | -0.00061 | -0.00009 | -0.00059 | -0.00419 | -0.00488 | -0.00550 |
| D13 | -0.00720 | 0.00008  | 0.00101  | 0.00276  | 0.00382  | -0.00338 |
| D14 | 3.10659  | -0.00100 | -0.00544 | -0.02719 | -0.03322 | 3.07337  |
| D15 | 3.13324  | 0.00023  | 0.00168  | 0.00809  | 0.00986  | -3.14009 |
| D16 | -0.03616 | -0.00086 | -0.00477 | -0.02185 | -0.02717 | -0.06334 |
| D17 | 0.05185  | 0.00011  | 0.00034  | 0.00456  | 0.00495  | 0.05680  |
| D18 | -3.08740 | 0.00012  | 0.00041  | 0.00466  | 0.00512  | -3.08228 |
| D19 | -3.08835 | -0.00006 | -0.00047 | -0.00184 | -0.00237 | -3.09071 |
| D20 | 0.05559  | -0.00005 | -0.00040 | -0.00175 | -0.00219 | 0.05339  |
| D21 | 0.00476  | 0.00029  | 0.00026  | 0.00708  | 0.00739  | 0.01215  |
| D22 | 3.10045  | 0.00033  | -0.00501 | -0.00365 | -0.00861 | 3.09184  |
| D23 | -3.10648 | 0.00106  | 0.00516  | 0.03920  | 0.04384  | -3.06264 |
| D24 | -0.01079 | 0.00110  | -0.00011 | 0.02847  | 0.02784  | 0.01705  |
| D25 | -2.69607 | 0.00126  | -0.01391 | 0.07405  | 0.06007  | -2.63600 |
| D26 | 0.41119  | 0.00024  | -0.02051 | 0.03749  | 0.01705  | 0.42824  |
| D27 | 1.62157  | 0.00219  | 0.01541  | 0.08732  | 0.10274  | 1.72430  |
| D28 | -2.52940 | -0.00017 | -0.00075 | 0.05737  | 0.05673  | -2.47267 |
| D29 | -0.48126 | 0.00011  | -0.00098 | 0.05939  | 0.05849  | -0.42277 |
| D30 | -1.46790 | 0.00237  | 0.02238  | 0.09957  | 0.12182  | -1.34608 |

|     |          |          |          |          |          |          |
|-----|----------|----------|----------|----------|----------|----------|
| D31 | 0.66432  | 0.00001  | 0.00622  | 0.06961  | 0.07581  | 0.74013  |
| D32 | 2.71246  | 0.00029  | 0.00598  | 0.07164  | 0.07757  | 2.79003  |
| D33 | -1.38277 | 0.00039  | -0.05314 | 0.10951  | 0.05645  | -1.32632 |
| D34 | 0.67311  | 0.00024  | -0.04829 | 0.10211  | 0.05389  | 0.72700  |
| D35 | 2.77812  | -0.00178 | -0.04148 | 0.07135  | 0.02993  | 2.80805  |
| D36 | 2.75452  | 0.00356  | -0.03046 | 0.14027  | 0.10972  | 2.86425  |
| D37 | -1.47278 | 0.00340  | -0.02562 | 0.13287  | 0.10716  | -1.36561 |
| D38 | 0.63223  | 0.00139  | -0.01881 | 0.10211  | 0.08321  | 0.71544  |
| D39 | 0.64994  | 0.00284  | -0.03216 | 0.13734  | 0.10521  | 0.75514  |
| D40 | 2.70582  | 0.00268  | -0.02732 | 0.12994  | 0.10265  | 2.80847  |
| D41 | -1.47236 | 0.00067  | -0.02051 | 0.09918  | 0.07869  | -1.39367 |
| D42 | 1.69967  | 0.00098  | -0.01514 | 0.05158  | 0.03652  | 1.73618  |
| D43 | -2.44257 | 0.00162  | -0.02642 | 0.07347  | 0.04697  | -2.39559 |
| D44 | -0.41357 | 0.00056  | -0.01343 | 0.03510  | 0.02166  | -0.39191 |
| D45 | 1.72739  | 0.00121  | -0.02471 | 0.05698  | 0.03211  | 1.75950  |
| D46 | -2.50999 | 0.00024  | -0.00794 | 0.02832  | 0.02054  | -2.48945 |
| D47 | -0.36904 | 0.00089  | -0.01922 | 0.05021  | 0.03100  | -0.33804 |
| D48 | -3.13575 | -0.00001 | 0.00005  | -0.00030 | -0.00026 | -3.13601 |
| D49 | 0.00637  | 0.00000  | -0.00007 | 0.00010  | 0.00003  | 0.00640  |
| D50 | 0.00325  | -0.00002 | -0.00004 | -0.00042 | -0.00045 | 0.00280  |
| D51 | -3.13782 | 0.00000  | -0.00015 | -0.00001 | -0.00016 | -3.13798 |

| Item                 | Value    | Threshold | Converged? |
|----------------------|----------|-----------|------------|
| Maximum Force        | 0.011804 | 0.000450  | NO         |
| RMS Force            | 0.002675 | 0.000300  | NO         |
| Maximum Displacement | 0.481887 | 0.001800  | NO         |
| RMS Displacement     | 0.105453 | 0.001200  | NO         |

Predicted change in Energy=-3.086627D-03

GradGradGradGradGradGradGradGradGradGradGradGradGradGradGradGradGradGradGradGrad

Input orientation:

| Center Number | Atomic Number | Atomic Type | Coordinates (Angstroms) |           |           |
|---------------|---------------|-------------|-------------------------|-----------|-----------|
|               |               |             | X                       | Y         | Z         |
| 1             | 6             | 0           | -1.800433               | -1.980173 | 0.254366  |
| 2             | 6             | 0           | -2.817410               | -1.109051 | 0.040266  |
| 3             | 7             | 0           | -2.250001               | 0.158880  | 0.018884  |
| 4             | 6             | 0           | -0.921827               | 0.051159  | 0.224592  |
| 5             | 7             | 0           | -0.631571               | -1.243843 | 0.379635  |
| 6             | 6             | 0           | 0.714890                | -1.830793 | 0.569563  |
| 7             | 6             | 0           | 1.522364                | -1.912639 | -0.742697 |
| 8             | 1             | 0           | -1.808046               | -3.053251 | 0.339145  |
| 9             | 1             | 0           | -3.868362               | -1.282641 | -0.100808 |
| 10            | 1             | 0           | 1.270556                | -1.204593 | 1.266148  |



|    |    |   |           |           |           |
|----|----|---|-----------|-----------|-----------|
| 11 | 1  | 0 | 0.547950  | -2.813483 | 1.014475  |
| 12 | 1  | 0 | 1.155018  | -2.743367 | -1.360370 |
| 13 | 1  | 0 | 1.360293  | -0.985280 | -1.292967 |
| 14 | 35 | 0 | 1.703108  | 1.966570  | -0.093385 |
| 15 | 1  | 0 | -0.207708 | 0.897500  | 0.197075  |
| 16 | 6  | 0 | -2.884942 | 1.414812  | -0.185582 |
| 17 | 6  | 0 | -4.191891 | 1.584338  | -0.337314 |
| 18 | 1  | 0 | -2.174074 | 2.231954  | -0.206920 |
| 19 | 1  | 0 | -4.578225 | 2.581963  | -0.493066 |
| 20 | 1  | 0 | -4.909272 | 0.773733  | -0.314090 |
| 21 | 7  | 0 | 2.941255  | -2.057778 | -0.414395 |
| 22 | 1  | 0 | 3.251824  | -3.019672 | -0.479731 |
| 23 | 1  | 0 | 3.532027  | -1.479428 | -0.997541 |

-----  
Distance matrix (angstroms):

|    |    | 1        | 2        | 3        | 4        | 5        |
|----|----|----------|----------|----------|----------|----------|
| 1  | C  | 0.000000 |          |          |          |          |
| 2  | C  | 1.356073 | 0.000000 |          |          |          |
| 3  | N  | 2.198434 | 1.389265 | 0.000000 |          |          |
| 4  | C  | 2.213401 | 2.230089 | 1.348319 | 0.000000 |          |
| 5  | N  | 1.387124 | 2.216130 | 2.171886 | 1.336158 | 0.000000 |
| 6  | C  | 2.539392 | 3.643928 | 3.612841 | 2.517855 | 1.481060 |
| 7  | C  | 3.469824 | 4.482458 | 4.370576 | 3.281192 | 2.519197 |
| 8  | H  | 1.076449 | 2.210896 | 3.258171 | 3.230460 | 2.158632 |
| 9  | H  | 2.211115 | 1.074493 | 2.170576 | 3.250689 | 3.272484 |
| 10 | H  | 3.325087 | 4.268885 | 3.976059 | 2.732818 | 2.098936 |
| 11 | H  | 2.605202 | 3.896129 | 4.201746 | 3.315167 | 2.063507 |
| 12 | H  | 3.453191 | 4.518070 | 4.681830 | 3.825541 | 2.909998 |
| 13 | H  | 3.657081 | 4.387030 | 4.008026 | 2.930061 | 2.613804 |
| 14 | Br | 5.288904 | 5.469221 | 4.348266 | 3.264995 | 3.997652 |
| 15 | H  | 3.289538 | 3.295661 | 2.179054 | 1.107708 | 2.190512 |
| 16 | C  | 3.591050 | 2.534848 | 1.422084 | 2.425204 | 3.530666 |
| 17 | C  | 4.333001 | 3.047311 | 2.435107 | 3.655091 | 4.603097 |
| 18 | H  | 4.253753 | 3.411348 | 2.086718 | 2.551508 | 3.847666 |
| 19 | H  | 5.393317 | 4.124136 | 3.399125 | 4.504359 | 5.565472 |
| 20 | H  | 4.191899 | 2.836605 | 2.749662 | 4.088032 | 4.780230 |
| 21 | N  | 4.789245 | 5.853975 | 5.661310 | 4.447395 | 3.749408 |
| 22 | H  | 5.210063 | 6.384080 | 6.373530 | 5.229287 | 4.355782 |
| 23 | H  | 5.500286 | 6.444344 | 6.095000 | 4.865503 | 4.391772 |
|    |    | 6        | 7        | 8        | 9        | 10       |
| 6  | C  | 0.000000 |          |          |          |          |
| 7  | C  | 1.542965 | 0.000000 |          |          |          |
| 8  | H  | 2.812952 | 3.682800 | 0.000000 |          |          |
| 9  | H  | 4.664340 | 5.465240 | 2.752003 | 0.000000 |          |

|    |    |          |          |          |          |          |
|----|----|----------|----------|----------|----------|----------|
| 10 | H  | 1.089093 | 2.144807 | 3.708728 | 5.318190 | 0.000000 |
| 11 | H  | 1.091556 | 2.201967 | 2.462575 | 4.805325 | 1.781580 |
| 12 | H  | 2.179712 | 1.098441 | 3.429888 | 5.380945 | 3.046272 |
| 13 | H  | 2.144867 | 1.090440 | 4.120517 | 5.371080 | 2.570062 |
| 14 | Br | 3.979452 | 3.937326 | 6.141163 | 6.449705 | 3.477313 |
| 15 | H  | 2.904052 | 3.431210 | 4.264939 | 4.271082 | 2.783339 |
| 16 | C  | 4.905404 | 5.550375 | 4.625866 | 2.872378 | 5.122204 |
| 17 | C  | 6.046656 | 6.711624 | 5.258093 | 2.894853 | 6.339365 |
| 18 | H  | 5.045291 | 5.579280 | 5.325933 | 3.903108 | 5.083824 |
| 19 | H  | 6.972708 | 7.581619 | 6.334201 | 3.948789 | 7.186173 |
| 20 | H  | 6.260639 | 6.983283 | 4.968916 | 2.314661 | 6.678413 |
| 21 | N  | 2.444667 | 1.463591 | 4.910667 | 6.860762 | 2.518608 |
| 22 | H  | 2.991736 | 2.070194 | 5.125814 | 7.338795 | 3.204377 |
| 23 | H  | 3.242767 | 2.071560 | 5.725385 | 7.457119 | 3.211553 |
|    |    | 11       | 12       | 13       | 14       | 15       |
| 11 | H  | 0.000000 |          |          |          |          |
| 12 | H  | 2.452211 | 0.000000 |          |          |          |
| 13 | H  | 3.053934 | 1.771313 | 0.000000 |          |          |
| 14 | Br | 5.040897 | 4.908070 | 3.204674 | 0.000000 |          |
| 15 | H  | 3.874346 | 4.187908 | 2.867702 | 2.208731 | 0.000000 |
| 16 | C  | 5.577039 | 5.915392 | 5.000876 | 4.622027 | 2.753475 |
| 17 | C  | 6.605623 | 6.954503 | 6.192168 | 5.912411 | 4.078116 |
| 18 | H  | 5.861541 | 6.096485 | 4.901208 | 3.887912 | 2.410514 |
| 19 | H  | 7.593496 | 7.872829 | 6.973597 | 6.324048 | 4.734462 |
| 20 | H  | 6.664419 | 7.088040 | 6.584813 | 6.722732 | 4.730889 |
| 21 | N  | 2.888022 | 2.134371 | 2.102756 | 4.222727 | 4.361597 |
| 22 | H  | 3.096143 | 2.290953 | 2.894477 | 5.235494 | 5.269788 |
| 23 | H  | 3.838310 | 2.716497 | 2.246751 | 4.004665 | 4.589391 |
|    |    | 16       | 17       | 18       | 19       | 20       |
| 16 | C  | 0.000000 |          |          |          |          |
| 17 | C  | 1.326603 | 0.000000 |          |          |          |
| 18 | H  | 1.083286 | 2.123203 | 0.000000 |          |          |
| 19 | H  | 2.079421 | 1.081096 | 2.446288 | 0.000000 |          |
| 20 | H  | 2.127301 | 1.082708 | 3.101484 | 1.846976 | 0.000000 |
| 21 | N  | 6.786443 | 8.009539 | 6.679180 | 8.836060 | 8.346154 |
| 22 | H  | 7.577010 | 8.753633 | 7.556083 | 9.627469 | 9.001158 |
| 23 | H  | 7.086141 | 8.335555 | 6.852666 | 9.084359 | 8.763525 |
|    |    | 21       | 22       | 23       |          |          |
| 21 | N  | 0.000000 |          |          |          |          |
| 22 | H  | 1.012899 | 0.000000 |          |          |          |
| 23 | H  | 1.011711 | 1.648937 | 0.000000 |          |          |

Stoichiometry C7H12BrN3

Framework group C1[X(C7H12BrN3)]

Deg. of freedom 63

Full point group C1 NOp 1  
 Largest Abelian subgroup C1 NOp 1  
 Largest concise Abelian subgroup C1 NOp 1

Standard orientation:

| Center<br>Number | Atomic<br>Number | Atomic<br>Type | Coordinates (Angstroms) |           |           |
|------------------|------------------|----------------|-------------------------|-----------|-----------|
|                  |                  |                | X                       | Y         | Z         |
| 1                | 6                | 0              | -1.696604               | 2.141139  | -0.209847 |
| 2                | 6                | 0              | -2.720310               | 1.280317  | 0.013642  |
| 3                | 7                | 0              | -2.172814               | 0.003797  | -0.014648 |
| 4                | 6                | 0              | -0.850020               | 0.096621  | -0.258705 |
| 5                | 7                | 0              | -0.544027               | 1.390634  | -0.389912 |
| 6                | 6                | 0              | 0.805173                | 1.961790  | -0.606660 |
| 7                | 6                | 0              | 1.653692                | 1.997562  | 0.681547  |
| 8                | 1                | 0              | -1.689690               | 3.216036  | -0.267207 |
| 9                | 1                | 0              | -3.763541               | 1.466138  | 0.191619  |
| 10               | 1                | 0              | 1.329166                | 1.345378  | -1.335762 |
| 11               | 1                | 0              | 0.640375                | 2.958029  | -1.021201 |
| 12               | 1                | 0              | 1.318751                | 2.817586  | 1.331121  |
| 13               | 1                | 0              | 1.493786                | 1.058907  | 1.212974  |
| 14               | 35               | 0              | 1.752533                | -1.865936 | -0.070879 |
| 15               | 1                | 0              | -0.148987               | -0.760883 | -0.274768 |
| 16               | 6                | 0              | -2.821148               | -1.247210 | 0.177631  |
| 17               | 6                | 0              | -4.125370               | -1.400743 | 0.365534  |
| 18               | 1                | 0              | -2.123088               | -2.075318 | 0.156234  |
| 19               | 1                | 0              | -4.522616               | -2.396074 | 0.507947  |
| 20               | 1                | 0              | -4.830101               | -0.579021 | 0.385085  |
| 21               | 7                | 0              | 3.063988                | 2.129568  | 0.313124  |
| 22               | 1                | 0              | 3.391721                | 3.084640  | 0.393071  |
| 23               | 1                | 0              | 3.663053                | 1.527501  | 0.862846  |

Rotational constants (GHZ): 0.7844732 0.4835611 0.3082103

Standard basis: 6-311++G(d,p) (5D, 7F)

There are 365 symmetry adapted cartesian basis functions of A symmetry.

There are 352 symmetry adapted basis functions of A symmetry.

352 basis functions, 562 primitive gaussians, 365 cartesian basis functions

55 alpha electrons 55 beta electrons

nuclear repulsion energy 833.5001773764 Hartrees.

NAtoms= 23 NActive= 23 NUniq= 23 SFac= 1.00D+00 NAtFMM= 60 NAOKFM=F

Big=F

Integral buffers will be 131072 words long.

Raffenetti 2 integral format.

Two-electron integral symmetry is turned on.

One-electron integrals computed using PRISM.

NBasis= 352 RedAO= T EigKep= 4.31D-06 NBF= 352  
NBsUse= 352 1.00D-06 EigRej= -1.00D+00 NBFU= 352  
Initial guess from the checkpoint file: "/home/suqian/liuwen/qianmengshijie/nh2/nh2.chk"  
B after Tr= 0.000000 0.000000 0.000000  
Rot= 0.999925 -0.008950 -0.000807 -0.008364 Ang= -1.41 deg.  
ExpMin= 3.50D-02 ExpMax= 4.40D+05 ExpMxC= 1.51D+04 IAcc=3 IRadAn= 5 AccDes= 0.00D+00

Harris functional with IExCor= 402 and IRadAn= 5 diagonalized for initial guess.  
HarFok: IExCor= 402 AccDes= 0.00D+00 IRadAn= 5 IDoV= 1 UseB2=F ITyADJ=14  
ICtDFT= 3500011 ScaDFX= 1.000000 1.000000 1.000000 1.000000  
FoFCou: FMM=F IPFlag= 0 FMFlag= 100000 FMFlg1= 0  
NFxFlg= 0 DoJE=T BraDBF=F KetDBF=T FulRan=T  
wScrn= 0.000000 ICntrl= 500 IOpCl= 0 I1Cent= 20000004 NGrid= 0  
NMat0= 1 NMatS0= 1 NMatT0= 0 NMatD0= 1 NMtDS0= 0  
NMtDT0= 0

Petite list used in FoFCou.

Requested convergence on RMS density matrix=1.00D-08 within 128 cycles.

Requested convergence on MAX density matrix=1.00D-06.

Requested convergence on energy=1.00D-06.

No special actions if energy rises.

SCF Done: E(RB3LYP) = -3012.46070248 A.U. after 12 cycles

NFock= 12 Conv=0.96D-08 -V/T= 2.0017

Calling FoFJK, ICntrl= 2127 FMM=F ISym2X=0 I1Cent= 0 IOpClX= 0 NMat=1 NMatS=1  
NMatT=0.

\*\*\*\*\* Axes restored to original set \*\*\*\*\*

| Center<br>Number | Atomic<br>Number | Forces (Hartrees/Bohr) |              |              |
|------------------|------------------|------------------------|--------------|--------------|
|                  |                  | X                      | Y            | Z            |
| 1                | 6                | -0.000712998           | -0.000027048 | 0.001297467  |
| 2                | 6                | 0.000025360            | -0.000058946 | -0.001031437 |
| 3                | 7                | -0.000511398           | -0.000078810 | 0.000066499  |
| 4                | 6                | -0.004329998           | -0.000415726 | 0.000014769  |
| 5                | 7                | -0.001614034           | -0.002539133 | -0.002449096 |
| 6                | 6                | 0.000790698            | 0.004464481  | -0.000290690 |
| 7                | 6                | 0.002069154            | -0.001722994 | 0.000769346  |
| 8                | 1                | 0.000055622            | 0.000111453  | 0.000177244  |
| 9                | 1                | -0.000075150           | -0.000001872 | -0.000066821 |
| 10               | 1                | -0.000950387           | 0.000864126  | -0.000184408 |
| 11               | 1                | 0.002201175            | 0.000409883  | 0.000913967  |
| 12               | 1                | -0.002008207           | 0.001036714  | -0.000287469 |
| 13               | 1                | 0.002168153            | 0.001676907  | 0.000844272  |

|    |    |              |              |              |
|----|----|--------------|--------------|--------------|
| 14 | 35 | -0.001982255 | -0.000540281 | -0.000868029 |
| 15 | 1  | 0.007547541  | -0.001719490 | 0.001429211  |
| 16 | 6  | 0.000047002  | 0.000279474  | 0.000121099  |
| 17 | 6  | -0.000012513 | -0.000065963 | 0.000035434  |
| 18 | 1  | 0.000100464  | -0.000165555 | -0.000047905 |
| 19 | 1  | -0.000021311 | 0.000027013  | -0.000024196 |
| 20 | 1  | 0.000031637  | -0.000016078 | 0.000013779  |
| 21 | 7  | -0.002946217 | -0.004310942 | -0.000921890 |
| 22 | 1  | 0.000793619  | 0.001155490  | -0.000980703 |
| 23 | 1  | -0.000665958 | 0.001637295  | 0.001469559  |

-----  
Cartesian Forces: Max 0.007547541 RMS 0.001661158

GradGradGradGradGradGradGradGradGradGradGradGradGradGradGradGradGradGradGrad

Berny optimization.

Using GEDIIS/GDIIS optimizer.

FormGI is forming the generalized inverse of G from B-inverse, IUseBI=4.

Internal Forces: Max 0.005974176 RMS 0.001300589

Search for a local minimum.

Step number 3 out of a maximum of 121

All quantities printed in internal units (Hartrees-Bohrs-Radians)

Mixed Optimization -- RFO/linear search

Update second derivatives using D2CorX and points 2 3

DE= -4.08D-03 DEPred=-3.09D-03 R= 1.32D+00

TightC=F SS= 1.41D+00 RLast= 3.76D-01 DXNew= 5.0454D-01 1.1279D+00

Trust test= 1.32D+00 RLast= 3.76D-01 DXMaxT set to 5.05D-01

ITU= 1 0 0

Use linear search instead of GDIIS.

|                 |         |         |         |         |         |
|-----------------|---------|---------|---------|---------|---------|
| Eigenvalues --- | 0.00227 | 0.00265 | 0.00481 | 0.00788 | 0.01401 |
| Eigenvalues --- | 0.01535 | 0.01832 | 0.01875 | 0.02126 | 0.02207 |
| Eigenvalues --- | 0.02316 | 0.02375 | 0.02405 | 0.03062 | 0.03062 |
| Eigenvalues --- | 0.03600 | 0.03677 | 0.04404 | 0.04601 | 0.05342 |
| Eigenvalues --- | 0.05605 | 0.08678 | 0.09452 | 0.12391 | 0.12890 |
| Eigenvalues --- | 0.15172 | 0.15845 | 0.15998 | 0.15999 | 0.16000 |
| Eigenvalues --- | 0.16000 | 0.16000 | 0.16077 | 0.21719 | 0.22000 |
| Eigenvalues --- | 0.22368 | 0.23188 | 0.23464 | 0.23766 | 0.24243 |
| Eigenvalues --- | 0.25157 | 0.27472 | 0.33498 | 0.34064 | 0.34406 |
| Eigenvalues --- | 0.34758 | 0.34924 | 0.35482 | 0.35587 | 0.35689 |
| Eigenvalues --- | 0.35829 | 0.35865 | 0.36443 | 0.36661 | 0.42191 |
| Eigenvalues --- | 0.42931 | 0.46275 | 0.47247 | 0.47686 | 0.49414 |
| Eigenvalues --- | 0.54373 | 0.57167 | 0.60352 |         |         |

RFO step: Lambda=-2.61375517D-03 EMin= 2.27384549D-03

Quartic linear search produced a step of 0.93645.

Iteration 1 RMS(Cart)= 0.15145497 RMS(Int)= 0.01547770

| Iteration 2 | RMS(Cart)= | 0.01865246 | RMS(Int)=           | 0.00071923        |                    |         |
|-------------|------------|------------|---------------------|-------------------|--------------------|---------|
| Iteration 3 | RMS(Cart)= | 0.00042838 | RMS(Int)=           | 0.00065253        |                    |         |
| Iteration 4 | RMS(Cart)= | 0.00000023 | RMS(Int)=           | 0.00065253        |                    |         |
| Variable    | Old X      | -DE/DX     | Delta X<br>(Linear) | Delta X<br>(Quad) | Delta X<br>(Total) | New X   |
| R1          | 2.56261    | 0.00083    | 0.00351             | 0.00065           | 0.00398            | 2.56659 |
| R2          | 2.62128    | 0.00024    | 0.00078             | -0.00037          | 0.00036            | 2.62164 |
| R3          | 2.03419    | -0.00010   | 0.00024             | -0.00068          | -0.00044           | 2.03375 |
| R4          | 2.62533    | 0.00069    | 0.00453             | -0.00046          | 0.00403            | 2.62936 |
| R5          | 2.03050    | 0.00008    | -0.00023            | 0.00060           | 0.00037            | 2.03087 |
| R6          | 2.54795    | 0.00011    | -0.00174            | 0.00147           | -0.00014           | 2.54781 |
| R7          | 2.68735    | -0.00003   | 0.00133             | -0.00130          | 0.00003            | 2.68739 |
| R8          | 2.52497    | -0.00372   | -0.01241            | -0.00133          | -0.01359           | 2.51138 |
| R9          | 2.09327    | 0.00185    | -0.00317            | 0.01222           | 0.00905            | 2.10232 |
| R10         | 2.79880    | -0.00057   | -0.00913            | 0.00490           | -0.00424           | 2.79456 |
| R11         | 2.91578    | -0.00106   | -0.00475            | -0.00143          | -0.00618           | 2.90960 |
| R12         | 2.05809    | -0.00010   | -0.00205            | 0.00126           | -0.00078           | 2.05731 |
| R13         | 2.06274    | -0.00033   | 0.00077             | -0.00247          | -0.00170           | 2.06104 |
| R14         | 2.07575    | 0.00005    | -0.00099            | 0.00054           | -0.00046           | 2.07530 |
| R15         | 2.06063    | 0.00068    | 0.00228             | 0.00213           | 0.00441            | 2.06504 |
| R16         | 2.76579    | -0.00267   | -0.00813            | -0.00512          | -0.01325           | 2.75254 |
| R17         | 4.17390    | -0.00186   | -0.07253            | 0.01329           | -0.05923           | 4.11466 |
| R18         | 2.50692    | 0.00000    | -0.00007            | 0.00004           | -0.00004           | 2.50688 |
| R19         | 2.04711    | -0.00006   | 0.00099             | -0.00124          | -0.00025           | 2.04687 |
| R20         | 2.04298    | 0.00004    | -0.00005            | 0.00022           | 0.00017            | 2.04315 |
| R21         | 2.04602    | -0.00001   | 0.00021             | -0.00024          | -0.00003           | 2.04599 |
| R22         | 1.91410    | -0.00079   | -0.00030            | -0.00399          | -0.00429           | 1.90981 |
| R23         | 1.91186    | -0.00030   | 0.00079             | -0.00303          | -0.00224           | 1.90961 |
| A1          | 1.88094    | -0.00083   | -0.00863            | 0.00222           | -0.00654           | 1.87440 |
| A2          | 2.27510    | 0.00050    | 0.00495             | -0.00073          | 0.00425            | 2.27935 |
| A3          | 2.12706    | 0.00033    | 0.00363             | -0.00129          | 0.00237            | 2.12943 |
| A4          | 1.85711    | -0.00018   | 0.00410             | -0.00108          | 0.00285            | 1.85996 |
| A5          | 2.27899    | 0.00011    | -0.00264            | 0.00138           | -0.00126           | 2.27772 |
| A6          | 2.14707    | 0.00008    | -0.00144            | -0.00012          | -0.00157           | 2.14549 |
| A7          | 1.90399    | -0.00084   | -0.00590            | -0.00042          | -0.00620           | 1.89779 |
| A8          | 2.24707    | 0.00068    | 0.00684             | -0.00184          | 0.00482            | 2.25188 |
| A9          | 2.13212    | 0.00016    | -0.00095            | 0.00221           | 0.00114            | 2.13327 |
| A10         | 1.88507    | 0.00100    | 0.00359             | 0.00153           | 0.00474            | 1.88981 |
| A11         | 2.17757    | 0.00405    | 0.03433             | 0.02079           | 0.05366            | 2.23122 |
| A12         | 2.21849    | -0.00510   | -0.03947            | -0.02382          | -0.06366           | 2.15483 |
| A13         | 1.89753    | 0.00086    | 0.00673             | -0.00159          | 0.00524            | 1.90277 |
| A14         | 2.17400    | 0.00513    | 0.02117             | 0.02192           | 0.04304            | 2.21703 |
| A15         | 2.20989    | -0.00597   | -0.02868            | -0.01880          | -0.04768           | 2.16221 |
| A16         | 1.96896    | -0.00144   | -0.01917            | 0.00581           | -0.01386           | 1.95509 |

|     |          |          |          |          |          |          |
|-----|----------|----------|----------|----------|----------|----------|
| A17 | 1.89441  | 0.00081  | -0.02358 | 0.02384  | -0.00044 | 1.89397  |
| A18 | 1.84420  | 0.00043  | 0.03203  | -0.01734 | 0.01478  | 1.85898  |
| A19 | 1.88332  | -0.00013 | -0.01059 | 0.00208  | -0.00925 | 1.87407  |
| A20 | 1.95944  | 0.00083  | 0.02513  | -0.00947 | 0.01573  | 1.97517  |
| A21 | 1.91236  | -0.00047 | -0.00351 | -0.00411 | -0.00727 | 1.90509  |
| A22 | 1.92127  | 0.00027  | 0.00353  | 0.00770  | 0.01116  | 1.93243  |
| A23 | 1.88208  | -0.00073 | -0.00186 | -0.01503 | -0.01713 | 1.86496  |
| A24 | 1.89846  | 0.00000  | -0.00664 | 0.00604  | -0.00084 | 1.89762  |
| A25 | 1.88568  | 0.00034  | -0.00273 | 0.01192  | 0.00937  | 1.89505  |
| A26 | 1.95557  | 0.00047  | 0.02168  | -0.01193 | 0.00972  | 1.96529  |
| A27 | 1.91944  | -0.00039 | -0.01461 | 0.00105  | -0.01375 | 1.90569  |
| A28 | 2.76741  | 0.00074  | 0.00408  | -0.00519 | -0.00111 | 2.76631  |
| A29 | 2.17630  | -0.00005 | -0.00126 | 0.00081  | -0.00045 | 2.17584  |
| A30 | 1.95630  | -0.00015 | -0.00016 | -0.00147 | -0.00163 | 1.95467  |
| A31 | 2.15058  | 0.00020  | 0.00142  | 0.00066  | 0.00207  | 2.15266  |
| A32 | 2.07883  | 0.00004  | -0.00074 | 0.00118  | 0.00044  | 2.07927  |
| A33 | 2.15872  | -0.00006 | 0.00087  | -0.00148 | -0.00060 | 2.15812  |
| A34 | 2.04563  | 0.00002  | -0.00013 | 0.00029  | 0.00016  | 2.04580  |
| A35 | 1.95730  | 0.00151  | 0.01767  | 0.00065  | 0.01825  | 1.97555  |
| A36 | 1.96072  | -0.00075 | 0.00163  | -0.00987 | -0.00830 | 1.95242  |
| A37 | 1.90355  | -0.00001 | -0.00350 | 0.00980  | 0.00620  | 1.90975  |
| D1  | 0.01398  | -0.00021 | 0.01660  | -0.03950 | -0.02232 | -0.00834 |
| D2  | -3.13492 | -0.00013 | 0.00081  | -0.01122 | -0.01034 | 3.13792  |
| D3  | -3.14122 | -0.00010 | 0.01053  | -0.02204 | -0.01149 | 3.13047  |
| D4  | -0.00694 | -0.00001 | -0.00527 | 0.00624  | 0.00049  | -0.00646 |
| D5  | -0.01652 | 0.00016  | -0.01496 | 0.03624  | 0.02078  | 0.00427  |
| D6  | -3.09778 | 0.00025  | 0.00124  | 0.01102  | 0.01125  | -3.08652 |
| D7  | 3.13729  | 0.00005  | -0.00951 | 0.02058  | 0.01106  | -3.13484 |
| D8  | 0.05603  | 0.00014  | 0.00668  | -0.00465 | 0.00153  | 0.05756  |
| D9  | -0.00681 | 0.00018  | -0.01273 | 0.02961  | 0.01642  | 0.00960  |
| D10 | 3.12947  | -0.00009 | -0.01887 | 0.01750  | -0.00233 | 3.12714  |
| D11 | 3.14140  | 0.00010  | 0.00156  | 0.00398  | 0.00557  | -3.13622 |
| D12 | -0.00550 | -0.00016 | -0.00457 | -0.00813 | -0.01318 | -0.01867 |
| D13 | -0.00338 | -0.00008 | 0.00358  | -0.00739 | -0.00367 | -0.00705 |
| D14 | 3.07337  | -0.00105 | -0.03111 | -0.03214 | -0.06643 | 3.00693  |
| D15 | -3.14009 | 0.00016  | 0.00924  | 0.00378  | 0.01353  | -3.12656 |
| D16 | -0.06334 | -0.00081 | -0.02545 | -0.02097 | -0.04924 | -0.11257 |
| D17 | 0.05680  | 0.00017  | 0.00463  | 0.00784  | 0.01279  | 0.06959  |
| D18 | -3.08228 | 0.00021  | 0.00480  | 0.01071  | 0.01581  | -3.06646 |
| D19 | -3.09071 | -0.00013 | -0.00222 | -0.00569 | -0.00821 | -3.09893 |
| D20 | 0.05339  | -0.00008 | -0.00205 | -0.00282 | -0.00519 | 0.04821  |
| D21 | 0.01215  | -0.00004 | 0.00692  | -0.01751 | -0.01037 | 0.00178  |
| D22 | 3.09184  | 0.00036  | -0.00806 | 0.01018  | 0.00267  | 3.09452  |
| D23 | -3.06264 | 0.00051  | 0.04106  | 0.00582  | 0.04359  | -3.01905 |

|     |          |          |          |          |          |          |
|-----|----------|----------|----------|----------|----------|----------|
| D24 | 0.01705  | 0.00091  | 0.02607  | 0.03350  | 0.05664  | 0.07369  |
| D25 | -2.63600 | 0.00134  | 0.05626  | 0.15680  | 0.21286  | -2.42314 |
| D26 | 0.42824  | 0.00051  | 0.01597  | 0.12869  | 0.14485  | 0.57309  |
| D27 | 1.72430  | 0.00133  | 0.09621  | 0.04920  | 0.14541  | 1.86971  |
| D28 | -2.47267 | 0.00081  | 0.05312  | 0.07148  | 0.12515  | -2.34752 |
| D29 | -0.42277 | 0.00088  | 0.05478  | 0.06931  | 0.12424  | -0.29853 |
| D30 | -1.34608 | 0.00109  | 0.11407  | 0.01846  | 0.13207  | -1.21402 |
| D31 | 0.74013  | 0.00057  | 0.07099  | 0.04074  | 0.11181  | 0.85194  |
| D32 | 2.79003  | 0.00064  | 0.07264  | 0.03857  | 0.11090  | 2.90093  |
| D33 | -1.32632 | 0.00162  | 0.05286  | 0.15261  | 0.20564  | -1.12068 |
| D34 | 0.72700  | 0.00175  | 0.05046  | 0.16246  | 0.21299  | 0.93999  |
| D35 | 2.80805  | 0.00087  | 0.02803  | 0.15852  | 0.18672  | 2.99477  |
| D36 | 2.86425  | 0.00159  | 0.10275  | 0.11792  | 0.22053  | 3.08478  |
| D37 | -1.36561 | 0.00172  | 0.10035  | 0.12777  | 0.22788  | -1.13773 |
| D38 | 0.71544  | 0.00084  | 0.07792  | 0.12383  | 0.20161  | 0.91705  |
| D39 | 0.75514  | 0.00176  | 0.09852  | 0.12754  | 0.22613  | 0.98127  |
| D40 | 2.80847  | 0.00188  | 0.09612  | 0.13738  | 0.23348  | 3.04195  |
| D41 | -1.39367 | 0.00100  | 0.07369  | 0.13344  | 0.20721  | -1.18646 |
| D42 | 1.73618  | 0.00135  | 0.03420  | 0.08287  | 0.11699  | 1.85317  |
| D43 | -2.39559 | 0.00191  | 0.04399  | 0.08883  | 0.13280  | -2.26280 |
| D44 | -0.39191 | 0.00070  | 0.02028  | 0.07678  | 0.09696  | -0.29494 |
| D45 | 1.75950  | 0.00127  | 0.03007  | 0.08275  | 0.11277  | 1.87227  |
| D46 | -2.48945 | 0.00023  | 0.01924  | 0.06885  | 0.08819  | -2.40126 |
| D47 | -0.33804 | 0.00080  | 0.02903  | 0.07482  | 0.10400  | -0.23404 |
| D48 | -3.13601 | 0.00005  | -0.00024 | 0.00320  | 0.00296  | -3.13305 |
| D49 | 0.00640  | 0.00003  | 0.00003  | 0.00173  | 0.00176  | 0.00816  |
| D50 | 0.00280  | 0.00000  | -0.00042 | 0.00002  | -0.00041 | 0.00239  |
| D51 | -3.13798 | -0.00002 | -0.00015 | -0.00145 | -0.00161 | -3.13959 |

| Item                 | Value    | Threshold | Converged? |
|----------------------|----------|-----------|------------|
| Maximum Force        | 0.005974 | 0.000450  | NO         |
| RMS Force            | 0.001301 | 0.000300  | NO         |
| Maximum Displacement | 0.690747 | 0.001800  | NO         |
| RMS Displacement     | 0.158132 | 0.001200  | NO         |

Predicted change in Energy=-4.773758D-03

GradGradGradGradGradGradGradGradGradGradGradGradGradGradGradGradGradGradGrad

Input orientation:

| Center Number | Atomic Number | Atomic Type | Coordinates (Angstroms) |           |          |
|---------------|---------------|-------------|-------------------------|-----------|----------|
|               |               |             | X                       | Y         | Z        |
| 1             | 6             | 0           | -1.845214               | -2.018626 | 0.323523 |
| 2             | 6             | 0           | -2.847236               | -1.133770 | 0.083439 |
| 3             | 7             | 0           | -2.259604               | 0.126343  | 0.030650 |



|    |    |   |           |           |           |
|----|----|---|-----------|-----------|-----------|
| 4  | 6  | 0 | -0.931821 | -0.006614 | 0.223210  |
| 5  | 7  | 0 | -0.663788 | -1.295765 | 0.403193  |
| 6  | 6  | 0 | 0.700272  | -1.836376 | 0.587536  |
| 7  | 6  | 0 | 1.535488  | -1.748023 | -0.702915 |
| 8  | 1  | 0 | -1.869208 | -3.087620 | 0.445637  |
| 9  | 1  | 0 | -3.902154 | -1.292328 | -0.046825 |
| 10 | 1  | 0 | 1.208328  | -1.241931 | 1.344990  |
| 11 | 1  | 0 | 0.582362  | -2.857073 | 0.953331  |
| 12 | 1  | 0 | 1.101124  | -2.377839 | -1.490761 |
| 13 | 1  | 0 | 1.501560  | -0.706401 | -1.031589 |
| 14 | 35 | 0 | 1.764249  | 1.673384  | -0.405252 |
| 15 | 1  | 0 | -0.146607 | 0.775627  | 0.127354  |
| 16 | 6  | 0 | -2.868306 | 1.388802  | -0.210298 |
| 17 | 6  | 0 | -4.172255 | 1.581508  | -0.359981 |
| 18 | 1  | 0 | -2.138472 | 2.187325  | -0.264412 |
| 19 | 1  | 0 | -4.538411 | 2.581247  | -0.548171 |
| 20 | 1  | 0 | -4.906268 | 0.787509  | -0.305105 |
| 21 | 7  | 0 | 2.912701  | -2.107968 | -0.394120 |
| 22 | 1  | 0 | 3.170645  | -3.023809 | -0.734813 |
| 23 | 1  | 0 | 3.568137  | -1.422685 | -0.743336 |

-----  
Distance matrix (angstroms):

|    |    | 1        | 2        | 3        | 4        | 5        |
|----|----|----------|----------|----------|----------|----------|
| 1  | C  | 0.000000 |          |          |          |          |
| 2  | C  | 1.358182 | 0.000000 |          |          |          |
| 3  | N  | 2.204175 | 1.391397 | 0.000000 |          |          |
| 4  | C  | 2.211909 | 2.226844 | 1.348245 | 0.000000 |          |
| 5  | N  | 1.387315 | 2.212675 | 2.169749 | 1.328965 | 0.000000 |
| 6  | C  | 2.565622 | 3.651380 | 3.594892 | 2.478808 | 1.478817 |
| 7  | C  | 3.543437 | 4.494878 | 4.295822 | 3.158770 | 2.502964 |
| 8  | H  | 1.076214 | 2.214781 | 3.264075 | 3.228121 | 2.159996 |
| 9  | H  | 2.212616 | 1.074692 | 2.171774 | 3.247901 | 3.269487 |
| 10 | H  | 3.312215 | 4.248624 | 3.953001 | 2.713786 | 2.096353 |
| 11 | H  | 2.644386 | 3.935559 | 4.222426 | 3.309221 | 2.072009 |
| 12 | H  | 3.478731 | 4.428923 | 4.458712 | 3.562761 | 2.805862 |
| 13 | H  | 3.841766 | 4.509763 | 3.996020 | 2.825875 | 2.663585 |
| 14 | Br | 5.214429 | 5.420768 | 4.332983 | 3.238233 | 3.919795 |
| 15 | H  | 3.275912 | 3.307737 | 2.212618 | 1.112497 | 2.152726 |
| 16 | C  | 3.597534 | 2.539704 | 1.422103 | 2.425921 | 3.527489 |
| 17 | C  | 4.340883 | 3.053692 | 2.434816 | 3.655497 | 4.601139 |
| 18 | H  | 4.256958 | 3.413652 | 2.085517 | 2.550912 | 3.840873 |
| 19 | H  | 5.401110 | 4.130419 | 3.399198 | 4.505502 | 5.563185 |
| 20 | H  | 4.199954 | 2.842867 | 2.748582 | 4.087295 | 4.779158 |
| 21 | N  | 4.812562 | 5.861228 | 5.650249 | 4.424605 | 3.753220 |

|    |    |          |          |          |          |          |
|----|----|----------|----------|----------|----------|----------|
| 22 | H  | 5.223918 | 6.360556 | 6.324318 | 5.181843 | 4.357072 |
| 23 | H  | 5.549568 | 6.474878 | 6.079565 | 4.815506 | 4.386323 |
|    |    | 6        | 7        | 8        | 9        | 10       |
| 6  | C  | 0.000000 |          |          |          |          |
| 7  | C  | 1.539694 | 0.000000 |          |          |          |
| 8  | H  | 2.861464 | 3.834795 | 0.000000 |          |          |
| 9  | H  | 4.677684 | 5.496005 | 2.756531 | 0.000000 |          |
| 10 | H  | 1.088679 | 2.134731 | 3.699545 | 5.296859 | 0.000000 |
| 11 | H  | 1.090657 | 2.209433 | 2.514180 | 4.853826 | 1.775927 |
| 12 | H  | 2.184761 | 1.098200 | 3.616117 | 5.319406 | 3.056675 |
| 13 | H  | 2.130839 | 1.092774 | 4.383433 | 5.523876 | 2.453753 |
| 14 | Br | 3.799485 | 3.441941 | 6.049230 | 6.405626 | 3.445497 |
| 15 | H  | 2.784157 | 3.144455 | 4.241856 | 4.290794 | 2.718276 |
| 16 | C  | 4.875762 | 5.429157 | 4.633229 | 2.878198 | 5.094960 |
| 17 | C  | 6.026710 | 6.616775 | 5.268188 | 2.903439 | 6.311054 |
| 18 | H  | 4.997444 | 5.401595 | 5.329327 | 3.907161 | 5.054803 |
| 19 | H  | 6.946151 | 7.460481 | 6.344159 | 3.957367 | 7.157217 |
| 20 | H  | 6.254188 | 6.934219 | 4.980358 | 2.323935 | 6.650543 |
| 21 | N  | 2.435623 | 1.456581 | 4.952936 | 6.872273 | 2.584456 |
| 22 | H  | 3.043247 | 2.074219 | 5.176646 | 7.314086 | 3.369178 |
| 23 | H  | 3.188576 | 2.058918 | 5.809509 | 7.503825 | 3.156339 |
|    |    | 11       | 12       | 13       | 14       | 15       |
| 11 | H  | 0.000000 |          |          |          |          |
| 12 | H  | 2.544084 | 0.000000 |          |          |          |
| 13 | H  | 3.067609 | 1.779014 | 0.000000 |          |          |
| 14 | Br | 4.875208 | 4.246230 | 2.474809 | 0.000000 |          |
| 15 | H  | 3.796070 | 3.757589 | 2.501202 | 2.177385 | 0.000000 |
| 16 | C  | 5.593622 | 5.619924 | 4.915296 | 4.645381 | 2.810274 |
| 17 | C  | 6.635674 | 6.690562 | 6.154492 | 5.937388 | 4.134342 |
| 18 | H  | 5.859333 | 5.730588 | 4.712966 | 3.938934 | 2.472630 |
| 19 | H  | 7.619196 | 7.568710 | 6.893735 | 6.369315 | 4.796305 |
| 20 | H  | 6.707585 | 6.893037 | 6.619654 | 6.729830 | 4.779282 |
| 21 | N  | 2.794149 | 2.134775 | 2.088558 | 3.951922 | 4.236321 |
| 22 | H  | 3.094648 | 2.296008 | 2.871288 | 4.914283 | 5.116953 |
| 23 | H  | 3.721694 | 2.749021 | 2.206104 | 3.599161 | 4.403408 |
|    |    | 16       | 17       | 18       | 19       | 20       |
| 16 | C  | 0.000000 |          |          |          |          |
| 17 | C  | 1.326583 | 0.000000 |          |          |          |
| 18 | H  | 1.083155 | 2.124246 | 0.000000 |          |          |
| 19 | H  | 2.079744 | 1.081186 | 2.448551 | 0.000000 |          |
| 20 | H  | 2.126930 | 1.082692 | 3.101909 | 1.847132 | 0.000000 |
| 21 | N  | 6.758790 | 7.988116 | 6.631796 | 8.805200 | 8.338344 |
| 22 | H  | 7.497679 | 8.675692 | 7.454121 | 9.533155 | 8.941327 |
| 23 | H  | 7.043891 | 8.311788 | 6.769559 | 9.043545 | 8.768840 |

```

          21      22      23
21  N    0.000000
22  H    1.010629  0.000000
23  H    1.010525  1.649748  0.000000
Stoichiometry   C7H12BrN3
Framework group C1[X(C7H12BrN3)]
Deg. of freedom   63
Full point group           C1      NOp   1
Largest Abelian subgroup   C1      NOp   1
Largest concise Abelian subgroup C1      NOp   1

```

Standard orientation:

| Center<br>Number | Atomic<br>Number | Atomic<br>Type | Coordinates (Angstroms) |           |           |
|------------------|------------------|----------------|-------------------------|-----------|-----------|
|                  |                  |                | X                       | Y         | Z         |
| 1                | 6                | 0              | -1.726852               | 2.142767  | -0.116520 |
| 2                | 6                | 0              | -2.743958               | 1.267324  | 0.092651  |
| 3                | 7                | 0              | -2.202749               | -0.007945 | -0.036840 |
| 4                | 6                | 0              | -0.886452               | 0.105490  | -0.305652 |
| 5                | 7                | 0              | -0.581769               | 1.397964  | -0.358796 |
| 6                | 6                | 0              | 0.786832                | 1.914155  | -0.576461 |
| 7                | 6                | 0              | 1.701378                | 1.653735  | 0.634507  |
| 8                | 1                | 0              | -1.717948               | 3.218944  | -0.116484 |
| 9                | 1                | 0              | -3.781146               | 1.442137  | 0.313205  |
| 10               | 1                | 0              | 1.220699                | 1.394737  | -1.429214 |
| 11               | 1                | 0              | 0.684169                | 2.973033  | -0.816814 |
| 12               | 1                | 0              | 1.344346                | 2.202560  | 1.516188  |
| 13               | 1                | 0              | 1.649395                | 0.582950  | 0.846336  |
| 14               | 35               | 0              | 1.778977                | -1.716780 | -0.058723 |
| 15               | 1                | 0              | -0.127118               | -0.706195 | -0.352878 |
| 16               | 6                | 0              | -2.842066               | -1.270461 | 0.103523  |
| 17               | 6                | 0              | -4.139712               | -1.439064 | 0.321493  |
| 18               | 1                | 0              | -2.141327               | -2.091862 | 0.016970  |
| 19               | 1                | 0              | -4.530623               | -2.442089 | 0.421955  |
| 20               | 1                | 0              | -4.844841               | -0.621940 | 0.407077  |
| 21               | 7                | 0              | 3.067973                | 2.004315  | 0.272375  |
| 22               | 1                | 0              | 3.382672                | 2.867016  | 0.694374  |
| 23               | 1                | 0              | 3.718331                | 1.263980  | 0.496198  |

Rotational constants (GHZ): 0.8800882 0.4773073 0.3179447

Standard basis: 6-311++G(d,p) (5D, 7F)

There are 365 symmetry adapted cartesian basis functions of A symmetry.

There are 352 symmetry adapted basis functions of A symmetry.

352 basis functions, 562 primitive gaussians, 365 cartesian basis functions

55 alpha electrons            55 beta electrons  
nuclear repulsion energy        846.6221527270 Hartrees.  
NAtoms= 23 NActive= 23 NUniq= 23 SFac= 1.00D+00 NAtFMM= 60 NAOKFM=F  
Big=F  
Integral buffers will be 131072 words long.  
Raffenetti 2 integral format.  
Two-electron integral symmetry is turned on.  
One-electron integrals computed using PRISM.  
NBasis= 352 RedAO= T EigKep= 4.57D-06 NBF= 352  
NBsUse= 352 1.00D-06 EigRej= -1.00D+00 NBFU= 352  
Initial guess from the checkpoint file: "/home/suqian/liuwen/qianmengshijie/nh2/nh2.chk"  
B after Tr= 0.000000 0.000000 0.000000  
Rot= 0.999931 -0.011519 -0.001185 -0.002122 Ang= -1.35 deg.  
ExpMin= 3.50D-02 ExpMax= 4.40D+05 ExpMxC= 1.51D+04 IAcc=3 IRadAn= 5 AccDes=  
0.00D+00  
Harris functional with IExCor= 402 and IRadAn= 5 diagonalized for initial guess.  
HarFok: IExCor= 402 AccDes= 0.00D+00 IRadAn= 5 IDoV= 1 UseB2=F ITyADJ=14  
ICtDFT= 3500011 ScaDFX= 1.000000 1.000000 1.000000 1.000000  
FoFCou: FMM=F IPFlag= 0 FMFlag= 100000 FMFlg1= 0  
NFXFlg= 0 DoJE=T BraDBF=F KetDBF=T FulRan=T  
wScrn= 0.000000 ICntrl= 500 IOpCl= 0 I1Cent= 200000004 NGrid=  
0  
NMat0= 1 NMatS0= 1 NMatT0= 0 NMatD0= 1 NMtDS0= 0  
NMtDT0= 0  
Petite list used in FoFCou.  
Requested convergence on RMS density matrix=1.00D-08 within 128 cycles.  
Requested convergence on MAX density matrix=1.00D-06.  
Requested convergence on energy=1.00D-06.  
No special actions if energy rises.  
SCF Done: E(RB3LYP) = -3012.46265867 A.U. after 13 cycles  
NFOck= 13 Conv=0.35D-08 -V/T= 2.0016  
Calling FoFJK, ICntrl= 2127 FMM=F ISym2X=0 I1Cent= 0 IOpClX= 0 NMat=1 NMatS=1  
NMatT=0.

\*\*\*\*\* Axes restored to original set \*\*\*\*\*

```

-----
Center      Atomic      Forces (Hartrees/Bohr)
Number      Number      X           Y           Z
-----
1           6           0.000750434 0.001044017 -0.000780432
2           6           0.000309610 0.000258755 0.001379183
3           7           0.000255776 0.000081065 -0.001547381
4           6           -0.001588347 0.002201054 -0.001593268
5           7           -0.001462136 -0.003222668 0.001112428
6           6           0.001791175 -0.000531392 -0.000817825

```

|    |    |              |              |              |
|----|----|--------------|--------------|--------------|
| 7  | 6  | -0.000795716 | -0.004005331 | -0.001852780 |
| 8  | 1  | -0.000054639 | -0.000053779 | -0.000169912 |
| 9  | 1  | -0.000029623 | 0.000088777  | 0.000306005  |
| 10 | 1  | -0.001212047 | 0.000233916  | 0.001372570  |
| 11 | 1  | 0.001530743  | -0.000513941 | -0.000164783 |
| 12 | 1  | -0.001477711 | -0.000526789 | 0.001042408  |
| 13 | 1  | 0.000755590  | -0.001224982 | -0.000686968 |
| 14 | 35 | 0.001120069  | 0.006843197  | 0.000147815  |
| 15 | 1  | 0.000076666  | 0.001138492  | 0.001597721  |
| 16 | 6  | -0.000106034 | -0.000708808 | -0.000030615 |
| 17 | 6  | -0.000059335 | 0.000314213  | 0.000031977  |
| 18 | 1  | -0.000176764 | -0.000085138 | -0.000091274 |
| 19 | 1  | -0.000035282 | -0.000024513 | 0.000026886  |
| 20 | 1  | 0.000079580  | -0.000038209 | 0.000015367  |
| 21 | 7  | -0.000606113 | -0.003316569 | 0.001050726  |
| 22 | 1  | 0.000574044  | 0.000095872  | -0.000861997 |
| 23 | 1  | 0.000360062  | 0.001952764  | 0.000514149  |

-----  
Cartesian Forces: Max 0.006843197 RMS 0.001411110

GradGradGradGradGradGradGradGradGradGradGradGradGradGradGradGradGradGradGrad

Berny optimization.

Using GEDIIS/GDIIS optimizer.

FormGI is forming the generalized inverse of G from B-inverse, IUseBI=4.

Internal Forces: Max 0.023403093 RMS 0.004103744

Search for a local minimum.

Step number 4 out of a maximum of 121

All quantities printed in internal units (Hartrees-Bohrs-Radians)

Mixed Optimization -- RFO/linear search

Update second derivatives using D2CorX and points 3 4

DE= -1.96D-03 DEPred=-4.77D-03 R= 4.10D-01

Trust test= 4.10D-01 RLast= 8.23D-01 DXMaxT set to 5.05D-01

ITU= 0 1 0 0

Use linear search instead of GDIIS.

|                 |         |         |         |         |         |
|-----------------|---------|---------|---------|---------|---------|
| Eigenvalues --- | 0.00225 | 0.00303 | 0.00676 | 0.00932 | 0.01401 |
| Eigenvalues --- | 0.01511 | 0.01868 | 0.01972 | 0.02193 | 0.02225 |
| Eigenvalues --- | 0.02318 | 0.02391 | 0.02570 | 0.03062 | 0.03062 |
| Eigenvalues --- | 0.03500 | 0.03689 | 0.04342 | 0.04602 | 0.05399 |
| Eigenvalues --- | 0.05635 | 0.08638 | 0.09349 | 0.12390 | 0.13274 |
| Eigenvalues --- | 0.15655 | 0.15939 | 0.16000 | 0.16000 | 0.16000 |
| Eigenvalues --- | 0.16000 | 0.16014 | 0.17514 | 0.21901 | 0.21999 |
| Eigenvalues --- | 0.22222 | 0.22721 | 0.23487 | 0.23584 | 0.25023 |
| Eigenvalues --- | 0.27462 | 0.32100 | 0.34016 | 0.34260 | 0.34448 |
| Eigenvalues --- | 0.34790 | 0.34932 | 0.35409 | 0.35689 | 0.35690 |

Eigenvalues --- 0.35859 0.36437 0.36657 0.38116 0.42190  
 Eigenvalues --- 0.43270 0.47193 0.47450 0.47712 0.50127  
 Eigenvalues --- 0.54382 0.60350 0.60697

RFO step: Lambda=-5.05364531D-03 EMin= 2.24711529D-03

Quartic linear search produced a step of -0.29062.

Iteration 1 RMS(Cart)= 0.11244585 RMS(Int)= 0.00409897  
 Iteration 2 RMS(Cart)= 0.00695939 RMS(Int)= 0.00009125  
 Iteration 3 RMS(Cart)= 0.00003661 RMS(Int)= 0.00008469  
 Iteration 4 RMS(Cart)= 0.00000000 RMS(Int)= 0.00008469

| Variable | Old X   | -DE/DX   | Delta X<br>(Linear) | Delta X<br>(Quad) | Delta X<br>(Total) | New X   |
|----------|---------|----------|---------------------|-------------------|--------------------|---------|
| R1       | 2.56659 | -0.00243 | -0.00116            | -0.00070          | -0.00190           | 2.56469 |
| R2       | 2.62164 | -0.00056 | -0.00010            | -0.00064          | -0.00075           | 2.62089 |
| R3       | 2.03375 | 0.00004  | 0.00013             | -0.00004          | 0.00009            | 2.03384 |
| R4       | 2.62936 | -0.00229 | -0.00117            | -0.00057          | -0.00176           | 2.62760 |
| R5       | 2.03087 | -0.00002 | -0.00011            | 0.00005           | -0.00006           | 2.03081 |
| R6       | 2.54781 | 0.00099  | 0.00004             | 0.00071           | 0.00078            | 2.54859 |
| R7       | 2.68739 | -0.00035 | -0.00001            | -0.00011          | -0.00012           | 2.68727 |
| R8       | 2.51138 | 0.01248  | 0.00395             | 0.00416           | 0.00814            | 2.51952 |
| R9       | 2.10232 | 0.00631  | -0.00263            | 0.01178           | 0.00915            | 2.11147 |
| R10      | 2.79456 | 0.00366  | 0.00123             | 0.00145           | 0.00268            | 2.79724 |
| R11      | 2.90960 | -0.00038 | 0.00180             | -0.00241          | -0.00061           | 2.90899 |
| R12      | 2.05731 | 0.00052  | 0.00023             | -0.00002          | 0.00021            | 2.05751 |
| R13      | 2.06104 | 0.00026  | 0.00049             | -0.00014          | 0.00035            | 2.06140 |
| R14      | 2.07530 | 0.00014  | 0.00013             | -0.00110          | -0.00097           | 2.07432 |
| R15      | 2.06504 | -0.00098 | -0.00128            | 0.00155           | 0.00026            | 2.06531 |
| R16      | 2.75254 | 0.00077  | 0.00385             | -0.00395          | -0.00010           | 2.75244 |
| R17      | 4.11466 | 0.00377  | 0.01721             | 0.01873           | 0.03594            | 4.15061 |
| R18      | 2.50688 | 0.00004  | 0.00001             | -0.00002          | -0.00001           | 2.50687 |
| R19      | 2.04687 | -0.00018 | 0.00007             | -0.00022          | -0.00015           | 2.04672 |
| R20      | 2.04315 | -0.00002 | -0.00005            | 0.00002           | -0.00003           | 2.04312 |
| R21      | 2.04599 | -0.00002 | 0.00001             | -0.00002          | -0.00002           | 2.04598 |
| R22      | 1.90981 | 0.00035  | 0.00125             | -0.00342          | -0.00217           | 1.90764 |
| R23      | 1.90961 | 0.00138  | 0.00065             | -0.00112          | -0.00047           | 1.90915 |
| A1       | 1.87440 | 0.00270  | 0.00190             | -0.00012          | 0.00180            | 1.87620 |
| A2       | 2.27935 | -0.00143 | -0.00124            | 0.00025           | -0.00099           | 2.27836 |
| A3       | 2.12943 | -0.00127 | -0.00069            | -0.00012          | -0.00081           | 2.12862 |
| A4       | 1.85996 | 0.00060  | -0.00083            | 0.00039           | -0.00043           | 1.85953 |
| A5       | 2.27772 | -0.00025 | 0.00037             | -0.00008          | 0.00029            | 2.27801 |
| A6       | 2.14549 | -0.00035 | 0.00046             | -0.00035          | 0.00010            | 2.14559 |
| A7       | 1.89779 | 0.00301  | 0.00180             | 0.00157           | 0.00342            | 1.90120 |
| A8       | 2.25188 | -0.00207 | -0.00140            | -0.00083          | -0.00229           | 2.24959 |
| A9       | 2.13327 | -0.00092 | -0.00033            | -0.00051          | -0.00090           | 2.13236 |
| A10      | 1.88981 | -0.00395 | -0.00138            | -0.00283          | -0.00428           | 1.88553 |

|     |          |          |          |          |          |          |
|-----|----------|----------|----------|----------|----------|----------|
| A11 | 2.23122  | -0.01308 | -0.01559 | -0.01217 | -0.02802 | 2.20320  |
| A12 | 2.15483  | 0.01734  | 0.01850  | 0.01843  | 0.03673  | 2.19155  |
| A13 | 1.90277  | -0.00236 | -0.00152 | 0.00095  | -0.00055 | 1.90222  |
| A14 | 2.21703  | -0.01215 | -0.01251 | -0.00203 | -0.01465 | 2.20239  |
| A15 | 2.16221  | 0.01454  | 0.01386  | 0.00218  | 0.01595  | 2.17816  |
| A16 | 1.95509  | 0.00396  | 0.00403  | 0.00055  | 0.00452  | 1.95961  |
| A17 | 1.89397  | -0.00230 | 0.00013  | -0.00474 | -0.00473 | 1.88924  |
| A18 | 1.85898  | -0.00007 | -0.00429 | 0.00769  | 0.00336  | 1.86234  |
| A19 | 1.87407  | 0.00352  | 0.00269  | 0.02023  | 0.02295  | 1.89702  |
| A20 | 1.97517  | -0.00530 | -0.00457 | -0.01666 | -0.02119 | 1.95398  |
| A21 | 1.90509  | 0.00010  | 0.00211  | -0.00748 | -0.00527 | 1.89982  |
| A22 | 1.93243  | -0.00106 | -0.00324 | -0.00044 | -0.00367 | 1.92876  |
| A23 | 1.86496  | 0.00103  | 0.00498  | -0.00092 | 0.00408  | 1.86904  |
| A24 | 1.89762  | -0.00074 | 0.00024  | -0.00111 | -0.00083 | 1.89679  |
| A25 | 1.89505  | -0.00005 | -0.00272 | 0.00368  | 0.00093  | 1.89598  |
| A26 | 1.96529  | 0.00097  | -0.00282 | 0.00478  | 0.00197  | 1.96725  |
| A27 | 1.90569  | -0.00013 | 0.00400  | -0.00638 | -0.00235 | 1.90334  |
| A28 | 2.76631  | 0.02340  | 0.00032  | 0.04084  | 0.04116  | 2.80746  |
| A29 | 2.17584  | 0.00016  | 0.00013  | 0.00002  | 0.00016  | 2.17600  |
| A30 | 1.95467  | 0.00001  | 0.00047  | -0.00034 | 0.00014  | 1.95481  |
| A31 | 2.15266  | -0.00017 | -0.00060 | 0.00031  | -0.00029 | 2.15236  |
| A32 | 2.07927  | 0.00011  | -0.00013 | 0.00040  | 0.00027  | 2.07954  |
| A33 | 2.15812  | -0.00014 | 0.00018  | -0.00053 | -0.00035 | 2.15777  |
| A34 | 2.04580  | 0.00003  | -0.00005 | 0.00013  | 0.00008  | 2.04588  |
| A35 | 1.97555  | 0.00059  | -0.00530 | 0.00791  | 0.00261  | 1.97816  |
| A36 | 1.95242  | -0.00094 | 0.00241  | -0.01006 | -0.00764 | 1.94477  |
| A37 | 1.90975  | 0.00030  | -0.00180 | 0.00325  | 0.00146  | 1.91121  |
| D1  | -0.00834 | -0.00049 | 0.00649  | -0.00967 | -0.00311 | -0.01144 |
| D2  | 3.13792  | 0.00014  | 0.00301  | 0.00011  | 0.00308  | 3.14100  |
| D3  | 3.13047  | -0.00026 | 0.00334  | -0.00583 | -0.00238 | 3.12809  |
| D4  | -0.00646 | 0.00037  | -0.00014 | 0.00395  | 0.00381  | -0.00265 |
| D5  | 0.00427  | 0.00072  | -0.00604 | 0.01464  | 0.00855  | 0.01282  |
| D6  | -3.08652 | -0.00050 | -0.00327 | -0.00920 | -0.01222 | -3.09874 |
| D7  | -3.13484 | 0.00052  | -0.00321 | 0.01120  | 0.00790  | -3.12693 |
| D8  | 0.05756  | -0.00070 | -0.00044 | -0.01263 | -0.01286 | 0.04470  |
| D9  | 0.00960  | 0.00010  | -0.00477 | 0.00160  | -0.00329 | 0.00631  |
| D10 | 3.12714  | 0.00108  | 0.00068  | 0.01291  | 0.01347  | 3.14061  |
| D11 | -3.13622 | -0.00047 | -0.00162 | -0.00726 | -0.00889 | 3.13807  |
| D12 | -0.01867 | 0.00051  | 0.00383  | 0.00405  | 0.00786  | -0.01081 |
| D13 | -0.00705 | 0.00037  | 0.00107  | 0.00753  | 0.00865  | 0.00160  |
| D14 | 3.00693  | 0.00449  | 0.01931  | 0.03882  | 0.05789  | 3.06482  |
| D15 | -3.12656 | -0.00051 | -0.00393 | -0.00285 | -0.00673 | -3.13329 |
| D16 | -0.11257 | 0.00361  | 0.01431  | 0.02844  | 0.04251  | -0.07006 |
| D17 | 0.06959  | -0.00046 | -0.00372 | -0.00218 | -0.00589 | 0.06371  |

|     |          |          |          |          |          |          |
|-----|----------|----------|----------|----------|----------|----------|
| D18 | -3.06646 | -0.00049 | -0.00460 | -0.00154 | -0.00613 | -3.07259 |
| D19 | -3.09893 | 0.00068  | 0.00239  | 0.01051  | 0.01289  | -3.08604 |
| D20 | 0.04821  | 0.00066  | 0.00151  | 0.01114  | 0.01264  | 0.06085  |
| D21 | 0.00178  | -0.00068 | 0.00301  | -0.01364 | -0.01060 | -0.00882 |
| D22 | 3.09452  | -0.00043 | -0.00078 | 0.00913  | 0.00873  | 3.10325  |
| D23 | -3.01905 | -0.00195 | -0.01267 | -0.04062 | -0.05366 | -3.07271 |
| D24 | 0.07369  | -0.00170 | -0.01646 | -0.01784 | -0.03432 | 0.03936  |
| D25 | -2.42314 | -0.00047 | -0.06186 | 0.16262  | 0.10067  | -2.32247 |
| D26 | 0.57309  | 0.00236  | -0.04210 | 0.19641  | 0.15439  | 0.72749  |
| D27 | 1.86971  | -0.00548 | -0.04226 | -0.04915 | -0.09136 | 1.77835  |
| D28 | -2.34752 | -0.00023 | -0.03637 | -0.02690 | -0.06326 | -2.41078 |
| D29 | -0.29853 | -0.00132 | -0.03611 | -0.03397 | -0.07004 | -0.36857 |
| D30 | -1.21402 | -0.00626 | -0.03838 | -0.07624 | -0.11464 | -1.32866 |
| D31 | 0.85194  | -0.00101 | -0.03249 | -0.05399 | -0.08654 | 0.76540  |
| D32 | 2.90093  | -0.00210 | -0.03223 | -0.06106 | -0.09332 | 2.80761  |
| D33 | -1.12068 | 0.00116  | -0.05976 | 0.16776  | 0.10802  | -1.01266 |
| D34 | 0.93999  | 0.00113  | -0.06190 | 0.17140  | 0.10954  | 1.04953  |
| D35 | 2.99477  | 0.00116  | -0.05426 | 0.16280  | 0.10856  | 3.10333  |
| D36 | 3.08478  | -0.00058 | -0.06409 | 0.16038  | 0.09621  | -3.10219 |
| D37 | -1.13773 | -0.00060 | -0.06623 | 0.16401  | 0.09773  | -1.04000 |
| D38 | 0.91705  | -0.00058 | -0.05859 | 0.15542  | 0.09675  | 1.01380  |
| D39 | 0.98127  | 0.00016  | -0.06572 | 0.16620  | 0.10051  | 1.08178  |
| D40 | 3.04195  | 0.00014  | -0.06785 | 0.16983  | 0.10203  | -3.13921 |
| D41 | -1.18646 | 0.00016  | -0.06022 | 0.16124  | 0.10105  | -1.08541 |
| D42 | 1.85317  | -0.00003 | -0.03400 | 0.08494  | 0.05095  | 1.90412  |
| D43 | -2.26280 | 0.00009  | -0.03859 | 0.08748  | 0.04889  | -2.21391 |
| D44 | -0.29494 | 0.00121  | -0.02818 | 0.08308  | 0.05491  | -0.24004 |
| D45 | 1.87227  | 0.00133  | -0.03277 | 0.08561  | 0.05285  | 1.92511  |
| D46 | -2.40126 | 0.00072  | -0.02563 | 0.07971  | 0.05407  | -2.34719 |
| D47 | -0.23404 | 0.00084  | -0.03022 | 0.08225  | 0.05201  | -0.18204 |
| D48 | -3.13305 | -0.00004 | -0.00086 | 0.00037  | -0.00049 | -3.13354 |
| D49 | 0.00816  | -0.00002 | -0.00051 | 0.00034  | -0.00018 | 0.00798  |
| D50 | 0.00239  | -0.00001 | 0.00012  | -0.00034 | -0.00022 | 0.00217  |
| D51 | -3.13959 | 0.00001  | 0.00047  | -0.00037 | 0.00010  | -3.13949 |

| Item                 | Value    | Threshold | Converged? |
|----------------------|----------|-----------|------------|
| Maximum Force        | 0.023403 | 0.000450  | NO         |
| RMS Force            | 0.004104 | 0.000300  | NO         |
| Maximum Displacement | 0.684050 | 0.001800  | NO         |
| RMS Displacement     | 0.116475 | 0.001200  | NO         |

Predicted change in Energy=-3.396532D-03

GradGradGradGradGradGradGradGradGradGradGradGradGradGradGradGradGradGrad

Input orientation:

-----



| Center<br>Number | Atomic<br>Number | Atomic<br>Type | Coordinates (Angstroms) |           |           |
|------------------|------------------|----------------|-------------------------|-----------|-----------|
|                  |                  |                | X                       | Y         | Z         |
| 1                | 6                | 0              | -1.793426               | -1.994268 | 0.286581  |
| 2                | 6                | 0              | -2.813149               | -1.131463 | 0.046447  |
| 3                | 7                | 0              | -2.255511               | 0.141922  | 0.016082  |
| 4                | 6                | 0              | -0.926942               | 0.042892  | 0.225791  |
| 5                | 7                | 0              | -0.629219               | -1.246942 | 0.384858  |
| 6                | 6                | 0              | 0.736391                | -1.779511 | 0.591196  |
| 7                | 6                | 0              | 1.555703                | -1.805419 | -0.711771 |
| 8                | 1                | 0              | -1.794192               | -3.064865 | 0.396870  |
| 9                | 1                | 0              | -3.863198               | -1.312918 | -0.092694 |
| 10               | 1                | 0              | 1.246016                | -1.141267 | 1.311188  |
| 11               | 1                | 0              | 0.622831                | -2.775474 | 1.021432  |
| 12               | 1                | 0              | 1.047059                | -2.409790 | -1.473959 |
| 13               | 1                | 0              | 1.621847                | -0.775032 | -1.070082 |
| 14               | 35               | 0              | 1.619500                | 2.035368  | -0.279331 |
| 15               | 1                | 0              | -0.188670               | 0.880894  | 0.191743  |
| 16               | 6                | 0              | -2.896646               | 1.392426  | -0.201599 |
| 17               | 6                | 0              | -4.204678               | 1.553751  | -0.352710 |
| 18               | 1                | 0              | -2.188280               | 2.211009  | -0.236216 |
| 19               | 1                | 0              | -4.596749               | 2.547083  | -0.521550 |
| 20               | 1                | 0              | -4.917349               | 0.739478  | -0.317157 |
| 21               | 7                | 0              | 2.895474                | -2.291083 | -0.410745 |
| 22               | 1                | 0              | 3.075289                | -3.217178 | -0.769998 |
| 23               | 1                | 0              | 3.603424                | -1.654694 | -0.749093 |

Distance matrix (angstroms):

|    |    | 1        | 2        | 3        | 4        | 5        |
|----|----|----------|----------|----------|----------|----------|
| 1  | C  | 0.000000 |          |          |          |          |
| 2  | C  | 1.357177 | 0.000000 |          |          |          |
| 3  | N  | 2.202272 | 1.390465 | 0.000000 |          |          |
| 4  | C  | 2.214613 | 2.229136 | 1.348658 | 0.000000 |          |
| 5  | N  | 1.386915 | 2.213009 | 2.170200 | 1.333272 | 0.000000 |
| 6  | C  | 2.557125 | 3.649103 | 3.601963 | 2.494264 | 1.480235 |
| 7  | C  | 3.499862 | 4.485083 | 4.341343 | 3.234008 | 2.507663 |
| 8  | H  | 1.076263 | 2.213393 | 3.262100 | 3.231028 | 2.159201 |
| 9  | H  | 2.211796 | 1.074658 | 2.170957 | 3.249808 | 3.269715 |
| 10 | H  | 3.318981 | 4.251644 | 3.947729 | 2.702233 | 2.094220 |
| 11 | H  | 2.643594 | 3.931834 | 4.219808 | 3.313311 | 2.075876 |
| 12 | H  | 3.367568 | 4.341308 | 4.431526 | 3.577916 | 2.759949 |
| 13 | H  | 3.871842 | 4.587250 | 4.129705 | 2.973990 | 2.721552 |
| 14 | Br | 5.310959 | 5.457410 | 4.322975 | 3.272534 | 4.033788 |
| 15 | H  | 3.294054 | 3.310375 | 2.201991 | 1.117341 | 2.181528 |

|    |    |          |          |          |          |          |
|----|----|----------|----------|----------|----------|----------|
| 16 | C  | 3.595150 | 2.537423 | 1.422040 | 2.425620 | 3.528657 |
| 17 | C  | 4.337196 | 3.050583 | 2.434855 | 3.655258 | 4.601282 |
| 18 | H  | 4.256005 | 3.412108 | 2.085496 | 2.550520 | 3.843674 |
| 19 | H  | 5.397736 | 4.127414 | 3.399300 | 4.505215 | 5.563946 |
| 20 | H  | 4.194849 | 2.839065 | 2.748364 | 4.086975 | 4.777735 |
| 21 | N  | 4.749753 | 5.843126 | 5.712648 | 4.523659 | 3.761206 |
| 22 | H  | 5.129937 | 6.300038 | 6.349716 | 5.257139 | 4.351884 |
| 23 | H  | 5.505808 | 6.486837 | 6.175794 | 4.935222 | 4.400837 |
|    |    | 6        | 7        | 8        | 9        | 10       |
| 6  | C  | 0.000000 |          |          |          |          |
| 7  | C  | 1.539372 | 0.000000 |          |          |          |
| 8  | H  | 2.844952 | 3.746610 | 0.000000 |          |          |
| 9  | H  | 4.673504 | 5.476340 | 2.754955 | 0.000000 |          |
| 10 | H  | 1.088789 | 2.151596 | 3.712017 | 5.301360 | 0.000000 |
| 11 | H  | 1.090844 | 2.194368 | 2.513130 | 4.848175 | 1.772836 |
| 12 | H  | 2.181428 | 1.097685 | 3.464366 | 5.217436 | 3.066884 |
| 13 | H  | 2.133742 | 1.092913 | 4.366303 | 5.597350 | 2.438406 |
| 14 | Br | 4.011359 | 3.865581 | 6.174376 | 6.426962 | 3.572149 |
| 15 | H  | 2.844830 | 3.327980 | 4.264832 | 4.289041 | 2.720407 |
| 16 | C  | 4.887603 | 5.505442 | 4.630443 | 2.874886 | 5.086233 |
| 17 | C  | 6.034547 | 6.677944 | 5.263452 | 2.898622 | 6.304105 |
| 18 | H  | 5.016230 | 5.511375 | 5.328315 | 3.904358 | 5.042479 |
| 19 | H  | 6.957011 | 7.538774 | 6.339698 | 3.952419 | 7.148478 |
| 20 | H  | 6.255812 | 6.966536 | 4.973627 | 2.318177 | 6.646486 |
| 21 | N  | 2.434590 | 1.456528 | 4.821198 | 6.836492 | 2.647233 |
| 22 | H  | 3.064339 | 2.074993 | 5.009653 | 7.226863 | 3.462222 |
| 23 | H  | 3.167306 | 2.053600 | 5.695267 | 7.503207 | 3.172654 |
|    |    | 11       | 12       | 13       | 14       | 15       |
| 11 | H  | 0.000000 |          |          |          |          |
| 12 | H  | 2.557473 | 0.000000 |          |          |          |
| 13 | H  | 3.061737 | 1.779306 | 0.000000 |          |          |
| 14 | Br | 5.082276 | 4.638346 | 2.919528 | 0.000000 |          |
| 15 | H  | 3.836136 | 3.889754 | 2.759033 | 2.196406 | 0.000000 |
| 16 | C  | 5.590519 | 5.623926 | 5.086149 | 4.562345 | 2.783795 |
| 17 | C  | 6.628370 | 6.674398 | 6.315556 | 5.844518 | 4.108222 |
| 18 | H  | 5.860804 | 5.775050 | 4.912112 | 3.812073 | 2.439425 |
| 19 | H  | 7.612779 | 7.571673 | 7.071652 | 6.241977 | 4.766144 |
| 20 | H  | 6.696289 | 6.843262 | 6.754385 | 6.664170 | 4.758086 |
| 21 | N  | 2.729592 | 2.135686 | 2.086927 | 4.512600 | 4.465017 |
| 22 | H  | 3.069019 | 2.293721 | 2.857730 | 5.472596 | 5.326590 |
| 23 | H  | 3.643465 | 2.762354 | 2.191686 | 4.215826 | 4.657720 |
|    |    | 16       | 17       | 18       | 19       | 20       |
| 16 | C  | 0.000000 |          |          |          |          |
| 17 | C  | 1.326578 | 0.000000 |          |          |          |

|    |   |          |          |          |          |          |
|----|---|----------|----------|----------|----------|----------|
| 18 | H | 1.083078 | 2.124010 | 0.000000 |          |          |
| 19 | H | 2.079892 | 1.081173 | 2.448486 | 0.000000 |          |
| 20 | H | 2.126719 | 1.082684 | 3.101576 | 1.847159 | 0.000000 |
| 21 | N | 6.867360 | 8.074545 | 6.792926 | 8.919279 | 8.380529 |
| 22 | H | 7.565417 | 8.714001 | 7.579927 | 9.599406 | 8.929863 |
| 23 | H | 7.199694 | 8.450899 | 6.982158 | 9.216807 | 8.861275 |
|    |   | 21       | 22       | 23       |          |          |
| 21 | N | 0.000000 |          |          |          |          |
| 22 | H | 1.009479 | 0.000000 |          |          |          |
| 23 | H | 1.010278 | 1.649460 | 0.000000 |          |          |

Stoichiometry C7H12BrN3

Framework group C1[X(C7H12BrN3)]

Deg. of freedom 63

Full point group C1 NOp 1

Largest Abelian subgroup C1 NOp 1

Largest concise Abelian subgroup C1 NOp 1

Standard orientation:

| Center Number | Atomic Number | Atomic Type | Coordinates (Angstroms) |           |           |
|---------------|---------------|-------------|-------------------------|-----------|-----------|
|               |               |             | X                       | Y         | Z         |
| 1             | 6             | 0           | -1.644098               | 2.196406  | -0.172302 |
| 2             | 6             | 0           | -2.674828               | 1.345125  | 0.061891  |
| 3             | 7             | 0           | -2.152966               | 0.059025  | -0.021782 |
| 4             | 6             | 0           | -0.834199               | 0.138716  | -0.292672 |
| 5             | 7             | 0           | -0.508046               | 1.428509  | -0.380276 |
| 6             | 6             | 0           | 0.860252                | 1.939430  | -0.620726 |
| 7             | 6             | 0           | 1.743816                | 1.855770  | 0.637042  |
| 8             | 1             | 0           | -1.619776               | 3.271713  | -0.210564 |
| 9             | 1             | 0           | -3.711037               | 1.542992  | 0.266850  |
| 10            | 1             | 0           | 1.314965                | 1.339200  | -1.407123 |
| 11            | 1             | 0           | 0.753906                | 2.964968  | -0.976962 |
| 12            | 1             | 0           | 1.291215                | 2.419313  | 1.463167  |
| 13            | 1             | 0           | 1.798260                | 0.801999  | 0.921754  |
| 14            | 35            | 0           | 1.676285                | -1.946943 | -0.053993 |
| 15            | 1             | 0           | -0.119383               | -0.717942 | -0.352880 |
| 16            | 6             | 0           | -2.817923               | -1.186910 | 0.144576  |
| 17            | 6             | 0           | -4.120884               | -1.325250 | 0.351852  |
| 18            | 1             | 0           | -2.132381               | -2.023489 | 0.087777  |
| 19            | 1             | 0           | -4.532274               | -2.317620 | 0.473891  |
| 20            | 1             | 0           | -4.810894               | -0.492797 | 0.407652  |
| 21            | 7             | 0           | 3.080265                | 2.327021  | 0.300439  |
| 22            | 1             | 0           | 3.304117                | 3.221632  | 0.711061  |
| 23            | 1             | 0           | 3.785715                | 1.651439  | 0.558491  |

```

-----
Rotational constants (GHZ):      0.7523626      0.4936738      0.3066171
Standard basis: 6-311++G(d,p) (5D, 7F)
There are 365 symmetry adapted cartesian basis functions of A symmetry.
There are 352 symmetry adapted basis functions of A symmetry.
352 basis functions, 562 primitive gaussians, 365 cartesian basis functions
55 alpha electrons      55 beta electrons
nuclear repulsion energy      832.7937283912 Hartrees.
NAtoms= 23 NActive= 23 NUniq= 23 SFac= 1.00D+00 NAtFMM= 60 NAOKFM=F
Big=F
Integral buffers will be 131072 words long.
Raffenetti 2 integral format.
Two-electron integral symmetry is turned on.
One-electron integrals computed using PRISM.
NBasis= 352 RedAO= T EigKep= 4.52D-06 NBF= 352
NBsUse= 352 1.00D-06 EigRej= -1.00D+00 NBFU= 352
Initial guess from the checkpoint file: "/home/suqian/liuwen/qianmengshijie/nh2/nh2.chk"
B after Tr= 0.000000 0.000000 0.000000
Rot= 0.999878 0.009413 0.000532 0.012489 Ang= 1.79 deg.
ExpMin= 3.50D-02 ExpMax= 4.40D+05 ExpMxC= 1.51D+04 IAcc=3 IRadAn= 5 AccDes=
0.00D+00
Harris functional with IExCor= 402 and IRadAn= 5 diagonalized for initial guess.
HarFok: IExCor= 402 AccDes= 0.00D+00 IRadAn= 5 IDoV= 1 UseB2=F ITyADJ=14
ICtDFT= 3500011 ScaDFX= 1.000000 1.000000 1.000000 1.000000
FoFCou: FMM=F IPFlag= 0 FMFlag= 100000 FMFlg1= 0
NFxFlg= 0 DoJE=T BraDBF=F KetDBF=T FulRan=T
wScrn= 0.000000 ICntrl= 500 IOpCl= 0 I1Cent= 200000004 NGrid=
0
NMat0= 1 NMatS0= 1 NMatT0= 0 NMatD0= 1 NMtDS0= 0
NMtDT0= 0
Petite list used in FoFCou.
Requested convergence on RMS density matrix=1.00D-08 within 128 cycles.
Requested convergence on MAX density matrix=1.00D-06.
Requested convergence on energy=1.00D-06.
No special actions if energy rises.
SCF Done: E(RB3LYP) = -3012.46481693 A.U. after 13 cycles
NFock= 13 Conv=0.24D-08 -V/T= 2.0017
Calling FoFJK, ICntrl= 2127 FMM=F ISym2X=0 I1Cent= 0 IOpClX= 0 NMat=1 NMatS=1
NMatT=0.
***** Axes restored to original set *****

```

```

-----
Center      Atomic      Forces (Hartrees/Bohr)
Number      Number      X          Y          Z
-----

```

|    |    |              |              |              |
|----|----|--------------|--------------|--------------|
| 1  | 6  | 0.000474595  | 0.000318887  | -0.001599908 |
| 2  | 6  | 0.000030268  | 0.000242221  | 0.001203216  |
| 3  | 7  | 0.000531525  | 0.000081421  | -0.000544676 |
| 4  | 6  | -0.001100999 | 0.002303926  | -0.000738821 |
| 5  | 7  | -0.000062176 | -0.000664120 | 0.002194525  |
| 6  | 6  | -0.000312734 | -0.000293097 | -0.000607670 |
| 7  | 6  | -0.000082227 | 0.002205850  | 0.000180262  |
| 8  | 1  | 0.000001367  | -0.000071972 | -0.000343476 |
| 9  | 1  | 0.000003116  | 0.000033919  | 0.000062900  |
| 10 | 1  | -0.000296472 | 0.000461008  | 0.000283945  |
| 11 | 1  | 0.000863006  | -0.000221001 | -0.000109640 |
| 12 | 1  | -0.000865080 | 0.000387268  | 0.000822527  |
| 13 | 1  | -0.001587524 | 0.000435538  | -0.001147997 |
| 14 | 35 | -0.001348812 | -0.000834673 | -0.000020787 |
| 15 | 1  | 0.001442133  | -0.002464268 | -0.000126914 |
| 16 | 6  | -0.000123892 | 0.000132580  | -0.000148087 |
| 17 | 6  | -0.000015478 | -0.000050065 | 0.000069842  |
| 18 | 1  | 0.000176974  | 0.000024726  | -0.000109523 |
| 19 | 1  | 0.000022878  | -0.000015981 | 0.000021153  |
| 20 | 1  | -0.000038246 | -0.000019573 | -0.000009002 |
| 21 | 7  | -0.000016893 | -0.001236784 | 0.001191988  |
| 22 | 1  | 0.000840923  | -0.000718724 | -0.000983111 |
| 23 | 1  | 0.001463748  | -0.000037087 | 0.000459252  |

-----  
Cartesian Forces: Max 0.002464268 RMS 0.000833820

GradGradGradGradGradGradGradGradGradGradGradGradGradGradGradGradGradGradGrad

Berny optimization.

Using GEDIIS/GDIIS optimizer.

FormGI is forming the generalized inverse of G from B-inverse, IUseBI=4.

Internal Forces: Max 0.002912135 RMS 0.000769216

Search for a local minimum.

Step number 5 out of a maximum of 121

All quantities printed in internal units (Hartrees-Bohrs-Radians)

Mixed Optimization -- En-DIIS/RFO-DIIS

Update second derivatives using D2CorX and points 4 5

DE= -2.16D-03 DEPred=-3.40D-03 R= 6.35D-01

TightC=F SS= 1.41D+00 RLast= 4.57D-01 DXNew= 8.4853D-01 1.3717D+00

Trust test= 6.35D-01 RLast= 4.57D-01 DXMaxT set to 8.49D-01

ITU= 1 0 1 0 0

Use linear search instead of GDIIS.

|                 |         |         |         |         |         |
|-----------------|---------|---------|---------|---------|---------|
| Eigenvalues --- | 0.00226 | 0.00327 | 0.00660 | 0.00971 | 0.01401 |
| Eigenvalues --- | 0.01525 | 0.01867 | 0.01978 | 0.02195 | 0.02216 |
| Eigenvalues --- | 0.02318 | 0.02391 | 0.02654 | 0.03062 | 0.03062 |

|                 |         |         |         |         |         |
|-----------------|---------|---------|---------|---------|---------|
| Eigenvalues --- | 0.03527 | 0.03711 | 0.04387 | 0.04658 | 0.05336 |
| Eigenvalues --- | 0.05636 | 0.08608 | 0.09401 | 0.12396 | 0.13224 |
| Eigenvalues --- | 0.15657 | 0.15846 | 0.15999 | 0.16000 | 0.16000 |
| Eigenvalues --- | 0.16000 | 0.16011 | 0.17883 | 0.21846 | 0.21999 |
| Eigenvalues --- | 0.22080 | 0.22673 | 0.23496 | 0.23617 | 0.25037 |
| Eigenvalues --- | 0.27454 | 0.31441 | 0.34007 | 0.34402 | 0.34623 |
| Eigenvalues --- | 0.34782 | 0.34965 | 0.35419 | 0.35688 | 0.35690 |
| Eigenvalues --- | 0.35859 | 0.36437 | 0.36658 | 0.39425 | 0.42191 |
| Eigenvalues --- | 0.43392 | 0.47156 | 0.47583 | 0.47772 | 0.50710 |
| Eigenvalues --- | 0.54365 | 0.60351 | 0.61052 |         |         |

RFO step: Lambda=-4.46377218D-04 EMin= 2.25510301D-03

Quartic linear search produced a step of -0.12694.

Iteration 1 RMS(Cart)= 0.03032831 RMS(Int)= 0.00039487

Iteration 2 RMS(Cart)= 0.00055500 RMS(Int)= 0.00004276

Iteration 3 RMS(Cart)= 0.00000018 RMS(Int)= 0.00004276

| Variable | Old X   | -DE/DX   | Delta X<br>(Linear) | Delta X<br>(Quad) | Delta X<br>(Total) | New X   |
|----------|---------|----------|---------------------|-------------------|--------------------|---------|
| R1       | 2.56469 | 0.00042  | 0.00024             | -0.00026          | -0.00003           | 2.56466 |
| R2       | 2.62089 | -0.00048 | 0.00010             | -0.00079          | -0.00070           | 2.62019 |
| R3       | 2.03384 | 0.00004  | -0.00001            | 0.00010           | 0.00009            | 2.03393 |
| R4       | 2.62760 | 0.00010  | 0.00022             | -0.00085          | -0.00063           | 2.62697 |
| R5       | 2.03081 | -0.00002 | 0.00001             | -0.00005          | -0.00004           | 2.03077 |
| R6       | 2.54859 | -0.00084 | -0.00010            | -0.00095          | -0.00104           | 2.54755 |
| R7       | 2.68727 | 0.00008  | 0.00002             | 0.00004           | 0.00006            | 2.68732 |
| R8       | 2.51952 | -0.00089 | -0.00103            | 0.00249           | 0.00147            | 2.52099 |
| R9       | 2.11147 | -0.00241 | -0.00116            | -0.00238          | -0.00354           | 2.10793 |
| R10      | 2.79724 | -0.00033 | -0.00034            | 0.00104           | 0.00070            | 2.79793 |
| R11      | 2.90899 | -0.00061 | 0.00008             | -0.00290          | -0.00282           | 2.90617 |
| R12      | 2.05751 | 0.00032  | -0.00003            | 0.00103           | 0.00100            | 2.05852 |
| R13      | 2.06140 | 0.00007  | -0.00004            | 0.00034           | 0.00029            | 2.06169 |
| R14      | 2.07432 | -0.00039 | 0.00012             | -0.00067          | -0.00055           | 2.07378 |
| R15      | 2.06531 | 0.00069  | -0.00003            | 0.00108           | 0.00104            | 2.06635 |
| R16      | 2.75244 | 0.00291  | 0.00001             | 0.00664           | 0.00665            | 2.75909 |
| R17      | 4.15061 | -0.00155 | -0.00456            | -0.02556          | -0.03013           | 4.12048 |
| R18      | 2.50687 | 0.00001  | 0.00000             | 0.00004           | 0.00004            | 2.50691 |
| R19      | 2.04672 | 0.00014  | 0.00002             | 0.00029           | 0.00031            | 2.04703 |
| R20      | 2.04312 | -0.00003 | 0.00000             | -0.00007          | -0.00006           | 2.04306 |
| R21      | 2.04598 | 0.00004  | 0.00000             | 0.00009           | 0.00010            | 2.04607 |
| R22      | 1.90764 | 0.00116  | 0.00028             | 0.00281           | 0.00308            | 1.91072 |
| R23      | 1.90915 | 0.00085  | 0.00006             | 0.00267           | 0.00273            | 1.91188 |
| A1       | 1.87620 | -0.00030 | -0.00023            | 0.00094           | 0.00058            | 1.87678 |
| A2       | 2.27836 | 0.00010  | 0.00013             | -0.00081          | -0.00066           | 2.27770 |
| A3       | 2.12862 | 0.00020  | 0.00010             | -0.00016          | -0.00003           | 2.12858 |
| A4       | 1.85953 | 0.00015  | 0.00005             | 0.00051           | 0.00039            | 1.85993 |

|     |          |          |          |          |          |          |
|-----|----------|----------|----------|----------|----------|----------|
| A5  | 2.27801  | -0.00004 | -0.00004 | 0.00002  | -0.00003 | 2.27797  |
| A6  | 2.14559  | -0.00010 | -0.00001 | -0.00033 | -0.00037 | 2.14522  |
| A7  | 1.90120  | -0.00064 | -0.00043 | -0.00028 | -0.00079 | 1.90042  |
| A8  | 2.24959  | 0.00038  | 0.00029  | 0.00022  | 0.00055  | 2.25015  |
| A9  | 2.13236  | 0.00025  | 0.00011  | 0.00008  | 0.00024  | 2.13260  |
| A10 | 1.88553  | 0.00088  | 0.00054  | 0.00075  | 0.00127  | 1.88680  |
| A11 | 2.20320  | 0.00167  | 0.00356  | -0.00594 | -0.00230 | 2.20090  |
| A12 | 2.19155  | -0.00258 | -0.00466 | 0.00516  | 0.00055  | 2.19210  |
| A13 | 1.90222  | -0.00008 | 0.00007  | -0.00148 | -0.00159 | 1.90062  |
| A14 | 2.20239  | 0.00236  | 0.00186  | -0.00130 | 0.00049  | 2.20288  |
| A15 | 2.17816  | -0.00229 | -0.00203 | 0.00210  | 0.00001  | 2.17818  |
| A16 | 1.95961  | -0.00128 | -0.00057 | -0.00206 | -0.00263 | 1.95698  |
| A17 | 1.88924  | 0.00002  | 0.00060  | -0.00294 | -0.00232 | 1.88693  |
| A18 | 1.86234  | 0.00101  | -0.00043 | 0.00658  | 0.00616  | 1.86849  |
| A19 | 1.89702  | 0.00032  | -0.00291 | 0.00619  | 0.00327  | 1.90029  |
| A20 | 1.95398  | 0.00010  | 0.00269  | -0.00698 | -0.00429 | 1.94969  |
| A21 | 1.89982  | -0.00015 | 0.00067  | -0.00080 | -0.00014 | 1.89968  |
| A22 | 1.92876  | -0.00062 | 0.00047  | -0.01312 | -0.01267 | 1.91609  |
| A23 | 1.86904  | -0.00015 | -0.00052 | 0.00181  | 0.00126  | 1.87031  |
| A24 | 1.89679  | -0.00063 | 0.00011  | -0.00330 | -0.00322 | 1.89357  |
| A25 | 1.89598  | -0.00048 | -0.00012 | -0.00551 | -0.00570 | 1.89028  |
| A26 | 1.96725  | 0.00041  | -0.00025 | 0.00322  | 0.00291  | 1.97016  |
| A27 | 1.90334  | 0.00148  | 0.00030  | 0.01730  | 0.01757  | 1.92091  |
| A28 | 2.80746  | -0.00071 | -0.00522 | 0.01795  | 0.01273  | 2.82019  |
| A29 | 2.17600  | -0.00004 | -0.00002 | -0.00011 | -0.00013 | 2.17588  |
| A30 | 1.95481  | -0.00008 | -0.00002 | -0.00052 | -0.00054 | 1.95427  |
| A31 | 2.15236  | 0.00012  | 0.00004  | 0.00063  | 0.00066  | 2.15303  |
| A32 | 2.07954  | -0.00003 | -0.00003 | -0.00008 | -0.00011 | 2.07943  |
| A33 | 2.15777  | 0.00004  | 0.00004  | 0.00005  | 0.00009  | 2.15786  |
| A34 | 2.04588  | 0.00000  | -0.00001 | 0.00003  | 0.00002  | 2.04590  |
| A35 | 1.97816  | 0.00017  | -0.00033 | 0.00464  | 0.00427  | 1.98244  |
| A36 | 1.94477  | 0.00177  | 0.00097  | 0.01055  | 0.01149  | 1.95626  |
| A37 | 1.91121  | -0.00098 | -0.00019 | -0.00334 | -0.00358 | 1.90762  |
| D1  | -0.01144 | 0.00081  | 0.00039  | 0.03133  | 0.03172  | 0.02028  |
| D2  | 3.14100  | 0.00021  | -0.00039 | 0.00941  | 0.00903  | -3.13316 |
| D3  | 3.12809  | 0.00043  | 0.00030  | 0.01687  | 0.01718  | -3.13791 |
| D4  | -0.00265 | -0.00017 | -0.00048 | -0.00505 | -0.00551 | -0.00816 |
| D5  | 0.01282  | -0.00080 | -0.00109 | -0.03027 | -0.03132 | -0.01850 |
| D6  | -3.09874 | -0.00020 | 0.00155  | -0.00592 | -0.00435 | -3.10310 |
| D7  | -3.12693 | -0.00046 | -0.00100 | -0.01732 | -0.01829 | 3.13797  |
| D8  | 0.04470  | 0.00015  | 0.00163  | 0.00703  | 0.00867  | 0.05337  |
| D9  | 0.00631  | -0.00055 | 0.00042  | -0.02207 | -0.02162 | -0.01531 |
| D10 | 3.14061  | -0.00058 | -0.00171 | -0.01935 | -0.02102 | 3.11959  |
| D11 | 3.13807  | -0.00001 | 0.00113  | -0.00221 | -0.00107 | 3.13701  |

|     |          |          |          |          |          |          |
|-----|----------|----------|----------|----------|----------|----------|
| D12 | -0.01081 | -0.00004 | -0.00100 | 0.00050  | -0.00047 | -0.01128 |
| D13 | 0.00160  | 0.00006  | -0.00110 | 0.00346  | 0.00235  | 0.00395  |
| D14 | 3.06482  | -0.00046 | -0.00735 | 0.00331  | -0.00392 | 3.06091  |
| D15 | -3.13329 | 0.00009  | 0.00085  | 0.00097  | 0.00180  | -3.13149 |
| D16 | -0.07006 | -0.00043 | -0.00540 | 0.00081  | -0.00447 | -0.07453 |
| D17 | 0.06371  | 0.00009  | 0.00075  | 0.00403  | 0.00477  | 0.06848  |
| D18 | -3.07259 | 0.00011  | 0.00078  | 0.00472  | 0.00549  | -3.06710 |
| D19 | -3.08604 | 0.00005  | -0.00164 | 0.00707  | 0.00544  | -3.08060 |
| D20 | 0.06085  | 0.00007  | -0.00160 | 0.00776  | 0.00616  | 0.06701  |
| D21 | -0.00882 | 0.00045  | 0.00135  | 0.01634  | 0.01767  | 0.00885  |
| D22 | 3.10325  | -0.00004 | -0.00111 | -0.00766 | -0.00881 | 3.09445  |
| D23 | -3.07271 | 0.00073  | 0.00681  | 0.01712  | 0.02407  | -3.04864 |
| D24 | 0.03936  | 0.00023  | 0.00436  | -0.00688 | -0.00241 | 0.03695  |
| D25 | -2.32247 | 0.00042  | -0.01278 | 0.03449  | 0.02172  | -2.30075 |
| D26 | 0.72749  | 0.00001  | -0.01960 | 0.03399  | 0.01438  | 0.74187  |
| D27 | 1.77835  | 0.00022  | 0.01160  | 0.00412  | 0.01570  | 1.79405  |
| D28 | -2.41078 | -0.00016 | 0.00803  | 0.00860  | 0.01662  | -2.39416 |
| D29 | -0.36857 | 0.00020  | 0.00889  | 0.00962  | 0.01850  | -0.35007 |
| D30 | -1.32866 | 0.00086  | 0.01455  | 0.03223  | 0.04679  | -1.28187 |
| D31 | 0.76540  | 0.00048  | 0.01099  | 0.03671  | 0.04771  | 0.81311  |
| D32 | 2.80761  | 0.00084  | 0.01185  | 0.03773  | 0.04959  | 2.85720  |
| D33 | -1.01266 | 0.00004  | -0.01371 | -0.01446 | -0.02817 | -1.04083 |
| D34 | 1.04953  | -0.00096 | -0.01391 | -0.02721 | -0.04111 | 1.00842  |
| D35 | 3.10333  | 0.00036  | -0.01378 | -0.00757 | -0.02138 | 3.08195  |
| D36 | -3.10219 | 0.00060  | -0.01221 | -0.01362 | -0.02581 | -3.12800 |
| D37 | -1.04000 | -0.00040 | -0.01241 | -0.02637 | -0.03875 | -1.07875 |
| D38 | 1.01380  | 0.00093  | -0.01228 | -0.00673 | -0.01902 | 0.99478  |
| D39 | 1.08178  | 0.00051  | -0.01276 | -0.01235 | -0.02511 | 1.05668  |
| D40 | -3.13921 | -0.00049 | -0.01295 | -0.02511 | -0.03805 | 3.10593  |
| D41 | -1.08541 | 0.00084  | -0.01283 | -0.00547 | -0.01832 | -1.10372 |
| D42 | 1.90412  | -0.00018 | -0.00647 | 0.03111  | 0.02461  | 1.92873  |
| D43 | -2.21391 | 0.00004  | -0.00621 | 0.03850  | 0.03229  | -2.18162 |
| D44 | -0.24004 | 0.00079  | -0.00697 | 0.04803  | 0.04108  | -0.19896 |
| D45 | 1.92511  | 0.00101  | -0.00671 | 0.05543  | 0.04876  | 1.97388  |
| D46 | -2.34719 | 0.00011  | -0.00686 | 0.04093  | 0.03405  | -2.31314 |
| D47 | -0.18204 | 0.00033  | -0.00660 | 0.04833  | 0.04173  | -0.14030 |
| D48 | -3.13354 | 0.00000  | 0.00006  | -0.00002 | 0.00005  | -3.13350 |
| D49 | 0.00798  | 0.00000  | 0.00002  | 0.00006  | 0.00008  | 0.00806  |
| D50 | 0.00217  | -0.00002 | 0.00003  | -0.00079 | -0.00076 | 0.00141  |
| D51 | -3.13949 | -0.00002 | -0.00001 | -0.00071 | -0.00072 | -3.14021 |

| Item                 | Value    | Threshold | Converged? |
|----------------------|----------|-----------|------------|
| Maximum Force        | 0.002912 | 0.000450  | NO         |
| RMS Force            | 0.000769 | 0.000300  | NO         |
| Maximum Displacement | 0.098475 | 0.001800  | NO         |



RMS Displacement 0.030288 0.001200 NO

Predicted change in Energy=-2.223001D-04

GradGradGradGradGradGradGradGradGradGradGradGradGradGradGradGradGradGradGrad

Input orientation:

| Center Number | Atomic Number | Atomic Type | Coordinates (Angstroms) |           |           |
|---------------|---------------|-------------|-------------------------|-----------|-----------|
|               |               |             | X                       | Y         | Z         |
| 1             | 6             | 0           | -1.802998               | -2.001305 | 0.289874  |
| 2             | 6             | 0           | -2.819882               | -1.129893 | 0.069712  |
| 3             | 7             | 0           | -2.251565               | 0.137743  | 0.018858  |
| 4             | 6             | 0           | -0.923612               | 0.029145  | 0.224138  |
| 5             | 7             | 0           | -0.635090               | -1.261753 | 0.397417  |
| 6             | 6             | 0           | 0.728644                | -1.803852 | 0.593745  |
| 7             | 6             | 0           | 1.549409                | -1.792161 | -0.706748 |
| 8             | 1             | 0           | -1.810303               | -3.072729 | 0.392045  |
| 9             | 1             | 0           | -3.872247               | -1.303681 | -0.061333 |
| 10            | 1             | 0           | 1.234701                | -1.187121 | 1.335477  |
| 11            | 1             | 0           | 0.617413                | -2.813580 | 0.991684  |
| 12            | 1             | 0           | 1.045081                | -2.398616 | -1.469729 |
| 13            | 1             | 0           | 1.583046                | -0.757104 | -1.057736 |
| 14            | 35            | 0           | 1.604595                | 2.009419  | -0.324284 |
| 15            | 1             | 0           | -0.180309               | 0.859187  | 0.171202  |
| 16            | 6             | 0           | -2.882288               | 1.391024  | -0.213009 |
| 17            | 6             | 0           | -4.190040               | 1.562887  | -0.354808 |
| 18            | 1             | 0           | -2.165600               | 2.201437  | -0.267779 |
| 19            | 1             | 0           | -4.573798               | 2.557249  | -0.536014 |
| 20            | 1             | 0           | -4.910391               | 0.756432  | -0.299679 |
| 21            | 7             | 0           | 2.898436                | -2.263513 | -0.407257 |
| 22            | 1             | 0           | 3.106180                | -3.171717 | -0.800133 |
| 23            | 1             | 0           | 3.606142                | -1.602583 | -0.700358 |

Distance matrix (angstroms):

|   |   | 1        | 2        | 3        | 4        | 5        |
|---|---|----------|----------|----------|----------|----------|
| 1 | C | 0.000000 |          |          |          |          |
| 2 | C | 1.357161 | 0.000000 |          |          |          |
| 3 | N | 2.202315 | 1.390134 | 0.000000 |          |          |
| 4 | C | 2.213678 | 2.227792 | 1.348107 | 0.000000 |          |
| 5 | N | 1.386546 | 2.213164 | 2.171380 | 1.334050 | 0.000000 |
| 6 | C | 2.557447 | 3.649777 | 3.603045 | 2.495283 | 1.480603 |
| 7 | C | 3.503660 | 4.486892 | 4.324169 | 3.209289 | 2.504506 |
| 8 | H | 1.076309 | 2.213089 | 3.262072 | 3.230485 | 2.158885 |
| 9 | H | 2.211746 | 1.074638 | 2.170425 | 3.248441 | 3.269770 |

|    |    |          |          |          |          |          |
|----|----|----------|----------|----------|----------|----------|
| 10 | H  | 3.314181 | 4.247950 | 3.955098 | 2.715270 | 2.093238 |
| 11 | H  | 2.647776 | 3.936983 | 4.229389 | 3.323398 | 2.080885 |
| 12 | H  | 3.371292 | 4.349423 | 4.417792 | 3.555132 | 2.757112 |
| 13 | H  | 3.850893 | 4.560251 | 4.082162 | 2.923135 | 2.700420 |
| 14 | Br | 5.298564 | 5.439348 | 4.300103 | 3.257926 | 4.029591 |
| 15 | H  | 3.290838 | 3.306673 | 2.198589 | 1.115469 | 2.180914 |
| 16 | C  | 3.595226 | 2.537488 | 1.422071 | 2.425329 | 3.529836 |
| 17 | C  | 4.337863 | 3.051002 | 2.434820 | 3.654736 | 4.602403 |
| 18 | H  | 4.255056 | 3.411707 | 2.085278 | 2.550171 | 3.844299 |
| 19 | H  | 5.398133 | 4.127728 | 3.399214 | 4.504775 | 5.565024 |
| 20 | H  | 4.196257 | 2.839876 | 2.748381 | 4.086286 | 4.778830 |
| 21 | N  | 4.760065 | 5.849082 | 5.698256 | 4.501443 | 3.759897 |
| 22 | H  | 5.163139 | 6.328024 | 6.350489 | 5.247273 | 4.367973 |
| 23 | H  | 5.513468 | 6.489239 | 6.152945 | 4.902642 | 4.394237 |
|    |    | 6        | 7        | 8        | 9        | 10       |
| 6  | C  | 0.000000 |          |          |          |          |
| 7  | C  | 1.537880 | 0.000000 |          |          |          |
| 8  | H  | 2.845519 | 3.759636 | 0.000000 |          |          |
| 9  | H  | 4.674131 | 5.481746 | 2.754396 | 0.000000 |          |
| 10 | H  | 1.089320 | 2.153090 | 3.703732 | 5.295808 | 0.000000 |
| 11 | H  | 1.090999 | 2.190110 | 2.514067 | 4.852391 | 1.773304 |
| 12 | H  | 2.170669 | 1.097395 | 3.474744 | 5.230925 | 3.061512 |
| 13 | H  | 2.133793 | 1.093465 | 4.356466 | 5.572413 | 2.456364 |
| 14 | Br | 4.018843 | 3.821169 | 6.164647 | 6.406370 | 3.620703 |
| 15 | H  | 2.845437 | 3.285173 | 4.262113 | 4.285146 | 2.746846 |
| 16 | C  | 4.888447 | 5.478721 | 4.630370 | 2.874797 | 5.098454 |
| 17 | C  | 6.035573 | 6.657439 | 5.264017 | 2.899022 | 6.312482 |
| 18 | H  | 5.016095 | 5.472003 | 5.327141 | 3.903987 | 5.061107 |
| 19 | H  | 6.957833 | 7.512668 | 6.339941 | 3.952755 | 7.159710 |
| 20 | H  | 6.257153 | 6.956296 | 4.975088 | 2.319184 | 6.649307 |
| 21 | N  | 2.433370 | 1.460048 | 4.844165 | 6.847123 | 2.638893 |
| 22 | H  | 3.076789 | 2.082170 | 5.059930 | 7.261806 | 3.464374 |
| 23 | H  | 3.161519 | 2.065461 | 5.717739 | 7.511591 | 3.152929 |
|    |    | 11       | 12       | 13       | 14       | 15       |
| 11 | H  | 0.000000 |          |          |          |          |
| 12 | H  | 2.532519 | 0.000000 |          |          |          |
| 13 | H  | 3.059683 | 1.775868 | 0.000000 |          |          |
| 14 | Br | 5.095842 | 4.588668 | 2.862178 | 0.000000 |          |
| 15 | H  | 3.846916 | 3.848053 | 2.689257 | 2.180463 | 0.000000 |
| 16 | C  | 5.601597 | 5.600441 | 5.026651 | 4.530664 | 2.780497 |
| 17 | C  | 6.639135 | 6.659058 | 6.261389 | 5.811895 | 4.104855 |
| 18 | H  | 5.872121 | 5.737042 | 4.840387 | 3.775505 | 2.436334 |
| 19 | H  | 7.624194 | 7.550114 | 7.011694 | 6.206246 | 4.763016 |
| 20 | H  | 6.705909 | 6.840394 | 6.710452 | 6.634427 | 4.754573 |

|    |   |          |          |          |          |          |
|----|---|----------|----------|----------|----------|----------|
| 21 | N | 2.731789 | 2.140567 | 2.103008 | 4.465294 | 4.423182 |
| 22 | H | 3.087528 | 2.300907 | 2.866470 | 5.415289 | 5.290811 |
| 23 | H | 3.641705 | 2.790095 | 2.221592 | 4.146586 | 4.599688 |
|    |   | 16       | 17       | 18       | 19       | 20       |
| 16 | C | 0.000000 |          |          |          |          |
| 17 | C | 1.326597 | 0.000000 |          |          |          |
| 18 | H | 1.083241 | 2.124542 | 0.000000 |          |          |
| 19 | H | 2.079812 | 1.081138 | 2.449075 | 0.000000 |          |
| 20 | H | 2.126833 | 1.082735 | 3.102085 | 1.847185 | 0.000000 |
| 21 | N | 6.841794 | 8.055469 | 6.752755 | 8.893290 | 8.373136 |
| 22 | H | 7.551494 | 8.709169 | 7.546248 | 9.585033 | 8.941265 |
| 23 | H | 7.162326 | 8.421405 | 6.926089 | 9.178378 | 8.846288 |
|    |   | 21       | 22       | 23       |          |          |
| 21 | N | 0.000000 |          |          |          |          |
| 22 | H | 1.011110 | 0.000000 |          |          |          |
| 23 | H | 1.011723 | 1.649878 | 0.000000 |          |          |

Stoichiometry C7H12BrN3

Framework group C1[X(C7H12BrN3)]

Deg. of freedom 63

Full point group C1 NOp 1

Largest Abelian subgroup C1 NOp 1

Largest concise Abelian subgroup C1 NOp 1

Standard orientation:

| Center<br>Number | Atomic<br>Number | Atomic<br>Type | Coordinates (Angstroms) |           |           |
|------------------|------------------|----------------|-------------------------|-----------|-----------|
|                  |                  |                | X                       | Y         | Z         |
| 1                | 6                | 0              | -1.644150               | 2.203419  | -0.148136 |
| 2                | 6                | 0              | -2.674761               | 1.345149  | 0.059467  |
| 3                | 7                | 0              | -2.145426               | 0.062482  | -0.024443 |
| 4                | 6                | 0              | -0.828008               | 0.151031  | -0.296401 |
| 5                | 7                | 0              | -0.508249               | 1.443378  | -0.381750 |
| 6                | 6                | 0              | 0.859264                | 1.962087  | -0.612042 |
| 7                | 6                | 0              | 1.749662                | 1.821256  | 0.633924  |
| 8                | 1                | 0              | -1.622732               | 3.279408  | -0.163331 |
| 9                | 1                | 0              | -3.712192               | 1.536446  | 0.264380  |
| 10               | 1                | 0              | 1.303644                | 1.394588  | -1.428797 |
| 11               | 1                | 0              | 0.758690                | 3.003718  | -0.920534 |
| 12               | 1                | 0              | 1.307849                | 2.376727  | 1.470900  |
| 13               | 1                | 0              | 1.769401                | 0.760372  | 0.898125  |
| 14               | 35               | 0              | 1.661813                | -1.936236 | -0.055182 |
| 15               | 1                | 0              | -0.109902               | -0.700658 | -0.353160 |
| 16               | 6                | 0              | -2.802254               | -1.187792 | 0.141918  |
| 17               | 6                | 0              | -4.105039               | -1.334719 | 0.344464  |

|    |   |   |           |           |          |
|----|---|---|-----------|-----------|----------|
| 18 | 1 | 0 | -2.109980 | -2.019346 | 0.090093 |
| 19 | 1 | 0 | -4.509899 | -2.329674 | 0.466997 |
| 20 | 1 | 0 | -4.801115 | -0.506979 | 0.395825 |
| 21 | 7 | 0 | 3.094545  | 2.278347  | 0.296138 |
| 22 | 1 | 0 | 3.352628  | 3.145226  | 0.748085 |
| 23 | 1 | 0 | 3.795782  | 1.576420  | 0.494001 |

-----

Rotational constants (GHZ):      0.7593978      0.4967119      0.3087908

Standard basis: 6-311++G(d,p) (5D, 7F)

There are    365 symmetry adapted cartesian basis functions of A    symmetry.

There are    352 symmetry adapted basis functions of A    symmetry.

    352 basis functions,    562 primitive gaussians,    365 cartesian basis functions

    55 alpha electrons      55 beta electrons

        nuclear repulsion energy      834.6366422834 Hartrees.

NAtoms=    23 NActive=    23 NUniq=    23 SFac= 1.00D+00 NATFMM=    60 NAOKFM=F

Big=F

Integral buffers will be    131072 words long.

Raffenetti 2 integral format.

Two-electron integral symmetry is turned on.

One-electron integrals computed using PRISM.

NBasis=    352 RedAO= T EigKep=    4.38D-06    NBF=    352

NBsUse=    352 1.00D-06 EigRej= -1.00D+00    NBFU=    352

Initial guess from the checkpoint file: "/home/suqian/liuwen/qianmengshijie/nh2/nh2.chk"

B after Tr=    0.000000    0.000000    0.000000

        Rot=    0.999997    -0.002139    -0.000334    0.001267 Ang=    -0.29 deg.

ExpMin= 3.50D-02 ExpMax= 4.40D+05 ExpMxC= 1.51D+04 IAcc=3 IRadAn=      5 AccDes=

0.00D+00

Harris functional with IExCor=    402 and IRadAn=      5 diagonalized for initial guess.

HarFok: IExCor=    402 AccDes= 0.00D+00 IRadAn=      5 IDoV= 1 UseB2=F ITyADJ=14

ICtDFT= 3500011 ScaDFX= 1.000000 1.000000 1.000000 1.000000

FoFCou: FMM=F IPFlag=      0 FMFlag=      100000 FMFlg1=      0

        NFxFlg=      0 DoJE=T BraDBF=F KetDBF=T FulRan=T

        wScrn= 0.000000 ICntrl=      500 IOpCl=    0 I1Cent=    200000004 NGrid=

0

        NMat0=    1 NMatS0=    1 NMatT0=    0 NMatD0=    1 NMtDS0=    0

NMtDT0=    0

Petite list used in FoFCou.

Requested convergence on RMS density matrix=1.00D-08 within 128 cycles.

Requested convergence on MAX density matrix=1.00D-06.

Requested convergence on      energy=1.00D-06.

No special actions if energy rises.

SCF Done: E(RB3LYP) = -3012.46505845      A.U. after    11 cycles

        NFock= 11 Conv=0.68D-08    -V/T= 2.0017

Calling FoFJK, ICntrl=      2127 FMM=F ISym2X=0 I1Cent= 0 IOpClX= 0 NMat=1 NMtS=1

NMatT=0.

\*\*\*\*\* Axes restored to original set \*\*\*\*\*

| Center<br>Number | Atomic<br>Number | Forces (Hartrees/Bohr) |              |              |
|------------------|------------------|------------------------|--------------|--------------|
|                  |                  | X                      | Y            | Z            |
| 1                | 6                | -0.000239988           | 0.000209448  | 0.001726381  |
| 2                | 6                | 0.000030522            | -0.000262850 | -0.001783058 |
| 3                | 7                | 0.000325234            | -0.000169365 | 0.000859703  |
| 4                | 6                | -0.001332110           | 0.001142400  | 0.000066883  |
| 5                | 7                | -0.000292955           | -0.000992691 | -0.000966249 |
| 6                | 6                | -0.000052121           | 0.000762052  | 0.000245547  |
| 7                | 6                | 0.000561173            | 0.000890968  | 0.000185072  |
| 8                | 1                | -0.000096722           | 0.000006794  | 0.000249385  |
| 9                | 1                | 0.000022407            | -0.000046068 | -0.000186834 |
| 10               | 1                | -0.000309395           | 0.000159547  | 0.000078388  |
| 11               | 1                | 0.000159393            | 0.000219491  | 0.000192806  |
| 12               | 1                | 0.000373646            | -0.000167954 | 0.000209689  |
| 13               | 1                | 0.000453644            | 0.000082853  | -0.000738629 |
| 14               | 35               | -0.000635580           | -0.000036844 | -0.000181480 |
| 15               | 1                | 0.002018004            | -0.001479173 | 0.000395745  |
| 16               | 6                | -0.000048639           | 0.000224870  | 0.000064490  |
| 17               | 6                | 0.000014300            | -0.000094090 | 0.000051842  |
| 18               | 1                | 0.000101570            | -0.000004946 | -0.000062249 |
| 19               | 1                | 0.000013152            | 0.000003024  | -0.000010425 |
| 20               | 1                | -0.000013704           | -0.000000900 | 0.000024851  |
| 21               | 7                | -0.000543517           | -0.001296900 | -0.000176102 |
| 22               | 1                | -0.000117481           | 0.000710794  | -0.000690463 |
| 23               | 1                | -0.000390832           | 0.000139541  | 0.000444707  |

Cartesian Forces: Max 0.002018004 RMS 0.000610430

GradGradGradGradGradGradGradGradGradGradGradGradGradGradGradGradGradGradGrad

Berny optimization.

Using GEDIIS/GDIIS optimizer.

FormGI is forming the generalized inverse of G from B-inverse, IUseBI=4.

Internal Forces: Max 0.002024194 RMS 0.000442692

Search for a local minimum.

Step number 6 out of a maximum of 121

All quantities printed in internal units (Hartrees-Bohrs-Radians)

Mixed Optimization -- En-DIIS/RFO-DIIS

Swapping is turned off.

Update second derivatives using D2CorX and points 4 5 6

DE= -2.42D-04 DEPred=-2.22D-04 R= 1.09D+00

TightC=F SS= 1.41D+00 RLast= 1.78D-01 DXNew= 1.4270D+00 5.3478D-01

Trust test= 1.09D+00 RLast= 1.78D-01 DXMaxT set to 8.49D-01

ITU= 1 1 0 1 0 0

|                 |         |         |         |         |         |
|-----------------|---------|---------|---------|---------|---------|
| Eigenvalues --- | 0.00215 | 0.00315 | 0.00481 | 0.00910 | 0.01396 |
| Eigenvalues --- | 0.01529 | 0.01871 | 0.01963 | 0.02194 | 0.02318 |
| Eigenvalues --- | 0.02390 | 0.02595 | 0.03025 | 0.03062 | 0.03065 |
| Eigenvalues --- | 0.03511 | 0.03785 | 0.04190 | 0.04710 | 0.05344 |
| Eigenvalues --- | 0.05704 | 0.09177 | 0.09648 | 0.12324 | 0.13259 |
| Eigenvalues --- | 0.15656 | 0.15979 | 0.15998 | 0.15999 | 0.16000 |
| Eigenvalues --- | 0.16007 | 0.16337 | 0.17764 | 0.21422 | 0.21980 |
| Eigenvalues --- | 0.22016 | 0.22717 | 0.23579 | 0.23908 | 0.25034 |
| Eigenvalues --- | 0.27788 | 0.31929 | 0.33993 | 0.34385 | 0.34523 |
| Eigenvalues --- | 0.34792 | 0.34944 | 0.35682 | 0.35689 | 0.35859 |
| Eigenvalues --- | 0.36436 | 0.36657 | 0.37287 | 0.38251 | 0.42190 |
| Eigenvalues --- | 0.43280 | 0.47357 | 0.47708 | 0.47893 | 0.50184 |
| Eigenvalues --- | 0.54322 | 0.60346 | 0.60561 |         |         |

En-DIIS/RFO-DIIS IScMMF= 0 using points: 6 5

RFO step: Lambda=-7.28005100D-05.

DidBck=F Rises=F RFO-DIIS coefs: 0.98493 0.01507

Iteration 1 RMS(Cart)= 0.03481118 RMS(Int)= 0.00191480

Iteration 2 RMS(Cart)= 0.00231625 RMS(Int)= 0.00002057

Iteration 3 RMS(Cart)= 0.00001210 RMS(Int)= 0.00001622

Iteration 4 RMS(Cart)= 0.00000000 RMS(Int)= 0.00001622

| Variable | Old X   | -DE/DX   | Delta X<br>(Linear) | Delta X<br>(Quad) | Delta X<br>(Total) | New X   |
|----------|---------|----------|---------------------|-------------------|--------------------|---------|
| R1       | 2.56466 | 0.00021  | 0.00000             | 0.00072           | 0.00071            | 2.56538 |
| R2       | 2.62019 | -0.00001 | 0.00001             | -0.00089          | -0.00088           | 2.61932 |
| R3       | 2.03393 | 0.00002  | 0.00000             | 0.00010           | 0.00010            | 2.03403 |
| R4       | 2.62697 | 0.00036  | 0.00001             | 0.00067           | 0.00068            | 2.62765 |
| R5       | 2.03077 | 0.00001  | 0.00000             | 0.00002           | 0.00002            | 2.03079 |
| R6       | 2.54755 | -0.00042 | 0.00002             | -0.00156          | -0.00154           | 2.54601 |
| R7       | 2.68732 | 0.00007  | 0.00000             | 0.00023           | 0.00023            | 2.68756 |
| R8       | 2.52099 | -0.00096 | -0.00002            | -0.00068          | -0.00070           | 2.52029 |
| R9       | 2.10793 | -0.00022 | 0.00005             | -0.00005          | 0.00001            | 2.10794 |
| R10      | 2.79793 | -0.00045 | -0.00001            | -0.00104          | -0.00105           | 2.79689 |
| R11      | 2.90617 | 0.00083  | 0.00004             | 0.00000           | 0.00004            | 2.90621 |
| R12      | 2.05852 | 0.00000  | -0.00002            | 0.00067           | 0.00065            | 2.05917 |
| R13      | 2.06169 | -0.00015 | 0.00000             | -0.00032          | -0.00032           | 2.06136 |
| R14      | 2.07378 | -0.00023 | 0.00001             | -0.00171          | -0.00170           | 2.07207 |
| R15      | 2.06635 | 0.00033  | -0.00002            | 0.00281           | 0.00279            | 2.06914 |
| R16      | 2.75909 | -0.00091 | -0.00010            | 0.00110           | 0.00099            | 2.76009 |
| R17      | 4.12048 | -0.00050 | 0.00045             | -0.02960          | -0.02914           | 4.09134 |
| R18      | 2.50691 | -0.00003 | 0.00000             | -0.00004          | -0.00004           | 2.50687 |
| R19      | 2.04703 | 0.00007  | 0.00000             | 0.00037           | 0.00036            | 2.04739 |

|     |          |          |          |          |          |          |
|-----|----------|----------|----------|----------|----------|----------|
| R20 | 2.04306  | 0.00000  | 0.00000  | -0.00004 | -0.00004 | 2.04301  |
| R21 | 2.04607  | 0.00001  | 0.00000  | 0.00011  | 0.00010  | 2.04618  |
| R22 | 1.91072  | -0.00040 | -0.00005 | -0.00013 | -0.00018 | 1.91054  |
| R23 | 1.91188  | -0.00031 | -0.00004 | 0.00061  | 0.00057  | 1.91245  |
| A1  | 1.87678  | -0.00032 | -0.00001 | -0.00132 | -0.00136 | 1.87542  |
| A2  | 2.27770  | 0.00010  | 0.00001  | 0.00023  | 0.00022  | 2.27792  |
| A3  | 2.12858  | 0.00022  | 0.00000  | 0.00127  | 0.00125  | 2.12984  |
| A4  | 1.85993  | -0.00012 | -0.00001 | 0.00102  | 0.00100  | 1.86093  |
| A5  | 2.27797  | 0.00003  | 0.00000  | -0.00049 | -0.00049 | 2.27748  |
| A6  | 2.14522  | 0.00009  | 0.00001  | -0.00048 | -0.00047 | 2.14476  |
| A7  | 1.90042  | -0.00010 | 0.00001  | -0.00113 | -0.00114 | 1.89928  |
| A8  | 2.25015  | 0.00016  | -0.00001 | 0.00116  | 0.00115  | 2.25129  |
| A9  | 2.13260  | -0.00006 | 0.00000  | -0.00007 | -0.00008 | 2.13252  |
| A10 | 1.88680  | 0.00020  | -0.00002 | 0.00090  | 0.00087  | 1.88767  |
| A11 | 2.20090  | 0.00128  | 0.00003  | 0.00784  | 0.00787  | 2.20877  |
| A12 | 2.19210  | -0.00150 | -0.00001 | -0.00938 | -0.00940 | 2.18270  |
| A13 | 1.90062  | 0.00035  | 0.00002  | 0.00082  | 0.00083  | 1.90145  |
| A14 | 2.20288  | 0.00168  | -0.00001 | 0.01070  | 0.01068  | 2.21356  |
| A15 | 2.17818  | -0.00202 | 0.00000  | -0.01192 | -0.01192 | 2.16626  |
| A16 | 1.95698  | -0.00031 | 0.00004  | -0.00513 | -0.00509 | 1.95190  |
| A17 | 1.88693  | 0.00003  | 0.00003  | -0.00571 | -0.00566 | 1.88127  |
| A18 | 1.86849  | -0.00004 | -0.00009 | 0.00915  | 0.00906  | 1.87755  |
| A19 | 1.90029  | 0.00005  | -0.00005 | 0.00807  | 0.00801  | 1.90830  |
| A20 | 1.94969  | 0.00036  | 0.00006  | -0.00329 | -0.00322 | 1.94648  |
| A21 | 1.89968  | -0.00012 | 0.00000  | -0.00333 | -0.00331 | 1.89637  |
| A22 | 1.91609  | 0.00022  | 0.00019  | -0.00860 | -0.00844 | 1.90765  |
| A23 | 1.87031  | 0.00026  | -0.00002 | 0.00630  | 0.00624  | 1.87654  |
| A24 | 1.89357  | 0.00031  | 0.00005  | -0.00099 | -0.00100 | 1.89257  |
| A25 | 1.89028  | -0.00003 | 0.00009  | -0.00360 | -0.00347 | 1.88681  |
| A26 | 1.97016  | -0.00065 | -0.00004 | -0.00580 | -0.00588 | 1.96428  |
| A27 | 1.92091  | -0.00007 | -0.00026 | 0.01332  | 0.01303  | 1.93394  |
| A28 | 2.82019  | 0.00042  | -0.00019 | 0.02100  | 0.02081  | 2.84100  |
| A29 | 2.17588  | -0.00010 | 0.00000  | -0.00060 | -0.00059 | 2.17528  |
| A30 | 1.95427  | -0.00002 | 0.00001  | -0.00077 | -0.00076 | 1.95351  |
| A31 | 2.15303  | 0.00012  | -0.00001 | 0.00136  | 0.00135  | 2.15437  |
| A32 | 2.07943  | -0.00002 | 0.00000  | -0.00008 | -0.00008 | 2.07935  |
| A33 | 2.15786  | 0.00001  | 0.00000  | 0.00000  | 0.00000  | 2.15786  |
| A34 | 2.04590  | 0.00000  | 0.00000  | 0.00008  | 0.00008  | 2.04598  |
| A35 | 1.98244  | -0.00053 | -0.00006 | 0.00056  | 0.00050  | 1.98294  |
| A36 | 1.95626  | -0.00027 | -0.00017 | 0.00104  | 0.00087  | 1.95713  |
| A37 | 1.90762  | 0.00023  | 0.00005  | -0.00369 | -0.00363 | 1.90399  |
| D1  | 0.02028  | -0.00073 | -0.00048 | -0.01286 | -0.01333 | 0.00695  |
| D2  | -3.13316 | -0.00033 | -0.00014 | -0.00787 | -0.00801 | -3.14117 |
| D3  | -3.13791 | -0.00024 | -0.00026 | -0.00052 | -0.00076 | -3.13867 |

|     |          |          |          |          |          |          |
|-----|----------|----------|----------|----------|----------|----------|
| D4  | -0.00816 | 0.00017  | 0.00008  | 0.00447  | 0.00455  | -0.00360 |
| D5  | -0.01850 | 0.00064  | 0.00047  | 0.01095  | 0.01141  | -0.00709 |
| D6  | -3.10310 | 0.00061  | 0.00007  | 0.01899  | 0.01909  | -3.08400 |
| D7  | 3.13797  | 0.00020  | 0.00028  | -0.00011 | 0.00015  | 3.13812  |
| D8  | 0.05337  | 0.00017  | -0.00013 | 0.00793  | 0.00784  | 0.06120  |
| D9  | -0.01531 | 0.00057  | 0.00033  | 0.01049  | 0.01080  | -0.00451 |
| D10 | 3.11959  | 0.00031  | 0.00032  | 0.00256  | 0.00286  | 3.12245  |
| D11 | 3.13701  | 0.00021  | 0.00002  | 0.00597  | 0.00599  | -3.14019 |
| D12 | -0.01128 | -0.00005 | 0.00001  | -0.00196 | -0.00195 | -0.01324 |
| D13 | 0.00395  | -0.00017 | -0.00004 | -0.00379 | -0.00381 | 0.00014  |
| D14 | 3.06091  | -0.00052 | 0.00006  | -0.01231 | -0.01228 | 3.04863  |
| D15 | -3.13149 | 0.00006  | -0.00003 | 0.00350  | 0.00347  | -3.12801 |
| D16 | -0.07453 | -0.00028 | 0.00007  | -0.00502 | -0.00499 | -0.07952 |
| D17 | 0.06848  | 0.00021  | -0.00007 | 0.01429  | 0.01422  | 0.08270  |
| D18 | -3.06710 | 0.00022  | -0.00008 | 0.01565  | 0.01557  | -3.05152 |
| D19 | -3.08060 | -0.00008 | -0.00008 | 0.00542  | 0.00534  | -3.07526 |
| D20 | 0.06701  | -0.00007 | -0.00009 | 0.00678  | 0.00669  | 0.07370  |
| D21 | 0.00885  | -0.00028 | -0.00027 | -0.00433 | -0.00460 | 0.00425  |
| D22 | 3.09445  | -0.00010 | 0.00013  | -0.01132 | -0.01113 | 3.08331  |
| D23 | -3.04864 | -0.00011 | -0.00036 | 0.00309  | 0.00267  | -3.04598 |
| D24 | 0.03695  | 0.00007  | 0.00004  | -0.00391 | -0.00387 | 0.03308  |
| D25 | -2.30075 | 0.00042  | -0.00033 | 0.16973  | 0.16939  | -2.13136 |
| D26 | 0.74187  | 0.00013  | -0.00022 | 0.16045  | 0.16024  | 0.90211  |
| D27 | 1.79405  | 0.00039  | -0.00024 | 0.00368  | 0.00343  | 1.79748  |
| D28 | -2.39416 | 0.00030  | -0.00025 | 0.00679  | 0.00655  | -2.38761 |
| D29 | -0.35007 | 0.00016  | -0.00028 | 0.00477  | 0.00449  | -0.34558 |
| D30 | -1.28187 | 0.00026  | -0.00071 | 0.01239  | 0.01167  | -1.27020 |
| D31 | 0.81311  | 0.00016  | -0.00072 | 0.01550  | 0.01478  | 0.82789  |
| D32 | 2.85720  | 0.00002  | -0.00075 | 0.01347  | 0.01272  | 2.86992  |
| D33 | -1.04083 | -0.00005 | 0.00042  | 0.03993  | 0.04036  | -1.00046 |
| D34 | 1.00842  | 0.00018  | 0.00062  | 0.03462  | 0.03522  | 1.04364  |
| D35 | 3.08195  | 0.00041  | 0.00032  | 0.05332  | 0.05363  | 3.13558  |
| D36 | -3.12800 | 0.00006  | 0.00039  | 0.04492  | 0.04532  | -3.08268 |
| D37 | -1.07875 | 0.00029  | 0.00058  | 0.03960  | 0.04018  | -1.03857 |
| D38 | 0.99478  | 0.00052  | 0.00029  | 0.05830  | 0.05859  | 1.05337  |
| D39 | 1.05668  | -0.00006 | 0.00038  | 0.04581  | 0.04620  | 1.10288  |
| D40 | 3.10593  | 0.00018  | 0.00057  | 0.04049  | 0.04106  | -3.13620 |
| D41 | -1.10372 | 0.00040  | 0.00028  | 0.05919  | 0.05946  | -1.04426 |
| D42 | 1.92873  | 0.00042  | -0.00037 | 0.08869  | 0.08831  | 2.01704  |
| D43 | -2.18162 | 0.00010  | -0.00049 | 0.08500  | 0.08451  | -2.09711 |
| D44 | -0.19896 | 0.00035  | -0.00062 | 0.10411  | 0.10347  | -0.09549 |
| D45 | 1.97388  | 0.00003  | -0.00074 | 0.10042  | 0.09967  | 2.07355  |
| D46 | -2.31314 | 0.00088  | -0.00051 | 0.10316  | 0.10267  | -2.21047 |
| D47 | -0.14030 | 0.00056  | -0.00063 | 0.09947  | 0.09887  | -0.04143 |



|     |          |         |         |          |          |          |
|-----|----------|---------|---------|----------|----------|----------|
| D48 | -3.13350 | 0.00002 | 0.00000 | 0.00085  | 0.00085  | -3.13265 |
| D49 | 0.00806  | 0.00003 | 0.00000 | 0.00110  | 0.00110  | 0.00916  |
| D50 | 0.00141  | 0.00000 | 0.00001 | -0.00067 | -0.00066 | 0.00075  |
| D51 | -3.14021 | 0.00001 | 0.00001 | -0.00042 | -0.00041 | -3.14062 |

| Item                 | Value    | Threshold | Converged? |
|----------------------|----------|-----------|------------|
| Maximum Force        | 0.002024 | 0.000450  | NO         |
| RMS Force            | 0.000443 | 0.000300  | NO         |
| Maximum Displacement | 0.214960 | 0.001800  | NO         |
| RMS Displacement     | 0.035278 | 0.001200  | NO         |

Predicted change in Energy=-2.926776D-04

GradGradGradGradGradGradGradGradGradGradGradGradGradGradGradGradGradGradGrad

Input orientation:

| Center Number | Atomic Number | Atomic Type | Coordinates (Angstroms) |           |           |
|---------------|---------------|-------------|-------------------------|-----------|-----------|
|               |               |             | X                       | Y         | Z         |
| 1             | 6             | 0           | -1.804807               | -2.008907 | 0.307490  |
| 2             | 6             | 0           | -2.816400               | -1.135902 | 0.067799  |
| 3             | 7             | 0           | -2.245950               | 0.131400  | 0.023086  |
| 4             | 6             | 0           | -0.920564               | 0.019264  | 0.237504  |
| 5             | 7             | 0           | -0.636090               | -1.271539 | 0.415264  |
| 6             | 6             | 0           | 0.732552                | -1.801206 | 0.607141  |
| 7             | 6             | 0           | 1.545512                | -1.771707 | -0.697990 |
| 8             | 1             | 0           | -1.815781               | -3.080035 | 0.412928  |
| 9             | 1             | 0           | -3.867319               | -1.308146 | -0.076306 |
| 10            | 1             | 0           | 1.227482                | -1.181770 | 1.354612  |
| 11            | 1             | 0           | 0.641431                | -2.815104 | 0.999074  |
| 12            | 1             | 0           | 1.016159                | -2.345779 | -1.467745 |
| 13            | 1             | 0           | 1.600534                | -0.729294 | -1.028520 |
| 14            | 35            | 0           | 1.553168                | 2.034614  | -0.366000 |
| 15            | 1             | 0           | -0.166959               | 0.839849  | 0.182732  |
| 16            | 6             | 0           | -2.870612               | 1.385815  | -0.219553 |
| 17            | 6             | 0           | -4.177406               | 1.561722  | -0.364995 |
| 18            | 1             | 0           | -2.149306               | 2.191941  | -0.280397 |
| 19            | 1             | 0           | -4.556757               | 2.556048  | -0.555315 |
| 20            | 1             | 0           | -4.901155               | 0.758667  | -0.303963 |
| 21            | 7             | 0           | 2.879225                | -2.300025 | -0.423458 |
| 22            | 1             | 0           | 3.082883                | -3.160348 | -0.913885 |
| 23            | 1             | 0           | 3.605684                | -1.624641 | -0.624216 |

Distance matrix (angstroms):

|     | 1        | 2 | 3 | 4 | 5 |
|-----|----------|---|---|---|---|
| 1 C | 0.000000 |   |   |   |   |

|    |    |          |          |          |          |          |
|----|----|----------|----------|----------|----------|----------|
| 2  | C  | 1.357538 | 0.000000 |          |          |          |
| 3  | N  | 2.203725 | 1.390491 | 0.000000 |          |          |
| 4  | C  | 2.213653 | 2.226522 | 1.347292 | 0.000000 |          |
| 5  | N  | 1.386083 | 2.211986 | 2.171103 | 1.333678 | 0.000000 |
| 6  | C  | 2.563420 | 3.650833 | 3.598272 | 2.486672 | 1.480049 |
| 7  | C  | 3.505979 | 4.474031 | 4.303132 | 3.188143 | 2.499778 |
| 8  | H  | 1.076361 | 2.213596 | 3.263485 | 3.230765 | 2.159244 |
| 9  | H  | 2.211859 | 1.074647 | 2.170486 | 3.247131 | 3.268612 |
| 10 | H  | 3.312914 | 4.243934 | 3.944883 | 2.702687 | 2.088859 |
| 11 | H  | 2.666894 | 3.955198 | 4.239269 | 3.324675 | 2.086980 |
| 12 | H  | 3.350043 | 4.302349 | 4.358938 | 3.500314 | 2.725737 |
| 13 | H  | 3.875395 | 4.569087 | 4.079474 | 2.918749 | 2.716806 |
| 14 | Br | 5.299023 | 5.416038 | 4.266955 | 3.247338 | 4.041519 |
| 15 | H  | 3.288392 | 3.307013 | 2.202178 | 1.115473 | 2.175343 |
| 16 | C  | 3.596922 | 2.538614 | 1.422193 | 2.424675 | 3.529534 |
| 17 | C  | 4.339453 | 3.052347 | 2.434533 | 3.653656 | 4.601858 |
| 18 | H  | 4.255751 | 3.411861 | 2.085012 | 2.549226 | 3.843106 |
| 19 | H  | 5.399673 | 4.128875 | 3.399014 | 4.503969 | 5.564538 |
| 20 | H  | 4.197703 | 2.841444 | 2.747825 | 4.084729 | 4.778055 |
| 21 | N  | 4.749651 | 5.834094 | 5.690223 | 4.500485 | 3.757483 |
| 22 | H  | 5.167890 | 6.313765 | 6.333243 | 5.240536 | 4.377784 |
| 23 | H  | 5.503558 | 6.477725 | 6.143639 | 4.892025 | 4.381535 |
|    |    | 6        | 7        | 8        | 9        | 10       |
| 6  | C  | 0.000000 |          |          |          |          |
| 7  | C  | 1.537901 | 0.000000 |          |          |          |
| 8  | H  | 2.857817 | 3.774142 | 0.000000 |          |          |
| 9  | H  | 4.676433 | 5.468100 | 2.754587 | 0.000000 |          |
| 10 | H  | 1.089665 | 2.159246 | 3.708319 | 5.293439 | 0.000000 |
| 11 | H  | 1.090827 | 2.187708 | 2.540009 | 4.874032 | 1.771340 |
| 12 | H  | 2.163826 | 1.096493 | 3.477922 | 5.182773 | 3.060274 |
| 13 | H  | 2.139574 | 1.094944 | 4.390326 | 5.580251 | 2.454225 |
| 14 | Br | 4.041526 | 3.820779 | 6.173830 | 6.374923 | 3.662198 |
| 15 | H  | 2.822130 | 3.244757 | 4.258767 | 4.286449 | 2.721160 |
| 16 | C  | 4.880913 | 5.449862 | 4.632118 | 2.875999 | 5.085751 |
| 17 | C  | 6.030093 | 6.631321 | 5.265771 | 2.900972 | 6.300525 |
| 18 | H  | 5.003805 | 5.434756 | 5.327821 | 3.904335 | 5.045580 |
| 19 | H  | 6.950810 | 7.482480 | 6.341599 | 3.954335 | 7.146784 |
| 20 | H  | 6.254736 | 6.936682 | 4.976857 | 2.322146 | 6.639003 |
| 21 | N  | 2.432932 | 1.460575 | 4.832290 | 6.827898 | 2.672130 |
| 22 | H  | 3.112048 | 2.082893 | 5.075804 | 7.241374 | 3.536009 |
| 23 | H  | 3.130863 | 2.066732 | 5.708425 | 7.499744 | 3.125339 |
|    |    | 11       | 12       | 13       | 14       | 15       |
| 11 | H  | 0.000000 |          |          |          |          |
| 12 | H  | 2.538875 | 0.000000 |          |          |          |

|    |    |          |          |          |          |          |
|----|----|----------|----------|----------|----------|----------|
| 13 | H  | 3.062944 | 1.774102 | 0.000000 |          |          |
| 14 | Br | 5.120005 | 4.548633 | 2.842598 | 0.000000 |          |
| 15 | H  | 3.831265 | 3.777839 | 2.655819 | 2.165042 | 0.000000 |
| 16 | C  | 5.609565 | 5.530801 | 5.011912 | 4.473502 | 2.787410 |
| 17 | C  | 6.651201 | 6.592248 | 6.250889 | 5.750053 | 4.111544 |
| 18 | H  | 5.873309 | 5.658699 | 4.811924 | 3.706804 | 2.443838 |
| 19 | H  | 7.634563 | 7.477822 | 6.994972 | 6.135056 | 4.770784 |
| 20 | H  | 6.722351 | 6.782815 | 6.709022 | 6.579527 | 4.759840 |
| 21 | N  | 2.701227 | 2.136269 | 2.113846 | 4.533301 | 4.416504 |
| 22 | H  | 3.120785 | 2.289461 | 2.849653 | 5.443145 | 5.269309 |
| 23 | H  | 3.583165 | 2.817308 | 2.232876 | 4.203528 | 4.577960 |
|    |    | 16       | 17       | 18       | 19       | 20       |
| 16 | C  | 0.000000 |          |          |          |          |
| 17 | C  | 1.326577 | 0.000000 |          |          |          |
| 18 | H  | 1.083432 | 2.125446 | 0.000000 |          |          |
| 19 | H  | 2.079728 | 1.081117 | 2.450300 | 0.000000 |          |
| 20 | H  | 2.126862 | 1.082790 | 3.102822 | 1.847259 | 0.000000 |
| 21 | N  | 6.832833 | 8.044411 | 6.744209 | 8.882154 | 8.360872 |
| 22 | H  | 7.522885 | 8.678192 | 7.511598 | 9.548290 | 8.914906 |
| 23 | H  | 7.153252 | 8.414072 | 6.914075 | 9.171061 | 8.840194 |
|    |    | 21       | 22       | 23       |          |          |
| 21 | N  | 0.000000 |          |          |          |          |
| 22 | H  | 1.011015 | 0.000000 |          |          |          |
| 23 | H  | 1.012023 | 1.647915 | 0.000000 |          |          |

Stoichiometry C7H12BrN3

Framework group C1[X(C7H12BrN3)]

Deg. of freedom 63

Full point group C1 NOp 1

Largest Abelian subgroup C1 NOp 1

Largest concise Abelian subgroup C1 NOp 1

Standard orientation:

| Center<br>Number | Atomic<br>Number | Atomic<br>Type | Coordinates (Angstroms) |          |           |
|------------------|------------------|----------------|-------------------------|----------|-----------|
|                  |                  |                | X                       | Y        | Z         |
| 1                | 6                | 0              | -1.618200               | 2.229775 | -0.144908 |
| 2                | 6                | 0              | -2.646949               | 1.372458 | 0.077786  |
| 3                | 7                | 0              | -2.124615               | 0.088190 | -0.028458 |
| 4                | 6                | 0              | -0.810982               | 0.175552 | -0.314698 |
| 5                | 7                | 0              | -0.487560               | 1.467092 | -0.392286 |
| 6                | 6                | 0              | 0.886815                | 1.966418 | -0.621005 |
| 7                | 6                | 0              | 1.774247                | 1.788835 | 0.622405  |
| 8                | 1                | 0              | -1.593724               | 3.305835 | -0.151953 |
| 9                | 1                | 0              | -3.679925               | 1.565478 | 0.302662  |

|    |    |   |           |           |           |
|----|----|---|-----------|-----------|-----------|
| 10 | 1  | 0 | 1.311890  | 1.402910  | -1.451149 |
| 11 | 1  | 0 | 0.812065  | 3.014790  | -0.912948 |
| 12 | 1  | 0 | 1.314396  | 2.306278  | 1.472751  |
| 13 | 1  | 0 | 1.808224  | 0.718989  | 0.853005  |
| 14 | 35 | 0 | 1.613953  | -1.968365 | -0.052949 |
| 15 | 1  | 0 | -0.087969 | -0.671210 | -0.381975 |
| 16 | 6  | 0 | -2.782086 | -1.161834 | 0.138287  |
| 17 | 6  | 0 | -4.083762 | -1.306873 | 0.349025  |
| 18 | 1  | 0 | -2.090366 | -1.993697 | 0.080385  |
| 19 | 1  | 0 | -4.489532 | -2.301388 | 0.471923  |
| 20 | 1  | 0 | -4.778050 | -0.477969 | 0.406615  |
| 21 | 7  | 0 | 3.108809  | 2.295654  | 0.313608  |
| 22 | 1  | 0 | 3.374632  | 3.099475  | 0.866203  |
| 23 | 1  | 0 | 3.819087  | 1.580738  | 0.406290  |

-----

Rotational constants (GHZ):      0.7472404      0.5049521      0.3100846  
Standard basis: 6-311++G(d,p) (5D, 7F)  
There are    365 symmetry adapted cartesian basis functions of A    symmetry.  
There are    352 symmetry adapted basis functions of A    symmetry.  
352 basis functions,    562 primitive gaussians,    365 cartesian basis functions  
55 alpha electrons      55 beta electrons  
nuclear repulsion energy      835.3268288519 Hartrees.  
NAtoms=    23 NActive=    23 NUniq=    23 SFac= 1.00D+00 NAtFMM=    60 NAOKFM=F  
Big=F  
Integral buffers will be    131072 words long.  
Raffenetti 2 integral format.  
Two-electron integral symmetry is turned on.  
One-electron integrals computed using PRISM.  
NBasis=    352 RedAO= T EigKep= 4.50D-06 NBF=    352  
NBsUse=    352 1.00D-06 EigRej= -1.00D+00 NBFU=    352  
Initial guess from the checkpoint file: "/home/suqian/liuwen/qianmengshijie/nh2/nh2.chk"  
B after Tr=    0.000000    0.000000    0.000000  
Rot=    0.999983    -0.000742    -0.000182    0.005718 Ang=    -0.66 deg.  
ExpMin= 3.50D-02 ExpMax= 4.40D+05 ExpMxC= 1.51D+04 IAcc=3 IRadAn=      5 AccDes=  
0.00D+00  
Harris functional with IExCor=    402 and IRadAn=      5 diagonalized for initial guess.  
HarFok: IExCor=    402 AccDes= 0.00D+00 IRadAn=      5 IDoV= 1 UseB2=F ITyADJ=14  
ICtDFT= 3500011 ScaDFX= 1.000000 1.000000 1.000000 1.000000  
FoFCou: FMM=F IPFlag=            0 FMFlag=    100000 FMFlg1=            0  
NFXFlg=            0 DoJE=T BraDBF=F KetDBF=T FulRan=T  
wScrn= 0.000000 ICntrl=            500 IOpCl= 0 I1Cent=    200000004 NGrid=  
0  
NMat0=    1 NMatS0=            1 NMatT0=    0 NMatD0=    1 NMtDS0=    0  
NMtDT0=    0

Petite list used in FoFCou.

Requested convergence on RMS density matrix=1.00D-08 within 128 cycles.

Requested convergence on MAX density matrix=1.00D-06.

Requested convergence on energy=1.00D-06.

No special actions if energy rises.

SCF Done: E(RB3LYP) = -3012.46544779 A.U. after 12 cycles

NFock= 12 Conv=0.70D-08 -V/T= 2.0017

Calling FoFJK, ICntrl= 2127 FMM=F ISym2X=0 l1Cent= 0 IOpClX= 0 NMat=1 NMatS=1

NMatT=0.

\*\*\*\*\* Axes restored to original set \*\*\*\*\*

---

| Center | Atomic | Forces (Hartrees/Bohr) |              |              |
|--------|--------|------------------------|--------------|--------------|
| Number | Number | X                      | Y            | Z            |
| 1      | 6      | -0.000081773           | -0.000078974 | 0.000155295  |
| 2      | 6      | -0.000231172           | -0.000198918 | -0.000469600 |
| 3      | 7      | 0.000298561            | -0.000328013 | -0.000049563 |
| 4      | 6      | -0.000691433           | 0.000148955  | 0.000440980  |
| 5      | 7      | -0.000202440           | -0.000373291 | 0.000050534  |
| 6      | 6      | -0.000299683           | 0.000748473  | 0.000688941  |
| 7      | 6      | 0.000353308            | 0.000543245  | 0.000160419  |
| 8      | 1      | -0.000096326           | 0.000019632  | 0.000177656  |
| 9      | 1      | -0.000019981           | -0.000020313 | 0.000043601  |
| 10     | 1      | 0.000140313            | -0.000112373 | -0.000033015 |
| 11     | 1      | -0.000394772           | 0.000208288  | -0.000183286 |
| 12     | 1      | 0.000850945            | -0.000558186 | -0.000116784 |
| 13     | 1      | 0.000387035            | -0.000589852 | -0.000358627 |
| 14     | 35     | -0.000042019           | 0.000351789  | -0.000148661 |
| 15     | 1      | 0.000911593            | -0.000067343 | 0.000112114  |
| 16     | 6      | -0.000016490           | 0.000238391  | -0.000037105 |
| 17     | 6      | 0.000001149            | -0.000095946 | 0.000089428  |
| 18     | 1      | 0.000060377            | -0.000024291 | -0.000029269 |
| 19     | 1      | 0.000003143            | 0.000016530  | -0.000035742 |
| 20     | 1      | 0.000002435            | 0.000011498  | 0.000049927  |
| 21     | 7      | 0.000016308            | -0.000734911 | -0.000112038 |
| 22     | 1      | -0.000343277           | 0.000804939  | -0.000586972 |
| 23     | 1      | -0.000605802           | 0.000090671  | 0.000191764  |

---

Cartesian Forces: Max 0.000911593 RMS 0.000343457

GradGradGradGradGradGradGradGradGradGradGradGradGradGradGradGradGradGradGrad

Berny optimization.

Using GEDIIS/GDIIS optimizer.

FormGI is forming the generalized inverse of G from B-inverse, IUseBI=4.

Internal Forces: Max 0.001035458 RMS 0.000307235

Search for a local minimum.

Step number 7 out of a maximum of 121

All quantities printed in internal units (Hartrees-Bohrs-Radians)

Mixed Optimization -- En-DIIS/RFO-DIIS

Swapping is turned off.

Update second derivatives using D2CorX and points 5 6 7

DE= -3.89D-04 DEPred=-2.93D-04 R= 1.33D+00

TightC=F SS= 1.41D+00 RLast= 3.68D-01 DXNew= 1.4270D+00 1.1032D+00

Trust test= 1.33D+00 RLast= 3.68D-01 DXMaxT set to 1.10D+00

ITU= 1 1 1 0 1 0 0

|                 |         |         |         |         |         |
|-----------------|---------|---------|---------|---------|---------|
| Eigenvalues --- | 0.00131 | 0.00332 | 0.00375 | 0.00935 | 0.01392 |
| Eigenvalues --- | 0.01538 | 0.01874 | 0.01959 | 0.02209 | 0.02320 |
| Eigenvalues --- | 0.02390 | 0.02608 | 0.03062 | 0.03062 | 0.03218 |
| Eigenvalues --- | 0.03457 | 0.03800 | 0.04251 | 0.04736 | 0.05342 |
| Eigenvalues --- | 0.05704 | 0.09283 | 0.09953 | 0.12279 | 0.13372 |
| Eigenvalues --- | 0.15714 | 0.15978 | 0.16000 | 0.16000 | 0.16000 |
| Eigenvalues --- | 0.16007 | 0.16863 | 0.17673 | 0.21580 | 0.21972 |
| Eigenvalues --- | 0.22031 | 0.22704 | 0.23567 | 0.23998 | 0.25039 |
| Eigenvalues --- | 0.27786 | 0.31871 | 0.34004 | 0.34393 | 0.34727 |
| Eigenvalues --- | 0.34789 | 0.34966 | 0.35684 | 0.35689 | 0.35858 |
| Eigenvalues --- | 0.36436 | 0.36657 | 0.37436 | 0.41088 | 0.42190 |
| Eigenvalues --- | 0.43645 | 0.47510 | 0.47703 | 0.48389 | 0.51316 |
| Eigenvalues --- | 0.54323 | 0.60353 | 0.61811 |         |         |

En-DIIS/RFO-DIIS IScMMF= 0 using points: 7 6 5

RFO step: Lambda=-3.28383085D-05.

DidBck=F Rises=F RFO-DIIS coefs: 1.56527 -0.38563 -0.17964

Iteration 1 RMS(Cart)= 0.04329999 RMS(Int)= 0.00274155

Iteration 2 RMS(Cart)= 0.00309789 RMS(Int)= 0.00004488

Iteration 3 RMS(Cart)= 0.00001360 RMS(Int)= 0.00004253

Iteration 4 RMS(Cart)= 0.00000000 RMS(Int)= 0.00004253

| Variable | Old X   | -DE/DX   | Delta X<br>(Linear) | Delta X<br>(Quad) | Delta X<br>(Total) | New X   |
|----------|---------|----------|---------------------|-------------------|--------------------|---------|
| R1       | 2.56538 | -0.00003 | 0.00040             | 0.00023           | 0.00061            | 2.56598 |
| R2       | 2.61932 | 0.00024  | -0.00062            | 0.00044           | -0.00018           | 2.61914 |
| R3       | 2.03403 | 0.00000  | 0.00007             | 0.00006           | 0.00013            | 2.03416 |
| R4       | 2.62765 | 0.00019  | 0.00027             | 0.00071           | 0.00096            | 2.62861 |
| R5       | 2.03079 | 0.00002  | 0.00000             | 0.00003           | 0.00003            | 2.03082 |
| R6       | 2.54601 | -0.00009 | -0.00106            | -0.00080          | -0.00185           | 2.54416 |
| R7       | 2.68756 | 0.00010  | 0.00014             | 0.00049           | 0.00064            | 2.68819 |
| R8       | 2.52029 | 0.00005  | -0.00013            | -0.00024          | -0.00035           | 2.51994 |
| R9       | 2.10794 | 0.00080  | -0.00063            | 0.00210           | 0.00147            | 2.10941 |
| R10      | 2.79689 | -0.00009 | -0.00047            | -0.00094          | -0.00140           | 2.79548 |
| R11      | 2.90621 | 0.00104  | -0.00048            | 0.00342           | 0.00294            | 2.90915 |

|     |         |          |          |          |          |         |
|-----|---------|----------|----------|----------|----------|---------|
| R12 | 2.05917 | -0.00002 | 0.00055  | 0.00012  | 0.00067  | 2.05984 |
| R13 | 2.06136 | -0.00023 | -0.00013 | -0.00070 | -0.00083 | 2.06053 |
| R14 | 2.07207 | -0.00004 | -0.00106 | -0.00059 | -0.00166 | 2.07042 |
| R15 | 2.06914 | -0.00043 | 0.00177  | -0.00106 | 0.00071  | 2.06985 |
| R16 | 2.76009 | -0.00100 | 0.00176  | -0.00180 | -0.00004 | 2.76004 |
| R17 | 4.09134 | 0.00020  | -0.02189 | -0.01077 | -0.03265 | 4.05868 |
| R18 | 2.50687 | -0.00003 | -0.00001 | -0.00005 | -0.00007 | 2.50680 |
| R19 | 2.04739 | 0.00002  | 0.00026  | 0.00031  | 0.00057  | 2.04796 |
| R20 | 2.04301 | 0.00002  | -0.00003 | 0.00005  | 0.00001  | 2.04303 |
| R21 | 2.04618 | -0.00001 | 0.00008  | 0.00004  | 0.00011  | 2.04629 |
| R22 | 1.91054 | -0.00047 | 0.00045  | -0.00036 | 0.00009  | 1.91063 |
| R23 | 1.91245 | -0.00041 | 0.00081  | -0.00010 | 0.00071  | 1.91316 |
| A1  | 1.87542 | -0.00002 | -0.00067 | -0.00068 | -0.00135 | 1.87406 |
| A2  | 2.27792 | -0.00006 | 0.00001  | -0.00034 | -0.00034 | 2.27758 |
| A3  | 2.12984 | 0.00008  | 0.00070  | 0.00100  | 0.00169  | 2.13152 |
| A4  | 1.86093 | -0.00016 | 0.00064  | -0.00031 | 0.00029  | 1.86121 |
| A5  | 2.27748 | 0.00005  | -0.00028 | -0.00004 | -0.00032 | 2.27716 |
| A6  | 2.14476 | 0.00010  | -0.00033 | 0.00033  | -0.00001 | 2.14475 |
| A7  | 1.89928 | 0.00027  | -0.00078 | 0.00070  | -0.00009 | 1.89918 |
| A8  | 2.25129 | -0.00003 | 0.00075  | 0.00068  | 0.00142  | 2.25271 |
| A9  | 2.13252 | -0.00024 | 0.00000  | -0.00134 | -0.00135 | 2.13117 |
| A10 | 1.88767 | -0.00022 | 0.00072  | -0.00067 | 0.00004  | 1.88772 |
| A11 | 2.20877 | -0.00009 | 0.00403  | 0.00014  | 0.00411  | 2.21288 |
| A12 | 2.18270 | 0.00030  | -0.00521 | -0.00024 | -0.00551 | 2.17719 |
| A13 | 1.90145 | 0.00013  | 0.00018  | 0.00090  | 0.00103  | 1.90249 |
| A14 | 2.21356 | 0.00005  | 0.00613  | 0.00230  | 0.00832  | 2.22188 |
| A15 | 2.16626 | -0.00018 | -0.00673 | -0.00366 | -0.01047 | 2.15579 |
| A16 | 1.95190 | 0.00062  | -0.00335 | 0.00088  | -0.00246 | 1.94944 |
| A17 | 1.88127 | -0.00001 | -0.00362 | -0.00094 | -0.00453 | 1.87673 |
| A18 | 1.87755 | -0.00050 | 0.00623  | -0.00029 | 0.00594  | 1.88349 |
| A19 | 1.90830 | -0.00025 | 0.00512  | 0.00151  | 0.00662  | 1.91492 |
| A20 | 1.94648 | 0.00000  | -0.00259 | -0.00123 | -0.00381 | 1.94267 |
| A21 | 1.89637 | 0.00013  | -0.00190 | 0.00002  | -0.00186 | 1.89451 |
| A22 | 1.90765 | 0.00050  | -0.00705 | 0.00349  | -0.00361 | 1.90404 |
| A23 | 1.87654 | 0.00002  | 0.00375  | 0.00439  | 0.00803  | 1.88457 |
| A24 | 1.89257 | 0.00077  | -0.00114 | 0.00316  | 0.00190  | 1.89447 |
| A25 | 1.88681 | 0.00012  | -0.00299 | -0.00211 | -0.00505 | 1.88176 |
| A26 | 1.96428 | -0.00096 | -0.00280 | -0.00892 | -0.01177 | 1.95251 |
| A27 | 1.93394 | -0.00039 | 0.01052  | 0.00064  | 0.01109  | 1.94503 |
| A28 | 2.84100 | 0.00069  | 0.01405  | 0.01138  | 0.02543  | 2.86643 |
| A29 | 2.17528 | -0.00010 | -0.00036 | -0.00078 | -0.00114 | 2.17415 |
| A30 | 1.95351 | -0.00001 | -0.00053 | -0.00044 | -0.00097 | 1.95253 |
| A31 | 2.15437 | 0.00011  | 0.00088  | 0.00123  | 0.00210  | 2.15648 |
| A32 | 2.07935 | -0.00001 | -0.00007 | -0.00017 | -0.00023 | 2.07912 |

|     |          |          |          |          |          |          |
|-----|----------|----------|----------|----------|----------|----------|
| A33 | 2.15786  | 0.00000  | 0.00002  | 0.00011  | 0.00013  | 2.15799  |
| A34 | 2.04598  | 0.00001  | 0.00005  | 0.00006  | 0.00011  | 2.04608  |
| A35 | 1.98294  | -0.00084 | 0.00105  | -0.00743 | -0.00642 | 1.97651  |
| A36 | 1.95713  | -0.00055 | 0.00256  | -0.00436 | -0.00184 | 1.95529  |
| A37 | 1.90399  | 0.00044  | -0.00270 | -0.00483 | -0.00759 | 1.89640  |
| D1  | 0.00695  | -0.00015 | -0.00183 | 0.00909  | 0.00729  | 0.01424  |
| D2  | -3.14117 | -0.00002 | -0.00291 | 0.00469  | 0.00177  | -3.13940 |
| D3  | -3.13867 | -0.00011 | 0.00266  | 0.00203  | 0.00475  | -3.13393 |
| D4  | -0.00360 | 0.00002  | 0.00158  | -0.00237 | -0.00077 | -0.00437 |
| D5  | -0.00709 | 0.00016  | 0.00082  | -0.00643 | -0.00562 | -0.01271 |
| D6  | -3.08400 | 0.00012  | 0.01001  | 0.00153  | 0.01169  | -3.07231 |
| D7  | 3.13812  | 0.00013  | -0.00320 | -0.00010 | -0.00334 | 3.13478  |
| D8  | 0.06120  | 0.00009  | 0.00599  | 0.00786  | 0.01398  | 0.07518  |
| D9  | -0.00451 | 0.00008  | 0.00222  | -0.00872 | -0.00653 | -0.01104 |
| D10 | 3.12245  | 0.00009  | -0.00216 | -0.00588 | -0.00807 | 3.11438  |
| D11 | -3.14019 | -0.00004 | 0.00319  | -0.00473 | -0.00153 | 3.14146  |
| D12 | -0.01324 | -0.00003 | -0.00119 | -0.00189 | -0.00307 | -0.01630 |
| D13 | 0.00014  | 0.00002  | -0.00173 | 0.00480  | 0.00309  | 0.00322  |
| D14 | 3.04863  | -0.00005 | -0.00764 | -0.00404 | -0.01171 | 3.03692  |
| D15 | -3.12801 | 0.00001  | 0.00229  | 0.00217  | 0.00447  | -3.12354 |
| D16 | -0.07952 | -0.00006 | -0.00362 | -0.00667 | -0.01033 | -0.08985 |
| D17 | 0.08270  | 0.00009  | 0.00890  | 0.00990  | 0.01879  | 0.10149  |
| D18 | -3.05152 | 0.00007  | 0.00979  | 0.00936  | 0.01914  | -3.03238 |
| D19 | -3.07526 | 0.00010  | 0.00399  | 0.01309  | 0.01709  | -3.05818 |
| D20 | 0.07370  | 0.00009  | 0.00489  | 0.01255  | 0.01744  | 0.09114  |
| D21 | 0.00425  | -0.00011 | 0.00058  | 0.00095  | 0.00153  | 0.00578  |
| D22 | 3.08331  | -0.00006 | -0.00787 | -0.00648 | -0.01416 | 3.06915  |
| D23 | -3.04598 | -0.00002 | 0.00583  | 0.00960  | 0.01531  | -3.03066 |
| D24 | 0.03308  | 0.00003  | -0.00262 | 0.00217  | -0.00038 | 0.03271  |
| D25 | -2.13136 | 0.00022  | 0.09965  | 0.11605  | 0.21568  | -1.91568 |
| D26 | 0.90211  | 0.00012  | 0.09316  | 0.10577  | 0.19896  | 1.10106  |
| D27 | 1.79748  | 0.00003  | 0.00476  | 0.00592  | 0.01067  | 1.80815  |
| D28 | -2.38761 | 0.00010  | 0.00669  | 0.00771  | 0.01442  | -2.37319 |
| D29 | -0.34558 | -0.00002 | 0.00586  | 0.00709  | 0.01297  | -0.33261 |
| D30 | -1.27020 | -0.00003 | 0.01500  | 0.01481  | 0.02978  | -1.24042 |
| D31 | 0.82789  | 0.00004  | 0.01693  | 0.01660  | 0.03353  | 0.86142  |
| D32 | 2.86992  | -0.00008 | 0.01610  | 0.01598  | 0.03208  | 2.90200  |
| D33 | -1.00046 | -0.00016 | 0.01776  | -0.03139 | -0.01362 | -1.01409 |
| D34 | 1.04364  | 0.00025  | 0.01252  | -0.02960 | -0.01711 | 1.02654  |
| D35 | 3.13558  | 0.00022  | 0.02647  | -0.02460 | 0.00186  | 3.13745  |
| D36 | -3.08268 | -0.00038 | 0.02098  | -0.03177 | -0.01076 | -3.09344 |
| D37 | -1.03857 | 0.00004  | 0.01575  | -0.02998 | -0.01424 | -1.05281 |
| D38 | 1.05337  | 0.00001  | 0.02970  | -0.02498 | 0.00473  | 1.05810  |
| D39 | 1.10288  | -0.00038 | 0.02161  | -0.03200 | -0.01037 | 1.09251  |



|     |          |          |          |          |          |          |
|-----|----------|----------|----------|----------|----------|----------|
| D40 | -3.13620 | 0.00004  | 0.01637  | -0.03022 | -0.01386 | 3.13313  |
| D41 | -1.04426 | 0.00001  | 0.03032  | -0.02521 | 0.00511  | -1.03915 |
| D42 | 2.01704  | 0.00064  | 0.05434  | 0.08043  | 0.13473  | 2.15177  |
| D43 | -2.09711 | 0.00013  | 0.05357  | 0.06454  | 0.11811  | -1.97901 |
| D44 | -0.09549 | 0.00010  | 0.06587  | 0.07958  | 0.14541  | 0.04992  |
| D45 | 2.07355  | -0.00041 | 0.06510  | 0.06369  | 0.12878  | 2.20233  |
| D46 | -2.21047 | 0.00090  | 0.06415  | 0.08805  | 0.15224  | -2.05823 |
| D47 | -0.04143 | 0.00039  | 0.06338  | 0.07216  | 0.13561  | 0.09418  |
| D48 | -3.13265 | 0.00002  | 0.00049  | 0.00083  | 0.00132  | -3.13133 |
| D49 | 0.00916  | 0.00003  | 0.00064  | 0.00142  | 0.00206  | 0.01122  |
| D50 | 0.00075  | 0.00004  | -0.00051 | 0.00143  | 0.00092  | 0.00167  |
| D51 | -3.14062 | 0.00005  | -0.00036 | 0.00202  | 0.00166  | -3.13897 |

| Item                 | Value    | Threshold | Converged? |
|----------------------|----------|-----------|------------|
| Maximum Force        | 0.001035 | 0.000450  | NO         |
| RMS Force            | 0.000307 | 0.000300  | NO         |
| Maximum Displacement | 0.220205 | 0.001800  | NO         |
| RMS Displacement     | 0.044400 | 0.001200  | NO         |

Predicted change in Energy=-1.854204D-04

GradGradGradGradGradGradGradGradGradGradGradGradGradGradGradGradGrad

Input orientation:

| Center Number | Atomic Number | Atomic Type | Coordinates (Angstroms) |           |           |
|---------------|---------------|-------------|-------------------------|-----------|-----------|
|               |               |             | X                       | Y         | Z         |
| 1             | 6             | 0           | -1.818618               | -2.021298 | 0.323290  |
| 2             | 6             | 0           | -2.821331               | -1.138887 | 0.078954  |
| 3             | 7             | 0           | -2.237509               | 0.122509  | 0.024959  |
| 4             | 6             | 0           | -0.915314               | -0.001147 | 0.246474  |
| 5             | 7             | 0           | -0.644400               | -1.293317 | 0.433836  |
| 6             | 6             | 0           | 0.724723                | -1.822655 | 0.617273  |
| 7             | 6             | 0           | 1.536193                | -1.767088 | -0.689766 |
| 8             | 1             | 0           | -1.840747               | -3.091994 | 0.432043  |
| 9             | 1             | 0           | -3.873517               | -1.301590 | -0.067085 |
| 10            | 1             | 0           | 1.212498                | -1.214509 | 1.379097  |
| 11            | 1             | 0           | 0.642310                | -2.844286 | 0.989327  |
| 12            | 1             | 0           | 1.011737                | -2.340817 | -1.461878 |
| 13            | 1             | 0           | 1.577325                | -0.722926 | -1.018024 |
| 14            | 35            | 0           | 1.491929                | 2.053856  | -0.428472 |
| 15            | 1             | 0           | -0.147716               | 0.806436  | 0.178479  |
| 16            | 6             | 0           | -2.846229               | 1.381885  | -0.233929 |
| 17            | 6             | 0           | -4.151947               | 1.573227  | -0.368850 |
| 18            | 1             | 0           | -2.112768               | 2.175372  | -0.316934 |
| 19            | 1             | 0           | -4.519366               | 2.569000  | -0.574436 |

|    |   |   |           |           |           |
|----|---|---|-----------|-----------|-----------|
| 20 | 1 | 0 | -4.886185 | 0.781877  | -0.283869 |
| 21 | 7 | 0 | 2.871782  | -2.298200 | -0.430283 |
| 22 | 1 | 0 | 3.116117  | -3.074341 | -1.030413 |
| 23 | 1 | 0 | 3.586554  | -1.586189 | -0.514509 |

-----  
Distance matrix (angstroms):

|    |    | 1        | 2        | 3        | 4        | 5        |
|----|----|----------|----------|----------|----------|----------|
| 1  | C  | 0.000000 |          |          |          |          |
| 2  | C  | 1.357860 | 0.000000 |          |          |          |
| 3  | N  | 2.204628 | 1.391001 | 0.000000 |          |          |
| 4  | C  | 2.214243 | 2.226076 | 1.346314 | 0.000000 |          |
| 5  | N  | 1.385989 | 2.211067 | 2.170195 | 1.333493 | 0.000000 |
| 6  | C  | 2.567970 | 3.651277 | 3.592955 | 2.478932 | 1.479306 |
| 7  | C  | 3.513639 | 4.469181 | 4.280448 | 3.163064 | 2.498384 |
| 8  | H  | 1.076432 | 2.213784 | 3.264379 | 3.231748 | 2.160205 |
| 9  | H  | 2.212009 | 1.074661 | 2.170957 | 3.246605 | 3.267750 |
| 10 | H  | 3.309577 | 4.238852 | 3.940033 | 2.698641 | 2.085137 |
| 11 | H  | 2.679008 | 3.966608 | 4.245615 | 3.325878 | 2.090382 |
| 12 | H  | 3.361522 | 4.302466 | 4.340077 | 3.479375 | 2.726496 |
| 13 | H  | 3.875219 | 4.552423 | 4.044197 | 2.886723 | 2.714646 |
| 14 | Br | 5.303938 | 5.390297 | 4.224264 | 3.236265 | 4.063379 |
| 15 | H  | 3.287699 | 3.307930 | 2.204214 | 1.116252 | 2.172755 |
| 16 | C  | 3.598352 | 2.540238 | 1.422529 | 2.423221 | 3.528551 |
| 17 | C  | 4.340978 | 3.053953 | 2.434078 | 3.651448 | 4.600464 |
| 18 | H  | 4.255402 | 3.412198 | 2.084873 | 2.547265 | 3.840777 |
| 19 | H  | 5.400999 | 4.130214 | 3.398744 | 4.502082 | 5.563225 |
| 20 | H  | 4.199571 | 2.843342 | 2.746930 | 4.081937 | 4.776429 |
| 21 | N  | 4.758613 | 5.832226 | 5.672031 | 4.480686 | 3.757662 |
| 22 | H  | 5.224272 | 6.342710 | 6.324158 | 5.227561 | 4.411072 |
| 23 | H  | 5.486995 | 6.450835 | 6.093471 | 4.833039 | 4.345814 |
|    |    | 6        | 7        | 8        | 9        | 10       |
| 6  | C  | 0.000000 |          |          |          |          |
| 7  | C  | 1.539455 | 0.000000 |          |          |          |
| 8  | H  | 2.868304 | 3.797046 | 0.000000 |          |          |
| 9  | H  | 4.677999 | 5.465289 | 2.754420 | 0.000000 |          |
| 10 | H  | 1.090019 | 2.165713 | 3.707312 | 5.288344 | 0.000000 |
| 11 | H  | 1.090388 | 2.186032 | 2.556854 | 4.887599 | 1.770087 |
| 12 | H  | 2.161883 | 1.095617 | 3.505407 | 5.185668 | 3.062681 |
| 13 | H  | 2.147214 | 1.095317 | 4.404361 | 5.563346 | 2.474053 |
| 14 | Br | 4.087729 | 3.830124 | 6.190880 | 6.338583 | 3.745344 |
| 15 | H  | 2.804605 | 3.195688 | 4.257746 | 4.287852 | 2.715858 |
| 16 | C  | 4.872917 | 5.415666 | 4.633584 | 2.878229 | 5.080982 |
| 17 | C  | 6.023817 | 6.604212 | 5.267576 | 2.903990 | 6.293175 |
| 18 | H  | 4.990823 | 5.384877 | 5.327297 | 3.905372 | 5.042341 |

|    |    |          |          |          |          |          |
|----|----|----------|----------|----------|----------|----------|
| 19 | H  | 6.943146 | 7.448808 | 6.343094 | 3.956765 | 7.140413 |
| 20 | H  | 6.251235 | 6.921626 | 4.979366 | 2.326655 | 6.629098 |
| 21 | N  | 2.435852 | 1.460551 | 4.856094 | 6.828192 | 2.683554 |
| 22 | H  | 3.162333 | 2.078729 | 5.168133 | 7.275001 | 3.590052 |
| 23 | H  | 3.086571 | 2.065774 | 5.711306 | 7.478894 | 3.059417 |
|    |    | 11       | 12       | 13       | 14       | 15       |
| 11 | H  | 0.000000 |          |          |          |          |
| 12 | H  | 2.529499 | 0.000000 |          |          |          |
| 13 | H  | 3.066575 | 1.770443 | 0.000000 |          |          |
| 14 | Br | 5.169508 | 4.540007 | 2.839962 | 0.000000 |          |
| 15 | H  | 3.822223 | 3.733671 | 2.597370 | 2.147762 | 0.000000 |
| 16 | C  | 5.614872 | 5.500025 | 4.961135 | 4.394201 | 2.789838 |
| 17 | C  | 6.659127 | 6.571003 | 6.206311 | 5.664617 | 4.113563 |
| 18 | H  | 5.873137 | 5.609758 | 4.744306 | 3.608468 | 2.445577 |
| 19 | H  | 7.641461 | 7.448957 | 6.942851 | 6.035093 | 4.773347 |
| 20 | H  | 6.733078 | 6.776755 | 6.676853 | 6.505319 | 4.761035 |
| 21 | N  | 2.698897 | 2.127386 | 2.121921 | 4.565566 | 4.373410 |
| 22 | H  | 3.201873 | 2.269941 | 2.810193 | 5.412830 | 5.212912 |
| 23 | H  | 3.537358 | 2.845462 | 2.244049 | 4.200570 | 4.488837 |
|    |    | 16       | 17       | 18       | 19       | 20       |
| 16 | C  | 0.000000 |          |          |          |          |
| 17 | C  | 1.326542 | 0.000000 |          |          |          |
| 18 | H  | 1.083732 | 2.126858 | 0.000000 |          |          |
| 19 | H  | 2.079561 | 1.081123 | 2.452135 | 0.000000 |          |
| 20 | H  | 2.126952 | 1.082850 | 3.103992 | 1.847375 | 0.000000 |
| 21 | N  | 6.802737 | 8.020255 | 6.698614 | 8.850959 | 8.348315 |
| 22 | H  | 7.486114 | 8.652300 | 7.443774 | 9.505567 | 8.914291 |
| 23 | H  | 7.090056 | 8.359876 | 6.831592 | 9.109069 | 8.800468 |
|    |    | 21       | 22       | 23       |          |          |
| 21 | N  | 0.000000 |          |          |          |          |
| 22 | H  | 1.011064 | 0.000000 |          |          |          |
| 23 | H  | 1.012400 | 1.643796 | 0.000000 |          |          |

Stoichiometry C7H12BrN3

Framework group C1[X(C7H12BrN3)]

Deg. of freedom 63

Full point group C1 NOp 1

Largest Abelian subgroup C1 NOp 1

Largest concise Abelian subgroup C1 NOp 1

Standard orientation:

| Center<br>Number | Atomic<br>Number | Atomic<br>Type | Coordinates (Angstroms) |          |           |
|------------------|------------------|----------------|-------------------------|----------|-----------|
|                  |                  |                | X                       | Y        | Z         |
| 1                | 6                | 0              | -1.602385               | 2.259646 | -0.126092 |

|    |    |   |           |           |           |
|----|----|---|-----------|-----------|-----------|
| 2  | 6  | 0 | -2.625912 | 1.394738  | 0.093241  |
| 3  | 7  | 0 | -2.098121 | 0.113642  | -0.029689 |
| 4  | 6  | 0 | -0.789353 | 0.210219  | -0.330290 |
| 5  | 7  | 0 | -0.472684 | 1.503837  | -0.397191 |
| 6  | 6  | 0 | 0.903957  | 1.997363  | -0.619982 |
| 7  | 6  | 0 | 1.797318  | 1.767543  | 0.612499  |
| 8  | 1  | 0 | -1.582696 | 3.335867  | -0.117857 |
| 9  | 1  | 0 | -3.657481 | 1.580541  | 0.330393  |
| 10 | 1  | 0 | 1.311548  | 1.458381  | -1.475266 |
| 11 | 1  | 0 | 0.843770  | 3.056084  | -0.873820 |
| 12 | 1  | 0 | 1.352277  | 2.272614  | 1.476916  |
| 13 | 1  | 0 | 1.812410  | 0.692834  | 0.823433  |
| 14 | 35 | 0 | 1.560955  | -1.997062 | -0.052130 |
| 15 | 1  | 0 | -0.056688 | -0.628712 | -0.403887 |
| 16 | 6  | 0 | -2.745224 | -1.142341 | 0.135705  |
| 17 | 6  | 0 | -4.046434 | -1.297260 | 0.342018  |
| 18 | 1  | 0 | -2.044939 | -1.967615 | 0.080932  |
| 19 | 1  | 0 | -4.444517 | -2.294804 | 0.465563  |
| 20 | 1  | 0 | -4.747723 | -0.473861 | 0.394658  |
| 21 | 7  | 0 | 3.135549  | 2.272468  | 0.316869  |
| 22 | 1  | 0 | 3.454586  | 2.968064  | 0.977636  |
| 23 | 1  | 0 | 3.821016  | 1.528697  | 0.273351  |

-----  
Rotational constants (GHZ): 0.7364246 0.5148880 0.3118910

Standard basis: 6-311++G(d,p) (5D, 7F)

There are 365 symmetry adapted cartesian basis functions of A symmetry.

There are 352 symmetry adapted basis functions of A symmetry.

352 basis functions, 562 primitive gaussians, 365 cartesian basis functions

55 alpha electrons 55 beta electrons

nuclear repulsion energy 836.2658328008 Hartrees.

NAtoms= 23 NActive= 23 NUniq= 23 SFac= 1.00D+00 NAtFMM= 60 NAOKFM=F

Big=F

Integral buffers will be 131072 words long.

Raffenetti 2 integral format.

Two-electron integral symmetry is turned on.

One-electron integrals computed using PRISM.

NBasis= 352 RedAO= T EigKep= 4.57D-06 NBF= 352

NBsUse= 352 1.00D-06 EigRej= -1.00D+00 NBFU= 352

Initial guess from the checkpoint file: "/home/suqian/liuwen/qianmengshijie/nh2/nh2.chk"

B after Tr= 0.000000 0.000000 0.000000

Rot= 0.999982 -0.001892 -0.000624 0.005662 Ang= -0.69 deg.

ExpMin= 3.50D-02 ExpMax= 4.40D+05 ExpMxC= 1.51D+04 IAcc=3 IRadAn= 5 AccDes=

0.00D+00

Harris functional with IExCor= 402 and IRadAn= 5 diagonalized for initial guess.

HarFok: IExCor= 402 AccDes= 0.00D+00 IRadAn= 5 IDoV= 1 UseB2=F ITyADJ=14  
 ICtDFT= 3500011 ScaDFX= 1.000000 1.000000 1.000000 1.000000  
 FoFCou: FMM=F IPFlag= 0 FMFlag= 100000 FMFlg1= 0  
 NFxFlg= 0 DoJE=T BraDBF=F KetDBF=T FulRan=T  
 wScrn= 0.000000 ICntrl= 500 IOpCl= 0 I1Cent= 200000004 NGrid= 0  
 NMat0= 1 NMatS0= 1 NMatT0= 0 NMatD0= 1 NMtDS0= 0  
 NMtDT0= 0

Petite list used in FoFCou.

Requested convergence on RMS density matrix=1.00D-08 within 128 cycles.

Requested convergence on MAX density matrix=1.00D-06.

Requested convergence on energy=1.00D-06.

No special actions if energy rises.

SCF Done: E(RB3LYP) = -3012.46571223 A.U. after 12 cycles

NFock= 12 Conv=0.35D-08 -V/T= 2.0017

Calling FoFJK, ICntrl= 2127 FMM=F ISym2X=0 I1Cent= 0 IOpClX= 0 NMat=1 NMatS=1  
 NMatT=0.

\*\*\*\*\* Axes restored to original set \*\*\*\*\*

| Center<br>Number | Atomic<br>Number | Forces (Hartrees/Bohr) |              |              |
|------------------|------------------|------------------------|--------------|--------------|
|                  |                  | X                      | Y            | Z            |
| 1                | 6                | -0.000249312           | -0.000030215 | 0.000801399  |
| 2                | 6                | 0.000044947            | -0.000167185 | -0.001064591 |
| 3                | 7                | -0.000187734           | -0.000055322 | 0.000425643  |
| 4                | 6                | -0.000055127           | -0.000960831 | 0.000368126  |
| 5                | 7                | 0.000183056            | -0.000432153 | -0.000722641 |
| 6                | 6                | -0.000051625           | 0.000570951  | 0.000352876  |
| 7                | 6                | -0.000208877           | 0.000728280  | -0.000032959 |
| 8                | 1                | -0.000046719           | 0.000067694  | 0.000291831  |
| 9                | 1                | -0.000010128           | 0.000012154  | -0.000032716 |
| 10               | 1                | 0.000517958            | -0.000302308 | -0.000206062 |
| 11               | 1                | -0.000617961           | 0.000102136  | -0.000168548 |
| 12               | 1                | 0.000895108            | -0.000907678 | 0.000094150  |
| 13               | 1                | 0.000139490            | -0.000323628 | 0.000010520  |
| 14               | 35               | 0.000600042            | 0.000766391  | -0.000248608 |
| 15               | 1                | -0.000297070           | 0.001044290  | 0.000195188  |
| 16               | 6                | -0.000077597           | 0.000207611  | 0.000073740  |
| 17               | 6                | -0.000009263           | -0.000032737 | 0.000083997  |
| 18               | 1                | 0.000017847            | -0.000051418 | -0.000026521 |
| 19               | 1                | -0.000014060           | 0.000015929  | -0.000051200 |
| 20               | 1                | 0.000025410            | 0.000007285  | 0.000041266  |
| 21               | 7                | 0.000482556            | -0.001395098 | -0.000017329 |
| 22               | 1                | -0.000383024           | 0.000753952  | -0.000356513 |

```

23      1      -0.000697919    0.000381900    0.000188954
-----
Cartesian Forces:  Max      0.001395098 RMS      0.000443689

GradGradGradGradGradGradGradGradGradGradGradGradGradGradGradGradGradGradGradGrad
Berny optimization.
Using GEDIIS/GDIIS optimizer.
FormGI is forming the generalized inverse of G from B-inverse, IUseBI=4.
Internal Forces:  Max      0.001727202 RMS      0.000451968
Search for a local minimum.
Step number      8 out of a maximum of 121
All quantities printed in internal units (Hartrees-Bohrs-Radians)
Mixed Optimization -- En-DIIS/RFO-DIIS
Swapping is turned off.
Update second derivatives using D2CorX and points      7      8
DE= -2.64D-04 DEPred=-1.85D-04 R= 1.43D+00
TightC=F SS= 1.41D+00 RLast= 4.55D-01 DXNew= 1.8553D+00 1.3661D+00
Trust test= 1.43D+00 RLast= 4.55D-01 DXMaxT set to 1.37D+00
ITU= 1 1 1 1 0 1 0 0
Eigenvalues --- 0.00056 0.00313 0.00378 0.00943 0.01390
Eigenvalues --- 0.01551 0.01875 0.02006 0.02220 0.02321
Eigenvalues --- 0.02391 0.02609 0.03061 0.03062 0.03282
Eigenvalues --- 0.03477 0.03999 0.04288 0.04759 0.05336
Eigenvalues --- 0.05827 0.09250 0.09878 0.12266 0.13448
Eigenvalues --- 0.15675 0.15985 0.15999 0.16000 0.16001
Eigenvalues --- 0.16007 0.16845 0.18335 0.21825 0.22014
Eigenvalues --- 0.22026 0.22663 0.23517 0.23932 0.25037
Eigenvalues --- 0.28090 0.31947 0.34097 0.34395 0.34725
Eigenvalues --- 0.34821 0.35006 0.35686 0.35689 0.35858
Eigenvalues --- 0.36436 0.36658 0.37993 0.40911 0.42191
Eigenvalues --- 0.43742 0.47640 0.47962 0.48206 0.51645
Eigenvalues --- 0.54361 0.60352 0.64204
En-DIIS/RFO-DIIS IScMMF= 0 using points: 8 7 6 5
RFO step: Lambda=-5.02926812D-05.
DidBck=F Rises=F RFO-DIIS coefs: 1.64848 -0.33067 -0.39161 0.07380
Iteration 1 RMS(Cart)= 0.06425389 RMS(Int)= 0.01823724
Iteration 2 RMS(Cart)= 0.01367754 RMS(Int)= 0.00035489
Iteration 3 RMS(Cart)= 0.00051204 RMS(Int)= 0.00007676
Iteration 4 RMS(Cart)= 0.00000048 RMS(Int)= 0.00007675
Variable      Old X      -DE/DX      Delta X      Delta X      Delta X      New X
              (Linear)      (Quad)      (Total)
R1      2.56598 -0.00016 0.00062 0.00036 0.00096 2.56695
R2      2.61914 0.00027 -0.00034 0.00033 0.00000 2.61914
R3      2.03416 -0.00004 0.00011 0.00001 0.00012 2.03428

```

|     |         |          |          |          |          |         |
|-----|---------|----------|----------|----------|----------|---------|
| R4  | 2.62861 | -0.00012 | 0.00089  | 0.00025  | 0.00112  | 2.62973 |
| R5  | 2.03082 | 0.00001  | 0.00003  | -0.00004 | -0.00001 | 2.03080 |
| R6  | 2.54416 | 0.00032  | -0.00161 | -0.00074 | -0.00234 | 2.54182 |
| R7  | 2.68819 | 0.00013  | 0.00048  | 0.00101  | 0.00149  | 2.68969 |
| R8  | 2.51994 | 0.00100  | -0.00056 | 0.00087  | 0.00033  | 2.52027 |
| R9  | 2.10941 | 0.00152  | 0.00122  | 0.00227  | 0.00348  | 2.11290 |
| R10 | 2.79548 | 0.00020  | -0.00129 | -0.00123 | -0.00252 | 2.79296 |
| R11 | 2.90915 | 0.00019  | 0.00212  | -0.00094 | 0.00119  | 2.91034 |
| R12 | 2.05984 | -0.00008 | 0.00057  | 0.00012  | 0.00069  | 2.06053 |
| R13 | 2.06053 | -0.00011 | -0.00066 | -0.00023 | -0.00089 | 2.05964 |
| R14 | 2.07042 | -0.00002 | -0.00158 | -0.00137 | -0.00294 | 2.06747 |
| R15 | 2.06985 | -0.00030 | 0.00127  | 0.00023  | 0.00150  | 2.07135 |
| R16 | 2.76004 | -0.00048 | -0.00020 | 0.00287  | 0.00267  | 2.76271 |
| R17 | 4.05868 | 0.00097  | -0.02821 | -0.00554 | -0.03375 | 4.02493 |
| R18 | 2.50680 | -0.00001 | -0.00006 | -0.00003 | -0.00009 | 2.50672 |
| R19 | 2.04796 | -0.00003 | 0.00046  | 0.00049  | 0.00095  | 2.04891 |
| R20 | 2.04303 | 0.00003  | 0.00000  | 0.00006  | 0.00006  | 2.04308 |
| R21 | 2.04629 | -0.00002 | 0.00010  | 0.00007  | 0.00017  | 2.04646 |
| R22 | 1.91063 | -0.00046 | -0.00022 | 0.00060  | 0.00037  | 1.91101 |
| R23 | 1.91316 | -0.00024 | 0.00044  | 0.00123  | 0.00167  | 1.91483 |
| A1  | 1.87406 | 0.00027  | -0.00135 | -0.00040 | -0.00175 | 1.87232 |
| A2  | 2.27758 | -0.00013 | -0.00010 | -0.00018 | -0.00030 | 2.27728 |
| A3  | 2.13152 | -0.00013 | 0.00150  | 0.00057  | 0.00206  | 2.13358 |
| A4  | 1.86121 | -0.00001 | 0.00047  | 0.00050  | 0.00097  | 1.86219 |
| A5  | 2.27716 | 0.00003  | -0.00036 | -0.00008 | -0.00044 | 2.27672 |
| A6  | 2.14475 | -0.00001 | -0.00013 | -0.00037 | -0.00049 | 2.14426 |
| A7  | 1.89918 | 0.00034  | -0.00036 | -0.00024 | -0.00060 | 1.89858 |
| A8  | 2.25271 | -0.00017 | 0.00125  | 0.00121  | 0.00243  | 2.25515 |
| A9  | 2.13117 | -0.00017 | -0.00092 | -0.00102 | -0.00196 | 2.12921 |
| A10 | 1.88772 | -0.00038 | 0.00021  | 0.00040  | 0.00060  | 1.88831 |
| A11 | 2.21288 | -0.00133 | 0.00534  | -0.00534 | -0.00010 | 2.21278 |
| A12 | 2.17719 | 0.00173  | -0.00660 | 0.00451  | -0.00218 | 2.17501 |
| A13 | 1.90249 | -0.00021 | 0.00105  | -0.00020 | 0.00085  | 1.90333 |
| A14 | 2.22188 | -0.00114 | 0.00875  | 0.00065  | 0.00929  | 2.23117 |
| A15 | 2.15579 | 0.00137  | -0.01058 | -0.00079 | -0.01142 | 2.14436 |
| A16 | 1.94944 | 0.00096  | -0.00302 | 0.00003  | -0.00299 | 1.94645 |
| A17 | 1.87673 | 0.00017  | -0.00457 | 0.00033  | -0.00422 | 1.87251 |
| A18 | 1.88349 | -0.00073 | 0.00628  | 0.00205  | 0.00833  | 1.89182 |
| A19 | 1.91492 | -0.00050 | 0.00660  | -0.00159 | 0.00500  | 1.91993 |
| A20 | 1.94267 | -0.00010 | -0.00317 | -0.00093 | -0.00409 | 1.93857 |
| A21 | 1.89451 | 0.00020  | -0.00225 | 0.00021  | -0.00201 | 1.89249 |
| A22 | 1.90404 | 0.00053  | -0.00409 | -0.00161 | -0.00586 | 1.89818 |
| A23 | 1.88457 | -0.00025 | 0.00709  | 0.00228  | 0.00912  | 1.89370 |
| A24 | 1.89447 | 0.00047  | 0.00115  | -0.00055 | 0.00033  | 1.89480 |

|     |          |          |          |          |          |          |
|-----|----------|----------|----------|----------|----------|----------|
| A25 | 1.88176  | 0.00030  | -0.00396 | -0.00040 | -0.00416 | 1.87760  |
| A26 | 1.95251  | -0.00090 | -0.00972 | -0.01161 | -0.02135 | 1.93116  |
| A27 | 1.94503  | -0.00012 | 0.01003  | 0.01214  | 0.02204  | 1.96707  |
| A28 | 2.86643  | 0.00069  | 0.02216  | 0.01345  | 0.03561  | 2.90204  |
| A29 | 2.17415  | -0.00006 | -0.00092 | -0.00103 | -0.00195 | 2.17220  |
| A30 | 1.95253  | -0.00001 | -0.00083 | -0.00080 | -0.00163 | 1.95091  |
| A31 | 2.15648  | 0.00007  | 0.00174  | 0.00182  | 0.00356  | 2.16004  |
| A32 | 2.07912  | 0.00003  | -0.00017 | -0.00006 | -0.00023 | 2.07889  |
| A33 | 2.15799  | -0.00004 | 0.00007  | -0.00001 | 0.00006  | 2.15805  |
| A34 | 2.04608  | 0.00001  | 0.00009  | 0.00007  | 0.00016  | 2.04625  |
| A35 | 1.97651  | -0.00069 | -0.00432 | -0.00732 | -0.01179 | 1.96472  |
| A36 | 1.95529  | -0.00098 | -0.00177 | -0.00449 | -0.00641 | 1.94888  |
| A37 | 1.89640  | 0.00063  | -0.00581 | -0.00619 | -0.01227 | 1.88413  |
| D1  | 0.01424  | -0.00052 | -0.00185 | -0.00431 | -0.00612 | 0.00812  |
| D2  | -3.13940 | -0.00010 | -0.00206 | 0.00075  | -0.00133 | -3.14073 |
| D3  | -3.13393 | -0.00033 | 0.00157  | -0.00537 | -0.00373 | -3.13766 |
| D4  | -0.00437 | 0.00009  | 0.00135  | -0.00031 | 0.00106  | -0.00332 |
| D5  | -0.01271 | 0.00045  | 0.00229  | 0.00083  | 0.00309  | -0.00962 |
| D6  | -3.07231 | 0.00012  | 0.01397  | 0.00545  | 0.01962  | -3.05269 |
| D7  | 3.13478  | 0.00029  | -0.00077 | 0.00178  | 0.00096  | 3.13574  |
| D8  | 0.07518  | -0.00005 | 0.01092  | 0.00641  | 0.01748  | 0.09266  |
| D9  | -0.01104 | 0.00042  | 0.00079  | 0.00633  | 0.00709  | -0.00395 |
| D10 | 3.11438  | 0.00038  | -0.00277 | 0.00244  | -0.00038 | 3.11400  |
| D11 | 3.14146  | 0.00004  | 0.00099  | 0.00175  | 0.00275  | -3.13898 |
| D12 | -0.01630 | 0.00000  | -0.00258 | -0.00214 | -0.00472 | -0.02102 |
| D13 | 0.00322  | -0.00014 | 0.00062  | -0.00588 | -0.00523 | -0.00201 |
| D14 | 3.03692  | 0.00014  | -0.01121 | -0.00981 | -0.02104 | 3.01588  |
| D15 | -3.12354 | -0.00011 | 0.00387  | -0.00233 | 0.00154  | -3.12200 |
| D16 | -0.08985 | 0.00017  | -0.00795 | -0.00627 | -0.01427 | -0.10412 |
| D17 | 0.10149  | 0.00009  | 0.01635  | 0.01818  | 0.03454  | 0.13603  |
| D18 | -3.03238 | 0.00009  | 0.01696  | 0.01892  | 0.03587  | -2.99651 |
| D19 | -3.05818 | 0.00005  | 0.01238  | 0.01384  | 0.02622  | -3.03195 |
| D20 | 0.09114  | 0.00005  | 0.01298  | 0.01458  | 0.02756  | 0.11869  |
| D21 | 0.00578  | -0.00019 | -0.00178 | 0.00315  | 0.00137  | 0.00715  |
| D22 | 3.06915  | -0.00001 | -0.01207 | -0.00118 | -0.01302 | 3.05613  |
| D23 | -3.03066 | -0.00023 | 0.00900  | 0.00774  | 0.01660  | -3.01406 |
| D24 | 0.03271  | -0.00005 | -0.00129 | 0.00340  | 0.00221  | 0.03492  |
| D25 | -1.91568 | 0.00002  | 0.19210  | 0.13929  | 0.33135  | -1.58432 |
| D26 | 1.10106  | 0.00018  | 0.17888  | 0.13436  | 0.31328  | 1.41434  |
| D27 | 1.80815  | -0.00003 | 0.00686  | 0.01759  | 0.02445  | 1.83260  |
| D28 | -2.37319 | 0.00003  | 0.01021  | 0.01587  | 0.02610  | -2.34709 |
| D29 | -0.33261 | -0.00002 | 0.00847  | 0.01735  | 0.02583  | -0.30678 |
| D30 | -1.24042 | -0.00032 | 0.01957  | 0.02280  | 0.04234  | -1.19807 |
| D31 | 0.86142  | -0.00026 | 0.02292  | 0.02107  | 0.04400  | 0.90542  |



|     |          |          |         |          |          |          |
|-----|----------|----------|---------|----------|----------|----------|
| D32 | 2.90200  | -0.00031 | 0.02118 | 0.02256  | 0.04373  | 2.94573  |
| D33 | -1.01409 | -0.00018 | 0.00607 | -0.06303 | -0.05694 | -1.07103 |
| D34 | 1.02654  | 0.00033  | 0.00314 | -0.06312 | -0.06003 | 0.96650  |
| D35 | 3.13745  | 0.00030  | 0.01983 | -0.04750 | -0.02766 | 3.10979  |
| D36 | -3.09344 | -0.00067 | 0.00933 | -0.06241 | -0.05305 | 3.13669  |
| D37 | -1.05281 | -0.00016 | 0.00639 | -0.06250 | -0.05615 | -1.10896 |
| D38 | 1.05810  | -0.00019 | 0.02309 | -0.04688 | -0.02377 | 1.03433  |
| D39 | 1.09251  | -0.00052 | 0.00981 | -0.06103 | -0.05120 | 1.04131  |
| D40 | 3.13313  | -0.00002 | 0.00687 | -0.06112 | -0.05429 | 3.07884  |
| D41 | -1.03915 | -0.00004 | 0.02357 | -0.04550 | -0.02191 | -1.06106 |
| D42 | 2.15177  | 0.00066  | 0.11362 | 0.12216  | 0.23569  | 2.38746  |
| D43 | -1.97901 | 0.00021  | 0.10106 | 0.10481  | 0.20592  | -1.77309 |
| D44 | 0.04992  | 0.00025  | 0.12415 | 0.13179  | 0.25574  | 0.30566  |
| D45 | 2.20233  | -0.00020 | 0.11159 | 0.11444  | 0.22597  | 2.42830  |
| D46 | -2.05823 | 0.00057  | 0.12884 | 0.13188  | 0.26080  | -1.79744 |
| D47 | 0.09418  | 0.00012  | 0.11628 | 0.11453  | 0.23102  | 0.32520  |
| D48 | -3.13133 | 0.00004  | 0.00112 | 0.00248  | 0.00360  | -3.12772 |
| D49 | 0.01122  | 0.00003  | 0.00168 | 0.00222  | 0.00390  | 0.01512  |
| D50 | 0.00167  | 0.00004  | 0.00044 | 0.00164  | 0.00208  | 0.00375  |
| D51 | -3.13897 | 0.00003  | 0.00100 | 0.00138  | 0.00238  | -3.13659 |

| Item                 | Value    | Threshold | Converged? |
|----------------------|----------|-----------|------------|
| Maximum Force        | 0.001727 | 0.000450  | NO         |
| RMS Force            | 0.000452 | 0.000300  | NO         |
| Maximum Displacement | 0.357753 | 0.001800  | NO         |
| RMS Displacement     | 0.073297 | 0.001200  | NO         |

Predicted change in Energy=-2.590848D-04

GradGradGradGradGradGradGradGradGradGradGradGradGradGradGradGradGrad

Input orientation:

| Center Number | Atomic Number | Atomic Type | Coordinates (Angstroms) |           |           |
|---------------|---------------|-------------|-------------------------|-----------|-----------|
|               |               |             | X                       | Y         | Z         |
| 1             | 6             | 0           | -1.841453               | -2.037648 | 0.348953  |
| 2             | 6             | 0           | -2.828265               | -1.141242 | 0.088521  |
| 3             | 7             | 0           | -2.224118               | 0.110665  | 0.023188  |
| 4             | 6             | 0           | -0.905207               | -0.032893 | 0.244760  |
| 5             | 7             | 0           | -0.655835               | -1.326921 | 0.449645  |
| 6             | 6             | 0           | 0.710791                | -1.862995 | 0.620981  |
| 7             | 6             | 0           | 1.518920                | -1.778749 | -0.687333 |
| 8             | 1             | 0           | -1.882849               | -3.106194 | 0.472821  |
| 9             | 1             | 0           | -3.882717               | -1.288126 | -0.057904 |
| 10            | 1             | 0           | 1.195917                | -1.271289 | 1.397817  |
| 11            | 1             | 0           | 0.635035                | -2.893022 | 0.969152  |

|    |    |   |           |           |           |
|----|----|---|-----------|-----------|-----------|
| 12 | 1  | 0 | 1.017846  | -2.382447 | -1.449856 |
| 13 | 1  | 0 | 1.514094  | -0.738501 | -1.032760 |
| 14 | 35 | 0 | 1.404039  | 2.092735  | -0.505295 |
| 15 | 1  | 0 | -0.120593 | 0.758151  | 0.151112  |
| 16 | 6  | 0 | -2.808648 | 1.378460  | -0.254051 |
| 17 | 6  | 0 | -4.112687 | 1.596204  | -0.362046 |
| 18 | 1  | 0 | -2.056760 | 2.149974  | -0.376504 |
| 19 | 1  | 0 | -4.462420 | 2.593949  | -0.588061 |
| 20 | 1  | 0 | -4.862336 | 0.825082  | -0.234952 |
| 21 | 7  | 0 | 2.867637  | -2.283164 | -0.434612 |
| 22 | 1  | 0 | 3.200285  | -2.888668 | -1.173098 |
| 23 | 1  | 0 | 3.534847  | -1.528446 | -0.325194 |

-----  
Distance matrix (angstroms):

|    |    | 1        | 2        | 3        | 4        | 5        |
|----|----|----------|----------|----------|----------|----------|
| 1  | C  | 0.000000 |          |          |          |          |
| 2  | C  | 1.358370 | 0.000000 |          |          |          |
| 3  | N  | 2.206310 | 1.391593 | 0.000000 |          |          |
| 4  | C  | 2.215053 | 2.225084 | 1.345076 | 0.000000 |          |
| 5  | N  | 1.385988 | 2.210054 | 2.169800 | 1.333670 | 0.000000 |
| 6  | C  | 2.572635 | 3.650940 | 3.586974 | 2.470277 | 1.477971 |
| 7  | C  | 3.526050 | 4.461657 | 4.252653 | 3.129410 | 2.495281 |
| 8  | H  | 1.076497 | 2.214167 | 3.266009 | 3.233106 | 2.161460 |
| 9  | H  | 2.212255 | 1.074655 | 2.171207 | 3.245424 | 3.266784 |
| 10 | H  | 3.303490 | 4.233818 | 3.936501 | 2.697756 | 2.081133 |
| 11 | H  | 2.692453 | 3.979785 | 4.253438 | 3.328277 | 2.094971 |
| 12 | H  | 3.395614 | 4.324323 | 4.346929 | 3.477105 | 2.742890 |
| 13 | H  | 3.854428 | 4.502839 | 3.976221 | 2.825413 | 2.693020 |
| 14 | Br | 5.321938 | 5.359442 | 4.167903 | 3.226994 | 4.104758 |
| 15 | H  | 3.288920 | 3.308035 | 2.204636 | 1.118096 | 2.173277 |
| 16 | C  | 3.601233 | 2.542958 | 1.423321 | 2.421532 | 3.528297 |
| 17 | C  | 4.343836 | 3.057182 | 2.433501 | 3.648301 | 4.599275 |
| 18 | H  | 4.255446 | 3.412267 | 2.084836 | 2.544985 | 3.838478 |
| 19 | H  | 5.403624 | 4.132780 | 3.398576 | 4.499739 | 5.562387 |
| 20 | H  | 4.202607 | 2.847545 | 2.745401 | 4.077391 | 4.774353 |
| 21 | N  | 4.780144 | 5.832748 | 5.644994 | 4.445179 | 3.756483 |
| 22 | H  | 5.334791 | 6.402233 | 6.312784 | 5.198157 | 4.465647 |
| 23 | H  | 5.442276 | 6.388293 | 5.997811 | 4.719704 | 4.266475 |
|    |    | 6        | 7        | 8        | 9        | 10       |
| 6  | C  | 0.000000 |          |          |          |          |
| 7  | C  | 1.540083 | 0.000000 |          |          |          |
| 8  | H  | 2.880011 | 3.831462 | 0.000000 |          |          |
| 9  | H  | 4.678854 | 5.460272 | 2.754362 | 0.000000 |          |
| 10 | H  | 1.090385 | 2.170184 | 3.701526 | 5.283175 | 0.000000 |

|    |    |          |          |          |          |          |
|----|----|----------|----------|----------|----------|----------|
| 11 | H  | 1.089916 | 2.183300 | 2.575175 | 4.903123 | 1.768718 |
| 12 | H  | 2.156960 | 1.094060 | 3.554508 | 5.210622 | 3.061964 |
| 13 | H  | 2.155143 | 1.096111 | 4.405901 | 5.511624 | 2.508546 |
| 14 | Br | 4.170958 | 3.877464 | 6.228098 | 6.291276 | 3.870633 |
| 15 | H  | 2.789692 | 3.134782 | 4.259366 | 4.287716 | 2.721415 |
| 16 | C  | 4.864069 | 5.374342 | 4.636547 | 2.881454 | 5.078029 |
| 17 | C  | 6.016506 | 6.573517 | 5.270837 | 2.909424 | 6.284975 |
| 18 | H  | 4.975765 | 5.321369 | 5.327184 | 3.905912 | 5.043130 |
| 19 | H  | 6.934569 | 7.409910 | 6.345966 | 3.960761 | 7.134462 |
| 20 | H  | 6.246449 | 6.906882 | 4.983294 | 2.335947 | 6.615372 |
| 21 | N  | 2.437786 | 1.461964 | 4.905907 | 6.833687 | 2.678868 |
| 22 | H  | 3.235475 | 2.072407 | 5.347393 | 7.346720 | 3.639094 |
| 23 | H  | 2.997076 | 2.063433 | 5.698908 | 7.426268 | 2.916417 |
|    |    | 11       | 12       | 13       | 14       | 15       |
| 11 | H  | 0.000000 |          |          |          |          |
| 12 | H  | 2.501765 | 0.000000 |          |          |          |
| 13 | H  | 3.069586 | 1.767142 | 0.000000 |          |          |
| 14 | Br | 5.255771 | 4.590054 | 2.882053 | 0.000000 |          |
| 15 | H  | 3.817227 | 3.704389 | 2.512712 | 2.129903 | 0.000000 |
| 16 | C  | 5.621453 | 5.496947 | 4.875860 | 4.280192 | 2.788293 |
| 17 | C  | 6.668291 | 6.582960 | 6.128734 | 5.540878 | 4.111263 |
| 18 | H  | 5.872678 | 5.581050 | 4.639500 | 3.463667 | 2.442190 |
| 19 | H  | 7.649562 | 7.452551 | 6.857237 | 5.888412 | 4.771581 |
| 20 | H  | 6.745017 | 6.807406 | 6.613634 | 6.399022 | 4.757904 |
| 21 | N  | 2.706841 | 2.112417 | 2.139122 | 4.614716 | 4.303741 |
| 22 | H  | 3.342119 | 2.257409 | 2.736083 | 5.337306 | 5.106961 |
| 23 | H  | 3.456343 | 2.886084 | 2.282127 | 4.205441 | 4.337930 |
|    |    | 16       | 17       | 18       | 19       | 20       |
| 16 | C  | 0.000000 |          |          |          |          |
| 17 | C  | 1.326497 | 0.000000 |          |          |          |
| 18 | H  | 1.084234 | 2.129250 | 0.000000 |          |          |
| 19 | H  | 2.079408 | 1.081152 | 2.455416 | 0.000000 |          |
| 20 | H  | 2.127023 | 1.082938 | 3.105903 | 1.847568 | 0.000000 |
| 21 | N  | 6.757241 | 7.986218 | 6.626143 | 8.805652 | 8.333879 |
| 22 | H  | 7.426998 | 8.616927 | 7.325229 | 9.440254 | 8.926248 |
| 23 | H  | 6.978187 | 8.261330 | 6.693241 | 9.001084 | 8.721234 |
|    |    | 21       | 22       | 23       |          |          |
| 21 | N  | 0.000000 |          |          |          |          |
| 22 | H  | 1.011262 | 0.000000 |          |          |          |
| 23 | H  | 1.013283 | 1.637399 | 0.000000 |          |          |

Stoichiometry C7H12BrN3

Framework group C1[X(C7H12BrN3)]

Deg. of freedom 63

Full point group C1 NOp 1

Largest Abelian subgroup C1 NOp 1

Largest concise Abelian subgroup C1 NOp 1

Standard orientation:

---

| Center<br>Number | Atomic<br>Number | Atomic<br>Type | Coordinates (Angstroms) |           |           |
|------------------|------------------|----------------|-------------------------|-----------|-----------|
|                  |                  |                | X                       | Y         | Z         |
| 1                | 6                | 0              | -1.581844               | 2.304772  | -0.109364 |
| 2                | 6                | 0              | -2.594784               | 1.428149  | 0.115697  |
| 3                | 7                | 0              | -2.058356               | 0.152095  | -0.027354 |
| 4                | 6                | 0              | -0.753935               | 0.262831  | -0.336308 |
| 5                | 7                | 0              | -0.448770               | 1.559753  | -0.395815 |
| 6                | 6                | 0              | 0.928881                | 2.050511  | -0.609430 |
| 7                | 6                | 0              | 1.827324                | 1.759573  | 0.607127  |
| 8                | 1                | 0              | -1.572663               | 3.381112  | -0.093444 |
| 9                | 1                | 0              | -3.625340               | 1.602769  | 0.365387  |
| 10               | 1                | 0              | 1.320255                | 1.543547  | -1.491899 |
| 11               | 1                | 0              | 0.884798                | 3.119511  | -0.817306 |
| 12               | 1                | 0              | 1.419664                | 2.281009  | 1.478268  |
| 13               | 1                | 0              | 1.790403                | 0.684493  | 0.817601  |
| 14               | 35               | 0              | 1.482829                | -2.045811 | -0.052495 |
| 15               | 1                | 0              | -0.009942               | -0.568724 | -0.407932 |
| 16               | 6                | 0              | -2.690282               | -1.112946 | 0.134452  |
| 17               | 6                | 0              | -3.992602               | -1.283033 | 0.320534  |
| 18               | 1                | 0              | -1.975608               | -1.927416 | 0.096454  |
| 19               | 1                | 0              | -4.379531               | -2.284676 | 0.446581  |
| 20               | 1                | 0              | -4.705418               | -0.468449 | 0.353712  |
| 21               | 7                | 0              | 3.179243                | 2.230403  | 0.310523  |
| 22               | 1                | 0              | 3.599917                | 2.718626  | 1.089832  |
| 23               | 1                | 0              | 3.793079                | 1.466665  | 0.052355  |

---

Rotational constants (GHZ): 0.7179759 0.5294961 0.3135897

Standard basis: 6-311++G(d,p) (5D, 7F)

There are 365 symmetry adapted cartesian basis functions of A symmetry.

There are 352 symmetry adapted basis functions of A symmetry.

352 basis functions, 562 primitive gaussians, 365 cartesian basis functions

55 alpha electrons 55 beta electrons

nuclear repulsion energy 836.8865688611 Hartrees.

NAtoms= 23 NActive= 23 NUniq= 23 SFac= 1.00D+00 NAtFMM= 60 NAOKFM=F

Big=F

Integral buffers will be 131072 words long.

Raffenetti 2 integral format.

Two-electron integral symmetry is turned on.

One-electron integrals computed using PRISM.

NBasis= 352 RedAO= T EigKep= 4.85D-06 NBF= 352  
 NBsUse= 352 1.00D-06 EigRej= -1.00D+00 NBFU= 352  
 Initial guess from the checkpoint file: "/home/suqian/liuwen/qianmengshijie/nh2/nh2.chk"  
 B after Tr= 0.000000 0.000000 0.000000  
 Rot= 0.999960 -0.002482 -0.000943 0.008583 Ang= -1.03 deg.  
 ExpMin= 3.50D-02 ExpMax= 4.40D+05 ExpMxC= 1.51D+04 IAcc=3 IRadAn= 5 AccDes=  
 0.00D+00  
 Harris functional with IExCor= 402 and IRadAn= 5 diagonalized for initial guess.  
 HarFok: IExCor= 402 AccDes= 0.00D+00 IRadAn= 5 IDoV= 1 UseB2=F ITyADJ=14  
 ICtDFT= 3500011 ScaDFX= 1.000000 1.000000 1.000000 1.000000  
 FoFCou: FMM=F IPFlag= 0 FMFlag= 100000 FMFlg1= 0  
 NFxFlg= 0 DoJE=T BraDBF=F KetDBF=T FulRan=T  
 wScrn= 0.000000 ICntrl= 500 IOpCl= 0 l1Cent= 200000004 NGrid=  
 0  
 NMat0= 1 NMatS0= 1 NMatT0= 0 NMatD0= 1 NMtDS0= 0  
 NMtDT0= 0  
 Petite list used in FoFCou.  
 Requested convergence on RMS density matrix=1.00D-08 within 128 cycles.  
 Requested convergence on MAX density matrix=1.00D-06.  
 Requested convergence on energy=1.00D-06.  
 No special actions if energy rises.  
 SCF Done: E(RB3LYP) = -3012.46603922 A.U. after 12 cycles  
 NFock= 12 Conv=0.91D-08 -V/T= 2.0017  
 Calling FoFJK, ICntrl= 2127 FMM=F ISym2X=0 l1Cent= 0 IOpClX= 0 NMat=1 NMtS=1  
 NMtT=0.  
 \*\*\*\*\* Axes restored to original set \*\*\*\*\*

| Center<br>Number | Atomic<br>Number | Forces (Hartrees/Bohr) |              |              |
|------------------|------------------|------------------------|--------------|--------------|
|                  |                  | X                      | Y            | Z            |
| 1                | 6                | -0.000364765           | 0.000093459  | 0.000358685  |
| 2                | 6                | 0.000004613            | 0.000011701  | -0.000038616 |
| 3                | 7                | -0.000366803           | -0.000230439 | -0.000178769 |
| 4                | 6                | 0.001072876            | -0.001847398 | 0.000341757  |
| 5                | 7                | 0.000257808            | -0.000366736 | -0.001199232 |
| 6                | 6                | 0.000769127            | 0.000613306  | 0.000271521  |
| 7                | 6                | -0.000509407           | 0.000231179  | -0.000195677 |
| 8                | 1                | 0.000046095            | 0.000089592  | 0.000154824  |
| 9                | 1                | -0.000054736           | 0.000037919  | 0.000027192  |
| 10               | 1                | 0.000794240            | -0.000407023 | -0.000152073 |
| 11               | 1                | -0.000938727           | 0.000064540  | -0.000109699 |
| 12               | 1                | 0.000858959            | -0.001335725 | -0.000033241 |
| 13               | 1                | 0.000578054            | 0.000060419  | 0.000370290  |
| 14               | 35               | 0.001198423            | 0.001021309  | -0.000495632 |

|    |   |              |              |              |
|----|---|--------------|--------------|--------------|
| 15 | 1 | -0.001907772 | 0.001945769  | 0.000779898  |
| 16 | 6 | -0.000103392 | 0.000077496  | -0.000135709 |
| 17 | 6 | 0.000014815  | -0.000015685 | 0.000051645  |
| 18 | 1 | -0.000020898 | -0.000030778 | 0.000070858  |
| 19 | 1 | -0.000021759 | 0.000023679  | -0.000001383 |
| 20 | 1 | 0.000050778  | -0.000011700 | 0.000035864  |
| 21 | 7 | -0.000087272 | -0.001346437 | 0.000374794  |
| 22 | 1 | -0.000515506 | 0.000572120  | -0.000512270 |
| 23 | 1 | -0.000754753 | 0.000749431  | 0.000214971  |

-----  
Cartesian Forces: Max 0.001945769 RMS 0.000634297

GradGradGradGradGradGradGradGradGradGradGradGradGradGradGradGradGradGradGrad  
Berny optimization.

Using GEDIIS/GDIIS optimizer.

FormGI is forming the generalized inverse of G from B-inverse, IUseBI=4.

Internal Forces: Max 0.002850896 RMS 0.000682439

Search for a local minimum.

Step number 9 out of a maximum of 121

All quantities printed in internal units (Hartrees-Bohrs-Radians)

Mixed Optimization -- En-DIIS/RFO-DIIS

Swapping is turned off.

Update second derivatives using D2CorX and points 8 9

DE= -3.27D-04 DEPred=-2.59D-04 R= 1.26D+00

TightC=F SS= 1.41D+00 RLast= 7.63D-01 DXNew= 2.2975D+00 2.2881D+00

Trust test= 1.26D+00 RLast= 7.63D-01 DXMaxT set to 2.29D+00

ITU= 1 1 1 1 1 0 1 0 0

|                 |         |         |         |         |         |
|-----------------|---------|---------|---------|---------|---------|
| Eigenvalues --- | 0.00035 | 0.00302 | 0.00379 | 0.00937 | 0.01395 |
| Eigenvalues --- | 0.01582 | 0.01875 | 0.02010 | 0.02218 | 0.02325 |
| Eigenvalues --- | 0.02391 | 0.02643 | 0.03061 | 0.03062 | 0.03540 |
| Eigenvalues --- | 0.03627 | 0.03950 | 0.04308 | 0.04767 | 0.05340 |
| Eigenvalues --- | 0.05883 | 0.09203 | 0.09806 | 0.12300 | 0.13321 |
| Eigenvalues --- | 0.15670 | 0.15987 | 0.15999 | 0.16000 | 0.16002 |
| Eigenvalues --- | 0.16009 | 0.16705 | 0.18406 | 0.21798 | 0.22004 |
| Eigenvalues --- | 0.22226 | 0.23016 | 0.23490 | 0.23976 | 0.25029 |
| Eigenvalues --- | 0.28442 | 0.32166 | 0.34159 | 0.34441 | 0.34695 |
| Eigenvalues --- | 0.34822 | 0.34996 | 0.35685 | 0.35689 | 0.35858 |
| Eigenvalues --- | 0.36436 | 0.36658 | 0.38009 | 0.40483 | 0.42189 |
| Eigenvalues --- | 0.43678 | 0.47641 | 0.47945 | 0.48280 | 0.51523 |
| Eigenvalues --- | 0.54368 | 0.60353 | 0.63698 |         |         |

En-DIIS/RFO-DIIS IScMMF= 0 using points: 9 8 7 6 5

RFO step: Lambda=-9.88396986D-05.

DidBck=F Rises=F RFO-DIIS coefs: 1.71082 -0.29749 -0.66157 -0.10640

0.35464

|             |            |            |                     |                   |                    |         |
|-------------|------------|------------|---------------------|-------------------|--------------------|---------|
| Iteration 1 | RMS(Cart)= | 0.06982395 | RMS(Int)=           | 0.04594330        |                    |         |
| Iteration 2 | RMS(Cart)= | 0.03871488 | RMS(Int)=           | 0.00297294        |                    |         |
| Iteration 3 | RMS(Cart)= | 0.00308196 | RMS(Int)=           | 0.00022302        |                    |         |
| Iteration 4 | RMS(Cart)= | 0.00001550 | RMS(Int)=           | 0.00022271        |                    |         |
| Iteration 5 | RMS(Cart)= | 0.00000002 | RMS(Int)=           | 0.00022271        |                    |         |
| Variable    | Old X      | -DE/DX     | Delta X<br>(Linear) | Delta X<br>(Quad) | Delta X<br>(Total) | New X   |
| R1          | 2.56695    | -0.00044   | 0.00077             | -0.00003          | 0.00074            | 2.56769 |
| R2          | 2.61914    | 0.00036    | 0.00039             | 0.00034           | 0.00071            | 2.61985 |
| R3          | 2.03428    | -0.00007   | 0.00009             | -0.00011          | -0.00003           | 2.03426 |
| R4          | 2.62973    | -0.00050   | 0.00125             | -0.00055          | 0.00071            | 2.63044 |
| R5          | 2.03080    | 0.00005    | 0.00001             | 0.00010           | 0.00011            | 2.03092 |
| R6          | 2.54182    | 0.00065    | -0.00168            | -0.00051          | -0.00218           | 2.53965 |
| R7          | 2.68969    | 0.00007    | 0.00125             | 0.00114           | 0.00238            | 2.69207 |
| R8          | 2.52027    | 0.00148    | -0.00025            | 0.00097           | 0.00071            | 2.52098 |
| R9          | 2.11290    | 0.00158    | 0.00434             | 0.00082           | 0.00516            | 2.11805 |
| R10         | 2.79296    | 0.00050    | -0.00236            | -0.00119          | -0.00355           | 2.78941 |
| R11         | 2.91034    | -0.00048   | 0.00305             | -0.00452          | -0.00147           | 2.90886 |
| R12         | 2.06053    | 0.00002    | 0.00025             | 0.00078           | 0.00103            | 2.06155 |
| R13         | 2.05964    | -0.00003   | -0.00100            | -0.00002          | -0.00102           | 2.05863 |
| R14         | 2.06747    | 0.00037    | -0.00216            | -0.00057          | -0.00273           | 2.06474 |
| R15         | 2.07135    | -0.00006   | 0.00029             | 0.00286           | 0.00316            | 2.07451 |
| R16         | 2.76271    | -0.00123   | -0.00073            | 0.00100           | 0.00027            | 2.76298 |
| R17         | 4.02493    | 0.00165    | -0.01957            | 0.01202           | -0.00755           | 4.01739 |
| R18         | 2.50672    | -0.00005   | -0.00009            | -0.00018          | -0.00027           | 2.50644 |
| R19         | 2.04891    | -0.00004   | 0.00071             | 0.00065           | 0.00136            | 2.05027 |
| R20         | 2.04308    | 0.00003    | 0.00008             | 0.00006           | 0.00014            | 2.04322 |
| R21         | 2.04646    | -0.00002   | 0.00011             | 0.00009           | 0.00020            | 2.04666 |
| R22         | 1.91101    | -0.00014   | -0.00074            | 0.00141           | 0.00066            | 1.91167 |
| R23         | 1.91483    | 0.00009    | 0.00037             | 0.00222           | 0.00259            | 1.91741 |
| A1          | 1.87232    | 0.00058    | -0.00167            | 0.00025           | -0.00143           | 1.87088 |
| A2          | 2.27728    | -0.00022   | -0.00017            | -0.00004          | -0.00022           | 2.27706 |
| A3          | 2.13358    | -0.00036   | 0.00186             | -0.00024          | 0.00161            | 2.13519 |
| A4          | 1.86219    | -0.00006   | 0.00042             | 0.00010           | 0.00055            | 1.86274 |
| A5          | 2.27672    | 0.00007    | -0.00031            | 0.00034           | 0.00004            | 2.27676 |
| A6          | 2.14426    | -0.00001   | -0.00010            | -0.00049          | -0.00058           | 2.14367 |
| A7          | 1.89858    | 0.00057    | 0.00009             | 0.00006           | 0.00017            | 1.89875 |
| A8          | 2.25515    | -0.00040   | 0.00184             | 0.00081           | 0.00264            | 2.25779 |
| A9          | 2.12921    | -0.00017   | -0.00201            | -0.00073          | -0.00276           | 2.12646 |
| A10         | 1.88831    | -0.00062   | -0.00022            | 0.00039           | 0.00011            | 1.88843 |
| A11         | 2.21278    | -0.00220   | 0.00049             | -0.00740          | -0.00696           | 2.20582 |
| A12         | 2.17501    | 0.00285    | -0.00169            | 0.00672           | 0.00496            | 2.17997 |
| A13         | 1.90333    | -0.00046   | 0.00139             | -0.00088          | 0.00059            | 1.90393 |
| A14         | 2.23117    | -0.00220   | 0.00722             | 0.00066           | 0.00799            | 2.23916 |

|     |          |          |          |          |          |          |
|-----|----------|----------|----------|----------|----------|----------|
| A15 | 2.14436  | 0.00269  | -0.00949 | 0.00061  | -0.00879 | 2.13558  |
| A16 | 1.94645  | 0.00129  | -0.00095 | -0.00015 | -0.00110 | 1.94534  |
| A17 | 1.87251  | 0.00033  | -0.00265 | 0.00404  | 0.00138  | 1.87389  |
| A18 | 1.89182  | -0.00113 | 0.00395  | -0.00175 | 0.00219  | 1.89402  |
| A19 | 1.91993  | -0.00060 | 0.00314  | -0.00048 | 0.00267  | 1.92260  |
| A20 | 1.93857  | -0.00012 | -0.00216 | -0.00080 | -0.00298 | 1.93559  |
| A21 | 1.89249  | 0.00023  | -0.00133 | -0.00073 | -0.00207 | 1.89043  |
| A22 | 1.89818  | 0.00074  | 0.00093  | -0.00105 | -0.00051 | 1.89767  |
| A23 | 1.89370  | -0.00011 | 0.00781  | 0.00395  | 0.01154  | 1.90524  |
| A24 | 1.89480  | -0.00016 | 0.00241  | -0.00737 | -0.00524 | 1.88956  |
| A25 | 1.87760  | 0.00049  | -0.00216 | 0.00699  | 0.00506  | 1.88266  |
| A26 | 1.93116  | -0.00071 | -0.01961 | -0.01678 | -0.03632 | 1.89484  |
| A27 | 1.96707  | -0.00020 | 0.01078  | 0.01430  | 0.02503  | 1.99210  |
| A28 | 2.90204  | 0.00005  | 0.02615  | 0.00882  | 0.03496  | 2.93700  |
| A29 | 2.17220  | -0.00009 | -0.00166 | -0.00171 | -0.00337 | 2.16882  |
| A30 | 1.95091  | 0.00003  | -0.00118 | -0.00073 | -0.00191 | 1.94900  |
| A31 | 2.16004  | 0.00006  | 0.00283  | 0.00247  | 0.00530  | 2.16534  |
| A32 | 2.07889  | 0.00005  | -0.00020 | 0.00008  | -0.00012 | 2.07877  |
| A33 | 2.15805  | -0.00008 | 0.00006  | -0.00036 | -0.00030 | 2.15775  |
| A34 | 2.04625  | 0.00003  | 0.00013  | 0.00028  | 0.00041  | 2.04666  |
| A35 | 1.96472  | -0.00095 | -0.01268 | -0.01487 | -0.02834 | 1.93638  |
| A36 | 1.94888  | -0.00144 | -0.00961 | -0.01134 | -0.02176 | 1.92712  |
| A37 | 1.88413  | 0.00092  | -0.00969 | -0.00770 | -0.01896 | 1.86517  |
| D1  | 0.00812  | -0.00025 | -0.00928 | 0.01137  | 0.00207  | 0.01019  |
| D2  | -3.14073 | 0.00000  | -0.00143 | 0.00444  | 0.00302  | -3.13770 |
| D3  | -3.13766 | -0.00023 | -0.00660 | 0.00254  | -0.00409 | 3.14143  |
| D4  | -0.00332 | 0.00001  | 0.00126  | -0.00439 | -0.00314 | -0.00646 |
| D5  | -0.00962 | 0.00030  | 0.00815  | -0.00700 | 0.00115  | -0.00847 |
| D6  | -3.05269 | -0.00026 | 0.01558  | -0.01141 | 0.00411  | -3.04858 |
| D7  | 3.13574  | 0.00029  | 0.00575  | 0.00095  | 0.00671  | -3.14074 |
| D8  | 0.09266  | -0.00027 | 0.01318  | -0.00346 | 0.00967  | 0.10233  |
| D9  | -0.00395 | 0.00012  | 0.00732  | -0.01195 | -0.00459 | -0.00854 |
| D10 | 3.11400  | 0.00028  | 0.00314  | -0.00536 | -0.00219 | 3.11181  |
| D11 | -3.13898 | -0.00010 | 0.00021  | -0.00567 | -0.00545 | 3.13876  |
| D12 | -0.02102 | 0.00006  | -0.00397 | 0.00092  | -0.00306 | -0.02408 |
| D13 | -0.00201 | 0.00007  | -0.00233 | 0.00769  | 0.00534  | 0.00334  |
| D14 | 3.01588  | 0.00059  | -0.01536 | 0.00573  | -0.00958 | 3.00630  |
| D15 | -3.12200 | -0.00008 | 0.00144  | 0.00165  | 0.00308  | -3.11893 |
| D16 | -0.10412 | 0.00045  | -0.01159 | -0.00031 | -0.01184 | -0.11596 |
| D17 | 0.13603  | -0.00004 | 0.02709  | 0.01474  | 0.04183  | 0.17786  |
| D18 | -2.99651 | -0.00011 | 0.02760  | 0.01118  | 0.03878  | -2.95773 |
| D19 | -3.03195 | 0.00015  | 0.02245  | 0.02210  | 0.04455  | -2.98740 |
| D20 | 0.11869  | 0.00008  | 0.02295  | 0.01855  | 0.04150  | 0.16020  |
| D21 | 0.00715  | -0.00023 | -0.00352 | -0.00050 | -0.00403 | 0.00312  |



|     |          |          |          |          |          |          |
|-----|----------|----------|----------|----------|----------|----------|
| D22 | 3.05613  | -0.00002 | -0.00922 | 0.00365  | -0.00568 | 3.05045  |
| D23 | -3.01406 | -0.00030 | 0.00893  | 0.00263  | 0.01166  | -3.00241 |
| D24 | 0.03492  | -0.00010 | 0.00323  | 0.00679  | 0.01001  | 0.04492  |
| D25 | -1.58432 | -0.00016 | 0.27493  | 0.13642  | 0.41136  | -1.17296 |
| D26 | 1.41434  | 0.00014  | 0.26004  | 0.13351  | 0.39354  | 1.80788  |
| D27 | 1.83260  | -0.00018 | 0.01537  | 0.01957  | 0.03495  | 1.86755  |
| D28 | -2.34709 | 0.00006  | 0.01699  | 0.02148  | 0.03846  | -2.30863 |
| D29 | -0.30678 | -0.00009 | 0.01605  | 0.02187  | 0.03791  | -0.26887 |
| D30 | -1.19807 | -0.00060 | 0.02292  | 0.01468  | 0.03762  | -1.16046 |
| D31 | 0.90542  | -0.00036 | 0.02454  | 0.01659  | 0.04113  | 0.94655  |
| D32 | 2.94573  | -0.00051 | 0.02359  | 0.01698  | 0.04058  | 2.98630  |
| D33 | -1.07103 | -0.00012 | -0.04614 | -0.04446 | -0.09064 | -1.16167 |
| D34 | 0.96650  | 0.00080  | -0.04391 | -0.03455 | -0.07847 | 0.88803  |
| D35 | 3.10979  | 0.00039  | -0.02462 | -0.01920 | -0.04375 | 3.06604  |
| D36 | 3.13669  | -0.00096 | -0.04426 | -0.04910 | -0.09340 | 3.04329  |
| D37 | -1.10896 | -0.00004 | -0.04203 | -0.03919 | -0.08124 | -1.19019 |
| D38 | 1.03433  | -0.00044 | -0.02274 | -0.02383 | -0.04651 | 0.98782  |
| D39 | 1.04131  | -0.00077 | -0.04325 | -0.04736 | -0.09065 | 0.95066  |
| D40 | 3.07884  | 0.00016  | -0.04102 | -0.03745 | -0.07849 | 3.00036  |
| D41 | -1.06106 | -0.00025 | -0.02173 | -0.02209 | -0.04376 | -1.10482 |
| D42 | 2.38746  | 0.00078  | 0.19257  | 0.17482  | 0.36710  | 2.75456  |
| D43 | -1.77309 | 0.00023  | 0.16276  | 0.14575  | 0.30906  | -1.46403 |
| D44 | 0.30566  | 0.00040  | 0.20163  | 0.19068  | 0.39161  | 0.69728  |
| D45 | 2.42830  | -0.00015 | 0.17182  | 0.16161  | 0.33357  | 2.76187  |
| D46 | -1.79744 | 0.00041  | 0.21074  | 0.18381  | 0.39428  | -1.40315 |
| D47 | 0.32520  | -0.00014 | 0.18092  | 0.15474  | 0.33624  | 0.66144  |
| D48 | -3.12772 | -0.00004 | 0.00288  | -0.00196 | 0.00091  | -3.12681 |
| D49 | 0.01512  | -0.00001 | 0.00332  | -0.00021 | 0.00311  | 0.01823  |
| D50 | 0.00375  | 0.00003  | 0.00229  | 0.00199  | 0.00429  | 0.00804  |
| D51 | -3.13659 | 0.00006  | 0.00273  | 0.00374  | 0.00648  | -3.13011 |

| Item                 | Value    | Threshold | Converged? |
|----------------------|----------|-----------|------------|
| Maximum Force        | 0.002851 | 0.000450  | NO         |
| RMS Force            | 0.000682 | 0.000300  | NO         |
| Maximum Displacement | 0.604984 | 0.001800  | NO         |
| RMS Displacement     | 0.101373 | 0.001200  | NO         |

Predicted change in Energy=-2.865013D-04

GradGradGradGradGradGradGradGradGradGradGradGradGradGradGradGradGrad

Input orientation:

| Center Number | Atomic Number | Atomic Type | Coordinates (Angstroms) |           |          |
|---------------|---------------|-------------|-------------------------|-----------|----------|
|               |               |             | X                       | Y         | Z        |
| 1             | 6             | 0           | -1.865453               | -2.052910 | 0.373875 |

|    |    |   |           |           |           |
|----|----|---|-----------|-----------|-----------|
| 2  | 6  | 0 | -2.837044 | -1.140913 | 0.108346  |
| 3  | 7  | 0 | -2.208370 | 0.097106  | 0.010063  |
| 4  | 6  | 0 | -0.891686 | -0.067915 | 0.222769  |
| 5  | 7  | 0 | -0.665045 | -1.363247 | 0.447337  |
| 6  | 6  | 0 | 0.696289  | -1.910982 | 0.607332  |
| 7  | 6  | 0 | 1.501216  | -1.810206 | -0.700869 |
| 8  | 1  | 0 | -1.928127 | -3.117196 | 0.522813  |
| 9  | 1  | 0 | -3.896360 | -1.268221 | -0.020697 |
| 10 | 1  | 0 | 1.187037  | -1.338499 | 1.395719  |
| 11 | 1  | 0 | 0.616191  | -2.946640 | 0.935571  |
| 12 | 1  | 0 | 1.046914  | -2.469868 | -1.444014 |
| 13 | 1  | 0 | 1.442265  | -0.782382 | -1.081955 |
| 14 | 35 | 0 | 1.316487  | 2.153570  | -0.571511 |
| 15 | 1  | 0 | -0.094809 | 0.709686  | 0.094019  |
| 16 | 6  | 0 | -2.767431 | 1.373244  | -0.287183 |
| 17 | 6  | 0 | -4.068699 | 1.624467  | -0.340095 |
| 18 | 1  | 0 | -1.997313 | 2.114958  | -0.471324 |
| 19 | 1  | 0 | -4.401941 | 2.622863  | -0.587482 |
| 20 | 1  | 0 | -4.831573 | 0.880893  | -0.144891 |
| 21 | 7  | 0 | 2.862908  | -2.273213 | -0.437853 |
| 22 | 1  | 0 | 3.315942  | -2.568524 | -1.292788 |
| 23 | 1  | 0 | 3.424124  | -1.521154 | -0.051898 |

-----  
Distance matrix (angstroms):

|    |    | 1        | 2        | 3        | 4        | 5        |
|----|----|----------|----------|----------|----------|----------|
| 1  | C  | 0.000000 |          |          |          |          |
| 2  | C  | 1.358762 | 0.000000 |          |          |          |
| 3  | N  | 2.207378 | 1.391970 | 0.000000 |          |          |
| 4  | C  | 2.216137 | 2.224598 | 1.343924 | 0.000000 |          |
| 5  | N  | 1.386366 | 2.209507 | 2.169260 | 1.334047 | 0.000000 |
| 6  | C  | 2.576270 | 3.650539 | 3.581367 | 2.463016 | 1.476091 |
| 7  | C  | 3.542378 | 4.463550 | 4.231346 | 3.100753 | 2.492156 |
| 8  | H  | 1.076483 | 2.214409 | 3.266984 | 3.234557 | 2.162732 |
| 9  | H  | 2.212693 | 1.074714 | 2.171261 | 3.244700 | 3.266417 |
| 10 | H  | 3.297308 | 4.229609 | 3.938247 | 2.703938 | 2.080925 |
| 11 | H  | 2.696815 | 3.983690 | 4.254303 | 3.326986 | 2.094534 |
| 12 | H  | 3.458389 | 4.388744 | 4.393241 | 3.507950 | 2.780760 |
| 13 | H  | 3.830755 | 4.456214 | 3.910644 | 2.767688 | 2.667751 |
| 14 | Br | 5.358449 | 5.344871 | 4.122122 | 3.231394 | 4.163235 |
| 15 | H  | 3.293241 | 3.308288 | 2.202145 | 1.120826 | 2.178773 |
| 16 | C  | 3.604038 | 2.546030 | 1.424582 | 2.419795 | 3.528162 |
| 17 | C  | 4.345935 | 3.060294 | 2.432338 | 3.643403 | 4.596884 |
| 18 | H  | 4.254747 | 3.412017 | 2.085187 | 2.543444 | 3.836246 |
| 19 | H  | 5.405630 | 4.135105 | 3.398274 | 4.496519 | 5.560964 |

|    |    |          |          |          |          |          |
|----|----|----------|----------|----------|----------|----------|
| 20 | H  | 4.204068 | 2.851311 | 2.742176 | 4.069167 | 4.769365 |
| 21 | N  | 4.802586 | 5.836942 | 5.615772 | 4.404173 | 3.749407 |
| 22 | H  | 5.467218 | 6.469967 | 6.270647 | 5.123875 | 4.508768 |
| 23 | H  | 5.333261 | 6.274750 | 5.860682 | 4.562188 | 4.122557 |
|    |    | 6        | 7        | 8        | 9        | 10       |
| 6  | C  | 0.000000 |          |          |          |          |
| 7  | C  | 1.539304 | 0.000000 |          |          |          |
| 8  | H  | 2.889577 | 3.868594 | 0.000000 |          |          |
| 9  | H  | 4.679742 | 5.467194 | 2.754642 | 0.000000 |          |
| 10 | H  | 1.090928 | 2.171842 | 3.691880 | 5.277508 | 0.000000 |
| 11 | H  | 1.089378 | 2.180067 | 2.583218 | 4.908631 | 1.767404 |
| 12 | H  | 2.154835 | 1.092616 | 3.624681 | 5.282589 | 3.060018 |
| 13 | H  | 2.164234 | 1.097781 | 4.402975 | 5.464726 | 2.552112 |
| 14 | Br | 4.277254 | 3.970186 | 6.285384 | 6.259859 | 4.010149 |
| 15 | H  | 2.785179 | 3.086907 | 4.264967 | 4.286848 | 2.744560 |
| 16 | C  | 4.856300 | 5.341052 | 4.639459 | 2.884932 | 5.081685 |
| 17 | C  | 6.008505 | 6.553708 | 5.273522 | 2.915366 | 6.278135 |
| 18 | H  | 4.962578 | 5.263013 | 5.326212 | 3.905809 | 5.054928 |
| 19 | H  | 6.926419 | 7.383240 | 6.348291 | 3.964517 | 7.131771 |
| 20 | H  | 6.238402 | 6.903285 | 4.986035 | 2.347070 | 6.597184 |
| 21 | N  | 2.432666 | 1.462107 | 4.958751 | 6.846294 | 2.654095 |
| 22 | H  | 3.302332 | 2.053933 | 5.576532 | 7.438165 | 3.643249 |
| 23 | H  | 2.833308 | 2.049949 | 5.614645 | 7.324919 | 2.670864 |
|    |    | 11       | 12       | 13       | 14       | 15       |
| 11 | H  | 0.000000 |          |          |          |          |
| 12 | H  | 2.464804 | 0.000000 |          |          |          |
| 13 | H  | 3.071941 | 1.770592 | 0.000000 |          |          |
| 14 | Br | 5.364127 | 4.712760 | 2.982648 | 0.000000 |          |
| 15 | H  | 3.818697 | 3.711959 | 2.443722 | 2.125909 | 0.000000 |
| 16 | C  | 5.621870 | 5.536876 | 4.795824 | 4.167511 | 2.780024 |
| 17 | C  | 6.668623 | 6.644676 | 6.059209 | 5.416063 | 4.100864 |
| 18 | H  | 5.867668 | 5.588745 | 4.538518 | 3.315539 | 2.431856 |
| 19 | H  | 7.649883 | 7.507302 | 6.781958 | 5.737676 | 4.761941 |
| 20 | H  | 6.745038 | 6.889987 | 6.557867 | 6.292881 | 4.745874 |
| 21 | N  | 2.718002 | 2.085394 | 2.157700 | 4.691022 | 4.234225 |
| 22 | H  | 3.520967 | 2.276201 | 2.597194 | 5.178439 | 4.929818 |
| 23 | H  | 3.300241 | 2.913619 | 2.352566 | 4.267989 | 4.169032 |
|    |    | 16       | 17       | 18       | 19       | 20       |
| 16 | C  | 0.000000 |          |          |          |          |
| 17 | C  | 1.326353 | 0.000000 |          |          |          |
| 18 | H  | 1.084956 | 2.132708 | 0.000000 |          |          |
| 19 | H  | 2.079267 | 1.081224 | 2.460427 | 0.000000 |          |
| 20 | H  | 2.126813 | 1.083043 | 3.108457 | 1.847953 | 0.000000 |
| 21 | N  | 6.709700 | 7.952902 | 6.548199 | 8.761963 | 8.321012 |

|    |   |          |          |          |          |          |
|----|---|----------|----------|----------|----------|----------|
| 22 | H | 7.318210 | 8.545275 | 7.130251 | 9.328112 | 8.921779 |
| 23 | H | 6.838732 | 8.131445 | 6.541346 | 8.871699 | 8.598547 |
|    |   | 21       | 22       | 23       |          |          |
| 21 | N | 0.000000 |          |          |          |          |
| 22 | H | 1.011613 | 0.000000 |          |          |          |
| 23 | H | 1.014651 | 1.627420 | 0.000000 |          |          |

Stoichiometry C7H12BrN3

Framework group C1[X(C7H12BrN3)]

Deg. of freedom 63

Full point group C1 NOp 1

Largest Abelian subgroup C1 NOp 1

Largest concise Abelian subgroup C1 NOp 1

Standard orientation:

| Center Number | Atomic Number | Atomic Type | Coordinates (Angstroms) |           |           |
|---------------|---------------|-------------|-------------------------|-----------|-----------|
|               |               |             | X                       | Y         | Z         |
| 1             | 6             | 0           | -1.565089               | 2.352083  | -0.101219 |
| 2             | 6             | 0           | -2.568333               | 1.463045  | 0.120919  |
| 3             | 7             | 0           | -2.015404               | 0.192850  | -0.014929 |
| 4             | 6             | 0           | -0.713117               | 0.318234  | -0.322272 |
| 5             | 7             | 0           | -0.422333               | 1.618861  | -0.381403 |
| 6             | 6             | 0           | 0.953611                | 2.112249  | -0.586809 |
| 7             | 6             | 0           | 1.856581                | 1.779005  | 0.614460  |
| 8             | 1             | 0           | -1.570700               | 3.428511  | -0.091866 |
| 9             | 1             | 0           | -3.602683               | 1.625242  | 0.363454  |
| 10            | 1             | 0           | 1.338673                | 1.636587  | -1.489913 |
| 11            | 1             | 0           | 0.913862                | 3.187573  | -0.756636 |
| 12            | 1             | 0           | 1.509650                | 2.345508  | 1.481940  |
| 13            | 1             | 0           | 1.762976                | 0.710942  | 0.850263  |
| 14            | 35            | 0           | 1.404621                | -2.107936 | -0.056213 |
| 15            | 1             | 0           | 0.039521                | -0.510396 | -0.378481 |
| 16            | 6             | 0           | -2.629440               | -1.082096 | 0.149101  |
| 17            | 6             | 0           | -3.935323               | -1.270031 | 0.285338  |
| 18            | 1             | 0           | -1.896459               | -1.881993 | 0.155020  |
| 19            | 1             | 0           | -4.310920               | -2.275109 | 0.418720  |
| 20            | 1             | 0           | -4.661900               | -0.467055 | 0.268112  |
| 21            | 7             | 0           | 3.218785                | 2.203769  | 0.295502  |
| 22            | 1             | 0           | 3.759761                | 2.346576  | 1.138302  |
| 23            | 1             | 0           | 3.695817                | 1.488082  | -0.242782 |

Rotational constants (GHZ): 0.6940590 0.5444655 0.3136823

Standard basis: 6-311++G(d,p) (5D, 7F)

There are 365 symmetry adapted cartesian basis functions of A symmetry.

There are 352 symmetry adapted basis functions of A symmetry.  
 352 basis functions, 562 primitive gaussians, 365 cartesian basis functions  
 55 alpha electrons 55 beta electrons  
 nuclear repulsion energy 836.3626352120 Hartrees.  
 NAtoms= 23 NActive= 23 NUniq= 23 SFac= 1.00D+00 NATFMM= 60 NAOKFM=F  
 Big=F  
 Integral buffers will be 131072 words long.  
 Raffanetti 2 integral format.  
 Two-electron integral symmetry is turned on.  
 One-electron integrals computed using PRISM.  
 NBasis= 352 RedAO= T EigKep= 5.08D-06 NBF= 352  
 NBsUse= 352 1.00D-06 EigRej= -1.00D+00 NBFU= 352  
 Initial guess from the checkpoint file: "/home/suqian/liuwen/qianmengshijie/nh2/nh2.chk"  
 B after Tr= 0.000000 0.000000 0.000000  
 Rot= 0.999961 -0.002181 -0.001077 0.008474 Ang= -1.01 deg.  
 ExpMin= 3.50D-02 ExpMax= 4.40D+05 ExpMxC= 1.51D+04 IAcc=3 IRadAn= 5 AccDes=  
 0.00D+00  
 Harris functional with IExCor= 402 and IRadAn= 5 diagonalized for initial guess.  
 HarFok: IExCor= 402 AccDes= 0.00D+00 IRadAn= 5 IDoV= 1 UseB2=F ITyADJ=14  
 ICtDFT= 3500011 ScaDFX= 1.000000 1.000000 1.000000 1.000000  
 FoFCou: FMM=F IPFlag= 0 FMFlag= 100000 FMFlg1= 0  
 NFxFlg= 0 DoJE=T BraDBF=F KetDBF=T FulRan=T  
 wScrn= 0.000000 ICntrl= 500 IOpCl= 0 l1Cent= 200000004 NGrid=  
 0  
 NMat0= 1 NMatS0= 1 NMatT0= 0 NMatD0= 1 NMtDS0= 0  
 NMtDT0= 0  
 Petite list used in FoFCou.  
 Requested convergence on RMS density matrix=1.00D-08 within 128 cycles.  
 Requested convergence on MAX density matrix=1.00D-06.  
 Requested convergence on energy=1.00D-06.  
 No special actions if energy rises.  
 SCF Done: E(RB3LYP) = -3012.46625078 A.U. after 13 cycles  
 NFock= 13 Conv=0.17D-08 -V/T= 2.0017  
 Calling FoFJK, ICntrl= 2127 FMM=F ISym2X=0 l1Cent= 0 IOpClX= 0 NMat=1 NMatS=1  
 NMatT=0.  
 \*\*\*\*\* Axes restored to original set \*\*\*\*\*

| Center<br>Number | Atomic<br>Number | Forces (Hartrees/Bohr) |              |              |
|------------------|------------------|------------------------|--------------|--------------|
|                  |                  | X                      | Y            | Z            |
| 1                | 6                | -0.000285086           | 0.000274075  | 0.000857608  |
| 2                | 6                | 0.000247703            | 0.000196140  | 0.000006961  |
| 3                | 7                | -0.000574242           | -0.000048856 | 0.000496497  |
| 4                | 6                | 0.002327410            | -0.002027667 | -0.001479467 |

|    |    |              |              |              |
|----|----|--------------|--------------|--------------|
| 5  | 7  | 0.000373237  | 0.000310136  | -0.001256677 |
| 6  | 6  | 0.001294780  | -0.000035330 | -0.000751079 |
| 7  | 6  | -0.000971118 | -0.001483712 | -0.000022837 |
| 8  | 1  | 0.000150074  | 0.000040877  | -0.000040882 |
| 9  | 1  | -0.000012358 | -0.000001278 | -0.000132582 |
| 10 | 1  | 0.000420683  | -0.000073312 | 0.000006020  |
| 11 | 1  | -0.000780486 | -0.000097651 | 0.000066675  |
| 12 | 1  | -0.000720058 | -0.000818552 | -0.000644427 |
| 13 | 1  | 0.000994719  | 0.000213838  | 0.001031798  |
| 14 | 35 | 0.000871658  | 0.000481800  | -0.000501780 |
| 15 | 1  | -0.003040288 | 0.002206143  | 0.001620638  |
| 16 | 6  | -0.000188999 | -0.000107716 | -0.000078927 |
| 17 | 6  | 0.000023215  | 0.000067887  | -0.000037333 |
| 18 | 1  | -0.000090462 | 0.000055257  | 0.000214011  |
| 19 | 1  | -0.000025496 | -0.000001101 | -0.000001306 |
| 20 | 1  | 0.000056027  | -0.000023432 | -0.000014108 |
| 21 | 7  | -0.000818078 | 0.000312129  | 0.001615814  |
| 22 | 1  | 0.000369733  | -0.000367576 | -0.001188006 |
| 23 | 1  | 0.000377431  | 0.000927902  | 0.000233388  |

-----  
Cartesian Forces: Max 0.003040288 RMS 0.000844957

GradGradGradGradGradGradGradGradGradGradGradGradGradGradGradGradGradGradGrad

Berny optimization.

Using GEDIIS/GDIIS optimizer.

FormGI is forming the generalized inverse of G from B-inverse, IUseBI=4.

Internal Forces: Max 0.003809326 RMS 0.000779629

Search for a local minimum.

Step number 10 out of a maximum of 121

All quantities printed in internal units (Hartrees-Bohrs-Radians)

Mixed Optimization -- En-DIIS/RFO-DIIS

Swapping is turned off.

Update second derivatives using D2CorX and points 9 10

DE= -2.12D-04 DEPred=-2.87D-04 R= 7.38D-01

TightC=F SS= 1.41D+00 RLast= 1.08D+00 DXNew= 3.8482D+00 3.2308D+00

Trust test= 7.38D-01 RLast= 1.08D+00 DXMaxT set to 3.00D+00

ITU= 1 1 1 1 1 1 0 1 0 0

|                 |         |         |         |         |         |
|-----------------|---------|---------|---------|---------|---------|
| Eigenvalues --- | 0.00081 | 0.00300 | 0.00379 | 0.00924 | 0.01401 |
| Eigenvalues --- | 0.01551 | 0.01875 | 0.02031 | 0.02206 | 0.02328 |
| Eigenvalues --- | 0.02389 | 0.02635 | 0.03061 | 0.03062 | 0.03506 |
| Eigenvalues --- | 0.03782 | 0.03930 | 0.04376 | 0.04744 | 0.05337 |
| Eigenvalues --- | 0.05730 | 0.09164 | 0.09662 | 0.12409 | 0.12982 |
| Eigenvalues --- | 0.15414 | 0.15988 | 0.15999 | 0.16000 | 0.16000 |
| Eigenvalues --- | 0.16005 | 0.16211 | 0.17908 | 0.21633 | 0.21990 |

Eigenvalues --- 0.22105 0.22876 0.23490 0.24000 0.25030  
 Eigenvalues --- 0.28339 0.32254 0.34089 0.34464 0.34663  
 Eigenvalues --- 0.34803 0.34988 0.35680 0.35689 0.35858  
 Eigenvalues --- 0.36437 0.36658 0.38121 0.38670 0.42187  
 Eigenvalues --- 0.43301 0.47460 0.47726 0.48651 0.50333  
 Eigenvalues --- 0.54335 0.60348 0.60924  
 En-DIIS/RFO-DIIS IScMMF= 0 using points: 10 9 8 7 6  
 RFO step: Lambda=-1.39908655D-04.  
 DidBck=F Rises=F RFO-DIIS coefs: 0.83332 -0.89132 0.00316 1.22840 -

0.17355

Iteration 1 RMS(Cart)= 0.09333082 RMS(Int)= 0.07525140  
 Iteration 2 RMS(Cart)= 0.04688373 RMS(Int)= 0.02866329  
 Iteration 3 RMS(Cart)= 0.02053031 RMS(Int)= 0.00109045  
 Iteration 4 RMS(Cart)= 0.00189380 RMS(Int)= 0.00024734  
 Iteration 5 RMS(Cart)= 0.00001898 RMS(Int)= 0.00024697  
 Iteration 6 RMS(Cart)= 0.00000000 RMS(Int)= 0.00024697

| Variable | Old X   | -DE/DX   | Delta X<br>(Linear) | Delta X<br>(Quad) | Delta X<br>(Total) | New X   |
|----------|---------|----------|---------------------|-------------------|--------------------|---------|
| R1       | 2.56769 | -0.00060 | -0.00166            | -0.00015          | -0.00180           | 2.56588 |
| R2       | 2.61985 | 0.00010  | -0.00008            | 0.00015           | 0.00008            | 2.61993 |
| R3       | 2.03426 | -0.00006 | -0.00025            | 0.00004           | -0.00021           | 2.03405 |
| R4       | 2.63044 | -0.00082 | -0.00220            | -0.00001          | -0.00221           | 2.62823 |
| R5       | 2.03092 | 0.00003  | -0.00003            | 0.00001           | -0.00003           | 2.03089 |
| R6       | 2.53965 | 0.00076  | 0.00452             | -0.00012          | 0.00440            | 2.54405 |
| R7       | 2.69207 | 0.00007  | -0.00261            | 0.00042           | -0.00219           | 2.68988 |
| R8       | 2.52098 | 0.00154  | -0.00022            | -0.00010          | -0.00032           | 2.52066 |
| R9       | 2.11805 | 0.00019  | -0.00610            | -0.00105          | -0.00715           | 2.11090 |
| R10      | 2.78941 | 0.00072  | 0.00456             | -0.00011          | 0.00445            | 2.79386 |
| R11      | 2.90886 | -0.00136 | -0.00410            | 0.00105           | -0.00305           | 2.90581 |
| R12      | 2.06155 | 0.00015  | -0.00149            | 0.00023           | -0.00126           | 2.06029 |
| R13      | 2.05863 | 0.00017  | 0.00193             | -0.00023          | 0.00170            | 2.06033 |
| R14      | 2.06474 | 0.00123  | 0.00502             | 0.00182           | 0.00684            | 2.07158 |
| R15      | 2.07451 | -0.00021 | -0.00237            | -0.00178          | -0.00415           | 2.07036 |
| R16      | 2.76298 | -0.00022 | -0.00265            | 0.00001           | -0.00264           | 2.76034 |
| R17      | 4.01739 | 0.00106  | 0.06635             | -0.00883          | 0.05753            | 4.07491 |
| R18      | 2.50644 | -0.00005 | 0.00020             | -0.00005          | 0.00015            | 2.50660 |
| R19      | 2.05027 | -0.00006 | -0.00177            | 0.00011           | -0.00166           | 2.04861 |
| R20      | 2.04322 | 0.00001  | -0.00010            | 0.00002           | -0.00008           | 2.04314 |
| R21      | 2.04666 | -0.00003 | -0.00031            | -0.00002          | -0.00034           | 2.04632 |
| R22      | 1.91167 | 0.00128  | -0.00064            | 0.00149           | 0.00086            | 1.91253 |
| R23      | 1.91741 | 0.00098  | -0.00285            | 0.00074           | -0.00211           | 1.91530 |
| A1       | 1.87088 | 0.00072  | 0.00328             | 0.00014           | 0.00342            | 1.87430 |
| A2       | 2.27706 | -0.00022 | 0.00075             | -0.00019          | 0.00056            | 2.27763 |
| A3       | 2.13519 | -0.00050 | -0.00401            | 0.00005           | -0.00396           | 2.13124 |

|     |          |          |          |          |          |          |
|-----|----------|----------|----------|----------|----------|----------|
| A4  | 1.86274  | 0.00001  | -0.00125 | -0.00036 | -0.00162 | 1.86112  |
| A5  | 2.27676  | 0.00002  | 0.00072  | -0.00003 | 0.00069  | 2.27745  |
| A6  | 2.14367  | -0.00003 | 0.00054  | 0.00041  | 0.00095  | 2.14462  |
| A7  | 1.89875  | 0.00047  | 0.00051  | 0.00051  | 0.00100  | 1.89975  |
| A8  | 2.25779  | -0.00052 | -0.00432 | -0.00021 | -0.00452 | 2.25327  |
| A9  | 2.12646  | 0.00005  | 0.00394  | -0.00033 | 0.00362  | 2.13007  |
| A10 | 1.88843  | -0.00057 | -0.00054 | -0.00036 | -0.00089 | 1.88753  |
| A11 | 2.20582  | -0.00246 | -0.00171 | -0.00111 | -0.00280 | 2.20301  |
| A12 | 2.17997  | 0.00311  | 0.00566  | 0.00247  | 0.00819  | 2.18816  |
| A13 | 1.90393  | -0.00063 | -0.00194 | 0.00010  | -0.00187 | 1.90206  |
| A14 | 2.23916  | -0.00314 | -0.01808 | -0.00209 | -0.02018 | 2.21897  |
| A15 | 2.13558  | 0.00381  | 0.02253  | 0.00225  | 0.02475  | 2.16032  |
| A16 | 1.94534  | 0.00169  | 0.00506  | 0.00407  | 0.00913  | 1.95447  |
| A17 | 1.87389  | -0.00009 | 0.00804  | -0.00143 | 0.00661  | 1.88051  |
| A18 | 1.89402  | -0.00120 | -0.01387 | -0.00390 | -0.01777 | 1.87624  |
| A19 | 1.92260  | -0.00037 | -0.01133 | 0.00073  | -0.01063 | 1.91197  |
| A20 | 1.93559  | -0.00034 | 0.00829  | -0.00042 | 0.00787  | 1.94347  |
| A21 | 1.89043  | 0.00027  | 0.00386  | 0.00080  | 0.00465  | 1.89508  |
| A22 | 1.89767  | 0.00005  | 0.00862  | 0.00331  | 0.01235  | 1.91002  |
| A23 | 1.90524  | 0.00013  | -0.01896 | 0.00025  | -0.01835 | 1.88688  |
| A24 | 1.88956  | -0.00058 | -0.00165 | 0.00233  | 0.00112  | 1.89067  |
| A25 | 1.88266  | 0.00037  | 0.00828  | -0.00051 | 0.00747  | 1.89013  |
| A26 | 1.89484  | 0.00063  | 0.04004  | 0.00238  | 0.04244  | 1.93728  |
| A27 | 1.99210  | -0.00057 | -0.03692 | -0.00731 | -0.04407 | 1.94803  |
| A28 | 2.93700  | -0.00056 | -0.06672 | 0.00020  | -0.06652 | 2.87049  |
| A29 | 2.16882  | -0.00002 | 0.00372  | -0.00034 | 0.00338  | 2.17220  |
| A30 | 1.94900  | 0.00008  | 0.00293  | 0.00009  | 0.00302  | 1.95202  |
| A31 | 2.16534  | -0.00006 | -0.00664 | 0.00025  | -0.00639 | 2.15895  |
| A32 | 2.07877  | 0.00006  | 0.00049  | -0.00001 | 0.00048  | 2.07925  |
| A33 | 2.15775  | -0.00008 | -0.00015 | -0.00001 | -0.00016 | 2.15759  |
| A34 | 2.04666  | 0.00002  | -0.00034 | 0.00003  | -0.00031 | 2.04635  |
| A35 | 1.93638  | -0.00031 | 0.02406  | -0.00456 | 0.02043  | 1.95680  |
| A36 | 1.92712  | -0.00038 | 0.01250  | 0.00013  | 0.01356  | 1.94068  |
| A37 | 1.86517  | 0.00022  | 0.02352  | -0.00416 | 0.02105  | 1.88622  |
| D1  | 0.01019  | -0.00039 | -0.00387 | -0.00338 | -0.00723 | 0.00297  |
| D2  | -3.13770 | -0.00007 | -0.00235 | -0.00002 | -0.00236 | -3.14006 |
| D3  | 3.14143  | -0.00027 | -0.00051 | -0.00304 | -0.00357 | 3.13786  |
| D4  | -0.00646 | 0.00005  | 0.00101  | 0.00032  | 0.00130  | -0.00516 |
| D5  | -0.00847 | 0.00029  | 0.00445  | -0.00069 | 0.00374  | -0.00473 |
| D6  | -3.04858 | -0.00042 | -0.03046 | -0.00373 | -0.03429 | -3.08287 |
| D7  | -3.14074 | 0.00018  | 0.00142  | -0.00099 | 0.00043  | -3.14031 |
| D8  | 0.10233  | -0.00053 | -0.03349 | -0.00403 | -0.03760 | 0.06474  |
| D9  | -0.00854 | 0.00036  | 0.00203  | 0.00629  | 0.00831  | -0.00024 |
| D10 | 3.11181  | 0.00044  | 0.00977  | 0.00493  | 0.01467  | 3.12648  |



|     |          |          |          |          |          |          |
|-----|----------|----------|----------|----------|----------|----------|
| D11 | 3.13876  | 0.00007  | 0.00066  | 0.00325  | 0.00390  | -3.14053 |
| D12 | -0.02408 | 0.00014  | 0.00840  | 0.00189  | 0.01026  | -0.01381 |
| D13 | 0.00334  | -0.00019 | 0.00073  | -0.00677 | -0.00604 | -0.00271 |
| D14 | 3.00630  | 0.00072  | 0.03408  | 0.00115  | 0.03505  | 3.04135  |
| D15 | -3.11893 | -0.00024 | -0.00626 | -0.00553 | -0.01175 | -3.13068 |
| D16 | -0.11596 | 0.00066  | 0.02710  | 0.00238  | 0.02934  | -0.08662 |
| D17 | 0.17786  | -0.00014 | -0.06087 | 0.00033  | -0.06051 | 0.11734  |
| D18 | -2.95773 | -0.00022 | -0.06191 | -0.00073 | -0.06263 | -3.02035 |
| D19 | -2.98740 | -0.00006 | -0.05227 | -0.00117 | -0.05345 | -3.04086 |
| D20 | 0.16020  | -0.00013 | -0.05331 | -0.00224 | -0.05557 | 0.10463  |
| D21 | 0.00312  | -0.00007 | -0.00319 | 0.00464  | 0.00146  | 0.00458  |
| D22 | 3.05045  | 0.00013  | 0.02773  | 0.00717  | 0.03487  | 3.08532  |
| D23 | -3.00241 | -0.00040 | -0.03520 | -0.00278 | -0.03812 | -3.04052 |
| D24 | 0.04492  | -0.00021 | -0.00428 | -0.00025 | -0.00471 | 0.04021  |
| D25 | -1.17296 | -0.00046 | -0.61725 | 0.03610  | -0.58114 | -1.75410 |
| D26 | 1.80788  | 0.00021  | -0.57910 | 0.04500  | -0.53412 | 1.27376  |
| D27 | 1.86755  | -0.00031 | -0.04236 | 0.00048  | -0.04188 | 1.82567  |
| D28 | -2.30863 | 0.00019  | -0.04810 | 0.00288  | -0.04519 | -2.35382 |
| D29 | -0.26887 | -0.00017 | -0.04655 | 0.00103  | -0.04550 | -0.31437 |
| D30 | -1.16046 | -0.00081 | -0.08046 | -0.00277 | -0.08326 | -1.24372 |
| D31 | 0.94655  | -0.00031 | -0.08621 | -0.00037 | -0.08657 | 0.85997  |
| D32 | 2.98630  | -0.00066 | -0.08465 | -0.00222 | -0.08688 | 2.89942  |
| D33 | -1.16167 | 0.00040  | 0.09673  | 0.00515  | 0.10188  | -1.05979 |
| D34 | 0.88803  | 0.00094  | 0.10075  | 0.00655  | 0.10735  | 0.99539  |
| D35 | 3.06604  | -0.00005 | 0.04389  | -0.00082 | 0.04301  | 3.10905  |
| D36 | 3.04329  | -0.00033 | 0.09092  | 0.00386  | 0.09480  | 3.13809  |
| D37 | -1.19019 | 0.00021  | 0.09494  | 0.00527  | 0.10027  | -1.08992 |
| D38 | 0.98782  | -0.00078 | 0.03808  | -0.00210 | 0.03593  | 1.02374  |
| D39 | 0.95066  | -0.00020 | 0.08824  | 0.00266  | 0.09091  | 1.04156  |
| D40 | 3.00036  | 0.00034  | 0.09226  | 0.00407  | 0.09638  | 3.09674  |
| D41 | -1.10482 | -0.00066 | 0.03540  | -0.00330 | 0.03204  | -1.07278 |
| D42 | 2.75456  | 0.00027  | -0.43735 | 0.02416  | -0.41282 | 2.34175  |
| D43 | -1.46403 | 0.00010  | -0.37930 | 0.01621  | -0.36359 | -1.82762 |
| D44 | 0.69728  | 0.00018  | -0.47128 | 0.01761  | -0.45294 | 0.24434  |
| D45 | 2.76187  | 0.00002  | -0.41323 | 0.00966  | -0.40372 | 2.35815  |
| D46 | -1.40315 | -0.00037 | -0.48441 | 0.02133  | -0.46287 | -1.86602 |
| D47 | 0.66144  | -0.00054 | -0.42636 | 0.01337  | -0.41365 | 0.24779  |
| D48 | -3.12681 | -0.00004 | -0.00521 | 0.00076  | -0.00444 | -3.13125 |
| D49 | 0.01823  | -0.00006 | -0.00662 | -0.00006 | -0.00668 | 0.01155  |
| D50 | 0.00804  | 0.00004  | -0.00400 | 0.00196  | -0.00205 | 0.00599  |
| D51 | -3.13011 | 0.00002  | -0.00542 | 0.00114  | -0.00428 | -3.13439 |

|  | Item          | Value    | Threshold | Converged? |
|--|---------------|----------|-----------|------------|
|  | Maximum Force | 0.003809 | 0.000450  | NO         |
|  | RMS Force     | 0.000780 | 0.000300  | NO         |

Maximum Displacement 0.772979 0.001800 NO  
 RMS Displacement 0.129348 0.001200 NO

Predicted change in Energy=-1.861700D-04

GradGradGradGradGradGradGradGradGradGradGradGradGradGradGradGradGradGradGrad

Input orientation:

| Center Number | Atomic Number | Atomic Type | Coordinates (Angstroms) |           |           |
|---------------|---------------|-------------|-------------------------|-----------|-----------|
|               |               |             | X                       | Y         | Z         |
| 1             | 6             | 0           | -1.827538               | -2.022395 | 0.320371  |
| 2             | 6             | 0           | -2.824713               | -1.134771 | 0.072574  |
| 3             | 7             | 0           | -2.233137               | 0.122597  | 0.014395  |
| 4             | 6             | 0           | -0.909742               | -0.009315 | 0.223246  |
| 5             | 7             | 0           | -0.646182               | -1.302873 | 0.414221  |
| 6             | 6             | 0           | 0.715939                | -1.844516 | 0.606700  |
| 7             | 6             | 0           | 1.539556                | -1.805674 | -0.691236 |
| 8             | 1             | 0           | -1.857548               | -3.091446 | 0.442051  |
| 9             | 1             | 0           | -3.879186               | -1.290321 | -0.064805 |
| 10            | 1             | 0           | 1.208671                | -1.241298 | 1.369597  |
| 11            | 1             | 0           | 0.613754                | -2.863170 | 0.981679  |
| 12            | 1             | 0           | 1.044434                | -2.415578 | -1.455829 |
| 13            | 1             | 0           | 1.569725                | -0.769058 | -1.044543 |
| 14            | 35            | 0           | 1.425496                | 2.122938  | -0.511129 |
| 15            | 1             | 0           | -0.145765               | 0.802312  | 0.149883  |
| 16            | 6             | 0           | -2.835782               | 1.387582  | -0.236135 |
| 17            | 6             | 0           | -4.142758               | 1.588954  | -0.339526 |
| 18            | 1             | 0           | -2.096218               | 2.173721  | -0.337389 |
| 19            | 1             | 0           | -4.507267               | 2.586653  | -0.541231 |
| 20            | 1             | 0           | -4.880744               | 0.803865  | -0.231771 |
| 21            | 7             | 0           | 2.877760                | -2.314515 | -0.401462 |
| 22            | 1             | 0           | 3.192453                | -2.977567 | -1.098319 |
| 23            | 1             | 0           | 3.554314                | -1.561211 | -0.356059 |

Distance matrix (angstroms):

|   |   | 1        | 2        | 3        | 4        | 5        |
|---|---|----------|----------|----------|----------|----------|
| 1 | C | 0.000000 |          |          |          |          |
| 2 | C | 1.357807 | 0.000000 |          |          |          |
| 3 | N | 2.204343 | 1.390799 | 0.000000 |          |          |
| 4 | C | 2.214560 | 2.226313 | 1.346252 | 0.000000 |          |
| 5 | N | 1.386406 | 2.211556 | 2.170312 | 1.333877 | 0.000000 |
| 6 | C | 2.565716 | 3.650376 | 3.594079 | 2.481498 | 1.478445 |
| 7 | C | 3.522448 | 4.481112 | 4.295271 | 3.172103 | 2.500459 |
| 8 | H | 1.076372 | 2.213708 | 3.264052 | 3.231988 | 2.160365 |

|    |    |          |          |          |          |          |
|----|----|----------|----------|----------|----------|----------|
| 9  | H  | 2.212138 | 1.074701 | 2.170735 | 3.246775 | 3.268324 |
| 10 | H  | 3.305987 | 4.238137 | 3.942439 | 2.705471 | 2.087346 |
| 11 | H  | 2.665358 | 3.954351 | 4.237361 | 3.322761 | 2.084220 |
| 12 | H  | 3.399662 | 4.352790 | 4.398450 | 3.525364 | 2.755609 |
| 13 | H  | 3.869786 | 4.548932 | 4.046994 | 2.886564 | 2.706141 |
| 14 | Br | 5.334548 | 5.386803 | 4.202752 | 3.246404 | 4.109051 |
| 15 | H  | 3.291868 | 3.306816 | 2.199430 | 1.117042 | 2.179930 |
| 16 | C  | 3.599194 | 2.541197 | 1.423422 | 2.423218 | 3.529286 |
| 17 | C  | 4.340226 | 3.053809 | 2.433540 | 3.650147 | 4.599657 |
| 18 | H  | 4.255847 | 3.412462 | 2.085571 | 2.547094 | 3.841124 |
| 19 | H  | 5.400615 | 4.129981 | 3.398818 | 4.501741 | 5.563208 |
| 20 | H  | 4.196984 | 2.842217 | 2.744913 | 4.078868 | 4.773590 |
| 21 | N  | 4.769298 | 5.842491 | 5.677475 | 4.477653 | 3.755919 |
| 22 | H  | 5.303333 | 6.401029 | 6.347139 | 5.233073 | 4.452808 |
| 23 | H  | 5.443765 | 6.407617 | 6.038794 | 4.761488 | 4.278345 |
|    |    | 6        | 7        | 8        | 9        | 10       |
| 6  | C  | 0.000000 |          |          |          |          |
| 7  | C  | 1.537691 | 0.000000 |          |          |          |
| 8  | H  | 2.864399 | 3.804979 | 0.000000 |          |          |
| 9  | H  | 4.676882 | 5.479122 | 2.754628 | 0.000000 |          |
| 10 | H  | 1.090260 | 2.162183 | 3.699336 | 5.286417 | 0.000000 |
| 11 | H  | 1.090278 | 2.184961 | 2.539811 | 4.873961 | 1.770558 |
| 12 | H  | 2.165190 | 1.096235 | 3.532739 | 5.238624 | 3.064138 |
| 13 | H  | 2.147595 | 1.095586 | 4.398824 | 5.560777 | 2.486250 |
| 14 | Br | 4.182547 | 3.934391 | 6.235120 | 6.323700 | 3.860339 |
| 15 | H  | 2.820800 | 3.217045 | 4.263440 | 4.285282 | 2.738346 |
| 16 | C  | 4.875607 | 5.435768 | 4.634498 | 2.879098 | 5.083993 |
| 17 | C  | 6.024201 | 6.628416 | 5.266801 | 2.904336 | 6.290407 |
| 18 | H  | 4.994573 | 5.401819 | 5.327896 | 3.905492 | 5.049598 |
| 19 | H  | 6.945134 | 7.475233 | 6.342607 | 3.956311 | 7.139777 |
| 20 | H  | 6.248185 | 6.945578 | 4.976665 | 2.327361 | 6.620275 |
| 21 | N  | 2.431206 | 1.460711 | 4.872194 | 6.842414 | 2.659756 |
| 22 | H  | 3.213101 | 2.066668 | 5.280930 | 7.343230 | 3.611181 |
| 23 | H  | 3.010571 | 2.057025 | 5.680391 | 7.444134 | 2.929552 |
|    |    | 11       | 12       | 13       | 14       | 15       |
| 11 | H  | 0.000000 |          |          |          |          |
| 12 | H  | 2.515407 | 0.000000 |          |          |          |
| 13 | H  | 3.066719 | 1.776546 | 0.000000 |          |          |
| 14 | Br | 5.267700 | 4.651429 | 2.944312 | 0.000000 |          |
| 15 | H  | 3.834646 | 3.788100 | 2.615103 | 2.156351 | 0.000000 |
| 16 | C  | 5.608142 | 5.568460 | 4.971228 | 4.332996 | 2.779882 |
| 17 | C  | 6.647661 | 6.647509 | 6.220108 | 5.596431 | 4.102961 |
| 18 | H  | 5.869766 | 5.672413 | 4.753857 | 3.526362 | 2.433612 |
| 19 | H  | 7.631820 | 7.528624 | 6.960169 | 5.950934 | 4.762795 |

|    |   |          |          |          |          |          |
|----|---|----------|----------|----------|----------|----------|
| 20 | H | 6.716331 | 6.853529 | 6.689038 | 6.448771 | 4.750336 |
| 21 | N | 2.709211 | 2.117307 | 2.124369 | 4.670341 | 4.377247 |
| 22 | H | 3.314992 | 2.248918 | 2.741103 | 5.429740 | 5.195112 |
| 23 | H | 3.483035 | 2.870354 | 2.245018 | 4.257800 | 4.419593 |
|    |   | 16       | 17       | 18       | 19       | 20       |
| 16 | C | 0.000000 |          |          |          |          |
| 17 | C | 1.326434 | 0.000000 |          |          |          |
| 18 | H | 1.084077 | 2.128447 | 0.000000 |          |          |
| 19 | H | 2.079596 | 1.081182 | 2.454633 | 0.000000 |          |
| 20 | H | 2.126644 | 1.082866 | 3.105036 | 1.847589 | 0.000000 |
| 21 | N | 6.810096 | 8.032969 | 6.699912 | 8.864514 | 8.363460 |
| 22 | H | 7.492496 | 8.673765 | 7.421915 | 9.516122 | 8.956932 |
| 23 | H | 7.038685 | 8.316774 | 6.773372 | 9.067974 | 8.761234 |
|    |   | 21       | 22       | 23       |          |          |
| 21 | N | 0.000000 |          |          |          |          |
| 22 | H | 1.012066 | 0.000000 |          |          |          |
| 23 | H | 1.013535 | 1.639498 | 0.000000 |          |          |

Stoichiometry C7H12BrN3

Framework group C1[X(C7H12BrN3)]

Deg. of freedom 63

Full point group C1 NOp 1

Largest Abelian subgroup C1 NOp 1

Largest concise Abelian subgroup C1 NOp 1

Standard orientation:

| Center Number | Atomic Number | Atomic Type | Coordinates (Angstroms) |           |           |
|---------------|---------------|-------------|-------------------------|-----------|-----------|
|               |               |             | X                       | Y         | Z         |
| 1             | 6             | 0           | -1.567273               | 2.300622  | -0.099335 |
| 2             | 6             | 0           | -2.593200               | 1.438293  | 0.118615  |
| 3             | 7             | 0           | -2.073007               | 0.156388  | -0.024355 |
| 4             | 6             | 0           | -0.763337               | 0.249180  | -0.321927 |
| 5             | 7             | 0           | -0.439953               | 1.542172  | -0.375061 |
| 6             | 6             | 0           | 0.933295                | 2.037029  | -0.609805 |
| 7             | 6             | 0           | 1.847309                | 1.795585  | 0.602951  |
| 8             | 1             | 0           | -1.544057               | 3.376677  | -0.087451 |
| 9             | 1             | 0           | -3.623745               | 1.626287  | 0.358653  |
| 10            | 1             | 0           | 1.332164                | 1.511243  | -1.477629 |
| 11            | 1             | 0           | 0.862931                | 3.098462  | -0.848796 |
| 12            | 1             | 0           | 1.446574                | 2.327900  | 1.473459  |
| 13            | 1             | 0           | 1.843325                | 0.722568  | 0.824142  |
| 14            | 35            | 0           | 1.492096                | -2.069104 | -0.043140 |
| 15            | 1             | 0           | -0.044481               | -0.601307 | -0.409678 |
| 16            | 6             | 0           | -2.727886               | -1.099333 | 0.118576  |

|    |   |   |           |           |          |
|----|---|---|-----------|-----------|----------|
| 17 | 6 | 0 | -4.033072 | -1.248502 | 0.302052 |
| 18 | 1 | 0 | -2.029783 | -1.926884 | 0.063487 |
| 19 | 1 | 0 | -4.438967 | -2.244783 | 0.409893 |
| 20 | 1 | 0 | -4.730147 | -0.421252 | 0.350454 |
| 21 | 7 | 0 | 3.187620  | 2.271321  | 0.269903 |
| 22 | 1 | 0 | 3.591157  | 2.825550  | 1.014394 |
| 23 | 1 | 0 | 3.814017  | 1.497782  | 0.078809 |

-----

Rotational constants (GHZ):      0.7100243      0.5235547      0.3095386

Standard basis: 6-311++G(d,p) (5D, 7F)

There are    365 symmetry adapted cartesian basis functions of A    symmetry.

There are    352 symmetry adapted basis functions of A    symmetry.

    352 basis functions,    562 primitive gaussians,    365 cartesian basis functions

    55 alpha electrons      55 beta electrons

        nuclear repulsion energy      833.8270860035 Hartrees.

NAtoms=    23 NActive=    23 NUniq=    23 SFac= 1.00D+00 NAtFMM=    60 NAOKFM=F

Big=F

Integral buffers will be    131072 words long.

Raffenetti 2 integral format.

Two-electron integral symmetry is turned on.

One-electron integrals computed using PRISM.

NBasis=    352 RedAO= T EigKep= 4.76D-06 NBF=    352

NBsUse=    352 1.00D-06 EigRej= -1.00D+00 NBFU=    352

Initial guess from the checkpoint file: "/home/suqian/liuwen/qianmengshijie/nh2/nh2.chk"

B after Tr=    0.000000    0.000000    0.000000

        Rot=    0.999964    0.004217    0.001027    -0.007341 Ang=    0.98 deg.

ExpMin= 3.50D-02 ExpMax= 4.40D+05 ExpMxC= 1.51D+04 IAcc=3 IRadAn=      5 AccDes=

0.00D+00

Harris functional with IExCor=    402 and IRadAn=      5 diagonalized for initial guess.

HarFok: IExCor=    402 AccDes= 0.00D+00 IRadAn=      5 IDoV= 1 UseB2=F ITyADJ=14

ICtDFT= 3500011 ScaDFX= 1.000000 1.000000 1.000000 1.000000

FoFCou: FMM=F IPFlag=            0 FMFlag=    100000 FMFlg1=            0

        NFxFlg=            0 DoJE=T BraDBF=F KetDBF=T FulRan=T

        wScrn= 0.000000 ICntrl=      500 IOpCl= 0 I1Cent=    20000004 NGrid=

0

        NMat0=    1 NMatS0=      1 NMatT0=    0 NMatD0=    1 NMtDS0=    0

NMtDT0=    0

Petite list used in FoFCou.

Requested convergence on RMS density matrix=1.00D-08 within 128 cycles.

Requested convergence on MAX density matrix=1.00D-06.

Requested convergence on            energy=1.00D-06.

No special actions if energy rises.

SCF Done: E(RB3LYP) = -3012.46610569      A.U. after    13 cycles

        NFock= 13 Conv=0.34D-08      -V/T= 2.0017

Calling FoFJK, ICntrl= 2127 FMM=F ISym2X=0 l1Cent= 0 IOpClX= 0 NMat=1 NMatS=1  
NMatT=0.

\*\*\*\*\* Axes restored to original set \*\*\*\*\*

---

| Center<br>Number | Atomic<br>Number | Forces (Hartrees/Bohr) |              |              |
|------------------|------------------|------------------------|--------------|--------------|
|                  |                  | X                      | Y            | Z            |
| 1                | 6                | -0.000069217           | -0.000114650 | 0.000065877  |
| 2                | 6                | 0.000018870            | 0.000005847  | 0.000209944  |
| 3                | 7                | 0.000111415            | 0.000139575  | -0.000509319 |
| 4                | 6                | 0.000178530            | -0.000274889 | 0.000853297  |
| 5                | 7                | -0.000096625           | 0.000397723  | -0.000192559 |
| 6                | 6                | -0.000663744           | -0.000160099 | 0.000326705  |
| 7                | 6                | -0.000662220           | 0.001843434  | -0.000450665 |
| 8                | 1                | 0.000012355            | -0.000019134 | -0.000050533 |
| 9                | 1                | 0.000028292            | -0.000007040 | -0.000032406 |
| 10               | 1                | -0.000065266           | -0.000222448 | 0.000079299  |
| 11               | 1                | 0.000359786            | 0.000053647  | -0.000114802 |
| 12               | 1                | 0.000969931            | 0.000132453  | 0.001060985  |
| 13               | 1                | -0.001254582           | -0.000081702 | -0.000940813 |
| 14               | 35               | 0.000096582            | -0.000216046 | -0.000003587 |
| 15               | 1                | -0.000294033           | 0.000371083  | -0.000111863 |
| 16               | 6                | 0.000124297            | 0.000037551  | 0.000112271  |
| 17               | 6                | -0.000020064           | 0.000005449  | 0.000012877  |
| 18               | 1                | -0.000001138           | -0.000113074 | -0.000172966 |
| 19               | 1                | -0.000000742           | -0.000007300 | 0.000000643  |
| 20               | 1                | -0.000016653           | 0.000012046  | -0.000022134 |
| 21               | 7                | 0.001276524            | -0.002462306 | -0.000855225 |
| 22               | 1                | 0.000230490            | 0.000828291  | 0.000382788  |
| 23               | 1                | -0.000262787           | -0.000148411 | 0.000352187  |

---

Cartesian Forces: Max 0.002462306 RMS 0.000547225

GradGradGradGradGradGradGradGradGradGradGradGradGradGradGradGradGradGradGradGrad

Berny optimization.

Using GEDIIS/GDIIS optimizer.

FormGI is forming the generalized inverse of G from B-inverse, IUseBI=4.

Internal Forces: Max 0.001739067 RMS 0.000330972

Search for a local minimum.

Step number 11 out of a maximum of 121

All quantities printed in internal units (Hartrees-Bohrs-Radians)

Mixed Optimization -- En-DIIS/RFO-DIIS

Swapping is turned off.

Update second derivatives using D2CorX and points 8 9 10 11

DE= 1.45D-04 DEPred=-1.86D-04 R=-7.79D-01

Trust test=-7.79D-01 RLast= 1.34D+00 DXMaxT set to 1.50D+00

ITU= -1 1 1 1 1 1 1 0 1 0 0

|                 |         |         |         |         |         |
|-----------------|---------|---------|---------|---------|---------|
| Eigenvalues --- | 0.00069 | 0.00241 | 0.00381 | 0.00886 | 0.01379 |
| Eigenvalues --- | 0.01452 | 0.01876 | 0.02002 | 0.02238 | 0.02328 |
| Eigenvalues --- | 0.02387 | 0.02574 | 0.03062 | 0.03062 | 0.03435 |
| Eigenvalues --- | 0.03667 | 0.03871 | 0.04549 | 0.04767 | 0.05326 |
| Eigenvalues --- | 0.05800 | 0.09257 | 0.09633 | 0.12414 | 0.12909 |
| Eigenvalues --- | 0.14793 | 0.15926 | 0.15992 | 0.16000 | 0.16001 |
| Eigenvalues --- | 0.16009 | 0.16030 | 0.17442 | 0.20694 | 0.21994 |
| Eigenvalues --- | 0.22037 | 0.22799 | 0.23599 | 0.24024 | 0.25036 |
| Eigenvalues --- | 0.28151 | 0.31514 | 0.34076 | 0.34648 | 0.34704 |
| Eigenvalues --- | 0.34822 | 0.34986 | 0.35685 | 0.35690 | 0.35858 |
| Eigenvalues --- | 0.36437 | 0.36658 | 0.37214 | 0.42052 | 0.42246 |
| Eigenvalues --- | 0.43382 | 0.47157 | 0.47715 | 0.48343 | 0.50462 |
| Eigenvalues --- | 0.54332 | 0.60343 | 0.60453 |         |         |

En-DIIS/RFO-DIIS IScMMF= 0 using points: 11 10 9 8 7

RFO step: Lambda=-4.41956571D-05.

DidBck=T Rises=F RFO-DIIS coefs: 0.48461 0.75193 -0.61074 -0.40782

0.78202

Iteration 1 RMS(Cart)= 0.03633702 RMS(Int)= 0.00171932

Iteration 2 RMS(Cart)= 0.00168299 RMS(Int)= 0.00016393

Iteration 3 RMS(Cart)= 0.00000263 RMS(Int)= 0.00016391

Iteration 4 RMS(Cart)= 0.00000000 RMS(Int)= 0.00016391

| Variable | Old X   | -DE/DX   | Delta X<br>(Linear) | Delta X<br>(Quad) | Delta X<br>(Total) | New X   |
|----------|---------|----------|---------------------|-------------------|--------------------|---------|
| R1       | 2.56588 | 0.00009  | 0.00027             | -0.00023          | 0.00007            | 2.56596 |
| R2       | 2.61993 | 0.00002  | 0.00027             | -0.00004          | 0.00023            | 2.62016 |
| R3       | 2.03405 | 0.00001  | -0.00005            | 0.00005           | 0.00000            | 2.03405 |
| R4       | 2.62823 | 0.00014  | 0.00014             | -0.00017          | -0.00002           | 2.62821 |
| R5       | 2.03089 | -0.00002 | 0.00002             | -0.00001          | 0.00002            | 2.03091 |
| R6       | 2.54405 | -0.00017 | -0.00046            | -0.00017          | -0.00065           | 2.54340 |
| R7       | 2.68988 | -0.00008 | 0.00064             | 0.00011           | 0.00075            | 2.69062 |
| R8       | 2.52066 | -0.00029 | 0.00048             | -0.00019          | 0.00027            | 2.52093 |
| R9       | 2.11090 | -0.00001 | 0.00245             | -0.00205          | 0.00040            | 2.11130 |
| R10      | 2.79386 | -0.00001 | -0.00109            | 0.00026           | -0.00083           | 2.79303 |
| R11      | 2.90581 | 0.00054  | -0.00152            | 0.00075           | -0.00077           | 2.90504 |
| R12      | 2.06029 | -0.00010 | 0.00011             | 0.00026           | 0.00037            | 2.06066 |
| R13      | 2.06033 | -0.00012 | -0.00014            | -0.00017          | -0.00031           | 2.06002 |
| R14      | 2.07158 | -0.00125 | -0.00178            | 0.00040           | -0.00137           | 2.07021 |
| R15      | 2.07036 | 0.00019  | 0.00177             | -0.00072          | 0.00105            | 2.07141 |
| R16      | 2.76034 | 0.00174  | 0.00046             | 0.00210           | 0.00256            | 2.76290 |
| R17      | 4.07491 | -0.00006 | 0.00673             | -0.01026          | -0.00353           | 4.07138 |
| R18      | 2.50660 | 0.00004  | -0.00006            | -0.00002          | -0.00008           | 2.50652 |

|     |          |          |          |          |          |         |
|-----|----------|----------|----------|----------|----------|---------|
| R19 | 2.04861  | -0.00007 | 0.00038  | -0.00002 | 0.00036  | 2.04897 |
| R20 | 2.04314  | -0.00001 | 0.00004  | -0.00001 | 0.00003  | 2.04317 |
| R21 | 2.04632  | 0.00000  | 0.00007  | -0.00002 | 0.00005  | 2.04637 |
| R22 | 1.91253  | -0.00074 | -0.00050 | 0.00120  | 0.00071  | 1.91324 |
| R23 | 1.91530  | -0.00027 | 0.00052  | 0.00086  | 0.00138  | 1.91668 |
| A1  | 1.87430  | -0.00019 | -0.00039 | 0.00009  | -0.00030 | 1.87400 |
| A2  | 2.27763  | 0.00010  | 0.00004  | 0.00004  | 0.00008  | 2.27770 |
| A3  | 2.13124  | 0.00009  | 0.00033  | -0.00010 | 0.00024  | 2.13147 |
| A4  | 1.86112  | 0.00004  | 0.00038  | -0.00025 | 0.00013  | 1.86125 |
| A5  | 2.27745  | -0.00002 | 0.00007  | -0.00007 | 0.00000  | 2.27744 |
| A6  | 2.14462  | -0.00001 | -0.00044 | 0.00031  | -0.00013 | 2.14449 |
| A7  | 1.89975  | -0.00008 | -0.00018 | 0.00035  | 0.00014  | 1.89989 |
| A8  | 2.25327  | 0.00019  | 0.00093  | -0.00014 | 0.00081  | 2.25407 |
| A9  | 2.13007  | -0.00010 | -0.00073 | -0.00022 | -0.00094 | 2.12914 |
| A10 | 1.88753  | 0.00009  | 0.00023  | -0.00028 | 0.00001  | 1.88754 |
| A11 | 2.20301  | 0.00010  | -0.00338 | -0.00126 | -0.00449 | 2.19852 |
| A12 | 2.18816  | -0.00022 | 0.00208  | 0.00178  | 0.00403  | 2.19219 |
| A13 | 1.90206  | 0.00014  | -0.00002 | 0.00009  | 0.00004  | 1.90210 |
| A14 | 2.21897  | 0.00052  | 0.00231  | -0.00157 | 0.00081  | 2.21978 |
| A15 | 2.16032  | -0.00067 | -0.00237 | 0.00164  | -0.00069 | 2.15963 |
| A16 | 1.95447  | -0.00052 | -0.00192 | 0.00235  | 0.00042  | 1.95490 |
| A17 | 1.88051  | -0.00005 | 0.00204  | -0.00214 | -0.00010 | 1.88040 |
| A18 | 1.87624  | 0.00060  | 0.00192  | -0.00106 | 0.00086  | 1.87710 |
| A19 | 1.91197  | 0.00025  | -0.00094 | 0.00223  | 0.00127  | 1.91324 |
| A20 | 1.94347  | -0.00012 | -0.00025 | -0.00116 | -0.00142 | 1.94205 |
| A21 | 1.89508  | -0.00014 | -0.00068 | -0.00038 | -0.00106 | 1.89402 |
| A22 | 1.91002  | 0.00016  | -0.00147 | 0.00002  | -0.00101 | 1.90901 |
| A23 | 1.88688  | -0.00028 | 0.00250  | 0.00094  | 0.00385  | 1.89073 |
| A24 | 1.89067  | 0.00011  | -0.00342 | 0.00095  | -0.00195 | 1.88873 |
| A25 | 1.89013  | -0.00022 | 0.00285  | -0.00193 | 0.00053  | 1.89066 |
| A26 | 1.93728  | -0.00068 | -0.01327 | 0.00120  | -0.01198 | 1.92530 |
| A27 | 1.94803  | 0.00090  | 0.01172  | -0.00116 | 0.01072  | 1.95874 |
| A28 | 2.87049  | -0.00046 | 0.00934  | -0.00073 | 0.00861  | 2.87910 |
| A29 | 2.17220  | 0.00008  | -0.00092 | -0.00002 | -0.00095 | 2.17125 |
| A30 | 1.95202  | -0.00009 | -0.00064 | -0.00003 | -0.00068 | 1.95135 |
| A31 | 2.15895  | 0.00001  | 0.00157  | 0.00006  | 0.00163  | 2.16058 |
| A32 | 2.07925  | -0.00002 | -0.00001 | -0.00002 | -0.00003 | 2.07922 |
| A33 | 2.15759  | 0.00003  | -0.00011 | 0.00003  | -0.00007 | 2.15751 |
| A34 | 2.04635  | -0.00002 | 0.00012  | -0.00001 | 0.00010  | 2.04645 |
| A35 | 1.95680  | 0.00048  | -0.00780 | -0.00065 | -0.00798 | 1.94883 |
| A36 | 1.94068  | -0.00014 | -0.00830 | 0.00156  | -0.00626 | 1.93442 |
| A37 | 1.88622  | -0.00017 | -0.00481 | -0.00313 | -0.00705 | 1.87917 |
| D1  | 0.00297  | 0.00006  | 0.00081  | -0.00262 | -0.00183 | 0.00114 |
| D2  | -3.14006 | -0.00011 | 0.00105  | -0.00375 | -0.00268 | 3.14044 |



|     |          |          |          |          |          |          |
|-----|----------|----------|----------|----------|----------|----------|
| D3  | 3.13786  | 0.00017  | -0.00144 | 0.00192  | 0.00040  | 3.13827  |
| D4  | -0.00516 | 0.00000  | -0.00120 | 0.00079  | -0.00045 | -0.00561 |
| D5  | -0.00473 | 0.00009  | 0.00159  | 0.00260  | 0.00419  | -0.00054 |
| D6  | -3.08287 | 0.00019  | 0.00216  | -0.00035 | 0.00161  | -3.08126 |
| D7  | -3.14031 | -0.00001 | 0.00362  | -0.00147 | 0.00219  | -3.13813 |
| D8  | 0.06474  | 0.00009  | 0.00419  | -0.00443 | -0.00040 | 0.06434  |
| D9  | -0.00024 | -0.00019 | -0.00291 | 0.00178  | -0.00111 | -0.00135 |
| D10 | 3.12648  | -0.00016 | -0.00163 | 0.00118  | -0.00044 | 3.12604  |
| D11 | -3.14053 | -0.00004 | -0.00313 | 0.00279  | -0.00034 | -3.14087 |
| D12 | -0.01381 | -0.00001 | -0.00185 | 0.00219  | 0.00033  | -0.01348 |
| D13 | -0.00271 | 0.00025  | 0.00392  | -0.00017 | 0.00373  | 0.00103  |
| D14 | 3.04135  | -0.00003 | -0.00330 | 0.00264  | -0.00074 | 3.04061  |
| D15 | -3.13068 | 0.00022  | 0.00271  | 0.00038  | 0.00310  | -3.12758 |
| D16 | -0.08662 | -0.00006 | -0.00451 | 0.00319  | -0.00137 | -0.08799 |
| D17 | 0.11734  | 0.00002  | 0.01346  | -0.00160 | 0.01188  | 0.12922  |
| D18 | -3.02035 | 0.00010  | 0.01306  | -0.00140 | 0.01167  | -3.00868 |
| D19 | -3.04086 | 0.00005  | 0.01491  | -0.00226 | 0.01264  | -3.02822 |
| D20 | 0.10463  | 0.00013  | 0.01451  | -0.00206 | 0.01243  | 0.11706  |
| D21 | 0.00458  | -0.00021 | -0.00341 | -0.00149 | -0.00489 | -0.00031 |
| D22 | 3.08532  | -0.00025 | -0.00337 | 0.00121  | -0.00235 | 3.08297  |
| D23 | -3.04052 | 0.00004  | 0.00421  | -0.00406 | 0.00017  | -3.04036 |
| D24 | 0.04021  | 0.00000  | 0.00426  | -0.00137 | 0.00270  | 0.04292  |
| D25 | -1.75410 | 0.00004  | 0.10416  | -0.01272 | 0.09149  | -1.66262 |
| D26 | 1.27376  | -0.00026 | 0.09555  | -0.00959 | 0.08592  | 1.35968  |
| D27 | 1.82567  | -0.00001 | 0.01236  | 0.00145  | 0.01381  | 1.83948  |
| D28 | -2.35382 | -0.00006 | 0.01135  | 0.00423  | 0.01558  | -2.33824 |
| D29 | -0.31437 | 0.00006  | 0.01261  | 0.00213  | 0.01474  | -0.29964 |
| D30 | -1.24372 | 0.00007  | 0.01267  | -0.00184 | 0.01084  | -1.23288 |
| D31 | 0.85997  | 0.00002  | 0.01166  | 0.00094  | 0.01261  | 0.87259  |
| D32 | 2.89942  | 0.00014  | 0.01293  | -0.00115 | 0.01177  | 2.91119  |
| D33 | -1.05979 | -0.00044 | -0.04198 | 0.00238  | -0.03963 | -1.09942 |
| D34 | 0.99539  | -0.00077 | -0.03805 | 0.00063  | -0.03736 | 0.95803  |
| D35 | 3.10905  | 0.00021  | -0.02362 | 0.00033  | -0.02331 | 3.08574  |
| D36 | 3.13809  | -0.00020 | -0.04268 | 0.00209  | -0.04062 | 3.09747  |
| D37 | -1.08992 | -0.00053 | -0.03875 | 0.00034  | -0.03835 | -1.12827 |
| D38 | 1.02374  | 0.00045  | -0.02432 | 0.00004  | -0.02430 | 0.99944  |
| D39 | 1.04156  | -0.00011 | -0.04103 | 0.00184  | -0.03923 | 1.00233  |
| D40 | 3.09674  | -0.00044 | -0.03709 | 0.00008  | -0.03696 | 3.05978  |
| D41 | -1.07278 | 0.00054  | -0.02266 | -0.00022 | -0.02291 | -1.09569 |
| D42 | 2.34175  | 0.00012  | 0.10604  | 0.02129  | 0.12753  | 2.46928  |
| D43 | -1.82762 | 0.00014  | 0.09108  | 0.01792  | 0.10874  | -1.71888 |
| D44 | 0.24434  | 0.00026  | 0.11666  | 0.01993  | 0.13713  | 0.38147  |
| D45 | 2.35815  | 0.00027  | 0.10171  | 0.01656  | 0.11834  | 2.47649  |
| D46 | -1.86602 | 0.00039  | 0.11518  | 0.02236  | 0.13749  | -1.72853 |

|     |          |          |         |          |         |          |
|-----|----------|----------|---------|----------|---------|----------|
| D47 | 0.24779  | 0.00040  | 0.10023 | 0.01899  | 0.11870 | 0.36649  |
| D48 | -3.13125 | 0.00005  | 0.00012 | 0.00059  | 0.00071 | -3.13054 |
| D49 | 0.01155  | 0.00003  | 0.00111 | -0.00023 | 0.00087 | 0.01242  |
| D50 | 0.00599  | -0.00005 | 0.00057 | 0.00037  | 0.00094 | 0.00693  |
| D51 | -3.13439 | -0.00006 | 0.00155 | -0.00045 | 0.00110 | -3.13329 |

| Item                 | Value    | Threshold | Converged? |
|----------------------|----------|-----------|------------|
| Maximum Force        | 0.001739 | 0.000450  | NO         |
| RMS Force            | 0.000331 | 0.000300  | NO         |
| Maximum Displacement | 0.190352 | 0.001800  | NO         |
| RMS Displacement     | 0.036334 | 0.001200  | NO         |

Predicted change in Energy=-2.186222D-04

GradGradGradGradGradGradGradGradGradGradGradGradGradGradGradGradGradGrad

Input orientation:

| -----  |        |        |                         |           |           |  |
|--------|--------|--------|-------------------------|-----------|-----------|--|
| Center | Atomic | Atomic | Coordinates (Angstroms) |           |           |  |
| Number | Number | Type   | X                       | Y         | Z         |  |
| -----  |        |        |                         |           |           |  |
| 1      | 6      | 0      | -1.836987               | -2.026807 | 0.329439  |  |
| 2      | 6      | 0      | -2.828491               | -1.133385 | 0.079517  |  |
| 3      | 7      | 0      | -2.228164               | 0.119358  | 0.012173  |  |
| 4      | 6      | 0      | -0.905610               | -0.020390 | 0.219047  |  |
| 5      | 7      | 0      | -0.649922               | -1.315227 | 0.413041  |  |
| 6      | 6      | 0      | 0.709297                | -1.864285 | 0.601623  |  |
| 7      | 6      | 0      | 1.533264                | -1.820702 | -0.695456 |  |
| 8      | 1      | 0      | -1.874245               | -3.094929 | 0.457123  |  |
| 9      | 1      | 0      | -3.884394               | -1.282145 | -0.054415 |  |
| 10     | 1      | 0      | 1.204230                | -1.269517 | 1.369989  |  |
| 11     | 1      | 0      | 0.603385                | -2.885244 | 0.968746  |  |
| 12     | 1      | 0      | 1.056572                | -2.455481 | -1.450413 |  |
| 13     | 1      | 0      | 1.538539                | -0.789113 | -1.066028 |  |
| 14     | 35     | 0      | 1.395206                | 2.139940  | -0.541596 |  |
| 15     | 1      | 0      | -0.139532               | 0.788720  | 0.137068  |  |
| 16     | 6      | 0      | -2.821624               | 1.387923  | -0.244347 |  |
| 17     | 6      | 0      | -4.127958               | 1.600111  | -0.332573 |  |
| 18     | 1      | 0      | -2.075029               | 2.165101  | -0.363600 |  |
| 19     | 1      | 0      | -4.486079               | 2.598750  | -0.541035 |  |
| 20     | 1      | 0      | -4.871466               | 0.823108  | -0.205614 |  |
| 21     | 7      | 0      | 2.879154                | -2.308625 | -0.398562 |  |
| 22     | 1      | 0      | 3.245360                | -2.876836 | -1.152262 |  |
| 23     | 1      | 0      | 3.520021                | -1.535409 | -0.256583 |  |

Distance matrix (angstroms):

1 2 3 4 5

|    |    |          |          |          |          |          |
|----|----|----------|----------|----------|----------|----------|
| 1  | C  | 0.000000 |          |          |          |          |
| 2  | C  | 1.357845 | 0.000000 |          |          |          |
| 3  | N  | 2.204473 | 1.390788 | 0.000000 |          |          |
| 4  | C  | 2.214804 | 2.226139 | 1.345910 | 0.000000 |          |
| 5  | N  | 1.386528 | 2.211440 | 2.170156 | 1.334021 | 0.000000 |
| 6  | C  | 2.565942 | 3.650034 | 3.593183 | 2.480773 | 1.478007 |
| 7  | C  | 3.528666 | 4.483067 | 4.291027 | 3.166314 | 2.500114 |
| 8  | H  | 1.076371 | 2.213781 | 3.264181 | 3.232294 | 2.160613 |
| 9  | H  | 2.212180 | 1.074709 | 2.170655 | 3.246531 | 3.268244 |
| 10 | H  | 3.302308 | 4.236353 | 3.943852 | 2.708581 | 2.087036 |
| 11 | H  | 2.664779 | 3.954429 | 4.237963 | 3.323628 | 2.084356 |
| 12 | H  | 3.424079 | 4.379765 | 4.422493 | 3.544986 | 2.772140 |
| 13 | H  | 3.856603 | 4.527885 | 4.021926 | 2.866394 | 2.693288 |
| 14 | Br | 5.344862 | 5.379596 | 4.185477 | 3.246438 | 4.126991 |
| 15 | H  | 3.293259 | 3.305798 | 2.196822 | 1.117254 | 2.182487 |
| 16 | C  | 3.599878 | 2.542032 | 1.423817 | 2.422641 | 3.529230 |
| 17 | C  | 4.340661 | 3.054575 | 2.433247 | 3.648812 | 4.599115 |
| 18 | H  | 4.255474 | 3.412341 | 2.085599 | 2.546250 | 3.840154 |
| 19 | H  | 5.401036 | 4.130558 | 3.398765 | 4.500819 | 5.562874 |
| 20 | H  | 4.197185 | 2.843046 | 2.744038 | 4.076744 | 4.772488 |
| 21 | N  | 4.780313 | 5.846961 | 5.669964 | 4.465635 | 3.754985 |
| 22 | H  | 5.361739 | 6.438056 | 6.347642 | 5.222100 | 4.479065 |
| 23 | H  | 5.411325 | 6.370101 | 5.987664 | 4.701885 | 4.229102 |
|    |    | 6        | 7        | 8        | 9        | 10       |
| 6  | C  | 0.000000 |          |          |          |          |
| 7  | C  | 1.537282 | 0.000000 |          |          |          |
| 8  | H  | 2.865319 | 3.816178 | 0.000000 |          |          |
| 9  | H  | 4.676673 | 5.481970 | 2.754733 | 0.000000 |          |
| 10 | H  | 1.090456 | 2.162899 | 3.693571 | 5.284240 | 0.000000 |
| 11 | H  | 1.090117 | 2.183459 | 2.538578 | 4.874110 | 1.769910 |
| 12 | H  | 2.163554 | 1.095509 | 3.554895 | 5.266752 | 3.063165 |
| 13 | H  | 2.150510 | 1.096141 | 4.391340 | 5.538469 | 2.505340 |
| 14 | Br | 4.220336 | 3.966033 | 6.252248 | 6.310482 | 3.913442 |
| 15 | H  | 2.823961 | 3.209428 | 4.265489 | 4.283590 | 2.749933 |
| 16 | C  | 4.874415 | 5.428059 | 4.635251 | 2.880073 | 5.086804 |
| 17 | C  | 6.022772 | 6.624430 | 5.267469 | 2.905872 | 6.290127 |
| 18 | H  | 4.992001 | 5.386700 | 5.327459 | 3.905497 | 5.055242 |
| 19 | H  | 6.943793 | 7.469129 | 6.343183 | 3.957293 | 7.141086 |
| 20 | H  | 6.246489 | 6.946240 | 4.977305 | 2.330078 | 6.616320 |
| 21 | N  | 2.430244 | 1.462065 | 4.893391 | 6.849648 | 2.648186 |
| 22 | H  | 3.245457 | 2.062854 | 5.371037 | 7.387943 | 3.620972 |
| 23 | H  | 2.957169 | 2.054558 | 5.660352 | 7.411504 | 2.842415 |
|    |    | 11       | 12       | 13       | 14       | 15       |
| 11 | H  | 0.000000 |          |          |          |          |

|    |    |          |          |          |          |          |
|----|----|----------|----------|----------|----------|----------|
| 12 | H  | 2.498480 | 0.000000 |          |          |          |
| 13 | H  | 3.067341 | 1.776746 | 0.000000 |          |          |
| 14 | Br | 5.306655 | 4.696650 | 2.979081 | 0.000000 |          |
| 15 | H  | 3.839482 | 3.804682 | 2.598638 | 2.154484 | 0.000000 |
| 16 | C  | 5.609121 | 5.591669 | 4.942233 | 4.293663 | 2.774552 |
| 17 | C  | 6.648115 | 6.676582 | 6.193184 | 5.553417 | 4.097128 |
| 18 | H  | 5.869841 | 5.686640 | 4.720027 | 3.474888 | 2.427188 |
| 19 | H  | 7.632579 | 7.556004 | 6.931756 | 5.899154 | 4.756942 |
| 20 | H  | 6.716025 | 6.887693 | 6.665413 | 6.412340 | 4.744451 |
| 21 | N  | 2.716826 | 2.109445 | 2.133465 | 4.691726 | 4.358085 |
| 22 | H  | 3.388035 | 2.248828 | 2.698011 | 5.381824 | 5.153268 |
| 23 | H  | 3.439513 | 2.887966 | 2.266811 | 4.254911 | 4.353030 |
|    |    | 16       | 17       | 18       | 19       | 20       |
| 16 | C  | 0.000000 |          |          |          |          |
| 17 | C  | 1.326391 | 0.000000 |          |          |          |
| 18 | H  | 1.084266 | 2.129482 | 0.000000 |          |          |
| 19 | H  | 2.079551 | 1.081197 | 2.456155 | 0.000000 |          |
| 20 | H  | 2.126586 | 1.082893 | 3.105796 | 1.847683 | 0.000000 |
| 21 | N  | 6.796110 | 8.023850 | 6.675281 | 8.851512 | 8.361644 |
| 22 | H  | 7.471331 | 8.664915 | 7.372222 | 9.493724 | 8.970429 |
| 23 | H  | 6.983015 | 8.266126 | 6.708936 | 9.014978 | 8.716781 |
|    |    | 21       | 22       | 23       |          |          |
| 21 | N  | 0.000000 |          |          |          |          |
| 22 | H  | 1.012441 | 0.000000 |          |          |          |
| 23 | H  | 1.014264 | 1.636187 | 0.000000 |          |          |

Stoichiometry C7H12BrN3

Framework group C1[X(C7H12BrN3)]

Deg. of freedom 63

Full point group C1 NOp 1

Largest Abelian subgroup C1 NOp 1

Largest concise Abelian subgroup C1 NOp 1

Standard orientation:

| Center Number | Atomic Number | Atomic Type | Coordinates (Angstroms) |          |           |
|---------------|---------------|-------------|-------------------------|----------|-----------|
|               |               |             | X                       | Y        | Z         |
| 1             | 6             | 0           | -1.558895               | 2.318035 | -0.093850 |
| 2             | 6             | 0           | -2.582327               | 1.452409 | 0.122997  |
| 3             | 7             | 0           | -2.058724               | 0.172166 | -0.022291 |
| 4             | 6             | 0           | -0.750052               | 0.268811 | -0.321477 |
| 5             | 7             | 0           | -0.429110               | 1.562782 | -0.368875 |
| 6             | 6             | 0           | 0.943256                | 2.060186 | -0.600615 |
| 7             | 6             | 0           | 1.861043                | 1.801461 | 0.605190  |
| 8             | 1             | 0           | -1.538570               | 3.394123 | -0.079843 |

|    |    |   |           |           |           |
|----|----|---|-----------|-----------|-----------|
| 9  | 1  | 0 | -3.613168 | 1.637064  | 0.364391  |
| 10 | 1  | 0 | 1.338580  | 1.547813  | -1.478276 |
| 11 | 1  | 0 | 0.873712  | 3.125028  | -0.823391 |
| 12 | 1  | 0 | 1.485351  | 2.354265  | 1.473178  |
| 13 | 1  | 0 | 1.830053  | 0.730904  | 0.838585  |
| 14 | 35 | 0 | 1.462149  | -2.090850 | -0.043046 |
| 15 | 1  | 0 | -0.032436 | -0.582969 | -0.409530 |
| 16 | 6  | 0 | -2.709236 | -1.086450 | 0.119041  |
| 17 | 6  | 0 | -4.015544 | -1.239861 | 0.290320  |
| 18 | 1  | 0 | -2.006099 | -1.910563 | 0.073572  |
| 19 | 1  | 0 | -4.418618 | -2.237241 | 0.398732  |
| 20 | 1  | 0 | -4.716220 | -0.415059 | 0.327889  |
| 21 | 7  | 0 | 3.207887  | 2.253458  | 0.259724  |
| 22 | 1  | 0 | 3.666576  | 2.696454  | 1.046105  |
| 23 | 1  | 0 | 3.785796  | 1.473537  | -0.034343 |

-----

Rotational constants (GHZ):      0.7021927      0.5285011      0.3096310

Standard basis: 6-311++G(d,p) (5D, 7F)

There are    365 symmetry adapted cartesian basis functions of A    symmetry.

There are    352 symmetry adapted basis functions of A    symmetry.

     352 basis functions,    562 primitive gaussians,    365 cartesian basis functions

     55 alpha electrons      55 beta electrons

     nuclear repulsion energy      833.6362801912 Hartrees.

NAtoms=    23 NActive=    23 NUniq=    23 SFac= 1.00D+00 NAtFMM=    60 NAOKFM=F

Big=F

Integral buffers will be    131072 words long.

Raffenetti 2 integral format.

Two-electron integral symmetry is turned on.

One-electron integrals computed using PRISM.

NBasis=    352 RedAO= T EigKep= 4.87D-06 NBF=    352

NBsUse=    352 1.00D-06 EigRej= -1.00D+00 NBFU=    352

Initial guess from the checkpoint file: "/home/suqian/liuwen/qianmengshijie/nh2/nh2.chk"

B after Tr=    0.000000    0.000000    0.000000

     Rot=    0.999993    -0.000785    -0.000397    0.003598 Ang=    -0.42 deg.

ExpMin= 3.50D-02 ExpMax= 4.40D+05 ExpMxC= 1.51D+04 IAcc=3 IRadAn=      5 AccDes=

0.00D+00

Harris functional with IExCor=    402 and IRadAn=      5 diagonalized for initial guess.

HarFok: IExCor=    402 AccDes= 0.00D+00 IRadAn=      5 IDoV= 1 UseB2=F ITyADJ=14

ICtDFT= 3500011 ScaDFX= 1.000000 1.000000 1.000000 1.000000

FoFCou: FMM=F IPFlag=      0 FMFlag=    100000 FMFlg1=      0

     NFXFlg=      0 DoJE=T BraDBF=F KetDBF=T FulRan=T

wScrn= 0.000000 ICntrl=      500 IOpCl= 0 I1Cent=    200000004 NGrid=

0

     NMat0=    1 NMatS0=    1 NMatT0=    0 NMatD0=    1 NMtDS0=    0

NMtDT0= 0

Petite list used in FoFCou.

Requested convergence on RMS density matrix=1.00D-08 within 128 cycles.

Requested convergence on MAX density matrix=1.00D-06.

Requested convergence on energy=1.00D-06.

No special actions if energy rises.

SCF Done: E(RB3LYP) = -3012.46636416 A.U. after 11 cycles

NFock= 11 Conv=0.81D-08 -V/T= 2.0017

Calling FoFJK, ICntrl= 2127 FMM=F ISym2X=0 l1Cent= 0 IOpCIX= 0 NMat=1 NMatS=1

NMatT=0.

\*\*\*\*\* Axes restored to original set \*\*\*\*\*

| Center<br>Number | Atomic<br>Number | Forces (Hartrees/Bohr) |              |              |
|------------------|------------------|------------------------|--------------|--------------|
|                  |                  | X                      | Y            | Z            |
| 1                | 6                | -0.000003048           | -0.000139841 | -0.000220634 |
| 2                | 6                | 0.000002833            | 0.000036484  | 0.000272563  |
| 3                | 7                | -0.000003099           | 0.000189540  | -0.000238109 |
| 4                | 6                | 0.000320678            | -0.000349945 | 0.000193739  |
| 5                | 7                | -0.000095996           | 0.000458661  | 0.000180586  |
| 6                | 6                | -0.000405753           | -0.000170711 | 0.000317321  |
| 7                | 6                | -0.000453076           | 0.001406782  | -0.000437962 |
| 8                | 1                | 0.000032340            | -0.000026256 | -0.000098514 |
| 9                | 1                | 0.000026376            | -0.000011979 | -0.000017066 |
| 10               | 1                | -0.000134291           | -0.000133158 | 0.000094316  |
| 11               | 1                | 0.000400987            | 0.000050497  | -0.000039414 |
| 12               | 1                | 0.000722385            | 0.000122940  | 0.000917546  |
| 13               | 1                | -0.000962683           | -0.000077443 | -0.000814305 |
| 14               | 35               | 0.000084054            | -0.000316051 | 0.000007434  |
| 15               | 1                | -0.000287739           | 0.000357178  | -0.000007607 |
| 16               | 6                | 0.000130746            | -0.000036312 | 0.000159025  |
| 17               | 6                | -0.000016086           | 0.000024188  | -0.000021092 |
| 18               | 1                | -0.000025986           | -0.000083525 | -0.000147964 |
| 19               | 1                | -0.000000883           | -0.000010621 | -0.000000511 |
| 20               | 1                | -0.000019935           | 0.000010841  | -0.000018972 |
| 21               | 7                | 0.000763843            | -0.001886340 | -0.000822523 |
| 22               | 1                | 0.000143541            | 0.000690235  | 0.000354916  |
| 23               | 1                | -0.000219209           | -0.000105163 | 0.000387227  |

Cartesian Forces: Max 0.001886340 RMS 0.000428381

GradGradGradGradGradGradGradGradGradGradGradGradGradGradGradGradGradGradGrad

Berny optimization.

Using GEDIIS/GDIIS optimizer.

FormGI is forming the generalized inverse of G from B-inverse, IUseBI=4.

Internal Forces: Max 0.001053365 RMS 0.000281435

Search for a local minimum.

Step number 12 out of a maximum of 121

All quantities printed in internal units (Hartrees-Bohrs-Radians)

Mixed Optimization -- En-DIIS/RFO-DIIS

Swapping is turned off.

Update second derivatives using D2CorX and points 9 11 12

DE= -2.58D-04 DEPred=-2.19D-04 R= 1.18D+00

TightC=F SS= 1.41D+00 RLast= 3.50D-01 DXNew= 2.5227D+00 1.0506D+00

Trust test= 1.18D+00 RLast= 3.50D-01 DXMaxT set to 1.50D+00

ITU= 1 -1 1 1 1 1 1 1 0 1 0 0

|                 |         |         |         |         |         |
|-----------------|---------|---------|---------|---------|---------|
| Eigenvalues --- | 0.00019 | 0.00218 | 0.00405 | 0.00889 | 0.01383 |
| Eigenvalues --- | 0.01505 | 0.01877 | 0.02077 | 0.02247 | 0.02329 |
| Eigenvalues --- | 0.02393 | 0.02746 | 0.03062 | 0.03063 | 0.03426 |
| Eigenvalues --- | 0.03761 | 0.04067 | 0.04509 | 0.04734 | 0.05332 |
| Eigenvalues --- | 0.05769 | 0.09277 | 0.09712 | 0.12377 | 0.13292 |
| Eigenvalues --- | 0.15039 | 0.15920 | 0.15995 | 0.16000 | 0.16000 |
| Eigenvalues --- | 0.16010 | 0.16063 | 0.17541 | 0.20851 | 0.21989 |
| Eigenvalues --- | 0.22060 | 0.22831 | 0.23657 | 0.24137 | 0.25036 |
| Eigenvalues --- | 0.28222 | 0.31587 | 0.34069 | 0.34585 | 0.34735 |
| Eigenvalues --- | 0.34811 | 0.35019 | 0.35688 | 0.35689 | 0.35858 |
| Eigenvalues --- | 0.36437 | 0.36658 | 0.38396 | 0.41786 | 0.42199 |
| Eigenvalues --- | 0.43333 | 0.47240 | 0.47694 | 0.48325 | 0.50536 |
| Eigenvalues --- | 0.54342 | 0.60352 | 0.60987 |         |         |

En-DIIS/RFO-DIIS IScMMF= 0 using points: 12 11 10 9 8

RFO step: Lambda=-5.31957548D-05.

DidBck=T Rises=F En-DIIS coefs: 0.53546 0.00000 0.46454 0.00000

Iteration 1 RMS(Cart)= 0.08814372 RMS(Int)= 0.09086035

Iteration 2 RMS(Cart)= 0.04635872 RMS(Int)= 0.04277503

Iteration 3 RMS(Cart)= 0.04061861 RMS(Int)= 0.00369013

Iteration 4 RMS(Cart)= 0.00355964 RMS(Int)= 0.00030776

Iteration 5 RMS(Cart)= 0.00001831 RMS(Int)= 0.00030714

Iteration 6 RMS(Cart)= 0.00000001 RMS(Int)= 0.00030714

| Variable | Old X   | -DE/DX   | Delta X<br>(Linear) | Delta X<br>(Quad) | Delta X<br>(Total) | New X   |
|----------|---------|----------|---------------------|-------------------|--------------------|---------|
| R1       | 2.56596 | 0.00012  | 0.00080             | -0.00018          | 0.00065            | 2.56661 |
| R2       | 2.62016 | -0.00002 | -0.00014            | 0.00090           | 0.00075            | 2.62091 |
| R3       | 2.03405 | 0.00001  | 0.00010             | -0.00013          | -0.00003           | 2.03402 |
| R4       | 2.62821 | 0.00015  | 0.00104             | -0.00092          | 0.00015            | 2.62835 |
| R5       | 2.03091 | -0.00002 | 0.00000             | 0.00008           | 0.00008            | 2.03099 |
| R6       | 2.54340 | -0.00010 | -0.00174            | -0.00076          | -0.00251           | 2.54089 |
| R7       | 2.69062 | -0.00010 | 0.00067             | 0.00237           | 0.00304            | 2.69366 |

|     |         |          |          |          |          |         |
|-----|---------|----------|----------|----------|----------|---------|
| R8  | 2.52093 | -0.00042 | 0.00002  | 0.00058  | 0.00057  | 2.52150 |
| R9  | 2.11130 | -0.00011 | 0.00314  | -0.00031 | 0.00282  | 2.11412 |
| R10 | 2.79303 | -0.00010 | -0.00168 | -0.00248 | -0.00416 | 2.78887 |
| R11 | 2.90504 | 0.00034  | 0.00177  | -0.00626 | -0.00448 | 2.90056 |
| R12 | 2.06066 | -0.00007 | 0.00041  | 0.00142  | 0.00183  | 2.06250 |
| R13 | 2.06002 | -0.00010 | -0.00065 | -0.00085 | -0.00150 | 2.05853 |
| R14 | 2.07021 | -0.00102 | -0.00254 | -0.00269 | -0.00523 | 2.06498 |
| R15 | 2.07141 | 0.00020  | 0.00144  | 0.00332  | 0.00476  | 2.07617 |
| R16 | 2.76290 | 0.00105  | 0.00004  | 0.00635  | 0.00639  | 2.76929 |
| R17 | 4.07138 | -0.00014 | -0.02508 | 0.00527  | -0.01982 | 4.05157 |
| R18 | 2.50652 | 0.00004  | -0.00003 | -0.00028 | -0.00032 | 2.50620 |
| R19 | 2.04897 | -0.00006 | 0.00061  | 0.00089  | 0.00149  | 2.05046 |
| R20 | 2.04317 | -0.00001 | 0.00002  | 0.00010  | 0.00013  | 2.04329 |
| R21 | 2.04637 | 0.00000  | 0.00013  | 0.00009  | 0.00022  | 2.04659 |
| R22 | 1.91324 | -0.00060 | -0.00073 | 0.00361  | 0.00288  | 1.91611 |
| R23 | 1.91668 | -0.00017 | 0.00034  | 0.00580  | 0.00614  | 1.92282 |
| A1  | 1.87400 | -0.00019 | -0.00145 | -0.00003 | -0.00150 | 1.87250 |
| A2  | 2.27770 | 0.00011  | -0.00030 | 0.00084  | 0.00055  | 2.27826 |
| A3  | 2.13147 | 0.00008  | 0.00173  | -0.00078 | 0.00096  | 2.13243 |
| A4  | 1.86125 | 0.00003  | 0.00069  | 0.00008  | 0.00078  | 1.86203 |
| A5  | 2.27744 | -0.00003 | -0.00032 | 0.00014  | -0.00018 | 2.27726 |
| A6  | 2.14449 | -0.00001 | -0.00038 | -0.00022 | -0.00060 | 2.14388 |
| A7  | 1.89989 | -0.00013 | -0.00053 | 0.00054  | -0.00001 | 1.89988 |
| A8  | 2.25407 | 0.00018  | 0.00173  | 0.00179  | 0.00353  | 2.25760 |
| A9  | 2.12914 | -0.00005 | -0.00124 | -0.00235 | -0.00358 | 2.12556 |
| A10 | 1.88754 | 0.00012  | 0.00041  | 0.00005  | 0.00048  | 1.88802 |
| A11 | 2.19852 | 0.00032  | 0.00339  | -0.01766 | -0.01414 | 2.18439 |
| A12 | 2.19219 | -0.00045 | -0.00568 | 0.01900  | 0.01345  | 2.20564 |
| A13 | 1.90210 | 0.00018  | 0.00085  | -0.00063 | 0.00025  | 1.90235 |
| A14 | 2.21978 | 0.00059  | 0.00900  | -0.00277 | 0.00640  | 2.22618 |
| A15 | 2.15963 | -0.00078 | -0.01117 | 0.00443  | -0.00662 | 2.15301 |
| A16 | 1.95490 | -0.00071 | -0.00444 | 0.00352  | -0.00092 | 1.95397 |
| A17 | 1.88040 | -0.00005 | -0.00302 | 0.00199  | -0.00106 | 1.87935 |
| A18 | 1.87710 | 0.00066  | 0.00786  | -0.00251 | 0.00534  | 1.88244 |
| A19 | 1.91324 | 0.00034  | 0.00435  | 0.00409  | 0.00845  | 1.92169 |
| A20 | 1.94205 | -0.00007 | -0.00300 | -0.00379 | -0.00680 | 1.93525 |
| A21 | 1.89402 | -0.00017 | -0.00167 | -0.00344 | -0.00511 | 1.88891 |
| A22 | 1.90901 | 0.00015  | -0.00527 | 0.00185  | -0.00428 | 1.90473 |
| A23 | 1.89073 | -0.00015 | 0.00674  | 0.01008  | 0.01667  | 1.90740 |
| A24 | 1.88873 | -0.00011 | 0.00039  | -0.01176 | -0.01183 | 1.87690 |
| A25 | 1.89066 | -0.00019 | -0.00371 | 0.00913  | 0.00578  | 1.89643 |
| A26 | 1.92530 | -0.00046 | -0.01415 | -0.03697 | -0.05133 | 1.87397 |
| A27 | 1.95874 | 0.00076  | 0.01550  | 0.02809  | 0.04375  | 2.00249 |
| A28 | 2.87910 | -0.00054 | 0.02690  | 0.01261  | 0.03951  | 2.91861 |



|     |          |          |          |          |          |          |
|-----|----------|----------|----------|----------|----------|----------|
| A29 | 2.17125  | 0.00010  | -0.00113 | -0.00266 | -0.00378 | 2.16747  |
| A30 | 1.95135  | -0.00007 | -0.00109 | -0.00169 | -0.00278 | 1.94857  |
| A31 | 2.16058  | -0.00003 | 0.00221  | 0.00434  | 0.00656  | 2.16713  |
| A32 | 2.07922  | -0.00002 | -0.00021 | 0.00011  | -0.00010 | 2.07912  |
| A33 | 2.15751  | 0.00004  | 0.00011  | -0.00043 | -0.00032 | 2.15719  |
| A34 | 2.04645  | -0.00002 | 0.00010  | 0.00033  | 0.00042  | 2.04688  |
| A35 | 1.94883  | 0.00035  | -0.00578 | -0.03121 | -0.03795 | 1.91088  |
| A36 | 1.93442  | -0.00011 | -0.00339 | -0.02545 | -0.02981 | 1.90461  |
| A37 | 1.87917  | -0.00010 | -0.00651 | -0.02283 | -0.03141 | 1.84776  |
| D1  | 0.00114  | 0.00014  | 0.00421  | -0.00771 | -0.00355 | -0.00241 |
| D2  | 3.14044  | -0.00003 | 0.00234  | -0.00722 | -0.00486 | 3.13558  |
| D3  | 3.13827  | 0.00016  | 0.00147  | -0.00217 | -0.00080 | 3.13747  |
| D4  | -0.00561 | -0.00001 | -0.00039 | -0.00169 | -0.00211 | -0.00772 |
| D5  | -0.00054 | -0.00008 | -0.00368 | 0.00460  | 0.00095  | 0.00041  |
| D6  | -3.08126 | 0.00008  | 0.01518  | -0.01430 | 0.00065  | -3.08061 |
| D7  | -3.13813 | -0.00010 | -0.00121 | -0.00037 | -0.00152 | -3.13965 |
| D8  | 0.06434  | 0.00007  | 0.01765  | -0.01927 | -0.00182 | 0.06252  |
| D9  | -0.00135 | -0.00016 | -0.00334 | 0.00823  | 0.00495  | 0.00360  |
| D10 | 3.12604  | -0.00016 | -0.00661 | 0.00725  | 0.00069  | 3.12673  |
| D11 | -3.14087 | 0.00000  | -0.00165 | 0.00779  | 0.00614  | -3.13474 |
| D12 | -0.01348 | 0.00000  | -0.00492 | 0.00681  | 0.00188  | -0.01161 |
| D13 | 0.00103  | 0.00011  | 0.00107  | -0.00544 | -0.00440 | -0.00337 |
| D14 | 3.04061  | -0.00005 | -0.01594 | 0.01030  | -0.00558 | 3.03503  |
| D15 | -3.12758 | 0.00011  | 0.00402  | -0.00458 | -0.00059 | -3.12817 |
| D16 | -0.08799 | -0.00005 | -0.01299 | 0.01116  | -0.00177 | -0.08977 |
| D17 | 0.12922  | 0.00001  | 0.02259  | 0.03044  | 0.05304  | 0.18226  |
| D18 | -3.00868 | 0.00009  | 0.02367  | 0.03033  | 0.05400  | -2.95468 |
| D19 | -3.02822 | 0.00000  | 0.01896  | 0.02938  | 0.04833  | -2.97989 |
| D20 | 0.11706  | 0.00009  | 0.02004  | 0.02926  | 0.04929  | 0.16636  |
| D21 | -0.00031 | -0.00002 | 0.00159  | 0.00056  | 0.00216  | 0.00185  |
| D22 | 3.08297  | -0.00012 | -0.01511 | 0.01837  | 0.00298  | 3.08595  |
| D23 | -3.04036 | 0.00008  | 0.01763  | -0.01241 | 0.00540  | -3.03496 |
| D24 | 0.04292  | -0.00002 | 0.00093  | 0.00540  | 0.00622  | 0.04914  |
| D25 | -1.66262 | -0.00007 | 0.22746  | 0.13567  | 0.36318  | -1.29943 |
| D26 | 1.35968  | -0.00021 | 0.20820  | 0.15247  | 0.36063  | 1.72031  |
| D27 | 1.83948  | -0.00007 | 0.01304  | 0.02774  | 0.04078  | 1.88026  |
| D28 | -2.33824 | -0.00011 | 0.01376  | 0.03627  | 0.04999  | -2.28825 |
| D29 | -0.29964 | 0.00000  | 0.01429  | 0.03197  | 0.04623  | -0.25340 |
| D30 | -1.23288 | 0.00007  | 0.03364  | 0.00645  | 0.04013  | -1.19275 |
| D31 | 0.87259  | 0.00004  | 0.03436  | 0.01499  | 0.04935  | 0.92193  |
| D32 | 2.91119  | 0.00015  | 0.03489  | 0.01068  | 0.04559  | 2.95678  |
| D33 | -1.09942 | -0.00041 | -0.02892 | -0.12727 | -0.15617 | -1.25559 |
| D34 | 0.95803  | -0.00063 | -0.03251 | -0.10951 | -0.14199 | 0.81603  |
| D35 | 3.08574  | 0.00013  | -0.00915 | -0.07654 | -0.08571 | 3.00003  |

|     |          |          |          |          |          |          |
|-----|----------|----------|----------|----------|----------|----------|
| D36 | 3.09747  | -0.00013 | -0.02517 | -0.13474 | -0.15990 | 2.93756  |
| D37 | -1.12827 | -0.00035 | -0.02876 | -0.11697 | -0.14573 | -1.27400 |
| D38 | 0.99944  | 0.00041  | -0.00540 | -0.08401 | -0.08945 | 0.90999  |
| D39 | 1.00233  | -0.00009 | -0.02401 | -0.13071 | -0.15471 | 0.84763  |
| D40 | 3.05978  | -0.00032 | -0.02761 | -0.11294 | -0.14053 | 2.91925  |
| D41 | -1.09569 | 0.00044  | -0.00424 | -0.07998 | -0.08425 | -1.17994 |
| D42 | 2.46928  | 0.00013  | 0.13253  | 0.45259  | 0.58483  | 3.05411  |
| D43 | -1.71888 | 0.00016  | 0.11839  | 0.38551  | 0.50477  | -1.21411 |
| D44 | 0.38147  | 0.00029  | 0.14670  | 0.47932  | 0.62494  | 1.00642  |
| D45 | 2.47649  | 0.00032  | 0.13257  | 0.41224  | 0.54488  | 3.02138  |
| D46 | -1.72853 | 0.00033  | 0.15115  | 0.47450  | 0.62528  | -1.10325 |
| D47 | 0.36649  | 0.00037  | 0.13702  | 0.40742  | 0.54522  | 0.91171  |
| D48 | -3.13054 | 0.00005  | 0.00173  | 0.00315  | 0.00488  | -3.12566 |
| D49 | 0.01242  | 0.00003  | 0.00270  | 0.00258  | 0.00527  | 0.01770  |
| D50 | 0.00693  | -0.00005 | 0.00052  | 0.00326  | 0.00378  | 0.01071  |
| D51 | -3.13329 | -0.00006 | 0.00148  | 0.00269  | 0.00417  | -3.12912 |

| Item                 | Value    | Threshold | Converged? |
|----------------------|----------|-----------|------------|
| Maximum Force        | 0.001053 | 0.000450  | NO         |
| RMS Force            | 0.000281 | 0.000300  | YES        |
| Maximum Displacement | 1.006241 | 0.001800  | NO         |
| RMS Displacement     | 0.155931 | 0.001200  | NO         |

Predicted change in Energy=-8.354484D-04

GradGradGradGradGradGradGradGradGradGradGradGradGradGradGradGradGradGradGrad

Input orientation:

| Center Number | Atomic Number | Atomic Type | Coordinates (Angstroms) |           |           |
|---------------|---------------|-------------|-------------------------|-----------|-----------|
|               |               |             | X                       | Y         | Z         |
| 1             | 6             | 0           | -1.864840               | -2.043701 | 0.356097  |
| 2             | 6             | 0           | -2.836912               | -1.129417 | 0.103419  |
| 3             | 7             | 0           | -2.205783               | 0.105419  | -0.003166 |
| 4             | 6             | 0           | -0.884266               | -0.065030 | 0.176938  |
| 5             | 7             | 0           | -0.658063               | -1.361403 | 0.397541  |
| 6             | 6             | 0           | 0.692051                | -1.931561 | 0.571066  |
| 7             | 6             | 0           | 1.506632                | -1.883705 | -0.728980 |
| 8             | 1             | 0           | -1.927600               | -3.107238 | 0.509373  |
| 9             | 1             | 0           | -3.898560               | -1.252947 | -0.009457 |
| 10            | 1             | 0           | 1.196222                | -1.358236 | 1.351015  |
| 11            | 1             | 0           | 0.579159                | -2.956953 | 0.921003  |
| 12            | 1             | 0           | 1.107083                | -2.621226 | -1.429341 |
| 13            | 1             | 0           | 1.413941                | -0.885621 | -1.178749 |
| 14            | 35            | 0           | 1.294424                | 2.191897  | -0.651504 |
| 15            | 1             | 0           | -0.109070               | 0.731930  | 0.052359  |

|    |   |   |           |           |           |
|----|---|---|-----------|-----------|-----------|
| 16 | 6 | 0 | -2.767105 | 1.386680  | -0.277257 |
| 17 | 6 | 0 | -4.068230 | 1.643197  | -0.288952 |
| 18 | 1 | 0 | -1.998518 | 2.125337  | -0.479760 |
| 19 | 1 | 0 | -4.405284 | 2.643775  | -0.522127 |
| 20 | 1 | 0 | -4.827315 | 0.901118  | -0.074431 |
| 21 | 7 | 0 | 2.878314  | -2.285576 | -0.405688 |
| 22 | 1 | 0 | 3.423462  | -2.344357 | -1.258613 |
| 23 | 1 | 0 | 3.315781  | -1.557466 | 0.154501  |

-----  
Distance matrix (angstroms):

|    |    | 1        | 2        | 3        | 4        | 5        |
|----|----|----------|----------|----------|----------|----------|
| 1  | C  | 0.000000 |          |          |          |          |
| 2  | C  | 1.358191 | 0.000000 |          |          |          |
| 3  | N  | 2.205454 | 1.390865 | 0.000000 |          |          |
| 4  | C  | 2.215573 | 2.225119 | 1.344581 | 0.000000 |          |
| 5  | N  | 1.386924 | 2.210816 | 2.169693 | 1.334322 | 0.000000 |
| 6  | C  | 2.568362 | 3.649070 | 3.588381 | 2.474683 | 1.475805 |
| 7  | C  | 3.545393 | 4.486448 | 4.273810 | 3.137620 | 2.495547 |
| 8  | H  | 1.076357 | 2.214367 | 3.265157 | 3.233278 | 2.161520 |
| 9  | H  | 2.212450 | 1.074754 | 2.170413 | 3.245282 | 3.267756 |
| 10 | H  | 3.290870 | 4.227887 | 3.943315 | 2.716481 | 2.085065 |
| 11 | H  | 2.669510 | 3.959530 | 4.241240 | 3.325428 | 2.085789 |
| 12 | H  | 3.514776 | 4.486640 | 4.521466 | 3.616593 | 2.835559 |
| 13 | H  | 3.800961 | 4.446700 | 3.932754 | 2.791597 | 2.646555 |
| 14 | Br | 5.379266 | 5.354342 | 4.126159 | 3.244492 | 4.187916 |
| 15 | H  | 3.298350 | 3.302779 | 2.189019 | 1.118747 | 2.191480 |
| 16 | C  | 3.603155 | 2.545689 | 1.425425 | 2.420503 | 3.529216 |
| 17 | C  | 4.343297 | 3.059001 | 2.432107 | 3.643174 | 4.596535 |
| 18 | H  | 4.254103 | 3.411221 | 2.085705 | 2.543721 | 3.837164 |
| 19 | H  | 5.403477 | 4.133773 | 3.398584 | 4.497097 | 5.561376 |
| 20 | H  | 4.199234 | 2.848931 | 2.740555 | 4.067464 | 4.767014 |
| 21 | N  | 4.810024 | 5.853179 | 5.632666 | 4.407640 | 3.742357 |
| 22 | H  | 5.537492 | 6.521004 | 6.266255 | 5.080616 | 4.513080 |
| 23 | H  | 5.207293 | 6.167777 | 5.768685 | 4.457384 | 3.986094 |
|    |    | 6        | 7        | 8        | 9        | 10       |
| 6  | C  | 0.000000 |          |          |          |          |
| 7  | C  | 1.534911 | 0.000000 |          |          |          |
| 8  | H  | 2.872037 | 3.850259 | 0.000000 |          |          |
| 9  | H  | 4.676669 | 5.489232 | 2.755406 | 0.000000 |          |
| 10 | H  | 1.091426 | 2.167683 | 3.677721 | 5.274350 | 0.000000 |
| 11 | H  | 1.089325 | 2.175893 | 2.544772 | 4.880508 | 1.766798 |
| 12 | H  | 2.156273 | 1.092740 | 3.633747 | 5.380029 | 3.055072 |
| 13 | H  | 2.162629 | 1.098661 | 4.353301 | 5.452048 | 2.582725 |
| 14 | Br | 4.342861 | 4.081859 | 6.309509 | 6.264684 | 4.077152 |

|    |    |          |          |          |          |          |
|----|----|----------|----------|----------|----------|----------|
| 15 | H  | 2.829318 | 3.172149 | 4.272601 | 4.278293 | 2.785514 |
| 16 | C  | 4.867868 | 5.400397 | 4.638841 | 2.884361 | 5.088594 |
| 17 | C  | 6.014882 | 6.611486 | 5.271267 | 2.914542 | 6.277942 |
| 18 | H  | 4.980143 | 5.331098 | 5.325716 | 3.904375 | 5.068864 |
| 19 | H  | 6.936253 | 7.449269 | 6.346421 | 3.962833 | 7.134538 |
| 20 | H  | 6.237319 | 6.950004 | 4.981575 | 2.346658 | 6.589354 |
| 21 | N  | 2.420561 | 1.465446 | 4.960773 | 6.866538 | 2.602959 |
| 22 | H  | 3.313416 | 2.041311 | 5.686970 | 7.507567 | 3.569760 |
| 23 | H  | 2.682803 | 2.039606 | 5.479121 | 7.222626 | 2.442103 |
|    |    | 11       | 12       | 13       | 14       | 15       |
| 11 | H  | 0.000000 |          |          |          |          |
| 12 | H  | 2.432187 | 0.000000 |          |          |          |
| 13 | H  | 3.065328 | 1.780248 | 0.000000 |          |          |
| 14 | Br | 5.430934 | 4.879168 | 3.124642 | 0.000000 |          |
| 15 | H  | 3.851761 | 3.862398 | 2.540011 | 2.143997 | 0.000000 |
| 16 | C  | 5.612527 | 5.692094 | 4.843261 | 4.157458 | 2.757262 |
| 17 | C  | 6.650083 | 6.802180 | 6.102529 | 5.402831 | 4.076991 |
| 18 | H  | 5.868239 | 5.751201 | 4.604273 | 3.298090 | 2.407228 |
| 19 | H  | 7.635146 | 7.676553 | 6.837482 | 5.719056 | 4.737366 |
| 20 | H  | 6.716068 | 7.032764 | 6.585228 | 6.282899 | 4.722980 |
| 21 | N  | 2.738059 | 2.073110 | 2.168384 | 4.755723 | 4.270786 |
| 22 | H  | 3.635390 | 2.339106 | 2.484444 | 5.047671 | 4.864254 |
| 23 | H  | 3.167837 | 2.918645 | 2.417836 | 4.335119 | 4.120846 |
|    |    | 16       | 17       | 18       | 19       | 20       |
| 16 | C  | 0.000000 |          |          |          |          |
| 17 | C  | 1.326222 | 0.000000 |          |          |          |
| 18 | H  | 1.085056 | 2.133676 | 0.000000 |          |          |
| 19 | H  | 2.079395 | 1.081265 | 2.462335 | 0.000000 |          |
| 20 | H  | 2.126353 | 1.083010 | 3.108873 | 1.848079 | 0.000000 |
| 21 | N  | 6.735927 | 7.981439 | 6.576103 | 8.795616 | 8.345146 |
| 22 | H  | 7.294299 | 8.542030 | 7.069840 | 9.311989 | 8.944871 |
| 23 | H  | 6.771699 | 8.060057 | 6.496699 | 8.816071 | 8.509234 |
|    |    | 21       | 22       | 23       |          |          |
| 21 | N  | 0.000000 |          |          |          |          |
| 22 | H  | 1.013964 | 0.000000 |          |          |          |
| 23 | H  | 1.017513 | 1.621013 | 0.000000 |          |          |

Stoichiometry C7H12BrN3

Framework group C1[X(C7H12BrN3)]

Deg. of freedom 63

Full point group C1 NOp 1

Largest Abelian subgroup C1 NOp 1

Largest concise Abelian subgroup C1 NOp 1

Standard orientation:

-----

| Center<br>Number | Atomic<br>Number | Atomic<br>Type | Coordinates (Angstroms) |           |           |
|------------------|------------------|----------------|-------------------------|-----------|-----------|
|                  |                  |                | X                       | Y         | Z         |
| 1                | 6                | 0              | -1.522246               | 2.380704  | -0.074823 |
| 2                | 6                | 0              | -2.539724               | 1.505941  | 0.135446  |
| 3                | 7                | 0              | -2.005806               | 0.229893  | -0.009942 |
| 4                | 6                | 0              | -0.696452               | 0.336757  | -0.296418 |
| 5                | 7                | 0              | -0.384727               | 1.633373  | -0.341481 |
| 6                | 6                | 0              | 0.986652                | 2.131042  | -0.564294 |
| 7                | 6                | 0              | 1.908744                | 1.823720  | 0.623666  |
| 8                | 1                | 0              | -1.510466               | 3.456882  | -0.059179 |
| 9                | 1                | 0              | -3.572943               | 1.681705  | 0.373480  |
| 10               | 1                | 0              | 1.369061                | 1.655100  | -1.468979 |
| 11               | 1                | 0              | 0.927732                | 3.204051  | -0.742648 |
| 12               | 1                | 0              | 1.636544                | 2.466890  | 1.464094  |
| 13               | 1                | 0              | 1.774920                | 0.775787  | 0.925297  |
| 14               | 35               | 0              | 1.354160                | -2.164825 | -0.043805 |
| 15               | 1                | 0              | 0.018279                | -0.520503 | -0.372973 |
| 16               | 6                | 0              | -2.644034               | -1.037585 | 0.124228  |
| 17               | 6                | 0              | -3.955502               | -1.204060 | 0.230075  |
| 18               | 1                | 0              | -1.923993               | -1.849248 | 0.133741  |
| 19               | 1                | 0              | -4.351647               | -2.203750 | 0.343312  |
| 20               | 1                | 0              | -4.666916               | -0.387773 | 0.208288  |
| 21               | 7                | 0              | 3.274066                | 2.177759  | 0.226067  |
| 22               | 1                | 0              | 3.897125                | 2.064247  | 1.017923  |
| 23               | 1                | 0              | 3.597358                | 1.519186  | -0.478984 |

Rotational constants (GHZ): 0.6778707 0.5467830 0.3103244

Standard basis: 6-311++G(d,p) (5D, 7F)

There are 365 symmetry adapted cartesian basis functions of A symmetry.

There are 352 symmetry adapted basis functions of A symmetry.

352 basis functions, 562 primitive gaussians, 365 cartesian basis functions

55 alpha electrons 55 beta electrons

nuclear repulsion energy 833.6684737515 Hartrees.

NAtoms= 23 NActive= 23 NUniq= 23 SFac= 1.00D+00 NAtFMM= 60 NAOKFM=F

Big=F

Integral buffers will be 131072 words long.

Raffenetti 2 integral format.

Two-electron integral symmetry is turned on.

One-electron integrals computed using PRISM.

NBasis= 352 RedAO= T EigKep= 5.13D-06 NBF= 352

NBsUse= 352 1.00D-06 EigRej= -1.00D+00 NBFU= 352

Initial guess from the checkpoint file: "/home/suqian/liuwen/qianmengshijie/nh2/nh2.chk"

B after Tr= 0.000000 0.000000 0.000000

Rot= 0.999907 -0.002745 -0.001292 0.013310 Ang= -1.56 deg.  
 ExpMin= 3.50D-02 ExpMax= 4.40D+05 ExpMxC= 1.51D+04 IAcc=3 IRadAn= 5 AccDes= 0.00D+00  
 Harris functional with IExCor= 402 and IRadAn= 5 diagonalized for initial guess.  
 HarFok: IExCor= 402 AccDes= 0.00D+00 IRadAn= 5 IDoV= 1 UseB2=F ITyADJ=14  
 ICtDFT= 3500011 ScaDFX= 1.000000 1.000000 1.000000 1.000000  
 FoFCou: FMM=F IPFlag= 0 FMFlag= 100000 FMFlg1= 0  
 NFxFlg= 0 DoJE=T BraDBF=F KetDBF=T FulRan=T  
 wScrn= 0.000000 ICntrl= 500 IOpCl= 0 I1Cent= 200000004 NGrid= 0  
 NMat0= 1 NMatS0= 1 NMatT0= 0 NMatD0= 1 NMtDS0= 0  
 NMtDT0= 0

Petite list used in FoFCou.

Requested convergence on RMS density matrix=1.00D-08 within 128 cycles.

Requested convergence on MAX density matrix=1.00D-06.

Requested convergence on energy=1.00D-06.

No special actions if energy rises.

SCF Done: E(RB3LYP) = -3012.46578895 A.U. after 13 cycles

NFock= 13 Conv=0.24D-08 -V/T= 2.0017

Calling FoFJK, ICntrl= 2127 FMM=F ISym2X=0 I1Cent= 0 IOpClX= 0 NMat=1 NMatS=1

NMatT=0.

\*\*\*\*\* Axes restored to original set \*\*\*\*\*

| Center Number | Atomic Number | Forces (Hartrees/Bohr) |              |              |
|---------------|---------------|------------------------|--------------|--------------|
|               |               | X                      | Y            | Z            |
| 1             | 6             | -0.000008082           | -0.000137610 | -0.000187796 |
| 2             | 6             | -0.000090019           | 0.000103114  | 0.000913984  |
| 3             | 7             | 0.000076667            | -0.000072417 | -0.000522495 |
| 4             | 6             | 0.000427788            | 0.000011614  | -0.000188702 |
| 5             | 7             | 0.000068455            | 0.000224293  | -0.000181251 |
| 6             | 6             | -0.000240365           | -0.000581569 | -0.001064630 |
| 7             | 6             | 0.000358665            | -0.002728821 | 0.000856116  |
| 8             | 1             | 0.000049527            | -0.000057302 | -0.000207489 |
| 9             | 1             | 0.000006064            | -0.000029484 | 0.000011761  |
| 10            | 1             | -0.000426778           | 0.000583610  | -0.000121849 |
| 11            | 1             | -0.000096902           | -0.000121914 | 0.000558889  |
| 12            | 1             | -0.002170425           | 0.000647158  | -0.001443854 |
| 13            | 1             | 0.001422355            | 0.000103331  | 0.001195689  |
| 14            | 35            | -0.000091736           | -0.000506634 | -0.000038593 |
| 15            | 1             | -0.000250618           | 0.000494151  | 0.000693214  |
| 16            | 6             | 0.000076860            | -0.000400923 | -0.000231072 |
| 17            | 6             | 0.000018831            | 0.000040511  | -0.000155712 |
| 18            | 1             | -0.000113838           | 0.000136747  | 0.000158196  |

|    |   |              |              |              |
|----|---|--------------|--------------|--------------|
| 19 | 1 | 0.000009228  | -0.000000337 | 0.000090540  |
| 20 | 1 | -0.000023019 | -0.000012605 | -0.000011965 |
| 21 | 7 | -0.000928569 | 0.003725332  | 0.000992636  |
| 22 | 1 | 0.000852605  | -0.001508043 | -0.000390982 |
| 23 | 1 | 0.001073306  | 0.000087798  | -0.000724632 |

-----  
Cartesian Forces: Max 0.003725332 RMS 0.000806396

GradGradGradGradGradGradGradGradGradGradGradGradGradGradGradGradGradGradGrad

Berny optimization.

Using GEDIIS/GDIIS optimizer.

FormGI is forming the generalized inverse of G from B-inverse, IUseBI=4.

Internal Forces: Max 0.001643424 RMS 0.000477095

Search for a local minimum.

Step number 13 out of a maximum of 121

All quantities printed in internal units (Hartrees-Bohrs-Radians)

Mixed Optimization -- En-DIIS/RFO-DIIS

Swapping is turned off.

Update second derivatives using D2CorX and points 12 13

DE= 5.75D-04 DEPred=-8.35D-04 R=-6.89D-01

Trust test=-6.89D-01 RLast= 1.56D+00 DXMaxT set to 7.50D-01

ITU= -1 1 -1 1 1 1 1 1 0 1 0 0

|                 |         |         |         |         |         |
|-----------------|---------|---------|---------|---------|---------|
| Eigenvalues --- | 0.00138 | 0.00260 | 0.00405 | 0.00889 | 0.01385 |
| Eigenvalues --- | 0.01504 | 0.01876 | 0.02077 | 0.02247 | 0.02334 |
| Eigenvalues --- | 0.02394 | 0.02752 | 0.03062 | 0.03064 | 0.03464 |
| Eigenvalues --- | 0.04024 | 0.04167 | 0.04675 | 0.04793 | 0.05322 |
| Eigenvalues --- | 0.05800 | 0.09264 | 0.09657 | 0.12606 | 0.13291 |
| Eigenvalues --- | 0.14904 | 0.15921 | 0.15996 | 0.16000 | 0.16001 |
| Eigenvalues --- | 0.16010 | 0.16063 | 0.17552 | 0.20923 | 0.21985 |
| Eigenvalues --- | 0.22066 | 0.22831 | 0.23660 | 0.24134 | 0.25036 |
| Eigenvalues --- | 0.28194 | 0.31583 | 0.34080 | 0.34648 | 0.34735 |
| Eigenvalues --- | 0.34823 | 0.35015 | 0.35688 | 0.35690 | 0.35859 |
| Eigenvalues --- | 0.36437 | 0.36658 | 0.38387 | 0.41687 | 0.42198 |
| Eigenvalues --- | 0.43324 | 0.47236 | 0.47705 | 0.48340 | 0.50520 |
| Eigenvalues --- | 0.54341 | 0.60352 | 0.60967 |         |         |

En-DIIS/RFO-DIIS IScMMF= 0 using points: 13 12 11 10 9

RFO step: Lambda=-1.57302787D-04.

EnCoef did 100 forward-backward iterations

DidBck=T Rises=T En-DIIS coefs: 0.45920 0.00426 0.37236 0.00000

0.16418

Iteration 1 RMS(Cart)= 0.08172979 RMS(Int)= 0.07053908

Iteration 2 RMS(Cart)= 0.04743991 RMS(Int)= 0.02050231

Iteration 3 RMS(Cart)= 0.01948196 RMS(Int)= 0.00090894

Iteration 4 RMS(Cart)= 0.00088686 RMS(Int)= 0.00002543

| Iteration 5 | RMS(Cart)= | 0.00000127 | RMS(Int)=           | 0.00002540        |                    |         |
|-------------|------------|------------|---------------------|-------------------|--------------------|---------|
| Iteration 6 | RMS(Cart)= | 0.00000000 | RMS(Int)=           | 0.00002540        |                    |         |
| Variable    | Old X      | -DE/DX     | Delta X<br>(Linear) | Delta X<br>(Quad) | Delta X<br>(Total) | New X   |
| R1          | 2.56661    | -0.00017   | -0.00022            | -0.00032          | -0.00053           | 2.56608 |
| R2          | 2.62091    | -0.00002   | -0.00066            | 0.00004           | -0.00062           | 2.62028 |
| R3          | 2.03402    | 0.00002    | 0.00005             | -0.00001          | 0.00004            | 2.03406 |
| R4          | 2.62835    | 0.00003    | 0.00018             | -0.00011          | 0.00008            | 2.62843 |
| R5          | 2.03099    | 0.00000    | -0.00007            | -0.00003          | -0.00009           | 2.03090 |
| R6          | 2.54089    | 0.00013    | 0.00134             | 0.00084           | 0.00218            | 2.54307 |
| R7          | 2.69366    | -0.00016   | -0.00207            | -0.00080          | -0.00287           | 2.69079 |
| R8          | 2.52150    | -0.00023   | -0.00052            | -0.00018          | -0.00070           | 2.52080 |
| R9          | 2.11412    | -0.00032   | -0.00141            | -0.00036          | -0.00177           | 2.11235 |
| R10         | 2.78887    | -0.00024   | 0.00255             | 0.00087           | 0.00342            | 2.79229 |
| R11         | 2.90056    | -0.00008   | 0.00358             | 0.00139           | 0.00497            | 2.90553 |
| R12         | 2.06250    | 0.00002    | -0.00115            | -0.00052          | -0.00167           | 2.06083 |
| R13         | 2.05853    | 0.00031    | 0.00086             | 0.00034           | 0.00120            | 2.05973 |
| R14         | 2.06498    | 0.00128    | 0.00289             | 0.00062           | 0.00352            | 2.06849 |
| R15         | 2.07617    | -0.00052   | -0.00298            | -0.00125          | -0.00422           | 2.07195 |
| R16         | 2.76929    | 0.00027    | -0.00444            | 0.00035           | -0.00408           | 2.76521 |
| R17         | 4.05157    | -0.00039   | 0.00440             | 0.01109           | 0.01549            | 4.06706 |
| R18         | 2.50620    | 0.00000    | 0.00024             | 0.00008           | 0.00032            | 2.50651 |
| R19         | 2.05046    | -0.00001   | -0.00095            | -0.00048          | -0.00143           | 2.04903 |
| R20         | 2.04329    | -0.00002   | -0.00009            | -0.00003          | -0.00012           | 2.04317 |
| R21         | 2.04659    | 0.00002    | -0.00012            | -0.00006          | -0.00018           | 2.04641 |
| R22         | 1.91611    | 0.00087    | -0.00219            | -0.00092          | -0.00310           | 1.91301 |
| R23         | 1.92282    | 0.00012    | -0.00414            | -0.00147          | -0.00561           | 1.91721 |
| A1          | 1.87250    | -0.00005   | 0.00065             | 0.00034           | 0.00098            | 1.87348 |
| A2          | 2.27826    | 0.00005    | -0.00040            | 0.00011           | -0.00028           | 2.27798 |
| A3          | 2.13243    | 0.00000    | -0.00026            | -0.00045          | -0.00070           | 2.13173 |
| A4          | 1.86203    | -0.00002   | -0.00032            | -0.00029          | -0.00061           | 1.86142 |
| A5          | 2.27726    | -0.00002   | -0.00002            | 0.00007           | 0.00005            | 2.27731 |
| A6          | 2.14388    | 0.00004    | 0.00034             | 0.00021           | 0.00055            | 2.14444 |
| A7          | 1.89988    | 0.00005    | -0.00026            | 0.00033           | 0.00006            | 1.89993 |
| A8          | 2.25760    | -0.00024   | -0.00203            | -0.00100          | -0.00303           | 2.25457 |
| A9          | 2.12556    | 0.00019    | 0.00230             | 0.00073           | 0.00303            | 2.12858 |
| A10         | 1.88802    | -0.00018   | -0.00013            | -0.00051          | -0.00065           | 1.88737 |
| A11         | 2.18439    | 0.00047    | 0.01166             | 0.00144           | 0.01312            | 2.19751 |
| A12         | 2.20564    | -0.00030   | -0.01159            | -0.00112          | -0.01269           | 2.19295 |
| A13         | 1.90235    | 0.00020    | 0.00005             | 0.00015           | 0.00022            | 1.90257 |
| A14         | 2.22618    | -0.00045   | -0.00189            | -0.00280          | -0.00464           | 2.22153 |
| A15         | 2.15301    | 0.00025    | 0.00133             | 0.00286           | 0.00424            | 2.15725 |
| A16         | 1.95397    | 0.00025    | -0.00105            | 0.00081           | -0.00023           | 1.95374 |
| A17         | 1.87935    | -0.00028   | -0.00069            | 0.00062           | -0.00006           | 1.87928 |



|     |          |          |          |          |          |          |
|-----|----------|----------|----------|----------|----------|----------|
| A18 | 1.88244  | -0.00036 | -0.00079 | -0.00221 | -0.00301 | 1.87944  |
| A19 | 1.92169  | 0.00008  | -0.00395 | -0.00235 | -0.00629 | 1.91540  |
| A20 | 1.93525  | 0.00024  | 0.00364  | 0.00214  | 0.00578  | 1.94103  |
| A21 | 1.88891  | 0.00004  | 0.00291  | 0.00097  | 0.00387  | 1.89278  |
| A22 | 1.90473  | -0.00124 | 0.00091  | 0.00108  | 0.00202  | 1.90675  |
| A23 | 1.90740  | 0.00026  | -0.00996 | -0.00370 | -0.01361 | 1.89379  |
| A24 | 1.87690  | 0.00113  | 0.00812  | 0.00404  | 0.01220  | 1.88909  |
| A25 | 1.89643  | 0.00007  | -0.00547 | -0.00128 | -0.00676 | 1.88967  |
| A26 | 1.87397  | 0.00140  | 0.03318  | 0.00942  | 0.04258  | 1.91655  |
| A27 | 2.00249  | -0.00164 | -0.02628 | -0.00898 | -0.03524 | 1.96725  |
| A28 | 2.91861  | -0.00067 | -0.02081 | -0.01373 | -0.03453 | 2.88408  |
| A29 | 2.16747  | 0.00000  | 0.00255  | 0.00097  | 0.00353  | 2.17100  |
| A30 | 1.94857  | 0.00016  | 0.00168  | 0.00068  | 0.00237  | 1.95094  |
| A31 | 2.16713  | -0.00016 | -0.00424 | -0.00166 | -0.00590 | 2.16124  |
| A32 | 2.07912  | -0.00001 | 0.00001  | 0.00003  | 0.00005  | 2.07916  |
| A33 | 2.15719  | 0.00002  | 0.00029  | 0.00010  | 0.00039  | 2.15758  |
| A34 | 2.04688  | -0.00001 | -0.00030 | -0.00013 | -0.00044 | 2.04644  |
| A35 | 1.91088  | 0.00136  | 0.02610  | 0.00939  | 0.03558  | 1.94645  |
| A36 | 1.90461  | 0.00125  | 0.02083  | 0.00557  | 0.02648  | 1.93110  |
| A37 | 1.84776  | -0.00073 | 0.02042  | 0.00659  | 0.02718  | 1.87494  |
| D1  | -0.00241 | 0.00024  | 0.00375  | 0.00102  | 0.00476  | 0.00235  |
| D2  | 3.13558  | -0.00001 | 0.00396  | -0.00150 | 0.00246  | 3.13804  |
| D3  | 3.13747  | 0.00021  | 0.00147  | 0.00284  | 0.00430  | -3.14142 |
| D4  | -0.00772 | -0.00003 | 0.00169  | 0.00032  | 0.00200  | -0.00572 |
| D5  | 0.00041  | -0.00009 | -0.00356 | 0.00334  | -0.00022 | 0.00019  |
| D6  | -3.08061 | -0.00013 | 0.00374  | -0.00072 | 0.00299  | -3.07762 |
| D7  | -3.13965 | -0.00007 | -0.00152 | 0.00171  | 0.00019  | -3.13945 |
| D8  | 0.06252  | -0.00011 | 0.00578  | -0.00236 | 0.00340  | 0.06592  |
| D9  | 0.00360  | -0.00031 | -0.00269 | -0.00500 | -0.00768 | -0.00409 |
| D10 | 3.12673  | -0.00018 | -0.00218 | -0.00183 | -0.00402 | 3.12271  |
| D11 | -3.13474 | -0.00009 | -0.00288 | -0.00272 | -0.00560 | -3.14034 |
| D12 | -0.01161 | 0.00004  | -0.00237 | 0.00045  | -0.00193 | -0.01354 |
| D13 | -0.00337 | 0.00026  | 0.00049  | 0.00713  | 0.00762  | 0.00424  |
| D14 | 3.03503  | 0.00019  | -0.00077 | 0.00519  | 0.00442  | 3.03945  |
| D15 | -3.12817 | 0.00015  | 0.00008  | 0.00427  | 0.00434  | -3.12383 |
| D16 | -0.08977 | 0.00008  | -0.00118 | 0.00232  | 0.00114  | -0.08862 |
| D17 | 0.18226  | -0.00016 | -0.03199 | -0.01332 | -0.04531 | 0.13696  |
| D18 | -2.95468 | -0.00024 | -0.03155 | -0.01300 | -0.04455 | -2.99923 |
| D19 | -2.97989 | -0.00002 | -0.03146 | -0.00980 | -0.04126 | -3.02114 |
| D20 | 0.16636  | -0.00011 | -0.03102 | -0.00948 | -0.04050 | 0.12586  |
| D21 | 0.00185  | -0.00010 | 0.00188  | -0.00649 | -0.00461 | -0.00276 |
| D22 | 3.08595  | -0.00010 | -0.00514 | -0.00286 | -0.00803 | 3.07791  |
| D23 | -3.03496 | -0.00009 | 0.00133  | -0.00471 | -0.00336 | -3.03831 |
| D24 | 0.04914  | -0.00008 | -0.00569 | -0.00108 | -0.00678 | 0.04236  |

|     |          |          |          |          |          |          |
|-----|----------|----------|----------|----------|----------|----------|
| D25 | -1.29943 | -0.00010 | -0.21762 | -0.13018 | -0.34780 | -1.64723 |
| D26 | 1.72031  | -0.00016 | -0.21805 | -0.13240 | -0.35045 | 1.36986  |
| D27 | 1.88026  | -0.00005 | -0.02832 | -0.01298 | -0.04131 | 1.83895  |
| D28 | -2.28825 | 0.00002  | -0.03429 | -0.01499 | -0.04929 | -2.33753 |
| D29 | -0.25340 | -0.00027 | -0.03166 | -0.01468 | -0.04635 | -0.29975 |
| D30 | -1.19275 | -0.00009 | -0.02002 | -0.01746 | -0.03748 | -1.23023 |
| D31 | 0.92193  | -0.00002 | -0.02599 | -0.01947 | -0.04546 | 0.87647  |
| D32 | 2.95678  | -0.00030 | -0.02336 | -0.01916 | -0.04252 | 2.91426  |
| D33 | -1.25559 | 0.00096  | 0.10387  | 0.02778  | 0.13166  | -1.12393 |
| D34 | 0.81603  | 0.00047  | 0.09209  | 0.02469  | 0.11679  | 0.93282  |
| D35 | 3.00003  | -0.00066 | 0.05898  | 0.01390  | 0.07288  | 3.07290  |
| D36 | 2.93756  | 0.00109  | 0.10804  | 0.02805  | 0.13610  | 3.07366  |
| D37 | -1.27400 | 0.00060  | 0.09626  | 0.02496  | 0.12123  | -1.15278 |
| D38 | 0.90999  | -0.00053 | 0.06315  | 0.01417  | 0.07731  | 0.98731  |
| D39 | 0.84763  | 0.00083  | 0.10467  | 0.02700  | 0.13168  | 0.97931  |
| D40 | 2.91925  | 0.00034  | 0.09289  | 0.02391  | 0.11680  | 3.03606  |
| D41 | -1.17994 | -0.00078 | 0.05978  | 0.01312  | 0.07289  | -1.10705 |
| D42 | 3.05411  | -0.00104 | -0.37720 | -0.11930 | -0.49645 | 2.55766  |
| D43 | -1.21411 | -0.00047 | -0.32237 | -0.10313 | -0.42554 | -1.63965 |
| D44 | 1.00642  | -0.00091 | -0.40148 | -0.12752 | -0.52893 | 0.47749  |
| D45 | 3.02138  | -0.00034 | -0.34665 | -0.11135 | -0.45802 | 2.56336  |
| D46 | -1.10325 | -0.00095 | -0.40066 | -0.12697 | -0.52762 | -1.63087 |
| D47 | 0.91171  | -0.00038 | -0.34583 | -0.11080 | -0.45671 | 0.45501  |
| D48 | -3.12566 | -0.00013 | -0.00244 | -0.00125 | -0.00369 | -3.12935 |
| D49 | 0.01770  | -0.00006 | -0.00273 | -0.00109 | -0.00382 | 0.01388  |
| D50 | 0.01071  | -0.00003 | -0.00291 | -0.00160 | -0.00451 | 0.00620  |
| D51 | -3.12912 | 0.00003  | -0.00321 | -0.00144 | -0.00464 | -3.13376 |

| Item                 | Value    | Threshold | Converged? |
|----------------------|----------|-----------|------------|
| Maximum Force        | 0.001643 | 0.000450  | NO         |
| RMS Force            | 0.000477 | 0.000300  | NO         |
| Maximum Displacement | 0.865790 | 0.001800  | NO         |
| RMS Displacement     | 0.134473 | 0.001200  | NO         |

Predicted change in Energy=-1.246750D-03

GradGradGradGradGradGradGradGradGradGradGradGradGradGradGradGradGradGradGrad

Input orientation:

| Center Number | Atomic Number | Atomic Type | Coordinates (Angstroms) |           |          |
|---------------|---------------|-------------|-------------------------|-----------|----------|
|               |               |             | X                       | Y         | Z        |
| 1             | 6             | 0           | -1.842172               | -2.029501 | 0.336228 |
| 2             | 6             | 0           | -2.830432               | -1.132718 | 0.085140 |
| 3             | 7             | 0           | -2.225175               | 0.117492  | 0.012641 |
| 4             | 6             | 0           | -0.903478               | -0.026360 | 0.221014 |

|    |    |   |           |           |           |
|----|----|---|-----------|-----------|-----------|
| 5  | 7  | 0 | -0.652529 | -1.321768 | 0.416897  |
| 6  | 6  | 0 | 0.706076  | -1.872786 | 0.601070  |
| 7  | 6  | 0 | 1.524717  | -1.829713 | -0.699703 |
| 8  | 1  | 0 | -1.882970 | -3.097411 | 0.464659  |
| 9  | 1  | 0 | -3.886745 | -1.278000 | -0.049342 |
| 10 | 1  | 0 | 1.202978  | -1.278857 | 1.368939  |
| 11 | 1  | 0 | 0.602301  | -2.893825 | 0.968114  |
| 12 | 1  | 0 | 1.056494  | -2.483231 | -1.442556 |
| 13 | 1  | 0 | 1.509940  | -0.803845 | -1.086394 |
| 14 | 35 | 0 | 1.396815  | 2.131886  | -0.543764 |
| 15 | 1  | 0 | -0.134556 | 0.780357  | 0.134623  |
| 16 | 6  | 0 | -2.812854 | 1.387485  | -0.250520 |
| 17 | 6  | 0 | -4.118488 | 1.606161  | -0.333043 |
| 18 | 1  | 0 | -2.062126 | 2.158791  | -0.381672 |
| 19 | 1  | 0 | -4.472243 | 2.604891  | -0.548423 |
| 20 | 1  | 0 | -4.865598 | 0.834579  | -0.194522 |
| 21 | 7  | 0 | 2.877623  | -2.303129 | -0.405218 |
| 22 | 1  | 0 | 3.275568  | -2.802513 | -1.190744 |
| 23 | 1  | 0 | 3.492378  | -1.523068 | -0.198139 |

-----  
Distance matrix (angstroms):

|    |    | 1        | 2        | 3        | 4        | 5        |
|----|----|----------|----------|----------|----------|----------|
| 1  | C  | 0.000000 |          |          |          |          |
| 2  | C  | 1.357911 | 0.000000 |          |          |          |
| 3  | N  | 2.204764 | 1.390906 | 0.000000 |          |          |
| 4  | C  | 2.215174 | 2.226127 | 1.345733 | 0.000000 |          |
| 5  | N  | 1.386594 | 2.211122 | 2.169818 | 1.333951 | 0.000000 |
| 6  | C  | 2.566762 | 3.649763 | 3.591613 | 2.478788 | 1.477615 |
| 7  | C  | 3.528315 | 4.479855 | 4.284942 | 3.161634 | 2.499040 |
| 8  | H  | 1.076378 | 2.213987 | 3.264511 | 3.232665 | 2.160827 |
| 9  | H  | 2.212171 | 1.074704 | 2.170727 | 3.246471 | 3.267942 |
| 10 | H  | 3.301953 | 4.235314 | 3.942280 | 2.706221 | 2.085937 |
| 11 | H  | 2.668667 | 3.957877 | 4.239762 | 3.323836 | 2.085618 |
| 12 | H  | 3.431065 | 4.389297 | 4.432912 | 3.556004 | 2.779806 |
| 13 | H  | 3.842231 | 4.507713 | 4.000978 | 2.852785 | 2.684101 |
| 14 | Br | 5.346266 | 5.377990 | 4.181648 | 3.245652 | 4.129214 |
| 15 | H  | 3.294222 | 3.306063 | 2.196578 | 1.117809 | 2.183324 |
| 16 | C  | 3.600318 | 2.542519 | 1.423903 | 2.422193 | 3.528810 |
| 17 | C  | 4.341380 | 3.055393 | 2.433160 | 3.648068 | 4.598701 |
| 18 | H  | 4.255062 | 3.412073 | 2.085418 | 2.545699 | 3.839136 |
| 19 | H  | 5.401618 | 4.131183 | 3.398714 | 4.500178 | 5.562437 |
| 20 | H  | 4.198305 | 2.844358 | 2.743896 | 4.075817 | 4.772171 |
| 21 | N  | 4.785507 | 5.847410 | 5.663265 | 4.457866 | 3.755119 |
| 22 | H  | 5.396336 | 6.457501 | 6.342928 | 5.211958 | 4.495226 |

|    |    |          |          |          |          |          |
|----|----|----------|----------|----------|----------|----------|
| 23 | H  | 5.385113 | 6.341178 | 5.951998 | 4.662550 | 4.195122 |
|    |    | 6        | 7        | 8        | 9        | 10       |
| 6  | C  | 0.000000 |          |          |          |          |
| 7  | C  | 1.537543 | 0.000000 |          |          |          |
| 8  | H  | 2.867311 | 3.817738 | 0.000000 |          |          |
| 9  | H  | 4.676623 | 5.478255 | 2.754917 | 0.000000 |          |
| 10 | H  | 1.090543 | 2.164771 | 3.694311 | 5.283635 | 0.000000 |
| 11 | H  | 1.089960 | 2.182842 | 2.543911 | 4.878282 | 1.769066 |
| 12 | H  | 2.161445 | 1.094600 | 3.557406 | 5.275342 | 3.062103 |
| 13 | H  | 2.153222 | 1.096427 | 4.379275 | 5.515841 | 2.519627 |
| 14 | Br | 4.221985 | 3.966729 | 6.254555 | 6.307755 | 3.915249 |
| 15 | H  | 2.821950 | 3.203397 | 4.266493 | 4.283643 | 2.748253 |
| 16 | C  | 4.872108 | 5.419100 | 4.635780 | 2.880716 | 5.085168 |
| 17 | C  | 6.020968 | 6.617056 | 5.268535 | 2.907331 | 6.287930 |
| 18 | H  | 4.988219 | 5.373523 | 5.326916 | 3.905280 | 5.054005 |
| 19 | H  | 6.941607 | 7.460035 | 6.344046 | 3.958375 | 7.139181 |
| 20 | H  | 6.245506 | 6.941886 | 4.979070 | 2.332857 | 6.613519 |
| 21 | N  | 2.431754 | 1.463284 | 4.904163 | 6.850855 | 2.645978 |
| 22 | H  | 3.267611 | 2.062266 | 5.425665 | 7.411185 | 3.628930 |
| 23 | H  | 2.919678 | 2.053603 | 5.640232 | 7.384690 | 2.785089 |
|    |    | 11       | 12       | 13       | 14       | 15       |
| 11 | H  | 0.000000 |          |          |          |          |
| 12 | H  | 2.487210 | 0.000000 |          |          |          |
| 13 | H  | 3.068034 | 1.775613 | 0.000000 |          |          |
| 14 | Br | 5.307994 | 4.714122 | 2.987601 | 0.000000 |          |
| 15 | H  | 3.838917 | 3.815377 | 2.589391 | 2.152194 | 0.000000 |
| 16 | C  | 5.610523 | 5.601361 | 4.918044 | 4.285025 | 2.773124 |
| 17 | C  | 6.650469 | 6.688392 | 6.168863 | 5.544309 | 4.095409 |
| 18 | H  | 5.869414 | 5.692067 | 4.693985 | 3.462841 | 2.425317 |
| 19 | H  | 7.634577 | 7.566729 | 6.906186 | 5.888090 | 4.755103 |
| 20 | H  | 6.719423 | 6.901929 | 6.642843 | 6.404904 | 4.742788 |
| 21 | N  | 2.722509 | 2.103573 | 2.140657 | 4.677750 | 4.344254 |
| 22 | H  | 3.437348 | 2.256023 | 2.668895 | 5.319453 | 5.120791 |
| 23 | H  | 3.404654 | 2.898968 | 2.288305 | 4.227236 | 4.309426 |
|    |    | 16       | 17       | 18       | 19       | 20       |
| 16 | C  | 0.000000 |          |          |          |          |
| 17 | C  | 1.326390 | 0.000000 |          |          |          |
| 18 | H  | 1.084300 | 2.129881 | 0.000000 |          |          |
| 19 | H  | 2.079518 | 1.081200 | 2.456721 | 0.000000 |          |
| 20 | H  | 2.126641 | 1.082913 | 3.106127 | 1.847696 | 0.000000 |
| 21 | N  | 6.784253 | 8.014570 | 6.656606 | 8.839101 | 8.357457 |
| 22 | H  | 7.450435 | 8.651250 | 7.332128 | 9.470014 | 8.972150 |
| 23 | H  | 6.944783 | 8.230161 | 6.666504 | 8.977635 | 8.684140 |
|    |    | 21       | 22       | 23       |          |          |

21 N 0.000000  
 22 H 1.012322 0.000000  
 23 H 1.014544 1.633784 0.000000  
 Stoichiometry C7H12BrN3  
 Framework group C1[X(C7H12BrN3)]  
 Deg. of freedom 63  
 Full point group C1 NOp 1  
 Largest Abelian subgroup C1 NOP 1  
 Largest concise Abelian subgroup C1 NOp 1

Standard orientation:

| Center Number | Atomic Number | Atomic Type | Coordinates (Angstroms) |           |           |
|---------------|---------------|-------------|-------------------------|-----------|-----------|
|               |               |             | X                       | Y         | Z         |
| 1             | 6             | 0           | -1.570829               | 2.314836  | -0.096565 |
| 2             | 6             | 0           | -2.588869               | 1.442851  | 0.120597  |
| 3             | 7             | 0           | -2.056868               | 0.165615  | -0.021743 |
| 4             | 6             | 0           | -0.749427               | 0.270069  | -0.322886 |
| 5             | 7             | 0           | -0.436461               | 1.565917  | -0.370378 |
| 6             | 6             | 0           | 0.934351                | 2.068272  | -0.598105 |
| 7             | 6             | 0           | 1.848887                | 1.810550  | 0.610713  |
| 8             | 1             | 0           | -1.556664               | 3.391019  | -0.081719 |
| 9             | 1             | 0           | -3.620502               | 1.621242  | 0.363290  |
| 10            | 1             | 0           | 1.332143                | 1.558587  | -1.476324 |
| 11            | 1             | 0           | 0.864187                | 3.133179  | -0.819608 |
| 12            | 1             | 0           | 1.481281                | 2.381135  | 1.469461  |
| 13            | 1             | 0           | 1.802344                | 0.744138  | 0.861218  |
| 14            | 35            | 0           | 1.468609                | -2.083086 | -0.044974 |
| 15            | 1             | 0           | -0.026531               | -0.578244 | -0.408218 |
| 16            | 6             | 0           | -2.698041               | -1.097319 | 0.124520  |
| 17            | 6             | 0           | -4.003969               | -1.259764 | 0.290276  |
| 18            | 1             | 0           | -1.987566               | -1.915677 | 0.089556  |
| 19            | 1             | 0           | -4.399667               | -2.259473 | 0.404282  |
| 20            | 1             | 0           | -4.711409               | -0.440326 | 0.317685  |
| 21            | 7             | 0           | 3.200615                | 2.251166  | 0.264465  |
| 22            | 1             | 0           | 3.688873                | 2.620332  | 1.070763  |
| 23            | 1             | 0           | 3.748588                | 1.476242  | -0.094030 |

Rotational constants (GHZ): 0.7033873 0.5291748 0.3101740

Standard basis: 6-311++G(d,p) (5D, 7F)

There are 365 symmetry adapted cartesian basis functions of A symmetry.

There are 352 symmetry adapted basis functions of A symmetry.

352 basis functions, 562 primitive gaussians, 365 cartesian basis functions

55 alpha electrons 55 beta electrons

nuclear repulsion energy 833.9714255529 Hartrees.  
 NAtoms= 23 NActive= 23 NUniq= 23 SFac= 1.00D+00 NAtFMM= 60 NAOKFM=F  
 Big=F  
 Integral buffers will be 131072 words long.  
 Raffenetti 2 integral format.  
 Two-electron integral symmetry is turned on.  
 One-electron integrals computed using PRISM.  
 NBasis= 352 RedAO= T EigKep= 4.90D-06 NBF= 352  
 NBsUse= 352 1.00D-06 EigRej= -1.00D+00 NBFU= 352  
 Initial guess from the checkpoint file: "/home/suqian/liuwen/qianmengshijie/nh2/nh2.chk"  
 B after Tr= 0.000000 0.000000 0.000000  
 Rot= 0.999883 0.002401 0.001252 -0.015066 Ang= 1.75 deg.  
 ExpMin= 3.50D-02 ExpMax= 4.40D+05 ExpMxC= 1.51D+04 IAcc=3 IRadAn= 5 AccDes=  
 0.00D+00  
 Harris functional with IExCor= 402 and IRadAn= 5 diagonalized for initial guess.  
 HarFok: IExCor= 402 AccDes= 0.00D+00 IRadAn= 5 IDoV= 1 UseB2=F ITyADJ=14  
 ICtDFT= 3500011 ScaDFX= 1.000000 1.000000 1.000000 1.000000  
 FoFCou: FMM=F IPFlag= 0 FMFlag= 100000 FMFlg1= 0  
 NFxFlg= 0 DoJE=T BraDBF=F KetDBF=T FulRan=T  
 wScrn= 0.000000 ICntrl= 500 IOpCl= 0 I1Cent= 20000004 NGrid=  
 0  
 NMat0= 1 NMatS0= 1 NMatT0= 0 NMatD0= 1 NMtDS0= 0  
 NMtDT0= 0  
 Petite list used in FoFCou.  
 Requested convergence on RMS density matrix=1.00D-08 within 128 cycles.  
 Requested convergence on MAX density matrix=1.00D-06.  
 Requested convergence on energy=1.00D-06.  
 No special actions if energy rises.  
 SCF Done: E(RB3LYP) = -3012.46654145 A.U. after 13 cycles  
 NFock= 13 Conv=0.29D-08 -V/T= 2.0017  
 Calling FoFJK, ICntrl= 2127 FMM=F ISym2X=0 I1Cent= 0 IOpClX= 0 NMat=1 NMatS=1  
 NMatT=0.

\*\*\*\*\* Axes restored to original set \*\*\*\*\*

| Center<br>Number | Atomic<br>Number | Forces (Hartrees/Bohr) |              |              |
|------------------|------------------|------------------------|--------------|--------------|
|                  |                  | X                      | Y            | Z            |
| 1                | 6                | 0.000052422            | -0.000034149 | -0.000265362 |
| 2                | 6                | 0.000032488            | 0.000029799  | 0.000043062  |
| 3                | 7                | -0.000125844           | 0.000171999  | 0.000101932  |
| 4                | 6                | 0.000326581            | -0.000259241 | -0.000317907 |
| 5                | 7                | 0.000107586            | 0.000377611  | 0.000283466  |
| 6                | 6                | 0.000143480            | -0.000163628 | 0.000171292  |
| 7                | 6                | 0.000008898            | 0.000684373  | -0.000379259 |

|    |    |              |              |              |
|----|----|--------------|--------------|--------------|
| 8  | 1  | 0.000029074  | -0.000010823 | -0.000038585 |
| 9  | 1  | 0.000009032  | -0.000003475 | 0.000006077  |
| 10 | 1  | -0.000065485 | -0.000020933 | 0.000035466  |
| 11 | 1  | 0.000253554  | 0.000005417  | -0.000025452 |
| 12 | 1  | 0.000415198  | -0.000161504 | 0.000515217  |
| 13 | 1  | -0.000533426 | 0.000057635  | -0.000437488 |
| 14 | 35 | 0.000110264  | -0.000274216 | 0.000000077  |
| 15 | 1  | -0.000380977 | 0.000236213  | 0.000123498  |
| 16 | 6  | 0.000058411  | -0.000103904 | 0.000097655  |
| 17 | 6  | -0.000006634 | 0.000050676  | -0.000013342 |
| 18 | 1  | -0.000051211 | -0.000025539 | -0.000052155 |
| 19 | 1  | -0.000004648 | -0.000008399 | -0.000005068 |
| 20 | 1  | 0.000000533  | 0.000004276  | -0.000003616 |
| 21 | 7  | -0.000179620 | -0.001143357 | -0.000137271 |
| 22 | 1  | -0.000055243 | 0.000443820  | -0.000051245 |
| 23 | 1  | -0.000144430 | 0.000147347  | 0.000349008  |

-----  
Cartesian Forces: Max 0.001143357 RMS 0.000252831

GradGradGradGradGradGradGradGradGradGradGradGradGradGradGradGradGradGradGrad

Berny optimization.

Using GEDIIS/GDIIS optimizer.

FormGI is forming the generalized inverse of G from B-inverse, IUseBI=4.

Internal Forces: Max 0.000574193 RMS 0.000180033

Search for a local minimum.

Step number 14 out of a maximum of 121

All quantities printed in internal units (Hartrees-Bohrs-Radians)

Mixed Optimization -- En-DIIS/RFO-DIIS

Swapping is turned off.

Update second derivatives using D2CorX and points 9 11 12 13 14

DE= -7.53D-04 DEPred=-1.25D-03 R= 6.04D-01

TightC=F SS= 1.41D+00 RLast= 1.34D+00 DXNew= 1.2613D+00 4.0107D+00

Trust test= 6.04D-01 RLast= 1.34D+00 DXMaxT set to 1.26D+00

ITU= 1 -1 1 -1 1 1 1 1 1 1 0 1 0 0

|                 |         |         |         |         |         |
|-----------------|---------|---------|---------|---------|---------|
| Eigenvalues --- | 0.00113 | 0.00246 | 0.00402 | 0.00840 | 0.01379 |
| Eigenvalues --- | 0.01484 | 0.01877 | 0.02100 | 0.02261 | 0.02327 |
| Eigenvalues --- | 0.02394 | 0.02810 | 0.03062 | 0.03063 | 0.03488 |
| Eigenvalues --- | 0.03818 | 0.04048 | 0.04585 | 0.04695 | 0.05350 |
| Eigenvalues --- | 0.05710 | 0.09251 | 0.09693 | 0.12641 | 0.12999 |
| Eigenvalues --- | 0.14847 | 0.15926 | 0.15994 | 0.16000 | 0.16001 |
| Eigenvalues --- | 0.16006 | 0.16123 | 0.17922 | 0.20896 | 0.21903 |
| Eigenvalues --- | 0.22108 | 0.22904 | 0.23562 | 0.24255 | 0.25043 |
| Eigenvalues --- | 0.28476 | 0.31285 | 0.34071 | 0.34627 | 0.34794 |
| Eigenvalues --- | 0.34822 | 0.35068 | 0.35683 | 0.35690 | 0.35858 |

|                                  |                         |            |                     |                   |                    |         |
|----------------------------------|-------------------------|------------|---------------------|-------------------|--------------------|---------|
| Eigenvalues ---                  | 0.36437                 | 0.36658    | 0.39051             | 0.41891           | 0.42225            |         |
| Eigenvalues ---                  | 0.43330                 | 0.47137    | 0.47694             | 0.48383           | 0.50489            |         |
| Eigenvalues ---                  | 0.54352                 | 0.60332    | 0.60540             |                   |                    |         |
| En-DIIS/RFO-DIIS IScMMF=         | 0 using points:         |            | 14                  | 13                | 12                 | 11 10   |
| RFO step:                        | Lambda=-1.50451589D-05. |            |                     |                   |                    |         |
| DidBck=F Rises=F RFO-DIIS coefs: | 1.80490                 | 0.21513    | -2.25436            | 1.33981           | -                  |         |
| 0.10548                          |                         |            |                     |                   |                    |         |
| Iteration 1                      | RMS(Cart)=              | 0.02162598 | RMS(Int)=           | 0.00094964        |                    |         |
| Iteration 2                      | RMS(Cart)=              | 0.00102901 | RMS(Int)=           | 0.00009421        |                    |         |
| Iteration 3                      | RMS(Cart)=              | 0.00000885 | RMS(Int)=           | 0.00009409        |                    |         |
| Iteration 4                      | RMS(Cart)=              | 0.00000000 | RMS(Int)=           | 0.00009409        |                    |         |
| Variable                         | Old X                   | -DE/DX     | Delta X<br>(Linear) | Delta X<br>(Quad) | Delta X<br>(Total) | New X   |
| R1                               | 2.56608                 | 0.00009    | -0.00004            | -0.00005          | -0.00009           | 2.56599 |
| R2                               | 2.62028                 | -0.00006   | -0.00001            | -0.00008          | -0.00009           | 2.62019 |
| R3                               | 2.03406                 | 0.00000    | -0.00002            | 0.00000           | -0.00002           | 2.03404 |
| R4                               | 2.62843                 | 0.00004    | 0.00000             | -0.00002          | -0.00003           | 2.62840 |
| R5                               | 2.03090                 | -0.00001   | -0.00001            | 0.00001           | 0.00000            | 2.03089 |
| R6                               | 2.54307                 | 0.00003    | 0.00045             | 0.00029           | 0.00074            | 2.54381 |
| R7                               | 2.69079                 | -0.00007   | -0.00037            | -0.00030          | -0.00067           | 2.69012 |
| R8                               | 2.52080                 | -0.00026   | -0.00035            | -0.00013          | -0.00048           | 2.52033 |
| R9                               | 2.11235                 | -0.00022   | 0.00020             | -0.00057          | -0.00037           | 2.11198 |
| R10                              | 2.79229                 | -0.00008   | 0.00000             | 0.00007           | 0.00007            | 2.79236 |
| R11                              | 2.90553                 | -0.00015   | 0.00006             | -0.00059          | -0.00053           | 2.90501 |
| R12                              | 2.06083                 | -0.00002   | -0.00006            | -0.00009          | -0.00015           | 2.06068 |
| R13                              | 2.05973                 | -0.00004   | 0.00000             | 0.00011           | 0.00011            | 2.05983 |
| R14                              | 2.06849                 | -0.00043   | -0.00009            | 0.00004           | -0.00005           | 2.06845 |
| R15                              | 2.07195                 | 0.00021    | -0.00027            | 0.00005           | -0.00023           | 2.07172 |
| R16                              | 2.76521                 | -0.00014   | -0.00021            | -0.00043          | -0.00064           | 2.76457 |
| R17                              | 4.06706                 | -0.00009   | 0.00268             | -0.00030          | 0.00238            | 4.06944 |
| R18                              | 2.50651                 | 0.00002    | 0.00005             | 0.00001           | 0.00006            | 2.50657 |
| R19                              | 2.04903                 | -0.00005   | -0.00024            | -0.00024          | -0.00048           | 2.04855 |
| R20                              | 2.04317                 | 0.00000    | -0.00001            | 0.00000           | -0.00002           | 2.04316 |
| R21                              | 2.04641                 | -0.00001   | -0.00002            | -0.00004          | -0.00006           | 2.04635 |
| R22                              | 1.91301                 | -0.00020   | -0.00034            | 0.00001           | -0.00033           | 1.91268 |
| R23                              | 1.91721                 | 0.00010    | -0.00018            | 0.00010           | -0.00008           | 1.91713 |
| A1                               | 1.87348                 | -0.00006   | -0.00001            | 0.00019           | 0.00019            | 1.87367 |
| A2                               | 2.27798                 | 0.00005    | 0.00031             | 0.00000           | 0.00030            | 2.27828 |
| A3                               | 2.13173                 | 0.00001    | -0.00030            | -0.00019          | -0.00049           | 2.13124 |
| A4                               | 1.86142                 | 0.00003    | -0.00003            | -0.00002          | -0.00004           | 1.86138 |
| A5                               | 2.27731                 | -0.00002   | -0.00007            | 0.00002           | -0.00005           | 2.27726 |
| A6                               | 2.14444                 | -0.00001   | 0.00009             | -0.00001          | 0.00008            | 2.14452 |
| A7                               | 1.89993                 | -0.00014   | -0.00003            | -0.00018          | -0.00020           | 1.89973 |
| A8                               | 2.25457                 | 0.00007    | -0.00031            | -0.00042          | -0.00073           | 2.25384 |



|     |          |          |          |          |          |          |
|-----|----------|----------|----------|----------|----------|----------|
| A9  | 2.12858  | 0.00006  | 0.00032  | 0.00061  | 0.00093  | 2.12952  |
| A10 | 1.88737  | 0.00012  | -0.00014 | 0.00015  | 0.00002  | 1.88739  |
| A11 | 2.19751  | 0.00033  | 0.00138  | 0.00217  | 0.00353  | 2.20104  |
| A12 | 2.19295  | -0.00044 | -0.00061 | -0.00278 | -0.00340 | 2.18954  |
| A13 | 1.90257  | 0.00005  | 0.00019  | -0.00017 | 0.00002  | 1.90259  |
| A14 | 2.22153  | 0.00030  | -0.00034 | -0.00022 | -0.00060 | 2.22093  |
| A15 | 2.15725  | -0.00036 | 0.00013  | 0.00037  | 0.00046  | 2.15771  |
| A16 | 1.95374  | -0.00055 | -0.00069 | -0.00071 | -0.00140 | 1.95235  |
| A17 | 1.87928  | -0.00002 | -0.00031 | -0.00051 | -0.00081 | 1.87847  |
| A18 | 1.87944  | 0.00048  | 0.00009  | 0.00085  | 0.00093  | 1.88037  |
| A19 | 1.91540  | 0.00026  | 0.00086  | -0.00058 | 0.00028  | 1.91569  |
| A20 | 1.94103  | -0.00006 | 0.00030  | 0.00015  | 0.00046  | 1.94148  |
| A21 | 1.89278  | -0.00010 | -0.00030 | 0.00085  | 0.00056  | 1.89334  |
| A22 | 1.90675  | 0.00026  | -0.00020 | -0.00009 | -0.00002 | 1.90673  |
| A23 | 1.89379  | -0.00003 | -0.00064 | -0.00133 | -0.00188 | 1.89191  |
| A24 | 1.88909  | -0.00052 | 0.00027  | -0.00034 | 0.00011  | 1.88921  |
| A25 | 1.88967  | -0.00009 | 0.00059  | 0.00018  | 0.00063  | 1.89031  |
| A26 | 1.91655  | -0.00019 | 0.00117  | -0.00018 | 0.00106  | 1.91762  |
| A27 | 1.96725  | 0.00057  | -0.00162 | 0.00170  | 0.00004  | 1.96729  |
| A28 | 2.88408  | -0.00048 | -0.00514 | -0.00489 | -0.01002 | 2.87405  |
| A29 | 2.17100  | 0.00008  | 0.00051  | 0.00035  | 0.00086  | 2.17186  |
| A30 | 1.95094  | -0.00001 | 0.00022  | 0.00035  | 0.00058  | 1.95152  |
| A31 | 2.16124  | -0.00007 | -0.00074 | -0.00070 | -0.00144 | 2.15980  |
| A32 | 2.07916  | 0.00000  | 0.00002  | 0.00011  | 0.00013  | 2.07930  |
| A33 | 2.15758  | 0.00000  | 0.00006  | -0.00012 | -0.00006 | 2.15752  |
| A34 | 2.04644  | -0.00001 | -0.00008 | 0.00001  | -0.00007 | 2.04637  |
| A35 | 1.94645  | -0.00019 | 0.00193  | -0.00071 | 0.00154  | 1.94799  |
| A36 | 1.93110  | -0.00022 | 0.00008  | -0.00020 | 0.00021  | 1.93130  |
| A37 | 1.87494  | 0.00015  | 0.00076  | 0.00073  | 0.00210  | 1.87705  |
| D1  | 0.00235  | 0.00007  | 0.00171  | -0.00185 | -0.00013 | 0.00222  |
| D2  | 3.13804  | 0.00002  | 0.00008  | -0.00164 | -0.00156 | 3.13648  |
| D3  | -3.14142 | 0.00004  | 0.00177  | 0.00068  | 0.00247  | -3.13894 |
| D4  | -0.00572 | 0.00000  | 0.00015  | 0.00089  | 0.00104  | -0.00468 |
| D5  | 0.00019  | -0.00010 | -0.00398 | 0.00453  | 0.00054  | 0.00074  |
| D6  | -3.07762 | 0.00001  | -0.00253 | 0.00489  | 0.00240  | -3.07522 |
| D7  | -3.13945 | -0.00008 | -0.00405 | 0.00227  | -0.00179 | -3.14124 |
| D8  | 0.06592  | 0.00004  | -0.00260 | 0.00262  | 0.00007  | 0.06599  |
| D9  | -0.00409 | -0.00002 | 0.00111  | -0.00142 | -0.00033 | -0.00441 |
| D10 | 3.12271  | -0.00004 | -0.00044 | -0.00018 | -0.00063 | 3.12208  |
| D11 | -3.14034 | 0.00003  | 0.00258  | -0.00161 | 0.00097  | -3.13937 |
| D12 | -0.01354 | 0.00000  | 0.00103  | -0.00037 | 0.00067  | -0.01288 |
| D13 | 0.00424  | -0.00005 | -0.00360 | 0.00426  | 0.00067  | 0.00491  |
| D14 | 3.03945  | -0.00005 | 0.00248  | -0.00049 | 0.00196  | 3.04141  |
| D15 | -3.12383 | -0.00002 | -0.00218 | 0.00313  | 0.00096  | -3.12286 |



Input orientation:

| Center<br>Number | Atomic<br>Number | Atomic<br>Type | Coordinates (Angstroms) |           |           |
|------------------|------------------|----------------|-------------------------|-----------|-----------|
|                  |                  |                | X                       | Y         | Z         |
| 1                | 6                | 0              | -1.835900               | -2.024965 | 0.331366  |
| 2                | 6                | 0              | -2.827558               | -1.132083 | 0.080044  |
| 3                | 7                | 0              | -2.228156               | 0.121333  | 0.014917  |
| 4                | 6                | 0              | -0.906296               | -0.017173 | 0.228348  |
| 5                | 7                | 0              | -0.649966               | -1.311993 | 0.419367  |
| 6                | 6                | 0              | 0.710530                | -1.858348 | 0.603779  |
| 7                | 6                | 0              | 1.518135                | -1.836889 | -0.704081 |
| 8                | 1                | 0              | -1.871321               | -3.093805 | 0.453415  |
| 9                | 1                | 0              | -3.882435               | -1.282200 | -0.060265 |
| 10               | 1                | 0              | 1.211779                | -1.249205 | 1.356645  |
| 11               | 1                | 0              | 0.611457                | -2.872789 | 0.990080  |
| 12               | 1                | 0              | 1.045652                | -2.505136 | -1.430922 |
| 13               | 1                | 0              | 1.495823                | -0.817890 | -1.107856 |
| 14               | 35               | 0              | 1.453051                | 2.088718  | -0.497833 |
| 15               | 1                | 0              | -0.138371               | 0.791144  | 0.151040  |
| 16               | 6                | 0              | -2.821694               | 1.388634  | -0.246142 |
| 17               | 6                | 0              | -4.127817               | 1.600443  | -0.338696 |
| 18               | 1                | 0              | -2.075527               | 2.165621  | -0.367313 |
| 19               | 1                | 0              | -4.485508               | 2.598394  | -0.551124 |
| 20               | 1                | 0              | -4.871635               | 0.823870  | -0.211032 |
| 21               | 7                | 0              | 2.875013                | -2.299324 | -0.412114 |
| 22               | 1                | 0              | 3.266926                | -2.818360 | -1.187645 |
| 23               | 1                | 0              | 3.489342                | -1.513083 | -0.228694 |

Distance matrix (angstroms):

|    |   | 1        | 2        | 3        | 4        | 5        |
|----|---|----------|----------|----------|----------|----------|
| 1  | C | 0.000000 |          |          |          |          |
| 2  | C | 1.357861 | 0.000000 |          |          |          |
| 3  | N | 2.204677 | 1.390890 | 0.000000 |          |          |
| 4  | C | 2.214951 | 2.226268 | 1.346124 | 0.000000 |          |
| 5  | N | 1.386547 | 2.211203 | 2.169951 | 1.333700 | 0.000000 |
| 6  | C | 2.566375 | 3.649634 | 3.591903 | 2.478911 | 1.477654 |
| 7  | C | 3.515263 | 4.471762 | 4.287923 | 3.171538 | 2.497661 |
| 8  | H | 1.076368 | 2.214080 | 3.264463 | 3.232274 | 2.160490 |
| 9  | H | 2.212098 | 1.074703 | 2.170759 | 3.246690 | 3.267995 |
| 10 | H | 3.307772 | 4.237886 | 3.938498 | 2.697629 | 2.085312 |
| 11 | H | 2.672502 | 3.960436 | 4.240178 | 3.322402 | 2.086380 |
| 12 | H | 3.411680 | 4.378361 | 4.439212 | 3.571167 | 2.778899 |
| 13 | H | 3.824758 | 4.494603 | 4.001347 | 2.863000 | 2.679732 |

|    |    |          |          |          |          |          |
|----|----|----------|----------|----------|----------|----------|
| 14 | Br | 5.331713 | 5.388053 | 4.205330 | 3.244786 | 4.102289 |
| 15 | H  | 3.293113 | 3.306897 | 2.198722 | 1.117614 | 2.181035 |
| 16 | C  | 3.599717 | 2.541741 | 1.423549 | 2.422846 | 3.528837 |
| 17 | C  | 4.341134 | 3.054949 | 2.433418 | 3.649167 | 4.599173 |
| 18 | H  | 4.255184 | 3.411822 | 2.085308 | 2.546862 | 3.839908 |
| 19 | H  | 5.401357 | 4.130814 | 3.398805 | 4.501058 | 5.562766 |
| 20 | H  | 4.198302 | 2.844068 | 2.744557 | 4.077293 | 4.773029 |
| 21 | N  | 4.777106 | 5.841575 | 5.664298 | 4.462814 | 3.753886 |
| 22 | H  | 5.382909 | 6.449287 | 6.346958 | 5.221826 | 4.493737 |
| 23 | H  | 5.379023 | 6.335906 | 5.951507 | 4.665647 | 4.194554 |
|    |    | 6        | 7        | 8        | 9        | 10       |
| 6  | C  | 0.000000 |          |          |          |          |
| 7  | C  | 1.537265 | 0.000000 |          |          |          |
| 8  | H  | 2.866168 | 3.795793 | 0.000000 |          |          |
| 9  | H  | 4.676348 | 5.467023 | 2.755061 | 0.000000 |          |
| 10 | H  | 1.090465 | 2.164675 | 3.704575 | 5.287697 | 0.000000 |
| 11 | H  | 1.090016 | 2.182964 | 2.549714 | 4.881420 | 1.769402 |
| 12 | H  | 2.161168 | 1.094574 | 3.522213 | 5.259307 | 3.061942 |
| 13 | H  | 2.151495 | 1.096308 | 4.353736 | 5.498972 | 2.518031 |
| 14 | Br | 4.164638 | 3.931560 | 6.230157 | 6.326292 | 3.826099 |
| 15 | H  | 2.818760 | 3.222080 | 4.264665 | 4.285023 | 2.727529 |
| 16 | C  | 4.872562 | 5.426585 | 4.635175 | 2.879770 | 5.078979 |
| 17 | C  | 6.021719 | 6.620085 | 5.268318 | 2.906435 | 6.285377 |
| 18 | H  | 4.989736 | 5.389611 | 5.326993 | 3.904698 | 5.043755 |
| 19 | H  | 6.942273 | 7.465846 | 6.343832 | 3.957732 | 7.134612 |
| 20 | H  | 6.246501 | 6.939157 | 4.979111 | 2.331689 | 6.615375 |
| 21 | N  | 2.431354 | 1.462945 | 4.889583 | 6.842620 | 2.645299 |
| 22 | H  | 3.265882 | 2.062860 | 5.400975 | 7.398928 | 3.627574 |
| 23 | H  | 2.921303 | 2.053411 | 5.630333 | 7.377314 | 2.787512 |
|    |    | 11       | 12       | 13       | 14       | 15       |
| 11 | H  | 0.000000 |          |          |          |          |
| 12 | H  | 2.486954 | 0.000000 |          |          |          |
| 13 | H  | 3.066928 | 1.775901 | 0.000000 |          |          |
| 14 | Br | 5.247734 | 4.705329 | 2.970240 | 0.000000 |          |
| 15 | H  | 3.832836 | 3.843172 | 2.616180 | 2.153453 | 0.000000 |
| 16 | C  | 5.610214 | 5.614402 | 4.924658 | 4.338999 | 2.777583 |
| 17 | C  | 6.651027 | 6.694289 | 6.169706 | 5.604448 | 4.100060 |
| 18 | H  | 5.869240 | 5.717429 | 4.712143 | 3.531829 | 2.431143 |
| 19 | H  | 7.634671 | 7.577188 | 6.910663 | 5.960629 | 4.759915 |
| 20 | H  | 6.721031 | 6.898166 | 6.636580 | 6.456296 | 4.747205 |
| 21 | N  | 2.723728 | 2.104018 | 2.140296 | 4.613484 | 4.353001 |
| 22 | H  | 3.434671 | 2.256403 | 2.673023 | 5.276874 | 5.139712 |
| 23 | H  | 3.408288 | 2.898472 | 2.286993 | 4.146310 | 4.314389 |
|    |    | 16       | 17       | 18       | 19       | 20       |

|    |   |          |          |          |          |          |
|----|---|----------|----------|----------|----------|----------|
| 16 | C | 0.000000 |          |          |          |          |
| 17 | C | 1.326419 | 0.000000 |          |          |          |
| 18 | H | 1.084046 | 2.128882 | 0.000000 |          |          |
| 19 | H | 2.079618 | 1.081191 | 2.455420 | 0.000000 |          |
| 20 | H | 2.126606 | 1.082880 | 3.105308 | 1.847618 | 0.000000 |
| 21 | N | 6.788302 | 8.015810 | 6.666753 | 8.842185 | 8.354958 |
| 22 | H | 7.460330 | 8.656140 | 7.352199 | 9.478745 | 8.969715 |
| 23 | H | 6.946181 | 8.229657 | 6.672320 | 8.978108 | 8.681451 |
|    |   | 21       | 22       | 23       |          |          |
| 21 | N | 0.000000 |          |          |          |          |
| 22 | H | 1.012148 | 0.000000 |          |          |          |
| 23 | H | 1.014503 | 1.634871 | 0.000000 |          |          |

Stoichiometry C7H12BrN3

Framework group C1[X(C7H12BrN3)]

Deg. of freedom 63

Full point group C1 NOp 1

Largest Abelian subgroup C1 NOp 1

Largest concise Abelian subgroup C1 NOp 1

Standard orientation:

| Center Number | Atomic Number | Atomic Type | Coordinates (Angstroms) |           |           |
|---------------|---------------|-------------|-------------------------|-----------|-----------|
|               |               |             | X                       | Y         | Z         |
| 1             | 6             | 0           | -1.601736               | 2.280835  | -0.111181 |
| 2             | 6             | 0           | -2.615796               | 1.405511  | 0.110802  |
| 3             | 7             | 0           | -2.077597               | 0.129943  | -0.022772 |
| 4             | 6             | 0           | -0.770143               | 0.238979  | -0.323979 |
| 5             | 7             | 0           | -0.463464               | 1.535773  | -0.379012 |
| 6             | 6             | 0           | 0.905346                | 2.044043  | -0.605901 |
| 7             | 6             | 0           | 1.806622                | 1.828511  | 0.620651  |
| 8             | 1             | 0           | -1.591907               | 3.357115  | -0.101438 |
| 9             | 1             | 0           | -3.648197               | 1.580634  | 0.352603  |
| 10            | 1             | 0           | 1.317157                | 1.511997  | -1.464070 |
| 11            | 1             | 0           | 0.829205                | 3.101525  | -0.859020 |
| 12            | 1             | 0           | 1.424507                | 2.421176  | 1.457806  |
| 13            | 1             | 0           | 1.762956                | 0.769370  | 0.900301  |
| 14            | 35            | 0           | 1.527070                | -2.035833 | -0.047076 |
| 15            | 1             | 0           | -0.040607               | -0.603709 | -0.405920 |
| 16            | 6             | 0           | -2.713449               | -1.134264 | 0.132035  |
| 17            | 6             | 0           | -4.018017               | -1.301760 | 0.303602  |
| 18            | 1             | 0           | -2.000702               | -1.950387 | 0.098994  |
| 19            | 1             | 0           | -4.408965               | -2.302645 | 0.423448  |
| 20            | 1             | 0           | -4.728932               | -0.485346 | 0.329978  |
| 21            | 7             | 0           | 3.159504                | 2.266955  | 0.277597  |

|    |   |   |          |          |           |
|----|---|---|----------|----------|-----------|
| 22 | 1 | 0 | 3.634311 | 2.670003 | 1.075439  |
| 23 | 1 | 0 | 3.717643 | 1.484576 | -0.047335 |

-----  
Rotational constants (GHZ): 0.7183347 0.5217128 0.3106827

Standard basis: 6-311++G(d,p) (5D, 7F)

There are 365 symmetry adapted cartesian basis functions of A symmetry.

There are 352 symmetry adapted basis functions of A symmetry.

352 basis functions, 562 primitive gaussians, 365 cartesian basis functions

55 alpha electrons 55 beta electrons

nuclear repulsion energy 834.6554530488 Hartrees.

NAtoms= 23 NActive= 23 NUniq= 23 SFac= 1.00D+00 NAtFMM= 60 NAOKFM=F

Big=F

Integral buffers will be 131072 words long.

Raffenetti 2 integral format.

Two-electron integral symmetry is turned on.

One-electron integrals computed using PRISM.

NBasis= 352 RedAO= T EigKep= 4.86D-06 NBF= 352

NBsUse= 352 1.00D-06 EigRej= -1.00D+00 NBFU= 352

Initial guess from the checkpoint file: "/home/suqian/liuwen/qianmengshijie/nh2/nh2.chk"

B after Tr= 0.000000 0.000000 0.000000

Rot= 0.999966 0.000900 0.000542 -0.008205 Ang= 0.95 deg.

ExpMin= 3.50D-02 ExpMax= 4.40D+05 ExpMxC= 1.51D+04 IAcc=3 IRadAn= 5 AccDes=

0.00D+00

Harris functional with IExCor= 402 and IRadAn= 5 diagonalized for initial guess.

HarFok: IExCor= 402 AccDes= 0.00D+00 IRadAn= 5 IDoV= 1 UseB2=F ITyADJ=14

ICtDFT= 3500011 ScaDFX= 1.000000 1.000000 1.000000 1.000000

FoFCou: FMM=F IPFlag= 0 FMFlag= 100000 FMFlg1= 0

NFxFlg= 0 DoJE=T BraDBF=F KetDBF=T FulRan=T

wScrn= 0.000000 ICntrl= 500 IOpCl= 0 I1Cent= 20000004 NGrid=

0

NMat0= 1 NMatS0= 1 NMatT0= 0 NMatD0= 1 NMtDS0= 0

NMtDT0= 0

Petite list used in FoFCou.

Requested convergence on RMS density matrix=1.00D-08 within 128 cycles.

Requested convergence on MAX density matrix=1.00D-06.

Requested convergence on energy=1.00D-06.

No special actions if energy rises.

SCF Done: E(RB3LYP) = -3012.46658827 A.U. after 11 cycles

NFock= 11 Conv=0.58D-08 -V/T= 2.0017

Calling FoFJK, ICntrl= 2127 FMM=F ISym2X=0 I1Cent= 0 IOpClX= 0 NMat=1 NMatS=1

NMatT=0.

\*\*\*\*\* Axes restored to original set \*\*\*\*\*

-----  
Center Atomic Forces (Hartrees/Bohr)

| Number | Number | X            | Y            | Z            |
|--------|--------|--------------|--------------|--------------|
| 1      | 6      | 0.000119574  | -0.000026272 | -0.000413183 |
| 2      | 6      | -0.000016639 | -0.000049986 | -0.000047838 |
| 3      | 7      | -0.000036454 | 0.000078474  | 0.000137653  |
| 4      | 6      | -0.000023705 | 0.000061903  | -0.000382288 |
| 5      | 7      | -0.000046601 | 0.000313255  | 0.000527431  |
| 6      | 6      | 0.000192894  | -0.000108115 | 0.000261372  |
| 7      | 6      | 0.000021922  | 0.000657118  | -0.000431830 |
| 8      | 1      | -0.000014238 | -0.000009843 | 0.000028337  |
| 9      | 1      | -0.000000762 | -0.000000455 | 0.000051053  |
| 10     | 1      | -0.000016979 | 0.000038406  | -0.000086424 |
| 11     | 1      | 0.000153272  | 0.000018219  | -0.000024483 |
| 12     | 1      | 0.000452267  | -0.000263082 | 0.000450662  |
| 13     | 1      | -0.000384530 | 0.000054241  | -0.000382737 |
| 14     | 35     | 0.000169028  | -0.000208802 | 0.000021188  |
| 15     | 1      | -0.000119315 | 0.000023451  | 0.000061861  |
| 16     | 6      | 0.000048245  | -0.000137092 | 0.000110935  |
| 17     | 6      | -0.000017626 | 0.000070007  | 0.000017468  |
| 18     | 1      | -0.000062292 | -0.000005883 | -0.000013139 |
| 19     | 1      | -0.000003297 | -0.000012973 | -0.000026666 |
| 20     | 1      | 0.000011024  | 0.000001359  | 0.000004014  |
| 21     | 7      | -0.000256142 | -0.001192604 | -0.000050088 |
| 22     | 1      | -0.000010599 | 0.000492836  | -0.000156784 |
| 23     | 1      | -0.000159046 | 0.000205836  | 0.000343486  |

Cartesian Forces: Max 0.001192604 RMS 0.000251738

GradGradGradGradGradGradGradGradGradGradGradGradGradGradGradGradGradGradGrad  
 Berny optimization.

Using GEDIIS/GDIIS optimizer.

FormGI is forming the generalized inverse of G from B-inverse, IUseBI=4.

Internal Forces: Max 0.000746046 RMS 0.000186026

Search for a local minimum.

Step number 15 out of a maximum of 121

All quantities printed in internal units (Hartrees-Bohrs-Radians)

Mixed Optimization -- En-DIIS/RFO-DIIS

Swapping is turned off.

Update second derivatives using D2CorX and points 9 11 12 14 15

DE= -4.68D-05 DEPred=-1.36D-06 R= 3.44D+01

TightC=F SS= 1.41D+00 RLast= 2.19D-01 DXNew= 2.1213D+00 6.5603D-01

Trust test= 3.44D+01 RLast= 2.19D-01 DXMaxT set to 1.26D+00

ITU= 1 1 -1 1 -1 1 1 1 1 1 0 1 0 0

Eigenvalues --- -0.02097 0.00001 0.00292 0.00461 0.01146

|                 |         |         |         |         |         |
|-----------------|---------|---------|---------|---------|---------|
| Eigenvalues --- | 0.01396 | 0.01448 | 0.01953 | 0.02088 | 0.02320 |
| Eigenvalues --- | 0.02391 | 0.02650 | 0.03011 | 0.03062 | 0.03212 |
| Eigenvalues --- | 0.03720 | 0.03980 | 0.04248 | 0.04655 | 0.05294 |
| Eigenvalues --- | 0.05562 | 0.08304 | 0.09582 | 0.09687 | 0.12253 |
| Eigenvalues --- | 0.12676 | 0.15677 | 0.15920 | 0.15993 | 0.16000 |
| Eigenvalues --- | 0.16001 | 0.16041 | 0.16138 | 0.20146 | 0.21516 |
| Eigenvalues --- | 0.22043 | 0.22523 | 0.23251 | 0.23636 | 0.24925 |
| Eigenvalues --- | 0.27468 | 0.30523 | 0.34044 | 0.34470 | 0.34682 |
| Eigenvalues --- | 0.34796 | 0.35041 | 0.35660 | 0.35689 | 0.35858 |
| Eigenvalues --- | 0.36436 | 0.36657 | 0.37701 | 0.41677 | 0.42148 |
| Eigenvalues --- | 0.43047 | 0.46965 | 0.47669 | 0.48224 | 0.50146 |
| Eigenvalues --- | 0.54303 | 0.59704 | 0.60361 |         |         |

Eigenvalue 2 is 1.02D-05 Eigenvector:

|   |         |         |         |         |         |
|---|---------|---------|---------|---------|---------|
|   | D25     | D26     | D46     | D44     | D42     |
| 1 | 0.65583 | 0.64819 | 0.13006 | 0.12328 | 0.11617 |
|   | D28     | D29     | D27     | D31     | D47     |
| 1 | 0.11410 | 0.11067 | 0.10951 | 0.10391 | 0.10199 |

Use linear search instead of GDII.

RFO step: Lambda=-2.09998255D-02 EMin=-2.09716951D-02

I= 1 Eig= -2.10D-02 Dot1= 4.61D-04

I= 1 Stepn= 6.00D-01 RXN= 6.00D-01 EDone=F

Mixed 1 eigenvectors in step. Raw Step.Grad= 4.61D-04.

RFO eigenvector is Hessian eigenvector with negative curvature.

Taking step of 6.00D-01 in eigenvector direction(s). Step.Grad= 3.15D-06.

Skip linear search -- no minimum in search direction.

Iteration 1 RMS(Cart)= 0.14618413 RMS(Int)= 0.00732718

Iteration 2 RMS(Cart)= 0.01304415 RMS(Int)= 0.00142140

Iteration 3 RMS(Cart)= 0.00010707 RMS(Int)= 0.00142034

Iteration 4 RMS(Cart)= 0.00000025 RMS(Int)= 0.00142034

| Variable | Old X   | -DE/DX   | Delta X  | Delta X  | Delta X  | New X   |
|----------|---------|----------|----------|----------|----------|---------|
|          |         |          | (Linear) | (Quad)   | (Total)  |         |
| R1       | 2.56599 | 0.00006  | 0.00000  | -0.00424 | -0.00404 | 2.56194 |
| R2       | 2.62019 | -0.00007 | 0.00000  | -0.00296 | -0.00287 | 2.61733 |
| R3       | 2.03404 | 0.00001  | 0.00000  | 0.00191  | 0.00191  | 2.03595 |
| R4       | 2.62840 | 0.00012  | 0.00000  | 0.01224  | 0.01234  | 2.64074 |
| R5       | 2.03089 | -0.00001 | 0.00000  | 0.00056  | 0.00056  | 2.03145 |
| R6       | 2.54381 | 0.00001  | 0.00000  | -0.00342 | -0.00353 | 2.54027 |
| R7       | 2.69012 | -0.00008 | 0.00000  | -0.00235 | -0.00235 | 2.68776 |
| R8       | 2.52033 | -0.00023 | 0.00000  | 0.00660  | 0.00630  | 2.52663 |
| R9       | 2.11198 | -0.00011 | 0.00000  | 0.02910  | 0.02910  | 2.14108 |
| R10      | 2.79236 | 0.00002  | 0.00000  | 0.02804  | 0.02804  | 2.82040 |
| R11      | 2.90501 | 0.00001  | 0.00000  | 0.04450  | 0.04450  | 2.94951 |
| R12      | 2.06068 | -0.00005 | 0.00000  | -0.00712 | -0.00712 | 2.05356 |
| R13      | 2.05983 | -0.00004 | 0.00000  | -0.00055 | -0.00055 | 2.05928 |



|     |         |          |         |          |          |         |
|-----|---------|----------|---------|----------|----------|---------|
| R14 | 2.06845 | -0.00034 | 0.00000 | 0.01023  | 0.01023  | 2.07867 |
| R15 | 2.07172 | 0.00020  | 0.00000 | -0.00018 | -0.00018 | 2.07155 |
| R16 | 2.76457 | -0.00021 | 0.00000 | 0.02132  | 0.02132  | 2.78588 |
| R17 | 4.06944 | -0.00001 | 0.00000 | 0.15550  | 0.15550  | 4.22493 |
| R18 | 2.50657 | 0.00002  | 0.00000 | 0.00047  | 0.00047  | 2.50704 |
| R19 | 2.04855 | -0.00004 | 0.00000 | -0.00085 | -0.00085 | 2.04770 |
| R20 | 2.04316 | 0.00000  | 0.00000 | -0.00039 | -0.00039 | 2.04277 |
| R21 | 2.04635 | -0.00001 | 0.00000 | -0.00063 | -0.00063 | 2.04572 |
| R22 | 1.91268 | -0.00014 | 0.00000 | 0.00789  | 0.00789  | 1.92057 |
| R23 | 1.91713 | 0.00013  | 0.00000 | 0.00484  | 0.00484  | 1.92197 |
| A1  | 1.87367 | -0.00007 | 0.00000 | -0.00530 | -0.00622 | 1.86745 |
| A2  | 2.27828 | 0.00003  | 0.00000 | -0.01195 | -0.01379 | 2.26448 |
| A3  | 2.13124 | 0.00005  | 0.00000 | 0.01729  | 0.01504  | 2.14627 |
| A4  | 1.86138 | 0.00001  | 0.00000 | -0.00281 | -0.00285 | 1.85853 |
| A5  | 2.27726 | -0.00001 | 0.00000 | 0.00078  | -0.00045 | 2.27681 |
| A6  | 2.14452 | 0.00000  | 0.00000 | 0.00250  | 0.00137  | 2.14589 |
| A7  | 1.89973 | -0.00011 | 0.00000 | 0.00940  | 0.00935  | 1.90908 |
| A8  | 2.25384 | 0.00001  | 0.00000 | -0.02059 | -0.02149 | 2.23235 |
| A9  | 2.12952 | 0.00010  | 0.00000 | 0.01199  | 0.01127  | 2.14079 |
| A10 | 1.88739 | 0.00007  | 0.00000 | -0.01640 | -0.01723 | 1.87016 |
| A11 | 2.20104 | 0.00069  | 0.00000 | 0.15708  | 0.15670  | 2.35774 |
| A12 | 2.18954 | -0.00075 | 0.00000 | -0.13381 | -0.13488 | 2.05466 |
| A13 | 1.90259 | 0.00010  | 0.00000 | 0.01529  | 0.01541  | 1.91800 |
| A14 | 2.22093 | 0.00035  | 0.00000 | 0.01414  | 0.01375  | 2.23468 |
| A15 | 2.15771 | -0.00046 | 0.00000 | -0.03030 | -0.03017 | 2.12754 |
| A16 | 1.95235 | -0.00028 | 0.00000 | 0.09461  | 0.09502  | 2.04737 |
| A17 | 1.87847 | -0.00006 | 0.00000 | -0.01247 | -0.01038 | 1.86809 |
| A18 | 1.88037 | 0.00032  | 0.00000 | -0.04992 | -0.05133 | 1.82904 |
| A19 | 1.91569 | 0.00010  | 0.00000 | -0.08274 | -0.08189 | 1.83380 |
| A20 | 1.94148 | -0.00006 | 0.00000 | 0.01305  | 0.01314  | 1.95462 |
| A21 | 1.89334 | -0.00002 | 0.00000 | 0.03662  | 0.03624  | 1.92957 |
| A22 | 1.90673 | 0.00032  | 0.00000 | 0.05406  | 0.05403  | 1.96076 |
| A23 | 1.89191 | -0.00003 | 0.00000 | -0.01428 | -0.01485 | 1.87706 |
| A24 | 1.88921 | -0.00047 | 0.00000 | 0.01444  | 0.01421  | 1.90342 |
| A25 | 1.89031 | -0.00004 | 0.00000 | 0.04097  | 0.03972  | 1.93003 |
| A26 | 1.91762 | -0.00024 | 0.00000 | -0.02996 | -0.03076 | 1.88686 |
| A27 | 1.96729 | 0.00046  | 0.00000 | -0.06171 | -0.06217 | 1.90512 |
| A28 | 2.87405 | -0.00043 | 0.00000 | 0.00139  | 0.00139  | 2.87544 |
| A29 | 2.17186 | 0.00006  | 0.00000 | -0.00668 | -0.00679 | 2.16506 |
| A30 | 1.95152 | 0.00002  | 0.00000 | 0.01002  | 0.00992  | 1.96143 |
| A31 | 2.15980 | -0.00007 | 0.00000 | -0.00320 | -0.00330 | 2.15650 |
| A32 | 2.07930 | 0.00001  | 0.00000 | 0.00487  | 0.00477  | 2.08406 |
| A33 | 2.15752 | -0.00001 | 0.00000 | -0.00789 | -0.00799 | 2.14953 |
| A34 | 2.04637 | 0.00000  | 0.00000 | 0.00306  | 0.00296  | 2.04932 |

|     |          |          |         |          |          |          |
|-----|----------|----------|---------|----------|----------|----------|
| A35 | 1.94799  | -0.00022 | 0.00000 | -0.00109 | -0.00173 | 1.94626  |
| A36 | 1.93130  | -0.00030 | 0.00000 | -0.05181 | -0.05251 | 1.87879  |
| A37 | 1.87705  | 0.00016  | 0.00000 | -0.03220 | -0.03363 | 1.84342  |
| D1  | 0.00222  | 0.00007  | 0.00000 | 0.02548  | 0.02414  | 0.02636  |
| D2  | 3.13648  | 0.00008  | 0.00000 | 0.09937  | 0.09860  | -3.04810 |
| D3  | -3.13894 | -0.00001 | 0.00000 | -0.08389 | -0.08284 | 3.06140  |
| D4  | -0.00468 | -0.00001 | 0.00000 | -0.01001 | -0.00838 | -0.01306 |
| D5  | 0.00074  | -0.00013 | 0.00000 | -0.05185 | -0.05086 | -0.05012 |
| D6  | -3.07522 | 0.00000  | 0.00000 | -0.03605 | -0.03410 | -3.10932 |
| D7  | -3.14124 | -0.00005 | 0.00000 | 0.04627  | 0.04715  | -3.09409 |
| D8  | 0.06599  | 0.00007  | 0.00000 | 0.06208  | 0.06391  | 0.12990  |
| D9  | -0.00441 | 0.00001  | 0.00000 | 0.00900  | 0.00987  | 0.00545  |
| D10 | 3.12208  | 0.00000  | 0.00000 | 0.07037  | 0.07172  | -3.08939 |
| D11 | -3.13937 | 0.00000  | 0.00000 | -0.05791 | -0.05764 | 3.08618  |
| D12 | -0.01288 | -0.00001 | 0.00000 | 0.00346  | 0.00421  | -0.00867 |
| D13 | 0.00491  | -0.00009 | 0.00000 | -0.04143 | -0.04106 | -0.03615 |
| D14 | 3.04141  | -0.00007 | 0.00000 | 0.01695  | 0.02348  | 3.06489  |
| D15 | -3.12286 | -0.00008 | 0.00000 | -0.09723 | -0.09868 | 3.06164  |
| D16 | -0.08637 | -0.00006 | 0.00000 | -0.03885 | -0.03415 | -0.12052 |
| D17 | 0.13237  | 0.00001  | 0.00000 | -0.03431 | -0.03467 | 0.09770  |
| D18 | -3.00325 | 0.00002  | 0.00000 | -0.06057 | -0.06102 | -3.06427 |
| D19 | -3.02608 | -0.00001 | 0.00000 | 0.03412  | 0.03457  | -2.99151 |
| D20 | 0.12148  | 0.00001  | 0.00000 | 0.00786  | 0.00822  | 0.12970  |
| D21 | -0.00351 | 0.00013  | 0.00000 | 0.05753  | 0.05671  | 0.05320  |
| D22 | 3.07534  | 0.00005  | 0.00000 | 0.04436  | 0.04303  | 3.11837  |
| D23 | -3.04087 | 0.00001  | 0.00000 | -0.02231 | -0.01517 | -3.05604 |
| D24 | 0.03798  | -0.00007 | 0.00000 | -0.03548 | -0.02885 | 0.00912  |
| D25 | -1.79527 | -0.00018 | 0.00000 | -0.04848 | -0.04827 | -1.84355 |
| D26 | 1.22363  | -0.00009 | 0.00000 | 0.03084  | 0.03063  | 1.25426  |
| D27 | 1.81293  | -0.00010 | 0.00000 | -0.08385 | -0.08498 | 1.72795  |
| D28 | -2.36459 | -0.00019 | 0.00000 | -0.13690 | -0.13715 | -2.50174 |
| D29 | -0.32609 | -0.00008 | 0.00000 | -0.12635 | -0.12600 | -0.45209 |
| D30 | -1.25412 | 0.00001  | 0.00000 | -0.06778 | -0.06823 | -1.32236 |
| D31 | 0.85155  | -0.00008 | 0.00000 | -0.12084 | -0.12040 | 0.73114  |
| D32 | 2.89004  | 0.00004  | 0.00000 | -0.11029 | -0.10925 | 2.78079  |
| D33 | -1.12560 | -0.00037 | 0.00000 | -0.04972 | -0.05087 | -1.17647 |
| D34 | 0.93082  | -0.00025 | 0.00000 | 0.02152  | 0.02047  | 0.95129  |
| D35 | 3.06989  | 0.00001  | 0.00000 | -0.05331 | -0.05472 | 3.01517  |
| D36 | 3.07371  | -0.00018 | 0.00000 | -0.03965 | -0.03890 | 3.03480  |
| D37 | -1.15305 | -0.00006 | 0.00000 | 0.03159  | 0.03243  | -1.12062 |
| D38 | 0.98602  | 0.00020  | 0.00000 | -0.04324 | -0.04276 | 0.94326  |
| D39 | 0.97818  | -0.00019 | 0.00000 | -0.03939 | -0.03881 | 0.93937  |
| D40 | 3.03461  | -0.00007 | 0.00000 | 0.03186  | 0.03252  | 3.06713  |
| D41 | -1.10951 | 0.00019  | 0.00000 | -0.04297 | -0.04267 | -1.15218 |

|     |          |          |         |          |          |          |
|-----|----------|----------|---------|----------|----------|----------|
| D42 | 2.54985  | 0.00033  | 0.00000 | 0.19057  | 0.18980  | 2.73965  |
| D43 | -1.64366 | 0.00019  | 0.00000 | 0.11441  | 0.11442  | -1.52923 |
| D44 | 0.46902  | 0.00036  | 0.00000 | 0.13383  | 0.13398  | 0.60300  |
| D45 | 2.55869  | 0.00022  | 0.00000 | 0.05766  | 0.05861  | 2.61730  |
| D46 | -1.64092 | 0.00027  | 0.00000 | 0.14413  | 0.14356  | -1.49735 |
| D47 | 0.44876  | 0.00012  | 0.00000 | 0.06796  | 0.06819  | 0.51694  |
| D48 | -3.12984 | 0.00004  | 0.00000 | 0.01834  | 0.01838  | -3.11146 |
| D49 | 0.01371  | 0.00001  | 0.00000 | -0.00938 | -0.00934 | 0.00437  |
| D50 | 0.00510  | 0.00002  | 0.00000 | 0.04770  | 0.04766  | 0.05275  |
| D51 | -3.13454 | -0.00001 | 0.00000 | 0.01998  | 0.01994  | -3.11460 |

| Item                 | Value    | Threshold | Converged? |
|----------------------|----------|-----------|------------|
| Maximum Force        | 0.000746 | 0.000450  | NO         |
| RMS Force            | 0.000186 | 0.000300  | YES        |
| Maximum Displacement | 0.632719 | 0.001800  | NO         |
| RMS Displacement     | 0.150223 | 0.001200  | NO         |

Predicted change in Energy=-4.200008D-03

GradGradGradGradGradGradGradGradGradGradGradGradGradGradGradGradGradGradGrad

Input orientation:

| Center Number | Atomic Number | Atomic Type | Coordinates (Angstroms) |           |           |
|---------------|---------------|-------------|-------------------------|-----------|-----------|
|               |               |             | X                       | Y         | Z         |
| 1             | 6             | 0           | -1.886418               | -1.998769 | 0.234614  |
| 2             | 6             | 0           | -2.881027               | -1.104032 | 0.015113  |
| 3             | 7             | 0           | -2.275453               | 0.153580  | -0.051832 |
| 4             | 6             | 0           | -0.948509               | 0.019272  | 0.116102  |
| 5             | 7             | 0           | -0.707679               | -1.278065 | 0.331910  |
| 6             | 6             | 0           | 0.675837                | -1.800623 | 0.532779  |
| 7             | 6             | 0           | 1.581267                | -1.934404 | -0.731511 |
| 8             | 1             | 0           | -1.941397               | -3.059800 | 0.413316  |
| 9             | 1             | 0           | -3.945305               | -1.244298 | -0.041996 |
| 10            | 1             | 0           | 1.192554                | -1.094173 | 1.176859  |
| 11            | 1             | 0           | 0.541745                | -2.754939 | 1.041501  |
| 12            | 1             | 0           | 1.221138                | -2.709822 | -1.423613 |
| 13            | 1             | 0           | 1.604284                | -0.956586 | -1.226515 |
| 14            | 35            | 0           | 1.787872                | 1.833710  | -0.508510 |
| 15            | 1             | 0           | -0.060037               | 0.721446  | 0.080244  |
| 16            | 6             | 0           | -2.904948               | 1.419242  | -0.209253 |
| 17            | 6             | 0           | -4.219260               | 1.599848  | -0.212786 |
| 18            | 1             | 0           | -2.189079               | 2.226882  | -0.306380 |
| 19            | 1             | 0           | -4.618196               | 2.592720  | -0.366365 |
| 20            | 1             | 0           | -4.928408               | 0.791030  | -0.091006 |
| 21            | 7             | 0           | 2.946945                | -2.295260 | -0.309555 |

|    |   |   |          |           |           |
|----|---|---|----------|-----------|-----------|
| 22 | 1 | 0 | 3.460588 | -2.750448 | -1.059147 |
| 23 | 1 | 0 | 3.449010 | -1.431595 | -0.118683 |

-----  
Distance matrix (angstroms):

|    |    | 1        | 2        | 3        | 4        | 5        |
|----|----|----------|----------|----------|----------|----------|
| 1  | C  | 0.000000 |          |          |          |          |
| 2  | C  | 1.355722 | 0.000000 |          |          |          |
| 3  | N  | 2.205903 | 1.397422 | 0.000000 |          |          |
| 4  | C  | 2.228499 | 2.237551 | 1.344255 | 0.000000 |          |
| 5  | N  | 1.385030 | 2.203200 | 2.157495 | 1.337033 | 0.000000 |
| 6  | C  | 2.587145 | 3.661215 | 3.587589 | 2.474699 | 1.492491 |
| 7  | C  | 3.600331 | 4.599895 | 4.438010 | 3.306821 | 2.607857 |
| 8  | H  | 1.077378 | 2.206014 | 3.264011 | 3.248823 | 2.168702 |
| 9  | H  | 2.210147 | 1.075000 | 2.177743 | 3.256131 | 3.259320 |
| 10 | H  | 3.344576 | 4.236013 | 3.885054 | 2.636118 | 2.087735 |
| 11 | H  | 2.668115 | 3.936284 | 4.194218 | 3.282296 | 2.060518 |
| 12 | H  | 3.593358 | 4.634247 | 4.723029 | 3.811305 | 2.975252 |
| 13 | H  | 3.925054 | 4.656328 | 4.202941 | 3.044943 | 2.806637 |
| 14 | Br | 5.361020 | 5.541039 | 4.420634 | 3.342171 | 4.076423 |
| 15 | H  | 3.280102 | 3.360743 | 2.290848 | 1.133013 | 2.116795 |
| 16 | C  | 3.594054 | 2.533342 | 1.422303 | 2.427638 | 3.520840 |
| 17 | C  | 4.311886 | 3.025520 | 2.428164 | 3.647492 | 4.572776 |
| 18 | H  | 4.270878 | 3.417182 | 2.090654 | 2.567303 | 3.858318 |
| 19 | H  | 5.376389 | 4.102348 | 3.396584 | 4.507994 | 5.546415 |
| 20 | H  | 4.140376 | 2.791826 | 2.728745 | 4.059323 | 4.719595 |
| 21 | N  | 4.872928 | 5.957322 | 5.773793 | 4.551132 | 3.847394 |
| 22 | H  | 5.552415 | 6.639337 | 6.507705 | 5.337855 | 4.634371 |
| 23 | H  | 5.377109 | 6.339918 | 5.940264 | 4.636628 | 4.183858 |
|    |    | 6        | 7        | 8        | 9        | 10       |
| 6  | C  | 0.000000 |          |          |          |          |
| 7  | C  | 1.560811 | 0.000000 |          |          |          |
| 8  | H  | 2.906839 | 3.871216 | 0.000000 |          |          |
| 9  | H  | 4.689863 | 5.612012 | 2.742079 | 0.000000 |          |
| 10 | H  | 1.086695 | 2.121076 | 3.777346 | 5.282588 | 0.000000 |
| 11 | H  | 1.089724 | 2.213020 | 2.579448 | 4.856914 | 1.788859 |
| 12 | H  | 2.225189 | 1.099986 | 3.674020 | 5.545156 | 3.061632 |
| 13 | H  | 2.160909 | 1.096215 | 4.436712 | 5.681884 | 2.442265 |
| 14 | Br | 3.940721 | 3.780357 | 6.221226 | 6.523886 | 3.430360 |
| 15 | H  | 2.665920 | 3.225890 | 4.236541 | 4.355961 | 2.463336 |
| 16 | C  | 4.872388 | 5.625462 | 4.623618 | 2.864397 | 5.002808 |
| 17 | C  | 6.006750 | 6.812205 | 5.224269 | 2.862410 | 6.202951 |
| 18 | H  | 5.013255 | 5.631390 | 5.341190 | 3.899143 | 4.966371 |
| 19 | H  | 6.938063 | 7.685150 | 6.302709 | 3.909055 | 7.052627 |
| 20 | H  | 6.205912 | 7.086192 | 4.899538 | 2.260854 | 6.528986 |

|    |    |          |          |          |          |          |
|----|----|----------|----------|----------|----------|----------|
| 21 | N  | 2.472271 | 1.474225 | 5.000296 | 6.977049 | 2.594210 |
| 22 | H  | 3.345330 | 2.074878 | 5.607610 | 7.625636 | 3.589839 |
| 23 | H  | 2.872469 | 2.028999 | 5.656021 | 7.397084 | 2.623714 |
|    |    | 11       | 12       | 13       | 14       | 15       |
| 11 | H  | 0.000000 |          |          |          |          |
| 12 | H  | 2.557420 | 0.000000 |          |          |          |
| 13 | H  | 3.083336 | 1.805404 | 0.000000 |          |          |
| 14 | Br | 5.001106 | 4.669291 | 2.887038 | 0.000000 |          |
| 15 | H  | 3.656694 | 3.959368 | 2.700625 | 2.235739 | 0.000000 |
| 16 | C  | 5.555885 | 5.962250 | 5.197361 | 4.720582 | 2.943509 |
| 17 | C  | 6.573019 | 7.045374 | 6.440239 | 6.018952 | 4.261055 |
| 18 | H  | 5.838897 | 6.103182 | 5.036936 | 4.001447 | 2.636026 |
| 19 | H  | 7.563368 | 7.958175 | 7.215033 | 6.452442 | 4.947519 |
| 20 | H  | 6.616574 | 7.200606 | 6.857085 | 6.809546 | 4.871879 |
| 21 | N  | 2.796721 | 2.095566 | 2.106087 | 4.293184 | 4.277196 |
| 22 | H  | 3.596163 | 2.269277 | 2.586854 | 4.910772 | 5.074156 |
| 23 | H  | 3.398450 | 2.880993 | 2.203619 | 3.684231 | 4.121719 |
|    |    | 16       | 17       | 18       | 19       | 20       |
| 16 | C  | 0.000000 |          |          |          |          |
| 17 | C  | 1.326668 | 0.000000 |          |          |          |
| 18 | H  | 1.083597 | 2.126868 | 0.000000 |          |          |
| 19 | H  | 2.082536 | 1.080987 | 2.457244 | 0.000000 |          |
| 20 | H  | 2.122033 | 1.082547 | 3.100319 | 1.848822 | 0.000000 |
| 21 | N  | 6.931972 | 8.156944 | 6.843137 | 9.007050 | 8.461332 |
| 22 | H  | 7.656937 | 8.866875 | 7.566981 | 9.710620 | 9.157217 |
| 23 | H  | 6.964787 | 8.246264 | 6.723669 | 9.018663 | 8.667293 |
|    |    | 21       | 22       | 23       |          |          |
| 21 | N  | 0.000000 |          |          |          |          |
| 22 | H  | 1.016323 | 0.000000 |          |          |          |
| 23 | H  | 1.017064 | 1.619871 | 0.000000 |          |          |

Stoichiometry C7H12BrN3

Framework group C1[X(C7H12BrN3)]

Deg. of freedom 63

Full point group C1 NOp 1

Largest Abelian subgroup C1 NOp 1

Largest concise Abelian subgroup C1 NOp 1

Standard orientation:

| -----  |        |        |                         |           |           |  |
|--------|--------|--------|-------------------------|-----------|-----------|--|
| Center | Atomic | Atomic | Coordinates (Angstroms) |           |           |  |
| Number | Number | Type   | X                       | Y         | Z         |  |
| -----  |        |        |                         |           |           |  |
| 1      | 6      | 0      | -1.788333               | 2.139003  | -0.058550 |  |
| 2      | 6      | 0      | -2.787633               | 1.245228  | 0.142816  |  |
| 3      | 7      | 0      | -2.214190               | -0.023751 | 0.026010  |  |

|    |    |   |           |           |           |
|----|----|---|-----------|-----------|-----------|
| 4  | 6  | 0 | -0.901007 | 0.102173  | -0.232285 |
| 5  | 7  | 0 | -0.641348 | 1.410359  | -0.326526 |
| 6  | 6  | 0 | 0.736547  | 1.924632  | -0.580418 |
| 7  | 6  | 0 | 1.740621  | 1.902195  | 0.614347  |
| 8  | 1  | 0 | -1.827226 | 3.214057  | -0.117634 |
| 9  | 1  | 0 | -3.839933 | 1.399150  | 0.299648  |
| 10 | 1  | 0 | 1.181789  | 1.282631  | -1.335732 |
| 11 | 1  | 0 | 0.590243  | 2.931126  | -0.971651 |
| 12 | 1  | 0 | 1.457089  | 2.604457  | 1.412099  |
| 13 | 1  | 0 | 1.774505  | 0.876003  | 0.998363  |
| 14 | 35 | 0 | 1.823600  | -1.822494 | -0.026669 |
| 15 | 1  | 0 | -0.032464 | -0.616907 | -0.343075 |
| 16 | 6  | 0 | -2.864828 | -1.286521 | 0.096900  |
| 17 | 6  | 0 | -4.179460 | -1.440791 | 0.186302  |
| 18 | 1  | 0 | -2.166510 | -2.113730 | 0.049356  |
| 19 | 1  | 0 | -4.592973 | -2.436522 | 0.264133  |
| 20 | 1  | 0 | -4.872957 | -0.609855 | 0.209003  |
| 21 | 7  | 0 | 3.079072  | 2.280196  | 0.125467  |
| 22 | 1  | 0 | 3.661817  | 2.640905  | 0.875940  |
| 23 | 1  | 0 | 3.540425  | 1.432851  | -0.196370 |

-----

Rotational constants (GHZ):      0.8049924      0.4648118      0.3012423

Standard basis: 6-311++G(d,p) (5D, 7F)

There are    365 symmetry adapted cartesian basis functions of A    symmetry.

There are    352 symmetry adapted basis functions of A    symmetry.

     352 basis functions,    562 primitive gaussians,    365 cartesian basis functions

     55 alpha electrons            55 beta electrons

     nuclear repulsion energy            830.1083271095 Hartrees.

NAtoms=    23 NActive=    23 NUniq=    23 SFac= 1.00D+00 NAtFMM=    60 NAOKFM=F

Big=F

Integral buffers will be    131072 words long.

Raffenetti 2 integral format.

Two-electron integral symmetry is turned on.

One-electron integrals computed using PRISM.

NBasis=    352 RedAO= T EigKep=    5.04D-06 NBF=    352

NBsUse=    352 1.00D-06 EigRej= -1.00D+00 NBFU=    352

Initial guess from the checkpoint file: "/home/suqian/liuwen/qianmengshijie/nh2/nh2.chk"

B after Tr=      0.000000      0.000000      0.000000

     Rot=      0.999450      0.003742      -0.000921      -0.032946 Ang=    3.80 deg.

ExpMin= 3.50D-02 ExpMax= 4.40D+05 ExpMxC= 1.51D+04 IAcc=3 IRadAn=            5 AccDes=

0.00D+00

Harris functional with IExCor=    402 and IRadAn=            5 diagonalized for initial guess.

HarFok: IExCor=    402 AccDes= 0.00D+00 IRadAn=            5 IDoV= 1 UseB2=F ITyADJ=14

ICtDFT= 3500011 ScaDFX= 1.000000 1.000000 1.000000 1.000000

FoFCou: FMM=F IPFlag= 0 FMFlag= 100000 FMFlg1= 0  
 NFxFlg= 0 DoJE=T BraDBF=F KetDBF=T FulRan=T  
 wScrn= 0.000000 ICntrl= 500 IOpCl= 0 I1Cent= 200000004 NGrid=  
 0  
 NMat0= 1 NMatS0= 1 NMatT0= 0 NMatD0= 1 NMtDS0= 0  
 NMtDT0= 0

Petite list used in FoFCou.

Requested convergence on RMS density matrix=1.00D-08 within 128 cycles.

Requested convergence on MAX density matrix=1.00D-06.

Requested convergence on energy=1.00D-06.

No special actions if energy rises.

SCF Done: E(RB3LYP) = -3012.46036542 A.U. after 12 cycles

NFock= 12 Conv=0.92D-08 -V/T= 2.0017

Calling FoFJK, ICntrl= 2127 FMM=F ISym2X=0 I1Cent= 0 IOpClX= 0 NMat=1 NMatS=1

NMatT=0.

\*\*\*\*\* Axes restored to original set \*\*\*\*\*

| Center<br>Number | Atomic<br>Number | Forces (Hartrees/Bohr) |              |              |
|------------------|------------------|------------------------|--------------|--------------|
|                  |                  | X                      | Y            | Z            |
| 1                | 6                | 0.000692414            | 0.000716240  | 0.006440409  |
| 2                | 6                | 0.002948254            | 0.004061177  | 0.001590956  |
| 3                | 7                | -0.003326688           | 0.006297818  | -0.001788397 |
| 4                | 6                | 0.012228996            | -0.011639280 | 0.007926880  |
| 5                | 7                | 0.014651983            | -0.001429580 | -0.012669820 |
| 6                | 6                | 0.003094846            | -0.007281953 | -0.003251976 |
| 7                | 6                | -0.001985859           | -0.000171628 | -0.005233798 |
| 8                | 1                | 0.001670809            | 0.000207912  | -0.002026722 |
| 9                | 1                | 0.000616705            | 0.000424112  | -0.001963622 |
| 10               | 1                | -0.002371239           | 0.000072223  | 0.005659370  |
| 11               | 1                | 0.005372135            | -0.000413844 | 0.001083992  |
| 12               | 1                | -0.002778834           | 0.004252714  | 0.003810929  |
| 13               | 1                | -0.006803704           | -0.001532108 | -0.002750082 |
| 14               | 35               | -0.002738234           | -0.003415069 | 0.002028980  |
| 15               | 1                | -0.013802975           | 0.007351350  | -0.004396669 |
| 16               | 6                | -0.000545514           | 0.000659257  | 0.000010676  |
| 17               | 6                | 0.000397984            | 0.000165726  | -0.001948051 |
| 18               | 1                | -0.000102022           | -0.000654057 | -0.001116796 |
| 19               | 1                | -0.000004464           | 0.000219665  | 0.001277373  |
| 20               | 1                | -0.000549190           | 0.000505318  | -0.000270706 |
| 21               | 7                | -0.003368424           | 0.002689888  | 0.004262807  |
| 22               | 1                | -0.004462969           | -0.000397057 | 0.000740393  |
| 23               | 1                | 0.001165990            | -0.000688824 | 0.002583876  |

Cartesian Forces: Max 0.014651983 RMS 0.004648964

GradGradGradGradGradGradGradGradGradGradGradGradGradGradGradGradGradGradGrad  
Berny optimization.

Using GEDIIS/GDIIS optimizer.

FormGI is forming the generalized inverse of G from B-inverse, IUseBI=4.

Internal Forces: Max 0.020280318 RMS 0.004228606

Search for a local minimum.

Step number 16 out of a maximum of 121

All quantities printed in internal units (Hartrees-Bohrs-Radians)

Mixed Optimization -- RFO/linear search

Update second derivatives using D2CorX and points 9 11 12 14 16  
15

ITU= 0 1 1-1 1-1 1 1 1 1 1 1 0 1 0 0

Use linear search instead of GDIIS.

Energy rises -- skip Quadratic/GDIIS search.

Quartic linear search produced a step of -0.96623.

Iteration 1 RMS(Cart)= 0.14553043 RMS(Int)= 0.00742855

Iteration 2 RMS(Cart)= 0.01199931 RMS(Int)= 0.00006018

Iteration 3 RMS(Cart)= 0.00006805 RMS(Int)= 0.00004600

Iteration 4 RMS(Cart)= 0.00000001 RMS(Int)= 0.00004600

| Variable | Old X   | -DE/DX   | Delta X<br>(Linear) | Delta X<br>(Quad) | Delta X<br>(Total) | New X   |
|----------|---------|----------|---------------------|-------------------|--------------------|---------|
| R1       | 2.56194 | 0.00338  | 0.00391             | 0.00000           | 0.00390            | 2.56584 |
| R2       | 2.61733 | -0.00266 | 0.00277             | 0.00000           | 0.00277            | 2.62010 |
| R3       | 2.03595 | -0.00063 | -0.00184            | 0.00000           | -0.00184           | 2.03411 |
| R4       | 2.64074 | -0.00376 | -0.01193            | 0.00000           | -0.01193           | 2.62881 |
| R5       | 2.03145 | -0.00056 | -0.00054            | 0.00000           | -0.00054           | 2.03091 |
| R6       | 2.54027 | 0.00007  | 0.00341             | 0.00000           | 0.00342            | 2.54369 |
| R7       | 2.68776 | 0.00137  | 0.00228             | 0.00000           | 0.00228            | 2.69004 |
| R8       | 2.52663 | 0.00121  | -0.00609            | 0.00000           | -0.00608           | 2.52055 |
| R9       | 2.14108 | -0.01046 | -0.02812            | 0.00000           | -0.02812           | 2.11297 |
| R10      | 2.82040 | -0.00910 | -0.02709            | 0.00000           | -0.02709           | 2.79331 |
| R11      | 2.94951 | -0.01369 | -0.04299            | 0.00000           | -0.04299           | 2.90651 |
| R12      | 2.05356 | 0.00227  | 0.00688             | 0.00000           | 0.00688            | 2.06044 |
| R13      | 2.05928 | 0.00021  | 0.00053             | 0.00000           | 0.00053            | 2.05981 |
| R14      | 2.07867 | -0.00449 | -0.00988            | 0.00000           | -0.00988           | 2.06879 |
| R15      | 2.07155 | -0.00027 | 0.00017             | 0.00000           | 0.00017            | 2.07172 |
| R16      | 2.78588 | -0.00439 | -0.02060            | 0.00000           | -0.02060           | 2.76529 |
| R17      | 4.22493 | -0.00450 | -0.15025            | 0.00000           | -0.15025           | 4.07469 |
| R18      | 2.50704 | 0.00028  | -0.00045            | 0.00000           | -0.00045           | 2.50659 |
| R19      | 2.04770 | -0.00046 | 0.00082             | 0.00000           | 0.00082            | 2.04852 |
| R20      | 2.04277 | 0.00002  | 0.00037             | 0.00000           | 0.00037            | 2.04314 |
| R21      | 2.04572 | -0.00004 | 0.00061             | 0.00000           | 0.00061            | 2.04632 |



|     |          |          |          |         |          |          |
|-----|----------|----------|----------|---------|----------|----------|
| R22 | 1.92057  | -0.00262 | -0.00762 | 0.00000 | -0.00762 | 1.91295  |
| R23 | 1.92197  | 0.00048  | -0.00468 | 0.00000 | -0.00468 | 1.91730  |
| A1  | 1.86745  | 0.00105  | 0.00601  | 0.00000 | 0.00604  | 1.87350  |
| A2  | 2.26448  | 0.00105  | 0.01333  | 0.00000 | 0.01339  | 2.27788  |
| A3  | 2.14627  | -0.00184 | -0.01453 | 0.00000 | -0.01446 | 2.13181  |
| A4  | 1.85853  | 0.00195  | 0.00276  | 0.00000 | 0.00276  | 1.86128  |
| A5  | 2.27681  | -0.00031 | 0.00043  | 0.00000 | 0.00047  | 2.27729  |
| A6  | 2.14589  | -0.00156 | -0.00132 | 0.00000 | -0.00128 | 2.14460  |
| A7  | 1.90908  | -0.00396 | -0.00903 | 0.00000 | -0.00903 | 1.90005  |
| A8  | 2.23235  | 0.00365  | 0.02076  | 0.00000 | 0.02079  | 2.25314  |
| A9  | 2.14079  | 0.00032  | -0.01089 | 0.00000 | -0.01086 | 2.12992  |
| A10 | 1.87016  | 0.00534  | 0.01665  | 0.00000 | 0.01667  | 1.88683  |
| A11 | 2.35774  | -0.01388 | -0.15140 | 0.00000 | -0.15141 | 2.20632  |
| A12 | 2.05466  | 0.00849  | 0.13033  | 0.00000 | 0.13038  | 2.18504  |
| A13 | 1.91800  | -0.00425 | -0.01489 | 0.00000 | -0.01489 | 1.90311  |
| A14 | 2.23468  | -0.00114 | -0.01328 | 0.00000 | -0.01327 | 2.22141  |
| A15 | 2.12754  | 0.00542  | 0.02916  | 0.00000 | 0.02915  | 2.15669  |
| A16 | 2.04737  | -0.02028 | -0.09181 | 0.00000 | -0.09183 | 1.95554  |
| A17 | 1.86809  | 0.00167  | 0.01003  | 0.00000 | 0.00996  | 1.87805  |
| A18 | 1.82904  | 0.01146  | 0.04960  | 0.00000 | 0.04965  | 1.87869  |
| A19 | 1.83380  | 0.01022  | 0.07912  | 0.00000 | 0.07910  | 1.91290  |
| A20 | 1.95462  | 0.00125  | -0.01269 | 0.00000 | -0.01270 | 1.94192  |
| A21 | 1.92957  | -0.00462 | -0.03501 | 0.00000 | -0.03500 | 1.89457  |
| A22 | 1.96076  | -0.00044 | -0.05221 | 0.00000 | -0.05221 | 1.90855  |
| A23 | 1.87706  | 0.00186  | 0.01435  | 0.00000 | 0.01437  | 1.89143  |
| A24 | 1.90342  | -0.01237 | -0.01373 | 0.00000 | -0.01373 | 1.88969  |
| A25 | 1.93003  | -0.00292 | -0.03838 | 0.00000 | -0.03834 | 1.89169  |
| A26 | 1.88686  | 0.00625  | 0.02972  | 0.00000 | 0.02975  | 1.91660  |
| A27 | 1.90512  | 0.00766  | 0.06007  | 0.00000 | 0.06008  | 1.96521  |
| A28 | 2.87544  | 0.00018  | -0.00134 | 0.00000 | -0.00134 | 2.87410  |
| A29 | 2.16506  | 0.00282  | 0.00656  | 0.00000 | 0.00656  | 2.17163  |
| A30 | 1.96143  | -0.00169 | -0.00958 | 0.00000 | -0.00958 | 1.95185  |
| A31 | 2.15650  | -0.00112 | 0.00319  | 0.00000 | 0.00319  | 2.15969  |
| A32 | 2.08406  | -0.00048 | -0.00461 | 0.00000 | -0.00460 | 2.07946  |
| A33 | 2.14953  | 0.00103  | 0.00772  | 0.00000 | 0.00773  | 2.15725  |
| A34 | 2.04932  | -0.00053 | -0.00286 | 0.00000 | -0.00285 | 2.04647  |
| A35 | 1.94626  | -0.00522 | 0.00167  | 0.00000 | 0.00169  | 1.94796  |
| A36 | 1.87879  | 0.00447  | 0.05074  | 0.00000 | 0.05076  | 1.92955  |
| A37 | 1.84342  | 0.00155  | 0.03249  | 0.00000 | 0.03254  | 1.87596  |
| D1  | 0.02636  | -0.00091 | -0.02333 | 0.00000 | -0.02328 | 0.00308  |
| D2  | -3.04810 | -0.00229 | -0.09527 | 0.00000 | -0.09526 | 3.13983  |
| D3  | 3.06140  | 0.00176  | 0.08005  | 0.00000 | 0.08002  | 3.14142  |
| D4  | -0.01306 | 0.00037  | 0.00810  | 0.00000 | 0.00805  | -0.00502 |
| D5  | -0.05012 | 0.00220  | 0.04915  | 0.00000 | 0.04912  | -0.00100 |

|     |          |          |          |         |          |          |
|-----|----------|----------|----------|---------|----------|----------|
| D6  | -3.10932 | 0.00166  | 0.03295  | 0.00000 | 0.03289  | -3.07643 |
| D7  | -3.09409 | -0.00044 | -0.04556 | 0.00000 | -0.04559 | -3.13968 |
| D8  | 0.12990  | -0.00098 | -0.06176 | 0.00000 | -0.06182 | 0.06808  |
| D9  | 0.00545  | -0.00047 | -0.00953 | 0.00000 | -0.00957 | -0.00412 |
| D10 | -3.08939 | -0.00090 | -0.06929 | 0.00000 | -0.06934 | 3.12445  |
| D11 | 3.08618  | 0.00083  | 0.05569  | 0.00000 | 0.05568  | -3.14132 |
| D12 | -0.00867 | 0.00040  | -0.00407 | 0.00000 | -0.00409 | -0.01276 |
| D13 | -0.03615 | 0.00168  | 0.03967  | 0.00000 | 0.03967  | 0.00353  |
| D14 | 3.06489  | 0.00030  | -0.02269 | 0.00000 | -0.02291 | 3.04197  |
| D15 | 3.06164  | 0.00220  | 0.09535  | 0.00000 | 0.09541  | -3.12614 |
| D16 | -0.12052 | 0.00082  | 0.03299  | 0.00000 | 0.03282  | -0.08769 |
| D17 | 0.09770  | 0.00000  | 0.03350  | 0.00000 | 0.03351  | 0.13121  |
| D18 | -3.06427 | 0.00037  | 0.05896  | 0.00000 | 0.05897  | -3.00530 |
| D19 | -2.99151 | -0.00040 | -0.03340 | 0.00000 | -0.03341 | -3.02492 |
| D20 | 0.12970  | -0.00003 | -0.00794 | 0.00000 | -0.00795 | 0.12175  |
| D21 | 0.05320  | -0.00232 | -0.05480 | 0.00000 | -0.05478 | -0.00158 |
| D22 | 3.11837  | -0.00214 | -0.04157 | 0.00000 | -0.04154 | 3.07683  |
| D23 | -3.05604 | -0.00063 | 0.01466  | 0.00000 | 0.01444  | -3.04160 |
| D24 | 0.00912  | -0.00045 | 0.02788  | 0.00000 | 0.02768  | 0.03681  |
| D25 | -1.84355 | -0.00017 | 0.04664  | 0.00000 | 0.04666  | -1.79689 |
| D26 | 1.25426  | -0.00178 | -0.02959 | 0.00000 | -0.02960 | 1.22465  |
| D27 | 1.72795  | -0.00189 | 0.08211  | 0.00000 | 0.08214  | 1.81009  |
| D28 | -2.50174 | -0.00004 | 0.13252  | 0.00000 | 0.13253  | -2.36921 |
| D29 | -0.45209 | 0.00098  | 0.12174  | 0.00000 | 0.12173  | -0.33035 |
| D30 | -1.32236 | -0.00204 | 0.06593  | 0.00000 | 0.06594  | -1.25642 |
| D31 | 0.73114  | -0.00019 | 0.11634  | 0.00000 | 0.11632  | 0.84747  |
| D32 | 2.78079  | 0.00083  | 0.10557  | 0.00000 | 0.10553  | 2.88632  |
| D33 | -1.17647 | -0.00082 | 0.04915  | 0.00000 | 0.04919  | -1.12728 |
| D34 | 0.95129  | -0.00348 | -0.01978 | 0.00000 | -0.01974 | 0.93155  |
| D35 | 3.01517  | -0.00007 | 0.05287  | 0.00000 | 0.05292  | 3.06809  |
| D36 | 3.03480  | 0.00149  | 0.03759  | 0.00000 | 0.03757  | 3.07237  |
| D37 | -1.12062 | -0.00117 | -0.03133 | 0.00000 | -0.03136 | -1.15198 |
| D38 | 0.94326  | 0.00225  | 0.04132  | 0.00000 | 0.04130  | 0.98456  |
| D39 | 0.93937  | 0.00004  | 0.03750  | 0.00000 | 0.03748  | 0.97685  |
| D40 | 3.06713  | -0.00263 | -0.03142 | 0.00000 | -0.03144 | 3.03568  |
| D41 | -1.15218 | 0.00079  | 0.04123  | 0.00000 | 0.04122  | -1.11096 |
| D42 | 2.73965  | -0.00204 | -0.18339 | 0.00000 | -0.18337 | 2.55629  |
| D43 | -1.52923 | -0.00037 | -0.11056 | 0.00000 | -0.11056 | -1.63979 |
| D44 | 0.60300  | 0.00214  | -0.12946 | 0.00000 | -0.12946 | 0.47354  |
| D45 | 2.61730  | 0.00382  | -0.05663 | 0.00000 | -0.05666 | 2.56064  |
| D46 | -1.49735 | -0.00250 | -0.13871 | 0.00000 | -0.13870 | -1.63605 |
| D47 | 0.51694  | -0.00083 | -0.06588 | 0.00000 | -0.06589 | 0.45105  |
| D48 | -3.11146 | -0.00095 | -0.01776 | 0.00000 | -0.01776 | -3.12922 |
| D49 | 0.00437  | 0.00003  | 0.00902  | 0.00000 | 0.00902  | 0.01339  |

D50            0.05275 -0.00136 -0.04605    0.00000 -0.04605    0.00671  
D51            -3.11460 -0.00038 -0.01927    0.00000 -0.01927 -3.13387

| Item                 | Value    | Threshold | Converged? |
|----------------------|----------|-----------|------------|
| Maximum Force        | 0.020280 | 0.000450  | NO         |
| RMS Force            | 0.004229 | 0.000300  | NO         |
| Maximum Displacement | 0.610442 | 0.001800  | NO         |
| RMS Displacement     | 0.145175 | 0.001200  | NO         |

Predicted change in Energy=-5.776290D-05

GradGradGradGradGradGradGradGradGradGradGradGradGradGradGradGradGrad

Input orientation:

| Center Number | Atomic Number | Atomic Type | Coordinates (Angstroms) |           |           |
|---------------|---------------|-------------|-------------------------|-----------|-----------|
|               |               |             | X                       | Y         | Z         |
| 1             | 6             | 0           | -1.837595               | -2.024111 | 0.328146  |
| 2             | 6             | 0           | -2.829388               | -1.131186 | 0.077928  |
| 3             | 7             | 0           | -2.229811               | 0.122384  | 0.012753  |
| 4             | 6             | 0           | -0.907750               | -0.015947 | 0.224668  |
| 5             | 7             | 0           | -0.651912               | -1.310865 | 0.416506  |
| 6             | 6             | 0           | 0.709376                | -1.856399 | 0.601520  |
| 7             | 6             | 0           | 1.520293                | -1.840223 | -0.705300 |
| 8             | 1             | 0           | -1.873684               | -3.092746 | 0.452080  |
| 9             | 1             | 0           | -3.884687               | -1.280990 | -0.059591 |
| 10            | 1             | 0           | 1.211136                | -1.243689 | 1.350959  |
| 11            | 1             | 0           | 0.609145                | -2.869098 | 0.992042  |
| 12            | 1             | 0           | 1.051492                | -2.512067 | -1.431484 |
| 13            | 1             | 0           | 1.499554                | -0.822449 | -1.112229 |
| 14            | 35            | 0           | 1.464840                | 2.081303  | -0.498063 |
| 15            | 1             | 0           | -0.135566               | 0.789158  | 0.148772  |
| 16            | 6             | 0           | -2.824709               | 1.389695  | -0.244912 |
| 17            | 6             | 0           | -4.131216               | 1.600482  | -0.334457 |
| 18            | 1             | 0           | -2.079619               | 2.167802  | -0.365384 |
| 19            | 1             | 0           | -4.490380               | 2.598297  | -0.544998 |
| 20            | 1             | 0           | -4.873846               | 0.822776  | -0.206871 |
| 21            | 7             | 0           | 2.877593                | -2.299674 | -0.408708 |
| 22            | 1             | 0           | 3.273809                | -2.816741 | -1.183552 |
| 23            | 1             | 0           | 3.488449                | -1.510796 | -0.224539 |

Distance matrix (angstroms):

|   |   | 1        | 2        | 3        | 4 | 5 |
|---|---|----------|----------|----------|---|---|
| 1 | C | 0.000000 |          |          |   |   |
| 2 | C | 1.357784 | 0.000000 |          |   |   |
| 3 | N | 2.204711 | 1.391108 | 0.000000 |   |   |

|    |    |          |          |          |          |          |
|----|----|----------|----------|----------|----------|----------|
| 4  | C  | 2.215410 | 2.226653 | 1.346064 | 0.000000 |          |
| 5  | N  | 1.386496 | 2.210955 | 2.169559 | 1.333817 | 0.000000 |
| 6  | C  | 2.567084 | 3.650060 | 3.591803 | 2.478785 | 1.478155 |
| 7  | C  | 3.518130 | 4.476149 | 4.293100 | 3.176195 | 2.501428 |
| 8  | H  | 1.076402 | 2.213838 | 3.264490 | 3.232868 | 2.160808 |
| 9  | H  | 2.212048 | 1.074713 | 2.171015 | 3.247043 | 3.267782 |
| 10 | H  | 3.309073 | 4.237818 | 3.936632 | 2.695470 | 2.085345 |
| 11 | H  | 2.672320 | 3.959729 | 4.238826 | 3.321190 | 2.085568 |
| 12 | H  | 3.417780 | 4.387071 | 4.448944 | 3.579397 | 2.785595 |
| 13 | H  | 3.828215 | 4.500170 | 4.008298 | 2.869294 | 2.684099 |
| 14 | Br | 5.333209 | 5.393723 | 4.212925 | 3.248073 | 4.101692 |
| 15 | H  | 3.292956 | 3.308991 | 2.202033 | 1.118134 | 2.179081 |
| 16 | C  | 3.599565 | 2.541474 | 1.423507 | 2.423029 | 3.528675 |
| 17 | C  | 4.340210 | 3.053986 | 2.433243 | 3.649137 | 4.598418 |
| 18 | H  | 4.255784 | 3.412038 | 2.085492 | 2.547587 | 3.840680 |
| 19 | H  | 5.400584 | 4.129888 | 3.398735 | 4.501322 | 5.562363 |
| 20 | H  | 4.196407 | 2.842338 | 2.744031 | 4.076714 | 4.771347 |
| 21 | N  | 4.780364 | 5.845666 | 5.668295 | 4.466027 | 3.757143 |
| 22 | H  | 5.388872 | 6.456117 | 6.352908 | 5.226181 | 4.498792 |
| 23 | H  | 5.379191 | 6.336455 | 5.951645 | 4.665075 | 4.194461 |
|    |    | 6        | 7        | 8        | 9        | 10       |
| 6  | C  | 0.000000 |          |          |          |          |
| 7  | C  | 1.538060 | 0.000000 |          |          |          |
| 8  | H  | 2.867592 | 3.798345 | 0.000000 |          |          |
| 9  | H  | 4.676920 | 5.472065 | 2.754706 | 0.000000 |          |
| 10 | H  | 1.090337 | 2.163245 | 3.707170 | 5.287576 | 0.000000 |
| 11 | H  | 1.090006 | 2.183975 | 2.550689 | 4.880834 | 1.770077 |
| 12 | H  | 2.163342 | 1.094757 | 3.527274 | 5.269109 | 3.062067 |
| 13 | H  | 2.151829 | 1.096305 | 4.356609 | 5.505302 | 2.515536 |
| 14 | Br | 4.157560 | 3.927389 | 6.230513 | 6.333617 | 3.812980 |
| 15 | H  | 2.813873 | 3.222569 | 4.264063 | 4.287754 | 2.718700 |
| 16 | C  | 4.872713 | 5.433541 | 4.634925 | 2.879315 | 5.076373 |
| 17 | C  | 6.021413 | 6.626880 | 5.267019 | 2.905032 | 6.282569 |
| 18 | H  | 4.990750 | 5.398071 | 5.327666 | 3.904605 | 5.041148 |
| 19 | H  | 6.942354 | 7.473577 | 6.342652 | 3.956179 | 7.131816 |
| 20 | H  | 6.245305 | 6.944423 | 4.976595 | 2.329368 | 6.612421 |
| 21 | N  | 2.432739 | 1.463326 | 4.893317 | 6.847483 | 2.643598 |
| 22 | H  | 3.268800 | 2.063281 | 5.408156 | 7.407151 | 3.626687 |
| 23 | H  | 2.919771 | 2.052630 | 5.631416 | 7.378561 | 2.782030 |
|    |    | 11       | 12       | 13       | 14       | 15       |
| 11 | H  | 0.000000 |          |          |          |          |
| 12 | H  | 2.489301 | 0.000000 |          |          |          |
| 13 | H  | 3.067500 | 1.776933 | 0.000000 |          |          |
| 14 | Br | 5.240143 | 4.705441 | 2.968195 | 0.000000 |          |

|    |   |          |          |          |          |          |
|----|---|----------|----------|----------|----------|----------|
| 15 | H | 3.827341 | 3.847649 | 2.619355 | 2.156231 | 0.000000 |
| 16 | C | 5.608808 | 5.626423 | 4.934072 | 4.352314 | 2.783365 |
| 17 | C | 6.648893 | 6.706489 | 6.179086 | 5.619057 | 4.105725 |
| 18 | H | 5.868766 | 5.730759 | 4.723331 | 3.547996 | 2.438105 |
| 19 | H | 7.632828 | 7.590391 | 6.921168 | 5.977803 | 4.766414 |
| 20 | H | 6.717925 | 6.908725 | 6.644295 | 6.468973 | 4.751727 |
| 21 | N | 2.726207 | 2.103764 | 2.139188 | 4.604000 | 4.350954 |
| 22 | H | 3.440405 | 2.256765 | 2.670256 | 5.266223 | 5.138233 |
| 23 | H | 3.408144 | 2.897933 | 2.284189 | 4.131947 | 4.308438 |
|    |   | 16       | 17       | 18       | 19       | 20       |
| 16 | C | 0.000000 |          |          |          |          |
| 17 | C | 1.326428 | 0.000000 |          |          |          |
| 18 | H | 1.084031 | 2.128816 | 0.000000 |          |          |
| 19 | H | 2.079719 | 1.081185 | 2.455475 | 0.000000 |          |
| 20 | H | 2.126454 | 1.082868 | 3.105145 | 1.847661 | 0.000000 |
| 21 | N | 6.793712 | 8.021230 | 6.673393 | 8.848487 | 8.359141 |
| 22 | H | 7.467736 | 8.664134 | 7.360317 | 9.487519 | 8.976874 |
| 23 | H | 6.947606 | 8.231126 | 6.674976 | 8.980482 | 8.681811 |
|    |   | 21       | 22       | 23       |          |          |
| 21 | N | 0.000000 |          |          |          |          |
| 22 | H | 1.012289 | 0.000000 |          |          |          |
| 23 | H | 1.014590 | 1.634402 | 0.000000 |          |          |

Stoichiometry C7H12BrN3

Framework group C1[X(C7H12BrN3)]

Deg. of freedom 63

Full point group C1 NOp 1

Largest Abelian subgroup C1 NOp 1

Largest concise Abelian subgroup C1 NOp 1

Standard orientation:

| Center Number | Atomic Number | Atomic Type | Coordinates (Angstroms) |          |           |
|---------------|---------------|-------------|-------------------------|----------|-----------|
|               |               |             | X                       | Y        | Z         |
| 1             | 6             | 0           | -1.611499               | 2.274189 | -0.109540 |
| 2             | 6             | 0           | -2.623847               | 1.396827 | 0.111745  |
| 3             | 7             | 0           | -2.082655               | 0.122223 | -0.021201 |
| 4             | 6             | 0           | -0.775132               | 0.233642 | -0.320965 |
| 5             | 7             | 0           | -0.471867               | 1.531300 | -0.377361 |
| 6             | 6             | 0           | 0.896525                | 2.041718 | -0.605217 |
| 7             | 6             | 0           | 1.801723                | 1.833994 | 0.620791  |
| 8             | 1             | 0           | -1.604869               | 3.350545 | -0.102141 |
| 9             | 1             | 0           | -3.657284               | 1.569828 | 0.350675  |
| 10            | 1             | 0           | 1.310125                | 1.506202 | -1.460198 |
| 11            | 1             | 0           | 0.816496                | 3.097745 | -0.863126 |

|    |    |   |           |           |           |
|----|----|---|-----------|-----------|-----------|
| 12 | 1  | 0 | 1.422072  | 2.429711  | 1.457140  |
| 13 | 1  | 0 | 1.762255  | 0.775659  | 0.904080  |
| 14 | 35 | 0 | 1.540448  | -2.027481 | -0.046390 |
| 15 | 1  | 0 | -0.039441 | -0.604279 | -0.403852 |
| 16 | 6  | 0 | -2.717324 | -1.142855 | 0.130938  |
| 17 | 6  | 0 | -4.022082 | -1.311758 | 0.299728  |
| 18 | 1  | 0 | -2.003953 | -1.958397 | 0.097560  |
| 19 | 1  | 0 | -4.412421 | -2.313024 | 0.418303  |
| 20 | 1  | 0 | -4.733557 | -0.495837 | 0.325820  |
| 21 | 7  | 0 | 3.153567  | 2.272858  | 0.272596  |
| 22 | 1  | 0 | 3.631601  | 2.675294  | 1.068998  |
| 23 | 1  | 0 | 3.709800  | 1.489174  | -0.052730 |

-----  
Rotational constants (GHZ):      0.7207643      0.5195626      0.3103134

Standard basis: 6-311++G(d,p) (5D, 7F)

There are 365 symmetry adapted cartesian basis functions of A symmetry.

There are 352 symmetry adapted basis functions of A symmetry.

352 basis functions, 562 primitive gaussians, 365 cartesian basis functions

55 alpha electrons      55 beta electrons

nuclear repulsion energy      834.4203257673 Hartrees.

NAtoms= 23 NActive= 23 NUniq= 23 SFac= 1.00D+00 NAtFMM= 60 NAOKFM=F

Big=F

Integral buffers will be 131072 words long.

Raffenetti 2 integral format.

Two-electron integral symmetry is turned on.

One-electron integrals computed using PRISM.

NBasis= 352 RedAO= T EigKep= 4.86D-06 NBF= 352

NBsUse= 352 1.00D-06 EigRej= -1.00D+00 NBFU= 352

Lowest energy guess from the checkpoint file:

"/home/suqian/liuwen/qianmengshijie/nh2/nh2.chk"

B after Tr= 0.000000 0.000000 0.000000

Rot= 0.999998 0.000128 -0.000024 -0.001823 Ang= 0.21 deg.

B after Tr= 0.000000 0.000000 0.000000

Rot= 0.999509 -0.003616 0.000893 0.031124 Ang= -3.59 deg.

Requested convergence on RMS density matrix=1.00D-08 within 128 cycles.

Requested convergence on MAX density matrix=1.00D-06.

Requested convergence on energy=1.00D-06.

No special actions if energy rises.

SCF Done: E(RB3LYP) = -3012.46659570 A.U. after 9 cycles

NFock= 9 Conv=0.34D-08 -V/T= 2.0017

Calling FoFJK, ICntrl= 2127 FMM=F ISym2X=0 I1Cent= 0 IOpCIX= 0 NMat=1 NMatS=1

NMatT=0.

\*\*\*\*\* Axes restored to original set \*\*\*\*\*

-----

| Center Number | Atomic Number | Forces (Hartrees/Bohr) |              |              |
|---------------|---------------|------------------------|--------------|--------------|
|               |               | X                      | Y            | Z            |
| 1             | 6             | 0.000143457            | -0.000002760 | -0.000180072 |
| 2             | 6             | 0.000085562            | 0.000089357  | 0.000012078  |
| 3             | 7             | -0.000112364           | 0.000304188  | 0.000063990  |
| 4             | 6             | 0.000395664            | -0.000272306 | -0.000120847 |
| 5             | 7             | 0.000489868            | 0.000295983  | 0.000079085  |
| 6             | 6             | 0.000292147            | -0.000318415 | 0.000071176  |
| 7             | 6             | -0.000100991           | 0.000649392  | -0.000557565 |
| 8             | 1             | 0.000046362            | 0.000004519  | -0.000038871 |
| 9             | 1             | 0.000025692            | 0.000015534  | -0.000016428 |
| 10            | 1             | -0.000097796           | 0.000003430  | 0.000099774  |
| 11            | 1             | 0.000329570            | 0.000008491  | 0.000010054  |
| 12            | 1             | 0.000362898            | -0.000117196 | 0.000596276  |
| 13            | 1             | -0.000610353           | 0.000011061  | -0.000444804 |
| 14            | 35            | 0.000052438            | -0.000369621 | 0.000109767  |
| 15            | 1             | -0.000620413           | 0.000201072  | -0.000097625 |
| 16            | 6             | 0.000040337            | -0.000111861 | 0.000106888  |
| 17            | 6             | 0.000001924            | 0.000072302  | -0.000048505 |
| 18            | 1             | -0.000069639           | -0.000035872 | -0.000046757 |
| 19            | 1             | -0.000005848           | -0.000003920 | 0.000017448  |
| 20            | 1             | -0.000004060           | 0.000016775  | -0.000006728 |
| 21            | 7             | -0.000364588           | -0.001083948 | 0.000090212  |
| 22            | 1             | -0.000157204           | 0.000482415  | -0.000107067 |
| 23            | 1             | -0.000122665           | 0.000161378  | 0.000408520  |

-----  
Cartesian Forces: Max 0.001083948 RMS 0.000277605

GradGradGradGradGradGradGradGradGradGradGradGradGradGradGradGradGradGradGradGrad  
Berny optimization.

Using GEDIIS/GDIIS optimizer.

FormGI is forming the generalized inverse of G from B-inverse, IUseBI=4.

Internal Forces: Max 0.001013106 RMS 0.000243616

Search for a local minimum.

Step number 17 out of a maximum of 121

All quantities printed in internal units (Hartrees-Bohrs-Radians)

Mixed Optimization -- En-DIIS/RFO-DIIS

Update second derivatives using D2CorX and points 9 11 12 14 16  
15 17

ITU= 0 0 1 1-1 1-1 1 1 1 1 1 1 0 1 0 0

Use linear search instead of GDIIS.

Eigenvalues --- -0.00105 0.00000 0.00391 0.00697 0.01236  
Eigenvalues --- 0.01406 0.01817 0.02055 0.02163 0.02315

|                 |         |         |         |         |         |
|-----------------|---------|---------|---------|---------|---------|
| Eigenvalues --- | 0.02391 | 0.02927 | 0.03062 | 0.03083 | 0.03300 |
| Eigenvalues --- | 0.03790 | 0.03901 | 0.04348 | 0.04548 | 0.05233 |
| Eigenvalues --- | 0.05494 | 0.08977 | 0.09145 | 0.10076 | 0.12277 |
| Eigenvalues --- | 0.12776 | 0.15233 | 0.15920 | 0.15990 | 0.16000 |
| Eigenvalues --- | 0.16002 | 0.16047 | 0.16087 | 0.20576 | 0.21647 |
| Eigenvalues --- | 0.22026 | 0.22939 | 0.23440 | 0.24685 | 0.24920 |
| Eigenvalues --- | 0.28514 | 0.30580 | 0.34029 | 0.34385 | 0.34610 |
| Eigenvalues --- | 0.34788 | 0.35003 | 0.35674 | 0.35689 | 0.35858 |
| Eigenvalues --- | 0.36437 | 0.36658 | 0.37876 | 0.40276 | 0.42166 |
| Eigenvalues --- | 0.42901 | 0.46795 | 0.47679 | 0.48191 | 0.50068 |
| Eigenvalues --- | 0.54251 | 0.59429 | 0.60360 |         |         |

RFO step: Lambda=-1.49760559D-03 EMin=-1.04831770D-03

Quartic linear search produced a step of -0.01374.

|             |            |            |           |            |
|-------------|------------|------------|-----------|------------|
| Iteration 1 | RMS(Cart)= | 0.09722948 | RMS(Int)= | 0.03539721 |
| Iteration 2 | RMS(Cart)= | 0.03303819 | RMS(Int)= | 0.00205455 |
| Iteration 3 | RMS(Cart)= | 0.00210309 | RMS(Int)= | 0.00014070 |
| Iteration 4 | RMS(Cart)= | 0.00000620 | RMS(Int)= | 0.00014062 |
| Iteration 5 | RMS(Cart)= | 0.00000000 | RMS(Int)= | 0.00014062 |

| Variable | Old X   | -DE/DX   | Delta X<br>(Linear) | Delta X<br>(Quad) | Delta X<br>(Total) | New X   |
|----------|---------|----------|---------------------|-------------------|--------------------|---------|
| R1       | 2.56584 | 0.00017  | 0.00000             | 0.00075           | 0.00076            | 2.56660 |
| R2       | 2.62010 | -0.00017 | 0.00000             | -0.00223          | -0.00223           | 2.61787 |
| R3       | 2.03411 | -0.00001 | 0.00000             | -0.00013          | -0.00013           | 2.03397 |
| R4       | 2.62881 | -0.00001 | -0.00001            | 0.00151           | 0.00151            | 2.63032 |
| R5       | 2.03091 | -0.00002 | 0.00000             | -0.00022          | -0.00022           | 2.03069 |
| R6       | 2.54369 | -0.00003 | 0.00000             | -0.00086          | -0.00086           | 2.54283 |
| R7       | 2.69004 | -0.00004 | 0.00000             | -0.00130          | -0.00130           | 2.68873 |
| R8       | 2.52055 | -0.00023 | 0.00000             | -0.00034          | -0.00035           | 2.52020 |
| R9       | 2.11297 | -0.00051 | -0.00001            | 0.00012           | 0.00011            | 2.11308 |
| R10      | 2.79331 | -0.00033 | -0.00001            | -0.00321          | -0.00322           | 2.79009 |
| R11      | 2.90651 | -0.00052 | -0.00002            | -0.00539          | -0.00541           | 2.90110 |
| R12      | 2.06044 | 0.00002  | 0.00000             | 0.00001           | 0.00002            | 2.06045 |
| R13      | 2.05981 | -0.00003 | 0.00000             | -0.00115          | -0.00115           | 2.05867 |
| R14      | 2.06879 | -0.00048 | 0.00000             | -0.00598          | -0.00599           | 2.06280 |
| R15      | 2.07172 | 0.00019  | 0.00000             | 0.00130           | 0.00130            | 2.07301 |
| R16      | 2.76529 | -0.00038 | -0.00001            | 0.00292           | 0.00291            | 2.76819 |
| R17      | 4.07469 | -0.00022 | -0.00007            | -0.00280          | -0.00287           | 4.07182 |
| R18      | 2.50659 | 0.00002  | 0.00000             | 0.00025           | 0.00025            | 2.50683 |
| R19      | 2.04852 | -0.00007 | 0.00000             | -0.00210          | -0.00210           | 2.04642 |
| R20      | 2.04314 | 0.00000  | 0.00000             | -0.00008          | -0.00008           | 2.04307 |
| R21      | 2.04632 | -0.00001 | 0.00000             | -0.00034          | -0.00034           | 2.04598 |
| R22      | 1.91295 | -0.00023 | 0.00000             | -0.00066          | -0.00066           | 1.91229 |
| R23      | 1.91730 | 0.00013  | 0.00000             | 0.00361           | 0.00361            | 1.92091 |
| A1       | 1.87350 | -0.00005 | 0.00000             | -0.00100          | -0.00101           | 1.87248 |



|     |          |          |          |          |          |          |
|-----|----------|----------|----------|----------|----------|----------|
| A2  | 2.27788  | 0.00006  | 0.00001  | 0.00010  | 0.00011  | 2.27798  |
| A3  | 2.13181  | -0.00001 | -0.00001 | 0.00091  | 0.00091  | 2.13272  |
| A4  | 1.86128  | 0.00007  | 0.00000  | 0.00144  | 0.00143  | 1.86271  |
| A5  | 2.27729  | -0.00002 | 0.00000  | -0.00006 | -0.00006 | 2.27723  |
| A6  | 2.14460  | -0.00005 | 0.00000  | -0.00136 | -0.00136 | 2.14324  |
| A7  | 1.90005  | -0.00025 | 0.00000  | -0.00266 | -0.00270 | 1.89735  |
| A8  | 2.25314  | 0.00014  | 0.00001  | -0.00196 | -0.00197 | 2.25117  |
| A9  | 2.12992  | 0.00011  | -0.00001 | 0.00477  | 0.00474  | 2.13467  |
| A10 | 1.88683  | 0.00026  | 0.00001  | 0.00175  | 0.00174  | 1.88857  |
| A11 | 2.20632  | 0.00021  | -0.00007 | 0.02982  | 0.02973  | 2.23605  |
| A12 | 2.18504  | -0.00047 | 0.00006  | -0.03222 | -0.03213 | 2.15291  |
| A13 | 1.90311  | -0.00004 | -0.00001 | 0.00045  | 0.00039  | 1.90350  |
| A14 | 2.22141  | 0.00032  | -0.00001 | 0.00781  | 0.00779  | 2.22920  |
| A15 | 2.15669  | -0.00029 | 0.00001  | -0.00913 | -0.00914 | 2.14756  |
| A16 | 1.95554  | -0.00101 | -0.00004 | -0.00929 | -0.00936 | 1.94618  |
| A17 | 1.87805  | 0.00005  | 0.00001  | -0.00702 | -0.00705 | 1.87100  |
| A18 | 1.87869  | 0.00071  | 0.00002  | 0.01096  | 0.01100  | 1.88968  |
| A19 | 1.91290  | 0.00045  | 0.00004  | -0.00027 | -0.00030 | 1.91260  |
| A20 | 1.94192  | 0.00001  | -0.00001 | 0.00143  | 0.00144  | 1.94336  |
| A21 | 1.89457  | -0.00019 | -0.00002 | 0.00443  | 0.00443  | 1.89900  |
| A22 | 1.90855  | 0.00030  | -0.00003 | 0.00419  | 0.00368  | 1.91223  |
| A23 | 1.89143  | 0.00004  | 0.00001  | 0.00103  | 0.00104  | 1.89247  |
| A24 | 1.88969  | -0.00087 | -0.00001 | -0.01350 | -0.01371 | 1.87599  |
| A25 | 1.89169  | -0.00014 | -0.00002 | 0.01071  | 0.01088  | 1.90257  |
| A26 | 1.91660  | -0.00004 | 0.00001  | -0.03326 | -0.03332 | 1.88328  |
| A27 | 1.96521  | 0.00071  | 0.00003  | 0.03086  | 0.03102  | 1.99623  |
| A28 | 2.87410  | -0.00044 | 0.00000  | -0.01312 | -0.01312 | 2.86098  |
| A29 | 2.17163  | 0.00015  | 0.00000  | 0.00278  | 0.00278  | 2.17441  |
| A30 | 1.95185  | -0.00004 | 0.00000  | 0.00108  | 0.00107  | 1.95293  |
| A31 | 2.15969  | -0.00011 | 0.00000  | -0.00385 | -0.00385 | 2.15584  |
| A32 | 2.07946  | 0.00000  | 0.00000  | 0.00113  | 0.00112  | 2.08058  |
| A33 | 2.15725  | 0.00002  | 0.00000  | -0.00113 | -0.00112 | 2.15613  |
| A34 | 2.04647  | -0.00001 | 0.00000  | 0.00000  | 0.00000  | 2.04647  |
| A35 | 1.94796  | -0.00038 | 0.00000  | -0.02153 | -0.02195 | 1.92601  |
| A36 | 1.92955  | -0.00015 | 0.00002  | -0.02386 | -0.02426 | 1.90529  |
| A37 | 1.87596  | 0.00020  | 0.00001  | -0.01310 | -0.01396 | 1.86199  |
| D1  | 0.00308  | 0.00003  | -0.00001 | -0.00591 | -0.00589 | -0.00282 |
| D2  | 3.13983  | -0.00001 | -0.00005 | -0.00170 | -0.00175 | 3.13808  |
| D3  | 3.14142  | 0.00005  | 0.00004  | -0.00002 | 0.00004  | 3.14145  |
| D4  | -0.00502 | 0.00001  | 0.00000  | 0.00419  | 0.00418  | -0.00083 |
| D5  | -0.00100 | -0.00005 | 0.00002  | 0.01360  | 0.01359  | 0.01258  |
| D6  | -3.07643 | 0.00006  | 0.00002  | 0.02849  | 0.02853  | -3.04790 |
| D7  | -3.13968 | -0.00007 | -0.00002 | 0.00831  | 0.00826  | -3.13141 |
| D8  | 0.06808  | 0.00005  | -0.00003 | 0.02320  | 0.02321  | 0.09129  |



|                      |          |          |     |
|----------------------|----------|----------|-----|
| Maximum Force        | 0.001013 | 0.000450 | NO  |
| RMS Force            | 0.000244 | 0.000300 | YES |
| Maximum Displacement | 0.524633 | 0.001800 | NO  |
| RMS Displacement     | 0.115863 | 0.001200 | NO  |

Predicted change in Energy=-1.362295D-03

GradGradGradGradGradGradGradGradGradGradGradGradGradGradGradGradGradGradGrad

Input orientation:

| Center Number | Atomic Number | Atomic Type | Coordinates (Angstroms) |           |           |
|---------------|---------------|-------------|-------------------------|-----------|-----------|
|               |               |             | X                       | Y         | Z         |
| 1             | 6             | 0           | -1.830351               | -2.018470 | 0.329059  |
| 2             | 6             | 0           | -2.819526               | -1.126763 | 0.062490  |
| 3             | 7             | 0           | -2.222232               | 0.129228  | 0.006566  |
| 4             | 6             | 0           | -0.905022               | -0.008219 | 0.244740  |
| 5             | 7             | 0           | -0.647798               | -1.303813 | 0.428717  |
| 6             | 6             | 0           | 0.718343                | -1.837090 | 0.599550  |
| 7             | 6             | 0           | 1.460948                | -1.922576 | -0.741367 |
| 8             | 1             | 0           | -1.866769               | -3.087080 | 0.452488  |
| 9             | 1             | 0           | -3.872631               | -1.277782 | -0.088891 |
| 10            | 1             | 0           | 1.248246                | -1.158093 | 1.268145  |
| 11            | 1             | 0           | 0.646490                | -2.814113 | 1.076049  |
| 12            | 1             | 0           | 1.042436                | -2.733865 | -1.339884 |
| 13            | 1             | 0           | 1.321149                | -0.975087 | -1.276261 |
| 14            | 35            | 0           | 1.644981                | 1.914582  | -0.324240 |
| 15            | 1             | 0           | -0.109004               | 0.775456  | 0.194139  |
| 16            | 6             | 0           | -2.820468               | 1.394175  | -0.251176 |
| 17            | 6             | 0           | -4.126839               | 1.603725  | -0.347283 |
| 18            | 1             | 0           | -2.079473               | 2.175637  | -0.365026 |
| 19            | 1             | 0           | -4.487131               | 2.601203  | -0.557285 |
| 20            | 1             | 0           | -4.868281               | 0.824343  | -0.224656 |
| 21            | 7             | 0           | 2.858297                | -2.252120 | -0.450429 |
| 22            | 1             | 0           | 3.335487                | -2.539118 | -1.295381 |
| 23            | 1             | 0           | 3.334668                | -1.419242 | -0.114781 |

Distance matrix (angstroms):

|   |   | 1        | 2        | 3        | 4        | 5        |
|---|---|----------|----------|----------|----------|----------|
| 1 | C | 0.000000 |          |          |          |          |
| 2 | C | 1.358185 | 0.000000 |          |          |          |
| 3 | N | 2.206848 | 1.391905 | 0.000000 |          |          |
| 4 | C | 2.214600 | 2.224788 | 1.345608 | 0.000000 |          |
| 5 | N | 1.385315 | 2.209496 | 2.170406 | 1.333633 | 0.000000 |
| 6 | C | 2.569417 | 3.648220 | 3.586783 | 2.471026 | 1.476451 |

|    |    |          |          |          |          |          |
|----|----|----------|----------|----------|----------|----------|
| 7  | C  | 3.462319 | 4.427409 | 4.281952 | 3.199215 | 2.489733 |
| 8  | H  | 1.076331 | 2.214202 | 3.266472 | 3.232260 | 2.160208 |
| 9  | H  | 2.212285 | 1.074595 | 2.170854 | 3.244966 | 3.266213 |
| 10 | H  | 3.331650 | 4.242800 | 3.910626 | 2.646910 | 2.078667 |
| 11 | H  | 2.706619 | 3.985940 | 4.246954 | 3.312296 | 2.091704 |
| 12 | H  | 3.398538 | 4.411822 | 4.546238 | 3.705775 | 2.833705 |
| 13 | H  | 3.687500 | 4.354360 | 3.926921 | 2.864283 | 2.625217 |
| 14 | Br | 5.289010 | 5.415825 | 4.272266 | 3.243982 | 4.022667 |
| 15 | H  | 3.284397 | 3.314015 | 2.217775 | 1.118191 | 2.160715 |
| 16 | C  | 3.600438 | 2.540377 | 1.422817 | 2.425196 | 3.530141 |
| 17 | C  | 4.341842 | 3.054922 | 2.434518 | 3.650885 | 4.599966 |
| 18 | H  | 4.258445 | 3.411201 | 2.084767 | 2.553503 | 3.845296 |
| 19 | H  | 5.402357 | 4.130709 | 3.399758 | 4.503758 | 5.564336 |
| 20 | H  | 4.197285 | 2.843706 | 2.745583 | 4.076875 | 4.771627 |
| 21 | N  | 4.758741 | 5.810954 | 5.629515 | 4.436319 | 3.736962 |
| 22 | H  | 5.440198 | 6.459314 | 6.301061 | 5.172942 | 4.512765 |
| 23 | H  | 5.218572 | 6.163690 | 5.769889 | 4.482769 | 4.021038 |
|    |    | 6        | 7        | 8        | 9        | 10       |
| 6  | C  | 0.000000 |          |          |          |          |
| 7  | C  | 1.535196 | 0.000000 |          |          |          |
| 8  | H  | 2.875223 | 3.722238 | 0.000000 |          |          |
| 9  | H  | 4.675876 | 5.411889 | 2.755020 | 0.000000 |          |
| 10 | H  | 1.090345 | 2.160512 | 3.753612 | 5.298986 | 0.000000 |
| 11 | H  | 1.089399 | 2.182013 | 2.603807 | 4.913233 | 1.772403 |
| 12 | H  | 2.161167 | 1.091588 | 3.435233 | 5.276650 | 3.054051 |
| 13 | H  | 2.150602 | 1.096991 | 4.196655 | 5.336368 | 2.552021 |
| 14 | Br | 3.973296 | 3.864148 | 6.160545 | 6.378920 | 3.483449 |
| 15 | H  | 2.770245 | 3.258726 | 4.251549 | 4.296601 | 2.595039 |
| 16 | C  | 4.867031 | 5.437981 | 4.635336 | 2.876237 | 5.037543 |
| 17 | C  | 6.017598 | 6.619174 | 5.267941 | 2.904216 | 6.255301 |
| 18 | H  | 4.985996 | 5.428772 | 5.330082 | 3.900997 | 4.985451 |
| 19 | H  | 6.937843 | 7.475166 | 6.343698 | 3.955190 | 7.096411 |
| 20 | H  | 6.242828 | 6.918937 | 4.976628 | 2.329953 | 6.600788 |
| 21 | N  | 2.419527 | 1.464865 | 4.882486 | 6.810686 | 2.596663 |
| 22 | H  | 3.306516 | 2.049622 | 5.515321 | 7.416437 | 3.582662 |
| 23 | H  | 2.744089 | 2.038819 | 5.491669 | 7.208734 | 2.516713 |
|    |    | 11       | 12       | 13       | 14       | 15       |
| 11 | H  | 0.000000 |          |          |          |          |
| 12 | H  | 2.449478 | 0.000000 |          |          |          |
| 13 | H  | 3.061135 | 1.781861 | 0.000000 |          |          |
| 14 | Br | 5.031735 | 4.796108 | 3.059640 | 0.000000 |          |
| 15 | H  | 3.772737 | 3.999297 | 2.696631 | 2.154713 | 0.000000 |
| 16 | C  | 5.611686 | 5.757432 | 4.880287 | 4.496265 | 2.816586 |
| 17 | C  | 6.657916 | 6.820656 | 6.098676 | 5.780232 | 4.137894 |

|    |   |          |          |          |          |          |
|----|---|----------|----------|----------|----------|----------|
| 18 | H | 5.865593 | 5.899142 | 4.724579 | 3.733815 | 2.481113 |
| 19 | H | 7.638553 | 7.723440 | 6.858783 | 6.174833 | 4.802706 |
| 20 | H | 6.733713 | 6.988644 | 6.530916 | 6.604629 | 4.777918 |
| 21 | N | 2.745553 | 2.078596 | 2.162322 | 4.341597 | 4.287956 |
| 22 | H | 3.595832 | 2.301736 | 2.550316 | 4.861724 | 5.006954 |
| 23 | H | 3.254235 | 2.912634 | 2.366552 | 3.743434 | 4.095243 |
|    |   | 16       | 17       | 18       | 19       | 20       |
| 16 | C | 0.000000 |          |          |          |          |
| 17 | C | 1.326557 | 0.000000 |          |          |          |
| 18 | H | 1.082921 | 2.125819 | 0.000000 |          |          |
| 19 | H | 2.080477 | 1.081145 | 2.452527 | 0.000000 |          |
| 20 | H | 2.125783 | 1.082686 | 3.102120 | 1.847471 | 0.000000 |
| 21 | N | 6.751559 | 7.979368 | 6.632790 | 8.804628 | 8.319592 |
| 22 | H | 7.379494 | 8.587685 | 7.239908 | 9.389410 | 8.930908 |
| 23 | H | 6.769019 | 8.053973 | 6.503746 | 8.805699 | 8.504947 |
|    |   | 21       | 22       | 23       |          |          |
| 21 | N | 0.000000 |          |          |          |          |
| 22 | H | 1.011940 | 0.000000 |          |          |          |
| 23 | H | 1.016501 | 1.627249 | 0.000000 |          |          |

Stoichiometry C7H12BrN3

Framework group C1[X(C7H12BrN3)]

Deg. of freedom 63

Full point group C1 NOp 1

Largest Abelian subgroup C1 NOp 1

Largest concise Abelian subgroup C1 NOp 1

Standard orientation:

| Center Number | Atomic Number | Atomic Type | Coordinates (Angstroms) |           |           |
|---------------|---------------|-------------|-------------------------|-----------|-----------|
|               |               |             | X                       | Y         | Z         |
| 1             | 6             | 0           | -1.696187               | 2.178825  | -0.181782 |
| 2             | 6             | 0           | -2.692809               | 1.291261  | 0.070492  |
| 3             | 7             | 0           | -2.128684               | 0.021460  | -0.011778 |
| 4             | 6             | 0           | -0.824183               | 0.147609  | -0.316777 |
| 5             | 7             | 0           | -0.541887               | 1.447679  | -0.410071 |
| 6             | 6             | 0           | 0.826436                | 1.961491  | -0.618871 |
| 7             | 6             | 0           | 1.647703                | 1.918550  | 0.677471  |
| 8             | 1             | 0           | -1.709765               | 3.254539  | -0.215613 |
| 9             | 1             | 0           | -3.730712               | 1.453578  | 0.296685  |
| 10            | 1             | 0           | 1.297426                | 1.328043  | -1.371046 |
| 11            | 1             | 0           | 0.754443                | 2.975983  | -1.009273 |
| 12            | 1             | 0           | 1.287511                | 2.687020  | 1.363971  |
| 13            | 1             | 0           | 1.512700                | 0.933553  | 1.141094  |
| 14            | 35            | 0           | 1.699692                | -1.874181 | -0.060182 |

|    |   |   |           |           |           |
|----|---|---|-----------|-----------|-----------|
| 15 | 1 | 0 | -0.048829 | -0.655782 | -0.377938 |
| 16 | 6 | 0 | -2.746144 | -1.246284 | 0.177896  |
| 17 | 6 | 0 | -4.050093 | -1.432768 | 0.335048  |
| 18 | 1 | 0 | -2.021967 | -2.051429 | 0.183149  |
| 19 | 1 | 0 | -4.425384 | -2.435590 | 0.484639  |
| 20 | 1 | 0 | -4.775284 | -0.628959 | 0.320921  |
| 21 | 7 | 0 | 3.034495  | 2.238596  | 0.330760  |
| 22 | 1 | 0 | 3.567761  | 2.443592  | 1.166000  |
| 23 | 1 | 0 | 3.467075  | 1.425533  | -0.099448 |

-----

Rotational constants (GHZ):      0.7751261      0.5003997      0.3138248

Standard basis: 6-311++G(d,p) (5D, 7F)

There are 365 symmetry adapted cartesian basis functions of A symmetry.

There are 352 symmetry adapted basis functions of A symmetry.

352 basis functions, 562 primitive gaussians, 365 cartesian basis functions

55 alpha electrons      55 beta electrons

nuclear repulsion energy      838.2889948072 Hartrees.

NAtoms= 23 NActive= 23 NUniq= 23 SFac= 1.00D+00 NatFMM= 60 NAOKFM=F

Big=F

Integral buffers will be 131072 words long.

Raffenetti 2 integral format.

Two-electron integral symmetry is turned on.

One-electron integrals computed using PRISM.

NBasis= 352 RedAO= T EigKep= 4.80D-06 NBF= 352

NBsUse= 352 1.00D-06 EigRej= -1.00D+00 NBFU= 352

Initial guess from the checkpoint file: "/home/suqian/liuwen/qianmengshijie/nh2/nh2.chk"

B after Tr= 0.000000 0.000000 0.000000

Rot= 0.999747 0.002499 0.002051 -0.022252 Ang= 2.58 deg.

ExpMin= 3.50D-02 ExpMax= 4.40D+05 ExpMxC= 1.51D+04 IAcc=3 IRadAn= 5 AccDes= 0.00D+00

Harris functional with IExCor= 402 and IRadAn= 5 diagonalized for initial guess.

HarFok: IExCor= 402 AccDes= 0.00D+00 IRadAn= 5 IDoV= 1 UseB2=F ITyADJ=14

ICtDFT= 3500011 ScaDFX= 1.000000 1.000000 1.000000 1.000000

FoFCou: FMM=F IPFlag= 0 FMFlag= 100000 FMFlg1= 0

NFxFlg= 0 DoJE=T BraDBF=F KetDBF=T FulRan=T

wScrn= 0.000000 ICntrl= 500 IOpCl= 0 I1Cent= 200000004 NGrid= 0

NMat0= 1 NMatS0= 1 NMatT0= 0 NMatD0= 1 NMtDS0= 0

NMtDT0= 0

Petite list used in FoFCou.

Requested convergence on RMS density matrix=1.00D-08 within 128 cycles.

Requested convergence on MAX density matrix=1.00D-06.

Requested convergence on energy=1.00D-06.

No special actions if energy rises.

SCF Done: E(RB3LYP) = -3012.46696184 A.U. after 12 cycles

NFock= 12 Conv=0.68D-08 -V/T= 2.0017

Calling FoFJK, ICntrl= 2127 FMM=F ISym2X=0 l1Cent= 0 IOpCIX= 0 NMat=1 NMatS=1  
NMatT=0.

\*\*\*\*\* Axes restored to original set \*\*\*\*\*

| Center<br>Number | Atomic<br>Number | Forces (Hartrees/Bohr) |              |              |
|------------------|------------------|------------------------|--------------|--------------|
|                  |                  | X                      | Y            | Z            |
| 1                | 6                | -0.000184571           | -0.000072662 | -0.001335221 |
| 2                | 6                | -0.000204136           | -0.000116724 | 0.000354645  |
| 3                | 7                | -0.000492889           | -0.000248140 | 0.001314500  |
| 4                | 6                | 0.002588104            | -0.001019874 | -0.001721145 |
| 5                | 7                | -0.000968887           | 0.000680094  | 0.002054221  |
| 6                | 6                | 0.000200745            | 0.000013030  | -0.000736482 |
| 7                | 6                | 0.002223025            | -0.002357661 | 0.001886293  |
| 8                | 1                | 0.000000734            | -0.000100733 | -0.000230340 |
| 9                | 1                | -0.000076442           | -0.000058053 | -0.000016125 |
| 10               | 1                | -0.000116076           | 0.000243384  | -0.000064864 |
| 11               | 1                | -0.000293558           | -0.000126009 | 0.000390154  |
| 12               | 1                | -0.002149831           | -0.000581821 | -0.001433630 |
| 13               | 1                | 0.001458732            | 0.000238206  | 0.000042040  |
| 14               | 35               | 0.000555455            | -0.000626593 | 0.000244170  |
| 15               | 1                | -0.001900910           | 0.001641008  | -0.000464024 |
| 16               | 6                | -0.000132595           | -0.000078376 | 0.000208391  |
| 17               | 6                | 0.000113300            | -0.000207058 | -0.000027951 |
| 18               | 1                | 0.000217399            | 0.000295093  | 0.000027646  |
| 19               | 1                | 0.000055644            | 0.000010464  | -0.000015300 |
| 20               | 1                | -0.000082027           | -0.000031027 | -0.000018879 |
| 21               | 7                | -0.002569759           | 0.002544189  | 0.001006067  |
| 22               | 1                | 0.000939436            | -0.000838973 | -0.001281483 |
| 23               | 1                | 0.000819108            | 0.000798237  | -0.000182685 |

Cartesian Forces: Max 0.002588104 RMS 0.001013076

GradGradGradGradGradGradGradGradGradGradGradGradGradGradGradGradGradGradGrad

Berny optimization.

Using GEDIIS/GDIIS optimizer.

FormGI is forming the generalized inverse of G from B-inverse, IUseBI=4.

Internal Forces: Max 0.002040345 RMS 0.000539586

Search for a local minimum.

Step number 18 out of a maximum of 121

All quantities printed in internal units (Hartrees-Bohrs-Radians)

Mixed Optimization -- En-DIIS/RFO-DIIS

Swapping is turned off.

Update second derivatives using D2CorX and points 17 18

DE= -3.66D-04 DEPred=-1.36D-03 R= 2.69D-01

Trust test= 2.69D-01 RLast= 1.00D+00 DXMaxT set to 1.26D+00

ITU= 0 0 0 1 1 -1 1 -1 1 1 1 1 1 1 0 1 0 0

|                 |         |         |         |         |         |
|-----------------|---------|---------|---------|---------|---------|
| Eigenvalues --- | 0.00000 | 0.00179 | 0.00418 | 0.00705 | 0.01255 |
| Eigenvalues --- | 0.01407 | 0.01817 | 0.02071 | 0.02166 | 0.02314 |
| Eigenvalues --- | 0.02391 | 0.02947 | 0.03062 | 0.03086 | 0.03362 |
| Eigenvalues --- | 0.03880 | 0.04079 | 0.04574 | 0.04736 | 0.05264 |
| Eigenvalues --- | 0.05639 | 0.08953 | 0.09100 | 0.10008 | 0.12621 |
| Eigenvalues --- | 0.13281 | 0.15153 | 0.15924 | 0.15997 | 0.16002 |
| Eigenvalues --- | 0.16002 | 0.16046 | 0.16088 | 0.20844 | 0.21653 |
| Eigenvalues --- | 0.22030 | 0.22964 | 0.23468 | 0.24904 | 0.25171 |
| Eigenvalues --- | 0.28798 | 0.30586 | 0.34033 | 0.34621 | 0.34783 |
| Eigenvalues --- | 0.34915 | 0.35043 | 0.35689 | 0.35730 | 0.35858 |
| Eigenvalues --- | 0.36438 | 0.36659 | 0.38149 | 0.40522 | 0.42169 |
| Eigenvalues --- | 0.42930 | 0.46796 | 0.47697 | 0.48492 | 0.50111 |
| Eigenvalues --- | 0.54256 | 0.59447 | 0.60362 |         |         |

Eigenvalue 1 is 5.14D-07 Eigenvector:

|   |         |         |         |          |          |
|---|---------|---------|---------|----------|----------|
|   | D25     | D26     | D28     | D29      | D27      |
| 1 | 0.62401 | 0.61770 | 0.17094 | 0.16198  | 0.15547  |
|   | D31     | D32     | D30     | D44      | D42      |
| 1 | 0.14793 | 0.13896 | 0.13245 | -0.11070 | -0.10874 |

En-DIIS/RFO-DIIS IScMMF= 0 using points: 18 17

RFO step: Lambda=-1.21635987D-04.

DidBck=T Rises=F RFO-DIIS coefs: 0.36229 0.63771

|              |            |            |           |            |
|--------------|------------|------------|-----------|------------|
| Iteration 1  | RMS(Cart)= | 0.23615767 | RMS(Int)= | 0.42498883 |
| Iteration 2  | RMS(Cart)= | 0.11287350 | RMS(Int)= | 0.38512586 |
| Iteration 3  | RMS(Cart)= | 0.12679303 | RMS(Int)= | 0.35062942 |
| Iteration 4  | RMS(Cart)= | 0.11761668 | RMS(Int)= | 0.32114719 |
| Iteration 5  | RMS(Cart)= | 0.03586926 | RMS(Int)= | 0.29415899 |
| Iteration 6  | RMS(Cart)= | 0.03566508 | RMS(Int)= | 0.26730919 |
| Iteration 7  | RMS(Cart)= | 0.03522386 | RMS(Int)= | 0.24046041 |
| Iteration 8  | RMS(Cart)= | 0.03456662 | RMS(Int)= | 0.21361110 |
| Iteration 9  | RMS(Cart)= | 0.03376330 | RMS(Int)= | 0.18676175 |
| Iteration 10 | RMS(Cart)= | 0.03291470 | RMS(Int)= | 0.15991302 |
| Iteration 11 | RMS(Cart)= | 0.03213757 | RMS(Int)= | 0.13306566 |
| Iteration 12 | RMS(Cart)= | 0.03154709 | RMS(Int)= | 0.10622062 |
| Iteration 13 | RMS(Cart)= | 0.03123529 | RMS(Int)= | 0.07937955 |
| Iteration 14 | RMS(Cart)= | 0.03125156 | RMS(Int)= | 0.05254705 |
| Iteration 15 | RMS(Cart)= | 0.03158956 | RMS(Int)= | 0.02574614 |
| Iteration 16 | RMS(Cart)= | 0.03081714 | RMS(Int)= | 0.00202834 |
| Iteration 17 | RMS(Cart)= | 0.00303463 | RMS(Int)= | 0.00139757 |
| Iteration 18 | RMS(Cart)= | 0.00001300 | RMS(Int)= | 0.00139753 |



Iteration 19 RMS(Cart)= 0.00000000 RMS(Int)= 0.00139753  
Iteration 1 RMS(Cart)= 0.24046655 RMS(Int)= 0.38807826  
Iteration 2 RMS(Cart)= 0.12706103 RMS(Int)= 0.34831455  
Iteration 3 RMS(Cart)= 0.12848189 RMS(Int)= 0.31500240  
Iteration 4 RMS(Cart)= 0.07349103 RMS(Int)= 0.28710671  
Iteration 5 RMS(Cart)= 0.03096970 RMS(Int)= 0.26023044  
Iteration 6 RMS(Cart)= 0.03181178 RMS(Int)= 0.23338699  
Iteration 7 RMS(Cart)= 0.03233161 RMS(Int)= 0.20654301  
Iteration 8 RMS(Cart)= 0.03292277 RMS(Int)= 0.17969984  
Iteration 9 RMS(Cart)= 0.03348275 RMS(Int)= 0.15285726  
Iteration 10 RMS(Cart)= 0.03391233 RMS(Int)= 0.12601512  
Iteration 11 RMS(Cart)= 0.03413813 RMS(Int)= 0.09917366  
Iteration 12 RMS(Cart)= 0.03411863 RMS(Int)= 0.07233430  
Iteration 13 RMS(Cart)= 0.03384582 RMS(Int)= 0.04550254  
Iteration 14 RMS(Cart)= 0.03334372 RMS(Int)= 0.01871597  
Iteration 15 RMS(Cart)= 0.02252426 RMS(Int)= 0.00137438  
Iteration 16 RMS(Cart)= 0.00150447 RMS(Int)= 0.00113106  
Iteration 17 RMS(Cart)= 0.00000332 RMS(Int)= 0.00113106  
Iteration 18 RMS(Cart)= 0.00000000 RMS(Int)= 0.00113106  
ITry= 2 IFail=0 DXMaxC= 3.67D+00 DCold= 3.38D+00 DXMaxT= 1.26D+00 DXLimC= 3.00D+00

Rises=F

Iteration 1 RMS(Cart)= 0.22292990 RMS(Int)= 0.33679661  
Iteration 2 RMS(Cart)= 0.12602276 RMS(Int)= 0.29872487  
Iteration 3 RMS(Cart)= 0.12766974 RMS(Int)= 0.26774244  
Iteration 4 RMS(Cart)= 0.03296474 RMS(Int)= 0.24074950  
Iteration 5 RMS(Cart)= 0.02999001 RMS(Int)= 0.21390209  
Iteration 6 RMS(Cart)= 0.03035189 RMS(Int)= 0.18705706  
Iteration 7 RMS(Cart)= 0.03084266 RMS(Int)= 0.16021302  
Iteration 8 RMS(Cart)= 0.03141342 RMS(Int)= 0.13337004  
Iteration 9 RMS(Cart)= 0.03195651 RMS(Int)= 0.10652821  
Iteration 10 RMS(Cart)= 0.03237679 RMS(Int)= 0.07968819  
Iteration 11 RMS(Cart)= 0.03260334 RMS(Int)= 0.05285283  
Iteration 12 RMS(Cart)= 0.03259590 RMS(Int)= 0.02603824  
Iteration 13 RMS(Cart)= 0.03128486 RMS(Int)= 0.00172508  
Iteration 14 RMS(Cart)= 0.00272870 RMS(Int)= 0.00089352  
Iteration 15 RMS(Cart)= 0.00001081 RMS(Int)= 0.00089348  
Iteration 16 RMS(Cart)= 0.00000000 RMS(Int)= 0.00089348  
ITry= 3 IFail=0 DXMaxC= 3.50D+00 DCold= 3.38D+00 DXMaxT= 1.26D+00 DXLimC= 3.00D+00

Rises=F

Iteration 1 RMS(Cart)= 0.20157063 RMS(Int)= 0.28608953  
Iteration 2 RMS(Cart)= 0.12828440 RMS(Int)= 0.24984058  
Iteration 3 RMS(Cart)= 0.08485821 RMS(Int)= 0.22108044  
Iteration 4 RMS(Cart)= 0.02798729 RMS(Int)= 0.19419015  
Iteration 5 RMS(Cart)= 0.02856625 RMS(Int)= 0.16734529

Iteration 6 RMS(Cart)= 0.02887695 RMS(Int)= 0.14050034  
 Iteration 7 RMS(Cart)= 0.02934897 RMS(Int)= 0.11365668  
 Iteration 8 RMS(Cart)= 0.02989892 RMS(Int)= 0.08681482  
 Iteration 9 RMS(Cart)= 0.03042347 RMS(Int)= 0.05997631  
 Iteration 10 RMS(Cart)= 0.03083291 RMS(Int)= 0.03314871  
 Iteration 11 RMS(Cart)= 0.03105840 RMS(Int)= 0.00647132  
 Iteration 12 RMS(Cart)= 0.00767322 RMS(Int)= 0.00069383  
 Iteration 13 RMS(Cart)= 0.00018849 RMS(Int)= 0.00068522  
 Iteration 14 RMS(Cart)= 0.00000007 RMS(Int)= 0.00068522  
 ITry= 4 IFail=0 DXMaxC= 3.19D+00 DCold= 3.38D+00 DXMaxT= 1.26D+00 DXLimC= 3.00D+00

Rises=F

Iteration 1 RMS(Cart)= 0.17896089 RMS(Int)= 0.23591702  
 Iteration 2 RMS(Cart)= 0.12722641 RMS(Int)= 0.20193471  
 Iteration 3 RMS(Cart)= 0.03938166 RMS(Int)= 0.17469501  
 Iteration 4 RMS(Cart)= 0.02692419 RMS(Int)= 0.14784206  
 Iteration 5 RMS(Cart)= 0.02710861 RMS(Int)= 0.12099646  
 Iteration 6 RMS(Cart)= 0.02739318 RMS(Int)= 0.09415215  
 Iteration 7 RMS(Cart)= 0.02784335 RMS(Int)= 0.06731027  
 Iteration 8 RMS(Cart)= 0.02837055 RMS(Int)= 0.04047453  
 Iteration 9 RMS(Cart)= 0.02887693 RMS(Int)= 0.01367876  
 Iteration 10 RMS(Cart)= 0.01501059 RMS(Int)= 0.00062610  
 Iteration 11 RMS(Cart)= 0.00072417 RMS(Int)= 0.00050678  
 Iteration 12 RMS(Cart)= 0.00000077 RMS(Int)= 0.00050678  
 ITry= 5 IFail=0 DXMaxC= 2.76D+00 DCold= 3.19D+00 DXMaxT= 1.26D+00 DXLimC= 3.00D+00

Rises=F

| Variable | Old X   | -DE/DX   | Delta X<br>(Linear) | Delta X<br>(Quad) | Delta X<br>(Total) | New X   |
|----------|---------|----------|---------------------|-------------------|--------------------|---------|
| R1       | 2.56660 | -0.00027 | -0.00048            | 0.00051           | -0.00024           | 2.56636 |
| R2       | 2.61787 | 0.00041  | 0.00142             | -0.01324          | -0.00648           | 2.61139 |
| R3       | 2.03397 | 0.00007  | 0.00009             | -0.00008          | 0.00004            | 2.03401 |
| R4       | 2.63032 | 0.00008  | -0.00096            | 0.00994           | 0.00492            | 2.63524 |
| R5       | 2.03069 | 0.00009  | 0.00014             | -0.00084          | -0.00036           | 2.03033 |
| R6       | 2.54283 | 0.00037  | 0.00055             | 0.00740           | 0.00499            | 2.54782 |
| R7       | 2.68873 | -0.00012 | 0.00083             | -0.01876          | -0.01042           | 2.67831 |
| R8       | 2.52020 | -0.00025 | 0.00022             | -0.00662          | -0.00364           | 2.51656 |
| R9       | 2.11308 | -0.00024 | -0.00007            | -0.00059          | -0.00042           | 2.11265 |
| R10      | 2.79009 | 0.00046  | 0.00205             | 0.00146           | 0.00293            | 2.79301 |
| R11      | 2.90110 | 0.00032  | 0.00345             | -0.01232          | -0.00394           | 2.89716 |
| R12      | 2.06045 | 0.00006  | -0.00001            | -0.00592          | -0.00356           | 2.05690 |
| R13      | 2.05867 | 0.00030  | 0.00073             | -0.00161          | -0.00024           | 2.05843 |
| R14      | 2.06280 | 0.00204  | 0.00382             | -0.01264          | -0.00376           | 2.05904 |
| R15      | 2.07301 | 0.00000  | -0.00083            | -0.00278          | -0.00249           | 2.07052 |
| R16      | 2.76819 | -0.00142 | -0.00185            | -0.00845          | -0.00692           | 2.76127 |
| R17      | 4.07182 | 0.00006  | 0.00183             | 0.06113           | 0.03851            | 4.11032 |

|     |          |          |          |          |          |          |
|-----|----------|----------|----------|----------|----------|----------|
| R18 | 2.50683  | -0.00011 | -0.00016 | 0.00226  | 0.00120  | 2.50803  |
| R19 | 2.04642  | 0.00036  | 0.00134  | -0.01662 | -0.00863 | 2.03779  |
| R20 | 2.04307  | -0.00001 | 0.00005  | -0.00082 | -0.00044 | 2.04263  |
| R21 | 2.04598  | 0.00008  | 0.00022  | -0.00267 | -0.00138 | 2.04460  |
| R22 | 1.91229  | 0.00175  | 0.00042  | -0.00666 | -0.00358 | 1.90871  |
| R23 | 1.92091  | 0.00098  | -0.00230 | 0.00886  | 0.00301  | 1.92392  |
| A1  | 1.87248  | 0.00005  | 0.00065  | -0.00119 | 0.00008  | 1.87256  |
| A2  | 2.27798  | -0.00006 | -0.00007 | -0.00103 | -0.00076 | 2.27722  |
| A3  | 2.13272  | 0.00001  | -0.00058 | 0.00221  | 0.00068  | 2.13339  |
| A4  | 1.86271  | -0.00020 | -0.00091 | 0.00405  | 0.00150  | 1.86422  |
| A5  | 2.27723  | 0.00005  | 0.00004  | -0.00063 | -0.00040 | 2.27683  |
| A6  | 2.14324  | 0.00015  | 0.00087  | -0.00340 | -0.00123 | 2.14201  |
| A7  | 1.89735  | 0.00036  | 0.00172  | -0.01266 | -0.00588 | 1.89147  |
| A8  | 2.25117  | -0.00017 | 0.00125  | -0.02814 | -0.01579 | 2.23538  |
| A9  | 2.13467  | -0.00019 | -0.00302 | 0.04081  | 0.02133  | 2.15600  |
| A10 | 1.88857  | -0.00041 | -0.00111 | 0.00413  | 0.00149  | 1.89006  |
| A11 | 2.23605  | 0.00021  | -0.01896 | 0.24813  | 0.12997  | 2.36602  |
| A12 | 2.15291  | 0.00027  | 0.02049  | -0.24831 | -0.12899 | 2.02392  |
| A13 | 1.90350  | 0.00022  | -0.00025 | 0.00531  | 0.00275  | 1.90624  |
| A14 | 2.22920  | -0.00011 | -0.00496 | 0.02777  | 0.01075  | 2.23994  |
| A15 | 2.14756  | -0.00013 | 0.00583  | -0.04156 | -0.01961 | 2.12795  |
| A16 | 1.94618  | 0.00122  | 0.00597  | -0.03175 | -0.01340 | 1.93278  |
| A17 | 1.87100  | -0.00054 | 0.00450  | -0.04674 | -0.02404 | 1.84695  |
| A18 | 1.88968  | -0.00056 | -0.00701 | 0.04277  | 0.01872  | 1.90840  |
| A19 | 1.91260  | -0.00011 | 0.00019  | -0.03047 | -0.01857 | 1.89403  |
| A20 | 1.94336  | -0.00020 | -0.00092 | 0.02212  | 0.01241  | 1.95577  |
| A21 | 1.89900  | 0.00016  | -0.00282 | 0.04403  | 0.02380  | 1.92280  |
| A22 | 1.91223  | -0.00093 | -0.00235 | 0.03651  | 0.01988  | 1.93211  |
| A23 | 1.89247  | 0.00076  | -0.00066 | -0.04520 | -0.02783 | 1.86465  |
| A24 | 1.87599  | 0.00052  | 0.00874  | -0.04422 | -0.01783 | 1.85816  |
| A25 | 1.90257  | -0.00007 | -0.00694 | 0.05971  | 0.02890  | 1.93147  |
| A26 | 1.88328  | 0.00143  | 0.02125  | -0.05576 | -0.01206 | 1.87122  |
| A27 | 1.99623  | -0.00174 | -0.01978 | 0.04902  | 0.00904  | 2.00526  |
| A28 | 2.86098  | -0.00167 | 0.00837  | -0.22019 | -0.12374 | 2.73723  |
| A29 | 2.17441  | -0.00023 | -0.00177 | 0.02558  | 0.01357  | 2.18798  |
| A30 | 1.95293  | 0.00015  | -0.00069 | 0.01867  | 0.01051  | 1.96344  |
| A31 | 2.15584  | 0.00008  | 0.00246  | -0.04422 | -0.02408 | 2.13176  |
| A32 | 2.08058  | -0.00010 | -0.00072 | 0.00785  | 0.00399  | 2.08458  |
| A33 | 2.15613  | 0.00009  | 0.00072  | -0.00735 | -0.00369 | 2.15244  |
| A34 | 2.04647  | 0.00001  | 0.00000  | -0.00049 | -0.00030 | 2.04617  |
| A35 | 1.92601  | 0.00031  | 0.01400  | -0.02803 | -0.00262 | 1.92339  |
| A36 | 1.90529  | 0.00035  | 0.01547  | -0.07313 | -0.02820 | 1.87710  |
| A37 | 1.86199  | -0.00030 | 0.00890  | 0.00148  | 0.01024  | 1.87223  |
| D1  | -0.00282 | 0.00029  | 0.00376  | -0.01192 | -0.00379 | -0.00660 |

|     |          |          |          |          |          |          |
|-----|----------|----------|----------|----------|----------|----------|
| D2  | 3.13808  | 0.00026  | 0.00111  | 0.02184  | 0.01400  | -3.13110 |
| D3  | 3.14145  | -0.00003 | -0.00002 | -0.00214 | -0.00110 | 3.14035  |
| D4  | -0.00083 | -0.00006 | -0.00267 | 0.03162  | 0.01669  | 0.01585  |
| D5  | 0.01258  | -0.00064 | -0.00866 | 0.02086  | 0.00429  | 0.01687  |
| D6  | -3.04790 | -0.00043 | -0.01819 | 0.14007  | 0.06714  | -2.98075 |
| D7  | -3.13141 | -0.00036 | -0.00527 | 0.01208  | 0.00187  | -3.12954 |
| D8  | 0.09129  | -0.00015 | -0.01480 | 0.13128  | 0.06473  | 0.15602  |
| D9  | -0.00778 | 0.00016  | 0.00234  | -0.00077 | 0.00209  | -0.00569 |
| D10 | 3.13378  | 0.00003  | -0.00595 | 0.05879  | 0.02961  | -3.11980 |
| D11 | 3.13444  | 0.00019  | 0.00473  | -0.03132 | -0.01400 | 3.12044  |
| D12 | -0.00719 | 0.00006  | -0.00355 | 0.02824  | 0.01352  | 0.00633  |
| D13 | 0.01568  | -0.00057 | -0.00775 | 0.01374  | 0.00054  | 0.01622  |
| D14 | 3.04491  | 0.00002  | -0.00187 | 0.03261  | 0.02013  | 3.06504  |
| D15 | -3.12588 | -0.00044 | -0.00017 | -0.04104 | -0.02545 | 3.13186  |
| D16 | -0.09665 | 0.00014  | 0.00571  | -0.02217 | -0.00585 | -0.10250 |
| D17 | 0.13418  | -0.00004 | -0.00189 | -0.12086 | -0.07465 | 0.05953  |
| D18 | -3.00374 | -0.00001 | -0.00100 | -0.12866 | -0.07848 | -3.08222 |
| D19 | -3.00745 | -0.00019 | -0.01114 | -0.05411 | -0.04332 | -3.05077 |
| D20 | 0.13781  | -0.00016 | -0.01025 | -0.06192 | -0.04715 | 0.09066  |
| D21 | -0.01750 | 0.00075  | 0.01015  | -0.02148 | -0.00302 | -0.02051 |
| D22 | 3.04757  | 0.00055  | 0.01866  | -0.13021 | -0.05946 | 2.98811  |
| D23 | -3.05328 | 0.00021  | 0.00744  | -0.07727 | -0.03663 | -3.08990 |
| D24 | 0.01179  | 0.00001  | 0.01595  | -0.18600 | -0.09307 | -0.08129 |
| D25 | -2.08488 | -0.00074 | 0.18365  | -3.41463 | -1.86477 | 2.33354  |
| D26 | 0.92885  | -0.00012 | 0.18864  | -3.37194 | -1.83488 | -0.90604 |
| D27 | 1.70304  | -0.00040 | 0.06827  | -0.86542 | -0.45119 | 1.25185  |
| D28 | -2.48676 | -0.00016 | 0.07496  | -0.95082 | -0.49541 | -2.98217 |
| D29 | -0.44072 | -0.00055 | 0.07038  | -0.90179 | -0.47081 | -0.91154 |
| D30 | -1.34706 | -0.00018 | 0.05781  | -0.73353 | -0.38238 | -1.72944 |
| D31 | 0.74632  | 0.00006  | 0.06450  | -0.81893 | -0.42660 | 0.31973  |
| D32 | 2.79236  | -0.00033 | 0.05992  | -0.76991 | -0.40200 | 2.39035  |
| D33 | -1.25470 | 0.00055  | 0.08126  | -0.34984 | -0.12853 | -1.38324 |
| D34 | 0.81992  | 0.00037  | 0.07119  | -0.28332 | -0.09890 | 0.72102  |
| D35 | 2.98642  | -0.00095 | 0.05208  | -0.27836 | -0.11461 | 2.87181  |
| D36 | 2.95981  | 0.00053  | 0.07178  | -0.25266 | -0.07995 | 2.87987  |
| D37 | -1.24875 | 0.00035  | 0.06171  | -0.18614 | -0.05032 | -1.29906 |
| D38 | 0.91775  | -0.00097 | 0.04260  | -0.18118 | -0.06603 | 0.85172  |
| D39 | 0.85804  | 0.00053  | 0.07577  | -0.30177 | -0.10528 | 0.75276  |
| D40 | 2.93267  | 0.00036  | 0.06570  | -0.23525 | -0.07565 | 2.85702  |
| D41 | -1.18402 | -0.00097 | 0.04659  | -0.23029 | -0.09136 | -1.27538 |
| D42 | 2.90203  | -0.00038 | -0.22048 | 0.61133  | 0.14642  | 3.04845  |
| D43 | -1.34011 | -0.00036 | -0.19111 | 0.55357  | 0.14089  | -1.19922 |
| D44 | 0.84114  | -0.00032 | -0.23442 | 0.62151  | 0.13874  | 0.97988  |
| D45 | 2.88218  | -0.00030 | -0.20505 | 0.56375  | 0.13321  | 3.01539  |

|     |          |          |          |          |          |          |
|-----|----------|----------|----------|----------|----------|----------|
| D46 | -1.27906 | -0.00013 | -0.22766 | 0.55363  | 0.10453  | -1.17453 |
| D47 | 0.76198  | -0.00011 | -0.19828 | 0.49586  | 0.09899  | 0.86098  |
| D48 | -3.12942 | 0.00003  | 0.00013  | -0.00622 | -0.00359 | -3.13301 |
| D49 | 0.01408  | 0.00000  | -0.00044 | -0.00841 | -0.00547 | 0.00862  |
| D50 | 0.00809  | 0.00000  | -0.00088 | 0.00261  | 0.00067  | 0.00876  |
| D51 | -3.13160 | -0.00004 | -0.00145 | 0.00043  | -0.00121 | -3.13281 |

| Item                 | Value    | Threshold | Converged? |
|----------------------|----------|-----------|------------|
| Maximum Force        | 0.002040 | 0.000450  | NO         |
| RMS Force            | 0.000540 | 0.000300  | NO         |
| Maximum Displacement | 2.759033 | 0.001800  | NO         |
| RMS Displacement     | 0.383366 | 0.001200  | NO         |

Predicted change in Energy=-1.858612D-03

GradGradGradGradGradGradGradGradGradGradGradGradGradGradGradGradGrad

Input orientation:

| Center Number | Atomic Number | Atomic Type | Coordinates (Angstroms) |           |           |
|---------------|---------------|-------------|-------------------------|-----------|-----------|
|               |               |             | X                       | Y         | Z         |
| 1             | 6             | 0           | -1.717750               | -1.944991 | 0.275779  |
| 2             | 6             | 0           | -2.737884               | -1.093864 | -0.005707 |
| 3             | 7             | 0           | -2.198739               | 0.192156  | -0.017021 |
| 4             | 6             | 0           | -0.882350               | 0.103553  | 0.260545  |
| 5             | 7             | 0           | -0.575205               | -1.181918 | 0.423845  |
| 6             | 6             | 0           | 0.823893                | -1.641112 | 0.550917  |
| 7             | 6             | 0           | 1.340688                | -2.184098 | -0.786437 |
| 8             | 1             | 0           | -1.709634               | -3.016517 | 0.377252  |
| 9             | 1             | 0           | -3.779912               | -1.288436 | -0.180807 |
| 10            | 1             | 0           | 1.403552                | -0.757788 | 0.812613  |
| 11            | 1             | 0           | 0.889466                | -2.382535 | 1.346222  |
| 12            | 1             | 0           | 0.979619                | -3.198077 | -0.955837 |
| 13            | 1             | 0           | 0.974043                | -1.507710 | -1.566545 |
| 14            | 35            | 0           | 1.748882                | 1.765659  | 1.135778  |
| 15            | 1             | 0           | -0.026168               | 0.820975  | 0.306450  |
| 16            | 6             | 0           | -2.871082               | 1.419902  | -0.239142 |
| 17            | 6             | 0           | -4.178909               | 1.558068  | -0.417860 |
| 18            | 1             | 0           | -2.198393               | 2.262647  | -0.249952 |
| 19            | 1             | 0           | -4.590686               | 2.542829  | -0.588310 |
| 20            | 1             | 0           | -4.871941               | 0.727340  | -0.402884 |
| 21            | 7             | 0           | 2.795375                | -2.256985 | -0.669467 |
| 22            | 1             | 0           | 3.190075                | -2.691348 | -1.491498 |
| 23            | 1             | 0           | 3.148587                | -1.302834 | -0.632651 |

Distance matrix (angstroms):

|    |    | 1        | 2        | 3        | 4        | 5        |
|----|----|----------|----------|----------|----------|----------|
| 1  | C  | 0.000000 |          |          |          |          |
| 2  | C  | 1.358059 | 0.000000 |          |          |          |
| 3  | N  | 2.210086 | 1.394509 | 0.000000 |          |          |
| 4  | C  | 2.212387 | 2.224344 | 1.348248 | 0.000000 |          |
| 5  | N  | 1.381888 | 2.206683 | 2.172166 | 1.331706 | 0.000000 |
| 6  | C  | 2.574489 | 3.646309 | 3.580465 | 2.457526 | 1.478000 |
| 7  | C  | 3.246463 | 4.293355 | 4.331989 | 3.357293 | 2.477861 |
| 8  | H  | 1.076350 | 2.213718 | 3.269596 | 3.229993 | 2.157511 |
| 9  | H  | 2.211797 | 1.074402 | 2.172346 | 3.244733 | 3.262989 |
| 10 | H  | 3.382332 | 4.234866 | 3.816699 | 2.504403 | 2.060706 |
| 11 | H  | 2.852169 | 4.079957 | 4.245524 | 3.240164 | 2.106543 |
| 12 | H  | 3.219146 | 4.376104 | 4.740993 | 3.980863 | 2.895841 |
| 13 | H  | 3.291067 | 4.047948 | 3.918815 | 3.062779 | 2.543219 |
| 14 | Br | 5.150346 | 5.441593 | 4.403245 | 3.232957 | 3.820529 |
| 15 | H  | 3.242370 | 3.334285 | 2.284756 | 1.117967 | 2.080097 |
| 16 | C  | 3.594138 | 2.528094 | 1.417302 | 2.436703 | 3.532715 |
| 17 | C  | 4.337034 | 3.046173 | 2.438742 | 3.666490 | 4.604636 |
| 18 | H  | 4.267509 | 3.408354 | 2.083552 | 2.579586 | 3.867010 |
| 19 | H  | 5.398235 | 4.122844 | 3.401977 | 4.519113 | 5.569765 |
| 20 | H  | 4.189375 | 2.833503 | 2.753420 | 4.092198 | 4.773959 |
| 21 | N  | 4.621594 | 5.693012 | 5.600460 | 4.467966 | 3.702960 |
| 22 | H  | 5.269446 | 6.316663 | 6.287129 | 5.240779 | 4.486006 |
| 23 | H  | 4.991878 | 5.923450 | 5.586402 | 4.361671 | 3.872652 |
|    |    | 6        | 7        | 8        | 9        | 10       |
| 6  | C  | 0.000000 |          |          |          |          |
| 7  | C  | 1.533110 | 0.000000 |          |          |          |
| 8  | H  | 2.888020 | 3.369208 | 0.000000 |          |          |
| 9  | H  | 4.674914 | 5.233502 | 2.753860 | 0.000000 |          |
| 10 | H  | 1.088462 | 2.143658 | 3.870830 | 5.304411 | 0.000000 |
| 11 | H  | 1.089274 | 2.188884 | 2.845375 | 5.033087 | 1.785729 |
| 12 | H  | 2.172256 | 1.089597 | 3.007020 | 5.186573 | 3.043377 |
| 13 | H  | 2.126966 | 1.095672 | 3.641011 | 4.956656 | 2.531255 |
| 14 | Br | 3.578233 | 4.411588 | 5.950286 | 6.452012 | 2.567387 |
| 15 | H  | 2.616150 | 3.477522 | 4.191111 | 4.333316 | 2.189245 |
| 16 | C  | 4.862802 | 5.570221 | 4.627172 | 2.857354 | 4.911316 |
| 17 | C  | 6.016753 | 6.678743 | 5.258930 | 2.884090 | 6.167749 |
| 18 | H  | 5.001494 | 5.708454 | 5.338711 | 3.887952 | 4.819345 |
| 19 | H  | 6.936921 | 7.587114 | 6.335542 | 3.937258 | 6.984809 |
| 20 | H  | 6.241941 | 6.871707 | 4.962385 | 2.303302 | 6.562382 |
| 21 | N  | 2.399037 | 1.461201 | 4.686962 | 6.664179 | 2.526128 |
| 22 | H  | 3.297464 | 2.043195 | 5.254056 | 7.229578 | 3.498463 |
| 23 | H  | 2.630488 | 2.017120 | 5.249659 | 6.943232 | 2.330452 |
|    |    | 11       | 12       | 13       | 14       | 15       |

|    |    |          |          |          |          |          |
|----|----|----------|----------|----------|----------|----------|
| 11 | H  | 0.000000 |          |          |          |          |
| 12 | H  | 2.443913 | 0.000000 |          |          |          |
| 13 | H  | 3.042480 | 1.797313 | 0.000000 |          |          |
| 14 | Br | 4.241509 | 5.441075 | 4.314843 | 0.000000 |          |
| 15 | H  | 3.490271 | 4.331022 | 3.151397 | 2.175089 | 0.000000 |
| 16 | C  | 5.577960 | 6.055352 | 5.011776 | 4.832600 | 2.958027 |
| 17 | C  | 6.657985 | 7.037098 | 6.105030 | 6.131524 | 4.279391 |
| 18 | H  | 5.801755 | 6.357479 | 5.100329 | 4.212864 | 2.665814 |
| 19 | H  | 7.617985 | 8.007582 | 6.951980 | 6.615632 | 4.959859 |
| 20 | H  | 6.776763 | 7.067914 | 6.365932 | 6.876109 | 4.898310 |
| 21 | N  | 2.776915 | 2.065098 | 2.164119 | 4.531636 | 4.288049 |
| 22 | H  | 3.666173 | 2.330198 | 2.513450 | 5.370711 | 5.090506 |
| 23 | H  | 3.191445 | 2.898416 | 2.375452 | 3.808171 | 3.933388 |
|    |    | 16       | 17       | 18       | 19       | 20       |
| 16 | C  | 0.000000 |          |          |          |          |
| 17 | C  | 1.327193 | 0.000000 |          |          |          |
| 18 | H  | 1.078353 | 2.108808 | 0.000000 |          |          |
| 19 | H  | 2.083248 | 1.080911 | 2.432294 | 0.000000 |          |
| 20 | H  | 2.123650 | 1.081954 | 3.086813 | 1.846479 | 0.000000 |
| 21 | N  | 6.768561 | 7.953526 | 6.748392 | 8.809013 | 8.231950 |
| 22 | H  | 7.430236 | 8.573924 | 7.424224 | 9.420860 | 8.824320 |
| 23 | H  | 6.618501 | 7.869123 | 6.438113 | 8.642189 | 8.276670 |
|    |    | 21       | 22       | 23       |          |          |
| 21 | N  | 0.000000 |          |          |          |          |
| 22 | H  | 1.010046 | 0.000000 |          |          |          |
| 23 | H  | 1.018096 | 1.633191 | 0.000000 |          |          |

Stoichiometry C7H12BrN3

Framework group C1[X(C7H12BrN3)]

Deg. of freedom 63

Full point group C1 NOp 1

Largest Abelian subgroup C1 NOp 1

Largest concise Abelian subgroup C1 NOp 1

Standard orientation:

| Center<br>Number | Atomic<br>Number | Atomic<br>Type | Coordinates (Angstroms) |           |           |
|------------------|------------------|----------------|-------------------------|-----------|-----------|
|                  |                  |                | X                       | Y         | Z         |
| 1                | 6                | 0              | -1.586176               | 1.931947  | -0.721417 |
| 2                | 6                | 0              | -2.658695               | 1.181922  | -0.358802 |
| 3                | 7                | 0              | -2.164300               | -0.053001 | 0.059758  |
| 4                | 6                | 0              | -0.821519               | -0.036032 | -0.060346 |
| 5                | 7                | 0              | -0.457692               | 1.161359  | -0.515676 |
| 6                | 6                | 0              | 0.959583                | 1.575870  | -0.578886 |
| 7                | 6                | 0              | 1.321989                | 2.455910  | 0.623037  |

|    |    |   |           |           |           |
|----|----|---|-----------|-----------|-----------|
| 8  | 1  | 0 | -1.533083 | 2.938274  | -1.099591 |
| 9  | 1  | 0 | -3.708052 | 1.411902  | -0.376101 |
| 10 | 1  | 0 | 1.540337  | 0.657032  | -0.522228 |
| 11 | 1  | 0 | 1.146083  | 2.080223  | -1.526179 |
| 12 | 1  | 0 | 0.973468  | 3.477114  | 0.471722  |
| 13 | 1  | 0 | 0.840758  | 2.009071  | 1.500105  |
| 14 | 35 | 0 | 1.846744  | -1.860457 | -0.122429 |
| 15 | 1  | 0 | 0.011622  | -0.736635 | 0.194372  |
| 16 | 6  | 0 | -2.895894 | -1.180558 | 0.509346  |
| 17 | 6  | 0 | -4.219372 | -1.271483 | 0.549086  |
| 18 | 1  | 0 | -2.255586 | -1.987679 | 0.827793  |
| 19 | 1  | 0 | -4.678764 | -2.177433 | 0.918656  |
| 20 | 1  | 0 | -4.879699 | -0.477132 | 0.227215  |
| 21 | 7  | 0 | 2.781452  | 2.500829  | 0.678342  |
| 22 | 1  | 0 | 3.083662  | 3.139068  | 1.400501  |
| 23 | 1  | 0 | 3.107478  | 1.572424  | 0.939665  |

-----

Rotational constants (GHZ):      0.7583693      0.4770702      0.3091576  
Standard basis: 6-311++G(d,p) (5D, 7F)  
There are    365 symmetry adapted cartesian basis functions of A    symmetry.  
There are    352 symmetry adapted basis functions of A    symmetry.  
   352 basis functions,    562 primitive gaussians,    365 cartesian basis functions  
   55 alpha electrons      55 beta electrons  
   nuclear repulsion energy      835.2397498685 Hartrees.  
NAtoms=    23 NActive=    23 NUniq=    23 SFac= 1.00D+00 NAtFMM=    60 NAOKFM=F  
Big=F  
Integral buffers will be    131072 words long.  
Raffenetti 2 integral format.  
Two-electron integral symmetry is turned on.  
One-electron integrals computed using PRISM.  
NBasis=    352 RedAO= T EigKep=    4.38D-06    NBF=    352  
NBsUse=    352 1.00D-06 EigRej= -1.00D+00    NBFU=    352  
Initial guess from the checkpoint file: "/home/suqian/liuwen/qianmengshijie/nh2/nh2.chk"  
B after Tr=    0.000000    0.000000    0.000000  
         Rot=    0.999156    0.035557    0.014121    -0.014973 Ang=    4.71 deg.  
ExpMin= 3.50D-02 ExpMax= 4.40D+05 ExpMxC= 1.51D+04 IAcc=3 IRadAn=            5 AccDes=  
0.00D+00  
Harris functional with IExCor=    402 and IRadAn=            5 diagonalized for initial guess.  
HarFok: IExCor=    402 AccDes= 0.00D+00 IRadAn=            5 IDoV= 1 UseB2=F ITyADJ=14  
ICtDFT= 3500011 ScaDFX= 1.000000 1.000000 1.000000 1.000000  
FoFCou: FMM=F IPFlag=            0 FMFlag=    100000 FMFlg1=            0  
         NFxFlg=            0 DoJE=T BraDBF=F KetDBF=T FulRan=T  
         wScrn= 0.000000 ICntrl=            500 IOpCl=    0 I1Cent=    200000004 NGrid=  
0





Using GEDIIS/GDIIS optimizer.

FormGI is forming the generalized inverse of G from B-inverse, IUseBI=4.

Internal Forces: Max 0.019206743 RMS 0.003397808

Search for a local minimum.

Step number 19 out of a maximum of 121

All quantities printed in internal units (Hartrees-Bohrs-Radians)

Mixed Optimization -- RFO/linear search

Update second derivatives using D2CorX and points 19 18

DE= 6.40D-03 DEPred=-1.86D-03 R=-3.45D+00

Trust test=-3.45D+00 RLast= 2.88D+00 DXMaxT set to 6.31D-01

ITU= -1 0 0 0 1 1 -1 1 -1 1 1 1 1 1 0 1 0 0

Use linear search instead of GDIIS.

Energy rises -- skip Quadratic/GDIIS search.

Quartic linear search produced a step of -0.86826.

Iteration 1 RMS(Cart)= 0.15643428 RMS(Int)= 0.18965788

Iteration 2 RMS(Cart)= 0.12123480 RMS(Int)= 0.15537269

Iteration 3 RMS(Cart)= 0.02481122 RMS(Int)= 0.12834452

Iteration 4 RMS(Cart)= 0.02016211 RMS(Int)= 0.10149536

Iteration 5 RMS(Cart)= 0.01992663 RMS(Int)= 0.07464881

Iteration 6 RMS(Cart)= 0.01987293 RMS(Int)= 0.04780372

Iteration 7 RMS(Cart)= 0.02000091 RMS(Int)= 0.02096490

Iteration 8 RMS(Cart)= 0.01583932 RMS(Int)= 0.00049234

Iteration 9 RMS(Cart)= 0.00134067 RMS(Int)= 0.00005590

Iteration 10 RMS(Cart)= 0.00000249 RMS(Int)= 0.00005585

Iteration 11 RMS(Cart)= 0.00000000 RMS(Int)= 0.00005585

| Variable | Old X   | -DE/DX   | Delta X<br>(Linear) | Delta X<br>(Quad) | Delta X<br>(Total) | New X   |
|----------|---------|----------|---------------------|-------------------|--------------------|---------|
| R1       | 2.56636 | -0.00190 | 0.00021             | 0.00000           | 0.00021            | 2.56657 |
| R2       | 2.61139 | 0.00280  | 0.00562             | 0.00000           | 0.00562            | 2.61701 |
| R3       | 2.03401 | 0.00014  | -0.00003            | 0.00000           | -0.00003           | 2.03398 |
| R4       | 2.63524 | -0.00093 | -0.00427            | 0.00000           | -0.00426           | 2.63098 |
| R5       | 2.03033 | 0.00014  | 0.00032             | 0.00000           | 0.00032            | 2.03064 |
| R6       | 2.54782 | -0.00163 | -0.00433            | 0.00000           | -0.00433           | 2.54349 |
| R7       | 2.67831 | 0.00136  | 0.00905             | 0.00000           | 0.00905            | 2.68736 |
| R8       | 2.51656 | 0.00783  | 0.00316             | 0.00000           | 0.00315            | 2.51971 |
| R9       | 2.11265 | 0.00134  | 0.00037             | 0.00000           | 0.00037            | 2.11302 |
| R10      | 2.79301 | 0.00091  | -0.00254            | 0.00000           | -0.00254           | 2.79047 |
| R11      | 2.89716 | 0.00357  | 0.00342             | 0.00000           | 0.00342            | 2.90058 |
| R12      | 2.05690 | 0.00430  | 0.00309             | 0.00000           | 0.00309            | 2.05999 |
| R13      | 2.05843 | 0.00027  | 0.00020             | 0.00000           | 0.00020            | 2.05863 |
| R14      | 2.05904 | 0.00288  | 0.00327             | 0.00000           | 0.00327            | 2.06231 |
| R15      | 2.07052 | 0.00282  | 0.00217             | 0.00000           | 0.00217            | 2.07268 |
| R16      | 2.76127 | 0.00425  | 0.00601             | 0.00000           | 0.00601            | 2.76728 |
| R17      | 4.11032 | 0.00116  | -0.03343            | 0.00000           | -0.03343           | 4.07689 |

|     |          |          |          |         |          |          |
|-----|----------|----------|----------|---------|----------|----------|
| R18 | 2.50803  | -0.00017 | -0.00104 | 0.00000 | -0.00104 | 2.50699  |
| R19 | 2.03779  | 0.00310  | 0.00749  | 0.00000 | 0.00749  | 2.04529  |
| R20 | 2.04263  | -0.00004 | 0.00038  | 0.00000 | 0.00038  | 2.04301  |
| R21 | 2.04460  | 0.00059  | 0.00120  | 0.00000 | 0.00120  | 2.04580  |
| R22 | 1.90871  | 0.00420  | 0.00311  | 0.00000 | 0.00311  | 1.91182  |
| R23 | 1.92392  | 0.00012  | -0.00262 | 0.00000 | -0.00262 | 1.92131  |
| A1  | 1.87256  | 0.00058  | -0.00007 | 0.00000 | -0.00008 | 1.87247  |
| A2  | 2.27722  | -0.00080 | 0.00066  | 0.00000 | 0.00067  | 2.27789  |
| A3  | 2.13339  | 0.00023  | -0.00059 | 0.00000 | -0.00058 | 2.13281  |
| A4  | 1.86422  | 0.00030  | -0.00131 | 0.00000 | -0.00130 | 1.86291  |
| A5  | 2.27683  | 0.00004  | 0.00035  | 0.00000 | 0.00035  | 2.27718  |
| A6  | 2.14201  | -0.00034 | 0.00107  | 0.00000 | 0.00108  | 2.14309  |
| A7  | 1.89147  | 0.00328  | 0.00510  | 0.00000 | 0.00511  | 1.89658  |
| A8  | 2.23538  | 0.00043  | 0.01371  | 0.00000 | 0.01373  | 2.24911  |
| A9  | 2.15600  | -0.00371 | -0.01852 | 0.00000 | -0.01850 | 2.13749  |
| A10 | 1.89006  | -0.00281 | -0.00130 | 0.00000 | -0.00131 | 1.88875  |
| A11 | 2.36602  | -0.01630 | -0.11285 | 0.00000 | -0.11286 | 2.25316  |
| A12 | 2.02392  | 0.01921  | 0.11200  | 0.00000 | 0.11206  | 2.13598  |
| A13 | 1.90624  | -0.00131 | -0.00239 | 0.00000 | -0.00236 | 1.90389  |
| A14 | 2.23994  | -0.00615 | -0.00933 | 0.00000 | -0.00923 | 2.23071  |
| A15 | 2.12795  | 0.00754  | 0.01703  | 0.00000 | 0.01709  | 2.14504  |
| A16 | 1.93278  | 0.00479  | 0.01163  | 0.00000 | 0.01167  | 1.94446  |
| A17 | 1.84695  | -0.00130 | 0.02088  | 0.00000 | 0.02094  | 1.86789  |
| A18 | 1.90840  | -0.00315 | -0.01625 | 0.00000 | -0.01626 | 1.89214  |
| A19 | 1.89403  | 0.00092  | 0.01612  | 0.00000 | 0.01618  | 1.91021  |
| A20 | 1.95577  | -0.00041 | -0.01077 | 0.00000 | -0.01078 | 1.94499  |
| A21 | 1.92280  | -0.00087 | -0.02066 | 0.00000 | -0.02069 | 1.90211  |
| A22 | 1.93211  | -0.00073 | -0.01726 | 0.00000 | -0.01726 | 1.91485  |
| A23 | 1.86465  | 0.00245  | 0.02416  | 0.00000 | 0.02417  | 1.88881  |
| A24 | 1.85816  | 0.00170  | 0.01548  | 0.00000 | 0.01550  | 1.87366  |
| A25 | 1.93147  | -0.00270 | -0.02509 | 0.00000 | -0.02511 | 1.90636  |
| A26 | 1.87122  | 0.00120  | 0.01047  | 0.00000 | 0.01046  | 1.88168  |
| A27 | 2.00526  | -0.00179 | -0.00785 | 0.00000 | -0.00779 | 1.99748  |
| A28 | 2.73723  | 0.00880  | 0.10744  | 0.00000 | 0.10744  | 2.84467  |
| A29 | 2.18798  | -0.00173 | -0.01179 | 0.00000 | -0.01178 | 2.17620  |
| A30 | 1.96344  | -0.00049 | -0.00913 | 0.00000 | -0.00913 | 1.95431  |
| A31 | 2.13176  | 0.00222  | 0.02091  | 0.00000 | 0.02091  | 2.15267  |
| A32 | 2.08458  | -0.00084 | -0.00347 | 0.00000 | -0.00347 | 2.08111  |
| A33 | 2.15244  | 0.00088  | 0.00321  | 0.00000 | 0.00321  | 2.15564  |
| A34 | 2.04617  | -0.00004 | 0.00026  | 0.00000 | 0.00026  | 2.04643  |
| A35 | 1.92339  | 0.00159  | 0.00227  | 0.00000 | 0.00228  | 1.92567  |
| A36 | 1.87710  | 0.00865  | 0.02448  | 0.00000 | 0.02449  | 1.90158  |
| A37 | 1.87223  | -0.00262 | -0.00889 | 0.00000 | -0.00888 | 1.86336  |
| D1  | -0.00660 | 0.00080  | 0.00329  | 0.00000 | 0.00333  | -0.00327 |

|     |          |          |          |         |          |          |
|-----|----------|----------|----------|---------|----------|----------|
| D2  | -3.13110 | 0.00105  | -0.01216 | 0.00000 | -0.01214 | 3.13995  |
| D3  | 3.14035  | -0.00083 | 0.00096  | 0.00000 | 0.00094  | 3.14129  |
| D4  | 0.01585  | -0.00058 | -0.01449 | 0.00000 | -0.01453 | 0.00132  |
| D5  | 0.01687  | -0.00170 | -0.00372 | 0.00000 | -0.00376 | 0.01311  |
| D6  | -2.98075 | -0.00302 | -0.05830 | 0.00000 | -0.05844 | -3.03920 |
| D7  | -3.12954 | -0.00023 | -0.00163 | 0.00000 | -0.00161 | -3.13115 |
| D8  | 0.15602  | -0.00156 | -0.05620 | 0.00000 | -0.05629 | 0.09973  |
| D9  | -0.00569 | 0.00030  | -0.00182 | 0.00000 | -0.00185 | -0.00753 |
| D10 | -3.11980 | 0.00023  | -0.02571 | 0.00000 | -0.02574 | 3.13765  |
| D11 | 3.12044  | 0.00008  | 0.01216  | 0.00000 | 0.01214  | 3.13259  |
| D12 | 0.00633  | 0.00000  | -0.01174 | 0.00000 | -0.01175 | -0.00542 |
| D13 | 0.01622  | -0.00138 | -0.00047 | 0.00000 | -0.00046 | 0.01576  |
| D14 | 3.06504  | 0.00124  | -0.01748 | 0.00000 | -0.01777 | 3.04727  |
| D15 | 3.13186  | -0.00124 | 0.02210  | 0.00000 | 0.02218  | -3.12914 |
| D16 | -0.10250 | 0.00138  | 0.00508  | 0.00000 | 0.00487  | -0.09763 |
| D17 | 0.05953  | -0.00010 | 0.06482  | 0.00000 | 0.06485  | 0.12438  |
| D18 | -3.08222 | -0.00024 | 0.06814  | 0.00000 | 0.06817  | -3.01404 |
| D19 | -3.05077 | -0.00030 | 0.03762  | 0.00000 | 0.03758  | -3.01319 |
| D20 | 0.09066  | -0.00044 | 0.04094  | 0.00000 | 0.04091  | 0.13158  |
| D21 | -0.02051 | 0.00193  | 0.00262  | 0.00000 | 0.00264  | -0.01787 |
| D22 | 2.98811  | 0.00188  | 0.05163  | 0.00000 | 0.05161  | 3.03972  |
| D23 | -3.08990 | 0.00178  | 0.03180  | 0.00000 | 0.03157  | -3.05833 |
| D24 | -0.08129 | 0.00172  | 0.08081  | 0.00000 | 0.08054  | -0.00074 |
| D25 | 2.33354  | 0.00003  | 1.61910  | 0.00000 | 1.61907  | -2.33057 |
| D26 | -0.90604 | 0.00178  | 1.59315  | 0.00000 | 1.59317  | 0.68714  |
| D27 | 1.25185  | 0.00099  | 0.39175  | 0.00000 | 0.39178  | 1.64363  |
| D28 | -2.98217 | 0.00381  | 0.43014  | 0.00000 | 0.43013  | -2.55204 |
| D29 | -0.91154 | 0.00045  | 0.40879  | 0.00000 | 0.40880  | -0.50273 |
| D30 | -1.72944 | 0.00035  | 0.33200  | 0.00000 | 0.33201  | -1.39743 |
| D31 | 0.31973  | 0.00317  | 0.37040  | 0.00000 | 0.37036  | 0.69009  |
| D32 | 2.39035  | -0.00020 | 0.34904  | 0.00000 | 0.34904  | 2.73939  |
| D33 | -1.38324 | 0.00297  | 0.11160  | 0.00000 | 0.11159  | -1.27165 |
| D34 | 0.72102  | 0.00078  | 0.08587  | 0.00000 | 0.08588  | 0.80690  |
| D35 | 2.87181  | 0.00096  | 0.09951  | 0.00000 | 0.09948  | 2.97128  |
| D36 | 2.87987  | 0.00135  | 0.06942  | 0.00000 | 0.06943  | 2.94930  |
| D37 | -1.29906 | -0.00085 | 0.04369  | 0.00000 | 0.04373  | -1.25534 |
| D38 | 0.85172  | -0.00067 | 0.05733  | 0.00000 | 0.05732  | 0.90904  |
| D39 | 0.75276  | 0.00207  | 0.09141  | 0.00000 | 0.09141  | 0.84417  |
| D40 | 2.85702  | -0.00013 | 0.06568  | 0.00000 | 0.06570  | 2.92272  |
| D41 | -1.27538 | 0.00005  | 0.07932  | 0.00000 | 0.07930  | -1.19608 |
| D42 | 3.04845  | -0.00196 | -0.12713 | 0.00000 | -0.12714 | 2.92131  |
| D43 | -1.19922 | 0.00070  | -0.12233 | 0.00000 | -0.12234 | -1.32157 |
| D44 | 0.97988  | -0.00259 | -0.12047 | 0.00000 | -0.12046 | 0.85943  |
| D45 | 3.01539  | 0.00007  | -0.11566 | 0.00000 | -0.11566 | 2.89974  |

|     |          |          |          |         |          |          |
|-----|----------|----------|----------|---------|----------|----------|
| D46 | -1.17453 | 0.00121  | -0.09076 | 0.00000 | -0.09074 | -1.26528 |
| D47 | 0.86098  | 0.00387  | -0.08595 | 0.00000 | -0.08595 | 0.77503  |
| D48 | -3.13301 | -0.00016 | 0.00312  | 0.00000 | 0.00311  | -3.12989 |
| D49 | 0.00862  | -0.00002 | 0.00475  | 0.00000 | 0.00474  | 0.01336  |
| D50 | 0.00876  | -0.00001 | -0.00058 | 0.00000 | -0.00058 | 0.00818  |
| D51 | -3.13281 | 0.00014  | 0.00105  | 0.00000 | 0.00105  | -3.13175 |

| Item                 | Value    | Threshold | Converged? |
|----------------------|----------|-----------|------------|
| Maximum Force        | 0.019207 | 0.000450  | NO         |
| RMS Force            | 0.003398 | 0.000300  | NO         |
| Maximum Displacement | 2.412436 | 0.001800  | NO         |
| RMS Displacement     | 0.338052 | 0.001200  | NO         |

Predicted change in Energy=-4.121868D-04

GradGradGradGradGradGradGradGradGradGradGradGradGradGradGradGradGradGrad

Input orientation:

| Center Number | Atomic Number | Atomic Type | Coordinates (Angstroms) |           |           |
|---------------|---------------|-------------|-------------------------|-----------|-----------|
|               |               |             | X                       | Y         | Z         |
| 1             | 6             | 0           | -1.818655               | -2.014744 | 0.302893  |
| 2             | 6             | 0           | -2.812834               | -1.125711 | 0.046260  |
| 3             | 7             | 0           | -2.224859               | 0.135960  | 0.017296  |
| 4             | 6             | 0           | -0.907897               | 0.003182  | 0.261382  |
| 5             | 7             | 0           | -0.642527               | -1.293507 | 0.422809  |
| 6             | 6             | 0           | 0.728636                | -1.817823 | 0.582544  |
| 7             | 6             | 0           | 1.442844                | -1.940248 | -0.770564 |
| 8             | 1             | 0           | -1.847861               | -3.085678 | 0.406538  |
| 9             | 1             | 0           | -3.864045               | -1.281647 | -0.112921 |
| 10            | 1             | 0           | 1.268155                | -1.112890 | 1.215238  |
| 11            | 1             | 0           | 0.672208                | -2.779374 | 1.091456  |
| 12            | 1             | 0           | 1.028217                | -2.779869 | -1.331022 |
| 13            | 1             | 0           | 1.275038                | -1.013115 | -1.332057 |
| 14            | 35            | 0           | 1.745384                | 1.824309  | -0.140828 |
| 15            | 1             | 0           | -0.104397               | 0.780416  | 0.237276  |
| 16            | 6             | 0           | -2.834297               | 1.399281  | -0.217111 |
| 17            | 6             | 0           | -4.141517               | 1.598752  | -0.323719 |
| 18            | 1             | 0           | -2.102610               | 2.192124  | -0.303420 |
| 19            | 1             | 0           | -4.509560               | 2.597386  | -0.513670 |
| 20            | 1             | 0           | -4.876242               | 0.809302  | -0.229121 |
| 21            | 7             | 0           | 2.850510                | -2.236271 | -0.496220 |
| 22            | 1             | 0           | 3.319706                | -2.529178 | -1.343319 |
| 23            | 1             | 0           | 3.312126                | -1.385741 | -0.184434 |

Distance matrix (angstroms):

|    |    | 1        | 2        | 3        | 4        | 5        |
|----|----|----------|----------|----------|----------|----------|
| 1  | C  | 0.000000 |          |          |          |          |
| 2  | C  | 1.358172 | 0.000000 |          |          |          |
| 3  | N  | 2.207283 | 1.392253 | 0.000000 |          |          |
| 4  | C  | 2.214324 | 2.224739 | 1.345956 | 0.000000 |          |
| 5  | N  | 1.384861 | 2.209112 | 2.170621 | 1.333373 | 0.000000 |
| 6  | C  | 2.570151 | 3.648099 | 3.586071 | 2.469301 | 1.476655 |
| 7  | C  | 3.434419 | 4.409247 | 4.287588 | 3.219909 | 2.488209 |
| 8  | H  | 1.076334 | 2.214145 | 3.266893 | 3.231975 | 2.159855 |
| 9  | H  | 2.212228 | 1.074569 | 2.171059 | 3.244950 | 3.265781 |
| 10 | H  | 3.342770 | 4.245132 | 3.898184 | 2.625007 | 2.076360 |
| 11 | H  | 2.722295 | 3.996567 | 4.248057 | 3.305809 | 2.093661 |
| 12 | H  | 3.370426 | 4.403045 | 4.571927 | 3.745619 | 2.841932 |
| 13 | H  | 3.639678 | 4.315452 | 3.923060 | 2.887405 | 2.614427 |
| 14 | Br | 5.257146 | 5.432768 | 4.317216 | 3.243174 | 3.967440 |
| 15 | H  | 3.279620 | 3.317445 | 2.227122 | 1.118162 | 2.150619 |
| 16 | C  | 3.599653 | 2.538782 | 1.422091 | 2.426740 | 3.530505 |
| 17 | C  | 4.341161 | 3.053683 | 2.435083 | 3.653010 | 4.600587 |
| 18 | H  | 4.259810 | 3.410971 | 2.084613 | 2.556914 | 3.848231 |
| 19 | H  | 5.401804 | 4.129631 | 3.400059 | 4.505838 | 5.565068 |
| 20 | H  | 4.196083 | 2.842141 | 2.746624 | 4.078994 | 4.771915 |
| 21 | N  | 4.742231 | 5.796644 | 5.625882 | 4.440127 | 3.732924 |
| 22 | H  | 5.420093 | 6.442724 | 6.300511 | 5.182716 | 4.510585 |
| 23 | H  | 5.192113 | 6.134816 | 5.745822 | 4.465025 | 4.002065 |
|    |    | 6        | 7        | 8        | 9        | 10       |
| 6  | C  | 0.000000 |          |          |          |          |
| 7  | C  | 1.534921 | 0.000000 |          |          |          |
| 8  | H  | 2.876938 | 3.677815 | 0.000000 |          |          |
| 9  | H  | 4.675882 | 5.387886 | 2.754879 | 0.000000 |          |
| 10 | H  | 1.090097 | 2.158343 | 3.775638 | 5.303957 | 0.000000 |
| 11 | H  | 1.089383 | 2.182917 | 2.629389 | 4.926591 | 1.774159 |
| 12 | H  | 2.162641 | 1.091326 | 3.374086 | 5.259530 | 3.052839 |
| 13 | H  | 2.147512 | 1.096818 | 4.131674 | 5.288532 | 2.549257 |
| 14 | Br | 3.849957 | 3.828836 | 6.108927 | 6.411976 | 3.270138 |
| 15 | H  | 2.750272 | 3.288116 | 4.244408 | 4.302290 | 2.534742 |
| 16 | C  | 4.866591 | 5.454604 | 4.634312 | 2.873780 | 5.019238 |
| 17 | C  | 6.017698 | 6.626407 | 5.266689 | 2.901400 | 6.243873 |
| 18 | H  | 4.988042 | 5.464885 | 5.331429 | 3.899491 | 4.958982 |
| 19 | H  | 6.937900 | 7.489140 | 6.342605 | 3.952744 | 7.080767 |
| 20 | H  | 6.243016 | 6.912600 | 4.974537 | 2.325965 | 6.598077 |
| 21 | N  | 2.416853 | 1.464383 | 4.859131 | 6.792898 | 2.587454 |
| 22 | H  | 3.305846 | 2.048780 | 5.484108 | 7.394355 | 3.572247 |
| 23 | H  | 2.729353 | 2.035986 | 5.464842 | 7.177282 | 2.492257 |
|    |    | 11       | 12       | 13       | 14       | 15       |

|    |    |          |          |          |          |          |
|----|----|----------|----------|----------|----------|----------|
| 11 | H  | 0.000000 |          |          |          |          |
| 12 | H  | 2.448498 | 0.000000 |          |          |          |
| 13 | H  | 3.058837 | 1.783912 | 0.000000 |          |          |
| 14 | Br | 4.885092 | 4.809298 | 3.113073 | 0.000000 |          |
| 15 | H  | 3.742304 | 4.051913 | 2.753615 | 2.157398 | 0.000000 |
| 16 | C  | 5.609731 | 5.798716 | 4.893812 | 4.599995 | 2.835811 |
| 17 | C  | 6.659028 | 6.849315 | 6.097348 | 5.894059 | 4.157250 |
| 18 | H  | 5.861833 | 5.964793 | 4.768664 | 3.868951 | 2.505620 |
| 19 | H  | 7.637846 | 7.762080 | 6.867826 | 6.313555 | 4.823978 |
| 20 | H  | 6.738533 | 6.997068 | 6.509679 | 6.699550 | 4.794671 |
| 21 | N  | 2.749667 | 2.076811 | 2.162602 | 4.223259 | 4.286011 |
| 22 | H  | 3.605547 | 2.305194 | 2.545436 | 4.783025 | 5.017586 |
| 23 | H  | 3.246424 | 2.911099 | 2.367618 | 3.572254 | 4.067272 |
|    |    | 16       | 17       | 18       | 19       | 20       |
| 16 | C  | 0.000000 |          |          |          |          |
| 17 | C  | 1.326641 | 0.000000 |          |          |          |
| 18 | H  | 1.082319 | 2.123592 | 0.000000 |          |          |
| 19 | H  | 2.080843 | 1.081114 | 2.449867 | 0.000000 |          |
| 20 | H  | 2.125502 | 1.082590 | 3.100121 | 1.847341 | 0.000000 |
| 21 | N  | 6.753678 | 7.976565 | 6.646898 | 8.805405 | 8.309606 |
| 22 | H  | 7.387347 | 8.587738 | 7.264544 | 9.395072 | 8.919667 |
| 23 | H  | 6.748032 | 8.030155 | 6.491120 | 8.783647 | 8.477593 |
|    |    | 21       | 22       | 23       |          |          |
| 21 | N  | 0.000000 |          |          |          |          |
| 22 | H  | 1.011690 | 0.000000 |          |          |          |
| 23 | H  | 1.016711 | 1.628042 | 0.000000 |          |          |

Stoichiometry C7H12BrN3

Framework group C1[X(C7H12BrN3)]

Deg. of freedom 63

Full point group C1 NOp 1

Largest Abelian subgroup C1 NOp 1

Largest concise Abelian subgroup C1 NOp 1

Standard orientation:

| Center<br>Number | Atomic<br>Number | Atomic<br>Type | Coordinates (Angstroms) |           |           |
|------------------|------------------|----------------|-------------------------|-----------|-----------|
|                  |                  |                | X                       | Y         | Z         |
| 1                | 6                | 0              | -1.706853               | 2.135928  | -0.237207 |
| 2                | 6                | 0              | -2.713653               | 1.264702  | 0.031027  |
| 3                | 7                | 0              | -2.159660               | -0.012038 | -0.006336 |
| 4                | 6                | 0              | -0.850607               | 0.094835  | -0.300539 |
| 5                | 7                | 0              | -0.556725               | 1.388975  | -0.429838 |
| 6                | 6                | 0              | 0.820594                | 1.882733  | -0.629098 |
| 7                | 6                | 0              | 1.592438                | 1.940226  | 0.696396  |

|    |    |   |           |           |           |
|----|----|---|-----------|-----------|-----------|
| 8  | 1  | 0 | -1.711002 | 3.210179  | -0.304014 |
| 9  | 1  | 0 | -3.752851 | 1.442294  | 0.238938  |
| 10 | 1  | 0 | 1.314424  | 1.186119  | -1.306720 |
| 11 | 1  | 0 | 0.769750  | 2.862276  | -1.103086 |
| 12 | 1  | 0 | 1.224083  | 2.770639  | 1.301145  |
| 13 | 1  | 0 | 1.422401  | 0.999081  | 1.233372  |
| 14 | 35 | 0 | 1.766139  | -1.807151 | -0.069751 |
| 15 | 1  | 0 | -0.068318 | -0.703334 | -0.335684 |
| 16 | 6  | 0 | -2.793311 | -1.266419 | 0.211279  |
| 17 | 6  | 0 | -4.100058 | -1.435471 | 0.365583  |
| 18 | 1  | 0 | -2.080639 | -2.080451 | 0.240722  |
| 19 | 1  | 0 | -4.487187 | -2.430145 | 0.537517  |
| 20 | 1  | 0 | -4.816195 | -0.624467 | 0.327875  |
| 21 | 7  | 0 | 2.995310  | 2.208878  | 0.373608  |
| 22 | 1  | 0 | 3.506468  | 2.460363  | 1.209664  |
| 23 | 1  | 0 | 3.420435  | 1.357836  | 0.014861  |

-----

Rotational constants (GHZ):      0.8074380      0.4879127      0.3146441

Standard basis: 6-311++G(d,p) (5D, 7F)

There are    365 symmetry adapted cartesian basis functions of A    symmetry.

There are    352 symmetry adapted basis functions of A    symmetry.

    352 basis functions,    562 primitive gaussians,    365 cartesian basis functions

    55 alpha electrons      55 beta electrons

        nuclear repulsion energy      840.0462127929 Hartrees.

NAtoms=    23 NActive=    23 NUniq=    23 SFac= 1.00D+00 NAtFMM=    60 NAOKFM=F

Big=F

Integral buffers will be    131072 words long.

Raffenetti 2 integral format.

Two-electron integral symmetry is turned on.

One-electron integrals computed using PRISM.

NBasis=    352 RedAO= T EigKep= 4.70D-06 NBF=    352

NBsUse=    352 1.00D-06 EigRej= -1.00D+00 NBFU=    352

Lowest      energy      guess      from      the      checkpoint      file:

"/home/suqian/liuwen/qianmengshijie/nh2/nh2.chk"

B after Tr=    0.000000    0.000000    0.000000

    Rot=    0.999974    0.002931    0.001593    -0.006371 Ang=    0.82 deg.

B after Tr=    0.000000    0.000000    0.000000

    Rot=    0.999298    -0.034375    -0.012343    0.008326 Ang=    -4.29 deg.

Requested convergence on RMS density matrix=1.00D-08 within 128 cycles.

Requested convergence on MAX density matrix=1.00D-06.

Requested convergence on                    energy=1.00D-06.

No special actions if energy rises.

SCF Done: E(RB3LYP) = -3012.46723102      A.U. after    12 cycles

             NFock= 12 Conv=0.62D-08      -V/T= 2.0017



Calling FoFJK, ICntrl= 2127 FMM=F ISym2X=0 I1Cent= 0 IOpClX= 0 NMat=1 NMatS=1  
NMatT=0.

\*\*\*\*\* Axes restored to original set \*\*\*\*\*

| Center<br>Number | Atomic<br>Number | Forces (Hartrees/Bohr) |              |              |
|------------------|------------------|------------------------|--------------|--------------|
|                  |                  | X                      | Y            | Z            |
| 1                | 6                | -0.000207715           | -0.000082723 | -0.001408984 |
| 2                | 6                | -0.000243820           | -0.000107389 | 0.000493425  |
| 3                | 7                | -0.000572353           | -0.000409540 | 0.001465779  |
| 4                | 6                | 0.003208390            | -0.001349192 | -0.002139679 |
| 5                | 7                | -0.001125749           | 0.000641320  | 0.002159561  |
| 6                | 6                | 0.000000414            | -0.000289126 | -0.000553765 |
| 7                | 6                | 0.002823560            | -0.002426994 | 0.002688558  |
| 8                | 1                | -0.000014895           | -0.000105491 | -0.000233895 |
| 9                | 1                | -0.000088140           | -0.000039137 | -0.000015526 |
| 10               | 1                | 0.000018920            | 0.000369393  | -0.000118226 |
| 11               | 1                | -0.000468551           | -0.000231391 | 0.000341407  |
| 12               | 1                | -0.002506359           | -0.000562980 | -0.001726280 |
| 13               | 1                | 0.001426291            | 0.000149193  | -0.000314956 |
| 14               | 35               | 0.000843636            | -0.000577679 | 0.000153040  |
| 15               | 1                | -0.002528539           | 0.002124919  | -0.000341925 |
| 16               | 6                | -0.000287579           | 0.000020158  | 0.000167700  |
| 17               | 6                | 0.000136374            | -0.000335408 | -0.000034003 |
| 18               | 1                | 0.000409185            | 0.000420426  | 0.000076742  |
| 19               | 1                | 0.000076771            | 0.000023677  | -0.000005956 |
| 20               | 1                | -0.000139367           | -0.000034623 | -0.000018555 |
| 21               | 7                | -0.002794974           | 0.002816062  | 0.000901278  |
| 22               | 1                | 0.001129025            | -0.000995099 | -0.001476001 |
| 23               | 1                | 0.000905476            | 0.000981624  | -0.000059738 |

Cartesian Forces: Max 0.003208390 RMS 0.001187865

GradGradGradGradGradGradGradGradGradGradGradGradGradGradGradGradGradGradGradGrad

Berny optimization.

Using GEDIIS/GDIIS optimizer.

FormGI is forming the generalized inverse of G from B-inverse, IUseBI=4.

Internal Forces: Max 0.002736984 RMS 0.000647102

Search for a local minimum.

Step number 20 out of a maximum of 121

All quantities printed in internal units (Hartrees-Bohrs-Radians)

Mixed Optimization -- En-DIIS/RFO-DIIS

Update second derivatives using D2CorX and points 18 20

ITU= 0 -1 0 0 0 1 1 -1 1 -1 1 1 1 1 1 1 1 0 1 0 0

Use linear search instead of GDIIIS.

|                 |         |         |         |         |         |
|-----------------|---------|---------|---------|---------|---------|
| Eigenvalues --- | 0.00002 | 0.00019 | 0.00434 | 0.00713 | 0.01358 |
| Eigenvalues --- | 0.01407 | 0.01821 | 0.02068 | 0.02170 | 0.02311 |
| Eigenvalues --- | 0.02391 | 0.02938 | 0.03062 | 0.03084 | 0.03479 |
| Eigenvalues --- | 0.03875 | 0.04275 | 0.04317 | 0.04625 | 0.05272 |
| Eigenvalues --- | 0.05843 | 0.09015 | 0.09462 | 0.10969 | 0.12613 |
| Eigenvalues --- | 0.12929 | 0.15131 | 0.15922 | 0.15988 | 0.16000 |
| Eigenvalues --- | 0.16017 | 0.16050 | 0.16156 | 0.21217 | 0.21732 |
| Eigenvalues --- | 0.22024 | 0.22955 | 0.23476 | 0.24885 | 0.24951 |
| Eigenvalues --- | 0.28841 | 0.31587 | 0.34012 | 0.34494 | 0.34628 |
| Eigenvalues --- | 0.34796 | 0.35084 | 0.35689 | 0.35858 | 0.35943 |
| Eigenvalues --- | 0.36438 | 0.36660 | 0.38116 | 0.40095 | 0.42198 |
| Eigenvalues --- | 0.42937 | 0.46802 | 0.47689 | 0.48507 | 0.50128 |
| Eigenvalues --- | 0.54249 | 0.59443 | 0.60358 |         |         |

RFO step: Lambda=-1.46547356D-03 EMin= 2.18199694D-05

Quartic linear search produced a step of 0.95537.

Iteration 1 RMS(Cart)= 0.08979701 RMS(Int)= 0.03849667

Iteration 2 RMS(Cart)= 0.03203802 RMS(Int)= 0.00480786

Iteration 3 RMS(Cart)= 0.00479536 RMS(Int)= 0.00023918

Iteration 4 RMS(Cart)= 0.00011678 RMS(Int)= 0.00023249

Iteration 5 RMS(Cart)= 0.00000002 RMS(Int)= 0.00023249

| Variable | Old X   | -DE/DX   | Delta X<br>(Linear) | Delta X<br>(Quad) | Delta X<br>(Total) | New X   |
|----------|---------|----------|---------------------|-------------------|--------------------|---------|
| R1       | 2.56657 | -0.00028 | -0.00002            | -0.00163          | -0.00165           | 2.56492 |
| R2       | 2.61701 | 0.00052  | -0.00082            | 0.00143           | 0.00060            | 2.61760 |
| R3       | 2.03398 | 0.00008  | 0.00000             | 0.00032           | 0.00033            | 2.03430 |
| R4       | 2.63098 | 0.00003  | 0.00063             | -0.00025          | 0.00039            | 2.63137 |
| R5       | 2.03064 | 0.00009  | -0.00005            | 0.00043           | 0.00038            | 2.03103 |
| R6       | 2.54349 | 0.00040  | 0.00063             | 0.00343           | 0.00407            | 2.54756 |
| R7       | 2.68736 | -0.00003 | -0.00131            | -0.00222          | -0.00353           | 2.68383 |
| R8       | 2.51971 | -0.00007 | -0.00047            | -0.00139          | -0.00187           | 2.51784 |
| R9       | 2.11302 | -0.00013 | -0.00005            | -0.00320          | -0.00326           | 2.10976 |
| R10      | 2.79047 | 0.00053  | 0.00037             | 0.00591           | 0.00627            | 2.79675 |
| R11      | 2.90058 | 0.00043  | -0.00050            | 0.00337           | 0.00287            | 2.90345 |
| R12      | 2.05999 | 0.00018  | -0.00045            | -0.00091          | -0.00136           | 2.05862 |
| R13      | 2.05863 | 0.00039  | -0.00003            | 0.00221           | 0.00218            | 2.06081 |
| R14      | 2.06231 | 0.00227  | -0.00047            | 0.01265           | 0.01218            | 2.07448 |
| R15      | 2.07268 | 0.00007  | -0.00031            | -0.00178          | -0.00209           | 2.07059 |
| R16      | 2.76728 | -0.00141 | -0.00087            | -0.01081          | -0.01169           | 2.75560 |
| R17      | 4.07689 | 0.00042  | 0.00485             | 0.01391           | 0.01875            | 4.09564 |
| R18      | 2.50699 | -0.00012 | 0.00015             | -0.00016          | -0.00001           | 2.50698 |
| R19      | 2.04529 | 0.00058  | -0.00109            | 0.00058           | -0.00050           | 2.04478 |
| R20      | 2.04301 | 0.00000  | -0.00006            | -0.00008          | -0.00013           | 2.04288 |
| R21      | 2.04580 | 0.00012  | -0.00017            | 0.00015           | -0.00003           | 2.04577 |

|     |          |          |          |          |          |          |
|-----|----------|----------|----------|----------|----------|----------|
| R22 | 1.91182  | 0.00204  | -0.00045 | 0.00504  | 0.00459  | 1.91640  |
| R23 | 1.92131  | 0.00122  | 0.00038  | 0.00077  | 0.00115  | 1.92245  |
| A1  | 1.87247  | 0.00007  | -0.00001 | 0.00193  | 0.00176  | 1.87424  |
| A2  | 2.27789  | -0.00009 | -0.00009 | -0.00069 | -0.00071 | 2.27718  |
| A3  | 2.13281  | 0.00002  | 0.00009  | -0.00122 | -0.00106 | 2.13175  |
| A4  | 1.86291  | -0.00022 | 0.00019  | -0.00217 | -0.00210 | 1.86081  |
| A5  | 2.27718  | 0.00008  | -0.00004 | 0.00035  | 0.00036  | 2.27755  |
| A6  | 2.14309  | 0.00014  | -0.00015 | 0.00182  | 0.00173  | 2.14482  |
| A7  | 1.89658  | 0.00047  | -0.00074 | 0.00269  | 0.00182  | 1.89840  |
| A8  | 2.24911  | -0.00014 | -0.00197 | -0.00363 | -0.00557 | 2.24354  |
| A9  | 2.13749  | -0.00034 | 0.00270  | 0.00099  | 0.00372  | 2.14121  |
| A10 | 1.88875  | -0.00052 | 0.00017  | -0.00243 | -0.00272 | 1.88604  |
| A11 | 2.25316  | -0.00019 | 0.01635  | 0.01045  | 0.02662  | 2.27978  |
| A12 | 2.13598  | 0.00077  | -0.01617 | -0.00397 | -0.02044 | 2.11554  |
| A13 | 1.90389  | 0.00021  | 0.00037  | 0.00085  | 0.00101  | 1.90489  |
| A14 | 2.23071  | -0.00014 | 0.00145  | -0.00706 | -0.00561 | 2.22510  |
| A15 | 2.14504  | -0.00008 | -0.00240 | 0.00551  | 0.00315  | 2.14819  |
| A16 | 1.94446  | 0.00151  | -0.00165 | 0.01229  | 0.01064  | 1.95510  |
| A17 | 1.86789  | -0.00058 | -0.00297 | -0.00267 | -0.00563 | 1.86226  |
| A18 | 1.89214  | -0.00073 | 0.00235  | -0.01045 | -0.00815 | 1.88399  |
| A19 | 1.91021  | -0.00036 | -0.00228 | -0.00573 | -0.00799 | 1.90222  |
| A20 | 1.94499  | -0.00016 | 0.00155  | 0.00359  | 0.00515  | 1.95014  |
| A21 | 1.90211  | 0.00029  | 0.00297  | 0.00259  | 0.00556  | 1.90767  |
| A22 | 1.91485  | -0.00095 | 0.00250  | 0.00192  | 0.00363  | 1.91848  |
| A23 | 1.88881  | 0.00092  | -0.00350 | -0.00816 | -0.01223 | 1.87658  |
| A24 | 1.87366  | 0.00053  | -0.00222 | 0.00836  | 0.00541  | 1.87907  |
| A25 | 1.90636  | -0.00030 | 0.00362  | -0.00302 | 0.00123  | 1.90759  |
| A26 | 1.88168  | 0.00169  | -0.00153 | 0.05463  | 0.05302  | 1.93470  |
| A27 | 1.99748  | -0.00189 | 0.00119  | -0.05235 | -0.05117 | 1.94631  |
| A28 | 2.84467  | -0.00274 | -0.01557 | -0.03886 | -0.05444 | 2.79023  |
| A29 | 2.17620  | -0.00029 | 0.00171  | 0.00027  | 0.00198  | 2.17818  |
| A30 | 1.95431  | 0.00011  | 0.00132  | 0.00295  | 0.00427  | 1.95858  |
| A31 | 2.15267  | 0.00018  | -0.00303 | -0.00322 | -0.00625 | 2.14641  |
| A32 | 2.08111  | -0.00016 | 0.00050  | -0.00068 | -0.00018 | 2.08093  |
| A33 | 2.15564  | 0.00017  | -0.00046 | 0.00071  | 0.00024  | 2.15589  |
| A34 | 2.04643  | 0.00000  | -0.00004 | -0.00003 | -0.00007 | 2.04636  |
| A35 | 1.92567  | 0.00047  | -0.00032 | 0.02141  | 0.02080  | 1.94647  |
| A36 | 1.90158  | 0.00039  | -0.00354 | 0.01722  | 0.01339  | 1.91497  |
| A37 | 1.86336  | -0.00032 | 0.00130  | 0.01592  | 0.01666  | 1.88002  |
| D1  | -0.00327 | 0.00034  | -0.00044 | 0.00780  | 0.00722  | 0.00394  |
| D2  | 3.13995  | 0.00031  | 0.00178  | 0.00877  | 0.01055  | -3.13269 |
| D3  | 3.14129  | -0.00006 | -0.00016 | -0.00110 | -0.00131 | 3.13997  |
| D4  | 0.00132  | -0.00009 | 0.00206  | -0.00013 | 0.00202  | 0.00334  |
| D5  | 0.01311  | -0.00074 | 0.00050  | -0.03303 | -0.03246 | -0.01935 |

|     |          |          |          |          |          |          |
|-----|----------|----------|----------|----------|----------|----------|
| D6  | -3.03920 | -0.00056 | 0.00831  | -0.02451 | -0.01607 | -3.05527 |
| D7  | -3.13115 | -0.00038 | 0.00025  | -0.02504 | -0.02480 | 3.12724  |
| D8  | 0.09973  | -0.00020 | 0.00806  | -0.01652 | -0.00841 | 0.09132  |
| D9  | -0.00753 | 0.00017  | 0.00023  | 0.01973  | 0.02008  | 0.01255  |
| D10 | 3.13765  | 0.00004  | 0.00370  | 0.00365  | 0.00758  | -3.13796 |
| D11 | 3.13259  | 0.00020  | -0.00177 | 0.01886  | 0.01706  | -3.13353 |
| D12 | -0.00542 | 0.00006  | 0.00169  | 0.00277  | 0.00457  | -0.00085 |
| D13 | 0.01576  | -0.00064 | 0.00007  | -0.04049 | -0.04044 | -0.02468 |
| D14 | 3.04727  | 0.00008  | 0.00226  | 0.00104  | 0.00394  | 3.05121  |
| D15 | -3.12914 | -0.00052 | -0.00312 | -0.02566 | -0.02885 | 3.12520  |
| D16 | -0.09763 | 0.00020  | -0.00093 | 0.01587  | 0.01553  | -0.08210 |
| D17 | 0.12438  | -0.00007 | -0.00937 | -0.02635 | -0.03578 | 0.08859  |
| D18 | -3.01404 | -0.00005 | -0.00985 | -0.02441 | -0.03432 | -3.04837 |
| D19 | -3.01319 | -0.00022 | -0.00548 | -0.04441 | -0.04983 | -3.06302 |
| D20 | 0.13158  | -0.00020 | -0.00596 | -0.04248 | -0.04837 | 0.08320  |
| D21 | -0.01787 | 0.00086  | -0.00036 | 0.04557  | 0.04509  | 0.02721  |
| D22 | 3.03972  | 0.00069  | -0.00750 | 0.03679  | 0.02903  | 3.06875  |
| D23 | -3.05833 | 0.00027  | -0.00483 | 0.00632  | 0.00226  | -3.05608 |
| D24 | -0.00074 | 0.00009  | -0.01197 | -0.00245 | -0.01380 | -0.01454 |
| D25 | -2.33057 | -0.00076 | -0.23473 | -0.19359 | -0.42833 | -2.75890 |
| D26 | 0.68714  | -0.00003 | -0.23092 | -0.14659 | -0.37750 | 0.30964  |
| D27 | 1.64363  | -0.00020 | -0.05676 | -0.03891 | -0.09574 | 1.54789  |
| D28 | -2.55204 | -0.00014 | -0.06237 | -0.04049 | -0.10293 | -2.65496 |
| D29 | -0.50273 | -0.00049 | -0.05924 | -0.04428 | -0.10355 | -0.60629 |
| D30 | -1.39743 | -0.00002 | -0.04812 | -0.02898 | -0.07706 | -1.47449 |
| D31 | 0.69009  | 0.00005  | -0.05372 | -0.03056 | -0.08425 | 0.60584  |
| D32 | 2.73939  | -0.00030 | -0.05060 | -0.03435 | -0.08487 | 2.65452  |
| D33 | -1.27165 | 0.00065  | -0.01619 | 0.05762  | 0.04143  | -1.23022 |
| D34 | 0.80690  | 0.00028  | -0.01244 | 0.05023  | 0.03775  | 0.84465  |
| D35 | 2.97128  | -0.00114 | -0.01446 | -0.01299 | -0.02745 | 2.94383  |
| D36 | 2.94930  | 0.00067  | -0.01005 | 0.05704  | 0.04701  | 2.99631  |
| D37 | -1.25534 | 0.00030  | -0.00630 | 0.04966  | 0.04333  | -1.21200 |
| D38 | 0.90904  | -0.00112 | -0.00832 | -0.01356 | -0.02187 | 0.88718  |
| D39 | 0.84417  | 0.00065  | -0.01325 | 0.05530  | 0.04208  | 0.88625  |
| D40 | 2.92272  | 0.00029  | -0.00950 | 0.04792  | 0.03840  | 2.96113  |
| D41 | -1.19608 | -0.00114 | -0.01152 | -0.01530 | -0.02679 | -1.22288 |
| D42 | 2.92131  | -0.00042 | 0.01842  | -0.29584 | -0.27747 | 2.64384  |
| D43 | -1.32157 | -0.00030 | 0.01772  | -0.25414 | -0.23618 | -1.55775 |
| D44 | 0.85943  | -0.00046 | 0.01747  | -0.33128 | -0.31451 | 0.54492  |
| D45 | 2.89974  | -0.00035 | 0.01677  | -0.28958 | -0.27322 | 2.62652  |
| D46 | -1.26528 | -0.00007 | 0.01317  | -0.33297 | -0.31949 | -1.58477 |
| D47 | 0.77503  | 0.00004  | 0.01246  | -0.29127 | -0.27820 | 0.49683  |
| D48 | -3.12989 | 0.00002  | -0.00045 | -0.00055 | -0.00100 | -3.13090 |
| D49 | 0.01336  | -0.00001 | -0.00069 | -0.00289 | -0.00358 | 0.00978  |

D50            0.00818    0.00000    0.00009   -0.00268   -0.00259    0.00558  
 D51           -3.13175   -0.00003   -0.00015   -0.00502   -0.00517   -3.13692

| Item                 | Value    | Threshold | Converged? |
|----------------------|----------|-----------|------------|
| Maximum Force        | 0.002737 | 0.000450  | NO         |
| RMS Force            | 0.000647 | 0.000300  | NO         |
| Maximum Displacement | 0.564918 | 0.001800  | NO         |
| RMS Displacement     | 0.112823 | 0.001200  | NO         |

Predicted change in Energy=-1.505867D-03

GradGradGradGradGradGradGradGradGradGradGradGradGradGradGradGradGrad

Input orientation:

| Center Number | Atomic Number | Atomic Type | Coordinates (Angstroms) |           |           |
|---------------|---------------|-------------|-------------------------|-----------|-----------|
|               |               |             | X                       | Y         | Z         |
| 1             | 6             | 0           | -1.793780               | -1.986607 | 0.255748  |
| 2             | 6             | 0           | -2.805823               | -1.114565 | 0.015812  |
| 3             | 7             | 0           | -2.242818               | 0.159000  | 0.017267  |
| 4             | 6             | 0           | -0.917582               | 0.047185  | 0.237829  |
| 5             | 7             | 0           | -0.634146               | -1.243897 | 0.405216  |
| 6             | 6             | 0           | 0.744761                | -1.752181 | 0.580116  |
| 7             | 6             | 0           | 1.450572                | -1.977784 | -0.765834 |
| 8             | 1             | 0           | -1.800757               | -3.060060 | 0.336478  |
| 9             | 1             | 0           | -3.853638               | -1.289273 | -0.147588 |
| 10            | 1             | 0           | 1.288651                | -0.994473 | 1.142969  |
| 11            | 1             | 0           | 0.692741                | -2.669480 | 1.167587  |
| 12            | 1             | 0           | 1.006055                | -2.838898 | -1.281572 |
| 13            | 1             | 0           | 1.301900                | -1.076775 | -1.371362 |
| 14            | 35            | 0           | 1.864621                | 1.699557  | 0.109585  |
| 15            | 1             | 0           | -0.112497               | 0.820664  | 0.235421  |
| 16            | 6             | 0           | -2.884026               | 1.410297  | -0.183098 |
| 17            | 6             | 0           | -4.193141               | 1.577126  | -0.318542 |
| 18            | 1             | 0           | -2.178907               | 2.230267  | -0.219092 |
| 19            | 1             | 0           | -4.584829               | 2.572089  | -0.477557 |
| 20            | 1             | 0           | -4.906664               | 0.763887  | -0.279834 |
| 21            | 7             | 0           | 2.863632                | -2.210226 | -0.490924 |
| 22            | 1             | 0           | 3.288949                | -2.797423 | -1.199964 |
| 23            | 1             | 0           | 3.362250                | -1.323513 | -0.483376 |

Distance matrix (angstroms):

|   |   | 1        | 2        | 3        | 4 | 5 |
|---|---|----------|----------|----------|---|---|
| 1 | C | 0.000000 |          |          |   |   |
| 2 | C | 1.357298 | 0.000000 |          |   |   |
| 3 | N | 2.205026 | 1.392460 | 0.000000 |   |   |

|    |    |          |          |          |          |          |
|----|----|----------|----------|----------|----------|----------|
| 4  | C  | 2.214578 | 2.228096 | 1.348111 | 0.000000 |          |
| 5  | N  | 1.385176 | 2.210101 | 2.169436 | 1.332384 | 0.000000 |
| 6  | C  | 2.569896 | 3.651253 | 3.590967 | 2.473512 | 1.479975 |
| 7  | C  | 3.401401 | 4.412825 | 4.338229 | 3.273529 | 2.501199 |
| 8  | H  | 1.076507 | 2.213129 | 3.264914 | 3.231826 | 2.159665 |
| 9  | H  | 2.211779 | 1.074773 | 2.172421 | 3.248860 | 3.266922 |
| 10 | H  | 3.357510 | 4.248485 | 3.881879 | 2.602267 | 2.074521 |
| 11 | H  | 2.735060 | 3.998037 | 4.235687 | 3.292090 | 2.091440 |
| 12 | H  | 3.305878 | 4.380291 | 4.607554 | 3.786612 | 2.842453 |
| 13 | H  | 3.613657 | 4.335789 | 4.002556 | 2.962917 | 2.632951 |
| 14 | Br | 5.195485 | 5.453542 | 4.387812 | 3.238430 | 3.872357 |
| 15 | H  | 3.272292 | 3.323754 | 2.241352 | 1.116439 | 2.136202 |
| 16 | C  | 3.594465 | 2.533892 | 1.420224 | 2.429436 | 3.528856 |
| 17 | C  | 4.334390 | 3.046579 | 2.434668 | 3.657808 | 4.598744 |
| 18 | H  | 4.260966 | 3.411174 | 2.085688 | 2.562337 | 3.853033 |
| 19 | H  | 5.395313 | 4.123068 | 3.398950 | 4.509504 | 5.563177 |
| 20 | H  | 4.188331 | 2.833641 | 2.747768 | 4.085880 | 4.770210 |
| 21 | N  | 4.722183 | 5.796549 | 5.652197 | 4.463694 | 3.737821 |
| 22 | H  | 5.348893 | 6.438662 | 6.389251 | 5.277683 | 4.514500 |
| 23 | H  | 5.250776 | 6.191767 | 5.819388 | 4.551473 | 4.094766 |
|    |    | 6        | 7        | 8        | 9        | 10       |
| 6  | C  | 0.000000 |          |          |          |          |
| 7  | C  | 1.536440 | 0.000000 |          |          |          |
| 8  | H  | 2.872206 | 3.599660 | 0.000000 |          |          |
| 9  | H  | 4.678580 | 5.384321 | 2.753966 | 0.000000 |          |
| 10 | H  | 1.089376 | 2.153287 | 3.802830 | 5.309951 | 0.000000 |
| 11 | H  | 1.090534 | 2.188806 | 2.657221 | 4.929930 | 1.778022 |
| 12 | H  | 2.171431 | 1.097770 | 3.247336 | 5.225310 | 3.059438 |
| 13 | H  | 2.138888 | 1.095711 | 4.059139 | 5.303050 | 2.515712 |
| 14 | Br | 3.659232 | 3.802713 | 6.011691 | 6.457377 | 2.942349 |
| 15 | H  | 2.733723 | 3.358125 | 4.233255 | 4.312152 | 2.466087 |
| 16 | C  | 4.873588 | 5.532397 | 4.628987 | 2.868638 | 4.995259 |
| 17 | C  | 6.022852 | 6.684980 | 5.258902 | 2.891493 | 6.228899 |
| 18 | H  | 5.004645 | 5.583882 | 5.332844 | 3.898333 | 4.927283 |
| 19 | H  | 6.944243 | 7.563763 | 6.335204 | 3.943809 | 7.060045 |
| 20 | H  | 6.245696 | 6.940274 | 4.964783 | 2.311238 | 6.595311 |
| 21 | N  | 2.417963 | 1.458199 | 4.812830 | 6.788796 | 2.574534 |
| 22 | H  | 3.276294 | 2.059103 | 5.323038 | 7.375537 | 3.569475 |
| 23 | H  | 2.857625 | 2.040188 | 5.508575 | 7.223777 | 2.655763 |
|    |    | 11       | 12       | 13       | 14       | 15       |
| 11 | H  | 0.000000 |          |          |          |          |
| 12 | H  | 2.474925 | 0.000000 |          |          |          |
| 13 | H  | 3.058438 | 1.789040 | 0.000000 |          |          |
| 14 | Br | 4.645552 | 4.823902 | 3.196541 | 0.000000 |          |

|    |   |          |          |          |          |          |
|----|---|----------|----------|----------|----------|----------|
| 15 | H | 3.701141 | 4.116409 | 2.860514 | 2.167322 | 0.000000 |
| 16 | C | 5.591260 | 5.864728 | 5.011933 | 4.766443 | 2.864297 |
| 17 | C | 6.641843 | 6.889146 | 6.192503 | 6.074105 | 4.186975 |
| 18 | H | 5.846089 | 6.080237 | 4.937638 | 4.091430 | 2.542364 |
| 19 | H | 7.617958 | 7.821969 | 6.983314 | 6.534635 | 4.855675 |
| 20 | H | 6.725799 | 6.995984 | 6.567018 | 6.846709 | 4.822110 |
| 21 | N | 2.770261 | 2.114462 | 2.121058 | 4.079832 | 4.309433 |
| 22 | H | 3.515959 | 2.284728 | 2.634078 | 4.895554 | 5.169208 |
| 23 | H | 3.415200 | 2.912931 | 2.257087 | 3.425412 | 4.145845 |
|    |   | 16       | 17       | 18       | 19       | 20       |
| 16 | C | 0.000000 |          |          |          |          |
| 17 | C | 1.326634 | 0.000000 |          |          |          |
| 18 | H | 1.082053 | 2.119816 | 0.000000 |          |          |
| 19 | H | 2.080672 | 1.081044 | 2.443789 | 0.000000 |          |
| 20 | H | 2.125622 | 1.082577 | 3.097518 | 1.847232 | 0.000000 |
| 21 | N | 6.799891 | 8.010730 | 6.724513 | 8.851570 | 8.322704 |
| 22 | H | 7.539532 | 8.711788 | 7.492478 | 9.557714 | 8.983186 |
| 23 | H | 6.824943 | 8.094739 | 6.588142 | 8.850526 | 8.530745 |
|    |   | 21       | 22       | 23       |          |          |
| 21 | N | 0.000000 |          |          |          |          |
| 22 | H | 1.014117 | 0.000000 |          |          |          |
| 23 | H | 1.017318 | 1.640513 | 0.000000 |          |          |

Stoichiometry C7H12BrN3

Framework group C1[X(C7H12BrN3)]

Deg. of freedom 63

Full point group C1 NOp 1

Largest Abelian subgroup C1 NOp 1

Largest concise Abelian subgroup C1 NOp 1

Standard orientation:

| Center Number | Atomic Number | Atomic Type | Coordinates (Angstroms) |           |           |
|---------------|---------------|-------------|-------------------------|-----------|-----------|
|               |               |             | X                       | Y         | Z         |
| 1             | 6             | 0           | -1.677826               | 2.085206  | -0.304154 |
| 2             | 6             | 0           | -2.722588               | 1.262902  | -0.031120 |
| 3             | 7             | 0           | -2.212245               | -0.032281 | 0.000454  |
| 4             | 6             | 0           | -0.885528               | 0.018420  | -0.233328 |
| 5             | 7             | 0           | -0.550937               | 1.291344  | -0.440594 |
| 6             | 6             | 0           | 0.846041                | 1.737122  | -0.640751 |
| 7             | 6             | 0           | 1.572284                | 1.972329  | 0.692627  |
| 8             | 1             | 0           | -1.641544               | 3.155248  | -0.416230 |
| 9             | 1             | 0           | -3.760894               | 1.485279  | 0.135032  |
| 10            | 1             | 0           | 1.353484                | 0.941679  | -1.185280 |
| 11            | 1             | 0           | 0.826475                | 2.638395  | -1.254421 |

|    |    |   |           |           |           |
|----|----|---|-----------|-----------|-----------|
| 12 | 1  | 0 | 1.167948  | 2.865591  | 1.186281  |
| 13 | 1  | 0 | 1.392158  | 1.096115  | 1.325389  |
| 14 | 35 | 0 | 1.827690  | -1.742745 | -0.077843 |
| 15 | 1  | 0 | -0.112805 | -0.787170 | -0.214372 |
| 16 | 6  | 0 | -2.902376 | -1.249779 | 0.242230  |
| 17 | 6  | 0 | -4.215985 | -1.358553 | 0.392421  |
| 18 | 1  | 0 | -2.231139 | -2.096712 | 0.296875  |
| 19 | 1  | 0 | -4.646680 | -2.331516 | 0.583469  |
| 20 | 1  | 0 | -4.895918 | -0.518074 | 0.335324  |
| 21 | 7  | 0 | 2.991211  | 2.138312  | 0.400324  |
| 22 | 1  | 0 | 3.446424  | 2.727771  | 1.088620  |
| 23 | 1  | 0 | 3.453012  | 1.231967  | 0.414967  |

-----

Rotational constants (GHZ):      0.8550459      0.4692189      0.3137792

Standard basis: 6-311++G(d,p) (5D, 7F)

There are    365 symmetry adapted cartesian basis functions of A    symmetry.

There are    352 symmetry adapted basis functions of A    symmetry.

    352 basis functions,    562 primitive gaussians,    365 cartesian basis functions

    55 alpha electrons      55 beta electrons

    nuclear repulsion energy      841.7768513714 Hartrees.

NAtoms=    23 NActive=    23 NUniq=    23 SFac= 1.00D+00 NAtFMM=    60 NAOKFM=F

Big=F

Integral buffers will be    131072 words long.

Raffenetti 2 integral format.

Two-electron integral symmetry is turned on.

One-electron integrals computed using PRISM.

NBasis=    352 RedAO= T EigKep= 4.49D-06 NBF=    352

NBsUse=    352 1.00D-06 EigRej= -1.00D+00 NBFU=    352

Initial guess from the checkpoint file: "/home/suqian/liuwen/qianmengshijie/nh2/nh2.chk"

B after Tr=    0.000000    0.000000    0.000000

    Rot=    0.999973    0.006988    0.002181    -0.000970 Ang=    0.85 deg.

ExpMin= 3.50D-02 ExpMax= 4.40D+05 ExpMxC= 1.51D+04 IAcc=3 IRadAn=      5 AccDes=

0.00D+00

Harris functional with IExCor= 402 and IRadAn=      5 diagonalized for initial guess.

HarFok: IExCor= 402 AccDes= 0.00D+00 IRadAn=      5 IDoV= 1 UseB2=F ITyADJ=14

ICtDFT= 3500011 ScaDFX= 1.000000 1.000000 1.000000 1.000000

FoFCou: FMM=F IPFlag=      0 FMFlag=    100000 FMFlg1=      0

    NFxFlg=      0 DoJE=T BraDBF=F KetDBF=T FulRan=T

    wScrn= 0.000000 ICntrl=      500 IOpCl= 0 I1Cent=    200000004 NGrid=

0

    NMat0=    1 NMatS0=      1 NMatT0=    0 NMatD0=    1 NMtDS0=    0

NMtDT0=    0

Petite list used in FoFCou.

Requested convergence on RMS density matrix=1.00D-08 within 128 cycles.



Requested convergence on MAX density matrix=1.00D-06.

Requested convergence on energy=1.00D-06.

No special actions if energy rises.

SCF Done: E(RB3LYP) = -3012.46691841 A.U. after 13 cycles

NFock= 13 Conv=0.83D-08 -V/T= 2.0017

Calling FoFJK, ICntrl= 2127 FMM=F ISym2X=0 l1Cent= 0 IOpCIX= 0 NMat=1 NMatS=1

NMatT=0.

\*\*\*\*\* Axes restored to original set \*\*\*\*\*

---

| Center | Atomic | Forces (Hartrees/Bohr) |              |              |
|--------|--------|------------------------|--------------|--------------|
| Number | Number | X                      | Y            | Z            |
| 1      | 6      | 0.000151744            | -0.000409815 | 0.000735876  |
| 2      | 6      | 0.000118023            | 0.000327555  | 0.001127038  |
| 3      | 7      | 0.000349750            | 0.000366064  | -0.001742088 |
| 4      | 6      | 0.001203561            | -0.002457641 | 0.002104729  |
| 5      | 7      | 0.000505630            | -0.001457340 | -0.002853915 |
| 6      | 6      | -0.001167623           | -0.001127129 | 0.001408985  |
| 7      | 6      | -0.000645946           | 0.003219678  | 0.000750437  |
| 8      | 1      | -0.000075122           | 0.000041611  | 0.000194251  |
| 9      | 1      | 0.000086521            | 0.000188327  | 0.000128271  |
| 10     | 1      | 0.000528511            | 0.000374194  | -0.000239198 |
| 11     | 1      | -0.000067650           | -0.000166205 | -0.000175549 |
| 12     | 1      | 0.002328821            | 0.001607155  | 0.000606355  |
| 13     | 1      | -0.002732001           | -0.000981955 | -0.001897210 |
| 14     | 35     | 0.001305517            | 0.000283156  | -0.000574139 |
| 15     | 1      | -0.003049413           | 0.002950173  | 0.000376709  |
| 16     | 6      | -0.000318793           | 0.000555754  | -0.000658557 |
| 17     | 6      | -0.000151936           | -0.000313512 | -0.000107837 |
| 18     | 1      | 0.000578924            | 0.000202029  | 0.000244494  |
| 19     | 1      | 0.000015468            | 0.000049560  | 0.000121275  |
| 20     | 1      | -0.000130565           | 0.000047133  | 0.000038117  |
| 21     | 7      | 0.002440650            | -0.003837554 | -0.002422948 |
| 22     | 1      | -0.000486581           | 0.000944079  | 0.000675735  |
| 23     | 1      | -0.000787489           | -0.000405318 | 0.002159172  |

---

Cartesian Forces: Max 0.003837554 RMS 0.001319663

GradGradGradGradGradGradGradGradGradGradGradGradGradGradGradGradGradGradGrad

Berny optimization.

Using GEDIIS/GDIIS optimizer.

FormGI is forming the generalized inverse of G from B-inverse, IUseBI=4.

Internal Forces: Max 0.003414141 RMS 0.000859858

Search for a local minimum.

Step number 21 out of a maximum of 121

All quantities printed in internal units (Hartrees-Bohrs-Radians)

Mixed Optimization -- En-DIIS/RFO-DIIS

Swapping is turned off.

Update second derivatives using D2CorX and points 20 21

DE= 3.13D-04 DEPred=-1.51D-03 R=-2.08D-01

Trust test=-2.08D-01 RLast= 9.50D-01 DXMaxT set to 3.15D-01

ITU= -1 0 -1 0 0 0 1 1 -1 1 -1 1 1 1 1 1 1 0 1 0

ITU= 0

|                 |         |         |         |         |         |
|-----------------|---------|---------|---------|---------|---------|
| Eigenvalues --- | 0.00019 | 0.00043 | 0.00495 | 0.00783 | 0.01315 |
| Eigenvalues --- | 0.01408 | 0.01760 | 0.01904 | 0.02165 | 0.02306 |
| Eigenvalues --- | 0.02391 | 0.02597 | 0.03062 | 0.03077 | 0.03361 |
| Eigenvalues --- | 0.03478 | 0.03927 | 0.04309 | 0.04557 | 0.05260 |
| Eigenvalues --- | 0.05693 | 0.08931 | 0.09463 | 0.10436 | 0.11839 |
| Eigenvalues --- | 0.12678 | 0.15236 | 0.15919 | 0.15975 | 0.16000 |
| Eigenvalues --- | 0.16015 | 0.16055 | 0.16171 | 0.20091 | 0.21659 |
| Eigenvalues --- | 0.22035 | 0.22969 | 0.23477 | 0.24692 | 0.24936 |
| Eigenvalues --- | 0.28563 | 0.31087 | 0.33475 | 0.34094 | 0.34632 |
| Eigenvalues --- | 0.34793 | 0.35026 | 0.35689 | 0.35736 | 0.35859 |
| Eigenvalues --- | 0.36436 | 0.36656 | 0.38126 | 0.39865 | 0.42212 |
| Eigenvalues --- | 0.42923 | 0.46792 | 0.47574 | 0.47777 | 0.50127 |
| Eigenvalues --- | 0.54244 | 0.59538 | 0.60361 |         |         |

En-DIIS/RFO-DIIS IScMMF= 0 using points: 21 20

RFO step: Lambda=-2.86645893D-04.

DidBck=T Rises=T RFO-DIIS coefs: 0.40734 0.59266

Iteration 1 RMS(Cart)= 0.10928500 RMS(Int)= 0.06709333

Iteration 2 RMS(Cart)= 0.04751928 RMS(Int)= 0.02128263

Iteration 3 RMS(Cart)= 0.02087175 RMS(Int)= 0.00103048

Iteration 4 RMS(Cart)= 0.00099146 RMS(Int)= 0.00024133

Iteration 5 RMS(Cart)= 0.00000210 RMS(Int)= 0.00024133

Iteration 6 RMS(Cart)= 0.00000000 RMS(Int)= 0.00024133

| Variable | Old X   | -DE/DX   | Delta X<br>(Linear) | Delta X<br>(Quad) | Delta X<br>(Total) | New X   |
|----------|---------|----------|---------------------|-------------------|--------------------|---------|
| R1       | 2.56492 | 0.00033  | 0.00098             | -0.00173          | -0.00077           | 2.56415 |
| R2       | 2.61760 | -0.00004 | -0.00035            | 0.00235           | 0.00200            | 2.61961 |
| R3       | 2.03430 | -0.00003 | -0.00019            | 0.00031           | 0.00012            | 2.03442 |
| R4       | 2.63137 | -0.00029 | -0.00023            | -0.00024          | -0.00049           | 2.63088 |
| R5       | 2.03103 | -0.00013 | -0.00023            | 0.00056           | 0.00033            | 2.03136 |
| R6       | 2.54756 | -0.00045 | -0.00241            | 0.00246           | 0.00004            | 2.54760 |
| R7       | 2.68383 | 0.00053  | 0.00209             | -0.00058          | 0.00151            | 2.68535 |
| R8       | 2.51784 | 0.00163  | 0.00111             | -0.00101          | 0.00013            | 2.51797 |
| R9       | 2.10976 | 0.00098  | 0.00193             | -0.00607          | -0.00414           | 2.10562 |
| R10      | 2.79675 | -0.00032 | -0.00372            | 0.00136           | -0.00236           | 2.79439 |
| R11      | 2.90345 | 0.00009  | -0.00170            | -0.00598          | -0.00768           | 2.89577 |

|     |         |          |          |          |          |         |
|-----|---------|----------|----------|----------|----------|---------|
| R12 | 2.05862 | 0.00040  | 0.00081  | 0.00100  | 0.00181  | 2.06043 |
| R13 | 2.06081 | 0.00005  | -0.00129 | 0.00247  | 0.00118  | 2.06200 |
| R14 | 2.07448 | -0.00249 | -0.00722 | 0.01444  | 0.00723  | 2.08171 |
| R15 | 2.07059 | 0.00061  | 0.00124  | 0.00188  | 0.00312  | 2.07372 |
| R16 | 2.75560 | 0.00173  | 0.00693  | -0.00812 | -0.00120 | 2.75440 |
| R17 | 4.09564 | 0.00134  | -0.01111 | 0.03133  | 0.02022  | 4.11586 |
| R18 | 2.50698 | 0.00023  | 0.00001  | -0.00054 | -0.00053 | 2.50644 |
| R19 | 2.04478 | 0.00052  | 0.00030  | 0.00238  | 0.00267  | 2.04746 |
| R20 | 2.04288 | 0.00002  | 0.00008  | -0.00003 | 0.00005  | 2.04293 |
| R21 | 2.04577 | 0.00005  | 0.00002  | 0.00046  | 0.00047  | 2.04625 |
| R22 | 1.91640 | -0.00122 | -0.00272 | 0.01353  | 0.01081  | 1.92721 |
| R23 | 1.92245 | -0.00072 | -0.00068 | 0.01120  | 0.01052  | 1.93297 |
| A1  | 1.87424 | -0.00004 | -0.00105 | 0.00125  | 0.00027  | 1.87451 |
| A2  | 2.27718 | -0.00002 | 0.00042  | -0.00016 | 0.00024  | 2.27742 |
| A3  | 2.13175 | 0.00006  | 0.00063  | -0.00113 | -0.00053 | 2.13123 |
| A4  | 1.86081 | 0.00040  | 0.00125  | -0.00258 | -0.00130 | 1.85951 |
| A5  | 2.27755 | -0.00004 | -0.00022 | 0.00144  | 0.00120  | 2.27875 |
| A6  | 2.14482 | -0.00036 | -0.00103 | 0.00114  | 0.00010  | 2.14492 |
| A7  | 1.89840 | -0.00001 | -0.00108 | 0.00317  | 0.00215  | 1.90055 |
| A8  | 2.24354 | 0.00048  | 0.00330  | -0.00267 | 0.00062  | 2.24416 |
| A9  | 2.14121 | -0.00047 | -0.00220 | -0.00057 | -0.00278 | 2.13843 |
| A10 | 1.88604 | 0.00012  | 0.00161  | -0.00378 | -0.00207 | 1.88397 |
| A11 | 2.27978 | -0.00341 | -0.01578 | 0.00037  | -0.01549 | 2.26429 |
| A12 | 2.11554 | 0.00326  | 0.01211  | 0.00689  | 0.01899  | 2.13453 |
| A13 | 1.90489 | -0.00045 | -0.00060 | 0.00048  | -0.00003 | 1.90486 |
| A14 | 2.22510 | -0.00037 | 0.00332  | -0.00640 | -0.00314 | 2.22197 |
| A15 | 2.14819 | 0.00087  | -0.00187 | 0.00670  | 0.00474  | 2.15293 |
| A16 | 1.95510 | 0.00014  | -0.00631 | 0.01784  | 0.01153  | 1.96663 |
| A17 | 1.86226 | 0.00037  | 0.00334  | -0.00884 | -0.00552 | 1.85674 |
| A18 | 1.88399 | -0.00021 | 0.00483  | -0.01278 | -0.00798 | 1.87602 |
| A19 | 1.90222 | -0.00103 | 0.00474  | -0.00629 | -0.00155 | 1.90067 |
| A20 | 1.95014 | 0.00049  | -0.00306 | 0.00751  | 0.00446  | 1.95461 |
| A21 | 1.90767 | 0.00024  | -0.00329 | 0.00163  | -0.00169 | 1.90598 |
| A22 | 1.91848 | 0.00182  | -0.00215 | 0.00241  | 0.00066  | 1.91915 |
| A23 | 1.87658 | -0.00054 | 0.00725  | 0.00466  | 0.01223  | 1.88881 |
| A24 | 1.87907 | -0.00105 | -0.00321 | -0.00838 | -0.01117 | 1.86790 |
| A25 | 1.90759 | -0.00107 | -0.00073 | 0.00357  | 0.00245  | 1.91003 |
| A26 | 1.93470 | -0.00172 | -0.03142 | 0.02836  | -0.00305 | 1.93165 |
| A27 | 1.94631 | 0.00264  | 0.03032  | -0.03127 | -0.00090 | 1.94541 |
| A28 | 2.79023 | -0.00141 | 0.03226  | -0.05541 | -0.02314 | 2.76709 |
| A29 | 2.17818 | 0.00001  | -0.00117 | -0.00198 | -0.00315 | 2.17503 |
| A30 | 1.95858 | -0.00035 | -0.00253 | 0.00211  | -0.00043 | 1.95816 |
| A31 | 2.14641 | 0.00034  | 0.00371  | -0.00012 | 0.00359  | 2.15000 |
| A32 | 2.08093 | -0.00013 | 0.00010  | -0.00159 | -0.00148 | 2.07945 |

|     |          |          |          |          |          |          |
|-----|----------|----------|----------|----------|----------|----------|
| A33 | 2.15589  | 0.00019  | -0.00014 | 0.00150  | 0.00135  | 2.15724  |
| A34 | 2.04636  | -0.00006 | 0.00004  | 0.00009  | 0.00013  | 2.04649  |
| A35 | 1.94647  | 0.00017  | -0.01233 | -0.01857 | -0.03146 | 1.91501  |
| A36 | 1.91497  | 0.00018  | -0.00793 | -0.01762 | -0.02614 | 1.88883  |
| A37 | 1.88002  | 0.00053  | -0.00987 | -0.01749 | -0.02862 | 1.85140  |
| D1  | 0.00394  | 0.00021  | -0.00428 | 0.00383  | -0.00027 | 0.00367  |
| D2  | -3.13269 | -0.00001 | -0.00625 | 0.00450  | -0.00174 | -3.13443 |
| D3  | 3.13997  | 0.00005  | 0.00078  | -0.00435 | -0.00352 | 3.13645  |
| D4  | 0.00334  | -0.00018 | -0.00120 | -0.00368 | -0.00498 | -0.00164 |
| D5  | -0.01935 | 0.00023  | 0.01924  | -0.03295 | -0.01383 | -0.03318 |
| D6  | -3.05527 | -0.00031 | 0.00952  | -0.04164 | -0.03226 | -3.08753 |
| D7  | 3.12724  | 0.00038  | 0.01470  | -0.02560 | -0.01092 | 3.11632  |
| D8  | 0.09132  | -0.00016 | 0.00498  | -0.03429 | -0.02935 | 0.06197  |
| D9  | 0.01255  | -0.00056 | -0.01190 | 0.02612  | 0.01411  | 0.02666  |
| D10 | -3.13796 | -0.00028 | -0.00450 | 0.01777  | 0.01303  | -3.12493 |
| D11 | -3.13353 | -0.00036 | -0.01011 | 0.02552  | 0.01544  | -3.11810 |
| D12 | -0.00085 | -0.00007 | -0.00271 | 0.01717  | 0.01435  | 0.01350  |
| D13 | -0.02468 | 0.00071  | 0.02396  | -0.04678 | -0.02280 | -0.04747 |
| D14 | 3.05121  | 0.00023  | -0.00234 | 0.01600  | 0.01293  | 3.06414  |
| D15 | 3.12520  | 0.00044  | 0.01710  | -0.03901 | -0.02181 | 3.10339  |
| D16 | -0.08210 | -0.00004 | -0.00920 | 0.02378  | 0.01391  | -0.06819 |
| D17 | 0.08859  | -0.00014 | 0.02121  | -0.00513 | 0.01615  | 0.10474  |
| D18 | -3.04837 | -0.00030 | 0.02034  | -0.00721 | 0.01320  | -3.03516 |
| D19 | -3.06302 | 0.00019  | 0.02953  | -0.01450 | 0.01496  | -3.04806 |
| D20 | 0.08320  | 0.00002  | 0.02867  | -0.01659 | 0.01201  | 0.09522  |
| D21 | 0.02721  | -0.00058 | -0.02672 | 0.04923  | 0.02259  | 0.04981  |
| D22 | 3.06875  | -0.00016 | -0.01721 | 0.05653  | 0.03959  | 3.10833  |
| D23 | -3.05608 | 0.00014  | -0.00134 | -0.00623 | -0.00843 | -3.06451 |
| D24 | -0.01454 | 0.00056  | 0.00818  | 0.00106  | 0.00856  | -0.00598 |
| D25 | -2.75890 | 0.00066  | 0.25385  | -0.15594 | 0.09792  | -2.66098 |
| D26 | 0.30964  | -0.00002 | 0.22373  | -0.08651 | 0.13722  | 0.44686  |
| D27 | 1.54789  | 0.00132  | 0.05674  | -0.07050 | -0.01370 | 1.53419  |
| D28 | -2.65496 | 0.00037  | 0.06100  | -0.07358 | -0.01254 | -2.66750 |
| D29 | -0.60629 | 0.00075  | 0.06137  | -0.08274 | -0.02129 | -0.62758 |
| D30 | -1.47449 | 0.00080  | 0.04567  | -0.07981 | -0.03420 | -1.50870 |
| D31 | 0.60584  | -0.00015 | 0.04993  | -0.08289 | -0.03304 | 0.57280  |
| D32 | 2.65452  | 0.00022  | 0.05030  | -0.09205 | -0.04179 | 2.61272  |
| D33 | -1.23022 | -0.00036 | -0.02455 | -0.15541 | -0.17997 | -1.41020 |
| D34 | 0.84465  | -0.00095 | -0.02237 | -0.14703 | -0.16936 | 0.67529  |
| D35 | 2.94383  | 0.00130  | 0.01627  | -0.18615 | -0.16990 | 2.77393  |
| D36 | 2.99631  | -0.00024 | -0.02786 | -0.15123 | -0.17911 | 2.81720  |
| D37 | -1.21200 | -0.00083 | -0.02568 | -0.14284 | -0.16849 | -1.38049 |
| D38 | 0.88718  | 0.00142  | 0.01296  | -0.18196 | -0.16904 | 0.71814  |
| D39 | 0.88625  | -0.00017 | -0.02494 | -0.15385 | -0.17880 | 0.70745  |

|     |          |          |          |          |          |          |
|-----|----------|----------|----------|----------|----------|----------|
| D40 | 2.96113  | -0.00076 | -0.02276 | -0.14547 | -0.16819 | 2.79294  |
| D41 | -1.22288 | 0.00149  | 0.01588  | -0.18459 | -0.16873 | -1.39161 |
| D42 | 2.64384  | 0.00043  | 0.16445  | 0.34481  | 0.50885  | -3.13050 |
| D43 | -1.55775 | 0.00131  | 0.13997  | 0.29976  | 0.44004  | -1.11771 |
| D44 | 0.54492  | -0.00012 | 0.18640  | 0.33036  | 0.51672  | 1.06164  |
| D45 | 2.62652  | 0.00077  | 0.16192  | 0.28532  | 0.44791  | 3.07442  |
| D46 | -1.58477 | 0.00063  | 0.18935  | 0.32761  | 0.51635  | -1.06842 |
| D47 | 0.49683  | 0.00151  | 0.16488  | 0.28256  | 0.44753  | 0.94436  |
| D48 | -3.13090 | -0.00020 | 0.00059  | -0.00286 | -0.00227 | -3.13317 |
| D49 | 0.00978  | -0.00004 | 0.00212  | -0.00263 | -0.00051 | 0.00928  |
| D50 | 0.00558  | -0.00002 | 0.00154  | -0.00056 | 0.00098  | 0.00656  |
| D51 | -3.13692 | 0.00014  | 0.00306  | -0.00032 | 0.00274  | -3.13418 |

| Item                 | Value    | Threshold | Converged? |
|----------------------|----------|-----------|------------|
| Maximum Force        | 0.003414 | 0.000450  | NO         |
| RMS Force            | 0.000860 | 0.000300  | NO         |
| Maximum Displacement | 0.914548 | 0.001800  | NO         |
| RMS Displacement     | 0.149471 | 0.001200  | NO         |

Predicted change in Energy=-1.009064D-03

GradGradGradGradGradGradGradGradGradGradGradGradGradGradGradGradGradGrad

Input orientation:

| Center Number | Atomic Number | Atomic Type | Coordinates (Angstroms) |           |           |
|---------------|---------------|-------------|-------------------------|-----------|-----------|
|               |               |             | X                       | Y         | Z         |
| 1             | 6             | 0           | -1.813845               | -1.994824 | 0.223991  |
| 2             | 6             | 0           | -2.812100               | -1.104648 | -0.004542 |
| 3             | 7             | 0           | -2.225549               | 0.157958  | -0.002079 |
| 4             | 6             | 0           | -0.898076               | 0.022244  | 0.189917  |
| 5             | 7             | 0           | -0.639221               | -1.272745 | 0.367204  |
| 6             | 6             | 0           | 0.724171                | -1.809472 | 0.566516  |
| 7             | 6             | 0           | 1.441499                | -2.105812 | -0.754773 |
| 8             | 1             | 0           | -1.839052               | -3.068165 | 0.303388  |
| 9             | 1             | 0           | -3.864172               | -1.259323 | -0.161820 |
| 10            | 1             | 0           | 1.280643                | -1.042779 | 1.106284  |
| 11            | 1             | 0           | 0.638170                | -2.698634 | 1.193115  |
| 12            | 1             | 0           | 1.108892                | -3.077336 | -1.153550 |
| 13            | 1             | 0           | 1.187716                | -1.311887 | -1.468555 |
| 14            | 35            | 0           | 1.894103                | 1.649673  | -0.050532 |
| 15            | 1             | 0           | -0.095147               | 0.794793  | 0.185760  |
| 16            | 6             | 0           | -2.846566               | 1.423932  | -0.178021 |
| 17            | 6             | 0           | -4.155991               | 1.614875  | -0.268340 |
| 18            | 1             | 0           | -2.124531               | 2.229868  | -0.233110 |
| 19            | 1             | 0           | -4.533239               | 2.618069  | -0.409752 |

|    |   |   |           |           |           |
|----|---|---|-----------|-----------|-----------|
| 20 | 1 | 0 | -4.883755 | 0.815388  | -0.207556 |
| 21 | 7 | 0 | 2.870515  | -2.128960 | -0.468636 |
| 22 | 1 | 0 | 3.390313  | -2.313465 | -1.326443 |
| 23 | 1 | 0 | 3.150745  | -1.193833 | -0.163182 |

-----  
Distance matrix (angstroms):

|    |    | 1        | 2        | 3        | 4        | 5        |
|----|----|----------|----------|----------|----------|----------|
| 1  | C  | 0.000000 |          |          |          |          |
| 2  | C  | 1.356891 | 0.000000 |          |          |          |
| 3  | N  | 2.203424 | 1.392200 | 0.000000 |          |          |
| 4  | C  | 2.215481 | 2.229616 | 1.348134 | 0.000000 |          |
| 5  | N  | 1.386236 | 2.210850 | 2.167883 | 1.332454 | 0.000000 |
| 6  | C  | 2.567724 | 3.650767 | 3.590951 | 2.475621 | 1.478729 |
| 7  | C  | 3.401112 | 4.433766 | 4.374750 | 3.300708 | 2.506437 |
| 8  | H  | 1.076569 | 2.212926 | 3.263519 | 3.232482 | 2.160371 |
| 9  | H  | 2.212160 | 1.074949 | 2.172392 | 3.250209 | 3.268082 |
| 10 | H  | 3.355695 | 4.241263 | 3.868284 | 2.592455 | 2.070024 |
| 11 | H  | 2.728907 | 3.984914 | 4.217760 | 3.281713 | 2.084950 |
| 12 | H  | 3.407616 | 4.537169 | 4.786596 | 3.929405 | 2.936858 |
| 13 | H  | 3.512903 | 4.264365 | 3.995168 | 2.980095 | 2.590220 |
| 14 | Br | 5.206400 | 5.453141 | 4.381677 | 3.240773 | 3.890085 |
| 15 | H  | 3.276790 | 3.320532 | 2.231470 | 1.114247 | 2.145613 |
| 16 | C  | 3.593886 | 2.534758 | 1.421024 | 2.428316 | 3.527281 |
| 17 | C  | 4.331046 | 3.044904 | 2.433128 | 3.655199 | 4.594556 |
| 18 | H  | 4.260692 | 3.412330 | 2.087198 | 2.560615 | 3.851600 |
| 19 | H  | 5.392172 | 4.121303 | 3.397614 | 4.506919 | 5.559269 |
| 20 | H  | 4.184240 | 2.831873 | 2.745996 | 4.083221 | 4.765157 |
| 21 | N  | 4.737188 | 5.792815 | 5.605134 | 4.389037 | 3.708096 |
| 22 | H  | 5.439544 | 6.455896 | 6.276924 | 5.113234 | 4.493181 |
| 23 | H  | 5.043674 | 5.965622 | 5.545974 | 4.242226 | 3.827712 |
|    |    | 6        | 7        | 8        | 9        | 10       |
| 6  | C  | 0.000000 |          |          |          |          |
| 7  | C  | 1.532377 | 0.000000 |          |          |          |
| 8  | H  | 2.867693 | 3.578805 | 0.000000 |          |          |
| 9  | H  | 4.678252 | 5.405394 | 2.754894 | 0.000000 |          |
| 10 | H  | 1.090334 | 2.149290 | 3.805172 | 5.303217 | 0.000000 |
| 11 | H  | 1.091161 | 2.188845 | 2.657969 | 4.917170 | 1.778248 |
| 12 | H  | 2.171201 | 1.101594 | 3.288332 | 5.387028 | 3.045615 |
| 13 | H  | 2.145688 | 1.097364 | 3.922451 | 5.218419 | 2.590531 |
| 14 | Br | 3.703400 | 3.847658 | 6.026583 | 6.452316 | 2.993970 |
| 15 | H  | 2.756530 | 3.414585 | 4.239988 | 4.306479 | 2.473224 |
| 16 | C  | 4.874362 | 5.583837 | 4.628798 | 2.869780 | 4.976742 |
| 17 | C  | 6.019894 | 6.738844 | 5.256039 | 2.890937 | 6.205619 |
| 18 | H  | 5.007073 | 5.637980 | 5.332775 | 3.899473 | 4.909115 |

|    |    |          |          |          |          |          |
|----|----|----------|----------|----------|----------|----------|
| 19 | H  | 6.942376 | 7.624407 | 6.332493 | 3.942498 | 7.035723 |
| 20 | H  | 6.240025 | 6.988683 | 4.961175 | 2.312155 | 6.571055 |
| 21 | N  | 2.404247 | 1.457565 | 4.863964 | 6.797530 | 2.487540 |
| 22 | H  | 3.308415 | 2.041519 | 5.529212 | 7.422609 | 3.461721 |
| 23 | H  | 2.607630 | 2.025638 | 5.350597 | 7.015224 | 2.265313 |
|    |    | 11       | 12       | 13       | 14       | 15       |
| 11 | H  | 0.000000 |          |          |          |          |
| 12 | H  | 2.423186 | 0.000000 |          |          |          |
| 13 | H  | 3.051157 | 1.795063 | 0.000000 |          |          |
| 14 | Br | 4.693805 | 4.917094 | 3.358661 | 0.000000 |          |
| 15 | H  | 3.708983 | 4.270462 | 2.969948 | 2.178019 | 0.000000 |
| 16 | C  | 5.569466 | 6.071138 | 5.042382 | 4.747753 | 2.845779 |
| 17 | C  | 6.612579 | 7.107702 | 6.209803 | 6.054113 | 4.167637 |
| 18 | H  | 5.827244 | 6.282408 | 5.004131 | 4.064404 | 2.520574 |
| 19 | H  | 7.588148 | 8.051367 | 7.021036 | 6.509805 | 4.834835 |
| 20 | H  | 6.693421 | 7.208329 | 6.555774 | 6.830816 | 4.804778 |
| 21 | N  | 2.840653 | 2.114672 | 2.121145 | 3.925081 | 4.215651 |
| 22 | H  | 3.751109 | 2.412109 | 2.423796 | 4.424144 | 4.908814 |
| 23 | H  | 3.227538 | 2.949166 | 2.360385 | 3.110846 | 3.822592 |
|    |    | 16       | 17       | 18       | 19       | 20       |
| 16 | C  | 0.000000 |          |          |          |          |
| 17 | C  | 1.326352 | 0.000000 |          |          |          |
| 18 | H  | 1.083469 | 2.122802 | 0.000000 |          |          |
| 19 | H  | 2.079550 | 1.081070 | 2.446176 | 0.000000 |          |
| 20 | H  | 2.126343 | 1.082827 | 3.100762 | 1.847540 | 0.000000 |
| 21 | N  | 6.737396 | 7.964182 | 6.633652 | 8.795074 | 8.298556 |
| 22 | H  | 7.361092 | 8.573106 | 7.228468 | 9.377794 | 8.916379 |
| 23 | H  | 6.543749 | 7.828684 | 6.289289 | 8.581084 | 8.282036 |
|    |    | 21       | 22       | 23       |          |          |
| 21 | N  | 0.000000 |          |          |          |          |
| 22 | H  | 1.019836 | 0.000000 |          |          |          |
| 23 | H  | 1.022886 | 1.632221 | 0.000000 |          |          |

Stoichiometry C7H12BrN3

Framework group C1[X(C7H12BrN3)]

Deg. of freedom 63

Full point group C1 NOp 1

Largest Abelian subgroup C1 NOp 1

Largest concise Abelian subgroup C1 NOp 1

Standard orientation:

| Center Number | Atomic Number | Atomic Type | Coordinates (Angstroms) |          |           |
|---------------|---------------|-------------|-------------------------|----------|-----------|
|               |               |             | X                       | Y        | Z         |
| 1             | 6             | 0           | -1.717628               | 2.081612 | -0.225814 |

|    |    |   |           |           |           |
|----|----|---|-----------|-----------|-----------|
| 2  | 6  | 0 | -2.743831 | 1.230825  | 0.027607  |
| 3  | 7  | 0 | -2.208132 | -0.053999 | 0.005808  |
| 4  | 6  | 0 | -0.882038 | 0.029751  | -0.222064 |
| 5  | 7  | 0 | -0.576918 | 1.314121  | -0.402981 |
| 6  | 6  | 0 | 0.800769  | 1.797171  | -0.638100 |
| 7  | 6  | 0 | 1.564993  | 2.059992  | 0.663847  |
| 8  | 1  | 0 | -1.702373 | 3.155395  | -0.301689 |
| 9  | 1  | 0 | -3.784265 | 1.426456  | 0.214000  |
| 10 | 1  | 0 | 1.311477  | 1.011044  | -1.194885 |
| 11 | 1  | 0 | 0.733096  | 2.691350  | -1.259789 |
| 12 | 1  | 0 | 1.282180  | 3.042445  | 1.074106  |
| 13 | 1  | 0 | 1.299428  | 1.274108  | 1.382227  |
| 14 | 35 | 0 | 1.848869  | -1.707843 | -0.062311 |
| 15 | 1  | 0 | -0.110583 | -0.773997 | -0.241882 |
| 16 | 6  | 0 | -2.873879 | -1.295030 | 0.195360  |
| 17 | 6  | 0 | -4.186906 | -1.434306 | 0.320955  |
| 18 | 1  | 0 | -2.183163 | -2.129124 | 0.228579  |
| 19 | 1  | 0 | -4.599678 | -2.422290 | 0.470010  |
| 20 | 1  | 0 | -4.883754 | -0.606408 | 0.282184  |
| 21 | 7  | 0 | 2.985482  | 2.027592  | 0.338800  |
| 22 | 1  | 0 | 3.535351  | 2.188200  | 1.182550  |
| 23 | 1  | 0 | 3.219964  | 1.083236  | 0.023356  |

-----

Rotational constants (GHZ):      0.8682780      0.4704338      0.3147464

Standard basis: 6-311++G(d,p) (5D, 7F)

There are    365 symmetry adapted cartesian basis functions of A    symmetry.

There are    352 symmetry adapted basis functions of A    symmetry.

352 basis functions,    562 primitive gaussians,    365 cartesian basis functions

55 alpha electrons      55 beta electrons

nuclear repulsion energy      843.1867817912 Hartrees.

NAtoms=    23 NActive=    23 NUniq=    23 SFac= 1.00D+00 NAtFMM=    60 NAOKFM=F

Big=F

Integral buffers will be    131072 words long.

Raffenetti 2 integral format.

Two-electron integral symmetry is turned on.

One-electron integrals computed using PRISM.

NBasis=    352 RedAO= T EigKep= 4.41D-06 NBF=    352

NBsUse=    352 1.00D-06 EigRej= -1.00D+00 NBFU=    352

Initial guess from the checkpoint file: "/home/suqian/liuwen/qianmengshijie/nh2/nh2.chk"

B after Tr=    0.000000    0.000000    0.000000

Rot=    0.999984    -0.003186    -0.001033    -0.004527 Ang=    -0.65 deg.

ExpMin= 3.50D-02 ExpMax= 4.40D+05 ExpMxC= 1.51D+04 IAcc=3 IRadAn=      5 AccDes=

0.00D+00

Harris functional with IExCor=    402 and IRadAn=      5 diagonalized for initial guess.



HarFok: IExCor= 402 AccDes= 0.00D+00 IRadAn= 5 IDoV= 1 UseB2=F ITyADJ=14  
 ICtDFT= 3500011 ScaDFX= 1.000000 1.000000 1.000000 1.000000  
 FoFCou: FMM=F IPFlag= 0 FMFlag= 100000 FMFlg1= 0  
 NFxFlg= 0 DoJE=T BraDBF=F KetDBF=T FulRan=T  
 wScrn= 0.000000 ICntrl= 500 IOpCl= 0 I1Cent= 200000004 NGrid= 0  
 NMat0= 1 NMatS0= 1 NMatT0= 0 NMatD0= 1 NMtDS0= 0  
 NMtDT0= 0

Petite list used in FoFCou.

Requested convergence on RMS density matrix=1.00D-08 within 128 cycles.

Requested convergence on MAX density matrix=1.00D-06.

Requested convergence on energy=1.00D-06.

No special actions if energy rises.

SCF Done: E(RB3LYP) = -3012.46654524 A.U. after 13 cycles

NFock= 13 Conv=0.33D-08 -V/T= 2.0017

Calling FoFJK, ICntrl= 2127 FMM=F ISym2X=0 I1Cent= 0 IOpClX= 0 NMat=1 NMatS=1  
 NMatT=0.

\*\*\*\*\* Axes restored to original set \*\*\*\*\*

| Center<br>Number | Atomic<br>Number | Forces (Hartrees/Bohr) |              |              |
|------------------|------------------|------------------------|--------------|--------------|
|                  |                  | X                      | Y            | Z            |
| 1                | 6                | 0.000675991            | -0.000444475 | 0.001657561  |
| 2                | 6                | 0.000293512            | 0.000667665  | 0.001513926  |
| 3                | 7                | 0.000791182            | 0.000945217  | -0.003959766 |
| 4                | 6                | -0.001527710           | -0.001800940 | 0.006105588  |
| 5                | 7                | 0.000553242            | -0.002281712 | -0.004805177 |
| 6                | 6                | -0.001920749           | -0.000948744 | 0.002327148  |
| 7                | 6                | -0.000580315           | 0.003225772  | -0.001333214 |
| 8                | 1                | -0.000011057           | 0.000092433  | 0.000174113  |
| 9                | 1                | 0.000232564            | 0.000139834  | 0.000199840  |
| 10               | 1                | -0.000577491           | 0.000231850  | 0.000017403  |
| 11               | 1                | 0.000551320            | 0.000473077  | 0.000081184  |
| 12               | 1                | 0.003120981            | 0.004076546  | 0.000037113  |
| 13               | 1                | -0.004146680           | -0.000903808 | -0.001193474 |
| 14               | 35               | 0.001060916            | -0.000520528 | 0.000106228  |
| 15               | 1                | -0.001526861           | 0.001706706  | -0.000275833 |
| 16               | 6                | 0.000321840            | 0.000342253  | -0.000880466 |
| 17               | 6                | -0.000361056           | 0.000199139  | -0.000128890 |
| 18               | 1                | -0.000226581           | -0.000414235 | 0.000183151  |
| 19               | 1                | -0.000109396           | 0.000023411  | 0.000086808  |
| 20               | 1                | 0.000067243            | 0.000146942  | 0.000022169  |
| 21               | 7                | 0.005154388            | -0.002680679 | -0.002126723 |
| 22               | 1                | -0.001184930           | -0.000858247 | 0.004254836  |

```

23          1          -0.000650354  -0.001417476  -0.002063526
-----
Cartesian Forces:  Max      0.006105588 RMS      0.001856064

GradGradGradGradGradGradGradGradGradGradGradGradGradGradGradGradGradGradGrad
Berny optimization.
Using GEDIIS/GDIIS optimizer.
FormGI is forming the generalized inverse of G from B-inverse, IUseBI=4.
Internal Forces:  Max      0.004554399 RMS      0.001251480
Search for a local minimum.
Step number  22 out of a maximum of  121
All quantities printed in internal units (Hartrees-Bohrs-Radians)
Mixed Optimization -- RFO/linear search
Update second derivatives using D2CorX and points  18  22  20
DE=  6.86D-04 DEPred=-1.01D-03 R=-6.80D-01
Trust test=-6.80D-01 RLast= 8.66D-01 DXMaxT set to 1.58D-01
ITU= -1 -1  0 -1  0  0  0  1  1 -1  1 -1  1  1  1  1  1  1  0  1
ITU=  0  0
Use linear search instead of GDIIS.
Energy rises -- skip Quadratic/GDIIS search.
Quartic linear search produced a step of -0.66330.
Iteration  1 RMS(Cart)=  0.08521311 RMS(Int)=  0.00466503
Iteration  2 RMS(Cart)=  0.00938986 RMS(Int)=  0.00007387
Iteration  3 RMS(Cart)=  0.00008552 RMS(Int)=  0.00005344
Iteration  4 RMS(Cart)=  0.00000001 RMS(Int)=  0.00005344
Variable      Old X      -DE/DX      Delta X      Delta X      Delta X      New X
                    (Linear)      (Quad)      (Total)
R1          2.56415      0.00107      0.00161      0.00000      0.00161      2.56576
R2          2.61961     -0.00099     -0.00172      0.00000     -0.00171      2.61789
R3          2.03442     -0.00008     -0.00029      0.00000     -0.00029      2.03413
R4          2.63088      0.00010      0.00007      0.00000      0.00006      2.63094
R5          2.03136     -0.00028     -0.00048      0.00000     -0.00048      2.03088
R6          2.54760     -0.00078     -0.00273      0.00000     -0.00274      2.54486
R7          2.68535      0.00049      0.00134      0.00000      0.00134      2.68668
R8          2.51797     -0.00014      0.00115      0.00000      0.00115      2.51912
R9          2.10562      0.00049      0.00491      0.00000      0.00491      2.11053
R10         2.79439     -0.00065     -0.00260      0.00000     -0.00260      2.79179
R11         2.89577      0.00260      0.00319      0.00000      0.00319      2.89896
R12         2.06043     -0.00013     -0.00030      0.00000     -0.00030      2.06014
R13         2.06200     -0.00038     -0.00223      0.00000     -0.00223      2.05977
R14         2.08171     -0.00455     -0.01287      0.00000     -0.01287      2.06884
R15         2.07372      0.00108     -0.00069      0.00000     -0.00069      2.07303
R16         2.75440      0.00335      0.00855      0.00000      0.00855      2.76294
R17         4.11586      0.00075     -0.02585      0.00000     -0.02585      4.09001

```

|     |         |          |          |         |          |          |
|-----|---------|----------|----------|---------|----------|----------|
| R18 | 2.50644 | 0.00045  | 0.00036  | 0.00000 | 0.00036  | 2.50680  |
| R19 | 2.04746 | -0.00047 | -0.00144 | 0.00000 | -0.00144 | 2.04602  |
| R20 | 2.04293 | 0.00005  | 0.00006  | 0.00000 | 0.00006  | 2.04298  |
| R21 | 2.04625 | -0.00015 | -0.00030 | 0.00000 | -0.00030 | 2.04595  |
| R22 | 1.92721 | -0.00403 | -0.01021 | 0.00000 | -0.01021 | 1.91700  |
| R23 | 1.93297 | -0.00209 | -0.00774 | 0.00000 | -0.00774 | 1.92523  |
| A1  | 1.87451 | -0.00064 | -0.00135 | 0.00000 | -0.00126 | 1.87325  |
| A2  | 2.27742 | 0.00034  | 0.00031  | 0.00000 | 0.00028  | 2.27770  |
| A3  | 2.13123 | 0.00030  | 0.00105  | 0.00000 | 0.00102  | 2.13224  |
| A4  | 1.85951 | 0.00074  | 0.00226  | 0.00000 | 0.00233  | 1.86184  |
| A5  | 2.27875 | -0.00028 | -0.00104 | 0.00000 | -0.00108 | 2.27767  |
| A6  | 2.14492 | -0.00046 | -0.00122 | 0.00000 | -0.00125 | 2.14367  |
| A7  | 1.90055 | -0.00119 | -0.00263 | 0.00000 | -0.00257 | 1.89798  |
| A8  | 2.24416 | 0.00079  | 0.00328  | 0.00000 | 0.00326  | 2.24742  |
| A9  | 2.13843 | 0.00040  | -0.00062 | 0.00000 | -0.00064 | 2.13779  |
| A10 | 1.88397 | 0.00122  | 0.00317  | 0.00000 | 0.00344  | 1.88741  |
| A11 | 2.26429 | -0.00001 | -0.00738 | 0.00000 | -0.00721 | 2.25708  |
| A12 | 2.13453 | -0.00124 | 0.00096  | 0.00000 | 0.00115  | 2.13568  |
| A13 | 1.90486 | -0.00001 | -0.00065 | 0.00000 | -0.00057 | 1.90429  |
| A14 | 2.22197 | 0.00181  | 0.00580  | 0.00000 | 0.00576  | 2.22773  |
| A15 | 2.15293 | -0.00175 | -0.00523 | 0.00000 | -0.00527 | 2.14766  |
| A16 | 1.96663 | -0.00154 | -0.01471 | 0.00000 | -0.01471 | 1.95192  |
| A17 | 1.85674 | 0.00009  | 0.00740  | 0.00000 | 0.00739  | 1.86413  |
| A18 | 1.87602 | 0.00072  | 0.01069  | 0.00000 | 0.01073  | 1.88675  |
| A19 | 1.90067 | 0.00060  | 0.00633  | 0.00000 | 0.00631  | 1.90698  |
| A20 | 1.95461 | 0.00045  | -0.00638 | 0.00000 | -0.00639 | 1.94822  |
| A21 | 1.90598 | -0.00033 | -0.00257 | 0.00000 | -0.00255 | 1.90343  |
| A22 | 1.91915 | 0.00051  | -0.00285 | 0.00000 | -0.00277 | 1.91638  |
| A23 | 1.88881 | -0.00117 | 0.00000  | 0.00000 | 0.00017  | 1.88898  |
| A24 | 1.86790 | 0.00167  | 0.00382  | 0.00000 | 0.00395  | 1.87185  |
| A25 | 1.91003 | -0.00091 | -0.00244 | 0.00000 | -0.00256 | 1.90748  |
| A26 | 1.93165 | -0.00307 | -0.03315 | 0.00000 | -0.03318 | 1.89848  |
| A27 | 1.94541 | 0.00307  | 0.03453  | 0.00000 | 0.03454  | 1.97996  |
| A28 | 2.76709 | -0.00333 | 0.05146  | 0.00000 | 0.05146  | 2.81855  |
| A29 | 2.17503 | 0.00053  | 0.00078  | 0.00000 | 0.00078  | 2.17580  |
| A30 | 1.95816 | -0.00039 | -0.00255 | 0.00000 | -0.00255 | 1.95561  |
| A31 | 2.15000 | -0.00014 | 0.00177  | 0.00000 | 0.00177  | 2.15177  |
| A32 | 2.07945 | 0.00010  | 0.00110  | 0.00000 | 0.00110  | 2.08055  |
| A33 | 2.15724 | 0.00000  | -0.00106 | 0.00000 | -0.00106 | 2.15618  |
| A34 | 2.04649 | -0.00009 | -0.00004 | 0.00000 | -0.00004 | 2.04645  |
| A35 | 1.91501 | 0.00203  | 0.00707  | 0.00000 | 0.00710  | 1.92211  |
| A36 | 1.88883 | -0.00087 | 0.00846  | 0.00000 | 0.00849  | 1.89732  |
| A37 | 1.85140 | -0.00028 | 0.00793  | 0.00000 | 0.00799  | 1.85939  |
| D1  | 0.00367 | 0.00008  | -0.00460 | 0.00000 | -0.00459 | -0.00092 |

|     |          |          |          |         |          |          |
|-----|----------|----------|----------|---------|----------|----------|
| D2  | -3.13443 | -0.00051 | -0.00584 | 0.00000 | -0.00585 | -3.14028 |
| D3  | 3.13645  | 0.00059  | 0.00321  | 0.00000 | 0.00322  | 3.13968  |
| D4  | -0.00164 | 0.00001  | 0.00197  | 0.00000 | 0.00196  | 0.00032  |
| D5  | -0.03318 | 0.00113  | 0.03071  | 0.00000 | 0.03072  | -0.00247 |
| D6  | -3.08753 | 0.00075  | 0.03206  | 0.00000 | 0.03206  | -3.05547 |
| D7  | 3.11632  | 0.00067  | 0.02369  | 0.00000 | 0.02370  | 3.14002  |
| D8  | 0.06197  | 0.00029  | 0.02505  | 0.00000 | 0.02505  | 0.08702  |
| D9  | 0.02666  | -0.00125 | -0.02268 | 0.00000 | -0.02270 | 0.00396  |
| D10 | -3.12493 | -0.00063 | -0.01367 | 0.00000 | -0.01370 | -3.13863 |
| D11 | -3.11810 | -0.00072 | -0.02156 | 0.00000 | -0.02156 | -3.13966 |
| D12 | 0.01350  | -0.00010 | -0.01255 | 0.00000 | -0.01256 | 0.00094  |
| D13 | -0.04747 | 0.00194  | 0.04194  | 0.00000 | 0.04194  | -0.00553 |
| D14 | 3.06414  | 0.00051  | -0.01119 | 0.00000 | -0.01124 | 3.05290  |
| D15 | 3.10339  | 0.00137  | 0.03360  | 0.00000 | 0.03360  | 3.13699  |
| D16 | -0.06819 | -0.00007 | -0.01953 | 0.00000 | -0.01958 | -0.08777 |
| D17 | 0.10474  | -0.00033 | 0.01302  | 0.00000 | 0.01303  | 0.11777  |
| D18 | -3.03516 | -0.00045 | 0.01401  | 0.00000 | 0.01402  | -3.02115 |
| D19 | -3.04806 | 0.00036  | 0.02313  | 0.00000 | 0.02313  | -3.02494 |
| D20 | 0.09522  | 0.00024  | 0.02412  | 0.00000 | 0.02411  | 0.11933  |
| D21 | 0.04981  | -0.00186 | -0.04489 | 0.00000 | -0.04485 | 0.00495  |
| D22 | 3.10833  | -0.00128 | -0.04551 | 0.00000 | -0.04547 | 3.06287  |
| D23 | -3.06451 | -0.00057 | 0.00410  | 0.00000 | 0.00403  | -3.06048 |
| D24 | -0.00598 | 0.00001  | 0.00347  | 0.00000 | 0.00341  | -0.00257 |
| D25 | -2.66098 | 0.00046  | 0.21916  | 0.00000 | 0.21919  | -2.44179 |
| D26 | 0.44686  | -0.00112 | 0.15938  | 0.00000 | 0.15935  | 0.60621  |
| D27 | 1.53419  | 0.00041  | 0.07259  | 0.00000 | 0.07261  | 1.60679  |
| D28 | -2.66750 | 0.00032  | 0.07659  | 0.00000 | 0.07661  | -2.59089 |
| D29 | -0.62758 | 0.00034  | 0.08281  | 0.00000 | 0.08279  | -0.54479 |
| D30 | -1.50870 | -0.00014 | 0.07380  | 0.00000 | 0.07380  | -1.43489 |
| D31 | 0.57280  | -0.00023 | 0.07780  | 0.00000 | 0.07781  | 0.65061  |
| D32 | 2.61272  | -0.00021 | 0.08402  | 0.00000 | 0.08399  | 2.69671  |
| D33 | -1.41020 | -0.00030 | 0.09190  | 0.00000 | 0.09191  | -1.31828 |
| D34 | 0.67529  | -0.00182 | 0.08730  | 0.00000 | 0.08731  | 0.76260  |
| D35 | 2.77393  | 0.00212  | 0.13091  | 0.00000 | 0.13092  | 2.90485  |
| D36 | 2.81720  | 0.00013  | 0.08762  | 0.00000 | 0.08762  | 2.90482  |
| D37 | -1.38049 | -0.00139 | 0.08302  | 0.00000 | 0.08301  | -1.29748 |
| D38 | 0.71814  | 0.00255  | 0.12663  | 0.00000 | 0.12663  | 0.84477  |
| D39 | 0.70745  | -0.00015 | 0.09069  | 0.00000 | 0.09067  | 0.79812  |
| D40 | 2.79294  | -0.00167 | 0.08608  | 0.00000 | 0.08607  | 2.87901  |
| D41 | -1.39161 | 0.00226  | 0.12969  | 0.00000 | 0.12968  | -1.26193 |
| D42 | -3.13050 | -0.00156 | -0.15347 | 0.00000 | -0.15342 | 2.99926  |
| D43 | -1.11771 | -0.00129 | -0.13522 | 0.00000 | -0.13520 | -1.25291 |
| D44 | 1.06164  | -0.00145 | -0.13413 | 0.00000 | -0.13403 | 0.92761  |
| D45 | 3.07442  | -0.00118 | -0.11587 | 0.00000 | -0.11580 | 2.95862  |

|     |          |          |          |         |          |          |
|-----|----------|----------|----------|---------|----------|----------|
| D46 | -1.06842 | -0.00025 | -0.13057 | 0.00000 | -0.13068 | -1.19910 |
| D47 | 0.94436  | 0.00002  | -0.11232 | 0.00000 | -0.11245 | 0.83191  |
| D48 | -3.13317 | -0.00015 | 0.00217  | 0.00000 | 0.00217  | -3.13100 |
| D49 | 0.00928  | -0.00004 | 0.00271  | 0.00000 | 0.00271  | 0.01198  |
| D50 | 0.00656  | -0.00002 | 0.00107  | 0.00000 | 0.00107  | 0.00763  |
| D51 | -3.13418 | 0.00009  | 0.00161  | 0.00000 | 0.00161  | -3.13257 |

| Item                 | Value    | Threshold | Converged? |
|----------------------|----------|-----------|------------|
| Maximum Force        | 0.004554 | 0.000450  | NO         |
| RMS Force            | 0.001251 | 0.000300  | NO         |
| Maximum Displacement | 0.380219 | 0.001800  | NO         |
| RMS Displacement     | 0.088699 | 0.001200  | NO         |

Predicted change in Energy=-2.793295D-04

GradGradGradGradGradGradGradGradGradGradGradGradGradGradGradGradGradGrad

Input orientation:

| Center Number | Atomic Number | Atomic Type | Coordinates (Angstroms) |           |           |
|---------------|---------------|-------------|-------------------------|-----------|-----------|
|               |               |             | X                       | Y         | Z         |
| 1             | 6             | 0           | -1.818766               | -2.007793 | 0.275186  |
| 2             | 6             | 0           | -2.813907               | -1.117759 | 0.028199  |
| 3             | 7             | 0           | -2.225975               | 0.144118  | 0.010465  |
| 4             | 6             | 0           | -0.905374               | 0.009510  | 0.237288  |
| 5             | 7             | 0           | -0.642812               | -1.286824 | 0.403530  |
| 6             | 6             | 0           | 0.725592                | -1.816038 | 0.576661  |
| 7             | 6             | 0           | 1.441700                | -1.997158 | -0.767862 |
| 8             | 1             | 0           | -1.847129               | -3.079631 | 0.370185  |
| 9             | 1             | 0           | -3.865435               | -1.272783 | -0.130639 |
| 10            | 1             | 0           | 1.270677                | -1.089371 | 1.179423  |
| 11            | 1             | 0           | 0.658556                | -2.755204 | 1.125780  |
| 12            | 1             | 0           | 1.053949                | -2.884866 | -1.277934 |
| 13            | 1             | 0           | 1.245252                | -1.110683 | -1.383478 |
| 14            | 35            | 0           | 1.797512                | 1.765298  | -0.120099 |
| 15            | 1             | 0           | -0.101763               | 0.784925  | 0.220478  |
| 16            | 6             | 0           | -2.838926               | 1.408891  | -0.203918 |
| 17            | 6             | 0           | -4.146829               | 1.606004  | -0.305179 |
| 18            | 1             | 0           | -2.110236               | 2.206119  | -0.279362 |
| 19            | 1             | 0           | -4.517664               | 2.606609  | -0.478515 |
| 20            | 1             | 0           | -4.879452               | 0.813175  | -0.222354 |
| 21            | 7             | 0           | 2.860289                | -2.202241 | -0.479341 |
| 22            | 1             | 0           | 3.355129                | -2.460037 | -1.326542 |
| 23            | 1             | 0           | 3.261134                | -1.319345 | -0.166688 |

Distance matrix (angstroms):

|    |    | 1        | 2        | 3        | 4        | 5        |
|----|----|----------|----------|----------|----------|----------|
| 1  | C  | 0.000000 |          |          |          |          |
| 2  | C  | 1.357744 | 0.000000 |          |          |          |
| 3  | N  | 2.206041 | 1.392232 | 0.000000 |          |          |
| 4  | C  | 2.214777 | 2.226422 | 1.346684 | 0.000000 |          |
| 5  | N  | 1.385329 | 2.209776 | 2.169908 | 1.333063 | 0.000000 |
| 6  | C  | 2.569322 | 3.649172 | 3.588111 | 2.471407 | 1.477353 |
| 7  | C  | 3.423259 | 4.417832 | 4.317719 | 3.247429 | 2.494378 |
| 8  | H  | 1.076413 | 2.213720 | 3.265804 | 3.232238 | 2.160012 |
| 9  | H  | 2.212191 | 1.074697 | 2.171485 | 3.246785 | 3.266625 |
| 10 | H  | 3.347507 | 4.243813 | 3.887742 | 2.613495 | 2.074232 |
| 11 | H  | 2.723831 | 3.992983 | 4.239165 | 3.298324 | 2.090776 |
| 12 | H  | 3.381409 | 4.448478 | 4.646786 | 3.809496 | 2.874032 |
| 13 | H  | 3.597802 | 4.297633 | 3.945506 | 2.916660 | 2.605611 |
| 14 | Br | 5.241177 | 5.440514 | 4.339784 | 3.242855 | 3.942692 |
| 15 | H  | 3.278775 | 3.318569 | 2.228680 | 1.116844 | 2.149042 |
| 16 | C  | 3.597777 | 2.537413 | 1.421731 | 2.427252 | 3.529701 |
| 17 | C  | 4.337769 | 3.050690 | 2.434425 | 3.653778 | 4.598789 |
| 18 | H  | 4.260227 | 3.411438 | 2.085484 | 2.558067 | 3.849717 |
| 19 | H  | 5.398595 | 4.126799 | 3.399236 | 4.506211 | 5.563390 |
| 20 | H  | 4.192041 | 2.838619 | 2.746412 | 4.080496 | 4.769784 |
| 21 | N  | 4.743488 | 5.799155 | 5.622757 | 4.425564 | 3.726818 |
| 22 | H  | 5.435002 | 6.457092 | 6.302216 | 5.166828 | 4.511442 |
| 23 | H  | 5.145347 | 6.081508 | 5.681679 | 4.391906 | 3.945504 |
|    |    | 6        | 7        | 8        | 9        | 10       |
| 6  | C  | 0.000000 |          |          |          |          |
| 7  | C  | 1.534065 | 0.000000 |          |          |          |
| 8  | H  | 2.873708 | 3.644626 | 0.000000 |          |          |
| 9  | H  | 4.676851 | 5.394113 | 2.754829 | 0.000000 |          |
| 10 | H  | 1.090177 | 2.155283 | 3.786386 | 5.303730 | 0.000000 |
| 11 | H  | 1.089981 | 2.184909 | 2.637164 | 4.923684 | 1.775548 |
| 12 | H  | 2.165579 | 1.094783 | 3.342228 | 5.302399 | 3.051128 |
| 13 | H  | 2.147025 | 1.097002 | 4.063854 | 5.264505 | 2.563116 |
| 14 | Br | 3.802691 | 3.834354 | 6.082526 | 6.426432 | 3.180479 |
| 15 | H  | 2.752525 | 3.331528 | 4.243054 | 4.303798 | 2.513195 |
| 16 | C  | 4.869832 | 5.499360 | 4.632503 | 2.872363 | 5.004376 |
| 17 | C  | 6.019012 | 6.665472 | 5.263071 | 2.897769 | 6.230446 |
| 18 | H  | 4.995242 | 5.524709 | 5.332006 | 3.899436 | 4.941546 |
| 19 | H  | 6.940097 | 7.536074 | 6.339194 | 3.949191 | 7.064979 |
| 20 | H  | 6.242412 | 6.939201 | 4.969911 | 2.321177 | 6.588531 |
| 21 | N  | 2.412721 | 1.462087 | 4.863260 | 6.798592 | 2.552812 |
| 22 | H  | 3.309286 | 2.046360 | 5.506930 | 7.414601 | 3.536033 |
| 23 | H  | 2.688539 | 2.032530 | 5.429659 | 7.126813 | 2.413881 |
|    |    | 11       | 12       | 13       | 14       | 15       |

|    |    |          |          |          |          |          |
|----|----|----------|----------|----------|----------|----------|
| 11 | H  | 0.000000 |          |          |          |          |
| 12 | H  | 2.439465 | 0.000000 |          |          |          |
| 13 | H  | 3.056966 | 1.787585 | 0.000000 |          |          |
| 14 | Br | 4.825389 | 4.849484 | 3.189418 | 0.000000 |          |
| 15 | H  | 3.732314 | 4.128955 | 2.824970 | 2.164341 | 0.000000 |
| 16 | C  | 5.598229 | 5.894432 | 4.941672 | 4.650872 | 2.839279 |
| 17 | C  | 6.645262 | 6.939904 | 6.133324 | 5.949355 | 4.160895 |
| 18 | H  | 5.852808 | 6.076787 | 4.845570 | 3.935757 | 2.510696 |
| 19 | H  | 7.623389 | 7.863730 | 6.917255 | 6.381044 | 4.827764 |
| 20 | H  | 6.724606 | 7.070714 | 6.523912 | 6.745283 | 4.798250 |
| 21 | N  | 2.780254 | 2.089639 | 2.148792 | 4.123095 | 4.264582 |
| 22 | H  | 3.656845 | 2.340571 | 2.505110 | 4.662095 | 4.987299 |
| 23 | H  | 3.241231 | 2.925301 | 2.363874 | 3.414584 | 3.985841 |
|    |    | 16       | 17       | 18       | 19       | 20       |
| 16 | C  | 0.000000 |          |          |          |          |
| 17 | C  | 1.326544 | 0.000000 |          |          |          |
| 18 | H  | 1.082706 | 2.123327 | 0.000000 |          |          |
| 19 | H  | 2.080408 | 1.081099 | 2.448625 | 0.000000 |          |
| 20 | H  | 2.125785 | 1.082670 | 3.100338 | 1.847408 | 0.000000 |
| 21 | N  | 6.752569 | 7.977015 | 6.646785 | 8.806772 | 8.310377 |
| 22 | H  | 7.388857 | 8.593908 | 7.262218 | 9.400581 | 8.929808 |
| 23 | H  | 6.682469 | 7.965850 | 6.425979 | 8.718948 | 8.415455 |
|    |    | 21       | 22       | 23       |          |          |
| 21 | N  | 0.000000 |          |          |          |          |
| 22 | H  | 1.014433 | 0.000000 |          |          |          |
| 23 | H  | 1.018790 | 1.629501 | 0.000000 |          |          |

Stoichiometry C7H12BrN3

Framework group C1[X(C7H12BrN3)]

Deg. of freedom 63

Full point group C1 NOp 1

Largest Abelian subgroup C1 NOp 1

Largest concise Abelian subgroup C1 NOp 1

Standard orientation:

| Center<br>Number | Atomic<br>Number | Atomic<br>Type | Coordinates (Angstroms) |           |           |
|------------------|------------------|----------------|-------------------------|-----------|-----------|
|                  |                  |                | X                       | Y         | Z         |
| 1                | 6                | 0              | -1.712178               | 2.117786  | -0.228940 |
| 2                | 6                | 0              | -2.725139               | 1.252442  | 0.032901  |
| 3                | 7                | 0              | -2.177112               | -0.026878 | -0.003391 |
| 4                | 6                | 0              | -0.862196               | 0.073155  | -0.276420 |
| 5                | 7                | 0              | -0.565130               | 1.364774  | -0.419709 |
| 6                | 6                | 0              | 0.811982                | 1.856211  | -0.630953 |
| 7                | 6                | 0              | 1.582622                | 1.979781  | 0.689728  |

|    |    |   |           |           |           |
|----|----|---|-----------|-----------|-----------|
| 8  | 1  | 0 | -1.710155 | 3.192122  | -0.295742 |
| 9  | 1  | 0 | -3.764661 | 1.435356  | 0.235165  |
| 10 | 1  | 0 | 1.311204  | 1.129344  | -1.271989 |
| 11 | 1  | 0 | 0.754414  | 2.811149  | -1.153294 |
| 12 | 1  | 0 | 1.242212  | 2.865184  | 1.236293  |
| 13 | 1  | 0 | 1.381137  | 1.083808  | 1.289768  |
| 14 | 35 | 0 | 1.795226  | -1.773409 | -0.065675 |
| 15 | 1  | 0 | -0.083411 | -0.726682 | -0.309507 |
| 16 | 6  | 0 | -2.821377 | -1.277500 | 0.202007  |
| 17 | 6  | 0 | -4.130222 | -1.437064 | 0.347547  |
| 18 | 1  | 0 | -2.115948 | -2.098384 | 0.229771  |
| 19 | 1  | 0 | -4.525828 | -2.430066 | 0.509466  |
| 20 | 1  | 0 | -4.839991 | -0.620259 | 0.312447  |
| 21 | 7  | 0 | 2.995358  | 2.148859  | 0.353145  |
| 22 | 1  | 0 | 3.529047  | 2.368939  | 1.187300  |
| 23 | 1  | 0 | 3.356289  | 1.262656  | 0.003423  |

-----

Rotational constants (GHZ):      0.8273919      0.4815652      0.3145402

Standard basis: 6-311++G(d,p) (5D, 7F)

There are    365 symmetry adapted cartesian basis functions of A    symmetry.

There are    352 symmetry adapted basis functions of A    symmetry.

    352 basis functions,    562 primitive gaussians,    365 cartesian basis functions

    55 alpha electrons      55 beta electrons

        nuclear repulsion energy      840.8877429784 Hartrees.

NAtoms=    23 NActive=    23 NUniq=    23 SFac= 1.00D+00 NAtFMM=    60 NAOKFM=F

Big=F

Integral buffers will be    131072 words long.

Raffenetti 2 integral format.

Two-electron integral symmetry is turned on.

One-electron integrals computed using PRISM.

NBasis=    352 RedAO= T EigKep=    4.58D-06    NBF=    352

NBsUse=    352 1.00D-06 EigRej= -1.00D+00    NBFU=    352

Lowest      energy      guess      from      the      checkpoint      file:

"/home/suqian/liuwen/qianmengshijie/nh2/nh2.chk"

B after Tr=    0.000000    0.000000    0.000000

    Rot=    0.999997    0.001229    0.000254    -0.001989 Ang=    0.27 deg.

B after Tr=    0.000000    0.000000    0.000000

    Rot=    0.999989    -0.002856    -0.000668    0.003522 Ang=    -0.53 deg.

Requested convergence on RMS density matrix=1.00D-08 within 128 cycles.

Requested convergence on MAX density matrix=1.00D-06.

Requested convergence on                    energy=1.00D-06.

No special actions if energy rises.

SCF Done: E(RB3LYP) = -3012.46744228      A.U. after    11 cycles

          NFock= 11 Conv=0.26D-08      -V/T= 2.0017



Calling FoFJK, ICntrl= 2127 FMM=F ISym2X=0 I1Cent= 0 IOpClX= 0 NMat=1 NMatS=1  
NMatT=0.

\*\*\*\*\* Axes restored to original set \*\*\*\*\*

| Center<br>Number | Atomic<br>Number | Forces (Hartrees/Bohr) |              |              |
|------------------|------------------|------------------------|--------------|--------------|
|                  |                  | X                      | Y            | Z            |
| 1                | 6                | 0.000084085            | -0.000184087 | -0.000370833 |
| 2                | 6                | -0.000047524           | 0.000143515  | 0.000820988  |
| 3                | 7                | 0.000002691            | -0.000035834 | -0.000347880 |
| 4                | 6                | 0.001513862            | -0.001458800 | 0.000693756  |
| 5                | 7                | -0.000585393           | -0.000269706 | -0.000219275 |
| 6                | 6                | -0.000535655           | -0.000512482 | 0.000264127  |
| 7                | 6                | 0.001887205            | -0.000222499 | 0.001430819  |
| 8                | 1                | -0.000011565           | -0.000038465 | -0.000098714 |
| 9                | 1                | 0.000020154            | 0.000017105  | 0.000055870  |
| 10               | 1                | -0.000126553           | 0.000291090  | -0.000153603 |
| 11               | 1                | -0.000090519           | 0.000029033  | 0.000296899  |
| 12               | 1                | -0.000418108           | 0.000785754  | -0.000902332 |
| 13               | 1                | -0.000434111           | -0.000058022 | -0.000510102 |
| 14               | 35               | 0.000914400            | -0.000711043 | 0.000195017  |
| 15               | 1                | -0.002157274           | 0.001968409  | -0.000422220 |
| 16               | 6                | -0.000071060           | 0.000123118  | -0.000170867 |
| 17               | 6                | -0.000025002           | -0.000155519 | -0.000069542 |
| 18               | 1                | 0.000183415            | 0.000136156  | 0.000113377  |
| 19               | 1                | 0.000014214            | 0.000024334  | 0.000024193  |
| 20               | 1                | -0.000069524           | 0.000026610  | -0.000008271 |
| 21               | 7                | -0.000476404           | 0.000605462  | -0.000339082 |
| 22               | 1                | 0.000331608            | -0.000807786 | 0.000443926  |
| 23               | 1                | 0.000097059            | 0.000303656  | -0.000726250 |

Cartesian Forces: Max 0.002157274 RMS 0.000630962

GradGradGradGradGradGradGradGradGradGradGradGradGradGradGradGradGradGradGradGrad

Berny optimization.

Using GEDIIS/GDIIS optimizer.

FormGI is forming the generalized inverse of G from B-inverse, IUseBI=4.

Internal Forces: Max 0.003412917 RMS 0.000437332

Search for a local minimum.

Step number 23 out of a maximum of 121

All quantities printed in internal units (Hartrees-Bohrs-Radians)

Mixed Optimization -- En-DIIS/RFO-DIIS

Update second derivatives using D2CorX and points 22 20 23

ITU= 0 -1 -1 0 -1 0 0 0 1 1 -1 1 -1 1 1 1 1 1 1 1 0

ITU= 1 0 0

Use linear search instead of GDIIIS.

|                 |         |         |         |         |         |
|-----------------|---------|---------|---------|---------|---------|
| Eigenvalues --- | 0.00012 | 0.00085 | 0.00466 | 0.00554 | 0.01118 |
| Eigenvalues --- | 0.01407 | 0.01796 | 0.02015 | 0.02168 | 0.02306 |
| Eigenvalues --- | 0.02388 | 0.02963 | 0.03062 | 0.03117 | 0.03268 |
| Eigenvalues --- | 0.03556 | 0.04057 | 0.04567 | 0.04748 | 0.05249 |
| Eigenvalues --- | 0.05520 | 0.08253 | 0.08915 | 0.09863 | 0.11075 |
| Eigenvalues --- | 0.12714 | 0.15178 | 0.15946 | 0.15978 | 0.16000 |
| Eigenvalues --- | 0.16005 | 0.16042 | 0.16282 | 0.19822 | 0.21652 |
| Eigenvalues --- | 0.22039 | 0.22991 | 0.23474 | 0.24672 | 0.24917 |
| Eigenvalues --- | 0.28495 | 0.30921 | 0.34005 | 0.34021 | 0.34754 |
| Eigenvalues --- | 0.34945 | 0.35005 | 0.35651 | 0.35690 | 0.35859 |
| Eigenvalues --- | 0.36436 | 0.36656 | 0.38362 | 0.40268 | 0.42159 |
| Eigenvalues --- | 0.42997 | 0.46798 | 0.47689 | 0.48187 | 0.50240 |
| Eigenvalues --- | 0.54240 | 0.59417 | 0.60356 |         |         |

RFO step: Lambda=-1.23181804D-03 EMin= 1.21352687D-04

Quartic linear search produced a step of 0.01122.

Iteration 1 RMS(Cart)= 0.08781525 RMS(Int)= 0.02580606

Iteration 2 RMS(Cart)= 0.02414819 RMS(Int)= 0.00095644

Iteration 3 RMS(Cart)= 0.00236027 RMS(Int)= 0.00009524

Iteration 4 RMS(Cart)= 0.00000781 RMS(Int)= 0.00009499

Iteration 5 RMS(Cart)= 0.00000000 RMS(Int)= 0.00009499

| Variable | Old X   | -DE/DX   | Delta X  |          |          | New X   |
|----------|---------|----------|----------|----------|----------|---------|
|          |         |          | (Linear) | (Quad)   | (Total)  |         |
| R1       | 2.56576 | 0.00019  | -0.00001 | -0.00057 | -0.00059 | 2.56517 |
| R2       | 2.61789 | -0.00003 | 0.00001  | 0.00002  | 0.00002  | 2.61791 |
| R3       | 2.03413 | 0.00003  | 0.00000  | 0.00027  | 0.00027  | 2.03439 |
| R4       | 2.63094 | 0.00012  | 0.00000  | 0.00062  | 0.00063  | 2.63157 |
| R5       | 2.03088 | -0.00003 | 0.00000  | 0.00009  | 0.00009  | 2.03098 |
| R6       | 2.54486 | -0.00009 | 0.00002  | 0.00311  | 0.00314  | 2.54800 |
| R7       | 2.68668 | 0.00014  | -0.00001 | -0.00270 | -0.00271 | 2.68397 |
| R8       | 2.51912 | -0.00035 | -0.00001 | -0.00192 | -0.00192 | 2.51720 |
| R9       | 2.11053 | -0.00002 | -0.00003 | -0.00129 | -0.00132 | 2.10921 |
| R10      | 2.79179 | 0.00005  | 0.00001  | 0.00389  | 0.00390  | 2.79570 |
| R11      | 2.89896 | 0.00091  | -0.00002 | 0.00533  | 0.00532  | 2.90428 |
| R12      | 2.06014 | 0.00005  | 0.00000  | -0.00104 | -0.00104 | 2.05909 |
| R13      | 2.05977 | 0.00013  | 0.00001  | 0.00170  | 0.00171  | 2.06148 |
| R14      | 2.06884 | -0.00007 | 0.00007  | 0.00613  | 0.00620  | 2.07504 |
| R15      | 2.07303 | 0.00032  | 0.00000  | -0.00050 | -0.00050 | 2.07254 |
| R16      | 2.76294 | -0.00018 | -0.00005 | -0.00946 | -0.00950 | 2.75344 |
| R17      | 4.09001 | 0.00045  | 0.00015  | 0.02712  | 0.02727  | 4.11728 |
| R18      | 2.50680 | 0.00007  | 0.00000  | 0.00024  | 0.00024  | 2.50704 |
| R19      | 2.04602 | 0.00022  | 0.00001  | -0.00041 | -0.00040 | 2.04562 |
| R20      | 2.04298 | 0.00001  | 0.00000  | -0.00006 | -0.00006 | 2.04293 |

|     |          |          |          |          |          |          |
|-----|----------|----------|----------|----------|----------|----------|
| R21 | 2.04595  | 0.00003  | 0.00000  | -0.00006 | -0.00006 | 2.04589  |
| R22 | 1.91700  | -0.00001 | 0.00006  | 0.00100  | 0.00106  | 1.91806  |
| R23 | 1.92523  | 0.00008  | 0.00004  | -0.00067 | -0.00063 | 1.92461  |
| A1  | 1.87325  | -0.00027 | 0.00001  | 0.00005  | -0.00001 | 1.87324  |
| A2  | 2.27770  | 0.00010  | 0.00000  | 0.00028  | 0.00030  | 2.27799  |
| A3  | 2.13224  | 0.00016  | -0.00001 | -0.00033 | -0.00032 | 2.13192  |
| A4  | 1.86184  | 0.00009  | -0.00001 | -0.00036 | -0.00042 | 1.86142  |
| A5  | 2.27767  | -0.00004 | 0.00001  | -0.00025 | -0.00023 | 2.27745  |
| A6  | 2.14367  | -0.00006 | 0.00001  | 0.00062  | 0.00064  | 2.14431  |
| A7  | 1.89798  | -0.00015 | 0.00002  | 0.00012  | 0.00013  | 1.89810  |
| A8  | 2.24742  | 0.00022  | -0.00002 | -0.00326 | -0.00328 | 2.24414  |
| A9  | 2.13779  | -0.00008 | 0.00000  | 0.00314  | 0.00315  | 2.14094  |
| A10 | 1.88741  | 0.00010  | -0.00002 | -0.00145 | -0.00157 | 1.88584  |
| A11 | 2.25708  | 0.00027  | 0.00004  | 0.02043  | 0.02042  | 2.27750  |
| A12 | 2.13568  | -0.00037 | 0.00000  | -0.01728 | -0.01738 | 2.11830  |
| A13 | 1.90429  | 0.00022  | 0.00000  | 0.00156  | 0.00151  | 1.90580  |
| A14 | 2.22773  | 0.00089  | -0.00003 | 0.00053  | 0.00049  | 2.22822  |
| A15 | 2.14766  | -0.00111 | 0.00003  | -0.00277 | -0.00271 | 2.14495  |
| A16 | 1.95192  | 0.00032  | 0.00008  | 0.00626  | 0.00634  | 1.95826  |
| A17 | 1.86413  | -0.00030 | -0.00004 | -0.00816 | -0.00820 | 1.85593  |
| A18 | 1.88675  | -0.00014 | -0.00006 | -0.00323 | -0.00333 | 1.88342  |
| A19 | 1.90698  | -0.00011 | -0.00004 | -0.00449 | -0.00451 | 1.90247  |
| A20 | 1.94822  | 0.00014  | 0.00004  | 0.00604  | 0.00608  | 1.95429  |
| A21 | 1.90343  | 0.00006  | 0.00001  | 0.00297  | 0.00298  | 1.90641  |
| A22 | 1.91638  | -0.00030 | 0.00002  | 0.00042  | 0.00006  | 1.91644  |
| A23 | 1.88898  | 0.00021  | 0.00000  | -0.00540 | -0.00545 | 1.88353  |
| A24 | 1.87185  | 0.00054  | -0.00002 | 0.00904  | 0.00881  | 1.88066  |
| A25 | 1.90748  | -0.00050 | 0.00001  | -0.00777 | -0.00759 | 1.89988  |
| A26 | 1.89848  | 0.00020  | 0.00019  | 0.03064  | 0.03075  | 1.92923  |
| A27 | 1.97996  | -0.00015 | -0.00020 | -0.02645 | -0.02657 | 1.95339  |
| A28 | 2.81855  | -0.00341 | -0.00029 | -0.05538 | -0.05568 | 2.76288  |
| A29 | 2.17580  | 0.00000  | 0.00000  | 0.00240  | 0.00240  | 2.17820  |
| A30 | 1.95561  | -0.00006 | 0.00001  | 0.00290  | 0.00292  | 1.95852  |
| A31 | 2.15177  | 0.00006  | -0.00001 | -0.00531 | -0.00532 | 2.14645  |
| A32 | 2.08055  | -0.00008 | -0.00001 | -0.00038 | -0.00038 | 2.08017  |
| A33 | 2.15618  | 0.00011  | 0.00001  | 0.00074  | 0.00074  | 2.15693  |
| A34 | 2.04645  | -0.00003 | 0.00000  | -0.00036 | -0.00036 | 2.04609  |
| A35 | 1.92211  | 0.00098  | -0.00004 | 0.02072  | 0.02050  | 1.94261  |
| A36 | 1.89732  | -0.00033 | -0.00005 | 0.00730  | 0.00707  | 1.90438  |
| A37 | 1.85939  | -0.00020 | -0.00004 | 0.01464  | 0.01424  | 1.87363  |
| D1  | -0.00092 | 0.00027  | 0.00003  | 0.01439  | 0.01435  | 0.01343  |
| D2  | -3.14028 | 0.00004  | 0.00003  | 0.00732  | 0.00735  | -3.13293 |
| D3  | 3.13968  | 0.00017  | -0.00002 | 0.00694  | 0.00690  | -3.13661 |
| D4  | 0.00032  | -0.00006 | -0.00001 | -0.00013 | -0.00010 | 0.00022  |

|     |          |          |          |          |          |          |
|-----|----------|----------|----------|----------|----------|----------|
| D5  | -0.00247 | -0.00013 | -0.00017 | -0.02221 | -0.02235 | -0.02482 |
| D6  | -3.05547 | -0.00009 | -0.00018 | -0.01350 | -0.01359 | -3.06906 |
| D7  | 3.14002  | -0.00004 | -0.00013 | -0.01551 | -0.01566 | 3.12436  |
| D8  | 0.08702  | 0.00000  | -0.00014 | -0.00680 | -0.00690 | 0.08011  |
| D9  | 0.00396  | -0.00032 | 0.00013  | -0.00193 | -0.00176 | 0.00220  |
| D10 | -3.13863 | -0.00020 | 0.00008  | -0.00387 | -0.00370 | 3.14085  |
| D11 | -3.13966 | -0.00011 | 0.00012  | 0.00447  | 0.00458  | -3.13508 |
| D12 | 0.00094  | 0.00000  | 0.00007  | 0.00252  | 0.00264  | 0.00358  |
| D13 | -0.00553 | 0.00024  | -0.00024 | -0.01187 | -0.01210 | -0.01763 |
| D14 | 3.05290  | 0.00016  | 0.00006  | 0.01037  | 0.01071  | 3.06361  |
| D15 | 3.13699  | 0.00014  | -0.00019 | -0.01007 | -0.01029 | 3.12669  |
| D16 | -0.08777 | 0.00006  | 0.00011  | 0.01217  | 0.01252  | -0.07525 |
| D17 | 0.11777  | -0.00015 | -0.00007 | -0.03416 | -0.03426 | 0.08351  |
| D18 | -3.02115 | -0.00018 | -0.00008 | -0.03352 | -0.03362 | -3.05477 |
| D19 | -3.02494 | -0.00002 | -0.00013 | -0.03634 | -0.03644 | -3.06138 |
| D20 | 0.11933  | -0.00005 | -0.00014 | -0.03570 | -0.03581 | 0.08352  |
| D21 | 0.00495  | -0.00007 | 0.00026  | 0.02100  | 0.02122  | 0.02618  |
| D22 | 3.06287  | 0.00001  | 0.00026  | 0.01296  | 0.01315  | 3.07601  |
| D23 | -3.06048 | -0.00003 | -0.00002 | -0.00147 | -0.00118 | -3.06167 |
| D24 | -0.00257 | 0.00005  | -0.00002 | -0.00951 | -0.00925 | -0.01183 |
| D25 | -2.44179 | -0.00042 | -0.00125 | -0.36657 | -0.36783 | -2.80962 |
| D26 | 0.60621  | -0.00049 | -0.00091 | -0.34055 | -0.34145 | 0.26475  |
| D27 | 1.60679  | 0.00009  | -0.00041 | -0.09099 | -0.09142 | 1.51537  |
| D28 | -2.59089 | -0.00005 | -0.00044 | -0.09802 | -0.09849 | -2.68938 |
| D29 | -0.54479 | -0.00020 | -0.00047 | -0.10046 | -0.10094 | -0.64572 |
| D30 | -1.43489 | 0.00005  | -0.00042 | -0.08139 | -0.08179 | -1.51668 |
| D31 | 0.65061  | -0.00009 | -0.00044 | -0.08842 | -0.08886 | 0.56175  |
| D32 | 2.69671  | -0.00024 | -0.00048 | -0.09086 | -0.09130 | 2.60541  |
| D33 | -1.31828 | 0.00020  | -0.00052 | 0.04412  | 0.04358  | -1.27471 |
| D34 | 0.76260  | -0.00044 | -0.00050 | 0.03173  | 0.03123  | 0.79383  |
| D35 | 2.90485  | -0.00018 | -0.00075 | 0.00213  | 0.00137  | 2.90622  |
| D36 | 2.90482  | 0.00045  | -0.00050 | 0.05327  | 0.05277  | 2.95759  |
| D37 | -1.29748 | -0.00020 | -0.00047 | 0.04088  | 0.04041  | -1.25707 |
| D38 | 0.84477  | 0.00006  | -0.00072 | 0.01128  | 0.01055  | 0.85532  |
| D39 | 0.79812  | 0.00035  | -0.00052 | 0.04867  | 0.04816  | 0.84628  |
| D40 | 2.87901  | -0.00029 | -0.00049 | 0.03628  | 0.03581  | 2.91482  |
| D41 | -1.26193 | -0.00003 | -0.00074 | 0.00668  | 0.00595  | -1.25598 |
| D42 | 2.99926  | -0.00070 | 0.00087  | -0.20238 | -0.20148 | 2.79779  |
| D43 | -1.25291 | -0.00058 | 0.00077  | -0.16897 | -0.16797 | -1.42088 |
| D44 | 0.92761  | -0.00075 | 0.00077  | -0.22447 | -0.22402 | 0.70359  |
| D45 | 2.95862  | -0.00063 | 0.00066  | -0.19105 | -0.19052 | 2.76810  |
| D46 | -1.19910 | -0.00016 | 0.00074  | -0.21893 | -0.21819 | -1.41729 |
| D47 | 0.83191  | -0.00004 | 0.00064  | -0.18551 | -0.18469 | 0.64722  |
| D48 | -3.13100 | -0.00004 | -0.00001 | -0.00247 | -0.00249 | -3.13348 |

|     |          |          |          |          |          |          |
|-----|----------|----------|----------|----------|----------|----------|
| D49 | 0.01198  | -0.00002 | -0.00002 | -0.00261 | -0.00263 | 0.00936  |
| D50 | 0.00763  | -0.00001 | -0.00001 | -0.00317 | -0.00318 | 0.00446  |
| D51 | -3.13257 | 0.00001  | -0.00001 | -0.00331 | -0.00332 | -3.13589 |

| Item                 | Value    | Threshold | Converged? |
|----------------------|----------|-----------|------------|
| Maximum Force        | 0.003413 | 0.000450  | NO         |
| RMS Force            | 0.000437 | 0.000300  | NO         |
| Maximum Displacement | 0.514599 | 0.001800  | NO         |
| RMS Displacement     | 0.100234 | 0.001200  | NO         |

Predicted change in Energy=-9.642930D-04

GradGradGradGradGradGradGradGradGradGradGradGradGradGradGradGradGradGradGrad

Input orientation:

```

-----
Center      Atomic      Atomic      Coordinates (Angstroms)
Number      Number      Type        X           Y           Z
-----
  1          6          0          -1.794647   -1.985538    0.242490
  2          6          0          -2.806780   -1.110276    0.014189
  3          7          0          -2.241163    0.162246    0.012630
  4          6          0          -0.915891    0.047830    0.233085
  5          7          0          -0.634320   -1.244091    0.394346
  6          6          0          0.744218    -1.749453    0.575789
  7          6          0          1.443632    -2.022944   -0.765112
  8          1          0          -1.801926   -3.059562    0.315901
  9          1          0          -3.855279   -1.282586   -0.147172
 10          1          0          1.288945    -0.969866    1.107580
 11          1          0          0.694647    -2.642756    1.199958
 12          1          0          1.024157    -2.927078   -1.225901
 13          1          0          1.253785    -1.167956   -1.425255
 14          35         0          1.900124    1.652622    0.152215
 15          1          0          -0.112525    0.822659    0.238477
 16          6          0          -2.880271    1.415335   -0.183710
 17          6          0          -4.189265    1.585035   -0.317082
 18          1          0          -2.173412    2.234498   -0.217169
 19          1          0          -4.578683    2.581778   -0.470597
 20          1          0          -4.905150    0.773709   -0.280115
 21          7          0          2.865079    -2.198201   -0.497173
 22          1          0          3.326083    -2.687503   -1.257613
 23          1          0          3.304165    -1.282984   -0.414478
-----

```

Distance matrix (angstroms):

```

          1          2          3          4          5
1  C      0.000000
2  C      1.357431  0.000000

```

|    |    |          |          |          |          |          |
|----|----|----------|----------|----------|----------|----------|
| 3  | N  | 2.205717 | 1.392565 | 0.000000 |          |          |
| 4  | C  | 2.215149 | 2.228135 | 1.348346 | 0.000000 |          |
| 5  | N  | 1.385339 | 2.209527 | 2.169201 | 1.332046 | 0.000000 |
| 6  | C  | 2.571509 | 3.651511 | 3.589462 | 2.470554 | 1.479419 |
| 7  | C  | 3.391624 | 4.416591 | 4.354038 | 3.294215 | 2.503765 |
| 8  | H  | 1.076554 | 2.213702 | 3.265723 | 3.232306 | 2.159953 |
| 9  | H  | 2.211829 | 1.074746 | 2.172199 | 3.248785 | 3.266390 |
| 10 | H  | 3.359837 | 4.241483 | 3.865521 | 2.581036 | 2.069504 |
| 11 | H  | 2.746864 | 4.001816 | 4.230457 | 3.281453 | 2.090796 |
| 12 | H  | 3.314865 | 4.417542 | 4.662638 | 3.839597 | 2.864995 |
| 13 | H  | 3.569699 | 4.308540 | 4.006446 | 2.989268 | 2.623297 |
| 14 | Br | 5.186106 | 5.459634 | 4.403516 | 3.242196 | 3.856550 |
| 15 | H  | 3.273457 | 3.323485 | 2.240145 | 1.116148 | 2.137292 |
| 16 | C  | 3.595298 | 2.534419 | 1.420296 | 2.429522 | 3.528596 |
| 17 | C  | 4.335471 | 3.047246 | 2.434777 | 3.657958 | 4.598664 |
| 18 | H  | 4.261861 | 3.412067 | 2.086056 | 2.562344 | 3.852705 |
| 19 | H  | 5.396270 | 4.123824 | 3.398771 | 4.509114 | 5.562679 |
| 20 | H  | 4.190679 | 2.835343 | 2.748894 | 4.087109 | 4.771415 |
| 21 | N  | 4.722856 | 5.797850 | 5.648479 | 4.457989 | 3.735094 |
| 22 | H  | 5.381908 | 6.458880 | 6.381912 | 5.262943 | 4.527383 |
| 23 | H  | 5.188744 | 6.128395 | 5.746457 | 4.472055 | 4.020867 |
|    |    | 6        | 7        | 8        | 9        | 10       |
| 6  | C  | 0.000000 |          |          |          |          |
| 7  | C  | 1.536878 | 0.000000 |          |          |          |
| 8  | H  | 2.875201 | 3.574467 | 0.000000 |          |          |
| 9  | H  | 4.679318 | 5.385949 | 2.754694 | 0.000000 |          |
| 10 | H  | 1.089626 | 2.154037 | 3.814062 | 5.304266 | 0.000000 |
| 11 | H  | 1.090887 | 2.192406 | 2.681075 | 4.936259 | 1.777719 |
| 12 | H  | 2.170542 | 1.098064 | 3.222026 | 5.260885 | 3.057110 |
| 13 | H  | 2.145222 | 1.096739 | 3.993391 | 5.267749 | 2.540813 |
| 14 | Br | 3.617963 | 3.815713 | 5.994719 | 6.467592 | 2.857220 |
| 15 | H  | 2.731950 | 3.395036 | 4.234585 | 4.311495 | 2.435694 |
| 16 | C  | 4.871309 | 5.554812 | 4.630026 | 2.868929 | 4.973829 |
| 17 | C  | 6.021236 | 6.704310 | 5.260450 | 2.892000 | 6.210311 |
| 18 | H  | 5.001322 | 5.613294 | 5.333783 | 3.899162 | 4.900084 |
| 19 | H  | 6.941741 | 7.586731 | 6.336693 | 3.944772 | 7.038031 |
| 20 | H  | 6.246141 | 6.954389 | 4.967817 | 2.312629 | 6.582747 |
| 21 | N  | 2.418817 | 1.457058 | 4.814974 | 6.791470 | 2.562857 |
| 22 | H  | 3.302624 | 2.056165 | 5.376881 | 7.401272 | 3.562913 |
| 23 | H  | 2.784160 | 2.032748 | 5.455442 | 7.164432 | 2.544762 |
|    |    | 11       | 12       | 13       | 14       | 15       |
| 11 | H  | 0.000000 |          |          |          |          |
| 12 | H  | 2.464591 | 0.000000 |          |          |          |
| 13 | H  | 3.062583 | 1.785212 | 0.000000 |          |          |

|    |    |          |          |          |          |          |
|----|----|----------|----------|----------|----------|----------|
| 14 | Br | 4.582708 | 4.862117 | 3.295729 | 0.000000 |          |
| 15 | H  | 3.685794 | 4.182938 | 2.932124 | 2.178769 | 0.000000 |
| 16 | C  | 5.582355 | 5.931886 | 5.030432 | 4.798054 | 2.861805 |
| 17 | C  | 6.635376 | 6.954487 | 6.199500 | 6.107819 | 4.184456 |
| 18 | H  | 5.832806 | 6.154987 | 4.978137 | 4.131430 | 2.539323 |
| 19 | H  | 7.608845 | 7.893656 | 6.999255 | 6.574660 | 4.852201 |
| 20 | H  | 6.724625 | 7.053157 | 6.558498 | 6.875402 | 4.820849 |
| 21 | N  | 2.790817 | 2.109810 | 2.125796 | 4.022647 | 4.304985 |
| 22 | H  | 3.600849 | 2.314576 | 2.575178 | 4.780969 | 5.136491 |
| 23 | H  | 3.356332 | 2.925728 | 2.288877 | 3.303068 | 4.066183 |
|    |    | 16       | 17       | 18       | 19       | 20       |
| 16 | C  | 0.000000 |          |          |          |          |
| 17 | C  | 1.326669 | 0.000000 |          |          |          |
| 18 | H  | 1.082496 | 2.120247 | 0.000000 |          |          |
| 19 | H  | 2.080264 | 1.081069 | 2.443391 | 0.000000 |          |
| 20 | H  | 2.126291 | 1.082639 | 3.098429 | 1.847154 | 0.000000 |
| 21 | N  | 6.794480 | 8.006814 | 6.716667 | 8.846384 | 8.322008 |
| 22 | H  | 7.517006 | 8.695954 | 7.453393 | 9.532578 | 8.982688 |
| 23 | H  | 6.751402 | 8.024120 | 6.512715 | 8.779455 | 8.464094 |
|    |    | 21       | 22       | 23       |          |          |
| 21 | N  | 0.000000 |          |          |          |          |
| 22 | H  | 1.014993 | 0.000000 |          |          |          |
| 23 | H  | 1.018458 | 1.638301 | 0.000000 |          |          |

Stoichiometry C7H12BrN3

Framework group C1[X(C7H12BrN3)]

Deg. of freedom 63

Full point group C1 NOp 1

Largest Abelian subgroup C1 NOp 1

Largest concise Abelian subgroup C1 NOp 1

Standard orientation:

| Center<br>Number | Atomic<br>Number | Atomic<br>Type | Coordinates (Angstroms) |           |           |
|------------------|------------------|----------------|-------------------------|-----------|-----------|
|                  |                  |                | X                       | Y         | Z         |
| 1                | 6                | 0              | -1.682149               | 2.072302  | -0.313572 |
| 2                | 6                | 0              | -2.731296               | 1.252783  | -0.048433 |
| 3                | 7                | 0              | -2.222518               | -0.042439 | 0.004330  |
| 4                | 6                | 0              | -0.894172               | 0.004054  | -0.222323 |
| 5                | 7                | 0              | -0.556231               | 1.274587  | -0.436539 |
| 6                | 6                | 0              | 0.842743                | 1.710545  | -0.640237 |
| 7                | 6                | 0              | 1.557721                | 2.007135  | 0.687481  |
| 8                | 1                | 0              | -1.642141               | 3.141713  | -0.430745 |
| 9                | 1                | 0              | -3.770642               | 1.477822  | 0.107116  |
| 10               | 1                | 0              | 1.350802                | 0.886575  | -1.140471 |

|    |    |   |           |           |           |
|----|----|---|-----------|-----------|-----------|
| 11 | 1  | 0 | 0.830801  | 2.579012  | -1.300279 |
| 12 | 1  | 0 | 1.180079  | 2.946983  | 1.111528  |
| 13 | 1  | 0 | 1.332287  | 1.188989  | 1.382213  |
| 14 | 35 | 0 | 1.848338  | -1.719351 | -0.079662 |
| 15 | 1  | 0 | -0.125885 | -0.805197 | -0.197125 |
| 16 | 6  | 0 | -2.915818 | -1.256936 | 0.252473  |
| 17 | 6  | 0 | -4.230617 | -1.362879 | 0.394350  |
| 18 | 1  | 0 | -2.245784 | -2.104582 | 0.318423  |
| 19 | 1  | 0 | -4.663266 | -2.334305 | 0.588919  |
| 20 | 1  | 0 | -4.910025 | -0.522799 | 0.325227  |
| 21 | 7  | 0 | 2.984692  | 2.108162  | 0.410777  |
| 22 | 1  | 0 | 3.469241  | 2.607105  | 1.150018  |
| 23 | 1  | 0 | 3.382606  | 1.171776  | 0.364936  |

-----

Rotational constants (GHZ):      0.8678660      0.4654617      0.3138679

Standard basis: 6-311++G(d,p) (5D, 7F)

There are    365 symmetry adapted cartesian basis functions of A    symmetry.

There are    352 symmetry adapted basis functions of A    symmetry.

    352 basis functions,    562 primitive gaussians,    365 cartesian basis functions

    55 alpha electrons      55 beta electrons

        nuclear repulsion energy      842.4337522124 Hartrees.

NAtoms=    23 NActive=    23 NUniq=    23 SFac= 1.00D+00 NAtFMM=    60 NAOKFM=F

Big=F

Integral buffers will be    131072 words long.

Raffenetti 2 integral format.

Two-electron integral symmetry is turned on.

One-electron integrals computed using PRISM.

NBasis=    352 RedAO= T EigKep= 4.37D-06 NBF=    352

NBsUse=    352 1.00D-06 EigRej= -1.00D+00 NBFU=    352

Initial guess from the checkpoint file: "/home/suqian/liuwen/qianmengshijie/nh2/nh2.chk"

B after Tr=    0.000000    0.000000    0.000000

        Rot=    0.999972    0.007142    0.002212    -0.000733 Ang=    0.86 deg.

ExpMin= 3.50D-02 ExpMax= 4.40D+05 ExpMxC= 1.51D+04 IAcc=3 IRadAn=      5 AccDes=

0.00D+00

Harris functional with IExCor= 402 and IRadAn=      5 diagonalized for initial guess.

HarFok: IExCor= 402 AccDes= 0.00D+00 IRadAn=      5 IDoV= 1 UseB2=F ITyADJ=14

ICtDFT= 3500011 ScaDFX= 1.000000 1.000000 1.000000 1.000000

FoFCou: FMM=F IPFlag=      0 FMFlag=    100000 FMFlg1=      0

        NFXFlg=      0 DoJE=T BraDBF=F KetDBF=T FulRan=T

        wScrn= 0.000000 ICntrl=      500 IOpCl= 0 I1Cent=    200000004 NGrid=

0

        NMat0=    1 NMatS0=    1 NMatT0=    0 NMatD0=    1 NMtDS0=    0

NMtDT0=    0

Petite list used in FoFCou.



Requested convergence on RMS density matrix=1.00D-08 within 128 cycles.

Requested convergence on MAX density matrix=1.00D-06.

Requested convergence on energy=1.00D-06.

No special actions if energy rises.

SCF Done: E(RB3LYP) = -3012.46741221 A.U. after 12 cycles

NFock= 12 Conv=0.98D-08 -V/T= 2.0017

Calling FoFJK, ICntrl= 2127 FMM=F ISym2X=0 l1Cent= 0 IOpClX= 0 NMat=1 NMatS=1

NMatT=0.

\*\*\*\*\* Axes restored to original set \*\*\*\*\*

| Center<br>Number | Atomic<br>Number | Forces (Hartrees/Bohr) |              |              |
|------------------|------------------|------------------------|--------------|--------------|
|                  |                  | X                      | Y            | Z            |
| 1                | 6                | 0.000218577            | 0.000068536  | 0.001459467  |
| 2                | 6                | 0.000247381            | 0.000273252  | -0.000115121 |
| 3                | 7                | 0.000366069            | 0.000342282  | -0.000769686 |
| 4                | 6                | 0.000686363            | -0.001774765 | 0.001511826  |
| 5                | 7                | 0.001044774            | -0.001390060 | -0.003223220 |
| 6                | 6                | -0.000515002           | -0.001416337 | 0.001565851  |
| 7                | 6                | -0.001676042           | 0.002320366  | -0.000216800 |
| 8                | 1                | -0.000107467           | 0.000107224  | 0.000351626  |
| 9                | 1                | 0.000074704            | 0.000160972  | 0.000055958  |
| 10               | 1                | 0.000736104            | 0.000510184  | -0.000203335 |
| 11               | 1                | 0.000125962            | -0.000251387 | -0.000626971 |
| 12               | 1                | 0.002507255            | 0.001563780  | 0.000388161  |
| 13               | 1                | -0.002888083           | -0.000546553 | -0.001144730 |
| 14               | 35               | 0.001198494            | 0.000317157  | -0.000590218 |
| 15               | 1                | -0.002913857           | 0.002084447  | 0.000349593  |
| 16               | 6                | -0.000297376           | 0.000548877  | -0.000457201 |
| 17               | 6                | -0.000132083           | -0.000142168 | -0.000042473 |
| 18               | 1                | 0.000312107            | -0.000035821 | 0.000221355  |
| 19               | 1                | -0.000013540           | 0.000024936  | 0.000038057  |
| 20               | 1                | -0.000022315           | 0.000039593  | 0.000017749  |
| 21               | 7                | 0.002532143            | -0.002867894 | -0.001252541 |
| 22               | 1                | -0.000994348           | 0.000482656  | 0.000958812  |
| 23               | 1                | -0.000489822           | -0.000419279 | 0.001723842  |

Cartesian Forces: Max 0.003223220 RMS 0.001161925

GradGradGradGradGradGradGradGradGradGradGradGradGradGradGradGradGrad  
Berny optimization.

Using GEDIIS/GDIIS optimizer.

FormGI is forming the generalized inverse of G from B-inverse, IUseBI=4.

Internal Forces: Max 0.003128493 RMS 0.000855886

Search for a local minimum.

Step number 24 out of a maximum of 121

All quantities printed in internal units (Hartrees-Bohrs-Radians)

Mixed Optimization -- En-DIIS/RFO-DIIS

Swapping is turned off.

Update second derivatives using D2CorX and points 21 23 24

DE= 3.01D-05 DEPred=-9.64D-04 R=-3.12D-02

Trust test=-3.12D-02 RLast= 7.52D-01 DXMaxT set to 7.88D-02

ITU= -1 0 -1 -1 0 -1 0 0 0 1 1 -1 1 -1 1 1 1 1 1 1

ITU= 0 1 0 0

|                 |         |         |         |         |         |
|-----------------|---------|---------|---------|---------|---------|
| Eigenvalues --- | 0.00026 | 0.00201 | 0.00461 | 0.00691 | 0.01009 |
| Eigenvalues --- | 0.01407 | 0.01738 | 0.01981 | 0.02171 | 0.02308 |
| Eigenvalues --- | 0.02391 | 0.02668 | 0.03061 | 0.03079 | 0.03274 |
| Eigenvalues --- | 0.03456 | 0.04083 | 0.04519 | 0.04850 | 0.05242 |
| Eigenvalues --- | 0.05436 | 0.08222 | 0.09053 | 0.10047 | 0.11754 |
| Eigenvalues --- | 0.12738 | 0.15283 | 0.15945 | 0.15962 | 0.16000 |
| Eigenvalues --- | 0.16007 | 0.16041 | 0.16244 | 0.19007 | 0.21660 |
| Eigenvalues --- | 0.22044 | 0.23114 | 0.23484 | 0.24919 | 0.24955 |
| Eigenvalues --- | 0.28800 | 0.29997 | 0.33986 | 0.34163 | 0.34767 |
| Eigenvalues --- | 0.34888 | 0.35060 | 0.35685 | 0.35691 | 0.35859 |
| Eigenvalues --- | 0.36437 | 0.36657 | 0.38243 | 0.40209 | 0.42164 |
| Eigenvalues --- | 0.42960 | 0.46751 | 0.47709 | 0.48167 | 0.50163 |
| Eigenvalues --- | 0.54251 | 0.59481 | 0.60360 |         |         |

En-DIIS/RFO-DIIS IScMMF= 0 using points: 24 23

RFO step: Lambda=-2.63125840D-04.

DidBck=T Rises=F RFO-DIIS coefs: 0.45080 0.54920

Iteration 1 RMS(Cart)= 0.13487521 RMS(Int)= 0.04667269

Iteration 2 RMS(Cart)= 0.02837099 RMS(Int)= 0.01905847

Iteration 3 RMS(Cart)= 0.01910302 RMS(Int)= 0.00063028

Iteration 4 RMS(Cart)= 0.00143883 RMS(Int)= 0.00015719

Iteration 5 RMS(Cart)= 0.00000289 RMS(Int)= 0.00015717

Iteration 6 RMS(Cart)= 0.00000000 RMS(Int)= 0.00015717

| Variable | Old X   | -DE/DX   | Delta X<br>(Linear) | Delta X<br>(Quad) | Delta X<br>(Total) | New X   |
|----------|---------|----------|---------------------|-------------------|--------------------|---------|
| R1       | 2.56517 | 0.00026  | 0.00033             | -0.00044          | -0.00014           | 2.56503 |
| R2       | 2.61791 | -0.00028 | -0.00001            | 0.00415           | 0.00424            | 2.62215 |
| R3       | 2.03439 | -0.00008 | -0.00015            | 0.00022           | 0.00007            | 2.03446 |
| R4       | 2.63157 | -0.00048 | -0.00035            | -0.00337          | -0.00383           | 2.62774 |
| R5       | 2.03098 | -0.00011 | -0.00005            | 0.00004           | -0.00001           | 2.03097 |
| R6       | 2.54800 | -0.00048 | -0.00172            | 0.00218           | 0.00041            | 2.54841 |
| R7       | 2.68397 | 0.00048  | 0.00149             | 0.00327           | 0.00475            | 2.68873 |
| R8       | 2.51720 | 0.00167  | 0.00106             | 0.00066           | 0.00180            | 2.51900 |
| R9       | 2.10921 | 0.00043  | 0.00072             | -0.00250          | -0.00178           | 2.10744 |
| R10      | 2.79570 | -0.00026 | -0.00214            | 0.00108           | -0.00106           | 2.79463 |

|     |         |          |          |          |          |         |
|-----|---------|----------|----------|----------|----------|---------|
| R11 | 2.90428 | -0.00095 | -0.00292 | 0.00704  | 0.00412  | 2.90840 |
| R12 | 2.05909 | 0.00063  | 0.00057  | 0.00212  | 0.00269  | 2.06178 |
| R13 | 2.06148 | -0.00016 | -0.00094 | 0.00278  | 0.00184  | 2.06332 |
| R14 | 2.07504 | -0.00241 | -0.00340 | 0.00473  | 0.00132  | 2.07636 |
| R15 | 2.07254 | 0.00076  | 0.00027  | 0.00354  | 0.00381  | 2.07635 |
| R16 | 2.75344 | 0.00163  | 0.00522  | -0.00705 | -0.00183 | 2.75161 |
| R17 | 4.11728 | 0.00125  | -0.01497 | 0.06845  | 0.05347  | 4.17075 |
| R18 | 2.50704 | 0.00015  | -0.00013 | -0.00016 | -0.00029 | 2.50675 |
| R19 | 2.04562 | 0.00017  | 0.00022  | 0.00525  | 0.00547  | 2.05109 |
| R20 | 2.04293 | 0.00002  | 0.00003  | 0.00028  | 0.00031  | 2.04324 |
| R21 | 2.04589 | -0.00001 | 0.00003  | 0.00076  | 0.00079  | 2.04669 |
| R22 | 1.91806 | -0.00140 | -0.00058 | 0.00150  | 0.00092  | 1.91898 |
| R23 | 1.92461 | -0.00045 | 0.00034  | -0.00247 | -0.00213 | 1.92248 |
| A1  | 1.87324 | 0.00023  | 0.00000  | -0.00017 | -0.00001 | 1.87323 |
| A2  | 2.27799 | -0.00016 | -0.00016 | 0.00204  | 0.00179  | 2.27978 |
| A3  | 2.13192 | -0.00006 | 0.00018  | -0.00198 | -0.00190 | 2.13002 |
| A4  | 1.86142 | 0.00030  | 0.00023  | -0.00056 | -0.00042 | 1.86100 |
| A5  | 2.27745 | -0.00001 | 0.00013  | -0.00008 | -0.00001 | 2.27743 |
| A6  | 2.14431 | -0.00029 | -0.00035 | 0.00053  | 0.00012  | 2.14443 |
| A7  | 1.89810 | -0.00005 | -0.00007 | 0.00313  | 0.00302  | 1.90113 |
| A8  | 2.24414 | 0.00030  | 0.00180  | 0.00622  | 0.00803  | 2.25217 |
| A9  | 2.14094 | -0.00025 | -0.00173 | -0.00938 | -0.01110 | 2.12984 |
| A10 | 1.88584 | 0.00026  | 0.00086  | -0.00255 | -0.00150 | 1.88434 |
| A11 | 2.27750 | -0.00307 | -0.01121 | -0.07232 | -0.08358 | 2.19392 |
| A12 | 2.11830 | 0.00278  | 0.00955  | 0.07576  | 0.08530  | 2.20360 |
| A13 | 1.90580 | -0.00072 | -0.00083 | -0.00041 | -0.00150 | 1.90430 |
| A14 | 2.22822 | -0.00060 | -0.00027 | -0.01019 | -0.01115 | 2.21708 |
| A15 | 2.14495 | 0.00136  | 0.00149  | 0.01542  | 0.01626  | 2.16121 |
| A16 | 1.95826 | -0.00047 | -0.00348 | 0.01446  | 0.01095  | 1.96921 |
| A17 | 1.85593 | 0.00061  | 0.00450  | -0.00122 | 0.00322  | 1.85915 |
| A18 | 1.88342 | 0.00023  | 0.00183  | -0.01182 | -0.00998 | 1.87344 |
| A19 | 1.90247 | -0.00090 | 0.00248  | -0.00046 | 0.00196  | 1.90443 |
| A20 | 1.95429 | 0.00029  | -0.00334 | 0.00632  | 0.00301  | 1.95731 |
| A21 | 1.90641 | 0.00029  | -0.00164 | -0.00822 | -0.00985 | 1.89656 |
| A22 | 1.91644 | 0.00226  | -0.00003 | -0.00432 | -0.00418 | 1.91226 |
| A23 | 1.88353 | -0.00072 | 0.00300  | 0.01374  | 0.01661  | 1.90014 |
| A24 | 1.88066 | -0.00211 | -0.00484 | 0.01892  | 0.01401  | 1.89467 |
| A25 | 1.89988 | -0.00095 | 0.00417  | -0.03913 | -0.03499 | 1.86489 |
| A26 | 1.92923 | -0.00154 | -0.01689 | 0.02239  | 0.00554  | 1.93477 |
| A27 | 1.95339 | 0.00313  | 0.01459  | -0.01106 | 0.00319  | 1.95658 |
| A28 | 2.76288 | -0.00092 | 0.03058  | -0.03722 | -0.00664 | 2.75623 |
| A29 | 2.17820 | 0.00008  | -0.00132 | -0.00403 | -0.00534 | 2.17286 |
| A30 | 1.95852 | -0.00034 | -0.00160 | -0.00330 | -0.00491 | 1.95362 |
| A31 | 2.14645 | 0.00026  | 0.00292  | 0.00733  | 0.01025  | 2.15671 |

|     |          |          |          |          |          |          |
|-----|----------|----------|----------|----------|----------|----------|
| A32 | 2.08017  | -0.00002 | 0.00021  | -0.00355 | -0.00334 | 2.07683  |
| A33 | 2.15693  | 0.00005  | -0.00041 | 0.00430  | 0.00389  | 2.16081  |
| A34 | 2.04609  | -0.00003 | 0.00020  | -0.00075 | -0.00056 | 2.04554  |
| A35 | 1.94261  | -0.00038 | -0.01126 | 0.02298  | 0.01166  | 1.95427  |
| A36 | 1.90438  | 0.00041  | -0.00388 | 0.01932  | 0.01538  | 1.91976  |
| A37 | 1.87363  | 0.00066  | -0.00782 | 0.01716  | 0.00922  | 1.88285  |
| D1  | 0.01343  | -0.00024 | -0.00788 | 0.02596  | 0.01822  | 0.03165  |
| D2  | -3.13293 | -0.00012 | -0.00404 | -0.00008 | -0.00415 | -3.13708 |
| D3  | -3.13661 | -0.00019 | -0.00379 | 0.01109  | 0.00748  | -3.12912 |
| D4  | 0.00022  | -0.00007 | 0.00006  | -0.01496 | -0.01488 | -0.01467 |
| D5  | -0.02482 | 0.00050  | 0.01228  | -0.02599 | -0.01381 | -0.03863 |
| D6  | -3.06906 | -0.00008 | 0.00747  | -0.08244 | -0.07453 | 3.13959  |
| D7  | 3.12436  | 0.00046  | 0.00860  | -0.01266 | -0.00422 | 3.12014  |
| D8  | 0.08011  | -0.00012 | 0.00379  | -0.06911 | -0.06494 | 0.01517  |
| D9  | 0.00220  | -0.00007 | 0.00097  | -0.01742 | -0.01658 | -0.01438 |
| D10 | 3.14085  | 0.00000  | 0.00203  | -0.02622 | -0.02438 | 3.11647  |
| D11 | -3.13508 | -0.00018 | -0.00251 | 0.00616  | 0.00367  | -3.13141 |
| D12 | 0.00358  | -0.00011 | -0.00145 | -0.00264 | -0.00413 | -0.00055 |
| D13 | -0.01763 | 0.00037  | 0.00664  | 0.00143  | 0.00811  | -0.00951 |
| D14 | 3.06361  | -0.00007 | -0.00588 | 0.02214  | 0.01603  | 3.07964  |
| D15 | 3.12669  | 0.00031  | 0.00565  | 0.00957  | 0.01523  | -3.14126 |
| D16 | -0.07525 | -0.00014 | -0.00688 | 0.03028  | 0.02314  | -0.05211 |
| D17 | 0.08351  | -0.00006 | 0.01881  | -0.01745 | 0.00136  | 0.08487  |
| D18 | -3.05477 | -0.00017 | 0.01846  | -0.01894 | -0.00047 | -3.05524 |
| D19 | -3.06138 | 0.00002  | 0.02002  | -0.02733 | -0.00732 | -3.06870 |
| D20 | 0.08352  | -0.00009 | 0.01967  | -0.02882 | -0.00915 | 0.07437  |
| D21 | 0.02618  | -0.00054 | -0.01165 | 0.01498  | 0.00336  | 0.02954  |
| D22 | 3.07601  | -0.00011 | -0.00722 | 0.06652  | 0.05993  | 3.13594  |
| D23 | -3.06167 | 0.00009  | 0.00065  | 0.00234  | 0.00242  | -3.05924 |
| D24 | -0.01183 | 0.00051  | 0.00508  | 0.05389  | 0.05899  | 0.04716  |
| D25 | -2.80962 | 0.00069  | 0.20201  | 0.32254  | 0.52460  | -2.28503 |
| D26 | 0.26475  | 0.00009  | 0.18753  | 0.34245  | 0.52994  | 0.79469  |
| D27 | 1.51537  | 0.00125  | 0.05021  | 0.14057  | 0.19082  | 1.70619  |
| D28 | -2.68938 | 0.00027  | 0.05409  | 0.14737  | 0.20154  | -2.48784 |
| D29 | -0.64572 | 0.00103  | 0.05543  | 0.13135  | 0.18687  | -0.45886 |
| D30 | -1.51668 | 0.00072  | 0.04492  | 0.07811  | 0.12294  | -1.39374 |
| D31 | 0.56175  | -0.00026 | 0.04880  | 0.08491  | 0.13366  | 0.69541  |
| D32 | 2.60541  | 0.00050  | 0.05014  | 0.06889  | 0.11899  | 2.72439  |
| D33 | -1.27471 | -0.00052 | -0.02393 | 0.12077  | 0.09686  | -1.17784 |
| D34 | 0.79383  | -0.00081 | -0.01715 | 0.07930  | 0.06206  | 0.85589  |
| D35 | 2.90622  | 0.00131  | -0.00075 | 0.08468  | 0.08402  | 2.99024  |
| D36 | 2.95759  | -0.00041 | -0.02898 | 0.11389  | 0.08491  | 3.04250  |
| D37 | -1.25707 | -0.00070 | -0.02220 | 0.07242  | 0.05011  | -1.20695 |
| D38 | 0.85532  | 0.00142  | -0.00580 | 0.07780  | 0.07208  | 0.92740  |

|     |          |          |          |          |          |          |
|-----|----------|----------|----------|----------|----------|----------|
| D39 | 0.84628  | -0.00035 | -0.02645 | 0.12046  | 0.09403  | 0.94031  |
| D40 | 2.91482  | -0.00064 | -0.01967 | 0.07899  | 0.05923  | 2.97404  |
| D41 | -1.25598 | 0.00148  | -0.00327 | 0.08437  | 0.08119  | -1.17479 |
| D42 | 2.79779  | 0.00038  | 0.11065  | -0.25244 | -0.14188 | 2.65591  |
| D43 | -1.42088 | 0.00122  | 0.09225  | -0.20528 | -0.11306 | -1.53394 |
| D44 | 0.70359  | -0.00017 | 0.12303  | -0.27197 | -0.14888 | 0.55471  |
| D45 | 2.76810  | 0.00068  | 0.10463  | -0.22481 | -0.12005 | 2.64805  |
| D46 | -1.41729 | -0.00002 | 0.11983  | -0.23009 | -0.11033 | -1.52762 |
| D47 | 0.64722  | 0.00082  | 0.10143  | -0.18293 | -0.08150 | 0.56572  |
| D48 | -3.13348 | -0.00010 | 0.00137  | -0.00616 | -0.00479 | -3.13828 |
| D49 | 0.00936  | -0.00004 | 0.00144  | -0.00218 | -0.00074 | 0.00862  |
| D50 | 0.00446  | 0.00002  | 0.00174  | -0.00454 | -0.00279 | 0.00167  |
| D51 | -3.13589 | 0.00008  | 0.00182  | -0.00056 | 0.00127  | -3.13462 |

| Item                 | Value    | Threshold | Converged? |
|----------------------|----------|-----------|------------|
| Maximum Force        | 0.003128 | 0.000450  | NO         |
| RMS Force            | 0.000856 | 0.000300  | NO         |
| Maximum Displacement | 1.017532 | 0.001800  | NO         |
| RMS Displacement     | 0.166466 | 0.001200  | NO         |

Predicted change in Energy=-7.047748D-04

GradGradGradGradGradGradGradGradGradGradGradGradGradGradGradGradGrad

Input orientation:

| Center Number | Atomic Number | Atomic Type | Coordinates (Angstroms) |           |           |
|---------------|---------------|-------------|-------------------------|-----------|-----------|
|               |               |             | X                       | Y         | Z         |
| 1             | 6             | 0           | -1.824653               | -2.010501 | 0.228372  |
| 2             | 6             | 0           | -2.832219               | -1.118794 | 0.049249  |
| 3             | 7             | 0           | -2.247648               | 0.142683  | 0.025693  |
| 4             | 6             | 0           | -0.917570               | 0.011852  | 0.205683  |
| 5             | 7             | 0           | -0.648272               | -1.285295 | 0.353221  |
| 6             | 6             | 0           | 0.712195                | -1.824712 | 0.565758  |
| 7             | 6             | 0           | 1.521963                | -1.933250 | -0.738540 |
| 8             | 1             | 0           | -1.842824               | -3.084997 | 0.293016  |
| 9             | 1             | 0           | -3.887309               | -1.275247 | -0.082571 |
| 10            | 1             | 0           | 1.217174                | -1.134702 | 1.243452  |
| 11            | 1             | 0           | 0.605290                | -2.789667 | 1.065352  |
| 12            | 1             | 0           | 1.076372                | -2.701546 | -1.385418 |
| 13            | 1             | 0           | 1.451540                | -0.980271 | -1.280886 |
| 14            | 35            | 0           | 1.667672                | 1.920423  | -0.386239 |
| 15            | 1             | 0           | -0.172588               | 0.841314  | 0.179539  |
| 16            | 6             | 0           | -2.862309               | 1.411844  | -0.163563 |
| 17            | 6             | 0           | -4.170680               | 1.605176  | -0.265731 |
| 18            | 1             | 0           | -2.131346               | 2.212418  | -0.216909 |

|    |   |   |           |           |           |
|----|---|---|-----------|-----------|-----------|
| 19 | 1 | 0 | -4.542142 | 2.610040  | -0.411784 |
| 20 | 1 | 0 | -4.903714 | 0.810059  | -0.206841 |
| 21 | 7 | 0 | 2.897690  | -2.272339 | -0.402996 |
| 22 | 1 | 0 | 3.355678  | -2.785187 | -1.150281 |
| 23 | 1 | 0 | 3.433225  | -1.424385 | -0.232291 |

-----  
Distance matrix (angstroms):

|    |    | 1        | 2        | 3        | 4        | 5        |
|----|----|----------|----------|----------|----------|----------|
| 1  | C  | 0.000000 |          |          |          |          |
| 2  | C  | 1.357356 | 0.000000 |          |          |          |
| 3  | N  | 2.203680 | 1.390540 | 0.000000 |          |          |
| 4  | C  | 2.216580 | 2.229061 | 1.348563 | 0.000000 |          |
| 5  | N  | 1.387581 | 2.211276 | 2.168963 | 1.332996 | 0.000000 |
| 6  | C  | 2.565920 | 3.650749 | 3.594855 | 2.481683 | 1.478855 |
| 7  | C  | 3.484355 | 4.499205 | 4.370757 | 3.259800 | 2.514301 |
| 8  | H  | 1.076592 | 2.214560 | 3.263933 | 3.233294 | 2.160903 |
| 9  | H  | 2.211748 | 1.074741 | 2.170422 | 3.249471 | 3.268237 |
| 10 | H  | 3.324172 | 4.221842 | 3.888398 | 2.636035 | 2.072457 |
| 11 | H  | 2.685565 | 3.954839 | 4.221235 | 3.302520 | 2.083671 |
| 12 | H  | 3.390842 | 4.454262 | 4.596736 | 3.724236 | 2.828963 |
| 13 | H  | 3.751357 | 4.487654 | 4.080707 | 2.967638 | 2.678163 |
| 14 | Br | 5.293982 | 5.447523 | 4.319696 | 3.267490 | 4.023310 |
| 15 | H  | 3.296142 | 3.306454 | 2.194910 | 1.115208 | 2.186072 |
| 16 | C  | 3.597609 | 2.539749 | 1.422813 | 2.424528 | 3.527547 |
| 17 | C  | 4.338329 | 3.051345 | 2.433488 | 3.652895 | 4.598400 |
| 18 | H  | 4.257392 | 3.414534 | 2.087148 | 2.548398 | 3.841687 |
| 19 | H  | 5.398514 | 4.128026 | 3.397638 | 4.502152 | 5.560674 |
| 20 | H  | 4.198283 | 2.842032 | 2.748481 | 4.086154 | 4.776291 |
| 21 | N  | 4.771552 | 5.862341 | 5.700053 | 4.488231 | 3.757654 |
| 22 | H  | 5.416332 | 6.519647 | 6.430599 | 5.284194 | 4.532307 |
| 23 | H  | 5.310464 | 6.279206 | 5.898693 | 4.602609 | 4.125626 |
|    |    | 6        | 7        | 8        | 9        | 10       |
| 6  | C  | 0.000000 |          |          |          |          |
| 7  | C  | 1.539058 | 0.000000 |          |          |          |
| 8  | H  | 2.861962 | 3.703029 | 0.000000 |          |          |
| 9  | H  | 4.677357 | 5.488487 | 2.756116 | 0.000000 |          |
| 10 | H  | 1.091048 | 2.158441 | 3.751075 | 5.275778 | 0.000000 |
| 11 | H  | 1.091862 | 2.197218 | 2.583986 | 4.877975 | 1.773423 |
| 12 | H  | 2.169920 | 1.098764 | 3.389083 | 5.326337 | 3.063622 |
| 13 | H  | 2.160973 | 1.098757 | 4.214247 | 5.479624 | 2.539893 |
| 14 | Br | 3.980611 | 3.872485 | 6.151357 | 6.415787 | 3.491794 |
| 15 | H  | 2.835436 | 3.378251 | 4.268311 | 4.283420 | 2.639694 |
| 16 | C  | 4.876913 | 5.544556 | 4.633508 | 2.877089 | 5.010666 |
| 17 | C  | 6.024779 | 6.719389 | 5.265817 | 2.900118 | 6.230051 |

|    |    |          |          |          |          |          |
|----|----|----------|----------|----------|----------|----------|
| 18 | H  | 4.999671 | 5.550255 | 5.329716 | 3.907078 | 4.954640 |
| 19 | H  | 6.944830 | 7.584301 | 6.341649 | 3.953814 | 7.066302 |
| 20 | H  | 6.251188 | 7.006980 | 4.978992 | 2.323150 | 6.584126 |
| 21 | N  | 2.432127 | 1.456089 | 4.859765 | 6.865352 | 2.613262 |
| 22 | H  | 3.294739 | 2.063453 | 5.403463 | 7.475345 | 3.609329 |
| 23 | H  | 2.863765 | 2.041606 | 5.556102 | 7.323583 | 2.678174 |
|    |    | 11       | 12       | 13       | 14       | 15       |
| 11 | H  | 0.000000 |          |          |          |          |
| 12 | H  | 2.497190 | 0.000000 |          |          |          |
| 13 | H  | 3.081377 | 1.764785 | 0.000000 |          |          |
| 14 | Br | 5.041896 | 4.765563 | 3.043210 | 0.000000 |          |
| 15 | H  | 3.817562 | 4.069502 | 2.844082 | 2.207065 | 0.000000 |
| 16 | C  | 5.584548 | 5.824613 | 5.057660 | 4.563876 | 2.770889 |
| 17 | C  | 6.625430 | 6.879906 | 6.270920 | 5.848098 | 4.094691 |
| 18 | H  | 5.844162 | 5.983470 | 4.915525 | 3.813983 | 2.423599 |
| 19 | H  | 7.604922 | 7.792856 | 7.040589 | 6.248041 | 4.750901 |
| 20 | H  | 6.702658 | 7.034332 | 6.689402 | 6.666948 | 4.746980 |
| 21 | N  | 2.771059 | 2.113426 | 2.128727 | 4.369494 | 4.411438 |
| 22 | H  | 3.531810 | 2.292929 | 2.626884 | 5.057261 | 5.231500 |
| 23 | H  | 3.397806 | 2.918150 | 2.285577 | 3.785316 | 4.278420 |
|    |    | 16       | 17       | 18       | 19       | 20       |
| 16 | C  | 0.000000 |          |          |          |          |
| 17 | C  | 1.326517 | 0.000000 |          |          |          |
| 18 | H  | 1.085391 | 2.128382 | 0.000000 |          |          |
| 19 | H  | 2.078251 | 1.081234 | 2.451126 | 0.000000 |          |
| 20 | H  | 2.128697 | 1.083060 | 3.106885 | 1.847341 | 0.000000 |
| 21 | N  | 6.841646 | 8.063238 | 6.740836 | 8.898809 | 8.390563 |
| 22 | H  | 7.566508 | 8.758069 | 7.480286 | 9.593196 | 9.057230 |
| 23 | H  | 6.905264 | 8.185275 | 6.647633 | 8.939535 | 8.631218 |
|    |    | 21       | 22       | 23       |          |          |
| 21 | N  | 0.000000 |          |          |          |          |
| 22 | H  | 1.015481 | 0.000000 |          |          |          |
| 23 | H  | 1.017332 | 1.643321 | 0.000000 |          |          |

Stoichiometry C7H12BrN3

Framework group C1[X(C7H12BrN3)]

Deg. of freedom 63

Full point group C1 NOp 1

Largest Abelian subgroup C1 NOp 1

Largest concise Abelian subgroup C1 NOp 1

Standard orientation:

```

-----
Center      Atomic      Atomic      Coordinates (Angstroms)
Number      Number      Type        X           Y           Z
-----

```

|    |    |   |           |           |           |
|----|----|---|-----------|-----------|-----------|
| 1  | 6  | 0 | -1.667291 | 2.188375  | -0.089005 |
| 2  | 6  | 0 | -2.695482 | 1.320751  | 0.091179  |
| 3  | 7  | 0 | -2.162106 | 0.041901  | -0.025673 |
| 4  | 6  | 0 | -0.843215 | 0.140437  | -0.289185 |
| 5  | 7  | 0 | -0.532432 | 1.435093  | -0.353664 |
| 6  | 6  | 0 | 0.831036  | 1.942201  | -0.619761 |
| 7  | 6  | 0 | 1.731651  | 1.916700  | 0.628015  |
| 8  | 1  | 0 | -1.646409 | 3.264559  | -0.067983 |
| 9  | 1  | 0 | -3.731932 | 1.502698  | 0.309661  |
| 10 | 1  | 0 | 1.260301  | 1.292046  | -1.383578 |
| 11 | 1  | 0 | 0.729356  | 2.947512  | -1.033491 |
| 12 | 1  | 0 | 1.362646  | 2.645259  | 1.363079  |
| 13 | 1  | 0 | 1.659964  | 0.926041  | 1.097826  |
| 14 | 35 | 0 | 1.697178  | -1.898624 | -0.033990 |
| 15 | 1  | 0 | -0.132303 | -0.713872 | -0.381115 |
| 16 | 6  | 0 | -2.813186 | -1.216219 | 0.107084  |
| 17 | 6  | 0 | -4.118274 | -1.371481 | 0.286777  |
| 18 | 1  | 0 | -2.113226 | -2.043462 | 0.045460  |
| 19 | 1  | 0 | -4.519193 | -2.371310 | 0.379911  |
| 20 | 1  | 0 | -4.820897 | -0.549154 | 0.342609  |
| 21 | 7  | 0 | 3.093843  | 2.233667  | 0.222851  |
| 22 | 1  | 0 | 3.622105  | 2.668178  | 0.973412  |
| 23 | 1  | 0 | 3.581787  | 1.384143  | -0.051348 |

-----

Rotational constants (GHZ):      0.7747664      0.4909512      0.3085018

Standard basis: 6-311++G(d,p) (5D, 7F)

There are    365 symmetry adapted cartesian basis functions of A    symmetry.

There are    352 symmetry adapted basis functions of A    symmetry.

    352 basis functions,    562 primitive gaussians,    365 cartesian basis functions

    55 alpha electrons      55 beta electrons

        nuclear repulsion energy      834.6621990632 Hartrees.

NAtoms=    23 NActive=    23 NUniq=    23 SFac= 1.00D+00 NAtFMM=    60 NAOKFM=F

Big=F

Integral buffers will be    131072 words long.

Raffenetti 2 integral format.

Two-electron integral symmetry is turned on.

One-electron integrals computed using PRISM.

NBasis=    352 RedAO= T EigKep= 4.40D-06 NBF=    352

NBsUse=    352 1.00D-06 EigRej= -1.00D+00 NBFU=    352

Initial guess from the checkpoint file: "/home/suqian/liuwen/qianmengshijie/nh2/nh2.chk"

B after Tr=    0.000000    0.000000    0.000000

        Rot=    0.999838    -0.009096    -0.004687    0.014814 Ang=    -2.06 deg.

ExpMin= 3.50D-02 ExpMax= 4.40D+05 ExpMxC= 1.51D+04 IAcc=3 IRadAn=      5 AccDes=

0.00D+00



Harris functional with IExCor= 402 and IRadAn= 5 diagonalized for initial guess.  
 HarFok: IExCor= 402 AccDes= 0.00D+00 IRadAn= 5 IDoV= 1 UseB2=F ITyADJ=14  
 ICtDFT= 3500011 ScaDFX= 1.000000 1.000000 1.000000 1.000000  
 FoFCou: FMM=F IPFlag= 0 FMFlag= 100000 FMFlg1= 0  
 NFxFlg= 0 DoJE=T BraDBF=F KetDBF=T FulRan=T  
 wScrn= 0.000000 ICntrl= 500 IOpCl= 0 I1Cent= 200000004 NGrid= 0  
 NMat0= 1 NMatS0= 1 NMatT0= 0 NMatD0= 1 NMtDS0= 0  
 NMtDT0= 0

Petite list used in FoFCou.

Requested convergence on RMS density matrix=1.00D-08 within 128 cycles.

Requested convergence on MAX density matrix=1.00D-06.

Requested convergence on energy=1.00D-06.

No special actions if energy rises.

SCF Done: E(RB3LYP) = -3012.46637664 A.U. after 14 cycles

NFock= 14 Conv=0.21D-08 -V/T= 2.0017

Calling FoFJK, ICntrl= 2127 FMM=F ISym2X=0 I1Cent= 0 IOpClX= 0 NMat=1 NMatS=1  
 NMatT=0.

\*\*\*\*\* Axes restored to original set \*\*\*\*\*

| Center Number | Atomic Number | Forces (Hartrees/Bohr) |              |              |
|---------------|---------------|------------------------|--------------|--------------|
|               |               | X                      | Y            | Z            |
| 1             | 6             | 0.000617099            | 0.001060061  | 0.003164148  |
| 2             | 6             | 0.000156293            | -0.000092269 | -0.003041284 |
| 3             | 7             | 0.000832036            | 0.000424085  | -0.000488515 |
| 4             | 6             | -0.004568202           | 0.002882599  | 0.003019537  |
| 5             | 7             | 0.002017091            | -0.000327129 | -0.003483484 |
| 6             | 6             | 0.001753427            | 0.001753053  | 0.000665270  |
| 7             | 6             | -0.005205456           | 0.002451276  | -0.006481670 |
| 8             | 1             | -0.000062299           | 0.000217709  | 0.000616565  |
| 9             | 1             | 0.000067080            | -0.000045842 | -0.000116099 |
| 10            | 1             | 0.000361718            | -0.000750017 | -0.000259002 |
| 11            | 1             | 0.001263443            | 0.000512982  | -0.001266629 |
| 12            | 1             | 0.002917043            | -0.000732531 | 0.002934824  |
| 13            | 1             | -0.001819472           | 0.000214567  | 0.002607622  |
| 14            | 35            | -0.000856687           | -0.001148059 | 0.000658502  |
| 15            | 1             | 0.002457838            | -0.003580635 | -0.000609620 |
| 16            | 6             | 0.000447152            | -0.000150903 | 0.000308161  |
| 17            | 6             | -0.000078135           | 0.000783688  | 0.000154194  |
| 18            | 1             | -0.001170314           | -0.000979417 | -0.000161462 |
| 19            | 1             | -0.000157980           | -0.000072986 | -0.000136794 |
| 20            | 1             | 0.000370094            | 0.000046638  | -0.000069771 |
| 21            | 7             | 0.002983775            | -0.003311673 | 0.000653160  |

|    |   |              |              |              |
|----|---|--------------|--------------|--------------|
| 22 | 1 | -0.001585406 | 0.002085696  | 0.001630870  |
| 23 | 1 | -0.000740140 | -0.001240893 | -0.000298524 |

-----  
 Cartesian Forces: Max 0.006481670 RMS 0.001895608

GradGradGradGradGradGradGradGradGradGradGradGradGradGradGradGradGradGradGrad

Berny optimization.

Using GEDIIS/GDIIS optimizer.

FormGI is forming the generalized inverse of G from B-inverse, IUseBI=4.

Internal Forces: Max 0.006515747 RMS 0.001362705

Search for a local minimum.

Step number 25 out of a maximum of 121

All quantities printed in internal units (Hartrees-Bohrs-Radians)

Mixed Optimization -- RFO/linear search

Update second derivatives using D2CorX and points 22 20 25 23

DE= 1.07D-03 DEPred=-7.05D-04 R=-1.51D+00

Trust test=-1.51D+00 RLast= 9.33D-01 DXMaxT set to 5.00D-02

ITU= -1 -1 0 -1 -1 0 -1 0 0 0 1 1 -1 1 -1 1 1 1 1 1 1

ITU= 1 0 1 0 0

Use linear search instead of GDIIS.

Energy rises -- skip Quadratic/GDIIS search.

Quartic linear search produced a step of -0.77304.

Iteration 1 RMS(Cart)= 0.09152467 RMS(Int)= 0.01354061

Iteration 2 RMS(Cart)= 0.01407635 RMS(Int)= 0.00040144

Iteration 3 RMS(Cart)= 0.00038762 RMS(Int)= 0.00005583

Iteration 4 RMS(Cart)= 0.00000027 RMS(Int)= 0.00005583

| Variable | Old X   | -DE/DX   | Delta X<br>(Linear) | Delta X<br>(Quad) | Delta X<br>(Total) | New X   |
|----------|---------|----------|---------------------|-------------------|--------------------|---------|
| R1       | 2.56503 | 0.00069  | 0.00057             | 0.00000           | 0.00058            | 2.56561 |
| R2       | 2.62215 | -0.00126 | -0.00329            | 0.00000           | -0.00329           | 2.61886 |
| R3       | 2.03446 | -0.00018 | -0.00026            | 0.00000           | -0.00026           | 2.03420 |
| R4       | 2.62774 | 0.00023  | 0.00247             | 0.00000           | 0.00248            | 2.63022 |
| R5       | 2.03097 | -0.00004 | -0.00006            | 0.00000           | -0.00006           | 2.03090 |
| R6       | 2.54841 | -0.00054 | -0.00275            | 0.00000           | -0.00275           | 2.54567 |
| R7       | 2.68873 | -0.00009 | -0.00158            | 0.00000           | -0.00158           | 2.68715 |
| R8       | 2.51900 | -0.00196 | 0.00010             | 0.00000           | 0.00009            | 2.51908 |
| R9       | 2.10744 | -0.00245 | 0.00239             | 0.00000           | 0.00239            | 2.10983 |
| R10      | 2.79463 | -0.00039 | -0.00219            | 0.00000           | -0.00219           | 2.79244 |
| R11      | 2.90840 | -0.00267 | -0.00729            | 0.00000           | -0.00729           | 2.90110 |
| R12      | 2.06178 | -0.00047 | -0.00127            | 0.00000           | -0.00127           | 2.06051 |
| R13      | 2.06332 | -0.00116 | -0.00275            | 0.00000           | -0.00275           | 2.06057 |
| R14      | 2.07636 | -0.00240 | -0.00581            | 0.00000           | -0.00581           | 2.07055 |
| R15      | 2.07635 | -0.00098 | -0.00256            | 0.00000           | -0.00256           | 2.07379 |
| R16      | 2.75161 | 0.00166  | 0.00876             | 0.00000           | 0.00876            | 2.76037 |

|     |         |          |          |         |          |         |
|-----|---------|----------|----------|---------|----------|---------|
| R17 | 4.17075 | -0.00144 | -0.06241 | 0.00000 | -0.06241 | 4.10834 |
| R18 | 2.50675 | -0.00002 | 0.00004  | 0.00000 | 0.00004  | 2.50679 |
| R19 | 2.05109 | -0.00150 | -0.00392 | 0.00000 | -0.00392 | 2.04717 |
| R20 | 2.04324 | 0.00000  | -0.00020 | 0.00000 | -0.00020 | 2.04304 |
| R21 | 2.04669 | -0.00029 | -0.00057 | 0.00000 | -0.00057 | 2.04612 |
| R22 | 1.91898 | -0.00297 | -0.00153 | 0.00000 | -0.00153 | 1.91745 |
| R23 | 1.92248 | -0.00147 | 0.00213  | 0.00000 | 0.00213  | 1.92461 |
| A1  | 1.87323 | 0.00003  | 0.00001  | 0.00000 | 0.00003  | 1.87326 |
| A2  | 2.27978 | 0.00002  | -0.00161 | 0.00000 | -0.00160 | 2.27817 |
| A3  | 2.13002 | -0.00004 | 0.00172  | 0.00000 | 0.00172  | 2.13174 |
| A4  | 1.86100 | -0.00001 | 0.00065  | 0.00000 | 0.00068  | 1.86169 |
| A5  | 2.27743 | -0.00004 | 0.00019  | 0.00000 | 0.00020  | 2.27763 |
| A6  | 2.14443 | 0.00006  | -0.00059 | 0.00000 | -0.00057 | 2.14386 |
| A7  | 1.90113 | -0.00132 | -0.00244 | 0.00000 | -0.00243 | 1.89870 |
| A8  | 2.25217 | 0.00002  | -0.00367 | 0.00000 | -0.00367 | 2.24850 |
| A9  | 2.12984 | 0.00130  | 0.00615  | 0.00000 | 0.00614  | 2.13598 |
| A10 | 1.88434 | 0.00160  | 0.00237  | 0.00000 | 0.00238  | 1.88672 |
| A11 | 2.19392 | 0.00486  | 0.04882  | 0.00000 | 0.04887  | 2.24279 |
| A12 | 2.20360 | -0.00652 | -0.05251 | 0.00000 | -0.05250 | 2.15110 |
| A13 | 1.90430 | -0.00023 | 0.00000  | 0.00000 | 0.00006  | 1.90435 |
| A14 | 2.21708 | 0.00232  | 0.00824  | 0.00000 | 0.00831  | 2.22539 |
| A15 | 2.16121 | -0.00208 | -0.01047 | 0.00000 | -0.01040 | 2.15081 |
| A16 | 1.96921 | -0.00370 | -0.01336 | 0.00000 | -0.01336 | 1.95585 |
| A17 | 1.85915 | 0.00139  | 0.00385  | 0.00000 | 0.00386  | 1.86301 |
| A18 | 1.87344 | 0.00230  | 0.01029  | 0.00000 | 0.01031  | 1.88375 |
| A19 | 1.90443 | 0.00077  | 0.00197  | 0.00000 | 0.00197  | 1.90640 |
| A20 | 1.95731 | -0.00023 | -0.00703 | 0.00000 | -0.00703 | 1.95027 |
| A21 | 1.89656 | -0.00037 | 0.00532  | 0.00000 | 0.00533  | 1.90188 |
| A22 | 1.91226 | 0.00143  | 0.00318  | 0.00000 | 0.00332  | 1.91558 |
| A23 | 1.90014 | -0.00207 | -0.00862 | 0.00000 | -0.00865 | 1.89149 |
| A24 | 1.89467 | -0.00165 | -0.01764 | 0.00000 | -0.01758 | 1.87709 |
| A25 | 1.86489 | 0.00118  | 0.03292  | 0.00000 | 0.03289  | 1.89778 |
| A26 | 1.93477 | -0.00157 | -0.02806 | 0.00000 | -0.02801 | 1.90676 |
| A27 | 1.95658 | 0.00271  | 0.01807  | 0.00000 | 0.01807  | 1.97465 |
| A28 | 2.75623 | -0.00114 | 0.04817  | 0.00000 | 0.04817  | 2.80441 |
| A29 | 2.17286 | 0.00056  | 0.00228  | 0.00000 | 0.00228  | 2.17514 |
| A30 | 1.95362 | -0.00004 | 0.00154  | 0.00000 | 0.00154  | 1.95516 |
| A31 | 2.15671 | -0.00052 | -0.00382 | 0.00000 | -0.00382 | 2.15289 |
| A32 | 2.07683 | 0.00040  | 0.00288  | 0.00000 | 0.00288  | 2.07971 |
| A33 | 2.16081 | -0.00044 | -0.00358 | 0.00000 | -0.00358 | 2.15723 |
| A34 | 2.04554 | 0.00004  | 0.00071  | 0.00000 | 0.00071  | 2.04624 |
| A35 | 1.95427 | -0.00098 | -0.02486 | 0.00000 | -0.02475 | 1.92952 |
| A36 | 1.91976 | 0.00010  | -0.01735 | 0.00000 | -0.01723 | 1.90253 |
| A37 | 1.88285 | 0.00009  | -0.01814 | 0.00000 | -0.01790 | 1.86495 |

|     |          |          |          |         |          |          |
|-----|----------|----------|----------|---------|----------|----------|
| D1  | 0.03165  | -0.00137 | -0.02518 | 0.00000 | -0.02522 | 0.00643  |
| D2  | -3.13708 | -0.00077 | -0.00247 | 0.00000 | -0.00247 | -3.13955 |
| D3  | -3.12912 | -0.00015 | -0.01112 | 0.00000 | -0.01114 | -3.14026 |
| D4  | -0.01467 | 0.00045  | 0.01159  | 0.00000 | 0.01161  | -0.00306 |
| D5  | -0.03863 | 0.00178  | 0.02795  | 0.00000 | 0.02799  | -0.01063 |
| D6  | 3.13959  | 0.00181  | 0.06813  | 0.00000 | 0.06812  | -3.07548 |
| D7  | 3.12014  | 0.00069  | 0.01537  | 0.00000 | 0.01540  | 3.13554  |
| D8  | 0.01517  | 0.00072  | 0.05554  | 0.00000 | 0.05552  | 0.07069  |
| D9  | -0.01438 | 0.00053  | 0.01418  | 0.00000 | 0.01422  | -0.00017 |
| D10 | 3.11647  | 0.00042  | 0.02171  | 0.00000 | 0.02178  | 3.13825  |
| D11 | -3.13141 | -0.00001 | -0.00638 | 0.00000 | -0.00638 | -3.13779 |
| D12 | -0.00055 | -0.00013 | 0.00116  | 0.00000 | 0.00119  | 0.00063  |
| D13 | -0.00951 | 0.00057  | 0.00308  | 0.00000 | 0.00307  | -0.00644 |
| D14 | 3.07964  | -0.00063 | -0.02067 | 0.00000 | -0.02049 | 3.05915  |
| D15 | -3.14126 | 0.00068  | -0.00381 | 0.00000 | -0.00384 | 3.13808  |
| D16 | -0.05211 | -0.00052 | -0.02756 | 0.00000 | -0.02740 | -0.07951 |
| D17 | 0.08487  | 0.00008  | 0.02543  | 0.00000 | 0.02542  | 0.11029  |
| D18 | -3.05524 | 0.00021  | 0.02635  | 0.00000 | 0.02634  | -3.02890 |
| D19 | -3.06870 | -0.00006 | 0.03383  | 0.00000 | 0.03385  | -3.03486 |
| D20 | 0.07437  | 0.00008  | 0.03475  | 0.00000 | 0.03477  | 0.10914  |
| D21 | 0.02954  | -0.00143 | -0.01901 | 0.00000 | -0.01902 | 0.01052  |
| D22 | 3.13594  | -0.00135 | -0.05649 | 0.00000 | -0.05660 | 3.07934  |
| D23 | -3.05924 | -0.00065 | -0.00096 | 0.00000 | -0.00072 | -3.05996 |
| D24 | 0.04716  | -0.00057 | -0.03844 | 0.00000 | -0.03831 | 0.00885  |
| D25 | -2.28503 | 0.00010  | -0.12119 | 0.00000 | -0.12119 | -2.40621 |
| D26 | 0.79469  | -0.00099 | -0.14571 | 0.00000 | -0.14571 | 0.64898  |
| D27 | 1.70619  | -0.00021 | -0.07684 | 0.00000 | -0.07685 | 1.62934  |
| D28 | -2.48784 | -0.00050 | -0.07966 | 0.00000 | -0.07967 | -2.56751 |
| D29 | -0.45886 | 0.00087  | -0.06643 | 0.00000 | -0.06646 | -0.52532 |
| D30 | -1.39374 | -0.00024 | -0.03181 | 0.00000 | -0.03179 | -1.42553 |
| D31 | 0.69541  | -0.00053 | -0.03464 | 0.00000 | -0.03461 | 0.66080  |
| D32 | 2.72439  | 0.00085  | -0.02140 | 0.00000 | -0.02140 | 2.70300  |
| D33 | -1.17784 | -0.00121 | -0.10857 | 0.00000 | -0.10856 | -1.28640 |
| D34 | 0.85589  | -0.00017 | -0.07212 | 0.00000 | -0.07210 | 0.78379  |
| D35 | 2.99024  | 0.00086  | -0.06601 | 0.00000 | -0.06601 | 2.92423  |
| D36 | 3.04250  | -0.00117 | -0.10643 | 0.00000 | -0.10643 | 2.93607  |
| D37 | -1.20695 | -0.00013 | -0.06998 | 0.00000 | -0.06997 | -1.27692 |
| D38 | 0.92740  | 0.00090  | -0.06388 | 0.00000 | -0.06388 | 0.86351  |
| D39 | 0.94031  | -0.00108 | -0.10992 | 0.00000 | -0.10992 | 0.83038  |
| D40 | 2.97404  | -0.00004 | -0.07347 | 0.00000 | -0.07347 | 2.90058  |
| D41 | -1.17479 | 0.00099  | -0.06736 | 0.00000 | -0.06738 | -1.24217 |
| D42 | 2.65591  | 0.00098  | 0.26543  | 0.00000 | 0.26542  | 2.92133  |
| D43 | -1.53394 | 0.00052  | 0.21725  | 0.00000 | 0.21711  | -1.31683 |
| D44 | 0.55471  | 0.00124  | 0.28827  | 0.00000 | 0.28840  | 0.84312  |

|     |          |          |         |         |         |          |
|-----|----------|----------|---------|---------|---------|----------|
| D45 | 2.64805  | 0.00077  | 0.24008 | 0.00000 | 0.24009 | 2.88814  |
| D46 | -1.52762 | -0.00100 | 0.25396 | 0.00000 | 0.25403 | -1.27359 |
| D47 | 0.56572  | -0.00146 | 0.20578 | 0.00000 | 0.20571 | 0.77143  |
| D48 | -3.13828 | 0.00020  | 0.00563 | 0.00000 | 0.00563 | -3.13265 |
| D49 | 0.00862  | 0.00000  | 0.00260 | 0.00000 | 0.00260 | 0.01122  |
| D50 | 0.00167  | 0.00005  | 0.00461 | 0.00000 | 0.00461 | 0.00628  |
| D51 | -3.13462 | -0.00015 | 0.00158 | 0.00000 | 0.00158 | -3.13304 |

| Item                 | Value    | Threshold | Converged? |
|----------------------|----------|-----------|------------|
| Maximum Force        | 0.006516 | 0.000450  | NO         |
| RMS Force            | 0.001363 | 0.000300  | NO         |
| Maximum Displacement | 0.469552 | 0.001800  | NO         |
| RMS Displacement     | 0.097454 | 0.001200  | NO         |

Predicted change in Energy=-6.036102D-05

GradGradGradGradGradGradGradGradGradGradGradGradGradGradGradGradGradGradGrad

Input orientation:

| Center<br>Number | Atomic<br>Number | Atomic<br>Type | Coordinates (Angstroms) |           |           |
|------------------|------------------|----------------|-------------------------|-----------|-----------|
|                  |                  |                | X                       | Y         | Z         |
| 1                | 6                | 0              | -1.820846               | -2.008603 | 0.263575  |
| 2                | 6                | 0              | -2.818906               | -1.117697 | 0.032482  |
| 3                | 7                | 0              | -2.231519               | 0.144011  | 0.014533  |
| 4                | 6                | 0              | -0.908674               | 0.009837  | 0.230822  |
| 5                | 7                | 0              | -0.644754               | -1.286861 | 0.391823  |
| 6                | 6                | 0              | 0.721891                | -1.818657 | 0.573628  |
| 7                | 6                | 0              | 1.459507                | -1.982230 | -0.762785 |
| 8                | 1                | 0              | -1.846933               | -3.081192 | 0.350891  |
| 9                | 1                | 0              | -3.871310               | -1.272747 | -0.120494 |
| 10               | 1                | 0              | 1.258400                | -1.100486 | 1.194358  |
| 11               | 1                | 0              | 0.645404                | -2.764279 | 1.111159  |
| 12               | 1                | 0              | 1.056477                | -2.844790 | -1.305082 |
| 13               | 1                | 0              | 1.292211                | -1.078926 | -1.363068 |
| 14               | 35               | 0              | 1.772822                | 1.798085  | -0.176418 |
| 15               | 1                | 0              | -0.117894               | 0.797764  | 0.212154  |
| 16               | 6                | 0              | -2.844690               | 1.410070  | -0.193153 |
| 17               | 6                | 0              | -4.152670               | 1.606549  | -0.294583 |
| 18               | 1                | 0              | -2.115383               | 2.208085  | -0.262835 |
| 19               | 1                | 0              | -4.523508               | 2.608371  | -0.460934 |
| 20               | 1                | 0              | -4.885489               | 0.813160  | -0.217940 |
| 21               | 7                | 0              | 2.869224                | -2.218451 | -0.461758 |
| 22               | 1                | 0              | 3.361828                | -2.536711 | -1.289774 |
| 23               | 1                | 0              | 3.300335                | -1.339387 | -0.181315 |

## Distance matrix (angstroms):

|    |    | 1        | 2        | 3        | 4        | 5        |
|----|----|----------|----------|----------|----------|----------|
| 1  | C  | 0.000000 |          |          |          |          |
| 2  | C  | 1.357661 | 0.000000 |          |          |          |
| 3  | N  | 2.205543 | 1.391853 | 0.000000 |          |          |
| 4  | C  | 2.215227 | 2.227029 | 1.347108 | 0.000000 |          |
| 5  | N  | 1.385839 | 2.210131 | 2.169692 | 1.333042 | 0.000000 |
| 6  | C  | 2.568604 | 3.649854 | 3.589886 | 2.473793 | 1.477694 |
| 7  | C  | 3.437270 | 4.436743 | 4.329988 | 3.250210 | 2.498914 |
| 8  | H  | 1.076454 | 2.213917 | 3.265422 | 3.232524 | 2.160216 |
| 9  | H  | 2.212102 | 1.074707 | 2.171256 | 3.247407 | 3.267006 |
| 10 | H  | 3.342572 | 4.239656 | 3.888482 | 2.618670 | 2.073836 |
| 11 | H  | 2.715112 | 3.984497 | 4.235259 | 3.299374 | 2.089190 |
| 12 | H  | 3.382142 | 4.448655 | 4.635217 | 3.790741 | 2.863707 |
| 13 | H  | 3.633372 | 4.341699 | 3.976183 | 2.927420 | 2.621968 |
| 14 | Br | 5.253467 | 5.443289 | 4.336723 | 3.248707 | 3.960362 |
| 15 | H  | 3.283045 | 3.316133 | 2.221228 | 1.116473 | 2.157667 |
| 16 | C  | 3.597803 | 2.537948 | 1.421977 | 2.426636 | 3.529214 |
| 17 | C  | 4.338003 | 3.050805 | 2.434213 | 3.653634 | 4.598744 |
| 18 | H  | 4.259615 | 3.412182 | 2.085862 | 2.555805 | 3.847853 |
| 19 | H  | 5.398680 | 4.127071 | 3.398876 | 4.505322 | 5.562802 |
| 20 | H  | 4.193595 | 2.839310 | 2.746882 | 4.081883 | 4.771345 |
| 21 | N  | 4.750463 | 5.814702 | 5.641424 | 4.440434 | 3.734234 |
| 22 | H  | 5.436165 | 6.477919 | 6.338218 | 5.199452 | 4.521348 |
| 23 | H  | 5.183847 | 6.126987 | 5.730639 | 4.439146 | 3.986850 |
|    |    | 6        | 7        | 8        | 9        | 10       |
| 6  | C  | 0.000000 |          |          |          |          |
| 7  | C  | 1.535198 | 0.000000 |          |          |          |
| 8  | H  | 2.870970 | 3.657942 | 0.000000 |          |          |
| 9  | H  | 4.677320 | 5.416042 | 2.755136 | 0.000000 |          |
| 10 | H  | 1.090375 | 2.155997 | 3.778589 | 5.298343 | 0.000000 |
| 11 | H  | 1.090408 | 2.187699 | 2.624916 | 4.913485 | 1.775076 |
| 12 | H  | 2.166668 | 1.095687 | 3.350810 | 5.306378 | 3.054598 |
| 13 | H  | 2.150177 | 1.097400 | 4.098897 | 5.314462 | 2.557740 |
| 14 | Br | 3.840292 | 3.838329 | 6.098199 | 6.425680 | 3.247363 |
| 15 | H  | 2.771563 | 3.341716 | 4.249133 | 4.299512 | 2.542099 |
| 16 | C  | 4.871667 | 5.509836 | 4.632811 | 2.873454 | 5.006339 |
| 17 | C  | 6.020562 | 6.677955 | 5.263837 | 2.898244 | 6.230944 |
| 18 | H  | 4.996443 | 5.530690 | 5.331527 | 3.901248 | 4.944944 |
| 19 | H  | 6.941406 | 7.547265 | 6.339893 | 3.950234 | 7.065839 |
| 20 | H  | 6.244658 | 6.954857 | 4.972159 | 2.321436 | 6.588172 |
| 21 | N  | 2.417209 | 1.460726 | 4.862804 | 6.815102 | 2.566578 |
| 22 | H  | 3.310156 | 2.050363 | 5.488117 | 7.435260 | 3.557817 |
| 23 | H  | 2.729104 | 2.034699 | 5.459991 | 7.172212 | 2.473671 |

|    |    |          |          |          |          |          |
|----|----|----------|----------|----------|----------|----------|
|    |    | 11       | 12       | 13       | 14       | 15       |
| 11 | H  | 0.000000 |          |          |          |          |
| 12 | H  | 2.452282 | 0.000000 |          |          |          |
| 13 | H  | 3.062772 | 1.782473 | 0.000000 |          |          |
| 14 | Br | 4.872790 | 4.831492 | 3.149018 | 0.000000 |          |
| 15 | H  | 3.752197 | 4.116959 | 2.826957 | 2.174037 | 0.000000 |
| 16 | C  | 5.595281 | 5.878718 | 4.967671 | 4.633816 | 2.823935 |
| 17 | C  | 6.640915 | 6.926091 | 6.164427 | 5.929764 | 4.146122 |
| 18 | H  | 5.851000 | 6.056280 | 4.860725 | 3.910717 | 2.490899 |
| 19 | H  | 7.619350 | 7.847662 | 6.944969 | 6.354627 | 4.810486 |
| 20 | H  | 6.719773 | 7.061830 | 6.561653 | 6.730892 | 4.786980 |
| 21 | N  | 2.778016 | 2.095124 | 2.144259 | 4.173258 | 4.298208 |
| 22 | H  | 3.632523 | 2.325895 | 2.532552 | 4.749206 | 5.048067 |
| 23 | H  | 3.278637 | 2.926429 | 2.344555 | 3.489562 | 4.050497 |
|    |    | 16       | 17       | 18       | 19       | 20       |
| 16 | C  | 0.000000 |          |          |          |          |
| 17 | C  | 1.326538 | 0.000000 |          |          |          |
| 18 | H  | 1.083315 | 2.124474 | 0.000000 |          |          |
| 19 | H  | 2.079919 | 1.081130 | 2.449192 | 0.000000 |          |
| 20 | H  | 2.126447 | 1.082758 | 3.101826 | 1.847393 | 0.000000 |
| 21 | N  | 6.774004 | 7.997848 | 6.669340 | 8.828970 | 8.329807 |
| 22 | H  | 7.436432 | 8.638558 | 7.318984 | 9.451845 | 8.965974 |
| 23 | H  | 6.732086 | 8.014901 | 6.474658 | 8.767867 | 8.464190 |
|    |    | 21       | 22       | 23       |          |          |
| 21 | N  | 0.000000 |          |          |          |          |
| 22 | H  | 1.014671 | 0.000000 |          |          |          |
| 23 | H  | 1.018459 | 1.632803 | 0.000000 |          |          |

Stoichiometry C7H12BrN3

Framework group C1[X(C7H12BrN3)]

Deg. of freedom 63

Full point group C1 NOp 1

Largest Abelian subgroup C1 NOp 1

Largest concise Abelian subgroup C1 NOp 1

Standard orientation:

| Center<br>Number | Atomic<br>Number | Atomic<br>Type | Coordinates (Angstroms) |           |           |
|------------------|------------------|----------------|-------------------------|-----------|-----------|
|                  |                  |                | X                       | Y         | Z         |
| 1                | 6                | 0              | -1.705286               | 2.132771  | -0.197677 |
| 2                | 6                | 0              | -2.721020               | 1.265502  | 0.045984  |
| 3                | 7                | 0              | -2.175322               | -0.013765 | -0.008273 |
| 4                | 6                | 0              | -0.859588               | 0.086951  | -0.279200 |
| 5                | 7                | 0              | -0.560417               | 1.379882  | -0.405007 |
| 6                | 6                | 0              | 0.813678                | 1.875075  | -0.629118 |

|    |    |   |           |           |           |
|----|----|---|-----------|-----------|-----------|
| 7  | 6  | 0 | 1.614447  | 1.965133  | 0.677592  |
| 8  | 1  | 0 | -1.699824 | 3.208174  | -0.244900 |
| 9  | 1  | 0 | -3.759978 | 1.447575  | 0.251922  |
| 10 | 1  | 0 | 1.298353  | 1.164289  | -1.299036 |
| 11 | 1  | 0 | 0.744795  | 2.842160  | -1.128109 |
| 12 | 1  | 0 | 1.264353  | 2.818902  | 1.268389  |
| 13 | 1  | 0 | 1.444076  | 1.045591  | 1.251789  |
| 14 | 35 | 0 | 1.776841  | -1.798433 | -0.058596 |
| 15 | 1  | 0 | -0.095156 | -0.725499 | -0.324819 |
| 16 | 6  | 0 | -2.820148 | -1.266911 | 0.181047  |
| 17 | 6  | 0 | -4.128154 | -1.426006 | 0.334383  |
| 18 | 1  | 0 | -2.115181 | -2.089428 | 0.188774  |
| 19 | 1  | 0 | -4.524125 | -2.421267 | 0.481025  |
| 20 | 1  | 0 | -4.837087 | -0.607737 | 0.319700  |
| 21 | 7  | 0 | 3.016553  | 2.168237  | 0.321827  |
| 22 | 1  | 0 | 3.555381  | 2.439573  | 1.137669  |
| 23 | 1  | 0 | 3.405678  | 1.287263  | -0.009422 |

-----

Rotational constants (GHZ):      0.8165299      0.4831827      0.3131493

Standard basis: 6-311++G(d,p) (5D, 7F)

There are    365 symmetry adapted cartesian basis functions of A    symmetry.

There are    352 symmetry adapted basis functions of A    symmetry.

     352 basis functions,    562 primitive gaussians,    365 cartesian basis functions

     55 alpha electrons      55 beta electrons

     nuclear repulsion energy      839.4775430351 Hartrees.

NAtoms=    23 NActive=    23 NUniq=    23 SFac= 1.00D+00 NAtFMM=    60 NAOKFM=F

Big=F

Integral buffers will be    131072 words long.

Raffenetti 2 integral format.

Two-electron integral symmetry is turned on.

One-electron integrals computed using PRISM.

NBasis=    352 RedAO= T EigKep= 4.53D-06    NBF=    352

NBsUse=    352 1.00D-06 EigRej= -1.00D+00    NBFU=    352

Lowest      energy      guess      from      the      checkpoint      file:

"/home/suqian/liuwen/qianmengshijie/nh2/nh2.chk"

B after Tr=    0.000000    0.000000    0.000000

     Rot=    0.999996    -0.000538    -0.000651    0.002654 Ang=    -0.32 deg.

B after Tr=    0.000000    0.000000    0.000000

     Rot=    0.999932    0.001914    0.001993    -0.011363 Ang=    1.34 deg.

Requested convergence on RMS density matrix=1.00D-08 within 128 cycles.

Requested convergence on MAX density matrix=1.00D-06.

Requested convergence on                    energy=1.00D-06.

No special actions if energy rises.

SCF Done: E(RB3LYP) = -3012.46756715      A.U. after    10 cycles



NFock= 10 Conv=0.65D-08 -V/T= 2.0017  
 Calling FoFJK, ICtrl= 2127 FMM=F ISym2X=0 l1Cent= 0 IOpClX= 0 NMat=1 NMatS=1  
 NMatT=0.

\*\*\*\*\* Axes restored to original set \*\*\*\*\*

| Center<br>Number | Atomic<br>Number | Forces (Hartrees/Bohr) |              |              |
|------------------|------------------|------------------------|--------------|--------------|
|                  |                  | X                      | Y            | Z            |
| 1                | 6                | 0.000199015            | 0.000145244  | 0.000438394  |
| 2                | 6                | 0.000035901            | 0.000082483  | -0.000055311 |
| 3                | 7                | 0.000197027            | 0.000066300  | -0.000374284 |
| 4                | 6                | 0.000148355            | -0.000451882 | 0.001161793  |
| 5                | 7                | 0.000035365            | -0.000278787 | -0.000988674 |
| 6                | 6                | 0.000126245            | 0.000089751  | 0.000273046  |
| 7                | 6                | 0.000148885            | 0.000329113  | -0.000429826 |
| 8                | 1                | -0.000022924           | 0.000024425  | 0.000060201  |
| 9                | 1                | 0.000034063            | -0.000000718 | 0.000020379  |
| 10               | 1                | 0.000008490            | 0.000067228  | -0.000174984 |
| 11               | 1                | 0.000215904            | 0.000130141  | -0.000093127 |
| 12               | 1                | 0.000526895            | 0.000495682  | 0.000053768  |
| 13               | 1                | -0.000764702           | 0.000013028  | 0.000214267  |
| 14               | 35               | 0.000479403            | -0.000835423 | 0.000288589  |
| 15               | 1                | -0.001116599           | 0.000624253  | -0.000422430 |
| 16               | 6                | 0.000051809            | 0.000056834  | -0.000068453 |
| 17               | 6                | -0.000034943           | 0.000062533  | -0.000024635 |
| 18               | 1                | -0.000129455           | -0.000123357 | 0.000067131  |
| 19               | 1                | -0.000025970           | 0.000001033  | -0.000011590 |
| 20               | 1                | 0.000030751            | 0.000033167  | -0.000020940 |
| 21               | 7                | 0.000264392            | -0.000374913 | -0.000047925 |
| 22               | 1                | -0.000250374           | -0.000145751 | 0.000721667  |
| 23               | 1                | -0.000157532           | -0.000010386 | -0.000587055 |

Cartesian Forces: Max 0.001161793 RMS 0.000357801

GradGradGradGradGradGradGradGradGradGradGradGradGradGradGradGradGradGradGradGrad  
 Berny optimization.

Using GEDIIS/GDIIS optimizer.

FormGI is forming the generalized inverse of G from B-inverse, IUseBI=4.

Internal Forces: Max 0.002929263 RMS 0.000477081

Search for a local minimum.

Step number 26 out of a maximum of 121

All quantities printed in internal units (Hartrees-Bohrs-Radians)

Mixed Optimization -- En-DIIS/RFO-DIIS

Update second derivatives using D2CorX and points 18 20 23 26

ITU= 0 -1 -1 0 -1 -1 0 -1 0 0 0 1 1 -1 1 -1 1 1 1 1

ITU= 1 1 0 1 0 0

Use linear search instead of GDIIIS.

|                 |         |         |         |         |         |
|-----------------|---------|---------|---------|---------|---------|
| Eigenvalues --- | 0.00032 | 0.00246 | 0.00449 | 0.00624 | 0.01219 |
| Eigenvalues --- | 0.01407 | 0.01820 | 0.02031 | 0.02167 | 0.02309 |
| Eigenvalues --- | 0.02390 | 0.03051 | 0.03060 | 0.03229 | 0.03308 |
| Eigenvalues --- | 0.03783 | 0.04119 | 0.04516 | 0.04894 | 0.05234 |
| Eigenvalues --- | 0.05443 | 0.08980 | 0.09228 | 0.10158 | 0.11680 |
| Eigenvalues --- | 0.12798 | 0.15240 | 0.15926 | 0.15974 | 0.16000 |
| Eigenvalues --- | 0.16010 | 0.16023 | 0.16267 | 0.19073 | 0.21734 |
| Eigenvalues --- | 0.22043 | 0.23121 | 0.23495 | 0.24846 | 0.24938 |
| Eigenvalues --- | 0.28303 | 0.30126 | 0.34078 | 0.34369 | 0.34733 |
| Eigenvalues --- | 0.34892 | 0.35108 | 0.35689 | 0.35739 | 0.35859 |
| Eigenvalues --- | 0.36437 | 0.36659 | 0.38695 | 0.40239 | 0.42160 |
| Eigenvalues --- | 0.43038 | 0.46711 | 0.47711 | 0.48452 | 0.50257 |
| Eigenvalues --- | 0.54244 | 0.59603 | 0.60363 |         |         |

RFO step: Lambda=-8.52232711D-04 EMin= 3.15935603D-04

Quartic linear search produced a step of 0.00675.

Maximum step size ( 0.050) exceeded in Quadratic search.

-- Step size scaled by 0.410

Iteration 1 RMS(Cart)= 0.04240533 RMS(Int)= 0.00269743

Iteration 2 RMS(Cart)= 0.00294266 RMS(Int)= 0.00002823

Iteration 3 RMS(Cart)= 0.00004136 RMS(Int)= 0.00001003

Iteration 4 RMS(Cart)= 0.00000000 RMS(Int)= 0.00001003

| Variable | Old X   | -DE/DX   | Delta X  |          |          | New X   |
|----------|---------|----------|----------|----------|----------|---------|
|          |         |          | (Linear) | (Quad)   | (Total)  |         |
| R1       | 2.56561 | 0.00032  | 0.00000  | -0.00007 | -0.00008 | 2.56553 |
| R2       | 2.61886 | -0.00035 | 0.00001  | -0.00047 | -0.00046 | 2.61839 |
| R3       | 2.03420 | -0.00002 | 0.00000  | 0.00001  | 0.00001  | 2.03421 |
| R4       | 2.63022 | 0.00015  | 0.00000  | 0.00006  | 0.00005  | 2.63027 |
| R5       | 2.03090 | -0.00004 | 0.00000  | -0.00003 | -0.00003 | 2.03087 |
| R6       | 2.54567 | -0.00022 | 0.00001  | 0.00097  | 0.00098  | 2.54664 |
| R7       | 2.68715 | 0.00008  | 0.00000  | -0.00080 | -0.00080 | 2.68634 |
| R8       | 2.51908 | -0.00083 | 0.00000  | -0.00038 | -0.00038 | 2.51870 |
| R9       | 2.10983 | -0.00060 | 0.00000  | -0.00147 | -0.00148 | 2.10835 |
| R10      | 2.79244 | -0.00011 | 0.00000  | 0.00089  | 0.00089  | 2.79333 |
| R11      | 2.90110 | -0.00009 | 0.00001  | -0.00100 | -0.00098 | 2.90012 |
| R12      | 2.06051 | -0.00005 | 0.00000  | 0.00010  | 0.00010  | 2.06061 |
| R13      | 2.06057 | -0.00017 | 0.00001  | 0.00025  | 0.00026  | 2.06083 |
| R14      | 2.07055 | -0.00061 | 0.00001  | 0.00048  | 0.00049  | 2.07104 |
| R15      | 2.07379 | 0.00001  | 0.00001  | 0.00012  | 0.00013  | 2.07391 |
| R16      | 2.76037 | -0.00003 | -0.00002 | -0.00242 | -0.00244 | 2.75793 |
| R17      | 4.10834 | -0.00002 | 0.00012  | 0.02194  | 0.02206  | 4.13040 |
| R18      | 2.50679 | 0.00005  | 0.00000  | 0.00012  | 0.00012  | 2.50691 |

|     |          |          |          |          |          |          |
|-----|----------|----------|----------|----------|----------|----------|
| R19 | 2.04717  | -0.00018 | 0.00001  | -0.00043 | -0.00042 | 2.04675  |
| R20 | 2.04304  | 0.00001  | 0.00000  | -0.00001 | -0.00001 | 2.04303  |
| R21 | 2.04612  | -0.00005 | 0.00000  | -0.00010 | -0.00010 | 2.04601  |
| R22 | 1.91745  | -0.00067 | 0.00000  | 0.00002  | 0.00003  | 1.91748  |
| R23 | 1.92461  | -0.00024 | 0.00000  | 0.00059  | 0.00058  | 1.92519  |
| A1  | 1.87326  | -0.00023 | 0.00000  | 0.00032  | 0.00032  | 1.87358  |
| A2  | 2.27817  | 0.00010  | 0.00000  | -0.00011 | -0.00010 | 2.27807  |
| A3  | 2.13174  | 0.00013  | 0.00000  | -0.00022 | -0.00022 | 2.13152  |
| A4  | 1.86169  | 0.00006  | 0.00000  | 0.00001  | 0.00001  | 1.86170  |
| A5  | 2.27763  | -0.00004 | 0.00000  | 0.00007  | 0.00007  | 2.27770  |
| A6  | 2.14386  | -0.00002 | 0.00000  | -0.00007 | -0.00007 | 2.14379  |
| A7  | 1.89870  | -0.00044 | 0.00000  | -0.00044 | -0.00043 | 1.89827  |
| A8  | 2.24850  | 0.00020  | 0.00001  | -0.00139 | -0.00138 | 2.24711  |
| A9  | 2.13598  | 0.00025  | -0.00001 | 0.00184  | 0.00182  | 2.13780  |
| A10 | 1.88672  | 0.00047  | 0.00000  | 0.00010  | 0.00009  | 1.88681  |
| A11 | 2.24279  | 0.00143  | -0.00010 | 0.00849  | 0.00838  | 2.25118  |
| A12 | 2.15110  | -0.00192 | 0.00010  | -0.00795 | -0.00787 | 2.14323  |
| A13 | 1.90435  | 0.00014  | 0.00000  | 0.00000  | 0.00000  | 1.90435  |
| A14 | 2.22539  | 0.00133  | -0.00002 | 0.00004  | 0.00002  | 2.22540  |
| A15 | 2.15081  | -0.00147 | 0.00002  | 0.00011  | 0.00013  | 2.15094  |
| A16 | 1.95585  | -0.00076 | 0.00003  | 0.00011  | 0.00013  | 1.95597  |
| A17 | 1.86301  | 0.00011  | -0.00001 | -0.00289 | -0.00291 | 1.86010  |
| A18 | 1.88375  | 0.00051  | -0.00002 | 0.00118  | 0.00116  | 1.88491  |
| A19 | 1.90640  | 0.00012  | 0.00000  | -0.00471 | -0.00471 | 1.90168  |
| A20 | 1.95027  | 0.00008  | 0.00001  | 0.00237  | 0.00238  | 1.95265  |
| A21 | 1.90188  | -0.00005 | -0.00001 | 0.00390  | 0.00389  | 1.90578  |
| A22 | 1.91558  | 0.00020  | -0.00001 | 0.00459  | 0.00459  | 1.92017  |
| A23 | 1.89149  | -0.00032 | 0.00002  | -0.00362 | -0.00361 | 1.88788  |
| A24 | 1.87709  | -0.00014 | 0.00004  | -0.00223 | -0.00220 | 1.87489  |
| A25 | 1.89778  | -0.00009 | -0.00007 | -0.00125 | -0.00131 | 1.89647  |
| A26 | 1.90676  | -0.00024 | 0.00006  | 0.00253  | 0.00258  | 1.90934  |
| A27 | 1.97465  | 0.00060  | -0.00004 | 0.00014  | 0.00009  | 1.97474  |
| A28 | 2.80441  | -0.00293 | -0.00010 | -0.02856 | -0.02866 | 2.77575  |
| A29 | 2.17514  | 0.00013  | 0.00000  | 0.00130  | 0.00130  | 2.17643  |
| A30 | 1.95516  | -0.00006 | 0.00000  | 0.00090  | 0.00089  | 1.95605  |
| A31 | 2.15289  | -0.00007 | 0.00001  | -0.00220 | -0.00219 | 2.15070  |
| A32 | 2.07971  | 0.00003  | -0.00001 | 0.00006  | 0.00005  | 2.07976  |
| A33 | 2.15723  | -0.00001 | 0.00001  | 0.00008  | 0.00009  | 2.15732  |
| A34 | 2.04624  | -0.00002 | 0.00000  | -0.00014 | -0.00014 | 2.04610  |
| A35 | 1.92952  | 0.00033  | 0.00005  | 0.00154  | 0.00159  | 1.93111  |
| A36 | 1.90253  | -0.00041 | 0.00004  | -0.00161 | -0.00158 | 1.90095  |
| A37 | 1.86495  | -0.00003 | 0.00004  | 0.00440  | 0.00444  | 1.86939  |
| D1  | 0.00643  | -0.00010 | 0.00005  | -0.00071 | -0.00067 | 0.00576  |
| D2  | -3.13955 | -0.00015 | 0.00000  | 0.00182  | 0.00183  | -3.13772 |

|     |          |          |          |          |          |          |
|-----|----------|----------|----------|----------|----------|----------|
| D3  | -3.14026 | 0.00011  | 0.00002  | -0.00169 | -0.00167 | 3.14125  |
| D4  | -0.00306 | 0.00006  | -0.00002 | 0.00084  | 0.00083  | -0.00223 |
| D5  | -0.01063 | 0.00030  | -0.00006 | -0.00022 | -0.00026 | -0.01090 |
| D6  | -3.07548 | 0.00037  | -0.00014 | -0.00233 | -0.00245 | -3.07793 |
| D7  | 3.13554  | 0.00012  | -0.00003 | 0.00066  | 0.00063  | 3.13617  |
| D8  | 0.07069  | 0.00018  | -0.00011 | -0.00145 | -0.00155 | 0.06914  |
| D9  | -0.00017 | -0.00013 | -0.00003 | 0.00140  | 0.00137  | 0.00121  |
| D10 | 3.13825  | -0.00007 | -0.00004 | 0.00405  | 0.00401  | -3.14092 |
| D11 | -3.13779 | -0.00009 | 0.00001  | -0.00090 | -0.00089 | -3.13867 |
| D12 | 0.00063  | -0.00003 | 0.00000  | 0.00175  | 0.00175  | 0.00239  |
| D13 | -0.00644 | 0.00032  | -0.00001 | -0.00154 | -0.00155 | -0.00799 |
| D14 | 3.05915  | -0.00004 | 0.00004  | 0.00751  | 0.00761  | 3.06676  |
| D15 | 3.13808  | 0.00026  | 0.00001  | -0.00398 | -0.00398 | 3.13409  |
| D16 | -0.07951 | -0.00010 | 0.00006  | 0.00508  | 0.00517  | -0.07434 |
| D17 | 0.11029  | -0.00010 | -0.00005 | -0.01566 | -0.01571 | 0.09458  |
| D18 | -3.02890 | -0.00010 | -0.00005 | -0.01699 | -0.01704 | -3.04594 |
| D19 | -3.03486 | -0.00003 | -0.00007 | -0.01269 | -0.01275 | -3.04761 |
| D20 | 0.10914  | -0.00003 | -0.00007 | -0.01402 | -0.01408 | 0.09505  |
| D21 | 0.01052  | -0.00038 | 0.00004  | 0.00109  | 0.00113  | 0.01165  |
| D22 | 3.07934  | -0.00029 | 0.00011  | 0.00309  | 0.00319  | 3.08253  |
| D23 | -3.05996 | -0.00022 | 0.00000  | -0.00823 | -0.00818 | -3.06814 |
| D24 | 0.00885  | -0.00013 | 0.00008  | -0.00623 | -0.00611 | 0.00274  |
| D25 | -2.40621 | -0.00034 | 0.00024  | -0.20077 | -0.20053 | -2.60674 |
| D26 | 0.64898  | -0.00063 | 0.00029  | -0.19002 | -0.18973 | 0.45926  |
| D27 | 1.62934  | 0.00001  | 0.00015  | -0.03851 | -0.03836 | 1.59098  |
| D28 | -2.56751 | -0.00020 | 0.00016  | -0.04604 | -0.04588 | -2.61339 |
| D29 | -0.52532 | 0.00005  | 0.00013  | -0.04239 | -0.04226 | -0.56758 |
| D30 | -1.42553 | -0.00001 | 0.00006  | -0.04089 | -0.04082 | -1.46635 |
| D31 | 0.66080  | -0.00022 | 0.00007  | -0.04841 | -0.04834 | 0.61246  |
| D32 | 2.70300  | 0.00003  | 0.00004  | -0.04477 | -0.04472 | 2.65827  |
| D33 | -1.28640 | -0.00022 | 0.00022  | -0.01318 | -0.01296 | -1.29937 |
| D34 | 0.78379  | -0.00041 | 0.00014  | -0.01419 | -0.01405 | 0.76974  |
| D35 | 2.92423  | 0.00004  | 0.00013  | -0.01748 | -0.01734 | 2.90688  |
| D36 | 2.93607  | 0.00002  | 0.00021  | -0.00663 | -0.00642 | 2.92965  |
| D37 | -1.27692 | -0.00017 | 0.00014  | -0.00764 | -0.00750 | -1.28443 |
| D38 | 0.86351  | 0.00028  | 0.00013  | -0.01093 | -0.01080 | 0.85271  |
| D39 | 0.83038  | -0.00005 | 0.00022  | -0.00988 | -0.00966 | 0.82072  |
| D40 | 2.90058  | -0.00024 | 0.00015  | -0.01089 | -0.01075 | 2.88983  |
| D41 | -1.24217 | 0.00022  | 0.00013  | -0.01418 | -0.01404 | -1.25621 |
| D42 | 2.92133  | -0.00017 | -0.00053 | -0.01392 | -0.01445 | 2.90688  |
| D43 | -1.31683 | -0.00026 | -0.00043 | -0.00864 | -0.00908 | -1.32591 |
| D44 | 0.84312  | -0.00019 | -0.00057 | -0.01954 | -0.02011 | 0.82301  |
| D45 | 2.88814  | -0.00028 | -0.00048 | -0.01426 | -0.01474 | 2.87340  |
| D46 | -1.27359 | -0.00030 | -0.00050 | -0.01984 | -0.02035 | -1.29394 |

|     |          |          |          |          |          |          |
|-----|----------|----------|----------|----------|----------|----------|
| D47 | 0.77143  | -0.00039 | -0.00041 | -0.01457 | -0.01497 | 0.75646  |
| D48 | -3.13265 | 0.00001  | -0.00001 | -0.00115 | -0.00116 | -3.13381 |
| D49 | 0.01122  | -0.00002 | -0.00001 | -0.00170 | -0.00171 | 0.00951  |
| D50 | 0.00628  | 0.00001  | -0.00001 | 0.00033  | 0.00032  | 0.00659  |
| D51 | -3.13304 | -0.00002 | 0.00000  | -0.00023 | -0.00023 | -3.13327 |

| Item                 | Value    | Threshold | Converged? |
|----------------------|----------|-----------|------------|
| Maximum Force        | 0.002929 | 0.000450  | NO         |
| RMS Force            | 0.000477 | 0.000300  | NO         |
| Maximum Displacement | 0.251783 | 0.001800  | NO         |
| RMS Displacement     | 0.043406 | 0.001200  | NO         |

Predicted change in Energy=-3.175029D-04

GradGradGradGradGradGradGradGradGradGradGradGradGradGradGradGradGradGrad

Input orientation:

| Center Number | Atomic Number | Atomic Type | Coordinates (Angstroms) |           |           |
|---------------|---------------|-------------|-------------------------|-----------|-----------|
|               |               |             | X                       | Y         | Z         |
| 1             | 6             | 0           | -1.811417               | -1.998979 | 0.256541  |
| 2             | 6             | 0           | -2.814954               | -1.113969 | 0.026751  |
| 3             | 7             | 0           | -2.235627               | 0.151533  | 0.012090  |
| 4             | 6             | 0           | -0.911392               | 0.024563  | 0.227430  |
| 5             | 7             | 0           | -0.639893               | -1.270606 | 0.386450  |
| 6             | 6             | 0           | 0.729932                | -1.794661 | 0.570615  |
| 7             | 6             | 0           | 1.451443                | -2.005334 | -0.767398 |
| 8             | 1             | 0           | -1.831035               | -3.071801 | 0.342732  |
| 9             | 1             | 0           | -3.866547               | -1.275157 | -0.125338 |
| 10            | 1             | 0           | 1.272728                | -1.048911 | 1.152222  |
| 11            | 1             | 0           | 0.662692                | -2.718646 | 1.145956  |
| 12            | 1             | 0           | 1.055179                | -2.894169 | -1.271425 |
| 13            | 1             | 0           | 1.261713                | -1.128965 | -1.400182 |
| 14            | 35            | 0           | 1.848602                | 1.723299  | -0.043180 |
| 15            | 1             | 0           | -0.120349               | 0.811295  | 0.219153  |
| 16            | 6             | 0           | -2.858985               | 1.413210  | -0.188928 |
| 17            | 6             | 0           | -4.167495               | 1.599480  | -0.302840 |
| 18            | 1             | 0           | -2.137961               | 2.219746  | -0.240996 |
| 19            | 1             | 0           | -4.545348               | 2.599908  | -0.461592 |
| 20            | 1             | 0           | -4.894083               | 0.798921  | -0.244325 |
| 21            | 7             | 0           | 2.866999                | -2.205252 | -0.473828 |
| 22            | 1             | 0           | 3.353895                | -2.565029 | -1.288126 |
| 23            | 1             | 0           | 3.287427                | -1.305560 | -0.246498 |

Distance matrix (angstroms):

1            2            3            4            5

|    |    |          |          |          |          |          |
|----|----|----------|----------|----------|----------|----------|
| 1  | C  | 0.000000 |          |          |          |          |
| 2  | C  | 1.357620 | 0.000000 |          |          |          |
| 3  | N  | 2.205542 | 1.391880 | 0.000000 |          |          |
| 4  | C  | 2.214863 | 2.227124 | 1.347625 | 0.000000 |          |
| 5  | N  | 1.385595 | 2.210161 | 2.170021 | 1.332840 | 0.000000 |
| 6  | C  | 2.568822 | 3.650390 | 3.590845 | 2.474125 | 1.478165 |
| 7  | C  | 3.419758 | 4.430277 | 4.342138 | 3.270039 | 2.498975 |
| 8  | H  | 1.076457 | 2.213831 | 3.265410 | 3.232106 | 2.159869 |
| 9  | H  | 2.212082 | 1.074690 | 2.171227 | 3.247562 | 3.266993 |
| 10 | H  | 3.349153 | 4.240290 | 3.879372 | 2.603453 | 2.072118 |
| 11 | H  | 2.725838 | 3.990192 | 4.233655 | 3.293422 | 2.090550 |
| 12 | H  | 3.369483 | 4.453348 | 4.664024 | 3.825306 | 2.873635 |
| 13 | H  | 3.598025 | 4.319211 | 3.983162 | 2.949938 | 2.613087 |
| 14 | Br | 5.228855 | 5.459280 | 4.376577 | 3.252152 | 3.916715 |
| 15 | H  | 3.280054 | 3.317312 | 2.225435 | 1.115690 | 2.152261 |
| 16 | C  | 3.597065 | 2.536748 | 1.421553 | 2.427924 | 3.529631 |
| 17 | C  | 4.337386 | 3.049722 | 2.434716 | 3.655648 | 4.599618 |
| 18 | H  | 4.260496 | 3.412282 | 2.085928 | 2.557875 | 3.849735 |
| 19 | H  | 5.398135 | 4.126212 | 3.399077 | 4.506971 | 5.563509 |
| 20 | H  | 4.193083 | 2.838205 | 2.748135 | 4.084607 | 4.772730 |
| 21 | N  | 4.739574 | 5.807415 | 5.641573 | 4.442980 | 3.729870 |
| 22 | H  | 5.420964 | 6.472184 | 6.349254 | 5.214937 | 4.519964 |
| 23 | H  | 5.170308 | 6.111499 | 5.717877 | 4.429888 | 3.978151 |
|    |    | 6        | 7        | 8        | 9        | 10       |
| 6  | C  | 0.000000 |          |          |          |          |
| 7  | C  | 1.534679 | 0.000000 |          |          |          |
| 8  | H  | 2.870813 | 3.625521 | 0.000000 |          |          |
| 9  | H  | 4.677804 | 5.406146 | 2.755055 | 0.000000 |          |
| 10 | H  | 1.090429 | 2.152120 | 3.792189 | 5.300518 | 0.000000 |
| 11 | H  | 1.090545 | 2.189033 | 2.643588 | 4.920757 | 1.777695 |
| 12 | H  | 2.169750 | 1.095946 | 3.311690 | 5.306421 | 3.053910 |
| 13 | H  | 2.147087 | 1.097468 | 4.046907 | 5.286365 | 2.553682 |
| 14 | Br | 3.742220 | 3.819022 | 6.056537 | 6.454487 | 3.073397 |
| 15 | H  | 2.763605 | 3.373013 | 4.245015 | 4.301854 | 2.504326 |
| 16 | C  | 4.873158 | 5.531804 | 4.631918 | 2.871679 | 4.993173 |
| 17 | C  | 6.022284 | 6.692008 | 5.262763 | 2.895792 | 6.223119 |
| 18 | H  | 4.999899 | 5.568862 | 5.332487 | 3.900735 | 4.925239 |
| 19 | H  | 6.943073 | 7.567250 | 6.338984 | 3.948413 | 7.054664 |
| 20 | H  | 6.246626 | 6.957237 | 4.970854 | 2.317712 | 6.587441 |
| 21 | N  | 2.413815 | 1.459434 | 4.846565 | 6.806406 | 2.553989 |
| 22 | H  | 3.306594 | 2.050302 | 5.458938 | 7.426346 | 3.547557 |
| 23 | H  | 2.729042 | 2.032697 | 5.446600 | 7.155064 | 2.466028 |
|    |    | 11       | 12       | 13       | 14       | 15       |
| 11 | H  | 0.000000 |          |          |          |          |

|    |    |          |          |          |          |          |
|----|----|----------|----------|----------|----------|----------|
| 12 | H  | 2.455318 | 0.000000 |          |          |          |
| 13 | H  | 3.060838 | 1.781904 | 0.000000 |          |          |
| 14 | Br | 4.748822 | 4.843461 | 3.212678 | 0.000000 |          |
| 15 | H  | 3.732640 | 4.163431 | 2.880443 | 2.185712 | 0.000000 |
| 16 | C  | 5.590739 | 5.919966 | 4.990986 | 4.720039 | 2.833541 |
| 17 | C  | 6.638970 | 6.957540 | 6.174535 | 6.022971 | 4.156092 |
| 18 | H  | 5.844229 | 6.116377 | 4.910740 | 4.022222 | 2.503244 |
| 19 | H  | 7.615439 | 7.887117 | 6.964726 | 6.467310 | 4.821116 |
| 20 | H  | 6.721897 | 7.077257 | 6.553364 | 6.808724 | 4.796196 |
| 21 | N  | 2.783207 | 2.096057 | 2.143237 | 4.081190 | 4.301631 |
| 22 | H  | 3.631931 | 2.322220 | 2.540090 | 4.712277 | 5.073640 |
| 23 | H  | 3.290133 | 2.925249 | 2.337881 | 3.359396 | 4.038668 |
|    |    | 16       | 17       | 18       | 19       | 20       |
| 16 | C  | 0.000000 |          |          |          |          |
| 17 | C  | 1.326602 | 0.000000 |          |          |          |
| 18 | H  | 1.083091 | 2.123103 | 0.000000 |          |          |
| 19 | H  | 2.080004 | 1.081125 | 2.447181 | 0.000000 |          |
| 20 | H  | 2.126510 | 1.082704 | 3.100800 | 1.847261 | 0.000000 |
| 21 | N  | 6.779478 | 7.999333 | 6.684643 | 8.833606 | 8.325390 |
| 22 | H  | 7.458853 | 8.653625 | 7.358739 | 9.474057 | 8.968546 |
| 23 | H  | 6.721116 | 8.001143 | 6.470135 | 8.755073 | 8.447836 |
|    |    | 21       | 22       | 23       |          |          |
| 21 | N  | 0.000000 |          |          |          |          |
| 22 | H  | 1.014685 | 0.000000 |          |          |          |
| 23 | H  | 1.018767 | 1.635747 | 0.000000 |          |          |

Stoichiometry C7H12BrN3

Framework group C1[X(C7H12BrN3)]

Deg. of freedom 63

Full point group C1 NOp 1

Largest Abelian subgroup C1 NOp 1

Largest concise Abelian subgroup C1 NOp 1

Standard orientation:

| Center<br>Number | Atomic<br>Number | Atomic<br>Type | Coordinates (Angstroms) |           |           |
|------------------|------------------|----------------|-------------------------|-----------|-----------|
|                  |                  |                | X                       | Y         | Z         |
| 1                | 6                | 0              | -1.707334               | 2.101011  | -0.247171 |
| 2                | 6                | 0              | -2.735224               | 1.250909  | 0.005618  |
| 3                | 7                | 0              | -2.201358               | -0.034492 | -0.002258 |
| 4                | 6                | 0              | -0.879818               | 0.046553  | -0.253374 |
| 5                | 7                | 0              | -0.566613               | 1.332185  | -0.413109 |
| 6                | 6                | 0              | 0.815529                | 1.808239  | -0.632263 |
| 7                | 6                | 0              | 1.580471                | 1.984830  | 0.686417  |
| 8                | 1                | 0              | -1.690910               | 3.174361  | -0.327231 |

|    |    |   |           |           |           |
|----|----|---|-----------|-----------|-----------|
| 9  | 1  | 0 | -3.775819 | 1.448512  | 0.187482  |
| 10 | 1  | 0 | 1.315173  | 1.047226  | -1.232472 |
| 11 | 1  | 0 | 0.765663  | 2.737561  | -1.200737 |
| 12 | 1  | 0 | 1.230206  | 2.884094  | 1.205778  |
| 13 | 1  | 0 | 1.376904  | 1.111893  | 1.319645  |
| 14 | 35 | 0 | 1.824007  | -1.751050 | -0.067782 |
| 15 | 1  | 0 | -0.117498 | -0.767893 | -0.270990 |
| 16 | 6  | 0 | -2.863717 | -1.274379 | 0.209336  |
| 17 | 6  | 0 | -4.174444 | -1.414620 | 0.358322  |
| 18 | 1  | 0 | -2.170854 | -2.106392 | 0.237322  |
| 19 | 1  | 0 | -4.583359 | -2.401914 | 0.522249  |
| 20 | 1  | 0 | -4.873256 | -0.588343 | 0.324015  |
| 21 | 7  | 0 | 2.993706  | 2.136005  | 0.354962  |
| 22 | 1  | 0 | 3.515270  | 2.473186  | 1.157375  |
| 23 | 1  | 0 | 3.375297  | 1.223326  | 0.111467  |

-----

Rotational constants (GHZ): 0.8434647 0.4733027 0.3132212

Standard basis: 6-311++G(d,p) (5D, 7F)

There are 365 symmetry adapted cartesian basis functions of A symmetry.

There are 352 symmetry adapted basis functions of A symmetry.

352 basis functions, 562 primitive gaussians, 365 cartesian basis functions

55 alpha electrons 55 beta electrons

nuclear repulsion energy 840.7343888881 Hartrees.

NAtoms= 23 NActive= 23 NUniq= 23 SFac= 1.00D+00 NAtFMM= 60 NAOKFM=F

Big=F

Integral buffers will be 131072 words long.

Raffenetti 2 integral format.

Two-electron integral symmetry is turned on.

One-electron integrals computed using PRISM.

NBasis= 352 RedAO= T EigKep= 4.44D-06 NBF= 352

NBsUse= 352 1.00D-06 EigRej= -1.00D+00 NBFU= 352

Initial guess from the checkpoint file: "/home/suqian/liuwen/qianmengshijie/nh2/nh2.chk"

B after Tr= 0.000000 0.000000 0.000000

Rot= 0.999989 0.002826 0.001198 -0.003578 Ang= 0.54 deg.

ExpMin= 3.50D-02 ExpMax= 4.40D+05 ExpMxC= 1.51D+04 IAcc=3 IRadAn= 5 AccDes= 0.00D+00

Harris functional with IExCor= 402 and IRadAn= 5 diagonalized for initial guess.

HarFok: IExCor= 402 AccDes= 0.00D+00 IRadAn= 5 IDoV= 1 UseB2=F ITYADJ=14

ICtDFT= 3500011 ScaDFX= 1.000000 1.000000 1.000000 1.000000

FoFCou: FMM=F IPFlag= 0 FMFlag= 100000 FMFlg1= 0

NFxFlg= 0 DoJE=T BraDBF=F KetDBF=T FulRan=T

wScrn= 0.000000 ICntrl= 500 IOpCl= 0 l1Cent= 200000004 NGrid= 0

NMat0= 1 NMatS0= 1 NMatT0= 0 NMatD0= 1 NMtDS0= 0



NMtDT0= 0

Petite list used in FoFCou.

Requested convergence on RMS density matrix=1.00D-08 within 128 cycles.

Requested convergence on MAX density matrix=1.00D-06.

Requested convergence on energy=1.00D-06.

No special actions if energy rises.

SCF Done: E(RB3LYP) = -3012.46786164 A.U. after 12 cycles

NFock= 12 Conv=0.50D-08 -V/T= 2.0017

Calling FoFJK, ICntrl= 2127 FMM=F ISym2X=0 l1Cent= 0 IOpCIX= 0 NMat=1 NMatS=1

NMatT=0.

\*\*\*\*\* Axes restored to original set \*\*\*\*\*

| Center<br>Number | Atomic<br>Number | Forces (Hartrees/Bohr) |              |              |
|------------------|------------------|------------------------|--------------|--------------|
|                  |                  | X                      | Y            | Z            |
| 1                | 6                | 0.000251432            | 0.000176215  | 0.000458210  |
| 2                | 6                | -0.000019187           | 0.000110159  | 0.000091020  |
| 3                | 7                | 0.000229618            | 0.000072435  | -0.000423348 |
| 4                | 6                | 0.000258643            | -0.000464415 | 0.000855465  |
| 5                | 7                | -0.000047664           | -0.000377434 | -0.000927629 |
| 6                | 6                | -0.000070941           | 0.000122503  | 0.000665824  |
| 7                | 6                | -0.000027488           | 0.000479295  | -0.000403333 |
| 8                | 1                | -0.000029312           | 0.000025433  | 0.000054122  |
| 9                | 1                | 0.000033953            | 0.000018010  | 0.000026840  |
| 10               | 1                | 0.000023409            | -0.000064410 | -0.000169826 |
| 11               | 1                | 0.000087087            | 0.000108670  | -0.000196726 |
| 12               | 1                | 0.000546269            | 0.000620894  | 0.000215650  |
| 13               | 1                | -0.000756901           | -0.000022674 | -0.000157231 |
| 14               | 35               | 0.000475954            | -0.000669544 | 0.000091959  |
| 15               | 1                | -0.001248148           | 0.000481838  | -0.000134547 |
| 16               | 6                | 0.000018779            | 0.000117152  | -0.000082881 |
| 17               | 6                | -0.000016774           | 0.000029124  | -0.000055112 |
| 18               | 1                | -0.000080742           | -0.000126795 | 0.000055576  |
| 19               | 1                | -0.000021643           | 0.000001258  | 0.000010071  |
| 20               | 1                | 0.000024755            | 0.000027729  | -0.000020017 |
| 21               | 7                | 0.000655452            | -0.000605220 | -0.000588067 |
| 22               | 1                | -0.000172730           | 0.000052320  | 0.000809277  |
| 23               | 1                | -0.000113823           | -0.000112544 | -0.000175296 |

Cartesian Forces: Max 0.001248148 RMS 0.000367035

GradGradGradGradGradGradGradGradGradGradGradGradGradGradGradGradGradGradGrad

Berny optimization.

Using GEDIIS/GDIIS optimizer.

FormGI is forming the generalized inverse of G from B-inverse, IUseBI=4.

Internal Forces: Max 0.003052066 RMS 0.000437795

Search for a local minimum.

Step number 27 out of a maximum of 121

All quantities printed in internal units (Hartrees-Bohrs-Radians)

Mixed Optimization -- En-DIIS/RFO-DIIS

Swapping is turned off.

Update second derivatives using D2CorX and points 20 24 23 26 27

DE= -2.94D-04 DEPred=-3.18D-04 R= 9.28D-01

TightC=F SS= 1.41D+00 RLast= 3.05D-01 DXNew= 8.4090D-02 9.1567D-01

Trust test= 9.28D-01 RLast= 3.05D-01 DXMaxT set to 8.41D-02

ITU= 1 0 -1 -1 0 -1 -1 0 -1 0 0 0 1 1 -1 1 -1 1 1 1

ITU= 1 1 1 0 1 0 0

|                 |         |         |         |         |         |
|-----------------|---------|---------|---------|---------|---------|
| Eigenvalues --- | 0.00078 | 0.00276 | 0.00427 | 0.00508 | 0.01190 |
| Eigenvalues --- | 0.01412 | 0.01825 | 0.01988 | 0.02158 | 0.02304 |
| Eigenvalues --- | 0.02389 | 0.03054 | 0.03055 | 0.03167 | 0.03274 |
| Eigenvalues --- | 0.03645 | 0.04012 | 0.04506 | 0.04734 | 0.05247 |
| Eigenvalues --- | 0.05394 | 0.08831 | 0.09435 | 0.10077 | 0.10821 |
| Eigenvalues --- | 0.12748 | 0.15278 | 0.15900 | 0.15960 | 0.16000 |
| Eigenvalues --- | 0.16008 | 0.16024 | 0.16203 | 0.18557 | 0.21812 |
| Eigenvalues --- | 0.22040 | 0.23100 | 0.23510 | 0.24736 | 0.24961 |
| Eigenvalues --- | 0.27883 | 0.29679 | 0.34102 | 0.34329 | 0.34663 |
| Eigenvalues --- | 0.34903 | 0.35196 | 0.35689 | 0.35776 | 0.35859 |
| Eigenvalues --- | 0.36437 | 0.36659 | 0.38617 | 0.40602 | 0.42152 |
| Eigenvalues --- | 0.43080 | 0.46671 | 0.47719 | 0.48449 | 0.50267 |
| Eigenvalues --- | 0.54242 | 0.59920 | 0.60374 |         |         |

En-DIIS/RFO-DIIS IScMMF= 0 using points: 27 26

RFO step: Lambda=-5.34860504D-05.

DidBck=F Rises=F RFO-DIIS coefs: 2.28363 -1.28363

Maximum step size ( 0.084) exceeded in Quadratic search.

-- Step size scaled by 0.653

Iteration 1 RMS(Cart)= 0.04786752 RMS(Int)= 0.00937015

Iteration 2 RMS(Cart)= 0.01012612 RMS(Int)= 0.00017605

Iteration 3 RMS(Cart)= 0.00038566 RMS(Int)= 0.00001756

Iteration 4 RMS(Cart)= 0.00000022 RMS(Int)= 0.00001756

| Variable | Old X   | -DE/DX   | Delta X<br>(Linear) | Delta X<br>(Quad) | Delta X<br>(Total) | New X   |
|----------|---------|----------|---------------------|-------------------|--------------------|---------|
| R1       | 2.56553 | 0.00032  | -0.00006            | 0.00029           | 0.00022            | 2.56575 |
| R2       | 2.61839 | -0.00035 | -0.00039            | -0.00042          | -0.00080           | 2.61759 |
| R3       | 2.03421 | -0.00002 | 0.00001             | -0.00003          | -0.00003           | 2.03418 |
| R4       | 2.63027 | 0.00007  | 0.00004             | -0.00047          | -0.00043           | 2.62984 |
| R5       | 2.03087 | -0.00004 | -0.00003            | -0.00010          | -0.00013           | 2.03074 |
| R6       | 2.54664 | -0.00027 | 0.00082             | 0.00026           | 0.00108            | 2.54773 |
| R7       | 2.68634 | 0.00009  | -0.00067            | 0.00019           | -0.00048           | 2.68586 |

|     |         |          |          |          |          |         |
|-----|---------|----------|----------|----------|----------|---------|
| R8  | 2.51870 | -0.00069 | -0.00032 | -0.00019 | -0.00050 | 2.51820 |
| R9  | 2.10835 | -0.00068 | -0.00124 | -0.00283 | -0.00407 | 2.10428 |
| R10 | 2.79333 | -0.00004 | 0.00075  | 0.00026  | 0.00100  | 2.79433 |
| R11 | 2.90012 | 0.00025  | -0.00082 | 0.00076  | -0.00006 | 2.90006 |
| R12 | 2.06061 | -0.00012 | 0.00009  | 0.00014  | 0.00022  | 2.06084 |
| R13 | 2.06083 | -0.00020 | 0.00022  | -0.00014 | 0.00007  | 2.06090 |
| R14 | 2.07104 | -0.00080 | 0.00041  | -0.00134 | -0.00093 | 2.07010 |
| R15 | 2.07391 | 0.00020  | 0.00011  | 0.00155  | 0.00166  | 2.07557 |
| R16 | 2.75793 | 0.00046  | -0.00205 | -0.00032 | -0.00236 | 2.75557 |
| R17 | 4.13040 | 0.00014  | 0.01849  | 0.03180  | 0.05029  | 4.18069 |
| R18 | 2.50691 | 0.00003  | 0.00010  | 0.00001  | 0.00011  | 2.50702 |
| R19 | 2.04675 | -0.00015 | -0.00035 | 0.00004  | -0.00032 | 2.04643 |
| R20 | 2.04303 | 0.00001  | -0.00001 | 0.00003  | 0.00003  | 2.04306 |
| R21 | 2.04601 | -0.00004 | -0.00009 | -0.00005 | -0.00013 | 2.04588 |
| R22 | 1.91748 | -0.00075 | 0.00002  | -0.00073 | -0.00071 | 1.91677 |
| R23 | 1.92519 | -0.00018 | 0.00049  | 0.00078  | 0.00127  | 1.92646 |
| A1  | 1.87358 | -0.00017 | 0.00027  | 0.00033  | 0.00060  | 1.87418 |
| A2  | 2.27807 | 0.00006  | -0.00009 | -0.00008 | -0.00017 | 2.27790 |
| A3  | 2.13152 | 0.00010  | -0.00018 | -0.00026 | -0.00045 | 2.13107 |
| A4  | 1.86170 | 0.00004  | 0.00001  | 0.00010  | 0.00011  | 1.86180 |
| A5  | 2.27770 | -0.00001 | 0.00005  | 0.00013  | 0.00018  | 2.27788 |
| A6  | 2.14379 | -0.00003 | -0.00006 | -0.00023 | -0.00029 | 2.14350 |
| A7  | 1.89827 | -0.00039 | -0.00036 | -0.00054 | -0.00089 | 1.89738 |
| A8  | 2.24711 | 0.00021  | -0.00116 | 0.00032  | -0.00085 | 2.24627 |
| A9  | 2.13780 | 0.00017  | 0.00153  | 0.00021  | 0.00173  | 2.13954 |
| A10 | 1.88681 | 0.00047  | 0.00008  | 0.00072  | 0.00078  | 1.88760 |
| A11 | 2.25118 | 0.00098  | 0.00703  | -0.00369 | 0.00328  | 2.25446 |
| A12 | 2.14323 | -0.00147 | -0.00660 | 0.00334  | -0.00332 | 2.13992 |
| A13 | 1.90435 | 0.00005  | 0.00000  | -0.00058 | -0.00058 | 1.90377 |
| A14 | 2.22540 | 0.00117  | 0.00001  | 0.00028  | 0.00025  | 2.22565 |
| A15 | 2.15094 | -0.00122 | 0.00011  | 0.00111  | 0.00118  | 2.15212 |
| A16 | 1.95597 | -0.00042 | 0.00011  | 0.00144  | 0.00153  | 1.95750 |
| A17 | 1.86010 | 0.00014  | -0.00244 | -0.00180 | -0.00426 | 1.85584 |
| A18 | 1.88491 | 0.00025  | 0.00097  | -0.00004 | 0.00092  | 1.88583 |
| A19 | 1.90168 | -0.00011 | -0.00395 | -0.00376 | -0.00772 | 1.89396 |
| A20 | 1.95265 | 0.00014  | 0.00199  | 0.00190  | 0.00389  | 1.95655 |
| A21 | 1.90578 | 0.00001  | 0.00326  | 0.00217  | 0.00545  | 1.91123 |
| A22 | 1.92017 | 0.00018  | 0.00384  | 0.00198  | 0.00582  | 1.92599 |
| A23 | 1.88788 | -0.00021 | -0.00302 | 0.00218  | -0.00084 | 1.88704 |
| A24 | 1.87489 | -0.00012 | -0.00184 | -0.00141 | -0.00325 | 1.87164 |
| A25 | 1.89647 | -0.00015 | -0.00109 | -0.00609 | -0.00718 | 1.88930 |
| A26 | 1.90934 | -0.00029 | 0.00217  | -0.00324 | -0.00107 | 1.90827 |
| A27 | 1.97474 | 0.00059  | 0.00008  | 0.00676  | 0.00684  | 1.98158 |
| A28 | 2.77575 | -0.00305 | -0.02402 | -0.02819 | -0.05221 | 2.72354 |

|     |          |          |          |          |          |          |
|-----|----------|----------|----------|----------|----------|----------|
| A29 | 2.17643  | 0.00011  | 0.00109  | 0.00048  | 0.00156  | 2.17800  |
| A30 | 1.95605  | -0.00008 | 0.00075  | -0.00027 | 0.00048  | 1.95653  |
| A31 | 2.15070  | -0.00002 | -0.00184 | -0.00021 | -0.00204 | 2.14866  |
| A32 | 2.07976  | 0.00002  | 0.00004  | -0.00022 | -0.00018 | 2.07958  |
| A33 | 2.15732  | -0.00001 | 0.00008  | 0.00041  | 0.00049  | 2.15781  |
| A34 | 2.04610  | -0.00002 | -0.00012 | -0.00019 | -0.00031 | 2.04579  |
| A35 | 1.93111  | 0.00049  | 0.00133  | 0.00229  | 0.00361  | 1.93472  |
| A36 | 1.90095  | -0.00018 | -0.00132 | -0.00075 | -0.00208 | 1.89887  |
| A37 | 1.86939  | -0.00007 | 0.00372  | 0.00296  | 0.00667  | 1.87606  |
| D1  | 0.00576  | -0.00003 | -0.00056 | 0.00114  | 0.00057  | 0.00633  |
| D2  | -3.13772 | -0.00011 | 0.00153  | 0.00019  | 0.00172  | -3.13601 |
| D3  | 3.14125  | 0.00010  | -0.00140 | -0.00067 | -0.00207 | 3.13919  |
| D4  | -0.00223 | 0.00002  | 0.00069  | -0.00162 | -0.00092 | -0.00315 |
| D5  | -0.01090 | 0.00022  | -0.00022 | 0.00146  | 0.00125  | -0.00964 |
| D6  | -3.07793 | 0.00024  | -0.00205 | -0.01067 | -0.01269 | -3.09062 |
| D7  | 3.13617  | 0.00011  | 0.00053  | 0.00309  | 0.00362  | 3.13979  |
| D8  | 0.06914  | 0.00012  | -0.00130 | -0.00904 | -0.01033 | 0.05881  |
| D9  | 0.00121  | -0.00017 | 0.00115  | -0.00334 | -0.00218 | -0.00097 |
| D10 | -3.14092 | -0.00011 | 0.00337  | -0.00087 | 0.00250  | -3.13841 |
| D11 | -3.13867 | -0.00010 | -0.00074 | -0.00248 | -0.00322 | 3.14130  |
| D12 | 0.00239  | -0.00004 | 0.00147  | -0.00001 | 0.00147  | 0.00385  |
| D13 | -0.00799 | 0.00031  | -0.00130 | 0.00427  | 0.00297  | -0.00502 |
| D14 | 3.06676  | -0.00004 | 0.00638  | 0.01064  | 0.01709  | 3.08385  |
| D15 | 3.13409  | 0.00026  | -0.00334 | 0.00200  | -0.00136 | 3.13273  |
| D16 | -0.07434 | -0.00009 | 0.00433  | 0.00836  | 0.01275  | -0.06158 |
| D17 | 0.09458  | -0.00010 | -0.01317 | -0.01394 | -0.02712 | 0.06746  |
| D18 | -3.04594 | -0.00009 | -0.01429 | -0.01427 | -0.02856 | -3.07451 |
| D19 | -3.04761 | -0.00004 | -0.01069 | -0.01118 | -0.02186 | -3.06947 |
| D20 | 0.09505  | -0.00003 | -0.01181 | -0.01150 | -0.02330 | 0.07175  |
| D21 | 0.01165  | -0.00032 | 0.00094  | -0.00356 | -0.00262 | 0.00903  |
| D22 | 3.08253  | -0.00022 | 0.00267  | 0.00791  | 0.01057  | 3.09310  |
| D23 | -3.06814 | -0.00011 | -0.00685 | -0.00912 | -0.01590 | -3.08404 |
| D24 | 0.00274  | -0.00001 | -0.00512 | 0.00234  | -0.00271 | 0.00003  |
| D25 | -2.60674 | -0.00010 | -0.16808 | -0.08200 | -0.25008 | -2.85682 |
| D26 | 0.45926  | -0.00041 | -0.15902 | -0.07495 | -0.23397 | 0.22529  |
| D27 | 1.59098  | 0.00025  | -0.03215 | 0.00114  | -0.03102 | 1.55997  |
| D28 | -2.61339 | -0.00003 | -0.03845 | -0.00376 | -0.04221 | -2.65560 |
| D29 | -0.56758 | 0.00018  | -0.03542 | -0.00219 | -0.03762 | -0.60520 |
| D30 | -1.46635 | 0.00020  | -0.03421 | -0.01250 | -0.04672 | -1.51307 |
| D31 | 0.61246  | -0.00008 | -0.04052 | -0.01740 | -0.05791 | 0.55455  |
| D32 | 2.65827  | 0.00013  | -0.03749 | -0.01583 | -0.05332 | 2.60495  |
| D33 | -1.29937 | -0.00017 | -0.01087 | -0.01816 | -0.02902 | -1.32839 |
| D34 | 0.76974  | -0.00037 | -0.01178 | -0.02310 | -0.03487 | 0.73487  |
| D35 | 2.90688  | 0.00015  | -0.01454 | -0.01453 | -0.02906 | 2.87782  |

|     |          |          |          |          |          |          |
|-----|----------|----------|----------|----------|----------|----------|
| D36 | 2.92965  | -0.00001 | -0.00538 | -0.01440 | -0.01979 | 2.90986  |
| D37 | -1.28443 | -0.00022 | -0.00629 | -0.01934 | -0.02564 | -1.31007 |
| D38 | 0.85271  | 0.00030  | -0.00905 | -0.01077 | -0.01983 | 0.83288  |
| D39 | 0.82072  | -0.00004 | -0.00810 | -0.01581 | -0.02390 | 0.79683  |
| D40 | 2.88983  | -0.00024 | -0.00901 | -0.02074 | -0.02975 | 2.86009  |
| D41 | -1.25621 | 0.00028  | -0.01177 | -0.01218 | -0.02394 | -1.28015 |
| D42 | 2.90688  | -0.00017 | -0.01211 | 0.02432  | 0.01221  | 2.91909  |
| D43 | -1.32591 | -0.00007 | -0.00761 | 0.02880  | 0.02119  | -1.30471 |
| D44 | 0.82301  | -0.00015 | -0.01685 | 0.02458  | 0.00773  | 0.83073  |
| D45 | 2.87340  | -0.00005 | -0.01235 | 0.02906  | 0.01671  | 2.89011  |
| D46 | -1.29394 | -0.00015 | -0.01705 | 0.03014  | 0.01309  | -1.28085 |
| D47 | 0.75646  | -0.00005 | -0.01255 | 0.03462  | 0.02207  | 0.77853  |
| D48 | -3.13381 | 0.00000  | -0.00098 | -0.00111 | -0.00209 | -3.13590 |
| D49 | 0.00951  | -0.00001 | -0.00143 | -0.00103 | -0.00246 | 0.00705  |
| D50 | 0.00659  | -0.00001 | 0.00026  | -0.00075 | -0.00049 | 0.00611  |
| D51 | -3.13327 | -0.00002 | -0.00019 | -0.00067 | -0.00086 | -3.13413 |

| Item                 | Value    | Threshold | Converged? |
|----------------------|----------|-----------|------------|
| Maximum Force        | 0.003052 | 0.000450  | NO         |
| RMS Force            | 0.000438 | 0.000300  | NO         |
| Maximum Displacement | 0.337773 | 0.001800  | NO         |
| RMS Displacement     | 0.053875 | 0.001200  | NO         |

Predicted change in Energy=-1.955865D-04

GradGradGradGradGradGradGradGradGradGradGradGradGradGradGradGradGradGradGrad

Input orientation:

| Center Number | Atomic Number | Atomic Type | Coordinates (Angstroms) |           |           |
|---------------|---------------|-------------|-------------------------|-----------|-----------|
|               |               |             | X                       | Y         | Z         |
| 1             | 6             | 0           | -1.802969               | -1.987643 | 0.253624  |
| 2             | 6             | 0           | -2.813178               | -1.108169 | 0.031262  |
| 3             | 7             | 0           | -2.240718               | 0.160085  | 0.008623  |
| 4             | 6             | 0           | -0.913864               | 0.039446  | 0.214893  |
| 5             | 7             | 0           | -0.634076               | -1.253912 | 0.372040  |
| 6             | 6             | 0           | 0.738566                | -1.770775 | 0.559785  |
| 7             | 6             | 0           | 1.444490                | -2.037281 | -0.776547 |
| 8             | 1             | 0           | -1.816728               | -3.060209 | 0.343846  |
| 9             | 1             | 0           | -3.865388               | -1.274750 | -0.109868 |
| 10            | 1             | 0           | 1.288303                | -0.994451 | 1.093082  |
| 11            | 1             | 0           | 0.680563                | -2.666619 | 1.179034  |
| 12            | 1             | 0           | 1.067408                | -2.960893 | -1.229052 |
| 13            | 1             | 0           | 1.217118                | -1.204080 | -1.455103 |
| 14            | 35            | 0           | 1.934076                | 1.626893  | 0.135561  |
| 15            | 1             | 0           | -0.127378               | 0.827733  | 0.213925  |

|    |   |   |           |           |           |
|----|---|---|-----------|-----------|-----------|
| 16 | 6 | 0 | -2.873826 | 1.417525  | -0.186583 |
| 17 | 6 | 0 | -4.182359 | 1.594341  | -0.315053 |
| 18 | 1 | 0 | -2.160816 | 2.231925  | -0.219603 |
| 19 | 1 | 0 | -4.566467 | 2.593647  | -0.465753 |
| 20 | 1 | 0 | -4.903112 | 0.787410  | -0.276724 |
| 21 | 7 | 0 | 2.866985  | -2.184865 | -0.491895 |
| 22 | 1 | 0 | 3.357909  | -2.566175 | -1.293407 |
| 23 | 1 | 0 | 3.260985  | -1.264266 | -0.300802 |

-----  
Distance matrix (angstroms):

|    |    | 1        | 2        | 3        | 4        | 5        |
|----|----|----------|----------|----------|----------|----------|
| 1  | C  | 0.000000 |          |          |          |          |
| 2  | C  | 1.357734 | 0.000000 |          |          |          |
| 3  | N  | 2.205535 | 1.391651 | 0.000000 |          |          |
| 4  | C  | 2.213842 | 2.226687 | 1.348199 | 0.000000 |          |
| 5  | N  | 1.385169 | 2.210397 | 2.170888 | 1.332573 | 0.000000 |
| 6  | C  | 2.569080 | 3.651476 | 3.592789 | 2.475152 | 1.478696 |
| 7  | C  | 3.407302 | 4.432104 | 4.361841 | 3.295084 | 2.500671 |
| 8  | H  | 1.076441 | 2.213839 | 3.265338 | 3.231045 | 2.159205 |
| 9  | H  | 2.212219 | 1.074622 | 2.170794 | 3.247164 | 3.267116 |
| 10 | H  | 3.353667 | 4.238224 | 3.868202 | 2.586445 | 2.069484 |
| 11 | H  | 2.735933 | 3.994043 | 4.230130 | 3.285507 | 2.091712 |
| 12 | H  | 3.374109 | 4.481063 | 4.713389 | 3.874591 | 2.893498 |
| 13 | H  | 3.557337 | 4.296716 | 3.995006 | 2.979317 | 2.601510 |
| 14 | Br | 5.200416 | 5.479769 | 4.426799 | 3.261449 | 3.866571 |
| 15 | H  | 3.276512 | 3.315812 | 2.225783 | 1.113535 | 2.148254 |
| 16 | C  | 3.596622 | 2.535797 | 1.421298 | 2.429349 | 3.530598 |
| 17 | C  | 4.337684 | 3.049287 | 2.435534 | 3.658087 | 4.601625 |
| 18 | H  | 4.261075 | 3.412439 | 2.085904 | 2.559422 | 3.851239 |
| 19 | H  | 5.398393 | 4.126074 | 3.399466 | 4.508740 | 5.565008 |
| 20 | H  | 4.194410 | 2.838291 | 2.750146 | 4.088427 | 4.776249 |
| 21 | N  | 4.733199 | 5.804931 | 5.642512 | 4.443189 | 3.724310 |
| 22 | H  | 5.418734 | 6.477874 | 6.361792 | 5.226115 | 4.520144 |
| 23 | H  | 5.145318 | 6.085235 | 5.691506 | 4.403972 | 3.952761 |
|    |    | 6        | 7        | 8        | 9        | 10       |
| 6  | C  | 0.000000 |          |          |          |          |
| 7  | C  | 1.534645 | 0.000000 |          |          |          |
| 8  | H  | 2.870331 | 3.596833 | 0.000000 |          |          |
| 9  | H  | 4.678768 | 5.405619 | 2.755127 | 0.000000 |          |
| 10 | H  | 1.090548 | 2.146486 | 3.803936 | 5.299640 | 0.000000 |
| 11 | H  | 1.090583 | 2.191791 | 2.662502 | 4.925875 | 1.781258 |
| 12 | H  | 2.173582 | 1.095451 | 3.286657 | 5.331803 | 3.050901 |
| 13 | H  | 2.147074 | 1.098344 | 3.985681 | 5.257996 | 2.557784 |
| 14 | Br | 3.626756 | 3.807599 | 6.006733 | 6.489496 | 2.864492 |

|    |    |          |          |          |          |          |
|----|----|----------|----------|----------|----------|----------|
| 15 | H  | 2.760747 | 3.414690 | 4.241094 | 4.300930 | 2.469296 |
| 16 | C  | 4.875624 | 5.561618 | 4.631297 | 2.870091 | 4.977800 |
| 17 | C  | 6.025351 | 6.712904 | 5.262622 | 2.893830 | 6.213922 |
| 18 | H  | 5.003546 | 5.615562 | 5.333156 | 3.900561 | 4.901945 |
| 19 | H  | 6.945739 | 7.594320 | 6.338975 | 3.947488 | 7.041502 |
| 20 | H  | 6.250808 | 6.965684 | 4.971423 | 2.314566 | 6.586730 |
| 21 | N  | 2.409910 | 1.458184 | 4.837547 | 6.804344 | 2.534063 |
| 22 | H  | 3.305744 | 2.051353 | 5.449912 | 7.432669 | 3.528303 |
| 23 | H  | 2.712887 | 2.030649 | 5.424403 | 7.128938 | 2.430471 |
|    |    | 11       | 12       | 13       | 14       | 15       |
| 11 | H  | 0.000000 |          |          |          |          |
| 12 | H  | 2.456649 | 0.000000 |          |          |          |
| 13 | H  | 3.060325 | 1.777612 | 0.000000 |          |          |
| 14 | Br | 4.592862 | 4.864265 | 3.325456 | 0.000000 |          |
| 15 | H  | 3.714122 | 4.226510 | 2.953234 | 2.212327 | 0.000000 |
| 16 | C  | 5.583801 | 5.982526 | 5.021731 | 4.823229 | 2.837471 |
| 17 | C  | 6.635969 | 7.010393 | 6.187506 | 6.133098 | 4.160574 |
| 18 | H  | 5.833126 | 6.197240 | 4.974237 | 4.154557 | 2.508899 |
| 19 | H  | 7.609669 | 7.948339 | 6.989378 | 6.599489 | 4.825550 |
| 20 | H  | 6.725101 | 7.113636 | 6.543075 | 6.900860 | 4.801042 |
| 21 | N  | 2.793659 | 2.093824 | 2.147503 | 3.974107 | 4.305826 |
| 22 | H  | 3.645715 | 2.325154 | 2.542525 | 4.653072 | 5.092926 |
| 23 | H  | 3.288629 | 2.924375 | 2.348068 | 3.210904 | 4.015271 |
|    |    | 16       | 17       | 18       | 19       | 20       |
| 16 | C  | 0.000000 |          |          |          |          |
| 17 | C  | 1.326659 | 0.000000 |          |          |          |
| 18 | H  | 1.082923 | 2.121853 | 0.000000 |          |          |
| 19 | H  | 2.079960 | 1.081140 | 2.445116 | 0.000000 |          |
| 20 | H  | 2.126775 | 1.082633 | 3.100013 | 1.847040 | 0.000000 |
| 21 | N  | 6.784346 | 8.000433 | 6.697833 | 8.836916 | 8.321967 |
| 22 | H  | 7.478600 | 8.667336 | 7.391289 | 9.492340 | 8.973553 |
| 23 | H  | 6.696339 | 7.973406 | 6.451811 | 8.728099 | 8.417983 |
|    |    | 21       | 22       | 23       |          |          |
| 21 | N  | 0.000000 |          |          |          |          |
| 22 | H  | 1.014311 | 0.000000 |          |          |          |
| 23 | H  | 1.019439 | 1.640008 | 0.000000 |          |          |

Stoichiometry C7H12BrN3

Framework group C1[X(C7H12BrN3)]

Deg. of freedom 63

Full point group C1 NOp 1

Largest Abelian subgroup C1 NOp 1

Largest concise Abelian subgroup C1 NOp 1

Standard orientation:

-----

| Center Number | Atomic Number | Atomic Type | Coordinates (Angstroms) |           |           |
|---------------|---------------|-------------|-------------------------|-----------|-----------|
|               |               |             | X                       | Y         | Z         |
| 1             | 6             | 0           | -1.708265               | 2.061461  | -0.318272 |
| 2             | 6             | 0           | -2.752588               | 1.233116  | -0.060052 |
| 3             | 7             | 0           | -2.232670               | -0.056043 | 0.006635  |
| 4             | 6             | 0           | -0.903105               | 0.002120  | -0.209039 |
| 5             | 7             | 0           | -0.571198               | 1.276260  | -0.414361 |
| 6             | 6             | 0           | 0.820515                | 1.728827  | -0.626158 |
| 7             | 6             | 0           | 1.543978                | 2.014281  | 0.696813  |
| 8             | 1             | 0           | -1.678375               | 3.129697  | -0.447519 |
| 9             | 1             | 0           | -3.796280               | 1.448030  | 0.078981  |
| 10            | 1             | 0           | 1.334976                | 0.911612  | -1.132897 |
| 11            | 1             | 0           | 0.796086                | 2.603232  | -1.277457 |
| 12            | 1             | 0           | 1.207648                | 2.968499  | 1.116770  |
| 13            | 1             | 0           | 1.286174                | 1.216366  | 1.406198  |
| 14            | 35            | 0           | 1.877507                | -1.697681 | -0.082865 |
| 15            | 1             | 0           | -0.149719               | -0.817426 | -0.182352 |
| 16            | 6             | 0           | -2.915912               | -1.278343 | 0.250049  |
| 17            | 6             | 0           | -4.229901               | -1.396178 | 0.389953  |
| 18            | 1             | 0           | -2.236840               | -2.119764 | 0.310003  |
| 19            | 1             | 0           | -4.653977               | -2.372636 | 0.578507  |
| 20            | 1             | 0           | -4.917045               | -0.562088 | 0.324997  |
| 21            | 7             | 0           | 2.969790                | 2.092553  | 0.401456  |
| 22            | 1             | 0           | 3.480286                | 2.482104  | 1.186612  |
| 23            | 1             | 0           | 3.324552                | 1.150135  | 0.242560  |

Rotational constants (GHZ): 0.8758733 0.4616777 0.3129937

Standard basis: 6-311++G(d,p) (5D, 7F)

There are 365 symmetry adapted cartesian basis functions of A symmetry.

There are 352 symmetry adapted basis functions of A symmetry.

352 basis functions, 562 primitive gaussians, 365 cartesian basis functions

55 alpha electrons 55 beta electrons

nuclear repulsion energy 842.0869441426 Hartrees.

NAtoms= 23 NActive= 23 NUniq= 23 SFac= 1.00D+00 NAtFMM= 60 NAOKFM=F

Big=F

Integral buffers will be 131072 words long.

Raffenetti 2 integral format.

Two-electron integral symmetry is turned on.

One-electron integrals computed using PRISM.

NBasis= 352 RedAO= T EigKep= 4.32D-06 NBF= 352

NBsUse= 352 1.00D-06 EigRej= -1.00D+00 NBFU= 352

Initial guess from the checkpoint file: "/home/suqian/liuwen/qianmengshijie/nh2/nh2.chk"

B after Tr= 0.000000 0.000000 0.000000



Rot= 0.999986 0.003540 0.001484 -0.003665 Ang= 0.61 deg.  
 ExpMin= 3.50D-02 ExpMax= 4.40D+05 ExpMxC= 1.51D+04 IAcc=3 IRadAn= 5 AccDes=  
 0.00D+00  
 Harris functional with IExCor= 402 and IRadAn= 5 diagonalized for initial guess.  
 HarFok: IExCor= 402 AccDes= 0.00D+00 IRadAn= 5 IDoV= 1 UseB2=F ITyADJ=14  
 ICtDFT= 3500011 ScaDFX= 1.000000 1.000000 1.000000 1.000000  
 FoFCou: FMM=F IPFlag= 0 FMFlag= 100000 FMFlg1= 0  
 NFxFlg= 0 DoJE=T BraDBF=F KetDBF=T FulRan=T  
 wScrn= 0.000000 ICntrl= 500 IOpCl= 0 I1Cent= 200000004 NGrid=  
 0  
 NMat0= 1 NMatS0= 1 NMatT0= 0 NMatD0= 1 NMtDS0= 0  
 NMtDT0= 0

Petite list used in FoFCou.

Requested convergence on RMS density matrix=1.00D-08 within 128 cycles.

Requested convergence on MAX density matrix=1.00D-06.

Requested convergence on energy=1.00D-06.

No special actions if energy rises.

SCF Done: E(RB3LYP) = -3012.46798035 A.U. after 12 cycles

NFock= 12 Conv=0.60D-08 -V/T= 2.0017

Calling FoFJK, ICntrl= 2127 FMM=F ISym2X=0 I1Cent= 0 IOpClX= 0 NMat=1 NMatS=1

NMatT=0.

\*\*\*\*\* Axes restored to original set \*\*\*\*\*

| Center Number | Atomic Number | Forces (Hartrees/Bohr) |              |              |
|---------------|---------------|------------------------|--------------|--------------|
|               |               | X                      | Y            | Z            |
| 1             | 6             | 0.000168979            | 0.000251801  | 0.000476802  |
| 2             | 6             | -0.000063189           | 0.000023360  | -0.000065622 |
| 3             | 7             | 0.000226597            | 0.000051347  | -0.000039581 |
| 4             | 6             | 0.000358978            | -0.000028759 | -0.000213257 |
| 5             | 7             | -0.000141340           | -0.000342794 | -0.000414528 |
| 6             | 6             | -0.000144126           | 0.000002614  | 0.000613248  |
| 7             | 6             | -0.000299645           | 0.000175273  | -0.000429506 |
| 8             | 1             | -0.000022668           | 0.000022331  | 0.000034825  |
| 9             | 1             | 0.000001619            | 0.000000547  | 0.000020855  |
| 10            | 1             | 0.000041867            | 0.000140412  | 0.000252685  |
| 11            | 1             | -0.000025489           | -0.000013651 | -0.000396074 |
| 12            | 1             | 0.000191214            | 0.000243122  | 0.000181152  |
| 13            | 1             | -0.000253345           | 0.000092306  | -0.000116049 |
| 14            | 35            | 0.000308782            | -0.000174632 | -0.000293416 |
| 15            | 1             | -0.000947710           | -0.000163228 | 0.000416959  |
| 16            | 6             | 0.000041789            | 0.000087618  | -0.000043985 |
| 17            | 6             | 0.000014141            | 0.000037308  | -0.000071303 |
| 18            | 1             | -0.000085249           | -0.000123625 | 0.000025327  |

|    |   |              |              |              |
|----|---|--------------|--------------|--------------|
| 19 | 1 | -0.000014562 | -0.000007968 | 0.000027037  |
| 20 | 1 | 0.000048077  | -0.000005831 | -0.000023173 |
| 21 | 7 | 0.000578659  | -0.000026999 | -0.000575780 |
| 22 | 1 | -0.000075721 | 0.000151157  | 0.000544629  |
| 23 | 1 | 0.000092344  | -0.000391711 | 0.000088754  |

-----  
Cartesian Forces: Max 0.000947710 RMS 0.000256741

GradGradGradGradGradGradGradGradGradGradGradGradGradGradGradGradGradGradGrad

Berny optimization.

Using GEDIIS/GDIIS optimizer.

FormGI is forming the generalized inverse of G from B-inverse, IUseBI=4.

Internal Forces: Max 0.001238902 RMS 0.000225837

Search for a local minimum.

Step number 28 out of a maximum of 121

All quantities printed in internal units (Hartrees-Bohrs-Radians)

Mixed Optimization -- En-DIIS/RFO-DIIS

Swapping is turned off.

Update second derivatives using D2CorX and points 24 27 28

DE= -1.19D-04 DEPred=-1.96D-04 R= 6.07D-01

TightC=F SS= 1.41D+00 RLast= 3.84D-01 DXNew= 1.4142D-01 1.1510D+00

Trust test= 6.07D-01 RLast= 3.84D-01 DXMaxT set to 1.41D-01

ITU= 1 1 0 -1 -1 0 -1 -1 0 -1 0 0 0 1 1 -1 1 -1 1 1

ITU= 1 1 1 1 0 1 0 0

|                 |         |         |         |         |         |
|-----------------|---------|---------|---------|---------|---------|
| Eigenvalues --- | 0.00182 | 0.00234 | 0.00437 | 0.00708 | 0.01086 |
| Eigenvalues --- | 0.01416 | 0.01817 | 0.02009 | 0.02160 | 0.02303 |
| Eigenvalues --- | 0.02393 | 0.02770 | 0.03061 | 0.03070 | 0.03328 |
| Eigenvalues --- | 0.03587 | 0.04035 | 0.04456 | 0.04961 | 0.05272 |
| Eigenvalues --- | 0.05363 | 0.08962 | 0.09498 | 0.10060 | 0.12620 |
| Eigenvalues --- | 0.12743 | 0.15210 | 0.15789 | 0.15960 | 0.16000 |
| Eigenvalues --- | 0.16005 | 0.16017 | 0.16242 | 0.18025 | 0.21930 |
| Eigenvalues --- | 0.22072 | 0.23076 | 0.23535 | 0.24889 | 0.25066 |
| Eigenvalues --- | 0.27513 | 0.29793 | 0.34089 | 0.34420 | 0.34510 |
| Eigenvalues --- | 0.34939 | 0.35200 | 0.35689 | 0.35802 | 0.35858 |
| Eigenvalues --- | 0.36437 | 0.36663 | 0.37975 | 0.39750 | 0.42186 |
| Eigenvalues --- | 0.43032 | 0.46694 | 0.47696 | 0.48325 | 0.49923 |
| Eigenvalues --- | 0.54252 | 0.60211 | 0.60504 |         |         |

En-DIIS/RFO-DIIS IScMMF= 0 using points: 28 27 26

RFO step: Lambda=-1.93383240D-05.

DidBck=F Rises=F RFO-DIIS coefs: 0.94572 -0.64304 0.69732

Iteration 1 RMS(Cart)= 0.04430836 RMS(Int)= 0.00141184

Iteration 2 RMS(Cart)= 0.00241085 RMS(Int)= 0.00001562

Iteration 3 RMS(Cart)= 0.00000733 RMS(Int)= 0.00001464

Iteration 4 RMS(Cart)= 0.00000000 RMS(Int)= 0.00001464

| Variable | Old X   | -DE/DX   | Delta X<br>(Linear) | Delta X<br>(Quad) | Delta X<br>(Total) | New X   |
|----------|---------|----------|---------------------|-------------------|--------------------|---------|
| R1       | 2.56575 | 0.00011  | 0.00004             | 0.00027           | 0.00032            | 2.56606 |
| R2       | 2.61759 | -0.00023 | 0.00037             | -0.00064          | -0.00028           | 2.61731 |
| R3       | 2.03418 | -0.00002 | 0.00000             | -0.00002          | -0.00003           | 2.03415 |
| R4       | 2.62984 | -0.00001 | -0.00001            | -0.00007          | -0.00008           | 2.62976 |
| R5       | 2.03074 | 0.00000  | 0.00003             | -0.00003          | -0.00001           | 2.03074 |
| R6       | 2.54773 | -0.00025 | -0.00074            | -0.00039          | -0.00114           | 2.54659 |
| R7       | 2.68586 | 0.00000  | 0.00059             | 0.00018           | 0.00076            | 2.68663 |
| R8       | 2.51820 | -0.00030 | 0.00029             | -0.00013          | 0.00016            | 2.51836 |
| R9       | 2.10428 | -0.00069 | 0.00125             | -0.00220          | -0.00095           | 2.10333 |
| R10      | 2.79433 | -0.00001 | -0.00067            | 0.00063           | -0.00004           | 2.79429 |
| R11      | 2.90006 | 0.00033  | 0.00069             | 0.00088           | 0.00157            | 2.90163 |
| R12      | 2.06084 | 0.00024  | -0.00008            | 0.00080           | 0.00072            | 2.06155 |
| R13      | 2.06090 | -0.00021 | -0.00018            | -0.00062          | -0.00080           | 2.06010 |
| R14      | 2.07010 | -0.00035 | -0.00029            | -0.00073          | -0.00102           | 2.06908 |
| R15      | 2.07557 | 0.00020  | -0.00018            | -0.00002          | -0.00020           | 2.07536 |
| R16      | 2.75557 | 0.00062  | 0.00183             | 0.00000           | 0.00183            | 2.75740 |
| R17      | 4.18069 | 0.00023  | -0.01811            | 0.01471           | -0.00341           | 4.17728 |
| R18      | 2.50702 | -0.00004 | -0.00009            | -0.00003          | -0.00012           | 2.50690 |
| R19      | 2.04643 | -0.00015 | 0.00031             | -0.00029          | 0.00002            | 2.04645 |
| R20      | 2.04306 | 0.00000  | 0.00000             | 0.00001           | 0.00001            | 2.04307 |
| R21      | 2.04588 | -0.00003 | 0.00008             | -0.00009          | -0.00001           | 2.04587 |
| R22      | 1.91677 | -0.00052 | 0.00002             | -0.00151          | -0.00149           | 1.91528 |
| R23      | 1.92646 | -0.00030 | -0.00047            | -0.00109          | -0.00156           | 1.92490 |
| A1       | 1.87418 | 0.00000  | -0.00026            | 0.00024           | -0.00002           | 1.87416 |
| A2       | 2.27790 | -0.00002 | 0.00008             | -0.00046          | -0.00037           | 2.27753 |
| A3       | 2.13107 | 0.00002  | 0.00018             | 0.00023           | 0.00041            | 2.13148 |
| A4       | 1.86180 | -0.00006 | -0.00001            | -0.00005          | -0.00006           | 1.86174 |
| A5       | 2.27788 | 0.00003  | -0.00006            | -0.00007          | -0.00012           | 2.27776 |
| A6       | 2.14350 | 0.00003  | 0.00006             | 0.00012           | 0.00018            | 2.14368 |
| A7       | 1.89738 | -0.00012 | 0.00035             | -0.00040          | -0.00006           | 1.89732 |
| A8       | 2.24627 | 0.00008  | 0.00101             | 0.00038           | 0.00140            | 2.24766 |
| A9       | 2.13954 | 0.00004  | -0.00136            | 0.00002           | -0.00133           | 2.13820 |
| A10      | 1.88760 | 0.00023  | -0.00011            | 0.00063           | 0.00053            | 1.88812 |
| A11      | 2.25446 | 0.00016  | -0.00602            | -0.00047          | -0.00646           | 2.24800 |
| A12      | 2.13992 | -0.00040 | 0.00567             | -0.00027          | 0.00543            | 2.14535 |
| A13      | 1.90377 | -0.00004 | 0.00003             | -0.00038          | -0.00035           | 1.90342 |
| A14      | 2.22565 | 0.00050  | -0.00002            | 0.00168           | 0.00167            | 2.22732 |
| A15      | 2.15212 | -0.00046 | -0.00016            | -0.00109          | -0.00123           | 2.15089 |
| A16      | 1.95750 | -0.00006 | -0.00017            | -0.00076          | -0.00092           | 1.95659 |
| A17      | 1.85584 | 0.00006  | 0.00226             | 0.00014           | 0.00242            | 1.85826 |
| A18      | 1.88583 | -0.00002 | -0.00086            | 0.00099           | 0.00013            | 1.88596 |
| A19      | 1.89396 | -0.00008 | 0.00371             | -0.00029          | 0.00342            | 1.89738 |

|     |          |          |          |          |          |          |
|-----|----------|----------|----------|----------|----------|----------|
| A20 | 1.95655  | 0.00004  | -0.00187 | -0.00186 | -0.00373 | 1.95282  |
| A21 | 1.91123  | 0.00005  | -0.00301 | 0.00196  | -0.00106 | 1.91016  |
| A22 | 1.92599  | 0.00005  | -0.00351 | 0.00064  | -0.00288 | 1.92311  |
| A23 | 1.88704  | -0.00009 | 0.00256  | -0.00142 | 0.00113  | 1.88818  |
| A24 | 1.87164  | -0.00005 | 0.00171  | -0.00028 | 0.00143  | 1.87306  |
| A25 | 1.88930  | -0.00001 | 0.00130  | -0.00220 | -0.00090 | 1.88839  |
| A26 | 1.90827  | -0.00016 | -0.00174 | 0.00082  | -0.00093 | 1.90734  |
| A27 | 1.98158  | 0.00026  | -0.00044 | 0.00246  | 0.00203  | 1.98360  |
| A28 | 2.72354  | -0.00124 | 0.02282  | -0.00817 | 0.01465  | 2.73819  |
| A29 | 2.17800  | 0.00002  | -0.00099 | 0.00013  | -0.00086 | 2.17714  |
| A30 | 1.95653  | -0.00003 | -0.00065 | -0.00027 | -0.00092 | 1.95561  |
| A31 | 2.14866  | 0.00001  | 0.00164  | 0.00014  | 0.00178  | 2.15043  |
| A32 | 2.07958  | 0.00004  | -0.00003 | 0.00014  | 0.00011  | 2.07969  |
| A33 | 2.15781  | -0.00006 | -0.00009 | -0.00016 | -0.00025 | 2.15756  |
| A34 | 2.04579  | 0.00002  | 0.00012  | 0.00002  | 0.00013  | 2.04593  |
| A35 | 1.93472  | 0.00033  | -0.00130 | 0.00527  | 0.00395  | 1.93867  |
| A36 | 1.89887  | 0.00040  | 0.00121  | 0.00545  | 0.00665  | 1.90552  |
| A37 | 1.87606  | -0.00019 | -0.00346 | 0.00344  | -0.00004 | 1.87602  |
| D1  | 0.00633  | -0.00002 | 0.00044  | -0.00201 | -0.00156 | 0.00477  |
| D2  | -3.13601 | -0.00003 | -0.00137 | 0.00013  | -0.00124 | -3.13724 |
| D3  | 3.13919  | 0.00000  | 0.00128  | -0.00161 | -0.00033 | 3.13886  |
| D4  | -0.00315 | -0.00001 | -0.00053 | 0.00053  | 0.00000  | -0.00315 |
| D5  | -0.00964 | 0.00005  | 0.00012  | 0.00390  | 0.00400  | -0.00564 |
| D6  | -3.09062 | 0.00003  | 0.00240  | 0.00010  | 0.00248  | -3.08814 |
| D7  | 3.13979  | 0.00003  | -0.00064 | 0.00354  | 0.00290  | -3.14050 |
| D8  | 0.05881  | 0.00001  | 0.00164  | -0.00026 | 0.00137  | 0.06018  |
| D9  | -0.00097 | -0.00002 | -0.00084 | -0.00051 | -0.00136 | -0.00232 |
| D10 | -3.13841 | -0.00007 | -0.00294 | -0.00113 | -0.00408 | 3.14069  |
| D11 | 3.14130  | -0.00001 | 0.00079  | -0.00244 | -0.00165 | 3.13964  |
| D12 | 0.00385  | -0.00006 | -0.00130 | -0.00307 | -0.00438 | -0.00053 |
| D13 | -0.00502 | 0.00005  | 0.00092  | 0.00293  | 0.00386  | -0.00116 |
| D14 | 3.08385  | -0.00016 | -0.00623 | 0.00049  | -0.00581 | 3.07804  |
| D15 | 3.13273  | 0.00009  | 0.00285  | 0.00351  | 0.00638  | 3.13912  |
| D16 | -0.06158 | -0.00011 | -0.00430 | 0.00107  | -0.00328 | -0.06487 |
| D17 | 0.06746  | -0.00004 | 0.01243  | -0.00965 | 0.00278  | 0.07024  |
| D18 | -3.07451 | -0.00003 | 0.01344  | -0.00951 | 0.00393  | -3.07058 |
| D19 | -3.06947 | -0.00009 | 0.01008  | -0.01036 | -0.00029 | -3.06976 |
| D20 | 0.07175  | -0.00009 | 0.01109  | -0.01022 | 0.00086  | 0.07261  |
| D21 | 0.00903  | -0.00006 | -0.00064 | -0.00421 | -0.00485 | 0.00418  |
| D22 | 3.09310  | 0.00000  | -0.00280 | -0.00050 | -0.00329 | 3.08981  |
| D23 | -3.08404 | 0.00011  | 0.00656  | -0.00195 | 0.00455  | -3.07950 |
| D24 | 0.00003  | 0.00017  | 0.00441  | 0.00176  | 0.00611  | 0.00614  |
| D25 | -2.85682 | 0.00032  | 0.15341  | 0.01987  | 0.17328  | -2.68355 |
| D26 | 0.22529  | 0.00011  | 0.14500  | 0.01713  | 0.16213  | 0.38742  |

|     |          |          |          |          |          |          |
|-----|----------|----------|----------|----------|----------|----------|
| D27 | 1.55997  | 0.00037  | 0.02843  | 0.02092  | 0.04936  | 1.60933  |
| D28 | -2.65560 | 0.00028  | 0.03428  | 0.02023  | 0.05452  | -2.60109 |
| D29 | -0.60520 | 0.00037  | 0.03151  | 0.02309  | 0.05461  | -0.55059 |
| D30 | -1.51307 | 0.00033  | 0.03100  | 0.01659  | 0.04759  | -1.46548 |
| D31 | 0.55455  | 0.00024  | 0.03685  | 0.01590  | 0.05275  | 0.60729  |
| D32 | 2.60495  | 0.00032  | 0.03408  | 0.01876  | 0.05284  | 2.65779  |
| D33 | -1.32839 | 0.00000  | 0.01062  | 0.00993  | 0.02054  | -1.30785 |
| D34 | 0.73487  | -0.00004 | 0.01169  | 0.00679  | 0.01848  | 0.75335  |
| D35 | 2.87782  | 0.00019  | 0.01367  | 0.00876  | 0.02242  | 2.90024  |
| D36 | 2.90986  | 0.00002  | 0.00555  | 0.01039  | 0.01594  | 2.92580  |
| D37 | -1.31007 | -0.00003 | 0.00662  | 0.00725  | 0.01389  | -1.29618 |
| D38 | 0.83288  | 0.00021  | 0.00861  | 0.00921  | 0.01782  | 0.85071  |
| D39 | 0.79683  | -0.00003 | 0.00803  | 0.00931  | 0.01734  | 0.81416  |
| D40 | 2.86009  | -0.00007 | 0.00911  | 0.00617  | 0.01528  | 2.87536  |
| D41 | -1.28015 | 0.00016  | 0.01109  | 0.00813  | 0.01922  | -1.26093 |
| D42 | 2.91909  | -0.00011 | 0.00941  | -0.04329 | -0.03389 | 2.88520  |
| D43 | -1.30471 | 0.00010  | 0.00518  | -0.03266 | -0.02748 | -1.33219 |
| D44 | 0.83073  | -0.00005 | 0.01360  | -0.04435 | -0.03076 | 0.79998  |
| D45 | 2.89011  | 0.00016  | 0.00937  | -0.03371 | -0.02434 | 2.86577  |
| D46 | -1.28085 | -0.00010 | 0.01348  | -0.04377 | -0.03029 | -1.31114 |
| D47 | 0.77853  | 0.00011  | 0.00924  | -0.03313 | -0.02388 | 0.75466  |
| D48 | -3.13590 | -0.00002 | 0.00093  | -0.00034 | 0.00058  | -3.13532 |
| D49 | 0.00705  | -0.00002 | 0.00133  | -0.00116 | 0.00017  | 0.00722  |
| D50 | 0.00611  | -0.00003 | -0.00019 | -0.00050 | -0.00069 | 0.00541  |
| D51 | -3.13413 | -0.00003 | 0.00021  | -0.00131 | -0.00111 | -3.13523 |

| Item                 | Value    | Threshold | Converged? |
|----------------------|----------|-----------|------------|
| Maximum Force        | 0.001239 | 0.000450  | NO         |
| RMS Force            | 0.000226 | 0.000300  | YES        |
| Maximum Displacement | 0.293711 | 0.001800  | NO         |
| RMS Displacement     | 0.044654 | 0.001200  | NO         |

Predicted change in Energy=-3.955261D-05

GradGradGradGradGradGradGradGradGradGradGradGradGradGradGradGradGradGradGrad

Input orientation:

| Center Number | Atomic Number | Atomic Type | Coordinates (Angstroms) |           |          |
|---------------|---------------|-------------|-------------------------|-----------|----------|
|               |               |             | X                       | Y         | Z        |
| 1             | 6             | 0           | -1.815341               | -1.997504 | 0.266193 |
| 2             | 6             | 0           | -2.820762               | -1.112636 | 0.042504 |
| 3             | 7             | 0           | -2.240946               | 0.152156  | 0.016344 |
| 4             | 6             | 0           | -0.915500               | 0.024401  | 0.223444 |
| 5             | 7             | 0           | -0.641967               | -1.270476 | 0.379823 |
| 6             | 6             | 0           | 0.729096                | -1.792709 | 0.564039 |

|    |    |   |           |           |           |
|----|----|---|-----------|-----------|-----------|
| 7  | 6  | 0 | 1.453655  | -1.998434 | -0.774011 |
| 8  | 1  | 0 | -1.835658 | -3.069712 | 0.359227  |
| 9  | 1  | 0 | -3.874051 | -1.273578 | -0.097083 |
| 10 | 1  | 0 | 1.270244  | -1.043359 | 1.143483  |
| 11 | 1  | 0 | 0.664207  | -2.717591 | 1.137473  |
| 12 | 1  | 0 | 1.068301  | -2.890150 | -1.279152 |
| 13 | 1  | 0 | 1.249557  | -1.127892 | -1.411682 |
| 14 | 35 | 0 | 1.900765  | 1.655507  | -0.019864 |
| 15 | 1  | 0 | -0.129033 | 0.811946  | 0.214103  |
| 16 | 6  | 0 | -2.864639 | 1.413668  | -0.185721 |
| 17 | 6  | 0 | -4.171840 | 1.598542  | -0.315711 |
| 18 | 1  | 0 | -2.144656 | 2.221716  | -0.223512 |
| 19 | 1  | 0 | -4.549270 | 2.599489  | -0.472327 |
| 20 | 1  | 0 | -4.897797 | 0.796501  | -0.273340 |
| 21 | 7  | 0 | 2.869673  | -2.187148 | -0.476677 |
| 22 | 1  | 0 | 3.363579  | -2.562381 | -1.278231 |
| 23 | 1  | 0 | 3.287908  | -1.285438 | -0.254040 |

-----  
Distance matrix (angstroms):

|    |    | 1        | 2        | 3        | 4        | 5        |
|----|----|----------|----------|----------|----------|----------|
| 1  | C  | 0.000000 |          |          |          |          |
| 2  | C  | 1.357903 | 0.000000 |          |          |          |
| 3  | N  | 2.205584 | 1.391607 | 0.000000 |          |          |
| 4  | C  | 2.213513 | 2.226121 | 1.347597 | 0.000000 |          |
| 5  | N  | 1.385023 | 2.210394 | 2.170882 | 1.332659 | 0.000000 |
| 6  | C  | 2.569983 | 3.651847 | 3.592160 | 2.474387 | 1.478674 |
| 7  | C  | 3.430505 | 4.440944 | 4.347387 | 3.271036 | 2.500578 |
| 8  | H  | 1.076428 | 2.213795 | 3.265311 | 3.230891 | 2.159299 |
| 9  | H  | 2.212313 | 1.074619 | 2.170856 | 3.246615 | 3.267081 |
| 10 | H  | 3.346770 | 4.237132 | 3.876616 | 2.600781 | 2.071548 |
| 11 | H  | 2.725034 | 3.989968 | 4.234653 | 3.293849 | 2.091474 |
| 12 | H  | 3.391209 | 4.475617 | 4.678146 | 3.832476 | 2.881070 |
| 13 | H  | 3.600707 | 4.322313 | 3.982636 | 2.947693 | 2.609154 |
| 14 | Br | 5.218789 | 5.473511 | 4.406262 | 3.263596 | 3.897000 |
| 15 | H  | 3.277096 | 3.313437 | 2.221397 | 1.113034 | 2.151057 |
| 16 | C  | 3.597409 | 2.536972 | 1.421702 | 2.428296 | 3.530544 |
| 17 | C  | 4.338577 | 3.050282 | 2.435292 | 3.656823 | 4.601634 |
| 18 | H  | 4.260291 | 3.412592 | 2.085637 | 2.557105 | 3.849349 |
| 19 | H  | 5.399271 | 4.127064 | 3.399500 | 4.507710 | 5.565051 |
| 20 | H  | 4.195127 | 2.838773 | 2.749174 | 4.086761 | 4.776097 |
| 21 | N  | 4.747334 | 5.814222 | 5.642148 | 4.439444 | 3.729008 |
| 22 | H  | 5.433741 | 6.487848 | 6.360450 | 5.220822 | 4.523556 |
| 23 | H  | 5.178884 | 6.118305 | 5.719091 | 4.428579 | 3.980694 |
|    |    | 6        | 7        | 8        | 9        | 10       |

|    |    |          |          |          |          |          |
|----|----|----------|----------|----------|----------|----------|
| 6  | C  | 0.000000 |          |          |          |          |
| 7  | C  | 1.535476 | 0.000000 |          |          |          |
| 8  | H  | 2.872394 | 3.640254 | 0.000000 |          |          |
| 9  | H  | 4.679268 | 5.419235 | 2.754879 | 0.000000 |          |
| 10 | H  | 1.090927 | 2.150021 | 3.790487 | 5.296771 | 0.000000 |
| 11 | H  | 1.090158 | 2.189563 | 2.641776 | 4.919866 | 1.780553 |
| 12 | H  | 2.171818 | 1.094909 | 3.339088 | 5.332676 | 3.052963 |
| 13 | H  | 2.148565 | 1.098236 | 4.052818 | 5.291574 | 2.556647 |
| 14 | Br | 3.688352 | 3.757649 | 6.035914 | 6.475647 | 3.005796 |
| 15 | H  | 2.764610 | 3.373353 | 4.242746 | 4.297838 | 2.502775 |
| 16 | C  | 4.874210 | 5.534997 | 4.632112 | 2.871944 | 4.990093 |
| 17 | C  | 6.024427 | 6.692867 | 5.263637 | 2.895782 | 6.222955 |
| 18 | H  | 4.999429 | 5.573199 | 5.332379 | 3.901778 | 4.918428 |
| 19 | H  | 6.944537 | 7.567497 | 6.339953 | 3.949351 | 7.053221 |
| 20 | H  | 6.250371 | 6.957246 | 4.972367 | 2.316106 | 6.590690 |
| 21 | N  | 2.412622 | 1.459153 | 4.859815 | 6.815902 | 2.547812 |
| 22 | H  | 3.305579 | 2.054284 | 5.474552 | 7.445765 | 3.543187 |
| 23 | H  | 2.733879 | 2.035489 | 5.459914 | 7.163689 | 2.466301 |
|    |    | 11       | 12       | 13       | 14       | 15       |
| 11 | H  | 0.000000 |          |          |          |          |
| 12 | H  | 2.456247 | 0.000000 |          |          |          |
| 13 | H  | 3.060713 | 1.776505 | 0.000000 |          |          |
| 14 | Br | 4.689615 | 4.789760 | 3.179393 | 0.000000 |          |
| 15 | H  | 3.733560 | 4.167606 | 2.882128 | 2.210524 | 0.000000 |
| 16 | C  | 5.592038 | 5.931818 | 4.988900 | 4.774418 | 2.829393 |
| 17 | C  | 6.642898 | 6.966754 | 6.166534 | 6.080074 | 4.152556 |
| 18 | H  | 5.842836 | 6.129326 | 4.914499 | 4.089926 | 2.498338 |
| 19 | H  | 7.618604 | 7.895835 | 6.957165 | 6.534430 | 4.817155 |
| 20 | H  | 6.728678 | 7.085011 | 6.541336 | 6.857302 | 4.793636 |
| 21 | N  | 2.784050 | 2.093591 | 2.149659 | 3.989168 | 4.296974 |
| 22 | H  | 3.625786 | 2.318563 | 2.558252 | 4.638307 | 5.080500 |
| 23 | H  | 3.297147 | 2.924486 | 2.349432 | 3.260086 | 4.036541 |
|    |    | 16       | 17       | 18       | 19       | 20       |
| 16 | C  | 0.000000 |          |          |          |          |
| 17 | C  | 1.326594 | 0.000000 |          |          |          |
| 18 | H  | 1.082933 | 2.122810 | 0.000000 |          |          |
| 19 | H  | 2.079974 | 1.081145 | 2.446791 | 0.000000 |          |
| 20 | H  | 2.126571 | 1.082626 | 3.100565 | 1.847115 | 0.000000 |
| 21 | N  | 6.777380 | 7.996266 | 6.681742 | 8.829079 | 8.323287 |
| 22 | H  | 7.469487 | 8.661539 | 7.371612 | 9.481959 | 8.974532 |
| 23 | H  | 6.718905 | 7.998062 | 6.466360 | 8.749952 | 8.446337 |
|    |    | 21       | 22       | 23       |          |          |
| 21 | N  | 0.000000 |          |          |          |          |
| 22 | H  | 1.013524 | 0.000000 |          |          |          |

23 H 1.018612 1.638682 0.000000  
 Stoichiometry C7H12BrN3  
 Framework group C1[X(C7H12BrN3)]  
 Deg. of freedom 63  
 Full point group C1 NOp 1  
 Largest Abelian subgroup C1 NOp 1  
 Largest concise Abelian subgroup C1 NOp 1

Standard orientation:

| Center Number | Atomic Number | Atomic Type | Coordinates (Angstroms) |           |           |
|---------------|---------------|-------------|-------------------------|-----------|-----------|
|               |               |             | X                       | Y         | Z         |
| 1             | 6             | 0           | -1.722149               | 2.083160  | -0.262506 |
| 2             | 6             | 0           | -2.754399               | 1.236322  | -0.015068 |
| 3             | 7             | 0           | -2.222242               | -0.049475 | -0.004868 |
| 4             | 6             | 0           | -0.898447               | 0.028693  | -0.244602 |
| 5             | 7             | 0           | -0.580207               | 1.312680  | -0.406096 |
| 6             | 6             | 0           | 0.804608                | 1.783276  | -0.623590 |
| 7             | 6             | 0           | 1.569274                | 1.958629  | 0.696343  |
| 8             | 1             | 0           | -1.704295               | 3.155572  | -0.353668 |
| 9             | 1             | 0           | -3.797093               | 1.436537  | 0.150788  |
| 10            | 1             | 0           | 1.302609                | 1.015333  | -1.217206 |
| 11            | 1             | 0           | 0.760499                | 2.711196  | -1.194084 |
| 12            | 1             | 0           | 1.230442                | 2.863129  | 1.211996  |
| 13            | 1             | 0           | 1.348307                | 1.095007  | 1.337790  |
| 14            | 35            | 0           | 1.859432                | -1.707910 | -0.073219 |
| 15            | 1             | 0           | -0.142260               | -0.787949 | -0.255743 |
| 16            | 6             | 0           | -2.887897               | -1.287027 | 0.211019  |
| 17            | 6             | 0           | -4.197528               | -1.422792 | 0.373142  |
| 18            | 1             | 0           | -2.198197               | -2.121712 | 0.229941  |
| 19            | 1             | 0           | -4.608464               | -2.409144 | 0.537816  |
| 20            | 1             | 0           | -4.893536               | -0.593873 | 0.349782  |
| 21            | 7             | 0           | 2.983619                | 2.094497  | 0.364235  |
| 22            | 1             | 0           | 3.510995                | 2.449100  | 1.153767  |
| 23            | 1             | 0           | 3.361905                | 1.178155  | 0.130172  |

Rotational constants (GHZ): 0.8689218 0.4659695 0.3134919

Standard basis: 6-311++G(d,p) (5D, 7F)

There are 365 symmetry adapted cartesian basis functions of A symmetry.

There are 352 symmetry adapted basis functions of A symmetry.

352 basis functions, 562 primitive gaussians, 365 cartesian basis functions

55 alpha electrons 55 beta electrons

nuclear repulsion energy 841.9842684942 Hartrees.

NAtoms= 23 NActive= 23 NUniq= 23 SFac= 1.00D+00 NAtFMM= 60 NAOKFM=F



Big=F

Integral buffers will be 131072 words long.

Raffenetti 2 integral format.

Two-electron integral symmetry is turned on.

One-electron integrals computed using PRISM.

NBasis= 352 RedAO= T EigKep= 4.37D-06 NBF= 352

NBsUse= 352 1.00D-06 EigRej= -1.00D+00 NBFU= 352

Initial guess from the checkpoint file: "/home/suqian/liuwen/qianmengshijie/nh2/nh2.chk"

B after Tr= 0.000000 0.000000 0.000000

Rot= 0.999990 -0.004152 -0.001205 0.000577 Ang= -0.50 deg.

ExpMin= 3.50D-02 ExpMax= 4.40D+05 ExpMxC= 1.51D+04 IAcc=3 IRadAn= 5 AccDes= 0.00D+00

Harris functional with IExCor= 402 and IRadAn= 5 diagonalized for initial guess.

HarFok: IExCor= 402 AccDes= 0.00D+00 IRadAn= 5 IDoV= 1 UseB2=F ITyADJ=14

ICtDFT= 3500011 ScaDFX= 1.000000 1.000000 1.000000 1.000000

FoFCou: FMM=F IPFlag= 0 FMFlag= 100000 FMFlg1= 0

NFxFlg= 0 DoJE=T BraDBF=F KetDBF=T FulRan=T

wScrn= 0.000000 ICntrl= 500 IOpCl= 0 I1Cent= 200000004 NGrid=

0

NMat0= 1 NMatS0= 1 NMatT0= 0 NMatD0= 1 NMtDS0= 0

NMtDT0= 0

Petite list used in FoFCou.

Requested convergence on RMS density matrix=1.00D-08 within 128 cycles.

Requested convergence on MAX density matrix=1.00D-06.

Requested convergence on energy=1.00D-06.

No special actions if energy rises.

SCF Done: E(RB3LYP) = -3012.46799466 A.U. after 12 cycles

NFock= 12 Conv=0.48D-08 -V/T= 2.0017

Calling FoFJK, ICntrl= 2127 FMM=F ISym2X=0 I1Cent= 0 IOpClX= 0 NMat=1 NMatS=1 NMatT=0.

\*\*\*\*\* Axes restored to original set \*\*\*\*\*

```
-----
```

| Center | Atomic | Forces (Hartrees/Bohr) |              |              |
|--------|--------|------------------------|--------------|--------------|
| Number | Number | X                      | Y            | Z            |
| 1      | 6      | 0.000026871            | 0.000130581  | 0.000150932  |
| 2      | 6      | -0.000026615           | -0.000022199 | -0.000106479 |
| 3      | 7      | -0.000005190           | 0.000007588  | 0.000038037  |
| 4      | 6      | 0.000239344            | 0.000082766  | -0.000058534 |
| 5      | 7      | -0.000050932           | 0.000034040  | 0.000070328  |
| 6      | 6      | 0.000387198            | 0.000595698  | 0.000151253  |
| 7      | 6      | 0.000035709            | 0.000277097  | -0.000754035 |
| 8      | 1      | 0.000020506            | 0.000004939  | -0.000026615 |
| 9      | 1      | 0.000002946            | -0.000023174 | -0.000000942 |

```
-----
```

|    |    |              |              |              |
|----|----|--------------|--------------|--------------|
| 10 | 1  | -0.000066807 | -0.000512406 | -0.000183117 |
| 11 | 1  | -0.000036288 | 0.000019879  | -0.000011923 |
| 12 | 1  | 0.000108749  | -0.000283415 | 0.000347113  |
| 13 | 1  | 0.000339045  | 0.000090194  | 0.000486678  |
| 14 | 35 | 0.000050514  | -0.000331782 | 0.000171210  |
| 15 | 1  | -0.000393977 | 0.000059529  | -0.000146939 |
| 16 | 6  | 0.000055378  | -0.000127052 | 0.000086814  |
| 17 | 6  | 0.000020076  | 0.000079317  | -0.000053882 |
| 18 | 1  | -0.000111232 | -0.000049040 | -0.000022400 |
| 19 | 1  | -0.000011842 | -0.000010279 | 0.000008874  |
| 20 | 1  | 0.000018535  | -0.000005747 | -0.000016433 |
| 21 | 7  | -0.000104990 | -0.000333929 | 0.000251751  |
| 22 | 1  | -0.000145817 | 0.000115866  | -0.000015998 |
| 23 | 1  | -0.000351183 | 0.000201529  | -0.000365695 |

-----  
Cartesian Forces: Max 0.000754035 RMS 0.000211114

GradGradGradGradGradGradGradGradGradGradGradGradGradGradGradGradGradGradGradGrad  
Berny optimization.

Using GEDIIS/GDIIS optimizer.

FormGI is forming the generalized inverse of G from B-inverse, IUseBI=4.

Internal Forces: Max 0.001174129 RMS 0.000219973

Search for a local minimum.

Step number 29 out of a maximum of 121

All quantities printed in internal units (Hartrees-Bohrs-Radians)

Mixed Optimization -- En-DIIS/RFO-DIIS

Swapping is turned off.

Update second derivatives using D2CorX and points 20 24 23 26 27  
28 29

DE= -1.43D-05 DEPred=-3.96D-05 R= 3.62D-01

Trust test= 3.62D-01 RLast= 2.85D-01 DXMaxT set to 1.41D-01

ITU= 0 1 1 0 -1 -1 0 -1 -1 0 -1 0 0 1 1 -1 1 -1 1

ITU= 1 1 1 1 1 0 1 0 0

|                 |         |         |         |         |         |
|-----------------|---------|---------|---------|---------|---------|
| Eigenvalues --- | 0.00178 | 0.00224 | 0.00380 | 0.00720 | 0.00973 |
| Eigenvalues --- | 0.01413 | 0.01813 | 0.02020 | 0.02161 | 0.02305 |
| Eigenvalues --- | 0.02393 | 0.02743 | 0.03060 | 0.03070 | 0.03291 |
| Eigenvalues --- | 0.04043 | 0.04193 | 0.04468 | 0.05070 | 0.05271 |
| Eigenvalues --- | 0.05722 | 0.08977 | 0.09442 | 0.09814 | 0.12500 |
| Eigenvalues --- | 0.12983 | 0.15523 | 0.15764 | 0.15974 | 0.16000 |
| Eigenvalues --- | 0.16006 | 0.16018 | 0.16454 | 0.18217 | 0.22029 |
| Eigenvalues --- | 0.22636 | 0.23104 | 0.23539 | 0.24920 | 0.25116 |
| Eigenvalues --- | 0.27042 | 0.29806 | 0.34134 | 0.34465 | 0.34711 |
| Eigenvalues --- | 0.35069 | 0.35431 | 0.35690 | 0.35847 | 0.35859 |
| Eigenvalues --- | 0.36436 | 0.36664 | 0.37839 | 0.40678 | 0.42214 |

|                                   |                 |           |            |          |          |         |
|-----------------------------------|-----------------|-----------|------------|----------|----------|---------|
| Eigenvalues ---                   | 0.43032         | 0.46680   | 0.47712    | 0.48449  | 0.49933  |         |
| Eigenvalues ---                   | 0.54246         | 0.60056   | 0.60420    |          |          |         |
| En-DIIS/RFO-DIIS IScMMF=          | 0 using points: |           |            | 29       | 28       | 27 26   |
| RFO step: Lambda=-1.41604123D-05. |                 |           |            |          |          |         |
| DidBck=F Rises=F RFO-DIIS coefs:  | 0.90908         | 0.45424   | -0.45056   | 0.08724  |          |         |
| Iteration 1 RMS(Cart)=            | 0.01908767      | RMS(Int)= | 0.00071743 |          |          |         |
| Iteration 2 RMS(Cart)=            | 0.00082699      | RMS(Int)= | 0.00000608 |          |          |         |
| Iteration 3 RMS(Cart)=            | 0.00000261      | RMS(Int)= | 0.00000587 |          |          |         |
| Iteration 4 RMS(Cart)=            | 0.00000000      | RMS(Int)= | 0.00000587 |          |          |         |
| Variable                          | Old X           | -DE/DX    | Delta X    | Delta X  | Delta X  | New X   |
|                                   |                 |           | (Linear)   | (Quad)   | (Total)  |         |
| R1                                | 2.56606         | 0.00001   | 0.00006    | -0.00013 | -0.00007 | 2.56599 |
| R2                                | 2.61731         | -0.00010  | -0.00023   | -0.00022 | -0.00045 | 2.61687 |
| R3                                | 2.03415         | -0.00001  | -0.00001   | -0.00002 | -0.00003 | 2.03412 |
| R4                                | 2.62976         | 0.00004   | -0.00015   | -0.00019 | -0.00034 | 2.62941 |
| R5                                | 2.03074         | 0.00000   | -0.00004   | 0.00000  | -0.00004 | 2.03070 |
| R6                                | 2.54659         | 0.00003   | 0.00041    | 0.00000  | 0.00041  | 2.54700 |
| R7                                | 2.68663         | -0.00008  | -0.00017   | -0.00004 | -0.00022 | 2.68641 |
| R8                                | 2.51836         | -0.00028  | -0.00016   | 0.00012  | -0.00004 | 2.51832 |
| R9                                | 2.10333         | -0.00044  | -0.00126   | -0.00204 | -0.00330 | 2.10003 |
| R10                               | 2.79429         | 0.00008   | 0.00029    | 0.00049  | 0.00079  | 2.79508 |
| R11                               | 2.90163         | -0.00003  | -0.00008   | 0.00001  | -0.00007 | 2.90155 |
| R12                               | 2.06155         | -0.00048  | 0.00001    | -0.00061 | -0.00061 | 2.06095 |
| R13                               | 2.06010         | -0.00002  | 0.00008    | -0.00009 | -0.00001 | 2.06009 |
| R14                               | 2.06908         | 0.00003   | -0.00029   | 0.00023  | -0.00006 | 2.06902 |
| R15                               | 2.07536         | -0.00028  | 0.00061    | -0.00059 | 0.00002  | 2.07539 |
| R16                               | 2.75740         | -0.00061  | -0.00081   | -0.00074 | -0.00155 | 2.75585 |
| R17                               | 4.17728         | -0.00010  | 0.01666    | 0.00710  | 0.02376  | 4.20104 |
| R18                               | 2.50690         | -0.00001  | 0.00004    | -0.00006 | -0.00002 | 2.50688 |
| R19                               | 2.04645         | -0.00011  | -0.00008   | -0.00020 | -0.00028 | 2.04616 |
| R20                               | 2.04307         | 0.00000   | 0.00001    | -0.00002 | -0.00001 | 2.04306 |
| R21                               | 2.04587         | -0.00001  | -0.00004   | -0.00004 | -0.00007 | 2.04579 |
| R22                               | 1.91528         | -0.00010  | -0.00012   | -0.00014 | -0.00027 | 1.91502 |
| R23                               | 1.92490         | -0.00005  | 0.00055    | -0.00021 | 0.00034  | 1.92524 |
| A1                                | 1.87416         | 0.00001   | 0.00019    | 0.00047  | 0.00067  | 1.87483 |
| A2                                | 2.27753         | 0.00001   | -0.00002   | -0.00020 | -0.00022 | 2.27730 |
| A3                                | 2.13148         | -0.00002  | -0.00018   | -0.00026 | -0.00045 | 2.13103 |
| A4                                | 1.86174         | -0.00004  | 0.00004    | -0.00027 | -0.00023 | 1.86151 |
| A5                                | 2.27776         | 0.00000   | 0.00007    | 0.00004  | 0.00011  | 2.27787 |
| A6                                | 2.14368         | 0.00004   | -0.00012   | 0.00024  | 0.00012  | 2.14380 |
| A7                                | 1.89732         | -0.00009  | -0.00028   | 0.00010  | -0.00018 | 1.89713 |
| A8                                | 2.24766         | -0.00002  | -0.00031   | -0.00017 | -0.00048 | 2.24718 |
| A9                                | 2.13820         | 0.00011   | 0.00059    | 0.00007  | 0.00066  | 2.13887 |
| A10                               | 1.88812         | 0.00008   | 0.00023    | 0.00009  | 0.00032  | 1.88845 |

|     |          |          |          |          |          |          |
|-----|----------|----------|----------|----------|----------|----------|
| A11 | 2.24800  | 0.00064  | 0.00105  | -0.00108 | -0.00003 | 2.24796  |
| A12 | 2.14535  | -0.00072 | -0.00101 | 0.00115  | 0.00013  | 2.14548  |
| A13 | 1.90342  | 0.00003  | -0.00018 | -0.00039 | -0.00057 | 1.90285  |
| A14 | 2.22732  | 0.00020  | -0.00006 | -0.00137 | -0.00145 | 2.22587  |
| A15 | 2.15089  | -0.00024 | 0.00053  | 0.00173  | 0.00224  | 2.15312  |
| A16 | 1.95659  | -0.00044 | 0.00063  | -0.00046 | 0.00017  | 1.95676  |
| A17 | 1.85826  | 0.00025  | -0.00151 | 0.00247  | 0.00096  | 1.85922  |
| A18 | 1.88596  | 0.00013  | 0.00022  | -0.00157 | -0.00135 | 1.88461  |
| A19 | 1.89738  | 0.00008  | -0.00270 | 0.00018  | -0.00253 | 1.89486  |
| A20 | 1.95282  | 0.00009  | 0.00155  | -0.00086 | 0.00068  | 1.95350  |
| A21 | 1.91016  | -0.00010 | 0.00174  | 0.00044  | 0.00217  | 1.91234  |
| A22 | 1.92311  | -0.00024 | 0.00198  | -0.00055 | 0.00143  | 1.92454  |
| A23 | 1.88818  | -0.00007 | -0.00009 | -0.00071 | -0.00081 | 1.88736  |
| A24 | 1.87306  | 0.00026  | -0.00112 | -0.00051 | -0.00163 | 1.87143  |
| A25 | 1.88839  | 0.00034  | -0.00241 | 0.00374  | 0.00133  | 1.88972  |
| A26 | 1.90734  | -0.00003 | -0.00053 | 0.00014  | -0.00039 | 1.90695  |
| A27 | 1.98360  | -0.00028 | 0.00229  | -0.00217 | 0.00012  | 1.98372  |
| A28 | 2.73819  | -0.00117 | -0.01780 | -0.00542 | -0.02322 | 2.71498  |
| A29 | 2.17714  | 0.00007  | 0.00053  | 0.00008  | 0.00062  | 2.17776  |
| A30 | 1.95561  | 0.00002  | 0.00018  | 0.00013  | 0.00031  | 1.95592  |
| A31 | 2.15043  | -0.00009 | -0.00071 | -0.00021 | -0.00093 | 2.14951  |
| A32 | 2.07969  | 0.00002  | -0.00008 | 0.00016  | 0.00008  | 2.07978  |
| A33 | 2.15756  | -0.00003 | 0.00019  | -0.00023 | -0.00004 | 2.15752  |
| A34 | 2.04593  | 0.00000  | -0.00011 | 0.00007  | -0.00004 | 2.04589  |
| A35 | 1.93867  | -0.00016 | 0.00082  | -0.00143 | -0.00062 | 1.93805  |
| A36 | 1.90552  | -0.00077 | -0.00122 | -0.00296 | -0.00419 | 1.90132  |
| A37 | 1.87602  | 0.00019  | 0.00204  | -0.00056 | 0.00147  | 1.87749  |
| D1  | 0.00477  | -0.00006 | 0.00041  | -0.00093 | -0.00052 | 0.00425  |
| D2  | -3.13724 | -0.00006 | 0.00058  | -0.00031 | 0.00027  | -3.13697 |
| D3  | 3.13886  | 0.00005  | -0.00057 | 0.00039  | -0.00019 | 3.13867  |
| D4  | -0.00315 | 0.00005  | -0.00041 | 0.00101  | 0.00060  | -0.00255 |
| D5  | -0.00564 | 0.00009  | 0.00011  | 0.00074  | 0.00085  | -0.00479 |
| D6  | -3.08814 | 0.00018  | -0.00462 | 0.00116  | -0.00347 | -3.09161 |
| D7  | -3.14050 | -0.00001 | 0.00100  | -0.00044 | 0.00056  | -3.13994 |
| D8  | 0.06018  | 0.00008  | -0.00374 | -0.00002 | -0.00377 | 0.05642  |
| D9  | -0.00232 | 0.00001  | -0.00079 | 0.00081  | 0.00002  | -0.00231 |
| D10 | 3.14069  | 0.00000  | 0.00093  | 0.00016  | 0.00108  | -3.14141 |
| D11 | 3.13964  | 0.00001  | -0.00094 | 0.00024  | -0.00070 | 3.13895  |
| D12 | -0.00053 | 0.00000  | 0.00078  | -0.00041 | 0.00037  | -0.00016 |
| D13 | -0.00116 | 0.00004  | 0.00086  | -0.00035 | 0.00052  | -0.00065 |
| D14 | 3.07804  | 0.00001  | 0.00607  | 0.00265  | 0.00870  | 3.08674  |
| D15 | 3.13912  | 0.00005  | -0.00073 | 0.00025  | -0.00047 | 3.13864  |
| D16 | -0.06487 | 0.00002  | 0.00448  | 0.00325  | 0.00771  | -0.05716 |
| D17 | 0.07024  | -0.00004 | -0.00874 | -0.00528 | -0.01401 | 0.05623  |

|     |          |          |          |          |          |          |
|-----|----------|----------|----------|----------|----------|----------|
| D18 | -3.07058 | -0.00001 | -0.00925 | -0.00489 | -0.01413 | -3.08471 |
| D19 | -3.06976 | -0.00006 | -0.00680 | -0.00601 | -0.01281 | -3.08257 |
| D20 | 0.07261  | -0.00002 | -0.00732 | -0.00561 | -0.01293 | 0.05968  |
| D21 | 0.00418  | -0.00008 | -0.00061 | -0.00024 | -0.00085 | 0.00333  |
| D22 | 3.08981  | -0.00015 | 0.00386  | -0.00075 | 0.00311  | 3.09293  |
| D23 | -3.07950 | -0.00011 | -0.00548 | -0.00293 | -0.00843 | -3.08793 |
| D24 | 0.00614  | -0.00018 | -0.00101 | -0.00344 | -0.00447 | 0.00167  |
| D25 | -2.68355 | -0.00020 | -0.08912 | 0.00117  | -0.08794 | -2.77149 |
| D26 | 0.38742  | -0.00019 | -0.08320 | 0.00452  | -0.07868 | 0.30874  |
| D27 | 1.60933  | -0.00011 | -0.01241 | 0.00863  | -0.00378 | 1.60555  |
| D28 | -2.60109 | -0.00010 | -0.01629 | 0.01013  | -0.00616 | -2.60724 |
| D29 | -0.55059 | -0.00003 | -0.01495 | 0.01114  | -0.00380 | -0.55440 |
| D30 | -1.46548 | -0.00002 | -0.01774 | 0.00918  | -0.00856 | -1.47404 |
| D31 | 0.60729  | -0.00001 | -0.02162 | 0.01068  | -0.01094 | 0.59635  |
| D32 | 2.65779  | 0.00007  | -0.02027 | 0.01169  | -0.00859 | 2.64920  |
| D33 | -1.30785 | -0.00007 | -0.01128 | -0.00384 | -0.01512 | -1.32297 |
| D34 | 0.75335  | 0.00016  | -0.01312 | -0.00006 | -0.01319 | 0.74016  |
| D35 | 2.90024  | -0.00006 | -0.01108 | -0.00340 | -0.01448 | 2.88576  |
| D36 | 2.92580  | -0.00017 | -0.00808 | -0.00673 | -0.01481 | 2.91099  |
| D37 | -1.29618 | 0.00006  | -0.00992 | -0.00295 | -0.01287 | -1.30905 |
| D38 | 0.85071  | -0.00016 | -0.00788 | -0.00629 | -0.01417 | 0.83654  |
| D39 | 0.81416  | -0.00016 | -0.00942 | -0.00684 | -0.01626 | 0.79791  |
| D40 | 2.87536  | 0.00008  | -0.01126 | -0.00306 | -0.01432 | 2.86104  |
| D41 | -1.26093 | -0.00015 | -0.00922 | -0.00640 | -0.01562 | -1.27655 |
| D42 | 2.88520  | 0.00008  | 0.00878  | -0.00835 | 0.00042  | 2.88563  |
| D43 | -1.33219 | -0.00026 | 0.01099  | -0.01175 | -0.00076 | -1.33295 |
| D44 | 0.79998  | 0.00023  | 0.00736  | -0.00748 | -0.00013 | 0.79985  |
| D45 | 2.86577  | -0.00011 | 0.00957  | -0.01088 | -0.00131 | 2.86446  |
| D46 | -1.31114 | 0.00000  | 0.00928  | -0.01091 | -0.00162 | -1.31276 |
| D47 | 0.75466  | -0.00034 | 0.01150  | -0.01431 | -0.00281 | 0.75184  |
| D48 | -3.13532 | 0.00001  | -0.00071 | -0.00040 | -0.00111 | -3.13643 |
| D49 | 0.00722  | 0.00000  | -0.00076 | -0.00065 | -0.00141 | 0.00581  |
| D50 | 0.00541  | -0.00002 | -0.00014 | -0.00084 | -0.00098 | 0.00443  |
| D51 | -3.13523 | -0.00004 | -0.00019 | -0.00109 | -0.00128 | -3.13651 |

| Item                 | Value    | Threshold | Converged? |
|----------------------|----------|-----------|------------|
| Maximum Force        | 0.001174 | 0.000450  | NO         |
| RMS Force            | 0.000220 | 0.000300  | YES        |
| Maximum Displacement | 0.116461 | 0.001800  | NO         |
| RMS Displacement     | 0.019401 | 0.001200  | NO         |

Predicted change in Energy=-4.071927D-05

GradGradGradGradGradGradGradGradGradGradGradGradGradGradGradGradGradGradGrad

Input orientation:

-----

| Center<br>Number | Atomic<br>Number | Atomic<br>Type | Coordinates (Angstroms) |           |           |
|------------------|------------------|----------------|-------------------------|-----------|-----------|
|                  |                  |                | X                       | Y         | Z         |
| 1                | 6                | 0              | -1.813034               | -1.993014 | 0.270292  |
| 2                | 6                | 0              | -2.820569               | -1.110191 | 0.048273  |
| 3                | 7                | 0              | -2.242440               | 0.155043  | 0.016442  |
| 4                | 6                | 0              | -0.915837               | 0.029131  | 0.218614  |
| 5                | 7                | 0              | -0.639873               | -1.265002 | 0.376699  |
| 6                | 6                | 0              | 0.731474                | -1.787758 | 0.560657  |
| 7                | 6                | 0              | 1.450883                | -2.007035 | -0.777975 |
| 8                | 1                | 0              | -1.831717               | -3.064964 | 0.366404  |
| 9                | 1                | 0              | -3.874268               | -1.272812 | -0.086024 |
| 10               | 1                | 0              | 1.277318                | -1.033644 | 1.128800  |
| 11               | 1                | 0              | 0.665893                | -2.707037 | 1.142944  |
| 12               | 1                | 0              | 1.074165                | -2.911093 | -1.267384 |
| 13               | 1                | 0              | 1.234178                | -1.148202 | -1.427277 |
| 14               | 35               | 0              | 1.936363                | 1.613091  | 0.041765  |
| 15               | 1                | 0              | -0.132484               | 0.817335  | 0.211459  |
| 16               | 6                | 0              | -2.869156               | 1.414971  | -0.185336 |
| 17               | 6                | 0              | -4.175894               | 1.596434  | -0.324377 |
| 18               | 1                | 0              | -2.152218               | 2.225874  | -0.214585 |
| 19               | 1                | 0              | -4.555346               | 2.596944  | -0.478845 |
| 20               | 1                | 0              | -4.899543               | 0.791905  | -0.291844 |
| 21               | 7                | 0              | 2.869284                | -2.174892 | -0.483543 |
| 22               | 1                | 0              | 3.363724                | -2.557229 | -1.281223 |
| 23               | 1                | 0              | 3.274622                | -1.262940 | -0.278653 |

Distance matrix (angstroms):

|    |    | 1        | 2        | 3        | 4        | 5        |
|----|----|----------|----------|----------|----------|----------|
| 1  | C  | 0.000000 |          |          |          |          |
| 2  | C  | 1.357864 | 0.000000 |          |          |          |
| 3  | N  | 2.205216 | 1.391425 | 0.000000 |          |          |
| 4  | C  | 2.212849 | 2.226000 | 1.347814 | 0.000000 |          |
| 5  | N  | 1.384785 | 2.210716 | 2.171297 | 1.332639 | 0.000000 |
| 6  | C  | 2.569234 | 3.652211 | 3.593718 | 2.476230 | 1.479090 |
| 7  | C  | 3.428150 | 4.442107 | 4.352736 | 3.277274 | 2.501028 |
| 8  | H  | 1.076413 | 2.213633 | 3.264906 | 3.230186 | 2.158810 |
| 9  | H  | 2.212314 | 1.074598 | 2.170744 | 3.246563 | 3.267335 |
| 10 | H  | 3.347791 | 4.238642 | 3.878017 | 2.601511 | 2.072391 |
| 11 | H  | 2.723313 | 3.987937 | 4.233073 | 3.292852 | 2.090843 |
| 12 | H  | 3.397535 | 4.488113 | 4.695665 | 3.848794 | 2.889732 |
| 13 | H  | 3.589004 | 4.315052 | 3.983672 | 2.952564 | 2.603850 |
| 14 | Br | 5.207129 | 5.481306 | 4.425940 | 3.267300 | 3.877189 |
| 15 | H  | 3.275023 | 3.311766 | 2.220040 | 1.111287 | 2.149622 |

|    |    |          |          |          |          |          |
|----|----|----------|----------|----------|----------|----------|
| 16 | C  | 3.596853 | 2.536411 | 1.421586 | 2.428824 | 3.530983 |
| 17 | C  | 4.338303 | 3.049852 | 2.435572 | 3.657765 | 4.602474 |
| 18 | H  | 4.260184 | 3.412495 | 2.085630 | 2.557729 | 3.850067 |
| 19 | H  | 5.399000 | 4.126761 | 3.399666 | 4.508452 | 5.565744 |
| 20 | H  | 4.195034 | 2.838271 | 2.749697 | 4.088069 | 4.777301 |
| 21 | N  | 4.746099 | 5.812990 | 5.639885 | 4.435976 | 3.725869 |
| 22 | H  | 5.433632 | 6.488988 | 6.361558 | 5.220480 | 4.521874 |
| 23 | H  | 5.169004 | 6.105864 | 5.704010 | 4.413238 | 3.968975 |
|    |    | 6        | 7        | 8        | 9        | 10       |
| 6  | C  | 0.000000 |          |          |          |          |
| 7  | C  | 1.535437 | 0.000000 |          |          |          |
| 8  | H  | 2.870355 | 3.633769 | 0.000000 |          |          |
| 9  | H  | 4.679340 | 5.419881 | 2.754726 | 0.000000 |          |
| 10 | H  | 1.090606 | 2.147884 | 3.791254 | 5.298286 | 0.000000 |
| 11 | H  | 1.090152 | 2.190009 | 2.639921 | 4.917360 | 1.781653 |
| 12 | H  | 2.172799 | 1.094879 | 3.337228 | 5.344770 | 3.050867 |
| 13 | H  | 2.147935 | 1.098248 | 4.036209 | 5.283058 | 2.559006 |
| 14 | Br | 3.645104 | 3.743391 | 6.015648 | 6.489083 | 2.936186 |
| 15 | H  | 2.766745 | 3.385720 | 4.240713 | 4.296295 | 2.501036 |
| 16 | C  | 4.876322 | 5.542931 | 4.631471 | 2.871287 | 4.991585 |
| 17 | C  | 6.026467 | 6.697115 | 5.263172 | 2.894886 | 6.226279 |
| 18 | H  | 5.002592 | 5.587241 | 5.332282 | 3.901639 | 4.918420 |
| 19 | H  | 6.946701 | 7.573697 | 6.339543 | 3.948821 | 7.055896 |
| 20 | H  | 6.252182 | 6.956889 | 4.971950 | 2.314435 | 6.595793 |
| 21 | N  | 2.410489 | 1.458331 | 4.859429 | 6.815223 | 2.537016 |
| 22 | H  | 3.303535 | 2.053030 | 5.474036 | 7.447600 | 3.533074 |
| 23 | H  | 2.729007 | 2.032000 | 5.453264 | 7.151491 | 2.454123 |
|    |    | 11       | 12       | 13       | 14       | 15       |
| 11 | H  | 0.000000 |          |          |          |          |
| 12 | H  | 2.453163 | 0.000000 |          |          |          |
| 13 | H  | 3.059240 | 1.777345 | 0.000000 |          |          |
| 14 | Br | 4.635752 | 4.788058 | 3.205602 | 0.000000 |          |
| 15 | H  | 3.731792 | 4.188575 | 2.901131 | 2.223095 | 0.000000 |
| 16 | C  | 5.590336 | 5.952768 | 4.994960 | 4.814960 | 2.829132 |
| 17 | C  | 6.641972 | 6.983566 | 6.165898 | 6.123236 | 4.152502 |
| 18 | H  | 5.841083 | 6.156815 | 4.931804 | 4.142187 | 2.498964 |
| 19 | H  | 7.617333 | 7.915281 | 6.960189 | 6.586447 | 4.817181 |
| 20 | H  | 6.728692 | 7.095708 | 6.532669 | 6.893131 | 4.793622 |
| 21 | N  | 2.789905 | 2.092571 | 2.149022 | 3.936382 | 4.295005 |
| 22 | H  | 3.630057 | 2.316784 | 2.557666 | 4.602089 | 5.083233 |
| 23 | H  | 3.303304 | 2.921645 | 2.344337 | 3.188284 | 4.021956 |
|    |    | 16       | 17       | 18       | 19       | 20       |
| 16 | C  | 0.000000 |          |          |          |          |
| 17 | C  | 1.326584 | 0.000000 |          |          |          |

|    |   |          |          |          |          |          |
|----|---|----------|----------|----------|----------|----------|
| 18 | H | 1.082783 | 2.122148 | 0.000000 |          |          |
| 19 | H | 2.080011 | 1.081141 | 2.445925 | 0.000000 |          |
| 20 | H | 2.126506 | 1.082587 | 3.100005 | 1.847054 | 0.000000 |
| 21 | N | 6.775378 | 7.992670 | 6.682407 | 8.825847 | 8.318252 |
| 22 | H | 7.471823 | 8.661080 | 7.378442 | 9.482667 | 8.970906 |
| 23 | H | 6.702681 | 7.980495 | 6.451862 | 8.731963 | 8.428496 |
|    |   | 21       | 22       | 23       |          |          |
| 21 | N | 0.000000 |          |          |          |          |
| 22 | H | 1.013383 | 0.000000 |          |          |          |
| 23 | H | 1.018791 | 1.639595 | 0.000000 |          |          |

Stoichiometry C7H12BrN3

Framework group C1[X(C7H12BrN3)]

Deg. of freedom 63

Full point group C1 NOp 1

Largest Abelian subgroup C1 NOp 1

Largest concise Abelian subgroup C1 NOp 1

Standard orientation:

| Center<br>Number | Atomic<br>Number | Atomic<br>Type | Coordinates (Angstroms) |           |           |
|------------------|------------------|----------------|-------------------------|-----------|-----------|
|                  |                  |                | X                       | Y         | Z         |
| 1                | 6                | 0              | -1.724632               | 2.067055  | -0.289962 |
| 2                | 6                | 0              | -2.762516               | 1.227832  | -0.040371 |
| 3                | 7                | 0              | -2.234697               | -0.059045 | -0.002722 |
| 4                | 6                | 0              | -0.907804               | 0.011399  | -0.228538 |
| 5                | 7                | 0              | -0.583349               | 1.291554  | -0.407027 |
| 6                | 6                | 0              | 0.804341                | 1.756921  | -0.620235 |
| 7                | 6                | 0              | 1.554778                | 1.962724  | 0.703417  |
| 8                | 1                | 0              | -1.702318               | 3.137713  | -0.398854 |
| 9                | 1                | 0              | -3.806453               | 1.433979  | 0.109500  |
| 10               | 1                | 0              | 1.309929                | 0.975077  | -1.188145 |
| 11               | 1                | 0              | 0.765381                | 2.671296  | -1.212547 |
| 12               | 1                | 0              | 1.222769                | 2.886712  | 1.187953  |
| 13               | 1                | 0              | 1.315272                | 1.120800  | 1.366703  |
| 14               | 35               | 0              | 1.881767                | -1.683144 | -0.079971 |
| 15               | 1                | 0              | -0.156408               | -0.807350 | -0.224822 |
| 16               | 6                | 0              | -2.907465               | -1.290502 | 0.224887  |
| 17               | 6                | 0              | -4.217805               | -1.417973 | 0.387934  |
| 18               | 1                | 0              | -2.222944               | -2.129019 | 0.252080  |
| 19               | 1                | 0              | -4.634036               | -2.400665 | 0.560942  |
| 20               | 1                | 0              | -4.909340               | -0.585593 | 0.357649  |
| 21               | 7                | 0              | 2.973468                | 2.070342  | 0.383316  |
| 22               | 1                | 0              | 3.496344                | 2.441805  | 1.167892  |
| 23               | 1                | 0              | 3.338642                | 1.140611  | 0.182857  |



```

-----
Rotational constants (GHZ):      0.8841794      0.4613289      0.3136201
Standard basis: 6-311++G(d,p) (5D, 7F)
There are 365 symmetry adapted cartesian basis functions of A symmetry.
There are 352 symmetry adapted basis functions of A symmetry.
352 basis functions, 562 primitive gaussians, 365 cartesian basis functions
55 alpha electrons      55 beta electrons
nuclear repulsion energy      842.7709813770 Hartrees.
NAtoms= 23 NActive= 23 NUniq= 23 SFac= 1.00D+00 NAtFMM= 60 NAOKFM=F
Big=F
Integral buffers will be 131072 words long.
Raffenetti 2 integral format.
Two-electron integral symmetry is turned on.
One-electron integrals computed using PRISM.
NBasis= 352 RedAO= T EigKep= 4.32D-06 NBF= 352
NBsUse= 352 1.00D-06 EigRej= -1.00D+00 NBFU= 352
Initial guess from the checkpoint file: "/home/suqian/liuwen/qianmengshijie/nh2/nh2.chk"
B after Tr= 0.000000 0.000000 0.000000
Rot= 0.999998 0.000869 0.000524 -0.001658 Ang= 0.22 deg.
ExpMin= 3.50D-02 ExpMax= 4.40D+05 ExpMxC= 1.51D+04 IAcc=3 IRadAn= 5 AccDes=
0.00D+00
Harris functional with IExCor= 402 and IRadAn= 5 diagonalized for initial guess.
HarFok: IExCor= 402 AccDes= 0.00D+00 IRadAn= 5 IDoV= 1 UseB2=F ITyADJ=14
ICtDFT= 3500011 ScaDFX= 1.000000 1.000000 1.000000 1.000000
FoFCou: FMM=F IPFlag= 0 FMFlag= 100000 FMFlg1= 0
NFxFlg= 0 DoJE=T BraDBF=F KetDBF=T FulRan=T
wScrn= 0.000000 ICntrl= 500 IOpCl= 0 I1Cent= 200000004 NGrid=
0
NMat0= 1 NMatS0= 1 NMatT0= 0 NMatD0= 1 NMtDS0= 0
NMtDT0= 0
Petite list used in FoFCou.
Requested convergence on RMS density matrix=1.00D-08 within 128 cycles.
Requested convergence on MAX density matrix=1.00D-06.
Requested convergence on energy=1.00D-06.
No special actions if energy rises.
SCF Done: E(RB3LYP) = -3012.46804499 A.U. after 12 cycles
NFock= 12 Conv=0.22D-08 -V/T= 2.0017
Calling FoFJK, ICntrl= 2127 FMM=F ISym2X=0 I1Cent= 0 IOpClX= 0 NMat=1 NMatS=1
NMatT=0.
***** Axes restored to original set *****

```

```

-----
Center      Atomic      Forces (Hartrees/Bohr)
Number      Number      X              Y              Z
-----

```

|    |    |              |              |              |
|----|----|--------------|--------------|--------------|
| 1  | 6  | 0.000003351  | 0.000007391  | 0.000060940  |
| 2  | 6  | -0.000039049 | -0.000035075 | -0.000113271 |
| 3  | 7  | -0.000041299 | 0.000047147  | 0.000097717  |
| 4  | 6  | 0.000024520  | 0.000030537  | -0.000249493 |
| 5  | 7  | -0.000072018 | 0.000141822  | 0.000286192  |
| 6  | 6  | 0.000088789  | 0.000311469  | 0.000072847  |
| 7  | 6  | -0.000170630 | 0.000039433  | -0.000551423 |
| 8  | 1  | 0.000020033  | -0.000004718 | -0.000016329 |
| 9  | 1  | -0.000002741 | -0.000018624 | 0.000012348  |
| 10 | 1  | -0.000141334 | -0.000231488 | 0.000030595  |
| 11 | 1  | -0.000003347 | -0.000000059 | 0.000010761  |
| 12 | 1  | -0.000080677 | -0.000138330 | 0.000219758  |
| 13 | 1  | 0.000257660  | 0.000037996  | 0.000205086  |
| 14 | 35 | 0.000041419  | -0.000101588 | 0.000028480  |
| 15 | 1  | 0.000032553  | -0.000051749 | -0.000023645 |
| 16 | 6  | 0.000069565  | -0.000137860 | 0.000082903  |
| 17 | 6  | 0.000002452  | 0.000051291  | -0.000050562 |
| 18 | 1  | -0.000062669 | -0.000009029 | -0.000022654 |
| 19 | 1  | -0.000005071 | -0.000010305 | 0.000006044  |
| 20 | 1  | 0.000004676  | -0.000011693 | -0.000005658 |
| 21 | 7  | 0.000067193  | -0.000144737 | 0.000071100  |
| 22 | 1  | 0.000029667  | 0.000064253  | -0.000102336 |
| 23 | 1  | -0.000023042 | 0.000163914  | -0.000049401 |

-----  
Cartesian Forces: Max 0.000551423 RMS 0.000122900

GradGradGradGradGradGradGradGradGradGradGradGradGradGradGradGradGradGradGradGrad

Berny optimization.

Using GEDIIS/GDIIS optimizer.

FormGI is forming the generalized inverse of G from B-inverse, IUseBI=4.

Internal Forces: Max 0.000438907 RMS 0.000107680

Search for a local minimum.

Step number 30 out of a maximum of 121

All quantities printed in internal units (Hartrees-Bohrs-Radians)

Mixed Optimization -- En-DIIS/RFO-DIIS

Swapping is turned off.

Update second derivatives using D2CorX and points 24 23 26 27 28  
29 30

DE= -5.03D-05 DEPred=-4.07D-05 R= 1.24D+00

TightC=F SS= 1.41D+00 RLast= 1.35D-01 DXNew= 2.3784D-01 4.0643D-01

Trust test= 1.24D+00 RLast= 1.35D-01 DXMaxT set to 2.38D-01

ITU= 1 0 1 1 0 -1 -1 0 -1 -1 0 -1 0 0 0 1 1 -1 1 -1

ITU= 1 1 1 1 1 1 0 1 0 0

Eigenvalues --- 0.00161 0.00235 0.00361 0.00811 0.00968

|                 |         |         |         |         |         |
|-----------------|---------|---------|---------|---------|---------|
| Eigenvalues --- | 0.01416 | 0.01807 | 0.01991 | 0.02156 | 0.02300 |
| Eigenvalues --- | 0.02390 | 0.02691 | 0.03060 | 0.03069 | 0.03309 |
| Eigenvalues --- | 0.04052 | 0.04142 | 0.04478 | 0.05082 | 0.05284 |
| Eigenvalues --- | 0.05691 | 0.08965 | 0.09560 | 0.09986 | 0.12750 |
| Eigenvalues --- | 0.13118 | 0.15557 | 0.15665 | 0.15985 | 0.16000 |
| Eigenvalues --- | 0.16007 | 0.16015 | 0.16282 | 0.18326 | 0.21990 |
| Eigenvalues --- | 0.22190 | 0.23113 | 0.23555 | 0.24813 | 0.25102 |
| Eigenvalues --- | 0.26313 | 0.29946 | 0.34079 | 0.34642 | 0.34684 |
| Eigenvalues --- | 0.34939 | 0.35286 | 0.35690 | 0.35779 | 0.35859 |
| Eigenvalues --- | 0.36437 | 0.36661 | 0.37809 | 0.40538 | 0.42215 |
| Eigenvalues --- | 0.42968 | 0.46682 | 0.47698 | 0.48644 | 0.49926 |
| Eigenvalues --- | 0.54257 | 0.59940 | 0.60402 |         |         |

En-DIIS/RFO-DIIS IScMMF= 0 using points: 30 29 28 27 26

RFO step: Lambda=-3.16322444D-06.

DidBck=F Rises=F RFO-DIIS coefs: 1.24014 -0.25602 0.07102 -0.18867

0.13353

Iteration 1 RMS(Cart)= 0.00689672 RMS(Int)= 0.00003220

Iteration 2 RMS(Cart)= 0.00003739 RMS(Int)= 0.00000289

Iteration 3 RMS(Cart)= 0.00000001 RMS(Int)= 0.00000289

| Variable | Old X   | -DE/DX   | Delta X<br>(Linear) | Delta X<br>(Quad) | Delta X<br>(Total) | New X   |
|----------|---------|----------|---------------------|-------------------|--------------------|---------|
| R1       | 2.56599 | 0.00001  | 0.00000             | -0.00002          | -0.00002           | 2.56597 |
| R2       | 2.61687 | -0.00003 | -0.00009            | -0.00013          | -0.00022           | 2.61665 |
| R3       | 2.03412 | 0.00000  | -0.00001            | 0.00002           | 0.00001            | 2.03414 |
| R4       | 2.62941 | 0.00007  | -0.00011            | 0.00018           | 0.00007            | 2.62949 |
| R5       | 2.03070 | 0.00000  | -0.00001            | 0.00000           | -0.00002           | 2.03068 |
| R6       | 2.54700 | 0.00006  | 0.00005             | 0.00001           | 0.00005            | 2.54705 |
| R7       | 2.68641 | -0.00011 | 0.00002             | -0.00025          | -0.00024           | 2.68617 |
| R8       | 2.51832 | -0.00022 | 0.00001             | 0.00004           | 0.00005            | 2.51837 |
| R9       | 2.10003 | -0.00006 | -0.00080            | 0.00032           | -0.00049           | 2.09954 |
| R10      | 2.79508 | -0.00003 | 0.00013             | -0.00005          | 0.00007            | 2.79515 |
| R11      | 2.90155 | 0.00021  | 0.00008             | 0.00103           | 0.00112            | 2.90267 |
| R12      | 2.06095 | -0.00022 | -0.00016            | -0.00029          | -0.00045           | 2.06050 |
| R13      | 2.06009 | 0.00001  | -0.00002            | 0.00003           | 0.00001            | 2.06010 |
| R14      | 2.06902 | 0.00004  | -0.00011            | -0.00007          | -0.00018           | 2.06884 |
| R15      | 2.07539 | -0.00014 | 0.00008             | -0.00041          | -0.00033           | 2.07506 |
| R16      | 2.75585 | 0.00005  | -0.00021            | 0.00065           | 0.00044            | 2.75628 |
| R17      | 4.20104 | 0.00000  | 0.00559             | 0.00263           | 0.00822            | 4.20926 |
| R18      | 2.50688 | 0.00000  | -0.00001            | 0.00003           | 0.00002            | 2.50690 |
| R19      | 2.04616 | -0.00005 | -0.00003            | -0.00009          | -0.00012           | 2.04604 |
| R20      | 2.04306 | -0.00001 | 0.00000             | -0.00003          | -0.00003           | 2.04303 |
| R21      | 2.04579 | 0.00000  | -0.00001            | 0.00001           | 0.00000            | 2.04579 |
| R22      | 1.91502 | 0.00007  | -0.00008            | 0.00012           | 0.00004            | 1.91506 |
| R23      | 1.92524 | 0.00013  | 0.00010             | 0.00029           | 0.00039            | 1.92562 |

|     |          |          |          |          |          |          |
|-----|----------|----------|----------|----------|----------|----------|
| A1  | 1.87483  | -0.00003 | 0.00015  | -0.00008 | 0.00007  | 1.87490  |
| A2  | 2.27730  | 0.00003  | -0.00004 | 0.00001  | -0.00003 | 2.27727  |
| A3  | 2.13103  | 0.00000  | -0.00011 | 0.00007  | -0.00004 | 2.13100  |
| A4  | 1.86151  | -0.00004 | -0.00005 | -0.00005 | -0.00010 | 1.86141  |
| A5  | 2.27787  | 0.00000  | 0.00003  | -0.00006 | -0.00003 | 2.27784  |
| A6  | 2.14380  | 0.00004  | 0.00002  | 0.00011  | 0.00013  | 2.14393  |
| A7  | 1.89713  | -0.00003 | -0.00003 | 0.00011  | 0.00008  | 1.89721  |
| A8  | 2.24718  | -0.00004 | 0.00000  | -0.00027 | -0.00027 | 2.24691  |
| A9  | 2.13887  | 0.00007  | 0.00003  | 0.00016  | 0.00020  | 2.13906  |
| A10 | 1.88845  | -0.00001 | 0.00010  | -0.00025 | -0.00015 | 1.88829  |
| A11 | 2.24796  | 0.00041  | -0.00084 | 0.00146  | 0.00062  | 2.24858  |
| A12 | 2.14548  | -0.00041 | 0.00081  | -0.00118 | -0.00036 | 2.14512  |
| A13 | 1.90285  | 0.00009  | -0.00016 | 0.00027  | 0.00010  | 1.90295  |
| A14 | 2.22587  | 0.00010  | -0.00036 | -0.00014 | -0.00051 | 2.22536  |
| A15 | 2.15312  | -0.00020 | 0.00060  | -0.00039 | 0.00021  | 2.15334  |
| A16 | 1.95676  | -0.00024 | 0.00012  | -0.00099 | -0.00086 | 1.95589  |
| A17 | 1.85922  | 0.00005  | 0.00035  | -0.00039 | -0.00005 | 1.85918  |
| A18 | 1.88461  | 0.00007  | -0.00043 | 0.00034  | -0.00009 | 1.88452  |
| A19 | 1.89486  | 0.00013  | -0.00046 | 0.00144  | 0.00098  | 1.89584  |
| A20 | 1.95350  | 0.00007  | 0.00012  | -0.00019 | -0.00007 | 1.95343  |
| A21 | 1.91234  | -0.00009 | 0.00032  | -0.00022 | 0.00010  | 1.91243  |
| A22 | 1.92454  | -0.00023 | 0.00010  | -0.00130 | -0.00121 | 1.92334  |
| A23 | 1.88736  | -0.00002 | 0.00022  | -0.00019 | 0.00003  | 1.88739  |
| A24 | 1.87143  | 0.00024  | -0.00030 | 0.00054  | 0.00024  | 1.87167  |
| A25 | 1.88972  | 0.00019  | 0.00011  | 0.00113  | 0.00124  | 1.89097  |
| A26 | 1.90695  | 0.00005  | -0.00048 | 0.00092  | 0.00044  | 1.90738  |
| A27 | 1.98372  | -0.00024 | 0.00036  | -0.00118 | -0.00082 | 1.98290  |
| A28 | 2.71498  | -0.00044 | -0.00486 | 0.00039  | -0.00447 | 2.71050  |
| A29 | 2.17776  | 0.00002  | 0.00007  | 0.00010  | 0.00018  | 2.17793  |
| A30 | 1.95592  | 0.00003  | 0.00000  | 0.00020  | 0.00020  | 1.95612  |
| A31 | 2.14951  | -0.00005 | -0.00007 | -0.00031 | -0.00038 | 2.14913  |
| A32 | 2.07978  | 0.00001  | 0.00000  | 0.00007  | 0.00007  | 2.07985  |
| A33 | 2.15752  | -0.00002 | 0.00001  | -0.00009 | -0.00008 | 2.15744  |
| A34 | 2.04589  | 0.00000  | -0.00001 | 0.00002  | 0.00001  | 2.04589  |
| A35 | 1.93805  | -0.00004 | -0.00022 | 0.00028  | 0.00005  | 1.93811  |
| A36 | 1.90132  | -0.00018 | -0.00102 | -0.00006 | -0.00108 | 1.90024  |
| A37 | 1.87749  | 0.00002  | 0.00013  | -0.00034 | -0.00021 | 1.87728  |
| D1  | 0.00425  | -0.00002 | 0.00002  | -0.00011 | -0.00009 | 0.00416  |
| D2  | -3.13697 | -0.00001 | -0.00006 | 0.00042  | 0.00036  | -3.13661 |
| D3  | 3.13867  | 0.00002  | 0.00007  | 0.00061  | 0.00068  | 3.13935  |
| D4  | -0.00255 | 0.00003  | -0.00002 | 0.00115  | 0.00113  | -0.00142 |
| D5  | -0.00479 | 0.00000  | 0.00025  | -0.00093 | -0.00069 | -0.00548 |
| D6  | -3.09161 | 0.00009  | -0.00125 | 0.00429  | 0.00304  | -3.08857 |
| D7  | -3.13994 | -0.00004 | 0.00020  | -0.00158 | -0.00138 | -3.14132 |

|     |          |          |          |          |          |          |
|-----|----------|----------|----------|----------|----------|----------|
| D8  | 0.05642  | 0.00005  | -0.00129 | 0.00364  | 0.00235  | 0.05877  |
| D9  | -0.00231 | 0.00003  | -0.00028 | 0.00110  | 0.00082  | -0.00148 |
| D10 | -3.14141 | 0.00000  | -0.00007 | -0.00026 | -0.00034 | 3.14143  |
| D11 | 3.13895  | 0.00002  | -0.00020 | 0.00062  | 0.00042  | 3.13937  |
| D12 | -0.00016 | -0.00001 | 0.00000  | -0.00075 | -0.00074 | -0.00090 |
| D13 | -0.00065 | -0.00003 | 0.00043  | -0.00169 | -0.00126 | -0.00191 |
| D14 | 3.08674  | -0.00004 | 0.00211  | -0.00120 | 0.00089  | 3.08763  |
| D15 | 3.13864  | 0.00000  | 0.00024  | -0.00043 | -0.00018 | 3.13846  |
| D16 | -0.05716 | -0.00001 | 0.00192  | 0.00007  | 0.00197  | -0.05519 |
| D17 | 0.05623  | -0.00002 | -0.00281 | -0.00176 | -0.00457 | 0.05166  |
| D18 | -3.08471 | 0.00001  | -0.00275 | -0.00103 | -0.00378 | -3.08849 |
| D19 | -3.08257 | -0.00005 | -0.00257 | -0.00330 | -0.00587 | -3.08844 |
| D20 | 0.05968  | -0.00003 | -0.00252 | -0.00256 | -0.00509 | 0.05459  |
| D21 | 0.00333  | 0.00002  | -0.00042 | 0.00163  | 0.00121  | 0.00454  |
| D22 | 3.09293  | -0.00005 | 0.00096  | -0.00332 | -0.00236 | 3.09057  |
| D23 | -3.08793 | 0.00000  | -0.00188 | 0.00107  | -0.00083 | -3.08876 |
| D24 | 0.00167  | -0.00007 | -0.00050 | -0.00388 | -0.00440 | -0.00273 |
| D25 | -2.77149 | -0.00005 | -0.01088 | -0.00631 | -0.01719 | -2.78869 |
| D26 | 0.30874  | -0.00004 | -0.00904 | -0.00571 | -0.01474 | 0.29400  |
| D27 | 1.60555  | -0.00003 | 0.00172  | 0.00238  | 0.00411  | 1.60965  |
| D28 | -2.60724 | 0.00003  | 0.00145  | 0.00333  | 0.00479  | -2.60245 |
| D29 | -0.55440 | -0.00001 | 0.00179  | 0.00304  | 0.00483  | -0.54956 |
| D30 | -1.47404 | 0.00006  | 0.00006  | 0.00827  | 0.00833  | -1.46571 |
| D31 | 0.59635  | 0.00012  | -0.00020 | 0.00922  | 0.00902  | 0.60537  |
| D32 | 2.64920  | 0.00008  | 0.00013  | 0.00893  | 0.00906  | 2.65826  |
| D33 | -1.32297 | 0.00000  | -0.00383 | -0.00092 | -0.00475 | -1.32772 |
| D34 | 0.74016  | 0.00008  | -0.00351 | -0.00041 | -0.00392 | 0.73625  |
| D35 | 2.88576  | -0.00008 | -0.00312 | -0.00162 | -0.00474 | 2.88102  |
| D36 | 2.91099  | -0.00001 | -0.00404 | -0.00076 | -0.00481 | 2.90619  |
| D37 | -1.30905 | 0.00008  | -0.00372 | -0.00025 | -0.00397 | -1.31303 |
| D38 | 0.83654  | -0.00008 | -0.00334 | -0.00146 | -0.00480 | 0.83174  |
| D39 | 0.79791  | -0.00003 | -0.00421 | -0.00134 | -0.00554 | 0.79236  |
| D40 | 2.86104  | 0.00005  | -0.00389 | -0.00082 | -0.00471 | 2.85633  |
| D41 | -1.27655 | -0.00011 | -0.00350 | -0.00203 | -0.00554 | -1.28208 |
| D42 | 2.88563  | 0.00003  | 0.00324  | 0.00032  | 0.00357  | 2.88919  |
| D43 | -1.33295 | -0.00007 | 0.00263  | 0.00004  | 0.00267  | -1.33028 |
| D44 | 0.79985  | 0.00014  | 0.00357  | 0.00106  | 0.00463  | 0.80448  |
| D45 | 2.86446  | 0.00003  | 0.00296  | 0.00078  | 0.00374  | 2.86820  |
| D46 | -1.31276 | 0.00003  | 0.00353  | -0.00026 | 0.00327  | -1.30949 |
| D47 | 0.75184  | -0.00008 | 0.00292  | -0.00055 | 0.00238  | 0.75422  |
| D48 | -3.13643 | 0.00001  | -0.00024 | 0.00010  | -0.00013 | -3.13657 |
| D49 | 0.00581  | 0.00001  | -0.00025 | 0.00017  | -0.00008 | 0.00573  |
| D50 | 0.00443  | -0.00002 | -0.00029 | -0.00071 | -0.00100 | 0.00343  |
| D51 | -3.13651 | -0.00002 | -0.00031 | -0.00064 | -0.00095 | -3.13746 |

| Item                 | Value    | Threshold | Converged? |
|----------------------|----------|-----------|------------|
| Maximum Force        | 0.000439 | 0.000450  | YES        |
| RMS Force            | 0.000108 | 0.000300  | YES        |
| Maximum Displacement | 0.027741 | 0.001800  | NO         |
| RMS Displacement     | 0.006894 | 0.001200  | NO         |

Predicted change in Energy=-6.014924D-06

GradGradGradGradGradGradGradGradGradGradGradGradGradGradGradGradGradGrad

Input orientation:

| Center Number | Atomic Number | Atomic Type | Coordinates (Angstroms) |           |           |
|---------------|---------------|-------------|-------------------------|-----------|-----------|
|               |               |             | X                       | Y         | Z         |
| 1             | 6             | 0           | -1.814105               | -1.993202 | 0.277029  |
| 2             | 6             | 0           | -2.821074               | -1.110167 | 0.053373  |
| 3             | 7             | 0           | -2.241847               | 0.154515  | 0.018081  |
| 4             | 6             | 0           | -0.915056               | 0.027951  | 0.218793  |
| 5             | 7             | 0           | -0.640355               | -1.265985 | 0.380851  |
| 6             | 6             | 0           | 0.730836                | -1.790319 | 0.561772  |
| 7             | 6             | 0           | 1.448329                | -2.004486 | -0.779391 |
| 8             | 1             | 0           | -1.833515               | -3.064953 | 0.375273  |
| 9             | 1             | 0           | -3.875011               | -1.272306 | -0.079564 |
| 10            | 1             | 0           | 1.277207                | -1.039209 | 1.132928  |
| 11            | 1             | 0           | 0.664940                | -2.712204 | 1.139897  |
| 12            | 1             | 0           | 1.072950                | -2.909039 | -1.268696 |
| 13            | 1             | 0           | 1.227892                | -1.144891 | -1.426127 |
| 14            | 35            | 0           | 1.948159                | 1.598411  | 0.050775  |
| 15            | 1             | 0           | -0.130881               | 0.814954  | 0.209816  |
| 16            | 6             | 0           | -2.867809               | 1.414164  | -0.186863 |
| 17            | 6             | 0           | -4.173998               | 1.595696  | -0.330982 |
| 18            | 1             | 0           | -2.150939               | 2.225090  | -0.214736 |
| 19            | 1             | 0           | -4.552820               | 2.596127  | -0.487400 |
| 20            | 1             | 0           | -4.897793               | 0.791207  | -0.300749 |
| 21            | 7             | 0           | 2.868257                | -2.167953 | -0.488719 |
| 22            | 1             | 0           | 3.362727                | -2.543823 | -1.289473 |
| 23            | 1             | 0           | 3.269429                | -1.254661 | -0.280605 |

Distance matrix (angstroms):

|   |   | 1        | 2        | 3        | 4        | 5        |
|---|---|----------|----------|----------|----------|----------|
| 1 | C | 0.000000 |          |          |          |          |
| 2 | C | 1.357852 | 0.000000 |          |          |          |
| 3 | N | 2.205154 | 1.391464 | 0.000000 |          |          |
| 4 | C | 2.212858 | 2.226114 | 1.347842 | 0.000000 |          |
| 5 | N | 1.384670 | 2.210669 | 2.171221 | 1.332664 | 0.000000 |

|    |    |          |          |          |          |          |
|----|----|----------|----------|----------|----------|----------|
| 6  | C  | 2.568845 | 3.652005 | 3.593719 | 2.476428 | 1.479129 |
| 7  | C  | 3.429231 | 4.440846 | 4.349097 | 3.273035 | 2.500829 |
| 8  | H  | 1.076420 | 2.213613 | 3.264858 | 3.230187 | 2.158691 |
| 9  | H  | 2.212281 | 1.074590 | 2.170847 | 3.246693 | 3.267265 |
| 10 | H  | 3.346472 | 4.238678 | 3.879639 | 2.603937 | 2.072219 |
| 11 | H  | 2.721611 | 3.987399 | 4.233905 | 3.294429 | 2.090811 |
| 12 | H  | 3.400457 | 4.488567 | 4.693510 | 3.845867 | 2.890682 |
| 13 | H  | 3.588052 | 4.310946 | 3.976591 | 2.945088 | 2.601957 |
| 14 | Br | 5.206294 | 5.484705 | 4.431935 | 3.269950 | 3.874806 |
| 15 | H  | 3.274675 | 3.311753 | 2.220162 | 1.111029 | 2.149215 |
| 16 | C  | 3.596614 | 2.536168 | 1.421460 | 2.428866 | 3.530872 |
| 17 | C  | 4.338083 | 3.049561 | 2.435581 | 3.657975 | 4.602451 |
| 18 | H  | 4.260197 | 3.412463 | 2.085605 | 2.557885 | 3.850220 |
| 19 | H  | 5.398783 | 4.126499 | 3.399644 | 4.508610 | 5.565713 |
| 20 | H  | 4.194746 | 2.837849 | 2.749742 | 4.088359 | 4.777279 |
| 21 | N  | 4.747780 | 5.812165 | 5.635943 | 4.431255 | 3.725594 |
| 22 | H  | 5.436608 | 6.488298 | 6.356255 | 5.214242 | 4.521894 |
| 23 | H  | 5.167080 | 6.101365 | 5.696415 | 4.405043 | 3.965358 |
|    |    | 6        | 7        | 8        | 9        | 10       |
| 6  | C  | 0.000000 |          |          |          |          |
| 7  | C  | 1.536028 | 0.000000 |          |          |          |
| 8  | H  | 2.869733 | 3.637079 | 0.000000 |          |          |
| 9  | H  | 4.679046 | 5.418837 | 2.754663 | 0.000000 |          |
| 10 | H  | 1.090370 | 2.148954 | 3.788703 | 5.298096 | 0.000000 |
| 11 | H  | 1.090158 | 2.190486 | 2.636542 | 4.916456 | 1.781526 |
| 12 | H  | 2.172370 | 1.094781 | 3.342825 | 5.345582 | 3.050538 |
| 13 | H  | 2.148344 | 1.098073 | 4.037808 | 5.279118 | 2.561711 |
| 14 | Br | 3.636823 | 3.730934 | 6.012763 | 6.493636 | 2.928868 |
| 15 | H  | 2.766563 | 3.379597 | 4.240285 | 4.296383 | 2.504549 |
| 16 | C  | 4.876414 | 5.537807 | 4.631226 | 2.871078 | 4.994201 |
| 17 | C  | 6.026566 | 6.691259 | 5.262918 | 2.894484 | 6.229076 |
| 18 | H  | 5.003109 | 5.582373 | 5.332301 | 3.901599 | 4.921792 |
| 19 | H  | 6.946848 | 7.567344 | 6.339295 | 3.948484 | 7.059062 |
| 20 | H  | 6.252174 | 6.951134 | 4.971597 | 2.313674 | 6.598218 |
| 21 | N  | 2.411370 | 1.458563 | 4.863923 | 6.814782 | 2.536777 |
| 22 | H  | 3.304804 | 2.053287 | 5.481231 | 7.447516 | 3.532886 |
| 23 | H  | 2.727816 | 2.031607 | 5.454115 | 7.147290 | 2.452232 |
|    |    | 11       | 12       | 13       | 14       | 15       |
| 11 | H  | 0.000000 |          |          |          |          |
| 12 | H  | 2.450824 | 0.000000 |          |          |          |
| 13 | H  | 3.059063 | 1.777922 | 0.000000 |          |          |
| 14 | Br | 4.627552 | 4.777457 | 3.197770 | 0.000000 |          |
| 15 | H  | 3.733526 | 4.183698 | 2.891983 | 2.227443 | 0.000000 |
| 16 | C  | 5.591737 | 5.948952 | 4.985911 | 4.825346 | 2.829697 |

|    |   |          |          |          |          |          |
|----|---|----------|----------|----------|----------|----------|
| 17 | C | 6.643553 | 6.978711 | 6.155532 | 6.134048 | 4.153170 |
| 18 | H | 5.843036 | 6.153338 | 4.923489 | 4.155217 | 2.499873 |
| 19 | H | 7.619153 | 7.909903 | 6.949321 | 6.599076 | 4.817908 |
| 20 | H | 6.730033 | 7.090734 | 6.522190 | 6.902333 | 4.794236 |
| 21 | N | 2.793422 | 2.093012 | 2.148531 | 3.914477 | 4.287249 |
| 22 | H | 3.634316 | 2.318813 | 2.556014 | 4.577704 | 5.072923 |
| 23 | H | 3.305393 | 2.921953 | 2.343532 | 3.161579 | 4.010725 |
|    |   | 16       | 17       | 18       | 19       | 20       |
| 16 | C | 0.000000 |          |          |          |          |
| 17 | C | 1.326594 | 0.000000 |          |          |          |
| 18 | H | 1.082719 | 2.121890 | 0.000000 |          |          |
| 19 | H | 2.080053 | 1.081127 | 2.445618 | 0.000000 |          |
| 20 | H | 2.126471 | 1.082588 | 3.099778 | 1.847047 | 0.000000 |
| 21 | N | 6.769426 | 7.986444 | 6.675794 | 8.818664 | 8.312851 |
| 22 | H | 7.463310 | 8.651968 | 7.368725 | 9.471975 | 8.963046 |
| 23 | H | 6.693064 | 7.970675 | 6.441536 | 8.721176 | 8.419590 |
|    |   | 21       | 22       | 23       |          |          |
| 21 | N | 0.000000 |          |          |          |          |
| 22 | H | 1.013404 | 0.000000 |          |          |          |
| 23 | H | 1.018996 | 1.639652 | 0.000000 |          |          |

Stoichiometry C7H12BrN3

Framework group C1[X(C7H12BrN3)]

Deg. of freedom 63

Full point group C1 NOp 1

Largest Abelian subgroup C1 NOp 1

Largest concise Abelian subgroup C1 NOp 1

Standard orientation:

| Center<br>Number | Atomic<br>Number | Atomic<br>Type | Coordinates (Angstroms) |           |           |
|------------------|------------------|----------------|-------------------------|-----------|-----------|
|                  |                  |                | X                       | Y         | Z         |
| 1                | 6                | 0              | -1.730764               | 2.061413  | -0.297313 |
| 2                | 6                | 0              | -2.767678               | 1.221425  | -0.046336 |
| 3                | 7                | 0              | -2.237742               | -0.064461 | -0.003485 |
| 4                | 6                | 0              | -0.910438               | 0.007441  | -0.226579 |
| 5                | 7                | 0              | -0.588113               | 1.287475  | -0.409917 |
| 6                | 6                | 0              | 0.799392                | 1.755316  | -0.619150 |
| 7                | 6                | 0              | 1.546261                | 1.957961  | 0.707690  |
| 8                | 1                | 0              | -1.709925               | 3.131786  | -0.409326 |
| 9                | 1                | 0              | -3.812201               | 1.426429  | 0.100932  |
| 10               | 1                | 0              | 1.306745                | 0.976258  | -1.188858 |
| 11               | 1                | 0              | 0.760188                | 2.671762  | -1.208246 |
| 12               | 1                | 0              | 1.214412                | 2.882600  | 1.190872  |
| 13               | 1                | 0              | 1.302925                | 1.115843  | 1.369043  |



|    |    |   |           |           |           |
|----|----|---|-----------|-----------|-----------|
| 14 | 35 | 0 | 1.891659  | -1.671885 | -0.082747 |
| 15 | 1  | 0 | -0.157525 | -0.809539 | -0.219526 |
| 16 | 6  | 0 | -2.908986 | -1.295923 | 0.227774  |
| 17 | 6  | 0 | -4.218765 | -1.424264 | 0.394689  |
| 18 | 1  | 0 | -2.223947 | -2.133930 | 0.255088  |
| 19 | 1  | 0 | -4.633759 | -2.407029 | 0.570157  |
| 20 | 1  | 0 | -4.911013 | -0.592446 | 0.365209  |
| 21 | 7  | 0 | 2.966606  | 2.061955  | 0.392712  |
| 22 | 1  | 0 | 3.488233  | 2.428143  | 1.180619  |
| 23 | 1  | 0 | 3.328424  | 1.131095  | 0.190374  |

-----

Rotational constants (GHZ):      0.8897000      0.4599595      0.3138358

Standard basis: 6-311++G(d,p) (5D, 7F)

There are    365 symmetry adapted cartesian basis functions of A    symmetry.

There are    352 symmetry adapted basis functions of A    symmetry.

    352 basis functions,    562 primitive gaussians,    365 cartesian basis functions

    55 alpha electrons      55 beta electrons

        nuclear repulsion energy      843.1065821910 Hartrees.

NAtoms=    23 NActive=    23 NUniq=    23 SFac= 1.00D+00 NAtFMM=    60 NAOKFM=F

Big=F

Integral buffers will be    131072 words long.

Raffenetti 2 integral format.

Two-electron integral symmetry is turned on.

One-electron integrals computed using PRISM.

NBasis=    352 RedAO= T EigKep= 4.31D-06 NBF=    352

NBsUse=    352 1.00D-06 EigRej= -1.00D+00 NBFU=    352

Initial guess from the checkpoint file: "/home/suqian/liuwen/qianmengshijie/nh2/nh2.chk"

B after Tr=    0.000000    0.000000    0.000000

        Rot=    0.999999    -0.000325    0.000112    -0.001272 Ang=    -0.15 deg.

ExpMin= 3.50D-02 ExpMax= 4.40D+05 ExpMxC= 1.51D+04 IAcc=3 IRadAn=      5 AccDes=

0.00D+00

Harris functional with IExCor=    402 and IRadAn=      5 diagonalized for initial guess.

HarFok: IExCor=    402 AccDes= 0.00D+00 IRadAn=      5 IDoV= 1 UseB2=F ITyADJ=14

ICtDFT= 3500011 ScaDFX= 1.000000 1.000000 1.000000 1.000000

FoFCou: FMM=F IPFlag=            0 FMFlag=      100000 FMFlg1=            0

        NFxFlg=            0 DoJE=T BraDBF=F KetDBF=T FulRan=T

        wScrn= 0.000000 ICntrl=      500 IOpCl= 0 I1Cent=    200000004 NGrid=

0

        NMat0=    1 NMatS0=      1 NMatT0=    0 NMatD0=    1 NMtDS0=    0

NMtDT0=    0

Petite list used in FoFCou.

Requested convergence on RMS density matrix=1.00D-08 within 128 cycles.

Requested convergence on MAX density matrix=1.00D-06.

Requested convergence on            energy=1.00D-06.

No special actions if energy rises.

SCF Done: E(RB3LYP) = -3012.46805263 A.U. after 11 cycles

NFock= 11 Conv=0.36D-08 -V/T= 2.0017

Calling FoFJK, ICntrl= 2127 FMM=F ISym2X=0 l1Cent= 0 IOpClX= 0 NMat=1 NMatS=1

NMatT=0.

\*\*\*\*\* Axes restored to original set \*\*\*\*\*

```
-----
```

| Center<br>Number | Atomic<br>Number | Forces (Hartrees/Bohr) |              |              |
|------------------|------------------|------------------------|--------------|--------------|
|                  |                  | X                      | Y            | Z            |
| 1                | 6                | -0.000029739           | 0.000019397  | 0.000038796  |
| 2                | 6                | -0.000012355           | 0.000006387  | -0.000056094 |
| 3                | 7                | -0.000075731           | 0.000030927  | 0.000005009  |
| 4                | 6                | 0.000034846            | -0.000023331 | -0.000103504 |
| 5                | 7                | -0.000002760           | 0.000051999  | 0.000110732  |
| 6                | 6                | 0.000107449            | 0.000217289  | -0.000098323 |
| 7                | 6                | 0.000052576            | 0.000013236  | -0.000164894 |
| 8                | 1                | 0.000024525            | 0.000005731  | 0.000013503  |
| 9                | 1                | -0.000007054           | -0.000001436 | 0.000026444  |
| 10               | 1                | 0.000002072            | -0.000140815 | 0.000025523  |
| 11               | 1                | -0.000028495           | 0.000009728  | 0.000010335  |
| 12               | 1                | -0.000052630           | -0.000140097 | 0.000084430  |
| 13               | 1                | 0.000161011            | 0.000053873  | 0.000122032  |
| 14               | 35               | -0.000020849           | -0.000025200 | 0.000028589  |
| 15               | 1                | 0.000030153            | -0.000072299 | 0.000001315  |
| 16               | 6                | 0.000024117            | -0.000081458 | 0.000015167  |
| 17               | 6                | -0.000000382           | 0.000019369  | -0.000020071 |
| 18               | 1                | -0.000029715           | 0.000010927  | 0.000000644  |
| 19               | 1                | -0.000002826           | -0.000004029 | 0.000000456  |
| 20               | 1                | -0.000000124           | -0.000002754 | 0.000000444  |
| 21               | 7                | -0.000095571           | -0.000101067 | 0.000141304  |
| 22               | 1                | -0.000013987           | 0.000030337  | -0.000118336 |
| 23               | 1                | -0.000064532           | 0.000123288  | -0.000063497 |

```
-----
```

Cartesian Forces: Max 0.000217289 RMS 0.000069183

GradGradGradGradGradGradGradGradGradGradGradGradGradGradGradGradGradGradGrad

Berny optimization.

Using GEDIIS/GDIIS optimizer.

FormGI is forming the generalized inverse of G from B-inverse, IUseBI=4.

Internal Forces: Max 0.000195434 RMS 0.000054351

Search for a local minimum.

Step number 31 out of a maximum of 121

All quantities printed in internal units (Hartrees-Bohrs-Radians)

Mixed Optimization -- En-DIIS/RFO-DIIS

Swapping is turned off.

Update second derivatives using D2CorX and points 24 23 26 27 28  
29 30 31

DE= -7.63D-06 DEPred=-6.01D-06 R= 1.27D+00

TightC=F SS= 1.41D+00 RLast= 3.65D-02 DXNew= 4.0000D-01 1.0964D-01

Trust test= 1.27D+00 RLast= 3.65D-02 DXMaxT set to 2.38D-01

ITU= 1 1 0 1 1 0 -1 -1 0 -1 -1 0 0 0 1 1 -1 1

ITU= -1 1 1 1 1 1 1 0 1 0 0

|                 |         |         |         |         |         |
|-----------------|---------|---------|---------|---------|---------|
| Eigenvalues --- | 0.00161 | 0.00221 | 0.00332 | 0.00695 | 0.00969 |
| Eigenvalues --- | 0.01366 | 0.01825 | 0.02014 | 0.02150 | 0.02311 |
| Eigenvalues --- | 0.02386 | 0.02770 | 0.03060 | 0.03069 | 0.03326 |
| Eigenvalues --- | 0.04047 | 0.04185 | 0.04485 | 0.05054 | 0.05289 |
| Eigenvalues --- | 0.05440 | 0.08903 | 0.09552 | 0.10091 | 0.12675 |
| Eigenvalues --- | 0.12917 | 0.15294 | 0.15846 | 0.15947 | 0.16000 |
| Eigenvalues --- | 0.16008 | 0.16030 | 0.16225 | 0.18975 | 0.21346 |
| Eigenvalues --- | 0.22046 | 0.23091 | 0.23739 | 0.24857 | 0.25089 |
| Eigenvalues --- | 0.27612 | 0.29889 | 0.34123 | 0.34628 | 0.34764 |
| Eigenvalues --- | 0.34889 | 0.35393 | 0.35690 | 0.35776 | 0.35859 |
| Eigenvalues --- | 0.36438 | 0.36660 | 0.38085 | 0.41441 | 0.42164 |
| Eigenvalues --- | 0.43079 | 0.46830 | 0.47696 | 0.48687 | 0.50027 |
| Eigenvalues --- | 0.54277 | 0.59957 | 0.60414 |         |         |

En-DIIS/RFO-DIIS IScMMF= 0 using points: 31 30 29 28 27

RFO step: Lambda=-1.02258603D-06.

DidBck=F Rises=F RFO-DIIS coefs: 1.51159 -0.21988 -0.36396 -0.04680

0.11905

Iteration 1 RMS(Cart)= 0.00622309 RMS(Int)= 0.00003138

Iteration 2 RMS(Cart)= 0.00004817 RMS(Int)= 0.00000135

Iteration 3 RMS(Cart)= 0.00000001 RMS(Int)= 0.00000135

| Variable | Old X   | -DE/DX   | Delta X<br>(Linear) | Delta X<br>(Quad) | Delta X<br>(Total) | New X   |
|----------|---------|----------|---------------------|-------------------|--------------------|---------|
| R1       | 2.56597 | 0.00001  | -0.00008            | 0.00009           | 0.00001            | 2.56598 |
| R2       | 2.61665 | 0.00001  | -0.00013            | 0.00000           | -0.00012           | 2.61653 |
| R3       | 2.03414 | 0.00000  | 0.00000             | -0.00002          | -0.00001           | 2.03412 |
| R4       | 2.62949 | -0.00001 | -0.00001            | -0.00004          | -0.00005           | 2.62944 |
| R5       | 2.03068 | 0.00000  | 0.00000             | 0.00000           | 0.00000            | 2.03068 |
| R6       | 2.54705 | 0.00008  | 0.00010             | 0.00010           | 0.00020            | 2.54725 |
| R7       | 2.68617 | -0.00004 | -0.00018            | -0.00001          | -0.00020           | 2.68597 |
| R8       | 2.51837 | -0.00011 | 0.00006             | -0.00011          | -0.00005           | 2.51832 |
| R9       | 2.09954 | -0.00006 | -0.00066            | 0.00006           | -0.00060           | 2.09894 |
| R10      | 2.79515 | 0.00003  | 0.00015             | 0.00003           | 0.00018            | 2.79533 |
| R11      | 2.90267 | -0.00001 | 0.00044             | -0.00007          | 0.00038            | 2.90305 |
| R12      | 2.06050 | -0.00009 | -0.00048            | 0.00015           | -0.00034           | 2.06016 |
| R13      | 2.06010 | 0.00000  | 0.00005             | -0.00004          | 0.00001            | 2.06011 |

|     |         |          |          |          |          |         |
|-----|---------|----------|----------|----------|----------|---------|
| R14 | 2.06884 | 0.00010  | 0.00007  | 0.00005  | 0.00013  | 2.06896 |
| R15 | 2.07506 | -0.00006 | -0.00035 | 0.00009  | -0.00025 | 2.07481 |
| R16 | 2.75628 | -0.00018 | -0.00008 | 0.00011  | 0.00003  | 2.75632 |
| R17 | 4.20926 | -0.00003 | 0.00539  | 0.00016  | 0.00555  | 4.21481 |
| R18 | 2.50690 | 0.00000  | 0.00000  | 0.00002  | 0.00002  | 2.50692 |
| R19 | 2.04604 | -0.00001 | -0.00011 | 0.00004  | -0.00007 | 2.04597 |
| R20 | 2.04303 | 0.00000  | -0.00002 | 0.00000  | -0.00002 | 2.04302 |
| R21 | 2.04579 | 0.00000  | 0.00000  | 0.00000  | -0.00001 | 2.04579 |
| R22 | 1.91506 | 0.00007  | 0.00013  | 0.00015  | 0.00028  | 1.91534 |
| R23 | 1.92562 | 0.00007  | 0.00026  | 0.00025  | 0.00051  | 1.92613 |
| A1  | 1.87490 | 0.00002  | 0.00016  | 0.00007  | 0.00023  | 1.87512 |
| A2  | 2.27727 | 0.00001  | -0.00003 | 0.00011  | 0.00007  | 2.27735 |
| A3  | 2.13100 | -0.00003 | -0.00012 | -0.00017 | -0.00030 | 2.13070 |
| A4  | 1.86141 | -0.00002 | -0.00013 | 0.00002  | -0.00011 | 1.86130 |
| A5  | 2.27784 | 0.00001  | 0.00000  | 0.00005  | 0.00006  | 2.27790 |
| A6  | 2.14393 | 0.00001  | 0.00012  | -0.00007 | 0.00005  | 2.14398 |
| A7  | 1.89721 | -0.00002 | 0.00009  | -0.00014 | -0.00004 | 1.89717 |
| A8  | 2.24691 | -0.00002 | -0.00028 | 0.00000  | -0.00028 | 2.24663 |
| A9  | 2.13906 | 0.00004  | 0.00018  | 0.00014  | 0.00033  | 2.13939 |
| A10 | 1.88829 | 0.00002  | -0.00011 | 0.00019  | 0.00008  | 1.88837 |
| A11 | 2.24858 | 0.00013  | 0.00038  | 0.00008  | 0.00046  | 2.24904 |
| A12 | 2.14512 | -0.00015 | -0.00015 | -0.00025 | -0.00040 | 2.14472 |
| A13 | 1.90295 | 0.00000  | -0.00002 | -0.00013 | -0.00015 | 1.90280 |
| A14 | 2.22536 | 0.00001  | -0.00083 | 0.00003  | -0.00080 | 2.22456 |
| A15 | 2.15334 | -0.00001 | 0.00071  | 0.00011  | 0.00082  | 2.15416 |
| A16 | 1.95589 | -0.00007 | -0.00051 | 0.00016  | -0.00035 | 1.95555 |
| A17 | 1.85918 | 0.00007  | 0.00059  | 0.00050  | 0.00109  | 1.86027 |
| A18 | 1.88452 | -0.00002 | -0.00056 | -0.00042 | -0.00098 | 1.88354 |
| A19 | 1.89584 | 0.00003  | 0.00044  | 0.00019  | 0.00062  | 1.89646 |
| A20 | 1.95343 | 0.00003  | -0.00003 | -0.00014 | -0.00018 | 1.95325 |
| A21 | 1.91243 | -0.00004 | 0.00011  | -0.00027 | -0.00015 | 1.91228 |
| A22 | 1.92334 | -0.00010 | -0.00069 | -0.00008 | -0.00076 | 1.92257 |
| A23 | 1.88739 | -0.00001 | -0.00020 | -0.00012 | -0.00033 | 1.88706 |
| A24 | 1.87167 | 0.00010  | -0.00007 | -0.00010 | -0.00017 | 1.87150 |
| A25 | 1.89097 | 0.00011  | 0.00194  | 0.00009  | 0.00204  | 1.89300 |
| A26 | 1.90738 | 0.00003  | 0.00030  | 0.00022  | 0.00052  | 1.90791 |
| A27 | 1.98290 | -0.00014 | -0.00134 | -0.00002 | -0.00137 | 1.98154 |
| A28 | 2.71050 | -0.00006 | -0.00390 | 0.00112  | -0.00279 | 2.70772 |
| A29 | 2.17793 | 0.00002  | 0.00015  | 0.00004  | 0.00019  | 2.17812 |
| A30 | 1.95612 | 0.00002  | 0.00020  | 0.00007  | 0.00027  | 1.95639 |
| A31 | 2.14913 | -0.00004 | -0.00035 | -0.00011 | -0.00046 | 2.14867 |
| A32 | 2.07985 | 0.00000  | 0.00007  | -0.00003 | 0.00005  | 2.07990 |
| A33 | 2.15744 | 0.00000  | -0.00009 | 0.00004  | -0.00005 | 2.15739 |
| A34 | 2.04589 | 0.00000  | 0.00002  | -0.00001 | 0.00000  | 2.04590 |

|     |          |          |          |          |          |          |
|-----|----------|----------|----------|----------|----------|----------|
| A35 | 1.93811  | -0.00011 | -0.00087 | -0.00052 | -0.00140 | 1.93671  |
| A36 | 1.90024  | -0.00020 | -0.00201 | -0.00027 | -0.00228 | 1.89796  |
| A37 | 1.87728  | 0.00006  | -0.00047 | -0.00021 | -0.00068 | 1.87660  |
| D1  | 0.00416  | -0.00001 | -0.00015 | -0.00013 | -0.00028 | 0.00388  |
| D2  | -3.13661 | 0.00000  | 0.00015  | 0.00090  | 0.00105  | -3.13556 |
| D3  | 3.13935  | 0.00000  | 0.00056  | -0.00070 | -0.00014 | 3.13921  |
| D4  | -0.00142 | 0.00002  | 0.00086  | 0.00033  | 0.00119  | -0.00023 |
| D5  | -0.00548 | 0.00002  | -0.00054 | 0.00072  | 0.00018  | -0.00530 |
| D6  | -3.08857 | 0.00004  | 0.00187  | 0.00066  | 0.00253  | -3.08604 |
| D7  | -3.14132 | 0.00000  | -0.00118 | 0.00123  | 0.00005  | -3.14127 |
| D8  | 0.05877  | 0.00003  | 0.00123  | 0.00117  | 0.00241  | 0.06117  |
| D9  | -0.00148 | 0.00001  | 0.00078  | -0.00050 | 0.00029  | -0.00120 |
| D10 | 3.14143  | 0.00001  | 0.00014  | 0.00047  | 0.00061  | -3.14114 |
| D11 | 3.13937  | -0.00001 | 0.00051  | -0.00143 | -0.00091 | 3.13845  |
| D12 | -0.00090 | -0.00001 | -0.00013 | -0.00046 | -0.00059 | -0.00149 |
| D13 | -0.00191 | 0.00000  | -0.00113 | 0.00095  | -0.00018 | -0.00209 |
| D14 | 3.08763  | 0.00002  | 0.00138  | 0.00142  | 0.00280  | 3.09043  |
| D15 | 3.13846  | 0.00000  | -0.00053 | 0.00005  | -0.00048 | 3.13798  |
| D16 | -0.05519 | 0.00002  | 0.00198  | 0.00052  | 0.00250  | -0.05269 |
| D17 | 0.05166  | -0.00002 | -0.00340 | -0.00112 | -0.00452 | 0.04714  |
| D18 | -3.08849 | -0.00001 | -0.00294 | -0.00160 | -0.00454 | -3.09303 |
| D19 | -3.08844 | -0.00001 | -0.00412 | -0.00003 | -0.00415 | -3.09260 |
| D20 | 0.05459  | -0.00001 | -0.00366 | -0.00051 | -0.00417 | 0.05042  |
| D21 | 0.00454  | -0.00001 | 0.00103  | -0.00103 | 0.00000  | 0.00454  |
| D22 | 3.09057  | -0.00004 | -0.00132 | -0.00097 | -0.00230 | 3.08827  |
| D23 | -3.08876 | -0.00004 | -0.00132 | -0.00148 | -0.00279 | -3.09155 |
| D24 | -0.00273 | -0.00006 | -0.00367 | -0.00142 | -0.00509 | -0.00783 |
| D25 | -2.78869 | -0.00004 | -0.01720 | -0.00600 | -0.02320 | -2.81188 |
| D26 | 0.29400  | -0.00002 | -0.01436 | -0.00545 | -0.01980 | 0.27419  |
| D27 | 1.60965  | -0.00003 | 0.00112  | 0.00263  | 0.00376  | 1.61341  |
| D28 | -2.60245 | 0.00001  | 0.00174  | 0.00326  | 0.00500  | -2.59745 |
| D29 | -0.54956 | -0.00001 | 0.00190  | 0.00300  | 0.00489  | -0.54467 |
| D30 | -1.46571 | 0.00000  | 0.00389  | 0.00257  | 0.00646  | -1.45925 |
| D31 | 0.60537  | 0.00004  | 0.00450  | 0.00320  | 0.00771  | 0.61308  |
| D32 | 2.65826  | 0.00002  | 0.00466  | 0.00294  | 0.00760  | 2.66586  |
| D33 | -1.32772 | 0.00003  | -0.00487 | 0.00120  | -0.00367 | -1.33139 |
| D34 | 0.73625  | 0.00010  | -0.00303 | 0.00120  | -0.00183 | 0.73441  |
| D35 | 2.88102  | -0.00002 | -0.00481 | 0.00104  | -0.00377 | 2.87725  |
| D36 | 2.90619  | -0.00004 | -0.00557 | 0.00038  | -0.00520 | 2.90099  |
| D37 | -1.31303 | 0.00003  | -0.00374 | 0.00037  | -0.00336 | -1.31639 |
| D38 | 0.83174  | -0.00008 | -0.00551 | 0.00022  | -0.00530 | 0.82644  |
| D39 | 0.79236  | -0.00003 | -0.00599 | 0.00068  | -0.00531 | 0.78705  |
| D40 | 2.85633  | 0.00004  | -0.00415 | 0.00067  | -0.00348 | 2.85285  |
| D41 | -1.28208 | -0.00007 | -0.00593 | 0.00051  | -0.00541 | -1.28750 |

|     |          |          |          |          |          |          |
|-----|----------|----------|----------|----------|----------|----------|
| D42 | 2.88919  | 0.00005  | 0.00294  | 0.00200  | 0.00495  | 2.89414  |
| D43 | -1.33028 | -0.00006 | 0.00061  | 0.00127  | 0.00187  | -1.32840 |
| D44 | 0.80448  | 0.00009  | 0.00363  | 0.00203  | 0.00567  | 0.81015  |
| D45 | 2.86820  | -0.00002 | 0.00130  | 0.00130  | 0.00260  | 2.87079  |
| D46 | -1.30949 | 0.00003  | 0.00183  | 0.00177  | 0.00360  | -1.30590 |
| D47 | 0.75422  | -0.00008 | -0.00051 | 0.00103  | 0.00052  | 0.75475  |
| D48 | -3.13657 | 0.00000  | -0.00019 | -0.00023 | -0.00041 | -3.13698 |
| D49 | 0.00573  | 0.00000  | -0.00017 | -0.00013 | -0.00030 | 0.00542  |
| D50 | 0.00343  | 0.00000  | -0.00069 | 0.00030  | -0.00039 | 0.00304  |
| D51 | -3.13746 | 0.00000  | -0.00068 | 0.00039  | -0.00028 | -3.13775 |

| Item                 | Value    | Threshold | Converged? |
|----------------------|----------|-----------|------------|
| Maximum Force        | 0.000195 | 0.000450  | YES        |
| RMS Force            | 0.000054 | 0.000300  | YES        |
| Maximum Displacement | 0.031140 | 0.001800  | NO         |
| RMS Displacement     | 0.006221 | 0.001200  | NO         |

Predicted change in Energy=-3.004798D-06

GradGradGradGradGradGradGradGradGradGradGradGradGradGradGradGradGradGrad

Input orientation:

| Center<br>Number | Atomic<br>Number | Atomic<br>Type | Coordinates (Angstroms) |           |           |
|------------------|------------------|----------------|-------------------------|-----------|-----------|
|                  |                  |                | X                       | Y         | Z         |
| 1                | 6                | 0              | -1.814444               | -1.992666 | 0.283447  |
| 2                | 6                | 0              | -2.821202               | -1.109838 | 0.058001  |
| 3                | 7                | 0              | -2.241260               | 0.154354  | 0.018189  |
| 4                | 6                | 0              | -0.914201               | 0.027515  | 0.217666  |
| 5                | 7                | 0              | -0.640079               | -1.266039 | 0.383509  |
| 6                | 6                | 0              | 0.730917                | -1.792088 | 0.561669  |
| 7                | 6                | 0              | 1.446396                | -2.003547 | -0.781227 |
| 8                | 1                | 0              | -1.834221               | -3.064075 | 0.385205  |
| 9                | 1                | 0              | -3.875504               | -1.271707 | -0.072328 |
| 10               | 1                | 0              | 1.279121                | -1.044234 | 1.134995  |
| 11               | 1                | 0              | 0.663648                | -2.715814 | 1.136705  |
| 12               | 1                | 0              | 1.071611                | -2.908753 | -1.269928 |
| 13               | 1                | 0              | 1.224094                | -1.142992 | -1.425818 |
| 14               | 35               | 0              | 1.956880                | 1.588957  | 0.067254  |
| 15               | 1                | 0              | -0.129719               | 0.813757  | 0.207841  |
| 16               | 6                | 0              | -2.867069               | 1.413524  | -0.189437 |
| 17               | 6                | 0              | -4.172933               | 1.594758  | -0.336950 |
| 18               | 1                | 0              | -2.150630               | 2.224814  | -0.216327 |
| 19               | 1                | 0              | -4.551578               | 2.595018  | -0.494826 |
| 20               | 1                | 0              | -4.896628               | 0.790134  | -0.308040 |
| 21               | 7                | 0              | 2.867245                | -2.163809 | -0.493198 |

|    |   |   |          |           |           |
|----|---|---|----------|-----------|-----------|
| 22 | 1 | 0 | 3.360854 | -2.533633 | -1.297480 |
| 23 | 1 | 0 | 3.264227 | -1.248720 | -0.283638 |

-----

Distance matrix (angstroms):

|    |    | 1        | 2        | 3        | 4        | 5        |
|----|----|----------|----------|----------|----------|----------|
| 1  | C  | 0.000000 |          |          |          |          |
| 2  | C  | 1.357856 | 0.000000 |          |          |          |
| 3  | N  | 2.205046 | 1.391438 | 0.000000 |          |          |
| 4  | C  | 2.212667 | 2.226144 | 1.347949 | 0.000000 |          |
| 5  | N  | 1.384606 | 2.210803 | 2.171349 | 1.332640 | 0.000000 |
| 6  | C  | 2.568366 | 3.651945 | 3.594141 | 2.477036 | 1.479223 |
| 7  | C  | 3.430266 | 4.440204 | 4.346770 | 3.270385 | 2.500781 |
| 8  | H  | 1.076412 | 2.213648 | 3.264762 | 3.229929 | 2.158452 |
| 9  | H  | 2.212312 | 1.074588 | 2.170851 | 3.246750 | 3.267383 |
| 10 | H  | 3.345864 | 4.239914 | 3.882906 | 2.607835 | 2.072983 |
| 11 | H  | 2.718811 | 3.985842 | 4.234080 | 3.295465 | 2.090181 |
| 12 | H  | 3.403161 | 4.489264 | 4.692227 | 3.844224 | 2.891755 |
| 13 | H  | 3.588348 | 4.308971 | 3.972020 | 2.939971 | 2.600758 |
| 14 | Br | 5.205540 | 5.487590 | 4.436763 | 3.271670 | 3.872365 |
| 15 | H  | 3.274145 | 3.311609 | 2.220222 | 1.110714 | 2.148692 |
| 16 | C  | 3.596355 | 2.535880 | 1.421356 | 2.429084 | 3.530978 |
| 17 | C  | 4.337854 | 3.049263 | 2.435621 | 3.658304 | 4.602638 |
| 18 | H  | 4.260274 | 3.412452 | 2.085669 | 2.558365 | 3.850666 |
| 19 | H  | 5.398560 | 4.126230 | 3.399646 | 4.508906 | 5.565883 |
| 20 | H  | 4.194484 | 2.837477 | 2.749840 | 4.088726 | 4.777478 |
| 21 | N  | 4.748755 | 5.811463 | 5.633136 | 4.427930 | 3.725041 |
| 22 | H  | 5.438353 | 6.487090 | 6.351374 | 5.208766 | 4.521060 |
| 23 | H  | 5.164101 | 6.096593 | 5.689473 | 4.397652 | 3.960933 |
|    |    | 6        | 7        | 8        | 9        | 10       |
| 6  | C  | 0.000000 |          |          |          |          |
| 7  | C  | 1.536227 | 0.000000 |          |          |          |
| 8  | H  | 2.868628 | 3.639744 | 0.000000 |          |          |
| 9  | H  | 4.678874 | 5.418555 | 2.754769 | 0.000000 |          |
| 10 | H  | 1.090191 | 2.149458 | 3.786139 | 5.299012 | 0.000000 |
| 11 | H  | 1.090165 | 2.190543 | 2.631614 | 4.914377 | 1.781288 |
| 12 | H  | 2.172041 | 1.094847 | 3.347754 | 5.346785 | 3.050106 |
| 13 | H  | 2.148175 | 1.097940 | 4.040255 | 5.277726 | 2.563307 |
| 14 | Br | 3.630275 | 3.726472 | 6.010345 | 6.497659 | 2.921151 |
| 15 | H  | 2.767005 | 3.376328 | 4.239619 | 4.296342 | 2.509298 |
| 16 | C  | 4.877050 | 5.534670 | 4.630970 | 2.870735 | 4.998559 |
| 17 | C  | 6.027105 | 6.687454 | 5.262681 | 2.893978 | 6.233442 |
| 18 | H  | 5.004409 | 5.580031 | 5.332383 | 3.901485 | 4.927063 |
| 19 | H  | 6.947492 | 7.563367 | 6.339071 | 3.948055 | 7.063818 |
| 20 | H  | 6.252483 | 6.947123 | 4.971303 | 2.312887 | 6.602056 |

|    |    |          |          |          |          |          |
|----|----|----------|----------|----------|----------|----------|
| 21 | N  | 2.411393 | 1.458580 | 4.866812 | 6.814517 | 2.535073 |
| 22 | H  | 3.304980 | 2.052477 | 5.486493 | 7.447035 | 3.531127 |
| 23 | H  | 2.725335 | 2.030239 | 5.453168 | 7.142894 | 2.448464 |
|    |    | 11       | 12       | 13       | 14       | 15       |
| 11 | H  | 0.000000 |          |          |          |          |
| 12 | H  | 2.448579 | 0.000000 |          |          |          |
| 13 | H  | 3.058495 | 1.779176 | 0.000000 |          |          |
| 14 | Br | 4.620305 | 4.775055 | 3.198403 | 0.000000 |          |
| 15 | H  | 3.734981 | 4.181396 | 2.886263 | 2.230379 | 0.000000 |
| 16 | C  | 5.592499 | 5.946658 | 4.980163 | 4.833958 | 2.830307 |
| 17 | C  | 6.644186 | 6.975479 | 6.148887 | 6.143128 | 4.153835 |
| 18 | H  | 5.844713 | 6.151945 | 4.918714 | 4.166098 | 2.501017 |
| 19 | H  | 7.620066 | 7.906487 | 6.942467 | 6.609699 | 4.818659 |
| 20 | H  | 6.730203 | 7.087093 | 6.515339 | 6.910104 | 4.794801 |
| 21 | N  | 2.795913 | 2.093454 | 2.147509 | 3.902066 | 4.282422 |
| 22 | H  | 3.637769 | 2.319937 | 2.552665 | 4.563923 | 5.065087 |
| 23 | H  | 3.306470 | 2.921651 | 2.340491 | 3.143992 | 4.001778 |
|    |    | 16       | 17       | 18       | 19       | 20       |
| 16 | C  | 0.000000 |          |          |          |          |
| 17 | C  | 1.326607 | 0.000000 |          |          |          |
| 18 | H  | 1.082682 | 2.121610 | 0.000000 |          |          |
| 19 | H  | 2.080087 | 1.081118 | 2.445233 | 0.000000 |          |
| 20 | H  | 2.126451 | 1.082585 | 3.099552 | 1.847039 | 0.000000 |
| 21 | N  | 6.765496 | 7.982189 | 6.672012 | 8.813930 | 8.308898 |
| 22 | H  | 7.456195 | 8.644315 | 7.361262 | 9.463292 | 8.956140 |
| 23 | H  | 6.684999 | 7.962384 | 6.433557 | 8.712389 | 8.411723 |
|    |    | 21       | 22       | 23       |          |          |
| 21 | N  | 0.000000 |          |          |          |          |
| 22 | H  | 1.013553 | 0.000000 |          |          |          |
| 23 | H  | 1.019264 | 1.639578 | 0.000000 |          |          |

Stoichiometry C7H12BrN3

Framework group C1[X(C7H12BrN3)]

Deg. of freedom 63

Full point group C1 NOp 1

Largest Abelian subgroup C1 NOp 1

Largest concise Abelian subgroup C1 NOp 1

Standard orientation:

| -----  |        |        |                         |           |           |
|--------|--------|--------|-------------------------|-----------|-----------|
| Center | Atomic | Atomic | Coordinates (Angstroms) |           |           |
| Number | Number | Type   | X                       | Y         | Z         |
| -----  |        |        |                         |           |           |
| 1      | 6      | 0      | -1.734682               | 2.056210  | -0.307905 |
| 2      | 6      | 0      | -2.771305               | 1.216493  | -0.054805 |
| 3      | 7      | 0      | -2.239837               | -0.068393 | -0.002766 |



|    |    |   |           |           |           |
|----|----|---|-----------|-----------|-----------|
| 4  | 6  | 0 | -0.911846 | 0.004017  | -0.222227 |
| 5  | 7  | 0 | -0.590626 | 1.283317  | -0.412327 |
| 6  | 6  | 0 | 0.796899  | 1.753223  | -0.617421 |
| 7  | 6  | 0 | 1.538933  | 1.957505  | 0.712108  |
| 8  | 1  | 0 | -1.714737 | 3.125893  | -0.426413 |
| 9  | 1  | 0 | -3.816659 | 1.420945  | 0.087230  |
| 10 | 1  | 0 | 1.307796  | 0.976030  | -1.186167 |
| 11 | 1  | 0 | 0.757012  | 2.669909  | -1.206109 |
| 12 | 1  | 0 | 1.206154  | 2.883915  | 1.191393  |
| 13 | 1  | 0 | 1.292904  | 1.116186  | 1.373262  |
| 14 | 35 | 0 | 1.898993  | -1.664650 | -0.085978 |
| 15 | 1  | 0 | -0.158078 | -0.811692 | -0.210546 |
| 16 | 6  | 0 | -2.910537 | -1.299113 | 0.233334  |
| 17 | 6  | 0 | -4.220176 | -1.427488 | 0.401419  |
| 18 | 1  | 0 | -2.225475 | -2.136959 | 0.263398  |
| 19 | 1  | 0 | -4.634680 | -2.409833 | 0.580308  |
| 20 | 1  | 0 | -4.912772 | -0.596054 | 0.369540  |
| 21 | 7  | 0 | 2.960664  | 2.058325  | 0.402311  |
| 22 | 1  | 0 | 3.479462  | 2.421128  | 1.193836  |
| 23 | 1  | 0 | 3.319199  | 1.125474  | 0.201963  |

-----

Rotational constants (GHZ):      0.8929855      0.4589105      0.3139285

Standard basis: 6-311++G(d,p) (5D, 7F)

There are    365 symmetry adapted cartesian basis functions of A    symmetry.

There are    352 symmetry adapted basis functions of A    symmetry.

    352 basis functions,    562 primitive gaussians,    365 cartesian basis functions

    55 alpha electrons      55 beta electrons

        nuclear repulsion energy      843.2699748345 Hartrees.

NAtoms=    23 NActive=    23 NUniq=    23 SFac= 1.00D+00 NAtFMM=    60 NAOKFM=F

Big=F

Integral buffers will be    131072 words long.

Raffenetti 2 integral format.

Two-electron integral symmetry is turned on.

One-electron integrals computed using PRISM.

NBasis=    352 RedAO= T EigKep= 4.31D-06 NBF=    352

NBsUse=    352 1.00D-06 EigRej= -1.00D+00 NBFU=    352

Initial guess from the checkpoint file: "/home/suqian/liuwen/qianmengshijie/nh2/nh2.chk"

B after Tr=      0.000000      0.000000      0.000000

        Rot=      1.000000    -0.000054      0.000139    -0.000925 Ang=    -0.11 deg.

ExpMin= 3.50D-02 ExpMax= 4.40D+05 ExpMxC= 1.51D+04 IAcc=3 IRadAn=            5 AccDes=

0.00D+00

Harris functional with IExCor=    402 and IRadAn=            5 diagonalized for initial guess.

HarFok: IExCor=    402 AccDes= 0.00D+00 IRadAn=            5 IDoV= 1 UseB2=F ITyADJ=14

ICtDFT= 3500011 ScaDFX= 1.000000 1.000000 1.000000 1.000000

FoFCou: FMM=F IPFlag= 0 FMFlag= 100000 FMFlg1= 0  
 NFXFlg= 0 DoJE=T BraDBF=F KetDBF=T FulRan=T  
 wScrn= 0.000000 ICntrl= 500 IOpCl= 0 I1Cent= 200000004 NGrid= 0  
 0  
 NMat0= 1 NMatS0= 1 NMatT0= 0 NMatD0= 1 NMtDS0= 0  
 NMtDT0= 0

Petite list used in FoFCou.

Requested convergence on RMS density matrix=1.00D-08 within 128 cycles.

Requested convergence on MAX density matrix=1.00D-06.

Requested convergence on energy=1.00D-06.

No special actions if energy rises.

SCF Done: E(RB3LYP) = -3012.46805644 A.U. after 11 cycles

NFock= 11 Conv=0.31D-08 -V/T= 2.0017

Calling FoFJK, ICntrl= 2127 FMM=F ISym2X=0 I1Cent= 0 IOpClX= 0 NMat=1 NMatS=1

NMatT=0.

\*\*\*\*\* Axes restored to original set \*\*\*\*\*

| Center Number | Atomic Number | Forces (Hartrees/Bohr) |              |              |
|---------------|---------------|------------------------|--------------|--------------|
|               |               | X                      | Y            | Z            |
| 1             | 6             | -0.000053991           | -0.000025925 | -0.000001241 |
| 2             | 6             | 0.000022449            | 0.000000974  | 0.000015853  |
| 3             | 7             | -0.000027519           | 0.000002839  | 0.000039729  |
| 4             | 6             | 0.000031222            | -0.000009828 | -0.000100700 |
| 5             | 7             | -0.000012748           | 0.000035450  | 0.000025675  |
| 6             | 6             | -0.000006961           | 0.000009148  | -0.000079319 |
| 7             | 6             | 0.000071187            | 0.000024017  | 0.000129862  |
| 8             | 1             | 0.000010212            | -0.000000445 | 0.000008219  |
| 9             | 1             | -0.000001706           | -0.000001839 | 0.000014896  |
| 10            | 1             | 0.000002377            | 0.000020822  | 0.000025153  |
| 11            | 1             | 0.000003361            | 0.000000071  | 0.000018276  |
| 12            | 1             | -0.000020929           | -0.000004357 | -0.000031408 |
| 13            | 1             | -0.000004165           | -0.000003783 | -0.000039775 |
| 14            | 35            | -0.000041941           | 0.000007236  | 0.000001654  |
| 15            | 1             | 0.000067519            | -0.000041445 | 0.000002499  |
| 16            | 6             | 0.000003039            | -0.000004298 | 0.000001537  |
| 17            | 6             | -0.000000054           | -0.000017294 | -0.000002540 |
| 18            | 1             | 0.000005113            | 0.000006987  | 0.000003328  |
| 19            | 1             | 0.000000459            | -0.000000666 | -0.000005343 |
| 20            | 1             | -0.000006259           | 0.000001767  | -0.000001516 |
| 21            | 7             | -0.000055442           | -0.000000989 | 0.000009664  |
| 22            | 1             | 0.000014025            | 0.000008368  | -0.000021732 |
| 23            | 1             | 0.000000753            | -0.000006809 | -0.000012772 |

Cartesian Forces: Max 0.000129862 RMS 0.000031044

GradGradGradGradGradGradGradGradGradGradGradGradGradGradGradGradGradGradGrad  
Berny optimization.

Using GEDIIS/GDIIS optimizer.

FormGI is forming the generalized inverse of G from B-inverse, IUseBI=4.

Internal Forces: Max 0.000084635 RMS 0.000017741

Search for a local minimum.

Step number 32 out of a maximum of 121

All quantities printed in internal units (Hartrees-Bohrs-Radians)

Mixed Optimization -- En-DIIS/RFO-DIIS

Swapping is turned off.

Update second derivatives using D2CorX and points 24 27 28 29 30  
31 32

DE= -3.82D-06 DEPred=-3.00D-06 R= 1.27D+00

TightC=F SS= 1.41D+00 RLast= 4.01D-02 DXNew= 4.0000D-01 1.2018D-01

Trust test= 1.27D+00 RLast= 4.01D-02 DXMaxT set to 2.38D-01

ITU= 1 1 1 0 1 1 0 -1 -1 0 -1 -1 0 -1 0 0 0 1 1 -1

ITU= 1 -1 1 1 1 1 1 1 0 1 0 0

|                 |         |         |         |         |         |
|-----------------|---------|---------|---------|---------|---------|
| Eigenvalues --- | 0.00146 | 0.00220 | 0.00329 | 0.00620 | 0.00965 |
| Eigenvalues --- | 0.01387 | 0.01822 | 0.02022 | 0.02159 | 0.02308 |
| Eigenvalues --- | 0.02388 | 0.02889 | 0.03061 | 0.03080 | 0.03345 |
| Eigenvalues --- | 0.04043 | 0.04168 | 0.04616 | 0.05007 | 0.05310 |
| Eigenvalues --- | 0.05508 | 0.08910 | 0.09543 | 0.10231 | 0.12603 |
| Eigenvalues --- | 0.12939 | 0.15470 | 0.15780 | 0.15932 | 0.16000 |
| Eigenvalues --- | 0.16010 | 0.16027 | 0.16253 | 0.18850 | 0.21804 |
| Eigenvalues --- | 0.22183 | 0.23081 | 0.23784 | 0.24921 | 0.25086 |
| Eigenvalues --- | 0.26862 | 0.29875 | 0.34173 | 0.34477 | 0.34782 |
| Eigenvalues --- | 0.35012 | 0.35424 | 0.35690 | 0.35810 | 0.35859 |
| Eigenvalues --- | 0.36438 | 0.36661 | 0.37915 | 0.41014 | 0.42166 |
| Eigenvalues --- | 0.43033 | 0.46769 | 0.47709 | 0.48659 | 0.49993 |
| Eigenvalues --- | 0.54224 | 0.59721 | 0.60401 |         |         |

En-DIIS/RFO-DIIS IScMMF= 0 using points: 32 31 30 29 28

RFO step: Lambda=-1.02199268D-07.

DidBck=F Rises=F RFO-DIIS coefs: 1.06287 -0.02858 -0.07779 0.03875  
0.00474

Iteration 1 RMS(Cart)= 0.00148538 RMS(Int)= 0.00000191

Iteration 2 RMS(Cart)= 0.00000267 RMS(Int)= 0.00000013

Iteration 3 RMS(Cart)= 0.00000000 RMS(Int)= 0.00000013

| Variable | Old X   | -DE/DX   | Delta X<br>(Linear) | Delta X<br>(Quad) | Delta X<br>(Total) | New X   |
|----------|---------|----------|---------------------|-------------------|--------------------|---------|
| R1       | 2.56598 | -0.00001 | 0.00000             | -0.00002          | -0.00002           | 2.56595 |
| R2       | 2.61653 | 0.00003  | 0.00001             | 0.00005           | 0.00005            | 2.61658 |
| R3       | 2.03412 | 0.00000  | 0.00000             | 0.00000           | 0.00000            | 2.03413 |

|     |         |          |          |          |          |         |
|-----|---------|----------|----------|----------|----------|---------|
| R4  | 2.62944 | 0.00001  | 0.00001  | 0.00001  | 0.00003  | 2.62946 |
| R5  | 2.03068 | 0.00000  | 0.00000  | 0.00000  | 0.00000  | 2.03068 |
| R6  | 2.54725 | 0.00001  | 0.00000  | -0.00002 | -0.00001 | 2.54724 |
| R7  | 2.68597 | -0.00001 | -0.00001 | -0.00003 | -0.00004 | 2.68593 |
| R8  | 2.51832 | -0.00006 | 0.00000  | -0.00004 | -0.00004 | 2.51829 |
| R9  | 2.09894 | -0.00001 | 0.00009  | 0.00000  | 0.00009  | 2.09904 |
| R10 | 2.79533 | -0.00001 | -0.00002 | -0.00001 | -0.00003 | 2.79530 |
| R11 | 2.90305 | -0.00003 | 0.00006  | -0.00011 | -0.00006 | 2.90299 |
| R12 | 2.06016 | 0.00003  | -0.00001 | 0.00003  | 0.00001  | 2.06018 |
| R13 | 2.06011 | 0.00001  | 0.00001  | 0.00001  | 0.00002  | 2.06013 |
| R14 | 2.06896 | 0.00002  | 0.00001  | 0.00000  | 0.00001  | 2.06897 |
| R15 | 2.07481 | 0.00002  | -0.00003 | 0.00000  | -0.00003 | 2.07477 |
| R16 | 2.75632 | -0.00004 | 0.00008  | -0.00005 | 0.00003  | 2.75634 |
| R17 | 4.21481 | -0.00004 | -0.00039 | -0.00123 | -0.00162 | 4.21319 |
| R18 | 2.50692 | 0.00000  | 0.00000  | 0.00000  | 0.00001  | 2.50693 |
| R19 | 2.04597 | 0.00001  | 0.00000  | 0.00000  | 0.00001  | 2.04598 |
| R20 | 2.04302 | 0.00000  | 0.00000  | 0.00000  | 0.00000  | 2.04302 |
| R21 | 2.04579 | 0.00000  | 0.00000  | 0.00000  | 0.00000  | 2.04579 |
| R22 | 1.91534 | 0.00002  | 0.00004  | 0.00000  | 0.00004  | 1.91537 |
| R23 | 1.92613 | -0.00001 | 0.00004  | -0.00005 | -0.00001 | 1.92612 |
| A1  | 1.87512 | -0.00002 | -0.00001 | -0.00005 | -0.00007 | 1.87506 |
| A2  | 2.27735 | 0.00002  | 0.00002  | 0.00006  | 0.00008  | 2.27743 |
| A3  | 2.13070 | 0.00000  | 0.00000  | -0.00001 | -0.00002 | 2.13068 |
| A4  | 1.86130 | 0.00000  | 0.00000  | 0.00002  | 0.00002  | 1.86132 |
| A5  | 2.27790 | 0.00000  | 0.00000  | -0.00002 | -0.00002 | 2.27788 |
| A6  | 2.14398 | 0.00000  | 0.00000  | -0.00001 | 0.00000  | 2.14398 |
| A7  | 1.89717 | 0.00000  | 0.00001  | 0.00001  | 0.00002  | 1.89719 |
| A8  | 2.24663 | 0.00001  | -0.00001 | 0.00004  | 0.00002  | 2.24665 |
| A9  | 2.13939 | -0.00001 | 0.00000  | -0.00005 | -0.00004 | 2.13935 |
| A10 | 1.88837 | 0.00000  | -0.00002 | -0.00003 | -0.00004 | 1.88833 |
| A11 | 2.24904 | 0.00001  | 0.00008  | 0.00011  | 0.00019  | 2.24922 |
| A12 | 2.14472 | -0.00001 | -0.00007 | -0.00003 | -0.00010 | 2.14462 |
| A13 | 1.90280 | 0.00002  | 0.00002  | 0.00005  | 0.00007  | 1.90287 |
| A14 | 2.22456 | 0.00004  | -0.00001 | 0.00006  | 0.00005  | 2.22461 |
| A15 | 2.15416 | -0.00006 | -0.00003 | -0.00011 | -0.00014 | 2.15401 |
| A16 | 1.95555 | 0.00003  | -0.00005 | 0.00006  | 0.00001  | 1.95555 |
| A17 | 1.86027 | -0.00001 | 0.00001  | 0.00004  | 0.00005  | 1.86032 |
| A18 | 1.88354 | -0.00002 | -0.00001 | -0.00001 | -0.00002 | 1.88352 |
| A19 | 1.89646 | -0.00001 | 0.00017  | 0.00004  | 0.00021  | 1.89667 |
| A20 | 1.95325 | 0.00001  | -0.00003 | -0.00003 | -0.00005 | 1.95320 |
| A21 | 1.91228 | 0.00000  | -0.00010 | -0.00011 | -0.00020 | 1.91208 |
| A22 | 1.92257 | 0.00000  | -0.00014 | -0.00005 | -0.00019 | 1.92239 |
| A23 | 1.88706 | 0.00001  | 0.00001  | 0.00006  | 0.00007  | 1.88714 |
| A24 | 1.87150 | 0.00001  | 0.00006  | 0.00010  | 0.00016  | 1.87167 |

|     |          |          |          |          |          |          |
|-----|----------|----------|----------|----------|----------|----------|
| A25 | 1.89300  | -0.00002 | 0.00012  | -0.00006 | 0.00005  | 1.89306  |
| A26 | 1.90791  | 0.00000  | 0.00007  | -0.00010 | -0.00003 | 1.90787  |
| A27 | 1.98154  | -0.00001 | -0.00013 | 0.00005  | -0.00008 | 1.98146  |
| A28 | 2.70772  | 0.00008  | 0.00061  | 0.00103  | 0.00165  | 2.70937  |
| A29 | 2.17812  | 0.00000  | 0.00000  | 0.00004  | 0.00003  | 2.17816  |
| A30 | 1.95639  | 0.00000  | 0.00001  | -0.00002 | 0.00000  | 1.95639  |
| A31 | 2.14867  | 0.00000  | -0.00001 | -0.00002 | -0.00003 | 2.14864  |
| A32 | 2.07990  | -0.00001 | 0.00000  | -0.00004 | -0.00004 | 2.07986  |
| A33 | 2.15739  | 0.00001  | 0.00000  | 0.00005  | 0.00005  | 2.15744  |
| A34 | 2.04590  | 0.00000  | 0.00000  | -0.00001 | -0.00001 | 2.04589  |
| A35 | 1.93671  | 0.00000  | -0.00008 | -0.00004 | -0.00012 | 1.93659  |
| A36 | 1.89796  | 0.00000  | -0.00003 | -0.00013 | -0.00016 | 1.89780  |
| A37 | 1.87660  | -0.00001 | -0.00011 | -0.00019 | -0.00031 | 1.87629  |
| D1  | 0.00388  | 0.00001  | 0.00001  | 0.00001  | 0.00002  | 0.00390  |
| D2  | -3.13556 | 0.00001  | 0.00007  | 0.00046  | 0.00053  | -3.13504 |
| D3  | 3.13921  | -0.00001 | 0.00002  | -0.00034 | -0.00032 | 3.13890  |
| D4  | -0.00023 | 0.00000  | 0.00009  | 0.00010  | 0.00019  | -0.00004 |
| D5  | -0.00530 | -0.00002 | -0.00007 | -0.00025 | -0.00032 | -0.00562 |
| D6  | -3.08604 | -0.00002 | 0.00040  | -0.00023 | 0.00017  | -3.08587 |
| D7  | -3.14127 | 0.00000  | -0.00008 | 0.00006  | -0.00002 | -3.14129 |
| D8  | 0.06117  | 0.00000  | 0.00039  | 0.00008  | 0.00047  | 0.06164  |
| D9  | -0.00120 | 0.00000  | 0.00005  | 0.00023  | 0.00028  | -0.00092 |
| D10 | -3.14114 | 0.00000  | 0.00000  | 0.00022  | 0.00021  | -3.14093 |
| D11 | 3.13845  | 0.00000  | 0.00000  | -0.00017 | -0.00018 | 3.13828  |
| D12 | -0.00149 | 0.00000  | -0.00006 | -0.00019 | -0.00024 | -0.00173 |
| D13 | -0.00209 | -0.00001 | -0.00010 | -0.00039 | -0.00048 | -0.00257 |
| D14 | 3.09043  | 0.00001  | -0.00014 | 0.00079  | 0.00064  | 3.09108  |
| D15 | 3.13798  | -0.00001 | -0.00005 | -0.00038 | -0.00042 | 3.13756  |
| D16 | -0.05269 | 0.00001  | -0.00009 | 0.00080  | 0.00071  | -0.05198 |
| D17 | 0.04714  | -0.00001 | 0.00016  | -0.00075 | -0.00059 | 0.04655  |
| D18 | -3.09303 | -0.00001 | 0.00018  | -0.00064 | -0.00046 | -3.09349 |
| D19 | -3.09260 | -0.00001 | 0.00010  | -0.00076 | -0.00066 | -3.09326 |
| D20 | 0.05042  | -0.00001 | 0.00012  | -0.00065 | -0.00053 | 0.04989  |
| D21 | 0.00454  | 0.00002  | 0.00010  | 0.00039  | 0.00050  | 0.00504  |
| D22 | 3.08827  | 0.00002  | -0.00035 | 0.00039  | 0.00004  | 3.08831  |
| D23 | -3.09155 | -0.00001 | 0.00014  | -0.00070 | -0.00056 | -3.09211 |
| D24 | -0.00783 | 0.00000  | -0.00031 | -0.00071 | -0.00101 | -0.00884 |
| D25 | -2.81188 | -0.00002 | 0.00096  | -0.00461 | -0.00366 | -2.81554 |
| D26 | 0.27419  | 0.00001  | 0.00090  | -0.00328 | -0.00238 | 0.27181  |
| D27 | 1.61341  | 0.00002  | 0.00031  | 0.00213  | 0.00244  | 1.61585  |
| D28 | -2.59745 | 0.00002  | 0.00049  | 0.00224  | 0.00273  | -2.59473 |
| D29 | -0.54467 | 0.00000  | 0.00038  | 0.00213  | 0.00251  | -0.54216 |
| D30 | -1.45925 | 0.00002  | 0.00084  | 0.00214  | 0.00298  | -1.45626 |
| D31 | 0.61308  | 0.00002  | 0.00102  | 0.00225  | 0.00327  | 0.61635  |

|     |          |          |          |          |          |          |
|-----|----------|----------|----------|----------|----------|----------|
| D32 | 2.66586  | 0.00000  | 0.00091  | 0.00214  | 0.00306  | 2.66892  |
| D33 | -1.33139 | 0.00001  | 0.00017  | 0.00053  | 0.00070  | -1.33069 |
| D34 | 0.73441  | -0.00001 | 0.00024  | 0.00047  | 0.00071  | 0.73512  |
| D35 | 2.87725  | 0.00000  | 0.00012  | 0.00062  | 0.00075  | 2.87799  |
| D36 | 2.90099  | 0.00001  | 0.00008  | 0.00043  | 0.00050  | 2.90149  |
| D37 | -1.31639 | 0.00000  | 0.00015  | 0.00036  | 0.00051  | -1.31589 |
| D38 | 0.82644  | 0.00000  | 0.00003  | 0.00051  | 0.00055  | 0.82699  |
| D39 | 0.78705  | 0.00001  | 0.00010  | 0.00055  | 0.00065  | 0.78770  |
| D40 | 2.85285  | 0.00000  | 0.00017  | 0.00048  | 0.00065  | 2.85350  |
| D41 | -1.28750 | 0.00001  | 0.00006  | 0.00064  | 0.00069  | -1.28680 |
| D42 | 2.89414  | 0.00001  | 0.00058  | -0.00065 | -0.00007 | 2.89407  |
| D43 | -1.32840 | 0.00000  | 0.00037  | -0.00098 | -0.00061 | -1.32901 |
| D44 | 0.81015  | 0.00000  | 0.00067  | -0.00059 | 0.00007  | 0.81022  |
| D45 | 2.87079  | -0.00001 | 0.00046  | -0.00093 | -0.00046 | 2.87033  |
| D46 | -1.30590 | 0.00002  | 0.00055  | -0.00047 | 0.00008  | -1.30581 |
| D47 | 0.75475  | 0.00001  | 0.00035  | -0.00081 | -0.00046 | 0.75429  |
| D48 | -3.13698 | 0.00000  | 0.00002  | 0.00013  | 0.00014  | -3.13684 |
| D49 | 0.00542  | 0.00000  | 0.00004  | -0.00004 | 0.00000  | 0.00542  |
| D50 | 0.00304  | 0.00000  | -0.00001 | 0.00001  | 0.00000  | 0.00304  |
| D51 | -3.13775 | 0.00000  | 0.00001  | -0.00015 | -0.00014 | -3.13789 |

| Item                 | Value    | Threshold | Converged? |
|----------------------|----------|-----------|------------|
| Maximum Force        | 0.000085 | 0.000450  | YES        |
| RMS Force            | 0.000018 | 0.000300  | YES        |
| Maximum Displacement | 0.005005 | 0.001800  | NO         |
| RMS Displacement     | 0.001487 | 0.001200  | NO         |

Predicted change in Energy=-2.740036D-07

GradGradGradGradGradGradGradGradGradGradGradGradGradGradGradGradGradGrad

Input orientation:

| Center Number | Atomic Number | Atomic Type | Coordinates (Angstroms) |           |           |
|---------------|---------------|-------------|-------------------------|-----------|-----------|
|               |               |             | X                       | Y         | Z         |
| 1             | 6             | 0           | -1.814973               | -1.992993 | 0.284871  |
| 2             | 6             | 0           | -2.821511               | -1.109996 | 0.059169  |
| 3             | 7             | 0           | -2.241150               | 0.153975  | 0.017991  |
| 4             | 6             | 0           | -0.913991               | 0.026842  | 0.216566  |
| 5             | 7             | 0           | -0.640320               | -1.266614 | 0.383754  |
| 6             | 6             | 0           | 0.730642                | -1.792853 | 0.561500  |
| 7             | 6             | 0           | 1.446523                | -2.002186 | -0.781480 |
| 8             | 1             | 0           | -1.835042               | -3.064284 | 0.387819  |
| 9             | 1             | 0           | -3.875989               | -1.271572 | -0.070094 |
| 10            | 1             | 0           | 1.278597                | -1.046020 | 1.136406  |
| 11            | 1             | 0           | 0.663233                | -2.717520 | 1.135024  |

|    |    |   |           |           |           |
|----|----|---|-----------|-----------|-----------|
| 12 | 1  | 0 | 1.071303  | -2.906301 | -1.271873 |
| 13 | 1  | 0 | 1.225004  | -1.140343 | -1.424591 |
| 14 | 35 | 0 | 1.955970  | 1.589935  | 0.067994  |
| 15 | 1  | 0 | -0.129149 | 0.812787  | 0.206158  |
| 16 | 6  | 0 | -2.866623 | 1.413198  | -0.190163 |
| 17 | 6  | 0 | -4.172456 | 1.594773  | -0.337560 |
| 18 | 1  | 0 | -2.149942 | 2.224256  | -0.217707 |
| 19 | 1  | 0 | -4.550758 | 2.595073  | -0.496006 |
| 20 | 1  | 0 | -4.896441 | 0.790429  | -0.308138 |
| 21 | 7  | 0 | 2.867218  | -2.163867 | -0.493416 |
| 22 | 1  | 0 | 3.360693  | -2.532521 | -1.298342 |
| 23 | 1  | 0 | 3.264685  | -1.249282 | -0.282598 |

-----  
Distance matrix (angstroms):

|    |    | 1        | 2        | 3        | 4        | 5        |
|----|----|----------|----------|----------|----------|----------|
| 1  | C  | 0.000000 |          |          |          |          |
| 2  | C  | 1.357844 | 0.000000 |          |          |          |
| 3  | N  | 2.205067 | 1.391452 | 0.000000 |          |          |
| 4  | C  | 2.212728 | 2.226164 | 1.347941 | 0.000000 |          |
| 5  | N  | 1.384635 | 2.210764 | 2.171292 | 1.332620 | 0.000000 |
| 6  | C  | 2.568411 | 3.651906 | 3.594035 | 2.476911 | 1.479209 |
| 7  | C  | 3.431406 | 4.440586 | 4.345930 | 3.268803 | 2.500750 |
| 8  | H  | 1.076413 | 2.213678 | 3.264795 | 3.229972 | 2.158470 |
| 9  | H  | 2.212292 | 1.074589 | 2.170862 | 3.246766 | 3.267347 |
| 10 | H  | 3.345451 | 4.239742 | 3.883228 | 2.608559 | 2.073015 |
| 11 | H  | 2.718309 | 3.985603 | 4.234227 | 3.295864 | 2.090164 |
| 12 | H  | 3.404141 | 4.489140 | 4.690562 | 3.841897 | 2.891250 |
| 13 | H  | 3.590367 | 4.310076 | 3.971212 | 2.937860 | 2.601057 |
| 14 | Br | 5.206190 | 5.487625 | 4.436248 | 3.271393 | 3.873022 |
| 15 | H  | 3.274232 | 3.311723 | 2.220357 | 1.110763 | 2.148661 |
| 16 | C  | 3.596354 | 2.535885 | 1.421333 | 2.429029 | 3.530892 |
| 17 | C  | 4.337881 | 3.049299 | 2.435623 | 3.658286 | 4.602587 |
| 18 | H  | 4.260279 | 3.412463 | 2.085650 | 2.558280 | 3.850569 |
| 19 | H  | 5.398577 | 4.126264 | 3.399624 | 4.508841 | 5.565799 |
| 20 | H  | 4.194585 | 2.837581 | 2.749910 | 4.088800 | 4.777521 |
| 21 | N  | 4.749510 | 5.811852 | 5.632881 | 4.427282 | 3.725227 |
| 22 | H  | 5.439226 | 6.487377 | 6.350640 | 5.207515 | 4.521070 |
| 23 | H  | 5.165080 | 6.097375 | 5.689789 | 4.397612 | 3.961489 |
|    |    | 6        | 7        | 8        | 9        | 10       |
| 6  | C  | 0.000000 |          |          |          |          |
| 7  | C  | 1.536197 | 0.000000 |          |          |          |
| 8  | H  | 2.868699 | 3.641975 | 0.000000 |          |          |
| 9  | H  | 4.678856 | 5.419317 | 2.754808 | 0.000000 |          |
| 10 | H  | 1.090198 | 2.149591 | 3.785303 | 5.298705 | 0.000000 |

|    |    |          |          |          |          |          |
|----|----|----------|----------|----------|----------|----------|
| 11 | H  | 1.090175 | 2.190487 | 2.630577 | 4.914022 | 1.781176 |
| 12 | H  | 2.171882 | 1.094851 | 3.350578 | 5.347178 | 3.050151 |
| 13 | H  | 2.148191 | 1.097923 | 4.043546 | 5.279396 | 2.563294 |
| 14 | Br | 3.631561 | 3.726187 | 6.011307 | 6.497618 | 2.923798 |
| 15 | H  | 2.766743 | 3.373758 | 4.239663 | 4.296473 | 2.510433 |
| 16 | C  | 4.876892 | 5.533329 | 4.630990 | 2.870754 | 4.999039 |
| 17 | C  | 6.026997 | 6.686412 | 5.262746 | 2.894022 | 6.233806 |
| 18 | H  | 5.004208 | 5.578101 | 5.332399 | 3.901518 | 4.927799 |
| 19 | H  | 6.947330 | 7.561988 | 6.339131 | 3.948121 | 7.064255 |
| 20 | H  | 6.252494 | 6.946649 | 4.971452 | 2.312971 | 6.602299 |
| 21 | N  | 2.411526 | 1.458594 | 4.868118 | 6.815148 | 2.535669 |
| 22 | H  | 3.305040 | 2.052425 | 5.488312 | 7.447695 | 3.531686 |
| 23 | H  | 2.725683 | 2.030138 | 5.454439 | 7.143870 | 2.449374 |
|    |    | 11       | 12       | 13       | 14       | 15       |
| 11 | H  | 0.000000 |          |          |          |          |
| 12 | H  | 2.448532 | 0.000000 |          |          |          |
| 13 | H  | 3.058546 | 1.779200 | 0.000000 |          |          |
| 14 | Br | 4.622109 | 4.774308 | 3.196332 | 0.000000 |          |
| 15 | H  | 3.735468 | 4.178190 | 2.882324 | 2.229523 | 0.000000 |
| 16 | C  | 5.592748 | 5.944361 | 4.978534 | 4.832731 | 2.830429 |
| 17 | C  | 6.644416 | 6.973494 | 6.147770 | 6.141833 | 4.153970 |
| 18 | H  | 5.845082 | 6.149008 | 4.916031 | 4.164433 | 2.501102 |
| 19 | H  | 7.620341 | 7.904091 | 6.940824 | 6.608019 | 4.818735 |
| 20 | H  | 6.730408 | 7.085800 | 6.515093 | 6.909141 | 4.795005 |
| 21 | N  | 2.795693 | 2.093446 | 2.147453 | 3.903406 | 4.281131 |
| 22 | H  | 3.637552 | 2.319854 | 2.552501 | 4.564510 | 5.062963 |
| 23 | H  | 3.306498 | 2.921524 | 2.340152 | 3.145918 | 4.001140 |
|    |    | 16       | 17       | 18       | 19       | 20       |
| 16 | C  | 0.000000 |          |          |          |          |
| 17 | C  | 1.326610 | 0.000000 |          |          |          |
| 18 | H  | 1.082684 | 2.121598 | 0.000000 |          |          |
| 19 | H  | 2.080067 | 1.081118 | 2.445173 | 0.000000 |          |
| 20 | H  | 2.126481 | 1.082584 | 3.099564 | 1.847033 | 0.000000 |
| 21 | N  | 6.764931 | 7.981772 | 6.671097 | 8.813279 | 8.308826 |
| 22 | H  | 7.454946 | 8.643263 | 7.359469 | 9.461872 | 8.955599 |
| 23 | H  | 6.685079 | 7.962584 | 6.433340 | 8.712391 | 8.412197 |
|    |    | 21       | 22       | 23       |          |          |
| 21 | N  | 0.000000 |          |          |          |          |
| 22 | H  | 1.013572 | 0.000000 |          |          |          |
| 23 | H  | 1.019259 | 1.639407 | 0.000000 |          |          |

Stoichiometry C7H12BrN3

Framework group C1[X(C7H12BrN3)]

Deg. of freedom 63

Full point group C1 NOp 1



Largest Abelian subgroup C1 NOp 1

Largest concise Abelian subgroup C1 NOp 1

Standard orientation:

---

| Center<br>Number | Atomic<br>Number | Atomic<br>Type | Coordinates (Angstroms) |           |           |
|------------------|------------------|----------------|-------------------------|-----------|-----------|
|                  |                  |                | X                       | Y         | Z         |
| 1                | 6                | 0              | -1.735434               | 2.056315  | -0.309057 |
| 2                | 6                | 0              | -2.771638               | 1.216141  | -0.055818 |
| 3                | 7                | 0              | -2.239398               | -0.068387 | -0.002494 |
| 4                | 6                | 0              | -0.911291               | 0.004682  | -0.220987 |
| 5                | 7                | 0              | -0.590862               | 1.283977  | -0.412309 |
| 6                | 6                | 0              | 0.796532                | 1.754451  | -0.616885 |
| 7                | 6                | 0              | 1.538769                | 1.956682  | 0.712811  |
| 8                | 1                | 0              | -1.716069               | 3.125887  | -0.428664 |
| 9                | 1                | 0              | -3.817255               | 1.420012  | 0.085121  |
| 10               | 1                | 0              | 1.307425                | 0.978438  | -1.187258 |
| 11               | 1                | 0              | 0.756358                | 2.672142  | -1.204005 |
| 12               | 1                | 0              | 1.205277                | 2.881922  | 1.193864  |
| 13               | 1                | 0              | 1.293635                | 1.113910  | 1.372417  |
| 14               | 35               | 0              | 1.898759                | -1.664913 | -0.086522 |
| 15               | 1                | 0              | -0.156936               | -0.810544 | -0.208757 |
| 16               | 6                | 0              | -2.909454               | -1.299355 | 0.234001  |
| 17               | 6                | 0              | -4.219053               | -1.428421 | 0.401899  |
| 18               | 1                | 0              | -2.223920               | -2.136796 | 0.264683  |
| 19               | 1                | 0              | -4.632966               | -2.410930 | 0.581258  |
| 20               | 1                | 0              | -4.912167               | -0.597438 | 0.369546  |
| 21               | 7                | 0              | 2.960389                | 2.059312  | 0.403037  |
| 22               | 1                | 0              | 3.478886                | 2.421031  | 1.195281  |
| 23               | 1                | 0              | 3.319659                | 1.127034  | 0.201363  |

---

Rotational constants (GHZ): 0.8926169 0.4590174 0.3139476

Standard basis: 6-311++G(d,p) (5D, 7F)

There are 365 symmetry adapted cartesian basis functions of A symmetry.

There are 352 symmetry adapted basis functions of A symmetry.

352 basis functions, 562 primitive gaussians, 365 cartesian basis functions

55 alpha electrons 55 beta electrons

nuclear repulsion energy 843.2611166219 Hartrees.

NAtoms= 23 NActive= 23 NUniq= 23 SFac= 1.00D+00 NAtFMM= 60 NAOKFM=F

Big=F

Integral buffers will be 131072 words long.

Raffenetti 2 integral format.

Two-electron integral symmetry is turned on.

One-electron integrals computed using PRISM.

NBasis= 352 RedAO= T EigKep= 4.31D-06 NBF= 352  
 NBsUse= 352 1.00D-06 EigRej= -1.00D+00 NBFU= 352  
 Initial guess from the checkpoint file: "/home/suqian/liuwen/qianmengshijie/nh2/nh2.chk"  
 B after Tr= 0.000000 0.000000 0.000000  
 Rot= 1.000000 -0.000073 -0.000015 -0.000055 Ang= -0.01 deg.  
 Requested convergence on RMS density matrix=1.00D-08 within 128 cycles.  
 Requested convergence on MAX density matrix=1.00D-06.  
 Requested convergence on energy=1.00D-06.  
 No special actions if energy rises.  
 SCF Done: E(RB3LYP) = -3012.46805686 A.U. after 9 cycles  
 NFock= 9 Conv=0.42D-08 -V/T= 2.0017  
 Calling FoFJK, ICntrl= 2127 FMM=F ISym2X=0 l1Cent= 0 IOpClX= 0 NMat=1 NMatS=1

NMatT=0.

\*\*\*\*\* Axes restored to original set \*\*\*\*\*

| Center Number | Atomic Number | Forces (Hartrees/Bohr) |              |              |
|---------------|---------------|------------------------|--------------|--------------|
|               |               | X                      | Y            | Z            |
| 1             | 6             | -0.000031692           | -0.000005868 | 0.000024674  |
| 2             | 6             | 0.000005940            | 0.000010953  | 0.000040713  |
| 3             | 7             | -0.000023669           | -0.000007425 | 0.000010957  |
| 4             | 6             | -0.000001782           | -0.000024913 | -0.000030042 |
| 5             | 7             | 0.000008466            | -0.000005732 | -0.000042819 |
| 6             | 6             | 0.000003092            | 0.000009575  | -0.000039645 |
| 7             | 6             | 0.000061082            | -0.000009045 | 0.000110396  |
| 8             | 1             | 0.000007922            | 0.000000641  | 0.000001913  |
| 9             | 1             | -0.000000946           | -0.000001305 | 0.000006608  |
| 10            | 1             | 0.000008644            | 0.000021572  | 0.000009087  |
| 11            | 1             | -0.000000843           | 0.000003779  | 0.000009218  |
| 12            | 1             | -0.000020139           | -0.000001785 | -0.000036721 |
| 13            | 1             | -0.000007422           | -0.000001325 | -0.000033312 |
| 14            | 35            | -0.000029187           | 0.000008861  | 0.000004640  |
| 15            | 1             | 0.000060517            | -0.000014413 | -0.000005650 |
| 16            | 6             | -0.000005149           | 0.000007847  | -0.000020439 |
| 17            | 6             | 0.000001278            | -0.000015541 | -0.000007208 |
| 18            | 1             | 0.000006154            | 0.000005769  | 0.000007643  |
| 19            | 1             | -0.000001524           | -0.000000238 | 0.000001052  |
| 20            | 1             | -0.000004490           | -0.000000154 | 0.000000359  |
| 21            | 7             | -0.000045540           | 0.000026255  | -0.000000197 |
| 22            | 1             | 0.000003996            | -0.000002554 | -0.000012673 |
| 23            | 1             | 0.000005292            | -0.000004952 | 0.000001446  |

Cartesian Forces: Max 0.000110396 RMS 0.000023437

GradGradGradGradGradGradGradGradGradGradGradGradGradGradGradGradGradGradGradGrad

Berny optimization.

Using GEDIIS/GDIIS optimizer.

FormGI is forming the generalized inverse of G from B-inverse, IUseBI=4.

Internal Forces: Max 0.000073583 RMS 0.000014520

Search for a local minimum.

Step number 33 out of a maximum of 121

All quantities printed in internal units (Hartrees-Bohrs-Radians)

Mixed Optimization -- En-DIIS/RFO-DIIS

Swapping is turned off.

Update second derivatives using D2CorX and points 24 27 28 29 30  
31 32 33

DE= -4.22D-07 DEPred=-2.74D-07 R= 1.54D+00

Trust test= 1.54D+00 RLast= 9.12D-03 DXMaxT set to 2.38D-01

ITU= 0 1 1 1 0 1 1 0 -1 -1 0 -1 -1 0 0 0 1 1

ITU= -1 1 -1 1 1 1 1 1 0 1 0 0

|                 |         |         |         |         |         |
|-----------------|---------|---------|---------|---------|---------|
| Eigenvalues --- | 0.00081 | 0.00208 | 0.00336 | 0.00528 | 0.00988 |
| Eigenvalues --- | 0.01444 | 0.01811 | 0.01914 | 0.02147 | 0.02176 |
| Eigenvalues --- | 0.02348 | 0.02399 | 0.03059 | 0.03063 | 0.03892 |
| Eigenvalues --- | 0.04157 | 0.04205 | 0.04593 | 0.04998 | 0.05315 |
| Eigenvalues --- | 0.05551 | 0.08950 | 0.09280 | 0.09709 | 0.12651 |
| Eigenvalues --- | 0.12990 | 0.15436 | 0.15774 | 0.15957 | 0.15984 |
| Eigenvalues --- | 0.16000 | 0.16015 | 0.16307 | 0.18831 | 0.21487 |
| Eigenvalues --- | 0.22013 | 0.23240 | 0.23945 | 0.24824 | 0.25095 |
| Eigenvalues --- | 0.26997 | 0.30119 | 0.34062 | 0.34484 | 0.34818 |
| Eigenvalues --- | 0.35045 | 0.35309 | 0.35690 | 0.35807 | 0.35858 |
| Eigenvalues --- | 0.36441 | 0.36661 | 0.38030 | 0.40838 | 0.42279 |
| Eigenvalues --- | 0.43003 | 0.46850 | 0.47698 | 0.48660 | 0.50002 |
| Eigenvalues --- | 0.54208 | 0.59686 | 0.60391 |         |         |

En-DIIS/RFO-DIIS IScMMF= 0 using points: 33 32 31 30 29

RFO step: Lambda=-1.16293372D-07.

DidBck=F Rises=F RFO-DIIS coefs: 2.86393 -1.77644 -0.14392 0.07726 -

0.02084

Iteration 1 RMS(Cart)= 0.00506534 RMS(Int)= 0.00002377

Iteration 2 RMS(Cart)= 0.00004299 RMS(Int)= 0.00000068

Iteration 3 RMS(Cart)= 0.00000000 RMS(Int)= 0.00000068

| Variable | Old X   | -DE/DX  | Delta X<br>(Linear) | Delta X<br>(Quad) | Delta X<br>(Total) | New X   |
|----------|---------|---------|---------------------|-------------------|--------------------|---------|
| R1       | 2.56595 | 0.00000 | -0.00004            | 0.00002           | -0.00002           | 2.56593 |
| R2       | 2.61658 | 0.00002 | 0.00009             | 0.00005           | 0.00014            | 2.61672 |
| R3       | 2.03413 | 0.00000 | 0.00000             | -0.00001          | -0.00001           | 2.03412 |
| R4       | 2.62946 | 0.00000 | 0.00003             | 0.00000           | 0.00003            | 2.62949 |
| R5       | 2.03068 | 0.00000 | 0.00000             | 0.00001           | 0.00001            | 2.03069 |
| R6       | 2.54724 | 0.00001 | 0.00000             | 0.00003           | 0.00003            | 2.54727 |

|     |         |          |          |          |          |         |
|-----|---------|----------|----------|----------|----------|---------|
| R7  | 2.68593 | 0.00001  | -0.00009 | 0.00000  | -0.00009 | 2.68584 |
| R8  | 2.51829 | -0.00003 | -0.00008 | -0.00006 | -0.00014 | 2.51815 |
| R9  | 2.09904 | 0.00002  | 0.00008  | 0.00025  | 0.00033  | 2.09937 |
| R10 | 2.79530 | -0.00001 | -0.00002 | -0.00002 | -0.00004 | 2.79526 |
| R11 | 2.90299 | -0.00003 | -0.00014 | -0.00016 | -0.00030 | 2.90270 |
| R12 | 2.06018 | 0.00002  | 0.00001  | 0.00006  | 0.00007  | 2.06024 |
| R13 | 2.06013 | 0.00000  | 0.00004  | 0.00000  | 0.00003  | 2.06016 |
| R14 | 2.06897 | 0.00002  | 0.00003  | 0.00009  | 0.00013  | 2.06909 |
| R15 | 2.07477 | 0.00002  | -0.00006 | 0.00003  | -0.00003 | 2.07474 |
| R16 | 2.75634 | -0.00004 | -0.00001 | -0.00005 | -0.00006 | 2.75629 |
| R17 | 4.21319 | -0.00002 | -0.00250 | -0.00125 | -0.00375 | 4.20944 |
| R18 | 2.50693 | 0.00000  | 0.00001  | 0.00000  | 0.00001  | 2.50694 |
| R19 | 2.04598 | 0.00001  | 0.00000  | 0.00002  | 0.00002  | 2.04600 |
| R20 | 2.04302 | 0.00000  | 0.00000  | 0.00001  | 0.00001  | 2.04303 |
| R21 | 2.04579 | 0.00000  | 0.00000  | 0.00000  | -0.00001 | 2.04578 |
| R22 | 1.91537 | 0.00001  | 0.00008  | 0.00005  | 0.00014  | 1.91551 |
| R23 | 1.92612 | 0.00000  | 0.00001  | 0.00006  | 0.00007  | 1.92619 |
| A1  | 1.87506 | -0.00001 | -0.00009 | -0.00002 | -0.00011 | 1.87494 |
| A2  | 2.27743 | 0.00001  | 0.00015  | 0.00006  | 0.00022  | 2.27764 |
| A3  | 2.13068 | 0.00000  | -0.00006 | -0.00005 | -0.00011 | 2.13057 |
| A4  | 1.86132 | 0.00000  | 0.00003  | 0.00001  | 0.00004  | 1.86136 |
| A5  | 2.27788 | 0.00000  | -0.00003 | -0.00001 | -0.00003 | 2.27785 |
| A6  | 2.14398 | 0.00000  | -0.00001 | 0.00000  | -0.00001 | 2.14397 |
| A7  | 1.89719 | 0.00000  | 0.00002  | -0.00001 | 0.00001  | 1.89719 |
| A8  | 2.24665 | 0.00001  | 0.00002  | 0.00007  | 0.00009  | 2.24674 |
| A9  | 2.13935 | -0.00001 | -0.00005 | -0.00005 | -0.00010 | 2.13925 |
| A10 | 1.88833 | 0.00001  | -0.00006 | 0.00002  | -0.00004 | 1.88829 |
| A11 | 2.24922 | 0.00000  | 0.00035  | 0.00022  | 0.00057  | 2.24980 |
| A12 | 2.14462 | -0.00001 | -0.00019 | -0.00018 | -0.00037 | 2.14425 |
| A13 | 1.90287 | 0.00000  | 0.00009  | 0.00000  | 0.00010  | 1.90297 |
| A14 | 2.22461 | 0.00004  | 0.00002  | 0.00028  | 0.00030  | 2.22492 |
| A15 | 2.15401 | -0.00004 | -0.00016 | -0.00021 | -0.00037 | 2.15364 |
| A16 | 1.95555 | 0.00003  | 0.00004  | 0.00018  | 0.00022  | 1.95577 |
| A17 | 1.86032 | -0.00001 | 0.00021  | -0.00014 | 0.00008  | 1.86040 |
| A18 | 1.88352 | -0.00002 | -0.00014 | -0.00001 | -0.00015 | 1.88337 |
| A19 | 1.89667 | -0.00001 | 0.00034  | -0.00009 | 0.00025  | 1.89692 |
| A20 | 1.95320 | 0.00000  | -0.00010 | 0.00005  | -0.00004 | 1.95316 |
| A21 | 1.91208 | 0.00000  | -0.00035 | -0.00001 | -0.00036 | 1.91172 |
| A22 | 1.92239 | 0.00001  | -0.00032 | 0.00021  | -0.00010 | 1.92228 |
| A23 | 1.88714 | 0.00001  | 0.00009  | -0.00005 | 0.00004  | 1.88717 |
| A24 | 1.87167 | -0.00001 | 0.00024  | -0.00008 | 0.00016  | 1.87183 |
| A25 | 1.89306 | -0.00002 | 0.00024  | -0.00024 | 0.00000  | 1.89306 |
| A26 | 1.90787 | 0.00001  | -0.00005 | 0.00039  | 0.00035  | 1.90822 |
| A27 | 1.98146 | 0.00000  | -0.00022 | -0.00022 | -0.00044 | 1.98101 |

|     |          |          |          |          |          |          |
|-----|----------|----------|----------|----------|----------|----------|
| A28 | 2.70937  | 0.00007  | 0.00259  | 0.00155  | 0.00414  | 2.71351  |
| A29 | 2.17816  | 0.00000  | 0.00008  | 0.00003  | 0.00011  | 2.17827  |
| A30 | 1.95639  | 0.00000  | 0.00002  | -0.00002 | -0.00001 | 1.95638  |
| A31 | 2.14864  | 0.00000  | -0.00010 | -0.00001 | -0.00011 | 2.14854  |
| A32 | 2.07986  | -0.00001 | -0.00007 | -0.00004 | -0.00011 | 2.07975  |
| A33 | 2.15744  | 0.00001  | 0.00009  | 0.00005  | 0.00015  | 2.15759  |
| A34 | 2.04589  | 0.00000  | -0.00002 | -0.00001 | -0.00003 | 2.04585  |
| A35 | 1.93659  | -0.00001 | -0.00035 | 0.00007  | -0.00029 | 1.93631  |
| A36 | 1.89780  | 0.00001  | -0.00052 | 0.00030  | -0.00022 | 1.89758  |
| A37 | 1.87629  | 0.00000  | -0.00059 | 0.00000  | -0.00059 | 1.87570  |
| D1  | 0.00390  | 0.00001  | 0.00001  | 0.00008  | 0.00008  | 0.00399  |
| D2  | -3.13504 | 0.00000  | 0.00106  | 0.00014  | 0.00120  | -3.13383 |
| D3  | 3.13890  | 0.00000  | -0.00064 | -0.00003 | -0.00068 | 3.13822  |
| D4  | -0.00004 | 0.00000  | 0.00041  | 0.00003  | 0.00044  | 0.00040  |
| D5  | -0.00562 | 0.00000  | -0.00052 | 0.00024  | -0.00029 | -0.00591 |
| D6  | -3.08587 | -0.00001 | 0.00029  | -0.00119 | -0.00090 | -3.08677 |
| D7  | -3.14129 | 0.00000  | 0.00006  | 0.00033  | 0.00039  | -3.14089 |
| D8  | 0.06164  | -0.00001 | 0.00087  | -0.00109 | -0.00022 | 0.06142  |
| D9  | -0.00092 | -0.00001 | 0.00050  | -0.00036 | 0.00014  | -0.00077 |
| D10 | -3.14093 | 0.00000  | 0.00050  | -0.00003 | 0.00047  | -3.14046 |
| D11 | 3.13828  | 0.00000  | -0.00045 | -0.00042 | -0.00087 | 3.13741  |
| D12 | -0.00173 | 0.00000  | -0.00046 | -0.00009 | -0.00055 | -0.00228 |
| D13 | -0.00257 | 0.00000  | -0.00083 | 0.00051  | -0.00032 | -0.00289 |
| D14 | 3.09108  | 0.00002  | 0.00158  | 0.00214  | 0.00372  | 3.09480  |
| D15 | 3.13756  | 0.00000  | -0.00083 | 0.00020  | -0.00062 | 3.13693  |
| D16 | -0.05198 | 0.00002  | 0.00158  | 0.00184  | 0.00342  | -0.04856 |
| D17 | 0.04655  | -0.00001 | -0.00153 | -0.00194 | -0.00347 | 0.04308  |
| D18 | -3.09349 | -0.00001 | -0.00133 | -0.00232 | -0.00365 | -3.09714 |
| D19 | -3.09326 | -0.00001 | -0.00154 | -0.00157 | -0.00311 | -3.09637 |
| D20 | 0.04989  | -0.00001 | -0.00134 | -0.00195 | -0.00329 | 0.04660  |
| D21 | 0.00504  | 0.00000  | 0.00084  | -0.00046 | 0.00038  | 0.00542  |
| D22 | 3.08831  | 0.00001  | 0.00007  | 0.00092  | 0.00099  | 3.08929  |
| D23 | -3.09211 | -0.00001 | -0.00141 | -0.00199 | -0.00340 | -3.09551 |
| D24 | -0.00884 | 0.00000  | -0.00218 | -0.00061 | -0.00279 | -0.01163 |
| D25 | -2.81554 | -0.00002 | -0.00971 | -0.01123 | -0.02094 | -2.83648 |
| D26 | 0.27181  | 0.00000  | -0.00698 | -0.00937 | -0.01635 | 0.25546  |
| D27 | 1.61585  | 0.00002  | 0.00456  | 0.00466  | 0.00922  | 1.62507  |
| D28 | -2.59473 | 0.00002  | 0.00512  | 0.00457  | 0.00969  | -2.58503 |
| D29 | -0.54216 | 0.00001  | 0.00476  | 0.00448  | 0.00924  | -0.53292 |
| D30 | -1.45626 | 0.00001  | 0.00548  | 0.00303  | 0.00851  | -1.44776 |
| D31 | 0.61635  | 0.00000  | 0.00604  | 0.00294  | 0.00898  | 0.62533  |
| D32 | 2.66892  | -0.00001 | 0.00567  | 0.00285  | 0.00852  | 2.67744  |
| D33 | -1.33069 | 0.00001  | 0.00094  | 0.00034  | 0.00129  | -1.32940 |
| D34 | 0.73512  | 0.00000  | 0.00110  | 0.00015  | 0.00125  | 0.73637  |

|     |          |          |          |          |          |          |
|-----|----------|----------|----------|----------|----------|----------|
| D35 | 2.87799  | 0.00000  | 0.00103  | -0.00020 | 0.00083  | 2.87883  |
| D36 | 2.90149  | 0.00001  | 0.00044  | 0.00046  | 0.00090  | 2.90240  |
| D37 | -1.31589 | 0.00000  | 0.00060  | 0.00027  | 0.00087  | -1.31502 |
| D38 | 0.82699  | 0.00000  | 0.00053  | -0.00008 | 0.00045  | 0.82744  |
| D39 | 0.78770  | 0.00001  | 0.00072  | 0.00050  | 0.00122  | 0.78891  |
| D40 | 2.85350  | 0.00000  | 0.00088  | 0.00031  | 0.00118  | 2.85469  |
| D41 | -1.28680 | 0.00000  | 0.00081  | -0.00004 | 0.00076  | -1.28604 |
| D42 | 2.89407  | 0.00000  | 0.00011  | 0.00087  | 0.00098  | 2.89505  |
| D43 | -1.32901 | 0.00001  | -0.00114 | 0.00110  | -0.00004 | -1.32906 |
| D44 | 0.81022  | -0.00001 | 0.00037  | 0.00045  | 0.00082  | 0.81105  |
| D45 | 2.87033  | -0.00001 | -0.00088 | 0.00067  | -0.00020 | 2.87013  |
| D46 | -1.30581 | 0.00001  | 0.00025  | 0.00062  | 0.00087  | -1.30495 |
| D47 | 0.75429  | 0.00001  | -0.00100 | 0.00084  | -0.00016 | 0.75413  |
| D48 | -3.13684 | -0.00001 | 0.00021  | -0.00056 | -0.00035 | -3.13718 |
| D49 | 0.00542  | 0.00000  | -0.00004 | -0.00032 | -0.00036 | 0.00506  |
| D50 | 0.00304  | 0.00000  | 0.00000  | -0.00014 | -0.00015 | 0.00289  |
| D51 | -3.13789 | 0.00000  | -0.00026 | 0.00010  | -0.00016 | -3.13805 |

| Item                 | Value    | Threshold | Converged? |
|----------------------|----------|-----------|------------|
| Maximum Force        | 0.000074 | 0.000450  | YES        |
| RMS Force            | 0.000015 | 0.000300  | YES        |
| Maximum Displacement | 0.018885 | 0.001800  | NO         |
| RMS Displacement     | 0.005081 | 0.001200  | NO         |

Predicted change in Energy=-7.845839D-07

GradGradGradGradGradGradGradGradGradGradGradGradGradGradGradGradGradGradGrad

Input orientation:

| Center Number | Atomic Number | Atomic Type | Coordinates (Angstroms) |           |           |
|---------------|---------------|-------------|-------------------------|-----------|-----------|
|               |               |             | X                       | Y         | Z         |
| 1             | 6             | 0           | -1.816919               | -1.993769 | 0.290357  |
| 2             | 6             | 0           | -2.822920               | -1.110207 | 0.064538  |
| 3             | 7             | 0           | -2.241015               | 0.152854  | 0.017147  |
| 4             | 6             | 0           | -0.913397               | 0.024657  | 0.212026  |
| 5             | 7             | 0           | -0.641022               | -1.268469 | 0.383254  |
| 6             | 6             | 0           | 0.729837                | -1.795308 | 0.559848  |
| 7             | 6             | 0           | 1.447007                | -1.998930 | -0.783143 |
| 8             | 1             | 0           | -1.837975               | -3.064604 | 0.397730  |
| 9             | 1             | 0           | -3.878119               | -1.270740 | -0.060100 |
| 10            | 1             | 0           | 1.277198                | -1.051118 | 1.138802  |
| 11            | 1             | 0           | 0.661909                | -2.722424 | 1.129374  |
| 12            | 1             | 0           | 1.071346                | -2.900376 | -1.278235 |
| 13            | 1             | 0           | 1.227121                | -1.133840 | -1.422415 |
| 14            | 35            | 0           | 1.955143                | 1.590520  | 0.076540  |

|    |   |   |           |           |           |
|----|---|---|-----------|-----------|-----------|
| 15 | 1 | 0 | -0.127414 | 0.809680  | 0.199709  |
| 16 | 6 | 0 | -2.865389 | 1.412228  | -0.193071 |
| 17 | 6 | 0 | -4.171087 | 1.594878  | -0.340381 |
| 18 | 1 | 0 | -2.147981 | 2.222606  | -0.222136 |
| 19 | 1 | 0 | -4.548334 | 2.595366  | -0.500176 |
| 20 | 1 | 0 | -4.895970 | 0.791397  | -0.309633 |
| 21 | 7 | 0 | 2.867294  | -2.162844 | -0.494479 |
| 22 | 1 | 0 | 3.361247  | -2.527280 | -1.301123 |
| 23 | 1 | 0 | 3.264965  | -1.249359 | -0.279148 |

-----  
Distance matrix (angstroms):

|    |    | 1        | 2        | 3        | 4        | 5        |
|----|----|----------|----------|----------|----------|----------|
| 1  | C  | 0.000000 |          |          |          |          |
| 2  | C  | 1.357834 | 0.000000 |          |          |          |
| 3  | N  | 2.205106 | 1.391468 | 0.000000 |          |          |
| 4  | C  | 2.212811 | 2.226196 | 1.347955 | 0.000000 |          |
| 5  | N  | 1.384711 | 2.210725 | 2.171214 | 1.332547 | 0.000000 |
| 6  | C  | 2.568653 | 3.651955 | 3.593858 | 2.476584 | 1.479188 |
| 7  | C  | 3.435934 | 4.443047 | 4.344208 | 3.264471 | 2.500784 |
| 8  | H  | 1.076410 | 2.213775 | 3.264861 | 3.229994 | 2.158473 |
| 9  | H  | 2.212269 | 1.074593 | 2.170874 | 3.246795 | 3.267318 |
| 10 | H  | 3.343951 | 4.238927 | 3.884003 | 2.610538 | 2.073080 |
| 11 | H  | 2.716519 | 3.984614 | 4.234529 | 3.296903 | 2.090050 |
| 12 | H  | 3.409470 | 4.491442 | 4.687426 | 3.836131 | 2.890652 |
| 13 | H  | 3.597116 | 4.314443 | 3.969368 | 2.931779 | 2.601639 |
| 14 | Br | 5.207811 | 5.488530 | 4.436007 | 3.270903 | 3.874012 |
| 15 | H  | 3.274442 | 3.312098 | 2.220824 | 1.110938 | 2.148531 |
| 16 | C  | 3.596361 | 2.535912 | 1.421288 | 2.428936 | 3.530736 |
| 17 | C  | 4.338010 | 3.049426 | 2.435660 | 3.658319 | 4.602583 |
| 18 | H  | 4.260290 | 3.412531 | 2.085614 | 2.558061 | 3.850329 |
| 19 | H  | 5.398679 | 4.126407 | 3.399590 | 4.508719 | 5.565677 |
| 20 | H  | 4.194960 | 2.837893 | 2.750147 | 4.089120 | 4.777837 |
| 21 | N  | 4.752515 | 5.813697 | 5.631966 | 4.424696 | 3.725399 |
| 22 | H  | 5.443422 | 6.489765 | 6.348724 | 5.203324 | 4.521049 |
| 23 | H  | 5.167594 | 6.099166 | 5.689447 | 4.395802 | 3.961802 |
|    |    | 6        | 7        | 8        | 9        | 10       |
| 6  | C  | 0.000000 |          |          |          |          |
| 7  | C  | 1.536040 | 0.000000 |          |          |          |
| 8  | H  | 2.868981 | 3.649826 | 0.000000 |          |          |
| 9  | H  | 4.678970 | 5.423100 | 2.754949 | 0.000000 |          |
| 10 | H  | 1.090234 | 2.149663 | 3.782541 | 5.297442 | 0.000000 |
| 11 | H  | 1.090192 | 2.190330 | 2.627129 | 4.912645 | 1.780992 |
| 12 | H  | 2.171717 | 1.094918 | 3.361544 | 5.351333 | 3.050279 |
| 13 | H  | 2.148069 | 1.097907 | 4.054083 | 5.285651 | 2.563042 |

|    |    |          |          |          |          |          |
|----|----|----------|----------|----------|----------|----------|
| 14 | Br | 3.633014 | 3.725776 | 6.013409 | 6.498648 | 2.926818 |
| 15 | H  | 2.765961 | 3.366465 | 4.239730 | 4.296910 | 2.513443 |
| 16 | C  | 4.876558 | 5.530004 | 4.631053 | 2.870823 | 5.000299 |
| 17 | C  | 6.026842 | 6.683897 | 5.262983 | 2.894159 | 6.234829 |
| 18 | H  | 5.003695 | 5.573153 | 5.332441 | 3.901679 | 4.929632 |
| 19 | H  | 6.946996 | 7.558554 | 6.339365 | 3.948371 | 7.065403 |
| 20 | H  | 6.252738 | 6.945754 | 4.971965 | 2.313157 | 6.603092 |
| 21 | N  | 2.411516 | 1.458564 | 4.873270 | 6.818000 | 2.536128 |
| 22 | H  | 3.305044 | 2.052260 | 5.496065 | 7.451674 | 3.532074 |
| 23 | H  | 2.725592 | 2.029985 | 5.458322 | 7.146473 | 2.449714 |
|    |    | 11       | 12       | 13       | 14       | 15       |
| 11 | H  | 0.000000 |          |          |          |          |
| 12 | H  | 2.448651 | 0.000000 |          |          |          |
| 13 | H  | 3.058544 | 1.779243 | 0.000000 |          |          |
| 14 | Br | 4.624111 | 4.773328 | 3.193590 | 0.000000 |          |
| 15 | H  | 3.736718 | 4.169636 | 2.871118 | 2.227538 | 0.000000 |
| 16 | C  | 5.593392 | 5.939193 | 4.974172 | 4.831357 | 2.830874 |
| 17 | C  | 6.645083 | 6.969217 | 6.144701 | 6.140402 | 4.154459 |
| 18 | H  | 5.845971 | 6.142016 | 4.908942 | 4.162255 | 2.501401 |
| 19 | H  | 7.621086 | 7.898694 | 6.936381 | 6.605871 | 4.819030 |
| 20 | H  | 6.731099 | 7.083518 | 6.514373 | 6.908363 | 4.795716 |
| 21 | N  | 2.795309 | 2.093719 | 2.147111 | 3.904590 | 4.276221 |
| 22 | H  | 3.637558 | 2.320210 | 2.551643 | 4.564138 | 5.055547 |
| 23 | H  | 3.306019 | 2.921644 | 2.339490 | 3.147548 | 3.997146 |
|    |    | 16       | 17       | 18       | 19       | 20       |
| 16 | C  | 0.000000 |          |          |          |          |
| 17 | C  | 1.326616 | 0.000000 |          |          |          |
| 18 | H  | 1.082696 | 2.121552 | 0.000000 |          |          |
| 19 | H  | 2.080008 | 1.081123 | 2.444985 | 0.000000 |          |
| 20 | H  | 2.126565 | 1.082582 | 3.099590 | 1.847015 | 0.000000 |
| 21 | N  | 6.762813 | 7.980165 | 6.667782 | 8.810910 | 8.308428 |
| 22 | H  | 7.451074 | 8.640097 | 7.353722 | 9.457510 | 8.954234 |
| 23 | H  | 6.683763 | 7.961677 | 6.431001 | 8.710821 | 8.412281 |
|    |    | 21       | 22       | 23       |          |          |
| 21 | N  | 0.000000 |          |          |          |          |
| 22 | H  | 1.013646 | 0.000000 |          |          |          |
| 23 | H  | 1.019297 | 1.639142 | 0.000000 |          |          |

Stoichiometry C7H12BrN3

Framework group C1[X(C7H12BrN3)]

Deg. of freedom 63

Full point group C1 NOp 1

Largest Abelian subgroup C1 NOp 1

Largest concise Abelian subgroup C1 NOp 1

Standard orientation:



| Center<br>Number | Atomic<br>Number | Atomic<br>Type | Coordinates (Angstroms) |           |           |
|------------------|------------------|----------------|-------------------------|-----------|-----------|
|                  |                  |                | X                       | Y         | Z         |
| 1                | 6                | 0              | -1.738274               | 2.055452  | -0.315962 |
| 2                | 6                | 0              | -2.773589               | 1.214238  | -0.062594 |
| 3                | 7                | 0              | -2.238825               | -0.068899 | -0.001201 |
| 4                | 6                | 0              | -0.910029               | 0.005980  | -0.214923 |
| 5                | 7                | 0              | -0.591699               | 1.284944  | -0.411393 |
| 6                | 6                | 0              | 0.795476                | 1.756799  | -0.614113 |
| 7                | 6                | 0              | 1.537461                | 1.955273  | 0.716107  |
| 8                | 1                | 0              | -1.720625               | 3.124413  | -0.441139 |
| 9                | 1                | 0              | -3.820295               | 1.416430  | 0.072593  |
| 10               | 1                | 0              | 1.306879                | 0.983117  | -1.187258 |
| 11               | 1                | 0              | 0.754798                | 2.676344  | -1.198322 |
| 12               | 1                | 0              | 1.202405                | 2.878235  | 1.200589  |
| 13               | 1                | 0              | 1.293797                | 1.109688  | 1.372624  |
| 14               | 35               | 0              | 1.899389                | -1.664395 | -0.089135 |
| 15               | 1                | 0              | -0.153906               | -0.807786 | -0.199243 |
| 16               | 6                | 0              | -2.907097               | -1.300240 | 0.238112  |
| 17               | 6                | 0              | -4.216659               | -1.431132 | 0.404919  |
| 18               | 1                | 0              | -2.220223               | -2.136481 | 0.271828  |
| 19               | 1                | 0              | -4.628968               | -2.413942 | 0.586335  |
| 20               | 1                | 0              | -4.911281               | -0.601528 | 0.369731  |
| 21               | 7                | 0              | 2.958951                | 2.060810  | 0.406851  |
| 22               | 1                | 0              | 3.476828                | 2.419569  | 1.200937  |
| 23               | 1                | 0              | 3.319247                | 1.129581  | 0.201994  |

Rotational constants (GHZ): 0.8922497 0.4590431 0.3139910

Standard basis: 6-311++G(d,p) (5D, 7F)

There are 365 symmetry adapted cartesian basis functions of A symmetry.

There are 352 symmetry adapted basis functions of A symmetry.

352 basis functions, 562 primitive gaussians, 365 cartesian basis functions

55 alpha electrons 55 beta electrons

nuclear repulsion energy 843.2536351564 Hartrees.

NAtoms= 23 NActive= 23 NUniq= 23 SFac= 1.00D+00 NAtFMM= 60 NAOKFM=F

Big=F

Integral buffers will be 131072 words long.

Raffenetti 2 integral format.

Two-electron integral symmetry is turned on.

One-electron integrals computed using PRISM.

NBasis= 352 RedAO= T EigKep= 4.31D-06 NBF= 352

NBsUse= 352 1.00D-06 EigRej= -1.00D+00 NBFU= 352

Initial guess from the checkpoint file: "/home/suqian/liuwen/qianmengshijie/nh2/nh2.chk"

B after Tr= 0.000000 0.000000 0.000000  
Rot= 1.000000 -0.000157 -0.000017 -0.000279 Ang= -0.04 deg.

Requested convergence on RMS density matrix=1.00D-08 within 128 cycles.

Requested convergence on MAX density matrix=1.00D-06.

Requested convergence on energy=1.00D-06.

No special actions if energy rises.

SCF Done: E(RB3LYP) = -3012.46805807 A.U. after 10 cycles

NFock= 10 Conv=0.92D-08 -V/T= 2.0017

Calling FoFJK, ICntrl= 2127 FMM=F ISym2X=0 l1Cent= 0 IOpCIX= 0 NMat=1 NMatS=1

NMatT=0.

\*\*\*\*\* Axes restored to original set \*\*\*\*\*

| Center<br>Number | Atomic<br>Number | Forces (Hartrees/Bohr) |              |              |
|------------------|------------------|------------------------|--------------|--------------|
|                  |                  | X                      | Y            | Z            |
| 1                | 6                | 0.000032686            | 0.000031520  | 0.000059166  |
| 2                | 6                | -0.000018952           | 0.000020315  | 0.000060111  |
| 3                | 7                | 0.000005226            | -0.000024121 | 0.000007395  |
| 4                | 6                | -0.000053196           | -0.000012036 | 0.000033347  |
| 5                | 7                | 0.000006696            | -0.000093882 | -0.000122769 |
| 6                | 6                | -0.000005385           | -0.000013255 | 0.000091842  |
| 7                | 6                | 0.000030951            | -0.000008508 | 0.000028282  |
| 8                | 1                | -0.000002698           | -0.000001198 | -0.000014137 |
| 9                | 1                | 0.000003543            | -0.000003293 | -0.000014504 |
| 10               | 1                | 0.000016094            | 0.000024135  | -0.000017991 |
| 11               | 1                | -0.000007300           | 0.000008830  | -0.000010979 |
| 12               | 1                | 0.000018947            | 0.000023271  | -0.000015911 |
| 13               | 1                | -0.000035730           | -0.000002716 | -0.000035835 |
| 14               | 35               | 0.000010014            | 0.000023629  | 0.000005417  |
| 15               | 1                | 0.000017061            | 0.000021524  | -0.000028676 |
| 16               | 6                | -0.000019949           | 0.000037379  | -0.000026564 |
| 17               | 6                | 0.000001036            | -0.000006805 | -0.000007557 |
| 18               | 1                | 0.000006518            | -0.000003183 | 0.000006586  |
| 19               | 1                | -0.000004695           | -0.000003225 | 0.000001250  |
| 20               | 1                | 0.000001037            | -0.000006697 | 0.000001086  |
| 21               | 7                | 0.000030394            | 0.000025731  | -0.000048402 |
| 22               | 1                | -0.000021676           | -0.000016921 | 0.000032450  |
| 23               | 1                | -0.000010621           | -0.000020496 | 0.000016393  |

Cartesian Forces: Max 0.000122769 RMS 0.000030990

GradGradGradGradGradGradGradGradGradGradGradGradGradGradGradGradGradGradGrad

Berny optimization.

Using GEDIIS/GDIIS optimizer.

FormGI is forming the generalized inverse of G from B-inverse, IUseBI=4.

Internal Forces: Max 0.000072720 RMS 0.000017099

Search for a local minimum.

Step number 34 out of a maximum of 121

All quantities printed in internal units (Hartrees-Bohrs-Radians)

Mixed Optimization -- En-DIIS/RFO-DIIS

Swapping is turned off.

Update second derivatives using D2CorX and points 24 27 28 29 30  
31 32 33 34

DE= -1.21D-06 DEPred=-7.85D-07 R= 1.54D+00

TightC=F SS= 1.41D+00 RLast= 3.66D-02 DXNew= 4.0000D-01 1.0974D-01

Trust test= 1.54D+00 RLast= 3.66D-02 DXMaxT set to 2.38D-01

ITU= 1 0 1 1 1 0 1 1 0 -1 -1 0 -1 -1 0 -1 0 0 0 1

ITU= 1 -1 1 -1 1 1 1 1 1 1 0 1 0 0

|                 |         |         |         |         |         |
|-----------------|---------|---------|---------|---------|---------|
| Eigenvalues --- | 0.00044 | 0.00205 | 0.00350 | 0.00550 | 0.00986 |
| Eigenvalues --- | 0.01394 | 0.01822 | 0.01861 | 0.02126 | 0.02259 |
| Eigenvalues --- | 0.02365 | 0.02433 | 0.03059 | 0.03064 | 0.03827 |
| Eigenvalues --- | 0.04096 | 0.04328 | 0.04595 | 0.05089 | 0.05335 |
| Eigenvalues --- | 0.05524 | 0.08925 | 0.09218 | 0.09699 | 0.12742 |
| Eigenvalues --- | 0.13004 | 0.15400 | 0.15762 | 0.15964 | 0.16000 |
| Eigenvalues --- | 0.16010 | 0.16033 | 0.16355 | 0.18901 | 0.20998 |
| Eigenvalues --- | 0.22050 | 0.23256 | 0.23943 | 0.24879 | 0.25345 |
| Eigenvalues --- | 0.27295 | 0.29910 | 0.34010 | 0.34608 | 0.34839 |
| Eigenvalues --- | 0.35039 | 0.35339 | 0.35690 | 0.35811 | 0.35859 |
| Eigenvalues --- | 0.36441 | 0.36663 | 0.38358 | 0.41240 | 0.42319 |
| Eigenvalues --- | 0.42985 | 0.47047 | 0.47723 | 0.48829 | 0.50010 |
| Eigenvalues --- | 0.54224 | 0.60361 | 0.61077 |         |         |

En-DIIS/RFO-DIIS IScMMF= 0 using points: 34 33 32 31 30

RFO step: Lambda=-9.07463692D-08.

DidBck=F Rises=F RFO-DIIS coefs: 1.68674 -1.26517 0.56508 0.02036 -  
0.00700

Iteration 1 RMS(Cart)= 0.00452243 RMS(Int)= 0.00002209

Iteration 2 RMS(Cart)= 0.00004762 RMS(Int)= 0.00000063

Iteration 3 RMS(Cart)= 0.00000000 RMS(Int)= 0.00000063

| Variable | Old X   | -DE/DX   | Delta X  |          |          | New X   |
|----------|---------|----------|----------|----------|----------|---------|
|          |         |          | (Linear) | (Quad)   | (Total)  |         |
| R1       | 2.56593 | 0.00002  | 0.00000  | 0.00002  | 0.00002  | 2.56595 |
| R2       | 2.61672 | -0.00002 | 0.00007  | -0.00004 | 0.00003  | 2.61675 |
| R3       | 2.03412 | 0.00000  | 0.00000  | 0.00000  | -0.00001 | 2.03411 |
| R4       | 2.62949 | -0.00002 | 0.00001  | -0.00004 | -0.00003 | 2.62946 |
| R5       | 2.03069 | 0.00000  | 0.00000  | 0.00000  | 0.00000  | 2.03069 |
| R6       | 2.54727 | -0.00001 | 0.00002  | 0.00000  | 0.00002  | 2.54729 |
| R7       | 2.68584 | 0.00003  | -0.00003 | 0.00003  | 0.00000  | 2.68584 |
| R8       | 2.51815 | 0.00005  | -0.00007 | 0.00002  | -0.00005 | 2.51810 |

|     |         |          |          |          |          |         |
|-----|---------|----------|----------|----------|----------|---------|
| R9  | 2.09937 | 0.00005  | 0.00018  | 0.00004  | 0.00022  | 2.09959 |
| R10 | 2.79526 | 0.00001  | -0.00001 | 0.00002  | 0.00001  | 2.79527 |
| R11 | 2.90270 | 0.00002  | -0.00017 | 0.00008  | -0.00009 | 2.90261 |
| R12 | 2.06024 | 0.00001  | 0.00004  | 0.00004  | 0.00008  | 2.06033 |
| R13 | 2.06016 | -0.00001 | 0.00001  | -0.00004 | -0.00003 | 2.06013 |
| R14 | 2.06909 | -0.00002 | 0.00008  | -0.00011 | -0.00004 | 2.06906 |
| R15 | 2.07474 | 0.00003  | 0.00000  | 0.00007  | 0.00007  | 2.07481 |
| R16 | 2.75629 | 0.00000  | -0.00005 | 0.00005  | 0.00000  | 2.75629 |
| R17 | 4.20944 | 0.00002  | -0.00166 | 0.00019  | -0.00146 | 4.20797 |
| R18 | 2.50694 | 0.00000  | 0.00000  | -0.00001 | 0.00000  | 2.50694 |
| R19 | 2.04600 | 0.00000  | 0.00001  | -0.00002 | -0.00001 | 2.04599 |
| R20 | 2.04303 | 0.00000  | 0.00001  | 0.00000  | 0.00000  | 2.04303 |
| R21 | 2.04578 | 0.00000  | 0.00000  | 0.00000  | -0.00001 | 2.04578 |
| R22 | 1.91551 | -0.00003 | 0.00007  | -0.00010 | -0.00003 | 1.91548 |
| R23 | 1.92619 | -0.00002 | 0.00005  | -0.00007 | -0.00002 | 1.92617 |
| A1  | 1.87494 | 0.00002  | -0.00004 | 0.00004  | 0.00000  | 1.87494 |
| A2  | 2.27764 | -0.00002 | 0.00010  | -0.00002 | 0.00009  | 2.27773 |
| A3  | 2.13057 | 0.00000  | -0.00006 | -0.00002 | -0.00008 | 2.13049 |
| A4  | 1.86136 | 0.00000  | 0.00002  | -0.00001 | 0.00001  | 1.86137 |
| A5  | 2.27785 | 0.00000  | -0.00001 | -0.00001 | -0.00002 | 2.27782 |
| A6  | 2.14397 | 0.00000  | -0.00001 | 0.00002  | 0.00002  | 2.14398 |
| A7  | 1.89719 | 0.00000  | 0.00000  | -0.00002 | -0.00002 | 1.89718 |
| A8  | 2.24674 | 0.00001  | 0.00005  | 0.00003  | 0.00008  | 2.24682 |
| A9  | 2.13925 | 0.00000  | -0.00005 | -0.00002 | -0.00006 | 2.13918 |
| A10 | 1.88829 | 0.00001  | 0.00000  | 0.00004  | 0.00003  | 1.88832 |
| A11 | 2.24980 | -0.00004 | 0.00028  | -0.00011 | 0.00016  | 2.24996 |
| A12 | 2.14425 | 0.00003  | -0.00020 | 0.00015  | -0.00005 | 2.14420 |
| A13 | 1.90297 | -0.00002 | 0.00003  | -0.00005 | -0.00002 | 1.90295 |
| A14 | 2.22492 | 0.00002  | 0.00019  | 0.00007  | 0.00025  | 2.22517 |
| A15 | 2.15364 | 0.00001  | -0.00018 | 0.00006  | -0.00012 | 2.15352 |
| A16 | 1.95577 | 0.00002  | 0.00014  | -0.00001 | 0.00013  | 1.95590 |
| A17 | 1.86040 | 0.00000  | 0.00001  | 0.00013  | 0.00013  | 1.86053 |
| A18 | 1.88337 | -0.00001 | -0.00008 | -0.00011 | -0.00019 | 1.88318 |
| A19 | 1.89692 | -0.00002 | 0.00005  | -0.00007 | -0.00002 | 1.89690 |
| A20 | 1.95316 | 0.00000  | 0.00000  | -0.00006 | -0.00006 | 1.95310 |
| A21 | 1.91172 | 0.00002  | -0.00013 | 0.00014  | 0.00001  | 1.91173 |
| A22 | 1.92228 | 0.00003  | 0.00004  | 0.00002  | 0.00006  | 1.92234 |
| A23 | 1.88717 | 0.00001  | -0.00001 | 0.00013  | 0.00012  | 1.88729 |
| A24 | 1.87183 | -0.00003 | 0.00002  | 0.00001  | 0.00003  | 1.87186 |
| A25 | 1.89306 | -0.00002 | -0.00005 | -0.00014 | -0.00019 | 1.89288 |
| A26 | 1.90822 | -0.00001 | 0.00025  | -0.00040 | -0.00015 | 1.90808 |
| A27 | 1.98101 | 0.00003  | -0.00025 | 0.00037  | 0.00013  | 1.98114 |
| A28 | 2.71351 | 0.00007  | 0.00190  | 0.00081  | 0.00270  | 2.71621 |
| A29 | 2.17827 | -0.00001 | 0.00006  | 0.00000  | 0.00006  | 2.17833 |

|     |          |          |          |          |          |          |
|-----|----------|----------|----------|----------|----------|----------|
| A30 | 1.95638  | 0.00000  | -0.00001 | -0.00002 | -0.00003 | 1.95635  |
| A31 | 2.14854  | 0.00002  | -0.00005 | 0.00002  | -0.00003 | 2.14851  |
| A32 | 2.07975  | 0.00000  | -0.00005 | 0.00002  | -0.00003 | 2.07971  |
| A33 | 2.15759  | -0.00001 | 0.00007  | -0.00002 | 0.00005  | 2.15763  |
| A34 | 2.04585  | 0.00000  | -0.00002 | 0.00000  | -0.00001 | 2.04584  |
| A35 | 1.93631  | 0.00000  | -0.00011 | 0.00006  | -0.00005 | 1.93625  |
| A36 | 1.89758  | 0.00001  | -0.00004 | 0.00003  | -0.00001 | 1.89757  |
| A37 | 1.87570  | 0.00001  | -0.00022 | 0.00021  | -0.00001 | 1.87570  |
| D1  | 0.00399  | 0.00000  | 0.00005  | -0.00022 | -0.00017 | 0.00382  |
| D2  | -3.13383 | -0.00001 | 0.00051  | -0.00026 | 0.00025  | -3.13359 |
| D3  | 3.13822  | 0.00001  | -0.00028 | 0.00007  | -0.00021 | 3.13801  |
| D4  | 0.00040  | 0.00000  | 0.00019  | 0.00003  | 0.00021  | 0.00061  |
| D5  | -0.00591 | 0.00001  | -0.00002 | 0.00003  | 0.00001  | -0.00589 |
| D6  | -3.08677 | -0.00002 | -0.00073 | -0.00134 | -0.00207 | -3.08884 |
| D7  | -3.14089 | 0.00000  | 0.00027  | -0.00023 | 0.00004  | -3.14085 |
| D8  | 0.06142  | -0.00002 | -0.00044 | -0.00160 | -0.00204 | 0.05939  |
| D9  | -0.00077 | -0.00001 | -0.00006 | 0.00033  | 0.00027  | -0.00050 |
| D10 | -3.14046 | -0.00001 | 0.00019  | 0.00008  | 0.00026  | -3.14020 |
| D11 | 3.13741  | 0.00001  | -0.00048 | 0.00037  | -0.00011 | 3.13730  |
| D12 | -0.00228 | 0.00001  | -0.00023 | 0.00012  | -0.00012 | -0.00240 |
| D13 | -0.00289 | 0.00001  | 0.00005  | -0.00031 | -0.00026 | -0.00316 |
| D14 | 3.09480  | 0.00002  | 0.00215  | 0.00166  | 0.00382  | 3.09861  |
| D15 | 3.13693  | 0.00001  | -0.00018 | -0.00008 | -0.00026 | 3.13668  |
| D16 | -0.04856 | 0.00001  | 0.00192  | 0.00190  | 0.00382  | -0.04474 |
| D17 | 0.04308  | -0.00001 | -0.00201 | -0.00197 | -0.00399 | 0.03910  |
| D18 | -3.09714 | -0.00001 | -0.00221 | -0.00186 | -0.00406 | -3.10121 |
| D19 | -3.09637 | -0.00001 | -0.00174 | -0.00226 | -0.00399 | -3.10036 |
| D20 | 0.04660  | -0.00001 | -0.00193 | -0.00214 | -0.00407 | 0.04252  |
| D21 | 0.00542  | -0.00001 | -0.00002 | 0.00017  | 0.00015  | 0.00557  |
| D22 | 3.08929  | 0.00001  | 0.00067  | 0.00148  | 0.00215  | 3.09144  |
| D23 | -3.09551 | -0.00001 | -0.00198 | -0.00165 | -0.00363 | -3.09914 |
| D24 | -0.01163 | 0.00001  | -0.00129 | -0.00034 | -0.00164 | -0.01327 |
| D25 | -2.83648 | -0.00001 | -0.01207 | -0.01398 | -0.02606 | -2.86253 |
| D26 | 0.25546  | -0.00001 | -0.00969 | -0.01175 | -0.02144 | 0.23402  |
| D27 | 1.62507  | 0.00001  | 0.00490  | 0.00365  | 0.00855  | 1.63362  |
| D28 | -2.58503 | 0.00000  | 0.00505  | 0.00364  | 0.00869  | -2.57634 |
| D29 | -0.53292 | 0.00001  | 0.00486  | 0.00381  | 0.00867  | -0.52425 |
| D30 | -1.44776 | -0.00001 | 0.00409  | 0.00210  | 0.00619  | -1.44157 |
| D31 | 0.62533  | -0.00002 | 0.00423  | 0.00209  | 0.00632  | 0.63165  |
| D32 | 2.67744  | -0.00001 | 0.00405  | 0.00226  | 0.00631  | 2.68375  |
| D33 | -1.32940 | 0.00000  | 0.00049  | 0.00059  | 0.00108  | -1.32832 |
| D34 | 0.73637  | -0.00001 | 0.00045  | 0.00052  | 0.00096  | 0.73733  |
| D35 | 2.87883  | 0.00001  | 0.00016  | 0.00105  | 0.00120  | 2.88003  |
| D36 | 2.90240  | 0.00000  | 0.00037  | 0.00048  | 0.00085  | 2.90325  |

|     |          |          |          |          |          |          |
|-----|----------|----------|----------|----------|----------|----------|
| D37 | -1.31502 | -0.00001 | 0.00032  | 0.00041  | 0.00073  | -1.31429 |
| D38 | 0.82744  | 0.00001  | 0.00003  | 0.00094  | 0.00097  | 0.82841  |
| D39 | 0.78891  | 0.00000  | 0.00049  | 0.00039  | 0.00089  | 0.78980  |
| D40 | 2.85469  | -0.00001 | 0.00045  | 0.00032  | 0.00077  | 2.85545  |
| D41 | -1.28604 | 0.00001  | 0.00016  | 0.00085  | 0.00101  | -1.28503 |
| D42 | 2.89505  | -0.00001 | 0.00067  | -0.00100 | -0.00033 | 2.89472  |
| D43 | -1.32906 | 0.00001  | 0.00032  | -0.00069 | -0.00037 | -1.32943 |
| D44 | 0.81105  | -0.00002 | 0.00048  | -0.00082 | -0.00034 | 0.81071  |
| D45 | 2.87013  | 0.00000  | 0.00012  | -0.00050 | -0.00038 | 2.86974  |
| D46 | -1.30495 | -0.00001 | 0.00052  | -0.00060 | -0.00008 | -1.30503 |
| D47 | 0.75413  | 0.00002  | 0.00017  | -0.00029 | -0.00012 | 0.75401  |
| D48 | -3.13718 | -0.00001 | -0.00032 | 0.00003  | -0.00028 | -3.13747 |
| D49 | 0.00506  | 0.00000  | -0.00025 | -0.00016 | -0.00041 | 0.00465  |
| D50 | 0.00289  | 0.00000  | -0.00010 | -0.00010 | -0.00020 | 0.00270  |
| D51 | -3.13805 | 0.00000  | -0.00003 | -0.00029 | -0.00032 | -3.13837 |

| Item                 | Value    | Threshold | Converged? |
|----------------------|----------|-----------|------------|
| Maximum Force        | 0.000073 | 0.000450  | YES        |
| RMS Force            | 0.000017 | 0.000300  | YES        |
| Maximum Displacement | 0.022437 | 0.001800  | NO         |
| RMS Displacement     | 0.004531 | 0.001200  | NO         |

Predicted change in Energy=-4.541730D-07

GradGradGradGradGradGradGradGradGradGradGradGradGradGradGradGradGradGradGrad

Input orientation:

| Center Number | Atomic Number | Atomic Type | Coordinates (Angstroms) |           |           |
|---------------|---------------|-------------|-------------------------|-----------|-----------|
|               |               |             | X                       | Y         | Z         |
| 1             | 6             | 0           | -1.818345               | -1.993975 | 0.295190  |
| 2             | 6             | 0           | -2.824206               | -1.110117 | 0.069855  |
| 3             | 7             | 0           | -2.241223               | 0.152195  | 0.016585  |
| 4             | 6             | 0           | -0.913051               | 0.023233  | 0.207213  |
| 5             | 7             | 0           | -0.641393               | -1.269575 | 0.381750  |
| 6             | 6             | 0           | 0.729398                | -1.796761 | 0.557866  |
| 7             | 6             | 0           | 1.447742                | -1.996526 | -0.785023 |
| 8             | 1             | 0           | -1.840044               | -3.064424 | 0.406188  |
| 9             | 1             | 0           | -3.880006               | -1.269974 | -0.050505 |
| 10            | 1             | 0           | 1.276340                | -1.054287 | 1.139495  |
| 11            | 1             | 0           | 0.660932                | -2.725538 | 1.124583  |
| 12            | 1             | 0           | 1.071877                | -2.895983 | -1.283526 |
| 13            | 1             | 0           | 1.229194                | -1.129218 | -1.421807 |
| 14            | 35            | 0           | 1.955209                | 1.591361  | 0.088413  |
| 15            | 1             | 0           | -0.126531               | 0.807850  | 0.193032  |
| 16            | 6             | 0           | -2.864971               | 1.411603  | -0.195280 |

|    |   |   |           |           |           |
|----|---|---|-----------|-----------|-----------|
| 17 | 6 | 0 | -4.170560 | 1.594774  | -0.342895 |
| 18 | 1 | 0 | -2.147154 | 2.221580  | -0.225269 |
| 19 | 1 | 0 | -4.547245 | 2.595310  | -0.503725 |
| 20 | 1 | 0 | -4.895883 | 0.791718  | -0.311529 |
| 21 | 7 | 0 | 2.867584  | -2.162762 | -0.495497 |
| 22 | 1 | 0 | 3.361892  | -2.525224 | -1.302791 |
| 23 | 1 | 0 | 3.265966  | -1.250343 | -0.277036 |

-----  
Distance matrix (angstroms):

|    |    | 1        | 2        | 3        | 4        | 5        |
|----|----|----------|----------|----------|----------|----------|
| 1  | C  | 0.000000 |          |          |          |          |
| 2  | C  | 1.357843 | 0.000000 |          |          |          |
| 3  | N  | 2.205105 | 1.391452 | 0.000000 |          |          |
| 4  | C  | 2.212787 | 2.226177 | 1.347965 | 0.000000 |          |
| 5  | N  | 1.384726 | 2.210742 | 2.171228 | 1.332522 | 0.000000 |
| 6  | C  | 2.568830 | 3.652087 | 3.593884 | 2.476485 | 1.479192 |
| 7  | C  | 3.440086 | 4.445906 | 4.343735 | 3.261487 | 2.500860 |
| 8  | H  | 1.076407 | 2.213823 | 3.264869 | 3.229943 | 2.158435 |
| 9  | H  | 2.212267 | 1.074594 | 2.170870 | 3.246787 | 3.267332 |
| 10 | H  | 3.342595 | 4.238128 | 3.884555 | 2.612208 | 2.073216 |
| 11 | H  | 2.714755 | 3.983495 | 4.234561 | 3.297686 | 2.089899 |
| 12 | H  | 3.414579 | 4.494489 | 4.685969 | 3.831979 | 2.890267 |
| 13 | H  | 3.603246 | 4.319198 | 3.969229 | 2.927637 | 2.602232 |
| 14 | Br | 5.209328 | 5.490094 | 4.436935 | 3.271094 | 3.874705 |
| 15 | H  | 3.274584 | 3.312284 | 2.221022 | 1.111054 | 2.148580 |
| 16 | C  | 3.596379 | 2.535947 | 1.421287 | 2.428902 | 3.530719 |
| 17 | C  | 4.338108 | 3.049502 | 2.435693 | 3.658377 | 4.602676 |
| 18 | H  | 4.260269 | 3.412579 | 2.085593 | 2.557886 | 3.850189 |
| 19 | H  | 5.398769 | 4.126506 | 3.399600 | 4.508701 | 5.565707 |
| 20 | H  | 4.195167 | 2.838004 | 2.750249 | 4.089329 | 4.778101 |
| 21 | N  | 4.755166 | 5.815854 | 5.632154 | 4.423299 | 3.725622 |
| 22 | H  | 5.447075 | 6.492650 | 6.348560 | 5.200950 | 4.521130 |
| 23 | H  | 5.170169 | 6.101655 | 5.690558 | 4.395529 | 3.962552 |
|    |    | 6        | 7        | 8        | 9        | 10       |
| 6  | C  | 0.000000 |          |          |          |          |
| 7  | C  | 1.535993 | 0.000000 |          |          |          |
| 8  | H  | 2.869147 | 3.656354 | 0.000000 |          |          |
| 9  | H  | 4.679127 | 5.426996 | 2.755007 | 0.000000 |          |
| 10 | H  | 1.090278 | 2.149642 | 3.780243 | 5.296274 | 0.000000 |
| 11 | H  | 1.090175 | 2.190233 | 2.624084 | 4.911173 | 1.781019 |
| 12 | H  | 2.171705 | 1.094899 | 3.370874 | 5.355875 | 3.050357 |
| 13 | H  | 2.148142 | 1.097943 | 4.062857 | 5.291900 | 2.562831 |
| 14 | Br | 3.633507 | 3.727378 | 6.015086 | 6.500482 | 2.926617 |
| 15 | H  | 2.765813 | 3.361465 | 4.239820 | 4.297120 | 2.516226 |

|    |    |          |          |          |          |          |
|----|----|----------|----------|----------|----------|----------|
| 16 | C  | 4.876507 | 5.528347 | 4.631096 | 2.870907 | 5.001269 |
| 17 | C  | 6.026896 | 6.682680 | 5.263132 | 2.894252 | 6.235681 |
| 18 | H  | 5.003491 | 5.570369 | 5.332437 | 3.901828 | 4.930943 |
| 19 | H  | 6.946959 | 7.556716 | 6.339517 | 3.948549 | 7.066391 |
| 20 | H  | 6.252988 | 6.945507 | 4.972232 | 2.313160 | 6.603751 |
| 21 | N  | 2.411507 | 1.458565 | 4.877273 | 6.820928 | 2.536528 |
| 22 | H  | 3.304955 | 2.052213 | 5.501952 | 7.455800 | 3.532413 |
| 23 | H  | 2.725767 | 2.029970 | 5.461595 | 7.149588 | 2.450226 |
|    |    | 11       | 12       | 13       | 14       | 15       |
| 11 | H  | 0.000000 |          |          |          |          |
| 12 | H  | 2.448860 | 0.000000 |          |          |          |
| 13 | H  | 3.058637 | 1.779137 | 0.000000 |          |          |
| 14 | Br | 4.624329 | 4.774804 | 3.195217 | 0.000000 |          |
| 15 | H  | 3.738010 | 4.163506 | 2.863202 | 2.226763 | 0.000000 |
| 16 | C  | 5.593743 | 5.936190 | 4.972155 | 4.831866 | 2.830964 |
| 17 | C  | 6.645442 | 6.966694 | 6.143413 | 6.140935 | 4.154592 |
| 18 | H  | 5.846488 | 6.137713 | 4.905026 | 4.162326 | 2.501305 |
| 19 | H  | 7.621544 | 7.895374 | 6.934136 | 6.606092 | 4.819046 |
| 20 | H  | 6.731396 | 7.082237 | 6.514543 | 6.909185 | 4.795994 |
| 21 | N  | 2.794761 | 2.093601 | 2.147227 | 3.907277 | 4.273561 |
| 22 | H  | 3.636956 | 2.319914 | 2.551744 | 4.567327 | 5.051333 |
| 23 | H  | 3.305591 | 2.921503 | 2.339575 | 3.150701 | 3.995767 |
|    |    | 16       | 17       | 18       | 19       | 20       |
| 16 | C  | 0.000000 |          |          |          |          |
| 17 | C  | 1.326614 | 0.000000 |          |          |          |
| 18 | H  | 1.082692 | 2.121530 | 0.000000 |          |          |
| 19 | H  | 2.079988 | 1.081125 | 2.444923 | 0.000000 |          |
| 20 | H  | 2.126587 | 1.082579 | 3.099589 | 1.847007 | 0.000000 |
| 21 | N  | 6.762277 | 7.979839 | 6.666564 | 8.810165 | 8.308682 |
| 22 | H  | 7.449765 | 8.639075 | 7.351380 | 9.455836 | 8.954080 |
| 23 | H  | 6.684386 | 7.962471 | 6.431081 | 8.711298 | 8.413499 |
|    |    | 21       | 22       | 23       |          |          |
| 21 | N  | 0.000000 |          |          |          |          |
| 22 | H  | 1.013629 | 0.000000 |          |          |          |
| 23 | H  | 1.019285 | 1.639115 | 0.000000 |          |          |

Stoichiometry C7H12BrN3

Framework group C1[X(C7H12BrN3)]

Deg. of freedom 63

Full point group C1 NOp 1

Largest Abelian subgroup C1 NOp 1

Largest concise Abelian subgroup C1 NOp 1

Standard orientation:

-----  
Center Atomic Atomic Coordinates (Angstroms)



| Number | Number | Type | X         | Y         | Z         |
|--------|--------|------|-----------|-----------|-----------|
| 1      | 6      | 0    | -1.740466 | 2.054095  | -0.323938 |
| 2      | 6      | 0    | -2.775485 | 1.212486  | -0.070623 |
| 3      | 7      | 0    | -2.238866 | -0.069385 | -0.000021 |
| 4      | 6      | 0    | -0.909210 | 0.006660  | -0.207968 |
| 5      | 7      | 0    | -0.592151 | 1.285047  | -0.409989 |
| 6      | 6      | 0    | 0.794954  | 1.757661  | -0.611445 |
| 7      | 6      | 0    | 1.536146  | 1.955447  | 0.719266  |
| 8      | 1      | 0    | -1.723988 | 3.122375  | -0.454929 |
| 9      | 1      | 0    | -3.823159 | 1.413606  | 0.058544  |
| 10     | 1      | 0    | 1.307159  | 0.984771  | -1.185023 |
| 11     | 1      | 0    | 0.754038  | 2.677694  | -1.194837 |
| 12     | 1      | 0    | 1.199688  | 2.877300  | 1.204844  |
| 13     | 1      | 0    | 1.293367  | 1.108775  | 1.374769  |
| 14     | 35     | 0    | 1.900468  | -1.664344 | -0.091740 |
| 15     | 1      | 0    | -0.152054 | -0.806203 | -0.187774 |
| 16     | 6      | 0    | -2.906073 | -1.300647 | 0.242643  |
| 17     | 6      | 0    | -4.215676 | -1.432488 | 0.408360  |
| 18     | 1      | 0    | -2.218316 | -2.136006 | 0.279892  |
| 19     | 1      | 0    | -4.627066 | -2.415213 | 0.592324  |
| 20     | 1      | 0    | -4.911206 | -0.603791 | 0.369949  |
| 21     | 7      | 0    | 2.957599  | 2.063502  | 0.410709  |
| 22     | 1      | 0    | 3.474535  | 2.422249  | 1.205391  |
| 23     | 1      | 0    | 3.319419  | 1.133045  | 0.205097  |

Rotational constants (GHZ): 0.8917064 0.4588819 0.3139300  
Standard basis: 6-311++G(d,p) (5D, 7F)  
There are 365 symmetry adapted cartesian basis functions of A symmetry.  
There are 352 symmetry adapted basis functions of A symmetry.  
352 basis functions, 562 primitive gaussians, 365 cartesian basis functions  
55 alpha electrons 55 beta electrons  
nuclear repulsion energy 843.1635340307 Hartrees.  
NAtoms= 23 NActive= 23 NUniq= 23 SFac= 1.00D+00 NAtFMM= 60 NAOKFM=F  
Big=F  
Integral buffers will be 131072 words long.  
Raffenetti 2 integral format.  
Two-electron integral symmetry is turned on.  
One-electron integrals computed using PRISM.  
NBasis= 352 RedAO= T EigKep= 4.32D-06 NBF= 352  
NBsUse= 352 1.00D-06 EigRej= -1.00D+00 NBFU= 352  
Initial guess from the checkpoint file: "/home/suqian/liuwen/qianmengshijie/nh2/nh2.chk"  
B after Tr= 0.000000 0.000000 0.000000  
Rot= 1.000000 0.000001 0.000009 -0.000241 Ang= 0.03 deg.

ExpMin= 3.50D-02 ExpMax= 4.40D+05 ExpMxC= 1.51D+04 IAcc=3 IRadAn= 5 AccDes= 0.00D+00

Harris functional with IExCor= 402 and IRadAn= 5 diagonalized for initial guess.  
HarFok: IExCor= 402 AccDes= 0.00D+00 IRadAn= 5 IDoV= 1 UseB2=F ITyADJ=14  
ICtDFT= 3500011 ScaDFX= 1.000000 1.000000 1.000000 1.000000  
FoFCou: FMM=F IPFlag= 0 FMFlag= 100000 FMFlg1= 0  
NFxFlg= 0 DoJE=T BraDBF=F KetDBF=T FulRan=T  
wScr= 0.000000 ICntrl= 500 IOpCl= 0 l1Cent= 200000004 NGrid= 0  
NMat0= 1 NMatS0= 1 NMatT0= 0 NMatD0= 1 NMtDS0= 0

NMtDT0= 0

Petite list used in FoFCou.

Requested convergence on RMS density matrix=1.00D-08 within 128 cycles.

Requested convergence on MAX density matrix=1.00D-06.

Requested convergence on energy=1.00D-06.

No special actions if energy rises.

SCF Done: E(RB3LYP) = -3012.46805909 A.U. after 10 cycles

NFock= 10 Conv=0.90D-08 -V/T= 2.0017

Calling FoFJK, ICntrl= 2127 FMM=F ISym2X=0 l1Cent= 0 IOpClX= 0 NMat=1 NMatS=1 NMatT=0.

\*\*\*\*\* Axes restored to original set \*\*\*\*\*

-----

| Center | Atomic | Forces (Hartrees/Bohr) |              |              |
|--------|--------|------------------------|--------------|--------------|
| Number | Number | X                      | Y            | Z            |
| 1      | 6      | 0.000056422            | 0.000029067  | 0.000042924  |
| 2      | 6      | -0.000029698           | 0.000012968  | 0.000068961  |
| 3      | 7      | 0.000029948            | -0.000033138 | -0.000016733 |
| 4      | 6      | -0.000065493           | 0.000033665  | 0.000057581  |
| 5      | 7      | -0.000010221           | -0.000092241 | -0.000118859 |
| 6      | 6      | -0.000004009           | -0.000013461 | 0.000098653  |
| 7      | 6      | 0.000028899            | -0.000035167 | 0.000007248  |
| 8      | 1      | -0.000010011           | -0.000003244 | -0.000013733 |
| 9      | 1      | 0.000004004            | -0.000005012 | -0.000011827 |
| 10     | 1      | 0.000007611            | 0.000030188  | -0.000022266 |
| 11     | 1      | -0.000004896           | 0.000002659  | -0.000016480 |
| 12     | 1      | -0.000001696           | 0.000013919  | -0.000012455 |
| 13     | 1      | -0.000016286           | -0.000005227 | -0.000015558 |
| 14     | 35     | 0.000021128            | 0.000017172  | -0.000003312 |
| 15     | 1      | 0.000001947            | 0.000008529  | -0.000017184 |
| 16     | 6      | -0.000019828           | 0.000034871  | -0.000033327 |
| 17     | 6      | -0.000001410           | -0.000004098 | -0.000010571 |
| 18     | 1      | 0.000008626            | -0.000001573 | 0.000007936  |
| 19     | 1      | -0.000005226           | -0.000004705 | 0.000004593  |

-----

|    |   |              |              |              |
|----|---|--------------|--------------|--------------|
| 20 | 1 | 0.000001702  | -0.000009102 | 0.000004054  |
| 21 | 7 | 0.000015983  | 0.000070842  | -0.000051553 |
| 22 | 1 | -0.000010576 | -0.000022149 | 0.000023167  |
| 23 | 1 | 0.000003081  | -0.000024762 | 0.000028741  |

-----  
 Cartesian Forces: Max 0.000118859 RMS 0.000033062

GradGradGradGradGradGradGradGradGradGradGradGradGradGradGradGradGradGradGradGrad  
 Berny optimization.

Using GEDIIS/GDIIS optimizer.

FormGI is forming the generalized inverse of G from B-inverse, IUseBI=4.

Internal Forces: Max 0.000054740 RMS 0.000014609

Search for a local minimum.

Step number 35 out of a maximum of 121

All quantities printed in internal units (Hartrees-Bohrs-Radians)

Mixed Optimization -- En-DIIS/RFO-DIIS

Swapping is turned off.

Update second derivatives using D2CorX and points 24 27 28 29 30  
 31 32 33 34 35

DE= -1.02D-06 DEPred=-4.54D-07 R= 2.24D+00

TightC=F SS= 1.41D+00 RLast= 4.03D-02 DXNew= 4.0000D-01 1.2085D-01

Trust test= 2.24D+00 RLast= 4.03D-02 DXMaxT set to 2.38D-01

ITU= 1 1 0 1 1 1 0 1 1 0 -1 -1 0 -1 -1 0 -1 0 0 0

ITU= 1 1 -1 1 -1 1 1 1 1 1 0 1 0 0

|                 |         |         |         |         |         |
|-----------------|---------|---------|---------|---------|---------|
| Eigenvalues --- | 0.00032 | 0.00204 | 0.00343 | 0.00541 | 0.00970 |
| Eigenvalues --- | 0.01268 | 0.01830 | 0.01850 | 0.02114 | 0.02273 |
| Eigenvalues --- | 0.02376 | 0.02494 | 0.03059 | 0.03065 | 0.03919 |
| Eigenvalues --- | 0.04073 | 0.04373 | 0.04628 | 0.05057 | 0.05440 |
| Eigenvalues --- | 0.05479 | 0.08767 | 0.09180 | 0.09718 | 0.12661 |
| Eigenvalues --- | 0.12968 | 0.15299 | 0.15743 | 0.15966 | 0.16000 |
| Eigenvalues --- | 0.16008 | 0.16060 | 0.16338 | 0.19047 | 0.20768 |
| Eigenvalues --- | 0.22089 | 0.23228 | 0.23937 | 0.24903 | 0.25153 |
| Eigenvalues --- | 0.26869 | 0.29924 | 0.33978 | 0.34581 | 0.34867 |
| Eigenvalues --- | 0.34991 | 0.35376 | 0.35690 | 0.35817 | 0.35859 |
| Eigenvalues --- | 0.36441 | 0.36663 | 0.38087 | 0.41387 | 0.42229 |
| Eigenvalues --- | 0.43027 | 0.46945 | 0.47714 | 0.48759 | 0.50043 |
| Eigenvalues --- | 0.54308 | 0.60341 | 0.60617 |         |         |

En-DIIS/RFO-DIIS IScMMF= 0 using points: 35 34 33 32 31

RFO step: Lambda=-7.24394411D-08.

DidBck=F Rises=F RFO-DIIS coefs: 1.65362 -0.30704 -1.88769 1.42896  
 0.11214

Iteration 1 RMS(Cart)= 0.00290910 RMS(Int)= 0.00000869

Iteration 2 RMS(Cart)= 0.00001961 RMS(Int)= 0.00000065

Iteration 3 RMS(Cart)= 0.00000000 RMS(Int)= 0.00000065

| Variable | Old X   | -DE/DX   | Delta X<br>(Linear) | Delta X<br>(Quad) | Delta X<br>(Total) | New X   |
|----------|---------|----------|---------------------|-------------------|--------------------|---------|
| R1       | 2.56595 | 0.00002  | 0.00004             | 0.00001           | 0.00005            | 2.56600 |
| R2       | 2.61675 | -0.00003 | 0.00000             | -0.00008          | -0.00008           | 2.61667 |
| R3       | 2.03411 | 0.00000  | -0.00001            | 0.00001           | 0.00000            | 2.03412 |
| R4       | 2.62946 | 0.00000  | -0.00004            | 0.00003           | -0.00002           | 2.62944 |
| R5       | 2.03069 | 0.00000  | 0.00000             | -0.00001          | 0.00000            | 2.03068 |
| R6       | 2.54729 | -0.00002 | 0.00002             | -0.00005          | -0.00003           | 2.54725 |
| R7       | 2.68584 | 0.00003  | 0.00006             | 0.00002           | 0.00008            | 2.68593 |
| R8       | 2.51810 | 0.00005  | -0.00002            | 0.00006           | 0.00004            | 2.51814 |
| R9       | 2.09959 | 0.00003  | 0.00018             | -0.00009          | 0.00009            | 2.09968 |
| R10      | 2.79527 | 0.00001  | 0.00001             | 0.00006           | 0.00007            | 2.79534 |
| R11      | 2.90261 | 0.00003  | -0.00012            | 0.00014           | 0.00002            | 2.90263 |
| R12      | 2.06033 | 0.00001  | 0.00009             | 0.00000           | 0.00010            | 2.06042 |
| R13      | 2.06013 | -0.00001 | -0.00004            | 0.00000           | -0.00005           | 2.06009 |
| R14      | 2.06906 | 0.00000  | -0.00001            | 0.00000           | -0.00001           | 2.06905 |
| R15      | 2.07481 | 0.00001  | 0.00011             | -0.00002          | 0.00009            | 2.07491 |
| R16      | 2.75629 | 0.00001  | -0.00006            | -0.00008          | -0.00015           | 2.75614 |
| R17      | 4.20797 | 0.00003  | -0.00038            | 0.00107           | 0.00068            | 4.20865 |
| R18      | 2.50694 | 0.00000  | -0.00001            | 0.00000           | -0.00001           | 2.50693 |
| R19      | 2.04599 | 0.00001  | 0.00000             | 0.00001           | 0.00002            | 2.04601 |
| R20      | 2.04303 | 0.00000  | 0.00001             | -0.00001          | 0.00000            | 2.04303 |
| R21      | 2.04578 | 0.00000  | 0.00000             | 0.00001           | 0.00000            | 2.04578 |
| R22      | 1.91548 | -0.00002 | -0.00006            | -0.00001          | -0.00007           | 1.91541 |
| R23      | 1.92617 | -0.00002 | -0.00004            | -0.00003          | -0.00007           | 1.92610 |
| A1       | 1.87494 | 0.00001  | 0.00004             | -0.00002          | 0.00001            | 1.87496 |
| A2       | 2.27773 | -0.00002 | 0.00000             | -0.00008          | -0.00008           | 2.27765 |
| A3       | 2.13049 | 0.00001  | -0.00004            | 0.00010           | 0.00007            | 2.13056 |
| A4       | 1.86137 | 0.00000  | 0.00000             | 0.00000           | 0.00000            | 1.86137 |
| A5       | 2.27782 | 0.00000  | 0.00000             | -0.00003          | -0.00003           | 2.27779 |
| A6       | 2.14398 | 0.00000  | 0.00001             | 0.00003           | 0.00003            | 2.14402 |
| A7       | 1.89718 | 0.00000  | -0.00003            | 0.00001           | -0.00002           | 1.89715 |
| A8       | 2.24682 | 0.00000  | 0.00008             | -0.00002          | 0.00006            | 2.24689 |
| A9       | 2.13918 | 0.00000  | -0.00005            | 0.00001           | -0.00004           | 2.13914 |
| A10      | 1.88832 | 0.00000  | 0.00007             | -0.00004          | 0.00003            | 1.88835 |
| A11      | 2.24996 | -0.00001 | -0.00003            | 0.00017           | 0.00014            | 2.25010 |
| A12      | 2.14420 | 0.00001  | 0.00003             | -0.00011          | -0.00008           | 2.14412 |
| A13      | 1.90295 | -0.00001 | -0.00007            | 0.00005           | -0.00002           | 1.90293 |
| A14      | 2.22517 | 0.00002  | 0.00028             | 0.00006           | 0.00034            | 2.22551 |
| A15      | 2.15352 | -0.00001 | -0.00008            | -0.00007          | -0.00015           | 2.15337 |
| A16      | 1.95590 | 0.00003  | 0.00019             | 0.00005           | 0.00024            | 1.95614 |
| A17      | 1.86053 | -0.00001 | -0.00009            | -0.00004          | -0.00013           | 1.86041 |
| A18      | 1.88318 | -0.00001 | -0.00004            | -0.00006          | -0.00011           | 1.88308 |
| A19      | 1.89690 | -0.00002 | -0.00032            | -0.00001          | -0.00033           | 1.89657 |

|     |          |          |          |          |          |          |
|-----|----------|----------|----------|----------|----------|----------|
| A20 | 1.95310  | -0.00001 | 0.00005  | -0.00008 | -0.00003 | 1.95307  |
| A21 | 1.91173  | 0.00002  | 0.00021  | 0.00015  | 0.00036  | 1.91208  |
| A22 | 1.92234  | 0.00001  | 0.00038  | -0.00015 | 0.00023  | 1.92257  |
| A23 | 1.88729  | 0.00000  | 0.00001  | 0.00005  | 0.00007  | 1.88736  |
| A24 | 1.87186  | -0.00002 | -0.00016 | 0.00008  | -0.00008 | 1.87178  |
| A25 | 1.89288  | -0.00002 | -0.00043 | 0.00003  | -0.00040 | 1.89248  |
| A26 | 1.90808  | 0.00001  | 0.00002  | 0.00001  | 0.00003  | 1.90811  |
| A27 | 1.98114  | 0.00001  | 0.00021  | -0.00003 | 0.00017  | 1.98131  |
| A28 | 2.71621  | 0.00003  | 0.00098  | -0.00020 | 0.00078  | 2.71699  |
| A29 | 2.17833  | -0.00002 | 0.00001  | -0.00005 | -0.00005 | 2.17828  |
| A30 | 1.95635  | 0.00000  | -0.00005 | 0.00000  | -0.00005 | 1.95631  |
| A31 | 2.14851  | 0.00002  | 0.00004  | 0.00005  | 0.00010  | 2.14860  |
| A32 | 2.07971  | 0.00001  | -0.00001 | 0.00004  | 0.00003  | 2.07974  |
| A33 | 2.15763  | -0.00001 | 0.00001  | -0.00005 | -0.00004 | 2.15759  |
| A34 | 2.04584  | 0.00000  | 0.00000  | 0.00001  | 0.00001  | 2.04585  |
| A35 | 1.93625  | 0.00001  | 0.00020  | 0.00007  | 0.00028  | 1.93653  |
| A36 | 1.89757  | 0.00004  | 0.00042  | -0.00004 | 0.00037  | 1.89794  |
| A37 | 1.87570  | 0.00001  | 0.00034  | 0.00015  | 0.00049  | 1.87619  |
| D1  | 0.00382  | 0.00001  | -0.00008 | 0.00017  | 0.00009  | 0.00391  |
| D2  | -3.13359 | -0.00001 | -0.00035 | -0.00001 | -0.00036 | -3.13395 |
| D3  | 3.13801  | 0.00001  | 0.00013  | 0.00012  | 0.00025  | 3.13827  |
| D4  | 0.00061  | -0.00001 | -0.00014 | -0.00006 | -0.00020 | 0.00041  |
| D5  | -0.00589 | 0.00000  | 0.00038  | -0.00019 | 0.00019  | -0.00570 |
| D6  | -3.08884 | -0.00002 | -0.00221 | -0.00086 | -0.00306 | -3.09190 |
| D7  | -3.14085 | 0.00000  | 0.00019  | -0.00014 | 0.00005  | -3.14080 |
| D8  | 0.05939  | -0.00002 | -0.00240 | -0.00081 | -0.00321 | 0.05618  |
| D9  | -0.00050 | -0.00002 | -0.00024 | -0.00010 | -0.00034 | -0.00084 |
| D10 | -3.14020 | -0.00001 | -0.00007 | -0.00008 | -0.00015 | -3.14034 |
| D11 | 3.13730  | 0.00000  | 0.00001  | 0.00006  | 0.00007  | 3.13737  |
| D12 | -0.00240 | 0.00001  | 0.00018  | 0.00009  | 0.00026  | -0.00213 |
| D13 | -0.00316 | 0.00002  | 0.00048  | -0.00002 | 0.00046  | -0.00269 |
| D14 | 3.09861  | 0.00001  | 0.00248  | 0.00056  | 0.00304  | 3.10165  |
| D15 | 3.13668  | 0.00001  | 0.00032  | -0.00004 | 0.00028  | 3.13696  |
| D16 | -0.04474 | 0.00000  | 0.00232  | 0.00054  | 0.00286  | -0.04188 |
| D17 | 0.03910  | 0.00000  | -0.00239 | -0.00098 | -0.00337 | 0.03572  |
| D18 | -3.10121 | -0.00001 | -0.00271 | -0.00098 | -0.00368 | -3.10489 |
| D19 | -3.10036 | 0.00000  | -0.00220 | -0.00095 | -0.00315 | -3.10351 |
| D20 | 0.04252  | -0.00001 | -0.00251 | -0.00095 | -0.00347 | 0.03906  |
| D21 | 0.00557  | -0.00001 | -0.00053 | 0.00013  | -0.00041 | 0.00517  |
| D22 | 3.09144  | 0.00001  | 0.00194  | 0.00077  | 0.00271  | 3.09415  |
| D23 | -3.09914 | 0.00000  | -0.00238 | -0.00042 | -0.00280 | -3.10193 |
| D24 | -0.01327 | 0.00002  | 0.00010  | 0.00022  | 0.00032  | -0.01295 |
| D25 | -2.86253 | 0.00000  | -0.01605 | -0.00237 | -0.01842 | -2.88095 |
| D26 | 0.23402  | -0.00001 | -0.01379 | -0.00171 | -0.01550 | 0.21852  |

|     |          |          |          |          |          |          |
|-----|----------|----------|----------|----------|----------|----------|
| D27 | 1.63362  | 0.00001  | 0.00460  | 0.00142  | 0.00602  | 1.63964  |
| D28 | -2.57634 | 0.00000  | 0.00427  | 0.00140  | 0.00568  | -2.57067 |
| D29 | -0.52425 | 0.00002  | 0.00445  | 0.00153  | 0.00598  | -0.51827 |
| D30 | -1.44157 | -0.00001 | 0.00167  | 0.00066  | 0.00233  | -1.43924 |
| D31 | 0.63165  | -0.00002 | 0.00134  | 0.00064  | 0.00198  | 0.63364  |
| D32 | 2.68375  | -0.00001 | 0.00151  | 0.00077  | 0.00228  | 2.68603  |
| D33 | -1.32832 | 0.00000  | 0.00048  | -0.00013 | 0.00036  | -1.32796 |
| D34 | 0.73733  | -0.00001 | 0.00018  | -0.00014 | 0.00004  | 0.73738  |
| D35 | 2.88003  | 0.00000  | 0.00035  | -0.00010 | 0.00024  | 2.88027  |
| D36 | 2.90325  | 0.00001  | 0.00068  | -0.00010 | 0.00058  | 2.90383  |
| D37 | -1.31429 | 0.00000  | 0.00038  | -0.00011 | 0.00027  | -1.31402 |
| D38 | 0.82841  | 0.00001  | 0.00054  | -0.00008 | 0.00046  | 0.82888  |
| D39 | 0.78980  | 0.00000  | 0.00060  | -0.00023 | 0.00037  | 0.79017  |
| D40 | 2.85545  | -0.00001 | 0.00030  | -0.00024 | 0.00006  | 2.85551  |
| D41 | -1.28503 | 0.00000  | 0.00046  | -0.00021 | 0.00026  | -1.28478 |
| D42 | 2.89472  | -0.00001 | -0.00032 | 0.00018  | -0.00014 | 2.89458  |
| D43 | -1.32943 | 0.00002  | 0.00047  | 0.00037  | 0.00085  | -1.32858 |
| D44 | 0.81071  | -0.00002 | -0.00069 | 0.00030  | -0.00039 | 0.81032  |
| D45 | 2.86974  | 0.00001  | 0.00010  | 0.00050  | 0.00061  | 2.87035  |
| D46 | -1.30503 | -0.00002 | -0.00028 | 0.00027  | -0.00001 | -1.30504 |
| D47 | 0.75401  | 0.00002  | 0.00051  | 0.00047  | 0.00098  | 0.75499  |
| D48 | -3.13747 | -0.00001 | -0.00048 | -0.00003 | -0.00051 | -3.13797 |
| D49 | 0.00465  | 0.00000  | -0.00036 | -0.00002 | -0.00039 | 0.00427  |
| D50 | 0.00270  | 0.00000  | -0.00013 | -0.00003 | -0.00016 | 0.00254  |
| D51 | -3.13837 | 0.00001  | -0.00001 | -0.00003 | -0.00004 | -3.13841 |

| Item                 | Value    | Threshold | Converged? |
|----------------------|----------|-----------|------------|
| Maximum Force        | 0.000055 | 0.000450  | YES        |
| RMS Force            | 0.000015 | 0.000300  | YES        |
| Maximum Displacement | 0.014632 | 0.001800  | NO         |
| RMS Displacement     | 0.002909 | 0.001200  | NO         |

Predicted change in Energy=-2.381059D-07

GradGradGradGradGradGradGradGradGradGradGradGradGradGradGradGradGradGradGrad

Input orientation:

| Center<br>Number | Atomic<br>Number | Atomic<br>Type | Coordinates (Angstroms) |           |          |
|------------------|------------------|----------------|-------------------------|-----------|----------|
|                  |                  |                | X                       | Y         | Z        |
| 1                | 6                | 0              | -1.819413               | -1.993954 | 0.297724 |
| 2                | 6                | 0              | -2.825356               | -1.109809 | 0.073739 |
| 3                | 7                | 0              | -2.241659               | 0.151977  | 0.016244 |
| 4                | 6                | 0              | -0.913078               | 0.022466  | 0.203501 |
| 5                | 7                | 0              | -0.641738               | -1.270246 | 0.379410 |
| 6                | 6                | 0              | 0.729046                | -1.797402 | 0.555980 |

|    |    |   |           |           |           |
|----|----|---|-----------|-----------|-----------|
| 7  | 6  | 0 | 1.448722  | -1.995731 | -0.786421 |
| 8  | 1  | 0 | -1.841580 | -3.064194 | 0.410650  |
| 9  | 1  | 0 | -3.881576 | -1.269227 | -0.043450 |
| 10 | 1  | 0 | 1.275446  | -1.055181 | 1.138535  |
| 11 | 1  | 0 | 0.660209  | -2.726739 | 1.121685  |
| 12 | 1  | 0 | 1.073380  | -2.894511 | -1.286528 |
| 13 | 1  | 0 | 1.230720  | -1.127799 | -1.422626 |
| 14 | 35 | 0 | 1.956418  | 1.590502  | 0.096156  |
| 15 | 1  | 0 | -0.126231 | 0.806800  | 0.188142  |
| 16 | 6  | 0 | -2.865090 | 1.411473  | -0.196320 |
| 17 | 6  | 0 | -4.170626 | 1.594836  | -0.344122 |
| 18 | 1  | 0 | -2.147052 | 2.221264  | -0.226351 |
| 19 | 1  | 0 | -4.547169 | 2.595414  | -0.505026 |
| 20 | 1  | 0 | -4.896054 | 0.791874  | -0.312729 |
| 21 | 7  | 0 | 2.868168  | -2.162343 | -0.495562 |
| 22 | 1  | 0 | 3.363526  | -2.524061 | -1.302501 |
| 23 | 1  | 0 | 3.266509  | -1.250489 | -0.274845 |

-----  
Distance matrix (angstroms):

|    |    | 1        | 2        | 3        | 4        | 5        |
|----|----|----------|----------|----------|----------|----------|
| 1  | C  | 0.000000 |          |          |          |          |
| 2  | C  | 1.357867 | 0.000000 |          |          |          |
| 3  | N  | 2.205117 | 1.391442 | 0.000000 |          |          |
| 4  | C  | 2.212751 | 2.226138 | 1.347949 | 0.000000 |          |
| 5  | N  | 1.384682 | 2.210738 | 2.171256 | 1.332544 | 0.000000 |
| 6  | C  | 2.569041 | 3.652276 | 3.593951 | 2.476435 | 1.479229 |
| 7  | C  | 3.443266 | 4.448874 | 4.344633 | 3.260546 | 2.501102 |
| 8  | H  | 1.076410 | 2.213808 | 3.264870 | 3.229937 | 2.158436 |
| 9  | H  | 2.212272 | 1.074592 | 2.170878 | 3.246758 | 3.267317 |
| 10 | H  | 3.341618 | 4.237140 | 3.884173 | 2.612518 | 2.073191 |
| 11 | H  | 2.713745 | 3.982690 | 4.234364 | 3.297942 | 2.089835 |
| 12 | H  | 3.418934 | 4.498404 | 4.686981 | 3.830790 | 2.890539 |
| 13 | H  | 3.607373 | 4.323330 | 3.970590 | 2.926306 | 2.602638 |
| 14 | Br | 5.210168 | 5.491588 | 4.438422 | 3.271738 | 3.874858 |
| 15 | H  | 3.274614 | 3.312363 | 2.221121 | 1.111100 | 2.148593 |
| 16 | C  | 3.596450 | 2.536015 | 1.421331 | 2.428899 | 3.530776 |
| 17 | C  | 4.338154 | 3.049502 | 2.435697 | 3.658396 | 4.602743 |
| 18 | H  | 4.260289 | 3.412652 | 2.085606 | 2.557768 | 3.850138 |
| 19 | H  | 5.398829 | 4.126534 | 3.399630 | 4.508735 | 5.565783 |
| 20 | H  | 4.195141 | 2.837877 | 2.750183 | 4.089325 | 4.778138 |
| 21 | N  | 4.757213 | 5.817916 | 5.632793 | 4.422657 | 3.725702 |
| 22 | H  | 5.450192 | 6.495876 | 6.349674 | 5.200210 | 4.521395 |
| 23 | H  | 5.171767 | 6.103451 | 5.691358 | 4.395244 | 3.962680 |
|    |    | 6        | 7        | 8        | 9        | 10       |

|    |    |          |          |          |          |          |
|----|----|----------|----------|----------|----------|----------|
| 6  | C  | 0.000000 |          |          |          |          |
| 7  | C  | 1.536004 | 0.000000 |          |          |          |
| 8  | H  | 2.869495 | 3.660694 | 0.000000 |          |          |
| 9  | H  | 4.679330 | 5.430644 | 2.754941 | 0.000000 |          |
| 10 | H  | 1.090328 | 2.149446 | 3.779128 | 5.295072 | 0.000000 |
| 11 | H  | 1.090151 | 2.190204 | 2.622669 | 4.910162 | 1.781266 |
| 12 | H  | 2.171878 | 1.094895 | 3.377306 | 5.360819 | 3.050393 |
| 13 | H  | 2.148238 | 1.097993 | 4.068114 | 5.296952 | 2.562581 |
| 14 | Br | 3.632598 | 3.727971 | 6.015803 | 6.502285 | 2.924023 |
| 15 | H  | 2.765623 | 3.359231 | 4.239873 | 4.297224 | 2.516926 |
| 16 | C  | 4.876541 | 5.528674 | 4.631154 | 2.871021 | 5.001026 |
| 17 | C  | 6.026961 | 6.683179 | 5.263145 | 2.894271 | 6.235429 |
| 18 | H  | 5.003365 | 5.570127 | 5.332462 | 3.901993 | 4.930669 |
| 19 | H  | 6.947014 | 7.557017 | 6.339545 | 3.948609 | 7.066186 |
| 20 | H  | 6.253060 | 6.946316 | 4.972157 | 2.312966 | 6.603423 |
| 21 | N  | 2.411383 | 1.458488 | 4.880193 | 6.823570 | 2.536305 |
| 22 | H  | 3.304916 | 2.052302 | 5.506338 | 7.459981 | 3.532187 |
| 23 | H  | 2.725454 | 2.030134 | 5.463698 | 7.151854 | 2.449514 |
|    |    | 11       | 12       | 13       | 14       | 15       |
| 11 | H  | 0.000000 |          |          |          |          |
| 12 | H  | 2.449153 | 0.000000 |          |          |          |
| 13 | H  | 3.058694 | 1.778918 | 0.000000 |          |          |
| 14 | Br | 4.622817 | 4.775658 | 3.197264 | 0.000000 |          |
| 15 | H  | 3.738434 | 4.160940 | 2.859819 | 2.227123 | 0.000000 |
| 16 | C  | 5.593717 | 5.936464 | 4.972664 | 4.833687 | 2.831040 |
| 17 | C  | 6.645417 | 6.967207 | 6.144140 | 6.142844 | 4.154689 |
| 18 | H  | 5.846422 | 6.137289 | 4.904757 | 4.164173 | 2.501246 |
| 19 | H  | 7.621567 | 7.895606 | 6.934573 | 6.608170 | 4.819161 |
| 20 | H  | 6.731288 | 7.083210 | 6.515702 | 6.910960 | 4.796072 |
| 21 | N  | 2.794480 | 2.093553 | 2.147316 | 3.907078 | 4.271965 |
| 22 | H  | 3.636713 | 2.319969 | 2.552027 | 4.567912 | 5.049263 |
| 23 | H  | 3.304907 | 2.921665 | 2.340276 | 3.150430 | 3.994681 |
|    |    | 16       | 17       | 18       | 19       | 20       |
| 16 | C  | 0.000000 |          |          |          |          |
| 17 | C  | 1.326609 | 0.000000 |          |          |          |
| 18 | H  | 1.082701 | 2.121588 | 0.000000 |          |          |
| 19 | H  | 2.080001 | 1.081125 | 2.445037 | 0.000000 |          |
| 20 | H  | 2.126562 | 1.082579 | 3.099617 | 1.847012 | 0.000000 |
| 21 | N  | 6.762541 | 7.980223 | 6.666402 | 8.810424 | 8.309270 |
| 22 | H  | 7.450351 | 8.639864 | 7.351373 | 9.456431 | 8.955207 |
| 23 | H  | 6.684962 | 7.963143 | 6.431334 | 8.711918 | 8.414280 |
|    |    | 21       | 22       | 23       |          |          |
| 21 | N  | 0.000000 |          |          |          |          |
| 22 | H  | 1.013592 | 0.000000 |          |          |          |



23 H 1.019249 1.639352 0.000000  
 Stoichiometry C7H12BrN3  
 Framework group C1[X(C7H12BrN3)]  
 Deg. of freedom 63  
 Full point group C1 NOp 1  
 Largest Abelian subgroup C1 NOp 1  
 Largest concise Abelian subgroup C1 NOp 1

Standard orientation:

| Center Number | Atomic Number | Atomic Type | Coordinates (Angstroms) |           |           |
|---------------|---------------|-------------|-------------------------|-----------|-----------|
|               |               |             | X                       | Y         | Z         |
| 1             | 6             | 0           | -1.741941               | 2.053002  | -0.328825 |
| 2             | 6             | 0           | -2.777122               | 1.211267  | -0.076462 |
| 3             | 7             | 0           | -2.239546               | -0.069815 | 0.000692  |
| 4             | 6             | 0           | -0.909265               | 0.006770  | -0.202911 |
| 5             | 7             | 0           | -0.592612               | 1.284803  | -0.407932 |
| 6             | 6             | 0           | 0.794560                | 1.757336  | -0.609394 |
| 7             | 6             | 0           | 1.535886                | 1.955741  | 0.721163  |
| 8             | 1             | 0           | -1.726048               | 3.120860  | -0.463305 |
| 9             | 1             | 0           | -3.825410               | 1.411897  | 0.048384  |
| 10            | 1             | 0           | 1.306840                | 0.983946  | -1.182326 |
| 11            | 1             | 0           | 0.753618                | 2.677089  | -1.193180 |
| 12            | 1             | 0           | 1.199371                | 2.877586  | 1.206706  |
| 13            | 1             | 0           | 1.293236                | 1.109342  | 1.377148  |
| 14            | 35            | 0           | 1.901736                | -1.663720 | -0.093346 |
| 15            | 1             | 0           | -0.151626               | -0.805627 | -0.179718 |
| 16            | 6             | 0           | -2.906404               | -1.300926 | 0.245327  |
| 17            | 6             | 0           | -4.216073               | -1.432954 | 0.410345  |
| 18            | 1             | 0           | -2.218295               | -2.135922 | 0.284420  |
| 19            | 1             | 0           | -4.627291               | -2.415526 | 0.595499  |
| 20            | 1             | 0           | -4.911832               | -0.604535 | 0.370106  |
| 21            | 7             | 0           | 2.957177                | 2.063966  | 0.412286  |
| 22            | 1             | 0           | 3.474407                | 2.423198  | 1.206513  |
| 23            | 1             | 0           | 3.319294                | 1.133793  | 0.206088  |

Rotational constants (GHZ): 0.8918921 0.4585798 0.3138477

Standard basis: 6-311++G(d,p) (5D, 7F)

There are 365 symmetry adapted cartesian basis functions of A symmetry.

There are 352 symmetry adapted basis functions of A symmetry.

352 basis functions, 562 primitive gaussians, 365 cartesian basis functions

55 alpha electrons 55 beta electrons

nuclear repulsion energy 843.1050180292 Hartrees.

NAtoms= 23 NActive= 23 NUniq= 23 SFac= 1.00D+00 NAtFMM= 60 NAOKFM=F

Big=F

Integral buffers will be 131072 words long.

Raffenetti 2 integral format.

Two-electron integral symmetry is turned on.

One-electron integrals computed using PRISM.

NBasis= 352 RedAO= T EigKep= 4.32D-06 NBF= 352

NBsUse= 352 1.00D-06 EigRej= -1.00D+00 NBFU= 352

Initial guess from the checkpoint file: "/home/suqian/liuwen/qianmengshijie/nh2/nh2.chk"

B after Tr= 0.000000 0.000000 0.000000

Rot= 1.000000 0.000025 0.000002 -0.000149 Ang= 0.02 deg.

Requested convergence on RMS density matrix=1.00D-08 within 128 cycles.

Requested convergence on MAX density matrix=1.00D-06.

Requested convergence on energy=1.00D-06.

No special actions if energy rises.

SCF Done: E(RB3LYP) = -3012.46805973 A.U. after 10 cycles

NFock= 10 Conv=0.50D-08 -V/T= 2.0017

Calling FoFJK, ICntrl= 2127 FMM=F ISym2X=0 l1Cent= 0 IOpClX= 0 NMat=1 NMatS=1

NMatT=0.

\*\*\*\*\* Axes restored to original set \*\*\*\*\*

```
-----
```

| Center | Atomic | Forces (Hartrees/Bohr) |              |              |
|--------|--------|------------------------|--------------|--------------|
| Number | Number | X                      | Y            | Z            |
| 1      | 6      | 0.000037854            | 0.000020603  | 0.000021685  |
| 2      | 6      | -0.000018410           | 0.000000759  | 0.000008840  |
| 3      | 7      | 0.000019873            | -0.000014842 | 0.000004459  |
| 4      | 6      | -0.000025370           | 0.000037292  | 0.000011073  |
| 5      | 7      | -0.000003780           | -0.000035352 | -0.000032257 |
| 6      | 6      | 0.000002606            | -0.000002061 | 0.000041883  |
| 7      | 6      | -0.000001081           | -0.000014374 | -0.000026959 |
| 8      | 1      | -0.000004959           | -0.000000500 | -0.000002258 |
| 9      | 1      | 0.000001911            | -0.000004124 | -0.000002996 |
| 10     | 1      | -0.000001313           | 0.000006721  | -0.000006085 |
| 11     | 1      | 0.000001549            | 0.000001433  | -0.000006580 |
| 12     | 1      | -0.000004385           | -0.000003184 | 0.000008841  |
| 13     | 1      | 0.000002500            | -0.000000608 | 0.000008007  |
| 14     | 35     | 0.000010459            | 0.000013314  | -0.000005100 |
| 15     | 1      | -0.000013693           | -0.000016181 | -0.000010857 |
| 16     | 6      | -0.000010229           | 0.000010345  | -0.000005312 |
| 17     | 6      | -0.000001454           | 0.000000241  | -0.000004450 |
| 18     | 1      | -0.000001287           | -0.000004337 | -0.000001845 |
| 19     | 1      | -0.000004122           | -0.000005089 | -0.000001084 |
| 20     | 1      | 0.000001421            | -0.000006494 | 0.000001228  |
| 21     | 7      | 0.000006996            | 0.000024050  | -0.000011450 |

```
-----
```

|    |   |              |              |             |
|----|---|--------------|--------------|-------------|
| 22 | 1 | -0.000001531 | -0.000003244 | 0.000007058 |
| 23 | 1 | 0.000006444  | -0.000004369 | 0.000004158 |

-----  
 Cartesian Forces: Max 0.000041883 RMS 0.000013761

GradGradGradGradGradGradGradGradGradGradGradGradGradGradGradGradGradGradGrad

Berny optimization.

Using GEDIIS/GDIIS optimizer.

FormGI is forming the generalized inverse of G from B-inverse, IUseBI=4.

Internal Forces: Max 0.000032712 RMS 0.000007024

Search for a local minimum.

Step number 36 out of a maximum of 121

All quantities printed in internal units (Hartrees-Bohrs-Radians)

Mixed Optimization -- En-DIIS/RFO-DIIS

Swapping is turned off.

Update second derivatives using D2CorX and points 24 27 28 29 30  
 31 32 33 34 35  
 36

DE= -6.42D-07 DEPred=-2.38D-07 R= 2.70D+00

Trust test= 2.70D+00 RLast= 2.84D-02 DXMaxT set to 2.38D-01

ITU= 0 1 1 0 1 1 1 0 1 1 0 -1 -1 0 -1 -1 0 0

ITU= 0 1 1 -1 1 -1 1 1 1 1 1 0 1 0 0

|                 |         |         |         |         |         |
|-----------------|---------|---------|---------|---------|---------|
| Eigenvalues --- | 0.00034 | 0.00205 | 0.00339 | 0.00537 | 0.00873 |
| Eigenvalues --- | 0.01160 | 0.01824 | 0.01839 | 0.02110 | 0.02249 |
| Eigenvalues --- | 0.02374 | 0.02412 | 0.03059 | 0.03065 | 0.03909 |
| Eigenvalues --- | 0.04011 | 0.04165 | 0.04622 | 0.05023 | 0.05326 |
| Eigenvalues --- | 0.05628 | 0.08597 | 0.09138 | 0.09736 | 0.12822 |
| Eigenvalues --- | 0.13056 | 0.15363 | 0.15747 | 0.15917 | 0.16000 |
| Eigenvalues --- | 0.16003 | 0.16029 | 0.16214 | 0.19202 | 0.20942 |
| Eigenvalues --- | 0.22062 | 0.23150 | 0.23926 | 0.24848 | 0.25073 |
| Eigenvalues --- | 0.27562 | 0.30003 | 0.34035 | 0.34557 | 0.34880 |
| Eigenvalues --- | 0.35093 | 0.35380 | 0.35691 | 0.35839 | 0.35859 |
| Eigenvalues --- | 0.36441 | 0.36661 | 0.37869 | 0.41126 | 0.42158 |
| Eigenvalues --- | 0.43057 | 0.46902 | 0.47711 | 0.48653 | 0.50025 |
| Eigenvalues --- | 0.54259 | 0.59646 | 0.60391 |         |         |

En-DIIS/RFO-DIIS IScMMF= 0 using points: 36 35 34 33 32

RFO step: Lambda=-1.11931660D-08.

DidBck=F Rises=F RFO-DIIS coefs: 1.15009 -0.07642 -0.23061 0.22485 -  
 0.06792

Iteration 1 RMS(Cart)= 0.00034162 RMS(Int)= 0.00000019

Iteration 2 RMS(Cart)= 0.00000020 RMS(Int)= 0.00000017

| Variable | Old X   | -DE/DX  | Delta X<br>(Linear) | Delta X<br>(Quad) | Delta X<br>(Total) | New X   |
|----------|---------|---------|---------------------|-------------------|--------------------|---------|
| R1       | 2.56600 | 0.00001 | 0.00001             | 0.00001           | 0.00002            | 2.56601 |

|     |         |          |          |          |          |         |
|-----|---------|----------|----------|----------|----------|---------|
| R2  | 2.61667 | -0.00002 | -0.00003 | -0.00003 | -0.00006 | 2.61661 |
| R3  | 2.03412 | 0.00000  | 0.00000  | 0.00000  | 0.00000  | 2.03412 |
| R4  | 2.62944 | 0.00000  | -0.00001 | 0.00000  | 0.00000  | 2.62944 |
| R5  | 2.03068 | 0.00000  | 0.00000  | 0.00000  | 0.00000  | 2.03068 |
| R6  | 2.54725 | -0.00001 | -0.00001 | -0.00002 | -0.00003 | 2.54723 |
| R7  | 2.68593 | 0.00001  | 0.00002  | 0.00001  | 0.00004  | 2.68596 |
| R8  | 2.51814 | 0.00003  | 0.00002  | 0.00003  | 0.00005  | 2.51819 |
| R9  | 2.09968 | 0.00000  | -0.00002 | -0.00002 | -0.00004 | 2.09964 |
| R10 | 2.79534 | 0.00001  | 0.00002  | 0.00001  | 0.00002  | 2.79536 |
| R11 | 2.90263 | 0.00001  | 0.00004  | 0.00001  | 0.00005  | 2.90268 |
| R12 | 2.06042 | 0.00000  | 0.00001  | -0.00001 | 0.00000  | 2.06042 |
| R13 | 2.06009 | 0.00000  | -0.00001 | 0.00000  | -0.00001 | 2.06007 |
| R14 | 2.06905 | 0.00000  | -0.00002 | 0.00002  | -0.00001 | 2.06904 |
| R15 | 2.07491 | -0.00001 | 0.00002  | -0.00003 | -0.00001 | 2.07489 |
| R16 | 2.75614 | 0.00001  | -0.00001 | 0.00002  | 0.00001  | 2.75616 |
| R17 | 4.20865 | 0.00002  | 0.00047  | -0.00008 | 0.00040  | 4.20905 |
| R18 | 2.50693 | 0.00000  | 0.00000  | 0.00000  | 0.00000  | 2.50692 |
| R19 | 2.04601 | 0.00000  | 0.00000  | 0.00000  | 0.00000  | 2.04600 |
| R20 | 2.04303 | 0.00000  | 0.00000  | 0.00000  | 0.00000  | 2.04303 |
| R21 | 2.04578 | 0.00000  | 0.00000  | 0.00000  | 0.00000  | 2.04578 |
| R22 | 1.91541 | 0.00000  | -0.00003 | 0.00000  | -0.00003 | 1.91538 |
| R23 | 1.92610 | 0.00000  | -0.00002 | -0.00001 | -0.00003 | 1.92607 |
| A1  | 1.87496 | 0.00001  | 0.00002  | 0.00002  | 0.00004  | 1.87499 |
| A2  | 2.27765 | -0.00001 | -0.00003 | -0.00005 | -0.00008 | 2.27757 |
| A3  | 2.13056 | 0.00000  | 0.00002  | 0.00003  | 0.00005  | 2.13060 |
| A4  | 1.86137 | 0.00000  | 0.00000  | -0.00002 | -0.00003 | 1.86134 |
| A5  | 2.27779 | 0.00000  | 0.00000  | 0.00000  | 0.00000  | 2.27779 |
| A6  | 2.14402 | 0.00000  | 0.00001  | 0.00002  | 0.00003  | 2.14404 |
| A7  | 1.89715 | 0.00000  | 0.00000  | 0.00002  | 0.00001  | 1.89717 |
| A8  | 2.24689 | -0.00001 | 0.00000  | -0.00002 | -0.00001 | 2.24687 |
| A9  | 2.13914 | 0.00000  | 0.00000  | 0.00000  | 0.00000  | 2.13914 |
| A10 | 1.88835 | 0.00000  | 0.00001  | -0.00001 | 0.00000  | 1.88836 |
| A11 | 2.25010 | -0.00001 | -0.00004 | 0.00004  | -0.00001 | 2.25009 |
| A12 | 2.14412 | 0.00001  | 0.00004  | -0.00003 | 0.00000  | 2.14413 |
| A13 | 1.90293 | -0.00001 | -0.00002 | -0.00001 | -0.00003 | 1.90290 |
| A14 | 2.22551 | -0.00001 | 0.00003  | -0.00003 | 0.00000  | 2.22551 |
| A15 | 2.15337 | 0.00002  | 0.00002  | 0.00004  | 0.00006  | 2.15343 |
| A16 | 1.95614 | 0.00000  | 0.00001  | -0.00003 | -0.00002 | 1.95612 |
| A17 | 1.86041 | 0.00000  | -0.00002 | 0.00000  | -0.00002 | 1.86039 |
| A18 | 1.88308 | 0.00000  | -0.00001 | 0.00001  | 0.00000  | 1.88308 |
| A19 | 1.89657 | 0.00000  | -0.00008 | 0.00006  | -0.00001 | 1.89656 |
| A20 | 1.95307 | -0.00001 | -0.00001 | -0.00006 | -0.00006 | 1.95300 |
| A21 | 1.91208 | 0.00000  | 0.00010  | 0.00002  | 0.00012  | 1.91220 |
| A22 | 1.92257 | -0.00001 | 0.00004  | -0.00007 | -0.00003 | 1.92254 |

|     |          |          |          |          |          |          |
|-----|----------|----------|----------|----------|----------|----------|
| A23 | 1.88736  | 0.00000  | 0.00002  | -0.00005 | -0.00004 | 1.88732  |
| A24 | 1.87178  | 0.00000  | -0.00002 | 0.00002  | 0.00000  | 1.87177  |
| A25 | 1.89248  | 0.00000  | -0.00007 | 0.00011  | 0.00004  | 1.89251  |
| A26 | 1.90811  | 0.00000  | -0.00006 | 0.00008  | 0.00002  | 1.90813  |
| A27 | 1.98131  | 0.00000  | 0.00010  | -0.00009 | 0.00001  | 1.98132  |
| A28 | 2.71699  | 0.00002  | -0.00022 | 0.00034  | 0.00012  | 2.71711  |
| A29 | 2.17828  | -0.00001 | -0.00002 | -0.00001 | -0.00003 | 2.17824  |
| A30 | 1.95631  | 0.00000  | -0.00001 | -0.00001 | -0.00001 | 1.95629  |
| A31 | 2.14860  | 0.00001  | 0.00003  | 0.00002  | 0.00005  | 2.14865  |
| A32 | 2.07974  | 0.00000  | 0.00002  | 0.00002  | 0.00004  | 2.07978  |
| A33 | 2.15759  | -0.00001 | -0.00002 | -0.00003 | -0.00005 | 2.15755  |
| A34 | 2.04585  | 0.00000  | 0.00000  | 0.00001  | 0.00001  | 2.04586  |
| A35 | 1.93653  | 0.00000  | 0.00007  | 0.00001  | 0.00009  | 1.93662  |
| A36 | 1.89794  | 0.00002  | 0.00008  | 0.00013  | 0.00021  | 1.89816  |
| A37 | 1.87619  | 0.00000  | 0.00014  | -0.00002 | 0.00013  | 1.87631  |
| D1  | 0.00391  | 0.00000  | -0.00001 | -0.00007 | -0.00008 | 0.00382  |
| D2  | -3.13395 | 0.00000  | -0.00019 | -0.00008 | -0.00027 | -3.13422 |
| D3  | 3.13827  | 0.00000  | 0.00011  | 0.00003  | 0.00014  | 3.13840  |
| D4  | 0.00041  | 0.00000  | -0.00007 | 0.00002  | -0.00005 | 0.00036  |
| D5  | -0.00570 | 0.00000  | 0.00005  | 0.00008  | 0.00013  | -0.00556 |
| D6  | -3.09190 | 0.00000  | -0.00046 | -0.00004 | -0.00050 | -3.09240 |
| D7  | -3.14080 | 0.00000  | -0.00005 | -0.00001 | -0.00006 | -3.14086 |
| D8  | 0.05618  | -0.00001 | -0.00057 | -0.00013 | -0.00070 | 0.05548  |
| D9  | -0.00084 | 0.00000  | -0.00003 | 0.00004  | 0.00001  | -0.00084 |
| D10 | -3.14034 | 0.00000  | -0.00006 | 0.00004  | -0.00002 | -3.14036 |
| D11 | 3.13737  | 0.00000  | 0.00013  | 0.00005  | 0.00017  | 3.13754  |
| D12 | -0.00213 | 0.00000  | 0.00010  | 0.00005  | 0.00015  | -0.00199 |
| D13 | -0.00269 | 0.00000  | 0.00007  | 0.00001  | 0.00008  | -0.00262 |
| D14 | 3.10165  | 0.00000  | 0.00020  | -0.00010 | 0.00010  | 3.10175  |
| D15 | 3.13696  | 0.00000  | 0.00009  | 0.00001  | 0.00010  | 3.13706  |
| D16 | -0.04188 | 0.00000  | 0.00022  | -0.00010 | 0.00012  | -0.04175 |
| D17 | 0.03572  | 0.00000  | -0.00030 | 0.00001  | -0.00028 | 0.03544  |
| D18 | -3.10489 | 0.00000  | -0.00031 | -0.00002 | -0.00033 | -3.10522 |
| D19 | -3.10351 | 0.00000  | -0.00032 | 0.00001  | -0.00032 | -3.10383 |
| D20 | 0.03906  | 0.00000  | -0.00034 | -0.00002 | -0.00036 | 0.03870  |
| D21 | 0.00517  | 0.00000  | -0.00008 | -0.00006 | -0.00013 | 0.00504  |
| D22 | 3.09415  | 0.00000  | 0.00041  | 0.00006  | 0.00047  | 3.09462  |
| D23 | -3.10193 | 0.00000  | -0.00019 | 0.00004  | -0.00015 | -3.10209 |
| D24 | -0.01295 | 0.00000  | 0.00030  | 0.00015  | 0.00045  | -0.01250 |
| D25 | -2.88095 | 0.00000  | -0.00165 | -0.00005 | -0.00169 | -2.88264 |
| D26 | 0.21852  | 0.00000  | -0.00150 | -0.00017 | -0.00167 | 0.21685  |
| D27 | 1.63964  | 0.00000  | 0.00025  | 0.00019  | 0.00044  | 1.64008  |
| D28 | -2.57067 | 0.00000  | 0.00016  | 0.00024  | 0.00040  | -2.57027 |
| D29 | -0.51827 | 0.00001  | 0.00026  | 0.00027  | 0.00053  | -0.51774 |

|     |          |          |          |          |          |          |
|-----|----------|----------|----------|----------|----------|----------|
| D30 | -1.43924 | -0.00001 | -0.00033 | 0.00005  | -0.00028 | -1.43952 |
| D31 | 0.63364  | -0.00001 | -0.00042 | 0.00011  | -0.00032 | 0.63332  |
| D32 | 2.68603  | 0.00000  | -0.00032 | 0.00014  | -0.00019 | 2.68584  |
| D33 | -1.32796 | 0.00000  | -0.00002 | 0.00027  | 0.00025  | -1.32771 |
| D34 | 0.73738  | 0.00000  | -0.00007 | 0.00033  | 0.00025  | 0.73763  |
| D35 | 2.88027  | 0.00000  | 0.00005  | 0.00020  | 0.00024  | 2.88052  |
| D36 | 2.90383  | 0.00000  | 0.00004  | 0.00025  | 0.00029  | 2.90412  |
| D37 | -1.31402 | 0.00000  | -0.00001 | 0.00031  | 0.00030  | -1.31372 |
| D38 | 0.82888  | 0.00000  | 0.00011  | 0.00018  | 0.00029  | 0.82916  |
| D39 | 0.79017  | 0.00000  | -0.00003 | 0.00022  | 0.00020  | 0.79037  |
| D40 | 2.85551  | 0.00000  | -0.00008 | 0.00028  | 0.00020  | 2.85571  |
| D41 | -1.28478 | 0.00000  | 0.00004  | 0.00015  | 0.00019  | -1.28459 |
| D42 | 2.89458  | -0.00001 | -0.00020 | -0.00022 | -0.00042 | 2.89416  |
| D43 | -1.32858 | 0.00000  | 0.00007  | -0.00015 | -0.00008 | -1.32866 |
| D44 | 0.81032  | 0.00000  | -0.00021 | -0.00019 | -0.00040 | 0.80993  |
| D45 | 2.87035  | 0.00001  | 0.00006  | -0.00012 | -0.00006 | 2.87029  |
| D46 | -1.30504 | -0.00001 | -0.00014 | -0.00032 | -0.00046 | -1.30550 |
| D47 | 0.75499  | 0.00000  | 0.00013  | -0.00025 | -0.00012 | 0.75486  |
| D48 | -3.13797 | 0.00000  | -0.00003 | -0.00005 | -0.00008 | -3.13805 |
| D49 | 0.00427  | 0.00000  | -0.00003 | 0.00000  | -0.00004 | 0.00423  |
| D50 | 0.00254  | 0.00000  | -0.00002 | -0.00002 | -0.00003 | 0.00251  |
| D51 | -3.13841 | 0.00000  | -0.00001 | 0.00003  | 0.00001  | -3.13840 |

| Item                 | Value    | Threshold | Converged? |
|----------------------|----------|-----------|------------|
| Maximum Force        | 0.000033 | 0.000450  | YES        |
| RMS Force            | 0.000007 | 0.000300  | YES        |
| Maximum Displacement | 0.001522 | 0.001800  | YES        |
| RMS Displacement     | 0.000342 | 0.001200  | YES        |

Predicted change in Energy=-2.420970D-08

Optimization completed.

-- Stationary point found.

-----  
! Optimized Parameters !  
! (Angstroms and Degrees) !

| ! Name | Definition | Value  | Derivative Info. | ! |
|--------|------------|--------|------------------|---|
| ! R1   | R(1,2)     | 1.3579 | -DE/DX = 0.0     | ! |
| ! R2   | R(1,5)     | 1.3847 | -DE/DX = 0.0     | ! |
| ! R3   | R(1,8)     | 1.0764 | -DE/DX = 0.0     | ! |
| ! R4   | R(2,3)     | 1.3914 | -DE/DX = 0.0     | ! |
| ! R5   | R(2,9)     | 1.0746 | -DE/DX = 0.0     | ! |
| ! R6   | R(3,4)     | 1.3479 | -DE/DX = 0.0     | ! |
| ! R7   | R(3,16)    | 1.4213 | -DE/DX = 0.0     | ! |
| ! R8   | R(4,5)     | 1.3325 | -DE/DX = 0.0     | ! |

|       |            |          |          |     |   |
|-------|------------|----------|----------|-----|---|
| ! R9  | R(4,15)    | 1.1111   | -DE/DX = | 0.0 | ! |
| ! R10 | R(5,6)     | 1.4792   | -DE/DX = | 0.0 | ! |
| ! R11 | R(6,7)     | 1.536    | -DE/DX = | 0.0 | ! |
| ! R12 | R(6,10)    | 1.0903   | -DE/DX = | 0.0 | ! |
| ! R13 | R(6,11)    | 1.0902   | -DE/DX = | 0.0 | ! |
| ! R14 | R(7,12)    | 1.0949   | -DE/DX = | 0.0 | ! |
| ! R15 | R(7,13)    | 1.098    | -DE/DX = | 0.0 | ! |
| ! R16 | R(7,21)    | 1.4585   | -DE/DX = | 0.0 | ! |
| ! R17 | R(14,15)   | 2.2271   | -DE/DX = | 0.0 | ! |
| ! R18 | R(16,17)   | 1.3266   | -DE/DX = | 0.0 | ! |
| ! R19 | R(16,18)   | 1.0827   | -DE/DX = | 0.0 | ! |
| ! R20 | R(17,19)   | 1.0811   | -DE/DX = | 0.0 | ! |
| ! R21 | R(17,20)   | 1.0826   | -DE/DX = | 0.0 | ! |
| ! R22 | R(21,22)   | 1.0136   | -DE/DX = | 0.0 | ! |
| ! R23 | R(21,23)   | 1.0192   | -DE/DX = | 0.0 | ! |
| ! A1  | A(2,1,5)   | 107.427  | -DE/DX = | 0.0 | ! |
| ! A2  | A(2,1,8)   | 130.4998 | -DE/DX = | 0.0 | ! |
| ! A3  | A(5,1,8)   | 122.0719 | -DE/DX = | 0.0 | ! |
| ! A4  | A(1,2,3)   | 106.6486 | -DE/DX = | 0.0 | ! |
| ! A5  | A(1,2,9)   | 130.5079 | -DE/DX = | 0.0 | ! |
| ! A6  | A(3,2,9)   | 122.8431 | -DE/DX = | 0.0 | ! |
| ! A7  | A(2,3,4)   | 108.699  | -DE/DX = | 0.0 | ! |
| ! A8  | A(2,3,16)  | 128.7371 | -DE/DX = | 0.0 | ! |
| ! A9  | A(4,3,16)  | 122.5638 | -DE/DX = | 0.0 | ! |
| ! A10 | A(3,4,5)   | 108.1947 | -DE/DX = | 0.0 | ! |
| ! A11 | A(3,4,15)  | 128.9211 | -DE/DX = | 0.0 | ! |
| ! A12 | A(5,4,15)  | 122.8492 | -DE/DX = | 0.0 | ! |
| ! A13 | A(1,5,4)   | 109.0297 | -DE/DX = | 0.0 | ! |
| ! A14 | A(1,5,6)   | 127.5124 | -DE/DX = | 0.0 | ! |
| ! A15 | A(4,5,6)   | 123.379  | -DE/DX = | 0.0 | ! |
| ! A16 | A(5,6,7)   | 112.0788 | -DE/DX = | 0.0 | ! |
| ! A17 | A(5,6,10)  | 106.5934 | -DE/DX = | 0.0 | ! |
| ! A18 | A(5,6,11)  | 107.8923 | -DE/DX = | 0.0 | ! |
| ! A19 | A(7,6,10)  | 108.6657 | -DE/DX = | 0.0 | ! |
| ! A20 | A(7,6,11)  | 111.9026 | -DE/DX = | 0.0 | ! |
| ! A21 | A(10,6,11) | 109.5543 | -DE/DX = | 0.0 | ! |
| ! A22 | A(6,7,12)  | 110.1552 | -DE/DX = | 0.0 | ! |
| ! A23 | A(6,7,13)  | 108.1376 | -DE/DX = | 0.0 | ! |
| ! A24 | A(6,7,21)  | 107.2449 | -DE/DX = | 0.0 | ! |
| ! A25 | A(12,7,13) | 108.4309 | -DE/DX = | 0.0 | ! |
| ! A26 | A(12,7,21) | 109.3265 | -DE/DX = | 0.0 | ! |
| ! A27 | A(13,7,21) | 113.5209 | -DE/DX = | 0.0 | ! |
| ! A28 | A(4,15,14) | 155.6721 | -DE/DX = | 0.0 | ! |
| ! A29 | A(3,16,17) | 124.8061 | -DE/DX = | 0.0 | ! |

|       |              |           |          |     |   |
|-------|--------------|-----------|----------|-----|---|
| ! A30 | A(3,16,18)   | 112.088   | -DE/DX = | 0.0 | ! |
| ! A31 | A(17,16,18)  | 123.1058  | -DE/DX = | 0.0 | ! |
| ! A32 | A(16,17,19)  | 119.1605  | -DE/DX = | 0.0 | ! |
| ! A33 | A(16,17,20)  | 123.6211  | -DE/DX = | 0.0 | ! |
| ! A34 | A(19,17,20)  | 117.2184  | -DE/DX = | 0.0 | ! |
| ! A35 | A(7,21,22)   | 110.955   | -DE/DX = | 0.0 | ! |
| ! A36 | A(7,21,23)   | 108.7441  | -DE/DX = | 0.0 | ! |
| ! A37 | A(22,21,23)  | 107.4976  | -DE/DX = | 0.0 | ! |
| ! D1  | D(5,1,2,3)   | 0.2238    | -DE/DX = | 0.0 | ! |
| ! D2  | D(5,1,2,9)   | -179.5619 | -DE/DX = | 0.0 | ! |
| ! D3  | D(8,1,2,3)   | 179.8094  | -DE/DX = | 0.0 | ! |
| ! D4  | D(8,1,2,9)   | 0.0237    | -DE/DX = | 0.0 | ! |
| ! D5  | D(2,1,5,4)   | -0.3264   | -DE/DX = | 0.0 | ! |
| ! D6  | D(2,1,5,6)   | -177.1531 | -DE/DX = | 0.0 | ! |
| ! D7  | D(8,1,5,4)   | -179.9546 | -DE/DX = | 0.0 | ! |
| ! D8  | D(8,1,5,6)   | 3.2188    | -DE/DX = | 0.0 | ! |
| ! D9  | D(1,2,3,4)   | -0.0483   | -DE/DX = | 0.0 | ! |
| ! D10 | D(1,2,3,16)  | -179.9283 | -DE/DX = | 0.0 | ! |
| ! D11 | D(9,2,3,4)   | 179.7578  | -DE/DX = | 0.0 | ! |
| ! D12 | D(9,2,3,16)  | -0.1222   | -DE/DX = | 0.0 | ! |
| ! D13 | D(2,3,4,5)   | -0.1543   | -DE/DX = | 0.0 | ! |
| ! D14 | D(2,3,4,15)  | 177.7116  | -DE/DX = | 0.0 | ! |
| ! D15 | D(16,3,4,5)  | 179.7346  | -DE/DX = | 0.0 | ! |
| ! D16 | D(16,3,4,15) | -2.3994   | -DE/DX = | 0.0 | ! |
| ! D17 | D(2,3,16,17) | 2.0469    | -DE/DX = | 0.0 | ! |
| ! D18 | D(2,3,16,18) | -177.8971 | -DE/DX = | 0.0 | ! |
| ! D19 | D(4,3,16,17) | -177.8183 | -DE/DX = | 0.0 | ! |
| ! D20 | D(4,3,16,18) | 2.2378    | -DE/DX = | 0.0 | ! |
| ! D21 | D(3,4,5,1)   | 0.296     | -DE/DX = | 0.0 | ! |
| ! D22 | D(3,4,5,6)   | 177.2818  | -DE/DX = | 0.0 | ! |
| ! D23 | D(15,4,5,1)  | -177.7277 | -DE/DX = | 0.0 | ! |
| ! D24 | D(15,4,5,6)  | -0.742    | -DE/DX = | 0.0 | ! |
| ! D25 | D(3,4,15,14) | -165.0663 | -DE/DX = | 0.0 | ! |
| ! D26 | D(5,4,15,14) | 12.5204   | -DE/DX = | 0.0 | ! |
| ! D27 | D(1,5,6,7)   | 93.9444   | -DE/DX = | 0.0 | ! |
| ! D28 | D(1,5,6,10)  | -147.2883 | -DE/DX = | 0.0 | ! |
| ! D29 | D(1,5,6,11)  | -29.6948  | -DE/DX = | 0.0 | ! |
| ! D30 | D(4,5,6,7)   | -82.4626  | -DE/DX = | 0.0 | ! |
| ! D31 | D(4,5,6,10)  | 36.3047   | -DE/DX = | 0.0 | ! |
| ! D32 | D(4,5,6,11)  | 153.8983  | -DE/DX = | 0.0 | ! |
| ! D33 | D(5,6,7,12)  | -76.0866  | -DE/DX = | 0.0 | ! |
| ! D34 | D(5,6,7,13)  | 42.2485   | -DE/DX = | 0.0 | ! |
| ! D35 | D(5,6,7,21)  | 165.0276  | -DE/DX = | 0.0 | ! |
| ! D36 | D(10,6,7,12) | 166.3769  | -DE/DX = | 0.0 | ! |



|       |                |           |          |     |   |
|-------|----------------|-----------|----------|-----|---|
| ! D37 | D(10,6,7,13)   | -75.2879  | -DE/DX = | 0.0 | ! |
| ! D38 | D(10,6,7,21)   | 47.4911   | -DE/DX = | 0.0 | ! |
| ! D39 | D(11,6,7,12)   | 45.2735   | -DE/DX = | 0.0 | ! |
| ! D40 | D(11,6,7,13)   | 163.6087  | -DE/DX = | 0.0 | ! |
| ! D41 | D(11,6,7,21)   | -73.6123  | -DE/DX = | 0.0 | ! |
| ! D42 | D(6,7,21,22)   | 165.847   | -DE/DX = | 0.0 | ! |
| ! D43 | D(6,7,21,23)   | -76.1221  | -DE/DX = | 0.0 | ! |
| ! D44 | D(12,7,21,22)  | 46.4281   | -DE/DX = | 0.0 | ! |
| ! D45 | D(12,7,21,23)  | 164.4589  | -DE/DX = | 0.0 | ! |
| ! D46 | D(13,7,21,22)  | -74.7733  | -DE/DX = | 0.0 | ! |
| ! D47 | D(13,7,21,23)  | 43.2575   | -DE/DX = | 0.0 | ! |
| ! D48 | D(3,16,17,19)  | -179.7926 | -DE/DX = | 0.0 | ! |
| ! D49 | D(3,16,17,20)  | 0.2445    | -DE/DX = | 0.0 | ! |
| ! D50 | D(18,16,17,19) | 0.1454    | -DE/DX = | 0.0 | ! |
| ! D51 | D(18,16,17,20) | -179.8175 | -DE/DX = | 0.0 | ! |

-----  
GradGradGradGradGradGradGradGradGradGradGradGradGradGradGradGradGradGradGrad

Input orientation:

| Center<br>Number | Atomic<br>Number | Atomic<br>Type | Coordinates (Angstroms) |           |           |
|------------------|------------------|----------------|-------------------------|-----------|-----------|
|                  |                  |                | X                       | Y         | Z         |
| 1                | 6                | 0              | -1.819413               | -1.993954 | 0.297724  |
| 2                | 6                | 0              | -2.825356               | -1.109809 | 0.073739  |
| 3                | 7                | 0              | -2.241659               | 0.151977  | 0.016244  |
| 4                | 6                | 0              | -0.913078               | 0.022466  | 0.203501  |
| 5                | 7                | 0              | -0.641738               | -1.270246 | 0.379410  |
| 6                | 6                | 0              | 0.729046                | -1.797402 | 0.555980  |
| 7                | 6                | 0              | 1.448722                | -1.995731 | -0.786421 |
| 8                | 1                | 0              | -1.841580               | -3.064194 | 0.410650  |
| 9                | 1                | 0              | -3.881576               | -1.269227 | -0.043450 |
| 10               | 1                | 0              | 1.275446                | -1.055181 | 1.138535  |
| 11               | 1                | 0              | 0.660209                | -2.726739 | 1.121685  |
| 12               | 1                | 0              | 1.073380                | -2.894511 | -1.286528 |
| 13               | 1                | 0              | 1.230720                | -1.127799 | -1.422626 |
| 14               | 35               | 0              | 1.956418                | 1.590502  | 0.096156  |
| 15               | 1                | 0              | -0.126231               | 0.806800  | 0.188142  |
| 16               | 6                | 0              | -2.865090               | 1.411473  | -0.196320 |
| 17               | 6                | 0              | -4.170626               | 1.594836  | -0.344122 |
| 18               | 1                | 0              | -2.147052               | 2.221264  | -0.226351 |
| 19               | 1                | 0              | -4.547169               | 2.595414  | -0.505026 |
| 20               | 1                | 0              | -4.896054               | 0.791874  | -0.312729 |
| 21               | 7                | 0              | 2.868168                | -2.162343 | -0.495562 |

|    |   |   |          |           |           |
|----|---|---|----------|-----------|-----------|
| 22 | 1 | 0 | 3.363526 | -2.524061 | -1.302501 |
| 23 | 1 | 0 | 3.266509 | -1.250489 | -0.274845 |

-----  
Distance matrix (angstroms):

|    |    | 1        | 2        | 3        | 4        | 5        |
|----|----|----------|----------|----------|----------|----------|
| 1  | C  | 0.000000 |          |          |          |          |
| 2  | C  | 1.357867 | 0.000000 |          |          |          |
| 3  | N  | 2.205117 | 1.391442 | 0.000000 |          |          |
| 4  | C  | 2.212751 | 2.226138 | 1.347949 | 0.000000 |          |
| 5  | N  | 1.384682 | 2.210738 | 2.171256 | 1.332544 | 0.000000 |
| 6  | C  | 2.569041 | 3.652276 | 3.593951 | 2.476435 | 1.479229 |
| 7  | C  | 3.443266 | 4.448874 | 4.344633 | 3.260546 | 2.501102 |
| 8  | H  | 1.076410 | 2.213808 | 3.264870 | 3.229937 | 2.158436 |
| 9  | H  | 2.212272 | 1.074592 | 2.170878 | 3.246758 | 3.267317 |
| 10 | H  | 3.341618 | 4.237140 | 3.884173 | 2.612518 | 2.073191 |
| 11 | H  | 2.713745 | 3.982690 | 4.234364 | 3.297942 | 2.089835 |
| 12 | H  | 3.418934 | 4.498404 | 4.686981 | 3.830790 | 2.890539 |
| 13 | H  | 3.607373 | 4.323330 | 3.970590 | 2.926306 | 2.602638 |
| 14 | Br | 5.210168 | 5.491588 | 4.438422 | 3.271738 | 3.874858 |
| 15 | H  | 3.274614 | 3.312363 | 2.221121 | 1.111100 | 2.148593 |
| 16 | C  | 3.596450 | 2.536015 | 1.421331 | 2.428899 | 3.530776 |
| 17 | C  | 4.338154 | 3.049502 | 2.435697 | 3.658396 | 4.602743 |
| 18 | H  | 4.260289 | 3.412652 | 2.085606 | 2.557768 | 3.850138 |
| 19 | H  | 5.398829 | 4.126534 | 3.399630 | 4.508735 | 5.565783 |
| 20 | H  | 4.195141 | 2.837877 | 2.750183 | 4.089325 | 4.778138 |
| 21 | N  | 4.757213 | 5.817916 | 5.632793 | 4.422657 | 3.725702 |
| 22 | H  | 5.450192 | 6.495876 | 6.349674 | 5.200210 | 4.521395 |
| 23 | H  | 5.171767 | 6.103451 | 5.691358 | 4.395244 | 3.962680 |
|    |    | 6        | 7        | 8        | 9        | 10       |
| 6  | C  | 0.000000 |          |          |          |          |
| 7  | C  | 1.536004 | 0.000000 |          |          |          |
| 8  | H  | 2.869495 | 3.660694 | 0.000000 |          |          |
| 9  | H  | 4.679330 | 5.430644 | 2.754941 | 0.000000 |          |
| 10 | H  | 1.090328 | 2.149446 | 3.779128 | 5.295072 | 0.000000 |
| 11 | H  | 1.090151 | 2.190204 | 2.622669 | 4.910162 | 1.781266 |
| 12 | H  | 2.171878 | 1.094895 | 3.377306 | 5.360819 | 3.050393 |
| 13 | H  | 2.148238 | 1.097993 | 4.068114 | 5.296952 | 2.562581 |
| 14 | Br | 3.632598 | 3.727971 | 6.015803 | 6.502285 | 2.924023 |
| 15 | H  | 2.765623 | 3.359231 | 4.239873 | 4.297224 | 2.516926 |
| 16 | C  | 4.876541 | 5.528674 | 4.631154 | 2.871021 | 5.001026 |
| 17 | C  | 6.026961 | 6.683179 | 5.263145 | 2.894271 | 6.235429 |
| 18 | H  | 5.003365 | 5.570127 | 5.332462 | 3.901993 | 4.930669 |
| 19 | H  | 6.947014 | 7.557017 | 6.339545 | 3.948609 | 7.066186 |
| 20 | H  | 6.253060 | 6.946316 | 4.972157 | 2.312966 | 6.603423 |

|    |    |          |          |          |          |          |
|----|----|----------|----------|----------|----------|----------|
| 21 | N  | 2.411383 | 1.458488 | 4.880193 | 6.823570 | 2.536305 |
| 22 | H  | 3.304916 | 2.052302 | 5.506338 | 7.459981 | 3.532187 |
| 23 | H  | 2.725454 | 2.030134 | 5.463698 | 7.151854 | 2.449514 |
|    |    | 11       | 12       | 13       | 14       | 15       |
| 11 | H  | 0.000000 |          |          |          |          |
| 12 | H  | 2.449153 | 0.000000 |          |          |          |
| 13 | H  | 3.058694 | 1.778918 | 0.000000 |          |          |
| 14 | Br | 4.622817 | 4.775658 | 3.197264 | 0.000000 |          |
| 15 | H  | 3.738434 | 4.160940 | 2.859819 | 2.227123 | 0.000000 |
| 16 | C  | 5.593717 | 5.936464 | 4.972664 | 4.833687 | 2.831040 |
| 17 | C  | 6.645417 | 6.967207 | 6.144140 | 6.142844 | 4.154689 |
| 18 | H  | 5.846422 | 6.137289 | 4.904757 | 4.164173 | 2.501246 |
| 19 | H  | 7.621567 | 7.895606 | 6.934573 | 6.608170 | 4.819161 |
| 20 | H  | 6.731288 | 7.083210 | 6.515702 | 6.910960 | 4.796072 |
| 21 | N  | 2.794480 | 2.093553 | 2.147316 | 3.907078 | 4.271965 |
| 22 | H  | 3.636713 | 2.319969 | 2.552027 | 4.567912 | 5.049263 |
| 23 | H  | 3.304907 | 2.921665 | 2.340276 | 3.150430 | 3.994681 |
|    |    | 16       | 17       | 18       | 19       | 20       |
| 16 | C  | 0.000000 |          |          |          |          |
| 17 | C  | 1.326609 | 0.000000 |          |          |          |
| 18 | H  | 1.082701 | 2.121588 | 0.000000 |          |          |
| 19 | H  | 2.080001 | 1.081125 | 2.445037 | 0.000000 |          |
| 20 | H  | 2.126562 | 1.082579 | 3.099617 | 1.847012 | 0.000000 |
| 21 | N  | 6.762541 | 7.980223 | 6.666402 | 8.810424 | 8.309270 |
| 22 | H  | 7.450351 | 8.639864 | 7.351373 | 9.456431 | 8.955207 |
| 23 | H  | 6.684962 | 7.963143 | 6.431334 | 8.711918 | 8.414280 |
|    |    | 21       | 22       | 23       |          |          |
| 21 | N  | 0.000000 |          |          |          |          |
| 22 | H  | 1.013592 | 0.000000 |          |          |          |
| 23 | H  | 1.019249 | 1.639352 | 0.000000 |          |          |

Stoichiometry C7H12BrN3

Framework group C1[X(C7H12BrN3)]

Deg. of freedom 63

Full point group C1 NOp 1

Largest Abelian subgroup C1 NOP 1

Largest concise Abelian subgroup C1 NOp 1

Standard orientation:

| Center<br>Number | Atomic<br>Number | Atomic<br>Type | Coordinates (Angstroms) |           |           |
|------------------|------------------|----------------|-------------------------|-----------|-----------|
|                  |                  |                | X                       | Y         | Z         |
| 1                | 6                | 0              | -1.741941               | 2.053002  | -0.328825 |
| 2                | 6                | 0              | -2.777122               | 1.211267  | -0.076462 |
| 3                | 7                | 0              | -2.239546               | -0.069815 | 0.000692  |



(A)  
(A) (A) (A) (A) (A) (A) (A) (A) (A) (A) (A) (A)  
(A) (A) (A) (A) (A) (A) (A) (A) (A) (A) (A) (A)  
(A) (A) (A) (A) (A) (A) (A) (A) (A) (A) (A) (A)  
(A) (A) (A) (A) (A) (A) (A) (A) (A) (A) (A) (A)  
(A) (A) (A) (A) (A) (A) (A) (A) (A) (A) (A) (A)  
(A) (A) (A) (A) (A) (A) (A) (A) (A) (A) (A) (A)  
(A) (A) (A) (A) (A) (A) (A) (A) (A) (A) (A) (A)  
(A) (A) (A) (A) (A) (A) (A) (A) (A) (A) (A) (A)  
(A) (A) (A) (A) (A) (A) (A) (A) (A) (A) (A) (A)  
(A) (A) (A) (A) (A) (A) (A) (A) (A) (A) (A) (A)  
(A) (A) (A) (A) (A) (A) (A) (A) (A) (A) (A) (A)  
(A) (A) (A) (A) (A) (A) (A) (A) (A) (A) (A) (A)  
(A) (A) (A) (A) (A) (A) (A) (A) (A) (A) (A) (A)  
(A) (A) (A) (A) (A) (A) (A) (A) (A) (A) (A) (A)  
(A) (A) (A) (A) (A) (A) (A) (A) (A) (A) (A) (A)

The electronic state is 1-A.

|       |                   |    |            |           |           |           |           |  |  |
|-------|-------------------|----|------------|-----------|-----------|-----------|-----------|--|--|
| Alpha | occ. eigenvalues  | -- | -482.69288 | -62.34625 | -56.16406 | -56.16393 | -56.16389 |  |  |
| Alpha | occ. eigenvalues  | -- | -14.45414  | -14.44036 | -14.29508 | -10.29534 | -10.27329 |  |  |
| Alpha | occ. eigenvalues  | -- | -10.27258  | -10.27137 | -10.23824 | -10.22253 | -10.21047 |  |  |
| Alpha | occ. eigenvalues  | -- | -8.55532   | -6.37859  | -6.37799  | -6.37789  | -2.49098  |  |  |
| Alpha | occ. eigenvalues  | -- | -2.49081   | -2.49072  | -2.49025  | -2.49023  | -1.11660  |  |  |
| Alpha | occ. eigenvalues  | -- | -1.00233   | -0.89365  | -0.85310  | -0.82543  | -0.77403  |  |  |
| Alpha | occ. eigenvalues  | -- | -0.71439   | -0.67954  | -0.65113  | -0.63181  | -0.62846  |  |  |
| Alpha | occ. eigenvalues  | -- | -0.58582   | -0.54324  | -0.53272  | -0.52228  | -0.50751  |  |  |
| Alpha | occ. eigenvalues  | -- | -0.50149   | -0.49286  | -0.48463  | -0.45096  | -0.43935  |  |  |
| Alpha | occ. eigenvalues  | -- | -0.43518   | -0.42839  | -0.38634  | -0.37114  | -0.31616  |  |  |
| Alpha | occ. eigenvalues  | -- | -0.30436   | -0.24984  | -0.19661  | -0.19278  | -0.18985  |  |  |
| Alpha | virt. eigenvalues | -- | -0.08470   | -0.04620  | -0.03229  | -0.01762  | -0.00870  |  |  |
| Alpha | virt. eigenvalues | -- | -0.00663   | 0.00260   | 0.00805   | 0.01235   | 0.01606   |  |  |
| Alpha | virt. eigenvalues | -- | 0.03444    | 0.03790   | 0.04625   | 0.04949   | 0.05387   |  |  |
| Alpha | virt. eigenvalues | -- | 0.05880    | 0.06472   | 0.07204   | 0.07620   | 0.07783   |  |  |
| Alpha | virt. eigenvalues | -- | 0.08384    | 0.08679   | 0.08758   | 0.09399   | 0.09626   |  |  |
| Alpha | virt. eigenvalues | -- | 0.10341    | 0.10762   | 0.11004   | 0.11310   | 0.11926   |  |  |
| Alpha | virt. eigenvalues | -- | 0.12268    | 0.12565   | 0.12938   | 0.13412   | 0.13627   |  |  |
| Alpha | virt. eigenvalues | -- | 0.13920    | 0.14308   | 0.14615   | 0.15585   | 0.15674   |  |  |
| Alpha | virt. eigenvalues | -- | 0.16098    | 0.16205   | 0.16374   | 0.17289   | 0.18021   |  |  |
| Alpha | virt. eigenvalues | -- | 0.18340    | 0.18788   | 0.18980   | 0.19736   | 0.20480   |  |  |
| Alpha | virt. eigenvalues | -- | 0.20838    | 0.21005   | 0.21548   | 0.21893   | 0.22514   |  |  |
| Alpha | virt. eigenvalues | -- | 0.22812    | 0.23576   | 0.24257   | 0.24529   | 0.25029   |  |  |
| Alpha | virt. eigenvalues | -- | 0.25662    | 0.26071   | 0.26736   | 0.27573   | 0.27813   |  |  |
| Alpha | virt. eigenvalues | -- | 0.28306    | 0.29488   | 0.30283   | 0.30671   | 0.30906   |  |  |
| Alpha | virt. eigenvalues | -- | 0.32447    | 0.33733   | 0.33798   | 0.34349   | 0.35173   |  |  |
| Alpha | virt. eigenvalues | -- | 0.36326    | 0.36704   | 0.39020   | 0.39780   | 0.41248   |  |  |

|                            |           |            |          |           |           |
|----------------------------|-----------|------------|----------|-----------|-----------|
| Alpha virt. eigenvalues -- | 0.43005   | 0.46329    | 0.46845  | 0.49029   | 0.49826   |
| Alpha virt. eigenvalues -- | 0.50947   | 0.51569    | 0.52710  | 0.53156   | 0.53869   |
| Alpha virt. eigenvalues -- | 0.54456   | 0.54904    | 0.55875  | 0.57590   | 0.57819   |
| Alpha virt. eigenvalues -- | 0.59707   | 0.60622    | 0.61303  | 0.61973   | 0.63209   |
| Alpha virt. eigenvalues -- | 0.64160   | 0.64640    | 0.65911  | 0.66414   | 0.68261   |
| Alpha virt. eigenvalues -- | 0.68608   | 0.68899    | 0.70027  | 0.70592   | 0.71976   |
| Alpha virt. eigenvalues -- | 0.72502   | 0.73918    | 0.74949  | 0.75291   | 0.75611   |
| Alpha virt. eigenvalues -- | 0.76634   | 0.78247    | 0.79092  | 0.79468   | 0.80579   |
| Alpha virt. eigenvalues -- | 0.80815   | 0.82630    | 0.84428  | 0.84923   | 0.86422   |
| Alpha virt. eigenvalues -- | 0.87646   | 0.88622    | 0.90199  | 0.90607   | 0.92188   |
| Alpha virt. eigenvalues -- | 0.94367   | 0.95911    | 0.96969  | 0.99456   | 1.00477   |
| Alpha virt. eigenvalues -- | 1.01071   | 1.02826    | 1.03731  | 1.05306   | 1.07329   |
| Alpha virt. eigenvalues -- | 1.09501   | 1.10546    | 1.11774  | 1.13186   | 1.15108   |
| Alpha virt. eigenvalues -- | 1.20180   | 1.23965    | 1.27183  | 1.28425   | 1.31137   |
| Alpha virt. eigenvalues -- | 1.32678   | 1.38448    | 1.40859  | 1.42933   | 1.44626   |
| Alpha virt. eigenvalues -- | 1.46824   | 1.48737    | 1.49016  | 1.50424   | 1.52782   |
| Alpha virt. eigenvalues -- | 1.54564   | 1.56131    | 1.57908  | 1.58658   | 1.59422   |
| Alpha virt. eigenvalues -- | 1.59874   | 1.61904    | 1.64813  | 1.66646   | 1.67674   |
| Alpha virt. eigenvalues -- | 1.68678   | 1.69708    | 1.70376  | 1.71779   | 1.72436   |
| Alpha virt. eigenvalues -- | 1.73148   | 1.73470    | 1.76715  | 1.77396   | 1.79417   |
| Alpha virt. eigenvalues -- | 1.81293   | 1.83583    | 1.84225  | 1.87608   | 1.89652   |
| Alpha virt. eigenvalues -- | 1.90331   | 1.94352    | 1.97916  | 1.98903   | 2.01535   |
| Alpha virt. eigenvalues -- | 2.03651   | 2.05291    | 2.07911  | 2.08433   | 2.08835   |
| Alpha virt. eigenvalues -- | 2.10434   | 2.12066    | 2.13140  | 2.15341   | 2.15669   |
| Alpha virt. eigenvalues -- | 2.18037   | 2.20546    | 2.22828  | 2.26130   | 2.28556   |
| Alpha virt. eigenvalues -- | 2.31368   | 2.36301    | 2.39346  | 2.42286   | 2.42457   |
| Alpha virt. eigenvalues -- | 2.44547   | 2.46423    | 2.46831  | 2.50937   | 2.51700   |
| Alpha virt. eigenvalues -- | 2.53564   | 2.55550    | 2.56751  | 2.57966   | 2.60381   |
| Alpha virt. eigenvalues -- | 2.61282   | 2.62648    | 2.64293  | 2.65636   | 2.68798   |
| Alpha virt. eigenvalues -- | 2.69548   | 2.70936    | 2.71960  | 2.72491   | 2.75138   |
| Alpha virt. eigenvalues -- | 2.75620   | 2.77595    | 2.79506  | 2.80891   | 2.82384   |
| Alpha virt. eigenvalues -- | 2.82703   | 2.85931    | 2.87380  | 2.87937   | 2.90668   |
| Alpha virt. eigenvalues -- | 2.92374   | 2.94053    | 2.96249  | 3.01518   | 3.08920   |
| Alpha virt. eigenvalues -- | 3.14994   | 3.16374    | 3.21470  | 3.25952   | 3.37272   |
| Alpha virt. eigenvalues -- | 3.49135   | 3.52285    | 3.54410  | 3.59108   | 3.63508   |
| Alpha virt. eigenvalues -- | 3.64611   | 3.71719    | 3.75793  | 3.78765   | 3.81677   |
| Alpha virt. eigenvalues -- | 3.82979   | 3.85876    | 3.87535  | 4.05180   | 4.07465   |
| Alpha virt. eigenvalues -- | 4.08526   | 4.25910    | 4.26929  | 4.28708   | 4.30029   |
| Alpha virt. eigenvalues -- | 4.34578   | 4.43196    | 4.68870  | 4.74227   | 4.83903   |
| Alpha virt. eigenvalues -- | 4.92507   | 5.02254    | 5.22445  | 6.77222   | 7.68510   |
| Alpha virt. eigenvalues -- | 7.72883   | 7.75506    | 23.69349 | 23.74236  | 23.84020  |
| Alpha virt. eigenvalues -- | 23.87340  | 23.88657   | 24.13334 | 24.22097  | 35.43781  |
| Alpha virt. eigenvalues -- | 35.56715  | 35.60716   | 48.05845 | 289.89287 | 289.93540 |
| Alpha virt. eigenvalues -- | 289.95757 | 1020.84698 |          |           |           |

## Condensed to atoms (all electrons):

|    |    | 1         | 2         | 3         | 4         | 5         | 6         |
|----|----|-----------|-----------|-----------|-----------|-----------|-----------|
| 1  | C  | 8.104870  | -2.390873 | 0.626770  | -0.547320 | -0.573751 | 0.644942  |
| 2  | C  | -2.390873 | 8.067432  | -0.453285 | 0.533346  | 0.862983  | -0.763244 |
| 3  | N  | 0.626770  | -0.453285 | 6.897964  | -0.086320 | -0.487830 | 0.114147  |
| 4  | C  | -0.547320 | 0.533346  | -0.086320 | 7.076055  | 0.742281  | -0.509416 |
| 5  | N  | -0.573751 | 0.862983  | -0.487830 | 0.742281  | 7.035008  | -0.200550 |
| 6  | C  | 0.644942  | -0.763244 | 0.114147  | -0.509416 | -0.200550 | 7.117414  |
| 7  | C  | -0.343551 | 0.421625  | -0.115016 | 0.100909  | 0.215042  | -0.688437 |
| 8  | H  | 0.490608  | -0.111734 | 0.033909  | 0.024595  | -0.071962 | -0.011741 |
| 9  | H  | -0.146137 | 0.547835  | -0.085204 | 0.004741  | 0.034335  | -0.004343 |
| 10 | H  | 0.014485  | -0.027083 | 0.015996  | 0.034342  | -0.050964 | 0.401470  |
| 11 | H  | -0.048083 | 0.060814  | 0.008220  | -0.020909 | -0.063423 | 0.341878  |
| 12 | H  | 0.097773  | -0.111973 | 0.020650  | -0.039656 | -0.050610 | 0.189137  |
| 13 | H  | -0.125084 | 0.116232  | -0.037284 | 0.021951  | 0.054053  | -0.214791 |
| 14 | Br | -0.017388 | 0.005264  | 0.006579  | -0.168115 | -0.032290 | 0.050127  |
| 15 | H  | 0.151561  | -0.307370 | 0.127767  | -0.669558 | -0.222901 | 0.174182  |
| 16 | C  | 0.448250  | -0.491381 | 0.311041  | -0.357501 | -0.188061 | -0.035052 |
| 17 | C  | -0.187143 | 0.094943  | -0.018890 | -0.232259 | -0.064414 | -0.060426 |
| 18 | H  | -0.032742 | 0.052156  | -0.093120 | 0.143143  | 0.029090  | -0.010357 |
| 19 | H  | -0.000705 | 0.001849  | 0.022780  | -0.009705 | -0.000838 | 0.000662  |
| 20 | H  | -0.007909 | 0.012709  | -0.035286 | 0.011767  | 0.002323  | -0.002460 |
| 21 | N  | -0.002897 | -0.002573 | 0.003463  | 0.048785  | -0.002384 | -0.216930 |
| 22 | H  | 0.002262  | 0.000191  | 0.000246  | 0.001317  | 0.001612  | 0.012528  |
| 23 | H  | -0.001771 | 0.001502  | 0.000790  | 0.008484  | -0.001686 | -0.009935 |
|    |    | 7         | 8         | 9         | 10        | 11        | 12        |
| 1  | C  | -0.343551 | 0.490608  | -0.146137 | 0.014485  | -0.048083 | 0.097773  |
| 2  | C  | 0.421625  | -0.111734 | 0.547835  | -0.027083 | 0.060814  | -0.111973 |
| 3  | N  | -0.115016 | 0.033909  | -0.085204 | 0.015996  | 0.008220  | 0.020650  |
| 4  | C  | 0.100909  | 0.024595  | 0.004741  | 0.034342  | -0.020909 | -0.039656 |
| 5  | N  | 0.215042  | -0.071962 | 0.034335  | -0.050964 | -0.063423 | -0.050610 |
| 6  | C  | -0.688437 | -0.011741 | -0.004343 | 0.401470  | 0.341878  | 0.189137  |
| 7  | C  | 6.274456  | -0.000610 | 0.005108  | -0.079314 | -0.089879 | 0.243004  |
| 8  | H  | -0.000610 | 0.488154  | -0.011776 | 0.002407  | -0.019539 | 0.000100  |
| 9  | H  | 0.005108  | -0.011776 | 0.502221  | -0.000446 | 0.003794  | -0.000672 |
| 10 | H  | -0.079314 | 0.002407  | -0.000446 | 0.469681  | -0.047881 | 0.006995  |
| 11 | H  | -0.089879 | -0.019539 | 0.003794  | -0.047881 | 0.686594  | -0.012938 |
| 12 | H  | 0.243004  | 0.000100  | -0.000672 | 0.006995  | -0.012938 | 0.688329  |
| 13 | H  | 0.520820  | -0.002869 | 0.000935  | -0.024493 | 0.028684  | -0.112173 |
| 14 | Br | -0.011431 | -0.001157 | -0.000697 | -0.010014 | 0.018757  | 0.008195  |
| 15 | H  | -0.197733 | -0.002281 | -0.007962 | -0.003213 | 0.013304  | 0.030695  |
| 16 | C  | -0.043267 | 0.003999  | 0.000130  | 0.012805  | 0.002712  | 0.003306  |
| 17 | C  | -0.009645 | 0.000775  | -0.011275 | -0.000608 | -0.001476 | -0.001585 |
| 18 | H  | 0.008140  | 0.000253  | 0.002202  | 0.000550  | -0.002072 | -0.001334 |

|    |    |           |           |           |           |           |           |
|----|----|-----------|-----------|-----------|-----------|-----------|-----------|
| 19 | H  | -0.000283 | -0.000185 | -0.000636 | -0.000068 | 0.000173  | 0.000049  |
| 20 | H  | 0.000137  | 0.000631  | 0.004980  | 0.000130  | -0.000419 | -0.000185 |
| 21 | N  | 0.232747  | 0.000518  | -0.000282 | 0.007173  | 0.014791  | -0.077911 |
| 22 | H  | -0.048356 | 0.000106  | 0.000030  | -0.001950 | -0.002688 | -0.013505 |
| 23 | H  | -0.048600 | -0.000095 | 0.000047  | 0.009217  | 0.007439  | 0.006433  |
|    |    | 13        | 14        | 15        | 16        | 17        | 18        |
| 1  | C  | -0.125084 | -0.017388 | 0.151561  | 0.448250  | -0.187143 | -0.032742 |
| 2  | C  | 0.116232  | 0.005264  | -0.307370 | -0.491381 | 0.094943  | 0.052156  |
| 3  | N  | -0.037284 | 0.006579  | 0.127767  | 0.311041  | -0.018890 | -0.093120 |
| 4  | C  | 0.021951  | -0.168115 | -0.669558 | -0.357501 | -0.232259 | 0.143143  |
| 5  | N  | 0.054053  | -0.032290 | -0.222901 | -0.188061 | -0.064414 | 0.029090  |
| 6  | C  | -0.214791 | 0.050127  | 0.174182  | -0.035052 | -0.060426 | -0.010357 |
| 7  | C  | 0.520820  | -0.011431 | -0.197733 | -0.043267 | -0.009645 | 0.008140  |
| 8  | H  | -0.002869 | -0.001157 | -0.002281 | 0.003999  | 0.000775  | 0.000253  |
| 9  | H  | 0.000935  | -0.000697 | -0.007962 | 0.000130  | -0.011275 | 0.002202  |
| 10 | H  | -0.024493 | -0.010014 | -0.003213 | 0.012805  | -0.000608 | 0.000550  |
| 11 | H  | 0.028684  | 0.018757  | 0.013304  | 0.002712  | -0.001476 | -0.002072 |
| 12 | H  | -0.112173 | 0.008195  | 0.030695  | 0.003306  | -0.001585 | -0.001334 |
| 13 | H  | 0.694204  | -0.024830 | -0.044409 | -0.015444 | 0.005318  | 0.001450  |
| 14 | Br | -0.024830 | 35.558632 | 0.269243  | 0.025255  | 0.031133  | -0.004791 |
| 15 | H  | -0.044409 | 0.269243  | 1.542182  | 0.046049  | 0.138408  | -0.081965 |
| 16 | C  | -0.015444 | 0.025255  | 0.046049  | 6.095783  | -0.250365 | 0.409504  |
| 17 | C  | 0.005318  | 0.031133  | 0.138408  | -0.250365 | 6.332283  | -0.100461 |
| 18 | H  | 0.001450  | -0.004791 | -0.081965 | 0.409504  | -0.100461 | 0.468427  |
| 19 | H  | 0.000010  | -0.000369 | 0.005859  | -0.091182 | 0.449236  | -0.010238 |
| 20 | H  | 0.000141  | 0.000425  | 0.001560  | 0.070715  | 0.299947  | 0.004254  |
| 21 | N  | -0.060162 | -0.045244 | -0.015999 | 0.006180  | 0.000557  | 0.000668  |
| 22 | H  | -0.000573 | -0.000482 | -0.002183 | 0.000107  | -0.000086 | 0.000086  |
| 23 | H  | -0.000013 | 0.020404  | -0.012514 | 0.000258  | -0.000139 | 0.000058  |
|    |    | 19        | 20        | 21        | 22        | 23        |           |
| 1  | C  | -0.000705 | -0.007909 | -0.002897 | 0.002262  | -0.001771 |           |
| 2  | C  | 0.001849  | 0.012709  | -0.002573 | 0.000191  | 0.001502  |           |
| 3  | N  | 0.022780  | -0.035286 | 0.003463  | 0.000246  | 0.000790  |           |
| 4  | C  | -0.009705 | 0.011767  | 0.048785  | 0.001317  | 0.008484  |           |
| 5  | N  | -0.000838 | 0.002323  | -0.002384 | 0.001612  | -0.001686 |           |
| 6  | C  | 0.000662  | -0.002460 | -0.216930 | 0.012528  | -0.009935 |           |
| 7  | C  | -0.000283 | 0.000137  | 0.232747  | -0.048356 | -0.048600 |           |
| 8  | H  | -0.000185 | 0.000631  | 0.000518  | 0.000106  | -0.000095 |           |
| 9  | H  | -0.000636 | 0.004980  | -0.000282 | 0.000030  | 0.000047  |           |
| 10 | H  | -0.000068 | 0.000130  | 0.007173  | -0.001950 | 0.009217  |           |
| 11 | H  | 0.000173  | -0.000419 | 0.014791  | -0.002688 | 0.007439  |           |
| 12 | H  | 0.000049  | -0.000185 | -0.077911 | -0.013505 | 0.006433  |           |
| 13 | H  | 0.000010  | 0.000141  | -0.060162 | -0.000573 | -0.000013 |           |
| 14 | Br | -0.000369 | 0.000425  | -0.045244 | -0.000482 | 0.020404  |           |



|    |   |           |           |           |           |           |
|----|---|-----------|-----------|-----------|-----------|-----------|
| 15 | H | 0.005859  | 0.001560  | -0.015999 | -0.002183 | -0.012514 |
| 16 | C | -0.091182 | 0.070715  | 0.006180  | 0.000107  | 0.000258  |
| 17 | C | 0.449236  | 0.299947  | 0.000557  | -0.000086 | -0.000139 |
| 18 | H | -0.010238 | 0.004254  | 0.000668  | 0.000086  | 0.000058  |
| 19 | H | 0.464642  | -0.021790 | -0.000021 | -0.000002 | 0.000003  |
| 20 | H | -0.021790 | 0.533022  | 0.000048  | 0.000000  | -0.000004 |
| 21 | N | -0.000021 | 0.000048  | 6.645828  | 0.386886  | 0.396937  |
| 22 | H | -0.000002 | 0.000000  | 0.386886  | 0.474870  | -0.047249 |
| 23 | H | 0.000003  | -0.000004 | 0.396937  | -0.047249 | 0.428406  |

Mulliken charges:

|    |    | 1         |
|----|----|-----------|
| 1  | C  | -0.156167 |
| 2  | C  | -0.119363 |
| 3  | N  | 0.221912  |
| 4  | C  | -0.110958 |
| 5  | N  | 0.034934  |
| 6  | C  | -0.318805 |
| 7  | C  | -0.345869 |
| 8  | H  | 0.187893  |
| 9  | H  | 0.163072  |
| 10 | H  | 0.270784  |
| 11 | H  | 0.122150  |
| 12 | H  | 0.127877  |
| 13 | H  | 0.218326  |
| 14 | Br | -0.677207 |
| 15 | H  | 0.067279  |
| 16 | C  | 0.036160  |
| 17 | C  | -0.413828 |
| 18 | H  | 0.217099  |
| 19 | H  | 0.190761  |
| 20 | H  | 0.125265  |
| 21 | N  | -0.320177 |
| 22 | H  | 0.236833  |
| 23 | H  | 0.242028  |

Sum of Mulliken charges = 0.00000

Mulliken charges with hydrogens summed into heavy atoms:

|   |   | 1         |
|---|---|-----------|
| 1 | C | 0.031726  |
| 2 | C | 0.043709  |
| 3 | N | 0.221912  |
| 4 | C | -0.043679 |
| 5 | N | 0.034934  |
| 6 | C | 0.074129  |
| 7 | C | 0.000334  |

14 Br -0.677207  
 16 C 0.253260  
 17 C -0.097802  
 21 N 0.158684

Electronic spatial extent (au):  $\langle R^2 \rangle =$  3282.9008  
 Charge= 0.0000 electrons  
 Dipole moment (field-independent basis, Debye):  
 X= -10.8568 Y= 6.8535 Z= 0.9335  
 Tot= 12.8730  
 Quadrupole moment (field-independent basis, Debye-Ang):  
 XX= -72.4820 YY= -81.9221 ZZ= -83.6860  
 XY= 10.1606 XZ= 3.0924 YZ= -0.0670  
 Traceless Quadrupole moment (field-independent basis, Debye-Ang):  
 XX= 6.8814 YY= -2.5588 ZZ= -4.3226  
 XY= 10.1606 XZ= 3.0924 YZ= -0.0670  
 Octapole moment (field-independent basis, Debye-Ang<sup>2</sup>):  
 XXX= -47.9482 YYY= -7.8376 ZZZ= -1.5191  
 XYY= -36.5917  
 XXY= 1.1842 XXZ= 23.0414 XZZ= 26.8731  
 YZZ= -4.6168  
 YYZ= 6.4699 XYZ= 14.3554  
 Hexadecapole moment (field-independent basis, Debye-Ang<sup>3</sup>):  
 XXXX= -2304.2815 YYYY= -1301.1644 ZZZZ= -194.9067  
 XXXY= -11.2140  
 XXXZ= 16.9993 YYYY= -56.1907 YYYZ= 2.1255  
 ZZZX= 10.6970  
 ZZZY= 10.8328 XXYY= -661.0236 XXZZ= -498.6175  
 YYZZ= -253.5802  
 XXYZ= 22.2977 YYXZ= 25.3496 ZZXY= -7.8833

N-N= 8.431050180292D+02 E-N=-8.859190974210D+03 KE= 3.007463276976D+03

1\1\GINC-NODE12\FOpt\RB3LYP\6-311++G(d,p)\C7H12Br1N3\SUQIAN\20-Jul-202

4\0\# opt b3lyp/6-311++g(d,p)\oh\0,1\C,-1.8194127754,-1.9939540463,  
 0.2977240836\C,-2.8253560048,-1.1098088699,0.0737390223\N,-2.241658869  
 5,0.1519766127,0.0162441466\C,-0.9130778391,0.0224655164,0.2035005146\  
 N,-0.64173791,-1.2702462573,0.379409687\C,0.7290464499,-1.79740169,0.5  
 559803443\C,1.4487220977,-1.9957313229,-0.7864211071\H,-1.8415798554,-  
 3.0641943909,0.4106497129\H,-3.8815759697,-1.2692267394,-0.04345049\H,  
 1.2754464604,-1.0551806835,1.138535278\H,0.6602090227,-2.7267390285,1.  
 121685224\H,1.0733803148,-2.8945114095,-1.2865280125\H,1.2307199425,-1  
 .1277992297,-1.4226259507\Br,1.9564180091,1.5905016501,0.0961560181\H,  
 -0.1262311996,0.8067997092,0.1881421968\C,-2.8650900021,1.4114729542,-  
 0.1963203874\C,-4.1706264741,1.5948357098,-0.3441222162\H,-2.147052310  
 2,2.2212637198,-0.226351132\H,-4.5471691084,2.5954135631,-0.5050257152  
 \H,-4.8960537266,0.7918738252,-0.3127294357\N,2.8681684367,-2.16234265

56,-0.4955619347\H,3.3635261162,-2.5240612417,-1.3025006948\H,3.266508  
685,-1.2504892053,-0.2748446619\\Version=EM64L-G09RevD.01\State=1-A\HF  
=-3012.4680597\RMSD=5.014e-09\RMSF=1.376e-05\Dipole=-4.3716519,-2.5296  
895,-0.3736571\Quadrupole=4.5004534,-1.3406218,-3.1598316,-7.741675,-2  
.5375706,0.1530448\PG=C01 [X(C7H12Br1N3)]\@\

THE RED LIGHT IS ALWAYS LONGER THAN THE GREEN LIGHT.

-- PETER'S THEORY OF RELATIVITY

Job cpu time: 0 days 10 hours 59 minutes 32.8 seconds.

File lengths (MBytes): RWF= 75 Int= 0 D2E= 0 Chk= 10 Scr= 1

Normal termination of Gaussian 09 at Sat Jul 20 21:30:23 2024.

Entering Gaussian System, Link 0=/opt/gaussian/g09/g09

Initial command:

/opt/gaussian/g09/l1.exe "/tmp/Gau-6630.inp" -scrdir="/tmp/"

Entering Link 1 = /opt/gaussian/g09/l1.exe PID= 6631.

Copyright (c) 1988,1990,1992,1993,1995,1998,2003,2009,2013,  
Gaussian, Inc. All Rights Reserved.

This is part of the Gaussian(R) 09 program. It is based on  
the Gaussian(R) 03 system (copyright 2003, Gaussian, Inc.),  
the Gaussian(R) 98 system (copyright 1998, Gaussian, Inc.),  
the Gaussian(R) 94 system (copyright 1995, Gaussian, Inc.),  
the Gaussian 92(TM) system (copyright 1992, Gaussian, Inc.),  
the Gaussian 90(TM) system (copyright 1990, Gaussian, Inc.),  
the Gaussian 88(TM) system (copyright 1988, Gaussian, Inc.),  
the Gaussian 86(TM) system (copyright 1986, Carnegie Mellon  
University), and the Gaussian 82(TM) system (copyright 1983,  
Carnegie Mellon University). Gaussian is a federally registered  
trademark of Gaussian, Inc.

This software contains proprietary and confidential information,  
including trade secrets, belonging to Gaussian, Inc.

This software is provided under written license and may be  
used, copied, transmitted, or stored only in accord with that  
written license.

The following legend is applicable only to US Government  
contracts under FAR:

## RESTRICTED RIGHTS LEGEND

Use, reproduction and disclosure by the US Government is subject to restrictions as set forth in subparagraphs (a) and (c) of the Commercial Computer Software - Restricted Rights clause in FAR 52.227-19.

Gaussian, Inc.

340 Quinnipiac St., Bldg. 40, Wallingford CT 06492

-----  
Warning -- This program may not be used in any manner that competes with the business of Gaussian, Inc. or will provide assistance to any competitor of Gaussian, Inc. The licensee of this program is prohibited from giving any competitor of Gaussian, Inc. access to this program. By using this program, the user acknowledges that Gaussian, Inc. is engaged in the business of creating and licensing software in the field of computational chemistry and represents and warrants to the licensee that it is not a competitor of Gaussian, Inc. and that it will not use this program in any manner prohibited above.  
-----

Cite this work as:

Gaussian 09, Revision D.01,

M. J. Frisch, G. W. Trucks, H. B. Schlegel, G. E. Scuseria,  
M. A. Robb, J. R. Cheeseman, G. Scalmani, V. Barone, B. Mennucci,  
G. A. Petersson, H. Nakatsuji, M. Caricato, X. Li, H. P. Hratchian,  
A. F. Izmaylov, J. Bloino, G. Zheng, J. L. Sonnenberg, M. Hada,  
M. Ehara, K. Toyota, R. Fukuda, J. Hasegawa, M. Ishida, T. Nakajima,  
Y. Honda, O. Kitao, H. Nakai, T. Vreven, J. A. Montgomery, Jr.,  
J. E. Peralta, F. Ogliaro, M. Bearpark, J. J. Heyd, E. Brothers,  
K. N. Kudin, V. N. Staroverov, T. Keith, R. Kobayashi, J. Normand,  
K. Raghavachari, A. Rendell, J. C. Burant, S. S. Iyengar, J. Tomasi,  
M. Cossi, N. Rega, J. M. Millam, M. Klene, J. E. Knox, J. B. Cross,  
V. Bakken, C. Adamo, J. Jaramillo, R. Gomperts, R. E. Stratmann,  
O. Yazyev, A. J. Austin, R. Cammi, C. Pomelli, J. W. Ochterski,  
R. L. Martin, K. Morokuma, V. G. Zakrzewski, G. A. Voth,  
P. Salvador, J. J. Dannenberg, S. Dapprich, A. D. Daniels,  
O. Farkas, J. B. Foresman, J. V. Ortiz, J. Cioslowski,  
and D. J. Fox, Gaussian, Inc., Wallingford CT, 2013.

\*\*\*\*\*

Gaussian 09: EM64L-G09RevD.01 24-Apr-2013

22-Jul-2024

\*\*\*\*\*

%chk=/home/suqian/liuwen/qianmengshijie/ohpo/ohpo.chk

%mem=40000MB

%nprocl=1

Will use up to 1 processors via Linda.

%nprocs=8

Will use up to 8 processors via shared memory.

-----

# opt b3lyp/6-311++g(d,p)

-----

1/14=-1,18=20,19=15,26=3,38=1/1,3;

2/9=110,12=2,17=6,18=5,40=1/2;

3/5=4,6=6,7=1111,11=2,16=1,25=1,30=1,71=1,74=-5/1,2,3;

4//1;

5/5=2,38=5/2;

6/7=2,8=2,9=2,10=2,28=1/1;

7//1,2,3,16;

1/14=-1,18=20,19=15,26=3/3(2);

2/9=110/2;

99//99;

2/9=110/2;

3/5=4,6=6,7=1111,11=2,16=1,25=1,30=1,71=1,74=-5/1,2,3;

4/5=5,16=3,69=1/1;

5/5=2,38=5/2;

7//1,2,3,16;

1/14=-1,18=20,19=15,26=3/3(-5);

2/9=110/2;

6/7=2,8=2,9=2,10=2,19=2,28=1/1;

99/9=1/99;

--

oh

--

Symbolic Z-matrix:

Charge = 0 Multiplicity = 1

|   |          |          |          |
|---|----------|----------|----------|
| C | -1.85298 | -2.00477 | 0.26195  |
| C | -2.84494 | -1.10868 | 0.02227  |
| N | -2.2526  | 0.1497   | 0.01266  |
| C | -0.93264 | 0.00637  | 0.24353  |
| N | -0.67446 | -1.292   | 0.4013   |
| C | 0.68899  | -1.82956 | 0.59657  |
| C | 1.47835  | -1.92564 | -0.73551 |

|    |          |          |          |
|----|----------|----------|----------|
| H  | -1.88574 | -3.07712 | 0.34901  |
| H  | -3.89688 | -1.25872 | -0.13791 |
| H  | 1.21191  | -1.1335  | 1.25067  |
| H  | 0.59178  | -2.79327 | 1.09741  |
| H  | 1.34487  | -2.9108  | -1.19079 |
| H  | 1.08962  | -1.16668 | -1.42475 |
| Br | 2.0255   | 1.47738  | 0.09935  |
| H  | -0.1445  | 0.78154  | 0.25732  |
| C  | -2.86233 | 1.41676  | -0.19872 |
| C  | -4.16281 | 1.61048  | -0.37392 |
| H  | -2.13902 | 2.2222   | -0.2043  |
| H  | -4.52894 | 2.61515  | -0.53341 |
| H  | -4.89412 | 0.81234  | -0.36723 |
| O  | 2.85001  | -1.74993 | -0.50409 |
| H  | 2.97789  | -0.79367 | -0.33511 |
| C  | 5.02891  | 2.32267  | -0.02622 |
| C  | 5.70243  | 1.28787  | -0.80621 |
| O  | 4.27439  | 1.23764  | -0.6477  |
| H  | 5.0356   | 2.30003  | 1.07929  |
| H  | 4.82935  | 3.32222  | -0.45494 |
| H  | 6.02983  | 1.47781  | -1.84517 |
| C  | 6.44565  | 0.12879  | -0.11645 |
| H  | 6.37202  | -0.75156 | -0.72016 |
| H  | 7.47564  | 0.39006  | 0.00909  |
| H  | 6.00568  | -0.05746 | 0.84096  |

Add virtual bond connecting atoms H15 and Br14 Dist= 4.32D+00.  
Add virtual bond connecting atoms O25 and Br14 Dist= 4.50D+00.  
Add virtual bond connecting atoms O25 and H22 Dist= 4.59D+00.

GradGradGradGradGradGradGradGradGradGradGradGradGradGradGradGradGradGradGrad

Berny optimization.

Initialization pass.

```

-----
! Initial Parameters !
! (Angstroms and Degrees) !
-----
! Name Definition Value Derivative Info. !
-----
! R1 R(1,2) 1.3581 estimate D2E/DX2 !
! R2 R(1,5) 1.3843 estimate D2E/DX2 !
! R3 R(1,8) 1.0764 estimate D2E/DX2 !
! R4 R(2,3) 1.3909 estimate D2E/DX2 !
! R5 R(2,9) 1.0746 estimate D2E/DX2 !

```

|       |           |          |                  |   |
|-------|-----------|----------|------------------|---|
| ! R6  | R(3,4)    | 1.3476   | estimate D2E/DX2 | ! |
| ! R7  | R(3,16)   | 1.4219   | estimate D2E/DX2 | ! |
| ! R8  | R(4,5)    | 1.3332   | estimate D2E/DX2 | ! |
| ! R9  | R(4,15)   | 1.1056   | estimate D2E/DX2 | ! |
| ! R10 | R(5,6)    | 1.4785   | estimate D2E/DX2 | ! |
| ! R11 | R(6,7)    | 1.5514   | estimate D2E/DX2 | ! |
| ! R12 | R(6,10)   | 1.0889   | estimate D2E/DX2 | ! |
| ! R13 | R(6,11)   | 1.0904   | estimate D2E/DX2 | ! |
| ! R14 | R(7,12)   | 1.0935   | estimate D2E/DX2 | ! |
| ! R15 | R(7,13)   | 1.0964   | estimate D2E/DX2 | ! |
| ! R16 | R(7,21)   | 1.4021   | estimate D2E/DX2 | ! |
| ! R17 | R(14,15)  | 2.2843   | estimate D2E/DX2 | ! |
| ! R18 | R(14,25)  | 2.3818   | estimate D2E/DX2 | ! |
| ! R19 | R(16,17)  | 1.3265   | estimate D2E/DX2 | ! |
| ! R20 | R(16,18)  | 1.0826   | estimate D2E/DX2 | ! |
| ! R21 | R(17,19)  | 1.0811   | estimate D2E/DX2 | ! |
| ! R22 | R(17,20)  | 1.0825   | estimate D2E/DX2 | ! |
| ! R23 | R(21,22)  | 0.9795   | estimate D2E/DX2 | ! |
| ! R24 | R(22,25)  | 2.43     | estimate D2E/DX2 | ! |
| ! R25 | R(23,24)  | 1.4604   | estimate D2E/DX2 | ! |
| ! R26 | R(23,25)  | 1.4604   | estimate D2E/DX2 | ! |
| ! R27 | R(23,26)  | 1.1058   | estimate D2E/DX2 | ! |
| ! R28 | R(23,27)  | 1.1058   | estimate D2E/DX2 | ! |
| ! R29 | R(24,25)  | 1.4377   | estimate D2E/DX2 | ! |
| ! R30 | R(24,28)  | 1.1058   | estimate D2E/DX2 | ! |
| ! R31 | R(24,29)  | 1.54     | estimate D2E/DX2 | ! |
| ! R32 | R(29,30)  | 1.07     | estimate D2E/DX2 | ! |
| ! R33 | R(29,31)  | 1.07     | estimate D2E/DX2 | ! |
| ! R34 | R(29,32)  | 1.07     | estimate D2E/DX2 | ! |
| ! A1  | A(2,1,5)  | 107.4487 | estimate D2E/DX2 | ! |
| ! A2  | A(2,1,8)  | 130.4957 | estimate D2E/DX2 | ! |
| ! A3  | A(5,1,8)  | 122.0547 | estimate D2E/DX2 | ! |
| ! A4  | A(1,2,3)  | 106.6857 | estimate D2E/DX2 | ! |
| ! A5  | A(1,2,9)  | 130.4812 | estimate D2E/DX2 | ! |
| ! A6  | A(3,2,9)  | 122.8331 | estimate D2E/DX2 | ! |
| ! A7  | A(2,3,4)  | 108.6462 | estimate D2E/DX2 | ! |
| ! A8  | A(2,3,16) | 128.6538 | estimate D2E/DX2 | ! |
| ! A9  | A(4,3,16) | 122.6999 | estimate D2E/DX2 | ! |
| ! A10 | A(3,4,5)  | 108.2726 | estimate D2E/DX2 | ! |
| ! A11 | A(3,4,15) | 128.7417 | estimate D2E/DX2 | ! |
| ! A12 | A(5,4,15) | 122.9107 | estimate D2E/DX2 | ! |
| ! A13 | A(1,5,4)  | 108.9455 | estimate D2E/DX2 | ! |
| ! A14 | A(1,5,6)  | 127.6728 | estimate D2E/DX2 | ! |
| ! A15 | A(4,5,6)  | 123.2506 | estimate D2E/DX2 | ! |

|       |                   |          |                  |   |
|-------|-------------------|----------|------------------|---|
| ! A16 | A(5,6,7)          | 112.2301 | estimate D2E/DX2 | ! |
| ! A17 | A(5,6,10)         | 106.8437 | estimate D2E/DX2 | ! |
| ! A18 | A(5,6,11)         | 107.4442 | estimate D2E/DX2 | ! |
| ! A19 | A(7,6,10)         | 108.1204 | estimate D2E/DX2 | ! |
| ! A20 | A(7,6,11)         | 112.6443 | estimate D2E/DX2 | ! |
| ! A21 | A(10,6,11)        | 109.3802 | estimate D2E/DX2 | ! |
| ! A22 | A(6,7,12)         | 110.5609 | estimate D2E/DX2 | ! |
| ! A23 | A(6,7,13)         | 108.4511 | estimate D2E/DX2 | ! |
| ! A24 | A(6,7,21)         | 110.3829 | estimate D2E/DX2 | ! |
| ! A25 | A(12,7,13)        | 108.5799 | estimate D2E/DX2 | ! |
| ! A26 | A(12,7,21)        | 107.5209 | estimate D2E/DX2 | ! |
| ! A27 | A(13,7,21)        | 111.3365 | estimate D2E/DX2 | ! |
| ! A28 | A(15,14,25)       | 152.6194 | estimate D2E/DX2 | ! |
| ! A29 | A(4,15,14)        | 152.8661 | estimate D2E/DX2 | ! |
| ! A30 | A(3,16,17)        | 124.7632 | estimate D2E/DX2 | ! |
| ! A31 | A(3,16,18)        | 112.1624 | estimate D2E/DX2 | ! |
| ! A32 | A(17,16,18)       | 123.0742 | estimate D2E/DX2 | ! |
| ! A33 | A(16,17,19)       | 119.1583 | estimate D2E/DX2 | ! |
| ! A34 | A(16,17,20)       | 123.6301 | estimate D2E/DX2 | ! |
| ! A35 | A(19,17,20)       | 117.2116 | estimate D2E/DX2 | ! |
| ! A36 | A(7,21,22)        | 106.174  | estimate D2E/DX2 | ! |
| ! A37 | A(21,22,25)       | 149.7232 | estimate D2E/DX2 | ! |
| ! A38 | A(24,23,26)       | 121.1085 | estimate D2E/DX2 | ! |
| ! A39 | A(24,23,27)       | 121.1085 | estimate D2E/DX2 | ! |
| ! A40 | A(25,23,26)       | 114.4165 | estimate D2E/DX2 | ! |
| ! A41 | A(25,23,27)       | 114.4165 | estimate D2E/DX2 | ! |
| ! A42 | A(26,23,27)       | 114.0306 | estimate D2E/DX2 | ! |
| ! A43 | A(23,24,28)       | 121.1085 | estimate D2E/DX2 | ! |
| ! A44 | A(23,24,29)       | 121.1085 | estimate D2E/DX2 | ! |
| ! A45 | A(25,24,28)       | 113.8091 | estimate D2E/DX2 | ! |
| ! A46 | A(25,24,29)       | 113.8091 | estimate D2E/DX2 | ! |
| ! A47 | A(28,24,29)       | 114.0306 | estimate D2E/DX2 | ! |
| ! A48 | A(14,25,22)       | 62.6147  | estimate D2E/DX2 | ! |
| ! A49 | A(14,25,23)       | 106.2333 | estimate D2E/DX2 | ! |
| ! A50 | A(22,25,23)       | 147.349  | estimate D2E/DX2 | ! |
| ! A51 | A(22,25,24)       | 124.9845 | estimate D2E/DX2 | ! |
| ! A52 | A(24,29,30)       | 109.4712 | estimate D2E/DX2 | ! |
| ! A53 | A(24,29,31)       | 109.4712 | estimate D2E/DX2 | ! |
| ! A54 | A(24,29,32)       | 109.4712 | estimate D2E/DX2 | ! |
| ! A55 | A(30,29,31)       | 109.4713 | estimate D2E/DX2 | ! |
| ! A56 | A(30,29,32)       | 109.4712 | estimate D2E/DX2 | ! |
| ! A57 | A(31,29,32)       | 109.4712 | estimate D2E/DX2 | ! |
| ! A58 | L(14,25,24,22,-1) | 187.5992 | estimate D2E/DX2 | ! |
| ! A59 | L(14,25,24,22,-2) | 194.2234 | estimate D2E/DX2 | ! |



|       |               |           |                  |   |
|-------|---------------|-----------|------------------|---|
| ! D1  | D(5,1,2,3)    | 0.2541    | estimate D2E/DX2 | ! |
| ! D2  | D(5,1,2,9)    | -179.7257 | estimate D2E/DX2 | ! |
| ! D3  | D(8,1,2,3)    | 179.9213  | estimate D2E/DX2 | ! |
| ! D4  | D(8,1,2,9)    | -0.0585   | estimate D2E/DX2 | ! |
| ! D5  | D(2,1,5,4)    | -0.3687   | estimate D2E/DX2 | ! |
| ! D6  | D(2,1,5,6)    | -176.2729 | estimate D2E/DX2 | ! |
| ! D7  | D(8,1,5,4)    | 179.9299  | estimate D2E/DX2 | ! |
| ! D8  | D(8,1,5,6)    | 4.0256    | estimate D2E/DX2 | ! |
| ! D9  | D(1,2,3,4)    | -0.0562   | estimate D2E/DX2 | ! |
| ! D10 | D(1,2,3,16)   | 179.8446  | estimate D2E/DX2 | ! |
| ! D11 | D(9,2,3,4)    | 179.9255  | estimate D2E/DX2 | ! |
| ! D12 | D(9,2,3,16)   | -0.1737   | estimate D2E/DX2 | ! |
| ! D13 | D(2,3,4,5)    | -0.1729   | estimate D2E/DX2 | ! |
| ! D14 | D(2,3,4,15)   | 176.707   | estimate D2E/DX2 | ! |
| ! D15 | D(16,3,4,5)   | 179.9192  | estimate D2E/DX2 | ! |
| ! D16 | D(16,3,4,15)  | -3.2009   | estimate D2E/DX2 | ! |
| ! D17 | D(2,3,16,17)  | 3.0504    | estimate D2E/DX2 | ! |
| ! D18 | D(2,3,16,18)  | -176.7973 | estimate D2E/DX2 | ! |
| ! D19 | D(4,3,16,17)  | -177.0614 | estimate D2E/DX2 | ! |
| ! D20 | D(4,3,16,18)  | 3.0909    | estimate D2E/DX2 | ! |
| ! D21 | D(3,4,5,1)    | 0.3336    | estimate D2E/DX2 | ! |
| ! D22 | D(3,4,5,6)    | 176.4574  | estimate D2E/DX2 | ! |
| ! D23 | D(15,4,5,1)   | -176.7678 | estimate D2E/DX2 | ! |
| ! D24 | D(15,4,5,6)   | -0.644    | estimate D2E/DX2 | ! |
| ! D25 | D(3,4,15,14)  | -157.7623 | estimate D2E/DX2 | ! |
| ! D26 | D(5,4,15,14)  | 18.7081   | estimate D2E/DX2 | ! |
| ! D27 | D(1,5,6,7)    | 96.5542   | estimate D2E/DX2 | ! |
| ! D28 | D(1,5,6,10)   | -145.1004 | estimate D2E/DX2 | ! |
| ! D29 | D(1,5,6,11)   | -27.8065  | estimate D2E/DX2 | ! |
| ! D30 | D(4,5,6,7)    | -78.8125  | estimate D2E/DX2 | ! |
| ! D31 | D(4,5,6,10)   | 39.5329   | estimate D2E/DX2 | ! |
| ! D32 | D(4,5,6,11)   | 156.8268  | estimate D2E/DX2 | ! |
| ! D33 | D(5,6,7,12)   | -91.7943  | estimate D2E/DX2 | ! |
| ! D34 | D(5,6,7,13)   | 27.1459   | estimate D2E/DX2 | ! |
| ! D35 | D(5,6,7,21)   | 149.3646  | estimate D2E/DX2 | ! |
| ! D36 | D(10,6,7,12)  | 150.6177  | estimate D2E/DX2 | ! |
| ! D37 | D(10,6,7,13)  | -90.4421  | estimate D2E/DX2 | ! |
| ! D38 | D(10,6,7,21)  | 31.7765   | estimate D2E/DX2 | ! |
| ! D39 | D(11,6,7,12)  | 29.6316   | estimate D2E/DX2 | ! |
| ! D40 | D(11,6,7,13)  | 148.5719  | estimate D2E/DX2 | ! |
| ! D41 | D(11,6,7,21)  | -89.2095  | estimate D2E/DX2 | ! |
| ! D42 | D(6,7,21,22)  | -74.5924  | estimate D2E/DX2 | ! |
| ! D43 | D(12,7,21,22) | 164.7311  | estimate D2E/DX2 | ! |
| ! D44 | D(13,7,21,22) | 45.9129   | estimate D2E/DX2 | ! |

|       |                |           |                  |   |
|-------|----------------|-----------|------------------|---|
| ! D45 | D(25,14,15,4)  | 23.9892   | estimate D2E/DX2 | ! |
| ! D46 | D(15,14,25,22) | -27.5846  | estimate D2E/DX2 | ! |
| ! D47 | D(15,14,25,23) | -174.3868 | estimate D2E/DX2 | ! |
| ! D48 | D(3,16,17,19)  | -179.6544 | estimate D2E/DX2 | ! |
| ! D49 | D(3,16,17,20)  | 0.3485    | estimate D2E/DX2 | ! |
| ! D50 | D(18,16,17,19) | 0.1773    | estimate D2E/DX2 | ! |
| ! D51 | D(18,16,17,20) | -179.8198 | estimate D2E/DX2 | ! |
| ! D52 | D(7,21,22,25)  | -138.9065 | estimate D2E/DX2 | ! |
| ! D53 | D(21,22,25,14) | 162.2392  | estimate D2E/DX2 | ! |
| ! D54 | D(21,22,25,23) | -120.7569 | estimate D2E/DX2 | ! |
| ! D55 | D(21,22,25,24) | -31.9842  | estimate D2E/DX2 | ! |
| ! D56 | D(26,23,24,28) | -156.8753 | estimate D2E/DX2 | ! |
| ! D57 | D(26,23,24,29) | 0.0       | estimate D2E/DX2 | ! |
| ! D58 | D(27,23,24,28) | 0.0       | estimate D2E/DX2 | ! |
| ! D59 | D(27,23,24,29) | 156.8753  | estimate D2E/DX2 | ! |
| ! D60 | D(26,23,25,14) | 61.1869   | estimate D2E/DX2 | ! |
| ! D61 | D(26,23,25,22) | -3.1182   | estimate D2E/DX2 | ! |
| ! D62 | D(27,23,25,14) | -73.0187  | estimate D2E/DX2 | ! |
| ! D63 | D(27,23,25,22) | -137.3239 | estimate D2E/DX2 | ! |
| ! D64 | D(28,24,25,22) | 104.7601  | estimate D2E/DX2 | ! |
| ! D65 | D(29,24,25,22) | -28.1776  | estimate D2E/DX2 | ! |
| ! D66 | D(23,24,29,30) | 147.4407  | estimate D2E/DX2 | ! |
| ! D67 | D(23,24,29,31) | -92.5593  | estimate D2E/DX2 | ! |
| ! D68 | D(23,24,29,32) | 27.4407   | estimate D2E/DX2 | ! |
| ! D69 | D(25,24,29,30) | 78.6702   | estimate D2E/DX2 | ! |
| ! D70 | D(25,24,29,31) | -161.3298 | estimate D2E/DX2 | ! |
| ! D71 | D(25,24,29,32) | -41.3298  | estimate D2E/DX2 | ! |
| ! D72 | D(28,24,29,30) | -54.1618  | estimate D2E/DX2 | ! |
| ! D73 | D(28,24,29,31) | 65.8383   | estimate D2E/DX2 | ! |
| ! D74 | D(28,24,29,32) | -174.1618 | estimate D2E/DX2 | ! |

Trust Radius=3.00D-01 FncErr=1.00D-07 GrdErr=1.00D-06

Number of steps in this run= 177 maximum allowed number of steps= 192.

GradGradGradGradGradGradGradGradGradGradGradGradGradGradGradGradGradGradGrad

Input orientation:

| Center<br>Number | Atomic<br>Number | Atomic<br>Type | Coordinates (Angstroms) |           |          |
|------------------|------------------|----------------|-------------------------|-----------|----------|
|                  |                  |                | X                       | Y         | Z        |
| 1                | 6                | 0              | -1.852977               | -2.004770 | 0.261946 |
| 2                | 6                | 0              | -2.844936               | -1.108684 | 0.022270 |
| 3                | 7                | 0              | -2.252596               | 0.149697  | 0.012664 |
| 4                | 6                | 0              | -0.932640               | 0.006366  | 0.243529 |

|    |    |   |           |           |           |
|----|----|---|-----------|-----------|-----------|
| 5  | 7  | 0 | -0.674460 | -1.291997 | 0.401298  |
| 6  | 6  | 0 | 0.688990  | -1.829559 | 0.596565  |
| 7  | 6  | 0 | 1.478350  | -1.925642 | -0.735506 |
| 8  | 1  | 0 | -1.885737 | -3.077123 | 0.349012  |
| 9  | 1  | 0 | -3.896876 | -1.258715 | -0.137907 |
| 10 | 1  | 0 | 1.211914  | -1.133502 | 1.250666  |
| 11 | 1  | 0 | 0.591782  | -2.793267 | 1.097412  |
| 12 | 1  | 0 | 1.344868  | -2.910804 | -1.190791 |
| 13 | 1  | 0 | 1.089622  | -1.166684 | -1.424751 |
| 14 | 35 | 0 | 2.025502  | 1.477383  | 0.099347  |
| 15 | 1  | 0 | -0.144502 | 0.781540  | 0.257320  |
| 16 | 6  | 0 | -2.862333 | 1.416758  | -0.198718 |
| 17 | 6  | 0 | -4.162812 | 1.610481  | -0.373924 |
| 18 | 1  | 0 | -2.139017 | 2.222199  | -0.204304 |
| 19 | 1  | 0 | -4.528939 | 2.615146  | -0.533412 |
| 20 | 1  | 0 | -4.894120 | 0.812340  | -0.367232 |
| 21 | 8  | 0 | 2.850009  | -1.749930 | -0.504093 |
| 22 | 1  | 0 | 2.977890  | -0.793667 | -0.335111 |
| 23 | 6  | 0 | 5.028905  | 2.322671  | -0.026222 |
| 24 | 6  | 0 | 5.702430  | 1.287870  | -0.806209 |
| 25 | 8  | 0 | 4.274393  | 1.237636  | -0.647703 |
| 26 | 1  | 0 | 5.035601  | 2.300029  | 1.079288  |
| 27 | 1  | 0 | 4.829352  | 3.322217  | -0.454937 |
| 28 | 1  | 0 | 6.029830  | 1.477806  | -1.845171 |
| 29 | 6  | 0 | 6.445646  | 0.128789  | -0.116454 |
| 30 | 1  | 0 | 6.372016  | -0.751562 | -0.720160 |
| 31 | 1  | 0 | 7.475636  | 0.390056  | 0.009086  |
| 32 | 1  | 0 | 6.005675  | -0.057463 | 0.840957  |

-----  
Distance matrix (angstroms):

|    |   | 1        | 2        | 3        | 4        | 5        |
|----|---|----------|----------|----------|----------|----------|
| 1  | C | 0.000000 |          |          |          |          |
| 2  | C | 1.358086 | 0.000000 |          |          |          |
| 3  | N | 2.205349 | 1.390856 | 0.000000 |          |          |
| 4  | C | 2.211793 | 2.224673 | 1.347637 | 0.000000 |          |
| 5  | N | 1.384329 | 2.210935 | 2.172563 | 1.333152 | 0.000000 |
| 6  | C | 2.569876 | 3.652138 | 3.593233 | 2.474861 | 1.478546 |
| 7  | C | 3.478349 | 4.464577 | 4.334368 | 3.240993 | 2.515635 |
| 8  | H | 1.076380 | 2.213950 | 3.264978 | 3.229152 | 2.157916 |
| 9  | H | 2.212240 | 1.074590 | 2.170243 | 3.245400 | 3.267387 |
| 10 | H | 3.336200 | 4.238821 | 3.896419 | 2.629208 | 2.074838 |
| 11 | H | 2.701218 | 3.975523 | 4.234171 | 3.300140 | 2.083688 |
| 12 | H | 3.627334 | 4.719493 | 4.874086 | 3.969156 | 3.038580 |
| 13 | H | 3.493741 | 4.192610 | 3.869036 | 2.872063 | 2.542075 |

|    |    |          |           |          |           |          |
|----|----|----------|-----------|----------|-----------|----------|
| 14 | Br | 5.214828 | 5.514966  | 4.480222 | 3.306854  | 3.879489 |
| 15 | H  | 3.268399 | 3.304624  | 2.214304 | 1.105553  | 2.145027 |
| 16 | C  | 3.596924 | 2.535152  | 1.421937 | 2.430741  | 3.533293 |
| 17 | C  | 4.337016 | 3.047561  | 2.435624 | 3.659022  | 4.603688 |
| 18 | H  | 4.262215 | 3.412395  | 2.086921 | 2.562385  | 3.855030 |
| 19 | H  | 5.397869 | 4.124507  | 3.399761 | 4.510292  | 5.567446 |
| 20 | H  | 4.192914 | 2.835701  | 2.749739 | 4.088514  | 4.777489 |
| 21 | O  | 4.771775 | 5.755055  | 5.469205 | 4.236974  | 3.667604 |
| 22 | H  | 5.016027 | 5.842282  | 5.326243 | 4.033252  | 3.759028 |
| 23 | C  | 8.134500 | 8.589175  | 7.598920 | 6.401411  | 6.765869 |
| 24 | C  | 8.310632 | 8.915566  | 8.077650 | 6.838740  | 6.984162 |
| 25 | O  | 6.991804 | 7.525884  | 6.649909 | 5.424345  | 5.656023 |
| 26 | H  | 8.164058 | 8.650981  | 7.673293 | 6.448200  | 6.779905 |
| 27 | H  | 8.575793 | 8.874419  | 7.774157 | 6.684555  | 7.232984 |
| 28 | H  | 8.871692 | 9.430734  | 8.591508 | 7.416454  | 7.593809 |
| 29 | C  | 8.576852 | 9.373659  | 8.699225 | 7.388077  | 7.278915 |
| 30 | H  | 8.377683 | 9.253699  | 8.702484 | 7.406831  | 7.155597 |
| 31 | H  | 9.634425 | 10.428835 | 9.731201 | 8.420290  | 8.331098 |
| 32 | H  | 8.116999 | 8.950343  | 8.302291 | 6.964281  | 6.807465 |
|    |    | 6        | 7         | 8        | 9         | 10       |
| 6  | C  | 0.000000 |           |          |           |          |
| 7  | C  | 1.551365 | 0.000000  |          |           |          |
| 8  | H  | 2.871745 | 3.717414  | 0.000000 |           |          |
| 9  | H  | 4.679261 | 5.449309  | 2.754701 | 0.000000  |          |
| 10 | H  | 1.088941 | 2.154844  | 3.766442 | 5.295616  | 0.000000 |
| 11 | H  | 1.090427 | 2.213225  | 2.603608 | 4.901930  | 1.778446 |
| 12 | H  | 2.189500 | 1.093456  | 3.582662 | 5.595877  | 3.022779 |
| 13 | H  | 2.164631 | 1.096442  | 3.955853 | 5.150689  | 2.678416 |
| 14 | Br | 3.601299 | 3.546397  | 6.008631 | 6.528176  | 2.967184 |
| 15 | H  | 2.761817 | 3.308804  | 4.234334 | 4.289424  | 2.548330 |
| 16 | C  | 4.876776 | 5.504662  | 4.631276 | 2.869169  | 5.020361 |
| 17 | C  | 6.026251 | 6.667654  | 5.261306 | 2.891144  | 6.249513 |
| 18 | H  | 5.005573 | 5.529205  | 5.334147 | 3.900159  | 4.960484 |
| 19 | H  | 6.946872 | 7.533068  | 6.337753 | 3.944962  | 7.084680 |
| 20 | H  | 6.251372 | 6.945541  | 4.969034 | 2.310055  | 6.609656 |
| 21 | O  | 2.426477 | 1.402097  | 4.991645 | 6.774647  | 2.478410 |
| 22 | H  | 2.679581 | 1.921016  | 5.416370 | 6.893299  | 2.397675 |
| 23 | C  | 6.038522 | 5.581908  | 8.781279 | 9.618127  | 5.305186 |
| 24 | C  | 6.068008 | 5.307967  | 8.829948 | 9.953814  | 5.500774 |
| 25 | O  | 4.879652 | 4.222783  | 7.586685 | 8.559282  | 4.313338 |
| 26 | H  | 6.014943 | 5.814104  | 8.794998 | 9.692026  | 5.141895 |
| 27 | H  | 6.692462 | 6.232813  | 9.310763 | 9.860654  | 5.987351 |
| 28 | H  | 6.739830 | 5.790578  | 9.392445 | 10.437566 | 6.294081 |
| 29 | C  | 6.122304 | 5.410909  | 8.939042 | 10.435199 | 5.554669 |

|    |    |           |           |          |           |           |
|----|----|-----------|-----------|----------|-----------|-----------|
| 30 | H  | 5.932337  | 5.032561  | 8.645337 | 10.297882 | 5.536848  |
| 31 | H  | 7.164522  | 6.471809  | 9.988602 | 11.492348 | 6.564827  |
| 32 | H  | 5.609563  | 5.145095  | 8.463731 | 10.023059 | 4.930098  |
|    |    | 11        | 12        | 13       | 14        | 15        |
| 11 | H  | 0.000000  |           |          |           |           |
| 12 | H  | 2.411810  | 0.000000  |          |           |           |
| 13 | H  | 3.042191  | 1.778157  | 0.000000 |           |           |
| 14 | Br | 4.614124  | 4.624273  | 3.192152 | 0.000000  |           |
| 15 | H  | 3.745279  | 4.236585  | 2.854470 | 2.284310  | 0.000000  |
| 16 | C  | 5.597783  | 6.116579  | 4.878040 | 4.897290  | 2.828087  |
| 17 | C  | 6.645599  | 7.172435  | 6.033651 | 6.207812  | 4.151196  |
| 18 | H  | 5.857186  | 6.281587  | 4.837161 | 4.241482  | 2.503335  |
| 19 | H  | 7.624454  | 8.091346  | 6.831175 | 6.682483  | 4.817744  |
| 20 | H  | 6.726121  | 7.311978  | 6.390622 | 6.967148  | 4.790604  |
| 21 | O  | 2.958540  | 2.021047  | 2.070447 | 3.385188  | 3.994394  |
| 22 | H  | 3.426957  | 2.807351  | 2.211790 | 2.500693  | 3.547053  |
| 23 | C  | 6.864652  | 6.505199  | 5.445130 | 3.122613  | 5.405518  |
| 24 | C  | 6.811621  | 6.063424  | 5.261695 | 3.791536  | 5.964401  |
| 25 | O  | 5.731948  | 5.107506  | 4.065381 | 2.381822  | 4.533622  |
| 26 | H  | 6.759402  | 6.776987  | 5.818854 | 3.270738  | 5.460303  |
| 27 | H  | 7.600390  | 7.178695  | 5.922529 | 3.401796  | 5.630415  |
| 28 | H  | 7.514867  | 6.452673  | 5.619229 | 4.451493  | 6.559545  |
| 29 | C  | 6.654292  | 6.034174  | 5.663646 | 4.626332  | 6.632936  |
| 30 | H  | 6.394000  | 5.491451  | 5.345321 | 4.952976  | 6.765418  |
| 31 | H  | 7.661947  | 7.065528  | 6.727592 | 5.558272  | 7.634224  |
| 32 | H  | 6.071296  | 5.830324  | 5.525521 | 4.329840  | 6.234520  |
|    |    | 16        | 17        | 18       | 19        | 20        |
| 16 | C  | 0.000000  |           |          |           |           |
| 17 | C  | 1.326451  | 0.000000  |          |           |           |
| 18 | H  | 1.082568  | 2.121018  | 0.000000 |           |           |
| 19 | H  | 2.079839  | 1.081128  | 2.444268 | 0.000000  |           |
| 20 | H  | 2.126470  | 1.082536  | 3.099168 | 1.846912  | 0.000000  |
| 21 | O  | 6.538503  | 7.777465  | 6.384204 | 8.573425  | 8.158155  |
| 22 | H  | 6.246022  | 7.534657  | 5.940984 | 8.246927  | 8.034229  |
| 23 | C  | 7.944940  | 9.225821  | 7.170838 | 9.575760  | 10.043098 |
| 24 | C  | 8.587248  | 9.879977  | 7.919820 | 10.320707 | 10.616294 |
| 25 | O  | 7.153079  | 8.449876  | 6.503676 | 8.911187  | 9.182656  |
| 26 | H  | 8.049275  | 9.337993  | 7.288951 | 9.704665  | 10.144210 |
| 27 | H  | 7.928331  | 9.153994  | 7.059109 | 9.385293  | 10.042563 |
| 28 | H  | 9.043511  | 10.299132 | 8.365203 | 10.700554 | 11.043543 |
| 29 | C  | 9.397026  | 10.714526 | 8.836658 | 11.260432 | 11.363117 |
| 30 | H  | 9.499827  | 10.801932 | 9.030340 | 11.410540 | 11.379638 |
| 31 | H  | 10.390904 | 11.708527 | 9.789986 | 12.221094 | 12.382681 |
| 32 | H  | 9.049631  | 10.375746 | 8.522056 | 10.954900 | 11.000992 |

|    |   |          |          |          |          |          |
|----|---|----------|----------|----------|----------|----------|
|    |   | 21       | 22       | 23       | 24       | 25       |
| 21 | O | 0.000000 |          |          |          |          |
| 22 | H | 0.979463 | 0.000000 |          |          |          |
| 23 | C | 4.643494 | 3.743480 | 0.000000 |          |          |
| 24 | C | 4.178015 | 3.460903 | 1.460421 | 0.000000 |          |
| 25 | O | 3.312861 | 2.429985 | 1.460421 | 1.437685 | 0.000000 |
| 26 | H | 4.866834 | 3.975632 | 1.105762 | 2.241478 | 2.165783 |
| 27 | H | 5.444896 | 4.514728 | 1.105762 | 2.241478 | 2.165783 |
| 28 | H | 4.725255 | 4.093191 | 2.241478 | 1.105762 | 2.138497 |
| 29 | C | 4.075347 | 3.595006 | 2.613124 | 1.540000 | 2.495216 |
| 30 | H | 3.667146 | 3.416157 | 3.425844 | 2.148263 | 2.891743 |
| 31 | H | 5.122432 | 4.663624 | 3.118130 | 2.148263 | 3.376050 |
| 32 | H | 3.825158 | 3.330558 | 2.714980 | 2.148263 | 2.625020 |
|    |   | 26       | 27       | 28       | 29       | 30       |
| 26 | H | 0.000000 |          |          |          |          |
| 27 | H | 1.855062 | 0.000000 |          |          |          |
| 28 | H | 3.196405 | 2.603027 | 0.000000 |          |          |
| 29 | C | 2.851720 | 3.595130 | 2.231863 | 0.000000 |          |
| 30 | H | 3.786321 | 4.364153 | 2.520481 | 1.070000 | 0.000000 |
| 31 | H | 3.278276 | 3.976896 | 2.590719 | 1.070000 | 1.747303 |
| 32 | H | 2.560393 | 3.805958 | 3.094014 | 1.070000 | 1.747303 |
|    |   | 31       | 32       |          |          |          |
| 31 | H | 0.000000 |          |          |          |          |
| 32 | H | 1.747303 | 0.000000 |          |          |          |

Stoichiometry C10H17BrN2O2

Framework group C1[X(C10H17BrN2O2)]

Deg. of freedom 90

Full point group C1 NOp 1

Largest Abelian subgroup C1 NOp 1

Largest concise Abelian subgroup C1 NOp 1

Standard orientation:

| Center<br>Number | Atomic<br>Number | Atomic<br>Type | Coordinates (Angstroms) |           |           |
|------------------|------------------|----------------|-------------------------|-----------|-----------|
|                  |                  |                | X                       | Y         | Z         |
| 1                | 6                | 0              | -3.377565               | 1.817649  | -0.193450 |
| 2                | 6                | 0              | -4.220960               | 0.784347  | 0.062229  |
| 3                | 7                | 0              | -3.454108               | -0.375436 | 0.025840  |
| 4                | 6                | 0              | -2.177919               | -0.039753 | -0.247632 |
| 5                | 7                | 0              | -2.114910               | 1.284499  | -0.387922 |
| 6                | 6                | 0              | -0.850999               | 2.015982  | -0.619348 |
| 7                | 6                | 0              | -0.034651               | 2.204855  | 0.686270  |
| 8                | 1                | 0              | -3.567193               | 2.875250  | -0.257598 |
| 9                | 1                | 0              | -5.276852               | 0.778648  | 0.261732  |

|    |    |   |           |           |           |
|----|----|---|-----------|-----------|-----------|
| 10 | 1  | 0 | -0.258219 | 1.412557  | -1.305120 |
| 11 | 1  | 0 | -1.104141 | 2.963020  | -1.096913 |
| 12 | 1  | 0 | -0.291205 | 3.153495  | 1.165758  |
| 13 | 1  | 0 | -0.284468 | 1.387475  | 1.373050  |
| 14 | 35 | 0 | 0.964099  | -1.070704 | -0.235760 |
| 15 | 1  | 0 | -1.287696 | -0.692843 | -0.304393 |
| 16 | 6  | 0 | -3.867287 | -1.720232 | 0.232504  |
| 17 | 6  | 0 | -5.119046 | -2.102127 | 0.448668  |
| 18 | 1  | 0 | -3.036101 | -2.412911 | 0.196736  |
| 19 | 1  | 0 | -5.330920 | -3.151382 | 0.600359  |
| 20 | 1  | 0 | -5.957128 | -1.417807 | 0.483460  |
| 21 | 8  | 0 | 1.338463  | 2.232333  | 0.404000  |
| 22 | 1  | 0 | 1.595971  | 1.307169  | 0.211364  |
| 23 | 6  | 0 | 4.060330  | -1.475734 | -0.231383 |
| 24 | 6  | 0 | 4.606797  | -0.366464 | 0.545613  |
| 25 | 8  | 0 | 3.181453  | -0.520356 | 0.437690  |
| 26 | 1  | 0 | 4.022604  | -1.435723 | -1.335777 |
| 27 | 1  | 0 | 4.022459  | -2.499950 | 0.183656  |
| 28 | 1  | 0 | 4.996473  | -0.522808 | 1.568560  |
| 29 | 6  | 0 | 5.149702  | 0.897949  | -0.145846 |
| 30 | 1  | 0 | 4.972907  | 1.749284  | 0.477750  |
| 31 | 1  | 0 | 6.201149  | 0.789900  | -0.312232 |
| 32 | 1  | 0 | 4.652262  | 1.033182  | -1.083484 |

-----  
Rotational constants (GHZ): 0.8595191 0.2035802 0.1694573

Standard basis: 6-311++G(d,p) (5D, 7F)

There are 492 symmetry adapted cartesian basis functions of A symmetry.

There are 475 symmetry adapted basis functions of A symmetry.

475 basis functions, 751 primitive gaussians, 492 cartesian basis functions  
71 alpha electrons 71 beta electrons

nuclear repulsion energy 1350.4616834160 Hartrees.

NAtoms= 32 NActive= 32 NUniq= 32 SFac= 1.00D+00 NAtFMM= 60 NAOKFM=F

Big=F

Integral buffers will be 131072 words long.

Raffenetti 2 integral format.

Two-electron integral symmetry is turned on.

One-electron integrals computed using PRISM.

NBasis= 475 RedAO= T EigKep= 4.43D-06 NBF= 475

NBsUse= 475 1.00D-06 EigRej= -1.00D+00 NBFU= 475

ExpMin= 3.50D-02 ExpMax= 4.40D+05 ExpMxC= 1.51D+04 IAcc=3 IRadAn= 5 AccDes=  
0.00D+00

Harris functional with IExCor= 402 and IRadAn= 5 diagonalized for initial guess.

HarFok: IExCor= 402 AccDes= 0.00D+00 IRadAn= 5 IDoV= 1 UseB2=F ITyADJ=14

ICtDFT= 3500011 ScaDFX= 1.000000 1.000000 1.000000 1.000000





(A)  
 (A) (A) (A) (A) (A) (A) (A) (A) (A) (A) (A) (A)  
 (A) (A) (A) (A) (A) (A) (A) (A) (A) (A) (A) (A)  
 (A) (A) (A) (A) (A) (A) (A) (A) (A) (A) (A) (A)  
 (A) (A) (A) (A) (A) (A) (A) (A) (A) (A) (A) (A)  
 (A) (A) (A) (A) (A) (A) (A) (A) (A) (A) (A) (A)  
 (A) (A) (A) (A) (A) (A) (A) (A) (A) (A) (A) (A)  
 (A) (A) (A) (A) (A) (A) (A) (A) (A) (A) (A) (A)  
 (A) (A) (A) (A) (A) (A) (A) (A) (A) (A) (A) (A)  
 (A) (A) (A) (A) (A) (A) (A) (A) (A) (A) (A) (A)  
 (A) (A) (A) (A) (A) (A) (A) (A) (A) (A) (A) (A)  
 (A) (A) (A) (A) (A) (A) (A) (A) (A) (A) (A) (A)  
 (A) (A) (A) (A) (A) (A) (A) (A) (A) (A) (A) (A)  
 (A) (A) (A) (A) (A) (A) (A) (A) (A) (A) (A) (A)  
 (A) (A) (A) (A) (A) (A) (A) (A) (A) (A) (A) (A)  
 (A) (A) (A) (A) (A) (A) (A) (A) (A) (A) (A) (A)  
 (A) (A) (A) (A) (A) (A) (A) (A) (A) (A) (A) (A)  
 (A) (A) (A) (A) (A) (A) (A) (A) (A) (A) (A) (A)  
 (A) (A) (A) (A) (A) (A) (A) (A) (A) (A) (A) (A)  
 (A) (A) (A) (A) (A) (A) (A) (A) (A) (A) (A) (A)  
 (A) (A) (A) (A) (A) (A) (A) (A) (A) (A) (A) (A)  
 (A) (A) (A) (A) (A) (A) (A) (A) (A) (A) (A) (A)

The electronic state is 1-A.

|       |                      |            |           |           |           |           |
|-------|----------------------|------------|-----------|-----------|-----------|-----------|
| Alpha | occ. eigenvalues --  | -482.68264 | -62.33656 | -56.15425 | -56.15422 | -56.15410 |
| Alpha | occ. eigenvalues --  | -19.10183  | -19.09272 | -14.45177 | -14.43827 | -10.29176 |
| Alpha | occ. eigenvalues --  | -10.27091  | -10.27018 | -10.26969 | -10.23541 | -10.22253 |
| Alpha | occ. eigenvalues --  | -10.22087  | -10.19521 | -10.19217 | -10.13568 | -8.54629  |
| Alpha | occ. eigenvalues --  | -6.36935   | -6.36916  | -6.36884  | -2.48191  | -2.48187  |
| Alpha | occ. eigenvalues --  | -2.48159   | -2.48143  | -2.48138  | -1.11421  | -1.03187  |
| Alpha | occ. eigenvalues --  | -1.01195   | -0.99805  | -0.85368  | -0.82336  | -0.77654  |
| Alpha | occ. eigenvalues --  | -0.71788   | -0.71253  | -0.68050  | -0.65029  | -0.63900  |
| Alpha | occ. eigenvalues --  | -0.63338   | -0.62218  | -0.58419  | -0.56352  | -0.54072  |
| Alpha | occ. eigenvalues --  | -0.53198   | -0.51913  | -0.50868  | -0.49221  | -0.49119  |
| Alpha | occ. eigenvalues --  | -0.47886   | -0.47328  | -0.46208  | -0.44232  | -0.43786  |
| Alpha | occ. eigenvalues --  | -0.43619   | -0.40365  | -0.39711  | -0.38712  | -0.38055  |
| Alpha | occ. eigenvalues --  | -0.34380   | -0.33763  | -0.33384  | -0.31172  | -0.30274  |
| Alpha | occ. eigenvalues --  | -0.28798   | -0.26740  | -0.24286  | -0.18856  | -0.18170  |
| Alpha | occ. eigenvalues --  | -0.16247   |           |           |           |           |
| Alpha | virt. eigenvalues -- | -0.08290   | -0.04386  | -0.03080  | -0.01604  | -0.00692  |
| Alpha | virt. eigenvalues -- | -0.00479   | 0.00890   | 0.01248   | 0.01278   | 0.01540   |
| Alpha | virt. eigenvalues -- | 0.02846    | 0.03431   | 0.03461   | 0.03966   | 0.04212   |
| Alpha | virt. eigenvalues -- | 0.04937    | 0.05330   | 0.05859   | 0.06132   | 0.06376   |
| Alpha | virt. eigenvalues -- | 0.06841    | 0.07226   | 0.07527   | 0.07917   | 0.08262   |
| Alpha | virt. eigenvalues -- | 0.08785    | 0.08857   | 0.09214   | 0.09316   | 0.09863   |
| Alpha | virt. eigenvalues -- | 0.10091    | 0.10406   | 0.10849   | 0.11459   | 0.11496   |
| Alpha | virt. eigenvalues -- | 0.12268    | 0.12644   | 0.12842   | 0.13004   | 0.13180   |
| Alpha | virt. eigenvalues -- | 0.13633    | 0.13657   | 0.13931   | 0.14020   | 0.14441   |
| Alpha | virt. eigenvalues -- | 0.14799    | 0.14950   | 0.14969   | 0.15413   | 0.15580   |

|                            |         |         |         |         |         |
|----------------------------|---------|---------|---------|---------|---------|
| Alpha virt. eigenvalues -- | 0.15948 | 0.16084 | 0.16992 | 0.17098 | 0.17473 |
| Alpha virt. eigenvalues -- | 0.17882 | 0.18136 | 0.18332 | 0.18538 | 0.18726 |
| Alpha virt. eigenvalues -- | 0.19559 | 0.19691 | 0.19929 | 0.20340 | 0.20885 |
| Alpha virt. eigenvalues -- | 0.21336 | 0.21615 | 0.21796 | 0.22391 | 0.22605 |
| Alpha virt. eigenvalues -- | 0.23234 | 0.23307 | 0.23781 | 0.24271 | 0.24512 |
| Alpha virt. eigenvalues -- | 0.25055 | 0.25222 | 0.25510 | 0.25726 | 0.26026 |
| Alpha virt. eigenvalues -- | 0.26913 | 0.27647 | 0.27874 | 0.28680 | 0.29459 |
| Alpha virt. eigenvalues -- | 0.29749 | 0.30389 | 0.30614 | 0.30960 | 0.31685 |
| Alpha virt. eigenvalues -- | 0.32005 | 0.32746 | 0.33358 | 0.33743 | 0.34336 |
| Alpha virt. eigenvalues -- | 0.34699 | 0.35106 | 0.35757 | 0.36784 | 0.36904 |
| Alpha virt. eigenvalues -- | 0.36972 | 0.38081 | 0.38768 | 0.39283 | 0.40454 |
| Alpha virt. eigenvalues -- | 0.41103 | 0.41841 | 0.43366 | 0.43926 | 0.44856 |
| Alpha virt. eigenvalues -- | 0.45422 | 0.47655 | 0.48168 | 0.48550 | 0.50162 |
| Alpha virt. eigenvalues -- | 0.51495 | 0.52090 | 0.52501 | 0.53576 | 0.54198 |
| Alpha virt. eigenvalues -- | 0.54307 | 0.55219 | 0.55545 | 0.56366 | 0.57129 |
| Alpha virt. eigenvalues -- | 0.57395 | 0.58371 | 0.59649 | 0.60056 | 0.60471 |
| Alpha virt. eigenvalues -- | 0.61303 | 0.61750 | 0.63049 | 0.63597 | 0.64157 |
| Alpha virt. eigenvalues -- | 0.64880 | 0.65242 | 0.66202 | 0.66524 | 0.67547 |
| Alpha virt. eigenvalues -- | 0.68129 | 0.68800 | 0.69318 | 0.70040 | 0.70307 |
| Alpha virt. eigenvalues -- | 0.70425 | 0.71163 | 0.72343 | 0.72857 | 0.73198 |
| Alpha virt. eigenvalues -- | 0.74555 | 0.75047 | 0.75238 | 0.76209 | 0.76495 |
| Alpha virt. eigenvalues -- | 0.77215 | 0.77664 | 0.77987 | 0.79432 | 0.79948 |
| Alpha virt. eigenvalues -- | 0.81550 | 0.81922 | 0.83081 | 0.83339 | 0.84310 |
| Alpha virt. eigenvalues -- | 0.86324 | 0.87190 | 0.88025 | 0.89352 | 0.90039 |
| Alpha virt. eigenvalues -- | 0.91576 | 0.92549 | 0.93608 | 0.94405 | 0.97719 |
| Alpha virt. eigenvalues -- | 0.98656 | 0.99355 | 1.00179 | 1.01426 | 1.03678 |
| Alpha virt. eigenvalues -- | 1.04324 | 1.05026 | 1.05493 | 1.06418 | 1.09106 |
| Alpha virt. eigenvalues -- | 1.10314 | 1.11008 | 1.12113 | 1.13086 | 1.14625 |
| Alpha virt. eigenvalues -- | 1.15874 | 1.18223 | 1.19668 | 1.20799 | 1.22359 |
| Alpha virt. eigenvalues -- | 1.24860 | 1.27221 | 1.29026 | 1.30015 | 1.31705 |
| Alpha virt. eigenvalues -- | 1.33921 | 1.35385 | 1.37544 | 1.38585 | 1.39461 |
| Alpha virt. eigenvalues -- | 1.43726 | 1.44623 | 1.46148 | 1.47223 | 1.48104 |
| Alpha virt. eigenvalues -- | 1.48886 | 1.49141 | 1.50063 | 1.50810 | 1.51139 |
| Alpha virt. eigenvalues -- | 1.53548 | 1.54261 | 1.54953 | 1.56244 | 1.58041 |
| Alpha virt. eigenvalues -- | 1.58798 | 1.59904 | 1.60125 | 1.60546 | 1.61750 |
| Alpha virt. eigenvalues -- | 1.62169 | 1.63034 | 1.63779 | 1.66020 | 1.66882 |
| Alpha virt. eigenvalues -- | 1.67190 | 1.69233 | 1.69915 | 1.70479 | 1.71193 |
| Alpha virt. eigenvalues -- | 1.72263 | 1.72889 | 1.73600 | 1.73936 | 1.75071 |
| Alpha virt. eigenvalues -- | 1.76028 | 1.77265 | 1.78311 | 1.81749 | 1.82065 |
| Alpha virt. eigenvalues -- | 1.83593 | 1.85975 | 1.86436 | 1.86673 | 1.88177 |
| Alpha virt. eigenvalues -- | 1.89431 | 1.90061 | 1.90293 | 1.94648 | 1.95272 |
| Alpha virt. eigenvalues -- | 1.97450 | 1.98412 | 2.01044 | 2.04017 | 2.05568 |
| Alpha virt. eigenvalues -- | 2.05908 | 2.06626 | 2.08851 | 2.10105 | 2.11971 |
| Alpha virt. eigenvalues -- | 2.12380 | 2.13097 | 2.13922 | 2.15256 | 2.17386 |

|                            |           |           |           |            |          |
|----------------------------|-----------|-----------|-----------|------------|----------|
| Alpha virt. eigenvalues -- | 2.19281   | 2.20218   | 2.21391   | 2.22394    | 2.22822  |
| Alpha virt. eigenvalues -- | 2.26662   | 2.27743   | 2.29264   | 2.30596    | 2.35630  |
| Alpha virt. eigenvalues -- | 2.37581   | 2.39069   | 2.42633   | 2.43003    | 2.44588  |
| Alpha virt. eigenvalues -- | 2.45492   | 2.46897   | 2.49757   | 2.50619    | 2.51333  |
| Alpha virt. eigenvalues -- | 2.53124   | 2.54371   | 2.55776   | 2.56105    | 2.56939  |
| Alpha virt. eigenvalues -- | 2.57201   | 2.58654   | 2.59290   | 2.60426    | 2.61189  |
| Alpha virt. eigenvalues -- | 2.62126   | 2.64117   | 2.64538   | 2.70603    | 2.70908  |
| Alpha virt. eigenvalues -- | 2.71690   | 2.71861   | 2.72626   | 2.73335    | 2.74335  |
| Alpha virt. eigenvalues -- | 2.75537   | 2.76566   | 2.78327   | 2.79621    | 2.80089  |
| Alpha virt. eigenvalues -- | 2.81152   | 2.82699   | 2.83189   | 2.84536    | 2.85090  |
| Alpha virt. eigenvalues -- | 2.85660   | 2.87333   | 2.89764   | 2.91204    | 2.93860  |
| Alpha virt. eigenvalues -- | 2.95190   | 2.96078   | 2.97631   | 3.02192    | 3.09520  |
| Alpha virt. eigenvalues -- | 3.11158   | 3.11405   | 3.14822   | 3.15631    | 3.16571  |
| Alpha virt. eigenvalues -- | 3.23001   | 3.25874   | 3.26384   | 3.27718    | 3.35547  |
| Alpha virt. eigenvalues -- | 3.36151   | 3.37631   | 3.49319   | 3.54862    | 3.59808  |
| Alpha virt. eigenvalues -- | 3.63792   | 3.64910   | 3.71868   | 3.72044    | 3.75774  |
| Alpha virt. eigenvalues -- | 3.76310   | 3.76906   | 3.82593   | 3.84478    | 3.85392  |
| Alpha virt. eigenvalues -- | 3.88218   | 3.88414   | 3.89911   | 3.90589    | 3.96818  |
| Alpha virt. eigenvalues -- | 4.05763   | 4.08497   | 4.09609   | 4.12114    | 4.20229  |
| Alpha virt. eigenvalues -- | 4.31065   | 4.32784   | 4.36724   | 4.42318    | 4.46691  |
| Alpha virt. eigenvalues -- | 4.58743   | 4.69157   | 4.91286   | 5.02376    | 5.10665  |
| Alpha virt. eigenvalues -- | 5.11878   | 5.22775   | 5.44171   | 5.52283    | 5.65058  |
| Alpha virt. eigenvalues -- | 5.69538   | 6.86657   | 7.72278   | 7.77253    | 7.90118  |
| Alpha virt. eigenvalues -- | 23.69821  | 23.74564  | 23.82978  | 23.85822   | 23.88200 |
| Alpha virt. eigenvalues -- | 23.88913  | 23.91562  | 24.05464  | 24.13510   | 24.22331 |
| Alpha virt. eigenvalues -- | 35.44033  | 35.56981  | 48.13437  | 49.95068   | 49.95860 |
| Alpha virt. eigenvalues -- | 289.93228 | 289.98362 | 290.10648 | 1020.94060 |          |

Condensed to atoms (all electrons):

|    |    | 1         | 2         | 3         | 4         | 5         | 6         |
|----|----|-----------|-----------|-----------|-----------|-----------|-----------|
| 1  | C  | 9.275823  | -3.260380 | 0.675177  | -1.114562 | -0.652715 | 0.897564  |
| 2  | C  | -3.260380 | 8.688903  | -0.446289 | 0.981685  | 0.819466  | -0.905357 |
| 3  | N  | 0.675177  | -0.446289 | 6.895546  | -0.290571 | -0.410723 | 0.110331  |
| 4  | C  | -1.114562 | 0.981685  | -0.290571 | 7.879254  | 0.847497  | -0.746066 |
| 5  | N  | -0.652715 | 0.819466  | -0.410723 | 0.847497  | 6.970346  | -0.253622 |
| 6  | C  | 0.897564  | -0.905357 | 0.110331  | -0.746066 | -0.253622 | 6.985979  |
| 7  | C  | -0.235063 | 0.286327  | -0.054581 | 0.078500  | 0.113743  | -0.295845 |
| 8  | H  | 0.559195  | -0.171086 | 0.043668  | -0.000274 | -0.095586 | 0.017280  |
| 9  | H  | -0.130420 | 0.526154  | -0.077484 | -0.003557 | 0.026510  | -0.001475 |
| 10 | H  | 0.118696  | -0.124400 | 0.037802  | -0.039197 | -0.097367 | 0.521017  |
| 11 | H  | -0.115526 | 0.116619  | -0.006268 | 0.006200  | -0.016767 | 0.278460  |
| 12 | H  | 0.097883  | -0.099682 | 0.019773  | -0.065736 | -0.046179 | 0.095268  |
| 13 | H  | -0.166825 | 0.133285  | -0.046200 | 0.119715  | 0.063564  | -0.195287 |
| 14 | Br | 0.014590  | -0.018747 | -0.021057 | -0.109215 | -0.012337 | 0.024003  |
| 15 | H  | 0.006057  | -0.137518 | 0.217565  | -1.156038 | -0.151999 | 0.173043  |

|    |    |           |           |           |           |           |           |
|----|----|-----------|-----------|-----------|-----------|-----------|-----------|
| 16 | C  | 0.584289  | -0.577721 | 0.259695  | -0.333810 | -0.131441 | -0.038357 |
| 17 | C  | -0.308100 | 0.199027  | -0.030659 | -0.161514 | -0.047544 | -0.057739 |
| 18 | H  | -0.016075 | 0.029310  | -0.091089 | 0.125531  | 0.021388  | -0.003561 |
| 19 | H  | -0.003500 | 0.004525  | 0.023762  | -0.008005 | -0.000743 | 0.000185  |
| 20 | H  | -0.011418 | 0.016688  | -0.039391 | 0.014213  | 0.002930  | -0.002812 |
| 21 | O  | -0.035911 | 0.022634  | -0.008263 | 0.043434  | 0.012785  | -0.181777 |
| 22 | H  | -0.052915 | 0.032518  | -0.006791 | 0.083868  | 0.009658  | -0.081188 |
| 23 | C  | 0.002877  | -0.002957 | -0.000309 | -0.016853 | -0.000427 | 0.037988  |
| 24 | C  | -0.001892 | 0.002447  | -0.000329 | 0.034011  | 0.001088  | -0.052959 |
| 25 | O  | -0.001740 | -0.000172 | -0.000129 | -0.017181 | -0.001979 | -0.006065 |
| 26 | H  | -0.000400 | 0.000487  | 0.000108  | 0.004920  | -0.000026 | -0.007099 |
| 27 | H  | 0.000094  | -0.000197 | -0.000258 | -0.000121 | 0.000049  | 0.003028  |
| 28 | H  | -0.000218 | 0.000171  | 0.000031  | 0.000918  | -0.000024 | -0.003003 |
| 29 | C  | 0.000733  | -0.000304 | 0.000133  | -0.007711 | 0.000394  | 0.009542  |
| 30 | H  | 0.000023  | -0.000049 | -0.000003 | -0.000090 | 0.000006  | -0.000653 |
| 31 | H  | 0.000096  | -0.000039 | 0.000001  | -0.000516 | 0.000043  | 0.001247  |
| 32 | H  | 0.000036  | -0.000124 | 0.000012  | -0.000702 | -0.000235 | 0.002384  |
|    |    | 7         | 8         | 9         | 10        | 11        | 12        |
| 1  | C  | -0.235063 | 0.559195  | -0.130420 | 0.118696  | -0.115526 | 0.097883  |
| 2  | C  | 0.286327  | -0.171086 | 0.526154  | -0.124400 | 0.116619  | -0.099682 |
| 3  | N  | -0.054581 | 0.043668  | -0.077484 | 0.037802  | -0.006268 | 0.019773  |
| 4  | C  | 0.078500  | -0.000274 | -0.003557 | -0.039197 | 0.006200  | -0.065736 |
| 5  | N  | 0.113743  | -0.095586 | 0.026510  | -0.097367 | -0.016767 | -0.046179 |
| 6  | C  | -0.295845 | 0.017280  | -0.001475 | 0.521017  | 0.278460  | 0.095268  |
| 7  | C  | 5.929496  | -0.010479 | 0.002098  | -0.099857 | -0.077239 | 0.396774  |
| 8  | H  | -0.010479 | 0.491527  | -0.010565 | 0.007754  | -0.021947 | 0.004213  |
| 9  | H  | 0.002098  | -0.010565 | 0.503057  | -0.000361 | 0.004041  | -0.000297 |
| 10 | H  | -0.099857 | 0.007754  | -0.000361 | 0.495708  | -0.069046 | 0.024466  |
| 11 | H  | -0.077239 | -0.021947 | 0.004041  | -0.069046 | 0.727817  | -0.027232 |
| 12 | H  | 0.396774  | 0.004213  | -0.000297 | 0.024466  | -0.027232 | 0.684011  |
| 13 | H  | 0.316718  | -0.005863 | 0.000139  | -0.039184 | 0.032450  | -0.118319 |
| 14 | Br | 0.159908  | 0.000035  | -0.002401 | -0.015931 | 0.014828  | 0.017769  |
| 15 | H  | -0.119804 | -0.004605 | 0.002220  | 0.002550  | 0.028639  | 0.014939  |
| 16 | C  | -0.021487 | 0.014645  | 0.001809  | 0.022825  | -0.010964 | 0.002453  |
| 17 | C  | -0.004324 | -0.002713 | -0.010554 | -0.005551 | 0.000748  | -0.001108 |
| 18 | H  | 0.001250  | 0.000102  | 0.001204  | -0.000068 | -0.001717 | -0.001032 |
| 19 | H  | 0.000155  | -0.000194 | -0.000377 | -0.000065 | 0.000172  | 0.000057  |
| 20 | H  | -0.000031 | 0.000588  | 0.003691  | -0.000024 | -0.000526 | -0.000186 |
| 21 | O  | 0.158645  | -0.001628 | -0.000131 | -0.050271 | 0.025987  | -0.137083 |
| 22 | H  | -0.115347 | -0.001343 | 0.000090  | 0.009423  | 0.003922  | -0.000006 |
| 23 | C  | 0.001627  | 0.000048  | -0.000007 | 0.003610  | 0.001449  | 0.004582  |
| 24 | C  | 0.016672  | 0.000049  | -0.000002 | 0.001136  | -0.004010 | -0.004952 |
| 25 | O  | -0.047805 | -0.000001 | -0.000025 | -0.002972 | -0.000482 | -0.005139 |
| 26 | H  | -0.001973 | 0.000005  | 0.000003  | 0.001117  | -0.000523 | -0.000556 |

|    |    |           |           |           |           |           |           |
|----|----|-----------|-----------|-----------|-----------|-----------|-----------|
| 27 | H  | -0.000489 | -0.000001 | -0.000004 | -0.000860 | 0.000145  | 0.000035  |
| 28 | H  | -0.002803 | 0.000001  | 0.000000  | 0.000123  | -0.000278 | -0.000739 |
| 29 | C  | 0.005556  | -0.000021 | -0.000002 | -0.001866 | 0.001193  | 0.002457  |
| 30 | H  | -0.000440 | 0.000005  | 0.000000  | 0.001030  | -0.000390 | 0.000121  |
| 31 | H  | 0.002919  | 0.000001  | 0.000000  | -0.000149 | 0.000251  | 0.000360  |
| 32 | H  | 0.001422  | 0.000001  | -0.000003 | -0.000668 | 0.000521  | 0.000061  |
|    |    | 13        | 14        | 15        | 16        | 17        | 18        |
| 1  | C  | -0.166825 | 0.014590  | 0.006057  | 0.584289  | -0.308100 | -0.016075 |
| 2  | C  | 0.133285  | -0.018747 | -0.137518 | -0.577721 | 0.199027  | 0.029310  |
| 3  | N  | -0.046200 | -0.021057 | 0.217565  | 0.259695  | -0.030659 | -0.091089 |
| 4  | C  | 0.119715  | -0.109215 | -1.156038 | -0.333810 | -0.161514 | 0.125531  |
| 5  | N  | 0.063564  | -0.012337 | -0.151999 | -0.131441 | -0.047544 | 0.021388  |
| 6  | C  | -0.195287 | 0.024003  | 0.173043  | -0.038357 | -0.057739 | -0.003561 |
| 7  | C  | 0.316718  | 0.159908  | -0.119804 | -0.021487 | -0.004324 | 0.001250  |
| 8  | H  | -0.005863 | 0.000035  | -0.004605 | 0.014645  | -0.002713 | 0.000102  |
| 9  | H  | 0.000139  | -0.002401 | 0.002220  | 0.001809  | -0.010554 | 0.001204  |
| 10 | H  | -0.039184 | -0.015931 | 0.002550  | 0.022825  | -0.005551 | -0.000068 |
| 11 | H  | 0.032450  | 0.014828  | 0.028639  | -0.010964 | 0.000748  | -0.001717 |
| 12 | H  | -0.118319 | 0.017769  | 0.014939  | 0.002453  | -0.001108 | -0.001032 |
| 13 | H  | 0.698161  | -0.034197 | -0.039618 | -0.013010 | 0.007471  | 0.001628  |
| 14 | Br | -0.034197 | 36.025862 | 0.045582  | 0.033753  | 0.035987  | 0.000015  |
| 15 | H  | -0.039618 | 0.045582  | 2.014248  | -0.020833 | 0.122078  | -0.077909 |
| 16 | C  | -0.013010 | 0.033753  | -0.020833 | 6.185087  | -0.391310 | 0.426771  |
| 17 | C  | 0.007471  | 0.035987  | 0.122078  | -0.391310 | 6.416582  | -0.091314 |
| 18 | H  | 0.001628  | 0.000015  | -0.077909 | 0.426771  | -0.091314 | 0.462773  |
| 19 | H  | -0.000033 | -0.000506 | 0.006430  | -0.095525 | 0.450162  | -0.009808 |
| 20 | H  | 0.000335  | 0.001330  | -0.002602 | 0.071814  | 0.303696  | 0.004274  |
| 21 | O  | 0.050438  | -0.146061 | -0.003919 | 0.000958  | 0.000725  | 0.000323  |
| 22 | H  | 0.001730  | 0.009684  | -0.031855 | -0.001172 | 0.001296  | 0.000580  |
| 23 | C  | -0.008858 | -0.027202 | 0.004949  | -0.002411 | -0.000457 | 0.000155  |
| 24 | C  | 0.004821  | 0.108576  | -0.056962 | 0.001924  | 0.000157  | 0.000447  |
| 25 | O  | 0.011542  | -0.422632 | 0.054734  | 0.002208  | 0.000376  | -0.000460 |
| 26 | H  | 0.000781  | 0.000007  | -0.003740 | 0.000776  | 0.000030  | 0.000021  |
| 27 | H  | 0.000236  | 0.011516  | -0.003869 | -0.000761 | -0.000041 | 0.000107  |
| 28 | H  | 0.001012  | -0.011742 | 0.000705  | 0.000251  | 0.000030  | -0.000008 |
| 29 | C  | -0.000846 | -0.012232 | 0.015065  | 0.000006  | 0.000016  | -0.000144 |
| 30 | H  | -0.000199 | -0.005414 | -0.000094 | -0.000005 | 0.000000  | 0.000005  |
| 31 | H  | -0.000163 | 0.006459  | -0.000294 | -0.000032 | -0.000004 | 0.000000  |
| 32 | H  | -0.000025 | 0.000113  | 0.000506  | 0.000047  | 0.000020  | -0.000005 |
|    |    | 19        | 20        | 21        | 22        | 23        | 24        |
| 1  | C  | -0.003500 | -0.011418 | -0.035911 | -0.052915 | 0.002877  | -0.001892 |
| 2  | C  | 0.004525  | 0.016688  | 0.022634  | 0.032518  | -0.002957 | 0.002447  |
| 3  | N  | 0.023762  | -0.039391 | -0.008263 | -0.006791 | -0.000309 | -0.000329 |
| 4  | C  | -0.008005 | 0.014213  | 0.043434  | 0.083868  | -0.016853 | 0.034011  |

|    |    |           |           |           |           |           |           |
|----|----|-----------|-----------|-----------|-----------|-----------|-----------|
| 5  | N  | -0.000743 | 0.002930  | 0.012785  | 0.009658  | -0.000427 | 0.001088  |
| 6  | C  | 0.000185  | -0.002812 | -0.181777 | -0.081188 | 0.037988  | -0.052959 |
| 7  | C  | 0.000155  | -0.000031 | 0.158645  | -0.115347 | 0.001627  | 0.016672  |
| 8  | H  | -0.000194 | 0.000588  | -0.001628 | -0.001343 | 0.000048  | 0.000049  |
| 9  | H  | -0.000377 | 0.003691  | -0.000131 | 0.000090  | -0.000007 | -0.000002 |
| 10 | H  | -0.000065 | -0.000024 | -0.050271 | 0.009423  | 0.003610  | 0.001136  |
| 11 | H  | 0.000172  | -0.000526 | 0.025987  | 0.003922  | 0.001449  | -0.004010 |
| 12 | H  | 0.000057  | -0.000186 | -0.137083 | -0.000006 | 0.004582  | -0.004952 |
| 13 | H  | -0.000033 | 0.000335  | 0.050438  | 0.001730  | -0.008858 | 0.004821  |
| 14 | Br | -0.000506 | 0.001330  | -0.146061 | 0.009684  | -0.027202 | 0.108576  |
| 15 | H  | 0.006430  | -0.002602 | -0.003919 | -0.031855 | 0.004949  | -0.056962 |
| 16 | C  | -0.095525 | 0.071814  | 0.000958  | -0.001172 | -0.002411 | 0.001924  |
| 17 | C  | 0.450162  | 0.303696  | 0.000725  | 0.001296  | -0.000457 | 0.000157  |
| 18 | H  | -0.009808 | 0.004274  | 0.000323  | 0.000580  | 0.000155  | 0.000447  |
| 19 | H  | 0.465687  | -0.021696 | -0.000015 | -0.000045 | -0.000006 | -0.000002 |
| 20 | H  | -0.021696 | 0.535649  | 0.000038  | 0.000092  | -0.000005 | 0.000010  |
| 21 | O  | -0.000015 | 0.000038  | 8.139827  | 0.250158  | -0.005095 | -0.012715 |
| 22 | H  | -0.000045 | 0.000092  | 0.250158  | 0.622717  | 0.018235  | 0.001050  |
| 23 | C  | -0.000006 | -0.000005 | -0.005095 | 0.018235  | 6.591787  | -1.106129 |
| 24 | C  | -0.000002 | 0.000010  | -0.012715 | 0.001050  | -1.106129 | 6.934027  |
| 25 | O  | -0.000001 | 0.000008  | 0.064965  | -0.026730 | 0.093090  | -0.104317 |
| 26 | H  | 0.000000  | 0.000002  | 0.000464  | 0.004289  | 0.235773  | 0.146874  |
| 27 | H  | -0.000003 | -0.000001 | 0.000832  | -0.001491 | 0.434968  | -0.071269 |
| 28 | H  | 0.000000  | 0.000001  | 0.003007  | 0.004620  | 0.013592  | 0.309870  |
| 29 | C  | 0.000002  | -0.000001 | 0.006358  | -0.012840 | 0.045173  | -0.013090 |
| 30 | H  | 0.000000  | 0.000000  | -0.000545 | -0.000769 | -0.002034 | 0.001078  |
| 31 | H  | 0.000000  | 0.000000  | -0.000289 | -0.007573 | 0.032026  | -0.104803 |
| 32 | H  | 0.000000  | 0.000000  | -0.002665 | -0.005142 | -0.001436 | -0.066825 |
|    |    | 25        | 26        | 27        | 28        | 29        | 30        |
| 1  | C  | -0.001740 | -0.000400 | 0.000094  | -0.000218 | 0.000733  | 0.000023  |
| 2  | C  | -0.000172 | 0.000487  | -0.000197 | 0.000171  | -0.000304 | -0.000049 |
| 3  | N  | -0.000129 | 0.000108  | -0.000258 | 0.000031  | 0.000133  | -0.000003 |
| 4  | C  | -0.017181 | 0.004920  | -0.000121 | 0.000918  | -0.007711 | -0.000090 |
| 5  | N  | -0.001979 | -0.000026 | 0.000049  | -0.000024 | 0.000394  | 0.000006  |
| 6  | C  | -0.006065 | -0.007099 | 0.003028  | -0.003003 | 0.009542  | -0.000653 |
| 7  | C  | -0.047805 | -0.001973 | -0.000489 | -0.002803 | 0.005556  | -0.000440 |
| 8  | H  | -0.000001 | 0.000005  | -0.000001 | 0.000001  | -0.000021 | 0.000005  |
| 9  | H  | -0.000025 | 0.000003  | -0.000004 | 0.000000  | -0.000002 | 0.000000  |
| 10 | H  | -0.002972 | 0.001117  | -0.000860 | 0.000123  | -0.001866 | 0.001030  |
| 11 | H  | -0.000482 | -0.000523 | 0.000145  | -0.000278 | 0.001193  | -0.000390 |
| 12 | H  | -0.005139 | -0.000556 | 0.000035  | -0.000739 | 0.002457  | 0.000121  |
| 13 | H  | 0.011542  | 0.000781  | 0.000236  | 0.001012  | -0.000846 | -0.000199 |
| 14 | Br | -0.422632 | 0.000007  | 0.011516  | -0.011742 | -0.012232 | -0.005414 |
| 15 | H  | 0.054734  | -0.003740 | -0.003869 | 0.000705  | 0.015065  | -0.000094 |

|    |   |           |           |           |           |           |           |
|----|---|-----------|-----------|-----------|-----------|-----------|-----------|
| 16 | C | 0.002208  | 0.000776  | -0.000761 | 0.000251  | 0.000006  | -0.000005 |
| 17 | C | 0.000376  | 0.000030  | -0.000041 | 0.000030  | 0.000016  | 0.000000  |
| 18 | H | -0.000460 | 0.000021  | 0.000107  | -0.000008 | -0.000144 | 0.000005  |
| 19 | H | -0.000001 | 0.000000  | -0.000003 | 0.000000  | 0.000002  | 0.000000  |
| 20 | H | 0.000008  | 0.000002  | -0.000001 | 0.000001  | -0.000001 | 0.000000  |
| 21 | O | 0.064965  | 0.000464  | 0.000832  | 0.003007  | 0.006358  | -0.000545 |
| 22 | H | -0.026730 | 0.004289  | -0.001491 | 0.004620  | -0.012840 | -0.000769 |
| 23 | C | 0.093090  | 0.235773  | 0.434968  | 0.013592  | 0.045173  | -0.002034 |
| 24 | C | -0.104317 | 0.146874  | -0.071269 | 0.309870  | -0.013090 | 0.001078  |
| 25 | O | 8.608112  | -0.054730 | -0.046781 | 0.002128  | -0.097576 | -0.011128 |
| 26 | H | -0.054730 | 0.620358  | -0.077319 | 0.012137  | -0.002990 | -0.001115 |
| 27 | H | -0.046781 | -0.077319 | 0.632530  | -0.016466 | -0.009214 | 0.000247  |
| 28 | H | 0.002128  | 0.012137  | -0.016466 | 0.550470  | -0.039913 | 0.005496  |
| 29 | C | -0.097576 | -0.002990 | -0.009214 | -0.039913 | 5.428992  | 0.382979  |
| 30 | H | -0.011128 | -0.001115 | 0.000247  | 0.005496  | 0.382979  | 0.551656  |
| 31 | H | 0.014450  | -0.008712 | 0.004976  | -0.008085 | 0.391689  | -0.043402 |
| 32 | H | 0.022279  | -0.005625 | 0.005207  | 0.005421  | 0.390513  | -0.024813 |

31 32

|    |    |           |           |
|----|----|-----------|-----------|
| 1  | C  | 0.000096  | 0.000036  |
| 2  | C  | -0.000039 | -0.000124 |
| 3  | N  | 0.000001  | 0.000012  |
| 4  | C  | -0.000516 | -0.000702 |
| 5  | N  | 0.000043  | -0.000235 |
| 6  | C  | 0.001247  | 0.002384  |
| 7  | C  | 0.002919  | 0.001422  |
| 8  | H  | 0.000001  | 0.000001  |
| 9  | H  | 0.000000  | -0.000003 |
| 10 | H  | -0.000149 | -0.000668 |
| 11 | H  | 0.000251  | 0.000521  |
| 12 | H  | 0.000360  | 0.000061  |
| 13 | H  | -0.000163 | -0.000025 |
| 14 | Br | 0.006459  | 0.000113  |
| 15 | H  | -0.000294 | 0.000506  |
| 16 | C  | -0.000032 | 0.000047  |
| 17 | C  | -0.000004 | 0.000020  |
| 18 | H  | 0.000000  | -0.000005 |
| 19 | H  | 0.000000  | 0.000000  |
| 20 | H  | 0.000000  | 0.000000  |
| 21 | O  | -0.000289 | -0.002665 |
| 22 | H  | -0.007573 | -0.005142 |
| 23 | C  | 0.032026  | -0.001436 |
| 24 | C  | -0.104803 | -0.066825 |
| 25 | O  | 0.014450  | 0.022279  |
| 26 | H  | -0.008712 | -0.005625 |

|    |   |           |           |
|----|---|-----------|-----------|
| 27 | H | 0.004976  | 0.005207  |
| 28 | H | -0.008085 | 0.005421  |
| 29 | C | 0.391689  | 0.390513  |
| 30 | H | -0.043402 | -0.024813 |
| 31 | H | 0.632989  | -0.031527 |
| 32 | H | -0.031527 | 0.576628  |

Mulliken charges:

| 1  |    |           |  |
|----|----|-----------|--|
| 1  | C  | -0.125475 |  |
| 2  | C  | -0.115221 |  |
| 3  | N  | 0.246789  |  |
| 4  | C  | -0.148026 |  |
| 5  | N  | 0.030245  |  |
| 6  | C  | -0.324454 |  |
| 7  | C  | -0.384242 |  |
| 8  | H  | 0.187190  |  |
| 9  | H  | 0.166650  |  |
| 10 | H  | 0.300582  |  |
| 11 | H  | 0.109473  |  |
| 12 | H  | 0.143024  |  |
| 13 | H  | 0.224598  |  |
| 14 | Br | -0.670344 |  |
| 15 | H  | 0.102347  |  |
| 16 | C  | 0.029528  |  |
| 17 | C  | -0.425468 |  |
| 18 | H  | 0.217307  |  |
| 19 | H  | 0.189389  |  |
| 20 | H  | 0.123334  |  |
| 21 | O  | -0.195211 |  |
| 22 | H  | 0.291277  |  |
| 23 | C  | -0.347742 |  |
| 24 | C  | 0.036020  |  |
| 25 | O  | -0.025847 |  |
| 26 | H  | 0.136655  |  |
| 27 | H  | 0.135175  |  |
| 28 | H  | 0.173294  |  |
| 29 | C  | -0.482049 |  |
| 30 | H  | 0.148496  |  |
| 31 | H  | 0.118082  |  |
| 32 | H  | 0.134624  |  |

Sum of Mulliken charges = 0.00000

Mulliken charges with hydrogens summed into heavy atoms:

| 1 |   |          |
|---|---|----------|
| 1 | C | 0.061715 |



2 C 0.051429  
 3 N 0.246789  
 4 C -0.045679  
 5 N 0.030245  
 6 C 0.085601  
 7 C -0.016620  
 14 Br -0.670344  
 16 C 0.246834  
 17 C -0.112745  
 21 O 0.096066  
 23 C -0.075912  
 24 C 0.209314  
 25 O -0.025847  
 29 C -0.080847

Electronic spatial extent (au):  $\langle R^2 \rangle =$  6175.1399

Charge= 0.0000 electrons

Dipole moment (field-independent basis, Debye):

X= -10.8628 Y= 2.7574 Z= -0.0067  
 Tot= 11.2073

Quadrupole moment (field-independent basis, Debye-Ang):

XX= -63.7749 YY= -100.2708 ZZ= -108.8446  
 XY= -4.0644 XZ= -2.3549 YZ= -3.4508

Traceless Quadrupole moment (field-independent basis, Debye-Ang):

XX= 27.1885 YY= -9.3074 ZZ= -17.8811  
 XY= -4.0644 XZ= -2.3549 YZ= -3.4508

Octapole moment (field-independent basis, Debye-Ang<sup>2</sup>):

XXX= -103.8812 YYY= -22.4828 ZZZ= -4.3231  
 XYY= -44.1933  
 XXY= -30.3237 XXZ= 12.6637 XZZ= 24.3888  
 YZZ= -2.0538  
 YYZ= -1.2603 XYZ= 6.3136

Hexadecapole moment (field-independent basis, Debye-Ang<sup>3</sup>):

XXXX= -5529.1076 YYYY= -1398.0568 ZZZZ= -261.0578  
 XXXY= -0.4063  
 XXXZ= -74.0919 YYYY= -70.1130 YYYZ= -21.0309  
 ZZZX= 10.8563  
 ZZZY= 7.6865 XXYY= -1189.1591 XXZZ= -1184.0930  
 YYZZ= -300.1282  
 XXYZ= -24.8886 YYXZ= -10.7561 ZZXY= -19.7542

N-N= 1.350461683416D+03 E-N=-1.037553542817D+04 KE= 3.219914379625D+03

Calling FoFJK, ICntrl= 2127 FMM=F ISym2X=0 I1Cent= 0 IOpCIX= 0 NMat=1 NMatS=1

NMatT=0.

\*\*\*\*\* Axes restored to original set \*\*\*\*\*

-----

| Center<br>Number | Atomic<br>Number | Forces (Hartrees/Bohr) |              |              |
|------------------|------------------|------------------------|--------------|--------------|
|                  |                  | X                      | Y            | Z            |
| 1                | 6                | -0.000372078           | -0.000200632 | -0.000049186 |
| 2                | 6                | -0.000574335           | -0.000490478 | -0.000005486 |
| 3                | 7                | -0.000351604           | -0.000230484 | 0.000026669  |
| 4                | 6                | -0.001617928           | -0.001604569 | -0.000376613 |
| 5                | 7                | -0.000307782           | 0.000151222  | 0.000051698  |
| 6                | 6                | -0.000211996           | 0.000140158  | -0.000190817 |
| 7                | 6                | 0.000025949            | 0.000041991  | 0.000224929  |
| 8                | 1                | -0.000070167           | -0.000017800 | -0.000016928 |
| 9                | 1                | -0.000030554           | -0.000085639 | -0.000019887 |
| 10               | 1                | 0.000179887            | 0.000463991  | -0.000207254 |
| 11               | 1                | -0.000115620           | -0.000198051 | -0.000032852 |
| 12               | 1                | -0.000144350           | -0.000242687 | -0.000006714 |
| 13               | 1                | 0.000088880            | 0.000112724  | 0.000087191  |
| 14               | 35               | -0.059618989           | 0.004329976  | 0.018226918  |
| 15               | 1                | 0.004276536            | 0.003518553  | 0.000470684  |
| 16               | 6                | 0.000490313            | -0.000459560 | 0.000072016  |
| 17               | 6                | -0.000259298           | 0.000069706  | -0.000033245 |
| 18               | 1                | 0.000241010            | -0.000094954 | 0.000054264  |
| 19               | 1                | -0.000002259           | -0.000000761 | 0.000008121  |
| 20               | 1                | 0.000005743            | -0.000041507 | -0.000004509 |
| 21               | 8                | -0.000182307           | -0.000139754 | 0.000140764  |
| 22               | 1                | 0.001154246            | 0.001155761  | -0.000338844 |
| 23               | 6                | -0.011577360           | 0.003431097  | -0.001139389 |
| 24               | 6                | 0.017279084            | -0.021022867 | -0.002875664 |
| 25               | 8                | 0.050983527            | 0.010124535  | -0.009060942 |
| 26               | 1                | 0.001241654            | -0.001875727 | -0.012000138 |
| 27               | 1                | 0.002075603            | -0.011520202 | 0.003246675  |
| 28               | 1                | -0.001764962           | 0.003471758  | 0.009949297  |
| 29               | 6                | -0.011632851           | 0.026316690  | -0.014094424 |
| 30               | 1                | -0.000528007           | -0.013406446 | -0.007737705 |
| 31               | 1                | 0.017072015            | 0.001548884  | 0.002467213  |
| 32               | 1                | -0.005752000           | -0.003244926 | 0.013164156  |

-----  
Cartesian Forces: Max 0.059618989 RMS 0.010114262

GradGradGradGradGradGradGradGradGradGradGradGradGradGradGradGradGradGradGrad

Berny optimization.

FormGI is forming the generalized inverse of G from B-inverse, IUseBI=4.

GSVD: received Info= 1 from GESDD.

Internal Forces: Max 0.059381023 RMS 0.005723550

Search for a local minimum.

Step number 1 out of a maximum of 177

All quantities printed in internal units (Hartrees-Bohrs-Radians)

Mixed Optimization -- RFO/linear search

Second derivative matrix not updated -- first step.

ITU= 0

|                 |         |         |         |         |         |
|-----------------|---------|---------|---------|---------|---------|
| Eigenvalues --- | 0.00237 | 0.00257 | 0.00356 | 0.00508 | 0.00810 |
| Eigenvalues --- | 0.01240 | 0.01358 | 0.01402 | 0.01507 | 0.01851 |
| Eigenvalues --- | 0.01906 | 0.02069 | 0.02144 | 0.02198 | 0.02243 |
| Eigenvalues --- | 0.02314 | 0.02390 | 0.02590 | 0.02751 | 0.03062 |
| Eigenvalues --- | 0.03062 | 0.03218 | 0.03385 | 0.04008 | 0.04333 |
| Eigenvalues --- | 0.04542 | 0.05288 | 0.05720 | 0.05720 | 0.05729 |
| Eigenvalues --- | 0.05914 | 0.06893 | 0.09368 | 0.10000 | 0.10415 |
| Eigenvalues --- | 0.10996 | 0.11476 | 0.12363 | 0.12885 | 0.13324 |
| Eigenvalues --- | 0.14853 | 0.15708 | 0.16000 | 0.16000 | 0.16000 |
| Eigenvalues --- | 0.16000 | 0.16000 | 0.16000 | 0.16000 | 0.16000 |
| Eigenvalues --- | 0.16294 | 0.18515 | 0.19546 | 0.21313 | 0.22000 |
| Eigenvalues --- | 0.22781 | 0.23357 | 0.23765 | 0.25000 | 0.26990 |
| Eigenvalues --- | 0.27497 | 0.28519 | 0.31333 | 0.32783 | 0.33053 |
| Eigenvalues --- | 0.33053 | 0.33053 | 0.34079 | 0.34289 | 0.34416 |
| Eigenvalues --- | 0.34763 | 0.34935 | 0.35686 | 0.35690 | 0.35858 |
| Eigenvalues --- | 0.36435 | 0.36656 | 0.37230 | 0.37230 | 0.37230 |
| Eigenvalues --- | 0.38103 | 0.42170 | 0.42456 | 0.44625 | 0.45579 |
| Eigenvalues --- | 0.49034 | 0.50912 | 0.54371 | 0.55994 | 0.60352 |

RFO step: Lambda=-4.02579373D-02 EMin= 2.36824163D-03

Linear search not attempted -- first point.

Maximum step size ( 0.300) exceeded in Quadratic search.

-- Step size scaled by 0.509

Iteration 1 RMS(Cart)= 0.03927860 RMS(Int)= 0.00686799

Iteration 2 RMS(Cart)= 0.01601280 RMS(Int)= 0.00004126

Iteration 3 RMS(Cart)= 0.00005621 RMS(Int)= 0.00003546

Iteration 4 RMS(Cart)= 0.00000000 RMS(Int)= 0.00003546

| Variable | Old X   | -DE/DX   | Delta X<br>(Linear) | Delta X<br>(Quad) | Delta X<br>(Total) | New X   |
|----------|---------|----------|---------------------|-------------------|--------------------|---------|
| R1       | 2.56641 | -0.00022 | 0.00000             | -0.00017          | -0.00018           | 2.56623 |
| R2       | 2.61600 | 0.00083  | 0.00000             | 0.00093           | 0.00093            | 2.61693 |
| R3       | 2.03406 | 0.00002  | 0.00000             | 0.00002           | 0.00002            | 2.03409 |
| R4       | 2.62834 | 0.00031  | 0.00000             | 0.00021           | 0.00019            | 2.62853 |
| R5       | 2.03068 | 0.00004  | 0.00000             | 0.00006           | 0.00006            | 2.03074 |
| R6       | 2.54667 | 0.00025  | 0.00000             | 0.00013           | 0.00014            | 2.54680 |
| R7       | 2.68707 | -0.00068 | 0.00000             | -0.00075          | -0.00075           | 2.68632 |
| R8       | 2.51929 | 0.00039  | 0.00000             | 0.00052           | 0.00057            | 2.51987 |
| R9       | 2.08919 | 0.00278  | 0.00000             | 0.00285           | 0.00288            | 2.09207 |
| R10      | 2.79405 | 0.00140  | 0.00000             | 0.00305           | 0.00307            | 2.79712 |
| R11      | 2.93166 | 0.00124  | 0.00000             | 0.00277           | 0.00279            | 2.93445 |

|     |         |          |         |          |          |         |
|-----|---------|----------|---------|----------|----------|---------|
| R12 | 2.05780 | 0.00026  | 0.00000 | 0.00034  | 0.00034  | 2.05814 |
| R13 | 2.06061 | 0.00017  | 0.00000 | 0.00022  | 0.00022  | 2.06083 |
| R14 | 2.06633 | 0.00024  | 0.00000 | 0.00032  | 0.00032  | 2.06665 |
| R15 | 2.07198 | -0.00001 | 0.00000 | -0.00001 | -0.00001 | 2.07196 |
| R16 | 2.64958 | 0.00172  | 0.00000 | 0.00279  | 0.00279  | 2.65237 |
| R17 | 4.31672 | -0.00324 | 0.00000 | -0.02753 | -0.02753 | 4.28919 |
| R18 | 4.50099 | 0.05938  | 0.00000 | 0.29003  | 0.29001  | 4.79100 |
| R19 | 2.50663 | 0.00026  | 0.00000 | 0.00020  | 0.00020  | 2.50683 |
| R20 | 2.04576 | 0.00009  | 0.00000 | 0.00012  | 0.00012  | 2.04587 |
| R21 | 2.04304 | 0.00000  | 0.00000 | 0.00000  | 0.00000  | 2.04304 |
| R22 | 2.04570 | 0.00002  | 0.00000 | 0.00003  | 0.00003  | 2.04573 |
| R23 | 1.85092 | 0.00016  | 0.00000 | 0.00026  | 0.00022  | 1.85113 |
| R24 | 4.59201 | -0.00040 | 0.00000 | 0.00093  | 0.00090  | 4.59290 |
| R25 | 2.75980 | -0.00056 | 0.00000 | 0.00195  | 0.00196  | 2.76176 |
| R26 | 2.75980 | -0.01292 | 0.00000 | -0.02117 | -0.02118 | 2.73862 |
| R27 | 2.08959 | -0.01195 | 0.00000 | -0.01642 | -0.01642 | 2.07316 |
| R28 | 2.08959 | -0.01205 | 0.00000 | -0.01656 | -0.01656 | 2.07303 |
| R29 | 2.71683 | 0.01181  | 0.00000 | 0.01601  | 0.01601  | 2.73284 |
| R30 | 2.08959 | -0.00927 | 0.00000 | -0.01274 | -0.01274 | 2.07684 |
| R31 | 2.91018 | -0.01162 | 0.00000 | -0.01819 | -0.01819 | 2.89199 |
| R32 | 2.02201 | 0.01543  | 0.00000 | 0.01906  | 0.01906  | 2.04107 |
| R33 | 2.02201 | 0.01710  | 0.00000 | 0.02112  | 0.02112  | 2.04313 |
| R34 | 2.02201 | 0.01471  | 0.00000 | 0.01817  | 0.01817  | 2.04017 |
| A1  | 1.87533 | 0.00034  | 0.00000 | 0.00096  | 0.00098  | 1.87631 |
| A2  | 2.27758 | -0.00024 | 0.00000 | -0.00067 | -0.00067 | 2.27691 |
| A3  | 2.13026 | -0.00009 | 0.00000 | -0.00029 | -0.00030 | 2.12996 |
| A4  | 1.86202 | -0.00039 | 0.00000 | -0.00084 | -0.00084 | 1.86117 |
| A5  | 2.27733 | 0.00012  | 0.00000 | 0.00022  | 0.00022  | 2.27755 |
| A6  | 2.14384 | 0.00027  | 0.00000 | 0.00062  | 0.00062  | 2.14446 |
| A7  | 1.89623 | 0.00058  | 0.00000 | 0.00076  | 0.00078  | 1.89701 |
| A8  | 2.24543 | 0.00021  | 0.00000 | 0.00050  | 0.00049  | 2.24592 |
| A9  | 2.14152 | -0.00079 | 0.00000 | -0.00126 | -0.00127 | 2.14025 |
| A10 | 1.88971 | -0.00037 | 0.00000 | -0.00005 | -0.00008 | 1.88964 |
| A11 | 2.24697 | 0.00063  | 0.00000 | 0.00244  | 0.00236  | 2.24933 |
| A12 | 2.14520 | -0.00025 | 0.00000 | -0.00235 | -0.00225 | 2.14295 |
| A13 | 1.90146 | -0.00016 | 0.00000 | -0.00081 | -0.00082 | 1.90063 |
| A14 | 2.22831 | -0.00148 | 0.00000 | -0.00347 | -0.00356 | 2.22475 |
| A15 | 2.15113 | 0.00164  | 0.00000 | 0.00439  | 0.00448  | 2.15561 |
| A16 | 1.95878 | 0.00175  | 0.00000 | 0.00586  | 0.00587  | 1.96465 |
| A17 | 1.86477 | 0.00002  | 0.00000 | 0.00320  | 0.00318  | 1.86795 |
| A18 | 1.87525 | -0.00109 | 0.00000 | -0.00615 | -0.00615 | 1.86911 |
| A19 | 1.88706 | -0.00008 | 0.00000 | 0.00121  | 0.00122  | 1.88828 |
| A20 | 1.96601 | -0.00098 | 0.00000 | -0.00449 | -0.00452 | 1.96149 |
| A21 | 1.90904 | 0.00041  | 0.00000 | 0.00073  | 0.00074  | 1.90978 |

|     |          |          |         |          |          |          |
|-----|----------|----------|---------|----------|----------|----------|
| A22 | 1.92965  | -0.00146 | 0.00000 | -0.00558 | -0.00559 | 1.92406  |
| A23 | 1.89283  | -0.00010 | 0.00000 | 0.00176  | 0.00174  | 1.89456  |
| A24 | 1.92654  | 0.00293  | 0.00000 | 0.00763  | 0.00764  | 1.93419  |
| A25 | 1.89508  | 0.00035  | 0.00000 | -0.00027 | -0.00026 | 1.89482  |
| A26 | 1.87659  | -0.00132 | 0.00000 | -0.00632 | -0.00631 | 1.87028  |
| A27 | 1.94319  | -0.00048 | 0.00000 | 0.00253  | 0.00249  | 1.94567  |
| A28 | 2.66371  | -0.00369 | 0.00000 | -0.01883 | -0.01888 | 2.64484  |
| A29 | 2.66802  | -0.00277 | 0.00000 | -0.00976 | -0.00962 | 2.65840  |
| A30 | 2.17753  | 0.00013  | 0.00000 | 0.00025  | 0.00025  | 2.17777  |
| A31 | 1.95760  | -0.00032 | 0.00000 | -0.00077 | -0.00077 | 1.95683  |
| A32 | 2.14805  | 0.00019  | 0.00000 | 0.00052  | 0.00052  | 2.14857  |
| A33 | 2.07971  | 0.00002  | 0.00000 | 0.00005  | 0.00005  | 2.07975  |
| A34 | 2.15775  | -0.00004 | 0.00000 | -0.00010 | -0.00010 | 2.15765  |
| A35 | 2.04573  | 0.00002  | 0.00000 | 0.00005  | 0.00005  | 2.04578  |
| A36 | 1.85309  | 0.00419  | 0.00000 | 0.01603  | 0.01595  | 1.86903  |
| A37 | 2.61316  | -0.00073 | 0.00000 | -0.00143 | -0.00135 | 2.61181  |
| A38 | 2.11374  | -0.00264 | 0.00000 | -0.00568 | -0.00569 | 2.10805  |
| A39 | 2.11374  | -0.00125 | 0.00000 | -0.00222 | -0.00223 | 2.11151  |
| A40 | 1.99695  | -0.00062 | 0.00000 | -0.00099 | -0.00100 | 1.99595  |
| A41 | 1.99695  | -0.00468 | 0.00000 | -0.00475 | -0.00472 | 1.99223  |
| A42 | 1.99021  | 0.00275  | 0.00000 | 0.00512  | 0.00511  | 1.99532  |
| A43 | 2.11374  | -0.00371 | 0.00000 | -0.01309 | -0.01307 | 2.10068  |
| A44 | 2.11374  | 0.00497  | 0.00000 | 0.00496  | 0.00498  | 2.11872  |
| A45 | 1.98634  | -0.00104 | 0.00000 | 0.00221  | 0.00203  | 1.98838  |
| A46 | 1.98634  | 0.00787  | 0.00000 | 0.01558  | 0.01547  | 2.00181  |
| A47 | 1.99021  | -0.00123 | 0.00000 | 0.00338  | 0.00326  | 1.99347  |
| A48 | 1.09283  | -0.00282 | 0.00000 | -0.01368 | -0.01378 | 1.07905  |
| A49 | 1.85412  | 0.00340  | 0.00000 | 0.01094  | 0.01104  | 1.86516  |
| A50 | 2.57173  | 0.00167  | 0.00000 | 0.00169  | 0.00167  | 2.57340  |
| A51 | 2.18139  | -0.00049 | 0.00000 | 0.00151  | 0.00159  | 2.18298  |
| A52 | 1.91063  | 0.00100  | 0.00000 | 0.00207  | 0.00206  | 1.91270  |
| A53 | 1.91063  | 0.00353  | 0.00000 | 0.00956  | 0.00955  | 1.92018  |
| A54 | 1.91063  | 0.00016  | 0.00000 | 0.00028  | 0.00028  | 1.91091  |
| A55 | 1.91063  | -0.00216 | 0.00000 | -0.00527 | -0.00529 | 1.90535  |
| A56 | 1.91063  | -0.00111 | 0.00000 | -0.00398 | -0.00398 | 1.90665  |
| A57 | 1.91063  | -0.00141 | 0.00000 | -0.00267 | -0.00268 | 1.90795  |
| A58 | 3.27422  | -0.00331 | 0.00000 | -0.01216 | -0.01219 | 3.26203  |
| A59 | 3.38984  | -0.00125 | 0.00000 | -0.00506 | -0.00508 | 3.38476  |
| D1  | 0.00444  | -0.00016 | 0.00000 | -0.00101 | -0.00102 | 0.00342  |
| D2  | -3.13680 | -0.00011 | 0.00000 | -0.00064 | -0.00065 | -3.13745 |
| D3  | 3.14022  | 0.00002  | 0.00000 | -0.00012 | -0.00012 | 3.14010  |
| D4  | -0.00102 | 0.00007  | 0.00000 | 0.00024  | 0.00025  | -0.00077 |
| D5  | -0.00643 | 0.00028  | 0.00000 | 0.00176  | 0.00177  | -0.00466 |
| D6  | -3.07654 | 0.00012  | 0.00000 | -0.00011 | -0.00010 | -3.07664 |

|     |          |          |         |          |          |          |
|-----|----------|----------|---------|----------|----------|----------|
| D7  | 3.14037  | 0.00012  | 0.00000 | 0.00097  | 0.00097  | 3.14134  |
| D8  | 0.07026  | -0.00004 | 0.00000 | -0.00090 | -0.00090 | 0.06936  |
| D9  | -0.00098 | -0.00001 | 0.00000 | -0.00007 | -0.00007 | -0.00105 |
| D10 | 3.13888  | 0.00010  | 0.00000 | 0.00054  | 0.00055  | 3.13943  |
| D11 | 3.14029  | -0.00006 | 0.00000 | -0.00040 | -0.00040 | 3.13989  |
| D12 | -0.00303 | 0.00005  | 0.00000 | 0.00020  | 0.00021  | -0.00282 |
| D13 | -0.00302 | 0.00018  | 0.00000 | 0.00116  | 0.00117  | -0.00185 |
| D14 | 3.08412  | 0.00039  | 0.00000 | 0.00184  | 0.00187  | 3.08599  |
| D15 | 3.14018  | 0.00008  | 0.00000 | 0.00060  | 0.00060  | 3.14079  |
| D16 | -0.05587 | 0.00029  | 0.00000 | 0.00128  | 0.00130  | -0.05456 |
| D17 | 0.05324  | -0.00007 | 0.00000 | -0.00039 | -0.00040 | 0.05284  |
| D18 | -3.08570 | -0.00008 | 0.00000 | -0.00048 | -0.00048 | -3.08618 |
| D19 | -3.09031 | 0.00006  | 0.00000 | 0.00029  | 0.00029  | -3.09001 |
| D20 | 0.05395  | 0.00005  | 0.00000 | 0.00020  | 0.00021  | 0.05415  |
| D21 | 0.00582  | -0.00029 | 0.00000 | -0.00181 | -0.00182 | 0.00400  |
| D22 | 3.07976  | -0.00029 | 0.00000 | -0.00042 | -0.00043 | 3.07934  |
| D23 | -3.08518 | -0.00051 | 0.00000 | -0.00261 | -0.00264 | -3.08782 |
| D24 | -0.01124 | -0.00051 | 0.00000 | -0.00122 | -0.00125 | -0.01249 |
| D25 | -2.75347 | -0.00085 | 0.00000 | -0.00559 | -0.00562 | -2.75909 |
| D26 | 0.32652  | -0.00062 | 0.00000 | -0.00473 | -0.00474 | 0.32178  |
| D27 | 1.68519  | -0.00108 | 0.00000 | -0.00810 | -0.00816 | 1.67702  |
| D28 | -2.53248 | -0.00017 | 0.00000 | -0.00131 | -0.00131 | -2.53379 |
| D29 | -0.48532 | -0.00023 | 0.00000 | -0.00192 | -0.00193 | -0.48725 |
| D30 | -1.37554 | -0.00117 | 0.00000 | -0.00996 | -0.01002 | -1.38556 |
| D31 | 0.68998  | -0.00026 | 0.00000 | -0.00316 | -0.00317 | 0.68681  |
| D32 | 2.73714  | -0.00032 | 0.00000 | -0.00378 | -0.00379 | 2.73335  |
| D33 | -1.60211 | 0.00097  | 0.00000 | 0.01171  | 0.01172  | -1.59039 |
| D34 | 0.47379  | 0.00049  | 0.00000 | 0.00918  | 0.00918  | 0.48297  |
| D35 | 2.60690  | 0.00167  | 0.00000 | 0.01824  | 0.01827  | 2.62518  |
| D36 | 2.62877  | -0.00003 | 0.00000 | 0.00359  | 0.00358  | 2.63236  |
| D37 | -1.57851 | -0.00052 | 0.00000 | 0.00106  | 0.00104  | -1.57747 |
| D38 | 0.55460  | 0.00067  | 0.00000 | 0.01013  | 0.01013  | 0.56474  |
| D39 | 0.51717  | 0.00012  | 0.00000 | 0.00469  | 0.00468  | 0.52185  |
| D40 | 2.59307  | -0.00036 | 0.00000 | 0.00216  | 0.00214  | 2.59521  |
| D41 | -1.55700 | 0.00082  | 0.00000 | 0.01122  | 0.01123  | -1.54577 |
| D42 | -1.30188 | -0.00159 | 0.00000 | -0.01194 | -0.01198 | -1.31386 |
| D43 | 2.87510  | -0.00072 | 0.00000 | -0.00571 | -0.00572 | 2.86938  |
| D44 | 0.80133  | -0.00006 | 0.00000 | -0.00292 | -0.00292 | 0.79841  |
| D45 | 0.41869  | -0.00091 | 0.00000 | -0.00670 | -0.00671 | 0.41198  |
| D46 | -0.48144 | 0.00048  | 0.00000 | 0.00646  | 0.00642  | -0.47502 |
| D47 | -3.04362 | -0.00047 | 0.00000 | 0.00643  | 0.00647  | -3.03716 |
| D48 | -3.13556 | -0.00001 | 0.00000 | -0.00010 | -0.00010 | -3.13566 |
| D49 | 0.00608  | -0.00001 | 0.00000 | -0.00011 | -0.00011 | 0.00598  |
| D50 | 0.00309  | 0.00000  | 0.00000 | 0.00000  | 0.00000  | 0.00309  |

|     |          |          |         |          |          |          |
|-----|----------|----------|---------|----------|----------|----------|
| D51 | -3.13845 | 0.00000  | 0.00000 | -0.00001 | -0.00001 | -3.13846 |
| D52 | -2.42438 | -0.00033 | 0.00000 | -0.00106 | -0.00108 | -2.42546 |
| D53 | 2.83161  | -0.00072 | 0.00000 | -0.00030 | -0.00033 | 2.83128  |
| D54 | -2.10761 | -0.00005 | 0.00000 | -0.00285 | -0.00286 | -2.11047 |
| D55 | -0.55823 | 0.00054  | 0.00000 | 0.00477  | 0.00475  | -0.55348 |
| D56 | -2.73799 | 0.00077  | 0.00000 | 0.00911  | 0.00909  | -2.72890 |
| D57 | 0.00000  | 0.00058  | 0.00000 | -0.00416 | -0.00415 | -0.00415 |
| D58 | 0.00000  | -0.00200 | 0.00000 | 0.00205  | 0.00206  | 0.00206  |
| D59 | 2.73799  | -0.00218 | 0.00000 | -0.01122 | -0.01119 | 2.72680  |
| D60 | 1.06791  | -0.00043 | 0.00000 | 0.00025  | 0.00022  | 1.06814  |
| D61 | -0.05442 | 0.00022  | 0.00000 | 0.00958  | 0.00960  | -0.04482 |
| D62 | -1.27442 | 0.00104  | 0.00000 | -0.00145 | -0.00149 | -1.27590 |
| D63 | -2.39675 | 0.00170  | 0.00000 | 0.00788  | 0.00789  | -2.38886 |
| D64 | 1.82841  | 0.00364  | 0.00000 | 0.01639  | 0.01641  | 1.84482  |
| D65 | -0.49179 | -0.00145 | 0.00000 | -0.00668 | -0.00672 | -0.49851 |
| D66 | 2.57333  | -0.00158 | 0.00000 | 0.00003  | 0.00004  | 2.57336  |
| D67 | -1.61546 | -0.00146 | 0.00000 | 0.00070  | 0.00072  | -1.61475 |
| D68 | 0.47893  | -0.00093 | 0.00000 | 0.00346  | 0.00348  | 0.48241  |
| D69 | 1.37305  | 0.00278  | 0.00000 | 0.00658  | 0.00660  | 1.37965  |
| D70 | -2.81574 | 0.00291  | 0.00000 | 0.00725  | 0.00728  | -2.80846 |
| D71 | -0.72134 | 0.00344  | 0.00000 | 0.01001  | 0.01004  | -0.71130 |
| D72 | -0.94530 | -0.00242 | 0.00000 | -0.01600 | -0.01604 | -0.96135 |
| D73 | 1.14909  | -0.00229 | 0.00000 | -0.01533 | -0.01537 | 1.13373  |
| D74 | -3.03970 | -0.00177 | 0.00000 | -0.01257 | -0.01260 | -3.05230 |

| Item                 | Value    | Threshold | Converged? |
|----------------------|----------|-----------|------------|
| Maximum Force        | 0.059381 | 0.000450  | NO         |
| RMS Force            | 0.005724 | 0.000300  | NO         |
| Maximum Displacement | 0.181644 | 0.001800  | NO         |
| RMS Displacement     | 0.054779 | 0.001200  | NO         |

Predicted change in Energy=-1.715787D-02

GradGradGradGradGradGradGradGradGradGradGradGradGradGradGradGradGradGradGrad

Input orientation:

| Center Number | Atomic Number | Atomic Type | Coordinates (Angstroms) |           |           |
|---------------|---------------|-------------|-------------------------|-----------|-----------|
|               |               |             | X                       | Y         | Z         |
| 1             | 6             | 0           | -1.864014               | -2.006007 | 0.249747  |
| 2             | 6             | 0           | -2.871803               | -1.127738 | 0.010704  |
| 3             | 7             | 0           | -2.302936               | 0.141573  | 0.013550  |
| 4             | 6             | 0           | -0.981704               | 0.022181  | 0.251068  |
| 5             | 7             | 0           | -0.699057               | -1.272459 | 0.399793  |
| 6             | 6             | 0           | 0.672681                | -1.791748 | 0.598742  |
| 7             | 6             | 0           | 1.474282                | -1.881193 | -0.728192 |

|    |    |   |           |           |           |
|----|----|---|-----------|-----------|-----------|
| 8  | 1  | 0 | -1.877110 | -3.079392 | 0.329068  |
| 9  | 1  | 0 | -3.919824 | -1.296776 | -0.156282 |
| 10 | 1  | 0 | 1.185244  | -1.093715 | 1.259206  |
| 11 | 1  | 0 | 0.580566  | -2.758815 | 1.094307  |
| 12 | 1  | 0 | 1.343802  | -2.867010 | -1.183332 |
| 13 | 1  | 0 | 1.088729  | -1.123321 | -1.420399 |
| 14 | 35 | 0 | 1.945754  | 1.520748  | 0.142197  |
| 15 | 1  | 0 | -0.206226 | 0.811853  | 0.277017  |
| 16 | 6  | 0 | -2.934294 | 1.398594  | -0.191546 |
| 17 | 6  | 0 | -4.237152 | 1.570339  | -0.372714 |
| 18 | 1  | 0 | -2.225100 | 2.216584  | -0.186630 |
| 19 | 1  | 0 | -4.620443 | 2.569479  | -0.526488 |
| 20 | 1  | 0 | -4.953940 | 0.759091  | -0.376414 |
| 21 | 8  | 0 | 2.847734  | -1.711851 | -0.493733 |
| 22 | 1  | 0 | 2.995955  | -0.757848 | -0.327963 |
| 23 | 6  | 0 | 5.109563  | 2.306942  | -0.036909 |
| 24 | 6  | 0 | 5.775438  | 1.261749  | -0.811536 |
| 25 | 8  | 0 | 4.338704  | 1.242616  | -0.647815 |
| 26 | 1  | 0 | 5.120139  | 2.285857  | 1.059909  |
| 27 | 1  | 0 | 4.925474  | 3.298744  | -0.468012 |
| 28 | 1  | 0 | 6.104059  | 1.457937  | -1.841759 |
| 29 | 6  | 0 | 6.512453  | 0.108771  | -0.126332 |
| 30 | 1  | 0 | 6.430995  | -0.782922 | -0.730348 |
| 31 | 1  | 0 | 7.556869  | 0.359080  | -0.001905 |
| 32 | 1  | 0 | 6.071628  | -0.075729 | 0.841757  |

-----  
Distance matrix (angstroms):

|    |    | 1        | 2        | 3        | 4        | 5        |
|----|----|----------|----------|----------|----------|----------|
| 1  | C  | 0.000000 |          |          |          |          |
| 2  | C  | 1.357990 | 0.000000 |          |          |          |
| 3  | N  | 2.204664 | 1.390959 | 0.000000 |          |          |
| 4  | C  | 2.211791 | 2.225435 | 1.347710 | 0.000000 |          |
| 5  | N  | 1.384821 | 2.212048 | 2.172809 | 1.333455 | 0.000000 |
| 6  | C  | 2.569538 | 3.653774 | 3.596453 | 2.479557 | 1.480171 |
| 7  | C  | 3.480828 | 4.472372 | 4.348464 | 3.257860 | 2.523155 |
| 8  | H  | 1.076392 | 2.213532 | 3.264276 | 3.229179 | 2.158198 |
| 9  | H  | 2.212290 | 1.074620 | 2.170718 | 3.246249 | 3.268509 |
| 10 | H  | 3.339051 | 4.244943 | 3.904484 | 2.637656 | 2.078733 |
| 11 | H  | 2.693691 | 3.969062 | 4.230233 | 3.299345 | 2.080634 |
| 12 | H  | 3.617337 | 4.714034 | 4.876761 | 3.976545 | 3.036800 |
| 13 | H  | 3.505312 | 4.211162 | 3.893528 | 2.897010 | 2.555684 |
| 14 | Br | 5.192677 | 5.499147 | 4.468785 | 3.290526 | 3.855306 |
| 15 | H  | 3.269455 | 3.307300 | 2.216953 | 1.107077 | 2.145300 |
| 16 | C  | 3.596046 | 2.535185 | 1.421541 | 2.429614 | 3.532774 |



|    |    |          |           |           |           |          |
|----|----|----------|-----------|-----------|-----------|----------|
| 17 | C  | 4.336991 | 3.048082  | 2.435521  | 3.658393  | 4.603953 |
| 18 | H  | 4.260409 | 3.411987  | 2.086097  | 2.559886  | 3.853067 |
| 19 | H  | 5.397732 | 4.125012  | 3.399589  | 4.509295  | 5.567383 |
| 20 | H  | 4.193506 | 2.836420  | 2.749768  | 4.088451  | 4.778464 |
| 21 | O  | 4.779106 | 5.771373  | 5.497446  | 4.269214  | 3.683908 |
| 22 | H  | 5.050836 | 5.889151  | 5.385521  | 4.094569  | 3.800996 |
| 23 | C  | 8.204539 | 8.689159  | 7.722467  | 6.512034  | 6.836877 |
| 24 | C  | 8.376501 | 9.008911  | 8.197297  | 6.951591  | 7.057521 |
| 25 | O  | 7.059240 | 7.618637  | 6.764693  | 5.532105  | 5.727313 |
| 26 | H  | 8.237405 | 8.753547  | 7.797106  | 6.558272  | 6.852766 |
| 27 | H  | 8.645965 | 8.978888  | 7.902502  | 6.793209  | 7.299612 |
| 28 | H  | 8.936637 | 9.522784  | 8.709336  | 7.526576  | 7.665638 |
| 29 | C  | 8.647480 | 9.466361  | 8.816560  | 7.504153  | 7.361419 |
| 30 | H  | 8.441783 | 9.338635  | 8.814172  | 7.520603  | 7.235642 |
| 31 | H  | 9.716480 | 10.534133 | 9.862215  | 8.548960  | 8.425176 |
| 32 | H  | 8.188459 | 9.043358  | 8.418222  | 7.078699  | 6.889823 |
|    |    | 6        | 7         | 8         | 9         | 10       |
| 6  | C  | 0.000000 |           |           |           |          |
| 7  | C  | 1.552843 | 0.000000  |           |           |          |
| 8  | H  | 2.869178 | 3.712857  | 0.000000  |           |          |
| 9  | H  | 4.680402 | 5.455732  | 2.754264  | 0.000000  |          |
| 10 | H  | 1.089120 | 2.157178  | 3.766442  | 5.301562  | 0.000000 |
| 11 | H  | 1.090545 | 2.211436  | 2.593941  | 4.894389  | 1.779153 |
| 12 | H  | 2.186866 | 1.093624  | 3.564651  | 5.588044  | 3.022533 |
| 13 | H  | 2.167215 | 1.096436  | 3.960183  | 5.168529  | 2.681506 |
| 14 | Br | 3.577957 | 3.543030  | 5.984187  | 6.514026  | 2.943043 |
| 15 | H  | 2.766717 | 3.329722  | 4.235133  | 4.292420  | 2.555792 |
| 16 | C  | 4.879867 | 5.520918  | 4.630447  | 2.870110  | 5.028606 |
| 17 | C  | 6.029412 | 6.682808  | 5.261397  | 2.892730  | 6.258013 |
| 18 | H  | 5.008060 | 5.547116  | 5.332392  | 3.900860  | 4.967793 |
| 19 | H  | 6.950079 | 7.549493  | 6.337791  | 3.946624  | 7.093215 |
| 20 | H  | 6.254324 | 6.958224  | 4.969763  | 2.311805  | 6.617985 |
| 21 | O  | 2.435311 | 1.403573  | 4.987115  | 6.788667  | 2.493744 |
| 22 | H  | 2.706536 | 1.933281  | 5.437648  | 6.938871  | 2.431170 |
| 23 | C  | 6.073650 | 5.588703  | 8.829503  | 9.722698  | 5.352070 |
| 24 | C  | 6.111534 | 5.327754  | 8.871751  | 10.048558 | 5.559322 |
| 25 | O  | 4.919450 | 4.239051  | 7.633505  | 8.654097  | 4.363425 |
| 26 | H  | 6.051398 | 5.818408  | 8.847684  | 9.799761  | 5.190821 |
| 27 | H  | 6.718432 | 6.229781  | 9.359012  | 9.972727  | 6.022151 |
| 28 | H  | 6.783536 | 5.815896  | 9.433922  | 10.531263 | 6.349933 |
| 29 | C  | 6.183902 | 5.450262  | 8.986464  | 10.526579 | 5.634256 |
| 30 | H  | 5.995198 | 5.076929  | 8.684512  | 10.379454 | 5.618970 |
| 31 | H  | 7.237325 | 6.522589  | 10.046521 | 11.596559 | 6.655720 |
| 32 | H  | 5.670309 | 5.182665  | 8.512771  | 10.115145 | 5.008723 |

|    |    | 11        | 12        | 13       | 14        | 15        |
|----|----|-----------|-----------|----------|-----------|-----------|
| 11 | H  | 0.000000  |           |          |           |           |
| 12 | H  | 2.404553  | 0.000000  |          |           |           |
| 13 | H  | 3.042502  | 1.778121  | 0.000000 |           |           |
| 14 | Br | 4.591831  | 4.622964  | 3.188620 | 0.000000  |           |
| 15 | H  | 3.746555  | 4.250793  | 2.881497 | 2.269742  | 0.000000  |
| 16 | C  | 5.593899  | 6.122183  | 4.904574 | 4.892972  | 2.829517  |
| 17 | C  | 6.641094  | 7.175947  | 6.059576 | 6.204508  | 4.152808  |
| 18 | H  | 5.853815  | 6.290740  | 4.864012 | 4.241266  | 2.502816  |
| 19 | H  | 7.620248  | 8.096856  | 6.857878 | 6.682957  | 4.818732  |
| 20 | H  | 6.720821  | 7.311722  | 6.414610 | 6.960952  | 4.792759  |
| 21 | O  | 2.959401  | 2.017858  | 2.073445 | 3.415797  | 4.036063  |
| 22 | H  | 3.443955  | 2.812442  | 2.228115 | 2.552640  | 3.617171  |
| 23 | C  | 6.888639  | 6.501155  | 5.463318 | 3.264945  | 5.530954  |
| 24 | C  | 6.839873  | 6.068301  | 5.293818 | 3.955144  | 6.096528  |
| 25 | O  | 5.759344  | 5.113242  | 4.093516 | 2.535288  | 4.658032  |
| 26 | H  | 6.786576  | 6.770885  | 5.833239 | 3.391800  | 5.581736  |
| 27 | H  | 7.616632  | 7.166351  | 5.931468 | 3.523117  | 5.751004  |
| 28 | H  | 7.543901  | 6.465194  | 5.656320 | 4.607768  | 6.687775  |
| 29 | C  | 6.700768  | 6.057018  | 5.710467 | 4.787539  | 6.767397  |
| 30 | H  | 6.439025  | 5.516171  | 5.397392 | 5.117189  | 6.900058  |
| 31 | H  | 7.719569  | 7.099691  | 6.785754 | 5.731915  | 7.781288  |
| 32 | H  | 6.116738  | 5.851885  | 5.571721 | 4.478946  | 6.365390  |
|    |    | 16        | 17        | 18       | 19        | 20        |
| 16 | C  | 0.000000  |           |          |           |           |
| 17 | C  | 1.326559  | 0.000000  |          |           |           |
| 18 | H  | 1.082630  | 2.121465  | 0.000000 |           |           |
| 19 | H  | 2.079966  | 1.081128  | 2.444935 | 0.000000  |           |
| 20 | H  | 2.126525  | 1.082553  | 3.099495 | 1.846955  | 0.000000  |
| 21 | O  | 6.572521  | 7.809163  | 6.423438 | 8.608398  | 8.184463  |
| 22 | H  | 6.311632  | 7.598703  | 6.010544 | 8.313846  | 8.093471  |
| 23 | C  | 8.096458  | 9.381707  | 7.336747 | 9.745852  | 10.187501 |
| 24 | C  | 8.732842  | 10.026951 | 8.081511 | 10.481686 | 10.749955 |
| 25 | O  | 7.288964  | 8.586523  | 6.651678 | 9.057681  | 9.309171  |
| 26 | H  | 8.199223  | 9.493327  | 7.450583 | 9.872995  | 10.289854 |
| 27 | H  | 8.090918  | 9.324708  | 7.237469 | 9.573911  | 10.201031 |
| 28 | H  | 9.187956  | 10.445638 | 8.525836 | 10.861878 | 11.176535 |
| 29 | C  | 9.534617  | 10.851308 | 8.988401 | 11.408619 | 11.487542 |
| 30 | H  | 9.631093  | 10.930467 | 9.177181 | 11.550517 | 11.494339 |
| 31 | H  | 10.544242 | 11.861853 | 9.958481 | 12.387412 | 12.522803 |
| 32 | H  | 9.184115  | 10.509777 | 8.668793 | 11.099081 | 11.124028 |
|    |    | 21        | 22        | 23       | 24        | 25        |
| 21 | O  | 0.000000  |           |          |           |           |
| 22 | H  | 0.979577  | 0.000000  |          |           |           |

|    |   |          |          |          |          |          |
|----|---|----------|----------|----------|----------|----------|
| 23 | C | 4.634139 | 3.734298 | 0.000000 |          |          |
| 24 | C | 4.185062 | 3.469602 | 1.461460 | 0.000000 |          |
| 25 | O | 3.312945 | 2.430460 | 1.449213 | 1.446159 | 0.000000 |
| 26 | H | 4.853791 | 3.962636 | 1.097071 | 2.231707 | 2.148327 |
| 27 | H | 5.424364 | 4.494285 | 1.097001 | 2.233786 | 2.145761 |
| 28 | H | 4.740082 | 4.106286 | 2.228748 | 1.099019 | 2.142042 |
| 29 | C | 4.108505 | 3.627319 | 2.609224 | 1.530377 | 2.506539 |
| 30 | H | 3.709266 | 3.458619 | 3.431370 | 2.148727 | 2.913298 |
| 31 | H | 5.167843 | 4.706992 | 3.128050 | 2.154950 | 3.399179 |
| 32 | H | 3.854078 | 3.360549 | 2.715648 | 2.147080 | 2.638159 |
|    |   | 26       | 27       | 28       | 29       | 30       |
| 26 | H | 0.000000 |          |          |          |          |
| 27 | H | 1.843469 | 0.000000 |          |          |          |
| 28 | H | 3.173834 | 2.581631 | 0.000000 |          |          |
| 29 | C | 2.843485 | 3.579271 | 2.220298 | 0.000000 |          |
| 30 | H | 3.786921 | 4.358373 | 2.522612 | 1.080087 | 0.000000 |
| 31 | H | 3.282921 | 3.972797 | 2.589055 | 1.081176 | 1.761360 |
| 32 | H | 2.555388 | 3.796872 | 3.091026 | 1.079613 | 1.760903 |
|    |   | 31       | 32       |          |          |          |
| 31 | H | 0.000000 |          |          |          |          |
| 32 | H | 1.762602 | 0.000000 |          |          |          |

Stoichiometry C10H17BrN2O2

Framework group C1[X(C10H17BrN2O2)]

Deg. of freedom 90

Full point group C1 NOp 1

Largest Abelian subgroup C1 NOp 1

Largest concise Abelian subgroup C1 NOp 1

Standard orientation:

| Center Number | Atomic Number | Atomic Type | Coordinates (Angstroms) |           |           |
|---------------|---------------|-------------|-------------------------|-----------|-----------|
|               |               |             | X                       | Y         | Z         |
| 1             | 6             | 0           | -3.361787               | 1.843505  | -0.187767 |
| 2             | 6             | 0           | -4.227686               | 0.831086  | 0.075599  |
| 3             | 7             | 0           | -3.487682               | -0.346058 | 0.036967  |
| 4             | 6             | 0           | -2.205624               | -0.041169 | -0.245333 |
| 5             | 7             | 0           | -2.112102               | 1.281354  | -0.387778 |
| 6             | 6             | 0           | -0.834483               | 1.988976  | -0.628336 |
| 7             | 6             | 0           | -0.005274               | 2.179899  | 0.670617  |
| 8             | 1             | 0           | -3.527489               | 2.905050  | -0.253215 |
| 9             | 1             | 0           | -5.282236               | 0.850539  | 0.281404  |
| 10            | 1             | 0           | -0.253972               | 1.374462  | -1.315040 |
| 11            | 1             | 0           | -1.078744               | 2.937276  | -1.108285 |
| 12            | 1             | 0           | -0.255378               | 3.134353  | 1.142294  |

|    |    |   |           |           |           |
|----|----|---|-----------|-----------|-----------|
| 13 | 1  | 0 | -0.255700 | 1.370419  | 1.366462  |
| 14 | 35 | 0 | 0.904372  | -1.116030 | -0.258070 |
| 15 | 1  | 0 | -1.328973 | -0.714320 | -0.308344 |
| 16 | 6  | 0 | -3.929457 | -1.680555 | 0.248466  |
| 17 | 6  | 0 | -5.188084 | -2.034292 | 0.473159  |
| 18 | 1  | 0 | -3.113674 | -2.391178 | 0.208451  |
| 19 | 1  | 0 | -5.422264 | -3.078353 | 0.627864  |
| 20 | 1  | 0 | -6.010484 | -1.331399 | 0.512143  |
| 21 | 8  | 0 | 1.368876  | 2.206190  | 0.385945  |
| 22 | 1  | 0 | 1.642668  | 1.283577  | 0.203210  |
| 23 | 6  | 0 | 4.151364  | -1.452991 | -0.200061 |
| 24 | 6  | 0 | 4.692665  | -0.330658 | 0.563632  |
| 25 | 8  | 0 | 3.262315  | -0.511584 | 0.450756  |
| 26 | 1  | 0 | 4.118809  | -1.422509 | -1.296225 |
| 27 | 1  | 0 | 4.123410  | -2.463962 | 0.224870  |
| 28 | 1  | 0 | 5.082877  | -0.486548 | 1.579149  |
| 29 | 6  | 0 | 5.235974  | 0.919166  | -0.132649 |
| 30 | 1  | 0 | 5.052958  | 1.786184  | 0.484906  |
| 31 | 1  | 0 | 6.299855  | 0.818424  | -0.296810 |
| 32 | 1  | 0 | 4.738633  | 1.047320  | -1.082277 |

-----

Rotational constants (GHZ):      0.8606705      0.1990397      0.1664600

Standard basis: 6-311++G(d,p) (5D, 7F)

There are    492 symmetry adapted cartesian basis functions of A    symmetry.

There are    475 symmetry adapted basis functions of A    symmetry.

    475 basis functions,    751 primitive gaussians,    492 cartesian basis functions

    71 alpha electrons      71 beta electrons

        nuclear repulsion energy      1340.3218048522 Hartrees.

NAtoms=    32 NActive=    32 NUniq=    32 SFac= 1.00D+00 NAtFMM=    60 NAOKFM=F

Big=F

Integral buffers will be    131072 words long.

Raffenetti 2 integral format.

Two-electron integral symmetry is turned on.

One-electron integrals computed using PRISM.

NBasis=    475 RedAO= T EigKep=    4.43D-06    NBF=    475

NBsUse=    475 1.00D-06 EigRej= -1.00D+00    NBFU=    475

Initial guess from the checkpoint file: "/home/suqian/liuwen/qianmengshijie/ohpo/ohpo.chk"

B after Tr=      0.000000      0.000000      0.000000

        Rot=    0.999992    0.002578    -0.000491    0.003118 Ang=    0.47 deg.

ExpMin= 3.50D-02 ExpMax= 4.40D+05 ExpMxC= 1.51D+04 IAcc=3 IRadAn=            5 AccDes=

0.00D+00

Harris functional with IExCor=    402 and IRadAn=            5 diagonalized for initial guess.

HarFok: IExCor=    402 AccDes= 0.00D+00 IRadAn=            5 IDoV= 1 UseB2=F ITyADJ=14

ICtDFT= 3500011 ScaDFX= 1.000000 1.000000 1.000000 1.000000

FoFCou: FMM=F IPFlag= 0 FMFlag= 100000 FMFlg1= 0  
 NFxFlg= 0 DoJE=T BraDBF=F KetDBF=T FulRan=T  
 wScrn= 0.000000 ICntrl= 500 IOpCl= 0 l1Cent= 200000004 NGrid=  
 0  
 NMat0= 1 NMatS0= 1 NMatT0= 0 NMatD0= 1 NMtDS0= 0  
 NMtDT0= 0

Petite list used in FoFCou.

Requested convergence on RMS density matrix=1.00D-08 within 128 cycles.

Requested convergence on MAX density matrix=1.00D-06.

Requested convergence on energy=1.00D-06.

No special actions if energy rises.

SCF Done: E(RB3LYP) = -3225.48460998 A.U. after 11 cycles

NFock= 11 Conv=0.99D-08 -V/T= 2.0018

Calling FoFJK, ICntrl= 2127 FMM=F ISym2X=0 l1Cent= 0 IOpClX= 0 NMat=1 NMatS=1

NMatT=0.

\*\*\*\*\* Axes restored to original set \*\*\*\*\*

| Center<br>Number | Atomic<br>Number | Forces (Hartrees/Bohr) |              |              |
|------------------|------------------|------------------------|--------------|--------------|
|                  |                  | X                      | Y            | Z            |
| 1                | 6                | -0.000090030           | -0.000298278 | -0.000173259 |
| 2                | 6                | -0.000175577           | -0.000370907 | 0.000089298  |
| 3                | 7                | -0.000269214           | -0.000037779 | 0.000089476  |
| 4                | 6                | -0.000344965           | -0.001183951 | -0.000272388 |
| 5                | 7                | 0.000304262            | 0.000049383  | -0.000433740 |
| 6                | 6                | 0.000328173            | -0.000099932 | 0.000179300  |
| 7                | 6                | 0.000067265            | 0.000303612  | -0.000136099 |
| 8                | 1                | -0.000032724           | -0.000018917 | -0.000032473 |
| 9                | 1                | 0.000013182            | -0.000029867 | -0.000012749 |
| 10               | 1                | -0.000111735           | 0.000550000  | -0.000338153 |
| 11               | 1                | 0.000200472            | -0.000142665 | 0.000121379  |
| 12               | 1                | -0.000249388           | -0.000078680 | -0.000210337 |
| 13               | 1                | 0.000294491            | 0.000232962  | 0.000371821  |
| 14               | 35               | -0.037124936           | 0.003944985  | 0.011704051  |
| 15               | 1                | 0.002757714            | 0.002267947  | 0.000246553  |
| 16               | 6                | 0.000256977            | -0.000292516 | 0.000069488  |
| 17               | 6                | -0.000132066           | 0.000092769  | -0.000029119 |
| 18               | 1                | 0.000079827            | -0.000043587 | 0.000022375  |
| 19               | 1                | -0.000002459           | -0.000006796 | -0.000000894 |
| 20               | 1                | 0.000025210            | -0.000031388 | -0.000003755 |
| 21               | 8                | -0.000687190           | 0.000470673  | 0.000925427  |
| 22               | 1                | -0.000328478           | 0.000297635  | -0.000641971 |
| 23               | 6                | -0.010493534           | 0.002274142  | -0.001239115 |
| 24               | 6                | 0.008886896            | -0.015616120 | -0.000041070 |

|    |   |              |              |              |
|----|---|--------------|--------------|--------------|
| 25 | 8 | 0.037148314  | 0.004240279  | -0.007174674 |
| 26 | 1 | 0.001425387  | -0.001236194 | -0.006384139 |
| 27 | 1 | 0.001718298  | -0.006081061 | 0.001715544  |
| 28 | 1 | -0.001813063 | 0.003101267  | 0.005983990  |
| 29 | 6 | -0.008166206 | 0.017450444  | -0.009288083 |
| 30 | 1 | -0.000014202 | -0.007823049 | -0.003641796 |
| 31 | 1 | 0.009190311  | 0.000431873  | 0.001221689  |
| 32 | 1 | -0.002661011 | -0.002316286 | 0.007313422  |

-----  
Cartesian Forces: Max 0.037148314 RMS 0.006660229

GradGradGradGradGradGradGradGradGradGradGradGradGradGradGradGradGradGradGrad

Berny optimization.

Using GEDIIS/GDIIS optimizer.

FormGI is forming the generalized inverse of G from B-inverse, IUseBI=4.

GSVD: received Info= 1 from GESDD.

Internal Forces: Max 0.036517785 RMS 0.003449870

Search for a local minimum.

Step number 2 out of a maximum of 177

All quantities printed in internal units (Hartrees-Bohrs-Radians)

Mixed Optimization -- RFO/linear search

Update second derivatives using D2CorX and points 1 2

DE= -1.63D-02 DEPred=-1.72D-02 R= 9.48D-01

TightC=F SS= 1.41D+00 RLast= 3.05D-01 DXNew= 5.0454D-01 9.1472D-01

Trust test= 9.48D-01 RLast= 3.05D-01 DXMaxT set to 5.05D-01

ITU= 1 0

Use linear search instead of GDIIS.

Linear search step of 0.600 exceeds DXMaxT= 0.505 but not scaled.

Quartic linear search produced a step of 2.00000.

Iteration 1 RMS(Cart)= 0.04496000 RMS(Int)= 0.02900207

Iteration 2 RMS(Cart)= 0.03728201 RMS(Int)= 0.01293401

Iteration 3 RMS(Cart)= 0.02951295 RMS(Int)= 0.00021819

Iteration 4 RMS(Cart)= 0.00019125 RMS(Int)= 0.00020731

Iteration 5 RMS(Cart)= 0.00000004 RMS(Int)= 0.00020731

| Variable | Old X   | -DE/DX   | Delta X<br>(Linear) | Delta X<br>(Quad) | Delta X<br>(Total) | New X   |
|----------|---------|----------|---------------------|-------------------|--------------------|---------|
| R1       | 2.56623 | -0.00026 | -0.00036            | 0.00000           | -0.00044           | 2.56579 |
| R2       | 2.61693 | 0.00038  | 0.00186             | 0.00000           | 0.00189            | 2.61882 |
| R3       | 2.03409 | 0.00001  | 0.00004             | 0.00000           | 0.00004            | 2.03413 |
| R4       | 2.62853 | 0.00019  | 0.00039             | 0.00000           | 0.00031            | 2.62884 |
| R5       | 2.03074 | -0.00001 | 0.00011             | 0.00000           | 0.00011            | 2.03085 |
| R6       | 2.54680 | 0.00021  | 0.00028             | 0.00000           | 0.00031            | 2.54712 |
| R7       | 2.68632 | -0.00034 | -0.00150            | 0.00000           | -0.00150           | 2.68483 |
| R8       | 2.51987 | 0.00043  | 0.00115             | 0.00000           | 0.00148            | 2.52134 |

|     |         |          |          |         |          |         |
|-----|---------|----------|----------|---------|----------|---------|
| R9  | 2.09207 | 0.00152  | 0.00576  | 0.00000 | 0.00591  | 2.09798 |
| R10 | 2.79712 | 0.00017  | 0.00614  | 0.00000 | 0.00625  | 2.80337 |
| R11 | 2.93445 | -0.00009 | 0.00558  | 0.00000 | 0.00572  | 2.94017 |
| R12 | 2.05814 | 0.00009  | 0.00068  | 0.00000 | 0.00068  | 2.05882 |
| R13 | 2.06083 | 0.00016  | 0.00045  | 0.00000 | 0.00045  | 2.06128 |
| R14 | 2.06665 | 0.00019  | 0.00063  | 0.00000 | 0.00063  | 2.06728 |
| R15 | 2.07196 | -0.00018 | -0.00002 | 0.00000 | -0.00002 | 2.07194 |
| R16 | 2.65237 | -0.00035 | 0.00558  | 0.00000 | 0.00558  | 2.65795 |
| R17 | 4.28919 | -0.00261 | -0.05506 | 0.00000 | -0.05503 | 4.23416 |
| R18 | 4.79100 | 0.03652  | 0.58002  | 0.00000 | 0.57990  | 5.37090 |
| R19 | 2.50683 | 0.00012  | 0.00041  | 0.00000 | 0.00041  | 2.50724 |
| R20 | 2.04587 | 0.00002  | 0.00024  | 0.00000 | 0.00024  | 2.04611 |
| R21 | 2.04304 | 0.00000  | 0.00000  | 0.00000 | 0.00000  | 2.04304 |
| R22 | 2.04573 | 0.00000  | 0.00006  | 0.00000 | 0.00006  | 2.04579 |
| R23 | 1.85113 | -0.00115 | 0.00043  | 0.00000 | 0.00019  | 1.85132 |
| R24 | 4.59290 | -0.00069 | 0.00180  | 0.00000 | 0.00165  | 4.59455 |
| R25 | 2.76176 | 0.00013  | 0.00393  | 0.00000 | 0.00398  | 2.76574 |
| R26 | 2.73862 | -0.00866 | -0.04236 | 0.00000 | -0.04243 | 2.69619 |
| R27 | 2.07316 | -0.00634 | -0.03285 | 0.00000 | -0.03285 | 2.04031 |
| R28 | 2.07303 | -0.00646 | -0.03311 | 0.00000 | -0.03311 | 2.03992 |
| R29 | 2.73284 | 0.00357  | 0.03203  | 0.00000 | 0.03204  | 2.76488 |
| R30 | 2.07684 | -0.00560 | -0.02549 | 0.00000 | -0.02549 | 2.05136 |
| R31 | 2.89199 | -0.00858 | -0.03637 | 0.00000 | -0.03637 | 2.85562 |
| R32 | 2.04107 | 0.00850  | 0.03812  | 0.00000 | 0.03812  | 2.07919 |
| R33 | 2.04313 | 0.00912  | 0.04224  | 0.00000 | 0.04224  | 2.08536 |
| R34 | 2.04017 | 0.00804  | 0.03633  | 0.00000 | 0.03633  | 2.07650 |
| A1  | 1.87631 | 0.00016  | 0.00195  | 0.00000 | 0.00204  | 1.87835 |
| A2  | 2.27691 | -0.00012 | -0.00135 | 0.00000 | -0.00139 | 2.27551 |
| A3  | 2.12996 | -0.00004 | -0.00059 | 0.00000 | -0.00064 | 2.12932 |
| A4  | 1.86117 | -0.00013 | -0.00169 | 0.00000 | -0.00169 | 1.85948 |
| A5  | 2.27755 | 0.00004  | 0.00045  | 0.00000 | 0.00045  | 2.27800 |
| A6  | 2.14446 | 0.00009  | 0.00124  | 0.00000 | 0.00124  | 2.14570 |
| A7  | 1.89701 | 0.00033  | 0.00155  | 0.00000 | 0.00166  | 1.89867 |
| A8  | 2.24592 | 0.00008  | 0.00098  | 0.00000 | 0.00093  | 2.24685 |
| A9  | 2.14025 | -0.00041 | -0.00253 | 0.00000 | -0.00258 | 2.13767 |
| A10 | 1.88964 | -0.00037 | -0.00015 | 0.00000 | -0.00027 | 1.88937 |
| A11 | 2.24933 | 0.00006  | 0.00473  | 0.00000 | 0.00425  | 2.25358 |
| A12 | 2.14295 | 0.00031  | -0.00450 | 0.00000 | -0.00390 | 2.13904 |
| A13 | 1.90063 | 0.00001  | -0.00165 | 0.00000 | -0.00173 | 1.89890 |
| A14 | 2.22475 | -0.00153 | -0.00711 | 0.00000 | -0.00762 | 2.21714 |
| A15 | 2.15561 | 0.00153  | 0.00897  | 0.00000 | 0.00955  | 2.16517 |
| A16 | 1.96465 | 0.00005  | 0.01173  | 0.00000 | 0.01176  | 1.97641 |
| A17 | 1.86795 | 0.00023  | 0.00635  | 0.00000 | 0.00622  | 1.87417 |
| A18 | 1.86911 | -0.00024 | -0.01229 | 0.00000 | -0.01227 | 1.85684 |

|     |          |          |          |         |          |          |
|-----|----------|----------|----------|---------|----------|----------|
| A19 | 1.88828  | 0.00034  | 0.00243  | 0.00000 | 0.00243  | 1.89071  |
| A20 | 1.96149  | -0.00050 | -0.00904 | 0.00000 | -0.00917 | 1.95232  |
| A21 | 1.90978  | 0.00016  | 0.00147  | 0.00000 | 0.00152  | 1.91130  |
| A22 | 1.92406  | -0.00069 | -0.01118 | 0.00000 | -0.01121 | 1.91285  |
| A23 | 1.89456  | 0.00017  | 0.00347  | 0.00000 | 0.00332  | 1.89788  |
| A24 | 1.93419  | 0.00086  | 0.01528  | 0.00000 | 0.01537  | 1.94956  |
| A25 | 1.89482  | 0.00017  | -0.00052 | 0.00000 | -0.00049 | 1.89432  |
| A26 | 1.87028  | -0.00052 | -0.01263 | 0.00000 | -0.01260 | 1.85768  |
| A27 | 1.94567  | -0.00003 | 0.00497  | 0.00000 | 0.00472  | 1.95040  |
| A28 | 2.64484  | -0.00405 | -0.03775 | 0.00000 | -0.03798 | 2.60686  |
| A29 | 2.65840  | -0.00199 | -0.01923 | 0.00000 | -0.01838 | 2.64002  |
| A30 | 2.17777  | 0.00010  | 0.00049  | 0.00000 | 0.00049  | 2.17827  |
| A31 | 1.95683  | -0.00014 | -0.00154 | 0.00000 | -0.00154 | 1.95530  |
| A32 | 2.14857  | 0.00004  | 0.00104  | 0.00000 | 0.00104  | 2.14962  |
| A33 | 2.07975  | 0.00003  | 0.00010  | 0.00000 | 0.00010  | 2.07985  |
| A34 | 2.15765  | -0.00005 | -0.00020 | 0.00000 | -0.00020 | 2.15745  |
| A35 | 2.04578  | 0.00002  | 0.00010  | 0.00000 | 0.00010  | 2.04588  |
| A36 | 1.86903  | 0.00204  | 0.03189  | 0.00000 | 0.03142  | 1.90045  |
| A37 | 2.61181  | -0.00134 | -0.00271 | 0.00000 | -0.00226 | 2.60955  |
| A38 | 2.10805  | -0.00150 | -0.01139 | 0.00000 | -0.01148 | 2.09657  |
| A39 | 2.11151  | -0.00075 | -0.00446 | 0.00000 | -0.00448 | 2.10704  |
| A40 | 1.99595  | 0.00023  | -0.00199 | 0.00000 | -0.00202 | 1.99393  |
| A41 | 1.99223  | -0.00215 | -0.00943 | 0.00000 | -0.00925 | 1.98298  |
| A42 | 1.99532  | 0.00149  | 0.01022  | 0.00000 | 0.01013  | 2.00545  |
| A43 | 2.10068  | -0.00320 | -0.02613 | 0.00000 | -0.02598 | 2.07470  |
| A44 | 2.11872  | 0.00327  | 0.00995  | 0.00000 | 0.01007  | 2.12879  |
| A45 | 1.98838  | -0.00128 | 0.00407  | 0.00000 | 0.00301  | 1.99139  |
| A46 | 2.00181  | 0.00465  | 0.03094  | 0.00000 | 0.03030  | 2.03211  |
| A47 | 1.99347  | -0.00004 | 0.00651  | 0.00000 | 0.00576  | 1.99923  |
| A48 | 1.07905  | -0.00101 | -0.02756 | 0.00000 | -0.02816 | 1.05089  |
| A49 | 1.86516  | 0.00079  | 0.02207  | 0.00000 | 0.02267  | 1.88782  |
| A50 | 2.57340  | 0.00083  | 0.00335  | 0.00000 | 0.00326  | 2.57666  |
| A51 | 2.18298  | -0.00087 | 0.00318  | 0.00000 | 0.00362  | 2.18659  |
| A52 | 1.91270  | 0.00147  | 0.00413  | 0.00000 | 0.00408  | 1.91678  |
| A53 | 1.92018  | 0.00186  | 0.01910  | 0.00000 | 0.01901  | 1.93919  |
| A54 | 1.91091  | 0.00097  | 0.00055  | 0.00000 | 0.00051  | 1.91142  |
| A55 | 1.90535  | -0.00171 | -0.01057 | 0.00000 | -0.01066 | 1.89468  |
| A56 | 1.90665  | -0.00143 | -0.00796 | 0.00000 | -0.00795 | 1.89871  |
| A57 | 1.90795  | -0.00119 | -0.00536 | 0.00000 | -0.00544 | 1.90251  |
| A58 | 3.26203  | -0.00188 | -0.02438 | 0.00000 | -0.02455 | 3.23748  |
| A59 | 3.38476  | -0.00061 | -0.01016 | 0.00000 | -0.01025 | 3.37451  |
| D1  | 0.00342  | -0.00010 | -0.00204 | 0.00000 | -0.00209 | 0.00133  |
| D2  | -3.13745 | -0.00006 | -0.00129 | 0.00000 | -0.00132 | -3.13877 |
| D3  | 3.14010  | 0.00001  | -0.00025 | 0.00000 | -0.00025 | 3.13985  |



|     |          |          |          |         |          |          |
|-----|----------|----------|----------|---------|----------|----------|
| D4  | -0.00077 | 0.00005  | 0.00050  | 0.00000 | 0.00053  | -0.00024 |
| D5  | -0.00466 | 0.00016  | 0.00355  | 0.00000 | 0.00362  | -0.00104 |
| D6  | -3.07664 | 0.00004  | -0.00019 | 0.00000 | -0.00013 | -3.07677 |
| D7  | 3.14134  | 0.00007  | 0.00194  | 0.00000 | 0.00197  | -3.13987 |
| D8  | 0.06936  | -0.00006 | -0.00179 | 0.00000 | -0.00178 | 0.06758  |
| D9  | -0.00105 | 0.00000  | -0.00013 | 0.00000 | -0.00012 | -0.00117 |
| D10 | 3.13943  | 0.00008  | 0.00109  | 0.00000 | 0.00114  | 3.14057  |
| D11 | 3.13989  | -0.00003 | -0.00081 | 0.00000 | -0.00083 | 3.13907  |
| D12 | -0.00282 | 0.00005  | 0.00042  | 0.00000 | 0.00044  | -0.00238 |
| D13 | -0.00185 | 0.00010  | 0.00234  | 0.00000 | 0.00238  | 0.00054  |
| D14 | 3.08599  | 0.00033  | 0.00375  | 0.00000 | 0.00393  | 3.08992  |
| D15 | 3.14079  | 0.00002  | 0.00120  | 0.00000 | 0.00121  | -3.14119 |
| D16 | -0.05456 | 0.00026  | 0.00261  | 0.00000 | 0.00275  | -0.05181 |
| D17 | 0.05284  | -0.00006 | -0.00080 | 0.00000 | -0.00082 | 0.05202  |
| D18 | -3.08618 | -0.00006 | -0.00097 | 0.00000 | -0.00099 | -3.08717 |
| D19 | -3.09001 | 0.00003  | 0.00058  | 0.00000 | 0.00061  | -3.08941 |
| D20 | 0.05415  | 0.00003  | 0.00041  | 0.00000 | 0.00043  | 0.05458  |
| D21 | 0.00400  | -0.00016 | -0.00364 | 0.00000 | -0.00370 | 0.00030  |
| D22 | 3.07934  | -0.00019 | -0.00085 | 0.00000 | -0.00090 | 3.07843  |
| D23 | -3.08782 | -0.00037 | -0.00528 | 0.00000 | -0.00542 | -3.09324 |
| D24 | -0.01249 | -0.00040 | -0.00249 | 0.00000 | -0.00262 | -0.01510 |
| D25 | -2.75909 | -0.00072 | -0.01124 | 0.00000 | -0.01143 | -2.77052 |
| D26 | 0.32178  | -0.00047 | -0.00948 | 0.00000 | -0.00954 | 0.31223  |
| D27 | 1.67702  | -0.00091 | -0.01633 | 0.00000 | -0.01666 | 1.66036  |
| D28 | -2.53379 | -0.00032 | -0.00262 | 0.00000 | -0.00264 | -2.53643 |
| D29 | -0.48725 | -0.00014 | -0.00387 | 0.00000 | -0.00396 | -0.49121 |
| D30 | -1.38556 | -0.00097 | -0.02005 | 0.00000 | -0.02040 | -1.40596 |
| D31 | 0.68681  | -0.00038 | -0.00634 | 0.00000 | -0.00637 | 0.68044  |
| D32 | 2.73335  | -0.00020 | -0.00759 | 0.00000 | -0.00769 | 2.72566  |
| D33 | -1.59039 | 0.00067  | 0.02345  | 0.00000 | 0.02354  | -1.56685 |
| D34 | 0.48297  | 0.00058  | 0.01836  | 0.00000 | 0.01839  | 0.50136  |
| D35 | 2.62518  | 0.00122  | 0.03655  | 0.00000 | 0.03675  | 2.66192  |
| D36 | 2.63236  | 0.00014  | 0.00716  | 0.00000 | 0.00709  | 2.63945  |
| D37 | -1.57747 | 0.00005  | 0.00208  | 0.00000 | 0.00195  | -1.57553 |
| D38 | 0.56474  | 0.00068  | 0.02027  | 0.00000 | 0.02030  | 0.58504  |
| D39 | 0.52185  | 0.00002  | 0.00936  | 0.00000 | 0.00932  | 0.53117  |
| D40 | 2.59521  | -0.00007 | 0.00428  | 0.00000 | 0.00417  | 2.59938  |
| D41 | -1.54577 | 0.00057  | 0.02247  | 0.00000 | 0.02253  | -1.52324 |
| D42 | -1.31386 | -0.00120 | -0.02396 | 0.00000 | -0.02419 | -1.33805 |
| D43 | 2.86938  | -0.00054 | -0.01144 | 0.00000 | -0.01151 | 2.85787  |
| D44 | 0.79841  | -0.00041 | -0.00584 | 0.00000 | -0.00580 | 0.79261  |
| D45 | 0.41198  | -0.00068 | -0.01343 | 0.00000 | -0.01351 | 0.39846  |
| D46 | -0.47502 | 0.00062  | 0.01283  | 0.00000 | 0.01260  | -0.46242 |
| D47 | -3.03716 | -0.00021 | 0.01293  | 0.00000 | 0.01316  | -3.02399 |

|     |          |          |          |         |          |          |
|-----|----------|----------|----------|---------|----------|----------|
| D48 | -3.13566 | 0.00000  | -0.00019 | 0.00000 | -0.00019 | -3.13585 |
| D49 | 0.00598  | -0.00001 | -0.00021 | 0.00000 | -0.00021 | 0.00577  |
| D50 | 0.00309  | 0.00000  | 0.00000  | 0.00000 | 0.00000  | 0.00309  |
| D51 | -3.13846 | -0.00001 | -0.00002 | 0.00000 | -0.00002 | -3.13848 |
| D52 | -2.42546 | -0.00009 | -0.00216 | 0.00000 | -0.00230 | -2.42776 |
| D53 | 2.83128  | 0.00010  | -0.00066 | 0.00000 | -0.00085 | 2.83043  |
| D54 | -2.11047 | -0.00078 | -0.00572 | 0.00000 | -0.00579 | -2.11626 |
| D55 | -0.55348 | 0.00071  | 0.00950  | 0.00000 | 0.00940  | -0.54408 |
| D56 | -2.72890 | 0.00038  | 0.01819  | 0.00000 | 0.01812  | -2.71078 |
| D57 | -0.00415 | 0.00042  | -0.00830 | 0.00000 | -0.00823 | -0.01239 |
| D58 | 0.00206  | -0.00143 | 0.00412  | 0.00000 | 0.00416  | 0.00622  |
| D59 | 2.72680  | -0.00139 | -0.02237 | 0.00000 | -0.02219 | 2.70461  |
| D60 | 1.06814  | 0.00009  | 0.00045  | 0.00000 | 0.00029  | 1.06843  |
| D61 | -0.04482 | 0.00113  | 0.01921  | 0.00000 | 0.01934  | -0.02548 |
| D62 | -1.27590 | -0.00014 | -0.00298 | 0.00000 | -0.00318 | -1.27909 |
| D63 | -2.38886 | 0.00090  | 0.01578  | 0.00000 | 0.01587  | -2.37299 |
| D64 | 1.84482  | 0.00275  | 0.03283  | 0.00000 | 0.03295  | 1.87778  |
| D65 | -0.49851 | -0.00077 | -0.01344 | 0.00000 | -0.01367 | -0.51219 |
| D66 | 2.57336  | -0.00071 | 0.00008  | 0.00000 | 0.00013  | 2.57349  |
| D67 | -1.61475 | -0.00075 | 0.00143  | 0.00000 | 0.00151  | -1.61324 |
| D68 | 0.48241  | -0.00045 | 0.00696  | 0.00000 | 0.00706  | 0.48947  |
| D69 | 1.37965  | 0.00153  | 0.01320  | 0.00000 | 0.01331  | 1.39296  |
| D70 | -2.80846 | 0.00149  | 0.01455  | 0.00000 | 0.01470  | -2.79376 |
| D71 | -0.71130 | 0.00179  | 0.02008  | 0.00000 | 0.02024  | -0.69106 |
| D72 | -0.96135 | -0.00145 | -0.03209 | 0.00000 | -0.03233 | -0.99368 |
| D73 | 1.13373  | -0.00148 | -0.03074 | 0.00000 | -0.03095 | 1.10278  |
| D74 | -3.05230 | -0.00119 | -0.02521 | 0.00000 | -0.02540 | -3.07770 |

| Item                 | Value    | Threshold | Converged? |
|----------------------|----------|-----------|------------|
| Maximum Force        | 0.036518 | 0.000450  | NO         |
| RMS Force            | 0.003450 | 0.000300  | NO         |
| Maximum Displacement | 0.351321 | 0.001800  | NO         |
| RMS Displacement     | 0.108086 | 0.001200  | NO         |

Predicted change in Energy=-9.148240D-03

GradGradGradGradGradGradGradGradGradGradGradGradGradGradGradGradGradGradGrad

Input orientation:

| Center Number | Atomic Number | Atomic Type | Coordinates (Angstroms) |           |           |
|---------------|---------------|-------------|-------------------------|-----------|-----------|
|               |               |             | X                       | Y         | Z         |
| 1             | 6             | 0           | -1.882482               | -2.005638 | 0.226116  |
| 2             | 6             | 0           | -2.921272               | -1.164391 | -0.012047 |
| 3             | 7             | 0           | -2.400659               | 0.125358  | 0.015078  |
| 4             | 6             | 0           | -1.078226               | 0.054451  | 0.265893  |

|    |    |   |           |           |           |
|----|----|---|-----------|-----------|-----------|
| 5  | 7  | 0 | -0.746098 | -1.231109 | 0.397095  |
| 6  | 6  | 0 | 0.641440  | -1.713784 | 0.603198  |
| 7  | 6  | 0 | 1.466873  | -1.789990 | -0.713460 |
| 8  | 1  | 0 | -1.855682 | -3.079794 | 0.290439  |
| 9  | 1  | 0 | -3.960253 | -1.371498 | -0.192495 |
| 10 | 1  | 0 | 1.133534  | -1.012218 | 1.275964  |
| 11 | 1  | 0 | 0.559768  | -2.687354 | 1.088271  |
| 12 | 1  | 0 | 1.341884  | -2.777031 | -1.168296 |
| 13 | 1  | 0 | 1.087597  | -1.034090 | -1.411249 |
| 14 | 35 | 0 | 1.784025  | 1.610464  | 0.226222  |
| 15 | 1  | 0 | -0.329848 | 0.872979  | 0.315842  |
| 16 | 6  | 0 | -3.075433 | 1.360657  | -0.177908 |
| 17 | 6  | 0 | -4.381919 | 1.487852  | -0.370906 |
| 18 | 1  | 0 | -2.395680 | 2.203061  | -0.152414 |
| 19 | 1  | 0 | -4.799841 | 2.474673  | -0.513616 |
| 20 | 1  | 0 | -5.068424 | 0.651118  | -0.394970 |
| 21 | 8  | 0 | 2.843987  | -1.633722 | -0.473755 |
| 22 | 1  | 0 | 3.032555  | -0.685689 | -0.314253 |
| 23 | 6  | 0 | 5.265796  | 2.272921  | -0.057003 |
| 24 | 6  | 0 | 5.916604  | 1.208094  | -0.821607 |
| 25 | 8  | 0 | 4.464506  | 1.250753  | -0.647557 |
| 26 | 1  | 0 | 5.284060  | 2.253826  | 1.022361  |
| 27 | 1  | 0 | 5.111385  | 3.248810  | -0.491829 |
| 28 | 1  | 0 | 6.247988  | 1.417140  | -1.833963 |
| 29 | 6  | 0 | 6.641723  | 0.066937  | -0.146716 |
| 30 | 1  | 0 | 6.544491  | -0.846813 | -0.751844 |
| 31 | 1  | 0 | 7.714546  | 0.294698  | -0.024452 |
| 32 | 1  | 0 | 6.199522  | -0.115059 | 0.842617  |

-----  
Distance matrix (angstroms):

|    |   | 1        | 2        | 3        | 4        | 5        |
|----|---|----------|----------|----------|----------|----------|
| 1  | C | 0.000000 |          |          |          |          |
| 2  | C | 1.357756 | 0.000000 |          |          |          |
| 3  | N | 2.203222 | 1.391124 | 0.000000 |          |          |
| 4  | C | 2.211872 | 2.227026 | 1.347875 | 0.000000 |          |
| 5  | N | 1.385821 | 2.214324 | 2.173365 | 1.334236 | 0.000000 |
| 6  | C | 2.568570 | 3.656948 | 3.603151 | 2.489513 | 1.483480 |
| 7  | C | 3.485324 | 4.487668 | 4.376886 | 3.292206 | 2.538291 |
| 8  | H | 1.076414 | 2.212633 | 3.262794 | 3.229324 | 2.158748 |
| 9  | H | 2.212351 | 1.074679 | 2.171634 | 3.248004 | 3.270797 |
| 10 | H | 3.344461 | 4.257179 | 3.921025 | 2.655166 | 2.086465 |
| 11 | H | 2.678177 | 3.955724 | 4.222230 | 3.298002 | 2.074526 |
| 12 | H | 3.596661 | 4.702342 | 4.881687 | 3.991380 | 3.033149 |
| 13 | H | 3.527923 | 4.248032 | 3.942926 | 2.947629 | 2.582899 |

|    |    |          |           |           |           |          |
|----|----|----------|-----------|-----------|-----------|----------|
| 14 | Br | 5.149705 | 5.467761  | 4.445414  | 3.258102  | 3.808576 |
| 15 | H  | 3.271874 | 3.312683  | 2.222084  | 1.110204  | 2.146405 |
| 16 | C  | 3.594205 | 2.535181  | 1.420749  | 2.427339  | 3.531810 |
| 17 | C  | 4.336829 | 3.049043  | 2.435315  | 3.657122  | 4.604537 |
| 18 | H  | 4.256736 | 3.411112  | 2.084449  | 2.554837  | 3.849234 |
| 19 | H  | 5.397348 | 4.125940  | 3.399245  | 4.507275  | 5.567319 |
| 20 | H  | 4.194559 | 2.837775  | 2.749824  | 4.088330  | 4.780445 |
| 21 | O  | 4.792458 | 5.802728  | 5.553344  | 4.333677  | 3.716071 |
| 22 | H  | 5.117798 | 5.980680  | 5.503279  | 4.216977  | 3.883519 |
| 23 | C  | 8.335713 | 8.879482  | 7.961894  | 6.728483  | 6.973327 |
| 24 | C  | 8.500091 | 9.186519  | 8.429071  | 7.172251  | 7.199066 |
| 25 | O  | 7.186908 | 7.796571  | 6.988283  | 5.743466  | 5.865265 |
| 26 | H  | 8.374746 | 8.948837  | 8.037407  | 6.774081  | 6.992749 |
| 27 | H  | 8.777177 | 9.177696  | 8.151301  | 7.006379  | 7.427648 |
| 28 | H  | 9.058911 | 9.698402  | 8.937939  | 7.742074  | 7.804362 |
| 29 | C  | 8.780470 | 9.642882  | 9.044019  | 7.730977  | 7.520675 |
| 30 | H  | 8.562311 | 9.499938  | 9.030449  | 7.742989  | 7.390564 |
| 31 | H  | 9.872045 | 10.735442 | 10.116700 | 8.800843  | 8.607455 |
| 32 | H  | 8.323050 | 9.220652  | 8.643249  | 7.302531  | 7.048808 |
|    |    | 6        | 7         | 8         | 9         | 10       |
| 6  | C  | 0.000000 |           |           |           |          |
| 7  | C  | 1.555872 | 0.000000  |           |           |          |
| 8  | H  | 2.863463 | 3.702807  | 0.000000  |           |          |
| 9  | H  | 4.682505 | 5.468110  | 2.753310  | 0.000000  |          |
| 10 | H  | 1.089479 | 2.161909  | 3.765839  | 5.313390  | 0.000000 |
| 11 | H  | 1.090782 | 2.207790  | 2.573897  | 4.878773  | 1.780594 |
| 12 | H  | 2.181584 | 1.093959  | 3.527606  | 5.571388  | 3.021982 |
| 13 | H  | 2.172335 | 1.096424  | 3.967813  | 5.203844  | 2.687695 |
| 14 | Br | 3.535284 | 3.542129  | 5.937180  | 6.485687  | 2.898889 |
| 15 | H  | 2.778006 | 3.373288  | 4.237126  | 4.298363  | 2.572410 |
| 16 | C  | 4.886457 | 5.553912  | 4.628688  | 2.871896  | 5.045759 |
| 17 | C  | 6.036015 | 6.713416  | 5.261429  | 2.895775  | 6.275567 |
| 18 | H  | 5.013653 | 5.583775  | 5.328816  | 3.902174  | 4.983336 |
| 19 | H  | 6.956865 | 7.582809  | 6.337719  | 3.949817  | 7.110973 |
| 20 | H  | 6.260323 | 6.983592  | 4.971036  | 2.315171  | 6.634983 |
| 21 | O  | 2.453050 | 1.406528  | 4.976144  | 6.815096  | 2.524565 |
| 22 | H  | 2.759734 | 1.957092  | 5.476519  | 7.027412  | 2.498338 |
| 23 | C  | 6.141201 | 5.600893  | 8.915589  | 9.920691  | 5.444679 |
| 24 | C  | 6.196354 | 5.366593  | 8.946009  | 10.227530 | 5.675152 |
| 25 | O  | 4.996870 | 4.270395  | 7.718696  | 8.835148  | 4.462774 |
| 26 | H  | 6.121401 | 5.825500  | 8.941987  | 10.003808 | 5.287554 |
| 27 | H  | 6.768075 | 6.222628  | 9.444744  | 10.184864 | 6.091367 |
| 28 | H  | 6.868465 | 5.865174  | 9.508152  | 10.708832 | 6.459958 |
| 29 | C  | 6.303709 | 5.527066  | 9.071876  | 10.699209 | 5.790401 |

|    |    |           |           |           |           |           |
|----|----|-----------|-----------|-----------|-----------|-----------|
| 30 | H  | 6.118317  | 5.164617  | 8.754169  | 10.532702 | 5.780815  |
| 31 | H  | 7.379483  | 6.622241  | 10.152616 | 11.794294 | 6.834386  |
| 32 | H  | 5.788396  | 5.255925  | 8.601214  | 10.289369 | 5.163034  |
|    |    | 11        | 12        | 13        | 14        | 15        |
| 11 | H  | 0.000000  |           |           |           |           |
| 12 | H  | 2.389946  | 0.000000  |           |           |           |
| 13 | H  | 3.042940  | 1.778069  | 0.000000  |           |           |
| 14 | Br | 4.551172  | 4.624962  | 3.187474  | 0.000000  |           |
| 15 | H  | 3.750205  | 4.280179  | 2.937500  | 2.240619  | 0.000000  |
| 16 | C  | 5.586080  | 6.133028  | 4.958505  | 4.882628  | 2.831935  |
| 17 | C  | 6.631878  | 7.182407  | 6.112128  | 6.196003  | 4.155595  |
| 18 | H  | 5.847233  | 6.308940  | 4.919048  | 4.238452  | 2.501209  |
| 19 | H  | 7.611699  | 8.107391  | 6.912242  | 6.681430  | 4.820193  |
| 20 | H  | 6.709840  | 7.310424  | 6.462922  | 6.947106  | 4.796726  |
| 21 | O  | 2.961034  | 2.011431  | 2.079268  | 3.483995  | 4.120708  |
| 22 | H  | 3.476840  | 2.821608  | 2.260010  | 2.668943  | 3.759284  |
| 23 | C  | 6.932725  | 6.491076  | 5.497968  | 3.555530  | 5.780145  |
| 24 | C  | 6.893319  | 6.076963  | 5.356713  | 4.282296  | 6.358007  |
| 25 | O  | 5.811090  | 5.122986  | 4.148162  | 2.842158  | 4.904761  |
| 26 | H  | 6.836559  | 6.756423  | 5.860303  | 3.646642  | 5.824249  |
| 27 | H  | 7.645389  | 7.139853  | 5.948061  | 3.777711  | 5.991988  |
| 28 | H  | 7.598826  | 6.488762  | 5.728599  | 4.920233  | 6.941591  |
| 29 | C  | 6.789808  | 6.100826  | 5.801691  | 5.110654  | 7.033240  |
| 30 | H  | 6.526142  | 5.564737  | 5.499780  | 5.445811  | 7.166183  |
| 31 | H  | 7.830813  | 7.166220  | 6.899662  | 6.079897  | 8.072328  |
| 32 | H  | 6.203537  | 5.892921  | 5.661829  | 4.780584  | 6.624680  |
|    |    | 16        | 17        | 18        | 19        | 20        |
| 16 | C  | 0.000000  |           |           |           |           |
| 17 | C  | 1.326774  | 0.000000  |           |           |           |
| 18 | H  | 1.082755  | 2.122359  | 0.000000  |           |           |
| 19 | H  | 2.080219  | 1.081130  | 2.446268  | 0.000000  |           |
| 20 | H  | 2.126635  | 1.082586  | 3.100149  | 1.847043  | 0.000000  |
| 21 | O  | 6.640284  | 7.872008  | 6.502174  | 8.678052  | 8.236076  |
| 22 | H  | 6.443108  | 7.726701  | 6.151163  | 8.448317  | 8.210934  |
| 23 | C  | 8.391838  | 9.684692  | 7.662389  | 10.078008 | 10.466163 |
| 24 | C  | 9.016339  | 10.312176 | 8.398324  | 10.795428 | 11.007411 |
| 25 | O  | 7.555352  | 8.853925  | 6.943646  | 9.345804  | 9.555110  |
| 26 | H  | 8.492322  | 9.795870  | 7.769240  | 10.202601 | 10.571255 |
| 27 | H  | 8.407595  | 9.656004  | 7.587148  | 9.941436  | 10.506469 |
| 28 | H  | 9.469524  | 10.730351 | 8.840717  | 11.176592 | 11.433227 |
| 29 | C  | 9.802950  | 11.117101 | 9.286427  | 11.697914 | 11.727338 |
| 30 | H  | 9.886621  | 11.179544 | 9.465078  | 11.822981 | 11.714562 |
| 31 | H  | 10.843591 | 12.160103 | 10.289553 | 12.712256 | 12.793305 |
| 32 | H  | 9.446905  | 10.770740 | 8.957749  | 11.381215 | 11.361570 |

|    |   |          |          |          |          |          |
|----|---|----------|----------|----------|----------|----------|
|    |   | 21       | 22       | 23       | 24       | 25       |
| 21 | O | 0.000000 |          |          |          |          |
| 22 | H | 0.979676 | 0.000000 |          |          |          |
| 23 | C | 4.615268 | 3.715765 | 0.000000 |          |          |
| 24 | C | 4.199750 | 3.487343 | 1.463566 | 0.000000 |          |
| 25 | O | 3.313078 | 2.431334 | 1.426760 | 1.463113 | 0.000000 |
| 26 | H | 4.827561 | 3.936567 | 1.079688 | 2.212213 | 2.113398 |
| 27 | H | 5.383357 | 4.453465 | 1.079479 | 2.218480 | 2.105929 |
| 28 | H | 4.769187 | 4.131635 | 2.203326 | 1.085532 | 2.148499 |
| 29 | C | 4.173967 | 3.690611 | 2.601459 | 1.511130 | 2.528346 |
| 30 | H | 3.793454 | 3.542759 | 3.442471 | 2.149826 | 2.955841 |
| 31 | H | 5.257663 | 4.792304 | 3.148143 | 2.168489 | 3.444569 |
| 32 | H | 3.911367 | 3.419597 | 2.717280 | 2.144859 | 2.663896 |
|    |   | 26       | 27       | 28       | 29       | 30       |
| 26 | H | 0.000000 |          |          |          |          |
| 27 | H | 1.820050 | 0.000000 |          |          |          |
| 28 | H | 3.128544 | 2.539332 | 0.000000 |          |          |
| 29 | C | 2.827096 | 3.547584 | 2.196560 | 0.000000 |          |
| 30 | H | 3.788199 | 4.346899 | 2.526732 | 1.100261 | 0.000000 |
| 31 | H | 3.292607 | 3.965056 | 2.585536 | 1.103527 | 1.789183 |
| 32 | H | 2.545976 | 3.778942 | 3.084487 | 1.098838 | 1.787953 |
|    |   | 31       | 32       |          |          |          |
| 31 | H | 0.000000 |          |          |          |          |
| 32 | H | 1.793044 | 0.000000 |          |          |          |

Stoichiometry C10H17BrN2O2

Framework group C1[X(C10H17BrN2O2)]

Deg. of freedom 90

Full point group C1 NOp 1

Largest Abelian subgroup C1 NOp 1

Largest concise Abelian subgroup C1 NOp 1

Standard orientation:

| Center<br>Number | Atomic<br>Number | Atomic<br>Type | Coordinates (Angstroms) |           |           |
|------------------|------------------|----------------|-------------------------|-----------|-----------|
|                  |                  |                | X                       | Y         | Z         |
| 1                | 6                | 0              | -3.325380               | 1.894440  | -0.180845 |
| 2                | 6                | 0              | -4.235469               | 0.926676  | 0.099637  |
| 3                | 7                | 0              | -3.551262               | -0.283907 | 0.059924  |
| 4                | 6                | 0              | -2.259436               | -0.042741 | -0.239727 |
| 5                | 7                | 0              | -2.103961               | 1.273905  | -0.389581 |
| 6                | 6                | 0              | -0.800124               | 1.932240  | -0.649036 |
| 7                | 6                | 0              | 0.054755                | 2.128966  | 0.635961  |
| 8                | 1                | 0              | -3.442227               | 2.962155  | -0.251560 |
| 9                | 1                | 0              | -5.285519               | 0.997574  | 0.317132  |

|    |    |   |           |           |           |
|----|----|---|-----------|-----------|-----------|
| 10 | 1  | 0 | -0.244545 | 1.294634  | -1.335880 |
| 11 | 1  | 0 | -1.026284 | 2.881874  | -1.135710 |
| 12 | 1  | 0 | -0.182437 | 3.095542  | 1.090073  |
| 13 | 1  | 0 | -0.196716 | 1.336789  | 1.351058  |
| 14 | 35 | 0 | 0.781972  | -1.209673 | -0.297484 |
| 15 | 1  | 0 | -1.412298 | -0.756561 | -0.313019 |
| 16 | 6  | 0 | -4.050583 | -1.595034 | 0.283869  |
| 17 | 6  | 0 | -5.321286 | -1.890477 | 0.525442  |
| 18 | 1  | 0 | -3.267419 | -2.341276 | 0.237661  |
| 19 | 1  | 0 | -5.600585 | -2.922111 | 0.688436  |
| 20 | 1  | 0 | -6.110446 | -1.150756 | 0.570499  |
| 21 | 8  | 0 | 1.430990  | 2.152203  | 0.346553  |
| 22 | 1  | 0 | 1.736620  | 1.235542  | 0.185035  |
| 23 | 6  | 0 | 4.328480  | -1.407195 | -0.139179 |
| 24 | 6  | 0 | 4.860735  | -0.258761 | 0.595552  |
| 25 | 8  | 0 | 3.421530  | -0.493108 | 0.475257  |
| 26 | 1  | 0 | 4.305421  | -1.396513 | -1.218568 |
| 27 | 1  | 0 | 4.319261  | -2.390569 | 0.305979  |
| 28 | 1  | 0 | 5.252738  | -0.412572 | 1.596079  |
| 29 | 6  | 0 | 5.405044  | 0.960889  | -0.111340 |
| 30 | 1  | 0 | 5.210359  | 1.859931  | 0.492310  |
| 31 | 1  | 0 | 6.493417  | 0.874527  | -0.271831 |
| 32 | 1  | 0 | 4.907633  | 1.073588  | -1.084647 |

-----

Rotational constants (GHZ):      0.8602395      0.1904933      0.1606718

Standard basis: 6-311++G(d,p) (5D, 7F)

There are    492 symmetry adapted cartesian basis functions of A    symmetry.

There are    475 symmetry adapted basis functions of A    symmetry.

    475 basis functions,    751 primitive gaussians,    492 cartesian basis functions

    71 alpha electrons      71 beta electrons

        nuclear repulsion energy      1322.2801640434 Hartrees.

NAtoms=    32 NActive=    32 NUniq=    32 SFac= 1.00D+00 NAtFMM=    60 NAOKFM=F

Big=F

Integral buffers will be    131072 words long.

Raffenetti 2 integral format.

Two-electron integral symmetry is turned on.

One-electron integrals computed using PRISM.

NBasis=    475 RedAO= T EigKep= 4.43D-06 NBF=    475

NBsUse=    475 1.00D-06 EigRej= -1.00D+00 NBFU=    475

Initial guess from the checkpoint file: "/home/suqian/liuwen/qianmengshijie/ohpo/ohpo.chk"

B after Tr=    0.000000    0.000000    0.000000

        Rot=    0.999960    0.006262    -0.001098    0.006357 Ang=    1.03 deg.

ExpMin= 3.50D-02 ExpMax= 4.40D+05 ExpMxC= 1.51D+04 IAcc=3 IRadAn=      5 AccDes=

0.00D+00

Harris functional with IExCor= 402 and IRadAn= 5 diagonalized for initial guess.  
 HarFok: IExCor= 402 AccDes= 0.00D+00 IRadAn= 5 IDoV= 1 UseB2=F ITyADJ=14  
 ICtDFT= 3500011 ScaDFX= 1.000000 1.000000 1.000000 1.000000  
 FoFCou: FMM=F IPFlag= 0 FMFlag= 100000 FMFlg1= 0  
 NFxFlg= 0 DoJE=T BraDBF=F KetDBF=T FulRan=T  
 wScrn= 0.000000 ICntrl= 500 IOpCl= 0 I1Cent= 200000004 NGrid= 0

NMat0= 1 NMatS0= 1 NMatT0= 0 NMatD0= 1 NMtDS0= 0  
 NMtDT0= 0

Petite list used in FoFCou.

Requested convergence on RMS density matrix=1.00D-08 within 128 cycles.

Requested convergence on MAX density matrix=1.00D-06.

Requested convergence on energy=1.00D-06.

No special actions if energy rises.

SCF Done: E(RB3LYP) = -3225.49940141 A.U. after 12 cycles

NFock= 12 Conv=0.73D-08 -V/T= 2.0018

Calling FoFJK, ICntrl= 2127 FMM=F ISym2X=0 I1Cent= 0 IOpClX= 0 NMat=1 NMatS=1  
 NMatT=0.

\*\*\*\*\* Axes restored to original set \*\*\*\*\*

| Center Number | Atomic Number | Forces (Hartrees/Bohr) |              |              |
|---------------|---------------|------------------------|--------------|--------------|
|               |               | X                      | Y            | Z            |
| 1             | 6             | 0.000444896            | -0.000555426 | -0.000429121 |
| 2             | 6             | 0.000516180            | -0.000140179 | 0.000288251  |
| 3             | 7             | -0.000089095           | 0.000245810  | 0.000250799  |
| 4             | 6             | 0.001492793            | -0.000762191 | -0.000132175 |
| 5             | 7             | 0.001365910            | -0.000020793 | -0.001399346 |
| 6             | 6             | 0.001365000            | -0.000561623 | 0.000974947  |
| 7             | 6             | -0.000132037           | 0.000643081  | -0.000965279 |
| 8             | 1             | 0.000030471            | -0.000028131 | -0.000062402 |
| 9             | 1             | 0.000059326            | 0.000038829  | 0.000010245  |
| 10            | 1             | -0.000780210           | 0.000741378  | -0.000628773 |
| 11            | 1             | 0.000825955            | -0.000025571 | 0.000447591  |
| 12            | 1             | -0.000449683           | 0.000256536  | -0.000641681 |
| 13            | 1             | 0.000657141            | 0.000490555  | 0.000970936  |
| 14            | 35            | -0.013833373           | 0.003550807  | 0.005011135  |
| 15            | 1             | 0.000696763            | 0.000260227  | -0.000191085 |
| 16            | 6             | -0.000129762           | -0.000018556 | 0.000076628  |
| 17            | 6             | 0.000078644            | 0.000148480  | -0.000018568 |
| 18            | 1             | -0.000213857           | 0.000044896  | -0.000030215 |
| 19            | 1             | -0.000007405           | -0.000017404 | -0.000019940 |
| 20            | 1             | 0.000067616            | -0.000008248 | 0.000008158  |
| 21            | 8             | -0.001406508           | 0.001339927  | 0.002424405  |



|    |   |              |              |              |
|----|---|--------------|--------------|--------------|
| 22 | 1 | -0.003272927 | -0.001055601 | -0.001164393 |
| 23 | 6 | -0.005887473 | -0.000612744 | -0.002204591 |
| 24 | 6 | -0.003078094 | -0.004199321 | 0.004723377  |
| 25 | 8 | 0.022885896  | -0.008282715 | -0.008360802 |
| 26 | 1 | 0.001845591  | -0.000047442 | 0.005660032  |
| 27 | 1 | 0.001315919  | 0.005519770  | -0.001872397 |
| 28 | 1 | -0.001574058 | 0.002757554  | -0.002487280 |
| 29 | 6 | -0.001608778 | -0.000415487 | 0.000537090  |
| 30 | 1 | 0.001171091  | 0.002513536  | 0.003678463  |
| 31 | 1 | -0.005299398 | -0.001033456 | -0.000951976 |
| 32 | 1 | 0.002943467  | -0.000766497 | -0.003502031 |

-----  
Cartesian Forces: Max 0.022885896 RMS 0.003512681

GradGradGradGradGradGradGradGradGradGradGradGradGradGradGradGradGradGradGradGrad  
Berny optimization.

Using GEDIIS/GDIIS optimizer.

FormGI is forming the generalized inverse of G from B-inverse, IUseBI=4.

GSVD: received Info= 1 from GESDD.

Internal Forces: Max 0.012939079 RMS 0.001830458

Search for a local minimum.

Step number 3 out of a maximum of 177

All quantities printed in internal units (Hartrees-Bohrs-Radians)

Mixed Optimization -- RFO/linear search

Update second derivatives using D2CorX and points 2 3

ITU= 0 1 0

Use linear search instead of GDIIS.

|                 |         |         |         |         |         |
|-----------------|---------|---------|---------|---------|---------|
| Eigenvalues --- | 0.00237 | 0.00260 | 0.00356 | 0.00519 | 0.00803 |
| Eigenvalues --- | 0.01254 | 0.01347 | 0.01402 | 0.01508 | 0.01850 |
| Eigenvalues --- | 0.01902 | 0.02069 | 0.02094 | 0.02144 | 0.02241 |
| Eigenvalues --- | 0.02316 | 0.02389 | 0.02564 | 0.02673 | 0.03062 |
| Eigenvalues --- | 0.03062 | 0.03190 | 0.03450 | 0.03874 | 0.04247 |
| Eigenvalues --- | 0.04317 | 0.04704 | 0.05231 | 0.05512 | 0.05682 |
| Eigenvalues --- | 0.05764 | 0.06292 | 0.09500 | 0.09992 | 0.10473 |
| Eigenvalues --- | 0.10855 | 0.11585 | 0.12307 | 0.12951 | 0.13476 |
| Eigenvalues --- | 0.14614 | 0.15590 | 0.15971 | 0.16000 | 0.16000 |
| Eigenvalues --- | 0.16000 | 0.16000 | 0.16000 | 0.16000 | 0.16056 |
| Eigenvalues --- | 0.16225 | 0.18677 | 0.19652 | 0.21468 | 0.22000 |
| Eigenvalues --- | 0.22780 | 0.23386 | 0.23763 | 0.25001 | 0.27003 |
| Eigenvalues --- | 0.27801 | 0.28403 | 0.31434 | 0.32795 | 0.33044 |
| Eigenvalues --- | 0.33053 | 0.33815 | 0.34082 | 0.34319 | 0.34416 |
| Eigenvalues --- | 0.34763 | 0.34936 | 0.35686 | 0.35690 | 0.35858 |
| Eigenvalues --- | 0.36435 | 0.36656 | 0.37227 | 0.37230 | 0.37835 |
| Eigenvalues --- | 0.38297 | 0.42170 | 0.42469 | 0.44693 | 0.45601 |

Eigenvalues --- 0.49053 0.51019 0.54372 0.56006 0.60352

RFO step: Lambda=-8.13149240D-03 EMin= 2.36841589D-03

Quartic linear search produced a step of 0.77028.

Iteration 1 RMS(Cart)= 0.06673376 RMS(Int)= 0.03098657

Iteration 2 RMS(Cart)= 0.03620013 RMS(Int)= 0.01483510

Iteration 3 RMS(Cart)= 0.03272963 RMS(Int)= 0.00045408

Iteration 4 RMS(Cart)= 0.00024085 RMS(Int)= 0.00044627

Iteration 5 RMS(Cart)= 0.00000008 RMS(Int)= 0.00044627

| Variable | Old X   | -DE/DX   | Delta X<br>(Linear) | Delta X<br>(Quad) | Delta X<br>(Total) | New X   |
|----------|---------|----------|---------------------|-------------------|--------------------|---------|
| R1       | 2.56579 | -0.00038 | -0.00034            | -0.00063          | -0.00116           | 2.56462 |
| R2       | 2.61882 | -0.00040 | 0.00145             | -0.00218          | -0.00066           | 2.61816 |
| R3       | 2.03413 | 0.00002  | 0.00003             | 0.00008           | 0.00012            | 2.03424 |
| R4       | 2.62884 | 0.00004  | 0.00024             | 0.00055           | 0.00061            | 2.62945 |
| R5       | 2.03085 | -0.00007 | 0.00009             | -0.00028          | -0.00019           | 2.03066 |
| R6       | 2.54712 | 0.00011  | 0.00024             | 0.00017           | 0.00049            | 2.54761 |
| R7       | 2.68483 | 0.00024  | -0.00115            | 0.00136           | 0.00020            | 2.68503 |
| R8       | 2.52134 | 0.00039  | 0.00114             | -0.00071          | 0.00107            | 2.52241 |
| R9       | 2.09798 | -0.00022 | 0.00455             | -0.00241          | 0.00249            | 2.10047 |
| R10      | 2.80337 | -0.00202 | 0.00482             | -0.01225          | -0.00733           | 2.79604 |
| R11      | 2.94017 | -0.00237 | 0.00441             | -0.01585          | -0.01154           | 2.92863 |
| R12      | 2.05882 | -0.00026 | 0.00052             | -0.00138          | -0.00086           | 2.05796 |
| R13      | 2.06128 | 0.00016  | 0.00034             | 0.00050           | 0.00084            | 2.06212 |
| R14      | 2.06728 | 0.00009  | 0.00049             | 0.00012           | 0.00061            | 2.06790 |
| R15      | 2.07194 | -0.00051 | -0.00002            | -0.00214          | -0.00216           | 2.06978 |
| R16      | 2.65795 | -0.00366 | 0.00430             | -0.01449          | -0.01024           | 2.64772 |
| R17      | 4.23416 | -0.00171 | -0.04239            | -0.03294          | -0.07513           | 4.15902 |
| R18      | 5.37090 | 0.01294  | 0.44669             | 0.16217           | 0.60885            | 5.97975 |
| R19      | 2.50724 | -0.00012 | 0.00031             | -0.00044          | -0.00013           | 2.50711 |
| R20      | 2.04611 | -0.00010 | 0.00018             | -0.00047          | -0.00029           | 2.04582 |
| R21      | 2.04304 | -0.00001 | 0.00000             | -0.00003          | -0.00003           | 2.04301 |
| R22      | 2.04579 | -0.00004 | 0.00005             | -0.00019          | -0.00014           | 2.04565 |
| R23      | 1.85132 | -0.00332 | 0.00014             | -0.00896          | -0.00922           | 1.84210 |
| R24      | 4.59455 | -0.00079 | 0.00127             | -0.03706          | -0.03615           | 4.55840 |
| R25      | 2.76574 | 0.00139  | 0.00307             | 0.00742           | 0.01030            | 2.77604 |
| R26      | 2.69619 | 0.00143  | -0.03268            | 0.02502           | -0.00775           | 2.68844 |
| R27      | 2.04031 | 0.00569  | -0.02530            | 0.03815           | 0.01285            | 2.05316 |
| R28      | 2.03992 | 0.00555  | -0.02551            | 0.03766           | 0.01216            | 2.05208 |
| R29      | 2.76488 | -0.00784 | 0.02468             | -0.04290          | -0.01795           | 2.74693 |
| R30      | 2.05136 | 0.00237  | -0.01963            | 0.02061           | 0.00098            | 2.05234 |
| R31      | 2.85562 | -0.00166 | -0.02802            | 0.00621           | -0.02181           | 2.83382 |
| R32      | 2.07919 | -0.00421 | 0.02937             | -0.03038          | -0.00102           | 2.07817 |
| R33      | 2.08536 | -0.00547 | 0.03254             | -0.03675          | -0.00422           | 2.08115 |
| R34      | 2.07650 | -0.00421 | 0.02798             | -0.02974          | -0.00175           | 2.07475 |

|     |         |          |          |          |          |         |
|-----|---------|----------|----------|----------|----------|---------|
| A1  | 1.87835 | -0.00020 | 0.00157  | -0.00353 | -0.00176 | 1.87659 |
| A2  | 2.27551 | 0.00011  | -0.00107 | 0.00201  | 0.00084  | 2.27635 |
| A3  | 2.12932 | 0.00008  | -0.00049 | 0.00150  | 0.00090  | 2.13022 |
| A4  | 1.85948 | 0.00032  | -0.00130 | 0.00275  | 0.00142  | 1.86090 |
| A5  | 2.27800 | -0.00013 | 0.00035  | -0.00102 | -0.00066 | 2.27735 |
| A6  | 2.14570 | -0.00019 | 0.00095  | -0.00173 | -0.00076 | 2.14493 |
| A7  | 1.89867 | -0.00008 | 0.00128  | -0.00147 | 0.00004  | 1.89871 |
| A8  | 2.24685 | -0.00015 | 0.00071  | -0.00099 | -0.00039 | 2.24646 |
| A9  | 2.13767 | 0.00024  | -0.00199 | 0.00246  | 0.00035  | 2.13802 |
| A10 | 1.88937 | -0.00040 | -0.00020 | -0.00173 | -0.00219 | 1.88718 |
| A11 | 2.25358 | -0.00077 | 0.00327  | -0.00246 | -0.00042 | 2.25316 |
| A12 | 2.13904 | 0.00118  | -0.00301 | 0.00443  | 0.00288  | 2.14192 |
| A13 | 1.89890 | 0.00036  | -0.00133 | 0.00398  | 0.00246  | 1.90136 |
| A14 | 2.21714 | -0.00190 | -0.00587 | -0.00264 | -0.00949 | 2.20765 |
| A15 | 2.16517 | 0.00153  | 0.00736  | -0.00131 | 0.00721  | 2.17237 |
| A16 | 1.97641 | -0.00300 | 0.00906  | -0.02499 | -0.01481 | 1.96160 |
| A17 | 1.87417 | 0.00068  | 0.00479  | -0.00313 | 0.00145  | 1.87562 |
| A18 | 1.85684 | 0.00115  | -0.00945 | 0.01268  | 0.00263  | 1.85946 |
| A19 | 1.89071 | 0.00123  | 0.00187  | 0.00529  | 0.00657  | 1.89728 |
| A20 | 1.95232 | 0.00026  | -0.00707 | 0.00586  | -0.00130 | 1.95102 |
| A21 | 1.91130 | -0.00028 | 0.00117  | 0.00454  | 0.00586  | 1.91716 |
| A22 | 1.91285 | 0.00046  | -0.00863 | 0.01035  | 0.00239  | 1.91524 |
| A23 | 1.89788 | 0.00066  | 0.00256  | 0.00311  | 0.00560  | 1.90348 |
| A24 | 1.94956 | -0.00239 | 0.01184  | -0.03018 | -0.01985 | 1.92971 |
| A25 | 1.89432 | -0.00011 | -0.00038 | 0.00581  | 0.00528  | 1.89961 |
| A26 | 1.85768 | 0.00057  | -0.00971 | 0.00965  | 0.00019  | 1.85787 |
| A27 | 1.95040 | 0.00085  | 0.00364  | 0.00253  | 0.00674  | 1.95714 |
| A28 | 2.60686 | -0.00568 | -0.02925 | -0.03567 | -0.06556 | 2.54130 |
| A29 | 2.64002 | -0.00100 | -0.01416 | -0.00450 | -0.01713 | 2.62289 |
| A30 | 2.17827 | 0.00003  | 0.00038  | -0.00002 | 0.00036  | 2.17863 |
| A31 | 1.95530 | 0.00019  | -0.00118 | 0.00223  | 0.00104  | 1.95634 |
| A32 | 2.14962 | -0.00022 | 0.00080  | -0.00221 | -0.00141 | 2.14821 |
| A33 | 2.07985 | 0.00005  | 0.00008  | 0.00046  | 0.00053  | 2.08039 |
| A34 | 2.15745 | -0.00008 | -0.00016 | -0.00068 | -0.00084 | 2.15661 |
| A35 | 2.04588 | 0.00003  | 0.00008  | 0.00022  | 0.00030  | 2.04618 |
| A36 | 1.90045 | -0.00031 | 0.02420  | -0.02106 | 0.00235  | 1.90280 |
| A37 | 2.60955 | -0.00341 | -0.00174 | -0.01546 | -0.01520 | 2.59435 |
| A38 | 2.09657 | 0.00040  | -0.00884 | -0.00791 | -0.01700 | 2.07956 |
| A39 | 2.10704 | 0.00014  | -0.00345 | -0.01067 | -0.01443 | 2.09260 |
| A40 | 1.99393 | 0.00139  | -0.00156 | 0.02089  | 0.01886  | 2.01278 |
| A41 | 1.98298 | 0.00229  | -0.00712 | 0.03403  | 0.02663  | 2.00962 |
| A42 | 2.00545 | -0.00069 | 0.00780  | -0.00063 | 0.00565  | 2.01111 |
| A43 | 2.07470 | -0.00229 | -0.02001 | -0.01511 | -0.03497 | 2.03973 |
| A44 | 2.12879 | -0.00013 | 0.00776  | 0.00240  | 0.01016  | 2.13895 |

|     |          |          |          |          |          |          |
|-----|----------|----------|----------|----------|----------|----------|
| A45 | 1.99139  | -0.00147 | 0.00232  | -0.01819 | -0.01661 | 1.97477  |
| A46 | 2.03211  | -0.00132 | 0.02334  | -0.01587 | 0.00710  | 2.03922  |
| A47 | 1.99923  | 0.00240  | 0.00444  | 0.01872  | 0.02278  | 2.02201  |
| A48 | 1.05089  | 0.00053  | -0.02169 | 0.00379  | -0.01891 | 1.03198  |
| A49 | 1.88782  | -0.00168 | 0.01746  | -0.02310 | -0.00473 | 1.88310  |
| A50 | 2.57666  | -0.00024 | 0.00251  | -0.00223 | -0.00032 | 2.57633  |
| A51 | 2.18659  | -0.00093 | 0.00278  | 0.00854  | 0.01176  | 2.19835  |
| A52 | 1.91678  | 0.00237  | 0.00314  | 0.01993  | 0.02288  | 1.93965  |
| A53 | 1.93919  | -0.00132 | 0.01464  | -0.02071 | -0.00607 | 1.93313  |
| A54 | 1.91142  | 0.00259  | 0.00039  | 0.02423  | 0.02442  | 1.93584  |
| A55 | 1.89468  | -0.00084 | -0.00821 | -0.00662 | -0.01482 | 1.87986  |
| A56 | 1.89871  | -0.00206 | -0.00612 | -0.01083 | -0.01734 | 1.88137  |
| A57 | 1.90251  | -0.00081 | -0.00419 | -0.00638 | -0.01058 | 1.89192  |
| A58 | 3.23748  | -0.00040 | -0.01891 | 0.01233  | -0.00715 | 3.23034  |
| A59 | 3.37451  | -0.00007 | -0.00790 | 0.01280  | 0.00476  | 3.37927  |
| D1  | 0.00133  | 0.00001  | -0.00161 | 0.00545  | 0.00389  | 0.00522  |
| D2  | -3.13877 | 0.00004  | -0.00101 | 0.00388  | 0.00293  | -3.13583 |
| D3  | 3.13985  | -0.00001 | -0.00019 | -0.00028 | -0.00056 | 3.13929  |
| D4  | -0.00024 | 0.00001  | 0.00041  | -0.00185 | -0.00152 | -0.00176 |
| D5  | -0.00104 | -0.00005 | 0.00279  | -0.00966 | -0.00701 | -0.00805 |
| D6  | -3.07677 | -0.00012 | -0.00010 | -0.01004 | -0.01043 | -3.08720 |
| D7  | -3.13987 | -0.00002 | 0.00152  | -0.00452 | -0.00302 | 3.14029  |
| D8  | 0.06758  | -0.00010 | -0.00137 | -0.00489 | -0.00644 | 0.06115  |
| D9  | -0.00117 | 0.00003  | -0.00010 | 0.00054  | 0.00049  | -0.00068 |
| D10 | 3.14057  | 0.00007  | 0.00088  | -0.00087 | -0.00003 | 3.14054  |
| D11 | 3.13907  | 0.00000  | -0.00064 | 0.00196  | 0.00136  | 3.14043  |
| D12 | -0.00238 | 0.00005  | 0.00034  | 0.00055  | 0.00084  | -0.00154 |
| D13 | 0.00054  | -0.00006 | 0.00184  | -0.00657 | -0.00486 | -0.00433 |
| D14 | 3.08992  | 0.00026  | 0.00303  | -0.00130 | 0.00149  | 3.09141  |
| D15 | -3.14119 | -0.00010 | 0.00093  | -0.00526 | -0.00438 | 3.13761  |
| D16 | -0.05181 | 0.00022  | 0.00212  | 0.00001  | 0.00197  | -0.04984 |
| D17 | 0.05202  | -0.00006 | -0.00063 | -0.00113 | -0.00171 | 0.05030  |
| D18 | -3.08717 | -0.00003 | -0.00076 | 0.00001  | -0.00070 | -3.08788 |
| D19 | -3.08941 | -0.00001 | 0.00047  | -0.00272 | -0.00230 | -3.09171 |
| D20 | 0.05458  | 0.00001  | 0.00033  | -0.00158 | -0.00129 | 0.05330  |
| D21 | 0.00030  | 0.00007  | -0.00285 | 0.00999  | 0.00731  | 0.00761  |
| D22 | 3.07843  | -0.00002 | -0.00070 | 0.01028  | 0.00988  | 3.08831  |
| D23 | -3.09324 | -0.00016 | -0.00417 | 0.00537  | 0.00156  | -3.09167 |
| D24 | -0.01510 | -0.00025 | -0.00202 | 0.00566  | 0.00413  | -0.01098 |
| D25 | -2.77052 | -0.00060 | -0.00880 | -0.02584 | -0.03389 | -2.80441 |
| D26 | 0.31223  | -0.00029 | -0.00735 | -0.02009 | -0.02686 | 0.28537  |
| D27 | 1.66036  | -0.00074 | -0.01284 | -0.01328 | -0.02575 | 1.63461  |
| D28 | -2.53643 | -0.00057 | -0.00203 | -0.02387 | -0.02552 | -2.56195 |
| D29 | -0.49121 | 0.00002  | -0.00305 | -0.01378 | -0.01667 | -0.50788 |

|     |          |          |          |          |          |          |
|-----|----------|----------|----------|----------|----------|----------|
| D30 | -1.40596 | -0.00075 | -0.01571 | -0.01387 | -0.02936 | -1.43532 |
| D31 | 0.68044  | -0.00058 | -0.00491 | -0.02447 | -0.02913 | 0.65130  |
| D32 | 2.72566  | 0.00000  | -0.00593 | -0.01438 | -0.02029 | 2.70537  |
| D33 | -1.56685 | 0.00034  | 0.01813  | 0.05630  | 0.07448  | -1.49238 |
| D34 | 0.50136  | 0.00086  | 0.01417  | 0.07116  | 0.08563  | 0.58699  |
| D35 | 2.66192  | 0.00080  | 0.02831  | 0.05622  | 0.08474  | 2.74666  |
| D36 | 2.63945  | 0.00052  | 0.00546  | 0.07206  | 0.07740  | 2.71684  |
| D37 | -1.57553 | 0.00104  | 0.00150  | 0.08692  | 0.08855  | -1.48698 |
| D38 | 0.58504  | 0.00098  | 0.01564  | 0.07198  | 0.08766  | 0.67269  |
| D39 | 0.53117  | -0.00011 | 0.00718  | 0.05923  | 0.06650  | 0.59767  |
| D40 | 2.59938  | 0.00041  | 0.00321  | 0.07410  | 0.07765  | 2.67703  |
| D41 | -1.52324 | 0.00035  | 0.01735  | 0.05915  | 0.07676  | -1.44648 |
| D42 | -1.33805 | -0.00084 | -0.01863 | -0.02767 | -0.04545 | -1.38350 |
| D43 | 2.85787  | -0.00041 | -0.00886 | -0.02922 | -0.03740 | 2.82047  |
| D44 | 0.79261  | -0.00109 | -0.00447 | -0.04355 | -0.04768 | 0.74493  |
| D45 | 0.39846  | -0.00039 | -0.01041 | -0.04441 | -0.05474 | 0.34372  |
| D46 | -0.46242 | 0.00088  | 0.00971  | 0.06737  | 0.07641  | -0.38602 |
| D47 | -3.02399 | 0.00040  | 0.01014  | 0.05848  | 0.06835  | -2.95564 |
| D48 | -3.13585 | 0.00003  | -0.00015 | 0.00134  | 0.00119  | -3.13465 |
| D49 | 0.00577  | 0.00001  | -0.00016 | 0.00064  | 0.00048  | 0.00625  |
| D50 | 0.00309  | 0.00000  | 0.00000  | 0.00008  | 0.00008  | 0.00317  |
| D51 | -3.13848 | -0.00001 | -0.00002 | -0.00062 | -0.00064 | -3.13912 |
| D52 | -2.42776 | 0.00027  | -0.00177 | -0.03080 | -0.03352 | -2.46127 |
| D53 | 2.83043  | 0.00099  | -0.00066 | 0.02802  | 0.02718  | 2.85761  |
| D54 | -2.11626 | -0.00138 | -0.00446 | -0.01174 | -0.01627 | -2.13252 |
| D55 | -0.54408 | 0.00107  | 0.00724  | 0.01522  | 0.02242  | -0.52166 |
| D56 | -2.71078 | -0.00015 | 0.01395  | 0.01016  | 0.02384  | -2.68694 |
| D57 | -0.01239 | 0.00037  | -0.00634 | 0.03034  | 0.02375  | 0.01137  |
| D58 | 0.00622  | -0.00070 | 0.00320  | -0.04234 | -0.03880 | -0.03258 |
| D59 | 2.70461  | -0.00018 | -0.01709 | -0.02216 | -0.03889 | 2.66572  |
| D60 | 1.06843  | 0.00083  | 0.00023  | 0.02274  | 0.02318  | 1.09161  |
| D61 | -0.02548 | 0.00241  | 0.01490  | 0.05158  | 0.06717  | 0.04169  |
| D62 | -1.27909 | -0.00202 | -0.00245 | -0.03446 | -0.03761 | -1.31670 |
| D63 | -2.37299 | -0.00044 | 0.01222  | -0.00563 | 0.00638  | -2.36661 |
| D64 | 1.87778  | 0.00096  | 0.02538  | 0.00425  | 0.02960  | 1.90738  |
| D65 | -0.51219 | 0.00037  | -0.01053 | 0.01453  | 0.00405  | -0.50814 |
| D66 | 2.57349  | 0.00091  | 0.00010  | -0.00643 | -0.00620 | 2.56729  |
| D67 | -1.61324 | 0.00057  | 0.00116  | -0.01490 | -0.01372 | -1.62695 |
| D68 | 0.48947  | 0.00041  | 0.00544  | -0.02019 | -0.01482 | 0.47465  |
| D69 | 1.39296  | -0.00072 | 0.01025  | -0.02087 | -0.01039 | 1.38258  |
| D70 | -2.79376 | -0.00107 | 0.01132  | -0.02934 | -0.01790 | -2.81166 |
| D71 | -0.69106 | -0.00122 | 0.01559  | -0.03462 | -0.01900 | -0.71006 |
| D72 | -0.99368 | 0.00034  | -0.02490 | 0.00518  | -0.01977 | -1.01344 |
| D73 | 1.10278  | -0.00001 | -0.02384 | -0.00329 | -0.02728 | 1.07550  |

D74            -3.07770   -0.00016   -0.01956   -0.00857   -0.02839   -3.10608

| Item                 | Value    | Threshold | Converged? |
|----------------------|----------|-----------|------------|
| Maximum Force        | 0.012939 | 0.000450  | NO         |
| RMS Force            | 0.001830 | 0.000300  | NO         |
| Maximum Displacement | 0.439082 | 0.001800  | NO         |
| RMS Displacement     | 0.123452 | 0.001200  | NO         |

Predicted change in Energy=-2.244255D-03

GradGradGradGradGradGradGradGradGradGradGradGradGradGradGradGradGradGradGrad

Input orientation:

| Center Number | Atomic Number | Atomic Type | Coordinates (Angstroms) |           |           |
|---------------|---------------|-------------|-------------------------|-----------|-----------|
|               |               |             | X                       | Y         | Z         |
| 1             | 6             | 0           | -1.842404               | -1.998549 | 0.208363  |
| 2             | 6             | 0           | -2.924953               | -1.211632 | -0.016759 |
| 3             | 7             | 0           | -2.474630               | 0.104452  | 0.018635  |
| 4             | 6             | 0           | -1.148490               | 0.103217  | 0.261165  |
| 5             | 7             | 0           | -0.750097               | -1.164728 | 0.384824  |
| 6             | 6             | 0           | 0.653300                | -1.585076 | 0.592185  |
| 7             | 6             | 0           | 1.453128                | -1.646839 | -0.733799 |
| 8             | 1             | 0           | -1.757847               | -3.070272 | 0.263676  |
| 9             | 1             | 0           | -3.952195               | -1.472402 | -0.194218 |
| 10            | 1             | 0           | 1.120558                | -0.851981 | 1.248097  |
| 11            | 1             | 0           | 0.616602                | -2.556153 | 1.088614  |
| 12            | 1             | 0           | 1.302057                | -2.619699 | -1.211477 |
| 13            | 1             | 0           | 1.090987                | -0.862302 | -1.406849 |
| 14            | 35            | 0           | 1.604970                | 1.760535  | 0.252229  |
| 15            | 1             | 0           | -0.444979               | 0.962076  | 0.315146  |
| 16            | 6             | 0           | -3.216874               | 1.302745  | -0.160254 |
| 17            | 6             | 0           | -4.529101               | 1.360436  | -0.347033 |
| 18            | 1             | 0           | -2.584983               | 2.181305  | -0.130720 |
| 19            | 1             | 0           | -5.001015               | 2.323977  | -0.480066 |
| 20            | 1             | 0           | -5.168501               | 0.487412  | -0.375724 |
| 21            | 8             | 0           | 2.827543                | -1.536135 | -0.485124 |
| 22            | 1             | 0           | 3.049236                | -0.598395 | -0.337735 |
| 23            | 6             | 0           | 5.409606                | 2.229828  | -0.076253 |
| 24            | 6             | 0           | 6.028226                | 1.119132  | -0.812238 |
| 25            | 8             | 0           | 4.586241                | 1.231330  | -0.667045 |
| 26            | 1             | 0           | 5.438014                | 2.225921  | 1.009856  |
| 27            | 1             | 0           | 5.343737                | 3.212344  | -0.533994 |
| 28            | 1             | 0           | 6.373506                | 1.330118  | -1.820093 |
| 29            | 6             | 0           | 6.690252                | -0.036283 | -0.122664 |
| 30            | 1             | 0           | 6.567801                | -0.964938 | -0.698851 |

|    |   |   |          |           |           |
|----|---|---|----------|-----------|-----------|
| 31 | 1 | 0 | 7.770137 | 0.145538  | -0.005859 |
| 32 | 1 | 0 | 6.256634 | -0.199365 | 0.872720  |

-----  
Distance matrix (angstroms):

|    |    | 1        | 2         | 3         | 4        | 5        |
|----|----|----------|-----------|-----------|----------|----------|
| 1  | C  | 0.000000 |           |           |          |          |
| 2  | C  | 1.357141 | 0.000000  |           |          |          |
| 3  | N  | 2.204159 | 1.391446  | 0.000000  |          |          |
| 4  | C  | 2.213984 | 2.227531  | 1.348136  | 0.000000 |          |
| 5  | N  | 1.385472 | 2.212119  | 2.172309  | 1.334801 | 0.000000 |
| 6  | C  | 2.558676 | 3.648859  | 3.601029  | 2.491255 | 1.479599 |
| 7  | C  | 3.445562 | 4.457707  | 4.365828  | 3.289539 | 2.517528 |
| 8  | H  | 1.076475 | 2.212538  | 3.263846  | 3.231463 | 2.159012 |
| 9  | H  | 2.211361 | 1.074578  | 2.171399  | 3.248186 | 3.268545 |
| 10 | H  | 3.342874 | 4.253865  | 3.918126  | 2.652360 | 2.083842 |
| 11 | H  | 2.670669 | 3.946162  | 4.216561  | 3.297342 | 2.073462 |
| 12 | H  | 3.505625 | 4.612767  | 4.816382  | 3.948180 | 2.979338 |
| 13 | H  | 3.536205 | 4.264054  | 3.959828  | 2.954615 | 2.586724 |
| 14 | Br | 5.100688 | 5.424604  | 4.409117  | 3.213770 | 3.757803 |
| 15 | H  | 3.275591 | 3.314429  | 2.223268  | 1.111522 | 2.149709 |
| 16 | C  | 3.594939 | 2.535330  | 1.420857  | 2.427896 | 3.531363 |
| 17 | C  | 4.337002 | 3.049247  | 2.435582  | 3.657737 | 4.603579 |
| 18 | H  | 4.258824 | 3.411831  | 2.085139  | 2.556470 | 3.850783 |
| 19 | H  | 5.397684 | 4.126163  | 3.399650  | 4.508121 | 5.566813 |
| 20 | H  | 4.193338 | 2.837096  | 2.749386  | 4.088243 | 4.778106 |
| 21 | O  | 4.743749 | 5.780648  | 5.573001  | 4.365004 | 3.700576 |
| 22 | H  | 5.117304 | 6.014152  | 5.579793  | 4.297888 | 3.908677 |
| 23 | C  | 8.399513 | 9.017320  | 8.166235  | 6.902531 | 7.048229 |
| 24 | C  | 8.526921 | 9.285724  | 8.603400  | 7.327314 | 7.252216 |
| 25 | O  | 7.247478 | 7.925211  | 7.183029  | 5.917884 | 5.943402 |
| 26 | H  | 8.455355 | 9.099996  | 8.251853  | 6.960491 | 7.083776 |
| 27 | H  | 8.907588 | 9.392036  | 8.431562  | 7.242096 | 7.558954 |
| 28 | H  | 9.093726 | 9.806827  | 9.119906  | 7.900465 | 7.863310 |
| 29 | C  | 8.761638 | 9.687355  | 9.167052  | 7.849373 | 7.542528 |
| 30 | H  | 8.521909 | 9.520425  | 9.133670  | 7.848804 | 7.400398 |
| 31 | H  | 9.851088 | 10.780862 | 10.244878 | 8.922723 | 8.629241 |
| 32 | H  | 8.323032 | 9.279947  | 8.778197  | 7.436492 | 7.089728 |
|    |    | 6        | 7         | 8         | 9        | 10       |
| 6  | C  | 0.000000 |           |           |          |          |
| 7  | C  | 1.549765 | 0.000000  |           |          |          |
| 8  | H  | 2.850852 | 3.651229  | 0.000000  |          |          |
| 9  | H  | 4.673512 | 5.434987  | 2.752820  | 0.000000 |          |
| 10 | H  | 1.089026 | 2.161091  | 3.764985  | 5.310180 | 0.000000 |
| 11 | H  | 1.091228 | 2.201775  | 2.565706  | 4.867656 | 1.784266 |

|    |    |          |          |           |           |          |
|----|----|----------|----------|-----------|-----------|----------|
| 12 | H  | 2.178194 | 1.094283 | 3.426675  | 5.473414  | 3.034349 |
| 13 | H  | 2.170278 | 1.095281 | 3.972611  | 5.222679  | 2.655130 |
| 14 | Br | 3.494904 | 3.550423 | 5.886031  | 6.444631  | 2.837542 |
| 15 | H  | 2.787642 | 3.392570 | 4.241002  | 4.299616  | 2.571401 |
| 16 | C  | 4.887118 | 5.553190 | 4.629444  | 2.871113  | 5.043770 |
| 17 | C  | 6.034522 | 6.706740 | 5.261558  | 2.895021  | 6.273585 |
| 18 | H  | 5.019432 | 5.596850 | 5.330925  | 3.901650  | 4.983271 |
| 19 | H  | 6.957133 | 7.582066 | 6.337919  | 3.948953  | 7.109635 |
| 20 | H  | 6.255032 | 6.966292 | 4.969759  | 2.313702  | 6.631970 |
| 21 | O  | 2.426999 | 1.401111 | 4.892860  | 6.786275  | 2.527038 |
| 22 | H  | 2.752962 | 1.950298 | 5.438742  | 7.057232  | 2.509775 |
| 23 | C  | 6.133737 | 5.578049 | 8.920705  | 10.067955 | 5.444941 |
| 24 | C  | 6.178590 | 5.346800 | 8.906831  | 10.329898 | 5.675868 |
| 25 | O  | 4.998582 | 4.254963 | 7.721235  | 8.968758  | 4.474250 |
| 26 | H  | 6.131201 | 5.823909 | 8.965871  | 10.163828 | 5.307605 |
| 27 | H  | 6.803213 | 6.228035 | 9.515252  | 10.415212 | 6.126159 |
| 28 | H  | 6.858440 | 5.852558 | 9.477575  | 10.822093 | 6.462880 |
| 29 | C  | 6.273321 | 5.513152 | 8.984694  | 10.739145 | 5.793604 |
| 30 | H  | 6.085446 | 5.160047 | 8.641487  | 10.544310 | 5.785830 |
| 31 | H  | 7.348608 | 6.606596 | 10.059649 | 11.834959 | 6.839909 |
| 32 | H  | 5.778948 | 5.267804 | 8.534925  | 10.343073 | 5.190963 |
|    |    | 11       | 12       | 13        | 14        | 15       |
| 11 | H  | 0.000000 |          |           |           |          |
| 12 | H  | 2.400897 | 0.000000 |           |           |          |
| 13 | H  | 3.053114 | 1.780777 | 0.000000  |           |          |
| 14 | Br | 4.506684 | 4.628244 | 3.145789  | 0.000000  |          |
| 15 | H  | 3.755414 | 4.267531 | 2.941566  | 2.200860  | 0.000000 |
| 16 | C  | 5.580887 | 6.075473 | 4.979869  | 4.861059  | 2.832926 |
| 17 | C  | 6.624123 | 7.112745 | 6.135891  | 6.176246  | 4.156588 |
| 18 | H  | 5.846403 | 6.271105 | 4.940121  | 4.228404  | 2.502985 |
| 19 | H  | 7.604870 | 8.043856 | 6.937131  | 6.670289  | 4.821266 |
| 20 | H  | 6.698880 | 7.226392 | 6.485841  | 6.920627  | 4.797319 |
| 21 | O  | 2.899198 | 2.007189 | 2.078282  | 3.592549  | 4.194150 |
| 22 | H  | 3.432928 | 2.811002 | 2.246640  | 2.828165  | 3.882121 |
| 23 | C  | 6.872802 | 6.455897 | 5.475602  | 3.847517  | 6.003045 |
| 24 | C  | 6.812241 | 6.039448 | 5.353128  | 4.594528  | 6.572522 |
| 25 | O  | 5.760677 | 5.090452 | 4.140943  | 3.164348  | 5.133261 |
| 26 | H  | 6.791203 | 6.746888 | 5.854419  | 3.934820  | 6.057188 |
| 27 | H  | 7.632445 | 7.127895 | 5.954032  | 4.087086  | 6.268490 |
| 28 | H  | 7.530314 | 6.456862 | 5.734326  | 5.217156  | 7.154470 |
| 29 | C  | 6.686267 | 6.073895 | 5.803724  | 5.406403  | 7.218027 |
| 30 | H  | 6.414340 | 5.543381 | 5.523340  | 5.741293  | 7.343068 |
| 31 | H  | 7.724640 | 7.136953 | 6.898518  | 6.378409  | 8.261834 |
| 32 | H  | 6.116455 | 5.894890 | 5.685053  | 5.085686  | 6.824328 |



|    |   | 16        | 17        | 18        | 19        | 20        |
|----|---|-----------|-----------|-----------|-----------|-----------|
| 16 | C | 0.000000  |           |           |           |           |
| 17 | C | 1.326707  | 0.000000  |           |           |           |
| 18 | H | 1.082602  | 2.121370  | 0.000000  |           |           |
| 19 | H | 2.080470  | 1.081116  | 2.445324  | 0.000000  |           |
| 20 | H | 2.126039  | 1.082510  | 3.099011  | 1.847136  | 0.000000  |
| 21 | O | 6.685788  | 7.907554  | 6.575744  | 8.728506  | 8.248845  |
| 22 | H | 6.550571  | 7.827407  | 6.286017  | 8.565458  | 8.289248  |
| 23 | C | 8.676560  | 9.980333  | 7.994921  | 10.418875 | 10.724833 |
| 24 | C | 9.269881  | 10.570326 | 8.705174  | 11.099827 | 11.223027 |
| 25 | O | 7.819881  | 9.121871  | 7.253726  | 9.651130  | 9.787404  |
| 26 | H | 8.782284  | 10.096216 | 8.103788  | 10.545274 | 10.836993 |
| 27 | H | 8.778970  | 10.046763 | 8.005640  | 10.382967 | 10.860822 |
| 28 | H | 9.732997  | 11.001712 | 9.156038  | 11.496224 | 11.662517 |
| 29 | C | 9.997278  | 11.308185 | 9.536653  | 11.932489 | 11.873009 |
| 30 | H | 10.058446 | 11.343384 | 9.695105  | 12.029228 | 11.830237 |
| 31 | H | 11.048863 | 12.363803 | 10.554072 | 12.964289 | 12.948437 |
| 32 | H | 9.647318  | 10.965986 | 9.211334  | 11.616022 | 11.513644 |
|    |   | 21        | 22        | 23        | 24        | 25        |
| 21 | O | 0.000000  |           |           |           |           |
| 22 | H | 0.974796  | 0.000000  |           |           |           |
| 23 | C | 4.584397  | 3.693042  | 0.000000  |           |           |
| 24 | C | 4.171549  | 3.471230  | 1.469017  | 0.000000  |           |
| 25 | O | 3.284049  | 2.412203  | 1.422660  | 1.453613  | 0.000000  |
| 26 | H | 4.816907  | 3.936880  | 1.086488  | 2.212094  | 2.127610  |
| 27 | H | 5.374167  | 4.452526  | 1.085912  | 2.219793  | 2.125069  |
| 28 | H | 4.750937  | 4.119141  | 2.186221  | 1.086050  | 2.129225  |
| 29 | C | 4.159502  | 3.690423  | 2.603357  | 1.499591  | 2.515961  |
| 30 | H | 3.789653  | 3.555988  | 3.454790  | 2.155770  | 2.958241  |
| 31 | H | 5.242800  | 4.790666  | 3.149813  | 2.152297  | 3.428309  |
| 32 | H | 3.922928  | 3.451352  | 2.742076  | 2.151671  | 2.684768  |
|    |   | 26        | 27        | 28        | 29        | 30        |
| 26 | H | 0.000000  |           |           |           |           |
| 27 | H | 1.834501  | 0.000000  |           |           |           |
| 28 | H | 3.112270  | 2.501450  | 0.000000  |           |           |
| 29 | C | 2.822812  | 3.540603  | 2.201964  | 0.000000  |           |
| 30 | H | 3.791791  | 4.356053  | 2.561683  | 1.099721  | 0.000000  |
| 31 | H | 3.286102  | 3.946092  | 2.577838  | 1.101296  | 1.777359  |
| 32 | H | 2.563388  | 3.801576  | 3.099067  | 1.097911  | 1.775602  |
|    |   | 31        | 32        |           |           |           |
| 31 | H | 0.000000  |           |           |           |           |
| 32 | H | 1.783690  | 0.000000  |           |           |           |

Stoichiometry C10H17BrN2O2

Framework group C1[X(C10H17BrN2O2)]

Deg. of freedom 90  
 Full point group C1 NOp 1  
 Largest Abelian subgroup C1 NOp 1  
 Largest concise Abelian subgroup C1 NOp 1

Standard orientation:

| Center<br>Number | Atomic<br>Number | Atomic<br>Type | Coordinates (Angstroms) |           |           |
|------------------|------------------|----------------|-------------------------|-----------|-----------|
|                  |                  |                | X                       | Y         | Z         |
| 1                | 6                | 0              | -3.227487               | 1.964874  | -0.196060 |
| 2                | 6                | 0              | -4.197858               | 1.059919  | 0.089015  |
| 3                | 7                | 0              | -3.592956               | -0.192947 | 0.065781  |
| 4                | 6                | 0              | -2.286375               | -0.038869 | -0.228458 |
| 5                | 7                | 0              | -2.049289               | 1.263946  | -0.396261 |
| 6                | 6                | 0              | -0.715585               | 1.844185  | -0.667869 |
| 7                | 6                | 0              | 0.118262                | 2.037674  | 0.624042  |
| 8                | 1                | 0              | -3.275470               | 3.037087  | -0.278861 |
| 9                | 1                | 0              | -5.242039               | 1.200017  | 0.300622  |
| 10               | 1                | 0              | -0.186953               | 1.155035  | -1.324831 |
| 11               | 1                | 0              | -0.887598               | 2.789954  | -1.184310 |
| 12               | 1                | 0              | -0.132216               | 2.997932  | 1.085151  |
| 13               | 1                | 0              | -0.121584               | 1.233868  | 1.328323  |
| 14               | 35               | 0              | 0.646127                | -1.352254 | -0.289880 |
| 15               | 1                | 0              | -1.486392               | -0.808061 | -0.290513 |
| 16               | 6                | 0              | -4.177578               | -1.466481 | 0.300647  |
| 17               | 6                | 0              | -5.465530               | -1.676427 | 0.539924  |
| 18               | 1                | 0              | -3.445369               | -2.263171 | 0.266264  |
| 19               | 1                | 0              | -5.812095               | -2.685744 | 0.713087  |
| 20               | 1                | 0              | -6.204548               | -0.886157 | 0.573884  |
| 21               | 8                | 0              | 1.486072                | 2.086304  | 0.324305  |
| 22               | 1                | 0              | 1.814286                | 1.178364  | 0.189589  |
| 23               | 6                | 0              | 4.488961                | -1.351607 | -0.100107 |
| 24               | 6                | 0              | 4.994631                | -0.155004 | 0.585788  |
| 25               | 8                | 0              | 3.572567                | -0.443664 | 0.499746  |
| 26               | 1                | 0              | 4.477414                | -1.373828 | -1.186306 |
| 27               | 1                | 0              | 4.559218                | -2.322111 | 0.381961  |
| 28               | 1                | 0              | 5.399130                | -0.295481 | 1.583862  |
| 29               | 6                | 0              | 5.486417                | 1.052457  | -0.155130 |
| 30               | 1                | 0              | 5.273245                | 1.974965  | 0.404266  |
| 31               | 1                | 0              | 6.575443                | 0.998684  | -0.309990 |
| 32               | 1                | 0              | 5.000544                | 1.135112  | -1.136203 |

Rotational constants (GHZ): 0.8548864 0.1849270 0.1565346

Standard basis: 6-311++G(d,p) (5D, 7F)

There are 492 symmetry adapted cartesian basis functions of A symmetry.  
 There are 475 symmetry adapted basis functions of A symmetry.  
 475 basis functions, 751 primitive gaussians, 492 cartesian basis functions  
 71 alpha electrons 71 beta electrons  
 nuclear repulsion energy 1310.1824125098 Hartrees.  
 NAToms= 32 NActive= 32 NUniq= 32 SFac= 1.00D+00 NATFMM= 60 NAOKFM=F  
 Big=F  
 Integral buffers will be 131072 words long.  
 Raffenetti 2 integral format.  
 Two-electron integral symmetry is turned on.  
 One-electron integrals computed using PRISM.  
 NBasis= 475 RedAO= T EigKep= 4.35D-06 NBF= 475  
 NBsUse= 475 1.00D-06 EigRej= -1.00D+00 NBFU= 475  
 Initial guess from the checkpoint file: "/home/suqian/liuwen/qianmengshijie/ohpo/ohpo.chk"  
 B after Tr= 0.000000 0.000000 0.000000  
 Rot= 0.999918 0.010111 -0.000749 0.007854 Ang= 1.47 deg.  
 ExpMin= 3.50D-02 ExpMax= 4.40D+05 ExpMxC= 1.51D+04 IAcc=3 IRadAn= 5 AccDes=  
 0.00D+00  
 Harris functional with IExCor= 402 and IRadAn= 5 diagonalized for initial guess.  
 HarFok: IExCor= 402 AccDes= 0.00D+00 IRadAn= 5 IDoV= 1 UseB2=F ITyADJ=14  
 ICtDFT= 3500011 ScaDFX= 1.000000 1.000000 1.000000 1.000000  
 FoFCou: FMM=F IPFlag= 0 FMFlag= 100000 FMFlg1= 0  
 NFxFlg= 0 DoJE=T BraDBF=F KetDBF=T FulRan=T  
 wScrn= 0.000000 ICntrl= 500 IOpCl= 0 I1Cent= 20000004 NGrid=  
 0  
 NMat0= 1 NMatS0= 1 NMatT0= 0 NMatD0= 1 NMtDS0= 0  
 NMtDT0= 0  
 Petite list used in FoFCou.  
 Requested convergence on RMS density matrix=1.00D-08 within 128 cycles.  
 Requested convergence on MAX density matrix=1.00D-06.  
 Requested convergence on energy=1.00D-06.  
 No special actions if energy rises.  
 SCF Done: E(RB3LYP)= -3225.50616232 A.U. after 12 cycles  
 NFock= 12 Conv=0.32D-08 -V/T= 2.0018  
 Calling FoFJK, ICntrl= 2127 FMM=F ISym2X=0 I1Cent= 0 IOpCIX= 0 NMat=1 NMatS=1  
 NMatT=0.  
 \*\*\*\*\* Axes restored to original set \*\*\*\*\*

| Center<br>Number | Atomic<br>Number | Forces (Hartrees/Bohr) |              |              |
|------------------|------------------|------------------------|--------------|--------------|
|                  |                  | X                      | Y            | Z            |
| 1                | 6                | -0.000035421           | 0.000375268  | 0.000240891  |
| 2                | 6                | -0.000470950           | 0.000224486  | -0.000200566 |
| 3                | 7                | -0.000395429           | -0.000182898 | -0.000118680 |

|    |    |              |              |              |
|----|----|--------------|--------------|--------------|
| 4  | 6  | 0.000331839  | -0.001200452 | 0.000761598  |
| 5  | 7  | -0.000258173 | -0.000157741 | -0.000886304 |
| 6  | 6  | -0.000402457 | -0.000754113 | -0.000055486 |
| 7  | 6  | -0.001352624 | -0.001379691 | 0.000391646  |
| 8  | 1  | 0.000084094  | 0.000078698  | 0.000004116  |
| 9  | 1  | -0.000052981 | 0.000019968  | -0.000065776 |
| 10 | 1  | -0.000432254 | 0.000761065  | -0.000715723 |
| 11 | 1  | 0.001089427  | 0.000287932  | 0.000413688  |
| 12 | 1  | -0.001062929 | 0.000291415  | -0.000964482 |
| 13 | 1  | 0.000588727  | 0.000640608  | 0.000782109  |
| 14 | 35 | -0.003524499 | 0.004146187  | 0.002232698  |
| 15 | 1  | 0.000262045  | -0.000956155 | -0.000108720 |
| 16 | 6  | 0.000031325  | -0.000263974 | -0.000080219 |
| 17 | 6  | -0.000040261 | 0.000047929  | -0.000042594 |
| 18 | 1  | -0.000057900 | 0.000015511  | 0.000030944  |
| 19 | 1  | -0.000006699 | -0.000008987 | 0.000034130  |
| 20 | 1  | -0.000032307 | -0.000009762 | 0.000006292  |
| 21 | 8  | 0.003420617  | 0.000624382  | 0.000866100  |
| 22 | 1  | -0.001662758 | 0.001336800  | -0.000567329 |
| 23 | 6  | 0.001088693  | 0.000728418  | 0.001436294  |
| 24 | 6  | -0.006478485 | 0.002977709  | 0.001769181  |
| 25 | 8  | 0.010010088  | -0.006756256 | -0.004690187 |
| 26 | 1  | -0.000910460 | 0.000182287  | 0.001009439  |
| 27 | 1  | -0.000681786 | 0.001052236  | -0.000120015 |
| 28 | 1  | 0.000085043  | -0.000169024 | -0.002335763 |
| 29 | 6  | 0.003171992  | -0.006026804 | 0.003083354  |
| 30 | 1  | 0.000038869  | 0.003228915  | 0.001555712  |
| 31 | 1  | -0.003642491 | -0.000257504 | -0.000581688 |
| 32 | 1  | 0.001298107  | 0.001103547  | -0.003084663 |

-----  
Cartesian Forces: Max 0.010010088 RMS 0.002034537

GradGradGradGradGradGradGradGradGradGradGradGradGradGradGradGradGradGradGrad

Berny optimization.

Using GEDIIS/GDIIS optimizer.

FormGI is forming the generalized inverse of G from B-inverse, IUseBI=4.

GSVD: received Info= 1 from GESDD.

Internal Forces: Max 0.004966943 RMS 0.001009625

Search for a local minimum.

Step number 4 out of a maximum of 177

All quantities printed in internal units (Hartrees-Bohrs-Radians)

Mixed Optimization -- RFO/linear search

Update second derivatives using D2CorX and points 3 4

DE= -6.76D-03 DEPred=-2.24D-03 R= 3.01D+00

TightC=F SS= 1.41D+00 RLast= 7.01D-01 DXNew= 8.4853D-01 2.1040D+00

Trust test= 3.01D+00 RLast= 7.01D-01 DXMaxT set to 8.49D-01

ITU= 1 0 1 0

Use linear search instead of GDIIIS.

Linear search step of 1.253 exceeds DXMaxT= 0.849 but not scaled.

Quartic linear search produced a step of 2.00000.

Iteration 1 RMS(Cart)= 0.12158761 RMS(Int)= 0.07683171

Iteration 2 RMS(Cart)= 0.03835391 RMS(Int)= 0.05931836

Iteration 3 RMS(Cart)= 0.03608290 RMS(Int)= 0.04239193

Iteration 4 RMS(Cart)= 0.03450437 RMS(Int)= 0.02597464

Iteration 5 RMS(Cart)= 0.03307617 RMS(Int)= 0.01016660

Iteration 6 RMS(Cart)= 0.02011576 RMS(Int)= 0.00244668

Iteration 7 RMS(Cart)= 0.00010207 RMS(Int)= 0.00244643

Iteration 8 RMS(Cart)= 0.00000013 RMS(Int)= 0.00244643

| Variable | Old X   | -DE/DX   | Delta X<br>(Linear) | Delta X<br>(Quad) | Delta X<br>(Total) | New X   |
|----------|---------|----------|---------------------|-------------------|--------------------|---------|
| R1       | 2.56462 | 0.00012  | -0.00232            | 0.00000           | -0.00312           | 2.56151 |
| R2       | 2.61816 | 0.00002  | -0.00132            | 0.00000           | -0.00105           | 2.61711 |
| R3       | 2.03424 | -0.00007 | 0.00023             | 0.00000           | 0.00023            | 2.03447 |
| R4       | 2.62945 | -0.00035 | 0.00122             | 0.00000           | 0.00045            | 2.62990 |
| R5       | 2.03066 | 0.00006  | -0.00038            | 0.00000           | -0.00038           | 2.03027 |
| R6       | 2.54761 | 0.00079  | 0.00098             | 0.00000           | 0.00130            | 2.54891 |
| R7       | 2.68503 | -0.00011 | 0.00041             | 0.00000           | 0.00041            | 2.68544 |
| R8       | 2.52241 | -0.00032 | 0.00213             | 0.00000           | 0.00482            | 2.52722 |
| R9       | 2.10047 | 0.00139  | 0.00498             | 0.00000           | 0.00647            | 2.10694 |
| R10      | 2.79604 | -0.00003 | -0.01467            | 0.00000           | -0.01424           | 2.78180 |
| R11      | 2.92863 | -0.00069 | -0.02308            | 0.00000           | -0.02410           | 2.90453 |
| R12      | 2.05796 | -0.00010 | -0.00171            | 0.00000           | -0.00171           | 2.05625 |
| R13      | 2.06212 | -0.00010 | 0.00169             | 0.00000           | 0.00169            | 2.06381 |
| R14      | 2.06790 | 0.00031  | 0.00122             | 0.00000           | 0.00122            | 2.06912 |
| R15      | 2.06978 | -0.00022 | -0.00432            | 0.00000           | -0.00432           | 2.06547 |
| R16      | 2.64772 | 0.00158  | -0.02047            | 0.00000           | -0.02035           | 2.62737 |
| R17      | 4.15902 | 0.00136  | -0.15027            | 0.00000           | -0.14938           | 4.00964 |
| R18      | 5.97975 | 0.00495  | 1.21770             | 0.00000           | 1.21765            | 7.19741 |
| R19      | 2.50711 | 0.00008  | -0.00025            | 0.00000           | -0.00025           | 2.50686 |
| R20      | 2.04582 | -0.00002 | -0.00058            | 0.00000           | -0.00058           | 2.04524 |
| R21      | 2.04301 | -0.00001 | -0.00005            | 0.00000           | -0.00005           | 2.04296 |
| R22      | 2.04565 | 0.00002  | -0.00029            | 0.00000           | -0.00029           | 2.04536 |
| R23      | 1.84210 | -0.00093 | -0.01844            | 0.00000           | -0.02000           | 1.82210 |
| R24      | 4.55840 | -0.00152 | -0.07230            | 0.00000           | -0.07371           | 4.48469 |
| R25      | 2.77604 | 0.00055  | 0.02060             | 0.00000           | 0.01928            | 2.79532 |
| R26      | 2.68844 | 0.00085  | -0.01550            | 0.00000           | -0.01579           | 2.67264 |
| R27      | 2.05316 | 0.00099  | 0.02570             | 0.00000           | 0.02570            | 2.07886 |
| R28      | 2.05208 | 0.00104  | 0.02431             | 0.00000           | 0.02431            | 2.07639 |

|     |         |          |          |         |          |         |
|-----|---------|----------|----------|---------|----------|---------|
| R29 | 2.74693 | -0.00497 | -0.03590 | 0.00000 | -0.03426 | 2.71267 |
| R30 | 2.05234 | 0.00216  | 0.00196  | 0.00000 | 0.00196  | 2.05430 |
| R31 | 2.83382 | 0.00234  | -0.04361 | 0.00000 | -0.04361 | 2.79021 |
| R32 | 2.07817 | -0.00354 | -0.00204 | 0.00000 | -0.00204 | 2.07613 |
| R33 | 2.08115 | -0.00368 | -0.00843 | 0.00000 | -0.00843 | 2.07271 |
| R34 | 2.07475 | -0.00347 | -0.00350 | 0.00000 | -0.00350 | 2.07125 |
| A1  | 1.87659 | 0.00031  | -0.00353 | 0.00000 | -0.00274 | 1.87385 |
| A2  | 2.27635 | -0.00006 | 0.00168  | 0.00000 | 0.00123  | 2.27758 |
| A3  | 2.13022 | -0.00024 | 0.00181  | 0.00000 | 0.00140  | 2.13162 |
| A4  | 1.86090 | -0.00031 | 0.00284  | 0.00000 | 0.00274  | 1.86365 |
| A5  | 2.27735 | 0.00020  | -0.00131 | 0.00000 | -0.00126 | 2.27609 |
| A6  | 2.14493 | 0.00012  | -0.00153 | 0.00000 | -0.00148 | 2.14345 |
| A7  | 1.89871 | 0.00025  | 0.00008  | 0.00000 | 0.00103  | 1.89974 |
| A8  | 2.24646 | -0.00039 | -0.00078 | 0.00000 | -0.00126 | 2.24520 |
| A9  | 2.13802 | 0.00013  | 0.00071  | 0.00000 | 0.00023  | 2.13825 |
| A10 | 1.88718 | -0.00026 | -0.00438 | 0.00000 | -0.00542 | 1.88177 |
| A11 | 2.25316 | -0.00058 | -0.00084 | 0.00000 | -0.00612 | 2.24704 |
| A12 | 2.14192 | 0.00084  | 0.00576  | 0.00000 | 0.01193  | 2.15385 |
| A13 | 1.90136 | 0.00001  | 0.00492  | 0.00000 | 0.00410  | 1.90546 |
| A14 | 2.20765 | 0.00025  | -0.01898 | 0.00000 | -0.02292 | 2.18473 |
| A15 | 2.17237 | -0.00026 | 0.01442  | 0.00000 | 0.01921  | 2.19159 |
| A16 | 1.96160 | -0.00047 | -0.02962 | 0.00000 | -0.02200 | 1.93960 |
| A17 | 1.87562 | -0.00009 | 0.00291  | 0.00000 | 0.00185  | 1.87747 |
| A18 | 1.85946 | 0.00066  | 0.00525  | 0.00000 | 0.00129  | 1.86075 |
| A19 | 1.89728 | -0.00003 | 0.01315  | 0.00000 | 0.00921  | 1.90649 |
| A20 | 1.95102 | -0.00009 | -0.00260 | 0.00000 | -0.00275 | 1.94827 |
| A21 | 1.91716 | 0.00003  | 0.01172  | 0.00000 | 0.01265  | 1.92980 |
| A22 | 1.91524 | 0.00021  | 0.00477  | 0.00000 | 0.00925  | 1.92448 |
| A23 | 1.90348 | -0.00035 | 0.01119  | 0.00000 | 0.01044  | 1.91392 |
| A24 | 1.92971 | -0.00008 | -0.03969 | 0.00000 | -0.04835 | 1.88136 |
| A25 | 1.89961 | -0.00005 | 0.01057  | 0.00000 | 0.00960  | 1.90921 |
| A26 | 1.85787 | 0.00054  | 0.00037  | 0.00000 | 0.00146  | 1.85933 |
| A27 | 1.95714 | -0.00025 | 0.01349  | 0.00000 | 0.01758  | 1.97472 |
| A28 | 2.54130 | -0.00466 | -0.13111 | 0.00000 | -0.13392 | 2.40739 |
| A29 | 2.62289 | 0.00165  | -0.03426 | 0.00000 | -0.02852 | 2.59437 |
| A30 | 2.17863 | 0.00005  | 0.00072  | 0.00000 | 0.00072  | 2.17935 |
| A31 | 1.95634 | 0.00003  | 0.00209  | 0.00000 | 0.00209  | 1.95843 |
| A32 | 2.14821 | -0.00007 | -0.00281 | 0.00000 | -0.00282 | 2.14540 |
| A33 | 2.08039 | -0.00001 | 0.00107  | 0.00000 | 0.00107  | 2.08146 |
| A34 | 2.15661 | 0.00003  | -0.00167 | 0.00000 | -0.00167 | 2.15494 |
| A35 | 2.04618 | -0.00002 | 0.00060  | 0.00000 | 0.00060  | 2.04679 |
| A36 | 1.90280 | -0.00093 | 0.00469  | 0.00000 | 0.00255  | 1.90535 |
| A37 | 2.59435 | -0.00233 | -0.03039 | 0.00000 | -0.01959 | 2.57476 |
| A38 | 2.07956 | 0.00106  | -0.03400 | 0.00000 | -0.03510 | 2.04447 |

|     |          |          |          |         |          |          |
|-----|----------|----------|----------|---------|----------|----------|
| A39 | 2.09260  | 0.00031  | -0.02887 | 0.00000 | -0.03035 | 2.06225  |
| A40 | 2.01278  | 0.00050  | 0.03771  | 0.00000 | 0.03467  | 2.04745  |
| A41 | 2.00962  | 0.00039  | 0.05327  | 0.00000 | 0.05068  | 2.06030  |
| A42 | 2.01111  | -0.00058 | 0.01131  | 0.00000 | 0.00243  | 2.01354  |
| A43 | 2.03973  | 0.00055  | -0.06995 | 0.00000 | -0.06941 | 1.97031  |
| A44 | 2.13895  | -0.00086 | 0.02032  | 0.00000 | 0.01985  | 2.15880  |
| A45 | 1.97477  | -0.00026 | -0.03323 | 0.00000 | -0.03442 | 1.94036  |
| A46 | 2.03922  | -0.00068 | 0.01421  | 0.00000 | 0.01404  | 2.05326  |
| A47 | 2.02201  | 0.00026  | 0.04557  | 0.00000 | 0.04552  | 2.06753  |
| A48 | 1.03198  | 0.00119  | -0.03781 | 0.00000 | -0.04292 | 0.98906  |
| A49 | 1.88310  | -0.00225 | -0.00946 | 0.00000 | -0.00565 | 1.87745  |
| A50 | 2.57633  | -0.00108 | -0.00065 | 0.00000 | -0.00438 | 2.57196  |
| A51 | 2.19835  | -0.00037 | 0.02352  | 0.00000 | 0.02529  | 2.22365  |
| A52 | 1.93965  | -0.00050 | 0.04575  | 0.00000 | 0.04468  | 1.98433  |
| A53 | 1.93313  | -0.00037 | -0.01214 | 0.00000 | -0.01179 | 1.92133  |
| A54 | 1.93584  | -0.00051 | 0.04883  | 0.00000 | 0.04770  | 1.98353  |
| A55 | 1.87986  | 0.00049  | -0.02965 | 0.00000 | -0.02927 | 1.85059  |
| A56 | 1.88137  | 0.00058  | -0.03468 | 0.00000 | -0.03686 | 1.84451  |
| A57 | 1.89192  | 0.00037  | -0.02117 | 0.00000 | -0.02093 | 1.87100  |
| A58 | 3.23034  | 0.00082  | -0.01429 | 0.00000 | -0.01763 | 3.21271  |
| A59 | 3.37927  | 0.00060  | 0.00952  | 0.00000 | 0.00963  | 3.38889  |
| D1  | 0.00522  | -0.00013 | 0.00778  | 0.00000 | 0.00833  | 0.01355  |
| D2  | -3.13583 | -0.00010 | 0.00586  | 0.00000 | 0.00641  | -3.12943 |
| D3  | 3.13929  | 0.00002  | -0.00112 | 0.00000 | -0.00176 | 3.13753  |
| D4  | -0.00176 | 0.00004  | -0.00304 | 0.00000 | -0.00369 | -0.00545 |
| D5  | -0.00805 | 0.00018  | -0.01403 | 0.00000 | -0.01528 | -0.02334 |
| D6  | -3.08720 | 0.00013  | -0.02086 | 0.00000 | -0.02319 | -3.11039 |
| D7  | 3.14029  | 0.00005  | -0.00604 | 0.00000 | -0.00622 | 3.13407  |
| D8  | 0.06115  | 0.00000  | -0.01287 | 0.00000 | -0.01413 | 0.04702  |
| D9  | -0.00068 | 0.00003  | 0.00099  | 0.00000 | 0.00129  | 0.00061  |
| D10 | 3.14054  | 0.00005  | -0.00006 | 0.00000 | -0.00049 | 3.14005  |
| D11 | 3.14043  | 0.00001  | 0.00272  | 0.00000 | 0.00303  | -3.13973 |
| D12 | -0.00154 | 0.00002  | 0.00168  | 0.00000 | 0.00126  | -0.00029 |
| D13 | -0.00433 | 0.00008  | -0.00972 | 0.00000 | -0.01073 | -0.01506 |
| D14 | 3.09141  | 0.00005  | 0.00297  | 0.00000 | 0.00071  | 3.09211  |
| D15 | 3.13761  | 0.00007  | -0.00876 | 0.00000 | -0.00909 | 3.12852  |
| D16 | -0.04984 | 0.00003  | 0.00394  | 0.00000 | 0.00235  | -0.04749 |
| D17 | 0.05030  | 0.00000  | -0.00343 | 0.00000 | -0.00302 | 0.04728  |
| D18 | -3.08788 | -0.00004 | -0.00141 | 0.00000 | -0.00099 | -3.08887 |
| D19 | -3.09171 | 0.00002  | -0.00460 | 0.00000 | -0.00501 | -3.09672 |
| D20 | 0.05330  | -0.00002 | -0.00258 | 0.00000 | -0.00299 | 0.05031  |
| D21 | 0.00761  | -0.00017 | 0.01463  | 0.00000 | 0.01604  | 0.02365  |
| D22 | 3.08831  | -0.00009 | 0.01976  | 0.00000 | 0.02212  | 3.11043  |
| D23 | -3.09167 | -0.00009 | 0.00313  | 0.00000 | 0.00589  | -3.08579 |

|     |          |          |          |         |          |          |
|-----|----------|----------|----------|---------|----------|----------|
| D24 | -0.01098 | -0.00002 | 0.00826  | 0.00000 | 0.01197  | 0.00100  |
| D25 | -2.80441 | -0.00008 | -0.06777 | 0.00000 | -0.06158 | -2.86599 |
| D26 | 0.28537  | -0.00015 | -0.05373 | 0.00000 | -0.04902 | 0.23635  |
| D27 | 1.63461  | 0.00001  | -0.05150 | 0.00000 | -0.04784 | 1.58677  |
| D28 | -2.56195 | -0.00036 | -0.05103 | 0.00000 | -0.04832 | -2.61027 |
| D29 | -0.50788 | -0.00003 | -0.03334 | 0.00000 | -0.03199 | -0.53987 |
| D30 | -1.43532 | -0.00006 | -0.05873 | 0.00000 | -0.05615 | -1.49148 |
| D31 | 0.65130  | -0.00044 | -0.05826 | 0.00000 | -0.05664 | 0.59467  |
| D32 | 2.70537  | -0.00011 | -0.04057 | 0.00000 | -0.04031 | 2.66506  |
| D33 | -1.49238 | 0.00040  | 0.14895  | 0.00000 | 0.14905  | -1.34332 |
| D34 | 0.58699  | 0.00026  | 0.17126  | 0.00000 | 0.17301  | 0.76000  |
| D35 | 2.74666  | -0.00034 | 0.16947  | 0.00000 | 0.17008  | 2.91674  |
| D36 | 2.71684  | 0.00082  | 0.15479  | 0.00000 | 0.15427  | 2.87111  |
| D37 | -1.48698 | 0.00068  | 0.17710  | 0.00000 | 0.17823  | -1.30875 |
| D38 | 0.67269  | 0.00007  | 0.17531  | 0.00000 | 0.17530  | 0.84799  |
| D39 | 0.59767  | 0.00086  | 0.13300  | 0.00000 | 0.13384  | 0.73151  |
| D40 | 2.67703  | 0.00072  | 0.15530  | 0.00000 | 0.15780  | 2.83483  |
| D41 | -1.44648 | 0.00012  | 0.15351  | 0.00000 | 0.15487  | -1.29162 |
| D42 | -1.38350 | 0.00011  | -0.09089 | 0.00000 | -0.08379 | -1.46729 |
| D43 | 2.82047  | -0.00043 | -0.07481 | 0.00000 | -0.07000 | 2.75047  |
| D44 | 0.74493  | -0.00057 | -0.09536 | 0.00000 | -0.09288 | 0.65204  |
| D45 | 0.34372  | -0.00031 | -0.10948 | 0.00000 | -0.10752 | 0.23620  |
| D46 | -0.38602 | 0.00019  | 0.15281  | 0.00000 | 0.14903  | -0.23699 |
| D47 | -2.95564 | 0.00053  | 0.13670  | 0.00000 | 0.13384  | -2.82181 |
| D48 | -3.13465 | -0.00005 | 0.00239  | 0.00000 | 0.00238  | -3.13227 |
| D49 | 0.00625  | -0.00001 | 0.00096  | 0.00000 | 0.00096  | 0.00720  |
| D50 | 0.00317  | -0.00001 | 0.00016  | 0.00000 | 0.00016  | 0.00333  |
| D51 | -3.13912 | 0.00003  | -0.00127 | 0.00000 | -0.00127 | -3.14039 |
| D52 | -2.46127 | -0.00004 | -0.06704 | 0.00000 | -0.07039 | -2.53167 |
| D53 | 2.85761  | 0.00085  | 0.05436  | 0.00000 | 0.05529  | 2.91289  |
| D54 | -2.13252 | -0.00069 | -0.03254 | 0.00000 | -0.03197 | -2.16450 |
| D55 | -0.52166 | 0.00025  | 0.04484  | 0.00000 | 0.04566  | -0.47600 |
| D56 | -2.68694 | -0.00103 | 0.04768  | 0.00000 | 0.04589  | -2.64105 |
| D57 | 0.01137  | -0.00106 | 0.04751  | 0.00000 | 0.04554  | 0.05691  |
| D58 | -0.03258 | 0.00061  | -0.07761 | 0.00000 | -0.07552 | -0.10810 |
| D59 | 2.66572  | 0.00058  | -0.07778 | 0.00000 | -0.07587 | 2.58985  |
| D60 | 1.09161  | -0.00016 | 0.04636  | 0.00000 | 0.04739  | 1.13900  |
| D61 | 0.04169  | 0.00063  | 0.13435  | 0.00000 | 0.13823  | 0.17993  |
| D62 | -1.31670 | -0.00029 | -0.07523 | 0.00000 | -0.07898 | -1.39568 |
| D63 | -2.36661 | 0.00050  | 0.01276  | 0.00000 | 0.01186  | -2.35475 |
| D64 | 1.90738  | -0.00031 | 0.05921  | 0.00000 | 0.05883  | 1.96621  |
| D65 | -0.50814 | 0.00040  | 0.00810  | 0.00000 | 0.00922  | -0.49892 |
| D66 | 2.56729  | 0.00020  | -0.01240 | 0.00000 | -0.01180 | 2.55549  |
| D67 | -1.62695 | 0.00025  | -0.02743 | 0.00000 | -0.02751 | -1.65446 |



|     |          |          |          |         |          |          |
|-----|----------|----------|----------|---------|----------|----------|
| D68 | 0.47465  | 0.00013  | -0.02964 | 0.00000 | -0.03029 | 0.44437  |
| D69 | 1.38258  | -0.00072 | -0.02077 | 0.00000 | -0.01980 | 1.36278  |
| D70 | -2.81166 | -0.00067 | -0.03580 | 0.00000 | -0.03551 | -2.84717 |
| D71 | -0.71006 | -0.00079 | -0.03801 | 0.00000 | -0.03828 | -0.74834 |
| D72 | -1.01344 | 0.00024  | -0.03954 | 0.00000 | -0.03918 | -1.05263 |
| D73 | 1.07550  | 0.00029  | -0.05456 | 0.00000 | -0.05489 | 1.02061  |
| D74 | -3.10608 | 0.00017  | -0.05677 | 0.00000 | -0.05767 | 3.11944  |

| Item                 | Value    | Threshold | Converged? |
|----------------------|----------|-----------|------------|
| Maximum Force        | 0.004967 | 0.000450  | NO         |
| RMS Force            | 0.001010 | 0.000300  | NO         |
| Maximum Displacement | 0.815811 | 0.001800  | NO         |
| RMS Displacement     | 0.244336 | 0.001200  | NO         |

Predicted change in Energy=-6.579672D-03

GradGradGradGradGradGradGradGradGradGradGradGradGradGradGradGradGradGradGrad

Input orientation:

| Center Number | Atomic Number | Atomic Type | Coordinates (Angstroms) |           |           |
|---------------|---------------|-------------|-------------------------|-----------|-----------|
|               |               |             | X                       | Y         | Z         |
| 1             | 6             | 0           | -1.740008               | -1.957737 | 0.185005  |
| 2             | 6             | 0           | -2.904520               | -1.290955 | -0.006480 |
| 3             | 7             | 0           | -2.600499               | 0.066673  | 0.028159  |
| 4             | 6             | 0           | -1.275684               | 0.211350  | 0.236162  |
| 5             | 7             | 0           | -0.743806               | -1.010228 | 0.351734  |
| 6             | 6             | 0           | 0.684382                | -1.307096 | 0.549525  |
| 7             | 6             | 0           | 1.430241                | -1.361074 | -0.793304 |
| 8             | 1             | 0           | -1.538772               | -3.014363 | 0.230898  |
| 9             | 1             | 0           | -3.901245               | -1.660554 | -0.162097 |
| 10            | 1             | 0           | 1.103870                | -0.510612 | 1.160792  |
| 11            | 1             | 0           | 0.734676                | -2.262293 | 1.076589  |
| 12            | 1             | 0           | 1.222697                | -2.306761 | -1.304649 |
| 13            | 1             | 0           | 1.110123                | -0.528874 | -1.425451 |
| 14            | 35            | 0           | 1.229515                | 2.084744  | 0.228850  |
| 15            | 1             | 0           | -0.674285               | 1.149239  | 0.278417  |
| 16            | 6             | 0           | -3.475486               | 1.176103  | -0.123546 |
| 17            | 6             | 0           | -4.789807               | 1.089379  | -0.281142 |
| 18            | 1             | 0           | -2.946643               | 2.120151  | -0.102074 |
| 19            | 1             | 0           | -5.368939               | 1.994847  | -0.397281 |
| 20            | 1             | 0           | -5.327715               | 0.150399  | -0.302864 |
| 21            | 8             | 0           | 2.793936                | -1.348632 | -0.522683 |
| 22            | 1             | 0           | 3.085192                | -0.436928 | -0.405740 |
| 23            | 6             | 0           | 5.661531                | 2.124258  | -0.109148 |
| 24            | 6             | 0           | 6.219746                | 0.929355  | -0.778999 |

|    |   |   |          |           |           |
|----|---|---|----------|-----------|-----------|
| 25 | 8 | 0 | 4.806299 | 1.169154  | -0.706314 |
| 26 | 1 | 0 | 5.701991 | 2.148240  | 0.989932  |
| 27 | 1 | 0 | 5.775445 | 3.097767  | -0.605750 |
| 28 | 1 | 0 | 6.603586 | 1.142684  | -1.773442 |
| 29 | 6 | 0 | 6.754177 | -0.240987 | -0.054585 |
| 30 | 1 | 0 | 6.586759 | -1.195173 | -0.572770 |
| 31 | 1 | 0 | 7.840574 | -0.146980 | 0.063512  |
| 32 | 1 | 0 | 6.329133 | -0.369481 | 0.947498  |

-----  
Distance matrix (angstroms):

|    |    | 1        | 2         | 3         | 4        | 5        |
|----|----|----------|-----------|-----------|----------|----------|
| 1  | C  | 0.000000 |           |           |          |          |
| 2  | C  | 1.355490 | 0.000000  |           |          |          |
| 3  | N  | 2.205285 | 1.391684  | 0.000000  |          |          |
| 4  | C  | 2.218817 | 2.229104  | 1.348826  | 0.000000 |          |
| 5  | N  | 1.384915 | 2.208124  | 2.170652  | 1.337350 | 0.000000 |
| 6  | C  | 2.536509 | 3.631752  | 3.598543  | 2.499147 | 1.472064 |
| 7  | C  | 3.370990 | 4.406151  | 4.354324  | 3.294594 | 2.482073 |
| 8  | H  | 1.076597 | 2.211731  | 3.265143  | 3.236428 | 2.159428 |
| 9  | H  | 2.209015 | 1.074374  | 2.170588  | 3.249031 | 3.264410 |
| 10 | H  | 3.336761 | 4.247194  | 3.916436  | 2.653008 | 2.078003 |
| 11 | H  | 2.647968 | 3.919220  | 4.200795  | 3.296479 | 2.068571 |
| 12 | H  | 3.334442 | 4.444213  | 4.693229  | 3.867414 | 2.879537 |
| 13 | H  | 3.571899 | 4.325692  | 4.029439  | 3.000161 | 2.612879 |
| 14 | Br | 5.016138 | 5.342376  | 4.333809  | 3.128208 | 3.672594 |
| 15 | H  | 3.285999 | 3.318081  | 2.223708  | 1.114945 | 2.161829 |
| 16 | C  | 3.595558 | 2.534972  | 1.421073  | 2.428841 | 3.531007 |
| 17 | C  | 4.336299 | 3.048891  | 2.436116  | 3.658907 | 4.602066 |
| 18 | H  | 4.262342 | 3.412706  | 2.086516  | 2.559303 | 3.854570 |
| 19 | H  | 5.397325 | 4.125843  | 3.400457  | 4.509639 | 5.566269 |
| 20 | H  | 4.189737 | 2.834999  | 2.748507  | 4.088180 | 4.773655 |
| 21 | O  | 4.629091 | 5.722080  | 5.604146  | 4.423935 | 3.659883 |
| 22 | H  | 5.093564 | 6.063450  | 5.724419  | 4.455283 | 3.945081 |
| 23 | C  | 8.457658 | 9.222335  | 8.515495  | 7.204403 | 7.146031 |
| 24 | C  | 8.521871 | 9.422251  | 8.899015  | 7.597866 | 7.316529 |
| 25 | O  | 7.309311 | 8.123955  | 7.524333  | 6.228657 | 6.055810 |
| 26 | H  | 8.537581 | 9.321638  | 8.613319  | 7.280636 | 7.206352 |
| 27 | H  | 9.092054 | 9.744835  | 8.930051  | 7.665419 | 7.764859 |
| 28 | H  | 9.113928 | 9.972404  | 9.440273  | 8.184668 | 7.945789 |
| 29 | C  | 8.669245 | 9.715719  | 9.360100  | 8.047846 | 7.548283 |
| 30 | H  | 8.395878 | 9.508640  | 9.292959  | 8.028118 | 7.390946 |
| 31 | H  | 9.750956 | 10.806046 | 10.443319 | 9.124932 | 8.632488 |
| 32 | H  | 8.259236 | 9.328426  | 8.987422  | 7.660066 | 7.126847 |
|    |    | 6        | 7         | 8         | 9        | 10       |

|    |    |          |          |          |           |          |
|----|----|----------|----------|----------|-----------|----------|
| 6  | C  | 0.000000 |          |          |           |          |
| 7  | C  | 1.537013 | 0.000000 |          |           |          |
| 8  | H  | 2.821117 | 3.549281 | 0.000000 |           |          |
| 9  | H  | 4.653957 | 5.377068 | 2.751095 | 0.000000  |          |
| 10 | H  | 1.088120 | 2.155990 | 3.757264 | 5.303167  | 0.000000 |
| 11 | H  | 1.092120 | 2.189179 | 2.539561 | 4.836134  | 1.792144 |
| 12 | H  | 2.174184 | 1.094930 | 3.237950 | 5.289404  | 3.052650 |
| 13 | H  | 2.165044 | 1.092997 | 3.992217 | 5.290612  | 2.586315 |
| 14 | Br | 3.450301 | 3.599826 | 5.802096 | 6.364338  | 2.760466 |
| 15 | H  | 2.820117 | 3.446634 | 4.252667 | 4.301425  | 2.587572 |
| 16 | C  | 4.891197 | 5.563452 | 4.629957 | 2.868689  | 5.046289 |
| 17 | C  | 6.033229 | 6.704926 | 5.260429 | 2.892377  | 6.274917 |
| 18 | H  | 5.035370 | 5.635055 | 5.334437 | 3.899821  | 4.992234 |
| 19 | H  | 6.960026 | 7.592621 | 6.336953 | 3.946060  | 7.113520 |
| 20 | H  | 6.244692 | 6.942266 | 4.965553 | 2.309585  | 6.629066 |
| 21 | O  | 2.366764 | 1.390343 | 4.702649 | 6.712137  | 2.528377 |
| 22 | H  | 2.726465 | 1.934713 | 5.331935 | 7.096966  | 2.526873 |
| 23 | C  | 6.081122 | 5.524439 | 8.852425 | 10.284663 | 5.415493 |
| 24 | C  | 6.116122 | 5.309014 | 8.761702 | 10.465308 | 5.657604 |
| 25 | O  | 4.969823 | 4.219880 | 7.657683 | 9.171955  | 4.473889 |
| 26 | H  | 6.108166 | 5.808877 | 8.925091 | 10.395010 | 5.314264 |
| 27 | H  | 6.830549 | 6.228743 | 9.568484 | 10.792441 | 6.161549 |
| 28 | H  | 6.814291 | 5.830349 | 9.359296 | 10.991181 | 6.449030 |
| 29 | C  | 6.192249 | 5.490410 | 8.749064 | 10.750105 | 5.785828 |
| 30 | H  | 6.009169 | 5.163897 | 8.365380 | 10.506353 | 5.791021 |
| 31 | H  | 7.265890 | 6.580314 | 9.809284 | 11.841121 | 6.835162 |
| 32 | H  | 5.735914 | 5.292710 | 8.331437 | 10.371051 | 5.231518 |
|    |    | 11       | 12       | 13       | 14        | 15       |
| 11 | H  | 0.000000 |          |          |           |          |
| 12 | H  | 2.431139 | 0.000000 |          |           |          |
| 13 | H  | 3.066905 | 1.785538 | 0.000000 |           |          |
| 14 | Br | 4.456485 | 4.651557 | 3.095475 | 0.000000  |          |
| 15 | H  | 3.776347 | 4.248361 | 2.983846 | 2.121811  | 0.000000 |
| 16 | C  | 5.566718 | 5.966428 | 5.062580 | 4.804878  | 2.830022 |
| 17 | C  | 6.602806 | 6.980798 | 6.223934 | 6.122343  | 4.153819 |
| 18 | H  | 5.843558 | 6.198962 | 5.022550 | 4.189399  | 2.500211 |
| 19 | H  | 7.586148 | 7.923181 | 7.028836 | 6.628704  | 4.817820 |
| 20 | H  | 6.669075 | 7.067468 | 6.570188 | 6.857236  | 4.794787 |
| 21 | O  | 2.762789 | 1.999569 | 2.078995 | 3.847114  | 4.348526 |
| 22 | H  | 3.324783 | 2.788046 | 2.224672 | 3.194538  | 4.137350 |
| 23 | C  | 6.702366 | 6.384857 | 5.430201 | 4.445061  | 6.422105 |
| 24 | C  | 6.611794 | 5.976559 | 5.352811 | 5.220449  | 6.978119 |
| 25 | O  | 5.615308 | 5.028140 | 4.130639 | 3.808703  | 5.568384 |
| 26 | H  | 6.643382 | 6.721325 | 5.838344 | 4.537214  | 6.493162 |

|    |   |           |           |           |           |           |
|----|---|-----------|-----------|-----------|-----------|-----------|
| 27 | H | 7.547838  | 7.101049  | 5.965708  | 4.731623  | 6.795405  |
| 28 | H | 7.359392  | 6.408775  | 5.752681  | 5.811823  | 7.561585  |
| 29 | C | 6.449778  | 6.035508  | 5.815282  | 6.000937  | 7.564765  |
| 30 | H | 6.173006  | 5.526702  | 5.582522  | 6.332496  | 7.677470  |
| 31 | H | 7.482959  | 7.094563  | 6.903755  | 6.979543  | 8.615637  |
| 32 | H | 5.907398  | 5.907699  | 5.735360  | 5.704890  | 7.197364  |
|    |   | 16        | 17        | 18        | 19        | 20        |
| 16 | C | 0.000000  |           |           |           |           |
| 17 | C | 1.326573  | 0.000000  |           |           |           |
| 18 | H | 1.082296  | 2.119389  | 0.000000  |           |           |
| 19 | H | 2.080970  | 1.081089  | 2.443433  | 0.000000  |           |
| 20 | H | 2.124847  | 1.082359  | 3.096731  | 1.847323  | 0.000000  |
| 21 | O | 6.770469  | 7.969655  | 6.720388  | 8.821967  | 8.261758  |
| 22 | H | 6.761953  | 8.022515  | 6.558499  | 8.796927  | 8.434011  |
| 23 | C | 9.186092  | 10.503858 | 8.608178  | 11.034991 | 11.166789 |
| 24 | C | 9.720496  | 11.021966 | 9.268167  | 11.643822 | 11.583494 |
| 25 | O | 8.302267  | 9.605852  | 7.834387  | 10.213361 | 10.193080 |
| 26 | H | 9.295750  | 10.621424 | 8.717347  | 11.158556 | 11.283488 |
| 27 | H | 9.460711  | 10.759347 | 8.791146  | 11.200767 | 11.491688 |
| 28 | H | 10.213274 | 11.490831 | 9.744526  | 12.081446 | 12.062470 |
| 29 | C | 10.327580 | 11.622598 | 9.984145  | 12.332329 | 12.090780 |
| 30 | H | 10.347633 | 11.607346 | 10.104389 | 12.375206 | 11.993252 |
| 31 | H | 11.394681 | 12.695429 | 11.024126 | 13.389958 | 13.176741 |
| 32 | H | 9.983312  | 11.281341 | 9.661257  | 12.010135 | 11.735237 |
|    |   | 21        | 22        | 23        | 24        | 25        |
| 21 | O | 0.000000  |           |           |           |           |
| 22 | H | 0.964214  | 0.000000  |           |           |           |
| 23 | C | 4.522728  | 3.644882  | 0.000000  |           |           |
| 24 | C | 4.122025  | 3.439692  | 1.479222  | 0.000000  |           |
| 25 | O | 3.228400  | 2.373195  | 1.414303  | 1.435486  | 0.000000  |
| 26 | H | 4.793005  | 3.934289  | 1.100086  | 2.209721  | 2.153630  |
| 27 | H | 5.354134  | 4.446519  | 1.098776  | 2.220231  | 2.160765  |
| 28 | H | 4.720644  | 4.092051  | 2.149611  | 1.087087  | 2.090383  |
| 29 | C | 4.138780  | 3.690956  | 2.606000  | 1.476514  | 2.491481  |
| 30 | H | 3.796256  | 3.586614  | 3.477012  | 2.165836  | 2.962754  |
| 31 | H | 5.220742  | 4.787267  | 3.152231  | 2.120237  | 3.395830  |
| 32 | H | 3.951934  | 3.515530  | 2.789432  | 2.163269  | 2.724245  |
|    |   | 26        | 27        | 28        | 29        | 30        |
| 26 | H | 0.000000  |           |           |           |           |
| 27 | H | 1.858279  | 0.000000  |           |           |           |
| 28 | H | 3.075752  | 2.423153  | 0.000000  |           |           |
| 29 | C | 2.811853  | 3.522637  | 2.211717  | 0.000000  |           |
| 30 | H | 3.795163  | 4.369055  | 2.628207  | 1.098643  | 0.000000  |
| 31 | H | 3.271059  | 3.903978  | 2.562767  | 1.096833  | 1.753744  |

```

32 H 2.595000 3.839395 3.124977 1.096058 1.749100
      31      32
31 H 0.000000
32 H 1.765048 0.000000

```

```

Stoichiometry C10H17BrN2O2
Framework group C1[X(C10H17BrN2O2)]
Deg. of freedom 90
Full point group C1 NOp 1
Largest Abelian subgroup C1 NOp 1
Largest concise Abelian subgroup C1 NOp 1

```

Standard orientation:

| Center<br>Number | Atomic<br>Number | Atomic<br>Type | Coordinates (Angstroms) |           |           |
|------------------|------------------|----------------|-------------------------|-----------|-----------|
|                  |                  |                | X                       | Y         | Z         |
| 1                | 6                | 0              | -2.995978               | 2.093575  | -0.230781 |
| 2                | 6                | 0              | -4.081656               | 1.328372  | 0.039627  |
| 3                | 7                | 0              | -3.648180               | 0.005975  | 0.051777  |
| 4                | 6                | 0              | -2.324545               | -0.021070 | -0.206273 |
| 5                | 7                | 0              | -1.919227               | 1.238844  | -0.398205 |
| 6                | 6                | 0              | -0.535477               | 1.661188  | -0.669932 |
| 7                | 6                | 0              | 0.252597                | 1.850630  | 0.636000  |
| 8                | 1                | 0              | -2.900709               | 3.161187  | -0.331727 |
| 9                | 1                | 0              | -5.102968               | 1.607931  | 0.221421  |
| 10               | 1                | 0              | -0.064076               | 0.880106  | -1.262972 |
| 11               | 1                | 0              | -0.598910               | 2.590433  | -1.240202 |
| 12               | 1                | 0              | -0.026425               | 2.795547  | 1.113652  |
| 13               | 1                | 0              | 0.039729                | 1.022895  | 1.317311  |
| 14               | 35               | 0              | 0.349909                | -1.643621 | -0.223937 |
| 15               | 1                | 0              | -1.636576               | -0.898048 | -0.232953 |
| 16               | 6                | 0              | -4.404268               | -1.173536 | 0.289550  |
| 17               | 6                | 0              | -5.713750               | -1.205524 | 0.499390  |
| 18               | 1                | 0              | -3.787056               | -2.062584 | 0.286996  |
| 19               | 1                | 0              | -6.196880               | -2.155638 | 0.679999  |
| 20               | 1                | 0              | -6.339473               | -0.322371 | 0.502805  |
| 21               | 8                | 0              | 1.599590                | 1.955777  | 0.307963  |
| 22               | 1                | 0              | 1.973701                | 1.071574  | 0.218882  |
| 23               | 6                | 0              | 4.774333                | -1.242584 | -0.074886 |
| 24               | 6                | 0              | 5.238622                | 0.030997  | 0.517165  |
| 25               | 8                | 0              | 3.853572                | -0.346167 | 0.515782  |
| 26               | 1                | 0              | 4.774680                | -1.315267 | -1.172569 |
| 27               | 1                | 0              | 5.001683                | -2.175782 | 0.458744  |
| 28               | 1                | 0              | 5.679368                | -0.096683 | 1.502659  |
| 29               | 6                | 0              | 5.628084                | 1.211014  | -0.280313 |

|    |   |   |          |          |           |
|----|---|---|----------|----------|-----------|
| 30 | 1 | 0 | 5.388399 | 2.168549 | 0.202071  |
| 31 | 1 | 0 | 6.713126 | 1.215844 | -0.440634 |
| 32 | 1 | 0 | 5.154344 | 1.250038 | -1.267931 |

-----

Rotational constants (GHZ):      0.8247900      0.1759470      0.1488064

Standard basis: 6-311++G(d,p) (5D, 7F)

There are    492 symmetry adapted cartesian basis functions of A    symmetry.

There are    475 symmetry adapted basis functions of A    symmetry.

     475 basis functions,    751 primitive gaussians,    492 cartesian basis functions

     71 alpha electrons      71 beta electrons

     nuclear repulsion energy      1291.1060625503 Hartrees.

NAtoms=    32 NActive=    32 NUniq=    32 SFac= 1.00D+00 NATFMM=    60 NAOKFM=F

Big=F

Integral buffers will be    131072 words long.

Raffenetti 2 integral format.

Two-electron integral symmetry is turned on.

One-electron integrals computed using PRISM.

NBasis=    475 RedAO= T EigKep= 4.17D-06 NBF=    475

NBsUse=    475 1.00D-06 EigRej= -1.00D+00 NBFU=    475

Initial guess from the checkpoint file: "/home/suqian/liuwen/qianmengshijie/ohpo/ohpo.chk"

B after Tr=    0.000000    0.000000    0.000000

     Rot=    0.999669    0.019096    -0.001315    0.017212 Ang=    2.95 deg.

ExpMin= 3.50D-02 ExpMax= 4.40D+05 ExpMxC= 1.51D+04 IAcc=3 IRadAn=      5 AccDes=

0.00D+00

Harris functional with IExCor= 402 and IRadAn=      5 diagonalized for initial guess.

HarFok: IExCor= 402 AccDes= 0.00D+00 IRadAn=      5 IDoV= 1 UseB2=F ITyADJ=14

ICtDFT= 3500011 ScaDFX= 1.000000 1.000000 1.000000 1.000000

FoFCou: FMM=F IPFlag=      0 FMFlag=    100000 FMFlg1=      0

     NxFlg=      0 DoJE=T BraDBF=F KetDBF=T FulRan=T

     wScrn= 0.000000 ICntrl=      500 IOpCl= 0 I1Cent=    200000004 NGrid=

0

     NMat0=    1 NMatS0=      1 NMatT0=    0 NMatD0=    1 NMtDS0=    0

NMtDT0=    0

Petite list used in FoFCou.

Requested convergence on RMS density matrix=1.00D-08 within 128 cycles.

Requested convergence on MAX density matrix=1.00D-06.

Requested convergence on      energy=1.00D-06.

No special actions if energy rises.

SCF Done: E(RB3LYP) = -3225.50645471    A.U. after    13 cycles

     NFock= 13 Conv=0.61D-08    -V/T= 2.0018

Calling FoFJK, ICntrl=      2127 FMM=F ISym2X=0 I1Cent= 0 IOpClX= 0 NMat=1 NMatS=1

NMatT=0.

\*\*\*\*\* Axes restored to original set \*\*\*\*\*

-----

| Center<br>Number | Atomic<br>Number | Forces (Hartrees/Bohr) |              |              |
|------------------|------------------|------------------------|--------------|--------------|
|                  |                  | X                      | Y            | Z            |
| 1                | 6                | -0.001014399           | 0.001841418  | 0.001728383  |
| 2                | 6                | -0.003005360           | 0.000458568  | -0.001145816 |
| 3                | 7                | -0.000800566           | -0.000987043 | -0.000834962 |
| 4                | 6                | -0.002351774           | -0.003869445 | 0.002502497  |
| 5                | 7                | -0.004423735           | 0.000686782  | -0.000451313 |
| 6                | 6                | -0.004992731           | -0.000577178 | -0.001573094 |
| 7                | 6                | -0.004684623           | -0.005035786 | 0.003254815  |
| 8                | 1                | 0.000124492            | 0.000258219  | 0.000132417  |
| 9                | 1                | -0.000258342           | -0.000020606 | -0.000243914 |
| 10               | 1                | 0.000454868            | 0.000696396  | -0.000425052 |
| 11               | 1                | 0.001944566            | 0.001030198  | 0.000107937  |
| 12               | 1                | -0.002486419           | 0.000535940  | -0.001216230 |
| 13               | 1                | 0.000663562            | 0.001351155  | 0.000226163  |
| 14               | 35               | 0.004650041            | 0.007030873  | 0.000442050  |
| 15               | 1                | -0.000042295           | -0.003456182 | 0.000433586  |
| 16               | 6                | 0.000386842            | -0.000607384 | -0.000464351 |
| 17               | 6                | -0.000259282           | -0.000201304 | -0.000105854 |
| 18               | 1                | 0.000339549            | 0.000026008  | 0.000144466  |
| 19               | 1                | 0.000010108            | 0.000009351  | 0.000171385  |
| 20               | 1                | -0.000176532           | -0.000055854 | -0.000019922 |
| 21               | 8                | 0.013640073            | -0.003428683 | -0.002844815 |
| 22               | 1                | 0.003092335            | 0.007204252  | 0.000516678  |
| 23               | 6                | 0.016665913            | 0.002180395  | 0.009533308  |
| 24               | 6                | -0.008522918           | 0.017762031  | -0.006308286 |
| 25               | 8                | -0.007597682           | -0.002543658 | -0.001400607 |
| 26               | 1                | -0.006177720           | 0.000750915  | -0.007556820 |
| 27               | 1                | -0.006632641           | -0.006117978 | 0.002806931  |
| 28               | 1                | 0.003336587            | -0.006434833 | -0.002058755 |
| 29               | 6                | 0.011655642            | -0.018829313 | 0.009485993  |
| 30               | 1                | -0.001961694           | 0.004407291  | -0.002945982 |
| 31               | 1                | -0.000087364           | 0.000810586  | 0.000139206  |
| 32               | 1                | -0.001488503           | 0.005124872  | -0.002030042 |

-----  
Cartesian Forces: Max 0.018829313 RMS 0.004869347

GradGradGradGradGradGradGradGradGradGradGradGradGradGradGradGradGradGradGrad

Berny optimization.

Using GEDIIS/GDIIS optimizer.

FormGI is forming the generalized inverse of G from B-inverse, IUseBI=4.

Internal Forces: Max 0.013966608 RMS 0.002716994

Search for a local minimum.

Step number 5 out of a maximum of 177

All quantities printed in internal units (Hartrees-Bohrs-Radians)

Mixed Optimization -- RFO/linear search

Update second derivatives using D2CorX and points 4 5

ITU= 0 1 0 1 0

Use linear search instead of GDIIIS.

|                 |         |         |         |         |         |
|-----------------|---------|---------|---------|---------|---------|
| Eigenvalues --- | 0.00234 | 0.00242 | 0.00317 | 0.00431 | 0.00570 |
| Eigenvalues --- | 0.00932 | 0.01282 | 0.01343 | 0.01402 | 0.01550 |
| Eigenvalues --- | 0.01857 | 0.01894 | 0.01948 | 0.02106 | 0.02146 |
| Eigenvalues --- | 0.02250 | 0.02300 | 0.02313 | 0.02389 | 0.02540 |
| Eigenvalues --- | 0.03062 | 0.03062 | 0.03161 | 0.03574 | 0.04226 |
| Eigenvalues --- | 0.04614 | 0.04993 | 0.05170 | 0.05287 | 0.05350 |
| Eigenvalues --- | 0.05756 | 0.06552 | 0.09194 | 0.09901 | 0.10645 |
| Eigenvalues --- | 0.10932 | 0.11250 | 0.12293 | 0.13017 | 0.13535 |
| Eigenvalues --- | 0.14090 | 0.15387 | 0.15996 | 0.16000 | 0.16000 |
| Eigenvalues --- | 0.16000 | 0.16000 | 0.16000 | 0.16007 | 0.16225 |
| Eigenvalues --- | 0.16662 | 0.19147 | 0.20212 | 0.21789 | 0.22000 |
| Eigenvalues --- | 0.22794 | 0.23507 | 0.24291 | 0.25000 | 0.27144 |
| Eigenvalues --- | 0.27799 | 0.28974 | 0.31746 | 0.32881 | 0.33053 |
| Eigenvalues --- | 0.33094 | 0.34026 | 0.34097 | 0.34416 | 0.34759 |
| Eigenvalues --- | 0.34929 | 0.35328 | 0.35687 | 0.35690 | 0.35858 |
| Eigenvalues --- | 0.36435 | 0.36656 | 0.37230 | 0.37234 | 0.37760 |
| Eigenvalues --- | 0.38792 | 0.42174 | 0.42460 | 0.45479 | 0.46487 |
| Eigenvalues --- | 0.49131 | 0.51735 | 0.54433 | 0.56034 | 0.60353 |

RFO step: Lambda=-2.80650034D-03 EMin= 2.34383587D-03

Quartic linear search produced a step of -0.50853.

Iteration 1 RMS(Cart)= 0.05147494 RMS(Int)= 0.01437236

Iteration 2 RMS(Cart)= 0.02906664 RMS(Int)= 0.00073075

Iteration 3 RMS(Cart)= 0.00022103 RMS(Int)= 0.00072734

Iteration 4 RMS(Cart)= 0.00000016 RMS(Int)= 0.00072734

| Variable | Old X   | -DE/DX   | Delta X<br>(Linear) | Delta X<br>(Quad) | Delta X<br>(Total) | New X   |
|----------|---------|----------|---------------------|-------------------|--------------------|---------|
| R1       | 2.56151 | 0.00141  | 0.00159             | 0.00087           | 0.00271            | 2.56422 |
| R2       | 2.61711 | 0.00111  | 0.00053             | 0.00069           | 0.00111            | 2.61822 |
| R3       | 2.03447 | -0.00022 | -0.00012            | -0.00033          | -0.00044           | 2.03403 |
| R4       | 2.62990 | -0.00097 | -0.00023            | -0.00099          | -0.00096           | 2.62894 |
| R5       | 2.03027 | 0.00028  | 0.00020             | 0.00034           | 0.00053            | 2.03081 |
| R6       | 2.54891 | 0.00205  | -0.00066            | 0.00249           | 0.00173            | 2.55064 |
| R7       | 2.68544 | -0.00081 | -0.00021            | -0.00086          | -0.00107           | 2.68437 |
| R8       | 2.52722 | -0.00304 | -0.00245            | -0.00180          | -0.00510           | 2.52212 |
| R9       | 2.10694 | 0.00485  | -0.00329            | 0.00875           | 0.00503            | 2.11197 |
| R10      | 2.78180 | 0.00502  | 0.00724             | 0.00427           | 0.01135            | 2.79315 |
| R11      | 2.90453 | 0.00359  | 0.01226             | 0.00079           | 0.01342            | 2.91795 |
| R12      | 2.05625 | 0.00044  | 0.00087             | 0.00005           | 0.00092            | 2.05717 |



|     |         |          |          |          |          |         |
|-----|---------|----------|----------|----------|----------|---------|
| R13 | 2.06381 | -0.00076 | -0.00086 | -0.00078 | -0.00164 | 2.06217 |
| R14 | 2.06912 | 0.00058  | -0.00062 | 0.00141  | 0.00078  | 2.06990 |
| R15 | 2.06547 | 0.00071  | 0.00220  | -0.00025 | 0.00194  | 2.06741 |
| R16 | 2.62737 | 0.01397  | 0.01035  | 0.01182  | 0.02212  | 2.64949 |
| R17 | 4.00964 | 0.00776  | 0.07596  | 0.07106  | 0.14677  | 4.15641 |
| R18 | 7.19741 | 0.00184  | -0.61921 | 0.23316  | -0.38605 | 6.81135 |
| R19 | 2.50686 | 0.00043  | 0.00013  | 0.00032  | 0.00045  | 2.50731 |
| R20 | 2.04524 | 0.00019  | 0.00029  | 0.00009  | 0.00038  | 2.04563 |
| R21 | 2.04296 | -0.00002 | 0.00003  | -0.00004 | -0.00001 | 2.04295 |
| R22 | 2.04536 | 0.00014  | 0.00015  | 0.00015  | 0.00029  | 2.04565 |
| R23 | 1.82210 | 0.00603  | 0.01017  | 0.00067  | 0.01130  | 1.83340 |
| R24 | 4.48469 | -0.00247 | 0.03749  | -0.07361 | -0.03569 | 4.44900 |
| R25 | 2.79532 | -0.00013 | -0.00981 | 0.00203  | -0.00781 | 2.78751 |
| R26 | 2.67264 | 0.00102  | 0.00803  | 0.00218  | 0.01007  | 2.68272 |
| R27 | 2.07886 | -0.00776 | -0.01307 | -0.00331 | -0.01637 | 2.06249 |
| R28 | 2.07639 | -0.00738 | -0.01236 | -0.00297 | -0.01533 | 2.06105 |
| R29 | 2.71267 | 0.00389  | 0.01742  | -0.00934 | 0.00825  | 2.72092 |
| R30 | 2.05430 | 0.00180  | -0.00100 | 0.00649  | 0.00549  | 2.05979 |
| R31 | 2.79021 | 0.01194  | 0.02218  | 0.01467  | 0.03685  | 2.82705 |
| R32 | 2.07613 | -0.00214 | 0.00104  | -0.00842 | -0.00739 | 2.06875 |
| R33 | 2.07271 | 0.00000  | 0.00429  | -0.00739 | -0.00310 | 2.06961 |
| R34 | 2.07125 | -0.00188 | 0.00178  | -0.00826 | -0.00648 | 2.06477 |
| A1  | 1.87385 | 0.00126  | 0.00139  | 0.00287  | 0.00389  | 1.87774 |
| A2  | 2.27758 | -0.00043 | -0.00063 | -0.00054 | -0.00103 | 2.27655 |
| A3  | 2.13162 | -0.00083 | -0.00071 | -0.00216 | -0.00274 | 2.12889 |
| A4  | 1.86365 | -0.00187 | -0.00139 | -0.00316 | -0.00455 | 1.85909 |
| A5  | 2.27609 | 0.00102  | 0.00064  | 0.00196  | 0.00259  | 2.27868 |
| A6  | 2.14345 | 0.00085  | 0.00075  | 0.00121  | 0.00196  | 2.14541 |
| A7  | 1.89974 | 0.00081  | -0.00052 | 0.00223  | 0.00138  | 1.90112 |
| A8  | 2.24520 | -0.00065 | 0.00064  | -0.00225 | -0.00144 | 2.24375 |
| A9  | 2.13825 | -0.00016 | -0.00012 | 0.00002  | 0.00007  | 2.13832 |
| A10 | 1.88177 | 0.00047  | 0.00275  | -0.00052 | 0.00242  | 1.88419 |
| A11 | 2.24704 | 0.00013  | 0.00311  | -0.00142 | 0.00336  | 2.25040 |
| A12 | 2.15385 | -0.00063 | -0.00607 | 0.00154  | -0.00649 | 2.14736 |
| A13 | 1.90546 | -0.00066 | -0.00208 | -0.00094 | -0.00283 | 1.90263 |
| A14 | 2.18473 | 0.00445  | 0.01166  | 0.00401  | 0.01699  | 2.20172 |
| A15 | 2.19159 | -0.00378 | -0.00977 | -0.00263 | -0.01393 | 2.17766 |
| A16 | 1.93960 | 0.00517  | 0.01119  | 0.00514  | 0.01395  | 1.95354 |
| A17 | 1.87747 | -0.00162 | -0.00094 | -0.00514 | -0.00569 | 1.87177 |
| A18 | 1.86075 | -0.00034 | -0.00065 | 0.01084  | 0.01131  | 1.87206 |
| A19 | 1.90649 | -0.00238 | -0.00468 | -0.00779 | -0.01125 | 1.89524 |
| A20 | 1.94827 | -0.00132 | 0.00140  | -0.00186 | -0.00062 | 1.94765 |
| A21 | 1.92980 | 0.00059  | -0.00643 | -0.00088 | -0.00764 | 1.92216 |
| A22 | 1.92448 | -0.00136 | -0.00470 | 0.00144  | -0.00502 | 1.91946 |

|     |          |          |          |          |          |          |
|-----|----------|----------|----------|----------|----------|----------|
| A23 | 1.91392  | -0.00268 | -0.00531 | -0.00984 | -0.01484 | 1.89907  |
| A24 | 1.88136  | 0.00744  | 0.02459  | 0.01132  | 0.03842  | 1.91979  |
| A25 | 1.90921  | 0.00051  | -0.00488 | -0.00361 | -0.00826 | 1.90096  |
| A26 | 1.85933  | -0.00025 | -0.00074 | 0.01316  | 0.01181  | 1.87114  |
| A27 | 1.97472  | -0.00354 | -0.00894 | -0.01152 | -0.02149 | 1.95323  |
| A28 | 2.40739  | -0.00228 | 0.06810  | -0.05173 | 0.01729  | 2.42467  |
| A29 | 2.59437  | 0.00686  | 0.01450  | 0.00661  | 0.01950  | 2.61388  |
| A30 | 2.17935  | 0.00003  | -0.00037 | 0.00030  | -0.00007 | 2.17928  |
| A31 | 1.95843  | -0.00032 | -0.00106 | -0.00031 | -0.00137 | 1.95705  |
| A32 | 2.14540  | 0.00029  | 0.00143  | 0.00003  | 0.00146  | 2.14685  |
| A33 | 2.08146  | -0.00012 | -0.00054 | -0.00016 | -0.00070 | 2.08075  |
| A34 | 2.15494  | 0.00019  | 0.00085  | 0.00030  | 0.00114  | 2.15609  |
| A35 | 2.04679  | -0.00007 | -0.00031 | -0.00013 | -0.00044 | 2.04634  |
| A36 | 1.90535  | -0.00075 | -0.00130 | -0.00055 | -0.00121 | 1.90413  |
| A37 | 2.57476  | 0.00003  | 0.00996  | -0.01160 | -0.00479 | 2.56997  |
| A38 | 2.04447  | 0.00198  | 0.01785  | 0.01927  | 0.03632  | 2.08079  |
| A39 | 2.06225  | 0.00050  | 0.01543  | 0.01594  | 0.03062  | 2.09288  |
| A40 | 2.04745  | -0.00114 | -0.01763 | -0.01534 | -0.03323 | 2.01422  |
| A41 | 2.06030  | -0.00304 | -0.02577 | -0.01646 | -0.04252 | 2.01778  |
| A42 | 2.01354  | 0.00051  | -0.00124 | -0.00026 | -0.00388 | 2.00966  |
| A43 | 1.97031  | 0.00631  | 0.03530  | 0.01533  | 0.05061  | 2.02092  |
| A44 | 2.15880  | -0.00214 | -0.01010 | -0.00062 | -0.01055 | 2.14825  |
| A45 | 1.94036  | 0.00258  | 0.01750  | -0.00910 | 0.00829  | 1.94864  |
| A46 | 2.05326  | 0.00061  | -0.00714 | 0.00080  | -0.00638 | 2.04689  |
| A47 | 2.06753  | -0.00431 | -0.02315 | -0.00735 | -0.03081 | 2.03672  |
| A48 | 0.98906  | 0.00162  | 0.02183  | -0.00052 | 0.02278  | 1.01184  |
| A49 | 1.87745  | -0.00217 | 0.00287  | -0.01655 | -0.01464 | 1.86280  |
| A50 | 2.57196  | -0.00213 | 0.00223  | -0.00538 | -0.00205 | 2.56990  |
| A51 | 2.22365  | 0.00121  | -0.01286 | 0.00863  | -0.00470 | 2.21894  |
| A52 | 1.98433  | -0.00581 | -0.02272 | -0.00900 | -0.03172 | 1.95261  |
| A53 | 1.92133  | 0.00157  | 0.00600  | 0.00197  | 0.00796  | 1.92929  |
| A54 | 1.98353  | -0.00611 | -0.02425 | -0.01100 | -0.03526 | 1.94827  |
| A55 | 1.85059  | 0.00285  | 0.01488  | 0.00720  | 0.02209  | 1.87268  |
| A56 | 1.84451  | 0.00619  | 0.01874  | 0.00918  | 0.02792  | 1.87243  |
| A57 | 1.87100  | 0.00238  | 0.01064  | 0.00357  | 0.01419  | 1.88519  |
| A58 | 3.21271  | 0.00283  | 0.00897  | 0.00811  | 0.01808  | 3.23078  |
| A59 | 3.38889  | 0.00151  | -0.00490 | 0.01696  | 0.01204  | 3.40094  |
| D1  | 0.01355  | -0.00045 | -0.00424 | -0.01138 | -0.01581 | -0.00226 |
| D2  | -3.12943 | -0.00042 | -0.00326 | -0.00914 | -0.01258 | 3.14118  |
| D3  | 3.13753  | 0.00005  | 0.00090  | 0.00034  | 0.00143  | 3.13896  |
| D4  | -0.00545 | 0.00008  | 0.00187  | 0.00258  | 0.00466  | -0.00079 |
| D5  | -0.02334 | 0.00069  | 0.00777  | 0.01769  | 0.02588  | 0.00254  |
| D6  | -3.11039 | 0.00054  | 0.01179  | 0.00922  | 0.02169  | -3.08870 |
| D7  | 3.13407  | 0.00023  | 0.00316  | 0.00714  | 0.01040  | -3.13872 |

|     |          |          |          |          |          |          |
|-----|----------|----------|----------|----------|----------|----------|
| D8  | 0.04702  | 0.00009  | 0.00718  | -0.00132 | 0.00621  | 0.05323  |
| D9  | 0.00061  | 0.00004  | -0.00065 | 0.00138  | 0.00063  | 0.00124  |
| D10 | 3.14005  | -0.00003 | 0.00025  | 0.00193  | 0.00231  | -3.14082 |
| D11 | -3.13973 | 0.00002  | -0.00154 | -0.00066 | -0.00230 | 3.14116  |
| D12 | -0.00029 | -0.00006 | -0.00064 | -0.00011 | -0.00061 | -0.00090 |
| D13 | -0.01506 | 0.00037  | 0.00546  | 0.00958  | 0.01539  | 0.00033  |
| D14 | 3.09211  | -0.00046 | -0.00036 | -0.00341 | -0.00309 | 3.08903  |
| D15 | 3.12852  | 0.00044  | 0.00462  | 0.00907  | 0.01383  | -3.14083 |
| D16 | -0.04749 | -0.00039 | -0.00120 | -0.00391 | -0.00465 | -0.05214 |
| D17 | 0.04728  | 0.00011  | 0.00154  | 0.00022  | 0.00163  | 0.04891  |
| D18 | -3.08887 | -0.00005 | 0.00051  | -0.00281 | -0.00243 | -3.09130 |
| D19 | -3.09672 | 0.00002  | 0.00255  | 0.00084  | 0.00352  | -3.09320 |
| D20 | 0.05031  | -0.00013 | 0.00152  | -0.00219 | -0.00054 | 0.04977  |
| D21 | 0.02365  | -0.00068 | -0.00815 | -0.01683 | -0.02540 | -0.00175 |
| D22 | 3.11043  | -0.00021 | -0.01125 | -0.00807 | -0.02010 | 3.09034  |
| D23 | -3.08579 | 0.00008  | -0.00299 | -0.00463 | -0.00849 | -3.09427 |
| D24 | 0.00100  | 0.00055  | -0.00609 | 0.00413  | -0.00318 | -0.00218 |
| D25 | -2.86599 | 0.00131  | 0.03131  | 0.02158  | 0.05090  | -2.81508 |
| D26 | 0.23635  | 0.00038  | 0.02493  | 0.00672  | 0.03013  | 0.26648  |
| D27 | 1.58677  | 0.00124  | 0.02433  | 0.00013  | 0.02337  | 1.61015  |
| D28 | -2.61027 | 0.00034  | 0.02457  | -0.00959 | 0.01415  | -2.59612 |
| D29 | -0.53987 | 0.00001  | 0.01627  | -0.00758 | 0.00819  | -0.53169 |
| D30 | -1.49148 | 0.00091  | 0.02856  | -0.00980 | 0.01800  | -1.47348 |
| D31 | 0.59467  | 0.00002  | 0.02880  | -0.01952 | 0.00878  | 0.60344  |
| D32 | 2.66506  | -0.00031 | 0.02050  | -0.01751 | 0.00281  | 2.66787  |
| D33 | -1.34332 | 0.00103  | -0.07580 | 0.06137  | -0.01451 | -1.35783 |
| D34 | 0.76000  | -0.00091 | -0.08798 | 0.05152  | -0.03698 | 0.72302  |
| D35 | 2.91674  | -0.00216 | -0.08649 | 0.03848  | -0.04837 | 2.86836  |
| D36 | 2.87111  | 0.00138  | -0.07845 | 0.06949  | -0.00877 | 2.86235  |
| D37 | -1.30875 | -0.00056 | -0.09063 | 0.05963  | -0.03124 | -1.33999 |
| D38 | 0.84799  | -0.00181 | -0.08914 | 0.04659  | -0.04263 | 0.80536  |
| D39 | 0.73151  | 0.00317  | -0.06806 | 0.07725  | 0.00892  | 0.74043  |
| D40 | 2.83483  | 0.00123  | -0.08024 | 0.06740  | -0.01354 | 2.82128  |
| D41 | -1.29162 | -0.00001 | -0.07875 | 0.05436  | -0.02494 | -1.31655 |
| D42 | -1.46729 | 0.00130  | 0.04261  | -0.01410 | 0.02664  | -1.44064 |
| D43 | 2.75047  | -0.00077 | 0.03560  | -0.02846 | 0.00540  | 2.75587  |
| D44 | 0.65204  | 0.00085  | 0.04723  | -0.02595 | 0.02049  | 0.67253  |
| D45 | 0.23620  | -0.00014 | 0.05468  | -0.05233 | 0.00151  | 0.23771  |
| D46 | -0.23699 | -0.00143 | -0.07579 | 0.04756  | -0.02747 | -0.26445 |
| D47 | -2.82181 | 0.00044  | -0.06806 | 0.04204  | -0.02523 | -2.84704 |
| D48 | -3.13227 | -0.00024 | -0.00121 | -0.00392 | -0.00513 | -3.13740 |
| D49 | 0.00720  | -0.00009 | -0.00049 | -0.00154 | -0.00203 | 0.00517  |
| D50 | 0.00333  | -0.00007 | -0.00008 | -0.00057 | -0.00065 | 0.00267  |
| D51 | -3.14039 | 0.00009  | 0.00064  | 0.00180  | 0.00244  | -3.13794 |

|     |          |          |          |          |          |          |
|-----|----------|----------|----------|----------|----------|----------|
| D52 | -2.53167 | -0.00143 | 0.03580  | -0.03202 | 0.00459  | -2.52708 |
| D53 | 2.91289  | 0.00004  | -0.02811 | 0.01544  | -0.01302 | 2.89987  |
| D54 | -2.16450 | 0.00100  | 0.01626  | -0.01605 | 0.00009  | -2.16441 |
| D55 | -0.47600 | -0.00147 | -0.02322 | -0.00152 | -0.02507 | -0.50107 |
| D56 | -2.64105 | -0.00221 | -0.02334 | -0.04803 | -0.07217 | -2.71322 |
| D57 | 0.05691  | -0.00343 | -0.02316 | -0.03172 | -0.05523 | 0.00168  |
| D58 | -0.10810 | 0.00295  | 0.03840  | 0.01021  | 0.04895  | -0.05915 |
| D59 | 2.58985  | 0.00172  | 0.03858  | 0.02652  | 0.06590  | 2.65575  |
| D60 | 1.13900  | -0.00236 | -0.02410 | -0.03515 | -0.05824 | 1.08076  |
| D61 | 0.17993  | -0.00342 | -0.07029 | -0.01003 | -0.08013 | 0.09979  |
| D62 | -1.39568 | 0.00362  | 0.04016  | 0.01865  | 0.05861  | -1.33707 |
| D63 | -2.35475 | 0.00256  | -0.00603 | 0.04377  | 0.03671  | -2.31804 |
| D64 | 1.96621  | -0.00292 | -0.02992 | -0.01988 | -0.04978 | 1.91643  |
| D65 | -0.49892 | 0.00024  | -0.00469 | 0.00362  | -0.00124 | -0.50016 |
| D66 | 2.55549  | -0.00134 | 0.00600  | -0.02522 | -0.01917 | 2.53632  |
| D67 | -1.65446 | -0.00043 | 0.01399  | -0.02057 | -0.00655 | -1.66101 |
| D68 | 0.44437  | -0.00038 | 0.01540  | -0.02203 | -0.00658 | 0.43779  |
| D69 | 1.36278  | -0.00064 | 0.01007  | -0.02825 | -0.01807 | 1.34471  |
| D70 | -2.84717 | 0.00026  | 0.01806  | -0.02360 | -0.00544 | -2.85261 |
| D71 | -0.74834 | 0.00031  | 0.01947  | -0.02506 | -0.00547 | -0.75382 |
| D72 | -1.05263 | -0.00012 | 0.01993  | -0.00267 | 0.01710  | -1.03553 |
| D73 | 1.02061  | 0.00079  | 0.02791  | 0.00198  | 0.02973  | 1.05034  |
| D74 | 3.11944  | 0.00084  | 0.02933  | 0.00052  | 0.02970  | -3.13405 |

| Item                 | Value    | Threshold | Converged? |
|----------------------|----------|-----------|------------|
| Maximum Force        | 0.013967 | 0.000450  | NO         |
| RMS Force            | 0.002717 | 0.000300  | NO         |
| Maximum Displacement | 0.300403 | 0.001800  | NO         |
| RMS Displacement     | 0.072462 | 0.001200  | NO         |

Predicted change in Energy=-2.820706D-03

GradGradGradGradGradGradGradGradGradGradGradGradGradGradGradGradGrad

Input orientation:

| Center Number | Atomic Number | Atomic Type | Coordinates (Angstroms) |           |           |
|---------------|---------------|-------------|-------------------------|-----------|-----------|
|               |               |             | X                       | Y         | Z         |
| 1             | 6             | 0           | -1.782162               | -1.978828 | 0.203189  |
| 2             | 6             | 0           | -2.922150               | -1.275213 | -0.012677 |
| 3             | 7             | 0           | -2.570621               | 0.070150  | 0.029772  |
| 4             | 6             | 0           | -1.245222               | 0.169104  | 0.264988  |
| 5             | 7             | 0           | -0.752780               | -1.066820 | 0.371195  |
| 6             | 6             | 0           | 0.675831                | -1.390965 | 0.567902  |
| 7             | 6             | 0           | 1.447683                | -1.429988 | -0.768888 |
| 8             | 1             | 0           | -1.616047               | -3.041189 | 0.251654  |

|    |    |   |           |           |           |
|----|----|---|-----------|-----------|-----------|
| 9  | 1  | 0 | -3.928078 | -1.610858 | -0.186862 |
| 10 | 1  | 0 | 1.101693  | -0.607057 | 1.191756  |
| 11 | 1  | 0 | 0.721840  | -2.350109 | 1.086322  |
| 12 | 1  | 0 | 1.242247  | -2.369986 | -1.292319 |
| 13 | 1  | 0 | 1.113926  | -0.596013 | -1.393373 |
| 14 | 35 | 0 | 1.380489  | 2.023773  | 0.255390  |
| 15 | 1  | 0 | -0.607858 | 1.085590  | 0.318565  |
| 16 | 6  | 0 | -3.403676 | 1.208628  | -0.136741 |
| 17 | 6  | 0 | -4.717495 | 1.167183  | -0.317285 |
| 18 | 1  | 0 | -2.842199 | 2.133455  | -0.101504 |
| 19 | 1  | 0 | -5.262991 | 2.092663  | -0.438361 |
| 20 | 1  | 0 | -5.287840 | 0.247712  | -0.350673 |
| 21 | 8  | 0 | 2.827924  | -1.382927 | -0.527105 |
| 22 | 1  | 0 | 3.095868  | -0.459791 | -0.395574 |
| 23 | 6  | 0 | 5.599993  | 2.152984  | -0.108338 |
| 24 | 6  | 0 | 6.173826  | 0.980714  | -0.795643 |
| 25 | 8  | 0 | 4.751316  | 1.185022  | -0.706799 |
| 26 | 1  | 0 | 5.586411  | 2.177070  | 0.982733  |
| 27 | 1  | 0 | 5.616479  | 3.129767  | -0.593276 |
| 28 | 1  | 0 | 6.543080  | 1.157055  | -1.805910 |
| 29 | 6  | 0 | 6.744499  | -0.194708 | -0.067104 |
| 30 | 1  | 0 | 6.560784  | -1.133261 | -0.599842 |
| 31 | 1  | 0 | 7.829099  | -0.089343 | 0.042379  |
| 32 | 1  | 0 | 6.312597  | -0.298201 | 0.931186  |

-----  
Distance matrix (angstroms):

|    |    | 1        | 2        | 3        | 4        | 5        |
|----|----|----------|----------|----------|----------|----------|
| 1  | C  | 0.000000 |          |          |          |          |
| 2  | C  | 1.356926 | 0.000000 |          |          |          |
| 3  | N  | 2.202283 | 1.391177 | 0.000000 |          |          |
| 4  | C  | 2.214890 | 2.230525 | 1.349742 | 0.000000 |          |
| 5  | N  | 1.385501 | 2.212906 | 2.171133 | 1.334649 | 0.000000 |
| 6  | C  | 2.553493 | 3.646360 | 3.600540 | 2.493194 | 1.478070 |
| 7  | C  | 3.417317 | 4.437483 | 4.362916 | 3.298140 | 2.504738 |
| 8  | H  | 1.076362 | 2.212341 | 3.262035 | 3.231668 | 2.158160 |
| 9  | H  | 2.211899 | 1.074657 | 2.171498 | 3.251177 | 3.269545 |
| 10 | H  | 3.342998 | 4.253046 | 3.910844 | 2.639949 | 2.079367 |
| 11 | H  | 2.681007 | 3.954980 | 4.220693 | 3.300054 | 2.081523 |
| 12 | H  | 3.396557 | 4.492017 | 4.715946 | 3.880681 | 2.906140 |
| 13 | H  | 3.584483 | 4.319438 | 4.005621 | 2.983479 | 2.611504 |
| 14 | Br | 5.101559 | 5.428432 | 4.413482 | 3.214692 | 3.757128 |
| 15 | H  | 3.283742 | 3.322508 | 2.228668 | 1.117609 | 2.157926 |
| 16 | C  | 3.592317 | 2.533125 | 1.420507 | 2.429182 | 3.530286 |
| 17 | C  | 4.334104 | 3.046530 | 2.435774 | 3.659492 | 4.602580 |

|    |    |          |           |           |           |          |
|----|----|----------|-----------|-----------|-----------|----------|
| 18 | H  | 4.257627 | 3.410762  | 2.085238  | 2.557993  | 3.851088 |
| 19 | H  | 5.394886 | 4.123509  | 3.399789  | 4.509684  | 5.565943 |
| 20 | H  | 4.189752 | 2.833731  | 2.749463  | 4.089986  | 4.776596 |
| 21 | O  | 4.705456 | 5.774045  | 5.618348  | 4.430206  | 3.705172 |
| 22 | H  | 5.144042 | 6.085069  | 5.707088  | 4.435867  | 3.970958 |
| 23 | C  | 8.465526 | 9.186328  | 8.433043  | 7.136674  | 7.138264 |
| 24 | C  | 8.547180 | 9.404202  | 8.830390  | 7.538296  | 7.316541 |
| 25 | O  | 7.316035 | 8.088056  | 7.442865  | 6.159133  | 6.043834 |
| 26 | H  | 8.495590 | 9.236055  | 8.478468  | 7.156695  | 7.147177 |
| 27 | H  | 9.026184 | 9.625442  | 8.762309  | 7.522305  | 7.688238 |
| 28 | H  | 9.120301 | 9.935904  | 9.360055  | 8.119255  | 7.931895 |
| 29 | C  | 8.715509 | 9.727002  | 9.319389  | 8.004891  | 7.560547 |
| 30 | H  | 8.424048 | 9.502155  | 9.231856  | 7.961018  | 7.378044 |
| 31 | H  | 9.796548 | 10.816593 | 10.400951 | 9.080729  | 8.643623 |
| 32 | H  | 8.299374 | 9.334130  | 8.936431  | 7.601501  | 7.129089 |
|    |    | 6        | 7         | 8         | 9         | 10       |
| 6  | C  | 0.000000 |           |           |           |          |
| 7  | C  | 1.544113 | 0.000000  |           |           |          |
| 8  | H  | 2.841823 | 3.608866  | 0.000000  |           |          |
| 9  | H  | 4.670546 | 5.410201  | 2.753839  | 0.000000  |          |
| 10 | H  | 1.088606 | 2.154309  | 3.767612  | 5.311007  | 0.000000 |
| 11 | H  | 1.091253 | 2.194373  | 2.576816  | 4.877420  | 1.787074 |
| 12 | H  | 2.177092 | 1.095345  | 3.317260  | 5.341401  | 3.049312 |
| 13 | H  | 2.161128 | 1.094025  | 4.017183  | 5.282744  | 2.585181 |
| 14 | Br | 3.500663 | 3.603071  | 5.884989  | 6.448799  | 2.806381 |
| 15 | H  | 2.800599 | 3.425775  | 4.248674  | 4.306989  | 2.559312 |
| 16 | C  | 4.888434 | 5.558560  | 4.626815  | 2.868277  | 5.035868 |
| 17 | C  | 6.034537 | 6.705122  | 5.258619  | 2.890969  | 6.268020 |
| 18 | H  | 5.024557 | 5.616637  | 5.329645  | 3.899525  | 4.973651 |
| 19 | H  | 6.958293 | 7.586268  | 6.335042  | 3.944783  | 7.103166 |
| 20 | H  | 6.252553 | 6.953909  | 4.966058  | 2.308694  | 6.628412 |
| 21 | O  | 2.414665 | 1.402048  | 4.806785  | 6.768403  | 2.556625 |
| 22 | H  | 2.766216 | 1.948630  | 5.411531  | 7.120698  | 2.553045 |
| 23 | C  | 6.104445 | 5.524101  | 8.898330  | 10.244843 | 5.435327 |
| 24 | C  | 6.141015 | 5.305528  | 8.829194  | 10.446785 | 5.674267 |
| 25 | O  | 4.986998 | 4.213802  | 7.702130  | 9.133409  | 4.487294 |
| 26 | H  | 6.084140 | 5.762648  | 8.924131  | 10.307369 | 5.282779 |
| 27 | H  | 6.796717 | 6.180701  | 9.544844  | 10.664768 | 6.126458 |
| 28 | H  | 6.822902 | 5.807863  | 9.403732  | 10.951155 | 6.458078 |
| 29 | C  | 6.217958 | 5.484039  | 8.837579  | 10.766788 | 5.796208 |
| 30 | H  | 6.005224 | 5.124493  | 8.439538  | 10.507848 | 5.769609 |
| 31 | H  | 7.289694 | 6.570993  | 9.897877  | 11.857435 | 6.844493 |
| 32 | H  | 5.753194 | 5.276228  | 8.417193  | 10.384822 | 5.226549 |
|    |    | 11       | 12        | 13        | 14        | 15       |

|    |    |           |           |           |           |           |
|----|----|-----------|-----------|-----------|-----------|-----------|
| 11 | H  | 0.000000  |           |           |           |           |
| 12 | H  | 2.434985  | 0.000000  |           |           |           |
| 13 | H  | 3.062592  | 1.781476  | 0.000000  |           |           |
| 14 | Br | 4.500568  | 4.660433  | 3.106888  | 0.000000  |           |
| 15 | H  | 3.763187  | 4.237787  | 2.953482  | 2.199478  | 0.000000  |
| 16 | C  | 5.583939  | 5.977160  | 5.024399  | 4.868929  | 2.835321  |
| 17 | C  | 6.627806  | 6.998626  | 6.186461  | 6.184425  | 4.159336  |
| 18 | H  | 5.849415  | 6.195298  | 4.976932  | 4.239163  | 2.503350  |
| 19 | H  | 7.607962  | 7.934897  | 6.986136  | 6.679960  | 4.822593  |
| 20 | H  | 6.702976  | 7.097963  | 6.540773  | 6.927361  | 4.801266  |
| 21 | O  | 2.823858  | 2.018467  | 2.075438  | 3.783249  | 4.314317  |
| 22 | H  | 3.377177  | 2.808720  | 2.223118  | 3.087778  | 4.076246  |
| 23 | C  | 6.745475  | 6.391324  | 5.416003  | 4.237123  | 6.313398  |
| 24 | C  | 6.660354  | 5.982838  | 5.333473  | 5.016843  | 6.873404  |
| 25 | O  | 5.652355  | 5.029362  | 4.107806  | 3.604412  | 5.457289  |
| 26 | H  | 6.646061  | 6.687551  | 5.773992  | 4.271101  | 6.324667  |
| 27 | H  | 7.537081  | 7.061859  | 5.898692  | 4.459492  | 6.614566  |
| 28 | H  | 7.385935  | 6.387693  | 5.720064  | 5.626055  | 7.460188  |
| 29 | C  | 6.499890  | 6.042166  | 5.798567  | 5.813627  | 7.472955  |
| 30 | H  | 6.198156  | 5.504167  | 5.530514  | 6.126478  | 7.560172  |
| 31 | H  | 7.530870  | 7.097139  | 6.885611  | 6.789345  | 8.522851  |
| 32 | H  | 5.957429  | 5.911406  | 5.702494  | 5.493082  | 7.083987  |
|    |    | 16        | 17        | 18        | 19        | 20        |
| 16 | C  | 0.000000  |           |           |           |           |
| 17 | C  | 1.326813  | 0.000000  |           |           |           |
| 18 | H  | 1.082498  | 2.120607  | 0.000000  |           |           |
| 19 | H  | 2.080755  | 1.081082  | 2.444457  | 0.000000  |           |
| 20 | H  | 2.125841  | 1.082514  | 3.098269  | 1.847201  | 0.000000  |
| 21 | O  | 6.760280  | 7.967460  | 6.685535  | 8.806277  | 8.279839  |
| 22 | H  | 6.715259  | 7.981342  | 6.486297  | 8.739988  | 8.413629  |
| 23 | C  | 9.053103  | 10.366582 | 8.442218  | 10.868164 | 11.055935 |
| 24 | C  | 9.602845  | 10.903415 | 9.115884  | 11.496298 | 11.493697 |
| 25 | O  | 8.174927  | 9.476836  | 7.676417  | 10.058937 | 10.089105 |
| 26 | H  | 9.111135  | 10.434577 | 8.498173  | 10.942402 | 11.124286 |
| 27 | H  | 9.233764  | 10.522306 | 8.531337  | 10.929888 | 11.281369 |
| 28 | H  | 10.085967 | 11.358549 | 9.588629  | 11.921781 | 11.954718 |
| 29 | C  | 10.244983 | 11.545330 | 9.865410  | 12.229052 | 12.043809 |
| 30 | H  | 10.246432 | 11.513968 | 9.966738  | 12.257011 | 11.931432 |
| 31 | H  | 11.308937 | 12.614485 | 10.901291 | 13.281381 | 13.127155 |
| 32 | H  | 9.890246  | 11.196828 | 9.528363  | 11.898997 | 11.683806 |
|    |    | 21        | 22        | 23        | 24        | 25        |
| 21 | O  | 0.000000  |           |           |           |           |
| 22 | H  | 0.970193  | 0.000000  |           |           |           |
| 23 | C  | 4.512472  | 3.630391  | 0.000000  |           |           |

|    |   |          |          |          |          |          |
|----|---|----------|----------|----------|----------|----------|
| 24 | C | 4.105359 | 3.421832 | 1.475089 | 0.000000 |          |
| 25 | O | 3.213424 | 2.354311 | 1.419633 | 1.439850 | 0.000000 |
| 26 | H | 4.749994 | 3.880151 | 1.091421 | 2.222373 | 2.129803 |
| 27 | H | 5.305170 | 4.390615 | 1.090662 | 2.229353 | 2.131532 |
| 28 | H | 4.678593 | 4.060358 | 2.182438 | 1.089992 | 2.102199 |
| 29 | C | 4.118620 | 3.672965 | 2.612135 | 1.496012 | 2.507118 |
| 30 | H | 3.741907 | 3.535665 | 3.458916 | 2.158000 | 2.942796 |
| 31 | H | 5.197059 | 4.767862 | 3.165384 | 2.141783 | 3.414385 |
| 32 | H | 3.930164 | 3.483353 | 2.756215 | 2.153328 | 2.705651 |
|    |   | 26       | 27       | 28       | 29       | 30       |
| 26 | H | 0.000000 |          |          |          |          |
| 27 | H | 1.841831 | 0.000000 |          |          |          |
| 28 | H | 3.119643 | 2.494126 | 0.000000 |          |          |
| 29 | C | 2.840537 | 3.549848 | 2.211623 | 0.000000 |          |
| 30 | H | 3.796345 | 4.366367 | 2.588524 | 1.094734 | 0.000000 |
| 31 | H | 3.324235 | 3.957577 | 2.573621 | 1.095192 | 1.763756 |
| 32 | H | 2.580110 | 3.815696 | 3.108470 | 1.092627 | 1.761525 |
|    |   | 31       | 32       |          |          |          |
| 31 | H | 0.000000 |          |          |          |          |
| 32 | H | 1.770135 | 0.000000 |          |          |          |

Stoichiometry C10H17BrN2O2

Framework group C1[X(C10H17BrN2O2)]

Deg. of freedom 90

Full point group C1 NOp 1

Largest Abelian subgroup C1 NOp 1

Largest concise Abelian subgroup C1 NOp 1

Standard orientation:

| Center<br>Number | Atomic<br>Number | Atomic<br>Type | Coordinates (Angstroms) |           |           |
|------------------|------------------|----------------|-------------------------|-----------|-----------|
|                  |                  |                | X                       | Y         | Z         |
| 1                | 6                | 0              | -3.094107               | 2.061940  | -0.234315 |
| 2                | 6                | 0              | -4.143433               | 1.253122  | 0.058901  |
| 3                | 7                | 0              | -3.652053               | -0.048384 | 0.057712  |
| 4                | 6                | 0              | -2.333506               | -0.018252 | -0.229219 |
| 5                | 7                | 0              | -1.980277               | 1.256373  | -0.407682 |
| 6                | 6                | 0              | -0.602927               | 1.719428  | -0.678198 |
| 7                | 6                | 0              | 0.210296                | 1.900736  | 0.621833  |
| 8                | 1                | 0              | -3.044381               | 3.132517  | -0.334049 |
| 9                | 1                | 0              | -5.172156               | 1.488877  | 0.261477  |
| 10               | 1                | 0              | -0.119639               | 0.956754  | -1.286330 |
| 11               | 1                | 0              | -0.679264               | 2.653246  | -1.237652 |
| 12               | 1                | 0              | -0.074456               | 2.837011  | 1.113857  |
| 13               | 1                | 0              | -0.008625               | 1.065905  | 1.294159  |



|    |    |   |           |           |           |
|----|----|---|-----------|-----------|-----------|
| 14 | 35 | 0 | 0.473783  | -1.584385 | -0.253743 |
| 15 | 1  | 0 | -1.604367 | -0.864192 | -0.271533 |
| 16 | 6  | 0 | -4.351832 | -1.259219 | 0.306768  |
| 17 | 6  | 0 | -5.654795 | -1.347778 | 0.541031  |
| 18 | 1  | 0 | -3.696508 | -2.120575 | 0.286330  |
| 19 | 1  | 0 | -6.093338 | -2.318896 | 0.723642  |
| 20 | 1  | 0 | -6.318429 | -0.492759 | 0.560224  |
| 21 | 8  | 0 | 1.577539  | 1.987880  | 0.323856  |
| 22 | 1  | 0 | 1.937402  | 1.092938  | 0.219683  |
| 23 | 6  | 0 | 4.693658  | -1.252719 | -0.064373 |
| 24 | 6  | 0 | 5.164536  | 0.003698  | 0.548469  |
| 25 | 8  | 0 | 3.769656  | -0.352795 | 0.528683  |
| 26 | 1  | 0 | 4.641510  | -1.328229 | -1.151930 |
| 27 | 1  | 0 | 4.832706  | -2.199035 | 0.459742  |
| 28 | 1  | 0 | 5.588422  | -0.086243 | 1.548626  |
| 29 | 6  | 0 | 5.578441  | 1.197831  | -0.252020 |
| 30 | 1  | 0 | 5.315777  | 2.135380  | 0.248430  |
| 31 | 1  | 0 | 6.663174  | 1.202077  | -0.402953 |
| 32 | 1  | 0 | 5.100544  | 1.209375  | -1.234525 |

-----

Rotational constants (GHZ):      0.8259601      0.1776631      0.1503100

Standard basis: 6-311++G(d,p) (5D, 7F)

There are    492 symmetry adapted cartesian basis functions of A    symmetry.

There are    475 symmetry adapted basis functions of A    symmetry.

475 basis functions,    751 primitive gaussians,    492 cartesian basis functions

71 alpha electrons      71 beta electrons

nuclear repulsion energy      1292.4415371916 Hartrees.

NAtoms=    32 NActive=    32 NUniq=    32 SFac= 1.00D+00 NAtFMM=    60 NAOKFM=F

Big=F

Integral buffers will be    131072 words long.

Raffenetti 2 integral format.

Two-electron integral symmetry is turned on.

One-electron integrals computed using PRISM.

NBasis=    475 RedAO= T EigKep=    4.32D-06    NBF=    475

NBsUse=    475 1.00D-06 EigRej= -1.00D+00    NBFU=    475

Initial guess from the checkpoint file: "/home/suqian/liuwen/qianmengshijie/ohpo/ohpo.chk"

B after Tr=    0.000000    0.000000    0.000000

Rot=    0.999968    -0.004406    0.000431    -0.006634 Ang=    -0.91 deg.

ExpMin= 3.50D-02 ExpMax= 4.40D+05 ExpMxC= 1.51D+04 IAcc=3 IRadAn=      5 AccDes=

0.00D+00

Harris functional with IExCor=    402 and IRadAn=      5 diagonalized for initial guess.

HarFok: IExCor=    402 AccDes= 0.00D+00 IRadAn=      5 IDoV= 1 UseB2=F ITyADJ=14

ICtDFT= 3500011 ScaDFX= 1.000000 1.000000 1.000000 1.000000

FoFCou: FMM=F IPFlag=      0 FMFlag=    100000 FMFlg1=      0

NFxFIlg= 0 DoJE=T BraDBF=F KetDBF=T FulRan=T  
wScrn= 0.000000 ICntrl= 500 IOpCl= 0 I1Cent= 200000004 NGrid=  
0  
NMat0= 1 NMatS0= 1 NMatT0= 0 NMatD0= 1 NMtDS0= 0  
NMtDT0= 0

Petite list used in FoFCou.

Requested convergence on RMS density matrix=1.00D-08 within 128 cycles.

Requested convergence on MAX density matrix=1.00D-06.

Requested convergence on energy=1.00D-06.

No special actions if energy rises.

SCF Done: E(RB3LYP) = -3225.50991994 A.U. after 12 cycles

NFock= 12 Conv=0.64D-08 -V/T= 2.0018

Calling FoFJK, ICntrl= 2127 FMM=F ISym2X=0 I1Cent= 0 IOpClX= 0 NMat=1 NMatS=1  
NMatT=0.

\*\*\*\*\* Axes restored to original set \*\*\*\*\*

| Center<br>Number | Atomic<br>Number | Forces (Hartrees/Bohr) |              |              |
|------------------|------------------|------------------------|--------------|--------------|
|                  |                  | X                      | Y            | Z            |
| 1                | 6                | -0.000013433           | 0.000110410  | -0.000786849 |
| 2                | 6                | 0.000099281            | 0.000415035  | 0.000332981  |
| 3                | 7                | -0.000085843           | 0.000524649  | -0.000055484 |
| 4                | 6                | 0.000579732            | 0.001096955  | -0.000333261 |
| 5                | 7                | -0.001101821           | -0.001343790 | 0.000862442  |
| 6                | 6                | 0.000115379            | 0.000153585  | -0.000305388 |
| 7                | 6                | -0.002145339           | -0.000809140 | -0.000022552 |
| 8                | 1                | 0.000096081            | -0.000002819 | -0.000037502 |
| 9                | 1                | 0.000027777            | 0.000073749  | 0.000069880  |
| 10               | 1                | 0.000115914            | 0.000775707  | -0.000063180 |
| 11               | 1                | 0.000297797            | 0.000453841  | 0.000327238  |
| 12               | 1                | -0.000122235           | 0.000381471  | -0.000386526 |
| 13               | 1                | 0.000323605            | 0.000710202  | 0.000286042  |
| 14               | 35               | -0.000315641           | 0.003483335  | 0.000905963  |
| 15               | 1                | -0.001041552           | -0.004099635 | -0.000176619 |
| 16               | 6                | -0.000102279           | 0.000074214  | 0.000067820  |
| 17               | 6                | 0.000061256            | -0.000096511 | 0.000044980  |
| 18               | 1                | 0.000049641            | 0.000043511  | -0.000003268 |
| 19               | 1                | 0.000019319            | 0.000004026  | -0.000035889 |
| 20               | 1                | -0.000081815           | 0.000014143  | -0.000020505 |
| 21               | 8                | 0.002993952            | -0.001956199 | 0.000129492  |
| 22               | 1                | 0.000427630            | 0.003174753  | -0.000188743 |
| 23               | 6                | 0.004350007            | 0.002150368  | 0.003581783  |
| 24               | 6                | -0.004577208           | 0.007341117  | -0.002676852 |
| 25               | 8                | -0.002265209           | -0.006578010 | -0.002077580 |

|    |   |              |              |              |
|----|---|--------------|--------------|--------------|
| 26 | 1 | -0.000756060 | -0.000080315 | -0.002409059 |
| 27 | 1 | -0.001070793 | -0.002014581 | 0.000833607  |
| 28 | 1 | 0.001978086  | -0.001913667 | 0.000663361  |
| 29 | 6 | 0.003756854  | -0.005840271 | 0.003177469  |
| 30 | 1 | -0.000990242 | 0.001381054  | -0.001393588 |
| 31 | 1 | 0.000169362  | 0.000657165  | -0.000155416 |
| 32 | 1 | -0.000792200 | 0.001715647  | -0.000154799 |

-----  
Cartesian Forces: Max 0.007341117 RMS 0.001845077

GradGradGradGradGradGradGradGradGradGradGradGradGradGradGradGradGradGradGrad

Berny optimization.

Using GEDIIS/GDIIS optimizer.

FormGI is forming the generalized inverse of G from B-inverse, IUseBI=4.

GSVD: received Info= 1 from GESDD.

Internal Forces: Max 0.003277238 RMS 0.000856644

Search for a local minimum.

Step number 6 out of a maximum of 177

All quantities printed in internal units (Hartrees-Bohrs-Radians)

Mixed Optimization -- En-DIIS/RFO-DIIS

Update second derivatives using D2CorX and points 5 6

DE= -3.47D-03 DEPred=-2.82D-03 R= 1.23D+00

TightC=F SS= 1.41D+00 RLast= 4.97D-01 DXNew= 1.4270D+00 1.4921D+00

Trust test= 1.23D+00 RLast= 4.97D-01 DXMaxT set to 1.43D+00

ITU= 1 0 1 0 1 0

Use linear search instead of GDIIS.

|                 |         |         |         |         |         |
|-----------------|---------|---------|---------|---------|---------|
| Eigenvalues --- | 0.00235 | 0.00244 | 0.00316 | 0.00435 | 0.00572 |
| Eigenvalues --- | 0.00918 | 0.01274 | 0.01329 | 0.01402 | 0.01541 |
| Eigenvalues --- | 0.01856 | 0.01907 | 0.02041 | 0.02099 | 0.02162 |
| Eigenvalues --- | 0.02248 | 0.02315 | 0.02358 | 0.02390 | 0.02488 |
| Eigenvalues --- | 0.03062 | 0.03062 | 0.03152 | 0.03642 | 0.04009 |
| Eigenvalues --- | 0.04491 | 0.05061 | 0.05287 | 0.05323 | 0.05433 |
| Eigenvalues --- | 0.05853 | 0.06443 | 0.09294 | 0.09987 | 0.10711 |
| Eigenvalues --- | 0.10937 | 0.11439 | 0.11918 | 0.13133 | 0.13536 |
| Eigenvalues --- | 0.14037 | 0.14804 | 0.15828 | 0.16000 | 0.16000 |
| Eigenvalues --- | 0.16000 | 0.16000 | 0.16000 | 0.16001 | 0.16094 |
| Eigenvalues --- | 0.16275 | 0.18964 | 0.20120 | 0.21982 | 0.22000 |
| Eigenvalues --- | 0.22775 | 0.23564 | 0.23986 | 0.25001 | 0.27033 |
| Eigenvalues --- | 0.27706 | 0.28643 | 0.31723 | 0.32921 | 0.33053 |
| Eigenvalues --- | 0.33292 | 0.33949 | 0.34085 | 0.34416 | 0.34761 |
| Eigenvalues --- | 0.34929 | 0.35266 | 0.35686 | 0.35690 | 0.35858 |
| Eigenvalues --- | 0.36436 | 0.36658 | 0.37225 | 0.37241 | 0.37767 |
| Eigenvalues --- | 0.38649 | 0.42177 | 0.42477 | 0.45478 | 0.46141 |
| Eigenvalues --- | 0.49067 | 0.51479 | 0.54477 | 0.56035 | 0.60354 |

RFO step: Lambda=-1.49222661D-03 EMin= 2.34535060D-03

Quartic linear search produced a step of 0.13848.

Iteration 1 RMS(Cart)= 0.07142014 RMS(Int)= 0.00108170  
Iteration 2 RMS(Cart)= 0.00290422 RMS(Int)= 0.00024710  
Iteration 3 RMS(Cart)= 0.00000381 RMS(Int)= 0.00024709  
Iteration 4 RMS(Cart)= 0.00000000 RMS(Int)= 0.00024709

| Variable | Old X   | -DE/DX   | Delta X<br>(Linear) | Delta X<br>(Quad) | Delta X<br>(Total) | New X   |
|----------|---------|----------|---------------------|-------------------|--------------------|---------|
| R1       | 2.56422 | 0.00031  | 0.00038             | 0.00065           | 0.00099            | 2.56521 |
| R2       | 2.61822 | -0.00014 | 0.00015             | -0.00051          | -0.00034           | 2.61788 |
| R3       | 2.03403 | 0.00002  | -0.00006            | 0.00008           | 0.00002            | 2.03405 |
| R4       | 2.62894 | -0.00022 | -0.00013            | -0.00016          | -0.00033           | 2.62861 |
| R5       | 2.03081 | -0.00006 | 0.00007             | -0.00024          | -0.00017           | 2.03064 |
| R6       | 2.55064 | -0.00027 | 0.00024             | -0.00052          | -0.00027           | 2.55037 |
| R7       | 2.68437 | 0.00005  | -0.00015            | 0.00019           | 0.00004            | 2.68441 |
| R8       | 2.52212 | -0.00038 | -0.00071            | -0.00090          | -0.00146           | 2.52066 |
| R9       | 2.11197 | -0.00183 | 0.00070             | -0.00550          | -0.00476           | 2.10721 |
| R10      | 2.79315 | 0.00045  | 0.00157             | -0.00086          | 0.00078            | 2.79393 |
| R11      | 2.91795 | 0.00007  | 0.00186             | -0.00358          | -0.00181           | 2.91614 |
| R12      | 2.05717 | 0.00057  | 0.00013             | 0.00162           | 0.00174            | 2.05891 |
| R13      | 2.06217 | -0.00023 | -0.00023            | -0.00052          | -0.00075           | 2.06142 |
| R14      | 2.06990 | -0.00012 | 0.00011             | -0.00017          | -0.00006           | 2.06984 |
| R15      | 2.06741 | 0.00028  | 0.00027             | 0.00026           | 0.00053            | 2.06794 |
| R16      | 2.64949 | 0.00212  | 0.00306             | 0.00247           | 0.00559            | 2.65508 |
| R17      | 4.15641 | 0.00157  | 0.02032             | 0.02525           | 0.04558            | 4.20199 |
| R18      | 6.81135 | 0.00156  | -0.05346            | 0.23674           | 0.18325            | 6.99461 |
| R19      | 2.50731 | 0.00000  | 0.00006             | -0.00002          | 0.00004            | 2.50735 |
| R20      | 2.04563 | 0.00006  | 0.00005             | 0.00011           | 0.00017            | 2.04579 |
| R21      | 2.04295 | 0.00000  | 0.00000             | -0.00002          | -0.00002           | 2.04293 |
| R22      | 2.04565 | 0.00003  | 0.00004             | 0.00006           | 0.00010            | 2.04576 |
| R23      | 1.83340 | 0.00112  | 0.00156             | -0.00026          | 0.00127            | 1.83466 |
| R24      | 4.44900 | -0.00216 | -0.00494            | -0.11183          | -0.11681           | 4.33219 |
| R25      | 2.78751 | -0.00120 | -0.00108            | -0.00539          | -0.00655           | 2.78097 |
| R26      | 2.68272 | 0.00219  | 0.00139             | 0.00847           | 0.00981            | 2.69253 |
| R27      | 2.06249 | -0.00240 | -0.00227            | -0.00433          | -0.00659           | 2.05589 |
| R28      | 2.06105 | -0.00219 | -0.00212            | -0.00383          | -0.00595           | 2.05510 |
| R29      | 2.72092 | 0.00054  | 0.00114             | -0.00308          | -0.00180           | 2.71912 |
| R30      | 2.05979 | -0.00026 | 0.00076             | -0.00044          | 0.00032            | 2.06011 |
| R31      | 2.82705 | 0.00317  | 0.00510             | 0.00620           | 0.01130            | 2.83836 |
| R32      | 2.06875 | -0.00034 | -0.00102            | -0.00150          | -0.00252           | 2.06623 |
| R33      | 2.06961 | 0.00022  | -0.00043            | -0.00077          | -0.00120           | 2.06841 |
| R34      | 2.06477 | 0.00001  | -0.00090            | -0.00065          | -0.00155           | 2.06321 |
| A1       | 1.87774 | -0.00017 | 0.00054             | -0.00138          | -0.00082           | 1.87692 |
| A2       | 2.27655 | 0.00017  | -0.00014            | 0.00132           | 0.00115            | 2.27770 |

|     |         |          |          |          |          |         |
|-----|---------|----------|----------|----------|----------|---------|
| A3  | 2.12889 | 0.00000  | -0.00038 | 0.00005  | -0.00036 | 2.12853 |
| A4  | 1.85909 | 0.00017  | -0.00063 | 0.00176  | 0.00110  | 1.86019 |
| A5  | 2.27868 | -0.00003 | 0.00036  | -0.00043 | -0.00007 | 2.27861 |
| A6  | 2.14541 | -0.00014 | 0.00027  | -0.00131 | -0.00104 | 2.14438 |
| A7  | 1.90112 | -0.00034 | 0.00019  | -0.00213 | -0.00192 | 1.89920 |
| A8  | 2.24375 | 0.00017  | -0.00020 | 0.00092  | 0.00071  | 2.24447 |
| A9  | 2.13832 | 0.00017  | 0.00001  | 0.00121  | 0.00121  | 2.13952 |
| A10 | 1.88419 | 0.00048  | 0.00034  | 0.00170  | 0.00198  | 1.88617 |
| A11 | 2.25040 | -0.00073 | 0.00046  | -0.00104 | -0.00087 | 2.24953 |
| A12 | 2.14736 | 0.00026  | -0.00090 | -0.00032 | -0.00091 | 2.14645 |
| A13 | 1.90263 | -0.00014 | -0.00039 | 0.00010  | -0.00041 | 1.90222 |
| A14 | 2.20172 | 0.00130  | 0.00235  | 0.00505  | 0.00719  | 2.20891 |
| A15 | 2.17766 | -0.00117 | -0.00193 | -0.00557 | -0.00720 | 2.17046 |
| A16 | 1.95354 | 0.00013  | 0.00193  | -0.00292 | 0.00000  | 1.95354 |
| A17 | 1.87177 | 0.00008  | -0.00079 | -0.00123 | -0.00220 | 1.86957 |
| A18 | 1.87206 | -0.00012 | 0.00157  | 0.00263  | 0.00374  | 1.87580 |
| A19 | 1.89524 | -0.00023 | -0.00156 | -0.00270 | -0.00473 | 1.89051 |
| A20 | 1.94765 | 0.00012  | -0.00009 | 0.00277  | 0.00262  | 1.95027 |
| A21 | 1.92216 | 0.00001  | -0.00106 | 0.00140  | 0.00047  | 1.92264 |
| A22 | 1.91946 | 0.00033  | -0.00070 | 0.00636  | 0.00609  | 1.92555 |
| A23 | 1.89907 | -0.00030 | -0.00206 | -0.00220 | -0.00428 | 1.89480 |
| A24 | 1.91979 | 0.00025  | 0.00532  | -0.00659 | -0.00230 | 1.91748 |
| A25 | 1.90096 | 0.00007  | -0.00114 | 0.00281  | 0.00157  | 1.90253 |
| A26 | 1.87114 | -0.00018 | 0.00164  | 0.00248  | 0.00427  | 1.87541 |
| A27 | 1.95323 | -0.00016 | -0.00298 | -0.00248 | -0.00502 | 1.94821 |
| A28 | 2.42467 | -0.00328 | 0.00239  | -0.05020 | -0.04841 | 2.37626 |
| A29 | 2.61388 | 0.00299  | 0.00270  | 0.00414  | 0.00676  | 2.62064 |
| A30 | 2.17928 | 0.00001  | -0.00001 | 0.00017  | 0.00016  | 2.17943 |
| A31 | 1.95705 | -0.00002 | -0.00019 | 0.00015  | -0.00004 | 1.95702 |
| A32 | 2.14685 | 0.00002  | 0.00020  | -0.00032 | -0.00012 | 2.14673 |
| A33 | 2.08075 | -0.00007 | -0.00010 | -0.00036 | -0.00046 | 2.08029 |
| A34 | 2.15609 | 0.00012  | 0.00016  | 0.00058  | 0.00074  | 2.15682 |
| A35 | 2.04634 | -0.00004 | -0.00006 | -0.00021 | -0.00027 | 2.04607 |
| A36 | 1.90413 | -0.00117 | -0.00017 | -0.00972 | -0.00989 | 1.89424 |
| A37 | 2.56997 | -0.00114 | -0.00066 | -0.00892 | -0.00873 | 2.56124 |
| A38 | 2.08079 | 0.00037  | 0.00503  | 0.00131  | 0.00612  | 2.08691 |
| A39 | 2.09288 | -0.00006 | 0.00424  | 0.00330  | 0.00724  | 2.10011 |
| A40 | 2.01422 | -0.00063 | -0.00460 | -0.00376 | -0.00855 | 2.00566 |
| A41 | 2.01778 | -0.00007 | -0.00589 | -0.00284 | -0.00891 | 2.00887 |
| A42 | 2.00966 | 0.00009  | -0.00054 | 0.00053  | -0.00100 | 2.00865 |
| A43 | 2.02092 | 0.00225  | 0.00701  | 0.00419  | 0.01126  | 2.03218 |
| A44 | 2.14825 | -0.00128 | -0.00146 | -0.00247 | -0.00404 | 2.14422 |
| A45 | 1.94864 | 0.00159  | 0.00115  | 0.00993  | 0.01098  | 1.95962 |
| A46 | 2.04689 | -0.00103 | -0.00088 | -0.00045 | -0.00133 | 2.04555 |

|     |          |          |          |          |          |          |
|-----|----------|----------|----------|----------|----------|----------|
| A47 | 2.03672  | -0.00126 | -0.00427 | -0.00696 | -0.01127 | 2.02545  |
| A48 | 1.01184  | 0.00094  | 0.00315  | 0.00291  | 0.00572  | 1.01756  |
| A49 | 1.86280  | -0.00131 | -0.00203 | -0.01875 | -0.02054 | 1.84226  |
| A50 | 2.56990  | -0.00066 | -0.00028 | -0.00454 | -0.00499 | 2.56492  |
| A51 | 2.21894  | 0.00116  | -0.00065 | 0.01011  | 0.00959  | 2.22853  |
| A52 | 1.95261  | -0.00252 | -0.00439 | -0.01138 | -0.01589 | 1.93673  |
| A53 | 1.92929  | 0.00003  | 0.00110  | -0.00029 | 0.00083  | 1.93012  |
| A54 | 1.94827  | -0.00204 | -0.00488 | -0.00814 | -0.01314 | 1.93513  |
| A55 | 1.87268  | 0.00146  | 0.00306  | 0.00775  | 0.01084  | 1.88352  |
| A56 | 1.87243  | 0.00226  | 0.00387  | 0.00827  | 0.01190  | 1.88433  |
| A57 | 1.88519  | 0.00110  | 0.00197  | 0.00511  | 0.00708  | 1.89227  |
| A58 | 3.23078  | 0.00210  | 0.00250  | 0.01302  | 0.01531  | 3.24609  |
| A59 | 3.40094  | 0.00133  | 0.00167  | 0.02537  | 0.02705  | 3.42798  |
| D1  | -0.00226 | 0.00021  | -0.00219 | 0.01320  | 0.01109  | 0.00883  |
| D2  | 3.14118  | 0.00014  | -0.00174 | 0.00789  | 0.00621  | -3.13579 |
| D3  | 3.13896  | 0.00005  | 0.00020  | 0.00255  | 0.00269  | -3.14154 |
| D4  | -0.00079 | -0.00002 | 0.00065  | -0.00276 | -0.00219 | -0.00297 |
| D5  | 0.00254  | -0.00027 | 0.00358  | -0.01811 | -0.01466 | -0.01213 |
| D6  | -3.08870 | -0.00008 | 0.00300  | -0.00883 | -0.00606 | -3.09476 |
| D7  | -3.13872 | -0.00013 | 0.00144  | -0.00855 | -0.00714 | 3.13733  |
| D8  | 0.05323  | 0.00006  | 0.00086  | 0.00073  | 0.00146  | 0.05470  |
| D9  | 0.00124  | -0.00008 | 0.00009  | -0.00399 | -0.00388 | -0.00264 |
| D10 | -3.14082 | -0.00004 | 0.00032  | -0.00371 | -0.00345 | 3.13891  |
| D11 | 3.14116  | -0.00001 | -0.00032 | 0.00082  | 0.00053  | -3.14150 |
| D12 | -0.00090 | 0.00003  | -0.00009 | 0.00109  | 0.00096  | 0.00006  |
| D13 | 0.00033  | -0.00009 | 0.00213  | -0.00720 | -0.00519 | -0.00486 |
| D14 | 3.08903  | 0.00010  | -0.00043 | -0.00002 | -0.00072 | 3.08830  |
| D15 | -3.14083 | -0.00013 | 0.00191  | -0.00746 | -0.00559 | 3.13676  |
| D16 | -0.05214 | 0.00006  | -0.00064 | -0.00028 | -0.00112 | -0.05325 |
| D17 | 0.04891  | -0.00003 | 0.00023  | -0.00139 | -0.00112 | 0.04779  |
| D18 | -3.09130 | -0.00002 | -0.00034 | -0.00029 | -0.00058 | -3.09189 |
| D19 | -3.09320 | 0.00001  | 0.00049  | -0.00108 | -0.00064 | -3.09385 |
| D20 | 0.04977  | 0.00003  | -0.00008 | 0.00002  | -0.00011 | 0.04966  |
| D21 | -0.00175 | 0.00022  | -0.00352 | 0.01552  | 0.01219  | 0.01043  |
| D22 | 3.09034  | 0.00012  | -0.00278 | 0.00678  | 0.00432  | 3.09466  |
| D23 | -3.09427 | 0.00009  | -0.00118 | 0.00889  | 0.00804  | -3.08623 |
| D24 | -0.00218 | -0.00001 | -0.00044 | 0.00015  | 0.00018  | -0.00200 |
| D25 | -2.81508 | -0.00015 | 0.00705  | -0.00934 | -0.00154 | -2.81663 |
| D26 | 0.26648  | 0.00005  | 0.00417  | -0.00114 | 0.00360  | 0.27008  |
| D27 | 1.61015  | -0.00011 | 0.00324  | -0.01611 | -0.01243 | 1.59772  |
| D28 | -2.59612 | -0.00026 | 0.00196  | -0.02188 | -0.01960 | -2.61571 |
| D29 | -0.53169 | -0.00027 | 0.00113  | -0.01952 | -0.01825 | -0.54994 |
| D30 | -1.47348 | 0.00006  | 0.00249  | -0.00565 | -0.00285 | -1.47633 |
| D31 | 0.60344  | -0.00009 | 0.00122  | -0.01142 | -0.01002 | 0.59343  |

|     |          |          |          |          |          |          |
|-----|----------|----------|----------|----------|----------|----------|
| D32 | 2.66787  | -0.00010 | 0.00039  | -0.00906 | -0.00867 | 2.65920  |
| D33 | -1.35783 | 0.00031  | -0.00201 | 0.06993  | 0.06791  | -1.28992 |
| D34 | 0.72302  | 0.00040  | -0.00512 | 0.07579  | 0.07084  | 0.79385  |
| D35 | 2.86836  | 0.00017  | -0.00670 | 0.06704  | 0.06039  | 2.92876  |
| D36 | 2.86235  | 0.00027  | -0.00121 | 0.07492  | 0.07362  | 2.93597  |
| D37 | -1.33999 | 0.00037  | -0.00433 | 0.08077  | 0.07655  | -1.26344 |
| D38 | 0.80536  | 0.00014  | -0.00590 | 0.07202  | 0.06610  | 0.87146  |
| D39 | 0.74043  | 0.00032  | 0.00124  | 0.07321  | 0.07454  | 0.81498  |
| D40 | 2.82128  | 0.00042  | -0.00188 | 0.07907  | 0.07747  | 2.89875  |
| D41 | -1.31655 | 0.00019  | -0.00345 | 0.07032  | 0.06702  | -1.24953 |
| D42 | -1.44064 | 0.00011  | 0.00369  | -0.01574 | -0.01140 | -1.45204 |
| D43 | 2.75587  | -0.00032 | 0.00075  | -0.02115 | -0.01997 | 2.73590  |
| D44 | 0.67253  | -0.00019 | 0.00284  | -0.02473 | -0.02168 | 0.65086  |
| D45 | 0.23771  | -0.00024 | 0.00021  | -0.07086 | -0.07030 | 0.16741  |
| D46 | -0.26445 | 0.00008  | -0.00380 | 0.07822  | 0.07402  | -0.19043 |
| D47 | -2.84704 | 0.00040  | -0.00349 | 0.07207  | 0.06828  | -2.77876 |
| D48 | -3.13740 | 0.00004  | -0.00071 | 0.00182  | 0.00111  | -3.13629 |
| D49 | 0.00517  | 0.00000  | -0.00028 | 0.00035  | 0.00007  | 0.00524  |
| D50 | 0.00267  | 0.00002  | -0.00009 | 0.00061  | 0.00052  | 0.00319  |
| D51 | -3.13794 | -0.00002 | 0.00034  | -0.00086 | -0.00052 | -3.13847 |
| D52 | -2.52708 | -0.00015 | 0.00064  | -0.03448 | -0.03445 | -2.56153 |
| D53 | 2.89987  | 0.00055  | -0.00180 | 0.00357  | 0.00176  | 2.90163  |
| D54 | -2.16441 | 0.00023  | 0.00001  | -0.02704 | -0.02694 | -2.19135 |
| D55 | -0.50107 | -0.00078 | -0.00347 | -0.02181 | -0.02529 | -0.52636 |
| D56 | -2.71322 | 0.00023  | -0.00999 | 0.00596  | -0.00423 | -2.71746 |
| D57 | 0.00168  | -0.00076 | -0.00765 | -0.00934 | -0.01721 | -0.01553 |
| D58 | -0.05915 | 0.00118  | 0.00678  | 0.01782  | 0.02482  | -0.03434 |
| D59 | 2.65575  | 0.00019  | 0.00913  | 0.00252  | 0.01184  | 2.66759  |
| D60 | 1.08076  | -0.00024 | -0.00806 | -0.01236 | -0.02020 | 1.06057  |
| D61 | 0.09979  | -0.00035 | -0.01110 | 0.01013  | -0.00059 | 0.09920  |
| D62 | -1.33707 | 0.00048  | 0.00812  | -0.00493 | 0.00285  | -1.33422 |
| D63 | -2.31804 | 0.00037  | 0.00508  | 0.01756  | 0.02245  | -2.29559 |
| D64 | 1.91643  | -0.00077 | -0.00689 | 0.00548  | -0.00137 | 1.91506  |
| D65 | -0.50016 | 0.00053  | -0.00017 | 0.00520  | 0.00515  | -0.49501 |
| D66 | 2.53632  | 0.00000  | -0.00265 | -0.01045 | -0.01306 | 2.52325  |
| D67 | -1.66101 | 0.00021  | -0.00091 | -0.00835 | -0.00928 | -1.67029 |
| D68 | 0.43779  | 0.00027  | -0.00091 | -0.00750 | -0.00850 | 0.42929  |
| D69 | 1.34471  | -0.00041 | -0.00250 | -0.01596 | -0.01836 | 1.32636  |
| D70 | -2.85261 | -0.00020 | -0.00075 | -0.01385 | -0.01458 | -2.86718 |
| D71 | -0.75382 | -0.00014 | -0.00076 | -0.01300 | -0.01379 | -0.76760 |
| D72 | -1.03553 | -0.00021 | 0.00237  | -0.02336 | -0.02093 | -1.05646 |
| D73 | 1.05034  | 0.00000  | 0.00412  | -0.02125 | -0.01715 | 1.03319  |
| D74 | -3.13405 | 0.00006  | 0.00411  | -0.02040 | -0.01636 | 3.13277  |

Item Value Threshold Converged?

|                      |          |          |    |
|----------------------|----------|----------|----|
| Maximum Force        | 0.003277 | 0.000450 | NO |
| RMS Force            | 0.000857 | 0.000300 | NO |
| Maximum Displacement | 0.216035 | 0.001800 | NO |
| RMS Displacement     | 0.072151 | 0.001200 | NO |

Predicted change in Energy=-9.135644D-04

GradGradGradGradGradGradGradGradGradGradGradGradGradGradGradGradGradGrad

Input orientation:

| -----  |        |        |                         |           |           |  |
|--------|--------|--------|-------------------------|-----------|-----------|--|
| Center | Atomic | Atomic | Coordinates (Angstroms) |           |           |  |
| Number | Number | Type   | X                       | Y         | Z         |  |
| -----  |        |        |                         |           |           |  |
| 1      | 6      | 0      | -1.745849               | -1.973117 | 0.198214  |  |
| 2      | 6      | 0      | -2.907391               | -1.296690 | 0.008653  |  |
| 3      | 7      | 0      | -2.588306               | 0.056837  | 0.040762  |  |
| 4      | 6      | 0      | -1.261186               | 0.186373  | 0.249060  |  |
| 5      | 7      | 0      | -0.737730               | -1.035940 | 0.354771  |  |
| 6      | 6      | 0      | 0.703668                | -1.313998 | 0.530761  |  |
| 7      | 6      | 0      | 1.453911                | -1.342597 | -0.817442 |  |
| 8      | 1      | 0      | -1.552065               | -3.030996 | 0.242051  |  |
| 9      | 1      | 0      | -3.908262               | -1.656347 | -0.144966 |  |
| 10     | 1      | 0      | 1.114880                | -0.505535 | 1.134387  |  |
| 11     | 1      | 0      | 0.791799                | -2.262427 | 1.062439  |  |
| 12     | 1      | 0      | 1.218242                | -2.261739 | -1.364568 |  |
| 13     | 1      | 0      | 1.134058                | -0.481692 | -1.412457 |  |
| 14     | 35     | 0      | 1.333346                | 2.123674  | 0.183867  |  |
| 15     | 1      | 0      | -0.645923               | 1.115584  | 0.287006  |  |
| 16     | 6      | 0      | -3.451574               | 1.174692  | -0.111113 |  |
| 17     | 6      | 0      | -4.767334               | 1.101601  | -0.265773 |  |
| 18     | 1      | 0      | -2.911742               | 2.112818  | -0.088855 |  |
| 19     | 1      | 0      | -5.336470               | 2.013788  | -0.378526 |  |
| 20     | 1      | 0      | -5.316841               | 0.169099  | -0.286606 |  |
| 21     | 8      | 0      | 2.840723                | -1.329962 | -0.592414 |  |
| 22     | 1      | 0      | 3.123067                | -0.410926 | -0.457398 |  |
| 23     | 6      | 0      | 5.630231                | 2.112085  | -0.124915 |  |
| 24     | 6      | 0      | 6.202737                | 0.921387  | -0.773107 |  |
| 25     | 8      | 0      | 4.781904                | 1.146117  | -0.739221 |  |
| 26     | 1      | 0      | 5.566294                | 2.154135  | 0.960323  |  |
| 27     | 1      | 0      | 5.665060                | 3.078431  | -0.622556 |  |
| 28     | 1      | 0      | 6.620202                | 1.064911  | -1.769891 |  |
| 29     | 6      | 0      | 6.730779                | -0.252878 | 0.000365  |  |
| 30     | 1      | 0      | 6.528543                | -1.190257 | -0.524936 |  |
| 31     | 1      | 0      | 7.813773                | -0.169335 | 0.135263  |  |
| 32     | 1      | 0      | 6.263922                | -0.311481 | 0.985581  |  |



-----

Distance matrix (angstroms):

|    |    | 1        | 2         | 3         | 4        | 5        |
|----|----|----------|-----------|-----------|----------|----------|
| 1  | C  | 0.000000 |           |           |          |          |
| 2  | C  | 1.357448 | 0.000000  |           |          |          |
| 3  | N  | 2.203461 | 1.391001  | 0.000000  |          |          |
| 4  | C  | 2.213794 | 2.228736  | 1.349598  | 0.000000 |          |
| 5  | N  | 1.385322 | 2.212513  | 2.171956  | 1.333877 | 0.000000 |
| 6  | C  | 2.558351 | 3.648649  | 3.599496  | 2.488196 | 1.478485 |
| 7  | C  | 3.415783 | 4.439087  | 4.362848  | 3.293467 | 2.504279 |
| 8  | H  | 1.076374 | 2.213414  | 3.263285  | 3.230499 | 2.157799 |
| 9  | H  | 2.212272 | 1.074567  | 2.170663  | 3.249290 | 3.269084 |
| 10 | H  | 3.348729 | 4.251101  | 3.902033  | 2.628351 | 2.078772 |
| 11 | H  | 2.696339 | 3.965743  | 4.224680  | 3.297417 | 2.084353 |
| 12 | H  | 3.363247 | 4.453976  | 4.673388  | 3.839871 | 2.878287 |
| 13 | H  | 3.621116 | 4.360858  | 4.032103  | 2.990676 | 2.633226 |
| 14 | Br | 5.124973 | 5.451004  | 4.435273  | 3.238670 | 3.781762 |
| 15 | H  | 3.279908 | 3.318250  | 2.225855  | 1.115087 | 2.154547 |
| 16 | C  | 3.593589 | 2.533419  | 1.420527  | 2.429876 | 3.531131 |
| 17 | C  | 4.335730 | 3.047376  | 2.435911  | 3.660023 | 4.603462 |
| 18 | H  | 4.258706 | 3.410905  | 2.085298  | 2.559240 | 3.851987 |
| 19 | H  | 5.396351 | 4.124270  | 3.399686  | 4.510127 | 5.566594 |
| 20 | H  | 4.192389 | 2.835695  | 2.750396  | 4.090914 | 4.778257 |
| 21 | O  | 4.698445 | 5.779550  | 5.639014  | 4.453426 | 3.713346 |
| 22 | H  | 5.155251 | 6.112954  | 5.752108  | 4.480795 | 3.994498 |
| 23 | C  | 8.438000 | 9.193942  | 8.473243  | 7.165183 | 7.119768 |
| 24 | C  | 8.514790 | 9.408796  | 8.870866  | 7.569361 | 7.298858 |
| 25 | O  | 7.295202 | 8.102584  | 7.490988  | 6.198124 | 6.035276 |
| 26 | H  | 8.431042 | 9.198761  | 8.470050  | 7.140901 | 7.091121 |
| 27 | H  | 9.006297 | 9.645052  | 8.814083  | 7.556229 | 7.673261 |
| 28 | H  | 9.115583 | 9.975740  | 9.438818  | 8.183169 | 7.941469 |
| 29 | C  | 8.651682 | 9.694531  | 9.324318  | 8.007890 | 7.517807 |
| 30 | H  | 8.342744 | 9.451608  | 9.219121  | 7.948211 | 7.320958 |
| 31 | H  | 9.728513 | 10.781016 | 10.404966 | 9.082641 | 8.598104 |
| 32 | H  | 8.218116 | 9.275668  | 8.910123  | 7.577439 | 7.067242 |
|    |    | 6        | 7         | 8         | 9        | 10       |
| 6  | C  | 0.000000 |           |           |          |          |
| 7  | C  | 1.543157 | 0.000000  |           |          |          |
| 8  | H  | 2.849520 | 3.606814  | 0.000000  |          |          |
| 9  | H  | 4.673725 | 5.413276  | 2.755197  | 0.000000 |          |
| 10 | H  | 1.089528 | 2.150640  | 3.779790  | 5.309714 | 0.000000 |
| 11 | H  | 1.090856 | 2.195093  | 2.599506  | 4.890372 | 1.787800 |
| 12 | H  | 2.180659 | 1.095312  | 3.293567  | 5.304241 | 3.056095 |
| 13 | H  | 2.157328 | 1.094306  | 4.056058  | 5.330229 | 2.547028 |

|    |    |          |          |          |           |          |
|----|----|----------|----------|----------|-----------|----------|
| 14 | Br | 3.512039 | 3.610012 | 5.907589 | 6.470792  | 2.804275 |
| 15 | H  | 2.789924 | 3.416395 | 4.244672 | 4.302680  | 2.538997 |
| 16 | C  | 4.885858 | 5.558725 | 4.628247 | 2.867838  | 5.022642 |
| 17 | C  | 6.033361 | 6.706887 | 5.260628 | 2.891172  | 6.256499 |
| 18 | H  | 5.019778 | 5.615127 | 5.330764 | 3.899077  | 4.956387 |
| 19 | H  | 6.955877 | 7.587307 | 6.336930 | 3.945152  | 7.089133 |
| 20 | H  | 6.254134 | 6.957736 | 4.969268 | 2.310067  | 6.621283 |
| 21 | O  | 2.414287 | 1.405007 | 4.783976 | 6.771671  | 2.576831 |
| 22 | H  | 2.765048 | 1.945180 | 5.404707 | 7.147606  | 2.564283 |
| 23 | C  | 6.036471 | 5.464071 | 8.841455 | 10.255941 | 5.369001 |
| 24 | C  | 6.077564 | 5.261078 | 8.762924 | 10.453305 | 5.617912 |
| 25 | O  | 4.929202 | 4.156363 | 7.650512 | 9.150187  | 4.436826 |
| 26 | H  | 5.988122 | 5.683245 | 8.835867 | 10.271741 | 5.188375 |
| 27 | H  | 6.725993 | 6.108784 | 9.495237 | 10.690870 | 6.052752 |
| 28 | H  | 6.779202 | 5.778738 | 9.360037 | 10.995189 | 6.419478 |
| 29 | C  | 6.142749 | 5.449921 | 8.739672 | 10.732197 | 5.734821 |
| 30 | H  | 5.921063 | 5.085338 | 8.323029 | 10.454115 | 5.703504 |
| 31 | H  | 7.212508 | 6.536974 | 9.793846 | 11.819299 | 6.781331 |
| 32 | H  | 5.668186 | 5.239304 | 8.308926 | 10.322797 | 5.154847 |
|    |    | 11       | 12       | 13       | 14        | 15       |
| 11 | H  | 0.000000 |          |          |           |          |
| 12 | H  | 2.464187 | 0.000000 |          |           |          |
| 13 | H  | 3.068106 | 1.782680 | 0.000000 |           |          |
| 14 | Br | 4.505891 | 4.652176 | 3.062009 | 0.000000  |          |
| 15 | H  | 3.752239 | 4.196322 | 2.933905 | 2.223599  | 0.000000 |
| 16 | C  | 5.585448 | 5.931896 | 5.046298 | 4.887028  | 2.834373 |
| 17 | C  | 6.632104 | 6.953167 | 6.216763 | 6.202025  | 4.158340 |
| 18 | H  | 5.846748 | 6.149874 | 4.985168 | 4.253853  | 2.503933 |
| 19 | H  | 7.610393 | 7.887754 | 7.011717 | 6.694386  | 4.821922 |
| 20 | H  | 6.711761 | 7.055373 | 6.580667 | 6.947425  | 4.800244 |
| 21 | O  | 2.793943 | 2.024073 | 2.074786 | 3.847389  | 4.348652 |
| 22 | H  | 3.342570 | 2.806567 | 2.207555 | 3.168363  | 4.133964 |
| 23 | C  | 6.629977 | 6.335039 | 5.347991 | 4.307981  | 6.368109 |
| 24 | C  | 6.540960 | 5.943678 | 5.298009 | 5.106100  | 6.932943 |
| 25 | O  | 5.548431 | 4.970334 | 4.050899 | 3.701386  | 5.524073 |
| 26 | H  | 6.504787 | 6.618959 | 5.676476 | 4.303680  | 6.334319 |
| 27 | H  | 7.423789 | 6.988718 | 5.816218 | 4.508394  | 6.671475 |
| 28 | H  | 7.284473 | 6.357047 | 5.711174 | 5.734892  | 7.551819 |
| 29 | C  | 6.359070 | 6.023838 | 5.776825 | 5.900335  | 7.508035 |
| 30 | H  | 6.048102 | 5.482002 | 5.512733 | 6.202791  | 7.579520 |
| 31 | H  | 7.385716 | 7.080160 | 6.863788 | 6.874313  | 8.558066 |
| 32 | H  | 5.810011 | 5.897932 | 5.665251 | 5.557275  | 7.090168 |
|    |    | 16       | 17       | 18       | 19        | 20       |
| 16 | C  | 0.000000 |          |          |           |          |

|    |   |           |           |           |           |           |
|----|---|-----------|-----------|-----------|-----------|-----------|
| 17 | C | 1.326834  | 0.000000  |           |           |           |
| 18 | H | 1.082587  | 2.120633  | 0.000000  |           |           |
| 19 | H | 2.080487  | 1.081071  | 2.443977  | 0.000000  |           |
| 20 | H | 2.126321  | 1.082568  | 3.098654  | 1.847083  | 0.000000  |
| 21 | O | 6.789546  | 7.993856  | 6.722883  | 8.837018  | 8.299793  |
| 22 | H | 6.772001  | 8.036348  | 6.551643  | 8.800524  | 8.461540  |
| 23 | C | 9.130064  | 10.447501 | 8.542049  | 10.970073 | 11.119341 |
| 24 | C | 9.680296  | 10.983275 | 9.217453  | 11.597514 | 11.554363 |
| 25 | O | 8.257451  | 9.561071  | 7.781367  | 10.161911 | 10.155988 |
| 26 | H | 9.133960  | 10.459208 | 8.542808  | 10.985558 | 11.132738 |
| 27 | H | 9.327315  | 10.624029 | 8.647472  | 11.055617 | 11.365704 |
| 28 | H | 10.208049 | 11.486500 | 9.735601  | 12.074695 | 12.062156 |
| 29 | C | 10.282543 | 11.580676 | 9.928881  | 12.284129 | 12.058424 |
| 30 | H | 10.264841 | 11.528947 | 10.010966 | 12.290886 | 11.925510 |
| 31 | H | 11.347914 | 12.651497 | 10.967913 | 13.340123 | 13.141748 |
| 32 | H | 9.889505  | 11.191574 | 9.551149  | 11.909524 | 11.660339 |
|    |   | 21        | 22        | 23        | 24        | 25        |
| 21 | O | 0.000000  |           |           |           |           |
| 22 | H | 0.970863  | 0.000000  |           |           |           |
| 23 | C | 4.455065  | 3.572395  | 0.000000  |           |           |
| 24 | C | 4.050230  | 3.370326  | 1.471624  | 0.000000  |           |
| 25 | O | 3.149715  | 2.292498  | 1.424825  | 1.438895  | 0.000000  |
| 26 | H | 4.688141  | 3.815604  | 1.087933  | 2.220250  | 2.125986  |
| 27 | H | 5.235620  | 4.320257  | 1.087513  | 2.228138  | 2.127772  |
| 28 | H | 4.626697  | 4.016302  | 2.186907  | 1.090162  | 2.109079  |
| 29 | C | 4.079711  | 3.640070  | 2.611503  | 1.501994  | 2.510436  |
| 30 | H | 3.691083  | 3.494164  | 3.445642  | 2.150995  | 2.924946  |
| 31 | H | 5.158275  | 4.734167  | 3.168663  | 2.147149  | 3.418679  |
| 32 | H | 3.904571  | 3.457897  | 2.740153  | 2.148649  | 2.701095  |
|    |   | 26        | 27        | 28        | 29        | 30        |
| 26 | H | 0.000000  |           |           |           |           |
| 27 | H | 1.835643  | 0.000000  |           |           |           |
| 28 | H | 3.122691  | 2.506579  | 0.000000  |           |           |
| 29 | C | 2.840995  | 3.552662  | 2.209661  | 0.000000  |           |
| 30 | H | 3.783765  | 4.356241  | 2.577614  | 1.093399  | 0.000000  |
| 31 | H | 3.336225  | 3.967272  | 2.564681  | 1.094556  | 1.769169  |
| 32 | H | 2.562535  | 3.799506  | 3.100648  | 1.091806  | 1.767466  |
|    |   | 31        | 32        |           |           |           |
| 31 | H | 0.000000  |           |           |           |           |
| 32 | H | 1.773495  | 0.000000  |           |           |           |

Stoichiometry C10H17BrN2O2

Framework group C1[X(C10H17BrN2O2)]

Deg. of freedom 90

Full point group C1 NOp 1

Largest Abelian subgroup C1 NOp 1

Largest concise Abelian subgroup C1 NOp 1

Standard orientation:

---

| Center<br>Number | Atomic<br>Number | Atomic<br>Type | Coordinates (Angstroms) |           |           |
|------------------|------------------|----------------|-------------------------|-----------|-----------|
|                  |                  |                | X                       | Y         | Z         |
| 1                | 6                | 0              | -3.041377               | 2.098868  | -0.238996 |
| 2                | 6                | 0              | -4.119578               | 1.318221  | 0.026975  |
| 3                | 7                | 0              | -3.665942               | 0.003281  | 0.032434  |
| 4                | 6                | 0              | -2.341883               | -0.001487 | -0.228831 |
| 5                | 7                | 0              | -1.950160               | 1.261504  | -0.403864 |
| 6                | 6                | 0              | -0.552699               | 1.674721  | -0.653406 |
| 7                | 6                | 0              | 0.243830                | 1.835264  | 0.658501  |
| 8                | 1                | 0              | -2.958153               | 3.168023  | -0.331530 |
| 9                | 1                | 0              | -5.144938               | 1.582083  | 0.210575  |
| 10               | 1                | 0              | -0.085715               | 0.886662  | -1.243289 |
| 11               | 1                | 0              | -0.582784               | 2.603865  | -1.224155 |
| 12               | 1                | 0              | -0.062175               | 2.748524  | 1.180062  |
| 13               | 1                | 0              | 0.037198                | 0.972616  | 1.299319  |
| 14               | 35               | 0              | 0.436854                | -1.664910 | -0.203887 |
| 15               | 1                | 0              | -1.637256               | -0.865228 | -0.258350 |
| 16               | 6                | 0              | -4.404235               | -1.187925 | 0.264492  |
| 17               | 6                | 0              | -5.713395               | -1.240401 | 0.473860  |
| 18               | 1                | 0              | -3.773055               | -2.067414 | 0.254285  |
| 19               | 1                | 0              | -6.181804               | -2.199375 | 0.646123  |
| 20               | 1                | 0              | -6.353677               | -0.367530 | 0.483282  |
| 21               | 8                | 0              | 1.614661                | 1.951972  | 0.373465  |
| 22               | 1                | 0              | 1.983463                | 1.060921  | 0.261266  |
| 23               | 6                | 0              | 4.719123                | -1.210311 | -0.084666 |
| 24               | 6                | 0              | 5.192843                | 0.058052  | 0.491982  |
| 25               | 8                | 0              | 3.802039                | -0.308973 | 0.529069  |
| 26               | 1                | 0              | 4.616631                | -1.304418 | -1.163664 |
| 27               | 1                | 0              | 4.871900                | -2.146400 | 0.447389  |
| 28               | 1                | 0              | 5.662108                | -0.000678 | 1.474222  |
| 29               | 6                | 0              | 5.567423                | 1.245490  | -0.348057 |
| 30               | 1                | 0              | 5.291926                | 2.179303  | 0.149554  |
| 31               | 1                | 0              | 6.647061                | 1.265118  | -0.527082 |
| 32               | 1                | 0              | 5.058165                | 1.215349  | -1.313349 |

---

Rotational constants (GHZ): 0.8153943 0.1767760 0.1491180

Standard basis: 6-311++G(d,p) (5D, 7F)

There are 492 symmetry adapted cartesian basis functions of A symmetry.

There are 475 symmetry adapted basis functions of A symmetry.

475 basis functions, 751 primitive gaussians, 492 cartesian basis functions  
 71 alpha electrons 71 beta electrons  
 nuclear repulsion energy 1288.8381685768 Hartrees.  
 NAToms= 32 NActive= 32 NUniq= 32 SFac= 1.00D+00 NATFMM= 60 NAOKFM=F  
 Big=F  
 Integral buffers will be 131072 words long.  
 Raffenetti 2 integral format.  
 Two-electron integral symmetry is turned on.  
 One-electron integrals computed using PRISM.  
 NBasis= 475 RedAO= T EigKep= 4.26D-06 NBF= 475  
 NBsUse= 475 1.00D-06 EigRej= -1.00D+00 NBFU= 475  
 Initial guess from the checkpoint file: "/home/suqian/liuwen/qianmengshijie/ohpo/ohpo.chk"  
 B after Tr= 0.000000 0.000000 0.000000  
 Rot= 0.999987 0.003947 -0.000107 0.003301 Ang= 0.59 deg.  
 ExpMin= 3.50D-02 ExpMax= 4.40D+05 ExpMxC= 1.51D+04 IAcc=3 IRadAn= 5 AccDes=  
 0.00D+00  
 Harris functional with IExCor= 402 and IRadAn= 5 diagonalized for initial guess.  
 HarFok: IExCor= 402 AccDes= 0.00D+00 IRadAn= 5 IDoV= 1 UseB2=F ITyADJ=14  
 ICtDFT= 3500011 ScaDFX= 1.000000 1.000000 1.000000 1.000000  
 FoFCou: FMM=F IPFlag= 0 FMFlag= 100000 FMFlg1= 0  
 NxFFlg= 0 DoJE=T BraDBF=F KetDBF=T FulRan=T  
 wScrn= 0.000000 ICntrl= 500 IOpCl= 0 I1Cent= 200000004 NGrid=  
 0  
 NMat0= 1 NMatS0= 1 NMatT0= 0 NMatD0= 1 NMtDS0= 0  
 NMtDT0= 0  
 Petite list used in FoFCou.  
 Requested convergence on RMS density matrix=1.00D-08 within 128 cycles.  
 Requested convergence on MAX density matrix=1.00D-06.  
 Requested convergence on energy=1.00D-06.  
 No special actions if energy rises.  
 SCF Done: E(RB3LYP) = -3225.51128845 A.U. after 12 cycles  
 NFock= 12 Conv=0.39D-08 -V/T= 2.0018  
 Calling FoFJK, ICntrl= 2127 FMM=F ISym2X=0 I1Cent= 0 IOpClX= 0 NMat=1 NMatS=1  
 NMatT=0.  
 \*\*\*\*\* Axes restored to original set \*\*\*\*\*

| Center Number | Atomic Number | Forces (Hartrees/Bohr) |              |              |
|---------------|---------------|------------------------|--------------|--------------|
|               |               | X                      | Y            | Z            |
| 1             | 6             | -0.000300927           | 0.000144348  | 0.000618804  |
| 2             | 6             | 0.000281183            | 0.000043301  | -0.000442950 |
| 3             | 7             | 0.000340836            | 0.000245618  | 0.000015679  |
| 4             | 6             | 0.000335671            | 0.001591438  | 0.000534006  |
| 5             | 7             | -0.000297390           | -0.000772116 | -0.000721683 |

|    |    |              |              |              |
|----|----|--------------|--------------|--------------|
| 6  | 6  | 0.000722613  | 0.000275968  | -0.000575478 |
| 7  | 6  | -0.001506974 | -0.000480665 | -0.000302837 |
| 8  | 1  | -0.000032611 | -0.000010304 | 0.000101947  |
| 9  | 1  | -0.000002437 | -0.000015517 | -0.000042977 |
| 10 | 1  | -0.000071867 | 0.000322084  | 0.000002266  |
| 11 | 1  | 0.000198184  | 0.000090606  | 0.000071296  |
| 12 | 1  | -0.000039573 | 0.000064404  | 0.000054226  |
| 13 | 1  | 0.000183064  | 0.000310062  | 0.000307701  |
| 14 | 35 | -0.000942211 | 0.002881323  | 0.000926856  |
| 15 | 1  | -0.000637116 | -0.003213859 | -0.000027717 |
| 16 | 6  | -0.000100813 | 0.000178086  | -0.000050358 |
| 17 | 6  | 0.000081745  | -0.000118386 | -0.000003836 |
| 18 | 1  | 0.000027525  | 0.000003035  | -0.000004081 |
| 19 | 1  | 0.000001717  | 0.000018535  | 0.000017761  |
| 20 | 1  | 0.000003712  | 0.000017101  | -0.000005045 |
| 21 | 8  | 0.000740280  | -0.000624440 | 0.000452327  |
| 22 | 1  | 0.001746271  | 0.002133832  | -0.000471858 |
| 23 | 6  | 0.000662275  | 0.001596883  | 0.002201857  |
| 24 | 6  | -0.001190475 | 0.003855551  | -0.001547135 |
| 25 | 8  | -0.001081671 | -0.006064354 | -0.001939258 |
| 26 | 1  | 0.000152946  | -0.000160438 | -0.000262451 |
| 27 | 1  | -0.000201694 | -0.000386253 | -0.000122969 |
| 28 | 1  | 0.000812006  | -0.000994267 | 0.000554462  |
| 29 | 6  | 0.000587537  | -0.001690761 | 0.001061860  |
| 30 | 1  | -0.000323378 | 0.000069610  | -0.000550599 |
| 31 | 1  | 0.000218705  | 0.000365491  | -0.000171788 |
| 32 | 1  | -0.000367133 | 0.000324085  | 0.000321970  |

-----  
Cartesian Forces: Max 0.006064354 RMS 0.001092739

GradGradGradGradGradGradGradGradGradGradGradGradGradGradGradGradGradGradGrad

Berny optimization.

Using GEDIIS/GDIIS optimizer.

FormGI is forming the generalized inverse of G from B-inverse, IUseBI=4.

Internal Forces: Max 0.003079836 RMS 0.000553865

Search for a local minimum.

Step number 7 out of a maximum of 177

All quantities printed in internal units (Hartrees-Bohrs-Radians)

Mixed Optimization -- En-DIIS/RFO-DIIS

Swapping is turned off.

Update second derivatives using D2CorX and points 5 6 7

DE= -1.37D-03 DEPred=-9.14D-04 R= 1.50D+00

TightC=F SS= 1.41D+00 RLast= 3.54D-01 DXNew= 2.4000D+00 1.0609D+00

Trust test= 1.50D+00 RLast= 3.54D-01 DXMaxT set to 1.43D+00

ITU= 1 1 0 1 0 1 0

|                 |         |         |         |         |         |
|-----------------|---------|---------|---------|---------|---------|
| Eigenvalues --- | 0.00159 | 0.00237 | 0.00265 | 0.00389 | 0.00570 |
| Eigenvalues --- | 0.00990 | 0.01265 | 0.01271 | 0.01402 | 0.01518 |
| Eigenvalues --- | 0.01690 | 0.01860 | 0.01950 | 0.02075 | 0.02149 |
| Eigenvalues --- | 0.02243 | 0.02313 | 0.02333 | 0.02390 | 0.02428 |
| Eigenvalues --- | 0.03062 | 0.03063 | 0.03122 | 0.03705 | 0.04085 |
| Eigenvalues --- | 0.04486 | 0.05069 | 0.05285 | 0.05468 | 0.05501 |
| Eigenvalues --- | 0.05882 | 0.06359 | 0.09286 | 0.09759 | 0.10656 |
| Eigenvalues --- | 0.10794 | 0.11007 | 0.11462 | 0.12969 | 0.13338 |
| Eigenvalues --- | 0.13855 | 0.14735 | 0.15980 | 0.15999 | 0.16000 |
| Eigenvalues --- | 0.16000 | 0.16000 | 0.16001 | 0.16007 | 0.16329 |
| Eigenvalues --- | 0.16938 | 0.18912 | 0.20765 | 0.21797 | 0.22006 |
| Eigenvalues --- | 0.22757 | 0.23555 | 0.23953 | 0.25001 | 0.27254 |
| Eigenvalues --- | 0.27664 | 0.28773 | 0.31697 | 0.32827 | 0.33054 |
| Eigenvalues --- | 0.33213 | 0.34068 | 0.34265 | 0.34419 | 0.34761 |
| Eigenvalues --- | 0.34938 | 0.35685 | 0.35689 | 0.35858 | 0.36434 |
| Eigenvalues --- | 0.36657 | 0.36801 | 0.37229 | 0.37541 | 0.37765 |
| Eigenvalues --- | 0.38904 | 0.42178 | 0.42479 | 0.45524 | 0.46991 |
| Eigenvalues --- | 0.49144 | 0.51761 | 0.54688 | 0.56138 | 0.60360 |

En-DIIS/RFO-DIIS IScMMF= 0 using points: 7 6

RFO step: Lambda=-3.60079291D-04.

DidBck=F Rises=F RFO-DIIS coefs: 3.17212 -2.17212

|             |            |            |           |            |
|-------------|------------|------------|-----------|------------|
| Iteration 1 | RMS(Cart)= | 0.16388656 | RMS(Int)= | 0.07238988 |
| Iteration 2 | RMS(Cart)= | 0.09651667 | RMS(Int)= | 0.04699628 |
| Iteration 3 | RMS(Cart)= | 0.04748891 | RMS(Int)= | 0.02913347 |
| Iteration 4 | RMS(Cart)= | 0.02773632 | RMS(Int)= | 0.01354263 |
| Iteration 5 | RMS(Cart)= | 0.02216161 | RMS(Int)= | 0.00417268 |
| Iteration 6 | RMS(Cart)= | 0.00021185 | RMS(Int)= | 0.00417230 |
| Iteration 7 | RMS(Cart)= | 0.00000095 | RMS(Int)= | 0.00417230 |

| Variable | Old X   | -DE/DX   | Delta X  | Delta X  | Delta X  | New X   |
|----------|---------|----------|----------|----------|----------|---------|
|          |         |          | (Linear) | (Quad)   | (Total)  |         |
| R1       | 2.56521 | -0.00010 | 0.00215  | -0.00067 | 0.00062  | 2.56583 |
| R2       | 2.61788 | -0.00006 | -0.00074 | 0.00048  | 0.00016  | 2.61804 |
| R3       | 2.03405 | 0.00001  | 0.00005  | -0.00010 | -0.00005 | 2.03400 |
| R4       | 2.62861 | 0.00000  | -0.00073 | -0.00023 | -0.00179 | 2.62682 |
| R5       | 2.03064 | 0.00001  | -0.00037 | 0.00036  | -0.00001 | 2.03063 |
| R6       | 2.55037 | -0.00043 | -0.00059 | -0.00011 | -0.00039 | 2.54998 |
| R7       | 2.68441 | 0.00007  | 0.00008  | -0.00030 | -0.00022 | 2.68419 |
| R8       | 2.52066 | 0.00000  | -0.00317 | -0.00006 | 0.00025  | 2.52091 |
| R9       | 2.10721 | -0.00176 | -0.01035 | -0.00498 | -0.01384 | 2.09337 |
| R10      | 2.79393 | 0.00010  | 0.00170  | 0.00234  | 0.00532  | 2.79925 |
| R11      | 2.91614 | -0.00066 | -0.00392 | -0.01055 | -0.01598 | 2.90016 |
| R12      | 2.05891 | 0.00021  | 0.00378  | 0.00078  | 0.00457  | 2.06348 |
| R13      | 2.06142 | -0.00003 | -0.00163 | -0.00008 | -0.00171 | 2.05971 |

|     |         |          |          |          |          |         |
|-----|---------|----------|----------|----------|----------|---------|
| R14 | 2.06984 | -0.00007 | -0.00013 | 0.00086  | 0.00073  | 2.07057 |
| R15 | 2.06794 | 0.00002  | 0.00116  | -0.00128 | -0.00012 | 2.06781 |
| R16 | 2.65508 | 0.00075  | 0.01215  | 0.00888  | 0.02251  | 2.67759 |
| R17 | 4.20199 | 0.00074  | 0.09901  | 0.03649  | 0.13622  | 4.33822 |
| R18 | 6.99461 | 0.00155  | 0.39805  | 0.65354  | 1.05022  | 8.04483 |
| R19 | 2.50735 | -0.00008 | 0.00009  | -0.00019 | -0.00010 | 2.50725 |
| R20 | 2.04579 | 0.00001  | 0.00036  | 0.00001  | 0.00037  | 2.04617 |
| R21 | 2.04293 | 0.00001  | -0.00005 | 0.00005  | 0.00000  | 2.04293 |
| R22 | 2.04576 | -0.00001 | 0.00022  | -0.00013 | 0.00009  | 2.04585 |
| R23 | 1.83466 | 0.00045  | 0.00275  | -0.00154 | -0.00010 | 1.83456 |
| R24 | 4.33219 | -0.00244 | -0.25372 | -0.30064 | -0.55494 | 3.77725 |
| R25 | 2.78097 | -0.00015 | -0.01422 | 0.00125  | -0.01303 | 2.76793 |
| R26 | 2.69253 | 0.00166  | 0.02131  | 0.00893  | 0.03013  | 2.72266 |
| R27 | 2.05589 | -0.00028 | -0.01432 | 0.00221  | -0.01211 | 2.04379 |
| R28 | 2.05510 | -0.00029 | -0.01292 | 0.00161  | -0.01132 | 2.04379 |
| R29 | 2.71912 | -0.00020 | -0.00392 | -0.00958 | -0.01333 | 2.70579 |
| R30 | 2.06011 | -0.00033 | 0.00069  | 0.00021  | 0.00090  | 2.06101 |
| R31 | 2.83836 | 0.00110  | 0.02455  | 0.00320  | 0.02775  | 2.86611 |
| R32 | 2.06623 | 0.00026  | -0.00548 | 0.00014  | -0.00534 | 2.06089 |
| R33 | 2.06841 | 0.00022  | -0.00261 | -0.00125 | -0.00387 | 2.06455 |
| R34 | 2.06321 | 0.00043  | -0.00337 | 0.00057  | -0.00281 | 2.06041 |
| A1  | 1.87692 | -0.00011 | -0.00179 | 0.00113  | 0.00027  | 1.87719 |
| A2  | 2.27770 | 0.00004  | 0.00249  | -0.00051 | 0.00141  | 2.27911 |
| A3  | 2.12853 | 0.00007  | -0.00077 | -0.00030 | -0.00171 | 2.12682 |
| A4  | 1.86019 | 0.00008  | 0.00239  | -0.00106 | 0.00112  | 1.86131 |
| A5  | 2.27861 | -0.00005 | -0.00015 | 0.00040  | 0.00032  | 2.27893 |
| A6  | 2.14438 | -0.00003 | -0.00225 | 0.00072  | -0.00147 | 2.14291 |
| A7  | 1.89920 | -0.00005 | -0.00416 | 0.00146  | -0.00182 | 1.89738 |
| A8  | 2.24447 | 0.00002  | 0.00155  | -0.00145 | -0.00036 | 2.24410 |
| A9  | 2.13952 | 0.00003  | 0.00262  | -0.00001 | 0.00217  | 2.14169 |
| A10 | 1.88617 | 0.00011  | 0.00430  | -0.00068 | 0.00267  | 1.88884 |
| A11 | 2.24953 | -0.00051 | -0.00189 | -0.00494 | -0.01337 | 2.23616 |
| A12 | 2.14645 | 0.00040  | -0.00198 | 0.00418  | 0.00928  | 2.15573 |
| A13 | 1.90222 | -0.00002 | -0.00090 | 0.00004  | -0.00246 | 1.89976 |
| A14 | 2.20891 | 0.00059  | 0.01563  | 0.00155  | 0.01274  | 2.22165 |
| A15 | 2.17046 | -0.00056 | -0.01564 | 0.00016  | -0.00950 | 2.16096 |
| A16 | 1.95354 | -0.00031 | 0.00000  | -0.00023 | 0.01932  | 1.97286 |
| A17 | 1.86957 | 0.00002  | -0.00479 | -0.00200 | -0.01058 | 1.85899 |
| A18 | 1.87580 | 0.00019  | 0.00812  | 0.00691  | 0.00674  | 1.88254 |
| A19 | 1.89051 | 0.00018  | -0.01028 | -0.00030 | -0.01865 | 1.87186 |
| A20 | 1.95027 | -0.00005 | 0.00569  | -0.00712 | -0.00354 | 1.94672 |
| A21 | 1.92264 | -0.00002 | 0.00103  | 0.00301  | 0.00659  | 1.92922 |
| A22 | 1.92555 | 0.00008  | 0.01322  | 0.00061  | 0.02306  | 1.94860 |
| A23 | 1.89480 | -0.00005 | -0.00929 | -0.00501 | -0.01646 | 1.87834 |



|     |          |          |          |          |          |          |
|-----|----------|----------|----------|----------|----------|----------|
| A24 | 1.91748  | -0.00041 | -0.00500 | -0.00774 | -0.02863 | 1.88886  |
| A25 | 1.90253  | 0.00014  | 0.00342  | 0.00607  | 0.00832  | 1.91085  |
| A26 | 1.87541  | 0.00015  | 0.00927  | 0.00868  | 0.02107  | 1.89648  |
| A27 | 1.94821  | 0.00009  | -0.01091 | -0.00237 | -0.00710 | 1.94110  |
| A28 | 2.37626  | -0.00308 | -0.10516 | -0.13798 | -0.24844 | 2.12782  |
| A29 | 2.62064  | 0.00213  | 0.01468  | 0.00522  | 0.01926  | 2.63989  |
| A30 | 2.17943  | -0.00012 | 0.00034  | -0.00124 | -0.00090 | 2.17853  |
| A31 | 1.95702  | 0.00004  | -0.00008 | 0.00052  | 0.00044  | 1.95746  |
| A32 | 2.14673  | 0.00008  | -0.00026 | 0.00072  | 0.00046  | 2.14719  |
| A33 | 2.08029  | -0.00002 | -0.00100 | 0.00009  | -0.00092 | 2.07938  |
| A34 | 2.15682  | 0.00001  | 0.00160  | -0.00041 | 0.00119  | 2.15801  |
| A35 | 2.04607  | 0.00000  | -0.00059 | 0.00032  | -0.00027 | 2.04580  |
| A36 | 1.89424  | -0.00034 | -0.02148 | 0.01283  | -0.01080 | 1.88345  |
| A37 | 2.56124  | 0.00001  | -0.01896 | -0.01147 | -0.01462 | 2.54662  |
| A38 | 2.08691  | 0.00013  | 0.01330  | -0.00247 | 0.01078  | 2.09769  |
| A39 | 2.10011  | -0.00015 | 0.01572  | 0.00194  | 0.01625  | 2.11637  |
| A40 | 2.00566  | -0.00018 | -0.01858 | 0.00106  | -0.01718 | 1.98848  |
| A41 | 2.00887  | 0.00023  | -0.01934 | -0.00326 | -0.02315 | 1.98573  |
| A42 | 2.00865  | 0.00012  | -0.00218 | 0.00343  | -0.00060 | 2.00805  |
| A43 | 2.03218  | 0.00117  | 0.02445  | 0.00567  | 0.03207  | 2.06424  |
| A44 | 2.14422  | -0.00084 | -0.00877 | 0.00221  | -0.00887 | 2.13535  |
| A45 | 1.95962  | 0.00085  | 0.02385  | -0.00285 | 0.02053  | 1.98015  |
| A46 | 2.04555  | -0.00089 | -0.00289 | -0.00558 | -0.00837 | 2.03718  |
| A47 | 2.02545  | -0.00045 | -0.02448 | -0.00370 | -0.02816 | 1.99729  |
| A48 | 1.01756  | 0.00129  | 0.01242  | 0.00220  | 0.00632  | 1.02388  |
| A49 | 1.84226  | -0.00169 | -0.04461 | -0.04737 | -0.08648 | 1.75578  |
| A50 | 2.56492  | -0.00052 | -0.01083 | -0.00995 | -0.02486 | 2.54005  |
| A51 | 2.22853  | 0.00049  | 0.02083  | 0.01911  | 0.04283  | 2.27137  |
| A52 | 1.93673  | -0.00067 | -0.03451 | 0.00040  | -0.03456 | 1.90217  |
| A53 | 1.93012  | -0.00036 | 0.00180  | -0.00585 | -0.00412 | 1.92600  |
| A54 | 1.93513  | -0.00034 | -0.02855 | 0.00481  | -0.02418 | 1.91095  |
| A55 | 1.88352  | 0.00052  | 0.02354  | 0.00043  | 0.02390  | 1.90742  |
| A56 | 1.88433  | 0.00052  | 0.02585  | -0.00071 | 0.02431  | 1.90864  |
| A57 | 1.89227  | 0.00039  | 0.01538  | 0.00096  | 0.01628  | 1.90856  |
| A58 | 3.24609  | 0.00178  | 0.03325  | 0.02131  | 0.04915  | 3.29524  |
| A59 | 3.42798  | 0.00112  | 0.05875  | 0.06577  | 0.12552  | 3.55351  |
| D1  | 0.00883  | -0.00030 | 0.02408  | -0.05286 | -0.02777 | -0.01894 |
| D2  | -3.13579 | -0.00017 | 0.01349  | -0.03067 | -0.01598 | 3.13141  |
| D3  | -3.14154 | -0.00004 | 0.00584  | -0.01045 | -0.00617 | 3.13547  |
| D4  | -0.00297 | 0.00009  | -0.00475 | 0.01174  | 0.00561  | 0.00264  |
| D5  | -0.01213 | 0.00039  | -0.03185 | 0.07051  | 0.03609  | 0.02396  |
| D6  | -3.09476 | 0.00033  | -0.01317 | 0.03818  | 0.01963  | -3.07512 |
| D7  | 3.13733  | 0.00015  | -0.01551 | 0.03250  | 0.01676  | -3.12910 |
| D8  | 0.05470  | 0.00010  | 0.00318  | 0.00018  | 0.00031  | 0.05501  |

|     |          |          |          |          |          |          |
|-----|----------|----------|----------|----------|----------|----------|
| D9  | -0.00264 | 0.00011  | -0.00843 | 0.01789  | 0.01029  | 0.00764  |
| D10 | 3.13891  | 0.00012  | -0.00750 | 0.01520  | 0.00699  | -3.13729 |
| D11 | -3.14150 | -0.00001 | 0.00115  | -0.00218 | -0.00037 | 3.14132  |
| D12 | 0.00006  | 0.00000  | 0.00208  | -0.00488 | -0.00367 | -0.00361 |
| D13 | -0.00486 | 0.00012  | -0.01127 | 0.02574  | 0.01206  | 0.00720  |
| D14 | 3.08830  | 0.00010  | -0.00157 | -0.00777 | -0.01359 | 3.07472  |
| D15 | 3.13676  | 0.00012  | -0.01213 | 0.02824  | 0.01513  | -3.13129 |
| D16 | -0.05325 | 0.00010  | -0.00242 | -0.00527 | -0.01052 | -0.06377 |
| D17 | 0.04779  | -0.00001 | -0.00243 | 0.00034  | -0.00122 | 0.04657  |
| D18 | -3.09189 | 0.00000  | -0.00127 | -0.00206 | -0.00247 | -3.09435 |
| D19 | -3.09385 | 0.00000  | -0.00139 | -0.00268 | -0.00494 | -3.09878 |
| D20 | 0.04966  | 0.00000  | -0.00023 | -0.00509 | -0.00618 | 0.04348  |
| D21 | 0.01043  | -0.00031 | 0.02647  | -0.05910 | -0.02956 | -0.01913 |
| D22 | 3.09466  | -0.00021 | 0.00939  | -0.02759 | -0.01290 | 3.08176  |
| D23 | -3.08623 | -0.00026 | 0.01747  | -0.02771 | -0.00461 | -3.09084 |
| D24 | -0.00200 | -0.00016 | 0.00039  | 0.00380  | 0.01206  | 0.01005  |
| D25 | -2.81663 | 0.00001  | -0.00335 | 0.07515  | 0.08662  | -2.73001 |
| D26 | 0.27008  | -0.00003 | 0.00782  | 0.03699  | 0.05709  | 0.32717  |
| D27 | 1.59772  | -0.00014 | -0.02700 | -0.01541 | -0.03556 | 1.56216  |
| D28 | -2.61571 | -0.00009 | -0.04256 | -0.01716 | -0.05410 | -2.66982 |
| D29 | -0.54994 | -0.00001 | -0.03964 | -0.01108 | -0.04848 | -0.59842 |
| D30 | -1.47633 | -0.00023 | -0.00619 | -0.05245 | -0.05469 | -1.53101 |
| D31 | 0.59343  | -0.00018 | -0.02176 | -0.05420 | -0.07323 | 0.52020  |
| D32 | 2.65920  | -0.00010 | -0.01883 | -0.04812 | -0.06761 | 2.59159  |
| D33 | -1.28992 | 0.00001  | 0.14751  | 0.10582  | 0.25351  | -1.03641 |
| D34 | 0.79385  | 0.00020  | 0.15386  | 0.11052  | 0.26709  | 1.06094  |
| D35 | 2.92876  | 0.00003  | 0.13118  | 0.09954  | 0.23160  | -3.12283 |
| D36 | 2.93597  | 0.00006  | 0.15992  | 0.10859  | 0.26715  | -3.08006 |
| D37 | -1.26344 | 0.00025  | 0.16627  | 0.11329  | 0.28073  | -0.98271 |
| D38 | 0.87146  | 0.00008  | 0.14359  | 0.10232  | 0.24524  | 1.11670  |
| D39 | 0.81498  | 0.00000  | 0.16192  | 0.10954  | 0.27348  | 1.08845  |
| D40 | 2.89875  | 0.00019  | 0.16827  | 0.11424  | 0.28706  | -3.09738 |
| D41 | -1.24953 | 0.00002  | 0.14559  | 0.10326  | 0.25157  | -0.99796 |
| D42 | -1.45204 | -0.00001 | -0.02475 | -0.04309 | -0.05531 | -1.50735 |
| D43 | 2.73590  | 0.00004  | -0.04338 | -0.04460 | -0.07900 | 2.65690  |
| D44 | 0.65086  | -0.00028 | -0.04709 | -0.05614 | -0.09847 | 0.55238  |
| D45 | 0.16741  | -0.00005 | -0.15269 | -0.14677 | -0.28815 | -0.12074 |
| D46 | -0.19043 | 0.00019  | 0.16079  | 0.11769  | 0.27109  | 0.08066  |
| D47 | -2.77876 | 0.00022  | 0.14831  | 0.09699  | 0.23729  | -2.54147 |
| D48 | -3.13629 | -0.00001 | 0.00242  | -0.00499 | -0.00258 | -3.13886 |
| D49 | 0.00524  | 0.00000  | 0.00014  | -0.00179 | -0.00164 | 0.00360  |
| D50 | 0.00319  | -0.00002 | 0.00113  | -0.00234 | -0.00120 | 0.00199  |
| D51 | -3.13847 | -0.00001 | -0.00114 | 0.00087  | -0.00027 | -3.13874 |
| D52 | -2.56153 | -0.00009 | -0.07482 | -0.07767 | -0.15936 | -2.72088 |

|     |          |          |          |          |          |          |
|-----|----------|----------|----------|----------|----------|----------|
| D53 | 2.90163  | 0.00058  | 0.00382  | 0.06040  | 0.06635  | 2.96797  |
| D54 | -2.19135 | -0.00008 | -0.05852 | -0.02862 | -0.08422 | -2.27557 |
| D55 | -0.52636 | -0.00054 | -0.05493 | -0.00537 | -0.05917 | -0.58553 |
| D56 | -2.71746 | 0.00028  | -0.00920 | -0.00464 | -0.01422 | -2.73168 |
| D57 | -0.01553 | -0.00010 | -0.03739 | 0.00520  | -0.03331 | -0.04884 |
| D58 | -0.03434 | 0.00056  | 0.05390  | 0.00339  | 0.05774  | 0.02341  |
| D59 | 2.66759  | 0.00018  | 0.02571  | 0.01322  | 0.03866  | 2.70624  |
| D60 | 1.06057  | 0.00021  | -0.04387 | -0.02834 | -0.07327 | 0.98730  |
| D61 | 0.09920  | 0.00013  | -0.00129 | 0.03963  | 0.04120  | 0.14040  |
| D62 | -1.33422 | -0.00003 | 0.00619  | -0.03129 | -0.02711 | -1.36133 |
| D63 | -2.29559 | -0.00012 | 0.04877  | 0.03668  | 0.08735  | -2.20824 |
| D64 | 1.91506  | -0.00032 | -0.00298 | 0.00048  | -0.00055 | 1.91452  |
| D65 | -0.49501 | 0.00041  | 0.01118  | 0.01662  | 0.03018  | -0.46483 |
| D66 | 2.52325  | 0.00007  | -0.02838 | -0.00974 | -0.03829 | 2.48496  |
| D67 | -1.67029 | 0.00005  | -0.02017 | -0.01278 | -0.03332 | -1.70361 |
| D68 | 0.42929  | 0.00009  | -0.01846 | -0.01229 | -0.03133 | 0.39796  |
| D69 | 1.32636  | -0.00017 | -0.03987 | -0.01422 | -0.05366 | 1.27269  |
| D70 | -2.86718 | -0.00019 | -0.03166 | -0.01726 | -0.04870 | -2.91588 |
| D71 | -0.76760 | -0.00016 | -0.02995 | -0.01677 | -0.04671 | -0.81431 |
| D72 | -1.05646 | 0.00007  | -0.04546 | 0.00222  | -0.04287 | -1.09933 |
| D73 | 1.03319  | 0.00005  | -0.03725 | -0.00082 | -0.03790 | 0.99528  |
| D74 | 3.13277  | 0.00008  | -0.03554 | -0.00033 | -0.03592 | 3.09685  |

| Item                 | Value    | Threshold | Converged? |
|----------------------|----------|-----------|------------|
| Maximum Force        | 0.003080 | 0.000450  | NO         |
| RMS Force            | 0.000554 | 0.000300  | NO         |
| Maximum Displacement | 0.911781 | 0.001800  | NO         |
| RMS Displacement     | 0.311593 | 0.001200  | NO         |

Predicted change in Energy=-2.492353D-03

GradGradGradGradGradGradGradGradGradGradGradGradGradGradGradGradGradGrad

Input orientation:

| Center Number | Atomic Number | Atomic Type | Coordinates (Angstroms) |           |           |
|---------------|---------------|-------------|-------------------------|-----------|-----------|
|               |               |             | X                       | Y         | Z         |
| 1             | 6             | 0           | -1.548777               | -1.910225 | 0.221704  |
| 2             | 6             | 0           | -2.787111               | -1.369276 | 0.089556  |
| 3             | 7             | 0           | -2.622249               | 0.010896  | 0.103253  |
| 4             | 6             | 0           | -1.307981               | 0.288632  | 0.231396  |
| 5             | 7             | 0           | -0.641454               | -0.865466 | 0.289505  |
| 6             | 6             | 0           | 0.835129                | -0.962118 | 0.357367  |
| 7             | 6             | 0           | 1.499988                | -0.980139 | -1.025725 |
| 8             | 1             | 0           | -1.234762               | -2.938934 | 0.262636  |
| 9             | 1             | 0           | -3.748880               | -1.839408 | -0.003499 |

|    |    |   |           |           |           |
|----|----|---|-----------|-----------|-----------|
| 10 | 1  | 0 | 1.181677  | -0.063297 | 0.871537  |
| 11 | 1  | 0 | 1.085726  | -1.852801 | 0.933457  |
| 12 | 1  | 0 | 1.152277  | -1.825171 | -1.630351 |
| 13 | 1  | 0 | 1.244615  | -0.042265 | -1.528258 |
| 14 | 35 | 0 | 1.030713  | 2.606168  | -0.109493 |
| 15 | 1  | 0 | -0.814209 | 1.280188  | 0.219458  |
| 16 | 6  | 0 | -3.614102 | 1.022466  | 0.000662  |
| 17 | 6  | 0 | -4.919319 | 0.798314  | -0.080008 |
| 18 | 1  | 0 | -3.184528 | 2.016372  | -0.005607 |
| 19 | 1  | 0 | -5.594067 | 1.639380  | -0.157728 |
| 20 | 1  | 0 | -5.359696 | -0.190657 | -0.072070 |
| 21 | 8  | 0 | 2.900002  | -1.099223 | -0.842858 |
| 22 | 1  | 0 | 3.262368  | -0.206698 | -0.722187 |
| 23 | 6  | 0 | 5.718345  | 1.918160  | -0.199680 |
| 24 | 6  | 0 | 6.263977  | 0.643858  | -0.672824 |
| 25 | 8  | 0 | 4.880845  | 0.956841  | -0.870706 |
| 26 | 1  | 0 | 5.480184  | 2.052792  | 0.846670  |
| 27 | 1  | 0 | 5.865021  | 2.833113  | -0.757393 |
| 28 | 1  | 0 | 6.844891  | 0.641524  | -1.595876 |
| 29 | 6  | 0 | 6.575571  | -0.504611 | 0.267519  |
| 30 | 1  | 0 | 6.318151  | -1.444259 | -0.222533 |
| 31 | 1  | 0 | 7.637978  | -0.509647 | 0.522162  |
| 32 | 1  | 0 | 5.986141  | -0.398893 | 1.178670  |

-----  
Distance matrix (angstroms):

|    |    | 1        | 2        | 3        | 4        | 5        |
|----|----|----------|----------|----------|----------|----------|
| 1  | C  | 0.000000 |          |          |          |          |
| 2  | C  | 1.357778 | 0.000000 |          |          |          |
| 3  | N  | 2.203878 | 1.390051 | 0.000000 |          |          |
| 4  | C  | 2.212024 | 2.226344 | 1.349392 | 0.000000 |          |
| 5  | N  | 1.385407 | 2.213064 | 2.173994 | 1.334008 | 0.000000 |
| 6  | C  | 2.569108 | 3.654877 | 3.600665 | 2.484585 | 1.481298 |
| 7  | C  | 3.422880 | 4.446853 | 4.387434 | 3.327886 | 2.515701 |
| 8  | H  | 1.076347 | 2.214401 | 3.263743 | 3.228548 | 2.156851 |
| 9  | H  | 2.212732 | 1.074561 | 2.168944 | 3.246801 | 3.269635 |
| 10 | H  | 3.359882 | 4.250689 | 3.881445 | 2.594616 | 2.075101 |
| 11 | H  | 2.729560 | 3.993099 | 4.232220 | 3.287622 | 2.091090 |
| 12 | H  | 3.276131 | 4.322580 | 4.541318 | 3.739937 | 2.797203 |
| 13 | H  | 3.788757 | 4.542367 | 4.197295 | 3.117951 | 2.745756 |
| 14 | Br | 5.211647 | 5.515393 | 4.486071 | 3.310085 | 3.873962 |
| 15 | H  | 3.273886 | 3.305885 | 2.212151 | 1.107762 | 2.153737 |
| 16 | C  | 3.593759 | 2.532241 | 1.420412 | 2.431037 | 3.533320 |
| 17 | C  | 4.334486 | 3.045243 | 2.435188 | 3.660397 | 4.604870 |
| 18 | H  | 4.259755 | 3.410221 | 2.085652 | 2.561773 | 3.854777 |

|    |    |          |           |           |           |          |
|----|----|----------|-----------|-----------|-----------|----------|
| 19 | H  | 5.395186 | 4.122155  | 3.398790  | 4.510706  | 5.568002 |
| 20 | H  | 4.191219 | 2.834335  | 2.750450  | 4.091235  | 4.779949 |
| 21 | O  | 4.645712 | 5.769365  | 5.711632  | 4.559307  | 3.725425 |
| 22 | H  | 5.190380 | 6.213430  | 5.946210  | 4.694972  | 4.086235 |
| 23 | C  | 8.224668 | 9.123250  | 8.561246  | 7.225680  | 6.959520 |
| 24 | C  | 8.268171 | 9.303555  | 8.942480  | 7.634026  | 7.133661 |
| 25 | O  | 7.124146 | 8.070345  | 7.624947  | 6.321605  | 5.929812 |
| 26 | H  | 8.093354 | 8.979530  | 8.388768  | 7.040597  | 6.804492 |
| 27 | H  | 8.855636 | 9.655921  | 8.985510  | 7.674897  | 7.557096 |
| 28 | H  | 8.959279 | 9.982959  | 9.639060  | 8.362582  | 7.865815 |
| 29 | C  | 8.245173 | 9.404208  | 9.213719  | 7.923442  | 7.226074 |
| 30 | H  | 7.893226 | 9.110918  | 9.063904  | 7.833700  | 7.002377 |
| 31 | H  | 9.297761 | 10.469413 | 10.281961 | 8.986211  | 8.290340 |
| 32 | H  | 7.744346 | 8.893693  | 8.684977  | 7.387438  | 6.703232 |
|    |    | 6        | 7         | 8         | 9         | 10       |
| 6  | C  | 0.000000 |           |           |           |          |
| 7  | C  | 1.534701 | 0.000000  |           |           |          |
| 8  | H  | 2.863778 | 3.602168  | 0.000000  |           |          |
| 9  | H  | 4.681132 | 5.416078  | 2.756913  | 0.000000  |          |
| 10 | H  | 1.091946 | 2.131086  | 3.805158  | 5.313252  | 0.000000 |
| 11 | H  | 1.089952 | 2.184387  | 2.648462  | 4.924579  | 1.793144 |
| 12 | H  | 2.190083 | 1.095698  | 3.243736  | 5.164125  | 3.060148 |
| 13 | H  | 2.137613 | 1.094240  | 4.212517  | 5.521739  | 2.400712 |
| 14 | Br | 3.604008 | 3.731125  | 6.001584  | 6.528314  | 2.848026 |
| 15 | H  | 2.786983 | 3.466276  | 4.240250  | 4.288809  | 2.492734 |
| 16 | C  | 4.884820 | 5.587290  | 4.628453  | 2.865049  | 4.993676 |
| 17 | C  | 6.033580 | 6.727910  | 5.259314  | 2.886756  | 6.234578 |
| 18 | H  | 5.016054 | 5.653707  | 5.331848  | 3.896863  | 4.915094 |
| 19 | H  | 6.954687 | 7.611892  | 6.335708  | 3.940872  | 7.061813 |
| 20 | H  | 6.257429 | 6.970509  | 4.967910  | 2.306038  | 6.610308 |
| 21 | O  | 2.392287 | 1.416919  | 4.658640  | 6.742404  | 2.639116 |
| 22 | H  | 2.761808 | 1.948417  | 5.353426  | 7.234628  | 2.624842 |
| 23 | C  | 5.696675 | 5.184306  | 8.494163  | 10.187549 | 5.065080 |
| 24 | C  | 5.754376 | 5.045543  | 8.363168  | 10.337887 | 5.358628 |
| 25 | O  | 4.643100 | 3.899502  | 7.339085  | 9.112804  | 4.214253 |
| 26 | H  | 5.559284 | 5.342892  | 8.387427  | 10.052245 | 4.791202 |
| 27 | H  | 6.398929 | 5.802276  | 9.206732  | 10.715778 | 5.742501 |
| 28 | H  | 6.519514 | 5.614522  | 9.030755  | 10.996302 | 6.217467 |
| 29 | C  | 5.759345 | 5.259292  | 8.180908  | 10.413905 | 5.445520 |
| 30 | H  | 5.534643 | 4.906650  | 7.714657  | 10.077163 | 5.430231 |
| 31 | H  | 6.819872 | 6.347618  | 9.202952  | 11.476285 | 6.481136 |
| 32 | H  | 5.246398 | 5.032174  | 7.709239  | 9.911773  | 4.825954 |
|    |    | 11       | 12        | 13        | 14        | 15       |
| 11 | H  | 0.000000 |           |           |           |          |

|    |    |           |           |           |           |           |
|----|----|-----------|-----------|-----------|-----------|-----------|
| 12 | H  | 2.564820  | 0.000000  |           |           |           |
| 13 | H  | 3.059955  | 1.788212  | 0.000000  |           |           |
| 14 | Br | 4.579648  | 4.686635  | 3.012116  | 0.000000  |           |
| 15 | H  | 3.732984  | 4.114865  | 3.007017  | 2.295685  | 0.000000  |
| 16 | C  | 5.587991  | 5.786847  | 5.203688  | 4.908620  | 2.820229  |
| 17 | C  | 6.641994  | 6.793416  | 6.387337  | 6.218688  | 4.144129  |
| 18 | H  | 5.838442  | 6.017069  | 5.116029  | 4.257570  | 2.492194  |
| 19 | H  | 7.616144  | 7.725599  | 7.174527  | 6.695126  | 4.808152  |
| 20 | H  | 6.731810  | 6.892435  | 6.764571  | 6.975740  | 4.786420  |
| 21 | O  | 2.648541  | 2.049802  | 2.080202  | 4.214497  | 4.537122  |
| 22 | H  | 3.191956  | 2.810106  | 2.179017  | 3.642512  | 4.440271  |
| 23 | C  | 6.079910  | 6.075222  | 5.061882  | 4.738711  | 6.577002  |
| 24 | C  | 5.968897  | 5.756947  | 5.137756  | 5.617389  | 7.162529  |
| 25 | O  | 5.054900  | 4.713689  | 3.827892  | 4.257140  | 5.807465  |
| 26 | H  | 5.879834  | 6.317041  | 5.288629  | 4.584568  | 6.372574  |
| 27 | H  | 6.903508  | 6.683683  | 5.496380  | 4.882808  | 6.926611  |
| 28 | H  | 6.766621  | 6.204162  | 5.642272  | 6.314573  | 7.897161  |
| 29 | C  | 5.692054  | 5.895583  | 5.644260  | 6.369029  | 7.602412  |
| 30 | H  | 5.374150  | 5.367802  | 5.423216  | 6.661511  | 7.647779  |
| 31 | H  | 6.701137  | 6.959040  | 6.730362  | 7.332342  | 8.644919  |
| 32 | H  | 5.117426  | 5.769845  | 5.471446  | 5.936836  | 7.069949  |
|    |    | 16        | 17        | 18        | 19        | 20        |
| 16 | C  | 0.000000  |           |           |           |           |
| 17 | C  | 1.326779  | 0.000000  |           |           |           |
| 18 | H  | 1.082785  | 2.121014  | 0.000000  |           |           |
| 19 | H  | 2.079887  | 1.081072  | 2.443592  | 0.000000  |           |
| 20 | H  | 2.126983  | 1.082617  | 3.099476  | 1.846971  | 0.000000  |
| 21 | O  | 6.902654  | 8.082348  | 6.886902  | 8.950896  | 8.345190  |
| 22 | H  | 7.022762  | 8.268158  | 6.856967  | 9.064384  | 8.646554  |
| 23 | C  | 9.377472  | 10.697115 | 8.905530  | 11.315924 | 11.277694 |
| 24 | C  | 9.908248  | 11.200062 | 9.570957  | 11.910902 | 11.669066 |
| 25 | O  | 8.539772  | 9.833287  | 8.180540  | 10.521310 | 10.335533 |
| 26 | H  | 9.191482  | 10.515803 | 8.706603  | 11.127388 | 11.107661 |
| 27 | H  | 9.680231  | 10.995510 | 9.117378  | 11.536693 | 11.645047 |
| 28 | H  | 10.587001 | 11.862507 | 10.247361 | 12.561515 | 12.327467 |
| 29 | C  | 10.306920 | 11.573715 | 10.084120 | 12.364369 | 11.944223 |
| 30 | H  | 10.236415 | 11.459937 | 10.115529 | 12.305038 | 11.745904 |
| 31 | H  | 11.367878 | 12.639584 | 11.125913 | 13.422652 | 13.015160 |
| 32 | H  | 9.776126  | 11.042945 | 9.557049  | 11.833923 | 11.416467 |
|    |    | 21        | 22        | 23        | 24        | 25        |
| 21 | O  | 0.000000  |           |           |           |           |
| 22 | H  | 0.970810  | 0.000000  |           |           |           |
| 23 | C  | 4.178677  | 3.289356  | 0.000000  |           |           |
| 24 | C  | 3.792569  | 3.120183  | 1.464728  | 0.000000  |           |

|    |   |          |          |          |          |          |
|----|---|----------|----------|----------|----------|----------|
| 25 | O | 2.855156 | 1.998837 | 1.440770 | 1.431842 | 0.000000 |
| 26 | H | 4.409881 | 3.533457 | 1.081525 | 2.215466 | 2.123605 |
| 27 | H | 4.925639 | 4.001937 | 1.081525 | 2.226917 | 2.121754 |
| 28 | H | 4.377144 | 3.783819 | 2.201879 | 1.090638 | 2.117257 |
| 29 | C | 3.885397 | 3.470675 | 2.612075 | 1.516679 | 2.510676 |
| 30 | H | 3.491074 | 3.334519 | 3.415575 | 2.136803 | 2.872500 |
| 31 | H | 4.965814 | 4.559183 | 3.178096 | 2.155561 | 3.419423 |
| 32 | H | 3.755169 | 3.327031 | 2.709299 | 2.143024 | 2.694371 |
|    |   | 26       | 27       | 28       | 29       | 30       |
| 26 | H | 0.000000 |          |          |          |          |
| 27 | H | 1.824834 | 0.000000 |          |          |          |
| 28 | H | 3.133710 | 2.542885 | 0.000000 |          |          |
| 29 | C | 2.841760 | 3.563107 | 2.204178 | 0.000000 |          |
| 30 | H | 3.751633 | 4.334433 | 2.552257 | 1.090575 | 0.000000 |
| 31 | H | 3.365631 | 3.994331 | 2.537768 | 1.092510 | 1.780454 |
| 32 | H | 2.525268 | 3.769466 | 3.085129 | 1.090321 | 1.779435 |
|    |   | 31       | 32       |          |          |          |
| 31 | H | 0.000000 |          |          |          |          |
| 32 | H | 1.780964 | 0.000000 |          |          |          |

Stoichiometry C10H17BrN2O2

Framework group C1[X(C10H17BrN2O2)]

Deg. of freedom 90

Full point group C1 NOp 1

Largest Abelian subgroup C1 NOp 1

Largest concise Abelian subgroup C1 NOp 1

Standard orientation:

| Center Number | Atomic Number | Atomic Type | Coordinates (Angstroms) |           |           |
|---------------|---------------|-------------|-------------------------|-----------|-----------|
|               |               |             | X                       | Y         | Z         |
| 1             | 6             | 0           | -2.734125               | 2.260813  | -0.238237 |
| 2             | 6             | 0           | -3.922010               | 1.631541  | -0.047166 |
| 3             | 7             | 0           | -3.658567               | 0.266946  | -0.073981 |
| 4             | 6             | 0           | -2.335589               | 0.085187  | -0.267765 |
| 5             | 7             | 0           | -1.758029               | 1.284555  | -0.354474 |
| 6             | 6             | 0           | -0.297478               | 1.487960  | -0.494696 |
| 7             | 6             | 0           | 0.431886                | 1.554051  | 0.853995  |
| 8             | 1             | 0           | -2.497796               | 3.309575  | -0.290868 |
| 9             | 1             | 0           | -4.909503               | 2.030736  | 0.094894  |
| 10            | 1             | 0           | 0.087373                | 0.616639  | -1.028582 |
| 11            | 1             | 0           | -0.140787               | 2.394488  | -1.079204 |
| 12            | 1             | 0           | 0.054240                | 2.371635  | 1.478088  |
| 13            | 1             | 0           | 0.270216                | 0.600114  | 1.365100  |
| 14            | 35            | 0           | 0.178690                | -2.056792 | -0.050994 |

|    |   |   |           |           |           |
|----|---|---|-----------|-----------|-----------|
| 15 | 1 | 0 | -1.771362 | -0.867980 | -0.283781 |
| 16 | 6 | 0 | -4.568318 | -0.813846 | 0.073712  |
| 17 | 6 | 0 | -5.880747 | -0.684873 | 0.219441  |
| 18 | 1 | 0 | -4.068151 | -1.774010 | 0.055190  |
| 19 | 1 | 0 | -6.488183 | -1.572628 | 0.327278  |
| 20 | 1 | 0 | -6.391400 | 0.269585  | 0.236810  |
| 21 | 8 | 0 | 1.808853  | 1.774286  | 0.602765  |
| 22 | 1 | 0 | 2.228458  | 0.910373  | 0.461140  |
| 23 | 6 | 0 | 4.802946  | -1.030897 | -0.189511 |
| 24 | 6 | 0 | 5.277637  | 0.279574  | 0.260778  |
| 25 | 8 | 0 | 3.932261  | -0.132827 | 0.525468  |
| 26 | 1 | 0 | 4.523723  | -1.182386 | -1.223330 |
| 27 | 1 | 0 | 5.042847  | -1.932841 | 0.356970  |
| 28 | 1 | 0 | 5.901774  | 0.323957  | 1.154073  |
| 29 | 6 | 0 | 5.458427  | 1.447647  | -0.689609 |
| 30 | 1 | 0 | 5.158213  | 2.366147  | -0.184057 |
| 31 | 1 | 0 | 6.503794  | 1.529670  | -0.996298 |
| 32 | 1 | 0 | 4.833877  | 1.299534  | -1.570972 |

-----

Rotational constants (GHZ):      0.7190534      0.1760934      0.1452256

Standard basis: 6-311++G(d,p) (5D, 7F)

There are    492 symmetry adapted cartesian basis functions of A    symmetry.

There are    475 symmetry adapted basis functions of A    symmetry.

475 basis functions,    751 primitive gaussians,    492 cartesian basis functions

71 alpha electrons      71 beta electrons

nuclear repulsion energy      1272.9300909081 Hartrees.

NAtoms=    32 NActive=    32 NUniq=    32 SFac= 1.00D+00 NAtFMM=    60 NAOKFM=F

Big=F

Integral buffers will be    131072 words long.

Raffenetti 2 integral format.

Two-electron integral symmetry is turned on.

One-electron integrals computed using PRISM.

NBasis=    475 RedAO= T EigKep=    4.30D-06    NBF=    475

NBsUse=    475 1.00D-06 EigRej= -1.00D+00    NBFU=    475

Initial guess from the checkpoint file: "/home/suqian/liuwen/qianmengshijie/ohpo/ohpo.chk"

B after Tr=    0.000000    0.000000    0.000000

Rot=    0.999796    0.006119    -0.001166    0.019238 Ang=    2.32 deg.

ExpMin= 3.50D-02 ExpMax= 4.40D+05 ExpMxC= 1.51D+04 IAcc=3 IRadAn=      5 AccDes=

0.00D+00

Harris functional with IExCor=    402 and IRadAn=      5 diagonalized for initial guess.

HarFok: IExCor=    402 AccDes= 0.00D+00 IRadAn=      5 IDoV= 1 UseB2=F ITyADJ=14

ICtDFT= 3500011 ScaDFX= 1.000000 1.000000 1.000000 1.000000

FoFCou: FMM=F IPFlag=            0 FMFlag=    100000 FMFlg1=      0

NFxFlg=            0 DoJE=T BraDBF=F KetDBF=T FulRan=T



wScrn= 0.000000 ICntrl= 500 IOpCl= 0 l1Cent= 20000004 NGrid= 0  
 NMat0= 1 NMatS0= 1 NMatT0= 0 NMatD0= 1 NMtDS0= 0  
 NMtDT0= 0

Petite list used in FoFCou.

Requested convergence on RMS density matrix=1.00D-08 within 128 cycles.

Requested convergence on MAX density matrix=1.00D-06.

Requested convergence on energy=1.00D-06.

No special actions if energy rises.

SCF Done: E(RB3LYP) = -3225.51362922 A.U. after 13 cycles

NFock= 13 Conv=0.89D-08 -V/T= 2.0018

Calling FoFJK, ICntrl= 2127 FMM=F ISym2X=0 l1Cent= 0 IOpClX= 0 NMat=1 NMatS=1  
 NMatT=0.

\*\*\*\*\* Axes restored to original set \*\*\*\*\*

| Center<br>Number | Atomic<br>Number | Forces (Hartrees/Bohr) |              |              |
|------------------|------------------|------------------------|--------------|--------------|
|                  |                  | X                      | Y            | Z            |
| 1                | 6                | 0.001024362            | -0.000326498 | -0.003006882 |
| 2                | 6                | 0.000201979            | -0.000424641 | 0.001665935  |
| 3                | 7                | 0.001026177            | 0.000347263  | -0.000137895 |
| 4                | 6                | -0.000124679           | 0.000524183  | -0.002608836 |
| 5                | 7                | -0.000175715           | 0.002232005  | 0.001814418  |
| 6                | 6                | -0.000791884           | 0.001170162  | 0.002264628  |
| 7                | 6                | 0.002352681            | 0.001142297  | 0.000037634  |
| 8                | 1                | -0.000117591           | -0.000122216 | -0.000293353 |
| 9                | 1                | 0.000022596            | -0.000145661 | 0.000381067  |
| 10               | 1                | -0.000219121           | -0.001143197 | 0.001476139  |
| 11               | 1                | 0.000028610            | -0.000499534 | -0.000147474 |
| 12               | 1                | 0.001087546            | -0.000554936 | 0.001266924  |
| 13               | 1                | -0.000131270           | -0.000699702 | -0.001668873 |
| 14               | 35               | -0.002200585           | -0.000249927 | 0.001094146  |
| 15               | 1                | 0.001418574            | -0.001009367 | -0.000052851 |
| 16               | 6                | -0.000213830           | 0.000486926  | 0.000202217  |
| 17               | 6                | 0.000096608            | 0.000044376  | 0.000084089  |
| 18               | 1                | -0.000019696           | -0.000084535 | -0.000089204 |
| 19               | 1                | -0.000017453           | 0.000003416  | -0.000110805 |
| 20               | 1                | 0.000019603            | 0.000042768  | 0.000007213  |
| 21               | 8                | -0.007431144           | -0.000204420 | -0.000893811 |
| 22               | 1                | 0.005433620            | -0.000259475 | -0.001215132 |
| 23               | 6                | -0.006277176           | 0.000682333  | -0.002511659 |
| 24               | 6                | 0.006309950            | -0.006555887 | 0.002867968  |
| 25               | 8                | -0.000637060           | -0.000684218 | -0.000537375 |
| 26               | 1                | 0.000914756            | -0.000218037 | 0.003809710  |

|    |   |              |              |              |
|----|---|--------------|--------------|--------------|
| 27 | 1 | 0.002224515  | 0.002240802  | -0.001778182 |
| 28 | 1 | -0.001145104 | 0.001890259  | 0.000016796  |
| 29 | 6 | -0.003803715 | 0.007762670  | -0.005197612 |
| 30 | 1 | 0.000451775  | -0.002556312 | 0.001441271  |
| 31 | 1 | 0.000625387  | -0.000590072 | 0.000283325  |
| 32 | 1 | 0.000067285  | -0.002240825 | 0.001536461  |

-----  
Cartesian Forces: Max 0.007762670 RMS 0.002144294

GradGradGradGradGradGradGradGradGradGradGradGradGradGradGradGradGradGradGrad

Berny optimization.

Using GEDIIS/GDIIS optimizer.

FormGI is forming the generalized inverse of G from B-inverse, IUseBI=4.

GSVD: received Info= 1 from GESDD.

Internal Forces: Max 0.005162545 RMS 0.001107249

Search for a local minimum.

Step number 8 out of a maximum of 177

All quantities printed in internal units (Hartrees-Bohrs-Radians)

Mixed Optimization -- RFO/linear search

Update second derivatives using D2CorX and points 7 8

DE= -2.34D-03 DEPred=-2.49D-03 R= 9.39D-01

TightC=F SS= 1.41D+00 RLast= 1.58D+00 DXNew= 2.4000D+00 4.7431D+00

Trust test= 9.39D-01 RLast= 1.58D+00 DXMaxT set to 2.40D+00

ITU= 1 1 1 0 1 0 1 0

Use linear search instead of GDIIS.

|                 |         |         |         |         |         |
|-----------------|---------|---------|---------|---------|---------|
| Eigenvalues --- | 0.00151 | 0.00237 | 0.00254 | 0.00378 | 0.00612 |
| Eigenvalues --- | 0.00967 | 0.01246 | 0.01290 | 0.01402 | 0.01561 |
| Eigenvalues --- | 0.01653 | 0.01859 | 0.01950 | 0.02134 | 0.02147 |
| Eigenvalues --- | 0.02201 | 0.02262 | 0.02314 | 0.02391 | 0.02579 |
| Eigenvalues --- | 0.03062 | 0.03064 | 0.03142 | 0.03661 | 0.04136 |
| Eigenvalues --- | 0.04461 | 0.05194 | 0.05360 | 0.05629 | 0.05768 |
| Eigenvalues --- | 0.05927 | 0.06508 | 0.09410 | 0.09992 | 0.10552 |
| Eigenvalues --- | 0.10890 | 0.11072 | 0.11397 | 0.12928 | 0.13110 |
| Eigenvalues --- | 0.13695 | 0.14968 | 0.15994 | 0.15999 | 0.15999 |
| Eigenvalues --- | 0.16000 | 0.16000 | 0.16002 | 0.16015 | 0.16556 |
| Eigenvalues --- | 0.17196 | 0.18889 | 0.21461 | 0.22004 | 0.22063 |
| Eigenvalues --- | 0.22764 | 0.23549 | 0.23869 | 0.25006 | 0.27355 |
| Eigenvalues --- | 0.28243 | 0.28819 | 0.31849 | 0.32865 | 0.33054 |
| Eigenvalues --- | 0.33212 | 0.34075 | 0.34251 | 0.34421 | 0.34761 |
| Eigenvalues --- | 0.34938 | 0.35685 | 0.35689 | 0.35858 | 0.36435 |
| Eigenvalues --- | 0.36658 | 0.36958 | 0.37231 | 0.37740 | 0.37769 |
| Eigenvalues --- | 0.38905 | 0.42178 | 0.42509 | 0.45536 | 0.47462 |
| Eigenvalues --- | 0.49148 | 0.51795 | 0.54725 | 0.56094 | 0.60360 |

RFO step: Lambda=-1.24872417D-03 EMin= 1.51371594D-03

Quartic linear search produced a step of -0.14212.

Iteration 1 RMS(Cart)= 0.03894131 RMS(Int)= 0.00071509

Iteration 2 RMS(Cart)= 0.00099570 RMS(Int)= 0.00055331

Iteration 3 RMS(Cart)= 0.00000066 RMS(Int)= 0.00055331

| Variable | Old X   | -DE/DX   | Delta X<br>(Linear) | Delta X<br>(Quad) | Delta X<br>(Total) | New X   |
|----------|---------|----------|---------------------|-------------------|--------------------|---------|
| R1       | 2.56583 | -0.00031 | -0.00009            | 0.00002           | 0.00003            | 2.56586 |
| R2       | 2.61804 | -0.00032 | -0.00002            | -0.00013          | -0.00027           | 2.61777 |
| R3       | 2.03400 | 0.00007  | 0.00001             | 0.00009           | 0.00010            | 2.03410 |
| R4       | 2.62682 | 0.00060  | 0.00026             | 0.00041           | 0.00085            | 2.62767 |
| R5       | 2.03063 | 0.00001  | 0.00000             | 0.00006           | 0.00006            | 2.03069 |
| R6       | 2.54998 | -0.00099 | 0.00006             | -0.00084          | -0.00078           | 2.54920 |
| R7       | 2.68419 | 0.00043  | 0.00003             | 0.00050           | 0.00053            | 2.68472 |
| R8       | 2.52091 | -0.00125 | -0.00004            | -0.00180          | -0.00231           | 2.51860 |
| R9       | 2.09337 | -0.00201 | 0.00197             | -0.00340          | -0.00163           | 2.09173 |
| R10      | 2.79925 | -0.00121 | -0.00076            | -0.00018          | -0.00107           | 2.79817 |
| R11      | 2.90016 | 0.00158  | 0.00227             | 0.00395           | 0.00653            | 2.90669 |
| R12      | 2.06348 | -0.00032 | -0.00065            | 0.00010           | -0.00055           | 2.06293 |
| R13      | 2.05971 | 0.00034  | 0.00024             | 0.00026           | 0.00051            | 2.06022 |
| R14      | 2.07057 | -0.00062 | -0.00010            | -0.00101          | -0.00112           | 2.06945 |
| R15      | 2.06781 | 0.00020  | 0.00002             | 0.00058           | 0.00060            | 2.06841 |
| R16      | 2.67759 | -0.00381 | -0.00320            | 0.00008           | -0.00328           | 2.67431 |
| R17      | 4.33822 | -0.00213 | -0.01936            | -0.01022          | -0.02972           | 4.30850 |
| R18      | 8.04483 | 0.00076  | -0.14926            | 0.26415           | 0.11499            | 8.15982 |
| R19      | 2.50725 | -0.00011 | 0.00001             | -0.00003          | -0.00002           | 2.50723 |
| R20      | 2.04617 | -0.00009 | -0.00005            | -0.00008          | -0.00013           | 2.04603 |
| R21      | 2.04293 | 0.00002  | 0.00000             | 0.00002           | 0.00002            | 2.04295 |
| R22      | 2.04585 | -0.00005 | -0.00001            | -0.00003          | -0.00004           | 2.04581 |
| R23      | 1.83456 | 0.00158  | 0.00001             | 0.00269           | 0.00289            | 1.83745 |
| R24      | 3.77725 | -0.00107 | 0.07887             | -0.11038          | -0.03138           | 3.74587 |
| R25      | 2.76793 | 0.00210  | 0.00185             | 0.00318           | 0.00500            | 2.77294 |
| R26      | 2.72266 | -0.00020 | -0.00428            | 0.00101           | -0.00327           | 2.71939 |
| R27      | 2.04379 | 0.00346  | 0.00172             | 0.00379           | 0.00551            | 2.04929 |
| R28      | 2.04379 | 0.00311  | 0.00161             | 0.00323           | 0.00484            | 2.04862 |
| R29      | 2.70579 | 0.00086  | 0.00189             | 0.00172           | 0.00364            | 2.70943 |
| R30      | 2.06101 | -0.00063 | -0.00013            | -0.00081          | -0.00094           | 2.06007 |
| R31      | 2.86611 | -0.00356 | -0.00394            | -0.00327          | -0.00722           | 2.85889 |
| R32      | 2.06089 | 0.00145  | 0.00076             | 0.00186           | 0.00262            | 2.06351 |
| R33      | 2.06455 | 0.00068  | 0.00055             | 0.00112           | 0.00166            | 2.06621 |
| R34      | 2.06041 | 0.00103  | 0.00040             | 0.00129           | 0.00169            | 2.06210 |
| A1       | 1.87719 | -0.00036 | -0.00004            | 0.00046           | -0.00010           | 1.87709 |
| A2       | 2.27911 | 0.00001  | -0.00020            | -0.00046          | -0.00058           | 2.27853 |
| A3       | 2.12682 | 0.00036  | 0.00024             | 0.00030           | 0.00062            | 2.12744 |
| A4       | 1.86131 | -0.00010 | -0.00016            | -0.00027          | -0.00062           | 1.86070 |

|     |         |          |          |          |          |         |
|-----|---------|----------|----------|----------|----------|---------|
| A5  | 2.27893 | -0.00011 | -0.00005 | -0.00034 | -0.00035 | 2.27858 |
| A6  | 2.14291 | 0.00022  | 0.00021  | 0.00072  | 0.00097  | 2.14387 |
| A7  | 1.89738 | -0.00022 | 0.00026  | -0.00031 | -0.00030 | 1.89708 |
| A8  | 2.24410 | 0.00052  | 0.00005  | 0.00117  | 0.00133  | 2.24544 |
| A9  | 2.14169 | -0.00030 | -0.00031 | -0.00084 | -0.00103 | 2.14066 |
| A10 | 1.88884 | 0.00027  | -0.00038 | 0.00112  | 0.00066  | 1.88950 |
| A11 | 2.23616 | 0.00010  | 0.00190  | -0.00129 | 0.00155  | 2.23771 |
| A12 | 2.15573 | -0.00034 | -0.00132 | 0.00166  | -0.00076 | 2.15497 |
| A13 | 1.89976 | 0.00045  | 0.00035  | 0.00007  | 0.00034  | 1.90010 |
| A14 | 2.22165 | -0.00135 | -0.00181 | -0.00357 | -0.00467 | 2.21698 |
| A15 | 2.16096 | 0.00089  | 0.00135  | 0.00272  | 0.00322  | 2.16417 |
| A16 | 1.97286 | -0.00233 | -0.00275 | -0.00722 | -0.01252 | 1.96033 |
| A17 | 1.85899 | 0.00022  | 0.00150  | 0.00371  | 0.00565  | 1.86464 |
| A18 | 1.88254 | 0.00091  | -0.00096 | 0.00001  | 0.00008  | 1.88262 |
| A19 | 1.87186 | 0.00208  | 0.00265  | 0.01416  | 0.01794  | 1.88980 |
| A20 | 1.94672 | -0.00014 | 0.00050  | -0.00807 | -0.00742 | 1.93930 |
| A21 | 1.92922 | -0.00076 | -0.00094 | -0.00207 | -0.00330 | 1.92593 |
| A22 | 1.94860 | -0.00100 | -0.00328 | -0.00846 | -0.01295 | 1.93565 |
| A23 | 1.87834 | 0.00150  | 0.00234  | 0.01088  | 0.01347  | 1.89181 |
| A24 | 1.88886 | 0.00081  | 0.00407  | 0.00748  | 0.01350  | 1.90236 |
| A25 | 1.91085 | -0.00012 | -0.00118 | -0.00215 | -0.00313 | 1.90772 |
| A26 | 1.89648 | -0.00093 | -0.00299 | -0.00956 | -0.01288 | 1.88360 |
| A27 | 1.94110 | -0.00024 | 0.00101  | 0.00205  | 0.00201  | 1.94311 |
| A28 | 2.12782 | -0.00046 | 0.03531  | -0.05099 | -0.01547 | 2.11235 |
| A29 | 2.63989 | 0.00036  | -0.00274 | 0.00673  | 0.00384  | 2.64374 |
| A30 | 2.17853 | 0.00010  | 0.00013  | 0.00048  | 0.00060  | 2.17914 |
| A31 | 1.95746 | -0.00006 | -0.00006 | -0.00039 | -0.00045 | 1.95701 |
| A32 | 2.14719 | -0.00004 | -0.00007 | -0.00009 | -0.00016 | 2.14704 |
| A33 | 2.07938 | 0.00002  | 0.00013  | -0.00008 | 0.00005  | 2.07942 |
| A34 | 2.15801 | -0.00001 | -0.00017 | 0.00023  | 0.00006  | 2.15807 |
| A35 | 2.04580 | -0.00001 | 0.00004  | -0.00014 | -0.00010 | 2.04569 |
| A36 | 1.88345 | 0.00205  | 0.00153  | 0.01074  | 0.01215  | 1.89559 |
| A37 | 2.54662 | 0.00516  | 0.00208  | 0.01083  | 0.01125  | 2.55787 |
| A38 | 2.09769 | -0.00057 | -0.00153 | -0.00437 | -0.00595 | 2.09174 |
| A39 | 2.11637 | -0.00048 | -0.00231 | -0.00345 | -0.00566 | 2.11071 |
| A40 | 1.98848 | 0.00048  | 0.00244  | 0.00340  | 0.00577  | 1.99425 |
| A41 | 1.98573 | 0.00043  | 0.00329  | 0.00301  | 0.00635  | 1.99207 |
| A42 | 2.00805 | 0.00049  | 0.00009  | 0.00367  | 0.00379  | 2.01184 |
| A43 | 2.06424 | -0.00143 | -0.00456 | -0.00403 | -0.00882 | 2.05543 |
| A44 | 2.13535 | 0.00046  | 0.00126  | 0.00108  | 0.00259  | 2.13794 |
| A45 | 1.98015 | -0.00068 | -0.00292 | -0.00124 | -0.00412 | 1.97603 |
| A46 | 2.03718 | 0.00014  | 0.00119  | -0.00075 | 0.00043  | 2.03761 |
| A47 | 1.99729 | 0.00119  | 0.00400  | 0.00327  | 0.00727  | 2.00457 |
| A48 | 1.02388 | 0.00152  | -0.00090 | 0.00050  | 0.00051  | 1.02439 |

|     |          |          |          |          |          |          |
|-----|----------|----------|----------|----------|----------|----------|
| A49 | 1.75578  | -0.00185 | 0.01229  | -0.02319 | -0.01141 | 1.74437  |
| A50 | 2.54005  | -0.00014 | 0.00353  | -0.00526 | -0.00128 | 2.53877  |
| A51 | 2.27137  | -0.00062 | -0.00609 | 0.00795  | 0.00153  | 2.27289  |
| A52 | 1.90217  | 0.00311  | 0.00491  | 0.00739  | 0.01230  | 1.91447  |
| A53 | 1.92600  | -0.00040 | 0.00059  | -0.00149 | -0.00089 | 1.92511  |
| A54 | 1.91095  | 0.00303  | 0.00344  | 0.00884  | 0.01226  | 1.92321  |
| A55 | 1.90742  | -0.00169 | -0.00340 | -0.00546 | -0.00884 | 1.89858  |
| A56 | 1.90864  | -0.00274 | -0.00345 | -0.00569 | -0.00917 | 1.89946  |
| A57 | 1.90856  | -0.00135 | -0.00231 | -0.00364 | -0.00595 | 1.90260  |
| A58 | 3.29524  | 0.00090  | -0.00699 | 0.00845  | 0.00204  | 3.29729  |
| A59 | 3.55351  | 0.00061  | -0.01784 | 0.03681  | 0.01870  | 3.57220  |
| D1  | -0.01894 | 0.00111  | 0.00395  | 0.03651  | 0.04029  | 0.02135  |
| D2  | 3.13141  | 0.00072  | 0.00227  | 0.02097  | 0.02307  | -3.12870 |
| D3  | 3.13547  | 0.00011  | 0.00088  | 0.00886  | 0.00994  | -3.13777 |
| D4  | 0.00264  | -0.00028 | -0.00080 | -0.00668 | -0.00728 | -0.00464 |
| D5  | 0.02396  | -0.00138 | -0.00513 | -0.04336 | -0.04812 | -0.02416 |
| D6  | -3.07512 | -0.00110 | -0.00279 | -0.02345 | -0.02554 | -3.10066 |
| D7  | -3.12910 | -0.00049 | -0.00238 | -0.01865 | -0.02097 | 3.13312  |
| D8  | 0.05501  | -0.00021 | -0.00004 | 0.00126  | 0.00161  | 0.05661  |
| D9  | 0.00764  | -0.00045 | -0.00146 | -0.01751 | -0.01909 | -0.01145 |
| D10 | -3.13729 | -0.00038 | -0.00099 | -0.01205 | -0.01294 | 3.13296  |
| D11 | 3.14132  | -0.00011 | 0.00005  | -0.00349 | -0.00353 | 3.13779  |
| D12 | -0.00361 | -0.00003 | 0.00052  | 0.00198  | 0.00262  | -0.00099 |
| D13 | 0.00720  | -0.00040 | -0.00171 | -0.00930 | -0.01068 | -0.00347 |
| D14 | 3.07472  | 0.00015  | 0.00193  | 0.01334  | 0.01585  | 3.09057  |
| D15 | -3.13129 | -0.00047 | -0.00215 | -0.01439 | -0.01639 | 3.13551  |
| D16 | -0.06377 | 0.00007  | 0.00149  | 0.00826  | 0.01014  | -0.05363 |
| D17 | 0.04657  | -0.00004 | 0.00017  | -0.00247 | -0.00242 | 0.04415  |
| D18 | -3.09435 | 0.00004  | 0.00035  | -0.00068 | -0.00045 | -3.09480 |
| D19 | -3.09878 | 0.00005  | 0.00070  | 0.00369  | 0.00451  | -3.09428 |
| D20 | 0.04348  | 0.00013  | 0.00088  | 0.00548  | 0.00648  | 0.04996  |
| D21 | -0.01913 | 0.00109  | 0.00420  | 0.03230  | 0.03606  | 0.01693  |
| D22 | 3.08176  | 0.00075  | 0.00183  | 0.01305  | 0.01409  | 3.09585  |
| D23 | -3.09084 | 0.00055  | 0.00065  | 0.01109  | 0.01096  | -3.07987 |
| D24 | 0.01005  | 0.00022  | -0.00171 | -0.00816 | -0.01101 | -0.00096 |
| D25 | -2.73001 | 0.00055  | -0.01231 | 0.02152  | 0.00710  | -2.72290 |
| D26 | 0.32717  | 0.00120  | -0.00811 | 0.04728  | 0.03738  | 0.36455  |
| D27 | 1.56216  | -0.00105 | 0.00505  | -0.05559 | -0.05152 | 1.51063  |
| D28 | -2.66982 | 0.00033  | 0.00769  | -0.03998 | -0.03308 | -2.70290 |
| D29 | -0.59842 | 0.00002  | 0.00689  | -0.04044 | -0.03390 | -0.63232 |
| D30 | -1.53101 | -0.00071 | 0.00777  | -0.03283 | -0.02564 | -1.55665 |
| D31 | 0.52020  | 0.00067  | 0.01041  | -0.01721 | -0.00720 | 0.51300  |
| D32 | 2.59159  | 0.00036  | 0.00961  | -0.01767 | -0.00802 | 2.58358  |
| D33 | -1.03641 | -0.00042 | -0.03603 | 0.01218  | -0.02396 | -1.06037 |

|     |          |          |          |          |          |          |
|-----|----------|----------|----------|----------|----------|----------|
| D34 | 1.06094  | -0.00020 | -0.03796 | 0.01147  | -0.02700 | 1.03394  |
| D35 | -3.12283 | 0.00082  | -0.03292 | 0.02427  | -0.00886 | -3.13169 |
| D36 | -3.08006 | -0.00069 | -0.03797 | 0.00272  | -0.03509 | -3.11515 |
| D37 | -0.98271 | -0.00047 | -0.03990 | 0.00201  | -0.03813 | -1.02084 |
| D38 | 1.11670  | 0.00055  | -0.03485 | 0.01481  | -0.01999 | 1.09671  |
| D39 | 1.08845  | -0.00102 | -0.03887 | 0.00094  | -0.03816 | 1.05030  |
| D40 | -3.09738 | -0.00081 | -0.04080 | 0.00023  | -0.04120 | -3.13857 |
| D41 | -0.99796 | 0.00021  | -0.03575 | 0.01303  | -0.02306 | -1.02102 |
| D42 | -1.50735 | -0.00076 | 0.00786  | -0.02731 | -0.02123 | -1.52858 |
| D43 | 2.65690  | 0.00052  | 0.01123  | -0.01587 | -0.00591 | 2.65099  |
| D44 | 0.55238  | 0.00143  | 0.01400  | -0.00826 | 0.00502  | 0.55740  |
| D45 | -0.12074 | 0.00096  | 0.04095  | -0.02348 | 0.01576  | -0.10498 |
| D46 | 0.08066  | -0.00054 | -0.03853 | -0.01025 | -0.04801 | 0.03265  |
| D47 | -2.54147 | -0.00097 | -0.03372 | -0.02363 | -0.05634 | -2.59781 |
| D48 | -3.13886 | 0.00014  | 0.00037  | 0.00271  | 0.00308  | -3.13578 |
| D49 | 0.00360  | 0.00005  | 0.00023  | 0.00104  | 0.00127  | 0.00487  |
| D50 | 0.00199  | 0.00005  | 0.00017  | 0.00073  | 0.00090  | 0.00289  |
| D51 | -3.13874 | -0.00004 | 0.00004  | -0.00094 | -0.00091 | -3.13964 |
| D52 | -2.72088 | -0.00079 | 0.02265  | -0.02318 | -0.00009 | -2.72097 |
| D53 | 2.96797  | 0.00065  | -0.00943 | 0.05146  | 0.04149  | 3.00946  |
| D54 | -2.27557 | -0.00039 | 0.01197  | 0.00598  | 0.01747  | -2.25810 |
| D55 | -0.58553 | 0.00004  | 0.00841  | 0.01464  | 0.02279  | -0.56274 |
| D56 | -2.73168 | 0.00042  | 0.00202  | 0.00652  | 0.00857  | -2.72311 |
| D57 | -0.04884 | 0.00125  | 0.00473  | 0.00809  | 0.01291  | -0.03593 |
| D58 | 0.02341  | -0.00120 | -0.00821 | -0.00530 | -0.01351 | 0.00990  |
| D59 | 2.70624  | -0.00036 | -0.00549 | -0.00373 | -0.00916 | 2.69708  |
| D60 | 0.98730  | 0.00078  | 0.01041  | -0.01388 | -0.00328 | 0.98402  |
| D61 | 0.14040  | 0.00083  | -0.00585 | 0.02091  | 0.01477  | 0.15517  |
| D62 | -1.36133 | -0.00091 | 0.00385  | -0.02622 | -0.02218 | -1.38352 |
| D63 | -2.20824 | -0.00086 | -0.01241 | 0.00857  | -0.00413 | -2.21236 |
| D64 | 1.91452  | 0.00134  | 0.00008  | 0.00952  | 0.00937  | 1.92389  |
| D65 | -0.46483 | 0.00007  | -0.00429 | 0.00660  | 0.00205  | -0.46278 |
| D66 | 2.48496  | 0.00002  | 0.00544  | 0.00359  | 0.00908  | 2.49404  |
| D67 | -1.70361 | -0.00035 | 0.00474  | 0.00060  | 0.00537  | -1.69824 |
| D68 | 0.39796  | -0.00033 | 0.00445  | 0.00079  | 0.00528  | 0.40323  |
| D69 | 1.27269  | 0.00069  | 0.00763  | 0.00438  | 0.01199  | 1.28469  |
| D70 | -2.91588 | 0.00032  | 0.00692  | 0.00139  | 0.00828  | -2.90760 |
| D71 | -0.81431 | 0.00034  | 0.00664  | 0.00158  | 0.00819  | -0.80612 |
| D72 | -1.09933 | 0.00021  | 0.00609  | 0.00337  | 0.00946  | -1.08986 |
| D73 | 0.99528  | -0.00016 | 0.00539  | 0.00038  | 0.00575  | 1.00104  |
| D74 | 3.09685  | -0.00015 | 0.00510  | 0.00057  | 0.00566  | 3.10251  |

|  | Item          | Value    | Threshold | Converged? |
|--|---------------|----------|-----------|------------|
|  | Maximum Force | 0.005163 | 0.000450  | NO         |
|  | RMS Force     | 0.001107 | 0.000300  | NO         |

Maximum Displacement 0.192839 0.001800 NO  
 RMS Displacement 0.039225 0.001200 NO

Predicted change in Energy=-7.355796D-04

GradGradGradGradGradGradGradGradGradGradGradGradGradGradGradGradGradGrad

Input orientation:

| Center Number | Atomic Number | Atomic Type | Coordinates (Angstroms) |           |           |
|---------------|---------------|-------------|-------------------------|-----------|-----------|
|               |               |             | X                       | Y         | Z         |
| 1             | 6             | 0           | -1.549179               | -1.904923 | 0.164146  |
| 2             | 6             | 0           | -2.790342               | -1.366314 | 0.050034  |
| 3             | 7             | 0           | -2.629650               | 0.014315  | 0.089194  |
| 4             | 6             | 0           | -1.318251               | 0.292914  | 0.238718  |
| 5             | 7             | 0           | -0.650829               | -0.859128 | 0.299218  |
| 6             | 6             | 0           | 0.822768                | -0.957691 | 0.405789  |
| 7             | 6             | 0           | 1.507016                | -0.992171 | -0.971358 |
| 8             | 1             | 0           | -1.230856               | -2.933117 | 0.175305  |
| 9             | 1             | 0           | -3.749390               | -1.838401 | -0.060017 |
| 10            | 1             | 0           | 1.161970                | -0.064798 | 0.934363  |
| 11            | 1             | 0           | 1.057270                | -1.852136 | 0.983332  |
| 12            | 1             | 0           | 1.175385                | -1.860208 | -1.550831 |
| 13            | 1             | 0           | 1.245263                | -0.076034 | -1.510091 |
| 14            | 35            | 0           | 0.997447                | 2.624231  | -0.007447 |
| 15            | 1             | 0           | -0.827516               | 1.284768  | 0.263776  |
| 16            | 6             | 0           | -3.622682               | 1.026216  | -0.001964 |
| 17            | 6             | 0           | -4.926892               | 0.802269  | -0.097892 |
| 18            | 1             | 0           | -3.194344               | 2.020489  | 0.012778  |
| 19            | 1             | 0           | -5.601843               | 1.643880  | -0.167712 |
| 20            | 1             | 0           | -5.366219               | -0.187079 | -0.111804 |
| 21            | 8             | 0           | 2.906150                | -1.099679 | -0.788027 |
| 22            | 1             | 0           | 3.276917                | -0.205331 | -0.697946 |
| 23            | 6             | 0           | 5.721074                | 1.918465  | -0.234145 |
| 24            | 6             | 0           | 6.267552                | 0.638435  | -0.698986 |
| 25            | 8             | 0           | 4.879301                | 0.947070  | -0.881172 |
| 26            | 1             | 0           | 5.506457                | 2.063128  | 0.818956  |
| 27            | 1             | 0           | 5.868715                | 2.827840  | -0.805528 |
| 28            | 1             | 0           | 6.833203                | 0.636134  | -1.630890 |
| 29            | 6             | 0           | 6.594310                | -0.496919 | 0.245970  |
| 30            | 1             | 0           | 6.347576                | -1.450509 | -0.225382 |
| 31            | 1             | 0           | 7.659657                | -0.491067 | 0.491948  |
| 32            | 1             | 0           | 6.016429                | -0.399035 | 1.166418  |

Distance matrix (angstroms):

|    |    | 1        | 2         | 3         | 4        | 5        |
|----|----|----------|-----------|-----------|----------|----------|
| 1  | C  | 0.000000 |           |           |          |          |
| 2  | C  | 1.357795 | 0.000000  |           |          |          |
| 3  | N  | 2.203749 | 1.390500  | 0.000000  |          |          |
| 4  | C  | 2.211194 | 2.226139  | 1.348978  | 0.000000 |          |
| 5  | N  | 1.385267 | 2.212882  | 2.173187  | 1.332784 | 0.000000 |
| 6  | C  | 2.565496 | 3.653505  | 3.600585  | 2.485133 | 1.480730 |
| 7  | C  | 3.385677 | 4.432890  | 4.387458  | 3.331345 | 2.507660 |
| 8  | H  | 1.076400 | 2.214173  | 3.263647  | 3.227838 | 2.157131 |
| 9  | H  | 2.212602 | 1.074593  | 2.169940  | 3.246873 | 3.269420 |
| 10 | H  | 3.365950 | 4.254028  | 3.885479  | 2.600649 | 2.078608 |
| 11 | H  | 2.732659 | 3.988883  | 4.228061  | 3.286152 | 2.090857 |
| 12 | H  | 3.219688 | 4.305077  | 4.547726  | 3.749219 | 2.785661 |
| 13 | H  | 3.735881 | 4.514966  | 4.192949  | 3.125069 | 2.735325 |
| 14 | Br | 5.198844 | 5.502282  | 4.469545  | 3.295162 | 3.865830 |
| 15 | H  | 3.271827 | 3.305542  | 2.211835  | 1.106897 | 2.151456 |
| 16 | C  | 3.594244 | 2.533712  | 1.420693  | 2.430239 | 3.532300 |
| 17 | C  | 4.336646 | 3.047865  | 2.435815  | 3.659923 | 4.604633 |
| 18 | H  | 4.258913 | 3.411018  | 2.085535  | 2.560330 | 3.852753 |
| 19 | H  | 5.397056 | 4.124708  | 3.399326  | 4.509928 | 5.567370 |
| 20 | H  | 4.194870 | 2.837592  | 2.751322  | 4.091370 | 4.780741 |
| 21 | O  | 4.626555 | 5.763980  | 5.714506  | 4.564985 | 3.727207 |
| 22 | H  | 5.188739 | 6.222458  | 5.962832  | 4.716053 | 4.104750 |
| 23 | C  | 8.223960 | 9.127691  | 8.571169  | 7.240036 | 6.971417 |
| 24 | C  | 8.265285 | 9.307282  | 8.953823  | 7.651345 | 7.148643 |
| 25 | O  | 7.109986 | 8.064882  | 7.628629  | 6.331802 | 5.936161 |
| 26 | H  | 8.121342 | 9.010504  | 8.421782  | 7.074388 | 6.835340 |
| 27 | H  | 8.852370 | 9.659306  | 8.996591  | 7.692124 | 7.570908 |
| 28 | H  | 8.941110 | 9.972358  | 9.637994  | 8.370151 | 7.872221 |
| 29 | C  | 8.264719 | 9.426873  | 9.239447  | 7.951887 | 7.254383 |
| 30 | H  | 7.919404 | 9.142456  | 9.101387  | 7.875266 | 7.042913 |
| 31 | H  | 9.322505 | 10.495896 | 10.309581 | 9.015630 | 8.320866 |
| 32 | H  | 7.778860 | 8.929791  | 8.722726  | 7.425426 | 6.739143 |
|    |    | 6        | 7         | 8         | 9        | 10       |
| 6  | C  | 0.000000 |           |           |          |          |
| 7  | C  | 1.538154 | 0.000000  |           |          |          |
| 8  | H  | 2.858811 | 3.546555  | 0.000000  |          |          |
| 9  | H  | 4.679450 | 5.401523  | 2.756228  | 0.000000 |          |
| 10 | H  | 1.091653 | 2.147288  | 3.811697  | 5.315630 | 0.000000 |
| 11 | H  | 1.090220 | 2.182344  | 2.656491  | 4.918613 | 1.791072 |
| 12 | H  | 2.183401 | 1.095106  | 3.149710  | 5.145524 | 3.065920 |
| 13 | H  | 2.150911 | 1.094557  | 4.139402  | 5.491376 | 2.445899 |
| 14 | Br | 3.609909 | 3.777187  | 5.990229  | 6.515391 | 2.853936 |
| 15 | H  | 2.787872 | 3.487125  | 4.238049  | 4.289100 | 2.495811 |



|    |    |          |          |          |           |          |
|----|----|----------|----------|----------|-----------|----------|
| 16 | C  | 4.885097 | 5.597089 | 4.629101 | 2.868006  | 4.995990 |
| 17 | C  | 6.034048 | 6.736328 | 5.261979 | 2.891554  | 6.236313 |
| 18 | H  | 5.016095 | 5.669870 | 5.331033 | 3.899283  | 4.916830 |
| 19 | H  | 6.955048 | 7.624335 | 6.338145 | 3.945815  | 7.062812 |
| 20 | H  | 6.258219 | 6.973404 | 4.972362 | 2.311641  | 6.612615 |
| 21 | O  | 2.405378 | 1.415184 | 4.626481 | 6.735869  | 2.660784 |
| 22 | H  | 2.794123 | 1.956124 | 5.340730 | 7.241744  | 2.675291 |
| 23 | C  | 5.716222 | 5.174319 | 8.487333 | 10.189900 | 5.107267 |
| 24 | C  | 5.780469 | 5.039421 | 8.351436 | 10.338381 | 5.406416 |
| 25 | O  | 4.662601 | 3.891156 | 7.314780 | 9.104255  | 4.258943 |
| 26 | H  | 5.588649 | 5.341872 | 8.412379 | 10.082917 | 4.839003 |
| 27 | H  | 6.423326 | 5.800379 | 9.195355 | 10.716228 | 5.792066 |
| 28 | H  | 6.543216 | 5.608443 | 9.001719 | 10.980995 | 6.263762 |
| 29 | C  | 5.792111 | 5.254305 | 8.195930 | 10.434814 | 5.492807 |
| 30 | H  | 5.582540 | 4.919104 | 7.732484 | 10.105768 | 5.491422 |
| 31 | H  | 6.853337 | 6.344081 | 9.225242 | 11.501580 | 6.526666 |
| 32 | H  | 5.278709 | 5.025605 | 7.741254 | 9.947218  | 4.871482 |
|    |    | 11       | 12       | 13       | 14        | 15       |
| 11 | H  | 0.000000 |          |          |           |          |
| 12 | H  | 2.536927 | 0.000000 |          |           |          |
| 13 | H  | 3.067090 | 1.786007 | 0.000000 |           |          |
| 14 | Br | 4.585094 | 4.745934 | 3.100126 | 0.000000  |          |
| 15 | H  | 3.729658 | 4.146720 | 3.048737 | 2.279959  | 0.000000 |
| 16 | C  | 5.581906 | 5.809637 | 5.214047 | 4.888689  | 2.819649 |
| 17 | C  | 6.635142 | 6.814514 | 6.392277 | 6.198832  | 4.143487 |
| 18 | H  | 5.832275 | 6.049729 | 5.140491 | 4.235095  | 2.491217 |
| 19 | H  | 7.608602 | 7.753868 | 7.186302 | 6.673635  | 4.807217 |
| 20 | H  | 6.725545 | 6.903821 | 6.758641 | 6.957773  | 4.786148 |
| 21 | O  | 2.668757 | 2.038583 | 2.080330 | 4.256755  | 4.553257 |
| 22 | H  | 3.235042 | 2.807573 | 2.191784 | 3.698539  | 4.471205 |
| 23 | C  | 6.119702 | 6.056016 | 5.063492 | 4.781438  | 6.597995 |
| 24 | C  | 6.014996 | 5.735767 | 5.137289 | 5.674118  | 7.189203 |
| 25 | O  | 5.091154 | 4.695556 | 3.827338 | 4.317992  | 5.830327 |
| 26 | H  | 5.928876 | 6.306079 | 5.306435 | 4.618327  | 6.405723 |
| 27 | H  | 6.946380 | 6.675374 | 5.505016 | 4.940409  | 6.954422 |
| 28 | H  | 6.810803 | 6.184581 | 5.634434 | 6.375276  | 7.918150 |
| 29 | C  | 5.747967 | 5.869566 | 5.645636 | 6.413320  | 7.632708 |
| 30 | H  | 5.441473 | 5.355019 | 5.438130 | 6.728661  | 7.694346 |
| 31 | H  | 6.759104 | 6.934932 | 6.732375 | 7.371534  | 8.673971 |
| 32 | H  | 5.170907 | 5.740573 | 5.480151 | 5.975640  | 7.105599 |
|    |    | 16       | 17       | 18       | 19        | 20       |
| 16 | C  | 0.000000 |          |          |           |          |
| 17 | C  | 1.326769 | 0.000000 |          |           |          |
| 18 | H  | 1.082714 | 2.120855 | 0.000000 |           |          |

|    |   |           |           |           |           |           |  |  |  |  |
|----|---|-----------|-----------|-----------|-----------|-----------|--|--|--|--|
| 19 | H | 2.079918  | 1.081084  | 2.443452  | 0.000000  |           |  |  |  |  |
| 20 | H | 2.126986  | 1.082594  | 3.099341  | 1.846903  | 0.000000  |  |  |  |  |
| 21 | O | 6.911077  | 8.090132  | 6.898752  | 8.960907  | 8.349983  |  |  |  |  |
| 22 | H | 7.043122  | 8.287207  | 6.880162  | 9.084773  | 8.663007  |  |  |  |  |
| 23 | C | 9.389132  | 10.707177 | 8.919421  | 11.326441 | 11.286113 |  |  |  |  |
| 24 | C | 9.922345  | 11.211767 | 9.588752  | 11.923745 | 11.677794 |  |  |  |  |
| 25 | O | 8.547689  | 9.838491  | 8.193603  | 10.528482 | 10.336774 |  |  |  |  |
| 26 | H | 9.224439  | 10.549177 | 8.738174  | 11.159910 | 11.142029 |  |  |  |  |
| 27 | H | 9.694234  | 11.006762 | 9.135671  | 11.549124 | 11.653099 |  |  |  |  |
| 28 | H | 10.589197 | 11.860755 | 10.255232 | 12.561322 | 12.321169 |  |  |  |  |
| 29 | C | 10.332877 | 11.599320 | 10.109870 | 12.389524 | 11.969890 |  |  |  |  |
| 30 | H | 10.275706 | 11.498038 | 10.156417 | 12.343710 | 11.782281 |  |  |  |  |
| 31 | H | 11.394616 | 12.666564 | 11.151093 | 13.448440 | 13.043404 |  |  |  |  |
| 32 | H | 9.813711  | 11.081420 | 9.592879  | 11.871716 | 11.456153 |  |  |  |  |
|    |   | 21        | 22        | 23        | 24        | 25        |  |  |  |  |
| 21 | O | 0.000000  |           |           |           |           |  |  |  |  |
| 22 | H | 0.972338  | 0.000000  |           |           |           |  |  |  |  |
| 23 | C | 4.164106  | 3.271013  | 0.000000  |           |           |  |  |  |  |
| 24 | C | 3.785233  | 3.107385  | 1.467376  | 0.000000  |           |  |  |  |  |
| 25 | O | 2.844500  | 1.982230  | 1.439040  | 1.433767  | 0.000000  |  |  |  |  |
| 26 | H | 4.398561  | 3.523882  | 1.084439  | 2.216566  | 2.128226  |  |  |  |  |
| 27 | H | 4.919604  | 3.991130  | 1.084085  | 2.227985  | 2.126490  |  |  |  |  |
| 28 | H | 4.375524  | 3.771687  | 2.198204  | 1.090142  | 2.115772  |  |  |  |  |
| 29 | C | 3.877498  | 3.461373  | 2.612878  | 1.512859  | 2.509345  |  |  |  |  |
| 30 | H | 3.504720  | 3.347049  | 3.426743  | 2.143453  | 2.886915  |  |  |  |  |
| 31 | H | 4.960300  | 4.550375  | 3.176658  | 2.152221  | 3.418198  |  |  |  |  |
| 32 | H | 3.739598  | 3.319383  | 2.723897  | 2.149218  | 2.701423  |  |  |  |  |
|    |   | 26        | 27        | 28        | 29        | 30        |  |  |  |  |
| 26 | H | 0.000000  |           |           |           |           |  |  |  |  |
| 27 | H | 1.831656  | 0.000000  |           |           |           |  |  |  |  |
| 28 | H | 3.130225  | 2.532792  | 0.000000  |           |           |  |  |  |  |
| 29 | C | 2.839996  | 3.561764  | 2.205331  | 0.000000  |           |  |  |  |  |
| 30 | H | 3.760820  | 4.343978  | 2.562296  | 1.091963  | 0.000000  |  |  |  |  |
| 31 | H | 3.356652  | 3.988240  | 2.541662  | 1.093391  | 1.776696  |  |  |  |  |
| 32 | H | 2.538316  | 3.784589  | 3.092511  | 1.091216  | 1.775489  |  |  |  |  |
|    |   | 31        | 32        |           |           |           |  |  |  |  |
| 31 | H | 0.000000  |           |           |           |           |  |  |  |  |
| 32 | H | 1.778645  | 0.000000  |           |           |           |  |  |  |  |

Stoichiometry C10H17BrN2O2

Framework group C1[X(C10H17BrN2O2)]

Deg. of freedom 90

Full point group C1 NOp 1

Largest Abelian subgroup C1 NOp 1

Largest concise Abelian subgroup C1 NOp 1

Standard orientation:

| Center<br>Number | Atomic<br>Number | Atomic<br>Type | Coordinates (Angstroms) |           |           |
|------------------|------------------|----------------|-------------------------|-----------|-----------|
|                  |                  |                | X                       | Y         | Z         |
| 1                | 6                | 0              | -2.714454               | 2.265271  | -0.211088 |
| 2                | 6                | 0              | -3.908319               | 1.645931  | -0.024776 |
| 3                | 7                | 0              | -3.654521               | 0.278950  | -0.045817 |
| 4                | 6                | 0              | -2.335816               | 0.087190  | -0.255551 |
| 5                | 7                | 0              | -1.753496               | 1.280440  | -0.371189 |
| 6                | 6                | 0              | -0.297198               | 1.476893  | -0.553290 |
| 7                | 6                | 0              | 0.449241                | 1.588690  | 0.786952  |
| 8                | 1                | 0              | -2.469004               | 3.312278  | -0.257625 |
| 9                | 1                | 0              | -4.891255               | 2.053834  | 0.124231  |
| 10               | 1                | 0              | 0.076879                | 0.597647  | -1.081209 |
| 11               | 1                | 0              | -0.153576               | 2.372141  | -1.158669 |
| 12               | 1                | 0              | 0.086907                | 2.444798  | 1.365788  |
| 13               | 1                | 0              | 0.278079                | 0.669082  | 1.355353  |
| 14               | 35               | 0              | 0.144965                | -2.074654 | -0.081648 |
| 15               | 1                | 0              | -1.779391               | -0.869189 | -0.286396 |
| 16               | 6                | 0              | -4.569494               | -0.796048 | 0.114095  |
| 17               | 6                | 0              | -5.879860               | -0.659505 | 0.270984  |
| 18               | 1                | 0              | -4.074572               | -1.758866 | 0.096723  |
| 19               | 1                | 0              | -6.490722               | -1.543429 | 0.390433  |
| 20               | 1                | 0              | -6.385432               | 0.297633  | 0.288171  |
| 21               | 8                | 0              | 1.826989                | 1.787274  | 0.531762  |
| 22               | 1                | 0              | 2.253961                | 0.918514  | 0.440152  |
| 23               | 6                | 0              | 4.813815                | -1.043425 | -0.105253 |
| 24               | 6                | 0              | 5.292335                | 0.280955  | 0.307335  |
| 25               | 8                | 0              | 3.939301                | -0.117519 | 0.564642  |
| 26               | 1                | 0              | 4.558724                | -1.225855 | -1.143355 |
| 27               | 1                | 0              | 5.051699                | -1.927634 | 0.475115  |
| 28               | 1                | 0              | 5.901158                | 0.342631  | 1.209522  |
| 29               | 6                | 0              | 5.493318                | 1.414585  | -0.674108 |
| 30               | 1                | 0              | 5.204390                | 2.359402  | -0.209109 |
| 31               | 1                | 0              | 6.543275                | 1.475931  | -0.972991 |
| 32               | 1                | 0              | 4.879484                | 1.256993  | -1.562436 |

Rotational constants (GHZ): 0.7131404 0.1756928 0.1446394

Standard basis: 6-311++G(d,p) (5D, 7F)

There are 492 symmetry adapted cartesian basis functions of A symmetry.

There are 475 symmetry adapted basis functions of A symmetry.

475 basis functions, 751 primitive gaussians, 492 cartesian basis functions

71 alpha electrons 71 beta electrons

nuclear repulsion energy 1271.2037364075 Hartrees.

NAtoms= 32 NActive= 32 NUniq= 32 SFac= 1.00D+00 NAtFMM= 60 NAOKFM=F

Big=F

Integral buffers will be 131072 words long.

Raffenetti 2 integral format.

Two-electron integral symmetry is turned on.

One-electron integrals computed using PRISM.

NBasis= 475 RedAO= T EigKep= 4.06D-06 NBF= 475

NBsUse= 475 1.00D-06 EigRej= -1.00D+00 NBFU= 475

Initial guess from the checkpoint file: "/home/suqian/liuwen/qianmengshijie/ohpo/ohpo.chk"

B after Tr= 0.000000 0.000000 0.000000

Rot= 0.999994 0.002800 -0.000025 0.002078 Ang= 0.40 deg.

ExpMin= 3.50D-02 ExpMax= 4.40D+05 ExpMxC= 1.51D+04 IAcc=3 IRadAn= 5 AccDes= 0.00D+00

Harris functional with IExCor= 402 and IRadAn= 5 diagonalized for initial guess.

HarFok: IExCor= 402 AccDes= 0.00D+00 IRadAn= 5 IDoV= 1 UseB2=F ITyADJ=14

ICtDFT= 3500011 ScaDFX= 1.000000 1.000000 1.000000 1.000000

FoFCou: FMM=F IPFlag= 0 FMFlag= 100000 FMFlg1= 0

NFxFlg= 0 DoJE=T BraDBF=F KetDBF=T FulRan=T

wScrn= 0.000000 ICntrl= 500 IOpCl= 0 I1Cent= 200000004 NGrid= 0

NMat0= 1 NMatS0= 1 NMatT0= 0 NMatD0= 1 NMtDS0= 0

NMtDT0= 0

Petite list used in FoFCou.

Requested convergence on RMS density matrix=1.00D-08 within 128 cycles.

Requested convergence on MAX density matrix=1.00D-06.

Requested convergence on energy=1.00D-06.

No special actions if energy rises.

SCF Done: E(RB3LYP) = -3225.51456300 A.U. after 12 cycles

NFock= 12 Conv=0.30D-08 -V/T= 2.0018

Calling FoFJK, ICntrl= 2127 FMM=F ISym2X=0 I1Cent= 0 IOpClX= 0 NMat=1 NMatS=1 NMatT=0.

\*\*\*\*\* Axes restored to original set \*\*\*\*\*

| Center<br>Number | Atomic<br>Number | Forces (Hartrees/Bohr) |              |              |
|------------------|------------------|------------------------|--------------|--------------|
|                  |                  | X                      | Y            | Z            |
| 1                | 6                | -0.000026500           | -0.000625754 | 0.001955698  |
| 2                | 6                | 0.000630476            | -0.000299756 | -0.001550218 |
| 3                | 7                | 0.000549286            | 0.000225804  | 0.000588304  |
| 4                | 6                | -0.000842111           | 0.000855719  | 0.001009602  |
| 5                | 7                | 0.000984677            | 0.001097859  | -0.002151765 |
| 6                | 6                | 0.000180513            | 0.000675576  | -0.000302922 |
| 7                | 6                | 0.003054735            | 0.000867039  | 0.000228270  |

|    |    |              |              |              |
|----|----|--------------|--------------|--------------|
| 8  | 1  | -0.000173797 | -0.000076400 | 0.000243927  |
| 9  | 1  | 0.000059809  | -0.000062154 | -0.000214353 |
| 10 | 1  | -0.000363212 | -0.000600014 | 0.000332772  |
| 11 | 1  | -0.000177103 | -0.000344231 | 0.000061068  |
| 12 | 1  | 0.000033469  | -0.000484545 | 0.000532686  |
| 13 | 1  | -0.000477361 | -0.000373786 | -0.000291571 |
| 14 | 35 | -0.001773259 | -0.000153350 | 0.000858383  |
| 15 | 1  | 0.001572462  | -0.000255675 | -0.000350304 |
| 16 | 6  | -0.000130868 | 0.000317742  | -0.000025599 |
| 17 | 6  | 0.000119679  | -0.000027906 | -0.000017602 |
| 18 | 1  | 0.000024656  | -0.000038431 | -0.000058505 |
| 19 | 1  | -0.000010251 | 0.000010718  | 0.000024721  |
| 20 | 1  | 0.000026382  | 0.000000760  | -0.000000084 |
| 21 | 8  | -0.005976580 | 0.000840791  | 0.000179728  |
| 22 | 1  | 0.003951614  | -0.001417540 | -0.000943654 |
| 23 | 6  | -0.004223914 | 0.000341613  | -0.000963706 |
| 24 | 6  | 0.004170389  | -0.004052568 | 0.002332999  |
| 25 | 8  | -0.000585673 | -0.000162726 | -0.000698149 |
| 26 | 1  | 0.000579283  | -0.000134585 | 0.001647359  |
| 27 | 1  | 0.001228687  | 0.000869669  | -0.000870786 |
| 28 | 1  | -0.000821678 | 0.001046259  | -0.000017278 |
| 29 | 6  | -0.002236133 | 0.004585569  | -0.003161275 |
| 30 | 1  | 0.000279714  | -0.001241259 | 0.000758581  |
| 31 | 1  | 0.000371692  | -0.000288600 | 0.000147019  |
| 32 | 1  | 0.000000917  | -0.001095840 | 0.000716655  |

-----  
Cartesian Forces: Max 0.005976580 RMS 0.001437530

GradGradGradGradGradGradGradGradGradGradGradGradGradGradGradGradGradGradGrad  
Berny optimization.

Using GEDIIS/GDIIS optimizer.

FormGI is forming the generalized inverse of G from B-inverse, IUseBI=4.

GSVD: received Info= 1 from GESDD.

Internal Forces: Max 0.003881390 RMS 0.000712341

Search for a local minimum.

Step number 9 out of a maximum of 177

All quantities printed in internal units (Hartrees-Bohrs-Radians)

Mixed Optimization -- En-DIIS/RFO-DIIS

Update second derivatives using D2CorX and points 8 9

DE= -9.34D-04 DEPred=-7.36D-04 R= 1.27D+00

TightC=F SS= 1.41D+00 RLast= 2.31D-01 DXNew= 4.0363D+00 6.9248D-01

Trust test= 1.27D+00 RLast= 2.31D-01 DXMaxT set to 2.40D+00

ITU= 1 1 1 1 0 1 0 1 0

Use linear search instead of GDIIS.

|                 |         |         |         |         |         |
|-----------------|---------|---------|---------|---------|---------|
| Eigenvalues --- | 0.00148 | 0.00237 | 0.00250 | 0.00370 | 0.00556 |
| Eigenvalues --- | 0.00938 | 0.01246 | 0.01287 | 0.01401 | 0.01558 |
| Eigenvalues --- | 0.01659 | 0.01860 | 0.01941 | 0.02109 | 0.02142 |
| Eigenvalues --- | 0.02188 | 0.02275 | 0.02314 | 0.02390 | 0.03058 |
| Eigenvalues --- | 0.03062 | 0.03129 | 0.03603 | 0.03661 | 0.03874 |
| Eigenvalues --- | 0.04531 | 0.05163 | 0.05303 | 0.05575 | 0.05645 |
| Eigenvalues --- | 0.05891 | 0.06056 | 0.09274 | 0.09914 | 0.10412 |
| Eigenvalues --- | 0.10984 | 0.11110 | 0.11500 | 0.12936 | 0.13023 |
| Eigenvalues --- | 0.13687 | 0.15007 | 0.15552 | 0.15996 | 0.15999 |
| Eigenvalues --- | 0.16000 | 0.16000 | 0.16000 | 0.16007 | 0.16139 |
| Eigenvalues --- | 0.16664 | 0.18889 | 0.19450 | 0.21906 | 0.22010 |
| Eigenvalues --- | 0.22749 | 0.23554 | 0.23728 | 0.24992 | 0.26999 |
| Eigenvalues --- | 0.27655 | 0.28910 | 0.31842 | 0.32863 | 0.33054 |
| Eigenvalues --- | 0.33168 | 0.34076 | 0.34288 | 0.34457 | 0.34762 |
| Eigenvalues --- | 0.34940 | 0.35682 | 0.35688 | 0.35858 | 0.35929 |
| Eigenvalues --- | 0.36436 | 0.36658 | 0.37227 | 0.37292 | 0.37765 |
| Eigenvalues --- | 0.38887 | 0.42178 | 0.42410 | 0.45025 | 0.46179 |
| Eigenvalues --- | 0.49162 | 0.51899 | 0.54535 | 0.56144 | 0.60358 |

RFO step: Lambda=-9.27634981D-04 EMin= 1.47804193D-03

Quartic linear search produced a step of 0.43781.

Iteration 1 RMS(Cart)= 0.04418583 RMS(Int)= 0.00390334

Iteration 2 RMS(Cart)= 0.00614016 RMS(Int)= 0.00018470

Iteration 3 RMS(Cart)= 0.00001199 RMS(Int)= 0.00018464

Iteration 4 RMS(Cart)= 0.00000000 RMS(Int)= 0.00018464

| Variable | Old X   | -DE/DX   | Delta X  | Delta X  | Delta X  | New X   |
|----------|---------|----------|----------|----------|----------|---------|
|          |         |          | (Linear) | (Quad)   | (Total)  |         |
| R1       | 2.56586 | -0.00035 | 0.00001  | -0.00019 | -0.00015 | 2.56571 |
| R2       | 2.61777 | 0.00012  | -0.00012 | 0.00043  | 0.00026  | 2.61804 |
| R3       | 2.03410 | 0.00003  | 0.00004  | 0.00007  | 0.00011  | 2.03422 |
| R4       | 2.62767 | 0.00047  | 0.00037  | 0.00121  | 0.00165  | 2.62932 |
| R5       | 2.03069 | 0.00000  | 0.00003  | -0.00005 | -0.00003 | 2.03066 |
| R6       | 2.54920 | -0.00070 | -0.00034 | -0.00117 | -0.00150 | 2.54770 |
| R7       | 2.68472 | 0.00016  | 0.00023  | 0.00039  | 0.00062  | 2.68534 |
| R8       | 2.51860 | -0.00017 | -0.00101 | -0.00167 | -0.00274 | 2.51586 |
| R9       | 2.09173 | -0.00109 | -0.00071 | -0.00200 | -0.00269 | 2.08905 |
| R10      | 2.79817 | -0.00105 | -0.00047 | -0.00325 | -0.00374 | 2.79444 |
| R11      | 2.90669 | -0.00039 | 0.00286  | 0.00023  | 0.00325  | 2.90994 |
| R12      | 2.06293 | -0.00044 | -0.00024 | -0.00119 | -0.00143 | 2.06150 |
| R13      | 2.06022 | 0.00028  | 0.00022  | 0.00070  | 0.00092  | 2.06114 |
| R14      | 2.06945 | 0.00009  | -0.00049 | 0.00043  | -0.00006 | 2.06939 |
| R15      | 2.06841 | -0.00005 | 0.00026  | 0.00023  | 0.00049  | 2.06891 |
| R16      | 2.67431 | -0.00335 | -0.00144 | -0.00653 | -0.00800 | 2.66631 |
| R17      | 4.30850 | -0.00193 | -0.01301 | -0.04540 | -0.05841 | 4.25009 |
| R18      | 8.15982 | 0.00045  | 0.05035  | 0.20383  | 0.25413  | 8.41395 |

|     |         |          |          |          |          |         |
|-----|---------|----------|----------|----------|----------|---------|
| R19 | 2.50723 | -0.00013 | -0.00001 | -0.00014 | -0.00015 | 2.50708 |
| R20 | 2.04603 | -0.00003 | -0.00006 | -0.00003 | -0.00009 | 2.04594 |
| R21 | 2.04295 | 0.00001  | 0.00001  | 0.00001  | 0.00002  | 2.04297 |
| R22 | 2.04581 | -0.00001 | -0.00002 | 0.00006  | 0.00004  | 2.04585 |
| R23 | 1.83745 | 0.00023  | 0.00126  | 0.00145  | 0.00269  | 1.84014 |
| R24 | 3.74587 | -0.00073 | -0.01374 | -0.07536 | -0.08909 | 3.65678 |
| R25 | 2.77294 | 0.00111  | 0.00219  | 0.00271  | 0.00492  | 2.77786 |
| R26 | 2.71939 | -0.00057 | -0.00143 | -0.00324 | -0.00471 | 2.71468 |
| R27 | 2.04929 | 0.00147  | 0.00241  | 0.00245  | 0.00486  | 2.05415 |
| R28 | 2.04862 | 0.00136  | 0.00212  | 0.00226  | 0.00438  | 2.05301 |
| R29 | 2.70943 | 0.00069  | 0.00159  | 0.00542  | 0.00703  | 2.71646 |
| R30 | 2.06007 | -0.00041 | -0.00041 | -0.00103 | -0.00144 | 2.05863 |
| R31 | 2.85889 | -0.00278 | -0.00316 | -0.00923 | -0.01239 | 2.84650 |
| R32 | 2.06351 | 0.00069  | 0.00115  | 0.00150  | 0.00265  | 2.06616 |
| R33 | 2.06621 | 0.00039  | 0.00073  | 0.00136  | 0.00209  | 2.06830 |
| R34 | 2.06210 | 0.00050  | 0.00074  | 0.00084  | 0.00158  | 2.06368 |
| A1  | 1.87709 | -0.00033 | -0.00004 | -0.00127 | -0.00159 | 1.87549 |
| A2  | 2.27853 | 0.00001  | -0.00025 | -0.00013 | -0.00036 | 2.27817 |
| A3  | 2.12744 | 0.00033  | 0.00027  | 0.00178  | 0.00207  | 2.12951 |
| A4  | 1.86070 | 0.00013  | -0.00027 | 0.00083  | 0.00043  | 1.86113 |
| A5  | 2.27858 | -0.00014 | -0.00015 | -0.00082 | -0.00097 | 2.27762 |
| A6  | 2.14387 | 0.00002  | 0.00042  | 0.00013  | 0.00056  | 2.14444 |
| A7  | 1.89708 | -0.00004 | -0.00013 | -0.00043 | -0.00067 | 1.89642 |
| A8  | 2.24544 | 0.00022  | 0.00058  | 0.00143  | 0.00205  | 2.24749 |
| A9  | 2.14066 | -0.00018 | -0.00045 | -0.00098 | -0.00139 | 2.13927 |
| A10 | 1.88950 | 0.00000  | 0.00029  | 0.00023  | 0.00041  | 1.88991 |
| A11 | 2.23771 | 0.00020  | 0.00068  | 0.00205  | 0.00298  | 2.24069 |
| A12 | 2.15497 | -0.00020 | -0.00033 | -0.00266 | -0.00327 | 2.15170 |
| A13 | 1.90010 | 0.00027  | 0.00015  | 0.00161  | 0.00167  | 1.90177 |
| A14 | 2.21698 | -0.00095 | -0.00204 | -0.00333 | -0.00513 | 2.21185 |
| A15 | 2.16417 | 0.00071  | 0.00141  | 0.00229  | 0.00344  | 2.16761 |
| A16 | 1.96033 | -0.00108 | -0.00548 | -0.00934 | -0.01544 | 1.94489 |
| A17 | 1.86464 | 0.00013  | 0.00247  | 0.00167  | 0.00429  | 1.86893 |
| A18 | 1.88262 | 0.00019  | 0.00004  | -0.00115 | -0.00100 | 1.88163 |
| A19 | 1.88980 | 0.00090  | 0.00786  | 0.01214  | 0.02031  | 1.91011 |
| A20 | 1.93930 | 0.00010  | -0.00325 | -0.00274 | -0.00609 | 1.93321 |
| A21 | 1.92593 | -0.00026 | -0.00144 | -0.00048 | -0.00198 | 1.92395 |
| A22 | 1.93565 | -0.00064 | -0.00567 | -0.01051 | -0.01632 | 1.91933 |
| A23 | 1.89181 | 0.00030  | 0.00590  | 0.00483  | 0.01057  | 1.90238 |
| A24 | 1.90236 | -0.00014 | 0.00591  | 0.00614  | 0.01227  | 1.91463 |
| A25 | 1.90772 | 0.00008  | -0.00137 | -0.00225 | -0.00351 | 1.90421 |
| A26 | 1.88360 | -0.00010 | -0.00564 | -0.00542 | -0.01100 | 1.87260 |
| A27 | 1.94311 | 0.00050  | 0.00088  | 0.00708  | 0.00740  | 1.95051 |
| A28 | 2.11235 | -0.00090 | -0.00677 | -0.03401 | -0.04132 | 2.07103 |

|     |          |          |          |          |          |          |
|-----|----------|----------|----------|----------|----------|----------|
| A29 | 2.64374  | 0.00039  | 0.00168  | 0.00590  | 0.00737  | 2.65111  |
| A30 | 2.17914  | -0.00009 | 0.00026  | 0.00000  | 0.00026  | 2.17940  |
| A31 | 1.95701  | 0.00001  | -0.00020 | -0.00036 | -0.00056 | 1.95645  |
| A32 | 2.14704  | 0.00008  | -0.00007 | 0.00036  | 0.00029  | 2.14733  |
| A33 | 2.07942  | 0.00002  | 0.00002  | -0.00003 | -0.00001 | 2.07941  |
| A34 | 2.15807  | -0.00004 | 0.00002  | 0.00009  | 0.00012  | 2.15819  |
| A35 | 2.04569  | 0.00002  | -0.00005 | -0.00006 | -0.00011 | 2.04559  |
| A36 | 1.89559  | 0.00152  | 0.00532  | 0.00737  | 0.01195  | 1.90754  |
| A37 | 2.55787  | 0.00388  | 0.00492  | 0.02227  | 0.02773  | 2.58560  |
| A38 | 2.09174  | -0.00032 | -0.00260 | -0.00452 | -0.00721 | 2.08454  |
| A39 | 2.11071  | -0.00035 | -0.00248 | -0.00517 | -0.00777 | 2.10294  |
| A40 | 1.99425  | 0.00031  | 0.00253  | 0.00343  | 0.00595  | 2.00020  |
| A41 | 1.99207  | 0.00006  | 0.00278  | 0.00416  | 0.00691  | 1.99898  |
| A42 | 2.01184  | 0.00031  | 0.00166  | 0.00357  | 0.00495  | 2.01680  |
| A43 | 2.05543  | -0.00073 | -0.00386 | -0.00663 | -0.01041 | 2.04501  |
| A44 | 2.13794  | 0.00019  | 0.00113  | 0.00044  | 0.00148  | 2.13942  |
| A45 | 1.97603  | -0.00047 | -0.00180 | -0.00396 | -0.00581 | 1.97022  |
| A46 | 2.03761  | 0.00024  | 0.00019  | 0.00152  | 0.00171  | 2.03933  |
| A47 | 2.00457  | 0.00070  | 0.00318  | 0.00663  | 0.00982  | 2.01438  |
| A48 | 1.02439  | 0.00158  | 0.00023  | 0.00439  | 0.00438  | 1.02878  |
| A49 | 1.74437  | -0.00187 | -0.00500 | -0.02594 | -0.03052 | 1.71385  |
| A50 | 2.53877  | -0.00020 | -0.00056 | -0.00527 | -0.00602 | 2.53275  |
| A51 | 2.27289  | -0.00041 | 0.00067  | 0.00425  | 0.00503  | 2.27792  |
| A52 | 1.91447  | 0.00157  | 0.00539  | 0.00813  | 0.01343  | 1.92790  |
| A53 | 1.92511  | -0.00020 | -0.00039 | 0.00000  | -0.00039 | 1.92472  |
| A54 | 1.92321  | 0.00140  | 0.00537  | 0.00747  | 0.01276  | 1.93597  |
| A55 | 1.89858  | -0.00085 | -0.00387 | -0.00603 | -0.00989 | 1.88868  |
| A56 | 1.89946  | -0.00137 | -0.00402 | -0.00610 | -0.01028 | 1.88918  |
| A57 | 1.90260  | -0.00061 | -0.00261 | -0.00380 | -0.00641 | 1.89619  |
| A58 | 3.29729  | 0.00117  | 0.00089  | 0.00864  | 0.00941  | 3.30670  |
| A59 | 3.57220  | 0.00077  | 0.00819  | 0.04174  | 0.04980  | 3.62200  |
| D1  | 0.02135  | -0.00085 | 0.01764  | -0.03554 | -0.01794 | 0.00341  |
| D2  | -3.12870 | -0.00043 | 0.01010  | -0.01756 | -0.00750 | -3.13621 |
| D3  | -3.13777 | -0.00025 | 0.00435  | -0.00990 | -0.00549 | 3.13992  |
| D4  | -0.00464 | 0.00017  | -0.00319 | 0.00808  | 0.00495  | 0.00031  |
| D5  | -0.02416 | 0.00089  | -0.02107 | 0.03622  | 0.01526  | -0.00890 |
| D6  | -3.10066 | 0.00055  | -0.01118 | 0.02636  | 0.01538  | -3.08528 |
| D7  | 3.13312  | 0.00035  | -0.00918 | 0.01329  | 0.00412  | 3.13724  |
| D8  | 0.05661  | 0.00001  | 0.00070  | 0.00344  | 0.00425  | 0.06086  |
| D9  | -0.01145 | 0.00052  | -0.00836 | 0.02297  | 0.01458  | 0.00313  |
| D10 | 3.13296  | 0.00033  | -0.00566 | 0.01407  | 0.00842  | 3.14138  |
| D11 | 3.13779  | 0.00014  | -0.00154 | 0.00672  | 0.00514  | -3.14025 |
| D12 | -0.00099 | -0.00005 | 0.00115  | -0.00219 | -0.00102 | -0.00200 |
| D13 | -0.00347 | 0.00002  | -0.00467 | -0.00068 | -0.00524 | -0.00872 |



|     |          |          |          |          |          |          |
|-----|----------|----------|----------|----------|----------|----------|
| D14 | 3.09057  | -0.00019 | 0.00694  | -0.00961 | -0.00252 | 3.08805  |
| D15 | 3.13551  | 0.00020  | -0.00717 | 0.00759  | 0.00046  | 3.13597  |
| D16 | -0.05363 | -0.00001 | 0.00444  | -0.00134 | 0.00318  | -0.05045 |
| D17 | 0.04415  | 0.00013  | -0.00106 | 0.00706  | 0.00597  | 0.05012  |
| D18 | -3.09480 | 0.00014  | -0.00020 | 0.00784  | 0.00761  | -3.08719 |
| D19 | -3.09428 | -0.00009 | 0.00197  | -0.00296 | -0.00095 | -3.09523 |
| D20 | 0.04996  | -0.00007 | 0.00284  | -0.00218 | 0.00068  | 0.05064  |
| D21 | 0.01693  | -0.00056 | 0.01579  | -0.02171 | -0.00606 | 0.01087  |
| D22 | 3.09585  | -0.00030 | 0.00617  | -0.01248 | -0.00657 | 3.08928  |
| D23 | -3.07987 | -0.00037 | 0.00480  | -0.01345 | -0.00881 | -3.08868 |
| D24 | -0.00096 | -0.00011 | -0.00482 | -0.00422 | -0.00932 | -0.01027 |
| D25 | -2.72290 | 0.00048  | 0.00311  | 0.02367  | 0.02611  | -2.69680 |
| D26 | 0.36455  | 0.00025  | 0.01637  | 0.01360  | 0.02932  | 0.39387  |
| D27 | 1.51063  | -0.00022 | -0.02256 | -0.02083 | -0.04359 | 1.46705  |
| D28 | -2.70290 | 0.00035  | -0.01448 | -0.01025 | -0.02494 | -2.72784 |
| D29 | -0.63232 | 0.00022  | -0.01484 | -0.01052 | -0.02550 | -0.65782 |
| D30 | -1.55665 | -0.00058 | -0.01123 | -0.03201 | -0.04331 | -1.59997 |
| D31 | 0.51300  | -0.00001 | -0.00315 | -0.02143 | -0.02467 | 0.48833  |
| D32 | 2.58358  | -0.00014 | -0.00351 | -0.02170 | -0.02523 | 2.55835  |
| D33 | -1.06037 | -0.00001 | -0.01049 | 0.01968  | 0.00904  | -1.05134 |
| D34 | 1.03394  | -0.00011 | -0.01182 | 0.01362  | 0.00148  | 1.03542  |
| D35 | -3.13169 | 0.00059  | -0.00388 | 0.02883  | 0.02476  | -3.10694 |
| D36 | -3.11515 | -0.00011 | -0.01536 | 0.01538  | 0.00009  | -3.11506 |
| D37 | -1.02084 | -0.00021 | -0.01669 | 0.00932  | -0.00747 | -1.02830 |
| D38 | 1.09671  | 0.00049  | -0.00875 | 0.02453  | 0.01581  | 1.11252  |
| D39 | 1.05030  | -0.00045 | -0.01671 | 0.00975  | -0.00695 | 1.04334  |
| D40 | -3.13857 | -0.00055 | -0.01804 | 0.00370  | -0.01451 | 3.13010  |
| D41 | -1.02102 | 0.00015  | -0.01010 | 0.01890  | 0.00877  | -1.01225 |
| D42 | -1.52858 | -0.00043 | -0.00929 | -0.01612 | -0.02576 | -1.55434 |
| D43 | 2.65099  | 0.00048  | -0.00259 | -0.00381 | -0.00664 | 2.64435  |
| D44 | 0.55740  | 0.00016  | 0.00220  | -0.00183 | 0.00029  | 0.55769  |
| D45 | -0.10498 | 0.00061  | 0.00690  | 0.01118  | 0.01723  | -0.08775 |
| D46 | 0.03265  | -0.00001 | -0.02102 | -0.01665 | -0.03750 | -0.00485 |
| D47 | -2.59781 | -0.00033 | -0.02466 | -0.03034 | -0.05518 | -2.65299 |
| D48 | -3.13578 | -0.00002 | 0.00135  | -0.00006 | 0.00129  | -3.13449 |
| D49 | 0.00487  | 0.00001  | 0.00056  | 0.00036  | 0.00092  | 0.00579  |
| D50 | 0.00289  | -0.00003 | 0.00040  | -0.00092 | -0.00052 | 0.00237  |
| D51 | -3.13964 | -0.00001 | -0.00040 | -0.00050 | -0.00089 | -3.14054 |
| D52 | -2.72097 | -0.00028 | -0.00004 | -0.01498 | -0.01520 | -2.73617 |
| D53 | 3.00946  | 0.00053  | 0.01816  | 0.03820  | 0.05609  | 3.06555  |
| D54 | -2.25810 | -0.00031 | 0.00765  | -0.00618 | 0.00143  | -2.25667 |
| D55 | -0.56274 | -0.00024 | 0.00998  | -0.00354 | 0.00629  | -0.55645 |
| D56 | -2.72311 | 0.00015  | 0.00375  | 0.00472  | 0.00842  | -2.71469 |
| D57 | -0.03593 | 0.00071  | 0.00565  | 0.00741  | 0.01296  | -0.02297 |

|     |          |          |          |          |          |          |
|-----|----------|----------|----------|----------|----------|----------|
| D58 | 0.00990  | -0.00079 | -0.00591 | -0.01181 | -0.01764 | -0.00774 |
| D59 | 2.69708  | -0.00023 | -0.00401 | -0.00912 | -0.01309 | 2.68399  |
| D60 | 0.98402  | 0.00045  | -0.00144 | -0.01833 | -0.01972 | 0.96430  |
| D61 | 0.15517  | 0.00033  | 0.00647  | 0.01375  | 0.02034  | 0.17551  |
| D62 | -1.38352 | -0.00043 | -0.00971 | -0.03225 | -0.04206 | -1.42557 |
| D63 | -2.21236 | -0.00055 | -0.00181 | -0.00016 | -0.00199 | -2.21435 |
| D64 | 1.92389  | 0.00082  | 0.00410  | 0.01254  | 0.01671  | 1.94060  |
| D65 | -0.46278 | -0.00003 | 0.00090  | 0.00479  | 0.00579  | -0.45699 |
| D66 | 2.49404  | -0.00010 | 0.00398  | 0.00828  | 0.01228  | 2.50633  |
| D67 | -1.69824 | -0.00028 | 0.00235  | 0.00596  | 0.00829  | -1.68995 |
| D68 | 0.40323  | -0.00027 | 0.00231  | 0.00605  | 0.00830  | 0.41153  |
| D69 | 1.28469  | 0.00048  | 0.00525  | 0.01112  | 0.01643  | 1.30112  |
| D70 | -2.90760 | 0.00030  | 0.00363  | 0.00880  | 0.01244  | -2.89516 |
| D71 | -0.80612 | 0.00031  | 0.00359  | 0.00889  | 0.01245  | -0.79367 |
| D72 | -1.08986 | 0.00011  | 0.00414  | 0.00778  | 0.01197  | -1.07789 |
| D73 | 1.00104  | -0.00007 | 0.00252  | 0.00546  | 0.00798  | 1.00902  |
| D74 | 3.10251  | -0.00006 | 0.00248  | 0.00555  | 0.00799  | 3.11050  |

| Item                 | Value    | Threshold | Converged? |
|----------------------|----------|-----------|------------|
| Maximum Force        | 0.003881 | 0.000450  | NO         |
| RMS Force            | 0.000712 | 0.000300  | NO         |
| Maximum Displacement | 0.270471 | 0.001800  | NO         |
| RMS Displacement     | 0.047912 | 0.001200  | NO         |

Predicted change in Energy=-5.966857D-04

GradGradGradGradGradGradGradGradGradGradGradGradGradGradGradGradGradGradGrad

Input orientation:

| Center Number | Atomic Number | Atomic Type | Coordinates (Angstroms) |           |           |
|---------------|---------------|-------------|-------------------------|-----------|-----------|
|               |               |             | X                       | Y         | Z         |
| 1             | 6             | 0           | -1.521260               | -1.889042 | 0.139845  |
| 2             | 6             | 0           | -2.766008               | -1.365570 | -0.001489 |
| 3             | 7             | 0           | -2.629535               | 0.016200  | 0.088007  |
| 4             | 6             | 0           | -1.327057               | 0.309717  | 0.275107  |
| 5             | 7             | 0           | -0.643524               | -0.831971 | 0.317392  |
| 6             | 6             | 0           | 0.827224                | -0.915789 | 0.446165  |
| 7             | 6             | 0           | 1.510833                | -0.966691 | -0.932709 |
| 8             | 1             | 0           | -1.187995               | -2.912596 | 0.133640  |
| 9             | 1             | 0           | -3.713489               | -1.849410 | -0.152803 |
| 10            | 1             | 0           | 1.153533                | -0.022417 | 0.980455  |
| 11            | 1             | 0           | 1.060886                | -1.809036 | 1.026820  |
| 12            | 1             | 0           | 1.168517                | -1.846521 | -1.487603 |
| 13            | 1             | 0           | 1.248117                | -0.064341 | -1.494289 |
| 14            | 35            | 0           | 0.921623                | 2.674160  | 0.135680  |

|    |   |   |           |           |           |
|----|---|---|-----------|-----------|-----------|
| 15 | 1 | 0 | -0.850555 | 1.304936  | 0.342644  |
| 16 | 6 | 0 | -3.634763 | 1.017023  | 0.003358  |
| 17 | 6 | 0 | -4.933089 | 0.778703  | -0.129554 |
| 18 | 1 | 0 | -3.220393 | 2.015886  | 0.055679  |
| 19 | 1 | 0 | -5.617839 | 1.612989  | -0.191603 |
| 20 | 1 | 0 | -5.358308 | -0.215532 | -0.181957 |
| 21 | 8 | 0 | 2.906450  | -1.091974 | -0.767346 |
| 22 | 1 | 0 | 3.304312  | -0.205182 | -0.708058 |
| 23 | 6 | 0 | 5.709842  | 1.892483  | -0.281318 |
| 24 | 6 | 0 | 6.265383  | 0.605338  | -0.723433 |
| 25 | 8 | 0 | 4.873048  | 0.909392  | -0.911377 |
| 26 | 1 | 0 | 5.505027  | 2.051573  | 0.774302  |
| 27 | 1 | 0 | 5.869118  | 2.792474  | -0.868618 |
| 28 | 1 | 0 | 6.827637  | 0.600384  | -1.656491 |
| 29 | 6 | 0 | 6.594982  | -0.508229 | 0.235880  |
| 30 | 1 | 0 | 6.370452  | -1.479166 | -0.213911 |
| 31 | 1 | 0 | 7.659252  | -0.487039 | 0.490445  |
| 32 | 1 | 0 | 6.014044  | -0.415134 | 1.155894  |

-----  
Distance matrix (angstroms):

|    |    | 1        | 2        | 3        | 4        | 5        |
|----|----|----------|----------|----------|----------|----------|
| 1  | C  | 0.000000 |          |          |          |          |
| 2  | C  | 1.357717 | 0.000000 |          |          |          |
| 3  | N  | 2.204747 | 1.391374 | 0.000000 |          |          |
| 4  | C  | 2.211459 | 2.225684 | 1.348187 | 0.000000 |          |
| 5  | N  | 1.385405 | 2.211640 | 2.171693 | 1.331336 | 0.000000 |
| 6  | C  | 2.560553 | 3.648837 | 3.598064 | 2.484362 | 1.478752 |
| 7  | C  | 3.345847 | 4.395184 | 4.376138 | 3.337912 | 2.494425 |
| 8  | H  | 1.076460 | 2.213973 | 3.264654 | 3.228413 | 2.158522 |
| 9  | H  | 2.212031 | 1.074578 | 2.171047 | 3.246536 | 3.268173 |
| 10 | H  | 3.368299 | 4.258060 | 3.887102 | 2.600222 | 2.079529 |
| 11 | H  | 2.731411 | 3.987380 | 4.222802 | 3.279704 | 2.088769 |
| 12 | H  | 3.144089 | 4.233242 | 4.514142 | 3.739572 | 2.751511 |
| 13 | H  | 3.697212 | 4.476030 | 4.188834 | 3.146776 | 2.729422 |
| 14 | Br | 5.175955 | 5.471458 | 4.435961 | 3.265975 | 3.843911 |
| 15 | H  | 3.269935 | 3.304390 | 2.211437 | 1.105476 | 2.147061 |
| 16 | C  | 3.595934 | 2.536042 | 1.421020 | 2.428917 | 3.530568 |
| 17 | C  | 4.339356 | 3.051319 | 2.436207 | 3.658848 | 4.603738 |
| 18 | H  | 4.259413 | 3.412327 | 2.085402 | 2.558102 | 3.849550 |
| 19 | H  | 5.399633 | 4.128063 | 3.399688 | 4.508564 | 5.566033 |
| 20 | H  | 4.198467 | 2.841685 | 2.751868 | 4.090938 | 4.781060 |
| 21 | O  | 4.589437 | 5.730459 | 5.710237 | 4.579740 | 3.721097 |
| 22 | H  | 5.180780 | 6.220493 | 5.991100 | 4.762491 | 4.126720 |
| 23 | C  | 8.171056 | 9.084781 | 8.555820 | 7.234135 | 6.938757 |

|    |    |          |           |           |           |          |
|----|----|----------|-----------|-----------|-----------|----------|
| 24 | C  | 8.221862 | 9.272093  | 8.951262  | 7.663526  | 7.133174 |
| 25 | O  | 7.058576 | 8.022377  | 7.621373  | 6.341030  | 5.913948 |
| 26 | H  | 8.080823 | 8.982691  | 8.413373  | 7.068283  | 6.806487 |
| 27 | H  | 8.806321 | 9.623235  | 8.991659  | 7.697865  | 7.547034 |
| 28 | H  | 8.895401 | 9.931869  | 9.634451  | 8.385379  | 7.859141 |
| 29 | C  | 8.233423 | 9.403165  | 9.240595  | 7.964250  | 7.246200 |
| 30 | H  | 7.910264 | 9.139635  | 9.128365  | 7.917758  | 7.063781 |
| 31 | H  | 9.293565 | 10.473770 | 10.308945 | 9.024131  | 8.311739 |
| 32 | H  | 7.745036 | 8.906861  | 8.719971  | 7.429197  | 6.723098 |
|    |    | 6        | 7         | 8         | 9         | 10       |
| 6  | C  | 0.000000 |           |           |           |          |
| 7  | C  | 1.539872 | 0.000000  |           |           |          |
| 8  | H  | 2.854123 | 3.493898  | 0.000000  |           |          |
| 9  | H  | 4.674237 | 5.355463  | 2.755093  | 0.000000  |          |
| 10 | H  | 1.090897 | 2.163218  | 3.814837  | 5.320722  | 0.000000 |
| 11 | H  | 1.090709 | 2.179851  | 2.659526  | 4.918109  | 1.789620 |
| 12 | H  | 2.173063 | 1.095075  | 3.052555  | 5.061194  | 3.069021 |
| 13 | H  | 2.160434 | 1.094818  | 4.086239  | 5.440918  | 2.476905 |
| 14 | Br | 3.604587 | 3.839846  | 5.971795  | 6.483068  | 2.835305 |
| 15 | H  | 2.785190 | 3.516101  | 4.236169  | 4.288562  | 2.486974 |
| 16 | C  | 4.882743 | 5.593613  | 4.630935  | 2.871763  | 4.996292 |
| 17 | C  | 6.031912 | 6.724253  | 5.265044  | 2.897402  | 6.238660 |
| 18 | H  | 5.013024 | 5.679540  | 5.331666  | 3.902194  | 4.913362 |
| 19 | H  | 6.952720 | 7.617214  | 6.341153  | 3.951742  | 7.063976 |
| 20 | H  | 6.256652 | 6.950752  | 4.976471  | 2.318584  | 6.617595 |
| 21 | O  | 2.413882 | 1.410953  | 4.570658  | 6.691410  | 2.696567 |
| 22 | H  | 2.823678 | 1.961360  | 5.312191  | 7.229200  | 2.740498 |
| 23 | C  | 5.679400 | 5.121608  | 8.416718  | 10.139894 | 5.100869 |
| 24 | C  | 5.766746 | 5.012068  | 8.286331  | 10.292197 | 5.424788 |
| 25 | O  | 4.641433 | 3.850277  | 7.241264  | 9.050694  | 4.275756 |
| 26 | H  | 5.549302 | 5.289366  | 8.357629  | 10.052773 | 4.824877 |
| 27 | H  | 6.395355 | 5.755874  | 9.129907  | 10.671731 | 5.794776 |
| 28 | H  | 6.536428 | 5.589990  | 8.932858  | 10.926020 | 6.287831 |
| 29 | C  | 5.785962 | 5.236828  | 8.146543  | 10.402616 | 5.513598 |
| 30 | H  | 5.610746 | 4.939150  | 7.701016  | 10.090921 | 5.546609 |
| 31 | H  | 6.845611 | 6.329178  | 9.180655  | 11.472100 | 6.540670 |
| 32 | H  | 5.259037 | 4.994537  | 7.691014  | 9.919413  | 4.879505 |
|    |    | 11       | 12        | 13        | 14        | 15       |
| 11 | H  | 0.000000 |           |           |           |          |
| 12 | H  | 2.517005 | 0.000000  |           |           |          |
| 13 | H  | 3.071645 | 1.783970  | 0.000000  |           |          |
| 14 | Br | 4.573026 | 4.809632  | 3.203558  | 0.000000  |          |
| 15 | H  | 3.717327 | 4.166310  | 3.107034  | 2.249049  | 0.000000 |
| 16 | C  | 5.575231 | 5.787431  | 5.220614  | 4.850183  | 2.819544 |

|    |   |           |           |           |           |           |
|----|---|-----------|-----------|-----------|-----------|-----------|
| 17 | C | 6.630334  | 6.779800  | 6.385963  | 6.159607  | 4.143306  |
| 18 | H | 5.822585  | 6.046689  | 5.166946  | 4.194762  | 2.490770  |
| 19 | H | 7.602643  | 7.726736  | 7.186917  | 6.633081  | 4.807007  |
| 20 | H | 6.723573  | 6.853049  | 6.737204  | 6.920169  | 4.786112  |
| 21 | O | 2.671949  | 2.026949  | 2.081957  | 4.351867  | 4.592639  |
| 22 | H | 3.258083  | 2.804159  | 2.205887  | 3.831411  | 4.543936  |
| 23 | C | 6.084838  | 6.004907  | 5.020702  | 4.869491  | 6.616143  |
| 24 | C | 5.998281  | 5.707331  | 5.120123  | 5.794296  | 7.229283  |
| 25 | O | 5.067449  | 4.653026  | 3.798430  | 4.452471  | 5.872704  |
| 26 | H | 5.892237  | 6.254332  | 5.267341  | 4.669373  | 6.413830  |
| 27 | H | 6.919948  | 6.633180  | 5.468685  | 5.049784  | 6.988128  |
| 28 | H | 6.801535  | 6.167780  | 5.621318  | 6.511023  | 7.965397  |
| 29 | C | 5.739678  | 5.848756  | 5.637330  | 6.505738  | 7.663875  |
| 30 | H | 5.462575  | 5.368182  | 5.466207  | 6.860180  | 7.759118  |
| 31 | H | 6.750838  | 6.920297  | 6.724619  | 7.450817  | 8.697691  |
| 32 | H | 5.147174  | 5.702288  | 5.464485  | 6.042956  | 7.123393  |
|    |   | 16        | 17        | 18        | 19        | 20        |
| 16 | C | 0.000000  |           |           |           |           |
| 17 | C | 1.326692  | 0.000000  |           |           |           |
| 18 | H | 1.082667  | 2.120910  | 0.000000  |           |           |
| 19 | H | 2.079850  | 1.081095  | 2.443608  | 0.000000  |           |
| 20 | H | 2.127002  | 1.082617  | 3.099415  | 1.846873  | 0.000000  |
| 21 | O | 6.915874  | 8.084836  | 6.919130  | 8.961685  | 8.331689  |
| 22 | H | 7.081714  | 8.316098  | 6.934567  | 9.120157  | 8.678587  |
| 23 | C | 9.389841  | 10.702127 | 8.937444  | 11.331484 | 11.267543 |
| 24 | C | 9.935322  | 11.215549 | 9.621675  | 11.937721 | 11.665214 |
| 25 | O | 8.557522  | 9.838123  | 8.225772  | 10.539063 | 10.318825 |
| 26 | H | 9.230407  | 10.554214 | 8.755036  | 11.173338 | 11.138502 |
| 27 | H | 9.707540  | 11.013136 | 9.169331  | 11.567183 | 11.643655 |
| 28 | H | 10.601439 | 11.860776 | 10.290679 | 12.572236 | 12.301919 |
| 29 | C | 10.345441 | 11.605436 | 10.136332 | 12.403036 | 11.964171 |
| 30 | H | 10.314190 | 11.527148 | 10.211385 | 12.380672 | 11.796677 |
| 31 | H | 11.404133 | 12.670973 | 11.172303 | 13.459438 | 13.037741 |
| 32 | H | 9.822367  | 11.086810 | 9.612241  | 11.884012 | 11.452514 |
|    |   | 21        | 22        | 23        | 24        | 25        |
| 21 | O | 0.000000  |           |           |           |           |
| 22 | H | 0.973760  | 0.000000  |           |           |           |
| 23 | C | 4.123374  | 3.220074  | 0.000000  |           |           |
| 24 | C | 3.763673  | 3.070036  | 1.469978  | 0.000000  |           |
| 25 | O | 2.809577  | 1.935083  | 1.436547  | 1.437487  | 0.000000  |
| 26 | H | 4.360180  | 3.483314  | 1.087010  | 2.216516  | 2.132015  |
| 27 | H | 4.886368  | 3.948411  | 1.086404  | 2.227480  | 2.130723  |
| 28 | H | 4.362380  | 3.736613  | 2.193191  | 1.089381  | 2.114497  |
| 29 | C | 3.866845  | 3.436766  | 2.610438  | 1.506303  | 2.508167  |

|    |   |          |          |          |          |          |
|----|---|----------|----------|----------|----------|----------|
| 30 | H | 3.529238 | 3.356848 | 3.436418 | 2.148444 | 2.904115 |
| 31 | H | 4.953495 | 4.525633 | 3.171427 | 2.147012 | 3.417317 |
| 32 | H | 3.716734 | 3.295610 | 2.735546 | 2.153231 | 2.707370 |
|    |   | 26       | 27       | 28       | 29       | 30       |
| 26 | H | 0.000000 |          |          |          |          |
| 27 | H | 1.838663 | 0.000000 |          |          |          |
| 28 | H | 3.124740 | 2.518880 | 0.000000 |          |          |
| 29 | C | 2.833811 | 3.555479 | 2.205498 | 0.000000 |          |
| 30 | H | 3.767179 | 4.350504 | 2.571883 | 1.093364 | 0.000000 |
| 31 | H | 3.341528 | 3.975782 | 2.546254 | 1.094497 | 1.772410 |
| 32 | H | 2.547421 | 3.795840 | 3.098825 | 1.092054 | 1.770751 |
|    |   | 31       | 32       |          |          |          |
| 31 | H | 0.000000 |          |          |          |          |
| 32 | H | 1.776148 | 0.000000 |          |          |          |

Stoichiometry C10H17BrN2O2

Framework group C1[X(C10H17BrN2O2)]

Deg. of freedom 90

Full point group C1 NOp 1

Largest Abelian subgroup C1 NOp 1

Largest concise Abelian subgroup C1 NOp 1

Standard orientation:

| Center | Atomic | Atomic | Coordinates (Angstroms) |           |           |
|--------|--------|--------|-------------------------|-----------|-----------|
| Number | Number | Type   | X                       | Y         | Z         |
| 1      | 6      | 0      | -2.647320               | 2.281297  | -0.229861 |
| 2      | 6      | 0      | -3.849362               | 1.694725  | 0.003423  |
| 3      | 7      | 0      | -3.633569               | 0.320423  | -0.022035 |
| 4      | 6      | 0      | -2.326472               | 0.093473  | -0.262034 |
| 5      | 7      | 0      | -1.716675               | 1.269016  | -0.398784 |
| 6      | 6      | 0      | -0.261928               | 1.431170  | -0.608841 |
| 7      | 6      | 0      | 0.484619                | 1.596721  | 0.727746  |
| 8      | 1      | 0      | -2.377119               | 3.321333  | -0.293767 |
| 9      | 1      | 0      | -4.815917               | 2.130109  | 0.179293  |
| 10     | 1      | 0      | 0.091386                | 0.530563  | -1.112957 |
| 11     | 1      | 0      | -0.112091               | 2.303586  | -1.246090 |
| 12     | 1      | 0      | 0.117190                | 2.484019  | 1.253947  |
| 13     | 1      | 0      | 0.305428                | 0.712501  | 1.347966  |
| 14     | 35     | 0      | 0.066189                | -2.124979 | -0.119772 |
| 15     | 1      | 0      | -1.794157               | -0.874522 | -0.303325 |
| 16     | 6      | 0      | -4.570557               | -0.731125 | 0.166642  |
| 17     | 6      | 0      | -5.872830               | -0.561902 | 0.355217  |
| 18     | 1      | 0      | -4.099208               | -1.705539 | 0.143980  |
| 19     | 1      | 0      | -6.501587               | -1.430018 | 0.495952  |

|    |   |   |           |           |           |
|----|---|---|-----------|-----------|-----------|
| 20 | 1 | 0 | -6.354707 | 0.407272  | 0.378769  |
| 21 | 8 | 0 | 1.860132  | 1.793843  | 0.483017  |
| 22 | 1 | 0 | 2.307854  | 0.929803  | 0.448518  |
| 23 | 6 | 0 | 4.812651  | -1.044392 | 0.004197  |
| 24 | 6 | 0 | 5.309931  | 0.295052  | 0.349796  |
| 25 | 8 | 0 | 3.949694  | -0.078854 | 0.626054  |
| 26 | 1 | 0 | 4.565988  | -1.272330 | -1.029628 |
| 27 | 1 | 0 | 5.055281  | -1.900297 | 0.627759  |
| 28 | 1 | 0 | 5.916263  | 0.383481  | 1.250514  |
| 29 | 6 | 0 | 5.523276  | 1.372070  | -0.681447 |
| 30 | 1 | 0 | 5.262528  | 2.351323  | -0.270937 |
| 31 | 1 | 0 | 6.572977  | 1.399046  | -0.990192 |
| 32 | 1 | 0 | 4.904331  | 1.195402  | -1.563647 |

-----

Rotational constants (GHZ):      0.6970476      0.1759359      0.1443321

Standard basis: 6-311++G(d,p) (5D, 7F)

There are    492 symmetry adapted cartesian basis functions of A    symmetry.

There are    475 symmetry adapted basis functions of A    symmetry.

    475 basis functions,    751 primitive gaussians,    492 cartesian basis functions

    71 alpha electrons      71 beta electrons

        nuclear repulsion energy      1269.7675591719 Hartrees.

NAtoms=    32 NActive=    32 NUniq=    32 SFac= 1.00D+00 NAtFMM=    60 NAOKFM=F

Big=F

Integral buffers will be    131072 words long.

Raffenetti 2 integral format.

Two-electron integral symmetry is turned on.

One-electron integrals computed using PRISM.

NBasis=    475 RedAO= T EigKep= 4.10D-06 NBF=    475

NBsUse=    475 1.00D-06 EigRej= -1.00D+00 NBFU=    475

Initial guess from the checkpoint file: "/home/suqian/liuwen/qianmengshijie/ohpo/ohpo.chk"

B after Tr=    0.000000    0.000000    0.000000

        Rot=    0.999976    0.004511    -0.000108    0.005259 Ang=    0.79 deg.

ExpMin= 3.50D-02 ExpMax= 4.40D+05 ExpMxC= 1.51D+04 IAcc=3 IRadAn=      5 AccDes=

0.00D+00

Harris functional with IExCor= 402 and IRadAn=      5 diagonalized for initial guess.

HarFok: IExCor= 402 AccDes= 0.00D+00 IRadAn=      5 IDoV= 1 UseB2=F ITyADJ=14

ICtDFT= 3500011 ScaDFX= 1.000000 1.000000 1.000000 1.000000

FoFCou: FMM=F IPFlag=      0 FMFlag=    100000 FMFlg1=      0

        NFXFlg=      0 DoJE=T BraDBF=F KetDBF=T FulRan=T

        wScrn= 0.000000 ICntrl=      500 IOpCl= 0 I1Cent=    200000004 NGrid=

0

        NMat0=    1 NMatS0=      1 NMatT0=    0 NMatD0=    1 NMtDS0=    0

NMtDT0=    0

Petite list used in FoFCou.

Requested convergence on RMS density matrix=1.00D-08 within 128 cycles.

Requested convergence on MAX density matrix=1.00D-06.

Requested convergence on energy=1.00D-06.

No special actions if energy rises.

SCF Done: E(RB3LYP) = -3225.51530539 A.U. after 12 cycles

NFock= 12 Conv=0.63D-08 -V/T= 2.0018

Calling FoFJK, ICntrl= 2127 FMM=F ISym2X=0 l1Cent= 0 IOpClX= 0 NMat=1 NMatS=1

NMatT=0.

\*\*\*\*\* Axes restored to original set \*\*\*\*\*

```
-----
```

| Center<br>Number | Atomic<br>Number | Forces (Hartrees/Bohr) |              |              |
|------------------|------------------|------------------------|--------------|--------------|
|                  |                  | X                      | Y            | Z            |
| 1                | 6                | -0.000466567           | -0.000111005 | 0.000035186  |
| 2                | 6                | 0.000089292            | -0.000134742 | 0.000186620  |
| 3                | 7                | -0.000039740           | -0.000214975 | -0.000616212 |
| 4                | 6                | -0.001408142           | 0.000289959  | 0.001396474  |
| 5                | 7                | 0.001008347            | -0.000357947 | -0.000168732 |
| 6                | 6                | 0.000579271            | -0.000188485 | -0.001134384 |
| 7                | 6                | 0.002161265            | -0.000696258 | 0.000260190  |
| 8                | 1                | -0.000078580           | 0.000028294  | 0.000055315  |
| 9                | 1                | -0.000052666           | 0.000009054  | -0.000028582 |
| 10               | 1                | 0.000011011            | 0.000149406  | -0.000470648 |
| 11               | 1                | -0.000047434           | -0.000167546 | 0.000018133  |
| 12               | 1                | -0.000830454           | -0.000191705 | -0.000293426 |
| 13               | 1                | -0.000447672           | 0.000070556  | 0.000634681  |
| 14               | 35               | -0.000857724           | 0.000553541  | 0.000578597  |
| 15               | 1                | 0.001697146            | 0.001113703  | -0.000527417 |
| 16               | 6                | 0.000042185            | -0.000029254 | -0.000219103 |
| 17               | 6                | -0.000001936           | -0.000066559 | -0.000013122 |
| 18               | 1                | 0.000046286            | -0.000008258 | 0.000001729  |
| 19               | 1                | -0.000011787           | 0.000011033  | 0.000043078  |
| 20               | 1                | 0.000067114            | -0.000013040 | 0.000018524  |
| 21               | 8                | -0.003338871           | 0.002182263  | 0.000990463  |
| 22               | 1                | 0.002830316            | -0.002634327 | -0.000536412 |
| 23               | 6                | -0.001537034           | 0.000208264  | 0.000540030  |
| 24               | 6                | 0.001338062            | -0.000324827 | 0.001141701  |
| 25               | 8                | -0.000100569           | 0.000243978  | -0.001098637 |
| 26               | 1                | 0.000060537            | 0.000064720  | -0.000281043 |
| 27               | 1                | 0.000082075            | -0.000229105 | 0.000072562  |
| 28               | 1                | -0.000453469           | 0.000064543  | -0.000129067 |
| 29               | 6                | -0.000278024           | 0.000215540  | -0.000369712 |
| 30               | 1                | 0.000064530            | -0.000003635 | -0.000005712 |
| 31               | 1                | -0.000012216           | 0.000089580  | -0.000046922 |

```
-----
```



32 1 -0.000114550 0.000077236 -0.000034151

-----  
Cartesian Forces: Max 0.003338871 RMS 0.000792655

GradGradGradGradGradGradGradGradGradGradGradGradGradGradGradGradGradGradGrad  
Berny optimization.

Using GEDIIS/GDIIS optimizer.

FormGI is forming the generalized inverse of G from B-inverse, IUseBI=4.

GSVD: received Info= 1 from GESDD.

Internal Forces: Max 0.003004910 RMS 0.000479294

Search for a local minimum.

Step number 10 out of a maximum of 177

All quantities printed in internal units (Hartrees-Bohrs-Radians)

Mixed Optimization -- En-DIIS/RFO-DIIS

Swapping is turned off.

Update second derivatives using D2CorX and points 8 9 10

DE= -7.42D-04 DEPred=-5.97D-04 R= 1.24D+00

TightC=F SS= 1.41D+00 RLast= 3.31D-01 DXNew= 4.0363D+00 9.9317D-01

Trust test= 1.24D+00 RLast= 3.31D-01 DXMaxT set to 2.40D+00

ITU= 1 1 1 1 1 0 1 0 1 0

|                 |         |         |         |         |         |
|-----------------|---------|---------|---------|---------|---------|
| Eigenvalues --- | 0.00122 | 0.00235 | 0.00241 | 0.00382 | 0.00522 |
| Eigenvalues --- | 0.00935 | 0.01245 | 0.01291 | 0.01400 | 0.01551 |
| Eigenvalues --- | 0.01659 | 0.01855 | 0.01974 | 0.02068 | 0.02126 |
| Eigenvalues --- | 0.02168 | 0.02260 | 0.02316 | 0.02391 | 0.03059 |
| Eigenvalues --- | 0.03062 | 0.03150 | 0.03336 | 0.03719 | 0.03922 |
| Eigenvalues --- | 0.04607 | 0.05124 | 0.05304 | 0.05486 | 0.05562 |
| Eigenvalues --- | 0.05864 | 0.06390 | 0.09184 | 0.09842 | 0.10258 |
| Eigenvalues --- | 0.10985 | 0.11360 | 0.11751 | 0.12713 | 0.13127 |
| Eigenvalues --- | 0.14049 | 0.14809 | 0.15353 | 0.15998 | 0.16000 |
| Eigenvalues --- | 0.16000 | 0.16000 | 0.16001 | 0.16038 | 0.16069 |
| Eigenvalues --- | 0.16715 | 0.18687 | 0.19163 | 0.21862 | 0.22019 |
| Eigenvalues --- | 0.22753 | 0.23554 | 0.23758 | 0.25025 | 0.26699 |
| Eigenvalues --- | 0.28027 | 0.28903 | 0.31917 | 0.32986 | 0.33055 |
| Eigenvalues --- | 0.33289 | 0.34098 | 0.34287 | 0.34480 | 0.34761 |
| Eigenvalues --- | 0.34937 | 0.35685 | 0.35690 | 0.35858 | 0.36433 |
| Eigenvalues --- | 0.36655 | 0.37023 | 0.37231 | 0.37582 | 0.37853 |
| Eigenvalues --- | 0.39034 | 0.42191 | 0.42657 | 0.45069 | 0.46030 |
| Eigenvalues --- | 0.49235 | 0.51956 | 0.54610 | 0.56278 | 0.60357 |

En-DIIS/RFO-DIIS IScMMF= 0 using points: 10 9

RFO step: Lambda=-1.20489337D-04.

DidBck=F Rises=F RFO-DIIS coefs: 1.53640 -0.53640

Iteration 1 RMS(Cart)= 0.07674415 RMS(Int)= 0.02348056

Iteration 2 RMS(Cart)= 0.02488012 RMS(Int)= 0.00752897

Iteration 3 RMS(Cart)= 0.01191198 RMS(Int)= 0.00029862

| Iteration 4 | RMS(Cart)= | 0.00004009 | RMS(Int)=           | 0.00029815        |                    |         |
|-------------|------------|------------|---------------------|-------------------|--------------------|---------|
| Iteration 5 | RMS(Cart)= | 0.00000001 | RMS(Int)=           | 0.00029815        |                    |         |
| Variable    | Old X      | -DE/DX     | Delta X<br>(Linear) | Delta X<br>(Quad) | Delta X<br>(Total) | New X   |
| R1          | 2.56571    | -0.00023   | -0.00008            | -0.00088          | -0.00107           | 2.56464 |
| R2          | 2.61804    | 0.00040    | 0.00014             | 0.00118           | 0.00134            | 2.61938 |
| R3          | 2.03422    | -0.00005   | 0.00006             | -0.00014          | -0.00008           | 2.03413 |
| R4          | 2.62932    | -0.00002   | 0.00089             | -0.00039          | 0.00040            | 2.62972 |
| R5          | 2.03066    | 0.00005    | -0.00001            | 0.00020           | 0.00018            | 2.03084 |
| R6          | 2.54770    | 0.00020    | -0.00080            | 0.00043           | -0.00031           | 2.54739 |
| R7          | 2.68534    | -0.00018   | 0.00033             | -0.00033          | 0.00000            | 2.68534 |
| R8          | 2.51586    | 0.00107    | -0.00147            | 0.00188           | 0.00065            | 2.51651 |
| R9          | 2.08905    | 0.00106    | -0.00144            | 0.00277           | 0.00160            | 2.09064 |
| R10         | 2.79444    | 0.00006    | -0.00200            | 0.00039           | -0.00175           | 2.79268 |
| R11         | 2.90994    | -0.00122   | 0.00174             | -0.00547          | -0.00371           | 2.90623 |
| R12         | 2.06150    | -0.00010   | -0.00077            | 0.00023           | -0.00054           | 2.06096 |
| R13         | 2.06114    | 0.00014    | 0.00050             | 0.00049           | 0.00099            | 2.06213 |
| R14         | 2.06939    | 0.00056    | -0.00003            | 0.00182           | 0.00179            | 2.07118 |
| R15         | 2.06891    | -0.00016   | 0.00026             | -0.00025          | 0.00002            | 2.06892 |
| R16         | 2.66631    | -0.00134   | -0.00429            | -0.00152          | -0.00592           | 2.66039 |
| R17         | 4.25009    | -0.00096   | -0.03133            | -0.02094          | -0.05203           | 4.19805 |
| R18         | 8.41395    | 0.00029    | 0.13631             | 0.37466           | 0.51098            | 8.92493 |
| R19         | 2.50708    | -0.00004   | -0.00008            | -0.00009          | -0.00016           | 2.50692 |
| R20         | 2.04594    | 0.00001    | -0.00005            | 0.00002           | -0.00002           | 2.04592 |
| R21         | 2.04297    | 0.00001    | 0.00001             | 0.00005           | 0.00006            | 2.04303 |
| R22         | 2.04585    | -0.00001   | 0.00002             | -0.00003          | -0.00001           | 2.04584 |
| R23         | 1.84014    | -0.00047   | 0.00144             | -0.00016          | 0.00102            | 1.84116 |
| R24         | 3.65678    | 0.00004    | -0.04779            | -0.14421          | -0.19224           | 3.46454 |
| R25         | 2.77786    | 0.00041    | 0.00264             | 0.00005           | 0.00283            | 2.78069 |
| R26         | 2.71468    | -0.00055   | -0.00253            | 0.00157           | -0.00101           | 2.71367 |
| R27         | 2.05415    | -0.00028   | 0.00261             | -0.00045          | 0.00216            | 2.05631 |
| R28         | 2.05301    | -0.00021   | 0.00235             | -0.00040          | 0.00195            | 2.05496 |
| R29         | 2.71646    | 0.00007    | 0.00377             | 0.00176           | 0.00545            | 2.72191 |
| R30         | 2.05863    | -0.00012   | -0.00077            | -0.00067          | -0.00144           | 2.05719 |
| R31         | 2.84650    | -0.00066   | -0.00665            | -0.00239          | -0.00904           | 2.83746 |
| R32         | 2.06616    | -0.00001   | 0.00142             | 0.00017           | 0.00159            | 2.06775 |
| R33         | 2.06830    | -0.00002   | 0.00112             | -0.00005          | 0.00107            | 2.06937 |
| R34         | 2.06368    | 0.00004    | 0.00085             | 0.00021           | 0.00106            | 2.06474 |
| A1          | 1.87549    | 0.00018    | -0.00085            | 0.00116           | 0.00029            | 1.87578 |
| A2          | 2.27817    | -0.00014   | -0.00019            | -0.00108          | -0.00131           | 2.27686 |
| A3          | 2.12951    | -0.00003   | 0.00111             | -0.00016          | 0.00092            | 2.13043 |
| A4          | 1.86113    | 0.00011    | 0.00023             | -0.00068          | -0.00058           | 1.86055 |
| A5          | 2.27762    | -0.00002   | -0.00052            | 0.00044           | -0.00007           | 2.27755 |
| A6          | 2.14444    | -0.00008   | 0.00030             | 0.00028           | 0.00059            | 2.14502 |

|     |         |          |          |          |          |         |
|-----|---------|----------|----------|----------|----------|---------|
| A7  | 1.89642 | 0.00025  | -0.00036 | 0.00132  | 0.00103  | 1.89744 |
| A8  | 2.24749 | -0.00028 | 0.00110  | -0.00098 | 0.00007  | 2.24756 |
| A9  | 2.13927 | 0.00003  | -0.00074 | -0.00031 | -0.00110 | 2.13817 |
| A10 | 1.88991 | -0.00030 | 0.00022  | -0.00078 | -0.00076 | 1.88914 |
| A11 | 2.24069 | 0.00027  | 0.00160  | -0.00482 | -0.00385 | 2.23684 |
| A12 | 2.15170 | 0.00002  | -0.00175 | 0.00532  | 0.00437  | 2.15606 |
| A13 | 1.90177 | -0.00023 | 0.00090  | -0.00108 | -0.00025 | 1.90152 |
| A14 | 2.21185 | -0.00021 | -0.00275 | -0.00413 | -0.00725 | 2.20461 |
| A15 | 2.16761 | 0.00044  | 0.00185  | 0.00438  | 0.00658  | 2.17419 |
| A16 | 1.94489 | 0.00006  | -0.00828 | -0.00101 | -0.00904 | 1.93585 |
| A17 | 1.86893 | 0.00005  | 0.00230  | 0.00053  | 0.00290  | 1.87182 |
| A18 | 1.88163 | -0.00003 | -0.00053 | 0.00129  | 0.00041  | 1.88203 |
| A19 | 1.91011 | -0.00023 | 0.01090  | 0.00165  | 0.01235  | 1.92246 |
| A20 | 1.93321 | -0.00003 | -0.00327 | -0.00489 | -0.00815 | 1.92506 |
| A21 | 1.92395 | 0.00019  | -0.00106 | 0.00265  | 0.00165  | 1.92560 |
| A22 | 1.91933 | -0.00025 | -0.00875 | -0.00179 | -0.01004 | 1.90929 |
| A23 | 1.90238 | -0.00049 | 0.00567  | -0.00618 | -0.00084 | 1.90154 |
| A24 | 1.91463 | -0.00054 | 0.00658  | -0.00351 | 0.00249  | 1.91712 |
| A25 | 1.90421 | 0.00009  | -0.00188 | -0.00090 | -0.00283 | 1.90137 |
| A26 | 1.87260 | 0.00071  | -0.00590 | 0.00910  | 0.00330  | 1.87590 |
| A27 | 1.95051 | 0.00049  | 0.00397  | 0.00343  | 0.00753  | 1.95804 |
| A28 | 2.07103 | -0.00114 | -0.02216 | -0.07683 | -0.09837 | 1.97267 |
| A29 | 2.65111 | 0.00076  | 0.00395  | 0.01430  | 0.01908  | 2.67019 |
| A30 | 2.17940 | -0.00022 | 0.00014  | -0.00098 | -0.00084 | 2.17856 |
| A31 | 1.95645 | 0.00006  | -0.00030 | 0.00001  | -0.00029 | 1.95615 |
| A32 | 2.14733 | 0.00015  | 0.00016  | 0.00098  | 0.00114  | 2.14847 |
| A33 | 2.07941 | 0.00005  | -0.00001 | 0.00027  | 0.00027  | 2.07968 |
| A34 | 2.15819 | -0.00010 | 0.00006  | -0.00052 | -0.00046 | 2.15773 |
| A35 | 2.04559 | 0.00005  | -0.00006 | 0.00025  | 0.00019  | 2.04578 |
| A36 | 1.90754 | 0.00108  | 0.00641  | 0.00968  | 0.01541  | 1.92295 |
| A37 | 2.58560 | 0.00300  | 0.01487  | 0.02892  | 0.04510  | 2.63069 |
| A38 | 2.08454 | 0.00001  | -0.00386 | -0.00114 | -0.00506 | 2.07948 |
| A39 | 2.10294 | -0.00003 | -0.00417 | -0.00052 | -0.00473 | 2.09821 |
| A40 | 2.00020 | 0.00016  | 0.00319  | 0.00033  | 0.00367  | 2.00387 |
| A41 | 1.99898 | -0.00014 | 0.00371  | -0.00139 | 0.00218  | 2.00116 |
| A42 | 2.01680 | -0.00001 | 0.00266  | 0.00157  | 0.00404  | 2.02084 |
| A43 | 2.04501 | -0.00005 | -0.00559 | 0.00088  | -0.00432 | 2.04069 |
| A44 | 2.13942 | 0.00003  | 0.00079  | 0.00067  | 0.00104  | 2.14046 |
| A45 | 1.97022 | -0.00021 | -0.00312 | -0.00496 | -0.00812 | 1.96210 |
| A46 | 2.03933 | 0.00019  | 0.00092  | -0.00172 | -0.00072 | 2.03860 |
| A47 | 2.01438 | 0.00013  | 0.00527  | 0.00175  | 0.00700  | 2.02138 |
| A48 | 1.02878 | 0.00199  | 0.00235  | 0.01050  | 0.01233  | 1.04111 |
| A49 | 1.71385 | -0.00212 | -0.01637 | -0.04669 | -0.06213 | 1.65173 |
| A50 | 2.53275 | -0.00021 | -0.00323 | -0.01141 | -0.01538 | 2.51737 |

|     |          |          |          |          |          |          |
|-----|----------|----------|----------|----------|----------|----------|
| A51 | 2.27792  | -0.00040 | 0.00270  | 0.00861  | 0.01156  | 2.28948  |
| A52 | 1.92790  | 0.00008  | 0.00721  | 0.00163  | 0.00878  | 1.93668  |
| A53 | 1.92472  | -0.00013 | -0.00021 | -0.00205 | -0.00225 | 1.92248  |
| A54 | 1.93597  | -0.00017 | 0.00684  | 0.00115  | 0.00794  | 1.94391  |
| A55 | 1.88868  | 0.00003  | -0.00531 | -0.00054 | -0.00583 | 1.88285  |
| A56 | 1.88918  | 0.00006  | -0.00551 | -0.00029 | -0.00591 | 1.88327  |
| A57 | 1.89619  | 0.00013  | -0.00344 | 0.00006  | -0.00337 | 1.89281  |
| A58 | 3.30670  | 0.00159  | 0.00505  | 0.01911  | 0.02389  | 3.33058  |
| A59 | 3.62200  | 0.00081  | 0.02671  | 0.07246  | 0.09916  | 3.72116  |
| D1  | 0.00341  | -0.00004 | -0.00962 | 0.03065  | 0.02106  | 0.02447  |
| D2  | -3.13621 | -0.00014 | -0.00403 | 0.01059  | 0.00658  | -3.12962 |
| D3  | 3.13992  | 0.00011  | -0.00294 | 0.01301  | 0.01005  | -3.13321 |
| D4  | 0.00031  | 0.00002  | 0.00265  | -0.00704 | -0.00442 | -0.00411 |
| D5  | -0.00890 | 0.00027  | 0.00819  | -0.02272 | -0.01459 | -0.02349 |
| D6  | -3.08528 | 0.00026  | 0.00825  | -0.00919 | -0.00105 | -3.08633 |
| D7  | 3.13724  | 0.00013  | 0.00221  | -0.00691 | -0.00470 | 3.13255  |
| D8  | 0.06086  | 0.00013  | 0.00228  | 0.00663  | 0.00884  | 0.06970  |
| D9  | 0.00313  | -0.00019 | 0.00782  | -0.02827 | -0.02046 | -0.01732 |
| D10 | 3.14138  | -0.00009 | 0.00452  | -0.01874 | -0.01427 | 3.12711  |
| D11 | -3.14025 | -0.00010 | 0.00276  | -0.01011 | -0.00735 | 3.13559  |
| D12 | -0.00200 | 0.00000  | -0.00055 | -0.00059 | -0.00116 | -0.00316 |
| D13 | -0.00872 | 0.00036  | -0.00281 | 0.01442  | 0.01159  | 0.00288  |
| D14 | 3.08805  | 0.00014  | -0.00135 | 0.00749  | 0.00596  | 3.09400  |
| D15 | 3.13597  | 0.00027  | 0.00025  | 0.00561  | 0.00587  | -3.14134 |
| D16 | -0.05045 | 0.00004  | 0.00171  | -0.00132 | 0.00024  | -0.05021 |
| D17 | 0.05012  | -0.00001 | 0.00320  | -0.00104 | 0.00219  | 0.05232  |
| D18 | -3.08719 | -0.00005 | 0.00408  | -0.00231 | 0.00180  | -3.08539 |
| D19 | -3.09523 | 0.00011  | -0.00051 | 0.00968  | 0.00914  | -3.08609 |
| D20 | 0.05064  | 0.00007  | 0.00037  | 0.00841  | 0.00875  | 0.05939  |
| D21 | 0.01087  | -0.00039 | -0.00325 | 0.00491  | 0.00170  | 0.01257  |
| D22 | 3.08928  | -0.00042 | -0.00352 | -0.00859 | -0.01218 | 3.07710  |
| D23 | -3.08868 | -0.00019 | -0.00472 | 0.01171  | 0.00726  | -3.08142 |
| D24 | -0.01027 | -0.00022 | -0.00500 | -0.00179 | -0.00662 | -0.01689 |
| D25 | -2.69680 | -0.00012 | 0.01400  | 0.03148  | 0.04549  | -2.65130 |
| D26 | 0.39387  | -0.00038 | 0.01573  | 0.02341  | 0.03891  | 0.43278  |
| D27 | 1.46705  | -0.00007 | -0.02338 | -0.04285 | -0.06594 | 1.40111  |
| D28 | -2.72784 | -0.00028 | -0.01338 | -0.04108 | -0.05432 | -2.78216 |
| D29 | -0.65782 | -0.00005 | -0.01368 | -0.03701 | -0.05061 | -0.70843 |
| D30 | -1.59997 | -0.00004 | -0.02323 | -0.02711 | -0.05004 | -1.65000 |
| D31 | 0.48833  | -0.00026 | -0.01323 | -0.02534 | -0.03841 | 0.44992  |
| D32 | 2.55835  | -0.00003 | -0.01353 | -0.02127 | -0.03471 | 2.52364  |
| D33 | -1.05134 | 0.00023  | 0.00485  | 0.06746  | 0.07228  | -0.97906 |
| D34 | 1.03542  | -0.00011 | 0.00079  | 0.06151  | 0.06236  | 1.09778  |
| D35 | -3.10694 | -0.00016 | 0.01328  | 0.05954  | 0.07276  | -3.03418 |

|     |          |          |          |          |          |          |
|-----|----------|----------|----------|----------|----------|----------|
| D36 | -3.11506 | 0.00028  | 0.00005  | 0.06637  | 0.06645  | -3.04862 |
| D37 | -1.02830 | -0.00006 | -0.00401 | 0.06041  | 0.05652  | -0.97178 |
| D38 | 1.11252  | -0.00011 | 0.00848  | 0.05844  | 0.06693  | 1.17945  |
| D39 | 1.04334  | 0.00022  | -0.00373 | 0.06513  | 0.06152  | 1.10487  |
| D40 | 3.13010  | -0.00012 | -0.00778 | 0.05917  | 0.05159  | -3.10149 |
| D41 | -1.01225 | -0.00017 | 0.00470  | 0.05720  | 0.06200  | -0.95025 |
| D42 | -1.55434 | -0.00019 | -0.01382 | -0.01777 | -0.03078 | -1.58512 |
| D43 | 2.64435  | 0.00000  | -0.00356 | -0.01901 | -0.02205 | 2.62230  |
| D44 | 0.55769  | -0.00085 | 0.00015  | -0.02569 | -0.02513 | 0.53256  |
| D45 | -0.08775 | 0.00005  | 0.00924  | -0.04971 | -0.04145 | -0.12920 |
| D46 | -0.00485 | 0.00047  | -0.02012 | 0.04306  | 0.02273  | 0.01789  |
| D47 | -2.65299 | 0.00027  | -0.02960 | 0.02102  | -0.01030 | -2.66329 |
| D48 | -3.13449 | -0.00006 | 0.00069  | -0.00132 | -0.00063 | -3.13512 |
| D49 | 0.00579  | -0.00001 | 0.00049  | -0.00023 | 0.00026  | 0.00605  |
| D50 | 0.00237  | -0.00002 | -0.00028 | 0.00008  | -0.00020 | 0.00217  |
| D51 | -3.14054 | 0.00003  | -0.00048 | 0.00117  | 0.00069  | -3.13985 |
| D52 | -2.73617 | 0.00002  | -0.00815 | -0.03720 | -0.04557 | -2.78174 |
| D53 | 3.06555  | 0.00025  | 0.03009  | 0.03020  | 0.06029  | 3.12584  |
| D54 | -2.25667 | -0.00028 | 0.00077  | -0.04226 | -0.04085 | -2.29752 |
| D55 | -0.55645 | -0.00055 | 0.00338  | -0.04225 | -0.03888 | -0.59532 |
| D56 | -2.71469 | -0.00015 | 0.00452  | -0.00528 | -0.00085 | -2.71554 |
| D57 | -0.02297 | 0.00015  | 0.00695  | 0.00349  | 0.01029  | -0.01268 |
| D58 | -0.00774 | -0.00023 | -0.00946 | -0.00512 | -0.01455 | -0.02229 |
| D59 | 2.68399  | 0.00007  | -0.00702 | 0.00365  | -0.00341 | 2.68057  |
| D60 | 0.96430  | 0.00020  | -0.01058 | -0.03834 | -0.04902 | 0.91528  |
| D61 | 0.17551  | -0.00033 | 0.01091  | 0.01303  | 0.02421  | 0.19972  |
| D62 | -1.42557 | 0.00019  | -0.02256 | -0.03962 | -0.06239 | -1.48796 |
| D63 | -2.21435 | -0.00034 | -0.00107 | 0.01176  | 0.01083  | -2.20352 |
| D64 | 1.94060  | 0.00019  | 0.00896  | 0.01063  | 0.02001  | 1.96061  |
| D65 | -0.45699 | 0.00001  | 0.00311  | 0.01578  | 0.01929  | -0.43770 |
| D66 | 2.50633  | -0.00015 | 0.00659  | 0.00863  | 0.01517  | 2.52150  |
| D67 | -1.68995 | -0.00014 | 0.00445  | 0.00769  | 0.01206  | -1.67789 |
| D68 | 0.41153  | -0.00017 | 0.00445  | 0.00717  | 0.01152  | 0.42305  |
| D69 | 1.30112  | 0.00015  | 0.00881  | 0.00891  | 0.01781  | 1.31892  |
| D70 | -2.89516 | 0.00016  | 0.00667  | 0.00797  | 0.01469  | -2.88046 |
| D71 | -0.79367 | 0.00013  | 0.00668  | 0.00745  | 0.01415  | -0.77952 |
| D72 | -1.07789 | 0.00010  | 0.00642  | 0.01705  | 0.02353  | -1.05436 |
| D73 | 1.00902  | 0.00011  | 0.00428  | 0.01612  | 0.02042  | 1.02944  |
| D74 | 3.11050  | 0.00008  | 0.00429  | 0.01559  | 0.01988  | 3.13038  |

| Item                 | Value    | Threshold | Converged? |
|----------------------|----------|-----------|------------|
| Maximum Force        | 0.003005 | 0.000450  | NO         |
| RMS Force            | 0.000479 | 0.000300  | NO         |
| Maximum Displacement | 0.284650 | 0.001800  | NO         |
| RMS Displacement     | 0.090048 | 0.001200  | NO         |

Predicted change in Energy=-4.265237D-04

GradGradGradGradGradGradGradGradGradGradGradGradGradGradGradGradGradGradGrad

Input orientation:

| Center<br>Number | Atomic<br>Number | Atomic<br>Type | Coordinates (Angstroms) |           |           |
|------------------|------------------|----------------|-------------------------|-----------|-----------|
|                  |                  |                | X                       | Y         | Z         |
| 1                | 6                | 0              | -1.445086               | -1.852503 | 0.090688  |
| 2                | 6                | 0              | -2.708698               | -1.369684 | -0.018979 |
| 3                | 7                | 0              | -2.617821               | 0.013533  | 0.103350  |
| 4                | 6                | 0              | -1.327025               | 0.346108  | 0.304364  |
| 5                | 7                | 0              | -0.604338               | -0.772405 | 0.309429  |
| 6                | 6                | 0              | 0.868285                | -0.818799 | 0.424293  |
| 7                | 6                | 0              | 1.525582                | -0.882755 | -0.964606 |
| 8                | 1                | 0              | -1.077171               | -2.863080 | 0.045466  |
| 9                | 1                | 0              | -3.639805               | -1.881538 | -0.180131 |
| 10               | 1                | 0              | 1.180587                | 0.086364  | 0.946390  |
| 11               | 1                | 0              | 1.130254                | -1.702708 | 1.008129  |
| 12               | 1                | 0              | 1.131136                | -1.744846 | -1.514586 |
| 13               | 1                | 0              | 1.282517                | 0.031663  | -1.515429 |
| 14               | 35               | 0              | 0.770993                | 2.821706  | 0.214355  |
| 15               | 1                | 0              | -0.888903               | 1.357261  | 0.402166  |
| 16               | 6                | 0              | -3.655630               | 0.982367  | 0.043267  |
| 17               | 6                | 0              | -4.945490               | 0.703386  | -0.092056 |
| 18               | 1                | 0              | -3.273889               | 1.992776  | 0.117335  |
| 19               | 1                | 0              | -5.658429               | 1.515071  | -0.133500 |
| 20               | 1                | 0              | -5.336685               | -0.303415 | -0.165325 |
| 21               | 8                | 0              | 2.914481                | -1.067777 | -0.827932 |
| 22               | 1                | 0              | 3.366620                | -0.205424 | -0.793623 |
| 23               | 6                | 0              | 5.685567                | 1.824280  | -0.348010 |
| 24               | 6                | 0              | 6.261636                | 0.518856  | -0.707530 |
| 25               | 8                | 0              | 4.878018                | 0.816227  | -0.975559 |
| 26               | 1                | 0              | 5.437712                | 2.025793  | 0.692200  |
| 27               | 1                | 0              | 5.881690                | 2.697761  | -0.965330 |
| 28               | 1                | 0              | 6.860891                | 0.477726  | -1.615436 |
| 29               | 6                | 0              | 6.539699                | -0.551127 | 0.308532  |
| 30               | 1                | 0              | 6.354090                | -1.545317 | -0.109104 |
| 31               | 1                | 0              | 7.587645                | -0.509059 | 0.623494  |
| 32               | 1                | 0              | 5.908033                | -0.434829 | 1.192432  |

Distance matrix (angstroms):

|     | 1        | 2 | 3 | 4 | 5 |
|-----|----------|---|---|---|---|
| 1 C | 0.000000 |   |   |   |   |

|    |    |          |           |           |          |          |
|----|----|----------|-----------|-----------|----------|----------|
| 2  | C  | 1.357150 | 0.000000  |           |          |          |
| 3  | N  | 2.203987 | 1.391587  | 0.000000  |          |          |
| 4  | C  | 2.212123 | 2.226547  | 1.348023  | 0.000000 |          |
| 5  | N  | 1.386116 | 2.211996  | 2.171239  | 1.331681 | 0.000000 |
| 6  | C  | 2.555685 | 3.646200  | 3.598432  | 2.488128 | 1.477824 |
| 7  | C  | 3.298322 | 4.365826  | 4.371687  | 3.355258 | 2.484332 |
| 8  | H  | 1.076417 | 2.212750  | 3.263718  | 3.229295 | 2.159669 |
| 9  | H  | 2.211555 | 1.074674  | 2.171660  | 3.247474 | 3.268624 |
| 10 | H  | 3.374254 | 4.263631  | 3.891519  | 2.601497 | 2.080664 |
| 11 | H  | 2.737977 | 3.987908  | 4.220447  | 3.275844 | 2.088649 |
| 12 | H  | 3.037336 | 4.137862  | 4.445705  | 3.704487 | 2.698989 |
| 13 | H  | 3.683682 | 4.486973  | 4.222962  | 3.196909 | 2.745333 |
| 14 | Br | 5.174411 | 5.452563  | 4.402523  | 3.246285 | 3.849442 |
| 15 | H  | 3.272452 | 3.305336  | 2.209989  | 1.106321 | 2.150594 |
| 16 | C  | 3.595168 | 2.536276  | 1.421019  | 2.428043 | 3.529936 |
| 17 | C  | 4.338063 | 3.050606  | 2.435595  | 3.657606 | 4.602689 |
| 18 | H  | 4.258098 | 3.412354  | 2.085192  | 2.556712 | 3.848328 |
| 19 | H  | 5.398433 | 4.127450  | 3.399414  | 4.507689 | 5.565301 |
| 20 | H  | 4.196398 | 2.839835  | 2.750430  | 4.088992 | 4.779169 |
| 21 | O  | 4.523879 | 5.689085  | 5.713395  | 4.612108 | 3.709841 |
| 22 | H  | 5.162111 | 6.234185  | 6.055248  | 4.851811 | 4.160132 |
| 23 | C  | 8.034763 | 8.987400  | 8.510510  | 7.196321 | 6.836513 |
| 24 | C  | 8.102719 | 9.192800  | 8.930712  | 7.657777 | 7.059969 |
| 25 | O  | 6.945549 | 7.953082  | 7.615508  | 6.353092 | 5.850742 |
| 26 | H  | 7.923125 | 8.854323  | 8.323914  | 6.980933 | 6.669542 |
| 27 | H  | 8.689174 | 9.551673  | 8.977129  | 7.688171 | 7.465630 |
| 28 | H  | 8.793753 | 9.876165  | 9.644464  | 8.411001 | 7.810095 |
| 29 | C  | 8.093073 | 9.290325  | 9.177206  | 7.917727 | 7.147463 |
| 30 | H  | 7.807780 | 9.064937  | 9.108805  | 7.921362 | 7.013721 |
| 31 | H  | 9.147620 | 10.352203 | 10.232066 | 8.961278 | 8.202229 |
| 32 | H  | 7.569149 | 8.751544  | 8.606818  | 7.331071 | 6.580626 |
|    |    | 6        | 7         | 8         | 9        | 10       |
| 6  | C  | 0.000000 |           |           |          |          |
| 7  | C  | 1.537910 | 0.000000  |           |          |          |
| 8  | H  | 2.847349 | 3.422902  | 0.000000  |          |          |
| 9  | H  | 4.670933 | 5.319229  | 2.753437  | 0.000000 |          |
| 10 | H  | 1.090614 | 2.170281  | 3.822088  | 5.327088 | 0.000000 |
| 11 | H  | 1.091232 | 2.172623  | 2.673184  | 4.919086 | 1.790844 |
| 12 | H  | 2.164695 | 1.096024  | 2.925889  | 4.955939 | 3.067928 |
| 13 | H  | 2.158099 | 1.094827  | 4.047722  | 5.447257 | 2.464535 |
| 14 | Br | 3.647850 | 3.960098  | 5.980052  | 6.459973 | 2.861073 |
| 15 | H  | 2.797041 | 3.565877  | 4.239571  | 4.289097 | 2.488805 |
| 16 | C  | 4.884177 | 5.598164  | 4.629894  | 2.872648 | 5.000744 |
| 17 | C  | 6.031885 | 6.719521  | 5.263315  | 2.897309 | 6.244029 |

|    |    |          |          |          |           |          |
|----|----|----------|----------|----------|-----------|----------|
| 18 | H  | 5.015654 | 5.698614 | 5.330110 | 3.902908  | 4.915699 |
| 19 | H  | 6.953854 | 7.619077 | 6.339414 | 3.951452  | 7.069619 |
| 20 | H  | 6.254193 | 6.932907 | 4.973910 | 2.317346  | 6.622890 |
| 21 | O  | 2.411841 | 1.407818 | 4.463095 | 6.636303  | 2.736175 |
| 22 | H  | 2.846265 | 1.969120 | 5.245425 | 7.230195  | 2.809186 |
| 23 | C  | 5.548741 | 5.001370 | 8.237767 | 10.036127 | 4.999067 |
| 24 | C  | 5.670853 | 4.945786 | 8.115576 | 10.201891 | 5.360929 |
| 25 | O  | 4.550918 | 3.758389 | 7.074184 | 8.970170  | 4.230554 |
| 26 | H  | 5.389169 | 5.148729 | 8.170866 | 9.921165  | 4.684988 |
| 27 | H  | 6.279449 | 5.638774 | 8.964955 | 10.594593 | 5.707403 |
| 28 | H  | 6.461641 | 5.544367 | 8.771113 | 10.857756 | 6.243555 |
| 29 | C  | 5.678907 | 5.183843 | 7.964361 | 10.277699 | 5.434459 |
| 30 | H  | 5.559352 | 4.948268 | 7.548777 | 9.999801  | 5.526444 |
| 31 | H  | 6.729444 | 6.277763 | 8.997475 | 11.339539 | 6.442762 |
| 32 | H  | 5.112390 | 4.905031 | 7.483650 | 9.753877  | 4.762450 |
|    |    | 11       | 12       | 13       | 14        | 15       |
| 11 | H  | 0.000000 |          |          |           |          |
| 12 | H  | 2.523067 | 0.000000 |          |           |          |
| 13 | H  | 3.065872 | 1.782948 | 0.000000 |           |          |
| 14 | Br | 4.607544 | 4.896155 | 3.322370 | 0.000000  |          |
| 15 | H  | 3.715857 | 4.168641 | 3.185819 | 2.221514  | 0.000000 |
| 16 | C  | 5.571828 | 5.725182 | 5.264851 | 4.796606  | 2.814983 |
| 17 | C  | 6.626791 | 6.703940 | 6.423805 | 6.104043  | 4.138563 |
| 18 | H  | 5.817782 | 6.003102 | 5.222328 | 4.130086  | 2.484586 |
| 19 | H  | 7.598924 | 7.657196 | 7.230972 | 6.570066  | 4.802106 |
| 20 | H  | 6.719845 | 6.762465 | 6.763793 | 6.871264  | 4.781491 |
| 21 | O  | 2.637750 | 2.027371 | 2.084401 | 4.561686  | 4.675434 |
| 22 | H  | 3.238750 | 2.808380 | 2.218265 | 4.113005  | 4.688430 |
| 23 | C  | 5.918584 | 5.902746 | 4.895222 | 5.046202  | 6.633591 |
| 24 | C  | 5.848923 | 5.665485 | 5.067710 | 6.024960  | 7.284542 |
| 25 | O  | 4.932118 | 4.570424 | 3.719493 | 4.722869  | 5.953841 |
| 26 | H  | 5.705762 | 6.134674 | 5.110364 | 4.758159  | 6.368446 |
| 27 | H  | 6.770141 | 6.527343 | 5.344444 | 5.246546  | 7.036187 |
| 28 | H  | 6.669152 | 6.146552 | 5.597074 | 6.777111  | 8.056278 |
| 29 | C  | 5.574735 | 5.831062 | 5.595037 | 6.683026  | 7.670388 |
| 30 | H  | 5.344290 | 5.412434 | 5.494130 | 7.095525  | 7.819674 |
| 31 | H  | 6.578042 | 6.912674 | 6.679971 | 7.597903  | 8.682396 |
| 32 | H  | 4.946581 | 5.644718 | 5.380105 | 6.160425  | 7.073504 |
|    |    | 16       | 17       | 18       | 19        | 20       |
| 16 | C  | 0.000000 |          |          |           |          |
| 17 | C  | 1.326605 | 0.000000 |          |           |          |
| 18 | H  | 1.082654 | 2.121467 | 0.000000 |           |          |
| 19 | H  | 2.079958 | 1.081126 | 2.444822 | 0.000000  |          |
| 20 | H  | 2.126662 | 1.082612 | 3.099600 | 1.847004  | 0.000000 |



|    |   |           |           |           |           |           |
|----|---|-----------|-----------|-----------|-----------|-----------|
| 21 | O | 6.937466  | 8.090592  | 6.968245  | 8.980430  | 8.312944  |
| 22 | H | 7.170998  | 8.391025  | 7.053955  | 9.211264  | 8.726505  |
| 23 | C | 9.387219  | 10.693049 | 8.973115  | 11.350237 | 11.227222 |
| 24 | C | 9.956440  | 11.225530 | 9.683960  | 11.975387 | 11.640067 |
| 25 | O | 8.595857  | 9.863804  | 8.308566  | 10.593119 | 10.307776 |
| 26 | H | 9.175985  | 10.496413 | 8.730610  | 11.138535 | 11.056590 |
| 27 | H | 9.742706  | 11.043911 | 9.246286  | 11.630351 | 11.640404 |
| 28 | H | 10.658479 | 11.906395 | 10.392865 | 12.649332 | 12.308285 |
| 29 | C | 10.313423 | 11.560443 | 10.139749 | 12.379778 | 11.888415 |
| 30 | H | 10.325061 | 11.521174 | 10.259988 | 12.396257 | 11.756687 |
| 31 | H | 11.356594 | 12.611958 | 11.157432 | 13.421200 | 12.950013 |
| 32 | H | 9.736153  | 10.988376 | 9.558075  | 11.804375 | 11.327156 |
|    |   | 21        | 22        | 23        | 24        | 25        |
| 21 | O | 0.000000  |           |           |           |           |
| 22 | H | 0.974300  | 0.000000  |           |           |           |
| 23 | C | 4.034011  | 3.113806  | 0.000000  |           |           |
| 24 | C | 3.706123  | 2.985483  | 1.471476  | 0.000000  |           |
| 25 | O | 2.725206  | 1.833356  | 1.436010  | 1.440370  | 0.000000  |
| 26 | H | 4.271730  | 3.387539  | 1.088153  | 2.215617  | 2.134884  |
| 27 | H | 4.796091  | 3.844937  | 1.087436  | 2.226758  | 2.132518  |
| 28 | H | 4.310789  | 3.654039  | 2.191110  | 1.088619  | 2.110879  |
| 29 | C | 3.834147  | 3.376786  | 2.608284  | 1.501520  | 2.505939  |
| 30 | H | 3.546219  | 3.344975  | 3.443571  | 2.151156  | 2.916577  |
| 31 | H | 4.925166  | 4.462898  | 3.163256  | 2.141619  | 3.414005  |
| 32 | H | 3.666586  | 3.233546  | 2.743360  | 2.155088  | 2.706706  |
|    |   | 26        | 27        | 28        | 29        | 30        |
| 26 | H | 0.000000  |           |           |           |           |
| 27 | H | 1.842842  | 0.000000  |           |           |           |
| 28 | H | 3.122040  | 2.511977  | 0.000000  |           |           |
| 29 | C | 2.828798  | 3.551193  | 2.205301  | 0.000000  |           |
| 30 | H | 3.772886  | 4.354308  | 2.572662  | 1.094205  | 0.000000  |
| 31 | H | 3.324517  | 3.964636  | 2.552395  | 1.095062  | 1.769799  |
| 32 | H | 2.554622  | 3.803913  | 3.102389  | 1.092614  | 1.768091  |
|    |   | 31        | 32        |           |           |           |
| 31 | H | 0.000000  |           |           |           |           |
| 32 | H | 1.774907  | 0.000000  |           |           |           |

Stoichiometry C10H17BrN2O2

Framework group C1[X(C10H17BrN2O2)]

Deg. of freedom 90

Full point group C1 NOp 1

Largest Abelian subgroup C1 NOp 1

Largest concise Abelian subgroup C1 NOp 1

Standard orientation:

-----

| Center<br>Number | Atomic<br>Number | Atomic<br>Type | Coordinates (Angstroms) |           |           |
|------------------|------------------|----------------|-------------------------|-----------|-----------|
|                  |                  |                | X                       | Y         | Z         |
| 1                | 6                | 0              | -2.496239               | 2.327293  | -0.223265 |
| 2                | 6                | 0              | -3.730211               | 1.805887  | -0.005770 |
| 3                | 7                | 0              | -3.586530               | 0.421908  | -0.027487 |
| 4                | 6                | 0              | -2.295214               | 0.124941  | -0.275436 |
| 5                | 7                | 0              | -1.622667               | 1.266815  | -0.406504 |
| 6                | 6                | 0              | -0.161663               | 1.361168  | -0.607819 |
| 7                | 6                | 0              | 0.565626                | 1.559162  | 0.732709  |
| 8                | 1                | 0              | -2.170288               | 3.351818  | -0.275960 |
| 9                | 1                | 0              | -4.672540               | 2.292279  | 0.168480  |
| 10               | 1                | 0              | 0.160949                | 0.430694  | -1.076411 |
| 11               | 1                | 0              | 0.030395                | 2.206131  | -1.271099 |
| 12               | 1                | 0              | 0.164409                | 2.445727  | 1.236988  |
| 13               | 1                | 0              | 0.391975                | 0.681955  | 1.364374  |
| 14               | 35               | 0              | -0.090734               | -2.252735 | -0.116411 |
| 15               | 1                | 0              | -1.819818               | -0.873004 | -0.320713 |
| 16               | 6                | 0              | -4.576957               | -0.578776 | 0.164821  |
| 17               | 6                | 0              | -5.868546               | -0.340307 | 0.351399  |
| 18               | 1                | 0              | -4.156571               | -1.576309 | 0.146310  |
| 19               | 1                | 0              | -6.542635               | -1.173300 | 0.494791  |
| 20               | 1                | 0              | -6.298252               | 0.653202  | 0.369924  |
| 21               | 8                | 0              | 1.935968                | 1.786658  | 0.503882  |
| 22               | 1                | 0              | 2.422337                | 0.942459  | 0.509700  |
| 23               | 6                | 0              | 4.799372                | -1.024410 | 0.089084  |
| 24               | 6                | 0              | 5.337101                | 0.326527  | 0.315050  |
| 25               | 8                | 0              | 3.983892                | -0.002395 | 0.682887  |
| 26               | 1                | 0              | 4.505134                | -1.316240 | -0.917065 |
| 27               | 1                | 0              | 5.065667                | -1.838589 | 0.758948  |
| 28               | 1                | 0              | 5.981738                | 0.461857  | 1.181780  |
| 29               | 6                | 0              | 5.514082                | 1.323622  | -0.793572 |
| 30               | 1                | 0              | 5.308441                | 2.339517  | -0.442922 |
| 31               | 1                | 0              | 6.544516                | 1.297704  | -1.163292 |
| 32               | 1                | 0              | 4.841632                | 1.114033  | -1.628850 |

Rotational constants (GHZ):      0.6572132      0.1770569      0.1436000

Standard basis: 6-311++G(d,p) (5D, 7F)

There are 492 symmetry adapted cartesian basis functions of A<sub>g</sub> symmetry.

There are 475 symmetry adapted basis functions of A<sub>g</sub> symmetry.

475 basis functions, 751 primitive gaussians, 492 cartesian basis functions

71 alpha electrons      71 beta electrons

nuclear repulsion energy      1265.8619368898 Hartrees.

NAtoms= 32 NActive= 32 NUniq= 32 SFac= 1.00D+00 NAtFMM= 60 NAOKFM=F

Big=F

Integral buffers will be 131072 words long.

Raffenetti 2 integral format.

Two-electron integral symmetry is turned on.

One-electron integrals computed using PRISM.

NBasis= 475 RedAO= T EigKep= 3.93D-06 NBF= 475

NBsUse= 475 1.00D-06 EigRej= -1.00D+00 NBFU= 475

Initial guess from the checkpoint file: "/home/suqian/liuwen/qianmengshijie/ohpo/ohpo.chk"

B after Tr= 0.000000 0.000000 0.000000

Rot= 0.999917 0.006770 -0.000556 0.010986 Ang= 1.48 deg.

ExpMin= 3.50D-02 ExpMax= 4.40D+05 ExpMxC= 1.51D+04 IAcc=3 IRadAn= 5 AccDes= 0.00D+00

Harris functional with IExCor= 402 and IRadAn= 5 diagonalized for initial guess.

HarFok: IExCor= 402 AccDes= 0.00D+00 IRadAn= 5 IDoV= 1 UseB2=F ITyADJ=14

ICtDFT= 3500011 ScaDFX= 1.000000 1.000000 1.000000 1.000000

FoFCou: FMM=F IPFlag= 0 FMFlag= 100000 FMFlg1= 0

NFxFlg= 0 DoJE=T BraDBF=F KetDBF=T FulRan=T

wScrn= 0.000000 ICntrl= 500 IOpCl= 0 l1Cent= 200000004 NGrid=

0

NMat0= 1 NMatS0= 1 NMatT0= 0 NMatD0= 1 NMtDS0= 0

NMtDT0= 0

Petite list used in FoFCou.

Requested convergence on RMS density matrix=1.00D-08 within 128 cycles.

Requested convergence on MAX density matrix=1.00D-06.

Requested convergence on energy=1.00D-06.

No special actions if energy rises.

EnCoef did 1 forward-backward iterations

SCF Done: E(RB3LYP) = -3225.51571374 A.U. after 12 cycles

NFock= 12 Conv=0.82D-08 -V/T= 2.0018

Calling FoFJK, ICntrl= 2127 FMM=F ISym2X=0 l1Cent= 0 IOpClX= 0 NMat=1 NMatS=1

NMatT=0.

\*\*\*\*\* Axes restored to original set \*\*\*\*\*

```
-----
```

| Center | Atomic | Forces (Hartrees/Bohr) |              |              |
|--------|--------|------------------------|--------------|--------------|
| Number | Number | X                      | Y            | Z            |
| 1      | 6      | -0.000597172           | -0.000331017 | 0.002020748  |
| 2      | 6      | 0.000217530            | 0.000254604  | -0.002012265 |
| 3      | 7      | -0.000562885           | -0.000310611 | 0.001124505  |
| 4      | 6      | -0.001490994           | -0.000541769 | 0.000957977  |
| 5      | 7      | 0.000353580            | -0.000349468 | -0.000862505 |
| 6      | 6      | -0.000150689           | -0.000764839 | -0.000819396 |
| 7      | 6      | 0.001339102            | -0.000736474 | 0.000196634  |
| 8      | 1      | 0.000005470            | 0.000002483  | 0.000344524  |

```
-----
```

|    |    |              |              |              |
|----|----|--------------|--------------|--------------|
| 9  | 1  | 0.000043420  | 0.000085516  | -0.000314549 |
| 10 | 1  | -0.000012700 | 0.000439855  | -0.000464120 |
| 11 | 1  | -0.000129266 | 0.000193677  | 0.000177034  |
| 12 | 1  | -0.000355114 | 0.000239035  | -0.000593539 |
| 13 | 1  | -0.000142439 | 0.000186543  | 0.000222345  |
| 14 | 35 | -0.000027125 | 0.000660229  | 0.000457688  |
| 15 | 1  | 0.001942812  | 0.001200459  | -0.000621442 |
| 16 | 6  | 0.000100455  | -0.000142400 | 0.000141837  |
| 17 | 6  | -0.000192808 | -0.000023373 | -0.000032742 |
| 18 | 1  | 0.000033226  | 0.000047522  | -0.000024446 |
| 19 | 1  | 0.000006625  | -0.000006307 | -0.000007342 |
| 20 | 1  | 0.000069543  | -0.000002489 | 0.000026225  |
| 21 | 8  | -0.002664516 | 0.000676967  | 0.000821016  |
| 22 | 1  | 0.001748763  | -0.002963945 | -0.000303005 |
| 23 | 6  | 0.000284194  | 0.000081741  | 0.001265295  |
| 24 | 6  | -0.000816170 | 0.001534325  | -0.000185839 |
| 25 | 8  | 0.000831627  | 0.002084094  | -0.001476822 |
| 26 | 1  | -0.000236488 | 0.000181458  | -0.001282069 |
| 27 | 1  | -0.000549527 | -0.000691628 | 0.000638673  |
| 28 | 1  | 0.000121616  | -0.000297025 | -0.000049038 |
| 29 | 6  | 0.001172972  | -0.002460051 | 0.001805629  |
| 30 | 1  | -0.000052584 | 0.000768289  | -0.000528104 |
| 31 | 1  | -0.000197331 | 0.000177249  | -0.000087016 |
| 32 | 1  | -0.000093127 | 0.000807351  | -0.000535893 |

-----  
Cartesian Forces: Max 0.002963945 RMS 0.000877460

GradGradGradGradGradGradGradGradGradGradGradGradGradGradGradGradGradGradGradGrad

Berny optimization.

Using GEDIIS/GDIIS optimizer.

FormGI is forming the generalized inverse of G from B-inverse, IUseBI=4.

GSVD: received Info= 1 from GESDD.

Internal Forces: Max 0.003249004 RMS 0.000579364

Search for a local minimum.

Step number 11 out of a maximum of 177

All quantities printed in internal units (Hartrees-Bohrs-Radians)

Mixed Optimization -- En-DIIS/RFO-DIIS

Swapping is turned off.

Update second derivatives using D2CorX and points 10 11

DE= -4.08D-04 DEPred=-4.27D-04 R= 9.57D-01

TightC=F SS= 1.41D+00 RLast= 6.41D-01 DXNew= 4.0363D+00 1.9228D+00

Trust test= 9.57D-01 RLast= 6.41D-01 DXMaxT set to 2.40D+00

ITU= 1 1 1 1 1 1 0 1 0 1 0

Eigenvalues --- 0.00137 0.00229 0.00242 0.00384 0.00479

|                 |         |         |         |         |         |
|-----------------|---------|---------|---------|---------|---------|
| Eigenvalues --- | 0.00937 | 0.01230 | 0.01289 | 0.01398 | 0.01533 |
| Eigenvalues --- | 0.01742 | 0.01876 | 0.02007 | 0.02033 | 0.02152 |
| Eigenvalues --- | 0.02163 | 0.02314 | 0.02389 | 0.02471 | 0.03060 |
| Eigenvalues --- | 0.03064 | 0.03103 | 0.03212 | 0.03718 | 0.04202 |
| Eigenvalues --- | 0.04679 | 0.05128 | 0.05315 | 0.05419 | 0.05540 |
| Eigenvalues --- | 0.05882 | 0.06400 | 0.09056 | 0.09403 | 0.10158 |
| Eigenvalues --- | 0.10966 | 0.11501 | 0.11642 | 0.12029 | 0.12928 |
| Eigenvalues --- | 0.13972 | 0.14843 | 0.15496 | 0.15997 | 0.15999 |
| Eigenvalues --- | 0.16000 | 0.16000 | 0.16000 | 0.16029 | 0.16064 |
| Eigenvalues --- | 0.16838 | 0.18140 | 0.19224 | 0.21847 | 0.22015 |
| Eigenvalues --- | 0.22834 | 0.23548 | 0.23821 | 0.25021 | 0.26677 |
| Eigenvalues --- | 0.27909 | 0.29192 | 0.31901 | 0.32943 | 0.33054 |
| Eigenvalues --- | 0.33267 | 0.34094 | 0.34283 | 0.34484 | 0.34763 |
| Eigenvalues --- | 0.34942 | 0.35685 | 0.35690 | 0.35858 | 0.36435 |
| Eigenvalues --- | 0.36658 | 0.37017 | 0.37232 | 0.37662 | 0.37828 |
| Eigenvalues --- | 0.39097 | 0.42186 | 0.42569 | 0.45135 | 0.46087 |
| Eigenvalues --- | 0.49156 | 0.52331 | 0.54687 | 0.56191 | 0.60362 |

En-DIIS/RFO-DIIS IScMMF= 0 using points: 11 10 9

RFO step: Lambda=-1.52119081D-04.

DidBck=T Rises=F RFO-DIIS coefs: 0.77806 0.57184 -0.34989

Iteration 1 RMS(Cart)= 0.02979529 RMS(Int)= 0.00033019

Iteration 2 RMS(Cart)= 0.00062049 RMS(Int)= 0.00017120

Iteration 3 RMS(Cart)= 0.00000014 RMS(Int)= 0.00017120

| Variable | Old X   | -DE/DX   | Delta X<br>(Linear) | Delta X<br>(Quad) | Delta X<br>(Total) | New X   |
|----------|---------|----------|---------------------|-------------------|--------------------|---------|
| R1       | 2.56464 | 0.00003  | 0.00019             | -0.00077          | -0.00057           | 2.56407 |
| R2       | 2.61938 | 0.00022  | -0.00021            | 0.00089           | 0.00066            | 2.62004 |
| R3       | 2.03413 | -0.00001 | 0.00006             | -0.00009          | -0.00003           | 2.03410 |
| R4       | 2.62972 | -0.00007 | 0.00049             | -0.00023          | 0.00028            | 2.63000 |
| R5       | 2.03084 | -0.00003 | -0.00005            | 0.00005           | 0.00000            | 2.03084 |
| R6       | 2.54739 | 0.00046  | -0.00045            | 0.00083           | 0.00038            | 2.54778 |
| R7       | 2.68534 | -0.00012 | 0.00022             | -0.00028          | -0.00007           | 2.68527 |
| R8       | 2.51651 | 0.00060  | -0.00110            | 0.00207           | 0.00097            | 2.51748 |
| R9       | 2.09064 | 0.00174  | -0.00129            | 0.00628           | 0.00502            | 2.09566 |
| R10      | 2.79268 | 0.00044  | -0.00092            | -0.00024          | -0.00116           | 2.79152 |
| R11      | 2.90623 | 0.00025  | 0.00196             | -0.00190          | 0.00026            | 2.90649 |
| R12      | 2.06096 | 0.00014  | -0.00038            | 0.00015           | -0.00023           | 2.06073 |
| R13      | 2.06213 | -0.00009 | 0.00010             | 0.00030           | 0.00041            | 2.06254 |
| R14      | 2.07118 | 0.00024  | -0.00042            | 0.00138           | 0.00096            | 2.07215 |
| R15      | 2.06892 | 0.00008  | 0.00017             | 0.00006           | 0.00022            | 2.06915 |
| R16      | 2.66039 | -0.00007 | -0.00148            | -0.00431          | -0.00580           | 2.65459 |
| R17      | 4.19805 | -0.00030 | -0.00889            | -0.02914          | -0.03804           | 4.16001 |
| R18      | 8.92493 | -0.00008 | -0.02449            | 0.11823           | 0.09366            | 9.01859 |
| R19      | 2.50692 | 0.00013  | -0.00001            | 0.00009           | 0.00007            | 2.50699 |

|     |         |          |          |          |          |         |
|-----|---------|----------|----------|----------|----------|---------|
| R20 | 2.04592 | 0.00005  | -0.00003 | 0.00007  | 0.00004  | 2.04596 |
| R21 | 2.04303 | -0.00001 | -0.00001 | 0.00001  | 0.00000  | 2.04304 |
| R22 | 2.04584 | -0.00002 | 0.00002  | -0.00010 | -0.00008 | 2.04576 |
| R23 | 1.84116 | 0.00105  | 0.00071  | 0.00113  | 0.00183  | 1.84299 |
| R24 | 3.46454 | 0.00231  | 0.01149  | 0.02249  | 0.03400  | 3.49854 |
| R25 | 2.78069 | 0.00003  | 0.00109  | -0.00127 | -0.00019 | 2.78050 |
| R26 | 2.71367 | -0.00039 | -0.00142 | -0.00030 | -0.00174 | 2.71193 |
| R27 | 2.05631 | -0.00114 | 0.00122  | -0.00075 | 0.00047  | 2.05678 |
| R28 | 2.05496 | -0.00102 | 0.00110  | -0.00058 | 0.00052  | 2.05548 |
| R29 | 2.72191 | 0.00015  | 0.00125  | 0.00324  | 0.00451  | 2.72642 |
| R30 | 2.05719 | 0.00012  | -0.00018 | -0.00032 | -0.00051 | 2.05668 |
| R31 | 2.83746 | 0.00109  | -0.00233 | -0.00121 | -0.00354 | 2.83392 |
| R32 | 2.06775 | -0.00049 | 0.00057  | -0.00044 | 0.00013  | 2.06788 |
| R33 | 2.06937 | -0.00021 | 0.00049  | -0.00039 | 0.00010  | 2.06947 |
| R34 | 2.06474 | -0.00029 | 0.00032  | -0.00019 | 0.00013  | 2.06487 |
| A1  | 1.87578 | 0.00008  | -0.00062 | 0.00054  | -0.00011 | 1.87567 |
| A2  | 2.27686 | 0.00003  | 0.00016  | -0.00041 | -0.00023 | 2.27662 |
| A3  | 2.13043 | -0.00010 | 0.00052  | -0.00010 | 0.00044  | 2.13087 |
| A4  | 1.86055 | 0.00015  | 0.00028  | -0.00007 | 0.00023  | 1.86077 |
| A5  | 2.27755 | -0.00002 | -0.00032 | 0.00020  | -0.00013 | 2.27742 |
| A6  | 2.14502 | -0.00011 | 0.00007  | -0.00010 | -0.00004 | 2.14499 |
| A7  | 1.89744 | 0.00005  | -0.00046 | 0.00111  | 0.00064  | 1.89809 |
| A8  | 2.24756 | -0.00024 | 0.00070  | -0.00129 | -0.00059 | 2.24697 |
| A9  | 2.13817 | 0.00019  | -0.00024 | 0.00019  | -0.00005 | 2.13812 |
| A10 | 1.88914 | -0.00017 | 0.00031  | -0.00131 | -0.00101 | 1.88813 |
| A11 | 2.23684 | 0.00044  | 0.00190  | -0.00132 | 0.00068  | 2.23752 |
| A12 | 2.15606 | -0.00027 | -0.00211 | 0.00251  | 0.00031  | 2.15637 |
| A13 | 1.90152 | -0.00007 | 0.00064  | -0.00014 | 0.00054  | 1.90206 |
| A14 | 2.20461 | 0.00025  | -0.00019 | -0.00262 | -0.00275 | 2.20185 |
| A15 | 2.17419 | -0.00016 | -0.00026 | 0.00254  | 0.00221  | 2.17640 |
| A16 | 1.93585 | 0.00137  | -0.00340 | 0.00262  | -0.00135 | 1.93451 |
| A17 | 1.87182 | -0.00038 | 0.00086  | -0.00197 | -0.00099 | 1.87084 |
| A18 | 1.88203 | -0.00052 | -0.00044 | 0.00023  | -0.00005 | 1.88198 |
| A19 | 1.92246 | -0.00071 | 0.00437  | -0.00247 | 0.00221  | 1.92467 |
| A20 | 1.92506 | -0.00006 | -0.00032 | 0.00006  | -0.00035 | 1.92471 |
| A21 | 1.92560 | 0.00030  | -0.00106 | 0.00157  | 0.00046  | 1.92605 |
| A22 | 1.90929 | 0.00015  | -0.00348 | 0.00120  | -0.00252 | 1.90677 |
| A23 | 1.90154 | -0.00027 | 0.00388  | -0.00522 | -0.00133 | 1.90021 |
| A24 | 1.91712 | 0.00011  | 0.00374  | -0.00261 | 0.00140  | 1.91852 |
| A25 | 1.90137 | -0.00014 | -0.00060 | -0.00242 | -0.00296 | 1.89841 |
| A26 | 1.87590 | 0.00014  | -0.00458 | 0.00728  | 0.00273  | 1.87864 |
| A27 | 1.95804 | 0.00002  | 0.00092  | 0.00194  | 0.00255  | 1.96059 |
| A28 | 1.97267 | -0.00042 | 0.00738  | -0.02064 | -0.01360 | 1.95906 |
| A29 | 2.67019 | 0.00151  | -0.00166 | 0.01414  | 0.01260  | 2.68278 |

|     |          |          |          |          |          |          |
|-----|----------|----------|----------|----------|----------|----------|
| A30 | 2.17856  | -0.00013 | 0.00028  | -0.00104 | -0.00076 | 2.17780  |
| A31 | 1.95615  | 0.00005  | -0.00013 | 0.00021  | 0.00008  | 1.95624  |
| A32 | 2.14847  | 0.00008  | -0.00015 | 0.00083  | 0.00067  | 2.14914  |
| A33 | 2.07968  | 0.00005  | -0.00006 | 0.00053  | 0.00047  | 2.08014  |
| A34 | 2.15773  | -0.00010 | 0.00014  | -0.00093 | -0.00079 | 2.15694  |
| A35 | 2.04578  | 0.00004  | -0.00008 | 0.00040  | 0.00032  | 2.04610  |
| A36 | 1.92295  | 0.00086  | 0.00076  | 0.00646  | 0.00678  | 1.92973  |
| A37 | 2.63069  | 0.00325  | -0.00031 | 0.03299  | 0.03295  | 2.66364  |
| A38 | 2.07948  | 0.00015  | -0.00140 | -0.00010 | -0.00157 | 2.07790  |
| A39 | 2.09821  | 0.00019  | -0.00167 | -0.00031 | -0.00203 | 2.09618  |
| A40 | 2.00387  | 0.00004  | 0.00127  | 0.00106  | 0.00234  | 2.00621  |
| A41 | 2.00116  | -0.00025 | 0.00193  | 0.00001  | 0.00191  | 2.00307  |
| A42 | 2.02084  | -0.00021 | 0.00084  | -0.00074 | -0.00006 | 2.02078  |
| A43 | 2.04069  | 0.00033  | -0.00268 | -0.00073 | -0.00333 | 2.03736  |
| A44 | 2.14046  | -0.00008 | 0.00029  | 0.00036  | 0.00054  | 2.14101  |
| A45 | 1.96210  | 0.00002  | -0.00023 | -0.00430 | -0.00457 | 1.95753  |
| A46 | 2.03860  | 0.00028  | 0.00076  | -0.00044 | 0.00034  | 2.03894  |
| A47 | 2.02138  | -0.00025 | 0.00188  | 0.00251  | 0.00440  | 2.02578  |
| A48 | 1.04111  | 0.00203  | -0.00120 | 0.01629  | 0.01499  | 1.05609  |
| A49 | 1.65173  | -0.00210 | 0.00311  | -0.03436 | -0.03090 | 1.62083  |
| A50 | 2.51737  | -0.00021 | 0.00131  | -0.00644 | -0.00534 | 2.51202  |
| A51 | 2.28948  | -0.00032 | -0.00081 | -0.00184 | -0.00262 | 2.28686  |
| A52 | 1.93668  | -0.00087 | 0.00275  | 0.00073  | 0.00344  | 1.94012  |
| A53 | 1.92248  | 0.00016  | 0.00036  | -0.00083 | -0.00046 | 1.92201  |
| A54 | 1.94391  | -0.00112 | 0.00270  | -0.00175 | 0.00090  | 1.94481  |
| A55 | 1.88285  | 0.00048  | -0.00217 | 0.00028  | -0.00188 | 1.88097  |
| A56 | 1.88327  | 0.00098  | -0.00228 | 0.00122  | -0.00115 | 1.88212  |
| A57 | 1.89281  | 0.00047  | -0.00149 | 0.00045  | -0.00104 | 1.89177  |
| A58 | 3.33058  | 0.00171  | -0.00201 | 0.01445  | 0.01237  | 3.34295  |
| A59 | 3.72116  | 0.00090  | -0.00459 | 0.05093  | 0.04610  | 3.76727  |
| D1  | 0.02447  | -0.00103 | -0.01095 | -0.00525 | -0.01624 | 0.00823  |
| D2  | -3.12962 | -0.00047 | -0.00409 | -0.00257 | -0.00671 | -3.13633 |
| D3  | -3.13321 | -0.00034 | -0.00415 | -0.00286 | -0.00695 | -3.14016 |
| D4  | -0.00411 | 0.00022  | 0.00271  | -0.00018 | 0.00258  | -0.00153 |
| D5  | -0.02349 | 0.00095  | 0.00858  | 0.00415  | 0.01285  | -0.01064 |
| D6  | -3.08633 | 0.00074  | 0.00562  | 0.00693  | 0.01278  | -3.07355 |
| D7  | 3.13255  | 0.00033  | 0.00249  | 0.00201  | 0.00451  | 3.13706  |
| D8  | 0.06970  | 0.00012  | -0.00048 | 0.00479  | 0.00444  | 0.07414  |
| D9  | -0.01732 | 0.00077  | 0.00964  | 0.00459  | 0.01420  | -0.00313 |
| D10 | 3.12711  | 0.00051  | 0.00611  | 0.00179  | 0.00793  | 3.13504  |
| D11 | 3.13559  | 0.00026  | 0.00343  | 0.00216  | 0.00556  | 3.14115  |
| D12 | -0.00316 | 0.00001  | -0.00010 | -0.00064 | -0.00070 | -0.00387 |
| D13 | 0.00288  | -0.00018 | -0.00441 | -0.00206 | -0.00634 | -0.00346 |
| D14 | 3.09400  | -0.00027 | -0.00221 | -0.00470 | -0.00675 | 3.08725  |

|     |          |          |          |          |          |          |
|-----|----------|----------|----------|----------|----------|----------|
| D15 | -3.14134 | 0.00005  | -0.00114 | 0.00053  | -0.00055 | 3.14130  |
| D16 | -0.05021 | -0.00004 | 0.00106  | -0.00211 | -0.00096 | -0.05117 |
| D17 | 0.05232  | 0.00015  | 0.00160  | 0.00544  | 0.00700  | 0.05932  |
| D18 | -3.08539 | 0.00017  | 0.00226  | 0.00574  | 0.00796  | -3.07743 |
| D19 | -3.08609 | -0.00013 | -0.00236 | 0.00229  | -0.00003 | -3.08612 |
| D20 | 0.05939  | -0.00011 | -0.00170 | 0.00259  | 0.00093  | 0.06032  |
| D21 | 0.01257  | -0.00047 | -0.00250 | -0.00127 | -0.00391 | 0.00866  |
| D22 | 3.07710  | -0.00024 | 0.00040  | -0.00427 | -0.00411 | 3.07299  |
| D23 | -3.08142 | -0.00041 | -0.00469 | 0.00135  | -0.00354 | -3.08496 |
| D24 | -0.01689 | -0.00018 | -0.00179 | -0.00165 | -0.00374 | -0.02063 |
| D25 | -2.65130 | -0.00030 | -0.00096 | -0.00203 | -0.00372 | -2.65502 |
| D26 | 0.43278  | -0.00040 | 0.00162  | -0.00516 | -0.00422 | 0.42857  |
| D27 | 1.40111  | 0.00026  | -0.00061 | -0.01748 | -0.01837 | 1.38274  |
| D28 | -2.78216 | -0.00004 | 0.00333  | -0.02020 | -0.01708 | -2.79924 |
| D29 | -0.70843 | -0.00016 | 0.00231  | -0.01928 | -0.01710 | -0.72554 |
| D30 | -1.65000 | 0.00002  | -0.00405 | -0.01413 | -0.01833 | -1.66834 |
| D31 | 0.44992  | -0.00029 | -0.00011 | -0.01684 | -0.01705 | 0.43288  |
| D32 | 2.52364  | -0.00041 | -0.00112 | -0.01593 | -0.01707 | 2.50658  |
| D33 | -0.97906 | 0.00015  | -0.01288 | 0.01758  | 0.00459  | -0.97446 |
| D34 | 1.09778  | -0.00009 | -0.01332 | 0.01226  | -0.00125 | 1.09653  |
| D35 | -3.03418 | -0.00017 | -0.00749 | 0.00955  | 0.00195  | -3.03223 |
| D36 | -3.04862 | 0.00021  | -0.01472 | 0.01995  | 0.00526  | -3.04336 |
| D37 | -0.97178 | -0.00003 | -0.01516 | 0.01463  | -0.00058 | -0.97237 |
| D38 | 1.17945  | -0.00011 | -0.00932 | 0.01192  | 0.00262  | 1.18207  |
| D39 | 1.10487  | 0.00034  | -0.01609 | 0.01958  | 0.00345  | 1.10831  |
| D40 | -3.10149 | 0.00010  | -0.01653 | 0.01426  | -0.00240 | -3.10388 |
| D41 | -0.95025 | 0.00002  | -0.01069 | 0.01156  | 0.00080  | -0.94945 |
| D42 | -1.58512 | -0.00022 | -0.00218 | -0.00473 | -0.00735 | -1.59247 |
| D43 | 2.62230  | -0.00055 | 0.00257  | -0.00898 | -0.00671 | 2.61559  |
| D44 | 0.53256  | -0.00047 | 0.00568  | -0.01188 | -0.00636 | 0.52620  |
| D45 | -0.12920 | -0.00021 | 0.01523  | 0.00738  | 0.02161  | -0.10759 |
| D46 | 0.01789  | 0.00030  | -0.01817 | -0.00456 | -0.02262 | -0.00473 |
| D47 | -2.66329 | 0.00023  | -0.01702 | -0.01811 | -0.03531 | -2.69860 |
| D48 | -3.13512 | 0.00002  | 0.00059  | 0.00060  | 0.00119  | -3.13393 |
| D49 | 0.00605  | 0.00002  | 0.00026  | 0.00098  | 0.00124  | 0.00729  |
| D50 | 0.00217  | 0.00000  | -0.00014 | 0.00027  | 0.00013  | 0.00230  |
| D51 | -3.13985 | 0.00001  | -0.00047 | 0.00065  | 0.00018  | -3.13966 |
| D52 | -2.78174 | 0.00028  | 0.00480  | 0.00057  | 0.00492  | -2.77682 |
| D53 | 3.12584  | 0.00029  | 0.00625  | 0.01218  | 0.01800  | -3.13934 |
| D54 | -2.29752 | -0.00002 | 0.00957  | -0.02668 | -0.01715 | -2.31466 |
| D55 | -0.59532 | -0.00061 | 0.01083  | -0.03875 | -0.02810 | -0.62342 |
| D56 | -2.71554 | -0.00018 | 0.00313  | -0.00303 | 0.00008  | -2.71546 |
| D57 | -0.01268 | -0.00025 | 0.00225  | 0.00308  | 0.00527  | -0.00742 |
| D58 | -0.02229 | 0.00012  | -0.00294 | -0.00607 | -0.00896 | -0.03125 |



|     |          |          |          |          |          |          |
|-----|----------|----------|----------|----------|----------|----------|
| D59 | 2.68057  | 0.00005  | -0.00382 | 0.00004  | -0.00378 | 2.67680  |
| D60 | 0.91528  | -0.00007 | 0.00398  | -0.02927 | -0.02530 | 0.88998  |
| D61 | 0.19972  | -0.00073 | 0.00175  | -0.00605 | -0.00422 | 0.19550  |
| D62 | -1.48796 | 0.00051  | -0.00087 | -0.02935 | -0.03030 | -1.51826 |
| D63 | -2.20352 | -0.00015 | -0.00310 | -0.00613 | -0.00923 | -2.21275 |
| D64 | 1.96061  | -0.00004 | 0.00140  | 0.00867  | 0.01014  | 1.97075  |
| D65 | -0.43770 | 0.00003  | -0.00225 | 0.01028  | 0.00813  | -0.42957 |
| D66 | 2.52150  | -0.00015 | 0.00093  | 0.01060  | 0.01154  | 2.53304  |
| D67 | -1.67789 | 0.00000  | 0.00022  | 0.01088  | 0.01108  | -1.66681 |
| D68 | 0.42305  | -0.00005 | 0.00035  | 0.00974  | 0.01005  | 0.43310  |
| D69 | 1.31892  | -0.00002 | 0.00180  | 0.01132  | 0.01315  | 1.33208  |
| D70 | -2.88046 | 0.00012  | 0.00109  | 0.01160  | 0.01270  | -2.86777 |
| D71 | -0.77952 | 0.00008  | 0.00122  | 0.01046  | 0.01166  | -0.76786 |
| D72 | -1.05436 | -0.00008 | -0.00104 | 0.01591  | 0.01491  | -1.03945 |
| D73 | 1.02944  | 0.00006  | -0.00174 | 0.01618  | 0.01445  | 1.04389  |
| D74 | 3.13038  | 0.00002  | -0.00162 | 0.01505  | 0.01342  | -3.13939 |

| Item                 | Value    | Threshold | Converged? |
|----------------------|----------|-----------|------------|
| Maximum Force        | 0.003249 | 0.000450  | NO         |
| RMS Force            | 0.000579 | 0.000300  | NO         |
| Maximum Displacement | 0.137841 | 0.001800  | NO         |
| RMS Displacement     | 0.029998 | 0.001200  | NO         |

Predicted change in Energy=-2.698900D-04

GradGradGradGradGradGradGradGradGradGradGradGradGradGradGradGradGradGrad

Input orientation:

| Center Number | Atomic Number | Atomic Type | Coordinates (Angstroms) |           |           |
|---------------|---------------|-------------|-------------------------|-----------|-----------|
|               |               |             | X                       | Y         | Z         |
| 1             | 6             | 0           | -1.450945               | -1.851244 | 0.075182  |
| 2             | 6             | 0           | -2.709787               | -1.359426 | -0.045101 |
| 3             | 7             | 0           | -2.614012               | 0.020688  | 0.106681  |
| 4             | 6             | 0           | -1.322458               | 0.344944  | 0.317534  |
| 5             | 7             | 0           | -0.605187               | -0.777633 | 0.308298  |
| 6             | 6             | 0           | 0.866428                | -0.836218 | 0.422595  |
| 7             | 6             | 0           | 1.520553                | -0.913041 | -0.967300 |
| 8             | 1             | 0           | -1.088619               | -2.863383 | 0.021012  |
| 9             | 1             | 0           | -3.641788               | -1.863704 | -0.223987 |
| 10            | 1             | 0           | 1.185707                | 0.068474  | 0.941025  |
| 11            | 1             | 0           | 1.121081                | -1.720241 | 1.009888  |
| 12            | 1             | 0           | 1.112302                | -1.772722 | -1.511971 |
| 13            | 1             | 0           | 1.282584                | 0.000664  | -1.521754 |
| 14            | 35            | 0           | 0.758217                | 2.819495  | 0.287297  |
| 15            | 1             | 0           | -0.878811               | 1.354829  | 0.432151  |

|    |   |   |           |           |           |
|----|---|---|-----------|-----------|-----------|
| 16 | 6 | 0 | -3.647654 | 0.994546  | 0.057909  |
| 17 | 6 | 0 | -4.937944 | 0.721980  | -0.086462 |
| 18 | 1 | 0 | -3.262107 | 2.002218  | 0.148117  |
| 19 | 1 | 0 | -5.648331 | 1.536303  | -0.119121 |
| 20 | 1 | 0 | -5.331464 | -0.282590 | -0.175566 |
| 21 | 8 | 0 | 2.904841  | -1.111629 | -0.834536 |
| 22 | 1 | 0 | 3.372961  | -0.256368 | -0.811273 |
| 23 | 6 | 0 | 5.666334  | 1.825751  | -0.378648 |
| 24 | 6 | 0 | 6.270279  | 0.524980  | -0.707584 |
| 25 | 8 | 0 | 4.884027  | 0.796280  | -1.001279 |
| 26 | 1 | 0 | 5.403371  | 2.040046  | 0.655541  |
| 27 | 1 | 0 | 5.861629  | 2.692270  | -1.006443 |
| 28 | 1 | 0 | 6.879884  | 0.481986  | -1.608162 |
| 29 | 6 | 0 | 6.550051  | -0.522758 | 0.328233  |
| 30 | 1 | 0 | 6.400409  | -1.528324 | -0.076592 |
| 31 | 1 | 0 | 7.588972  | -0.449914 | 0.666776  |
| 32 | 1 | 0 | 5.895945  | -0.410644 | 1.196296  |

-----  
Distance matrix (angstroms):

|    |    | 1        | 2        | 3        | 4        | 5        |
|----|----|----------|----------|----------|----------|----------|
| 1  | C  | 0.000000 |          |          |          |          |
| 2  | C  | 1.356848 | 0.000000 |          |          |          |
| 3  | N  | 2.204052 | 1.391735 | 0.000000 |          |          |
| 4  | C  | 2.213251 | 2.227344 | 1.348225 | 0.000000 |          |
| 5  | N  | 1.386466 | 2.211949 | 2.171024 | 1.332195 | 0.000000 |
| 6  | C  | 2.553662 | 3.644421 | 3.598271 | 2.489459 | 1.477209 |
| 7  | C  | 3.285848 | 4.352642 | 4.372632 | 3.363932 | 2.482792 |
| 8  | H  | 1.076402 | 2.212339 | 3.263745 | 3.230475 | 2.160230 |
| 9  | H  | 2.211210 | 1.074673 | 2.171773 | 3.248178 | 3.268612 |
| 10 | H  | 3.374453 | 4.264530 | 3.890537 | 2.599244 | 2.079313 |
| 11 | H  | 2.739737 | 3.989830 | 4.218713 | 3.273412 | 2.088239 |
| 12 | H  | 3.015867 | 4.114716 | 4.440920 | 3.709401 | 2.693204 |
| 13 | H  | 3.667689 | 4.468711 | 4.223228 | 3.207453 | 2.741991 |
| 14 | Br | 5.171188 | 5.440673 | 4.386099 | 3.233192 | 3.846900 |
| 15 | H  | 3.276227 | 3.308689 | 2.212868 | 1.108976 | 2.153510 |
| 16 | C  | 3.595045 | 2.536018 | 1.420984 | 2.428153 | 3.529862 |
| 17 | C  | 4.336677 | 3.049367 | 2.435113 | 3.657472 | 4.601897 |
| 18 | H  | 4.258497 | 3.412190 | 2.085235 | 2.556853 | 3.848695 |
| 19 | H  | 5.397339 | 4.126228 | 3.399289 | 4.508123 | 5.565095 |
| 20 | H  | 4.193087 | 2.837214 | 2.748852 | 4.087673 | 4.776703 |
| 21 | O  | 4.510819 | 5.675268 | 5.711897 | 4.617243 | 3.706470 |
| 22 | H  | 5.157470 | 6.229252 | 6.063269 | 4.866492 | 4.165431 |
| 23 | C  | 8.023834 | 8.967497 | 8.488693 | 7.177790 | 6.825062 |
| 24 | C  | 8.116432 | 9.199536 | 8.935768 | 7.663742 | 7.071128 |

|    |    |          |           |           |           |          |
|----|----|----------|-----------|-----------|-----------|----------|
| 25 | O  | 6.949822 | 7.951564  | 7.619036  | 6.361088  | 5.858640 |
| 26 | H  | 7.903202 | 8.824435  | 8.285981  | 6.944379  | 6.645499 |
| 27 | H  | 8.676817 | 9.529407  | 8.956164  | 7.672937  | 7.455768 |
| 28 | H  | 8.813643 | 9.889173  | 9.658547  | 8.426476  | 7.828521 |
| 29 | C  | 8.114484 | 9.305052  | 9.182835  | 7.920191  | 7.159804 |
| 30 | H  | 7.859458 | 9.111816  | 9.148377  | 7.956579  | 7.056207 |
| 31 | H  | 9.166996 | 10.363322 | 10.229177 | 8.953623  | 8.208542 |
| 32 | H  | 7.570272 | 8.746421  | 8.590266  | 7.310847  | 6.571753 |
|    |    | 6        | 7         | 8         | 9         | 10       |
| 6  | C  | 0.000000 |           |           |           |          |
| 7  | C  | 1.538048 | 0.000000  |           |           |          |
| 8  | H  | 2.844798 | 3.404170  | 0.000000  |           |          |
| 9  | H  | 4.668812 | 5.301513  | 2.752827  | 0.000000  |          |
| 10 | H  | 1.090494 | 2.171912  | 3.822927  | 5.328721  | 0.000000 |
| 11 | H  | 1.091447 | 2.172653  | 2.677205  | 4.922190  | 1.791206 |
| 12 | H  | 2.163340 | 1.096534  | 2.895450  | 4.926312  | 3.067993 |
| 13 | H  | 2.157326 | 1.094946  | 4.025605  | 5.423053  | 2.465617 |
| 14 | Br | 3.659816 | 4.010860  | 5.981372  | 6.446224  | 2.859759 |
| 15 | H  | 2.801185 | 3.585896  | 4.243391  | 4.292262  | 2.485135 |
| 16 | C  | 4.884837 | 5.603598  | 4.629648  | 2.872123  | 4.999889 |
| 17 | C  | 6.031406 | 6.720220  | 5.261528  | 2.895633  | 6.243548 |
| 18 | H  | 5.017655 | 5.711106  | 5.330505  | 3.902303  | 4.914379 |
| 19 | H  | 6.954452 | 7.623096  | 6.337811  | 3.949336  | 7.069831 |
| 20 | H  | 6.251253 | 6.926359  | 4.969997  | 2.314578  | 6.621446 |
| 21 | O  | 2.410676 | 1.404748  | 4.443909  | 6.617910  | 2.738738 |
| 22 | H  | 2.853308 | 1.971542  | 5.234016  | 7.220466  | 2.821374 |
| 23 | C  | 5.546816 | 5.003498  | 8.232685  | 10.013847 | 4.990549 |
| 24 | C  | 5.686103 | 4.969432  | 8.134202  | 10.207289 | 5.364623 |
| 25 | O  | 4.564381 | 3.773048  | 7.078893  | 8.964888  | 4.240262 |
| 26 | H  | 5.376896 | 5.141071  | 8.160403  | 9.890790  | 4.664471 |
| 27 | H  | 6.280478 | 5.643114  | 8.956947  | 10.568068 | 5.704488 |
| 28 | H  | 6.482537 | 5.574874  | 8.794472  | 10.868476 | 6.252439 |
| 29 | C  | 5.693042 | 5.208318  | 7.995136  | 10.294497 | 5.431506 |
| 30 | H  | 5.599388 | 4.998493  | 7.607723  | 10.048877 | 5.547831 |
| 31 | H  | 6.738060 | 6.301619  | 9.030085  | 11.354393 | 6.430066 |
| 32 | H  | 5.106443 | 4.906894  | 7.495422  | 9.751766  | 4.741419 |
|    |    | 11       | 12        | 13        | 14        | 15       |
| 11 | H  | 0.000000 |           |           |           |          |
| 12 | H  | 2.522420 | 0.000000  |           |           |          |
| 13 | H  | 3.065422 | 1.781570  | 0.000000  |           |          |
| 14 | Br | 4.611183 | 4.944815  | 3.390197  | 0.000000  |          |
| 15 | H  | 3.713409 | 4.186373  | 3.212963  | 2.201384  | 0.000000 |
| 16 | C  | 5.569306 | 5.725337  | 5.271659  | 4.774386  | 2.817154 |
| 17 | C  | 6.624063 | 6.697842  | 6.424587  | 6.081572  | 4.140775 |

|    |   |           |           |           |           |           |
|----|---|-----------|-----------|-----------|-----------|-----------|
| 18 | H | 5.814782  | 6.011782  | 5.239170  | 4.104914  | 2.485938  |
| 19 | H | 7.596360  | 7.654791  | 7.236238  | 6.546420  | 4.804701  |
| 20 | H | 6.716211  | 6.747488  | 6.755597  | 6.849919  | 4.782947  |
| 21 | O | 2.637064  | 2.027106  | 2.083551  | 4.617384  | 4.690835  |
| 22 | H | 3.245075  | 2.810851  | 2.222729  | 4.183858  | 4.713769  |
| 23 | C | 5.929706  | 5.913766  | 4.884148  | 5.051793  | 6.611965  |
| 24 | C | 5.874093  | 5.703613  | 5.080835  | 6.052884  | 7.286778  |
| 25 | O | 4.953527  | 4.592003  | 3.724822  | 4.772435  | 5.964646  |
| 26 | H | 5.709932  | 6.135844  | 5.087296  | 4.724468  | 6.323388  |
| 27 | H | 6.782966  | 6.538181  | 5.336473  | 5.266380  | 7.020814  |
| 28 | H | 6.698342  | 6.193380  | 5.618621  | 6.821401  | 8.069825  |
| 29 | C | 5.601101  | 5.875192  | 5.607374  | 6.687127  | 7.663166  |
| 30 | H | 5.393382  | 5.484899  | 5.533393  | 7.132340  | 7.845918  |
| 31 | H | 6.600384  | 6.960174  | 6.690533  | 7.582364  | 8.661149  |
| 32 | H | 4.954706  | 5.663321  | 5.370296  | 6.136474  | 7.042594  |
|    |   | 16        | 17        | 18        | 19        | 20        |
| 16 | C | 0.000000  |           |           |           |           |
| 17 | C | 1.326643  | 0.000000  |           |           |           |
| 18 | H | 1.082676  | 2.121902  | 0.000000  |           |           |
| 19 | H | 2.080276  | 1.081128  | 2.445927  | 0.000000  |           |
| 20 | H | 2.126218  | 1.082571  | 3.099574  | 1.847150  | 0.000000  |
| 21 | O | 6.940290  | 8.088944  | 6.978030  | 8.982211  | 8.304112  |
| 22 | H | 7.183961  | 8.399622  | 7.074303  | 9.223689  | 8.727647  |
| 23 | C | 9.361189  | 10.665570 | 8.945707  | 11.321341 | 11.199906 |
| 24 | C | 9.958508  | 11.227148 | 9.684051  | 11.975906 | 11.641978 |
| 25 | O | 8.599464  | 9.864762  | 8.314740  | 10.595112 | 10.305437 |
| 26 | H | 9.130788  | 10.451347 | 8.680404  | 11.090265 | 11.014630 |
| 27 | H | 9.718105  | 11.016314 | 9.222350  | 11.601843 | 11.611437 |
| 28 | H | 10.670875 | 11.917811 | 10.404595 | 12.660371 | 12.318844 |
| 29 | C | 10.313510 | 11.562671 | 10.133429 | 12.379030 | 11.894616 |
| 30 | H | 10.360818 | 11.559507 | 10.289773 | 12.432453 | 11.798241 |
| 31 | H | 11.345438 | 12.604139 | 11.136781 | 13.408538 | 12.948947 |
| 32 | H | 9.713432  | 10.968201 | 9.528404  | 11.780969 | 11.311636 |
|    |   | 21        | 22        | 23        | 24        | 25        |
| 21 | O | 0.000000  |           |           |           |           |
| 22 | H | 0.975269  | 0.000000  |           |           |           |
| 23 | C | 4.057324  | 3.127610  | 0.000000  |           |           |
| 24 | C | 3.744433  | 3.002617  | 1.471379  | 0.000000  |           |
| 25 | O | 2.754106  | 1.851349  | 1.435089  | 1.442759  | 0.000000  |
| 26 | H | 4.289060  | 3.398180  | 1.088402  | 2.214738  | 2.135819  |
| 27 | H | 4.820974  | 3.863421  | 1.087714  | 2.225637  | 2.133192  |
| 28 | H | 4.351904  | 3.671336  | 2.188633  | 1.088350  | 2.109628  |
| 29 | C | 3.871222  | 3.385756  | 2.606939  | 1.499648  | 2.506611  |
| 30 | H | 3.600987  | 3.364978  | 3.446727  | 2.152009  | 2.925448  |

|    |   |          |          |          |          |          |
|----|---|----------|----------|----------|----------|----------|
| 31 | H | 4.963154 | 4.471783 | 3.157230 | 2.139682 | 3.413522 |
| 32 | H | 3.682711 | 3.227938 | 2.744929 | 2.154131 | 2.703697 |
|    |   | 26       | 27       | 28       | 29       | 30       |
| 26 | H | 0.000000 |          |          |          |          |
| 27 | H | 1.843255 | 0.000000 |          |          |          |
| 28 | H | 3.119614 | 2.506844 | 0.000000 |          |          |
| 29 | C | 2.826653 | 3.548477 | 2.206338 | 0.000000 |          |
| 30 | H | 3.776688 | 4.355264 | 2.572343 | 1.094276 | 0.000000 |
| 31 | H | 3.313137 | 3.956855 | 2.558630 | 1.095114 | 1.768685 |
| 32 | H | 2.557523 | 3.805432 | 3.103209 | 1.092684 | 1.767467 |
|    |   | 31       | 32       |          |          |          |
| 31 | H | 0.000000 |          |          |          |          |
| 32 | H | 1.774338 | 0.000000 |          |          |          |

Stoichiometry C10H17BrN2O2

Framework group C1[X(C10H17BrN2O2)]

Deg. of freedom 90

Full point group C1 NOp 1

Largest Abelian subgroup C1 NOp 1

Largest concise Abelian subgroup C1 NOp 1

Standard orientation:

| Center<br>Number | Atomic<br>Number | Atomic<br>Type | Coordinates (Angstroms) |           |           |
|------------------|------------------|----------------|-------------------------|-----------|-----------|
|                  |                  |                | X                       | Y         | Z         |
| 1                | 6                | 0              | -2.492168               | 2.327239  | -0.237072 |
| 2                | 6                | 0              | -3.721453               | 1.805449  | 0.002992  |
| 3                | 7                | 0              | -3.577833               | 0.421349  | -0.020835 |
| 4                | 6                | 0              | -2.287537               | 0.123784  | -0.274411 |
| 5                | 7                | 0              | -1.617254               | 1.266476  | -0.414831 |
| 6                | 6                | 0              | -0.157679               | 1.365505  | -0.619722 |
| 7                | 6                | 0              | 0.567563                | 1.601522  | 0.715910  |
| 8                | 1                | 0              | -2.169049               | 3.351971  | -0.301567 |
| 9                | 1                | 0              | -4.662123               | 2.291616  | 0.186575  |
| 10               | 1                | 0              | 0.169528                | 0.426118  | -1.066559 |
| 11               | 1                | 0              | 0.028277                | 2.196017  | -1.303043 |
| 12               | 1                | 0              | 0.154859                | 2.495578  | 1.198326  |
| 13               | 1                | 0              | 0.397673                | 0.738854  | 1.368480  |
| 14               | 35               | 0              | -0.109026               | -2.260776 | -0.127819 |
| 15               | 1                | 0              | -1.809942               | -0.876169 | -0.317128 |
| 16               | 6                | 0              | -4.566662               | -0.578916 | 0.181362  |
| 17               | 6                | 0              | -5.857211               | -0.339243 | 0.373767  |
| 18               | 1                | 0              | -4.145791               | -1.576323 | 0.166070  |
| 19               | 1                | 0              | -6.530925               | -1.171007 | 0.525807  |
| 20               | 1                | 0              | -6.285970               | 0.654690  | 0.388725  |

|    |   |   |          |           |           |
|----|---|---|----------|-----------|-----------|
| 21 | 8 | 0 | 1.933292 | 1.834890  | 0.484306  |
| 22 | 1 | 0 | 2.433971 | 0.998553  | 0.516087  |
| 23 | 6 | 0 | 4.783431 | -1.033663 | 0.152666  |
| 24 | 6 | 0 | 5.350806 | 0.313645  | 0.319404  |
| 25 | 8 | 0 | 3.994859 | 0.023697  | 0.718019  |
| 26 | 1 | 0 | 4.473447 | -1.357647 | -0.839082 |
| 27 | 1 | 0 | 5.047872 | -1.826893 | 0.848352  |
| 28 | 1 | 0 | 6.006336 | 0.466388  | 1.174656  |
| 29 | 6 | 0 | 5.530687 | 1.263814  | -0.826792 |
| 30 | 1 | 0 | 5.362412 | 2.298361  | -0.512409 |
| 31 | 1 | 0 | 6.551714 | 1.194822  | -1.216690 |
| 32 | 1 | 0 | 4.835353 | 1.043950  | -1.640505 |

-----

Rotational constants (GHZ):      0.6507346      0.1770297      0.1434440

Standard basis: 6-311++G(d,p) (5D, 7F)

There are    492 symmetry adapted cartesian basis functions of A    symmetry.

There are    475 symmetry adapted basis functions of A    symmetry.

475 basis functions,    751 primitive gaussians,    492 cartesian basis functions

71 alpha electrons      71 beta electrons

nuclear repulsion energy      1264.5351507745 Hartrees.

NAtoms=    32 NActive=    32 NUniq=    32 SFac= 1.00D+00 NAtFMM=    60 NAOKFM=F

Big=F

Integral buffers will be    131072 words long.

Raffenetti 2 integral format.

Two-electron integral symmetry is turned on.

One-electron integrals computed using PRISM.

NBasis=    475 RedAO= T EigKep=    3.95D-06    NBF=    475

NBsUse=    475 1.00D-06 EigRej= -1.00D+00    NBFU=    475

Initial guess from the checkpoint file: "/home/suqian/liuwen/qianmengshijie/ohpo/ohpo.chk"

B after Tr=    0.000000    0.000000    0.000000

Rot=    0.999994    0.003281    -0.000051    0.001087 Ang=    0.40 deg.

ExpMin= 3.50D-02 ExpMax= 4.40D+05 ExpMxC= 1.51D+04 IAcc=3 IRadAn=      5 AccDes=

0.00D+00

Harris functional with IExCor=    402 and IRadAn=      5 diagonalized for initial guess.

HarFok: IExCor=    402 AccDes= 0.00D+00 IRadAn=      5 IDoV= 1 UseB2=F ITyADJ=14

ICtDFT=    3500011 ScaDFX=    1.000000    1.000000    1.000000    1.000000

FoFCou: FMM=F IPFlag=      0 FMFlag=    100000 FMFlg1=      0

NFxFlg=      0 DoJE=T BraDBF=F KetDBF=T FulRan=T

wScrn=    0.000000 ICntrl=      500 IOpCl=    0 I1Cent=    200000004 NGrid=

0

NMat0=    1 NMatS0=      1 NMatT0=    0 NMatD0=    1 NMtDS0=    0

NMtDT0=    0

Petite list used in FoFCou.

Requested convergence on RMS density matrix=1.00D-08 within 128 cycles.

Requested convergence on MAX density matrix=1.00D-06.

Requested convergence on energy=1.00D-06.

No special actions if energy rises.

SCF Done: E(RB3LYP) = -3225.51608300 A.U. after 11 cycles

NFock= 11 Conv=0.30D-08 -V/T= 2.0018

Calling FoFJK, ICntrl= 2127 FMM=F ISym2X=0 l1Cent= 0 IOpCIX= 0 NMat=1 NMatS=1

NMatT=0.

\*\*\*\*\* Axes restored to original set \*\*\*\*\*

| Center | Atomic | Forces (Hartrees/Bohr) |              |              |
|--------|--------|------------------------|--------------|--------------|
| Number | Number | X                      | Y            | Z            |
| 1      | 6      | -0.000337256           | 0.000004727  | 0.000508753  |
| 2      | 6      | -0.000154409           | 0.000227192  | -0.000338640 |
| 3      | 7      | -0.000294245           | -0.000249007 | -0.000012418 |
| 4      | 6      | -0.001336704           | -0.000619058 | 0.001065814  |
| 5      | 7      | -0.000182101           | -0.000594555 | -0.000146912 |
| 6      | 6      | -0.000306984           | -0.000671286 | -0.000460498 |
| 7      | 6      | -0.000519031           | -0.000132908 | 0.000222109  |
| 8      | 1      | 0.000065693            | 0.000025790  | 0.000130556  |
| 9      | 1      | 0.000009416            | 0.000067608  | -0.000084058 |
| 10     | 1      | 0.000192066            | 0.000502849  | -0.000379389 |
| 11     | 1      | -0.000032530           | 0.000326855  | 0.000145372  |
| 12     | 1      | 0.000045066            | 0.000360901  | -0.000588001 |
| 13     | 1      | -0.000010043           | 0.000260791  | 0.000097931  |
| 14     | 35     | 0.000423529            | 0.001009135  | 0.000372816  |
| 15     | 1      | 0.001541668            | 0.000392484  | -0.000603620 |
| 16     | 6      | 0.000113538            | -0.000153835 | -0.000068718 |
| 17     | 6      | -0.000155267           | 0.000027822  | -0.000001590 |
| 18     | 1      | 0.000015949            | 0.000043375  | 0.000021712  |
| 19     | 1      | 0.000015268            | -0.000011286 | 0.000017148  |
| 20     | 1      | 0.000005523            | -0.000006681 | 0.000019973  |
| 21     | 8      | 0.000389041            | 0.001067961  | 0.000759555  |
| 22     | 1      | 0.000739479            | -0.003343980 | -0.000273655 |
| 23     | 6      | 0.000900165            | 0.000349424  | 0.001790225  |
| 24     | 6      | -0.002015653           | 0.002337508  | -0.001332436 |
| 25     | 8      | 0.000504829            | 0.001092866  | -0.001317295 |
| 26     | 1      | -0.000471342           | 0.000190055  | -0.001509312 |
| 27     | 1      | -0.000804393           | -0.000775456 | 0.000702528  |
| 28     | 1      | 0.000479234            | -0.000595984 | 0.000077793  |
| 29     | 6      | 0.001569044            | -0.003120826 | 0.002581991  |
| 30     | 1      | -0.000144899           | 0.000855073  | -0.000725889 |
| 31     | 1      | -0.000162697           | 0.000170788  | -0.000078761 |
| 32     | 1      | -0.000081950           | 0.000961658  | -0.000593082 |

-----  
Cartesian Forces: Max 0.003343980 RMS 0.000851659

GradGradGradGradGradGradGradGradGradGradGradGradGradGradGradGradGradGradGradGrad

Berny optimization.

Using GEDIIS/GDIIS optimizer.

FormGI is forming the generalized inverse of G from B-inverse, IUseBI=4.

GSVD: received Info= 1 from GESDD.

Internal Forces: Max 0.002349768 RMS 0.000548663

Search for a local minimum.

Step number 12 out of a maximum of 177

All quantities printed in internal units (Hartrees-Bohrs-Radians)

Mixed Optimization -- En-DIIS/RFO-DIIS

Swapping is turned off.

Update second derivatives using D2CorX and points 11 12

DE= -3.69D-04 DEPred=-2.70D-04 R= 1.37D+00

TightC=F SS= 1.41D+00 RLast= 1.64D-01 DXNew= 4.0363D+00 4.9315D-01

Trust test= 1.37D+00 RLast= 1.64D-01 DXMaxT set to 2.40D+00

ITU= 1 1 1 1 1 1 1 0 1 0 1 0

|                 |         |         |         |         |         |
|-----------------|---------|---------|---------|---------|---------|
| Eigenvalues --- | 0.00116 | 0.00220 | 0.00240 | 0.00384 | 0.00440 |
| Eigenvalues --- | 0.00933 | 0.01117 | 0.01314 | 0.01398 | 0.01603 |
| Eigenvalues --- | 0.01703 | 0.01873 | 0.02014 | 0.02067 | 0.02152 |
| Eigenvalues --- | 0.02157 | 0.02313 | 0.02386 | 0.02554 | 0.02906 |
| Eigenvalues --- | 0.03062 | 0.03066 | 0.03290 | 0.03781 | 0.04057 |
| Eigenvalues --- | 0.04664 | 0.05076 | 0.05242 | 0.05397 | 0.05526 |
| Eigenvalues --- | 0.05909 | 0.06483 | 0.07324 | 0.09220 | 0.09920 |
| Eigenvalues --- | 0.10785 | 0.11000 | 0.11847 | 0.11920 | 0.12890 |
| Eigenvalues --- | 0.13818 | 0.15144 | 0.15525 | 0.15997 | 0.16000 |
| Eigenvalues --- | 0.16000 | 0.16000 | 0.16002 | 0.16019 | 0.16106 |
| Eigenvalues --- | 0.16895 | 0.17310 | 0.19347 | 0.21834 | 0.22023 |
| Eigenvalues --- | 0.22775 | 0.23563 | 0.23694 | 0.25011 | 0.26695 |
| Eigenvalues --- | 0.27880 | 0.29227 | 0.31914 | 0.32889 | 0.33054 |
| Eigenvalues --- | 0.33177 | 0.34096 | 0.34308 | 0.34540 | 0.34769 |
| Eigenvalues --- | 0.34952 | 0.35684 | 0.35688 | 0.35859 | 0.36197 |
| Eigenvalues --- | 0.36441 | 0.36660 | 0.37228 | 0.37315 | 0.37782 |
| Eigenvalues --- | 0.38865 | 0.42188 | 0.42521 | 0.45338 | 0.46882 |
| Eigenvalues --- | 0.49292 | 0.53577 | 0.54564 | 0.56248 | 0.60357 |

En-DIIS/RFO-DIIS IScMMF= 0 using points: 12 11 10 9

RFO step: Lambda=-1.87006801D-04.

EnCoef did 100 forward-backward iterations

DidBck=T Rises=F En-DIIS coefs: 0.76382 0.00000 0.00339 0.23279

Iteration 1 RMS(Cart)= 0.11971240 RMS(Int)= 0.01212438

Iteration 2 RMS(Cart)= 0.01646707 RMS(Int)= 0.00035256

Iteration 3 RMS(Cart)= 0.00009575 RMS(Int)= 0.00035013



| Iteration | 4 RMS(Cart)= | 0.00000002 | RMS(Int)= | 0.00035013 |          |         |
|-----------|--------------|------------|-----------|------------|----------|---------|
| Variable  | Old X        | -DE/DX     | Delta X   | Delta X    | Delta X  | New X   |
|           |              |            | (Linear)  | (Quad)     | (Total)  |         |
| R1        | 2.56407      | 0.00019    | 0.00042   | -0.00125   | -0.00089 | 2.56318 |
| R2        | 2.62004      | 0.00013    | -0.00053  | 0.00209    | 0.00156  | 2.62160 |
| R3        | 2.03410      | -0.00001   | 0.00000   | 0.00003    | 0.00002  | 2.03413 |
| R4        | 2.63000      | -0.00020   | -0.00055  | 0.00082    | 0.00023  | 2.63023 |
| R5        | 2.03084      | -0.00002   | -0.00004  | -0.00009   | -0.00012 | 2.03071 |
| R6        | 2.54778      | 0.00035    | 0.00033   | 0.00023    | 0.00060  | 2.54837 |
| R7        | 2.68527      | -0.00008   | -0.00013  | 0.00030    | 0.00017  | 2.68544 |
| R8        | 2.51748      | 0.00022    | 0.00025   | 0.00132    | 0.00185  | 2.51933 |
| R9        | 2.09566      | 0.00134    | -0.00094  | 0.01335    | 0.01249  | 2.10815 |
| R10       | 2.79152      | 0.00075    | 0.00156   | -0.00228   | -0.00057 | 2.79095 |
| R11       | 2.90649      | 0.00044    | 0.00006   | 0.00259    | 0.00301  | 2.90950 |
| R12       | 2.06073      | 0.00029    | 0.00051   | 0.00103    | 0.00154  | 2.06228 |
| R13       | 2.06254      | -0.00019   | -0.00054  | 0.00059    | 0.00005  | 2.06259 |
| R14       | 2.07215      | -0.00001   | -0.00064  | 0.00168    | 0.00104  | 2.07319 |
| R15       | 2.06915      | 0.00017    | -0.00017  | 0.00215    | 0.00197  | 2.07112 |
| R16       | 2.65459      | 0.00149    | 0.00463   | -0.01272   | -0.00793 | 2.64666 |
| R17       | 4.16001      | 0.00022    | 0.03487   | -0.10739   | -0.07256 | 4.08745 |
| R18       | 9.01859      | -0.00023   | -0.20197  | 0.56372    | 0.36146  | 9.38006 |
| R19       | 2.50699      | 0.00013    | 0.00006   | 0.00034    | 0.00039  | 2.50738 |
| R20       | 2.04596      | 0.00004    | 0.00002   | 0.00024    | 0.00026  | 2.04622 |
| R21       | 2.04304      | -0.00002   | -0.00002  | -0.00007   | -0.00009 | 2.04295 |
| R22       | 2.04576      | 0.00001    | 0.00001   | -0.00017   | -0.00016 | 2.04560 |
| R23       | 1.84299      | -0.00067   | -0.00130  | 0.00203    | 0.00073  | 1.84372 |
| R24       | 3.49854      | 0.00143    | 0.05811   | -0.04026   | 0.01795  | 3.51649 |
| R25       | 2.78050      | 0.00012    | -0.00177  | -0.00337   | -0.00570 | 2.77480 |
| R26       | 2.71193      | -0.00026   | 0.00175   | 0.00207    | 0.00410  | 2.71602 |
| R27       | 2.05678      | -0.00128   | -0.00175  | -0.00062   | -0.00237 | 2.05441 |
| R28       | 2.05548      | -0.00117   | -0.00160  | -0.00042   | -0.00202 | 2.05346 |
| R29       | 2.72642      | -0.00027   | -0.00399  | 0.01480    | 0.01110  | 2.73752 |
| R30       | 2.05668      | 0.00023    | 0.00079   | -0.00134   | -0.00055 | 2.05614 |
| R31       | 2.83392      | 0.00182    | 0.00585   | -0.00214   | 0.00371  | 2.83764 |
| R32       | 2.06788      | -0.00050   | -0.00102  | -0.00052   | -0.00155 | 2.06634 |
| R33       | 2.06947      | -0.00017   | -0.00076  | -0.00004   | -0.00080 | 2.06866 |
| R34       | 2.06487      | -0.00032   | -0.00065  | -0.00007   | -0.00072 | 2.06415 |
| A1        | 1.87567      | 0.00011    | 0.00033   | -0.00113   | -0.00083 | 1.87484 |
| A2        | 2.27662      | 0.00004    | 0.00045   | -0.00007   | 0.00036  | 2.27699 |
| A3        | 2.13087      | -0.00015   | -0.00080  | 0.00129    | 0.00047  | 2.13134 |
| A4        | 1.86077      | 0.00002    | -0.00002  | 0.00082    | 0.00071  | 1.86148 |
| A5        | 2.27742      | 0.00004    | 0.00027   | -0.00062   | -0.00035 | 2.27707 |
| A6        | 2.14499      | -0.00006   | -0.00026  | -0.00016   | -0.00042 | 2.14457 |
| A7        | 1.89809      | 0.00002    | -0.00024  | 0.00103    | 0.00081  | 1.89890 |

|     |         |          |          |          |          |         |
|-----|---------|----------|----------|----------|----------|---------|
| A8  | 2.24697 | -0.00012 | -0.00036 | -0.00057 | -0.00094 | 2.24603 |
| A9  | 2.13812 | 0.00010  | 0.00060  | -0.00049 | 0.00009  | 2.13821 |
| A10 | 1.88813 | 0.00001  | 0.00032  | -0.00186 | -0.00165 | 1.88648 |
| A11 | 2.23752 | 0.00033  | 0.00005  | 0.00182  | 0.00159  | 2.23911 |
| A12 | 2.15637 | -0.00034 | -0.00034 | -0.00030 | -0.00027 | 2.15611 |
| A13 | 1.90206 | -0.00015 | -0.00046 | 0.00144  | 0.00084  | 1.90290 |
| A14 | 2.20185 | 0.00054  | 0.00356  | -0.00462 | -0.00137 | 2.20048 |
| A15 | 2.17640 | -0.00038 | -0.00288 | 0.00320  | 0.00079  | 2.17719 |
| A16 | 1.93451 | 0.00149  | 0.00605  | 0.00132  | 0.00796  | 1.94246 |
| A17 | 1.87084 | -0.00025 | -0.00145 | -0.00319 | -0.00481 | 1.86603 |
| A18 | 1.88198 | -0.00056 | 0.00015  | -0.00040 | -0.00039 | 1.88160 |
| A19 | 1.92467 | -0.00082 | -0.00817 | 0.00726  | -0.00105 | 1.92362 |
| A20 | 1.92471 | -0.00011 | 0.00343  | -0.00411 | -0.00078 | 1.92393 |
| A21 | 1.92605 | 0.00027  | -0.00004 | -0.00101 | -0.00100 | 1.92505 |
| A22 | 1.90677 | 0.00034  | 0.00677  | -0.00481 | 0.00211  | 1.90889 |
| A23 | 1.90021 | -0.00016 | -0.00195 | 0.00109  | -0.00070 | 1.89951 |
| A24 | 1.91852 | 0.00027  | -0.00377 | 0.00427  | 0.00003  | 1.91855 |
| A25 | 1.89841 | -0.00016 | 0.00219  | -0.01162 | -0.00948 | 1.88893 |
| A26 | 1.87864 | -0.00023 | 0.00114  | -0.00005 | 0.00114  | 1.87978 |
| A27 | 1.96059 | -0.00005 | -0.00410 | 0.01053  | 0.00673  | 1.96731 |
| A28 | 1.95906 | -0.00061 | 0.03606  | -0.11247 | -0.07773 | 1.88134 |
| A29 | 2.68278 | 0.00167  | -0.00920 | 0.06292  | 0.05355  | 2.73634 |
| A30 | 2.17780 | 0.00002  | 0.00032  | -0.00164 | -0.00132 | 2.17648 |
| A31 | 1.95624 | -0.00001 | 0.00018  | -0.00028 | -0.00010 | 1.95614 |
| A32 | 2.14914 | -0.00001 | -0.00050 | 0.00191  | 0.00142  | 2.15056 |
| A33 | 2.08014 | 0.00001  | -0.00017 | 0.00108  | 0.00090  | 2.08105 |
| A34 | 2.15694 | -0.00001 | 0.00027  | -0.00183 | -0.00156 | 2.15538 |
| A35 | 2.04610 | 0.00001  | -0.00010 | 0.00075  | 0.00066  | 2.04676 |
| A36 | 1.92973 | 0.00017  | -0.00802 | 0.01526  | 0.00748  | 1.93721 |
| A37 | 2.66364 | 0.00235  | -0.02489 | 0.13975  | 0.11544  | 2.77908 |
| A38 | 2.07790 | 0.00033  | 0.00324  | 0.00018  | 0.00306  | 2.08097 |
| A39 | 2.09618 | 0.00024  | 0.00340  | -0.00232 | 0.00153  | 2.09771 |
| A40 | 2.00621 | -0.00003 | -0.00280 | 0.00165  | -0.00101 | 2.00520 |
| A41 | 2.00307 | -0.00021 | -0.00257 | -0.00012 | -0.00296 | 2.00011 |
| A42 | 2.02078 | -0.00027 | -0.00209 | -0.00130 | -0.00322 | 2.01756 |
| A43 | 2.03736 | 0.00067  | 0.00423  | -0.00210 | 0.00266  | 2.04002 |
| A44 | 2.14101 | -0.00021 | -0.00072 | -0.00246 | -0.00375 | 2.13725 |
| A45 | 1.95753 | 0.00027  | 0.00435  | -0.00721 | -0.00300 | 1.95453 |
| A46 | 2.03894 | 0.00018  | -0.00031 | -0.00034 | -0.00053 | 2.03841 |
| A47 | 2.02578 | -0.00051 | -0.00498 | 0.00710  | 0.00215  | 2.02793 |
| A48 | 1.05609 | 0.00195  | -0.00747 | 0.06972  | 0.06221  | 1.11831 |
| A49 | 1.62083 | -0.00218 | 0.02908  | -0.16042 | -0.13099 | 1.48983 |
| A50 | 2.51202 | -0.00040 | 0.00630  | -0.03068 | -0.02538 | 2.48664 |
| A51 | 2.28686 | -0.00031 | -0.00328 | -0.00215 | -0.00588 | 2.28098 |

|     |          |          |          |          |          |          |
|-----|----------|----------|----------|----------|----------|----------|
| A52 | 1.94012  | -0.00116 | -0.00601 | 0.00337  | -0.00260 | 1.93751  |
| A53 | 1.92201  | 0.00025  | 0.00073  | -0.00133 | -0.00061 | 1.92140  |
| A54 | 1.94481  | -0.00127 | -0.00506 | -0.00335 | -0.00837 | 1.93644  |
| A55 | 1.88097  | 0.00059  | 0.00413  | -0.00117 | 0.00295  | 1.88391  |
| A56 | 1.88212  | 0.00120  | 0.00406  | 0.00296  | 0.00710  | 1.88922  |
| A57 | 1.89177  | 0.00050  | 0.00254  | -0.00042 | 0.00210  | 1.89387  |
| A58 | 3.34295  | 0.00164  | -0.01075 | 0.06757  | 0.05633  | 3.39928  |
| A59 | 3.76727  | 0.00085  | -0.04590 | 0.24184  | 0.19447  | 3.96174  |
| D1  | 0.00823  | -0.00024 | 0.00304  | -0.02939 | -0.02635 | -0.01812 |
| D2  | -3.13633 | -0.00015 | 0.00178  | -0.01290 | -0.01113 | 3.13572  |
| D3  | -3.14016 | -0.00004 | 0.00055  | -0.01421 | -0.01364 | 3.12939  |
| D4  | -0.00153 | 0.00005  | -0.00072 | 0.00228  | 0.00158  | 0.00005  |
| D5  | -0.01064 | 0.00032  | -0.00314 | 0.02771  | 0.02460  | 0.01397  |
| D6  | -3.07355 | 0.00024  | -0.00635 | 0.02720  | 0.02088  | -3.05267 |
| D7  | 3.13706  | 0.00014  | -0.00092 | 0.01408  | 0.01319  | -3.13294 |
| D8  | 0.07414  | 0.00006  | -0.00412 | 0.01357  | 0.00947  | 0.08361  |
| D9  | -0.00313 | 0.00009  | -0.00192 | 0.02131  | 0.01937  | 0.01625  |
| D10 | 3.13504  | 0.00011  | -0.00046 | 0.01342  | 0.01295  | -3.13520 |
| D11 | 3.14115  | 0.00001  | -0.00078 | 0.00637  | 0.00559  | -3.13644 |
| D12 | -0.00387 | 0.00003  | 0.00068  | -0.00152 | -0.00084 | -0.00470 |
| D13 | -0.00346 | 0.00010  | -0.00002 | -0.00427 | -0.00423 | -0.00770 |
| D14 | 3.08725  | -0.00001 | 0.00078  | -0.01182 | -0.01109 | 3.07616  |
| D15 | 3.14130  | 0.00009  | -0.00137 | 0.00303  | 0.00172  | -3.14017 |
| D16 | -0.05117 | -0.00002 | -0.00057 | -0.00452 | -0.00514 | -0.05631 |
| D17 | 0.05932  | 0.00003  | -0.00356 | 0.02155  | 0.01798  | 0.07730  |
| D18 | -3.07743 | 0.00000  | -0.00408 | 0.02153  | 0.01745  | -3.05998 |
| D19 | -3.08612 | 0.00005  | -0.00193 | 0.01269  | 0.01077  | -3.07535 |
| D20 | 0.06032  | 0.00001  | -0.00244 | 0.01267  | 0.01024  | 0.07055  |
| D21 | 0.00866  | -0.00026 | 0.00193  | -0.01428 | -0.01240 | -0.00375 |
| D22 | 3.07299  | -0.00013 | 0.00538  | -0.01422 | -0.00887 | 3.06412  |
| D23 | -3.08496 | -0.00018 | 0.00117  | -0.00724 | -0.00602 | -3.09098 |
| D24 | -0.02063 | -0.00005 | 0.00462  | -0.00718 | -0.00248 | -0.02311 |
| D25 | -2.65502 | -0.00028 | -0.01594 | 0.01704  | 0.00085  | -2.65417 |
| D26 | 0.42857  | -0.00039 | -0.01502 | 0.00841  | -0.00699 | 0.42157  |
| D27 | 1.38274  | 0.00020  | 0.03006  | -0.09388 | -0.06387 | 1.31887  |
| D28 | -2.79924 | -0.00009 | 0.02267  | -0.08626 | -0.06354 | -2.86277 |
| D29 | -0.72554 | -0.00020 | 0.02193  | -0.08938 | -0.06748 | -0.79301 |
| D30 | -1.66834 | 0.00010  | 0.02623  | -0.09431 | -0.06813 | -1.73646 |
| D31 | 0.43288  | -0.00020 | 0.01884  | -0.08668 | -0.06779 | 0.36508  |
| D32 | 2.50658  | -0.00031 | 0.01810  | -0.08980 | -0.07174 | 2.43484  |
| D33 | -0.97446 | 0.00014  | -0.02026 | 0.06806  | 0.04790  | -0.92656 |
| D34 | 1.09653  | 0.00004  | -0.01478 | 0.05187  | 0.03729  | 1.13381  |
| D35 | -3.03223 | 0.00005  | -0.02341 | 0.06848  | 0.04524  | -2.98699 |
| D36 | -3.04336 | 0.00003  | -0.01696 | 0.06659  | 0.04955  | -2.99381 |

|     |          |          |          |          |          |          |
|-----|----------|----------|----------|----------|----------|----------|
| D37 | -0.97237 | -0.00006 | -0.01147 | 0.05040  | 0.03893  | -0.93344 |
| D38 | 1.18207  | -0.00005 | -0.02011 | 0.06701  | 0.04688  | 1.22895  |
| D39 | 1.10831  | 0.00031  | -0.01373 | 0.06576  | 0.05202  | 1.16033  |
| D40 | -3.10388 | 0.00022  | -0.00824 | 0.04957  | 0.04140  | -3.06248 |
| D41 | -0.94945 | 0.00023  | -0.01687 | 0.06618  | 0.04935  | -0.90010 |
| D42 | -1.59247 | -0.00029 | 0.01500  | -0.05708 | -0.04193 | -1.63441 |
| D43 | 2.61559  | -0.00071 | 0.00834  | -0.05367 | -0.04517 | 2.57042  |
| D44 | 0.52620  | -0.00033 | 0.00737  | -0.04558 | -0.03823 | 0.48797  |
| D45 | -0.10759 | -0.00028 | 0.00067  | 0.03115  | 0.03083  | -0.07676 |
| D46 | -0.00473 | 0.00017  | 0.00870  | -0.05671 | -0.04901 | -0.05375 |
| D47 | -2.69860 | 0.00025  | 0.02362  | -0.12752 | -0.10478 | -2.80339 |
| D48 | -3.13393 | -0.00003 | -0.00043 | 0.00127  | 0.00084  | -3.13309 |
| D49 | 0.00729  | -0.00001 | -0.00057 | 0.00290  | 0.00233  | 0.00962  |
| D50 | 0.00230  | 0.00001  | 0.00014  | 0.00129  | 0.00143  | 0.00373  |
| D51 | -3.13966 | 0.00004  | 0.00000  | 0.00291  | 0.00291  | -3.13675 |
| D52 | -2.77682 | 0.00021  | 0.01314  | -0.01042 | 0.00136  | -2.77547 |
| D53 | -3.13934 | 0.00026  | -0.03155 | 0.10126  | 0.06828  | -3.07106 |
| D54 | -2.31466 | -0.00005 | 0.01337  | -0.09513 | -0.08118 | -2.39584 |
| D55 | -0.62342 | -0.00058 | 0.01435  | -0.14058 | -0.12619 | -0.74961 |
| D56 | -2.71546 | -0.00027 | -0.00178 | -0.00358 | -0.00528 | -2.72074 |
| D57 | -0.00742 | -0.00052 | -0.00669 | 0.00476  | -0.00189 | -0.00931 |
| D58 | -0.03125 | 0.00037  | 0.00966  | -0.01230 | -0.00273 | -0.03398 |
| D59 | 2.67680  | 0.00012  | 0.00475  | -0.00396 | 0.00066  | 2.67746  |
| D60 | 0.88998  | -0.00018 | 0.02214  | -0.14290 | -0.12189 | 0.76809  |
| D61 | 0.19550  | -0.00077 | -0.00946 | -0.01785 | -0.02663 | 0.16886  |
| D62 | -1.51826 | 0.00055  | 0.03168  | -0.14261 | -0.11192 | -1.63018 |
| D63 | -2.21275 | -0.00004 | 0.00008  | -0.01756 | -0.01666 | -2.22941 |
| D64 | 1.97075  | -0.00017 | -0.01101 | 0.04414  | 0.03362  | 2.00437  |
| D65 | -0.42957 | 0.00011  | -0.00782 | 0.04171  | 0.03434  | -0.39523 |
| D66 | 2.53304  | -0.00016 | -0.00917 | 0.02365  | 0.01449  | 2.54752  |
| D67 | -1.66681 | 0.00001  | -0.00740 | 0.02348  | 0.01611  | -1.65070 |
| D68 | 0.43310  | -0.00003 | -0.00703 | 0.01987  | 0.01290  | 0.44600  |
| D69 | 1.33208  | -0.00009 | -0.01114 | 0.02622  | 0.01501  | 1.34709  |
| D70 | -2.86777 | 0.00008  | -0.00937 | 0.02605  | 0.01663  | -2.85114 |
| D71 | -0.76786 | 0.00005  | -0.00900 | 0.02244  | 0.01342  | -0.75444 |
| D72 | -1.03945 | -0.00013 | -0.01187 | 0.02985  | 0.01799  | -1.02146 |
| D73 | 1.04389  | 0.00003  | -0.01009 | 0.02968  | 0.01961  | 1.06350  |
| D74 | -3.13939 | 0.00000  | -0.00972 | 0.02607  | 0.01640  | -3.12299 |

| Item                 | Value    | Threshold | Converged? |
|----------------------|----------|-----------|------------|
| Maximum Force        | 0.002350 | 0.000450  | NO         |
| RMS Force            | 0.000549 | 0.000300  | NO         |
| Maximum Displacement | 0.414959 | 0.001800  | NO         |
| RMS Displacement     | 0.117321 | 0.001200  | NO         |

Predicted change in Energy=-6.027139D-04

GradGradGradGradGradGradGradGradGradGradGradGradGradGradGradGradGradGradGrad

Input orientation:

| Center<br>Number | Atomic<br>Number | Atomic<br>Type | Coordinates (Angstroms) |           |           |
|------------------|------------------|----------------|-------------------------|-----------|-----------|
|                  |                  |                | X                       | Y         | Z         |
| 1                | 6                | 0              | -1.444732               | -1.843033 | -0.003346 |
| 2                | 6                | 0              | -2.694804               | -1.327785 | -0.111062 |
| 3                | 7                | 0              | -2.584553               | 0.039337  | 0.125760  |
| 4                | 6                | 0              | -1.288889               | 0.338391  | 0.350229  |
| 5                | 7                | 0              | -0.584079               | -0.790582 | 0.272702  |
| 6                | 6                | 0              | 0.887574                | -0.872234 | 0.366629  |
| 7                | 6                | 0              | 1.531717                | -0.980208 | -1.027614 |
| 8                | 1                | 0              | -1.095927               | -2.856479 | -0.103009 |
| 9                | 1                | 0              | -3.632037               | -1.809643 | -0.321273 |
| 10               | 1                | 0              | 1.224625                | 0.036377  | 0.868404  |
| 11               | 1                | 0              | 1.135602                | -1.750020 | 0.966037  |
| 12               | 1                | 0              | 1.072121                | -1.810898 | -1.577453 |
| 13               | 1                | 0              | 1.336842                | -0.053934 | -1.580095 |
| 14               | 35               | 0              | 0.725161                | 2.844743  | 0.491495  |
| 15               | 1                | 0              | -0.829754               | 1.341375  | 0.516819  |
| 16               | 6                | 0              | -3.608570               | 1.024605  | 0.135423  |
| 17               | 6                | 0              | -4.902878               | 0.770346  | -0.008275 |
| 18               | 1                | 0              | -3.211603               | 2.022887  | 0.270812  |
| 19               | 1                | 0              | -5.606805               | 1.590741  | 0.005151  |
| 20               | 1                | 0              | -5.304951               | -0.226091 | -0.139536 |
| 21               | 8                | 0              | 2.898755                | -1.257472 | -0.901631 |
| 22               | 1                | 0              | 3.424667                | -0.435786 | -0.913953 |
| 23               | 6                | 0              | 5.570187                | 1.799411  | -0.500084 |
| 24               | 6                | 0              | 6.271421                | 0.521665  | -0.678186 |
| 25               | 8                | 0              | 4.897803                | 0.684364  | -1.108588 |
| 26               | 1                | 0              | 5.204347                | 2.071138  | 0.486940  |
| 27               | 1                | 0              | 5.768340                | 2.629818  | -1.172359 |
| 28               | 1                | 0              | 6.956411                | 0.449582  | -1.520487 |
| 29               | 6                | 0              | 6.516531                | -0.428323 | 0.458602  |
| 30               | 1                | 0              | 6.473425                | -1.466541 | 0.118167  |
| 31               | 1                | 0              | 7.509108                | -0.254664 | 0.886363  |
| 32               | 1                | 0              | 5.771414                | -0.295472 | 1.246176  |

Distance matrix (angstroms):

|   |   | 1        | 2        | 3 | 4 | 5 |
|---|---|----------|----------|---|---|---|
| 1 | C | 0.000000 |          |   |   |   |
| 2 | C | 1.356379 | 0.000000 |   |   |   |

|    |    |          |           |           |          |          |
|----|----|----------|-----------|-----------|----------|----------|
| 3  | N  | 2.204355 | 1.391856  | 0.000000  |          |          |
| 4  | C  | 2.215382 | 2.228346  | 1.348542  | 0.000000 |          |
| 5  | N  | 1.387292 | 2.211565  | 2.170773  | 1.333172 | 0.000000 |
| 6  | C  | 2.553230 | 3.642684  | 3.597867  | 2.490557 | 1.476906 |
| 7  | C  | 3.263869 | 4.338705  | 4.394704  | 3.404846 | 2.490657 |
| 8  | H  | 1.076415 | 2.212098  | 3.264061  | 3.232623 | 2.161267 |
| 9  | H  | 2.210541 | 1.074608  | 2.171586  | 3.248893 | 3.268231 |
| 10 | H  | 3.378994 | 4.264061  | 3.880898  | 2.584081 | 2.076086 |
| 11 | H  | 2.757985 | 4.001304  | 4.212769  | 3.258656 | 2.087711 |
| 12 | H  | 2.968736 | 4.071047  | 4.437969  | 3.729580 | 2.684607 |
| 13 | H  | 3.663901 | 4.476039  | 4.277380  | 3.282459 | 2.768654 |
| 14 | Br | 5.189272 | 5.428555  | 4.354109  | 3.218408 | 3.870086 |
| 15 | H  | 3.284696 | 3.316181  | 2.219808  | 1.115587 | 2.159905 |
| 16 | C  | 3.595108 | 2.535638  | 1.421076  | 2.428569 | 3.530056 |
| 17 | C  | 4.334576 | 3.047673  | 2.434537  | 3.657325 | 4.600812 |
| 18 | H  | 4.259382 | 3.411732  | 2.085354  | 2.557472 | 3.849610 |
| 19 | H  | 5.395714 | 4.124445  | 3.399324  | 4.509086 | 5.565074 |
| 20 | H  | 4.187403 | 2.833268  | 2.746161  | 4.085005 | 4.772339 |
| 21 | O  | 4.473889 | 5.649588  | 5.727470  | 4.652988 | 3.705021 |
| 22 | H  | 5.149815 | 6.236042  | 6.116982  | 4.941165 | 4.195721 |
| 23 | C  | 7.919800 | 8.845381  | 8.365962  | 7.064314 | 6.721626 |
| 24 | C  | 8.098532 | 9.172528  | 8.905461  | 7.632137 | 7.044434 |
| 25 | O  | 6.916433 | 7.917795  | 7.610869  | 6.365768 | 5.842471 |
| 26 | H  | 7.731195 | 8.620143  | 8.057644  | 6.721846 | 6.460744 |
| 27 | H  | 8.567462 | 9.402860  | 8.841183  | 7.574522 | 7.358027 |
| 28 | H  | 8.839514 | 9.914205  | 9.690636  | 8.455585 | 7.849365 |
| 29 | C  | 8.099167 | 9.272661  | 9.119168  | 7.843735 | 7.112275 |
| 30 | H  | 7.928034 | 9.172143  | 9.182303  | 7.972775 | 7.091485 |
| 31 | H  | 9.137054 | 10.308552 | 10.126546 | 8.834246 | 8.134093 |
| 32 | H  | 7.485253 | 8.636238  | 8.437393  | 7.145095 | 6.448649 |
|    |    | 6        | 7         | 8         | 9        | 10       |
| 6  | C  | 0.000000 |           |           |          |          |
| 7  | C  | 1.539640 | 0.000000  |           |          |          |
| 8  | H  | 2.844655 | 3.358542  | 0.000000  |          |          |
| 9  | H  | 4.666779 | 5.277427  | 2.752336  | 0.000000 |          |
| 10 | H  | 1.091310 | 2.173163  | 3.833695  | 5.330130 | 0.000000 |
| 11 | H  | 1.091474 | 2.173514  | 2.710504  | 4.938735 | 1.791276 |
| 12 | H  | 2.166703 | 1.097086  | 2.822704  | 4.868993 | 3.068860 |
| 13 | H  | 2.158979 | 1.095990  | 3.994297  | 5.418201 | 2.452732 |
| 14 | Br | 3.722618 | 4.193861  | 6.014459  | 6.427213 | 2.877228 |
| 15 | H  | 2.805679 | 3.653979  | 4.251706  | 4.299314 | 2.459086 |
| 16 | C  | 4.885362 | 5.638659  | 4.629582  | 2.870903 | 4.987347 |
| 17 | C  | 6.030585 | 6.745925  | 5.258869  | 2.892982 | 6.233264 |
| 18 | H  | 5.019379 | 5.762255  | 5.331420  | 3.900720 | 4.897291 |

|    |    |          |          |          |           |          |
|----|----|----------|----------|----------|-----------|----------|
| 19 | H  | 6.955132 | 7.657341 | 6.335414 | 3.945741  | 7.059015 |
| 20 | H  | 6.246685 | 6.935230 | 4.963482 | 2.310694  | 6.612126 |
| 21 | O  | 2.408681 | 1.400550 | 4.376312 | 6.579738  | 2.758583 |
| 22 | H  | 2.875277 | 1.972960 | 5.191643 | 7.213585  | 2.870526 |
| 23 | C  | 5.460379 | 4.930903 | 8.140765 | 9.886261  | 4.885177 |
| 24 | C  | 5.658657 | 4.984226 | 8.125300 | 10.180415 | 5.300716 |
| 25 | O  | 4.547659 | 3.756047 | 7.033744 | 8.921777  | 4.221448 |
| 26 | H  | 5.226131 | 5.009271 | 8.020156 | 9.684799  | 4.485973 |
| 27 | H  | 6.201188 | 5.567963 | 8.852182 | 10.430735 | 5.615692 |
| 28 | H  | 6.491470 | 5.631565 | 8.819265 | 10.892999 | 6.223416 |
| 29 | C  | 5.647183 | 5.230849 | 8.010048 | 10.271790 | 5.328053 |
| 30 | H  | 5.622870 | 5.096058 | 7.699087 | 10.120829 | 5.511035 |
| 31 | H  | 6.670549 | 6.318142 | 9.044055 | 11.313772 | 6.291244 |
| 32 | H  | 4.995813 | 4.859425 | 7.452478 | 9.652693  | 4.574508 |
|    |    | 11       | 12       | 13       | 14        | 15       |
| 11 | H  | 0.000000 |          |          |           |          |
| 12 | H  | 2.545010 | 0.000000 |          |           |          |
| 13 | H  | 3.065940 | 1.776797 | 0.000000 |           |          |
| 14 | Br | 4.637401 | 5.106458 | 3.614964 | 0.000000  |          |
| 15 | H  | 3.690683 | 4.235555 | 3.322359 | 2.162988  | 0.000000 |
| 16 | C  | 5.558384 | 5.734360 | 5.344469 | 4.713906  | 2.822698 |
| 17 | C  | 6.615495 | 6.695204 | 6.487231 | 6.018946  | 4.146341 |
| 18 | H  | 5.797962 | 6.038567 | 5.331735 | 4.027686  | 2.489615 |
| 19 | H  | 7.585778 | 7.660537 | 7.309733 | 6.473240  | 4.810842 |
| 20 | H  | 6.710095 | 6.726535 | 6.798402 | 6.796357  | 4.786977 |
| 21 | O  | 2.615243 | 2.024749 | 2.085279 | 4.847007  | 4.761070 |
| 22 | H  | 3.240584 | 2.804574 | 2.224537 | 4.474873  | 4.827577 |
| 23 | C  | 5.866302 | 5.867508 | 4.745789 | 5.054723  | 6.496393 |
| 24 | C  | 5.851551 | 5.769077 | 5.049239 | 6.125834  | 7.247526 |
| 25 | O  | 4.938061 | 4.591515 | 3.667130 | 4.963713  | 5.989868 |
| 26 | H  | 5.602273 | 6.033839 | 4.873003 | 4.545502  | 6.078143 |
| 27 | H  | 6.724431 | 6.475997 | 5.196820 | 5.314909  | 6.931684 |
| 28 | H  | 6.700959 | 6.303799 | 5.642396 | 6.972327  | 8.097547 |
| 29 | C  | 5.564060 | 5.974834 | 5.579034 | 6.652369  | 7.556660 |
| 30 | H  | 5.412170 | 5.671666 | 5.591424 | 7.195073  | 7.834521 |
| 31 | H  | 6.547061 | 7.065908 | 6.649855 | 7.468881  | 8.498265 |
| 32 | H  | 4.866717 | 5.687948 | 5.264178 | 5.991257  | 6.840076 |
|    |    | 16       | 17       | 18       | 19        | 20       |
| 16 | C  | 0.000000 |          |          |           |          |
| 17 | C  | 1.326850 | 0.000000 |          |           |          |
| 18 | H  | 1.082811 | 2.123008 | 0.000000 |           |          |
| 19 | H  | 2.080967 | 1.081083 | 2.448330 | 0.000000  |          |
| 20 | H  | 2.125454 | 1.082487 | 3.099742 | 1.847411  | 0.000000 |
| 21 | O  | 6.973423 | 8.110217 | 7.033623 | 9.015493  | 8.303333 |

|    |   |           |           |           |           |           |
|----|---|-----------|-----------|-----------|-----------|-----------|
| 22 | H | 7.259500  | 8.463038  | 7.175571  | 9.301561  | 8.766409  |
| 23 | C | 9.233296  | 10.534986 | 8.818393  | 11.190350 | 11.068030 |
| 24 | C | 9.926183  | 11.197124 | 9.647901  | 11.945799 | 11.612996 |
| 25 | O | 8.603587  | 9.862628  | 8.334078  | 10.602298 | 10.289033 |
| 26 | H | 8.881796  | 10.202612 | 8.418863  | 10.832539 | 10.775671 |
| 27 | H | 9.602783  | 10.894385 | 9.115398  | 11.483036 | 11.482191 |
| 28 | H | 10.709412 | 11.959616 | 10.443780 | 12.706856 | 12.357369 |
| 29 | C | 10.233919 | 11.491635 | 10.033957 | 12.298679 | 11.838332 |
| 30 | H | 10.385216 | 11.594823 | 10.295590 | 12.461608 | 11.846319 |
| 31 | H | 11.216202 | 12.486329 | 10.977239 | 13.274382 | 12.855092 |
| 32 | H | 9.537319  | 10.800469 | 9.328489  | 11.600077 | 11.162924 |
|    |   | 21        | 22        | 23        | 24        | 25        |
| 21 | O | 0.000000  |           |           |           |           |
| 22 | H | 0.975655  | 0.000000  |           |           |           |
| 23 | C | 4.079500  | 3.125804  | 0.000000  |           |           |
| 24 | C | 3.819702  | 3.012691  | 1.468361  | 0.000000  |           |
| 25 | O | 2.794593  | 1.860846  | 1.437257  | 1.448634  | 0.000000  |
| 26 | H | 4.280599  | 3.378525  | 1.087148  | 2.212924  | 2.136076  |
| 27 | H | 4.839301  | 3.867494  | 1.086644  | 2.222973  | 2.132298  |
| 28 | H | 4.445400  | 3.691203  | 2.187437  | 1.088062  | 2.112498  |
| 29 | C | 3.952977  | 3.382837  | 2.603353  | 1.501613  | 2.512854  |
| 30 | H | 3.723165  | 3.379741  | 3.444490  | 2.151266  | 2.934944  |
| 31 | H | 5.045582  | 4.467281  | 3.146566  | 2.140647  | 3.417677  |
| 32 | H | 3.713581  | 3.192658  | 2.734676  | 2.149625  | 2.695957  |
|    |   | 26        | 27        | 28        | 29        | 30        |
| 26 | H | 0.000000  |           |           |           |           |
| 27 | H | 1.839425  | 0.000000  |           |           |           |
| 28 | H | 3.119124  | 2.507217  | 0.000000  |           |           |
| 29 | C | 2.823108  | 3.545709  | 2.209300  | 0.000000  |           |
| 30 | H | 3.776470  | 4.352328  | 2.567097  | 1.093458  | 0.000000  |
| 31 | H | 3.298608  | 3.948272  | 2.567950  | 1.094690  | 1.769579  |
| 32 | H | 2.549284  | 3.795609  | 3.100605  | 1.092301  | 1.771052  |
|    |   | 31        | 32        |           |           |           |
| 31 | H | 0.000000  |           |           |           |           |
| 32 | H | 1.775024  | 0.000000  |           |           |           |

Stoichiometry C10H17BrN2O2

Framework group C1[X(C10H17BrN2O2)]

Deg. of freedom 90

Full point group C1 NOp 1

Largest Abelian subgroup C1 NOp 1

Largest concise Abelian subgroup C1 NOp 1

Standard orientation:

-----  
Center Atomic Atomic Coordinates (Angstroms)



| Number | Number | Type | X         | Y         | Z         |
|--------|--------|------|-----------|-----------|-----------|
| 1      | 6      | 0    | -2.450737 | 2.341204  | -0.259857 |
| 2      | 6      | 0    | -3.675606 | 1.824273  | 0.008917  |
| 3      | 7      | 0    | -3.537769 | 0.439436  | -0.013240 |
| 4      | 6      | 0    | -2.249367 | 0.135017  | -0.269977 |
| 5      | 7      | 0    | -1.576261 | 1.276078  | -0.419159 |
| 6      | 6      | 0    | -0.116138 | 1.371996  | -0.619394 |
| 7      | 6      | 0    | 0.607098  | 1.716687  | 0.695372  |
| 8      | 1      | 0    | -2.127934 | 3.364466  | -0.345890 |
| 9      | 1      | 0    | -4.612883 | 2.314193  | 0.199371  |
| 10     | 1      | 0    | 0.217924  | 0.401551  | -0.990331 |
| 11     | 1      | 0    | 0.068234  | 2.146597  | -1.365929 |
| 12     | 1      | 0    | 0.156063  | 2.615459  | 1.133977  |
| 13     | 1      | 0    | 0.474428  | 0.887778  | 1.400001  |
| 14     | 35     | 0    | -0.171261 | -2.319036 | -0.138634 |
| 15     | 1      | 0    | -1.770427 | -0.871971 | -0.303520 |
| 16     | 6      | 0    | -4.529692 | -0.555504 | 0.200390  |
| 17     | 6      | 0    | -5.820223 | -0.308279 | 0.384625  |
| 18     | 1      | 0    | -4.111046 | -1.554111 | 0.200832  |
| 19     | 1      | 0    | -6.498090 | -1.134512 | 0.547639  |
| 20     | 1      | 0    | -6.244155 | 0.687736  | 0.380740  |
| 21     | 8      | 0    | 1.954894  | 1.998279  | 0.439066  |
| 22     | 1      | 0    | 2.505641  | 1.200408  | 0.548530  |
| 23     | 6      | 0    | 4.690167  | -1.027328 | 0.359597  |
| 24     | 6      | 0    | 5.361176  | 0.276671  | 0.285973  |
| 25     | 8      | 0    | 4.021606  | 0.157068  | 0.824292  |
| 26     | 1      | 0    | 4.274140  | -1.462167 | -0.545790 |
| 27     | 1      | 0    | 4.953882  | -1.734186 | 1.141647  |
| 28     | 1      | 0    | 6.093061  | 0.497801  | 1.060133  |
| 29     | 6      | 0    | 5.508080  | 1.035807  | -1.001263 |
| 30     | 1      | 0    | 5.453593  | 2.114212  | -0.828857 |
| 31     | 1      | 0    | 6.477995  | 0.816055  | -1.458777 |
| 32     | 1      | 0    | 4.721369  | 0.762295  | -1.707944 |

Rotational constants (GHZ): 0.6200152 0.1786223 0.1435865

Standard basis: 6-311++G(d,p) (5D, 7F)

There are 492 symmetry adapted cartesian basis functions of A symmetry.

There are 475 symmetry adapted basis functions of A symmetry.

475 basis functions, 751 primitive gaussians, 492 cartesian basis functions

71 alpha electrons 71 beta electrons

nuclear repulsion energy 1260.3446923791 Hartrees.

NAtoms= 32 NActive= 32 NUniq= 32 SFac= 1.00D+00 NAtFMM= 60 NAOKFM=F

Big=F

Integral buffers will be 131072 words long.  
Raffenetti 2 integral format.  
Two-electron integral symmetry is turned on.  
One-electron integrals computed using PRISM.  
NBasis= 475 RedAO= T EigKep= 3.97D-06 NBF= 475  
NBsUse= 475 1.00D-06 EigRej= -1.00D+00 NBFU= 475  
Initial guess from the checkpoint file: "/home/suqian/liuwen/qianmengshijie/ohpo/ohpo.chk"  
B after Tr= 0.000000 0.000000 0.000000  
Rot= 0.999905 0.012963 -0.000548 0.004609 Ang= 1.58 deg.  
ExpMin= 3.50D-02 ExpMax= 4.40D+05 ExpMxC= 1.51D+04 IAcc=3 IRadAn= 5 AccDes= 0.00D+00  
Harris functional with IExCor= 402 and IRadAn= 5 diagonalized for initial guess.  
HarFok: IExCor= 402 AccDes= 0.00D+00 IRadAn= 5 IDoV= 1 UseB2=F ITyADJ=14  
ICtDFT= 3500011 ScaDFX= 1.000000 1.000000 1.000000 1.000000  
FoFCou: FMM=F IPFlag= 0 FMFlag= 100000 FMFlg1= 0  
NFXFlg= 0 DoJE=T BraDBF=F KetDBF=T FulRan=T  
wScrn= 0.000000 ICntrl= 500 IOpCl= 0 I1Cent= 20000004 NGrid= 0  
NMat0= 1 NMatS0= 1 NMatT0= 0 NMatD0= 1 NMtDS0= 0  
NMtDT0= 0  
Petite list used in FoFCou.  
Requested convergence on RMS density matrix=1.00D-08 within 128 cycles.  
Requested convergence on MAX density matrix=1.00D-06.  
Requested convergence on energy=1.00D-06.  
No special actions if energy rises.  
SCF Done: E(RB3LYP) = -3225.51702919 A.U. after 12 cycles  
NFock= 12 Conv=0.38D-08 -V/T= 2.0018  
Calling FoFJK, ICntrl= 2127 FMM=F ISym2X=0 I1Cent= 0 IOpClX= 0 NMat=1 NMatS=1  
NMatT=0.  
\*\*\*\*\* Axes restored to original set \*\*\*\*\*

| Center Number | Atomic Number | Forces (Hartrees/Bohr) |              |              |
|---------------|---------------|------------------------|--------------|--------------|
|               |               | X                      | Y            | Z            |
| 1             | 6             | 0.000423072            | 0.000556273  | -0.001922678 |
| 2             | 6             | -0.000776585           | -0.000174252 | 0.002268941  |
| 3             | 7             | 0.000258148            | 0.000103222  | -0.001247940 |
| 4             | 6             | -0.000395642           | -0.000315513 | 0.000183997  |
| 5             | 7             | -0.000674291           | -0.000500765 | 0.000645778  |
| 6             | 6             | -0.000223289           | 0.000115039  | 0.000365569  |
| 7             | 6             | -0.004329310           | 0.000492863  | -0.000072333 |
| 8             | 1             | 0.000111088            | 0.000098292  | -0.000352350 |
| 9             | 1             | -0.000091485           | -0.000023595 | 0.000246028  |
| 10            | 1             | 0.000196474            | 0.000054163  | 0.000112408  |

|    |    |              |              |              |
|----|----|--------------|--------------|--------------|
| 11 | 1  | 0.000400691  | 0.000253039  | -0.000129368 |
| 12 | 1  | 0.000040476  | 0.000292115  | -0.000229971 |
| 13 | 1  | 0.000580436  | 0.000046484  | 0.000220504  |
| 14 | 35 | 0.001294254  | 0.001371071  | 0.000281635  |
| 15 | 1  | 0.000158626  | -0.001252503 | -0.000636889 |
| 16 | 6  | 0.000013713  | -0.000056854 | -0.000214143 |
| 17 | 6  | 0.000124577  | 0.000048719  | 0.000082980  |
| 18 | 1  | -0.000006216 | 0.000008928  | 0.000055995  |
| 19 | 1  | 0.000025301  | 0.000012854  | 0.000017653  |
| 20 | 1  | -0.000110354 | -0.000022755 | -0.000019782 |
| 21 | 8  | 0.004342105  | 0.001134514  | 0.000614102  |
| 22 | 1  | -0.000160349 | -0.002784939 | 0.000101459  |
| 23 | 6  | -0.000399308 | 0.001307480  | 0.001445266  |
| 24 | 6  | -0.002740985 | 0.000836186  | -0.001593818 |
| 25 | 8  | 0.001746820  | -0.000290989 | -0.000527628 |
| 26 | 1  | -0.000523492 | 0.000138747  | -0.000736998 |
| 27 | 1  | -0.000413672 | -0.000296951 | 0.000205653  |
| 28 | 1  | 0.000551032  | -0.000478773 | 0.000184265  |
| 29 | 6  | 0.000651205  | -0.001223401 | 0.001258133  |
| 30 | 1  | -0.000130939 | 0.000203145  | -0.000385184 |
| 31 | 1  | -0.000029071 | 0.000042664  | -0.000038178 |
| 32 | 1  | 0.000086972  | 0.000305492  | -0.000183104 |

-----  
Cartesian Forces: Max 0.004342105 RMS 0.000973364

GradGradGradGradGradGradGradGradGradGradGradGradGradGradGradGradGradGradGrad

Berny optimization.

Using GEDIIS/GDIIS optimizer.

FormGI is forming the generalized inverse of G from B-inverse, IUseBI=4.

GSVD: received Info= 1 from GESDD.

Internal Forces: Max 0.003949708 RMS 0.000573539

Search for a local minimum.

Step number 13 out of a maximum of 177

All quantities printed in internal units (Hartrees-Bohrs-Radians)

Mixed Optimization -- En-DIIS/RFO-DIIS

Swapping is turned off.

Update second derivatives using D2CorX and points 12 13

DE= -9.46D-04 DEPred=-6.03D-04 R= 1.57D+00

TightC=F SS= 1.41D+00 RLast= 5.93D-01 DXNew= 4.0363D+00 1.7798D+00

Trust test= 1.57D+00 RLast= 5.93D-01 DXMaxT set to 2.40D+00

ITU= 1 1 1 1 1 1 1 1 0 1 0 1 0

|                 |         |         |         |         |         |
|-----------------|---------|---------|---------|---------|---------|
| Eigenvalues --- | 0.00081 | 0.00203 | 0.00238 | 0.00361 | 0.00405 |
| Eigenvalues --- | 0.00878 | 0.00984 | 0.01343 | 0.01397 | 0.01549 |
| Eigenvalues --- | 0.01721 | 0.01871 | 0.02031 | 0.02065 | 0.02149 |

|                 |         |         |         |         |         |
|-----------------|---------|---------|---------|---------|---------|
| Eigenvalues --- | 0.02160 | 0.02314 | 0.02385 | 0.02558 | 0.02766 |
| Eigenvalues --- | 0.03062 | 0.03066 | 0.03330 | 0.03776 | 0.03952 |
| Eigenvalues --- | 0.04617 | 0.05217 | 0.05441 | 0.05514 | 0.05557 |
| Eigenvalues --- | 0.05957 | 0.06498 | 0.06620 | 0.09291 | 0.09887 |
| Eigenvalues --- | 0.10949 | 0.11144 | 0.11834 | 0.11990 | 0.12940 |
| Eigenvalues --- | 0.13868 | 0.15206 | 0.15503 | 0.15997 | 0.16000 |
| Eigenvalues --- | 0.16000 | 0.16001 | 0.16001 | 0.16048 | 0.16102 |
| Eigenvalues --- | 0.17016 | 0.17411 | 0.19387 | 0.21915 | 0.22033 |
| Eigenvalues --- | 0.22798 | 0.23565 | 0.23630 | 0.25029 | 0.26790 |
| Eigenvalues --- | 0.27888 | 0.29022 | 0.32035 | 0.32926 | 0.33054 |
| Eigenvalues --- | 0.33167 | 0.34101 | 0.34354 | 0.34532 | 0.34767 |
| Eigenvalues --- | 0.34948 | 0.35685 | 0.35690 | 0.35858 | 0.36318 |
| Eigenvalues --- | 0.36443 | 0.36660 | 0.37231 | 0.37298 | 0.37778 |
| Eigenvalues --- | 0.39649 | 0.42194 | 0.42498 | 0.45324 | 0.47064 |
| Eigenvalues --- | 0.49411 | 0.53993 | 0.54750 | 0.56305 | 0.60363 |

En-DIIS/RFO-DIIS IScMMF= 0 using points: 13 12 11 10 9

RFO step: Lambda=-1.83632478D-04.

EnCoef did 100 forward-backward iterations

DidBck=F Rises=F En-DIIS coefs: 0.79923 0.00000 0.00061 0.00211

0.19804

Iteration 1 RMS(Cart)= 0.18780421 RMS(Int)= 0.03257891

Iteration 2 RMS(Cart)= 0.08421674 RMS(Int)= 0.00980228

Iteration 3 RMS(Cart)= 0.01444398 RMS(Int)= 0.00161663

Iteration 4 RMS(Cart)= 0.00005616 RMS(Int)= 0.00161639

Iteration 5 RMS(Cart)= 0.00000006 RMS(Int)= 0.00161639

| Variable | Old X   | -DE/DX   | Delta X<br>(Linear) | Delta X<br>(Quad) | Delta X<br>(Total) | New X   |
|----------|---------|----------|---------------------|-------------------|--------------------|---------|
| R1       | 2.56318 | 0.00038  | 0.00054             | -0.00099          | -0.00067           | 2.56252 |
| R2       | 2.62160 | -0.00006 | -0.00077            | 0.00322           | 0.00253            | 2.62413 |
| R3       | 2.03413 | -0.00002 | -0.00001            | -0.00007          | -0.00007           | 2.03406 |
| R4       | 2.63023 | -0.00022 | -0.00051            | 0.00108           | 0.00037            | 2.63060 |
| R5       | 2.03071 | 0.00004  | -0.00001            | 0.00007           | 0.00006            | 2.03078 |
| R6       | 2.54837 | -0.00007 | 0.00016             | -0.00044          | -0.00019           | 2.54818 |
| R7       | 2.68544 | -0.00005 | -0.00014            | 0.00041           | 0.00026            | 2.68571 |
| R8       | 2.51933 | -0.00043 | -0.00015            | 0.00164           | 0.00269            | 2.52202 |
| R9       | 2.10815 | 0.00007  | -0.00330            | 0.02062           | 0.01793            | 2.12608 |
| R10      | 2.79095 | 0.00053  | 0.00144             | -0.00252          | -0.00061           | 2.79034 |
| R11      | 2.90950 | -0.00018 | -0.00056            | 0.00167           | 0.00224            | 2.91173 |
| R12      | 2.06228 | 0.00016  | 0.00013             | 0.00224           | 0.00236            | 2.06464 |
| R13      | 2.06259 | -0.00018 | -0.00047            | 0.00028           | -0.00019           | 2.06239 |
| R14      | 2.07319 | -0.00012 | -0.00075            | 0.00264           | 0.00189            | 2.07508 |
| R15      | 2.07112 | -0.00017 | -0.00054            | 0.00230           | 0.00176            | 2.07288 |
| R16      | 2.64666 | 0.00395  | 0.00553             | -0.00803          | -0.00195           | 2.64471 |
| R17      | 4.08745 | 0.00108  | 0.04419             | -0.12666          | -0.08218           | 4.00528 |

|     |         |          |          |          |          |         |
|-----|---------|----------|----------|----------|----------|---------|
| R18 | 9.38006 | -0.00062 | -0.24398 | 0.80769  | 0.56266  | 9.94272 |
| R19 | 2.50738 | -0.00005 | -0.00003 | 0.00026  | 0.00023  | 2.50761 |
| R20 | 2.04622 | 0.00001  | -0.00004 | 0.00051  | 0.00047  | 2.04669 |
| R21 | 2.04295 | -0.00001 | 0.00000  | -0.00010 | -0.00010 | 2.04285 |
| R22 | 2.04560 | 0.00007  | 0.00004  | -0.00002 | 0.00002  | 2.04562 |
| R23 | 1.84372 | -0.00193 | -0.00125 | 0.00084  | -0.00058 | 1.84314 |
| R24 | 3.51649 | 0.00026  | 0.04569  | -0.03308 | 0.01260  | 3.52909 |
| R25 | 2.77480 | 0.00106  | -0.00036 | -0.00685 | -0.00948 | 2.76532 |
| R26 | 2.71602 | -0.00024 | 0.00066  | 0.00937  | 0.01109  | 2.72711 |
| R27 | 2.05441 | -0.00046 | -0.00101 | -0.00313 | -0.00414 | 2.05027 |
| R28 | 2.05346 | -0.00043 | -0.00096 | -0.00262 | -0.00358 | 2.04988 |
| R29 | 2.73752 | -0.00190 | -0.00562 | 0.01815  | 0.01377  | 2.75129 |
| R30 | 2.05614 | 0.00024  | 0.00078  | -0.00170 | -0.00092 | 2.05522 |
| R31 | 2.83764 | 0.00101  | 0.00423  | 0.00287  | 0.00710  | 2.84474 |
| R32 | 2.06634 | -0.00007 | -0.00056 | -0.00111 | -0.00167 | 2.06467 |
| R33 | 2.06866 | -0.00003 | -0.00049 | -0.00041 | -0.00089 | 2.06777 |
| R34 | 2.06415 | -0.00015 | -0.00041 | -0.00047 | -0.00087 | 2.06328 |
| A1  | 1.87484 | 0.00012  | 0.00045  | -0.00193 | -0.00117 | 1.87367 |
| A2  | 2.27699 | 0.00002  | 0.00031  | 0.00033  | 0.00050  | 2.27749 |
| A3  | 2.13134 | -0.00013 | -0.00078 | 0.00158  | 0.00067  | 2.13201 |
| A4  | 1.86148 | -0.00024 | -0.00016 | 0.00062  | 0.00054  | 1.86202 |
| A5  | 2.27707 | 0.00016  | 0.00030  | -0.00042 | -0.00014 | 2.27693 |
| A6  | 2.14457 | 0.00008  | -0.00014 | -0.00028 | -0.00044 | 2.14413 |
| A7  | 1.89890 | 0.00004  | -0.00037 | 0.00169  | 0.00167  | 1.90057 |
| A8  | 2.24603 | 0.00014  | -0.00011 | 0.00001  | -0.00027 | 2.24577 |
| A9  | 2.13821 | -0.00018 | 0.00049  | -0.00171 | -0.00139 | 2.13682 |
| A10 | 1.88648 | 0.00025  | 0.00061  | -0.00237 | -0.00211 | 1.88438 |
| A11 | 2.23911 | -0.00016 | -0.00027 | 0.00166  | -0.00003 | 2.23907 |
| A12 | 2.15611 | -0.00008 | -0.00024 | 0.00037  | 0.00186  | 2.15797 |
| A13 | 1.90290 | -0.00015 | -0.00056 | 0.00168  | 0.00088  | 1.90377 |
| A14 | 2.20048 | 0.00057  | 0.00329  | -0.00138 | 0.00060  | 2.20108 |
| A15 | 2.17719 | -0.00043 | -0.00260 | 0.00024  | -0.00083 | 2.17636 |
| A16 | 1.94246 | 0.00037  | 0.00354  | 0.00657  | 0.01124  | 1.95370 |
| A17 | 1.86603 | 0.00006  | -0.00027 | -0.00587 | -0.00633 | 1.85970 |
| A18 | 1.88160 | 0.00006  | 0.00020  | 0.00354  | 0.00328  | 1.88488 |
| A19 | 1.92362 | -0.00014 | -0.00673 | 0.01085  | 0.00363  | 1.92725 |
| A20 | 1.92393 | -0.00030 | 0.00306  | -0.01008 | -0.00708 | 1.91685 |
| A21 | 1.92505 | -0.00003 | 0.00017  | -0.00508 | -0.00478 | 1.92027 |
| A22 | 1.90889 | 0.00011  | 0.00532  | -0.00283 | 0.00324  | 1.91213 |
| A23 | 1.89951 | 0.00022  | -0.00152 | 0.00066  | -0.00121 | 1.89830 |
| A24 | 1.91855 | 0.00006  | -0.00322 | 0.00296  | -0.00081 | 1.91774 |
| A25 | 1.88893 | -0.00001 | 0.00376  | -0.01680 | -0.01308 | 1.87586 |
| A26 | 1.87978 | -0.00002 | 0.00074  | 0.00785  | 0.00852  | 1.88829 |
| A27 | 1.96731 | -0.00035 | -0.00483 | 0.00761  | 0.00327  | 1.97058 |

|     |          |          |          |          |          |          |
|-----|----------|----------|----------|----------|----------|----------|
| A28 | 1.88134  | -0.00092 | 0.04621  | -0.19035 | -0.14859 | 1.73274  |
| A29 | 2.73634  | 0.00146  | -0.01856 | 0.12239  | 0.10382  | 2.84016  |
| A30 | 2.17648  | 0.00021  | 0.00053  | -0.00207 | -0.00154 | 2.17494  |
| A31 | 1.95614  | -0.00010 | 0.00017  | -0.00090 | -0.00073 | 1.95541  |
| A32 | 2.15056  | -0.00011 | -0.00071 | 0.00298  | 0.00227  | 2.15283  |
| A33 | 2.08105  | -0.00010 | -0.00033 | 0.00079  | 0.00047  | 2.08152  |
| A34 | 2.15538  | 0.00015  | 0.00054  | -0.00178 | -0.00124 | 2.15414  |
| A35 | 2.04676  | -0.00004 | -0.00021 | 0.00098  | 0.00077  | 2.04753  |
| A36 | 1.93721  | -0.00044 | -0.00831 | 0.01476  | 0.00591  | 1.94312  |
| A37 | 2.77908  | 0.00134  | -0.04431 | 0.25992  | 0.21949  | 2.99857  |
| A38 | 2.08097  | 0.00043  | 0.00214  | 0.00615  | 0.00596  | 2.08693  |
| A39 | 2.09771  | 0.00024  | 0.00259  | 0.00115  | 0.00593  | 2.10364  |
| A40 | 2.00520  | 0.00007  | -0.00218 | -0.00245 | -0.00369 | 2.00150  |
| A41 | 2.00011  | 0.00018  | -0.00159 | -0.00544 | -0.00850 | 1.99161  |
| A42 | 2.01756  | -0.00029 | -0.00113 | -0.00415 | -0.00521 | 2.01236  |
| A43 | 2.04002  | 0.00059  | 0.00306  | 0.00678  | 0.01307  | 2.05309  |
| A44 | 2.13725  | -0.00008 | 0.00014  | -0.00532 | -0.00872 | 2.12854  |
| A45 | 1.95453  | 0.00037  | 0.00430  | -0.00489 | -0.00150 | 1.95303  |
| A46 | 2.03841  | 0.00000  | -0.00016 | -0.00396 | -0.00334 | 2.03507  |
| A47 | 2.02793  | -0.00055 | -0.00466 | 0.00230  | -0.00224 | 2.02569  |
| A48 | 1.11831  | 0.00170  | -0.01884 | 0.14056  | 0.12217  | 1.24047  |
| A49 | 1.48983  | -0.00243 | 0.05098  | -0.30812 | -0.25264 | 1.23720  |
| A50 | 2.48664  | -0.00079 | 0.01044  | -0.06063 | -0.05647 | 2.43017  |
| A51 | 2.28098  | -0.00067 | -0.00160 | -0.01386 | -0.01737 | 2.26361  |
| A52 | 1.93751  | -0.00056 | -0.00458 | -0.00169 | -0.00626 | 1.93125  |
| A53 | 1.92140  | 0.00009  | 0.00074  | -0.00321 | -0.00250 | 1.91890  |
| A54 | 1.93644  | -0.00030 | -0.00262 | -0.00967 | -0.01229 | 1.92415  |
| A55 | 1.88391  | 0.00027  | 0.00291  | 0.00278  | 0.00569  | 1.88960  |
| A56 | 1.88922  | 0.00042  | 0.00202  | 0.01027  | 0.01232  | 1.90154  |
| A57 | 1.89387  | 0.00011  | 0.00173  | 0.00213  | 0.00382  | 1.89769  |
| A58 | 3.39928  | 0.00104  | -0.02044 | 0.12670  | 0.10480  | 3.50408  |
| A59 | 3.96174  | 0.00053  | -0.07801 | 0.46719  | 0.38202  | 4.34376  |
| D1  | -0.01812 | 0.00106  | 0.00789  | -0.01539 | -0.00749 | -0.02561 |
| D2  | 3.13572  | 0.00044  | 0.00375  | -0.00801 | -0.00432 | 3.13140  |
| D3  | 3.12939  | 0.00037  | 0.00321  | -0.01217 | -0.00889 | 3.12050  |
| D4  | 0.00005  | -0.00025 | -0.00093 | -0.00479 | -0.00572 | -0.00567 |
| D5  | 0.01397  | -0.00093 | -0.00762 | 0.01706  | 0.00950  | 0.02347  |
| D6  | -3.05267 | -0.00082 | -0.00959 | 0.00914  | -0.00036 | -3.05303 |
| D7  | -3.13294 | -0.00031 | -0.00343 | 0.01416  | 0.01076  | -3.12218 |
| D8  | 0.08361  | -0.00020 | -0.00540 | 0.00624  | 0.00090  | 0.08451  |
| D9  | 0.01625  | -0.00085 | -0.00553 | 0.00873  | 0.00307  | 0.01932  |
| D10 | -3.13520 | -0.00052 | -0.00300 | 0.00846  | 0.00534  | -3.12986 |
| D11 | -3.13644 | -0.00028 | -0.00179 | 0.00203  | 0.00021  | -3.13624 |
| D12 | -0.00470 | 0.00005  | 0.00074  | 0.00176  | 0.00247  | -0.00223 |

|     |          |          |          |          |          |          |
|-----|----------|----------|----------|----------|----------|----------|
| D13 | -0.00770 | 0.00027  | 0.00084  | 0.00184  | 0.00284  | -0.00486 |
| D14 | 3.07616  | 0.00034  | 0.00289  | -0.00473 | -0.00216 | 3.07400  |
| D15 | -3.14017 | -0.00004 | -0.00150 | 0.00207  | 0.00073  | -3.13944 |
| D16 | -0.05631 | 0.00003  | 0.00055  | -0.00449 | -0.00426 | -0.06057 |
| D17 | 0.07730  | -0.00015 | -0.00664 | 0.03094  | 0.02430  | 0.10160  |
| D18 | -3.05998 | -0.00021 | -0.00697 | 0.02878  | 0.02182  | -3.03816 |
| D19 | -3.07535 | 0.00022  | -0.00380 | 0.03065  | 0.02686  | -3.04849 |
| D20 | 0.07055  | 0.00016  | -0.00413 | 0.02850  | 0.02437  | 0.09493  |
| D21 | -0.00375 | 0.00040  | 0.00414  | -0.01157 | -0.00757 | -0.01132 |
| D22 | 3.06412  | 0.00034  | 0.00634  | -0.00387 | 0.00219  | 3.06631  |
| D23 | -3.09098 | 0.00034  | 0.00221  | -0.00545 | -0.00280 | -3.09378 |
| D24 | -0.02311 | 0.00028  | 0.00442  | 0.00225  | 0.00697  | -0.01615 |
| D25 | -2.65417 | -0.00017 | -0.01370 | -0.00912 | -0.02381 | -2.67798 |
| D26 | 0.42157  | -0.00008 | -0.01134 | -0.01668 | -0.02965 | 0.39193  |
| D27 | 1.31887  | -0.00009 | 0.03834  | -0.14386 | -0.10528 | 1.21359  |
| D28 | -2.86277 | -0.00001 | 0.03200  | -0.13050 | -0.09831 | -2.96108 |
| D29 | -0.79301 | 0.00002  | 0.03216  | -0.13773 | -0.10557 | -0.89858 |
| D30 | -1.73646 | 0.00001  | 0.03595  | -0.15302 | -0.11670 | -1.85316 |
| D31 | 0.36508  | 0.00010  | 0.02961  | -0.13965 | -0.10973 | 0.25536  |
| D32 | 2.43484  | 0.00013  | 0.02977  | -0.14688 | -0.11698 | 2.31786  |
| D33 | -0.92656 | 0.00012  | -0.02680 | 0.11907  | 0.09255  | -0.83401 |
| D34 | 1.13381  | 0.00029  | -0.02001 | 0.09757  | 0.07795  | 1.21177  |
| D35 | -2.98699 | 0.00004  | -0.02894 | 0.10946  | 0.08069  | -2.90629 |
| D36 | -2.99381 | -0.00010 | -0.02432 | 0.11526  | 0.09094  | -2.90287 |
| D37 | -0.93344 | 0.00007  | -0.01753 | 0.09376  | 0.07634  | -0.85710 |
| D38 | 1.22895  | -0.00018 | -0.02646 | 0.10565  | 0.07908  | 1.30803  |
| D39 | 1.16033  | 0.00023  | -0.02207 | 0.12112  | 0.09923  | 1.25956  |
| D40 | -3.06248 | 0.00040  | -0.01528 | 0.09963  | 0.08463  | -2.97785 |
| D41 | -0.90010 | 0.00015  | -0.02422 | 0.11151  | 0.08737  | -0.81273 |
| D42 | -1.63441 | -0.00030 | 0.02116  | -0.10709 | -0.08444 | -1.71885 |
| D43 | 2.57042  | -0.00046 | 0.01614  | -0.11000 | -0.09298 | 2.47744  |
| D44 | 0.48797  | -0.00022 | 0.01392  | -0.09893 | -0.08435 | 0.40363  |
| D45 | -0.07676 | -0.00023 | -0.00565 | 0.07039  | 0.06101  | -0.01574 |
| D46 | -0.05375 | -0.00026 | 0.01726  | -0.12491 | -0.10761 | -0.16136 |
| D47 | -2.80339 | -0.00006 | 0.04112  | -0.27447 | -0.23909 | -3.04248 |
| D48 | -3.13309 | -0.00005 | -0.00054 | 0.00087  | 0.00033  | -3.13276 |
| D49 | 0.00962  | -0.00004 | -0.00095 | 0.00318  | 0.00222  | 0.01184  |
| D50 | 0.00373  | 0.00002  | -0.00017 | 0.00325  | 0.00308  | 0.00681  |
| D51 | -3.13675 | 0.00003  | -0.00058 | 0.00555  | 0.00497  | -3.13178 |
| D52 | -2.77547 | -0.00011 | 0.01087  | 0.00542  | 0.01410  | -2.76137 |
| D53 | -3.07106 | 0.00024  | -0.04050 | 0.14218  | 0.09495  | -2.97611 |
| D54 | -2.39584 | -0.00037 | 0.02763  | -0.23083 | -0.19835 | -2.59420 |
| D55 | -0.74961 | -0.00029 | 0.03751  | -0.32502 | -0.28707 | -1.03668 |
| D56 | -2.72074 | -0.00036 | -0.00045 | -0.01158 | -0.01183 | -2.73258 |

|     |          |          |          |          |          |          |
|-----|----------|----------|----------|----------|----------|----------|
| D57 | -0.00931 | -0.00060 | -0.00530 | -0.00101 | -0.00653 | -0.01584 |
| D58 | -0.03398 | 0.00051  | 0.00875  | -0.00488 | 0.00376  | -0.03022 |
| D59 | 2.67746  | 0.00027  | 0.00390  | 0.00570  | 0.00906  | 2.68652  |
| D60 | 0.76809  | -0.00014 | 0.04327  | -0.30572 | -0.26766 | 0.50043  |
| D61 | 0.16886  | -0.00032 | -0.00268 | -0.05132 | -0.05080 | 0.11806  |
| D62 | -1.63018 | 0.00002  | 0.04937  | -0.28967 | -0.24528 | -1.87546 |
| D63 | -2.22941 | -0.00016 | 0.00342  | -0.03527 | -0.02842 | -2.25782 |
| D64 | 2.00437  | -0.00004 | -0.01610 | 0.07668  | 0.06361  | 2.06798  |
| D65 | -0.39523 | 0.00041  | -0.01353 | 0.08335  | 0.07274  | -0.32249 |
| D66 | 2.54752  | -0.00006 | -0.01069 | 0.02415  | 0.01341  | 2.56094  |
| D67 | -1.65070 | -0.00003 | -0.00951 | 0.02446  | 0.01491  | -1.63579 |
| D68 | 0.44600  | -0.00002 | -0.00856 | 0.01878  | 0.01021  | 0.45621  |
| D69 | 1.34709  | -0.00011 | -0.01247 | 0.02557  | 0.01294  | 1.36003  |
| D70 | -2.85114 | -0.00007 | -0.01129 | 0.02589  | 0.01444  | -2.83670 |
| D71 | -0.75444 | -0.00007 | -0.01033 | 0.02020  | 0.00974  | -0.74470 |
| D72 | -1.02146 | -0.00004 | -0.01369 | 0.03570  | 0.02218  | -0.99928 |
| D73 | 1.06350  | 0.00000  | -0.01251 | 0.03601  | 0.02367  | 1.08717  |
| D74 | -3.12299 | 0.00000  | -0.01155 | 0.03032  | 0.01898  | -3.10401 |

| Item                 | Value    | Threshold | Converged? |
|----------------------|----------|-----------|------------|
| Maximum Force        | 0.003950 | 0.000450  | NO         |
| RMS Force            | 0.000574 | 0.000300  | NO         |
| Maximum Displacement | 0.867896 | 0.001800  | NO         |
| RMS Displacement     | 0.251549 | 0.001200  | NO         |

Predicted change in Energy=-8.394767D-04

GradGradGradGradGradGradGradGradGradGradGradGradGradGradGradGradGradGrad

Input orientation:

| Center Number | Atomic Number | Atomic Type | Coordinates (Angstroms) |           |           |
|---------------|---------------|-------------|-------------------------|-----------|-----------|
|               |               |             | X                       | Y         | Z         |
| 1             | 6             | 0           | -1.408919               | -1.820408 | -0.170233 |
| 2             | 6             | 0           | -2.640495               | -1.254643 | -0.214222 |
| 3             | 7             | 0           | -2.481725               | 0.077758  | 0.156332  |
| 4             | 6             | 0           | -1.175256               | 0.312205  | 0.393949  |
| 5             | 7             | 0           | -0.509243               | -0.826525 | 0.191806  |
| 6             | 6             | 0           | 0.959231                | -0.964935 | 0.260540  |
| 7             | 6             | 0           | 1.589280                | -1.116052 | -1.137436 |
| 8             | 1             | 0           | -1.096954               | -2.831730 | -0.366425 |
| 9             | 1             | 0           | -3.595617               | -1.681522 | -0.459923 |
| 10            | 1             | 0           | 1.334101                | -0.064213 | 0.752331  |
| 11            | 1             | 0           | 1.187084                | -1.843749 | 0.866229  |
| 12            | 1             | 0           | 1.034638                | -1.870511 | -1.710985 |
| 13            | 1             | 0           | 1.496346                | -0.162344 | -1.671325 |



|    |    |   |           |           |           |
|----|----|---|-----------|-----------|-----------|
| 14 | 35 | 0 | 0.755094  | 2.833454  | 0.872776  |
| 15 | 1  | 0 | -0.678065 | 1.287290  | 0.654335  |
| 16 | 6  | 0 | -3.472269 | 1.089492  | 0.279096  |
| 17 | 6  | 0 | -4.777581 | 0.885457  | 0.155056  |
| 18 | 1  | 0 | -3.038394 | 2.059980  | 0.486283  |
| 19 | 1  | 0 | -5.455172 | 1.721545  | 0.257316  |
| 20 | 1  | 0 | -5.213113 | -0.085506 | -0.043294 |
| 21 | 8  | 0 | 2.915635  | -1.546270 | -1.017655 |
| 22 | 1  | 0 | 3.538772  | -0.799374 | -1.089437 |
| 23 | 6  | 0 | 5.329647  | 1.716002  | -0.745176 |
| 24 | 6  | 0 | 6.192685  | 0.542749  | -0.603685 |
| 25 | 8  | 0 | 4.914084  | 0.447419  | -1.293463 |
| 26 | 1  | 0 | 4.745076  | 2.056143  | 0.103183  |
| 27 | 1  | 0 | 5.545800  | 2.472186  | -1.492271 |
| 28 | 1  | 0 | 7.031564  | 0.447981  | -1.289340 |
| 29 | 6  | 0 | 6.314107  | -0.204782 | 0.697312  |
| 30 | 1  | 0 | 6.470076  | -1.270873 | 0.516082  |
| 31 | 1  | 0 | 7.167454  | 0.174607  | 1.267553  |
| 32 | 1  | 0 | 5.408597  | -0.075217 | 1.293446  |

-----  
Distance matrix (angstroms):

|    |    | 1        | 2        | 3        | 4        | 5        |
|----|----|----------|----------|----------|----------|----------|
| 1  | C  | 0.000000 |          |          |          |          |
| 2  | C  | 1.356026 | 0.000000 |          |          |          |
| 3  | N  | 2.204675 | 1.392053 | 0.000000 |          |          |
| 4  | C  | 2.218319 | 2.229756 | 1.348439 | 0.000000 |          |
| 5  | N  | 1.388630 | 2.211421 | 2.170178 | 1.334594 | 0.000000 |
| 6  | C  | 2.554512 | 3.642438 | 3.596977 | 2.490968 | 1.476583 |
| 7  | C  | 3.228126 | 4.331574 | 4.435325 | 3.468101 | 2.500902 |
| 8  | H  | 1.076376 | 2.211987 | 3.264351 | 3.235526 | 2.162839 |
| 9  | H  | 2.210172 | 1.074641 | 2.171541 | 3.249953 | 3.268253 |
| 10 | H  | 3.385189 | 4.260137 | 3.864700 | 2.562617 | 2.072010 |
| 11 | H  | 2.795358 | 4.020545 | 4.201940 | 3.232930 | 2.089764 |
| 12 | H  | 2.889187 | 4.015744 | 4.432543 | 3.752151 | 2.663474 |
| 13 | H  | 3.666472 | 4.519925 | 4.384407 | 3.409987 | 2.816874 |
| 14 | Br | 5.237294 | 5.424401 | 4.310934 | 3.211265 | 3.931630 |
| 15 | H  | 3.297248 | 3.326702 | 2.228040 | 1.125073 | 2.170402 |
| 16 | C  | 3.595390 | 2.535780 | 1.421216 | 2.427681 | 3.529627 |
| 17 | C  | 4.333060 | 3.046889 | 2.433790 | 3.655466 | 4.599016 |
| 18 | H  | 4.259533 | 3.411123 | 2.085174 | 2.556272 | 3.849056 |
| 19 | H  | 5.394478 | 4.123403 | 3.399061 | 4.508057 | 5.564096 |
| 20 | H  | 4.183048 | 2.830982 | 2.743535 | 4.080887 | 4.767680 |
| 21 | O  | 4.415319 | 5.621489 | 5.757362 | 4.709772 | 3.702785 |
| 22 | H  | 5.134889 | 6.257524 | 6.210288 | 5.065383 | 4.246027 |

|    |    |          |           |          |           |          |
|----|----|----------|-----------|----------|-----------|----------|
| 23 | C  | 7.631843 | 8.522313  | 8.032067 | 6.751446  | 6.437003 |
| 24 | C  | 7.972250 | 9.022603  | 8.720048 | 7.438749  | 6.886476 |
| 25 | O  | 6.810657 | 7.818788  | 7.545631 | 6.320262  | 5.765539 |
| 26 | H  | 7.278328 | 8.099921  | 7.492896 | 6.178689  | 5.993788 |
| 27 | H  | 8.279025 | 9.085048  | 8.537701 | 7.307253  | 7.097968 |
| 28 | H  | 8.811341 | 9.879450  | 9.629626 | 8.378771  | 7.789861 |
| 29 | C  | 7.937758 | 9.061898  | 8.816981 | 7.513313  | 6.870240 |
| 30 | H  | 7.927898 | 9.139809  | 9.059965 | 7.808467  | 7.000963 |
| 31 | H  | 8.921966 | 10.021691 | 9.713437 | 8.389454  | 7.816084 |
| 32 | H  | 7.187946 | 8.273572  | 7.973306 | 6.656299  | 6.066210 |
|    |    | 6        | 7         | 8        | 9         | 10       |
| 6  | C  | 0.000000 |           |          |           |          |
| 7  | C  | 1.540823 | 0.000000  |          |           |          |
| 8  | H  | 2.847087 | 3.279308  | 0.000000 |           |          |
| 9  | H  | 4.666820 | 5.259462  | 2.752279 | 0.000000  |          |
| 10 | H  | 1.092559 | 2.177775  | 3.849779 | 5.327980  | 0.000000 |
| 11 | H  | 1.091371 | 2.169327  | 2.777116 | 4.965806  | 1.789227 |
| 12 | H  | 2.170868 | 1.098087  | 2.697308 | 4.800015  | 3.069254 |
| 13 | H  | 2.159802 | 1.096920  | 3.943804 | 5.450090  | 2.431062 |
| 14 | Br | 3.852825 | 4.509481  | 6.087694 | 6.410131  | 2.957403 |
| 15 | H  | 2.812174 | 3.758636  | 4.264240 | 4.309005  | 2.425897 |
| 16 | C  | 4.884589 | 5.700024  | 4.629773 | 2.870519  | 4.965500 |
| 17 | C  | 6.028772 | 6.798051  | 5.257037 | 2.892165  | 6.213797 |
| 18 | H  | 5.018175 | 5.842860  | 5.331522 | 3.899313  | 4.868439 |
| 19 | H  | 6.954261 | 7.721502  | 6.333674 | 3.943759  | 7.037627 |
| 20 | H  | 6.242078 | 6.966471  | 4.958722 | 2.310224  | 6.595414 |
| 21 | O  | 2.408163 | 1.399519  | 4.263494 | 6.536495  | 2.798320 |
| 22 | H  | 2.916141 | 1.975628  | 5.113039 | 7.216230  | 2.965324 |
| 23 | C  | 5.224885 | 4.707945  | 7.882038 | 9.554312  | 4.623427 |
| 24 | C  | 5.514439 | 4.922179  | 8.036307 | 10.038870 | 5.080651 |
| 25 | O  | 4.477782 | 3.677378  | 6.909761 | 8.811481  | 4.154915 |
| 26 | H  | 4.846060 | 4.643383  | 7.631589 | 9.157205  | 4.068422 |
| 27 | H  | 5.993560 | 5.353075  | 8.574686 | 10.093787 | 5.404625 |
| 28 | H  | 6.424305 | 5.664603  | 8.813687 | 10.870129 | 6.073866 |
| 29 | C  | 5.426168 | 5.149825  | 7.934495 | 10.085762 | 4.982293 |
| 30 | H  | 5.525243 | 5.155604  | 7.776569 | 10.121235 | 5.281105 |
| 31 | H  | 6.391766 | 6.210137  | 8.944741 | 11.057717 | 5.860930 |
| 32 | H  | 4.653531 | 4.645396  | 7.257805 | 9.312915  | 4.110285 |
|    |    | 11       | 12        | 13       | 14        | 15       |
| 11 | H  | 0.000000 |           |          |           |          |
| 12 | H  | 2.581858 | 0.000000  |          |           |          |
| 13 | H  | 3.059729 | 1.769910  | 0.000000 |           |          |
| 14 | Br | 4.697115 | 5.374129  | 3.999589 | 0.000000  |          |
| 15 | H  | 3.650627 | 4.301139  | 3.498313 | 2.119501  | 0.000000 |

|    |   |           |           |           |           |           |
|----|---|-----------|-----------|-----------|-----------|-----------|
| 16 | C | 5.536984  | 5.747544  | 5.482552  | 4.611340  | 2.826218  |
| 17 | C | 6.597845  | 6.697714  | 6.617833  | 5.909341  | 4.149311  |
| 18 | H | 5.765251  | 6.071766  | 5.491618  | 3.890783  | 2.489266  |
| 19 | H | 7.563177  | 7.674289  | 7.456024  | 6.338969  | 4.813206  |
| 20 | H | 6.699341  | 6.708340  | 6.904580  | 6.706639  | 4.789354  |
| 21 | O | 2.573985  | 2.030761  | 2.087323  | 5.236760  | 4.872298  |
| 22 | H | 3.231994  | 2.793625  | 2.217184  | 4.979617  | 5.017630  |
| 23 | C | 5.694671  | 5.678289  | 4.368081  | 4.979258  | 6.183448  |
| 24 | C | 5.736903  | 5.801326  | 4.867506  | 6.082324  | 7.024540  |
| 25 | O | 4.878960  | 4.538417  | 3.492210  | 5.261460  | 5.980922  |
| 26 | H | 5.333920  | 5.698875  | 4.315648  | 4.137203  | 5.505031  |
| 27 | H | 6.571774  | 6.265576  | 4.834345  | 5.354889  | 6.689424  |
| 28 | H | 6.637503  | 6.443315  | 5.581850  | 7.054028  | 7.995042  |
| 29 | C | 5.385268  | 6.037163  | 5.368712  | 6.337531  | 7.149727  |
| 30 | H | 5.325485  | 5.904521  | 5.545410  | 7.045122  | 7.593367  |
| 31 | H | 6.324528  | 7.117979  | 6.396250  | 6.952963  | 7.947721  |
| 32 | H | 4.596889  | 5.601893  | 4.909498  | 5.503855  | 6.269955  |
|    |   | 16        | 17        | 18        | 19        | 20        |
| 16 | C | 0.000000  |           |           |           |           |
| 17 | C | 1.326972  | 0.000000  |           |           |           |
| 18 | H | 1.083061  | 2.124615  | 0.000000  |           |           |
| 19 | H | 2.081314  | 1.081032  | 2.451077  | 0.000000  |           |
| 20 | H | 2.124875  | 1.082497  | 3.100478  | 1.847808  | 0.000000  |
| 21 | O | 7.030941  | 8.153167  | 7.121611  | 9.076044  | 8.316234  |
| 22 | H | 7.388869  | 8.576080  | 7.342882  | 9.437150  | 8.843048  |
| 23 | C | 8.883433  | 10.181173 | 8.465159  | 10.831312 | 10.718575 |
| 24 | C | 9.720575  | 11.001812 | 9.418219  | 11.738971 | 11.436825 |
| 25 | O | 8.556642  | 9.809101  | 8.307212  | 10.561713 | 10.217977 |
| 26 | H | 8.275876  | 9.594488  | 7.792894  | 10.206898 | 10.186935 |
| 27 | H | 9.293824  | 10.573722 | 8.818899  | 11.164493 | 11.153274 |
| 28 | H | 10.639645 | 11.905191 | 10.351591 | 12.646449 | 12.319470 |
| 29 | C | 9.880446  | 11.158325 | 9.625121  | 11.933995 | 11.551602 |
| 30 | H | 10.221434 | 11.458180 | 10.075042 | 12.297685 | 11.756483 |
| 31 | H | 10.724634 | 12.017772 | 10.407899 | 12.757127 | 12.452486 |
| 32 | H | 9.014169  | 10.294516 | 8.749985  | 11.059990 | 10.705498 |
|    |   | 21        | 22        | 23        | 24        | 25        |
| 21 | O | 0.000000  |           |           |           |           |
| 22 | H | 0.975349  | 0.000000  |           |           |           |
| 23 | C | 4.067446  | 3.106906  | 0.000000  |           |           |
| 24 | C | 3.908251  | 3.013388  | 1.463345  | 0.000000  |           |
| 25 | O | 2.836312  | 1.867513  | 1.443126  | 1.455919  | 0.000000  |
| 26 | H | 4.192912  | 3.321369  | 1.084957  | 2.210338  | 2.137095  |
| 27 | H | 4.826077  | 3.859215  | 1.084752  | 2.220534  | 2.130322  |
| 28 | H | 4.581672  | 3.714223  | 2.191008  | 1.087576  | 2.117484  |

|    |   |          |          |          |          |          |
|----|---|----------|----------|----------|----------|----------|
| 29 | C | 4.036126 | 3.353878 | 2.596026 | 1.505370 | 2.519646 |
| 30 | H | 3.881010 | 3.375285 | 3.436971 | 2.149429 | 2.940763 |
| 31 | H | 5.124603 | 4.435243 | 3.131216 | 2.141783 | 3.422120 |
| 32 | H | 3.704057 | 3.114287 | 2.714900 | 2.143777 | 2.685105 |
|    |   | 26       | 27       | 28       | 29       | 30       |
| 26 | H | 0.000000 |          |          |          |          |
| 27 | H | 1.832955 | 0.000000 |          |          |          |
| 28 | H | 3.123033 | 2.519143 | 0.000000 |          |          |
| 29 | C | 2.815427 | 3.542701 | 2.210799 | 0.000000 |          |
| 30 | H | 3.770298 | 4.347212 | 2.555244 | 1.092575 | 0.000000 |
| 31 | H | 3.280831 | 3.940210 | 2.575053 | 1.094218 | 1.772133 |
| 32 | H | 2.529759 | 3.777341 | 3.094922 | 1.091838 | 1.777815 |
|    |   | 31       | 32       |          |          |          |
| 31 | H | 0.000000 |          |          |          |          |
| 32 | H | 1.776700 | 0.000000 |          |          |          |

Stoichiometry C<sub>10</sub>H<sub>17</sub>BrN<sub>2</sub>O<sub>2</sub>

Framework group C1[X(C<sub>10</sub>H<sub>17</sub>BrN<sub>2</sub>O<sub>2</sub>)]

Deg. of freedom 90

Full point group C1 NOp 1

Largest Abelian subgroup C1 NOp 1

Largest concise Abelian subgroup C1 NOp 1

Standard orientation:

| Center<br>Number | Atomic<br>Number | Atomic<br>Type | Coordinates (Angstroms) |           |           |
|------------------|------------------|----------------|-------------------------|-----------|-----------|
|                  |                  |                | X                       | Y         | Z         |
| 1                | 6                | 0              | -2.375793               | 2.361065  | -0.291699 |
| 2                | 6                | 0              | -3.592373               | 1.838811  | 0.001543  |
| 3                | 7                | 0              | -3.441606               | 0.454978  | 0.010740  |
| 4                | 6                | 0              | -2.152762               | 0.154423  | -0.247790 |
| 5                | 7                | 0              | -1.490551               | 1.299516  | -0.424934 |
| 6                | 6                | 0              | -0.033262               | 1.403243  | -0.639055 |
| 7                | 6                | 0              | 0.695278                | 1.938465  | 0.608704  |
| 8                | 1                | 0              | -2.065201               | 3.384580  | -0.412261 |
| 9                | 1                | 0              | -4.533093               | 2.323944  | 0.187410  |
| 10               | 1                | 0              | 0.317762                | 0.397919  | -0.883577 |
| 11               | 1                | 0              | 0.136622                | 2.073964  | -1.483071 |
| 12               | 1                | 0              | 0.173131                | 2.827721  | 0.986039  |
| 13               | 1                | 0              | 0.655774                | 1.174750  | 1.395095  |
| 14               | 35               | 0              | -0.225817               | -2.412148 | -0.139075 |
| 15               | 1                | 0              | -1.661702               | -0.857763 | -0.259108 |
| 16               | 6                | 0              | -4.423489               | -0.543750 | 0.252197  |
| 17               | 6                | 0              | -5.719057               | -0.304421 | 0.410567  |
| 18               | 1                | 0              | -3.991736               | -1.536102 | 0.295187  |

|    |   |   |           |           |           |
|----|---|---|-----------|-----------|-----------|
| 19 | 1 | 0 | -6.389945 | -1.130918 | 0.598831  |
| 20 | 1 | 0 | -6.153117 | 0.685904  | 0.359113  |
| 21 | 8 | 0 | 2.002810  | 2.308675  | 0.274101  |
| 22 | 1 | 0 | 2.640454  | 1.608284  | 0.506841  |
| 23 | 6 | 0 | 4.438093  | -0.913771 | 0.753011  |
| 24 | 6 | 0 | 5.271080  | 0.166199  | 0.222752  |
| 25 | 8 | 0 | 4.045219  | 0.460670  | 0.950937  |
| 26 | 1 | 0 | 3.797975  | -1.475577 | 0.080884  |
| 27 | 1 | 0 | 4.719534  | -1.429876 | 1.664665  |
| 28 | 1 | 0 | 6.156478  | 0.445030  | 0.789449  |
| 29 | 6 | 0 | 5.285793  | 0.515515  | -1.241455 |
| 30 | 1 | 0 | 5.438924  | 1.588378  | -1.380146 |
| 31 | 1 | 0 | 6.100533  | -0.014947 | -1.743571 |
| 32 | 1 | 0 | 4.341025  | 0.228996  | -1.707749 |

-----

Rotational constants (GHZ):      0.5686975      0.1862884      0.1466522

Standard basis: 6-311++G(d,p) (5D, 7F)

There are    492 symmetry adapted cartesian basis functions of A    symmetry.

There are    475 symmetry adapted basis functions of A    symmetry.

475 basis functions,    751 primitive gaussians,    492 cartesian basis functions

71 alpha electrons      71 beta electrons

nuclear repulsion energy      1258.5445469231 Hartrees.

NAtoms=    32 NActive=    32 NUniq=    32 SFac= 1.00D+00 NAtFMM=    60 NAOKFM=F

Big=F

Integral buffers will be    131072 words long.

Raffenetti 2 integral format.

Two-electron integral symmetry is turned on.

One-electron integrals computed using PRISM.

NBasis=    475 RedAO= T EigKep=    3.84D-06    NBF=    475

NBsUse=    475 1.00D-06 EigRej= -1.00D+00    NBFU=    475

Initial guess from the checkpoint file:    "/home/suqian/liuwen/qianmengshijie/ohpo/ohpo.chk"

B after Tr=    0.000000    0.000000    0.000000

Rot=    0.999592    0.027886    -0.001529    0.006028 Ang=    3.27 deg.

ExpMin= 3.50D-02 ExpMax= 4.40D+05 ExpMxC= 1.51D+04 IAcc=3 IRadAn=      5 AccDes=

0.00D+00

Harris functional with IExCor=    402 and IRadAn=      5 diagonalized for initial guess.

HarFok: IExCor=    402 AccDes= 0.00D+00 IRadAn=      5 IDoV= 1 UseB2=F ITyADJ=14

ICtDFT= 3500011 ScaDFX= 1.000000 1.000000 1.000000 1.000000

FoFCou: FMM=F IPFlag=                    0 FMFlag=      100000 FMFlg1=                    0

NFxFlg=                    0 DoJE=T BraDBF=F KetDBF=T FulRan=T

wScrn= 0.000000 ICntrl=                    500 IOpCl= 0 I1Cent=    200000004 NGrid=

0

NMat0=    1 NMatS0=                    1 NMatT0=    0 NMatD0=    1 NMtDS0=    0

NMtDT0=    0

Petite list used in FoFCou.

Requested convergence on RMS density matrix=1.00D-08 within 128 cycles.

Requested convergence on MAX density matrix=1.00D-06.

Requested convergence on energy=1.00D-06.

No special actions if energy rises.

SCF Done: E(RB3LYP) = -3225.51826339 A.U. after 14 cycles

NFock= 14 Conv=0.54D-08 -V/T= 2.0018

Calling FoFJK, ICntrl= 2127 FMM=F ISym2X=0 l1Cent= 0 IOpClX= 0 NMat=1 NMatS=1

NMatT=0.

\*\*\*\*\* Axes restored to original set \*\*\*\*\*

```
-----
```

| Center | Atomic | Forces (Hartrees/Bohr) |              |              |
|--------|--------|------------------------|--------------|--------------|
| Number | Number | X                      | Y            | Z            |
| 1      | 6      | 0.001029112            | 0.001060520  | -0.002145948 |
| 2      | 6      | -0.000863034           | -0.000512098 | 0.003057969  |
| 3      | 7      | 0.000591399            | 0.000453160  | -0.001084772 |
| 4      | 6      | 0.001574098            | 0.000042908  | -0.001283786 |
| 5      | 7      | -0.001238735           | -0.000250989 | 0.000285410  |
| 6      | 6      | 0.000276192            | 0.000708328  | 0.001380225  |
| 7      | 6      | -0.006231082           | 0.002524750  | -0.001046667 |
| 8      | 1      | 0.000046362            | 0.000165596  | -0.000636590 |
| 9      | 1      | -0.000095949           | -0.000078044 | 0.000323518  |
| 10     | 1      | 0.000162535            | -0.000860684 | 0.000475851  |
| 11     | 1      | 0.000431514            | 0.000034759  | -0.000134503 |
| 12     | 1      | 0.000692186            | 0.000007300  | 0.000565582  |
| 13     | 1      | 0.001155803            | -0.000497256 | 0.000125817  |
| 14     | 35     | 0.002504637            | 0.001700624  | 0.000285614  |
| 15     | 1      | -0.002081796           | -0.003298670 | -0.000856924 |
| 16     | 6      | -0.000186598           | 0.000191176  | -0.000142903 |
| 17     | 6      | 0.000354927            | 0.000023199  | 0.000063561  |
| 18     | 1      | -0.000055260           | -0.000022541 | 0.000108041  |
| 19     | 1      | 0.000005608            | 0.000026799  | 0.000018474  |
| 20     | 1      | -0.000187354           | 0.000010828  | -0.000065694 |
| 21     | 8      | 0.005878546            | -0.000670228 | 0.000320991  |
| 22     | 1      | -0.001762789           | -0.000205054 | 0.000498010  |
| 23     | 6      | -0.002969746           | 0.001947702  | -0.000849367 |
| 24     | 6      | -0.002797950           | -0.002684694 | -0.000649557 |
| 25     | 8      | 0.003563050            | -0.000905021 | 0.001585581  |
| 26     | 1      | -0.000931058           | 0.000343795  | 0.000834465  |
| 27     | 1      | 0.000741195            | 0.000474169  | -0.000598895 |
| 28     | 1      | 0.000406889            | 0.000476708  | -0.000035835 |
| 29     | 6      | -0.000304517           | 0.000978220  | -0.001747156 |
| 30     | 1      | -0.000162075           | -0.000454043 | 0.000459484  |

```
-----
```

|    |   |              |              |             |
|----|---|--------------|--------------|-------------|
| 31 | 1 | -0.000004927 | -0.000184487 | 0.000173423 |
| 32 | 1 | 0.000458815  | -0.000546733 | 0.000716584 |

-----  
 Cartesian Forces: Max 0.006231082 RMS 0.001426171

GradGradGradGradGradGradGradGradGradGradGradGradGradGradGradGradGradGradGrad  
 Berny optimization.

Using GEDIIS/GDIIS optimizer.

FormGI is forming the generalized inverse of G from B-inverse, IUseBI=4.

GSVD: received Info= 1 from GESDD.

Internal Forces: Max 0.003936499 RMS 0.000788474

Search for a local minimum.

Step number 14 out of a maximum of 177

All quantities printed in internal units (Hartrees-Bohrs-Radians)

Mixed Optimization -- En-DIIS/RFO-DIIS

Swapping is turned off.

Update second derivatives using D2CorX and points 13 14

DE= -1.23D-03 DEPred=-8.39D-04 R= 1.47D+00

TightC=F SS= 1.41D+00 RLast= 1.08D+00 DXNew= 4.0363D+00 3.2330D+00

Trust test= 1.47D+00 RLast= 1.08D+00 DXMaxT set to 3.00D+00

ITU= 1 1 1 1 1 1 1 1 1 0 1 0 1 0

|                 |         |         |         |         |         |
|-----------------|---------|---------|---------|---------|---------|
| Eigenvalues --- | 0.00068 | 0.00181 | 0.00237 | 0.00322 | 0.00401 |
| Eigenvalues --- | 0.00772 | 0.00967 | 0.01398 | 0.01410 | 0.01533 |
| Eigenvalues --- | 0.01774 | 0.01865 | 0.02054 | 0.02086 | 0.02149 |
| Eigenvalues --- | 0.02179 | 0.02316 | 0.02388 | 0.02602 | 0.02763 |
| Eigenvalues --- | 0.03062 | 0.03066 | 0.03383 | 0.03745 | 0.03903 |
| Eigenvalues --- | 0.04544 | 0.05226 | 0.05392 | 0.05551 | 0.05615 |
| Eigenvalues --- | 0.05901 | 0.06040 | 0.06673 | 0.09360 | 0.09867 |
| Eigenvalues --- | 0.10925 | 0.11323 | 0.11858 | 0.12011 | 0.13045 |
| Eigenvalues --- | 0.14014 | 0.15263 | 0.15525 | 0.15997 | 0.16000 |
| Eigenvalues --- | 0.16001 | 0.16001 | 0.16003 | 0.16057 | 0.16105 |
| Eigenvalues --- | 0.17299 | 0.17858 | 0.19479 | 0.22024 | 0.22087 |
| Eigenvalues --- | 0.22836 | 0.23565 | 0.23664 | 0.25033 | 0.27003 |
| Eigenvalues --- | 0.27853 | 0.28906 | 0.31876 | 0.32947 | 0.33058 |
| Eigenvalues --- | 0.33174 | 0.34099 | 0.34338 | 0.34531 | 0.34765 |
| Eigenvalues --- | 0.34973 | 0.35685 | 0.35691 | 0.35859 | 0.36436 |
| Eigenvalues --- | 0.36658 | 0.36824 | 0.37236 | 0.37321 | 0.37778 |
| Eigenvalues --- | 0.40660 | 0.42222 | 0.42520 | 0.45051 | 0.46446 |
| Eigenvalues --- | 0.49373 | 0.53699 | 0.54787 | 0.56256 | 0.60366 |

En-DIIS/RFO-DIIS IScMMF= 0 using points: 14 13 12 11 10

RFO step: Lambda=-2.62894829D-04.

EnCoef did 100 forward-backward iterations

DidBck=T Rises=F En-DIIS coefs: 0.77036 0.00000 0.00257 0.00339

0.22368

New curvilinear step failed, DQL= 6.19D+00 SP=-6.15D-02.

ITry= 1 IFail=1 DXMaxC= 0.00D+00 DCold= 1.00D+10 DXMaxT= 3.00D+00 DXLimC= 3.00D+00

Rises=F

New curvilinear step failed, DQL= 6.17D+00 SP=-9.89D-02.

ITry= 2 IFail=1 DXMaxC= 0.00D+00 DCold= 1.00D+10 DXMaxT= 3.00D+00 DXLimC= 3.00D+00

Rises=F

|              |            |            |           |            |
|--------------|------------|------------|-----------|------------|
| Iteration 1  | RMS(Cart)= | 0.02003922 | RMS(Int)= | 0.06124148 |
| Iteration 2  | RMS(Cart)= | 0.00181772 | RMS(Int)= | 0.06076657 |
| Iteration 3  | RMS(Cart)= | 0.00178918 | RMS(Int)= | 0.06029930 |
| Iteration 4  | RMS(Cart)= | 0.00175308 | RMS(Int)= | 0.05984177 |
| Iteration 5  | RMS(Cart)= | 0.00171822 | RMS(Int)= | 0.05939362 |
| Iteration 6  | RMS(Cart)= | 0.00168453 | RMS(Int)= | 0.05895454 |
| Iteration 7  | RMS(Cart)= | 0.00165195 | RMS(Int)= | 0.05852423 |
| Iteration 8  | RMS(Cart)= | 0.00162044 | RMS(Int)= | 0.05810239 |
| Iteration 9  | RMS(Cart)= | 0.00158994 | RMS(Int)= | 0.05768875 |
| Iteration 10 | RMS(Cart)= | 0.00156041 | RMS(Int)= | 0.05728304 |
| Iteration 11 | RMS(Cart)= | 0.00153180 | RMS(Int)= | 0.05688501 |
| Iteration 12 | RMS(Cart)= | 0.00150407 | RMS(Int)= | 0.05649443 |
| Iteration 13 | RMS(Cart)= | 0.00147718 | RMS(Int)= | 0.05611106 |
| Iteration 14 | RMS(Cart)= | 0.00145109 | RMS(Int)= | 0.05573468 |
| Iteration 15 | RMS(Cart)= | 0.00142577 | RMS(Int)= | 0.05536509 |
| Iteration 16 | RMS(Cart)= | 0.00140119 | RMS(Int)= | 0.05500209 |
| Iteration 17 | RMS(Cart)= | 0.00137732 | RMS(Int)= | 0.05464547 |

New curvilinear step failed, DQL= 6.15D+00 SP=-1.89D-01.

ITry= 3 IFail=1 DXMaxC= 1.75D-01 DCold= 1.00D+10 DXMaxT= 3.00D+00 DXLimC= 3.00D+00

Rises=F

|             |            |            |           |            |
|-------------|------------|------------|-----------|------------|
| Iteration 1 | RMS(Cart)= | 0.05739928 | RMS(Int)= | 0.03953379 |
| Iteration 2 | RMS(Cart)= | 0.06449424 | RMS(Int)= | 0.02320920 |
| Iteration 3 | RMS(Cart)= | 0.06446922 | RMS(Int)= | 0.00747933 |
| Iteration 4 | RMS(Cart)= | 0.02407371 | RMS(Int)= | 0.00259115 |
| Iteration 5 | RMS(Cart)= | 0.00600779 | RMS(Int)= | 0.00131233 |
| Iteration 6 | RMS(Cart)= | 0.00254780 | RMS(Int)= | 0.00117902 |
| Iteration 7 | RMS(Cart)= | 0.00004697 | RMS(Int)= | 0.00117734 |
| Iteration 8 | RMS(Cart)= | 0.00000046 | RMS(Int)= | 0.00117734 |

ITry= 4 IFail=0 DXMaxC= 7.57D-01 DCold= 1.00D+10 DXMaxT= 3.00D+00 DXLimC= 3.00D+00

Rises=F

| Variable | Old X   | -DE/DX   | Delta X<br>(Linear) | Delta X<br>(Quad) | Delta X<br>(Total) | New X   |
|----------|---------|----------|---------------------|-------------------|--------------------|---------|
| R1       | 2.56252 | 0.00044  | 0.00073             | 0.00015           | 0.00122            | 2.56374 |
| R2       | 2.62413 | -0.00045 | -0.00139            | 0.00305           | 0.00072            | 2.62484 |
| R3       | 2.03406 | -0.00003 | 0.00004             | -0.00027          | -0.00015           | 2.03391 |
| R4       | 2.63060 | -0.00032 | -0.00029            | 0.00007           | 0.00001            | 2.63061 |
| R5       | 2.03078 | 0.00004  | -0.00003            | 0.00016           | 0.00008            | 2.03086 |
| R6       | 2.54818 | -0.00053 | -0.00011            | -0.00171          | -0.00154           | 2.54664 |



|     |         |          |          |          |          |         |
|-----|---------|----------|----------|----------|----------|---------|
| R7  | 2.68571 | 0.00022  | -0.00009 | 0.00109  | 0.00068  | 2.68638 |
| R8  | 2.52202 | -0.00120 | -0.00141 | 0.00213  | -0.00027 | 2.52175 |
| R9  | 2.12608 | -0.00170 | -0.00848 | 0.02042  | 0.00506  | 2.13114 |
| R10 | 2.79034 | 0.00011  | 0.00093  | 0.00080  | 0.00227  | 2.79261 |
| R11 | 2.91173 | -0.00039 | -0.00043 | 0.00432  | 0.00199  | 2.91373 |
| R12 | 2.06464 | -0.00044 | -0.00072 | 0.00110  | 0.00004  | 2.06468 |
| R13 | 2.06239 | -0.00001 | -0.00028 | 0.00004  | -0.00025 | 2.06214 |
| R14 | 2.07508 | -0.00065 | -0.00129 | 0.00094  | -0.00064 | 2.07445 |
| R15 | 2.07288 | -0.00059 | -0.00091 | 0.00082  | -0.00034 | 2.07254 |
| R16 | 2.64471 | 0.00394  | 0.00491  | 0.00248  | 0.00740  | 2.65211 |
| R17 | 4.00528 | 0.00218  | 0.05581  | -0.06225 | 0.01145  | 4.01673 |
| R18 | 9.94272 | -0.00138 | -0.34778 | 0.55510  | 0.04075  | 9.98347 |
| R19 | 2.50761 | -0.00018 | -0.00012 | 0.00004  | -0.00010 | 2.50752 |
| R20 | 2.04669 | -0.00002 | -0.00017 | 0.00077  | 0.00037  | 2.04706 |
| R21 | 2.04285 | 0.00002  | 0.00003  | -0.00002 | 0.00001  | 2.04287 |
| R22 | 2.04562 | 0.00007  | 0.00005  | 0.00017  | 0.00017  | 2.04580 |
| R23 | 1.84314 | -0.00226 | -0.00068 | -0.00041 | -0.00049 | 1.84265 |
| R24 | 3.52909 | -0.00089 | 0.02826  | 0.03886  | 0.05594  | 3.58503 |
| R25 | 2.76532 | 0.00251  | 0.00289  | -0.00994 | -0.00369 | 2.76163 |
| R26 | 2.72711 | -0.00038 | -0.00287 | 0.01810  | 0.00956  | 2.73667 |
| R27 | 2.05027 | 0.00126  | 0.00091  | -0.00468 | -0.00237 | 2.04790 |
| R28 | 2.04988 | 0.00089  | 0.00073  | -0.00526 | -0.00295 | 2.04693 |
| R29 | 2.75129 | -0.00367 | -0.00795 | 0.01534  | 0.00266  | 2.75394 |
| R30 | 2.05522 | 0.00030  | 0.00077  | -0.00106 | 0.00003  | 2.05525 |
| R31 | 2.84474 | -0.00024 | 0.00034  | 0.01251  | 0.00910  | 2.85384 |
| R32 | 2.06467 | 0.00035  | 0.00035  | -0.00141 | -0.00064 | 2.06403 |
| R33 | 2.06777 | 0.00002  | 0.00013  | -0.00034 | -0.00011 | 2.06766 |
| R34 | 2.06328 | -0.00005 | 0.00010  | -0.00111 | -0.00068 | 2.06260 |
| A1  | 1.87367 | 0.00005  | 0.00042  | -0.00135 | -0.00064 | 1.87303 |
| A2  | 2.27749 | -0.00006 | 0.00015  | -0.00034 | -0.00004 | 2.27745 |
| A3  | 2.13201 | 0.00002  | -0.00057 | 0.00171  | 0.00069  | 2.13270 |
| A4  | 1.86202 | -0.00035 | -0.00021 | 0.00058  | 0.00035  | 1.86236 |
| A5  | 2.27693 | 0.00021  | 0.00016  | 0.00021  | 0.00024  | 2.27717 |
| A6  | 2.14413 | 0.00015  | 0.00007  | -0.00076 | -0.00053 | 2.14360 |
| A7  | 1.90057 | -0.00010 | -0.00095 | 0.00140  | -0.00040 | 1.90017 |
| A8  | 2.24577 | 0.00042  | 0.00040  | 0.00130  | 0.00151  | 2.24728 |
| A9  | 2.13682 | -0.00032 | 0.00056  | -0.00264 | -0.00109 | 2.13574 |
| A10 | 1.88438 | 0.00054  | 0.00126  | -0.00075 | 0.00132  | 1.88570 |
| A11 | 2.23907 | -0.00121 | 0.00035  | -0.00504 | -0.00107 | 2.23801 |
| A12 | 2.15797 | 0.00069  | -0.00141 | 0.00615  | 0.00025  | 2.15822 |
| A13 | 1.90377 | -0.00010 | -0.00046 | 0.00004  | -0.00050 | 1.90327 |
| A14 | 2.20108 | 0.00055  | 0.00242  | 0.00700  | 0.00841  | 2.20949 |
| A15 | 2.17636 | -0.00046 | -0.00196 | -0.00537 | -0.00691 | 2.16945 |
| A16 | 1.95370 | -0.00082 | -0.00208 | 0.01371  | 0.00613  | 1.95983 |

|     |          |          |          |          |          |          |
|-----|----------|----------|----------|----------|----------|----------|
| A17 | 1.85970  | 0.00042  | 0.00213  | -0.00491 | -0.00134 | 1.85836  |
| A18 | 1.88488  | 0.00045  | -0.00074 | 0.00522  | 0.00381  | 1.88869  |
| A19 | 1.92725  | 0.00042  | -0.00386 | 0.00816  | 0.00289  | 1.93014  |
| A20 | 1.91685  | -0.00007 | 0.00371  | -0.00993 | -0.00361 | 1.91323  |
| A21 | 1.92027  | -0.00040 | 0.00086  | -0.01247 | -0.00806 | 1.91221  |
| A22 | 1.91213  | 0.00002  | 0.00159  | 0.00034  | -0.00001 | 1.91212  |
| A23 | 1.89830  | 0.00094  | 0.00093  | 0.00467  | 0.00461  | 1.90291  |
| A24 | 1.91774  | -0.00050 | -0.00069 | 0.00140  | 0.00323  | 1.92097  |
| A25 | 1.87586  | 0.00018  | 0.00649  | -0.01330 | -0.00252 | 1.87333  |
| A26 | 1.88829  | -0.00002 | -0.00358 | 0.00978  | 0.00285  | 1.89114  |
| A27 | 1.97058  | -0.00060 | -0.00456 | -0.00314 | -0.00819 | 1.96239  |
| A28 | 1.73274  | -0.00157 | 0.07706  | -0.21483 | -0.07574 | 1.65701  |
| A29 | 2.84016  | 0.00102  | -0.04327 | 0.16291  | 0.06739  | 2.90755  |
| A30 | 2.17494  | 0.00032  | 0.00102  | -0.00190 | -0.00031 | 2.17463  |
| A31 | 1.95541  | -0.00011 | 0.00024  | -0.00138 | -0.00073 | 1.95468  |
| A32 | 2.15283  | -0.00020 | -0.00125 | 0.00329  | 0.00105  | 2.15387  |
| A33 | 2.08152  | -0.00016 | -0.00048 | -0.00007 | -0.00053 | 2.08099  |
| A34 | 2.15414  | 0.00026  | 0.00092  | -0.00051 | 0.00057  | 2.15471  |
| A35 | 2.04753  | -0.00010 | -0.00044 | 0.00058  | -0.00004 | 2.04749  |
| A36 | 1.94312  | -0.00180 | -0.00806 | -0.00083 | -0.01023 | 1.93290  |
| A37 | 2.99857  | -0.00030 | -0.09448 | 0.33606  | 0.13926  | 3.13782  |
| A38 | 2.08693  | 0.00041  | -0.00058 | 0.01114  | 0.00652  | 2.09345  |
| A39 | 2.10364  | 0.00005  | -0.00019 | 0.00646  | 0.00496  | 2.10860  |
| A40 | 2.00150  | 0.00031  | -0.00027 | -0.00827 | -0.00621 | 1.99530  |
| A41 | 1.99161  | 0.00071  | 0.00171  | -0.01313 | -0.00731 | 1.98430  |
| A42 | 2.01236  | -0.00014 | 0.00104  | -0.00543 | -0.00293 | 2.00943  |
| A43 | 2.05309  | -0.00020 | -0.00189 | 0.01882  | 0.01081  | 2.06390  |
| A44 | 2.12854  | 0.00042  | 0.00251  | -0.01042 | -0.00429 | 2.12424  |
| A45 | 1.95303  | 0.00017  | 0.00389  | 0.00554  | 0.00758  | 1.96061  |
| A46 | 2.03507  | -0.00001 | 0.00097  | -0.00573 | -0.00286 | 2.03222  |
| A47 | 2.02569  | -0.00026 | -0.00254 | -0.00807 | -0.00816 | 2.01753  |
| A48 | 1.24047  | 0.00133  | -0.04850 | 0.20362  | 0.09519  | 1.33567  |
| A49 | 1.23720  | -0.00266 | 0.10901  | -0.40168 | -0.17302 | 1.06417  |
| A50 | 2.43017  | -0.00118 | 0.02345  | -0.09278 | -0.04131 | 2.38886  |
| A51 | 2.26361  | -0.00111 | 0.00335  | -0.03550 | -0.02090 | 2.24271  |
| A52 | 1.93125  | 0.00046  | -0.00071 | -0.01116 | -0.00854 | 1.92271  |
| A53 | 1.91890  | 0.00001  | 0.00132  | -0.00263 | -0.00051 | 1.91839  |
| A54 | 1.92415  | 0.00130  | 0.00276  | -0.01481 | -0.00761 | 1.91653  |
| A55 | 1.88960  | -0.00033 | -0.00025 | 0.00875  | 0.00587  | 1.89547  |
| A56 | 1.90154  | -0.00086 | -0.00288 | 0.01692  | 0.00893  | 1.91047  |
| A57 | 1.89769  | -0.00065 | -0.00037 | 0.00377  | 0.00228  | 1.89997  |
| A58 | 3.50408  | 0.00022  | -0.04515 | 0.16813  | 0.07429  | 3.57837  |
| A59 | 4.34376  | 0.00003  | -0.16503 | 0.62390  | 0.27311  | 4.61687  |
| D1  | -0.02561 | 0.00145  | 0.00675  | -0.00169 | 0.00538  | -0.02023 |

|     |          |          |          |          |          |          |
|-----|----------|----------|----------|----------|----------|----------|
| D2  | 3.13140  | 0.00066  | 0.00360  | -0.00422 | 0.00068  | 3.13208  |
| D3  | 3.12050  | 0.00047  | 0.00450  | -0.00717 | -0.00068 | 3.11982  |
| D4  | -0.00567 | -0.00033 | 0.00135  | -0.00969 | -0.00538 | -0.01105 |
| D5  | 0.02347  | -0.00141 | -0.00749 | 0.00642  | -0.00292 | 0.02055  |
| D6  | -3.05303 | -0.00132 | -0.00738 | -0.02083 | -0.02214 | -3.07517 |
| D7  | -3.12218 | -0.00053 | -0.00547 | 0.01133  | 0.00253  | -3.11966 |
| D8  | 0.08451  | -0.00044 | -0.00537 | -0.01592 | -0.01670 | 0.06781  |
| D9  | 0.01932  | -0.00101 | -0.00380 | -0.00351 | -0.00605 | 0.01326  |
| D10 | -3.12986 | -0.00066 | -0.00281 | 0.00517  | 0.00109  | -3.12876 |
| D11 | -3.13624 | -0.00029 | -0.00095 | -0.00121 | -0.00179 | -3.13803 |
| D12 | -0.00223 | 0.00006  | 0.00004  | 0.00746  | 0.00536  | 0.00313  |
| D13 | -0.00486 | 0.00013  | -0.00083 | 0.00755  | 0.00429  | -0.00057 |
| D14 | 3.07400  | 0.00048  | 0.00324  | 0.01433  | 0.01407  | 3.08808  |
| D15 | -3.13944 | -0.00020 | -0.00175 | -0.00049 | -0.00232 | 3.14143  |
| D16 | -0.06057 | 0.00015  | 0.00232  | 0.00629  | 0.00746  | -0.05312 |
| D17 | 0.10160  | -0.00026 | -0.01179 | 0.02564  | 0.00611  | 0.10771  |
| D18 | -3.03816 | -0.00031 | -0.01123 | 0.02087  | 0.00334  | -3.03482 |
| D19 | -3.04849 | 0.00014  | -0.01068 | 0.03538  | 0.01413  | -3.03436 |
| D20 | 0.09493  | 0.00009  | -0.01012 | 0.03061  | 0.01136  | 0.10628  |
| D21 | -0.01132 | 0.00078  | 0.00510  | -0.00863 | -0.00090 | -0.01222 |
| D22 | 3.06631  | 0.00073  | 0.00519  | 0.01871  | 0.01848  | 3.08479  |
| D23 | -3.09378 | 0.00053  | 0.00120  | -0.01454 | -0.01006 | -3.10384 |
| D24 | -0.01615 | 0.00049  | 0.00130  | 0.01280  | 0.00932  | -0.00683 |
| D25 | -2.67798 | -0.00009 | -0.00406 | -0.12080 | -0.08755 | -2.76553 |
| D26 | 0.39193  | 0.00029  | 0.00067  | -0.11336 | -0.07636 | 0.31557  |
| D27 | 1.21359  | -0.00004 | 0.05776  | -0.12833 | -0.03305 | 1.18054  |
| D28 | -2.96108 | 0.00027  | 0.05319  | -0.11346 | -0.02675 | -2.98784 |
| D29 | -0.89858 | 0.00026  | 0.05494  | -0.12796 | -0.03494 | -0.93352 |
| D30 | -1.85316 | 0.00004  | 0.05780  | -0.15996 | -0.05540 | -1.90856 |
| D31 | 0.25536  | 0.00035  | 0.05323  | -0.14509 | -0.04911 | 0.20625  |
| D32 | 2.31786  | 0.00034  | 0.05498  | -0.15959 | -0.05729 | 2.26057  |
| D33 | -0.83401 | -0.00025 | -0.04947 | 0.07371  | 0.00191  | -0.83209 |
| D34 | 1.21177  | 0.00052  | -0.04013 | 0.06060  | 0.00153  | 1.21329  |
| D35 | -2.90629 | 0.00006  | -0.04564 | 0.06070  | -0.00352 | -2.90982 |
| D36 | -2.90287 | -0.00053 | -0.04832 | 0.06567  | -0.00230 | -2.90517 |
| D37 | -0.85710 | 0.00024  | -0.03898 | 0.05256  | -0.00269 | -0.85978 |
| D38 | 1.30803  | -0.00022 | -0.04449 | 0.05266  | -0.00774 | 1.30029  |
| D39 | 1.25956  | -0.00026 | -0.04928 | 0.08248  | 0.00825  | 1.26781  |
| D40 | -2.97785 | 0.00050  | -0.03994 | 0.06937  | 0.00787  | -2.96999 |
| D41 | -0.81273 | 0.00005  | -0.04545 | 0.06947  | 0.00282  | -0.80991 |
| D42 | -1.71885 | -0.00029 | 0.03757  | -0.13990 | -0.06306 | -1.78191 |
| D43 | 2.47744  | -0.00001 | 0.03818  | -0.14702 | -0.06667 | 2.41077  |
| D44 | 0.40363  | 0.00015  | 0.03521  | -0.13505 | -0.06046 | 0.34317  |
| D45 | -0.01574 | -0.00010 | -0.01673 | 0.19626  | 0.12593  | 0.11019  |

|     |          |          |          |          |          |          |
|-----|----------|----------|----------|----------|----------|----------|
| D46 | -0.16136 | -0.00062 | 0.03602  | -0.23950 | -0.12526 | -0.28661 |
| D47 | -3.04248 | -0.00076 | 0.08929  | -0.49745 | -0.25316 | 2.98755  |
| D48 | -3.13276 | -0.00004 | -0.00040 | -0.00106 | -0.00114 | -3.13390 |
| D49 | 0.01184  | -0.00007 | -0.00139 | 0.00095  | -0.00072 | 0.01112  |
| D50 | 0.00681  | 0.00002  | -0.00102 | 0.00422  | 0.00193  | 0.00874  |
| D51 | -3.13178 | -0.00002 | -0.00201 | 0.00623  | 0.00236  | -3.12942 |
| D52 | -2.76137 | -0.00026 | 0.00553  | 0.06851  | 0.05732  | -2.70404 |
| D53 | -2.97611 | 0.00031  | -0.05506 | 0.11900  | 0.03092  | -2.94519 |
| D54 | -2.59420 | -0.00084 | 0.07722  | -0.36885 | -0.18111 | -2.77531 |
| D55 | -1.03668 | 0.00028  | 0.10998  | -0.50490 | -0.24219 | -1.27887 |
| D56 | -2.73258 | -0.00037 | 0.00410  | -0.01314 | -0.00497 | -2.73755 |
| D57 | -0.01584 | -0.00053 | -0.00156 | -0.01387 | -0.01114 | -0.02697 |
| D58 | -0.03022 | 0.00043  | 0.00505  | 0.01706  | 0.01724  | -0.01298 |
| D59 | 2.68652  | 0.00027  | -0.00061 | 0.01633  | 0.01107  | 2.69759  |
| D60 | 0.50043  | -0.00012 | 0.10616  | -0.48655 | -0.23618 | 0.26425  |
| D61 | 0.11806  | 0.00048  | 0.01333  | -0.08211 | -0.04297 | 0.07509  |
| D62 | -1.87546 | -0.00105 | 0.10286  | -0.45389 | -0.21675 | -2.09221 |
| D63 | -2.25782 | -0.00045 | 0.01002  | -0.04945 | -0.02354 | -2.28137 |
| D64 | 2.06798  | 0.00064  | -0.02911 | 0.10597  | 0.04449  | 2.11246  |
| D65 | -0.32249 | 0.00086  | -0.03075 | 0.11877  | 0.05184  | -0.27065 |
| D66 | 2.56094  | 0.00011  | -0.01242 | 0.00429  | -0.00937 | 2.55157  |
| D67 | -1.63579 | 0.00000  | -0.01234 | 0.00643  | -0.00779 | -1.64358 |
| D68 | 0.45621  | 0.00003  | -0.01016 | 0.00010  | -0.01006 | 0.44614  |
| D69 | 1.36003  | -0.00009 | -0.01339 | 0.00222  | -0.01186 | 1.34817  |
| D70 | -2.83670 | -0.00020 | -0.01330 | 0.00436  | -0.01028 | -2.84698 |
| D71 | -0.74470 | -0.00017 | -0.01113 | -0.00197 | -0.01256 | -0.75726 |
| D72 | -0.99928 | -0.00004 | -0.01787 | 0.00971  | -0.01108 | -1.01036 |
| D73 | 1.08717  | -0.00015 | -0.01779 | 0.01185  | -0.00950 | 1.07767  |
| D74 | -3.10401 | -0.00012 | -0.01562 | 0.00552  | -0.01177 | -3.11579 |

| Item                 | Value    | Threshold | Converged? |
|----------------------|----------|-----------|------------|
| Maximum Force        | 0.003936 | 0.000450  | NO         |
| RMS Force            | 0.000788 | 0.000300  | NO         |
| Maximum Displacement | 0.757357 | 0.001800  | NO         |
| RMS Displacement     | 0.217989 | 0.001200  | NO         |

Predicted change in Energy=-8.648920D-04

GradGradGradGradGradGradGradGradGradGradGradGradGradGradGradGradGradGrad

Input orientation:

| Center Number | Atomic Number | Atomic Type | Coordinates (Angstroms) |           |           |
|---------------|---------------|-------------|-------------------------|-----------|-----------|
|               |               |             | X                       | Y         | Z         |
| 1             | 6             | 0           | -1.395215               | -1.817314 | -0.289692 |
| 2             | 6             | 0           | -2.595297               | -1.184583 | -0.286228 |

|    |    |   |           |           |           |
|----|----|---|-----------|-----------|-----------|
| 3  | 7  | 0 | -2.362701 | 0.112096  | 0.163605  |
| 4  | 6  | 0 | -1.045706 | 0.258745  | 0.408790  |
| 5  | 7  | 0 | -0.442088 | -0.898333 | 0.130269  |
| 6  | 6  | 0 | 1.017582  | -1.115816 | 0.207188  |
| 7  | 6  | 0 | 1.659140  | -1.276364 | -1.185656 |
| 8  | 1  | 0 | -1.139824 | -2.829905 | -0.550172 |
| 9  | 1  | 0 | -3.573333 | -1.542479 | -0.551374 |
| 10 | 1  | 0 | 1.433422  | -0.247639 | 0.723987  |
| 11 | 1  | 0 | 1.197800  | -2.014480 | 0.799408  |
| 12 | 1  | 0 | 1.072940  | -1.988983 | -1.780297 |
| 13 | 1  | 0 | 1.627735  | -0.312032 | -1.707118 |
| 14 | 35 | 0 | 0.932611  | 2.700214  | 1.169598  |
| 15 | 1  | 0 | -0.496298 | 1.186909  | 0.738164  |
| 16 | 6  | 0 | -3.295470 | 1.166716  | 0.360048  |
| 17 | 6  | 0 | -4.611322 | 1.039852  | 0.245331  |
| 18 | 1  | 0 | -2.806325 | 2.098116  | 0.618261  |
| 19 | 1  | 0 | -5.241061 | 1.903476  | 0.407272  |
| 20 | 1  | 0 | -5.101652 | 0.106898  | -0.001999 |
| 21 | 8  | 0 | 2.964985  | -1.774898 | -1.059681 |
| 22 | 1  | 0 | 3.619554  | -1.060696 | -1.170365 |
| 23 | 6  | 0 | 5.084250  | 1.676079  | -0.903533 |
| 24 | 6  | 0 | 6.048334  | 0.636448  | -0.549457 |
| 25 | 8  | 0 | 4.897947  | 0.324035  | -1.387789 |
| 26 | 1  | 0 | 4.344300  | 1.996855  | -0.179660 |
| 27 | 1  | 0 | 5.303016  | 2.392401  | -1.686046 |
| 28 | 1  | 0 | 6.985045  | 0.593743  | -1.100465 |
| 29 | 6  | 0 | 6.069949  | 0.008367  | 0.823755  |
| 30 | 1  | 0 | 6.362266  | -1.041642 | 0.752941  |
| 31 | 1  | 0 | 6.791261  | 0.529307  | 1.460554  |
| 32 | 1  | 0 | 5.080622  | 0.080521  | 1.279118  |

-----  
Distance matrix (angstroms):

|    |   | 1        | 2        | 3        | 4        | 5        |
|----|---|----------|----------|----------|----------|----------|
| 1  | C | 0.000000 |          |          |          |          |
| 2  | C | 1.356672 | 0.000000 |          |          |          |
| 3  | N | 2.205478 | 1.392059 | 0.000000 |          |          |
| 4  | C | 2.218120 | 2.228783 | 1.347626 | 0.000000 |          |
| 5  | N | 1.389008 | 2.211722 | 2.170445 | 1.334451 | 0.000000 |
| 6  | C | 2.561362 | 3.647064 | 3.596662 | 2.487412 | 1.477786 |
| 7  | C | 3.228694 | 4.349440 | 4.463579 | 3.494998 | 2.507933 |
| 8  | H | 1.076297 | 2.212499 | 3.265009 | 3.235464 | 2.163517 |
| 9  | H | 2.210930 | 1.074685 | 2.171278 | 3.248880 | 3.268678 |
| 10 | H | 3.390076 | 4.257813 | 3.854086 | 2.549873 | 2.072062 |
| 11 | H | 2.819351 | 4.031739 | 4.195681 | 3.217679 | 2.093505 |

|    |    |          |          |          |          |          |
|----|----|----------|----------|----------|----------|----------|
| 12 | H  | 2.888453 | 4.041690 | 4.471791 | 3.785901 | 2.671159 |
| 13 | H  | 3.662403 | 4.540294 | 4.427535 | 3.456897 | 2.829118 |
| 14 | Br | 5.287378 | 5.445843 | 4.309229 | 3.233163 | 3.989931 |
| 15 | H  | 3.299985 | 3.328536 | 2.229080 | 1.127752 | 2.172720 |
| 16 | C  | 3.596883 | 2.537030 | 1.421573 | 2.426566 | 3.529733 |
| 17 | C  | 4.335089 | 3.048774 | 2.433866 | 3.653828 | 4.599164 |
| 18 | H  | 4.259837 | 3.411561 | 2.085135 | 2.554788 | 3.847917 |
| 19 | H  | 5.396348 | 4.125181 | 3.399025 | 4.506234 | 5.563902 |
| 20 | H  | 4.186053 | 2.833818 | 2.743958 | 4.079522 | 4.768597 |
| 21 | O  | 4.427869 | 5.644770 | 5.782855 | 4.730513 | 3.713825 |
| 22 | H  | 5.147422 | 6.278647 | 6.240375 | 5.098951 | 4.267897 |
| 23 | C  | 7.386749 | 8.218266 | 7.683873 | 6.427083 | 6.183588 |
| 24 | C  | 7.841865 | 8.837296 | 8.457476 | 7.168424 | 6.703966 |
| 25 | O  | 6.737586 | 7.722568 | 7.427566 | 6.209587 | 5.684599 |
| 26 | H  | 6.892171 | 7.634848 | 6.975242 | 5.693809 | 5.602471 |
| 27 | H  | 8.033543 | 8.782805 | 8.208789 | 7.017628 | 6.865433 |
| 28 | H  | 8.757814 | 9.777953 | 9.445115 | 8.178205 | 7.674849 |
| 29 | C  | 7.765407 | 8.817124 | 8.459086 | 7.132141 | 6.611328 |
| 30 | H  | 7.865574 | 9.018772 | 8.820628 | 7.529110 | 6.834289 |
| 31 | H  | 8.694157 | 9.700316 | 9.254791 | 7.911856 | 7.491939 |
| 32 | H  | 6.928160 | 7.935397 | 7.526514 | 6.190406 | 5.725237 |
|    |    | 6        | 7        | 8        | 9        | 10       |
| 6  | C  | 0.000000 |          |          |          |          |
| 7  | C  | 1.541878 | 0.000000 |          |          |          |
| 8  | H  | 2.857639 | 3.263669 | 0.000000 |          |          |
| 9  | H  | 4.672682 | 5.277491 | 2.753077 | 0.000000 |          |
| 10 | H  | 1.092582 | 2.180816 | 3.861759 | 5.326420 | 0.000000 |
| 11 | H  | 1.091238 | 2.167518 | 2.819712 | 4.981075 | 1.784078 |
| 12 | H  | 2.171539 | 1.097750 | 2.667711 | 4.826746 | 3.071427 |
| 13 | H  | 2.164006 | 1.096742 | 3.916324 | 5.468167 | 2.439707 |
| 14 | Br | 3.936437 | 4.678486 | 6.151002 | 6.423840 | 3.023114 |
| 15 | H  | 2.806476 | 3.796671 | 4.267170 | 4.310524 | 2.404568 |
| 16 | C  | 4.882185 | 5.736375 | 4.631230 | 2.871870 | 4.949269 |
| 17 | C  | 6.027679 | 6.836028 | 5.259196 | 2.894926 | 6.198844 |
| 18 | H  | 5.012046 | 5.880613 | 5.331778 | 3.900036 | 4.846566 |
| 19 | H  | 6.951745 | 7.762833 | 6.335751 | 3.946508 | 7.019710 |
| 20 | H  | 6.243702 | 7.001626 | 4.961995 | 2.314739 | 6.584827 |
| 21 | O  | 2.414896 | 1.403437 | 4.268735 | 6.562164 | 2.803511 |
| 22 | H  | 2.944647 | 1.972300 | 5.115312 | 7.235530 | 3.004796 |
| 23 | C  | 5.056300 | 4.530771 | 7.692065 | 9.243207 | 4.435996 |
| 24 | C  | 5.380651 | 4.829971 | 7.980302 | 9.865303 | 4.868335 |
| 25 | O  | 4.435578 | 3.618287 | 6.863208 | 8.714703 | 4.097480 |
| 26 | H  | 4.572245 | 4.351559 | 7.315088 | 8.680666 | 3.785174 |
| 27 | H  | 5.852937 | 5.195003 | 8.370955 | 9.775497 | 5.268001 |

|    |    |           |           |           |           |           |
|----|----|-----------|-----------|-----------|-----------|-----------|
| 28 | H  | 6.343750  | 5.645336  | 8.833894  | 10.786301 | 5.903987  |
| 29 | C  | 5.212519  | 5.014329  | 7.869199  | 9.863519  | 4.644661  |
| 30 | H  | 5.372988  | 5.092410  | 7.821595  | 10.033355 | 4.992473  |
| 31 | H  | 6.132921  | 6.049920  | 8.844741  | 10.759413 | 5.463754  |
| 32 | H  | 4.369044  | 4.429761  | 7.107097  | 8.993095  | 3.703772  |
|    |    | 11        | 12        | 13        | 14        | 15        |
| 11 | H  | 0.000000  |           |           |           |           |
| 12 | H  | 2.582851  | 0.000000  |           |           |           |
| 13 | H  | 3.060367  | 1.767856  | 0.000000  |           |           |
| 14 | Br | 4.736634  | 5.541673  | 4.222833  | 0.000000  |           |
| 15 | H  | 3.622514  | 4.346429  | 3.568998  | 2.125561  | 0.000000  |
| 16 | C  | 5.522908  | 5.798493  | 5.540561  | 4.569864  | 2.824667  |
| 17 | C  | 6.586489  | 6.751877  | 6.675738  | 5.860568  | 4.147039  |
| 18 | H  | 5.742759  | 6.124227  | 5.556716  | 3.827028  | 2.486142  |
| 19 | H  | 7.547389  | 7.733260  | 7.520604  | 6.271376  | 4.809962  |
| 20 | H  | 6.695192  | 6.758746  | 6.954681  | 6.671601  | 4.787855  |
| 21 | O  | 2.576151  | 2.035916  | 2.085039  | 5.396930  | 4.897451  |
| 22 | H  | 3.264139  | 2.778304  | 2.194526  | 5.180688  | 5.063047  |
| 23 | C  | 5.623587  | 5.503817  | 4.067657  | 4.752139  | 5.837548  |
| 24 | C  | 5.689863  | 5.758680  | 4.667064  | 5.777967  | 6.692771  |
| 25 | O  | 4.893217  | 4.487180  | 3.346765  | 5.283024  | 5.861920  |
| 26 | H  | 5.191324  | 5.399142  | 3.878635  | 3.735617  | 4.992975  |
| 27 | H  | 6.515435  | 6.090891  | 4.563124  | 5.229713  | 6.400161  |
| 28 | H  | 6.626051  | 6.487344  | 5.467104  | 6.798702  | 7.726765  |
| 29 | C  | 5.275447  | 5.978343  | 5.122620  | 5.810154  | 6.671723  |
| 30 | H  | 5.255501  | 5.940683  | 5.385165  | 6.607287  | 7.211557  |
| 31 | H  | 6.180192  | 7.038756  | 6.115880  | 6.254700  | 7.352741  |
| 32 | H  | 4.437956  | 5.450172  | 4.581935  | 4.907217  | 5.711283  |
|    |    | 16        | 17        | 18        | 19        | 20        |
| 16 | C  | 0.000000  |           |           |           |           |
| 17 | C  | 1.326922  | 0.000000  |           |           |           |
| 18 | H  | 1.083256  | 2.125326  | 0.000000  |           |           |
| 19 | H  | 2.080954  | 1.081038  | 2.451599  | 0.000000  |           |
| 20 | H  | 2.125226  | 1.082589  | 3.101322  | 1.847871  | 0.000000  |
| 21 | O  | 7.061304  | 8.186959  | 7.150087  | 9.111617  | 8.350478  |
| 22 | H  | 7.424357  | 8.611841  | 7.380325  | 9.475534  | 8.876248  |
| 23 | C  | 8.489746  | 9.784109  | 8.047058  | 10.410666 | 10.345419 |
| 24 | C  | 9.402928  | 10.696854 | 9.050140  | 11.400488 | 11.175971 |
| 25 | O  | 8.420043  | 9.675002  | 8.156433  | 10.417118 | 10.097502 |
| 26 | H  | 7.703668  | 9.016631  | 7.195719  | 9.603768  | 9.634807  |
| 27 | H  | 8.923159  | 10.190864 | 8.435512  | 10.760976 | 10.785020 |
| 28 | H  | 10.399537 | 11.682718 | 10.054257 | 12.388153 | 12.146270 |
| 29 | C  | 9.448167  | 10.746538 | 9.121268  | 11.476230 | 11.202511 |
| 30 | H  | 9.914791  | 11.180783 | 9.692228  | 11.976243 | 11.546017 |

|    |   |           |           |          |           |           |
|----|---|-----------|-----------|----------|-----------|-----------|
| 31 | H | 10.166589 | 11.478515 | 9.761367 | 12.156254 | 11.989948 |
| 32 | H | 8.496082  | 9.794018  | 8.167702 | 10.517624 | 10.262585 |
|    |   | 21        | 22        | 23       | 24        | 25        |
| 21 | O | 0.000000  |           |          |           |           |
| 22 | H | 0.975088  | 0.000000  |          |           |           |
| 23 | C | 4.052766  | 3.115521  | 0.000000 |           |           |
| 24 | C | 3.947399  | 3.027342  | 1.461391 | 0.000000  |           |
| 25 | O | 2.872197  | 1.897114  | 1.448184 | 1.457325  | 0.000000  |
| 26 | H | 4.111333  | 3.294748  | 1.083704 | 2.211603  | 2.136452  |
| 27 | H | 4.819243  | 3.876062  | 1.083191 | 2.220520  | 2.128657  |
| 28 | H | 4.666155  | 3.750811  | 2.196191 | 1.087594  | 2.123977  |
| 29 | C | 4.045759  | 3.335243  | 2.595456 | 1.510186  | 2.522729  |
| 30 | H | 3.919794  | 3.349916  | 3.429758 | 2.147272  | 2.931216  |
| 31 | H | 5.128482  | 4.416963  | 3.133350 | 2.145591  | 3.426344  |
| 32 | H | 3.659027  | 3.071980  | 2.703661 | 2.142243  | 2.684225  |
|    |   | 26        | 27        | 28       | 29        | 30        |
| 26 | H | 0.000000  |           |          |           |           |
| 27 | H | 1.828878  | 0.000000  |          |           |           |
| 28 | H | 3.128919  | 2.531264  | 0.000000 |           |           |
| 29 | C | 2.817586  | 3.545547  | 2.209680 | 0.000000  |           |
| 30 | H | 3.764889  | 4.343192  | 2.549009 | 1.092238  | 0.000000  |
| 31 | H | 3.291142  | 3.948048  | 2.569148 | 1.094158  | 1.775565  |
| 32 | H | 2.518440  | 3.766490  | 3.090734 | 1.091481  | 1.782898  |
|    |   | 31        | 32        |          |           |           |
| 31 | H | 0.000000  |           |          |           |           |
| 32 | H | 1.777812  | 0.000000  |          |           |           |

Stoichiometry C10H17BrN2O2

Framework group C1[X(C10H17BrN2O2)]

Deg. of freedom 90

Full point group C1 NOp 1

Largest Abelian subgroup C1 NOp 1

Largest concise Abelian subgroup C1 NOp 1

Standard orientation:

| Center<br>Number | Atomic<br>Number | Atomic<br>Type | Coordinates (Angstroms) |          |           |
|------------------|------------------|----------------|-------------------------|----------|-----------|
|                  |                  |                | X                       | Y        | Z         |
| 1                | 6                | 0              | -2.401565               | 2.347853 | -0.314460 |
| 2                | 6                | 0              | -3.587765               | 1.776070 | 0.011961  |
| 3                | 7                | 0              | -3.370239               | 0.401897 | 0.058450  |
| 4                | 6                | 0              | -2.074401               | 0.156110 | -0.218115 |
| 5                | 7                | 0              | -1.469621               | 1.325256 | -0.437427 |
| 6                | 6                | 0              | -0.024249               | 1.477983 | -0.704681 |
| 7                | 6                | 0              | 0.722181                | 2.134856 | 0.473771  |



|    |    |   |           |           |           |
|----|----|---|-----------|-----------|-----------|
| 8  | 1  | 0 | -2.142960 | 3.381078  | -0.469327 |
| 9  | 1  | 0 | -4.547601 | 2.220608  | 0.201823  |
| 10 | 1  | 0 | 0.363702  | 0.474225  | -0.893619 |
| 11 | 1  | 0 | 0.094210  | 2.090055  | -1.600302 |
| 12 | 1  | 0 | 0.173069  | 3.025480  | 0.805916  |
| 13 | 1  | 0 | 0.747555  | 1.433449  | 1.316521  |
| 14 | 35 | 0 | -0.122656 | -2.421091 | -0.172633 |
| 15 | 1  | 0 | -1.537597 | -0.835683 | -0.221942 |
| 16 | 6  | 0 | -4.298315 | -0.637000 | 0.341711  |
| 17 | 6  | 0 | -5.602954 | -0.458015 | 0.504811  |
| 18 | 1  | 0 | -3.815930 | -1.604537 | 0.409693  |
| 19 | 1  | 0 | -6.229368 | -1.311061 | 0.725176  |
| 20 | 1  | 0 | -6.087402 | 0.506942  | 0.426278  |
| 21 | 8  | 0 | 2.005801  | 2.532507  | 0.069013  |
| 22 | 1  | 0 | 2.678562  | 1.901193  | 0.384656  |
| 23 | 6  | 0 | 4.161994  | -0.759611 | 1.037361  |
| 24 | 6  | 0 | 5.078228  | 0.060629  | 0.247814  |
| 25 | 8  | 0 | 3.992419  | 0.678087  | 0.998521  |
| 26 | 1  | 0 | 3.372710  | -1.315604 | 0.545104  |
| 27 | 1  | 0 | 4.453237  | -1.137409 | 2.009857  |
| 28 | 1  | 0 | 6.054557  | 0.291503  | 0.667741  |
| 29 | 6  | 0 | 4.981564  | 0.133886  | -1.257493 |
| 30 | 1  | 0 | 5.261451  | 1.130946  | -1.604651 |
| 31 | 1  | 0 | 5.658921  | -0.596323 | -1.710443 |
| 32 | 1  | 0 | 3.960788  | -0.088092 | -1.573838 |

-----

Rotational constants (GHZ):      0.5432681      0.1970733      0.1523192

Standard basis: 6-311++G(d,p) (5D, 7F)

There are    492 symmetry adapted cartesian basis functions of A    symmetry.

There are    475 symmetry adapted basis functions of A    symmetry.

     475 basis functions,    751 primitive gaussians,    492 cartesian basis functions

     71 alpha electrons      71 beta electrons

     nuclear repulsion energy      1263.9798971871 Hartrees.

NAtoms=    32 NActive=    32 NUniq=    32 SFac= 1.00D+00 NAtFMM=    60 NAOKFM=F

Big=F

Integral buffers will be    131072 words long.

Raffenetti 2 integral format.

Two-electron integral symmetry is turned on.

One-electron integrals computed using PRISM.

NBasis=    475 RedAO= T EigKep= 3.79D-06 NBF=    475

NBsUse=    475 1.00D-06 EigRej= -1.00D+00 NBFU=    475

Initial guess from the checkpoint file: "/home/suqian/liuwen/qianmengshijie/ohpo/ohpo.chk"

B after Tr=    0.000000    0.000000    0.000000

     Rot=    0.999827    0.017989    -0.000929    -0.004562 Ang=    2.13 deg.

ExpMin= 3.50D-02 ExpMax= 4.40D+05 ExpMxC= 1.51D+04 IAcc=3 IRadAn= 5 AccDes= 0.00D+00

Harris functional with IExCor= 402 and IRadAn= 5 diagonalized for initial guess.  
HarFok: IExCor= 402 AccDes= 0.00D+00 IRadAn= 5 IDoV= 1 UseB2=F ITyADJ=14  
ICtDFT= 3500011 ScaDFX= 1.000000 1.000000 1.000000 1.000000  
FoFCou: FMM=F IPFlag= 0 FMFlag= 100000 FMFlg1= 0  
NFxFlg= 0 DoJE=T BraDBF=F KetDBF=T FulRan=T  
wScrn= 0.000000 ICntrl= 500 IOpCl= 0 l1Cent= 200000004 NGrid= 0  
NMat0= 1 NMatS0= 1 NMatT0= 0 NMatD0= 1 NMtDS0= 0

NMtDT0= 0

Petite list used in FoFCou.

Requested convergence on RMS density matrix=1.00D-08 within 128 cycles.

Requested convergence on MAX density matrix=1.00D-06.

Requested convergence on energy=1.00D-06.

No special actions if energy rises.

SCF Done: E(RB3LYP) = -3225.51937871 A.U. after 12 cycles  
NFock= 12 Conv=0.73D-08 -V/T= 2.0018

Calling FoFJK, ICntrl= 2127 FMM=F ISym2X=0 l1Cent= 0 IOpClX= 0 NMat=1 NMatS=1 NMatT=0.

\*\*\*\*\* Axes restored to original set \*\*\*\*\*

| Center Number | Atomic Number | Forces (Hartrees/Bohr) |              |              |
|---------------|---------------|------------------------|--------------|--------------|
|               |               | X                      | Y            | Z            |
| 1             | 6             | 0.000985967            | 0.001002932  | -0.001452601 |
| 2             | 6             | -0.000301346           | -0.000604163 | 0.002434549  |
| 3             | 7             | 0.000654759            | 0.000248764  | -0.000509659 |
| 4             | 6             | 0.003280447            | 0.001458525  | -0.001588399 |
| 5             | 7             | -0.000581029           | -0.000208482 | 0.000239049  |
| 6             | 6             | 0.001387385            | 0.000244569  | 0.001025886  |
| 7             | 6             | -0.004627143           | 0.002778436  | -0.001687376 |
| 8             | 1             | 0.000014696            | 0.000158231  | -0.000647543 |
| 9             | 1             | -0.000052288           | -0.000106657 | 0.000258014  |
| 10            | 1             | -0.000218379           | -0.000742951 | 0.000447742  |
| 11            | 1             | 0.000066625            | -0.000231442 | -0.000088299 |
| 12            | 1             | 0.000535359            | -0.000316961 | 0.000554014  |
| 13            | 1             | 0.000538976            | -0.000491415 | 0.000327152  |
| 14            | 35            | 0.002414802            | 0.000564392  | -0.000241040 |
| 15            | 1             | -0.003182164           | -0.003410214 | -0.001051287 |
| 16            | 6             | -0.000296608           | 0.000330286  | -0.000007882 |
| 17            | 6             | 0.000478322            | -0.000002681 | -0.000037332 |
| 18            | 1             | -0.000087782           | -0.000067082 | 0.000137789  |
| 19            | 1             | -0.000012083           | 0.000022183  | 0.000022301  |

|    |   |              |              |              |
|----|---|--------------|--------------|--------------|
| 20 | 1 | -0.000185755 | 0.000047533  | -0.000071253 |
| 21 | 8 | 0.003753799  | -0.000325895 | 0.000611543  |
| 22 | 1 | -0.002149735 | 0.000862338  | 0.000957430  |
| 23 | 6 | -0.004568648 | 0.000499747  | -0.002814618 |
| 24 | 6 | -0.002089185 | -0.004343069 | 0.002371513  |
| 25 | 8 | 0.004019350  | -0.000829314 | 0.002602345  |
| 26 | 1 | -0.000959114 | 0.000866189  | 0.002364210  |
| 27 | 1 | 0.001858832  | 0.001316408  | -0.001116658 |
| 28 | 1 | -0.000231738 | 0.000974518  | -0.000973899 |
| 29 | 6 | -0.000736725 | 0.002375719  | -0.005067405 |
| 30 | 1 | -0.000185045 | -0.000692984 | 0.001326935  |
| 31 | 1 | -0.000128791 | -0.000440449 | 0.000175650  |
| 32 | 1 | 0.000604235  | -0.000937011 | 0.001499130  |

-----  
Cartesian Forces: Max 0.005067405 RMS 0.001614591

GradGradGradGradGradGradGradGradGradGradGradGradGradGradGradGradGradGradGrad

Berny optimization.

Using GEDIIS/GDIIS optimizer.

FormGI is forming the generalized inverse of G from B-inverse, IUseBI=4.

Internal Forces: Max 0.004237656 RMS 0.000917720

Search for a local minimum.

Step number 15 out of a maximum of 177

All quantities printed in internal units (Hartrees-Bohrs-Radians)

Mixed Optimization -- En-DIIS/RFO-DIIS

Swapping is turned off.

Update second derivatives using D2CorX and points 14 15

DE= -1.12D-03 DEPred=-8.65D-04 R= 1.29D+00

TightC=F SS= 1.41D+00 RLast= 7.07D-01 DXNew= 5.0454D+00 2.1208D+00

Trust test= 1.29D+00 RLast= 7.07D-01 DXMaxT set to 3.00D+00

ITU= 1 1 1 1 1 1 1 1 1 1 0 1 0 1 0

|                 |         |         |         |         |         |
|-----------------|---------|---------|---------|---------|---------|
| Eigenvalues --- | 0.00101 | 0.00145 | 0.00234 | 0.00279 | 0.00419 |
| Eigenvalues --- | 0.00675 | 0.00963 | 0.01394 | 0.01443 | 0.01571 |
| Eigenvalues --- | 0.01701 | 0.01865 | 0.02054 | 0.02123 | 0.02167 |
| Eigenvalues --- | 0.02221 | 0.02318 | 0.02390 | 0.02670 | 0.02828 |
| Eigenvalues --- | 0.03061 | 0.03069 | 0.03331 | 0.03746 | 0.03969 |
| Eigenvalues --- | 0.04501 | 0.05011 | 0.05256 | 0.05612 | 0.05655 |
| Eigenvalues --- | 0.05909 | 0.06000 | 0.06565 | 0.09423 | 0.09793 |
| Eigenvalues --- | 0.10866 | 0.11113 | 0.11851 | 0.11931 | 0.12965 |
| Eigenvalues --- | 0.14087 | 0.15428 | 0.15581 | 0.15994 | 0.16000 |
| Eigenvalues --- | 0.16000 | 0.16001 | 0.16003 | 0.16014 | 0.16088 |
| Eigenvalues --- | 0.17208 | 0.17804 | 0.19545 | 0.22014 | 0.22199 |
| Eigenvalues --- | 0.22881 | 0.23550 | 0.23952 | 0.25016 | 0.26159 |
| Eigenvalues --- | 0.27755 | 0.29038 | 0.31282 | 0.32924 | 0.33055 |

```

Eigenvalues --- 0.33190 0.34090 0.34210 0.34545 0.34766
Eigenvalues --- 0.34958 0.35685 0.35690 0.35859 0.36434
Eigenvalues --- 0.36657 0.36892 0.37230 0.37385 0.37802
Eigenvalues --- 0.39038 0.42181 0.42543 0.45204 0.47264
Eigenvalues --- 0.49221 0.53207 0.54686 0.56248 0.60363
En-DIIS/RFO-DIIS IScMMF= 0 using points: 15 14 13 12 11
RFO step: Lambda=-3.73758171D-04.
EnCoef did 100 forward-backward iterations
DidBck=T Rises=F En-DIIS coefs: 0.73942 0.00000 0.00325 0.00100
0.25633
New curvilinear step failed, DQL= 6.19D+00 SP=-1.84D-01.
ITry= 1 IFail=1 DXMaxC= 0.00D+00 DCold= 1.00D+10 DXMaxT= 3.00D+00 DXLimC= 3.00D+00
Rises=F
New curvilinear step failed, DQL= 6.20D+00 SP=-1.96D-01.
ITry= 2 IFail=1 DXMaxC= 0.00D+00 DCold= 1.00D+10 DXMaxT= 3.00D+00 DXLimC= 3.00D+00
Rises=F
New curvilinear step failed, DQL= 6.21D+00 SP=-4.45D-02.
ITry= 3 IFail=1 DXMaxC= 0.00D+00 DCold= 1.00D+10 DXMaxT= 3.00D+00 DXLimC= 3.00D+00
Rises=F
New curvilinear step failed, DQL= 6.23D+00 SP=-3.80D-02.
ITry= 4 IFail=1 DXMaxC= 0.00D+00 DCold= 1.00D+10 DXMaxT= 3.00D+00 DXLimC= 3.00D+00
Rises=F
Iteration 1 RMS(Cart)= 0.07969274 RMS(Int)= 0.03505351
Iteration 2 RMS(Cart)= 0.02497046 RMS(Int)= 0.01727998
Iteration 3 RMS(Cart)= 0.02365226 RMS(Int)= 0.00356838
Iteration 4 RMS(Cart)= 0.00213067 RMS(Int)= 0.00330009
Iteration 5 RMS(Cart)= 0.00000332 RMS(Int)= 0.00330009
Iteration 6 RMS(Cart)= 0.00000002 RMS(Int)= 0.00330009
ITry= 5 IFail=0 DXMaxC= 4.69D-01 DCold= 1.00D+10 DXMaxT= 3.00D+00 DXLimC= 3.00D+00
Rises=F
Variable Old X -DE/DX Delta X Delta X Delta X New X
(Linear) (Quad) (Total)
R1 2.56374 -0.00008 0.00023 0.00324 0.00239 2.56613
R2 2.62484 -0.00071 -0.00142 -0.00091 -0.00201 2.62283
R3 2.03391 0.00001 0.00006 -0.00022 -0.00007 2.03383
R4 2.63061 -0.00027 -0.00023 -0.00006 -0.00009 2.63052
R5 2.03086 0.00002 -0.00001 0.00021 0.00012 2.03098
R6 2.54664 -0.00059 0.00020 -0.00417 -0.00241 2.54424
R7 2.68638 0.00031 -0.00027 0.00178 0.00079 2.68718
R8 2.52175 -0.00105 -0.00135 -0.00427 -0.00537 2.51638
R9 2.13114 -0.00325 -0.01049 -0.00564 -0.01488 2.11627
R10 2.79261 -0.00118 0.00001 0.00253 0.00120 2.79381
R11 2.91373 -0.00149 -0.00194 0.00078 -0.00337 2.91036
R12 2.06468 -0.00046 -0.00097 -0.00158 -0.00191 2.06277

```

|     |         |          |          |          |          |         |
|-----|---------|----------|----------|----------|----------|---------|
| R13 | 2.06214 | 0.00015  | 0.00000  | -0.00026 | -0.00016 | 2.06198 |
| R14 | 2.07445 | -0.00038 | -0.00084 | -0.00213 | -0.00212 | 2.07232 |
| R15 | 2.07254 | -0.00060 | -0.00094 | -0.00197 | -0.00212 | 2.07042 |
| R16 | 2.65211 | 0.00151  | 0.00211  | 0.01948  | 0.01342  | 2.66553 |
| R17 | 4.01673 | 0.00134  | 0.04685  | 0.06934  | 0.08775  | 4.10447 |
| R18 | 9.98347 | -0.00202 | -0.27426 | -0.58945 | -0.62640 | 9.35707 |
| R19 | 2.50752 | -0.00027 | -0.00015 | -0.00063 | -0.00053 | 2.50698 |
| R20 | 2.04706 | -0.00007 | -0.00030 | 0.00048  | -0.00001 | 2.04705 |
| R21 | 2.04287 | 0.00002  | 0.00004  | 0.00008  | 0.00009  | 2.04296 |
| R22 | 2.04580 | 0.00006  | 0.00001  | 0.00060  | 0.00037  | 2.04616 |
| R23 | 1.84265 | -0.00260 | -0.00038 | -0.00305 | -0.00199 | 1.84066 |
| R24 | 3.58503 | -0.00168 | -0.03119 | 0.20492  | 0.09196  | 3.67699 |
| R25 | 2.76163 | 0.00256  | 0.00495  | -0.00150 | 0.00977  | 2.77140 |
| R26 | 2.73667 | -0.00003 | -0.00599 | 0.01714  | 0.00169  | 2.73836 |
| R27 | 2.04790 | 0.00249  | 0.00218  | -0.00082 | 0.00169  | 2.04960 |
| R28 | 2.04693 | 0.00205  | 0.00209  | -0.00302 | 0.00028  | 2.04721 |
| R29 | 2.75394 | -0.00424 | -0.00829 | -0.00445 | -0.01415 | 2.73979 |
| R30 | 2.05525 | 0.00025  | 0.00050  | 0.00083  | 0.00100  | 2.05625 |
| R31 | 2.85384 | -0.00201 | -0.00427 | 0.01381  | 0.00401  | 2.85785 |
| R32 | 2.06403 | 0.00053  | 0.00096  | 0.00122  | 0.00170  | 2.06573 |
| R33 | 2.06766 | -0.00019 | 0.00044  | 0.00111  | 0.00111  | 2.06877 |
| R34 | 2.06260 | 0.00002  | 0.00056  | -0.00032 | 0.00037  | 2.06297 |
| A1  | 1.87303 | -0.00005 | 0.00071  | -0.00131 | -0.00040 | 1.87263 |
| A2  | 2.27745 | -0.00007 | -0.00015 | -0.00048 | -0.00032 | 2.27713 |
| A3  | 2.13270 | 0.00011  | -0.00059 | 0.00177  | 0.00060  | 2.13330 |
| A4  | 1.86236 | -0.00022 | -0.00047 | 0.00027  | -0.00044 | 1.86193 |
| A5  | 2.27717 | 0.00009  | 0.00010  | 0.00044  | 0.00038  | 2.27754 |
| A6  | 2.14360 | 0.00014  | 0.00037  | -0.00050 | 0.00008  | 2.14368 |
| A7  | 1.90017 | -0.00006 | -0.00070 | -0.00194 | -0.00228 | 1.89789 |
| A8  | 2.24728 | 0.00032  | 0.00007  | 0.00416  | 0.00274  | 2.25003 |
| A9  | 2.13574 | -0.00026 | 0.00063  | -0.00221 | -0.00051 | 2.13523 |
| A10 | 1.88570 | 0.00017  | 0.00089  | 0.00416  | 0.00385  | 1.88955 |
| A11 | 2.23801 | -0.00143 | -0.00030 | 0.00250  | 0.00268  | 2.24069 |
| A12 | 2.15822 | 0.00127  | -0.00056 | -0.00514 | -0.00574 | 2.15248 |
| A13 | 1.90327 | 0.00018  | -0.00045 | -0.00044 | -0.00054 | 1.90273 |
| A14 | 2.20949 | -0.00020 | -0.00129 | 0.02332  | 0.01403  | 2.22352 |
| A15 | 2.16945 | 0.00002  | 0.00125  | -0.02140 | -0.01302 | 2.15644 |
| A16 | 1.95983 | -0.00211 | -0.00623 | 0.00315  | -0.00397 | 1.95586 |
| A17 | 1.85836 | 0.00060  | 0.00349  | -0.00164 | 0.00251  | 1.86087 |
| A18 | 1.88869 | 0.00066  | -0.00174 | 0.00661  | 0.00204  | 1.89073 |
| A19 | 1.93014 | 0.00088  | -0.00199 | 0.00532  | 0.00126  | 1.93140 |
| A20 | 1.91323 | 0.00043  | 0.00308  | 0.00229  | 0.00424  | 1.91748 |
| A21 | 1.91221 | -0.00045 | 0.00349  | -0.01640 | -0.00631 | 1.90591 |
| A22 | 1.91212 | 0.00042  | -0.00074 | -0.00140 | -0.00228 | 1.90984 |

|     |          |          |          |          |          |          |
|-----|----------|----------|----------|----------|----------|----------|
| A23 | 1.90291  | 0.00083  | -0.00036 | 0.01118  | 0.00696  | 1.90986  |
| A24 | 1.92097  | -0.00211 | -0.00100 | 0.00238  | 0.00060  | 1.92157  |
| A25 | 1.87333  | 0.00011  | 0.00726  | 0.00272  | 0.00889  | 1.88222  |
| A26 | 1.89114  | 0.00040  | -0.00396 | 0.00151  | -0.00316 | 1.88798  |
| A27 | 1.96239  | 0.00042  | -0.00110 | -0.01631 | -0.01088 | 1.95151  |
| A28 | 1.65701  | -0.00184 | 0.08195  | -0.05933 | 0.05281  | 1.70981  |
| A29 | 2.90755  | 0.00012  | -0.06163 | 0.10008  | -0.00261 | 2.90494  |
| A30 | 2.17463  | 0.00021  | 0.00102  | 0.00031  | 0.00120  | 2.17583  |
| A31 | 1.95468  | -0.00005 | 0.00038  | -0.00163 | -0.00060 | 1.95408  |
| A32 | 2.15387  | -0.00016 | -0.00140 | 0.00132  | -0.00061 | 2.15326  |
| A33 | 2.08099  | -0.00013 | -0.00034 | -0.00195 | -0.00151 | 2.07948  |
| A34 | 2.15471  | 0.00025  | 0.00078  | 0.00310  | 0.00264  | 2.15734  |
| A35 | 2.04749  | -0.00012 | -0.00044 | -0.00115 | -0.00113 | 2.04636  |
| A36 | 1.93290  | -0.00180 | -0.00254 | -0.02713 | -0.01621 | 1.91668  |
| A37 | 3.13782  | -0.00085 | -0.13163 | 0.21879  | -0.00766 | 3.13016  |
| A38 | 2.09345  | 0.00005  | -0.00364 | 0.00635  | 0.00508  | 2.09852  |
| A39 | 2.10860  | -0.00019 | -0.00271 | 0.00181  | -0.00596 | 2.10263  |
| A40 | 1.99530  | 0.00110  | 0.00224  | -0.00056 | 0.00032  | 1.99562  |
| A41 | 1.98430  | 0.00066  | 0.00439  | -0.01029 | 0.00098  | 1.98528  |
| A42 | 2.00943  | 0.00011  | 0.00296  | -0.00012 | 0.00276  | 2.01219  |
| A43 | 2.06390  | -0.00095 | -0.00605 | 0.01507  | -0.00312 | 2.06079  |
| A44 | 2.12424  | 0.00038  | 0.00422  | -0.00505 | 0.00811  | 2.13235  |
| A45 | 1.96061  | -0.00073 | 0.00036  | 0.01452  | 0.01097  | 1.97158  |
| A46 | 2.03222  | 0.00023  | 0.00166  | -0.00035 | 0.00005  | 2.03227  |
| A47 | 2.01753  | 0.00053  | 0.00103  | -0.01622 | -0.00907 | 2.00845  |
| A48 | 1.33567  | 0.00076  | -0.07649 | 0.17999  | 0.02981  | 1.36548  |
| A49 | 1.06417  | -0.00205 | 0.15255  | -0.28537 | -0.02877 | 1.03540  |
| A50 | 2.38886  | -0.00118 | 0.03338  | -0.06430 | 0.00665  | 2.39551  |
| A51 | 2.24271  | -0.00112 | 0.01216  | -0.05502 | -0.01618 | 2.22653  |
| A52 | 1.92271  | 0.00150  | 0.00365  | -0.01200 | -0.00353 | 1.91918  |
| A53 | 1.91839  | -0.00012 | 0.00106  | 0.00168  | 0.00209  | 1.92048  |
| A54 | 1.91653  | 0.00236  | 0.00711  | -0.00537 | 0.00393  | 1.92046  |
| A55 | 1.89547  | -0.00090 | -0.00329 | 0.00613  | 0.00039  | 1.89587  |
| A56 | 1.91047  | -0.00180 | -0.00707 | 0.01089  | -0.00050 | 1.90998  |
| A57 | 1.89997  | -0.00112 | -0.00186 | -0.00101 | -0.00243 | 1.89754  |
| A58 | 3.57837  | -0.00036 | -0.06433 | 0.12497  | 0.01364  | 3.59201  |
| A59 | 4.61687  | -0.00018 | -0.23258 | 0.44785  | 0.05269  | 4.66956  |
| D1  | -0.02023 | 0.00117  | 0.01149  | 0.03096  | 0.03006  | 0.00983  |
| D2  | 3.13208  | 0.00055  | 0.00553  | 0.00862  | 0.01096  | -3.14014 |
| D3  | 3.11982  | 0.00041  | 0.00778  | 0.01234  | 0.01478  | 3.13460  |
| D4  | -0.01105 | -0.00021 | 0.00182  | -0.00999 | -0.00432 | -0.01537 |
| D5  | 0.02055  | -0.00122 | -0.01134 | -0.02916 | -0.02921 | -0.00866 |
| D6  | -3.07517 | -0.00106 | -0.00279 | -0.06346 | -0.04187 | -3.11704 |
| D7  | -3.11966 | -0.00054 | -0.00801 | -0.01243 | -0.01546 | -3.13512 |

|     |          |          |          |          |          |          |
|-----|----------|----------|----------|----------|----------|----------|
| D8  | 0.06781  | -0.00038 | 0.00054  | -0.04673 | -0.02813 | 0.03968  |
| D9  | 0.01326  | -0.00072 | -0.00785 | -0.02258 | -0.02101 | -0.00775 |
| D10 | -3.12876 | -0.00049 | -0.00704 | -0.00656 | -0.01076 | -3.13952 |
| D11 | -3.13803 | -0.00016 | -0.00245 | -0.00235 | -0.00372 | 3.14143  |
| D12 | 0.00313  | 0.00006  | -0.00164 | 0.01366  | 0.00653  | 0.00965  |
| D13 | -0.00057 | -0.00004 | 0.00086  | 0.00460  | 0.00299  | 0.00242  |
| D14 | 3.08808  | 0.00041  | 0.00148  | 0.03632  | 0.02353  | 3.11161  |
| D15 | 3.14143  | -0.00025 | 0.00011  | -0.01018 | -0.00645 | 3.13498  |
| D16 | -0.05312 | 0.00020  | 0.00074  | 0.02154  | 0.01409  | -0.03902 |
| D17 | 0.10771  | -0.00028 | -0.01435 | -0.00960 | -0.02001 | 0.08770  |
| D18 | -3.03482 | -0.00031 | -0.01309 | -0.01648 | -0.02288 | -3.05771 |
| D19 | -3.03436 | -0.00003 | -0.01344 | 0.00834  | -0.00853 | -3.04289 |
| D20 | 0.10628  | -0.00005 | -0.01218 | 0.00146  | -0.01140 | 0.09489  |
| D21 | -0.01222 | 0.00077  | 0.00640  | 0.01494  | 0.01601  | 0.00379  |
| D22 | 3.08479  | 0.00061  | -0.00205 | 0.04970  | 0.02894  | 3.11373  |
| D23 | -3.10384 | 0.00045  | 0.00581  | -0.01526 | -0.00355 | -3.10739 |
| D24 | -0.00683 | 0.00028  | -0.00265 | 0.01950  | 0.00937  | 0.00254  |
| D25 | -2.76553 | -0.00020 | 0.02975  | -0.27831 | -0.13340 | -2.89893 |
| D26 | 0.31557  | 0.00027  | 0.03050  | -0.24178 | -0.10974 | 0.20583  |
| D27 | 1.18054  | -0.00003 | 0.05719  | 0.03661  | 0.07918  | 1.25972  |
| D28 | -2.98784 | 0.00019  | 0.05332  | 0.04396  | 0.08002  | -2.90782 |
| D29 | -0.93352 | 0.00031  | 0.05836  | 0.02728  | 0.07500  | -0.85852 |
| D30 | -1.90856 | 0.00015  | 0.06708  | -0.00341 | 0.06437  | -1.84419 |
| D31 | 0.20625  | 0.00037  | 0.06320  | 0.00393  | 0.06520  | 0.27145  |
| D32 | 2.26057  | 0.00049  | 0.06825  | -0.01274 | 0.06019  | 2.32076  |
| D33 | -0.83209 | -0.00040 | -0.03812 | -0.07664 | -0.08408 | -0.91617 |
| D34 | 1.21329  | 0.00044  | -0.02999 | -0.06771 | -0.07061 | 1.14268  |
| D35 | -2.90982 | 0.00013  | -0.03225 | -0.07908 | -0.07919 | -2.98900 |
| D36 | -2.90517 | -0.00038 | -0.03720 | -0.08021 | -0.08549 | -2.99066 |
| D37 | -0.85978 | 0.00047  | -0.02906 | -0.07128 | -0.07203 | -0.93181 |
| D38 | 1.30029  | 0.00016  | -0.03133 | -0.08265 | -0.08060 | 1.21969  |
| D39 | 1.26781  | -0.00065 | -0.04228 | -0.06468 | -0.08120 | 1.18661  |
| D40 | -2.96999 | 0.00019  | -0.03414 | -0.05575 | -0.06774 | -3.03773 |
| D41 | -0.80991 | -0.00012 | -0.03641 | -0.06712 | -0.07631 | -0.88622 |
| D42 | -1.78191 | -0.00004 | 0.05111  | -0.09510 | -0.00753 | -1.78943 |
| D43 | 2.41077  | 0.00046  | 0.05495  | -0.09573 | -0.00319 | 2.40758  |
| D44 | 0.34317  | -0.00019 | 0.04920  | -0.09027 | -0.00564 | 0.33753  |
| D45 | 0.11019  | -0.00010 | -0.06219 | 0.35347  | 0.15942  | 0.26961  |
| D46 | -0.28661 | -0.00007 | 0.07909  | -0.21903 | -0.05618 | -0.34279 |
| D47 | 2.98755  | -0.00060 | 0.16429  | -0.45361 | -0.09576 | 2.89179  |
| D48 | -3.13390 | -0.00003 | -0.00031 | -0.00526 | -0.00347 | -3.13737 |
| D49 | 0.01112  | -0.00007 | -0.00131 | -0.00494 | -0.00427 | 0.00685  |
| D50 | 0.00874  | -0.00001 | -0.00171 | 0.00238  | -0.00028 | 0.00846  |
| D51 | -3.12942 | -0.00005 | -0.00271 | 0.00271  | -0.00108 | -3.13050 |

|     |          |          |          |          |          |          |
|-----|----------|----------|----------|----------|----------|----------|
| D52 | -2.70404 | -0.00002 | -0.02022 | 0.18443  | 0.09499  | -2.60905 |
| D53 | -2.94519 | 0.00030  | -0.05499 | -0.05249 | -0.07057 | -3.01575 |
| D54 | -2.77531 | -0.00080 | 0.12417  | -0.39318 | -0.12252 | -2.89783 |
| D55 | -1.27887 | 0.00047  | 0.17759  | -0.50034 | -0.12326 | -1.40213 |
| D56 | -2.73755 | -0.00002 | 0.00572  | 0.00816  | 0.00992  | -2.72763 |
| D57 | -0.02697 | -0.00001 | 0.00374  | -0.01193 | -0.00306 | -0.03003 |
| D58 | -0.01298 | -0.00005 | -0.00247 | 0.03042  | 0.01582  | 0.00283  |
| D59 | 2.69759  | -0.00005 | -0.00445 | 0.01033  | 0.00284  | 2.70043  |
| D60 | 0.26425  | 0.00035  | 0.16914  | -0.42479 | -0.07686 | 0.18739  |
| D61 | 0.07509  | 0.00132  | 0.03237  | -0.08312 | -0.02202 | 0.05307  |
| D62 | -2.09221 | -0.00171 | 0.15696  | -0.41291 | -0.08252 | -2.17473 |
| D63 | -2.28137 | -0.00074 | 0.02019  | -0.07124 | -0.02768 | -2.30905 |
| D64 | 2.11246  | 0.00099  | -0.03942 | 0.06628  | -0.00523 | 2.10723  |
| D65 | -0.27065 | 0.00073  | -0.04338 | 0.07556  | -0.00362 | -0.27427 |
| D66 | 2.55157  | 0.00042  | -0.00774 | -0.03843 | -0.03089 | 2.52068  |
| D67 | -1.64358 | 0.00017  | -0.00884 | -0.03731 | -0.03130 | -1.67488 |
| D68 | 0.44614  | 0.00019  | -0.00593 | -0.04086 | -0.03053 | 0.41561  |
| D69 | 1.34817  | -0.00020 | -0.00752 | -0.04694 | -0.03519 | 1.31298  |
| D70 | -2.84698 | -0.00044 | -0.00862 | -0.04582 | -0.03560 | -2.88258 |
| D71 | -0.75726 | -0.00043 | -0.00571 | -0.04937 | -0.03483 | -0.79209 |
| D72 | -1.01036 | 0.00008  | -0.01134 | -0.05086 | -0.04229 | -1.05265 |
| D73 | 1.07767  | -0.00016 | -0.01244 | -0.04975 | -0.04270 | 1.03498  |
| D74 | -3.11579 | -0.00015 | -0.00954 | -0.05330 | -0.04193 | 3.12547  |

| Item                 | Value    | Threshold | Converged? |
|----------------------|----------|-----------|------------|
| Maximum Force        | 0.004238 | 0.000450  | NO         |
| RMS Force            | 0.000918 | 0.000300  | NO         |
| Maximum Displacement | 0.468655 | 0.001800  | NO         |
| RMS Displacement     | 0.118173 | 0.001200  | NO         |

Predicted change in Energy=-1.068467D-03

GradGradGradGradGradGradGradGradGradGradGradGradGradGradGradGradGradGrad

Input orientation:

| Center Number | Atomic Number | Atomic Type | Coordinates (Angstroms) |           |           |
|---------------|---------------|-------------|-------------------------|-----------|-----------|
|               |               |             | X                       | Y         | Z         |
| 1             | 6             | 0           | -1.441167               | -1.863779 | -0.300702 |
| 2             | 6             | 0           | -2.613015               | -1.178824 | -0.260737 |
| 3             | 7             | 0           | -2.305942               | 0.114555  | 0.152260  |
| 4             | 6             | 0           | -0.978957               | 0.197388  | 0.364189  |
| 5             | 7             | 0           | -0.438959               | -0.990422 | 0.098311  |
| 6             | 6             | 0           | 1.010488                | -1.267601 | 0.187763  |
| 7             | 6             | 0           | 1.665306                | -1.377356 | -1.201863 |
| 8             | 1             | 0           | -1.239335               | -2.888100 | -0.562165 |



|    |    |   |           |           |           |
|----|----|---|-----------|-----------|-----------|
| 9  | 1  | 0 | -3.613954 | -1.494133 | -0.492655 |
| 10 | 1  | 0 | 1.450723  | -0.446987 | 0.757245  |
| 11 | 1  | 0 | 1.148276  | -2.200181 | 0.737241  |
| 12 | 1  | 0 | 1.109203  | -2.100011 | -1.811052 |
| 13 | 1  | 0 | 1.616337  | -0.405617 | -1.705558 |
| 14 | 35 | 0 | 1.180613  | 2.529331  | 1.138234  |
| 15 | 1  | 0 | -0.379087 | 1.089956  | 0.676617  |
| 16 | 6  | 0 | -3.179024 | 1.218478  | 0.355105  |
| 17 | 6  | 0 | -4.501334 | 1.161309  | 0.264562  |
| 18 | 1  | 0 | -2.637054 | 2.124111  | 0.599094  |
| 19 | 1  | 0 | -5.079919 | 2.058856  | 0.433069  |
| 20 | 1  | 0 | -5.047454 | 0.256054  | 0.030707  |
| 21 | 8  | 0 | 2.993100  | -1.836713 | -1.077078 |
| 22 | 1  | 0 | 3.611385  | -1.090769 | -1.177271 |
| 23 | 6  | 0 | 4.985578  | 1.749868  | -0.913847 |
| 24 | 6  | 0 | 5.968488  | 0.736075  | -0.517714 |
| 25 | 8  | 0 | 4.861628  | 0.385499  | -1.386034 |
| 26 | 1  | 0 | 4.207898  | 2.056074  | -0.222610 |
| 27 | 1  | 0 | 5.216577  | 2.462944  | -1.696011 |
| 28 | 1  | 0 | 6.928843  | 0.726514  | -1.029217 |
| 29 | 6  | 0 | 5.969151  | 0.109590  | 0.858729  |
| 30 | 1  | 0 | 6.265493  | -0.940409 | 0.790689  |
| 31 | 1  | 0 | 6.679028  | 0.631852  | 1.508176  |
| 32 | 1  | 0 | 4.973554  | 0.178061  | 1.301280  |

-----  
Distance matrix (angstroms):

|    |    | 1        | 2        | 3        | 4        | 5        |
|----|----|----------|----------|----------|----------|----------|
| 1  | C  | 0.000000 |          |          |          |          |
| 2  | C  | 1.357936 | 0.000000 |          |          |          |
| 3  | N  | 2.206087 | 1.392009 | 0.000000 |          |          |
| 4  | C  | 2.214527 | 2.225901 | 1.346352 | 0.000000 |          |
| 5  | N  | 1.387943 | 2.211545 | 2.170141 | 1.331609 | 0.000000 |
| 6  | C  | 2.569948 | 3.652233 | 3.593094 | 2.476936 | 1.478420 |
| 7  | C  | 3.270913 | 4.385107 | 4.453118 | 3.453182 | 2.503618 |
| 8  | H  | 1.076258 | 2.213477 | 3.265577 | 3.232053 | 2.162871 |
| 9  | H  | 2.212350 | 1.074749 | 2.171334 | 3.246327 | 3.268572 |
| 10 | H  | 3.389628 | 4.252745 | 3.846279 | 2.544220 | 2.073744 |
| 11 | H  | 2.809929 | 4.023237 | 4.199027 | 3.226860 | 2.095486 |
| 12 | H  | 2.973441 | 4.136057 | 4.519083 | 3.790795 | 2.696972 |
| 13 | H  | 3.667177 | 4.535722 | 4.371080 | 3.373873 | 2.796459 |
| 14 | Br | 5.314479 | 5.486268 | 4.354233 | 3.271215 | 4.011623 |
| 15 | H  | 3.287509 | 3.319100 | 2.222414 | 1.119880 | 2.160091 |
| 16 | C  | 3.598686 | 2.539032 | 1.421993 | 2.425491 | 3.528901 |
| 17 | C  | 4.339966 | 3.052525 | 2.434759 | 3.653247 | 4.600052 |

|    |    |          |          |          |           |          |
|----|----|----------|----------|----------|-----------|----------|
| 18 | H  | 4.259466 | 3.413102 | 2.085092 | 2.552788  | 3.844831 |
| 19 | H  | 5.400556 | 4.129110 | 3.399133 | 4.504186  | 5.563153 |
| 20 | H  | 4.196288 | 2.840829 | 2.747851 | 4.082563  | 4.774568 |
| 21 | O  | 4.501801 | 5.703310 | 5.779149 | 4.689568  | 3.725154 |
| 22 | H  | 5.185962 | 6.292133 | 6.183464 | 5.010658  | 4.247643 |
| 23 | C  | 7.398476 | 8.169602 | 7.548317 | 6.294382  | 6.161108 |
| 24 | C  | 7.855528 | 8.796309 | 8.324742 | 7.023882  | 6.664507 |
| 25 | O  | 6.779559 | 7.719046 | 7.335790 | 6.100089  | 5.673857 |
| 26 | H  | 6.876284 | 7.549229 | 6.807358 | 5.540984  | 5.565735 |
| 27 | H  | 8.061822 | 8.753570 | 8.094401 | 6.910991  | 6.865159 |
| 28 | H  | 8.791895 | 9.760529 | 9.330147 | 8.047040  | 7.648771 |
| 29 | C  | 7.755725 | 8.750244 | 8.305196 | 6.966239  | 6.546154 |
| 30 | H  | 7.838134 | 8.943726 | 8.659678 | 7.345647  | 6.740293 |
| 31 | H  | 8.685492 | 9.630662 | 9.101416 | 7.755140  | 7.435403 |
| 32 | H  | 6.919833 | 7.863654 | 7.369894 | 6.025852  | 5.666373 |
|    |    | 6        | 7        | 8        | 9         | 10       |
| 6  | C  | 0.000000 |          |          |           |          |
| 7  | C  | 1.540095 | 0.000000 |          |           |          |
| 8  | H  | 2.872300 | 3.335941 | 0.000000 |           |          |
| 9  | H  | 4.679717 | 5.327965 | 2.754413 | 0.000000  |          |
| 10 | H  | 1.091570 | 2.179390 | 3.864750 | 5.320688  | 0.000000 |
| 11 | H  | 1.091154 | 2.168983 | 2.803992 | 4.968902  | 1.779204 |
| 12 | H  | 2.167466 | 1.096627 | 2.774245 | 4.941000  | 3.073317 |
| 13 | H  | 2.166733 | 1.095620 | 3.952839 | 5.478316  | 2.468712 |
| 14 | Br | 3.917785 | 4.579649 | 6.172201 | 6.468070  | 3.012736 |
| 15 | H  | 2.779923 | 3.714278 | 4.254355 | 4.302218  | 2.391003 |
| 16 | C  | 4.874485 | 5.712272 | 4.633332 | 2.875086  | 4.936603 |
| 17 | C  | 6.023760 | 6.828080 | 5.265152 | 2.900377  | 6.185170 |
| 18 | H  | 4.997746 | 5.832154 | 5.331454 | 3.903580  | 4.831715 |
| 19 | H  | 6.943958 | 7.744587 | 6.341368 | 3.953447  | 7.002401 |
| 20 | H  | 6.248588 | 7.017721 | 4.973828 | 2.322064  | 6.576353 |
| 21 | O  | 2.419599 | 1.410537 | 4.391361 | 6.641692  | 2.770380 |
| 22 | H  | 2.942661 | 1.967222 | 5.209438 | 7.268902  | 2.970736 |
| 23 | C  | 5.110774 | 4.570196 | 7.770712 | 9.200701  | 4.484854 |
| 24 | C  | 5.393902 | 4.842729 | 8.067796 | 9.838580  | 4.841008 |
| 25 | O  | 4.476701 | 3.654866 | 6.972586 | 8.727350  | 4.113508 |
| 26 | H  | 4.630189 | 4.383167 | 7.364272 | 8.594083  | 3.850642 |
| 27 | H  | 5.929313 | 5.253914 | 8.461565 | 9.751144  | 5.354234 |
| 28 | H  | 6.362741 | 5.671058 | 8.944424 | 10.787481 | 5.880336 |
| 29 | C  | 5.189912 | 4.998012 | 7.935197 | 9.809897  | 4.553709 |
| 30 | H  | 5.299590 | 5.032186 | 7.870588 | 9.977828  | 4.840102 |
| 31 | H  | 6.122398 | 6.043065 | 8.909368 | 10.699001 | 5.391007 |
| 32 | H  | 4.362998 | 4.430525 | 7.174521 | 8.930830  | 3.618977 |
|    |    | 11       | 12       | 13       | 14        | 15       |

|    |    |           |           |          |           |           |
|----|----|-----------|-----------|----------|-----------|-----------|
| 11 | H  | 0.000000  |           |          |           |           |
| 12 | H  | 2.550560  | 0.000000  |          |           |           |
| 13 | H  | 3.067052  | 1.771803  | 0.000000 |           |           |
| 14 | Br | 4.746591  | 5.489462  | 4.109857 | 0.000000  |           |
| 15 | H  | 3.627880  | 4.310382  | 3.448654 | 2.171993  | 0.000000  |
| 16 | C  | 5.528000  | 5.838964  | 5.466215 | 4.619314  | 2.821265  |
| 17 | C  | 6.590989  | 6.813406  | 6.615325 | 5.909256  | 4.143404  |
| 18 | H  | 5.748679  | 6.138929  | 5.459146 | 3.876784  | 2.484733  |
| 19 | H  | 7.551313  | 7.787007  | 7.448973 | 6.317662  | 4.805819  |
| 20 | H  | 6.702190  | 6.844526  | 6.917986 | 6.721846  | 4.786046  |
| 21 | O  | 2.612898  | 2.038899  | 2.082906 | 5.220637  | 4.797133  |
| 22 | H  | 3.311051  | 2.771491  | 2.174566 | 4.937139  | 4.910839  |
| 23 | C  | 5.749249  | 5.536499  | 4.077341 | 4.392762  | 5.634243  |
| 24 | C  | 5.781951  | 5.773106  | 4.653563 | 5.374167  | 6.468645  |
| 25 | O  | 4.998302  | 4.520961  | 3.355573 | 4.951547  | 5.675904  |
| 26 | H  | 5.329006  | 5.422001  | 3.869786 | 3.352659  | 4.773094  |
| 27 | H  | 6.649551  | 6.140384  | 4.603310 | 4.932175  | 6.231045  |
| 28 | H  | 6.715719  | 6.516803  | 5.473745 | 6.402355  | 7.513176  |
| 29 | C  | 5.347021  | 5.969016  | 5.078188 | 5.372464  | 6.426073  |
| 30 | H  | 5.270274  | 5.890760  | 5.303951 | 6.165702  | 6.948801  |
| 31 | H  | 6.261307  | 7.035858  | 6.085660 | 5.828366  | 7.121681  |
| 32 | H  | 4.539485  | 5.459801  | 4.544519 | 4.465586  | 5.465576  |
|    |    | 16        | 17        | 18       | 19        | 20        |
| 16 | C  | 0.000000  |           |          |           |           |
| 17 | C  | 1.326639  | 0.000000  |          |           |           |
| 18 | H  | 1.083251  | 2.124722  | 0.000000 |           |           |
| 19 | H  | 2.079835  | 1.081086  | 2.449370 | 0.000000  |           |
| 20 | H  | 2.126623  | 1.082784  | 3.102052 | 1.847443  | 0.000000  |
| 21 | O  | 7.034234  | 8.182583  | 7.084935 | 9.090084  | 8.381966  |
| 22 | H  | 7.334198  | 8.542070  | 7.248029 | 9.383608  | 8.845826  |
| 23 | C  | 8.279695  | 9.577920  | 7.780332 | 10.159915 | 10.187511 |
| 24 | C  | 9.201712  | 10.507614 | 8.788017 | 11.167857 | 11.040025 |
| 25 | O  | 8.269069  | 9.538941  | 7.949448 | 10.244198 | 10.010684 |
| 26 | H  | 7.456671  | 8.768618  | 6.894432 | 9.310932  | 9.432167  |
| 27 | H  | 8.731660  | 9.998794  | 8.189128 | 10.522076 | 10.639654 |
| 28 | H  | 10.214077 | 11.511380 | 9.803625 | 12.170611 | 12.032309 |
| 29 | C  | 9.228888  | 10.539934 | 8.842650 | 11.227768 | 11.048649 |
| 30 | H  | 9.697908  | 10.982649 | 9.417182 | 11.740606 | 11.401397 |
| 31 | H  | 9.942580  | 11.261767 | 9.478536 | 11.893907 | 11.825164 |
| 32 | H  | 8.272983  | 9.582018  | 7.886794 | 10.264672 | 10.101536 |
|    |    | 21        | 22        | 23       | 24        | 25        |
| 21 | O  | 0.000000  |           |          |           |           |
| 22 | H  | 0.974037  | 0.000000  |          |           |           |
| 23 | C  | 4.106115  | 3.166546  | 0.000000 |           |           |

|    |   |          |          |          |          |          |
|----|---|----------|----------|----------|----------|----------|
| 24 | C | 3.973042 | 3.054228 | 1.466563 | 0.000000 |          |
| 25 | O | 2.919773 | 1.945779 | 1.449078 | 1.449835 | 0.000000 |
| 26 | H | 4.166490 | 3.342129 | 1.084600 | 2.220171 | 2.138162 |
| 27 | H | 4.879957 | 3.933778 | 1.083337 | 2.221673 | 2.130224 |
| 28 | H | 4.697074 | 3.785494 | 2.199282 | 1.088122 | 2.125321 |
| 29 | C | 4.048744 | 3.338445 | 2.607672 | 1.512310 | 2.518272 |
| 30 | H | 3.873044 | 3.307531 | 3.432377 | 2.147261 | 2.909809 |
| 31 | H | 5.134532 | 4.426000 | 3.159735 | 2.149409 | 3.426381 |
| 32 | H | 3.692980 | 3.099782 | 2.716157 | 2.147094 | 2.697631 |
|    |   | 26       | 27       | 28       | 29       | 30       |
| 26 | H | 0.000000 |          |          |          |          |
| 27 | H | 1.831362 | 0.000000 |          |          |          |
| 28 | H | 3.133989 | 2.528173 | 0.000000 |          |          |
| 29 | C | 2.839033 | 3.554060 | 2.205889 | 0.000000 |          |
| 30 | H | 3.773510 | 4.343583 | 2.555528 | 1.093135 | 0.000000 |
| 31 | H | 3.336242 | 3.969694 | 2.551417 | 1.094744 | 1.777021 |
| 32 | H | 2.536809 | 3.776705 | 3.091144 | 1.091675 | 1.783475 |
|    |   | 31       | 32       |          |          |          |
| 31 | H | 0.000000 |          |          |          |          |
| 32 | H | 1.776900 | 0.000000 |          |          |          |

Stoichiometry C10H17BrN2O2

Framework group C1[X(C10H17BrN2O2)]

Deg. of freedom 90

Full point group C1 NOp 1

Largest Abelian subgroup C1 NOp 1

Largest concise Abelian subgroup C1 NOp 1

Standard orientation:

| Center<br>Number | Atomic<br>Number | Atomic<br>Type | Coordinates (Angstroms) |          |           |
|------------------|------------------|----------------|-------------------------|----------|-----------|
|                  |                  |                | X                       | Y        | Z         |
| 1                | 6                | 0              | -2.576781               | 2.278202 | -0.303283 |
| 2                | 6                | 0              | -3.716986               | 1.609259 | 0.007262  |
| 3                | 7                | 0              | -3.381634               | 0.260191 | 0.079686  |
| 4                | 6                | 0              | -2.069875               | 0.125350 | -0.191917 |
| 5                | 7                | 0              | -1.566339               | 1.335042 | -0.429148 |
| 6                | 6                | 0              | -0.140168               | 1.581810 | -0.730589 |
| 7                | 6                | 0              | 0.602589                | 2.212073 | 0.462296  |
| 8                | 1                | 0              | -2.403314               | 3.329211 | -0.456971 |
| 9                | 1                | 0              | -4.712762               | 1.972403 | 0.185146  |
| 10               | 1                | 0              | 0.296173                | 0.615130 | -0.988780 |
| 11               | 1                | 0              | -0.081891               | 2.244364 | -1.595599 |
| 12               | 1                | 0              | 0.057838                | 3.100835 | 0.802795  |
| 13               | 1                | 0              | 0.631446                | 1.497525 | 1.292340  |

|    |    |   |           |           |           |
|----|----|---|-----------|-----------|-----------|
| 14 | 35 | 0 | 0.133319  | -2.292532 | -0.217052 |
| 15 | 1  | 0 | -1.453657 | -0.809726 | -0.198349 |
| 16 | 6  | 0 | -4.216567 | -0.853449 | 0.370819  |
| 17 | 6  | 0 | -5.530824 | -0.787596 | 0.539227  |
| 18 | 1  | 0 | -3.652795 | -1.776048 | 0.437192  |
| 19 | 1  | 0 | -6.079073 | -1.692301 | 0.762112  |
| 20 | 1  | 0 | -6.099407 | 0.130809  | 0.463947  |
| 21 | 8  | 0 | 1.896992  | 2.612760  | 0.070398  |
| 22 | 1  | 0 | 2.553251  | 1.967839  | 0.390005  |
| 23 | 6  | 0 | 4.031223  | -0.744070 | 1.088693  |
| 24 | 6  | 0 | 4.938677  | 0.064385  | 0.267879  |
| 25 | 8  | 0 | 3.879272  | 0.695827  | 1.030090  |
| 26 | 1  | 0 | 3.222499  | -1.298176 | 0.624700  |
| 27 | 1  | 0 | 4.346647  | -1.110387 | 2.058197  |
| 28 | 1  | 0 | 5.930376  | 0.279158  | 0.660834  |
| 29 | 6  | 0 | 4.817367  | 0.132482  | -1.238019 |
| 30 | 1  | 0 | 5.070663  | 1.136702  | -1.587773 |
| 31 | 1  | 0 | 5.503712  | -0.582935 | -1.702317 |
| 32 | 1  | 0 | 3.797878  | -0.111799 | -1.542522 |

-----

Rotational constants (GHZ):      0.5612566      0.2024467      0.1573615  
Standard basis: 6-311++G(d,p) (5D, 7F)  
There are    492 symmetry adapted cartesian basis functions of A    symmetry.  
There are    475 symmetry adapted basis functions of A    symmetry.  
475 basis functions,    751 primitive gaussians,    492 cartesian basis functions  
71 alpha electrons      71 beta electrons  
nuclear repulsion energy      1273.0273552407 Hartrees.  
NAtoms=    32 NActive=    32 NUniq=    32 SFac= 1.00D+00 NAtFMM=    60 NAOKFM=F  
Big=F  
Integral buffers will be    131072 words long.  
Raffenetti 2 integral format.  
Two-electron integral symmetry is turned on.  
One-electron integrals computed using PRISM.  
NBasis=    475 RedAO= T EigKep=    3.77D-06    NBF=    475  
NBsUse=    475 1.00D-06 EigRej= -1.00D+00    NBFU=    475  
Initial guess from the checkpoint file: "/home/suqian/liuwen/qianmengshijie/ohpo/ohpo.chk"  
B after Tr=    0.000000    0.000000    0.000000  
Rot=    0.999790    -0.006304    0.000459    -0.019475 Ang=    -2.35 deg.  
ExpMin= 3.50D-02 ExpMax= 4.40D+05 ExpMxC= 1.51D+04 IAcc=3 IRadAn=      5 AccDes=  
0.00D+00  
Harris functional with IExCor=    402 and IRadAn=      5 diagonalized for initial guess.  
HarFok: IExCor=    402 AccDes= 0.00D+00 IRadAn=      5 IDoV= 1 UseB2=F ITyADJ=14  
ICtDFT= 3500011 ScaDFX= 1.000000 1.000000 1.000000 1.000000  
FoFCou: FMM=F IPFlag=      0 FMFlag=    100000 FMFlg1=      0

NFxFIlg= 0 DoJE=T BraDBF=F KetDBF=T FulRan=T  
wScrn= 0.000000 ICntrl= 500 IOpCl= 0 I1Cent= 200000004 NGrid=  
0  
NMat0= 1 NMatS0= 1 NMatT0= 0 NMatD0= 1 NMtDS0= 0  
NMtDT0= 0

Petite list used in FoFCou.

Requested convergence on RMS density matrix=1.00D-08 within 128 cycles.

Requested convergence on MAX density matrix=1.00D-06.

Requested convergence on energy=1.00D-06.

No special actions if energy rises.

SCF Done: E(RB3LYP) = -3225.52085213 A.U. after 12 cycles

NFock= 12 Conv=0.96D-08 -V/T= 2.0018

Calling FoFJK, ICntrl= 2127 FMM=F ISym2X=0 I1Cent= 0 IOpClX= 0 NMat=1 NMatS=1  
NMatT=0.

\*\*\*\*\* Axes restored to original set \*\*\*\*\*

| Center<br>Number | Atomic<br>Number | Forces (Hartrees/Bohr) |              |              |
|------------------|------------------|------------------------|--------------|--------------|
|                  |                  | X                      | Y            | Z            |
| 1                | 6                | -0.000088110           | -0.000113560 | 0.001102040  |
| 2                | 6                | 0.000887938            | 0.000054450  | -0.000544879 |
| 3                | 7                | -0.000126004           | -0.000122029 | 0.000566124  |
| 4                | 6                | 0.002625156            | 0.002279437  | -0.000367954 |
| 5                | 7                | 0.001123054            | -0.000395138 | -0.000562552 |
| 6                | 6                | 0.001954399            | -0.000793145 | -0.000169760 |
| 7                | 6                | -0.000081787           | 0.000867515  | -0.001214360 |
| 8                | 1                | -0.000022754           | -0.000061543 | -0.000131429 |
| 9                | 1                | 0.000063928            | -0.000029977 | -0.000027609 |
| 10               | 1                | 0.000020352            | 0.000315438  | -0.000165053 |
| 11               | 1                | -0.000444026           | -0.000395836 | -0.000223362 |
| 12               | 1                | 0.000108804            | -0.000237961 | -0.000185715 |
| 13               | 1                | -0.000397742           | -0.000043279 | 0.000521013  |
| 14               | 35               | 0.001191040            | -0.000759439 | -0.000671770 |
| 15               | 1                | -0.002234815           | -0.000832750 | -0.000161819 |
| 16               | 6                | -0.000187662           | 0.000093173  | 0.000196883  |
| 17               | 6                | 0.000145738            | 0.000013099  | -0.000160296 |
| 18               | 1                | -0.000141357           | -0.000070644 | 0.000069317  |
| 19               | 1                | -0.000028706           | 0.000012634  | 0.000002019  |
| 20               | 1                | 0.000022311            | 0.000068901  | -0.000038631 |
| 21               | 8                | -0.000408847           | 0.001346496  | 0.000479921  |
| 22               | 1                | -0.000758680           | 0.000811138  | 0.001102666  |
| 23               | 6                | -0.002946682           | -0.001539305 | -0.000709248 |
| 24               | 6                | -0.001820013           | -0.001883823 | 0.004327695  |
| 25               | 8                | 0.002112299            | -0.001871587 | 0.000632172  |

|    |   |              |              |              |
|----|---|--------------|--------------|--------------|
| 26 | 1 | -0.000882866 | 0.000398943  | 0.002219790  |
| 27 | 1 | 0.001798092  | 0.001145064  | -0.001297992 |
| 28 | 1 | -0.000566423 | 0.000491824  | -0.001763225 |
| 29 | 6 | -0.001042321 | 0.002921916  | -0.005055453 |
| 30 | 1 | -0.000114183 | -0.000268193 | 0.001316459  |
| 31 | 1 | -0.000300408 | -0.000594398 | -0.000218844 |
| 32 | 1 | 0.000540274  | -0.000807419 | 0.001133854  |

-----  
Cartesian Forces: Max 0.005055453 RMS 0.001200784

GradGradGradGradGradGradGradGradGradGradGradGradGradGradGradGradGradGradGradGrad

Berny optimization.

Using GEDIIS/GDIIS optimizer.

FormGI is forming the generalized inverse of G from B-inverse, IUseBI=4.

Internal Forces: Max 0.003097955 RMS 0.000888581

Search for a local minimum.

Step number 16 out of a maximum of 177

All quantities printed in internal units (Hartrees-Bohrs-Radians)

Mixed Optimization -- En-DIIS/RFO-DIIS

Swapping is turned off.

Update second derivatives using D2CorX and points 15 16

DE= -1.47D-03 DEPred=-1.07D-03 R= 1.38D+00

TightC=F SS= 1.41D+00 RLast= 8.06D-01 DXNew= 5.0454D+00 2.4189D+00

Trust test= 1.38D+00 RLast= 8.06D-01 DXMaxT set to 3.00D+00

ITU= 1 1 1 1 1 1 1 1 1 1 1 0 1 0 1 0

|                 |         |         |         |         |         |
|-----------------|---------|---------|---------|---------|---------|
| Eigenvalues --- | 0.00067 | 0.00171 | 0.00233 | 0.00268 | 0.00418 |
| Eigenvalues --- | 0.00652 | 0.00972 | 0.01347 | 0.01438 | 0.01531 |
| Eigenvalues --- | 0.01614 | 0.01861 | 0.02055 | 0.02103 | 0.02185 |
| Eigenvalues --- | 0.02224 | 0.02319 | 0.02389 | 0.02628 | 0.02945 |
| Eigenvalues --- | 0.03061 | 0.03068 | 0.03528 | 0.03657 | 0.03889 |
| Eigenvalues --- | 0.04519 | 0.05087 | 0.05285 | 0.05606 | 0.05639 |
| Eigenvalues --- | 0.05809 | 0.05984 | 0.06668 | 0.09405 | 0.09561 |
| Eigenvalues --- | 0.10852 | 0.11307 | 0.11845 | 0.12248 | 0.13050 |
| Eigenvalues --- | 0.14012 | 0.15360 | 0.15518 | 0.15960 | 0.15996 |
| Eigenvalues --- | 0.16000 | 0.16001 | 0.16003 | 0.16006 | 0.16081 |
| Eigenvalues --- | 0.16678 | 0.17777 | 0.19570 | 0.21734 | 0.22039 |
| Eigenvalues --- | 0.22902 | 0.23541 | 0.24257 | 0.25059 | 0.25243 |
| Eigenvalues --- | 0.27739 | 0.29703 | 0.30940 | 0.32827 | 0.33060 |
| Eigenvalues --- | 0.33163 | 0.34100 | 0.34187 | 0.34593 | 0.34767 |
| Eigenvalues --- | 0.34980 | 0.35598 | 0.35686 | 0.35706 | 0.35859 |
| Eigenvalues --- | 0.36438 | 0.36660 | 0.37225 | 0.37300 | 0.37784 |
| Eigenvalues --- | 0.37892 | 0.42181 | 0.42505 | 0.45195 | 0.47678 |
| Eigenvalues --- | 0.49881 | 0.52764 | 0.54497 | 0.56931 | 0.60356 |

En-DIIS/RFO-DIIS IScMMF= 0 using points: 16 15 14 13 12

RFO step: Lambda=-4.17005111D-04.  
 DidBck=F Rises=F En-DIIS coefs: 1.00000 0.00000 0.00000 0.00000  
 0.00000  
 New curvilinear step failed, DQL= 6.23D+00 SP=-1.20D-01.  
 ITry= 1 IFail=1 DXMaxC= 0.00D+00 DCOLd= 1.00D+10 DXMaxT= 3.00D+00 DXLimC= 3.00D+00  
 Rises=F  
 New curvilinear step failed, DQL= 6.22D+00 SP=-1.40D-01.  
 ITry= 2 IFail=1 DXMaxC= 0.00D+00 DCOLd= 1.00D+10 DXMaxT= 3.00D+00 DXLimC= 3.00D+00  
 Rises=F  
 New curvilinear step failed, DQL= 6.21D+00 SP=-1.58D-01.  
 ITry= 3 IFail=1 DXMaxC= 0.00D+00 DCOLd= 1.00D+10 DXMaxT= 3.00D+00 DXLimC= 3.00D+00  
 Rises=F  
 New curvilinear step failed, DQL= 6.20D+00 SP=-1.73D-01.  
 ITry= 4 IFail=1 DXMaxC= 0.00D+00 DCOLd= 1.00D+10 DXMaxT= 3.00D+00 DXLimC= 3.00D+00  
 Rises=F  
 New curvilinear step failed, DQL= 6.19D+00 SP=-1.91D-01.  
 ITry= 5 IFail=1 DXMaxC= 0.00D+00 DCOLd= 1.00D+10 DXMaxT= 3.00D+00 DXLimC= 3.00D+00  
 Rises=F  
 New curvilinear step failed, DQL= 6.19D+00 SP=-2.11D-01.  
 ITry= 6 IFail=1 DXMaxC= 0.00D+00 DCOLd= 1.00D+10 DXMaxT= 3.00D+00 DXLimC= 3.00D+00  
 Rises=F  
 New curvilinear step failed, DQL= 6.17D+00 SP=-1.19D-01.  
 ITry= 7 IFail=1 DXMaxC= 0.00D+00 DCOLd= 1.00D+10 DXMaxT= 3.00D+00 DXLimC= 3.00D+00  
 Rises=F  
 New curvilinear step failed, DQL= 6.15D+00 SP=-1.70D-01.  
 ITry= 8 IFail=1 DXMaxC= 0.00D+00 DCOLd= 1.00D+10 DXMaxT= 3.00D+00 DXLimC= 3.00D+00  
 Rises=F  
 New curvilinear step failed, DQL= 6.19D+00 SP=-1.81D-01.  
 ITry= 9 IFail=1 DXMaxC= 0.00D+00 DCOLd= 1.00D+10 DXMaxT= 3.00D+00 DXLimC= 3.00D+00  
 Rises=F  
 New curvilinear step failed, DQL= 6.23D+00 SP=-1.95D-01.  
 ITry=10 IFail=1 DXMaxC= 0.00D+00 DCOLd= 1.00D+10 DXMaxT= 3.00D+00 DXLimC= 3.00D+00  
 Rises=F  
 RedQX1 iteration 1 Try 1 RMS(Cart)= 0.12902103 RMS(Int)= 0.54022596 XScale=  
 0.38489970  
 RedQX1 iteration 2 Try 1 RMS(Cart)= 0.02580421 RMS(Int)= 0.17403451 XScale=  
 13.95862654  
 RedQX1 iteration 2 Try 2 RMS(Cart)= 0.02580297 RMS(Int)= 0.55072618 XScale=  
 0.38175528  
 RedQX1 iteration 3 Try 1 RMS(Cart)= 0.02477085 RMS(Int)= 0.55088601 XScale=  
 0.38170805  
 RedQX1 iteration 4 Try 1 RMS(Cart)= 0.00495417 RMS(Int)= 0.23771362 XScale=  
 0.76331983  
 RedQX1 iteration 5 Try 1 RMS(Cart)= 0.00099083 RMS(Int)= 0.17283416 XScale=



|             |                  |        |   |            |            |           |            |         |
|-------------|------------------|--------|---|------------|------------|-----------|------------|---------|
| 11.57664337 | RedQX1 iteration | 5 Try  | 2 | RMS(Cart)= | 0.00099082 | RMS(Int)= | 0.17112732 | XScale= |
| 9.01487982  | RedQX1 iteration | 5 Try  | 3 | RMS(Cart)= | 0.00099078 | RMS(Int)= | 0.16840367 | XScale= |
| 6.26018799  | RedQX1 iteration | 5 Try  | 4 | RMS(Cart)= | 0.00099072 | RMS(Int)= | 0.16390457 | XScale= |
| 3.34556956  | RedQX1 iteration | 5 Try  | 5 | RMS(Cart)= | 0.00099054 | RMS(Int)= | 0.23720062 | XScale= |
| 0.76555435  | RedQX1 iteration | 6 Try  | 1 | RMS(Cart)= | 0.00098420 | RMS(Int)= | 0.23520094 | XScale= |
| 0.77443973  | RedQX1 iteration | 7 Try  | 1 | RMS(Cart)= | 0.00019684 | RMS(Int)= | 0.16327570 | XScale= |
| 2.76766814  | RedQX1 iteration | 7 Try  | 2 | RMS(Cart)= | 0.00019682 | RMS(Int)= | 0.16390131 | XScale= |
| 2.19706644  | RedQX1 iteration | 7 Try  | 3 | RMS(Cart)= | 0.00019680 | RMS(Int)= | 0.16876827 | XScale= |
| 1.64749030  | RedQX1 iteration | 7 Try  | 4 | RMS(Cart)= | 0.00019676 | RMS(Int)= | 0.18699412 | XScale= |
| 1.15157876  | RedQX1 iteration | 7 Try  | 5 | RMS(Cart)= | 0.00019670 | RMS(Int)= | 0.23478475 | XScale= |
| 0.77632261  | RedQX1 iteration | 8 Try  | 1 | RMS(Cart)= | 0.00019644 | RMS(Int)= | 0.23470311 | XScale= |
| 0.77669365  | RedQX1 iteration | 9 Try  | 1 | RMS(Cart)= | 0.00003929 | RMS(Int)= | 0.19372293 | XScale= |
| 1.06467179  | RedQX1 iteration | 9 Try  | 2 | RMS(Cart)= | 0.00003929 | RMS(Int)= | 0.20184068 | XScale= |
| 0.98311396  | RedQX1 iteration | 10 Try | 1 | RMS(Cart)= | 0.00003928 | RMS(Int)= | 0.20184011 | XScale= |
| 0.98311900  | RedQX1 iteration | 11 Try | 1 | RMS(Cart)= | 0.00000786 | RMS(Int)= | 0.19523046 | XScale= |
| 1.04792640  | RedQX1 iteration | 11 Try | 2 | RMS(Cart)= | 0.00000786 | RMS(Int)= | 0.19679456 | XScale= |
| 1.03139926  | RedQX1 iteration | 11 Try | 3 | RMS(Cart)= | 0.00000786 | RMS(Int)= | 0.19841596 | XScale= |
| 1.01509606  | RedQX1 iteration | 11 Try | 4 | RMS(Cart)= | 0.00000786 | RMS(Int)= | 0.20009523 | XScale= |
| 0.99902244  | RedQX1 iteration | 11 Try | 5 | RMS(Cart)= | 0.00000786 | RMS(Int)= | 0.20183281 | XScale= |
| 0.98318393  | RedQX1 iteration | 12 Try | 1 | RMS(Cart)= | 0.00000786 | RMS(Int)= | 0.20183272 | XScale= |
| 0.98318473  | RedQX1 iteration | 13 Try | 1 | RMS(Cart)= | 0.00000157 | RMS(Int)= | 0.20043799 | XScale= |
| 0.99583648  | RedQX1 iteration | 14 Try | 1 | RMS(Cart)= | 0.00000031 | RMS(Int)= | 0.20016359 | XScale= |

0.99838452

RedQX1 iteration 15 Try 1 RMS(Cart)= 0.00000006 RMS(Int)= 0.20010889 XScale=

0.99889482

RedQX1 iteration 16 Try 1 RMS(Cart)= 0.00000001 RMS(Int)= 0.20009796 XScale=

0.99899691

RedQX1 iteration 17 Try 1 RMS(Cart)= 0.00000000 RMS(Int)= 0.20009577 XScale=

0.99901733

TrRot= 0.000000 0.000000 0.000000 0.000000 0.000000 0.000000

| Variable | Old X   | -DE/DX   | Delta X<br>(Linear) | Delta X<br>(Quad) | Delta X<br>(Total) | New X   |
|----------|---------|----------|---------------------|-------------------|--------------------|---------|
| R1       | 2.56613 | -0.00070 | 0.00000             | 0.00402           | 0.00031            | 2.56643 |
| R2       | 2.62283 | -0.00045 | 0.00000             | -0.00374          | -0.00007           | 2.62276 |
| R3       | 2.03383 | 0.00009  | 0.00000             | 0.00007           | 0.00009            | 2.03393 |
| R4       | 2.63052 | -0.00011 | 0.00000             | -0.00022          | 0.00010            | 2.63061 |
| R5       | 2.03098 | -0.00004 | 0.00000             | 0.00022           | 0.00010            | 2.03108 |
| R6       | 2.54424 | 0.00002  | 0.00000             | -0.00654          | -0.00020           | 2.54404 |
| R7       | 2.68718 | 0.00022  | 0.00000             | 0.00342           | 0.00029            | 2.68747 |
| R8       | 2.51638 | 0.00111  | 0.00000             | -0.00918          | -0.00033           | 2.51604 |
| R9       | 2.11627 | -0.00262 | 0.00000             | -0.03446          | -0.00154           | 2.11473 |
| R10      | 2.79381 | -0.00129 | 0.00000             | 0.00126           | 0.00014            | 2.79395 |
| R11      | 2.91036 | -0.00189 | 0.00000             | -0.00840          | -0.00039           | 2.90997 |
| R12      | 2.06277 | 0.00016  | 0.00000             | -0.00185          | 0.00001            | 2.06278 |
| R13      | 2.06198 | 0.00017  | 0.00000             | 0.00021           | 0.00009            | 2.06207 |
| R14      | 2.07232 | 0.00021  | 0.00000             | -0.00286          | -0.00012           | 2.07220 |
| R15      | 2.07042 | -0.00026 | 0.00000             | -0.00356          | -0.00015           | 2.07027 |
| R16      | 2.66553 | -0.00223 | 0.00000             | 0.02713           | 0.00130            | 2.66683 |
| R17      | 4.10447 | -0.00077 | 0.00000             | 0.12168           | 0.00591            | 4.11038 |
| R18      | 9.35707 | -0.00180 | 0.00000             | -1.28849          | -0.06086           | 9.29620 |
| R19      | 2.50698 | -0.00013 | 0.00000             | -0.00135          | 0.00004            | 2.50703 |
| R20      | 2.04705 | -0.00011 | 0.00000             | 0.00011           | 0.00010            | 2.04715 |
| R21      | 2.04296 | 0.00003  | 0.00000             | 0.00032           | 0.00012            | 2.04307 |
| R22      | 2.04616 | -0.00006 | 0.00000             | 0.00069           | 0.00013            | 2.04629 |
| R23      | 1.84066 | -0.00264 | 0.00000             | -0.00500          | -0.00024           | 1.84043 |
| R24      | 3.67699 | -0.00266 | 0.00000             | 0.07171           | 0.00362            | 3.68061 |
| R25      | 2.77140 | 0.00009  | 0.00000             | 0.00898           | 0.00105            | 2.77246 |
| R26      | 2.73836 | -0.00028 | 0.00000             | 0.01960           | 0.00152            | 2.73988 |
| R27      | 2.04960 | 0.00216  | 0.00000             | 0.00417           | 0.00078            | 2.05038 |
| R28      | 2.04721 | 0.00207  | 0.00000             | 0.00057           | 0.00007            | 2.04728 |
| R29      | 2.73979 | -0.00262 | 0.00000             | -0.02053          | -0.00011           | 2.73969 |
| R30      | 2.05625 | 0.00032  | 0.00000             | 0.00207           | 0.00062            | 2.05687 |
| R31      | 2.85785 | -0.00308 | 0.00000             | 0.00759           | 0.00064            | 2.85849 |
| R32      | 2.06573 | 0.00015  | 0.00000             | 0.00493           | 0.00049            | 2.06622 |
| R33      | 2.06877 | -0.00061 | 0.00000             | 0.00265           | 0.00056            | 2.06932 |
| R34      | 2.06297 | -0.00008 | 0.00000             | 0.00120           | 0.00043            | 2.06340 |

|     |         |          |         |          |          |         |
|-----|---------|----------|---------|----------|----------|---------|
| A1  | 1.87263 | 0.00009  | 0.00000 | -0.00188 | -0.00009 | 1.87254 |
| A2  | 2.27713 | -0.00010 | 0.00000 | -0.00159 | -0.00007 | 2.27706 |
| A3  | 2.13330 | 0.00001  | 0.00000 | 0.00321  | 0.00015  | 2.13345 |
| A4  | 1.86193 | 0.00037  | 0.00000 | 0.00038  | 0.00002  | 1.86194 |
| A5  | 2.27754 | -0.00024 | 0.00000 | -0.00045 | -0.00002 | 2.27752 |
| A6  | 2.14368 | -0.00013 | 0.00000 | -0.00011 | -0.00001 | 2.14368 |
| A7  | 1.89789 | -0.00003 | 0.00000 | -0.00549 | -0.00026 | 1.89762 |
| A8  | 2.25003 | -0.00011 | 0.00000 | 0.00702  | 0.00033  | 2.25036 |
| A9  | 2.13523 | 0.00014  | 0.00000 | -0.00162 | -0.00007 | 2.13516 |
| A10 | 1.88955 | -0.00042 | 0.00000 | 0.00838  | 0.00040  | 1.88995 |
| A11 | 2.24069 | -0.00088 | 0.00000 | 0.00117  | 0.00006  | 2.24074 |
| A12 | 2.15248 | 0.00131  | 0.00000 | -0.00754 | -0.00036 | 2.15212 |
| A13 | 1.90273 | 0.00000  | 0.00000 | -0.00185 | -0.00009 | 1.90265 |
| A14 | 2.22352 | -0.00154 | 0.00000 | 0.03214  | 0.00153  | 2.22505 |
| A15 | 2.15644 | 0.00154  | 0.00000 | -0.02922 | -0.00139 | 2.15504 |
| A16 | 1.95586 | -0.00175 | 0.00000 | -0.00759 | -0.00039 | 1.95546 |
| A17 | 1.86087 | 0.00064  | 0.00000 | 0.00416  | 0.00021  | 1.86108 |
| A18 | 1.89073 | 0.00028  | 0.00000 | 0.00327  | 0.00018  | 1.89091 |
| A19 | 1.93140 | 0.00031  | 0.00000 | 0.01031  | 0.00050  | 1.93189 |
| A20 | 1.91748 | 0.00051  | 0.00000 | 0.00554  | 0.00025  | 1.91773 |
| A21 | 1.90591 | 0.00004  | 0.00000 | -0.01633 | -0.00077 | 1.90514 |
| A22 | 1.90984 | 0.00104  | 0.00000 | -0.00041 | -0.00002 | 1.90983 |
| A23 | 1.90986 | 0.00012  | 0.00000 | 0.01449  | 0.00069  | 1.91055 |
| A24 | 1.92157 | -0.00310 | 0.00000 | -0.00889 | -0.00043 | 1.92114 |
| A25 | 1.88222 | -0.00016 | 0.00000 | 0.01115  | 0.00053  | 1.88275 |
| A26 | 1.88798 | 0.00072  | 0.00000 | 0.00075  | 0.00004  | 1.88802 |
| A27 | 1.95151 | 0.00146  | 0.00000 | -0.01665 | -0.00079 | 1.95072 |
| A28 | 1.70981 | -0.00166 | 0.00000 | -0.04923 | -0.00243 | 1.70738 |
| A29 | 2.90494 | -0.00128 | 0.00000 | 0.10208  | 0.00484  | 2.90978 |
| A30 | 2.17583 | 0.00001  | 0.00000 | 0.00123  | 0.00006  | 2.17589 |
| A31 | 1.95408 | 0.00009  | 0.00000 | -0.00212 | -0.00010 | 1.95399 |
| A32 | 2.15326 | -0.00010 | 0.00000 | 0.00088  | 0.00004  | 2.15330 |
| A33 | 2.07948 | 0.00001  | 0.00000 | -0.00336 | -0.00016 | 2.07932 |
| A34 | 2.15734 | 0.00001  | 0.00000 | 0.00589  | 0.00027  | 2.15762 |
| A35 | 2.04636 | -0.00002 | 0.00000 | -0.00252 | -0.00012 | 2.04624 |
| A36 | 1.91668 | -0.00165 | 0.00000 | -0.04440 | -0.00211 | 1.91457 |
| A37 | 3.13016 | -0.00029 | 0.00000 | 0.24002  | 0.01130  | 3.14145 |
| A38 | 2.09852 | -0.00046 | 0.00000 | 0.00588  | 0.00046  | 2.09899 |
| A39 | 2.10263 | -0.00019 | 0.00000 | -0.01272 | -0.00072 | 2.10191 |
| A40 | 1.99562 | 0.00111  | 0.00000 | 0.00387  | 0.00038  | 1.99600 |
| A41 | 1.98528 | -0.00037 | 0.00000 | -0.01446 | -0.00091 | 1.98437 |
| A42 | 2.01219 | 0.00052  | 0.00000 | 0.01415  | 0.00060  | 2.01279 |
| A43 | 2.06079 | -0.00057 | 0.00000 | 0.00992  | 0.00074  | 2.06153 |
| A44 | 2.13235 | -0.00074 | 0.00000 | 0.00043  | -0.00010 | 2.13225 |

|     |          |          |         |          |          |          |
|-----|----------|----------|---------|----------|----------|----------|
| A45 | 1.97158  | -0.00145 | 0.00000 | 0.01398  | 0.00066  | 1.97224  |
| A46 | 2.03227  | 0.00048  | 0.00000 | 0.00525  | 0.00040  | 2.03267  |
| A47 | 2.00845  | 0.00126  | 0.00000 | -0.01960 | -0.00109 | 2.00737  |
| A48 | 1.36548  | 0.00136  | 0.00000 | 0.25743  | 0.01221  | 1.37769  |
| A49 | 1.03540  | -0.00250 | 0.00000 | -0.38725 | -0.01820 | 1.01720  |
| A50 | 2.39551  | -0.00108 | 0.00000 | -0.08255 | -0.00397 | 2.39154  |
| A51 | 2.22653  | -0.00070 | 0.00000 | -0.06753 | -0.00316 | 2.22337  |
| A52 | 1.91918  | 0.00154  | 0.00000 | -0.00870 | -0.00058 | 1.91860  |
| A53 | 1.92048  | -0.00028 | 0.00000 | 0.00273  | 0.00031  | 1.92079  |
| A54 | 1.92046  | 0.00187  | 0.00000 | 0.00843  | 0.00030  | 1.92076  |
| A55 | 1.89587  | -0.00087 | 0.00000 | -0.00090 | -0.00010 | 1.89577  |
| A56 | 1.90998  | -0.00153 | 0.00000 | 0.00591  | 0.00047  | 1.91045  |
| A57 | 1.89754  | -0.00080 | 0.00000 | -0.00755 | -0.00040 | 1.89714  |
| A58 | 3.59201  | 0.00067  | 0.00000 | 0.18989  | 0.00905  | 3.60106  |
| A59 | 4.66956  | 0.00115  | 0.00000 | 0.66033  | 0.03137  | 4.70094  |
| D1  | 0.00983  | -0.00035 | 0.00000 | 0.03968  | 0.00188  | 0.01171  |
| D2  | -3.14014 | -0.00014 | 0.00000 | 0.01431  | 0.00068  | -3.13947 |
| D3  | 3.13460  | -0.00002 | 0.00000 | 0.02216  | 0.00105  | 3.13565  |
| D4  | -0.01537 | 0.00019  | 0.00000 | -0.00322 | -0.00015 | -0.01552 |
| D5  | -0.00866 | 0.00029  | 0.00000 | -0.05093 | -0.00242 | -0.01107 |
| D6  | -3.11704 | 0.00030  | 0.00000 | -0.08617 | -0.00409 | -3.12113 |
| D7  | -3.13512 | -0.00001 | 0.00000 | -0.03511 | -0.00167 | -3.13679 |
| D8  | 0.03968  | 0.00001  | 0.00000 | -0.07036 | -0.00334 | 0.03634  |
| D9  | -0.00775 | 0.00030  | 0.00000 | -0.01548 | -0.00073 | -0.00848 |
| D10 | -3.13952 | 0.00019  | 0.00000 | -0.00514 | -0.00024 | -3.13977 |
| D11 | 3.14143  | 0.00011  | 0.00000 | 0.00748  | 0.00036  | -3.14140 |
| D12 | 0.00965  | 0.00000  | 0.00000 | 0.01783  | 0.00085  | 0.01050  |
| D13 | 0.00242  | -0.00012 | 0.00000 | -0.01615 | -0.00077 | 0.00165  |
| D14 | 3.11161  | 0.00009  | 0.00000 | 0.05332  | 0.00254  | 3.11414  |
| D15 | 3.13498  | -0.00003 | 0.00000 | -0.02561 | -0.00122 | 3.13376  |
| D16 | -0.03902 | 0.00018  | 0.00000 | 0.04386  | 0.00209  | -0.03694 |
| D17 | 0.08770  | -0.00016 | 0.00000 | -0.04209 | -0.00200 | 0.08570  |
| D18 | -3.05771 | -0.00009 | 0.00000 | -0.04582 | -0.00218 | -3.05989 |
| D19 | -3.04289 | -0.00028 | 0.00000 | -0.03049 | -0.00145 | -3.04434 |
| D20 | 0.09489  | -0.00021 | 0.00000 | -0.03422 | -0.00163 | 0.09326  |
| D21 | 0.00379  | -0.00010 | 0.00000 | 0.04127  | 0.00196  | 0.00575  |
| D22 | 3.11373  | -0.00018 | 0.00000 | 0.07626  | 0.00362  | 3.11735  |
| D23 | -3.10739 | -0.00025 | 0.00000 | -0.02408 | -0.00115 | -3.10854 |
| D24 | 0.00254  | -0.00034 | 0.00000 | 0.01091  | 0.00051  | 0.00305  |
| D25 | -2.89893 | -0.00033 | 0.00000 | -0.38955 | -0.01873 | -2.91766 |
| D26 | 0.20583  | -0.00013 | 0.00000 | -0.31029 | -0.01496 | 0.19086  |
| D27 | 1.25972  | 0.00000  | 0.00000 | 0.11799  | 0.00560  | 1.26532  |
| D28 | -2.90782 | -0.00024 | 0.00000 | 0.12890  | 0.00611  | -2.90170 |
| D29 | -0.85852 | 0.00029  | 0.00000 | 0.11366  | 0.00542  | -0.85310 |

|     |          |          |         |          |          |          |
|-----|----------|----------|---------|----------|----------|----------|
| D30 | -1.84419 | 0.00006  | 0.00000 | 0.07730  | 0.00367  | -1.84053 |
| D31 | 0.27145  | -0.00018 | 0.00000 | 0.08821  | 0.00418  | 0.27563  |
| D32 | 2.32076  | 0.00034  | 0.00000 | 0.07297  | 0.00348  | 2.32424  |
| D33 | -0.91617 | -0.00018 | 0.00000 | -0.12955 | -0.00615 | -0.92232 |
| D34 | 1.14268  | 0.00031  | 0.00000 | -0.10779 | -0.00512 | 1.13756  |
| D35 | -2.98900 | 0.00018  | 0.00000 | -0.12486 | -0.00593 | -2.99493 |
| D36 | -2.99066 | -0.00004 | 0.00000 | -0.13675 | -0.00649 | -2.99715 |
| D37 | -0.93181 | 0.00045  | 0.00000 | -0.11498 | -0.00546 | -0.93727 |
| D38 | 1.21969  | 0.00032  | 0.00000 | -0.13205 | -0.00627 | 1.21342  |
| D39 | 1.18661  | -0.00062 | 0.00000 | -0.12663 | -0.00601 | 1.18059  |
| D40 | -3.03773 | -0.00014 | 0.00000 | -0.10487 | -0.00498 | -3.04270 |
| D41 | -0.88622 | -0.00027 | 0.00000 | -0.12194 | -0.00579 | -0.89201 |
| D42 | -1.78943 | 0.00033  | 0.00000 | -0.08355 | -0.00397 | -1.79340 |
| D43 | 2.40758  | 0.00044  | 0.00000 | -0.07831 | -0.00372 | 2.40385  |
| D44 | 0.33753  | -0.00068 | 0.00000 | -0.08263 | -0.00393 | 0.33360  |
| D45 | 0.26961  | -0.00033 | 0.00000 | 0.45156  | 0.02172  | 0.29133  |
| D46 | -0.34279 | 0.00049  | 0.00000 | -0.21108 | -0.01008 | -0.35287 |
| D47 | 2.89179  | 0.00014  | 0.00000 | -0.60679 | -0.02917 | 2.86262  |
| D48 | -3.13737 | 0.00003  | 0.00000 | -0.00421 | -0.00020 | -3.13757 |
| D49 | 0.00685  | -0.00001 | 0.00000 | -0.00795 | -0.00038 | 0.00647  |
| D50 | 0.00846  | -0.00004 | 0.00000 | -0.00005 | 0.00000  | 0.00846  |
| D51 | -3.13050 | -0.00008 | 0.00000 | -0.00379 | -0.00018 | -3.13068 |
| D52 | -2.60905 | -0.00003 | 0.00000 | 0.23973  | 1.18202  | -1.42703 |
| D53 | -3.01575 | 0.00062  | 0.00000 | -0.10978 | -1.17581 | 2.09162  |
| D54 | -2.89783 | -0.00014 | 0.00000 | -0.65030 | -1.20147 | 2.18388  |
| D55 | -1.40213 | -0.00053 | 0.00000 | -0.77011 | -1.20718 | -2.60931 |
| D56 | -2.72763 | -0.00023 | 0.00000 | 0.01210  | 0.00063  | -2.72700 |
| D57 | -0.03003 | -0.00002 | 0.00000 | -0.01646 | -0.00078 | -0.03081 |
| D58 | 0.00283  | -0.00046 | 0.00000 | 0.03590  | 0.00172  | 0.00455  |
| D59 | 2.70043  | -0.00025 | 0.00000 | 0.00733  | 0.00031  | 2.70074  |
| D60 | 0.18739  | 0.00039  | 0.00000 | -0.66675 | -0.03213 | 0.15526  |
| D61 | 0.05307  | 0.00102  | 0.00000 | -0.08849 | -0.00430 | 0.04877  |
| D62 | -2.17473 | -0.00122 | 0.00000 | -0.67703 | -0.03248 | -2.20720 |
| D63 | -2.30905 | -0.00060 | 0.00000 | -0.09877 | -0.00464 | -2.31369 |
| D64 | 2.10723  | 0.00085  | 0.00000 | 0.08823  | 0.00396  | 2.11119  |
| D65 | -0.27427 | -0.00002 | 0.00000 | 0.09718  | 0.00447  | -0.26981 |
| D66 | 2.52068  | 0.00040  | 0.00000 | -0.07332 | -0.00345 | 2.51724  |
| D67 | -1.67488 | 0.00011  | 0.00000 | -0.07816 | -0.00374 | -1.67862 |
| D68 | 0.41561  | 0.00012  | 0.00000 | -0.08048 | -0.00385 | 0.41176  |
| D69 | 1.31298  | -0.00010 | 0.00000 | -0.08875 | -0.00414 | 1.30884  |
| D70 | -2.88258 | -0.00039 | 0.00000 | -0.09360 | -0.00443 | -2.88702 |
| D71 | -0.79209 | -0.00038 | 0.00000 | -0.09591 | -0.00454 | -0.79663 |
| D72 | -1.05265 | 0.00019  | 0.00000 | -0.09432 | -0.00439 | -1.05704 |
| D73 | 1.03498  | -0.00009 | 0.00000 | -0.09916 | -0.00469 | 1.03029  |

D74            3.12547   -0.00008   0.00000   -0.10148   -0.00480   3.12067

| Item                 | Value    | Threshold | Converged? |
|----------------------|----------|-----------|------------|
| Maximum Force        | 0.003098 | 0.000450  | NO         |
| RMS Force            | 0.000889 | 0.000300  | NO         |
| Maximum Displacement | 0.120209 | 0.001800  | NO         |
| RMS Displacement     | 0.030625 | 0.001200  | NO         |

Predicted change in Energy=-1.477541D-02

GradGradGradGradGradGradGradGradGradGradGradGradGradGradGradGradGradGradGrad

Input orientation:

| Center Number | Atomic Number | Atomic Type | Coordinates (Angstroms) |           |           |
|---------------|---------------|-------------|-------------------------|-----------|-----------|
|               |               |             | X                       | Y         | Z         |
| 1             | 6             | 0           | -1.437776               | -1.866148 | -0.307632 |
| 2             | 6             | 0           | -2.604158               | -1.172072 | -0.260284 |
| 3             | 7             | 0           | -2.284939               | 0.117989  | 0.154051  |
| 4             | 6             | 0           | -0.956503               | 0.189402  | 0.360312  |
| 5             | 7             | 0           | -0.427231               | -1.002184 | 0.090673  |
| 6             | 6             | 0           | 1.020252                | -1.290326 | 0.178492  |
| 7             | 6             | 0           | 1.673779                | -1.396057 | -1.211826 |
| 8             | 1             | 0           | -1.245228               | -2.891246 | -0.573218 |
| 9             | 1             | 0           | -3.608589               | -1.478790 | -0.488841 |
| 10            | 1             | 0           | 1.466438                | -0.476801 | 0.753501  |
| 11            | 1             | 0           | 1.151494                | -2.227181 | 0.722366  |
| 12            | 1             | 0           | 1.116075                | -2.115542 | -1.823185 |
| 13            | 1             | 0           | 1.627315                | -0.422506 | -1.712074 |
| 14            | 35            | 0           | 1.220120                | 2.505403  | 1.147639  |
| 15            | 1             | 0           | -0.348606               | 1.075092  | 0.673874  |
| 16            | 6             | 0           | -3.148050               | 1.228679  | 0.363589  |
| 17            | 6             | 0           | -4.471114               | 1.183101  | 0.277243  |
| 18            | 1             | 0           | -2.597514               | 2.128789  | 0.609065  |
| 19            | 1             | 0           | -5.041353               | 2.085057  | 0.450973  |
| 20            | 1             | 0           | -5.025981               | 0.283521  | 0.041772  |
| 21            | 8             | 0           | 3.001402                | -1.858551 | -1.089070 |
| 22            | 1             | 0           | 3.619506                | -1.112802 | -1.190615 |
| 23            | 6             | 0           | 4.950802                | 1.748496  | -0.928749 |
| 24            | 6             | 0           | 5.939897                | 0.750622  | -0.506396 |
| 25            | 8             | 0           | 4.855611                | 0.378578  | -1.393959 |
| 26            | 1             | 0           | 4.154977                | 2.048740  | -0.255125 |
| 27            | 1             | 0           | 5.187778                | 2.458732  | -1.711757 |
| 28            | 1             | 0           | 6.910962                | 0.750867  | -0.998081 |
| 29            | 6             | 0           | 5.922400                | 0.133724  | 0.874628  |
| 30            | 1             | 0           | 6.230914                | -0.913759 | 0.818810  |

|    |   |   |          |          |          |
|----|---|---|----------|----------|----------|
| 31 | 1 | 0 | 6.615416 | 0.667694 | 1.533199 |
| 32 | 1 | 0 | 4.918371 | 0.195095 | 1.299380 |

-----

Distance matrix (angstroms):

|    |    | 1        | 2        | 3        | 4        | 5        |
|----|----|----------|----------|----------|----------|----------|
| 1  | C  | 0.000000 |          |          |          |          |
| 2  | C  | 1.358098 | 0.000000 |          |          |          |
| 3  | N  | 2.206272 | 1.392061 | 0.000000 |          |          |
| 4  | C  | 2.214285 | 2.225650 | 1.346249 | 0.000000 |          |
| 5  | N  | 1.387905 | 2.211570 | 2.170226 | 1.331432 | 0.000000 |
| 6  | C  | 2.570951 | 3.652787 | 3.592803 | 2.475927 | 1.478494 |
| 7  | C  | 3.274191 | 4.388205 | 4.453022 | 3.450172 | 2.503175 |
| 8  | H  | 1.076308 | 2.213635 | 3.265795 | 3.231909 | 2.162967 |
| 9  | H  | 2.212535 | 1.074800 | 2.171420 | 3.246149 | 3.268643 |
| 10 | H  | 3.389800 | 4.252166 | 3.845250 | 2.543436 | 2.073970 |
| 11 | H  | 2.809903 | 4.022906 | 4.199033 | 3.227167 | 2.095717 |
| 12 | H  | 2.980143 | 4.144023 | 4.523828 | 3.791571 | 2.698928 |
| 13 | H  | 3.667607 | 4.535957 | 4.368099 | 3.368283 | 2.794115 |
| 14 | Br | 5.319086 | 5.489187 | 4.355731 | 3.274359 | 4.016728 |
| 15 | H  | 3.286417 | 3.318119 | 2.221631 | 1.119065 | 2.159023 |
| 16 | C  | 3.599101 | 2.539418 | 1.422146 | 2.425486 | 3.529035 |
| 17 | C  | 4.340638 | 3.053080 | 2.434954 | 3.653331 | 4.600355 |
| 18 | H  | 4.259676 | 3.413429 | 2.085199 | 2.552649 | 3.844717 |
| 19 | H  | 5.401228 | 4.129733 | 3.399314 | 4.504189 | 5.563361 |
| 20 | H  | 4.197425 | 2.841693 | 2.748330 | 4.083011 | 4.775346 |
| 21 | O  | 4.507438 | 5.707928 | 5.779054 | 4.686132 | 3.725679 |
| 22 | H  | 5.188765 | 6.293093 | 6.179437 | 5.004095 | 4.246176 |
| 23 | C  | 7.366503 | 8.127360 | 7.495796 | 6.244094 | 6.126067 |
| 24 | C  | 7.830520 | 8.761175 | 8.275526 | 6.973269 | 6.630922 |
| 25 | O  | 6.769462 | 7.703109 | 7.311067 | 6.074037 | 5.658538 |
| 26 | H  | 6.827004 | 7.487293 | 6.735558 | 5.473858 | 5.515826 |
| 27 | H  | 8.035802 | 8.718015 | 8.049958 | 6.869900 | 6.837764 |
| 28 | H  | 8.776497 | 9.735479 | 9.289377 | 8.003592 | 7.622837 |
| 29 | C  | 7.718122 | 8.700305 | 8.238925 | 6.898327 | 6.497898 |
| 30 | H  | 7.809271 | 8.904474 | 8.603845 | 7.286024 | 6.698425 |
| 31 | H  | 8.640770 | 9.570886 | 9.023333 | 7.677134 | 7.380261 |
| 32 | H  | 6.872540 | 7.803213 | 7.294202 | 5.949455 | 5.609804 |
|    |    | 6        | 7        | 8        | 9        | 10       |
| 6  | C  | 0.000000 |          |          |          |          |
| 7  | C  | 1.539890 | 0.000000 |          |          |          |
| 8  | H  | 2.874093 | 3.341259 | 0.000000 |          |          |
| 9  | H  | 4.680493 | 5.332256 | 2.754565 | 0.000000 |          |
| 10 | H  | 1.091577 | 2.179572 | 3.865600 | 5.320084 | 0.000000 |
| 11 | H  | 1.091201 | 2.169020 | 2.804246 | 4.968450 | 1.778760 |

|    |    |          |          |          |           |          |
|----|----|----------|----------|----------|-----------|----------|
| 12 | H  | 2.167227 | 1.096563 | 2.782065 | 4.950593  | 3.073685 |
| 13 | H  | 2.166997 | 1.095540 | 3.955145 | 5.479664  | 2.471414 |
| 14 | Br | 3.922595 | 4.581951 | 6.177630 | 6.470570  | 3.018205 |
| 15 | H  | 2.777477 | 3.708435 | 4.253353 | 4.301361  | 2.389372 |
| 16 | C  | 4.873847 | 5.711498 | 4.633802 | 2.875608  | 4.934997 |
| 17 | C  | 6.023511 | 6.828550 | 5.265922 | 2.901120  | 6.183576 |
| 18 | H  | 4.996396 | 5.829591 | 5.331719 | 3.904138  | 4.829666 |
| 19 | H  | 6.943378 | 7.744421 | 6.342170 | 3.954373  | 7.000427 |
| 20 | H  | 6.249210 | 7.019920 | 4.975083 | 2.322992  | 6.575420 |
| 21 | O  | 2.419617 | 1.411223 | 4.400730 | 6.648042  | 2.767746 |
| 22 | H  | 2.943143 | 1.966351 | 5.216289 | 7.271298  | 2.969812 |
| 23 | C  | 5.090152 | 4.550520 | 7.748832 | 9.158169  | 4.463486 |
| 24 | C  | 5.370051 | 4.827590 | 8.055661 | 9.805313  | 4.806843 |
| 25 | O  | 4.468537 | 3.647816 | 6.970337 | 8.712734  | 4.102408 |
| 26 | H  | 4.600423 | 4.351810 | 7.325767 | 8.530594  | 3.824124 |
| 27 | H  | 5.915805 | 5.239992 | 8.444057 | 9.714714  | 5.342586 |
| 28 | H  | 6.344388 | 5.664191 | 8.942535 | 10.765298 | 5.849620 |
| 29 | C  | 5.152046 | 4.974364 | 7.913380 | 9.762120  | 4.499223 |
| 30 | H  | 5.263345 | 5.012342 | 7.857537 | 9.942083  | 4.784916 |
| 31 | H  | 6.080702 | 6.017808 | 8.882160 | 10.640785 | 5.331957 |
| 32 | H  | 4.319513 | 4.400602 | 7.142973 | 8.871790  | 3.558829 |
|    |    | 11       | 12       | 13       | 14        | 15       |
| 11 | H  | 0.000000 |          |          |           |          |
| 12 | H  | 2.548244 | 0.000000 |          |           |          |
| 13 | H  | 3.067532 | 1.772028 | 0.000000 |           |          |
| 14 | Br | 4.752149 | 5.494520 | 4.112957 | 0.000000  |          |
| 15 | H  | 3.627349 | 4.308218 | 3.440903 | 2.175119  | 0.000000 |
| 16 | C  | 5.527908 | 5.843677 | 5.462499 | 4.617971  | 2.820771 |
| 17 | C  | 6.591045 | 6.819789 | 6.612578 | 5.907301  | 4.142952 |
| 18 | H  | 5.748249 | 6.141737 | 5.453987 | 3.873787  | 2.484364 |
| 19 | H  | 7.551185 | 7.792993 | 7.445654 | 6.314116  | 4.805370 |
| 20 | H  | 6.702837 | 6.852622 | 6.916704 | 6.721122  | 4.785809 |
| 21 | O  | 2.615215 | 2.039467 | 2.082900 | 5.217272  | 4.789237 |
| 22 | H  | 3.315481 | 2.769981 | 2.171923 | 4.931114  | 4.899909 |
| 23 | C  | 5.741684 | 5.516877 | 4.046284 | 4.336160  | 5.577240 |
| 24 | C  | 5.771132 | 5.763513 | 4.629065 | 5.300130  | 6.406527 |
| 25 | O  | 4.998929 | 4.515418 | 3.341381 | 4.919339  | 5.643132 |
| 26 | H  | 5.316004 | 5.388412 | 3.823458 | 3.284764  | 4.700350 |
| 27 | H  | 6.646377 | 6.124962 | 4.580221 | 4.890873  | 6.185244 |
| 28 | H  | 6.708217 | 6.517500 | 5.459259 | 6.329944  | 7.456667 |
| 29 | C  | 5.325279 | 5.952995 | 5.044618 | 5.273598  | 6.344446 |
| 30 | H  | 5.247369 | 5.880985 | 5.276345 | 6.075101  | 6.875072 |
| 31 | H  | 6.236361 | 7.018152 | 6.049916 | 5.712710  | 7.028657 |
| 32 | H  | 4.515498 | 5.435706 | 4.503480 | 4.363211  | 5.376495 |



|    |   | 16        | 17        | 18       | 19        | 20        |
|----|---|-----------|-----------|----------|-----------|-----------|
| 16 | C | 0.000000  |           |          |           |           |
| 17 | C | 1.326662  | 0.000000  |          |           |           |
| 18 | H | 1.083303  | 2.124807  | 0.000000 |           |           |
| 19 | H | 2.079811  | 1.081147  | 2.449337 | 0.000000  |           |
| 20 | H | 2.126856  | 1.082852  | 3.102303 | 1.847489  | 0.000000  |
| 21 | O | 7.032564  | 8.182722  | 7.080283 | 9.088986  | 8.384876  |
| 22 | H | 7.327884  | 8.537207  | 7.238653 | 9.377184  | 8.843808  |
| 23 | C | 8.217770  | 9.515597  | 7.712754 | 10.092575 | 10.130364 |
| 24 | C | 9.142001  | 10.449415 | 8.719575 | 11.103383 | 10.989502 |
| 25 | O | 8.238339  | 9.509362  | 7.913559 | 10.211059 | 9.985801  |
| 26 | H | 7.374924  | 8.685746  | 6.808037 | 9.223468  | 9.353830  |
| 27 | H | 8.677910  | 9.943719  | 8.130551 | 10.461938 | 10.589017 |
| 28 | H | 10.161996 | 11.461454 | 9.741289 | 12.113531 | 11.991260 |
| 29 | C | 9.150581  | 10.463421 | 8.754413 | 11.144104 | 10.981035 |
| 30 | H | 9.631315  | 10.918952 | 9.340355 | 11.670141 | 11.347024 |
| 31 | H | 9.849262  | 11.169342 | 9.373735 | 11.792387 | 11.742831 |
| 32 | H | 8.186033  | 9.496491  | 7.791292 | 10.172897 | 10.023948 |
|    |   | 21        | 22        | 23       | 24        | 25        |
| 21 | O | 0.000000  |           |          |           |           |
| 22 | H | 0.973913  | 0.000000  |          |           |           |
| 23 | C | 4.103249  | 3.166694  | 0.000000 |           |           |
| 24 | C | 3.972662  | 3.053640  | 1.467120 | 0.000000  |           |
| 25 | O | 2.921609  | 1.947696  | 1.449881 | 1.449779  | 0.000000  |
| 26 | H | 4.158500  | 3.340242  | 1.085014 | 2.221303  | 2.139456  |
| 27 | H | 4.879233  | 3.935343  | 1.083372 | 2.221760  | 2.130345  |
| 28 | H | 4.701277  | 3.787350  | 2.200522 | 1.088450  | 2.125979  |
| 29 | C | 4.044441  | 3.335023  | 2.608383 | 1.512646  | 2.518825  |
| 30 | H | 3.868124  | 3.301039  | 3.432237 | 2.147330  | 2.908253  |
| 31 | H | 5.130235  | 4.423212  | 3.162319 | 2.150152  | 3.427646  |
| 32 | H | 3.687401  | 3.098019  | 2.716370 | 2.147779  | 2.700311  |
|    |   | 26        | 27        | 28       | 29        | 30        |
| 26 | H | 0.000000  |           |          |           |           |
| 27 | H | 1.832089  | 0.000000  |          |           |           |
| 28 | H | 3.135588  | 2.528932  | 0.000000 |           |           |
| 29 | C | 2.840319  | 3.554535  | 2.205711 | 0.000000  |           |
| 30 | H | 3.773493  | 4.343454  | 2.556275 | 1.093397  | 0.000000  |
| 31 | H | 3.340532  | 3.971865  | 2.549833 | 1.095039  | 1.777410  |
| 32 | H | 2.536781  | 3.776716  | 3.091542 | 1.091904  | 1.784173  |
|    |   | 31        | 32        |          |           |           |
| 31 | H | 0.000000  |           |          |           |           |
| 32 | H | 1.777072  | 0.000000  |          |           |           |

Stoichiometry C10H17BrN2O2

Framework group C1[X(C10H17BrN2O2)]

Deg. of freedom 90  
 Full point group C1 NOp 1  
 Largest Abelian subgroup C1 NOp 1  
 Largest concise Abelian subgroup C1 NOp 1

Standard orientation:

| Center<br>Number | Atomic<br>Number | Atomic<br>Type | Coordinates (Angstroms) |           |           |
|------------------|------------------|----------------|-------------------------|-----------|-----------|
|                  |                  |                | X                       | Y         | Z         |
| 1                | 6                | 0              | -2.588999               | 2.269704  | -0.304360 |
| 2                | 6                | 0              | -3.722138               | 1.588774  | 0.006701  |
| 3                | 7                | 0              | -3.371858               | 0.243654  | 0.082793  |
| 4                | 6                | 0              | -2.058669               | 0.123013  | -0.188067 |
| 5                | 7                | 0              | -1.568605               | 1.337249  | -0.429271 |
| 6                | 6                | 0              | -0.145535               | 1.596296  | -0.735397 |
| 7                | 6                | 0              | 0.595488                | 2.231219  | 0.455829  |
| 8                | 1                | 0              | -2.426993               | 3.322363  | -0.459610 |
| 9                | 1                | 0              | -4.721923               | 1.941364  | 0.183637  |
| 10               | 1                | 0              | 0.298036                | 0.633783  | -0.996843 |
| 11               | 1                | 0              | -0.095619               | 2.260222  | -1.599938 |
| 12               | 1                | 0              | 0.047656                | 3.118457  | 0.795151  |
| 13               | 1                | 0              | 0.628806                | 1.518330  | 1.287026  |
| 14               | 35               | 0              | 0.165271                | -2.279991 | -0.221054 |
| 15               | 1                | 0              | -1.432759               | -0.804622 | -0.194074 |
| 16               | 6                | 0              | -4.194313               | -0.878870 | 0.376061  |
| 17               | 6                | 0              | -5.509106               | -0.827375 | 0.545471  |
| 18               | 1                | 0              | -3.620256               | -1.795128 | 0.442963  |
| 19               | 1                | 0              | -6.047019               | -1.737987 | 0.769781  |
| 20               | 1                | 0              | -6.088136               | 0.084535  | 0.469882  |
| 21               | 8                | 0              | 1.888569                | 2.636333  | 0.061653  |
| 22               | 1                | 0              | 2.546372                | 1.995320  | 0.385542  |
| 23               | 6                | 0              | 3.989177                | -0.728720 | 1.110708  |
| 24               | 6                | 0              | 4.899432                | 0.052749  | 0.266207  |
| 25               | 8                | 0              | 3.861886                | 0.713498  | 1.033519  |
| 26               | 1                | 0              | 3.164249                | -1.275297 | 0.665733  |
| 27               | 1                | 0              | 4.311899                | -1.085994 | 2.081224  |
| 28               | 1                | 0              | 5.900671                | 0.255499  | 0.641886  |
| 29               | 6                | 0              | 4.759082                | 0.101451  | -1.239126 |
| 30               | 1                | 0              | 5.021326                | 1.097583  | -1.605821 |
| 31               | 1                | 0              | 5.429868                | -0.629527 | -1.702623 |
| 32               | 1                | 0              | 3.732433                | -0.133615 | -1.527207 |

Rotational constants (GHZ): 0.5609390 0.2044951 0.1586841

Standard basis: 6-311++G(d,p) (5D, 7F)

There are 492 symmetry adapted cartesian basis functions of A symmetry.  
 There are 475 symmetry adapted basis functions of A symmetry.  
 475 basis functions, 751 primitive gaussians, 492 cartesian basis functions  
 71 alpha electrons 71 beta electrons  
 nuclear repulsion energy 1275.2628642389 Hartrees.  
 NAToms= 32 NActive= 32 NUniq= 32 SFac= 1.00D+00 NATFMM= 60 NAOKFM=F  
 Big=F  
 Integral buffers will be 131072 words long.  
 Raffenetti 2 integral format.  
 Two-electron integral symmetry is turned on.  
 One-electron integrals computed using PRISM.  
 NBasis= 475 RedAO= T EigKep= 3.76D-06 NBF= 475  
 NBsUse= 475 1.00D-06 EigRej= -1.00D+00 NBFU= 475  
 Initial guess from the checkpoint file: "/home/suqian/liuwen/qianmengshijie/ohpo/ohpo.chk"  
 B after Tr= 0.000000 0.000000 0.000000  
 Rot= 0.999998 0.000744 -0.000056 -0.002013 Ang= 0.25 deg.  
 ExpMin= 3.50D-02 ExpMax= 4.40D+05 ExpMxC= 1.51D+04 IAcc=3 IRadAn= 5 AccDes=  
 0.00D+00  
 Harris functional with IExCor= 402 and IRadAn= 5 diagonalized for initial guess.  
 HarFok: IExCor= 402 AccDes= 0.00D+00 IRadAn= 5 IDoV= 1 UseB2=F ITyADJ=14  
 ICtDFT= 3500011 ScaDFX= 1.000000 1.000000 1.000000 1.000000  
 FoFCou: FMM=F IPFlag= 0 FMFlag= 100000 FMFlg1= 0  
 NxFIlg= 0 DoJE=T BraDBF=F KetDBF=T FulRan=T  
 wScrn= 0.000000 ICntrl= 500 IOpCl= 0 I1Cent= 20000004 NGrid=  
 0  
 NMat0= 1 NMatS0= 1 NMatT0= 0 NMatD0= 1 NMtDS0= 0  
 NMtDT0= 0  
 Petite list used in FoFCou.  
 Requested convergence on RMS density matrix=1.00D-08 within 128 cycles.  
 Requested convergence on MAX density matrix=1.00D-06.  
 Requested convergence on energy=1.00D-06.  
 No special actions if energy rises.  
 SCF Done: E(RB3LYP)= -3225.52108426 A.U. after 11 cycles  
 NFock= 11 Conv=0.33D-08 -V/T= 2.0018  
 Calling FoFJK, ICntrl= 2127 FMM=F ISym2X=0 I1Cent= 0 IOpCIX= 0 NMat=1 NMatS=1  
 NMatT=0.  
 \*\*\*\*\* Axes restored to original set \*\*\*\*\*

```

-----
Center      Atomic      Forces (Hartrees/Bohr)
Number      Number      X           Y           Z
-----
1           6           -0.000177636 -0.000186374 0.001284072
2           6           0.000982602  0.000080018 -0.000716052
3           7           -0.000165429 -0.000124541 0.000557231
  
```

|    |    |              |              |              |
|----|----|--------------|--------------|--------------|
| 4  | 6  | 0.002522309  | 0.002139833  | -0.000209471 |
| 5  | 7  | 0.001194127  | -0.000345529 | -0.000636397 |
| 6  | 6  | 0.001933875  | -0.000911005 | -0.000270502 |
| 7  | 6  | 0.000399916  | 0.000654515  | -0.001145205 |
| 8  | 1  | -0.000033596 | -0.000043460 | -0.000072693 |
| 9  | 1  | 0.000100248  | -0.000019188 | -0.000037793 |
| 10 | 1  | -0.000009867 | 0.000349293  | -0.000249379 |
| 11 | 1  | -0.000486153 | -0.000368951 | -0.000255317 |
| 12 | 1  | 0.000065817  | -0.000225777 | -0.000223934 |
| 13 | 1  | -0.000462917 | -0.000010269 | 0.000539457  |
| 14 | 35 | 0.001121934  | -0.000860919 | -0.000736172 |
| 15 | 1  | -0.002166953 | -0.000515118 | -0.000043156 |
| 16 | 6  | -0.000186742 | 0.000066935  | 0.000182923  |
| 17 | 6  | 0.000131147  | 0.000016173  | -0.000175048 |
| 18 | 1  | -0.000159211 | -0.000096253 | 0.000062231  |
| 19 | 1  | -0.000007804 | -0.000021660 | 0.000001648  |
| 20 | 1  | 0.000074131  | 0.000096412  | -0.000026517 |
| 21 | 8  | -0.000883888 | 0.001423416  | 0.000400082  |
| 22 | 1  | -0.000603859 | 0.000932447  | 0.001154525  |
| 23 | 6  | -0.002742041 | -0.001853632 | -0.000656610 |
| 24 | 6  | -0.001914335 | -0.001629647 | 0.004426814  |
| 25 | 8  | 0.002076862  | -0.001763551 | 0.000782105  |
| 26 | 1  | -0.000717297 | 0.000304660  | 0.002149304  |
| 27 | 1  | 0.001832557  | 0.001158744  | -0.001262348 |
| 28 | 1  | -0.000764727 | 0.000497516  | -0.001802823 |
| 29 | 6  | -0.001054053 | 0.002836953  | -0.005072607 |
| 30 | 1  | -0.000167580 | -0.000129531 | 0.001343954  |
| 31 | 1  | -0.000417334 | -0.000662465 | -0.000380488 |
| 32 | 1  | 0.000685896  | -0.000789049 | 0.001088165  |

-----  
Cartesian Forces: Max 0.005072607 RMS 0.001199902

GradGradGradGradGradGradGradGradGradGradGradGradGradGradGradGradGradGradGrad

Berny optimization.

Using GEDIIS/GDIIS optimizer.

FormGI is forming the generalized inverse of G from B-inverse, IUseBI=4.

Internal Forces: Max 0.003265178 RMS 0.000902153

Search for a local minimum.

Step number 17 out of a maximum of 177

All quantities printed in internal units (Hartrees-Bohrs-Radians)

Mixed Optimization -- En-DIIS/RFO-DIIS

Swapping is turned off.

Update second derivatives using D2CorX and points 16 17

DE= -2.32D-04 DEPred=-1.48D-02 R= 1.57D-02

Trust test= 1.57D-02 RLast= 2.39D+00 DXMaxT set to 1.50D+00

ITU= -1 1 1 1 1 1 1 1 1 1 1 1 0 1 0 1 0

|                 |         |         |         |         |         |
|-----------------|---------|---------|---------|---------|---------|
| Eigenvalues --- | 0.00000 | 0.00105 | 0.00233 | 0.00276 | 0.00417 |
| Eigenvalues --- | 0.00483 | 0.00976 | 0.01252 | 0.01408 | 0.01509 |
| Eigenvalues --- | 0.01767 | 0.01894 | 0.02050 | 0.02148 | 0.02187 |
| Eigenvalues --- | 0.02237 | 0.02320 | 0.02389 | 0.02622 | 0.03042 |
| Eigenvalues --- | 0.03062 | 0.03090 | 0.03538 | 0.03705 | 0.03994 |
| Eigenvalues --- | 0.04566 | 0.05105 | 0.05267 | 0.05610 | 0.05636 |
| Eigenvalues --- | 0.05953 | 0.06248 | 0.07667 | 0.09410 | 0.09537 |
| Eigenvalues --- | 0.10325 | 0.10981 | 0.11689 | 0.11967 | 0.12883 |
| Eigenvalues --- | 0.13917 | 0.15083 | 0.15529 | 0.15968 | 0.15996 |
| Eigenvalues --- | 0.16000 | 0.16001 | 0.16002 | 0.16006 | 0.16064 |
| Eigenvalues --- | 0.16829 | 0.17995 | 0.19798 | 0.21821 | 0.22036 |
| Eigenvalues --- | 0.22897 | 0.23568 | 0.24222 | 0.25056 | 0.25305 |
| Eigenvalues --- | 0.27763 | 0.29756 | 0.31038 | 0.32810 | 0.33093 |
| Eigenvalues --- | 0.33221 | 0.34100 | 0.34267 | 0.34576 | 0.34768 |
| Eigenvalues --- | 0.34980 | 0.35685 | 0.35698 | 0.35713 | 0.35866 |
| Eigenvalues --- | 0.36443 | 0.36661 | 0.37228 | 0.37316 | 0.37795 |
| Eigenvalues --- | 0.38052 | 0.42196 | 0.42493 | 0.45224 | 0.47969 |
| Eigenvalues --- | 0.50114 | 0.52613 | 0.54505 | 0.56833 | 0.60365 |

Eigenvalue 1 is 2.38D-06 Eigenvector:

|   |          |          |          |         |          |
|---|----------|----------|----------|---------|----------|
|   | D54      | D53      | D55      | D52     | R18      |
| 1 | -0.50051 | -0.50025 | -0.49965 | 0.49932 | -0.01354 |
|   | A37      | D30      | D32      | D27     | D29      |
| 1 | -0.00298 | 0.00258  | 0.00255  | 0.00254 | 0.00250  |

En-DIIS/RFO-DIIS IScMMF= 0 using points: 17 16 15 14 13

RFO step: Lambda=-3.72594456D-04.

DidBck=F Rises=F En-DIIS coefs: 1.00000 0.00000 0.00000 0.00000

0.00000

|              |            |            |           |            |
|--------------|------------|------------|-----------|------------|
| Iteration 1  | RMS(Cart)= | 0.16725076 | RMS(Int)= | 0.05857914 |
| Iteration 2  | RMS(Cart)= | 0.01273881 | RMS(Int)= | 0.05352344 |
| Iteration 3  | RMS(Cart)= | 0.00816103 | RMS(Int)= | 0.04994957 |
| Iteration 4  | RMS(Cart)= | 0.00183922 | RMS(Int)= | 0.04908604 |
| Iteration 5  | RMS(Cart)= | 0.00081023 | RMS(Int)= | 0.04869972 |
| Iteration 6  | RMS(Cart)= | 0.00062902 | RMS(Int)= | 0.04839776 |
| Iteration 7  | RMS(Cart)= | 0.00055132 | RMS(Int)= | 0.04813169 |
| Iteration 8  | RMS(Cart)= | 0.00050705 | RMS(Int)= | 0.04788585 |
| Iteration 9  | RMS(Cart)= | 0.00047760 | RMS(Int)= | 0.04765331 |
| Iteration 10 | RMS(Cart)= | 0.00045587 | RMS(Int)= | 0.04743046 |
| Iteration 11 | RMS(Cart)= | 0.00043874 | RMS(Int)= | 0.04721519 |
| Iteration 12 | RMS(Cart)= | 0.00042460 | RMS(Int)= | 0.04700610 |
| Iteration 13 | RMS(Cart)= | 0.00041253 | RMS(Int)= | 0.04680225 |
| Iteration 14 | RMS(Cart)= | 0.00040195 | RMS(Int)= | 0.04660295 |
| Iteration 15 | RMS(Cart)= | 0.00039252 | RMS(Int)= | 0.04640770 |

|              |            |            |           |            |
|--------------|------------|------------|-----------|------------|
| Iteration 16 | RMS(Cart)= | 0.00038398 | RMS(Int)= | 0.04621610 |
| Iteration 17 | RMS(Cart)= | 0.00037615 | RMS(Int)= | 0.04602782 |
| Iteration 18 | RMS(Cart)= | 0.00036891 | RMS(Int)= | 0.04584262 |
| Iteration 19 | RMS(Cart)= | 0.00036216 | RMS(Int)= | 0.04566027 |
| Iteration 20 | RMS(Cart)= | 0.00035583 | RMS(Int)= | 0.04548060 |
| Iteration 21 | RMS(Cart)= | 0.00034986 | RMS(Int)= | 0.04530345 |
| Iteration 22 | RMS(Cart)= | 0.00034420 | RMS(Int)= | 0.04512869 |
| Iteration 23 | RMS(Cart)= | 0.00033883 | RMS(Int)= | 0.04495620 |
| Iteration 24 | RMS(Cart)= | 0.00033370 | RMS(Int)= | 0.04478587 |
| Iteration 25 | RMS(Cart)= | 0.00032880 | RMS(Int)= | 0.04461762 |
| Iteration 26 | RMS(Cart)= | 0.00032410 | RMS(Int)= | 0.04445135 |
| Iteration 27 | RMS(Cart)= | 0.00031958 | RMS(Int)= | 0.04428700 |
| Iteration 28 | RMS(Cart)= | 0.00031524 | RMS(Int)= | 0.04412449 |
| Iteration 29 | RMS(Cart)= | 0.00031105 | RMS(Int)= | 0.04396376 |
| Iteration 30 | RMS(Cart)= | 0.00030701 | RMS(Int)= | 0.04380475 |
| Iteration 31 | RMS(Cart)= | 0.00030310 | RMS(Int)= | 0.04364741 |
| Iteration 32 | RMS(Cart)= | 0.00029931 | RMS(Int)= | 0.04349169 |
| Iteration 33 | RMS(Cart)= | 0.00029565 | RMS(Int)= | 0.04333753 |
| Iteration 34 | RMS(Cart)= | 0.00029209 | RMS(Int)= | 0.04318490 |
| Iteration 35 | RMS(Cart)= | 0.00028864 | RMS(Int)= | 0.04303376 |
| Iteration 36 | RMS(Cart)= | 0.00028529 | RMS(Int)= | 0.04288406 |
| Iteration 37 | RMS(Cart)= | 0.00028203 | RMS(Int)= | 0.04273577 |
| Iteration 38 | RMS(Cart)= | 0.00027886 | RMS(Int)= | 0.04258885 |
| Iteration 39 | RMS(Cart)= | 0.00027577 | RMS(Int)= | 0.04244327 |
| Iteration 40 | RMS(Cart)= | 0.00027276 | RMS(Int)= | 0.04229900 |
| Iteration 41 | RMS(Cart)= | 0.00026983 | RMS(Int)= | 0.04215601 |
| Iteration 42 | RMS(Cart)= | 0.00026697 | RMS(Int)= | 0.04201426 |
| Iteration 43 | RMS(Cart)= | 0.00026418 | RMS(Int)= | 0.04187374 |
| Iteration 44 | RMS(Cart)= | 0.00026146 | RMS(Int)= | 0.04173441 |
| Iteration 45 | RMS(Cart)= | 0.00025880 | RMS(Int)= | 0.04159626 |
| Iteration 46 | RMS(Cart)= | 0.00025620 | RMS(Int)= | 0.04145925 |
| Iteration 47 | RMS(Cart)= | 0.00025366 | RMS(Int)= | 0.04132336 |
| Iteration 48 | RMS(Cart)= | 0.00025118 | RMS(Int)= | 0.04118858 |
| Iteration 49 | RMS(Cart)= | 0.00024875 | RMS(Int)= | 0.04105487 |
| Iteration 50 | RMS(Cart)= | 0.00024637 | RMS(Int)= | 0.04092222 |
| Iteration 51 | RMS(Cart)= | 0.00024404 | RMS(Int)= | 0.04079061 |
| Iteration 52 | RMS(Cart)= | 0.00024177 | RMS(Int)= | 0.04066002 |
| Iteration 53 | RMS(Cart)= | 0.00023954 | RMS(Int)= | 0.04053043 |
| Iteration 54 | RMS(Cart)= | 0.00023735 | RMS(Int)= | 0.04040182 |
| Iteration 55 | RMS(Cart)= | 0.00023521 | RMS(Int)= | 0.04027418 |
| Iteration 56 | RMS(Cart)= | 0.00023311 | RMS(Int)= | 0.04014749 |
| Iteration 57 | RMS(Cart)= | 0.00023105 | RMS(Int)= | 0.04002172 |
| Iteration 58 | RMS(Cart)= | 0.00022904 | RMS(Int)= | 0.03989687 |
| Iteration 59 | RMS(Cart)= | 0.00022706 | RMS(Int)= | 0.03977293 |

Iteration 60 RMS(Cart)= 0.00022511 RMS(Int)= 0.03964986  
Iteration 61 RMS(Cart)= 0.00022321 RMS(Int)= 0.03952767  
Iteration 62 RMS(Cart)= 0.00022134 RMS(Int)= 0.03940634  
Iteration 63 RMS(Cart)= 0.00021950 RMS(Int)= 0.03928584  
Iteration 64 RMS(Cart)= 0.00021770 RMS(Int)= 0.03916618  
Iteration 65 RMS(Cart)= 0.00021593 RMS(Int)= 0.03904733  
Iteration 66 RMS(Cart)= 0.00021419 RMS(Int)= 0.03892929  
Iteration 67 RMS(Cart)= 0.00021248 RMS(Int)= 0.03881204  
Iteration 68 RMS(Cart)= 0.00021080 RMS(Int)= 0.03869556  
Iteration 69 RMS(Cart)= 0.00020914 RMS(Int)= 0.03857986  
Iteration 70 RMS(Cart)= 0.00020752 RMS(Int)= 0.03846491  
Iteration 71 RMS(Cart)= 0.00020592 RMS(Int)= 0.03835070  
Iteration 72 RMS(Cart)= 0.00020435 RMS(Int)= 0.03823723  
Iteration 73 RMS(Cart)= 0.00020281 RMS(Int)= 0.03812448  
Iteration 74 RMS(Cart)= 0.00020129 RMS(Int)= 0.03801245  
Iteration 75 RMS(Cart)= 0.00019980 RMS(Int)= 0.03790111  
Iteration 76 RMS(Cart)= 0.00019833 RMS(Int)= 0.03779048  
Iteration 77 RMS(Cart)= 0.00019688 RMS(Int)= 0.03768052  
Iteration 78 RMS(Cart)= 0.00019546 RMS(Int)= 0.03757124  
Iteration 79 RMS(Cart)= 0.00019405 RMS(Int)= 0.03746262  
Iteration 80 RMS(Cart)= 0.00019267 RMS(Int)= 0.03735466  
Iteration 81 RMS(Cart)= 0.00019131 RMS(Int)= 0.03724734  
Iteration 82 RMS(Cart)= 0.00018998 RMS(Int)= 0.03714067  
Iteration 83 RMS(Cart)= 0.00018866 RMS(Int)= 0.03703462  
Iteration 84 RMS(Cart)= 0.00018736 RMS(Int)= 0.03692919  
Iteration 85 RMS(Cart)= 0.00018608 RMS(Int)= 0.03682438  
Iteration 86 RMS(Cart)= 0.00018482 RMS(Int)= 0.03672017  
Iteration 87 RMS(Cart)= 0.00018358 RMS(Int)= 0.03661656  
Iteration 88 RMS(Cart)= 0.00018235 RMS(Int)= 0.03651354  
Iteration 89 RMS(Cart)= 0.00018115 RMS(Int)= 0.03641111  
Iteration 90 RMS(Cart)= 0.00017996 RMS(Int)= 0.03630924  
Iteration 91 RMS(Cart)= 0.00017878 RMS(Int)= 0.03620795  
Iteration 92 RMS(Cart)= 0.00017763 RMS(Int)= 0.03610722  
Iteration 93 RMS(Cart)= 0.00017649 RMS(Int)= 0.03600704  
Iteration 94 RMS(Cart)= 0.00017536 RMS(Int)= 0.03590741  
Iteration 95 RMS(Cart)= 0.00017425 RMS(Int)= 0.03580832  
Iteration 96 RMS(Cart)= 0.00017316 RMS(Int)= 0.03570976  
Iteration 97 RMS(Cart)= 0.00017208 RMS(Int)= 0.03561173  
Iteration 98 RMS(Cart)= 0.00017102 RMS(Int)= 0.03551423  
Iteration 99 RMS(Cart)= 0.00016997 RMS(Int)= 0.03541723  
Iteration100 RMS(Cart)= 0.00016893 RMS(Int)= 0.03532075

New curvilinear step not converged.

ITry= 1 IFail=1 DXMaxC= 8.29D-01 DCOld= 1.00D+10 DXMaxT= 1.50D+00 DXLimC= 3.00D+00

Rises=F

|              |            |            |           |            |
|--------------|------------|------------|-----------|------------|
| Iteration 1  | RMS(Cart)= | 0.16289103 | RMS(Int)= | 0.05043767 |
| Iteration 2  | RMS(Cart)= | 0.01373342 | RMS(Int)= | 0.04365137 |
| Iteration 3  | RMS(Cart)= | 0.00020927 | RMS(Int)= | 0.04353642 |
| Iteration 4  | RMS(Cart)= | 0.00020675 | RMS(Int)= | 0.04342270 |
| Iteration 5  | RMS(Cart)= | 0.00020435 | RMS(Int)= | 0.04331016 |
| Iteration 6  | RMS(Cart)= | 0.00020214 | RMS(Int)= | 0.04319869 |
| Iteration 7  | RMS(Cart)= | 0.00020005 | RMS(Int)= | 0.04308824 |
| Iteration 8  | RMS(Cart)= | 0.00019808 | RMS(Int)= | 0.04297874 |
| Iteration 9  | RMS(Cart)= | 0.00019620 | RMS(Int)= | 0.04287015 |
| Iteration 10 | RMS(Cart)= | 0.00019440 | RMS(Int)= | 0.04276243 |
| Iteration 11 | RMS(Cart)= | 0.00019271 | RMS(Int)= | 0.04265552 |
| Iteration 12 | RMS(Cart)= | 0.00019101 | RMS(Int)= | 0.04254944 |
| Iteration 13 | RMS(Cart)= | 0.00018940 | RMS(Int)= | 0.04244412 |
| Iteration 14 | RMS(Cart)= | 0.00018785 | RMS(Int)= | 0.04233955 |
| Iteration 15 | RMS(Cart)= | 0.00018634 | RMS(Int)= | 0.04223570 |
| Iteration 16 | RMS(Cart)= | 0.00018487 | RMS(Int)= | 0.04213256 |
| Iteration 17 | RMS(Cart)= | 0.00018345 | RMS(Int)= | 0.04203010 |
| Iteration 18 | RMS(Cart)= | 0.00018206 | RMS(Int)= | 0.04192830 |
| Iteration 19 | RMS(Cart)= | 0.00018071 | RMS(Int)= | 0.04182716 |
| Iteration 20 | RMS(Cart)= | 0.00017941 | RMS(Int)= | 0.04172664 |
| Iteration 21 | RMS(Cart)= | 0.00017812 | RMS(Int)= | 0.04162674 |
| Iteration 22 | RMS(Cart)= | 0.00017686 | RMS(Int)= | 0.04152744 |
| Iteration 23 | RMS(Cart)= | 0.00017562 | RMS(Int)= | 0.04142875 |
| Iteration 24 | RMS(Cart)= | 0.00017441 | RMS(Int)= | 0.04133063 |
| Iteration 25 | RMS(Cart)= | 0.00017322 | RMS(Int)= | 0.04123309 |
| Iteration 26 | RMS(Cart)= | 0.00017206 | RMS(Int)= | 0.04113611 |
| Iteration 27 | RMS(Cart)= | 0.00017092 | RMS(Int)= | 0.04103967 |
| Iteration 28 | RMS(Cart)= | 0.00016980 | RMS(Int)= | 0.04094379 |
| Iteration 29 | RMS(Cart)= | 0.00016870 | RMS(Int)= | 0.04084843 |
| Iteration 30 | RMS(Cart)= | 0.00016762 | RMS(Int)= | 0.04075360 |
| Iteration 31 | RMS(Cart)= | 0.00016655 | RMS(Int)= | 0.04065928 |
| Iteration 32 | RMS(Cart)= | 0.00016551 | RMS(Int)= | 0.04056547 |
| Iteration 33 | RMS(Cart)= | 0.00016448 | RMS(Int)= | 0.04047216 |
| Iteration 34 | RMS(Cart)= | 0.00016347 | RMS(Int)= | 0.04037934 |
| Iteration 35 | RMS(Cart)= | 0.00016248 | RMS(Int)= | 0.04028700 |
| Iteration 36 | RMS(Cart)= | 0.00016150 | RMS(Int)= | 0.04019514 |
| Iteration 37 | RMS(Cart)= | 0.00016053 | RMS(Int)= | 0.04010376 |
| Iteration 38 | RMS(Cart)= | 0.00015958 | RMS(Int)= | 0.04001284 |
| Iteration 39 | RMS(Cart)= | 0.00015864 | RMS(Int)= | 0.03992237 |
| Iteration 40 | RMS(Cart)= | 0.00015772 | RMS(Int)= | 0.03983236 |
| Iteration 41 | RMS(Cart)= | 0.00015681 | RMS(Int)= | 0.03974279 |
| Iteration 42 | RMS(Cart)= | 0.00015592 | RMS(Int)= | 0.03965367 |
| Iteration 43 | RMS(Cart)= | 0.00015503 | RMS(Int)= | 0.03956498 |
| Iteration 44 | RMS(Cart)= | 0.00015416 | RMS(Int)= | 0.03947672 |



|              |            |            |           |            |
|--------------|------------|------------|-----------|------------|
| Iteration 45 | RMS(Cart)= | 0.00015330 | RMS(Int)= | 0.03938888 |
| Iteration 46 | RMS(Cart)= | 0.00015245 | RMS(Int)= | 0.03930146 |
| Iteration 47 | RMS(Cart)= | 0.00015161 | RMS(Int)= | 0.03921445 |
| Iteration 48 | RMS(Cart)= | 0.00015079 | RMS(Int)= | 0.03912785 |
| Iteration 49 | RMS(Cart)= | 0.00014997 | RMS(Int)= | 0.03904166 |
| Iteration 50 | RMS(Cart)= | 0.00014917 | RMS(Int)= | 0.03895586 |
| Iteration 51 | RMS(Cart)= | 0.00014837 | RMS(Int)= | 0.03887046 |
| Iteration 52 | RMS(Cart)= | 0.00014759 | RMS(Int)= | 0.03878545 |
| Iteration 53 | RMS(Cart)= | 0.00014681 | RMS(Int)= | 0.03870083 |
| Iteration 54 | RMS(Cart)= | 0.00014605 | RMS(Int)= | 0.03861658 |
| Iteration 55 | RMS(Cart)= | 0.00014529 | RMS(Int)= | 0.03853272 |
| Iteration 56 | RMS(Cart)= | 0.00014454 | RMS(Int)= | 0.03844922 |
| Iteration 57 | RMS(Cart)= | 0.00014381 | RMS(Int)= | 0.03836610 |
| Iteration 58 | RMS(Cart)= | 0.00014308 | RMS(Int)= | 0.03828333 |
| Iteration 59 | RMS(Cart)= | 0.00014236 | RMS(Int)= | 0.03820094 |
| Iteration 60 | RMS(Cart)= | 0.00014165 | RMS(Int)= | 0.03811889 |
| Iteration 61 | RMS(Cart)= | 0.00014094 | RMS(Int)= | 0.03803720 |
| Iteration 62 | RMS(Cart)= | 0.00014025 | RMS(Int)= | 0.03795586 |
| Iteration 63 | RMS(Cart)= | 0.00013956 | RMS(Int)= | 0.03787487 |
| Iteration 64 | RMS(Cart)= | 0.00013888 | RMS(Int)= | 0.03779422 |
| Iteration 65 | RMS(Cart)= | 0.00013821 | RMS(Int)= | 0.03771391 |
| Iteration 66 | RMS(Cart)= | 0.00013754 | RMS(Int)= | 0.03763393 |
| Iteration 67 | RMS(Cart)= | 0.00013688 | RMS(Int)= | 0.03755429 |
| Iteration 68 | RMS(Cart)= | 0.00013623 | RMS(Int)= | 0.03747497 |
| Iteration 69 | RMS(Cart)= | 0.00013559 | RMS(Int)= | 0.03739598 |
| Iteration 70 | RMS(Cart)= | 0.00013495 | RMS(Int)= | 0.03731732 |
| Iteration 71 | RMS(Cart)= | 0.00013433 | RMS(Int)= | 0.03723897 |
| Iteration 72 | RMS(Cart)= | 0.00013370 | RMS(Int)= | 0.03716094 |
| Iteration 73 | RMS(Cart)= | 0.00013309 | RMS(Int)= | 0.03708322 |
| Iteration 74 | RMS(Cart)= | 0.00013248 | RMS(Int)= | 0.03700582 |
| Iteration 75 | RMS(Cart)= | 0.00013187 | RMS(Int)= | 0.03692872 |
| Iteration 76 | RMS(Cart)= | 0.00013128 | RMS(Int)= | 0.03685193 |
| Iteration 77 | RMS(Cart)= | 0.00013069 | RMS(Int)= | 0.03677543 |
| Iteration 78 | RMS(Cart)= | 0.00013010 | RMS(Int)= | 0.03669924 |
| Iteration 79 | RMS(Cart)= | 0.00012952 | RMS(Int)= | 0.03662334 |
| Iteration 80 | RMS(Cart)= | 0.00012895 | RMS(Int)= | 0.03654774 |
| Iteration 81 | RMS(Cart)= | 0.00012838 | RMS(Int)= | 0.03647243 |
| Iteration 82 | RMS(Cart)= | 0.00012782 | RMS(Int)= | 0.03639740 |
| Iteration 83 | RMS(Cart)= | 0.00012727 | RMS(Int)= | 0.03632267 |
| Iteration 84 | RMS(Cart)= | 0.00012672 | RMS(Int)= | 0.03624821 |
| Iteration 85 | RMS(Cart)= | 0.00012617 | RMS(Int)= | 0.03617404 |
| Iteration 86 | RMS(Cart)= | 0.00012563 | RMS(Int)= | 0.03610014 |
| Iteration 87 | RMS(Cart)= | 0.00012510 | RMS(Int)= | 0.03602652 |
| Iteration 88 | RMS(Cart)= | 0.00012457 | RMS(Int)= | 0.03595318 |

Iteration 89 RMS(Cart)= 0.00012405 RMS(Int)= 0.03588010  
Iteration 90 RMS(Cart)= 0.00012353 RMS(Int)= 0.03580729  
Iteration 91 RMS(Cart)= 0.00012301 RMS(Int)= 0.03573475  
Iteration 92 RMS(Cart)= 0.00012251 RMS(Int)= 0.03566248  
Iteration 93 RMS(Cart)= 0.00012200 RMS(Int)= 0.03559046  
Iteration 94 RMS(Cart)= 0.00012150 RMS(Int)= 0.03551871  
Iteration 95 RMS(Cart)= 0.00012101 RMS(Int)= 0.03544721  
Iteration 96 RMS(Cart)= 0.00012052 RMS(Int)= 0.03537597  
Iteration 97 RMS(Cart)= 0.00012003 RMS(Int)= 0.03530498  
Iteration 98 RMS(Cart)= 0.00011955 RMS(Int)= 0.03523424  
Iteration 99 RMS(Cart)= 0.00011907 RMS(Int)= 0.03516376  
Iteration100 RMS(Cart)= 0.00011859 RMS(Int)= 0.03509352

New curvilinear step not converged.

ITry= 2 IFail=1 DXMaxC= 7.34D-01 DCold= 1.00D+10 DXMaxT= 1.50D+00 DXLimC= 3.00D+00

Rises=F

Iteration 1 RMS(Cart)= 0.15117646 RMS(Int)= 0.04314419  
Iteration 2 RMS(Cart)= 0.02359686 RMS(Int)= 0.03023030  
Iteration 3 RMS(Cart)= 0.00013233 RMS(Int)= 0.03014600  
Iteration 4 RMS(Cart)= 0.00013172 RMS(Int)= 0.03006208  
Iteration 5 RMS(Cart)= 0.00013112 RMS(Int)= 0.02997853  
Iteration 6 RMS(Cart)= 0.00013052 RMS(Int)= 0.02989536  
Iteration 7 RMS(Cart)= 0.00012993 RMS(Int)= 0.02981256  
Iteration 8 RMS(Cart)= 0.00012934 RMS(Int)= 0.02973011  
Iteration 9 RMS(Cart)= 0.00012876 RMS(Int)= 0.02964803  
Iteration 10 RMS(Cart)= 0.00012819 RMS(Int)= 0.02956631  
Iteration 11 RMS(Cart)= 0.00012762 RMS(Int)= 0.02948494  
Iteration 12 RMS(Cart)= 0.00012706 RMS(Int)= 0.02940392  
Iteration 13 RMS(Cart)= 0.00012650 RMS(Int)= 0.02932325  
Iteration 14 RMS(Cart)= 0.00012595 RMS(Int)= 0.02924292  
Iteration 15 RMS(Cart)= 0.00012540 RMS(Int)= 0.02916293  
Iteration 16 RMS(Cart)= 0.00006341 RMS(Int)= 0.02912248  
Iteration 17 RMS(Cart)= 0.00006327 RMS(Int)= 0.02908212  
Iteration 18 RMS(Cart)= 0.00006313 RMS(Int)= 0.02904185  
Iteration 19 RMS(Cart)= 0.00006299 RMS(Int)= 0.02900166  
Iteration 20 RMS(Cart)= 0.00006285 RMS(Int)= 0.02896156  
Iteration 21 RMS(Cart)= 0.00006271 RMS(Int)= 0.02892155  
Iteration 22 RMS(Cart)= 0.00006257 RMS(Int)= 0.02888162  
Iteration 23 RMS(Cart)= 0.00006244 RMS(Int)= 0.02884178  
Iteration 24 RMS(Cart)= 0.00006230 RMS(Int)= 0.02880202  
Iteration 25 RMS(Cart)= 0.00006217 RMS(Int)= 0.02876235  
Iteration 26 RMS(Cart)= 0.00006203 RMS(Int)= 0.02872276  
Iteration 27 RMS(Cart)= 0.00006190 RMS(Int)= 0.02868326  
Iteration 28 RMS(Cart)= 0.00006176 RMS(Int)= 0.02864383  
Iteration 29 RMS(Cart)= 0.00006163 RMS(Int)= 0.02860450

|              |            |            |           |            |
|--------------|------------|------------|-----------|------------|
| Iteration 30 | RMS(Cart)= | 0.00006150 | RMS(Int)= | 0.02856524 |
| Iteration 31 | RMS(Cart)= | 0.00006136 | RMS(Int)= | 0.02852607 |
| Iteration 32 | RMS(Cart)= | 0.00006123 | RMS(Int)= | 0.02848698 |
| Iteration 33 | RMS(Cart)= | 0.00006110 | RMS(Int)= | 0.02844797 |
| Iteration 34 | RMS(Cart)= | 0.00006097 | RMS(Int)= | 0.02840904 |
| Iteration 35 | RMS(Cart)= | 0.00006084 | RMS(Int)= | 0.02837020 |
| Iteration 36 | RMS(Cart)= | 0.00006071 | RMS(Int)= | 0.02833143 |
| Iteration 37 | RMS(Cart)= | 0.00006058 | RMS(Int)= | 0.02829275 |
| Iteration 38 | RMS(Cart)= | 0.00006046 | RMS(Int)= | 0.02825414 |
| Iteration 39 | RMS(Cart)= | 0.00006033 | RMS(Int)= | 0.02821562 |
| Iteration 40 | RMS(Cart)= | 0.00006020 | RMS(Int)= | 0.02817717 |
| Iteration 41 | RMS(Cart)= | 0.00006007 | RMS(Int)= | 0.02813880 |
| Iteration 42 | RMS(Cart)= | 0.00005995 | RMS(Int)= | 0.02810051 |
| Iteration 43 | RMS(Cart)= | 0.00005982 | RMS(Int)= | 0.02806230 |
| Iteration 44 | RMS(Cart)= | 0.00005970 | RMS(Int)= | 0.02802417 |
| Iteration 45 | RMS(Cart)= | 0.00005958 | RMS(Int)= | 0.02798612 |
| Iteration 46 | RMS(Cart)= | 0.00005945 | RMS(Int)= | 0.02794814 |
| Iteration 47 | RMS(Cart)= | 0.00005933 | RMS(Int)= | 0.02791024 |
| Iteration 48 | RMS(Cart)= | 0.00005921 | RMS(Int)= | 0.02787241 |
| Iteration 49 | RMS(Cart)= | 0.00005908 | RMS(Int)= | 0.02783466 |
| Iteration 50 | RMS(Cart)= | 0.00005896 | RMS(Int)= | 0.02779699 |
| Iteration 51 | RMS(Cart)= | 0.00005884 | RMS(Int)= | 0.02775940 |
| Iteration 52 | RMS(Cart)= | 0.00005872 | RMS(Int)= | 0.02772188 |
| Iteration 53 | RMS(Cart)= | 0.00005860 | RMS(Int)= | 0.02768443 |
| Iteration 54 | RMS(Cart)= | 0.00005848 | RMS(Int)= | 0.02764706 |
| Iteration 55 | RMS(Cart)= | 0.00005836 | RMS(Int)= | 0.02760976 |
| Iteration 56 | RMS(Cart)= | 0.00005824 | RMS(Int)= | 0.02757254 |
| Iteration 57 | RMS(Cart)= | 0.00005813 | RMS(Int)= | 0.02753539 |
| Iteration 58 | RMS(Cart)= | 0.00005801 | RMS(Int)= | 0.02749832 |
| Iteration 59 | RMS(Cart)= | 0.00005789 | RMS(Int)= | 0.02746131 |
| Iteration 60 | RMS(Cart)= | 0.00005777 | RMS(Int)= | 0.02742438 |
| Iteration 61 | RMS(Cart)= | 0.00005766 | RMS(Int)= | 0.02738753 |
| Iteration 62 | RMS(Cart)= | 0.00005754 | RMS(Int)= | 0.02735074 |
| Iteration 63 | RMS(Cart)= | 0.00005743 | RMS(Int)= | 0.02731403 |
| Iteration 64 | RMS(Cart)= | 0.00005731 | RMS(Int)= | 0.02727739 |
| Iteration 65 | RMS(Cart)= | 0.00005720 | RMS(Int)= | 0.02724082 |
| Iteration 66 | RMS(Cart)= | 0.00005709 | RMS(Int)= | 0.02720433 |
| Iteration 67 | RMS(Cart)= | 0.00005697 | RMS(Int)= | 0.02716790 |
| Iteration 68 | RMS(Cart)= | 0.00005686 | RMS(Int)= | 0.02713154 |
| Iteration 69 | RMS(Cart)= | 0.00005675 | RMS(Int)= | 0.02709526 |
| Iteration 70 | RMS(Cart)= | 0.00005664 | RMS(Int)= | 0.02705904 |
| Iteration 71 | RMS(Cart)= | 0.00005652 | RMS(Int)= | 0.02702290 |
| Iteration 72 | RMS(Cart)= | 0.00005641 | RMS(Int)= | 0.02698682 |
| Iteration 73 | RMS(Cart)= | 0.00005630 | RMS(Int)= | 0.02695081 |

Iteration 74 RMS(Cart)= 0.00005619 RMS(Int)= 0.02691487  
Iteration 75 RMS(Cart)= 0.00005608 RMS(Int)= 0.02687900  
Iteration 76 RMS(Cart)= 0.00005597 RMS(Int)= 0.02684320  
Iteration 77 RMS(Cart)= 0.00005586 RMS(Int)= 0.02680747  
Iteration 78 RMS(Cart)= 0.00005576 RMS(Int)= 0.02677181  
Iteration 79 RMS(Cart)= 0.00005565 RMS(Int)= 0.02673621  
Iteration 80 RMS(Cart)= 0.00005554 RMS(Int)= 0.02670068  
Iteration 81 RMS(Cart)= 0.00005543 RMS(Int)= 0.02666522  
Iteration 82 RMS(Cart)= 0.00005533 RMS(Int)= 0.02662982  
Iteration 83 RMS(Cart)= 0.00005522 RMS(Int)= 0.02659449  
Iteration 84 RMS(Cart)= 0.00005511 RMS(Int)= 0.02655923  
Iteration 85 RMS(Cart)= 0.00005501 RMS(Int)= 0.02652404  
Iteration 86 RMS(Cart)= 0.00005490 RMS(Int)= 0.02648891  
Iteration 87 RMS(Cart)= 0.00005480 RMS(Int)= 0.02645384  
Iteration 88 RMS(Cart)= 0.00005469 RMS(Int)= 0.02641884  
Iteration 89 RMS(Cart)= 0.00005459 RMS(Int)= 0.02638391  
Iteration 90 RMS(Cart)= 0.00005448 RMS(Int)= 0.02634904  
Iteration 91 RMS(Cart)= 0.00005438 RMS(Int)= 0.02631424  
Iteration 92 RMS(Cart)= 0.00005428 RMS(Int)= 0.02627950  
Iteration 93 RMS(Cart)= 0.00005417 RMS(Int)= 0.02624483  
Iteration 94 RMS(Cart)= 0.00005407 RMS(Int)= 0.02621022  
Iteration 95 RMS(Cart)= 0.00005397 RMS(Int)= 0.02617567  
Iteration 96 RMS(Cart)= 0.00005387 RMS(Int)= 0.02614119  
Iteration 97 RMS(Cart)= 0.00005377 RMS(Int)= 0.02610677  
Iteration 98 RMS(Cart)= 0.00005366 RMS(Int)= 0.02607242  
Iteration 99 RMS(Cart)= 0.00005356 RMS(Int)= 0.02603813  
Iteration100 RMS(Cart)= 0.00005346 RMS(Int)= 0.02600390

New curvilinear step not converged.

ITry= 3 IFail=1 DXMaxC= 6.92D-01 DCOld= 1.00D+10 DXMaxT= 1.50D+00 DXLimC= 3.00D+00

Rises=F

Iteration 1 RMS(Cart)= 0.12311906 RMS(Int)= 0.03809950  
Iteration 2 RMS(Cart)= 0.00367158 RMS(Int)= 0.03625658  
Iteration 3 RMS(Cart)= 0.00049326 RMS(Int)= 0.03600480  
Iteration 4 RMS(Cart)= 0.00047917 RMS(Int)= 0.03575953  
Iteration 5 RMS(Cart)= 0.00046672 RMS(Int)= 0.03551996  
Iteration 6 RMS(Cart)= 0.00045566 RMS(Int)= 0.03528543  
Iteration 7 RMS(Cart)= 0.00044565 RMS(Int)= 0.03505543  
Iteration 8 RMS(Cart)= 0.00043644 RMS(Int)= 0.03482961  
Iteration 9 RMS(Cart)= 0.00042786 RMS(Int)= 0.03460767  
Iteration 10 RMS(Cart)= 0.00041967 RMS(Int)= 0.03438940  
Iteration 11 RMS(Cart)= 0.00041219 RMS(Int)= 0.03417454  
Iteration 12 RMS(Cart)= 0.00040496 RMS(Int)= 0.03396294  
Iteration 13 RMS(Cart)= 0.00039807 RMS(Int)= 0.03375447  
Iteration 14 RMS(Cart)= 0.00039148 RMS(Int)= 0.03354898

Iteration 15 RMS(Cart)= 0.00038516 RMS(Int)= 0.03334635  
Iteration 16 RMS(Cart)= 0.00037908 RMS(Int)= 0.03314649  
Iteration 17 RMS(Cart)= 0.00037324 RMS(Int)= 0.03294929  
Iteration 18 RMS(Cart)= 0.00036760 RMS(Int)= 0.03275466  
Iteration 19 RMS(Cart)= 0.00036216 RMS(Int)= 0.03256252  
Iteration 20 RMS(Cart)= 0.00035689 RMS(Int)= 0.03237279  
Iteration 21 RMS(Cart)= 0.00035180 RMS(Int)= 0.03218539  
Iteration 22 RMS(Cart)= 0.00034687 RMS(Int)= 0.03200026  
Iteration 23 RMS(Cart)= 0.00034209 RMS(Int)= 0.03181734  
Iteration 24 RMS(Cart)= 0.00033745 RMS(Int)= 0.03163655  
Iteration 25 RMS(Cart)= 0.00033294 RMS(Int)= 0.03145786  
Iteration 26 RMS(Cart)= 0.00032856 RMS(Int)= 0.03128119  
Iteration 27 RMS(Cart)= 0.00032431 RMS(Int)= 0.03110650  
Iteration 28 RMS(Cart)= 0.00032017 RMS(Int)= 0.03093374  
Iteration 29 RMS(Cart)= 0.00031613 RMS(Int)= 0.03076286  
Iteration 30 RMS(Cart)= 0.00031221 RMS(Int)= 0.03059382  
Iteration 31 RMS(Cart)= 0.00030839 RMS(Int)= 0.03042657  
Iteration 32 RMS(Cart)= 0.00030466 RMS(Int)= 0.03026107  
Iteration 33 RMS(Cart)= 0.00030102 RMS(Int)= 0.03009728  
Iteration 34 RMS(Cart)= 0.00029748 RMS(Int)= 0.02993517  
Iteration 35 RMS(Cart)= 0.00029401 RMS(Int)= 0.02977469  
Iteration 36 RMS(Cart)= 0.00029063 RMS(Int)= 0.02961582  
Iteration 37 RMS(Cart)= 0.00028733 RMS(Int)= 0.02945851  
Iteration 38 RMS(Cart)= 0.00028411 RMS(Int)= 0.02930273  
Iteration 39 RMS(Cart)= 0.00028095 RMS(Int)= 0.02914846  
Iteration 40 RMS(Cart)= 0.00027787 RMS(Int)= 0.02899566  
Iteration 41 RMS(Cart)= 0.00027485 RMS(Int)= 0.02884430  
Iteration 42 RMS(Cart)= 0.00027190 RMS(Int)= 0.02869436  
Iteration 43 RMS(Cart)= 0.00026901 RMS(Int)= 0.02854581  
Iteration 44 RMS(Cart)= 0.00026618 RMS(Int)= 0.02839862  
Iteration 45 RMS(Cart)= 0.00026340 RMS(Int)= 0.02825276  
Iteration 46 RMS(Cart)= 0.00026069 RMS(Int)= 0.02810822  
Iteration 47 RMS(Cart)= 0.00025802 RMS(Int)= 0.02796496  
Iteration 48 RMS(Cart)= 0.00025541 RMS(Int)= 0.02782297  
Iteration 49 RMS(Cart)= 0.00025285 RMS(Int)= 0.02768222  
Iteration 50 RMS(Cart)= 0.00025033 RMS(Int)= 0.02754269  
Iteration 51 RMS(Cart)= 0.00024786 RMS(Int)= 0.02740437  
Iteration 52 RMS(Cart)= 0.00024543 RMS(Int)= 0.02726722  
Iteration 53 RMS(Cart)= 0.00024304 RMS(Int)= 0.02713124  
Iteration 54 RMS(Cart)= 0.00011480 RMS(Int)= 0.02706700  
Iteration 55 RMS(Cart)= 0.00011434 RMS(Int)= 0.02700299  
Iteration 56 RMS(Cart)= 0.00011389 RMS(Int)= 0.02693919  
Iteration 57 RMS(Cart)= 0.00011344 RMS(Int)= 0.02687560  
Iteration 58 RMS(Cart)= 0.00011299 RMS(Int)= 0.02681224

Iteration 59 RMS(Cart)= 0.00011255 RMS(Int)= 0.02674908  
 Iteration 60 RMS(Cart)= 0.00011210 RMS(Int)= 0.02668614  
 Iteration 61 RMS(Cart)= 0.00011166 RMS(Int)= 0.02662341  
 Iteration 62 RMS(Cart)= 0.00011123 RMS(Int)= 0.02656089  
 Iteration 63 RMS(Cart)= 0.00011079 RMS(Int)= 0.02649858  
 Iteration 64 RMS(Cart)= 0.00011036 RMS(Int)= 0.02643647  
 Iteration 65 RMS(Cart)= 0.00010993 RMS(Int)= 0.02637457  
 Iteration 66 RMS(Cart)= 0.00010951 RMS(Int)= 0.02631287  
 Iteration 67 RMS(Cart)= 0.00010908 RMS(Int)= 0.02625138  
 Iteration 68 RMS(Cart)= 0.00010866 RMS(Int)= 0.02619008  
 Iteration 69 RMS(Cart)= 0.00010824 RMS(Int)= 0.02612899  
 Iteration 70 RMS(Cart)= 0.00010782 RMS(Int)= 0.02606809  
 Iteration 71 RMS(Cart)= 0.00010740 RMS(Int)= 0.02600739  
 Iteration 72 RMS(Cart)= 0.00010698 RMS(Int)= 0.02594689  
 Iteration 73 RMS(Cart)= 0.00010656 RMS(Int)= 0.02588657  
 Iteration 74 RMS(Cart)= 0.00010614 RMS(Int)= 0.02582644  
 Iteration 75 RMS(Cart)= 0.00010572 RMS(Int)= 0.02576650  
 Iteration 76 RMS(Cart)= 0.00010529 RMS(Int)= 0.02570674  
 Iteration 77 RMS(Cart)= 0.00010486 RMS(Int)= 0.02564714  
 Iteration 78 RMS(Cart)= 0.00010442 RMS(Int)= 0.02558768  
 Iteration 79 RMS(Cart)= 0.00010397 RMS(Int)= 0.02552832  
 Iteration 80 RMS(Cart)= 0.00010343 RMS(Int)= 0.02546896  
 Iteration 81 RMS(Cart)= 0.00010594 RMS(Int)= 0.02540713  
 Iteration 82 RMS(Cart)= 0.00010220 RMS(Int)= 0.48379006  
 Iteration 83 RMS(Cart)= 0.00002610 RMS(Int)= 0.02535062  
 Iteration 84 RMS(Cart)= 0.00010201 RMS(Int)= 0.02529265  
 Iteration 85 RMS(Cart)= 0.00010167 RMS(Int)= 0.02523484  
 Iteration 86 RMS(Cart)= 0.00010131 RMS(Int)= 0.02517719  
 Iteration 87 RMS(Cart)= 0.00010094 RMS(Int)= 0.02511971  
 Iteration 88 RMS(Cart)= 0.00010055 RMS(Int)= 0.02506239  
 Iteration 89 RMS(Cart)= 0.00010017 RMS(Int)= 0.02500522  
 Iteration 90 RMS(Cart)= 0.00009977 RMS(Int)= 0.02494819  
 Iteration 91 RMS(Cart)= 0.00009936 RMS(Int)= 0.02489127  
 Iteration 92 RMS(Cart)= 0.00009888 RMS(Int)= 0.02483440  
 Iteration 93 RMS(Cart)= 0.00009846 RMS(Int)= 0.02477713  
 Iteration 94 RMS(Cart)= 0.00009793 RMS(Int)= 0.02465734  
 Iteration 95 RMS(Cart)= 0.00000000 RMS(Int)= 0.02465631  
 ITry= 4 IFail=0 DXMaxC= 5.69D-01 DCold= 1.00D+10 DXMaxT= 1.50D+00 DXLimC= 3.00D+00

Rises=F

| Variable | Old X   | -DE/DX   | Delta X<br>(Linear) | Delta X<br>(Quad) | Delta X<br>(Total) | New X   |
|----------|---------|----------|---------------------|-------------------|--------------------|---------|
| R1       | 2.56643 | -0.00082 | 0.00000             | 0.00125           | 0.00042            | 2.56685 |
| R2       | 2.62276 | -0.00047 | 0.00000             | -0.00363          | -0.00069           | 2.62207 |
| R3       | 2.03393 | 0.00005  | 0.00000             | -0.00012          | 0.00054            | 2.03447 |

|     |         |          |         |          |          |         |
|-----|---------|----------|---------|----------|----------|---------|
| R4  | 2.63061 | -0.00014 | 0.00000 | -0.00081 | -0.00133 | 2.62928 |
| R5  | 2.03108 | -0.00008 | 0.00000 | -0.00029 | 0.00044  | 2.03151 |
| R6  | 2.54404 | 0.00004  | 0.00000 | -0.00283 | -0.00079 | 2.54325 |
| R7  | 2.68747 | 0.00015  | 0.00000 | 0.00119  | 0.00155  | 2.68902 |
| R8  | 2.51604 | 0.00122  | 0.00000 | -0.00512 | 0.00526  | 2.52130 |
| R9  | 2.11473 | -0.00240 | 0.00000 | -0.02741 | -0.01692 | 2.09781 |
| R10 | 2.79395 | -0.00136 | 0.00000 | -0.00002 | 0.00724  | 2.80119 |
| R11 | 2.90997 | -0.00190 | 0.00000 | -0.00805 | 0.00168  | 2.91165 |
| R12 | 2.06278 | 0.00012  | 0.00000 | -0.00120 | 0.00177  | 2.06455 |
| R13 | 2.06207 | 0.00013  | 0.00000 | -0.00038 | 0.00215  | 2.06423 |
| R14 | 2.07220 | 0.00024  | 0.00000 | -0.00175 | -0.00097 | 2.07124 |
| R15 | 2.07027 | -0.00023 | 0.00000 | -0.00230 | -0.00097 | 2.06930 |
| R16 | 2.66683 | -0.00261 | 0.00000 | 0.01319  | 0.01526  | 2.68208 |
| R17 | 4.11038 | -0.00083 | 0.00000 | 0.09772  | 0.06498  | 4.17536 |
| R18 | 9.29620 | -0.00176 | 0.00000 | -0.93966 | -0.34646 | 8.94975 |
| R19 | 2.50703 | -0.00019 | 0.00000 | -0.00114 | -0.00009 | 2.50693 |
| R20 | 2.04715 | -0.00015 | 0.00000 | -0.00059 | 0.00019  | 2.04733 |
| R21 | 2.04307 | -0.00001 | 0.00000 | -0.00014 | 0.00054  | 2.04362 |
| R22 | 2.04629 | -0.00011 | 0.00000 | -0.00022 | 0.00053  | 2.04683 |
| R23 | 1.84043 | -0.00250 | 0.00000 | -0.00288 | -0.00070 | 1.83973 |
| R24 | 3.68061 | -0.00271 | 0.00000 | -0.03978 | -0.02512 | 3.65549 |
| R25 | 2.77246 | -0.00033 | 0.00000 | 0.00492  | 0.00821  | 2.78067 |
| R26 | 2.73988 | -0.00035 | 0.00000 | 0.00495  | 0.00674  | 2.74662 |
| R27 | 2.05038 | 0.00195  | 0.00000 | 0.00185  | 0.00622  | 2.05660 |
| R28 | 2.04728 | 0.00207  | 0.00000 | 0.00224  | 0.00331  | 2.05058 |
| R29 | 2.73969 | -0.00264 | 0.00000 | -0.02055 | -0.00759 | 2.73209 |
| R30 | 2.05687 | 0.00013  | 0.00000 | 0.00011  | 0.00437  | 2.06124 |
| R31 | 2.85849 | -0.00325 | 0.00000 | -0.00203 | 0.00292  | 2.86141 |
| R32 | 2.06622 | 0.00001  | 0.00000 | 0.00192  | 0.00297  | 2.06919 |
| R33 | 2.06932 | -0.00082 | 0.00000 | -0.00066 | 0.00096  | 2.07028 |
| R34 | 2.06340 | -0.00025 | 0.00000 | -0.00070 | 0.00200  | 2.06540 |
| A1  | 1.87254 | 0.00010  | 0.00000 | -0.00035 | 0.00212  | 1.87466 |
| A2  | 2.27706 | -0.00010 | 0.00000 | -0.00070 | -0.00162 | 2.27544 |
| A3  | 2.13345 | 0.00001  | 0.00000 | 0.00103  | -0.00050 | 2.13295 |
| A4  | 1.86194 | 0.00041  | 0.00000 | 0.00042  | 0.00042  | 1.86236 |
| A5  | 2.27752 | -0.00026 | 0.00000 | -0.00058 | -0.00046 | 2.27707 |
| A6  | 2.14368 | -0.00014 | 0.00000 | 0.00009  | -0.00002 | 2.14366 |
| A7  | 1.89762 | 0.00000  | 0.00000 | -0.00362 | -0.00074 | 1.89688 |
| A8  | 2.25036 | -0.00017 | 0.00000 | 0.00282  | 0.00099  | 2.25134 |
| A9  | 2.13516 | 0.00017  | 0.00000 | 0.00080  | -0.00025 | 2.13490 |
| A10 | 1.88995 | -0.00051 | 0.00000 | 0.00461  | 0.00190  | 1.89184 |
| A11 | 2.24074 | -0.00088 | 0.00000 | -0.00088 | -0.00832 | 2.23242 |
| A12 | 2.15212 | 0.00139  | 0.00000 | -0.00279 | 0.00680  | 2.15892 |
| A13 | 1.90265 | 0.00001  | 0.00000 | -0.00128 | -0.00392 | 1.89872 |

|     |         |          |         |          |          |         |
|-----|---------|----------|---------|----------|----------|---------|
| A14 | 2.22505 | -0.00166 | 0.00000 | 0.01409  | -0.00125 | 2.22380 |
| A15 | 2.15504 | 0.00165  | 0.00000 | -0.01250 | 0.00537  | 2.16041 |
| A16 | 1.95546 | -0.00149 | 0.00000 | -0.00694 | -0.00499 | 1.95048 |
| A17 | 1.86108 | 0.00058  | 0.00000 | 0.00367  | 0.00334  | 1.86442 |
| A18 | 1.89091 | 0.00015  | 0.00000 | -0.00052 | -0.00093 | 1.88998 |
| A19 | 1.93189 | 0.00012  | 0.00000 | -0.00099 | 0.00264  | 1.93453 |
| A20 | 1.91773 | 0.00055  | 0.00000 | 0.00689  | 0.00134  | 1.91907 |
| A21 | 1.90514 | 0.00011  | 0.00000 | -0.00221 | -0.00141 | 1.90373 |
| A22 | 1.90983 | 0.00121  | 0.00000 | 0.00462  | -0.00102 | 1.90880 |
| A23 | 1.91055 | -0.00003 | 0.00000 | 0.00348  | 0.00317  | 1.91372 |
| A24 | 1.92114 | -0.00327 | 0.00000 | -0.01091 | -0.00070 | 1.92045 |
| A25 | 1.88275 | -0.00018 | 0.00000 | 0.01115  | 0.00805  | 1.89080 |
| A26 | 1.88802 | 0.00075  | 0.00000 | 0.00057  | -0.00288 | 1.88514 |
| A27 | 1.95072 | 0.00161  | 0.00000 | -0.00824 | -0.00648 | 1.94424 |
| A28 | 1.70738 | -0.00159 | 0.00000 | 0.04591  | 0.00277  | 1.71016 |
| A29 | 2.90978 | -0.00140 | 0.00000 | 0.00319  | 0.00493  | 2.91471 |
| A30 | 2.17589 | -0.00004 | 0.00000 | 0.00088  | 0.00060  | 2.17649 |
| A31 | 1.95399 | 0.00011  | 0.00000 | -0.00028 | -0.00017 | 1.95381 |
| A32 | 2.15330 | -0.00008 | 0.00000 | -0.00059 | -0.00042 | 2.15288 |
| A33 | 2.07932 | 0.00003  | 0.00000 | -0.00164 | -0.00111 | 2.07821 |
| A34 | 2.15762 | -0.00003 | 0.00000 | 0.00295  | 0.00193  | 2.15955 |
| A35 | 2.04624 | 0.00000  | 0.00000 | -0.00130 | -0.00082 | 2.04542 |
| A36 | 1.91457 | -0.00145 | 0.00000 | -0.02872 | -0.01261 | 1.90196 |
| A37 | 3.14145 | -0.00110 | 0.00000 | 0.00379  | 0.00014  | 3.14159 |
| A38 | 2.09899 | -0.00053 | 0.00000 | -0.00069 | 0.00193  | 2.10092 |
| A39 | 2.10191 | -0.00020 | 0.00000 | -0.01065 | -0.00932 | 2.09259 |
| A40 | 1.99600 | 0.00110  | 0.00000 | 0.00282  | 0.00426  | 2.00026 |
| A41 | 1.98437 | -0.00041 | 0.00000 | -0.00566 | -0.00714 | 1.97723 |
| A42 | 2.01279 | 0.00058  | 0.00000 | 0.01320  | 0.00878  | 2.02157 |
| A43 | 2.06153 | -0.00063 | 0.00000 | -0.00209 | 0.00261  | 2.06413 |
| A44 | 2.13225 | -0.00079 | 0.00000 | 0.00371  | -0.00051 | 2.13174 |
| A45 | 1.97224 | -0.00153 | 0.00000 | 0.00373  | 0.00209  | 1.97433 |
| A46 | 2.03267 | 0.00045  | 0.00000 | 0.00539  | 0.00514  | 2.03782 |
| A47 | 2.00737 | 0.00137  | 0.00000 | -0.00700 | -0.00566 | 2.00170 |
| A48 | 1.37769 | 0.00124  | 0.00000 | 0.07882  | 0.04110  | 1.41878 |
| A49 | 1.01720 | -0.00229 | 0.00000 | -0.10180 | -0.05482 | 0.96238 |
| A50 | 2.39154 | -0.00102 | 0.00000 | -0.00906 | -0.01090 | 2.38064 |
| A51 | 2.22337 | -0.00064 | 0.00000 | -0.02220 | -0.01267 | 2.21070 |
| A52 | 1.91860 | 0.00159  | 0.00000 | -0.00094 | -0.00113 | 1.91747 |
| A53 | 1.92079 | -0.00036 | 0.00000 | 0.00006  | 0.00129  | 1.92208 |
| A54 | 1.92076 | 0.00188  | 0.00000 | 0.01080  | 0.00691  | 1.92767 |
| A55 | 1.89577 | -0.00085 | 0.00000 | -0.00316 | -0.00331 | 1.89246 |
| A56 | 1.91045 | -0.00154 | 0.00000 | -0.00131 | 0.00033  | 1.91077 |
| A57 | 1.89714 | -0.00078 | 0.00000 | -0.00571 | -0.00428 | 1.89286 |



|     |          |          |         |          |          |          |
|-----|----------|----------|---------|----------|----------|----------|
| A58 | 3.60106  | 0.00060  | 0.00000 | 0.05662  | 0.02843  | 3.62949  |
| A59 | 4.70094  | 0.00112  | 0.00000 | 0.21578  | 0.14182  | 4.84276  |
| D1  | 0.01171  | -0.00042 | 0.00000 | 0.01433  | 0.00873  | 0.02044  |
| D2  | -3.13947 | -0.00018 | 0.00000 | 0.00598  | 0.00360  | -3.13587 |
| D3  | 3.13565  | -0.00004 | 0.00000 | 0.01304  | 0.00868  | -3.13886 |
| D4  | -0.01552 | 0.00020  | 0.00000 | 0.00469  | 0.00354  | -0.01198 |
| D5  | -0.01107 | 0.00038  | 0.00000 | -0.02159 | -0.01301 | -0.02409 |
| D6  | -3.12113 | 0.00038  | 0.00000 | -0.03223 | -0.02077 | 3.14129  |
| D7  | -3.13679 | 0.00004  | 0.00000 | -0.02041 | -0.01295 | 3.13345  |
| D8  | 0.03634  | 0.00004  | 0.00000 | -0.03105 | -0.02070 | 0.01564  |
| D9  | -0.00848 | 0.00033  | 0.00000 | -0.00241 | -0.00152 | -0.01000 |
| D10 | -3.13977 | 0.00019  | 0.00000 | -0.00166 | -0.00042 | -3.14019 |
| D11 | -3.14140 | 0.00012  | 0.00000 | 0.00515  | 0.00313  | -3.13827 |
| D12 | 0.01050  | -0.00002 | 0.00000 | 0.00590  | 0.00423  | 0.01473  |
| D13 | 0.00165  | -0.00010 | 0.00000 | -0.01104 | -0.00660 | -0.00495 |
| D14 | 3.11414  | -0.00003 | 0.00000 | 0.02506  | 0.01888  | 3.13303  |
| D15 | 3.13376  | 0.00002  | 0.00000 | -0.01172 | -0.00761 | 3.12615  |
| D16 | -0.03694 | 0.00010  | 0.00000 | 0.02438  | 0.01788  | -0.01906 |
| D17 | 0.08570  | -0.00014 | 0.00000 | -0.03786 | -0.02550 | 0.06019  |
| D18 | -3.05989 | -0.00008 | 0.00000 | -0.03671 | -0.02472 | -3.08461 |
| D19 | -3.04434 | -0.00030 | 0.00000 | -0.03699 | -0.02427 | -3.06861 |
| D20 | 0.09326  | -0.00023 | 0.00000 | -0.03584 | -0.02348 | 0.06977  |
| D21 | 0.00575  | -0.00017 | 0.00000 | 0.02012  | 0.01208  | 0.01784  |
| D22 | 3.11735  | -0.00024 | 0.00000 | 0.03081  | 0.01936  | 3.13670  |
| D23 | -3.10854 | -0.00019 | 0.00000 | -0.01377 | -0.01178 | -3.12033 |
| D24 | 0.00305  | -0.00027 | 0.00000 | -0.00308 | -0.00451 | -0.00146 |
| D25 | -2.91766 | -0.00025 | 0.00000 | -0.15920 | -0.10907 | -3.02673 |
| D26 | 0.19086  | -0.00021 | 0.00000 | -0.11806 | -0.08013 | 0.11073  |
| D27 | 1.26532  | 0.00017  | 0.00000 | 0.11605  | 0.07140  | 1.33672  |
| D28 | -2.90170 | -0.00018 | 0.00000 | 0.11311  | 0.07386  | -2.82785 |
| D29 | -0.85310 | 0.00033  | 0.00000 | 0.11219  | 0.07350  | -0.77960 |
| D30 | -1.84053 | 0.00022  | 0.00000 | 0.10371  | 0.06274  | -1.77778 |
| D31 | 0.27563  | -0.00014 | 0.00000 | 0.10077  | 0.06520  | 0.34084  |
| D32 | 2.32424  | 0.00037  | 0.00000 | 0.09985  | 0.06485  | 2.38909  |
| D33 | -0.92232 | -0.00015 | 0.00000 | -0.09772 | -0.06230 | -0.98463 |
| D34 | 1.13756  | 0.00033  | 0.00000 | -0.07944 | -0.05126 | 1.08630  |
| D35 | -2.99493 | 0.00016  | 0.00000 | -0.09467 | -0.05774 | -3.05267 |
| D36 | -2.99715 | 0.00001  | 0.00000 | -0.09714 | -0.06502 | -3.06217 |
| D37 | -0.93727 | 0.00049  | 0.00000 | -0.07886 | -0.05398 | -0.99124 |
| D38 | 1.21342  | 0.00032  | 0.00000 | -0.09409 | -0.06045 | 1.15297  |
| D39 | 1.18059  | -0.00056 | 0.00000 | -0.09824 | -0.06584 | 1.11476  |
| D40 | -3.04270 | -0.00009 | 0.00000 | -0.07996 | -0.05480 | -3.09750 |
| D41 | -0.89201 | -0.00025 | 0.00000 | -0.09519 | -0.06127 | -0.95328 |
| D42 | -1.79340 | 0.00064  | 0.00000 | 0.00903  | -0.00050 | -1.79391 |

|     |          |          |         |          |          |          |
|-----|----------|----------|---------|----------|----------|----------|
| D43 | 2.40385  | 0.00062  | 0.00000 | 0.00944  | 0.00288  | 2.40674  |
| D44 | 0.33360  | -0.00058 | 0.00000 | 0.00025  | -0.00134 | 0.33226  |
| D45 | 0.29133  | -0.00046 | 0.00000 | 0.17253  | 0.11126  | 0.40259  |
| D46 | -0.35287 | 0.00019  | 0.00000 | -0.04208 | -0.02415 | -0.37702 |
| D47 | 2.86262  | -0.00010 | 0.00000 | -0.19341 | -0.12789 | 2.73473  |
| D48 | -3.13757 | 0.00003  | 0.00000 | -0.00104 | -0.00067 | -3.13824 |
| D49 | 0.00647  | -0.00001 | 0.00000 | -0.00445 | -0.00296 | 0.00352  |
| D50 | 0.00846  | -0.00004 | 0.00000 | -0.00232 | -0.00154 | 0.00692  |
| D51 | -3.13068 | -0.00008 | 0.00000 | -0.00573 | -0.00383 | -3.13451 |
| D52 | -1.42703 | -0.00003 | 0.00000 | 0.06856  | 0.06191  | -1.36512 |
| D53 | 2.09162  | 0.00056  | 0.00000 | -0.05369 | -0.05863 | 2.03300  |
| D54 | 2.18388  | -0.00003 | 0.00000 | -0.24954 | -0.18640 | 1.99748  |
| D55 | -2.60931 | -0.00056 | 0.00000 | -0.26947 | -0.20045 | -2.80976 |
| D56 | -2.72700 | -0.00022 | 0.00000 | 0.00670  | 0.00390  | -2.72311 |
| D57 | -0.03081 | 0.00002  | 0.00000 | -0.00892 | -0.00656 | -0.03737 |
| D58 | 0.00455  | -0.00051 | 0.00000 | 0.01496  | 0.00983  | 0.01438  |
| D59 | 2.70074  | -0.00027 | 0.00000 | -0.00066 | -0.00063 | 2.70011  |
| D60 | 0.15526  | 0.00049  | 0.00000 | -0.23975 | -0.16189 | -0.00663 |
| D61 | 0.04877  | 0.00100  | 0.00000 | -0.02184 | -0.01261 | 0.03616  |
| D62 | -2.20720 | -0.00115 | 0.00000 | -0.25699 | -0.17227 | -2.37948 |
| D63 | -2.31369 | -0.00064 | 0.00000 | -0.03909 | -0.02299 | -2.33669 |
| D64 | 2.11119  | 0.00087  | 0.00000 | 0.00928  | 0.00767  | 2.11887  |
| D65 | -0.26981 | -0.00004 | 0.00000 | 0.00995  | 0.00840  | -0.26141 |
| D66 | 2.51724  | 0.00043  | 0.00000 | -0.04946 | -0.03252 | 2.48471  |
| D67 | -1.67862 | 0.00014  | 0.00000 | -0.05391 | -0.03651 | -1.71513 |
| D68 | 0.41176  | 0.00013  | 0.00000 | -0.05413 | -0.03663 | 0.37513  |
| D69 | 1.30884  | -0.00012 | 0.00000 | -0.05952 | -0.03804 | 1.27080  |
| D70 | -2.88702 | -0.00041 | 0.00000 | -0.06397 | -0.04203 | -2.92905 |
| D71 | -0.79663 | -0.00042 | 0.00000 | -0.06419 | -0.04215 | -0.83878 |
| D72 | -1.05704 | 0.00021  | 0.00000 | -0.06359 | -0.04074 | -1.09778 |
| D73 | 1.03029  | -0.00008 | 0.00000 | -0.06803 | -0.04473 | 0.98556  |
| D74 | 3.12067  | -0.00009 | 0.00000 | -0.06825 | -0.04484 | 3.07583  |

| Item                 | Value    | Threshold | Converged? |
|----------------------|----------|-----------|------------|
| Maximum Force        | 0.003265 | 0.000450  | NO         |
| RMS Force            | 0.000902 | 0.000300  | NO         |
| Maximum Displacement | 0.569139 | 0.001800  | NO         |
| RMS Displacement     | 0.144039 | 0.001200  | NO         |

Predicted change in Energy=-7.893192D-04

GradGradGradGradGradGradGradGradGradGradGradGradGradGradGradGradGradGradGrad

Input orientation:

-----

| Center Number | Atomic Number | Atomic Type | Coordinates (Angstroms) |   |   |
|---------------|---------------|-------------|-------------------------|---|---|
|               |               |             | X                       | Y | Z |

|    |    |   |           |           |           |
|----|----|---|-----------|-----------|-----------|
| 1  | 6  | 0 | -1.426066 | -1.886717 | -0.311282 |
| 2  | 6  | 0 | -2.565519 | -1.152008 | -0.228326 |
| 3  | 7  | 0 | -2.188748 | 0.126779  | 0.169947  |
| 4  | 6  | 0 | -0.853153 | 0.151309  | 0.333800  |
| 5  | 7  | 0 | -0.373083 | -1.063202 | 0.060625  |
| 6  | 6  | 0 | 1.065237  | -1.415299 | 0.128051  |
| 7  | 6  | 0 | 1.707459  | -1.463965 | -1.271660 |
| 8  | 1  | 0 | -1.279210 | -2.917231 | -0.586113 |
| 9  | 1  | 0 | -3.586650 | -1.423386 | -0.426660 |
| 10 | 1  | 0 | 1.547298  | -0.658040 | 0.750754  |
| 11 | 1  | 0 | 1.157331  | -2.388993 | 0.614516  |
| 12 | 1  | 0 | 1.155051  | -2.171492 | -1.900610 |
| 13 | 1  | 0 | 1.652444  | -0.474079 | -1.736617 |
| 14 | 35 | 0 | 1.418658  | 2.404163  | 1.144751  |
| 15 | 1  | 0 | -0.218998 | 1.010090  | 0.638249  |
| 16 | 6  | 0 | -3.004979 | 1.268783  | 0.403239  |
| 17 | 6  | 0 | -4.329728 | 1.277292  | 0.333469  |
| 18 | 1  | 0 | -2.415960 | 2.143636  | 0.651132  |
| 19 | 1  | 0 | -4.860155 | 2.199901  | 0.525671  |
| 20 | 1  | 0 | -4.924976 | 0.405066  | 0.092466  |
| 21 | 8  | 0 | 3.049057  | -1.917053 | -1.175557 |
| 22 | 1  | 0 | 3.647621  | -1.153646 | -1.257496 |
| 23 | 6  | 0 | 4.830436  | 1.755426  | -1.002887 |
| 24 | 6  | 0 | 5.808099  | 0.807313  | -0.445686 |
| 25 | 8  | 0 | 4.836954  | 0.363223  | -1.420308 |
| 26 | 1  | 0 | 3.958005  | 2.050592  | -0.423101 |
| 27 | 1  | 0 | 5.129162  | 2.440547  | -1.789562 |
| 28 | 1  | 0 | 6.826916  | 0.827560  | -0.834737 |
| 29 | 6  | 0 | 5.676482  | 0.243735  | 0.953539  |
| 30 | 1  | 0 | 5.991063  | -0.805027 | 0.963316  |
| 31 | 1  | 0 | 6.314241  | 0.803104  | 1.646786  |
| 32 | 1  | 0 | 4.642177  | 0.317235  | 1.299046  |

Distance matrix (angstroms):

|   |   | 1        | 2        | 3        | 4        | 5        |
|---|---|----------|----------|----------|----------|----------|
| 1 | C | 0.000000 |          |          |          |          |
| 2 | C | 1.358319 | 0.000000 |          |          |          |
| 3 | N | 2.206225 | 1.391357 | 0.000000 |          |          |
| 4 | C | 2.213121 | 2.224144 | 1.345832 | 0.000000 |          |
| 5 | N | 1.387539 | 2.213177 | 2.173624 | 1.334214 | 0.000000 |
| 6 | C | 2.573293 | 3.657693 | 3.601136 | 2.485320 | 1.482324 |
| 7 | C | 3.304546 | 4.409559 | 4.448497 | 3.426857 | 2.502849 |
| 8 | H | 1.076596 | 2.213281 | 3.265713 | 3.231671 | 2.162582 |

|    |    |          |          |          |          |          |
|----|----|----------|----------|----------|----------|----------|
| 9  | H  | 2.212716 | 1.075031 | 2.170963 | 3.244991 | 3.270197 |
| 10 | H  | 3.387987 | 4.256508 | 3.861517 | 2.567306 | 2.080456 |
| 11 | H  | 2.789861 | 4.012497 | 4.209869 | 3.251766 | 2.099211 |
| 12 | H  | 3.044540 | 4.204583 | 4.555243 | 3.797482 | 2.722121 |
| 13 | H  | 3.674826 | 4.530534 | 4.330216 | 3.309948 | 2.771264 |
| 14 | Br | 5.350153 | 5.514106 | 4.376083 | 3.300624 | 4.050714 |
| 15 | H  | 3.278736 | 3.306324 | 2.208949 | 1.110111 | 2.157760 |
| 16 | C  | 3.600095 | 2.540124 | 1.422966 | 2.425680 | 3.533046 |
| 17 | C  | 4.342569 | 3.054431 | 2.436025 | 3.654369 | 4.605148 |
| 18 | H  | 4.260267 | 3.414248 | 2.085876 | 2.551947 | 3.847838 |
| 19 | H  | 5.403139 | 4.131485 | 3.400117 | 4.504399 | 5.567578 |
| 20 | H  | 4.202101 | 2.845070 | 2.751434 | 4.086854 | 4.782944 |
| 21 | O  | 4.557917 | 5.745085 | 5.781196 | 4.667282 | 3.737412 |
| 22 | H  | 5.212966 | 6.297802 | 6.143312 | 4.948950 | 4.232220 |
| 23 | C  | 7.272368 | 7.984564 | 7.300477 | 6.055007 | 6.012681 |
| 24 | C  | 7.720686 | 8.602538 | 8.049328 | 6.738711 | 6.477823 |
| 25 | O  | 6.746672 | 7.649402 | 7.207309 | 5.958114 | 5.601101 |
| 26 | H  | 6.671066 | 7.269866 | 6.468024 | 5.227563 | 5.356120 |
| 27 | H  | 7.992592 | 8.634352 | 7.921174 | 6.748139 | 6.780424 |
| 28 | H  | 8.703621 | 9.617914 | 9.098499 | 7.797837 | 7.497776 |
| 29 | C  | 7.522286 | 8.442481 | 7.905032 | 6.559631 | 6.253209 |
| 30 | H  | 7.603187 | 8.646127 | 8.270853 | 6.939321 | 6.433029 |
| 31 | H  | 8.425052 | 9.283784 | 8.656748 | 7.315757 | 7.121749 |
| 32 | H  | 6.653881 | 7.512817 | 6.926231 | 5.581925 | 5.347161 |
|    |    | 6        | 7        | 8        | 9        | 10       |
| 6  | C  | 0.000000 |          |          |          |          |
| 7  | C  | 1.540781 | 0.000000 |          |          |          |
| 8  | H  | 2.874415 | 3.391483 | 0.000000 |          |          |
| 9  | H  | 4.684850 | 5.361275 | 2.753411 | 0.000000 |          |
| 10 | H  | 1.092512 | 2.182962 | 3.857499 | 5.322544 | 0.000000 |
| 11 | H  | 1.092341 | 2.171630 | 2.767179 | 4.951949 | 1.779560 |
| 12 | H  | 2.166877 | 1.096051 | 2.865250 | 5.021545 | 3.078006 |
| 13 | H  | 2.169722 | 1.095028 | 3.985881 | 5.483181 | 2.496379 |
| 14 | Br | 3.968234 | 4.569996 | 6.212215 | 6.494042 | 3.090124 |
| 15 | H  | 2.791429 | 3.671503 | 4.248171 | 4.289162 | 2.432101 |
| 16 | C  | 4.883307 | 5.699147 | 4.634631 | 2.876604 | 4.955465 |
| 17 | C  | 6.033067 | 6.821918 | 5.267382 | 2.902348 | 6.201537 |
| 18 | H  | 5.005834 | 5.806419 | 5.332481 | 3.905867 | 4.854557 |
| 19 | H  | 6.952557 | 7.732262 | 6.343837 | 3.956888 | 7.019540 |
| 20 | H  | 6.260803 | 7.024480 | 4.978929 | 2.324618 | 6.591954 |
| 21 | O  | 2.426250 | 1.419298 | 4.481260 | 6.696055 | 2.747920 |
| 22 | H  | 2.942263 | 1.964873 | 5.275856 | 7.286819 | 2.947890 |
| 23 | C  | 5.050667 | 4.493295 | 7.702934 | 9.015776 | 4.436110 |
| 24 | C  | 5.269148 | 4.759851 | 8.007615 | 9.655967 | 4.661883 |

|    |    |          |           |          |           |           |
|----|----|----------|-----------|----------|-----------|-----------|
| 25 | O  | 4.448191 | 3.626906  | 6.990331 | 8.668127  | 4.071649  |
| 26 | H  | 4.547997 | 4.258769  | 7.220406 | 8.306043  | 3.811316  |
| 27 | H  | 5.921172 | 5.217421  | 8.439272 | 9.630829  | 5.374402  |
| 28 | H  | 6.257342 | 5.625907  | 8.932780 | 10.661878 | 5.709217  |
| 29 | C  | 4.969648 | 4.860133  | 7.793837 | 9.512616  | 4.231369  |
| 30 | H  | 5.033276 | 4.876328  | 7.727808 | 9.697783  | 4.451274  |
| 31 | H  | 5.897449 | 5.905875  | 8.745697 | 10.357802 | 5.065724  |
| 32 | H  | 4.143357 | 4.288796  | 7.005599 | 8.586118  | 3.290906  |
|    |    | 11       | 12        | 13       | 14        | 15        |
| 11 | H  | 0.000000 |           |          |           |           |
| 12 | H  | 2.524514 | 0.000000  |          |           |           |
| 13 | H  | 3.072436 | 1.776374  | 0.000000 |           |           |
| 14 | Br | 4.829471 | 5.502756  | 4.079364 | 0.000000  |           |
| 15 | H  | 3.667235 | 4.296076  | 3.368240 | 2.209503  | 0.000000  |
| 16 | C  | 5.545159 | 5.869332  | 5.413699 | 4.626823  | 2.807817  |
| 17 | C  | 6.605184 | 6.853322  | 6.568024 | 5.913709  | 4.130664  |
| 18 | H  | 5.771870 | 6.154985  | 5.394969 | 3.875027  | 2.472193  |
| 19 | H  | 7.568090 | 7.821676  | 7.394732 | 6.312565  | 4.792563  |
| 20 | H  | 6.713700 | 6.897661  | 6.883378 | 6.733898  | 4.775998  |
| 21 | O  | 2.646831 | 2.043942  | 2.085064 | 5.168649  | 4.747445  |
| 22 | H  | 3.351426 | 2.768124  | 2.161505 | 4.837052  | 4.819372  |
| 23 | C  | 5.769220 | 5.452985  | 3.950783 | 4.083312  | 5.361496  |
| 24 | C  | 5.741955 | 5.713225  | 4.536292 | 4.934228  | 6.127147  |
| 25 | O  | 5.025418 | 4.495762  | 3.307905 | 4.736002  | 5.497158  |
| 26 | H  | 5.350732 | 5.278785  | 3.662636 | 3.005237  | 4.433561  |
| 27 | H  | 6.699216 | 6.089072  | 4.537116 | 4.730682  | 6.045105  |
| 28 | H  | 6.677630 | 6.503880  | 5.411360 | 5.971039  | 7.200550  |
| 29 | C  | 5.241080 | 5.867097  | 4.893371 | 4.778396  | 5.953435  |
| 30 | H  | 5.098586 | 5.784143  | 5.120819 | 5.589160  | 6.478054  |
| 31 | H  | 6.152136 | 6.931773  | 5.900082 | 5.175148  | 6.613864  |
| 32 | H  | 4.465020 | 5.347112  | 4.333582 | 3.843195  | 4.954566  |
|    |    | 16       | 17        | 18       | 19        | 20        |
| 16 | C  | 0.000000 |           |          |           |           |
| 17 | C  | 1.326613 | 0.000000  |          |           |           |
| 18 | H  | 1.083402 | 2.124610  | 0.000000 |           |           |
| 19 | H  | 2.079339 | 1.081435  | 2.448059 | 0.000000  |           |
| 20 | H  | 2.128139 | 1.083134  | 3.103206 | 1.847512  | 0.000000  |
| 21 | O  | 7.020932 | 8.180920  | 7.049283 | 9.077396  | 8.401506  |
| 22 | H  | 7.272090 | 8.489920  | 7.161142 | 9.317093  | 8.817109  |
| 23 | C  | 7.975446 | 9.269469  | 7.442899 | 9.820469  | 9.909154  |
| 24 | C  | 8.865888 | 10.178580 | 8.403804 | 10.802522 | 10.754083 |
| 25 | O  | 8.101930 | 9.377597  | 7.750194 | 10.059530 | 9.878538  |
| 26 | H  | 7.055296 | 8.358044  | 6.464524 | 8.870310  | 9.048807  |
| 27 | H  | 8.505625 | 9.763761  | 7.935617 | 10.256933 | 10.429329 |

|    |   |          |           |          |           |           |
|----|---|----------|-----------|----------|-----------|-----------|
| 28 | H | 9.919346 | 11.226650 | 9.453604 | 11.845745 | 11.795981 |
| 29 | C | 8.759070 | 10.078540 | 8.317974 | 10.725222 | 10.637593 |
| 30 | H | 9.248954 | 10.547582 | 8.914602 | 11.268100 | 11.017378 |
| 31 | H | 9.413348 | 10.735163 | 8.888462 | 11.317025 | 11.353164 |
| 32 | H | 7.758022 | 9.074642  | 7.319347 | 9.717863  | 9.643338  |
|    |   | 21       | 22        | 23       | 24        | 25        |
| 21 | O | 0.000000 |           |          |           |           |
| 22 | H | 0.973542 | 0.000000  |          |           |           |
| 23 | C | 4.085367 | 3.150647  | 0.000000 |           |           |
| 24 | C | 3.945529 | 3.028541  | 1.471467 | 0.000000  |           |
| 25 | O | 2.907944 | 1.934402  | 1.453448 | 1.445762  | 0.000000  |
| 26 | H | 4.139394 | 3.325612  | 1.088307 | 2.229148  | 2.148066  |
| 27 | H | 4.867496 | 3.923810  | 1.085121 | 2.221354  | 2.130026  |
| 28 | H | 4.682017 | 3.769857  | 2.207972 | 1.090761  | 2.125665  |
| 29 | C | 4.013156 | 3.310231  | 2.613160 | 1.514191  | 2.520761  |
| 30 | H | 3.803522 | 3.247347  | 3.430587 | 2.149047  | 2.894553  |
| 31 | H | 5.101598 | 4.401657  | 3.182666 | 2.152820  | 3.432628  |
| 32 | H | 3.695096 | 3.112642  | 2.720796 | 2.154911  | 2.726709  |
|    |   | 26       | 27        | 28       | 29        | 30        |
| 26 | H | 0.000000 |           |          |           |           |
| 27 | H | 1.841437 | 0.000000  |          |           |           |
| 28 | H | 3.145776 | 2.528990  | 0.000000 |           |           |
| 29 | C | 2.848338 | 3.556705  | 2.205058 | 0.000000  |           |
| 30 | H | 3.769620 | 4.342231  | 2.568460 | 1.094970  | 0.000000  |
| 31 | H | 3.375279 | 3.986744  | 2.534047 | 1.095546  | 1.776981  |
| 32 | H | 2.537402 | 3.779565  | 3.096215 | 1.092961  | 1.786528  |
|    |   | 31       | 32        |          |           |           |
| 31 | H | 0.000000 |           |          |           |           |
| 32 | H | 1.775609 | 0.000000  |          |           |           |

Stoichiometry C<sub>10</sub>H<sub>17</sub>BrN<sub>2</sub>O<sub>2</sub>

Framework group C1[X(C<sub>10</sub>H<sub>17</sub>BrN<sub>2</sub>O<sub>2</sub>)]

Deg. of freedom 90

Full point group C1 NOp 1

Largest Abelian subgroup C1 NOp 1

Largest concise Abelian subgroup C1 NOp 1

Standard orientation:

| Center<br>Number | Atomic<br>Number | Atomic<br>Type | Coordinates (Angstroms) |          |           |
|------------------|------------------|----------------|-------------------------|----------|-----------|
|                  |                  |                | X                       | Y        | Z         |
| 1                | 6                | 0              | -2.666920               | 2.219279 | -0.318125 |
| 2                | 6                | 0              | -3.761513               | 1.476173 | -0.010407 |
| 3                | 7                | 0              | -3.333685               | 0.155937 | 0.088661  |
| 4                | 6                | 0              | -2.013217               | 0.110287 | -0.167354 |

|    |    |   |           |           |           |
|----|----|---|-----------|-----------|-----------|
| 5  | 7  | 0 | -1.592238 | 1.348775  | -0.430131 |
| 6  | 6  | 0 | -0.186386 | 1.690360  | -0.752907 |
| 7  | 6  | 0 | 0.544360  | 2.304044  | 0.456808  |
| 8  | 1  | 0 | -2.566209 | 3.278992  | -0.479134 |
| 9  | 1  | 0 | -4.781857 | 1.771978  | 0.154181  |
| 10 | 1  | 0 | 0.298771  | 0.764767  | -1.071471 |
| 11 | 1  | 0 | -0.187938 | 2.397474  | -1.585492 |
| 12 | 1  | 0 | -0.007338 | 3.184199  | 0.806498  |
| 13 | 1  | 0 | 0.582392  | 1.574750  | 1.272756  |
| 14 | 35 | 0 | 0.334419  | -2.208887 | -0.231841 |
| 15 | 1  | 0 | -1.348867 | -0.779087 | -0.167636 |
| 16 | 6  | 0 | -4.091230 | -1.010614 | 0.388852  |
| 17 | 6  | 0 | -5.405181 | -1.031913 | 0.570462  |
| 18 | 1  | 0 | -3.467021 | -1.893966 | 0.450593  |
| 19 | 1  | 0 | -5.888990 | -1.971838 | 0.798433  |
| 20 | 1  | 0 | -6.035894 | -0.153871 | 0.503960  |
| 21 | 8  | 0 | 1.845690  | 2.724237  | 0.076826  |
| 22 | 1  | 0 | 2.494690  | 2.073034  | 0.397008  |
| 23 | 6  | 0 | 3.836146  | -0.664720 | 1.191849  |
| 24 | 6  | 0 | 4.713264  | 0.018431  | 0.227908  |
| 25 | 8  | 0 | 3.784236  | 0.779111  | 1.033203  |
| 26 | 1  | 0 | 2.946685  | -1.190436 | 0.849951  |
| 27 | 1  | 0 | 4.229157  | -0.976715 | 2.153976  |
| 28 | 1  | 0 | 5.755251  | 0.183869  | 0.504773  |
| 29 | 6  | 0 | 4.452966  | -0.016475 | -1.263333 |
| 30 | 1  | 0 | 4.700399  | 0.953527  | -1.706991 |
| 31 | 1  | 0 | 5.076119  | -0.783020 | -1.736945 |
| 32 | 1  | 0 | 3.404314  | -0.251488 | -1.462486 |

-----  
Rotational constants (GHZ): 0.5624593 0.2137250 0.1648352

Standard basis: 6-311++G(d,p) (5D, 7F)

There are 492 symmetry adapted cartesian basis functions of A symmetry.

There are 475 symmetry adapted basis functions of A symmetry.

475 basis functions, 751 primitive gaussians, 492 cartesian basis functions

71 alpha electrons 71 beta electrons

nuclear repulsion energy 1285.8467458822 Hartrees.

NAtoms= 32 NActive= 32 NUniq= 32 SFac= 1.00D+00 NATFMM= 60 NAOKFM=F

Big=F

Integral buffers will be 131072 words long.

Raffenetti 2 integral format.

Two-electron integral symmetry is turned on.

One-electron integrals computed using PRISM.

NBasis= 475 RedAO= T EigKep= 3.74D-06 NBF= 475

NBsUse= 475 1.00D-06 EigRej= -1.00D+00 NBFU= 475

Initial guess from the checkpoint file: "/home/suqian/liuwen/qianmengshijie/ohpo/ohpo.chk"

B after Tr= 0.000000 0.000000 0.000000

Rot= 0.999933 0.001073 -0.000943 -0.011521 Ang= 1.33 deg.

ExpMin= 3.50D-02 ExpMax= 4.40D+05 ExpMxC= 1.51D+04 IAcc=3 IRadAn= 5 AccDes= 0.00D+00

Harris functional with IExCor= 402 and IRadAn= 5 diagonalized for initial guess.

HarFok: IExCor= 402 AccDes= 0.00D+00 IRadAn= 5 IDoV= 1 UseB2=F ITyADJ=14

ICtDFT= 3500011 ScaDFX= 1.000000 1.000000 1.000000 1.000000

FoFCou: FMM=F IPFlag= 0 FMFlag= 100000 FMFlg1= 0

NFxFlg= 0 DoJE=T BraDBF=F KetDBF=T FulRan=T

wScrn= 0.000000 ICntrl= 500 IOpCl= 0 I1Cent= 200000004 NGrid= 0

NMat0= 1 NMatS0= 1 NMatT0= 0 NMatD0= 1 NMatDS0= 0

NMtDT0= 0

Petite list used in FoFCou.

Requested convergence on RMS density matrix=1.00D-08 within 128 cycles.

Requested convergence on MAX density matrix=1.00D-06.

Requested convergence on energy=1.00D-06.

No special actions if energy rises.

SCF Done: E(RB3LYP) = -3225.52202099 A.U. after 13 cycles

NFock= 13 Conv=0.24D-08 -V/T= 2.0018

Calling FoFJK, ICntrl= 2127 FMM=F ISym2X=0 I1Cent= 0 IOpClX= 0 NMat=1 NMatS=1 NMatT=0.

\*\*\*\*\* Axes restored to original set \*\*\*\*\*

| Center<br>Number | Atomic<br>Number | Forces (Hartrees/Bohr) |              |              |
|------------------|------------------|------------------------|--------------|--------------|
|                  |                  | X                      | Y            | Z            |
| 1                | 6                | -0.000159636           | -0.000824211 | 0.001953193  |
| 2                | 6                | 0.000761396            | -0.000080760 | -0.001710842 |
| 3                | 7                | 0.000238151            | -0.000069529 | 0.000358376  |
| 4                | 6                | 0.002074530            | -0.002044616 | 0.000358528  |
| 5                | 7                | 0.000786238            | 0.001318759  | -0.000596851 |
| 6                | 6                | 0.001223963            | -0.000126047 | -0.001045397 |
| 7                | 6                | 0.005350954            | -0.001159755 | 0.000111778  |
| 8                | 1                | -0.000038593           | 0.000009315  | 0.000352352  |
| 9                | 1                | 0.000272018            | 0.000028292  | -0.000072083 |
| 10               | 1                | -0.000571401           | 0.000186948  | -0.001202946 |
| 11               | 1                | -0.000892285           | 0.000616303  | -0.000425733 |
| 12               | 1                | -0.000131254           | 0.000196674  | -0.000506641 |
| 13               | 1                | -0.000895468           | -0.000006880 | 0.000547428  |
| 14               | 35               | 0.000120889            | -0.001570618 | -0.000917263 |
| 15               | 1                | 0.000418870            | 0.001910417  | 0.000828760  |
| 16               | 6                | -0.000007303           | 0.000018706  | 0.000017880  |



|    |   |              |              |              |
|----|---|--------------|--------------|--------------|
| 17 | 6 | -0.000042234 | 0.000028732  | -0.000260126 |
| 18 | 1 | -0.000159756 | -0.000151905 | 0.000049537  |
| 19 | 1 | 0.000074927  | -0.000187854 | 0.000024593  |
| 20 | 1 | 0.000322630  | 0.000174927  | 0.000064332  |
| 21 | 8 | -0.006670928 | 0.002340344  | 0.000317307  |
| 22 | 1 | 0.000673058  | 0.001306931  | 0.001167807  |
| 23 | 6 | -0.000700752 | -0.002830084 | -0.000697791 |
| 24 | 6 | -0.001760053 | 0.000618696  | 0.005436064  |
| 25 | 8 | 0.000419148  | -0.001630660 | 0.000698482  |
| 26 | 1 | 0.000903562  | -0.000565585 | 0.001399788  |
| 27 | 1 | 0.001244732  | 0.000725410  | -0.000249609 |
| 28 | 1 | -0.001973032 | 0.000537787  | -0.001824858 |
| 29 | 6 | -0.001037233 | 0.001556611  | -0.004793885 |
| 30 | 1 | -0.000349395 | 0.000654450  | 0.001127099  |
| 31 | 1 | -0.000581372 | -0.000524779 | -0.000933136 |
| 32 | 1 | 0.001085633  | -0.000456019 | 0.000423856  |

-----  
Cartesian Forces: Max 0.006670928 RMS 0.001472355

GradGradGradGradGradGradGradGradGradGradGradGradGradGradGradGradGradGradGrad  
Berny optimization.

Using GEDIIS/GDIIS optimizer.

FormGI is forming the generalized inverse of G from B-inverse, IUseBI=4.

Internal Forces: Max 0.006995827 RMS 0.001067583

Search for a local minimum.

Step number 18 out of a maximum of 177

All quantities printed in internal units (Hartrees-Bohrs-Radians)

Mixed Optimization -- RFO/linear search

Update second derivatives using D2CorX and points 17 18

DE= -9.37D-04 DEPred=-7.89D-04 R= 1.19D+00

TightC=F SS= 1.41D+00 RLast= 6.47D-01 DXNew= 2.5227D+00 1.9420D+00

Trust test= 1.19D+00 RLast= 6.47D-01 DXMaxT set to 1.94D+00

ITU= 1 -1 1 1 1 1 1 1 1 1 1 1 0 1 0 1 0

Use linear search instead of GDIIS.

|                 |         |         |         |         |         |
|-----------------|---------|---------|---------|---------|---------|
| Eigenvalues --- | 0.00000 | 0.00123 | 0.00232 | 0.00279 | 0.00366 |
| Eigenvalues --- | 0.00454 | 0.00900 | 0.01229 | 0.01399 | 0.01511 |
| Eigenvalues --- | 0.01755 | 0.01885 | 0.02051 | 0.02160 | 0.02200 |
| Eigenvalues --- | 0.02260 | 0.02319 | 0.02383 | 0.02608 | 0.03055 |
| Eigenvalues --- | 0.03064 | 0.03149 | 0.03553 | 0.03707 | 0.03996 |
| Eigenvalues --- | 0.04593 | 0.05094 | 0.05257 | 0.05566 | 0.05632 |
| Eigenvalues --- | 0.05918 | 0.06246 | 0.07773 | 0.09387 | 0.09625 |
| Eigenvalues --- | 0.10357 | 0.11093 | 0.11652 | 0.11979 | 0.12848 |
| Eigenvalues --- | 0.13874 | 0.15135 | 0.15435 | 0.15990 | 0.15999 |
| Eigenvalues --- | 0.16000 | 0.16000 | 0.16004 | 0.16007 | 0.16079 |

|                 |         |         |         |         |         |
|-----------------|---------|---------|---------|---------|---------|
| Eigenvalues --- | 0.16757 | 0.17659 | 0.19756 | 0.21845 | 0.22046 |
| Eigenvalues --- | 0.22845 | 0.23649 | 0.23722 | 0.25055 | 0.25263 |
| Eigenvalues --- | 0.27744 | 0.29931 | 0.31266 | 0.32908 | 0.33100 |
| Eigenvalues --- | 0.33260 | 0.34098 | 0.34490 | 0.34674 | 0.34888 |
| Eigenvalues --- | 0.35143 | 0.35555 | 0.35687 | 0.35712 | 0.35866 |
| Eigenvalues --- | 0.36439 | 0.36662 | 0.37225 | 0.37237 | 0.37763 |
| Eigenvalues --- | 0.37965 | 0.42190 | 0.42551 | 0.45449 | 0.48651 |
| Eigenvalues --- | 0.51158 | 0.52777 | 0.54574 | 0.56338 | 0.60367 |

RFO step: Lambda=-1.17899688D-03 EMin= 2.39906276D-06

Quartic linear search produced a step of 0.42586.

Iteration 1 RMS(Cart)= 0.00209032 RMS(Int)= 0.03246026

SL EqS3 Cycle: 90 Max:0.847797E-01 RMS: 2865.34 Conv:0.173959E-01

Iteration 2 RMS(Cart)= 0.05280305 RMS(Int)= 0.01634085

SL EqS3 Cycle: 22 Max:0.853184E-01 RMS: 10920.2 Conv:0.663278E-01

Iteration 3 RMS(Cart)= 0.05743977 RMS(Int)= 0.00931541

Iteration 4 RMS(Cart)= 0.00373514 RMS(Int)= 0.00866043

Iteration 5 RMS(Cart)= 0.00463149 RMS(Int)= 0.00751866

Iteration 6 RMS(Cart)= 0.00527858 RMS(Int)= 0.00619604

Iteration 7 RMS(Cart)= 0.00867142 RMS(Int)= 0.00450379

Iteration 8 RMS(Cart)= 0.00586445 RMS(Int)= 0.00149376

Iteration 9 RMS(Cart)= 0.00001114 RMS(Int)= 0.00062340

Iteration 10 RMS(Cart)= 0.00000228 RMS(Int)= 0.00062340

Iteration 11 RMS(Cart)= 0.00000000 RMS(Int)= 0.00062340

| Variable | Old X   | -DE/DX   | Delta X<br>(Linear) | Delta X<br>(Quad) | Delta X<br>(Total) | New X   |
|----------|---------|----------|---------------------|-------------------|--------------------|---------|
| R1       | 2.56685 | -0.00124 | 0.00018             | -0.00064          | -0.00048           | 2.56637 |
| R2       | 2.62207 | -0.00050 | -0.00029            | -0.00182          | -0.00210           | 2.61997 |
| R3       | 2.03447 | -0.00010 | 0.00023             | -0.00038          | -0.00015           | 2.03432 |
| R4       | 2.62928 | 0.00010  | -0.00057            | 0.00095           | 0.00036            | 2.62964 |
| R5       | 2.03151 | -0.00025 | 0.00019             | -0.00056          | -0.00037           | 2.03114 |
| R6       | 2.54325 | -0.00015 | -0.00034            | -0.00117          | -0.00150           | 2.54175 |
| R7       | 2.68902 | -0.00021 | 0.00066             | -0.00031          | 0.00036            | 2.68937 |
| R8       | 2.52130 | -0.00135 | 0.00224             | -0.00785          | -0.00541           | 2.51589 |
| R9       | 2.09781 | 0.00026  | -0.00721            | -0.00178          | -0.00895           | 2.08886 |
| R10      | 2.80119 | -0.00320 | 0.00308             | -0.00918          | -0.00594           | 2.79524 |
| R11      | 2.91165 | -0.00255 | 0.00072             | -0.00724          | -0.00648           | 2.90518 |
| R12      | 2.06455 | -0.00081 | 0.00075             | -0.00358          | -0.00283           | 2.06172 |
| R13      | 2.06423 | -0.00081 | 0.00092             | -0.00287          | -0.00195           | 2.06228 |
| R14      | 2.07124 | 0.00023  | -0.00041            | -0.00057          | -0.00098           | 2.07026 |
| R15      | 2.06930 | -0.00019 | -0.00041            | -0.00077          | -0.00118           | 2.06812 |
| R16      | 2.68208 | -0.00700 | 0.00650             | -0.01029          | -0.00363           | 2.67845 |
| R17      | 4.17536 | -0.00179 | 0.02767             | -0.00323          | 0.02444            | 4.19980 |
| R18      | 8.94975 | -0.00182 | -0.14754            | -0.13381          | -0.28150           | 8.66824 |
| R19      | 2.50693 | -0.00035 | -0.00004            | -0.00067          | -0.00070           | 2.50623 |

|     |         |          |          |          |          |         |
|-----|---------|----------|----------|----------|----------|---------|
| R20 | 2.04733 | -0.00020 | 0.00008  | -0.00043 | -0.00035 | 2.04698 |
| R21 | 2.04362 | -0.00019 | 0.00023  | -0.00051 | -0.00028 | 2.04334 |
| R22 | 2.04683 | -0.00033 | 0.00023  | -0.00076 | -0.00053 | 2.04630 |
| R23 | 1.83973 | -0.00130 | -0.00030 | 0.00084  | 0.00050  | 1.84023 |
| R24 | 3.65549 | -0.00264 | -0.01070 | -0.09469 | -0.10543 | 3.55006 |
| R25 | 2.78067 | -0.00286 | 0.00350  | -0.00429 | -0.00124 | 2.77943 |
| R26 | 2.74662 | -0.00081 | 0.00287  | -0.00162 | 0.00149  | 2.74810 |
| R27 | 2.05660 | -0.00013 | 0.00265  | -0.00272 | -0.00007 | 2.05653 |
| R28 | 2.05058 | 0.00098  | 0.00141  | 0.00018  | 0.00159  | 2.05217 |
| R29 | 2.73209 | -0.00146 | -0.00323 | -0.00293 | -0.00595 | 2.72615 |
| R30 | 2.06124 | -0.00118 | 0.00186  | -0.00396 | -0.00210 | 2.05914 |
| R31 | 2.86141 | -0.00422 | 0.00124  | -0.01094 | -0.00969 | 2.85171 |
| R32 | 2.06919 | -0.00071 | 0.00127  | -0.00053 | 0.00074  | 2.06993 |
| R33 | 2.07028 | -0.00120 | 0.00041  | -0.00114 | -0.00073 | 2.06955 |
| R34 | 2.06540 | -0.00092 | 0.00085  | -0.00175 | -0.00090 | 2.06449 |
| A1  | 1.87466 | -0.00031 | 0.00090  | -0.00215 | -0.00121 | 1.87345 |
| A2  | 2.27544 | 0.00018  | -0.00069 | 0.00107  | 0.00036  | 2.27580 |
| A3  | 2.13295 | 0.00014  | -0.00021 | 0.00114  | 0.00090  | 2.13385 |
| A4  | 1.86236 | -0.00009 | 0.00018  | -0.00124 | -0.00106 | 1.86130 |
| A5  | 2.27707 | -0.00002 | -0.00019 | 0.00013  | -0.00007 | 2.27700 |
| A6  | 2.14366 | 0.00012  | -0.00001 | 0.00110  | 0.00109  | 2.14475 |
| A7  | 1.89688 | 0.00022  | -0.00032 | 0.00054  | 0.00026  | 1.89714 |
| A8  | 2.25134 | -0.00030 | 0.00042  | 0.00021  | 0.00062  | 2.25196 |
| A9  | 2.13490 | 0.00008  | -0.00011 | -0.00077 | -0.00090 | 2.13400 |
| A10 | 1.89184 | -0.00078 | 0.00081  | -0.00142 | -0.00067 | 1.89117 |
| A11 | 2.23242 | -0.00061 | -0.00354 | 0.00229  | -0.00144 | 2.23098 |
| A12 | 2.15892 | 0.00139  | 0.00289  | -0.00087 | 0.00209  | 2.16100 |
| A13 | 1.89872 | 0.00099  | -0.00167 | 0.00437  | 0.00264  | 1.90136 |
| A14 | 2.22380 | -0.00196 | -0.00053 | 0.00214  | 0.00142  | 2.22522 |
| A15 | 2.16041 | 0.00098  | 0.00229  | -0.00657 | -0.00406 | 2.15635 |
| A16 | 1.95048 | -0.00067 | -0.00212 | -0.00354 | -0.00591 | 1.94456 |
| A17 | 1.86442 | 0.00044  | 0.00142  | -0.00064 | 0.00092  | 1.86534 |
| A18 | 1.88998 | -0.00054 | -0.00040 | -0.00420 | -0.00456 | 1.88542 |
| A19 | 1.93453 | -0.00018 | 0.00112  | 0.00014  | 0.00120  | 1.93573 |
| A20 | 1.91907 | 0.00058  | 0.00057  | 0.00448  | 0.00520  | 1.92427 |
| A21 | 1.90373 | 0.00037  | -0.00060 | 0.00366  | 0.00302  | 1.90675 |
| A22 | 1.90880 | 0.00126  | -0.00044 | 0.00312  | 0.00273  | 1.91154 |
| A23 | 1.91372 | -0.00029 | 0.00135  | -0.00020 | 0.00079  | 1.91450 |
| A24 | 1.92045 | -0.00318 | -0.00030 | -0.00975 | -0.00944 | 1.91100 |
| A25 | 1.89080 | -0.00039 | 0.00343  | 0.00010  | 0.00357  | 1.89437 |
| A26 | 1.88514 | 0.00060  | -0.00123 | 0.00179  | 0.00032  | 1.88546 |
| A27 | 1.94424 | 0.00206  | -0.00276 | 0.00516  | 0.00224  | 1.94648 |
| A28 | 1.71016 | -0.00195 | 0.00118  | 0.00042  | 0.00067  | 1.71083 |
| A29 | 2.91471 | -0.00099 | 0.00210  | -0.00344 | -0.00152 | 2.91320 |

|     |          |          |          |          |          |          |
|-----|----------|----------|----------|----------|----------|----------|
| A30 | 2.17649  | -0.00033 | 0.00025  | -0.00098 | -0.00073 | 2.17576  |
| A31 | 1.95381  | 0.00022  | -0.00007 | 0.00041  | 0.00034  | 1.95415  |
| A32 | 2.15288  | 0.00011  | -0.00018 | 0.00057  | 0.00039  | 2.15327  |
| A33 | 2.07821  | 0.00014  | -0.00047 | 0.00025  | -0.00022 | 2.07799  |
| A34 | 2.15955  | -0.00024 | 0.00082  | -0.00043 | 0.00039  | 2.15994  |
| A35 | 2.04542  | 0.00010  | -0.00035 | 0.00018  | -0.00017 | 2.04525  |
| A36 | 1.90196  | -0.00026 | -0.00537 | -0.00590 | -0.01174 | 1.89022  |
| A37 | 3.14159  | -0.00158 | 0.00006  | -0.00476 | -0.00419 | 3.13740  |
| A38 | 2.10092  | -0.00118 | 0.00082  | -0.01188 | -0.01214 | 2.08878  |
| A39 | 2.09259  | 0.00005  | -0.00397 | -0.00302 | -0.00600 | 2.08659  |
| A40 | 2.00026  | 0.00042  | 0.00181  | 0.00369  | 0.00591  | 2.00616  |
| A41 | 1.97723  | -0.00032 | -0.00304 | 0.00268  | -0.00093 | 1.97629  |
| A42 | 2.02157  | 0.00078  | 0.00374  | 0.00882  | 0.01247  | 2.03405  |
| A43 | 2.06413  | -0.00089 | 0.00111  | -0.00821 | -0.00583 | 2.05830  |
| A44 | 2.13174  | -0.00096 | -0.00022 | 0.00017  | -0.00145 | 2.13029  |
| A45 | 1.97433  | -0.00154 | 0.00089  | -0.00664 | -0.00615 | 1.96818  |
| A46 | 2.03782  | 0.00005  | 0.00219  | 0.00212  | 0.00474  | 2.04255  |
| A47 | 2.00170  | 0.00185  | -0.00241 | 0.00764  | 0.00525  | 2.00695  |
| A48 | 1.41878  | 0.00023  | 0.01750  | 0.01602  | 0.03496  | 1.45374  |
| A49 | 0.96238  | -0.00060 | -0.02334 | -0.02146 | -0.04053 | 0.92185  |
| A50 | 2.38064  | -0.00038 | -0.00464 | -0.00722 | -0.01425 | 2.36639  |
| A51 | 2.21070  | 0.00004  | -0.00540 | 0.00055  | -0.00566 | 2.20505  |
| A52 | 1.91747  | 0.00156  | -0.00048 | 0.00789  | 0.00738  | 1.92485  |
| A53 | 1.92208  | -0.00084 | 0.00055  | -0.00435 | -0.00379 | 1.91829  |
| A54 | 1.92767  | 0.00106  | 0.00294  | 0.00562  | 0.00853  | 1.93620  |
| A55 | 1.89246  | -0.00051 | -0.00141 | -0.00339 | -0.00479 | 1.88766  |
| A56 | 1.91077  | -0.00106 | 0.00014  | -0.00220 | -0.00213 | 1.90864  |
| A57 | 1.89286  | -0.00027 | -0.00182 | -0.00390 | -0.00571 | 1.88715  |
| A58 | 3.62949  | 0.00026  | 0.01211  | 0.01657  | 0.02930  | 3.65879  |
| A59 | 4.84276  | 0.00165  | 0.06040  | 0.06525  | 0.12348  | 4.96624  |
| D1  | 0.02044  | -0.00095 | 0.00372  | -0.00010 | 0.00367  | 0.02411  |
| D2  | -3.13587 | -0.00049 | 0.00153  | -0.00077 | 0.00076  | -3.13510 |
| D3  | -3.13886 | -0.00018 | 0.00370  | 0.00356  | 0.00729  | -3.13156 |
| D4  | -0.01198 | 0.00029  | 0.00151  | 0.00289  | 0.00439  | -0.00759 |
| D5  | -0.02409 | 0.00110  | -0.00554 | 0.00487  | -0.00070 | -0.02478 |
| D6  | 3.14129  | 0.00101  | -0.00884 | 0.00776  | -0.00105 | 3.14024  |
| D7  | 3.13345  | 0.00040  | -0.00551 | 0.00157  | -0.00396 | 3.12949  |
| D8  | 0.01564  | 0.00030  | -0.00882 | 0.00446  | -0.00431 | 0.01132  |
| D9  | -0.01000 | 0.00046  | -0.00065 | -0.00477 | -0.00546 | -0.01546 |
| D10 | -3.14019 | 0.00035  | -0.00018 | -0.00281 | -0.00304 | 3.13996  |
| D11 | -3.13827 | 0.00004  | 0.00133  | -0.00416 | -0.00282 | -3.14109 |
| D12 | 0.01473  | -0.00007 | 0.00180  | -0.00219 | -0.00040 | 0.01433  |
| D13 | -0.00495 | 0.00023  | -0.00281 | 0.00790  | 0.00510  | 0.00015  |
| D14 | 3.13303  | 0.00003  | 0.00804  | 0.00864  | 0.01652  | -3.13364 |

|     |          |          |          |          |          |          |
|-----|----------|----------|----------|----------|----------|----------|
| D15 | 3.12615  | 0.00033  | -0.00324 | 0.00610  | 0.00289  | 3.12904  |
| D16 | -0.01906 | 0.00014  | 0.00761  | 0.00684  | 0.01431  | -0.00475 |
| D17 | 0.06019  | -0.00010 | -0.01086 | -0.01419 | -0.02504 | 0.03515  |
| D18 | -3.08461 | -0.00007 | -0.01053 | -0.01443 | -0.02494 | -3.10955 |
| D19 | -3.06861 | -0.00023 | -0.01033 | -0.01200 | -0.02234 | -3.09095 |
| D20 | 0.06977  | -0.00020 | -0.01000 | -0.01223 | -0.02224 | 0.04753  |
| D21 | 0.01784  | -0.00082 | 0.00515  | -0.00789 | -0.00274 | 0.01509  |
| D22 | 3.13670  | -0.00078 | 0.00824  | -0.01051 | -0.00232 | 3.13438  |
| D23 | -3.12033 | -0.00063 | -0.00502 | -0.00861 | -0.01359 | -3.13391 |
| D24 | -0.00146 | -0.00058 | -0.00192 | -0.01123 | -0.01317 | -0.01462 |
| D25 | -3.02673 | -0.00017 | -0.04645 | 0.00851  | -0.03810 | -3.06483 |
| D26 | 0.11073  | -0.00040 | -0.03413 | 0.00936  | -0.02506 | 0.08567  |
| D27 | 1.33672  | 0.00002  | 0.03041  | 0.01200  | 0.04257  | 1.37929  |
| D28 | -2.82785 | -0.00031 | 0.03145  | 0.00964  | 0.04112  | -2.78672 |
| D29 | -0.77960 | 0.00008  | 0.03130  | 0.01144  | 0.04280  | -0.73679 |
| D30 | -1.77778 | -0.00008 | 0.02672  | 0.01512  | 0.04207  | -1.73571 |
| D31 | 0.34084  | -0.00041 | 0.02777  | 0.01277  | 0.04062  | 0.38146  |
| D32 | 2.38909  | -0.00002 | 0.02762  | 0.01457  | 0.04230  | 2.43139  |
| D33 | -0.98463 | 0.00030  | -0.02653 | 0.01534  | -0.01110 | -0.99572 |
| D34 | 1.08630  | 0.00041  | -0.02183 | 0.01721  | -0.00463 | 1.08168  |
| D35 | -3.05267 | 0.00070  | -0.02459 | 0.01710  | -0.00750 | -3.06017 |
| D36 | -3.06217 | 0.00030  | -0.02769 | 0.01837  | -0.00918 | -3.07135 |
| D37 | -0.99124 | 0.00041  | -0.02299 | 0.02024  | -0.00271 | -0.99395 |
| D38 | 1.15297  | 0.00070  | -0.02574 | 0.02013  | -0.00559 | 1.14739  |
| D39 | 1.11476  | -0.00043 | -0.02804 | 0.01075  | -0.01721 | 1.09755  |
| D40 | -3.09750 | -0.00031 | -0.02334 | 0.01262  | -0.01073 | -3.10824 |
| D41 | -0.95328 | -0.00002 | -0.02609 | 0.01251  | -0.01361 | -0.96690 |
| D42 | -1.79391 | 0.00054  | -0.00021 | 0.01094  | 0.01118  | -1.78273 |
| D43 | 2.40674  | 0.00049  | 0.00123  | 0.01173  | 0.01311  | 2.41985  |
| D44 | 0.33226  | -0.00063 | -0.00057 | 0.00745  | 0.00721  | 0.33947  |
| D45 | 0.40259  | -0.00042 | 0.04738  | -0.01378 | 0.03307  | 0.43566  |
| D46 | -0.37702 | 0.00048  | -0.01028 | 0.01478  | 0.00582  | -0.37120 |
| D47 | 2.73473  | 0.00021  | -0.05446 | -0.03613 | -0.09169 | 2.64303  |
| D48 | -3.13824 | -0.00004 | -0.00029 | -0.00217 | -0.00246 | -3.14070 |
| D49 | 0.00352  | 0.00002  | -0.00126 | -0.00065 | -0.00191 | 0.00160  |
| D50 | 0.00692  | -0.00007 | -0.00066 | -0.00191 | -0.00257 | 0.00435  |
| D51 | -3.13451 | -0.00002 | -0.00163 | -0.00039 | -0.00202 | -3.13654 |
| D52 | -1.36512 | 0.00043  | 0.02636  | -0.06304 | -0.03562 | -1.40074 |
| D53 | 2.03300  | 0.00079  | -0.02497 | 0.05033  | 0.02346  | 2.05646  |
| D54 | 1.99748  | 0.00050  | -0.07938 | -0.00944 | -0.08612 | 1.91136  |
| D55 | -2.80976 | -0.00086 | -0.08536 | -0.01491 | -0.10002 | -2.90978 |
| D56 | -2.72311 | -0.00006 | 0.00166  | 0.00650  | 0.00822  | -2.71488 |
| D57 | -0.03737 | 0.00041  | -0.00279 | 0.00735  | 0.00445  | -0.03292 |
| D58 | 0.01438  | -0.00088 | 0.00418  | -0.00872 | -0.00451 | 0.00987  |

|     |          |          |          |          |          |          |
|-----|----------|----------|----------|----------|----------|----------|
| D59 | 2.70011  | -0.00041 | -0.00027 | -0.00788 | -0.00828 | 2.69183  |
| D60 | -0.00663 | 0.00064  | -0.06894 | -0.05590 | -0.12631 | -0.13294 |
| D61 | 0.03616  | 0.00101  | -0.00537 | 0.01687  | 0.01214  | 0.04830  |
| D62 | -2.37948 | -0.00068 | -0.07336 | -0.07657 | -0.15140 | -2.53088 |
| D63 | -2.33669 | -0.00031 | -0.00979 | -0.00379 | -0.01295 | -2.34964 |
| D64 | 2.11887  | 0.00104  | 0.00327  | 0.01596  | 0.02043  | 2.13929  |
| D65 | -0.26141 | -0.00016 | 0.00358  | 0.00910  | 0.01383  | -0.24758 |
| D66 | 2.48471  | 0.00040  | -0.01385 | 0.00318  | -0.01072 | 2.47400  |
| D67 | -1.71513 | 0.00022  | -0.01555 | 0.00122  | -0.01439 | -1.72952 |
| D68 | 0.37513  | 0.00002  | -0.01560 | -0.00283 | -0.01851 | 0.35662  |
| D69 | 1.27080  | -0.00002 | -0.01620 | 0.00109  | -0.01511 | 1.25569  |
| D70 | -2.92905 | -0.00020 | -0.01790 | -0.00087 | -0.01878 | -2.94783 |
| D71 | -0.83878 | -0.00040 | -0.01795 | -0.00492 | -0.02290 | -0.86169 |
| D72 | -1.09778 | 0.00022  | -0.01735 | 0.00025  | -0.01700 | -1.11477 |
| D73 | 0.98556  | 0.00004  | -0.01905 | -0.00170 | -0.02067 | 0.96489  |
| D74 | 3.07583  | -0.00016 | -0.01910 | -0.00575 | -0.02479 | 3.05103  |

| Item                 | Value    | Threshold | Converged? |
|----------------------|----------|-----------|------------|
| Maximum Force        | 0.006996 | 0.000450  | NO         |
| RMS Force            | 0.001068 | 0.000300  | NO         |
| Maximum Displacement | 0.584263 | 0.001800  | NO         |
| RMS Displacement     | 0.121382 | 0.001200  | NO         |

Predicted change in Energy=-7.700962D-04

GradGradGradGradGradGradGradGradGradGradGradGradGradGradGradGradGradGrad

Input orientation:

| Center Number | Atomic Number | Atomic Type | Coordinates (Angstroms) |           |           |
|---------------|---------------|-------------|-------------------------|-----------|-----------|
|               |               |             | X                       | Y         | Z         |
| 1             | 6             | 0           | -1.382622               | -1.900376 | -0.293280 |
| 2             | 6             | 0           | -2.506864               | -1.146206 | -0.185372 |
| 3             | 7             | 0           | -2.096699               | 0.129120  | 0.191068  |
| 4             | 6             | 0           | -0.758251               | 0.129888  | 0.324054  |
| 5             | 7             | 0           | -0.308659               | -1.092183 | 0.046728  |
| 6             | 6             | 0           | 1.122571                | -1.464126 | 0.081505  |
| 7             | 6             | 0           | 1.735436                | -1.470001 | -1.328395 |
| 8             | 1             | 0           | -1.259571               | -2.933779 | -0.568635 |
| 9             | 1             | 0           | -3.537018               | -1.401518 | -0.355259 |
| 10            | 1             | 0           | 1.623652                | -0.735791 | 0.720853  |
| 11            | 1             | 0           | 1.203255                | -2.454551 | 0.532620  |
| 12            | 1             | 0           | 1.170786                | -2.155172 | -1.970191 |
| 13            | 1             | 0           | 1.680368                | -0.465229 | -1.758650 |
| 14            | 35            | 0           | 1.575396                | 2.337698  | 1.115524  |
| 15            | 1             | 0           | -0.106704               | 0.973098  | 0.617894  |

|    |   |   |           |           |           |
|----|---|---|-----------|-----------|-----------|
| 16 | 6 | 0 | -2.885070 | 1.288779  | 0.434030  |
| 17 | 6 | 0 | -4.209243 | 1.327449  | 0.370942  |
| 18 | 1 | 0 | -2.275022 | 2.148577  | 0.682916  |
| 19 | 1 | 0 | -4.717633 | 2.260259  | 0.572401  |
| 20 | 1 | 0 | -4.825272 | 0.470892  | 0.127240  |
| 21 | 8 | 0 | 3.072940  | -1.934185 | -1.260770 |
| 22 | 1 | 0 | 3.666938  | -1.164567 | -1.316942 |
| 23 | 6 | 0 | 4.732635  | 1.724524  | -1.063654 |
| 24 | 6 | 0 | 5.674713  | 0.818155  | -0.389661 |
| 25 | 8 | 0 | 4.811930  | 0.320246  | -1.433131 |
| 26 | 1 | 0 | 3.812166  | 2.015693  | -0.561373 |
| 27 | 1 | 0 | 5.094354  | 2.392714  | -1.839537 |
| 28 | 1 | 0 | 6.721584  | 0.854836  | -0.689754 |
| 29 | 6 | 0 | 5.429635  | 0.302417  | 1.007200  |
| 30 | 1 | 0 | 5.749226  | -0.742175 | 1.087865  |
| 31 | 1 | 0 | 6.005062  | 0.892014  | 1.728749  |
| 32 | 1 | 0 | 4.372450  | 0.379112  | 1.271769  |

-----  
Distance matrix (angstroms):

|    |    | 1        | 2        | 3        | 4        | 5        |
|----|----|----------|----------|----------|----------|----------|
| 1  | C  | 0.000000 |          |          |          |          |
| 2  | C  | 1.358063 | 0.000000 |          |          |          |
| 3  | N  | 2.205301 | 1.391546 | 0.000000 |          |          |
| 4  | C  | 2.211993 | 2.223865 | 1.345039 | 0.000000 |          |
| 5  | N  | 1.386426 | 2.211084 | 2.170140 | 1.331354 | 0.000000 |
| 6  | C  | 2.570364 | 3.653094 | 3.593625 | 2.477338 | 1.479179 |
| 7  | C  | 3.313453 | 4.405502 | 4.421676 | 3.392449 | 2.492395 |
| 8  | H  | 1.076515 | 2.213153 | 3.264856 | 3.230212 | 2.162031 |
| 9  | H  | 2.212266 | 1.074832 | 2.171600 | 3.244721 | 3.267964 |
| 10 | H  | 3.379705 | 4.248628 | 3.856132 | 2.565212 | 2.077326 |
| 11 | H  | 2.770556 | 3.999032 | 4.204963 | 3.251204 | 2.092371 |
| 12 | H  | 3.065427 | 4.210546 | 4.534919 | 3.769117 | 2.717842 |
| 13 | H  | 3.686308 | 4.524582 | 4.291956 | 3.261700 | 2.758385 |
| 14 | Br | 5.356853 | 5.522206 | 4.383688 | 3.308589 | 4.056609 |
| 15 | H  | 3.273386 | 3.301129 | 2.203306 | 1.105377 | 2.152302 |
| 16 | C  | 3.599588 | 2.540837 | 1.423154 | 2.424558 | 3.529430 |
| 17 | C  | 4.341640 | 3.053940 | 2.435403 | 3.653177 | 4.601554 |
| 18 | H  | 4.259502 | 3.415153 | 2.086126 | 2.550389 | 3.843677 |
| 19 | H  | 5.402091 | 4.131068 | 3.399480 | 4.502984 | 5.563655 |
| 20 | H  | 4.201379 | 2.843897 | 2.750635 | 4.086035 | 4.780114 |
| 21 | O  | 4.559519 | 5.736863 | 5.752411 | 4.631425 | 3.722060 |
| 22 | H  | 5.204551 | 6.276672 | 6.096493 | 4.893953 | 4.203594 |
| 23 | C  | 7.150506 | 7.837270 | 7.124566 | 5.883742 | 5.880597 |
| 24 | C  | 7.563443 | 8.416569 | 7.823481 | 6.508926 | 6.296075 |

|    |    |          |          |          |           |          |
|----|----|----------|----------|----------|-----------|----------|
| 25 | O  | 6.678539 | 7.567834 | 7.099556 | 5.843873  | 5.514106 |
| 26 | H  | 6.511013 | 7.075953 | 6.248200 | 5.022843  | 5.197103 |
| 27 | H  | 7.922926 | 8.546270 | 7.807590 | 6.637357  | 6.700378 |
| 28 | H  | 8.568929 | 9.456364 | 8.891829 | 7.582961  | 7.331958 |
| 29 | C  | 7.276702 | 8.155290 | 7.572438 | 6.227872  | 5.982929 |
| 30 | H  | 7.356103 | 8.363456 | 7.944932 | 6.609929  | 6.156658 |
| 31 | H  | 8.152541 | 8.959413 | 8.281607 | 6.949562  | 6.828565 |
| 32 | H  | 6.384849 | 7.195472 | 6.563559 | 5.223444  | 5.057491 |
|    |    | 6        | 7        | 8        | 9         | 10       |
| 6  | C  | 0.000000 |          |          |           |          |
| 7  | C  | 1.537353 | 0.000000 |          |           |          |
| 8  | H  | 2.873528 | 3.419056 | 0.000000 |           |          |
| 9  | H  | 4.680433 | 5.361945 | 2.753202 | 0.000000  |          |
| 10 | H  | 1.091017 | 2.179673 | 3.847973 | 5.313541  | 0.000000 |
| 11 | H  | 1.091310 | 2.171619 | 2.740061 | 4.936334  | 1.779409 |
| 12 | H  | 2.165485 | 1.095532 | 2.911567 | 5.033827  | 3.075946 |
| 13 | H  | 2.166818 | 1.094404 | 4.019094 | 5.483362  | 2.494865 |
| 14 | Br | 3.965868 | 4.527353 | 6.217869 | 6.502439  | 3.099102 |
| 15 | H  | 2.781886 | 3.626328 | 4.242716 | 4.284026  | 2.434140 |
| 16 | C  | 4.874827 | 5.662692 | 4.634391 | 2.878491  | 4.950729 |
| 17 | C  | 6.025356 | 6.786213 | 5.267014 | 2.902846  | 6.196940 |
| 18 | H  | 4.995694 | 5.763962 | 5.331779 | 3.908147  | 4.849813 |
| 19 | H  | 6.944063 | 7.692202 | 6.343358 | 3.957653  | 7.015002 |
| 20 | H  | 6.254856 | 6.994915 | 4.978981 | 2.323429  | 6.587646 |
| 21 | O  | 2.413834 | 1.417377 | 4.499877 | 6.692924  | 2.731925 |
| 22 | H  | 2.918765 | 1.955536 | 5.287774 | 7.271723  | 2.917443 |
| 23 | C  | 4.950902 | 4.388426 | 7.606008 | 8.869110  | 4.347803 |
| 24 | C  | 5.113980 | 4.651320 | 7.886274 | 9.475448  | 4.478737 |
| 25 | O  | 4.369150 | 3.561007 | 6.942560 | 8.592509  | 3.989985 |
| 26 | H  | 4.444811 | 4.129309 | 7.086595 | 8.107423  | 3.742240 |
| 27 | H  | 5.860092 | 5.144334 | 8.388033 | 9.544625  | 5.328126 |
| 28 | H  | 6.109122 | 5.538448 | 8.835559 | 10.509136 | 5.523479 |
| 29 | C  | 4.746408 | 4.716310 | 7.596163 | 9.228248  | 3.955425 |
| 30 | H  | 4.789563 | 4.741155 | 7.527972 | 9.420811  | 4.141872 |
| 31 | H  | 5.665997 | 5.758034 | 8.525817 | 10.032680 | 4.781461 |
| 32 | H  | 3.921220 | 4.139314 | 6.788372 | 8.269072  | 3.017021 |
|    |    | 11       | 12       | 13       | 14        | 15       |
| 11 | H  | 0.000000 |          |          |           |          |
| 12 | H  | 2.520862 | 0.000000 |          |           |          |
| 13 | H  | 3.071637 | 1.777732 | 0.000000 |           |          |
| 14 | Br | 4.841892 | 5.465458 | 4.016005 | 0.000000  |          |
| 15 | H  | 3.670428 | 4.256317 | 3.303085 | 2.222438  | 0.000000 |
| 16 | C  | 5.544063 | 5.838753 | 5.359815 | 4.632539  | 2.802280 |
| 17 | C  | 6.604907 | 6.823069 | 6.514321 | 5.919211  | 4.125212 |



|    |   |          |           |          |           |           |
|----|---|----------|-----------|----------|-----------|-----------|
| 18 | H | 5.771463 | 6.118401  | 5.332761 | 3.879257  | 2.467303  |
| 19 | H | 7.568879 | 7.786802  | 7.334610 | 6.316897  | 4.787433  |
| 20 | H | 6.713098 | 6.873729  | 6.837855 | 6.740195  | 4.770518  |
| 21 | O | 2.642490 | 2.042132  | 2.084460 | 5.112573  | 4.700193  |
| 22 | H | 3.339861 | 2.763839  | 2.151892 | 4.749453  | 4.749061  |
| 23 | C | 5.698182 | 5.344213  | 3.820258 | 3.884965  | 5.177977  |
| 24 | C | 5.617396 | 5.623531  | 4.413161 | 4.623742  | 5.870601  |
| 25 | O | 4.958448 | 4.435544  | 3.244936 | 4.587037  | 5.368974  |
| 26 | H | 5.290209 | 5.133981  | 3.483247 | 2.814038  | 4.223176  |
| 27 | H | 6.653102 | 6.007889  | 4.453054 | 4.595485  | 5.924972  |
| 28 | H | 6.549671 | 6.442905  | 5.319677 | 5.651651  | 6.953377  |
| 29 | C | 5.068371 | 5.748251  | 4.721886 | 4.359962  | 5.590387  |
| 30 | H | 4.889415 | 5.684222  | 4.973424 | 5.187219  | 6.120045  |
| 31 | H | 5.973908 | 6.807182  | 5.719007 | 4.699786  | 6.212428  |
| 32 | H | 4.315065 | 5.213785  | 4.140490 | 3.418184  | 4.565435  |
|    |   | 16       | 17        | 18       | 19        | 20        |
| 16 | C | 0.000000 |           |          |           |           |
| 17 | C | 1.326240 | 0.000000  |          |           |           |
| 18 | H | 1.083215 | 2.124333  | 0.000000 |           |           |
| 19 | H | 2.078752 | 1.081286  | 2.447659 | 0.000000  |           |
| 20 | H | 2.127780 | 1.082854  | 3.102770 | 1.847049  | 0.000000  |
| 21 | O | 6.982673 | 8.144381  | 7.003397 | 9.035868  | 8.372140  |
| 22 | H | 7.212046 | 8.431686  | 7.091068 | 9.252031  | 8.768011  |
| 23 | C | 7.775754 | 9.064928  | 7.234472 | 9.605793  | 9.713054  |
| 24 | C | 8.612191 | 9.926252  | 8.131342 | 10.535942 | 10.518435 |
| 25 | O | 7.979232 | 9.254766  | 7.618749 | 9.929671  | 9.763868  |
| 26 | H | 6.809713 | 8.104684  | 6.214481 | 8.608294  | 8.801474  |
| 27 | H | 8.370125 | 9.621743  | 7.792951 | 10.104954 | 10.293717 |
| 28 | H | 9.681890 | 10.992335 | 9.192221 | 11.594134 | 11.582089 |
| 29 | C | 8.392601 | 9.714088  | 7.929390 | 10.343561 | 10.293972 |
| 30 | H | 8.894006 | 10.196491 | 8.538676 | 10.901168 | 10.687111 |
| 31 | H | 8.992673 | 10.313355 | 8.439936 | 10.871312 | 10.956200 |
| 32 | H | 7.362125 | 8.680800  | 6.904103 | 9.308998  | 9.269114  |
|    |   | 21       | 22        | 23       | 24        | 25        |
| 21 | O | 0.000000 |           |          |           |           |
| 22 | H | 0.973807 | 0.000000  |          |           |           |
| 23 | C | 4.022386 | 3.089775  | 0.000000 |           |           |
| 24 | C | 3.886313 | 2.970219  | 1.470810 | 0.000000  |           |
| 25 | O | 2.852412 | 1.878610  | 1.454234 | 1.442615  | 0.000000  |
| 26 | H | 4.078866 | 3.272007  | 1.088269 | 2.220960  | 2.152680  |
| 27 | H | 4.810733 | 3.868447  | 1.085963 | 2.217700  | 2.130741  |
| 28 | H | 4.627883 | 3.715134  | 2.202743 | 1.089652  | 2.117824  |
| 29 | C | 3.962334 | 3.265085  | 2.607035 | 1.509062  | 2.517358  |
| 30 | H | 3.754927 | 3.208962  | 3.427403 | 2.150177  | 2.891830  |

|    |   |          |          |          |          |          |
|----|---|----------|----------|----------|----------|----------|
| 31 | H | 5.051927 | 4.355753 | 3.179569 | 2.145285 | 3.427531 |
| 32 | H | 3.667946 | 3.095500 | 2.719203 | 2.156153 | 2.741002 |
|    |   | 26       | 27       | 28       | 29       | 30       |
| 26 | H | 0.000000 |          |          |          |          |
| 27 | H | 1.849286 | 0.000000 |          |          |          |
| 28 | H | 3.135089 | 2.516932 | 0.000000 |          |          |
| 29 | C | 2.830537 | 3.547628 | 2.203168 | 0.000000 |          |
| 30 | H | 3.752068 | 4.338901 | 2.579894 | 1.095361 | 0.000000 |
| 31 | H | 3.363942 | 3.976701 | 2.522686 | 1.095160 | 1.773911 |
| 32 | H | 2.520461 | 3.775707 | 3.097147 | 1.092484 | 1.785110 |
|    |   | 31       | 32       |          |          |          |
| 31 | H | 0.000000 |          |          |          |          |
| 32 | H | 1.771249 | 0.000000 |          |          |          |

Stoichiometry C10H17BrN2O2

Framework group C1[X(C10H17BrN2O2)]

Deg. of freedom 90

Full point group C1 NOp 1

Largest Abelian subgroup C1 NOp 1

Largest concise Abelian subgroup C1 NOp 1

Standard orientation:

| Center<br>Number | Atomic<br>Number | Atomic<br>Type | Coordinates (Angstroms) |           |           |
|------------------|------------------|----------------|-------------------------|-----------|-----------|
|                  |                  |                | X                       | Y         | Z         |
| 1                | 6                | 0              | -2.689416               | 2.179398  | -0.347816 |
| 2                | 6                | 0              | -3.761744               | 1.403699  | -0.043288 |
| 3                | 7                | 0              | -3.288674               | 0.101035  | 0.081891  |
| 4                | 6                | 0              | -1.966011               | 0.097280  | -0.162394 |
| 5                | 7                | 0              | -1.586646               | 1.343758  | -0.436030 |
| 6                | 6                | 0              | -0.191455               | 1.723965  | -0.747244 |
| 7                | 6                | 0              | 0.515568                | 2.318999  | 0.481376  |
| 8                | 1                | 0              | -2.621648               | 3.240173  | -0.518253 |
| 9                | 1                | 0              | -4.793250               | 1.666778  | 0.105201  |
| 10               | 1                | 0              | 0.314848                | 0.819528  | -1.087787 |
| 11               | 1                | 0              | -0.213075               | 2.451882  | -1.560034 |
| 12               | 1                | 0              | -0.050740               | 3.182535  | 0.847151  |
| 13               | 1                | 0              | 0.562257                | 1.570537  | 1.278460  |
| 14               | 35               | 0              | 0.458814                | -2.152907 | -0.222724 |
| 15               | 1                | 0              | -1.277869               | -0.767748 | -0.155670 |
| 16               | 6                | 0              | -4.007213               | -1.087285 | 0.393284  |
| 17               | 6                | 0              | -5.317698               | -1.147165 | 0.588101  |
| 18               | 1                | 0              | -3.356069               | -1.950987 | 0.451463  |
| 19               | 1                | 0              | -5.770957               | -2.100716 | 0.821507  |
| 20               | 1                | 0              | -5.974922               | -0.288737 | 0.527027  |

|    |   |   |          |           |           |
|----|---|---|----------|-----------|-----------|
| 21 | 8 | 0 | 1.808642 | 2.766872  | 0.112149  |
| 22 | 1 | 0 | 2.458501 | 2.107665  | 0.414520  |
| 23 | 6 | 0 | 3.707532 | -0.597305 | 1.232917  |
| 24 | 6 | 0 | 4.533605 | -0.003430 | 0.170751  |
| 25 | 8 | 0 | 3.711813 | 0.838969  | 1.005113  |
| 26 | 1 | 0 | 2.777625 | -1.100205 | 0.974667  |
| 27 | 1 | 0 | 4.168856 | -0.883234 | 2.173523  |
| 28 | 1 | 0 | 5.598683 | 0.123019  | 0.362999  |
| 29 | 6 | 0 | 4.156230 | -0.102140 | -1.287026 |
| 30 | 1 | 0 | 4.394116 | 0.833200  | -1.805067 |
| 31 | 1 | 0 | 4.720920 | -0.909877 | -1.764582 |
| 32 | 1 | 0 | 3.091438 | -0.318432 | -1.400849 |

-----  
Rotational constants (GHZ):      0.5690779      0.2234424      0.1713774

Standard basis: 6-311++G(d,p) (5D, 7F)

There are 492 symmetry adapted cartesian basis functions of A symmetry.

There are 475 symmetry adapted basis functions of A symmetry.

475 basis functions, 751 primitive gaussians, 492 cartesian basis functions

71 alpha electrons      71 beta electrons

nuclear repulsion energy      1300.5523443860 Hartrees.

NAtoms= 32 NActive= 32 NUniq= 32 SFac= 1.00D+00 NATFMM= 60 NAOKFM=F

Big=F

Integral buffers will be 131072 words long.

Raffenetti 2 integral format.

Two-electron integral symmetry is turned on.

One-electron integrals computed using PRISM.

NBasis= 475 RedAO= T EigKep= 3.71D-06 NBF= 475

NBsUse= 475 1.00D-06 EigRej= -1.00D+00 NBFU= 475

Initial guess from the checkpoint file: "/home/suqian/liuwen/qianmengshijie/ohpo/ohpo.chk"

B after Tr= 0.000000 0.000000 0.000000

Rot= 0.999967 0.002268 -0.001058 -0.007765 Ang= 0.93 deg.

ExpMin= 3.50D-02 ExpMax= 4.40D+05 ExpMxC= 1.51D+04 IAcc=3 IRadAn= 5 AccDes=

0.00D+00

Harris functional with IExCor= 402 and IRadAn= 5 diagonalized for initial guess.

HarFok: IExCor= 402 AccDes= 0.00D+00 IRadAn= 5 IDoV= 1 UseB2=F ITyADJ=14

ICtDFT= 3500011 ScaDFX= 1.000000 1.000000 1.000000 1.000000

FoFCou: FMM=F IPFlag= 0 FMFlag= 100000 FMFlg1= 0

NFxFlg= 0 DoJE=T BraDBF=F KetDBF=T FulRan=T

wScrn= 0.000000 ICntrl= 500 IOpCl= 0 I1Cent= 20000004 NGrid=

0

NMat0= 1 NMatS0= 1 NMatT0= 0 NMatD0= 1 NMtDS0= 0

NMtDT0= 0

Petite list used in FoFCou.

Requested convergence on RMS density matrix=1.00D-08 within 128 cycles.

Requested convergence on MAX density matrix=1.00D-06.

Requested convergence on energy=1.00D-06.

No special actions if energy rises.

SCF Done: E(RB3LYP) = -3225.52286184 A.U. after 12 cycles

NFock= 12 Conv=0.58D-08 -V/T= 2.0018

Calling FoFJK, ICntrl= 2127 FMM=F ISym2X=0 l1Cent= 0 IOpCIX= 0 NMat=1 NMatS=1

NMatT=0.

\*\*\*\*\* Axes restored to original set \*\*\*\*\*

| Center<br>Number | Atomic<br>Number | Forces (Hartrees/Bohr) |              |              |
|------------------|------------------|------------------------|--------------|--------------|
|                  |                  | X                      | Y            | Z            |
| 1                | 6                | -0.000461782           | -0.000955463 | 0.001782253  |
| 2                | 6                | 0.000676890            | 0.000525026  | -0.002259226 |
| 3                | 7                | -0.001154950           | 0.000393493  | 0.000914708  |
| 4                | 6                | -0.000086457           | -0.001950795 | 0.000228354  |
| 5                | 7                | 0.001104319            | 0.000297650  | 0.000014497  |
| 6                | 6                | -0.000372795           | -0.000631109 | -0.001367369 |
| 7                | 6                | 0.006523426            | -0.002966091 | 0.000709604  |
| 8                | 1                | 0.000077003            | -0.000076800 | 0.000538313  |
| 9                | 1                | 0.000136493            | 0.000117217  | -0.000108164 |
| 10               | 1                | 0.000031367            | 0.000588033  | -0.000785299 |
| 11               | 1                | -0.000061180           | 0.000132919  | -0.000314225 |
| 12               | 1                | -0.000725559           | 0.000282259  | -0.000712206 |
| 13               | 1                | -0.000885170           | 0.000380878  | 0.000229128  |
| 14               | 35               | -0.001042124           | -0.001531113 | -0.000441746 |
| 15               | 1                | 0.001571883            | 0.003364073  | 0.000940331  |
| 16               | 6                | 0.000071614            | -0.000407479 | 0.000059132  |
| 17               | 6                | -0.000299710           | 0.000265184  | -0.000131691 |
| 18               | 1                | -0.000086722           | -0.000050395 | 0.000026430  |
| 19               | 1                | -0.000007666           | -0.000088725 | -0.000012184 |
| 20               | 1                | 0.000236693            | 0.000015883  | 0.000026802  |
| 21               | 8                | -0.006496298           | 0.002225818  | -0.000487152 |
| 22               | 1                | 0.002261979            | 0.001230511  | 0.000991747  |
| 23               | 6                | 0.000867377            | -0.001865513 | -0.000545589 |
| 24               | 6                | -0.000830022           | 0.001862890  | 0.004208680  |
| 25               | 8                | -0.001404945           | -0.001794109 | -0.000641066 |
| 26               | 1                | 0.000871956            | -0.000458456 | 0.000730858  |
| 27               | 1                | 0.000465545            | 0.000440247  | 0.000038631  |
| 28               | 1                | -0.000834874           | 0.000140481  | -0.001579920 |
| 29               | 6                | -0.000270361           | -0.000141200 | -0.001819514 |
| 30               | 1                | -0.000083632           | 0.000697616  | 0.000386635  |
| 31               | 1                | -0.000411732           | -0.000273759 | -0.000662294 |
| 32               | 1                | 0.000619433            | 0.000230828  | 0.000041542  |

-----  
Cartesian Forces: Max 0.006523426 RMS 0.001412238

GradGradGradGradGradGradGradGradGradGradGradGradGradGradGradGradGradGradGradGrad

Berny optimization.

Using GEDIIS/GDIIS optimizer.

FormGI is forming the generalized inverse of G from B-inverse, IUseBI=4.

GSVD: received Info= 1 from GESDD.

Internal Forces: Max 0.005551445 RMS 0.000734119

Search for a local minimum.

Step number 19 out of a maximum of 177

All quantities printed in internal units (Hartrees-Bohrs-Radians)

Mixed Optimization -- En-DIIS/RFO-DIIS

Update second derivatives using D2CorX and points 18 19

DE= -8.41D-04 DEPred=-7.70D-04 R= 1.09D+00

TightC=F SS= 1.41D+00 RLast= 4.48D-01 DXNew= 3.2661D+00 1.3440D+00

Trust test= 1.09D+00 RLast= 4.48D-01 DXMaxT set to 1.94D+00

ITU= 1 1 -1 1 1 1 1 1 1 1 1 1 1 0 1 0 1 0

Use linear search instead of GDIIS.

|                 |         |         |         |         |         |
|-----------------|---------|---------|---------|---------|---------|
| Eigenvalues --- | 0.00000 | 0.00178 | 0.00231 | 0.00288 | 0.00436 |
| Eigenvalues --- | 0.00450 | 0.00918 | 0.01073 | 0.01399 | 0.01511 |
| Eigenvalues --- | 0.01609 | 0.01869 | 0.02044 | 0.02139 | 0.02190 |
| Eigenvalues --- | 0.02270 | 0.02322 | 0.02384 | 0.02493 | 0.03058 |
| Eigenvalues --- | 0.03062 | 0.03244 | 0.03426 | 0.03698 | 0.04034 |
| Eigenvalues --- | 0.04643 | 0.05155 | 0.05195 | 0.05476 | 0.05630 |
| Eigenvalues --- | 0.05881 | 0.06254 | 0.07959 | 0.09369 | 0.09537 |
| Eigenvalues --- | 0.10400 | 0.10966 | 0.11562 | 0.11782 | 0.12931 |
| Eigenvalues --- | 0.13843 | 0.14673 | 0.15243 | 0.15991 | 0.16000 |
| Eigenvalues --- | 0.16000 | 0.16001 | 0.16004 | 0.16033 | 0.16073 |
| Eigenvalues --- | 0.16448 | 0.17488 | 0.19710 | 0.21975 | 0.22097 |
| Eigenvalues --- | 0.22867 | 0.23521 | 0.23783 | 0.25047 | 0.25274 |
| Eigenvalues --- | 0.27785 | 0.28034 | 0.31384 | 0.32934 | 0.33053 |
| Eigenvalues --- | 0.33211 | 0.34071 | 0.34110 | 0.34508 | 0.34779 |
| Eigenvalues --- | 0.35022 | 0.35686 | 0.35693 | 0.35859 | 0.35999 |
| Eigenvalues --- | 0.36436 | 0.36658 | 0.37202 | 0.37228 | 0.37754 |
| Eigenvalues --- | 0.38007 | 0.42152 | 0.42389 | 0.44287 | 0.46008 |
| Eigenvalues --- | 0.49365 | 0.52987 | 0.54675 | 0.56435 | 0.60368 |

RFO step: Lambda=-9.05216088D-04 EMin= 2.69463700D-06

Quartic linear search produced a step of 0.17451.

Iteration 1 RMS(Cart)= 0.04142387 RMS(Int)= 0.00514656

Iteration 2 RMS(Cart)= 0.00278257 RMS(Int)= 0.00025981

Iteration 3 RMS(Cart)= 0.00001071 RMS(Int)= 0.00012002

Iteration 4 RMS(Cart)= 0.00000023 RMS(Int)= 0.00012002

| Variable | Old X | -DE/DX | Delta X | Delta X | Delta X | New X |
|----------|-------|--------|---------|---------|---------|-------|
|----------|-------|--------|---------|---------|---------|-------|

|     |         |          | (Linear) | (Quad)   | (Total)  |         |
|-----|---------|----------|----------|----------|----------|---------|
| R1  | 2.56637 | -0.00020 | -0.00008 | -0.00021 | -0.00030 | 2.56606 |
| R2  | 2.61997 | 0.00003  | -0.00037 | -0.00059 | -0.00095 | 2.61902 |
| R3  | 2.03432 | -0.00006 | -0.00003 | -0.00014 | -0.00017 | 2.03415 |
| R4  | 2.62964 | 0.00003  | 0.00006  | 0.00029  | 0.00034  | 2.62998 |
| R5  | 2.03114 | -0.00014 | -0.00007 | -0.00037 | -0.00043 | 2.03070 |
| R6  | 2.54175 | 0.00088  | -0.00026 | 0.00189  | 0.00163  | 2.54339 |
| R7  | 2.68937 | -0.00016 | 0.00006  | -0.00025 | -0.00019 | 2.68918 |
| R8  | 2.51589 | 0.00069  | -0.00094 | -0.00243 | -0.00322 | 2.51268 |
| R9  | 2.08886 | 0.00205  | -0.00156 | 0.00344  | 0.00196  | 2.09082 |
| R10 | 2.79524 | -0.00067 | -0.00104 | -0.00474 | -0.00570 | 2.78954 |
| R11 | 2.90518 | -0.00086 | -0.00113 | -0.00515 | -0.00623 | 2.89895 |
| R12 | 2.06172 | -0.00005 | -0.00049 | -0.00110 | -0.00160 | 2.06013 |
| R13 | 2.06228 | -0.00025 | -0.00034 | -0.00100 | -0.00134 | 2.06093 |
| R14 | 2.07026 | 0.00061  | -0.00017 | 0.00163  | 0.00146  | 2.07172 |
| R15 | 2.06812 | 0.00030  | -0.00021 | 0.00071  | 0.00051  | 2.06863 |
| R16 | 2.67845 | -0.00555 | -0.00063 | -0.01482 | -0.01537 | 2.66308 |
| R17 | 4.19980 | -0.00167 | 0.00427  | -0.03984 | -0.03553 | 4.16427 |
| R18 | 8.66824 | -0.00018 | -0.04912 | 0.12552  | 0.07629  | 8.74453 |
| R19 | 2.50623 | 0.00008  | -0.00012 | 0.00013  | 0.00001  | 2.50624 |
| R20 | 2.04698 | -0.00008 | -0.00006 | -0.00031 | -0.00037 | 2.04661 |
| R21 | 2.04334 | -0.00007 | -0.00005 | -0.00015 | -0.00020 | 2.04313 |
| R22 | 2.04630 | -0.00016 | -0.00009 | -0.00038 | -0.00047 | 2.04583 |
| R23 | 1.84023 | 0.00055  | 0.00009  | 0.00173  | 0.00176  | 1.84198 |
| R24 | 3.55006 | -0.00174 | -0.01840 | -0.15808 | -0.17654 | 3.37351 |
| R25 | 2.77943 | -0.00228 | -0.00022 | -0.00215 | -0.00240 | 2.77703 |
| R26 | 2.74810 | -0.00040 | 0.00026  | -0.00442 | -0.00417 | 2.74393 |
| R27 | 2.05653 | -0.00053 | -0.00001 | -0.00020 | -0.00022 | 2.05631 |
| R28 | 2.05217 | 0.00040  | 0.00028  | 0.00238  | 0.00266  | 2.05483 |
| R29 | 2.72615 | 0.00102  | -0.00104 | 0.00145  | 0.00046  | 2.72660 |
| R30 | 2.05914 | -0.00036 | -0.00037 | -0.00122 | -0.00158 | 2.05756 |
| R31 | 2.85171 | -0.00205 | -0.00169 | -0.01258 | -0.01428 | 2.83744 |
| R32 | 2.06993 | -0.00066 | 0.00013  | -0.00070 | -0.00058 | 2.06936 |
| R33 | 2.06955 | -0.00080 | -0.00013 | -0.00115 | -0.00128 | 2.06827 |
| R34 | 2.06449 | -0.00057 | -0.00016 | -0.00111 | -0.00127 | 2.06323 |
| A1  | 1.87345 | 0.00004  | -0.00021 | -0.00033 | -0.00054 | 1.87291 |
| A2  | 2.27580 | 0.00012  | 0.00006  | 0.00104  | 0.00108  | 2.27688 |
| A3  | 2.13385 | -0.00016 | 0.00016  | -0.00061 | -0.00047 | 2.13338 |
| A4  | 1.86130 | 0.00044  | -0.00019 | 0.00075  | 0.00054  | 1.86184 |
| A5  | 2.27700 | -0.00016 | -0.00001 | -0.00007 | -0.00010 | 2.27689 |
| A6  | 2.14475 | -0.00027 | 0.00019  | -0.00049 | -0.00032 | 2.14443 |
| A7  | 1.89714 | -0.00028 | 0.00004  | -0.00142 | -0.00138 | 1.89576 |
| A8  | 2.25196 | -0.00021 | 0.00011  | -0.00008 | 0.00001  | 2.25197 |
| A9  | 2.13400 | 0.00049  | -0.00016 | 0.00162  | 0.00145  | 2.13545 |

|     |         |          |          |          |          |         |
|-----|---------|----------|----------|----------|----------|---------|
| A10 | 1.89117 | -0.00019 | -0.00012 | 0.00044  | 0.00030  | 1.89147 |
| A11 | 2.23098 | -0.00013 | -0.00025 | -0.00134 | -0.00166 | 2.22932 |
| A12 | 2.16100 | 0.00032  | 0.00036  | 0.00089  | 0.00134  | 2.16234 |
| A13 | 1.90136 | 0.00003  | 0.00046  | 0.00091  | 0.00131  | 1.90267 |
| A14 | 2.22522 | -0.00096 | 0.00025  | -0.00414 | -0.00400 | 2.22122 |
| A15 | 2.15635 | 0.00094  | -0.00071 | 0.00289  | 0.00222  | 2.15858 |
| A16 | 1.94456 | 0.00085  | -0.00103 | -0.00089 | -0.00180 | 1.94277 |
| A17 | 1.86534 | -0.00014 | 0.00016  | 0.00037  | 0.00046  | 1.86580 |
| A18 | 1.88542 | -0.00024 | -0.00080 | 0.00108  | 0.00027  | 1.88569 |
| A19 | 1.93573 | -0.00079 | 0.00021  | -0.00379 | -0.00361 | 1.93212 |
| A20 | 1.92427 | -0.00015 | 0.00091  | -0.00161 | -0.00074 | 1.92353 |
| A21 | 1.90675 | 0.00049  | 0.00053  | 0.00516  | 0.00570  | 1.91245 |
| A22 | 1.91154 | 0.00068  | 0.00048  | 0.00151  | 0.00205  | 1.91359 |
| A23 | 1.91450 | -0.00073 | 0.00014  | -0.00469 | -0.00460 | 1.90990 |
| A24 | 1.91100 | -0.00124 | -0.00165 | -0.00745 | -0.00907 | 1.90193 |
| A25 | 1.89437 | -0.00033 | 0.00062  | -0.00390 | -0.00330 | 1.89107 |
| A26 | 1.88546 | 0.00058  | 0.00006  | 0.00560  | 0.00567  | 1.89113 |
| A27 | 1.94648 | 0.00108  | 0.00039  | 0.00907  | 0.00941  | 1.95589 |
| A28 | 1.71083 | 0.00014  | 0.00012  | -0.00570 | -0.00615 | 1.70467 |
| A29 | 2.91320 | -0.00133 | -0.00026 | -0.01670 | -0.01703 | 2.89616 |
| A30 | 2.17576 | -0.00006 | -0.00013 | 0.00051  | 0.00038  | 2.17614 |
| A31 | 1.95415 | 0.00008  | 0.00006  | 0.00012  | 0.00018  | 1.95433 |
| A32 | 2.15327 | -0.00002 | 0.00007  | -0.00062 | -0.00055 | 2.15272 |
| A33 | 2.07799 | 0.00019  | -0.00004 | 0.00104  | 0.00100  | 2.07899 |
| A34 | 2.15994 | -0.00028 | 0.00007  | -0.00127 | -0.00120 | 2.15874 |
| A35 | 2.04525 | 0.00009  | -0.00003 | 0.00023  | 0.00020  | 2.04546 |
| A36 | 1.89022 | 0.00083  | -0.00205 | 0.01293  | 0.01036  | 1.90058 |
| A37 | 3.13740 | -0.00157 | -0.00073 | -0.02815 | -0.02863 | 3.10877 |
| A38 | 2.08878 | -0.00066 | -0.00212 | -0.01311 | -0.01529 | 2.07349 |
| A39 | 2.08659 | -0.00022 | -0.00105 | -0.00406 | -0.00522 | 2.08137 |
| A40 | 2.00616 | 0.00006  | 0.00103  | 0.00548  | 0.00651  | 2.01268 |
| A41 | 1.97629 | -0.00042 | -0.00016 | 0.00624  | 0.00598  | 1.98227 |
| A42 | 2.03405 | 0.00051  | 0.00218  | 0.00731  | 0.00918  | 2.04323 |
| A43 | 2.05830 | -0.00086 | -0.00102 | -0.01211 | -0.01299 | 2.04531 |
| A44 | 2.13029 | -0.00021 | -0.00025 | 0.00158  | 0.00116  | 2.13145 |
| A45 | 1.96818 | -0.00108 | -0.00107 | -0.01471 | -0.01583 | 1.95235 |
| A46 | 2.04255 | 0.00023  | 0.00083  | 0.00559  | 0.00641  | 2.04897 |
| A47 | 2.00695 | 0.00112  | 0.00092  | 0.01233  | 0.01325  | 2.02021 |
| A48 | 1.45374 | -0.00060 | 0.00610  | -0.01413 | -0.00817 | 1.44557 |
| A49 | 0.92185 | 0.00115  | -0.00707 | 0.02154  | 0.01537  | 0.93722 |
| A50 | 2.36639 | 0.00054  | -0.00249 | 0.00642  | 0.00344  | 2.36983 |
| A51 | 2.20505 | 0.00072  | -0.00099 | 0.01828  | 0.01724  | 2.22228 |
| A52 | 1.92485 | 0.00068  | 0.00129  | 0.01114  | 0.01237  | 1.93722 |
| A53 | 1.91829 | -0.00048 | -0.00066 | -0.00402 | -0.00466 | 1.91363 |

|     |          |          |          |          |          |          |
|-----|----------|----------|----------|----------|----------|----------|
| A54 | 1.93620  | 0.00007  | 0.00149  | 0.00705  | 0.00848  | 1.94469  |
| A55 | 1.88766  | -0.00014 | -0.00084 | -0.00566 | -0.00647 | 1.88119  |
| A56 | 1.90864  | -0.00010 | -0.00037 | -0.00296 | -0.00345 | 1.90519  |
| A57 | 1.88715  | -0.00003 | -0.00100 | -0.00622 | -0.00719 | 1.87995  |
| A58 | 3.65879  | 0.00011  | 0.00511  | 0.00414  | 0.00907  | 3.66786  |
| A59 | 4.96624  | 0.00085  | 0.02155  | -0.01135 | 0.01009  | 4.97633  |
| D1  | 0.02411  | -0.00110 | 0.00064  | -0.01439 | -0.01375 | 0.01036  |
| D2  | -3.13510 | -0.00048 | 0.00013  | -0.00212 | -0.00198 | -3.13708 |
| D3  | -3.13156 | -0.00034 | 0.00127  | -0.00611 | -0.00486 | -3.13642 |
| D4  | -0.00759 | 0.00029  | 0.00077  | 0.00616  | 0.00692  | -0.00067 |
| D5  | -0.02478 | 0.00113  | -0.00012 | 0.00949  | 0.00936  | -0.01542 |
| D6  | 3.14024  | 0.00111  | -0.00018 | 0.02603  | 0.02579  | -3.11716 |
| D7  | 3.12949  | 0.00044  | -0.00069 | 0.00203  | 0.00135  | 3.13084  |
| D8  | 0.01132  | 0.00042  | -0.00075 | 0.01857  | 0.01778  | 0.02910  |
| D9  | -0.01546 | 0.00071  | -0.00095 | 0.01446  | 0.01351  | -0.00195 |
| D10 | 3.13996  | 0.00045  | -0.00053 | 0.00506  | 0.00454  | -3.13869 |
| D11 | -3.14109 | 0.00015  | -0.00049 | 0.00334  | 0.00285  | -3.13824 |
| D12 | 0.01433  | -0.00011 | -0.00007 | -0.00606 | -0.00613 | 0.00820  |
| D13 | 0.00015  | -0.00002 | 0.00089  | -0.00869 | -0.00781 | -0.00766 |
| D14 | -3.13364 | -0.00027 | 0.00288  | -0.00748 | -0.00461 | -3.13824 |
| D15 | 3.12904  | 0.00022  | 0.00050  | -0.00007 | 0.00042  | 3.12947  |
| D16 | -0.00475 | -0.00003 | 0.00250  | 0.00114  | 0.00363  | -0.00112 |
| D17 | 0.03515  | 0.00001  | -0.00437 | -0.00823 | -0.01259 | 0.02256  |
| D18 | -3.10955 | 0.00007  | -0.00435 | -0.00482 | -0.00916 | -3.11871 |
| D19 | -3.09095 | -0.00028 | -0.00390 | -0.01873 | -0.02263 | -3.11358 |
| D20 | 0.04753  | -0.00022 | -0.00388 | -0.01532 | -0.01921 | 0.02832  |
| D21 | 0.01509  | -0.00068 | -0.00048 | -0.00040 | -0.00086 | 0.01423  |
| D22 | 3.13438  | -0.00069 | -0.00040 | -0.01626 | -0.01667 | 3.11771  |
| D23 | -3.13391 | -0.00045 | -0.00237 | -0.00157 | -0.00394 | -3.13785 |
| D24 | -0.01462 | -0.00046 | -0.00230 | -0.01743 | -0.01975 | -0.03437 |
| D25 | -3.06483 | -0.00014 | -0.00665 | 0.03405  | 0.02747  | -3.03736 |
| D26 | 0.08567  | -0.00042 | -0.00437 | 0.03544  | 0.03115  | 0.11682  |
| D27 | 1.37929  | 0.00023  | 0.00743  | -0.00813 | -0.00069 | 1.37860  |
| D28 | -2.78672 | -0.00033 | 0.00718  | -0.01308 | -0.00589 | -2.79261 |
| D29 | -0.73679 | 0.00005  | 0.00747  | -0.00630 | 0.00116  | -0.73563 |
| D30 | -1.73571 | 0.00022  | 0.00734  | 0.01069  | 0.01800  | -1.71771 |
| D31 | 0.38146  | -0.00033 | 0.00709  | 0.00574  | 0.01281  | 0.39427  |
| D32 | 2.43139  | 0.00005  | 0.00738  | 0.01252  | 0.01986  | 2.45125  |
| D33 | -0.99572 | 0.00024  | -0.00194 | 0.03946  | 0.03752  | -0.95821 |
| D34 | 1.08168  | -0.00019 | -0.00081 | 0.03278  | 0.03196  | 1.11363  |
| D35 | -3.06017 | -0.00013 | -0.00131 | 0.03617  | 0.03480  | -3.02537 |
| D36 | -3.07135 | 0.00038  | -0.00160 | 0.04208  | 0.04047  | -3.03088 |
| D37 | -0.99395 | -0.00005 | -0.00047 | 0.03540  | 0.03492  | -0.95903 |
| D38 | 1.14739  | 0.00001  | -0.00097 | 0.03879  | 0.03776  | 1.18515  |





Input orientation:

| Center<br>Number | Atomic<br>Number | Atomic<br>Type | Coordinates (Angstroms) |           |           |
|------------------|------------------|----------------|-------------------------|-----------|-----------|
|                  |                  |                | X                       | Y         | Z         |
| 1                | 6                | 0              | -1.354288               | -1.896055 | -0.279948 |
| 2                | 6                | 0              | -2.488300               | -1.155274 | -0.184251 |
| 3                | 7                | 0              | -2.098769               | 0.122770  | 0.205330  |
| 4                | 6                | 0              | -0.759861               | 0.141227  | 0.341118  |
| 5                | 7                | 0              | -0.293607               | -1.072504 | 0.062844  |
| 6                | 6                | 0              | 1.140466                | -1.422094 | 0.079234  |
| 7                | 6                | 0              | 1.736269                | -1.398581 | -1.334199 |
| 8                | 1                | 0              | -1.214813               | -2.927282 | -0.555287 |
| 9                | 1                | 0              | -3.513618               | -1.423832 | -0.361371 |
| 10               | 1                | 0              | 1.637266                | -0.692522 | 0.719069  |
| 11               | 1                | 0              | 1.240568                | -2.417359 | 0.513785  |
| 12               | 1                | 0              | 1.152535                | -2.054035 | -1.991102 |
| 13               | 1                | 0              | 1.688351                | -0.380135 | -1.732669 |
| 14               | 35               | 0              | 1.549327                | 2.347217  | 1.123138  |
| 15               | 1                | 0              | -0.121419               | 0.993649  | 0.640975  |
| 16               | 6                | 0              | -2.904674               | 1.270273  | 0.447888  |
| 17               | 6                | 0              | -4.227613               | 1.296099  | 0.357907  |
| 18               | 1                | 0              | -2.309442               | 2.133796  | 0.717989  |
| 19               | 1                | 0              | -4.750731               | 2.220475  | 0.559955  |
| 20               | 1                | 0              | -4.828175               | 0.435980  | 0.090414  |
| 21               | 8                | 0              | 3.057831                | -1.885170 | -1.282479 |
| 22               | 1                | 0              | 3.673595                | -1.130153 | -1.312368 |
| 23               | 6                | 0              | 4.742587                | 1.666134  | -1.091495 |
| 24               | 6                | 0              | 5.665771                | 0.761299  | -0.392530 |
| 25               | 8                | 0              | 4.795309                | 0.253999  | -1.425380 |
| 26               | 1                | 0              | 3.838291                | 1.989954  | -0.580155 |
| 27               | 1                | 0              | 5.125672                | 2.313316  | -1.876847 |
| 28               | 1                | 0              | 6.707484                | 0.771596  | -0.709141 |
| 29               | 6                | 0              | 5.415647                | 0.294824  | 1.012591  |
| 30               | 1                | 0              | 5.708265                | -0.753169 | 1.136016  |
| 31               | 1                | 0              | 6.010814                | 0.892456  | 1.710091  |
| 32               | 1                | 0              | 4.365728                | 0.408716  | 1.289633  |

Distance matrix (angstroms):

|     | 1        | 2        | 3        | 4        | 5 |
|-----|----------|----------|----------|----------|---|
| 1 C | 0.000000 |          |          |          |   |
| 2 C | 1.357902 | 0.000000 |          |          |   |
| 3 N | 2.205765 | 1.391727 | 0.000000 |          |   |
| 4 C | 2.211240 | 2.223607 | 1.345902 | 0.000000 |   |

|    |    |          |          |          |          |          |
|----|----|----------|----------|----------|----------|----------|
| 5  | N  | 1.385924 | 2.210109 | 2.169698 | 1.329651 | 0.000000 |
| 6  | C  | 2.564653 | 3.648090 | 3.590981 | 2.474631 | 1.476160 |
| 7  | C  | 3.303100 | 4.385039 | 4.403655 | 3.377627 | 2.485650 |
| 8  | H  | 1.076426 | 2.213470 | 3.265384 | 3.228973 | 2.161228 |
| 9  | H  | 2.211862 | 1.074603 | 2.171387 | 3.244391 | 3.266781 |
| 10 | H  | 3.375784 | 4.248579 | 3.858314 | 2.565970 | 2.074437 |
| 11 | H  | 2.763159 | 3.998071 | 4.206967 | 3.252367 | 2.089421 |
| 12 | H  | 3.039271 | 4.162711 | 4.487067 | 3.730374 | 2.696930 |
| 13 | H  | 3.696764 | 4.521378 | 4.283810 | 3.250562 | 2.762499 |
| 14 | Br | 5.329633 | 5.502649 | 4.370257 | 3.287902 | 4.026800 |
| 15 | H  | 3.273905 | 3.301666 | 2.204117 | 1.106412 | 2.152411 |
| 16 | C  | 3.599872 | 2.540915 | 1.423054 | 2.426184 | 3.529098 |
| 17 | C  | 4.341970 | 3.054239 | 2.435561 | 3.655039 | 4.601493 |
| 18 | H  | 4.260035 | 3.415262 | 2.086008 | 2.552169 | 3.843587 |
| 19 | H  | 5.402507 | 4.131358 | 3.399858 | 4.505353 | 5.563882 |
| 20 | H  | 4.200410 | 2.842982 | 2.749720 | 4.086674 | 4.778973 |
| 21 | O  | 4.524597 | 5.700738 | 5.730263 | 4.617047 | 3.701683 |
| 22 | H  | 5.189615 | 6.264362 | 6.098640 | 4.899588 | 4.199194 |
| 23 | C  | 7.107720 | 7.814676 | 7.132172 | 5.886821 | 5.847725 |
| 24 | C  | 7.507025 | 8.378873 | 7.813657 | 6.497036 | 6.251751 |
| 25 | O  | 6.614552 | 7.521796 | 7.085531 | 5.830365 | 5.465482 |
| 26 | H  | 6.492616 | 7.076366 | 6.273121 | 5.040788 | 5.183115 |
| 27 | H  | 7.890423 | 8.536309 | 7.831124 | 6.654085 | 6.677931 |
| 28 | H  | 8.502513 | 9.410143 | 8.877349 | 7.567143 | 7.280930 |
| 29 | C  | 7.232055 | 8.124506 | 7.559611 | 6.213804 | 5.947032 |
| 30 | H  | 7.293202 | 8.311948 | 7.910956 | 6.577877 | 6.105419 |
| 31 | H  | 8.122855 | 8.945204 | 8.283844 | 6.948416 | 6.805896 |
| 32 | H  | 6.363500 | 7.183043 | 6.561036 | 5.219473 | 5.040677 |
|    |    | 6        | 7        | 8        | 9        | 10       |
| 6  | C  | 0.000000 |          |          |          |          |
| 7  | C  | 1.534056 | 0.000000 |          |          |          |
| 8  | H  | 2.866278 | 3.413579 | 0.000000 |          |          |
| 9  | H  | 4.674894 | 5.339321 | 2.753629 | 0.000000 |          |
| 10 | H  | 1.090171 | 2.173530 | 3.840897 | 5.313546 | 0.000000 |
| 11 | H  | 1.090600 | 2.167643 | 2.726139 | 4.935107 | 1.781733 |
| 12 | H  | 2.164669 | 1.096306 | 2.903182 | 4.982587 | 3.071435 |
| 13 | H  | 2.160752 | 1.094672 | 4.037642 | 5.479986 | 2.472087 |
| 14 | Br | 3.932506 | 4.483800 | 6.186915 | 6.485213 | 3.067739 |
| 15 | H  | 2.782754 | 3.615949 | 4.242671 | 4.284382 | 2.437672 |
| 16 | C  | 4.873182 | 5.642427 | 4.634810 | 2.878179 | 4.955333 |
| 17 | C  | 6.023495 | 6.759616 | 5.267621 | 2.902615 | 6.203374 |
| 18 | H  | 4.995421 | 5.749518 | 5.332350 | 3.907912 | 4.854337 |
| 19 | H  | 6.943026 | 7.665936 | 6.343964 | 3.957305 | 7.022633 |
| 20 | H  | 6.251179 | 6.963265 | 4.978438 | 2.321868 | 6.593227 |

|    |    |          |          |          |           |          |
|----|----|----------|----------|----------|-----------|----------|
| 21 | O  | 2.396871 | 1.409244 | 4.457610 | 6.651707  | 2.728847 |
| 22 | H  | 2.904915 | 1.955955 | 5.263020 | 7.255803  | 2.909449 |
| 23 | C  | 4.887027 | 4.299922 | 7.541724 | 8.845671  | 4.299351 |
| 24 | C  | 5.046598 | 4.581791 | 7.808621 | 9.435939  | 4.424715 |
| 25 | O  | 4.293138 | 3.478083 | 6.855595 | 8.543156  | 3.932913 |
| 26 | H  | 4.399446 | 4.058232 | 7.050794 | 8.108783  | 3.705155 |
| 27 | H  | 5.801845 | 5.055759 | 8.331395 | 9.534164  | 5.286097 |
| 28 | H  | 6.035354 | 5.460159 | 8.744607 | 10.460008 | 5.467224 |
| 29 | C  | 4.700652 | 4.681118 | 7.536790 | 9.196375  | 3.916270 |
| 30 | H  | 4.735930 | 4.721787 | 7.450925 | 9.366701  | 4.092744 |
| 31 | H  | 5.633571 | 5.726106 | 8.481275 | 10.018530 | 4.756281 |
| 32 | H  | 3.901185 | 4.130965 | 6.758332 | 8.256400  | 2.997127 |
|    |    | 11       | 12       | 13       | 14        | 15       |
| 11 | H  | 0.000000 |          |          |           |          |
| 12 | H  | 2.532630 | 0.000000 |          |           |          |
| 13 | H  | 3.065510 | 1.776466 | 0.000000 |           |          |
| 14 | Br | 4.813297 | 5.406197 | 3.951381 | 0.000000  |          |
| 15 | H  | 3.675073 | 4.223644 | 3.285838 | 2.203638  | 0.000000 |
| 16 | C  | 5.548514 | 5.784518 | 5.345518 | 4.631836  | 2.803626 |
| 17 | C  | 6.611737 | 6.759234 | 6.494528 | 5.921441  | 4.127037 |
| 18 | H  | 5.775577 | 6.071442 | 5.320520 | 3.885846  | 2.468464 |
| 19 | H  | 7.576761 | 7.721910 | 7.313076 | 6.326450  | 4.789802 |
| 20 | H  | 6.719407 | 6.804541 | 6.815775 | 6.737349  | 4.771548 |
| 21 | O  | 2.610025 | 2.039807 | 2.084053 | 5.096634  | 4.700521 |
| 22 | H  | 3.303234 | 2.769473 | 2.163417 | 4.747242  | 4.767412 |
| 23 | C  | 5.613909 | 5.247611 | 3.731846 | 3.945299  | 5.206942 |
| 24 | C  | 5.523377 | 5.554353 | 4.349564 | 4.664493  | 5.883339 |
| 25 | O  | 4.851051 | 4.349353 | 3.185866 | 4.627408  | 5.384340 |
| 26 | H  | 5.231566 | 5.055483 | 3.401154 | 2.875448  | 4.261817 |
| 27 | H  | 6.571791 | 5.905305 | 4.369283 | 4.668116  | 5.967655 |
| 28 | H  | 6.446096 | 6.362788 | 5.250313 | 5.696175  | 6.964627 |
| 29 | C  | 5.003601 | 5.719566 | 4.678114 | 4.378694  | 5.593348 |
| 30 | H  | 4.808016 | 5.676777 | 4.952597 | 5.187420  | 6.105870 |
| 31 | H  | 5.928007 | 6.781115 | 5.670606 | 4.729240  | 6.225555 |
| 32 | H  | 4.284304 | 5.210852 | 4.113993 | 3.423101  | 4.571366 |
|    |    | 16       | 17       | 18       | 19        | 20       |
| 16 | C  | 0.000000 |          |          |           |          |
| 17 | C  | 1.326246 | 0.000000 |          |           |          |
| 18 | H  | 1.083018 | 2.123858 | 0.000000 |           |          |
| 19 | H  | 2.079271 | 1.081179 | 2.447934 | 0.000000  |          |
| 20 | H  | 2.126896 | 1.082604 | 3.101684 | 1.846859  | 0.000000 |
| 21 | O  | 6.964370 | 8.117205 | 6.997255 | 9.012465  | 8.334366 |
| 22 | H  | 7.220400 | 8.432414 | 7.111431 | 9.257515  | 8.757891 |
| 23 | C  | 7.810699 | 9.094074 | 7.295483 | 9.651823  | 9.721608 |

|    |   |          |           |          |           |           |
|----|---|----------|-----------|----------|-----------|-----------|
| 24 | C | 8.626580 | 9.936206  | 8.168294 | 10.561247 | 10.510088 |
| 25 | O | 7.989474 | 9.256306  | 7.655401 | 9.946631  | 9.743829  |
| 26 | H | 6.858746 | 8.149859  | 6.284942 | 8.667427  | 8.830183  |
| 27 | H | 8.424892 | 9.670201  | 7.876950 | 10.173002 | 10.318603 |
| 28 | H | 9.694379 | 10.999547 | 9.230236 | 11.618974 | 11.568204 |
| 29 | C | 8.396317 | 9.717181  | 7.946421 | 10.357039 | 10.286215 |
| 30 | H | 8.874152 | 10.174803 | 8.531878 | 10.888756 | 10.654761 |
| 31 | H | 9.012316 | 10.335217 | 8.470647 | 10.904004 | 10.968838 |
| 32 | H | 7.369503 | 8.689135  | 6.918134 | 9.323343  | 9.271824  |
|    |   | 21       | 22        | 23       | 24        | 25        |
| 21 | O | 0.000000 |           |          |           |           |
| 22 | H | 0.974736 | 0.000000  |          |           |           |
| 23 | C | 3.935307 | 3.001791  | 0.000000 |           |           |
| 24 | C | 3.820623 | 2.896974  | 1.469539 | 0.000000  |           |
| 25 | O | 2.759583 | 1.785187  | 1.452027 | 1.442856  | 0.000000  |
| 26 | H | 4.014843 | 3.209101  | 1.088154 | 2.210085  | 2.154954  |
| 27 | H | 4.717682 | 3.779503  | 1.087371 | 2.214421  | 2.133951  |
| 28 | H | 4.550504 | 3.631117  | 2.192535 | 1.088814  | 2.106493  |
| 29 | C | 3.947026 | 3.235852  | 2.600130 | 1.501508  | 2.515986  |
| 30 | H | 3.762359 | 3.205711  | 3.427443 | 2.152178  | 2.899762  |
| 31 | H | 5.038928 | 4.323054  | 3.171098 | 2.134777  | 3.422902  |
| 32 | H | 3.686227 | 3.101222  | 2.718988 | 2.155017  | 2.753139  |
|    |   | 26       | 27        | 28       | 29        | 30        |
| 26 | H | 0.000000 |           |          |           |           |
| 27 | H | 1.855619 | 0.000000  |          |           |           |
| 28 | H | 3.119824 | 2.498512  | 0.000000 |           |           |
| 29 | C | 2.810401 | 3.536558  | 2.204658 | 0.000000  |           |
| 30 | H | 3.737214 | 4.338212  | 2.593829 | 1.095057  | 0.000000  |
| 31 | H | 3.342093 | 3.958339  | 2.520445 | 1.094484  | 1.768949  |
| 32 | H | 2.504918 | 3.772482  | 3.100097 | 1.091812  | 1.782128  |
|    |   | 31       | 32        |          |           |           |
| 31 | H | 0.000000 |           |          |           |           |
| 32 | H | 1.765531 | 0.000000  |          |           |           |

Stoichiometry C10H17BrN2O2

Framework group C1[X(C10H17BrN2O2)]

Deg. of freedom 90

Full point group C1 NOp 1

Largest Abelian subgroup C1 NOp 1

Largest concise Abelian subgroup C1 NOp 1

Standard orientation:

```

-----
Center      Atomic      Atomic      Coordinates (Angstroms)
Number      Number      Type        X           Y           Z
-----

```

|    |    |   |           |           |           |
|----|----|---|-----------|-----------|-----------|
| 1  | 6  | 0 | -2.638115 | 2.189730  | -0.378035 |
| 2  | 6  | 0 | -3.726050 | 1.441958  | -0.060019 |
| 3  | 7  | 0 | -3.284353 | 0.128362  | 0.067541  |
| 4  | 6  | 0 | -1.960412 | 0.094982  | -0.172289 |
| 5  | 7  | 0 | -1.554288 | 1.329317  | -0.454157 |
| 6  | 6  | 0 | -0.150658 | 1.683216  | -0.743339 |
| 7  | 6  | 0 | 0.546346  | 2.257632  | 0.496646  |
| 8  | 1  | 0 | -2.545698 | 3.246906  | -0.558399 |
| 9  | 1  | 0 | -4.750977 | 1.729473  | 0.087055  |
| 10 | 1  | 0 | 0.344358  | 0.770498  | -1.075571 |
| 11 | 1  | 0 | -0.146590 | 2.415905  | -1.551149 |
| 12 | 1  | 0 | -0.029186 | 3.107212  | 0.882476  |
| 13 | 1  | 0 | 0.593092  | 1.490556  | 1.276208  |
| 14 | 35 | 0 | 0.423161  | -2.169512 | -0.203128 |
| 15 | 1  | 0 | -1.291862 | -0.786495 | -0.158616 |
| 16 | 6  | 0 | -4.030201 | -1.040861 | 0.386464  |
| 17 | 6  | 0 | -5.338720 | -1.066147 | 0.601099  |
| 18 | 1  | 0 | -3.401786 | -1.921542 | 0.435693  |
| 19 | 1  | 0 | -5.814535 | -2.007067 | 0.840297  |
| 20 | 1  | 0 | -5.972410 | -0.189793 | 0.551370  |
| 21 | 8  | 0 | 1.826615  | 2.718726  | 0.130217  |
| 22 | 1  | 0 | 2.490237  | 2.060376  | 0.406425  |
| 23 | 6  | 0 | 3.718137  | -0.548918 | 1.239852  |
| 24 | 6  | 0 | 4.528054  | 0.017076  | 0.152088  |
| 25 | 8  | 0 | 3.703941  | 0.877058  | 0.966400  |
| 26 | 1  | 0 | 2.801861  | -1.079864 | 0.989620  |
| 27 | 1  | 0 | 4.198017  | -0.806515 | 2.180987  |
| 28 | 1  | 0 | 5.588481  | 0.167633  | 0.347900  |
| 29 | 6  | 0 | 4.147196  | -0.139905 | -1.291806 |
| 30 | 1  | 0 | 4.362040  | 0.773819  | -1.855810 |
| 31 | 1  | 0 | 4.727443  | -0.953036 | -1.739050 |
| 32 | 1  | 0 | 3.089464  | -0.387759 | -1.400545 |

-----  
Rotational constants (GHZ):      0.5737082      0.2241041      0.1721234

Standard basis: 6-311++G(d,p) (5D, 7F)

There are 492 symmetry adapted cartesian basis functions of A symmetry.

There are 475 symmetry adapted basis functions of A symmetry.

475 basis functions, 751 primitive gaussians, 492 cartesian basis functions

71 alpha electrons      71 beta electrons

nuclear repulsion energy      1303.7934528933 Hartrees.

NAtoms= 32 NActive= 32 NUniq= 32 SFac= 1.00D+00 NAtFMM= 60 NAOKFM=F

Big=F

Integral buffers will be 131072 words long.

Raffenetti 2 integral format.

Two-electron integral symmetry is turned on.  
 One-electron integrals computed using PRISM.  
 NBasis= 475 RedAO= T EigKep= 3.69D-06 NBF= 475  
 NBsUse= 475 1.00D-06 EigRej= -1.00D+00 NBFU= 475  
 Initial guess from the checkpoint file: "/home/suqian/liuwen/qianmengshijie/ohpo/ohpo.chk"  
 B after Tr= 0.000000 0.000000 0.000000  
 Rot= 0.999982 0.004440 0.000083 0.003912 Ang= 0.68 deg.  
 ExpMin= 3.50D-02 ExpMax= 4.40D+05 ExpMxC= 1.51D+04 IAcc=3 IRadAn= 5 AccDes= 0.00D+00  
 Harris functional with IExCor= 402 and IRadAn= 5 diagonalized for initial guess.  
 HarFok: IExCor= 402 AccDes= 0.00D+00 IRadAn= 5 IDoV= 1 UseB2=F ITyADJ=14  
 ICtDFT= 3500011 ScaDFX= 1.000000 1.000000 1.000000 1.000000  
 FoFCou: FMM=F IPFlag= 0 FMFlag= 100000 FMFlg1= 0  
 NfXFlg= 0 DoJE=T BraDBF=F KetDBF=T FulRan=T  
 wScrn= 0.000000 ICntrl= 500 IOpCl= 0 I1Cent= 200000004 NGrid= 0  
 NMat0= 1 NMatS0= 1 NMatT0= 0 NMatD0= 1 NMtDS0= 0  
 NMtDT0= 0  
 Petite list used in FoFCou.  
 Requested convergence on RMS density matrix=1.00D-08 within 128 cycles.  
 Requested convergence on MAX density matrix=1.00D-06.  
 Requested convergence on energy=1.00D-06.  
 No special actions if energy rises.  
 SCF Done: E(RB3LYP) = -3225.52327474 A.U. after 11 cycles  
 NFock= 11 Conv=0.56D-08 -V/T= 2.0018  
 Calling FoFJK, ICntrl= 2127 FMM=F ISym2X=0 I1Cent= 0 IOpClX= 0 NMat=1 NMatS=1  
 NMatT=0.

\*\*\*\*\* Axes restored to original set \*\*\*\*\*

| Center<br>Number | Atomic<br>Number | Forces (Hartrees/Bohr) |              |              |
|------------------|------------------|------------------------|--------------|--------------|
|                  |                  | X                      | Y            | Z            |
| 1                | 6                | -0.000770187           | -0.000463846 | 0.000416965  |
| 2                | 6                | 0.000206397            | 0.000271245  | -0.000689616 |
| 3                | 7                | -0.000853171           | 0.000148818  | -0.000296733 |
| 4                | 6                | -0.001473525           | -0.000441588 | 0.001249015  |
| 5                | 7                | 0.000350101            | -0.000332378 | 0.000290009  |
| 6                | 6                | -0.001376629           | -0.000582112 | -0.000625460 |
| 7                | 6                | 0.004063439            | -0.002452063 | 0.000282472  |
| 8                | 1                | 0.000044097            | -0.000088573 | 0.000371665  |
| 9                | 1                | -0.000048861           | -0.000010750 | 0.000023981  |
| 10               | 1                | 0.000295024            | 0.000501629  | 0.000033779  |
| 11               | 1                | 0.000177667            | -0.000170105 | -0.000075039 |
| 12               | 1                | -0.000583052           | 0.000206380  | -0.000482225 |

|    |    |              |              |              |
|----|----|--------------|--------------|--------------|
| 13 | 1  | -0.000292757 | 0.000498707  | -0.000175527 |
| 14 | 35 | 0.000185553  | -0.000837335 | -0.000360852 |
| 15 | 1  | 0.001444741  | 0.002735474  | 0.000550579  |
| 16 | 6  | 0.000304137  | -0.000503385 | -0.000234833 |
| 17 | 6  | -0.000266816 | 0.000168397  | -0.000065170 |
| 18 | 1  | -0.000007495 | 0.000013077  | 0.000061856  |
| 19 | 1  | 0.000006450  | -0.000032868 | 0.000050844  |
| 20 | 1  | 0.000083836  | -0.000080837 | -0.000008543 |
| 21 | 8  | -0.003318466 | -0.000944982 | -0.001054575 |
| 22 | 1  | 0.001559653  | 0.001544122  | 0.000431699  |
| 23 | 6  | 0.001850277  | 0.000125593  | 0.000849845  |
| 24 | 6  | 0.001282496  | 0.002286305  | 0.000053739  |
| 25 | 8  | -0.001756247 | -0.000235069 | -0.001224450 |
| 26 | 1  | -0.000219181 | -0.000444015 | -0.000830968 |
| 27 | 1  | -0.000899378 | -0.000359348 | 0.000339022  |
| 28 | 1  | 0.000089966  | -0.000207129 | -0.000028993 |
| 29 | 6  | -0.000064020 | -0.001184471 | 0.002428791  |
| 30 | 1  | 0.000118867  | 0.000455466  | -0.000495673 |
| 31 | 1  | 0.000009158  | 0.000113600  | -0.000223912 |
| 32 | 1  | -0.000142074 | 0.000302040  | -0.000561692 |

-----  
Cartesian Forces: Max 0.004063439 RMS 0.000961156

GradGradGradGradGradGradGradGradGradGradGradGradGradGradGradGradGradGradGradGrad  
Berny optimization.

Using GEDIIS/GDIIS optimizer.

FormGI is forming the generalized inverse of G from B-inverse, IUseBI=4.

Internal Forces: Max 0.002957519 RMS 0.000572143

Search for a local minimum.

Step number 20 out of a maximum of 177

All quantities printed in internal units (Hartrees-Bohrs-Radians)

Mixed Optimization -- En-DIIS/RFO-DIIS

Swapping is turned off.

Update second derivatives using D2CorX and points 18 19 20

DE= -4.13D-04 DEPred=-5.06D-04 R= 8.16D-01

TightC=F SS= 1.41D+00 RLast= 2.61D-01 DXNew= 3.2661D+00 7.8394D-01

Trust test= 8.16D-01 RLast= 2.61D-01 DXMaxT set to 1.94D+00

ITU= 1 1 1 -1 1 1 1 1 1 1 1 1 1 1 0 1 0 1 0

|                 |         |         |         |         |         |
|-----------------|---------|---------|---------|---------|---------|
| Eigenvalues --- | 0.00001 | 0.00172 | 0.00237 | 0.00284 | 0.00429 |
| Eigenvalues --- | 0.00461 | 0.00914 | 0.01203 | 0.01399 | 0.01497 |
| Eigenvalues --- | 0.01748 | 0.01865 | 0.02030 | 0.02100 | 0.02166 |
| Eigenvalues --- | 0.02253 | 0.02322 | 0.02388 | 0.02507 | 0.03058 |
| Eigenvalues --- | 0.03059 | 0.03172 | 0.03385 | 0.03753 | 0.04082 |
| Eigenvalues --- | 0.04657 | 0.05114 | 0.05190 | 0.05367 | 0.05623 |



|                 |         |         |         |         |         |
|-----------------|---------|---------|---------|---------|---------|
| Eigenvalues --- | 0.05916 | 0.06254 | 0.07820 | 0.09305 | 0.09460 |
| Eigenvalues --- | 0.10194 | 0.11069 | 0.11597 | 0.11651 | 0.12890 |
| Eigenvalues --- | 0.13889 | 0.14721 | 0.15271 | 0.15993 | 0.15999 |
| Eigenvalues --- | 0.16001 | 0.16002 | 0.16003 | 0.16014 | 0.16065 |
| Eigenvalues --- | 0.16390 | 0.17408 | 0.19630 | 0.22033 | 0.22669 |
| Eigenvalues --- | 0.22858 | 0.23413 | 0.23788 | 0.25042 | 0.25178 |
| Eigenvalues --- | 0.27551 | 0.28286 | 0.31449 | 0.32637 | 0.33099 |
| Eigenvalues --- | 0.33288 | 0.33982 | 0.34140 | 0.34510 | 0.34781 |
| Eigenvalues --- | 0.35053 | 0.35686 | 0.35691 | 0.35858 | 0.36321 |
| Eigenvalues --- | 0.36435 | 0.36667 | 0.37212 | 0.37247 | 0.37755 |
| Eigenvalues --- | 0.39600 | 0.42013 | 0.42602 | 0.43383 | 0.45766 |
| Eigenvalues --- | 0.49287 | 0.53893 | 0.55187 | 0.56859 | 0.60384 |

Eigenvalue 1 is 1.26D-05 Eigenvector:

|   |          |          |         |          |          |
|---|----------|----------|---------|----------|----------|
|   | D54      | D52      | D55     | D53      | D47      |
| 1 | 0.50076  | -0.50063 | 0.50014 | 0.49763  | 0.01138  |
|   | R18      | D46      | D42     | D35      | D38      |
| 1 | -0.00922 | 0.00842  | 0.00765 | -0.00665 | -0.00621 |

En-DIIS/RFO-DIIS IScMMF= 0 using points: 20 19

RFO step: Lambda=-1.07952897D-04.

DidBck=F Rises=F RFO-DIIS coefs: 0.85731 0.14269

Iteration 1 RMS(Cart)= 0.04854799 RMS(Int)= 0.00559110

Iteration 2 RMS(Cart)= 0.00873699 RMS(Int)= 0.00007239

Iteration 3 RMS(Cart)= 0.00002426 RMS(Int)= 0.00007026

Iteration 4 RMS(Cart)= 0.00000001 RMS(Int)= 0.00007026

| Variable | Old X   | -DE/DX   | Delta X<br>(Linear) | Delta X<br>(Quad) | Delta X<br>(Total) | New X   |
|----------|---------|----------|---------------------|-------------------|--------------------|---------|
| R1       | 2.56606 | -0.00005 | 0.00004             | -0.00005          | 0.00000            | 2.56606 |
| R2       | 2.61902 | 0.00056  | 0.00014             | 0.00007           | 0.00020            | 2.61921 |
| R3       | 2.03415 | -0.00001 | 0.00002             | -0.00012          | -0.00010           | 2.03405 |
| R4       | 2.62998 | 0.00001  | -0.00005            | -0.00002          | -0.00006           | 2.62992 |
| R5       | 2.03070 | 0.00005  | 0.00006             | -0.00015          | -0.00009           | 2.03061 |
| R6       | 2.54339 | 0.00080  | -0.00023            | 0.00154           | 0.00131            | 2.54470 |
| R7       | 2.68918 | -0.00045 | 0.00003             | -0.00088          | -0.00085           | 2.68833 |
| R8       | 2.51268 | 0.00180  | 0.00046             | 0.00048           | 0.00099            | 2.51366 |
| R9       | 2.09082 | 0.00254  | -0.00028            | 0.00487           | 0.00464            | 2.09546 |
| R10      | 2.78954 | 0.00116  | 0.00081             | 0.00048           | 0.00129            | 2.79083 |
| R11      | 2.89895 | 0.00154  | 0.00089             | 0.00234           | 0.00320            | 2.90214 |
| R12      | 2.06013 | 0.00049  | 0.00023             | 0.00016           | 0.00039            | 2.06051 |
| R13      | 2.06093 | 0.00014  | 0.00019             | -0.00075          | -0.00055           | 2.06038 |
| R14      | 2.07172 | 0.00048  | -0.00021            | 0.00130           | 0.00109            | 2.07281 |
| R15      | 2.06863 | 0.00054  | -0.00007            | 0.00150           | 0.00143            | 2.07006 |
| R16      | 2.66308 | -0.00162 | 0.00219             | -0.00945          | -0.00725           | 2.65583 |
| R17      | 4.16427 | -0.00045 | 0.00507             | -0.02484          | -0.01973           | 4.14454 |
| R18      | 8.74453 | -0.00036 | -0.01089            | -0.26004          | -0.27092           | 8.47361 |

|     |         |          |          |          |          |         |
|-----|---------|----------|----------|----------|----------|---------|
| R19 | 2.50624 | 0.00018  | 0.00000  | 0.00013  | 0.00013  | 2.50637 |
| R20 | 2.04661 | 0.00002  | 0.00005  | -0.00018 | -0.00013 | 2.04648 |
| R21 | 2.04313 | -0.00002 | 0.00003  | -0.00019 | -0.00016 | 2.04297 |
| R22 | 2.04583 | 0.00002  | 0.00007  | -0.00022 | -0.00016 | 2.04567 |
| R23 | 1.84198 | 0.00296  | -0.00025 | 0.00482  | 0.00451  | 1.84649 |
| R24 | 3.37351 | 0.00079  | 0.02519  | -0.01377 | 0.01136  | 3.38487 |
| R25 | 2.77703 | -0.00060 | 0.00034  | -0.00473 | -0.00433 | 2.77269 |
| R26 | 2.74393 | -0.00006 | 0.00060  | -0.00193 | -0.00134 | 2.74259 |
| R27 | 2.05631 | -0.00034 | 0.00003  | -0.00131 | -0.00128 | 2.05503 |
| R28 | 2.05483 | -0.00078 | -0.00038 | -0.00070 | -0.00108 | 2.05375 |
| R29 | 2.72660 | 0.00230  | -0.00007 | 0.00544  | 0.00533  | 2.73193 |
| R30 | 2.05756 | 0.00009  | 0.00023  | -0.00091 | -0.00069 | 2.05687 |
| R31 | 2.83744 | 0.00119  | 0.00204  | -0.00265 | -0.00061 | 2.83683 |
| R32 | 2.06936 | -0.00046 | 0.00008  | -0.00105 | -0.00097 | 2.06839 |
| R33 | 2.06827 | -0.00008 | 0.00018  | -0.00066 | -0.00047 | 2.06780 |
| R34 | 2.06323 | 0.00003  | 0.00018  | -0.00042 | -0.00024 | 2.06299 |
| A1  | 1.87291 | 0.00018  | 0.00008  | -0.00008 | -0.00002 | 1.87289 |
| A2  | 2.27688 | -0.00001 | -0.00015 | 0.00098  | 0.00084  | 2.27772 |
| A3  | 2.13338 | -0.00017 | 0.00007  | -0.00089 | -0.00081 | 2.13257 |
| A4  | 1.86184 | 0.00034  | -0.00008 | 0.00083  | 0.00075  | 1.86259 |
| A5  | 2.27689 | -0.00016 | 0.00001  | -0.00028 | -0.00026 | 2.27663 |
| A6  | 2.14443 | -0.00018 | 0.00005  | -0.00052 | -0.00047 | 2.14396 |
| A7  | 1.89576 | 0.00019  | 0.00020  | -0.00075 | -0.00056 | 1.89520 |
| A8  | 2.25197 | -0.00039 | 0.00000  | -0.00075 | -0.00074 | 2.25122 |
| A9  | 2.13545 | 0.00020  | -0.00021 | 0.00149  | 0.00128  | 2.13673 |
| A10 | 1.89147 | -0.00046 | -0.00004 | 0.00008  | -0.00002 | 1.89144 |
| A11 | 2.22932 | 0.00049  | 0.00024  | 0.00316  | 0.00334  | 2.23266 |
| A12 | 2.16234 | -0.00003 | -0.00019 | -0.00312 | -0.00327 | 2.15908 |
| A13 | 1.90267 | -0.00025 | -0.00019 | 0.00015  | -0.00006 | 1.90261 |
| A14 | 2.22122 | -0.00021 | 0.00057  | -0.00042 | 0.00017  | 2.22138 |
| A15 | 2.15858 | 0.00046  | -0.00032 | 0.00001  | -0.00028 | 2.15830 |
| A16 | 1.94277 | 0.00190  | 0.00026  | 0.00849  | 0.00885  | 1.95161 |
| A17 | 1.86580 | -0.00067 | -0.00007 | -0.00169 | -0.00176 | 1.86404 |
| A18 | 1.88569 | -0.00031 | -0.00004 | 0.00059  | 0.00050  | 1.88619 |
| A19 | 1.93212 | -0.00079 | 0.00051  | -0.00835 | -0.00790 | 1.92422 |
| A20 | 1.92353 | -0.00048 | 0.00011  | -0.00021 | -0.00011 | 1.92342 |
| A21 | 1.91245 | 0.00036  | -0.00081 | 0.00131  | 0.00050  | 1.91294 |
| A22 | 1.91359 | 0.00003  | -0.00029 | 0.00265  | 0.00246  | 1.91605 |
| A23 | 1.90990 | -0.00064 | 0.00066  | -0.00530 | -0.00473 | 1.90517 |
| A24 | 1.90193 | 0.00095  | 0.00129  | 0.00025  | 0.00148  | 1.90341 |
| A25 | 1.89107 | -0.00011 | 0.00047  | -0.00440 | -0.00393 | 1.88714 |
| A26 | 1.89113 | 0.00012  | -0.00081 | 0.00507  | 0.00427  | 1.89540 |
| A27 | 1.95589 | -0.00033 | -0.00134 | 0.00188  | 0.00056  | 1.95646 |
| A28 | 1.70467 | 0.00117  | 0.00088  | 0.03110  | 0.03187  | 1.73654 |

|     |          |          |          |          |          |          |
|-----|----------|----------|----------|----------|----------|----------|
| A29 | 2.89616  | -0.00073 | 0.00243  | -0.01325 | -0.01078 | 2.88538  |
| A30 | 2.17614  | -0.00008 | -0.00005 | 0.00010  | 0.00005  | 2.17619  |
| A31 | 1.95433  | 0.00006  | -0.00003 | 0.00028  | 0.00026  | 1.95458  |
| A32 | 2.15272  | 0.00002  | 0.00008  | -0.00038 | -0.00030 | 2.15241  |
| A33 | 2.07899  | 0.00008  | -0.00014 | 0.00071  | 0.00057  | 2.07956  |
| A34 | 2.15874  | -0.00015 | 0.00017  | -0.00113 | -0.00095 | 2.15778  |
| A35 | 2.04546  | 0.00008  | -0.00003 | 0.00041  | 0.00038  | 2.04584  |
| A36 | 1.90058  | -0.00009 | -0.00148 | 0.00414  | 0.00235  | 1.90293  |
| A37 | 3.10877  | -0.00062 | 0.00409  | -0.01570 | -0.01127 | 3.09750  |
| A38 | 2.07349  | 0.00010  | 0.00218  | -0.00465 | -0.00244 | 2.07105  |
| A39 | 2.08137  | 0.00006  | 0.00075  | 0.00232  | 0.00307  | 2.08444  |
| A40 | 2.01268  | -0.00066 | -0.00093 | -0.00380 | -0.00468 | 2.00800  |
| A41 | 1.98227  | -0.00016 | -0.00085 | 0.00044  | -0.00045 | 1.98182  |
| A42 | 2.04323  | -0.00009 | -0.00131 | 0.00208  | 0.00080  | 2.04403  |
| A43 | 2.04531  | 0.00023  | 0.00185  | -0.00285 | -0.00089 | 2.04442  |
| A44 | 2.13145  | -0.00003 | -0.00017 | -0.00050 | -0.00076 | 2.13069  |
| A45 | 1.95235  | 0.00027  | 0.00226  | -0.00566 | -0.00340 | 1.94895  |
| A46 | 2.04897  | -0.00006 | -0.00092 | 0.00124  | 0.00034  | 2.04931  |
| A47 | 2.02021  | -0.00012 | -0.00189 | 0.00473  | 0.00283  | 2.02303  |
| A48 | 1.44557  | 0.00005  | 0.00117  | 0.00715  | 0.00828  | 1.45386  |
| A49 | 0.93722  | 0.00011  | -0.00219 | 0.00224  | 0.00052  | 0.93774  |
| A50 | 2.36983  | 0.00017  | -0.00049 | 0.00292  | 0.00226  | 2.37209  |
| A51 | 2.22228  | 0.00060  | -0.00246 | 0.00719  | 0.00472  | 2.22700  |
| A52 | 1.93722  | -0.00048 | -0.00177 | 0.00268  | 0.00092  | 1.93814  |
| A53 | 1.91363  | -0.00009 | 0.00067  | -0.00330 | -0.00265 | 1.91098  |
| A54 | 1.94469  | -0.00077 | -0.00121 | -0.00078 | -0.00198 | 1.94270  |
| A55 | 1.88119  | 0.00034  | 0.00092  | -0.00030 | 0.00062  | 1.88181  |
| A56 | 1.90519  | 0.00066  | 0.00049  | 0.00306  | 0.00357  | 1.90876  |
| A57 | 1.87995  | 0.00041  | 0.00103  | -0.00146 | -0.00044 | 1.87951  |
| A58 | 3.66786  | 0.00064  | -0.00129 | 0.01434  | 0.01300  | 3.68086  |
| A59 | 4.97633  | 0.00045  | -0.00144 | 0.03900  | 0.03759  | 5.01393  |
| D1  | 0.01036  | -0.00036 | 0.00196  | -0.00422 | -0.00224 | 0.00812  |
| D2  | -3.13708 | -0.00018 | 0.00028  | -0.00019 | 0.00010  | -3.13698 |
| D3  | -3.13642 | -0.00012 | 0.00069  | -0.00148 | -0.00079 | -3.13721 |
| D4  | -0.00067 | 0.00006  | -0.00099 | 0.00255  | 0.00155  | 0.00087  |
| D5  | -0.01542 | 0.00052  | -0.00134 | 0.01235  | 0.01098  | -0.00444 |
| D6  | -3.11716 | 0.00049  | -0.00368 | 0.01929  | 0.01557  | -3.10159 |
| D7  | 3.13084  | 0.00031  | -0.00019 | 0.00988  | 0.00968  | 3.14051  |
| D8  | 0.02910  | 0.00028  | -0.00254 | 0.01682  | 0.01426  | 0.04336  |
| D9  | -0.00195 | 0.00008  | -0.00193 | -0.00518 | -0.00711 | -0.00905 |
| D10 | -3.13869 | 0.00007  | -0.00065 | -0.00297 | -0.00365 | 3.14085  |
| D11 | -3.13824 | -0.00008 | -0.00041 | -0.00883 | -0.00923 | 3.13571  |
| D12 | 0.00820  | -0.00010 | 0.00087  | -0.00663 | -0.00577 | 0.00244  |
| D13 | -0.00766 | 0.00024  | 0.00111  | 0.01295  | 0.01404  | 0.00638  |

|     |          |          |          |          |          |          |
|-----|----------|----------|----------|----------|----------|----------|
| D14 | -3.13824 | -0.00016 | 0.00066  | 0.00081  | 0.00140  | -3.13685 |
| D15 | 3.12947  | 0.00026  | -0.00006 | 0.01091  | 0.01085  | 3.14032  |
| D16 | -0.00112 | -0.00014 | -0.00052 | -0.00122 | -0.00180 | -0.00292 |
| D17 | 0.02256  | -0.00002 | 0.00180  | -0.01465 | -0.01284 | 0.00972  |
| D18 | -3.11871 | -0.00005 | 0.00131  | -0.01481 | -0.01350 | -3.13221 |
| D19 | -3.11358 | -0.00004 | 0.00323  | -0.01217 | -0.00895 | -3.12253 |
| D20 | 0.02832  | -0.00007 | 0.00274  | -0.01233 | -0.00960 | 0.01872  |
| D21 | 0.01423  | -0.00047 | 0.00012  | -0.01564 | -0.01549 | -0.00126 |
| D22 | 3.11771  | -0.00046 | 0.00238  | -0.02230 | -0.01986 | 3.09785  |
| D23 | -3.13785 | -0.00009 | 0.00056  | -0.00403 | -0.00345 | -3.14130 |
| D24 | -0.03437 | -0.00008 | 0.00282  | -0.01068 | -0.00782 | -0.04219 |
| D25 | -3.03736 | 0.00014  | -0.00392 | -0.01258 | -0.01638 | -3.05375 |
| D26 | 0.11682  | -0.00031 | -0.00444 | -0.02648 | -0.03084 | 0.08598  |
| D27 | 1.37860  | 0.00031  | 0.00010  | 0.02425  | 0.02445  | 1.40304  |
| D28 | -2.79261 | 0.00003  | 0.00084  | 0.01795  | 0.01884  | -2.77377 |
| D29 | -0.73563 | -0.00006 | -0.00017 | 0.01889  | 0.01874  | -0.71688 |
| D30 | -1.71771 | 0.00029  | -0.00257 | 0.03214  | 0.02965  | -1.68806 |
| D31 | 0.39427  | 0.00002  | -0.00183 | 0.02584  | 0.02404  | 0.41830  |
| D32 | 2.45125  | -0.00007 | -0.00283 | 0.02678  | 0.02395  | 2.47520  |
| D33 | -0.95821 | 0.00010  | -0.00535 | -0.02270 | -0.02807 | -0.98627 |
| D34 | 1.11363  | -0.00040 | -0.00456 | -0.02966 | -0.03422 | 1.07941  |
| D35 | -3.02537 | -0.00062 | -0.00497 | -0.03055 | -0.03558 | -3.06095 |
| D36 | -3.03088 | 0.00023  | -0.00578 | -0.02061 | -0.02636 | -3.05724 |
| D37 | -0.95903 | -0.00027 | -0.00498 | -0.02757 | -0.03251 | -0.99155 |
| D38 | 1.18515  | -0.00049 | -0.00539 | -0.02846 | -0.03388 | 1.15127  |
| D39 | 1.13374  | 0.00062  | -0.00516 | -0.01659 | -0.02172 | 1.11202  |
| D40 | -3.07761 | 0.00012  | -0.00437 | -0.02355 | -0.02787 | -3.10548 |
| D41 | -0.93342 | -0.00010 | -0.00478 | -0.02444 | -0.02924 | -0.96266 |
| D42 | -1.77358 | 0.00052  | -0.00131 | 0.01549  | 0.01442  | -1.75916 |
| D43 | 2.42840  | -0.00012 | -0.00122 | 0.00922  | 0.00810  | 2.43651  |
| D44 | 0.34278  | 0.00015  | -0.00047 | 0.01021  | 0.00984  | 0.35262  |
| D45 | 0.39265  | -0.00009 | 0.00614  | 0.04372  | 0.05001  | 0.44266  |
| D46 | -0.35456 | -0.00020 | -0.00237 | -0.01714 | -0.01959 | -0.37415 |
| D47 | 2.63704  | -0.00015 | 0.00086  | -0.05397 | -0.05304 | 2.58400  |
| D48 | -3.13897 | -0.00006 | -0.00025 | -0.00181 | -0.00205 | -3.14102 |
| D49 | 0.00260  | -0.00001 | -0.00014 | -0.00070 | -0.00085 | 0.00176  |
| D50 | 0.00227  | -0.00003 | 0.00030  | -0.00162 | -0.00133 | 0.00095  |
| D51 | -3.13934 | 0.00002  | 0.00040  | -0.00052 | -0.00012 | -3.13946 |
| D52 | -1.42674 | -0.00012 | 0.00371  | -0.03197 | -0.02815 | -1.45489 |
| D53 | 2.05616  | 0.00010  | 0.00004  | 0.03348  | 0.03355  | 2.08972  |
| D54 | 1.88261  | 0.00012  | 0.00410  | -0.01005 | -0.00587 | 1.87674  |
| D55 | -2.92017 | -0.00035 | 0.00148  | -0.00551 | -0.00404 | -2.92421 |
| D56 | -2.71243 | -0.00033 | -0.00035 | -0.00686 | -0.00723 | -2.71966 |
| D57 | -0.02373 | -0.00016 | -0.00131 | -0.00228 | -0.00360 | -0.02733 |

|     |          |          |          |          |          |          |
|-----|----------|----------|----------|----------|----------|----------|
| D58 | -0.01456 | -0.00020 | 0.00349  | -0.00696 | -0.00350 | -0.01806 |
| D59 | 2.67414  | -0.00002 | 0.00252  | -0.00237 | 0.00012  | 2.67427  |
| D60 | -0.12091 | -0.00050 | -0.00172 | -0.04352 | -0.04524 | -0.16615 |
| D61 | 0.09332  | -0.00054 | -0.00642 | 0.01034  | 0.00394  | 0.09727  |
| D62 | -2.54842 | 0.00064  | 0.00250  | -0.04287 | -0.04037 | -2.58879 |
| D63 | -2.33419 | 0.00060  | -0.00220 | 0.01099  | 0.00882  | -2.32537 |
| D64 | 2.14542  | 0.00019  | -0.00087 | -0.00053 | -0.00129 | 2.14413  |
| D65 | -0.25130 | 0.00012  | 0.00053  | -0.00279 | -0.00216 | -0.25347 |
| D66 | 2.47256  | -0.00026 | 0.00020  | 0.00290  | 0.00308  | 2.47564  |
| D67 | -1.73422 | -0.00020 | 0.00067  | 0.00208  | 0.00273  | -1.73149 |
| D68 | 0.34530  | -0.00023 | 0.00161  | -0.00236 | -0.00075 | 0.34455  |
| D69 | 1.25243  | 0.00023  | 0.00046  | 0.00356  | 0.00404  | 1.25647  |
| D70 | -2.95435 | 0.00029  | 0.00093  | 0.00275  | 0.00370  | -2.95066 |
| D71 | -0.87483 | 0.00026  | 0.00188  | -0.00169 | 0.00021  | -0.87462 |
| D72 | -1.11588 | 0.00000  | 0.00016  | 0.00562  | 0.00578  | -1.11011 |
| D73 | 0.96052  | 0.00006  | 0.00062  | 0.00481  | 0.00543  | 0.96595  |
| D74 | 3.04004  | 0.00003  | 0.00157  | 0.00037  | 0.00194  | 3.04199  |

| Item                 | Value    | Threshold | Converged? |
|----------------------|----------|-----------|------------|
| Maximum Force        | 0.002958 | 0.000450  | NO         |
| RMS Force            | 0.000572 | 0.000300  | NO         |
| Maximum Displacement | 0.203127 | 0.001800  | NO         |
| RMS Displacement     | 0.054986 | 0.001200  | NO         |

Predicted change in Energy=-2.174936D-04

GradGradGradGradGradGradGradGradGradGradGradGradGradGradGradGradGradGradGrad

Input orientation:

| Center Number | Atomic Number | Atomic Type | Coordinates (Angstroms) |           |           |
|---------------|---------------|-------------|-------------------------|-----------|-----------|
|               |               |             | X                       | Y         | Z         |
| 1             | 6             | 0           | -1.365287               | -1.913349 | -0.262637 |
| 2             | 6             | 0           | -2.483052               | -1.148542 | -0.164834 |
| 3             | 7             | 0           | -2.065652               | 0.123836  | 0.214163  |
| 4             | 6             | 0           | -0.726025               | 0.113205  | 0.350586  |
| 5             | 7             | 0           | -0.285279               | -1.109046 | 0.065625  |
| 6             | 6             | 0           | 1.143486                | -1.482706 | 0.057095  |
| 7             | 6             | 0           | 1.737828                | -1.433851 | -1.358141 |
| 8             | 1             | 0           | -1.248144               | -2.949011 | -0.531449 |
| 9             | 1             | 0           | -3.514862               | -1.397565 | -0.332237 |
| 10            | 1             | 0           | 1.658297                | -0.774769 | 0.707262  |
| 11            | 1             | 0           | 1.232476                | -2.488546 | 0.468355  |
| 12            | 1             | 0           | 1.159861                | -2.084133 | -2.026149 |
| 13            | 1             | 0           | 1.673115                | -0.409197 | -1.740054 |
| 14            | 35            | 0           | 1.647427                | 2.239727  | 1.118375  |

|    |   |   |           |           |           |
|----|---|---|-----------|-----------|-----------|
| 15 | 1 | 0 | -0.064313 | 0.952828  | 0.645138  |
| 16 | 6 | 0 | -2.847184 | 1.288945  | 0.449818  |
| 17 | 6 | 0 | -4.168505 | 1.344581  | 0.349191  |
| 18 | 1 | 0 | -2.235167 | 2.138909  | 0.725092  |
| 19 | 1 | 0 | -4.672899 | 2.279795  | 0.548502  |
| 20 | 1 | 0 | -4.785206 | 0.497775  | 0.076327  |
| 21 | 8 | 0 | 3.063177  | -1.899474 | -1.315579 |
| 22 | 1 | 0 | 3.670278  | -1.133894 | -1.324488 |
| 23 | 6 | 0 | 4.698207  | 1.683816  | -1.094427 |
| 24 | 6 | 0 | 5.621827  | 0.801091  | -0.372947 |
| 25 | 8 | 0 | 4.776664  | 0.271550  | -1.419497 |
| 26 | 1 | 0 | 3.779391  | 1.992450  | -0.601346 |
| 27 | 1 | 0 | 5.081460  | 2.331764  | -1.878270 |
| 28 | 1 | 0 | 6.667573  | 0.824060  | -0.673962 |
| 29 | 6 | 0 | 5.353242  | 0.342305  | 1.030952  |
| 30 | 1 | 0 | 5.662613  | -0.698306 | 1.170407  |
| 31 | 1 | 0 | 5.924582  | 0.958329  | 1.731974  |
| 32 | 1 | 0 | 4.296535  | 0.443041  | 1.285912  |

-----  
Distance matrix (angstroms):

|    |    | 1        | 2        | 3        | 4        | 5        |
|----|----|----------|----------|----------|----------|----------|
| 1  | C  | 0.000000 |          |          |          |          |
| 2  | C  | 1.357900 | 0.000000 |          |          |          |
| 3  | N  | 2.206348 | 1.391693 | 0.000000 |          |          |
| 4  | C  | 2.211700 | 2.223692 | 1.346597 | 0.000000 |          |
| 5  | N  | 1.386029 | 2.210176 | 2.170666 | 1.330172 | 0.000000 |
| 6  | C  | 2.565467 | 3.648656 | 3.592244 | 2.475508 | 1.476843 |
| 7  | C  | 3.325564 | 4.395590 | 4.400567 | 3.373975 | 2.495109 |
| 8  | H  | 1.076374 | 2.213841 | 3.265983 | 3.229205 | 2.160805 |
| 9  | H  | 2.211685 | 1.074555 | 2.171042 | 3.244423 | 3.266763 |
| 10 | H  | 3.373296 | 4.248650 | 3.862439 | 2.569184 | 2.073867 |
| 11 | H  | 2.759270 | 4.000211 | 4.215068 | 3.258636 | 2.090166 |
| 12 | H  | 3.084723 | 4.196503 | 4.505337 | 3.746163 | 2.723003 |
| 13 | H  | 3.698259 | 4.505738 | 4.252231 | 3.224834 | 2.754192 |
| 14 | Br | 5.313349 | 5.494347 | 4.368243 | 3.277937 | 4.007233 |
| 15 | H  | 3.275905 | 3.304861 | 2.208693 | 1.108869 | 2.153134 |
| 16 | C  | 3.599763 | 2.540026 | 1.422605 | 2.427246 | 3.530060 |
| 17 | C  | 4.341252 | 3.052972 | 2.435250 | 3.656085 | 4.602189 |
| 18 | H  | 4.260644 | 3.414784 | 2.085738 | 2.553671 | 3.845279 |
| 19 | H  | 5.401916 | 4.130106 | 3.399658 | 4.506783 | 5.564946 |
| 20 | H  | 4.198125 | 2.840498 | 2.748600 | 4.086570 | 4.778214 |
| 21 | O  | 4.551942 | 5.713910 | 5.721782 | 4.602721 | 3.707379 |
| 22 | H  | 5.204997 | 6.261668 | 6.070439 | 4.867095 | 4.192787 |
| 23 | C  | 7.099114 | 7.775402 | 7.063691 | 5.828994 | 5.829316 |

|    |    |          |          |          |           |          |
|----|----|----------|----------|----------|-----------|----------|
| 24 | C  | 7.496673 | 8.338671 | 7.739554 | 6.425878  | 6.223734 |
| 25 | O  | 6.620851 | 7.502954 | 7.036188 | 5.782547  | 5.452971 |
| 26 | H  | 6.468207 | 7.019585 | 6.190420 | 4.973582  | 5.156130 |
| 27 | H  | 7.886178 | 8.501190 | 7.767524 | 6.604293  | 6.664817 |
| 28 | H  | 8.496437 | 9.374664 | 8.806151 | 7.498021  | 7.254381 |
| 29 | C  | 7.204163 | 8.065980 | 7.466917 | 6.121509  | 5.901796 |
| 30 | H  | 7.274704 | 8.266646 | 7.830479 | 6.491946  | 6.063553 |
| 31 | H  | 8.084998 | 8.872716 | 8.175816 | 6.844928  | 6.753749 |
| 32 | H  | 6.325093 | 7.113410 | 6.459718 | 5.119545  | 4.989097 |
|    |    | 6        | 7        | 8        | 9         | 10       |
| 6  | C  | 0.000000 |          |          |           |          |
| 7  | C  | 1.535748 | 0.000000 |          |           |          |
| 8  | H  | 2.866414 | 3.448937 | 0.000000 |           |          |
| 9  | H  | 4.675364 | 5.352060 | 2.754029 | 0.000000  |          |
| 10 | H  | 1.090377 | 2.169471 | 3.835249 | 5.313191  | 0.000000 |
| 11 | H  | 1.090307 | 2.168837 | 2.713875 | 4.936436  | 1.781974 |
| 12 | H  | 2.168384 | 1.096881 | 2.963213 | 5.019337  | 3.071548 |
| 13 | H  | 2.159322 | 1.095427 | 4.055261 | 5.465705  | 2.474514 |
| 14 | Br | 3.903432 | 4.431306 | 6.166787 | 6.479459  | 3.042420 |
| 15 | H  | 2.781438 | 3.599594 | 4.243838 | 4.287878  | 2.440458 |
| 16 | C  | 4.874600 | 5.630690 | 4.634661 | 2.876585  | 4.962313 |
| 17 | C  | 6.024626 | 6.746810 | 5.266780 | 2.900165  | 6.210595 |
| 18 | H  | 4.997760 | 5.734907 | 5.332920 | 3.906688  | 4.863013 |
| 19 | H  | 6.944654 | 7.650090 | 6.343158 | 3.954709  | 7.031330 |
| 20 | H  | 6.250765 | 6.952615 | 4.975995 | 2.317976  | 6.598194 |
| 21 | O  | 2.396486 | 1.405406 | 4.505983 | 6.670043  | 2.707496 |
| 22 | H  | 2.900883 | 1.955881 | 5.302306 | 7.258121  | 2.881848 |
| 23 | C  | 4.897847 | 4.307346 | 7.559042 | 8.805131  | 4.304855 |
| 24 | C  | 5.045414 | 4.588138 | 7.828467 | 9.397597  | 4.399973 |
| 25 | O  | 4.296245 | 3.485208 | 6.889046 | 8.527454  | 3.916899 |
| 26 | H  | 4.411151 | 4.059588 | 7.049755 | 8.048028  | 3.724111 |
| 27 | H  | 5.814074 | 5.062634 | 8.352509 | 9.497097  | 5.296562 |
| 28 | H  | 6.030850 | 5.465222 | 8.770118 | 10.427578 | 5.436625 |
| 29 | C  | 4.690534 | 4.683344 | 7.540037 | 9.139403  | 3.873661 |
| 30 | H  | 4.719879 | 4.726364 | 7.464621 | 9.325929  | 4.031737 |
| 31 | H  | 5.623411 | 5.727149 | 8.475753 | 9.945567  | 4.717505 |
| 32 | H  | 3.893612 | 4.130462 | 6.749244 | 8.186828  | 2.962803 |
|    |    | 11       | 12       | 13       | 14        | 15       |
| 11 | H  | 0.000000 |          |          |           |          |
| 12 | H  | 2.528117 | 0.000000 |          |           |          |
| 13 | H  | 3.065115 | 1.775019 | 0.000000 |           |          |
| 14 | Br | 4.790749 | 5.368568 | 3.897188 | 0.000000  |          |
| 15 | H  | 3.681843 | 4.225815 | 3.250063 | 2.193198  | 0.000000 |
| 16 | C  | 5.559982 | 5.793486 | 5.302106 | 4.642465  | 2.809892 |

|    |   |          |           |          |           |           |
|----|---|----------|-----------|----------|-----------|-----------|
| 17 | C | 6.624022 | 6.766817  | 6.447109 | 5.934476  | 4.133455  |
| 18 | H | 5.788246 | 6.076975  | 5.276785 | 3.903763  | 2.475032  |
| 19 | H | 7.590583 | 7.726175  | 7.262235 | 6.346092  | 4.796795  |
| 20 | H | 6.729360 | 6.813991  | 6.769915 | 6.745296  | 4.776761  |
| 21 | O | 2.623146 | 2.040005  | 2.081677 | 5.006143  | 4.664894  |
| 22 | H | 3.315456 | 2.774433  | 2.164842 | 4.630424  | 4.709672  |
| 23 | C | 5.644660 | 5.252184  | 3.734798 | 3.809565  | 5.122697  |
| 24 | C | 5.549405 | 5.564776  | 4.350413 | 4.482139  | 5.778556  |
| 25 | O | 4.872718 | 4.358731  | 3.193460 | 4.484042  | 5.306780  |
| 26 | H | 5.264063 | 5.050795  | 3.391307 | 2.750247  | 4.172362  |
| 27 | H | 6.599751 | 5.907703  | 4.375932 | 4.558610  | 5.894746  |
| 28 | H | 6.466725 | 6.373452  | 5.253769 | 5.515293  | 6.861115  |
| 29 | C | 5.030998 | 5.728692  | 4.667607 | 4.164243  | 5.465482  |
| 30 | H | 4.829488 | 5.693265  | 4.946763 | 4.975587  | 5.983297  |
| 31 | H | 5.957645 | 6.788419  | 5.656860 | 4.506944  | 6.086716  |
| 32 | H | 4.318687 | 5.214890  | 4.094522 | 3.205296  | 4.437057  |
|    |   | 16       | 17        | 18       | 19        | 20        |
| 16 | C | 0.000000 |           |          |           |           |
| 17 | C | 1.326315 | 0.000000  |          |           |           |
| 18 | H | 1.082949 | 2.123690  | 0.000000 |           |           |
| 19 | H | 2.079605 | 1.081093  | 2.448177 | 0.000000  |           |
| 20 | H | 2.126352 | 1.082522  | 3.101115 | 1.846932  | 0.000000  |
| 21 | O | 6.943703 | 8.098925  | 6.967447 | 8.988212  | 8.323540  |
| 22 | H | 7.176045 | 8.389909  | 7.055941 | 9.207061  | 8.724668  |
| 23 | C | 7.711908 | 8.989866  | 7.182578 | 9.532682  | 9.628731  |
| 24 | C | 8.522856 | 9.831962  | 8.045358 | 10.441121 | 10.421141 |
| 25 | O | 7.915332 | 9.181269  | 7.566509 | 9.859021  | 9.680806  |
| 26 | H | 6.746211 | 8.030711  | 6.160828 | 8.534983  | 8.720414  |
| 27 | H | 8.328916 | 9.565457  | 7.768379 | 10.051837 | 10.224238 |
| 28 | H | 9.592163 | 10.896715 | 9.107412 | 11.498691 | 11.481966 |
| 29 | C | 8.275314 | 9.598595  | 7.804183 | 10.223019 | 10.184478 |
| 30 | H | 8.768413 | 10.074655 | 8.403750 | 10.773981 | 10.572821 |
| 31 | H | 8.871139 | 10.194690 | 8.305966 | 10.744928 | 10.846789 |
| 32 | H | 7.242052 | 8.564294  | 6.771529 | 9.185215  | 9.162101  |
|    |   | 21       | 22        | 23       | 24        | 25        |
| 21 | O | 0.000000 |           |          |           |           |
| 22 | H | 0.977121 | 0.000000  |          |           |           |
| 23 | C | 3.944895 | 3.008165  | 0.000000 |           |           |
| 24 | C | 3.837746 | 2.908288  | 1.467246 | 0.000000  |           |
| 25 | O | 2.767703 | 1.791198  | 1.451317 | 1.445676  | 0.000000  |
| 26 | H | 4.021215 | 3.210742  | 1.087477 | 2.205917  | 2.150679  |
| 27 | H | 4.721596 | 3.782710  | 1.086798 | 2.213810  | 2.132570  |
| 28 | H | 4.563002 | 3.638756  | 2.189606 | 1.088450  | 2.106331  |
| 29 | C | 3.971924 | 3.249558  | 2.597298 | 1.501185  | 2.518362  |



```

30 H 3.792097 3.222365 3.425501 2.152161 2.903985
31 H 5.063818 4.336039 3.165259 2.132388 3.423616
32 H 3.711644 3.113376 2.714198 2.153233 2.753029
      26      27      28      29      30
26 H 0.000000
27 H 1.855007 0.000000
28 H 3.116409 2.497856 0.000000
29 C 2.804351 3.534882 2.205967 0.000000
30 H 3.731729 4.337453 2.594078 1.094545 0.000000
31 H 3.334011 3.953611 2.521624 1.094233 1.768735
32 H 2.495966 3.767682 3.099694 1.091687 1.783868
      31      32
31 H 0.000000
32 H 1.764945 0.000000

```

Stoichiometry C10H17BrN2O2

Framework group C1[X(C10H17BrN2O2)]

Deg. of freedom 90

Full point group C1 NOp 1

Largest Abelian subgroup C1 NOp 1

Largest concise Abelian subgroup C1 NOp 1

Standard orientation:

```

-----
Center      Atomic      Atomic      Coordinates (Angstroms)
Number      Number      Type        X           Y           Z
-----
  1          6          0        -2.696962   2.143077  -0.399847
  2          6          0        -3.759025   1.364119  -0.069489
  3          7          0        -3.275599   0.066668   0.070973
  4          6          0        -1.953069   0.071611  -0.182430
  5          7          0        -1.585537   1.317735  -0.467833
  6          6          0        -0.191237   1.716266  -0.747407
  7          6          0         0.501362   2.283693   0.500333
  8          1          0        -2.638650   3.200391  -0.592897
  9          1          0        -4.792434   1.619924   0.076445
 10          1          0         0.328532   0.822612  -1.094023
 11          1          0        -0.205666   2.462486  -1.542213
 12          1          0        -0.075732   3.129936   0.892741
 13          1          0         0.539313   1.509115   1.273993
 14         35          0         0.512836  -2.087615  -0.226307
 15          1          0        -1.252844  -0.788046  -0.166193
 16          6          0        -3.982996  -1.120266   0.409471
 17          6          0        -5.286450  -1.180278   0.647209
 18          1          0        -3.330113  -1.983230   0.452090
 19          1          0        -5.732670  -2.132460   0.898207

```

|    |   |   |           |           |           |
|----|---|---|-----------|-----------|-----------|
| 20 | 1 | 0 | -5.943925 | -0.321369 | 0.604140  |
| 21 | 8 | 0 | 1.782434  | 2.740506  | 0.146294  |
| 22 | 1 | 0 | 2.443787  | 2.072235  | 0.412358  |
| 23 | 6 | 0 | 3.659453  | -0.543537 | 1.266143  |
| 24 | 6 | 0 | 4.463074  | -0.005800 | 0.162583  |
| 25 | 8 | 0 | 3.655240  | 0.877835  | 0.972875  |
| 26 | 1 | 0 | 2.734209  | -1.064751 | 1.031907  |
| 27 | 1 | 0 | 4.142881  | -0.791263 | 2.207450  |
| 28 | 1 | 0 | 5.525922  | 0.139171  | 0.347134  |
| 29 | 6 | 0 | 4.064947  | -0.183420 | -1.273906 |
| 30 | 1 | 0 | 4.285949  | 0.716019  | -1.857170 |
| 31 | 1 | 0 | 4.630630  | -1.012528 | -1.709715 |
| 32 | 1 | 0 | 3.003545  | -0.422051 | -1.364807 |

-----

Rotational constants (GHZ):      0.5865619      0.2269697      0.1753397

Standard basis: 6-311++G(d,p) (5D, 7F)

There are    492 symmetry adapted cartesian basis functions of A    symmetry.

There are    475 symmetry adapted basis functions of A    symmetry.

    475 basis functions,    751 primitive gaussians,    492 cartesian basis functions

    71 alpha electrons      71 beta electrons

        nuclear repulsion energy      1311.5117449600 Hartrees.

NAtoms=    32 NActive=    32 NUniq=    32 SFac= 1.00D+00 NAtFMM=    60 NAOKFM=F

Big=F

Integral buffers will be    131072 words long.

Raffenetti 2 integral format.

Two-electron integral symmetry is turned on.

One-electron integrals computed using PRISM.

NBasis=    475 RedAO= T EigKep=    3.74D-06    NBF=    475

NBsUse=    475 1.00D-06 EigRej= -1.00D+00 NBFU=    475

Initial guess from the checkpoint file: "/home/suqian/liuwen/qianmengshijie/ohpo/ohpo.chk"

B after Tr=    0.000000    0.000000    0.000000

        Rot=    0.999971    -0.001607    0.000007    -0.007482 Ang=    -0.88 deg.

ExpMin= 3.50D-02 ExpMax= 4.40D+05 ExpMxC= 1.51D+04 IAcc=3 IRadAn=      5 AccDes=

0.00D+00

Harris functional with IExCor=    402 and IRadAn=      5 diagonalized for initial guess.

HarFok: IExCor=    402 AccDes= 0.00D+00 IRadAn=      5 IDoV= 1 UseB2=F ITyADJ=14

ICtDFT= 3500011 ScaDFX= 1.000000 1.000000 1.000000 1.000000

FoFCou: FMM=F IPFlag=            0 FMFlag=    100000 FMFlg1=            0

        NxFlg=            0 DoJE=T BraDBF=F KetDBF=T FulRan=T

        wScrn= 0.000000 ICntrl=            500 IOpCl=    0 I1Cent=    200000004 NGrid=

0

        NMat0=    1 NMatS0=            1 NMatT0=    0 NMatD0=    1 NMtDS0=    0

NMtDT0=    0

Petite list used in FoFCou.

Requested convergence on RMS density matrix=1.00D-08 within 128 cycles.

Requested convergence on MAX density matrix=1.00D-06.

Requested convergence on energy=1.00D-06.

No special actions if energy rises.

SCF Done: E(RB3LYP) = -3225.52341648 A.U. after 11 cycles

NFock= 11 Conv=0.65D-08 -V/T= 2.0018

Calling FoFJK, ICntrl= 2127 FMM=F ISym2X=0 l1Cent= 0 IOpClX= 0 NMat=1 NMatS=1

NMatT=0.

\*\*\*\*\* Axes restored to original set \*\*\*\*\*

```
-----
```

| Center | Atomic | Forces (Hartrees/Bohr) |              |              |
|--------|--------|------------------------|--------------|--------------|
| Number | Number | X                      | Y            | Z            |
| 1      | 6      | -0.000530610           | 0.000002587  | -0.000215381 |
| 2      | 6      | 0.000013488            | 0.000145749  | -0.000874230 |
| 3      | 7      | -0.000210505           | -0.000585486 | 0.000840699  |
| 4      | 6      | -0.000760412           | 0.000579686  | -0.000581158 |
| 5      | 7      | 0.000371865            | -0.000824393 | 0.000666447  |
| 6      | 6      | -0.000662692           | -0.000388264 | 0.000268603  |
| 7      | 6      | 0.001094236            | -0.000458954 | -0.000259036 |
| 8      | 1      | 0.000012469            | -0.000086653 | 0.000197727  |
| 9      | 1      | -0.000070161           | -0.000014559 | -0.000015490 |
| 10     | 1      | 0.000267874            | 0.000247005  | 0.000073598  |
| 11     | 1      | 0.000073357            | -0.000288468 | 0.000167816  |
| 12     | 1      | -0.000273213           | -0.000002786 | -0.000089647 |
| 13     | 1      | -0.000118679           | 0.000300302  | -0.000054699 |
| 14     | 35     | -0.000492177           | -0.000022355 | 0.000356365  |
| 15     | 1      | 0.000423613            | 0.001702556  | 0.000130970  |
| 16     | 6      | 0.000202443            | -0.000414277 | 0.000148145  |
| 17     | 6      | -0.000135718           | 0.000090218  | 0.000003097  |
| 18     | 1      | 0.000004452            | 0.000042285  | 0.000011727  |
| 19     | 1      | 0.000000920            | 0.000028948  | -0.000023658 |
| 20     | 1      | -0.000013394           | -0.000073967 | -0.000029535 |
| 21     | 8      | -0.000609868           | -0.000443478 | -0.000935351 |
| 22     | 1      | 0.000350125            | 0.000318827  | 0.000426317  |
| 23     | 6      | 0.000741031            | 0.000727030  | -0.000079942 |
| 24     | 6      | 0.001403952            | 0.001179196  | -0.000375712 |
| 25     | 8      | -0.001138942           | -0.000999647 | -0.000650774 |
| 26     | 1      | -0.000141543           | -0.000082526 | -0.000566560 |
| 27     | 1      | -0.000379328           | -0.000065452 | 0.000050982  |
| 28     | 1      | 0.000384629            | -0.000246692 | 0.000109615  |
| 29     | 6      | -0.000071049           | -0.000906174 | 0.002144314  |
| 30     | 1      | 0.000248123            | 0.000106245  | -0.000475221 |
| 31     | 1      | 0.000088180            | 0.000142073  | 0.000053997  |

```
-----
```

32 1 -0.000072466 0.000291424 -0.000424027

-----  
Cartesian Forces: Max 0.002144314 RMS 0.000530245

GradGradGradGradGradGradGradGradGradGradGradGradGradGradGradGradGradGradGrad

Berny optimization.

Using GEDIIS/GDIIS optimizer.

FormGI is forming the generalized inverse of G from B-inverse, IUseBI=4.

GSVD: received Info= 1 from GESDD.

Internal Forces: Max 0.001749612 RMS 0.000374759

Search for a local minimum.

Step number 21 out of a maximum of 177

All quantities printed in internal units (Hartrees-Bohrs-Radians)

Mixed Optimization -- En-DIIS/RFO-DIIS

Swapping is turned off.

Update second derivatives using D2CorX and points 19 20 21

DE= -1.42D-04 DEPred=-2.17D-04 R= 6.52D-01

TightC=F SS= 1.41D+00 RLast= 3.23D-01 DXNew= 3.2661D+00 9.6998D-01

Trust test= 6.52D-01 RLast= 3.23D-01 DXMaxT set to 1.94D+00

ITU= 1 1 1 1-1 1 1 1 1 1 1 1 1 1 1 0 1 0 1

ITU= 0

|                 |         |         |         |         |         |
|-----------------|---------|---------|---------|---------|---------|
| Eigenvalues --- | 0.00002 | 0.00222 | 0.00240 | 0.00325 | 0.00462 |
| Eigenvalues --- | 0.00519 | 0.00916 | 0.01108 | 0.01396 | 0.01443 |
| Eigenvalues --- | 0.01699 | 0.01857 | 0.02030 | 0.02057 | 0.02167 |
| Eigenvalues --- | 0.02242 | 0.02319 | 0.02385 | 0.02640 | 0.03045 |
| Eigenvalues --- | 0.03061 | 0.03151 | 0.03513 | 0.03791 | 0.04203 |
| Eigenvalues --- | 0.04675 | 0.04880 | 0.05192 | 0.05358 | 0.05647 |
| Eigenvalues --- | 0.05935 | 0.06261 | 0.07320 | 0.09345 | 0.09633 |
| Eigenvalues --- | 0.09968 | 0.11074 | 0.11596 | 0.11881 | 0.12930 |
| Eigenvalues --- | 0.13879 | 0.14862 | 0.15278 | 0.15959 | 0.15995 |
| Eigenvalues --- | 0.16000 | 0.16001 | 0.16003 | 0.16006 | 0.16062 |
| Eigenvalues --- | 0.16576 | 0.17399 | 0.19587 | 0.22022 | 0.22282 |
| Eigenvalues --- | 0.22921 | 0.23347 | 0.23797 | 0.24526 | 0.25056 |
| Eigenvalues --- | 0.27554 | 0.28357 | 0.31048 | 0.32174 | 0.33101 |
| Eigenvalues --- | 0.33273 | 0.33980 | 0.34157 | 0.34515 | 0.34808 |
| Eigenvalues --- | 0.35079 | 0.35681 | 0.35689 | 0.35852 | 0.35922 |
| Eigenvalues --- | 0.36436 | 0.36663 | 0.37217 | 0.37243 | 0.37743 |
| Eigenvalues --- | 0.38743 | 0.42022 | 0.42631 | 0.43810 | 0.45686 |
| Eigenvalues --- | 0.49162 | 0.53414 | 0.54846 | 0.56153 | 0.60374 |

Eigenvalue 1 is 1.94D-05 Eigenvector:

|   | D54      | D52      | D55      | D53      | D47      |
|---|----------|----------|----------|----------|----------|
| 1 | -0.50094 | 0.50072  | -0.50042 | -0.49634 | -0.01597 |
|   | R18      | D46      | D42      | D35      | D43      |
| 1 | 0.01323  | -0.01150 | -0.01014 | 0.00876  | -0.00823 |

En-DIIS/RFO-DIIS IScMMF= 0 using points: 21 20 19

RFO step: Lambda=-5.99163982D-05.

DidBck=T Rises=F RFO-DIIS coefs: 0.73119 0.35985 -0.09103

Iteration 1 RMS(Cart)= 0.03398486 RMS(Int)= 0.00075236

Iteration 2 RMS(Cart)= 0.00039482 RMS(Int)= 0.00002787

Iteration 3 RMS(Cart)= 0.00000064 RMS(Int)= 0.00002786

| Variable | Old X   | -DE/DX   | Delta X<br>(Linear) | Delta X<br>(Quad) | Delta X<br>(Total) | New X   |
|----------|---------|----------|---------------------|-------------------|--------------------|---------|
| R1       | 2.56606 | -0.00017 | -0.00003            | -0.00083          | -0.00086           | 2.56520 |
| R2       | 2.61921 | 0.00046  | -0.00014            | 0.00106           | 0.00092            | 2.62013 |
| R3       | 2.03405 | 0.00003  | 0.00001             | 0.00004           | 0.00005            | 2.03410 |
| R4       | 2.62992 | 0.00004  | 0.00005             | -0.00015          | -0.00009           | 2.62982 |
| R5       | 2.03061 | 0.00007  | -0.00002            | 0.00014           | 0.00012            | 2.03074 |
| R6       | 2.54470 | 0.00030  | -0.00020            | 0.00117           | 0.00097            | 2.54567 |
| R7       | 2.68833 | -0.00028 | 0.00021             | -0.00104          | -0.00083           | 2.68750 |
| R8       | 2.51366 | 0.00125  | -0.00056            | 0.00266           | 0.00210            | 2.51576 |
| R9       | 2.09546 | 0.00154  | -0.00107            | 0.00654           | 0.00548            | 2.10094 |
| R10      | 2.79083 | 0.00041  | -0.00087            | 0.00082           | -0.00005           | 2.79078 |
| R11      | 2.90214 | 0.00086  | -0.00143            | 0.00316           | 0.00174            | 2.90388 |
| R12      | 2.06051 | 0.00033  | -0.00025            | 0.00106           | 0.00081            | 2.06132 |
| R13      | 2.06038 | 0.00034  | 0.00003             | 0.00051           | 0.00054            | 2.06092 |
| R14      | 2.07281 | 0.00020  | -0.00016            | 0.00102           | 0.00086            | 2.07367 |
| R15      | 2.07006 | 0.00031  | -0.00034            | 0.00121           | 0.00087            | 2.07093 |
| R16      | 2.65583 | -0.00014 | 0.00055             | -0.00417          | -0.00363           | 2.65221 |
| R17      | 4.14454 | 0.00009  | 0.00207             | -0.01488          | -0.01280           | 4.13174 |
| R18      | 8.47361 | 0.00097  | 0.07977             | 0.00862           | 0.08839            | 8.56200 |
| R19      | 2.50637 | 0.00015  | -0.00003            | 0.00026           | 0.00023            | 2.50660 |
| R20      | 2.04648 | 0.00004  | 0.00000             | 0.00002           | 0.00002            | 2.04649 |
| R21      | 2.04297 | 0.00002  | 0.00002             | -0.00003          | -0.00001           | 2.04296 |
| R22      | 2.04567 | 0.00007  | 0.00000             | 0.00008           | 0.00008            | 2.04575 |
| R23      | 1.84649 | 0.00091  | -0.00105            | 0.00237           | 0.00131            | 1.84780 |
| R24      | 3.38487 | 0.00043  | -0.01912            | 0.01448           | -0.00465           | 3.38022 |
| R25      | 2.77269 | 0.00041  | 0.00095             | -0.00024          | 0.00061            | 2.77330 |
| R26      | 2.74259 | 0.00036  | -0.00002            | -0.00155          | -0.00153           | 2.74106 |
| R27      | 2.05503 | -0.00016 | 0.00032             | -0.00001          | 0.00032            | 2.05535 |
| R28      | 2.05375 | -0.00021 | 0.00053             | -0.00059          | -0.00006           | 2.05369 |
| R29      | 2.73193 | 0.00175  | -0.00139            | 0.00494           | 0.00361            | 2.73555 |
| R30      | 2.05687 | 0.00033  | 0.00004             | 0.00034           | 0.00038            | 2.05725 |
| R31      | 2.83683 | 0.00130  | -0.00114            | 0.00251           | 0.00138            | 2.83821 |
| R32      | 2.06839 | -0.00009 | 0.00021             | -0.00080          | -0.00059           | 2.06780 |
| R33      | 2.06780 | 0.00016  | 0.00001             | -0.00001          | 0.00000            | 2.06780 |
| R34      | 2.06299 | 0.00000  | -0.00005            | 0.00002           | -0.00004           | 2.06295 |
| A1       | 1.87289 | 0.00016  | -0.00004            | 0.00041           | 0.00036            | 1.87325 |
| A2       | 2.27772 | -0.00005 | -0.00013            | 0.00022           | 0.00009            | 2.27781 |

|     |         |          |          |          |          |         |
|-----|---------|----------|----------|----------|----------|---------|
| A3  | 2.13257 | -0.00011 | 0.00018  | -0.00063 | -0.00045 | 2.13212 |
| A4  | 1.86259 | 0.00005  | -0.00015 | -0.00013 | -0.00029 | 1.86230 |
| A5  | 2.27663 | -0.00002 | 0.00006  | 0.00007  | 0.00012  | 2.27675 |
| A6  | 2.14396 | -0.00003 | 0.00010  | 0.00008  | 0.00016  | 2.14413 |
| A7  | 1.89520 | 0.00042  | 0.00002  | 0.00157  | 0.00159  | 1.89679 |
| A8  | 2.25122 | -0.00033 | 0.00020  | -0.00174 | -0.00154 | 2.24969 |
| A9  | 2.13673 | -0.00008 | -0.00021 | 0.00019  | -0.00002 | 2.13671 |
| A10 | 1.89144 | -0.00051 | 0.00003  | -0.00205 | -0.00201 | 1.88944 |
| A11 | 2.23266 | 0.00049  | -0.00105 | 0.00153  | 0.00051  | 2.23317 |
| A12 | 2.15908 | 0.00002  | 0.00100  | 0.00051  | 0.00149  | 2.16057 |
| A13 | 1.90261 | -0.00012 | 0.00013  | 0.00025  | 0.00039  | 1.90300 |
| A14 | 2.22138 | -0.00018 | -0.00041 | -0.00305 | -0.00345 | 2.21794 |
| A15 | 2.15830 | 0.00029  | 0.00028  | 0.00248  | 0.00271  | 2.16100 |
| A16 | 1.95161 | 0.00015  | -0.00254 | 0.00371  | 0.00113  | 1.95275 |
| A17 | 1.86404 | 0.00006  | 0.00052  | -0.00046 | 0.00004  | 1.86408 |
| A18 | 1.88619 | -0.00005 | -0.00011 | 0.00015  | 0.00007  | 1.88627 |
| A19 | 1.92422 | -0.00032 | 0.00180  | -0.00431 | -0.00249 | 1.92173 |
| A20 | 1.92342 | 0.00013  | -0.00004 | -0.00013 | -0.00016 | 1.92326 |
| A21 | 1.91294 | 0.00003  | 0.00039  | 0.00110  | 0.00149  | 1.91443 |
| A22 | 1.91605 | -0.00007 | -0.00047 | 0.00095  | 0.00047  | 1.91652 |
| A23 | 1.90517 | -0.00027 | 0.00085  | -0.00331 | -0.00245 | 1.90272 |
| A24 | 1.90341 | 0.00030  | -0.00122 | 0.00070  | -0.00051 | 1.90290 |
| A25 | 1.88714 | 0.00002  | 0.00076  | -0.00242 | -0.00167 | 1.88546 |
| A26 | 1.89540 | 0.00004  | -0.00063 | 0.00247  | 0.00185  | 1.89725 |
| A27 | 1.95646 | -0.00002 | 0.00071  | 0.00164  | 0.00231  | 1.95877 |
| A28 | 1.73654 | 0.00085  | -0.00913 | 0.01182  | 0.00268  | 1.73922 |
| A29 | 2.88538 | -0.00096 | 0.00135  | -0.00900 | -0.00769 | 2.87769 |
| A30 | 2.17619 | 0.00001  | 0.00002  | -0.00008 | -0.00006 | 2.17613 |
| A31 | 1.95458 | 0.00002  | -0.00005 | 0.00036  | 0.00030  | 1.95489 |
| A32 | 2.15241 | -0.00003 | 0.00003  | -0.00028 | -0.00025 | 2.15216 |
| A33 | 2.07956 | 0.00001  | -0.00006 | 0.00034  | 0.00028  | 2.07984 |
| A34 | 2.15778 | -0.00004 | 0.00015  | -0.00072 | -0.00057 | 2.15721 |
| A35 | 2.04584 | 0.00003  | -0.00008 | 0.00038  | 0.00030  | 2.04614 |
| A36 | 1.90293 | 0.00035  | 0.00031  | 0.00341  | 0.00358  | 1.90652 |
| A37 | 3.09750 | -0.00071 | 0.00042  | -0.01268 | -0.01231 | 3.08519 |
| A38 | 2.07105 | 0.00053  | -0.00074 | 0.00341  | 0.00266  | 2.07371 |
| A39 | 2.08444 | -0.00037 | -0.00130 | 0.00286  | 0.00155  | 2.08598 |
| A40 | 2.00800 | -0.00036 | 0.00185  | -0.00560 | -0.00377 | 2.00422 |
| A41 | 1.98182 | -0.00001 | 0.00066  | 0.00073  | 0.00139  | 1.98321 |
| A42 | 2.04403 | -0.00013 | 0.00062  | -0.00317 | -0.00257 | 2.04146 |
| A43 | 2.04442 | -0.00004 | -0.00094 | 0.00005  | -0.00092 | 2.04350 |
| A44 | 2.13069 | 0.00052  | 0.00031  | 0.00166  | 0.00197  | 2.13266 |
| A45 | 1.94895 | 0.00033  | -0.00053 | -0.00167 | -0.00220 | 1.94675 |
| A46 | 2.04931 | -0.00002 | 0.00049  | -0.00140 | -0.00092 | 2.04839 |

|     |          |          |          |          |          |          |
|-----|----------|----------|----------|----------|----------|----------|
| A47 | 2.02303  | -0.00040 | 0.00045  | 0.00065  | 0.00110  | 2.02413  |
| A48 | 1.45386  | -0.00044 | -0.00297 | -0.01038 | -0.01342 | 1.44044  |
| A49 | 0.93774  | 0.00098  | 0.00126  | 0.01641  | 0.01763  | 0.95536  |
| A50 | 2.37209  | 0.00053  | -0.00029 | 0.00637  | 0.00598  | 2.37807  |
| A51 | 2.22700  | 0.00074  | 0.00030  | 0.01258  | 0.01285  | 2.23985  |
| A52 | 1.93814  | -0.00061 | 0.00088  | -0.00171 | -0.00084 | 1.93730  |
| A53 | 1.91098  | 0.00012  | 0.00029  | -0.00048 | -0.00019 | 1.91079  |
| A54 | 1.94270  | -0.00058 | 0.00131  | -0.00281 | -0.00151 | 1.94119  |
| A55 | 1.88181  | 0.00026  | -0.00076 | 0.00124  | 0.00049  | 1.88230  |
| A56 | 1.90876  | 0.00062  | -0.00127 | 0.00220  | 0.00091  | 1.90967  |
| A57 | 1.87951  | 0.00024  | -0.00054 | 0.00181  | 0.00127  | 1.88078  |
| A58 | 3.68086  | 0.00030  | -0.00267 | 0.00220  | -0.00057 | 3.68028  |
| A59 | 5.01393  | -0.00046 | -0.00919 | -0.01490 | -0.02420 | 4.98973  |
| D1  | 0.00812  | -0.00020 | -0.00065 | -0.00597 | -0.00662 | 0.00150  |
| D2  | -3.13698 | 0.00006  | -0.00021 | 0.00149  | 0.00129  | -3.13569 |
| D3  | -3.13721 | -0.00025 | -0.00023 | -0.00693 | -0.00716 | 3.13881  |
| D4  | 0.00087  | 0.00001  | 0.00021  | 0.00052  | 0.00074  | 0.00161  |
| D5  | -0.00444 | -0.00006 | -0.00210 | 0.00354  | 0.00145  | -0.00299 |
| D6  | -3.10159 | 0.00005  | -0.00184 | 0.01128  | 0.00944  | -3.09215 |
| D7  | 3.14051  | -0.00001 | -0.00248 | 0.00441  | 0.00194  | -3.14073 |
| D8  | 0.04336  | 0.00010  | -0.00222 | 0.01215  | 0.00992  | 0.05329  |
| D9  | -0.00905 | 0.00038  | 0.00314  | 0.00637  | 0.00952  | 0.00046  |
| D10 | 3.14085  | 0.00018  | 0.00139  | 0.00264  | 0.00405  | -3.13828 |
| D11 | 3.13571  | 0.00015  | 0.00274  | -0.00038 | 0.00236  | 3.13807  |
| D12 | 0.00244  | -0.00006 | 0.00099  | -0.00411 | -0.00311 | -0.00067 |
| D13 | 0.00638  | -0.00043 | -0.00449 | -0.00423 | -0.00871 | -0.00233 |
| D14 | -3.13685 | -0.00036 | -0.00079 | -0.00894 | -0.00972 | 3.13662  |
| D15 | 3.14032  | -0.00024 | -0.00288 | -0.00081 | -0.00368 | 3.13664  |
| D16 | -0.00292 | -0.00018 | 0.00081  | -0.00552 | -0.00469 | -0.00760 |
| D17 | 0.00972  | 0.00006  | 0.00231  | -0.00070 | 0.00160  | 0.01133  |
| D18 | -3.13221 | 0.00010  | 0.00279  | -0.00027 | 0.00252  | -3.12969 |
| D19 | -3.12253 | -0.00017 | 0.00034  | -0.00489 | -0.00454 | -3.12707 |
| D20 | 0.01872  | -0.00013 | 0.00083  | -0.00446 | -0.00362 | 0.01510  |
| D21 | -0.00126 | 0.00030  | 0.00409  | 0.00047  | 0.00454  | 0.00328  |
| D22 | 3.09785  | 0.00018  | 0.00382  | -0.00710 | -0.00331 | 3.09453  |
| D23 | -3.14130 | 0.00024  | 0.00057  | 0.00494  | 0.00550  | -3.13580 |
| D24 | -0.04219 | 0.00012  | 0.00030  | -0.00263 | -0.00236 | -0.04455 |
| D25 | -3.05375 | -0.00004 | 0.00690  | 0.00663  | 0.01351  | -3.04023 |
| D26 | 0.08598  | 0.00003  | 0.01113  | 0.00126  | 0.01236  | 0.09833  |
| D27 | 1.40304  | 0.00021  | -0.00663 | -0.00067 | -0.00732 | 1.39572  |
| D28 | -2.77377 | -0.00006 | -0.00560 | -0.00407 | -0.00969 | -2.78346 |
| D29 | -0.71688 | -0.00002 | -0.00493 | -0.00294 | -0.00789 | -0.72477 |
| D30 | -1.68806 | 0.00035  | -0.00633 | 0.00820  | 0.00185  | -1.68621 |
| D31 | 0.41830  | 0.00008  | -0.00530 | 0.00480  | -0.00051 | 0.41779  |

|     |          |          |          |          |          |          |
|-----|----------|----------|----------|----------|----------|----------|
| D32 | 2.47520  | 0.00013  | -0.00463 | 0.00593  | 0.00129  | 2.47649  |
| D33 | -0.98627 | 0.00008  | 0.01096  | 0.00792  | 0.01886  | -0.96741 |
| D34 | 1.07941  | -0.00010 | 0.01211  | 0.00356  | 0.01565  | 1.09507  |
| D35 | -3.06095 | -0.00010 | 0.01273  | 0.00393  | 0.01663  | -3.04432 |
| D36 | -3.05724 | 0.00012  | 0.01077  | 0.00895  | 0.01972  | -3.03751 |
| D37 | -0.99155 | -0.00006 | 0.01192  | 0.00460  | 0.01651  | -0.97504 |
| D38 | 1.15127  | -0.00007 | 0.01255  | 0.00496  | 0.01749  | 1.16876  |
| D39 | 1.11202  | 0.00020  | 0.00913  | 0.01047  | 0.01959  | 1.13161  |
| D40 | -3.10548 | 0.00003  | 0.01028  | 0.00611  | 0.01638  | -3.08909 |
| D41 | -0.96266 | 0.00002  | 0.01091  | 0.00648  | 0.01736  | -0.94530 |
| D42 | -1.75916 | 0.00023  | -0.00304 | 0.00554  | 0.00247  | -1.75669 |
| D43 | 2.43651  | 0.00011  | -0.00140 | 0.00252  | 0.00111  | 2.43761  |
| D44 | 0.35262  | 0.00008  | -0.00234 | 0.00291  | 0.00054  | 0.35316  |
| D45 | 0.44266  | -0.00003 | -0.01736 | -0.00341 | -0.02080 | 0.42186  |
| D46 | -0.37415 | -0.00027 | 0.00678  | 0.00193  | 0.00883  | -0.36532 |
| D47 | 2.58400  | -0.00019 | 0.01371  | 0.00513  | 0.01881  | 2.60281  |
| D48 | -3.14102 | 0.00005  | 0.00071  | 0.00011  | 0.00081  | -3.14021 |
| D49 | 0.00176  | 0.00001  | 0.00032  | 0.00018  | 0.00050  | 0.00225  |
| D50 | 0.00095  | 0.00001  | 0.00017  | -0.00037 | -0.00021 | 0.00074  |
| D51 | -3.13946 | -0.00003 | -0.00022 | -0.00030 | -0.00052 | -3.13998 |
| D52 | -1.45489 | -0.00023 | 0.00520  | -0.03335 | -0.02819 | -1.48308 |
| D53 | 2.08972  | -0.00017 | -0.00905 | 0.02416  | 0.01505  | 2.10477  |
| D54 | 1.87674  | -0.00034 | -0.00104 | 0.02386  | 0.02279  | 1.89953  |
| D55 | -2.92421 | 0.00029  | 0.00014  | 0.03906  | 0.03925  | -2.88496 |
| D56 | -2.71966 | -0.00016 | 0.00217  | -0.01026 | -0.00808 | -2.72774 |
| D57 | -0.02733 | -0.00007 | 0.00181  | -0.00425 | -0.00245 | -0.02978 |
| D58 | -0.01806 | -0.00013 | -0.00128 | -0.00335 | -0.00463 | -0.02269 |
| D59 | 2.67427  | -0.00004 | -0.00164 | 0.00265  | 0.00100  | 2.67527  |
| D60 | -0.16615 | -0.00021 | 0.01326  | 0.01247  | 0.02568  | -0.14047 |
| D61 | 0.09727  | -0.00020 | 0.00304  | 0.00927  | 0.01234  | 0.10961  |
| D62 | -2.58879 | 0.00045  | 0.00925  | 0.02344  | 0.03265  | -2.55614 |
| D63 | -2.32537 | 0.00046  | -0.00096 | 0.02024  | 0.01931  | -2.30606 |
| D64 | 2.14413  | -0.00016 | 0.00090  | -0.00672 | -0.00584 | 2.13829  |
| D65 | -0.25347 | 0.00011  | 0.00024  | -0.00415 | -0.00392 | -0.25739 |
| D66 | 2.47564  | -0.00013 | -0.00096 | 0.00757  | 0.00663  | 2.48227  |
| D67 | -1.73149 | -0.00011 | -0.00116 | 0.00775  | 0.00659  | -1.72490 |
| D68 | 0.34455  | -0.00010 | -0.00083 | 0.00793  | 0.00711  | 0.35166  |
| D69 | 1.25647  | 0.00007  | -0.00138 | 0.00968  | 0.00829  | 1.26476  |
| D70 | -2.95066 | 0.00009  | -0.00159 | 0.00985  | 0.00825  | -2.94241 |
| D71 | -0.87462 | 0.00010  | -0.00125 | 0.01003  | 0.00877  | -0.86585 |
| D72 | -1.11011 | 0.00003  | -0.00165 | 0.01336  | 0.01171  | -1.09839 |
| D73 | 0.96595  | 0.00006  | -0.00186 | 0.01353  | 0.01168  | 0.97763  |
| D74 | 3.04199  | 0.00007  | -0.00152 | 0.01372  | 0.01219  | 3.05418  |

Item Value Threshold Converged?



|                      |          |          |    |
|----------------------|----------|----------|----|
| Maximum Force        | 0.001750 | 0.000450 | NO |
| RMS Force            | 0.000375 | 0.000300 | NO |
| Maximum Displacement | 0.145162 | 0.001800 | NO |
| RMS Displacement     | 0.034021 | 0.001200 | NO |

Predicted change in Energy=-1.215930D-04

GradGradGradGradGradGradGradGradGradGradGradGradGradGradGradGradGradGrad

Input orientation:

| -----  |        |        |                         |           |           |
|--------|--------|--------|-------------------------|-----------|-----------|
| Center | Atomic | Atomic | Coordinates (Angstroms) |           |           |
| Number | Number | Type   | X                       | Y         | Z         |
| -----  |        |        |                         |           |           |
| 1      | 6      | 0      | -1.372328               | -1.908953 | -0.264743 |
| 2      | 6      | 0      | -2.496020               | -1.152511 | -0.176569 |
| 3      | 7      | 0      | -2.091673               | 0.120211  | 0.215034  |
| 4      | 6      | 0      | -0.752075               | 0.122631  | 0.357067  |
| 5      | 7      | 0      | -0.300395               | -1.097136 | 0.073391  |
| 6      | 6      | 0      | 1.130521                | -1.462368 | 0.065069  |
| 7      | 6      | 0      | 1.727006                | -1.409178 | -1.350108 |
| 8      | 1      | 0      | -1.245302               | -2.943764 | -0.532457 |
| 9      | 1      | 0      | -3.524693               | -1.409050 | -0.352146 |
| 10     | 1      | 0      | 1.641521                | -0.750257 | 0.714399  |
| 11     | 1      | 0      | 1.225439                | -2.468080 | 0.476076  |
| 12     | 1      | 0      | 1.142167                | -2.047497 | -2.024392 |
| 13     | 1      | 0      | 1.670399                | -0.380261 | -1.723064 |
| 14     | 35     | 0      | 1.605987                | 2.259639  | 1.120282  |
| 15     | 1      | 0      | -0.097541               | 0.970790  | 0.654125  |
| 16     | 6      | 0      | -2.885651               | 1.276178  | 0.451451  |
| 17     | 6      | 0      | -4.206729               | 1.320048  | 0.340713  |
| 18     | 1      | 0      | -2.283975               | 2.130541  | 0.735789  |
| 19     | 1      | 0      | -4.721644               | 2.249328  | 0.540850  |
| 20     | 1      | 0      | -4.812821               | 0.468679  | 0.058278  |
| 21     | 8      | 0      | 3.045922                | -1.887244 | -1.309032 |
| 22     | 1      | 0      | 3.663516                | -1.129155 | -1.309431 |
| 23     | 6      | 0      | 4.736230                | 1.673516  | -1.093790 |
| 24     | 6      | 0      | 5.661552                | 0.783211  | -0.383234 |
| 25     | 8      | 0      | 4.787050                | 0.258996  | -1.410832 |
| 26     | 1      | 0      | 3.828183                | 1.996295  | -0.589572 |
| 27     | 1      | 0      | 5.111906                | 2.311932  | -1.889000 |
| 28     | 1      | 0      | 6.700908                | 0.787950  | -0.707084 |
| 29     | 6      | 0      | 5.414509                | 0.334218  | 1.028545  |
| 30     | 1      | 0      | 5.720564                | -0.707027 | 1.168108  |
| 31     | 1      | 0      | 6.001398                | 0.951263  | 1.715685  |
| 32     | 1      | 0      | 4.362538                | 0.442669  | 1.299349  |

-----

Distance matrix (angstroms):

|    |    | 1        | 2        | 3        | 4        | 5        |
|----|----|----------|----------|----------|----------|----------|
| 1  | C  | 0.000000 |          |          |          |          |
| 2  | C  | 1.357447 | 0.000000 |          |          |          |
| 3  | N  | 2.205708 | 1.391643 | 0.000000 |          |          |
| 4  | C  | 2.213300 | 2.225331 | 1.347109 | 0.000000 |          |
| 5  | N  | 1.386514 | 2.210501 | 2.170409 | 1.331285 | 0.000000 |
| 6  | C  | 2.563682 | 3.647766 | 3.592990 | 2.478236 | 1.476815 |
| 7  | C  | 3.321696 | 4.390560 | 4.401251 | 3.377385 | 2.496813 |
| 8  | H  | 1.076402 | 2.213490 | 3.265430 | 3.230682 | 2.161003 |
| 9  | H  | 2.211384 | 1.074620 | 2.171147 | 3.245988 | 3.267181 |
| 10 | H  | 3.374105 | 4.251456 | 3.865724 | 2.572727 | 2.074188 |
| 11 | H  | 2.758592 | 4.000740 | 4.215522 | 3.261366 | 2.090409 |
| 12 | H  | 3.072173 | 4.177542 | 4.491293 | 3.737507 | 2.717511 |
| 13 | H  | 3.704293 | 4.510772 | 4.261441 | 3.232371 | 2.761374 |
| 14 | Br | 5.307147 | 5.490997 | 4.366843 | 3.272577 | 3.999777 |
| 15 | H  | 3.280598 | 3.309254 | 2.211979 | 1.111770 | 2.157480 |
| 16 | C  | 3.598352 | 2.538651 | 1.422165 | 2.427287 | 3.529745 |
| 17 | C  | 4.338993 | 3.050845 | 2.434926 | 3.656324 | 4.601488 |
| 18 | H  | 4.260244 | 3.414058 | 2.085568 | 2.553791 | 3.845941 |
| 19 | H  | 5.399834 | 4.128027 | 3.399418 | 4.507116 | 5.564601 |
| 20 | H  | 4.194577 | 2.837425 | 2.747845 | 4.086402 | 4.776400 |
| 21 | O  | 4.540038 | 5.703983 | 5.722546 | 4.608716 | 3.705833 |
| 22 | H  | 5.201844 | 6.262891 | 6.083347 | 4.882789 | 4.198310 |
| 23 | C  | 7.129929 | 7.818770 | 7.123625 | 5.884872 | 5.865698 |
| 24 | C  | 7.532413 | 8.386639 | 7.804485 | 6.489917 | 6.268096 |
| 25 | O  | 6.629589 | 7.520562 | 7.069620 | 5.816009 | 5.470293 |
| 26 | H  | 6.511666 | 7.076800 | 6.261931 | 5.038403 | 5.201345 |
| 27 | H  | 7.905654 | 8.533189 | 7.818066 | 6.650122 | 6.690719 |
| 28 | H  | 8.523268 | 9.414368 | 8.865984 | 7.557911 | 7.292526 |
| 29 | C  | 7.263991 | 8.138742 | 7.553169 | 6.206642 | 5.968351 |
| 30 | H  | 7.335312 | 8.337797 | 7.913515 | 6.575802 | 6.132090 |
| 31 | H  | 8.153206 | 8.956149 | 8.272872 | 6.938435 | 6.826835 |
| 32 | H  | 6.392589 | 7.194633 | 6.552599 | 5.210526 | 5.061315 |
|    |    | 6        | 7        | 8        | 9        | 10       |
| 6  | C  | 0.000000 |          |          |          |          |
| 7  | C  | 1.536668 | 0.000000 |          |          |          |
| 8  | H  | 2.862885 | 3.443562 | 0.000000 |          |          |
| 9  | H  | 4.674177 | 5.345678 | 2.753812 | 0.000000 |          |
| 10 | H  | 1.090804 | 2.168796 | 3.834041 | 5.316136 | 0.000000 |
| 11 | H  | 1.090593 | 2.169744 | 2.710715 | 4.936724 | 1.783490 |
| 12 | H  | 2.169876 | 1.097336 | 2.954517 | 4.998360 | 3.071346 |
| 13 | H  | 2.158667 | 1.095888 | 4.060837 | 5.470539 | 2.465554 |

|    |    |          |          |          |           |          |
|----|----|----------|----------|----------|-----------|----------|
| 14 | Br | 3.897804 | 4.424668 | 6.159286 | 6.476975  | 3.037347 |
| 15 | H  | 2.788437 | 3.606961 | 4.248420 | 4.292038  | 2.447442 |
| 16 | C  | 4.876327 | 5.633236 | 4.633220 | 2.874820  | 4.966978 |
| 17 | C  | 6.025285 | 6.746611 | 5.264274 | 2.897103  | 6.215130 |
| 18 | H  | 5.001764 | 5.741824 | 5.332529 | 3.905341  | 4.869186 |
| 19 | H  | 6.946286 | 7.651502 | 6.340754 | 3.951439  | 7.036867 |
| 20 | H  | 6.249185 | 6.948326 | 4.972015 | 2.313783  | 6.601124 |
| 21 | O  | 2.395294 | 1.403486 | 4.487082 | 6.657123  | 2.712813 |
| 22 | H  | 2.901093 | 1.957074 | 5.290840 | 7.257071  | 2.885813 |
| 23 | C  | 4.917099 | 4.315568 | 7.577143 | 8.848452  | 4.326829 |
| 24 | C  | 5.076794 | 4.606741 | 7.849665 | 9.444261  | 4.440379 |
| 25 | O  | 4.302508 | 3.485736 | 6.886108 | 8.543317  | 3.928046 |
| 26 | H  | 4.434894 | 4.073157 | 7.081504 | 8.106635  | 3.745047 |
| 27 | H  | 5.823671 | 5.059111 | 8.359224 | 9.528823  | 5.310203 |
| 28 | H  | 6.057174 | 5.475450 | 8.780571 | 10.464975 | 5.475773 |
| 29 | C  | 4.744318 | 4.721768 | 7.585181 | 9.211657  | 3.938300 |
| 30 | H  | 4.780766 | 4.773147 | 7.511205 | 9.395679  | 4.104425 |
| 31 | H  | 5.681161 | 5.765518 | 8.528778 | 10.029627 | 4.786050 |
| 32 | H  | 3.949499 | 4.170729 | 6.802302 | 8.268295  | 3.028063 |
|    |    | 11       | 12       | 13       | 14        | 15       |
| 11 | H  | 0.000000 |          |          |           |          |
| 12 | H  | 2.536960 | 0.000000 |          |           |          |
| 13 | H  | 3.064831 | 1.774684 | 0.000000 |           |          |
| 14 | Br | 4.786558 | 5.353086 | 3.880443 | 0.000000  |          |
| 15 | H  | 3.688875 | 4.221539 | 3.256068 | 2.186422  | 0.000000 |
| 16 | C  | 5.560677 | 5.779268 | 5.313181 | 4.646433  | 2.812098 |
| 17 | C  | 6.623948 | 6.748687 | 6.456846 | 5.939547  | 4.135896 |
| 18 | H  | 5.790574 | 6.067376 | 5.290289 | 3.911049  | 2.476325 |
| 19 | H  | 7.591174 | 7.708921 | 7.273119 | 6.354114  | 4.798940 |
| 20 | H  | 6.727533 | 6.791948 | 6.776874 | 6.748073  | 4.779228 |
| 21 | O  | 2.614984 | 2.040025 | 2.081942 | 5.017132  | 4.680139 |
| 22 | H  | 3.305295 | 2.776998 | 2.168974 | 4.649823  | 4.734012 |
| 23 | C  | 5.651809 | 5.256353 | 3.743435 | 3.878670  | 5.187906 |
| 24 | C  | 5.566723 | 5.579529 | 4.367850 | 4.570340  | 5.854780 |
| 25 | O  | 4.866460 | 4.356780 | 3.196819 | 4.530813  | 5.350694 |
| 26 | H  | 5.276412 | 5.062178 | 3.404241 | 2.816222  | 4.243790 |
| 27 | H  | 6.598994 | 5.897607 | 4.372574 | 4.620604  | 5.950166 |
| 28 | H  | 6.479380 | 6.377669 | 5.263360 | 5.609221  | 6.935793 |
| 29 | C  | 5.070148 | 5.765925 | 4.701084 | 4.268548  | 5.561304 |
| 30 | H  | 4.877126 | 5.740264 | 4.986931 | 5.072784  | 6.076972 |
| 31 | H  | 6.003193 | 6.825897 | 5.688190 | 4.624499  | 6.190667 |
| 32 | H  | 4.357938 | 5.255375 | 4.130351 | 3.306360  | 4.537348 |
|    |    | 16       | 17       | 18       | 19        | 20       |
| 16 | C  | 0.000000 |          |          |           |          |

|    |   |          |           |          |           |           |
|----|---|----------|-----------|----------|-----------|-----------|
| 17 | C | 1.326437 | 0.000000  |          |           |           |
| 18 | H | 1.082958 | 2.123668  | 0.000000 |           |           |
| 19 | H | 2.079876 | 1.081089  | 2.448334 | 0.000000  |           |
| 20 | H | 2.126176 | 1.082565  | 3.100946 | 1.847133  | 0.000000  |
| 21 | O | 6.949107 | 8.099959  | 6.980809 | 8.992685  | 8.317437  |
| 22 | H | 7.195687 | 8.406089  | 7.083868 | 9.227600  | 8.733384  |
| 23 | C | 7.787086 | 9.064174  | 7.269079 | 9.615352  | 9.693465  |
| 24 | C | 8.601999 | 9.909352  | 8.136271 | 10.526832 | 10.488391 |
| 25 | O | 7.960722 | 9.223979  | 7.622995 | 9.908872  | 9.713896  |
| 26 | H | 6.832120 | 8.116806  | 6.255644 | 8.627944  | 8.798879  |
| 27 | H | 8.397107 | 9.632882  | 7.849935 | 10.129501 | 10.280549 |
| 28 | H | 9.668644 | 10.970759 | 9.198509 | 11.583077 | 11.543556 |
| 29 | C | 8.373349 | 9.696040  | 7.910697 | 10.327008 | 10.274131 |
| 30 | H | 8.860792 | 10.165862 | 8.503607 | 10.870749 | 10.656745 |
| 31 | H | 8.982400 | 10.306911 | 8.426049 | 10.865029 | 10.951129 |
| 32 | H | 7.345060 | 8.667244  | 6.880599 | 9.293100  | 9.258950  |
|    |   | 21       | 22        | 23       | 24        | 25        |
| 21 | O | 0.000000 |           |          |           |           |
| 22 | H | 0.977814 | 0.000000  |          |           |           |
| 23 | C | 3.947465 | 3.008684  | 0.000000 |           |           |
| 24 | C | 3.850967 | 2.916699  | 1.467567 | 0.000000  |           |
| 25 | O | 2.765544 | 1.788735  | 1.450505 | 1.447589  | 0.000000  |
| 26 | H | 4.026342 | 3.211503  | 1.087645 | 2.208029  | 2.147581  |
| 27 | H | 4.715689 | 3.778202  | 1.086768 | 2.215046  | 2.132773  |
| 28 | H | 4.569237 | 3.641959  | 2.189459 | 1.088652  | 2.106634  |
| 29 | C | 4.001170 | 3.267042  | 2.599632 | 1.501914  | 2.519905  |
| 30 | H | 3.831819 | 3.247743  | 3.428131 | 2.151965  | 2.907848  |
| 31 | H | 5.093218 | 4.352604  | 3.164720 | 2.132885  | 3.424761  |
| 32 | H | 3.737060 | 3.124899  | 2.716936 | 2.152787  | 2.749368  |
|    |   | 26       | 27        | 28       | 29        | 30        |
| 26 | H | 0.000000 |           |          |           |           |
| 27 | H | 1.853668 | 0.000000  |          |           |           |
| 28 | H | 3.118727 | 2.498875  | 0.000000 |           |           |
| 29 | C | 2.810202 | 3.537653  | 2.207511 | 0.000000  |           |
| 30 | H | 3.738783 | 4.339411  | 2.590826 | 1.094230  | 0.000000  |
| 31 | H | 3.336041 | 3.954285  | 2.527014 | 1.094233  | 1.768795  |
| 32 | H | 2.503460 | 3.771109  | 3.100479 | 1.091668  | 1.784169  |
|    |   | 31       | 32        |          |           |           |
| 31 | H | 0.000000 |           |          |           |           |
| 32 | H | 1.765749 | 0.000000  |          |           |           |

Stoichiometry C10H17BrN2O2

Framework group C1[X(C10H17BrN2O2)]

Deg. of freedom 90

Full point group C1 NOp 1

Largest Abelian subgroup C1 NOp 1

Largest concise Abelian subgroup C1 NOp 1

Standard orientation:

| Center<br>Number | Atomic<br>Number | Atomic<br>Type | Coordinates (Angstroms) |           |           |
|------------------|------------------|----------------|-------------------------|-----------|-----------|
|                  |                  |                | X                       | Y         | Z         |
| 1                | 6                | 0              | -2.685086               | 2.152235  | -0.400280 |
| 2                | 6                | 0              | -3.755515               | 1.387642  | -0.065254 |
| 3                | 7                | 0              | -3.289716               | 0.082817  | 0.065642  |
| 4                | 6                | 0              | -1.966388               | 0.069865  | -0.186027 |
| 5                | 7                | 0              | -1.584087               | 1.312559  | -0.472170 |
| 6                | 6                | 0              | -0.185644               | 1.699518  | -0.747133 |
| 7                | 6                | 0              | 0.509608                | 2.261109  | 0.502903  |
| 8                | 1                | 0              | -2.613783               | 3.208508  | -0.594816 |
| 9                | 1                | 0              | -4.785211               | 1.656682  | 0.083580  |
| 10               | 1                | 0              | 0.328563                | 0.800830  | -1.090359 |
| 11               | 1                | 0              | -0.191187               | 2.445982  | -1.542213 |
| 12               | 1                | 0              | -0.071097               | 3.100452  | 0.905932  |
| 13               | 1                | 0              | 0.552290                | 1.479117  | 1.269478  |
| 14               | 35               | 0              | 0.479256                | -2.104441 | -0.217336 |
| 15               | 1                | 0              | -1.275299               | -0.800808 | -0.167128 |
| 16               | 6                | 0              | -4.013892               | -1.094591 | 0.400054  |
| 17               | 6                | 0              | -5.317664               | -1.136051 | 0.640668  |
| 18               | 1                | 0              | -3.374079               | -1.967519 | 0.437927  |
| 19               | 1                | 0              | -5.777772               | -2.082311 | 0.888952  |
| 20               | 1                | 0              | -5.961790               | -0.266794 | 0.602710  |
| 21               | 8                | 0              | 1.785158                | 2.726027  | 0.147099  |
| 22               | 1                | 0              | 2.453664                | 2.059553  | 0.402114  |
| 23               | 6                | 0              | 3.705555                | -0.538341 | 1.259959  |
| 24               | 6                | 0              | 4.513799                | 0.008641  | 0.163917  |
| 25               | 8                | 0              | 3.677427                | 0.880753  | 0.961047  |
| 26               | 1                | 0              | 2.790064                | -1.074057 | 1.019426  |
| 27               | 1                | 0              | 4.179823                | -0.774309 | 2.208881  |
| 28               | 1                | 0              | 5.570771                | 0.176467  | 0.363437  |
| 29               | 6                | 0              | 4.138339                | -0.179253 | -1.278120 |
| 30               | 1                | 0              | 4.359146                | 0.719980  | -1.861184 |
| 31               | 1                | 0              | 4.718681                | -1.004534 | -1.701746 |
| 32               | 1                | 0              | 3.080538                | -0.428337 | -1.381820 |

Rotational constants (GHZ): 0.5864757 0.2241664 0.1735551

Standard basis: 6-311++G(d,p) (5D, 7F)

There are 492 symmetry adapted cartesian basis functions of A symmetry.

There are 475 symmetry adapted basis functions of A symmetry.

475 basis functions, 751 primitive gaussians, 492 cartesian basis functions  
 71 alpha electrons 71 beta electrons  
 nuclear repulsion energy 1307.7672443807 Hartrees.  
 NAToms= 32 NActive= 32 NUniq= 32 SFac= 1.00D+00 NATFMM= 60 NAOKFM=F  
 Big=F  
 Integral buffers will be 131072 words long.  
 Raffenetti 2 integral format.  
 Two-electron integral symmetry is turned on.  
 One-electron integrals computed using PRISM.  
 NBasis= 475 RedAO= T EigKep= 3.74D-06 NBF= 475  
 NBsUse= 475 1.00D-06 EigRej= -1.00D+00 NBFU= 475  
 Initial guess from the checkpoint file: "/home/suqian/liuwen/qianmengshijie/ohpo/ohpo.chk"  
 B after Tr= 0.000000 0.000000 0.000000  
 Rot= 0.999997 0.001088 0.000214 0.002213 Ang= 0.28 deg.  
 ExpMin= 3.50D-02 ExpMax= 4.40D+05 ExpMxC= 1.51D+04 IAcc=3 IRadAn= 5 AccDes=  
 0.00D+00  
 Harris functional with IExCor= 402 and IRadAn= 5 diagonalized for initial guess.  
 HarFok: IExCor= 402 AccDes= 0.00D+00 IRadAn= 5 IDoV= 1 UseB2=F ITyADJ=14  
 ICtDFT= 3500011 ScaDFX= 1.000000 1.000000 1.000000 1.000000  
 FoFCou: FMM=F IPFlag= 0 FMFlag= 100000 FMFlg1= 0  
 NFXFlg= 0 DoJE=T BraDBF=F KetDBF=T FulRan=T  
 wScrn= 0.000000 ICntrl= 500 IOpCl= 0 I1Cent= 200000004 NGrid=  
 0  
 NMat0= 1 NMatS0= 1 NMatT0= 0 NMatD0= 1 NMtDS0= 0  
 NMtDT0= 0  
 Petite list used in FoFCou.  
 Requested convergence on RMS density matrix=1.00D-08 within 128 cycles.  
 Requested convergence on MAX density matrix=1.00D-06.  
 Requested convergence on energy=1.00D-06.  
 No special actions if energy rises.  
 SCF Done: E(RB3LYP) = -3225.52354660 A.U. after 11 cycles  
 NFock= 11 Conv=0.30D-08 -V/T= 2.0018  
 Calling FoFJK, ICntrl= 2127 FMM=F ISym2X=0 I1Cent= 0 IOpClX= 0 NMat=1 NMatS=1  
 NMatT=0.  
 \*\*\*\*\* Axes restored to original set \*\*\*\*\*

| Center<br>Number | Atomic<br>Number | Forces (Hartrees/Bohr) |              |              |
|------------------|------------------|------------------------|--------------|--------------|
|                  |                  | X                      | Y            | Z            |
| 1                | 6                | -0.000003133           | 0.000158622  | -0.000424600 |
| 2                | 6                | -0.000120540           | 0.000045593  | 0.000158442  |
| 3                | 7                | 0.000010527            | -0.000100707 | -0.000051013 |
| 4                | 6                | -0.000532678           | 0.000060176  | -0.000006147 |
| 5                | 7                | 0.000187336            | -0.000310279 | 0.000273090  |

|    |    |              |              |              |
|----|----|--------------|--------------|--------------|
| 6  | 6  | -0.000478158 | -0.000030823 | 0.000366524  |
| 7  | 6  | -0.000389857 | 0.000182468  | -0.000112535 |
| 8  | 1  | 0.000038590  | -0.000025540 | 0.000039000  |
| 9  | 1  | -0.000023292 | -0.000009914 | 0.000058676  |
| 10 | 1  | 0.000103387  | -0.000050995 | 0.000146003  |
| 11 | 1  | 0.000055566  | -0.000108216 | 0.000061869  |
| 12 | 1  | -0.000038280 | -0.000055622 | 0.000129826  |
| 13 | 1  | 0.000059645  | 0.000053704  | -0.000064724 |
| 14 | 35 | 0.000245409  | -0.000045954 | 0.000088614  |
| 15 | 1  | -0.000151333 | 0.000514316  | -0.000118929 |
| 16 | 6  | 0.000080093  | -0.000156342 | -0.000005853 |
| 17 | 6  | -0.000067584 | 0.000055750  | 0.000020933  |
| 18 | 1  | -0.000017943 | 0.000031846  | 0.000019540  |
| 19 | 1  | -0.000001517 | 0.000012551  | 0.000001694  |
| 20 | 1  | -0.000029571 | -0.000013878 | -0.000015398 |
| 21 | 8  | 0.000954041  | -0.000374796 | -0.000894391 |
| 22 | 1  | -0.000361924 | -0.000163115 | 0.000241552  |
| 23 | 6  | 0.000003603  | 0.000556230  | 0.000230898  |
| 24 | 6  | 0.000796243  | 0.000630497  | -0.000959350 |
| 25 | 8  | -0.000279103 | -0.000707124 | -0.000180191 |
| 26 | 1  | -0.000019411 | 0.000107541  | -0.000301588 |
| 27 | 1  | -0.000286336 | -0.000074560 | 0.000085316  |
| 28 | 1  | 0.000237580  | -0.000133632 | 0.000333172  |
| 29 | 6  | -0.000035146 | -0.000272346 | 0.001488457  |
| 30 | 1  | 0.000118685  | -0.000010284 | -0.000374452 |
| 31 | 1  | 0.000092079  | 0.000101844  | 0.000084963  |
| 32 | 1  | -0.000146980 | 0.000132987  | -0.000319397 |

-----  
Cartesian Forces: Max 0.001488457 RMS 0.000319659

GradGradGradGradGradGradGradGradGradGradGradGradGradGradGradGradGradGradGradGrad

Berny optimization.

Using GEDIIS/GDIIS optimizer.

FormGI is forming the generalized inverse of G from B-inverse, IUseBI=4.

GSVD: received Info= 1 from GESDD.

Internal Forces: Max 0.000925890 RMS 0.000212294

Search for a local minimum.

Step number 22 out of a maximum of 177

All quantities printed in internal units (Hartrees-Bohrs-Radians)

Mixed Optimization -- En-DIIS/RFO-DIIS

Swapping is turned off.

Update second derivatives using D2CorX and points 19 20 21 22

DE= -1.30D-04 DEPred=-1.22D-04 R= 1.07D+00

TightC=F SS= 1.41D+00 RLast= 1.45D-01 DXNew= 3.2661D+00 4.3362D-01

Trust test= 1.07D+00 RLast= 1.45D-01 DXMaxT set to 1.94D+00

ITU= 1 1 1 1 1 -1 1 1 1 1 1 1 1 1 1 1 0 1 0

ITU= 1 0

|                 |         |         |         |         |         |
|-----------------|---------|---------|---------|---------|---------|
| Eigenvalues --- | 0.00003 | 0.00227 | 0.00237 | 0.00318 | 0.00446 |
| Eigenvalues --- | 0.00526 | 0.00915 | 0.01200 | 0.01396 | 0.01412 |
| Eigenvalues --- | 0.01712 | 0.01835 | 0.01939 | 0.02052 | 0.02175 |
| Eigenvalues --- | 0.02220 | 0.02316 | 0.02381 | 0.02594 | 0.03053 |
| Eigenvalues --- | 0.03062 | 0.03233 | 0.03382 | 0.03741 | 0.04168 |
| Eigenvalues --- | 0.04644 | 0.04968 | 0.05197 | 0.05403 | 0.05654 |
| Eigenvalues --- | 0.05948 | 0.06316 | 0.07278 | 0.09396 | 0.09604 |
| Eigenvalues --- | 0.10335 | 0.11176 | 0.11494 | 0.11770 | 0.13006 |
| Eigenvalues --- | 0.13903 | 0.14958 | 0.15024 | 0.15937 | 0.15994 |
| Eigenvalues --- | 0.16000 | 0.16002 | 0.16003 | 0.16008 | 0.16062 |
| Eigenvalues --- | 0.16569 | 0.17401 | 0.19564 | 0.21336 | 0.22044 |
| Eigenvalues --- | 0.22915 | 0.23426 | 0.23846 | 0.24265 | 0.25067 |
| Eigenvalues --- | 0.27717 | 0.28661 | 0.30751 | 0.32153 | 0.33099 |
| Eigenvalues --- | 0.33195 | 0.34010 | 0.34141 | 0.34519 | 0.34792 |
| Eigenvalues --- | 0.35053 | 0.35678 | 0.35688 | 0.35777 | 0.35861 |
| Eigenvalues --- | 0.36437 | 0.36663 | 0.37208 | 0.37226 | 0.37495 |
| Eigenvalues --- | 0.37835 | 0.42134 | 0.42485 | 0.44530 | 0.45865 |
| Eigenvalues --- | 0.49265 | 0.53352 | 0.54690 | 0.56025 | 0.60363 |

Eigenvalue 1 is 2.93D-05 Eigenvector:

|   |          |          |          |          |          |
|---|----------|----------|----------|----------|----------|
|   | D54      | D55      | D52      | D53      | D47      |
| 1 | -0.50142 | -0.50105 | 0.50009  | -0.49481 | -0.02066 |
|   | R18      | D46      | D42      | D35      | D38      |
| 1 | 0.01672  | -0.01439 | -0.01269 | 0.01114  | 0.01043  |

En-DIIS/RFO-DIIS IScMMF= 0 using points: 22 21 20 19

RFO step: Lambda=-1.91965987D-05.

DidBck=F Rises=F RFO-DIIS coefs: 1.37635 -0.22305 -0.25880 0.10550

Iteration 1 RMS(Cart)= 0.01554553 RMS(Int)= 0.00148786

Iteration 2 RMS(Cart)= 0.00018994 RMS(Int)= 0.00005535

Iteration 3 RMS(Cart)= 0.00000206 RMS(Int)= 0.00005535

Iteration 4 RMS(Cart)= 0.00000000 RMS(Int)= 0.00005535

| Variable | Old X   | -DE/DX   | Delta X<br>(Linear) | Delta X<br>(Quad) | Delta X<br>(Total) | New X   |
|----------|---------|----------|---------------------|-------------------|--------------------|---------|
| R1       | 2.56520 | 0.00011  | -0.00029            | 0.00015           | -0.00014           | 2.56506 |
| R2       | 2.62013 | 0.00006  | 0.00048             | -0.00014          | 0.00033            | 2.62046 |
| R3       | 2.03410 | 0.00002  | 0.00002             | 0.00009           | 0.00012            | 2.03422 |
| R4       | 2.62982 | -0.00006 | -0.00008            | -0.00027          | -0.00035           | 2.62948 |
| R5       | 2.03074 | 0.00002  | 0.00008             | 0.00000           | 0.00007            | 2.03081 |
| R6       | 2.54567 | 0.00004  | 0.00039             | 0.00015           | 0.00055            | 2.54621 |
| R7       | 2.68750 | -0.00003 | -0.00042            | 0.00012           | -0.00031           | 2.68720 |
| R8       | 2.51576 | 0.00046  | 0.00128             | 0.00095           | 0.00227            | 2.51804 |
| R9       | 2.10094 | 0.00045  | 0.00257             | -0.00013          | 0.00250            | 2.10344 |



|     |         |          |          |          |          |         |
|-----|---------|----------|----------|----------|----------|---------|
| R10 | 2.79078 | 0.00028  | 0.00078  | 0.00038  | 0.00114  | 2.79192 |
| R11 | 2.90388 | 0.00068  | 0.00180  | 0.00103  | 0.00282  | 2.90670 |
| R12 | 2.06132 | 0.00010  | 0.00053  | 0.00007  | 0.00060  | 2.06192 |
| R13 | 2.06092 | 0.00013  | 0.00026  | 0.00027  | 0.00053  | 2.06145 |
| R14 | 2.07367 | -0.00003 | 0.00034  | -0.00008 | 0.00026  | 2.07392 |
| R15 | 2.07093 | 0.00007  | 0.00049  | -0.00005 | 0.00045  | 2.07137 |
| R16 | 2.65221 | 0.00093  | -0.00086 | 0.00149  | 0.00063  | 2.65283 |
| R17 | 4.13174 | 0.00027  | -0.00409 | 0.00627  | 0.00223  | 4.13397 |
| R18 | 8.56200 | 0.00016  | -0.01632 | -0.02608 | -0.04240 | 8.51960 |
| R19 | 2.50660 | 0.00010  | 0.00011  | 0.00019  | 0.00029  | 2.50690 |
| R20 | 2.04649 | 0.00002  | 0.00003  | 0.00003  | 0.00005  | 2.04655 |
| R21 | 2.04296 | 0.00001  | -0.00001 | 0.00007  | 0.00007  | 2.04303 |
| R22 | 2.04575 | 0.00003  | 0.00006  | 0.00004  | 0.00010  | 2.04585 |
| R23 | 1.84780 | 0.00012  | 0.00100  | -0.00064 | 0.00029  | 1.84809 |
| R24 | 3.38022 | 0.00046  | 0.01862  | -0.00312 | 0.01543  | 3.39565 |
| R25 | 2.77330 | 0.00019  | -0.00018 | 0.00064  | 0.00042  | 2.77372 |
| R26 | 2.74106 | 0.00051  | -0.00034 | 0.00131  | 0.00099  | 2.74205 |
| R27 | 2.05535 | -0.00009 | -0.00005 | 0.00027  | 0.00022  | 2.05557 |
| R28 | 2.05369 | -0.00021 | -0.00047 | 0.00024  | -0.00023 | 2.05347 |
| R29 | 2.73555 | 0.00088  | 0.00213  | 0.00127  | 0.00341  | 2.73896 |
| R30 | 2.05725 | 0.00013  | 0.00021  | 0.00050  | 0.00071  | 2.05796 |
| R31 | 2.83821 | 0.00085  | 0.00193  | 0.00101  | 0.00294  | 2.84115 |
| R32 | 2.06780 | 0.00000  | -0.00031 | 0.00018  | -0.00013 | 2.06767 |
| R33 | 2.06780 | 0.00016  | 0.00006  | 0.00035  | 0.00041  | 2.06821 |
| R34 | 2.06295 | 0.00008  | 0.00008  | 0.00029  | 0.00037  | 2.06332 |
| A1  | 1.87325 | 0.00010  | 0.00019  | 0.00061  | 0.00080  | 1.87405 |
| A2  | 2.27781 | -0.00001 | 0.00005  | 0.00010  | 0.00015  | 2.27796 |
| A3  | 2.13212 | -0.00009 | -0.00025 | -0.00071 | -0.00096 | 2.13116 |
| A4  | 1.86230 | 0.00001  | -0.00005 | -0.00006 | -0.00010 | 1.86220 |
| A5  | 2.27675 | 0.00001  | 0.00002  | 0.00014  | 0.00015  | 2.27690 |
| A6  | 2.14413 | -0.00002 | 0.00002  | -0.00008 | -0.00006 | 2.14406 |
| A7  | 1.89679 | 0.00006  | 0.00066  | -0.00010 | 0.00057  | 1.89735 |
| A8  | 2.24969 | -0.00005 | -0.00069 | -0.00012 | -0.00082 | 2.24887 |
| A9  | 2.13671 | -0.00001 | 0.00004  | 0.00022  | 0.00025  | 2.13696 |
| A10 | 1.88944 | -0.00001 | -0.00079 | 0.00035  | -0.00047 | 1.88897 |
| A11 | 2.23317 | 0.00017  | 0.00088  | -0.00023 | 0.00064  | 2.23381 |
| A12 | 2.16057 | -0.00016 | -0.00008 | -0.00012 | -0.00018 | 2.16039 |
| A13 | 1.90300 | -0.00017 | 0.00000  | -0.00081 | -0.00080 | 1.90220 |
| A14 | 2.21794 | -0.00003 | -0.00085 | -0.00166 | -0.00247 | 2.21547 |
| A15 | 2.16100 | 0.00019  | 0.00074  | 0.00228  | 0.00297  | 2.16397 |
| A16 | 1.95275 | 0.00006  | 0.00197  | -0.00181 | 0.00016  | 1.95290 |
| A17 | 1.86408 | 0.00001  | -0.00030 | 0.00165  | 0.00133  | 1.86540 |
| A18 | 1.88627 | -0.00001 | 0.00008  | -0.00056 | -0.00045 | 1.88582 |
| A19 | 1.92173 | -0.00006 | -0.00177 | -0.00016 | -0.00192 | 1.91981 |

|     |          |          |          |          |          |          |
|-----|----------|----------|----------|----------|----------|----------|
| A20 | 1.92326  | 0.00003  | 0.00000  | 0.00047  | 0.00047  | 1.92372  |
| A21 | 1.91443  | -0.00005 | 0.00003  | 0.00045  | 0.00048  | 1.91491  |
| A22 | 1.91652  | -0.00019 | 0.00034  | -0.00155 | -0.00117 | 1.91535  |
| A23 | 1.90272  | -0.00013 | -0.00116 | -0.00097 | -0.00218 | 1.90054  |
| A24 | 1.90290  | 0.00057  | 0.00099  | 0.00191  | 0.00291  | 1.90581  |
| A25 | 1.88546  | 0.00010  | -0.00088 | 0.00088  | 0.00000  | 1.88546  |
| A26 | 1.89725  | -0.00012 | 0.00075  | -0.00058 | 0.00021  | 1.89746  |
| A27 | 1.95877  | -0.00024 | -0.00004 | 0.00023  | 0.00017  | 1.95894  |
| A28 | 1.73922  | 0.00059  | 0.00654  | 0.00774  | 0.01426  | 1.75348  |
| A29 | 2.87769  | -0.00047 | -0.00275 | -0.00744 | -0.01017 | 2.86752  |
| A30 | 2.17613  | 0.00010  | -0.00005 | 0.00065  | 0.00060  | 2.17673  |
| A31 | 1.95489  | -0.00002 | 0.00014  | 0.00008  | 0.00022  | 1.95511  |
| A32 | 2.15216  | -0.00009 | -0.00008 | -0.00073 | -0.00081 | 2.15135  |
| A33 | 2.07984  | -0.00002 | 0.00009  | -0.00006 | 0.00003  | 2.07987  |
| A34 | 2.15721  | 0.00003  | -0.00024 | 0.00015  | -0.00009 | 2.15712  |
| A35 | 2.04614  | -0.00001 | 0.00015  | -0.00009 | 0.00006  | 2.04620  |
| A36 | 1.90652  | -0.00002 | 0.00062  | 0.00060  | 0.00072  | 1.90724  |
| A37 | 3.08519  | -0.00019 | -0.00334 | -0.01196 | -0.01514 | 3.07005  |
| A38 | 2.07371  | 0.00029  | 0.00224  | -0.00093 | 0.00137  | 2.07508  |
| A39 | 2.08598  | -0.00013 | 0.00160  | -0.00020 | 0.00135  | 2.08733  |
| A40 | 2.00422  | -0.00006 | -0.00282 | 0.00208  | -0.00075 | 2.00347  |
| A41 | 1.98321  | -0.00001 | -0.00018 | 0.00015  | -0.00004 | 1.98317  |
| A42 | 2.04146  | -0.00015 | -0.00181 | -0.00020 | -0.00202 | 2.03945  |
| A43 | 2.04350  | 0.00031  | 0.00089  | 0.00142  | 0.00233  | 2.04583  |
| A44 | 2.13266  | -0.00010 | 0.00050  | -0.00113 | -0.00065 | 2.13201  |
| A45 | 1.94675  | 0.00027  | 0.00032  | -0.00018 | 0.00016  | 1.94691  |
| A46 | 2.04839  | -0.00010 | -0.00097 | 0.00050  | -0.00049 | 2.04790  |
| A47 | 2.02413  | -0.00023 | -0.00055 | -0.00040 | -0.00096 | 2.02317  |
| A48 | 1.44044  | -0.00009 | -0.00292 | -0.00318 | -0.00629 | 1.43414  |
| A49 | 0.95536  | 0.00014  | 0.00509  | 0.00923  | 0.01450  | 0.96986  |
| A50 | 2.37807  | 0.00005  | 0.00223  | 0.00276  | 0.00487  | 2.38293  |
| A51 | 2.23985  | 0.00038  | 0.00374  | 0.00861  | 0.01236  | 2.25220  |
| A52 | 1.93730  | -0.00048 | -0.00148 | -0.00202 | -0.00350 | 1.93380  |
| A53 | 1.91079  | 0.00016  | 0.00001  | 0.00097  | 0.00099  | 1.91177  |
| A54 | 1.94119  | -0.00044 | -0.00177 | -0.00162 | -0.00338 | 1.93781  |
| A55 | 1.88230  | 0.00020  | 0.00096  | 0.00072  | 0.00168  | 1.88398  |
| A56 | 1.90967  | 0.00041  | 0.00125  | 0.00121  | 0.00246  | 1.91213  |
| A57 | 1.88078  | 0.00019  | 0.00117  | 0.00089  | 0.00206  | 1.88285  |
| A58 | 3.68028  | 0.00029  | 0.00082  | 0.00543  | 0.00606  | 3.68635  |
| A59 | 4.98973  | 0.00001  | -0.00441 | 0.00995  | 0.00557  | 4.99531  |
| D1  | 0.00150  | 0.00014  | -0.00138 | 0.00058  | -0.00080 | 0.00070  |
| D2  | -3.13569 | 0.00011  | 0.00071  | 0.00218  | 0.00289  | -3.13281 |
| D3  | 3.13881  | -0.00003 | -0.00231 | -0.00145 | -0.00377 | 3.13504  |
| D4  | 0.00161  | -0.00006 | -0.00021 | 0.00014  | -0.00008 | 0.00154  |

|     |          |          |          |          |          |          |
|-----|----------|----------|----------|----------|----------|----------|
| D5  | -0.00299 | -0.00018 | 0.00124  | -0.00241 | -0.00117 | -0.00416 |
| D6  | -3.09215 | -0.00014 | 0.00322  | 0.00149  | 0.00469  | -3.08746 |
| D7  | -3.14073 | -0.00003 | 0.00207  | -0.00059 | 0.00149  | -3.13925 |
| D8  | 0.05329  | 0.00001  | 0.00405  | 0.00332  | 0.00735  | 0.06064  |
| D9  | 0.00046  | -0.00005 | 0.00107  | 0.00142  | 0.00249  | 0.00295  |
| D10 | -3.13828 | -0.00006 | 0.00049  | 0.00006  | 0.00055  | -3.13774 |
| D11 | 3.13807  | -0.00002 | -0.00083 | -0.00003 | -0.00085 | 3.13722  |
| D12 | -0.00067 | -0.00003 | -0.00141 | -0.00138 | -0.00279 | -0.00347 |
| D13 | -0.00233 | -0.00006 | -0.00030 | -0.00293 | -0.00324 | -0.00557 |
| D14 | 3.13662  | -0.00011 | -0.00296 | -0.00243 | -0.00539 | 3.13123  |
| D15 | 3.13664  | -0.00006 | 0.00023  | -0.00168 | -0.00145 | 3.13518  |
| D16 | -0.00760 | -0.00010 | -0.00242 | -0.00118 | -0.00360 | -0.01120 |
| D17 | 0.01133  | -0.00001 | -0.00004 | -0.00432 | -0.00435 | 0.00697  |
| D18 | -3.12969 | -0.00001 | -0.00015 | -0.00363 | -0.00379 | -3.13348 |
| D19 | -3.12707 | -0.00002 | -0.00069 | -0.00584 | -0.00653 | -3.13361 |
| D20 | 0.01510  | -0.00002 | -0.00081 | -0.00516 | -0.00597 | 0.00913  |
| D21 | 0.00328  | 0.00015  | -0.00057 | 0.00330  | 0.00273  | 0.00602  |
| D22 | 3.09453  | 0.00010  | -0.00253 | -0.00058 | -0.00311 | 3.09142  |
| D23 | -3.13580 | 0.00019  | 0.00196  | 0.00282  | 0.00477  | -3.13103 |
| D24 | -0.04455 | 0.00015  | 0.00000  | -0.00106 | -0.00108 | -0.04563 |
| D25 | -3.04023 | 0.00010  | -0.00033 | -0.01366 | -0.01395 | -3.05419 |
| D26 | 0.09833  | 0.00004  | -0.00336 | -0.01307 | -0.01640 | 0.08193  |
| D27 | 1.39572  | 0.00009  | 0.00106  | 0.01013  | 0.01120  | 1.40692  |
| D28 | -2.78346 | 0.00007  | -0.00014 | 0.00993  | 0.00979  | -2.77367 |
| D29 | -0.72477 | 0.00001  | -0.00022 | 0.01105  | 0.01082  | -0.71395 |
| D30 | -1.68621 | 0.00015  | 0.00334  | 0.01467  | 0.01803  | -1.66818 |
| D31 | 0.41779  | 0.00013  | 0.00214  | 0.01448  | 0.01661  | 0.43440  |
| D32 | 2.47649  | 0.00007  | 0.00206  | 0.01560  | 0.01765  | 2.49413  |
| D33 | -0.96741 | 0.00003  | -0.00116 | 0.00363  | 0.00243  | -0.96499 |
| D34 | 1.09507  | -0.00004 | -0.00273 | 0.00321  | 0.00045  | 1.09552  |
| D35 | -3.04432 | -0.00005 | -0.00287 | 0.00410  | 0.00112  | -3.04320 |
| D36 | -3.03751 | 0.00001  | -0.00089 | 0.00281  | 0.00194  | -3.03558 |
| D37 | -0.97504 | -0.00006 | -0.00245 | 0.00240  | -0.00004 | -0.97507 |
| D38 | 1.16876  | -0.00007 | -0.00260 | 0.00328  | 0.00063  | 1.16939  |
| D39 | 1.13161  | 0.00009  | 0.00023  | 0.00205  | 0.00228  | 1.13390  |
| D40 | -3.08909 | 0.00002  | -0.00134 | 0.00164  | 0.00031  | -3.08878 |
| D41 | -0.94530 | 0.00000  | -0.00148 | 0.00252  | 0.00098  | -0.94432 |
| D42 | -1.75669 | 0.00014  | 0.00218  | 0.00773  | 0.01002  | -1.74667 |
| D43 | 2.43761  | 0.00011  | 0.00076  | 0.00883  | 0.00961  | 2.44722  |
| D44 | 0.35316  | 0.00021  | 0.00136  | 0.00797  | 0.00937  | 0.36253  |
| D45 | 0.42186  | 0.00009  | 0.00438  | 0.01215  | 0.01660  | 0.43847  |
| D46 | -0.36532 | -0.00024 | -0.00144 | 0.00350  | 0.00214  | -0.36318 |
| D47 | 2.60281  | -0.00027 | -0.00042 | -0.01168 | -0.01200 | 2.59081  |
| D48 | -3.14021 | 0.00000  | -0.00019 | 0.00041  | 0.00022  | -3.13999 |

|     |          |          |          |          |          |          |
|-----|----------|----------|----------|----------|----------|----------|
| D49 | 0.00225  | -0.00001 | -0.00005 | -0.00032 | -0.00037 | 0.00188  |
| D50 | 0.00074  | 0.00000  | -0.00006 | -0.00035 | -0.00041 | 0.00033  |
| D51 | -3.13998 | -0.00001 | 0.00008  | -0.00108 | -0.00100 | -3.14098 |
| D52 | -1.48308 | -0.00036 | -0.01218 | -0.04712 | -0.05928 | -1.54236 |
| D53 | 2.10477  | -0.00009 | 0.01084  | 0.03158  | 0.04248  | 2.14725  |
| D54 | 1.89953  | -0.00016 | 0.01071  | 0.01159  | 0.02221  | 1.92174  |
| D55 | -2.88496 | -0.00010 | 0.01525  | 0.02163  | 0.03690  | -2.84806 |
| D56 | -2.72774 | 0.00005  | -0.00441 | 0.00220  | -0.00222 | -2.72996 |
| D57 | -0.02978 | -0.00003 | -0.00244 | 0.00187  | -0.00058 | -0.03036 |
| D58 | -0.02269 | 0.00002  | 0.00030  | -0.00121 | -0.00094 | -0.02362 |
| D59 | 2.67527  | -0.00006 | 0.00226  | -0.00155 | 0.00070  | 2.67597  |
| D60 | -0.14047 | -0.00013 | 0.00146  | -0.00879 | -0.00731 | -0.14778 |
| D61 | 0.10961  | -0.00008 | 0.00050  | 0.01397  | 0.01452  | 0.12412  |
| D62 | -2.55614 | 0.00020  | 0.00795  | -0.01109 | -0.00312 | -2.55926 |
| D63 | -2.30606 | 0.00025  | 0.00699  | 0.01167  | 0.01870  | -2.28736 |
| D64 | 2.13829  | -0.00014 | -0.00304 | -0.00436 | -0.00737 | 2.13092  |
| D65 | -0.25739 | 0.00002  | -0.00141 | -0.00408 | -0.00547 | -0.26286 |
| D66 | 2.48227  | -0.00009 | 0.00312  | -0.00107 | 0.00205  | 2.48431  |
| D67 | -1.72490 | -0.00005 | 0.00340  | -0.00081 | 0.00259  | -1.72231 |
| D68 | 0.35166  | 0.00002  | 0.00375  | -0.00008 | 0.00367  | 0.35533  |
| D69 | 1.26476  | -0.00001 | 0.00408  | -0.00114 | 0.00294  | 1.26770  |
| D70 | -2.94241 | 0.00004  | 0.00436  | -0.00088 | 0.00348  | -2.93892 |
| D71 | -0.86585 | 0.00011  | 0.00472  | -0.00015 | 0.00457  | -0.86128 |
| D72 | -1.09839 | -0.00005 | 0.00541  | -0.00096 | 0.00444  | -1.09395 |
| D73 | 0.97763  | 0.00000  | 0.00569  | -0.00070 | 0.00499  | 0.98262  |
| D74 | 3.05418  | 0.00006  | 0.00605  | 0.00003  | 0.00607  | 3.06025  |

| Item                 | Value    | Threshold | Converged? |
|----------------------|----------|-----------|------------|
| Maximum Force        | 0.000926 | 0.000450  | NO         |
| RMS Force            | 0.000212 | 0.000300  | YES        |
| Maximum Displacement | 0.053466 | 0.001800  | NO         |
| RMS Displacement     | 0.015524 | 0.001200  | NO         |

Predicted change in Energy=-3.740747D-05

GradGradGradGradGradGradGradGradGradGradGradGradGradGradGradGradGradGrad

Input orientation:

| Center Number | Atomic Number | Atomic Type | Coordinates (Angstroms) |           |           |
|---------------|---------------|-------------|-------------------------|-----------|-----------|
|               |               |             | X                       | Y         | Z         |
| 1             | 6             | 0           | -1.381379               | -1.913158 | -0.262557 |
| 2             | 6             | 0           | -2.503550               | -1.154650 | -0.173923 |
| 3             | 7             | 0           | -2.096730               | 0.116681  | 0.218979  |
| 4             | 6             | 0           | -0.756575               | 0.117784  | 0.358493  |
| 5             | 7             | 0           | -0.307013               | -1.104235 | 0.075501  |

|    |    |   |           |           |           |
|----|----|---|-----------|-----------|-----------|
| 6  | 6  | 0 | 1.123020  | -1.475099 | 0.060045  |
| 7  | 6  | 0 | 1.718971  | -1.402965 | -1.356137 |
| 8  | 1  | 0 | -1.256452 | -2.948799 | -0.528291 |
| 9  | 1  | 0 | -3.533058 | -1.409647 | -0.347078 |
| 10 | 1  | 0 | 1.639171  | -0.774412 | 0.718204  |
| 11 | 1  | 0 | 1.213977  | -2.487386 | 0.456290  |
| 12 | 1  | 0 | 1.128637  | -2.027204 | -2.038981 |
| 13 | 1  | 0 | 1.665514  | -0.367382 | -1.711382 |
| 14 | 35 | 0 | 1.622606  | 2.235351  | 1.112304  |
| 15 | 1  | 0 | -0.098967 | 0.966720  | 0.651467  |
| 16 | 6  | 0 | -2.889310 | 1.273149  | 0.456657  |
| 17 | 6  | 0 | -4.210057 | 1.320619  | 0.341682  |
| 18 | 1  | 0 | -2.287183 | 2.125700  | 0.745552  |
| 19 | 1  | 0 | -4.723417 | 2.250497  | 0.543220  |
| 20 | 1  | 0 | -4.817177 | 0.471719  | 0.053867  |
| 21 | 8  | 0 | 3.036170  | -1.887622 | -1.327837 |
| 22 | 1  | 0 | 3.657612  | -1.132724 | -1.308844 |
| 23 | 6  | 0 | 4.755544  | 1.672726  | -1.101625 |
| 24 | 6  | 0 | 5.674162  | 0.785231  | -0.378503 |
| 25 | 8  | 0 | 4.796727  | 0.253820  | -1.402443 |
| 26 | 1  | 0 | 3.847758  | 2.007407  | -0.604498 |
| 27 | 1  | 0 | 5.135148  | 2.299273  | -1.904212 |
| 28 | 1  | 0 | 6.714733  | 0.776878  | -0.699633 |
| 29 | 6  | 0 | 5.420550  | 0.354740  | 1.039517  |
| 30 | 1  | 0 | 5.722655  | -0.686141 | 1.189486  |
| 31 | 1  | 0 | 6.007339  | 0.977783  | 1.721658  |
| 32 | 1  | 0 | 4.367042  | 0.470962  | 1.301779  |

-----  
Distance matrix (angstroms):

|    |    | 1        | 2        | 3        | 4        | 5        |
|----|----|----------|----------|----------|----------|----------|
| 1  | C  | 0.000000 |          |          |          |          |
| 2  | C  | 1.357372 | 0.000000 |          |          |          |
| 3  | N  | 2.205414 | 1.391459 | 0.000000 |          |          |
| 4  | C  | 2.213777 | 2.225866 | 1.347398 | 0.000000 |          |
| 5  | N  | 1.386688 | 2.211228 | 2.171246 | 1.332487 | 0.000000 |
| 6  | C  | 2.562807 | 3.648211 | 3.595249 | 2.481779 | 1.477421 |
| 7  | C  | 3.326918 | 4.391922 | 4.398851 | 3.373568 | 2.498687 |
| 8  | H  | 1.076464 | 2.213550 | 3.265218 | 3.231130 | 2.160652 |
| 9  | H  | 2.211423 | 1.074659 | 2.170975 | 3.246495 | 3.267907 |
| 10 | H  | 3.373775 | 4.254717 | 3.873014 | 2.581668 | 2.075929 |
| 11 | H  | 2.753607 | 3.999170 | 4.218799 | 3.267958 | 2.090817 |
| 12 | H  | 3.077152 | 4.175234 | 4.483037 | 3.728657 | 2.717352 |
| 13 | H  | 3.711074 | 4.512723 | 4.256183 | 3.222775 | 2.761660 |
| 14 | Br | 5.303234 | 5.492873 | 4.372671 | 3.273045 | 3.993898 |

|    |    |          |          |          |           |          |
|----|----|----------|----------|----------|-----------|----------|
| 15 | H  | 3.282334 | 3.311118 | 2.213746 | 1.113092  | 2.159601 |
| 16 | C  | 3.597732 | 2.537844 | 1.422002 | 2.427562  | 3.530650 |
| 17 | C  | 4.338645 | 3.050405 | 2.435297 | 3.656998  | 4.602665 |
| 18 | H  | 4.260181 | 3.413641 | 2.085595 | 2.554271  | 3.847404 |
| 19 | H  | 5.399492 | 4.127605 | 3.399674 | 4.507596  | 5.565753 |
| 20 | H  | 4.194338 | 2.837223 | 2.748481 | 4.087365  | 4.777623 |
| 21 | O  | 4.544250 | 5.705897 | 5.723332 | 4.609802  | 3.709437 |
| 22 | H  | 5.205307 | 6.264858 | 6.083396 | 4.881478  | 4.199461 |
| 23 | C  | 7.157123 | 7.845326 | 7.149750 | 5.910435  | 5.892930 |
| 24 | C  | 7.554827 | 8.407138 | 7.822449 | 6.507152  | 6.288931 |
| 25 | O  | 6.645610 | 7.535722 | 7.082907 | 5.827398  | 5.484232 |
| 26 | H  | 6.544587 | 7.107961 | 6.292050 | 5.069310  | 5.235154 |
| 27 | H  | 7.931250 | 8.559977 | 7.846764 | 6.677659  | 6.717161 |
| 28 | H  | 8.542503 | 9.433129 | 8.883783 | 7.574594  | 7.310563 |
| 29 | C  | 7.287317 | 8.157332 | 7.565676 | 6.219069  | 5.988565 |
| 30 | H  | 7.353999 | 8.351577 | 7.920176 | 6.581586  | 6.145947 |
| 31 | H  | 8.178496 | 8.976398 | 8.287066 | 6.953297  | 6.849501 |
| 32 | H  | 6.416816 | 7.212860 | 6.563408 | 5.221684  | 5.082499 |
|    |    | 6        | 7        | 8        | 9         | 10       |
| 6  | C  | 0.000000 |          |          |           |          |
| 7  | C  | 1.538159 | 0.000000 |          |           |          |
| 8  | H  | 2.860038 | 3.453705 | 0.000000 |           |          |
| 9  | H  | 4.674302 | 5.348089 | 2.754045 | 0.000000  |          |
| 10 | H  | 1.091122 | 2.168949 | 3.829666 | 5.318863  | 0.000000 |
| 11 | H  | 1.090875 | 2.171608 | 2.699134 | 4.933686  | 1.784283 |
| 12 | H  | 2.170429 | 1.097472 | 2.969877 | 4.997531  | 3.071190 |
| 13 | H  | 2.158538 | 1.096124 | 4.074470 | 5.474741  | 2.463586 |
| 14 | Br | 3.888994 | 4.397707 | 6.152718 | 6.480484  | 3.035500 |
| 15 | H  | 2.793835 | 3.598719 | 4.250046 | 4.293855  | 2.461122 |
| 16 | C  | 4.879443 | 5.628859 | 4.632623 | 2.873638  | 4.976751 |
| 17 | C  | 6.028024 | 6.741949 | 5.263893 | 2.896043  | 6.224500 |
| 18 | H  | 5.006512 | 5.737407 | 5.332507 | 3.904449  | 4.881358 |
| 19 | H  | 6.949413 | 7.645894 | 6.340399 | 3.950473  | 7.047214 |
| 20 | H  | 6.251087 | 6.944335 | 4.971682 | 2.312846  | 6.608981 |
| 21 | O  | 2.399277 | 1.403819 | 4.493548 | 6.659212  | 2.716087 |
| 22 | H  | 2.900902 | 1.957957 | 5.296737 | 7.259987  | 2.882953 |
| 23 | C  | 4.945049 | 4.329599 | 7.604689 | 8.875319  | 4.360280 |
| 24 | C  | 5.100423 | 4.624663 | 7.873934 | 9.465272  | 4.462780 |
| 25 | O  | 4.315571 | 3.495664 | 6.903759 | 8.559570  | 3.940123 |
| 26 | H  | 4.471427 | 4.089906 | 7.114967 | 8.137504  | 3.790240 |
| 27 | H  | 5.848193 | 5.067269 | 8.383792 | 9.556074  | 5.342889 |
| 28 | H  | 6.075834 | 5.490023 | 8.800558 | 10.484389 | 5.493459 |
| 29 | C  | 4.772467 | 4.746617 | 7.612736 | 9.230536  | 3.959426 |
| 30 | H  | 4.801535 | 4.798283 | 7.535139 | 9.410245  | 4.111537 |

|    |    |          |           |          |           |           |
|----|----|----------|-----------|----------|-----------|-----------|
| 31 | H  | 5.712631 | 5.790585  | 8.558211 | 10.049809 | 4.812275  |
| 32 | H  | 3.981550 | 4.193853  | 6.831370 | 8.286556  | 3.054963  |
|    |    | 11       | 12        | 13       | 14        | 15        |
| 11 | H  | 0.000000 |           |          |           |           |
| 12 | H  | 2.538785 | 0.000000  |          |           |           |
| 13 | H  | 3.065469 | 1.774984  | 0.000000 |           |           |
| 14 | Br | 4.785559 | 5.323906  | 3.840476 | 0.000000  |           |
| 15 | H  | 3.700373 | 4.208219  | 3.236707 | 2.187603  | 0.000000  |
| 16 | C  | 5.565841 | 5.767533  | 5.304541 | 4.659731  | 2.813870  |
| 17 | C  | 6.628287 | 6.736255  | 6.448779 | 5.954037  | 4.137907  |
| 18 | H  | 5.798479 | 6.055416  | 5.279753 | 3.928483  | 2.477978  |
| 19 | H  | 7.596561 | 7.695000  | 7.263260 | 6.371506  | 4.800556  |
| 20 | H  | 6.730012 | 6.780659  | 6.770929 | 6.760288  | 4.781596  |
| 21 | O  | 2.619773 | 2.040561  | 2.082531 | 4.995133  | 4.679102  |
| 22 | H  | 3.304869 | 2.780092  | 2.171691 | 4.620296  | 4.728887  |
| 23 | C  | 5.681226 | 5.265223  | 3.752616 | 3.877283  | 5.209419  |
| 24 | C  | 5.594654 | 5.597212  | 4.378852 | 4.554169  | 5.867094  |
| 25 | O  | 4.879057 | 4.366136  | 3.207153 | 4.508376  | 5.356734  |
| 26 | H  | 5.316506 | 5.072421  | 3.409839 | 2.819692  | 4.270493  |
| 27 | H  | 6.622662 | 5.898195  | 4.380250 | 4.630486  | 5.975212  |
| 28 | H  | 6.499992 | 6.392277  | 5.275185 | 5.598215  | 6.948958  |
| 29 | C  | 5.110097 | 5.794077  | 4.710541 | 4.238675  | 5.566881  |
| 30 | H  | 4.910218 | 5.772907  | 4.997703 | 5.035024  | 6.075582  |
| 31 | H  | 6.048542 | 6.853764  | 5.696198 | 4.602029  | 6.199387  |
| 32 | H  | 4.405507 | 5.280983  | 4.132822 | 3.268164  | 4.540256  |
|    |    | 16       | 17        | 18       | 19        | 20        |
| 16 | C  | 0.000000 |           |          |           |           |
| 17 | C  | 1.326593 | 0.000000  |          |           |           |
| 18 | H  | 1.082987 | 2.123373  | 0.000000 |           |           |
| 19 | H  | 2.080060 | 1.081124  | 2.447805 | 0.000000  |           |
| 20 | H  | 2.126312 | 1.082618  | 3.100799 | 1.847243  | 0.000000  |
| 21 | O  | 6.948827 | 8.098636  | 6.981674 | 8.990888  | 8.315687  |
| 22 | H  | 7.194957 | 8.404960  | 7.083675 | 9.225940  | 8.732312  |
| 23 | C  | 7.812278 | 9.087855  | 7.295015 | 9.637947  | 9.716716  |
| 24 | C  | 8.617924 | 9.924873  | 8.151280 | 10.540694 | 10.504924 |
| 25 | O  | 7.973108 | 9.235919  | 7.635417 | 9.919953  | 9.726021  |
| 26 | H  | 6.859538 | 8.142194  | 6.282843 | 8.651091  | 8.824561  |
| 27 | H  | 8.427251 | 9.660987  | 7.883043 | 10.157933 | 10.306445 |
| 28 | H  | 9.686120 | 10.987768 | 9.216418 | 11.599461 | 11.560529 |
| 29 | C  | 8.380750 | 9.704045  | 7.914029 | 10.331518 | 10.285730 |
| 30 | H  | 8.862381 | 10.168807 | 8.500649 | 10.870231 | 10.663880 |
| 31 | H  | 8.990985 | 10.315864 | 8.430278 | 10.870033 | 10.963930 |
| 32 | H  | 7.349311 | 8.672390  | 6.879408 | 9.294009  | 9.268612  |
|    |    | 21       | 22        | 23       | 24        | 25        |

|    |   |          |          |          |          |          |
|----|---|----------|----------|----------|----------|----------|
| 21 | O | 0.000000 |          |          |          |          |
| 22 | H | 0.977969 | 0.000000 |          |          |          |
| 23 | C | 3.960240 | 3.019759 | 0.000000 |          |          |
| 24 | C | 3.873549 | 2.934375 | 1.467792 | 0.000000 |          |
| 25 | O | 2.773248 | 1.796900 | 1.451028 | 1.449394 | 0.000000 |
| 26 | H | 4.043903 | 3.223769 | 1.087760 | 2.209195 | 2.147633 |
| 27 | H | 4.718899 | 3.783673 | 1.086649 | 2.215998 | 2.133115 |
| 28 | H | 4.585415 | 3.655640 | 2.191475 | 1.089028 | 2.108620 |
| 29 | C | 4.039532 | 3.291701 | 2.600732 | 1.503470 | 2.522401 |
| 30 | H | 3.872684 | 3.271925 | 3.427645 | 2.150785 | 2.908430 |
| 31 | H | 5.132037 | 4.377144 | 3.165574 | 2.135125 | 3.427785 |
| 32 | H | 3.774788 | 3.144909 | 2.715055 | 2.151901 | 2.746743 |
|    |   | 26       | 27       | 28       | 29       | 30       |
| 26 | H | 0.000000 |          |          |          |          |
| 27 | H | 1.852516 | 0.000000 |          |          |          |
| 28 | H | 3.121346 | 2.502756 | 0.000000 |          |          |
| 29 | C | 2.812075 | 3.539520 | 2.208564 | 0.000000 |          |
| 30 | H | 3.740163 | 4.339220 | 2.587163 | 1.094162 | 0.000000 |
| 31 | H | 3.336902 | 3.956512 | 2.530498 | 1.094449 | 1.769998 |
| 32 | H | 2.502841 | 3.769760 | 3.100143 | 1.091864 | 1.785828 |
|    |   | 31       | 32       |          |          |          |
| 31 | H | 0.000000 |          |          |          |          |
| 32 | H | 1.767410 | 0.000000 |          |          |          |

Stoichiometry C10H17BrN2O2

Framework group C1[X(C10H17BrN2O2)]

Deg. of freedom 90

Full point group C1 NOp 1

Largest Abelian subgroup C1 NOp 1

Largest concise Abelian subgroup C1 NOp 1

Standard orientation:

| Center Number | Atomic Number | Atomic Type | Coordinates (Angstroms) |          |           |
|---------------|---------------|-------------|-------------------------|----------|-----------|
|               |               |             | X                       | Y        | Z         |
| 1             | 6             | 0           | -2.703542               | 2.139706 | -0.405564 |
| 2             | 6             | 0           | -3.770095               | 1.370909 | -0.068109 |
| 3             | 7             | 0           | -3.298381               | 0.068482 | 0.063529  |
| 4             | 6             | 0           | -1.974493               | 0.060883 | -0.186956 |
| 5             | 7             | 0           | -1.598051               | 1.305659 | -0.477376 |
| 6             | 6             | 0           | -0.201594               | 1.703914 | -0.749544 |
| 7             | 6             | 0           | 0.493537                | 2.253411 | 0.507746  |
| 8             | 1             | 0           | -2.637512               | 3.195579 | -0.604425 |
| 9             | 1             | 0           | -4.801351               | 1.634998 | 0.079058  |
| 10            | 1             | 0           | 0.318629                | 0.812760 | -1.104169 |



|    |    |   |           |           |           |
|----|----|---|-----------|-----------|-----------|
| 11 | 1  | 0 | -0.212924 | 2.460570  | -1.535261 |
| 12 | 1  | 0 | -0.093161 | 3.082635  | 0.923218  |
| 13 | 1  | 0 | 0.541091  | 1.459920  | 1.262464  |
| 14 | 35 | 0 | 0.497339  | -2.084352 | -0.215874 |
| 15 | 1  | 0 | -1.277606 | -0.806719 | -0.162657 |
| 16 | 6  | 0 | -4.017837 | -1.111096 | 0.399790  |
| 17 | 6  | 0 | -5.320511 | -1.157091 | 0.646314  |
| 18 | 1  | 0 | -3.375604 | -1.982414 | 0.434435  |
| 19 | 1  | 0 | -5.776416 | -2.105127 | 0.895725  |
| 20 | 1  | 0 | -5.967516 | -0.289731 | 0.612664  |
| 21 | 8  | 0 | 1.766340  | 2.732302  | 0.159404  |
| 22 | 1  | 0 | 2.439047  | 2.063181  | 0.396394  |
| 23 | 6  | 0 | 3.724300  | -0.527364 | 1.265962  |
| 24 | 6  | 0 | 4.523279  | 0.011334  | 0.158781  |
| 25 | 8  | 0 | 3.681124  | 0.887804  | 0.948285  |
| 26 | 1  | 0 | 2.811817  | -1.073963 | 1.038308  |
| 27 | 1  | 0 | 4.203128  | -0.745900 | 2.216631  |
| 28 | 1  | 0 | 5.579919  | 0.193307  | 0.349515  |
| 29 | 6  | 0 | 4.142172  | -0.200466 | -1.280080 |
| 30 | 1  | 0 | 4.355656  | 0.693235  | -1.874146 |
| 31 | 1  | 0 | 4.725303  | -1.028447 | -1.695081 |
| 32 | 1  | 0 | 3.084650  | -0.456235 | -1.371710 |

-----

Rotational constants (GHZ):      0.5908450      0.2231960      0.1733828

Standard basis: 6-311++G(d,p) (5D, 7F)

There are    492 symmetry adapted cartesian basis functions of A    symmetry.

There are    475 symmetry adapted basis functions of A    symmetry.

475 basis functions,    751 primitive gaussians,    492 cartesian basis functions

71 alpha electrons      71 beta electrons

nuclear repulsion energy      1307.6484237588 Hartrees.

NAtoms=    32 NActive=    32 NUniq=    32 SFac= 1.00D+00 NAtFMM=    60 NAOKFM=F

Big=F

Integral buffers will be    131072 words long.

Raffenetti 2 integral format.

Two-electron integral symmetry is turned on.

One-electron integrals computed using PRISM.

NBasis=    475 RedAO= T EigKep=    3.76D-06    NBF=    475

NBsUse=    475 1.00D-06 EigRej= -1.00D+00    NBFU=    475

Initial guess from the checkpoint file: "/home/suqian/liuwen/qianmengshijie/ohpo/ohpo.chk"

B after Tr=    0.000000    0.000000    0.000000

Rot=    0.999998    0.000329    -0.000140    -0.001862 Ang=    0.22 deg.

ExpMin= 3.50D-02 ExpMax= 4.40D+05 ExpMxC= 1.51D+04 IAcc=3 IRadAn=      5 AccDes=

0.00D+00

Harris functional with IExCor=    402 and IRadAn=      5 diagonalized for initial guess.

HarFok: IExCor= 402 AccDes= 0.00D+00 IRadAn= 5 IDoV= 1 UseB2=F ITyADJ=14  
 ICtDFT= 3500011 ScaDFX= 1.000000 1.000000 1.000000 1.000000  
 FoFCou: FMM=F IPFlag= 0 FMFlag= 100000 FMFlg1= 0  
 NFxFlg= 0 DoJE=T BraDBF=F KetDBF=T FulRan=T  
 wScrn= 0.000000 ICntrl= 500 IOpCl= 0 I1Cent= 200000004 NGrid= 0  
 NMat0= 1 NMatS0= 1 NMatT0= 0 NMatD0= 1 NMtDS0= 0  
 NMtDT0= 0

Petite list used in FoFCou.

Requested convergence on RMS density matrix=1.00D-08 within 128 cycles.

Requested convergence on MAX density matrix=1.00D-06.

Requested convergence on energy=1.00D-06.

No special actions if energy rises.

SCF Done: E(RB3LYP) = -3225.52360173 A.U. after 11 cycles

NFock= 11 Conv=0.23D-08 -V/T= 2.0018

Calling FoFJK, ICntrl= 2127 FMM=F ISym2X=0 I1Cent= 0 IOpClX= 0 NMat=1 NMatS=1  
 NMatT=0.

\*\*\*\*\* Axes restored to original set \*\*\*\*\*

| Center Number | Atomic Number | Forces (Hartrees/Bohr) |              |              |
|---------------|---------------|------------------------|--------------|--------------|
|               |               | X                      | Y            | Z            |
| 1             | 6             | 0.000197950            | 0.000079624  | -0.000290847 |
| 2             | 6             | -0.000112994           | -0.000115758 | 0.000413127  |
| 3             | 7             | 0.000270630            | 0.000037459  | -0.000290767 |
| 4             | 6             | 0.000149954            | -0.000260940 | 0.000120961  |
| 5             | 7             | -0.000135010           | 0.000319083  | -0.000030388 |
| 6             | 6             | -0.000005397           | 0.000198491  | 0.000284502  |
| 7             | 6             | -0.000745742           | 0.000430980  | 0.000049871  |
| 8             | 1             | 0.000008038            | 0.000025008  | -0.000040682 |
| 9             | 1             | 0.000014697            | -0.000007551 | 0.000054498  |
| 10            | 1             | -0.000133191           | -0.000178651 | 0.000094133  |
| 11            | 1             | -0.000021172           | 0.000084483  | -0.000010632 |
| 12            | 1             | 0.000177684            | -0.000078612 | 0.000183715  |
| 13            | 1             | 0.000143797            | -0.000116181 | -0.000044302 |
| 14            | 35            | 0.000150501            | -0.000006002 | 0.000076826  |
| 15            | 1             | -0.000482099           | -0.000190193 | -0.000164623 |
| 16            | 6             | -0.000022025           | 0.000065179  | -0.000041445 |
| 17            | 6             | 0.000072786            | -0.000036458 | 0.000005550  |
| 18            | 1             | -0.000017281           | -0.000008679 | 0.000012356  |
| 19            | 1             | 0.000016738            | -0.000015088 | 0.000012197  |
| 20            | 1             | -0.000020837           | 0.000019539  | 0.000005448  |
| 21            | 8             | 0.000717069            | -0.000016793 | -0.000542312 |
| 22            | 1             | -0.000553756           | -0.000280538 | 0.000027284  |

|    |   |              |              |              |
|----|---|--------------|--------------|--------------|
| 23 | 6 | -0.000061773 | 0.000164277  | 0.000026854  |
| 24 | 6 | 0.000323989  | 0.000282037  | -0.000777633 |
| 25 | 8 | 0.000173098  | -0.000240264 | 0.000658463  |
| 26 | 1 | 0.000133777  | -0.000050877 | -0.000151726 |
| 27 | 1 | -0.000079250 | -0.000058107 | 0.000014963  |
| 28 | 1 | -0.000078621 | 0.000034748  | 0.000233706  |
| 29 | 6 | -0.000152306 | -0.000030501 | 0.000279615  |
| 30 | 1 | 0.000035840  | -0.000025656 | -0.000066696 |
| 31 | 1 | -0.000006159 | -0.000016423 | -0.000047363 |
| 32 | 1 | 0.000041062  | -0.000007638 | -0.000054653 |

-----  
Cartesian Forces: Max 0.000777633 RMS 0.000225092

GradGradGradGradGradGradGradGradGradGradGradGradGradGradGradGradGradGradGradGrad

Berny optimization.

Using GEDIIS/GDIIS optimizer.

FormGI is forming the generalized inverse of G from B-inverse, IUseBI=4.

GSVD: received Info= 1 from GESDD.

Internal Forces: Max 0.000479265 RMS 0.000116425

Search for a local minimum.

Step number 23 out of a maximum of 177

All quantities printed in internal units (Hartrees-Bohrs-Radians)

Mixed Optimization -- En-DIIS/RFO-DIIS

Swapping is turned off.

Update second derivatives using D2CorX and points 19 20 21 22 23

DE= -5.51D-05 DEPred=-3.74D-05 R= 1.47D+00

TightC=F SS= 1.41D+00 RLast= 1.18D-01 DXNew= 3.2661D+00 3.5509D-01

Trust test= 1.47D+00 RLast= 1.18D-01 DXMaxT set to 1.94D+00

ITU= 1 1 1 1 1 1 -1 1 1 1 1 1 1 1 1 1 1 1 0 1

ITU= 0 1 0

|                 |         |         |         |         |         |
|-----------------|---------|---------|---------|---------|---------|
| Eigenvalues --- | 0.00004 | 0.00211 | 0.00229 | 0.00298 | 0.00405 |
| Eigenvalues --- | 0.00535 | 0.00902 | 0.01175 | 0.01285 | 0.01401 |
| Eigenvalues --- | 0.01610 | 0.01737 | 0.01892 | 0.02053 | 0.02157 |
| Eigenvalues --- | 0.02178 | 0.02315 | 0.02385 | 0.02615 | 0.03053 |
| Eigenvalues --- | 0.03061 | 0.03163 | 0.03433 | 0.03747 | 0.04170 |
| Eigenvalues --- | 0.04641 | 0.05044 | 0.05243 | 0.05424 | 0.05660 |
| Eigenvalues --- | 0.05942 | 0.06320 | 0.07523 | 0.09410 | 0.09534 |
| Eigenvalues --- | 0.10386 | 0.10969 | 0.11509 | 0.11735 | 0.13007 |
| Eigenvalues --- | 0.13944 | 0.14308 | 0.15240 | 0.15972 | 0.15994 |
| Eigenvalues --- | 0.16000 | 0.16001 | 0.16003 | 0.16014 | 0.16078 |
| Eigenvalues --- | 0.16458 | 0.17447 | 0.19703 | 0.21300 | 0.22044 |
| Eigenvalues --- | 0.22916 | 0.23435 | 0.23861 | 0.24215 | 0.25065 |
| Eigenvalues --- | 0.27680 | 0.28282 | 0.31195 | 0.32434 | 0.33106 |
| Eigenvalues --- | 0.33411 | 0.34031 | 0.34285 | 0.34498 | 0.34841 |

|                 |         |         |         |         |         |
|-----------------|---------|---------|---------|---------|---------|
| Eigenvalues --- | 0.35159 | 0.35686 | 0.35691 | 0.35858 | 0.36358 |
| Eigenvalues --- | 0.36438 | 0.36676 | 0.37213 | 0.37260 | 0.37728 |
| Eigenvalues --- | 0.39684 | 0.42102 | 0.42803 | 0.43682 | 0.45849 |
| Eigenvalues --- | 0.49603 | 0.54058 | 0.55289 | 0.59164 | 0.60599 |

Eigenvalue 1 is 4.25D-05 Eigenvector:

|   |          |         |          |          |          |
|---|----------|---------|----------|----------|----------|
|   | D54      | D55     | D52      | D53      | D47      |
| 1 | 0.50151  | 0.50150 | -0.49969 | 0.49307  | 0.02655  |
|   | R18      | D46     | D42      | D35      | D41      |
| 1 | -0.01999 | 0.01853 | 0.01545  | -0.01395 | -0.01327 |

En-DIIS/RFO-DIIS IScMMF= 0 using points: 23 22 21 20 19

RFO step: Lambda=-7.39746157D-06.

DidBck=F Rises=F RFO-DIIS coefs: 1.54756 -0.46779 -0.08468 -0.00156

0.00647

|             |            |            |           |            |
|-------------|------------|------------|-----------|------------|
| Iteration 1 | RMS(Cart)= | 0.01930091 | RMS(Int)= | 0.00145357 |
| Iteration 2 | RMS(Cart)= | 0.00029590 | RMS(Int)= | 0.00010702 |
| Iteration 3 | RMS(Cart)= | 0.00000333 | RMS(Int)= | 0.00010702 |
| Iteration 4 | RMS(Cart)= | 0.00000000 | RMS(Int)= | 0.00010702 |

| Variable | Old X   | -DE/DX   | Delta X<br>(Linear) | Delta X<br>(Quad) | Delta X<br>(Total) | New X   |
|----------|---------|----------|---------------------|-------------------|--------------------|---------|
| R1       | 2.56506 | -0.00001 | -0.00014            | -0.00008          | -0.00021           | 2.56485 |
| R2       | 2.62046 | -0.00011 | 0.00026             | -0.00026          | -0.00001           | 2.62045 |
| R3       | 2.03422 | -0.00001 | 0.00007             | -0.00002          | 0.00005            | 2.03427 |
| R4       | 2.62948 | -0.00002 | -0.00020            | 0.00004           | -0.00014           | 2.62934 |
| R5       | 2.03081 | -0.00002 | 0.00005             | -0.00006          | 0.00000            | 2.03081 |
| R6       | 2.54621 | -0.00023 | 0.00036             | -0.00025          | 0.00011            | 2.54632 |
| R7       | 2.68720 | 0.00000  | -0.00023            | -0.00012          | -0.00035           | 2.68684 |
| R8       | 2.51804 | -0.00044 | 0.00143             | -0.00060          | 0.00090            | 2.51894 |
| R9       | 2.10344 | -0.00033 | 0.00177             | -0.00094          | 0.00094            | 2.10438 |
| R10      | 2.79192 | -0.00018 | 0.00065             | -0.00066          | -0.00002           | 2.79190 |
| R11      | 2.90670 | 0.00012  | 0.00171             | 0.00020           | 0.00189            | 2.90859 |
| R12      | 2.06192 | -0.00012 | 0.00040             | -0.00035          | 0.00005            | 2.06198 |
| R13      | 2.06145 | -0.00008 | 0.00035             | -0.00025          | 0.00010            | 2.06155 |
| R14      | 2.07392 | -0.00017 | 0.00019             | -0.00034          | -0.00014           | 2.07378 |
| R15      | 2.07137 | -0.00010 | 0.00030             | -0.00029          | 0.00002            | 2.07139 |
| R16      | 2.65283 | 0.00048  | 0.00019             | -0.00020          | -0.00001           | 2.65282 |
| R17      | 4.13397 | 0.00019  | 0.00053             | 0.00212           | 0.00274            | 4.13672 |
| R18      | 8.51960 | 0.00008  | -0.01533            | -0.00999          | -0.02534           | 8.49426 |
| R19      | 2.50690 | -0.00007 | 0.00018             | -0.00012          | 0.00006            | 2.50696 |
| R20      | 2.04655 | -0.00001 | 0.00003             | -0.00007          | -0.00003           | 2.04651 |
| R21      | 2.04303 | -0.00002 | 0.00004             | -0.00005          | -0.00002           | 2.04301 |
| R22      | 2.04585 | -0.00001 | 0.00007             | -0.00002          | 0.00004            | 2.04589 |
| R23      | 1.84809 | -0.00038 | 0.00023             | -0.00048          | -0.00036           | 1.84773 |
| R24      | 3.39565 | 0.00017  | 0.00916             | 0.00391           | 0.01297            | 3.40861 |
| R25      | 2.77372 | -0.00014 | 0.00032             | 0.00014           | 0.00045            | 2.77417 |

|     |         |          |          |          |          |         |
|-----|---------|----------|----------|----------|----------|---------|
| R26 | 2.74205 | 0.00009  | 0.00045  | -0.00087 | -0.00041 | 2.74164 |
| R27 | 2.05557 | -0.00020 | 0.00015  | -0.00035 | -0.00020 | 2.05537 |
| R28 | 2.05347 | -0.00007 | -0.00014 | 0.00004  | -0.00010 | 2.05337 |
| R29 | 2.73896 | -0.00003 | 0.00213  | -0.00011 | 0.00202  | 2.74097 |
| R30 | 2.05796 | -0.00014 | 0.00043  | -0.00044 | -0.00001 | 2.05795 |
| R31 | 2.84115 | 0.00015  | 0.00182  | -0.00034 | 0.00147  | 2.84262 |
| R32 | 2.06767 | 0.00003  | -0.00011 | 0.00010  | -0.00001 | 2.06766 |
| R33 | 2.06821 | -0.00004 | 0.00023  | -0.00021 | 0.00002  | 2.06823 |
| R34 | 2.06332 | -0.00005 | 0.00021  | -0.00009 | 0.00012  | 2.06345 |
| A1  | 1.87405 | -0.00006 | 0.00047  | -0.00016 | 0.00029  | 1.87434 |
| A2  | 2.27796 | 0.00003  | 0.00008  | 0.00018  | 0.00026  | 2.27822 |
| A3  | 2.13116 | 0.00002  | -0.00055 | -0.00003 | -0.00057 | 2.13058 |
| A4  | 1.86220 | -0.00010 | -0.00009 | -0.00015 | -0.00022 | 1.86197 |
| A5  | 2.27690 | 0.00005  | 0.00009  | 0.00009  | 0.00017  | 2.27707 |
| A6  | 2.14406 | 0.00005  | -0.00002 | 0.00007  | 0.00005  | 2.14411 |
| A7  | 1.89735 | 0.00001  | 0.00045  | 0.00012  | 0.00057  | 1.89793 |
| A8  | 2.24887 | 0.00004  | -0.00057 | -0.00009 | -0.00065 | 2.24822 |
| A9  | 2.13696 | -0.00005 | 0.00012  | -0.00004 | 0.00008  | 2.13704 |
| A10 | 1.88897 | 0.00006  | -0.00042 | -0.00016 | -0.00061 | 1.88836 |
| A11 | 2.23381 | -0.00001 | 0.00039  | 0.00053  | 0.00092  | 2.23474 |
| A12 | 2.16039 | -0.00005 | 0.00003  | -0.00039 | -0.00035 | 2.16005 |
| A13 | 1.90220 | 0.00008  | -0.00042 | 0.00037  | -0.00003 | 1.90217 |
| A14 | 2.21547 | -0.00011 | -0.00160 | -0.00110 | -0.00262 | 2.21285 |
| A15 | 2.16397 | 0.00002  | 0.00183  | 0.00078  | 0.00250  | 2.16647 |
| A16 | 1.95290 | -0.00016 | 0.00014  | -0.00123 | -0.00111 | 1.95180 |
| A17 | 1.86540 | 0.00003  | 0.00073  | 0.00041  | 0.00107  | 1.86648 |
| A18 | 1.88582 | -0.00002 | -0.00024 | -0.00103 | -0.00119 | 1.88464 |
| A19 | 1.91981 | 0.00018  | -0.00119 | 0.00173  | 0.00057  | 1.92038 |
| A20 | 1.92372 | 0.00004  | 0.00025  | -0.00007 | 0.00016  | 1.92388 |
| A21 | 1.91491 | -0.00008 | 0.00034  | 0.00017  | 0.00051  | 1.91542 |
| A22 | 1.91535 | -0.00008 | -0.00063 | -0.00053 | -0.00111 | 1.91423 |
| A23 | 1.90054 | 0.00006  | -0.00134 | 0.00047  | -0.00093 | 1.89962 |
| A24 | 1.90581 | 0.00024  | 0.00161  | 0.00109  | 0.00272  | 1.90854 |
| A25 | 1.88546 | 0.00008  | -0.00009 | 0.00095  | 0.00085  | 1.88632 |
| A26 | 1.89746 | -0.00020 | 0.00020  | -0.00188 | -0.00160 | 1.89586 |
| A27 | 1.95894 | -0.00011 | 0.00021  | -0.00013 | 0.00000  | 1.95893 |
| A28 | 1.75348 | 0.00021  | 0.00791  | 0.00720  | 0.01497  | 1.76845 |
| A29 | 2.86752 | -0.00022 | -0.00602 | -0.00597 | -0.01204 | 2.85547 |
| A30 | 2.17673 | 0.00001  | 0.00032  | -0.00003 | 0.00029  | 2.17702 |
| A31 | 1.95511 | 0.00001  | 0.00014  | 0.00019  | 0.00033  | 1.95543 |
| A32 | 2.15135 | -0.00001 | -0.00046 | -0.00016 | -0.00062 | 2.15073 |
| A33 | 2.07987 | -0.00003 | 0.00003  | -0.00015 | -0.00013 | 2.07974 |
| A34 | 2.15712 | 0.00005  | -0.00008 | 0.00018  | 0.00010  | 2.15722 |
| A35 | 2.04620 | -0.00001 | 0.00005  | -0.00003 | 0.00003  | 2.04622 |

|     |          |          |          |          |          |          |
|-----|----------|----------|----------|----------|----------|----------|
| A36 | 1.90724  | 0.00006  | 0.00060  | 0.00009  | -0.00026 | 1.90698  |
| A37 | 3.07005  | -0.00001 | -0.00903 | -0.00765 | -0.01645 | 3.05361  |
| A38 | 2.07508  | 0.00018  | 0.00108  | 0.00024  | 0.00146  | 2.07654  |
| A39 | 2.08733  | -0.00013 | 0.00088  | 0.00017  | 0.00090  | 2.08823  |
| A40 | 2.00347  | -0.00012 | -0.00073 | -0.00104 | -0.00178 | 2.00170  |
| A41 | 1.98317  | 0.00010  | 0.00005  | 0.00017  | 0.00022  | 1.98339  |
| A42 | 2.03945  | -0.00003 | -0.00137 | 0.00005  | -0.00132 | 2.03812  |
| A43 | 2.04583  | 0.00012  | 0.00129  | -0.00064 | 0.00066  | 2.04649  |
| A44 | 2.13201  | -0.00006 | -0.00020 | 0.00056  | 0.00035  | 2.13236  |
| A45 | 1.94691  | 0.00023  | 0.00003  | 0.00062  | 0.00069  | 1.94760  |
| A46 | 2.04790  | -0.00023 | -0.00038 | -0.00131 | -0.00174 | 2.04616  |
| A47 | 2.02317  | -0.00006 | -0.00054 | 0.00050  | -0.00005 | 2.02312  |
| A48 | 1.43414  | -0.00017 | -0.00450 | -0.00381 | -0.00865 | 1.42550  |
| A49 | 0.96986  | 0.00020  | 0.00924  | 0.00836  | 0.01797  | 0.98784  |
| A50 | 2.38293  | 0.00001  | 0.00311  | 0.00175  | 0.00458  | 2.38751  |
| A51 | 2.25220  | 0.00028  | 0.00766  | 0.00866  | 0.01633  | 2.26853  |
| A52 | 1.93380  | -0.00010 | -0.00207 | 0.00018  | -0.00189 | 1.93191  |
| A53 | 1.91177  | 0.00000  | 0.00057  | -0.00043 | 0.00014  | 1.91191  |
| A54 | 1.93781  | -0.00003 | -0.00202 | 0.00069  | -0.00133 | 1.93647  |
| A55 | 1.88398  | 0.00004  | 0.00100  | -0.00045 | 0.00055  | 1.88453  |
| A56 | 1.91213  | 0.00006  | 0.00143  | -0.00011 | 0.00131  | 1.91344  |
| A57 | 1.88285  | 0.00004  | 0.00128  | 0.00008  | 0.00136  | 1.88421  |
| A58 | 3.68635  | 0.00011  | 0.00315  | 0.00485  | 0.00768  | 3.69403  |
| A59 | 4.99531  | -0.00003 | 0.00087  | 0.00539  | 0.00639  | 5.00169  |
| D1  | 0.00070  | 0.00019  | -0.00087 | 0.00327  | 0.00239  | 0.00309  |
| D2  | -3.13281 | 0.00008  | 0.00170  | 0.00125  | 0.00295  | -3.12986 |
| D3  | 3.13504  | 0.00006  | -0.00260 | 0.00143  | -0.00118 | 3.13386  |
| D4  | 0.00154  | -0.00006 | -0.00004 | -0.00059 | -0.00062 | 0.00092  |
| D5  | -0.00416 | -0.00015 | -0.00064 | -0.00035 | -0.00098 | -0.00514 |
| D6  | -3.08746 | -0.00017 | 0.00308  | -0.00133 | 0.00174  | -3.08572 |
| D7  | -3.13925 | -0.00003 | 0.00091  | 0.00130  | 0.00222  | -3.13703 |
| D8  | 0.06064  | -0.00005 | 0.00463  | 0.00032  | 0.00494  | 0.06558  |
| D9  | 0.00295  | -0.00016 | 0.00207  | -0.00507 | -0.00299 | -0.00004 |
| D10 | -3.13774 | -0.00009 | 0.00061  | -0.00207 | -0.00145 | -3.13918 |
| D11 | 3.13722  | -0.00006 | -0.00025 | -0.00324 | -0.00350 | 3.13372  |
| D12 | -0.00347 | 0.00001  | -0.00171 | -0.00025 | -0.00195 | -0.00542 |
| D13 | -0.00557 | 0.00007  | -0.00249 | 0.00490  | 0.00241  | -0.00316 |
| D14 | 3.13123  | 0.00004  | -0.00370 | 0.00142  | -0.00225 | 3.12898  |
| D15 | 3.13518  | 0.00000  | -0.00114 | 0.00213  | 0.00098  | 3.13617  |
| D16 | -0.01120 | -0.00003 | -0.00236 | -0.00134 | -0.00367 | -0.01487 |
| D17 | 0.00697  | -0.00003 | -0.00211 | -0.00327 | -0.00538 | 0.00159  |
| D18 | -3.13348 | -0.00005 | -0.00175 | -0.00420 | -0.00595 | -3.13942 |
| D19 | -3.13361 | 0.00005  | -0.00375 | 0.00010  | -0.00365 | -3.13726 |
| D20 | 0.00913  | 0.00003  | -0.00338 | -0.00083 | -0.00421 | 0.00492  |

|     |          |          |          |          |          |          |
|-----|----------|----------|----------|----------|----------|----------|
| D21 | 0.00602  | 0.00005  | 0.00194  | -0.00284 | -0.00090 | 0.00511  |
| D22 | 3.09142  | 0.00007  | -0.00176 | -0.00197 | -0.00374 | 3.08768  |
| D23 | -3.13103 | 0.00008  | 0.00309  | 0.00045  | 0.00350  | -3.12753 |
| D24 | -0.04563 | 0.00009  | -0.00061 | 0.00132  | 0.00066  | -0.04497 |
| D25 | -3.05419 | 0.00007  | -0.00666 | -0.00733 | -0.01397 | -3.06816 |
| D26 | 0.08193  | 0.00004  | -0.00805 | -0.01130 | -0.01929 | 0.06264  |
| D27 | 1.40692  | -0.00003 | 0.00543  | 0.00845  | 0.01387  | 1.42080  |
| D28 | -2.77367 | 0.00012  | 0.00453  | 0.01012  | 0.01461  | -2.75906 |
| D29 | -0.71395 | 0.00003  | 0.00520  | 0.01000  | 0.01516  | -0.69878 |
| D30 | -1.66818 | -0.00005 | 0.00976  | 0.00736  | 0.01710  | -1.65108 |
| D31 | 0.43440  | 0.00010  | 0.00885  | 0.00902  | 0.01784  | 0.45224  |
| D32 | 2.49413  | 0.00001  | 0.00952  | 0.00891  | 0.01839  | 2.51252  |
| D33 | -0.96499 | 0.00001  | 0.00273  | 0.00715  | 0.00980  | -0.95518 |
| D34 | 1.09552  | 0.00010  | 0.00146  | 0.00826  | 0.00965  | 1.10517  |
| D35 | -3.04320 | 0.00015  | 0.00189  | 0.00909  | 0.01078  | -3.03242 |
| D36 | -3.03558 | -0.00005 | 0.00250  | 0.00628  | 0.00879  | -3.02679 |
| D37 | -0.97507 | 0.00004  | 0.00123  | 0.00740  | 0.00864  | -0.96644 |
| D38 | 1.16939  | 0.00009  | 0.00166  | 0.00822  | 0.00977  | 1.17916  |
| D39 | 1.13390  | -0.00009 | 0.00269  | 0.00499  | 0.00768  | 1.14158  |
| D40 | -3.08878 | 0.00000  | 0.00142  | 0.00611  | 0.00753  | -3.08125 |
| D41 | -0.94432 | 0.00005  | 0.00185  | 0.00693  | 0.00866  | -0.93566 |
| D42 | -1.74667 | 0.00003  | 0.00555  | 0.00863  | 0.01431  | -1.73236 |
| D43 | 2.44722  | 0.00009  | 0.00525  | 0.00975  | 0.01501  | 2.46223  |
| D44 | 0.36253  | 0.00020  | 0.00510  | 0.00989  | 0.01501  | 0.37754  |
| D45 | 0.43847  | 0.00008  | 0.00747  | 0.00552  | 0.01313  | 0.45159  |
| D46 | -0.36318 | -0.00007 | 0.00187  | 0.00884  | 0.01086  | -0.35233 |
| D47 | 2.59081  | -0.00016 | -0.00477 | -0.00288 | -0.00738 | 2.58344  |
| D48 | -3.13999 | -0.00002 | 0.00018  | -0.00127 | -0.00109 | -3.14108 |
| D49 | 0.00188  | -0.00001 | -0.00017 | -0.00067 | -0.00083 | 0.00105  |
| D50 | 0.00033  | 0.00000  | -0.00022 | -0.00024 | -0.00047 | -0.00014 |
| D51 | -3.14098 | 0.00001  | -0.00057 | 0.00036  | -0.00021 | -3.14119 |
| D52 | -1.54236 | -0.00022 | -0.03440 | -0.03296 | -0.06739 | -1.60975 |
| D53 | 2.14725  | -0.00003 | 0.02430  | 0.01733  | 0.04176  | 2.18900  |
| D54 | 1.92174  | -0.00018 | 0.01419  | 0.00144  | 0.01539  | 1.93713  |
| D55 | -2.84806 | 0.00000  | 0.02342  | 0.01194  | 0.03537  | -2.81269 |
| D56 | -2.72996 | 0.00002  | -0.00184 | -0.00043 | -0.00230 | -2.73226 |
| D57 | -0.03036 | 0.00000  | -0.00056 | 0.00073  | 0.00015  | -0.03021 |
| D58 | -0.02362 | 0.00007  | -0.00071 | 0.00075  | 0.00002  | -0.02361 |
| D59 | 2.67597  | 0.00004  | 0.00058  | 0.00191  | 0.00246  | 2.67844  |
| D60 | -0.14778 | -0.00005 | -0.00181 | -0.00565 | -0.00736 | -0.15514 |
| D61 | 0.12412  | 0.00008  | 0.00862  | 0.01192  | 0.02059  | 0.14471  |
| D62 | -2.55926 | 0.00001  | 0.00121  | -0.00472 | -0.00342 | -2.56268 |
| D63 | -2.28736 | 0.00015  | 0.01164  | 0.01285  | 0.02453  | -2.26282 |
| D64 | 2.13092  | 0.00001  | -0.00453 | -0.00064 | -0.00515 | 2.12577  |

|     |          |          |          |          |          |          |
|-----|----------|----------|----------|----------|----------|----------|
| D65 | -0.26286 | 0.00010  | -0.00327 | -0.00067 | -0.00391 | -0.26676 |
| D66 | 2.48431  | -0.00002 | 0.00164  | 0.00254  | 0.00418  | 2.48849  |
| D67 | -1.72231 | -0.00003 | 0.00196  | 0.00183  | 0.00378  | -1.71852 |
| D68 | 0.35533  | 0.00000  | 0.00266  | 0.00208  | 0.00473  | 0.36006  |
| D69 | 1.26770  | 0.00002  | 0.00227  | 0.00345  | 0.00573  | 1.27343  |
| D70 | -2.93892 | 0.00001  | 0.00259  | 0.00274  | 0.00534  | -2.93358 |
| D71 | -0.86128 | 0.00004  | 0.00329  | 0.00299  | 0.00629  | -0.85500 |
| D72 | -1.09395 | 0.00000  | 0.00335  | 0.00342  | 0.00676  | -1.08719 |
| D73 | 0.98262  | -0.00001 | 0.00366  | 0.00270  | 0.00637  | 0.98898  |
| D74 | 3.06025  | 0.00002  | 0.00436  | 0.00296  | 0.00731  | 3.06756  |

| Item                 | Value    | Threshold | Converged? |
|----------------------|----------|-----------|------------|
| Maximum Force        | 0.000479 | 0.000450  | NO         |
| RMS Force            | 0.000116 | 0.000300  | YES        |
| Maximum Displacement | 0.076090 | 0.001800  | NO         |
| RMS Displacement     | 0.019305 | 0.001200  | NO         |

Predicted change in Energy=-2.509019D-05

GradGradGradGradGradGradGradGradGradGradGradGradGradGradGradGradGradGrad

Input orientation:

| Center Number | Atomic Number | Atomic Type | Coordinates (Angstroms) |           |           |
|---------------|---------------|-------------|-------------------------|-----------|-----------|
|               |               |             | X                       | Y         | Z         |
| 1             | 6             | 0           | -1.387175               | -1.917208 | -0.256743 |
| 2             | 6             | 0           | -2.510572               | -1.161169 | -0.164331 |
| 3             | 7             | 0           | -2.104462               | 0.112001  | 0.223057  |
| 4             | 6             | 0           | -0.763930               | 0.116088  | 0.359426  |
| 5             | 7             | 0           | -0.313057               | -1.106001 | 0.076574  |
| 6             | 6             | 0           | 1.116800                | -1.477057 | 0.052598  |
| 7             | 6             | 0           | 1.708461                | -1.384319 | -1.365271 |
| 8             | 1             | 0           | -1.260986               | -2.953505 | -0.519405 |
| 9             | 1             | 0           | -3.540445               | -1.418990 | -0.330995 |
| 10            | 1             | 0           | 1.635586                | -0.787007 | 0.719907  |
| 11            | 1             | 0           | 1.206872                | -2.495508 | 0.433079  |
| 12            | 1             | 0           | 1.109145                | -1.990764 | -2.056159 |
| 13            | 1             | 0           | 1.662649                | -0.341693 | -1.700444 |
| 14            | 35            | 0           | 1.632880                | 2.218317  | 1.097807  |
| 15            | 1             | 0           | -0.105909               | 0.967548  | 0.645975  |
| 16            | 6             | 0           | -2.898788               | 1.267183  | 0.460048  |
| 17            | 6             | 0           | -4.219558               | 1.313074  | 0.344320  |
| 18            | 1             | 0           | -2.298454               | 2.120690  | 0.749781  |
| 19            | 1             | 0           | -4.734107               | 2.242147  | 0.546488  |
| 20            | 1             | 0           | -4.825539               | 0.463664  | 0.055530  |
| 21            | 8             | 0           | 3.021090                | -1.881909 | -1.355029 |



|    |   |   |          |           |           |
|----|---|---|----------|-----------|-----------|
| 22 | 1 | 0 | 3.649284 | -1.133861 | -1.312060 |
| 23 | 6 | 0 | 4.786171 | 1.666258  | -1.111626 |
| 24 | 6 | 0 | 5.691761 | 0.779630  | -0.370741 |
| 25 | 8 | 0 | 4.811945 | 0.242904  | -1.391372 |
| 26 | 1 | 0 | 3.878517 | 2.017442  | -0.626009 |
| 27 | 1 | 0 | 5.175413 | 2.276677  | -1.921917 |
| 28 | 1 | 0 | 6.733762 | 0.754481  | -0.686287 |
| 29 | 6 | 0 | 5.425662 | 0.370533  | 1.052144  |
| 30 | 1 | 0 | 5.721271 | -0.669964 | 1.216966  |
| 31 | 1 | 0 | 6.011558 | 0.999492  | 1.729627  |
| 32 | 1 | 0 | 4.370619 | 0.496440  | 1.303820  |

-----  
Distance matrix (angstroms):

|    |    | 1        | 2        | 3        | 4        | 5        |
|----|----|----------|----------|----------|----------|----------|
| 1  | C  | 0.000000 |          |          |          |          |
| 2  | C  | 1.357261 | 0.000000 |          |          |          |
| 3  | N  | 2.205085 | 1.391387 | 0.000000 |          |          |
| 4  | C  | 2.214135 | 2.226312 | 1.347456 | 0.000000 |          |
| 5  | N  | 1.386682 | 2.211369 | 2.171202 | 1.332965 | 0.000000 |
| 6  | C  | 2.561116 | 3.647557 | 3.595927 | 2.483828 | 1.477412 |
| 7  | C  | 3.331031 | 4.392300 | 4.393193 | 3.367272 | 2.498582 |
| 8  | H  | 1.076488 | 2.213597 | 3.264970 | 3.231379 | 2.160331 |
| 9  | H  | 2.211404 | 1.074656 | 2.170934 | 3.246872 | 3.268043 |
| 10 | H  | 3.371689 | 4.255878 | 3.878535 | 2.589055 | 2.076738 |
| 11 | H  | 2.745790 | 3.994590 | 4.219969 | 3.272601 | 2.089978 |
| 12 | H  | 3.078136 | 4.167685 | 4.465839 | 3.712451 | 2.711828 |
| 13 | H  | 3.723969 | 4.521831 | 4.254036 | 3.215729 | 2.765026 |
| 14 | Br | 5.296991 | 5.493825 | 4.378297 | 3.272503 | 3.985057 |
| 15 | H  | 3.283041 | 3.312165 | 2.214731 | 1.113592 | 2.160263 |
| 16 | C  | 3.597097 | 2.537213 | 1.421817 | 2.427501 | 3.530589 |
| 17 | C  | 4.338017 | 3.049793 | 2.435346 | 3.657098 | 4.602648 |
| 18 | H  | 4.260063 | 3.413384 | 2.085642 | 2.554519 | 3.847927 |
| 19 | H  | 5.398830 | 4.126976 | 3.399583 | 4.507485 | 5.565663 |
| 20 | H  | 4.193854 | 2.836810 | 2.748817 | 4.087766 | 4.777739 |
| 21 | O  | 4.543157 | 5.704078 | 5.721653 | 4.610610 | 3.710532 |
| 22 | H  | 5.205118 | 6.265929 | 6.083942 | 4.881875 | 4.198717 |
| 23 | C  | 7.189037 | 7.882523 | 7.188735 | 5.947322 | 5.924471 |
| 24 | C  | 7.576098 | 8.431344 | 7.847255 | 6.530649 | 6.309796 |
| 25 | O  | 6.662023 | 7.556210 | 7.103534 | 5.845662 | 5.499096 |
| 26 | H  | 6.583718 | 7.151026 | 6.336218 | 5.112587 | 5.274354 |
| 27 | H  | 7.964235 | 8.601294 | 7.891978 | 6.719261 | 6.749798 |
| 28 | H  | 8.559910 | 9.455151 | 8.908080 | 7.597135 | 7.328097 |
| 29 | C  | 7.304909 | 8.173722 | 7.580039 | 6.233431 | 6.005396 |
| 30 | H  | 7.365965 | 8.361370 | 7.927258 | 6.588710 | 6.156601 |

|    |    |          |          |          |           |          |
|----|----|----------|----------|----------|-----------|----------|
| 31 | H  | 8.197198 | 8.993455 | 8.302239 | 6.968866  | 6.867783 |
| 32 | H  | 6.435313 | 7.228688 | 6.575904 | 5.234515  | 5.100076 |
|    |    | 6        | 7        | 8        | 9         | 10       |
| 6  | C  | 0.000000 |          |          |           |          |
| 7  | C  | 1.539161 | 0.000000 |          |           |          |
| 8  | H  | 2.856737 | 3.463445 | 0.000000 |           |          |
| 9  | H  | 4.673376 | 5.349948 | 2.754300 | 0.000000  |          |
| 10 | H  | 1.091151 | 2.170268 | 3.823576 | 5.319313  | 0.000000 |
| 11 | H  | 1.090926 | 2.172648 | 2.684643 | 4.927445  | 1.784668 |
| 12 | H  | 2.170440 | 1.097397 | 2.984293 | 4.992175  | 3.071273 |
| 13 | H  | 2.158740 | 1.096133 | 4.094393 | 5.487089  | 2.461125 |
| 14 | Br | 3.874867 | 4.364797 | 6.143092 | 6.483423  | 3.028992 |
| 15 | H  | 2.797000 | 3.587246 | 4.250526 | 4.294889  | 2.473203 |
| 16 | C  | 4.880759 | 5.620409 | 4.632055 | 2.872803  | 4.984753 |
| 17 | C  | 6.028818 | 6.733502 | 5.263351 | 2.895067  | 6.231702 |
| 18 | H  | 5.009372 | 5.728342 | 5.332413 | 3.903838  | 4.892061 |
| 19 | H  | 6.950505 | 7.636280 | 6.339834 | 3.949522  | 7.055412 |
| 20 | H  | 6.251224 | 6.937354 | 4.971281 | 2.311980  | 6.614508 |
| 21 | O  | 2.402424 | 1.403814 | 4.492522 | 6.657077  | 2.724664 |
| 22 | H  | 2.897163 | 1.957640 | 5.296240 | 7.261955  | 2.881698 |
| 23 | C  | 4.969923 | 4.340812 | 7.632891 | 8.914071  | 4.393087 |
| 24 | C  | 5.118801 | 4.640952 | 7.892977 | 9.490476  | 4.482903 |
| 25 | O  | 4.324051 | 3.504304 | 6.917937 | 8.581883  | 3.950630 |
| 26 | H  | 4.505454 | 4.102150 | 7.150956 | 8.181509  | 3.834993 |
| 27 | H  | 5.870398 | 5.072722 | 8.411247 | 9.599748  | 5.375479 |
| 28 | H  | 6.089005 | 5.503557 | 8.814364 | 10.507594 | 5.508627 |
| 29 | C  | 4.793640 | 4.768751 | 7.630875 | 9.246975  | 3.976803 |
| 30 | H  | 4.817501 | 4.825028 | 7.548606 | 9.420011  | 4.117474 |
| 31 | H  | 5.736234 | 5.811849 | 8.577542 | 10.066577 | 4.833244 |
| 32 | H  | 4.005945 | 4.212883 | 6.851368 | 8.302194  | 3.077109 |
|    |    | 11       | 12       | 13       | 14        | 15       |
| 11 | H  | 0.000000 |          |          |           |          |
| 12 | H  | 2.541776 | 0.000000 |          |           |          |
| 13 | H  | 3.065709 | 1.775481 | 0.000000 |           |          |
| 14 | Br | 4.779487 | 5.285657 | 3.792723 | 0.000000  |          |
| 15 | H  | 3.709646 | 4.186824 | 3.216767 | 2.189055  | 0.000000 |
| 16 | C  | 5.569112 | 5.745350 | 5.297444 | 4.674121  | 2.815053 |
| 17 | C  | 6.630182 | 6.713622 | 6.443576 | 5.969777  | 4.139141 |
| 18 | H  | 5.804902 | 6.032336 | 5.268517 | 3.947916  | 2.479469 |
| 19 | H  | 7.599570 | 7.670392 | 7.255579 | 6.390857  | 4.801533 |
| 20 | H  | 6.729727 | 6.760468 | 6.769685 | 6.773207  | 4.783036 |
| 21 | O  | 2.620157 | 2.039354 | 2.082531 | 4.975479  | 4.679909 |
| 22 | H  | 3.296206 | 2.782134 | 2.173727 | 4.594611  | 4.727716 |
| 23 | C  | 5.702437 | 5.271287 | 3.759649 | 3.889680  | 5.244979 |

|    |   |          |           |          |           |           |
|----|---|----------|-----------|----------|-----------|-----------|
| 24 | C | 5.611318 | 5.613919  | 4.388532 | 4.549831  | 5.889142  |
| 25 | O | 4.880991 | 4.375151  | 3.217972 | 4.494966  | 5.372260  |
| 26 | H | 5.350334 | 5.077447  | 3.410279 | 2.838094  | 4.312293  |
| 27 | H | 6.638455 | 5.896067  | 4.386847 | 4.655285  | 6.016665  |
| 28 | H | 6.508604 | 6.406968  | 5.286426 | 5.598643  | 6.971472  |
| 29 | C | 5.137667 | 5.819758  | 4.716383 | 4.219193  | 5.578502  |
| 30 | H | 4.932230 | 5.807716  | 5.009137 | 5.007126  | 6.079762  |
| 31 | H | 6.081206 | 6.878042  | 5.698875 | 4.588851  | 6.212787  |
| 32 | H | 4.440635 | 5.302156  | 4.130517 | 3.240759  | 4.549067  |
|    |   | 16       | 17        | 18       | 19        | 20        |
| 16 | C | 0.000000 |           |          |           |           |
| 17 | C | 1.326625 | 0.000000  |          |           |           |
| 18 | H | 1.082968 | 2.123037  | 0.000000 |           |           |
| 19 | H | 2.080006 | 1.081115  | 2.447139 | 0.000000  |           |
| 20 | H | 2.126417 | 1.082641  | 3.100626 | 1.847269  | 0.000000  |
| 21 | O | 6.946671 | 8.094608  | 6.982017 | 8.987029  | 8.310293  |
| 22 | H | 7.196015 | 8.405342  | 7.086528 | 9.226749  | 8.731840  |
| 23 | C | 7.854171 | 9.129494  | 7.339159 | 9.680738  | 9.756713  |
| 24 | C | 8.644388 | 9.951387  | 8.179091 | 10.567828 | 10.530676 |
| 25 | O | 7.995768 | 9.258830  | 7.659529 | 9.943812  | 9.747993  |
| 26 | H | 6.904656 | 8.186360  | 6.329173 | 8.694973  | 8.867882  |
| 27 | H | 8.478535 | 9.712355  | 7.938576 | 10.212385 | 10.354534 |
| 28 | H | 9.714060 | 11.015870 | 9.247148 | 11.629485 | 11.586730 |
| 29 | C | 8.393511 | 9.716979  | 7.925683 | 10.343092 | 10.299954 |
| 30 | H | 8.867406 | 10.174185 | 8.504234 | 10.874046 | 10.670954 |
| 31 | H | 9.004319 | 10.329237 | 8.442362 | 10.881789 | 10.978724 |
| 32 | H | 7.358687 | 8.682090  | 6.886340 | 9.301457  | 9.280552  |
|    |   | 21       | 22        | 23       | 24        | 25        |
| 21 | O | 0.000000 |           |          |           |           |
| 22 | H | 0.977778 | 0.000000  |          |           |           |
| 23 | C | 3.970421 | 3.028754  | 0.000000 |           |           |
| 24 | C | 3.896806 | 2.952836  | 1.468030 | 0.000000  |           |
| 25 | O | 2.779085 | 1.803761  | 1.450812 | 1.450461  | 0.000000  |
| 26 | H | 4.058521 | 3.233253  | 1.087653 | 2.210247  | 2.146171  |
| 27 | H | 4.717660 | 3.785864  | 1.086597 | 2.216734  | 2.133031  |
| 28 | H | 4.602359 | 3.670345  | 2.192114 | 1.089022  | 2.110032  |
| 29 | C | 4.080434 | 3.317858  | 2.601875 | 1.504251  | 2.522638  |
| 30 | H | 3.921091 | 3.302167  | 3.428511 | 2.150118  | 2.909232  |
| 31 | H | 5.173053 | 4.402658  | 3.165260 | 2.135920  | 3.428138  |
| 32 | H | 3.814086 | 3.165602  | 2.715794 | 2.151689  | 2.742828  |
|    |   | 26       | 27        | 28       | 29        | 30        |
| 26 | H | 0.000000 |           |          |           |           |
| 27 | H | 1.851626 | 0.000000  |          |           |           |
| 28 | H | 3.122679 | 2.504459  | 0.000000 |           |           |

29 C 2.814634 3.541334 2.209227 0.000000  
 30 H 3.743588 4.339729 2.583903 1.094159 0.000000  
 31 H 3.336931 3.957792 2.533427 1.094462 1.770359  
 32 H 2.505963 3.771248 3.100251 1.091929 1.786702

31 32  
 31 H 0.000000  
 32 H 1.768347 0.000000

Stoichiometry C10H17BrN2O2

Framework group C1[X(C10H17BrN2O2)]

Deg. of freedom 90

Full point group C1 NOp 1

Largest Abelian subgroup C1 NOp 1

Largest concise Abelian subgroup C1 NOp 1

Standard orientation:

| Center Number | Atomic Number | Atomic Type | Coordinates (Angstroms) |           |           |
|---------------|---------------|-------------|-------------------------|-----------|-----------|
|               |               |             | X                       | Y         | Z         |
| 1             | 6             | 0           | -2.715932               | 2.129086  | -0.414760 |
| 2             | 6             | 0           | -3.782477               | 1.359506  | -0.079523 |
| 3             | 7             | 0           | -3.308441               | 0.058808  | 0.059876  |
| 4             | 6             | 0           | -1.983904               | 0.051858  | -0.187495 |
| 5             | 7             | 0           | -1.608694               | 1.296878  | -0.480642 |
| 6             | 6             | 0           | -0.212783               | 1.700990  | -0.746861 |
| 7             | 6             | 0           | 0.479635                | 2.235831  | 0.519441  |
| 8             | 1             | 0           | -2.651009               | 3.184086  | -0.618687 |
| 9             | 1             | 0           | -4.815137               | 1.621760  | 0.060909  |
| 10            | 1             | 0           | 0.310033                | 0.816094  | -1.113239 |
| 11            | 1             | 0           | -0.226350               | 2.468416  | -1.522100 |
| 12            | 1             | 0           | -0.115344               | 3.051570  | 0.949384  |
| 13            | 1             | 0           | 0.535969                | 1.429251  | 1.259550  |
| 14            | 35            | 0           | 0.509316                | -2.067738 | -0.208479 |
| 15            | 1             | 0           | -1.284348               | -0.813980 | -0.155354 |
| 16            | 6             | 0           | -4.027252               | -1.120128 | 0.398970  |
| 17            | 6             | 0           | -5.329752               | -1.166363 | 0.646538  |
| 18            | 1             | 0           | -3.385144               | -1.991481 | 0.434486  |
| 19            | 1             | 0           | -5.785005               | -2.114388 | 0.897142  |
| 20            | 1             | 0           | -5.977231               | -0.299347 | 0.612397  |
| 21            | 8             | 0           | 1.747002                | 2.735596  | 0.180756  |
| 22            | 1             | 0           | 2.425682                | 2.064562  | 0.393260  |
| 23            | 6             | 0           | 3.755176                | -0.512814 | 1.266719  |
| 24            | 6             | 0           | 4.538255                | 0.016658  | 0.143527  |
| 25            | 8             | 0           | 3.692039                | 0.896280  | 0.927123  |
| 26            | 1             | 0           | 2.845717                | -1.071633 | 1.057928  |

|    |   |   |          |           |           |
|----|---|---|----------|-----------|-----------|
| 27 | 1 | 0 | 4.243980 | -0.710549 | 2.216806  |
| 28 | 1 | 0 | 5.594460 | 0.213870  | 0.321030  |
| 29 | 6 | 0 | 4.145383 | -0.220313 | -1.289046 |
| 30 | 1 | 0 | 4.349335 | 0.665897  | -1.897504 |
| 31 | 1 | 0 | 4.729633 | -1.051382 | -1.696261 |
| 32 | 1 | 0 | 3.088202 | -0.482607 | -1.365726 |

-----

Rotational constants (GHZ): 0.5958532 0.2219560 0.1730421  
Standard basis: 6-311++G(d,p) (5D, 7F)  
There are 492 symmetry adapted cartesian basis functions of A symmetry.  
There are 475 symmetry adapted basis functions of A symmetry.  
475 basis functions, 751 primitive gaussians, 492 cartesian basis functions  
71 alpha electrons 71 beta electrons  
nuclear repulsion energy 1307.4324432254 Hartrees.  
NAtoms= 32 NActive= 32 NUniq= 32 SFac= 1.00D+00 NATFMM= 60 NAOKFM=F  
Big=F  
Integral buffers will be 131072 words long.  
Raffenetti 2 integral format.  
Two-electron integral symmetry is turned on.  
One-electron integrals computed using PRISM.  
NBasis= 475 RedAO= T EigKep= 3.77D-06 NBF= 475  
NBsUse= 475 1.00D-06 EigRej= -1.00D+00 NBFU= 475  
Initial guess from the checkpoint file: "/home/suqian/liuwen/qianmengshijie/ohpo/ohpo.chk"  
B after Tr= 0.000000 0.000000 0.000000  
Rot= 0.999999 0.000681 -0.000267 -0.001326 Ang= 0.17 deg.  
ExpMin= 3.50D-02 ExpMax= 4.40D+05 ExpMxC= 1.51D+04 IAcc=3 IRadAn= 5 AccDes=  
0.00D+00  
Harris functional with IExCor= 402 and IRadAn= 5 diagonalized for initial guess.  
HarFok: IExCor= 402 AccDes= 0.00D+00 IRadAn= 5 IDoV= 1 UseB2=F ITyADJ=14  
ICtDFT= 3500011 ScaDFX= 1.000000 1.000000 1.000000 1.000000  
FoFCou: FMM=F IPFlag= 0 FMFlag= 100000 FMFlg1= 0  
NFxFlg= 0 DoJE=T BraDBF=F KetDBF=T FulRan=T  
wScrn= 0.000000 ICntrl= 500 IOpCl= 0 I1Cent= 200000004 NGrid=  
0  
NMat0= 1 NMatS0= 1 NMatT0= 0 NMatD0= 1 NMtDS0= 0  
NMtDT0= 0  
Petite list used in FoFCou.  
Requested convergence on RMS density matrix=1.00D-08 within 128 cycles.  
Requested convergence on MAX density matrix=1.00D-06.  
Requested convergence on energy=1.00D-06.  
No special actions if energy rises.  
SCF Done: E(RB3LYP) = -3225.52363408 A.U. after 11 cycles  
NFock= 11 Conv=0.33D-08 -V/T= 2.0018  
Calling FoFJK, ICntrl= 2127 FMM=F ISym2X=0 I1Cent= 0 IOpClX= 0 NMat=1 NMatS=1

NMatT=0.

\*\*\*\*\* Axes restored to original set \*\*\*\*\*

```
-----
```

| Center<br>Number | Atomic<br>Number | Forces (Hartrees/Bohr) |              |              |
|------------------|------------------|------------------------|--------------|--------------|
|                  |                  | X                      | Y            | Z            |
| 1                | 6                | 0.000243773            | 0.000040504  | -0.000019957 |
| 2                | 6                | -0.000084629           | -0.000049290 | 0.000208291  |
| 3                | 7                | 0.000171420            | 0.000065550  | 0.000032024  |
| 4                | 6                | 0.000501785            | -0.000318859 | -0.000318197 |
| 5                | 7                | -0.000268267           | 0.000482804  | -0.000048866 |
| 6                | 6                | 0.000220623            | 0.000226185  | 0.000133573  |
| 7                | 6                | -0.000945822           | 0.000407928  | 0.000206810  |
| 8                | 1                | -0.000002374           | 0.000048689  | -0.000077393 |
| 9                | 1                | 0.000024719            | 0.000012815  | 0.000001467  |
| 10               | 1                | -0.000155863           | -0.000157895 | 0.000038274  |
| 11               | 1                | 0.000014825            | 0.000120542  | -0.000068917 |
| 12               | 1                | 0.000164563            | -0.000068058 | 0.000186899  |
| 13               | 1                | 0.000115619            | -0.000167028 | -0.000046401 |
| 14               | 35               | 0.000192537            | 0.000052574  | 0.000021603  |
| 15               | 1                | -0.000597104           | -0.000571933 | -0.000129835 |
| 16               | 6                | -0.000092691           | 0.000136456  | 0.000060924  |
| 17               | 6                | 0.000082329            | -0.000060822 | 0.000015302  |
| 18               | 1                | -0.000001206           | -0.000019381 | -0.000015535 |
| 19               | 1                | 0.000007900            | -0.000007189 | -0.000015746 |
| 20               | 1                | -0.000008348           | 0.000036000  | 0.000009141  |
| 21               | 8                | 0.000721672            | 0.000216498  | -0.000155986 |
| 22               | 1                | -0.000446886           | -0.000309606 | -0.000224685 |
| 23               | 6                | -0.000266469           | -0.000094452 | -0.000060311 |
| 24               | 6                | -0.000350587           | -0.000062628 | -0.000670999 |
| 25               | 8                | 0.000649532            | -0.000047418 | 0.000948904  |
| 26               | 1                | 0.000186516            | -0.000036029 | 0.000076813  |
| 27               | 1                | 0.000065107            | -0.000029997 | 0.000002111  |
| 28               | 1                | -0.000121888           | 0.000086430  | 0.000134968  |
| 29               | 6                | -0.000075074           | 0.000179088  | -0.000324452 |
| 30               | 1                | -0.000022467           | -0.000021848 | 0.000053851  |
| 31               | 1                | -0.000036816           | -0.000050127 | -0.000011103 |
| 32               | 1                | 0.000113572            | -0.000039501 | 0.000057427  |

```
-----
```

Cartesian Forces: Max 0.000948904 RMS 0.000255900

GradGradGradGradGradGradGradGradGradGradGradGradGradGradGradGradGradGradGrad

Berny optimization.

Using GEDIIS/GDIIS optimizer.

FormGI is forming the generalized inverse of G from B-inverse, IUseBI=4.

GSVD: received Info= 1 from GESDD.

Internal Forces: Max 0.000729037 RMS 0.000137697

Search for a local minimum.

Step number 24 out of a maximum of 177

All quantities printed in internal units (Hartrees-Bohrs-Radians)

Mixed Optimization -- En-DIIS/RFO-DIIS

Swapping is turned off.

Update second derivatives using D2CorX and points 19 20 21 22 23  
24

DE= -3.24D-05 DEPred=-2.51D-05 R= 1.29D+00

TightC=F SS= 1.41D+00 RLast= 1.25D-01 DXNew= 3.2661D+00 3.7524D-01

Trust test= 1.29D+00 RLast= 1.25D-01 DXMaxT set to 1.94D+00

ITU= 1 1 1 1 1 1 1 -1 1 1 1 1 1 1 1 1 1 1 1 0

ITU= 1 0 1 0

|                 |         |         |         |         |         |
|-----------------|---------|---------|---------|---------|---------|
| Eigenvalues --- | 0.00006 | 0.00172 | 0.00232 | 0.00283 | 0.00364 |
| Eigenvalues --- | 0.00543 | 0.00884 | 0.01223 | 0.01246 | 0.01404 |
| Eigenvalues --- | 0.01533 | 0.01779 | 0.01909 | 0.02070 | 0.02160 |
| Eigenvalues --- | 0.02181 | 0.02315 | 0.02385 | 0.02717 | 0.03058 |
| Eigenvalues --- | 0.03062 | 0.03134 | 0.03373 | 0.03923 | 0.04190 |
| Eigenvalues --- | 0.04657 | 0.04962 | 0.05194 | 0.05432 | 0.05662 |
| Eigenvalues --- | 0.05936 | 0.06129 | 0.07293 | 0.09293 | 0.09561 |
| Eigenvalues --- | 0.10407 | 0.11006 | 0.11546 | 0.11686 | 0.13039 |
| Eigenvalues --- | 0.13948 | 0.14168 | 0.15395 | 0.15978 | 0.15993 |
| Eigenvalues --- | 0.16000 | 0.16002 | 0.16004 | 0.16009 | 0.16077 |
| Eigenvalues --- | 0.16499 | 0.17404 | 0.19707 | 0.21528 | 0.22049 |
| Eigenvalues --- | 0.22927 | 0.23553 | 0.23981 | 0.24246 | 0.25046 |
| Eigenvalues --- | 0.27644 | 0.28355 | 0.31374 | 0.32579 | 0.33106 |
| Eigenvalues --- | 0.33473 | 0.34047 | 0.34288 | 0.34483 | 0.34849 |
| Eigenvalues --- | 0.35169 | 0.35684 | 0.35689 | 0.35857 | 0.36169 |
| Eigenvalues --- | 0.36439 | 0.36670 | 0.37224 | 0.37261 | 0.37765 |
| Eigenvalues --- | 0.41123 | 0.42119 | 0.43286 | 0.44034 | 0.45861 |
| Eigenvalues --- | 0.49721 | 0.54196 | 0.55230 | 0.59977 | 0.61246 |

Eigenvalue 1 is 5.84D-05 Eigenvector:

|   |          |          |          |          |          |
|---|----------|----------|----------|----------|----------|
|   | D55      | D52      | D54      | D53      | D47      |
| 1 | -0.50157 | 0.50060  | -0.49996 | -0.49152 | -0.03191 |
|   | R18      | D46      | D42      | D35      | D41      |
| 1 | 0.02504  | -0.02349 | -0.01891 | 0.01659  | 0.01604  |

En-DIIS/RFO-DIIS IScMMF= 0 using points: 24 23 22 21 20

RFO step: Lambda=-6.14485838D-06.

DidBck=F Rises=F RFO-DIIS coefs: 1.41040 -0.21095 -0.36527 0.06787

0.09795

Iteration 1 RMS(Cart)= 0.01989238 RMS(Int)= 0.00080676

Iteration 2 RMS(Cart)= 0.00024814 RMS(Int)= 0.00007069

| Iteration 3 | RMS(Cart)= | 0.00000114 | RMS(Int)=           | 0.00007069        |                    |         |
|-------------|------------|------------|---------------------|-------------------|--------------------|---------|
| Iteration 4 | RMS(Cart)= | 0.00000000 | RMS(Int)=           | 0.00007069        |                    |         |
| Variable    | Old X      | -DE/DX     | Delta X<br>(Linear) | Delta X<br>(Quad) | Delta X<br>(Total) | New X   |
| R1          | 2.56485    | 0.00005    | 0.00003             | 0.00007           | 0.00010            | 2.56496 |
| R2          | 2.62045    | -0.00016   | -0.00011            | -0.00016          | -0.00028           | 2.62017 |
| R3          | 2.03427    | -0.00003   | 0.00004             | -0.00008          | -0.00004           | 2.03423 |
| R4          | 2.62934    | -0.00003   | -0.00010            | 0.00001           | -0.00008           | 2.62926 |
| R5          | 2.03081    | -0.00003   | 0.00000             | -0.00004          | -0.00004           | 2.03077 |
| R6          | 2.54632    | -0.00019   | -0.00013            | 0.00000           | -0.00014           | 2.54619 |
| R7          | 2.68684    | 0.00008    | 0.00002             | -0.00007          | -0.00006           | 2.68679 |
| R8          | 2.51894    | -0.00073   | 0.00038             | -0.00081          | -0.00038           | 2.51855 |
| R9          | 2.10438    | -0.00064   | -0.00048            | -0.00076          | -0.00117           | 2.10321 |
| R10         | 2.79190    | -0.00017   | 0.00010             | -0.00004          | 0.00007            | 2.79198 |
| R11         | 2.90859    | -0.00025   | 0.00074             | -0.00065          | 0.00009            | 2.90868 |
| R12         | 2.06198    | -0.00015   | -0.00003            | -0.00019          | -0.00022           | 2.06176 |
| R13         | 2.06155    | -0.00014   | 0.00011             | -0.00033          | -0.00022           | 2.06133 |
| R14         | 2.07378    | -0.00017   | -0.00026            | -0.00019          | -0.00044           | 2.07334 |
| R15         | 2.07139    | -0.00015   | -0.00019            | -0.00016          | -0.00035           | 2.07104 |
| R16         | 2.65282    | 0.00050    | 0.00143             | 0.00008           | 0.00153            | 2.65435 |
| R17         | 4.13672    | 0.00019    | 0.00563             | 0.00458           | 0.01026            | 4.14698 |
| R18         | 8.49426    | -0.00005   | -0.00698            | -0.01193          | -0.01894           | 8.47532 |
| R19         | 2.50696    | -0.00008   | 0.00003             | -0.00009          | -0.00006           | 2.50690 |
| R20         | 2.04651    | -0.00002   | 0.00001             | -0.00007          | -0.00006           | 2.04645 |
| R21         | 2.04301    | -0.00001   | 0.00002             | -0.00005          | -0.00002           | 2.04299 |
| R22         | 2.04589    | -0.00002   | 0.00004             | -0.00006          | -0.00002           | 2.04587 |
| R23         | 1.84773    | -0.00054   | -0.00075            | -0.00011          | -0.00092           | 1.84682 |
| R24         | 3.40861    | -0.00002   | 0.00806             | -0.00336          | 0.00464            | 3.41325 |
| R25         | 2.77417    | -0.00030   | 0.00059             | -0.00082          | -0.00016           | 2.77401 |
| R26         | 2.74164    | -0.00007   | 0.00042             | -0.00050          | -0.00011           | 2.74153 |
| R27         | 2.05537    | -0.00013   | 0.00003             | -0.00055          | -0.00052           | 2.05485 |
| R28         | 2.05337    | 0.00000    | 0.00003             | -0.00024          | -0.00021           | 2.05316 |
| R29         | 2.74097    | -0.00057   | 0.00039             | -0.00086          | -0.00052           | 2.74045 |
| R30         | 2.05795    | -0.00016   | 0.00014             | -0.00037          | -0.00023           | 2.05773 |
| R31         | 2.84262    | -0.00022   | 0.00102             | -0.00032          | 0.00071            | 2.84333 |
| R32         | 2.06766    | 0.00002    | 0.00017             | -0.00015          | 0.00002            | 2.06768 |
| R33         | 2.06823    | -0.00006   | 0.00014             | -0.00024          | -0.00010           | 2.06813 |
| R34         | 2.06345    | -0.00010   | 0.00015             | -0.00033          | -0.00017           | 2.06328 |
| A1          | 1.87434    | -0.00006   | 0.00022             | -0.00004          | 0.00017            | 1.87451 |
| A2          | 2.27822    | 0.00002    | 0.00004             | 0.00010           | 0.00014            | 2.27836 |
| A3          | 2.13058    | 0.00004    | -0.00027            | -0.00006          | -0.00033           | 2.13025 |
| A4          | 1.86197    | -0.00012   | -0.00014            | -0.00012          | -0.00024           | 1.86173 |
| A5          | 2.27707    | 0.00006    | 0.00011             | 0.00010           | 0.00020            | 2.27728 |
| A6          | 2.14411    | 0.00005    | 0.00003             | 0.00000           | 0.00003            | 2.14413 |



|     |         |          |          |          |          |         |
|-----|---------|----------|----------|----------|----------|---------|
| A7  | 1.89793 | -0.00010 | 0.00014  | -0.00015 | -0.00001 | 1.89792 |
| A8  | 2.24822 | 0.00010  | -0.00010 | -0.00003 | -0.00014 | 2.24808 |
| A9  | 2.13704 | 0.00000  | -0.00004 | 0.00018  | 0.00014  | 2.13718 |
| A10 | 1.88836 | 0.00020  | -0.00001 | 0.00019  | 0.00017  | 1.88853 |
| A11 | 2.23474 | -0.00015 | 0.00009  | 0.00010  | 0.00021  | 2.23495 |
| A12 | 2.16005 | -0.00004 | -0.00011 | -0.00026 | -0.00036 | 2.15969 |
| A13 | 1.90217 | 0.00008  | -0.00023 | 0.00011  | -0.00011 | 1.90206 |
| A14 | 2.21285 | 0.00002  | -0.00101 | 0.00006  | -0.00091 | 2.21194 |
| A15 | 2.16647 | -0.00010 | 0.00120  | -0.00009 | 0.00106  | 2.16753 |
| A16 | 1.95180 | -0.00017 | -0.00148 | 0.00078  | -0.00072 | 1.95108 |
| A17 | 1.86648 | 0.00000  | 0.00087  | -0.00034 | 0.00048  | 1.86696 |
| A18 | 1.88464 | 0.00005  | -0.00064 | 0.00000  | -0.00058 | 1.88406 |
| A19 | 1.92038 | 0.00022  | 0.00104  | 0.00024  | 0.00131  | 1.92169 |
| A20 | 1.92388 | -0.00005 | 0.00020  | -0.00085 | -0.00067 | 1.92321 |
| A21 | 1.91542 | -0.00006 | 0.00001  | 0.00018  | 0.00019  | 1.91561 |
| A22 | 1.91423 | -0.00007 | -0.00101 | 0.00003  | -0.00097 | 1.91327 |
| A23 | 1.89962 | 0.00014  | 0.00005  | 0.00005  | 0.00008  | 1.89969 |
| A24 | 1.90854 | 0.00006  | 0.00164  | 0.00000  | 0.00168  | 1.91022 |
| A25 | 1.88632 | 0.00005  | 0.00101  | 0.00039  | 0.00140  | 1.88772 |
| A26 | 1.89586 | -0.00012 | -0.00134 | -0.00034 | -0.00164 | 1.89421 |
| A27 | 1.95893 | -0.00005 | -0.00041 | -0.00012 | -0.00059 | 1.95834 |
| A28 | 1.76845 | 0.00006  | 0.00542  | 0.00490  | 0.01014  | 1.77860 |
| A29 | 2.85547 | -0.00001 | -0.00464 | -0.00376 | -0.00848 | 2.84699 |
| A30 | 2.17702 | -0.00001 | 0.00024  | -0.00014 | 0.00010  | 2.17712 |
| A31 | 1.95543 | -0.00001 | 0.00010  | 0.00005  | 0.00015  | 1.95559 |
| A32 | 2.15073 | 0.00002  | -0.00035 | 0.00009  | -0.00026 | 2.15048 |
| A33 | 2.07974 | -0.00002 | -0.00015 | 0.00000  | -0.00015 | 2.07959 |
| A34 | 2.15722 | 0.00004  | 0.00021  | 0.00002  | 0.00024  | 2.15745 |
| A35 | 2.04622 | -0.00002 | -0.00006 | -0.00002 | -0.00009 | 2.04614 |
| A36 | 1.90698 | 0.00016  | -0.00079 | 0.00141  | 0.00006  | 1.90703 |
| A37 | 3.05361 | 0.00020  | -0.00662 | -0.00448 | -0.01099 | 3.04262 |
| A38 | 2.07654 | 0.00007  | 0.00067  | -0.00061 | 0.00017  | 2.07671 |
| A39 | 2.08823 | -0.00010 | 0.00008  | 0.00025  | 0.00023  | 2.08847 |
| A40 | 2.00170 | 0.00004  | 0.00020  | -0.00065 | -0.00043 | 2.00127 |
| A41 | 1.98339 | 0.00005  | -0.00011 | 0.00005  | -0.00005 | 1.98334 |
| A42 | 2.03812 | 0.00004  | -0.00060 | 0.00056  | -0.00004 | 2.03809 |
| A43 | 2.04649 | 0.00010  | 0.00098  | -0.00025 | 0.00075  | 2.04724 |
| A44 | 2.13236 | -0.00015 | -0.00024 | 0.00005  | -0.00020 | 2.13217 |
| A45 | 1.94760 | 0.00007  | 0.00101  | 0.00030  | 0.00134  | 1.94894 |
| A46 | 2.04616 | -0.00013 | -0.00069 | -0.00019 | -0.00090 | 2.04525 |
| A47 | 2.02312 | 0.00002  | -0.00067 | 0.00006  | -0.00062 | 2.02250 |
| A48 | 1.42550 | -0.00014 | -0.00339 | -0.00156 | -0.00511 | 1.42039 |
| A49 | 0.98784 | 0.00005  | 0.00730  | 0.00410  | 0.01175  | 0.99959 |
| A50 | 2.38751 | -0.00013 | 0.00164  | -0.00061 | 0.00083  | 2.38834 |

|     |          |          |          |          |          |          |
|-----|----------|----------|----------|----------|----------|----------|
| A51 | 2.26853  | 0.00016  | 0.00657  | 0.00768  | 0.01429  | 2.28283  |
| A52 | 1.93191  | 0.00005  | -0.00142 | 0.00006  | -0.00137 | 1.93055  |
| A53 | 1.91191  | 0.00002  | 0.00055  | -0.00024 | 0.00030  | 1.91222  |
| A54 | 1.93647  | 0.00011  | -0.00078 | 0.00022  | -0.00056 | 1.93591  |
| A55 | 1.88453  | -0.00004 | 0.00042  | -0.00015 | 0.00027  | 1.88480  |
| A56 | 1.91344  | -0.00008 | 0.00053  | 0.00034  | 0.00086  | 1.91430  |
| A57 | 1.88421  | -0.00006 | 0.00080  | -0.00024 | 0.00056  | 1.88477  |
| A58 | 3.69403  | 0.00002  | 0.00318  | 0.00612  | 0.00919  | 3.70322  |
| A59 | 5.00169  | 0.00007  | 0.00406  | 0.00828  | 0.01249  | 5.01418  |
| D1  | 0.00309  | 0.00008  | 0.00214  | -0.00169 | 0.00044  | 0.00352  |
| D2  | -3.12986 | 0.00004  | 0.00156  | 0.00022  | 0.00179  | -3.12807 |
| D3  | 3.13386  | 0.00003  | 0.00003  | -0.00128 | -0.00124 | 3.13262  |
| D4  | 0.00092  | -0.00001 | -0.00054 | 0.00064  | 0.00010  | 0.00102  |
| D5  | -0.00514 | -0.00010 | -0.00195 | -0.00013 | -0.00207 | -0.00721 |
| D6  | -3.08572 | -0.00013 | -0.00144 | -0.00150 | -0.00293 | -3.08864 |
| D7  | -3.13703 | -0.00006 | -0.00006 | -0.00050 | -0.00057 | -3.13759 |
| D8  | 0.06558  | -0.00009 | 0.00045  | -0.00188 | -0.00142 | 0.06416  |
| D9  | -0.00004 | -0.00003 | -0.00161 | 0.00293  | 0.00132  | 0.00128  |
| D10 | -3.13918 | 0.00000  | -0.00080 | 0.00234  | 0.00155  | -3.13763 |
| D11 | 3.13372  | 0.00001  | -0.00109 | 0.00119  | 0.00010  | 3.13382  |
| D12 | -0.00542 | 0.00003  | -0.00028 | 0.00060  | 0.00033  | -0.00509 |
| D13 | -0.00316 | -0.00003 | 0.00041  | -0.00304 | -0.00263 | -0.00579 |
| D14 | 3.12898  | 0.00007  | -0.00052 | 0.00038  | -0.00010 | 3.12888  |
| D15 | 3.13617  | -0.00006 | -0.00034 | -0.00249 | -0.00283 | 3.13333  |
| D16 | -0.01487 | 0.00004  | -0.00127 | 0.00093  | -0.00031 | -0.01518 |
| D17 | 0.00159  | -0.00001 | -0.00209 | -0.00144 | -0.00353 | -0.00194 |
| D18 | -3.13942 | 0.00000  | -0.00229 | -0.00114 | -0.00344 | 3.14033  |
| D19 | -3.13726 | 0.00002  | -0.00117 | -0.00210 | -0.00327 | -3.14053 |
| D20 | 0.00492  | 0.00002  | -0.00138 | -0.00181 | -0.00318 | 0.00174  |
| D21 | 0.00511  | 0.00009  | 0.00094  | 0.00197  | 0.00290  | 0.00802  |
| D22 | 3.08768  | 0.00012  | 0.00034  | 0.00331  | 0.00365  | 3.09133  |
| D23 | -3.12753 | -0.00001 | 0.00181  | -0.00127 | 0.00051  | -3.12702 |
| D24 | -0.04497 | 0.00002  | 0.00121  | 0.00006  | 0.00125  | -0.04371 |
| D25 | -3.06816 | -0.00006 | -0.00915 | -0.00988 | -0.01904 | -3.08720 |
| D26 | 0.06264  | 0.00005  | -0.01022 | -0.00597 | -0.01615 | 0.04649  |
| D27 | 1.42080  | -0.00010 | 0.00675  | 0.00587  | 0.01259  | 1.43339  |
| D28 | -2.75906 | 0.00007  | 0.00771  | 0.00641  | 0.01409  | -2.74498 |
| D29 | -0.69878 | 0.00003  | 0.00785  | 0.00644  | 0.01427  | -0.68452 |
| D30 | -1.65108 | -0.00014 | 0.00740  | 0.00429  | 0.01166  | -1.63942 |
| D31 | 0.45224  | 0.00003  | 0.00836  | 0.00483  | 0.01316  | 0.46540  |
| D32 | 2.51252  | -0.00001 | 0.00851  | 0.00486  | 0.01334  | 2.52586  |
| D33 | -0.95518 | -0.00002 | 0.00413  | 0.00486  | 0.00895  | -0.94623 |
| D34 | 1.10517  | 0.00008  | 0.00481  | 0.00537  | 0.01013  | 1.11530  |
| D35 | -3.03242 | 0.00014  | 0.00537  | 0.00526  | 0.01052  | -3.02191 |

|     |          |          |          |          |          |          |
|-----|----------|----------|----------|----------|----------|----------|
| D36 | -3.02679 | -0.00006 | 0.00331  | 0.00463  | 0.00794  | -3.01885 |
| D37 | -0.96644 | 0.00003  | 0.00398  | 0.00514  | 0.00912  | -0.95731 |
| D38 | 1.17916  | 0.00009  | 0.00455  | 0.00503  | 0.00951  | 1.18867  |
| D39 | 1.14158  | -0.00010 | 0.00249  | 0.00480  | 0.00729  | 1.14887  |
| D40 | -3.08125 | 0.00000  | 0.00316  | 0.00531  | 0.00847  | -3.07278 |
| D41 | -0.93566 | 0.00005  | 0.00373  | 0.00520  | 0.00886  | -0.92680 |
| D42 | -1.73236 | -0.00004 | 0.00605  | 0.00863  | 0.01472  | -1.71763 |
| D43 | 2.46223  | 0.00009  | 0.00710  | 0.00880  | 0.01589  | 2.47812  |
| D44 | 0.37754  | 0.00014  | 0.00698  | 0.00861  | 0.01559  | 0.39313  |
| D45 | 0.45159  | 0.00000  | 0.00725  | -0.00039 | 0.00694  | 0.45853  |
| D46 | -0.35233 | 0.00008  | 0.00534  | 0.00959  | 0.01503  | -0.33729 |
| D47 | 2.58344  | -0.00006 | -0.00334 | -0.00267 | -0.00580 | 2.57763  |
| D48 | -3.14108 | 0.00001  | -0.00034 | 0.00033  | -0.00001 | -3.14110 |
| D49 | 0.00105  | 0.00000  | -0.00042 | -0.00002 | -0.00043 | 0.00062  |
| D50 | -0.00014 | 0.00001  | -0.00011 | 0.00000  | -0.00011 | -0.00025 |
| D51 | -3.14119 | 0.00000  | -0.00019 | -0.00035 | -0.00053 | 3.14146  |
| D52 | -1.60975 | -0.00012 | -0.03205 | -0.02660 | -0.05866 | -1.66841 |
| D53 | 2.18900  | 0.00003  | 0.01983  | 0.01547  | 0.03540  | 2.22441  |
| D54 | 1.93713  | -0.00011 | 0.00754  | -0.00016 | 0.00725  | 1.94437  |
| D55 | -2.81269 | -0.00004 | 0.01576  | 0.00720  | 0.02291  | -2.78978 |
| D56 | -2.73226 | 0.00005  | 0.00066  | 0.00000  | 0.00063  | -2.73163 |
| D57 | -0.03021 | -0.00002 | 0.00070  | -0.00036 | 0.00033  | -0.02989 |
| D58 | -0.02361 | 0.00006  | 0.00093  | 0.00065  | 0.00156  | -0.02205 |
| D59 | 2.67844  | -0.00002 | 0.00097  | 0.00029  | 0.00125  | 2.67969  |
| D60 | -0.15514 | 0.00008  | -0.00431 | -0.00622 | -0.01041 | -0.16556 |
| D61 | 0.14471  | 0.00023  | 0.00891  | 0.01166  | 0.02057  | 0.16528  |
| D62 | -2.56268 | -0.00009 | -0.00349 | -0.00642 | -0.00980 | -2.57248 |
| D63 | -2.26282 | 0.00006  | 0.00973  | 0.01146  | 0.02118  | -2.24164 |
| D64 | 2.12577  | 0.00006  | -0.00249 | 0.00161  | -0.00084 | 2.12494  |
| D65 | -0.26676 | 0.00009  | -0.00183 | 0.00140  | -0.00040 | -0.26717 |
| D66 | 2.48849  | 0.00004  | 0.00072  | -0.00058 | 0.00013  | 2.48862  |
| D67 | -1.71852 | 0.00003  | 0.00071  | -0.00088 | -0.00019 | -1.71871 |
| D68 | 0.36006  | 0.00004  | 0.00157  | -0.00120 | 0.00035  | 0.36041  |
| D69 | 1.27343  | -0.00003 | 0.00117  | -0.00068 | 0.00051  | 1.27394  |
| D70 | -2.93358 | -0.00004 | 0.00116  | -0.00098 | 0.00019  | -2.93339 |
| D71 | -0.85500 | -0.00004 | 0.00202  | -0.00130 | 0.00073  | -0.85427 |
| D72 | -1.08719 | -0.00001 | 0.00115  | -0.00100 | 0.00015  | -1.08704 |
| D73 | 0.98898  | -0.00002 | 0.00114  | -0.00130 | -0.00017 | 0.98881  |
| D74 | 3.06756  | -0.00002 | 0.00200  | -0.00162 | 0.00037  | 3.06794  |

|     | Item                 | Value    | Threshold | Converged? |
|-----|----------------------|----------|-----------|------------|
|     | Maximum Force        | 0.000729 | 0.000450  | NO         |
| RMS | Force                | 0.000138 | 0.000300  | YES        |
|     | Maximum Displacement | 0.079039 | 0.001800  | NO         |
| RMS | Displacement         | 0.019886 | 0.001200  | NO         |

Predicted change in Energy=-1.357383D-05

GradGradGradGradGradGradGradGradGradGradGradGradGradGradGradGradGradGradGrad

Input orientation:

| Center<br>Number | Atomic<br>Number | Atomic<br>Type | Coordinates (Angstroms) |           |           |
|------------------|------------------|----------------|-------------------------|-----------|-----------|
|                  |                  |                | X                       | Y         | Z         |
| 1                | 6                | 0              | -1.388913               | -1.919260 | -0.253963 |
| 2                | 6                | 0              | -2.513967               | -1.166371 | -0.155380 |
| 3                | 7                | 0              | -2.108710               | 0.108753  | 0.226272  |
| 4                | 6                | 0              | -0.767187               | 0.117305  | 0.351517  |
| 5                | 7                | 0              | -0.314969               | -1.104483 | 0.070474  |
| 6                | 6                | 0              | 1.115249                | -1.473841 | 0.040340  |
| 7                | 6                | 0              | 1.702703                | -1.368686 | -1.378464 |
| 8                | 1                | 0              | -1.261362               | -2.955990 | -0.514163 |
| 9                | 1                | 0              | -3.544329               | -1.427742 | -0.313125 |
| 10               | 1                | 0              | 1.634970                | -0.789967 | 0.713068  |
| 11               | 1                | 0              | 1.206388                | -2.495763 | 0.410796  |
| 12               | 1                | 0              | 1.096216                | -1.962909 | -2.073330 |
| 13               | 1                | 0              | 1.664302                | -0.321921 | -1.700812 |
| 14               | 35               | 0              | 1.644225                | 2.212864  | 1.074396  |
| 15               | 1                | 0              | -0.109676               | 0.970767  | 0.630776  |
| 16               | 6                | 0              | -2.904862               | 1.261678  | 0.467896  |
| 17               | 6                | 0              | -4.226348               | 1.304077  | 0.359594  |
| 18               | 1                | 0              | -2.305421               | 2.116880  | 0.754339  |
| 19               | 1                | 0              | -4.742077               | 2.231802  | 0.564862  |
| 20               | 1                | 0              | -4.831852               | 0.453363  | 0.073700  |
| 21               | 8                | 0              | 3.011991                | -1.877332 | -1.381407 |
| 22               | 1                | 0              | 3.645965                | -1.136234 | -1.318534 |
| 23               | 6                | 0              | 4.813402                | 1.654629  | -1.123004 |
| 24               | 6                | 0              | 5.702103                | 0.771265  | -0.358320 |
| 25               | 8                | 0              | 4.829247                | 0.227004  | -1.380541 |
| 26               | 1                | 0              | 3.903446                | 2.021004  | -0.653813 |
| 27               | 1                | 0              | 5.217239                | 2.248818  | -1.938054 |
| 28               | 1                | 0              | 6.747664                | 0.732155  | -0.659954 |
| 29               | 6                | 0              | 5.414985                | 0.385544  | 1.067400  |
| 30               | 1                | 0              | 5.699881                | -0.655024 | 1.249765  |
| 31               | 1                | 0              | 5.998131                | 1.019039  | 1.742943  |
| 32               | 1                | 0              | 4.358031                | 0.524194  | 1.303484  |

Distance matrix (angstroms):

|     | 1        | 2 | 3 | 4 | 5 |
|-----|----------|---|---|---|---|
| 1 C | 0.000000 |   |   |   |   |

|    |    |          |          |          |          |          |
|----|----|----------|----------|----------|----------|----------|
| 2  | C  | 1.357316 | 0.000000 |          |          |          |
| 3  | N  | 2.204897 | 1.391342 | 0.000000 |          |          |
| 4  | C  | 2.213763 | 2.226210 | 1.347384 | 0.000000 |          |
| 5  | N  | 1.386534 | 2.211432 | 2.171110 | 1.332761 | 0.000000 |
| 6  | C  | 2.560438 | 3.647473 | 3.596260 | 2.484380 | 1.477450 |
| 7  | C  | 3.335524 | 4.395131 | 4.391454 | 3.361750 | 2.498044 |
| 8  | H  | 1.076468 | 2.213703 | 3.264796 | 3.230907 | 2.159986 |
| 9  | H  | 2.211540 | 1.074637 | 2.170892 | 3.246759 | 3.268090 |
| 10 | H  | 3.369618 | 4.255533 | 3.880697 | 2.593110 | 2.077044 |
| 11 | H  | 2.740411 | 3.991100 | 4.219885 | 3.275154 | 2.089499 |
| 12 | H  | 3.080238 | 4.164904 | 4.455502 | 3.698574 | 2.706332 |
| 13 | H  | 3.737243 | 4.534246 | 4.258492 | 3.212026 | 2.769002 |
| 14 | Br | 5.295178 | 5.497466 | 4.385329 | 3.275488 | 3.981342 |
| 15 | H  | 3.281991 | 3.311498 | 2.214233 | 1.112970 | 2.159339 |
| 16 | C  | 3.596880 | 2.537064 | 1.421786 | 2.427506 | 3.530468 |
| 17 | C  | 4.337902 | 3.049682 | 2.435358 | 3.657088 | 4.602569 |
| 18 | H  | 4.259940 | 3.413330 | 2.085695 | 2.554747 | 3.847954 |
| 19 | H  | 5.398656 | 4.126839 | 3.399500 | 4.507367 | 5.565473 |
| 20 | H  | 4.194106 | 2.837006 | 2.749097 | 4.087985 | 4.777983 |
| 21 | O  | 4.543220 | 5.704807 | 5.722827 | 4.611268 | 3.711323 |
| 22 | H  | 5.205424 | 6.268860 | 6.087093 | 4.882248 | 4.197541 |
| 23 | C  | 7.210869 | 7.911048 | 7.219828 | 5.973320 | 5.944517 |
| 24 | C  | 7.585007 | 8.443899 | 7.860628 | 6.540890 | 6.317235 |
| 25 | O  | 6.673915 | 7.573989 | 7.122575 | 5.859363 | 5.508290 |
| 26 | H  | 6.610191 | 7.182686 | 6.370029 | 5.142914 | 5.299838 |
| 27 | H  | 7.990637 | 8.637881 | 7.933077 | 6.752691 | 6.773783 |
| 28 | H  | 8.567305 | 9.467672 | 8.922409 | 7.607503 | 7.334000 |
| 29 | C  | 7.304187 | 8.171408 | 7.575625 | 6.229261 | 6.003867 |
| 30 | H  | 7.355984 | 8.348845 | 7.912332 | 6.574672 | 6.145825 |
| 31 | H  | 8.196929 | 8.990854 | 8.297577 | 6.965537 | 6.867440 |
| 32 | H  | 6.436108 | 7.225694 | 6.568997 | 5.228734 | 5.099984 |
|    |    | 6        | 7        | 8        | 9        | 10       |
| 6  | C  | 0.000000 |          |          |          |          |
| 7  | C  | 1.539209 | 0.000000 |          |          |          |
| 8  | H  | 2.855262 | 3.471632 | 0.000000 |          |          |
| 9  | H  | 4.673193 | 5.354417 | 2.754614 | 0.000000 |          |
| 10 | H  | 1.091035 | 2.171178 | 3.819227 | 5.318362 | 0.000000 |
| 11 | H  | 1.090811 | 2.172115 | 2.675285 | 4.922809 | 1.784598 |
| 12 | H  | 2.169597 | 1.097163 | 2.995894 | 4.991932 | 3.070841 |
| 13 | H  | 2.158701 | 1.095947 | 4.111686 | 5.502577 | 2.459013 |
| 14 | Br | 3.865343 | 4.341364 | 6.138648 | 6.488476 | 3.024506 |
| 15 | H  | 2.797349 | 3.576982 | 4.249316 | 4.294257 | 2.480070 |
| 16 | C  | 4.881307 | 5.617607 | 4.631874 | 2.872610 | 4.987929 |
| 17 | C  | 6.029214 | 6.731876 | 5.263342 | 2.894916 | 6.234182 |

|    |    |          |          |          |           |          |
|----|----|----------|----------|----------|-----------|----------|
| 18 | H  | 5.010395 | 5.723904 | 5.332277 | 3.903681  | 4.896749 |
| 19 | H  | 6.950912 | 7.633820 | 6.339784 | 3.949395  | 7.058313 |
| 20 | H  | 6.251659 | 6.937510 | 4.971687 | 2.312121  | 6.616226 |
| 21 | O  | 2.404537 | 1.404623 | 4.491899 | 6.657980  | 2.732284 |
| 22 | H  | 2.892238 | 1.958033 | 5.295317 | 7.266096  | 2.879480 |
| 23 | C  | 4.981670 | 4.345359 | 7.650572 | 8.944752  | 4.410175 |
| 24 | C  | 5.122369 | 4.649225 | 7.899783 | 9.504430  | 4.486300 |
| 25 | O  | 4.324992 | 3.510201 | 6.926585 | 8.601996  | 3.952320 |
| 26 | H  | 4.524360 | 4.105897 | 7.173926 | 8.214576  | 3.862111 |
| 27 | H  | 5.882053 | 5.074588 | 8.431474 | 9.639635  | 5.394007 |
| 28 | H  | 6.089411 | 5.511935 | 8.818626 | 10.521909 | 5.508328 |
| 29 | C  | 4.795820 | 4.779186 | 7.631566 | 9.244629  | 3.974404 |
| 30 | H  | 4.811655 | 4.836770 | 7.540875 | 9.407186  | 4.102408 |
| 31 | H  | 5.740718 | 5.821951 | 8.578789 | 10.063434 | 4.834285 |
| 32 | H  | 4.012893 | 4.222157 | 6.855152 | 8.298842  | 3.080693 |
|    |    | 11       | 12       | 13       | 14        | 15       |
| 11 | H  | 0.000000 |          |          |           |          |
| 12 | H  | 2.543020 | 0.000000 |          |           |          |
| 13 | H  | 3.064989 | 1.776044 | 0.000000 |           |          |
| 14 | Br | 4.775273 | 5.257906 | 3.758632 | 0.000000  |          |
| 15 | H  | 3.714464 | 4.168071 | 3.202240 | 2.194486  | 0.000000 |
| 16 | C  | 5.569919 | 5.732749 | 5.299843 | 4.686874  | 2.815000 |
| 17 | C  | 6.629934 | 6.702388 | 6.448946 | 5.983349  | 4.139037 |
| 18 | H  | 5.807521 | 6.017601 | 5.266329 | 3.963755  | 2.479948 |
| 19 | H  | 7.599858 | 7.657762 | 7.259233 | 6.406624  | 4.801426 |
| 20 | H  | 6.728396 | 6.752044 | 6.778641 | 6.785042  | 4.782989 |
| 21 | O  | 2.618139 | 2.038695 | 2.082688 | 4.963009  | 4.680315 |
| 22 | H  | 3.284880 | 2.784660 | 2.176288 | 4.577066  | 4.726954 |
| 23 | C  | 5.708664 | 5.273251 | 3.762638 | 3.896650  | 5.270684 |
| 24 | C  | 5.610389 | 5.624160 | 4.393311 | 4.538420  | 5.898719 |
| 25 | O  | 4.873136 | 4.383058 | 3.228122 | 4.484944  | 5.384379 |
| 26 | H  | 5.367373 | 5.076134 | 3.405770 | 2.850894  | 4.342615 |
| 27 | H  | 6.641917 | 5.894046 | 4.391850 | 4.673604  | 6.050481 |
| 28 | H  | 6.501669 | 6.418713 | 5.294812 | 5.589773  | 6.981835 |
| 29 | C  | 5.142504 | 5.833625 | 4.714989 | 4.190200  | 5.572701 |
| 30 | H  | 4.927846 | 5.826428 | 5.010266 | 4.970301  | 6.064429 |
| 31 | H  | 6.090094 | 6.890916 | 5.695585 | 4.563844  | 6.208425 |
| 32 | H  | 4.455321 | 5.313003 | 4.122849 | 3.204502  | 4.540084 |
|    |    | 16       | 17       | 18       | 19        | 20       |
| 16 | C  | 0.000000 |          |          |           |          |
| 17 | C  | 1.326594 | 0.000000 |          |           |          |
| 18 | H  | 1.082936 | 2.122836 | 0.000000 |           |          |
| 19 | H  | 2.079880 | 1.081103 | 2.446712 | 0.000000  |          |
| 20 | H  | 2.126512 | 1.082628 | 3.100550 | 1.847199  | 0.000000 |

|    |   |          |           |          |           |           |
|----|---|----------|-----------|----------|-----------|-----------|
| 21 | O | 6.948558 | 8.096049  | 6.984985 | 8.988799  | 8.311158  |
| 22 | H | 7.201017 | 8.410978  | 7.092147 | 9.233097  | 8.737191  |
| 23 | C | 7.890309 | 9.167229  | 7.376703 | 9.720556  | 9.793164  |
| 24 | C | 8.660427 | 9.968623  | 8.195678 | 10.586138 | 10.547602 |
| 25 | O | 8.018960 | 9.283963  | 7.683283 | 9.970659  | 9.772558  |
| 26 | H | 6.941748 | 8.224022  | 6.367269 | 8.733536  | 8.904616  |
| 27 | H | 8.528280 | 9.764890  | 7.991045 | 10.269024 | 10.404568 |
| 28 | H | 9.732610 | 11.036101 | 9.266932 | 11.651749 | 11.606083 |
| 29 | C | 8.387304 | 9.710819  | 7.918346 | 10.335720 | 10.295130 |
| 30 | H | 8.850236 | 10.156797 | 8.486093 | 10.855291 | 10.655001 |
| 31 | H | 8.997105 | 10.321573 | 8.433954 | 10.872476 | 10.972460 |
| 32 | H | 7.347905 | 8.671258  | 6.873122 | 9.288350  | 9.272073  |
|    |   | 21       | 22        | 23       | 24        | 25        |
| 21 | O | 0.000000 |           |          |           |           |
| 22 | H | 0.977293 | 0.000000  |          |           |           |
| 23 | C | 3.973236 | 3.031511  | 0.000000 |           |           |
| 24 | C | 3.911327 | 2.964501  | 1.467945 | 0.000000  |           |
| 25 | O | 2.780405 | 1.806217  | 1.450755 | 1.450184  | 0.000000  |
| 26 | H | 4.064617 | 3.236711  | 1.087378 | 2.210052  | 2.145618  |
| 27 | H | 4.711485 | 3.783026  | 1.086485 | 2.216712  | 2.132859  |
| 28 | H | 4.613586 | 3.680373  | 2.192428 | 1.088903  | 2.110627  |
| 29 | C | 4.109944 | 3.337352  | 2.601989 | 1.504625  | 2.522030  |
| 30 | H | 3.954979 | 3.323597  | 3.427882 | 2.149476  | 2.907660  |
| 31 | H | 5.202649 | 4.421597  | 3.165629 | 2.136429  | 3.427792  |
| 32 | H | 3.845490 | 3.184186  | 2.715343 | 2.151550  | 2.741233  |
|    |   | 26       | 27        | 28       | 29        | 30        |
| 26 | H | 0.000000 |           |          |           |           |
| 27 | H | 1.851277 | 0.000000  |          |           |           |
| 28 | H | 3.122619 | 2.505195  | 0.000000 |           |           |
| 29 | C | 2.814614 | 3.541701  | 2.209055 | 0.000000  |           |
| 30 | H | 3.743250 | 4.339059  | 2.582468 | 1.094169  | 0.000000  |
| 31 | H | 3.337077 | 3.958773  | 2.533380 | 1.094410  | 1.770498  |
| 32 | H | 2.505614 | 3.770959  | 3.099787 | 1.091838  | 1.787178  |
|    |   | 31       | 32        |          |           |           |
| 31 | H | 0.000000 |           |          |           |           |
| 32 | H | 1.768593 | 0.000000  |          |           |           |

Stoichiometry C10H17BrN2O2

Framework group C1[X(C10H17BrN2O2)]

Deg. of freedom 90

Full point group C1 NOp 1

Largest Abelian subgroup C1 NOp 1

Largest concise Abelian subgroup C1 NOp 1

Standard orientation:

-----

| Center Number | Atomic Number | Atomic Type | Coordinates (Angstroms) |           |           |
|---------------|---------------|-------------|-------------------------|-----------|-----------|
|               |               |             | X                       | Y         | Z         |
| 1             | 6             | 0           | -2.723503               | 2.122365  | -0.420245 |
| 2             | 6             | 0           | -3.791269               | 1.352133  | -0.090209 |
| 3             | 7             | 0           | -3.316149               | 0.052561  | 0.055414  |
| 4             | 6             | 0           | -1.989777               | 0.047414  | -0.181556 |
| 5             | 7             | 0           | -1.614831               | 1.291665  | -0.477370 |
| 6             | 6             | 0           | -0.218678               | 1.698034  | -0.739052 |
| 7             | 6             | 0           | 0.471429                | 2.223133  | 0.532636  |
| 8             | 1             | 0           | -2.658651               | 3.176738  | -0.627308 |
| 9             | 1             | 0           | -4.825402               | 1.612926  | 0.041707  |
| 10            | 1             | 0           | 0.304665                | 0.816812  | -1.113105 |
| 11            | 1             | 0           | -0.232326               | 2.472460  | -1.507131 |
| 12            | 1             | 0           | -0.129779               | 3.028819  | 0.972164  |
| 13            | 1             | 0           | 0.536136                | 1.408141  | 1.262499  |
| 14            | 35            | 0           | 0.520510                | -2.056658 | -0.194290 |
| 15            | 1             | 0           | -1.289215               | -0.816514 | -0.142259 |
| 16            | 6             | 0           | -4.035782               | -1.126863 | 0.390917  |
| 17            | 6             | 0           | -5.339463               | -1.174198 | 0.631808  |
| 18            | 1             | 0           | -3.393339               | -1.997779 | 0.429942  |
| 19            | 1             | 0           | -5.795034               | -2.122658 | 0.880126  |
| 20            | 1             | 0           | -5.987628               | -0.307831 | 0.594724  |
| 21            | 8             | 0           | 1.734689                | 2.739358  | 0.199992  |
| 22            | 1             | 0           | 2.418076                | 2.067249  | 0.390659  |
| 23            | 6             | 0           | 3.780973                | -0.496714 | 1.261674  |
| 24            | 6             | 0           | 4.544153                | 0.019284  | 0.118799  |
| 25            | 8             | 0           | 3.704395                | 0.906280  | 0.900515  |
| 26            | 1             | 0           | 2.871833                | -1.063463 | 1.075530  |
| 27            | 1             | 0           | 4.284580                | -0.676193 | 2.207517  |
| 28            | 1             | 0           | 5.601866                | 0.224545  | 0.276343  |
| 29            | 6             | 0           | 4.130664                | -0.242027 | -1.304100 |
| 30            | 1             | 0           | 4.321249                | 0.636323  | -1.928107 |
| 31            | 1             | 0           | 4.713014                | -1.076153 | -1.707628 |
| 32            | 1             | 0           | 3.073807                | -0.510441 | -1.359931 |

Rotational constants (GHZ): 0.5997321 0.2212557 0.1728136

Standard basis: 6-311++G(d,p) (5D, 7F)

There are 492 symmetry adapted cartesian basis functions of A symmetry.

There are 475 symmetry adapted basis functions of A symmetry.

475 basis functions, 751 primitive gaussians, 492 cartesian basis functions

71 alpha electrons 71 beta electrons

nuclear repulsion energy 1307.5373783703 Hartrees.

NAtoms= 32 NActive= 32 NUniq= 32 SFac= 1.00D+00 NAtFMM= 60 NAOKFM=F



Big=F

Integral buffers will be 131072 words long.

Raffenetti 2 integral format.

Two-electron integral symmetry is turned on.

One-electron integrals computed using PRISM.

NBasis= 475 RedAO= T EigKep= 3.79D-06 NBF= 475

NBsUse= 475 1.00D-06 EigRej= -1.00D+00 NBFU= 475

Initial guess from the checkpoint file: "/home/suqian/liuwen/qianmengshijie/ohpo/ohpo.chk"

B after Tr= 0.000000 0.000000 0.000000

Rot= 0.999999 0.000957 -0.000399 -0.000913 Ang= 0.16 deg.

ExpMin= 3.50D-02 ExpMax= 4.40D+05 ExpMxC= 1.51D+04 IAcc=3 IRadAn= 5 AccDes= 0.00D+00

Harris functional with IExCor= 402 and IRadAn= 5 diagonalized for initial guess.

HarFok: IExCor= 402 AccDes= 0.00D+00 IRadAn= 5 IDoV= 1 UseB2=F ITyADJ=14

ICtDFT= 3500011 ScaDFX= 1.000000 1.000000 1.000000 1.000000

FoFCou: FMM=F IPFlag= 0 FMFlag= 100000 FMFlg1= 0

NFxFlg= 0 DoJE=T BraDBF=F KetDBF=T FulRan=T

wScr= 0.000000 ICntrl= 500 IOpCl= 0 I1Cent= 200000004 NGrid=

0

NMat0= 1 NMatS0= 1 NMatT0= 0 NMatD0= 1 NMtDS0= 0

NMtDT0= 0

Petite list used in FoFCou.

Requested convergence on RMS density matrix=1.00D-08 within 128 cycles.

Requested convergence on MAX density matrix=1.00D-06.

Requested convergence on energy=1.00D-06.

No special actions if energy rises.

SCF Done: E(RB3LYP) = -3225.52365497 A.U. after 11 cycles

NFock= 11 Conv=0.21D-08 -V/T= 2.0018

Calling FoFJK, ICntrl= 2127 FMM=F ISym2X=0 I1Cent= 0 IOpClX= 0 NMat=1 NMatS=1 NMatT=0.

\*\*\*\*\* Axes restored to original set \*\*\*\*\*

```
-----
```

| Center | Atomic | Forces (Hartrees/Bohr) |              |              |
|--------|--------|------------------------|--------------|--------------|
| Number | Number | X                      | Y            | Z            |
| 1      | 6      | 0.000123605            | -0.000031828 | 0.000114162  |
| 2      | 6      | -0.000005077           | -0.000084561 | 0.000268894  |
| 3      | 7      | 0.000082664            | 0.000155705  | -0.000156623 |
| 4      | 6      | 0.000512617            | -0.000214321 | 0.000016026  |
| 5      | 7      | -0.000196228           | 0.000390110  | -0.000235553 |
| 6      | 6      | 0.000272310            | 0.000184870  | -0.000000994 |
| 7      | 6      | -0.000409223           | 0.000199509  | 0.000237508  |
| 8      | 1      | -0.000011040           | 0.000035780  | -0.000090648 |
| 9      | 1      | 0.000018096            | 0.000008884  | -0.000014777 |

```
-----
```

|    |    |              |              |              |
|----|----|--------------|--------------|--------------|
| 10 | 1  | -0.000100786 | -0.000064443 | 0.000022245  |
| 11 | 1  | -0.000022899 | 0.000058791  | -0.000043606 |
| 12 | 1  | 0.000141866  | -0.000064347 | 0.000093213  |
| 13 | 1  | 0.000030847  | -0.000112106 | -0.000101884 |
| 14 | 35 | 0.000068015  | -0.000002473 | -0.000042609 |
| 15 | 1  | -0.000444817 | -0.000507065 | -0.000021676 |
| 16 | 6  | -0.000073735 | 0.000147992  | -0.000019829 |
| 17 | 6  | 0.000050768  | -0.000038830 | 0.000004868  |
| 18 | 1  | 0.000009173  | -0.000015894 | -0.000013613 |
| 19 | 1  | -0.000004231 | -0.000003648 | 0.000000354  |
| 20 | 1  | 0.000002743  | 0.000021494  | 0.000012377  |
| 21 | 8  | 0.000016080  | 0.000147738  | 0.000092410  |
| 22 | 1  | -0.000165266 | -0.000054289 | -0.000393912 |
| 23 | 6  | -0.000242915 | -0.000202605 | -0.000202151 |
| 24 | 6  | -0.000496398 | -0.000167280 | -0.000219012 |
| 25 | 8  | 0.000706215  | 0.000049830  | 0.000891736  |
| 26 | 1  | 0.000062781  | -0.000021418 | 0.000208425  |
| 27 | 1  | 0.000118856  | 0.000021471  | -0.000041720 |
| 28 | 1  | -0.000069859 | 0.000090221  | -0.000030512 |
| 29 | 6  | 0.000023914  | 0.000187636  | -0.000621449 |
| 30 | 1  | -0.000037805 | -0.000022400 | 0.000135383  |
| 31 | 1  | -0.000024581 | -0.000042018 | 0.000016105  |
| 32 | 1  | 0.000064308  | -0.000050509 | 0.000136861  |

-----  
Cartesian Forces: Max 0.000891736 RMS 0.000209126

GradGradGradGradGradGradGradGradGradGradGradGradGradGradGradGradGradGradGradGrad

Berny optimization.

Using GEDIIS/GDIIS optimizer.

FormGI is forming the generalized inverse of G from B-inverse, IUseBI=4.

GSVD: received Info= 1 from GESDD.

Internal Forces: Max 0.000619562 RMS 0.000115700

Search for a local minimum.

Step number 25 out of a maximum of 177

All quantities printed in internal units (Hartrees-Bohrs-Radians)

Mixed Optimization -- En-DIIS/RFO-DIIS

Swapping is turned off.

Update second derivatives using D2CorX and points 19 20 21 22 23

24 25

DE= -2.09D-05 DEPred=-1.36D-05 R= 1.54D+00

TightC=F SS= 1.41D+00 RLast= 1.06D-01 DXNew= 3.2661D+00 3.1900D-01

Trust test= 1.54D+00 RLast= 1.06D-01 DXMaxT set to 1.94D+00

ITU= 1 1 1 1 1 1 1 1 -1 1 1 1 1 1 1 1 1 1 1 1

ITU= 0 1 0 1 0

|                 |         |         |         |         |         |
|-----------------|---------|---------|---------|---------|---------|
| Eigenvalues --- | 0.00007 | 0.00152 | 0.00231 | 0.00275 | 0.00330 |
| Eigenvalues --- | 0.00566 | 0.00870 | 0.01129 | 0.01205 | 0.01401 |
| Eigenvalues --- | 0.01481 | 0.01795 | 0.01917 | 0.02061 | 0.02102 |
| Eigenvalues --- | 0.02180 | 0.02316 | 0.02385 | 0.02746 | 0.03055 |
| Eigenvalues --- | 0.03063 | 0.03243 | 0.03493 | 0.03936 | 0.04498 |
| Eigenvalues --- | 0.04828 | 0.04982 | 0.05139 | 0.05440 | 0.05661 |
| Eigenvalues --- | 0.05937 | 0.05981 | 0.07063 | 0.09321 | 0.09637 |
| Eigenvalues --- | 0.10370 | 0.11209 | 0.11545 | 0.11729 | 0.13105 |
| Eigenvalues --- | 0.13982 | 0.14160 | 0.15617 | 0.15967 | 0.15993 |
| Eigenvalues --- | 0.16000 | 0.16002 | 0.16004 | 0.16016 | 0.16065 |
| Eigenvalues --- | 0.16651 | 0.17432 | 0.19641 | 0.21621 | 0.22061 |
| Eigenvalues --- | 0.22949 | 0.23438 | 0.23993 | 0.24489 | 0.25048 |
| Eigenvalues --- | 0.27640 | 0.28486 | 0.31164 | 0.32487 | 0.33103 |
| Eigenvalues --- | 0.33341 | 0.34044 | 0.34279 | 0.34496 | 0.34842 |
| Eigenvalues --- | 0.35177 | 0.35685 | 0.35690 | 0.35859 | 0.36049 |
| Eigenvalues --- | 0.36439 | 0.36666 | 0.37230 | 0.37253 | 0.37783 |
| Eigenvalues --- | 0.39479 | 0.42136 | 0.42705 | 0.45679 | 0.46159 |
| Eigenvalues --- | 0.49307 | 0.53629 | 0.54939 | 0.56644 | 0.60410 |

Eigenvalue 1 is 6.87D-05 Eigenvector:

|   |         |          |         |         |         |
|---|---------|----------|---------|---------|---------|
|   | D55     | D52      | D54     | D53     | D47     |
| 1 | 0.50168 | -0.50002 | 0.49988 | 0.49061 | 0.03616 |

|   |         |          |         |          |          |
|---|---------|----------|---------|----------|----------|
|   | D46     | R18      | D42     | D35      | D41      |
| 1 | 0.02703 | -0.02381 | 0.02030 | -0.01853 | -0.01823 |

En-DIIS/RFO-DIIS IScMMF= 0 using points: 25 24 23 22 21

RFO step: Lambda=-4.90724418D-06.

DidBck=F Rises=F RFO-DIIS coefs: 1.60534 -0.27416 -0.73090 0.32707  
0.07266

Iteration 1 RMS(Cart)= 0.01850718 RMS(Int)= 0.00030928

Iteration 2 RMS(Cart)= 0.00018637 RMS(Int)= 0.00003294

Iteration 3 RMS(Cart)= 0.00000024 RMS(Int)= 0.00003294

| Variable | Old X   | -DE/DX   | Delta X<br>(Linear) | Delta X<br>(Quad) | Delta X<br>(Total) | New X   |
|----------|---------|----------|---------------------|-------------------|--------------------|---------|
| R1       | 2.56496 | 0.00002  | 0.00011             | 0.00007           | 0.00019            | 2.56514 |
| R2       | 2.62017 | -0.00009 | -0.00037            | 0.00008           | -0.00029           | 2.61988 |
| R3       | 2.03423 | -0.00001 | -0.00006            | 0.00000           | -0.00006           | 2.03417 |
| R4       | 2.62926 | 0.00001  | 0.00005             | 0.00002           | 0.00007            | 2.62932 |
| R5       | 2.03077 | -0.00002 | -0.00006            | 0.00001           | -0.00005           | 2.03072 |
| R6       | 2.54619 | -0.00010 | -0.00033            | 0.00014           | -0.00019           | 2.54599 |
| R7       | 2.68679 | 0.00009  | 0.00003             | 0.00012           | 0.00015            | 2.68694 |
| R8       | 2.51855 | -0.00053 | -0.00099            | -0.00009          | -0.00108           | 2.51748 |
| R9       | 2.10321 | -0.00062 | -0.00180            | -0.00039          | -0.00220           | 2.10101 |
| R10      | 2.79198 | -0.00011 | -0.00042            | 0.00037           | -0.00003           | 2.79195 |
| R11      | 2.90868 | -0.00025 | -0.00057            | 0.00003           | -0.00053           | 2.90815 |
| R12      | 2.06176 | -0.00008 | -0.00041            | 0.00013           | -0.00028           | 2.06147 |

|     |         |          |          |          |          |         |
|-----|---------|----------|----------|----------|----------|---------|
| R13 | 2.06133 | -0.00007 | -0.00035 | 0.00014  | -0.00021 | 2.06112 |
| R14 | 2.07334 | -0.00010 | -0.00048 | -0.00004 | -0.00052 | 2.07282 |
| R15 | 2.07104 | -0.00007 | -0.00045 | 0.00010  | -0.00035 | 2.07069 |
| R16 | 2.65435 | 0.00004  | 0.00094  | 0.00007  | 0.00102  | 2.65537 |
| R17 | 4.14698 | 0.00003  | 0.00716  | -0.00007 | 0.00707  | 4.15405 |
| R18 | 8.47532 | -0.00008 | -0.00933 | 0.00506  | -0.00429 | 8.47102 |
| R19 | 2.50690 | -0.00005 | -0.00015 | 0.00006  | -0.00009 | 2.50681 |
| R20 | 2.04645 | -0.00001 | -0.00007 | 0.00000  | -0.00007 | 2.04638 |
| R21 | 2.04299 | 0.00000  | -0.00004 | 0.00003  | -0.00001 | 2.04297 |
| R22 | 2.04587 | -0.00002 | -0.00005 | -0.00002 | -0.00006 | 2.04581 |
| R23 | 1.84682 | -0.00020 | -0.00089 | 0.00019  | -0.00068 | 1.84614 |
| R24 | 3.41325 | -0.00005 | 0.00127  | 0.00445  | 0.00574  | 3.41899 |
| R25 | 2.77401 | -0.00020 | -0.00016 | -0.00008 | -0.00013 | 2.77388 |
| R26 | 2.74153 | -0.00015 | -0.00048 | -0.00011 | -0.00064 | 2.74089 |
| R27 | 2.05485 | 0.00003  | -0.00049 | 0.00026  | -0.00024 | 2.05461 |
| R28 | 2.05316 | 0.00009  | -0.00007 | 0.00013  | 0.00006  | 2.05322 |
| R29 | 2.74045 | -0.00057 | -0.00127 | -0.00032 | -0.00166 | 2.73879 |
| R30 | 2.05773 | -0.00006 | -0.00045 | 0.00023  | -0.00022 | 2.05751 |
| R31 | 2.84333 | -0.00033 | -0.00036 | -0.00018 | -0.00054 | 2.84279 |
| R32 | 2.06768 | 0.00004  | 0.00010  | 0.00003  | 0.00013  | 2.06781 |
| R33 | 2.06813 | -0.00003 | -0.00021 | 0.00018  | -0.00004 | 2.06810 |
| R34 | 2.06328 | -0.00004 | -0.00021 | 0.00001  | -0.00020 | 2.06308 |
| A1  | 1.87451 | -0.00006 | -0.00015 | 0.00008  | -0.00007 | 1.87444 |
| A2  | 2.27836 | 0.00001  | 0.00011  | -0.00005 | 0.00006  | 2.27842 |
| A3  | 2.13025 | 0.00005  | 0.00002  | -0.00001 | 0.00001  | 2.13026 |
| A4  | 1.86173 | -0.00004 | -0.00016 | 0.00009  | -0.00006 | 1.86167 |
| A5  | 2.27728 | 0.00002  | 0.00011  | -0.00003 | 0.00009  | 2.27736 |
| A6  | 2.14413 | 0.00002  | 0.00004  | -0.00005 | -0.00001 | 2.14413 |
| A7  | 1.89792 | -0.00011 | -0.00016 | -0.00026 | -0.00042 | 1.89749 |
| A8  | 2.24808 | 0.00010  | 0.00014  | 0.00009  | 0.00023  | 2.24831 |
| A9  | 2.13718 | 0.00002  | 0.00001  | 0.00017  | 0.00019  | 2.13737 |
| A10 | 1.88853 | 0.00015  | 0.00023  | 0.00032  | 0.00056  | 1.88909 |
| A11 | 2.23495 | -0.00015 | 0.00014  | -0.00009 | 0.00006  | 2.23501 |
| A12 | 2.15969 | 0.00000  | -0.00037 | -0.00022 | -0.00061 | 2.15907 |
| A13 | 1.90206 | 0.00007  | 0.00022  | -0.00022 | -0.00001 | 1.90205 |
| A14 | 2.21194 | 0.00005  | -0.00018 | 0.00014  | -0.00004 | 2.21190 |
| A15 | 2.16753 | -0.00011 | 0.00008  | 0.00020  | 0.00030  | 2.16783 |
| A16 | 1.95108 | -0.00009 | -0.00095 | 0.00041  | -0.00052 | 1.95056 |
| A17 | 1.86696 | -0.00002 | 0.00011  | 0.00006  | 0.00018  | 1.86714 |
| A18 | 1.88406 | 0.00002  | -0.00057 | -0.00013 | -0.00072 | 1.88334 |
| A19 | 1.92169 | 0.00017  | 0.00193  | 0.00029  | 0.00221  | 1.92390 |
| A20 | 1.92321 | -0.00006 | -0.00053 | -0.00070 | -0.00123 | 1.92198 |
| A21 | 1.91561 | -0.00002 | -0.00002 | 0.00008  | 0.00007  | 1.91568 |
| A22 | 1.91327 | 0.00000  | -0.00052 | -0.00050 | -0.00102 | 1.91224 |

|     |          |          |          |          |          |          |
|-----|----------|----------|----------|----------|----------|----------|
| A23 | 1.89969  | 0.00016  | 0.00079  | 0.00066  | 0.00144  | 1.90114  |
| A24 | 1.91022  | -0.00007 | 0.00079  | 0.00043  | 0.00124  | 1.91147  |
| A25 | 1.88772  | -0.00001 | 0.00126  | -0.00038 | 0.00088  | 1.88860  |
| A26 | 1.89421  | -0.00009 | -0.00174 | -0.00083 | -0.00259 | 1.89162  |
| A27 | 1.95834  | 0.00001  | -0.00059 | 0.00058  | -0.00001 | 1.95833  |
| A28 | 1.77860  | 0.00003  | 0.00520  | 0.00198  | 0.00705  | 1.78565  |
| A29 | 2.84699  | 0.00002  | -0.00450 | -0.00123 | -0.00579 | 2.84120  |
| A30 | 2.17712  | -0.00002 | -0.00007 | 0.00004  | -0.00003 | 2.17709  |
| A31 | 1.95559  | -0.00001 | 0.00009  | -0.00009 | 0.00000  | 1.95559  |
| A32 | 2.15048  | 0.00003  | -0.00002 | 0.00005  | 0.00003  | 2.15051  |
| A33 | 2.07959  | 0.00000  | -0.00016 | 0.00013  | -0.00003 | 2.07956  |
| A34 | 2.15745  | 0.00001  | 0.00025  | -0.00011 | 0.00015  | 2.15760  |
| A35 | 2.04614  | -0.00001 | -0.00009 | -0.00002 | -0.00011 | 2.04602  |
| A36 | 1.90703  | 0.00017  | -0.00060 | 0.00218  | 0.00166  | 1.90869  |
| A37 | 3.04262  | 0.00033  | -0.00515 | 0.00137  | -0.00377 | 3.03885  |
| A38 | 2.07671  | 0.00002  | -0.00016 | -0.00086 | -0.00102 | 2.07570  |
| A39 | 2.08847  | -0.00010 | -0.00021 | -0.00033 | -0.00053 | 2.08794  |
| A40 | 2.00127  | 0.00008  | -0.00027 | 0.00074  | 0.00048  | 2.00175  |
| A41 | 1.98334  | 0.00002  | -0.00004 | 0.00047  | 0.00043  | 1.98378  |
| A42 | 2.03809  | 0.00007  | 0.00053  | 0.00038  | 0.00091  | 2.03900  |
| A43 | 2.04724  | 0.00002  | -0.00019 | -0.00006 | -0.00024 | 2.04700  |
| A44 | 2.13217  | -0.00010 | 0.00011  | -0.00018 | -0.00007 | 2.13210  |
| A45 | 1.94894  | -0.00003 | 0.00113  | -0.00044 | 0.00069  | 1.94963  |
| A46 | 2.04525  | -0.00003 | -0.00086 | 0.00099  | 0.00014  | 2.04540  |
| A47 | 2.02250  | 0.00005  | -0.00009 | -0.00008 | -0.00017 | 2.02233  |
| A48 | 1.42039  | -0.00010 | -0.00246 | -0.00063 | -0.00299 | 1.41740  |
| A49 | 0.99959  | -0.00005 | 0.00599  | 0.00022  | 0.00644  | 1.00602  |
| A50 | 2.38834  | -0.00018 | -0.00036 | -0.00237 | -0.00280 | 2.38554  |
| A51 | 2.28283  | 0.00010  | 0.00819  | 0.00643  | 0.01466  | 2.29748  |
| A52 | 1.93055  | 0.00015  | 0.00001  | -0.00001 | 0.00000  | 1.93055  |
| A53 | 1.91222  | 0.00000  | -0.00015 | 0.00050  | 0.00035  | 1.91257  |
| A54 | 1.93591  | 0.00019  | 0.00068  | 0.00005  | 0.00074  | 1.93665  |
| A55 | 1.88480  | -0.00009 | -0.00036 | -0.00031 | -0.00067 | 1.88413  |
| A56 | 1.91430  | -0.00016 | -0.00010 | 0.00003  | -0.00006 | 1.91424  |
| A57 | 1.88477  | -0.00010 | -0.00013 | -0.00028 | -0.00041 | 1.88436  |
| A58 | 3.70322  | 0.00000  | 0.00572  | 0.00580  | 0.01167  | 3.71489  |
| A59 | 5.01418  | 0.00005  | 0.00921  | 0.00349  | 0.01279  | 5.02697  |
| D1  | 0.00352  | 0.00005  | 0.00186  | 0.00045  | 0.00231  | 0.00583  |
| D2  | -3.12807 | -0.00002 | 0.00081  | -0.00084 | -0.00003 | -3.12810 |
| D3  | 3.13262  | 0.00007  | 0.00088  | 0.00130  | 0.00218  | 3.13480  |
| D4  | 0.00102  | 0.00000  | -0.00017 | 0.00001  | -0.00015 | 0.00087  |
| D5  | -0.00721 | 0.00000  | -0.00122 | 0.00026  | -0.00096 | -0.00817 |
| D6  | -3.08864 | -0.00005 | -0.00376 | -0.00186 | -0.00560 | -3.09424 |
| D7  | -3.13759 | -0.00002 | -0.00034 | -0.00050 | -0.00084 | -3.13844 |

|     |          |          |          |          |          |          |
|-----|----------|----------|----------|----------|----------|----------|
| D8  | 0.06416  | -0.00007 | -0.00288 | -0.00262 | -0.00549 | 0.05867  |
| D9  | 0.00128  | -0.00009 | -0.00188 | -0.00100 | -0.00288 | -0.00160 |
| D10 | -3.13763 | -0.00003 | -0.00005 | -0.00008 | -0.00014 | -3.13777 |
| D11 | 3.13382  | -0.00002 | -0.00093 | 0.00016  | -0.00076 | 3.13306  |
| D12 | -0.00509 | 0.00004  | 0.00089  | 0.00109  | 0.00198  | -0.00311 |
| D13 | -0.00579 | 0.00008  | 0.00114  | 0.00117  | 0.00231  | -0.00347 |
| D14 | 3.12888  | 0.00013  | 0.00205  | 0.00189  | 0.00394  | 3.13282  |
| D15 | 3.13333  | 0.00003  | -0.00054 | 0.00032  | -0.00022 | 3.13311  |
| D16 | -0.01518 | 0.00008  | 0.00037  | 0.00104  | 0.00140  | -0.01378 |
| D17 | -0.00194 | -0.00001 | -0.00229 | 0.00039  | -0.00190 | -0.00384 |
| D18 | 3.14033  | -0.00002 | -0.00272 | 0.00018  | -0.00254 | 3.13779  |
| D19 | -3.14053 | 0.00006  | -0.00025 | 0.00143  | 0.00118  | -3.13935 |
| D20 | 0.00174  | 0.00004  | -0.00067 | 0.00122  | 0.00054  | 0.00228  |
| D21 | 0.00802  | -0.00005 | 0.00004  | -0.00089 | -0.00085 | 0.00716  |
| D22 | 3.09133  | 0.00000  | 0.00245  | 0.00116  | 0.00363  | 3.09496  |
| D23 | -3.12702 | -0.00009 | -0.00084 | -0.00157 | -0.00240 | -3.12942 |
| D24 | -0.04371 | -0.00004 | 0.00158  | 0.00048  | 0.00209  | -0.04162 |
| D25 | -3.08720 | -0.00005 | -0.01156 | -0.00622 | -0.01778 | -3.10498 |
| D26 | 0.04649  | 0.00000  | -0.01051 | -0.00540 | -0.01592 | 0.03057  |
| D27 | 1.43339  | -0.00011 | 0.00827  | 0.00064  | 0.00892  | 1.44230  |
| D28 | -2.74498 | 0.00004  | 0.01016  | 0.00128  | 0.01145  | -2.73353 |
| D29 | -0.68452 | 0.00002  | 0.00990  | 0.00134  | 0.01125  | -0.67327 |
| D30 | -1.63942 | -0.00017 | 0.00538  | -0.00177 | 0.00362  | -1.63580 |
| D31 | 0.46540  | -0.00003 | 0.00727  | -0.00113 | 0.00615  | 0.47155  |
| D32 | 2.52586  | -0.00005 | 0.00702  | -0.00107 | 0.00595  | 2.53181  |
| D33 | -0.94623 | -0.00003 | 0.00632  | 0.00094  | 0.00727  | -0.93897 |
| D34 | 1.11530  | 0.00004  | 0.00801  | 0.00057  | 0.00858  | 1.12388  |
| D35 | -3.02191 | 0.00012  | 0.00828  | 0.00199  | 0.01029  | -3.01162 |
| D36 | -3.01885 | -0.00006 | 0.00551  | 0.00040  | 0.00592  | -3.01293 |
| D37 | -0.95731 | 0.00001  | 0.00720  | 0.00004  | 0.00723  | -0.95008 |
| D38 | 1.18867  | 0.00009  | 0.00747  | 0.00146  | 0.00894  | 1.19761  |
| D39 | 1.14887  | -0.00011 | 0.00462  | 0.00057  | 0.00519  | 1.15406  |
| D40 | -3.07278 | -0.00003 | 0.00631  | 0.00020  | 0.00651  | -3.06628 |
| D41 | -0.92680 | 0.00004  | 0.00658  | 0.00162  | 0.00821  | -0.91859 |
| D42 | -1.71763 | -0.00006 | 0.00947  | 0.00707  | 0.01654  | -1.70109 |
| D43 | 2.47812  | 0.00004  | 0.01067  | 0.00792  | 0.01860  | 2.49672  |
| D44 | 0.39313  | 0.00011  | 0.01062  | 0.00859  | 0.01922  | 0.41234  |
| D45 | 0.45853  | 0.00000  | 0.00342  | 0.00069  | 0.00408  | 0.46261  |
| D46 | -0.33729 | 0.00017  | 0.01120  | 0.00775  | 0.01893  | -0.31836 |
| D47 | 2.57763  | 0.00003  | -0.00253 | 0.00052  | -0.00202 | 2.57561  |
| D48 | -3.14110 | -0.00001 | -0.00051 | -0.00016 | -0.00068 | 3.14141  |
| D49 | 0.00062  | 0.00000  | -0.00043 | -0.00005 | -0.00047 | 0.00014  |
| D50 | -0.00025 | 0.00000  | -0.00004 | 0.00007  | 0.00003  | -0.00022 |
| D51 | 3.14146  | 0.00001  | 0.00005  | 0.00019  | 0.00023  | -3.14149 |

|     |          |          |          |          |          |          |
|-----|----------|----------|----------|----------|----------|----------|
| D52 | -1.66841 | -0.00001 | -0.03208 | -0.01936 | -0.05142 | -1.71983 |
| D53 | 2.22441  | 0.00005  | 0.01719  | 0.01332  | 0.03053  | 2.25494  |
| D54 | 1.94437  | -0.00007 | -0.00105 | 0.00499  | 0.00401  | 1.94839  |
| D55 | -2.78978 | 0.00000  | 0.00798  | 0.00983  | 0.01775  | -2.77203 |
| D56 | -2.73163 | 0.00001  | 0.00110  | 0.00078  | 0.00186  | -2.72976 |
| D57 | -0.02989 | -0.00004 | 0.00066  | -0.00006 | 0.00059  | -0.02930 |
| D58 | -0.02205 | 0.00001  | 0.00166  | -0.00120 | 0.00046  | -0.02159 |
| D59 | 2.67969  | -0.00004 | 0.00122  | -0.00204 | -0.00081 | 2.67888  |
| D60 | -0.16556 | 0.00013  | -0.00769 | 0.00105  | -0.00657 | -0.17212 |
| D61 | 0.16528  | 0.00027  | 0.01257  | 0.01092  | 0.02343  | 0.18872  |
| D62 | -2.57248 | -0.00009 | -0.00819 | -0.00097 | -0.00910 | -2.58158 |
| D63 | -2.24164 | 0.00006  | 0.01207  | 0.00891  | 0.02090  | -2.22074 |
| D64 | 2.12494  | 0.00013  | 0.00116  | 0.00313  | 0.00431  | 2.12924  |
| D65 | -0.26717 | 0.00012  | 0.00093  | 0.00266  | 0.00360  | -0.26356 |
| D66 | 2.48862  | 0.00006  | 0.00016  | -0.00112 | -0.00098 | 2.48764  |
| D67 | -1.71871 | 0.00003  | -0.00037 | -0.00120 | -0.00158 | -1.72029 |
| D68 | 0.36041  | 0.00003  | -0.00020 | -0.00119 | -0.00140 | 0.35901  |
| D69 | 1.27394  | -0.00002 | 0.00043  | -0.00159 | -0.00115 | 1.27279  |
| D70 | -2.93339 | -0.00004 | -0.00011 | -0.00166 | -0.00175 | -2.93515 |
| D71 | -0.85427 | -0.00005 | 0.00006  | -0.00165 | -0.00157 | -0.85584 |
| D72 | -1.08704 | 0.00000  | -0.00030 | -0.00195 | -0.00225 | -1.08930 |
| D73 | 0.98881  | -0.00002 | -0.00084 | -0.00202 | -0.00286 | 0.98595  |
| D74 | 3.06794  | -0.00003 | -0.00067 | -0.00202 | -0.00268 | 3.06526  |

| Item                 | Value    | Threshold | Converged? |
|----------------------|----------|-----------|------------|
| Maximum Force        | 0.000620 | 0.000450  | NO         |
| RMS Force            | 0.000116 | 0.000300  | YES        |
| Maximum Displacement | 0.069504 | 0.001800  | NO         |
| RMS Displacement     | 0.018513 | 0.001200  | NO         |

Predicted change in Energy=-1.037704D-05

GradGradGradGradGradGradGradGradGradGradGradGradGradGradGradGradGradGrad

Input orientation:

| Center<br>Number | Atomic<br>Number | Atomic<br>Type | Coordinates (Angstroms) |           |           |
|------------------|------------------|----------------|-------------------------|-----------|-----------|
|                  |                  |                | X                       | Y         | Z         |
| 1                | 6                | 0              | -1.388036               | -1.920176 | -0.249729 |
| 2                | 6                | 0              | -2.515483               | -1.171833 | -0.142876 |
| 3                | 7                | 0              | -2.111927               | 0.106982  | 0.228210  |
| 4                | 6                | 0              | -0.769573               | 0.120625  | 0.342521  |
| 5                | 7                | 0              | -0.314861               | -1.099782 | 0.062209  |
| 6                | 6                | 0              | 1.116282                | -1.464950 | 0.026145  |
| 7                | 6                | 0              | 1.697193                | -1.356051 | -1.394764 |
| 8                | 1                | 0              | -1.258338               | -2.957115 | -0.507903 |

|    |    |   |           |           |           |
|----|----|---|-----------|-----------|-----------|
| 9  | 1  | 0 | -3.546117 | -1.438052 | -0.290205 |
| 10 | 1  | 0 | 1.636304  | -0.782300 | 0.699641  |
| 11 | 1  | 0 | 1.210734  | -2.487842 | 0.392736  |
| 12 | 1  | 0 | 1.084644  | -1.945257 | -2.088150 |
| 13 | 1  | 0 | 1.663043  | -0.308184 | -1.713363 |
| 14 | 35 | 0 | 1.649534  | 2.214288  | 1.051008  |
| 15 | 1  | 0 | -0.113561 | 0.976035  | 0.614617  |
| 16 | 6  | 0 | -2.910411 | 1.257809  | 0.472585  |
| 17 | 6  | 0 | -4.232929 | 1.294624  | 0.376054  |
| 18 | 1  | 0 | -2.311829 | 2.116241  | 0.750914  |
| 19 | 1  | 0 | -4.750455 | 2.220964  | 0.583008  |
| 20 | 1  | 0 | -4.837705 | 0.440670  | 0.098527  |
| 21 | 8  | 0 | 3.003734  | -1.873004 | -1.408714 |
| 22 | 1  | 0 | 3.643384  | -1.138762 | -1.330372 |
| 23 | 6  | 0 | 4.836207  | 1.641970  | -1.129785 |
| 24 | 6  | 0 | 5.710222  | 0.762309  | -0.344322 |
| 25 | 8  | 0 | 4.846853  | 0.211606  | -1.369897 |
| 26 | 1  | 0 | 3.923741  | 2.019335  | -0.674678 |
| 27 | 1  | 0 | 5.254019  | 2.224333  | -1.946366 |
| 28 | 1  | 0 | 6.759090  | 0.714298  | -0.632471 |
| 29 | 6  | 0 | 5.403895  | 0.395407  | 1.082066  |
| 30 | 1  | 0 | 5.679131  | -0.645024 | 1.279822  |
| 31 | 1  | 0 | 5.984061  | 1.031988  | 1.757241  |
| 32 | 1  | 0 | 4.345622  | 0.544464  | 1.305047  |

-----  
Distance matrix (angstroms):

|    |    | 1        | 2        | 3        | 4        | 5        |
|----|----|----------|----------|----------|----------|----------|
| 1  | C  | 0.000000 |          |          |          |          |
| 2  | C  | 1.357414 | 0.000000 |          |          |          |
| 3  | N  | 2.204952 | 1.391377 | 0.000000 |          |          |
| 4  | C  | 2.213171 | 2.225817 | 1.347281 | 0.000000 |          |
| 5  | N  | 1.386382 | 2.211332 | 2.171009 | 1.332191 | 0.000000 |
| 6  | C  | 2.560263 | 3.647493 | 3.596266 | 2.484067 | 1.477436 |
| 7  | C  | 3.338859 | 4.398613 | 4.391344 | 3.359116 | 2.497359 |
| 8  | H  | 1.076438 | 2.213796 | 3.264838 | 3.230263 | 2.159829 |
| 9  | H  | 2.211650 | 1.074609 | 2.170896 | 3.246385 | 3.267971 |
| 10 | H  | 3.367892 | 4.254281 | 3.881018 | 2.594427 | 2.077056 |
| 11 | H  | 2.736533 | 3.987914 | 4.219035 | 3.275399 | 2.088875 |
| 12 | H  | 3.081325 | 4.164516 | 4.449188 | 3.689736 | 2.701385 |
| 13 | H  | 3.748310 | 4.546691 | 4.265263 | 3.213745 | 2.773335 |
| 14 | Br | 5.292688 | 5.498959 | 4.389342 | 3.276806 | 3.977391 |
| 15 | H  | 3.280155 | 3.310039 | 2.213149 | 1.111807 | 2.157474 |
| 16 | C  | 3.597076 | 2.537306 | 1.421865 | 2.427611 | 3.530372 |
| 17 | C  | 4.338198 | 3.049970 | 2.435365 | 3.657080 | 4.602492 |



|    |    |          |          |          |           |          |
|----|----|----------|----------|----------|-----------|----------|
| 18 | H  | 4.259969 | 3.413468 | 2.085738 | 2.554960  | 3.847727 |
| 19 | H  | 5.398921 | 4.127114 | 3.399504 | 4.507402  | 5.565346 |
| 20 | H  | 4.194650 | 2.837455 | 2.749188 | 4.087990  | 4.778120 |
| 21 | O  | 4.542369 | 5.705764 | 5.724495 | 4.612941  | 3.711409 |
| 22 | H  | 5.205150 | 6.272391 | 6.091359 | 4.884549  | 4.196249 |
| 23 | C  | 7.225274 | 7.933399 | 7.244094 | 5.992240  | 5.955800 |
| 24 | C  | 7.588804 | 8.452438 | 7.870404 | 6.547614  | 6.319357 |
| 25 | O  | 6.683794 | 7.591013 | 7.140693 | 5.872384  | 5.514885 |
| 26 | H  | 6.626862 | 7.206246 | 6.395435 | 5.164009  | 5.313910 |
| 27 | H  | 8.010770 | 8.669007 | 7.966750 | 6.778514  | 6.789443 |
| 28 | H  | 8.571033 | 9.477072 | 8.933339 | 7.614711  | 7.335820 |
| 29 | C  | 7.298351 | 8.165371 | 7.569665 | 6.223676  | 5.998323 |
| 30 | H  | 7.342369 | 8.333865 | 7.897593 | 6.561290  | 6.133297 |
| 31 | H  | 8.190911 | 8.983848 | 8.290874 | 6.960142  | 6.862507 |
| 32 | H  | 6.431688 | 7.219205 | 6.561318 | 5.222194  | 5.095909 |
|    |    | 6        | 7        | 8        | 9         | 10       |
| 6  | C  | 0.000000 |          |          |           |          |
| 7  | C  | 1.538927 | 0.000000 |          |           |          |
| 8  | H  | 2.854923 | 3.476362 | 0.000000 |           |          |
| 9  | H  | 4.673196 | 5.359018 | 2.754791 | 0.000000  |          |
| 10 | H  | 1.090885 | 2.172425 | 3.816666 | 5.316700  | 0.000000 |
| 11 | H  | 1.090697 | 2.170887 | 2.669773 | 4.918953  | 1.784425 |
| 12 | H  | 2.168395 | 1.096888 | 3.001766 | 4.993376  | 3.070598 |
| 13 | H  | 2.159384 | 1.095763 | 4.123644 | 5.517004  | 2.459287 |
| 14 | Br | 3.856358 | 4.327978 | 6.134276 | 6.491012  | 3.017147 |
| 15 | H  | 2.795929 | 3.571424 | 4.247380 | 4.292896  | 2.482137 |
| 16 | C  | 4.881289 | 5.616874 | 4.632094 | 2.872915  | 4.988609 |
| 17 | C  | 6.029240 | 6.732623 | 5.263730 | 2.895364  | 6.234278 |
| 18 | H  | 5.010206 | 5.721276 | 5.332298 | 3.903895  | 4.898155 |
| 19 | H  | 6.950874 | 7.634053 | 6.340147 | 3.949852  | 7.058603 |
| 20 | H  | 6.251926 | 6.939957 | 4.972380 | 2.312771  | 6.615874 |
| 21 | O  | 2.405785 | 1.405163 | 4.489099 | 6.658888  | 2.739464 |
| 22 | H  | 2.886655 | 1.959342 | 5.292423 | 7.270519  | 2.876871 |
| 23 | C  | 4.982666 | 4.348764 | 7.660404 | 8.969659  | 4.411719 |
| 24 | C  | 5.118810 | 4.657819 | 7.900741 | 9.514427  | 4.480233 |
| 25 | O  | 4.321681 | 3.518313 | 6.932329 | 8.621429  | 3.946956 |
| 26 | H  | 4.529152 | 4.107222 | 7.186572 | 8.240153  | 3.869145 |
| 27 | H  | 5.884087 | 5.076852 | 8.445554 | 9.674623  | 5.397134 |
| 28 | H  | 6.084749 | 5.521797 | 8.818954 | 10.533140 | 5.500660 |
| 29 | C  | 4.791610 | 4.789774 | 7.625796 | 9.238367  | 3.965852 |
| 30 | H  | 4.802455 | 4.849206 | 7.527962 | 9.391436  | 4.086552 |
| 31 | H  | 5.738176 | 5.832247 | 8.572991 | 10.055716 | 4.828369 |
| 32 | H  | 4.012726 | 4.232624 | 6.852168 | 8.291848  | 3.076885 |
|    |    | 11       | 12       | 13       | 14        | 15       |

|    |    |          |           |          |           |           |
|----|----|----------|-----------|----------|-----------|-----------|
| 11 | H  | 0.000000 |           |          |           |           |
| 12 | H  | 2.542654 | 0.000000  |          |           |           |
| 13 | H  | 3.064498 | 1.776237  | 0.000000 |           |           |
| 14 | Br | 4.768218 | 5.241682  | 3.742298 | 0.000000  |           |
| 15 | H  | 3.715029 | 4.156272  | 3.197661 | 2.198230  | 0.000000  |
| 16 | C  | 5.569571 | 5.725160  | 5.305392 | 4.694947  | 2.814593  |
| 17 | C  | 6.628786 | 6.696694  | 6.457333 | 5.992055  | 4.138550  |
| 18 | H  | 5.808126 | 6.007668  | 5.267837 | 3.973924  | 2.480126  |
| 19 | H  | 7.599002 | 7.651200  | 7.266558 | 6.417081  | 4.801211  |
| 20 | H  | 6.726541 | 6.748957  | 6.789952 | 6.792438  | 4.782311  |
| 21 | O  | 2.614975 | 2.037095  | 2.083008 | 4.958835  | 4.682779  |
| 22 | H  | 3.272140 | 2.787797  | 2.181351 | 4.570487  | 4.729692  |
| 23 | C  | 5.702409 | 5.278341  | 3.769964 | 3.903625  | 5.290237  |
| 24 | C  | 5.599297 | 5.636295  | 4.404530 | 4.532590  | 5.906073  |
| 25 | O  | 4.859553 | 4.395698  | 3.244194 | 4.482673  | 5.397069  |
| 26 | H  | 5.367907 | 5.077043  | 3.406900 | 2.861471  | 4.364695  |
| 27 | H  | 6.635070 | 5.898244  | 4.400346 | 4.687927  | 6.076825  |
| 28 | H  | 6.487604 | 6.433628  | 5.308813 | 5.584947  | 6.989783  |
| 29 | C  | 5.135260 | 5.846786  | 4.722651 | 4.171872  | 5.567582  |
| 30 | H  | 4.914211 | 5.843214  | 5.020117 | 4.946278  | 6.051910  |
| 31 | H  | 6.085698 | 6.903282  | 5.701960 | 4.548046  | 6.204008  |
| 32 | H  | 4.455862 | 5.324140  | 4.127231 | 3.181468  | 4.532909  |
|    |    | 16       | 17        | 18       | 19        | 20        |
| 16 | C  | 0.000000 |           |          |           |           |
| 17 | C  | 1.326547 | 0.000000  |          |           |           |
| 18 | H  | 1.082900 | 2.122781  | 0.000000 |           |           |
| 19 | H  | 2.079813 | 1.081096  | 2.446641 | 0.000000  |           |
| 20 | H  | 2.126523 | 1.082596  | 3.100515 | 1.847101  | 0.000000  |
| 21 | O  | 6.951143 | 8.098676  | 6.988081 | 8.991939  | 8.313424  |
| 22 | H  | 7.207388 | 8.418406  | 7.098687 | 9.241499  | 8.744440  |
| 23 | C  | 7.919927 | 9.199860  | 7.406509 | 9.755663  | 9.825296  |
| 24 | C  | 8.673417 | 9.983414  | 8.208896 | 10.602517 | 10.562117 |
| 25 | O  | 8.041419 | 9.309334  | 7.705335 | 9.997983  | 9.797928  |
| 26 | H  | 6.971497 | 8.255938  | 6.397190 | 8.767217  | 8.936048  |
| 27 | H  | 8.569913 | 9.811227  | 8.032998 | 10.319265 | 10.450164 |
| 28 | H  | 9.747605 | 11.053433 | 9.282282 | 11.671206 | 11.623032 |
| 29 | C  | 8.381103 | 9.704402  | 7.912227 | 10.329208 | 10.288817 |
| 30 | H  | 8.834740 | 10.140412 | 8.471114 | 10.838620 | 10.638516 |
| 31 | H  | 8.989603 | 10.313270 | 8.426748 | 10.863807 | 10.964105 |
| 32 | H  | 7.338383 | 8.661253  | 6.862885 | 9.277424  | 9.262826  |
|    |    | 21       | 22        | 23       | 24        | 25        |
| 21 | O  | 0.000000 |           |          |           |           |
| 22 | H  | 0.976934 | 0.000000  |          |           |           |
| 23 | C  | 3.973764 | 3.032414  | 0.000000 |           |           |

|    |   |          |          |          |          |          |
|----|---|----------|----------|----------|----------|----------|
| 24 | C | 3.924651 | 2.976271 | 1.467875 | 0.000000 |          |
| 25 | O | 2.782839 | 1.809252 | 1.450416 | 1.449305 | 0.000000 |
| 26 | H | 4.066390 | 3.237609 | 1.087254 | 2.209245 | 2.145541 |
| 27 | H | 4.705425 | 3.779419 | 1.086517 | 2.216344 | 2.132879 |
| 28 | H | 4.625947 | 3.691683 | 2.192117 | 1.088788 | 2.110248 |
| 29 | C | 4.136478 | 3.357519 | 2.601629 | 1.504339 | 2.521150 |
| 30 | H | 3.986717 | 3.346813 | 3.427399 | 2.149278 | 2.906460 |
| 31 | H | 5.229207 | 4.441202 | 3.166160 | 2.136418 | 3.427136 |
| 32 | H | 3.874185 | 3.204968 | 2.715437 | 2.151745 | 2.741778 |
|    |   | 26       | 27       | 28       | 29       | 30       |
| 26 | H | 0.000000 |          |          |          |          |
| 27 | H | 1.851717 | 0.000000 |          |          |          |
| 28 | H | 3.121555 | 2.504349 | 0.000000 |          |          |
| 29 | C | 2.813209 | 3.541021 | 2.208592 | 0.000000 |          |
| 30 | H | 3.741693 | 4.338458 | 2.582814 | 1.094239 | 0.000000 |
| 31 | H | 3.336765 | 3.958706 | 2.532256 | 1.094390 | 1.770107 |
| 32 | H | 2.504503 | 3.770787 | 3.099620 | 1.091733 | 1.787110 |
|    |   | 31       | 32       |          |          |          |
| 31 | H | 0.000000 |          |          |          |          |
| 32 | H | 1.768232 | 0.000000 |          |          |          |

Stoichiometry C10H17BrN2O2

Framework group C1[X(C10H17BrN2O2)]

Deg. of freedom 90

Full point group C1 NOp 1

Largest Abelian subgroup C1 NOp 1

Largest concise Abelian subgroup C1 NOp 1

Standard orientation:

| Center<br>Number | Atomic<br>Number | Atomic<br>Type | Coordinates (Angstroms) |          |           |
|------------------|------------------|----------------|-------------------------|----------|-----------|
|                  |                  |                | X                       | Y        | Z         |
| 1                | 6                | 0              | -2.725511               | 2.118366 | -0.427392 |
| 2                | 6                | 0              | -3.796235               | 1.348638 | -0.105458 |
| 3                | 7                | 0              | -3.321564               | 0.050137 | 0.051109  |
| 4                | 6                | 0              | -1.993424               | 0.045074 | -0.175135 |
| 5                | 7                | 0              | -1.616294               | 1.287867 | -0.471730 |
| 6                | 6                | 0              | -0.218748               | 1.693039 | -0.727698 |
| 7                | 6                | 0              | 0.466404                | 2.215524 | 0.547400  |
| 8                | 1                | 0              | -2.658941               | 3.172151 | -0.636737 |
| 9                | 1                | 0              | -4.831636               | 1.609379 | 0.015959  |
| 10               | 1                | 0              | 0.304467                | 0.812616 | -1.103374 |
| 11               | 1                | 0              | -0.229655               | 2.470033 | -1.493060 |
| 12               | 1                | 0              | -0.140203               | 3.015791 | 0.988721  |
| 13               | 1                | 0              | 0.535879                | 1.398206 | 1.273940  |

|    |    |   |           |           |           |
|----|----|---|-----------|-----------|-----------|
| 14 | 35 | 0 | 0.525503  | -2.050744 | -0.178449 |
| 15 | 1  | 0 | -1.293609 | -0.817620 | -0.128958 |
| 16 | 6  | 0 | -4.043486 | -1.128656 | 0.384236  |
| 17 | 6  | 0 | -5.349224 | -1.175985 | 0.613445  |
| 18 | 1  | 0 | -3.400988 | -1.999076 | 0.431525  |
| 19 | 1  | 0 | -5.806518 | -2.123980 | 0.860334  |
| 20 | 1  | 0 | -5.997591 | -0.310215 | 0.567882  |
| 21 | 8  | 0 | 1.726717  | 2.743847  | 0.220338  |
| 22 | 1  | 0 | 2.414359  | 2.071749  | 0.393063  |
| 23 | 6  | 0 | 3.802328  | -0.483936 | 1.251872  |
| 24 | 6  | 0 | 4.548671  | 0.019311  | 0.092402  |
| 25 | 8  | 0 | 3.718731  | 0.913962  | 0.874248  |
| 26 | 1  | 0 | 2.892395  | -1.054910 | 1.084148  |
| 27 | 1  | 0 | 4.319892  | -0.651355 | 2.192413  |
| 28 | 1  | 0 | 5.608173  | 0.227195  | 0.232758  |
| 29 | 6  | 0 | 4.116221  | -0.260291 | -1.321050 |
| 30 | 1  | 0 | 4.295512  | 0.611021  | -1.958253 |
| 31 | 1  | 0 | 4.695563  | -1.097181 | -1.723128 |
| 32 | 1  | 0 | 3.059739  | -0.532762 | -1.359598 |

-----

Rotational constants (GHZ):      0.6023315      0.2207589      0.1725842

Standard basis: 6-311++G(d,p) (5D, 7F)

There are    492 symmetry adapted cartesian basis functions of A    symmetry.

There are    475 symmetry adapted basis functions of A    symmetry.

475 basis functions,    751 primitive gaussians,    492 cartesian basis functions

71 alpha electrons      71 beta electrons

nuclear repulsion energy      1307.5472710018 Hartrees.

NAtoms=    32 NActive=    32 NUniq=    32 SFac= 1.00D+00 NatFMM=    60 NAOKFM=F

Big=F

Integral buffers will be    131072 words long.

Raffenetti 2 integral format.

Two-electron integral symmetry is turned on.

One-electron integrals computed using PRISM.

NBasis=    475 RedAO= T EigKep=    3.80D-06    NBF=    475

NBsUse=    475 1.00D-06 EigRej= -1.00D+00    NBFU=    475

Initial guess from the checkpoint file: "/home/suqian/liuwen/qianmengshijie/ohpo/ohpo.chk"

B after Tr=    0.000000    0.000000    0.000000

Rot=    0.999999    0.001009    -0.000351    -0.000335 Ang=    0.13 deg.

ExpMin= 3.50D-02 ExpMax= 4.40D+05 ExpMxC= 1.51D+04 IAcc=3 IRadAn=      5 AccDes=

0.00D+00

Harris functional with IExCor=    402 and IRadAn=      5 diagonalized for initial guess.

HarFok: IExCor=    402 AccDes= 0.00D+00 IRadAn=      5 IDoV= 1 UseB2=F ITyADJ=14

ICtDFT= 3500011 ScaDFX= 1.000000 1.000000 1.000000 1.000000

FoFCou: FMM=F IPFlag=      0 FMFlag=    100000 FMFlg1=      0

NFxFIlg= 0 DoJE=T BraDBF=F KetDBF=T FulRan=T  
wScrnr= 0.000000 ICntrl= 500 IOpCl= 0 I1Cent= 200000004 NGrid=  
0  
NMat0= 1 NMatS0= 1 NMatT0= 0 NMatD0= 1 NMtDS0= 0  
NMtDT0= 0

Petite list used in FoFCou.

Requested convergence on RMS density matrix=1.00D-08 within 128 cycles.

Requested convergence on MAX density matrix=1.00D-06.

Requested convergence on energy=1.00D-06.

No special actions if energy rises.

SCF Done: E(RB3LYP) = -3225.52367319 A.U. after 11 cycles

NFock= 11 Conv=0.19D-08 -V/T= 2.0018

Calling FoFJK, ICntrl= 2127 FMM=F ISym2X=0 I1Cent= 0 IOpClX= 0 NMat=1 NMatS=1  
NMatT=0.

\*\*\*\*\* Axes restored to original set \*\*\*\*\*

| Center<br>Number | Atomic<br>Number | Forces (Hartrees/Bohr) |              |              |
|------------------|------------------|------------------------|--------------|--------------|
|                  |                  | X                      | Y            | Z            |
| 1                | 6                | -0.000056704           | -0.000066425 | 0.000216722  |
| 2                | 6                | 0.000069482            | -0.000004404 | -0.000058159 |
| 3                | 7                | -0.000042994           | 0.000020659  | 0.000105227  |
| 4                | 6                | 0.000307386            | 0.000083023  | -0.000103707 |
| 5                | 7                | -0.000075232           | 0.000063889  | -0.000134223 |
| 6                | 6                | 0.000183514            | 0.000013876  | -0.000065235 |
| 7                | 6                | 0.000102440            | -0.000055266 | 0.000137987  |
| 8                | 1                | -0.000014089           | 0.000002542  | -0.000037647 |
| 9                | 1                | 0.000000187            | 0.000002458  | -0.000042637 |
| 10               | 1                | -0.000005164           | 0.000069991  | -0.000008305 |
| 11               | 1                | -0.000020418           | -0.000007882 | -0.000004318 |
| 12               | 1                | 0.000047615            | -0.000033847 | -0.000013033 |
| 13               | 1                | -0.000035623           | -0.000013617 | -0.000078062 |
| 14               | 35               | 0.000032202            | -0.000014935 | -0.000076660 |
| 15               | 1                | -0.000167432           | -0.000150492 | 0.000083389  |
| 16               | 6                | -0.000022602           | 0.000046437  | 0.000011685  |
| 17               | 6                | 0.000010963            | -0.000005946 | 0.000005317  |
| 18               | 1                | 0.000014664            | 0.000001761  | -0.000020340 |
| 19               | 1                | -0.000005326           | 0.000008228  | -0.000010680 |
| 20               | 1                | 0.000005132            | -0.000003292 | 0.000003699  |
| 21               | 8                | -0.000331479           | 0.000046282  | 0.000222075  |
| 22               | 1                | -0.000035970           | 0.000181292  | -0.000428547 |
| 23               | 6                | -0.000102913           | -0.000068828 | -0.000171518 |
| 24               | 6                | -0.000342714           | -0.000077279 | 0.000004681  |
| 25               | 8                | 0.000441727            | -0.000066864 | 0.000637686  |

|    |   |              |              |              |
|----|---|--------------|--------------|--------------|
| 26 | 1 | -0.000054684 | -0.000032351 | 0.000151783  |
| 27 | 1 | 0.000032265  | 0.000016613  | -0.000047272 |
| 28 | 1 | 0.000022644  | 0.000045069  | -0.000092830 |
| 29 | 6 | 0.000105691  | 0.000047095  | -0.000386682 |
| 30 | 1 | -0.000034527 | -0.000014043 | 0.000099165  |
| 31 | 1 | 0.000003203  | 0.000000642  | 0.000001693  |
| 32 | 1 | -0.000031245 | -0.000034386 | 0.000098744  |

-----  
Cartesian Forces: Max 0.000637686 RMS 0.000135282

GradGradGradGradGradGradGradGradGradGradGradGradGradGradGradGradGradGradGrad

Berny optimization.

Using GEDIIS/GDIIS optimizer.

FormGI is forming the generalized inverse of G from B-inverse, IUseBI=4.

GSVD: received Info= 1 from GESDD.

Internal Forces: Max 0.000322630 RMS 0.000071195

Search for a local minimum.

Step number 26 out of a maximum of 177

All quantities printed in internal units (Hartrees-Bohrs-Radians)

Mixed Optimization -- En-DIIS/RFO-DIIS

Swapping is turned off.

Update second derivatives using D2CorX and points 21 22 23 24 25

26

DE= -1.82D-05 DEPred=-1.04D-05 R= 1.76D+00

TightC=F SS= 1.41D+00 RLast= 9.46D-02 DXNew= 3.2661D+00 2.8368D-01

Trust test= 1.76D+00 RLast= 9.46D-02 DXMaxT set to 1.94D+00

ITU= 1 1 1 1 1 1 1 1 1 -1 1 1 1 1 1 1 1 1 1

ITU= 1 0 1 0 1 0

|                 |         |         |         |         |         |
|-----------------|---------|---------|---------|---------|---------|
| Eigenvalues --- | 0.00007 | 0.00141 | 0.00231 | 0.00270 | 0.00314 |
| Eigenvalues --- | 0.00573 | 0.00842 | 0.01074 | 0.01216 | 0.01401 |
| Eigenvalues --- | 0.01456 | 0.01816 | 0.01920 | 0.02028 | 0.02097 |
| Eigenvalues --- | 0.02179 | 0.02315 | 0.02386 | 0.02803 | 0.03055 |
| Eigenvalues --- | 0.03064 | 0.03307 | 0.03382 | 0.03787 | 0.04461 |
| Eigenvalues --- | 0.04662 | 0.04990 | 0.05241 | 0.05446 | 0.05665 |
| Eigenvalues --- | 0.05943 | 0.06425 | 0.06823 | 0.09399 | 0.09590 |
| Eigenvalues --- | 0.10514 | 0.11381 | 0.11524 | 0.11606 | 0.13031 |
| Eigenvalues --- | 0.13995 | 0.14209 | 0.15083 | 0.15940 | 0.15992 |
| Eigenvalues --- | 0.16000 | 0.16001 | 0.16004 | 0.16019 | 0.16042 |
| Eigenvalues --- | 0.16637 | 0.17383 | 0.19154 | 0.21276 | 0.22052 |
| Eigenvalues --- | 0.22937 | 0.23477 | 0.23900 | 0.24472 | 0.25083 |
| Eigenvalues --- | 0.27642 | 0.28538 | 0.30539 | 0.32050 | 0.33107 |
| Eigenvalues --- | 0.33331 | 0.34047 | 0.34352 | 0.34530 | 0.34847 |
| Eigenvalues --- | 0.35339 | 0.35685 | 0.35689 | 0.35855 | 0.36016 |
| Eigenvalues --- | 0.36440 | 0.36671 | 0.37222 | 0.37272 | 0.37581 |

Eigenvalues --- 0.38136 0.42155 0.42567 0.44890 0.46016  
 Eigenvalues --- 0.49601 0.53986 0.55003 0.56692 0.60399  
 Eigenvalue 1 is 6.82D-05 Eigenvector:  
                   D52      D55      D53      D54      D47  
 1                  0.50867 -0.49858 -0.49224 -0.49148 -0.03554  
                   D46      D42      R18      D44      D43  
 1                  -0.03425 -0.02584 0.02497 -0.02432 -0.02386  
 En-DIIS/RFO-DIIS IScMMF= 0 using points: 26 25 24 23 22  
 RFO step: Lambda=-2.73709930D-06.  
 DidBck=F Rises=F RFO-DIIS coefs: 1.63806 -0.54670 -0.32610 0.23415  
 0.00059

Iteration 1 RMS(Cart)= 0.01456912 RMS(Int)= 0.00012972  
 Iteration 2 RMS(Cart)= 0.00023224 RMS(Int)= 0.00004358  
 Iteration 3 RMS(Cart)= 0.00000007 RMS(Int)= 0.00004358

| Variable | Old X   | -DE/DX   | Delta X<br>(Linear) | Delta X<br>(Quad) | Delta X<br>(Total) | New X   |
|----------|---------|----------|---------------------|-------------------|--------------------|---------|
| R1       | 2.56514 | -0.00004 | 0.00018             | -0.00012          | 0.00006            | 2.56520 |
| R2       | 2.61988 | 0.00002  | -0.00021            | 0.00010           | -0.00010           | 2.61978 |
| R3       | 2.03417 | 0.00001  | -0.00005            | 0.00001           | -0.00004           | 2.03413 |
| R4       | 2.62932 | 0.00002  | 0.00007             | 0.00005           | 0.00010            | 2.62943 |
| R5       | 2.03072 | 0.00001  | -0.00004            | 0.00001           | -0.00002           | 2.03069 |
| R6       | 2.54599 | 0.00002  | -0.00016            | 0.00002           | -0.00014           | 2.54585 |
| R7       | 2.68694 | 0.00002  | 0.00017             | -0.00008          | 0.00009            | 2.68703 |
| R8       | 2.51748 | -0.00007 | -0.00094            | 0.00002           | -0.00093           | 2.51655 |
| R9       | 2.10101 | -0.00023 | -0.00173            | 0.00006           | -0.00172           | 2.09929 |
| R10      | 2.79195 | 0.00001  | -0.00001            | 0.00003           | 0.00004            | 2.79199 |
| R11      | 2.90815 | -0.00014 | -0.00078            | 0.00023           | -0.00054           | 2.90761 |
| R12      | 2.06147 | 0.00003  | -0.00021            | 0.00012           | -0.00010           | 2.06138 |
| R13      | 2.06112 | 0.00000  | -0.00018            | 0.00002           | -0.00016           | 2.06096 |
| R14      | 2.07282 | 0.00000  | -0.00034            | -0.00002          | -0.00036           | 2.07246 |
| R15      | 2.07069 | 0.00002  | -0.00026            | 0.00015           | -0.00011           | 2.07058 |
| R16      | 2.65537 | -0.00026 | 0.00079             | -0.00064          | 0.00017            | 2.65554 |
| R17      | 4.15405 | -0.00005 | 0.00481             | 0.00001           | 0.00478            | 4.15883 |
| R18      | 8.47102 | -0.00009 | 0.00151             | -0.00303          | -0.00152           | 8.46950 |
| R19      | 2.50681 | -0.00001 | -0.00008            | -0.00002          | -0.00009           | 2.50672 |
| R20      | 2.04638 | 0.00000  | -0.00004            | 0.00000           | -0.00004           | 2.04634 |
| R21      | 2.04297 | 0.00001  | -0.00001            | -0.00001          | -0.00002           | 2.04295 |
| R22      | 2.04581 | 0.00000  | -0.00005            | 0.00001           | -0.00004           | 2.04577 |
| R23      | 1.84614 | 0.00005  | -0.00043            | 0.00013           | -0.00026           | 1.84588 |
| R24      | 3.41899 | -0.00006 | 0.00103             | 0.00035           | 0.00142            | 3.42042 |
| R25      | 2.77388 | -0.00002 | -0.00020            | 0.00005           | -0.00009           | 2.77379 |
| R26      | 2.74089 | -0.00010 | -0.00032            | -0.00014          | -0.00049           | 2.74040 |
| R27      | 2.05461 | 0.00010  | -0.00015            | -0.00008          | -0.00023           | 2.05438 |
| R28      | 2.05322 | 0.00005  | 0.00004             | -0.00010          | -0.00006           | 2.05316 |

|     |         |          |          |          |          |         |
|-----|---------|----------|----------|----------|----------|---------|
| R29 | 2.73879 | -0.00032 | -0.00158 | -0.00014 | -0.00176 | 2.73703 |
| R30 | 2.05751 | 0.00004  | -0.00016 | 0.00003  | -0.00013 | 2.05738 |
| R31 | 2.84279 | -0.00018 | -0.00063 | 0.00015  | -0.00048 | 2.84231 |
| R32 | 2.06781 | 0.00002  | 0.00009  | 0.00000  | 0.00008  | 2.06790 |
| R33 | 2.06810 | 0.00000  | -0.00004 | -0.00001 | -0.00005 | 2.06805 |
| R34 | 2.06308 | 0.00005  | -0.00017 | 0.00010  | -0.00007 | 2.06301 |
| A1  | 1.87444 | -0.00002 | -0.00010 | -0.00009 | -0.00018 | 1.87426 |
| A2  | 2.27842 | -0.00001 | -0.00001 | 0.00003  | 0.00001  | 2.27843 |
| A3  | 2.13026 | 0.00003  | 0.00011  | 0.00008  | 0.00018  | 2.13045 |
| A4  | 1.86167 | 0.00002  | -0.00001 | 0.00003  | 0.00002  | 1.86169 |
| A5  | 2.27736 | -0.00002 | 0.00003  | -0.00008 | -0.00005 | 2.27732 |
| A6  | 2.14413 | 0.00000  | -0.00001 | 0.00005  | 0.00004  | 2.14416 |
| A7  | 1.89749 | -0.00003 | -0.00041 | 0.00010  | -0.00031 | 1.89718 |
| A8  | 2.24831 | 0.00002  | 0.00029  | -0.00005 | 0.00024  | 2.24855 |
| A9  | 2.13737 | 0.00000  | 0.00011  | -0.00004 | 0.00007  | 2.13744 |
| A10 | 1.88909 | 0.00001  | 0.00052  | -0.00018 | 0.00035  | 1.88944 |
| A11 | 2.23501 | -0.00007 | -0.00016 | 0.00018  | 0.00001  | 2.23502 |
| A12 | 2.15907 | 0.00006  | -0.00034 | 0.00002  | -0.00034 | 2.15873 |
| A13 | 1.90205 | 0.00002  | -0.00001 | 0.00015  | 0.00013  | 1.90218 |
| A14 | 2.21190 | 0.00004  | 0.00051  | 0.00002  | 0.00049  | 2.21238 |
| A15 | 2.16783 | -0.00006 | -0.00030 | -0.00013 | -0.00040 | 2.16743 |
| A16 | 1.95056 | -0.00002 | -0.00014 | 0.00019  | 0.00007  | 1.95063 |
| A17 | 1.86714 | -0.00002 | -0.00009 | -0.00026 | -0.00033 | 1.86680 |
| A18 | 1.88334 | 0.00001  | -0.00023 | -0.00012 | -0.00039 | 1.88295 |
| A19 | 1.92390 | 0.00005  | 0.00140  | 0.00010  | 0.00148  | 1.92538 |
| A20 | 1.92198 | -0.00004 | -0.00089 | -0.00016 | -0.00104 | 1.92094 |
| A21 | 1.91568 | 0.00002  | -0.00006 | 0.00026  | 0.00020  | 1.91588 |
| A22 | 1.91224 | 0.00004  | -0.00048 | 0.00029  | -0.00020 | 1.91204 |
| A23 | 1.90114 | 0.00009  | 0.00115  | 0.00024  | 0.00140  | 1.90254 |
| A24 | 1.91147 | -0.00012 | 0.00030  | 0.00023  | 0.00053  | 1.91200 |
| A25 | 1.88860 | -0.00004 | 0.00049  | -0.00026 | 0.00022  | 1.88882 |
| A26 | 1.89162 | -0.00002 | -0.00143 | -0.00076 | -0.00222 | 1.88940 |
| A27 | 1.95833 | 0.00005  | -0.00006 | 0.00026  | 0.00023  | 1.95856 |
| A28 | 1.78565 | 0.00000  | 0.00190  | 0.00142  | 0.00329  | 1.78894 |
| A29 | 2.84120 | -0.00004 | -0.00164 | -0.00155 | -0.00320 | 2.83800 |
| A30 | 2.17709 | -0.00002 | -0.00008 | -0.00006 | -0.00014 | 2.17695 |
| A31 | 1.95559 | 0.00000  | -0.00006 | 0.00001  | -0.00005 | 1.95554 |
| A32 | 2.15051 | 0.00003  | 0.00014  | 0.00005  | 0.00019  | 2.15070 |
| A33 | 2.07956 | 0.00001  | 0.00000  | 0.00004  | 0.00004  | 2.07960 |
| A34 | 2.15760 | -0.00001 | 0.00009  | -0.00008 | 0.00001  | 2.15761 |
| A35 | 2.04602 | 0.00000  | -0.00009 | 0.00004  | -0.00005 | 2.04597 |
| A36 | 1.90869 | 0.00011  | 0.00112  | 0.00023  | 0.00171  | 1.91040 |
| A37 | 3.03885 | 0.00029  | 0.00046  | 0.00154  | 0.00189  | 3.04073 |
| A38 | 2.07570 | 0.00002  | -0.00098 | 0.00007  | -0.00097 | 2.07472 |



|     |          |          |          |          |          |          |
|-----|----------|----------|----------|----------|----------|----------|
| A39 | 2.08794  | -0.00005 | -0.00053 | 0.00042  | -0.00004 | 2.08790  |
| A40 | 2.00175  | 0.00003  | 0.00069  | -0.00099 | -0.00030 | 2.00146  |
| A41 | 1.98378  | 0.00001  | 0.00022  | 0.00004  | 0.00027  | 1.98404  |
| A42 | 2.03900  | 0.00004  | 0.00089  | 0.00008  | 0.00096  | 2.03996  |
| A43 | 2.04700  | 0.00000  | -0.00024 | -0.00016 | -0.00040 | 2.04660  |
| A44 | 2.13210  | -0.00003 | -0.00014 | 0.00048  | 0.00034  | 2.13244  |
| A45 | 1.94963  | -0.00003 | 0.00040  | 0.00016  | 0.00055  | 1.95018  |
| A46 | 2.04540  | 0.00001  | 0.00042  | -0.00034 | 0.00010  | 2.04550  |
| A47 | 2.02233  | 0.00002  | -0.00016 | -0.00014 | -0.00030 | 2.02203  |
| A48 | 1.41740  | 0.00003  | -0.00034 | -0.00001 | -0.00019 | 1.41721  |
| A49 | 1.00602  | -0.00018 | 0.00095  | -0.00079 | 0.00019  | 1.00622  |
| A50 | 2.38554  | -0.00017 | -0.00279 | -0.00305 | -0.00580 | 2.37974  |
| A51 | 2.29748  | 0.00006  | 0.00682  | 0.00711  | 0.01395  | 2.31144  |
| A52 | 1.93055  | 0.00012  | 0.00032  | 0.00006  | 0.00038  | 1.93093  |
| A53 | 1.91257  | -0.00004 | 0.00022  | -0.00039 | -0.00017 | 1.91239  |
| A54 | 1.93665  | 0.00012  | 0.00073  | 0.00006  | 0.00079  | 1.93745  |
| A55 | 1.88413  | -0.00005 | -0.00053 | 0.00004  | -0.00049 | 1.88364  |
| A56 | 1.91424  | -0.00012 | -0.00027 | 0.00011  | -0.00016 | 1.91408  |
| A57 | 1.88436  | -0.00005 | -0.00053 | 0.00013  | -0.00040 | 1.88397  |
| A58 | 3.71489  | 0.00009  | 0.00648  | 0.00710  | 0.01376  | 3.72864  |
| A59 | 5.02697  | 0.00000  | 0.00780  | 0.00353  | 0.01130  | 5.03828  |
| D1  | 0.00583  | -0.00007 | 0.00095  | -0.00088 | 0.00008  | 0.00592  |
| D2  | -3.12810 | -0.00005 | -0.00055 | -0.00069 | -0.00124 | -3.12934 |
| D3  | 3.13480  | 0.00001  | 0.00156  | 0.00007  | 0.00163  | 3.13643  |
| D4  | 0.00087  | 0.00003  | 0.00006  | 0.00026  | 0.00032  | 0.00118  |
| D5  | -0.00817 | 0.00007  | -0.00057 | 0.00050  | -0.00007 | -0.00823 |
| D6  | -3.09424 | 0.00004  | -0.00425 | -0.00026 | -0.00451 | -3.09875 |
| D7  | -3.13844 | 0.00000  | -0.00111 | -0.00035 | -0.00146 | -3.13990 |
| D8  | 0.05867  | -0.00003 | -0.00480 | -0.00110 | -0.00590 | 0.05277  |
| D9  | -0.00160 | 0.00005  | -0.00102 | 0.00095  | -0.00007 | -0.00167 |
| D10 | -3.13777 | 0.00004  | 0.00039  | 0.00068  | 0.00106  | -3.13671 |
| D11 | 3.13306  | 0.00003  | 0.00034  | 0.00078  | 0.00112  | 3.13418  |
| D12 | -0.00311 | 0.00002  | 0.00175  | 0.00050  | 0.00225  | -0.00086 |
| D13 | -0.00347 | -0.00001 | 0.00067  | -0.00065 | 0.00002  | -0.00345 |
| D14 | 3.13282  | 0.00007  | 0.00304  | 0.00098  | 0.00400  | 3.13682  |
| D15 | 3.13311  | 0.00000  | -0.00063 | -0.00039 | -0.00102 | 3.13209  |
| D16 | -0.01378 | 0.00007  | 0.00173  | 0.00124  | 0.00296  | -0.01082 |
| D17 | -0.00384 | 0.00002  | -0.00027 | 0.00064  | 0.00037  | -0.00347 |
| D18 | 3.13779  | 0.00002  | -0.00054 | 0.00066  | 0.00013  | 3.13792  |
| D19 | -3.13935 | 0.00001  | 0.00132  | 0.00033  | 0.00164  | -3.13770 |
| D20 | 0.00228  | 0.00001  | 0.00105  | 0.00035  | 0.00140  | 0.00368  |
| D21 | 0.00716  | -0.00004 | -0.00007 | 0.00010  | 0.00003  | 0.00719  |
| D22 | 3.09496  | -0.00001 | 0.00353  | 0.00084  | 0.00436  | 3.09932  |
| D23 | -3.12942 | -0.00010 | -0.00231 | -0.00145 | -0.00374 | -3.13315 |

|     |          |          |          |          |          |          |
|-----|----------|----------|----------|----------|----------|----------|
| D24 | -0.04162 | -0.00008 | 0.00129  | -0.00071 | 0.00060  | -0.04102 |
| D25 | -3.10498 | -0.00008 | -0.00980 | -0.00625 | -0.01606 | -3.12103 |
| D26 | 0.03057  | 0.00000  | -0.00709 | -0.00439 | -0.01152 | 0.01905  |
| D27 | 1.44230  | -0.00007 | 0.00358  | -0.00124 | 0.00234  | 1.44465  |
| D28 | -2.73353 | -0.00004 | 0.00516  | -0.00118 | 0.00399  | -2.72954 |
| D29 | -0.67327 | -0.00001 | 0.00492  | -0.00108 | 0.00385  | -0.66942 |
| D30 | -1.63580 | -0.00010 | -0.00065 | -0.00212 | -0.00276 | -1.63856 |
| D31 | 0.47155  | -0.00007 | 0.00093  | -0.00206 | -0.00111 | 0.47044  |
| D32 | 2.53181  | -0.00005 | 0.00069  | -0.00196 | -0.00125 | 2.53056  |
| D33 | -0.93897 | -0.00003 | 0.00315  | 0.00004  | 0.00322  | -0.93575 |
| D34 | 1.12388  | 0.00000  | 0.00414  | 0.00003  | 0.00420  | 1.12808  |
| D35 | -3.01162 | 0.00004  | 0.00500  | 0.00066  | 0.00573  | -3.00589 |
| D36 | -3.01293 | -0.00003 | 0.00244  | 0.00019  | 0.00262  | -3.01031 |
| D37 | -0.95008 | 0.00000  | 0.00342  | 0.00018  | 0.00359  | -0.94649 |
| D38 | 1.19761  | 0.00004  | 0.00428  | 0.00081  | 0.00513  | 1.20274  |
| D39 | 1.15406  | -0.00006 | 0.00217  | -0.00009 | 0.00208  | 1.15614  |
| D40 | -3.06628 | -0.00003 | 0.00316  | -0.00010 | 0.00306  | -3.06322 |
| D41 | -0.91859 | 0.00001  | 0.00402  | 0.00053  | 0.00459  | -0.91400 |
| D42 | -1.70109 | -0.00003 | 0.00853  | 0.00794  | 0.01643  | -1.68466 |
| D43 | 2.49672  | 0.00000  | 0.00979  | 0.00791  | 0.01769  | 2.51441  |
| D44 | 0.41234  | 0.00004  | 0.01016  | 0.00857  | 0.01873  | 0.43107  |
| D45 | 0.46261  | -0.00003 | 0.00015  | 0.00111  | 0.00118  | 0.46379  |
| D46 | -0.31836 | 0.00017  | 0.01090  | 0.00731  | 0.01819  | -0.30017 |
| D47 | 2.57561  | 0.00005  | -0.00008 | -0.00040 | -0.00061 | 2.57500  |
| D48 | 3.14141  | 0.00001  | -0.00018 | 0.00008  | -0.00010 | 3.14131  |
| D49 | 0.00014  | 0.00001  | -0.00015 | 0.00010  | -0.00004 | 0.00010  |
| D50 | -0.00022 | 0.00000  | 0.00012  | 0.00005  | 0.00017  | -0.00005 |
| D51 | -3.14149 | 0.00000  | 0.00015  | 0.00007  | 0.00022  | -3.14126 |
| D52 | -1.71983 | 0.00005  | -0.02231 | -0.04776 | -0.07007 | -1.78990 |
| D53 | 2.25494  | 0.00004  | 0.01289  | 0.04308  | 0.05590  | 2.31084  |
| D54 | 1.94839  | -0.00002 | -0.00040 | 0.03461  | 0.03437  | 1.98276  |
| D55 | -2.77203 | 0.00004  | 0.00509  | 0.03955  | 0.04459  | -2.72744 |
| D56 | -2.72976 | -0.00005 | 0.00179  | -0.00101 | 0.00078  | -2.72898 |
| D57 | -0.02930 | -0.00006 | 0.00037  | -0.00061 | -0.00023 | -0.02953 |
| D58 | -0.02159 | -0.00001 | 0.00044  | 0.00043  | 0.00088  | -0.02071 |
| D59 | 2.67888  | -0.00002 | -0.00098 | 0.00083  | -0.00014 | 2.67874  |
| D60 | -0.17212 | 0.00008  | -0.00341 | -0.00033 | -0.00374 | -0.17587 |
| D61 | 0.18872  | 0.00019  | 0.01199  | 0.00995  | 0.02189  | 0.21061  |
| D62 | -2.58158 | -0.00003 | -0.00590 | 0.00065  | -0.00526 | -2.58684 |
| D63 | -2.22074 | 0.00008  | 0.00950  | 0.01094  | 0.02038  | -2.20036 |
| D64 | 2.12924  | 0.00016  | 0.00388  | 0.00438  | 0.00826  | 2.13750  |
| D65 | -0.26356 | 0.00015  | 0.00318  | 0.00481  | 0.00797  | -0.25559 |
| D66 | 2.48764  | 0.00003  | -0.00159 | 0.00174  | 0.00015  | 2.48779  |
| D67 | -1.72029 | 0.00001  | -0.00192 | 0.00158  | -0.00034 | -1.72063 |

|     |          |          |          |         |          |          |
|-----|----------|----------|----------|---------|----------|----------|
| D68 | 0.35901  | 0.00000  | -0.00198 | 0.00153 | -0.00045 | 0.35856  |
| D69 | 1.27279  | 0.00000  | -0.00203 | 0.00181 | -0.00022 | 1.27257  |
| D70 | -2.93515 | -0.00002 | -0.00236 | 0.00165 | -0.00070 | -2.93585 |
| D71 | -0.85584 | -0.00002 | -0.00241 | 0.00160 | -0.00082 | -0.85666 |
| D72 | -1.08930 | 0.00001  | -0.00301 | 0.00213 | -0.00088 | -1.09018 |
| D73 | 0.98595  | 0.00000  | -0.00334 | 0.00197 | -0.00136 | 0.98459  |
| D74 | 3.06526  | -0.00001 | -0.00340 | 0.00192 | -0.00148 | 3.06378  |

| Item                 | Value    | Threshold | Converged? |
|----------------------|----------|-----------|------------|
| Maximum Force        | 0.000323 | 0.000450  | YES        |
| RMS Force            | 0.000071 | 0.000300  | YES        |
| Maximum Displacement | 0.047430 | 0.001800  | NO         |
| RMS Displacement     | 0.014775 | 0.001200  | NO         |

Predicted change in Energy=-8.509334D-06

GradGradGradGradGradGradGradGradGradGradGradGradGradGradGradGradGradGradGrad

Input orientation:

| Center<br>Number | Atomic<br>Number | Atomic<br>Type | Coordinates (Angstroms) |           |           |
|------------------|------------------|----------------|-------------------------|-----------|-----------|
|                  |                  |                | X                       | Y         | Z         |
| 1                | 6                | 0              | -1.385260               | -1.919321 | -0.246586 |
| 2                | 6                | 0              | -2.514591               | -1.174668 | -0.133644 |
| 3                | 7                | 0              | -2.112793               | 0.107155  | 0.229088  |
| 4                | 6                | 0              | -0.769692               | 0.125758  | 0.332508  |
| 5                | 7                | 0              | -0.312856               | -1.093629 | 0.053552  |
| 6                | 6                | 0              | 1.119313                | -1.454347 | 0.012848  |
| 7                | 6                | 0              | 1.693382                | -1.351016 | -1.410945 |
| 8                | 1                | 0              | -1.253718               | -2.956459 | -0.502938 |
| 9                | 1                | 0              | -3.545290               | -1.445024 | -0.272654 |
| 10               | 1                | 0              | 1.639586                | -0.767477 | 0.681762  |
| 11               | 1                | 0              | 1.218166                | -2.475492 | 0.382886  |
| 12               | 1                | 0              | 1.077703                | -1.943109 | -2.098779 |
| 13               | 1                | 0              | 1.658993                | -0.304746 | -1.734521 |
| 14               | 35               | 0              | 1.652527                | 2.220800  | 1.030452  |
| 15               | 1                | 0              | -0.115186               | 0.982888  | 0.599056  |
| 16               | 6                | 0              | -2.913373               | 1.255937  | 0.476496  |
| 17               | 6                | 0              | -4.236821               | 1.287182  | 0.392198  |
| 18               | 1                | 0              | -2.315478               | 2.117601  | 0.746088  |
| 19               | 1                | 0              | -4.756095               | 2.212235  | 0.600463  |
| 20               | 1                | 0              | -4.840770               | 0.429812  | 0.123626  |
| 21               | 8                | 0              | 2.998908                | -1.870588 | -1.430425 |
| 22               | 1                | 0              | 3.641240                | -1.139945 | -1.342640 |
| 23               | 6                | 0              | 4.848349                | 1.630555  | -1.131317 |
| 24               | 6                | 0              | 5.713711                | 0.755705  | -0.331130 |

|    |   |   |          |           |           |
|----|---|---|----------|-----------|-----------|
| 25 | 8 | 0 | 4.859569 | 0.198527  | -1.359616 |
| 26 | 1 | 0 | 3.932577 | 2.012094  | -0.686741 |
| 27 | 1 | 0 | 5.274594 | 2.205996  | -1.948405 |
| 28 | 1 | 0 | 6.765150 | 0.704894  | -0.608990 |
| 29 | 6 | 0 | 5.394250 | 0.400112  | 1.094974  |
| 30 | 1 | 0 | 5.666188 | -0.639135 | 1.303468  |
| 31 | 1 | 0 | 5.969673 | 1.040802  | 1.770277  |
| 32 | 1 | 0 | 4.334511 | 0.552518  | 1.308346  |

-----  
Distance matrix (angstroms):

|    |    | 1        | 2        | 3        | 4        | 5        |
|----|----|----------|----------|----------|----------|----------|
| 1  | C  | 0.000000 |          |          |          |          |
| 2  | C  | 1.357443 | 0.000000 |          |          |          |
| 3  | N  | 2.205034 | 1.391433 | 0.000000 |          |          |
| 4  | C  | 2.212832 | 2.225551 | 1.347206 | 0.000000 |          |
| 5  | N  | 1.386327 | 2.211164 | 2.170823 | 1.331699 | 0.000000 |
| 6  | C  | 2.560545 | 3.647593 | 3.596047 | 2.483395 | 1.477457 |
| 7  | C  | 3.340171 | 4.401095 | 4.393511 | 3.359647 | 2.497196 |
| 8  | H  | 1.076417 | 2.213811 | 3.264905 | 3.229909 | 2.159870 |
| 9  | H  | 2.211643 | 1.074596 | 2.170956 | 3.246155 | 3.267800 |
| 10 | H  | 3.367234 | 4.252984 | 3.879464 | 2.593157 | 2.076788 |
| 11 | H  | 2.735578 | 3.986529 | 4.217701 | 3.274235 | 2.088547 |
| 12 | H  | 3.081781 | 4.166154 | 4.449923 | 3.688392 | 2.699592 |
| 13 | H  | 3.753436 | 4.553941 | 4.272212 | 3.218145 | 2.776280 |
| 14 | Br | 5.291463 | 5.499926 | 4.391732 | 3.277723 | 3.975236 |
| 15 | H  | 3.278874 | 3.308933 | 2.212288 | 1.110899 | 2.156054 |
| 16 | C  | 3.597255 | 2.537545 | 1.421914 | 2.427634 | 3.530161 |
| 17 | C  | 4.338329 | 3.050129 | 2.435274 | 3.656973 | 4.602222 |
| 18 | H  | 4.259982 | 3.413591 | 2.085728 | 2.554983 | 3.847350 |
| 19 | H  | 5.399053 | 4.127271 | 3.399459 | 4.507393 | 5.565090 |
| 20 | H  | 4.194763 | 2.837544 | 2.749016 | 4.087757 | 4.777844 |
| 21 | O  | 4.541452 | 5.706542 | 5.726687 | 4.614725 | 3.711285 |
| 22 | H  | 5.203313 | 6.273526 | 6.093807 | 4.885125 | 4.193610 |
| 23 | C  | 7.227880 | 7.942135 | 7.254581 | 5.997464 | 5.955092 |
| 24 | C  | 7.586719 | 8.454010 | 7.873286 | 6.547653 | 6.315657 |
| 25 | O  | 6.687452 | 7.600454 | 7.151655 | 5.878534 | 5.515495 |
| 26 | H  | 6.627907 | 7.212998 | 6.404220 | 5.168023 | 5.311991 |
| 27 | H  | 8.016738 | 8.682951 | 7.982487 | 6.786998 | 6.790799 |
| 28 | H  | 8.570124 | 9.480100 | 8.937424 | 7.615488 | 7.332926 |
| 29 | C  | 7.289809 | 8.157156 | 7.562492 | 6.216977 | 5.990566 |
| 30 | H  | 7.332426 | 8.323294 | 7.888206 | 6.553501 | 6.125179 |
| 31 | H  | 8.180777 | 8.973068 | 8.280895 | 6.951512 | 6.853693 |
| 32 | H  | 6.422117 | 7.209210 | 6.552167 | 5.214142 | 5.087468 |
|    |    | 6        | 7        | 8        | 9        | 10       |

|    |    |          |          |          |           |          |
|----|----|----------|----------|----------|-----------|----------|
| 6  | C  | 0.000000 |          |          |           |          |
| 7  | C  | 1.538641 | 0.000000 |          |           |          |
| 8  | H  | 2.855459 | 3.476682 | 0.000000 |           |          |
| 9  | H  | 4.673341 | 5.361737 | 2.754772 | 0.000000  |          |
| 10 | H  | 1.090834 | 2.173208 | 3.816590 | 5.315347  | 0.000000 |
| 11 | H  | 1.090613 | 2.169816 | 2.669498 | 4.917530  | 1.784442 |
| 12 | H  | 2.167853 | 1.096700 | 3.001518 | 4.995486  | 3.070705 |
| 13 | H  | 2.160124 | 1.095704 | 4.127016 | 5.524658  | 2.460268 |
| 14 | Br | 3.850524 | 4.326657 | 6.132010 | 6.492584  | 3.008580 |
| 15 | H  | 2.794233 | 3.571853 | 4.246068 | 4.291881  | 2.479888 |
| 16 | C  | 4.880898 | 5.619682 | 4.632281 | 2.873279  | 4.986559 |
| 17 | C  | 6.028934 | 6.736373 | 5.263901 | 2.895719  | 6.231984 |
| 18 | H  | 5.009415 | 5.723203 | 5.332305 | 3.904173  | 4.895952 |
| 19 | H  | 6.950505 | 7.637950 | 6.340311 | 3.950180  | 7.056204 |
| 20 | H  | 6.251793 | 6.944163 | 4.972561 | 2.313075  | 6.613625 |
| 21 | O  | 2.406070 | 1.405252 | 4.485998 | 6.659435  | 2.743346 |
| 22 | H  | 2.880332 | 1.960451 | 5.288235 | 7.272149  | 2.871159 |
| 23 | C  | 4.973072 | 4.349917 | 7.659685 | 8.980516  | 4.397042 |
| 24 | C  | 5.109907 | 4.665546 | 7.896502 | 9.517128  | 4.465930 |
| 25 | O  | 4.313371 | 3.525402 | 6.932540 | 8.632751  | 3.933025 |
| 26 | H  | 4.518860 | 4.104750 | 7.184563 | 8.248734  | 3.854429 |
| 27 | H  | 5.874605 | 5.076049 | 8.447435 | 9.691668  | 5.382621 |
| 28 | H  | 6.076552 | 5.531069 | 8.815837 | 10.537572 | 5.486832 |
| 29 | C  | 4.783838 | 4.800261 | 7.616782 | 9.229859  | 3.953671 |
| 30 | H  | 4.796285 | 4.863949 | 7.517858 | 9.380029  | 4.076336 |
| 31 | H  | 5.730648 | 5.841886 | 8.562883 | 10.044273 | 4.817094 |
| 32 | H  | 4.005412 | 4.241881 | 6.842659 | 8.281365  | 3.065554 |
|    |    | 11       | 12       | 13       | 14        | 15       |
| 11 | H  | 0.000000 |          |          |           |          |
| 12 | H  | 2.542011 | 0.000000 |          |           |          |
| 13 | H  | 3.064291 | 1.776180 | 0.000000 |           |          |
| 14 | Br | 4.760584 | 5.240290 | 3.744796 | 0.000000  |          |
| 15 | H  | 3.712808 | 4.154847 | 3.201764 | 2.200758  | 0.000000 |
| 16 | C  | 5.567938 | 5.726659 | 5.313272 | 4.699497  | 2.814148 |
| 17 | C  | 6.626815 | 6.699545 | 6.466668 | 5.996951  | 4.138026 |
| 18 | H  | 5.806466 | 6.008020 | 5.274240 | 3.979520  | 2.480015 |
| 19 | H  | 7.596967 | 7.654148 | 7.276036 | 6.423036  | 4.800972 |
| 20 | H  | 6.724486 | 6.752641 | 6.799942 | 6.796534  | 4.781534 |
| 21 | O  | 2.612480 | 2.035433 | 2.083197 | 4.960657  | 4.686012 |
| 22 | H  | 3.260738 | 2.790796 | 2.186420 | 4.569589  | 4.731526 |
| 23 | C  | 5.686006 | 5.284395 | 3.779052 | 3.903193  | 5.296258 |
| 24 | C  | 5.582148 | 5.648075 | 4.419819 | 4.526989  | 5.907022 |
| 25 | O  | 4.842160 | 4.408569 | 3.261522 | 4.481867  | 5.403685 |
| 26 | H  | 5.352621 | 5.078167 | 3.410978 | 2.861982  | 4.370003 |

|    |   |          |           |          |           |           |
|----|---|----------|-----------|----------|-----------|-----------|
| 27 | H | 6.618599 | 5.903522  | 4.407055 | 4.689689  | 6.085662  |
| 28 | H | 6.470526 | 6.448135  | 5.325320 | 5.578948  | 6.991115  |
| 29 | C | 5.120141 | 5.858611  | 4.738672 | 4.161677  | 5.562324  |
| 30 | H | 4.899447 | 5.859166  | 5.039722 | 4.935914  | 6.045779  |
| 31 | H | 6.071738 | 6.914093  | 5.716298 | 4.536242  | 6.196824  |
| 32 | H | 4.442627 | 5.333241  | 4.141539 | 3.170715  | 4.526381  |
|    |   | 16       | 17        | 18       | 19        | 20        |
| 16 | C | 0.000000 |           |          |           |           |
| 17 | C | 1.326498 | 0.000000  |          |           |           |
| 18 | H | 1.082877 | 2.122826  | 0.000000 |           |           |
| 19 | H | 2.079783 | 1.081085  | 2.446788 | 0.000000  |           |
| 20 | H | 2.126466 | 1.082574  | 3.100514 | 1.847045  | 0.000000  |
| 21 | O | 6.954609 | 8.102422  | 6.991822 | 8.996334  | 8.316699  |
| 22 | H | 7.211966 | 8.424040  | 7.103300 | 9.248134  | 8.749775  |
| 23 | C | 7.935347 | 9.218423  | 7.421744 | 9.776643  | 9.843561  |
| 24 | C | 8.679233 | 9.990934  | 8.214806 | 10.611606 | 10.569299 |
| 25 | O | 8.056553 | 9.327289  | 7.719983 | 10.017880 | 9.815808  |
| 26 | H | 6.985121 | 8.272162  | 6.411109 | 8.785782  | 8.951644  |
| 27 | H | 8.592180 | 9.838173  | 8.054645 | 10.349468 | 10.477057 |
| 28 | H | 9.754780 | 11.062766 | 9.289230 | 11.682206 | 11.632273 |
| 29 | C | 8.374458 | 9.697335  | 7.906415 | 10.322685 | 10.281052 |
| 30 | H | 8.825194 | 10.129694 | 8.462698 | 10.828135 | 10.626893 |
| 31 | H | 8.979347 | 10.302054 | 8.417374 | 10.852779 | 10.952189 |
| 32 | H | 7.329298 | 8.651404  | 6.854778 | 9.267949  | 9.252265  |
|    |   | 21       | 22        | 23       | 24        | 25        |
| 21 | O | 0.000000 |           |          |           |           |
| 22 | H | 0.976799 | 0.000000  |          |           |           |
| 23 | C | 3.970882 | 3.029428  | 0.000000 |           |           |
| 24 | C | 3.933957 | 2.985259  | 1.467826 | 0.000000  |           |
| 25 | O | 2.783579 | 1.810006  | 1.450155 | 1.448375  | 0.000000  |
| 26 | H | 4.062022 | 3.232712  | 1.087134 | 2.208487  | 2.145018  |
| 27 | H | 4.697402 | 3.772282  | 1.086485 | 2.216246  | 2.132802  |
| 28 | H | 4.635994 | 3.701416  | 2.191757 | 1.088720  | 2.109759  |
| 29 | C | 4.155885 | 3.374430  | 2.601609 | 1.504086  | 2.520225  |
| 30 | H | 4.013107 | 3.369437  | 3.427613 | 2.149360  | 2.905913  |
| 31 | H | 5.248441 | 4.457298  | 3.166137 | 2.136050  | 3.426075  |
| 32 | H | 3.893090 | 3.220680  | 2.716275 | 2.152060  | 2.742083  |
|    |   | 26       | 27        | 28       | 29        | 30        |
| 26 | H | 0.000000 |           |          |           |           |
| 27 | H | 1.852135 | 0.000000  |          |           |           |
| 28 | H | 3.120623 | 2.503816  | 0.000000 |           |           |
| 29 | C | 2.812381 | 3.540860  | 2.208111 | 0.000000  |           |
| 30 | H | 3.741037 | 4.338524  | 2.582949 | 1.094283  | 0.000000  |
| 31 | H | 3.336182 | 3.958460  | 2.531112 | 1.094362  | 1.769803  |

```

32 H 2.504454 3.771495 3.099581 1.091696 1.787015
      31      32
31 H 0.000000
32 H 1.767924 0.000000

```

Stoichiometry C10H17BrN2O2

Framework group C1[X(C10H17BrN2O2)]

Deg. of freedom 90

Full point group C1 NOp 1

Largest Abelian subgroup C1 NOp 1

Largest concise Abelian subgroup C1 NOp 1

Standard orientation:

| Center<br>Number | Atomic<br>Number | Atomic<br>Type | Coordinates (Angstroms) |           |           |
|------------------|------------------|----------------|-------------------------|-----------|-----------|
|                  |                  |                | X                       | Y         | Z         |
| 1                | 6                | 0              | -2.723931               | 2.116423  | -0.433291 |
| 2                | 6                | 0              | -3.797400               | 1.347716  | -0.118003 |
| 3                | 7                | 0              | -3.324100               | 0.049686  | 0.046889  |
| 4                | 6                | 0              | -1.994171               | 0.044286  | -0.168106 |
| 5                | 7                | 0              | -1.614588               | 1.285625  | -0.465453 |
| 6                | 6                | 0              | -0.215306               | 1.688292  | -0.715955 |
| 7                | 6                | 0              | 0.463582                | 2.216054  | 0.559973  |
| 8                | 1                | 0              | -2.655348               | 3.169742  | -0.644214 |
| 9                | 1                | 0              | -4.833615               | 1.609075  | -0.005276 |
| 10               | 1                | 0              | 0.308294                | 0.805901  | -1.086291 |
| 11               | 1                | 0              | -0.221977               | 2.462699  | -1.483865 |
| 12               | 1                | 0              | -0.146241               | 3.016566  | 0.995916  |
| 13               | 1                | 0              | 0.533046                | 1.401989  | 1.290069  |
| 14               | 35               | 0              | 0.527873                | -2.049213 | -0.163435 |
| 15               | 1                | 0              | -1.295649               | -0.817988 | -0.116655 |
| 16               | 6                | 0              | -4.048793               | -1.128443 | 0.376543  |
| 17               | 6                | 0              | -5.356662               | -1.175462 | 0.593023  |
| 18               | 1                | 0              | -3.406435               | -1.998420 | 0.432563  |
| 19               | 1                | 0              | -5.816149               | -2.122819 | 0.838240  |
| 20               | 1                | 0              | -6.004781               | -0.310055 | 0.538443  |
| 21               | 8                | 0              | 1.723135                | 2.748649  | 0.236548  |
| 22               | 1                | 0              | 2.412314                | 2.075628  | 0.398446  |
| 23               | 6                | 0              | 3.812322                | -0.475541 | 1.240439  |
| 24               | 6                | 0              | 4.549083                | 0.016909  | 0.070315  |
| 25               | 8                | 0              | 3.728720                | 0.919089  | 0.851894  |
| 26               | 1                | 0              | 2.899865                | -1.045597 | 1.084502  |
| 27               | 1                | 0              | 4.338123                | -0.636649 | 2.177470  |
| 28               | 1                | 0              | 5.610346                | 0.222652  | 0.199555  |
| 29               | 6                | 0              | 4.103730                | -0.272714 | -1.336829 |

|    |   |   |          |           |           |
|----|---|---|----------|-----------|-----------|
| 30 | 1 | 0 | 4.279139 | 0.593028  | -1.982723 |
| 31 | 1 | 0 | 4.678158 | -1.113667 | -1.737404 |
| 32 | 1 | 0 | 3.046601 | -0.543818 | -1.364779 |

-----

Rotational constants (GHZ):      0.6034650      0.2206220      0.1724540

Standard basis: 6-311++G(d,p) (5D, 7F)

There are    492 symmetry adapted cartesian basis functions of A    symmetry.

There are    475 symmetry adapted basis functions of A    symmetry.

     475 basis functions,    751 primitive gaussians,    492 cartesian basis functions

     71 alpha electrons      71 beta electrons

         nuclear repulsion energy      1307.6149226731 Hartrees.

NAtoms=    32 NActive=    32 NUniq=    32 SFac= 1.00D+00 NAtFMM=    60 NAOKFM=F

Big=F

Integral buffers will be    131072 words long.

Raffenetti 2 integral format.

Two-electron integral symmetry is turned on.

One-electron integrals computed using PRISM.

NBasis=    475 RedAO= T EigKep=    3.81D-06    NBF=    475

NBsUse=    475 1.00D-06 EigRej= -1.00D+00    NBFU=    475

Initial guess from the checkpoint file: "/home/suqian/liuwen/qianmengshijie/ohpo/ohpo.chk"

B after Tr=    0.000000    0.000000    0.000000

         Rot=    1.000000    0.000877    -0.000187    -0.000023 Ang=    0.10 deg.

ExpMin= 3.50D-02 ExpMax= 4.40D+05 ExpMxC= 1.51D+04 IAcc=3 IRadAn=      5 AccDes=

0.00D+00

Harris functional with IExCor=    402 and IRadAn=      5 diagonalized for initial guess.

HarFok: IExCor=    402 AccDes= 0.00D+00 IRadAn=      5 IDoV= 1 UseB2=F ITyADJ=14

ICtDFT= 3500011 ScaDFX= 1.000000 1.000000 1.000000 1.000000

FoFCou: FMM=F IPFlag=                    0 FMFlag=      100000 FMFlg1=                    0

         NFXFlg=                    0 DoJE=T BraDBF=F KetDBF=T FulRan=T

         wScrn= 0.000000 ICntrl=            500 IOpCl=    0 I1Cent=      200000004 NGrid=

0

         NMat0=    1 NMatS0=            1 NMatT0=    0 NMatD0=    1 NMtDS0=    0

NMtDT0=    0

Petite list used in FoFCou.

Requested convergence on RMS density matrix=1.00D-08 within 128 cycles.

Requested convergence on MAX density matrix=1.00D-06.

Requested convergence on                    energy=1.00D-06.

No special actions if energy rises.

SCF Done: E(RB3LYP) = -3225.52368674      A.U. after    10 cycles

         NFOck= 10 Conv=0.72D-08    -V/T= 2.0018

Calling FoFJK, ICntrl=            2127 FMM=F ISym2X=0 I1Cent= 0 IOpClX= 0 NMat=1 NMatS=1

NMatT=0.

\*\*\*\*\* Axes restored to original set \*\*\*\*\*

-----



| Center<br>Number | Atomic<br>Number | Forces (Hartrees/Bohr) |              |              |
|------------------|------------------|------------------------|--------------|--------------|
|                  |                  | X                      | Y            | Z            |
| 1                | 6                | -0.000114546           | -0.000032727 | 0.000152128  |
| 2                | 6                | 0.000069722            | 0.000039185  | -0.000127356 |
| 3                | 7                | -0.000120780           | -0.000022320 | 0.000097191  |
| 4                | 6                | 0.000034922            | 0.000205271  | 0.000006086  |
| 5                | 7                | 0.000100252            | -0.000207252 | -0.000063682 |
| 6                | 6                | 0.000043554            | -0.000107430 | -0.000109104 |
| 7                | 6                | 0.000370946            | -0.000206157 | 0.000032994  |
| 8                | 1                | -0.000007127           | -0.000018870 | 0.000008281  |
| 9                | 1                | -0.000014140           | -0.000002497 | -0.000029293 |
| 10               | 1                | 0.000065710            | 0.000132729  | -0.000028443 |
| 11               | 1                | -0.000009125           | -0.000054441 | 0.000036295  |
| 12               | 1                | -0.000048990           | -0.000001192 | -0.000053161 |
| 13               | 1                | -0.000083119           | 0.000056819  | -0.000035236 |
| 14               | 35               | -0.000019284           | -0.000037054 | -0.000078432 |
| 15               | 1                | 0.000048926            | 0.000160260  | 0.000121970  |
| 16               | 6                | 0.000021565            | -0.000026465 | -0.000018660 |
| 17               | 6                | -0.000031486           | 0.000024802  | 0.000004133  |
| 18               | 1                | 0.000007811            | 0.000015924  | -0.000013345 |
| 19               | 1                | -0.000008770           | 0.000016269  | -0.000006295 |
| 20               | 1                | 0.000003219            | -0.000016117 | -0.000001142 |
| 21               | 8                | -0.000385854           | -0.000041131 | 0.000208548  |
| 22               | 1                | 0.000056026            | 0.000265683  | -0.000349440 |
| 23               | 6                | -0.000090390           | 0.000004111  | -0.000103920 |
| 24               | 6                | -0.000160234           | -0.000026534 | 0.000185758  |
| 25               | 8                | 0.000218429            | -0.000244040 | 0.000275385  |
| 26               | 1                | -0.000116855           | 0.000055539  | 0.000112830  |
| 27               | 1                | 0.000007351            | 0.000045453  | -0.000048559 |
| 28               | 1                | 0.000090575            | -0.000004031 | -0.000125977 |
| 29               | 6                | 0.000149042            | 0.000014567  | -0.000153588 |
| 30               | 1                | -0.000026427           | -0.000010653 | 0.000034908  |
| 31               | 1                | 0.000012864            | 0.000027362  | 0.000025377  |
| 32               | 1                | -0.000063785           | -0.000005062 | 0.000043750  |

-----  
Cartesian Forces: Max 0.000385854 RMS 0.000114491

GradGradGradGradGradGradGradGradGradGradGradGradGradGradGradGradGradGradGrad

Berny optimization.

Using GEDIIS/GDIIS optimizer.

FormGI is forming the generalized inverse of G from B-inverse, IUseBI=4.

GSVD: received Info= 1 from GESDD.

Internal Forces: Max 0.000300565 RMS 0.000065244

Search for a local minimum.

Step number 27 out of a maximum of 177

All quantities printed in internal units (Hartrees-Bohrs-Radians)

Mixed Optimization -- En-DIIS/RFO-DIIS

Swapping is turned off.

Update second derivatives using D2CorX and points 21 22 23 24 25  
26 27

DE= -1.36D-05 DEPred=-8.51D-06 R= 1.59D+00

TightC=F SS= 1.41D+00 RLast= 1.22D-01 DXNew= 3.2661D+00 3.6598D-01

Trust test= 1.59D+00 RLast= 1.22D-01 DXMaxT set to 1.94D+00

ITU= 1 1 1 1 1 1 1 1 1 1 1 -1 1 1 1 1 1 1 1 1 1

ITU= 1 1 0 1 0 1 0

|                 |         |         |         |         |         |
|-----------------|---------|---------|---------|---------|---------|
| Eigenvalues --- | 0.00006 | 0.00127 | 0.00232 | 0.00262 | 0.00293 |
| Eigenvalues --- | 0.00566 | 0.00752 | 0.01037 | 0.01242 | 0.01409 |
| Eigenvalues --- | 0.01474 | 0.01773 | 0.01900 | 0.01961 | 0.02100 |
| Eigenvalues --- | 0.02182 | 0.02315 | 0.02387 | 0.02758 | 0.03029 |
| Eigenvalues --- | 0.03063 | 0.03178 | 0.03423 | 0.03586 | 0.04153 |
| Eigenvalues --- | 0.04614 | 0.04993 | 0.05240 | 0.05439 | 0.05666 |
| Eigenvalues --- | 0.05930 | 0.06198 | 0.07087 | 0.09405 | 0.09599 |
| Eigenvalues --- | 0.10663 | 0.11083 | 0.11536 | 0.11778 | 0.13013 |
| Eigenvalues --- | 0.14016 | 0.14335 | 0.14704 | 0.15960 | 0.15992 |
| Eigenvalues --- | 0.16000 | 0.16000 | 0.16005 | 0.16020 | 0.16041 |
| Eigenvalues --- | 0.16490 | 0.17426 | 0.19104 | 0.21486 | 0.22053 |
| Eigenvalues --- | 0.22959 | 0.23706 | 0.23873 | 0.24259 | 0.25078 |
| Eigenvalues --- | 0.27670 | 0.28514 | 0.30753 | 0.32293 | 0.33108 |
| Eigenvalues --- | 0.33433 | 0.34055 | 0.34402 | 0.34527 | 0.34868 |
| Eigenvalues --- | 0.35333 | 0.35685 | 0.35690 | 0.35857 | 0.36243 |
| Eigenvalues --- | 0.36441 | 0.36677 | 0.37223 | 0.37275 | 0.37735 |
| Eigenvalues --- | 0.39872 | 0.42148 | 0.42857 | 0.44175 | 0.46087 |
| Eigenvalues --- | 0.49976 | 0.54146 | 0.55156 | 0.60159 | 0.62129 |

Eigenvalue 1 is 5.68D-05 Eigenvector:

|   |          |          |          |          |          |
|---|----------|----------|----------|----------|----------|
|   | D52      | D55      | D53      | D54      | D46      |
| 1 | 0.51126  | -0.49660 | -0.49453 | -0.48810 | -0.03786 |
|   | D47      | D42      | D44      | D43      | R18      |
| 1 | -0.03329 | -0.02790 | -0.02768 | -0.02665 | 0.01962  |

En-DIIS/RFO-DIIS IScMMF= 0 using points: 27 26 25 24 23

RFO step: Lambda=-2.13445150D-06.

DidBck=F Rises=F RFO-DIIS coefs: 2.45207 -1.82210 -0.01280 0.55717 -

0.17433

Iteration 1 RMS(Cart)= 0.01333863 RMS(Int)= 0.00033912

Iteration 2 RMS(Cart)= 0.00074269 RMS(Int)= 0.00007131

Iteration 3 RMS(Cart)= 0.00000037 RMS(Int)= 0.00007131

|          |       |        |          |         |         |       |
|----------|-------|--------|----------|---------|---------|-------|
| Variable | Old X | -DE/DX | Delta X  | Delta X | Delta X | New X |
|          |       |        | (Linear) | (Quad)  | (Total) |       |

|     |         |          |          |          |          |         |
|-----|---------|----------|----------|----------|----------|---------|
| R1  | 2.56520 | -0.00002 | -0.00006 | 0.00005  | -0.00002 | 2.56518 |
| R2  | 2.61978 | 0.00007  | 0.00006  | 0.00000  | 0.00006  | 2.61984 |
| R3  | 2.03413 | 0.00002  | -0.00001 | 0.00001  | -0.00001 | 2.03413 |
| R4  | 2.62943 | 0.00001  | 0.00014  | -0.00010 | 0.00003  | 2.62946 |
| R5  | 2.03069 | 0.00002  | 0.00000  | 0.00002  | 0.00002  | 2.03071 |
| R6  | 2.54585 | 0.00011  | -0.00006 | 0.00018  | 0.00012  | 2.54597 |
| R7  | 2.68703 | 0.00000  | 0.00004  | 0.00001  | 0.00005  | 2.68708 |
| R8  | 2.51655 | 0.00030  | -0.00065 | 0.00040  | -0.00030 | 2.51625 |
| R9  | 2.09929 | 0.00008  | -0.00106 | 0.00040  | -0.00074 | 2.09855 |
| R10 | 2.79199 | 0.00009  | 0.00004  | 0.00017  | 0.00022  | 2.79221 |
| R11 | 2.90761 | -0.00003 | -0.00029 | 0.00005  | -0.00023 | 2.90738 |
| R12 | 2.06138 | 0.00009  | 0.00006  | 0.00010  | 0.00016  | 2.06154 |
| R13 | 2.06096 | 0.00006  | -0.00005 | 0.00004  | -0.00001 | 2.06095 |
| R14 | 2.07246 | 0.00006  | -0.00018 | 0.00002  | -0.00017 | 2.07230 |
| R15 | 2.07058 | 0.00007  | 0.00010  | 0.00013  | 0.00023  | 2.07081 |
| R16 | 2.65554 | -0.00029 | -0.00072 | 0.00002  | -0.00070 | 2.65485 |
| R17 | 4.15883 | -0.00010 | 0.00087  | -0.00001 | 0.00079  | 4.15962 |
| R18 | 8.46950 | -0.00005 | 0.00221  | -0.00185 | 0.00037  | 8.46988 |
| R19 | 2.50672 | 0.00004  | -0.00007 | 0.00006  | -0.00001 | 2.50671 |
| R20 | 2.04634 | 0.00001  | -0.00002 | 0.00000  | -0.00002 | 2.04632 |
| R21 | 2.04295 | 0.00001  | -0.00002 | 0.00002  | 0.00000  | 2.04296 |
| R22 | 2.04577 | 0.00001  | -0.00002 | 0.00001  | -0.00001 | 2.04576 |
| R23 | 1.84588 | 0.00019  | 0.00017  | 0.00006  | 0.00030  | 1.84619 |
| R24 | 3.42042 | -0.00004 | 0.00043  | -0.00137 | -0.00087 | 3.41955 |
| R25 | 2.77379 | 0.00012  | 0.00005  | -0.00003 | 0.00005  | 2.77384 |
| R26 | 2.74040 | 0.00004  | -0.00051 | 0.00057  | 0.00005  | 2.74044 |
| R27 | 2.05438 | 0.00017  | -0.00008 | 0.00022  | 0.00014  | 2.05452 |
| R28 | 2.05316 | 0.00006  | -0.00005 | 0.00010  | 0.00006  | 2.05322 |
| R29 | 2.73703 | -0.00003 | -0.00138 | 0.00009  | -0.00131 | 2.73572 |
| R30 | 2.05738 | 0.00012  | -0.00002 | 0.00015  | 0.00013  | 2.05751 |
| R31 | 2.84231 | -0.00006 | -0.00051 | -0.00012 | -0.00063 | 2.84168 |
| R32 | 2.06790 | 0.00001  | 0.00006  | -0.00003 | 0.00003  | 2.06792 |
| R33 | 2.06805 | 0.00004  | -0.00002 | 0.00007  | 0.00005  | 2.06810 |
| R34 | 2.06301 | 0.00007  | 0.00006  | -0.00004 | 0.00002  | 2.06303 |
| A1  | 1.87426 | 0.00003  | -0.00025 | 0.00022  | -0.00002 | 1.87423 |
| A2  | 2.27843 | -0.00002 | -0.00001 | -0.00005 | -0.00007 | 2.27836 |
| A3  | 2.13045 | -0.00001 | 0.00029  | -0.00017 | 0.00011  | 2.13056 |
| A4  | 1.86169 | 0.00007  | 0.00010  | 0.00001  | 0.00010  | 1.86179 |
| A5  | 2.27732 | -0.00004 | -0.00015 | 0.00001  | -0.00013 | 2.27718 |
| A6  | 2.14416 | -0.00003 | 0.00005  | -0.00002 | 0.00004  | 2.14420 |
| A7  | 1.89718 | 0.00001  | -0.00019 | -0.00004 | -0.00024 | 1.89694 |
| A8  | 2.24855 | -0.00002 | 0.00020  | -0.00009 | 0.00012  | 2.24867 |
| A9  | 2.13744 | 0.00001  | -0.00001 | 0.00012  | 0.00012  | 2.13756 |
| A10 | 1.88944 | -0.00006 | 0.00012  | 0.00009  | 0.00023  | 1.88967 |

|     |         |          |          |          |          |         |
|-----|---------|----------|----------|----------|----------|---------|
| A11 | 2.23502 | 0.00000  | 0.00007  | -0.00010 | -0.00001 | 2.23501 |
| A12 | 2.15873 | 0.00005  | -0.00020 | 0.00002  | -0.00022 | 2.15850 |
| A13 | 1.90218 | -0.00005 | 0.00023  | -0.00028 | -0.00006 | 1.90212 |
| A14 | 2.21238 | 0.00002  | 0.00061  | -0.00026 | 0.00033  | 2.21271 |
| A15 | 2.16743 | 0.00003  | -0.00066 | 0.00050  | -0.00012 | 2.16731 |
| A16 | 1.95063 | 0.00002  | 0.00038  | -0.00003 | 0.00036  | 1.95099 |
| A17 | 1.86680 | 0.00000  | -0.00055 | -0.00015 | -0.00066 | 1.86614 |
| A18 | 1.88295 | 0.00001  | -0.00028 | 0.00036  | 0.00003  | 1.88298 |
| A19 | 1.92538 | -0.00005 | 0.00093  | -0.00044 | 0.00048  | 1.92586 |
| A20 | 1.92094 | -0.00001 | -0.00077 | 0.00004  | -0.00072 | 1.92021 |
| A21 | 1.91588 | 0.00004  | 0.00028  | 0.00023  | 0.00052  | 1.91640 |
| A22 | 1.91204 | 0.00003  | 0.00026  | -0.00029 | -0.00007 | 1.91196 |
| A23 | 1.90254 | -0.00001 | 0.00131  | -0.00074 | 0.00062  | 1.90315 |
| A24 | 1.91200 | -0.00009 | 0.00015  | 0.00064  | 0.00077  | 1.91277 |
| A25 | 1.88882 | -0.00004 | -0.00039 | -0.00028 | -0.00068 | 1.88815 |
| A26 | 1.88940 | 0.00004  | -0.00192 | 0.00042  | -0.00153 | 1.88787 |
| A27 | 1.95856 | 0.00006  | 0.00056  | 0.00023  | 0.00085  | 1.95941 |
| A28 | 1.78894 | 0.00003  | 0.00090  | 0.00116  | 0.00212  | 1.79107 |
| A29 | 2.83800 | -0.00011 | -0.00135 | -0.00177 | -0.00315 | 2.83486 |
| A30 | 2.17695 | 0.00000  | -0.00018 | 0.00014  | -0.00004 | 2.17690 |
| A31 | 1.95554 | 0.00000  | -0.00008 | 0.00002  | -0.00005 | 1.95548 |
| A32 | 2.15070 | 0.00000  | 0.00026  | -0.00016 | 0.00010  | 2.15080 |
| A33 | 2.07960 | 0.00001  | 0.00010  | 0.00002  | 0.00012  | 2.07972 |
| A34 | 2.15761 | -0.00002 | -0.00011 | -0.00002 | -0.00013 | 2.15748 |
| A35 | 2.04597 | 0.00001  | 0.00001  | 0.00000  | 0.00001  | 2.04598 |
| A36 | 1.91040 | 0.00006  | 0.00180  | 0.00040  | 0.00280  | 1.91320 |
| A37 | 3.04073 | 0.00020  | 0.00548  | 0.00022  | 0.00534  | 3.04608 |
| A38 | 2.07472 | 0.00005  | -0.00085 | -0.00026 | -0.00119 | 2.07353 |
| A39 | 2.08790 | -0.00005 | 0.00020  | -0.00043 | -0.00014 | 2.08776 |
| A40 | 2.00146 | 0.00008  | -0.00075 | 0.00113  | 0.00036  | 2.00182 |
| A41 | 1.98404 | -0.00004 | 0.00028  | 0.00035  | 0.00065  | 1.98469 |
| A42 | 2.03996 | 0.00000  | 0.00084  | -0.00013 | 0.00072  | 2.04068 |
| A43 | 2.04660 | -0.00001 | -0.00067 | 0.00007  | -0.00065 | 2.04595 |
| A44 | 2.13244 | -0.00001 | 0.00066  | -0.00035 | 0.00036  | 2.13280 |
| A45 | 1.95018 | -0.00007 | 0.00015  | -0.00051 | -0.00039 | 1.94979 |
| A46 | 2.04550 | 0.00007  | 0.00014  | 0.00080  | 0.00096  | 2.04646 |
| A47 | 2.02203 | 0.00001  | -0.00014 | 0.00000  | -0.00014 | 2.02189 |
| A48 | 1.41721 | 0.00008  | 0.00127  | -0.00041 | 0.00111  | 1.41832 |
| A49 | 1.00622 | -0.00020 | -0.00347 | 0.00017  | -0.00347 | 1.00274 |
| A50 | 2.37974 | -0.00013 | -0.00691 | -0.00205 | -0.00889 | 2.37084 |
| A51 | 2.31144 | 0.00006  | 0.01221  | 0.00639  | 0.01861  | 2.33004 |
| A52 | 1.93093 | 0.00005  | 0.00074  | -0.00034 | 0.00040  | 1.93133 |
| A53 | 1.91239 | 0.00000  | -0.00047 | 0.00048  | 0.00001  | 1.91240 |
| A54 | 1.93745 | 0.00004  | 0.00086  | -0.00033 | 0.00053  | 1.93798 |

|     |          |          |          |          |          |          |
|-----|----------|----------|----------|----------|----------|----------|
| A55 | 1.88364  | -0.00002 | -0.00048 | 0.00026  | -0.00022 | 1.88342  |
| A56 | 1.91408  | -0.00005 | -0.00031 | 0.00004  | -0.00027 | 1.91381  |
| A57 | 1.88397  | -0.00002 | -0.00041 | -0.00009 | -0.00050 | 1.88347  |
| A58 | 3.72864  | 0.00014  | 0.01349  | 0.00597  | 0.01972  | 3.74836  |
| A59 | 5.03828  | -0.00003 | 0.00802  | 0.00184  | 0.00981  | 5.04809  |
| D1  | 0.00592  | -0.00008 | -0.00049 | -0.00007 | -0.00056 | 0.00536  |
| D2  | -3.12934 | -0.00005 | -0.00195 | 0.00010  | -0.00186 | -3.13119 |
| D3  | 3.13643  | -0.00001 | 0.00183  | -0.00015 | 0.00168  | 3.13812  |
| D4  | 0.00118  | 0.00003  | 0.00037  | 0.00002  | 0.00038  | 0.00157  |
| D5  | -0.00823 | 0.00008  | 0.00088  | -0.00003 | 0.00084  | -0.00739 |
| D6  | -3.09875 | 0.00008  | -0.00305 | 0.00073  | -0.00233 | -3.10109 |
| D7  | -3.13990 | 0.00002  | -0.00120 | 0.00004  | -0.00116 | -3.14106 |
| D8  | 0.05277  | 0.00001  | -0.00513 | 0.00079  | -0.00434 | 0.04843  |
| D9  | -0.00167 | 0.00005  | -0.00006 | 0.00015  | 0.00009  | -0.00158 |
| D10 | -3.13671 | 0.00003  | 0.00075  | -0.00001 | 0.00073  | -3.13597 |
| D11 | 3.13418  | 0.00002  | 0.00127  | 0.00000  | 0.00127  | 3.13545  |
| D12 | -0.00086 | 0.00001  | 0.00207  | -0.00016 | 0.00191  | 0.00105  |
| D13 | -0.00345 | 0.00000  | 0.00060  | -0.00017 | 0.00043  | -0.00301 |
| D14 | 3.13682  | 0.00002  | 0.00400  | 0.00031  | 0.00429  | 3.14112  |
| D15 | 3.13209  | 0.00001  | -0.00014 | -0.00002 | -0.00016 | 3.13193  |
| D16 | -0.01082 | 0.00004  | 0.00325  | 0.00046  | 0.00370  | -0.00712 |
| D17 | -0.00347 | 0.00002  | 0.00166  | 0.00024  | 0.00190  | -0.00157 |
| D18 | 3.13792  | 0.00002  | 0.00141  | 0.00012  | 0.00153  | 3.13945  |
| D19 | -3.13770 | 0.00000  | 0.00256  | 0.00006  | 0.00263  | -3.13508 |
| D20 | 0.00368  | 0.00000  | 0.00232  | -0.00006 | 0.00226  | 0.00594  |
| D21 | 0.00719  | -0.00005 | -0.00091 | 0.00013  | -0.00079 | 0.00640  |
| D22 | 3.09932  | -0.00005 | 0.00294  | -0.00063 | 0.00230  | 3.10163  |
| D23 | -3.13315 | -0.00007 | -0.00412 | -0.00033 | -0.00444 | -3.13759 |
| D24 | -0.04102 | -0.00007 | -0.00027 | -0.00109 | -0.00135 | -0.04237 |
| D25 | -3.12103 | -0.00005 | -0.01188 | -0.00291 | -0.01480 | -3.13583 |
| D26 | 0.01905  | -0.00002 | -0.00801 | -0.00235 | -0.01039 | 0.00866  |
| D27 | 1.44465  | -0.00002 | -0.00230 | -0.00235 | -0.00466 | 1.43999  |
| D28 | -2.72954 | -0.00008 | -0.00129 | -0.00300 | -0.00428 | -2.73382 |
| D29 | -0.66942 | -0.00003 | -0.00139 | -0.00263 | -0.00401 | -0.67343 |
| D30 | -1.63856 | -0.00002 | -0.00683 | -0.00146 | -0.00829 | -1.64685 |
| D31 | 0.47044  | -0.00008 | -0.00582 | -0.00211 | -0.00791 | 0.46253  |
| D32 | 2.53056  | -0.00003 | -0.00592 | -0.00173 | -0.00764 | 2.52292  |
| D33 | -0.93575 | -0.00001 | 0.00027  | -0.00036 | -0.00005 | -0.93580 |
| D34 | 1.12808  | -0.00004 | 0.00072  | -0.00131 | -0.00055 | 1.12753  |
| D35 | -3.00589 | -0.00003 | 0.00237  | -0.00109 | 0.00140  | -3.00449 |
| D36 | -3.01031 | 0.00002  | 0.00011  | 0.00013  | 0.00023  | -3.01008 |
| D37 | -0.94649 | -0.00002 | 0.00056  | -0.00082 | -0.00027 | -0.94676 |
| D38 | 1.20274  | 0.00000  | 0.00220  | -0.00060 | 0.00167  | 1.20441  |
| D39 | 1.15614  | 0.00001  | -0.00035 | 0.00010  | -0.00026 | 1.15588  |

|     |          |          |          |          |          |          |
|-----|----------|----------|----------|----------|----------|----------|
| D40 | -3.06322 | -0.00003 | 0.00010  | -0.00085 | -0.00076 | -3.06398 |
| D41 | -0.91400 | -0.00001 | 0.00175  | -0.00063 | 0.00119  | -0.91281 |
| D42 | -1.68466 | 0.00001  | 0.01460  | 0.00665  | 0.02114  | -1.66352 |
| D43 | 2.51441  | -0.00001 | 0.01534  | 0.00638  | 0.02169  | 2.53610  |
| D44 | 0.43107  | -0.00002 | 0.01674  | 0.00631  | 0.02302  | 0.45409  |
| D45 | 0.46379  | -0.00002 | -0.00017 | 0.00083  | 0.00060  | 0.46439  |
| D46 | -0.30017 | 0.00011  | 0.01554  | 0.00463  | 0.02011  | -0.28006 |
| D47 | 2.57500  | 0.00004  | 0.00080  | -0.00106 | -0.00041 | 2.57459  |
| D48 | 3.14131  | 0.00000  | -0.00008 | -0.00006 | -0.00014 | 3.14117  |
| D49 | 0.00010  | 0.00001  | 0.00013  | -0.00006 | 0.00007  | 0.00017  |
| D50 | -0.00005 | 0.00000  | 0.00020  | 0.00007  | 0.00027  | 0.00022  |
| D51 | -3.14126 | 0.00000  | 0.00041  | 0.00008  | 0.00048  | -3.14078 |
| D52 | -1.78990 | 0.00005  | -0.07200 | -0.04547 | -0.11754 | -1.90743 |
| D53 | 2.31084  | 0.00001  | 0.06359  | 0.04200  | 0.10549  | 2.41633  |
| D54 | 1.98276  | 0.00001  | 0.04834  | 0.03559  | 0.08406  | 2.06682  |
| D55 | -2.72744 | 0.00004  | 0.05558  | 0.04015  | 0.09568  | -2.63176 |
| D56 | -2.72898 | -0.00004 | -0.00020 | 0.00091  | 0.00073  | -2.72825 |
| D57 | -0.02953 | -0.00004 | -0.00065 | 0.00022  | -0.00042 | -0.02995 |
| D58 | -0.02071 | -0.00004 | 0.00051  | -0.00118 | -0.00065 | -0.02136 |
| D59 | 2.67874  | -0.00005 | 0.00005  | -0.00188 | -0.00180 | 2.67694  |
| D60 | -0.17587 | 0.00006  | -0.00030 | 0.00236  | 0.00202  | -0.17384 |
| D61 | 0.21061  | 0.00012  | 0.01883  | 0.00995  | 0.02873  | 0.23933  |
| D62 | -2.58684 | 0.00003  | -0.00111 | 0.00083  | -0.00031 | -2.58715 |
| D63 | -2.20036 | 0.00008  | 0.01802  | 0.00842  | 0.02639  | -2.17398 |
| D64 | 2.13750  | 0.00011  | 0.00982  | 0.00250  | 0.01225  | 2.14975  |
| D65 | -0.25559 | 0.00010  | 0.00972  | 0.00220  | 0.01185  | -0.24374 |
| D66 | 2.48779  | 0.00001  | 0.00125  | -0.00186 | -0.00060 | 2.48719  |
| D67 | -1.72063 | 0.00002  | 0.00083  | -0.00145 | -0.00061 | -1.72125 |
| D68 | 0.35856  | 0.00001  | 0.00056  | -0.00146 | -0.00089 | 0.35767  |
| D69 | 1.27257  | -0.00002 | 0.00091  | -0.00241 | -0.00151 | 1.27106  |
| D70 | -2.93585 | -0.00001 | 0.00048  | -0.00200 | -0.00152 | -2.93737 |
| D71 | -0.85666 | -0.00002 | 0.00021  | -0.00201 | -0.00180 | -0.85846 |
| D72 | -1.09018 | 0.00000  | 0.00068  | -0.00253 | -0.00185 | -1.09203 |
| D73 | 0.98459  | 0.00001  | 0.00025  | -0.00212 | -0.00187 | 0.98272  |
| D74 | 3.06378  | 0.00000  | -0.00002 | -0.00213 | -0.00215 | 3.06163  |

| Item                 | Value    | Threshold | Converged? |
|----------------------|----------|-----------|------------|
| Maximum Force        | 0.000301 | 0.000450  | YES        |
| RMS Force            | 0.000065 | 0.000300  | YES        |
| Maximum Displacement | 0.056894 | 0.001800  | NO         |
| RMS Displacement     | 0.014070 | 0.001200  | NO         |

Predicted change in Energy=-7.048458D-06

GradGradGradGradGradGradGradGradGradGradGradGradGradGradGradGradGradGradGrad

Input orientation:

| Center Number | Atomic Number | Atomic Type | Coordinates (Angstroms) |           |           |
|---------------|---------------|-------------|-------------------------|-----------|-----------|
|               |               |             | X                       | Y         | Z         |
| 1             | 6             | 0           | -1.381755               | -1.917098 | -0.243295 |
| 2             | 6             | 0           | -2.513006               | -1.176107 | -0.125682 |
| 3             | 7             | 0           | -2.113589               | 0.108651  | 0.229269  |
| 4             | 6             | 0           | -0.769824               | 0.132380  | 0.323402  |
| 5             | 7             | 0           | -0.310325               | -1.086105 | 0.045639  |
| 6             | 6             | 0           | 1.122976                | -1.442070 | -0.000780 |
| 7             | 6             | 0           | 1.687625                | -1.352170 | -1.429113 |
| 8             | 1             | 0           | -1.248146               | -2.954431 | -0.497768 |
| 9             | 1             | 0           | -3.543530               | -1.450630 | -0.257729 |
| 10            | 1             | 0           | 1.644508                | -0.746024 | 0.657722  |
| 11            | 1             | 0           | 1.228021                | -2.459039 | 0.378911  |
| 12            | 1             | 0           | 1.069808                | -1.953909 | -2.106439 |
| 13            | 1             | 0           | 1.647132                | -0.309756 | -1.764628 |
| 14            | 35            | 0           | 1.652778                | 2.228503  | 1.013565  |
| 15            | 1             | 0           | -0.117027               | 0.991631  | 0.585637  |
| 16            | 6             | 0           | -2.916716               | 1.255329  | 0.478327  |
| 17            | 6             | 0           | -4.240978               | 1.280657  | 0.405733  |
| 18            | 1             | 0           | -2.320005               | 2.120613  | 0.738757  |
| 19            | 1             | 0           | -4.762380               | 2.204448  | 0.614296  |
| 20            | 1             | 0           | -4.843574               | 0.419399  | 0.146756  |
| 21            | 8             | 0           | 2.993935                | -1.868598 | -1.452671 |
| 22            | 1             | 0           | 3.636805                | -1.139129 | -1.357567 |
| 23            | 6             | 0           | 4.853584                | 1.619285  | -1.126976 |
| 24            | 6             | 0           | 5.716951                | 0.750247  | -0.318294 |
| 25            | 8             | 0           | 4.869037                | 0.185994  | -1.347100 |
| 26            | 1             | 0           | 3.935675                | 2.001428  | -0.687167 |
| 27            | 1             | 0           | 5.282706                | 2.191627  | -1.944774 |
| 28            | 1             | 0           | 6.769668                | 0.700369  | -0.591710 |
| 29            | 6             | 0           | 5.393001                | 0.402526  | 1.108388  |
| 30            | 1             | 0           | 5.664867                | -0.635290 | 1.324066  |
| 31            | 1             | 0           | 5.965680                | 1.047449  | 1.782036  |
| 32            | 1             | 0           | 4.332564                | 0.555433  | 1.317947  |

Distance matrix (angstroms):

|   |   | 1        | 2        | 3        | 4        | 5        |
|---|---|----------|----------|----------|----------|----------|
| 1 | C | 0.000000 |          |          |          |          |
| 2 | C | 1.357435 | 0.000000 |          |          |          |
| 3 | N | 2.205121 | 1.391449 | 0.000000 |          |          |
| 4 | C | 2.212683 | 2.225421 | 1.347267 | 0.000000 |          |
| 5 | N | 1.386360 | 2.211166 | 2.170927 | 1.331540 | 0.000000 |

|    |    |          |          |          |          |          |
|----|----|----------|----------|----------|----------|----------|
| 6  | C  | 2.560887 | 3.647835 | 3.596250 | 2.483280 | 1.477571 |
| 7  | C  | 3.338622 | 4.401730 | 4.396982 | 3.363666 | 2.497496 |
| 8  | H  | 1.076414 | 2.213765 | 3.264973 | 3.229786 | 2.159963 |
| 9  | H  | 2.211577 | 1.074606 | 2.171003 | 3.246086 | 3.267801 |
| 10 | H  | 3.367717 | 4.252484 | 3.877801 | 2.590823 | 2.076457 |
| 11 | H  | 2.737110 | 3.986955 | 4.216845 | 3.272601 | 2.088666 |
| 12 | H  | 3.079418 | 4.167124 | 4.454627 | 3.693369 | 2.699868 |
| 13 | H  | 3.751287 | 4.554498 | 4.277115 | 3.224442 | 2.776945 |
| 14 | Br | 5.289054 | 5.499364 | 4.392540 | 3.277050 | 3.972063 |
| 15 | H  | 3.278318 | 3.308440 | 2.211993 | 1.110506 | 2.155446 |
| 16 | C  | 3.597379 | 2.537655 | 1.421940 | 2.427789 | 3.530270 |
| 17 | C  | 4.338437 | 3.050243 | 2.435266 | 3.657079 | 4.602311 |
| 18 | H  | 4.260029 | 3.413630 | 2.085707 | 2.555123 | 3.847372 |
| 19 | H  | 5.399188 | 4.127398 | 3.399515 | 4.507615 | 5.565241 |
| 20 | H  | 4.194706 | 2.837502 | 2.748853 | 4.087668 | 4.777774 |
| 21 | O  | 4.540000 | 5.706736 | 5.729332 | 4.617817 | 3.711518 |
| 22 | H  | 5.199305 | 6.272087 | 6.094426 | 4.884749 | 4.189467 |
| 23 | C  | 7.222627 | 7.942509 | 7.256922 | 5.994764 | 5.946437 |
| 24 | C  | 7.583665 | 8.454592 | 7.875838 | 6.547655 | 6.311315 |
| 25 | O  | 6.686836 | 7.605376 | 7.158770 | 5.881344 | 5.512146 |
| 26 | H  | 6.620191 | 7.210928 | 6.404378 | 5.162976 | 5.300791 |
| 27 | H  | 8.011972 | 8.684691 | 7.985639 | 6.783675 | 6.781392 |
| 28 | H  | 8.568443 | 9.481897 | 8.940715 | 7.616034 | 7.329666 |
| 29 | C  | 7.287319 | 8.155977 | 7.563604 | 6.218489 | 5.989440 |
| 30 | H  | 7.331749 | 8.322972 | 7.890273 | 6.557126 | 6.127033 |
| 31 | H  | 8.177732 | 8.970602 | 8.280520 | 6.952121 | 6.852399 |
| 32 | H  | 6.419059 | 7.207227 | 6.552688 | 5.215597 | 5.086239 |
|    |    | 6        | 7        | 8        | 9        | 10       |
| 6  | C  | 0.000000 |          |          |          |          |
| 7  | C  | 1.538520 | 0.000000 |          |          |          |
| 8  | H  | 2.855951 | 3.471800 | 0.000000 |          |          |
| 9  | H  | 4.673582 | 5.361605 | 2.754601 | 0.000000 |          |
| 10 | H  | 1.090918 | 2.173511 | 3.818333 | 5.315097 | 0.000000 |
| 11 | H  | 1.090609 | 2.169181 | 2.673085 | 4.918322 | 1.784831 |
| 12 | H  | 2.167627 | 1.096612 | 2.993622 | 4.995388 | 3.070806 |
| 13 | H  | 2.160563 | 1.095827 | 4.120907 | 5.524066 | 2.461324 |
| 14 | Br | 3.844827 | 4.334640 | 6.128808 | 6.492597 | 2.995747 |
| 15 | H  | 2.793634 | 3.579020 | 4.245539 | 4.291483 | 2.475408 |
| 16 | C  | 4.881047 | 5.624707 | 4.632383 | 2.873480 | 4.984211 |
| 17 | C  | 6.029138 | 6.741422 | 5.263966 | 2.895953 | 6.229758 |
| 18 | H  | 5.009366 | 5.728959 | 5.332349 | 3.904327 | 4.893009 |
| 19 | H  | 6.950743 | 7.643796 | 6.340392 | 3.950395 | 7.053750 |
| 20 | H  | 6.251925 | 6.948265 | 4.972449 | 2.313165 | 6.611696 |
| 21 | O  | 2.406325 | 1.404884 | 4.481754 | 6.658906 | 2.744974 |



|    |    |          |          |          |           |           |
|----|----|----------|----------|----------|-----------|-----------|
| 22 | H  | 2.872626 | 1.962093 | 5.281791 | 7.270755  | 2.860973  |
| 23 | C  | 4.955567 | 4.352485 | 7.651528 | 8.982844  | 4.367837  |
| 24 | C  | 5.100164 | 4.678626 | 7.891098 | 9.518615  | 4.447046  |
| 25 | O  | 4.300714 | 3.534693 | 6.928460 | 8.639244  | 3.909674  |
| 26 | H  | 4.498898 | 4.104977 | 7.174149 | 8.248614  | 3.821867  |
| 27 | H  | 5.855444 | 5.074348 | 8.439654 | 9.696112  | 5.351566  |
| 28 | H  | 6.068308 | 5.544485 | 8.812021 | 10.540416 | 5.469953  |
| 29 | C  | 4.781830 | 4.821585 | 7.612735 | 9.228329  | 3.946323  |
| 30 | H  | 4.799467 | 4.890028 | 7.515800 | 9.378776  | 4.076710  |
| 31 | H  | 5.729565 | 5.862713 | 8.558729 | 10.041221 | 4.811772  |
| 32 | H  | 4.003812 | 4.263916 | 6.838149 | 8.278882  | 3.058648  |
|    |    | 11       | 12       | 13       | 14        | 15        |
| 11 | H  | 0.000000 |          |          |           |           |
| 12 | H  | 2.541093 | 0.000000 |          |           |           |
| 13 | H  | 3.064284 | 1.775775 | 0.000000 |           |           |
| 14 | Br | 4.749343 | 5.250414 | 3.763130 | 0.000000  |           |
| 15 | H  | 3.709314 | 4.163178 | 3.213971 | 2.201178  | 0.000000  |
| 16 | C  | 5.566440 | 5.733462 | 5.320624 | 4.702533  | 2.814127  |
| 17 | C  | 6.625406 | 6.706554 | 6.473772 | 6.000353  | 4.137980  |
| 18 | H  | 5.804411 | 6.015621 | 5.283163 | 3.983738  | 2.480153  |
| 19 | H  | 7.595290 | 7.662163 | 7.284391 | 6.427616  | 4.801151  |
| 20 | H  | 6.723360 | 6.758518 | 6.805463 | 6.799030  | 4.781246  |
| 21 | O  | 2.611852 | 2.033951 | 2.083551 | 4.966615  | 4.691875  |
| 22 | H  | 3.249578 | 2.795380 | 2.193708 | 4.571605  | 4.733649  |
| 23 | C  | 5.660842 | 5.295661 | 3.795936 | 3.898490  | 5.294711  |
| 24 | C  | 5.562024 | 5.666203 | 4.447349 | 4.525107  | 5.908524  |
| 25 | O  | 4.819991 | 4.426050 | 3.286452 | 4.482065  | 5.407898  |
| 26 | H  | 5.325757 | 5.086474 | 3.426357 | 2.855814  | 4.366247  |
| 27 | H  | 6.593079 | 5.912708 | 4.416647 | 4.682895  | 6.082769  |
| 28 | H  | 6.452427 | 6.467457 | 5.351304 | 5.576259  | 6.992678  |
| 29 | C  | 5.105659 | 5.880298 | 4.774212 | 4.163227  | 5.566033  |
| 30 | H  | 4.889273 | 5.884020 | 5.078208 | 4.939087  | 6.051648  |
| 31 | H  | 6.058848 | 6.935269 | 5.750712 | 4.537242  | 6.199501  |
| 32 | H  | 4.427981 | 5.354324 | 4.178799 | 3.173809  | 4.530497  |
|    |    | 16       | 17       | 18       | 19        | 20        |
| 16 | C  | 0.000000 |          |          |           |           |
| 17 | C  | 1.326493 | 0.000000 |          |           |           |
| 18 | H  | 1.082868 | 2.122868 | 0.000000 |           |           |
| 19 | H  | 2.079854 | 1.081087 | 2.446980 | 0.000000  |           |
| 20 | H  | 2.126383 | 1.082569 | 3.100483 | 1.847048  | 0.000000  |
| 21 | O  | 6.958697 | 8.106506 | 6.996722 | 9.001249  | 8.319835  |
| 22 | H  | 7.214746 | 8.427577 | 7.106622 | 9.252786  | 8.752647  |
| 23 | C  | 7.942734 | 9.229026 | 7.429177 | 9.789852  | 9.853781  |
| 24 | C  | 8.685040 | 9.998295 | 8.221188 | 10.620772 | 10.575936 |

|    |   |          |           |          |           |           |
|----|---|----------|-----------|----------|-----------|-----------|
| 25 | O | 8.068061 | 9.341472  | 7.731487 | 10.034213 | 9.829594  |
| 26 | H | 6.990730 | 8.280798  | 6.417243 | 8.797227  | 8.959546  |
| 27 | H | 8.601081 | 9.851665  | 8.062729 | 10.365942 | 10.490798 |
| 28 | H | 9.761095 | 11.070951 | 9.295665 | 11.692084 | 11.640089 |
| 29 | C | 8.377091 | 9.699402  | 7.910684 | 10.325833 | 10.281659 |
| 30 | H | 8.827983 | 10.131138 | 8.467336 | 10.830299 | 10.626654 |
| 31 | H | 8.979968 | 10.301673 | 8.419780 | 10.853273 | 10.950277 |
| 32 | H | 7.331226 | 8.652382  | 6.858711 | 9.269972  | 9.251578  |
|    |   | 21       | 22        | 23       | 24        | 25        |
| 21 | O | 0.000000 |           |          |           |           |
| 22 | H | 0.976960 | 0.000000  |          |           |           |
| 23 | C | 3.966069 | 3.023669  | 0.000000 |           |           |
| 24 | C | 3.944614 | 2.996137  | 1.467854 | 0.000000  |           |
| 25 | O | 2.783613 | 1.809546  | 1.450179 | 1.447681  | 0.000000  |
| 26 | H | 4.055857 | 3.225191  | 1.087208 | 2.207819  | 2.145339  |
| 27 | H | 4.686797 | 3.761348  | 1.086515 | 2.216209  | 2.133284  |
| 28 | H | 4.647257 | 3.712832  | 2.191414 | 1.088787  | 2.108932  |
| 29 | C | 4.180018 | 3.397332  | 2.601601 | 1.503754  | 2.520089  |
| 30 | H | 4.045392 | 3.399713  | 3.427666 | 2.149366  | 2.905681  |
| 31 | H | 5.272374 | 4.479050  | 3.166402 | 2.135786  | 3.425817  |
| 32 | H | 3.917164 | 3.242529  | 2.716779 | 2.152154  | 2.743495  |
|    |   | 26       | 27        | 28       | 29        | 30        |
| 26 | H | 0.000000 |           |          |           |           |
| 27 | H | 1.852631 | 0.000000  |          |           |           |
| 28 | H | 3.119837 | 2.503136  | 0.000000 |           |           |
| 29 | C | 2.811460 | 3.540459  | 2.207771 | 0.000000  |           |
| 30 | H | 3.739979 | 4.338528  | 2.583557 | 1.094299  | 0.000000  |
| 31 | H | 3.335860 | 3.957867  | 2.530124 | 1.094389  | 1.769699  |
| 32 | H | 2.503778 | 3.771638  | 3.099560 | 1.091707  | 1.786866  |
|    |   | 31       | 32        |          |           |           |
| 31 | H | 0.000000 |           |          |           |           |
| 32 | H | 1.767634 | 0.000000  |          |           |           |

Stoichiometry C10H17BrN2O2

Framework group C1[X(C10H17BrN2O2)]

Deg. of freedom 90

Full point group C1 NOp 1

Largest Abelian subgroup C1 NOp 1

Largest concise Abelian subgroup C1 NOp 1

Standard orientation:

| Center<br>Number | Atomic<br>Number | Atomic<br>Type | Coordinates (Angstroms) |          |           |
|------------------|------------------|----------------|-------------------------|----------|-----------|
|                  |                  |                | X                       | Y        | Z         |
| 1                | 6                | 0              | -2.720001               | 2.114328 | -0.441343 |

|    |    |   |           |           |           |
|----|----|---|-----------|-----------|-----------|
| 2  | 6  | 0 | -3.796522 | 1.347637  | -0.131639 |
| 3  | 7  | 0 | -3.325636 | 0.049878  | 0.042196  |
| 4  | 6  | 0 | -1.993958 | 0.042900  | -0.162041 |
| 5  | 7  | 0 | -1.610928 | 1.282716  | -0.460608 |
| 6  | 6  | 0 | -0.209457 | 1.682608  | -0.703881 |
| 7  | 6  | 0 | 0.459392  | 2.224014  | 0.571487  |
| 8  | 1  | 0 | -2.648830 | 3.167019  | -0.654519 |
| 9  | 1  | 0 | -4.833238 | 1.610509  | -0.027254 |
| 10 | 1  | 0 | 0.316380  | 0.795907  | -1.060753 |
| 11 | 1  | 0 | -0.209694 | 2.449217  | -1.479599 |
| 12 | 1  | 0 | -0.153648 | 3.029256  | 0.993772  |
| 13 | 1  | 0 | 0.522679  | 1.418374  | 1.311607  |
| 14 | 35 | 0 | 0.527833  | -2.049815 | -0.148799 |
| 15 | 1  | 0 | -1.297201 | -0.819961 | -0.105256 |
| 16 | 6  | 0 | -4.053921 | -1.126611 | 0.369895  |
| 17 | 6  | 0 | -5.363952 | -1.172370 | 0.573137  |
| 18 | 1  | 0 | -3.412357 | -1.996440 | 0.436197  |
| 19 | 1  | 0 | -5.826298 | -2.118449 | 0.817924  |
| 20 | 1  | 0 | -6.011164 | -0.307039 | 0.507755  |
| 21 | 8  | 0 | 1.720643  | 2.754656  | 0.253108  |
| 22 | 1  | 0 | 2.409312  | 2.079275  | 0.408180  |
| 23 | 6  | 0 | 3.814935  | -0.469258 | 1.227798  |
| 24 | 6  | 0 | 4.550111  | 0.013508  | 0.052618  |
| 25 | 8  | 0 | 3.735797  | 0.923196  | 0.830526  |
| 26 | 1  | 0 | 2.900425  | -1.037438 | 1.076587  |
| 27 | 1  | 0 | 4.343109  | -0.627204 | 2.164068  |
| 28 | 1  | 0 | 5.612500  | 0.215985  | 0.178276  |
| 29 | 6  | 0 | 4.100988  | -0.283791 | -1.351369 |
| 30 | 1  | 0 | 4.276593  | 0.577348  | -2.003360 |
| 31 | 1  | 0 | 4.672708  | -1.128452 | -1.748070 |
| 32 | 1  | 0 | 3.043313  | -0.553145 | -1.375748 |

-----  
Rotational constants (GHZ):      0.6037391      0.2205392      0.1722998

Standard basis: 6-311++G(d,p) (5D, 7F)

There are    492 symmetry adapted cartesian basis functions of A    symmetry.

There are    475 symmetry adapted basis functions of A    symmetry.

475 basis functions,    751 primitive gaussians,    492 cartesian basis functions

71 alpha electrons      71 beta electrons

nuclear repulsion energy      1307.5034848630 Hartrees.

NAtoms=    32 NActive=    32 NUniq=    32 SFac= 1.00D+00 NAtFMM=    60 NAOKFM=F

Big=F

Integral buffers will be    131072 words long.

Raffenetti 2 integral format.

Two-electron integral symmetry is turned on.

One-electron integrals computed using PRISM.

NBasis= 475 RedAO= T EigKep= 3.82D-06 NBF= 475  
NBsUse= 475 1.00D-06 EigRej= -1.00D+00 NBFU= 475  
Initial guess from the checkpoint file: "/home/suqian/liuwen/qianmengshijie/ohpo/ohpo.chk"  
B after Tr= 0.000000 0.000000 0.000000  
Rot= 0.999999 0.000991 0.000040 0.000146 Ang= 0.11 deg.  
ExpMin= 3.50D-02 ExpMax= 4.40D+05 ExpMxC= 1.51D+04 IAcc=3 IRadAn= 5 AccDes= 0.00D+00

Harris functional with IExCor= 402 and IRadAn= 5 diagonalized for initial guess.  
HarFok: IExCor= 402 AccDes= 0.00D+00 IRadAn= 5 IDoV= 1 UseB2=F ITyADJ=14  
ICtDFT= 3500011 ScaDFX= 1.000000 1.000000 1.000000 1.000000  
FoFCou: FMM=F IPFlag= 0 FMFlag= 100000 FMFlg1= 0  
NFxFlg= 0 DoJE=T BraDBF=F KetDBF=T FulRan=T  
wScrn= 0.000000 ICntrl= 500 IOpCl= 0 I1Cent= 20000004 NGrid= 0  
NMat0= 1 NMatS0= 1 NMatT0= 0 NMatD0= 1 NMtDS0= 0  
NMtDT0= 0

Petite list used in FoFCou.

Requested convergence on RMS density matrix=1.00D-08 within 128 cycles.

Requested convergence on MAX density matrix=1.00D-06.

Requested convergence on energy=1.00D-06.

No special actions if energy rises.

SCF Done: E(RB3LYP) = -3225.52370069 A.U. after 10 cycles

NFock= 10 Conv=0.81D-08 -V/T= 2.0018

Calling FoFJK, ICntrl= 2127 FMM=F ISym2X=0 I1Cent= 0 IOpClX= 0 NMat=1 NMatS=1  
NMatT=0.

\*\*\*\*\* Axes restored to original set \*\*\*\*\*

| Center Number | Atomic Number | Forces (Hartrees/Bohr) |              |              |
|---------------|---------------|------------------------|--------------|--------------|
|               |               | X                      | Y            | Z            |
| 1             | 6             | -0.000091248           | 0.000002452  | 0.000002362  |
| 2             | 6             | 0.000037570            | 0.000046264  | -0.000155115 |
| 3             | 7             | -0.000073080           | -0.000074437 | 0.000101801  |
| 4             | 6             | -0.000129206           | 0.000241348  | 0.000035338  |
| 5             | 7             | 0.000137762            | -0.000305953 | 0.000044393  |
| 6             | 6             | -0.000051612           | -0.000130997 | -0.000061580 |
| 7             | 6             | 0.000305891            | -0.000129777 | -0.000044596 |
| 8             | 1             | -0.000006123           | -0.000029834 | 0.000048652  |
| 9             | 1             | -0.000014921           | -0.000005777 | -0.000003229 |
| 10            | 1             | 0.000081862            | 0.000113182  | -0.000022316 |
| 11            | 1             | -0.000007833           | -0.000047731 | 0.000074757  |
| 12            | 1             | -0.000038997           | 0.000001741  | -0.000060972 |
| 13            | 1             | -0.000057232           | 0.000073588  | 0.000001710  |

|    |    |              |              |              |
|----|----|--------------|--------------|--------------|
| 14 | 35 | -0.000014393 | -0.000022008 | -0.000045625 |
| 15 | 1  | 0.000138794  | 0.000281854  | 0.000071490  |
| 16 | 6  | 0.000044443  | -0.000063179 | -0.000008996 |
| 17 | 6  | -0.000033168 | 0.000023168  | 0.000002222  |
| 18 | 1  | -0.000001305 | 0.000020787  | -0.000008677 |
| 19 | 1  | -0.000002359 | 0.000016946  | -0.000008958 |
| 20 | 1  | -0.000002682 | -0.000014368 | -0.000004959 |
| 21 | 8  | -0.000194523 | -0.000117899 | 0.000093830  |
| 22 | 1  | -0.000011429 | 0.000177513  | -0.000169654 |
| 23 | 6  | 0.000001423  | 0.000082069  | 0.000033553  |
| 24 | 6  | 0.000127670  | 0.000066007  | 0.000133959  |
| 25 | 8  | -0.000076263 | -0.000207117 | 0.000033398  |
| 26 | 1  | -0.000121880 | 0.000052073  | -0.000027144 |
| 27 | 1  | -0.000042233 | 0.000009969  | -0.000051860 |
| 28 | 1  | 0.000086105  | -0.000031536 | -0.000075629 |
| 29 | 6  | 0.000073635  | -0.000041177 | 0.000080953  |
| 30 | 1  | -0.000015110 | -0.000008298 | 0.000000137  |
| 31 | 1  | 0.000021796  | 0.000028535  | -0.000000380 |
| 32 | 1  | -0.000071354 | -0.000007408 | -0.000008866 |

-----  
Cartesian Forces: Max 0.000305953 RMS 0.000092395

GradGradGradGradGradGradGradGradGradGradGradGradGradGradGradGradGradGradGradGrad

Berny optimization.

Using GEDIIS/GDIIS optimizer.

FormGI is forming the generalized inverse of G from B-inverse, IUseBI=4.

GSVD: received Info= 1 from GESDD.

Internal Forces: Max 0.000391762 RMS 0.000060208

Search for a local minimum.

Step number 28 out of a maximum of 177

All quantities printed in internal units (Hartrees-Bohrs-Radians)

Mixed Optimization -- En-DIIS/RFO-DIIS

Swapping is turned off.

Update second derivatives using D2CorX and points 24 25 26 27 28

DE= -1.39D-05 DEPred=-7.05D-06 R= 1.98D+00

TightC=F SS= 1.41D+00 RLast= 2.16D-01 DXNew= 3.2661D+00 6.4724D-01

Trust test= 1.98D+00 RLast= 2.16D-01 DXMaxT set to 1.94D+00

ITU= 1 1 1 1 1 1 1 1 1 1 1 -1 1 1 1 1 1 1 1 1

ITU= 1 1 1 0 1 0 1 0

|                 |         |         |         |         |         |
|-----------------|---------|---------|---------|---------|---------|
| Eigenvalues --- | 0.00004 | 0.00118 | 0.00233 | 0.00249 | 0.00283 |
| Eigenvalues --- | 0.00519 | 0.00675 | 0.01076 | 0.01258 | 0.01410 |
| Eigenvalues --- | 0.01510 | 0.01736 | 0.01903 | 0.01965 | 0.02102 |
| Eigenvalues --- | 0.02182 | 0.02316 | 0.02388 | 0.02532 | 0.02974 |
| Eigenvalues --- | 0.03063 | 0.03083 | 0.03448 | 0.03579 | 0.04093 |

|                 |         |         |         |         |         |
|-----------------|---------|---------|---------|---------|---------|
| Eigenvalues --- | 0.04614 | 0.04986 | 0.05223 | 0.05434 | 0.05661 |
| Eigenvalues --- | 0.05919 | 0.05994 | 0.06890 | 0.09370 | 0.09688 |
| Eigenvalues --- | 0.10632 | 0.11079 | 0.11524 | 0.11758 | 0.13124 |
| Eigenvalues --- | 0.14039 | 0.14293 | 0.15126 | 0.15971 | 0.15991 |
| Eigenvalues --- | 0.16000 | 0.16002 | 0.16010 | 0.16013 | 0.16049 |
| Eigenvalues --- | 0.16484 | 0.17261 | 0.19321 | 0.21645 | 0.22059 |
| Eigenvalues --- | 0.22960 | 0.23657 | 0.24047 | 0.24210 | 0.25057 |
| Eigenvalues --- | 0.27666 | 0.28527 | 0.30887 | 0.32526 | 0.33109 |
| Eigenvalues --- | 0.33492 | 0.34054 | 0.34342 | 0.34491 | 0.34861 |
| Eigenvalues --- | 0.35198 | 0.35685 | 0.35690 | 0.35857 | 0.36222 |
| Eigenvalues --- | 0.36439 | 0.36674 | 0.37229 | 0.37268 | 0.37780 |
| Eigenvalues --- | 0.40470 | 0.42148 | 0.43264 | 0.43924 | 0.45994 |
| Eigenvalues --- | 0.49910 | 0.54040 | 0.55101 | 0.60026 | 0.61299 |

Eigenvalue 1 is 4.20D-05 Eigenvector:

|   |          |          |          |          |          |
|---|----------|----------|----------|----------|----------|
|   | D52      | D55      | D53      | D54      | D46      |
| 1 | 0.50737  | -0.49782 | -0.49598 | -0.49102 | -0.03436 |
|   | D47      | D44      | D42      | D43      | D39      |
| 1 | -0.03010 | -0.02326 | -0.02324 | -0.02204 | 0.01585  |

En-DIIS/RFO-DIIS IScMMF= 0 using points: 28 27 26 25 24

RFO step: Lambda=-1.26837109D-06.

DidBck=F Rises=F RFO-DIIS coefs: 1.92089 -1.20917 -0.17500 0.72262 -

0.25934

Iteration 1 RMS(Cart)= 0.00718794 RMS(Int)= 0.00013352

Iteration 2 RMS(Cart)= 0.00023873 RMS(Int)= 0.00002731

Iteration 3 RMS(Cart)= 0.00000005 RMS(Int)= 0.00002731

| Variable | Old X   | -DE/DX   | Delta X<br>(Linear) | Delta X<br>(Quad) | Delta X<br>(Total) | New X   |
|----------|---------|----------|---------------------|-------------------|--------------------|---------|
| R1       | 2.56518 | -0.00002 | -0.00009            | -0.00004          | -0.00013           | 2.56505 |
| R2       | 2.61984 | 0.00006  | 0.00015             | 0.00002           | 0.00016            | 2.62001 |
| R3       | 2.03413 | 0.00002  | 0.00002             | 0.00002           | 0.00004            | 2.03417 |
| R4       | 2.62946 | 0.00001  | -0.00005            | 0.00001           | -0.00005           | 2.62941 |
| R5       | 2.03071 | 0.00002  | 0.00004             | 0.00000           | 0.00004            | 2.03075 |
| R6       | 2.54597 | 0.00008  | 0.00020             | 0.00001           | 0.00021            | 2.54618 |
| R7       | 2.68708 | -0.00003 | -0.00007            | -0.00005          | -0.00011           | 2.68696 |
| R8       | 2.51625 | 0.00039  | 0.00039             | 0.00027           | 0.00064            | 2.51688 |
| R9       | 2.09855 | 0.00023  | 0.00053             | 0.00029           | 0.00079            | 2.09934 |
| R10      | 2.79221 | 0.00006  | 0.00022             | -0.00015          | 0.00007            | 2.79227 |
| R11      | 2.90738 | 0.00007  | 0.00022             | 0.00023           | 0.00044            | 2.90783 |
| R12      | 2.06154 | 0.00009  | 0.00025             | 0.00009           | 0.00033            | 2.06187 |
| R13      | 2.06095 | 0.00007  | 0.00008             | 0.00008           | 0.00016            | 2.06111 |
| R14      | 2.07230 | 0.00006  | 0.00008             | -0.00001          | 0.00007            | 2.07236 |
| R15      | 2.07081 | 0.00008  | 0.00032             | 0.00011           | 0.00043            | 2.07124 |
| R16      | 2.65485 | -0.00020 | -0.00077            | -0.00033          | -0.00109           | 2.65375 |
| R17      | 4.15962 | -0.00008 | -0.00126            | -0.00126          | -0.00254           | 4.15708 |

|     |         |          |          |          |          |         |
|-----|---------|----------|----------|----------|----------|---------|
| R18 | 8.46988 | -0.00002 | -0.00214 | -0.00005 | -0.00218 | 8.46769 |
| R19 | 2.50671 | 0.00004  | 0.00004  | 0.00002  | 0.00007  | 2.50677 |
| R20 | 2.04632 | 0.00001  | 0.00001  | 0.00000  | 0.00001  | 2.04634 |
| R21 | 2.04296 | 0.00001  | 0.00001  | 0.00001  | 0.00002  | 2.04298 |
| R22 | 2.04576 | 0.00002  | 0.00002  | 0.00001  | 0.00003  | 2.04579 |
| R23 | 1.84619 | 0.00013  | 0.00043  | -0.00003 | 0.00042  | 1.84661 |
| R24 | 3.41955 | 0.00000  | -0.00266 | 0.00122  | -0.00142 | 3.41813 |
| R25 | 2.77384 | 0.00016  | 0.00009  | 0.00026  | 0.00037  | 2.77421 |
| R26 | 2.74044 | 0.00008  | 0.00045  | -0.00013 | 0.00032  | 2.74076 |
| R27 | 2.05452 | 0.00011  | 0.00017  | 0.00011  | 0.00028  | 2.05480 |
| R28 | 2.05322 | 0.00003  | -0.00001 | 0.00008  | 0.00007  | 2.05329 |
| R29 | 2.73572 | 0.00014  | -0.00007 | 0.00021  | 0.00014  | 2.73586 |
| R30 | 2.05751 | 0.00010  | 0.00020  | 0.00005  | 0.00025  | 2.05776 |
| R31 | 2.84168 | 0.00008  | -0.00001 | 0.00008  | 0.00008  | 2.84176 |
| R32 | 2.06792 | 0.00001  | -0.00005 | 0.00004  | -0.00001 | 2.06791 |
| R33 | 2.06810 | 0.00003  | 0.00005  | 0.00000  | 0.00005  | 2.06815 |
| R34 | 2.06303 | 0.00007  | 0.00009  | 0.00006  | 0.00015  | 2.06318 |
| A1  | 1.87423 | 0.00003  | 0.00011  | -0.00003 | 0.00008  | 1.87431 |
| A2  | 2.27836 | -0.00002 | -0.00006 | -0.00002 | -0.00008 | 2.27828 |
| A3  | 2.13056 | -0.00001 | -0.00004 | 0.00004  | 0.00000  | 2.13056 |
| A4  | 1.86179 | 0.00006  | 0.00005  | 0.00001  | 0.00007  | 1.86185 |
| A5  | 2.27718 | -0.00003 | -0.00010 | 0.00000  | -0.00010 | 2.27708 |
| A6  | 2.14420 | -0.00002 | 0.00004  | -0.00001 | 0.00003  | 2.14423 |
| A7  | 1.89694 | 0.00006  | 0.00006  | 0.00013  | 0.00019  | 1.89713 |
| A8  | 2.24867 | -0.00005 | -0.00010 | -0.00012 | -0.00022 | 2.24845 |
| A9  | 2.13756 | -0.00001 | 0.00004  | -0.00001 | 0.00003  | 2.13759 |
| A10 | 1.88967 | -0.00011 | -0.00010 | -0.00020 | -0.00029 | 1.88938 |
| A11 | 2.23501 | 0.00005  | 0.00001  | 0.00014  | 0.00017  | 2.23518 |
| A12 | 2.15850 | 0.00006  | 0.00008  | 0.00006  | 0.00012  | 2.15862 |
| A13 | 1.90212 | -0.00004 | -0.00012 | 0.00008  | -0.00003 | 1.90208 |
| A14 | 2.21271 | -0.00003 | -0.00005 | -0.00032 | -0.00036 | 2.21235 |
| A15 | 2.16731 | 0.00007  | 0.00014  | 0.00020  | 0.00035  | 2.16766 |
| A16 | 1.95099 | 0.00000  | 0.00037  | -0.00025 | 0.00011  | 1.95110 |
| A17 | 1.86614 | 0.00003  | -0.00047 | 0.00012  | -0.00034 | 1.86580 |
| A18 | 1.88298 | -0.00001 | 0.00032  | -0.00019 | 0.00013  | 1.88312 |
| A19 | 1.92586 | -0.00008 | -0.00067 | -0.00009 | -0.00075 | 1.92512 |
| A20 | 1.92021 | 0.00005  | 0.00003  | 0.00043  | 0.00045  | 1.92066 |
| A21 | 1.91640 | 0.00002  | 0.00044  | -0.00003 | 0.00040  | 1.91680 |
| A22 | 1.91196 | 0.00005  | 0.00021  | 0.00031  | 0.00049  | 1.91246 |
| A23 | 1.90315 | -0.00005 | -0.00049 | -0.00004 | -0.00049 | 1.90266 |
| A24 | 1.91277 | -0.00005 | 0.00041  | 0.00006  | 0.00047  | 1.91324 |
| A25 | 1.88815 | -0.00002 | -0.00073 | -0.00002 | -0.00075 | 1.88740 |
| A26 | 1.88787 | 0.00002  | 0.00001  | -0.00056 | -0.00055 | 1.88732 |
| A27 | 1.95941 | 0.00005  | 0.00057  | 0.00025  | 0.00083  | 1.96023 |

|     |          |          |          |          |          |          |
|-----|----------|----------|----------|----------|----------|----------|
| A28 | 1.79107  | 0.00000  | 0.00037  | 0.00044  | 0.00087  | 1.79193  |
| A29 | 2.83486  | -0.00011 | -0.00149 | -0.00100 | -0.00252 | 2.83234  |
| A30 | 2.17690  | 0.00001  | 0.00005  | 0.00003  | 0.00007  | 2.17698  |
| A31 | 1.95548  | 0.00001  | 0.00000  | 0.00006  | 0.00007  | 1.95555  |
| A32 | 2.15080  | -0.00002 | -0.00005 | -0.00009 | -0.00014 | 2.15065  |
| A33 | 2.07972  | 0.00000  | 0.00008  | -0.00003 | 0.00005  | 2.07977  |
| A34 | 2.15748  | -0.00001 | -0.00013 | 0.00002  | -0.00011 | 2.15737  |
| A35 | 2.04598  | 0.00001  | 0.00005  | 0.00001  | 0.00006  | 2.04605  |
| A36 | 1.91320  | -0.00006 | 0.00133  | -0.00064 | 0.00085  | 1.91405  |
| A37 | 3.04608  | 0.00003  | 0.00327  | -0.00005 | 0.00302  | 3.04910  |
| A38 | 2.07353  | 0.00007  | -0.00030 | 0.00065  | 0.00033  | 2.07386  |
| A39 | 2.08776  | -0.00002 | 0.00019  | 0.00011  | 0.00032  | 2.08808  |
| A40 | 2.00182  | 0.00002  | 0.00008  | -0.00033 | -0.00025 | 2.00156  |
| A41 | 1.98469  | -0.00003 | 0.00030  | -0.00036 | -0.00005 | 1.98464  |
| A42 | 2.04068  | -0.00004 | -0.00005 | -0.00027 | -0.00032 | 2.04036  |
| A43 | 2.04595  | -0.00001 | -0.00018 | -0.00008 | -0.00028 | 2.04567  |
| A44 | 2.13280  | 0.00002  | 0.00021  | 0.00016  | 0.00040  | 2.13320  |
| A45 | 1.94979  | -0.00002 | -0.00049 | -0.00020 | -0.00070 | 1.94909  |
| A46 | 2.04646  | 0.00003  | 0.00055  | -0.00043 | 0.00013  | 2.04659  |
| A47 | 2.02189  | 0.00000  | -0.00012 | 0.00027  | 0.00015  | 2.02203  |
| A48 | 1.41832  | 0.00011  | 0.00114  | 0.00050  | 0.00174  | 1.42006  |
| A49 | 1.00274  | -0.00015 | -0.00319 | 0.00026  | -0.00301 | 0.99973  |
| A50 | 2.37084  | -0.00004 | -0.00501 | -0.00059 | -0.00559 | 2.36526  |
| A51 | 2.33004  | 0.00004  | 0.01003  | 0.00301  | 0.01302  | 2.34306  |
| A52 | 1.93133  | 0.00001  | -0.00010 | 0.00025  | 0.00016  | 1.93148  |
| A53 | 1.91240  | -0.00002 | -0.00002 | -0.00013 | -0.00015 | 1.91225  |
| A54 | 1.93798  | -0.00002 | -0.00023 | 0.00010  | -0.00013 | 1.93785  |
| A55 | 1.88342  | 0.00001  | 0.00032  | -0.00012 | 0.00021  | 1.88363  |
| A56 | 1.91381  | -0.00001 | 0.00005  | -0.00025 | -0.00020 | 1.91360  |
| A57 | 1.88347  | 0.00002  | -0.00001 | 0.00014  | 0.00013  | 1.88360  |
| A58 | 3.74836  | 0.00015  | 0.01117  | 0.00351  | 0.01476  | 3.76312  |
| A59 | 5.04809  | -0.00006 | 0.00309  | 0.00184  | 0.00493  | 5.05301  |
| D1  | 0.00536  | -0.00006 | -0.00149 | 0.00057  | -0.00093 | 0.00443  |
| D2  | -3.13119 | -0.00001 | -0.00088 | 0.00048  | -0.00039 | -3.13159 |
| D3  | 3.13812  | -0.00003 | -0.00025 | -0.00026 | -0.00051 | 3.13761  |
| D4  | 0.00157  | 0.00001  | 0.00036  | -0.00034 | 0.00002  | 0.00159  |
| D5  | -0.00739 | 0.00004  | 0.00070  | -0.00009 | 0.00062  | -0.00678 |
| D6  | -3.10109 | 0.00006  | 0.00099  | 0.00070  | 0.00169  | -3.09940 |
| D7  | -3.14106 | 0.00002  | -0.00041 | 0.00065  | 0.00024  | -3.14082 |
| D8  | 0.04843  | 0.00004  | -0.00012 | 0.00144  | 0.00132  | 0.04975  |
| D9  | -0.00158 | 0.00005  | 0.00178  | -0.00085 | 0.00093  | -0.00065 |
| D10 | -3.13597 | 0.00003  | 0.00083  | -0.00059 | 0.00025  | -3.13572 |
| D11 | 3.13545  | 0.00002  | 0.00122  | -0.00077 | 0.00045  | 3.13589  |
| D12 | 0.00105  | -0.00001 | 0.00028  | -0.00051 | -0.00023 | 0.00082  |



|     |          |          |          |          |          |          |
|-----|----------|----------|----------|----------|----------|----------|
| D13 | -0.00301 | -0.00003 | -0.00136 | 0.00080  | -0.00056 | -0.00357 |
| D14 | 3.14112  | -0.00003 | 0.00095  | -0.00058 | 0.00039  | 3.14150  |
| D15 | 3.13193  | 0.00000  | -0.00049 | 0.00056  | 0.00007  | 3.13200  |
| D16 | -0.00712 | 0.00000  | 0.00182  | -0.00082 | 0.00102  | -0.00611 |
| D17 | -0.00157 | 0.00002  | 0.00161  | -0.00011 | 0.00150  | -0.00007 |
| D18 | 3.13945  | 0.00002  | 0.00166  | -0.00023 | 0.00143  | 3.14087  |
| D19 | -3.13508 | -0.00002 | 0.00055  | 0.00019  | 0.00074  | -3.13434 |
| D20 | 0.00594  | -0.00001 | 0.00060  | 0.00006  | 0.00066  | 0.00660  |
| D21 | 0.00640  | -0.00001 | 0.00042  | -0.00044 | -0.00003 | 0.00637  |
| D22 | 3.10163  | -0.00003 | 0.00013  | -0.00123 | -0.00110 | 3.10053  |
| D23 | -3.13759 | -0.00001 | -0.00177 | 0.00086  | -0.00092 | -3.13851 |
| D24 | -0.04237 | -0.00003 | -0.00206 | 0.00008  | -0.00199 | -0.04436 |
| D25 | -3.13583 | -0.00001 | -0.00570 | 0.00052  | -0.00518 | -3.14102 |
| D26 | 0.00866  | -0.00001 | -0.00306 | -0.00106 | -0.00411 | 0.00455  |
| D27 | 1.43999  | 0.00001  | -0.00583 | -0.00210 | -0.00796 | 1.43203  |
| D28 | -2.73382 | -0.00007 | -0.00674 | -0.00229 | -0.00903 | -2.74285 |
| D29 | -0.67343 | -0.00004 | -0.00631 | -0.00236 | -0.00867 | -0.68210 |
| D30 | -1.64685 | 0.00003  | -0.00549 | -0.00119 | -0.00671 | -1.65357 |
| D31 | 0.46253  | -0.00005 | -0.00640 | -0.00138 | -0.00779 | 0.45473  |
| D32 | 2.52292  | -0.00002 | -0.00597 | -0.00145 | -0.00743 | 2.51549  |
| D33 | -0.93580 | 0.00000  | -0.00202 | 0.00109  | -0.00092 | -0.93672 |
| D34 | 1.12753  | -0.00002 | -0.00306 | 0.00122  | -0.00183 | 1.12569  |
| D35 | -3.00449 | -0.00003 | -0.00240 | 0.00155  | -0.00083 | -3.00531 |
| D36 | -3.01008 | 0.00002  | -0.00123 | 0.00117  | -0.00007 | -3.01015 |
| D37 | -0.94676 | -0.00001 | -0.00227 | 0.00130  | -0.00098 | -0.94774 |
| D38 | 1.20441  | -0.00001 | -0.00161 | 0.00162  | 0.00003  | 1.20444  |
| D39 | 1.15588  | 0.00002  | -0.00136 | 0.00099  | -0.00038 | 1.15550  |
| D40 | -3.06398 | -0.00001 | -0.00240 | 0.00112  | -0.00129 | -3.06527 |
| D41 | -0.91281 | -0.00001 | -0.00174 | 0.00144  | -0.00028 | -0.91309 |
| D42 | -1.66352 | 0.00003  | 0.01088  | 0.00279  | 0.01359  | -1.64993 |
| D43 | 2.53610  | -0.00002 | 0.01038  | 0.00270  | 0.01305  | 2.54915  |
| D44 | 0.45409  | -0.00003 | 0.01094  | 0.00294  | 0.01384  | 0.46793  |
| D45 | 0.46439  | -0.00001 | 0.00012  | -0.00007 | 0.00007  | 0.46447  |
| D46 | -0.28006 | 0.00002  | 0.00840  | 0.00169  | 0.01008  | -0.26998 |
| D47 | 2.57459  | 0.00000  | -0.00077 | -0.00214 | -0.00288 | 2.57172  |
| D48 | 3.14117  | 0.00001  | 0.00021  | -0.00011 | 0.00010  | 3.14128  |
| D49 | 0.00017  | 0.00000  | 0.00019  | -0.00008 | 0.00011  | 0.00028  |
| D50 | 0.00022  | 0.00000  | 0.00016  | 0.00003  | 0.00018  | 0.00041  |
| D51 | -3.14078 | 0.00000  | 0.00013  | 0.00005  | 0.00019  | -3.14059 |
| D52 | -1.90743 | 0.00002  | -0.07943 | -0.00337 | -0.08286 | -1.99029 |
| D53 | 2.41633  | -0.00002 | 0.07607  | 0.00151  | 0.07756  | 2.49389  |
| D54 | 2.06682  | 0.00001  | 0.06752  | -0.00306 | 0.06445  | 2.13127  |
| D55 | -2.63176 | 0.00004  | 0.07298  | -0.00033 | 0.07263  | -2.55912 |
| D56 | -2.72825 | -0.00004 | -0.00025 | -0.00097 | -0.00121 | -2.72947 |

|     |          |          |          |          |          |          |
|-----|----------|----------|----------|----------|----------|----------|
| D57 | -0.02995 | -0.00002 | -0.00050 | -0.00001 | -0.00051 | -0.03045 |
| D58 | -0.02136 | -0.00002 | -0.00067 | 0.00020  | -0.00046 | -0.02182 |
| D59 | 2.67694  | 0.00001  | -0.00092 | 0.00116  | 0.00025  | 2.67719  |
| D60 | -0.17384 | -0.00003 | 0.00329  | -0.00201 | 0.00127  | -0.17258 |
| D61 | 0.23933  | -0.00001 | 0.01462  | 0.00345  | 0.01806  | 0.25739  |
| D62 | -2.58715 | 0.00004  | 0.00290  | -0.00076 | 0.00213  | -2.58502 |
| D63 | -2.17398 | 0.00006  | 0.01423  | 0.00470  | 0.01892  | -2.15505 |
| D64 | 2.14975  | 0.00004  | 0.00669  | 0.00071  | 0.00737  | 2.15713  |
| D65 | -0.24374 | 0.00004  | 0.00684  | 0.00101  | 0.00782  | -0.23592 |
| D66 | 2.48719  | -0.00002 | -0.00011 | 0.00082  | 0.00072  | 2.48791  |
| D67 | -1.72125 | -0.00001 | 0.00022  | 0.00075  | 0.00097  | -1.72028 |
| D68 | 0.35767  | 0.00000  | 0.00005  | 0.00090  | 0.00095  | 0.35862  |
| D69 | 1.27106  | 0.00000  | -0.00066 | 0.00116  | 0.00050  | 1.27156  |
| D70 | -2.93737 | 0.00001  | -0.00034 | 0.00109  | 0.00075  | -2.93663 |
| D71 | -0.85846 | 0.00001  | -0.00051 | 0.00124  | 0.00073  | -0.85773 |
| D72 | -1.09203 | 0.00000  | -0.00037 | 0.00168  | 0.00131  | -1.09072 |
| D73 | 0.98272  | 0.00001  | -0.00005 | 0.00161  | 0.00157  | 0.98429  |
| D74 | 3.06163  | 0.00002  | -0.00021 | 0.00177  | 0.00155  | 3.06319  |

| Item                 | Value    | Threshold | Converged? |
|----------------------|----------|-----------|------------|
| Maximum Force        | 0.000392 | 0.000450  | YES        |
| RMS Force            | 0.000060 | 0.000300  | YES        |
| Maximum Displacement | 0.032909 | 0.001800  | NO         |
| RMS Displacement     | 0.007421 | 0.001200  | NO         |

Predicted change in Energy=-2.791625D-06

GradGradGradGradGradGradGradGradGradGradGradGradGradGradGradGradGradGradGrad

Input orientation:

| Center Number | Atomic Number | Atomic Type | Coordinates (Angstroms) |           |           |
|---------------|---------------|-------------|-------------------------|-----------|-----------|
|               |               |             | X                       | Y         | Z         |
| 1             | 6             | 0           | -1.379087               | -1.914744 | -0.242924 |
| 2             | 6             | 0           | -2.511160               | -1.175285 | -0.124399 |
| 3             | 7             | 0           | -2.113214               | 0.110135  | 0.229711  |
| 4             | 6             | 0           | -0.769213               | 0.136343  | 0.321397  |
| 5             | 7             | 0           | -0.308276               | -1.081924 | 0.043448  |
| 6             | 6             | 0           | 1.125413                | -1.435933 | -0.006879 |
| 7             | 6             | 0           | 1.683609                | -1.355884 | -1.438584 |
| 8             | 1             | 0           | -1.244439               | -2.952113 | -0.496799 |
| 9             | 1             | 0           | -3.541462               | -1.451456 | -0.254898 |
| 10            | 1             | 0           | 1.648714                | -0.733149 | 0.643302  |
| 11            | 1             | 0           | 1.234106                | -2.449654 | 0.380634  |
| 12            | 1             | 0           | 1.064598                | -1.964329 | -2.108852 |
| 13            | 1             | 0           | 1.637959                | -0.316034 | -1.782043 |

|    |    |   |           |           |           |
|----|----|---|-----------|-----------|-----------|
| 14 | 35 | 0 | 1.653360  | 2.230693  | 1.009939  |
| 15 | 1  | 0 | -0.117138 | 0.996942  | 0.582780  |
| 16 | 6  | 0 | -2.917947 | 1.255476  | 0.479397  |
| 17 | 6  | 0 | -4.242460 | 1.278233  | 0.409976  |
| 18 | 1  | 0 | -2.322368 | 2.122244  | 0.737504  |
| 19 | 1  | 0 | -4.765138 | 2.201286  | 0.618668  |
| 20 | 1  | 0 | -4.843975 | 0.415452  | 0.153499  |
| 21 | 8  | 0 | 2.990529  | -1.869068 | -1.464536 |
| 22 | 1  | 0 | 3.632535  | -1.139030 | -1.365743 |
| 23 | 6  | 0 | 4.851196  | 1.613173  | -1.122868 |
| 24 | 6  | 0 | 5.717845  | 0.748821  | -0.312324 |
| 25 | 8  | 0 | 4.870846  | 0.179155  | -1.339005 |
| 26 | 1  | 0 | 3.932032  | 1.993622  | -0.683848 |
| 27 | 1  | 0 | 5.277681  | 2.184513  | -1.942793 |
| 28 | 1  | 0 | 6.770452  | 0.700990  | -0.587046 |
| 29 | 6  | 0 | 5.396451  | 0.403716  | 1.115615  |
| 30 | 1  | 0 | 5.672374  | -0.632452 | 1.334006  |
| 31 | 1  | 0 | 5.967161  | 1.052881  | 1.786900  |
| 32 | 1  | 0 | 4.335484  | 0.552999  | 1.325517  |

-----  
Distance matrix (angstroms):

|    |    | 1        | 2        | 3        | 4        | 5        |
|----|----|----------|----------|----------|----------|----------|
| 1  | C  | 0.000000 |          |          |          |          |
| 2  | C  | 1.357364 | 0.000000 |          |          |          |
| 3  | N  | 2.205099 | 1.391423 | 0.000000 |          |          |
| 4  | C  | 2.212999 | 2.225642 | 1.347379 | 0.000000 |          |
| 5  | N  | 1.386447 | 2.211242 | 2.171060 | 1.331877 | 0.000000 |
| 6  | C  | 2.560762 | 3.647796 | 3.596527 | 2.483834 | 1.477606 |
| 7  | C  | 3.334971 | 4.399521 | 4.398668 | 3.367582 | 2.497814 |
| 8  | H  | 1.076437 | 2.213681 | 3.264958 | 3.230146 | 2.160063 |
| 9  | H  | 2.211480 | 1.074627 | 2.171015 | 3.246319 | 3.267883 |
| 10 | H  | 3.368849 | 4.253164 | 3.877407 | 2.589597 | 2.076362 |
| 11 | H  | 2.739294 | 3.988244 | 4.216615 | 3.271724 | 2.088856 |
| 12 | H  | 3.075020 | 4.164936 | 4.457664 | 3.698891 | 2.701077 |
| 13 | H  | 3.745307 | 4.549866 | 4.277858 | 3.228557 | 2.776118 |
| 14 | Br | 5.286780 | 5.498239 | 4.392334 | 3.275553 | 3.969326 |
| 15 | H  | 3.279057 | 3.309080 | 2.212555 | 1.110924 | 2.156176 |
| 16 | C  | 3.597240 | 2.537448 | 1.421881 | 2.427854 | 3.530421 |
| 17 | C  | 4.338236 | 3.050034 | 2.435290 | 3.657213 | 4.602445 |
| 18 | H  | 4.260081 | 3.413534 | 2.085708 | 2.555236 | 3.847723 |
| 19 | H  | 5.399016 | 4.127201 | 3.399544 | 4.507745 | 5.565426 |
| 20 | H  | 4.194331 | 2.837198 | 2.748833 | 4.087759 | 4.777742 |
| 21 | O  | 4.537397 | 5.704901 | 5.730263 | 4.620270 | 3.711566 |
| 22 | H  | 5.194113 | 6.267953 | 6.092578 | 4.883483 | 4.185578 |

|    |    |          |          |          |           |          |
|----|----|----------|----------|----------|-----------|----------|
| 23 | C  | 7.213663 | 7.935788 | 7.252006 | 5.987982  | 5.936665 |
| 24 | C  | 7.580623 | 8.453048 | 7.875735 | 6.546652  | 6.308116 |
| 25 | O  | 6.681877 | 7.602881 | 7.158403 | 5.879544  | 5.506796 |
| 26 | H  | 6.608913 | 7.202061 | 6.397430 | 5.153805  | 5.288492 |
| 27 | H  | 8.000377 | 8.675301 | 7.977979 | 6.773957  | 6.768876 |
| 28 | H  | 8.565949 | 9.480653 | 8.940678 | 7.615159  | 7.326984 |
| 29 | C  | 7.288951 | 8.158505 | 7.567436 | 6.222354  | 5.991709 |
| 30 | H  | 7.338535 | 8.330177 | 7.898499 | 6.565857  | 6.134797 |
| 31 | H  | 8.178897 | 8.972164 | 8.282878 | 6.954602  | 6.854059 |
| 32 | H  | 6.419197 | 7.208728 | 6.556113 | 5.219176  | 5.087355 |
|    |    | 6        | 7        | 8        | 9         | 10       |
| 6  | C  | 0.000000 |          |          |           |          |
| 7  | C  | 1.538755 | 0.000000 |          |           |          |
| 8  | H  | 2.855699 | 3.465309 | 0.000000 |           |          |
| 9  | H  | 4.673487 | 5.358322 | 2.754415 | 0.000000  |          |
| 10 | H  | 1.091094 | 2.173307 | 3.820204 | 5.316075  | 0.000000 |
| 11 | H  | 1.090693 | 2.169779 | 2.676852 | 4.919995  | 1.785296 |
| 12 | H  | 2.168222 | 1.096648 | 2.984306 | 4.991591  | 3.071049 |
| 13 | H  | 2.160574 | 1.096055 | 4.112053 | 5.517949  | 2.460975 |
| 14 | Br | 3.841457 | 4.342777 | 6.126089 | 6.491857  | 2.986436 |
| 15 | H  | 2.794729 | 3.586696 | 4.246331 | 4.292127  | 2.472875 |
| 16 | C  | 4.881487 | 5.627803 | 4.632213 | 2.873229  | 4.983562 |
| 17 | C  | 6.029472 | 6.743444 | 5.263668 | 2.895628  | 6.229449 |
| 18 | H  | 5.010182 | 5.734159 | 5.332403 | 3.904150  | 4.891997 |
| 19 | H  | 6.951206 | 7.646703 | 6.340118 | 3.950066  | 7.053298 |
| 20 | H  | 6.251955 | 6.948504 | 4.971925 | 2.312720  | 6.611672 |
| 21 | O  | 2.406455 | 1.404305 | 4.477103 | 6.656165  | 2.744770 |
| 22 | H  | 2.867110 | 1.962306 | 5.275149 | 7.266211  | 2.852463 |
| 23 | C  | 4.942058 | 4.352997 | 7.641371 | 8.976750  | 4.345167 |
| 24 | C  | 5.094789 | 4.687569 | 7.886972 | 9.517315  | 4.434781 |
| 25 | O  | 4.290843 | 3.539032 | 6.921767 | 8.637194  | 3.891526 |
| 26 | H  | 4.482995 | 4.104172 | 7.161782 | 8.240490  | 3.796070 |
| 27 | H  | 5.839240 | 5.070108 | 8.426973 | 9.687443  | 5.326354 |
| 28 | H  | 6.063786 | 5.552641 | 8.808619 | 10.539399 | 5.459186 |
| 29 | C  | 4.783939 | 4.837905 | 7.613336 | 9.230724  | 3.944753 |
| 30 | H  | 4.808161 | 4.911299 | 7.521634 | 9.385636  | 4.083755 |
| 31 | H  | 5.731873 | 5.878326 | 8.559348 | 10.042637 | 4.811103 |
| 32 | H  | 4.004458 | 4.279782 | 6.836825 | 8.280207  | 3.055868 |
|    |    | 11       | 12       | 13       | 14        | 15       |
| 11 | H  | 0.000000 |          |          |           |          |
| 12 | H  | 2.542010 | 0.000000 |          |           |          |
| 13 | H  | 3.064735 | 1.775506 | 0.000000 |           |          |
| 14 | Br | 4.741038 | 5.260389 | 3.779049 | 0.000000  |          |
| 15 | H  | 3.707525 | 4.172589 | 3.224384 | 2.199834  | 0.000000 |

|    |   |          |           |          |           |           |
|----|---|----------|-----------|----------|-----------|-----------|
| 16 | C | 5.565724 | 5.738191  | 5.323535 | 4.704186  | 2.814615  |
| 17 | C | 6.625012 | 6.709961  | 6.475026 | 6.002319  | 4.138511  |
| 18 | H | 5.803284 | 6.022736  | 5.289376 | 3.986526  | 2.480581  |
| 19 | H | 7.594657 | 7.666650  | 7.286971 | 6.430480  | 4.801628  |
| 20 | H | 6.723354 | 6.759647  | 6.804179 | 6.800290  | 4.781778  |
| 21 | O | 2.612807 | 2.033083  | 2.083788 | 4.971829  | 4.697139  |
| 22 | H | 3.243460 | 2.797789  | 2.197490 | 4.573404  | 4.734887  |
| 23 | C | 5.643618 | 5.301792  | 3.805423 | 3.893116  | 5.288981  |
| 24 | C | 5.551067 | 5.678150  | 4.465362 | 4.523755  | 5.908451  |
| 25 | O | 4.805588 | 4.435618  | 3.300463 | 4.480910  | 5.407589  |
| 26 | H | 5.306093 | 5.090990  | 3.435595 | 2.849116  | 4.358153  |
| 27 | H | 6.574520 | 5.915279  | 4.418841 | 4.675089  | 6.073954  |
| 28 | H | 6.443143 | 6.478933  | 5.367014 | 5.574494  | 6.992494  |
| 29 | C | 5.099710 | 5.896590  | 4.800076 | 4.166503  | 5.570951  |
| 30 | H | 4.889721 | 5.904131  | 5.107484 | 4.945209  | 6.061165  |
| 31 | H | 6.053689 | 6.950939  | 5.775230 | 4.538699  | 6.202559  |
| 32 | H | 4.418967 | 5.369406  | 4.205804 | 3.179314  | 4.535922  |
|    |   | 16       | 17        | 18       | 19        | 20        |
| 16 | C | 0.000000 |           |          |           |           |
| 17 | C | 1.326527 | 0.000000  |          |           |           |
| 18 | H | 1.082875 | 2.122825  | 0.000000 |           |           |
| 19 | H | 2.079920 | 1.081096  | 2.446936 | 0.000000  |           |
| 20 | H | 2.126367 | 1.082585  | 3.100436 | 1.847105  | 0.000000  |
| 21 | O | 6.960729 | 8.107740  | 7.000459 | 9.003215  | 8.319647  |
| 22 | H | 7.214361 | 8.426855  | 7.107771 | 9.252918  | 8.750755  |
| 23 | C | 7.940704 | 9.228021  | 7.428334 | 9.790439  | 9.851902  |
| 24 | C | 8.686795 | 10.000484 | 8.223955 | 10.623997 | 10.577342 |
| 25 | O | 8.070337 | 9.344478  | 7.734973 | 10.038609 | 9.831640  |
| 26 | H | 6.987146 | 8.278318  | 6.415162 | 8.796615  | 8.956007  |
| 27 | H | 8.596419 | 9.848348  | 8.059070 | 10.364341 | 10.486750 |
| 28 | H | 9.762675 | 11.073008 | 9.298052 | 11.695062 | 11.641514 |
| 29 | C | 8.382093 | 9.704191  | 7.916847 | 10.331317 | 10.285530 |
| 30 | H | 8.836755 | 10.139453 | 8.477031 | 10.838978 | 10.634157 |
| 31 | H | 8.983081 | 10.304518 | 8.423839 | 10.856604 | 10.952396 |
| 32 | H | 7.336324 | 8.657096  | 6.865513 | 9.275656  | 9.254999  |
|    |   | 21       | 22        | 23       | 24        | 25        |
| 21 | O | 0.000000 |           |          |           |           |
| 22 | H | 0.977184 | 0.000000  |          |           |           |
| 23 | C | 3.962931 | 3.019725  | 0.000000 |           |           |
| 24 | C | 3.952112 | 3.003696  | 1.468048 | 0.000000  |           |
| 25 | O | 2.783266 | 1.808796  | 1.450347 | 1.447757  | 0.000000  |
| 26 | H | 4.051700 | 3.219966  | 1.087356 | 2.208322  | 2.145435  |
| 27 | H | 4.678815 | 3.753056  | 1.086553 | 2.216616  | 2.133432  |
| 28 | H | 4.654353 | 3.720022  | 2.191512 | 1.088918  | 2.108615  |

|    |   |          |          |          |          |          |
|----|---|----------|----------|----------|----------|----------|
| 29 | C | 4.196569 | 3.413005 | 2.602094 | 1.503795 | 2.520288 |
| 30 | H | 4.068581 | 3.421434 | 3.428322 | 2.149508 | 2.906225 |
| 31 | H | 5.288664 | 4.493786 | 3.166394 | 2.135732 | 3.425870 |
| 32 | H | 3.931884 | 3.255761 | 2.717447 | 2.152160 | 2.743365 |
|    |   | 26       | 27       | 28       | 29       | 30       |
| 26 | H | 0.000000 |          |          |          |          |
| 27 | H | 1.852607 | 0.000000 |          |          |          |
| 28 | H | 3.120400 | 2.503449 | 0.000000 |          |          |
| 29 | C | 2.812541 | 3.541074 | 2.208009 | 0.000000 |          |
| 30 | H | 3.741228 | 4.339181 | 2.583464 | 1.094291 | 0.000000 |
| 31 | H | 3.336366 | 3.958103 | 2.530755 | 1.094417 | 1.769848 |
| 32 | H | 2.505138 | 3.772456 | 3.099818 | 1.091786 | 1.786797 |
|    |   | 31       | 32       |          |          |          |
| 31 | H | 0.000000 |          |          |          |          |
| 32 | H | 1.767803 | 0.000000 |          |          |          |

Stoichiometry C10H17BrN2O2

Framework group C1[X(C10H17BrN2O2)]

Deg. of freedom 90

Full point group C1 NOp 1

Largest Abelian subgroup C1 NOp 1

Largest concise Abelian subgroup C1 NOp 1

Standard orientation:

| Center Number | Atomic Number | Atomic Type | Coordinates (Angstroms) |           |           |
|---------------|---------------|-------------|-------------------------|-----------|-----------|
|               |               |             | X                       | Y         | Z         |
| 1             | 6             | 0           | -2.716652               | 2.112378  | -0.446355 |
| 2             | 6             | 0           | -3.794579               | 1.347418  | -0.137569 |
| 3             | 7             | 0           | -3.325544               | 0.049454  | 0.039503  |
| 4             | 6             | 0           | -1.993160               | 0.040577  | -0.160765 |
| 5             | 7             | 0           | -1.608122               | 1.279798  | -0.460715 |
| 6             | 6             | 0           | -0.205585               | 1.678812  | -0.699455 |
| 7             | 6             | 0           | 0.455791                | 2.231868  | 0.575095  |
| 8             | 1             | 0           | -2.644048               | 3.164572  | -0.661605 |
| 9             | 1             | 0           | -4.831284               | 1.611605  | -0.036231 |
| 10            | 1             | 0           | 0.323030                | 0.788927  | -1.044646 |
| 11            | 1             | 0           | -0.201826               | 2.438249  | -1.482303 |
| 12            | 1             | 0           | -0.159425               | 3.040937  | 0.986864  |
| 13            | 1             | 0           | 0.513649                | 1.432701  | 1.322973  |
| 14            | 35            | 0           | 0.527926                | -2.050605 | -0.142493 |
| 15            | 1             | 0           | -1.297257               | -0.823309 | -0.100997 |
| 16            | 6             | 0           | -4.056117               | -1.125473 | 0.367456  |
| 17            | 6             | 0           | -5.366942               | -1.169564 | 0.566120  |
| 18            | 1             | 0           | -3.415708               | -1.995817 | 0.438146  |

|    |   |   |           |           |           |
|----|---|---|-----------|-----------|-----------|
| 19 | 1 | 0 | -5.831049 | -2.114595 | 0.811661  |
| 20 | 1 | 0 | -6.013064 | -0.303755 | 0.496182  |
| 21 | 8 | 0 | 1.718404  | 2.759773  | 0.260137  |
| 22 | 1 | 0 | 2.405704  | 2.082291  | 0.413510  |
| 23 | 6 | 0 | 3.810626  | -0.465010 | 1.223567  |
| 24 | 6 | 0 | 4.550093  | 0.011000  | 0.048080  |
| 25 | 8 | 0 | 3.735978  | 0.926061  | 0.820014  |
| 26 | 1 | 0 | 2.894702  | -1.031300 | 1.072764  |
| 27 | 1 | 0 | 4.335682  | -0.620121 | 2.162105  |
| 28 | 1 | 0 | 5.612613  | 0.212015  | 0.176091  |
| 29 | 6 | 0 | 4.104310  | -0.290905 | -1.356032 |
| 30 | 1 | 0 | 4.284513  | 0.566800  | -2.011273 |
| 31 | 1 | 0 | 4.674518  | -1.139218 | -1.747154 |
| 32 | 1 | 0 | 3.045738  | -0.556850 | -1.382393 |

-----

Rotational constants (GHZ):      0.6034828      0.2205929      0.1722645

Standard basis: 6-311++G(d,p) (5D, 7F)

There are    492 symmetry adapted cartesian basis functions of A    symmetry.

There are    475 symmetry adapted basis functions of A    symmetry.

475 basis functions,    751 primitive gaussians,    492 cartesian basis functions

71 alpha electrons      71 beta electrons

nuclear repulsion energy      1307.4692723884 Hartrees.

NAtoms=    32 NActive=    32 NUniq=    32 SFac= 1.00D+00 NAtFMM=    60 NAOKFM=F

Big=F

Integral buffers will be    131072 words long.

Raffenetti 2 integral format.

Two-electron integral symmetry is turned on.

One-electron integrals computed using PRISM.

NBasis=    475 RedAO= T EigKep=    3.81D-06    NBF=    475

NBsUse=    475 1.00D-06 EigRej= -1.00D+00 NBFU=    475

Initial guess from the checkpoint file:    "/home/suqian/liuwen/qianmengshijie/ohpo/ohpo.chk"

B after Tr=    0.000000    0.000000    0.000000

Rot=    1.000000    0.000740    0.000172    0.000061 Ang=    0.09 deg.

ExpMin= 3.50D-02 ExpMax= 4.40D+05 ExpMxC= 1.51D+04 IAcc=3 IRadAn=      5 AccDes=

0.00D+00

Harris functional with IExCor=    402 and IRadAn=      5 diagonalized for initial guess.

HarFok: IExCor=    402 AccDes= 0.00D+00 IRadAn=      5 IDoV= 1 UseB2=F ITyADJ=14

ICtDFT= 3500011 ScaDFX= 1.000000 1.000000 1.000000 1.000000

FoFCou: FMM=F IPFlag=      0 FMFlag=    100000 FMFlg1=      0

NFxFlg=      0 DoJE=T BraDBF=F KetDBF=T FulRan=T

wScrn= 0.000000 ICntrl=      500 IOpCl= 0 I1Cent=    200000004 NGrid=

0

NMat0=    1 NMatS0=      1 NMatT0=    0 NMatD0=    1 NMtDS0=    0

NMtDT0=    0

Petite list used in FoFCou.

Requested convergence on RMS density matrix=1.00D-08 within 128 cycles.

Requested convergence on MAX density matrix=1.00D-06.

Requested convergence on energy=1.00D-06.

No special actions if energy rises.

SCF Done: E(RB3LYP) = -3225.52370721 A.U. after 10 cycles

NFock= 10 Conv=0.28D-08 -V/T= 2.0018

Calling FoFJK, ICntrl= 2127 FMM=F ISym2X=0 l1Cent= 0 IOpCIX= 0 NMat=1 NMatS=1

NMatT=0.

\*\*\*\*\* Axes restored to original set \*\*\*\*\*

```
-----
```

| Center<br>Number | Atomic<br>Number | Forces (Hartrees/Bohr) |              |              |
|------------------|------------------|------------------------|--------------|--------------|
|                  |                  | X                      | Y            | Z            |
| 1                | 6                | 0.000007459            | 0.000034140  | -0.000060979 |
| 2                | 6                | -0.000007407           | 0.000020636  | -0.000045193 |
| 3                | 7                | -0.000003120           | -0.000027812 | 0.000027054  |
| 4                | 6                | -0.000064768           | 0.000049890  | 0.000023879  |
| 5                | 7                | 0.000042294            | -0.000088470 | 0.000062059  |
| 6                | 6                | -0.000051849           | -0.000040537 | -0.000026699 |
| 7                | 6                | -0.000043060           | -0.000018321 | -0.000008173 |
| 8                | 1                | -0.000004087           | -0.000010825 | 0.000035901  |
| 9                | 1                | -0.000004609           | -0.000000536 | 0.000012597  |
| 10               | 1                | 0.000023237            | 0.000025317  | -0.000001444 |
| 11               | 1                | 0.000011670            | -0.000000149 | 0.000033994  |
| 12               | 1                | -0.000010657           | 0.000002778  | -0.000003527 |
| 13               | 1                | -0.000004256           | 0.000010305  | 0.000012665  |
| 14               | 35               | 0.000008346            | 0.000020909  | -0.000014130 |
| 15               | 1                | 0.000035645            | 0.000081314  | 0.000000456  |
| 16               | 6                | 0.000012918            | -0.000022443 | 0.000001575  |
| 17               | 6                | -0.000007222           | 0.000006726  | -0.000002883 |
| 18               | 1                | -0.000003544           | 0.000010042  | -0.000007577 |
| 19               | 1                | 0.000001610            | 0.000008403  | -0.000008043 |
| 20               | 1                | -0.000003644           | 0.000001157  | -0.000002481 |
| 21               | 8                | 0.000127784            | -0.000047100 | -0.000001076 |
| 22               | 1                | -0.000030155           | -0.000025556 | -0.000047367 |
| 23               | 6                | -0.000025163           | 0.000005970  | 0.000040718  |
| 24               | 6                | 0.000090523            | 0.000011921  | -0.000014513 |
| 25               | 8                | -0.000107422           | -0.000073478 | 0.000007556  |
| 26               | 1                | -0.000009281           | 0.000038830  | -0.000020404 |
| 27               | 1                | 0.000000076            | 0.000000193  | -0.000010108 |
| 28               | 1                | 0.000017548            | -0.000000799 | -0.000004544 |
| 29               | 6                | 0.000008925            | 0.000011972  | 0.000052701  |
| 30               | 1                | -0.000000598           | -0.000000788 | -0.000016196 |

```
-----
```



|    |   |              |             |              |
|----|---|--------------|-------------|--------------|
| 31 | 1 | 0.000000339  | 0.000008378 | 0.000000612  |
| 32 | 1 | -0.000007535 | 0.000007934 | -0.000016428 |

-----  
 Cartesian Forces: Max 0.000127784 RMS 0.000033476

GradGradGradGradGradGradGradGradGradGradGradGradGradGradGradGradGradGradGrad

Berny optimization.

Using GEDIIS/GDIIS optimizer.

FormGI is forming the generalized inverse of G from B-inverse, IUseBI=4.

GSVD: received Info= 1 from GESDD.

Internal Forces: Max 0.000106220 RMS 0.000020861

Search for a local minimum.

Step number 29 out of a maximum of 177

All quantities printed in internal units (Hartrees-Bohrs-Radians)

Mixed Optimization -- En-DIIS/RFO-DIIS

Swapping is turned off.

Update second derivatives using D2CorX and points 25 26 27 28 29

DE= -6.53D-06 DEPred=-2.79D-06 R= 2.34D+00

TightC=F SS= 1.41D+00 RLast= 1.57D-01 DXNew= 3.2661D+00 4.7178D-01

Trust test= 2.34D+00 RLast= 1.57D-01 DXMaxT set to 1.94D+00

ITU= 1 1 1 1 1 1 1 1 1 1 1 1 -1 1 1 1 1 1 1 1

ITU= 1 1 1 1 0 1 0 1 0

|                 |         |         |         |         |         |
|-----------------|---------|---------|---------|---------|---------|
| Eigenvalues --- | 0.00004 | 0.00129 | 0.00230 | 0.00237 | 0.00280 |
| Eigenvalues --- | 0.00440 | 0.00647 | 0.01074 | 0.01246 | 0.01397 |
| Eigenvalues --- | 0.01485 | 0.01753 | 0.01907 | 0.02015 | 0.02101 |
| Eigenvalues --- | 0.02178 | 0.02315 | 0.02371 | 0.02499 | 0.02989 |
| Eigenvalues --- | 0.03062 | 0.03085 | 0.03442 | 0.03546 | 0.04097 |
| Eigenvalues --- | 0.04613 | 0.04994 | 0.05191 | 0.05434 | 0.05651 |
| Eigenvalues --- | 0.05809 | 0.05922 | 0.06631 | 0.09365 | 0.09655 |
| Eigenvalues --- | 0.10535 | 0.11200 | 0.11502 | 0.11701 | 0.13090 |
| Eigenvalues --- | 0.14029 | 0.14216 | 0.15069 | 0.15946 | 0.15991 |
| Eigenvalues --- | 0.16000 | 0.16001 | 0.16003 | 0.16015 | 0.16046 |
| Eigenvalues --- | 0.16501 | 0.17106 | 0.19270 | 0.21472 | 0.22053 |
| Eigenvalues --- | 0.22898 | 0.23358 | 0.23952 | 0.24267 | 0.25044 |
| Eigenvalues --- | 0.27670 | 0.28537 | 0.30818 | 0.32261 | 0.33104 |
| Eigenvalues --- | 0.33309 | 0.34043 | 0.34154 | 0.34489 | 0.34831 |
| Eigenvalues --- | 0.35041 | 0.35685 | 0.35689 | 0.35856 | 0.36166 |
| Eigenvalues --- | 0.36436 | 0.36672 | 0.37223 | 0.37246 | 0.37718 |
| Eigenvalues --- | 0.38578 | 0.42158 | 0.42621 | 0.44604 | 0.45646 |
| Eigenvalues --- | 0.49315 | 0.53959 | 0.55080 | 0.56270 | 0.60399 |

Eigenvalue 1 is 3.69D-05 Eigenvector:

|   |          |         |         |         |         |
|---|----------|---------|---------|---------|---------|
|   | D52      | D55     | D54     | D53     | D47     |
| 1 | -0.50140 | 0.50057 | 0.49647 | 0.49532 | 0.03018 |
|   | D46      | D41     | D35     | D38     | D39     |

1                                    0.02878 -0.01701 -0.01701 -0.01673 -0.01673  
 En-DIIS/RFO-DIIS IScMMF=                    0 using points:    29    28    27    26    25  
 RFO step:    Lambda=-2.07466868D-07.  
 DidBck=F Rises=F RFO-DIIS coefs:            1.18054            -0.08011            -0.27691            0.13370  
 0.04278

Iteration 1 RMS(Cart)= 0.00339587 RMS(Int)= 0.00002047  
 Iteration 2 RMS(Cart)= 0.00003516 RMS(Int)= 0.00001534  
 Iteration 3 RMS(Cart)= 0.00000000 RMS(Int)= 0.00001534

| Variable | Old X   | -DE/DX   | Delta X<br>(Linear) | Delta X<br>(Quad) | Delta X<br>(Total) | New X   |
|----------|---------|----------|---------------------|-------------------|--------------------|---------|
| R1       | 2.56505 | 0.00000  | -0.00004            | 0.00001           | -0.00003           | 2.56502 |
| R2       | 2.62001 | 0.00000  | 0.00007             | -0.00004          | 0.00002            | 2.62003 |
| R3       | 2.03417 | 0.00000  | 0.00002             | -0.00001          | 0.00001            | 2.03418 |
| R4       | 2.62941 | -0.00001 | -0.00003            | -0.00002          | -0.00005           | 2.62936 |
| R5       | 2.03075 | 0.00000  | 0.00002             | 0.00000           | 0.00001            | 2.03076 |
| R6       | 2.54618 | 0.00001  | 0.00008             | -0.00005          | 0.00003            | 2.54621 |
| R7       | 2.68696 | -0.00001 | -0.00004            | 0.00000           | -0.00004           | 2.68693 |
| R8       | 2.51688 | 0.00011  | 0.00029             | -0.00003          | 0.00026            | 2.51714 |
| R9       | 2.09934 | 0.00008  | 0.00047             | -0.00007          | 0.00039            | 2.09973 |
| R10      | 2.79227 | 0.00001  | 0.00003             | -0.00004          | -0.00002           | 2.79225 |
| R11      | 2.90783 | 0.00002  | 0.00018             | -0.00006          | 0.00011            | 2.90793 |
| R12      | 2.06187 | 0.00002  | 0.00010             | 0.00000           | 0.00011            | 2.06197 |
| R13      | 2.06111 | 0.00001  | 0.00006             | -0.00003          | 0.00004            | 2.06115 |
| R14      | 2.07236 | 0.00001  | 0.00008             | -0.00005          | 0.00003            | 2.07239 |
| R15      | 2.07124 | 0.00001  | 0.00014             | -0.00003          | 0.00010            | 2.07135 |
| R16      | 2.65375 | 0.00007  | -0.00034            | 0.00034           | 0.00000            | 2.65375 |
| R17      | 4.15708 | 0.00000  | -0.00152            | 0.00066           | -0.00087           | 4.15621 |
| R18      | 8.46769 | 0.00000  | 0.00010             | 0.00130           | 0.00141            | 8.46910 |
| R19      | 2.50677 | 0.00001  | 0.00003             | -0.00001          | 0.00002            | 2.50679 |
| R20      | 2.04634 | 0.00000  | 0.00001             | 0.00000           | 0.00001            | 2.04635 |
| R21      | 2.04298 | 0.00000  | 0.00001             | 0.00000           | 0.00001            | 2.04298 |
| R22      | 2.04579 | 0.00000  | 0.00001             | 0.00000           | 0.00001            | 2.04580 |
| R23      | 1.84661 | -0.00002 | 0.00018             | -0.00016          | 0.00002            | 1.84663 |
| R24      | 3.41813 | 0.00001  | -0.00084            | 0.00073           | -0.00010           | 3.41803 |
| R25      | 2.77421 | 0.00002  | 0.00009             | -0.00012          | -0.00006           | 2.77415 |
| R26      | 2.74076 | 0.00006  | 0.00018             | 0.00012           | 0.00031            | 2.74107 |
| R27      | 2.05480 | 0.00002  | 0.00011             | -0.00008          | 0.00004            | 2.05484 |
| R28      | 2.05329 | 0.00001  | 0.00003             | -0.00003          | 0.00000            | 2.05328 |
| R29      | 2.73586 | 0.00007  | 0.00028             | -0.00005          | 0.00025            | 2.73611 |
| R30      | 2.05776 | 0.00002  | 0.00009             | -0.00005          | 0.00004            | 2.05780 |
| R31      | 2.84176 | 0.00002  | 0.00006             | 0.00004           | 0.00010            | 2.84186 |
| R32      | 2.06791 | 0.00000  | -0.00002            | -0.00001          | -0.00003           | 2.06788 |
| R33      | 2.06815 | 0.00000  | 0.00003             | -0.00003          | -0.00001           | 2.06814 |
| R34      | 2.06318 | 0.00001  | 0.00005             | -0.00004          | 0.00001            | 2.06319 |

|     |         |          |          |          |          |         |
|-----|---------|----------|----------|----------|----------|---------|
| A1  | 1.87431 | 0.00002  | 0.00005  | 0.00001  | 0.00006  | 1.87437 |
| A2  | 2.27828 | -0.00001 | -0.00003 | -0.00004 | -0.00006 | 2.27822 |
| A3  | 2.13056 | -0.00001 | -0.00002 | 0.00002  | 0.00000  | 2.13057 |
| A4  | 1.86185 | 0.00001  | 0.00002  | -0.00004 | -0.00002 | 1.86184 |
| A5  | 2.27708 | 0.00000  | -0.00003 | 0.00003  | 0.00001  | 2.27709 |
| A6  | 2.14423 | 0.00000  | 0.00000  | 0.00000  | 0.00001  | 2.14424 |
| A7  | 1.89713 | 0.00002  | 0.00008  | 0.00002  | 0.00011  | 1.89724 |
| A8  | 2.24845 | -0.00002 | -0.00008 | -0.00001 | -0.00009 | 2.24837 |
| A9  | 2.13759 | 0.00000  | 0.00000  | -0.00002 | -0.00002 | 2.13757 |
| A10 | 1.88938 | -0.00003 | -0.00011 | 0.00000  | -0.00011 | 1.88926 |
| A11 | 2.23518 | 0.00001  | 0.00003  | -0.00006 | -0.00004 | 2.23514 |
| A12 | 2.15862 | 0.00001  | 0.00009  | 0.00006  | 0.00015  | 2.15877 |
| A13 | 1.90208 | -0.00002 | -0.00003 | 0.00000  | -0.00004 | 1.90205 |
| A14 | 2.21235 | -0.00002 | -0.00012 | -0.00001 | -0.00013 | 2.21221 |
| A15 | 2.16766 | 0.00003  | 0.00011  | 0.00000  | 0.00012  | 2.16778 |
| A16 | 1.95110 | -0.00001 | 0.00007  | -0.00007 | 0.00000  | 1.95110 |
| A17 | 1.86580 | 0.00000  | -0.00008 | -0.00005 | -0.00012 | 1.86567 |
| A18 | 1.88312 | 0.00001  | 0.00013  | 0.00011  | 0.00022  | 1.88334 |
| A19 | 1.92512 | -0.00002 | -0.00044 | 0.00013  | -0.00032 | 1.92479 |
| A20 | 1.92066 | 0.00001  | 0.00025  | 0.00001  | 0.00026  | 1.92093 |
| A21 | 1.91680 | 0.00000  | 0.00009  | -0.00013 | -0.00004 | 1.91676 |
| A22 | 1.91246 | 0.00001  | 0.00016  | 0.00008  | 0.00025  | 1.91271 |
| A23 | 1.90266 | -0.00003 | -0.00034 | -0.00006 | -0.00039 | 1.90227 |
| A24 | 1.91324 | 0.00002  | 0.00001  | 0.00018  | 0.00018  | 1.91341 |
| A25 | 1.88740 | 0.00000  | -0.00028 | 0.00007  | -0.00021 | 1.88718 |
| A26 | 1.88732 | 0.00001  | 0.00025  | -0.00007 | 0.00018  | 1.88750 |
| A27 | 1.96023 | -0.00001 | 0.00019  | -0.00021 | 0.00000  | 1.96024 |
| A28 | 1.79193 | -0.00001 | -0.00051 | -0.00053 | -0.00099 | 1.79094 |
| A29 | 2.83234 | -0.00002 | 0.00004  | 0.00012  | 0.00019  | 2.83252 |
| A30 | 2.17698 | 0.00001  | 0.00004  | 0.00001  | 0.00005  | 2.17703 |
| A31 | 1.95555 | 0.00000  | 0.00002  | 0.00001  | 0.00003  | 1.95558 |
| A32 | 2.15065 | -0.00001 | -0.00005 | -0.00003 | -0.00008 | 2.15058 |
| A33 | 2.07977 | 0.00000  | 0.00002  | -0.00005 | -0.00003 | 2.07974 |
| A34 | 2.15737 | 0.00000  | -0.00004 | 0.00006  | 0.00002  | 2.15739 |
| A35 | 2.04605 | 0.00000  | 0.00003  | -0.00001 | 0.00001  | 2.04606 |
| A36 | 1.91405 | -0.00005 | 0.00006  | -0.00031 | -0.00017 | 1.91388 |
| A37 | 3.04910 | -0.00002 | 0.00091  | 0.00034  | 0.00123  | 3.05033 |
| A38 | 2.07386 | 0.00003  | 0.00016  | 0.00018  | 0.00033  | 2.07419 |
| A39 | 2.08808 | -0.00002 | 0.00007  | -0.00017 | -0.00010 | 2.08798 |
| A40 | 2.00156 | 0.00002  | 0.00002  | 0.00021  | 0.00023  | 2.00179 |
| A41 | 1.98464 | -0.00001 | -0.00001 | -0.00002 | -0.00003 | 1.98461 |
| A42 | 2.04036 | -0.00002 | -0.00019 | -0.00009 | -0.00028 | 2.04008 |
| A43 | 2.04567 | 0.00000  | -0.00003 | 0.00004  | 0.00001  | 2.04567 |
| A44 | 2.13320 | 0.00000  | 0.00005  | -0.00013 | -0.00008 | 2.13312 |

|     |          |          |          |          |          |          |
|-----|----------|----------|----------|----------|----------|----------|
| A45 | 1.94909  | 0.00000  | -0.00029 | 0.00032  | 0.00002  | 1.94912  |
| A46 | 2.04659  | 0.00000  | 0.00010  | -0.00011 | -0.00002 | 2.04658  |
| A47 | 2.02203  | 0.00000  | 0.00007  | -0.00006 | 0.00002  | 2.02205  |
| A48 | 1.42006  | 0.00006  | 0.00059  | 0.00065  | 0.00124  | 1.42130  |
| A49 | 0.99973  | -0.00004 | -0.00120 | -0.00044 | -0.00176 | 0.99797  |
| A50 | 2.36526  | 0.00002  | -0.00076 | 0.00009  | -0.00061 | 2.36465  |
| A51 | 2.34306  | 0.00003  | 0.00113  | 0.00090  | 0.00201  | 2.34507  |
| A52 | 1.93148  | -0.00002 | 0.00000  | -0.00016 | -0.00016 | 1.93133  |
| A53 | 1.91225  | 0.00001  | -0.00001 | 0.00008  | 0.00007  | 1.91232  |
| A54 | 1.93785  | -0.00002 | -0.00014 | -0.00011 | -0.00025 | 1.93760  |
| A55 | 1.88363  | 0.00001  | 0.00013  | 0.00010  | 0.00023  | 1.88386  |
| A56 | 1.91360  | 0.00002  | -0.00003 | 0.00003  | 0.00000  | 1.91360  |
| A57 | 1.88360  | 0.00001  | 0.00006  | 0.00007  | 0.00013  | 1.88373  |
| A58 | 3.76312  | 0.00009  | 0.00172  | 0.00156  | 0.00325  | 3.76637  |
| A59 | 5.05301  | -0.00003 | -0.00067 | -0.00057 | -0.00127 | 5.05175  |
| D1  | 0.00443  | -0.00001 | -0.00034 | 0.00002  | -0.00031 | 0.00412  |
| D2  | -3.13159 | 0.00001  | -0.00004 | 0.00026  | 0.00023  | -3.13136 |
| D3  | 3.13761  | -0.00002 | -0.00030 | -0.00042 | -0.00072 | 3.13688  |
| D4  | 0.00159  | 0.00000  | -0.00001 | -0.00018 | -0.00018 | 0.00141  |
| D5  | -0.00678 | 0.00000  | 0.00025  | -0.00022 | 0.00002  | -0.00675 |
| D6  | -3.09940 | 0.00001  | 0.00111  | 0.00008  | 0.00118  | -3.09821 |
| D7  | -3.14082 | 0.00001  | 0.00022  | 0.00017  | 0.00039  | -3.14043 |
| D8  | 0.04975  | 0.00002  | 0.00108  | 0.00047  | 0.00155  | 0.05130  |
| D9  | -0.00065 | 0.00001  | 0.00031  | 0.00019  | 0.00050  | -0.00015 |
| D10 | -3.13572 | 0.00000  | -0.00006 | 0.00002  | -0.00005 | -3.13577 |
| D11 | 3.13589  | 0.00000  | 0.00004  | -0.00003 | 0.00001  | 3.13590  |
| D12 | 0.00082  | -0.00001 | -0.00033 | -0.00020 | -0.00053 | 0.00029  |
| D13 | -0.00357 | -0.00002 | -0.00016 | -0.00033 | -0.00049 | -0.00406 |
| D14 | 3.14150  | -0.00003 | -0.00037 | -0.00064 | -0.00102 | 3.14048  |
| D15 | 3.13200  | -0.00001 | 0.00019  | -0.00017 | 0.00001  | 3.13202  |
| D16 | -0.00611 | -0.00002 | -0.00003 | -0.00049 | -0.00052 | -0.00663 |
| D17 | -0.00007 | 0.00000  | 0.00048  | 0.00020  | 0.00068  | 0.00061  |
| D18 | 3.14087  | 0.00001  | 0.00050  | 0.00029  | 0.00079  | -3.14152 |
| D19 | -3.13434 | -0.00001 | 0.00006  | 0.00001  | 0.00006  | -3.13428 |
| D20 | 0.00660  | -0.00001 | 0.00008  | 0.00010  | 0.00018  | 0.00678  |
| D21 | 0.00637  | 0.00001  | -0.00005 | 0.00034  | 0.00029  | 0.00666  |
| D22 | 3.10053  | 0.00000  | -0.00089 | 0.00005  | -0.00084 | 3.09969  |
| D23 | -3.13851 | 0.00002  | 0.00015  | 0.00064  | 0.00079  | -3.13772 |
| D24 | -0.04436 | 0.00001  | -0.00069 | 0.00034  | -0.00034 | -0.04470 |
| D25 | -3.14102 | 0.00001  | 0.00117  | 0.00152  | 0.00270  | -3.13831 |
| D26 | 0.00455  | 0.00000  | 0.00093  | 0.00116  | 0.00209  | 0.00664  |
| D27 | 1.43203  | 0.00000  | -0.00270 | -0.00237 | -0.00506 | 1.42697  |
| D28 | -2.74285 | -0.00003 | -0.00325 | -0.00229 | -0.00553 | -2.74839 |
| D29 | -0.68210 | -0.00002 | -0.00313 | -0.00241 | -0.00553 | -0.68764 |

|     |          |          |          |          |          |          |
|-----|----------|----------|----------|----------|----------|----------|
| D30 | -1.65357 | 0.00001  | -0.00171 | -0.00202 | -0.00373 | -1.65729 |
| D31 | 0.45473  | -0.00001 | -0.00227 | -0.00194 | -0.00420 | 0.45053  |
| D32 | 2.51549  | -0.00001 | -0.00214 | -0.00206 | -0.00420 | 2.51128  |
| D33 | -0.93672 | 0.00000  | -0.00105 | -0.00003 | -0.00108 | -0.93780 |
| D34 | 1.12569  | -0.00001 | -0.00149 | 0.00006  | -0.00142 | 1.12427  |
| D35 | -3.00531 | -0.00002 | -0.00146 | -0.00011 | -0.00156 | -3.00687 |
| D36 | -3.01015 | 0.00001  | -0.00071 | -0.00001 | -0.00071 | -3.01087 |
| D37 | -0.94774 | 0.00000  | -0.00115 | 0.00009  | -0.00106 | -0.94880 |
| D38 | 1.20444  | -0.00001 | -0.00111 | -0.00009 | -0.00119 | 1.20325  |
| D39 | 1.15550  | 0.00002  | -0.00068 | 0.00006  | -0.00062 | 1.15488  |
| D40 | -3.06527 | 0.00001  | -0.00113 | 0.00016  | -0.00096 | -3.06623 |
| D41 | -0.91309 | -0.00001 | -0.00109 | -0.00001 | -0.00110 | -0.91419 |
| D42 | -1.64993 | 0.00002  | 0.00097  | 0.00062  | 0.00159  | -1.64834 |
| D43 | 2.54915  | -0.00001 | 0.00062  | 0.00045  | 0.00108  | 2.55023  |
| D44 | 0.46793  | -0.00001 | 0.00068  | 0.00054  | 0.00122  | 0.46915  |
| D45 | 0.46447  | 0.00000  | -0.00031 | -0.00121 | -0.00152 | 0.46295  |
| D46 | -0.26998 | -0.00002 | -0.00018 | -0.00048 | -0.00071 | -0.27069 |
| D47 | 2.57172  | -0.00001 | -0.00037 | -0.00083 | -0.00121 | 2.57050  |
| D48 | 3.14128  | 0.00000  | 0.00005  | 0.00011  | 0.00016  | 3.14144  |
| D49 | 0.00028  | 0.00000  | 0.00005  | 0.00004  | 0.00009  | 0.00037  |
| D50 | 0.00041  | 0.00000  | 0.00003  | 0.00001  | 0.00004  | 0.00045  |
| D51 | -3.14059 | 0.00000  | 0.00003  | -0.00006 | -0.00003 | -3.14062 |
| D52 | -1.99029 | 0.00000  | -0.01220 | 0.00034  | -0.01187 | -2.00216 |
| D53 | 2.49389  | -0.00002 | 0.01343  | 0.00039  | 0.01381  | 2.50770  |
| D54 | 2.13127  | 0.00000  | 0.01384  | 0.00004  | 0.01386  | 2.14513  |
| D55 | -2.55912 | 0.00002  | 0.01409  | 0.00096  | 0.01508  | -2.54404 |
| D56 | -2.72947 | 0.00002  | -0.00036 | 0.00058  | 0.00022  | -2.72925 |
| D57 | -0.03045 | 0.00001  | -0.00012 | 0.00021  | 0.00009  | -0.03036 |
| D58 | -0.02182 | -0.00001 | -0.00032 | 0.00035  | 0.00003  | -0.02179 |
| D59 | 2.67719  | -0.00001 | -0.00008 | -0.00001 | -0.00009 | 2.67710  |
| D60 | -0.17258 | 0.00000  | 0.00137  | 0.00053  | 0.00187  | -0.17070 |
| D61 | 0.25739  | -0.00001 | 0.00128  | 0.00113  | 0.00243  | 0.25982  |
| D62 | -2.58502 | 0.00001  | 0.00167  | 0.00044  | 0.00208  | -2.58294 |
| D63 | -2.15505 | 0.00001  | 0.00158  | 0.00104  | 0.00264  | -2.15242 |
| D64 | 2.15713  | -0.00001 | 0.00092  | -0.00002 | 0.00089  | 2.15802  |
| D65 | -0.23592 | -0.00002 | 0.00104  | -0.00019 | 0.00085  | -0.23507 |
| D66 | 2.48791  | 0.00000  | 0.00009  | -0.00021 | -0.00012 | 2.48779  |
| D67 | -1.72028 | 0.00000  | 0.00024  | -0.00014 | 0.00011  | -1.72017 |
| D68 | 0.35862  | 0.00001  | 0.00022  | -0.00007 | 0.00016  | 0.35878  |
| D69 | 1.27156  | -0.00001 | 0.00003  | -0.00022 | -0.00020 | 1.27135  |
| D70 | -2.93663 | 0.00000  | 0.00018  | -0.00015 | 0.00003  | -2.93660 |
| D71 | -0.85773 | 0.00000  | 0.00016  | -0.00008 | 0.00008  | -0.85765 |
| D72 | -1.09072 | -0.00001 | 0.00030  | -0.00055 | -0.00025 | -1.09096 |
| D73 | 0.98429  | 0.00000  | 0.00046  | -0.00048 | -0.00002 | 0.98427  |

D74            3.06319    0.00000    0.00044    -0.00041    0.00003    3.06322

| Item                 | Value    | Threshold | Converged? |
|----------------------|----------|-----------|------------|
| Maximum Force        | 0.000106 | 0.000450  | YES        |
| RMS Force            | 0.000021 | 0.000300  | YES        |
| Maximum Displacement | 0.015032 | 0.001800  | NO         |
| RMS Displacement     | 0.003430 | 0.001200  | NO         |

Predicted change in Energy=-6.036185D-07

GradGradGradGradGradGradGradGradGradGradGradGradGradGradGradGradGradGradGrad

Input orientation:

| Center Number | Atomic Number | Atomic Type | Coordinates (Angstroms) |           |           |
|---------------|---------------|-------------|-------------------------|-----------|-----------|
|               |               |             | X                       | Y         | Z         |
| 1             | 6             | 0           | -1.378847               | -1.913561 | -0.244982 |
| 2             | 6             | 0           | -2.510846               | -1.173884 | -0.127288 |
| 3             | 7             | 0           | -2.113034               | 0.110827  | 0.229441  |
| 4             | 6             | 0           | -0.769132               | 0.136691  | 0.322895  |
| 5             | 7             | 0           | -0.308145               | -1.081509 | 0.044079  |
| 6             | 6             | 0           | 1.125476                | -1.435793 | -0.005889 |
| 7             | 6             | 0           | 1.683095                | -1.359718 | -1.438095 |
| 8             | 1             | 0           | -1.244234               | -2.950751 | -0.499627 |
| 9             | 1             | 0           | -3.541053               | -1.449591 | -0.259549 |
| 10            | 1             | 0           | 1.649094                | -0.730880 | 0.641823  |
| 11            | 1             | 0           | 1.234538                | -2.448284 | 0.384776  |
| 12            | 1             | 0           | 1.064545                | -1.970756 | -2.106450 |
| 13            | 1             | 0           | 1.635880                | -0.320880 | -1.784562 |
| 14            | 35            | 0           | 1.652526                | 2.230853  | 1.014206  |
| 15            | 1             | 0           | -0.117126               | 0.997170  | 0.585722  |
| 16            | 6             | 0           | -2.917852               | 1.256023  | 0.479403  |
| 17            | 6             | 0           | -4.242286               | 1.279168  | 0.408386  |
| 18            | 1             | 0           | -2.322450               | 2.122441  | 0.739105  |
| 19            | 1             | 0           | -4.764966               | 2.202168  | 0.617324  |
| 20            | 1             | 0           | -4.843711               | 0.416801  | 0.150293  |
| 21            | 8             | 0           | 2.990710                | -1.871174 | -1.463048 |
| 22            | 1             | 0           | 3.631599                | -1.139974 | -1.365478 |
| 23            | 6             | 0           | 4.846714                | 1.613336  | -1.120777 |
| 24            | 6             | 0           | 5.717474                | 0.750143  | -0.313469 |
| 25            | 8             | 0           | 4.868584                | 0.179371  | -1.338158 |
| 26            | 1             | 0           | 3.928057                | 1.991877  | -0.679011 |
| 27            | 1             | 0           | 5.269726                | 2.186151  | -1.941469 |
| 28            | 1             | 0           | 6.769399                | 0.704701  | -0.591283 |
| 29            | 6             | 0           | 5.400912                | 0.403407  | 1.115212  |
| 30            | 1             | 0           | 5.679449                | -0.632408 | 1.331878  |

|    |   |   |          |          |          |
|----|---|---|----------|----------|----------|
| 31 | 1 | 0 | 5.972178 | 1.053271 | 1.785341 |
| 32 | 1 | 0 | 4.340193 | 0.550382 | 1.328006 |

-----  
Distance matrix (angstroms):

|    |    | 1        | 2        | 3        | 4        | 5        |
|----|----|----------|----------|----------|----------|----------|
| 1  | C  | 0.000000 |          |          |          |          |
| 2  | C  | 1.357348 | 0.000000 |          |          |          |
| 3  | N  | 2.205052 | 1.391399 | 0.000000 |          |          |
| 4  | C  | 2.213090 | 2.225722 | 1.347396 | 0.000000 |          |
| 5  | N  | 1.386460 | 2.211287 | 2.171094 | 1.332012 | 0.000000 |
| 6  | C  | 2.560677 | 3.647763 | 3.596577 | 2.484018 | 1.477594 |
| 7  | C  | 3.332530 | 4.397942 | 4.399293 | 3.369532 | 2.497855 |
| 8  | H  | 1.076443 | 2.213639 | 3.264906 | 3.230257 | 2.160080 |
| 9  | H  | 2.211474 | 1.074632 | 2.171003 | 3.246395 | 3.267931 |
| 10 | H  | 3.369508 | 4.253573 | 3.877131 | 2.588863 | 2.076300 |
| 11 | H  | 2.740859 | 3.989262 | 4.216565 | 3.271180 | 2.089024 |
| 12 | H  | 3.072215 | 4.163593 | 4.459416 | 3.702084 | 2.701817 |
| 13 | H  | 3.741059 | 4.546373 | 4.277492 | 3.230299 | 2.775197 |
| 14 | Br | 5.286866 | 5.498083 | 4.392018 | 3.275341 | 3.969524 |
| 15 | H  | 3.279385 | 3.309343 | 2.212734 | 1.111132 | 2.156564 |
| 16 | C  | 3.597156 | 2.537356 | 1.421860 | 2.427838 | 3.530458 |
| 17 | C  | 4.338167 | 3.049967 | 2.435314 | 3.657235 | 4.602497 |
| 18 | H  | 4.260061 | 3.413486 | 2.085714 | 2.555236 | 3.847828 |
| 19 | H  | 5.398944 | 4.127134 | 3.399544 | 4.507724 | 5.565464 |
| 20 | H  | 4.194295 | 2.837180 | 2.748905 | 4.087842 | 4.777821 |
| 21 | O  | 4.536355 | 5.704172 | 5.730711 | 4.621420 | 3.711798 |
| 22 | H  | 5.192159 | 6.266090 | 6.091722 | 4.883329 | 4.184716 |
| 23 | C  | 7.208581 | 7.930278 | 7.246981 | 5.983511 | 5.932255 |
| 24 | C  | 7.580091 | 8.452324 | 7.875299 | 6.546551 | 6.308001 |
| 25 | O  | 6.678757 | 7.599571 | 7.155771 | 5.877479 | 5.504445 |
| 26 | H  | 6.603337 | 7.196243 | 6.392059 | 5.148700 | 5.283367 |
| 27 | H  | 7.993075 | 8.667087 | 7.970256 | 6.767233 | 6.762592 |
| 28 | H  | 8.565579 | 9.479838 | 8.940017 | 7.614972 | 7.327064 |
| 29 | C  | 7.292709 | 8.162571 | 7.571631 | 6.226423 | 5.995468 |
| 30 | H  | 7.344889 | 8.336864 | 7.905097 | 6.572196 | 6.140961 |
| 31 | H  | 8.183023 | 8.976639 | 8.287320 | 6.958744 | 6.857968 |
| 32 | H  | 6.422829 | 7.213023 | 6.560808 | 5.223656 | 5.091030 |
|    |    | 6        | 7        | 8        | 9        | 10       |
| 6  | C  | 0.000000 |          |          |          |          |
| 7  | C  | 1.538811 | 0.000000 |          |          |          |
| 8  | H  | 2.855592 | 3.461411 | 0.000000 |          |          |
| 9  | H  | 4.673439 | 5.356191 | 2.754360 | 0.000000 |          |
| 10 | H  | 1.091150 | 2.173166 | 3.821267 | 5.316639 | 0.000000 |
| 11 | H  | 1.090711 | 2.170031 | 2.679357 | 4.921262 | 1.785330 |

|    |    |          |          |          |           |          |
|----|----|----------|----------|----------|-----------|----------|
| 12 | H  | 2.168468 | 1.096663 | 2.978714 | 4.989408  | 3.071155 |
| 13 | H  | 2.160375 | 1.096109 | 4.106378 | 5.513647  | 2.460816 |
| 14 | Br | 3.842223 | 4.348209 | 6.126332 | 6.491640  | 2.985054 |
| 15 | H  | 2.795241 | 3.590481 | 4.246697 | 4.292365  | 2.471606 |
| 16 | C  | 4.881587 | 5.629176 | 4.632110 | 2.873113  | 4.983088 |
| 17 | C  | 6.029554 | 6.744136 | 5.263556 | 2.895513  | 6.229217 |
| 18 | H  | 5.010413 | 5.736726 | 5.332381 | 3.904064  | 4.891223 |
| 19 | H  | 6.951292 | 7.647828 | 6.340008 | 3.949963  | 7.052910 |
| 20 | H  | 6.252016 | 6.948252 | 4.971824 | 2.312640  | 6.611754 |
| 21 | O  | 2.406650 | 1.404302 | 4.475312 | 6.655079  | 2.744209 |
| 22 | H  | 2.866468 | 1.962199 | 5.272795 | 7.264013  | 2.850778 |
| 23 | C  | 4.938398 | 4.352956 | 7.636516 | 8.970947  | 4.338996 |
| 24 | C  | 5.095033 | 4.689617 | 7.886486 | 9.516410  | 4.433703 |
| 25 | O  | 4.288886 | 3.539226 | 6.918623 | 8.633592  | 3.887672 |
| 26 | H  | 4.478445 | 4.104784 | 7.156420 | 8.234516  | 3.788361 |
| 27 | H  | 5.834360 | 5.068579 | 8.420116 | 9.678704  | 5.318970 |
| 28 | H  | 6.064509 | 5.554224 | 8.808465 | 10.538333 | 5.458843 |
| 29 | C  | 4.787367 | 4.842535 | 7.616827 | 9.234843  | 3.948018 |
| 30 | H  | 4.813909 | 4.916561 | 7.527717 | 9.392449  | 4.090188 |
| 31 | H  | 5.735369 | 5.882965 | 8.563286 | 10.047261 | 4.814549 |
| 32 | H  | 4.007315 | 4.284853 | 6.839883 | 8.284580  | 3.058512 |
|    |    | 11       | 12       | 13       | 14        | 15       |
| 11 | H  | 0.000000 |          |          |           |          |
| 12 | H  | 2.542270 | 0.000000 |          |           |          |
| 13 | H  | 3.064792 | 1.775423 | 0.000000 |           |          |
| 14 | Br | 4.739749 | 5.266663 | 3.787443 | 0.000000  |          |
| 15 | H  | 3.706552 | 4.177645 | 3.229324 | 2.199373  | 0.000000 |
| 16 | C  | 5.565357 | 5.740926 | 5.324344 | 4.703687  | 2.814672 |
| 17 | C  | 6.624958 | 6.711846 | 6.474722 | 6.001795  | 4.138589 |
| 18 | H  | 5.802520 | 6.026872 | 5.292173 | 3.985959  | 2.480568 |
| 19 | H  | 7.594395 | 7.669122 | 7.287363 | 6.429817  | 4.801608 |
| 20 | H  | 6.723750 | 6.760238 | 6.802422 | 6.799871  | 4.781949 |
| 21 | O  | 2.613742 | 2.033222 | 2.083830 | 4.975355  | 4.699308 |
| 22 | H  | 3.243603 | 2.798036 | 2.197598 | 4.576254  | 4.735768 |
| 23 | C  | 5.640147 | 5.303025 | 3.806738 | 3.891314  | 5.285027 |
| 24 | C  | 5.551053 | 5.680477 | 4.468849 | 4.525375  | 5.908648 |
| 25 | O  | 4.804098 | 4.436669 | 3.301500 | 4.481654  | 5.406238 |
| 26 | H  | 5.301105 | 5.093108 | 3.438773 | 2.846424  | 4.353446 |
| 27 | H  | 6.570551 | 5.915289 | 4.417540 | 4.671418  | 6.067829 |
| 28 | H  | 6.444276 | 6.480676 | 5.369241 | 5.575762  | 6.992503 |
| 29 | C  | 5.101407 | 5.900834 | 4.807156 | 4.171350  | 5.575093 |
| 30 | H  | 4.894041 | 5.908521 | 5.114655 | 4.951291  | 6.067335 |
| 31 | H  | 6.055385 | 6.955259 | 5.782385 | 4.543208  | 6.206597 |
| 32 | H  | 4.418911 | 5.374151 | 4.214319 | 3.185279  | 4.540737 |



|    |   | 16       | 17        | 18       | 19        | 20        |
|----|---|----------|-----------|----------|-----------|-----------|
| 16 | C | 0.000000 |           |          |           |           |
| 17 | C | 1.326538 | 0.000000  |          |           |           |
| 18 | H | 1.082880 | 2.122794  | 0.000000 |           |           |
| 19 | H | 2.079914 | 1.081100  | 2.446849 | 0.000000  |           |
| 20 | H | 2.126392 | 1.082591  | 3.100430 | 1.847120  | 0.000000  |
| 21 | O | 6.961579 | 8.108215  | 7.002007 | 9.003920  | 8.319607  |
| 22 | H | 7.213854 | 8.425966  | 7.107975 | 9.252227  | 8.749399  |
| 23 | C | 7.935789 | 9.222795  | 7.423966 | 9.785301  | 9.846404  |
| 24 | C | 8.686393 | 9.999888  | 8.223836 | 10.623384 | 10.576617 |
| 25 | O | 8.067918 | 9.341730  | 7.733144 | 10.035980 | 9.828557  |
| 26 | H | 6.982111 | 8.273143  | 6.410689 | 8.791664  | 8.950560  |
| 27 | H | 8.588492 | 9.839859  | 8.051750 | 10.355807 | 10.477962 |
| 28 | H | 9.761822 | 11.071882 | 9.297399 | 11.693790 | 11.640325 |
| 29 | C | 8.386480 | 9.708648  | 7.921291 | 10.335788 | 10.289974 |
| 30 | H | 8.843443 | 10.146319 | 8.483570 | 10.845792 | 10.641141 |
| 31 | H | 8.987726 | 10.309331 | 8.428439 | 10.861422 | 10.957277 |
| 32 | H | 7.341476 | 8.662319  | 6.870879 | 9.281023  | 9.260073  |
|    |   | 21       | 22        | 23       | 24        | 25        |
| 21 | O | 0.000000 |           |          |           |           |
| 22 | H | 0.977196 | 0.000000  |          |           |           |
| 23 | C | 3.962791 | 3.019453  | 0.000000 |           |           |
| 24 | C | 3.953236 | 3.005019  | 1.468016 | 0.000000  |           |
| 25 | O | 2.783297 | 1.808742  | 1.450513 | 1.447889  | 0.000000  |
| 26 | H | 4.051728 | 3.219878  | 1.087375 | 2.208515  | 2.145751  |
| 27 | H | 4.678108 | 3.752110  | 1.086550 | 2.216525  | 2.133557  |
| 28 | H | 4.655492 | 3.721290  | 2.191506 | 1.088941  | 2.108766  |
| 29 | C | 4.198836 | 3.415599  | 2.602059 | 1.503850  | 2.520434  |
| 30 | H | 4.071299 | 3.424477  | 3.428167 | 2.149432  | 2.906128  |
| 31 | H | 5.290894 | 4.496253  | 3.166365 | 2.135828  | 3.426057  |
| 32 | H | 3.933831 | 3.257954  | 2.717163 | 2.152033  | 2.743224  |
|    |   | 26       | 27        | 28       | 29        | 30        |
| 26 | H | 0.000000 |           |          |           |           |
| 27 | H | 1.852463 | 0.000000  |          |           |           |
| 28 | H | 3.120536 | 2.503341  | 0.000000 |           |           |
| 29 | C | 2.812788 | 3.541000  | 2.208089 | 0.000000  |           |
| 30 | H | 3.741380 | 4.339003  | 2.583486 | 1.094276  | 0.000000  |
| 31 | H | 3.336532 | 3.958026  | 2.530890 | 1.094413  | 1.769981  |
| 32 | H | 2.505171 | 3.772166  | 3.099762 | 1.091792  | 1.786789  |
|    |   | 31       | 32        |          |           |           |
| 31 | H | 0.000000 |           |          |           |           |
| 32 | H | 1.767888 | 0.000000  |          |           |           |

Stoichiometry C10H17BrN2O2

Framework group C1[X(C10H17BrN2O2)]

Deg. of freedom 90  
 Full point group C1 NOp 1  
 Largest Abelian subgroup C1 NOp 1  
 Largest concise Abelian subgroup C1 NOp 1

Standard orientation:

| Center<br>Number | Atomic<br>Number | Atomic<br>Type | Coordinates (Angstroms) |           |           |
|------------------|------------------|----------------|-------------------------|-----------|-----------|
|                  |                  |                | X                       | Y         | Z         |
| 1                | 6                | 0              | -2.715512               | 2.112530  | -0.445800 |
| 2                | 6                | 0              | -3.793461               | 1.348033  | -0.136022 |
| 3                | 7                | 0              | -3.324952               | 0.049704  | 0.039568  |
| 4                | 6                | 0              | -1.992737               | 0.040148  | -0.161901 |
| 5                | 7                | 0              | -1.607385               | 1.279423  | -0.461833 |
| 6                | 6                | 0              | -0.204841               | 1.678258  | -0.700759 |
| 7                | 6                | 0              | 0.455231                | 2.236026  | 0.572481  |
| 8                | 1                | 0              | -2.642722               | 3.164718  | -0.661047 |
| 9                | 1                | 0              | -4.829938               | 1.612692  | -0.033515 |
| 10               | 1                | 0              | 0.324499                | 0.787203  | -1.041976 |
| 11               | 1                | 0              | -0.200483               | 2.434671  | -1.486552 |
| 12               | 1                | 0              | -0.159967               | 3.047007  | 0.980540  |
| 13               | 1                | 0              | 0.511318                | 1.439547  | 1.323434  |
| 14               | 35               | 0              | 0.527086                | -2.052221 | -0.143547 |
| 15               | 1                | 0              | -1.297093               | -0.824242 | -0.102553 |
| 16               | 6                | 0              | -4.055846               | -1.124914 | 0.367825  |
| 17               | 6                | 0              | -5.366532               | -1.168444 | 0.567604  |
| 18               | 1                | 0              | -3.415836               | -1.995610 | 0.437857  |
| 19               | 1                | 0              | -5.830822               | -2.113313 | 0.813436  |
| 20               | 1                | 0              | -6.012338               | -0.302334 | 0.498380  |
| 21               | 8                | 0              | 1.718754                | 2.761649  | 0.257370  |
| 22               | 1                | 0              | 2.405012                | 2.083658  | 0.413224  |
| 23               | 6                | 0              | 3.805877                | -0.465034 | 1.224914  |
| 24               | 6                | 0              | 4.550239                | 0.010514  | 0.052374  |
| 25               | 8                | 0              | 3.733778                | 0.926301  | 0.821210  |
| 26               | 1                | 0              | 2.890142                | -1.030789 | 1.070856  |
| 27               | 1                | 0              | 4.327265                | -0.620617 | 2.165414  |
| 28               | 1                | 0              | 5.612440                | 0.210670  | 0.184505  |
| 29               | 6                | 0              | 4.109619                | -0.291071 | -1.353494 |
| 30               | 1                | 0              | 4.292882                | 0.566637  | -2.007857 |
| 31               | 1                | 0              | 4.680610                | -1.139841 | -1.742466 |
| 32               | 1                | 0              | 3.050909                | -0.556087 | -1.383669 |

Rotational constants (GHZ): 0.6028350 0.2206469 0.1722443

Standard basis: 6-311++G(d,p) (5D, 7F)

There are 492 symmetry adapted cartesian basis functions of A symmetry.  
 There are 475 symmetry adapted basis functions of A symmetry.  
 475 basis functions, 751 primitive gaussians, 492 cartesian basis functions  
 71 alpha electrons 71 beta electrons  
 nuclear repulsion energy 1307.3523244152 Hartrees.  
 NAToms= 32 NActive= 32 NUniq= 32 SFac= 1.00D+00 NATFMM= 60 NAOKFM=F  
 Big=F  
 Integral buffers will be 131072 words long.  
 Raffenetti 2 integral format.  
 Two-electron integral symmetry is turned on.  
 One-electron integrals computed using PRISM.  
 NBasis= 475 RedAO= T EigKep= 3.80D-06 NBF= 475  
 NBsUse= 475 1.00D-06 EigRej= -1.00D+00 NBFU= 475  
 Initial guess from the checkpoint file: "/home/suqian/liuwen/qianmengshijie/ohpo/ohpo.chk"  
 B after Tr= 0.000000 0.000000 0.000000  
 Rot= 1.000000 0.000140 0.000128 0.000057 Ang= 0.02 deg.  
 Requested convergence on RMS density matrix=1.00D-08 within 128 cycles.  
 Requested convergence on MAX density matrix=1.00D-06.  
 Requested convergence on energy=1.00D-06.  
 No special actions if energy rises.  
 SCF Done: E(RB3LYP) = -3225.52370852 A.U. after 9 cycles  
 NFock= 9 Conv=0.37D-08 -V/T= 2.0018  
 Calling FoFJK, ICntrl= 2127 FMM=F ISym2X=0 l1Cent= 0 IOpCIX= 0 NMat=1 NMatS=1  
 NMatT=0.  
 \*\*\*\*\* Axes restored to original set \*\*\*\*\*

| Center<br>Number | Atomic<br>Number | Forces (Hartrees/Bohr) |              |              |
|------------------|------------------|------------------------|--------------|--------------|
|                  |                  | X                      | Y            | Z            |
| 1                | 6                | 0.000020546            | 0.000013042  | -0.000053967 |
| 2                | 6                | -0.000007517           | -0.000002985 | 0.000016811  |
| 3                | 7                | 0.000011504            | 0.000011583  | -0.000020748 |
| 4                | 6                | -0.000008266           | -0.000008780 | 0.000037618  |
| 5                | 7                | 0.000007822            | 0.000005234  | 0.000021727  |
| 6                | 6                | -0.000011269           | -0.000007019 | -0.000000601 |
| 7                | 6                | -0.000075191           | 0.000035775  | 0.000007887  |
| 8                | 1                | -0.000002977           | -0.000003593 | 0.000018264  |
| 9                | 1                | -0.000000201           | 0.000000545  | 0.000013383  |
| 10               | 1                | 0.000000764            | -0.000000826 | 0.000005691  |
| 11               | 1                | 0.000007051            | 0.000003372  | 0.000023660  |
| 12               | 1                | 0.000015835            | -0.000008138 | 0.000012771  |
| 13               | 1                | 0.000008337            | -0.000008919 | -0.000004622 |
| 14               | 35               | 0.000010801            | 0.000019567  | -0.000007789 |
| 15               | 1                | -0.000008891           | -0.000005108 | -0.000010634 |

|    |   |              |              |              |
|----|---|--------------|--------------|--------------|
| 16 | 6 | 0.000000525  | 0.000002652  | -0.000002588 |
| 17 | 6 | 0.000001423  | 0.000001895  | -0.000005851 |
| 18 | 1 | -0.000001498 | 0.000004758  | -0.000005574 |
| 19 | 1 | 0.000000986  | 0.000004518  | -0.000005083 |
| 20 | 1 | -0.000001862 | 0.000004357  | -0.000000965 |
| 21 | 8 | 0.000081087  | -0.000026647 | -0.000023542 |
| 22 | 1 | -0.000005357 | -0.000057960 | -0.000006805 |
| 23 | 6 | -0.000004788 | -0.000015476 | -0.000001551 |
| 24 | 6 | 0.000056169  | -0.000002326 | -0.000019031 |
| 25 | 8 | -0.000084507 | 0.000030164  | 0.000052819  |
| 26 | 1 | -0.000004428 | 0.000013214  | -0.000011489 |
| 27 | 1 | 0.000007801  | -0.000006835 | -0.000020204 |
| 28 | 1 | -0.000001046 | -0.000009848 | -0.000002220 |
| 29 | 6 | -0.000014093 | 0.000010561  | -0.000013011 |
| 30 | 1 | -0.000000167 | 0.000000244  | 0.000007957  |
| 31 | 1 | -0.000000499 | 0.000001477  | -0.000001369 |
| 32 | 1 | 0.000001906  | 0.000001502  | -0.000000943 |

-----  
Cartesian Forces: Max 0.000084507 RMS 0.000021419

GradGradGradGradGradGradGradGradGradGradGradGradGradGradGradGradGradGradGradGrad

Berny optimization.

Using GEDIIS/GDIIS optimizer.

FormGI is forming the generalized inverse of G from B-inverse, IUseBI=4.

GSVD: received Info= 1 from GESDD.

Internal Forces: Max 0.000049504 RMS 0.000010285

Search for a local minimum.

Step number 30 out of a maximum of 177

All quantities printed in internal units (Hartrees-Bohrs-Radians)

Mixed Optimization -- En-DIIS/RFO-DIIS

Swapping is turned off.

Update second derivatives using D2CorX and points 25 26 27 28 29

30

DE= -1.31D-06 DEPred=-6.04D-07 R= 2.17D+00

TightC=F SS= 1.41D+00 RLast= 3.13D-02 DXNew= 3.2661D+00 9.3893D-02

Trust test= 2.17D+00 RLast= 3.13D-02 DXMaxT set to 1.94D+00

ITU= 1 1 1 1 1 1 1 1 1 1 1 1 1 -1 1 1 1 1 1 1

ITU= 1 1 1 1 1 0 1 0 1 0

|                 |         |         |         |         |         |
|-----------------|---------|---------|---------|---------|---------|
| Eigenvalues --- | 0.00004 | 0.00120 | 0.00194 | 0.00234 | 0.00283 |
| Eigenvalues --- | 0.00357 | 0.00632 | 0.01057 | 0.01220 | 0.01402 |
| Eigenvalues --- | 0.01448 | 0.01751 | 0.01906 | 0.01974 | 0.02111 |
| Eigenvalues --- | 0.02191 | 0.02315 | 0.02380 | 0.02663 | 0.02984 |
| Eigenvalues --- | 0.03063 | 0.03087 | 0.03447 | 0.03535 | 0.04113 |
| Eigenvalues --- | 0.04608 | 0.04885 | 0.05239 | 0.05437 | 0.05603 |

|                 |         |         |         |         |         |
|-----------------|---------|---------|---------|---------|---------|
| Eigenvalues --- | 0.05702 | 0.05932 | 0.06786 | 0.09226 | 0.09386 |
| Eigenvalues --- | 0.10595 | 0.11096 | 0.11531 | 0.11768 | 0.12901 |
| Eigenvalues --- | 0.13864 | 0.14136 | 0.14718 | 0.15946 | 0.15992 |
| Eigenvalues --- | 0.15994 | 0.16001 | 0.16003 | 0.16014 | 0.16050 |
| Eigenvalues --- | 0.16499 | 0.17233 | 0.19028 | 0.21339 | 0.22043 |
| Eigenvalues --- | 0.22889 | 0.23331 | 0.23896 | 0.24235 | 0.25050 |
| Eigenvalues --- | 0.27676 | 0.28552 | 0.30754 | 0.32261 | 0.33107 |
| Eigenvalues --- | 0.33304 | 0.34020 | 0.34139 | 0.34502 | 0.34821 |
| Eigenvalues --- | 0.35009 | 0.35685 | 0.35689 | 0.35856 | 0.36209 |
| Eigenvalues --- | 0.36436 | 0.36675 | 0.37196 | 0.37251 | 0.37586 |
| Eigenvalues --- | 0.38485 | 0.42152 | 0.42564 | 0.44113 | 0.45728 |
| Eigenvalues --- | 0.49391 | 0.53989 | 0.55076 | 0.56346 | 0.60393 |

Eigenvalue 1 is 3.78D-05 Eigenvector:

|   |          |         |         |         |         |
|---|----------|---------|---------|---------|---------|
|   | D52      | D55     | D53     | D54     | D46     |
| 1 | -0.50675 | 0.49809 | 0.49587 | 0.49301 | 0.03286 |

|   |         |         |         |         |          |
|---|---------|---------|---------|---------|----------|
|   | D47     | D44     | D42     | D43     | D39      |
| 1 | 0.03190 | 0.01791 | 0.01710 | 0.01682 | -0.01589 |

En-DIIS/RFO-DIIS IScMMF= 0 using points: 30 29 28 27 26

RFO step: Lambda=-6.76922125D-08.

DidBck=F Rises=F RFO-DIIS coefs: 1.41696 -0.34195 -0.16607 0.15407 -

0.06301

Iteration 1 RMS(Cart)= 0.00220956 RMS(Int)= 0.00000421

Iteration 2 RMS(Cart)= 0.00000284 RMS(Int)= 0.00000377

Iteration 3 RMS(Cart)= 0.00000000 RMS(Int)= 0.00000377

| Variable | Old X   | -DE/DX   | Delta X<br>(Linear) | Delta X<br>(Quad) | Delta X<br>(Total) | New X   |
|----------|---------|----------|---------------------|-------------------|--------------------|---------|
| R1       | 2.56502 | 0.00001  | -0.00002            | 0.00001           | 0.00000            | 2.56501 |
| R2       | 2.62003 | -0.00001 | 0.00001             | 0.00000           | 0.00001            | 2.62004 |
| R3       | 2.03418 | 0.00000  | 0.00001             | 0.00000           | 0.00001            | 2.03419 |
| R4       | 2.62936 | 0.00000  | -0.00002            | 0.00001           | -0.00001           | 2.62935 |
| R5       | 2.03076 | 0.00000  | 0.00000             | 0.00000           | 0.00000            | 2.03076 |
| R6       | 2.54621 | -0.00001 | 0.00001             | 0.00000           | 0.00001            | 2.54622 |
| R7       | 2.68693 | 0.00000  | -0.00002            | 0.00001           | -0.00001           | 2.68692 |
| R8       | 2.51714 | 0.00000  | 0.00012             | 0.00001           | 0.00014            | 2.51728 |
| R9       | 2.09973 | -0.00001 | 0.00018             | -0.00004          | 0.00015            | 2.09988 |
| R10      | 2.79225 | -0.00001 | -0.00002            | -0.00001          | -0.00003           | 2.79222 |
| R11      | 2.90793 | 0.00000  | 0.00006             | -0.00002          | 0.00004            | 2.90797 |
| R12      | 2.06197 | 0.00000  | 0.00005             | 0.00001           | 0.00006            | 2.06203 |
| R13      | 2.06115 | 0.00000  | 0.00002             | 0.00003           | 0.00004            | 2.06119 |
| R14      | 2.07239 | -0.00001 | 0.00001             | -0.00003          | -0.00002           | 2.07237 |
| R15      | 2.07135 | 0.00000  | 0.00005             | 0.00000           | 0.00005            | 2.07139 |
| R16      | 2.65375 | 0.00005  | -0.00001            | 0.00006           | 0.00005            | 2.65379 |
| R17      | 4.15621 | 0.00001  | -0.00032            | -0.00005          | -0.00038           | 4.15584 |
| R18      | 8.46910 | 0.00000  | 0.00029             | 0.00038           | 0.00067            | 8.46976 |

|     |         |          |          |          |          |         |
|-----|---------|----------|----------|----------|----------|---------|
| R19 | 2.50679 | 0.00000  | 0.00001  | 0.00000  | 0.00001  | 2.50681 |
| R20 | 2.04635 | 0.00000  | 0.00000  | 0.00000  | 0.00000  | 2.04635 |
| R21 | 2.04298 | 0.00000  | 0.00000  | 0.00000  | 0.00001  | 2.04299 |
| R22 | 2.04580 | 0.00000  | 0.00001  | 0.00000  | 0.00000  | 2.04580 |
| R23 | 1.84663 | -0.00004 | 0.00000  | -0.00003 | -0.00003 | 1.84660 |
| R24 | 3.41803 | 0.00000  | 0.00002  | -0.00003 | -0.00002 | 3.41801 |
| R25 | 2.77415 | 0.00000  | -0.00001 | 0.00008  | 0.00007  | 2.77422 |
| R26 | 2.74107 | 0.00001  | 0.00012  | -0.00004 | 0.00008  | 2.74115 |
| R27 | 2.05484 | 0.00001  | 0.00001  | 0.00003  | 0.00004  | 2.05488 |
| R28 | 2.05328 | 0.00001  | -0.00001 | 0.00004  | 0.00003  | 2.05332 |
| R29 | 2.73611 | 0.00001  | 0.00012  | -0.00003 | 0.00009  | 2.73621 |
| R30 | 2.05780 | 0.00000  | 0.00002  | 0.00001  | 0.00002  | 2.05782 |
| R31 | 2.84186 | 0.00000  | 0.00008  | -0.00004 | 0.00004  | 2.84190 |
| R32 | 2.06788 | 0.00000  | -0.00001 | 0.00002  | 0.00001  | 2.06789 |
| R33 | 2.06814 | 0.00000  | -0.00001 | 0.00001  | 0.00000  | 2.06815 |
| R34 | 2.06319 | 0.00000  | 0.00001  | 0.00000  | 0.00001  | 2.06320 |
| A1  | 1.87437 | 0.00000  | 0.00002  | 0.00000  | 0.00002  | 1.87439 |
| A2  | 2.27822 | 0.00000  | -0.00003 | -0.00002 | -0.00004 | 2.27817 |
| A3  | 2.13057 | 0.00000  | 0.00000  | 0.00001  | 0.00001  | 2.13058 |
| A4  | 1.86184 | 0.00000  | -0.00001 | 0.00001  | 0.00000  | 1.86184 |
| A5  | 2.27709 | 0.00000  | 0.00000  | 0.00000  | 0.00001  | 2.27710 |
| A6  | 2.14424 | 0.00000  | 0.00000  | -0.00002 | -0.00001 | 2.14423 |
| A7  | 1.89724 | 0.00000  | 0.00006  | -0.00003 | 0.00004  | 1.89727 |
| A8  | 2.24837 | 0.00000  | -0.00005 | 0.00001  | -0.00004 | 2.24833 |
| A9  | 2.13757 | 0.00000  | -0.00001 | 0.00002  | 0.00000  | 2.13757 |
| A10 | 1.88926 | 0.00000  | -0.00007 | 0.00003  | -0.00004 | 1.88923 |
| A11 | 2.23514 | -0.00001 | 0.00000  | -0.00007 | -0.00008 | 2.23507 |
| A12 | 2.15877 | 0.00001  | 0.00007  | 0.00004  | 0.00012  | 2.15889 |
| A13 | 1.90205 | 0.00000  | 0.00000  | -0.00002 | -0.00002 | 1.90202 |
| A14 | 2.21221 | -0.00002 | -0.00008 | -0.00008 | -0.00016 | 2.21205 |
| A15 | 2.16778 | 0.00002  | 0.00006  | 0.00009  | 0.00015  | 2.16793 |
| A16 | 1.95110 | -0.00002 | -0.00002 | -0.00007 | -0.00009 | 1.95102 |
| A17 | 1.86567 | 0.00000  | -0.00004 | -0.00002 | -0.00006 | 1.86561 |
| A18 | 1.88334 | 0.00001  | 0.00008  | 0.00006  | 0.00014  | 1.88348 |
| A19 | 1.92479 | 0.00001  | -0.00014 | 0.00007  | -0.00007 | 1.92472 |
| A20 | 1.92093 | 0.00001  | 0.00014  | 0.00001  | 0.00015  | 1.92108 |
| A21 | 1.91676 | -0.00001 | -0.00002 | -0.00005 | -0.00007 | 1.91668 |
| A22 | 1.91271 | 0.00001  | 0.00014  | 0.00000  | 0.00014  | 1.91285 |
| A23 | 1.90227 | 0.00001  | -0.00017 | 0.00007  | -0.00010 | 1.90217 |
| A24 | 1.91341 | 0.00000  | 0.00007  | 0.00003  | 0.00011  | 1.91352 |
| A25 | 1.88718 | 0.00000  | -0.00007 | 0.00000  | -0.00006 | 1.88712 |
| A26 | 1.88750 | -0.00001 | 0.00003  | -0.00011 | -0.00007 | 1.88743 |
| A27 | 1.96024 | -0.00001 | 0.00000  | 0.00000  | 0.00000  | 1.96023 |
| A28 | 1.79094 | -0.00003 | -0.00033 | -0.00024 | -0.00058 | 1.79036 |

|     |          |          |          |          |          |          |
|-----|----------|----------|----------|----------|----------|----------|
| A29 | 2.83252  | 0.00000  | -0.00003 | -0.00009 | -0.00012 | 2.83241  |
| A30 | 2.17703  | 0.00000  | 0.00002  | 0.00002  | 0.00004  | 2.17707  |
| A31 | 1.95558  | 0.00000  | 0.00002  | 0.00000  | 0.00002  | 1.95560  |
| A32 | 2.15058  | 0.00000  | -0.00004 | -0.00002 | -0.00006 | 2.15052  |
| A33 | 2.07974  | 0.00000  | -0.00002 | -0.00001 | -0.00003 | 2.07971  |
| A34 | 2.15739  | 0.00000  | 0.00001  | 0.00001  | 0.00003  | 2.15741  |
| A35 | 2.04606  | 0.00000  | 0.00001  | -0.00001 | 0.00000  | 2.04606  |
| A36 | 1.91388  | -0.00004 | -0.00016 | -0.00013 | -0.00032 | 1.91356  |
| A37 | 3.05033  | -0.00001 | 0.00037  | 0.00001  | 0.00040  | 3.05073  |
| A38 | 2.07419  | 0.00001  | 0.00021  | 0.00001  | 0.00022  | 2.07441  |
| A39 | 2.08798  | 0.00000  | -0.00001 | -0.00006 | -0.00007 | 2.08791  |
| A40 | 2.00179  | 0.00000  | 0.00003  | 0.00015  | 0.00018  | 2.00197  |
| A41 | 1.98461  | 0.00000  | -0.00006 | -0.00007 | -0.00013 | 1.98448  |
| A42 | 2.04008  | 0.00000  | -0.00014 | 0.00001  | -0.00014 | 2.03994  |
| A43 | 2.04567  | -0.00001 | 0.00002  | 0.00005  | 0.00007  | 2.04574  |
| A44 | 2.13312  | 0.00000  | -0.00001 | -0.00005 | -0.00007 | 2.13306  |
| A45 | 1.94912  | 0.00000  | 0.00003  | -0.00011 | -0.00008 | 1.94904  |
| A46 | 2.04658  | -0.00001 | -0.00008 | -0.00002 | -0.00010 | 2.04648  |
| A47 | 2.02205  | 0.00001  | 0.00001  | 0.00006  | 0.00008  | 2.02213  |
| A48 | 1.42130  | 0.00003  | 0.00054  | 0.00062  | 0.00114  | 1.42244  |
| A49 | 0.99797  | 0.00000  | -0.00063 | 0.00005  | -0.00056 | 0.99741  |
| A50 | 2.36465  | 0.00003  | -0.00023 | 0.00034  | 0.00010  | 2.36475  |
| A51 | 2.34507  | 0.00000  | 0.00100  | 0.00075  | 0.00176  | 2.34683  |
| A52 | 1.93133  | 0.00001  | -0.00007 | 0.00006  | -0.00001 | 1.93132  |
| A53 | 1.91232  | 0.00000  | 0.00001  | 0.00005  | 0.00005  | 1.91237  |
| A54 | 1.93760  | 0.00000  | -0.00011 | 0.00001  | -0.00011 | 1.93749  |
| A55 | 1.88386  | -0.00001 | 0.00010  | -0.00005 | 0.00005  | 1.88391  |
| A56 | 1.91360  | 0.00000  | 0.00000  | -0.00003 | -0.00003 | 1.91357  |
| A57 | 1.88373  | 0.00000  | 0.00008  | -0.00004 | 0.00005  | 1.88377  |
| A58 | 3.76637  | 0.00004  | 0.00154  | 0.00137  | 0.00290  | 3.76927  |
| A59 | 5.05175  | -0.00002 | -0.00034 | -0.00010 | -0.00044 | 5.05131  |
| D1  | 0.00412  | 0.00001  | -0.00014 | 0.00021  | 0.00007  | 0.00418  |
| D2  | -3.13136 | 0.00001  | 0.00016  | 0.00012  | 0.00028  | -3.13108 |
| D3  | 3.13688  | 0.00000  | -0.00039 | -0.00003 | -0.00043 | 3.13646  |
| D4  | 0.00141  | -0.00001 | -0.00009 | -0.00013 | -0.00022 | 0.00119  |
| D5  | -0.00675 | -0.00001 | -0.00003 | 0.00000  | -0.00002 | -0.00678 |
| D6  | -3.09821 | -0.00001 | 0.00055  | 0.00011  | 0.00066  | -3.09755 |
| D7  | -3.14043 | 0.00000  | 0.00020  | 0.00022  | 0.00042  | -3.14001 |
| D8  | 0.05130  | 0.00001  | 0.00077  | 0.00033  | 0.00110  | 0.05240  |
| D9  | -0.00015 | -0.00001 | 0.00026  | -0.00035 | -0.00008 | -0.00023 |
| D10 | -3.13577 | -0.00001 | 0.00000  | -0.00024 | -0.00024 | -3.13601 |
| D11 | 3.13590  | -0.00001 | -0.00001 | -0.00027 | -0.00027 | 3.13563  |
| D12 | 0.00029  | 0.00000  | -0.00027 | -0.00016 | -0.00043 | -0.00014 |
| D13 | -0.00406 | 0.00000  | -0.00028 | 0.00035  | 0.00007  | -0.00399 |

|     |          |          |          |          |          |          |
|-----|----------|----------|----------|----------|----------|----------|
| D14 | 3.14048  | -0.00001 | -0.00054 | -0.00036 | -0.00089 | 3.13959  |
| D15 | 3.13202  | 0.00000  | -0.00004 | 0.00025  | 0.00021  | 3.13223  |
| D16 | -0.00663 | -0.00001 | -0.00029 | -0.00046 | -0.00075 | -0.00738 |
| D17 | 0.00061  | 0.00000  | 0.00024  | -0.00012 | 0.00012  | 0.00073  |
| D18 | -3.14152 | 0.00000  | 0.00030  | -0.00015 | 0.00015  | -3.14137 |
| D19 | -3.13428 | 0.00000  | -0.00005 | 0.00000  | -0.00005 | -3.13433 |
| D20 | 0.00678  | 0.00000  | 0.00001  | -0.00003 | -0.00002 | 0.00676  |
| D21 | 0.00666  | 0.00001  | 0.00019  | -0.00022 | -0.00003 | 0.00663  |
| D22 | 3.09969  | 0.00000  | -0.00037 | -0.00033 | -0.00070 | 3.09899  |
| D23 | -3.13772 | 0.00002  | 0.00043  | 0.00045  | 0.00088  | -3.13684 |
| D24 | -0.04470 | 0.00001  | -0.00013 | 0.00034  | 0.00021  | -0.04449 |
| D25 | -3.13831 | 0.00002  | 0.00107  | 0.00204  | 0.00311  | -3.13521 |
| D26 | 0.00664  | 0.00000  | 0.00079  | 0.00123  | 0.00201  | 0.00866  |
| D27 | 1.42697  | -0.00001 | -0.00213 | -0.00162 | -0.00375 | 1.42322  |
| D28 | -2.74839 | -0.00001 | -0.00234 | -0.00159 | -0.00393 | -2.75232 |
| D29 | -0.68764 | -0.00001 | -0.00235 | -0.00163 | -0.00398 | -0.69161 |
| D30 | -1.65729 | 0.00000  | -0.00148 | -0.00148 | -0.00296 | -1.66026 |
| D31 | 0.45053  | 0.00000  | -0.00169 | -0.00146 | -0.00314 | 0.44739  |
| D32 | 2.51128  | -0.00001 | -0.00169 | -0.00150 | -0.00319 | 2.50810  |
| D33 | -0.93780 | -0.00001 | -0.00031 | 0.00003  | -0.00029 | -0.93809 |
| D34 | 1.12427  | 0.00000  | -0.00042 | 0.00007  | -0.00035 | 1.12393  |
| D35 | -3.00687 | 0.00000  | -0.00048 | 0.00014  | -0.00034 | -3.00722 |
| D36 | -3.01087 | 0.00000  | -0.00016 | 0.00005  | -0.00010 | -3.01097 |
| D37 | -0.94880 | 0.00000  | -0.00026 | 0.00010  | -0.00016 | -0.94896 |
| D38 | 1.20325  | 0.00000  | -0.00032 | 0.00017  | -0.00016 | 1.20309  |
| D39 | 1.15488  | 0.00000  | -0.00013 | 0.00007  | -0.00007 | 1.15482  |
| D40 | -3.06623 | 0.00000  | -0.00024 | 0.00011  | -0.00012 | -3.06636 |
| D41 | -0.91419 | 0.00000  | -0.00030 | 0.00018  | -0.00012 | -0.91431 |
| D42 | -1.64834 | 0.00001  | 0.00079  | 0.00072  | 0.00151  | -1.64682 |
| D43 | 2.55023  | 0.00000  | 0.00057  | 0.00077  | 0.00133  | 2.55156  |
| D44 | 0.46915  | 0.00001  | 0.00063  | 0.00083  | 0.00146  | 0.47062  |
| D45 | 0.46295  | 0.00000  | -0.00061 | -0.00146 | -0.00206 | 0.46088  |
| D46 | -0.27069 | -0.00001 | -0.00022 | -0.00042 | -0.00064 | -0.27133 |
| D47 | 2.57050  | -0.00001 | -0.00072 | -0.00121 | -0.00193 | 2.56857  |
| D48 | 3.14144  | 0.00000  | 0.00008  | -0.00008 | 0.00000  | 3.14144  |
| D49 | 0.00037  | 0.00000  | 0.00004  | -0.00002 | 0.00001  | 0.00039  |
| D50 | 0.00045  | 0.00000  | 0.00002  | -0.00005 | -0.00003 | 0.00042  |
| D51 | -3.14062 | 0.00000  | -0.00003 | 0.00001  | -0.00002 | -3.14064 |
| D52 | -2.00216 | 0.00000  | -0.00488 | 0.00725  | 0.00238  | -1.99978 |
| D53 | 2.50770  | 0.00000  | 0.00549  | -0.00695 | -0.00145 | 2.50625  |
| D54 | 2.14513  | -0.00001 | 0.00512  | -0.00806 | -0.00294 | 2.14219  |
| D55 | -2.54404 | 0.00001  | 0.00583  | -0.00685 | -0.00102 | -2.54506 |
| D56 | -2.72925 | 0.00001  | -0.00002 | 0.00001  | -0.00001 | -2.72926 |
| D57 | -0.03036 | 0.00001  | 0.00002  | 0.00019  | 0.00022  | -0.03015 |



|     |          |          |         |          |          |          |
|-----|----------|----------|---------|----------|----------|----------|
| D58 | -0.02179 | 0.00000  | 0.00009 | -0.00010 | 0.00000  | -0.02179 |
| D59 | 2.67710  | 0.00001  | 0.00013 | 0.00009  | 0.00022  | 2.67732  |
| D60 | -0.17070 | -0.00001 | 0.00046 | -0.00018 | 0.00028  | -0.17043 |
| D61 | 0.25982  | 0.00000  | 0.00113 | 0.00119  | 0.00232  | 0.26214  |
| D62 | -2.58294 | -0.00001 | 0.00073 | -0.00029 | 0.00044  | -2.58249 |
| D63 | -2.15242 | 0.00000  | 0.00140 | 0.00109  | 0.00249  | -2.14993 |
| D64 | 2.15802  | -0.00003 | 0.00033 | -0.00065 | -0.00032 | 2.15770  |
| D65 | -0.23507 | -0.00003 | 0.00037 | -0.00061 | -0.00024 | -0.23531 |
| D66 | 2.48779  | 0.00000  | 0.00007 | -0.00004 | 0.00002  | 2.48781  |
| D67 | -1.72017 | 0.00000  | 0.00015 | -0.00004 | 0.00012  | -1.72005 |
| D68 | 0.35878  | 0.00000  | 0.00019 | -0.00005 | 0.00014  | 0.35892  |
| D69 | 1.27135  | 0.00000  | 0.00008 | 0.00002  | 0.00009  | 1.27145  |
| D70 | -2.93660 | 0.00000  | 0.00016 | 0.00002  | 0.00019  | -2.93641 |
| D71 | -0.85765 | 0.00000  | 0.00020 | 0.00001  | 0.00021  | -0.85744 |
| D72 | -1.09096 | 0.00000  | 0.00011 | 0.00014  | 0.00025  | -1.09072 |
| D73 | 0.98427  | 0.00000  | 0.00019 | 0.00014  | 0.00034  | 0.98461  |
| D74 | 3.06322  | 0.00000  | 0.00023 | 0.00013  | 0.00036  | 3.06358  |

| Item                 | Value    | Threshold | Converged? |
|----------------------|----------|-----------|------------|
| Maximum Force        | 0.000050 | 0.000450  | YES        |
| RMS Force            | 0.000010 | 0.000300  | YES        |
| Maximum Displacement | 0.009167 | 0.001800  | NO         |
| RMS Displacement     | 0.002211 | 0.001200  | NO         |

Predicted change in Energy=-2.544681D-07

GradGradGradGradGradGradGradGradGradGradGradGradGradGradGradGradGradGradGrad

Input orientation:

| Center Number | Atomic Number | Atomic Type | Coordinates (Angstroms) |           |           |
|---------------|---------------|-------------|-------------------------|-----------|-----------|
|               |               |             | X                       | Y         | Z         |
| 1             | 6             | 0           | -1.378471               | -1.912575 | -0.247197 |
| 2             | 6             | 0           | -2.510429               | -1.172826 | -0.129593 |
| 3             | 7             | 0           | -2.112723               | 0.111240  | 0.229542  |
| 4             | 6             | 0           | -0.768919               | 0.136680  | 0.324610  |
| 5             | 7             | 0           | -0.307877               | -1.081255 | 0.044384  |
| 6             | 6             | 0           | 1.125668                | -1.435817 | -0.005369 |
| 7             | 6             | 0           | 1.682856                | -1.361973 | -1.437882 |
| 8             | 1             | 0           | -1.243880               | -2.949498 | -0.502960 |
| 9             | 1             | 0           | -3.540569               | -1.448129 | -0.263226 |
| 10            | 1             | 0           | 1.649513                | -0.729822 | 0.641029  |
| 11            | 1             | 0           | 1.234859                | -2.447651 | 0.387021  |
| 12            | 1             | 0           | 1.064283                | -1.974130 | -2.105175 |
| 13            | 1             | 0           | 1.635294                | -0.323656 | -1.785944 |
| 14            | 35            | 0           | 1.652481                | 2.230199  | 1.018065  |

|    |   |   |           |           |           |
|----|---|---|-----------|-----------|-----------|
| 15 | 1 | 0 | -0.117015 | 0.996926  | 0.588773  |
| 16 | 6 | 0 | -2.917586 | 1.256262  | 0.480127  |
| 17 | 6 | 0 | -4.241934 | 1.279853  | 0.407544  |
| 18 | 1 | 0 | -2.322323 | 2.122204  | 0.741739  |
| 19 | 1 | 0 | -4.764604 | 2.202711  | 0.617147  |
| 20 | 1 | 0 | -4.843295 | 0.418015  | 0.147529  |
| 21 | 8 | 0 | 2.990591  | -1.873202 | -1.462539 |
| 22 | 1 | 0 | 3.631082  | -1.141675 | -1.364987 |
| 23 | 6 | 0 | 4.843832  | 1.612782  | -1.120345 |
| 24 | 6 | 0 | 5.716932  | 0.750891  | -0.314105 |
| 25 | 8 | 0 | 4.866933  | 0.178709  | -1.337157 |
| 26 | 1 | 0 | 3.925479  | 1.990704  | -0.677359 |
| 27 | 1 | 0 | 5.264875  | 2.185603  | -1.942068 |
| 28 | 1 | 0 | 6.768440  | 0.706357  | -0.593689 |
| 29 | 6 | 0 | 5.403007  | 0.404374  | 1.115231  |
| 30 | 1 | 0 | 5.683100  | -0.631027 | 1.331885  |
| 31 | 1 | 0 | 5.974464  | 1.055223  | 1.784244  |
| 32 | 1 | 0 | 4.342404  | 0.550118  | 1.329483  |

-----  
Distance matrix (angstroms):

|    |    | 1        | 2        | 3        | 4        | 5        |
|----|----|----------|----------|----------|----------|----------|
| 1  | C  | 0.000000 |          |          |          |          |
| 2  | C  | 1.357347 | 0.000000 |          |          |          |
| 3  | N  | 2.205048 | 1.391392 | 0.000000 |          |          |
| 4  | C  | 2.213134 | 2.225750 | 1.347403 | 0.000000 |          |
| 5  | N  | 1.386465 | 2.211310 | 2.171129 | 1.332086 | 0.000000 |
| 6  | C  | 2.560565 | 3.647712 | 3.596630 | 2.484168 | 1.477579 |
| 7  | C  | 3.330558 | 4.396708 | 4.399668 | 3.370985 | 2.497785 |
| 8  | H  | 1.076447 | 2.213620 | 3.264899 | 3.230317 | 2.160096 |
| 9  | H  | 2.211478 | 1.074634 | 2.170990 | 3.246416 | 3.267953 |
| 10 | H  | 3.369947 | 4.253849 | 3.877000 | 2.588390 | 2.076263 |
| 11 | H  | 2.741903 | 3.989894 | 4.216519 | 3.270747 | 2.089132 |
| 12 | H  | 3.069678 | 4.162161 | 4.460162 | 3.704052 | 2.701972 |
| 13 | H  | 3.738340 | 4.544404 | 4.277727 | 3.232118 | 2.774882 |
| 14 | Br | 5.286788 | 5.497955 | 4.391869 | 3.275191 | 3.969482 |
| 15 | H  | 3.279530 | 3.309426 | 2.212767 | 1.111209 | 2.156763 |
| 16 | C  | 3.597138 | 2.537322 | 1.421855 | 2.427842 | 3.530501 |
| 17 | C  | 4.338168 | 3.049960 | 2.435340 | 3.657261 | 4.602556 |
| 18 | H  | 4.260081 | 3.413476 | 2.085726 | 2.555262 | 3.847914 |
| 19 | H  | 5.398941 | 4.127126 | 3.399553 | 4.507722 | 5.565510 |
| 20 | H  | 4.194337 | 2.837223 | 2.748974 | 4.087915 | 4.777915 |
| 21 | O  | 4.535119 | 5.703376 | 5.731053 | 4.622493 | 3.711857 |
| 22 | H  | 5.190315 | 6.264610 | 6.091274 | 4.883538 | 4.183943 |
| 23 | C  | 7.204692 | 7.926308 | 7.243651 | 5.980781 | 5.929126 |

|    |    |          |          |          |           |          |
|----|----|----------|----------|----------|-----------|----------|
| 24 | C  | 7.579134 | 8.451284 | 7.874529 | 6.546103  | 6.307423 |
| 25 | O  | 6.675819 | 7.596732 | 7.153649 | 5.875888  | 5.502256 |
| 26 | H  | 6.599433 | 7.192280 | 6.388642 | 5.145748  | 5.280071 |
| 27 | H  | 7.987597 | 8.661378 | 7.965415 | 6.763327  | 6.758248 |
| 28 | H  | 8.564521 | 9.478614 | 8.939068 | 7.614433  | 7.326456 |
| 29 | C  | 7.294718 | 8.164534 | 7.573412 | 6.228115  | 5.997333 |
| 30 | H  | 7.348581 | 8.340466 | 7.908285 | 6.575144  | 6.144279 |
| 31 | H  | 8.185367 | 8.978885 | 8.289198 | 6.960422  | 6.859990 |
| 32 | H  | 6.424888 | 7.215176 | 6.562861 | 5.225545  | 5.092934 |
|    |    | 6        | 7        | 8        | 9         | 10       |
| 6  | C  | 0.000000 |          |          |           |          |
| 7  | C  | 1.538833 | 0.000000 |          |           |          |
| 8  | H  | 2.855448 | 3.458337 | 0.000000 |           |          |
| 9  | H  | 4.673373 | 5.354569 | 2.754335 | 0.000000  |          |
| 10 | H  | 1.091180 | 2.173154 | 3.821962 | 5.317010  | 0.000000 |
| 11 | H  | 1.090734 | 2.170178 | 2.681057 | 4.922050  | 1.785328 |
| 12 | H  | 2.168580 | 1.096654 | 2.974231 | 4.987396  | 3.071227 |
| 13 | H  | 2.160340 | 1.096134 | 4.102528 | 5.511140  | 2.460767 |
| 14 | Br | 3.842475 | 4.351585 | 6.126310 | 6.491500  | 2.983938 |
| 15 | H  | 2.795622 | 3.593226 | 4.246877 | 4.292426  | 2.470832 |
| 16 | C  | 4.881690 | 5.630095 | 4.632080 | 2.873050  | 4.982852 |
| 17 | C  | 6.029636 | 6.744477 | 5.263530 | 2.895468  | 6.229162 |
| 18 | H  | 5.010621 | 5.738614 | 5.332398 | 3.904018  | 4.890774 |
| 19 | H  | 6.951382 | 7.648519 | 6.339983 | 3.949931  | 7.052746 |
| 20 | H  | 6.252087 | 6.947844 | 4.971828 | 2.312642  | 6.611931 |
| 21 | O  | 2.406780 | 1.404327 | 4.473248 | 6.653953  | 2.744232 |
| 22 | H  | 2.865690 | 1.961996 | 5.270348 | 7.262257  | 2.849621 |
| 23 | C  | 4.935774 | 4.352214 | 7.632548 | 8.966717  | 4.335194 |
| 24 | C  | 5.094773 | 4.690505 | 7.885521 | 9.515230  | 4.432683 |
| 25 | O  | 4.286889 | 3.538671 | 6.915461 | 8.630528  | 3.884641 |
| 26 | H  | 4.475663 | 4.104656 | 7.152502 | 8.230368  | 3.784102 |
| 27 | H  | 5.830825 | 5.066592 | 8.414522 | 9.672558  | 5.314408 |
| 28 | H  | 6.064314 | 5.554621 | 8.807427 | 10.536920 | 5.458072 |
| 29 | C  | 4.789329 | 4.845399 | 7.618930 | 9.236853  | 3.949681 |
| 30 | H  | 4.817273 | 4.920147 | 7.531601 | 9.396175  | 4.093514 |
| 31 | H  | 5.737492 | 5.885816 | 8.565838 | 10.049615 | 4.816484 |
| 32 | H  | 4.009134 | 4.288076 | 6.841910 | 8.286795  | 3.060045 |
|    |    | 11       | 12       | 13       | 14        | 15       |
| 11 | H  | 0.000000 |          |          |           |          |
| 12 | H  | 2.542511 | 0.000000 |          |           |          |
| 13 | H  | 3.064879 | 1.775395 | 0.000000 |           |          |
| 14 | Br | 4.738660 | 5.270387 | 3.792748 | 0.000000  |          |
| 15 | H  | 3.705857 | 4.180909 | 3.233235 | 2.199174  | 0.000000 |
| 16 | C  | 5.565109 | 5.742342 | 5.325404 | 4.703556  | 2.814650 |

|    |   |          |           |          |           |           |
|----|---|----------|-----------|----------|-----------|-----------|
| 17 | C | 6.624950 | 6.712533  | 6.474908 | 6.001668  | 4.138580  |
| 18 | H | 5.801977 | 6.029425  | 5.294728 | 3.985860  | 2.480530  |
| 19 | H | 7.594233 | 7.670265  | 7.288077 | 6.429655  | 4.801542  |
| 20 | H | 6.724088 | 6.759920  | 6.801508 | 6.799775  | 4.782003  |
| 21 | O | 2.614088 | 2.033182  | 2.083870 | 4.978135  | 4.701354  |
| 22 | H | 3.242991 | 2.798092  | 2.197620 | 4.578573  | 4.736985  |
| 23 | C | 5.637726 | 5.302906  | 3.806249 | 3.890851  | 5.283026  |
| 24 | C | 5.550786 | 5.681620  | 4.469981 | 4.525792  | 5.908524  |
| 25 | O | 4.802345 | 4.436746  | 3.301102 | 4.482006  | 5.405407  |
| 26 | H | 5.298239 | 5.093625  | 3.439502 | 2.845759  | 4.351143  |
| 27 | H | 6.567551 | 5.913963  | 4.415271 | 4.670521  | 6.064887  |
| 28 | H | 6.444383 | 6.481281  | 5.369506 | 5.576099  | 6.992292  |
| 29 | C | 5.102724 | 5.903628  | 4.810666 | 4.172472  | 5.576640  |
| 30 | H | 4.896911 | 5.911918  | 5.118600 | 4.952876  | 6.069908  |
| 31 | H | 6.056914 | 6.958049  | 5.785841 | 4.543912  | 6.207952  |
| 32 | H | 4.419467 | 5.377247  | 4.218746 | 3.186744  | 4.542544  |
|    |   | 16       | 17        | 18       | 19        | 20        |
| 16 | C | 0.000000 |           |          |           |           |
| 17 | C | 1.326546 | 0.000000  |          |           |           |
| 18 | H | 1.082882 | 2.122769  | 0.000000 |           |           |
| 19 | H | 2.079908 | 1.081103  | 2.446782 | 0.000000  |           |
| 20 | H | 2.126414 | 1.082593  | 3.100427 | 1.847125  | 0.000000  |
| 21 | O | 6.962330 | 8.108537  | 7.003511 | 9.004510  | 8.319361  |
| 22 | H | 7.213848 | 8.425559  | 7.108743 | 9.252098  | 8.748452  |
| 23 | C | 7.932731 | 9.219351  | 7.421633 | 9.782072  | 9.842530  |
| 24 | C | 8.685683 | 9.998979  | 8.223437 | 10.622504 | 10.575552 |
| 25 | O | 8.066125 | 9.339591  | 7.732036 | 10.034061 | 9.825990  |
| 26 | H | 6.979020 | 8.269762  | 6.408288 | 8.788529  | 8.946798  |
| 27 | H | 8.583902 | 9.834657  | 8.048131 | 10.350861 | 10.472148 |
| 28 | H | 9.760869 | 11.070668 | 9.296771 | 11.692575 | 11.638941 |
| 29 | C | 8.388166 | 9.710415  | 7.922824 | 10.337428 | 10.291906 |
| 30 | H | 8.846420 | 10.149491 | 8.486185 | 10.848753 | 10.644631 |
| 31 | H | 8.989420 | 10.311185 | 8.429824 | 10.863076 | 10.959415 |
| 32 | H | 7.343534 | 8.664487  | 6.872807 | 9.283107  | 9.262372  |
|    |   | 21       | 22        | 23       | 24        | 25        |
| 21 | O | 0.000000 |           |          |           |           |
| 22 | H | 0.977178 | 0.000000  |          |           |           |
| 23 | C | 3.962788 | 3.019544  | 0.000000 |           |           |
| 24 | C | 3.954453 | 3.006148  | 1.468054 | 0.000000  |           |
| 25 | O | 2.783293 | 1.808734  | 1.450553 | 1.447938  | 0.000000  |
| 26 | H | 4.052197 | 3.220451  | 1.087397 | 2.208708  | 2.145925  |
| 27 | H | 4.677202 | 3.751411  | 1.086568 | 2.216532  | 2.133517  |
| 28 | H | 4.656304 | 3.721980  | 2.191595 | 1.088954  | 2.108764  |
| 29 | C | 4.201429 | 3.417817  | 2.602063 | 1.503870  | 2.520419  |

|    |   |          |          |          |          |          |
|----|---|----------|----------|----------|----------|----------|
| 30 | H | 4.074483 | 3.427048 | 3.428190 | 2.149448 | 2.906129 |
| 31 | H | 5.293465 | 4.498384 | 3.166361 | 2.135887 | 3.426083 |
| 32 | H | 3.936403 | 3.260110 | 2.717047 | 2.151980 | 2.742999 |
|    |   | 26       | 27       | 28       | 29       | 30       |
| 26 | H | 0.000000 |          |          |          |          |
| 27 | H | 1.852419 | 0.000000 |          |          |          |
| 28 | H | 3.120733 | 2.503397 | 0.000000 |          |          |
| 29 | C | 2.812990 | 3.541036 | 2.208169 | 0.000000 |          |
| 30 | H | 3.741626 | 4.339018 | 2.583485 | 1.094279 | 0.000000 |
| 31 | H | 3.336608 | 3.958115 | 2.531141 | 1.094416 | 1.770017 |
| 32 | H | 2.505300 | 3.772109 | 3.099783 | 1.091798 | 1.786778 |
|    |   | 31       | 32       |          |          |          |
| 31 | H | 0.000000 |          |          |          |          |
| 32 | H | 1.767925 | 0.000000 |          |          |          |

Stoichiometry C10H17BrN2O2

Framework group C1[X(C10H17BrN2O2)]

Deg. of freedom 90

Full point group C1 NOp 1

Largest Abelian subgroup C1 NOp 1

Largest concise Abelian subgroup C1 NOp 1

Standard orientation:

| Center<br>Number | Atomic<br>Number | Atomic<br>Type | Coordinates (Angstroms) |           |           |
|------------------|------------------|----------------|-------------------------|-----------|-----------|
|                  |                  |                | X                       | Y         | Z         |
| 1                | 6                | 0              | -2.714540               | 2.112514  | -0.445265 |
| 2                | 6                | 0              | -3.792557               | 1.348350  | -0.134909 |
| 3                | 7                | 0              | -3.324481               | 0.049731  | 0.039638  |
| 4                | 6                | 0              | -1.992458               | 0.039606  | -0.163107 |
| 5                | 7                | 0              | -1.606790               | 1.278926  | -0.462772 |
| 6                | 6                | 0              | -0.204276               | 1.677610  | -0.702032 |
| 7                | 6                | 0              | 0.454922                | 2.238721  | 0.570217  |
| 8                | 1                | 0              | -2.641563               | 3.164716  | -0.660398 |
| 9                | 1                | 0              | -4.828852               | 1.613381  | -0.031523 |
| 10               | 1                | 0              | 0.325504                | 0.785780  | -1.040625 |
| 11               | 1                | 0              | -0.199619               | 2.431936  | -1.489860 |
| 12               | 1                | 0              | -0.160518               | 3.050696  | 0.975900  |
| 13               | 1                | 0              | 0.510501                | 1.444107  | 1.323218  |
| 14               | 35               | 0              | 0.526797                | -2.053210 | -0.144243 |
| 15               | 1                | 0              | -1.297086               | -0.825121 | -0.104030 |
| 16               | 6                | 0              | -4.055622               | -1.124635 | 0.368224  |
| 17               | 6                | 0              | -5.366134               | -1.167638 | 0.569304  |
| 18               | 1                | 0              | -3.415983               | -1.995678 | 0.437360  |
| 19               | 1                | 0              | -5.830583               | -2.112396 | 0.815279  |

|    |   |   |           |           |           |
|----|---|---|-----------|-----------|-----------|
| 20 | 1 | 0 | -6.011639 | -0.301228 | 0.501020  |
| 21 | 8 | 0 | 1.718669  | 2.763645  | 0.254732  |
| 22 | 1 | 0 | 2.404483  | 2.085467  | 0.411615  |
| 23 | 6 | 0 | 3.802744  | -0.463611 | 1.226912  |
| 24 | 6 | 0 | 4.549932  | 0.010117  | 0.055386  |
| 25 | 8 | 0 | 3.731999  | 0.927237  | 0.821154  |
| 26 | 1 | 0 | 2.887191  | -1.029412 | 1.071783  |
| 27 | 1 | 0 | 4.321997  | -0.617949 | 2.168817  |
| 28 | 1 | 0 | 5.611887  | 0.210257  | 0.189611  |
| 29 | 6 | 0 | 4.112249  | -0.293191 | -1.351051 |
| 30 | 1 | 0 | 4.297305  | 0.563559  | -2.006169 |
| 31 | 1 | 0 | 4.683638  | -1.142783 | -1.737644 |
| 32 | 1 | 0 | 3.053455  | -0.557678 | -1.383080 |

-----

Rotational constants (GHZ):      0.6023882      0.2207079      0.1722443

Standard basis: 6-311++G(d,p) (5D, 7F)

There are    492 symmetry adapted cartesian basis functions of A    symmetry.

There are    475 symmetry adapted basis functions of A    symmetry.

    475 basis functions,    751 primitive gaussians,    492 cartesian basis functions

    71 alpha electrons      71 beta electrons

        nuclear repulsion energy      1307.3069266681 Hartrees.

NAtoms=    32 NActive=    32 NUniq=    32 SFac= 1.00D+00 NAtFMM=    60 NAOKFM=F

Big=F

Integral buffers will be    131072 words long.

Raffenetti 2 integral format.

Two-electron integral symmetry is turned on.

One-electron integrals computed using PRISM.

NBasis=    475 RedAO= T EigKep=    3.80D-06    NBF=    475

NBsUse=    475 1.00D-06 EigRej= -1.00D+00    NBFU=    475

Initial guess from the checkpoint file: "/home/suqian/liuwen/qianmengshijie/ohpo/ohpo.chk"

B after Tr=    0.000000    0.000000    0.000000

        Rot=    1.000000    0.000224    0.000078    0.000025 Ang=    0.03 deg.

Requested convergence on RMS density matrix=1.00D-08 within 128 cycles.

Requested convergence on MAX density matrix=1.00D-06.

Requested convergence on                    energy=1.00D-06.

No special actions if energy rises.

SCF Done: E(RB3LYP) = -3225.52370947      A.U. after    8 cycles

        NFock=    8 Conv=0.95D-08      -V/T= 2.0018

Calling FoFJK, ICntrl=                    2127 FMM=F ISym2X=0 l1Cent= 0 IOpClX= 0 NMat=1 NMatS=1

NMatT=0.

\*\*\*\*\* Axes restored to original set \*\*\*\*\*

-----

| Center | Atomic | Forces (Hartrees/Bohr) |   |   |
|--------|--------|------------------------|---|---|
| Number | Number | X                      | Y | Z |

|    |    |              |              |              |
|----|----|--------------|--------------|--------------|
| 1  | 6  | 0.000012312  | 0.000003664  | -0.000025623 |
| 2  | 6  | -0.000005121 | -0.000010267 | 0.000023628  |
| 3  | 7  | 0.000016360  | 0.000012316  | -0.000014227 |
| 4  | 6  | 0.000022274  | -0.000030671 | -0.000001410 |
| 5  | 7  | -0.000020839 | 0.000055737  | 0.000011655  |
| 6  | 6  | 0.000006063  | 0.000011750  | 0.000016478  |
| 7  | 6  | -0.000072909 | 0.000029561  | 0.000019126  |
| 8  | 1  | -0.000002081 | 0.000001765  | 0.000007384  |
| 9  | 1  | 0.000001326  | 0.000000768  | 0.000008659  |
| 10 | 1  | -0.000010408 | -0.000009633 | 0.000007157  |
| 11 | 1  | 0.000003306  | 0.000009230  | 0.000009260  |
| 12 | 1  | 0.000016133  | -0.000009825 | 0.000016564  |
| 13 | 1  | 0.000011309  | -0.000018081 | -0.000009894 |
| 14 | 35 | 0.000013305  | 0.000022517  | -0.000007189 |
| 15 | 1  | -0.000020279 | -0.000047527 | -0.000005510 |
| 16 | 6  | -0.000005340 | 0.000011291  | 0.000003170  |
| 17 | 6  | 0.000006320  | -0.000000420 | -0.000004947 |
| 18 | 1  | 0.000000825  | 0.000001673  | -0.000006483 |
| 19 | 1  | 0.000001421  | 0.000002468  | -0.000006764 |
| 20 | 1  | -0.000000160 | 0.000004991  | -0.000000828 |
| 21 | 8  | 0.000043320  | -0.000001382 | -0.000027815 |
| 22 | 1  | 0.000027802  | -0.000068347 | 0.000007255  |
| 23 | 6  | 0.000028454  | -0.000024331 | -0.000029903 |
| 24 | 6  | 0.000018705  | -0.000014810 | -0.000030958 |
| 25 | 8  | -0.000088568 | 0.000062836  | 0.000065608  |
| 26 | 1  | 0.000008387  | -0.000008314 | -0.000002542 |
| 27 | 1  | 0.000009503  | -0.000006177 | -0.000009121 |
| 28 | 1  | -0.000010530 | 0.000000964  | 0.000005265  |
| 29 | 6  | -0.000018167 | 0.000012288  | -0.000028034 |
| 30 | 1  | 0.000000845  | 0.000004481  | 0.000009273  |
| 31 | 1  | -0.000002850 | -0.000000332 | -0.000004199 |
| 32 | 1  | 0.000009280  | 0.000001820  | 0.000004965  |

-----  
Cartesian Forces: Max 0.000088568 RMS 0.000022794

GradGradGradGradGradGradGradGradGradGradGradGradGradGradGradGradGradGradGradGrad

Berny optimization.

Using GEDIIS/GDIIS optimizer.

FormGI is forming the generalized inverse of G from B-inverse, IUseBI=4.

GSVD: received Info= 1 from GESDD.

Internal Forces: Max 0.000058234 RMS 0.000011178

Search for a local minimum.

Step number 31 out of a maximum of 177

All quantities printed in internal units (Hartrees-Bohrs-Radians)

Mixed Optimization -- En-DIIS/RFO-DIIS

Swapping is turned off.

Update second derivatives using D2CorX and points 25 26 27 28 29  
30 31

DE= -9.53D-07 DEPred=-2.54D-07 R= 3.74D+00

Trust test= 3.74D+00 RLast= 1.24D-02 DXMaxT set to 1.94D+00

ITU= 0 1 1 1 1 1 1 1 1 1 1 1 1 1 1 1 1 1 1

ITU= 1 1 1 1 1 1 0 1 0 1 0

|                 |         |         |         |         |         |
|-----------------|---------|---------|---------|---------|---------|
| Eigenvalues --- | 0.00003 | 0.00126 | 0.00132 | 0.00233 | 0.00289 |
| Eigenvalues --- | 0.00318 | 0.00628 | 0.01046 | 0.01242 | 0.01417 |
| Eigenvalues --- | 0.01443 | 0.01753 | 0.01899 | 0.01912 | 0.02112 |
| Eigenvalues --- | 0.02193 | 0.02316 | 0.02385 | 0.02680 | 0.02931 |
| Eigenvalues --- | 0.03063 | 0.03077 | 0.03418 | 0.03545 | 0.04068 |
| Eigenvalues --- | 0.04504 | 0.04635 | 0.05229 | 0.05444 | 0.05572 |
| Eigenvalues --- | 0.05682 | 0.05933 | 0.06739 | 0.09010 | 0.09391 |
| Eigenvalues --- | 0.10601 | 0.11037 | 0.11541 | 0.11809 | 0.12970 |
| Eigenvalues --- | 0.13854 | 0.14135 | 0.14860 | 0.15956 | 0.15992 |
| Eigenvalues --- | 0.15997 | 0.16001 | 0.16003 | 0.16011 | 0.16046 |
| Eigenvalues --- | 0.16577 | 0.17863 | 0.19128 | 0.21648 | 0.22058 |
| Eigenvalues --- | 0.22965 | 0.23509 | 0.23977 | 0.24220 | 0.25072 |
| Eigenvalues --- | 0.27690 | 0.28567 | 0.30769 | 0.32499 | 0.33107 |
| Eigenvalues --- | 0.33414 | 0.34049 | 0.34259 | 0.34483 | 0.34857 |
| Eigenvalues --- | 0.35111 | 0.35685 | 0.35689 | 0.35856 | 0.36172 |
| Eigenvalues --- | 0.36438 | 0.36673 | 0.37225 | 0.37262 | 0.37740 |
| Eigenvalues --- | 0.39322 | 0.42150 | 0.42840 | 0.44007 | 0.45927 |
| Eigenvalues --- | 0.49526 | 0.53838 | 0.55031 | 0.58546 | 0.60486 |

Eigenvalue 1 is 3.32D-05 Eigenvector:

|   |          |         |         |         |          |
|---|----------|---------|---------|---------|----------|
|   | D52      | D53     | D55     | D54     | D46      |
| 1 | -0.51164 | 0.49645 | 0.49499 | 0.48958 | 0.03713  |
|   | D47      | D44     | D43     | D42     | D25      |
| 1 | 0.03210  | 0.02092 | 0.01971 | 0.01952 | -0.01842 |

En-DIIS/RFO-DIIS IScMMF= 0 using points: 31 30 29 28 27

RFO step: Lambda=-6.41796090D-08.

DidBck=F Rises=F RFO-DIIS coefs: 2.36850 -1.39102 -0.13734 0.20208 -  
0.04222

Iteration 1 RMS(Cart)= 0.00331993 RMS(Int)= 0.00000363

Iteration 2 RMS(Cart)= 0.00000787 RMS(Int)= 0.00000112

Iteration 3 RMS(Cart)= 0.00000000 RMS(Int)= 0.00000112

| Variable | Old X   | -DE/DX  | Delta X<br>(Linear) | Delta X<br>(Quad) | Delta X<br>(Total) | New X   |
|----------|---------|---------|---------------------|-------------------|--------------------|---------|
| R1       | 2.56501 | 0.00000 | 0.00002             | -0.00002          | -0.00001           | 2.56501 |
| R2       | 2.62004 | 0.00000 | -0.00001            | 0.00003           | 0.00001            | 2.62005 |
| R3       | 2.03419 | 0.00000 | 0.00000             | 0.00000           | 0.00000            | 2.03419 |



|     |         |          |          |          |          |         |
|-----|---------|----------|----------|----------|----------|---------|
| R4  | 2.62935 | 0.00000  | -0.00001 | 0.00001  | 0.00001  | 2.62936 |
| R5  | 2.03076 | 0.00000  | 0.00000  | 0.00000  | 0.00000  | 2.03076 |
| R6  | 2.54622 | -0.00001 | -0.00001 | -0.00001 | -0.00002 | 2.54620 |
| R7  | 2.68692 | 0.00000  | 0.00001  | -0.00001 | -0.00001 | 2.68691 |
| R8  | 2.51728 | -0.00006 | 0.00007  | -0.00007 | 0.00000  | 2.51727 |
| R9  | 2.09988 | -0.00003 | 0.00003  | -0.00004 | -0.00001 | 2.09987 |
| R10 | 2.79222 | -0.00001 | -0.00004 | -0.00002 | -0.00006 | 2.79216 |
| R11 | 2.90797 | 0.00000  | -0.00003 | -0.00003 | -0.00005 | 2.90792 |
| R12 | 2.06203 | -0.00001 | 0.00003  | 0.00000  | 0.00003  | 2.06206 |
| R13 | 2.06119 | -0.00001 | 0.00003  | -0.00001 | 0.00002  | 2.06121 |
| R14 | 2.07237 | -0.00001 | -0.00004 | -0.00001 | -0.00005 | 2.07232 |
| R15 | 2.07139 | -0.00001 | 0.00001  | 0.00000  | 0.00001  | 2.07140 |
| R16 | 2.65379 | 0.00004  | 0.00021  | -0.00002 | 0.00019  | 2.65398 |
| R17 | 4.15584 | 0.00001  | -0.00006 | 0.00029  | 0.00023  | 4.15607 |
| R18 | 8.46976 | 0.00000  | 0.00124  | -0.00189 | -0.00065 | 8.46912 |
| R19 | 2.50681 | -0.00001 | 0.00001  | -0.00001 | 0.00000  | 2.50681 |
| R20 | 2.04635 | 0.00000  | 0.00000  | 0.00000  | 0.00000  | 2.04635 |
| R21 | 2.04299 | 0.00000  | 0.00001  | 0.00000  | 0.00000  | 2.04299 |
| R22 | 2.04580 | 0.00000  | 0.00000  | 0.00000  | 0.00000  | 2.04580 |
| R23 | 1.84660 | -0.00003 | -0.00010 | 0.00001  | -0.00009 | 1.84651 |
| R24 | 3.41801 | 0.00000  | 0.00017  | -0.00008 | 0.00009  | 3.41810 |
| R25 | 2.77422 | -0.00003 | 0.00004  | -0.00002 | 0.00002  | 2.77424 |
| R26 | 2.74115 | -0.00001 | 0.00005  | -0.00007 | -0.00003 | 2.74112 |
| R27 | 2.05488 | -0.00001 | 0.00002  | -0.00003 | -0.00001 | 2.05487 |
| R28 | 2.05332 | 0.00001  | 0.00004  | -0.00002 | 0.00002  | 2.05334 |
| R29 | 2.73621 | -0.00001 | 0.00004  | -0.00002 | 0.00002  | 2.73623 |
| R30 | 2.05782 | -0.00001 | 0.00000  | -0.00002 | -0.00002 | 2.05781 |
| R31 | 2.84190 | -0.00001 | 0.00001  | 0.00002  | 0.00003  | 2.84193 |
| R32 | 2.06789 | 0.00000  | 0.00001  | -0.00001 | 0.00000  | 2.06789 |
| R33 | 2.06815 | -0.00001 | 0.00000  | -0.00001 | -0.00001 | 2.06814 |
| R34 | 2.06320 | -0.00001 | -0.00001 | 0.00000  | -0.00001 | 2.06319 |
| A1  | 1.87439 | -0.00001 | 0.00002  | -0.00002 | 0.00000  | 1.87439 |
| A2  | 2.27817 | 0.00000  | -0.00005 | 0.00000  | -0.00005 | 2.27812 |
| A3  | 2.13058 | 0.00000  | 0.00002  | 0.00002  | 0.00005  | 2.13063 |
| A4  | 1.86184 | -0.00001 | 0.00000  | -0.00002 | -0.00002 | 1.86182 |
| A5  | 2.27710 | 0.00001  | 0.00002  | 0.00000  | 0.00002  | 2.27713 |
| A6  | 2.14423 | 0.00000  | -0.00002 | 0.00002  | -0.00001 | 2.14422 |
| A7  | 1.89727 | 0.00000  | 0.00001  | 0.00003  | 0.00003  | 1.89730 |
| A8  | 2.24833 | 0.00001  | -0.00001 | 0.00000  | -0.00002 | 2.24831 |
| A9  | 2.13757 | 0.00000  | 0.00001  | -0.00002 | -0.00001 | 2.13756 |
| A10 | 1.88923 | 0.00001  | 0.00001  | -0.00003 | -0.00002 | 1.88921 |
| A11 | 2.23507 | -0.00001 | -0.00013 | 0.00002  | -0.00011 | 2.23496 |
| A12 | 2.15889 | 0.00000  | 0.00013  | 0.00001  | 0.00013  | 2.15902 |
| A13 | 1.90202 | 0.00001  | -0.00003 | 0.00004  | 0.00001  | 1.90203 |

|     |         |          |          |          |          |         |
|-----|---------|----------|----------|----------|----------|---------|
| A14 | 2.21205 | -0.00001 | -0.00014 | 0.00002  | -0.00012 | 2.21193 |
| A15 | 2.16793 | 0.00000  | 0.00014  | -0.00006 | 0.00008  | 2.16801 |
| A16 | 1.95102 | -0.00001 | -0.00012 | -0.00002 | -0.00014 | 1.95087 |
| A17 | 1.86561 | 0.00000  | -0.00005 | -0.00003 | -0.00008 | 1.86553 |
| A18 | 1.88348 | 0.00001  | 0.00017  | -0.00001 | 0.00016  | 1.88364 |
| A19 | 1.92472 | 0.00002  | 0.00005  | 0.00004  | 0.00009  | 1.92481 |
| A20 | 1.92108 | 0.00000  | 0.00010  | -0.00001 | 0.00009  | 1.92117 |
| A21 | 1.91668 | -0.00001 | -0.00014 | 0.00002  | -0.00013 | 1.91656 |
| A22 | 1.91285 | 0.00000  | 0.00010  | 0.00006  | 0.00015  | 1.91300 |
| A23 | 1.90217 | 0.00002  | -0.00002 | 0.00006  | 0.00004  | 1.90221 |
| A24 | 1.91352 | 0.00001  | 0.00010  | 0.00001  | 0.00012  | 1.91364 |
| A25 | 1.88712 | 0.00000  | 0.00001  | -0.00002 | -0.00001 | 1.88710 |
| A26 | 1.88743 | -0.00001 | -0.00008 | -0.00009 | -0.00017 | 1.88725 |
| A27 | 1.96023 | -0.00001 | -0.00010 | -0.00002 | -0.00012 | 1.96011 |
| A28 | 1.79036 | -0.00003 | -0.00082 | 0.00008  | -0.00075 | 1.78961 |
| A29 | 2.83241 | 0.00003  | 0.00010  | -0.00010 | -0.00001 | 2.83240 |
| A30 | 2.17707 | 0.00000  | 0.00004  | -0.00002 | 0.00002  | 2.17708 |
| A31 | 1.95560 | 0.00000  | 0.00002  | 0.00000  | 0.00002  | 1.95562 |
| A32 | 2.15052 | 0.00000  | -0.00005 | 0.00002  | -0.00003 | 2.15048 |
| A33 | 2.07971 | 0.00000  | -0.00004 | 0.00000  | -0.00003 | 2.07968 |
| A34 | 2.15741 | 0.00000  | 0.00005  | 0.00000  | 0.00004  | 2.15746 |
| A35 | 2.04606 | 0.00000  | -0.00001 | 0.00000  | -0.00001 | 2.04605 |
| A36 | 1.91356 | -0.00002 | -0.00045 | 0.00001  | -0.00045 | 1.91311 |
| A37 | 3.05073 | 0.00000  | 0.00026  | -0.00014 | 0.00011  | 3.05084 |
| A38 | 2.07441 | -0.00001 | 0.00019  | -0.00001 | 0.00018  | 2.07459 |
| A39 | 2.08791 | 0.00000  | -0.00015 | 0.00002  | -0.00012 | 2.08779 |
| A40 | 2.00197 | -0.00001 | 0.00030  | -0.00016 | 0.00014  | 2.00211 |
| A41 | 1.98448 | 0.00001  | -0.00015 | 0.00007  | -0.00008 | 1.98440 |
| A42 | 2.03994 | 0.00001  | -0.00010 | 0.00003  | -0.00007 | 2.03987 |
| A43 | 2.04574 | -0.00002 | 0.00011  | -0.00010 | 0.00002  | 2.04576 |
| A44 | 2.13306 | 0.00001  | -0.00014 | 0.00003  | -0.00010 | 2.13295 |
| A45 | 1.94904 | 0.00001  | -0.00001 | 0.00016  | 0.00014  | 1.94918 |
| A46 | 2.04648 | -0.00001 | -0.00011 | -0.00005 | -0.00017 | 2.04631 |
| A47 | 2.02213 | 0.00000  | 0.00008  | 0.00001  | 0.00008  | 2.02221 |
| A48 | 1.42244 | 0.00001  | 0.00130  | 0.00060  | 0.00191  | 1.42435 |
| A49 | 0.99741 | 0.00002  | -0.00039 | 0.00027  | -0.00011 | 0.99729 |
| A50 | 2.36475 | 0.00004  | 0.00067  | 0.00064  | 0.00131  | 2.36606 |
| A51 | 2.34683 | 0.00000  | 0.00106  | 0.00073  | 0.00180  | 2.34862 |
| A52 | 1.93132 | 0.00001  | -0.00001 | 0.00000  | -0.00001 | 1.93131 |
| A53 | 1.91237 | 0.00000  | 0.00010  | -0.00004 | 0.00005  | 1.91243 |
| A54 | 1.93749 | 0.00001  | -0.00010 | 0.00006  | -0.00004 | 1.93745 |
| A55 | 1.88391 | -0.00001 | 0.00002  | -0.00001 | 0.00001  | 1.88392 |
| A56 | 1.91357 | -0.00001 | -0.00002 | 0.00000  | -0.00002 | 1.91355 |
| A57 | 1.88377 | -0.00001 | 0.00002  | 0.00000  | 0.00002  | 1.88379 |

|     |          |          |          |          |          |          |
|-----|----------|----------|----------|----------|----------|----------|
| A58 | 3.76927  | 0.00001  | 0.00236  | 0.00134  | 0.00370  | 3.77297  |
| A59 | 5.05131  | -0.00001 | -0.00094 | -0.00051 | -0.00145 | 5.04986  |
| D1  | 0.00418  | 0.00001  | 0.00022  | -0.00011 | 0.00011  | 0.00429  |
| D2  | -3.13108 | 0.00001  | 0.00036  | 0.00000  | 0.00036  | -3.13073 |
| D3  | 3.13646  | 0.00000  | -0.00041 | -0.00010 | -0.00051 | 3.13594  |
| D4  | 0.00119  | 0.00000  | -0.00028 | 0.00001  | -0.00027 | 0.00092  |
| D5  | -0.00678 | -0.00001 | -0.00010 | -0.00006 | -0.00016 | -0.00694 |
| D6  | -3.09755 | -0.00001 | 0.00051  | -0.00008 | 0.00043  | -3.09713 |
| D7  | -3.14001 | 0.00000  | 0.00047  | -0.00007 | 0.00040  | -3.13961 |
| D8  | 0.05240  | 0.00000  | 0.00108  | -0.00009 | 0.00099  | 0.05338  |
| D9  | -0.00023 | -0.00001 | -0.00027 | 0.00025  | -0.00002 | -0.00026 |
| D10 | -3.13601 | 0.00000  | -0.00033 | 0.00009  | -0.00024 | -3.13625 |
| D11 | 3.13563  | 0.00000  | -0.00039 | 0.00014  | -0.00025 | 3.13538  |
| D12 | -0.00014 | 0.00000  | -0.00045 | -0.00001 | -0.00047 | -0.00061 |
| D13 | -0.00399 | 0.00000  | 0.00021  | -0.00029 | -0.00007 | -0.00406 |
| D14 | 3.13959  | 0.00000  | -0.00108 | -0.00030 | -0.00138 | 3.13821  |
| D15 | 3.13223  | 0.00000  | 0.00027  | -0.00014 | 0.00013  | 3.13235  |
| D16 | -0.00738 | 0.00000  | -0.00102 | -0.00016 | -0.00118 | -0.00856 |
| D17 | 0.00073  | 0.00000  | -0.00001 | -0.00008 | -0.00009 | 0.00064  |
| D18 | -3.14137 | 0.00000  | 0.00003  | 0.00003  | 0.00006  | -3.14131 |
| D19 | -3.13433 | 0.00000  | -0.00008 | -0.00026 | -0.00034 | -3.13466 |
| D20 | 0.00676  | 0.00000  | -0.00004 | -0.00014 | -0.00019 | 0.00657  |
| D21 | 0.00663  | 0.00001  | -0.00007 | 0.00022  | 0.00014  | 0.00678  |
| D22 | 3.09899  | 0.00001  | -0.00067 | 0.00024  | -0.00043 | 3.09855  |
| D23 | -3.13684 | 0.00001  | 0.00115  | 0.00023  | 0.00138  | -3.13546 |
| D24 | -0.04449 | 0.00001  | 0.00055  | 0.00025  | 0.00080  | -0.04368 |
| D25 | -3.13521 | 0.00001  | 0.00440  | 0.00190  | 0.00630  | -3.12891 |
| D26 | 0.00866  | 0.00000  | 0.00292  | 0.00188  | 0.00481  | 0.01346  |
| D27 | 1.42322  | -0.00001 | -0.00395 | -0.00130 | -0.00525 | 1.41797  |
| D28 | -2.75232 | 0.00000  | -0.00400 | -0.00127 | -0.00527 | -2.75759 |
| D29 | -0.69161 | 0.00000  | -0.00410 | -0.00128 | -0.00538 | -0.69699 |
| D30 | -1.66026 | -0.00001 | -0.00325 | -0.00133 | -0.00458 | -1.66483 |
| D31 | 0.44739  | 0.00000  | -0.00330 | -0.00130 | -0.00460 | 0.44279  |
| D32 | 2.50810  | 0.00000  | -0.00340 | -0.00130 | -0.00471 | 2.50339  |
| D33 | -0.93809 | 0.00000  | -0.00022 | -0.00005 | -0.00027 | -0.93836 |
| D34 | 1.12393  | 0.00000  | -0.00017 | 0.00000  | -0.00017 | 1.12375  |
| D35 | -3.00722 | 0.00000  | -0.00024 | 0.00002  | -0.00022 | -3.00744 |
| D36 | -3.01097 | -0.00001 | -0.00011 | -0.00003 | -0.00014 | -3.01111 |
| D37 | -0.94896 | 0.00000  | -0.00005 | 0.00002  | -0.00004 | -0.94900 |
| D38 | 1.20309  | 0.00000  | -0.00013 | 0.00004  | -0.00009 | 1.20300  |
| D39 | 1.15482  | -0.00001 | -0.00003 | -0.00007 | -0.00010 | 1.15472  |
| D40 | -3.06636 | 0.00000  | 0.00003  | -0.00003 | 0.00000  | -3.06636 |
| D41 | -0.91431 | 0.00000  | -0.00005 | -0.00001 | -0.00005 | -0.91436 |
| D42 | -1.64682 | 0.00000  | 0.00076  | 0.00103  | 0.00179  | -1.64503 |

|     |          |          |          |          |          |          |
|-----|----------|----------|----------|----------|----------|----------|
| D43 | 2.55156  | 0.00000  | 0.00063  | 0.00101  | 0.00164  | 2.55320  |
| D44 | 0.47062  | 0.00002  | 0.00073  | 0.00111  | 0.00184  | 0.47246  |
| D45 | 0.46088  | 0.00000  | -0.00278 | -0.00224 | -0.00502 | 0.45586  |
| D46 | -0.27133 | -0.00001 | -0.00162 | -0.00004 | -0.00165 | -0.27298 |
| D47 | 2.56857  | 0.00000  | -0.00217 | -0.00053 | -0.00270 | 2.56587  |
| D48 | 3.14144  | 0.00000  | -0.00002 | 0.00012  | 0.00010  | 3.14154  |
| D49 | 0.00039  | 0.00000  | 0.00000  | 0.00003  | 0.00003  | 0.00042  |
| D50 | 0.00042  | 0.00000  | -0.00006 | 0.00000  | -0.00007 | 0.00035  |
| D51 | -3.14064 | 0.00000  | -0.00004 | -0.00010 | -0.00014 | -3.14078 |
| D52 | -1.99978 | 0.00000  | 0.01180  | 0.00656  | 0.01836  | -1.98142 |
| D53 | 2.50625  | 0.00000  | -0.01025 | -0.00652 | -0.01676 | 2.48949  |
| D54 | 2.14219  | -0.00002 | -0.01109 | -0.00743 | -0.01852 | 2.12367  |
| D55 | -2.54506 | 0.00001  | -0.00930 | -0.00600 | -0.01531 | -2.56037 |
| D56 | -2.72926 | 0.00001  | 0.00020  | 0.00004  | 0.00025  | -2.72901 |
| D57 | -0.03015 | 0.00001  | 0.00036  | -0.00010 | 0.00026  | -0.02989 |
| D58 | -0.02179 | 0.00000  | 0.00004  | 0.00015  | 0.00019  | -0.02160 |
| D59 | 2.67732  | 0.00001  | 0.00019  | 0.00002  | 0.00021  | 2.67753  |
| D60 | -0.17043 | -0.00001 | 0.00022  | -0.00005 | 0.00016  | -0.17026 |
| D61 | 0.26214  | 0.00000  | 0.00145  | 0.00102  | 0.00247  | 0.26460  |
| D62 | -2.58249 | -0.00002 | 0.00021  | 0.00001  | 0.00021  | -2.58228 |
| D63 | -2.14993 | 0.00000  | 0.00144  | 0.00108  | 0.00251  | -2.14741 |
| D64 | 2.15770  | -0.00002 | -0.00112 | -0.00074 | -0.00186 | 2.15585  |
| D65 | -0.23531 | -0.00003 | -0.00109 | -0.00088 | -0.00197 | -0.23728 |
| D66 | 2.48781  | 0.00000  | -0.00010 | 0.00033  | 0.00023  | 2.48804  |
| D67 | -1.72005 | 0.00000  | -0.00003 | 0.00029  | 0.00027  | -1.71978 |
| D68 | 0.35892  | 0.00000  | 0.00000  | 0.00030  | 0.00029  | 0.35922  |
| D69 | 1.27145  | 0.00000  | -0.00001 | 0.00037  | 0.00036  | 1.27181  |
| D70 | -2.93641 | 0.00000  | 0.00007  | 0.00033  | 0.00040  | -2.93601 |
| D71 | -0.85744 | 0.00000  | 0.00009  | 0.00034  | 0.00043  | -0.85701 |
| D72 | -1.09072 | 0.00000  | 0.00006  | 0.00017  | 0.00023  | -1.09049 |
| D73 | 0.98461  | 0.00000  | 0.00013  | 0.00013  | 0.00026  | 0.98487  |
| D74 | 3.06358  | 0.00000  | 0.00016  | 0.00014  | 0.00029  | 3.06387  |

| Item                 | Value    | Threshold | Converged? |
|----------------------|----------|-----------|------------|
| Maximum Force        | 0.000058 | 0.000450  | YES        |
| RMS Force            | 0.000011 | 0.000300  | YES        |
| Maximum Displacement | 0.011953 | 0.001800  | NO         |
| RMS Displacement     | 0.003322 | 0.001200  | NO         |

Predicted change in Energy=-2.626672D-07

GradGradGradGradGradGradGradGradGradGradGradGradGradGradGradGradGradGradGrad

Input orientation:

-----

| Center Number | Atomic Number | Atomic Type | Coordinates (Angstroms) |   |   |
|---------------|---------------|-------------|-------------------------|---|---|
|               |               |             | X                       | Y | Z |
|               |               |             |                         |   |   |

---

|    |    |   |           |           |           |
|----|----|---|-----------|-----------|-----------|
| 1  | 6  | 0 | -1.378217 | -1.911133 | -0.251316 |
| 2  | 6  | 0 | -2.510024 | -1.171185 | -0.133543 |
| 3  | 7  | 0 | -2.112290 | 0.111707  | 0.229744  |
| 4  | 6  | 0 | -0.768646 | 0.136270  | 0.327109  |
| 5  | 7  | 0 | -0.307724 | -1.081138 | 0.044422  |
| 6  | 6  | 0 | 1.125685  | -1.436245 | -0.004437 |
| 7  | 6  | 0 | 1.682890  | -1.365295 | -1.437058 |
| 8  | 1  | 0 | -1.243763 | -2.947527 | -0.509285 |
| 9  | 1  | 0 | -3.540090 | -1.445672 | -0.269408 |
| 10 | 1  | 0 | 1.649595  | -0.729100 | 0.640676  |
| 11 | 1  | 0 | 1.234687  | -2.447304 | 0.390034  |
| 12 | 1  | 0 | 1.064414  | -1.978700 | -2.103251 |
| 13 | 1  | 0 | 1.635494  | -0.327666 | -1.787201 |
| 14 | 35 | 0 | 1.652846  | 2.228898  | 1.023466  |
| 15 | 1  | 0 | -0.116813 | 0.995865  | 0.593539  |
| 16 | 6  | 0 | -2.917013 | 1.256481  | 0.481879  |
| 17 | 6  | 0 | -4.241205 | 1.281013  | 0.406810  |
| 18 | 1  | 0 | -2.321793 | 2.121433  | 0.746844  |
| 19 | 1  | 0 | -4.763727 | 2.203634  | 0.617823  |
| 20 | 1  | 0 | -4.842583 | 0.420240  | 0.143330  |
| 21 | 8  | 0 | 2.990680  | -1.876701 | -1.460844 |
| 22 | 1  | 0 | 3.630829  | -1.144964 | -1.363115 |
| 23 | 6  | 0 | 4.840051  | 1.612125  | -1.120427 |
| 24 | 6  | 0 | 5.715927  | 0.751987  | -0.315303 |
| 25 | 8  | 0 | 4.864145  | 0.177865  | -1.335798 |
| 26 | 1  | 0 | 3.922333  | 1.989709  | -0.675852 |
| 27 | 1  | 0 | 5.258709  | 2.184454  | -1.943723 |
| 28 | 1  | 0 | 6.766856  | 0.708370  | -0.597166 |
| 29 | 6  | 0 | 5.405432  | 0.406546  | 1.115059  |
| 30 | 1  | 0 | 5.687355  | -0.628258 | 1.332199  |
| 31 | 1  | 0 | 5.977356  | 1.058849  | 1.782247  |
| 32 | 1  | 0 | 4.345069  | 0.551055  | 1.331301  |

---

Distance matrix (angstroms):

|   |   | 1        | 2        | 3        | 4        | 5        |
|---|---|----------|----------|----------|----------|----------|
| 1 | C | 0.000000 |          |          |          |          |
| 2 | C | 1.357344 | 0.000000 |          |          |          |
| 3 | N | 2.205031 | 1.391395 | 0.000000 |          |          |
| 4 | C | 2.213145 | 2.225767 | 1.347390 | 0.000000 |          |
| 5 | N | 1.386472 | 2.211313 | 2.171101 | 1.332083 | 0.000000 |
| 6 | C | 2.560467 | 3.647644 | 3.596592 | 2.484193 | 1.477548 |
| 7 | C | 3.327807 | 4.395152 | 4.400358 | 3.372983 | 2.497614 |
| 8 | H | 1.076447 | 2.213592 | 3.264875 | 3.230340 | 2.160131 |

|    |    |          |          |          |          |          |
|----|----|----------|----------|----------|----------|----------|
| 9  | H  | 2.211487 | 1.074633 | 2.170989 | 3.246425 | 3.267960 |
| 10 | H  | 3.370534 | 4.254091 | 3.876545 | 2.587486 | 2.076186 |
| 11 | H  | 2.743370 | 3.990674 | 4.216217 | 3.269887 | 2.089232 |
| 12 | H  | 3.066052 | 4.160341 | 4.461402 | 3.706731 | 2.702013 |
| 13 | H  | 3.734804 | 4.542183 | 4.278668 | 3.235032 | 2.774645 |
| 14 | Br | 5.286991 | 5.498066 | 4.391895 | 3.275306 | 3.969724 |
| 15 | H  | 3.279566 | 3.309412 | 2.212692 | 1.111204 | 2.156830 |
| 16 | C  | 3.597116 | 2.537311 | 1.421851 | 2.427819 | 3.530471 |
| 17 | C  | 4.338159 | 3.049957 | 2.435346 | 3.657247 | 4.602538 |
| 18 | H  | 4.260076 | 3.413480 | 2.085733 | 2.555252 | 3.847900 |
| 19 | H  | 5.398924 | 4.127121 | 3.399542 | 4.507680 | 5.565472 |
| 20 | H  | 4.194386 | 2.837273 | 2.749029 | 4.087955 | 4.777956 |
| 21 | O  | 4.533365 | 5.702388 | 5.731679 | 4.623998 | 3.711901 |
| 22 | H  | 5.187837 | 6.262796 | 6.090964 | 4.884036 | 4.182994 |
| 23 | C  | 7.199691 | 7.921134 | 7.239424 | 5.977541 | 5.925380 |
| 24 | C  | 7.577809 | 8.449728 | 7.873247 | 6.545342 | 6.306673 |
| 25 | O  | 6.671364 | 7.592347 | 7.150241 | 5.873273 | 5.498939 |
| 26 | H  | 6.594894 | 7.187529 | 6.384643 | 5.142612 | 5.276579 |
| 27 | H  | 7.980405 | 8.653917 | 7.959389 | 6.758754 | 6.752925 |
| 28 | H  | 8.562921 | 9.476718 | 8.937506 | 7.613500 | 7.325549 |
| 29 | C  | 7.297705 | 8.167171 | 7.575411 | 6.230020 | 5.999968 |
| 30 | H  | 7.353611 | 8.345070 | 7.911853 | 6.578348 | 6.148532 |
| 31 | H  | 8.189055 | 8.982145 | 8.291545 | 6.962552 | 6.863077 |
| 32 | H  | 6.428300 | 7.218323 | 6.565358 | 5.227861 | 5.095939 |
|    |    | 6        | 7        | 8        | 9        | 10       |
| 6  | C  | 0.000000 |          |          |          |          |
| 7  | C  | 1.538804 | 0.000000 |          |          |          |
| 8  | H  | 2.855368 | 3.453914 | 0.000000 |          |          |
| 9  | H  | 4.673302 | 5.352512 | 2.754310 | 0.000000 |          |
| 10 | H  | 1.091195 | 2.173208 | 3.823003 | 5.317383 | 0.000000 |
| 11 | H  | 1.090747 | 2.170229 | 2.683601 | 4.923071 | 1.785272 |
| 12 | H  | 2.168647 | 1.096626 | 2.967665 | 4.984832 | 3.071331 |
| 13 | H  | 2.160347 | 1.096138 | 4.097177 | 5.508203 | 2.460881 |
| 14 | Br | 3.842884 | 4.355836 | 6.126585 | 6.491577 | 2.982665 |
| 15 | H  | 2.795806 | 3.596850 | 4.246948 | 4.292389 | 2.469397 |
| 16 | C  | 4.881668 | 5.631620 | 4.632046 | 2.873028 | 4.982134 |
| 17 | C  | 6.029604 | 6.745198 | 5.263500 | 2.895452 | 6.228706 |
| 18 | H  | 5.010649 | 5.741445 | 5.332388 | 3.904005 | 4.889656 |
| 19 | H  | 6.951338 | 7.649749 | 6.339951 | 3.949924 | 7.052103 |
| 20 | H  | 6.252087 | 6.947486 | 4.971847 | 2.312675 | 6.611862 |
| 21 | O  | 2.406934 | 1.404427 | 4.470194 | 6.652537 | 2.744428 |
| 22 | H  | 2.864717 | 1.961754 | 5.266869 | 7.260076 | 2.848405 |
| 23 | C  | 4.933002 | 4.351201 | 7.627366 | 8.961089 | 4.331492 |
| 24 | C  | 5.094637 | 4.691120 | 7.884245 | 9.513447 | 4.431994 |

|    |    |          |          |          |           |           |
|----|----|----------|----------|----------|-----------|-----------|
| 25 | O  | 4.284153 | 3.537228 | 6.910698 | 8.625788  | 3.881027  |
| 26 | H  | 4.473165 | 4.104947 | 7.147908 | 8.225254  | 3.780279  |
| 27 | H  | 5.826850 | 5.063981 | 8.406960 | 9.664368  | 5.309767  |
| 28 | H  | 6.064117 | 5.554477 | 8.805869 | 10.534726 | 5.457558  |
| 29 | C  | 4.792221 | 4.848716 | 7.622342 | 9.239579  | 3.952346  |
| 30 | H  | 4.821646 | 4.924200 | 7.537272 | 9.401013  | 4.097789  |
| 31 | H  | 5.740771 | 5.889214 | 8.570107 | 10.053044 | 4.819695  |
| 32 | H  | 4.012230 | 4.292250 | 6.845646 | 8.290049  | 3.062897  |
|    |    | 11       | 12       | 13       | 14        | 15        |
| 11 | H  | 0.000000 |          |          |           |           |
| 12 | H  | 2.542646 | 0.000000 |          |           |           |
| 13 | H  | 3.064941 | 1.775368 | 0.000000 |           |           |
| 14 | Br | 4.737400 | 5.275082 | 3.799496 | 0.000000  |           |
| 15 | H  | 3.704508 | 4.185213 | 3.238863 | 2.199296  | 0.000000  |
| 16 | C  | 5.564448 | 5.744654 | 5.327623 | 4.703459  | 2.814518  |
| 17 | C  | 6.624653 | 6.713846 | 6.475887 | 6.001549  | 4.138452  |
| 18 | H  | 5.800795 | 6.033285 | 5.299018 | 3.985703  | 2.480392  |
| 19 | H  | 7.593687 | 7.672248 | 7.289832 | 6.429432  | 4.801365  |
| 20 | H  | 6.724350 | 6.759782 | 6.800867 | 6.799742  | 4.781938  |
| 21 | O  | 2.614354 | 2.033123 | 2.083878 | 4.981721  | 4.704108  |
| 22 | H  | 3.242085 | 2.798107 | 2.197541 | 4.581608  | 4.738825  |
| 23 | C  | 5.635522 | 5.302395 | 3.804809 | 3.890368  | 5.280905  |
| 24 | C  | 5.551079 | 5.682428 | 4.470132 | 4.525726  | 5.908158  |
| 25 | O  | 4.800310 | 4.435956 | 3.299018 | 4.481663  | 5.403833  |
| 26 | H  | 5.295908 | 5.094451 | 3.440198 | 2.845253  | 4.348998  |
| 27 | H  | 6.564477 | 5.911802 | 4.411682 | 4.669950  | 6.061905  |
| 28 | H  | 6.444978 | 6.481240 | 5.368467 | 5.575980  | 6.991805  |
| 29 | C  | 5.105412 | 5.906890 | 4.814002 | 4.172679  | 5.578035  |
| 30 | H  | 4.901311 | 5.915876 | 5.122362 | 4.953375  | 6.072213  |
| 31 | H  | 6.060056 | 6.961379 | 5.789228 | 4.543804  | 6.209340  |
| 32 | H  | 4.421608 | 5.381310 | 4.223625 | 3.187159  | 4.544286  |
|    |    | 16       | 17       | 18       | 19        | 20        |
| 16 | C  | 0.000000 |          |          |           |           |
| 17 | C  | 1.326545 | 0.000000 |          |           |           |
| 18 | H  | 1.082883 | 2.122751 | 0.000000 |           |           |
| 19 | H  | 2.079887 | 1.081104 | 2.446721 | 0.000000  |           |
| 20 | H  | 2.126437 | 1.082593 | 3.100431 | 1.847122  | 0.000000  |
| 21 | O  | 6.963608 | 8.109220 | 7.005807 | 9.005599  | 8.319214  |
| 22 | H  | 7.214235 | 8.425374 | 7.110203 | 9.252340  | 8.747454  |
| 23 | C  | 7.928803 | 9.214733 | 7.418768 | 9.777727  | 9.837229  |
| 24 | C  | 8.684335 | 9.997290 | 8.222438 | 10.620789 | 10.573672 |
| 25 | O  | 8.063113 | 9.336007 | 7.729978 | 10.030767 | 9.821769  |
| 26 | H  | 6.975287 | 8.265456 | 6.405508 | 8.784475  | 8.941927  |
| 27 | H  | 8.578294 | 9.828000 | 8.044075 | 10.344617 | 10.464433 |

|    |   |          |           |          |           |           |
|----|---|----------|-----------|----------|-----------|-----------|
| 28 | H | 9.759206 | 11.068573 | 9.295518 | 11.690439 | 11.636599 |
| 29 | C | 8.389660 | 9.712050  | 7.923789 | 10.338692 | 10.293991 |
| 30 | H | 8.849319 | 10.152732 | 8.488221 | 10.851500 | 10.648585 |
| 31 | H | 8.991097 | 10.313107 | 8.430719 | 10.864497 | 10.961978 |
| 32 | H | 7.345541 | 8.666696  | 6.874207 | 9.284946  | 9.265060  |
|    |   | 21       | 22        | 23       | 24        | 25        |
| 21 | O | 0.000000 |           |          |           |           |
| 22 | H | 0.977129 | 0.000000  |          |           |           |
| 23 | C | 3.963327 | 3.020373  | 0.000000 |           |           |
| 24 | C | 3.955912 | 3.007319  | 1.468066 | 0.000000  |           |
| 25 | O | 2.783299 | 1.808782  | 1.450540 | 1.447950  | 0.000000  |
| 26 | H | 4.053803 | 3.222341  | 1.087393 | 2.208831  | 2.146000  |
| 27 | H | 4.676549 | 3.751283  | 1.086578 | 2.216475  | 2.133460  |
| 28 | H | 4.657042 | 3.722390  | 2.191609 | 1.088945  | 2.108867  |
| 29 | C | 4.204703 | 3.420197  | 2.602013 | 1.503886  | 2.520315  |
| 30 | H | 4.078205 | 3.429432  | 3.428208 | 2.149455  | 2.906152  |
| 31 | H | 5.296729 | 4.500699  | 3.166243 | 2.135937  | 3.426015  |
| 32 | H | 3.940107 | 3.262898  | 2.716955 | 2.151960  | 2.742651  |
|    |   | 26       | 27        | 28       | 29        | 30        |
| 26 | H | 0.000000 |           |          |           |           |
| 27 | H | 1.852383 | 0.000000  |          |           |           |
| 28 | H | 3.120791 | 2.503307  | 0.000000 |           |           |
| 29 | C | 2.813068 | 3.540994  | 2.208233 | 0.000000  |           |
| 30 | H | 3.741835 | 4.338981  | 2.583476 | 1.094281  | 0.000000  |
| 31 | H | 3.336447 | 3.958067  | 2.531355 | 1.094412  | 1.770022  |
| 32 | H | 2.505414 | 3.772071  | 3.099805 | 1.091794  | 1.786761  |
|    |   | 31       | 32        |          |           |           |
| 31 | H | 0.000000 |           |          |           |           |
| 32 | H | 1.767928 | 0.000000  |          |           |           |

Stoichiometry C<sub>10</sub>H<sub>17</sub>BrN<sub>2</sub>O<sub>2</sub>

Framework group C1[X(C<sub>10</sub>H<sub>17</sub>BrN<sub>2</sub>O<sub>2</sub>)]

Deg. of freedom 90

Full point group C1 NOp 1

Largest Abelian subgroup C1 NOp 1

Largest concise Abelian subgroup C1 NOp 1

Standard orientation:

| Center<br>Number | Atomic<br>Number | Atomic<br>Type | Coordinates (Angstroms) |          |           |
|------------------|------------------|----------------|-------------------------|----------|-----------|
|                  |                  |                | X                       | Y        | Z         |
| 1                | 6                | 0              | -2.713566               | 2.112584 | -0.443459 |
| 2                | 6                | 0              | -3.791545               | 1.348629 | -0.132468 |
| 3                | 7                | 0              | -3.323897               | 0.049549 | 0.039802  |
| 4                | 6                | 0              | -1.992193               | 0.038929 | -0.164922 |



|    |    |   |           |           |           |
|----|----|---|-----------|-----------|-----------|
| 5  | 7  | 0 | -1.606315 | 1.278384  | -0.463740 |
| 6  | 6  | 0 | -0.203954 | 1.676818  | -0.704124 |
| 7  | 6  | 0 | 0.454647  | 2.242359  | 0.566437  |
| 8  | 1  | 0 | -2.640444 | 3.164936  | -0.657811 |
| 9  | 1  | 0 | -4.827579 | 1.614034  | -0.027439 |
| 10 | 1  | 0 | 0.326161  | 0.784013  | -1.039661 |
| 11 | 1  | 0 | -0.199299 | 2.428450  | -1.494538 |
| 12 | 1  | 0 | -0.160984 | 3.055577  | 0.969258  |
| 13 | 1  | 0 | 0.510223  | 1.450310  | 1.322141  |
| 14 | 35 | 0 | 0.526841  | -2.054326 | -0.145315 |
| 15 | 1  | 0 | -1.297133 | -0.826102 | -0.106723 |
| 16 | 6  | 0 | -4.055154 | -1.124772 | 0.368275  |
| 17 | 6  | 0 | -5.365333 | -1.167260 | 0.571614  |
| 18 | 1  | 0 | -3.415902 | -1.996257 | 0.435398  |
| 19 | 1  | 0 | -5.829848 | -2.112043 | 0.817371  |
| 20 | 1  | 0 | -6.010497 | -0.300428 | 0.505484  |
| 21 | 8  | 0 | 1.718487  | 2.766611  | 0.249763  |
| 22 | 1  | 0 | 2.403901  | 2.088363  | 0.407778  |
| 23 | 6  | 0 | 3.798675  | -0.461290 | 1.230294  |
| 24 | 6  | 0 | 4.549224  | 0.009784  | 0.059830  |
| 25 | 8  | 0 | 3.728961  | 0.928589  | 0.821096  |
| 26 | 1  | 0 | 2.883658  | -1.027634 | 1.074022  |
| 27 | 1  | 0 | 4.315317  | -0.613301 | 2.174024  |
| 28 | 1  | 0 | 5.610789  | 0.210207  | 0.196618  |
| 29 | 6  | 0 | 4.115415  | -0.296756 | -1.347123 |
| 30 | 1  | 0 | 4.302532  | 0.558401  | -2.003739 |
| 31 | 1  | 0 | 4.687615  | -1.147420 | -1.730129 |
| 32 | 1  | 0 | 3.056634  | -0.560986 | -1.381465 |

-----  
Rotational constants (GHZ): 0.6018059 0.2208022 0.1722490

Standard basis: 6-311++G(d,p) (5D, 7F)

There are 492 symmetry adapted cartesian basis functions of A symmetry.

There are 475 symmetry adapted basis functions of A symmetry.

475 basis functions, 751 primitive gaussians, 492 cartesian basis functions

71 alpha electrons 71 beta electrons

nuclear repulsion energy 1307.2676636064 Hartrees.

NAtoms= 32 NActive= 32 NUniq= 32 SFac= 1.00D+00 NAtFMM= 60 NAOKFM=F

Big=F

Integral buffers will be 131072 words long.

Raffenetti 2 integral format.

Two-electron integral symmetry is turned on.

One-electron integrals computed using PRISM.

NBasis= 475 RedAO= T EigKep= 3.79D-06 NBF= 475

NBsUse= 475 1.00D-06 EigRej= -1.00D+00 NBFU= 475

Initial guess from the checkpoint file: "/home/suqian/liuwen/qianmengshijie/ohpo/ohpo.chk"

B after Tr= 0.000000 0.000000 0.000000

Rot= 1.000000 0.000324 0.000096 -0.000001 Ang= 0.04 deg.

Requested convergence on RMS density matrix=1.00D-08 within 128 cycles.

Requested convergence on MAX density matrix=1.00D-06.

Requested convergence on energy=1.00D-06.

No special actions if energy rises.

SCF Done: E(RB3LYP) = -3225.52371082 A.U. after 9 cycles

NFock= 9 Conv=0.52D-08 -V/T= 2.0018

Calling FoFJK, ICntrl= 2127 FMM=F ISym2X=0 l1Cent= 0 IOpClX= 0 NMat=1 NMatS=1

NMatT=0.

\*\*\*\*\* Axes restored to original set \*\*\*\*\*

| Center<br>Number | Atomic<br>Number | Forces (Hartrees/Bohr) |              |              |
|------------------|------------------|------------------------|--------------|--------------|
|                  |                  | X                      | Y            | Z            |
| 1                | 6                | -0.000001728           | -0.000011656 | 0.000017347  |
| 2                | 6                | 0.000004250            | -0.000008921 | 0.000034969  |
| 3                | 7                | -0.000000164           | 0.000021319  | -0.000017763 |
| 4                | 6                | 0.000022453            | -0.000030140 | -0.000017793 |
| 5                | 7                | -0.000022234           | 0.000063358  | -0.000017886 |
| 6                | 6                | 0.000017058            | 0.000012467  | 0.000026152  |
| 7                | 6                | -0.000004430           | 0.000004415  | 0.000023260  |
| 8                | 1                | 0.000000907            | 0.000005187  | -0.000003741 |
| 9                | 1                | 0.000001977            | 0.000001448  | 0.000003122  |
| 10               | 1                | -0.000013590           | -0.000006718 | 0.000005779  |
| 11               | 1                | 0.000000330            | 0.000005270  | -0.000001048 |
| 12               | 1                | 0.000009693            | -0.000011178 | 0.000014146  |
| 13               | 1                | 0.000003761            | -0.000015701 | -0.000014251 |
| 14               | 35               | 0.000004137            | 0.000018552  | -0.000007783 |
| 15               | 1                | -0.000011237           | -0.000059388 | 0.000013674  |
| 16               | 6                | -0.000007471           | 0.000015798  | -0.000003413 |
| 17               | 6                | 0.000003842            | 0.000003030  | -0.000004798 |
| 18               | 1                | 0.000002556            | 0.000000488  | -0.000005802 |
| 19               | 1                | 0.000000084            | 0.000001173  | -0.000005351 |
| 20               | 1                | 0.000001830            | 0.000003339  | 0.000000113  |
| 21               | 8                | -0.000035108           | 0.000013443  | -0.000021456 |
| 22               | 1                | 0.000059809            | -0.000052654 | 0.000008103  |
| 23               | 6                | 0.000052532            | -0.000015285 | -0.000053070 |
| 24               | 6                | -0.000029170           | -0.000013841 | -0.000005981 |
| 25               | 8                | -0.000066847           | 0.000066423  | 0.000054763  |
| 26               | 1                | 0.000006232            | -0.000019903 | 0.000008195  |
| 27               | 1                | 0.000007517            | -0.000004168 | -0.000006383 |
| 28               | 1                | -0.000008437           | -0.000006967 | -0.000000543 |

|    |   |              |             |              |
|----|---|--------------|-------------|--------------|
| 29 | 6 | -0.000007512 | 0.000011188 | -0.000034885 |
| 30 | 1 | 0.000000957  | 0.000005665 | 0.000010522  |
| 31 | 1 | -0.000000843 | 0.000001517 | -0.000004173 |
| 32 | 1 | 0.000008845  | 0.000002439 | 0.000005974  |

-----  
Cartesian Forces: Max 0.000066847 RMS 0.000021942

GradGradGradGradGradGradGradGradGradGradGradGradGradGradGradGradGradGradGrad

Berny optimization.

Using GEDIIS/GDIIS optimizer.

FormGI is forming the generalized inverse of G from B-inverse, IUseBI=4.

GSVD: received Info= 1 from GESDD.

Internal Forces: Max 0.000057955 RMS 0.000011054

Search for a local minimum.

Step number 32 out of a maximum of 177

All quantities printed in internal units (Hartrees-Bohrs-Radians)

Mixed Optimization -- En-DIIS/RFO-DIIS

Swapping is turned off.

Update second derivatives using D2CorX and points 25 26 27 28 29  
30 31 32

DE= -1.34D-06 DEPred=-2.63D-07 R= 5.12D+00

TightC=F SS= 1.41D+00 RLast= 3.88D-02 DXNew= 3.2661D+00 1.1646D-01

Trust test= 5.12D+00 RLast= 3.88D-02 DXMaxT set to 1.94D+00

ITU= 1 0 1 1 1 1 1 1 1 1 1 1 1 1 1 1 -1 1 1 1 1

ITU= 1 1 1 1 1 1 1 0 1 0 1 0

|                 |         |         |         |         |         |
|-----------------|---------|---------|---------|---------|---------|
| Eigenvalues --- | 0.00003 | 0.00087 | 0.00131 | 0.00234 | 0.00278 |
| Eigenvalues --- | 0.00327 | 0.00634 | 0.01059 | 0.01260 | 0.01366 |
| Eigenvalues --- | 0.01482 | 0.01761 | 0.01821 | 0.01924 | 0.02125 |
| Eigenvalues --- | 0.02206 | 0.02317 | 0.02376 | 0.02425 | 0.02976 |
| Eigenvalues --- | 0.03061 | 0.03084 | 0.03417 | 0.03565 | 0.03879 |
| Eigenvalues --- | 0.04422 | 0.04630 | 0.05204 | 0.05443 | 0.05561 |
| Eigenvalues --- | 0.05678 | 0.05928 | 0.06512 | 0.09304 | 0.09433 |
| Eigenvalues --- | 0.10526 | 0.11071 | 0.11544 | 0.11743 | 0.13079 |
| Eigenvalues --- | 0.13853 | 0.14138 | 0.15131 | 0.15955 | 0.15993 |
| Eigenvalues --- | 0.16000 | 0.16001 | 0.16006 | 0.16015 | 0.16045 |
| Eigenvalues --- | 0.16637 | 0.17994 | 0.19335 | 0.21706 | 0.22083 |
| Eigenvalues --- | 0.23035 | 0.23667 | 0.23918 | 0.24263 | 0.25045 |
| Eigenvalues --- | 0.27800 | 0.28580 | 0.30769 | 0.32418 | 0.33103 |
| Eigenvalues --- | 0.33341 | 0.34053 | 0.34181 | 0.34470 | 0.34851 |
| Eigenvalues --- | 0.35104 | 0.35686 | 0.35690 | 0.35858 | 0.36166 |
| Eigenvalues --- | 0.36438 | 0.36671 | 0.37234 | 0.37258 | 0.37800 |
| Eigenvalues --- | 0.38559 | 0.42157 | 0.42665 | 0.45224 | 0.45973 |
| Eigenvalues --- | 0.49343 | 0.53877 | 0.55064 | 0.57458 | 0.60420 |

Eigenvalue 1 is 3.19D-05 Eigenvector:

|                                   |  |                 |          |          |          |          |       |
|-----------------------------------|--|-----------------|----------|----------|----------|----------|-------|
|                                   |  | D52             | D53      | D54      | D55      | D46      |       |
| 1                                 |  | 0.51101         | -0.49548 | -0.49396 | -0.49156 | -0.03559 |       |
|                                   |  | D47             | D25      | D26      | D44      | D43      |       |
| 1                                 |  | -0.03345        | 0.02951  | 0.02218  | -0.01469 | -0.01409 |       |
| En-DIIS/RFO-DIIS IScMMF=          |  | 0 using points: |          | 32       | 31       | 30       | 29 28 |
| RFO step: Lambda=-5.94704012D-08. |  |                 |          |          |          |          |       |
| DidBck=F Rises=F RFO-DIIS coefs:  |  | 2.09954         | -1.06025 | -0.38004 | 0.32262  |          |       |

0.01813

|           |   |            |            |           |            |
|-----------|---|------------|------------|-----------|------------|
| Iteration | 1 | RMS(Cart)= | 0.00338053 | RMS(Int)= | 0.00001369 |
| Iteration | 2 | RMS(Cart)= | 0.00001202 | RMS(Int)= | 0.00000313 |
| Iteration | 3 | RMS(Cart)= | 0.00000000 | RMS(Int)= | 0.00000313 |

| Variable | Old X   | -DE/DX   | Delta X  | Delta X  | Delta X  | New X   |
|----------|---------|----------|----------|----------|----------|---------|
|          |         |          | (Linear) | (Quad)   | (Total)  |         |
| R1       | 2.56501 | 0.00000  | 0.00001  | 0.00000  | 0.00001  | 2.56501 |
| R2       | 2.62005 | 0.00000  | 0.00001  | 0.00002  | 0.00002  | 2.62007 |
| R3       | 2.03419 | 0.00000  | 0.00000  | 0.00000  | 0.00000  | 2.03419 |
| R4       | 2.62936 | 0.00000  | 0.00002  | -0.00001 | 0.00002  | 2.62937 |
| R5       | 2.03076 | 0.00000  | -0.00001 | 0.00000  | -0.00001 | 2.03076 |
| R6       | 2.54620 | 0.00000  | -0.00004 | 0.00002  | -0.00002 | 2.54618 |
| R7       | 2.68691 | 0.00001  | 0.00001  | 0.00001  | 0.00002  | 2.68693 |
| R8       | 2.51727 | -0.00006 | -0.00010 | 0.00001  | -0.00009 | 2.51718 |
| R9       | 2.09987 | -0.00004 | -0.00015 | 0.00002  | -0.00014 | 2.09973 |
| R10      | 2.79216 | 0.00000  | -0.00006 | 0.00005  | 0.00000  | 2.79216 |
| R11      | 2.90792 | 0.00000  | -0.00010 | 0.00003  | -0.00007 | 2.90785 |
| R12      | 2.06206 | -0.00001 | -0.00001 | 0.00001  | 0.00000  | 2.06206 |
| R13      | 2.06121 | -0.00001 | 0.00001  | 0.00000  | 0.00002  | 2.06123 |
| R14      | 2.07232 | -0.00001 | -0.00007 | 0.00001  | -0.00006 | 2.07226 |
| R15      | 2.07140 | -0.00001 | -0.00003 | 0.00002  | -0.00001 | 2.07139 |
| R16      | 2.65398 | -0.00001 | 0.00023  | -0.00008 | 0.00016  | 2.65414 |
| R17      | 4.15607 | 0.00001  | 0.00058  | -0.00006 | 0.00052  | 4.15659 |
| R18      | 8.46912 | 0.00000  | -0.00113 | -0.00018 | -0.00130 | 8.46781 |
| R19      | 2.50681 | 0.00000  | -0.00001 | 0.00000  | -0.00001 | 2.50680 |
| R20      | 2.04635 | 0.00000  | 0.00000  | 0.00000  | 0.00000  | 2.04635 |
| R21      | 2.04299 | 0.00000  | 0.00000  | 0.00000  | 0.00000  | 2.04299 |
| R22      | 2.04580 | 0.00000  | 0.00000  | 0.00000  | 0.00000  | 2.04580 |
| R23      | 1.84651 | 0.00000  | -0.00012 | 0.00003  | -0.00008 | 1.84642 |
| R24      | 3.41810 | 0.00000  | 0.00016  | 0.00010  | 0.00026  | 3.41836 |
| R25      | 2.77424 | -0.00003 | 0.00004  | -0.00003 | 0.00001  | 2.77425 |
| R26      | 2.74112 | -0.00002 | -0.00014 | 0.00001  | -0.00013 | 2.74100 |
| R27      | 2.05487 | 0.00000  | -0.00002 | 0.00001  | -0.00001 | 2.05486 |
| R28      | 2.05334 | 0.00000  | 0.00002  | 0.00000  | 0.00003  | 2.05336 |
| R29      | 2.73623 | -0.00002 | -0.00006 | 0.00000  | -0.00006 | 2.73617 |
| R30      | 2.05781 | -0.00001 | -0.00004 | 0.00001  | -0.00003 | 2.05778 |
| R31      | 2.84193 | -0.00002 | 0.00000  | -0.00005 | -0.00005 | 2.84188 |

|     |         |          |          |          |          |         |
|-----|---------|----------|----------|----------|----------|---------|
| R32 | 2.06789 | 0.00000  | 0.00001  | 0.00000  | 0.00001  | 2.06790 |
| R33 | 2.06814 | 0.00000  | -0.00001 | 0.00001  | 0.00000  | 2.06814 |
| R34 | 2.06319 | -0.00001 | -0.00002 | 0.00000  | -0.00002 | 2.06317 |
| A1  | 1.87439 | -0.00001 | -0.00002 | 0.00000  | -0.00002 | 1.87437 |
| A2  | 2.27812 | 0.00000  | -0.00003 | 0.00001  | -0.00003 | 2.27810 |
| A3  | 2.13063 | 0.00000  | 0.00005  | -0.00001 | 0.00005  | 2.13067 |
| A4  | 1.86182 | 0.00000  | -0.00002 | 0.00003  | 0.00001  | 1.86183 |
| A5  | 2.27713 | 0.00000  | 0.00003  | -0.00002 | 0.00001  | 2.27713 |
| A6  | 2.14422 | 0.00000  | -0.00001 | -0.00001 | -0.00002 | 2.14420 |
| A7  | 1.89730 | -0.00001 | -0.00001 | -0.00004 | -0.00005 | 1.89725 |
| A8  | 2.24831 | 0.00001  | 0.00001  | 0.00002  | 0.00003  | 2.24835 |
| A9  | 2.13756 | 0.00000  | -0.00001 | 0.00002  | 0.00001  | 2.13757 |
| A10 | 1.88921 | 0.00002  | 0.00002  | 0.00004  | 0.00006  | 1.88927 |
| A11 | 2.23496 | -0.00001 | -0.00011 | -0.00006 | -0.00017 | 2.23479 |
| A12 | 2.15902 | -0.00001 | 0.00009  | 0.00002  | 0.00011  | 2.15913 |
| A13 | 1.90203 | 0.00001  | 0.00002  | -0.00003 | -0.00001 | 1.90202 |
| A14 | 2.21193 | 0.00001  | -0.00009 | 0.00001  | -0.00007 | 2.21186 |
| A15 | 2.16801 | -0.00001 | 0.00005  | 0.00003  | 0.00008  | 2.16809 |
| A16 | 1.95087 | 0.00000  | -0.00017 | 0.00006  | -0.00011 | 1.95076 |
| A17 | 1.86553 | -0.00001 | -0.00004 | -0.00008 | -0.00013 | 1.86540 |
| A18 | 1.88364 | 0.00000  | 0.00010  | 0.00004  | 0.00015  | 1.88379 |
| A19 | 1.92481 | 0.00002  | 0.00022  | 0.00000  | 0.00023  | 1.92504 |
| A20 | 1.92117 | -0.00001 | 0.00001  | -0.00006 | -0.00005 | 1.92112 |
| A21 | 1.91656 | 0.00000  | -0.00013 | 0.00004  | -0.00010 | 1.91646 |
| A22 | 1.91300 | -0.00001 | 0.00008  | 0.00000  | 0.00007  | 1.91307 |
| A23 | 1.90221 | 0.00002  | 0.00018  | 0.00001  | 0.00019  | 1.90240 |
| A24 | 1.91364 | 0.00001  | 0.00006  | 0.00009  | 0.00015  | 1.91379 |
| A25 | 1.88710 | 0.00000  | 0.00007  | -0.00009 | -0.00001 | 1.88709 |
| A26 | 1.88725 | -0.00001 | -0.00025 | -0.00004 | -0.00029 | 1.88696 |
| A27 | 1.96011 | -0.00001 | -0.00015 | 0.00004  | -0.00012 | 1.96000 |
| A28 | 1.78961 | -0.00002 | -0.00052 | -0.00011 | -0.00063 | 1.78898 |
| A29 | 2.83240 | 0.00004  | -0.00003 | 0.00015  | 0.00011  | 2.83251 |
| A30 | 2.17708 | 0.00000  | 0.00000  | 0.00000  | 0.00000  | 2.17708 |
| A31 | 1.95562 | 0.00000  | 0.00001  | -0.00001 | 0.00000  | 1.95561 |
| A32 | 2.15048 | 0.00000  | -0.00001 | 0.00001  | 0.00000  | 2.15049 |
| A33 | 2.07968 | 0.00000  | -0.00003 | 0.00002  | -0.00001 | 2.07967 |
| A34 | 2.15746 | 0.00000  | 0.00004  | -0.00002 | 0.00002  | 2.15747 |
| A35 | 2.04605 | 0.00000  | -0.00001 | 0.00000  | -0.00001 | 2.04604 |
| A36 | 1.91311 | 0.00000  | -0.00046 | 0.00008  | -0.00037 | 1.91274 |
| A37 | 3.05084 | 0.00001  | -0.00034 | 0.00012  | -0.00024 | 3.05060 |
| A38 | 2.07459 | -0.00003 | 0.00009  | -0.00014 | -0.00005 | 2.07454 |
| A39 | 2.08779 | 0.00001  | -0.00011 | 0.00002  | -0.00009 | 2.08770 |
| A40 | 2.00211 | -0.00001 | 0.00008  | 0.00001  | 0.00009  | 2.00220 |
| A41 | 1.98440 | 0.00001  | -0.00008 | 0.00009  | 0.00001  | 1.98441 |

|     |          |          |          |          |          |          |
|-----|----------|----------|----------|----------|----------|----------|
| A42 | 2.03987  | 0.00001  | 0.00002  | 0.00004  | 0.00006  | 2.03993  |
| A43 | 2.04576  | -0.00002 | 0.00002  | 0.00000  | 0.00002  | 2.04578  |
| A44 | 2.13295  | 0.00002  | -0.00010 | 0.00001  | -0.00008 | 2.13287  |
| A45 | 1.94918  | 0.00000  | 0.00016  | -0.00010 | 0.00006  | 1.94924  |
| A46 | 2.04631  | 0.00000  | -0.00018 | 0.00012  | -0.00006 | 2.04625  |
| A47 | 2.02221  | 0.00000  | 0.00009  | -0.00003 | 0.00006  | 2.02227  |
| A48 | 1.42435  | 0.00000  | 0.00169  | 0.00051  | 0.00220  | 1.42655  |
| A49 | 0.99729  | 0.00004  | 0.00051  | 0.00021  | 0.00071  | 0.99800  |
| A50 | 2.36606  | 0.00004  | 0.00175  | 0.00067  | 0.00242  | 2.36847  |
| A51 | 2.34862  | -0.00001 | 0.00112  | 0.00036  | 0.00147  | 2.35010  |
| A52 | 1.93131  | 0.00001  | 0.00004  | 0.00001  | 0.00005  | 1.93135  |
| A53 | 1.91243  | 0.00000  | 0.00004  | 0.00000  | 0.00004  | 1.91246  |
| A54 | 1.93745  | 0.00001  | 0.00004  | 0.00000  | 0.00004  | 1.93749  |
| A55 | 1.88392  | -0.00001 | -0.00007 | 0.00000  | -0.00007 | 1.88385  |
| A56 | 1.91355  | -0.00001 | -0.00002 | -0.00001 | -0.00003 | 1.91352  |
| A57 | 1.88379  | -0.00001 | -0.00003 | 0.00000  | -0.00003 | 1.88376  |
| A58 | 3.77297  | -0.00001 | 0.00281  | 0.00087  | 0.00368  | 3.77665  |
| A59 | 5.04986  | 0.00000  | -0.00127 | -0.00071 | -0.00198 | 5.04787  |
| D1  | 0.00429  | 0.00001  | 0.00025  | -0.00002 | 0.00022  | 0.00451  |
| D2  | -3.13073 | 0.00000  | 0.00033  | -0.00019 | 0.00014  | -3.13059 |
| D3  | 3.13594  | 0.00001  | -0.00033 | 0.00022  | -0.00011 | 3.13583  |
| D4  | 0.00092  | 0.00000  | -0.00024 | 0.00004  | -0.00019 | 0.00073  |
| D5  | -0.00694 | 0.00000  | -0.00019 | 0.00016  | -0.00004 | -0.00697 |
| D6  | -3.09713 | -0.00001 | 0.00006  | -0.00017 | -0.00010 | -3.09723 |
| D7  | -3.13961 | 0.00000  | 0.00032  | -0.00006 | 0.00026  | -3.13935 |
| D8  | 0.05338  | -0.00001 | 0.00058  | -0.00038 | 0.00020  | 0.05358  |
| D9  | -0.00026 | -0.00001 | -0.00022 | -0.00012 | -0.00033 | -0.00059 |
| D10 | -3.13625 | 0.00000  | -0.00026 | -0.00006 | -0.00032 | -3.13657 |
| D11 | 3.13538  | 0.00000  | -0.00030 | 0.00004  | -0.00026 | 3.13512  |
| D12 | -0.00061 | 0.00000  | -0.00034 | 0.00010  | -0.00025 | -0.00086 |
| D13 | -0.00406 | 0.00001  | 0.00010  | 0.00022  | 0.00031  | -0.00375 |
| D14 | 3.13821  | 0.00001  | -0.00121 | 0.00018  | -0.00103 | 3.13718  |
| D15 | 3.13235  | 0.00000  | 0.00014  | 0.00016  | 0.00031  | 3.13266  |
| D16 | -0.00856 | 0.00000  | -0.00117 | 0.00013  | -0.00104 | -0.00959 |
| D17 | 0.00064  | 0.00000  | -0.00035 | 0.00006  | -0.00029 | 0.00035  |
| D18 | -3.14131 | 0.00000  | -0.00022 | 0.00003  | -0.00019 | -3.14151 |
| D19 | -3.13466 | 0.00000  | -0.00041 | 0.00013  | -0.00028 | -3.13494 |
| D20 | 0.00657  | 0.00000  | -0.00028 | 0.00009  | -0.00018 | 0.00639  |
| D21 | 0.00678  | 0.00000  | 0.00006  | -0.00023 | -0.00017 | 0.00660  |
| D22 | 3.09855  | 0.00000  | -0.00020 | 0.00008  | -0.00011 | 3.09844  |
| D23 | -3.13546 | 0.00000  | 0.00130  | -0.00020 | 0.00110  | -3.13437 |
| D24 | -0.04368 | 0.00000  | 0.00104  | 0.00012  | 0.00116  | -0.04253 |
| D25 | -3.12891 | 0.00000  | 0.00622  | 0.00238  | 0.00860  | -3.12031 |
| D26 | 0.01346  | 0.00000  | 0.00472  | 0.00234  | 0.00707  | 0.02053  |

|     |          |          |          |          |          |          |
|-----|----------|----------|----------|----------|----------|----------|
| D27 | 1.41797  | -0.00001 | -0.00405 | -0.00093 | -0.00498 | 1.41299  |
| D28 | -2.75759 | 0.00001  | -0.00390 | -0.00094 | -0.00485 | -2.76244 |
| D29 | -0.69699 | 0.00000  | -0.00403 | -0.00092 | -0.00495 | -0.70194 |
| D30 | -1.66483 | -0.00001 | -0.00376 | -0.00129 | -0.00505 | -1.66989 |
| D31 | 0.44279  | 0.00000  | -0.00361 | -0.00131 | -0.00492 | 0.43787  |
| D32 | 2.50339  | 0.00000  | -0.00374 | -0.00129 | -0.00502 | 2.49836  |
| D33 | -0.93836 | 0.00000  | 0.00008  | -0.00027 | -0.00019 | -0.93855 |
| D34 | 1.12375  | 0.00000  | 0.00032  | -0.00037 | -0.00005 | 1.12370  |
| D35 | -3.00744 | 0.00000  | 0.00029  | -0.00026 | 0.00003  | -3.00741 |
| D36 | -3.01111 | 0.00000  | 0.00009  | -0.00021 | -0.00011 | -3.01122 |
| D37 | -0.94900 | 0.00000  | 0.00033  | -0.00031 | 0.00002  | -0.94897 |
| D38 | 1.20300  | 0.00000  | 0.00030  | -0.00020 | 0.00010  | 1.20310  |
| D39 | 1.15472  | -0.00001 | 0.00011  | -0.00022 | -0.00011 | 1.15460  |
| D40 | -3.06636 | 0.00000  | 0.00034  | -0.00032 | 0.00002  | -3.06633 |
| D41 | -0.91436 | 0.00000  | 0.00032  | -0.00021 | 0.00010  | -0.91426 |
| D42 | -1.64503 | 0.00000  | 0.00124  | 0.00072  | 0.00195  | -1.64308 |
| D43 | 2.55320  | 0.00000  | 0.00125  | 0.00070  | 0.00195  | 2.55515  |
| D44 | 0.47246  | 0.00002  | 0.00141  | 0.00081  | 0.00222  | 0.47468  |
| D45 | 0.45586  | 0.00000  | -0.00508 | -0.00265 | -0.00773 | 0.44813  |
| D46 | -0.27298 | 0.00000  | -0.00179 | 0.00015  | -0.00163 | -0.27461 |
| D47 | 2.56587  | 0.00001  | -0.00258 | 0.00015  | -0.00242 | 2.56345  |
| D48 | 3.14154  | 0.00000  | 0.00005  | -0.00006 | 0.00000  | 3.14154  |
| D49 | 0.00042  | 0.00000  | 0.00000  | 0.00001  | 0.00001  | 0.00043  |
| D50 | 0.00035  | 0.00000  | -0.00009 | -0.00002 | -0.00011 | 0.00024  |
| D51 | -3.14078 | 0.00000  | -0.00014 | 0.00004  | -0.00010 | -3.14088 |
| D52 | -1.98142 | 0.00000  | 0.02583  | 0.00321  | 0.02905  | -1.95237 |
| D53 | 2.48949  | 0.00001  | -0.02460 | -0.00302 | -0.02762 | 2.46187  |
| D54 | 2.12367  | -0.00002 | -0.02637 | -0.00334 | -0.02972 | 2.09395  |
| D55 | -2.56037 | 0.00001  | -0.02333 | -0.00231 | -0.02563 | -2.58600 |
| D56 | -2.72901 | 0.00000  | 0.00022  | -0.00004 | 0.00018  | -2.72883 |
| D57 | -0.02989 | 0.00000  | 0.00027  | -0.00008 | 0.00019  | -0.02969 |
| D58 | -0.02160 | 0.00000  | 0.00021  | -0.00021 | 0.00000  | -0.02160 |
| D59 | 2.67753  | 0.00000  | 0.00027  | -0.00025 | 0.00001  | 2.67754  |
| D60 | -0.17026 | -0.00001 | -0.00047 | 0.00034  | -0.00014 | -0.17040 |
| D61 | 0.26460  | 0.00001  | 0.00165  | 0.00070  | 0.00235  | 0.26695  |
| D62 | -2.58228 | -0.00002 | -0.00050 | 0.00016  | -0.00034 | -2.58262 |
| D63 | -2.14741 | 0.00000  | 0.00162  | 0.00052  | 0.00214  | -2.14527 |
| D64 | 2.15585  | -0.00003 | -0.00249 | -0.00099 | -0.00348 | 2.15236  |
| D65 | -0.23728 | -0.00003 | -0.00261 | -0.00097 | -0.00358 | -0.24086 |
| D66 | 2.48804  | 0.00001  | 0.00028  | 0.00004  | 0.00032  | 2.48836  |
| D67 | -1.71978 | 0.00000  | 0.00024  | 0.00004  | 0.00028  | -1.71950 |
| D68 | 0.35922  | 0.00000  | 0.00026  | 0.00004  | 0.00030  | 0.35952  |
| D69 | 1.27181  | 0.00000  | 0.00047  | -0.00004 | 0.00043  | 1.27224  |
| D70 | -2.93601 | 0.00000  | 0.00043  | -0.00004 | 0.00039  | -2.93562 |

|     |          |          |         |          |         |          |
|-----|----------|----------|---------|----------|---------|----------|
| D71 | -0.85701 | -0.00001 | 0.00044 | -0.00004 | 0.00041 | -0.85660 |
| D72 | -1.09049 | 0.00000  | 0.00032 | 0.00001  | 0.00033 | -1.09016 |
| D73 | 0.98487  | 0.00000  | 0.00028 | 0.00001  | 0.00029 | 0.98516  |
| D74 | 3.06387  | 0.00000  | 0.00030 | 0.00001  | 0.00031 | 3.06418  |

| Item                 | Value    | Threshold | Converged? |
|----------------------|----------|-----------|------------|
| Maximum Force        | 0.000058 | 0.000450  | YES        |
| RMS Force            | 0.000011 | 0.000300  | YES        |
| Maximum Displacement | 0.014068 | 0.001800  | NO         |
| RMS Displacement     | 0.003378 | 0.001200  | NO         |

Predicted change in Energy=-2.624381D-07

GradGradGradGradGradGradGradGradGradGradGradGradGradGradGradGradGradGradGrad

Input orientation:

| Center<br>Number | Atomic<br>Number | Atomic<br>Type | Coordinates (Angstroms) |           |           |
|------------------|------------------|----------------|-------------------------|-----------|-----------|
|                  |                  |                | X                       | Y         | Z         |
| 1                | 6                | 0              | -1.378073               | -1.909681 | -0.255960 |
| 2                | 6                | 0              | -2.509694               | -1.169547 | -0.137533 |
| 3                | 7                | 0              | -2.111867               | 0.112088  | 0.230093  |
| 4                | 6                | 0              | -0.768383               | 0.135574  | 0.329753  |
| 5                | 7                | 0              | -0.307622               | -1.081122 | 0.043977  |
| 6                | 6                | 0              | 1.125658                | -1.436885 | -0.003785 |
| 7                | 6                | 0              | 1.683194                | -1.368638 | -1.436369 |
| 8                | 1                | 0              | -1.243791               | -2.945394 | -0.516730 |
| 9                | 1                | 0              | -3.539698               | -1.443116 | -0.275672 |
| 10               | 1                | 0              | 1.649505                | -0.728836 | 0.640391  |
| 11               | 1                | 0              | 1.234281                | -2.447303 | 0.392452  |
| 12               | 1                | 0              | 1.064808                | -1.983080 | -2.101636 |
| 13               | 1                | 0              | 1.636306                | -0.331675 | -1.788526 |
| 14               | 35               | 0              | 1.653305                | 2.227491  | 1.028632  |
| 15               | 1                | 0              | -0.116619               | 0.994293  | 0.598857  |
| 16               | 6                | 0              | -2.916355               | 1.256607  | 0.484185  |
| 17               | 6                | 0              | -4.240384               | 1.282204  | 0.406695  |
| 18               | 1                | 0              | -2.321086               | 2.120398  | 0.752801  |
| 19               | 1                | 0              | -4.762717               | 2.204514  | 0.619526  |
| 20               | 1                | 0              | -4.841820               | 0.422626  | 0.139481  |
| 21               | 8                | 0              | 2.990868                | -1.880609 | -1.459198 |
| 22               | 1                | 0              | 3.630938                | -1.148946 | -1.360844 |
| 23               | 6                | 0              | 4.837079                | 1.611441  | -1.121207 |
| 24               | 6                | 0              | 5.714748                | 0.752863  | -0.316367 |
| 25               | 8                | 0              | 4.861217                | 0.176913  | -1.334322 |
| 26               | 1                | 0              | 3.920163                | 1.989524  | -0.675417 |
| 27               | 1                | 0              | 5.254100                | 2.182591  | -1.946172 |



|    |   |   |          |           |           |
|----|---|---|----------|-----------|-----------|
| 28 | 1 | 0 | 6.765155 | 0.709140  | -0.600099 |
| 29 | 6 | 0 | 5.406927 | 0.409625  | 1.115076  |
| 30 | 1 | 0 | 5.689856 | -0.624640 | 1.333509  |
| 31 | 1 | 0 | 5.979600 | 1.063356  | 1.780224  |
| 32 | 1 | 0 | 4.346866 | 0.553839  | 1.332942  |

-----  
Distance matrix (angstroms):

|    |    | 1        | 2        | 3        | 4        | 5        |
|----|----|----------|----------|----------|----------|----------|
| 1  | C  | 0.000000 |          |          |          |          |
| 2  | C  | 1.357347 | 0.000000 |          |          |          |
| 3  | N  | 2.205051 | 1.391403 | 0.000000 |          |          |
| 4  | C  | 2.213108 | 2.225727 | 1.347380 | 0.000000 |          |
| 5  | N  | 1.386484 | 2.211308 | 2.171103 | 1.332035 | 0.000000 |
| 6  | C  | 2.560429 | 3.647622 | 3.596607 | 2.484203 | 1.477546 |
| 7  | C  | 3.325274 | 4.393964 | 4.401378 | 3.375214 | 2.497487 |
| 8  | H  | 1.076445 | 2.213579 | 3.264888 | 3.230311 | 2.160166 |
| 9  | H  | 2.211491 | 1.074630 | 2.170981 | 3.246381 | 3.267955 |
| 10 | H  | 3.371064 | 4.254213 | 3.876005 | 2.586481 | 2.076093 |
| 11 | H  | 2.744789 | 3.991352 | 4.215868 | 3.268921 | 2.089342 |
| 12 | H  | 3.062610 | 4.158918 | 4.462954 | 3.709574 | 2.701990 |
| 13 | H  | 3.731667 | 4.540608 | 4.280250 | 3.238511 | 2.774634 |
| 14 | Br | 5.287307 | 5.498214 | 4.391937 | 3.275533 | 3.970100 |
| 15 | H  | 3.279489 | 3.309272 | 2.212529 | 1.111131 | 2.156785 |
| 16 | C  | 3.597153 | 2.537347 | 1.421861 | 2.427828 | 3.530474 |
| 17 | C  | 4.338210 | 3.050009 | 2.435353 | 3.657250 | 4.602553 |
| 18 | H  | 4.260096 | 3.413504 | 2.085739 | 2.555267 | 3.847883 |
| 19 | H  | 5.398972 | 4.127171 | 3.399546 | 4.507681 | 5.565477 |
| 20 | H  | 4.194469 | 2.837351 | 2.749052 | 4.087969 | 4.778005 |
| 21 | O  | 4.531697 | 5.701631 | 5.732578 | 4.625722 | 3.711975 |
| 22 | H  | 5.185526 | 6.261332 | 6.091067 | 4.884888 | 4.182150 |
| 23 | C  | 7.195489 | 7.916854 | 7.236153 | 5.975338 | 5.922457 |
| 24 | C  | 7.576338 | 8.448023 | 7.871792 | 6.544426 | 6.305735 |
| 25 | O  | 6.666744 | 7.587857 | 7.146712 | 5.870540 | 5.495385 |
| 26 | H  | 6.591741 | 7.184157 | 6.382014 | 5.141008 | 5.274520 |
| 27 | H  | 7.974285 | 8.647803 | 7.954909 | 6.755769 | 6.748724 |
| 28 | H  | 8.560889 | 9.474505 | 8.935726 | 7.612345 | 7.324210 |
| 29 | C  | 7.300353 | 8.169192 | 7.576542 | 6.231075 | 6.002138 |
| 30 | H  | 7.357538 | 8.348264 | 7.913733 | 6.579841 | 6.151505 |
| 31 | H  | 8.192700 | 8.985085 | 8.293349 | 6.964188 | 6.866039 |
| 32 | H  | 6.431832 | 7.221133 | 6.567088 | 5.229446 | 5.098900 |
|    |    | 6        | 7        | 8        | 9        | 10       |
| 6  | C  | 0.000000 |          |          |          |          |
| 7  | C  | 1.538766 | 0.000000 |          |          |          |
| 8  | H  | 2.855346 | 3.449513 | 0.000000 |          |          |

|    |    |          |          |          |           |          |
|----|----|----------|----------|----------|-----------|----------|
| 9  | H  | 4.673276 | 5.350828 | 2.754294 | 0.000000  |          |
| 10 | H  | 1.091198 | 2.173342 | 3.824032 | 5.317631  | 0.000000 |
| 11 | H  | 1.090755 | 2.170168 | 2.686178 | 4.923988  | 1.785221 |
| 12 | H  | 2.168643 | 1.096595 | 2.961015 | 4.982688  | 3.071435 |
| 13 | H  | 2.160452 | 1.096132 | 4.091937 | 5.505910  | 2.461209 |
| 14 | Br | 3.843429 | 4.359962 | 6.126993 | 6.491674  | 2.981713 |
| 15 | H  | 2.795901 | 3.600683 | 4.246903 | 4.292229  | 2.467812 |
| 16 | C  | 4.881689 | 5.633497 | 4.632074 | 2.873055  | 4.981311 |
| 17 | C  | 6.029623 | 6.746305 | 5.263541 | 2.895506  | 6.228137 |
| 18 | H  | 5.010662 | 5.744572 | 5.332403 | 3.904024  | 4.888391 |
| 19 | H  | 6.951350 | 7.651398 | 6.339990 | 3.949983  | 7.051352 |
| 20 | H  | 6.252128 | 6.947498 | 4.971919 | 2.312762  | 6.611662 |
| 21 | O  | 2.407099 | 1.404510 | 4.467030 | 6.651348  | 2.744834 |
| 22 | H  | 2.863729 | 1.961549 | 5.263339 | 7.258247  | 2.847369 |
| 23 | C  | 4.931081 | 4.350539 | 7.622802 | 8.956318  | 4.329059 |
| 24 | C  | 5.094355 | 4.691333 | 7.882799 | 9.511506  | 4.431368 |
| 25 | O  | 4.281246 | 3.535388 | 6.905677 | 8.620939  | 3.877495 |
| 26 | H  | 4.472206 | 4.106134 | 7.144580 | 8.221456  | 3.778455 |
| 27 | H  | 5.823874 | 5.061867 | 8.400127 | 9.657495  | 5.306583 |
| 28 | H  | 6.063410 | 5.553633 | 8.803737 | 10.532210 | 5.456781 |
| 29 | C  | 4.794863 | 4.851627 | 7.625681 | 9.241695  | 3.954699 |
| 30 | H  | 4.824935 | 4.927383 | 7.542198 | 9.404469  | 4.100696 |
| 31 | H  | 5.744096 | 5.892382 | 8.574582 | 10.056149 | 4.822954 |
| 32 | H  | 4.015719 | 4.296528 | 6.849917 | 8.292970  | 3.066046 |
|    |    | 11       | 12       | 13       | 14        | 15       |
| 11 | H  | 0.000000 |          |          |           |          |
| 12 | H  | 2.542578 | 0.000000 |          |           |          |
| 13 | H  | 3.064991 | 1.775327 | 0.000000 |           |          |
| 14 | Br | 4.736455 | 5.279566 | 3.806047 | 0.000000  |          |
| 15 | H  | 3.702988 | 4.189653 | 3.245079 | 2.199571  | 0.000000 |
| 16 | C  | 5.563734 | 5.747322 | 5.330532 | 4.703278  | 2.814334 |
| 17 | C  | 6.624302 | 6.715570 | 6.477583 | 6.001328  | 4.138267 |
| 18 | H  | 5.799516 | 6.037436 | 5.303957 | 3.985390  | 2.480219 |
| 19 | H  | 7.593086 | 7.674681 | 7.292356 | 6.429092  | 4.801175 |
| 20 | H  | 6.724544 | 6.760051 | 6.800904 | 6.799615  | 4.781773 |
| 21 | O  | 2.614450 | 2.032962 | 2.083865 | 4.985465  | 4.707137 |
| 22 | H  | 3.240948 | 2.798138 | 2.197590 | 4.584861  | 4.741106 |
| 23 | C  | 5.634245 | 5.302061 | 3.803415 | 3.890725  | 5.280021 |
| 24 | C  | 5.551403 | 5.682826 | 4.469583 | 4.525359  | 5.907688 |
| 25 | O  | 4.798220 | 4.434756 | 3.296212 | 4.480973  | 5.402235 |
| 26 | H  | 5.295257 | 5.095953 | 3.441363 | 2.845885  | 4.348549 |
| 27 | H  | 6.562319 | 5.909920 | 4.408495 | 4.670888  | 6.060846 |
| 28 | H  | 6.445064 | 6.480480 | 5.366633 | 5.575766  | 6.991253 |
| 29 | C  | 5.108346 | 5.909846 | 4.816432 | 4.171546  | 5.578341 |

|    |   |          |           |          |           |           |
|----|---|----------|-----------|----------|-----------|-----------|
| 30 | H | 4.905083 | 5.919177  | 5.124862 | 4.951904  | 6.072546  |
| 31 | H | 6.063719 | 6.964538  | 5.791916 | 4.542789  | 6.210015  |
| 32 | H | 4.424879 | 5.385554  | 4.227864 | 3.185748  | 4.544841  |
|    |   | 16       | 17        | 18       | 19        | 20        |
| 16 | C | 0.000000 |           |          |           |           |
| 17 | C | 1.326542 | 0.000000  |          |           |           |
| 18 | H | 1.082883 | 2.122749  | 0.000000 |           |           |
| 19 | H | 2.079879 | 1.081104  | 2.446711 | 0.000000  |           |
| 20 | H | 2.126443 | 1.082590  | 3.100434 | 1.847113  | 0.000000  |
| 21 | O | 6.965210 | 8.110238  | 7.008414 | 9.007076  | 8.319355  |
| 22 | H | 7.215113 | 8.425699  | 7.112152 | 9.253162  | 8.746910  |
| 23 | C | 7.925839 | 9.211038  | 7.416891 | 9.774352  | 9.832787  |
| 24 | C | 8.682775 | 9.995383  | 8.221187 | 10.618873 | 10.571565 |
| 25 | O | 8.059983 | 9.332307  | 7.727787 | 10.027402 | 9.817402  |
| 26 | H | 6.972792 | 8.262312  | 6.403916 | 8.781543  | 8.938209  |
| 27 | H | 8.574405 | 9.823030  | 8.041876 | 10.340208 | 10.458251 |
| 28 | H | 9.757408 | 11.066342 | 9.294179 | 11.688261 | 11.634042 |
| 29 | C | 8.390020 | 9.712560  | 7.923395 | 10.338707 | 10.295085 |
| 30 | H | 8.850272 | 10.154049 | 8.488089 | 10.852197 | 10.650759 |
| 31 | H | 8.991945 | 10.314192 | 8.430559 | 10.864936 | 10.963836 |
| 32 | H | 7.346336 | 8.667717  | 6.874028 | 9.285375  | 9.266796  |
|    |   | 21       | 22        | 23       | 24        | 25        |
| 21 | O | 0.000000 |           |          |           |           |
| 22 | H | 0.977084 | 0.000000  |          |           |           |
| 23 | C | 3.964485 | 3.021909  | 0.000000 |           |           |
| 24 | C | 3.957368 | 3.008334  | 1.468069 | 0.000000  |           |
| 25 | O | 2.783378 | 1.808920  | 1.450473 | 1.447918  | 0.000000  |
| 26 | H | 4.056579 | 3.225439  | 1.087387 | 2.208797  | 2.145996  |
| 27 | H | 4.676426 | 3.751853  | 1.086594 | 2.216435  | 2.133416  |
| 28 | H | 4.657262 | 3.722168  | 2.191615 | 1.088930  | 2.108869  |
| 29 | C | 4.208254 | 3.422493  | 2.601932 | 1.503860  | 2.520219  |
| 30 | H | 4.081814 | 3.431265  | 3.428253 | 2.149471  | 2.906278  |
| 31 | H | 5.300311 | 4.502976  | 3.166078 | 2.135941  | 3.425924  |
| 32 | H | 3.944783 | 3.266268  | 2.716924 | 2.151960  | 2.742431  |
|    |   | 26       | 27        | 28       | 29        | 30        |
| 26 | H | 0.000000 |           |          |           |           |
| 27 | H | 1.852425 | 0.000000  |          |           |           |
| 28 | H | 3.120742 | 2.503249  | 0.000000 |           |           |
| 29 | C | 2.812902 | 3.540904  | 2.208238 | 0.000000  |           |
| 30 | H | 3.741852 | 4.338979  | 2.583423 | 1.094288  | 0.000000  |
| 31 | H | 3.336052 | 3.957911  | 2.531502 | 1.094413  | 1.769982  |
| 32 | H | 2.505349 | 3.772068  | 3.099820 | 1.091784  | 1.786739  |
|    |   | 31       | 32        |          |           |           |
| 31 | H | 0.000000 |           |          |           |           |

32 H 1.767905 0.000000  
 Stoichiometry C10H17BrN2O2  
 Framework group C1[X(C10H17BrN2O2)]  
 Deg. of freedom 90  
 Full point group C1 NOp 1  
 Largest Abelian subgroup C1 NOp 1  
 Largest concise Abelian subgroup C1 NOp 1

Standard orientation:

| Center<br>Number | Atomic<br>Number | Atomic<br>Type | Coordinates (Angstroms) |           |           |
|------------------|------------------|----------------|-------------------------|-----------|-----------|
|                  |                  |                | X                       | Y         | Z         |
| 1                | 6                | 0              | -2.712727               | 2.112745  | -0.441171 |
| 2                | 6                | 0              | -3.790641               | 1.348816  | -0.129878 |
| 3                | 7                | 0              | -3.323353               | 0.049277  | 0.039961  |
| 4                | 6                | 0              | -1.991993               | 0.038337  | -0.166903 |
| 5                | 7                | 0              | -1.605918               | 1.278014  | -0.464329 |
| 6                | 6                | 0              | -0.203742               | 1.676204  | -0.706177 |
| 7                | 6                | 0              | 0.454649                | 2.246037  | 0.562528  |
| 8                | 1                | 0              | -2.639465               | 3.165351  | -0.654212 |
| 9                | 1                | 0              | -4.826413               | 1.614524  | -0.023079 |
| 10               | 1                | 0              | 0.326522                | 0.782484  | -1.039037 |
| 11               | 1                | 0              | -0.199322               | 2.425334  | -1.498977 |
| 12               | 1                | 0              | -0.161133               | 3.060397  | 0.962717  |
| 13               | 1                | 0              | 0.510611                | 1.456571  | 1.320893  |
| 14               | 35               | 0              | 0.526982                | -2.055334 | -0.146164 |
| 15               | 1                | 0              | -1.297276               | -0.826965 | -0.110032 |
| 16               | 6                | 0              | -4.054628               | -1.125148 | 0.368062  |
| 17               | 6                | 0              | -5.364453               | -1.167253 | 0.573732  |
| 18               | 1                | 0              | -3.415694               | -1.997043 | 0.432840  |
| 19               | 1                | 0              | -5.829002               | -2.112157 | 0.818959  |
| 20               | 1                | 0              | -6.009300               | -0.300006 | 0.510044  |
| 21               | 8                | 0              | 1.718356                | 2.769913  | 0.244333  |
| 22               | 1                | 0              | 2.403593                | 2.091687  | 0.402932  |
| 23               | 6                | 0              | 3.795519                | -0.458577 | 1.233973  |
| 24               | 6                | 0              | 4.548303                | 0.009559  | 0.063763  |
| 25               | 8                | 0              | 3.725795                | 0.929987  | 0.820573  |
| 26               | 1                | 0              | 2.881289                | -1.026077 | 1.077325  |
| 27               | 1                | 0              | 4.310307                | -0.607503 | 2.179225  |
| 28               | 1                | 0              | 5.609435                | 0.211041  | 0.202230  |
| 29               | 6                | 0              | 4.117615                | -0.301380 | -1.343155 |
| 30               | 1                | 0              | 4.305867                | 0.551816  | -2.002007 |
| 31               | 1                | 0              | 4.690901                | -1.153001 | -1.722396 |
| 32               | 1                | 0              | 3.059008                | -0.566062 | -1.379009 |

```

-----
Rotational constants (GHZ):      0.6012140      0.2209025      0.1722528
Standard basis: 6-311++G(d,p) (5D, 7F)
There are 492 symmetry adapted cartesian basis functions of A symmetry.
There are 475 symmetry adapted basis functions of A symmetry.
475 basis functions, 751 primitive gaussians, 492 cartesian basis functions
71 alpha electrons      71 beta electrons
nuclear repulsion energy      1307.2283037544 Hartrees.
NAtoms= 32 NActive= 32 NUniq= 32 SFac= 1.00D+00 NAtFMM= 60 NAOKFM=F
Big=F
Integral buffers will be 131072 words long.
Raffenetti 2 integral format.
Two-electron integral symmetry is turned on.
One-electron integrals computed using PRISM.
NBasis= 475 RedAO= T EigKep= 3.78D-06 NBF= 475
NBsUse= 475 1.00D-06 EigRej= -1.00D+00 NBFU= 475
Initial guess from the checkpoint file: "/home/suqian/liuwen/qianmengshijie/ohpo/ohpo.chk"
B after Tr= 0.000000 0.000000 0.000000
Rot= 1.000000 0.000361 0.000073 -0.000009 Ang= 0.04 deg.
Requested convergence on RMS density matrix=1.00D-08 within 128 cycles.
Requested convergence on MAX density matrix=1.00D-06.
Requested convergence on energy=1.00D-06.
No special actions if energy rises.
SCF Done: E(RB3LYP) = -3225.52371215 A.U. after 9 cycles
NFOck= 9 Conv=0.85D-08 -V/T= 2.0018
Calling FoFJK, ICntrl= 2127 FMM=F ISym2X=0 I1Cent= 0 IOpClX= 0 NMat=1 NMatS=1
NMatT=0.

```

\*\*\*\*\* Axes restored to original set \*\*\*\*\*

```

-----
Center      Atomic      Forces (Hartrees/Bohr)
Number      Number      X          Y          Z
-----
1           6           -0.000018737 -0.000016835 0.000048116
2           6           0.000006855 -0.000002074 0.000011438
3           7           -0.000006045 0.000000497 0.000009207
4           6           0.000010778 0.000009875 -0.000047937
5           7           -0.000017534 0.000031280 -0.000020057
6           6           0.000014605 0.000008912 0.000027086
7           6           0.000057426 -0.000023694 0.000013732
8           1           0.000001342 0.000004518 -0.000005926
9           1           0.000000374 0.000000525 -0.000002588
10          1           -0.000006036 0.000001856 0.000001597
11          1           -0.000004098 0.000001068 -0.000002113
12          1           -0.000003301 -0.000009316 0.000007377

```

|    |    |              |              |              |
|----|----|--------------|--------------|--------------|
| 13 | 1  | -0.000005466 | -0.000006481 | -0.000009941 |
| 14 | 35 | -0.000005256 | 0.000012764  | -0.000009328 |
| 15 | 1  | 0.000015158  | -0.000040890 | 0.000025730  |
| 16 | 6  | -0.000003067 | 0.000010123  | -0.000002152 |
| 17 | 6  | 0.000001353  | 0.000003337  | -0.000001870 |
| 18 | 1  | 0.000003764  | 0.000001629  | -0.000007286 |
| 19 | 1  | 0.000000205  | 0.000002301  | -0.000007096 |
| 20 | 1  | 0.000002171  | 0.000000844  | -0.000000235 |
| 21 | 8  | -0.000083037 | 0.000018916  | 0.000000762  |
| 22 | 1  | 0.000064066  | -0.000025349 | -0.000006014 |
| 23 | 6  | 0.000069408  | 0.000009265  | -0.000053498 |
| 24 | 6  | -0.000037521 | -0.000011235 | 0.000010196  |
| 25 | 8  | -0.000060434 | 0.000041138  | 0.000034735  |
| 26 | 1  | -0.000003093 | -0.000026453 | 0.000002845  |
| 27 | 1  | -0.000002569 | -0.000005908 | -0.000002974 |
| 28 | 1  | 0.000000790  | -0.000006818 | -0.000004341 |
| 29 | 6  | 0.000003786  | 0.000001524  | -0.000011505 |
| 30 | 1  | 0.000000930  | 0.000006405  | 0.000005543  |
| 31 | 1  | 0.000001553  | 0.000004862  | -0.000006604 |
| 32 | 1  | 0.000001632  | 0.000003414  | 0.000003101  |

-----  
Cartesian Forces: Max 0.000083037 RMS 0.000021705

GradGradGradGradGradGradGradGradGradGradGradGradGradGradGradGradGradGradGradGrad

Berny optimization.

Using GEDIIS/GDIIS optimizer.

FormGI is forming the generalized inverse of G from B-inverse, IUseBI=4.

GSVD: received Info= 1 from GESDD.

Internal Forces: Max 0.000048012 RMS 0.000009622

Search for a local minimum.

Step number 33 out of a maximum of 177

All quantities printed in internal units (Hartrees-Bohrs-Radians)

Mixed Optimization -- En-DIIS/RFO-DIIS

Swapping is turned off.

Update second derivatives using D2CorX and points 24 25 26 27 28  
29 30 31 32 33

DE= -1.33D-06 DEPred=-2.62D-07 R= 5.07D+00

TightC=F SS= 1.41D+00 RLast= 5.98D-02 DXNew= 3.2661D+00 1.7938D-01

Trust test= 5.07D+00 RLast= 5.98D-02 DXMaxT set to 1.94D+00

ITU= 1 1 0 1 1 1 1 1 1 1 1 1 1 1 1 -1 1 1 1

ITU= 1 1 1 1 1 1 1 1 0 1 0 1 0

Eigenvalues --- 0.00003 0.00072 0.00124 0.00234 0.00267

Eigenvalues --- 0.00332 0.00635 0.01081 0.01217 0.01297

Eigenvalues --- 0.01463 0.01722 0.01817 0.01956 0.02127

|                 |         |         |         |         |         |
|-----------------|---------|---------|---------|---------|---------|
| Eigenvalues --- | 0.02180 | 0.02220 | 0.02320 | 0.02396 | 0.03004 |
| Eigenvalues --- | 0.03061 | 0.03097 | 0.03420 | 0.03580 | 0.03841 |
| Eigenvalues --- | 0.04407 | 0.04633 | 0.05187 | 0.05444 | 0.05561 |
| Eigenvalues --- | 0.05679 | 0.05918 | 0.06436 | 0.09359 | 0.09608 |
| Eigenvalues --- | 0.10383 | 0.11155 | 0.11535 | 0.11678 | 0.13048 |
| Eigenvalues --- | 0.13822 | 0.14135 | 0.15112 | 0.15950 | 0.15994 |
| Eigenvalues --- | 0.16000 | 0.16001 | 0.16005 | 0.16024 | 0.16045 |
| Eigenvalues --- | 0.16666 | 0.17650 | 0.19167 | 0.21434 | 0.22069 |
| Eigenvalues --- | 0.22913 | 0.23418 | 0.23968 | 0.24210 | 0.25029 |
| Eigenvalues --- | 0.27782 | 0.28592 | 0.30814 | 0.31946 | 0.33103 |
| Eigenvalues --- | 0.33266 | 0.34045 | 0.34154 | 0.34491 | 0.34832 |
| Eigenvalues --- | 0.35025 | 0.35685 | 0.35690 | 0.35858 | 0.36261 |
| Eigenvalues --- | 0.36436 | 0.36677 | 0.37192 | 0.37243 | 0.37550 |
| Eigenvalues --- | 0.38160 | 0.42174 | 0.42509 | 0.45556 | 0.46265 |
| Eigenvalues --- | 0.49318 | 0.54325 | 0.55275 | 0.55932 | 0.60389 |

Eigenvalue 1 is 3.33D-05 Eigenvector:

|   |         |          |          |          |         |
|---|---------|----------|----------|----------|---------|
|   | D52     | D54      | D53      | D55      | D25     |
| 1 | 0.50845 | -0.49799 | -0.49499 | -0.48941 | 0.03755 |
|   | D26     | D46      | D47      | D45      | A48     |
| 1 | 0.03127 | -0.03107 | -0.03095 | -0.02441 | 0.01536 |

En-DIIS/RFO-DIIS IScMMF= 0 using points: 33 32 31 30 29

RFO step: Lambda=-3.51578345D-08.

DidBck=F Rises=F RFO-DIIS coefs: 1.82299 -0.94550 -0.37405 0.58680 -  
0.09024

Iteration 1 RMS(Cart)= 0.00181763 RMS(Int)= 0.00000670

Iteration 2 RMS(Cart)= 0.00000498 RMS(Int)= 0.00000194

Iteration 3 RMS(Cart)= 0.00000000 RMS(Int)= 0.00000194

| Variable | Old X   | -DE/DX   | Delta X<br>(Linear) | Delta X<br>(Quad) | Delta X<br>(Total) | New X   |
|----------|---------|----------|---------------------|-------------------|--------------------|---------|
| R1       | 2.56501 | -0.00001 | 0.00000             | -0.00001          | -0.00001           | 2.56501 |
| R2       | 2.62007 | 0.00001  | 0.00001             | 0.00002           | 0.00003            | 2.62011 |
| R3       | 2.03419 | 0.00000  | -0.00001            | 0.00000           | -0.00001           | 2.03418 |
| R4       | 2.62937 | 0.00000  | 0.00001             | 0.00000           | 0.00001            | 2.62938 |
| R5       | 2.03076 | 0.00000  | 0.00000             | 0.00000           | 0.00000            | 2.03076 |
| R6       | 2.54618 | 0.00000  | -0.00002            | 0.00001           | -0.00001           | 2.54617 |
| R7       | 2.68693 | 0.00000  | 0.00002             | -0.00001          | 0.00001            | 2.68694 |
| R8       | 2.51718 | -0.00003 | -0.00012            | 0.00003           | -0.00010           | 2.51709 |
| R9       | 2.09973 | -0.00001 | -0.00015            | 0.00004           | -0.00011           | 2.09962 |
| R10      | 2.79216 | 0.00001  | 0.00002             | 0.00001           | 0.00003            | 2.79218 |
| R11      | 2.90785 | 0.00000  | -0.00006            | 0.00004           | -0.00003           | 2.90782 |
| R12      | 2.06206 | 0.00000  | -0.00002            | 0.00001           | -0.00001           | 2.06206 |
| R13      | 2.06123 | 0.00000  | -0.00001            | 0.00001           | 0.00000            | 2.06123 |
| R14      | 2.07226 | 0.00000  | -0.00003            | 0.00001           | -0.00002           | 2.07224 |
| R15      | 2.07139 | 0.00000  | -0.00003            | 0.00003           | 0.00000            | 2.07139 |

|     |         |          |          |          |          |         |
|-----|---------|----------|----------|----------|----------|---------|
| R16 | 2.65414 | -0.00005 | 0.00008  | -0.00010 | -0.00002 | 2.65412 |
| R17 | 4.15659 | 0.00000  | 0.00051  | -0.00020 | 0.00031  | 4.15690 |
| R18 | 8.46781 | 0.00000  | -0.00120 | -0.00060 | -0.00180 | 8.46601 |
| R19 | 2.50680 | 0.00000  | -0.00001 | 0.00000  | -0.00001 | 2.50679 |
| R20 | 2.04635 | 0.00000  | 0.00000  | 0.00000  | 0.00000  | 2.04635 |
| R21 | 2.04299 | 0.00000  | 0.00000  | 0.00000  | 0.00000  | 2.04299 |
| R22 | 2.04580 | 0.00000  | 0.00000  | 0.00000  | 0.00000  | 2.04580 |
| R23 | 1.84642 | 0.00002  | -0.00004 | 0.00002  | -0.00002 | 1.84640 |
| R24 | 3.41836 | 0.00000  | 0.00020  | -0.00008 | 0.00013  | 3.41849 |
| R25 | 2.77425 | -0.00001 | -0.00004 | 0.00005  | 0.00001  | 2.77426 |
| R26 | 2.74100 | -0.00001 | -0.00011 | -0.00001 | -0.00012 | 2.74088 |
| R27 | 2.05486 | 0.00000  | -0.00003 | 0.00002  | -0.00001 | 2.05486 |
| R28 | 2.05336 | 0.00000  | 0.00000  | 0.00000  | 0.00000  | 2.05336 |
| R29 | 2.73617 | 0.00000  | -0.00008 | 0.00002  | -0.00006 | 2.73611 |
| R30 | 2.05778 | 0.00000  | -0.00003 | 0.00002  | -0.00001 | 2.05777 |
| R31 | 2.84188 | 0.00000  | -0.00005 | 0.00003  | -0.00003 | 2.84185 |
| R32 | 2.06790 | 0.00000  | 0.00001  | 0.00000  | 0.00001  | 2.06791 |
| R33 | 2.06814 | 0.00000  | 0.00000  | 0.00000  | 0.00000  | 2.06814 |
| R34 | 2.06317 | 0.00000  | -0.00002 | 0.00002  | 0.00000  | 2.06317 |
| A1  | 1.87437 | 0.00000  | -0.00002 | 0.00000  | -0.00003 | 1.87435 |
| A2  | 2.27810 | 0.00000  | 0.00000  | 0.00000  | 0.00000  | 2.27809 |
| A3  | 2.13067 | 0.00000  | 0.00002  | 0.00000  | 0.00003  | 2.13070 |
| A4  | 1.86183 | 0.00000  | 0.00001  | 0.00000  | 0.00001  | 1.86184 |
| A5  | 2.27713 | 0.00000  | 0.00000  | -0.00001 | -0.00001 | 2.27712 |
| A6  | 2.14420 | 0.00000  | -0.00001 | 0.00001  | 0.00000  | 2.14420 |
| A7  | 1.89725 | 0.00000  | -0.00005 | 0.00003  | -0.00002 | 1.89723 |
| A8  | 2.24835 | 0.00000  | 0.00004  | -0.00001 | 0.00003  | 2.24838 |
| A9  | 2.13757 | 0.00000  | 0.00001  | -0.00002 | -0.00001 | 2.13757 |
| A10 | 1.88927 | 0.00000  | 0.00006  | -0.00003 | 0.00003  | 1.88930 |
| A11 | 2.23479 | 0.00000  | -0.00009 | 0.00000  | -0.00009 | 2.23470 |
| A12 | 2.15913 | -0.00001 | 0.00003  | 0.00003  | 0.00006  | 2.15918 |
| A13 | 1.90202 | 0.00000  | 0.00000  | 0.00001  | 0.00001  | 1.90203 |
| A14 | 2.21186 | 0.00001  | 0.00002  | 0.00000  | 0.00003  | 2.21189 |
| A15 | 2.16809 | -0.00002 | -0.00001 | -0.00001 | -0.00002 | 2.16808 |
| A16 | 1.95076 | 0.00001  | -0.00003 | 0.00001  | -0.00002 | 1.95075 |
| A17 | 1.86540 | -0.00001 | -0.00007 | 0.00000  | -0.00007 | 1.86533 |
| A18 | 1.88379 | 0.00000  | 0.00005  | -0.00001 | 0.00004  | 1.88383 |
| A19 | 1.92504 | 0.00000  | 0.00018  | -0.00005 | 0.00014  | 1.92518 |
| A20 | 1.92112 | -0.00001 | -0.00010 | 0.00003  | -0.00007 | 1.92105 |
| A21 | 1.91646 | 0.00000  | -0.00003 | 0.00002  | -0.00001 | 1.91645 |
| A22 | 1.91307 | -0.00001 | -0.00001 | 0.00001  | 0.00000  | 1.91307 |
| A23 | 1.90240 | 0.00001  | 0.00017  | -0.00002 | 0.00015  | 1.90255 |
| A24 | 1.91379 | 0.00001  | 0.00008  | 0.00000  | 0.00008  | 1.91387 |
| A25 | 1.88709 | 0.00000  | 0.00000  | -0.00004 | -0.00004 | 1.88705 |



|     |          |          |          |          |          |          |
|-----|----------|----------|----------|----------|----------|----------|
| A26 | 1.88696  | 0.00000  | -0.00016 | -0.00002 | -0.00018 | 1.88678  |
| A27 | 1.96000  | 0.00000  | -0.00008 | 0.00007  | -0.00001 | 1.95999  |
| A28 | 1.78898  | -0.00002 | -0.00023 | -0.00006 | -0.00029 | 1.78869  |
| A29 | 2.83251  | 0.00003  | 0.00017  | 0.00013  | 0.00029  | 2.83280  |
| A30 | 2.17708  | -0.00001 | -0.00001 | -0.00001 | -0.00002 | 2.17706  |
| A31 | 1.95561  | 0.00000  | -0.00001 | 0.00000  | -0.00001 | 1.95560  |
| A32 | 2.15049  | 0.00001  | 0.00003  | 0.00001  | 0.00004  | 2.15052  |
| A33 | 2.07967  | 0.00000  | 0.00001  | 0.00001  | 0.00001  | 2.07968  |
| A34 | 2.15747  | 0.00000  | 0.00000  | -0.00001 | -0.00001 | 2.15746  |
| A35 | 2.04604  | 0.00000  | -0.00001 | 0.00001  | 0.00000  | 2.04604  |
| A36 | 1.91274  | 0.00001  | -0.00011 | 0.00000  | -0.00010 | 1.91264  |
| A37 | 3.05060  | 0.00002  | -0.00030 | 0.00013  | -0.00018 | 3.05042  |
| A38 | 2.07454  | -0.00002 | -0.00014 | 0.00001  | -0.00013 | 2.07441  |
| A39 | 2.08770  | 0.00002  | -0.00003 | 0.00009  | 0.00005  | 2.08776  |
| A40 | 2.00220  | -0.00002 | -0.00001 | -0.00014 | -0.00016 | 2.00204  |
| A41 | 1.98441  | 0.00001  | 0.00008  | -0.00002 | 0.00006  | 1.98447  |
| A42 | 2.03993  | 0.00001  | 0.00010  | 0.00000  | 0.00010  | 2.04003  |
| A43 | 2.04578  | -0.00002 | -0.00002 | -0.00001 | -0.00002 | 2.04576  |
| A44 | 2.13287  | 0.00002  | -0.00003 | 0.00006  | 0.00003  | 2.13290  |
| A45 | 1.94924  | 0.00000  | 0.00007  | -0.00005 | 0.00002  | 1.94927  |
| A46 | 2.04625  | 0.00000  | 0.00002  | 0.00002  | 0.00004  | 2.04629  |
| A47 | 2.02227  | -0.00001 | 0.00000  | -0.00002 | -0.00002 | 2.02226  |
| A48 | 1.42655  | 0.00000  | 0.00112  | 0.00044  | 0.00157  | 1.42812  |
| A49 | 0.99800  | 0.00003  | 0.00072  | 0.00015  | 0.00087  | 0.99887  |
| A50 | 2.36847  | 0.00003  | 0.00172  | 0.00044  | 0.00217  | 2.37064  |
| A51 | 2.35010  | -0.00001 | 0.00030  | 0.00030  | 0.00060  | 2.35069  |
| A52 | 1.93135  | 0.00001  | 0.00003  | 0.00002  | 0.00005  | 1.93141  |
| A53 | 1.91246  | -0.00001 | 0.00000  | -0.00004 | -0.00004 | 1.91243  |
| A54 | 1.93749  | 0.00001  | 0.00007  | 0.00001  | 0.00008  | 1.93757  |
| A55 | 1.88385  | 0.00000  | -0.00006 | 0.00000  | -0.00007 | 1.88378  |
| A56 | 1.91352  | 0.00000  | -0.00001 | -0.00001 | -0.00001 | 1.91350  |
| A57 | 1.88376  | 0.00000  | -0.00003 | 0.00002  | -0.00002 | 1.88375  |
| A58 | 3.77665  | -0.00001 | 0.00143  | 0.00073  | 0.00216  | 3.77881  |
| A59 | 5.04787  | 0.00000  | -0.00135 | -0.00024 | -0.00159 | 5.04628  |
| D1  | 0.00451  | 0.00000  | 0.00011  | -0.00010 | 0.00001  | 0.00452  |
| D2  | -3.13059 | -0.00001 | -0.00005 | -0.00012 | -0.00017 | -3.13076 |
| D3  | 3.13583  | 0.00001  | 0.00012  | 0.00007  | 0.00019  | 3.13603  |
| D4  | 0.00073  | 0.00000  | -0.00004 | 0.00005  | 0.00002  | 0.00075  |
| D5  | -0.00697 | 0.00000  | 0.00000  | 0.00001  | 0.00001  | -0.00696 |
| D6  | -3.09723 | 0.00000  | -0.00036 | -0.00009 | -0.00044 | -3.09767 |
| D7  | -3.13935 | -0.00001 | 0.00000  | -0.00015 | -0.00015 | -3.13950 |
| D8  | 0.05358  | -0.00001 | -0.00037 | -0.00024 | -0.00061 | 0.05297  |
| D9  | -0.00059 | 0.00000  | -0.00018 | 0.00016  | -0.00002 | -0.00062 |
| D10 | -3.13657 | 0.00000  | -0.00012 | 0.00004  | -0.00008 | -3.13665 |

|     |          |          |          |          |          |          |
|-----|----------|----------|----------|----------|----------|----------|
| D11 | 3.13512  | 0.00001  | -0.00004 | 0.00018  | 0.00013  | 3.13526  |
| D12 | -0.00086 | 0.00001  | 0.00002  | 0.00006  | 0.00008  | -0.00078 |
| D13 | -0.00375 | 0.00000  | 0.00019  | -0.00016 | 0.00003  | -0.00372 |
| D14 | 3.13718  | 0.00001  | -0.00033 | 0.00011  | -0.00021 | 3.13697  |
| D15 | 3.13266  | 0.00000  | 0.00013  | -0.00005 | 0.00009  | 3.13275  |
| D16 | -0.00959 | 0.00001  | -0.00038 | 0.00022  | -0.00016 | -0.00975 |
| D17 | 0.00035  | 0.00000  | -0.00023 | 0.00018  | -0.00005 | 0.00030  |
| D18 | -3.14151 | 0.00000  | -0.00017 | 0.00022  | 0.00005  | -3.14146 |
| D19 | -3.13494 | 0.00000  | -0.00016 | 0.00005  | -0.00011 | -3.13506 |
| D20 | 0.00639  | 0.00000  | -0.00010 | 0.00008  | -0.00002 | 0.00637  |
| D21 | 0.00660  | 0.00000  | -0.00012 | 0.00009  | -0.00003 | 0.00657  |
| D22 | 3.09844  | 0.00001  | 0.00023  | 0.00018  | 0.00042  | 3.09885  |
| D23 | -3.13437 | -0.00001 | 0.00037  | -0.00016 | 0.00021  | -3.13416 |
| D24 | -0.04253 | -0.00001 | 0.00072  | -0.00007 | 0.00065  | -0.04188 |
| D25 | -3.12031 | -0.00001 | 0.00501  | 0.00111  | 0.00611  | -3.11420 |
| D26 | 0.02053  | 0.00001  | 0.00442  | 0.00141  | 0.00583  | 0.02636  |
| D27 | 1.41299  | 0.00000  | -0.00205 | -0.00042 | -0.00247 | 1.41052  |
| D28 | -2.76244 | 0.00000  | -0.00189 | -0.00047 | -0.00236 | -2.76480 |
| D29 | -0.70194 | 0.00001  | -0.00194 | -0.00045 | -0.00239 | -0.70434 |
| D30 | -1.66989 | -0.00001 | -0.00246 | -0.00052 | -0.00299 | -1.67287 |
| D31 | 0.43787  | 0.00000  | -0.00230 | -0.00058 | -0.00288 | 0.43499  |
| D32 | 2.49836  | 0.00000  | -0.00235 | -0.00056 | -0.00291 | 2.49545  |
| D33 | -0.93855 | 0.00000  | -0.00008 | 0.00002  | -0.00006 | -0.93860 |
| D34 | 1.12370  | 0.00000  | 0.00002  | -0.00004 | -0.00002 | 1.12368  |
| D35 | -3.00741 | 0.00000  | 0.00008  | 0.00004  | 0.00012  | -3.00729 |
| D36 | -3.01122 | 0.00000  | -0.00009 | 0.00005  | -0.00004 | -3.01126 |
| D37 | -0.94897 | 0.00000  | 0.00001  | -0.00001 | 0.00000  | -0.94898 |
| D38 | 1.20310  | 0.00000  | 0.00007  | 0.00006  | 0.00013  | 1.20324  |
| D39 | 1.15460  | 0.00000  | -0.00010 | 0.00004  | -0.00007 | 1.15454  |
| D40 | -3.06633 | -0.00001 | 0.00000  | -0.00002 | -0.00003 | -3.06636 |
| D41 | -0.91426 | 0.00000  | 0.00005  | 0.00006  | 0.00011  | -0.91415 |
| D42 | -1.64308 | 0.00000  | 0.00078  | 0.00077  | 0.00154  | -1.64154 |
| D43 | 2.55515  | 0.00000  | 0.00084  | 0.00077  | 0.00160  | 2.55675  |
| D44 | 0.47468  | 0.00001  | 0.00099  | 0.00079  | 0.00178  | 0.47646  |
| D45 | 0.44813  | 0.00000  | -0.00486 | -0.00186 | -0.00672 | 0.44142  |
| D46 | -0.27461 | 0.00001  | -0.00088 | 0.00074  | -0.00014 | -0.27475 |
| D47 | 2.56345  | 0.00001  | -0.00081 | 0.00045  | -0.00036 | 2.56309  |
| D48 | 3.14154  | 0.00000  | 0.00000  | 0.00006  | 0.00006  | -3.14158 |
| D49 | 0.00043  | 0.00000  | 0.00000  | 0.00003  | 0.00003  | 0.00046  |
| D50 | 0.00024  | 0.00000  | -0.00006 | 0.00002  | -0.00005 | 0.00020  |
| D51 | -3.14088 | 0.00000  | -0.00006 | -0.00001 | -0.00007 | -3.14095 |
| D52 | -1.95237 | 0.00000  | 0.01940  | 0.00044  | 0.01985  | -1.93252 |
| D53 | 2.46187  | 0.00001  | -0.01871 | -0.00083 | -0.01953 | 2.44234  |
| D54 | 2.09395  | -0.00001 | -0.01948 | -0.00139 | -0.02087 | 2.07307  |

|     |          |          |          |          |          |          |
|-----|----------|----------|----------|----------|----------|----------|
| D55 | -2.58600 | 0.00001  | -0.01735 | -0.00059 | -0.01794 | -2.60395 |
| D56 | -2.72883 | 0.00000  | 0.00014  | -0.00025 | -0.00011 | -2.72894 |
| D57 | -0.02969 | -0.00001 | 0.00003  | -0.00017 | -0.00015 | -0.02984 |
| D58 | -0.02160 | 0.00000  | -0.00002 | 0.00000  | -0.00002 | -0.02162 |
| D59 | 2.67754  | 0.00000  | -0.00014 | 0.00008  | -0.00006 | 2.67748  |
| D60 | -0.17040 | -0.00001 | -0.00010 | -0.00029 | -0.00039 | -0.17079 |
| D61 | 0.26695  | 0.00001  | 0.00070  | 0.00038  | 0.00108  | 0.26804  |
| D62 | -2.58262 | -0.00001 | -0.00034 | -0.00010 | -0.00044 | -2.58306 |
| D63 | -2.14527 | 0.00000  | 0.00046  | 0.00057  | 0.00103  | -2.14423 |
| D64 | 2.15236  | -0.00002 | -0.00240 | -0.00067 | -0.00307 | 2.14929  |
| D65 | -0.24086 | -0.00001 | -0.00251 | -0.00060 | -0.00311 | -0.24398 |
| D66 | 2.48836  | 0.00001  | 0.00021  | 0.00014  | 0.00036  | 2.48871  |
| D67 | -1.71950 | 0.00000  | 0.00015  | 0.00013  | 0.00028  | -1.71922 |
| D68 | 0.35952  | 0.00000  | 0.00016  | 0.00013  | 0.00028  | 0.35980  |
| D69 | 1.27224  | 0.00000  | 0.00024  | 0.00014  | 0.00038  | 1.27262  |
| D70 | -2.93562 | 0.00000  | 0.00018  | 0.00012  | 0.00031  | -2.93531 |
| D71 | -0.85660 | 0.00000  | 0.00018  | 0.00012  | 0.00031  | -0.85629 |
| D72 | -1.09016 | 0.00000  | 0.00010  | 0.00022  | 0.00032  | -1.08985 |
| D73 | 0.98516  | 0.00000  | 0.00004  | 0.00020  | 0.00024  | 0.98540  |
| D74 | 3.06418  | 0.00000  | 0.00004  | 0.00021  | 0.00024  | 3.06442  |

| Item                 | Value    | Threshold | Converged? |
|----------------------|----------|-----------|------------|
| Maximum Force        | 0.000048 | 0.000450  | YES        |
| RMS Force            | 0.000010 | 0.000300  | YES        |
| Maximum Displacement | 0.008270 | 0.001800  | NO         |
| RMS Displacement     | 0.001816 | 0.001200  | NO         |

Predicted change in Energy=-1.385009D-07

GradGradGradGradGradGradGradGradGradGradGradGradGradGradGradGradGrad

#### Input orientation:

| Center Number | Atomic Number | Atomic Type | Coordinates (Angstroms) |           |           |
|---------------|---------------|-------------|-------------------------|-----------|-----------|
|               |               |             | X                       | Y         | Z         |
| 1             | 6             | 0           | -1.377887               | -1.908891 | -0.258573 |
| 2             | 6             | 0           | -2.509401               | -1.168713 | -0.139450 |
| 3             | 7             | 0           | -2.111475               | 0.112253  | 0.230420  |
| 4             | 6             | 0           | -0.768038               | 0.135265  | 0.330731  |
| 5             | 7             | 0           | -0.307404               | -1.081007 | 0.043189  |
| 6             | 6             | 0           | 1.125833                | -1.437081 | -0.003991 |
| 7             | 6             | 0           | 1.683539                | -1.370529 | -1.436573 |
| 8             | 1             | 0           | -1.243701               | -2.944168 | -0.521106 |
| 9             | 1             | 0           | -3.539389               | -1.441816 | -0.278624 |
| 10            | 1             | 0           | 1.649636                | -0.728441 | 0.639565  |
| 11            | 1             | 0           | 1.234259                | -2.447103 | 0.393312  |

|    |    |   |           |           |           |
|----|----|---|-----------|-----------|-----------|
| 12 | 1  | 0 | 1.065164  | -1.985643 | -2.101209 |
| 13 | 1  | 0 | 1.636922  | -0.333999 | -1.790042 |
| 14 | 35 | 0 | 1.653566  | 2.227452  | 1.029887  |
| 15 | 1  | 0 | -0.116301 | 0.993457  | 0.601328  |
| 16 | 6  | 0 | -2.915804 | 1.256576  | 0.485923  |
| 17 | 6  | 0 | -4.239780 | 1.282617  | 0.407742  |
| 18 | 1  | 0 | -2.320437 | 2.119791  | 0.756170  |
| 19 | 1  | 0 | -4.762017 | 2.204714  | 0.621718  |
| 20 | 1  | 0 | -4.841263 | 0.423602  | 0.138834  |
| 21 | 8  | 0 | 2.991067  | -1.882877 | -1.458819 |
| 22 | 1  | 0 | 3.631216  | -1.151388 | -1.359792 |
| 23 | 6  | 0 | 4.836311  | 1.611056  | -1.121967 |
| 24 | 6  | 0 | 5.713807  | 0.752982  | -0.316387 |
| 25 | 8  | 0 | 4.859600  | 0.176319  | -1.333327 |
| 26 | 1  | 0 | 3.919730  | 1.990009  | -0.676236 |
| 27 | 1  | 0 | 5.253302  | 2.181030  | -1.947760 |
| 28 | 1  | 0 | 6.764084  | 0.708382  | -0.600441 |
| 29 | 6  | 0 | 5.406354  | 0.411654  | 1.115575  |
| 30 | 1  | 0 | 5.689124  | -0.622384 | 1.335308  |
| 31 | 1  | 0 | 5.979435  | 1.066094  | 1.779674  |
| 32 | 1  | 0 | 4.346415  | 0.556404  | 1.333676  |

-----  
Distance matrix (angstroms):

|    |    | 1        | 2        | 3        | 4        | 5        |
|----|----|----------|----------|----------|----------|----------|
| 1  | C  | 0.000000 |          |          |          |          |
| 2  | C  | 1.357342 | 0.000000 |          |          |          |
| 3  | N  | 2.205060 | 1.391410 | 0.000000 |          |          |
| 4  | C  | 2.213091 | 2.225708 | 1.347374 | 0.000000 |          |
| 5  | N  | 1.386502 | 2.211299 | 2.171082 | 1.331984 | 0.000000 |
| 6  | C  | 2.560475 | 3.647643 | 3.596603 | 2.484162 | 1.477560 |
| 7  | C  | 3.324131 | 4.393632 | 4.402231 | 3.376538 | 2.497473 |
| 8  | H  | 1.076442 | 2.213571 | 3.264893 | 3.230292 | 2.160197 |
| 9  | H  | 2.211482 | 1.074630 | 2.170989 | 3.246365 | 3.267947 |
| 10 | H  | 3.371352 | 4.254209 | 3.875581 | 2.585829 | 2.076047 |
| 11 | H  | 2.745530 | 3.991630 | 4.215540 | 3.268292 | 2.089385 |
| 12 | H  | 3.060996 | 4.158531 | 4.464156 | 3.711227 | 2.701990 |
| 13 | H  | 3.730249 | 4.540176 | 4.281575 | 3.240635 | 2.774736 |
| 14 | Br | 5.287643 | 5.498325 | 4.391896 | 3.275703 | 3.970501 |
| 15 | H  | 3.279429 | 3.309179 | 2.212423 | 1.111070 | 2.156720 |
| 16 | C  | 3.597172 | 2.537377 | 1.421866 | 2.427823 | 3.530448 |
| 17 | C  | 4.338218 | 3.050025 | 2.435339 | 3.657232 | 4.602521 |
| 18 | H  | 4.260092 | 3.413517 | 2.085734 | 2.555246 | 3.847824 |
| 19 | H  | 5.398981 | 4.127187 | 3.399542 | 4.507679 | 5.565451 |
| 20 | H  | 4.194452 | 2.837338 | 2.749012 | 4.087925 | 4.777958 |

|    |    |          |          |          |           |          |
|----|----|----------|----------|----------|-----------|----------|
| 21 | O  | 4.530897 | 5.701396 | 5.733237 | 4.626690  | 3.711999 |
| 22 | H  | 5.184362 | 6.260728 | 6.091311 | 4.885364  | 4.181631 |
| 23 | C  | 7.193868 | 7.915298 | 7.235129 | 5.974698  | 5.921367 |
| 24 | C  | 7.575027 | 8.446619 | 7.870487 | 6.543290  | 6.304585 |
| 25 | O  | 6.664041 | 7.585291 | 7.144600 | 5.868653  | 5.493050 |
| 26 | H  | 6.590950 | 7.183272 | 6.381492 | 5.140936  | 5.274218 |
| 27 | H  | 7.972043 | 8.645827 | 7.953882 | 6.755235  | 6.747311 |
| 28 | H  | 8.559129 | 9.472778 | 8.934274 | 7.611071  | 7.322712 |
| 29 | C  | 7.300626 | 8.168955 | 7.575678 | 6.230207  | 6.002089 |
| 30 | H  | 7.357867 | 8.348006 | 7.912637 | 6.578613  | 6.151280 |
| 31 | H  | 8.193606 | 8.985419 | 8.292939 | 6.963783  | 6.866569 |
| 32 | H  | 6.432774 | 7.221382 | 6.566490 | 5.228851  | 5.099461 |
|    |    | 6        | 7        | 8        | 9         | 10       |
| 6  | C  | 0.000000 |          |          |           |          |
| 7  | C  | 1.538752 | 0.000000 |          |           |          |
| 8  | H  | 2.855418 | 3.447194 | 0.000000 |           |          |
| 9  | H  | 4.673302 | 5.350225 | 2.754278 | 0.000000  |          |
| 10 | H  | 1.091195 | 2.173426 | 3.824658 | 5.317703  | 0.000000 |
| 11 | H  | 1.090757 | 2.170102 | 2.687661 | 4.924411  | 1.785211 |
| 12 | H  | 2.168622 | 1.096582 | 2.957423 | 4.981914  | 3.071483 |
| 13 | H  | 2.160551 | 1.096133 | 4.089152 | 5.505074  | 2.461451 |
| 14 | Br | 3.843983 | 4.362315 | 6.127429 | 6.491726  | 2.981555 |
| 15 | H  | 2.795858 | 3.602901 | 4.246855 | 4.292133  | 2.466765 |
| 16 | C  | 4.881663 | 5.634859 | 4.632093 | 2.873101  | 4.980677 |
| 17 | C  | 6.029601 | 6.747325 | 5.263550 | 2.895545  | 6.227626 |
| 18 | H  | 5.010585 | 5.746501 | 5.332398 | 3.904060  | 4.887484 |
| 19 | H  | 6.951329 | 7.652720 | 6.339999 | 3.950015  | 7.050746 |
| 20 | H  | 6.252102 | 6.947939 | 4.971906 | 2.312775  | 6.611332 |
| 21 | O  | 2.407147 | 1.404502 | 4.465300 | 6.650884  | 2.745064 |
| 22 | H  | 2.862998 | 1.961470 | 5.261394 | 7.257469  | 2.846572 |
| 23 | C  | 4.930381 | 4.350724 | 7.620869 | 8.954530  | 4.327948 |
| 24 | C  | 5.093473 | 4.691181 | 7.881481 | 9.510006  | 4.430118 |
| 25 | O  | 4.279160 | 3.534228 | 6.902711 | 8.618224  | 3.874889 |
| 26 | H  | 4.472440 | 4.107540 | 7.143612 | 8.220340  | 3.778178 |
| 27 | H  | 5.822797 | 5.061432 | 8.397263 | 9.655177  | 5.305250 |
| 28 | H  | 6.062065 | 5.552741 | 8.801820 | 10.530360 | 5.455241 |
| 29 | C  | 4.795217 | 4.852730 | 7.626499 | 9.241507  | 3.954659 |
| 30 | H  | 4.825047 | 4.928262 | 7.543276 | 9.404345  | 4.100337 |
| 31 | H  | 5.744981 | 5.893735 | 8.576100 | 10.056552 | 4.823626 |
| 32 | H  | 4.016900 | 4.298636 | 6.851542 | 8.293269  | 3.066795 |
|    |    | 11       | 12       | 13       | 14        | 15       |
| 11 | H  | 0.000000 |          |          |           |          |
| 12 | H  | 2.542474 | 0.000000 |          |           |          |
| 13 | H  | 3.065026 | 1.775291 | 0.000000 |           |          |

|    |    |          |           |          |           |           |
|----|----|----------|-----------|----------|-----------|-----------|
| 14 | Br | 4.736297 | 5.282059  | 3.809634 | 0.000000  |           |
| 15 | H  | 3.701991 | 4.192207  | 3.248782 | 2.199735  | 0.000000  |
| 16 | C  | 5.563168 | 5.749203  | 5.332660 | 4.702939  | 2.814208  |
| 17 | C  | 6.623906 | 6.717052  | 6.479146 | 6.000942  | 4.138136  |
| 18 | H  | 5.798625 | 6.039991  | 5.307068 | 3.984872  | 2.480085  |
| 19 | H  | 7.592556 | 7.676553  | 7.294386 | 6.428594  | 4.801067  |
| 20 | H  | 6.724409 | 6.760778  | 6.801573 | 6.799313  | 4.781622  |
| 21 | O  | 2.614405 | 2.032813  | 2.083852 | 4.987722  | 4.708847  |
| 22 | H  | 3.240008 | 2.798268  | 2.197829 | 4.586745  | 4.742387  |
| 23 | C  | 5.633782 | 5.302519  | 3.803374 | 3.891052  | 5.280107  |
| 24 | C  | 5.550726 | 5.682916  | 4.469248 | 4.524608  | 5.906791  |
| 25 | O  | 4.796532 | 4.434125  | 3.294643 | 4.480021  | 5.400944  |
| 26 | H  | 5.295626 | 5.097539  | 3.442789 | 2.846531  | 4.349119  |
| 27 | H  | 6.561473 | 5.909755  | 4.407771 | 4.671899  | 6.061420  |
| 28 | H  | 6.443880 | 6.479797  | 5.365585 | 5.575208  | 6.990366  |
| 29 | C  | 5.108867 | 5.911062  | 4.817388 | 4.169878  | 5.576976  |
| 30 | H  | 4.905382 | 5.920231  | 5.125556 | 4.949806  | 6.070636  |
| 31 | H  | 6.064755 | 6.965947  | 5.793148 | 4.541374  | 6.209008  |
| 32 | H  | 4.426156 | 5.387676  | 4.229869 | 3.183729  | 4.543477  |
|    |    | 16       | 17        | 18       | 19        | 20        |
| 16 | C  | 0.000000 |           |          |           |           |
| 17 | C  | 1.326538 | 0.000000  |          |           |           |
| 18 | H  | 1.082883 | 2.122767  | 0.000000 |           |           |
| 19 | H  | 2.079882 | 1.081102  | 2.446754 | 0.000000  |           |
| 20 | H  | 2.126431 | 1.082590  | 3.100440 | 1.847111  | 0.000000  |
| 21 | O  | 6.966299 | 8.111076  | 7.009964 | 9.008183  | 8.319720  |
| 22 | H  | 7.215846 | 8.426217  | 7.113373 | 9.253982  | 8.746964  |
| 23 | C  | 7.925039 | 9.209957  | 7.416552 | 9.773473  | 9.831333  |
| 24 | C  | 8.681445 | 9.993937  | 8.219952 | 10.617460 | 10.570015 |
| 25 | O  | 8.058135 | 9.330270  | 7.726320 | 10.025573 | 9.815048  |
| 26 | H  | 6.972307 | 8.261539  | 6.403774 | 8.780861  | 8.937168  |
| 27 | H  | 8.573898 | 9.822125  | 8.042170 | 10.339700 | 10.456704 |
| 28 | H  | 9.756072 | 11.064864 | 9.293062 | 11.686903 | 11.632356 |
| 29 | C  | 8.388603 | 9.711205  | 7.921502 | 10.337056 | 10.294067 |
| 30 | H  | 8.848544 | 10.152465 | 8.485752 | 10.850256 | 10.649634 |
| 31 | H  | 8.990849 | 10.313169 | 8.428862 | 10.863523 | 10.963242 |
| 32 | H  | 7.344982 | 8.666458  | 6.872016 | 9.283715  | 9.265998  |
|    |    | 21       | 22        | 23       | 24        | 25        |
| 21 | O  | 0.000000 |           |          |           |           |
| 22 | H  | 0.977074 | 0.000000  |          |           |           |
| 23 | C  | 3.965597 | 3.023229  | 0.000000 |           |           |
| 24 | C  | 3.958057 | 3.008738  | 1.468077 | 0.000000  |           |
| 25 | O  | 2.783424 | 1.808987  | 1.450410 | 1.447887  | 0.000000  |
| 26 | H  | 4.058830 | 3.227827  | 1.087383 | 2.208718  | 2.145833  |

|    |   |          |          |          |          |          |
|----|---|----------|----------|----------|----------|----------|
| 27 | H | 4.676762 | 3.752583 | 1.086594 | 2.216475 | 2.133400 |
| 28 | H | 4.656940 | 3.721588 | 2.191603 | 1.088925 | 2.108856 |
| 29 | C | 4.210224 | 3.423690 | 2.601943 | 1.503844 | 2.520207 |
| 30 | H | 4.083565 | 3.431967 | 3.428374 | 2.149498 | 2.906485 |
| 31 | H | 5.302322 | 4.504177 | 3.165950 | 2.135901 | 3.425859 |
| 32 | H | 3.947796 | 3.268461 | 2.717070 | 2.152002 | 2.742395 |
|    |   | 26       | 27       | 28       | 29       | 30       |
| 26 | H | 0.000000 |          |          |          |          |
| 27 | H | 1.852478 | 0.000000 |          |          |          |
| 28 | H | 3.120683 | 2.503283 | 0.000000 |          |          |
| 29 | C | 2.812799 | 3.540923 | 2.208210 | 0.000000 |          |
| 30 | H | 3.741880 | 4.339079 | 2.583332 | 1.094293 | 0.000000 |
| 31 | H | 3.335791 | 3.957792 | 2.531518 | 1.094414 | 1.769944 |
| 32 | H | 2.505400 | 3.772224 | 3.099843 | 1.091783 | 1.786732 |
|    |   | 31       | 32       |          |          |          |
| 31 | H | 0.000000 |          |          |          |          |
| 32 | H | 1.767895 | 0.000000 |          |          |          |

Stoichiometry C10H17BrN2O2

Framework group C1[X(C10H17BrN2O2)]

Deg. of freedom 90

Full point group C1 NOp 1

Largest Abelian subgroup C1 NOp 1

Largest concise Abelian subgroup C1 NOp 1

Standard orientation:

| Center<br>Number | Atomic<br>Number | Atomic<br>Type | Coordinates (Angstroms) |           |           |
|------------------|------------------|----------------|-------------------------|-----------|-----------|
|                  |                  |                | X                       | Y         | Z         |
| 1                | 6                | 0              | -2.712251               | 2.112979  | -0.439538 |
| 2                | 6                | 0              | -3.790130               | 1.348906  | -0.128495 |
| 3                | 7                | 0              | -3.322974               | 0.049111  | 0.039790  |
| 4                | 6                | 0              | -1.991729               | 0.038186  | -0.167775 |
| 5                | 7                | 0              | -1.605594               | 1.278056  | -0.464095 |
| 6                | 6                | 0              | -0.203507               | 1.676124  | -0.706739 |
| 7                | 6                | 0              | 0.454859                | 2.248203  | 0.560950  |
| 8                | 1                | 0              | -2.638905               | 3.165817  | -0.651386 |
| 9                | 1                | 0              | -4.825783               | 1.614707  | -0.020778 |
| 10               | 1                | 0              | 0.326809                | 0.781937  | -1.038252 |
| 11               | 1                | 0              | -0.199272               | 2.423986  | -1.500738 |
| 12               | 1                | 0              | -0.161020               | 3.063133  | 0.959791  |
| 13               | 1                | 0              | 0.511096                | 1.460125  | 1.320739  |
| 14               | 35               | 0              | 0.527137                | -2.055867 | -0.145838 |
| 15               | 1                | 0              | -1.297195               | -0.827251 | -0.111942 |
| 16               | 6                | 0              | -4.054236               | -1.125539 | 0.367140  |

|    |   |   |           |           |           |
|----|---|---|-----------|-----------|-----------|
| 17 | 6 | 0 | -5.363938 | -1.167617 | 0.573565  |
| 18 | 1 | 0 | -3.415373 | -1.997574 | 0.430724  |
| 19 | 1 | 0 | -5.828513 | -2.112668 | 0.818166  |
| 20 | 1 | 0 | -6.008660 | -0.300187 | 0.511119  |
| 21 | 8 | 0 | 1.718376  | 2.771970  | 0.241861  |
| 22 | 1 | 0 | 2.403616  | 2.093700  | 0.400194  |
| 23 | 6 | 0 | 3.794703  | -0.457240 | 1.235355  |
| 24 | 6 | 0 | 4.547375  | 0.009449  | 0.064486  |
| 25 | 8 | 0 | 3.724039  | 0.930500  | 0.819576  |
| 26 | 1 | 0 | 2.880879  | -1.025566 | 1.079362  |
| 27 | 1 | 0 | 4.309373  | -0.604223 | 2.180974  |
| 28 | 1 | 0 | 5.608328  | 0.211923  | 0.202832  |
| 29 | 6 | 0 | 4.117239  | -0.304211 | -1.341981 |
| 30 | 1 | 0 | 4.305308  | 0.547844  | -2.002366 |
| 31 | 1 | 0 | 4.691069  | -1.156233 | -1.719502 |
| 32 | 1 | 0 | 3.058776  | -0.569482 | -1.377744 |

-----

Rotational constants (GHZ):      0.6008827      0.2209802      0.1722610

Standard basis: 6-311++G(d,p) (5D, 7F)

There are    492 symmetry adapted cartesian basis functions of A    symmetry.

There are    475 symmetry adapted basis functions of A    symmetry.

    475 basis functions,    751 primitive gaussians,    492 cartesian basis functions

    71 alpha electrons      71 beta electrons

    nuclear repulsion energy      1307.2249257763 Hartrees.

NAtoms=    32 NActive=    32 NUniq=    32 SFac= 1.00D+00 NAtFMM=    60 NAOKFM=F

Big=F

Integral buffers will be    131072 words long.

Raffenetti 2 integral format.

Two-electron integral symmetry is turned on.

One-electron integrals computed using PRISM.

NBasis=    475 RedAO= T EigKep=    3.78D-06    NBF=    475

NBsUse=    475 1.00D-06 EigRej= -1.00D+00 NBFU=    475

Initial guess from the checkpoint file: "/home/suqian/liuwen/qianmengshijie/ohpo/ohpo.chk"

B after Tr=      0.000000      0.000000      0.000000

    Rot=    1.000000      0.000191      0.000013    -0.000004 Ang=    0.02 deg.

Requested convergence on RMS density matrix=1.00D-08 within 128 cycles.

Requested convergence on MAX density matrix=1.00D-06.

Requested convergence on                    energy=1.00D-06.

No special actions if energy rises.

SCF Done: E(RB3LYP) = -3225.52371272      A.U. after    9 cycles

    NFock=    9 Conv=0.41D-08      -V/T= 2.0018

Calling FoFJK, ICntrl=                    2127 FMM=F ISym2X=0 l1Cent= 0 IOpClX= 0 NMat=1 NMatS=1

NMatT=0.

\*\*\*\*\* Axes restored to original set \*\*\*\*\*



| Center<br>Number | Atomic<br>Number | Forces (Hartrees/Bohr) |              |              |
|------------------|------------------|------------------------|--------------|--------------|
|                  |                  | X                      | Y            | Z            |
| 1                | 6                | -0.000013276           | -0.000012054 | 0.000045104  |
| 2                | 6                | 0.000005459            | 0.000004215  | 0.000003067  |
| 3                | 7                | -0.000009548           | -0.000002306 | 0.000007834  |
| 4                | 6                | -0.000014426           | 0.000021756  | -0.000025590 |
| 5                | 7                | -0.000000664           | -0.000002664 | -0.000016842 |
| 6                | 6                | 0.000001207            | 0.000003732  | 0.000013108  |
| 7                | 6                | 0.000062494            | -0.000029993 | 0.000007830  |
| 8                | 1                | 0.000001126            | 0.000001534  | 0.000000264  |
| 9                | 1                | -0.000000236           | 0.000000664  | -0.000001140 |
| 10               | 1                | -0.000000649           | 0.000005932  | 0.000000532  |
| 11               | 1                | -0.000002926           | -0.000001089 | 0.000000987  |
| 12               | 1                | -0.000008152           | -0.000007247 | 0.000004212  |
| 13               | 1                | -0.000007640           | -0.000001627 | -0.000002739 |
| 14               | 35               | -0.000012918           | 0.000008033  | -0.000008206 |
| 15               | 1                | 0.000034414            | -0.000013635 | 0.000018750  |
| 16               | 6                | 0.000000298            | 0.000005583  | -0.000007517 |
| 17               | 6                | -0.000001656           | 0.000004120  | -0.000001188 |
| 18               | 1                | 0.000002481            | 0.000003310  | -0.000007144 |
| 19               | 1                | -0.000000006           | 0.000003350  | -0.000006006 |
| 20               | 1                | 0.000001296            | 0.000000395  | 0.000000154  |
| 21               | 8                | -0.000065128           | 0.000010261  | 0.000013813  |
| 22               | 1                | 0.000042354            | -0.000007464 | -0.000022110 |
| 23               | 6                | 0.000045265            | 0.000013662  | -0.000033657 |
| 24               | 6                | -0.000026446           | -0.000006860 | 0.000013170  |
| 25               | 8                | -0.000042553           | 0.000006566  | 0.000018311  |
| 26               | 1                | -0.000002760           | -0.000014651 | -0.000001175 |
| 27               | 1                | -0.000002684           | -0.000005711 | -0.000002451 |
| 28               | 1                | 0.000005194            | -0.000006202 | -0.000007042 |
| 29               | 6                | 0.000007830            | 0.000000010  | 0.000004191  |
| 30               | 1                | 0.000001627            | 0.000005824  | -0.000001053 |
| 31               | 1                | 0.000001505            | 0.000006111  | -0.000005570 |
| 32               | 1                | -0.000000883           | 0.000006443  | -0.000001900 |

Cartesian Forces: Max 0.000065128 RMS 0.000016370

GradGradGradGradGradGradGradGradGradGradGradGradGradGradGradGradGradGradGrad

Berny optimization.

Using GEDIIS/GDIIS optimizer.

FormGI is forming the generalized inverse of G from B-inverse, IUseBI=4.

GSVD: received Info= 1 from GESDD.

Internal Forces: Max 0.000042918 RMS 0.000007277

Search for a local minimum.

Step number 34 out of a maximum of 177

All quantities printed in internal units (Hartrees-Bohrs-Radians)

Mixed Optimization -- En-DIIS/RFO-DIIS

Swapping is turned off.

Update second derivatives using D2CorX and points 24 25 26 27 28  
29 30 31 32 33  
34

DE= -5.73D-07 DEPred=-1.39D-07 R= 4.13D+00

Trust test= 4.13D+00 RLast= 4.18D-02 DXMaxT set to 1.94D+00

ITU= 0 1 1 0 1 1 1 1 1 1 1 1 1 1 1 1 -1 1 1

ITU= 1 1 1 1 1 1 1 1 1 0 1 0 1 0

|                 |         |         |         |         |         |
|-----------------|---------|---------|---------|---------|---------|
| Eigenvalues --- | 0.00004 | 0.00060 | 0.00124 | 0.00234 | 0.00252 |
| Eigenvalues --- | 0.00328 | 0.00633 | 0.01007 | 0.01113 | 0.01313 |
| Eigenvalues --- | 0.01450 | 0.01649 | 0.01826 | 0.01956 | 0.02026 |
| Eigenvalues --- | 0.02168 | 0.02230 | 0.02321 | 0.02393 | 0.03021 |
| Eigenvalues --- | 0.03060 | 0.03136 | 0.03428 | 0.03577 | 0.03831 |
| Eigenvalues --- | 0.04413 | 0.04637 | 0.05213 | 0.05433 | 0.05592 |
| Eigenvalues --- | 0.05677 | 0.05934 | 0.06590 | 0.09296 | 0.09424 |
| Eigenvalues --- | 0.10422 | 0.11165 | 0.11472 | 0.11693 | 0.12942 |
| Eigenvalues --- | 0.13810 | 0.14159 | 0.14606 | 0.15904 | 0.15970 |
| Eigenvalues --- | 0.15997 | 0.16001 | 0.16002 | 0.16020 | 0.16031 |
| Eigenvalues --- | 0.16091 | 0.16955 | 0.19053 | 0.21233 | 0.22046 |
| Eigenvalues --- | 0.22838 | 0.23395 | 0.23926 | 0.24228 | 0.25035 |
| Eigenvalues --- | 0.27696 | 0.28579 | 0.30776 | 0.32052 | 0.33106 |
| Eigenvalues --- | 0.33346 | 0.34035 | 0.34199 | 0.34500 | 0.34838 |
| Eigenvalues --- | 0.35025 | 0.35685 | 0.35689 | 0.35857 | 0.36245 |
| Eigenvalues --- | 0.36436 | 0.36677 | 0.37200 | 0.37255 | 0.37600 |
| Eigenvalues --- | 0.38516 | 0.42169 | 0.42501 | 0.44883 | 0.45844 |
| Eigenvalues --- | 0.49499 | 0.54238 | 0.55195 | 0.56535 | 0.60401 |

Eigenvalue 1 is 3.86D-05 Eigenvector:

|   |         |          |          |          |          |
|---|---------|----------|----------|----------|----------|
|   | D52     | D54      | D53      | D55      | D25      |
| 1 | 0.50872 | -0.49702 | -0.49641 | -0.48828 | 0.04005  |
|   | D26     | D45      | D46      | D47      | D65      |
| 1 | 0.03547 | -0.02920 | -0.02795 | -0.02530 | -0.01706 |

En-DIIS/RFO-DIIS IScMMF= 0 using points: 34 33 32 31 30

RFO step: Lambda=-2.21950665D-08.

DidBck=F Rises=F RFO-DIIS coefs: 2.05039 -1.12205 -0.41259 0.84567 -

0.36143

Iteration 1 RMS(Cart)= 0.00124965 RMS(Int)= 0.00000241

Iteration 2 RMS(Cart)= 0.00000399 RMS(Int)= 0.00000140

Iteration 3 RMS(Cart)= 0.00000000 RMS(Int)= 0.00000140

|          |       |        |         |         |         |       |
|----------|-------|--------|---------|---------|---------|-------|
| Variable | Old X | -DE/DX | Delta X | Delta X | Delta X | New X |
|----------|-------|--------|---------|---------|---------|-------|

|     |         |          | (Linear) | (Quad)   | (Total)  |         |
|-----|---------|----------|----------|----------|----------|---------|
| R1  | 2.56501 | 0.00000  | -0.00001 | 0.00000  | -0.00001 | 2.56500 |
| R2  | 2.62011 | 0.00000  | 0.00003  | -0.00001 | 0.00002  | 2.62013 |
| R3  | 2.03418 | 0.00000  | 0.00000  | 0.00000  | 0.00000  | 2.03418 |
| R4  | 2.62938 | 0.00000  | 0.00000  | 0.00000  | 0.00001  | 2.62939 |
| R5  | 2.03076 | 0.00000  | 0.00000  | 0.00000  | 0.00000  | 2.03076 |
| R6  | 2.54617 | 0.00001  | 0.00001  | -0.00001 | 0.00000  | 2.54616 |
| R7  | 2.68694 | 0.00000  | 0.00001  | 0.00000  | 0.00001  | 2.68695 |
| R8  | 2.51709 | 0.00000  | -0.00004 | -0.00001 | -0.00005 | 2.51704 |
| R9  | 2.09962 | 0.00001  | -0.00005 | 0.00004  | -0.00001 | 2.09961 |
| R10 | 2.79218 | 0.00001  | 0.00005  | -0.00002 | 0.00002  | 2.79221 |
| R11 | 2.90782 | 0.00001  | 0.00002  | 0.00002  | 0.00004  | 2.90786 |
| R12 | 2.06206 | 0.00000  | 0.00000  | 0.00000  | 0.00000  | 2.06205 |
| R13 | 2.06123 | 0.00000  | 0.00001  | -0.00001 | 0.00000  | 2.06123 |
| R14 | 2.07224 | 0.00001  | 0.00000  | 0.00000  | -0.00001 | 2.07223 |
| R15 | 2.07139 | 0.00000  | 0.00002  | 0.00000  | 0.00002  | 2.07141 |
| R16 | 2.65412 | -0.00004 | -0.00010 | -0.00001 | -0.00011 | 2.65402 |
| R17 | 4.15690 | -0.00001 | 0.00004  | -0.00025 | -0.00021 | 4.15669 |
| R18 | 8.46601 | 0.00000  | -0.00124 | 0.00006  | -0.00118 | 8.46483 |
| R19 | 2.50679 | 0.00000  | 0.00000  | 0.00000  | 0.00000  | 2.50679 |
| R20 | 2.04635 | 0.00000  | 0.00000  | 0.00000  | 0.00000  | 2.04635 |
| R21 | 2.04299 | 0.00000  | 0.00000  | 0.00000  | 0.00000  | 2.04298 |
| R22 | 2.04580 | 0.00000  | 0.00000  | 0.00000  | 0.00000  | 2.04580 |
| R23 | 1.84640 | 0.00002  | 0.00002  | 0.00000  | 0.00001  | 1.84641 |
| R24 | 3.41849 | 0.00000  | 0.00007  | 0.00006  | 0.00012  | 3.41861 |
| R25 | 2.77426 | 0.00000  | 0.00003  | -0.00003 | 0.00000  | 2.77426 |
| R26 | 2.74088 | 0.00000  | -0.00008 | 0.00002  | -0.00006 | 2.74082 |
| R27 | 2.05486 | 0.00000  | 0.00001  | -0.00002 | -0.00001 | 2.05485 |
| R28 | 2.05336 | 0.00000  | 0.00000  | -0.00001 | -0.00001 | 2.05335 |
| R29 | 2.73611 | 0.00001  | -0.00004 | 0.00001  | -0.00002 | 2.73609 |
| R30 | 2.05777 | 0.00001  | 0.00001  | -0.00001 | 0.00000  | 2.05777 |
| R31 | 2.84185 | 0.00000  | -0.00003 | 0.00000  | -0.00003 | 2.84182 |
| R32 | 2.06791 | 0.00000  | 0.00001  | -0.00001 | 0.00000  | 2.06791 |
| R33 | 2.06814 | 0.00000  | 0.00001  | -0.00001 | 0.00000  | 2.06815 |
| R34 | 2.06317 | 0.00000  | 0.00001  | -0.00001 | 0.00000  | 2.06317 |
| A1  | 1.87435 | 0.00000  | -0.00002 | -0.00001 | -0.00002 | 1.87433 |
| A2  | 2.27809 | 0.00000  | 0.00001  | 0.00000  | 0.00001  | 2.27810 |
| A3  | 2.13070 | 0.00000  | 0.00001  | 0.00001  | 0.00002  | 2.13072 |
| A4  | 1.86184 | 0.00000  | 0.00002  | 0.00000  | 0.00002  | 1.86186 |
| A5  | 2.27712 | 0.00000  | -0.00002 | 0.00000  | -0.00002 | 2.27710 |
| A6  | 2.14420 | 0.00000  | 0.00000  | 0.00001  | 0.00001  | 2.14421 |
| A7  | 1.89723 | 0.00000  | -0.00002 | 0.00000  | -0.00002 | 1.89721 |
| A8  | 2.24838 | 0.00000  | 0.00003  | 0.00001  | 0.00004  | 2.24841 |
| A9  | 2.13757 | 0.00000  | 0.00000  | -0.00001 | -0.00001 | 2.13755 |

|     |         |          |          |          |          |         |
|-----|---------|----------|----------|----------|----------|---------|
| A10 | 1.88930 | 0.00000  | 0.00002  | 0.00000  | 0.00002  | 1.88932 |
| A11 | 2.23470 | 0.00001  | -0.00006 | 0.00000  | -0.00006 | 2.23464 |
| A12 | 2.15918 | -0.00001 | 0.00003  | 0.00000  | 0.00004  | 2.15922 |
| A13 | 1.90203 | 0.00000  | 0.00000  | 0.00001  | 0.00001  | 1.90204 |
| A14 | 2.21189 | 0.00001  | 0.00003  | 0.00002  | 0.00006  | 2.21194 |
| A15 | 2.16808 | -0.00001 | -0.00001 | -0.00003 | -0.00004 | 2.16804 |
| A16 | 1.95075 | 0.00001  | 0.00003  | 0.00000  | 0.00003  | 1.95078 |
| A17 | 1.86533 | 0.00000  | -0.00005 | -0.00001 | -0.00007 | 1.86526 |
| A18 | 1.88383 | 0.00000  | 0.00001  | 0.00002  | 0.00002  | 1.88385 |
| A19 | 1.92518 | 0.00000  | 0.00005  | 0.00003  | 0.00009  | 1.92526 |
| A20 | 1.92105 | -0.00001 | -0.00006 | -0.00001 | -0.00008 | 1.92097 |
| A21 | 1.91645 | 0.00000  | 0.00003  | -0.00003 | 0.00000  | 1.91645 |
| A22 | 1.91307 | -0.00001 | -0.00003 | -0.00001 | -0.00003 | 1.91304 |
| A23 | 1.90255 | 0.00000  | 0.00009  | -0.00001 | 0.00008  | 1.90263 |
| A24 | 1.91387 | 0.00001  | 0.00005  | 0.00007  | 0.00012  | 1.91400 |
| A25 | 1.88705 | 0.00000  | -0.00006 | -0.00003 | -0.00009 | 1.88696 |
| A26 | 1.88678 | 0.00000  | -0.00012 | -0.00001 | -0.00013 | 1.88665 |
| A27 | 1.95999 | 0.00000  | 0.00006  | -0.00002 | 0.00003  | 1.96002 |
| A28 | 1.78869 | -0.00001 | -0.00011 | -0.00022 | -0.00033 | 1.78836 |
| A29 | 2.83280 | 0.00003  | 0.00026  | 0.00035  | 0.00060  | 2.83340 |
| A30 | 2.17706 | 0.00000  | -0.00002 | 0.00000  | -0.00002 | 2.17704 |
| A31 | 1.95560 | 0.00000  | -0.00001 | -0.00001 | -0.00002 | 1.95558 |
| A32 | 2.15052 | 0.00000  | 0.00003  | 0.00001  | 0.00004  | 2.15056 |
| A33 | 2.07968 | 0.00000  | 0.00002  | 0.00000  | 0.00002  | 2.07970 |
| A34 | 2.15746 | 0.00000  | -0.00003 | 0.00000  | -0.00002 | 2.15744 |
| A35 | 2.04604 | 0.00000  | 0.00000  | 0.00000  | 0.00001  | 2.04605 |
| A36 | 1.91264 | 0.00001  | 0.00003  | -0.00001 | 0.00001  | 1.91265 |
| A37 | 3.05042 | 0.00002  | -0.00008 | 0.00038  | 0.00031  | 3.05073 |
| A38 | 2.07441 | -0.00001 | -0.00014 | -0.00001 | -0.00015 | 2.07426 |
| A39 | 2.08776 | 0.00001  | 0.00010  | -0.00004 | 0.00005  | 2.08781 |
| A40 | 2.00204 | -0.00001 | -0.00017 | 0.00001  | -0.00016 | 2.00188 |
| A41 | 1.98447 | 0.00000  | 0.00005  | 0.00006  | 0.00011  | 1.98458 |
| A42 | 2.04003 | 0.00000  | 0.00009  | 0.00000  | 0.00009  | 2.04012 |
| A43 | 2.04576 | -0.00001 | -0.00001 | -0.00005 | -0.00006 | 2.04570 |
| A44 | 2.13290 | 0.00002  | 0.00006  | -0.00001 | 0.00005  | 2.13295 |
| A45 | 1.94927 | 0.00000  | -0.00008 | 0.00007  | -0.00001 | 1.94926 |
| A46 | 2.04629 | 0.00001  | 0.00009  | 0.00003  | 0.00011  | 2.04640 |
| A47 | 2.02226 | 0.00000  | -0.00003 | 0.00000  | -0.00004 | 2.02222 |
| A48 | 1.42812 | 0.00000  | 0.00098  | 0.00031  | 0.00128  | 1.42940 |
| A49 | 0.99887 | 0.00002  | 0.00071  | -0.00003 | 0.00069  | 0.99955 |
| A50 | 2.37064 | 0.00002  | 0.00151  | 0.00041  | 0.00192  | 2.37256 |
| A51 | 2.35069 | 0.00000  | 0.00029  | -0.00005 | 0.00024  | 2.35093 |
| A52 | 1.93141 | 0.00000  | 0.00005  | -0.00003 | 0.00002  | 1.93143 |
| A53 | 1.91243 | 0.00000  | -0.00005 | 0.00000  | -0.00005 | 1.91238 |

|     |          |          |          |          |          |          |
|-----|----------|----------|----------|----------|----------|----------|
| A54 | 1.93757  | 0.00000  | 0.00006  | 0.00000  | 0.00006  | 1.93763  |
| A55 | 1.88378  | 0.00000  | -0.00005 | 0.00001  | -0.00004 | 1.88374  |
| A56 | 1.91350  | 0.00000  | -0.00001 | 0.00002  | 0.00001  | 1.91351  |
| A57 | 1.88375  | 0.00000  | -0.00001 | -0.00001 | -0.00001 | 1.88373  |
| A58 | 3.77881  | 0.00000  | 0.00126  | 0.00026  | 0.00152  | 3.78033  |
| A59 | 5.04628  | 0.00000  | -0.00098 | -0.00070 | -0.00168 | 5.04460  |
| D1  | 0.00452  | -0.00001 | -0.00004 | 0.00000  | -0.00004 | 0.00448  |
| D2  | -3.13076 | -0.00001 | -0.00026 | -0.00007 | -0.00033 | -3.13109 |
| D3  | 3.13603  | 0.00000  | 0.00031  | 0.00007  | 0.00037  | 3.13640  |
| D4  | 0.00075  | 0.00000  | 0.00008  | 0.00000  | 0.00008  | 0.00083  |
| D5  | -0.00696 | 0.00001  | 0.00008  | 0.00002  | 0.00010  | -0.00686 |
| D6  | -3.09767 | 0.00000  | -0.00043 | 0.00002  | -0.00041 | -3.09808 |
| D7  | -3.13950 | 0.00000  | -0.00023 | -0.00004 | -0.00027 | -3.13977 |
| D8  | 0.05297  | -0.00001 | -0.00073 | -0.00005 | -0.00078 | 0.05219  |
| D9  | -0.00062 | 0.00000  | -0.00002 | -0.00002 | -0.00004 | -0.00065 |
| D10 | -3.13665 | 0.00000  | -0.00003 | -0.00004 | -0.00007 | -3.13673 |
| D11 | 3.13526  | 0.00000  | 0.00018  | 0.00005  | 0.00023  | 3.13549  |
| D12 | -0.00078 | 0.00000  | 0.00017  | 0.00002  | 0.00019  | -0.00059 |
| D13 | -0.00372 | 0.00000  | 0.00007  | 0.00003  | 0.00010  | -0.00362 |
| D14 | 3.13697  | 0.00001  | 0.00019  | 0.00005  | 0.00024  | 3.13721  |
| D15 | 3.13275  | 0.00000  | 0.00008  | 0.00005  | 0.00014  | 3.13288  |
| D16 | -0.00975 | 0.00001  | 0.00021  | 0.00007  | 0.00028  | -0.00948 |
| D17 | 0.00030  | 0.00000  | 0.00006  | 0.00031  | 0.00037  | 0.00066  |
| D18 | -3.14146 | 0.00000  | 0.00009  | 0.00029  | 0.00038  | -3.14108 |
| D19 | -3.13506 | 0.00000  | 0.00005  | 0.00028  | 0.00032  | -3.13473 |
| D20 | 0.00637  | 0.00000  | 0.00008  | 0.00026  | 0.00034  | 0.00671  |
| D21 | 0.00657  | -0.00001 | -0.00010 | -0.00003 | -0.00013 | 0.00645  |
| D22 | 3.09885  | 0.00000  | 0.00040  | -0.00003 | 0.00037  | 3.09923  |
| D23 | -3.13416 | -0.00001 | -0.00021 | -0.00005 | -0.00026 | -3.13442 |
| D24 | -0.04188 | -0.00001 | 0.00028  | -0.00004 | 0.00024  | -0.04164 |
| D25 | -3.11420 | -0.00001 | 0.00388  | 0.00073  | 0.00461  | -3.10959 |
| D26 | 0.02636  | 0.00000  | 0.00402  | 0.00075  | 0.00477  | 0.03113  |
| D27 | 1.41052  | 0.00000  | -0.00105 | -0.00034 | -0.00139 | 1.40913  |
| D28 | -2.76480 | 0.00000  | -0.00100 | -0.00031 | -0.00131 | -2.76610 |
| D29 | -0.70434 | 0.00000  | -0.00099 | -0.00034 | -0.00133 | -0.70567 |
| D30 | -1.67287 | 0.00000  | -0.00163 | -0.00035 | -0.00198 | -1.67485 |
| D31 | 0.43499  | 0.00000  | -0.00158 | -0.00032 | -0.00190 | 0.43309  |
| D32 | 2.49545  | 0.00000  | -0.00157 | -0.00035 | -0.00192 | 2.49353  |
| D33 | -0.93860 | 0.00000  | -0.00002 | -0.00015 | -0.00017 | -0.93877 |
| D34 | 1.12368  | -0.00001 | -0.00006 | -0.00019 | -0.00025 | 1.12344  |
| D35 | -3.00729 | 0.00000  | 0.00011  | -0.00018 | -0.00007 | -3.00736 |
| D36 | -3.01126 | 0.00000  | -0.00001 | -0.00015 | -0.00016 | -3.01142 |
| D37 | -0.94898 | 0.00000  | -0.00005 | -0.00019 | -0.00024 | -0.94922 |
| D38 | 1.20324  | 0.00000  | 0.00012  | -0.00018 | -0.00006 | 1.20317  |



Input orientation:

| Center<br>Number | Atomic<br>Number | Atomic<br>Type | Coordinates (Angstroms) |           |           |
|------------------|------------------|----------------|-------------------------|-----------|-----------|
|                  |                  |                | X                       | Y         | Z         |
| 1                | 6                | 0              | -1.377528               | -1.908512 | -0.259651 |
| 2                | 6                | 0              | -2.509026               | -1.168407 | -0.139956 |
| 3                | 7                | 0              | -2.111081               | 0.112342  | 0.230654  |
| 4                | 6                | 0              | -0.767638               | 0.135275  | 0.330878  |
| 5                | 7                | 0              | -0.307018               | -1.080767 | 0.042459  |
| 6                | 6                | 0              | 1.126233                | -1.436848 | -0.004616 |
| 7                | 6                | 0              | 1.683704                | -1.371854 | -1.437382 |
| 8                | 1                | 0              | -1.243345               | -2.943548 | -0.523124 |
| 9                | 1                | 0              | -3.539008               | -1.441386 | -0.279423 |
| 10               | 1                | 0              | 1.650065                | -0.727508 | 0.638143  |
| 11               | 1                | 0              | 1.234790                | -2.446452 | 0.393709  |
| 12               | 1                | 0              | 1.065318                | -1.987861 | -2.101175 |
| 13               | 1                | 0              | 1.636797                | -0.335771 | -1.792156 |
| 14               | 35               | 0              | 1.653145                | 2.228819  | 1.028907  |
| 15               | 1                | 0              | -0.115937               | 0.993272  | 0.602151  |
| 16               | 6                | 0              | -2.915360               | 1.256551  | 0.486869  |
| 17               | 6                | 0              | -4.239361               | 1.282558  | 0.409140  |
| 18               | 1                | 0              | -2.319906               | 2.119672  | 0.757228  |
| 19               | 1                | 0              | -4.761586               | 2.204545  | 0.623616  |
| 20               | 1                | 0              | -4.840874               | 0.423593  | 0.140140  |
| 21               | 8                | 0              | 2.991233                | -1.884051 | -1.459438 |
| 22               | 1                | 0              | 3.631296                | -1.152531 | -1.360030 |
| 23               | 6                | 0              | 4.836615                | 1.611118  | -1.122182 |
| 24               | 6                | 0              | 5.713034                | 0.752656  | -0.315843 |
| 25               | 8                | 0              | 4.858576                | 0.176268  | -1.332711 |
| 26               | 1                | 0              | 3.920245                | 1.991041  | -0.676852 |
| 27               | 1                | 0              | 5.254374                | 2.180315  | -1.948116 |
| 28               | 1                | 0              | 6.763347                | 0.706926  | -0.599591 |
| 29               | 6                | 0              | 5.404956                | 0.412520  | 1.116251  |
| 30               | 1                | 0              | 5.686815                | -0.621603 | 1.336754  |
| 31               | 1                | 0              | 5.978484                | 1.066906  | 1.780021  |
| 32               | 1                | 0              | 4.345107                | 0.558335  | 1.334082  |

Distance matrix (angstroms):

|     | 1        | 2        | 3        | 4        | 5 |
|-----|----------|----------|----------|----------|---|
| 1 C | 0.000000 |          |          |          |   |
| 2 C | 1.357339 | 0.000000 |          |          |   |
| 3 N | 2.205073 | 1.391413 | 0.000000 |          |   |
| 4 C | 2.213087 | 2.225692 | 1.347372 | 0.000000 |   |

|    |    |          |          |          |          |          |
|----|----|----------|----------|----------|----------|----------|
| 5  | N  | 1.386515 | 2.211289 | 2.171076 | 1.331959 | 0.000000 |
| 6  | C  | 2.560533 | 3.647669 | 3.596602 | 2.484125 | 1.477572 |
| 7  | C  | 3.323581 | 4.393596 | 4.402905 | 3.377463 | 2.497525 |
| 8  | H  | 1.076440 | 2.213570 | 3.264906 | 3.230289 | 2.160219 |
| 9  | H  | 2.211468 | 1.074630 | 2.170996 | 3.246354 | 3.267937 |
| 10 | H  | 3.371516 | 4.254159 | 3.875257 | 2.585362 | 2.076007 |
| 11 | H  | 2.745991 | 3.991787 | 4.215314 | 3.267872 | 2.089413 |
| 12 | H  | 3.060230 | 4.158584 | 4.465175 | 3.712454 | 2.702090 |
| 13 | H  | 3.729375 | 4.539923 | 4.282424 | 3.241985 | 2.774751 |
| 14 | Br | 5.287993 | 5.498277 | 4.391592 | 3.275723 | 3.970979 |
| 15 | H  | 3.279430 | 3.309147 | 2.212385 | 1.111063 | 2.156711 |
| 16 | C  | 3.597199 | 2.537408 | 1.421873 | 2.427818 | 3.530439 |
| 17 | C  | 4.338236 | 3.050048 | 2.435331 | 3.657218 | 4.602508 |
| 18 | H  | 4.260092 | 3.413527 | 2.085728 | 2.555218 | 3.847781 |
| 19 | H  | 5.399003 | 4.127211 | 3.399545 | 4.507681 | 5.565446 |
| 20 | H  | 4.194438 | 2.837328 | 2.748970 | 4.087879 | 4.777917 |
| 21 | O  | 4.530581 | 5.701406 | 5.733725 | 4.627313 | 3.712064 |
| 22 | H  | 5.183692 | 6.260383 | 6.091394 | 4.885513 | 4.181201 |
| 23 | C  | 7.193561 | 7.915110 | 7.235121 | 5.974709 | 5.921114 |
| 24 | C  | 7.573708 | 8.445336 | 7.869272 | 6.542058 | 6.303241 |
| 25 | O  | 6.662338 | 7.583691 | 7.143131 | 5.867154 | 5.491319 |
| 26 | H  | 6.591431 | 7.183724 | 6.382004 | 5.141560 | 5.274766 |
| 27 | H  | 7.971922 | 8.646026 | 7.954463 | 6.755785 | 6.747305 |
| 28 | H  | 8.557448 | 9.471275 | 8.932990 | 7.609750 | 7.321075 |
| 29 | C  | 7.299478 | 8.167527 | 7.573982 | 6.228531 | 6.000798 |
| 30 | H  | 7.355922 | 8.345746 | 7.910077 | 6.576064 | 6.149151 |
| 31 | H  | 8.192942 | 8.984474 | 8.291731 | 6.962623 | 6.865796 |
| 32 | H  | 6.432252 | 7.220358 | 6.564970 | 5.227385 | 5.098746 |
|    |    | 6        | 7        | 8        | 9        | 10       |
| 6  | C  | 0.000000 |          |          |          |          |
| 7  | C  | 1.538771 | 0.000000 |          |          |          |
| 8  | H  | 2.855503 | 3.445824 | 0.000000 |          |          |
| 9  | H  | 4.673330 | 5.349992 | 2.754259 | 0.000000 |          |
| 10 | H  | 1.091192 | 2.173503 | 3.825075 | 5.317708 | 0.000000 |
| 11 | H  | 1.090756 | 2.170065 | 2.688651 | 4.924673 | 1.785209 |
| 12 | H  | 2.168614 | 1.096579 | 2.955251 | 4.981689 | 3.071527 |
| 13 | H  | 2.160635 | 1.096144 | 4.087317 | 5.504516 | 2.461703 |
| 14 | Br | 3.844856 | 4.364443 | 6.127956 | 6.491578 | 2.982043 |
| 15 | H  | 2.795824 | 3.604472 | 4.246863 | 4.292103 | 2.465997 |
| 16 | C  | 4.881642 | 5.635835 | 4.632122 | 2.873153 | 4.980208 |
| 17 | C  | 6.029591 | 6.748203 | 5.263573 | 2.895598 | 6.227210 |
| 18 | H  | 5.010500 | 5.747691 | 5.332399 | 3.904099 | 4.886848 |
| 19 | H  | 6.951318 | 7.653763 | 6.340023 | 3.950062 | 7.050277 |
| 20 | H  | 6.252085 | 6.948548 | 4.971898 | 2.312799 | 6.611001 |



|    |    |          |          |          |           |          |
|----|----|----------|----------|----------|-----------|----------|
| 21 | O  | 2.407223 | 1.404445 | 4.464401 | 6.650747  | 2.745208 |
| 22 | H  | 2.862398 | 1.961429 | 5.260255 | 7.257024  | 2.845806 |
| 23 | C  | 4.930110 | 4.351818 | 7.620352 | 8.954277  | 4.326894 |
| 24 | C  | 5.092105 | 4.691151 | 7.880109 | 9.508703  | 4.428171 |
| 25 | O  | 4.277424 | 3.533759 | 6.900878 | 8.616590  | 3.872417 |
| 26 | H  | 4.473122 | 4.109694 | 7.143981 | 8.220703  | 3.778020 |
| 27 | H  | 5.822594 | 5.062454 | 8.396721 | 9.655300  | 5.304264 |
| 28 | H  | 6.060265 | 5.552117 | 8.799939 | 10.528830 | 5.453003 |
| 29 | C  | 4.794160 | 4.853118 | 7.625658 | 9.240095  | 3.953158 |
| 30 | H  | 4.823153 | 4.927840 | 7.541730 | 9.402121  | 4.098124 |
| 31 | H  | 5.744393 | 5.894436 | 8.575724 | 10.055620 | 4.822761 |
| 32 | H  | 4.016717 | 4.299966 | 6.851511 | 8.292258  | 3.066101 |
|    |    | 11       | 12       | 13       | 14        | 15       |
| 11 | H  | 0.000000 |          |          |           |          |
| 12 | H  | 2.542336 | 0.000000 |          |           |          |
| 13 | H  | 3.065060 | 1.775241 | 0.000000 |           |          |
| 14 | Br | 4.736735 | 5.284254 | 3.812583 | 0.000000  |          |
| 15 | H  | 3.701299 | 4.194101 | 3.251328 | 2.199625  | 0.000000 |
| 16 | C  | 5.562792 | 5.750650 | 5.334002 | 4.702163  | 2.814138 |
| 17 | C  | 6.623601 | 6.718403 | 6.480272 | 6.000095  | 4.138063 |
| 18 | H  | 5.798060 | 6.041691 | 5.308866 | 3.983824  | 2.479981 |
| 19 | H  | 7.592177 | 7.678122 | 7.295784 | 6.427567  | 4.801010 |
| 20 | H  | 6.724221 | 6.761783 | 6.802252 | 6.798605  | 4.781529 |
| 21 | O  | 2.614487 | 2.032671 | 2.083835 | 4.989794  | 4.709951 |
| 22 | H  | 3.239302 | 2.798448 | 2.198148 | 4.588424  | 4.743035 |
| 23 | C  | 5.633378 | 5.304126 | 3.805006 | 3.891430  | 5.280419 |
| 24 | C  | 5.549093 | 5.683230 | 4.469886 | 4.524391  | 5.905719 |
| 25 | O  | 4.794894 | 4.434274 | 3.294409 | 4.479397  | 5.399719 |
| 26 | H  | 5.296142 | 5.100094 | 3.445590 | 2.847086  | 4.349960 |
| 27 | H  | 6.561111 | 5.911455 | 4.409294 | 4.672673  | 6.062439 |
| 28 | H  | 6.441691 | 6.479519 | 5.365719 | 5.575153  | 6.989330 |
| 29 | C  | 5.107453 | 5.911523 | 4.818484 | 4.169251  | 5.575108 |
| 30 | H  | 4.903054 | 5.919818 | 5.125858 | 4.948755  | 6.067899 |
| 31 | H  | 6.063678 | 6.966669 | 5.794669 | 4.541231  | 6.207638 |
| 32 | H  | 4.425734 | 5.388981 | 4.231752 | 3.182814  | 4.541564 |
|    |    | 16       | 17       | 18       | 19        | 20       |
| 16 | C  | 0.000000 |          |          |           |          |
| 17 | C  | 1.326536 | 0.000000 |          |           |          |
| 18 | H  | 1.082884 | 2.122789 | 0.000000 |           |          |
| 19 | H  | 2.079890 | 1.081100 | 2.446805 | 0.000000  |          |
| 20 | H  | 2.126416 | 1.082589 | 3.100446 | 1.847113  | 0.000000 |
| 21 | O  | 6.967017 | 8.111750 | 7.010820 | 9.008991  | 8.320203 |
| 22 | H  | 7.216191 | 8.426557 | 7.113852 | 9.254473  | 8.747133 |
| 23 | C  | 7.925142 | 9.210116 | 7.416643 | 9.773711  | 9.831453 |

|    |   |          |           |          |           |           |
|----|---|----------|-----------|----------|-----------|-----------|
| 24 | C | 8.680290 | 9.992826  | 8.218780 | 10.616413 | 10.568878 |
| 25 | O | 8.056795 | 9.329007  | 7.724976 | 10.024401 | 9.813755  |
| 26 | H | 6.972748 | 8.261991  | 6.404109 | 8.781286  | 8.937649  |
| 27 | H | 8.574791 | 9.823117  | 8.043151 | 10.340882 | 10.457577 |
| 28 | H | 9.754991 | 11.063837 | 9.292055 | 11.686025 | 11.631226 |
| 29 | C | 8.386665 | 9.709265  | 7.919391 | 10.335018 | 10.292227 |
| 30 | H | 8.845743 | 10.149644 | 8.482807 | 10.847339 | 10.646904 |
| 31 | H | 8.989364 | 10.311653 | 8.427200 | 10.861887 | 10.961824 |
| 32 | H | 7.343000 | 8.664474  | 6.869710 | 9.281520  | 9.264227  |
|    |   | 21       | 22        | 23       | 24        | 25        |
| 21 | O | 0.000000 |           |          |           |           |
| 22 | H | 0.977079 | 0.000000  |          |           |           |
| 23 | C | 3.966784 | 3.024420  | 0.000000 |           |           |
| 24 | C | 3.958312 | 3.008936  | 1.468077 | 0.000000  |           |
| 25 | O | 2.783512 | 1.809052  | 1.450379 | 1.447876  | 0.000000  |
| 26 | H | 4.061014 | 3.229902  | 1.087380 | 2.208624  | 2.145697  |
| 27 | H | 4.677572 | 3.753410  | 1.086589 | 2.216505  | 2.133444  |
| 28 | H | 4.656323 | 3.720966  | 2.191566 | 1.088926  | 2.108843  |
| 29 | C | 4.211231 | 3.424503  | 2.601966 | 1.503828  | 2.520270  |
| 30 | H | 4.083947 | 3.432154  | 3.428447 | 2.149500  | 2.906651  |
| 31 | H | 5.303387 | 4.505010  | 3.165882 | 2.135851  | 3.425862  |
| 32 | H | 3.949934 | 3.270294  | 2.717198 | 2.152031  | 2.742519  |
|    |   | 26       | 27        | 28       | 29        | 30        |
| 26 | H | 0.000000 |           |          |           |           |
| 27 | H | 1.852522 | 0.000000  |          |           |           |
| 28 | H | 3.120601 | 2.503277  | 0.000000 |           |           |
| 29 | C | 2.812705 | 3.540920  | 2.208170 | 0.000000  |           |
| 30 | H | 3.741829 | 4.339138  | 2.583281 | 1.094293  | 0.000000  |
| 31 | H | 3.335655 | 3.957653  | 2.531432 | 1.094416  | 1.769921  |
| 32 | H | 2.505396 | 3.772321  | 3.099848 | 1.091784  | 1.786741  |
|    |   | 31       | 32        |          |           |           |
| 31 | H | 0.000000 |           |          |           |           |
| 32 | H | 1.767888 | 0.000000  |          |           |           |

Stoichiometry C10H17BrN2O2

Framework group C1[X(C10H17BrN2O2)]

Deg. of freedom 90

Full point group C1 NOp 1

Largest Abelian subgroup C1 NOp 1

Largest concise Abelian subgroup C1 NOp 1

Standard orientation:

```

-----
Center      Atomic      Atomic      Coordinates (Angstroms)
Number      Number      Type        X           Y           Z
-----

```

|    |    |   |           |           |           |
|----|----|---|-----------|-----------|-----------|
| 1  | 6  | 0 | -2.711678 | 2.113406  | -0.438522 |
| 2  | 6  | 0 | -3.789603 | 1.349182  | -0.128024 |
| 3  | 7  | 0 | -3.322540 | 0.049238  | 0.039397  |
| 4  | 6  | 0 | -1.991300 | 0.038381  | -0.168187 |
| 5  | 7  | 0 | -1.605065 | 1.278419  | -0.463559 |
| 6  | 6  | 0 | -0.202967 | 1.676406  | -0.706345 |
| 7  | 6  | 0 | 0.455145  | 2.249857  | 0.560880  |
| 8  | 1  | 0 | -2.638220 | 3.166438  | -0.649359 |
| 9  | 1  | 0 | -4.825203 | 1.615032  | -0.019925 |
| 10 | 1  | 0 | 0.327433  | 0.781928  | -1.036927 |
| 11 | 1  | 0 | -0.198647 | 2.423511  | -1.501056 |
| 12 | 1  | 0 | -0.160817 | 3.065236  | 0.958666  |
| 13 | 1  | 0 | 0.511154  | 1.462679  | 1.321633  |
| 14 | 35 | 0 | 0.526846  | -2.056555 | -0.144835 |
| 15 | 1  | 0 | -1.296895 | -0.827201 | -0.113129 |
| 16 | 6  | 0 | -4.053841 | -1.125599 | 0.366015  |
| 17 | 6  | 0 | -5.363595 | -1.167800 | 0.572080  |
| 18 | 1  | 0 | -3.414940 | -1.997625 | 0.429365  |
| 19 | 1  | 0 | -5.828227 | -2.112960 | 0.816146  |
| 20 | 1  | 0 | -6.008304 | -0.300347 | 0.509825  |
| 21 | 8  | 0 | 1.718668  | 2.773375  | 0.241655  |
| 22 | 1  | 0 | 2.403777  | 2.094873  | 0.399591  |
| 23 | 6  | 0 | 3.795113  | -0.457265 | 1.234992  |
| 24 | 6  | 0 | 4.546595  | 0.009451  | 0.063369  |
| 25 | 8  | 0 | 3.723098  | 0.930199  | 0.818631  |
| 26 | 1  | 0 | 2.881568  | -1.026241 | 1.079759  |
| 27 | 1  | 0 | 4.310538  | -0.603535 | 2.180306  |
| 28 | 1  | 0 | 5.607492  | 0.212765  | 0.200923  |
| 29 | 6  | 0 | 4.115838  | -0.305262 | -1.342654 |
| 30 | 1  | 0 | 4.302944  | 0.546540  | -2.003638 |
| 31 | 1  | 0 | 4.690078  | -1.157077 | -1.720022 |
| 32 | 1  | 0 | 3.057551  | -0.571331 | -1.377699 |

-----  
Rotational constants (GHZ):      0.6005774      0.2210490      0.1722658

Standard basis: 6-311++G(d,p) (5D, 7F)

There are 492 symmetry adapted cartesian basis functions of A symmetry.

There are 475 symmetry adapted basis functions of A symmetry.

475 basis functions, 751 primitive gaussians, 492 cartesian basis functions

71 alpha electrons      71 beta electrons

nuclear repulsion energy      1307.2102452976 Hartrees.

NAtoms= 32 NActive= 32 NUniq= 32 SFac= 1.00D+00 NAtFMM= 60 NAOKFM=F

Big=F

Integral buffers will be 131072 words long.

Raffenetti 2 integral format.

Two-electron integral symmetry is turned on.

One-electron integrals computed using PRISM.

NBasis= 475 RedAO= T EigKep= 3.78D-06 NBF= 475

NBsUse= 475 1.00D-06 EigRej= -1.00D+00 NBFU= 475

Initial guess from the checkpoint file: "/home/suqian/liuwen/qianmengshijie/ohpo/ohpo.chk"

B after Tr= 0.000000 0.000000 0.000000

Rot= 1.000000 0.000061 -0.000013 0.000029 Ang= 0.01 deg.

Requested convergence on RMS density matrix=1.00D-08 within 128 cycles.

Requested convergence on MAX density matrix=1.00D-06.

Requested convergence on energy=1.00D-06.

No special actions if energy rises.

SCF Done: E(RB3LYP) = -3225.52371282 A.U. after 8 cycles

NFock= 8 Conv=0.90D-08 -V/T= 2.0018

Calling FoFJK, ICntrl= 2127 FMM=F ISym2X=0 l1Cent= 0 IOpClX= 0 NMat=1 NMatS=1

NMatT=0.

\*\*\*\*\* Axes restored to original set \*\*\*\*\*

```
-----
```

| Center | Atomic | Forces (Hartrees/Bohr) |              |              |
|--------|--------|------------------------|--------------|--------------|
| Number | Number | X                      | Y            | Z            |
| 1      | 6      | -0.000005726           | -0.000003284 | 0.000025520  |
| 2      | 6      | 0.000001141            | 0.000006676  | -0.000009374 |
| 3      | 7      | -0.000006167           | -0.000005649 | 0.000009959  |
| 4      | 6      | -0.000024984           | 0.000026709  | -0.000004063 |
| 5      | 7      | 0.000010391            | -0.000022979 | -0.000001278 |
| 6      | 6      | -0.000004808           | -0.000000092 | -0.000002754 |
| 7      | 6      | 0.000027724            | -0.000016553 | 0.000001721  |
| 8      | 1      | -0.000000232           | -0.000001782 | 0.000009604  |
| 9      | 1      | -0.000001225           | 0.000000782  | 0.000002235  |
| 10     | 1      | 0.000004245            | 0.000006351  | -0.000000531 |
| 11     | 1      | -0.000001086           | -0.000001958 | 0.000006260  |
| 12     | 1      | -0.000008427           | -0.000006367 | 0.000004750  |
| 13     | 1      | -0.000005338           | -0.000000411 | 0.000004844  |
| 14     | 35     | -0.000012310           | 0.000005477  | -0.000005075 |
| 15     | 1      | 0.000038900            | 0.000003794  | -0.000002093 |
| 16     | 6      | 0.000002054            | 0.000001199  | -0.000005710 |
| 17     | 6      | -0.000001578           | 0.000002567  | -0.000000826 |
| 18     | 1      | 0.000001271            | 0.000004576  | -0.000007220 |
| 19     | 1      | 0.000000241            | 0.000004522  | -0.000006124 |
| 20     | 1      | -0.000000095           | 0.000000697  | -0.000000055 |
| 21     | 8      | -0.000022713           | 0.000001456  | 0.000022717  |
| 22     | 1      | 0.000018020            | -0.000002588 | -0.000027342 |
| 23     | 6      | 0.000018560            | 0.000009973  | -0.000007213 |
| 24     | 6      | -0.000005508           | 0.000001138  | 0.000001410  |

```
-----
```

|    |   |              |              |              |
|----|---|--------------|--------------|--------------|
| 25 | 8 | -0.000025255 | -0.000007790 | 0.000014770  |
| 26 | 1 | -0.000004610 | -0.000003523 | -0.000008690 |
| 27 | 1 | -0.000003514 | -0.000009121 | -0.000007523 |
| 28 | 1 | 0.000006633  | -0.000008170 | -0.000007119 |
| 29 | 6 | 0.000004300  | -0.000002693 | 0.000012553  |
| 30 | 1 | 0.000001154  | 0.000004518  | -0.000002767 |
| 31 | 1 | 0.000001759  | 0.000005999  | -0.000004751 |
| 32 | 1 | -0.000002815 | 0.000006525  | -0.000005836 |

-----  
Cartesian Forces: Max 0.000038900 RMS 0.000010567

GradGradGradGradGradGradGradGradGradGradGradGradGradGradGradGradGradGradGrad

Berny optimization.

Using GEDIIS/GDIIS optimizer.

FormGI is forming the generalized inverse of G from B-inverse, IUseBI=4.

GSVD: received Info= 1 from GESDD.

Internal Forces: Max 0.000020356 RMS 0.000005044

Search for a local minimum.

Step number 35 out of a maximum of 177

All quantities printed in internal units (Hartrees-Bohrs-Radians)

Mixed Optimization -- En-DIIS/RFO-DIIS

Swapping is turned off.

Update second derivatives using D2CorX and points 24 25 26 27 28  
29 30 31 32 33  
34 35

DE= -9.68D-08 DEPred=-7.50D-08 R= 1.29D+00

Trust test= 1.29D+00 RLast= 1.96D-02 DXMaxT set to 1.94D+00

ITU= 0 0 1 1 0 1 1 1 1 1 1 1 1 1 1 1 1 -1 1

ITU= 1 1 1 1 1 1 1 1 1 1 0 1 0 1 0

|                 |         |         |         |         |         |
|-----------------|---------|---------|---------|---------|---------|
| Eigenvalues --- | 0.00004 | 0.00058 | 0.00126 | 0.00234 | 0.00235 |
| Eigenvalues --- | 0.00316 | 0.00631 | 0.00816 | 0.01120 | 0.01317 |
| Eigenvalues --- | 0.01499 | 0.01559 | 0.01826 | 0.01894 | 0.01980 |
| Eigenvalues --- | 0.02177 | 0.02240 | 0.02319 | 0.02389 | 0.02993 |
| Eigenvalues --- | 0.03060 | 0.03097 | 0.03403 | 0.03595 | 0.03795 |
| Eigenvalues --- | 0.04338 | 0.04636 | 0.05223 | 0.05407 | 0.05535 |
| Eigenvalues --- | 0.05669 | 0.05956 | 0.06635 | 0.08831 | 0.09390 |
| Eigenvalues --- | 0.10532 | 0.11036 | 0.11478 | 0.11775 | 0.12939 |
| Eigenvalues --- | 0.13802 | 0.14068 | 0.14203 | 0.15378 | 0.15977 |
| Eigenvalues --- | 0.16000 | 0.16001 | 0.16004 | 0.16015 | 0.16031 |
| Eigenvalues --- | 0.16051 | 0.17164 | 0.19162 | 0.21283 | 0.22051 |
| Eigenvalues --- | 0.22841 | 0.23402 | 0.23880 | 0.24247 | 0.25041 |
| Eigenvalues --- | 0.27673 | 0.28563 | 0.30737 | 0.32259 | 0.33106 |
| Eigenvalues --- | 0.33380 | 0.34037 | 0.34214 | 0.34481 | 0.34855 |
| Eigenvalues --- | 0.35068 | 0.35686 | 0.35690 | 0.35858 | 0.36147 |

Eigenvalues --- 0.36438 0.36672 0.37216 0.37259 0.37671  
 Eigenvalues --- 0.38501 0.42164 0.42623 0.44262 0.45712  
 Eigenvalues --- 0.49466 0.53984 0.55068 0.56875 0.60410

Eigenvalue 1 is 3.85D-05 Eigenvector:

|   | D52     | D54      | D53      | D55      | D25     |
|---|---------|----------|----------|----------|---------|
| 1 | 0.50825 | -0.49779 | -0.49657 | -0.48732 | 0.04038 |
|   | D26     | D45      | D46      | D47      | A48     |
| 1 | 0.03484 | -0.02873 | -0.02675 | -0.02452 | 0.01853 |

En-DIIS/RFO-DIIS IScMMF= 0 using points: 35 34 33 32 31  
 RFO step: Lambda=-1.25327051D-08.  
 DidBck=F Rises=F RFO-DIIS coefs: 2.03997 -1.20611 -0.25134 0.67355 -

0.25607

Iteration 1 RMS(Cart)= 0.00160779 RMS(Int)= 0.00000314  
 Iteration 2 RMS(Cart)= 0.00000717 RMS(Int)= 0.00000125  
 Iteration 3 RMS(Cart)= 0.00000000 RMS(Int)= 0.00000125

| Variable | Old X   | -DE/DX   | Delta X<br>(Linear) | Delta X<br>(Quad) | Delta X<br>(Total) | New X   |
|----------|---------|----------|---------------------|-------------------|--------------------|---------|
| R1       | 2.56500 | 0.00000  | -0.00001            | 0.00001           | 0.00000            | 2.56500 |
| R2       | 2.62013 | 0.00000  | 0.00001             | 0.00000           | 0.00001            | 2.62015 |
| R3       | 2.03418 | 0.00000  | 0.00000             | 0.00000           | 0.00000            | 2.03418 |
| R4       | 2.62939 | 0.00000  | 0.00000             | 0.00000           | 0.00000            | 2.62939 |
| R5       | 2.03076 | 0.00000  | 0.00000             | 0.00000           | 0.00000            | 2.03076 |
| R6       | 2.54616 | 0.00001  | 0.00000             | 0.00000           | 0.00000            | 2.54617 |
| R7       | 2.68695 | 0.00000  | 0.00000             | 0.00000           | 0.00001            | 2.68696 |
| R8       | 2.51704 | 0.00002  | 0.00000             | 0.00002           | 0.00002            | 2.51706 |
| R9       | 2.09961 | 0.00002  | 0.00006             | 0.00002           | 0.00008            | 2.09969 |
| R10      | 2.79221 | 0.00000  | 0.00001             | -0.00001          | 0.00000            | 2.79221 |
| R11      | 2.90786 | 0.00000  | 0.00006             | -0.00001          | 0.00005            | 2.90791 |
| R12      | 2.06205 | 0.00000  | 0.00000             | 0.00000           | 0.00000            | 2.06206 |
| R13      | 2.06123 | 0.00000  | 0.00000             | 0.00001           | 0.00001            | 2.06124 |
| R14      | 2.07223 | 0.00001  | 0.00001             | -0.00001          | 0.00000            | 2.07224 |
| R15      | 2.07141 | 0.00000  | 0.00003             | 0.00001           | 0.00003            | 2.07144 |
| R16      | 2.65402 | -0.00002 | -0.00013            | 0.00001           | -0.00012           | 2.65390 |
| R17      | 4.15669 | -0.00001 | -0.00043            | -0.00018          | -0.00061           | 4.15608 |
| R18      | 8.46483 | 0.00000  | -0.00055            | -0.00036          | -0.00091           | 8.46392 |
| R19      | 2.50679 | 0.00000  | 0.00000             | 0.00000           | 0.00000            | 2.50679 |
| R20      | 2.04635 | 0.00000  | 0.00000             | 0.00000           | 0.00000            | 2.04636 |
| R21      | 2.04298 | 0.00000  | 0.00000             | 0.00000           | 0.00000            | 2.04298 |
| R22      | 2.04580 | 0.00000  | 0.00000             | 0.00000           | 0.00000            | 2.04580 |
| R23      | 1.84641 | 0.00001  | 0.00003             | 0.00001           | 0.00003            | 1.84645 |
| R24      | 3.41861 | 0.00000  | 0.00002             | -0.00017          | -0.00015           | 3.41846 |
| R25      | 2.77426 | 0.00000  | 0.00000             | 0.00002           | 0.00002            | 2.77428 |
| R26      | 2.74082 | 0.00000  | 0.00001             | 0.00000           | 0.00000            | 2.74082 |
| R27      | 2.05485 | 0.00000  | 0.00000             | 0.00001           | 0.00001            | 2.05486 |

|     |         |          |          |          |          |         |
|-----|---------|----------|----------|----------|----------|---------|
| R28 | 2.05335 | 0.00000  | -0.00002 | 0.00001  | -0.00001 | 2.05334 |
| R29 | 2.73609 | 0.00001  | 0.00002  | -0.00002 | 0.00000  | 2.73608 |
| R30 | 2.05777 | 0.00001  | 0.00001  | 0.00001  | 0.00002  | 2.05779 |
| R31 | 2.84182 | 0.00001  | 0.00000  | 0.00000  | 0.00000  | 2.84182 |
| R32 | 2.06791 | 0.00000  | 0.00000  | 0.00000  | 0.00000  | 2.06791 |
| R33 | 2.06815 | 0.00000  | 0.00000  | 0.00001  | 0.00001  | 2.06815 |
| R34 | 2.06317 | 0.00000  | 0.00001  | 0.00000  | 0.00001  | 2.06318 |
| A1  | 1.87433 | 0.00000  | -0.00001 | 0.00001  | -0.00001 | 1.87432 |
| A2  | 2.27810 | 0.00000  | 0.00001  | 0.00000  | 0.00000  | 2.27810 |
| A3  | 2.13072 | 0.00000  | 0.00001  | 0.00000  | 0.00001  | 2.13073 |
| A4  | 1.86186 | 0.00000  | 0.00001  | 0.00001  | 0.00001  | 1.86187 |
| A5  | 2.27710 | 0.00000  | -0.00002 | 0.00000  | -0.00002 | 2.27708 |
| A6  | 2.14421 | 0.00000  | 0.00002  | -0.00001 | 0.00001  | 2.14422 |
| A7  | 1.89721 | 0.00000  | 0.00001  | -0.00001 | 0.00000  | 1.89721 |
| A8  | 2.24841 | 0.00000  | 0.00001  | 0.00000  | 0.00002  | 2.24843 |
| A9  | 2.13755 | 0.00000  | -0.00002 | 0.00001  | -0.00002 | 2.13753 |
| A10 | 1.88932 | 0.00000  | -0.00002 | 0.00001  | -0.00001 | 1.88932 |
| A11 | 2.23464 | 0.00001  | 0.00000  | -0.00002 | -0.00002 | 2.23462 |
| A12 | 2.15922 | -0.00001 | 0.00002  | 0.00001  | 0.00003  | 2.15924 |
| A13 | 1.90204 | 0.00000  | 0.00001  | -0.00001 | 0.00000  | 1.90204 |
| A14 | 2.21194 | 0.00001  | 0.00005  | -0.00001 | 0.00004  | 2.21199 |
| A15 | 2.16804 | -0.00001 | -0.00005 | 0.00002  | -0.00003 | 2.16801 |
| A16 | 1.95078 | 0.00000  | 0.00004  | 0.00000  | 0.00004  | 1.95082 |
| A17 | 1.86526 | 0.00000  | -0.00003 | 0.00001  | -0.00002 | 1.86524 |
| A18 | 1.88385 | 0.00000  | 0.00000  | 0.00002  | 0.00002  | 1.88387 |
| A19 | 1.92526 | -0.00001 | -0.00001 | -0.00002 | -0.00002 | 1.92524 |
| A20 | 1.92097 | 0.00000  | -0.00002 | 0.00000  | -0.00002 | 1.92095 |
| A21 | 1.91645 | 0.00000  | 0.00001  | -0.00001 | 0.00000  | 1.91645 |
| A22 | 1.91304 | 0.00000  | -0.00002 | -0.00002 | -0.00004 | 1.91300 |
| A23 | 1.90263 | -0.00001 | -0.00001 | 0.00000  | -0.00001 | 1.90262 |
| A24 | 1.91400 | 0.00000  | 0.00008  | 0.00001  | 0.00009  | 1.91408 |
| A25 | 1.88696 | 0.00000  | -0.00008 | 0.00001  | -0.00007 | 1.88689 |
| A26 | 1.88665 | 0.00001  | -0.00002 | -0.00003 | -0.00005 | 1.88660 |
| A27 | 1.96002 | 0.00000  | 0.00006  | 0.00002  | 0.00008  | 1.96010 |
| A28 | 1.78836 | -0.00001 | -0.00022 | -0.00012 | -0.00034 | 1.78802 |
| A29 | 2.83340 | 0.00002  | 0.00053  | 0.00018  | 0.00071  | 2.83412 |
| A30 | 2.17704 | 0.00000  | -0.00001 | 0.00000  | -0.00001 | 2.17703 |
| A31 | 1.95558 | 0.00000  | -0.00001 | 0.00000  | -0.00001 | 1.95557 |
| A32 | 2.15056 | 0.00000  | 0.00003  | 0.00000  | 0.00002  | 2.15059 |
| A33 | 2.07970 | 0.00000  | 0.00001  | 0.00000  | 0.00001  | 2.07971 |
| A34 | 2.15744 | 0.00000  | -0.00002 | 0.00000  | -0.00002 | 2.15742 |
| A35 | 2.04605 | 0.00000  | 0.00001  | 0.00000  | 0.00001  | 2.04605 |
| A36 | 1.91265 | 0.00001  | 0.00006  | 0.00004  | 0.00010  | 1.91275 |
| A37 | 3.05073 | 0.00002  | 0.00048  | 0.00021  | 0.00069  | 3.05142 |

|     |          |          |          |          |          |          |
|-----|----------|----------|----------|----------|----------|----------|
| A38 | 2.07426  | 0.00000  | -0.00006 | 0.00001  | -0.00005 | 2.07421  |
| A39 | 2.08781  | 0.00000  | 0.00005  | 0.00001  | 0.00006  | 2.08788  |
| A40 | 2.00188  | 0.00000  | -0.00014 | 0.00002  | -0.00012 | 2.00176  |
| A41 | 1.98458  | 0.00000  | 0.00008  | -0.00007 | 0.00002  | 1.98460  |
| A42 | 2.04012  | 0.00000  | 0.00003  | 0.00001  | 0.00004  | 2.04015  |
| A43 | 2.04570  | -0.00001 | -0.00006 | 0.00006  | 0.00000  | 2.04570  |
| A44 | 2.13295  | 0.00001  | 0.00006  | -0.00001 | 0.00005  | 2.13300  |
| A45 | 1.94926  | 0.00000  | 0.00000  | -0.00008 | -0.00008 | 1.94918  |
| A46 | 2.04640  | 0.00000  | 0.00009  | -0.00002 | 0.00007  | 2.04647  |
| A47 | 2.02222  | 0.00000  | -0.00004 | 0.00001  | -0.00003 | 2.02219  |
| A48 | 1.42940  | 0.00001  | 0.00064  | 0.00028  | 0.00092  | 1.43031  |
| A49 | 0.99955  | 0.00000  | 0.00024  | 0.00006  | 0.00031  | 0.99987  |
| A50 | 2.37256  | 0.00001  | 0.00096  | 0.00020  | 0.00116  | 2.37372  |
| A51 | 2.35093  | 0.00000  | -0.00001 | 0.00026  | 0.00025  | 2.35119  |
| A52 | 1.93143  | 0.00000  | -0.00001 | 0.00001  | 0.00000  | 1.93143  |
| A53 | 1.91238  | 0.00000  | -0.00005 | 0.00000  | -0.00004 | 1.91233  |
| A54 | 1.93763  | -0.00001 | 0.00002  | -0.00003 | -0.00001 | 1.93763  |
| A55 | 1.88374  | 0.00000  | 0.00000  | 0.00000  | 0.00000  | 1.88374  |
| A56 | 1.91351  | 0.00001  | 0.00002  | 0.00002  | 0.00004  | 1.91355  |
| A57 | 1.88373  | 0.00000  | 0.00000  | 0.00000  | 0.00001  | 1.88374  |
| A58 | 3.78033  | 0.00001  | 0.00063  | 0.00054  | 0.00117  | 3.78150  |
| A59 | 5.04460  | 0.00000  | -0.00103 | 0.00001  | -0.00102 | 5.04358  |
| D1  | 0.00448  | -0.00001 | -0.00011 | -0.00001 | -0.00012 | 0.00436  |
| D2  | -3.13109 | 0.00000  | -0.00029 | 0.00002  | -0.00026 | -3.13135 |
| D3  | 3.13640  | 0.00000  | 0.00027  | -0.00005 | 0.00022  | 3.13662  |
| D4  | 0.00083  | 0.00000  | 0.00009  | -0.00002 | 0.00007  | 0.00090  |
| D5  | -0.00686 | 0.00001  | 0.00008  | 0.00001  | 0.00009  | -0.00676 |
| D6  | -3.09808 | 0.00001  | -0.00020 | 0.00011  | -0.00009 | -3.09817 |
| D7  | -3.13977 | 0.00000  | -0.00026 | 0.00005  | -0.00021 | -3.13998 |
| D8  | 0.05219  | 0.00000  | -0.00054 | 0.00015  | -0.00039 | 0.05179  |
| D9  | -0.00065 | 0.00001  | 0.00010  | 0.00000  | 0.00010  | -0.00055 |
| D10 | -3.13673 | 0.00000  | 0.00001  | 0.00001  | 0.00002  | -3.13670 |
| D11 | 3.13549  | 0.00000  | 0.00026  | -0.00003 | 0.00024  | 3.13572  |
| D12 | -0.00059 | 0.00000  | 0.00017  | -0.00002 | 0.00016  | -0.00043 |
| D13 | -0.00362 | 0.00000  | -0.00005 | 0.00000  | -0.00005 | -0.00366 |
| D14 | 3.13721  | 0.00000  | 0.00037  | -0.00005 | 0.00032  | 3.13753  |
| D15 | 3.13288  | 0.00000  | 0.00003  | -0.00001 | 0.00003  | 3.13291  |
| D16 | -0.00948 | 0.00000  | 0.00045  | -0.00006 | 0.00039  | -0.00908 |
| D17 | 0.00066  | 0.00000  | 0.00049  | 0.00018  | 0.00067  | 0.00133  |
| D18 | -3.14108 | 0.00000  | 0.00049  | 0.00016  | 0.00064  | -3.14044 |
| D19 | -3.13473 | 0.00000  | 0.00039  | 0.00019  | 0.00058  | -3.13415 |
| D20 | 0.00671  | 0.00000  | 0.00039  | 0.00017  | 0.00055  | 0.00726  |
| D21 | 0.00645  | 0.00000  | -0.00002 | -0.00001 | -0.00003 | 0.00642  |
| D22 | 3.09923  | 0.00000  | 0.00026  | -0.00010 | 0.00015  | 3.09938  |



|     |          |          |          |          |          |          |
|-----|----------|----------|----------|----------|----------|----------|
| D23 | -3.13442 | -0.00001 | -0.00041 | 0.00004  | -0.00037 | -3.13479 |
| D24 | -0.04164 | -0.00001 | -0.00014 | -0.00006 | -0.00019 | -0.04183 |
| D25 | -3.10959 | -0.00001 | 0.00180  | -0.00020 | 0.00160  | -3.10799 |
| D26 | 0.03113  | 0.00000  | 0.00227  | -0.00025 | 0.00202  | 0.03315  |
| D27 | 1.40913  | 0.00000  | -0.00030 | 0.00001  | -0.00029 | 1.40885  |
| D28 | -2.76610 | 0.00000  | -0.00030 | 0.00000  | -0.00030 | -2.76641 |
| D29 | -0.70567 | 0.00000  | -0.00030 | 0.00000  | -0.00030 | -0.70597 |
| D30 | -1.67485 | 0.00000  | -0.00062 | 0.00013  | -0.00049 | -1.67535 |
| D31 | 0.43309  | 0.00000  | -0.00062 | 0.00011  | -0.00051 | 0.43258  |
| D32 | 2.49353  | 0.00000  | -0.00062 | 0.00011  | -0.00051 | 2.49302  |
| D33 | -0.93877 | 0.00000  | -0.00016 | 0.00000  | -0.00015 | -0.93893 |
| D34 | 1.12344  | 0.00000  | -0.00028 | 0.00001  | -0.00026 | 1.12317  |
| D35 | -3.00736 | 0.00000  | -0.00016 | 0.00004  | -0.00012 | -3.00748 |
| D36 | -3.01142 | 0.00000  | -0.00015 | 0.00001  | -0.00014 | -3.01157 |
| D37 | -0.94922 | 0.00000  | -0.00027 | 0.00001  | -0.00025 | -0.94947 |
| D38 | 1.20317  | 0.00000  | -0.00015 | 0.00005  | -0.00011 | 1.20307  |
| D39 | 1.15437  | 0.00000  | -0.00014 | 0.00003  | -0.00011 | 1.15426  |
| D40 | -3.06661 | 0.00000  | -0.00026 | 0.00004  | -0.00022 | -3.06683 |
| D41 | -0.91422 | 0.00000  | -0.00015 | 0.00007  | -0.00007 | -0.91429 |
| D42 | -1.64007 | 0.00000  | 0.00092  | 0.00049  | 0.00141  | -1.63865 |
| D43 | 2.55827  | 0.00000  | 0.00092  | 0.00052  | 0.00144  | 2.55971  |
| D44 | 0.47815  | -0.00001 | 0.00100  | 0.00051  | 0.00151  | 0.47966  |
| D45 | 0.43561  | 0.00000  | -0.00298 | -0.00011 | -0.00310 | 0.43251  |
| D46 | -0.27361 | 0.00001  | 0.00146  | 0.00076  | 0.00222  | -0.27139 |
| D47 | 2.56452  | 0.00001  | 0.00187  | 0.00042  | 0.00228  | 2.56681  |
| D48 | -3.14156 | 0.00000  | 0.00004  | -0.00001 | 0.00003  | -3.14153 |
| D49 | 0.00050  | 0.00000  | 0.00004  | 0.00001  | 0.00005  | 0.00055  |
| D50 | 0.00020  | 0.00000  | 0.00004  | 0.00002  | 0.00006  | 0.00027  |
| D51 | -3.14092 | 0.00000  | 0.00005  | 0.00003  | 0.00008  | -3.14084 |
| D52 | -1.92470 | 0.00000  | -0.00259 | -0.00127 | -0.00386 | -1.92856 |
| D53 | 2.43416  | 0.00000  | 0.00198  | 0.00072  | 0.00269  | 2.43685  |
| D54 | 2.06432  | 0.00000  | 0.00203  | 0.00020  | 0.00223  | 2.06655  |
| D55 | -2.61044 | 0.00000  | 0.00300  | 0.00071  | 0.00371  | -2.60673 |
| D56 | -2.72905 | 0.00000  | -0.00011 | -0.00011 | -0.00022 | -2.72927 |
| D57 | -0.03007 | 0.00000  | -0.00023 | 0.00004  | -0.00019 | -0.03026 |
| D58 | -0.02172 | 0.00000  | -0.00005 | -0.00003 | -0.00008 | -0.02181 |
| D59 | 2.67726  | 0.00000  | -0.00017 | 0.00012  | -0.00005 | 2.67720  |
| D60 | -0.17081 | -0.00001 | 0.00015  | -0.00023 | -0.00008 | -0.17089 |
| D61 | 0.26860  | 0.00000  | 0.00005  | 0.00039  | 0.00045  | 0.26904  |
| D62 | -2.58317 | 0.00000  | 0.00016  | -0.00019 | -0.00003 | -2.58319 |
| D63 | -2.14376 | 0.00000  | 0.00007  | 0.00043  | 0.00050  | -2.14326 |
| D64 | 2.14664  | -0.00001 | -0.00127 | -0.00042 | -0.00169 | 2.14495  |
| D65 | -0.24669 | -0.00001 | -0.00132 | -0.00031 | -0.00162 | -0.24832 |
| D66 | 2.48891  | 0.00000  | 0.00008  | -0.00014 | -0.00006 | 2.48885  |

|     |          |         |          |          |          |          |
|-----|----------|---------|----------|----------|----------|----------|
| D67 | -1.71908 | 0.00000 | 0.00005  | -0.00013 | -0.00009 | -1.71917 |
| D68 | 0.35993  | 0.00000 | 0.00004  | -0.00015 | -0.00011 | 0.35982  |
| D69 | 1.27278  | 0.00000 | 0.00001  | -0.00012 | -0.00011 | 1.27267  |
| D70 | -2.93522 | 0.00000 | -0.00001 | -0.00012 | -0.00013 | -2.93535 |
| D71 | -0.85621 | 0.00000 | -0.00003 | -0.00013 | -0.00016 | -0.85637 |
| D72 | -1.08978 | 0.00000 | -0.00005 | 0.00003  | -0.00003 | -1.08980 |
| D73 | 0.98541  | 0.00000 | -0.00008 | 0.00003  | -0.00005 | 0.98536  |
| D74 | 3.06442  | 0.00000 | -0.00009 | 0.00002  | -0.00007 | 3.06435  |

| Item                 | Value    | Threshold | Converged? |
|----------------------|----------|-----------|------------|
| Maximum Force        | 0.000020 | 0.000450  | YES        |
| RMS Force            | 0.000005 | 0.000300  | YES        |
| Maximum Displacement | 0.007028 | 0.001800  | NO         |
| RMS Displacement     | 0.001615 | 0.001200  | NO         |

Predicted change in Energy=-3.639421D-08

GradGradGradGradGradGradGradGradGradGradGradGradGradGradGradGradGradGradGrad

Input orientation:

| Center<br>Number | Atomic<br>Number | Atomic<br>Type | Coordinates (Angstroms) |           |           |
|------------------|------------------|----------------|-------------------------|-----------|-----------|
|                  |                  |                | X                       | Y         | Z         |
| 1                | 6                | 0              | -1.376911               | -1.908535 | -0.259205 |
| 2                | 6                | 0              | -2.508464               | -1.168572 | -0.139164 |
| 3                | 7                | 0              | -2.110546               | 0.112362  | 0.230830  |
| 4                | 6                | 0              | -0.767044               | 0.135590  | 0.330232  |
| 5                | 7                | 0              | -0.306365               | -1.080473 | 0.041942  |
| 6                | 6                | 0              | 1.126931                | -1.436297 | -0.005689 |
| 7                | 6                | 0              | 1.683629                | -1.372304 | -1.438830 |
| 8                | 1                | 0              | -1.242686               | -2.943589 | -0.522591 |
| 9                | 1                | 0              | -3.538462               | -1.441747 | -0.278133 |
| 10               | 1                | 0              | 1.650974                | -0.726336 | 0.636214  |
| 11               | 1                | 0              | 1.235952                | -2.445568 | 0.393361  |
| 12               | 1                | 0              | 1.065078                | -1.989087 | -2.101749 |
| 13               | 1                | 0              | 1.636068                | -0.336532 | -1.794476 |
| 14               | 35               | 0              | 1.652539                | 2.231071  | 1.026072  |
| 15               | 1                | 0              | -0.115359               | 0.993771  | 0.601140  |
| 16               | 6                | 0              | -2.914870               | 1.256526  | 0.487122  |
| 17               | 6                | 0              | -4.238963               | 1.282097  | 0.410795  |
| 18               | 1                | 0              | -2.319356               | 2.119987  | 0.756268  |
| 19               | 1                | 0              | -4.761230               | 2.204085  | 0.625161  |
| 20               | 1                | 0              | -4.840504               | 0.422750  | 0.143077  |
| 21               | 8                | 0              | 2.991253                | -1.884071 | -1.461281 |
| 22               | 1                | 0              | 3.631189                | -1.152460 | -1.361552 |
| 23               | 6                | 0              | 4.837603                | 1.611250  | -1.122003 |

|    |   |   |          |           |           |
|----|---|---|----------|-----------|-----------|
| 24 | 6 | 0 | 5.712338 | 0.752008  | -0.314648 |
| 25 | 8 | 0 | 4.858304 | 0.176343  | -1.332280 |
| 26 | 1 | 0 | 3.921130 | 1.992063  | -0.677637 |
| 27 | 1 | 0 | 5.256706 | 2.179902  | -1.947625 |
| 28 | 1 | 0 | 6.762877 | 0.705083  | -0.597398 |
| 29 | 6 | 0 | 5.402583 | 0.412441  | 1.117219  |
| 30 | 1 | 0 | 5.683096 | -0.621959 | 1.338142  |
| 31 | 1 | 0 | 5.976274 | 1.066303  | 1.781370  |
| 32 | 1 | 0 | 4.342702 | 0.559513  | 1.334074  |

-----  
Distance matrix (angstroms):

|    |    | 1        | 2        | 3        | 4        | 5        |
|----|----|----------|----------|----------|----------|----------|
| 1  | C  | 0.000000 |          |          |          |          |
| 2  | C  | 1.357339 | 0.000000 |          |          |          |
| 3  | N  | 2.205080 | 1.391411 | 0.000000 |          |          |
| 4  | C  | 2.213102 | 2.225693 | 1.347374 | 0.000000 |          |
| 5  | N  | 1.386522 | 2.211289 | 2.171083 | 1.331971 | 0.000000 |
| 6  | C  | 2.560567 | 3.647682 | 3.596601 | 2.484112 | 1.477571 |
| 7  | C  | 3.323546 | 4.393663 | 4.403153 | 3.377739 | 2.497584 |
| 8  | H  | 1.076441 | 2.213571 | 3.264913 | 3.230307 | 2.160230 |
| 9  | H  | 2.211459 | 1.074632 | 2.171000 | 3.246360 | 3.267937 |
| 10 | H  | 3.371566 | 4.254139 | 3.875149 | 2.585218 | 2.075993 |
| 11 | H  | 2.746143 | 3.991861 | 4.215266 | 3.267776 | 2.089431 |
| 12 | H  | 3.060191 | 4.158748 | 4.465602 | 3.712877 | 2.702193 |
| 13 | H  | 3.729114 | 4.539767 | 4.282579 | 3.242257 | 2.774694 |
| 14 | Br | 5.288274 | 5.498117 | 4.391144 | 3.275610 | 3.971416 |
| 15 | H  | 3.279495 | 3.309188 | 2.212416 | 1.111108 | 2.156775 |
| 16 | C  | 3.597212 | 2.537419 | 1.421877 | 2.427811 | 3.530446 |
| 17 | C  | 4.338245 | 3.050059 | 2.435329 | 3.657210 | 4.602512 |
| 18 | H  | 4.260091 | 3.413528 | 2.085724 | 2.555192 | 3.847770 |
| 19 | H  | 5.399015 | 4.127222 | 3.399549 | 4.507680 | 5.565455 |
| 20 | H  | 4.194425 | 2.837318 | 2.748948 | 4.087855 | 4.777899 |
| 21 | O  | 4.530612 | 5.701475 | 5.733876 | 4.627456 | 3.712107 |
| 22 | H  | 5.183424 | 6.260178 | 6.091221 | 4.885250 | 4.180827 |
| 23 | C  | 7.193990 | 7.915686 | 7.235578 | 5.974833 | 5.921195 |
| 24 | C  | 7.572253 | 8.443992 | 7.867922 | 6.540508 | 6.301582 |
| 25 | O  | 6.661539 | 7.582980 | 7.142287 | 5.866016 | 5.490162 |
| 26 | H  | 6.592343 | 7.184653 | 6.382766 | 5.142108 | 5.275414 |
| 27 | H  | 7.973139 | 8.647581 | 7.955928 | 6.756731 | 6.748050 |
| 28 | H  | 8.555788 | 9.469863 | 8.931680 | 7.608188 | 7.319231 |
| 29 | C  | 7.296781 | 8.164727 | 7.571185 | 6.225777 | 5.998092 |
| 30 | H  | 7.351904 | 8.341634 | 7.906087 | 6.572220 | 6.145243 |
| 31 | H  | 8.190417 | 8.981864 | 8.289199 | 6.960199 | 6.863368 |
| 32 | H  | 6.429912 | 7.217699 | 6.562126 | 5.224645 | 5.096370 |

|    |    | 6        | 7        | 8        | 9         | 10       |
|----|----|----------|----------|----------|-----------|----------|
| 6  | C  | 0.000000 |          |          |           |          |
| 7  | C  | 1.538798 | 0.000000 |          |           |          |
| 8  | H  | 2.855556 | 3.445540 | 0.000000 |           |          |
| 9  | H  | 4.673344 | 5.349978 | 2.754247 | 0.000000  |          |
| 10 | H  | 1.091194 | 2.173510 | 3.825220 | 5.317714  | 0.000000 |
| 11 | H  | 1.090759 | 2.170076 | 2.688985 | 4.924794  | 1.785211 |
| 12 | H  | 2.168610 | 1.096580 | 2.954758 | 4.981741  | 3.071523 |
| 13 | H  | 2.160662 | 1.096161 | 4.086766 | 5.504230  | 2.461793 |
| 14 | Br | 3.845827 | 4.365893 | 6.128442 | 6.491304  | 2.982994 |
| 15 | H  | 2.795846 | 3.605016 | 4.246934 | 4.292145  | 2.465752 |
| 16 | C  | 4.881630 | 5.636154 | 4.632136 | 2.873179  | 4.980050 |
| 17 | C  | 6.029588 | 6.748633 | 5.263583 | 2.895625  | 6.227035 |
| 18 | H  | 5.010451 | 5.747907 | 5.332401 | 3.904120  | 4.886664 |
| 19 | H  | 6.951316 | 7.654203 | 6.340034 | 3.950087  | 7.050096 |
| 20 | H  | 6.252077 | 6.949026 | 4.971886 | 2.312807  | 6.610814 |
| 21 | O  | 2.407270 | 1.404383 | 4.464299 | 6.650765  | 2.745211 |
| 22 | H  | 2.861859 | 1.961452 | 5.259911 | 7.256816  | 2.844979 |
| 23 | C  | 4.929786 | 4.353106 | 7.620746 | 8.954964  | 4.325534 |
| 24 | C  | 5.090196 | 4.691161 | 7.878645 | 9.507429  | 4.425418 |
| 25 | O  | 4.275932 | 3.533868 | 6.900120 | 8.615980  | 3.869982 |
| 26 | H  | 4.473557 | 4.111544 | 7.144907 | 8.221689  | 3.777501 |
| 27 | H  | 5.822632 | 5.063983 | 8.397796 | 9.657045  | 5.303183 |
| 28 | H  | 6.058012 | 5.551784 | 8.798150 | 10.527506 | 5.449983 |
| 29 | C  | 4.791655 | 4.852765 | 7.623091 | 9.237278  | 3.950032 |
| 30 | H  | 4.819509 | 4.926492 | 7.537821 | 9.397953  | 4.094094 |
| 31 | H  | 5.742187 | 5.894344 | 8.573264 | 10.052963 | 4.820079 |
| 32 | H  | 4.014898 | 4.300184 | 6.849488 | 8.289571  | 3.063628 |
|    |    | 11       | 12       | 13       | 14        | 15       |
| 11 | H  | 0.000000 |          |          |           |          |
| 12 | H  | 2.542272 | 0.000000 |          |           |          |
| 13 | H  | 3.065086 | 1.775213 | 0.000000 |           |          |
| 14 | Br | 4.737597 | 5.285652 | 3.814230 | 0.000000  |          |
| 15 | H  | 3.701117 | 4.194816 | 3.252103 | 2.199304  | 0.000000 |
| 16 | C  | 5.562699 | 5.751195 | 5.334281 | 4.701216  | 2.814126 |
| 17 | C  | 6.623480 | 6.719105 | 6.480676 | 5.999075  | 4.138052 |
| 18 | H  | 5.797948 | 6.042114 | 5.309064 | 3.982597  | 2.479925 |
| 19 | H  | 7.592049 | 7.678841 | 7.296218 | 6.426344  | 4.800996 |
| 20 | H  | 6.724077 | 6.762551 | 6.802691 | 6.797743  | 4.781515 |
| 21 | O  | 2.614586 | 2.032579 | 2.083848 | 4.991340  | 4.710265 |
| 22 | H  | 3.238674 | 2.798707 | 2.198561 | 4.589563  | 4.742899 |
| 23 | C  | 5.632583 | 5.306060 | 3.807349 | 3.891407  | 5.280372 |
| 24 | C  | 5.546513 | 5.683692 | 4.471106 | 4.524062  | 5.904165 |
| 25 | O  | 4.793087 | 4.435057 | 3.295371 | 4.478913  | 5.398483 |

|    |   |          |           |          |           |           |
|----|---|----------|-----------|----------|-----------|-----------|
| 26 | H | 5.296205 | 5.102419  | 3.448361 | 2.847149  | 4.350298  |
| 27 | H | 6.560613 | 5.913879  | 4.411906 | 4.672849  | 6.063183  |
| 28 | H | 6.438563 | 6.479701  | 5.366761 | 5.574930  | 6.987843  |
| 29 | C | 5.104214 | 5.911264  | 4.819291 | 4.168760  | 5.572429  |
| 30 | H | 4.898494 | 5.918444  | 5.125739 | 4.947985  | 6.064308  |
| 31 | H | 6.060566 | 6.966625  | 5.795861 | 4.541129  | 6.205336  |
| 32 | H | 4.423499 | 5.389161  | 4.232799 | 3.182130  | 4.538730  |
|    |   | 16       | 17        | 18       | 19        | 20        |
| 16 | C | 0.000000 |           |          |           |           |
| 17 | C | 1.326537 | 0.000000  |          |           |           |
| 18 | H | 1.082886 | 2.122805  | 0.000000 |           |           |
| 19 | H | 2.079897 | 1.081100  | 2.446838 | 0.000000  |           |
| 20 | H | 2.126409 | 1.082591  | 3.100453 | 1.847118  | 0.000000  |
| 21 | O | 6.967203 | 8.112047  | 7.010889 | 9.009288  | 8.320566  |
| 22 | H | 7.216072 | 8.426599  | 7.113582 | 9.254519  | 8.747273  |
| 23 | C | 7.925652 | 9.210964  | 7.416790 | 9.774541  | 9.832534  |
| 24 | C | 8.679061 | 9.991779  | 8.217441 | 10.615433 | 10.567895 |
| 25 | O | 8.056007 | 9.328518  | 7.723896 | 10.023909 | 9.813474  |
| 26 | H | 6.973419 | 8.262920  | 6.404382 | 8.782119  | 8.938823  |
| 27 | H | 8.576437 | 9.825269  | 8.044336 | 10.343059 | 10.460032 |
| 28 | H | 9.753925 | 11.062995 | 9.290926 | 11.685320 | 11.630411 |
| 29 | C | 8.383886 | 9.706428  | 7.916713 | 10.332242 | 10.289310 |
| 30 | H | 8.841830 | 10.145573 | 8.479155 | 10.843377 | 10.642638 |
| 31 | H | 8.986863 | 10.309030 | 8.424877 | 10.859345 | 10.959053 |
| 32 | H | 7.339993 | 8.661382  | 6.866728 | 9.278403  | 9.261126  |
|    |   | 21       | 22        | 23       | 24        | 25        |
| 21 | O | 0.000000 |           |          |           |           |
| 22 | H | 0.977097 | 0.000000  |          |           |           |
| 23 | C | 3.967541 | 3.025047  | 0.000000 |           |           |
| 24 | C | 3.958280 | 3.009018  | 1.468087 | 0.000000  |           |
| 25 | O | 2.783491 | 1.808973  | 1.450379 | 1.447874  | 0.000000  |
| 26 | H | 4.062411 | 3.231073  | 1.087384 | 2.208602  | 2.145621  |
| 27 | H | 4.678106 | 3.753721  | 1.086583 | 2.216550  | 2.133452  |
| 28 | H | 4.655658 | 3.720465  | 2.191580 | 1.088935  | 2.108794  |
| 29 | C | 4.211548 | 3.425063  | 2.602011 | 1.503828  | 2.520323  |
| 30 | H | 4.083591 | 3.432215  | 3.428468 | 2.149501  | 2.906668  |
| 31 | H | 5.303757 | 4.505584  | 3.165930 | 2.135822  | 3.425887  |
| 32 | H | 3.951142 | 3.271620  | 2.717240 | 2.152032  | 2.742645  |
|    |   | 26       | 27        | 28       | 29        | 30        |
| 26 | H | 0.000000 |           |          |           |           |
| 27 | H | 1.852543 | 0.000000  |          |           |           |
| 28 | H | 3.120622 | 2.503348  | 0.000000 |           |           |
| 29 | C | 2.812725 | 3.540970  | 2.208155 | 0.000000  |           |
| 30 | H | 3.741791 | 4.339181  | 2.583270 | 1.094293  | 0.000000  |

|    |   |          |          |          |          |          |
|----|---|----------|----------|----------|----------|----------|
| 31 | H | 3.335771 | 3.957687 | 2.531356 | 1.094419 | 1.769924 |
| 32 | H | 2.505375 | 3.772348 | 3.099842 | 1.091790 | 1.786770 |
|    |   | 31       | 32       |          |          |          |
| 31 | H | 0.000000 |          |          |          |          |
| 32 | H | 1.767899 | 0.000000 |          |          |          |

Stoichiometry C10H17BrN2O2

Framework group C1[X(C10H17BrN2O2)]

Deg. of freedom 90

Full point group C1 NOp 1

Largest Abelian subgroup C1 NOp 1

Largest concise Abelian subgroup C1 NOp 1

Standard orientation:

| Center Number | Atomic Number | Atomic Type | Coordinates (Angstroms) |           |           |
|---------------|---------------|-------------|-------------------------|-----------|-----------|
|               |               |             | X                       | Y         | Z         |
| 1             | 6             | 0           | -2.711066               | 2.113818  | -0.438377 |
| 2             | 6             | 0           | -3.789079               | 1.349467  | -0.128499 |
| 3             | 7             | 0           | -3.322032               | 0.049507  | 0.038821  |
| 4             | 6             | 0           | -1.990683               | 0.038773  | -0.168085 |
| 5             | 7             | 0           | -1.604375               | 1.278911  | -0.462995 |
| 6             | 6             | 0           | -0.202185               | 1.676957  | -0.705154 |
| 7             | 6             | 0           | 0.455306                | 2.250750  | 0.562270  |
| 8             | 1             | 0           | -2.637547               | 3.166936  | -0.648767 |
| 9             | 1             | 0           | -4.824717               | 1.615279  | -0.020654 |
| 10            | 1             | 0           | 0.328440                | 0.782433  | -1.035259 |
| 11            | 1             | 0           | -0.197495               | 2.423882  | -1.500036 |
| 12            | 1             | 0           | -0.160844               | 3.066278  | 0.959462  |
| 13            | 1             | 0           | 0.510761                | 1.463801  | 1.323325  |
| 14            | 35            | 0           | 0.526460                | -2.057173 | -0.143252 |
| 15            | 1             | 0           | -1.296293               | -0.826885 | -0.113160 |
| 16            | 6             | 0           | -4.053406               | -1.125456 | 0.364842  |
| 17            | 6             | 0           | -5.363355               | -1.167901 | 0.569619  |
| 18            | 1             | 0           | -3.414372               | -1.997336 | 0.428887  |
| 19            | 1             | 0           | -5.828039               | -2.113119 | 0.813360  |
| 20            | 1             | 0           | -6.008172               | -0.300584 | 0.506586  |
| 21            | 8             | 0           | 1.718968                | 2.774150  | 0.243678  |
| 22            | 1             | 0           | 2.403922                | 2.095307  | 0.400931  |
| 23            | 6             | 0           | 3.796211                | -0.458073 | 1.233210  |
| 24            | 6             | 0           | 4.545758                | 0.009419  | 0.060644  |
| 25            | 8             | 0           | 3.722938                | 0.929505  | 0.817446  |
| 26            | 1             | 0           | 2.882648                | -1.027320 | 1.079056  |
| 27            | 1             | 0           | 4.313028                | -0.604449 | 2.177740  |
| 28            | 1             | 0           | 5.606749                | 0.213270  | 0.196738  |

|    |   |   |          |           |           |
|----|---|---|----------|-----------|-----------|
| 29 | 6 | 0 | 4.113189 | -0.305025 | -1.344883 |
| 30 | 1 | 0 | 4.298862 | 0.547129  | -2.005818 |
| 31 | 1 | 0 | 4.687429 | -1.156356 | -1.723350 |
| 32 | 1 | 0 | 3.055013 | -0.571743 | -1.378513 |

-----

Rotational constants (GHZ):      0.6003620      0.2211187      0.1722799

Standard basis: 6-311++G(d,p) (5D, 7F)

There are    492 symmetry adapted cartesian basis functions of A    symmetry.

There are    475 symmetry adapted basis functions of A    symmetry.

475 basis functions,    751 primitive gaussians,    492 cartesian basis functions

71 alpha electrons      71 beta electrons

nuclear repulsion energy      1307.2206229554 Hartrees.

NAtoms=    32 NActive=    32 NUniq=    32 SFac= 1.00D+00 NAtFMM=    60 NAOKFM=F

Big=F

Integral buffers will be    131072 words long.

Raffenetti 2 integral format.

Two-electron integral symmetry is turned on.

One-electron integrals computed using PRISM.

NBasis=    475 RedAO= T EigKep=    3.78D-06    NBF=    475

NBsUse=    475 1.00D-06 EigRej= -1.00D+00    NBFU=    475

Initial guess from the checkpoint file: "/home/suqian/liuwen/qianmengshijie/ohpo/ohpo.chk"

B after Tr=    0.000000    0.000000    0.000000

Rot=    1.000000    -0.000033    -0.000035    0.000039 Ang=    -0.01 deg.

Requested convergence on RMS density matrix=1.00D-08 within 128 cycles.

Requested convergence on MAX density matrix=1.00D-06.

Requested convergence on                    energy=1.00D-06.

No special actions if energy rises.

SCF Done: E(RB3LYP) = -3225.52371261      A.U. after    8 cycles

      NFock=    8    Conv=0.85D-08      -V/T= 2.0018

Calling FoFJK, ICntrl=            2127 FMM=F ISym2X=0 l1Cent= 0 IOpCIX= 0 NMat=1 NMatS=1

NMatT=0.

\*\*\*\*\* Axes restored to original set \*\*\*\*\*

-----

| Center<br>Number | Atomic<br>Number | Forces (Hartrees/Bohr) |              |              |
|------------------|------------------|------------------------|--------------|--------------|
|                  |                  | X                      | Y            | Z            |
| 1                | 6                | 0.000000799            | 0.000002449  | 0.000004609  |
| 2                | 6                | -0.000001685           | 0.000002477  | -0.000005961 |
| 3                | 7                | 0.000001951            | -0.000001931 | -0.000000457 |
| 4                | 6                | -0.000020978           | 0.000015075  | 0.000018762  |
| 5                | 7                | 0.000007422            | -0.000015744 | 0.000008841  |
| 6                | 6                | -0.000003047           | 0.000002096  | -0.000008306 |
| 7                | 6                | -0.000011846           | 0.000000177  | 0.000001576  |
| 8                | 1                | -0.000001254           | -0.000002863 | 0.000014590  |

|    |    |              |              |              |
|----|----|--------------|--------------|--------------|
| 9  | 1  | -0.000001028 | 0.000000780  | 0.000005677  |
| 10 | 1  | 0.000002606  | 0.000002024  | 0.000001145  |
| 11 | 1  | -0.000000589 | 0.000000576  | 0.000007591  |
| 12 | 1  | -0.000003078 | -0.000006138 | 0.000005932  |
| 13 | 1  | 0.000000638  | -0.000004382 | 0.000007765  |
| 14 | 35 | -0.000008564 | 0.000006677  | -0.000001413 |
| 15 | 1  | 0.000028816  | 0.000003110  | -0.000021802 |
| 16 | 6  | 0.000001537  | 0.000001174  | -0.000003650 |
| 17 | 6  | 0.000000305  | 0.000000969  | -0.000001623 |
| 18 | 1  | 0.000000450  | 0.000004270  | -0.000006723 |
| 19 | 1  | 0.000000608  | 0.000004287  | -0.000005910 |
| 20 | 1  | -0.000000715 | 0.000001859  | -0.000000269 |
| 21 | 8  | 0.000014559  | -0.000005337 | 0.000019539  |
| 22 | 1  | -0.000001839 | -0.000006978 | -0.000022151 |
| 23 | 6  | 0.000000042  | -0.000003369 | 0.000001302  |
| 24 | 6  | 0.000011252  | -0.000002906 | -0.000014659 |
| 25 | 8  | -0.000019131 | -0.000007140 | 0.000018293  |
| 26 | 1  | 0.000000349  | 0.000002300  | -0.000009833 |
| 27 | 1  | 0.000000044  | -0.000008050 | -0.000007307 |
| 28 | 1  | 0.000003428  | -0.000001309 | -0.000002813 |
| 29 | 6  | -0.000001638 | 0.000002198  | 0.000008876  |
| 30 | 1  | 0.000000794  | 0.000004435  | -0.000002812 |
| 31 | 1  | -0.000000061 | 0.000003819  | -0.000003620 |
| 32 | 1  | -0.000000148 | 0.000005394  | -0.000005187 |

-----  
Cartesian Forces: Max 0.000028816 RMS 0.000008224

GradGradGradGradGradGradGradGradGradGradGradGradGradGradGradGradGradGradGradGrad

Berny optimization.

Using GEDIIS/GDIIS optimizer.

FormGI is forming the generalized inverse of G from B-inverse, IUseBI=4.

GSVD: received Info= 1 from GESDD.

Internal Forces: Max 0.000018157 RMS 0.000003496

Search for a local minimum.

Step number 36 out of a maximum of 177

All quantities printed in internal units (Hartrees-Bohrs-Radians)

Mixed Optimization -- En-DIIS/RFO-DIIS

Swapping is turned off.

Update second derivatives using D2CorX and points 24 25 26 27 28  
29 30 31 32 33  
34 35 36

DE= 2.13D-07 DEPred=-3.64D-08 R=-5.84D+00

Trust test=-5.84D+00 RLast= 9.52D-03 DXMaxT set to 9.71D-01

ITU= -1 0 0 1 1 0 1 1 1 1 1 1 1 1 1 1 1 1 1 1 1 1



ITU= 1 1 1 1 1 1 1 1 1 1 1 0 1 0 1 0

|                 |         |         |         |         |         |
|-----------------|---------|---------|---------|---------|---------|
| Eigenvalues --- | 0.00004 | 0.00053 | 0.00127 | 0.00208 | 0.00235 |
| Eigenvalues --- | 0.00310 | 0.00559 | 0.00705 | 0.01119 | 0.01310 |
| Eigenvalues --- | 0.01394 | 0.01577 | 0.01823 | 0.01903 | 0.01994 |
| Eigenvalues --- | 0.02150 | 0.02231 | 0.02319 | 0.02395 | 0.02899 |
| Eigenvalues --- | 0.03049 | 0.03073 | 0.03302 | 0.03481 | 0.03726 |
| Eigenvalues --- | 0.04066 | 0.04632 | 0.05162 | 0.05381 | 0.05460 |
| Eigenvalues --- | 0.05670 | 0.05921 | 0.06479 | 0.09129 | 0.09396 |
| Eigenvalues --- | 0.10427 | 0.11036 | 0.11498 | 0.11692 | 0.13017 |
| Eigenvalues --- | 0.13828 | 0.14140 | 0.14304 | 0.15231 | 0.15976 |
| Eigenvalues --- | 0.15999 | 0.16001 | 0.16005 | 0.16016 | 0.16039 |
| Eigenvalues --- | 0.16050 | 0.17171 | 0.19247 | 0.21311 | 0.22056 |
| Eigenvalues --- | 0.22852 | 0.23399 | 0.23866 | 0.24250 | 0.25034 |
| Eigenvalues --- | 0.27777 | 0.28499 | 0.30765 | 0.32063 | 0.33105 |
| Eigenvalues --- | 0.33219 | 0.34046 | 0.34197 | 0.34466 | 0.34843 |
| Eigenvalues --- | 0.35046 | 0.35686 | 0.35690 | 0.35859 | 0.36205 |
| Eigenvalues --- | 0.36437 | 0.36670 | 0.37211 | 0.37238 | 0.37606 |
| Eigenvalues --- | 0.38291 | 0.42167 | 0.42561 | 0.45258 | 0.45614 |
| Eigenvalues --- | 0.49328 | 0.54101 | 0.55180 | 0.56041 | 0.60394 |

Eigenvalue 1 is 3.58D-05 Eigenvector:

|   |          |          |          |          |         |
|---|----------|----------|----------|----------|---------|
|   | D52      | D53      | D54      | D55      | D25     |
| 1 | 0.51036  | -0.49569 | -0.49555 | -0.48986 | 0.03359 |
|   | D46      | D47      | D26      | D45      | A48     |
| 1 | -0.03335 | -0.03112 | 0.02630  | -0.01704 | 0.01455 |

En-DIIS/RFO-DIIS IScMMF= 0 using points: 36 35 34 33 32

RFO step: Lambda=-7.22988457D-09.

DidBck=F Rises=F RFO-DIIS coefs: 1.99929 -1.05181 -0.28624 0.49883 -

0.16006

Iteration 1 RMS(Cart)= 0.00159794 RMS(Int)= 0.00000374

Iteration 2 RMS(Cart)= 0.00001205 RMS(Int)= 0.00000073

Iteration 3 RMS(Cart)= 0.00000000 RMS(Int)= 0.00000073

| Variable | Old X   | -DE/DX   | Delta X<br>(Linear) | Delta X<br>(Quad) | Delta X<br>(Total) | New X   |
|----------|---------|----------|---------------------|-------------------|--------------------|---------|
| R1       | 2.56500 | 0.00000  | 0.00000             | 0.00000           | 0.00000            | 2.56500 |
| R2       | 2.62015 | 0.00000  | 0.00000             | 0.00000           | 0.00001            | 2.62015 |
| R3       | 2.03418 | 0.00000  | 0.00000             | 0.00000           | 0.00000            | 2.03418 |
| R4       | 2.62939 | 0.00000  | -0.00001            | 0.00001           | 0.00000            | 2.62939 |
| R5       | 2.03076 | 0.00000  | 0.00000             | 0.00000           | 0.00000            | 2.03076 |
| R6       | 2.54617 | 0.00000  | 0.00000             | -0.00001          | -0.00001           | 2.54616 |
| R7       | 2.68696 | 0.00000  | 0.00001             | 0.00000           | 0.00000            | 2.68696 |
| R8       | 2.51706 | 0.00001  | 0.00004             | -0.00002          | 0.00002            | 2.51708 |
| R9       | 2.09969 | 0.00001  | 0.00010             | 0.00000           | 0.00010            | 2.09979 |
| R10      | 2.79221 | -0.00001 | -0.00001            | -0.00002          | -0.00003           | 2.79218 |
| R11      | 2.90791 | -0.00001 | 0.00005             | -0.00002          | 0.00003            | 2.90794 |

|     |         |          |          |          |          |         |
|-----|---------|----------|----------|----------|----------|---------|
| R12 | 2.06206 | 0.00000  | 0.00001  | -0.00001 | 0.00000  | 2.06205 |
| R13 | 2.06124 | 0.00000  | 0.00001  | -0.00001 | 0.00000  | 2.06124 |
| R14 | 2.07224 | 0.00000  | 0.00000  | -0.00001 | 0.00000  | 2.07223 |
| R15 | 2.07144 | 0.00000  | 0.00003  | -0.00001 | 0.00002  | 2.07146 |
| R16 | 2.65390 | 0.00001  | -0.00008 | 0.00003  | -0.00006 | 2.65384 |
| R17 | 4.15608 | -0.00001 | -0.00062 | -0.00009 | -0.00070 | 4.15538 |
| R18 | 8.46392 | 0.00000  | -0.00045 | -0.00044 | -0.00089 | 8.46303 |
| R19 | 2.50679 | 0.00000  | 0.00000  | 0.00000  | 0.00000  | 2.50679 |
| R20 | 2.04636 | 0.00000  | 0.00000  | 0.00000  | 0.00000  | 2.04636 |
| R21 | 2.04298 | 0.00000  | 0.00000  | 0.00000  | 0.00000  | 2.04298 |
| R22 | 2.04580 | 0.00000  | 0.00000  | 0.00000  | 0.00000  | 2.04580 |
| R23 | 1.84645 | 0.00000  | 0.00003  | -0.00001 | 0.00002  | 1.84646 |
| R24 | 3.41846 | 0.00000  | -0.00016 | 0.00003  | -0.00013 | 3.41834 |
| R25 | 2.77428 | 0.00000  | 0.00001  | 0.00000  | 0.00001  | 2.77429 |
| R26 | 2.74082 | 0.00000  | 0.00002  | -0.00003 | 0.00000  | 2.74082 |
| R27 | 2.05486 | 0.00000  | 0.00001  | -0.00001 | 0.00000  | 2.05486 |
| R28 | 2.05334 | 0.00000  | 0.00000  | 0.00000  | -0.00001 | 2.05334 |
| R29 | 2.73608 | 0.00000  | 0.00001  | 0.00000  | 0.00000  | 2.73609 |
| R30 | 2.05779 | 0.00000  | 0.00002  | 0.00000  | 0.00001  | 2.05780 |
| R31 | 2.84182 | 0.00000  | 0.00000  | 0.00001  | 0.00002  | 2.84184 |
| R32 | 2.06791 | 0.00000  | 0.00000  | 0.00000  | -0.00001 | 2.06791 |
| R33 | 2.06815 | 0.00000  | 0.00000  | 0.00000  | 0.00000  | 2.06815 |
| R34 | 2.06318 | 0.00000  | 0.00001  | 0.00000  | 0.00001  | 2.06319 |
| A1  | 1.87432 | 0.00000  | 0.00000  | -0.00001 | -0.00001 | 1.87431 |
| A2  | 2.27810 | 0.00000  | 0.00000  | 0.00000  | 0.00000  | 2.27810 |
| A3  | 2.13073 | 0.00000  | 0.00000  | 0.00001  | 0.00001  | 2.13074 |
| A4  | 1.86187 | 0.00000  | 0.00001  | -0.00001 | 0.00000  | 1.86187 |
| A5  | 2.27708 | 0.00000  | -0.00001 | 0.00001  | 0.00000  | 2.27708 |
| A6  | 2.14422 | 0.00000  | 0.00000  | 0.00000  | 0.00001  | 2.14423 |
| A7  | 1.89721 | 0.00000  | 0.00000  | 0.00002  | 0.00002  | 1.89723 |
| A8  | 2.24843 | 0.00000  | 0.00001  | 0.00000  | 0.00001  | 2.24844 |
| A9  | 2.13753 | 0.00000  | -0.00001 | -0.00002 | -0.00003 | 2.13751 |
| A10 | 1.88932 | 0.00000  | -0.00001 | -0.00001 | -0.00002 | 1.88930 |
| A11 | 2.23462 | 0.00001  | -0.00001 | 0.00001  | 0.00000  | 2.23462 |
| A12 | 2.15924 | -0.00001 | 0.00002  | 0.00000  | 0.00002  | 2.15927 |
| A13 | 1.90204 | 0.00000  | -0.00001 | 0.00002  | 0.00001  | 1.90205 |
| A14 | 2.21199 | 0.00000  | 0.00002  | 0.00001  | 0.00003  | 2.21202 |
| A15 | 2.16801 | 0.00000  | -0.00001 | -0.00003 | -0.00004 | 2.16796 |
| A16 | 1.95082 | -0.00001 | 0.00003  | -0.00002 | 0.00001  | 1.95083 |
| A17 | 1.86524 | 0.00000  | -0.00001 | 0.00003  | 0.00002  | 1.86526 |
| A18 | 1.88387 | 0.00000  | 0.00003  | -0.00001 | 0.00002  | 1.88389 |
| A19 | 1.92524 | 0.00000  | -0.00004 | 0.00002  | -0.00002 | 1.92522 |
| A20 | 1.92095 | 0.00000  | 0.00000  | 0.00000  | 0.00001  | 1.92096 |
| A21 | 1.91645 | 0.00000  | -0.00001 | -0.00002 | -0.00003 | 1.91641 |

|     |          |          |          |          |          |          |
|-----|----------|----------|----------|----------|----------|----------|
| A22 | 1.91300  | 0.00000  | -0.00003 | 0.00000  | -0.00002 | 1.91298  |
| A23 | 1.90262  | 0.00000  | -0.00004 | 0.00001  | -0.00003 | 1.90259  |
| A24 | 1.91408  | 0.00000  | 0.00008  | -0.00001 | 0.00007  | 1.91416  |
| A25 | 1.88689  | 0.00000  | -0.00005 | 0.00003  | -0.00002 | 1.88688  |
| A26 | 1.88660  | 0.00000  | -0.00003 | -0.00001 | -0.00005 | 1.88655  |
| A27 | 1.96010  | 0.00000  | 0.00006  | -0.00003 | 0.00003  | 1.96013  |
| A28 | 1.78802  | -0.00001 | -0.00033 | -0.00012 | -0.00045 | 1.78758  |
| A29 | 2.83412  | 0.00002  | 0.00060  | 0.00024  | 0.00084  | 2.83496  |
| A30 | 2.17703  | 0.00000  | 0.00000  | -0.00001 | -0.00001 | 2.17702  |
| A31 | 1.95557  | 0.00000  | -0.00001 | 0.00000  | -0.00001 | 1.95556  |
| A32 | 2.15059  | 0.00000  | 0.00001  | 0.00001  | 0.00002  | 2.15061  |
| A33 | 2.07971  | 0.00000  | 0.00000  | -0.00001 | 0.00000  | 2.07971  |
| A34 | 2.15742  | 0.00000  | -0.00001 | 0.00001  | 0.00000  | 2.15742  |
| A35 | 2.04605  | 0.00000  | 0.00000  | 0.00000  | 0.00000  | 2.04606  |
| A36 | 1.91275  | 0.00000  | 0.00007  | -0.00004 | 0.00004  | 1.91279  |
| A37 | 3.05142  | 0.00001  | 0.00070  | 0.00010  | 0.00079  | 3.05221  |
| A38 | 2.07421  | 0.00001  | -0.00001 | 0.00003  | 0.00002  | 2.07423  |
| A39 | 2.08788  | 0.00000  | 0.00003  | -0.00003 | 0.00000  | 2.08787  |
| A40 | 2.00176  | 0.00000  | -0.00004 | -0.00002 | -0.00007 | 2.00170  |
| A41 | 1.98460  | 0.00000  | -0.00001 | 0.00002  | 0.00001  | 1.98461  |
| A42 | 2.04015  | 0.00000  | 0.00001  | 0.00000  | 0.00001  | 2.04017  |
| A43 | 2.04570  | 0.00000  | 0.00001  | -0.00003 | -0.00002 | 2.04568  |
| A44 | 2.13300  | 0.00000  | 0.00003  | -0.00001 | 0.00001  | 2.13301  |
| A45 | 1.94918  | 0.00000  | -0.00008 | 0.00009  | 0.00002  | 1.94920  |
| A46 | 2.04647  | 0.00000  | 0.00004  | -0.00003 | 0.00001  | 2.04648  |
| A47 | 2.02219  | 0.00000  | -0.00002 | 0.00001  | -0.00001 | 2.02218  |
| A48 | 1.43031  | 0.00001  | 0.00067  | 0.00013  | 0.00081  | 1.43112  |
| A49 | 0.99987  | 0.00000  | 0.00010  | 0.00011  | 0.00020  | 1.00007  |
| A50 | 2.37372  | 0.00000  | 0.00071  | 0.00032  | 0.00103  | 2.37475  |
| A51 | 2.35119  | 0.00000  | 0.00027  | -0.00006 | 0.00021  | 2.35140  |
| A52 | 1.93143  | -0.00001 | -0.00001 | -0.00002 | -0.00003 | 1.93140  |
| A53 | 1.91233  | 0.00000  | -0.00002 | 0.00002  | 0.00000  | 1.91233  |
| A54 | 1.93763  | 0.00000  | -0.00003 | 0.00001  | -0.00002 | 1.93760  |
| A55 | 1.88374  | 0.00000  | 0.00001  | -0.00001 | 0.00001  | 1.88375  |
| A56 | 1.91355  | 0.00000  | 0.00004  | 0.00000  | 0.00004  | 1.91359  |
| A57 | 1.88374  | 0.00000  | 0.00001  | 0.00000  | 0.00001  | 1.88375  |
| A58 | 3.78150  | 0.00001  | 0.00095  | 0.00007  | 0.00102  | 3.78252  |
| A59 | 5.04358  | -0.00001 | -0.00071 | -0.00047 | -0.00118 | 5.04240  |
| D1  | 0.00436  | 0.00000  | -0.00008 | 0.00002  | -0.00006 | 0.00430  |
| D2  | -3.13135 | 0.00000  | -0.00017 | 0.00005  | -0.00012 | -3.13147 |
| D3  | 3.13662  | 0.00000  | 0.00012  | -0.00006 | 0.00006  | 3.13668  |
| D4  | 0.00090  | 0.00000  | 0.00003  | -0.00003 | 0.00001  | 0.00091  |
| D5  | -0.00676 | 0.00000  | 0.00008  | -0.00003 | 0.00004  | -0.00672 |
| D6  | -3.09817 | 0.00001  | 0.00006  | 0.00009  | 0.00015  | -3.09802 |

|     |          |          |          |          |          |          |
|-----|----------|----------|----------|----------|----------|----------|
| D7  | -3.13998 | 0.00000  | -0.00010 | 0.00003  | -0.00007 | -3.14005 |
| D8  | 0.05179  | 0.00001  | -0.00011 | 0.00015  | 0.00004  | 0.05183  |
| D9  | -0.00055 | 0.00000  | 0.00006  | 0.00001  | 0.00007  | -0.00048 |
| D10 | -3.13670 | 0.00000  | 0.00000  | 0.00003  | 0.00003  | -3.13667 |
| D11 | 3.13572  | 0.00000  | 0.00014  | -0.00002 | 0.00011  | 3.13584  |
| D12 | -0.00043 | 0.00000  | 0.00008  | 0.00000  | 0.00008  | -0.00035 |
| D13 | -0.00366 | 0.00000  | -0.00001 | -0.00003 | -0.00004 | -0.00370 |
| D14 | 3.13753  | 0.00000  | 0.00021  | -0.00010 | 0.00011  | 3.13764  |
| D15 | 3.13291  | 0.00000  | 0.00004  | -0.00005 | -0.00001 | 3.13290  |
| D16 | -0.00908 | 0.00000  | 0.00026  | -0.00012 | 0.00014  | -0.00895 |
| D17 | 0.00133  | 0.00000  | 0.00062  | 0.00010  | 0.00072  | 0.00205  |
| D18 | -3.14044 | 0.00000  | 0.00057  | 0.00012  | 0.00069  | -3.13975 |
| D19 | -3.13415 | 0.00000  | 0.00055  | 0.00013  | 0.00068  | -3.13347 |
| D20 | 0.00726  | 0.00000  | 0.00051  | 0.00014  | 0.00065  | 0.00791  |
| D21 | 0.00642  | 0.00000  | -0.00004 | 0.00004  | 0.00000  | 0.00642  |
| D22 | 3.09938  | 0.00000  | -0.00003 | -0.00008 | -0.00010 | 3.09928  |
| D23 | -3.13479 | 0.00000  | -0.00025 | 0.00011  | -0.00014 | -3.13493 |
| D24 | -0.04183 | 0.00000  | -0.00024 | -0.00001 | -0.00025 | -0.04208 |
| D25 | -3.10799 | 0.00000  | 0.00066  | -0.00041 | 0.00025  | -3.10774 |
| D26 | 0.03315  | 0.00000  | 0.00092  | -0.00050 | 0.00042  | 0.03357  |
| D27 | 1.40885  | 0.00000  | -0.00017 | 0.00027  | 0.00010  | 1.40895  |
| D28 | -2.76641 | 0.00000  | -0.00021 | 0.00030  | 0.00009  | -2.76632 |
| D29 | -0.70597 | 0.00000  | -0.00022 | 0.00029  | 0.00007  | -0.70590 |
| D30 | -1.67535 | 0.00001  | -0.00019 | 0.00041  | 0.00022  | -1.67512 |
| D31 | 0.43258  | 0.00000  | -0.00022 | 0.00044  | 0.00022  | 0.43280  |
| D32 | 2.49302  | 0.00000  | -0.00023 | 0.00042  | 0.00020  | 2.49321  |
| D33 | -0.93893 | 0.00000  | -0.00016 | 0.00001  | -0.00015 | -0.93908 |
| D34 | 1.12317  | 0.00000  | -0.00025 | 0.00006  | -0.00020 | 1.12298  |
| D35 | -3.00748 | 0.00000  | -0.00015 | 0.00003  | -0.00012 | -3.00760 |
| D36 | -3.01157 | 0.00000  | -0.00014 | -0.00002 | -0.00016 | -3.01173 |
| D37 | -0.94947 | 0.00000  | -0.00024 | 0.00002  | -0.00021 | -0.94968 |
| D38 | 1.20307  | 0.00000  | -0.00013 | -0.00001 | -0.00014 | 1.20293  |
| D39 | 1.15426  | 0.00000  | -0.00010 | -0.00002 | -0.00011 | 1.15414  |
| D40 | -3.06683 | 0.00000  | -0.00019 | 0.00003  | -0.00016 | -3.06699 |
| D41 | -0.91429 | 0.00000  | -0.00009 | 0.00000  | -0.00009 | -0.91438 |
| D42 | -1.63865 | 0.00000  | 0.00113  | -0.00002 | 0.00111  | -1.63755 |
| D43 | 2.55971  | 0.00000  | 0.00113  | -0.00001 | 0.00112  | 2.56083  |
| D44 | 0.47966  | -0.00001 | 0.00118  | -0.00003 | 0.00115  | 0.48081  |
| D45 | 0.43251  | 0.00000  | -0.00175 | 0.00038  | -0.00138 | 0.43114  |
| D46 | -0.27139 | 0.00001  | 0.00194  | 0.00033  | 0.00228  | -0.26912 |
| D47 | 2.56681  | 0.00001  | 0.00194  | 0.00061  | 0.00255  | 2.56936  |
| D48 | -3.14153 | 0.00000  | 0.00001  | 0.00004  | 0.00005  | -3.14147 |
| D49 | 0.00055  | 0.00000  | 0.00004  | 0.00001  | 0.00005  | 0.00061  |
| D50 | 0.00027  | 0.00000  | 0.00006  | 0.00002  | 0.00008  | 0.00035  |

|     |          |         |          |          |          |          |
|-----|----------|---------|----------|----------|----------|----------|
| D51 | -3.14084 | 0.00000 | 0.00009  | -0.00001 | 0.00008  | -3.14076 |
| D52 | -1.92856 | 0.00000 | -0.00635 | -0.00029 | -0.00664 | -1.93520 |
| D53 | 2.43685  | 0.00000 | 0.00532  | -0.00001 | 0.00531  | 2.44216  |
| D54 | 2.06655  | 0.00000 | 0.00500  | 0.00019  | 0.00519  | 2.07173  |
| D55 | -2.60673 | 0.00000 | 0.00603  | 0.00047  | 0.00650  | -2.60024 |
| D56 | -2.72927 | 0.00000 | -0.00015 | 0.00008  | -0.00007 | -2.72934 |
| D57 | -0.03026 | 0.00000 | -0.00010 | 0.00000  | -0.00010 | -0.03036 |
| D58 | -0.02181 | 0.00000 | -0.00007 | 0.00009  | 0.00001  | -0.02179 |
| D59 | 2.67720  | 0.00000 | -0.00002 | 0.00000  | -0.00002 | 2.67718  |
| D60 | -0.17089 | 0.00000 | 0.00003  | 0.00015  | 0.00017  | -0.17072 |
| D61 | 0.26904  | 0.00000 | 0.00043  | -0.00011 | 0.00032  | 0.26936  |
| D62 | -2.58319 | 0.00000 | 0.00007  | 0.00015  | 0.00022  | -2.58297 |
| D63 | -2.14326 | 0.00000 | 0.00047  | -0.00010 | 0.00037  | -2.14289 |
| D64 | 2.14495  | 0.00000 | -0.00107 | -0.00037 | -0.00144 | 2.14351  |
| D65 | -0.24832 | 0.00000 | -0.00100 | -0.00046 | -0.00146 | -0.24978 |
| D66 | 2.48885  | 0.00000 | -0.00014 | -0.00002 | -0.00016 | 2.48870  |
| D67 | -1.71917 | 0.00000 | -0.00014 | -0.00003 | -0.00017 | -1.71934 |
| D68 | 0.35982  | 0.00000 | -0.00016 | -0.00001 | -0.00018 | 0.35964  |
| D69 | 1.27267  | 0.00000 | -0.00018 | 0.00001  | -0.00016 | 1.27251  |
| D70 | -2.93535 | 0.00000 | -0.00018 | 0.00000  | -0.00017 | -2.93553 |
| D71 | -0.85637 | 0.00000 | -0.00020 | 0.00002  | -0.00018 | -0.85655 |
| D72 | -1.08980 | 0.00000 | -0.00008 | -0.00011 | -0.00019 | -1.08999 |
| D73 | 0.98536  | 0.00000 | -0.00009 | -0.00012 | -0.00021 | 0.98516  |
| D74 | 3.06435  | 0.00000 | -0.00011 | -0.00010 | -0.00021 | 3.06414  |

| Item                 | Value    | Threshold | Converged? |
|----------------------|----------|-----------|------------|
| Maximum Force        | 0.000018 | 0.000450  | YES        |
| RMS Force            | 0.000003 | 0.000300  | YES        |
| Maximum Displacement | 0.006720 | 0.001800  | NO         |
| RMS Displacement     | 0.001610 | 0.001200  | NO         |

Predicted change in Energy=-4.057922D-08

GradGradGradGradGradGradGradGradGradGradGradGradGradGradGradGradGradGradGrad

Input orientation:

| Center Number | Atomic Number | Atomic Type | Coordinates (Angstroms) |           |           |
|---------------|---------------|-------------|-------------------------|-----------|-----------|
|               |               |             | X                       | Y         | Z         |
| 1             | 6             | 0           | -1.376322               | -1.908773 | -0.258238 |
| 2             | 6             | 0           | -2.507926               | -1.168912 | -0.138059 |
| 3             | 7             | 0           | -2.110009               | 0.112318  | 0.230908  |
| 4             | 6             | 0           | -0.766458               | 0.135865  | 0.329498  |
| 5             | 7             | 0           | -0.305742               | -1.080321 | 0.041728  |
| 6             | 6             | 0           | 1.127589                | -1.435840 | -0.006635 |
| 7             | 6             | 0           | 1.683395                | -1.372410 | -1.440163 |

|    |    |   |           |           |           |
|----|----|---|-----------|-----------|-----------|
| 8  | 1  | 0 | -1.242076 | -2.943962 | -0.521087 |
| 9  | 1  | 0 | -3.537953 | -1.442332 | -0.276345 |
| 10 | 1  | 0 | 1.651891  | -0.725458 | 0.634589  |
| 11 | 1  | 0 | 1.237113  | -2.444884 | 0.392852  |
| 12 | 1  | 0 | 1.064651  | -1.989775 | -2.102355 |
| 13 | 1  | 0 | 1.635184  | -0.336838 | -1.796329 |
| 14 | 35 | 0 | 1.651750  | 2.233513  | 1.022977  |
| 15 | 1  | 0 | -0.114754 | 0.994355  | 0.599593  |
| 16 | 6  | 0 | -2.914368 | 1.256518  | 0.486944  |
| 17 | 6  | 0 | -4.238554 | 1.281623  | 0.412108  |
| 18 | 1  | 0 | -2.318783 | 2.120414  | 0.754542  |
| 19 | 1  | 0 | -4.760841 | 2.203693  | 0.626076  |
| 20 | 1  | 0 | -4.840153 | 0.421811  | 0.146011  |
| 21 | 8  | 0 | 2.991157  | -1.883717 | -1.463246 |
| 22 | 1  | 0 | 3.630912  | -1.151965 | -1.363304 |
| 23 | 6  | 0 | 4.838602  | 1.611607  | -1.121551 |
| 24 | 6  | 0 | 5.711752  | 0.751372  | -0.313527 |
| 25 | 8  | 0 | 4.858021  | 0.176706  | -1.331979 |
| 26 | 1  | 0 | 3.922077  | 1.993242  | -0.677993 |
| 27 | 1  | 0 | 5.259014  | 2.179934  | -1.946725 |
| 28 | 1  | 0 | 6.762498  | 0.703442  | -0.595361 |
| 29 | 6  | 0 | 5.400412  | 0.411942  | 1.118040  |
| 30 | 1  | 0 | 5.679540  | -0.622820 | 1.339002  |
| 31 | 1  | 0 | 5.974328  | 1.065021  | 1.782766  |
| 32 | 1  | 0 | 4.340520  | 0.560245  | 1.334021  |

-----  
Distance matrix (angstroms):

|    |    | 1        | 2        | 3        | 4        | 5        |
|----|----|----------|----------|----------|----------|----------|
| 1  | C  | 0.000000 |          |          |          |          |
| 2  | C  | 1.357338 | 0.000000 |          |          |          |
| 3  | N  | 2.205079 | 1.391411 | 0.000000 |          |          |
| 4  | C  | 2.213123 | 2.225706 | 1.347370 | 0.000000 |          |
| 5  | N  | 1.386526 | 2.211286 | 2.171073 | 1.331983 | 0.000000 |
| 6  | C  | 2.560575 | 3.647670 | 3.596563 | 2.484080 | 1.477556 |
| 7  | C  | 3.323628 | 4.393639 | 4.403046 | 3.377628 | 2.497596 |
| 8  | H  | 1.076442 | 2.213570 | 3.264912 | 3.230331 | 2.160240 |
| 9  | H  | 2.211457 | 1.074633 | 2.171005 | 3.246373 | 3.267937 |
| 10 | H  | 3.371565 | 4.254141 | 3.875142 | 2.585221 | 2.075991 |
| 11 | H  | 2.746157 | 3.991903 | 4.215298 | 3.267809 | 2.089431 |
| 12 | H  | 3.060339 | 4.158796 | 4.465577 | 3.712844 | 2.702254 |
| 13 | H  | 3.729058 | 4.539557 | 4.282278 | 3.241986 | 2.774602 |
| 14 | Br | 5.288598 | 5.497946 | 4.390635 | 3.275480 | 3.971917 |
| 15 | H  | 3.279571 | 3.309249 | 2.212456 | 1.111159 | 2.156843 |
| 16 | C  | 3.597214 | 2.537427 | 1.421879 | 2.427791 | 3.530434 |

|    |    |          |          |          |           |          |
|----|----|----------|----------|----------|-----------|----------|
| 17 | C  | 4.338244 | 3.050062 | 2.435325 | 3.657190  | 4.602496 |
| 18 | H  | 4.260083 | 3.413529 | 2.085720 | 2.555154  | 3.847746 |
| 19 | H  | 5.399015 | 4.127226 | 3.399546 | 4.507657  | 5.565440 |
| 20 | H  | 4.194421 | 2.837319 | 2.748941 | 4.087838  | 4.777882 |
| 21 | O  | 4.530733 | 5.701490 | 5.733778 | 4.627344  | 3.712134 |
| 22 | H  | 5.183274 | 6.259940 | 6.090822 | 4.884767  | 4.180490 |
| 23 | C  | 7.194697 | 7.916440 | 7.236035 | 5.974952  | 5.921484 |
| 24 | C  | 7.571013 | 8.442831 | 7.866686 | 6.539078  | 6.300123 |
| 25 | O  | 6.661019 | 7.582434 | 7.141443 | 5.864890  | 5.489229 |
| 26 | H  | 6.593554 | 7.185798 | 6.383576 | 5.142689  | 5.276291 |
| 27 | H  | 7.974723 | 8.649359 | 7.957363 | 6.757642  | 6.749054 |
| 28 | H  | 8.554397 | 9.468664 | 8.930483 | 7.606752  | 7.317630 |
| 29 | C  | 7.294106 | 8.162028 | 7.568567 | 6.223206  | 5.995456 |
| 30 | H  | 7.347792 | 8.337537 | 7.902239 | 6.568530  | 6.141321 |
| 31 | H  | 8.187869 | 8.979346 | 8.286882 | 6.957982  | 6.860976 |
| 32 | H  | 6.427568 | 7.215139 | 6.559484 | 5.222106  | 5.094039 |
|    |    | 6        | 7        | 8        | 9         | 10       |
| 6  | C  | 0.000000 |          |          |           |          |
| 7  | C  | 1.538813 | 0.000000 |          |           |          |
| 8  | H  | 2.855592 | 3.445701 | 0.000000 |           |          |
| 9  | H  | 4.673336 | 5.349938 | 2.754241 | 0.000000  |          |
| 10 | H  | 1.091192 | 2.173507 | 3.825230 | 5.317724  | 0.000000 |
| 11 | H  | 1.090760 | 2.170095 | 2.689004 | 4.924855  | 1.785190 |
| 12 | H  | 2.168605 | 1.096578 | 2.954973 | 4.981763  | 3.071516 |
| 13 | H  | 2.160663 | 1.096170 | 4.086803 | 5.503982  | 2.461842 |
| 14 | Br | 3.846946 | 4.367006 | 6.128998 | 6.491001  | 2.984352 |
| 15 | H  | 2.795850 | 3.604930 | 4.247013 | 4.292203  | 2.465769 |
| 16 | C  | 4.881580 | 5.635993 | 4.632140 | 2.873197  | 4.980035 |
| 17 | C  | 6.029548 | 6.748650 | 5.263583 | 2.895641  | 6.226975 |
| 18 | H  | 5.010371 | 5.747520 | 5.332395 | 3.904134  | 4.886679 |
| 19 | H  | 6.951269 | 7.654152 | 6.340035 | 3.950103  | 7.050045 |
| 20 | H  | 6.252049 | 6.949234 | 4.971882 | 2.312820  | 6.610716 |
| 21 | O  | 2.407321 | 1.404353 | 4.464531 | 6.650777  | 2.745197 |
| 22 | H  | 2.861427 | 1.961460 | 5.259904 | 7.256612  | 2.844294 |
| 23 | C  | 4.929663 | 4.354446 | 7.621575 | 8.955869  | 4.324468 |
| 24 | C  | 5.088480 | 4.691207 | 7.877455 | 9.506354  | 4.422943 |
| 25 | O  | 4.274688 | 3.534079 | 6.899804 | 8.615569  | 3.867888 |
| 26 | H  | 4.474202 | 4.113419 | 7.146263 | 8.222928  | 3.777294 |
| 27 | H  | 5.822924 | 5.065650 | 8.399460 | 9.659069  | 5.302436 |
| 28 | H  | 6.056015 | 5.551588 | 8.796719 | 10.526414 | 5.447278 |
| 29 | C  | 4.789175 | 4.852270 | 7.620464 | 9.234555  | 3.947000 |
| 30 | H  | 4.815806 | 4.924918 | 7.533684 | 9.393781  | 4.090072 |
| 31 | H  | 5.739959 | 5.894102 | 8.570657 | 10.050385 | 4.817425 |
| 32 | H  | 4.013058 | 4.300182 | 6.847355 | 8.286974  | 3.061203 |

|    |    | 11       | 12        | 13       | 14        | 15        |
|----|----|----------|-----------|----------|-----------|-----------|
| 11 | H  | 0.000000 |           |          |           |           |
| 12 | H  | 2.542229 | 0.000000  |          |           |           |
| 13 | H  | 3.065100 | 1.775208  | 0.000000 |           |           |
| 14 | Br | 4.738817 | 5.286639  | 3.815163 | 0.000000  |           |
| 15 | H  | 3.701170 | 4.194825  | 3.251892 | 2.198932  | 0.000000  |
| 16 | C  | 5.562735 | 5.751128  | 5.333905 | 4.700136  | 2.814117  |
| 17 | C  | 6.623455 | 6.719267  | 6.480541 | 5.997911  | 4.138043  |
| 18 | H  | 5.798032 | 6.041783  | 5.308379 | 3.981204  | 2.479872  |
| 19 | H  | 7.592043 | 7.678923  | 7.295991 | 6.424932  | 4.800971  |
| 20 | H  | 6.723989 | 6.762958  | 6.802810 | 6.796774  | 4.781520  |
| 21 | O  | 2.614705 | 2.032519  | 2.083852 | 4.992685  | 4.710126  |
| 22 | H  | 3.238210 | 2.798896  | 2.198835 | 4.590521  | 4.742328  |
| 23 | C  | 5.631985 | 5.307979  | 3.809678 | 3.891245  | 5.280063  |
| 24 | C  | 5.544134 | 5.684131  | 4.472283 | 4.524003  | 5.902627  |
| 25 | O  | 4.791529 | 4.435851  | 3.296365 | 4.478442  | 5.397037  |
| 26 | H  | 5.296481 | 5.104716  | 3.451062 | 2.847001  | 4.350403  |
| 27 | H  | 6.560355 | 5.916366  | 4.414624 | 4.672724  | 6.063557  |
| 28 | H  | 6.435713 | 6.479962  | 5.367853 | 5.574933  | 6.986354  |
| 29 | C  | 5.101020 | 5.910838  | 4.819871 | 4.168887  | 5.570013  |
| 30 | H  | 4.893902 | 5.916816  | 5.125319 | 4.947889  | 6.061009  |
| 31 | H  | 6.057433 | 6.966410  | 5.796835 | 4.541732  | 6.203371  |
| 32 | H  | 4.421282 | 5.389119  | 4.233520 | 3.182147  | 4.536221  |
|    |    | 16       | 17        | 18       | 19        | 20        |
| 16 | C  | 0.000000 |           |          |           |           |
| 17 | C  | 1.326537 | 0.000000  |          |           |           |
| 18 | H  | 1.082888 | 2.122817  | 0.000000 |           |           |
| 19 | H  | 2.079895 | 1.081101  | 2.446852 | 0.000000  |           |
| 20 | H  | 2.126410 | 1.082592  | 3.100462 | 1.847121  | 0.000000  |
| 21 | O  | 6.967032 | 8.112031  | 7.010500 | 9.009199  | 8.320732  |
| 22 | H  | 7.215601 | 8.426324  | 7.112849 | 9.254167  | 8.747214  |
| 23 | C  | 7.926025 | 9.211718  | 7.416655 | 9.775176  | 9.833647  |
| 24 | C  | 8.677895 | 9.990811  | 8.216115 | 10.614486 | 10.567047 |
| 25 | O  | 8.055091 | 9.327934  | 7.722570 | 10.023231 | 9.813210  |
| 26 | H  | 6.974010 | 8.263814  | 6.404426 | 8.782822  | 8.940081  |
| 27 | H  | 8.577856 | 9.827251  | 8.045085 | 10.344920 | 10.462491 |
| 28 | H  | 9.752897 | 11.062207 | 9.289764 | 11.684605 | 11.629722 |
| 29 | C  | 8.381357 | 9.703832  | 7.914353 | 10.329737 | 10.286598 |
| 30 | H  | 8.838165 | 10.141727 | 8.475854 | 10.839695 | 10.638534 |
| 31 | H  | 8.984694 | 10.306725 | 8.422992 | 10.857180 | 10.956536 |
| 32 | H  | 7.337284 | 8.658570  | 6.864128 | 9.275607  | 9.258255  |
|    |    | 21       | 22        | 23       | 24        | 25        |
| 21 | O  | 0.000000 |           |          |           |           |
| 22 | H  | 0.977106 | 0.000000  |          |           |           |



|    |   |          |          |          |          |          |
|----|---|----------|----------|----------|----------|----------|
| 23 | C | 3.968261 | 3.025606 | 0.000000 |          |          |
| 24 | C | 3.958180 | 3.009090 | 1.468093 | 0.000000 |          |
| 25 | O | 2.783479 | 1.808907 | 1.450378 | 1.447876 | 0.000000 |
| 26 | H | 4.063748 | 3.232145 | 1.087385 | 2.208623 | 2.145575 |
| 27 | H | 4.678695 | 3.754018 | 1.086579 | 2.216551 | 2.133455 |
| 28 | H | 4.655065 | 3.720094 | 2.191578 | 1.088942 | 2.108812 |
| 29 | C | 4.211603 | 3.425493 | 2.602036 | 1.503838 | 2.520340 |
| 30 | H | 4.082874 | 3.432103 | 3.428434 | 2.149487 | 2.906592 |
| 31 | H | 5.303863 | 4.506038 | 3.166020 | 2.135828 | 3.425913 |
| 32 | H | 3.952017 | 3.272732 | 2.717219 | 2.152027 | 2.742711 |
|    |   | 26       | 27       | 28       | 29       | 30       |
| 26 | H | 0.000000 |          |          |          |          |
| 27 | H | 1.852548 | 0.000000 |          |          |          |
| 28 | H | 3.120641 | 2.503333 | 0.000000 |          |          |
| 29 | C | 2.812777 | 3.540984 | 2.208165 | 0.000000 |          |
| 30 | H | 3.741755 | 4.339156 | 2.583318 | 1.094290 | 0.000000 |
| 31 | H | 3.335965 | 3.957752 | 2.531292 | 1.094419 | 1.769925 |
| 32 | H | 2.505349 | 3.772309 | 3.099838 | 1.091793 | 1.786797 |
|    |   | 31       | 32       |          |          |          |
| 31 | H | 0.000000 |          |          |          |          |
| 32 | H | 1.767908 | 0.000000 |          |          |          |

Stoichiometry C10H17BrN2O2

Framework group C1[X(C10H17BrN2O2)]

Deg. of freedom 90

Full point group C1 NOp 1

Largest Abelian subgroup C1 NOp 1

Largest concise Abelian subgroup C1 NOp 1

Standard orientation:

| Center<br>Number | Atomic<br>Number | Atomic<br>Type | Coordinates (Angstroms) |          |           |
|------------------|------------------|----------------|-------------------------|----------|-----------|
|                  |                  |                | X                       | Y        | Z         |
| 1                | 6                | 0              | -2.710548               | 2.114242 | -0.438495 |
| 2                | 6                | 0              | -3.788608               | 1.349742 | -0.129150 |
| 3                | 7                | 0              | -3.321483               | 0.049822 | 0.038265  |
| 4                | 6                | 0              | -1.990033               | 0.039250 | -0.167975 |
| 5                | 7                | 0              | -1.603739               | 1.279469 | -0.462616 |
| 6                | 6                | 0              | -0.201464               | 1.677677 | -0.703916 |
| 7                | 6                | 0              | 0.455321                | 2.251221 | 0.564007  |
| 8                | 1                | 0              | -2.637053               | 3.167395 | -0.648717 |
| 9                | 1                | 0              | -4.824317               | 1.615440 | -0.021693 |
| 10               | 1                | 0              | 0.329425                | 0.783282 | -1.033941 |
| 11               | 1                | 0              | -0.196378               | 2.424774 | -1.498633 |
| 12               | 1                | 0              | -0.161036               | 3.066705 | 0.960961  |

|    |    |   |           |           |           |
|----|----|---|-----------|-----------|-----------|
| 13 | 1  | 0 | 0.510235  | 1.464125  | 1.324962  |
| 14 | 35 | 0 | 0.526011  | -2.057797 | -0.141762 |
| 15 | 1  | 0 | -1.295563 | -0.826400 | -0.112880 |
| 16 | 6  | 0 | -4.052858 | -1.125267 | 0.363835  |
| 17 | 6  | 0 | -5.363011 | -1.168031 | 0.567235  |
| 18 | 1  | 0 | -3.413631 | -1.996944 | 0.428765  |
| 19 | 1  | 0 | -5.827674 | -2.113308 | 0.810790  |
| 20 | 1  | 0 | -6.008016 | -0.300922 | 0.503234  |
| 21 | 8  | 0 | 1.719168  | 2.774661  | 0.246344  |
| 22 | 1  | 0 | 2.403940  | 2.095466  | 0.402920  |
| 23 | 6  | 0 | 3.797379  | -0.459287 | 1.231085  |
| 24 | 6  | 0 | 4.545076  | 0.009538  | 0.057862  |
| 25 | 8  | 0 | 3.722824  | 0.928586  | 0.816542  |
| 26 | 1  | 0 | 2.883844  | -1.028803 | 1.077750  |
| 27 | 1  | 0 | 4.315573  | -0.606170 | 2.174777  |
| 28 | 1  | 0 | 5.606159  | 0.213794  | 0.192677  |
| 29 | 6  | 0 | 4.110752  | -0.303990 | -1.347339 |
| 30 | 1  | 0 | 4.294950  | 0.548868  | -2.007774 |
| 31 | 1  | 0 | 4.685040  | -1.154605 | -1.727340 |
| 32 | 1  | 0 | 3.052707  | -0.571396 | -1.379696 |

-----

Rotational constants (GHZ):      0.6001623      0.2211833      0.1722952

Standard basis: 6-311++G(d,p) (5D, 7F)

There are    492 symmetry adapted cartesian basis functions of A    symmetry.

There are    475 symmetry adapted basis functions of A    symmetry.

    475 basis functions,    751 primitive gaussians,    492 cartesian basis functions

    71 alpha electrons      71 beta electrons

        nuclear repulsion energy      1307.2303066825 Hartrees.

NAtoms=    32 NActive=    32 NUniq=    32 SFac= 1.00D+00 NAtFMM=    60 NAOKFM=F

Big=F

Integral buffers will be    131072 words long.

Raffenetti 2 integral format.

Two-electron integral symmetry is turned on.

One-electron integrals computed using PRISM.

NBasis=    475 RedAO= T EigKep=    3.78D-06    NBF=    475

NBsUse=    475 1.00D-06 EigRej= -1.00D+00    NBFU=    475

Initial guess from the checkpoint file: "/home/suqian/liuwen/qianmengshijie/ohpo/ohpo.chk"

B after Tr=      0.000000      0.000000      0.000000

        Rot=      1.000000    -0.000087    -0.000034    0.000035 Ang=    -0.01 deg.

Requested convergence on RMS density matrix=1.00D-08 within 128 cycles.

Requested convergence on MAX density matrix=1.00D-06.

Requested convergence on                    energy=1.00D-06.

No special actions if energy rises.

SCF Done: E(RB3LYP) = -3225.52371228      A.U. after    8 cycles



Berny optimization.

Using GEDIIS/GDIIS optimizer.

FormGI is forming the generalized inverse of G from B-inverse, IUseBI=4.

GSVD: received Info= 1 from GESDD.

Internal Forces: Max 0.000019220 RMS 0.000003384

Search for a local minimum.

Step number 37 out of a maximum of 177

All quantities printed in internal units (Hartrees-Bohrs-Radians)

Mixed Optimization -- En-DIIS/RFO-DIIS

Swapping is turned off.

Update second derivatives using D2CorX and points 24 25 26 27 28  
29 30 31 32 33  
34 35 36 37

DE= 3.26D-07 DEPred=-4.06D-08 R=-8.03D+00

Trust test=-8.03D+00 RLast= 1.32D-02 DXMaxT set to 4.86D-01

ITU= -1 -1 0 0 1 1 0 1 1 1 1 1 1 1 1 1 1 1 1 1

ITU= -1 1 1 1 1 1 1 1 1 1 1 1 0 1 0 1 0

|                 |         |         |         |         |         |
|-----------------|---------|---------|---------|---------|---------|
| Eigenvalues --- | 0.00003 | 0.00055 | 0.00117 | 0.00190 | 0.00235 |
| Eigenvalues --- | 0.00313 | 0.00430 | 0.00696 | 0.01121 | 0.01241 |
| Eigenvalues --- | 0.01316 | 0.01560 | 0.01824 | 0.01961 | 0.02014 |
| Eigenvalues --- | 0.02121 | 0.02237 | 0.02322 | 0.02397 | 0.02623 |
| Eigenvalues --- | 0.03043 | 0.03067 | 0.03226 | 0.03477 | 0.03710 |
| Eigenvalues --- | 0.04092 | 0.04625 | 0.05168 | 0.05391 | 0.05450 |
| Eigenvalues --- | 0.05670 | 0.05889 | 0.06487 | 0.09328 | 0.09434 |
| Eigenvalues --- | 0.10318 | 0.11088 | 0.11496 | 0.11632 | 0.12997 |
| Eigenvalues --- | 0.13825 | 0.14132 | 0.14397 | 0.15162 | 0.15973 |
| Eigenvalues --- | 0.15998 | 0.16001 | 0.16004 | 0.16018 | 0.16035 |
| Eigenvalues --- | 0.16060 | 0.17013 | 0.19060 | 0.21303 | 0.22051 |
| Eigenvalues --- | 0.22847 | 0.23398 | 0.23861 | 0.24273 | 0.25033 |
| Eigenvalues --- | 0.27749 | 0.28410 | 0.30896 | 0.31944 | 0.33107 |
| Eigenvalues --- | 0.33228 | 0.34052 | 0.34195 | 0.34472 | 0.34837 |
| Eigenvalues --- | 0.35029 | 0.35685 | 0.35690 | 0.35857 | 0.36251 |
| Eigenvalues --- | 0.36435 | 0.36674 | 0.37203 | 0.37245 | 0.37610 |
| Eigenvalues --- | 0.38533 | 0.42178 | 0.42516 | 0.45346 | 0.45852 |
| Eigenvalues --- | 0.49380 | 0.54399 | 0.55453 | 0.55767 | 0.60391 |

Eigenvalue 1 is 3.49D-05 Eigenvector:

|   |         |          |          |          |          |
|---|---------|----------|----------|----------|----------|
|   | D52     | D54      | D53      | D55      | D25      |
| 1 | 0.50791 | -0.49863 | -0.49468 | -0.48826 | 0.04247  |
|   | D26     | D47      | D45      | D46      | D28      |
| 1 | 0.03632 | -0.03010 | -0.03000 | -0.02985 | -0.01778 |

En-DIIS/RFO-DIIS IScMMF= 0 using points: 37 36 35 34 33

RFO step: Lambda=-5.29641283D-09.

DidBck=F Rises=F RFO-DIIS coefs: 2.12806 -1.34009 -0.24000 0.64223 -  
0.19019

| Iteration 1 | RMS(Cart)= | 0.00126201 | RMS(Int)=           | 0.00000244        |                    |         |
|-------------|------------|------------|---------------------|-------------------|--------------------|---------|
| Iteration 2 | RMS(Cart)= | 0.00000731 | RMS(Int)=           | 0.00000051        |                    |         |
| Iteration 3 | RMS(Cart)= | 0.00000000 | RMS(Int)=           | 0.00000051        |                    |         |
| Variable    | Old X      | -DE/DX     | Delta X<br>(Linear) | Delta X<br>(Quad) | Delta X<br>(Total) | New X   |
| R1          | 2.56500    | 0.00000    | 0.00000             | 0.00001           | 0.00001            | 2.56500 |
| R2          | 2.62015    | 0.00000    | 0.00000             | 0.00000           | 0.00000            | 2.62015 |
| R3          | 2.03418    | 0.00000    | 0.00000             | 0.00000           | 0.00000            | 2.03418 |
| R4          | 2.62939    | 0.00000    | 0.00000             | 0.00000           | 0.00000            | 2.62939 |
| R5          | 2.03076    | 0.00000    | 0.00000             | 0.00000           | 0.00000            | 2.03076 |
| R6          | 2.54616    | 0.00000    | -0.00001            | 0.00000           | -0.00001           | 2.54615 |
| R7          | 2.68696    | 0.00000    | 0.00000             | 0.00001           | 0.00001            | 2.68697 |
| R8          | 2.51708    | 0.00000    | 0.00002             | 0.00001           | 0.00003            | 2.51711 |
| R9          | 2.09979    | 0.00000    | 0.00008             | 0.00000           | 0.00008            | 2.09986 |
| R10         | 2.79218    | 0.00000    | -0.00004            | 0.00001           | -0.00002           | 2.79215 |
| R11         | 2.90794    | -0.00001   | 0.00000             | 0.00000           | 0.00000            | 2.90794 |
| R12         | 2.06205    | 0.00000    | 0.00000             | 0.00000           | -0.00001           | 2.06205 |
| R13         | 2.06124    | 0.00000    | 0.00000             | 0.00000           | 0.00000            | 2.06124 |
| R14         | 2.07223    | 0.00000    | -0.00001            | 0.00000           | -0.00001           | 2.07222 |
| R15         | 2.07146    | 0.00000    | 0.00000             | 0.00000           | 0.00000            | 2.07146 |
| R16         | 2.65384    | 0.00002    | 0.00001             | 0.00002           | 0.00003            | 2.65387 |
| R17         | 4.15538    | 0.00000    | -0.00051            | -0.00003          | -0.00054           | 4.15484 |
| R18         | 8.46303    | 0.00000    | -0.00062            | 0.00013           | -0.00049           | 8.46254 |
| R19         | 2.50679    | 0.00000    | 0.00000             | 0.00000           | 0.00000            | 2.50679 |
| R20         | 2.04636    | 0.00000    | 0.00000             | 0.00000           | 0.00000            | 2.04637 |
| R21         | 2.04298    | 0.00000    | 0.00000             | 0.00000           | 0.00000            | 2.04299 |
| R22         | 2.04580    | 0.00000    | 0.00000             | 0.00000           | 0.00000            | 2.04580 |
| R23         | 1.84646    | -0.00001   | 0.00000             | -0.00001          | -0.00001           | 1.84646 |
| R24         | 3.41834    | 0.00000    | -0.00014            | 0.00003           | -0.00011           | 3.41822 |
| R25         | 2.77429    | 0.00000    | 0.00001             | 0.00000           | 0.00001            | 2.77431 |
| R26         | 2.74082    | 0.00000    | 0.00000             | 0.00000           | 0.00000            | 2.74082 |
| R27         | 2.05486    | 0.00000    | 0.00000             | 0.00000           | 0.00000            | 2.05486 |
| R28         | 2.05334    | 0.00000    | 0.00000             | 0.00000           | 0.00000            | 2.05334 |
| R29         | 2.73609    | -0.00001   | 0.00000             | -0.00003          | -0.00002           | 2.73606 |
| R30         | 2.05780    | 0.00000    | 0.00001             | 0.00000           | 0.00000            | 2.05780 |
| R31         | 2.84184    | 0.00000    | 0.00003             | -0.00001          | 0.00001            | 2.84186 |
| R32         | 2.06791    | 0.00000    | 0.00000             | 0.00000           | 0.00000            | 2.06791 |
| R33         | 2.06815    | 0.00000    | 0.00000             | 0.00000           | 0.00000            | 2.06815 |
| R34         | 2.06319    | 0.00000    | 0.00000             | 0.00000           | 0.00000            | 2.06319 |
| A1          | 1.87431    | 0.00000    | 0.00000             | 0.00000           | 0.00000            | 1.87431 |
| A2          | 2.27810    | 0.00000    | -0.00001            | 0.00001           | 0.00000            | 2.27810 |
| A3          | 2.13074    | 0.00000    | 0.00001             | -0.00001          | 0.00000            | 2.13074 |
| A4          | 1.86187    | 0.00000    | -0.00001            | 0.00001           | 0.00000            | 1.86187 |
| A5          | 2.27708    | 0.00000    | 0.00001             | 0.00000           | 0.00000            | 2.27708 |

|     |         |          |          |          |          |         |
|-----|---------|----------|----------|----------|----------|---------|
| A6  | 2.14423 | 0.00000  | 0.00000  | -0.00001 | -0.00001 | 2.14422 |
| A7  | 1.89723 | 0.00000  | 0.00003  | -0.00002 | 0.00000  | 1.89723 |
| A8  | 2.24844 | 0.00000  | 0.00000  | 0.00001  | 0.00001  | 2.24845 |
| A9  | 2.13751 | 0.00000  | -0.00002 | 0.00001  | -0.00001 | 2.13749 |
| A10 | 1.88930 | 0.00000  | -0.00003 | 0.00002  | -0.00001 | 1.88929 |
| A11 | 2.23462 | 0.00000  | 0.00001  | -0.00003 | -0.00002 | 2.23460 |
| A12 | 2.15927 | 0.00000  | 0.00002  | 0.00001  | 0.00002  | 2.15929 |
| A13 | 1.90205 | 0.00000  | 0.00001  | -0.00001 | 0.00000  | 1.90205 |
| A14 | 2.21202 | 0.00000  | 0.00000  | 0.00000  | 0.00001  | 2.21202 |
| A15 | 2.16796 | 0.00000  | -0.00003 | 0.00001  | -0.00002 | 2.16794 |
| A16 | 1.95083 | -0.00001 | -0.00001 | 0.00002  | 0.00001  | 1.95084 |
| A17 | 1.86526 | 0.00000  | 0.00004  | -0.00001 | 0.00003  | 1.86529 |
| A18 | 1.88389 | 0.00000  | 0.00001  | 0.00000  | 0.00001  | 1.88390 |
| A19 | 1.92522 | 0.00000  | -0.00003 | 0.00001  | -0.00002 | 1.92520 |
| A20 | 1.92096 | 0.00000  | 0.00003  | -0.00002 | 0.00001  | 1.92097 |
| A21 | 1.91641 | 0.00000  | -0.00004 | 0.00000  | -0.00004 | 1.91637 |
| A22 | 1.91298 | 0.00000  | 0.00000  | -0.00001 | -0.00001 | 1.91297 |
| A23 | 1.90259 | 0.00000  | -0.00003 | 0.00000  | -0.00003 | 1.90257 |
| A24 | 1.91416 | 0.00000  | 0.00002  | 0.00000  | 0.00003  | 1.91418 |
| A25 | 1.88688 | 0.00000  | 0.00003  | 0.00001  | 0.00003  | 1.88691 |
| A26 | 1.88655 | 0.00000  | -0.00002 | 0.00000  | -0.00002 | 1.88654 |
| A27 | 1.96013 | 0.00000  | 0.00000  | -0.00001 | 0.00000  | 1.96013 |
| A28 | 1.78758 | -0.00001 | -0.00034 | -0.00018 | -0.00051 | 1.78706 |
| A29 | 2.83496 | 0.00002  | 0.00058  | 0.00017  | 0.00076  | 2.83572 |
| A30 | 2.17702 | 0.00000  | 0.00000  | 0.00000  | 0.00000  | 2.17702 |
| A31 | 1.95556 | 0.00000  | 0.00000  | 0.00000  | -0.00001 | 1.95555 |
| A32 | 2.15061 | 0.00000  | 0.00000  | 0.00000  | 0.00001  | 2.15061 |
| A33 | 2.07971 | 0.00000  | -0.00001 | 0.00000  | -0.00001 | 2.07970 |
| A34 | 2.15742 | 0.00000  | 0.00001  | 0.00000  | 0.00001  | 2.15743 |
| A35 | 2.04606 | 0.00000  | 0.00000  | 0.00000  | 0.00000  | 2.04605 |
| A36 | 1.91279 | 0.00000  | 0.00000  | -0.00002 | -0.00001 | 1.91278 |
| A37 | 3.05221 | 0.00000  | 0.00057  | 0.00008  | 0.00065  | 3.05286 |
| A38 | 2.07423 | 0.00001  | 0.00008  | -0.00003 | 0.00005  | 2.07428 |
| A39 | 2.08787 | 0.00000  | -0.00003 | 0.00000  | -0.00003 | 2.08784 |
| A40 | 2.00170 | 0.00000  | -0.00001 | 0.00004  | 0.00003  | 2.00172 |
| A41 | 1.98461 | 0.00000  | -0.00003 | -0.00001 | -0.00004 | 1.98456 |
| A42 | 2.04017 | 0.00000  | -0.00001 | 0.00001  | 0.00000  | 2.04016 |
| A43 | 2.04568 | 0.00000  | 0.00000  | 0.00004  | 0.00004  | 2.04572 |
| A44 | 2.13301 | 0.00000  | -0.00001 | -0.00002 | -0.00003 | 2.13298 |
| A45 | 1.94920 | 0.00000  | 0.00004  | -0.00004 | 0.00000  | 1.94921 |
| A46 | 2.04648 | 0.00000  | -0.00005 | 0.00000  | -0.00005 | 2.04643 |
| A47 | 2.02218 | 0.00000  | 0.00001  | 0.00000  | 0.00001  | 2.02219 |
| A48 | 1.43112 | 0.00000  | 0.00043  | 0.00013  | 0.00057  | 1.43169 |
| A49 | 1.00007 | 0.00000  | 0.00002  | 0.00004  | 0.00006  | 1.00013 |

|     |          |         |          |          |          |          |
|-----|----------|---------|----------|----------|----------|----------|
| A50 | 2.37475  | 0.00000 | 0.00047  | 0.00011  | 0.00058  | 2.37533  |
| A51 | 2.35140  | 0.00000 | 0.00019  | 0.00012  | 0.00032  | 2.35172  |
| A52 | 1.93140  | 0.00000 | -0.00003 | 0.00001  | -0.00003 | 1.93137  |
| A53 | 1.91233  | 0.00000 | 0.00002  | 0.00001  | 0.00003  | 1.91236  |
| A54 | 1.93760  | 0.00000 | -0.00004 | -0.00002 | -0.00005 | 1.93755  |
| A55 | 1.88375  | 0.00000 | 0.00001  | 0.00000  | 0.00001  | 1.88375  |
| A56 | 1.91359  | 0.00000 | 0.00003  | 0.00000  | 0.00003  | 1.91362  |
| A57 | 1.88375  | 0.00000 | 0.00001  | 0.00001  | 0.00002  | 1.88377  |
| A58 | 3.78252  | 0.00001 | 0.00063  | 0.00026  | 0.00089  | 3.78341  |
| A59 | 5.04240  | 0.00000 | -0.00066 | -0.00003 | -0.00069 | 5.04171  |
| D1  | 0.00430  | 0.00000 | -0.00003 | 0.00002  | -0.00001 | 0.00429  |
| D2  | -3.13147 | 0.00000 | 0.00004  | 0.00001  | 0.00005  | -3.13142 |
| D3  | 3.13668  | 0.00000 | -0.00011 | 0.00000  | -0.00011 | 3.13657  |
| D4  | 0.00091  | 0.00000 | -0.00004 | -0.00001 | -0.00005 | 0.00086  |
| D5  | -0.00672 | 0.00000 | -0.00002 | 0.00001  | 0.00000  | -0.00673 |
| D6  | -3.09802 | 0.00000 | 0.00029  | 0.00000  | 0.00030  | -3.09773 |
| D7  | -3.14005 | 0.00000 | 0.00006  | 0.00003  | 0.00009  | -3.13997 |
| D8  | 0.05183  | 0.00000 | 0.00037  | 0.00002  | 0.00038  | 0.05222  |
| D9  | -0.00048 | 0.00000 | 0.00006  | -0.00005 | 0.00002  | -0.00046 |
| D10 | -3.13667 | 0.00000 | 0.00005  | 0.00003  | 0.00008  | -3.13659 |
| D11 | 3.13584  | 0.00000 | 0.00000  | -0.00004 | -0.00003 | 3.13580  |
| D12 | -0.00035 | 0.00000 | -0.00001 | 0.00004  | 0.00003  | -0.00032 |
| D13 | -0.00370 | 0.00000 | -0.00008 | 0.00006  | -0.00002 | -0.00372 |
| D14 | 3.13764  | 0.00000 | -0.00010 | 0.00003  | -0.00006 | 3.13757  |
| D15 | 3.13290  | 0.00000 | -0.00006 | -0.00002 | -0.00008 | 3.13282  |
| D16 | -0.00895 | 0.00000 | -0.00008 | -0.00004 | -0.00012 | -0.00907 |
| D17 | 0.00205  | 0.00000 | 0.00049  | -0.00001 | 0.00049  | 0.00254  |
| D18 | -3.13975 | 0.00000 | 0.00048  | -0.00005 | 0.00043  | -3.13932 |
| D19 | -3.13347 | 0.00000 | 0.00048  | 0.00008  | 0.00056  | -3.13291 |
| D20 | 0.00791  | 0.00000 | 0.00046  | 0.00004  | 0.00051  | 0.00842  |
| D21 | 0.00642  | 0.00000 | 0.00006  | -0.00004 | 0.00001  | 0.00644  |
| D22 | 3.09928  | 0.00000 | -0.00024 | -0.00003 | -0.00027 | 3.09900  |
| D23 | -3.13493 | 0.00000 | 0.00008  | -0.00002 | 0.00006  | -3.13488 |
| D24 | -0.04208 | 0.00000 | -0.00022 | -0.00001 | -0.00023 | -0.04231 |
| D25 | -3.10774 | 0.00000 | -0.00097 | -0.00065 | -0.00162 | -3.10936 |
| D26 | 0.03357  | 0.00000 | -0.00100 | -0.00068 | -0.00167 | 0.03189  |
| D27 | 1.40895  | 0.00000 | 0.00033  | 0.00029  | 0.00063  | 1.40957  |
| D28 | -2.76632 | 0.00000 | 0.00031  | 0.00031  | 0.00062  | -2.76569 |
| D29 | -0.70590 | 0.00000 | 0.00029  | 0.00030  | 0.00060  | -0.70530 |
| D30 | -1.67512 | 0.00001 | 0.00068  | 0.00028  | 0.00097  | -1.67416 |
| D31 | 0.43280  | 0.00000 | 0.00066  | 0.00030  | 0.00096  | 0.43376  |
| D32 | 2.49321  | 0.00000 | 0.00064  | 0.00029  | 0.00094  | 2.49415  |
| D33 | -0.93908 | 0.00000 | -0.00007 | 0.00004  | -0.00003 | -0.93910 |
| D34 | 1.12298  | 0.00000 | -0.00006 | 0.00005  | -0.00001 | 1.12296  |

|     |          |          |          |          |          |          |
|-----|----------|----------|----------|----------|----------|----------|
| D35 | -3.00760 | 0.00000  | -0.00006 | 0.00004  | -0.00002 | -3.00762 |
| D36 | -3.01173 | 0.00000  | -0.00009 | 0.00003  | -0.00005 | -3.01178 |
| D37 | -0.94968 | 0.00000  | -0.00008 | 0.00004  | -0.00004 | -0.94971 |
| D38 | 1.20293  | 0.00000  | -0.00008 | 0.00004  | -0.00004 | 1.20289  |
| D39 | 1.15414  | 0.00000  | -0.00004 | 0.00004  | 0.00000  | 1.15415  |
| D40 | -3.06699 | 0.00000  | -0.00003 | 0.00005  | 0.00002  | -3.06697 |
| D41 | -0.91438 | 0.00000  | -0.00003 | 0.00004  | 0.00001  | -0.91437 |
| D42 | -1.63755 | 0.00000  | 0.00058  | -0.00005 | 0.00052  | -1.63703 |
| D43 | 2.56083  | 0.00000  | 0.00058  | -0.00005 | 0.00053  | 2.56136  |
| D44 | 0.48081  | -0.00001 | 0.00055  | -0.00005 | 0.00050  | 0.48131  |
| D45 | 0.43114  | 0.00000  | 0.00045  | 0.00065  | 0.00110  | 0.43224  |
| D46 | -0.26912 | 0.00000  | 0.00155  | 0.00006  | 0.00162  | -0.26750 |
| D47 | 2.56936  | 0.00000  | 0.00168  | -0.00008 | 0.00160  | 2.57096  |
| D48 | -3.14147 | 0.00000  | 0.00005  | -0.00005 | 0.00000  | -3.14148 |
| D49 | 0.00061  | 0.00000  | 0.00003  | -0.00001 | 0.00002  | 0.00063  |
| D50 | 0.00035  | 0.00000  | 0.00007  | -0.00001 | 0.00006  | 0.00040  |
| D51 | -3.14076 | 0.00000  | 0.00005  | 0.00004  | 0.00008  | -3.14067 |
| D52 | -1.93520 | 0.00000  | -0.00643 | 0.00110  | -0.00534 | -1.94053 |
| D53 | 2.44216  | 0.00000  | 0.00540  | -0.00122 | 0.00418  | 2.44634  |
| D54 | 2.07173  | 0.00000  | 0.00537  | -0.00145 | 0.00391  | 2.07565  |
| D55 | -2.60024 | 0.00000  | 0.00607  | -0.00119 | 0.00487  | -2.59536 |
| D56 | -2.72934 | 0.00000  | 0.00000  | -0.00001 | -0.00001 | -2.72935 |
| D57 | -0.03036 | 0.00000  | 0.00001  | 0.00005  | 0.00005  | -0.03031 |
| D58 | -0.02179 | 0.00000  | 0.00008  | -0.00005 | 0.00003  | -0.02176 |
| D59 | 2.67718  | 0.00000  | 0.00008  | 0.00001  | 0.00009  | 2.67728  |
| D60 | -0.17072 | 0.00000  | 0.00015  | -0.00003 | 0.00011  | -0.17060 |
| D61 | 0.26936  | 0.00000  | 0.00021  | 0.00024  | 0.00046  | 0.26982  |
| D62 | -2.58297 | 0.00000  | 0.00022  | -0.00008 | 0.00014  | -2.58283 |
| D63 | -2.14289 | 0.00000  | 0.00029  | 0.00019  | 0.00048  | -2.14241 |
| D64 | 2.14351  | 0.00000  | -0.00065 | -0.00024 | -0.00089 | 2.14262  |
| D65 | -0.24978 | 0.00000  | -0.00067 | -0.00019 | -0.00086 | -0.25064 |
| D66 | 2.48870  | 0.00000  | -0.00019 | -0.00005 | -0.00024 | 2.48846  |
| D67 | -1.71934 | 0.00000  | -0.00018 | -0.00004 | -0.00023 | -1.71957 |
| D68 | 0.35964  | 0.00000  | -0.00018 | -0.00004 | -0.00022 | 0.35943  |
| D69 | 1.27251  | 0.00000  | -0.00016 | -0.00005 | -0.00020 | 1.27230  |
| D70 | -2.93553 | 0.00000  | -0.00015 | -0.00004 | -0.00020 | -2.93572 |
| D71 | -0.85655 | 0.00000  | -0.00015 | -0.00004 | -0.00018 | -0.85673 |
| D72 | -1.08999 | 0.00000  | -0.00019 | 0.00002  | -0.00017 | -1.09016 |
| D73 | 0.98516  | 0.00000  | -0.00018 | 0.00002  | -0.00016 | 0.98500  |
| D74 | 3.06414  | 0.00000  | -0.00018 | 0.00003  | -0.00015 | 3.06400  |

| Item                 | Value    | Threshold | Converged? |
|----------------------|----------|-----------|------------|
| Maximum Force        | 0.000019 | 0.000450  | YES        |
| RMS Force            | 0.000003 | 0.000300  | YES        |
| Maximum Displacement | 0.005034 | 0.001800  | NO         |



RMS Displacement 0.001269 0.001200 NO

Predicted change in Energy=-1.846804D-08

GradGradGradGradGradGradGradGradGradGradGradGradGradGradGradGradGrad

Input orientation:

| Center<br>Number | Atomic<br>Number | Atomic<br>Type | Coordinates (Angstroms) |           |           |
|------------------|------------------|----------------|-------------------------|-----------|-----------|
|                  |                  |                | X                       | Y         | Z         |
| 1                | 6                | 0              | -1.375937               | -1.909159 | -0.257127 |
| 2                | 6                | 0              | -2.507539               | -1.169286 | -0.136969 |
| 3                | 7                | 0              | -2.109544               | 0.112244  | 0.230872  |
| 4                | 6                | 0              | -0.765952               | 0.135973  | 0.328804  |
| 5                | 7                | 0              | -0.305277               | -1.080409 | 0.041723  |
| 6                | 6                | 0              | 1.128060                | -1.435750 | -0.007376 |
| 7                | 6                | 0              | 1.683166                | -1.372128 | -1.441169 |
| 8                | 1                | 0              | -1.241745               | -2.944555 | -0.519190 |
| 9                | 1                | 0              | -3.537615               | -1.442885 | -0.274530 |
| 10               | 1                | 0              | 1.652616                | -0.725377 | 0.633642  |
| 11               | 1                | 0              | 1.237917                | -2.444805 | 0.391992  |
| 12               | 1                | 0              | 1.064187                | -1.989531 | -2.103097 |
| 13               | 1                | 0              | 1.634638                | -0.336524 | -1.797197 |
| 14               | 35               | 0              | 1.651146                | 2.235278  | 1.020791  |
| 15               | 1                | 0              | -0.114180               | 0.994772  | 0.597919  |
| 16               | 6                | 0              | -2.913864               | 1.256560  | 0.486529  |
| 17               | 6                | 0              | -4.238125               | 1.281364  | 0.412903  |
| 18               | 1                | 0              | -2.318177               | 2.120807  | 0.752771  |
| 19               | 1                | 0              | -4.760365               | 2.203558  | 0.626453  |
| 20               | 1                | 0              | -4.839833               | 0.421186  | 0.148238  |
| 21               | 8                | 0              | 2.991001                | -1.883257 | -1.464964 |
| 22               | 1                | 0              | 3.630683                | -1.151475 | -1.364803 |
| 23               | 6                | 0              | 4.839246                | 1.611869  | -1.121148 |
| 24               | 6                | 0              | 5.711324                | 0.750973  | -0.312657 |
| 25               | 8                | 0              | 4.857892                | 0.176979  | -1.331721 |
| 26               | 1                | 0              | 3.922672                | 1.994070  | -0.678183 |
| 27               | 1                | 0              | 5.260579                | 2.179980  | -1.946002 |
| 28               | 1                | 0              | 6.762228                | 0.702359  | -0.593789 |
| 29               | 6                | 0              | 5.398763                | 0.411550  | 1.118653  |
| 30               | 1                | 0              | 5.676876                | -0.623493 | 1.339582  |
| 31               | 1                | 0              | 5.972781                | 1.064012  | 1.783895  |
| 32               | 1                | 0              | 4.338844                | 0.560714  | 1.333913  |

Distance matrix (angstroms):

1 2 3 4 5

|    |    |          |          |          |          |          |
|----|----|----------|----------|----------|----------|----------|
| 1  | C  | 0.000000 |          |          |          |          |
| 2  | C  | 1.357341 | 0.000000 |          |          |          |
| 3  | N  | 2.205084 | 1.391412 | 0.000000 |          |          |
| 4  | C  | 2.213133 | 2.225706 | 1.347365 | 0.000000 |          |
| 5  | N  | 1.386524 | 2.211287 | 2.171078 | 1.331999 | 0.000000 |
| 6  | C  | 2.560565 | 3.647654 | 3.596545 | 2.484072 | 1.477543 |
| 7  | C  | 3.323924 | 4.393643 | 4.402697 | 3.377181 | 2.497594 |
| 8  | H  | 1.076443 | 2.213573 | 3.264918 | 3.230344 | 2.160239 |
| 9  | H  | 2.211463 | 1.074633 | 2.171001 | 3.246370 | 3.267938 |
| 10 | H  | 3.371489 | 4.254149 | 3.875266 | 2.585406 | 2.075996 |
| 11 | H  | 2.745998 | 3.991890 | 4.215443 | 3.268011 | 2.089428 |
| 12 | H  | 3.060763 | 4.158809 | 4.465137 | 3.712320 | 2.702256 |
| 13 | H  | 3.729418 | 4.539546 | 4.281747 | 3.241291 | 2.774574 |
| 14 | Br | 5.288918 | 5.497828 | 4.390220 | 3.275407 | 3.972398 |
| 15 | H  | 3.279626 | 3.309286 | 2.212478 | 1.111200 | 2.156907 |
| 16 | C  | 3.597224 | 2.537435 | 1.421882 | 2.427781 | 3.530440 |
| 17 | C  | 4.338259 | 3.050077 | 2.435329 | 3.657181 | 4.602504 |
| 18 | H  | 4.260087 | 3.413533 | 2.085721 | 2.555136 | 3.847746 |
| 19 | H  | 5.399029 | 4.127241 | 3.399548 | 4.507642 | 5.565444 |
| 20 | H  | 4.194449 | 2.837347 | 2.748954 | 4.087842 | 4.777900 |
| 21 | O  | 4.530970 | 5.701515 | 5.733537 | 4.627050 | 3.712159 |
| 22 | H  | 5.183365 | 6.259845 | 6.090433 | 4.884283 | 4.180328 |
| 23 | C  | 7.195323 | 7.916987 | 7.236195 | 5.974854 | 5.921718 |
| 24 | C  | 7.570248 | 8.442036 | 7.865709 | 6.537951 | 6.299129 |
| 25 | O  | 6.660882 | 7.582179 | 7.140802 | 5.864013 | 5.488687 |
| 26 | H  | 6.594524 | 7.186609 | 6.383987 | 5.142932 | 5.276954 |
| 27 | H  | 7.976008 | 8.650656 | 7.958206 | 6.758091 | 6.749811 |
| 28 | H  | 8.553543 | 9.467857 | 8.929538 | 7.605621 | 7.316540 |
| 29 | C  | 7.292120 | 8.159978 | 7.566533 | 6.221215 | 5.993479 |
| 30 | H  | 7.344698 | 8.334431 | 7.899297 | 6.565706 | 6.138352 |
| 31 | H  | 8.185913 | 8.977370 | 8.285030 | 6.956226 | 6.859134 |
| 32 | H  | 6.425761 | 7.213138 | 6.557403 | 5.220114 | 5.092239 |
|    |    | 6        | 7        | 8        | 9        | 10       |
| 6  | C  | 0.000000 |          |          |          |          |
| 7  | C  | 1.538815 | 0.000000 |          |          |          |
| 8  | H  | 2.855595 | 3.446401 | 0.000000 |          |          |
| 9  | H  | 4.673323 | 5.350011 | 2.754249 | 0.000000 |          |
| 10 | H  | 1.091189 | 2.173491 | 3.825061 | 5.317715 | 0.000000 |
| 11 | H  | 1.090759 | 2.170106 | 2.688629 | 4.924815 | 1.785162 |
| 12 | H  | 2.168594 | 1.096573 | 2.956037 | 4.981873 | 3.071495 |
| 13 | H  | 2.160643 | 1.096169 | 4.087628 | 5.504067 | 2.461810 |
| 14 | Br | 3.848011 | 4.367568 | 6.129520 | 6.490761 | 2.985860 |
| 15 | H  | 2.795886 | 3.604240 | 4.247073 | 4.292231 | 2.466122 |
| 16 | C  | 4.881560 | 5.635487 | 4.632151 | 2.873201 | 4.980207 |

|    |    |          |          |          |           |          |
|----|----|----------|----------|----------|-----------|----------|
| 17 | C  | 6.029534 | 6.748355 | 5.263599 | 2.895654  | 6.227083 |
| 18 | H  | 5.010337 | 5.746714 | 5.332399 | 3.904136  | 4.886937 |
| 19 | H  | 6.951249 | 7.653737 | 6.340051 | 3.950119  | 7.050180 |
| 20 | H  | 6.252054 | 6.949224 | 4.971912 | 2.312848  | 6.610757 |
| 21 | O  | 2.407358 | 1.404368 | 4.465085 | 6.650857  | 2.745198 |
| 22 | H  | 2.861213 | 1.961464 | 5.260299 | 7.256591  | 2.843957 |
| 23 | C  | 4.929642 | 4.355168 | 7.622454 | 8.956567  | 4.323959 |
| 24 | C  | 5.087363 | 4.691178 | 7.876849 | 9.505648  | 4.421335 |
| 25 | O  | 4.273924 | 3.534203 | 6.899982 | 8.615460  | 3.866613 |
| 26 | H  | 4.474763 | 4.114465 | 7.147482 | 8.223836  | 3.777491 |
| 27 | H  | 5.823185 | 5.066578 | 8.401004 | 9.660600  | 5.302176 |
| 28 | H  | 6.054687 | 5.551433 | 8.795972 | 10.525719 | 5.445471 |
| 29 | C  | 4.787417 | 4.851789 | 7.618550 | 9.232483  | 3.944801 |
| 30 | H  | 4.813085 | 4.923693 | 7.530583 | 9.390613  | 4.086980 |
| 31 | H  | 5.738361 | 5.893778 | 8.568675 | 10.048347 | 4.815478 |
| 32 | H  | 4.011740 | 4.299951 | 6.845719 | 8.284933  | 3.059449 |
|    |    | 11       | 12       | 13       | 14        | 15       |
| 11 | H  | 0.000000 |          |          |           |          |
| 12 | H  | 2.542229 | 0.000000 |          |           |          |
| 13 | H  | 3.065091 | 1.775225 | 0.000000 |           |          |
| 14 | Br | 4.740181 | 5.286985 | 3.815166 | 0.000000  |          |
| 15 | H  | 3.701521 | 4.194055 | 3.250737 | 2.198647  | 0.000000 |
| 16 | C  | 5.562942 | 5.750492 | 5.333122 | 4.699217  | 2.814103 |
| 17 | C  | 6.623579 | 6.718893 | 6.480081 | 5.996915  | 4.138029 |
| 18 | H  | 5.798343 | 6.040799 | 5.307124 | 3.980008  | 2.479827 |
| 19 | H  | 7.592209 | 7.678401 | 7.295352 | 6.423704  | 4.800939 |
| 20 | H  | 6.724013 | 6.762952 | 6.802765 | 6.795960  | 4.781528 |
| 21 | O  | 2.614752 | 2.032516 | 2.083862 | 4.993647  | 4.709637 |
| 22 | H  | 3.237957 | 2.798985 | 2.198933 | 4.591265  | 4.741587 |
| 23 | C  | 5.631676 | 5.308990 | 3.810878 | 3.891083  | 5.279434 |
| 24 | C  | 5.542644 | 5.684358 | 4.472793 | 4.523968  | 5.901278 |
| 25 | O  | 4.790528 | 4.436326 | 3.296926 | 4.478184  | 5.395720 |
| 26 | H  | 5.296867 | 5.105918 | 3.452385 | 2.846845  | 4.350081 |
| 27 | H  | 6.560234 | 5.917703 | 4.416151 | 4.672572  | 6.063356 |
| 28 | H  | 6.433850 | 6.480120 | 5.368393 | 5.574932  | 6.985031 |
| 29 | C  | 5.098965 | 5.910450 | 4.819796 | 4.168956  | 5.568110 |
| 30 | H  | 4.890753 | 5.915658 | 5.124590 | 4.947797  | 6.058479 |
| 31 | H  | 6.055422 | 6.966142 | 5.797000 | 4.542106  | 6.201808 |
| 32 | H  | 4.419967 | 5.388893 | 4.233393 | 3.182127  | 4.534260 |
|    |    | 16       | 17       | 18       | 19        | 20       |
| 16 | C  | 0.000000 |          |          |           |          |
| 17 | C  | 1.326538 | 0.000000 |          |           |          |
| 18 | H  | 1.082890 | 2.122822 | 0.000000 |           |          |
| 19 | H  | 2.079892 | 1.081102 | 2.446852 | 0.000000  |          |

|    |   |          |           |          |           |           |
|----|---|----------|-----------|----------|-----------|-----------|
| 20 | H | 2.126416 | 1.082592  | 3.100471 | 1.847121  | 0.000000  |
| 21 | O | 6.966650 | 8.111811  | 7.009869 | 9.008871  | 8.320747  |
| 22 | H | 7.215065 | 8.425976  | 7.112024 | 9.253704  | 8.747125  |
| 23 | C | 7.926007 | 9.212014  | 7.416152 | 9.775313  | 9.834309  |
| 24 | C | 8.676876 | 9.989959  | 8.214893 | 10.613585 | 10.566366 |
| 25 | O | 8.054298 | 9.327427  | 7.721370 | 10.022591 | 9.813041  |
| 26 | H | 6.974145 | 8.264201  | 6.404053 | 8.783000  | 8.940829  |
| 27 | H | 8.578545 | 9.828394  | 8.045150 | 10.345888 | 10.464106 |
| 28 | H | 9.751973 | 11.061484 | 9.288648 | 11.683866 | 11.629164 |
| 29 | C | 8.379343 | 9.701766  | 7.912433 | 10.327702 | 10.284485 |
| 30 | H | 8.835333 | 10.138760 | 8.473276 | 10.836825 | 10.635404 |
| 31 | H | 8.982911 | 10.304827 | 8.421403 | 10.855352 | 10.954507 |
| 32 | H | 7.335124 | 8.656327  | 6.862037 | 9.273351  | 9.255993  |
|    |   | 21       | 22        | 23       | 24        | 25        |
| 21 | O | 0.000000 |           |          |           |           |
| 22 | H | 0.977103 | 0.000000  |          |           |           |
| 23 | C | 3.968642 | 3.025898  | 0.000000 |           |           |
| 24 | C | 3.958173 | 3.009217  | 1.468100 | 0.000000  |           |
| 25 | O | 2.783452 | 1.808846  | 1.450379 | 1.447863  | 0.000000  |
| 26 | H | 4.064566 | 3.232825  | 1.087384 | 2.208659  | 2.145593  |
| 27 | H | 4.678918 | 3.754057  | 1.086580 | 2.216539  | 2.133427  |
| 28 | H | 4.654729 | 3.719910  | 2.191614 | 1.088944  | 2.108806  |
| 29 | C | 4.211714 | 3.425888  | 2.602025 | 1.503845  | 2.520297  |
| 30 | H | 4.082451 | 3.432109  | 3.428361 | 2.149474  | 2.906433  |
| 31 | H | 5.304007 | 4.506452  | 3.166121 | 2.135857  | 3.425912  |
| 32 | H | 3.952643 | 3.273553  | 2.717104 | 2.151997  | 2.742675  |
|    |   | 26       | 27        | 28       | 29        | 30        |
| 26 | H | 0.000000 |           |          |           |           |
| 27 | H | 1.852545 | 0.000000  |          |           |           |
| 28 | H | 3.120692 | 2.503356  | 0.000000 |           |           |
| 29 | C | 2.812799 | 3.540981  | 2.208182 | 0.000000  |           |
| 30 | H | 3.741690 | 4.339104  | 2.583369 | 1.094290  | 0.000000  |
| 31 | H | 3.336134 | 3.957871  | 2.531285 | 1.094418  | 1.769928  |
| 32 | H | 2.505243 | 3.772196  | 3.099821 | 1.091794  | 1.786815  |
|    |   | 31       | 32        |          |           |           |
| 31 | H | 0.000000 |           |          |           |           |
| 32 | H | 1.767921 | 0.000000  |          |           |           |

Stoichiometry C10H17BrN2O2

Framework group C1[X(C10H17BrN2O2)]

Deg. of freedom 90

Full point group C1 NOp 1

Largest Abelian subgroup C1 NOp 1

Largest concise Abelian subgroup C1 NOp 1

Standard orientation:

| Center<br>Number | Atomic<br>Number | Atomic<br>Type | Coordinates (Angstroms) |           |           |
|------------------|------------------|----------------|-------------------------|-----------|-----------|
|                  |                  |                | X                       | Y         | Z         |
| 1                | 6                | 0              | -2.710301               | 2.114523  | -0.438953 |
| 2                | 6                | 0              | -3.788323               | 1.349861  | -0.129869 |
| 3                | 7                | 0              | -3.321004               | 0.050062  | 0.037951  |
| 4                | 6                | 0              | -1.989477               | 0.039714  | -0.167772 |
| 5                | 7                | 0              | -1.603316               | 1.279969  | -0.462506 |
| 6                | 6                | 0              | -0.200996               | 1.678453  | -0.703010 |
| 7                | 6                | 0              | 0.455264                | 2.251244  | 0.565527  |
| 8                | 1                | 0              | -2.636951               | 3.167638  | -0.649424 |
| 9                | 1                | 0              | -4.824133               | 1.615357  | -0.022885 |
| 10               | 1                | 0              | 0.330122                | 0.784335  | -1.033404 |
| 11               | 1                | 0              | -0.195656               | 2.426040  | -1.497265 |
| 12               | 1                | 0              | -0.161304               | 3.066434  | 0.962743  |
| 13               | 1                | 0              | 0.509936                | 1.463650  | 1.325983  |
| 14               | 35               | 0              | 0.525692                | -2.058259 | -0.140782 |
| 15               | 1                | 0              | -1.294842               | -0.825827 | -0.112197 |
| 16               | 6                | 0              | -4.052272               | -1.125139 | 0.363372  |
| 17               | 6                | 0              | -5.362583               | -1.168251 | 0.565680  |
| 18               | 1                | 0              | -3.412817               | -1.996587 | 0.429138  |
| 19               | 1                | 0              | -5.827136               | -2.113588 | 0.809217  |
| 20               | 1                | 0              | -6.007830               | -0.301389 | 0.500767  |
| 21               | 8                | 0              | 1.719213                | 2.774992  | 0.248712  |
| 22               | 1                | 0              | 2.403915                | 2.095591  | 0.404680  |
| 23               | 6                | 0              | 3.798160                | -0.460163 | 1.229461  |
| 24               | 6                | 0              | 4.544580                | 0.009632  | 0.055806  |
| 25               | 8                | 0              | 3.722804                | 0.927949  | 0.815861  |
| 26               | 1                | 0              | 2.884642                | -1.029860 | 1.076705  |
| 27               | 1                | 0              | 4.317333                | -0.607444 | 2.172554  |
| 28               | 1                | 0              | 5.605736                | 0.214143  | 0.189677  |
| 29               | 6                | 0              | 4.108908                | -0.303105 | -1.349163 |
| 30               | 1                | 0              | 4.292008                | 0.550327  | -2.009162 |
| 31               | 1                | 0              | 4.683173                | -1.153179 | -1.730404 |
| 32               | 1                | 0              | 3.050948                | -0.570966 | -1.380529 |

Rotational constants (GHZ):      0.6000074      0.2212335      0.1723102

Standard basis: 6-311++G(d,p) (5D, 7F)

There are 492 symmetry adapted cartesian basis functions of A symmetry.

There are 475 symmetry adapted basis functions of A symmetry.

475 basis functions, 751 primitive gaussians, 492 cartesian basis functions

71 alpha electrons      71 beta electrons

nuclear repulsion energy      1307.2399090046 Hartrees.

NAtoms= 32 NActive= 32 NUniq= 32 SFac= 1.00D+00 NatFMM= 60 NAOKFM=F  
Big=F

Integral buffers will be 131072 words long.

Raffenetti 2 integral format.

Two-electron integral symmetry is turned on.

One-electron integrals computed using PRISM.

NBasis= 475 RedAO= T EigKep= 3.78D-06 NBF= 475

NBsUse= 475 1.00D-06 EigRej= -1.00D+00 NBFU= 475

Initial guess from the checkpoint file: "/home/suqian/liuwen/qianmengshijie/ohpo/ohpo.chk"

B after Tr= 0.000000 0.000000 0.000000

Rot= 1.000000 -0.000081 -0.000027 0.000019 Ang= -0.01 deg.

Requested convergence on RMS density matrix=1.00D-08 within 128 cycles.

Requested convergence on MAX density matrix=1.00D-06.

Requested convergence on energy=1.00D-06.

No special actions if energy rises.

SCF Done: E(RB3LYP) = -3225.52371204 A.U. after 8 cycles

NFock= 8 Conv=0.55D-08 -V/T= 2.0018

Calling FoFJK, ICntrl= 2127 FMM=F ISym2X=0 l1Cent= 0 IOpClX= 0 NMat=1 NMatS=1

NMatT=0.

\*\*\*\*\* Axes restored to original set \*\*\*\*\*

| Center<br>Number | Atomic<br>Number | Forces (Hartrees/Bohr) |              |              |
|------------------|------------------|------------------------|--------------|--------------|
|                  |                  | X                      | Y            | Z            |
| 1                | 6                | 0.000000310            | 0.000002011  | -0.000000591 |
| 2                | 6                | -0.000001207           | -0.000002073 | 0.000006222  |
| 3                | 7                | 0.000004130            | 0.000002714  | -0.000004954 |
| 4                | 6                | -0.000001541           | 0.000001269  | 0.000012036  |
| 5                | 7                | -0.000002843           | 0.000003320  | 0.000006553  |
| 6                | 6                | 0.000004326            | 0.000002330  | 0.000001701  |
| 7                | 6                | -0.000018443           | 0.000005387  | 0.000000369  |
| 8                | 1                | -0.000000829           | -0.000000979 | 0.000010949  |
| 9                | 1                | -0.000000398           | 0.000000475  | 0.000005985  |
| 10               | 1                | -0.000000417           | -0.000000763 | 0.000002705  |
| 11               | 1                | -0.000001063           | 0.000002233  | 0.000006930  |
| 12               | 1                | 0.000000362            | -0.000004947 | 0.000006113  |
| 13               | 1                | 0.000002532            | -0.000006837 | 0.000004084  |
| 14               | 35               | -0.000001326           | 0.000007840  | 0.000000892  |
| 15               | 1                | 0.000006505            | -0.000005637 | -0.000023470 |
| 16               | 6                | -0.000000437           | 0.000003261  | -0.000000593 |
| 17               | 6                | 0.000001640            | 0.000001726  | -0.000003865 |
| 18               | 1                | 0.000000612            | 0.000002861  | -0.000005190 |
| 19               | 1                | 0.000000646            | 0.000003224  | -0.000005854 |
| 20               | 1                | -0.000000141           | 0.000002299  | -0.000000864 |

|    |   |              |              |              |
|----|---|--------------|--------------|--------------|
| 21 | 8 | 0.000017005  | -0.000004300 | 0.000011113  |
| 22 | 1 | -0.000009289 | -0.000012471 | -0.000004000 |
| 23 | 6 | -0.000002707 | -0.000011215 | -0.000006458 |
| 24 | 6 | 0.000008644  | -0.000002232 | -0.000015058 |
| 25 | 8 | -0.000005176 | 0.000000260  | 0.000017681  |
| 26 | 1 | 0.000001894  | 0.000000266  | -0.000005252 |
| 27 | 1 | 0.000000299  | -0.000004999 | -0.000007851 |
| 28 | 1 | -0.000001205 | -0.000000140 | -0.000000932 |
| 29 | 6 | -0.000001802 | 0.000006481  | -0.000005815 |
| 30 | 1 | -0.000000818 | 0.000003099  | 0.000002413  |
| 31 | 1 | -0.000000446 | 0.000003527  | -0.000003505 |
| 32 | 1 | 0.000001184  | 0.000002010  | -0.000001494 |

-----  
Cartesian Forces: Max 0.000023470 RMS 0.000006142

GradGradGradGradGradGradGradGradGradGradGradGradGradGradGradGradGradGradGrad

Berny optimization.

Using GEDIIS/GDIIS optimizer.

FormGI is forming the generalized inverse of G from B-inverse, IUseBI=4.

Internal Forces: Max 0.000014469 RMS 0.000002703

Search for a local minimum.

Step number 38 out of a maximum of 177

All quantities printed in internal units (Hartrees-Bohrs-Radians)

Mixed Optimization -- En-DIIS/RFO-DIIS

Swapping is turned off.

Update second derivatives using D2CorX and points

|    |    |    |    |    |    |    |  |  |  |
|----|----|----|----|----|----|----|--|--|--|
| 24 | 25 | 26 | 27 | 28 |    |    |  |  |  |
|    |    | 29 | 30 | 31 | 32 | 33 |  |  |  |
|    |    | 34 | 35 | 36 | 37 | 38 |  |  |  |

DE= 2.43D-07 DEPred=-1.85D-08 R=-1.32D+01

Trust test=-1.32D+01 RLast= 1.04D-02 DXMaxT set to 2.43D-01

ITU= -1 -1 -1 0 0 1 1 0 1 1 1 1 1 1 1 1 1 1 1 1

ITU= 1 -1 1 1 1 1 1 1 1 1 1 1 0 1 0 1 0

|                 |         |         |         |         |         |
|-----------------|---------|---------|---------|---------|---------|
| Eigenvalues --- | 0.00004 | 0.00052 | 0.00097 | 0.00196 | 0.00235 |
| Eigenvalues --- | 0.00318 | 0.00337 | 0.00695 | 0.01079 | 0.01184 |
| Eigenvalues --- | 0.01328 | 0.01555 | 0.01826 | 0.01920 | 0.01993 |
| Eigenvalues --- | 0.02125 | 0.02248 | 0.02281 | 0.02329 | 0.02416 |
| Eigenvalues --- | 0.03027 | 0.03065 | 0.03142 | 0.03502 | 0.03704 |
| Eigenvalues --- | 0.04144 | 0.04622 | 0.05198 | 0.05407 | 0.05425 |
| Eigenvalues --- | 0.05670 | 0.05878 | 0.06514 | 0.09153 | 0.09348 |
| Eigenvalues --- | 0.10350 | 0.11079 | 0.11465 | 0.11586 | 0.12921 |
| Eigenvalues --- | 0.13806 | 0.14126 | 0.14160 | 0.15167 | 0.15983 |
| Eigenvalues --- | 0.15996 | 0.16001 | 0.16001 | 0.16012 | 0.16042 |
| Eigenvalues --- | 0.16060 | 0.16969 | 0.18782 | 0.21081 | 0.22048 |
| Eigenvalues --- | 0.22837 | 0.23407 | 0.23869 | 0.24298 | 0.25050 |

|                 |         |         |         |         |         |
|-----------------|---------|---------|---------|---------|---------|
| Eigenvalues --- | 0.27661 | 0.28378 | 0.30769 | 0.32071 | 0.33105 |
| Eigenvalues --- | 0.33277 | 0.34035 | 0.34203 | 0.34474 | 0.34842 |
| Eigenvalues --- | 0.35038 | 0.35683 | 0.35689 | 0.35856 | 0.36188 |
| Eigenvalues --- | 0.36436 | 0.36673 | 0.37198 | 0.37249 | 0.37606 |
| Eigenvalues --- | 0.38375 | 0.42174 | 0.42536 | 0.44591 | 0.45694 |
| Eigenvalues --- | 0.49401 | 0.54022 | 0.55069 | 0.56343 | 0.60404 |

Eigenvalue 1 is 3.78D-05 Eigenvector:

|   |         |          |          |          |          |
|---|---------|----------|----------|----------|----------|
|   | D52     | D53      | D54      | D55      | D25      |
| 1 | 0.50817 | -0.49686 | -0.49580 | -0.48892 | 0.04423  |
|   | D26     | D45      | D46      | D47      | D64      |
| 1 | 0.03950 | -0.03361 | -0.02667 | -0.02255 | -0.01671 |

En-DIIS/RFO-DIIS IScMMF= 0 using points: 38 37 36 35 34

RFO step: Lambda=-3.37506151D-09.

DidBck=F Rises=F RFO-DIIS coefs: 1.86661 -0.84071 -0.38641 0.48164 -

0.12113

Iteration 1 RMS(Cart)= 0.00070170 RMS(Int)= 0.00000057

Iteration 2 RMS(Cart)= 0.00000094 RMS(Int)= 0.00000032

| Variable | Old X   | -DE/DX   | Delta X<br>(Linear) | Delta X<br>(Quad) | Delta X<br>(Total) | New X   |
|----------|---------|----------|---------------------|-------------------|--------------------|---------|
| R1       | 2.56500 | 0.00000  | 0.00000             | 0.00000           | 0.00000            | 2.56500 |
| R2       | 2.62015 | 0.00000  | 0.00000             | 0.00001           | 0.00000            | 2.62015 |
| R3       | 2.03418 | 0.00000  | 0.00000             | 0.00000           | 0.00000            | 2.03418 |
| R4       | 2.62939 | 0.00000  | 0.00000             | 0.00000           | 0.00000            | 2.62939 |
| R5       | 2.03076 | 0.00000  | 0.00000             | 0.00000           | 0.00000            | 2.03076 |
| R6       | 2.54615 | 0.00000  | -0.00001            | 0.00000           | -0.00001           | 2.54614 |
| R7       | 2.68697 | 0.00000  | 0.00000             | 0.00000           | 0.00000            | 2.68697 |
| R8       | 2.51711 | -0.00001 | 0.00001             | -0.00001          | 0.00000            | 2.51712 |
| R9       | 2.09986 | -0.00001 | 0.00004             | 0.00000           | 0.00004            | 2.09990 |
| R10      | 2.79215 | 0.00000  | -0.00002            | 0.00000           | -0.00002           | 2.79213 |
| R11      | 2.90794 | -0.00001 | -0.00001            | -0.00001          | -0.00002           | 2.90792 |
| R12      | 2.06205 | 0.00000  | -0.00001            | 0.00000           | -0.00001           | 2.06204 |
| R13      | 2.06124 | 0.00000  | 0.00000             | 0.00000           | 0.00000            | 2.06123 |
| R14      | 2.07222 | 0.00000  | -0.00001            | 0.00000           | -0.00001           | 2.07221 |
| R15      | 2.07146 | 0.00000  | -0.00001            | 0.00000           | -0.00001           | 2.07145 |
| R16      | 2.65387 | 0.00001  | 0.00005             | -0.00001          | 0.00004            | 2.65391 |
| R17      | 4.15484 | 0.00000  | -0.00029            | -0.00008          | -0.00037           | 4.15447 |
| R18      | 8.46254 | 0.00000  | -0.00026            | -0.00009          | -0.00035           | 8.46220 |
| R19      | 2.50679 | 0.00000  | 0.00000             | 0.00000           | 0.00000            | 2.50679 |
| R20      | 2.04637 | 0.00000  | 0.00000             | 0.00000           | 0.00000            | 2.04637 |
| R21      | 2.04299 | 0.00000  | 0.00000             | 0.00000           | 0.00000            | 2.04299 |
| R22      | 2.04580 | 0.00000  | 0.00000             | 0.00000           | 0.00000            | 2.04580 |
| R23      | 1.84646 | -0.00001 | -0.00002            | 0.00000           | -0.00002           | 1.84644 |
| R24      | 3.41822 | 0.00000  | -0.00003            | 0.00001           | -0.00002           | 3.41820 |
| R25      | 2.77431 | 0.00000  | 0.00000             | 0.00001           | 0.00001            | 2.77432 |



|     |         |          |          |          |          |         |
|-----|---------|----------|----------|----------|----------|---------|
| R26 | 2.74082 | 0.00000  | -0.00001 | -0.00001 | -0.00002 | 2.74080 |
| R27 | 2.05486 | 0.00000  | 0.00000  | 0.00000  | 0.00000  | 2.05486 |
| R28 | 2.05334 | 0.00000  | 0.00000  | 0.00000  | 0.00000  | 2.05334 |
| R29 | 2.73606 | 0.00000  | -0.00002 | -0.00001 | -0.00003 | 2.73604 |
| R30 | 2.05780 | 0.00000  | 0.00000  | 0.00000  | 0.00000  | 2.05780 |
| R31 | 2.84186 | 0.00000  | 0.00001  | 0.00000  | 0.00001  | 2.84187 |
| R32 | 2.06791 | 0.00000  | 0.00000  | 0.00000  | 0.00000  | 2.06791 |
| R33 | 2.06815 | 0.00000  | 0.00000  | 0.00000  | 0.00000  | 2.06815 |
| R34 | 2.06319 | 0.00000  | 0.00000  | 0.00000  | 0.00000  | 2.06319 |
| A1  | 1.87431 | 0.00000  | 0.00000  | 0.00000  | 0.00000  | 1.87431 |
| A2  | 2.27810 | 0.00000  | 0.00000  | 0.00000  | 0.00000  | 2.27810 |
| A3  | 2.13074 | 0.00000  | 0.00000  | 0.00000  | 0.00000  | 2.13074 |
| A4  | 1.86187 | 0.00000  | 0.00000  | -0.00001 | -0.00001 | 1.86186 |
| A5  | 2.27708 | 0.00000  | 0.00001  | 0.00000  | 0.00001  | 2.27709 |
| A6  | 2.14422 | 0.00000  | -0.00001 | 0.00001  | 0.00000  | 2.14422 |
| A7  | 1.89723 | 0.00000  | 0.00000  | 0.00001  | 0.00001  | 1.89725 |
| A8  | 2.24845 | 0.00000  | 0.00001  | 0.00000  | 0.00001  | 2.24845 |
| A9  | 2.13749 | 0.00000  | -0.00001 | -0.00001 | -0.00002 | 2.13747 |
| A10 | 1.88929 | 0.00000  | 0.00000  | -0.00001 | -0.00001 | 1.88928 |
| A11 | 2.23460 | 0.00000  | -0.00002 | 0.00000  | -0.00001 | 2.23459 |
| A12 | 2.15929 | 0.00000  | 0.00002  | 0.00001  | 0.00002  | 2.15932 |
| A13 | 1.90205 | 0.00000  | 0.00000  | 0.00001  | 0.00001  | 1.90205 |
| A14 | 2.21202 | 0.00000  | 0.00000  | 0.00001  | 0.00001  | 2.21203 |
| A15 | 2.16794 | 0.00000  | -0.00001 | -0.00002 | -0.00003 | 2.16792 |
| A16 | 1.95084 | 0.00000  | 0.00000  | 0.00000  | -0.00001 | 1.95083 |
| A17 | 1.86529 | 0.00000  | 0.00002  | 0.00002  | 0.00004  | 1.86532 |
| A18 | 1.88390 | 0.00000  | 0.00001  | -0.00001 | 0.00000  | 1.88390 |
| A19 | 1.92520 | 0.00000  | 0.00000  | 0.00000  | 0.00000  | 1.92520 |
| A20 | 1.92097 | 0.00000  | 0.00001  | 0.00000  | 0.00001  | 1.92098 |
| A21 | 1.91637 | 0.00000  | -0.00003 | 0.00000  | -0.00003 | 1.91634 |
| A22 | 1.91297 | 0.00000  | 0.00000  | -0.00001 | -0.00001 | 1.91296 |
| A23 | 1.90257 | 0.00000  | -0.00001 | 0.00000  | -0.00001 | 1.90256 |
| A24 | 1.91418 | -0.00001 | 0.00001  | -0.00001 | 0.00000  | 1.91418 |
| A25 | 1.88691 | 0.00000  | 0.00004  | 0.00000  | 0.00004  | 1.88695 |
| A26 | 1.88654 | 0.00000  | -0.00001 | 0.00001  | 0.00000  | 1.88654 |
| A27 | 1.96013 | 0.00000  | -0.00003 | 0.00001  | -0.00002 | 1.96011 |
| A28 | 1.78706 | -0.00001 | -0.00037 | -0.00017 | -0.00054 | 1.78653 |
| A29 | 2.83572 | 0.00001  | 0.00049  | 0.00012  | 0.00061  | 2.83633 |
| A30 | 2.17702 | 0.00000  | 0.00000  | -0.00001 | 0.00000  | 2.17702 |
| A31 | 1.95555 | 0.00000  | 0.00000  | 0.00000  | -0.00001 | 1.95555 |
| A32 | 2.15061 | 0.00000  | 0.00000  | 0.00001  | 0.00001  | 2.15062 |
| A33 | 2.07970 | 0.00000  | -0.00001 | 0.00000  | -0.00001 | 2.07969 |
| A34 | 2.15743 | 0.00000  | 0.00001  | 0.00000  | 0.00001  | 2.15744 |
| A35 | 2.04605 | 0.00000  | 0.00000  | 0.00000  | 0.00000  | 2.04605 |

|     |          |          |          |          |          |          |
|-----|----------|----------|----------|----------|----------|----------|
| A36 | 1.91278  | -0.00001 | -0.00004 | 0.00000  | -0.00004 | 1.91274  |
| A37 | 3.05286  | -0.00001 | 0.00037  | 0.00007  | 0.00044  | 3.05330  |
| A38 | 2.07428  | 0.00000  | 0.00004  | 0.00000  | 0.00004  | 2.07432  |
| A39 | 2.08784  | 0.00000  | -0.00004 | 0.00001  | -0.00003 | 2.08781  |
| A40 | 2.00172  | 0.00000  | 0.00005  | -0.00003 | 0.00002  | 2.00174  |
| A41 | 1.98456  | 0.00000  | -0.00003 | 0.00001  | -0.00002 | 1.98454  |
| A42 | 2.04016  | 0.00000  | -0.00001 | 0.00000  | 0.00000  | 2.04016  |
| A43 | 2.04572  | 0.00000  | 0.00003  | -0.00001 | 0.00002  | 2.04574  |
| A44 | 2.13298  | 0.00000  | -0.00004 | 0.00000  | -0.00004 | 2.13294  |
| A45 | 1.94921  | 0.00000  | 0.00003  | 0.00001  | 0.00005  | 1.94925  |
| A46 | 2.04643  | 0.00000  | -0.00006 | 0.00000  | -0.00005 | 2.04638  |
| A47 | 2.02219  | 0.00000  | 0.00002  | 0.00000  | 0.00002  | 2.02221  |
| A48 | 1.43169  | 0.00000  | 0.00034  | 0.00016  | 0.00050  | 1.43219  |
| A49 | 1.00013  | 0.00000  | 0.00003  | -0.00001 | 0.00002  | 1.00015  |
| A50 | 2.37533  | 0.00000  | 0.00034  | 0.00005  | 0.00040  | 2.37573  |
| A51 | 2.35172  | 0.00001  | 0.00022  | 0.00029  | 0.00050  | 2.35222  |
| A52 | 1.93137  | 0.00000  | -0.00002 | 0.00001  | -0.00001 | 1.93136  |
| A53 | 1.91236  | 0.00000  | 0.00004  | 0.00000  | 0.00003  | 1.91239  |
| A54 | 1.93755  | 0.00000  | -0.00004 | 0.00001  | -0.00003 | 1.93752  |
| A55 | 1.88375  | 0.00000  | 0.00000  | 0.00000  | 0.00000  | 1.88375  |
| A56 | 1.91362  | 0.00000  | 0.00001  | -0.00001 | 0.00000  | 1.91362  |
| A57 | 1.88377  | 0.00000  | 0.00001  | 0.00000  | 0.00001  | 1.88378  |
| A58 | 3.78341  | 0.00001  | 0.00056  | 0.00045  | 0.00101  | 3.78442  |
| A59 | 5.04171  | 0.00000  | -0.00047 | -0.00003 | -0.00050 | 5.04120  |
| D1  | 0.00429  | 0.00000  | 0.00003  | -0.00001 | 0.00002  | 0.00431  |
| D2  | -3.13142 | 0.00000  | 0.00009  | -0.00001 | 0.00009  | -3.13134 |
| D3  | 3.13657  | 0.00000  | -0.00013 | 0.00001  | -0.00012 | 3.13645  |
| D4  | 0.00086  | 0.00000  | -0.00006 | 0.00001  | -0.00005 | 0.00081  |
| D5  | -0.00673 | 0.00000  | -0.00002 | -0.00001 | -0.00004 | -0.00676 |
| D6  | -3.09773 | 0.00000  | 0.00024  | -0.00003 | 0.00021  | -3.09752 |
| D7  | -3.13997 | 0.00000  | 0.00012  | -0.00003 | 0.00009  | -3.13988 |
| D8  | 0.05222  | 0.00000  | 0.00038  | -0.00005 | 0.00033  | 0.05255  |
| D9  | -0.00046 | 0.00000  | -0.00002 | 0.00003  | 0.00000  | -0.00046 |
| D10 | -3.13659 | 0.00000  | 0.00006  | 0.00005  | 0.00010  | -3.13649 |
| D11 | 3.13580  | 0.00000  | -0.00008 | 0.00003  | -0.00006 | 3.13575  |
| D12 | -0.00032 | 0.00000  | 0.00000  | 0.00004  | 0.00004  | -0.00028 |
| D13 | -0.00372 | 0.00000  | 0.00001  | -0.00004 | -0.00003 | -0.00375 |
| D14 | 3.13757  | 0.00000  | -0.00014 | 0.00007  | -0.00006 | 3.13751  |
| D15 | 3.13282  | 0.00000  | -0.00006 | -0.00005 | -0.00012 | 3.13270  |
| D16 | -0.00907 | 0.00000  | -0.00021 | 0.00006  | -0.00015 | -0.00922 |
| D17 | 0.00254  | 0.00000  | 0.00025  | -0.00006 | 0.00018  | 0.00272  |
| D18 | -3.13932 | 0.00000  | 0.00021  | -0.00004 | 0.00017  | -3.13915 |
| D19 | -3.13291 | 0.00000  | 0.00033  | -0.00004 | 0.00029  | -3.13262 |
| D20 | 0.00842  | 0.00000  | 0.00030  | -0.00002 | 0.00027  | 0.00869  |

|     |          |         |          |          |          |          |
|-----|----------|---------|----------|----------|----------|----------|
| D21 | 0.00644  | 0.00000 | 0.00001  | 0.00003  | 0.00004  | 0.00648  |
| D22 | 3.09900  | 0.00000 | -0.00025 | 0.00005  | -0.00020 | 3.09881  |
| D23 | -3.13488 | 0.00000 | 0.00015  | -0.00007 | 0.00007  | -3.13480 |
| D24 | -0.04231 | 0.00000 | -0.00011 | -0.00005 | -0.00016 | -0.04247 |
| D25 | -3.10936 | 0.00000 | -0.00142 | -0.00080 | -0.00222 | -3.11158 |
| D26 | 0.03189  | 0.00000 | -0.00159 | -0.00067 | -0.00226 | 0.02963  |
| D27 | 1.40957  | 0.00000 | 0.00048  | 0.00016  | 0.00064  | 1.41022  |
| D28 | -2.76569 | 0.00000 | 0.00049  | 0.00017  | 0.00066  | -2.76503 |
| D29 | -0.70530 | 0.00000 | 0.00047  | 0.00017  | 0.00064  | -0.70467 |
| D30 | -1.67416 | 0.00000 | 0.00078  | 0.00014  | 0.00092  | -1.67324 |
| D31 | 0.43376  | 0.00000 | 0.00079  | 0.00015  | 0.00094  | 0.43470  |
| D32 | 2.49415  | 0.00000 | 0.00077  | 0.00015  | 0.00092  | 2.49507  |
| D33 | -0.93910 | 0.00000 | 0.00001  | 0.00005  | 0.00005  | -0.93905 |
| D34 | 1.12296  | 0.00000 | 0.00005  | 0.00004  | 0.00009  | 1.12305  |
| D35 | -3.00762 | 0.00000 | 0.00002  | 0.00004  | 0.00006  | -3.00756 |
| D36 | -3.01178 | 0.00000 | -0.00002 | 0.00003  | 0.00001  | -3.01177 |
| D37 | -0.94971 | 0.00000 | 0.00003  | 0.00002  | 0.00005  | -0.94967 |
| D38 | 1.20289  | 0.00000 | -0.00001 | 0.00003  | 0.00002  | 1.20291  |
| D39 | 1.15415  | 0.00000 | 0.00002  | 0.00003  | 0.00005  | 1.15419  |
| D40 | -3.06697 | 0.00000 | 0.00006  | 0.00002  | 0.00008  | -3.06689 |
| D41 | -0.91437 | 0.00000 | 0.00003  | 0.00003  | 0.00005  | -0.91432 |
| D42 | -1.63703 | 0.00000 | 0.00015  | 0.00006  | 0.00021  | -1.63682 |
| D43 | 2.56136  | 0.00000 | 0.00015  | 0.00007  | 0.00022  | 2.56157  |
| D44 | 0.48131  | 0.00000 | 0.00012  | 0.00006  | 0.00018  | 0.48149  |
| D45 | 0.43224  | 0.00000 | 0.00133  | 0.00073  | 0.00206  | 0.43430  |
| D46 | -0.26750 | 0.00000 | 0.00080  | -0.00008 | 0.00072  | -0.26678 |
| D47 | 2.57096  | 0.00000 | 0.00081  | -0.00034 | 0.00047  | 2.57143  |
| D48 | -3.14148 | 0.00000 | -0.00001 | 0.00003  | 0.00002  | -3.14146 |
| D49 | 0.00063  | 0.00000 | 0.00001  | 0.00000  | 0.00001  | 0.00064  |
| D50 | 0.00040  | 0.00000 | 0.00003  | 0.00001  | 0.00004  | 0.00044  |
| D51 | -3.14067 | 0.00000 | 0.00005  | -0.00002 | 0.00003  | -3.14064 |
| D52 | -1.94053 | 0.00000 | -0.00246 | 0.00177  | -0.00069 | -1.94122 |
| D53 | 2.44634  | 0.00000 | 0.00180  | -0.00181 | -0.00002 | 2.44633  |
| D54 | 2.07565  | 0.00000 | 0.00166  | -0.00216 | -0.00050 | 2.07515  |
| D55 | -2.59536 | 0.00000 | 0.00227  | -0.00178 | 0.00049  | -2.59488 |
| D56 | -2.72935 | 0.00000 | 0.00006  | -0.00001 | 0.00005  | -2.72930 |
| D57 | -0.03031 | 0.00000 | 0.00008  | -0.00003 | 0.00005  | -0.03026 |
| D58 | -0.02176 | 0.00000 | 0.00004  | 0.00002  | 0.00006  | -0.02170 |
| D59 | 2.67728  | 0.00000 | 0.00007  | 0.00000  | 0.00007  | 2.67735  |
| D60 | -0.17060 | 0.00000 | 0.00013  | -0.00001 | 0.00012  | -0.17048 |
| D61 | 0.26982  | 0.00000 | 0.00031  | 0.00042  | 0.00073  | 0.27054  |
| D62 | -2.58283 | 0.00000 | 0.00012  | 0.00001  | 0.00013  | -2.58270 |
| D63 | -2.14241 | 0.00000 | 0.00030  | 0.00043  | 0.00074  | -2.14168 |
| D64 | 2.14262  | 0.00000 | -0.00053 | -0.00007 | -0.00060 | 2.14202  |

|     |          |         |          |          |          |          |
|-----|----------|---------|----------|----------|----------|----------|
| D65 | -0.25064 | 0.00000 | -0.00053 | -0.00010 | -0.00062 | -0.25127 |
| D66 | 2.48846  | 0.00000 | -0.00016 | 0.00006  | -0.00010 | 2.48836  |
| D67 | -1.71957 | 0.00000 | -0.00015 | 0.00006  | -0.00009 | -1.71966 |
| D68 | 0.35943  | 0.00000 | -0.00014 | 0.00006  | -0.00008 | 0.35935  |
| D69 | 1.27230  | 0.00000 | -0.00012 | 0.00006  | -0.00006 | 1.27224  |
| D70 | -2.93572 | 0.00000 | -0.00011 | 0.00006  | -0.00005 | -2.93578 |
| D71 | -0.85673 | 0.00000 | -0.00010 | 0.00006  | -0.00003 | -0.85676 |
| D72 | -1.09016 | 0.00000 | -0.00013 | 0.00004  | -0.00010 | -1.09025 |
| D73 | 0.98500  | 0.00000 | -0.00012 | 0.00003  | -0.00009 | 0.98491  |
| D74 | 3.06400  | 0.00000 | -0.00011 | 0.00004  | -0.00007 | 3.06393  |

| Item                 | Value    | Threshold | Converged? |
|----------------------|----------|-----------|------------|
| Maximum Force        | 0.000014 | 0.000450  | YES        |
| RMS Force            | 0.000003 | 0.000300  | YES        |
| Maximum Displacement | 0.002413 | 0.001800  | NO         |
| RMS Displacement     | 0.000702 | 0.001200  | YES        |

Predicted change in Energy=-1.731604D-08

GradGradGradGradGradGradGradGradGradGradGradGradGradGradGradGradGradGradGrad

Input orientation:

| Center Number | Atomic Number | Atomic Type | Coordinates (Angstroms) |           |           |
|---------------|---------------|-------------|-------------------------|-----------|-----------|
|               |               |             | X                       | Y         | Z         |
| 1             | 6             | 0           | -1.375827               | -1.909489 | -0.256433 |
| 2             | 6             | 0           | -2.507367               | -1.169513 | -0.136314 |
| 3             | 7             | 0           | -2.109205               | 0.112189  | 0.230754  |
| 4             | 6             | 0           | -0.765589               | 0.135926  | 0.328268  |
| 5             | 7             | 0           | -0.305050               | -1.080631 | 0.041699  |
| 6             | 6             | 0           | 1.128263                | -1.435960 | -0.007869 |
| 7             | 6             | 0           | 1.682989                | -1.371921 | -1.441782 |
| 8             | 1             | 0           | -1.241756               | -2.945048 | -0.517914 |
| 9             | 1             | 0           | -3.537500               | -1.443149 | -0.273374 |
| 10            | 1             | 0           | 1.653015                | -0.725808 | 0.633225  |
| 11            | 1             | 0           | 1.238213                | -2.445128 | 0.391180  |
| 12            | 1             | 0           | 1.063801                | -1.989086 | -2.103728 |
| 13            | 1             | 0           | 1.634450                | -0.336198 | -1.797450 |
| 14            | 35            | 0           | 1.650753                | 2.236135  | 1.019971  |
| 15            | 1             | 0           | -0.113707               | 0.994880  | 0.596701  |
| 16            | 6             | 0           | -2.913399               | 1.256647  | 0.486178  |
| 17            | 6             | 0           | -4.237698               | 1.281388  | 0.413254  |
| 18            | 1             | 0           | -2.317572               | 2.121049  | 0.751611  |
| 19            | 1             | 0           | -4.759829               | 2.203709  | 0.626530  |
| 20            | 1             | 0           | -4.839546               | 0.421051  | 0.149426  |
| 21            | 8             | 0           | 2.990808                | -1.883126 | -1.466080 |

|    |   |   |          |           |           |
|----|---|---|----------|-----------|-----------|
| 22 | 1 | 0 | 3.630515 | -1.151414 | -1.365668 |
| 23 | 6 | 0 | 4.839295 | 1.611970  | -1.120831 |
| 24 | 6 | 0 | 5.711026 | 0.750879  | -0.312166 |
| 25 | 8 | 0 | 4.857632 | 0.177077  | -1.331348 |
| 26 | 1 | 0 | 3.922732 | 1.994431  | -0.678069 |
| 27 | 1 | 0 | 5.260934 | 2.179930  | -1.945634 |
| 28 | 1 | 0 | 6.761978 | 0.702019  | -0.593078 |
| 29 | 6 | 0 | 5.398056 | 0.411549  | 1.119083  |
| 30 | 1 | 0 | 5.675791 | -0.623589 | 1.340048  |
| 31 | 1 | 0 | 5.972127 | 1.063807  | 1.784476  |
| 32 | 1 | 0 | 4.338133 | 0.561041  | 1.334087  |

-----  
Distance matrix (angstroms):

|    |    | 1        | 2        | 3        | 4        | 5        |
|----|----|----------|----------|----------|----------|----------|
| 1  | C  | 0.000000 |          |          |          |          |
| 2  | C  | 1.357341 | 0.000000 |          |          |          |
| 3  | N  | 2.205080 | 1.391414 | 0.000000 |          |          |
| 4  | C  | 2.213140 | 2.225713 | 1.347359 | 0.000000 |          |
| 5  | N  | 1.386525 | 2.211286 | 2.171068 | 1.332002 | 0.000000 |
| 6  | C  | 2.560563 | 3.647642 | 3.596513 | 2.484046 | 1.477532 |
| 7  | C  | 3.324213 | 4.393665 | 4.402351 | 3.376716 | 2.497572 |
| 8  | H  | 1.076443 | 2.213575 | 3.264915 | 3.230350 | 2.160240 |
| 9  | H  | 2.211468 | 1.074634 | 2.171002 | 3.246374 | 3.267939 |
| 10 | H  | 3.371421 | 4.254156 | 3.875374 | 2.585581 | 2.076011 |
| 11 | H  | 2.745818 | 3.991843 | 4.215545 | 3.268183 | 2.089414 |
| 12 | H  | 3.061146 | 4.158804 | 4.464653 | 3.711731 | 2.702203 |
| 13 | H  | 3.729846 | 4.539651 | 4.281311 | 3.240643 | 2.774583 |
| 14 | Br | 5.289196 | 5.497763 | 4.389908 | 3.275369 | 3.972797 |
| 15 | H  | 3.279656 | 3.309307 | 2.212481 | 1.111219 | 2.156939 |
| 16 | C  | 3.597224 | 2.537442 | 1.421884 | 2.427764 | 3.530427 |
| 17 | C  | 4.338259 | 3.050081 | 2.435327 | 3.657165 | 4.602490 |
| 18 | H  | 4.260079 | 3.413536 | 2.085720 | 2.555110 | 3.847723 |
| 19 | H  | 5.399027 | 4.127245 | 3.399545 | 4.507621 | 5.565427 |
| 20 | H  | 4.194459 | 2.837358 | 2.748958 | 4.087836 | 4.777897 |
| 21 | O  | 4.531164 | 5.701530 | 5.733294 | 4.626746 | 3.712153 |
| 22 | H  | 5.183487 | 6.259810 | 6.090126 | 4.883891 | 4.180235 |
| 23 | C  | 7.195527 | 7.917030 | 7.235868 | 5.974389 | 5.921644 |
| 24 | C  | 7.569951 | 8.441612 | 7.865031 | 6.537191 | 6.298637 |
| 25 | O  | 6.660721 | 7.581861 | 7.140111 | 5.863159 | 5.488203 |
| 26 | H  | 6.594930 | 7.186808 | 6.383812 | 5.142675 | 5.277141 |
| 27 | H  | 7.976425 | 8.650948 | 7.958089 | 6.757778 | 6.749884 |
| 28 | H  | 8.553197 | 9.467418 | 8.928857 | 7.604840 | 7.315987 |
| 29 | C  | 7.291417 | 8.159135 | 7.565561 | 6.220279 | 5.992727 |
| 30 | H  | 7.343542 | 8.333172 | 7.897979 | 6.564445 | 6.137187 |

|    |    |          |          |          |           |          |
|----|----|----------|----------|----------|-----------|----------|
| 31 | H  | 8.185245 | 8.976579 | 8.284176 | 6.955453  | 6.858487 |
| 32 | H  | 6.425154 | 7.212334 | 6.556445 | 5.219231  | 5.091611 |
|    |    | 6        | 7        | 8        | 9         | 10       |
| 6  | C  | 0.000000 |          |          |           |          |
| 7  | C  | 1.538807 | 0.000000 |          |           |          |
| 8  | H  | 2.855606 | 3.447085 | 0.000000 |           |          |
| 9  | H  | 4.673317 | 5.350118 | 2.754259 | 0.000000  |          |
| 10 | H  | 1.091184 | 2.173480 | 3.824899 | 5.317702  | 0.000000 |
| 11 | H  | 1.090757 | 2.170104 | 2.688237 | 4.924737  | 1.785135 |
| 12 | H  | 2.168577 | 1.096567 | 2.957070 | 4.981989  | 3.071475 |
| 13 | H  | 2.160625 | 1.096165 | 4.088506 | 5.504291  | 2.461772 |
| 14 | Br | 3.848861 | 4.367990 | 6.129956 | 6.490597  | 2.987086 |
| 15 | H  | 2.795885 | 3.603509 | 4.247104 | 4.292246  | 2.466456 |
| 16 | C  | 4.881521 | 5.634996 | 4.632153 | 2.873208  | 4.980350 |
| 17 | C  | 6.029500 | 6.748018 | 5.263603 | 2.895659  | 6.227177 |
| 18 | H  | 5.010279 | 5.745981 | 5.332393 | 3.904142  | 4.887144 |
| 19 | H  | 6.951207 | 7.653297 | 6.340055 | 3.950126  | 7.050297 |
| 20 | H  | 6.252037 | 6.949112 | 4.971927 | 2.312861  | 6.610801 |
| 21 | O  | 2.407366 | 1.404390 | 4.465568 | 6.650935  | 2.745206 |
| 22 | H  | 2.861092 | 1.961446 | 5.260687 | 7.256628  | 2.843803 |
| 23 | C  | 4.929535 | 4.355328 | 7.622933 | 8.956709  | 4.323690 |
| 24 | C  | 5.086903 | 4.691204 | 7.876763 | 9.505288  | 4.420613 |
| 25 | O  | 4.273368 | 3.534112 | 6.900136 | 8.615259  | 3.865788 |
| 26 | H  | 4.475020 | 4.114855 | 7.148150 | 8.224099  | 3.777672 |
| 27 | H  | 5.823106 | 5.066676 | 8.401712 | 9.661035  | 5.301972 |
| 28 | H  | 6.054103 | 5.551365 | 8.795823 | 10.525360 | 5.444631 |
| 29 | C  | 4.786903 | 4.851857 | 7.617979 | 9.231631  | 3.943979 |
| 30 | H  | 4.812155 | 4.923520 | 7.529519 | 9.389332  | 4.085679 |
| 31 | H  | 5.737975 | 5.893914 | 8.568082 | 10.047517 | 4.814855 |
| 32 | H  | 4.011499 | 4.300184 | 6.845270 | 8.284099  | 3.058928 |
|    |    | 11       | 12       | 13       | 14        | 15       |
| 11 | H  | 0.000000 |          |          |           |          |
| 12 | H  | 2.542236 | 0.000000 |          |           |          |
| 13 | H  | 3.065076 | 1.775243 | 0.000000 |           |          |
| 14 | Br | 4.741285 | 5.287201 | 3.815105 | 0.000000  |          |
| 15 | H  | 3.701835 | 4.193196 | 3.249582 | 2.198452  | 0.000000 |
| 16 | C  | 5.563097 | 5.749827 | 5.332452 | 4.698490  | 2.814073 |
| 17 | C  | 6.623671 | 6.718414 | 6.479655 | 5.996124  | 4.138000 |
| 18 | H  | 5.798576 | 6.039855 | 5.306058 | 3.979054  | 2.479773 |
| 19 | H  | 7.592337 | 7.677793 | 7.294767 | 6.422726  | 4.800896 |
| 20 | H  | 6.724030 | 6.762763 | 6.802674 | 6.795319  | 4.781515 |
| 21 | O  | 2.614737 | 2.032531 | 2.083867 | 4.994448  | 4.709140 |
| 22 | H  | 3.237795 | 2.799008 | 2.198928 | 4.591973  | 4.740957 |
| 23 | C  | 5.631520 | 5.309242 | 3.811063 | 3.890940  | 5.278537 |

|    |   |          |           |          |           |           |
|----|---|----------|-----------|----------|-----------|-----------|
| 24 | C | 5.542131 | 5.684524  | 4.472838 | 4.523980  | 5.900263  |
| 25 | O | 4.789912 | 4.436439  | 3.296908 | 4.478001  | 5.394478  |
| 26 | H | 5.297134 | 5.106310  | 3.452692 | 2.846691  | 4.349366  |
| 27 | H | 6.560042 | 5.917907  | 4.416361 | 4.672406  | 6.062556  |
| 28 | H | 6.433139 | 6.480226  | 5.368421 | 5.574949  | 6.984009  |
| 29 | C | 5.098504 | 5.910611  | 4.819753 | 4.169079  | 5.567108  |
| 30 | H | 4.889832 | 5.915626  | 5.124346 | 4.947868  | 6.057252  |
| 31 | H | 6.055068 | 6.966345  | 5.797038 | 4.542367  | 6.201044  |
| 32 | H | 4.419912 | 5.389153  | 4.233375 | 3.182235  | 4.533303  |
|    |   | 16       | 17        | 18       | 19        | 20        |
| 16 | C | 0.000000 |           |          |           |           |
| 17 | C | 1.326537 | 0.000000  |          |           |           |
| 18 | H | 1.082891 | 2.122828  | 0.000000 |           |           |
| 19 | H | 2.079887 | 1.081103  | 2.446855 | 0.000000  |           |
| 20 | H | 2.126421 | 1.082592  | 3.100479 | 1.847120  | 0.000000  |
| 21 | O | 6.966287 | 8.111557  | 7.009313 | 9.008531  | 8.320669  |
| 22 | H | 7.214631 | 8.425667  | 7.111373 | 9.253301  | 8.747004  |
| 23 | C | 7.925465 | 9.211651  | 7.415251 | 9.774795  | 9.834216  |
| 24 | C | 8.676051 | 9.989234  | 8.213853 | 10.612760 | 10.565814 |
| 25 | O | 8.053434 | 9.326745  | 7.720188 | 10.021781 | 9.812618  |
| 26 | H | 6.973699 | 8.263900  | 6.403235 | 8.782519  | 8.940793  |
| 27 | H | 8.578222 | 9.828314  | 8.044399 | 10.345642 | 10.464351 |
| 28 | H | 9.751170 | 11.060798 | 9.287629 | 11.683088 | 11.628654 |
| 29 | C | 8.378248 | 9.700649  | 7.911280 | 10.326523 | 10.283424 |
| 30 | H | 8.833944 | 10.137315 | 8.471904 | 10.835354 | 10.633963 |
| 31 | H | 8.981945 | 10.303792 | 8.420433 | 10.854267 | 10.953483 |
| 32 | H | 7.333998 | 8.655155  | 6.860854 | 9.272104  | 9.254880  |
|    |   | 21       | 22        | 23       | 24        | 25        |
| 21 | O | 0.000000 |           |          |           |           |
| 22 | H | 0.977092 | 0.000000  |          |           |           |
| 23 | C | 3.968854 | 3.026118  | 0.000000 |           |           |
| 24 | C | 3.958420 | 3.009504  | 1.468105 | 0.000000  |           |
| 25 | O | 2.783455 | 1.808835  | 1.450370 | 1.447848  | 0.000000  |
| 26 | H | 4.065083 | 3.233346  | 1.087383 | 2.208689  | 2.145598  |
| 27 | H | 4.678875 | 3.753996  | 1.086581 | 2.216526  | 2.133406  |
| 28 | H | 4.654764 | 3.719969  | 2.191630 | 1.088943  | 2.108824  |
| 29 | C | 4.212296 | 3.426520  | 2.602007 | 1.503851  | 2.520247  |
| 30 | H | 4.082882 | 3.432587  | 3.428320 | 2.149468  | 2.906339  |
| 31 | H | 5.304601 | 4.507079  | 3.166165 | 2.135885  | 3.425894  |
| 32 | H | 3.953501 | 3.274432  | 2.717028 | 2.151982  | 2.742600  |
|    |   | 26       | 27        | 28       | 29        | 30        |
| 26 | H | 0.000000 |           |          |           |           |
| 27 | H | 1.852543 | 0.000000  |          |           |           |
| 28 | H | 3.120716 | 2.503349  | 0.000000 |           |           |

29 C 2.812802 3.540969 2.208200 0.000000  
 30 H 3.741663 4.339070 2.583412 1.094290 0.000000  
 31 H 3.336197 3.957934 2.531307 1.094416 1.769925  
 32 H 2.505183 3.772126 3.099817 1.091794 1.786816

31 32  
 31 H 0.000000  
 32 H 1.767926 0.000000

Stoichiometry C10H17BrN2O2

Framework group C1[X(C10H17BrN2O2)]

Deg. of freedom 90

Full point group C1 NOp 1

Largest Abelian subgroup C1 NOp 1

Largest concise Abelian subgroup C1 NOp 1

Standard orientation:

| Center Number | Atomic Number | Atomic Type | Coordinates (Angstroms) |           |           |
|---------------|---------------|-------------|-------------------------|-----------|-----------|
|               |               |             | X                       | Y         | Z         |
| 1             | 6             | 0           | -2.710288               | 2.114647  | -0.439449 |
| 2             | 6             | 0           | -3.788208               | 1.349821  | -0.130412 |
| 3             | 7             | 0           | -3.320620               | 0.050176  | 0.037868  |
| 4             | 6             | 0           | -1.989047               | 0.040072  | -0.167530 |
| 5             | 7             | 0           | -1.603110               | 1.280335  | -0.462537 |
| 6             | 6             | 0           | -0.200799               | 1.679089  | -0.702580 |
| 7             | 6             | 0           | 0.455157                | 2.251286  | 0.566373  |
| 8             | 1             | 0           | -2.637144               | 3.167704  | -0.650282 |
| 9             | 1             | 0           | -4.824115               | 1.615089  | -0.023796 |
| 10            | 1             | 0           | 0.330501                | 0.785230  | -1.033363 |
| 11            | 1             | 0           | -0.195400               | 2.427086  | -1.496446 |
| 12            | 1             | 0           | -0.161603               | 3.066161  | 0.963921  |
| 13            | 1             | 0           | 0.509850                | 1.463271  | 1.326386  |
| 14            | 35            | 0           | 0.525507                | -2.058574 | -0.140372 |
| 15            | 1             | 0           | -1.294223               | -0.825310 | -0.111494 |
| 16            | 6             | 0           | -4.051697               | -1.125136 | 0.363325  |
| 17            | 6             | 0           | -5.362091               | -1.168563 | 0.565018  |
| 18            | 1             | 0           | -3.412012               | -1.996374 | 0.429666  |
| 19            | 1             | 0           | -5.826476               | -2.113956 | 0.808661  |
| 20            | 1             | 0           | -6.007569               | -0.301919 | 0.499503  |
| 21            | 8             | 0           | 1.719095                | 2.775412  | 0.250044  |
| 22            | 1             | 0           | 2.403821                | 2.095952  | 0.405584  |
| 23            | 6             | 0           | 3.798293                | -0.460475 | 1.228700  |
| 24            | 6             | 0           | 4.544288                | 0.009676  | 0.054910  |
| 25            | 8             | 0           | 3.722578                | 0.927690  | 0.815374  |
| 26            | 1             | 0           | 2.884828                | -1.030309 | 1.076149  |



|    |   |   |          |           |           |
|----|---|---|----------|-----------|-----------|
| 27 | 1 | 0 | 4.317795 | -0.607816 | 2.171603  |
| 28 | 1 | 0 | 5.605457 | 0.214313  | 0.188477  |
| 29 | 6 | 0 | 4.108174 | -0.302847 | -1.349975 |
| 30 | 1 | 0 | 4.290842 | 0.550783  | -2.009838 |
| 31 | 1 | 0 | 4.682471 | -1.152705 | -1.731646 |
| 32 | 1 | 0 | 3.050256 | -0.570916 | -1.380990 |

-----  
Rotational constants (GHZ): 0.5998721 0.2212703 0.1723208  
Standard basis: 6-311++G(d,p) (5D, 7F)  
There are 492 symmetry adapted cartesian basis functions of A symmetry.  
There are 475 symmetry adapted basis functions of A symmetry.  
475 basis functions, 751 primitive gaussians, 492 cartesian basis functions  
71 alpha electrons 71 beta electrons  
nuclear repulsion energy 1307.2430481336 Hartrees.  
NAtoms= 32 NActive= 32 NUniq= 32 SFac= 1.00D+00 NATFMM= 60 NAOKFM=F

Big=F

Integral buffers will be 131072 words long.  
Raffenetti 2 integral format.  
Two-electron integral symmetry is turned on.  
One-electron integrals computed using PRISM.  
NBasis= 475 RedAO= T EigKep= 3.78D-06 NBF= 475  
NBsUse= 475 1.00D-06 EigRej= -1.00D+00 NBFU= 475  
Initial guess from the checkpoint file: "/home/suqian/liuwen/qianmengshijie/ohpo/ohpo.chk"  
B after Tr= 0.000000 0.000000 0.000000  
Rot= 1.000000 -0.000036 -0.000010 0.000001 Ang= 0.00 deg.  
Requested convergence on RMS density matrix=1.00D-08 within 128 cycles.  
Requested convergence on MAX density matrix=1.00D-06.  
Requested convergence on energy=1.00D-06.  
No special actions if energy rises.  
SCF Done: E(RB3LYP) = -3225.52371196 A.U. after 8 cycles  
NFOck= 8 Conv=0.46D-08 -V/T= 2.0018  
Calling FoFJK, ICntrl= 2127 FMM=F ISym2X=0 I1Cent= 0 IOpCIX= 0 NMat=1 NMatS=1  
NMatT=0.

\*\*\*\*\* Axes restored to original set \*\*\*\*\*

-----

| Center | Atomic | Forces (Hartrees/Bohr) |              |              |
|--------|--------|------------------------|--------------|--------------|
| Number | Number | X                      | Y            | Z            |
| 1      | 6      | -0.000000551           | -0.000001126 | 0.000006535  |
| 2      | 6      | 0.000000671            | -0.000000984 | 0.000010745  |
| 3      | 7      | 0.000000531            | 0.000003701  | -0.000001949 |
| 4      | 6      | 0.000001258            | -0.000000595 | -0.000000582 |
| 5      | 7      | -0.000003897           | 0.000005752  | -0.000000082 |
| 6      | 6      | 0.000003021            | 0.000000928  | 0.000007911  |

|    |    |              |              |              |
|----|----|--------------|--------------|--------------|
| 7  | 6  | -0.000002762 | -0.000001169 | 0.000001176  |
| 8  | 1  | -0.000000225 | 0.000000049  | 0.000007150  |
| 9  | 1  | 0.000000165  | 0.000000375  | 0.000005056  |
| 10 | 1  | -0.000001158 | 0.000000201  | 0.000003455  |
| 11 | 1  | -0.000000960 | 0.000001905  | 0.000006513  |
| 12 | 1  | 0.000000534  | -0.000004856 | 0.000004749  |
| 13 | 1  | 0.000001119  | -0.000005967 | 0.000000790  |
| 14 | 35 | -0.000000312 | 0.000007405  | -0.000000188 |
| 15 | 1  | 0.000002448  | -0.000005452 | -0.000012399 |
| 16 | 6  | -0.000000627 | 0.000004203  | -0.000002664 |
| 17 | 6  | 0.000000793  | 0.000003236  | -0.000005113 |
| 18 | 1  | 0.000000657  | 0.000002448  | -0.000004308 |
| 19 | 1  | 0.000000443  | 0.000002769  | -0.000005263 |
| 20 | 1  | 0.000000340  | 0.000002122  | -0.000000806 |
| 21 | 8  | 0.000001524  | -0.000003085 | 0.000006506  |
| 22 | 1  | -0.000004775 | -0.000009617 | 0.000002731  |
| 23 | 6  | 0.000002804  | -0.000008297 | -0.000012641 |
| 24 | 6  | 0.000000883  | 0.000000286  | -0.000006206 |
| 25 | 8  | -0.000001942 | -0.000001763 | 0.000010268  |
| 26 | 1  | 0.000001394  | -0.000001950 | -0.000003049 |
| 27 | 1  | -0.000000425 | -0.000003531 | -0.000007264 |
| 28 | 1  | -0.000001690 | -0.000001689 | -0.000002078 |
| 29 | 6  | 0.000000649  | 0.000004896  | -0.000007677 |
| 30 | 1  | -0.000000859 | 0.000003157  | 0.000003190  |
| 31 | 1  | 0.000000075  | 0.000004757  | -0.000003923 |
| 32 | 1  | 0.000000874  | 0.000001889  | -0.000000583 |

-----  
Cartesian Forces: Max 0.000012641 RMS 0.000004219

GradGradGradGradGradGradGradGradGradGradGradGradGradGradGradGradGradGradGrad

Berny optimization.

Using GEDIIS/GDIIS optimizer.

FormGI is forming the generalized inverse of G from B-inverse, IUseBI=4.

GSVD: received Info= 1 from GESDD.

Internal Forces: Max 0.000011627 RMS 0.000002053

Search for a local minimum.

Step number 39 out of a maximum of 177

All quantities printed in internal units (Hartrees-Bohrs-Radians)

Mixed Optimization -- En-DIIS/RFO-DIIS

Swapping is turned off.

Update second derivatives using D2CorX and points

|    |    |    |    |    |    |    |  |  |  |
|----|----|----|----|----|----|----|--|--|--|
| 24 | 25 | 26 | 27 | 28 |    |    |  |  |  |
|    |    | 29 | 30 | 31 | 32 | 33 |  |  |  |
|    |    | 34 | 35 | 36 | 37 | 38 |  |  |  |
|    |    |    |    | 39 |    |    |  |  |  |

DE= 7.77D-08 DEPred=-1.73D-08 R=-4.49D+00

Trust test=-4.49D+00 RLast= 5.05D-03 DXMaxT set to 1.21D-01

ITU= -1 -1 -1 -1 0 0 1 1 0 1 1 1 1 1 1 1 1 1 1

ITU= 1 1 -1 1 1 1 1 1 1 1 1 1 1 1 0 1 0 1 0

|                 |         |         |         |         |         |
|-----------------|---------|---------|---------|---------|---------|
| Eigenvalues --- | 0.00004 | 0.00046 | 0.00081 | 0.00204 | 0.00234 |
| Eigenvalues --- | 0.00259 | 0.00347 | 0.00683 | 0.01025 | 0.01203 |
| Eigenvalues --- | 0.01365 | 0.01613 | 0.01709 | 0.01852 | 0.02044 |
| Eigenvalues --- | 0.02085 | 0.02197 | 0.02256 | 0.02325 | 0.02406 |
| Eigenvalues --- | 0.02997 | 0.03063 | 0.03101 | 0.03517 | 0.03719 |
| Eigenvalues --- | 0.04128 | 0.04623 | 0.05190 | 0.05392 | 0.05421 |
| Eigenvalues --- | 0.05670 | 0.05893 | 0.06487 | 0.08770 | 0.09356 |
| Eigenvalues --- | 0.10416 | 0.11032 | 0.11465 | 0.11584 | 0.12865 |
| Eigenvalues --- | 0.13828 | 0.14080 | 0.14263 | 0.15134 | 0.15969 |
| Eigenvalues --- | 0.15990 | 0.16001 | 0.16003 | 0.16010 | 0.16028 |
| Eigenvalues --- | 0.16050 | 0.17172 | 0.18455 | 0.20519 | 0.22048 |
| Eigenvalues --- | 0.22875 | 0.23409 | 0.23858 | 0.24336 | 0.25047 |
| Eigenvalues --- | 0.27837 | 0.28380 | 0.30707 | 0.32044 | 0.33105 |
| Eigenvalues --- | 0.33246 | 0.34030 | 0.34199 | 0.34470 | 0.34847 |
| Eigenvalues --- | 0.35044 | 0.35684 | 0.35689 | 0.35856 | 0.36087 |
| Eigenvalues --- | 0.36436 | 0.36670 | 0.37184 | 0.37240 | 0.37513 |
| Eigenvalues --- | 0.38075 | 0.42173 | 0.42559 | 0.44780 | 0.45619 |
| Eigenvalues --- | 0.49380 | 0.53712 | 0.54972 | 0.56080 | 0.60397 |

Eigenvalue 1 is 3.96D-05 Eigenvector:

|   |          |         |         |         |          |
|---|----------|---------|---------|---------|----------|
|   | D52      | D53     | D54     | D55     | D25      |
| 1 | -0.50594 | 0.49855 | 0.49825 | 0.49016 | -0.03062 |
|   | D26      | D46     | D47     | D45     | D65      |
| 1 | -0.02475 | 0.02433 | 0.02098 | 0.01875 | 0.01648  |

En-DIIS/RFO-DIIS IScMMF= 0 using points: 39 38 37 36 35

RFO step: Lambda=-2.17041196D-09.

DidBck=F Rises=F RFO-DIIS coefs: 2.66175 -2.12471 -0.19465 1.06864 -  
0.41104

Iteration 1 RMS(Cart)= 0.00062612 RMS(Int)= 0.00000093

Iteration 2 RMS(Cart)= 0.00000204 RMS(Int)= 0.00000039

Iteration 3 RMS(Cart)= 0.00000000 RMS(Int)= 0.00000039

| Variable | Old X   | -DE/DX   | Delta X<br>(Linear) | Delta X<br>(Quad) | Delta X<br>(Total) | New X   |
|----------|---------|----------|---------------------|-------------------|--------------------|---------|
| R1       | 2.56500 | 0.00000  | 0.00000             | 0.00000           | 0.00000            | 2.56501 |
| R2       | 2.62015 | 0.00000  | 0.00000             | 0.00000           | 0.00000            | 2.62015 |
| R3       | 2.03418 | 0.00000  | 0.00000             | 0.00000           | 0.00000            | 2.03418 |
| R4       | 2.62939 | 0.00000  | 0.00000             | 0.00000           | 0.00000            | 2.62939 |
| R5       | 2.03076 | 0.00000  | 0.00000             | 0.00000           | 0.00000            | 2.03076 |
| R6       | 2.54614 | 0.00000  | -0.00001            | 0.00000           | -0.00001           | 2.54613 |
| R7       | 2.68697 | 0.00000  | 0.00000             | 0.00001           | 0.00001            | 2.68698 |
| R8       | 2.51712 | -0.00001 | -0.00001            | 0.00001           | -0.00001           | 2.51711 |

|     |         |         |          |          |          |         |
|-----|---------|---------|----------|----------|----------|---------|
| R9  | 2.09990 | 0.00000 | -0.00001 | 0.00002  | 0.00001  | 2.09991 |
| R10 | 2.79213 | 0.00000 | 0.00000  | 0.00000  | 0.00000  | 2.79213 |
| R11 | 2.90792 | 0.00000 | -0.00003 | 0.00002  | -0.00001 | 2.90792 |
| R12 | 2.06204 | 0.00000 | -0.00001 | 0.00000  | -0.00001 | 2.06203 |
| R13 | 2.06123 | 0.00000 | 0.00000  | 0.00000  | -0.00001 | 2.06123 |
| R14 | 2.07221 | 0.00000 | -0.00001 | 0.00000  | -0.00001 | 2.07221 |
| R15 | 2.07145 | 0.00000 | -0.00001 | 0.00000  | -0.00001 | 2.07144 |
| R16 | 2.65391 | 0.00000 | 0.00004  | -0.00001 | 0.00004  | 2.65395 |
| R17 | 4.15447 | 0.00000 | -0.00015 | -0.00006 | -0.00021 | 4.15426 |
| R18 | 8.46220 | 0.00000 | -0.00014 | 0.00032  | 0.00018  | 8.46237 |
| R19 | 2.50679 | 0.00000 | 0.00000  | 0.00000  | 0.00000  | 2.50679 |
| R20 | 2.04637 | 0.00000 | 0.00000  | 0.00000  | 0.00000  | 2.04637 |
| R21 | 2.04299 | 0.00000 | 0.00000  | 0.00000  | 0.00000  | 2.04299 |
| R22 | 2.04580 | 0.00000 | 0.00000  | 0.00000  | 0.00000  | 2.04580 |
| R23 | 1.84644 | 0.00000 | -0.00003 | 0.00000  | -0.00003 | 1.84641 |
| R24 | 3.41820 | 0.00000 | 0.00004  | 0.00000  | 0.00003  | 3.41824 |
| R25 | 2.77432 | 0.00000 | 0.00001  | -0.00001 | 0.00000  | 2.77432 |
| R26 | 2.74080 | 0.00000 | -0.00003 | 0.00001  | -0.00002 | 2.74079 |
| R27 | 2.05486 | 0.00000 | 0.00000  | 0.00000  | 0.00000  | 2.05485 |
| R28 | 2.05334 | 0.00000 | 0.00000  | 0.00000  | 0.00000  | 2.05334 |
| R29 | 2.73604 | 0.00000 | -0.00004 | 0.00001  | -0.00003 | 2.73600 |
| R30 | 2.05780 | 0.00000 | 0.00000  | 0.00000  | 0.00000  | 2.05780 |
| R31 | 2.84187 | 0.00000 | 0.00000  | 0.00000  | 0.00000  | 2.84186 |
| R32 | 2.06791 | 0.00000 | 0.00001  | 0.00000  | 0.00000  | 2.06791 |
| R33 | 2.06815 | 0.00000 | 0.00000  | 0.00000  | 0.00000  | 2.06814 |
| R34 | 2.06319 | 0.00000 | 0.00000  | 0.00000  | 0.00000  | 2.06319 |
| A1  | 1.87431 | 0.00000 | 0.00000  | -0.00001 | -0.00001 | 1.87430 |
| A2  | 2.27810 | 0.00000 | 0.00000  | 0.00001  | 0.00001  | 2.27811 |
| A3  | 2.13074 | 0.00000 | 0.00000  | 0.00000  | 0.00000  | 2.13073 |
| A4  | 1.86186 | 0.00000 | -0.00001 | 0.00001  | 0.00000  | 1.86187 |
| A5  | 2.27709 | 0.00000 | 0.00001  | -0.00001 | 0.00000  | 2.27709 |
| A6  | 2.14422 | 0.00000 | 0.00000  | 0.00000  | -0.00001 | 2.14421 |
| A7  | 1.89725 | 0.00000 | 0.00001  | -0.00001 | 0.00000  | 1.89724 |
| A8  | 2.24845 | 0.00000 | 0.00001  | 0.00001  | 0.00002  | 2.24847 |
| A9  | 2.13747 | 0.00000 | -0.00001 | 0.00000  | -0.00001 | 2.13746 |
| A10 | 1.88928 | 0.00000 | 0.00000  | 0.00001  | 0.00001  | 1.88929 |
| A11 | 2.23459 | 0.00000 | -0.00002 | -0.00002 | -0.00004 | 2.23454 |
| A12 | 2.15932 | 0.00000 | 0.00002  | 0.00001  | 0.00004  | 2.15935 |
| A13 | 1.90205 | 0.00000 | 0.00000  | 0.00000  | 0.00000  | 1.90206 |
| A14 | 2.21203 | 0.00000 | 0.00001  | 0.00001  | 0.00002  | 2.21205 |
| A15 | 2.16792 | 0.00000 | -0.00002 | 0.00000  | -0.00003 | 2.16789 |
| A16 | 1.95083 | 0.00000 | -0.00001 | 0.00001  | 0.00000  | 1.95084 |
| A17 | 1.86532 | 0.00000 | 0.00003  | -0.00001 | 0.00002  | 1.86535 |
| A18 | 1.88390 | 0.00000 | -0.00002 | 0.00000  | -0.00001 | 1.88388 |

|     |          |          |          |          |          |          |
|-----|----------|----------|----------|----------|----------|----------|
| A19 | 1.92520  | 0.00000  | 0.00001  | 0.00001  | 0.00003  | 1.92522  |
| A20 | 1.92098  | 0.00000  | 0.00000  | -0.00001 | -0.00001 | 1.92097  |
| A21 | 1.91634  | 0.00000  | -0.00002 | -0.00001 | -0.00003 | 1.91631  |
| A22 | 1.91296  | 0.00000  | -0.00001 | 0.00001  | 0.00000  | 1.91296  |
| A23 | 1.90256  | 0.00000  | 0.00001  | 0.00001  | 0.00001  | 1.90257  |
| A24 | 1.91418  | 0.00000  | -0.00003 | 0.00001  | -0.00002 | 1.91416  |
| A25 | 1.88695  | 0.00000  | 0.00003  | -0.00001 | 0.00003  | 1.88698  |
| A26 | 1.88654  | 0.00000  | 0.00002  | 0.00000  | 0.00002  | 1.88656  |
| A27 | 1.96011  | 0.00000  | -0.00002 | -0.00002 | -0.00004 | 1.96008  |
| A28 | 1.78653  | -0.00001 | -0.00050 | -0.00024 | -0.00075 | 1.78578  |
| A29 | 2.83633  | 0.00001  | 0.00041  | 0.00019  | 0.00059  | 2.83693  |
| A30 | 2.17702  | 0.00000  | -0.00001 | 0.00000  | 0.00000  | 2.17701  |
| A31 | 1.95555  | 0.00000  | -0.00001 | 0.00000  | -0.00001 | 1.95554  |
| A32 | 2.15062  | 0.00000  | 0.00001  | 0.00000  | 0.00001  | 2.15063  |
| A33 | 2.07969  | 0.00000  | 0.00000  | 0.00000  | 0.00000  | 2.07969  |
| A34 | 2.15744  | 0.00000  | 0.00000  | 0.00000  | 0.00000  | 2.15744  |
| A35 | 2.04605  | 0.00000  | 0.00000  | 0.00000  | 0.00000  | 2.04605  |
| A36 | 1.91274  | -0.00001 | -0.00005 | -0.00004 | -0.00010 | 1.91264  |
| A37 | 3.05330  | -0.00001 | 0.00020  | 0.00007  | 0.00027  | 3.05357  |
| A38 | 2.07432  | 0.00000  | 0.00001  | -0.00002 | -0.00001 | 2.07431  |
| A39 | 2.08781  | 0.00000  | -0.00001 | 0.00000  | -0.00001 | 2.08780  |
| A40 | 2.00174  | 0.00000  | 0.00001  | 0.00001  | 0.00003  | 2.00177  |
| A41 | 1.98454  | 0.00000  | -0.00002 | 0.00002  | 0.00000  | 1.98454  |
| A42 | 2.04016  | 0.00000  | 0.00000  | 0.00000  | 0.00001  | 2.04017  |
| A43 | 2.04574  | 0.00000  | 0.00002  | -0.00001 | 0.00002  | 2.04575  |
| A44 | 2.13294  | 0.00000  | -0.00004 | 0.00000  | -0.00003 | 2.13291  |
| A45 | 1.94925  | 0.00000  | 0.00003  | 0.00000  | 0.00003  | 1.94929  |
| A46 | 2.04638  | 0.00000  | -0.00005 | 0.00001  | -0.00003 | 2.04634  |
| A47 | 2.02221  | 0.00000  | 0.00002  | 0.00000  | 0.00001  | 2.02223  |
| A48 | 1.43219  | 0.00000  | 0.00042  | 0.00009  | 0.00051  | 1.43271  |
| A49 | 1.00015  | 0.00000  | 0.00000  | -0.00001 | 0.00000  | 1.00014  |
| A50 | 2.37573  | 0.00000  | 0.00019  | 0.00011  | 0.00029  | 2.37602  |
| A51 | 2.35222  | 0.00000  | 0.00066  | -0.00001 | 0.00065  | 2.35287  |
| A52 | 1.93136  | 0.00000  | 0.00001  | 0.00000  | 0.00000  | 1.93136  |
| A53 | 1.91239  | 0.00000  | 0.00003  | 0.00000  | 0.00002  | 1.91242  |
| A54 | 1.93752  | 0.00000  | -0.00001 | 0.00000  | -0.00001 | 1.93752  |
| A55 | 1.88375  | 0.00000  | -0.00001 | 0.00000  | -0.00001 | 1.88374  |
| A56 | 1.91362  | 0.00000  | -0.00002 | 0.00000  | -0.00002 | 1.91361  |
| A57 | 1.88378  | 0.00000  | 0.00001  | 0.00000  | 0.00001  | 1.88379  |
| A58 | 3.78442  | 0.00000  | 0.00107  | 0.00009  | 0.00116  | 3.78558  |
| A59 | 5.04120  | 0.00000  | -0.00015 | -0.00014 | -0.00029 | 5.04091  |
| D1  | 0.00431  | 0.00000  | 0.00003  | 0.00001  | 0.00004  | 0.00435  |
| D2  | -3.13134 | 0.00000  | 0.00009  | -0.00002 | 0.00007  | -3.13127 |
| D3  | 3.13645  | 0.00000  | -0.00010 | 0.00005  | -0.00005 | 3.13641  |

|     |          |         |          |          |          |          |
|-----|----------|---------|----------|----------|----------|----------|
| D4  | 0.00081  | 0.00000 | -0.00004 | 0.00002  | -0.00002 | 0.00079  |
| D5  | -0.00676 | 0.00000 | -0.00005 | 0.00002  | -0.00003 | -0.00679 |
| D6  | -3.09752 | 0.00000 | 0.00007  | -0.00005 | 0.00002  | -3.09749 |
| D7  | -3.13988 | 0.00000 | 0.00007  | -0.00002 | 0.00005  | -3.13983 |
| D8  | 0.05255  | 0.00000 | 0.00019  | -0.00009 | 0.00010  | 0.05265  |
| D9  | -0.00046 | 0.00000 | 0.00000  | -0.00004 | -0.00004 | -0.00050 |
| D10 | -3.13649 | 0.00000 | 0.00012  | -0.00002 | 0.00010  | -3.13639 |
| D11 | 3.13575  | 0.00000 | -0.00006 | -0.00001 | -0.00006 | 3.13568  |
| D12 | -0.00028 | 0.00000 | 0.00006  | 0.00001  | 0.00008  | -0.00020 |
| D13 | -0.00375 | 0.00000 | -0.00003 | 0.00005  | 0.00002  | -0.00373 |
| D14 | 3.13751  | 0.00000 | -0.00002 | 0.00014  | 0.00012  | 3.13763  |
| D15 | 3.13270  | 0.00000 | -0.00014 | 0.00003  | -0.00011 | 3.13260  |
| D16 | -0.00922 | 0.00000 | -0.00013 | 0.00012  | -0.00001 | -0.00923 |
| D17 | 0.00272  | 0.00000 | -0.00012 | -0.00008 | -0.00020 | 0.00252  |
| D18 | -3.13915 | 0.00000 | -0.00012 | -0.00012 | -0.00023 | -3.13939 |
| D19 | -3.13262 | 0.00000 | 0.00001  | -0.00006 | -0.00004 | -3.13267 |
| D20 | 0.00869  | 0.00000 | 0.00002  | -0.00010 | -0.00008 | 0.00861  |
| D21 | 0.00648  | 0.00000 | 0.00005  | -0.00005 | 0.00000  | 0.00648  |
| D22 | 3.09881  | 0.00000 | -0.00007 | 0.00003  | -0.00004 | 3.09876  |
| D23 | -3.13480 | 0.00000 | 0.00004  | -0.00013 | -0.00009 | -3.13490 |
| D24 | -0.04247 | 0.00000 | -0.00008 | -0.00006 | -0.00014 | -0.04261 |
| D25 | -3.11158 | 0.00000 | -0.00244 | -0.00056 | -0.00300 | -3.11458 |
| D26 | 0.02963  | 0.00000 | -0.00243 | -0.00046 | -0.00289 | 0.02675  |
| D27 | 1.41022  | 0.00000 | 0.00060  | 0.00022  | 0.00081  | 1.41103  |
| D28 | -2.76503 | 0.00000 | 0.00063  | 0.00023  | 0.00086  | -2.76417 |
| D29 | -0.70467 | 0.00000 | 0.00062  | 0.00021  | 0.00083  | -0.70383 |
| D30 | -1.67324 | 0.00000 | 0.00074  | 0.00013  | 0.00087  | -1.67237 |
| D31 | 0.43470  | 0.00000 | 0.00077  | 0.00015  | 0.00092  | 0.43562  |
| D32 | 2.49507  | 0.00000 | 0.00076  | 0.00013  | 0.00088  | 2.49595  |
| D33 | -0.93905 | 0.00000 | 0.00013  | -0.00010 | 0.00003  | -0.93902 |
| D34 | 1.12305  | 0.00000 | 0.00017  | -0.00010 | 0.00007  | 1.12313  |
| D35 | -3.00756 | 0.00000 | 0.00014  | -0.00012 | 0.00002  | -3.00754 |
| D36 | -3.01177 | 0.00000 | 0.00009  | -0.00011 | -0.00002 | -3.01179 |
| D37 | -0.94967 | 0.00000 | 0.00013  | -0.00010 | 0.00003  | -0.94964 |
| D38 | 1.20291  | 0.00000 | 0.00010  | -0.00012 | -0.00003 | 1.20288  |
| D39 | 1.15419  | 0.00000 | 0.00011  | -0.00010 | 0.00001  | 1.15420  |
| D40 | -3.06689 | 0.00000 | 0.00015  | -0.00009 | 0.00005  | -3.06683 |
| D41 | -0.91432 | 0.00000 | 0.00011  | -0.00011 | 0.00000  | -0.91432 |
| D42 | -1.63682 | 0.00000 | -0.00005 | -0.00022 | -0.00027 | -1.63709 |
| D43 | 2.56157  | 0.00000 | -0.00003 | -0.00024 | -0.00027 | 2.56130  |
| D44 | 0.48149  | 0.00000 | -0.00007 | -0.00023 | -0.00030 | 0.48119  |
| D45 | 0.43430  | 0.00000 | 0.00255  | 0.00068  | 0.00322  | 0.43752  |
| D46 | -0.26678 | 0.00000 | -0.00013 | -0.00031 | -0.00043 | -0.26721 |
| D47 | 2.57143  | 0.00000 | -0.00070 | -0.00024 | -0.00093 | 2.57050  |

|     |          |         |          |          |          |          |
|-----|----------|---------|----------|----------|----------|----------|
| D48 | -3.14146 | 0.00000 | 0.00001  | -0.00006 | -0.00004 | -3.14150 |
| D49 | 0.00064  | 0.00000 | -0.00001 | -0.00002 | -0.00002 | 0.00062  |
| D50 | 0.00044  | 0.00000 | 0.00001  | -0.00002 | -0.00001 | 0.00044  |
| D51 | -3.14064 | 0.00000 | -0.00001 | 0.00003  | 0.00002  | -3.14063 |
| D52 | -1.94122 | 0.00000 | 0.00411  | 0.00088  | 0.00499  | -1.93623 |
| D53 | 2.44633  | 0.00000 | -0.00435 | -0.00066 | -0.00501 | 2.44131  |
| D54 | 2.07515  | 0.00000 | -0.00513 | -0.00062 | -0.00575 | 2.06940  |
| D55 | -2.59488 | 0.00000 | -0.00420 | -0.00053 | -0.00472 | -2.59960 |
| D56 | -2.72930 | 0.00000 | 0.00004  | 0.00003  | 0.00007  | -2.72924 |
| D57 | -0.03026 | 0.00000 | 0.00005  | 0.00001  | 0.00006  | -0.03020 |
| D58 | -0.02170 | 0.00000 | 0.00005  | -0.00002 | 0.00003  | -0.02167 |
| D59 | 2.67735  | 0.00000 | 0.00007  | -0.00004 | 0.00003  | 2.67737  |
| D60 | -0.17048 | 0.00000 | 0.00000  | 0.00007  | 0.00006  | -0.17042 |
| D61 | 0.27054  | 0.00000 | 0.00097  | 0.00002  | 0.00099  | 0.27154  |
| D62 | -2.58270 | 0.00000 | -0.00001 | 0.00003  | 0.00002  | -2.58268 |
| D63 | -2.14168 | 0.00000 | 0.00097  | -0.00002 | 0.00095  | -2.14072 |
| D64 | 2.14202  | 0.00000 | -0.00033 | -0.00014 | -0.00046 | 2.14155  |
| D65 | -0.25127 | 0.00000 | -0.00034 | -0.00014 | -0.00049 | -0.25175 |
| D66 | 2.48836  | 0.00000 | 0.00002  | 0.00006  | 0.00008  | 2.48844  |
| D67 | -1.71966 | 0.00000 | 0.00003  | 0.00006  | 0.00009  | -1.71957 |
| D68 | 0.35935  | 0.00000 | 0.00004  | 0.00006  | 0.00011  | 0.35946  |
| D69 | 1.27224  | 0.00000 | 0.00006  | 0.00005  | 0.00011  | 1.27235  |
| D70 | -2.93578 | 0.00000 | 0.00006  | 0.00005  | 0.00012  | -2.93566 |
| D71 | -0.85676 | 0.00000 | 0.00008  | 0.00005  | 0.00013  | -0.85663 |
| D72 | -1.09025 | 0.00000 | 0.00003  | 0.00004  | 0.00008  | -1.09018 |
| D73 | 0.98491  | 0.00000 | 0.00004  | 0.00004  | 0.00008  | 0.98500  |
| D74 | 3.06393  | 0.00000 | 0.00006  | 0.00004  | 0.00010  | 3.06403  |

| Item                 | Value    | Threshold | Converged? |
|----------------------|----------|-----------|------------|
| Maximum Force        | 0.000012 | 0.000450  | YES        |
| RMS Force            | 0.000002 | 0.000300  | YES        |
| Maximum Displacement | 0.002347 | 0.001800  | NO         |
| RMS Displacement     | 0.000628 | 0.001200  | YES        |

Predicted change in Energy=-6.413508D-09

GradGradGradGradGradGradGradGradGradGradGradGradGradGradGradGradGradGradGrad

Input orientation:

| Center Number | Atomic Number | Atomic Type | Coordinates (Angstroms) |           |           |
|---------------|---------------|-------------|-------------------------|-----------|-----------|
|               |               |             | X                       | Y         | Z         |
| 1             | 6             | 0           | -1.376068               | -1.909799 | -0.256212 |
| 2             | 6             | 0           | -2.507435               | -1.169551 | -0.136119 |
| 3             | 7             | 0           | -2.108951               | 0.112172  | 0.230533  |
| 4             | 6             | 0           | -0.765323               | 0.135640  | 0.327875  |

|    |    |   |           |           |           |
|----|----|---|-----------|-----------|-----------|
| 5  | 7  | 0 | -0.305080 | -1.081088 | 0.041573  |
| 6  | 6  | 0 | 1.128159  | -1.436688 | -0.008119 |
| 7  | 6  | 0 | 1.682978  | -1.371965 | -1.441961 |
| 8  | 1  | 0 | -1.242247 | -2.945467 | -0.517390 |
| 9  | 1  | 0 | -3.537649 | -1.443013 | -0.272918 |
| 10 | 1  | 0 | 1.653038  | -0.727050 | 0.633433  |
| 11 | 1  | 0 | 1.237860  | -2.446108 | 0.390355  |
| 12 | 1  | 0 | 1.063682  | -1.988603 | -2.104293 |
| 13 | 1  | 0 | 1.634753  | -0.336030 | -1.797036 |
| 14 | 35 | 0 | 1.650507  | 2.235984  | 1.021083  |
| 15 | 1  | 0 | -0.113261 | 0.994533  | 0.596091  |
| 16 | 6  | 0 | -2.912857 | 1.256856  | 0.485879  |
| 17 | 6  | 0 | -4.237157 | 1.281890  | 0.413072  |
| 18 | 1  | 0 | -2.316797 | 2.121141  | 0.751173  |
| 19 | 1  | 0 | -4.759058 | 2.204349  | 0.626313  |
| 20 | 1  | 0 | -4.839227 | 0.421662  | 0.149396  |
| 21 | 8  | 0 | 2.990699  | -1.883469 | -1.466442 |
| 22 | 1  | 0 | 3.630492  | -1.151883 | -1.365816 |
| 23 | 6  | 0 | 4.838567  | 1.611984  | -1.120641 |
| 24 | 6  | 0 | 5.710755  | 0.751214  | -0.312124 |
| 25 | 8  | 0 | 4.857127  | 0.177062  | -1.330888 |
| 26 | 1  | 0 | 3.922100  | 1.994362  | -0.677611 |
| 27 | 1  | 0 | 5.259815  | 2.179876  | -1.945693 |
| 28 | 1  | 0 | 6.761625  | 0.702528  | -0.593362 |
| 29 | 6  | 0 | 5.398294  | 0.412083  | 1.119281  |
| 30 | 1  | 0 | 5.676385  | -0.622933 | 1.340379  |
| 31 | 1  | 0 | 5.972356  | 1.064631  | 1.784396  |
| 32 | 1  | 0 | 4.338385  | 0.561297  | 1.334549  |

-----  
Distance matrix (angstroms):

|    |   | 1        | 2        | 3        | 4        | 5        |
|----|---|----------|----------|----------|----------|----------|
| 1  | C | 0.000000 |          |          |          |          |
| 2  | C | 1.357343 | 0.000000 |          |          |          |
| 3  | N | 2.205086 | 1.391416 | 0.000000 |          |          |
| 4  | C | 2.213140 | 2.225706 | 1.347354 | 0.000000 |          |
| 5  | N | 1.386525 | 2.211281 | 2.171066 | 1.331999 | 0.000000 |
| 6  | C | 2.560573 | 3.647641 | 3.596498 | 2.484025 | 1.477530 |
| 7  | C | 3.324609 | 4.393831 | 4.402115 | 3.376295 | 2.497570 |
| 8  | H | 1.076443 | 2.213581 | 3.264923 | 3.230348 | 2.160238 |
| 9  | H | 2.211470 | 1.074633 | 2.171000 | 3.246365 | 3.267934 |
| 10 | H | 3.371327 | 4.254122 | 3.875459 | 2.585744 | 2.076022 |
| 11 | H | 2.745596 | 3.991742 | 4.215624 | 3.268343 | 2.089400 |
| 12 | H | 3.061698 | 4.159018 | 4.464333 | 3.711215 | 2.702191 |
| 13 | H | 3.730405 | 4.539947 | 4.281032 | 3.240075 | 2.774625 |



|    |    |          |          |          |           |          |
|----|----|----------|----------|----------|-----------|----------|
| 14 | Br | 5.289532 | 5.497751 | 4.389655 | 3.275395  | 3.973251 |
| 15 | H  | 3.279671 | 3.309299 | 2.212458 | 1.111225  | 2.156962 |
| 16 | C  | 3.597238 | 2.537459 | 1.421889 | 2.427754  | 3.530423 |
| 17 | C  | 4.338277 | 3.050101 | 2.435328 | 3.657154  | 4.602489 |
| 18 | H  | 4.260078 | 3.413544 | 2.085718 | 2.555086  | 3.847702 |
| 19 | H  | 5.399045 | 4.127264 | 3.399546 | 4.507609  | 5.565423 |
| 20 | H  | 4.194485 | 2.837382 | 2.748959 | 4.087831  | 4.777905 |
| 21 | O  | 4.531446 | 5.701658 | 5.733126 | 4.626454  | 3.712153 |
| 22 | H  | 5.183753 | 6.259921 | 6.089939 | 4.883594  | 4.180249 |
| 23 | C  | 7.195267 | 7.916436 | 7.234854 | 5.973388  | 5.921189 |
| 24 | C  | 7.570150 | 8.441502 | 7.864518 | 6.536674  | 6.298627 |
| 25 | O  | 6.660528 | 7.581399 | 7.139222 | 5.862180  | 5.487712 |
| 26 | H  | 6.594743 | 7.186270 | 6.382863 | 5.141769  | 5.276805 |
| 27 | H  | 7.975884 | 8.650051 | 7.956762 | 6.756501  | 6.749161 |
| 28 | H  | 8.553360 | 9.467271 | 8.928294 | 7.604274  | 7.315924 |
| 29 | C  | 7.292125 | 8.159543 | 7.565616 | 6.220363  | 5.993287 |
| 30 | H  | 7.344536 | 8.333891 | 7.898328 | 6.564769  | 6.137974 |
| 31 | H  | 8.186003 | 8.977015 | 8.284273 | 6.955630  | 6.859136 |
| 32 | H  | 6.425870 | 7.212763 | 6.556577 | 5.219426  | 5.092247 |
|    |    | 6        | 7        | 8        | 9         | 10       |
| 6  | C  | 0.000000 |          |          |           |          |
| 7  | C  | 1.538803 | 0.000000 |          |           |          |
| 8  | H  | 2.855625 | 3.447851 | 0.000000 |           |          |
| 9  | H  | 4.673320 | 5.350388 | 2.754270 | 0.000000  |          |
| 10 | H  | 1.091180 | 2.173493 | 3.824715 | 5.317641  | 0.000000 |
| 11 | H  | 1.090754 | 2.170091 | 2.687805 | 4.924593  | 1.785111 |
| 12 | H  | 2.168575 | 1.096564 | 2.958236 | 4.982354  | 3.071482 |
| 13 | H  | 2.160627 | 1.096159 | 4.089472 | 5.504733  | 2.461790 |
| 14 | Br | 3.849756 | 4.368630 | 6.130445 | 6.490486  | 2.988285 |
| 15 | H  | 2.795894 | 3.602838 | 4.247122 | 4.292229  | 2.466790 |
| 16 | C  | 4.881498 | 5.634621 | 4.632170 | 2.873226  | 4.980467 |
| 17 | C  | 6.029484 | 6.747746 | 5.263629 | 2.895685  | 6.227262 |
| 18 | H  | 5.010228 | 5.745417 | 5.332393 | 3.904155  | 4.887294 |
| 19 | H  | 6.951185 | 7.652947 | 6.340080 | 3.950152  | 7.050399 |
| 20 | H  | 6.252038 | 6.949005 | 4.971964 | 2.312892  | 6.610850 |
| 21 | O  | 2.407358 | 1.404411 | 4.466136 | 6.651152  | 2.745199 |
| 22 | H  | 2.861141 | 1.961389 | 5.261212 | 7.256819  | 2.843906 |
| 23 | C  | 4.929425 | 4.354876 | 7.623029 | 8.956150  | 4.323823 |
| 24 | C  | 5.087192 | 4.691206 | 7.877298 | 9.505216  | 4.420905 |
| 25 | O  | 4.273068 | 3.533702 | 6.900314 | 8.614883  | 3.865509 |
| 26 | H  | 4.475090 | 4.114615 | 7.148291 | 8.223574  | 3.778036 |
| 27 | H  | 5.822741 | 5.065875 | 8.401548 | 9.660169  | 5.301976 |
| 28 | H  | 6.054312 | 5.551243 | 8.796340 | 10.525258 | 5.444848 |
| 29 | C  | 4.787801 | 4.852459 | 7.618964 | 9.232045  | 3.944694 |

|    |    |          |           |          |           |           |
|----|----|----------|-----------|----------|-----------|-----------|
| 30 | H  | 4.813211 | 4.924405  | 7.530799 | 9.390084  | 4.086310  |
| 31 | H  | 5.738985 | 5.894501  | 8.569107 | 10.047935 | 4.815739  |
| 32 | H  | 4.012512 | 4.300895  | 6.846205 | 8.284510  | 3.059818  |
|    |    | 11       | 12        | 13       | 14        | 15        |
| 11 | H  | 0.000000 |           |          |           |           |
| 12 | H  | 2.542227 | 0.000000  |          |           |           |
| 13 | H  | 3.065066 | 1.775254  | 0.000000 |           |           |
| 14 | Br | 4.742370 | 5.287672  | 3.815403 | 0.000000  |           |
| 15 | H  | 3.702143 | 4.192418  | 3.248539 | 2.198339  | 0.000000  |
| 16 | C  | 5.563229 | 5.749336  | 5.331954 | 4.697810  | 2.814018  |
| 17 | C  | 6.623767 | 6.718046  | 6.479318 | 5.995377  | 4.137944  |
| 18 | H  | 5.798753 | 6.039149  | 5.305262 | 3.978133  | 2.479691  |
| 19 | H  | 7.592460 | 7.677328  | 7.294310 | 6.421788  | 4.800833  |
| 20 | H  | 6.724073 | 6.762606  | 6.802581 | 6.794722  | 4.781472  |
| 21 | O  | 2.614709 | 2.032560  | 2.083854 | 4.995376  | 4.708662  |
| 22 | H  | 3.237876 | 2.798921  | 2.198758 | 4.592958  | 4.740449  |
| 23 | C  | 5.631723 | 5.308630  | 3.810078 | 3.891026  | 5.277216  |
| 24 | C  | 5.542845 | 5.684519  | 4.472232 | 4.524112  | 5.899425  |
| 25 | O  | 4.789863 | 4.436044  | 3.296097 | 4.478096  | 5.393169  |
| 26 | H  | 5.297496 | 5.105878  | 3.451927 | 2.846766  | 4.348116  |
| 27 | H  | 6.559952 | 5.916832  | 4.415083 | 4.672474  | 6.060994  |
| 28 | H  | 6.433784 | 6.480096  | 5.367705 | 5.575074  | 6.983131  |
| 29 | C  | 5.099979 | 5.911310  | 4.819629 | 4.169192  | 5.566885  |
| 30 | H  | 4.891525 | 5.916743  | 5.124498 | 4.948035  | 6.057240  |
| 31 | H  | 6.056738 | 6.967009  | 5.796836 | 4.542366  | 6.200945  |
| 32 | H  | 4.421452 | 5.389926  | 4.233397 | 3.182377  | 4.533229  |
|    |    | 16       | 17        | 18       | 19        | 20        |
| 16 | C  | 0.000000 |           |          |           |           |
| 17 | C  | 1.326536 | 0.000000  |          |           |           |
| 18 | H  | 1.082892 | 2.122836  | 0.000000 |           |           |
| 19 | H  | 2.079885 | 1.081103  | 2.446865 | 0.000000  |           |
| 20 | H  | 2.126423 | 1.082592  | 3.100486 | 1.847119  | 0.000000  |
| 21 | O  | 6.966001 | 8.111348  | 7.008868 | 9.008252  | 8.320595  |
| 22 | H  | 7.214305 | 8.425413  | 7.110877 | 9.252968  | 8.746888  |
| 23 | C  | 7.924114 | 9.210320  | 7.413647 | 9.773287  | 9.833085  |
| 24 | C  | 8.675203 | 9.988416  | 8.212727 | 10.611750 | 10.565213 |
| 25 | O  | 8.052282 | 9.325666  | 7.718783 | 10.020556 | 9.811746  |
| 26 | H  | 6.972393 | 8.262607  | 6.401667 | 8.781049  | 8.939697  |
| 27 | H  | 8.576542 | 9.826628  | 8.042486 | 10.343773 | 10.462856 |
| 28 | H  | 9.750263 | 11.059917 | 9.286441 | 11.682003 | 11.627998 |
| 29 | C  | 8.377951 | 9.700371  | 7.910689 | 10.326036 | 10.283365 |
| 30 | H  | 8.833960 | 10.137384 | 8.471603 | 10.835215 | 10.634271 |
| 31 | H  | 8.981653 | 10.303488 | 8.419847 | 10.853725 | 10.953400 |
| 32 | H  | 7.333795 | 8.654957  | 6.860386 | 9.271714  | 9.254872  |

|    |   |          |          |          |          |          |
|----|---|----------|----------|----------|----------|----------|
|    |   | 21       | 22       | 23       | 24       | 25       |
| 21 | O | 0.000000 |          |          |          |          |
| 22 | H | 0.977077 | 0.000000 |          |          |          |
| 23 | C | 3.968928 | 3.026304 | 0.000000 |          |          |
| 24 | C | 3.958878 | 3.009907 | 1.468107 | 0.000000 |          |
| 25 | O | 2.783473 | 1.808853 | 1.450362 | 1.447830 | 0.000000 |
| 26 | H | 4.065383 | 3.233809 | 1.087382 | 2.208683 | 2.145607 |
| 27 | H | 4.678605 | 3.753874 | 1.086583 | 2.216522 | 2.133402 |
| 28 | H | 4.655055 | 3.720150 | 2.191640 | 1.088942 | 2.108831 |
| 29 | C | 4.213317 | 3.427364 | 2.601982 | 1.503849 | 2.520204 |
| 30 | H | 4.084129 | 3.433506 | 3.428325 | 2.149471 | 2.906345 |
| 31 | H | 5.305612 | 4.507893 | 3.166120 | 2.135898 | 3.425859 |
| 32 | H | 3.954578 | 3.275373 | 2.716999 | 2.151975 | 2.742496 |
|    |   | 26       | 27       | 28       | 29       | 30       |
| 26 | H | 0.000000 |          |          |          |          |
| 27 | H | 1.852547 | 0.000000 |          |          |          |
| 28 | H | 3.120711 | 2.503356 | 0.000000 |          |          |
| 29 | C | 2.812753 | 3.540952 | 2.208207 | 0.000000 |          |
| 30 | H | 3.741662 | 4.339071 | 2.583398 | 1.094292 | 0.000000 |
| 31 | H | 3.336080 | 3.957911 | 2.531363 | 1.094415 | 1.769921 |
| 32 | H | 2.505146 | 3.772111 | 3.099819 | 1.091792 | 1.786806 |
|    |   | 31       | 32       |          |          |          |
| 31 | H | 0.000000 |          |          |          |          |
| 32 | H | 1.767928 | 0.000000 |          |          |          |

Stoichiometry C10H17BrN2O2

Framework group C1[X(C10H17BrN2O2)]

Deg. of freedom 90

Full point group C1 NOp 1

Largest Abelian subgroup C1 NOp 1

Largest concise Abelian subgroup C1 NOp 1

Standard orientation:

| Center<br>Number | Atomic<br>Number | Atomic<br>Type | Coordinates (Angstroms) |          |           |
|------------------|------------------|----------------|-------------------------|----------|-----------|
|                  |                  |                | X                       | Y        | Z         |
| 1                | 6                | 0              | -2.710549               | 2.114657 | -0.440047 |
| 2                | 6                | 0              | -3.788253               | 1.349614 | -0.130784 |
| 3                | 7                | 0              | -3.320262               | 0.050194 | 0.038127  |
| 4                | 6                | 0              | -1.988677               | 0.040427 | -0.167172 |
| 5                | 7                | 0              | -1.603110               | 1.280680 | -0.462694 |
| 6                | 6                | 0              | -0.200893               | 1.679746 | -0.702752 |
| 7                | 6                | 0              | 0.455123                | 2.251578 | 0.566330  |
| 8                | 1                | 0              | -2.637723               | 3.167635 | -0.651381 |
| 9                | 1                | 0              | -4.824262               | 1.614583 | -0.024418 |

|    |    |   |           |           |           |
|----|----|---|-----------|-----------|-----------|
| 10 | 1  | 0 | 0.330517  | 0.786121  | -1.033977 |
| 11 | 1  | 0 | -0.195722 | 2.428048  | -1.496327 |
| 12 | 1  | 0 | -0.161731 | 3.066187  | 0.964271  |
| 13 | 1  | 0 | 0.510108  | 1.463285  | 1.326024  |
| 14 | 35 | 0 | 0.525370  | -2.058879 | -0.140750 |
| 15 | 1  | 0 | -1.293625 | -0.824757 | -0.110783 |
| 16 | 6  | 0 | -4.050989 | -1.125247 | 0.363923  |
| 17 | 6  | 0 | -5.361376 | -1.169010 | 0.565587  |
| 18 | 1  | 0 | -3.411034 | -1.996269 | 0.430517  |
| 19 | 1  | 0 | -5.825486 | -2.114477 | 0.809465  |
| 20 | 1  | 0 | -6.007115 | -0.302581 | 0.499805  |
| 21 | 8  | 0 | 1.718943  | 2.776045  | 0.250000  |
| 22 | 1  | 0 | 2.403755  | 2.096672  | 0.405448  |
| 23 | 6  | 0 | 3.797622  | -0.460135 | 1.229091  |
| 24 | 6  | 0 | 4.544132  | 0.009608  | 0.055463  |
| 25 | 8  | 0 | 3.722062  | 0.927865  | 0.815211  |
| 26 | 1  | 0 | 2.884260  | -1.030076 | 1.076328  |
| 27 | 1  | 0 | 4.316715  | -0.607115 | 2.172278  |
| 28 | 1  | 0 | 5.605242  | 0.214299  | 0.189409  |
| 29 | 6  | 0 | 4.108602  | -0.303439 | -1.349484 |
| 30 | 1  | 0 | 4.291613  | 0.549918  | -2.009610 |
| 31 | 1  | 0 | 4.682986  | -1.153489 | -1.730590 |
| 32 | 1  | 0 | 3.050674  | -0.571421 | -1.380845 |

-----

Rotational constants (GHZ):      0.5996872      0.2212997      0.1723265

Standard basis: 6-311++G(d,p) (5D, 7F)

There are    492 symmetry adapted cartesian basis functions of A    symmetry.

There are    475 symmetry adapted basis functions of A    symmetry.

    475 basis functions,    751 primitive gaussians,    492 cartesian basis functions

    71 alpha electrons      71 beta electrons

        nuclear repulsion energy      1307.2271495218 Hartrees.

NAtoms=    32 NActive=    32 NUniq=    32 SFac= 1.00D+00 NAtFMM=    60 NAOKFM=F

Big=F

Integral buffers will be    131072 words long.

Raffenetti 2 integral format.

Two-electron integral symmetry is turned on.

One-electron integrals computed using PRISM.

NBasis=    475 RedAO= T EigKep=    3.79D-06    NBF=    475

NBsUse=    475 1.00D-06 EigRej= -1.00D+00    NBFU=    475

Initial guess from the checkpoint file: "/home/suqian/liuwen/qianmengshijie/ohpo/ohpo.chk"

B after Tr=    0.000000    0.000000    0.000000

        Rot=    1.000000    0.000021    0.000008    -0.000011 Ang=    0.00 deg.

Requested convergence on RMS density matrix=1.00D-08 within 128 cycles.

Requested convergence on MAX density matrix=1.00D-06.

Requested convergence on energy=1.00D-06.

No special actions if energy rises.

SCF Done: E(RB3LYP) = -3225.52371212 A.U. after 7 cycles

NFock= 7 Conv=0.66D-08 -V/T= 2.0018

Calling FoFJK, ICntrl= 2127 FMM=F ISym2X=0 l1Cent= 0 IOpClX= 0 NMat=1 NMatS=1

NMatT=0.

\*\*\*\*\* Axes restored to original set \*\*\*\*\*

| Center<br>Number | Atomic<br>Number | Forces (Hartrees/Bohr) |              |              |
|------------------|------------------|------------------------|--------------|--------------|
|                  |                  | X                      | Y            | Z            |
| 1                | 6                | -0.000001987           | -0.000000993 | 0.000011331  |
| 2                | 6                | -0.000000445           | 0.000000361  | 0.000007934  |
| 3                | 7                | -0.000000480           | -0.000001129 | 0.000004386  |
| 4                | 6                | 0.000002534            | 0.000003770  | -0.000012543 |
| 5                | 7                | -0.000002745           | 0.000002822  | -0.000001378 |
| 6                | 6                | -0.000000910           | 0.000001261  | 0.000008685  |
| 7                | 6                | 0.000009644            | -0.000007601 | 0.000002407  |
| 8                | 1                | -0.000000386           | 0.000000381  | 0.000005695  |
| 9                | 1                | -0.000000275           | -0.000000068 | 0.000004538  |
| 10               | 1                | 0.000000679            | 0.000001636  | 0.000002418  |
| 11               | 1                | -0.000000881           | 0.000001734  | 0.000007392  |
| 12               | 1                | -0.000001329           | -0.000004789 | 0.000005055  |
| 13               | 1                | -0.000001598           | -0.000004344 | -0.000000756 |
| 14               | 35               | -0.000000867           | 0.000004873  | -0.000002876 |
| 15               | 1                | 0.000003484            | -0.000001831 | -0.000002275 |
| 16               | 6                | 0.000000218            | 0.000003369  | -0.000003268 |
| 17               | 6                | 0.000000428            | 0.000003156  | -0.000004601 |
| 18               | 1                | 0.000000755            | 0.000002582  | -0.000004384 |
| 19               | 1                | 0.000000595            | 0.000003080  | -0.000005934 |
| 20               | 1                | 0.000000401            | 0.000001788  | -0.000001150 |
| 21               | 8                | -0.000011192           | -0.000001930 | 0.000004079  |
| 22               | 1                | 0.000001768            | -0.000005538 | 0.000007633  |
| 23               | 6                | 0.000007852            | -0.000004255 | -0.000013284 |
| 24               | 6                | -0.000002490           | 0.000001308  | 0.000002676  |
| 25               | 8                | -0.000002344           | -0.000004508 | 0.000000087  |
| 26               | 1                | -0.000000814           | -0.000003264 | -0.000004086 |
| 27               | 1                | -0.000001369           | -0.000003708 | -0.000006797 |
| 28               | 1                | -0.000000848           | -0.000002367 | -0.000003602 |
| 29               | 6                | 0.000002425            | 0.000001758  | -0.000004841 |
| 30               | 1                | -0.000000561           | 0.000003733  | 0.000002362  |
| 31               | 1                | 0.000000548            | 0.000005864  | -0.000004196 |
| 32               | 1                | 0.000000191            | 0.000002848  | -0.000000706 |

Cartesian Forces: Max 0.000013284 RMS 0.000004306

GradGradGradGradGradGradGradGradGradGradGradGradGradGradGradGradGradGradGrad  
Berny optimization.

Using GEDIIS/GDIIS optimizer.

FormGI is forming the generalized inverse of G from B-inverse, IUseBI=4.

GSVD: received Info= 1 from GESDD.

Internal Forces: Max 0.000008280 RMS 0.000001662

Search for a local minimum.

Step number 40 out of a maximum of 177

All quantities printed in internal units (Hartrees-Bohrs-Radians)

Mixed Optimization -- En-DIIS/RFO-DIIS

Swapping is turned off.

Update second derivatives using D2CorX and points

|    |    |    |    |    |    |    |  |  |  |
|----|----|----|----|----|----|----|--|--|--|
| 24 | 25 | 26 | 27 | 28 |    |    |  |  |  |
|    |    | 29 | 30 | 31 | 32 | 33 |  |  |  |
|    |    | 34 | 35 | 36 | 37 | 38 |  |  |  |
|    |    | 39 | 40 |    |    |    |  |  |  |

DE= -1.63D-07 DEPred=-6.41D-09 R= 2.55D+01

Trust test= 2.55D+01 RLast= 1.20D-02 DXMaxT set to 1.21D-01

ITU= 0 -1 -1 -1 -1 0 0 1 1 0 1 1 1 1 1 1 1 1 1

ITU= 1 1 1 -1 1 1 1 1 1 1 1 1 1 1 0 1 0 1 0

|                 |         |         |         |         |         |
|-----------------|---------|---------|---------|---------|---------|
| Eigenvalues --- | 0.00003 | 0.00036 | 0.00075 | 0.00206 | 0.00215 |
| Eigenvalues --- | 0.00237 | 0.00353 | 0.00680 | 0.00960 | 0.01195 |
| Eigenvalues --- | 0.01319 | 0.01428 | 0.01751 | 0.01884 | 0.02020 |
| Eigenvalues --- | 0.02137 | 0.02200 | 0.02251 | 0.02326 | 0.02402 |
| Eigenvalues --- | 0.03003 | 0.03062 | 0.03118 | 0.03474 | 0.03771 |
| Eigenvalues --- | 0.04073 | 0.04628 | 0.05159 | 0.05382 | 0.05430 |
| Eigenvalues --- | 0.05670 | 0.05898 | 0.06491 | 0.08869 | 0.09353 |
| Eigenvalues --- | 0.10355 | 0.11021 | 0.11476 | 0.11578 | 0.12860 |
| Eigenvalues --- | 0.13842 | 0.14131 | 0.14264 | 0.15099 | 0.15948 |
| Eigenvalues --- | 0.15992 | 0.16001 | 0.16002 | 0.16015 | 0.16019 |
| Eigenvalues --- | 0.16050 | 0.17040 | 0.18160 | 0.20116 | 0.22049 |
| Eigenvalues --- | 0.22829 | 0.23407 | 0.23872 | 0.24366 | 0.25032 |
| Eigenvalues --- | 0.27801 | 0.28376 | 0.30860 | 0.31954 | 0.33109 |
| Eigenvalues --- | 0.33198 | 0.34053 | 0.34209 | 0.34467 | 0.34844 |
| Eigenvalues --- | 0.35042 | 0.35684 | 0.35689 | 0.35857 | 0.36092 |
| Eigenvalues --- | 0.36435 | 0.36669 | 0.37184 | 0.37239 | 0.37544 |
| Eigenvalues --- | 0.38170 | 0.42183 | 0.42508 | 0.45115 | 0.45633 |
| Eigenvalues --- | 0.49341 | 0.53980 | 0.55036 | 0.55776 | 0.60392 |

Eigenvalue 1 is 3.33D-05 Eigenvector:

|   |         |          |          |         |         |
|---|---------|----------|----------|---------|---------|
|   | D54     | D52      | D53      | D55     | D47     |
| 1 | 0.50762 | -0.50295 | 0.49558  | 0.48680 | 0.03404 |
|   | D46     | A58      | A48      | D65     | D64     |
| 1 | 0.02804 | -0.02651 | -0.01940 | 0.01887 | 0.01855 |

En-DIIS/RFO-DIIS IScMMF= 0 using points: 40 39 38 37 36  
 RFO step: Lambda=-1.36933603D-09.  
 DidBck=F Rises=F RFO-DIIS coefs: 2.20005 -1.31677 -0.46116 0.84540 -  
 0.26752

Iteration 1 RMS(Cart)= 0.00086599 RMS(Int)= 0.00000054  
 Iteration 2 RMS(Cart)= 0.00000143 RMS(Int)= 0.00000026  
 Iteration 3 RMS(Cart)= 0.00000000 RMS(Int)= 0.00000026

| Variable | Old X   | -DE/DX   | Delta X<br>(Linear) | Delta X<br>(Quad) | Delta X<br>(Total) | New X   |
|----------|---------|----------|---------------------|-------------------|--------------------|---------|
| R1       | 2.56501 | 0.00000  | 0.00000             | 0.00000           | 0.00000            | 2.56501 |
| R2       | 2.62015 | 0.00000  | 0.00000             | 0.00000           | 0.00000            | 2.62015 |
| R3       | 2.03418 | 0.00000  | 0.00000             | 0.00000           | 0.00000            | 2.03418 |
| R4       | 2.62939 | 0.00000  | 0.00000             | 0.00000           | 0.00000            | 2.62939 |
| R5       | 2.03076 | 0.00000  | 0.00000             | 0.00000           | 0.00000            | 2.03076 |
| R6       | 2.54613 | 0.00000  | -0.00001            | 0.00000           | 0.00000            | 2.54613 |
| R7       | 2.68698 | 0.00000  | 0.00001             | 0.00000           | 0.00000            | 2.68698 |
| R8       | 2.51711 | 0.00000  | -0.00002            | 0.00001           | -0.00001           | 2.51710 |
| R9       | 2.09991 | 0.00000  | -0.00001            | 0.00002           | 0.00001            | 2.09992 |
| R10      | 2.79213 | 0.00000  | 0.00000             | -0.00001          | 0.00000            | 2.79212 |
| R11      | 2.90792 | 0.00000  | 0.00000             | 0.00000           | 0.00000            | 2.90791 |
| R12      | 2.06203 | 0.00000  | 0.00000             | 0.00000           | 0.00000            | 2.06203 |
| R13      | 2.06123 | 0.00000  | -0.00001            | 0.00000           | 0.00000            | 2.06122 |
| R14      | 2.07221 | 0.00000  | 0.00000             | 0.00000           | 0.00000            | 2.07221 |
| R15      | 2.07144 | 0.00000  | -0.00001            | 0.00001           | 0.00000            | 2.07144 |
| R16      | 2.65395 | -0.00001 | 0.00001             | -0.00001          | 0.00000            | 2.65395 |
| R17      | 4.15426 | 0.00000  | -0.00009            | -0.00011          | -0.00020           | 4.15406 |
| R18      | 8.46237 | 0.00000  | 0.00030             | -0.00005          | 0.00025            | 8.46263 |
| R19      | 2.50679 | 0.00000  | 0.00000             | 0.00000           | 0.00000            | 2.50679 |
| R20      | 2.04637 | 0.00000  | 0.00000             | 0.00000           | 0.00000            | 2.04637 |
| R21      | 2.04299 | 0.00000  | 0.00000             | 0.00000           | 0.00000            | 2.04299 |
| R22      | 2.04580 | 0.00000  | 0.00000             | 0.00000           | 0.00000            | 2.04580 |
| R23      | 1.84641 | 0.00000  | -0.00002            | 0.00001           | -0.00001           | 1.84639 |
| R24      | 3.41824 | 0.00000  | 0.00008             | -0.00003          | 0.00005            | 3.41828 |
| R25      | 2.77432 | 0.00000  | 0.00000             | 0.00000           | 0.00000            | 2.77432 |
| R26      | 2.74079 | 0.00000  | -0.00002            | 0.00001           | -0.00001           | 2.74078 |
| R27      | 2.05485 | 0.00000  | 0.00000             | 0.00001           | 0.00000            | 2.05486 |
| R28      | 2.05334 | 0.00000  | 0.00000             | 0.00000           | 0.00000            | 2.05335 |
| R29      | 2.73600 | 0.00000  | -0.00002            | 0.00001           | -0.00001           | 2.73599 |
| R30      | 2.05780 | 0.00000  | 0.00000             | 0.00000           | 0.00000            | 2.05780 |
| R31      | 2.84186 | 0.00000  | -0.00001            | 0.00000           | -0.00001           | 2.84185 |
| R32      | 2.06791 | 0.00000  | 0.00000             | 0.00000           | 0.00000            | 2.06791 |
| R33      | 2.06814 | 0.00000  | 0.00000             | 0.00000           | 0.00000            | 2.06815 |
| R34      | 2.06319 | 0.00000  | 0.00000             | 0.00000           | 0.00000            | 2.06319 |
| A1       | 1.87430 | 0.00000  | -0.00001            | 0.00001           | 0.00000            | 1.87430 |

|     |         |          |          |          |          |         |
|-----|---------|----------|----------|----------|----------|---------|
| A2  | 2.27811 | 0.00000  | 0.00001  | 0.00000  | 0.00001  | 2.27812 |
| A3  | 2.13073 | 0.00000  | 0.00000  | 0.00000  | 0.00000  | 2.13073 |
| A4  | 1.86187 | 0.00000  | 0.00000  | -0.00001 | 0.00000  | 1.86186 |
| A5  | 2.27709 | 0.00000  | 0.00000  | 0.00000  | 0.00000  | 2.27709 |
| A6  | 2.14421 | 0.00000  | 0.00000  | 0.00000  | 0.00000  | 2.14421 |
| A7  | 1.89724 | 0.00000  | 0.00000  | 0.00001  | 0.00000  | 1.89724 |
| A8  | 2.24847 | 0.00000  | 0.00002  | 0.00000  | 0.00001  | 2.24849 |
| A9  | 2.13746 | 0.00000  | -0.00001 | 0.00000  | -0.00002 | 2.13744 |
| A10 | 1.88929 | 0.00000  | 0.00000  | 0.00000  | 0.00000  | 1.88929 |
| A11 | 2.23454 | 0.00000  | -0.00004 | 0.00002  | -0.00002 | 2.23452 |
| A12 | 2.15935 | 0.00000  | 0.00003  | -0.00001 | 0.00002  | 2.15938 |
| A13 | 1.90206 | 0.00000  | 0.00001  | 0.00000  | 0.00000  | 1.90206 |
| A14 | 2.21205 | 0.00000  | 0.00003  | 0.00001  | 0.00004  | 2.21209 |
| A15 | 2.16789 | 0.00000  | -0.00003 | -0.00001 | -0.00003 | 2.16786 |
| A16 | 1.95084 | 0.00000  | 0.00000  | 0.00001  | 0.00002  | 1.95085 |
| A17 | 1.86535 | 0.00000  | 0.00001  | 0.00001  | 0.00003  | 1.86537 |
| A18 | 1.88388 | 0.00000  | -0.00002 | 0.00000  | -0.00002 | 1.88387 |
| A19 | 1.92522 | 0.00000  | 0.00004  | -0.00003 | 0.00001  | 1.92523 |
| A20 | 1.92097 | 0.00000  | -0.00002 | 0.00001  | -0.00001 | 1.92096 |
| A21 | 1.91631 | 0.00000  | -0.00002 | 0.00000  | -0.00002 | 1.91629 |
| A22 | 1.91296 | 0.00000  | 0.00001  | -0.00001 | -0.00001 | 1.91296 |
| A23 | 1.90257 | 0.00000  | 0.00003  | -0.00002 | 0.00000  | 1.90257 |
| A24 | 1.91416 | 0.00000  | -0.00003 | -0.00001 | -0.00003 | 1.91413 |
| A25 | 1.88698 | 0.00000  | 0.00001  | -0.00001 | -0.00001 | 1.88697 |
| A26 | 1.88656 | 0.00000  | 0.00002  | 0.00002  | 0.00004  | 1.88660 |
| A27 | 1.96008 | 0.00000  | -0.00003 | 0.00003  | 0.00000  | 1.96007 |
| A28 | 1.78578 | -0.00001 | -0.00066 | -0.00005 | -0.00071 | 1.78507 |
| A29 | 2.83693 | 0.00001  | 0.00043  | 0.00001  | 0.00044  | 2.83737 |
| A30 | 2.17701 | 0.00000  | -0.00001 | 0.00000  | -0.00001 | 2.17701 |
| A31 | 1.95554 | 0.00000  | -0.00001 | 0.00000  | -0.00001 | 1.95553 |
| A32 | 2.15063 | 0.00000  | 0.00002  | 0.00000  | 0.00002  | 2.15065 |
| A33 | 2.07969 | 0.00000  | 0.00000  | 0.00000  | 0.00000  | 2.07969 |
| A34 | 2.15744 | 0.00000  | 0.00000  | 0.00000  | 0.00000  | 2.15744 |
| A35 | 2.04605 | 0.00000  | 0.00000  | 0.00000  | 0.00000  | 2.04605 |
| A36 | 1.91264 | 0.00000  | -0.00010 | 0.00006  | -0.00004 | 1.91260 |
| A37 | 3.05357 | -0.00001 | 0.00011  | -0.00001 | 0.00009  | 3.05366 |
| A38 | 2.07431 | 0.00000  | -0.00004 | 0.00000  | -0.00004 | 2.07428 |
| A39 | 2.08780 | 0.00000  | 0.00001  | 0.00002  | 0.00002  | 2.08783 |
| A40 | 2.00177 | 0.00000  | -0.00001 | 0.00000  | -0.00001 | 2.00176 |
| A41 | 1.98454 | 0.00000  | 0.00003  | -0.00001 | 0.00002  | 1.98457 |
| A42 | 2.04017 | 0.00000  | 0.00001  | -0.00001 | 0.00000  | 2.04017 |
| A43 | 2.04575 | 0.00000  | -0.00001 | 0.00001  | -0.00001 | 2.04575 |
| A44 | 2.13291 | 0.00000  | -0.00001 | 0.00002  | 0.00000  | 2.13291 |
| A45 | 1.94929 | 0.00000  | 0.00004  | -0.00004 | -0.00001 | 1.94928 |



|     |          |         |          |          |          |          |
|-----|----------|---------|----------|----------|----------|----------|
| A46 | 2.04634  | 0.00000 | 0.00000  | 0.00001  | 0.00000  | 2.04635  |
| A47 | 2.02223  | 0.00000 | 0.00001  | 0.00000  | 0.00001  | 2.02223  |
| A48 | 1.43271  | 0.00000 | 0.00044  | 0.00002  | 0.00046  | 1.43316  |
| A49 | 1.00014  | 0.00000 | 0.00001  | 0.00001  | 0.00002  | 1.00016  |
| A50 | 2.37602  | 0.00000 | 0.00025  | -0.00008 | 0.00017  | 2.37619  |
| A51 | 2.35287  | 0.00000 | 0.00060  | 0.00019  | 0.00079  | 2.35366  |
| A52 | 1.93136  | 0.00000 | 0.00001  | 0.00000  | 0.00002  | 1.93138  |
| A53 | 1.91242  | 0.00000 | 0.00000  | -0.00001 | -0.00001 | 1.91241  |
| A54 | 1.93752  | 0.00000 | 0.00002  | -0.00001 | 0.00001  | 1.93753  |
| A55 | 1.88374  | 0.00000 | -0.00001 | 0.00001  | 0.00000  | 1.88374  |
| A56 | 1.91361  | 0.00000 | -0.00003 | 0.00001  | -0.00002 | 1.91359  |
| A57 | 1.88379  | 0.00000 | 0.00000  | 0.00000  | 0.00000  | 1.88378  |
| A58 | 3.78558  | 0.00000 | 0.00104  | 0.00021  | 0.00124  | 3.78682  |
| A59 | 5.04091  | 0.00000 | -0.00021 | 0.00020  | -0.00001 | 5.04090  |
| D1  | 0.00435  | 0.00000 | 0.00003  | -0.00002 | 0.00001  | 0.00436  |
| D2  | -3.13127 | 0.00000 | 0.00001  | 0.00002  | 0.00003  | -3.13124 |
| D3  | 3.13641  | 0.00000 | 0.00004  | -0.00001 | 0.00003  | 3.13644  |
| D4  | 0.00079  | 0.00000 | 0.00001  | 0.00003  | 0.00004  | 0.00083  |
| D5  | -0.00679 | 0.00000 | -0.00001 | -0.00001 | -0.00003 | -0.00682 |
| D6  | -3.09749 | 0.00000 | -0.00013 | -0.00003 | -0.00015 | -3.09765 |
| D7  | -3.13983 | 0.00000 | -0.00002 | -0.00003 | -0.00004 | -3.13987 |
| D8  | 0.05265  | 0.00000 | -0.00013 | -0.00004 | -0.00017 | 0.05248  |
| D9  | -0.00050 | 0.00000 | -0.00004 | 0.00005  | 0.00001  | -0.00049 |
| D10 | -3.13639 | 0.00000 | 0.00007  | 0.00000  | 0.00007  | -3.13632 |
| D11 | 3.13568  | 0.00000 | -0.00002 | 0.00001  | 0.00000  | 3.13568  |
| D12 | -0.00020 | 0.00000 | 0.00009  | -0.00003 | 0.00006  | -0.00015 |
| D13 | -0.00373 | 0.00000 | 0.00003  | -0.00006 | -0.00003 | -0.00375 |
| D14 | 3.13763  | 0.00000 | 0.00022  | 0.00013  | 0.00035  | 3.13798  |
| D15 | 3.13260  | 0.00000 | -0.00007 | -0.00001 | -0.00008 | 3.13251  |
| D16 | -0.00923 | 0.00000 | 0.00012  | 0.00017  | 0.00029  | -0.00894 |
| D17 | 0.00252  | 0.00000 | -0.00035 | -0.00012 | -0.00048 | 0.00204  |
| D18 | -3.13939 | 0.00000 | -0.00037 | -0.00011 | -0.00048 | -3.13986 |
| D19 | -3.13267 | 0.00000 | -0.00023 | -0.00018 | -0.00041 | -3.13308 |
| D20 | 0.00861  | 0.00000 | -0.00024 | -0.00017 | -0.00041 | 0.00820  |
| D21 | 0.00648  | 0.00000 | -0.00001 | 0.00004  | 0.00003  | 0.00651  |
| D22 | 3.09876  | 0.00000 | 0.00010  | 0.00006  | 0.00016  | 3.09892  |
| D23 | -3.13490 | 0.00000 | -0.00019 | -0.00013 | -0.00032 | -3.13522 |
| D24 | -0.04261 | 0.00000 | -0.00008 | -0.00012 | -0.00020 | -0.04281 |
| D25 | -3.11458 | 0.00000 | -0.00233 | -0.00091 | -0.00325 | -3.11782 |
| D26 | 0.02675  | 0.00000 | -0.00212 | -0.00070 | -0.00282 | 0.02393  |
| D27 | 1.41103  | 0.00000 | 0.00056  | 0.00021  | 0.00077  | 1.41180  |
| D28 | -2.76417 | 0.00000 | 0.00062  | 0.00019  | 0.00081  | -2.76336 |
| D29 | -0.70383 | 0.00000 | 0.00060  | 0.00019  | 0.00079  | -0.70305 |
| D30 | -1.67237 | 0.00000 | 0.00043  | 0.00020  | 0.00063  | -1.67174 |

|     |          |         |          |          |          |          |
|-----|----------|---------|----------|----------|----------|----------|
| D31 | 0.43562  | 0.00000 | 0.00049  | 0.00018  | 0.00067  | 0.43628  |
| D32 | 2.49595  | 0.00000 | 0.00047  | 0.00018  | 0.00064  | 2.49660  |
| D33 | -0.93902 | 0.00000 | 0.00001  | 0.00002  | 0.00003  | -0.93899 |
| D34 | 1.12313  | 0.00000 | 0.00003  | -0.00001 | 0.00002  | 1.12315  |
| D35 | -3.00754 | 0.00000 | 0.00000  | 0.00000  | 0.00000  | -3.00754 |
| D36 | -3.01179 | 0.00000 | -0.00003 | 0.00001  | -0.00002 | -3.01181 |
| D37 | -0.94964 | 0.00000 | -0.00001 | -0.00002 | -0.00003 | -0.94967 |
| D38 | 1.20288  | 0.00000 | -0.00005 | 0.00000  | -0.00005 | 1.20283  |
| D39 | 1.15420  | 0.00000 | -0.00002 | 0.00003  | 0.00001  | 1.15421  |
| D40 | -3.06683 | 0.00000 | 0.00000  | 0.00000  | 0.00000  | -3.06683 |
| D41 | -0.91432 | 0.00000 | -0.00004 | 0.00002  | -0.00002 | -0.91434 |
| D42 | -1.63709 | 0.00000 | -0.00035 | 0.00011  | -0.00024 | -1.63733 |
| D43 | 2.56130  | 0.00000 | -0.00036 | 0.00012  | -0.00024 | 2.56106  |
| D44 | 0.48119  | 0.00000 | -0.00036 | 0.00010  | -0.00026 | 0.48094  |
| D45 | 0.43752  | 0.00000 | 0.00262  | 0.00080  | 0.00343  | 0.44095  |
| D46 | -0.26721 | 0.00000 | -0.00093 | -0.00007 | -0.00099 | -0.26820 |
| D47 | 2.57050  | 0.00000 | -0.00142 | -0.00035 | -0.00176 | 2.56874  |
| D48 | -3.14150 | 0.00000 | -0.00004 | 0.00001  | -0.00003 | -3.14153 |
| D49 | 0.00062  | 0.00000 | -0.00003 | -0.00001 | -0.00004 | 0.00058  |
| D50 | 0.00044  | 0.00000 | -0.00003 | 0.00000  | -0.00002 | 0.00041  |
| D51 | -3.14063 | 0.00000 | -0.00001 | -0.00002 | -0.00003 | -3.14066 |
| D52 | -1.93623 | 0.00000 | 0.00738  | 0.00047  | 0.00785  | -1.92838 |
| D53 | 2.44131  | 0.00000 | -0.00701 | -0.00054 | -0.00755 | 2.43376  |
| D54 | 2.06940  | 0.00000 | -0.00772 | -0.00086 | -0.00858 | 2.06082  |
| D55 | -2.59960 | 0.00000 | -0.00680 | -0.00074 | -0.00754 | -2.60714 |
| D56 | -2.72924 | 0.00000 | 0.00006  | -0.00006 | 0.00000  | -2.72924 |
| D57 | -0.03020 | 0.00000 | 0.00001  | 0.00000  | 0.00000  | -0.03019 |
| D58 | -0.02167 | 0.00000 | 0.00002  | -0.00004 | -0.00002 | -0.02169 |
| D59 | 2.67737  | 0.00000 | -0.00004 | 0.00002  | -0.00002 | 2.67735  |
| D60 | -0.17042 | 0.00000 | 0.00004  | -0.00012 | -0.00008 | -0.17050 |
| D61 | 0.27154  | 0.00000 | 0.00093  | 0.00026  | 0.00119  | 0.27273  |
| D62 | -2.58268 | 0.00000 | -0.00001 | -0.00009 | -0.00010 | -2.58278 |
| D63 | -2.14072 | 0.00000 | 0.00087  | 0.00029  | 0.00117  | -2.13956 |
| D64 | 2.14155  | 0.00000 | -0.00036 | 0.00007  | -0.00028 | 2.14127  |
| D65 | -0.25175 | 0.00000 | -0.00041 | 0.00012  | -0.00029 | -0.25204 |
| D66 | 2.48844  | 0.00000 | 0.00021  | 0.00000  | 0.00020  | 2.48864  |
| D67 | -1.71957 | 0.00000 | 0.00020  | 0.00000  | 0.00021  | -1.71936 |
| D68 | 0.35946  | 0.00000 | 0.00021  | -0.00001 | 0.00021  | 0.35966  |
| D69 | 1.27235  | 0.00000 | 0.00021  | -0.00001 | 0.00020  | 1.27255  |
| D70 | -2.93566 | 0.00000 | 0.00021  | -0.00001 | 0.00021  | -2.93545 |
| D71 | -0.85663 | 0.00000 | 0.00022  | -0.00001 | 0.00021  | -0.85642 |
| D72 | -1.09018 | 0.00000 | 0.00015  | 0.00005  | 0.00020  | -1.08997 |
| D73 | 0.98500  | 0.00000 | 0.00015  | 0.00006  | 0.00021  | 0.98520  |
| D74 | 3.06403  | 0.00000 | 0.00016  | 0.00005  | 0.00021  | 3.06423  |

| Item                 | Value    | Threshold | Converged? |
|----------------------|----------|-----------|------------|
| Maximum Force        | 0.000008 | 0.000450  | YES        |
| RMS Force            | 0.000002 | 0.000300  | YES        |
| Maximum Displacement | 0.003885 | 0.001800  | NO         |
| RMS Displacement     | 0.000867 | 0.001200  | YES        |

Predicted change in Energy=-1.185284D-08

GradGradGradGradGradGradGradGradGradGradGradGradGradGradGradGradGradGrad

Input orientation:

| Center Number | Atomic Number | Atomic Type | Coordinates (Angstroms) |           |           |
|---------------|---------------|-------------|-------------------------|-----------|-----------|
|               |               |             | X                       | Y         | Z         |
| 1             | 6             | 0           | -1.376464               | -1.910028 | -0.256291 |
| 2             | 6             | 0           | -2.507629               | -1.169482 | -0.136128 |
| 3             | 7             | 0           | -2.108771               | 0.112177  | 0.230344  |
| 4             | 6             | 0           | -0.765127               | 0.135316  | 0.327505  |
| 5             | 7             | 0           | -0.305233               | -1.081559 | 0.041293  |
| 6             | 6             | 0           | 1.127915                | -1.437525 | -0.008349 |
| 7             | 6             | 0           | 1.683017                | -1.372186 | -1.442051 |
| 8             | 1             | 0           | -1.242929               | -2.945749 | -0.517405 |
| 9             | 1             | 0           | -3.537931               | -1.442700 | -0.272759 |
| 10            | 1             | 0           | 1.652901                | -0.728415 | 0.633698  |
| 11            | 1             | 0           | 1.237250                | -2.447195 | 0.389586  |
| 12            | 1             | 0           | 1.063651                | -1.988276 | -2.104828 |
| 13            | 1             | 0           | 1.635165                | -0.336046 | -1.796575 |
| 14            | 35            | 0           | 1.650465                | 2.235130  | 1.023139  |
| 15            | 1             | 0           | -0.112851               | 0.994013  | 0.595849  |
| 16            | 6             | 0           | -2.912342               | 1.257084  | 0.485757  |
| 17            | 6             | 0           | -4.236618               | 1.282570  | 0.412702  |
| 18            | 1             | 0           | -2.316033               | 2.121113  | 0.751328  |
| 19            | 1             | 0           | -4.758258               | 2.205153  | 0.626041  |
| 20            | 1             | 0           | -4.838919               | 0.422598  | 0.148714  |
| 21            | 8             | 0           | 2.990598                | -1.884044 | -1.466522 |
| 22            | 1             | 0           | 3.630547                | -1.152645 | -1.365595 |
| 23            | 6             | 0           | 4.837527                | 1.611843  | -1.120557 |
| 24            | 6             | 0           | 5.710529                | 0.751728  | -0.312217 |
| 25            | 8             | 0           | 4.856601                | 0.176861  | -1.330318 |
| 26            | 1             | 0           | 3.921145                | 1.993962  | -0.677123 |
| 27            | 1             | 0           | 5.258060                | 2.179657  | -1.946029 |
| 28            | 1             | 0           | 6.761264                | 0.703402  | -0.594019 |
| 29            | 6             | 0           | 5.398999                | 0.412954  | 1.119468  |
| 30            | 1             | 0           | 5.677845                | -0.621800 | 1.340841  |
| 31            | 1             | 0           | 5.972985                | 1.066124  | 1.784040  |

32            1            0            4.339106        0.561580        1.335217

-----  
Distance matrix (angstroms):

|    |    | 1        | 2        | 3        | 4        | 5        |
|----|----|----------|----------|----------|----------|----------|
| 1  | C  | 0.000000 |          |          |          |          |
| 2  | C  | 1.357344 | 0.000000 |          |          |          |
| 3  | N  | 2.205085 | 1.391416 | 0.000000 |          |          |
| 4  | C  | 2.213139 | 2.225706 | 1.347352 | 0.000000 |          |
| 5  | N  | 1.386526 | 2.211280 | 2.171059 | 1.331993 | 0.000000 |
| 6  | C  | 2.560596 | 3.647651 | 3.596483 | 2.483996 | 1.477528 |
| 7  | C  | 3.325016 | 4.394092 | 4.402033 | 3.375989 | 2.497581 |
| 8  | H  | 1.076443 | 2.213586 | 3.264922 | 3.230345 | 2.160236 |
| 9  | H  | 2.211471 | 1.074633 | 2.171002 | 3.246366 | 3.267933 |
| 10 | H  | 3.371253 | 4.254079 | 3.875496 | 2.585854 | 2.076040 |
| 11 | H  | 2.745397 | 3.991622 | 4.215637 | 3.268444 | 2.089383 |
| 12 | H  | 3.062251 | 4.159357 | 4.464213 | 3.710838 | 2.702187 |
| 13 | H  | 3.730926 | 4.540314 | 4.280930 | 3.239645 | 2.774652 |
| 14 | Br | 5.289761 | 5.497729 | 4.389454 | 3.275394 | 3.973562 |
| 15 | H  | 3.279682 | 3.309300 | 2.212448 | 1.111230 | 2.156975 |
| 16 | C  | 3.597243 | 2.537470 | 1.421891 | 2.427744 | 3.530413 |
| 17 | C  | 4.338285 | 3.050111 | 2.435325 | 3.657144 | 4.602482 |
| 18 | H  | 4.260069 | 3.413547 | 2.085715 | 2.555059 | 3.847672 |
| 19 | H  | 5.399052 | 4.127274 | 3.399545 | 4.507599 | 5.565415 |
| 20 | H  | 4.194493 | 2.837387 | 2.748951 | 4.087821 | 4.777901 |
| 21 | O  | 4.531730 | 5.701847 | 5.733047 | 4.626210 | 3.712141 |
| 22 | H  | 5.184047 | 6.260118 | 6.089874 | 4.883377 | 4.180281 |
| 23 | C  | 7.194736 | 7.915566 | 7.233602 | 5.972164 | 5.920497 |
| 24 | C  | 7.570572 | 8.441575 | 7.864150 | 6.536309 | 6.298834 |
| 25 | O  | 6.660311 | 7.580938 | 7.138365 | 5.861222 | 5.487209 |
| 26 | H  | 6.594157 | 7.185346 | 6.381575 | 5.140524 | 5.276099 |
| 27 | H  | 7.974814 | 8.648607 | 7.954953 | 6.754781 | 6.747978 |
| 28 | H  | 8.553754 | 9.467299 | 8.927858 | 7.603847 | 7.316084 |
| 29 | C  | 7.293549 | 8.160601 | 7.566216 | 6.220991 | 5.994522 |
| 30 | H  | 7.346675 | 8.335669 | 7.899577 | 6.565969 | 6.139822 |
| 31 | H  | 8.187480 | 8.978073 | 8.284852 | 6.956295 | 6.860446 |
| 32 | H  | 6.427245 | 7.213821 | 6.557273 | 5.220189 | 5.093528 |
|    |    | 6        | 7        | 8        | 9        | 10       |
| 6  | C  | 0.000000 |          |          |          |          |
| 7  | C  | 1.538801 | 0.000000 |          |          |          |
| 8  | H  | 2.855657 | 3.448512 | 0.000000 |          |          |
| 9  | H  | 4.673335 | 5.350749 | 2.754277 | 0.000000 |          |
| 10 | H  | 1.091179 | 2.173495 | 3.824583 | 5.317575 | 0.000000 |
| 11 | H  | 1.090752 | 2.170080 | 2.687466 | 4.924435 | 1.785094 |
| 12 | H  | 2.168567 | 1.096565 | 2.959220 | 4.982839 | 3.071480 |

|    |    |          |          |          |           |          |
|----|----|----------|----------|----------|-----------|----------|
| 13 | H  | 2.160628 | 1.096159 | 4.090263 | 5.505236  | 2.461807 |
| 14 | Br | 3.850379 | 4.369318 | 6.130783 | 6.490395  | 2.989024 |
| 15 | H  | 2.795878 | 3.602370 | 4.247132 | 4.292228  | 2.466996 |
| 16 | C  | 4.881469 | 5.634432 | 4.632178 | 2.873246  | 4.980515 |
| 17 | C  | 6.029463 | 6.747586 | 5.263644 | 2.895706  | 6.227306 |
| 18 | H  | 5.010169 | 5.745124 | 5.332385 | 3.904171  | 4.887339 |
| 19 | H  | 6.951158 | 7.652737 | 6.340094 | 3.950174  | 7.050450 |
| 20 | H  | 6.252027 | 6.948916 | 4.971983 | 2.312909  | 6.610883 |
| 21 | O  | 2.407330 | 1.404409 | 4.466631 | 6.651432  | 2.745148 |
| 22 | H  | 2.861195 | 1.961355 | 5.261693 | 7.257099  | 2.843980 |
| 23 | C  | 4.929186 | 4.354161 | 7.622820 | 8.955293  | 4.323894 |
| 24 | C  | 5.087781 | 4.691310 | 7.878072 | 9.505319  | 4.421530 |
| 25 | O  | 4.272814 | 3.533223 | 6.900419 | 8.614497  | 3.865304 |
| 26 | H  | 4.474874 | 4.114034 | 7.148000 | 8.222649  | 3.778163 |
| 27 | H  | 5.822088 | 5.064634 | 8.400811 | 9.658714  | 5.301797 |
| 28 | H  | 6.054849 | 5.551200 | 8.797118 | 10.525321 | 5.445435 |
| 29 | C  | 4.789405 | 4.853517 | 7.620725 | 9.233118  | 3.946131 |
| 30 | H  | 4.815348 | 4.926074 | 7.533321 | 9.391917  | 4.087981 |
| 31 | H  | 5.740698 | 5.895493 | 8.570950 | 10.048986 | 4.817341 |
| 32 | H  | 4.014142 | 4.302031 | 6.847823 | 8.285555  | 3.061358 |
|    |    | 11       | 12       | 13       | 14        | 15       |
| 11 | H  | 0.000000 |          |          |           |          |
| 12 | H  | 2.542213 | 0.000000 |          |           |          |
| 13 | H  | 3.065059 | 1.775250 | 0.000000 |           |          |
| 14 | Br | 4.743026 | 5.288259 | 3.816014 | 0.000000  |          |
| 15 | H  | 3.702327 | 4.191880 | 3.247816 | 2.198233  | 0.000000 |
| 16 | C  | 5.563276 | 5.749088 | 5.331690 | 4.697292  | 2.813979 |
| 17 | C  | 6.623814 | 6.717831 | 6.479094 | 5.994810  | 4.137906 |
| 18 | H  | 5.798803 | 6.038789 | 5.304848 | 3.977434  | 2.479625 |
| 19 | H  | 7.592520 | 7.677052 | 7.294013 | 6.421083  | 4.800790 |
| 20 | H  | 6.724103 | 6.762478 | 6.802460 | 6.794262  | 4.781440 |
| 21 | O  | 2.614672 | 2.032590 | 2.083850 | 4.996195  | 4.708289 |
| 22 | H  | 3.237961 | 2.798874 | 2.198664 | 4.593886  | 4.740087 |
| 23 | C  | 5.631902 | 5.307709 | 3.808725 | 3.891181  | 5.275794 |
| 24 | C  | 5.543994 | 5.684589 | 4.471595 | 4.524133  | 5.898732 |
| 25 | O  | 4.789931 | 4.435555 | 3.295166 | 4.478229  | 5.391967 |
| 26 | H  | 5.297644 | 5.105079 | 3.450769 | 2.846935  | 4.346663 |
| 27 | H  | 6.559709 | 5.915230 | 4.413215 | 4.672663  | 6.059173 |
| 28 | H  | 6.434942 | 6.480005 | 5.366888 | 5.575093  | 6.982385 |
| 29 | C  | 5.102288 | 5.912464 | 4.819829 | 4.169066  | 5.567072 |
| 30 | H  | 4.894470 | 5.918671 | 5.125260 | 4.948007  | 6.057889 |
| 31 | H  | 6.059298 | 6.968085 | 5.796858 | 4.541996  | 6.201160 |
| 32 | H  | 4.423624 | 5.391129 | 4.233810 | 3.182287  | 4.533606 |
|    |    | 16       | 17       | 18       | 19        | 20       |

|    |   |          |           |          |           |           |  |  |  |
|----|---|----------|-----------|----------|-----------|-----------|--|--|--|
| 16 | C | 0.000000 |           |          |           |           |  |  |  |
| 17 | C | 1.326535 | 0.000000  |          |           |           |  |  |  |
| 18 | H | 1.082893 | 2.122845  | 0.000000 |           |           |  |  |  |
| 19 | H | 2.079885 | 1.081102  | 2.446880 | 0.000000  |           |  |  |  |
| 20 | H | 2.126421 | 1.082593  | 3.100492 | 1.847120  | 0.000000  |  |  |  |
| 21 | O | 6.965829 | 8.111201  | 7.008601 | 9.008059  | 8.320513  |  |  |  |
| 22 | H | 7.214131 | 8.425253  | 7.110603 | 9.252755  | 8.746792  |  |  |  |
| 23 | C | 7.922535 | 9.208660  | 7.411932 | 9.771475  | 9.831529  |  |  |  |
| 24 | C | 8.674448 | 9.987645  | 8.211702 | 10.610762 | 10.564641 |  |  |  |
| 25 | O | 8.051179 | 9.324556  | 7.717516 | 10.019322 | 9.810761  |  |  |  |
| 26 | H | 6.970783 | 8.260926  | 6.399924 | 8.779230  | 8.938116  |  |  |  |
| 27 | H | 8.574391 | 9.824322  | 8.040277 | 10.341316 | 10.460602 |  |  |  |
| 28 | H | 9.749417 | 11.059039 | 9.285322 | 11.680890 | 11.627328 |  |  |  |
| 29 | C | 8.378098 | 9.700560  | 7.910440 | 10.325954 | 10.283843 |  |  |  |
| 30 | H | 8.834743 | 10.138276 | 8.471906 | 10.835813 | 10.635519 |  |  |  |
| 31 | H | 8.981705 | 10.303563 | 8.419460 | 10.853475 | 10.953798 |  |  |  |
| 32 | H | 7.334085 | 8.655282  | 6.860317 | 9.271801  | 9.255444  |  |  |  |
|    |   | 21       | 22        | 23       | 24        | 25        |  |  |  |
| 21 | O | 0.000000 |           |          |           |           |  |  |  |
| 22 | H | 0.977069 | 0.000000  |          |           |           |  |  |  |
| 23 | C | 3.968886 | 3.026423  | 0.000000 |           |           |  |  |  |
| 24 | C | 3.959512 | 3.010410  | 1.468109 | 0.000000  |           |  |  |  |
| 25 | O | 2.783495 | 1.808878  | 1.450357 | 1.447824  | 0.000000  |  |  |  |
| 26 | H | 4.065464 | 3.234127  | 1.087385 | 2.208664  | 2.145599  |  |  |  |
| 27 | H | 4.678138 | 3.753657  | 1.086584 | 2.216540  | 2.133416  |  |  |  |
| 28 | H | 4.655541 | 3.720435  | 2.191637 | 1.088941  | 2.108821  |  |  |  |
| 29 | C | 4.214729 | 3.428420  | 2.601980 | 1.503842  | 2.520196  |  |  |  |
| 30 | H | 4.086054 | 3.434824  | 3.428378 | 2.149477  | 2.906439  |  |  |  |
| 31 | H | 5.307002 | 4.508897  | 3.166032 | 2.135889  | 3.425832  |  |  |  |
| 32 | H | 3.955918 | 3.276432  | 2.717040 | 2.151976  | 2.742424  |  |  |  |
|    |   | 26       | 27        | 28       | 29        | 30        |  |  |  |
| 26 | H | 0.000000 |           |          |           |           |  |  |  |
| 27 | H | 1.852551 | 0.000000  |          |           |           |  |  |  |
| 28 | H | 3.120694 | 2.503374  | 0.000000 |           |           |  |  |  |
| 29 | C | 2.812717 | 3.540956  | 2.208204 | 0.000000  |           |  |  |  |
| 30 | H | 3.741709 | 4.339112  | 2.583339 | 1.094293  | 0.000000  |  |  |  |
| 31 | H | 3.335903 | 3.957838  | 2.531425 | 1.094416  | 1.769921  |  |  |  |
| 32 | H | 2.505179 | 3.772165  | 3.099825 | 1.091792  | 1.786797  |  |  |  |
|    |   | 31       | 32        |          |           |           |  |  |  |
| 31 | H | 0.000000 |           |          |           |           |  |  |  |
| 32 | H | 1.767927 | 0.000000  |          |           |           |  |  |  |

Stoichiometry C10H17BrN2O2  
Framework group C1[X(C10H17BrN2O2)]  
Deg. of freedom 90

Full point group C1 NOp 1  
 Largest Abelian subgroup C1 NOp 1  
 Largest concise Abelian subgroup C1 NOp 1

Standard orientation:

| Center<br>Number | Atomic<br>Number | Atomic<br>Type | Coordinates (Angstroms) |           |           |
|------------------|------------------|----------------|-------------------------|-----------|-----------|
|                  |                  |                | X                       | Y         | Z         |
| 1                | 6                | 0              | -2.710938               | 2.114512  | -0.440734 |
| 2                | 6                | 0              | -3.788409               | 1.349262  | -0.131165 |
| 3                | 7                | 0              | -3.319982               | 0.050096  | 0.038487  |
| 4                | 6                | 0              | -1.988375               | 0.040680  | -0.166671 |
| 5                | 7                | 0              | -1.603214               | 1.280897  | -0.462843 |
| 6                | 6                | 0              | -0.201120               | 1.680234  | -0.703157 |
| 7                | 6                | 0              | 0.455077                | 2.252082  | 0.565821  |
| 8                | 1                | 0              | -2.638443               | 3.167406  | -0.652601 |
| 9                | 1                | 0              | -4.824520               | 1.613930  | -0.025051 |
| 10               | 1                | 0              | 0.330399                | 0.786755  | -1.034602 |
| 11               | 1                | 0              | -0.196268               | 2.428609  | -1.496662 |
| 12               | 1                | 0              | -0.161852               | 3.066532  | 0.963971  |
| 13               | 1                | 0              | 0.510387                | 1.463739  | 1.325439  |
| 14               | 35               | 0              | 0.525336                | -2.059040 | -0.141452 |
| 15               | 1                | 0              | -1.293093               | -0.824310 | -0.110040 |
| 16               | 6                | 0              | -4.050328               | -1.125451 | 0.364768  |
| 17               | 6                | 0              | -5.360656               | -1.169492 | 0.566752  |
| 18               | 1                | 0              | -3.410124               | -1.996285 | 0.431436  |
| 19               | 1                | 0              | -5.824473               | -2.115016 | 0.810967  |
| 20               | 1                | 0              | -6.006624               | -0.303236 | 0.500923  |
| 21               | 8                | 0              | 1.718729                | 2.776780  | 0.249212  |
| 22               | 1                | 0              | 2.403684                | 2.097564  | 0.404667  |
| 23               | 6                | 0              | 3.796585                | -0.459333 | 1.230100  |
| 24               | 6                | 0              | 4.544042                | 0.009421  | 0.056678  |
| 25               | 8                | 0              | 3.721458                | 0.928338  | 0.815059  |
| 26               | 1                | 0              | 2.883303                | -1.029328 | 1.077042  |
| 27               | 1                | 0              | 4.314917                | -0.605629 | 2.173813  |
| 28               | 1                | 0              | 5.605061                | 0.214139  | 0.191292  |
| 29               | 6                | 0              | 4.109581                | -0.304705 | -1.348353 |
| 30               | 1                | 0              | 4.293354                | 0.548032  | -2.009068 |
| 31               | 1                | 0              | 4.684051                | -1.155236 | -1.728257 |
| 32               | 1                | 0              | 3.051607                | -0.572430 | -1.380363 |

Rotational constants (GHZ): 0.5995227 0.2213214 0.1723301

Standard basis: 6-311++G(d,p) (5D, 7F)

There are 492 symmetry adapted cartesian basis functions of A symmetry.

There are 475 symmetry adapted basis functions of A symmetry.  
 475 basis functions, 751 primitive gaussians, 492 cartesian basis functions  
 71 alpha electrons 71 beta electrons  
 nuclear repulsion energy 1307.2104317328 Hartrees.  
 NAtoms= 32 NActive= 32 NUniq= 32 SFac= 1.00D+00 NATFMM= 60 NAOKFM=F

Big=F

Integral buffers will be 131072 words long.

Raffenetti 2 integral format.

Two-electron integral symmetry is turned on.

One-electron integrals computed using PRISM.

NBasis= 475 RedAO= T EigKep= 3.79D-06 NBF= 475

NBsUse= 475 1.00D-06 EigRej= -1.00D+00 NBFU= 475

Initial guess from the checkpoint file: "/home/suqian/liuwen/qianmengshijie/ohpo/ohpo.chk"

B after Tr= 0.000000 0.000000 0.000000

Rot= 1.000000 0.000069 0.000018 -0.000021 Ang= 0.01 deg.

Requested convergence on RMS density matrix=1.00D-08 within 128 cycles.

Requested convergence on MAX density matrix=1.00D-06.

Requested convergence on energy=1.00D-06.

No special actions if energy rises.

SCF Done: E(RB3LYP) = -3225.52371243 A.U. after 8 cycles

NFock= 8 Conv=0.50D-08 -V/T= 2.0018

Calling FoFJK, ICntrl= 2127 FMM=F ISym2X=0 l1Cent= 0 IOpClX= 0 NMat=1 NMatS=1

NMatT=0.

\*\*\*\*\* Axes restored to original set \*\*\*\*\*

| Center<br>Number | Atomic<br>Number | Forces (Hartrees/Bohr) |              |              |
|------------------|------------------|------------------------|--------------|--------------|
|                  |                  | X                      | Y            | Z            |
| 1                | 6                | -0.000000247           | -0.000001178 | 0.000009915  |
| 2                | 6                | 0.000000116            | 0.000001308  | 0.000005341  |
| 3                | 7                | -0.000000817           | -0.000000160 | 0.000004975  |
| 4                | 6                | -0.000001491           | 0.000003952  | -0.000008549 |
| 5                | 7                | -0.000000121           | -0.000000597 | -0.000000878 |
| 6                | 6                | -0.000002812           | 0.000000969  | 0.000006061  |
| 7                | 6                | 0.000007461            | -0.000007447 | 0.000005675  |
| 8                | 1                | -0.000000661           | -0.000000340 | 0.000007138  |
| 9                | 1                | -0.000000141           | 0.000000005  | 0.000005278  |
| 10               | 1                | 0.000000174            | 0.000002719  | 0.000002859  |
| 11               | 1                | -0.000000265           | 0.000001598  | 0.000007860  |
| 12               | 1                | 0.000000443            | -0.000005905 | 0.000004886  |
| 13               | 1                | -0.000000847           | -0.000004357 | -0.000001255 |
| 14               | 35               | -0.000000740           | 0.000004004  | -0.000004713 |
| 15               | 1                | 0.000003576            | 0.000002364  | 0.000000474  |
| 16               | 6                | 0.000000796            | 0.000002947  | -0.000005284 |



|    |   |              |              |              |
|----|---|--------------|--------------|--------------|
| 17 | 6 | 0.000000086  | 0.000003172  | -0.000004802 |
| 18 | 1 | 0.000000335  | 0.000002742  | -0.000004400 |
| 19 | 1 | 0.000000480  | 0.000003151  | -0.000005446 |
| 20 | 1 | 0.000000217  | 0.000001895  | -0.000000911 |
| 21 | 8 | -0.000008038 | -0.000004874 | 0.000000283  |
| 22 | 1 | -0.000001009 | -0.000002051 | 0.000009540  |
| 23 | 6 | 0.000004893  | -0.000003417 | -0.000008431 |
| 24 | 6 | -0.000001627 | -0.000000537 | 0.000002438  |
| 25 | 8 | -0.000001733 | -0.000005478 | -0.000006886 |
| 26 | 1 | -0.000000034 | -0.000002741 | -0.000006041 |
| 27 | 1 | -0.000000269 | -0.000004919 | -0.000006309 |
| 28 | 1 | 0.000000045  | -0.000001540 | -0.000003452 |
| 29 | 6 | 0.000001368  | 0.000001324  | -0.000000677 |
| 30 | 1 | 0.000000054  | 0.000004186  | 0.000000869  |
| 31 | 1 | 0.000000421  | 0.000005425  | -0.000004139 |
| 32 | 1 | 0.000000389  | 0.000003779  | -0.000001419 |

-----  
Cartesian Forces: Max 0.000009915 RMS 0.000003905

GradGradGradGradGradGradGradGradGradGradGradGradGradGradGradGradGradGradGradGrad  
Berny optimization.

Using GEDIIS/GDIIS optimizer.

FormGI is forming the generalized inverse of G from B-inverse, IUseBI=4.

GSVD: received Info= 1 from GESDD.

Internal Forces: Max 0.000007274 RMS 0.000001200

Search for a local minimum.

Step number 41 out of a maximum of 177

All quantities printed in internal units (Hartrees-Bohrs-Radians)

Mixed Optimization -- En-DIIS/RFO-DIIS

Swapping is turned off.

Update second derivatives using D2CorX and points

|    |    |    |    |    |    |    |  |  |  |
|----|----|----|----|----|----|----|--|--|--|
| 24 | 25 | 26 | 27 | 28 |    |    |  |  |  |
|    |    | 29 | 30 | 31 | 32 | 33 |  |  |  |
|    |    | 34 | 35 | 36 | 37 | 38 |  |  |  |
|    |    | 39 | 40 | 41 |    |    |  |  |  |

DE= -3.02D-07 DEPred=-1.19D-08 R= 2.55D+01

Trust test= 2.55D+01 RLast= 1.72D-02 DXMaxT set to 1.21D-01

ITU= 0 0 -1 -1 -1 -1 0 0 1 1 0 1 1 1 1 1 1 1 1 1

ITU= 1 1 1 1 -1 1 1 1 1 1 1 1 1 1 1 0 1 0 1

ITU= 0

|                 |         |         |         |         |         |
|-----------------|---------|---------|---------|---------|---------|
| Eigenvalues --- | 0.00003 | 0.00033 | 0.00079 | 0.00177 | 0.00207 |
| Eigenvalues --- | 0.00236 | 0.00341 | 0.00669 | 0.00887 | 0.01155 |
| Eigenvalues --- | 0.01215 | 0.01443 | 0.01763 | 0.01888 | 0.01989 |
| Eigenvalues --- | 0.02102 | 0.02184 | 0.02263 | 0.02325 | 0.02400 |
| Eigenvalues --- | 0.03017 | 0.03061 | 0.03135 | 0.03467 | 0.03769 |

|                 |         |         |         |         |         |
|-----------------|---------|---------|---------|---------|---------|
| Eigenvalues --- | 0.04086 | 0.04627 | 0.05174 | 0.05392 | 0.05424 |
| Eigenvalues --- | 0.05670 | 0.05883 | 0.06499 | 0.08948 | 0.09354 |
| Eigenvalues --- | 0.10329 | 0.11041 | 0.11473 | 0.11584 | 0.12850 |
| Eigenvalues --- | 0.13839 | 0.14022 | 0.14171 | 0.15087 | 0.15954 |
| Eigenvalues --- | 0.15994 | 0.15999 | 0.16001 | 0.16015 | 0.16019 |
| Eigenvalues --- | 0.16055 | 0.16780 | 0.18139 | 0.20050 | 0.22048 |
| Eigenvalues --- | 0.22845 | 0.23403 | 0.23861 | 0.24373 | 0.25027 |
| Eigenvalues --- | 0.27656 | 0.28374 | 0.30876 | 0.32021 | 0.33106 |
| Eigenvalues --- | 0.33220 | 0.34052 | 0.34207 | 0.34471 | 0.34844 |
| Eigenvalues --- | 0.35044 | 0.35684 | 0.35689 | 0.35856 | 0.36139 |
| Eigenvalues --- | 0.36435 | 0.36670 | 0.37190 | 0.37243 | 0.37592 |
| Eigenvalues --- | 0.38271 | 0.42180 | 0.42488 | 0.44676 | 0.45660 |
| Eigenvalues --- | 0.49349 | 0.54038 | 0.55075 | 0.55784 | 0.60394 |

Eigenvalue 1 is 3.45D-05 Eigenvector:

|   |          |          |          |         |         |
|---|----------|----------|----------|---------|---------|
|   | D52      | D54      | D53      | D55     | D47     |
| 1 | -0.50892 | 0.50253  | 0.49358  | 0.48782 | 0.04187 |
|   | D46      | A58      | A48      | D65     | D64     |
| 1 | 0.03768  | -0.01983 | -0.01614 | 0.01525 | 0.01486 |

En-DIIS/RFO-DIIS IScMMF= 0 using points: 41 40 39 38 37

RFO step: Lambda=-6.59631240D-10.

DidBck=F Rises=F RFO-DIIS coefs: 1.33293 -0.11105 -0.67639 0.52719 -

0.07267

Iteration 1 RMS(Cart)= 0.00048121 RMS(Int)= 0.00000032

Iteration 2 RMS(Cart)= 0.00000021 RMS(Int)= 0.00000014

| Variable | Old X   | -DE/DX   | Delta X<br>(Linear) | Delta X<br>(Quad) | Delta X<br>(Total) | New X   |
|----------|---------|----------|---------------------|-------------------|--------------------|---------|
| R1       | 2.56501 | 0.00000  | 0.00000             | 0.00000           | 0.00000            | 2.56501 |
| R2       | 2.62015 | 0.00000  | 0.00000             | 0.00000           | 0.00000            | 2.62015 |
| R3       | 2.03418 | 0.00000  | 0.00000             | 0.00000           | 0.00000            | 2.03418 |
| R4       | 2.62939 | 0.00000  | 0.00000             | 0.00000           | 0.00000            | 2.62939 |
| R5       | 2.03076 | 0.00000  | 0.00000             | 0.00000           | 0.00000            | 2.03076 |
| R6       | 2.54613 | 0.00000  | 0.00000             | 0.00000           | 0.00000            | 2.54612 |
| R7       | 2.68698 | 0.00000  | 0.00000             | 0.00000           | 0.00000            | 2.68699 |
| R8       | 2.51710 | 0.00000  | 0.00000             | 0.00000           | 0.00000            | 2.51710 |
| R9       | 2.09992 | 0.00000  | 0.00000             | 0.00001           | 0.00000            | 2.09992 |
| R10      | 2.79212 | 0.00000  | 0.00001             | -0.00001          | 0.00000            | 2.79212 |
| R11      | 2.90791 | 0.00000  | 0.00000             | 0.00000           | 0.00000            | 2.90792 |
| R12      | 2.06203 | 0.00000  | 0.00000             | 0.00000           | 0.00000            | 2.06203 |
| R13      | 2.06122 | 0.00000  | 0.00000             | 0.00000           | 0.00000            | 2.06122 |
| R14      | 2.07221 | 0.00000  | 0.00000             | 0.00000           | 0.00000            | 2.07221 |
| R15      | 2.07144 | 0.00000  | 0.00000             | 0.00000           | 0.00000            | 2.07144 |
| R16      | 2.65395 | -0.00001 | -0.00001            | 0.00000           | -0.00001           | 2.65394 |
| R17      | 4.15406 | 0.00000  | 0.00001             | -0.00004          | -0.00003           | 4.15403 |
| R18      | 8.46263 | 0.00000  | 0.00025             | 0.00006           | 0.00030            | 8.46293 |

|     |         |         |          |          |          |         |
|-----|---------|---------|----------|----------|----------|---------|
| R19 | 2.50679 | 0.00000 | 0.00000  | 0.00000  | 0.00000  | 2.50679 |
| R20 | 2.04637 | 0.00000 | 0.00000  | 0.00000  | 0.00000  | 2.04637 |
| R21 | 2.04299 | 0.00000 | 0.00000  | 0.00000  | 0.00000  | 2.04299 |
| R22 | 2.04580 | 0.00000 | 0.00000  | 0.00000  | 0.00000  | 2.04580 |
| R23 | 1.84639 | 0.00000 | 0.00000  | 0.00000  | 0.00000  | 1.84639 |
| R24 | 3.41828 | 0.00000 | 0.00003  | 0.00002  | 0.00004  | 3.41833 |
| R25 | 2.77432 | 0.00000 | 0.00000  | 0.00000  | 0.00000  | 2.77432 |
| R26 | 2.74078 | 0.00000 | 0.00000  | 0.00000  | 0.00000  | 2.74077 |
| R27 | 2.05486 | 0.00000 | 0.00000  | 0.00000  | 0.00000  | 2.05486 |
| R28 | 2.05335 | 0.00000 | 0.00000  | 0.00000  | 0.00000  | 2.05335 |
| R29 | 2.73599 | 0.00000 | 0.00000  | 0.00001  | 0.00001  | 2.73600 |
| R30 | 2.05780 | 0.00000 | 0.00000  | 0.00000  | 0.00000  | 2.05780 |
| R31 | 2.84185 | 0.00000 | -0.00001 | 0.00000  | 0.00000  | 2.84185 |
| R32 | 2.06791 | 0.00000 | 0.00000  | 0.00000  | 0.00000  | 2.06791 |
| R33 | 2.06815 | 0.00000 | 0.00000  | 0.00000  | 0.00000  | 2.06815 |
| R34 | 2.06319 | 0.00000 | 0.00000  | 0.00000  | 0.00000  | 2.06319 |
| A1  | 1.87430 | 0.00000 | 0.00000  | 0.00000  | 0.00000  | 1.87430 |
| A2  | 2.27812 | 0.00000 | 0.00000  | 0.00000  | 0.00000  | 2.27812 |
| A3  | 2.13073 | 0.00000 | 0.00000  | 0.00000  | 0.00000  | 2.13073 |
| A4  | 1.86186 | 0.00000 | 0.00000  | 0.00000  | 0.00000  | 1.86187 |
| A5  | 2.27709 | 0.00000 | 0.00000  | 0.00000  | 0.00000  | 2.27709 |
| A6  | 2.14421 | 0.00000 | 0.00000  | 0.00000  | 0.00000  | 2.14421 |
| A7  | 1.89724 | 0.00000 | -0.00001 | 0.00000  | 0.00000  | 1.89724 |
| A8  | 2.24849 | 0.00000 | 0.00001  | 0.00000  | 0.00001  | 2.24849 |
| A9  | 2.13744 | 0.00000 | 0.00000  | 0.00000  | -0.00001 | 2.13744 |
| A10 | 1.88929 | 0.00000 | 0.00000  | 0.00000  | 0.00000  | 1.88929 |
| A11 | 2.23452 | 0.00000 | -0.00001 | 0.00001  | 0.00000  | 2.23452 |
| A12 | 2.15938 | 0.00000 | 0.00001  | 0.00000  | 0.00000  | 2.15938 |
| A13 | 1.90206 | 0.00000 | 0.00000  | 0.00000  | 0.00000  | 1.90206 |
| A14 | 2.21209 | 0.00000 | 0.00001  | 0.00001  | 0.00002  | 2.21211 |
| A15 | 2.16786 | 0.00000 | -0.00001 | -0.00001 | -0.00002 | 2.16784 |
| A16 | 1.95085 | 0.00000 | 0.00001  | 0.00000  | 0.00001  | 1.95086 |
| A17 | 1.86537 | 0.00000 | 0.00000  | 0.00000  | 0.00000  | 1.86537 |
| A18 | 1.88387 | 0.00000 | -0.00001 | 0.00000  | 0.00000  | 1.88386 |
| A19 | 1.92523 | 0.00000 | 0.00001  | 0.00000  | 0.00001  | 1.92524 |
| A20 | 1.92096 | 0.00000 | -0.00001 | 0.00000  | 0.00000  | 1.92096 |
| A21 | 1.91629 | 0.00000 | 0.00000  | -0.00001 | -0.00001 | 1.91628 |
| A22 | 1.91296 | 0.00000 | 0.00000  | 0.00001  | 0.00001  | 1.91297 |
| A23 | 1.90257 | 0.00000 | 0.00001  | 0.00000  | 0.00001  | 1.90258 |
| A24 | 1.91413 | 0.00000 | -0.00001 | 0.00000  | -0.00001 | 1.91412 |
| A25 | 1.88697 | 0.00000 | -0.00001 | 0.00000  | -0.00001 | 1.88696 |
| A26 | 1.88660 | 0.00000 | 0.00002  | -0.00001 | 0.00001  | 1.88661 |
| A27 | 1.96007 | 0.00000 | 0.00000  | -0.00001 | -0.00001 | 1.96006 |
| A28 | 1.78507 | 0.00000 | -0.00019 | -0.00008 | -0.00028 | 1.78480 |

|     |          |         |          |          |          |          |
|-----|----------|---------|----------|----------|----------|----------|
| A29 | 2.83737  | 0.00000 | 0.00006  | 0.00006  | 0.00012  | 2.83749  |
| A30 | 2.17701  | 0.00000 | 0.00000  | 0.00000  | 0.00000  | 2.17700  |
| A31 | 1.95553  | 0.00000 | 0.00000  | 0.00000  | 0.00000  | 1.95553  |
| A32 | 2.15065  | 0.00000 | 0.00000  | 0.00000  | 0.00000  | 2.15065  |
| A33 | 2.07969  | 0.00000 | 0.00000  | 0.00000  | 0.00000  | 2.07969  |
| A34 | 2.15744  | 0.00000 | 0.00000  | 0.00000  | 0.00000  | 2.15744  |
| A35 | 2.04605  | 0.00000 | 0.00000  | 0.00000  | 0.00000  | 2.04605  |
| A36 | 1.91260  | 0.00000 | -0.00002 | -0.00002 | -0.00003 | 1.91256  |
| A37 | 3.05366  | 0.00000 | -0.00006 | 0.00001  | -0.00005 | 3.05361  |
| A38 | 2.07428  | 0.00000 | -0.00003 | 0.00001  | -0.00002 | 2.07426  |
| A39 | 2.08783  | 0.00000 | 0.00002  | -0.00001 | 0.00001  | 2.08784  |
| A40 | 2.00176  | 0.00000 | 0.00000  | -0.00001 | -0.00001 | 2.00175  |
| A41 | 1.98457  | 0.00000 | 0.00002  | 0.00000  | 0.00002  | 1.98459  |
| A42 | 2.04017  | 0.00000 | 0.00000  | 0.00000  | 0.00000  | 2.04017  |
| A43 | 2.04575  | 0.00000 | 0.00000  | -0.00002 | -0.00002 | 2.04573  |
| A44 | 2.13291  | 0.00000 | 0.00001  | 0.00001  | 0.00002  | 2.13293  |
| A45 | 1.94928  | 0.00000 | -0.00002 | 0.00001  | 0.00000  | 1.94928  |
| A46 | 2.04635  | 0.00000 | 0.00001  | 0.00000  | 0.00002  | 2.04636  |
| A47 | 2.02223  | 0.00000 | 0.00000  | 0.00000  | 0.00000  | 2.02223  |
| A48 | 1.43316  | 0.00000 | 0.00008  | 0.00002  | 0.00010  | 1.43326  |
| A49 | 1.00016  | 0.00000 | 0.00000  | 0.00001  | 0.00001  | 1.00017  |
| A50 | 2.37619  | 0.00000 | -0.00002 | 0.00005  | 0.00004  | 2.37623  |
| A51 | 2.35366  | 0.00000 | 0.00020  | -0.00004 | 0.00016  | 2.35382  |
| A52 | 1.93138  | 0.00000 | 0.00001  | -0.00001 | 0.00001  | 1.93138  |
| A53 | 1.91241  | 0.00000 | -0.00001 | 0.00000  | -0.00001 | 1.91240  |
| A54 | 1.93753  | 0.00000 | 0.00001  | 0.00001  | 0.00002  | 1.93754  |
| A55 | 1.88374  | 0.00000 | 0.00000  | 0.00000  | 0.00000  | 1.88374  |
| A56 | 1.91359  | 0.00000 | -0.00001 | 0.00000  | -0.00001 | 1.91358  |
| A57 | 1.88378  | 0.00000 | 0.00000  | 0.00000  | -0.00001 | 1.88378  |
| A58 | 3.78682  | 0.00000 | 0.00028  | -0.00002 | 0.00026  | 3.78708  |
| A59 | 5.04090  | 0.00000 | 0.00011  | -0.00010 | 0.00001  | 5.04092  |
| D1  | 0.00436  | 0.00000 | 0.00000  | 0.00000  | 0.00000  | 0.00437  |
| D2  | -3.13124 | 0.00000 | -0.00001 | 0.00002  | 0.00000  | -3.13124 |
| D3  | 3.13644  | 0.00000 | 0.00005  | 0.00000  | 0.00004  | 3.13648  |
| D4  | 0.00083  | 0.00000 | 0.00003  | 0.00001  | 0.00004  | 0.00087  |
| D5  | -0.00682 | 0.00000 | 0.00000  | 0.00000  | 0.00000  | -0.00682 |
| D6  | -3.09765 | 0.00000 | -0.00012 | -0.00002 | -0.00014 | -3.09779 |
| D7  | -3.13987 | 0.00000 | -0.00004 | 0.00000  | -0.00004 | -3.13991 |
| D8  | 0.05248  | 0.00000 | -0.00016 | -0.00002 | -0.00017 | 0.05231  |
| D9  | -0.00049 | 0.00000 | -0.00001 | 0.00000  | -0.00001 | -0.00050 |
| D10 | -3.13632 | 0.00000 | 0.00001  | -0.00003 | -0.00003 | -3.13634 |
| D11 | 3.13568  | 0.00000 | 0.00001  | -0.00001 | -0.00001 | 3.13567  |
| D12 | -0.00015 | 0.00000 | 0.00002  | -0.00005 | -0.00003 | -0.00017 |
| D13 | -0.00375 | 0.00000 | 0.00001  | 0.00000  | 0.00001  | -0.00375 |

|     |          |         |          |          |          |          |
|-----|----------|---------|----------|----------|----------|----------|
| D14 | 3.13798  | 0.00000 | 0.00017  | 0.00006  | 0.00023  | 3.13821  |
| D15 | 3.13251  | 0.00000 | 0.00000  | 0.00003  | 0.00002  | 3.13254  |
| D16 | -0.00894 | 0.00000 | 0.00016  | 0.00009  | 0.00025  | -0.00869 |
| D17 | 0.00204  | 0.00000 | -0.00025 | -0.00009 | -0.00034 | 0.00170  |
| D18 | -3.13986 | 0.00000 | -0.00026 | -0.00009 | -0.00034 | -3.14021 |
| D19 | -3.13308 | 0.00000 | -0.00024 | -0.00013 | -0.00037 | -3.13344 |
| D20 | 0.00820  | 0.00000 | -0.00024 | -0.00012 | -0.00037 | 0.00784  |
| D21 | 0.00651  | 0.00000 | -0.00001 | 0.00000  | 0.00000  | 0.00651  |
| D22 | 3.09892  | 0.00000 | 0.00011  | 0.00002  | 0.00013  | 3.09905  |
| D23 | -3.13522 | 0.00000 | -0.00016 | -0.00006 | -0.00022 | -3.13543 |
| D24 | -0.04281 | 0.00000 | -0.00004 | -0.00004 | -0.00008 | -0.04289 |
| D25 | -3.11782 | 0.00000 | -0.00086 | -0.00030 | -0.00115 | -3.11898 |
| D26 | 0.02393  | 0.00000 | -0.00067 | -0.00022 | -0.00090 | 0.02303  |
| D27 | 1.41180  | 0.00000 | 0.00019  | 0.00001  | 0.00020  | 1.41200  |
| D28 | -2.76336 | 0.00000 | 0.00020  | 0.00001  | 0.00022  | -2.76315 |
| D29 | -0.70305 | 0.00000 | 0.00020  | 0.00000  | 0.00020  | -0.70285 |
| D30 | -1.67174 | 0.00000 | 0.00005  | -0.00001 | 0.00004  | -1.67170 |
| D31 | 0.43628  | 0.00000 | 0.00007  | -0.00001 | 0.00006  | 0.43634  |
| D32 | 2.49660  | 0.00000 | 0.00006  | -0.00002 | 0.00004  | 2.49664  |
| D33 | -0.93899 | 0.00000 | -0.00001 | -0.00007 | -0.00008 | -0.93907 |
| D34 | 1.12315  | 0.00000 | -0.00002 | -0.00006 | -0.00008 | 1.12307  |
| D35 | -3.00754 | 0.00000 | -0.00002 | -0.00006 | -0.00009 | -3.00763 |
| D36 | -3.01181 | 0.00000 | -0.00002 | -0.00007 | -0.00009 | -3.01190 |
| D37 | -0.94967 | 0.00000 | -0.00003 | -0.00006 | -0.00009 | -0.94976 |
| D38 | 1.20283  | 0.00000 | -0.00003 | -0.00007 | -0.00010 | 1.20273  |
| D39 | 1.15421  | 0.00000 | -0.00002 | -0.00006 | -0.00008 | 1.15413  |
| D40 | -3.06683 | 0.00000 | -0.00003 | -0.00006 | -0.00008 | -3.06692 |
| D41 | -0.91434 | 0.00000 | -0.00003 | -0.00006 | -0.00009 | -0.91443 |
| D42 | -1.63733 | 0.00000 | -0.00020 | 0.00002  | -0.00017 | -1.63750 |
| D43 | 2.56106  | 0.00000 | -0.00020 | 0.00002  | -0.00018 | 2.56088  |
| D44 | 0.48094  | 0.00000 | -0.00020 | 0.00003  | -0.00017 | 0.48077  |
| D45 | 0.44095  | 0.00000 | 0.00100  | 0.00031  | 0.00131  | 0.44226  |
| D46 | -0.26820 | 0.00000 | -0.00064 | -0.00008 | -0.00072 | -0.26893 |
| D47 | 2.56874  | 0.00000 | -0.00089 | 0.00001  | -0.00089 | 2.56785  |
| D48 | -3.14153 | 0.00000 | -0.00003 | 0.00000  | -0.00003 | -3.14155 |
| D49 | 0.00058  | 0.00000 | -0.00002 | -0.00001 | -0.00003 | 0.00055  |
| D50 | 0.00041  | 0.00000 | -0.00002 | 0.00000  | -0.00003 | 0.00039  |
| D51 | -3.14066 | 0.00000 | -0.00002 | -0.00001 | -0.00003 | -3.14069 |
| D52 | -1.92838 | 0.00000 | 0.00364  | -0.00058 | 0.00306  | -1.92532 |
| D53 | 2.43376  | 0.00000 | -0.00331 | 0.00065  | -0.00266 | 2.43110  |
| D54 | 2.06082  | 0.00000 | -0.00362 | 0.00073  | -0.00289 | 2.05794  |
| D55 | -2.60714 | 0.00000 | -0.00342 | 0.00074  | -0.00268 | -2.60982 |
| D56 | -2.72924 | 0.00000 | -0.00001 | 0.00001  | 0.00000  | -2.72923 |
| D57 | -0.03019 | 0.00000 | -0.00001 | -0.00001 | -0.00002 | -0.03021 |

|     |          |         |          |          |          |          |
|-----|----------|---------|----------|----------|----------|----------|
| D58 | -0.02169 | 0.00000 | -0.00003 | 0.00001  | -0.00002 | -0.02171 |
| D59 | 2.67735  | 0.00000 | -0.00003 | -0.00001 | -0.00004 | 2.67732  |
| D60 | -0.17050 | 0.00000 | -0.00006 | 0.00003  | -0.00003 | -0.17052 |
| D61 | 0.27273  | 0.00000 | 0.00032  | -0.00007 | 0.00025  | 0.27298  |
| D62 | -2.58278 | 0.00000 | -0.00008 | 0.00004  | -0.00004 | -2.58282 |
| D63 | -2.13956 | 0.00000 | 0.00030  | -0.00006 | 0.00024  | -2.13932 |
| D64 | 2.14127  | 0.00000 | 0.00001  | -0.00005 | -0.00004 | 2.14123  |
| D65 | -0.25204 | 0.00000 | 0.00002  | -0.00007 | -0.00005 | -0.25209 |
| D66 | 2.48864  | 0.00000 | 0.00011  | 0.00001  | 0.00012  | 2.48876  |
| D67 | -1.71936 | 0.00000 | 0.00011  | 0.00000  | 0.00012  | -1.71925 |
| D68 | 0.35966  | 0.00000 | 0.00011  | 0.00000  | 0.00012  | 0.35978  |
| D69 | 1.27255  | 0.00000 | 0.00010  | 0.00001  | 0.00011  | 1.27267  |
| D70 | -2.93545 | 0.00000 | 0.00010  | 0.00000  | 0.00011  | -2.93534 |
| D71 | -0.85642 | 0.00000 | 0.00010  | 0.00000  | 0.00011  | -0.85632 |
| D72 | -1.08997 | 0.00000 | 0.00012  | -0.00002 | 0.00010  | -1.08988 |
| D73 | 0.98520  | 0.00000 | 0.00012  | -0.00002 | 0.00009  | 0.98530  |
| D74 | 3.06423  | 0.00000 | 0.00011  | -0.00002 | 0.00009  | 3.06432  |

| Item                 | Value    | Threshold | Converged? |
|----------------------|----------|-----------|------------|
| Maximum Force        | 0.000007 | 0.000450  | YES        |
| RMS Force            | 0.000001 | 0.000300  | YES        |
| Maximum Displacement | 0.002466 | 0.001800  | NO         |
| RMS Displacement     | 0.000481 | 0.001200  | YES        |

Predicted change in Energy=-3.348831D-09

GradGradGradGradGradGradGradGradGradGradGradGradGradGradGradGradGradGradGrad

Input orientation:

| Center Number | Atomic Number | Atomic Type | Coordinates (Angstroms) |           |           |
|---------------|---------------|-------------|-------------------------|-----------|-----------|
|               |               |             | X                       | Y         | Z         |
| 1             | 6             | 0           | -1.376676               | -1.910079 | -0.256430 |
| 2             | 6             | 0           | -2.507758               | -1.169411 | -0.136228 |
| 3             | 7             | 0           | -2.108757               | 0.112186  | 0.230301  |
| 4             | 6             | 0           | -0.765111               | 0.135170  | 0.327464  |
| 5             | 7             | 0           | -0.305354               | -1.081740 | 0.041193  |
| 6             | 6             | 0           | 1.127755                | -1.437877 | -0.008303 |
| 7             | 6             | 0           | 1.683073                | -1.372417 | -1.441919 |
| 8             | 1             | 0           | -1.243253               | -2.945793 | -0.517628 |
| 9             | 1             | 0           | -3.538089               | -1.442511 | -0.272866 |
| 10            | 1             | 0           | 1.652740                | -0.728929 | 0.633925  |
| 11            | 1             | 0           | 1.236906                | -2.447614 | 0.389510  |
| 12            | 1             | 0           | 1.063777                | -1.988403 | -2.104861 |
| 13            | 1             | 0           | 1.635330                | -0.336240 | -1.796355 |
| 14            | 35            | 0           | 1.650471                | 2.234569  | 1.024443  |

|    |   |   |           |           |           |
|----|---|---|-----------|-----------|-----------|
| 15 | 1 | 0 | -0.112754 | 0.993734  | 0.596041  |
| 16 | 6 | 0 | -2.912192 | 1.257184  | 0.485744  |
| 17 | 6 | 0 | -4.236442 | 1.282929  | 0.412305  |
| 18 | 1 | 0 | -2.315799 | 2.121039  | 0.751693  |
| 19 | 1 | 0 | -4.757977 | 2.205552  | 0.625730  |
| 20 | 1 | 0 | -4.838820 | 0.423135  | 0.147915  |
| 21 | 8 | 0 | 2.990629  | -1.884328 | -1.466237 |
| 22 | 1 | 0 | 3.630571  | -1.152928 | -1.365294 |
| 23 | 6 | 0 | 4.836987  | 1.611876  | -1.120527 |
| 24 | 6 | 0 | 5.710468  | 0.752020  | -0.312432 |
| 25 | 8 | 0 | 4.856327  | 0.176888  | -1.330212 |
| 26 | 1 | 0 | 3.920667  | 1.993792  | -0.676788 |
| 27 | 1 | 0 | 5.257098  | 2.179762  | -1.946164 |
| 28 | 1 | 0 | 6.761117  | 0.703947  | -0.594600 |
| 29 | 6 | 0 | 5.399534  | 0.413259  | 1.119384  |
| 30 | 1 | 0 | 5.678815  | -0.621377 | 1.340757  |
| 31 | 1 | 0 | 5.973518  | 1.066690  | 1.783700  |
| 32 | 1 | 0 | 4.339665  | 0.561530  | 1.335492  |

-----  
Distance matrix (angstroms):

|    |    | 1        | 2        | 3        | 4        | 5        |
|----|----|----------|----------|----------|----------|----------|
| 1  | C  | 0.000000 |          |          |          |          |
| 2  | C  | 1.357345 | 0.000000 |          |          |          |
| 3  | N  | 2.205087 | 1.391416 | 0.000000 |          |          |
| 4  | C  | 2.213139 | 2.225705 | 1.347351 | 0.000000 |          |
| 5  | N  | 1.386526 | 2.211277 | 2.171056 | 1.331990 | 0.000000 |
| 6  | C  | 2.560608 | 3.647656 | 3.596476 | 2.483981 | 1.477527 |
| 7  | C  | 3.325135 | 4.394213 | 4.402084 | 3.375965 | 2.497590 |
| 8  | H  | 1.076443 | 2.213588 | 3.264924 | 3.230345 | 2.160237 |
| 9  | H  | 2.211470 | 1.074633 | 2.171003 | 3.246365 | 3.267930 |
| 10 | H  | 3.371232 | 4.254046 | 3.875467 | 2.585844 | 2.076040 |
| 11 | H  | 2.745358 | 3.991580 | 4.215613 | 3.268439 | 2.089379 |
| 12 | H  | 3.062457 | 4.159583 | 4.464352 | 3.710876 | 2.702241 |
| 13 | H  | 3.731020 | 4.540416 | 4.280959 | 3.239591 | 2.774636 |
| 14 | Br | 5.289835 | 5.497737 | 4.389415 | 3.275407 | 3.973656 |
| 15 | H  | 3.279685 | 3.309299 | 2.212447 | 1.111232 | 2.156976 |
| 16 | C  | 3.597247 | 2.537475 | 1.421892 | 2.427740 | 3.530409 |
| 17 | C  | 4.338291 | 3.050116 | 2.435325 | 3.657142 | 4.602481 |
| 18 | H  | 4.260067 | 3.413548 | 2.085714 | 2.555049 | 3.847660 |
| 19 | H  | 5.399058 | 4.127280 | 3.399545 | 4.507596 | 5.565413 |
| 20 | H  | 4.194500 | 2.837392 | 2.748949 | 4.087819 | 4.777902 |
| 21 | O  | 4.531848 | 5.701955 | 5.733066 | 4.626156 | 3.712142 |
| 22 | H  | 5.184147 | 6.260189 | 6.089855 | 4.883303 | 4.180285 |
| 23 | C  | 7.194473 | 7.915156 | 7.233061 | 5.971670 | 5.920206 |

|    |    |          |          |          |           |          |
|----|----|----------|----------|----------|-----------|----------|
| 24 | C  | 7.570833 | 8.441693 | 7.864110 | 6.536291  | 6.299035 |
| 25 | O  | 6.660238 | 7.580757 | 7.138052 | 5.860904  | 5.487063 |
| 26 | H  | 6.593841 | 7.184894 | 6.381003 | 5.139991  | 5.275761 |
| 27 | H  | 7.974269 | 8.647880 | 7.954100 | 6.754017  | 6.747434 |
| 28 | H  | 8.554014 | 9.467398 | 8.927783 | 7.603803  | 7.316278 |
| 29 | C  | 7.294366 | 8.161291 | 7.566740 | 6.221520  | 5.995271 |
| 30 | H  | 7.347905 | 8.336774 | 7.900475 | 6.566834  | 6.140935 |
| 31 | H  | 8.188323 | 8.978771 | 8.285367 | 6.956830  | 6.861219 |
| 32 | H  | 6.428034 | 7.214521 | 6.557858 | 5.220789  | 5.094286 |
|    |    | 6        | 7        | 8        | 9         | 10       |
| 6  | C  | 0.000000 |          |          |           |          |
| 7  | C  | 1.538804 | 0.000000 |          |           |          |
| 8  | H  | 2.855678 | 3.448653 | 0.000000 |           |          |
| 9  | H  | 4.673341 | 5.350900 | 2.754276 | 0.000000  |          |
| 10 | H  | 1.091180 | 2.173505 | 3.824570 | 5.317535  | 0.000000 |
| 11 | H  | 1.090751 | 2.170080 | 2.687427 | 4.924383  | 1.785088 |
| 12 | H  | 2.168577 | 1.096566 | 2.959442 | 4.983109  | 3.071498 |
| 13 | H  | 2.160640 | 1.096160 | 4.090372 | 5.505372  | 2.461862 |
| 14 | Br | 3.850540 | 4.369709 | 6.130886 | 6.490384  | 2.989118 |
| 15 | H  | 2.795859 | 3.602353 | 4.247135 | 4.292227  | 2.466976 |
| 16 | C  | 4.881455 | 5.634460 | 4.632183 | 2.873255  | 4.980482 |
| 17 | C  | 6.029453 | 6.747567 | 5.263653 | 2.895718  | 6.227291 |
| 18 | H  | 5.010144 | 5.745184 | 5.332383 | 3.904178  | 4.887278 |
| 19 | H  | 6.951145 | 7.652722 | 6.340103 | 3.950186  | 7.050428 |
| 20 | H  | 6.252023 | 6.948861 | 4.971994 | 2.312919  | 6.610886 |
| 21 | O  | 2.407319 | 1.404403 | 4.466802 | 6.651578  | 2.745100 |
| 22 | H  | 2.861242 | 1.961325 | 5.261850 | 7.257200  | 2.844023 |
| 23 | C  | 4.929142 | 4.353903 | 7.622674 | 8.954871  | 4.323991 |
| 24 | C  | 5.088163 | 4.691363 | 7.878462 | 9.505438  | 4.421986 |
| 25 | O  | 4.272840 | 3.533040 | 6.900457 | 8.614329  | 3.865399 |
| 26 | H  | 4.474772 | 4.113832 | 7.147789 | 8.222188  | 3.778183 |
| 27 | H  | 5.821864 | 5.064178 | 8.400393 | 9.657956  | 5.301768 |
| 28 | H  | 6.055239 | 5.551195 | 8.797526 | 10.525419 | 5.445909 |
| 29 | C  | 4.790248 | 4.853967 | 7.621657 | 9.233816  | 3.946990 |
| 30 | H  | 4.816511 | 4.926794 | 7.534688 | 9.393048  | 4.089065 |
| 31 | H  | 5.741564 | 5.895913 | 8.571926 | 10.049688 | 4.818232 |
| 32 | H  | 4.014945 | 4.302516 | 6.848674 | 8.286254  | 3.062196 |
|    |    | 11       | 12       | 13       | 14        | 15       |
| 11 | H  | 0.000000 |          |          |           |          |
| 12 | H  | 2.542191 | 0.000000 |          |           |          |
| 13 | H  | 3.065069 | 1.775244 | 0.000000 |           |          |
| 14 | Br | 4.743102 | 5.288690 | 3.816568 | 0.000000  |          |
| 15 | H  | 3.702313 | 4.191926 | 3.247797 | 2.198218  | 0.000000 |
| 16 | C  | 5.563254 | 5.749208 | 5.331691 | 4.697166  | 2.813969 |



|    |   |          |           |          |           |           |
|----|---|----------|-----------|----------|-----------|-----------|
| 17 | C | 6.623821 | 6.717891  | 6.479012 | 5.994671  | 4.137897  |
| 18 | H | 5.798748 | 6.038952  | 5.304921 | 3.977258  | 2.479607  |
| 19 | H | 7.592521 | 7.677123  | 7.293941 | 6.420905  | 4.800779  |
| 20 | H | 6.724137 | 6.762483  | 6.802312 | 6.794152  | 4.781433  |
| 21 | O | 2.614695 | 2.032592  | 2.083839 | 4.996481  | 4.708207  |
| 22 | H | 3.238083 | 2.798823  | 2.198586 | 4.594211  | 4.739987  |
| 23 | C | 5.632074 | 5.307357  | 3.808216 | 3.891340  | 5.275286  |
| 24 | C | 5.544650 | 5.684580  | 4.471363 | 4.524242  | 5.898615  |
| 25 | O | 4.790164 | 4.435313  | 3.294756 | 4.478389  | 5.391610  |
| 26 | H | 5.297703 | 5.104810  | 3.450398 | 2.847095  | 4.346112  |
| 27 | H | 6.559721 | 5.914620  | 4.412473 | 4.672823  | 6.058447  |
| 28 | H | 6.435660 | 6.479916  | 5.366554 | 5.575195  | 6.982242  |
| 29 | C | 5.103409 | 5.912911  | 4.820012 | 4.169131  | 5.567419  |
| 30 | H | 4.895975 | 5.919427  | 5.125675 | 4.948134  | 6.058503  |
| 31 | H | 6.060495 | 6.968505  | 5.796972 | 4.541932  | 6.201497  |
| 32 | H | 4.424585 | 5.391626  | 4.234133 | 3.182384  | 4.534051  |
|    |   | 16       | 17        | 18       | 19        | 20        |
| 16 | C | 0.000000 |           |          |           |           |
| 17 | C | 1.326535 | 0.000000  |          |           |           |
| 18 | H | 1.082893 | 2.122847  | 0.000000 |           |           |
| 19 | H | 2.079885 | 1.081102  | 2.446885 | 0.000000  |           |
| 20 | H | 2.126420 | 1.082593  | 3.100494 | 1.847120  | 0.000000  |
| 21 | O | 6.965817 | 8.111164  | 7.008591 | 9.008015  | 8.320465  |
| 22 | H | 7.214064 | 8.425150  | 7.110542 | 9.252638  | 8.746677  |
| 23 | C | 7.921849 | 9.207872  | 7.411262 | 9.770630  | 9.830732  |
| 24 | C | 8.674246 | 9.987398  | 8.211427 | 10.610431 | 10.564448 |
| 25 | O | 8.050753 | 9.324063  | 7.717088 | 10.018784 | 9.810269  |
| 26 | H | 6.970081 | 8.260137  | 6.399238 | 8.778397  | 8.937321  |
| 27 | H | 8.573367 | 9.823136  | 8.039319 | 10.340070 | 10.459373 |
| 28 | H | 9.749159 | 11.058724 | 9.284991 | 11.680477 | 11.627069 |
| 29 | C | 8.378454 | 9.700944  | 7.910630 | 10.326231 | 10.284345 |
| 30 | H | 8.835464 | 10.139069 | 8.472407 | 10.836485 | 10.636471 |
| 31 | H | 8.982027 | 10.303920 | 8.419588 | 10.853704 | 10.954297 |
| 32 | H | 7.334536 | 8.655766  | 6.860618 | 9.272198  | 9.256029  |
|    |   | 21       | 22        | 23       | 24        | 25        |
| 21 | O | 0.000000 |           |          |           |           |
| 22 | H | 0.977068 | 0.000000  |          |           |           |
| 23 | C | 3.968878 | 3.026465  | 0.000000 |           |           |
| 24 | C | 3.959687 | 3.010534  | 1.468107 | 0.000000  |           |
| 25 | O | 2.783513 | 1.808900  | 1.450356 | 1.447829  | 0.000000  |
| 26 | H | 4.065466 | 3.234199  | 1.087386 | 2.208652  | 2.145592  |
| 27 | H | 4.678038 | 3.753642  | 1.086584 | 2.216546  | 2.133429  |
| 28 | H | 4.655695 | 3.720520  | 2.191622 | 1.088941  | 2.108825  |
| 29 | C | 4.215111 | 3.428672  | 2.601988 | 1.503840  | 2.520212  |

|    |   |          |          |          |          |          |
|----|---|----------|----------|----------|----------|----------|
| 30 | H | 4.086637 | 3.435194 | 3.428413 | 2.149478 | 2.906509 |
| 31 | H | 5.307375 | 4.509131 | 3.165986 | 2.135880 | 3.425830 |
| 32 | H | 3.956236 | 3.276649 | 2.717092 | 2.151986 | 2.742421 |
|    |   | 26       | 27       | 28       | 29       | 30       |
| 26 | H | 0.000000 |          |          |          |          |
| 27 | H | 1.852552 | 0.000000 |          |          |          |
| 28 | H | 3.120675 | 2.503364 | 0.000000 |          |          |
| 29 | C | 2.812715 | 3.540962 | 2.208200 | 0.000000 |          |
| 30 | H | 3.741749 | 4.339134 | 2.583306 | 1.094293 | 0.000000 |
| 31 | H | 3.335824 | 3.957787 | 2.531443 | 1.094416 | 1.769921 |
| 32 | H | 2.505236 | 3.772218 | 3.099834 | 1.091792 | 1.786791 |
|    |   | 31       | 32       |          |          |          |
| 31 | H | 0.000000 |          |          |          |          |
| 32 | H | 1.767924 | 0.000000 |          |          |          |

Stoichiometry C10H17BrN2O2

Framework group C1[X(C10H17BrN2O2)]

Deg. of freedom 90

Full point group C1 NOp 1

Largest Abelian subgroup C1 NOp 1

Largest concise Abelian subgroup C1 NOp 1

Standard orientation:

| Center<br>Number | Atomic<br>Number | Atomic<br>Type | Coordinates (Angstroms) |           |           |
|------------------|------------------|----------------|-------------------------|-----------|-----------|
|                  |                  |                | X                       | Y         | Z         |
| 1                | 6                | 0              | -2.711113               | 2.114434  | -0.440979 |
| 2                | 6                | 0              | -3.788494               | 1.349121  | -0.131253 |
| 3                | 7                | 0              | -3.319916               | 0.050046  | 0.038677  |
| 4                | 6                | 0              | -1.988308               | 0.040744  | -0.166479 |
| 5                | 7                | 0              | -1.603294               | 1.280942  | -0.462910 |
| 6                | 6                | 0              | -0.201257               | 1.680336  | -0.703461 |
| 7                | 6                | 0              | 0.455082                | 2.252397  | 0.565350  |
| 8                | 1                | 0              | -2.638735               | 3.167298  | -0.653034 |
| 9                | 1                | 0              | -4.824637               | 1.613691  | -0.025201 |
| 10               | 1                | 0              | 0.330270                | 0.786849  | -1.034874 |
| 11               | 1                | 0              | -0.196562               | 2.428606  | -1.497065 |
| 12               | 1                | 0              | -0.161795               | 3.066919  | 0.963439  |
| 13               | 1                | 0              | 0.510477                | 1.464191  | 1.325105  |
| 14               | 35               | 0              | 0.525313                | -2.059113 | -0.141966 |
| 15               | 1                | 0              | -1.292956               | -0.824192 | -0.109858 |
| 16               | 6                | 0              | -4.050113               | -1.125518 | 0.365232  |
| 17               | 6                | 0              | -5.360377               | -1.169604 | 0.567616  |
| 18               | 1                | 0              | -3.409849               | -1.996320 | 0.431743  |
| 19               | 1                | 0              | -5.824086               | -2.115140 | 0.811989  |

|    |   |   |           |           |           |
|----|---|---|-----------|-----------|-----------|
| 20 | 1 | 0 | -6.006396 | -0.303372 | 0.501972  |
| 21 | 8 | 0 | 1.718699  | 2.777019  | 0.248505  |
| 22 | 1 | 0 | 2.403654  | 2.097851  | 0.404161  |
| 23 | 6 | 0 | 3.796049  | -0.458990 | 1.230774  |
| 24 | 6 | 0 | 4.544067  | 0.009358  | 0.057547  |
| 25 | 8 | 0 | 3.721173  | 0.928553  | 0.815264  |
| 26 | 1 | 0 | 2.882812  | -1.028988 | 1.077456  |
| 27 | 1 | 0 | 4.313935  | -0.605035 | 2.174772  |
| 28 | 1 | 0 | 5.605033  | 0.214057  | 0.192605  |
| 29 | 6 | 0 | 4.110267  | -0.305195 | -1.347589 |
| 30 | 1 | 0 | 4.294496  | 0.547280  | -2.008514 |
| 31 | 1 | 0 | 4.684810  | -1.155943 | -1.726899 |
| 32 | 1 | 0 | 3.052272  | -0.572783 | -1.380056 |

-----

Rotational constants (GHZ):      0.5994512      0.2213243      0.1723290

Standard basis: 6-311++G(d,p) (5D, 7F)

There are    492 symmetry adapted cartesian basis functions of A    symmetry.

There are    475 symmetry adapted basis functions of A    symmetry.

    475 basis functions,    751 primitive gaussians,    492 cartesian basis functions

    71 alpha electrons      71 beta electrons

        nuclear repulsion energy      1307.1965440362 Hartrees.

NAtoms=    32 NActive=    32 NUniq=    32 SFac= 1.00D+00 NAtFMM=    60 NAOKFM=F

Big=F

Integral buffers will be    131072 words long.

Raffenetti 2 integral format.

Two-electron integral symmetry is turned on.

One-electron integrals computed using PRISM.

NBasis=    475 RedAO= T EigKep=    3.79D-06    NBF=    475

NBsUse=    475 1.00D-06 EigRej= -1.00D+00    NBFU=    475

Initial guess from the checkpoint file: "/home/suqian/liuwen/qianmengshijie/ohpo/ohpo.chk"

B after Tr=    0.000000    0.000000    0.000000

        Rot=    1.000000    0.000033    0.000011    -0.000008 Ang=    0.00 deg.

Requested convergence on RMS density matrix=1.00D-08 within 128 cycles.

Requested convergence on MAX density matrix=1.00D-06.

Requested convergence on                    energy=1.00D-06.

No special actions if energy rises.

SCF Done:    E(RB3LYP) = -3225.52371259      A.U. after    7 cycles

        NFock=    7    Conv=0.53D-08      -V/T= 2.0018

Calling FoFJK, ICntrl=                    2127 FMM=F ISym2X=0 l1Cent= 0 IOpClX= 0 NMat=1 NMatS=1

NMatT=0.

\*\*\*\*\* Axes restored to original set \*\*\*\*\*

-----

| Center | Atomic | Forces (Hartrees/Bohr) |   |   |
|--------|--------|------------------------|---|---|
| Number | Number | X                      | Y | Z |

|    |    |              |              |              |
|----|----|--------------|--------------|--------------|
| 1  | 6  | -0.000000046 | 0.000000216  | 0.000007419  |
| 2  | 6  | -0.000000246 | 0.000001446  | 0.000002314  |
| 3  | 7  | -0.000000835 | 0.000000222  | 0.000004369  |
| 4  | 6  | -0.000002455 | 0.000003519  | -0.000003622 |
| 5  | 7  | 0.000001502  | -0.000002564 | 0.000002233  |
| 6  | 6  | -0.000002295 | 0.000000688  | 0.000002531  |
| 7  | 6  | 0.000002497  | -0.000006632 | 0.000006163  |
| 8  | 1  | -0.000000745 | -0.000000756 | 0.000008983  |
| 9  | 1  | -0.000000325 | 0.000000211  | 0.000005545  |
| 10 | 1  | 0.000000497  | 0.000003237  | 0.000001945  |
| 11 | 1  | -0.000000041 | 0.000001565  | 0.000007909  |
| 12 | 1  | -0.000000749 | -0.000005899 | 0.000006008  |
| 13 | 1  | -0.000001169 | -0.000004378 | -0.000000128 |
| 14 | 35 | -0.000000601 | 0.000003055  | -0.000005489 |
| 15 | 1  | 0.000003581  | 0.000004505  | -0.000002108 |
| 16 | 6  | 0.000000734  | 0.000002205  | -0.000004546 |
| 17 | 6  | -0.000000021 | 0.000002940  | -0.000004325 |
| 18 | 1  | 0.000000288  | 0.000003062  | -0.000004801 |
| 19 | 1  | 0.000000466  | 0.000003271  | -0.000005566 |
| 20 | 1  | 0.000000119  | 0.000001913  | -0.000000854 |
| 21 | 8  | -0.000002151 | -0.000004283 | 0.000000456  |
| 22 | 1  | -0.000000491 | -0.000002907 | 0.000009349  |
| 23 | 6  | 0.000000884  | -0.000003312 | -0.000004040 |
| 24 | 6  | -0.000001045 | -0.000000217 | 0.000000470  |
| 25 | 8  | 0.000000728  | -0.000005375 | -0.000007274 |
| 26 | 1  | 0.000000287  | -0.000001641 | -0.000007074 |
| 27 | 1  | -0.000000022 | -0.000006113 | -0.000006590 |
| 28 | 1  | 0.000000023  | -0.000002831 | -0.000003339 |
| 29 | 6  | 0.000000743  | 0.000001725  | 0.000000155  |
| 30 | 1  | 0.000000198  | 0.000003807  | 0.000000556  |
| 31 | 1  | 0.000000603  | 0.000005132  | -0.000004035 |
| 32 | 1  | 0.000000089  | 0.000004190  | -0.000002617 |

-----  
Cartesian Forces: Max 0.000009349 RMS 0.000003523

GradGradGradGradGradGradGradGradGradGradGradGradGradGradGradGradGradGradGradGrad

Berny optimization.

Using GEDIIS/GDIIS optimizer.

FormGI is forming the generalized inverse of G from B-inverse, IUseBI=4.

GSVD: received Info= 1 from GESDD.

Internal Forces: Max 0.000003300 RMS 0.000000700

Search for a local minimum.

Step number 42 out of a maximum of 177

All quantities printed in internal units (Hartrees-Bohrs-Radians)

Mixed Optimization -- En-DIIS/RFO-DIIS

Swapping is turned off.

Update second derivatives using D2CorX and points   24   25   26   27   28  
                                                          29   30   31   32   33  
                                                          34   35   36   37   38  
                                                          39   40   41   42

DE= -1.62D-07 DEPred=-3.35D-09 R= 4.85D+01

Trust test= 4.85D+01 RLast= 6.22D-03 DXMaxT set to 1.21D-01

ITU= 0 0 0 -1 -1 -1 -1 0 0 1 1 0 1 1 1 1 1 1 1

ITU= 1 1 1 1 1 -1 1 1 1 1 1 1 1 1 1 1 0 1 0

ITU= 1 0

|                 |         |         |         |         |         |
|-----------------|---------|---------|---------|---------|---------|
| Eigenvalues --- | 0.00003 | 0.00029 | 0.00083 | 0.00161 | 0.00217 |
| Eigenvalues --- | 0.00236 | 0.00340 | 0.00665 | 0.00839 | 0.01057 |
| Eigenvalues --- | 0.01215 | 0.01504 | 0.01764 | 0.01792 | 0.01898 |
| Eigenvalues --- | 0.02076 | 0.02178 | 0.02257 | 0.02325 | 0.02401 |
| Eigenvalues --- | 0.03018 | 0.03059 | 0.03118 | 0.03504 | 0.03778 |
| Eigenvalues --- | 0.04114 | 0.04624 | 0.05189 | 0.05404 | 0.05416 |
| Eigenvalues --- | 0.05670 | 0.05887 | 0.06505 | 0.08945 | 0.09357 |
| Eigenvalues --- | 0.10340 | 0.11036 | 0.11452 | 0.11610 | 0.12831 |
| Eigenvalues --- | 0.13593 | 0.13957 | 0.14123 | 0.15036 | 0.15969 |
| Eigenvalues --- | 0.15991 | 0.15997 | 0.16001 | 0.16009 | 0.16026 |
| Eigenvalues --- | 0.16054 | 0.16808 | 0.18081 | 0.20021 | 0.22047 |
| Eigenvalues --- | 0.22823 | 0.23402 | 0.23843 | 0.24380 | 0.25039 |
| Eigenvalues --- | 0.27486 | 0.28389 | 0.30673 | 0.31944 | 0.33104 |
| Eigenvalues --- | 0.33218 | 0.34018 | 0.34193 | 0.34470 | 0.34843 |
| Eigenvalues --- | 0.35040 | 0.35684 | 0.35689 | 0.35855 | 0.36109 |
| Eigenvalues --- | 0.36435 | 0.36671 | 0.37163 | 0.37239 | 0.37488 |
| Eigenvalues --- | 0.38069 | 0.42176 | 0.42502 | 0.44314 | 0.45613 |
| Eigenvalues --- | 0.49358 | 0.53814 | 0.55018 | 0.55829 | 0.60395 |

Eigenvalue 1 is 3.35D-05 Eigenvector:

|   |         |          |         |         |          |
|---|---------|----------|---------|---------|----------|
|   | D54     | D52      | D53     | D55     | D47      |
| 1 | 0.50885 | -0.50426 | 0.49347 | 0.48506 | 0.04013  |
|   | D46     | A58      | D65     | D64     | A48      |
| 1 | 0.03244 | -0.02868 | 0.02127 | 0.02111 | -0.02067 |

En-DIIS/RFO-DIIS IScMMF= 0 using points: 42 41 40 39 38

RFO step: Lambda=-2.83543984D-10.

DidBck=F Rises=F RFO-DIIS coefs: 1.55424 -0.48357 -0.37152 0.44517 -

0.14432

Iteration 1 RMS(Cart)= 0.00015630 RMS(Int)= 0.00000009

Iteration 2 RMS(Cart)= 0.00000003 RMS(Int)= 0.00000009

| Variable | Old X   | -DE/DX  | Delta X<br>(Linear) | Delta X<br>(Quad) | Delta X<br>(Total) | New X   |
|----------|---------|---------|---------------------|-------------------|--------------------|---------|
| R1       | 2.56501 | 0.00000 | 0.00000             | 0.00000           | 0.00000            | 2.56501 |

|     |         |         |          |          |          |         |
|-----|---------|---------|----------|----------|----------|---------|
| R2  | 2.62015 | 0.00000 | 0.00000  | 0.00000  | 0.00000  | 2.62015 |
| R3  | 2.03418 | 0.00000 | 0.00000  | 0.00000  | 0.00000  | 2.03418 |
| R4  | 2.62939 | 0.00000 | 0.00000  | 0.00000  | 0.00000  | 2.62939 |
| R5  | 2.03076 | 0.00000 | 0.00000  | 0.00000  | 0.00000  | 2.03076 |
| R6  | 2.54612 | 0.00000 | 0.00000  | 0.00000  | 0.00000  | 2.54612 |
| R7  | 2.68699 | 0.00000 | 0.00000  | 0.00000  | 0.00000  | 2.68699 |
| R8  | 2.51710 | 0.00000 | 0.00000  | 0.00001  | 0.00000  | 2.51710 |
| R9  | 2.09992 | 0.00000 | 0.00000  | 0.00001  | 0.00001  | 2.09993 |
| R10 | 2.79212 | 0.00000 | 0.00000  | 0.00000  | 0.00000  | 2.79212 |
| R11 | 2.90792 | 0.00000 | 0.00000  | 0.00000  | 0.00000  | 2.90792 |
| R12 | 2.06203 | 0.00000 | 0.00000  | 0.00000  | 0.00000  | 2.06204 |
| R13 | 2.06122 | 0.00000 | 0.00000  | 0.00000  | 0.00000  | 2.06122 |
| R14 | 2.07221 | 0.00000 | 0.00000  | 0.00000  | 0.00000  | 2.07221 |
| R15 | 2.07144 | 0.00000 | 0.00000  | 0.00000  | 0.00001  | 2.07145 |
| R16 | 2.65394 | 0.00000 | -0.00001 | 0.00000  | -0.00001 | 2.65393 |
| R17 | 4.15403 | 0.00000 | -0.00002 | -0.00001 | -0.00003 | 4.15400 |
| R18 | 8.46293 | 0.00000 | 0.00008  | 0.00008  | 0.00016  | 8.46309 |
| R19 | 2.50679 | 0.00000 | 0.00000  | 0.00000  | 0.00000  | 2.50679 |
| R20 | 2.04637 | 0.00000 | 0.00000  | 0.00000  | 0.00000  | 2.04637 |
| R21 | 2.04299 | 0.00000 | 0.00000  | 0.00000  | 0.00000  | 2.04299 |
| R22 | 2.04580 | 0.00000 | 0.00000  | 0.00000  | 0.00000  | 2.04580 |
| R23 | 1.84639 | 0.00000 | 0.00000  | 0.00000  | 0.00000  | 1.84639 |
| R24 | 3.41833 | 0.00000 | 0.00001  | -0.00001 | 0.00000  | 3.41833 |
| R25 | 2.77432 | 0.00000 | 0.00000  | 0.00000  | 0.00000  | 2.77432 |
| R26 | 2.74077 | 0.00000 | 0.00000  | 0.00000  | 0.00000  | 2.74078 |
| R27 | 2.05486 | 0.00000 | 0.00000  | 0.00000  | 0.00000  | 2.05486 |
| R28 | 2.05335 | 0.00000 | 0.00000  | 0.00000  | 0.00000  | 2.05335 |
| R29 | 2.73600 | 0.00000 | 0.00001  | 0.00000  | 0.00001  | 2.73601 |
| R30 | 2.05780 | 0.00000 | 0.00000  | 0.00000  | 0.00000  | 2.05780 |
| R31 | 2.84185 | 0.00000 | 0.00000  | 0.00000  | 0.00000  | 2.84184 |
| R32 | 2.06791 | 0.00000 | 0.00000  | 0.00000  | 0.00000  | 2.06791 |
| R33 | 2.06815 | 0.00000 | 0.00000  | 0.00000  | 0.00000  | 2.06815 |
| R34 | 2.06319 | 0.00000 | 0.00000  | 0.00000  | 0.00000  | 2.06319 |
| A1  | 1.87430 | 0.00000 | 0.00000  | 0.00000  | 0.00000  | 1.87429 |
| A2  | 2.27812 | 0.00000 | 0.00000  | 0.00000  | 0.00000  | 2.27812 |
| A3  | 2.13073 | 0.00000 | 0.00000  | 0.00000  | 0.00000  | 2.13073 |
| A4  | 1.86187 | 0.00000 | 0.00000  | 0.00000  | 0.00000  | 1.86187 |
| A5  | 2.27709 | 0.00000 | 0.00000  | 0.00000  | 0.00000  | 2.27709 |
| A6  | 2.14421 | 0.00000 | 0.00000  | 0.00000  | 0.00000  | 2.14421 |
| A7  | 1.89724 | 0.00000 | 0.00000  | 0.00000  | 0.00000  | 1.89724 |
| A8  | 2.24849 | 0.00000 | 0.00000  | 0.00000  | 0.00000  | 2.24849 |
| A9  | 2.13744 | 0.00000 | 0.00000  | 0.00000  | 0.00000  | 2.13744 |
| A10 | 1.88929 | 0.00000 | 0.00000  | 0.00000  | 0.00000  | 1.88929 |
| A11 | 2.23452 | 0.00000 | 0.00001  | 0.00000  | 0.00001  | 2.23453 |

|     |         |         |          |          |          |         |
|-----|---------|---------|----------|----------|----------|---------|
| A12 | 2.15938 | 0.00000 | 0.00000  | 0.00000  | -0.00001 | 2.15937 |
| A13 | 1.90206 | 0.00000 | 0.00000  | 0.00000  | 0.00000  | 1.90206 |
| A14 | 2.21211 | 0.00000 | 0.00001  | 0.00000  | 0.00001  | 2.21212 |
| A15 | 2.16784 | 0.00000 | -0.00001 | 0.00000  | -0.00001 | 2.16783 |
| A16 | 1.95086 | 0.00000 | 0.00000  | 0.00001  | 0.00001  | 1.95087 |
| A17 | 1.86537 | 0.00000 | 0.00000  | -0.00001 | -0.00001 | 1.86537 |
| A18 | 1.88386 | 0.00000 | 0.00000  | 0.00000  | 0.00000  | 1.88386 |
| A19 | 1.92524 | 0.00000 | 0.00000  | 0.00000  | 0.00000  | 1.92524 |
| A20 | 1.92096 | 0.00000 | 0.00000  | 0.00000  | 0.00000  | 1.92096 |
| A21 | 1.91628 | 0.00000 | 0.00000  | 0.00000  | -0.00001 | 1.91627 |
| A22 | 1.91297 | 0.00000 | 0.00000  | 0.00000  | 0.00000  | 1.91297 |
| A23 | 1.90258 | 0.00000 | 0.00000  | 0.00000  | 0.00000  | 1.90258 |
| A24 | 1.91412 | 0.00000 | 0.00000  | 0.00001  | 0.00000  | 1.91412 |
| A25 | 1.88696 | 0.00000 | -0.00001 | 0.00000  | -0.00001 | 1.88695 |
| A26 | 1.88661 | 0.00000 | 0.00000  | 0.00000  | 0.00000  | 1.88661 |
| A27 | 1.96006 | 0.00000 | 0.00000  | 0.00000  | 0.00000  | 1.96007 |
| A28 | 1.78480 | 0.00000 | -0.00006 | -0.00004 | -0.00010 | 1.78470 |
| A29 | 2.83749 | 0.00000 | 0.00001  | 0.00001  | 0.00002  | 2.83751 |
| A30 | 2.17700 | 0.00000 | 0.00000  | 0.00000  | 0.00000  | 2.17701 |
| A31 | 1.95553 | 0.00000 | 0.00000  | 0.00000  | 0.00000  | 1.95553 |
| A32 | 2.15065 | 0.00000 | 0.00000  | 0.00000  | 0.00000  | 2.15065 |
| A33 | 2.07969 | 0.00000 | 0.00000  | 0.00000  | 0.00000  | 2.07969 |
| A34 | 2.15744 | 0.00000 | 0.00000  | 0.00000  | 0.00000  | 2.15744 |
| A35 | 2.04605 | 0.00000 | 0.00000  | 0.00000  | 0.00000  | 2.04605 |
| A36 | 1.91256 | 0.00000 | 0.00000  | 0.00001  | 0.00001  | 1.91257 |
| A37 | 3.05361 | 0.00000 | -0.00004 | -0.00002 | -0.00005 | 3.05356 |
| A38 | 2.07426 | 0.00000 | 0.00000  | 0.00000  | 0.00000  | 2.07425 |
| A39 | 2.08784 | 0.00000 | 0.00001  | 0.00000  | 0.00001  | 2.08784 |
| A40 | 2.00175 | 0.00000 | -0.00001 | 0.00001  | 0.00000  | 2.00175 |
| A41 | 1.98459 | 0.00000 | 0.00001  | 0.00000  | 0.00001  | 1.98460 |
| A42 | 2.04017 | 0.00000 | 0.00000  | 0.00000  | 0.00000  | 2.04016 |
| A43 | 2.04573 | 0.00000 | -0.00001 | 0.00001  | -0.00001 | 2.04572 |
| A44 | 2.13293 | 0.00000 | 0.00001  | 0.00000  | 0.00001  | 2.13294 |
| A45 | 1.94928 | 0.00000 | -0.00001 | -0.00001 | -0.00002 | 1.94926 |
| A46 | 2.04636 | 0.00000 | 0.00001  | 0.00000  | 0.00001  | 2.04637 |
| A47 | 2.02223 | 0.00000 | 0.00000  | 0.00000  | 0.00000  | 2.02223 |
| A48 | 1.43326 | 0.00000 | 0.00001  | -0.00001 | 0.00000  | 1.43326 |
| A49 | 1.00017 | 0.00000 | 0.00001  | -0.00001 | 0.00000  | 1.00017 |
| A50 | 2.37623 | 0.00000 | 0.00000  | -0.00002 | -0.00002 | 2.37621 |
| A51 | 2.35382 | 0.00000 | 0.00002  | 0.00000  | 0.00002  | 2.35383 |
| A52 | 1.93138 | 0.00000 | 0.00000  | 0.00000  | 0.00000  | 1.93138 |
| A53 | 1.91240 | 0.00000 | -0.00001 | 0.00000  | -0.00001 | 1.91239 |
| A54 | 1.93754 | 0.00000 | 0.00001  | -0.00001 | 0.00000  | 1.93755 |
| A55 | 1.88374 | 0.00000 | 0.00000  | 0.00000  | 0.00000  | 1.88374 |

|     |          |         |          |          |          |          |
|-----|----------|---------|----------|----------|----------|----------|
| A56 | 1.91358  | 0.00000 | 0.00000  | 0.00000  | 0.00000  | 1.91359  |
| A57 | 1.88378  | 0.00000 | 0.00000  | 0.00000  | 0.00000  | 1.88378  |
| A58 | 3.78708  | 0.00000 | 0.00003  | -0.00001 | 0.00002  | 3.78710  |
| A59 | 5.04092  | 0.00000 | 0.00002  | 0.00006  | 0.00008  | 5.04100  |
| D1  | 0.00437  | 0.00000 | -0.00001 | 0.00000  | -0.00001 | 0.00436  |
| D2  | -3.13124 | 0.00000 | 0.00000  | 0.00002  | 0.00002  | -3.13122 |
| D3  | 3.13648  | 0.00000 | 0.00002  | -0.00002 | 0.00001  | 3.13649  |
| D4  | 0.00087  | 0.00000 | 0.00003  | 0.00001  | 0.00004  | 0.00091  |
| D5  | -0.00682 | 0.00000 | 0.00000  | 0.00000  | 0.00000  | -0.00682 |
| D6  | -3.09779 | 0.00000 | -0.00006 | 0.00000  | -0.00007 | -3.09785 |
| D7  | -3.13991 | 0.00000 | -0.00003 | 0.00001  | -0.00001 | -3.13992 |
| D8  | 0.05231  | 0.00000 | -0.00009 | 0.00001  | -0.00008 | 0.05223  |
| D9  | -0.00050 | 0.00000 | 0.00001  | 0.00000  | 0.00001  | -0.00049 |
| D10 | -3.13634 | 0.00000 | -0.00003 | -0.00001 | -0.00004 | -3.13638 |
| D11 | 3.13567  | 0.00000 | 0.00001  | -0.00002 | -0.00001 | 3.13566  |
| D12 | -0.00017 | 0.00000 | -0.00003 | -0.00004 | -0.00006 | -0.00024 |
| D13 | -0.00375 | 0.00000 | -0.00001 | 0.00000  | -0.00001 | -0.00376 |
| D14 | 3.13821  | 0.00000 | 0.00011  | 0.00004  | 0.00014  | 3.13836  |
| D15 | 3.13254  | 0.00000 | 0.00002  | 0.00001  | 0.00003  | 3.13257  |
| D16 | -0.00869 | 0.00000 | 0.00014  | 0.00005  | 0.00019  | -0.00850 |
| D17 | 0.00170  | 0.00000 | -0.00014 | -0.00011 | -0.00025 | 0.00145  |
| D18 | -3.14021 | 0.00000 | -0.00013 | -0.00012 | -0.00025 | -3.14046 |
| D19 | -3.13344 | 0.00000 | -0.00018 | -0.00013 | -0.00030 | -3.13374 |
| D20 | 0.00784  | 0.00000 | -0.00017 | -0.00013 | -0.00030 | 0.00754  |
| D21 | 0.00651  | 0.00000 | 0.00001  | 0.00000  | 0.00001  | 0.00651  |
| D22 | 3.09905  | 0.00000 | 0.00007  | 0.00000  | 0.00007  | 3.09912  |
| D23 | -3.13543 | 0.00000 | -0.00010 | -0.00004 | -0.00014 | -3.13557 |
| D24 | -0.04289 | 0.00000 | -0.00004 | -0.00003 | -0.00007 | -0.04297 |
| D25 | -3.11898 | 0.00000 | -0.00029 | -0.00040 | -0.00069 | -3.11966 |
| D26 | 0.02303  | 0.00000 | -0.00015 | -0.00036 | -0.00051 | 0.02252  |
| D27 | 1.41200  | 0.00000 | 0.00001  | 0.00004  | 0.00005  | 1.41205  |
| D28 | -2.76315 | 0.00000 | 0.00001  | 0.00003  | 0.00005  | -2.76310 |
| D29 | -0.70285 | 0.00000 | 0.00001  | 0.00003  | 0.00004  | -0.70281 |
| D30 | -1.67170 | 0.00000 | -0.00006 | 0.00003  | -0.00003 | -1.67172 |
| D31 | 0.43634  | 0.00000 | -0.00006 | 0.00003  | -0.00003 | 0.43631  |
| D32 | 2.49664  | 0.00000 | -0.00006 | 0.00003  | -0.00004 | 2.49660  |
| D33 | -0.93907 | 0.00000 | -0.00004 | -0.00002 | -0.00006 | -0.93913 |
| D34 | 1.12307  | 0.00000 | -0.00005 | -0.00002 | -0.00007 | 1.12299  |
| D35 | -3.00763 | 0.00000 | -0.00005 | -0.00002 | -0.00007 | -3.00770 |
| D36 | -3.01190 | 0.00000 | -0.00004 | -0.00001 | -0.00006 | -3.01196 |
| D37 | -0.94976 | 0.00000 | -0.00005 | -0.00002 | -0.00007 | -0.94983 |
| D38 | 1.20273  | 0.00000 | -0.00005 | -0.00002 | -0.00006 | 1.20266  |
| D39 | 1.15413  | 0.00000 | -0.00004 | -0.00001 | -0.00005 | 1.15408  |
| D40 | -3.06692 | 0.00000 | -0.00005 | -0.00001 | -0.00006 | -3.06698 |



|     |          |         |          |          |          |          |
|-----|----------|---------|----------|----------|----------|----------|
| D41 | -0.91443 | 0.00000 | -0.00004 | -0.00001 | -0.00006 | -0.91448 |
| D42 | -1.63750 | 0.00000 | 0.00000  | 0.00007  | 0.00007  | -1.63743 |
| D43 | 2.56088  | 0.00000 | -0.00001 | 0.00007  | 0.00006  | 2.56094  |
| D44 | 0.48077  | 0.00000 | 0.00000  | 0.00007  | 0.00008  | 0.48084  |
| D45 | 0.44226  | 0.00000 | 0.00029  | 0.00040  | 0.00069  | 0.44295  |
| D46 | -0.26893 | 0.00000 | -0.00023 | -0.00004 | -0.00027 | -0.26920 |
| D47 | 2.56785  | 0.00000 | -0.00027 | -0.00007 | -0.00034 | 2.56752  |
| D48 | -3.14155 | 0.00000 | 0.00000  | -0.00002 | -0.00002 | -3.14158 |
| D49 | 0.00055  | 0.00000 | -0.00001 | -0.00001 | -0.00002 | 0.00053  |
| D50 | 0.00039  | 0.00000 | -0.00001 | -0.00001 | -0.00002 | 0.00036  |
| D51 | -3.14069 | 0.00000 | -0.00002 | 0.00000  | -0.00002 | -3.14072 |
| D52 | -1.92532 | 0.00000 | 0.00065  | -0.00043 | 0.00023  | -1.92509 |
| D53 | 2.43110  | 0.00000 | -0.00050 | 0.00041  | -0.00009 | 2.43101  |
| D54 | 2.05794  | 0.00000 | -0.00055 | 0.00039  | -0.00016 | 2.05778  |
| D55 | -2.60982 | 0.00000 | -0.00053 | 0.00036  | -0.00017 | -2.60999 |
| D56 | -2.72923 | 0.00000 | -0.00001 | 0.00000  | -0.00001 | -2.72924 |
| D57 | -0.03021 | 0.00000 | -0.00002 | 0.00002  | 0.00000  | -0.03021 |
| D58 | -0.02171 | 0.00000 | -0.00001 | -0.00001 | -0.00002 | -0.02173 |
| D59 | 2.67732  | 0.00000 | -0.00002 | 0.00001  | -0.00001 | 2.67730  |
| D60 | -0.17052 | 0.00000 | -0.00002 | -0.00004 | -0.00006 | -0.17059 |
| D61 | 0.27298  | 0.00000 | 0.00003  | 0.00000  | 0.00002  | 0.27300  |
| D62 | -2.58282 | 0.00000 | -0.00002 | -0.00004 | -0.00006 | -2.58288 |
| D63 | -2.13932 | 0.00000 | 0.00003  | -0.00001 | 0.00002  | -2.13930 |
| D64 | 2.14123  | 0.00000 | 0.00001  | 0.00002  | 0.00003  | 2.14126  |
| D65 | -0.25209 | 0.00000 | 0.00001  | 0.00003  | 0.00004  | -0.25205 |
| D66 | 2.48876  | 0.00000 | 0.00004  | -0.00002 | 0.00002  | 2.48878  |
| D67 | -1.71925 | 0.00000 | 0.00004  | -0.00002 | 0.00002  | -1.71923 |
| D68 | 0.35978  | 0.00000 | 0.00004  | -0.00002 | 0.00002  | 0.35980  |
| D69 | 1.27267  | 0.00000 | 0.00003  | -0.00002 | 0.00001  | 1.27268  |
| D70 | -2.93534 | 0.00000 | 0.00003  | -0.00002 | 0.00001  | -2.93533 |
| D71 | -0.85632 | 0.00000 | 0.00003  | -0.00002 | 0.00001  | -0.85631 |
| D72 | -1.08988 | 0.00000 | 0.00003  | 0.00000  | 0.00003  | -1.08985 |
| D73 | 0.98530  | 0.00000 | 0.00003  | 0.00000  | 0.00003  | 0.98533  |
| D74 | 3.06432  | 0.00000 | 0.00002  | 0.00000  | 0.00003  | 3.06435  |

| Item                 | Value    | Threshold | Converged? |
|----------------------|----------|-----------|------------|
| Maximum Force        | 0.000003 | 0.000450  | YES        |
| RMS Force            | 0.000001 | 0.000300  | YES        |
| Maximum Displacement | 0.000964 | 0.001800  | YES        |
| RMS Displacement     | 0.000156 | 0.001200  | YES        |

Predicted change in Energy=-1.365943D-09

Optimization completed.

-- Stationary point found.

-----

! Optimized Parameters !

## ! (Angstroms and Degrees) !

| ! Name | Definition | Value    | Derivative Info. | ! |
|--------|------------|----------|------------------|---|
| ! R1   | R(1,2)     | 1.3573   | -DE/DX = 0.0     | ! |
| ! R2   | R(1,5)     | 1.3865   | -DE/DX = 0.0     | ! |
| ! R3   | R(1,8)     | 1.0764   | -DE/DX = 0.0     | ! |
| ! R4   | R(2,3)     | 1.3914   | -DE/DX = 0.0     | ! |
| ! R5   | R(2,9)     | 1.0746   | -DE/DX = 0.0     | ! |
| ! R6   | R(3,4)     | 1.3474   | -DE/DX = 0.0     | ! |
| ! R7   | R(3,16)    | 1.4219   | -DE/DX = 0.0     | ! |
| ! R8   | R(4,5)     | 1.332    | -DE/DX = 0.0     | ! |
| ! R9   | R(4,15)    | 1.1112   | -DE/DX = 0.0     | ! |
| ! R10  | R(5,6)     | 1.4775   | -DE/DX = 0.0     | ! |
| ! R11  | R(6,7)     | 1.5388   | -DE/DX = 0.0     | ! |
| ! R12  | R(6,10)    | 1.0912   | -DE/DX = 0.0     | ! |
| ! R13  | R(6,11)    | 1.0908   | -DE/DX = 0.0     | ! |
| ! R14  | R(7,12)    | 1.0966   | -DE/DX = 0.0     | ! |
| ! R15  | R(7,13)    | 1.0962   | -DE/DX = 0.0     | ! |
| ! R16  | R(7,21)    | 1.4044   | -DE/DX = 0.0     | ! |
| ! R17  | R(14,15)   | 2.1982   | -DE/DX = 0.0     | ! |
| ! R18  | R(14,25)   | 4.4784   | -DE/DX = 0.0     | ! |
| ! R19  | R(16,17)   | 1.3265   | -DE/DX = 0.0     | ! |
| ! R20  | R(16,18)   | 1.0829   | -DE/DX = 0.0     | ! |
| ! R21  | R(17,19)   | 1.0811   | -DE/DX = 0.0     | ! |
| ! R22  | R(17,20)   | 1.0826   | -DE/DX = 0.0     | ! |
| ! R23  | R(21,22)   | 0.9771   | -DE/DX = 0.0     | ! |
| ! R24  | R(22,25)   | 1.8089   | -DE/DX = 0.0     | ! |
| ! R25  | R(23,24)   | 1.4681   | -DE/DX = 0.0     | ! |
| ! R26  | R(23,25)   | 1.4504   | -DE/DX = 0.0     | ! |
| ! R27  | R(23,26)   | 1.0874   | -DE/DX = 0.0     | ! |
| ! R28  | R(23,27)   | 1.0866   | -DE/DX = 0.0     | ! |
| ! R29  | R(24,25)   | 1.4478   | -DE/DX = 0.0     | ! |
| ! R30  | R(24,28)   | 1.0889   | -DE/DX = 0.0     | ! |
| ! R31  | R(24,29)   | 1.5038   | -DE/DX = 0.0     | ! |
| ! R32  | R(29,30)   | 1.0943   | -DE/DX = 0.0     | ! |
| ! R33  | R(29,31)   | 1.0944   | -DE/DX = 0.0     | ! |
| ! R34  | R(29,32)   | 1.0918   | -DE/DX = 0.0     | ! |
| ! A1   | A(2,1,5)   | 107.3892 | -DE/DX = 0.0     | ! |
| ! A2   | A(2,1,8)   | 130.5267 | -DE/DX = 0.0     | ! |
| ! A3   | A(5,1,8)   | 122.0819 | -DE/DX = 0.0     | ! |
| ! A4   | A(1,2,3)   | 106.677  | -DE/DX = 0.0     | ! |
| ! A5   | A(1,2,9)   | 130.4676 | -DE/DX = 0.0     | ! |
| ! A6   | A(3,2,9)   | 122.8545 | -DE/DX = 0.0     | ! |

|       |             |          |          |     |   |
|-------|-------------|----------|----------|-----|---|
| ! A7  | A(2,3,4)    | 108.704  | -DE/DX = | 0.0 | ! |
| ! A8  | A(2,3,16)   | 128.8291 | -DE/DX = | 0.0 | ! |
| ! A9  | A(4,3,16)   | 122.4661 | -DE/DX = | 0.0 | ! |
| ! A10 | A(3,4,5)    | 108.2481 | -DE/DX = | 0.0 | ! |
| ! A11 | A(3,4,15)   | 128.0284 | -DE/DX = | 0.0 | ! |
| ! A12 | A(5,4,15)   | 123.7234 | -DE/DX = | 0.0 | ! |
| ! A13 | A(1,5,4)    | 108.9802 | -DE/DX = | 0.0 | ! |
| ! A14 | A(1,5,6)    | 126.7445 | -DE/DX = | 0.0 | ! |
| ! A15 | A(4,5,6)    | 124.208  | -DE/DX = | 0.0 | ! |
| ! A16 | A(5,6,7)    | 111.7763 | -DE/DX = | 0.0 | ! |
| ! A17 | A(5,6,10)   | 106.8779 | -DE/DX = | 0.0 | ! |
| ! A18 | A(5,6,11)   | 107.9373 | -DE/DX = | 0.0 | ! |
| ! A19 | A(7,6,10)   | 110.3081 | -DE/DX = | 0.0 | ! |
| ! A20 | A(7,6,11)   | 110.0629 | -DE/DX = | 0.0 | ! |
| ! A21 | A(10,6,11)  | 109.7946 | -DE/DX = | 0.0 | ! |
| ! A22 | A(6,7,12)   | 109.6049 | -DE/DX = | 0.0 | ! |
| ! A23 | A(6,7,13)   | 109.0101 | -DE/DX = | 0.0 | ! |
| ! A24 | A(6,7,21)   | 109.6709 | -DE/DX = | 0.0 | ! |
| ! A25 | A(12,7,13)  | 108.1149 | -DE/DX = | 0.0 | ! |
| ! A26 | A(12,7,21)  | 108.0947 | -DE/DX = | 0.0 | ! |
| ! A27 | A(13,7,21)  | 112.3034 | -DE/DX = | 0.0 | ! |
| ! A28 | A(15,14,25) | 102.2612 | -DE/DX = | 0.0 | ! |
| ! A29 | A(4,15,14)  | 162.5762 | -DE/DX = | 0.0 | ! |
| ! A30 | A(3,16,17)  | 124.7332 | -DE/DX = | 0.0 | ! |
| ! A31 | A(3,16,18)  | 112.0434 | -DE/DX = | 0.0 | ! |
| ! A32 | A(17,16,18) | 123.2234 | -DE/DX = | 0.0 | ! |
| ! A33 | A(16,17,19) | 119.1576 | -DE/DX = | 0.0 | ! |
| ! A34 | A(16,17,20) | 123.6123 | -DE/DX = | 0.0 | ! |
| ! A35 | A(19,17,20) | 117.2301 | -DE/DX = | 0.0 | ! |
| ! A36 | A(7,21,22)  | 109.5818 | -DE/DX = | 0.0 | ! |
| ! A37 | A(21,22,25) | 174.959  | -DE/DX = | 0.0 | ! |
| ! A38 | A(24,23,26) | 118.8462 | -DE/DX = | 0.0 | ! |
| ! A39 | A(24,23,27) | 119.6243 | -DE/DX = | 0.0 | ! |
| ! A40 | A(25,23,26) | 114.6918 | -DE/DX = | 0.0 | ! |
| ! A41 | A(25,23,27) | 113.7086 | -DE/DX = | 0.0 | ! |
| ! A42 | A(26,23,27) | 116.893  | -DE/DX = | 0.0 | ! |
| ! A43 | A(23,24,28) | 117.2114 | -DE/DX = | 0.0 | ! |
| ! A44 | A(23,24,29) | 122.2077 | -DE/DX = | 0.0 | ! |
| ! A45 | A(25,24,28) | 111.6854 | -DE/DX = | 0.0 | ! |
| ! A46 | A(25,24,29) | 117.2479 | -DE/DX = | 0.0 | ! |
| ! A47 | A(28,24,29) | 115.8653 | -DE/DX = | 0.0 | ! |
| ! A48 | A(14,25,22) | 82.1198  | -DE/DX = | 0.0 | ! |
| ! A49 | A(14,25,23) | 57.3054  | -DE/DX = | 0.0 | ! |
| ! A50 | A(22,25,23) | 136.1479 | -DE/DX = | 0.0 | ! |

|       |                   |           |          |     |   |
|-------|-------------------|-----------|----------|-----|---|
| ! A51 | A(22,25,24)       | 134.8639  | -DE/DX = | 0.0 | ! |
| ! A52 | A(24,29,30)       | 110.6602  | -DE/DX = | 0.0 | ! |
| ! A53 | A(24,29,31)       | 109.5725  | -DE/DX = | 0.0 | ! |
| ! A54 | A(24,29,32)       | 111.0131  | -DE/DX = | 0.0 | ! |
| ! A55 | A(30,29,31)       | 107.9304  | -DE/DX = | 0.0 | ! |
| ! A56 | A(30,29,32)       | 109.6402  | -DE/DX = | 0.0 | ! |
| ! A57 | A(31,29,32)       | 107.9326  | -DE/DX = | 0.0 | ! |
| ! A58 | L(14,25,24,22,-1) | 216.9837  | -DE/DX = | 0.0 | ! |
| ! A59 | L(14,25,24,22,-2) | 288.8232  | -DE/DX = | 0.0 | ! |
| ! D1  | D(5,1,2,3)        | 0.2502    | -DE/DX = | 0.0 | ! |
| ! D2  | D(5,1,2,9)        | -179.4069 | -DE/DX = | 0.0 | ! |
| ! D3  | D(8,1,2,3)        | 179.7071  | -DE/DX = | 0.0 | ! |
| ! D4  | D(8,1,2,9)        | 0.0501    | -DE/DX = | 0.0 | ! |
| ! D5  | D(2,1,5,4)        | -0.3907   | -DE/DX = | 0.0 | ! |
| ! D6  | D(2,1,5,6)        | -177.49   | -DE/DX = | 0.0 | ! |
| ! D7  | D(8,1,5,4)        | -179.9035 | -DE/DX = | 0.0 | ! |
| ! D8  | D(8,1,5,6)        | 2.9971    | -DE/DX = | 0.0 | ! |
| ! D9  | D(1,2,3,4)        | -0.0286   | -DE/DX = | 0.0 | ! |
| ! D10 | D(1,2,3,16)       | -179.6992 | -DE/DX = | 0.0 | ! |
| ! D11 | D(9,2,3,4)        | 179.6608  | -DE/DX = | 0.0 | ! |
| ! D12 | D(9,2,3,16)       | -0.0098   | -DE/DX = | 0.0 | ! |
| ! D13 | D(2,3,4,5)        | -0.2147   | -DE/DX = | 0.0 | ! |
| ! D14 | D(2,3,4,15)       | 179.8064  | -DE/DX = | 0.0 | ! |
| ! D15 | D(16,3,4,5)       | 179.4812  | -DE/DX = | 0.0 | ! |
| ! D16 | D(16,3,4,15)      | -0.4978   | -DE/DX = | 0.0 | ! |
| ! D17 | D(2,3,16,17)      | 0.0972    | -DE/DX = | 0.0 | ! |
| ! D18 | D(2,3,16,18)      | -179.9207 | -DE/DX = | 0.0 | ! |
| ! D19 | D(4,3,16,17)      | -179.533  | -DE/DX = | 0.0 | ! |
| ! D20 | D(4,3,16,18)      | 0.4491    | -DE/DX = | 0.0 | ! |
| ! D21 | D(3,4,5,1)        | 0.3729    | -DE/DX = | 0.0 | ! |
| ! D22 | D(3,4,5,6)        | 177.5624  | -DE/DX = | 0.0 | ! |
| ! D23 | D(15,4,5,1)       | -179.6471 | -DE/DX = | 0.0 | ! |
| ! D24 | D(15,4,5,6)       | -2.4575   | -DE/DX = | 0.0 | ! |
| ! D25 | D(3,4,15,14)      | -178.7043 | -DE/DX = | 0.0 | ! |
| ! D26 | D(5,4,15,14)      | 1.3198    | -DE/DX = | 0.0 | ! |
| ! D27 | D(1,5,6,7)        | 80.9016   | -DE/DX = | 0.0 | ! |
| ! D28 | D(1,5,6,10)       | -158.3167 | -DE/DX = | 0.0 | ! |
| ! D29 | D(1,5,6,11)       | -40.2702  | -DE/DX = | 0.0 | ! |
| ! D30 | D(4,5,6,7)        | -95.7812  | -DE/DX = | 0.0 | ! |
| ! D31 | D(4,5,6,10)       | 25.0005   | -DE/DX = | 0.0 | ! |
| ! D32 | D(4,5,6,11)       | 143.047   | -DE/DX = | 0.0 | ! |
| ! D33 | D(5,6,7,12)       | -53.8048  | -DE/DX = | 0.0 | ! |
| ! D34 | D(5,6,7,13)       | 64.3469   | -DE/DX = | 0.0 | ! |
| ! D35 | D(5,6,7,21)       | -172.3245 | -DE/DX = | 0.0 | ! |

|       |                |           |          |     |   |
|-------|----------------|-----------|----------|-----|---|
| ! D36 | D(10,6,7,12)   | -172.5691 | -DE/DX = | 0.0 | ! |
| ! D37 | D(10,6,7,13)   | -54.4174  | -DE/DX = | 0.0 | ! |
| ! D38 | D(10,6,7,21)   | 68.9112   | -DE/DX = | 0.0 | ! |
| ! D39 | D(11,6,7,12)   | 66.1269   | -DE/DX = | 0.0 | ! |
| ! D40 | D(11,6,7,13)   | -175.7214 | -DE/DX = | 0.0 | ! |
| ! D41 | D(11,6,7,21)   | -52.3928  | -DE/DX = | 0.0 | ! |
| ! D42 | D(6,7,21,22)   | -93.8219  | -DE/DX = | 0.0 | ! |
| ! D43 | D(12,7,21,22)  | 146.7276  | -DE/DX = | 0.0 | ! |
| ! D44 | D(13,7,21,22)  | 27.5459   | -DE/DX = | 0.0 | ! |
| ! D45 | D(25,14,15,4)  | 25.3394   | -DE/DX = | 0.0 | ! |
| ! D46 | D(15,14,25,22) | -15.4083  | -DE/DX = | 0.0 | ! |
| ! D47 | D(15,14,25,23) | 147.1271  | -DE/DX = | 0.0 | ! |
| ! D48 | D(3,16,17,19)  | -179.9978 | -DE/DX = | 0.0 | ! |
| ! D49 | D(3,16,17,20)  | 0.0316    | -DE/DX = | 0.0 | ! |
| ! D50 | D(18,16,17,19) | 0.0221    | -DE/DX = | 0.0 | ! |
| ! D51 | D(18,16,17,20) | -179.9485 | -DE/DX = | 0.0 | ! |
| ! D52 | D(7,21,22,25)  | -110.3126 | -DE/DX = | 0.0 | ! |
| ! D53 | D(21,22,25,14) | 139.2917  | -DE/DX = | 0.0 | ! |
| ! D54 | D(21,22,25,23) | 117.9112  | -DE/DX = | 0.0 | ! |
| ! D55 | D(21,22,25,24) | -149.5315 | -DE/DX = | 0.0 | ! |
| ! D56 | D(26,23,24,28) | -156.3734 | -DE/DX = | 0.0 | ! |
| ! D57 | D(26,23,24,29) | -1.7308   | -DE/DX = | 0.0 | ! |
| ! D58 | D(27,23,24,28) | -1.2436   | -DE/DX = | 0.0 | ! |
| ! D59 | D(27,23,24,29) | 153.399   | -DE/DX = | 0.0 | ! |
| ! D60 | D(26,23,25,14) | -9.7703   | -DE/DX = | 0.0 | ! |
| ! D61 | D(26,23,25,22) | 15.6404   | -DE/DX = | 0.0 | ! |
| ! D62 | D(27,23,25,14) | -147.9848 | -DE/DX = | 0.0 | ! |
| ! D63 | D(27,23,25,22) | -122.5741 | -DE/DX = | 0.0 | ! |
| ! D64 | D(28,24,25,22) | 122.6837  | -DE/DX = | 0.0 | ! |
| ! D65 | D(29,24,25,22) | -14.4438  | -DE/DX = | 0.0 | ! |
| ! D66 | D(23,24,29,30) | 142.5956  | -DE/DX = | 0.0 | ! |
| ! D67 | D(23,24,29,31) | -98.5056  | -DE/DX = | 0.0 | ! |
| ! D68 | D(23,24,29,32) | 20.6139   | -DE/DX = | 0.0 | ! |
| ! D69 | D(25,24,29,30) | 72.9183   | -DE/DX = | 0.0 | ! |
| ! D70 | D(25,24,29,31) | -168.1828 | -DE/DX = | 0.0 | ! |
| ! D71 | D(25,24,29,32) | -49.0634  | -DE/DX = | 0.0 | ! |
| ! D72 | D(28,24,29,30) | -62.4454  | -DE/DX = | 0.0 | ! |
| ! D73 | D(28,24,29,31) | 56.4534   | -DE/DX = | 0.0 | ! |
| ! D74 | D(28,24,29,32) | 175.5729  | -DE/DX = | 0.0 | ! |

-----  
GradGradGradGradGradGradGradGradGradGradGradGradGradGradGradGradGradGradGrad

Input orientation:

-----

| Center<br>Number | Atomic<br>Number | Atomic<br>Type | Coordinates (Angstroms) |           |           |
|------------------|------------------|----------------|-------------------------|-----------|-----------|
|                  |                  |                | X                       | Y         | Z         |
| 1                | 6                | 0              | -1.376676               | -1.910079 | -0.256430 |
| 2                | 6                | 0              | -2.507758               | -1.169411 | -0.136228 |
| 3                | 7                | 0              | -2.108757               | 0.112186  | 0.230301  |
| 4                | 6                | 0              | -0.765111               | 0.135170  | 0.327464  |
| 5                | 7                | 0              | -0.305354               | -1.081740 | 0.041193  |
| 6                | 6                | 0              | 1.127755                | -1.437877 | -0.008303 |
| 7                | 6                | 0              | 1.683073                | -1.372417 | -1.441919 |
| 8                | 1                | 0              | -1.243253               | -2.945793 | -0.517628 |
| 9                | 1                | 0              | -3.538089               | -1.442511 | -0.272866 |
| 10               | 1                | 0              | 1.652740                | -0.728929 | 0.633925  |
| 11               | 1                | 0              | 1.236906                | -2.447614 | 0.389510  |
| 12               | 1                | 0              | 1.063777                | -1.988403 | -2.104861 |
| 13               | 1                | 0              | 1.635330                | -0.336240 | -1.796355 |
| 14               | 35               | 0              | 1.650471                | 2.234569  | 1.024443  |
| 15               | 1                | 0              | -0.112754               | 0.993734  | 0.596041  |
| 16               | 6                | 0              | -2.912192               | 1.257184  | 0.485744  |
| 17               | 6                | 0              | -4.236442               | 1.282929  | 0.412305  |
| 18               | 1                | 0              | -2.315799               | 2.121039  | 0.751693  |
| 19               | 1                | 0              | -4.757977               | 2.205552  | 0.625730  |
| 20               | 1                | 0              | -4.838820               | 0.423135  | 0.147915  |
| 21               | 8                | 0              | 2.990629                | -1.884328 | -1.466237 |
| 22               | 1                | 0              | 3.630571                | -1.152928 | -1.365294 |
| 23               | 6                | 0              | 4.836987                | 1.611876  | -1.120527 |
| 24               | 6                | 0              | 5.710468                | 0.752020  | -0.312432 |
| 25               | 8                | 0              | 4.856327                | 0.176888  | -1.330212 |
| 26               | 1                | 0              | 3.920667                | 1.993792  | -0.676788 |
| 27               | 1                | 0              | 5.257098                | 2.179762  | -1.946164 |
| 28               | 1                | 0              | 6.761117                | 0.703947  | -0.594600 |
| 29               | 6                | 0              | 5.399534                | 0.413259  | 1.119384  |
| 30               | 1                | 0              | 5.678815                | -0.621377 | 1.340757  |
| 31               | 1                | 0              | 5.973518                | 1.066690  | 1.783700  |
| 32               | 1                | 0              | 4.339665                | 0.561530  | 1.335492  |

-----

Distance matrix (angstroms):

|   |   | 1        | 2        | 3        | 4        | 5        |
|---|---|----------|----------|----------|----------|----------|
| 1 | C | 0.000000 |          |          |          |          |
| 2 | C | 1.357345 | 0.000000 |          |          |          |
| 3 | N | 2.205087 | 1.391416 | 0.000000 |          |          |
| 4 | C | 2.213139 | 2.225705 | 1.347351 | 0.000000 |          |
| 5 | N | 1.386526 | 2.211277 | 2.171056 | 1.331990 | 0.000000 |
| 6 | C | 2.560608 | 3.647656 | 3.596476 | 2.483981 | 1.477527 |

|    |    |          |          |          |          |          |
|----|----|----------|----------|----------|----------|----------|
| 7  | C  | 3.325135 | 4.394213 | 4.402084 | 3.375965 | 2.497590 |
| 8  | H  | 1.076443 | 2.213588 | 3.264924 | 3.230345 | 2.160237 |
| 9  | H  | 2.211470 | 1.074633 | 2.171003 | 3.246365 | 3.267930 |
| 10 | H  | 3.371232 | 4.254046 | 3.875467 | 2.585844 | 2.076040 |
| 11 | H  | 2.745358 | 3.991580 | 4.215613 | 3.268439 | 2.089379 |
| 12 | H  | 3.062457 | 4.159583 | 4.464352 | 3.710876 | 2.702241 |
| 13 | H  | 3.731020 | 4.540416 | 4.280959 | 3.239591 | 2.774636 |
| 14 | Br | 5.289835 | 5.497737 | 4.389415 | 3.275407 | 3.973656 |
| 15 | H  | 3.279685 | 3.309299 | 2.212447 | 1.111232 | 2.156976 |
| 16 | C  | 3.597247 | 2.537475 | 1.421892 | 2.427740 | 3.530409 |
| 17 | C  | 4.338291 | 3.050116 | 2.435325 | 3.657142 | 4.602481 |
| 18 | H  | 4.260067 | 3.413548 | 2.085714 | 2.555049 | 3.847660 |
| 19 | H  | 5.399058 | 4.127280 | 3.399545 | 4.507596 | 5.565413 |
| 20 | H  | 4.194500 | 2.837392 | 2.748949 | 4.087819 | 4.777902 |
| 21 | O  | 4.531848 | 5.701955 | 5.733066 | 4.626156 | 3.712142 |
| 22 | H  | 5.184147 | 6.260189 | 6.089855 | 4.883303 | 4.180285 |
| 23 | C  | 7.194473 | 7.915156 | 7.233061 | 5.971670 | 5.920206 |
| 24 | C  | 7.570833 | 8.441693 | 7.864110 | 6.536291 | 6.299035 |
| 25 | O  | 6.660238 | 7.580757 | 7.138052 | 5.860904 | 5.487063 |
| 26 | H  | 6.593841 | 7.184894 | 6.381003 | 5.139991 | 5.275761 |
| 27 | H  | 7.974269 | 8.647880 | 7.954100 | 6.754017 | 6.747434 |
| 28 | H  | 8.554014 | 9.467398 | 8.927783 | 7.603803 | 7.316278 |
| 29 | C  | 7.294366 | 8.161291 | 7.566740 | 6.221520 | 5.995271 |
| 30 | H  | 7.347905 | 8.336774 | 7.900475 | 6.566834 | 6.140935 |
| 31 | H  | 8.188323 | 8.978771 | 8.285367 | 6.956830 | 6.861219 |
| 32 | H  | 6.428034 | 7.214521 | 6.557858 | 5.220789 | 5.094286 |
|    |    | 6        | 7        | 8        | 9        | 10       |
| 6  | C  | 0.000000 |          |          |          |          |
| 7  | C  | 1.538804 | 0.000000 |          |          |          |
| 8  | H  | 2.855678 | 3.448653 | 0.000000 |          |          |
| 9  | H  | 4.673341 | 5.350900 | 2.754276 | 0.000000 |          |
| 10 | H  | 1.091180 | 2.173505 | 3.824570 | 5.317535 | 0.000000 |
| 11 | H  | 1.090751 | 2.170080 | 2.687427 | 4.924383 | 1.785088 |
| 12 | H  | 2.168577 | 1.096566 | 2.959442 | 4.983109 | 3.071498 |
| 13 | H  | 2.160640 | 1.096160 | 4.090372 | 5.505372 | 2.461862 |
| 14 | Br | 3.850540 | 4.369709 | 6.130886 | 6.490384 | 2.989118 |
| 15 | H  | 2.795859 | 3.602353 | 4.247135 | 4.292227 | 2.466976 |
| 16 | C  | 4.881455 | 5.634460 | 4.632183 | 2.873255 | 4.980482 |
| 17 | C  | 6.029453 | 6.747567 | 5.263653 | 2.895718 | 6.227291 |
| 18 | H  | 5.010144 | 5.745184 | 5.332383 | 3.904178 | 4.887278 |
| 19 | H  | 6.951145 | 7.652722 | 6.340103 | 3.950186 | 7.050428 |
| 20 | H  | 6.252023 | 6.948861 | 4.971994 | 2.312919 | 6.610886 |
| 21 | O  | 2.407319 | 1.404403 | 4.466802 | 6.651578 | 2.745100 |
| 22 | H  | 2.861242 | 1.961325 | 5.261850 | 7.257200 | 2.844023 |

|    |    |          |          |          |           |           |
|----|----|----------|----------|----------|-----------|-----------|
| 23 | C  | 4.929142 | 4.353903 | 7.622674 | 8.954871  | 4.323991  |
| 24 | C  | 5.088163 | 4.691363 | 7.878462 | 9.505438  | 4.421986  |
| 25 | O  | 4.272840 | 3.533040 | 6.900457 | 8.614329  | 3.865399  |
| 26 | H  | 4.474772 | 4.113832 | 7.147789 | 8.222188  | 3.778183  |
| 27 | H  | 5.821864 | 5.064178 | 8.400393 | 9.657956  | 5.301768  |
| 28 | H  | 6.055239 | 5.551195 | 8.797526 | 10.525419 | 5.445909  |
| 29 | C  | 4.790248 | 4.853967 | 7.621657 | 9.233816  | 3.946990  |
| 30 | H  | 4.816511 | 4.926794 | 7.534688 | 9.393048  | 4.089065  |
| 31 | H  | 5.741564 | 5.895913 | 8.571926 | 10.049688 | 4.818232  |
| 32 | H  | 4.014945 | 4.302516 | 6.848674 | 8.286254  | 3.062196  |
|    |    | 11       | 12       | 13       | 14        | 15        |
| 11 | H  | 0.000000 |          |          |           |           |
| 12 | H  | 2.542191 | 0.000000 |          |           |           |
| 13 | H  | 3.065069 | 1.775244 | 0.000000 |           |           |
| 14 | Br | 4.743102 | 5.288690 | 3.816568 | 0.000000  |           |
| 15 | H  | 3.702313 | 4.191926 | 3.247797 | 2.198218  | 0.000000  |
| 16 | C  | 5.563254 | 5.749208 | 5.331691 | 4.697166  | 2.813969  |
| 17 | C  | 6.623821 | 6.717891 | 6.479012 | 5.994671  | 4.137897  |
| 18 | H  | 5.798748 | 6.038952 | 5.304921 | 3.977258  | 2.479607  |
| 19 | H  | 7.592521 | 7.677123 | 7.293941 | 6.420905  | 4.800779  |
| 20 | H  | 6.724137 | 6.762483 | 6.802312 | 6.794152  | 4.781433  |
| 21 | O  | 2.614695 | 2.032592 | 2.083839 | 4.996481  | 4.708207  |
| 22 | H  | 3.238083 | 2.798823 | 2.198586 | 4.594211  | 4.739987  |
| 23 | C  | 5.632074 | 5.307357 | 3.808216 | 3.891340  | 5.275286  |
| 24 | C  | 5.544650 | 5.684580 | 4.471363 | 4.524242  | 5.898615  |
| 25 | O  | 4.790164 | 4.435313 | 3.294756 | 4.478389  | 5.391610  |
| 26 | H  | 5.297703 | 5.104810 | 3.450398 | 2.847095  | 4.346112  |
| 27 | H  | 6.559721 | 5.914620 | 4.412473 | 4.672823  | 6.058447  |
| 28 | H  | 6.435660 | 6.479916 | 5.366554 | 5.575195  | 6.982242  |
| 29 | C  | 5.103409 | 5.912911 | 4.820012 | 4.169131  | 5.567419  |
| 30 | H  | 4.895975 | 5.919427 | 5.125675 | 4.948134  | 6.058503  |
| 31 | H  | 6.060495 | 6.968505 | 5.796972 | 4.541932  | 6.201497  |
| 32 | H  | 4.424585 | 5.391626 | 4.234133 | 3.182384  | 4.534051  |
|    |    | 16       | 17       | 18       | 19        | 20        |
| 16 | C  | 0.000000 |          |          |           |           |
| 17 | C  | 1.326535 | 0.000000 |          |           |           |
| 18 | H  | 1.082893 | 2.122847 | 0.000000 |           |           |
| 19 | H  | 2.079885 | 1.081102 | 2.446885 | 0.000000  |           |
| 20 | H  | 2.126420 | 1.082593 | 3.100494 | 1.847120  | 0.000000  |
| 21 | O  | 6.965817 | 8.111164 | 7.008591 | 9.008015  | 8.320465  |
| 22 | H  | 7.214064 | 8.425150 | 7.110542 | 9.252638  | 8.746677  |
| 23 | C  | 7.921849 | 9.207872 | 7.411262 | 9.770630  | 9.830732  |
| 24 | C  | 8.674246 | 9.987398 | 8.211427 | 10.610431 | 10.564448 |
| 25 | O  | 8.050753 | 9.324063 | 7.717088 | 10.018784 | 9.810269  |



|    |   |          |           |          |           |           |
|----|---|----------|-----------|----------|-----------|-----------|
| 26 | H | 6.970081 | 8.260137  | 6.399238 | 8.778397  | 8.937321  |
| 27 | H | 8.573367 | 9.823136  | 8.039319 | 10.340070 | 10.459373 |
| 28 | H | 9.749159 | 11.058724 | 9.284991 | 11.680477 | 11.627069 |
| 29 | C | 8.378454 | 9.700944  | 7.910630 | 10.326231 | 10.284345 |
| 30 | H | 8.835464 | 10.139069 | 8.472407 | 10.836485 | 10.636471 |
| 31 | H | 8.982027 | 10.303920 | 8.419588 | 10.853704 | 10.954297 |
| 32 | H | 7.334536 | 8.655766  | 6.860618 | 9.272198  | 9.256029  |
|    |   | 21       | 22        | 23       | 24        | 25        |
| 21 | O | 0.000000 |           |          |           |           |
| 22 | H | 0.977068 | 0.000000  |          |           |           |
| 23 | C | 3.968878 | 3.026465  | 0.000000 |           |           |
| 24 | C | 3.959687 | 3.010534  | 1.468107 | 0.000000  |           |
| 25 | O | 2.783513 | 1.808900  | 1.450356 | 1.447829  | 0.000000  |
| 26 | H | 4.065466 | 3.234199  | 1.087386 | 2.208652  | 2.145592  |
| 27 | H | 4.678038 | 3.753642  | 1.086584 | 2.216546  | 2.133429  |
| 28 | H | 4.655695 | 3.720520  | 2.191622 | 1.088941  | 2.108825  |
| 29 | C | 4.215111 | 3.428672  | 2.601988 | 1.503840  | 2.520212  |
| 30 | H | 4.086637 | 3.435194  | 3.428413 | 2.149478  | 2.906509  |
| 31 | H | 5.307375 | 4.509131  | 3.165986 | 2.135880  | 3.425830  |
| 32 | H | 3.956236 | 3.276649  | 2.717092 | 2.151986  | 2.742421  |
|    |   | 26       | 27        | 28       | 29        | 30        |
| 26 | H | 0.000000 |           |          |           |           |
| 27 | H | 1.852552 | 0.000000  |          |           |           |
| 28 | H | 3.120675 | 2.503364  | 0.000000 |           |           |
| 29 | C | 2.812715 | 3.540962  | 2.208200 | 0.000000  |           |
| 30 | H | 3.741749 | 4.339134  | 2.583306 | 1.094293  | 0.000000  |
| 31 | H | 3.335824 | 3.957787  | 2.531443 | 1.094416  | 1.769921  |
| 32 | H | 2.505236 | 3.772218  | 3.099834 | 1.091792  | 1.786791  |
|    |   | 31       | 32        |          |           |           |
| 31 | H | 0.000000 |           |          |           |           |
| 32 | H | 1.767924 | 0.000000  |          |           |           |

Stoichiometry C10H17BrN2O2

Framework group C1[X(C10H17BrN2O2)]

Deg. of freedom 90

Full point group C1 NOp 1

Largest Abelian subgroup C1 NOp 1

Largest concise Abelian subgroup C1 NOp 1

Standard orientation:

| Center<br>Number | Atomic<br>Number | Atomic<br>Type | Coordinates (Angstroms) |          |           |
|------------------|------------------|----------------|-------------------------|----------|-----------|
|                  |                  |                | X                       | Y        | Z         |
| 1                | 6                | 0              | -2.711113               | 2.114434 | -0.440979 |
| 2                | 6                | 0              | -3.788494               | 1.349121 | -0.131253 |

|    |    |   |           |           |           |
|----|----|---|-----------|-----------|-----------|
| 3  | 7  | 0 | -3.319916 | 0.050046  | 0.038677  |
| 4  | 6  | 0 | -1.988308 | 0.040744  | -0.166479 |
| 5  | 7  | 0 | -1.603294 | 1.280942  | -0.462910 |
| 6  | 6  | 0 | -0.201257 | 1.680336  | -0.703461 |
| 7  | 6  | 0 | 0.455082  | 2.252397  | 0.565350  |
| 8  | 1  | 0 | -2.638735 | 3.167298  | -0.653034 |
| 9  | 1  | 0 | -4.824637 | 1.613691  | -0.025201 |
| 10 | 1  | 0 | 0.330270  | 0.786849  | -1.034874 |
| 11 | 1  | 0 | -0.196562 | 2.428606  | -1.497065 |
| 12 | 1  | 0 | -0.161795 | 3.066919  | 0.963439  |
| 13 | 1  | 0 | 0.510477  | 1.464191  | 1.325105  |
| 14 | 35 | 0 | 0.525313  | -2.059113 | -0.141966 |
| 15 | 1  | 0 | -1.292956 | -0.824192 | -0.109858 |
| 16 | 6  | 0 | -4.050113 | -1.125518 | 0.365232  |
| 17 | 6  | 0 | -5.360377 | -1.169604 | 0.567616  |
| 18 | 1  | 0 | -3.409849 | -1.996320 | 0.431743  |
| 19 | 1  | 0 | -5.824086 | -2.115140 | 0.811989  |
| 20 | 1  | 0 | -6.006396 | -0.303372 | 0.501972  |
| 21 | 8  | 0 | 1.718699  | 2.777019  | 0.248505  |
| 22 | 1  | 0 | 2.403654  | 2.097851  | 0.404161  |
| 23 | 6  | 0 | 3.796049  | -0.458990 | 1.230774  |
| 24 | 6  | 0 | 4.544067  | 0.009358  | 0.057547  |
| 25 | 8  | 0 | 3.721173  | 0.928553  | 0.815264  |
| 26 | 1  | 0 | 2.882812  | -1.028988 | 1.077456  |
| 27 | 1  | 0 | 4.313935  | -0.605035 | 2.174772  |
| 28 | 1  | 0 | 5.605033  | 0.214057  | 0.192605  |
| 29 | 6  | 0 | 4.110267  | -0.305195 | -1.347589 |
| 30 | 1  | 0 | 4.294496  | 0.547280  | -2.008514 |
| 31 | 1  | 0 | 4.684810  | -1.155943 | -1.726899 |
| 32 | 1  | 0 | 3.052272  | -0.572783 | -1.380056 |

-----  
Rotational constants (GHZ):      0.5994512      0.2213243      0.1723290

\*\*\*\*\*

Population analysis using the SCF density.

\*\*\*\*\*

Orbital symmetries:

Occupied (A)  
(A) (A) (A) (A) (A) (A) (A) (A) (A) (A) (A) (A)  
(A) (A) (A) (A) (A) (A) (A) (A) (A) (A) (A) (A)  
(A) (A) (A) (A) (A) (A) (A) (A) (A) (A) (A) (A)

(A) (A) (A) (A) (A) (A) (A) (A) (A) (A) (A)  
 (A) (A) (A) (A) (A) (A) (A) (A) (A) (A) (A)  
 Virtual (A)  
 (A) (A) (A) (A) (A) (A) (A) (A) (A) (A) (A) (A)  
 (A) (A) (A) (A) (A) (A) (A) (A) (A) (A) (A) (A)  
 (A) (A) (A) (A) (A) (A) (A) (A) (A) (A) (A) (A)  
 (A) (A) (A) (A) (A) (A) (A) (A) (A) (A) (A) (A)  
 (A) (A) (A) (A) (A) (A) (A) (A) (A) (A) (A) (A)  
 (A) (A) (A) (A) (A) (A) (A) (A) (A) (A) (A) (A)  
 (A) (A) (A) (A) (A) (A) (A) (A) (A) (A) (A) (A)  
 (A) (A) (A) (A) (A) (A) (A) (A) (A) (A) (A) (A)  
 (A) (A) (A) (A) (A) (A) (A) (A) (A) (A) (A) (A)  
 (A) (A) (A) (A) (A) (A) (A) (A) (A) (A) (A) (A)  
 (A) (A) (A) (A) (A) (A) (A) (A) (A) (A) (A) (A)  
 (A) (A) (A) (A) (A) (A) (A) (A) (A) (A) (A) (A)  
 (A) (A) (A) (A) (A) (A) (A) (A) (A) (A) (A) (A)  
 (A) (A) (A) (A) (A) (A) (A) (A) (A) (A) (A) (A)  
 (A) (A) (A) (A) (A) (A) (A) (A) (A) (A) (A) (A)  
 (A) (A) (A) (A) (A) (A) (A) (A) (A) (A) (A) (A)  
 (A) (A) (A) (A) (A) (A) (A) (A) (A) (A) (A) (A)  
 (A) (A) (A) (A) (A) (A) (A) (A) (A) (A) (A) (A)  
 (A) (A) (A) (A) (A) (A) (A) (A) (A) (A) (A) (A)  
 (A) (A) (A) (A) (A) (A) (A) (A) (A) (A) (A) (A)  
 (A) (A) (A) (A) (A) (A) (A) (A) (A) (A) (A) (A)  
 (A) (A) (A) (A) (A) (A) (A) (A) (A) (A) (A) (A)  
 (A) (A) (A) (A) (A) (A) (A) (A) (A) (A) (A) (A)  
 (A) (A) (A) (A) (A) (A) (A) (A) (A) (A) (A) (A)  
 (A) (A) (A) (A) (A) (A) (A) (A) (A) (A) (A) (A)  
 (A) (A) (A) (A) (A) (A) (A) (A) (A) (A) (A) (A)  
 (A) (A) (A) (A) (A) (A) (A) (A) (A) (A) (A) (A)  
 (A) (A) (A) (A) (A) (A) (A) (A) (A) (A) (A) (A)  
 (A) (A) (A) (A) (A) (A) (A) (A) (A) (A) (A) (A)  
 (A) (A) (A) (A) (A) (A) (A) (A) (A) (A) (A) (A)

The electronic state is 1-A.

|       |                     |            |           |           |           |           |
|-------|---------------------|------------|-----------|-----------|-----------|-----------|
| Alpha | occ. eigenvalues -- | -482.69901 | -62.35241 | -56.17020 | -56.17009 | -56.17006 |
| Alpha | occ. eigenvalues -- | -19.13299  | -19.11271 | -14.45380 | -14.44198 | -10.29564 |
| Alpha | occ. eigenvalues -- | -10.27333  | -10.27242 | -10.27039 | -10.23843 | -10.23283 |
| Alpha | occ. eigenvalues -- | -10.22203  | -10.22168 | -10.20689 | -10.15291 | -8.56153  |
| Alpha | occ. eigenvalues -- | -6.38486   | -6.38418  | -6.38407  | -2.49727  | -2.49704  |
| Alpha | occ. eigenvalues -- | -2.49694   | -2.49642  | -2.49642  | -1.11700  | -1.06477  |
| Alpha | occ. eigenvalues -- | -1.02158   | -1.00144  | -0.85615  | -0.82567  | -0.78276  |

|                            |          |          |          |          |          |
|----------------------------|----------|----------|----------|----------|----------|
| Alpha occ. eigenvalues --  | -0.73829 | -0.71401 | -0.68816 | -0.65787 | -0.65418 |
| Alpha occ. eigenvalues --  | -0.63577 | -0.63410 | -0.58864 | -0.58571 | -0.54369 |
| Alpha occ. eigenvalues --  | -0.53766 | -0.52266 | -0.51918 | -0.50194 | -0.49657 |
| Alpha occ. eigenvalues --  | -0.49462 | -0.48351 | -0.46702 | -0.45740 | -0.44716 |
| Alpha occ. eigenvalues --  | -0.43719 | -0.41800 | -0.40709 | -0.39508 | -0.39128 |
| Alpha occ. eigenvalues --  | -0.36736 | -0.35797 | -0.33691 | -0.32119 | -0.30400 |
| Alpha occ. eigenvalues --  | -0.30121 | -0.28064 | -0.27343 | -0.20342 | -0.19834 |
| Alpha occ. eigenvalues --  | -0.19649 |          |          |          |          |
| Alpha virt. eigenvalues -- | -0.08377 | -0.04680 | -0.03103 | -0.01426 | -0.00829 |
| Alpha virt. eigenvalues -- | -0.00457 | 0.00845  | 0.00889  | 0.01038  | 0.01497  |
| Alpha virt. eigenvalues -- | 0.02483  | 0.02838  | 0.03419  | 0.04013  | 0.04171  |
| Alpha virt. eigenvalues -- | 0.04796  | 0.05352  | 0.05672  | 0.05729  | 0.06359  |
| Alpha virt. eigenvalues -- | 0.06844  | 0.07204  | 0.07844  | 0.07919  | 0.08120  |
| Alpha virt. eigenvalues -- | 0.08628  | 0.08758  | 0.09261  | 0.09464  | 0.09842  |
| Alpha virt. eigenvalues -- | 0.09888  | 0.10154  | 0.10621  | 0.10960  | 0.11070  |
| Alpha virt. eigenvalues -- | 0.11813  | 0.11989  | 0.12539  | 0.12693  | 0.12846  |
| Alpha virt. eigenvalues -- | 0.12969  | 0.13189  | 0.13477  | 0.13841  | 0.14235  |
| Alpha virt. eigenvalues -- | 0.14728  | 0.14947  | 0.15057  | 0.15220  | 0.15730  |
| Alpha virt. eigenvalues -- | 0.16038  | 0.16140  | 0.16474  | 0.16642  | 0.17072  |
| Alpha virt. eigenvalues -- | 0.17822  | 0.17913  | 0.17983  | 0.18493  | 0.18629  |
| Alpha virt. eigenvalues -- | 0.19136  | 0.19455  | 0.19820  | 0.20439  | 0.20762  |
| Alpha virt. eigenvalues -- | 0.20816  | 0.21533  | 0.21688  | 0.22085  | 0.22277  |
| Alpha virt. eigenvalues -- | 0.22778  | 0.23131  | 0.23301  | 0.23937  | 0.24174  |
| Alpha virt. eigenvalues -- | 0.24340  | 0.24803  | 0.25105  | 0.26191  | 0.26246  |
| Alpha virt. eigenvalues -- | 0.26641  | 0.27424  | 0.27728  | 0.28049  | 0.28687  |
| Alpha virt. eigenvalues -- | 0.29119  | 0.29467  | 0.29977  | 0.30227  | 0.30458  |
| Alpha virt. eigenvalues -- | 0.30861  | 0.31394  | 0.32395  | 0.32918  | 0.34271  |
| Alpha virt. eigenvalues -- | 0.34427  | 0.35348  | 0.35943  | 0.36342  | 0.36428  |
| Alpha virt. eigenvalues -- | 0.36748  | 0.37462  | 0.38346  | 0.39041  | 0.39923  |
| Alpha virt. eigenvalues -- | 0.40304  | 0.41089  | 0.41770  | 0.44194  | 0.44244  |
| Alpha virt. eigenvalues -- | 0.45845  | 0.47258  | 0.47946  | 0.48568  | 0.50262  |
| Alpha virt. eigenvalues -- | 0.50754  | 0.51579  | 0.52508  | 0.52732  | 0.53157  |
| Alpha virt. eigenvalues -- | 0.53587  | 0.54086  | 0.55055  | 0.55605  | 0.56559  |
| Alpha virt. eigenvalues -- | 0.57679  | 0.58059  | 0.58487  | 0.59567  | 0.60520  |
| Alpha virt. eigenvalues -- | 0.61019  | 0.61891  | 0.62416  | 0.62890  | 0.63309  |
| Alpha virt. eigenvalues -- | 0.63646  | 0.65056  | 0.65539  | 0.65800  | 0.66387  |
| Alpha virt. eigenvalues -- | 0.66776  | 0.67254  | 0.68047  | 0.68772  | 0.69391  |
| Alpha virt. eigenvalues -- | 0.69847  | 0.70258  | 0.71079  | 0.71293  | 0.72316  |
| Alpha virt. eigenvalues -- | 0.72642  | 0.74094  | 0.74591  | 0.75050  | 0.75792  |
| Alpha virt. eigenvalues -- | 0.76278  | 0.77376  | 0.78955  | 0.79001  | 0.79634  |
| Alpha virt. eigenvalues -- | 0.80312  | 0.81550  | 0.82008  | 0.82555  | 0.82836  |
| Alpha virt. eigenvalues -- | 0.85744  | 0.86335  | 0.86974  | 0.88249  | 0.89882  |
| Alpha virt. eigenvalues -- | 0.90563  | 0.92658  | 0.94203  | 0.95764  | 0.97903  |
| Alpha virt. eigenvalues -- | 0.98397  | 0.99892  | 1.01017  | 1.01792  | 1.02467  |

|                            |          |          |          |          |          |
|----------------------------|----------|----------|----------|----------|----------|
| Alpha virt. eigenvalues -- | 1.02993  | 1.03433  | 1.04742  | 1.06109  | 1.08943  |
| Alpha virt. eigenvalues -- | 1.09236  | 1.10257  | 1.10629  | 1.11797  | 1.13239  |
| Alpha virt. eigenvalues -- | 1.15756  | 1.16693  | 1.17106  | 1.19319  | 1.20525  |
| Alpha virt. eigenvalues -- | 1.21846  | 1.24276  | 1.26007  | 1.28137  | 1.30785  |
| Alpha virt. eigenvalues -- | 1.32830  | 1.33200  | 1.36670  | 1.37424  | 1.38423  |
| Alpha virt. eigenvalues -- | 1.42396  | 1.43953  | 1.45088  | 1.47237  | 1.47624  |
| Alpha virt. eigenvalues -- | 1.48373  | 1.49222  | 1.50397  | 1.50768  | 1.51210  |
| Alpha virt. eigenvalues -- | 1.51797  | 1.53699  | 1.55040  | 1.57050  | 1.57364  |
| Alpha virt. eigenvalues -- | 1.57695  | 1.59141  | 1.59694  | 1.60068  | 1.61212  |
| Alpha virt. eigenvalues -- | 1.61494  | 1.62169  | 1.62986  | 1.63309  | 1.65720  |
| Alpha virt. eigenvalues -- | 1.66249  | 1.67917  | 1.68570  | 1.68995  | 1.69536  |
| Alpha virt. eigenvalues -- | 1.71442  | 1.71912  | 1.72677  | 1.72876  | 1.73901  |
| Alpha virt. eigenvalues -- | 1.75378  | 1.76946  | 1.79645  | 1.80089  | 1.81041  |
| Alpha virt. eigenvalues -- | 1.81945  | 1.83858  | 1.84810  | 1.85966  | 1.86920  |
| Alpha virt. eigenvalues -- | 1.90192  | 1.90688  | 1.92115  | 1.94872  | 1.96744  |
| Alpha virt. eigenvalues -- | 1.97801  | 1.98998  | 2.00860  | 2.04175  | 2.04882  |
| Alpha virt. eigenvalues -- | 2.05521  | 2.07705  | 2.09191  | 2.09990  | 2.11338  |
| Alpha virt. eigenvalues -- | 2.12101  | 2.12484  | 2.14133  | 2.14537  | 2.16143  |
| Alpha virt. eigenvalues -- | 2.18915  | 2.19839  | 2.21261  | 2.22418  | 2.24543  |
| Alpha virt. eigenvalues -- | 2.25177  | 2.27324  | 2.29053  | 2.30553  | 2.35290  |
| Alpha virt. eigenvalues -- | 2.37059  | 2.39425  | 2.40767  | 2.42405  | 2.44906  |
| Alpha virt. eigenvalues -- | 2.46167  | 2.46530  | 2.49619  | 2.50120  | 2.50635  |
| Alpha virt. eigenvalues -- | 2.51320  | 2.52042  | 2.53922  | 2.55359  | 2.56410  |
| Alpha virt. eigenvalues -- | 2.56557  | 2.57064  | 2.58629  | 2.59551  | 2.61398  |
| Alpha virt. eigenvalues -- | 2.62215  | 2.64913  | 2.65106  | 2.69244  | 2.69970  |
| Alpha virt. eigenvalues -- | 2.71163  | 2.71702  | 2.71998  | 2.72575  | 2.74381  |
| Alpha virt. eigenvalues -- | 2.74580  | 2.75808  | 2.76804  | 2.77809  | 2.80205  |
| Alpha virt. eigenvalues -- | 2.81236  | 2.81880  | 2.82682  | 2.84649  | 2.85122  |
| Alpha virt. eigenvalues -- | 2.85624  | 2.87869  | 2.87900  | 2.89235  | 2.91122  |
| Alpha virt. eigenvalues -- | 2.93504  | 2.95325  | 2.97694  | 3.00793  | 3.09435  |
| Alpha virt. eigenvalues -- | 3.10039  | 3.12515  | 3.12898  | 3.15312  | 3.17943  |
| Alpha virt. eigenvalues -- | 3.22038  | 3.24602  | 3.27048  | 3.31570  | 3.31822  |
| Alpha virt. eigenvalues -- | 3.36782  | 3.38094  | 3.49548  | 3.55294  | 3.58490  |
| Alpha virt. eigenvalues -- | 3.63830  | 3.65643  | 3.70282  | 3.72191  | 3.75197  |
| Alpha virt. eigenvalues -- | 3.76166  | 3.81006  | 3.81703  | 3.82058  | 3.83220  |
| Alpha virt. eigenvalues -- | 3.84529  | 3.85974  | 3.87926  | 3.89768  | 3.94543  |
| Alpha virt. eigenvalues -- | 4.04854  | 4.05830  | 4.08602  | 4.12519  | 4.20180  |
| Alpha virt. eigenvalues -- | 4.28470  | 4.28953  | 4.30954  | 4.33976  | 4.45664  |
| Alpha virt. eigenvalues -- | 4.52000  | 4.69330  | 4.90127  | 5.02227  | 5.10565  |
| Alpha virt. eigenvalues -- | 5.12518  | 5.22283  | 5.43100  | 5.49049  | 5.59630  |
| Alpha virt. eigenvalues -- | 5.76408  | 6.76957  | 7.68901  | 7.74657  | 7.79222  |
| Alpha virt. eigenvalues -- | 23.69802 | 23.74590 | 23.82893 | 23.85718 | 23.87451 |
| Alpha virt. eigenvalues -- | 23.88260 | 23.90806 | 23.99467 | 24.13588 | 24.22273 |
| Alpha virt. eigenvalues -- | 35.43511 | 35.56816 | 48.05536 | 49.90780 | 49.94929 |

Alpha virt. eigenvalues -- 289.89764 289.95333 289.993051020.84461

Condensed to atoms (all electrons):

|    |    | 1         | 2         | 3         | 4         | 5         | 6         |
|----|----|-----------|-----------|-----------|-----------|-----------|-----------|
| 1  | C  | 7.461763  | -1.404750 | 0.304417  | -0.286925 | -0.110806 | 0.096507  |
| 2  | C  | -1.404750 | 6.847315  | -0.116134 | 0.338196  | 0.371118  | -0.363381 |
| 3  | N  | 0.304417  | -0.116134 | 6.791912  | 0.012592  | -0.353433 | -0.114693 |
| 4  | C  | -0.286925 | 0.338196  | 0.012592  | 7.544860  | 0.677716  | -0.788951 |
| 5  | N  | -0.110806 | 0.371118  | -0.353433 | 0.677716  | 6.864018  | -0.088600 |
| 6  | C  | 0.096507  | -0.363381 | -0.114693 | -0.788951 | -0.088600 | 8.044437  |
| 7  | C  | -0.157210 | 0.207968  | -0.024680 | 0.188280  | 0.077577  | -0.786820 |
| 8  | H  | 0.522631  | -0.117734 | 0.035670  | 0.013457  | -0.065873 | -0.039914 |
| 9  | H  | -0.116033 | 0.505830  | -0.086026 | 0.014678  | 0.030773  | 0.009517  |
| 10 | H  | 0.097057  | -0.084624 | 0.025269  | 0.052135  | -0.058012 | 0.267107  |
| 11 | H  | -0.030995 | 0.030801  | -0.004416 | -0.036668 | -0.044766 | 0.474969  |
| 12 | H  | -0.001866 | -0.056855 | 0.015953  | -0.007843 | -0.038884 | 0.009891  |
| 13 | H  | -0.011165 | 0.031063  | -0.012457 | 0.025899  | 0.036956  | -0.078695 |
| 14 | Br | -0.031544 | 0.016697  | 0.001839  | -0.155217 | -0.028139 | -0.031539 |
| 15 | H  | -0.140959 | -0.081432 | 0.108032  | -0.892673 | -0.173241 | 0.181749  |
| 16 | C  | 0.355544  | -0.383881 | 0.281394  | -0.185745 | -0.156658 | -0.215299 |
| 17 | C  | -0.280740 | 0.202639  | -0.002757 | -0.388161 | -0.070448 | -0.091543 |
| 18 | H  | -0.000761 | 0.019605  | -0.095375 | 0.171157  | 0.023318  | 0.000544  |
| 19 | H  | -0.003246 | 0.005714  | 0.023339  | -0.012661 | -0.000008 | 0.000286  |
| 20 | H  | -0.006794 | 0.013606  | -0.034194 | 0.004392  | -0.000545 | -0.005927 |
| 21 | O  | -0.009657 | 0.006196  | 0.000497  | 0.024601  | 0.021591  | -0.266875 |
| 22 | H  | 0.002962  | 0.001219  | -0.000063 | 0.015023  | 0.013766  | -0.067586 |
| 23 | C  | -0.002496 | 0.001116  | 0.000600  | 0.015324  | 0.001271  | -0.090523 |
| 24 | C  | 0.008911  | -0.002447 | 0.000207  | -0.012512 | 0.004707  | 0.071114  |
| 25 | O  | -0.004736 | 0.000591  | -0.000034 | -0.005249 | -0.006947 | 0.005284  |
| 26 | H  | 0.000841  | 0.000808  | -0.001307 | 0.018030  | 0.003445  | -0.019303 |
| 27 | H  | -0.000211 | 0.000116  | 0.000031  | 0.000672  | -0.000396 | 0.000926  |
| 28 | H  | 0.000041  | 0.000010  | -0.000001 | 0.000288  | 0.000283  | 0.000319  |
| 29 | C  | -0.007921 | 0.001876  | -0.000574 | -0.009006 | -0.003368 | -0.005339 |
| 30 | H  | 0.000839  | -0.000528 | 0.000010  | -0.002472 | -0.000464 | 0.006808  |
| 31 | H  | -0.000289 | 0.000154  | -0.000014 | 0.000653  | -0.000104 | -0.000820 |
| 32 | H  | -0.004021 | 0.002823  | 0.000173  | 0.013728  | -0.003485 | 0.006098  |
|    |    | 7         | 8         | 9         | 10        | 11        | 12        |
| 1  | C  | -0.157210 | 0.522631  | -0.116033 | 0.097057  | -0.030995 | -0.001866 |
| 2  | C  | 0.207968  | -0.117734 | 0.505830  | -0.084624 | 0.030801  | -0.056855 |
| 3  | N  | -0.024680 | 0.035670  | -0.086026 | 0.025269  | -0.004416 | 0.015953  |
| 4  | C  | 0.188280  | 0.013457  | 0.014678  | 0.052135  | -0.036668 | -0.007843 |
| 5  | N  | 0.077577  | -0.065873 | 0.030773  | -0.058012 | -0.044766 | -0.038884 |
| 6  | C  | -0.786820 | -0.039914 | 0.009517  | 0.267107  | 0.474969  | 0.009891  |
| 7  | C  | 6.073851  | 0.007630  | 0.000233  | -0.142410 | -0.156018 | 0.388539  |
| 8  | H  | 0.007630  | 0.486629  | -0.009254 | 0.005704  | -0.016129 | -0.006697 |

|    |    |           |           |           |           |           |           |
|----|----|-----------|-----------|-----------|-----------|-----------|-----------|
| 9  | H  | 0.000233  | -0.009254 | 0.498707  | -0.000913 | 0.001848  | -0.000745 |
| 10 | H  | -0.142410 | 0.005704  | -0.000913 | 0.670610  | -0.056150 | 0.011099  |
| 11 | H  | -0.156018 | -0.016129 | 0.001848  | -0.056150 | 0.627643  | -0.019061 |
| 12 | H  | 0.388539  | -0.006697 | -0.000745 | 0.011099  | -0.019061 | 0.699509  |
| 13 | H  | 0.359747  | 0.000628  | 0.000704  | -0.028341 | 0.020587  | -0.104615 |
| 14 | Br | -0.018699 | -0.002271 | -0.000184 | 0.035299  | 0.012467  | 0.003671  |
| 15 | H  | -0.105614 | -0.009777 | -0.007770 | -0.021655 | 0.014745  | 0.032790  |
| 16 | C  | 0.009165  | 0.009207  | -0.004934 | 0.019302  | -0.003678 | 0.000612  |
| 17 | C  | 0.007570  | -0.004178 | -0.013504 | -0.005782 | 0.000716  | -0.001003 |
| 18 | H  | 0.003822  | 0.000693  | 0.002901  | 0.001262  | -0.001416 | -0.001078 |
| 19 | H  | -0.000189 | -0.000172 | -0.000995 | -0.000132 | 0.000066  | 0.000050  |
| 20 | H  | 0.000904  | 0.000592  | 0.004968  | 0.000166  | -0.000212 | -0.000251 |
| 21 | O  | 0.378063  | 0.000478  | -0.000052 | -0.004514 | 0.014710  | -0.088265 |
| 22 | H  | -0.013592 | 0.000735  | -0.000128 | 0.023565  | -0.009565 | 0.015695  |
| 23 | C  | 0.014510  | -0.000028 | -0.000046 | 0.012889  | -0.010142 | -0.000398 |
| 24 | C  | -0.003087 | 0.000304  | 0.000024  | 0.017932  | 0.008631  | 0.000549  |
| 25 | O  | 0.017788  | -0.000272 | 0.000016  | -0.022844 | 0.004650  | -0.002099 |
| 26 | H  | 0.008251  | 0.000227  | -0.000012 | 0.010066  | -0.002102 | -0.001214 |
| 27 | H  | -0.002517 | -0.000022 | 0.000006  | -0.002151 | 0.000044  | -0.000721 |
| 28 | H  | -0.000420 | 0.000009  | 0.000000  | -0.002192 | 0.000567  | 0.000136  |
| 29 | C  | 0.005830  | -0.000345 | -0.000019 | -0.009689 | 0.000656  | 0.001416  |
| 30 | H  | -0.002949 | 0.000039  | 0.000006  | 0.005179  | -0.000764 | -0.000044 |
| 31 | H  | -0.000170 | -0.000017 | 0.000000  | -0.001344 | 0.000262  | -0.000107 |
| 32 | H  | 0.009212  | -0.000089 | 0.000018  | -0.042368 | 0.000030  | -0.000531 |
|    |    | 13        | 14        | 15        | 16        | 17        | 18        |
| 1  | C  | -0.011165 | -0.031544 | -0.140959 | 0.355544  | -0.280740 | -0.000761 |
| 2  | C  | 0.031063  | 0.016697  | -0.081432 | -0.383881 | 0.202639  | 0.019605  |
| 3  | N  | -0.012457 | 0.001839  | 0.108032  | 0.281394  | -0.002757 | -0.095375 |
| 4  | C  | 0.025899  | -0.155217 | -0.892673 | -0.185745 | -0.388161 | 0.171157  |
| 5  | N  | 0.036956  | -0.028139 | -0.173241 | -0.156658 | -0.070448 | 0.023318  |
| 6  | C  | -0.078695 | -0.031539 | 0.181749  | -0.215299 | -0.091543 | 0.000544  |
| 7  | C  | 0.359747  | -0.018699 | -0.105614 | 0.009165  | 0.007570  | 0.003822  |
| 8  | H  | 0.000628  | -0.002271 | -0.009777 | 0.009207  | -0.004178 | 0.000693  |
| 9  | H  | 0.000704  | -0.000184 | -0.007770 | -0.004934 | -0.013504 | 0.002901  |
| 10 | H  | -0.028341 | 0.035299  | -0.021655 | 0.019302  | -0.005782 | 0.001262  |
| 11 | H  | 0.020587  | 0.012467  | 0.014745  | -0.003678 | 0.000716  | -0.001416 |
| 12 | H  | -0.104615 | 0.003671  | 0.032790  | 0.000612  | -0.001003 | -0.001078 |
| 13 | H  | 0.627838  | -0.012029 | -0.062523 | 0.001288  | 0.000400  | 0.001366  |
| 14 | Br | -0.012029 | 35.689938 | 0.253080  | 0.032214  | 0.034547  | -0.005430 |
| 15 | H  | -0.062523 | 0.253080  | 1.740373  | -0.059540 | 0.190774  | -0.086181 |
| 16 | C  | 0.001288  | 0.032214  | -0.059540 | 6.313160  | -0.447579 | 0.406218  |
| 17 | C  | 0.000400  | 0.034547  | 0.190774  | -0.447579 | 6.659902  | -0.110732 |
| 18 | H  | 0.001366  | -0.005430 | -0.086181 | 0.406218  | -0.110732 | 0.464180  |
| 19 | H  | -0.000036 | -0.000372 | 0.007349  | -0.094625 | 0.449605  | -0.008854 |

|    |    |           |           |           |           |           |           |
|----|----|-----------|-----------|-----------|-----------|-----------|-----------|
| 20 | H  | 0.000081  | 0.000316  | 0.000666  | 0.072586  | 0.310932  | 0.001928  |
| 21 | O  | -0.008283 | -0.006050 | -0.007710 | 0.000668  | 0.000108  | 0.000035  |
| 22 | H  | -0.010436 | -0.007454 | -0.001773 | 0.000778  | 0.000318  | 0.000086  |
| 23 | C  | -0.006838 | -0.104772 | 0.010195  | 0.001989  | 0.000288  | -0.000495 |
| 24 | C  | -0.005701 | 0.111876  | -0.005851 | -0.000595 | -0.000145 | 0.000378  |
| 25 | O  | 0.012459  | 0.000393  | -0.000687 | -0.000159 | -0.000011 | -0.000030 |
| 26 | H  | -0.005363 | 0.015058  | -0.022575 | 0.000132  | 0.000197  | 0.000624  |
| 27 | H  | 0.003717  | -0.002326 | -0.001652 | 0.000048  | -0.000027 | 0.000007  |
| 28 | H  | 0.000335  | 0.002212  | -0.000862 | -0.000010 | 0.000000  | 0.000011  |
| 29 | C  | 0.001665  | -0.057856 | 0.011498  | -0.000325 | 0.000165  | -0.000183 |
| 30 | H  | -0.000334 | 0.004276  | 0.000338  | -0.000174 | -0.000049 | 0.000002  |
| 31 | H  | 0.000491  | -0.000318 | -0.000322 | 0.000093  | 0.000023  | -0.000005 |
| 32 | H  | 0.005724  | -0.010114 | -0.008702 | -0.000144 | -0.000067 | -0.000046 |
|    |    | 19        | 20        | 21        | 22        | 23        | 24        |
| 1  | C  | -0.003246 | -0.006794 | -0.009657 | 0.002962  | -0.002496 | 0.008911  |
| 2  | C  | 0.005714  | 0.013606  | 0.006196  | 0.001219  | 0.001116  | -0.002447 |
| 3  | N  | 0.023339  | -0.034194 | 0.000497  | -0.000063 | 0.000600  | 0.000207  |
| 4  | C  | -0.012661 | 0.004392  | 0.024601  | 0.015023  | 0.015324  | -0.012512 |
| 5  | N  | -0.000008 | -0.000545 | 0.021591  | 0.013766  | 0.001271  | 0.004707  |
| 6  | C  | 0.000286  | -0.005927 | -0.266875 | -0.067586 | -0.090523 | 0.071114  |
| 7  | C  | -0.000189 | 0.000904  | 0.378063  | -0.013592 | 0.014510  | -0.003087 |
| 8  | H  | -0.000172 | 0.000592  | 0.000478  | 0.000735  | -0.000028 | 0.000304  |
| 9  | H  | -0.000995 | 0.004968  | -0.000052 | -0.000128 | -0.000046 | 0.000024  |
| 10 | H  | -0.000132 | 0.000166  | -0.004514 | 0.023565  | 0.012889  | 0.017932  |
| 11 | H  | 0.000066  | -0.000212 | 0.014710  | -0.009565 | -0.010142 | 0.008631  |
| 12 | H  | 0.000050  | -0.000251 | -0.088265 | 0.015695  | -0.000398 | 0.000549  |
| 13 | H  | -0.000036 | 0.000081  | -0.008283 | -0.010436 | -0.006838 | -0.005701 |
| 14 | Br | -0.000372 | 0.000316  | -0.006050 | -0.007454 | -0.104772 | 0.111876  |
| 15 | H  | 0.007349  | 0.000666  | -0.007710 | -0.001773 | 0.010195  | -0.005851 |
| 16 | C  | -0.094625 | 0.072586  | 0.000668  | 0.000778  | 0.001989  | -0.000595 |
| 17 | C  | 0.449605  | 0.310932  | 0.000108  | 0.000318  | 0.000288  | -0.000145 |
| 18 | H  | -0.008854 | 0.001928  | 0.000035  | 0.000086  | -0.000495 | 0.000378  |
| 19 | H  | 0.460913  | -0.020022 | -0.000001 | -0.000003 | 0.000009  | -0.000005 |
| 20 | H  | -0.020022 | 0.533259  | 0.000008  | 0.000024  | 0.000004  | -0.000001 |
| 21 | O  | -0.000001 | 0.000008  | 7.978970  | 0.269043  | 0.011506  | -0.064264 |
| 22 | H  | -0.000003 | 0.000024  | 0.269043  | 0.394357  | 0.018595  | 0.020573  |
| 23 | C  | 0.000009  | 0.000004  | 0.011506  | 0.018595  | 6.734418  | -1.305769 |
| 24 | C  | -0.000005 | -0.000001 | -0.064264 | 0.020573  | -1.305769 | 7.045866  |
| 25 | O  | 0.000000  | -0.000001 | 0.064777  | -0.083909 | 0.102278  | 0.041199  |
| 26 | H  | -0.000018 | 0.000019  | -0.001353 | 0.012206  | 0.325087  | 0.080397  |
| 27 | H  | 0.000000  | -0.000001 | 0.003265  | -0.009039 | 0.347854  | -0.002639 |
| 28 | H  | 0.000000  | 0.000000  | 0.001836  | 0.000532  | -0.027192 | 0.284756  |
| 29 | C  | 0.000000  | 0.000004  | 0.031682  | -0.005972 | 0.178088  | -0.170962 |
| 30 | H  | 0.000000  | -0.000002 | -0.004818 | -0.005469 | 0.027082  | -0.006710 |



|    |    |           |           |           |           |           |           |
|----|----|-----------|-----------|-----------|-----------|-----------|-----------|
| 31 | H  | 0.000000  | 0.000001  | 0.000731  | -0.000625 | -0.008405 | -0.076075 |
| 32 | H  | 0.000010  | -0.000007 | 0.008858  | -0.003428 | -0.007469 | -0.120338 |
|    |    | 25        | 26        | 27        | 28        | 29        | 30        |
| 1  | C  | -0.004736 | 0.000841  | -0.000211 | 0.000041  | -0.007921 | 0.000839  |
| 2  | C  | 0.000591  | 0.000808  | 0.000116  | 0.000010  | 0.001876  | -0.000528 |
| 3  | N  | -0.000034 | -0.001307 | 0.000031  | -0.000001 | -0.000574 | 0.000010  |
| 4  | C  | -0.005249 | 0.018030  | 0.000672  | 0.000288  | -0.009006 | -0.002472 |
| 5  | N  | -0.006947 | 0.003445  | -0.000396 | 0.000283  | -0.003368 | -0.000464 |
| 6  | C  | 0.005284  | -0.019303 | 0.000926  | 0.000319  | -0.005339 | 0.006808  |
| 7  | C  | 0.017788  | 0.008251  | -0.002517 | -0.000420 | 0.005830  | -0.002949 |
| 8  | H  | -0.000272 | 0.000227  | -0.000022 | 0.000009  | -0.000345 | 0.000039  |
| 9  | H  | 0.000016  | -0.000012 | 0.000006  | 0.000000  | -0.000019 | 0.000006  |
| 10 | H  | -0.022844 | 0.010066  | -0.002151 | -0.002192 | -0.009689 | 0.005179  |
| 11 | H  | 0.004650  | -0.002102 | 0.000044  | 0.000567  | 0.000656  | -0.000764 |
| 12 | H  | -0.002099 | -0.001214 | -0.000721 | 0.000136  | 0.001416  | -0.000044 |
| 13 | H  | 0.012459  | -0.005363 | 0.003717  | 0.000335  | 0.001665  | -0.000334 |
| 14 | Br | 0.000393  | 0.015058  | -0.002326 | 0.002212  | -0.057856 | 0.004276  |
| 15 | H  | -0.000687 | -0.022575 | -0.001652 | -0.000862 | 0.011498  | 0.000338  |
| 16 | C  | -0.000159 | 0.000132  | 0.000048  | -0.000010 | -0.000325 | -0.000174 |
| 17 | C  | -0.000011 | 0.000197  | -0.000027 | 0.000000  | 0.000165  | -0.000049 |
| 18 | H  | -0.000030 | 0.000624  | 0.000007  | 0.000011  | -0.000183 | 0.000002  |
| 19 | H  | 0.000000  | -0.000018 | 0.000000  | 0.000000  | 0.000000  | 0.000000  |
| 20 | H  | -0.000001 | 0.000019  | -0.000001 | 0.000000  | 0.000004  | -0.000002 |
| 21 | O  | 0.064777  | -0.001353 | 0.003265  | 0.001836  | 0.031682  | -0.004818 |
| 22 | H  | -0.083909 | 0.012206  | -0.009039 | 0.000532  | -0.005972 | -0.005469 |
| 23 | C  | 0.102278  | 0.325087  | 0.347854  | -0.027192 | 0.178088  | 0.027082  |
| 24 | C  | 0.041199  | 0.080397  | -0.002639 | 0.284756  | -0.170962 | -0.006710 |
| 25 | O  | 8.293370  | -0.053266 | -0.036217 | -0.010684 | -0.068359 | -0.024429 |
| 26 | H  | -0.053266 | 0.530333  | -0.033616 | 0.010018  | -0.031433 | -0.006872 |
| 27 | H  | -0.036217 | -0.033616 | 0.572578  | -0.000858 | 0.005352  | 0.001939  |
| 28 | H  | -0.010684 | 0.010018  | -0.000858 | 0.559649  | -0.013407 | -0.011125 |
| 29 | C  | -0.068359 | -0.031433 | 0.005352  | -0.013407 | 5.508164  | 0.363555  |
| 30 | H  | -0.024429 | -0.006872 | 0.001939  | -0.011125 | 0.363555  | 0.610942  |
| 31 | H  | 0.017243  | 0.000486  | -0.000017 | 0.001618  | 0.432892  | -0.049405 |
| 32 | H  | 0.020358  | -0.000789 | 0.002867  | 0.019467  | 0.394317  | -0.052811 |
|    |    | 31        | 32        |           |           |           |           |
| 1  | C  | -0.000289 | -0.004021 |           |           |           |           |
| 2  | C  | 0.000154  | 0.002823  |           |           |           |           |
| 3  | N  | -0.000014 | 0.000173  |           |           |           |           |
| 4  | C  | 0.000653  | 0.013728  |           |           |           |           |
| 5  | N  | -0.000104 | -0.003485 |           |           |           |           |
| 6  | C  | -0.000820 | 0.006098  |           |           |           |           |
| 7  | C  | -0.000170 | 0.009212  |           |           |           |           |
| 8  | H  | -0.000017 | -0.000089 |           |           |           |           |

|    |    |           |           |
|----|----|-----------|-----------|
| 9  | H  | 0.000000  | 0.000018  |
| 10 | H  | -0.001344 | -0.042368 |
| 11 | H  | 0.000262  | 0.000030  |
| 12 | H  | -0.000107 | -0.000531 |
| 13 | H  | 0.000491  | 0.005724  |
| 14 | Br | -0.000318 | -0.010114 |
| 15 | H  | -0.000322 | -0.008702 |
| 16 | C  | 0.000093  | -0.000144 |
| 17 | C  | 0.000023  | -0.000067 |
| 18 | H  | -0.000005 | -0.000046 |
| 19 | H  | 0.000000  | 0.000010  |
| 20 | H  | 0.000001  | -0.000007 |
| 21 | O  | 0.000731  | 0.008858  |
| 22 | H  | -0.000625 | -0.003428 |
| 23 | C  | -0.008405 | -0.007469 |
| 24 | C  | -0.076075 | -0.120338 |
| 25 | O  | 0.017243  | 0.020358  |
| 26 | H  | 0.000486  | -0.000789 |
| 27 | H  | -0.000017 | 0.002867  |
| 28 | H  | 0.001618  | 0.019467  |
| 29 | C  | 0.432892  | 0.394317  |
| 30 | H  | -0.049405 | -0.052811 |
| 31 | H  | 0.573706  | -0.019976 |
| 32 | H  | -0.019976 | 0.621045  |

Mulliken charges:

|    |    |           |  |
|----|----|-----------|--|
|    |    | 1         |  |
| 1  | C  | -0.238385 |  |
| 2  | C  | 0.006304  |  |
| 3  | N  | 0.244223  |  |
| 4  | C  | -0.347599 |  |
| 5  | N  | 0.077638  |  |
| 6  | C  | -0.119751 |  |
| 7  | C  | -0.344565 |  |
| 8  | H  | 0.188138  |  |
| 9  | H  | 0.170386  |  |
| 10 | H  | 0.228481  |  |
| 11 | H  | 0.178691  |  |
| 12 | H  | 0.152369  |  |
| 13 | H  | 0.215866  |  |
| 14 | Br | -0.739571 |  |
| 15 | H  | 0.139912  |  |
| 16 | C  | 0.048950  |  |
| 17 | C  | -0.441457 |  |
| 18 | H  | 0.212450  |  |

|    |   |           |
|----|---|-----------|
| 19 | H | 0.193999  |
| 20 | H | 0.123501  |
| 21 | O | -0.355782 |
| 22 | H | 0.429565  |
| 23 | C | -0.238530 |
| 24 | C | 0.079677  |
| 25 | O | -0.260475 |
| 26 | H | 0.162998  |
| 27 | H | 0.152986  |
| 28 | H | 0.184665  |
| 29 | C | -0.552404 |
| 30 | H | 0.148404  |
| 31 | H | 0.129659  |
| 32 | H | 0.169658  |

Sum of Mulliken charges = 0.00000

Mulliken charges with hydrogens summed into heavy atoms:

| 1  |    |           |
|----|----|-----------|
| 1  | C  | -0.050247 |
| 2  | C  | 0.176690  |
| 3  | N  | 0.244223  |
| 4  | C  | -0.207687 |
| 5  | N  | 0.077638  |
| 6  | C  | 0.287422  |
| 7  | C  | 0.023670  |
| 14 | Br | -0.739571 |
| 16 | C  | 0.261400  |
| 17 | C  | -0.123958 |
| 21 | O  | 0.073783  |
| 23 | C  | 0.077454  |
| 24 | C  | 0.264342  |
| 25 | O  | -0.260475 |
| 29 | C  | -0.104682 |

Electronic spatial extent (au):  $\langle R^{*2} \rangle =$  6085.9469

Charge= 0.0000 electrons

Dipole moment (field-independent basis, Debye):

|    |         |    |        |    |         |
|----|---------|----|--------|----|---------|
| X= | -8.9875 | Y= | 5.0057 | Z= | -0.0991 |
|----|---------|----|--------|----|---------|

Tot= 10.2879

Quadrupole moment (field-independent basis, Debye-Ang):

|     |          |     |           |     |           |
|-----|----------|-----|-----------|-----|-----------|
| XX= | -63.8843 | YY= | -119.9986 | ZZ= | -107.2250 |
| XY= | -9.5949  | XZ= | -2.2476   | YZ= | -6.1613   |

Traceless Quadrupole moment (field-independent basis, Debye-Ang):

|     |         |     |          |     |          |
|-----|---------|-----|----------|-----|----------|
| XX= | 33.1517 | YY= | -22.9626 | ZZ= | -10.1891 |
| XY= | -9.5949 | XZ= | -2.2476  | YZ= | -6.1613  |

Octapole moment (field-independent basis, Debye-Ang\*\*2):

|      |          |      |          |      |         |
|------|----------|------|----------|------|---------|
| XXX= | -83.8975 | YYY= | -17.8947 | ZZZ= | 1.0570  |
| XYY= | -60.1105 |      |          |      |         |
| XXY= | -39.1584 | XXZ= | 9.1366   | XZZ= | 24.1610 |
| YZZ= | -10.1168 |      |          |      |         |
| YYZ= | -4.0828  | XYZ= | 1.9760   |      |         |

Hexadecapole moment (field-independent basis, Debye-Ang\*\*3):

|       |            |       |            |       |            |
|-------|------------|-------|------------|-------|------------|
| XXXX= | -4706.3923 | YYYY= | -1828.3705 | ZZZZ= | -411.1814  |
| XXXZ= | -73.8182   |       |            |       |            |
| XXXZ= | -89.0634   | YYYX= | -95.0363   | YYYZ= | -30.9743   |
| ZZZX= | 33.5365    |       |            |       |            |
| ZZZY= | 4.6175     | XXYY= | -1198.8964 | XXZZ= | -1076.2428 |
| YYZZ= | -360.3491  |       |            |       |            |
| XXYZ= | -62.1079   | YYXZ= | -9.5578    | ZZXY= | -11.9854   |

N-N= 1.307196544036D+03 E-N=-1.028726439868D+04 KE= 3.219705190211D+03  
 1\1\GINC-NODE12\FOpt\RB3LYP\6-311++G(d,p)\C10H17Br1N2O2\SUQIAN\22-Jul-  
 2024\0\# opt b3lyp/6-311++g(d,p)\oh\0,1\C,-1.3766755869,-1.91007880  
 27,-0.2564301242\C,-2.5077580369,-1.1694113582,-0.1362276955\N,-2.1087  
 571911,0.112186305,0.2303012262\C,-0.7651110361,0.1351698938,0.3274640  
 947\N,-0.3053543934,-1.0817403065,0.0411926471\C,1.1277550784,-1.43787  
 7287,-0.0083032571\C,1.6830727774,-1.3724169247,-1.4419189857\H,-1.243  
 2527924,-2.9457926882,-0.5176275404\H,-3.5380892155,-1.442511432,-0.27  
 28663522\H,1.6527399808,-0.7289287231,0.6339249238\H,1.2369059013,-2.4  
 47614485,0.3895096183\H,1.0637774618,-1.9884028595,-2.1048611861\H,1.6  
 353298825,-0.3362401786,-1.7963546081\Br,1.6504711291,2.2345688306,1.0  
 244434033\H,-0.1127538749,0.9937342965,0.5960414531\C,-2.9121915208,1.  
 257183592,0.4857444444\C,-4.2364418825,1.2829290828,0.4123053374\H,-2.  
 3157987819,2.1210385358,0.7516927258\H,-4.7579772764,2.2055516172,0.62  
 57303412\H,-4.8388201642,0.4231351609,0.1479146661\O,2.9906287605,-1.8  
 843275006,-1.4662370463\H,3.6305713048,-1.1529278785,-1.365293533\C,4.  
 8369873255,1.6118760139,-1.120526775\C,5.7104681645,0.7520195972,-0.31  
 24316255\O,4.8563272852,0.1768884256,-1.3302123534\H,3.9206666602,1.99  
 37921552,-0.6767882496\H,5.2570982575,2.179762432,-1.9461644567\H,6.76  
 11169239,0.7039473403,-0.5945995057\C,5.3995338211,0.413259078,1.11938  
 40503\H,5.6788145724,-0.6213773325,1.3407574882\H,5.9735183261,1.06669  
 01493,1.7837002312\H,4.3396646097,0.5615304107,1.3354924833\\Version=E  
 M64L-G09RevD.01\State=1-A\HF=-3225.5237126\RMSD=5.316e-09\RMSF=3.523e-  
 06\Dipole=-3.4362801,-2.0648827,-0.5578579\Quadrupole=24.085684,-10.80  
 57538,-13.2799302,8.0047286,2.4487033,-6.7927865\PG=C01 [X(C10H17Br1N2  
 O2)]\@

NECESSARY EVIL: ONE WE LIKE TOO MUCH TO RELINQUISH.

Job cpu time: 1 days 1 hours 17 minutes 34.3 seconds.

File lengths (MBytes): RWF= 135 Int= 0 D2E= 0 Chk= 17 Scr= 1

Normal termination of Gaussian 09 at Mon Jul 22 07:45:43 2024.

Entering Gaussian System, Link 0=g09

Input=oh.gjf

Output=oh.log

Initial command:

/apps/gaussian/09\_D01/g09/l1.exe "/scr/tmp/sywang/91397/Gau-1046.inp" -

scrdir="/scr/tmp/sywang/91397/"

Entering Link 1 = /apps/gaussian/09\_D01/g09/l1.exe PID= 1047.

Copyright (c) 1988,1990,1992,1993,1995,1998,2003,2009,2013,  
Gaussian, Inc. All Rights Reserved.

This is part of the Gaussian(R) 09 program. It is based on the Gaussian(R) 03 system (copyright 2003, Gaussian, Inc.), the Gaussian(R) 98 system (copyright 1998, Gaussian, Inc.), the Gaussian(R) 94 system (copyright 1995, Gaussian, Inc.), the Gaussian 92(TM) system (copyright 1992, Gaussian, Inc.), the Gaussian 90(TM) system (copyright 1990, Gaussian, Inc.), the Gaussian 88(TM) system (copyright 1988, Gaussian, Inc.), the Gaussian 86(TM) system (copyright 1986, Carnegie Mellon University), and the Gaussian 82(TM) system (copyright 1983, Carnegie Mellon University). Gaussian is a federally registered trademark of Gaussian, Inc.

This software contains proprietary and confidential information, including trade secrets, belonging to Gaussian, Inc.

This software is provided under written license and may be used, copied, transmitted, or stored only in accord with that written license.

The following legend is applicable only to US Government contracts under FAR:

#### RESTRICTED RIGHTS LEGEND

Use, reproduction and disclosure by the US Government is subject to restrictions as set forth in subparagraphs (a) and (c) of the Commercial Computer Software - Restricted Rights clause in FAR 52.227-19.

Gaussian, Inc.

340 Quinnipiac St., Bldg. 40, Wallingford CT 06492

-----  
Warning -- This program may not be used in any manner that competes with the business of Gaussian, Inc. or will provide assistance to any competitor of Gaussian, Inc. The licensee of this program is prohibited from giving any competitor of Gaussian, Inc. access to this program. By using this program, the user acknowledges that Gaussian, Inc. is engaged in the business of creating and licensing software in the field of computational chemistry and represents and warrants to the licensee that it is not a competitor of Gaussian, Inc. and that it will not use this program in any manner prohibited above.  
-----

Cite this work as:

Gaussian 09, Revision D.01,

M. J. Frisch, G. W. Trucks, H. B. Schlegel, G. E. Scuseria,  
M. A. Robb, J. R. Cheeseman, G. Scalmani, V. Barone, B. Mennucci,  
G. A. Petersson, H. Nakatsuji, M. Caricato, X. Li, H. P. Hratchian,  
A. F. Izmaylov, J. Bloino, G. Zheng, J. L. Sonnenberg, M. Hada,  
M. Ehara, K. Toyota, R. Fukuda, J. Hasegawa, M. Ishida, T. Nakajima,  
Y. Honda, O. Kitao, H. Nakai, T. Vreven, J. A. Montgomery, Jr.,  
J. E. Peralta, F. Ogliaro, M. Bearpark, J. J. Heyd, E. Brothers,  
K. N. Kudin, V. N. Staroverov, T. Keith, R. Kobayashi, J. Normand,  
K. Raghavachari, A. Rendell, J. C. Burant, S. S. Iyengar, J. Tomasi,  
M. Cossi, N. Rega, J. M. Millam, M. Klene, J. E. Knox, J. B. Cross,  
V. Bakken, C. Adamo, J. Jaramillo, R. Gomperts, R. E. Stratmann,  
O. Yazyev, A. J. Austin, R. Cammi, C. Pomelli, J. W. Ochterski,  
R. L. Martin, K. Morokuma, V. G. Zakrzewski, G. A. Voth,  
P. Salvador, J. J. Dannenberg, S. Dapprich, A. D. Daniels,  
O. Farkas, J. B. Foresman, J. V. Ortiz, J. Cioslowski,  
and D. J. Fox, Gaussian, Inc., Wallingford CT, 2013.

\*\*\*\*\*

Gaussian 09: EM64L-G09RevD.01 24-Apr-2013

17-Jul-2024

\*\*\*\*\*

%chk=.\\oh.chk

%mem=40000MB

%nprocl=1

Will use up to 1 processors via Linda.

%nprocs=28

Will use up to 28 processors via shared memory.

-----  
# opt b3lyp/6-311++g(d,p)  
-----

1/14=-1,18=20,19=15,26=3,38=1/1,3;  
2/9=110,12=2,17=6,18=5,40=1/2;  
3/5=4,6=6,7=1111,11=2,16=1,25=1,30=1,71=1,74=-5/1,2,3;  
4//1;  
5/5=2,38=5/2;  
6/7=2,8=2,9=2,10=2,28=1/1;  
7//1,2,3,16;  
1/14=-1,18=20,19=15,26=3/3(2);  
2/9=110/2;  
99//99;  
2/9=110/2;  
3/5=4,6=6,7=1111,11=2,16=1,25=1,30=1,71=1,74=-5/1,2,3;  
4/5=5,16=3,69=1/1;  
5/5=2,38=5/2;  
7//1,2,3,16;  
1/14=-1,18=20,19=15,26=3/3(-5);  
2/9=110/2;  
6/7=2,8=2,9=2,10=2,19=2,28=1/1;  
99/9=1/99;

--

oh

--

Symbolic Z-matrix:

Charge = 0 Multiplicity = 1

|    |          |          |          |
|----|----------|----------|----------|
| C  | -0.42168 | -1.85955 | -1.23032 |
| C  | -1.73784 | -1.55011 | -1.34941 |
| N  | -2.14352 | -1.00466 | -0.14423 |
| C  | -1.06727 | -0.89019 | 0.66667  |
| N  | -0.02662 | -1.48548 | 0.04411  |
| C  | 1.36706  | -1.51631 | 0.51578  |
| C  | 2.25431  | -0.50621 | -0.22394 |
| H  | 0.26355  | -2.30392 | -1.93306 |
| H  | -2.41539 | -1.6626  | -2.17975 |
| H  | 1.35298  | -1.30522 | 1.58654  |
| H  | 1.73293  | -2.54193 | 0.3935   |
| H  | 2.35166  | -0.81305 | -1.27423 |
| H  | 1.74501  | 0.46557  | -0.22669 |
| Br | -0.63112 | 1.91315  | -0.19863 |
| H  | -1.08973 | -0.55539 | 1.68269  |
| C  | -3.40627 | -0.27939 | 0.05662  |

|   |          |          |          |
|---|----------|----------|----------|
| C | -4.44575 | -0.41174 | -0.75579 |
| H | -3.41894 | 0.38099  | 0.93407  |
| H | -5.38917 | 0.13014  | -0.60574 |
| H | -4.43309 | -1.07212 | -1.63324 |
| O | 3.55259  | -0.40664 | 0.36721  |
| H | 4.12665  | 0.10777  | -0.20501 |

Add virtual bond connecting atoms Br14 and H13 Dist= 5.26D+00.

GradGradGradGradGradGradGradGradGradGradGradGradGradGradGradGradGradGradGrad

Berny optimization.

Initialization pass.

```

-----
!   Initial Parameters   !
! (Angstroms and Degrees) !
-----
! Name  Definition          Value      Derivative Info.      !
-----
! R1    R(1,2)              1.3573    estimate D2E/DX2      !
! R2    R(1,5)              1.3857    estimate D2E/DX2      !
! R3    R(1,8)              1.0774    estimate D2E/DX2      !
! R4    R(2,3)              1.3837    estimate D2E/DX2      !
! R5    R(2,9)              1.0776    estimate D2E/DX2      !
! R6    R(3,4)              1.3524    estimate D2E/DX2      !
! R7    R(3,16)             1.47      estimate D2E/DX2      !
! R8    R(4,5)              1.3509    estimate D2E/DX2      !
! R9    R(4,15)             1.07      estimate D2E/DX2      !
! R10   R(5,6)              1.4717    estimate D2E/DX2      !
! R11   R(6,7)              1.5345    estimate D2E/DX2      !
! R12   R(6,10)            1.0915    estimate D2E/DX2      !
! R13   R(6,11)            1.0958    estimate D2E/DX2      !
! R14   R(7,12)            1.0985    estimate D2E/DX2      !
! R15   R(7,13)            1.0972    estimate D2E/DX2      !
! R16   R(7,21)            1.43      estimate D2E/DX2      !
! R17   R(13,14)           2.7825    estimate D2E/DX2      !
! R18   R(16,17)           1.3259    estimate D2E/DX2      !
! R19   R(16,18)           1.0983    estimate D2E/DX2      !
! R20   R(17,19)           1.0983    estimate D2E/DX2      !
! R21   R(17,20)           1.0983    estimate D2E/DX2      !
! R22   R(21,22)           0.96      estimate D2E/DX2      !
! A1    A(2,1,5)            107.1943  estimate D2E/DX2      !
! A2    A(2,1,8)            130.8073  estimate D2E/DX2      !
! A3    A(5,1,8)            121.9977  estimate D2E/DX2      !
! A4    A(1,2,3)            107.323   estimate D2E/DX2      !

```



|       |             |           |                  |   |
|-------|-------------|-----------|------------------|---|
| ! A5  | A(1,2,9)    | 130.8079  | estimate D2E/DX2 | ! |
| ! A6  | A(3,2,9)    | 121.8677  | estimate D2E/DX2 | ! |
| ! A7  | A(2,3,4)    | 108.8017  | estimate D2E/DX2 | ! |
| ! A8  | A(2,3,16)   | 124.4271  | estimate D2E/DX2 | ! |
| ! A9  | A(4,3,16)   | 124.0504  | estimate D2E/DX2 | ! |
| ! A10 | A(3,4,5)    | 107.4229  | estimate D2E/DX2 | ! |
| ! A11 | A(3,4,15)   | 125.3898  | estimate D2E/DX2 | ! |
| ! A12 | A(5,4,15)   | 126.2746  | estimate D2E/DX2 | ! |
| ! A13 | A(1,5,4)    | 108.8551  | estimate D2E/DX2 | ! |
| ! A14 | A(1,5,6)    | 123.9942  | estimate D2E/DX2 | ! |
| ! A15 | A(4,5,6)    | 126.2317  | estimate D2E/DX2 | ! |
| ! A16 | A(5,6,7)    | 112.2888  | estimate D2E/DX2 | ! |
| ! A17 | A(5,6,10)   | 107.3471  | estimate D2E/DX2 | ! |
| ! A18 | A(5,6,11)   | 107.4599  | estimate D2E/DX2 | ! |
| ! A19 | A(7,6,10)   | 110.6751  | estimate D2E/DX2 | ! |
| ! A20 | A(7,6,11)   | 111.6701  | estimate D2E/DX2 | ! |
| ! A21 | A(10,6,11)  | 107.1461  | estimate D2E/DX2 | ! |
| ! A22 | A(6,7,12)   | 109.1639  | estimate D2E/DX2 | ! |
| ! A23 | A(6,7,13)   | 108.4117  | estimate D2E/DX2 | ! |
| ! A24 | A(6,7,21)   | 111.8083  | estimate D2E/DX2 | ! |
| ! A25 | A(12,7,13)  | 106.6273  | estimate D2E/DX2 | ! |
| ! A26 | A(12,7,21)  | 109.5258  | estimate D2E/DX2 | ! |
| ! A27 | A(13,7,21)  | 111.1495  | estimate D2E/DX2 | ! |
| ! A28 | A(7,13,14)  | 149.0011  | estimate D2E/DX2 | ! |
| ! A29 | A(3,16,17)  | 122.7159  | estimate D2E/DX2 | ! |
| ! A30 | A(3,16,18)  | 114.5661  | estimate D2E/DX2 | ! |
| ! A31 | A(17,16,18) | 122.718   | estimate D2E/DX2 | ! |
| ! A32 | A(16,17,19) | 122.7159  | estimate D2E/DX2 | ! |
| ! A33 | A(16,17,20) | 122.718   | estimate D2E/DX2 | ! |
| ! A34 | A(19,17,20) | 114.5661  | estimate D2E/DX2 | ! |
| ! A35 | A(7,21,22)  | 109.5     | estimate D2E/DX2 | ! |
| ! D1  | D(5,1,2,3)  | -0.7123   | estimate D2E/DX2 | ! |
| ! D2  | D(5,1,2,9)  | 178.8452  | estimate D2E/DX2 | ! |
| ! D3  | D(8,1,2,3)  | 179.6081  | estimate D2E/DX2 | ! |
| ! D4  | D(8,1,2,9)  | -0.8344   | estimate D2E/DX2 | ! |
| ! D5  | D(2,1,5,4)  | -3.2728   | estimate D2E/DX2 | ! |
| ! D6  | D(2,1,5,6)  | -172.8844 | estimate D2E/DX2 | ! |
| ! D7  | D(8,1,5,4)  | 176.4413  | estimate D2E/DX2 | ! |
| ! D8  | D(8,1,5,6)  | 6.8297    | estimate D2E/DX2 | ! |
| ! D9  | D(1,2,3,4)  | 4.449     | estimate D2E/DX2 | ! |
| ! D10 | D(1,2,3,16) | 166.335   | estimate D2E/DX2 | ! |
| ! D11 | D(9,2,3,4)  | -175.1566 | estimate D2E/DX2 | ! |
| ! D12 | D(9,2,3,16) | -13.2707  | estimate D2E/DX2 | ! |
| ! D13 | D(2,3,4,5)  | -6.4599   | estimate D2E/DX2 | ! |

|       |                |           |                  |   |
|-------|----------------|-----------|------------------|---|
| ! D14 | D(2,3,4,15)    | -176.0646 | estimate D2E/DX2 | ! |
| ! D15 | D(16,3,4,5)    | -168.4295 | estimate D2E/DX2 | ! |
| ! D16 | D(16,3,4,15)   | 21.9658   | estimate D2E/DX2 | ! |
| ! D17 | D(2,3,16,17)   | 20.8072   | estimate D2E/DX2 | ! |
| ! D18 | D(2,3,16,18)   | -159.1916 | estimate D2E/DX2 | ! |
| ! D19 | D(4,3,16,17)   | 180.0     | estimate D2E/DX2 | ! |
| ! D20 | D(4,3,16,18)   | 0.0013    | estimate D2E/DX2 | ! |
| ! D21 | D(3,4,5,1)     | 6.0135    | estimate D2E/DX2 | ! |
| ! D22 | D(3,4,5,6)     | 175.3324  | estimate D2E/DX2 | ! |
| ! D23 | D(15,4,5,1)    | 175.5003  | estimate D2E/DX2 | ! |
| ! D24 | D(15,4,5,6)    | -15.1808  | estimate D2E/DX2 | ! |
| ! D25 | D(1,5,6,7)     | 65.9316   | estimate D2E/DX2 | ! |
| ! D26 | D(1,5,6,10)    | -172.2114 | estimate D2E/DX2 | ! |
| ! D27 | D(1,5,6,11)    | -57.249   | estimate D2E/DX2 | ! |
| ! D28 | D(4,5,6,7)     | -101.8551 | estimate D2E/DX2 | ! |
| ! D29 | D(4,5,6,10)    | 20.0019   | estimate D2E/DX2 | ! |
| ! D30 | D(4,5,6,11)    | 134.9643  | estimate D2E/DX2 | ! |
| ! D31 | D(5,6,7,12)    | -67.0241  | estimate D2E/DX2 | ! |
| ! D32 | D(5,6,7,13)    | 48.7588   | estimate D2E/DX2 | ! |
| ! D33 | D(5,6,7,21)    | 171.6319  | estimate D2E/DX2 | ! |
| ! D34 | D(10,6,7,12)   | 173.0353  | estimate D2E/DX2 | ! |
| ! D35 | D(10,6,7,13)   | -71.1818  | estimate D2E/DX2 | ! |
| ! D36 | D(10,6,7,21)   | 51.6913   | estimate D2E/DX2 | ! |
| ! D37 | D(11,6,7,12)   | 53.7596   | estimate D2E/DX2 | ! |
| ! D38 | D(11,6,7,13)   | 169.5425  | estimate D2E/DX2 | ! |
| ! D39 | D(11,6,7,21)   | -67.5844  | estimate D2E/DX2 | ! |
| ! D40 | D(6,7,13,14)   | -29.1187  | estimate D2E/DX2 | ! |
| ! D41 | D(12,7,13,14)  | 88.3001   | estimate D2E/DX2 | ! |
| ! D42 | D(21,7,13,14)  | -152.3898 | estimate D2E/DX2 | ! |
| ! D43 | D(6,7,21,22)   | 169.9704  | estimate D2E/DX2 | ! |
| ! D44 | D(12,7,21,22)  | 48.8358   | estimate D2E/DX2 | ! |
| ! D45 | D(13,7,21,22)  | -68.727   | estimate D2E/DX2 | ! |
| ! D46 | D(3,16,17,19)  | -179.9988 | estimate D2E/DX2 | ! |
| ! D47 | D(3,16,17,20)  | 0.0016    | estimate D2E/DX2 | ! |
| ! D48 | D(18,16,17,19) | -0.0002   | estimate D2E/DX2 | ! |
| ! D49 | D(18,16,17,20) | -179.9998 | estimate D2E/DX2 | ! |

-----  
Trust Radius=3.00D-01 FncErr=1.00D-07 GrdErr=1.00D-06

Number of steps in this run= 116 maximum allowed number of steps= 132.

GradGradGradGradGradGradGradGradGradGradGradGradGradGradGradGradGradGrad

Input orientation:

-----  
Center Atomic Atomic Coordinates (Angstroms)

| Number | Number | Type | X         | Y         | Z         |
|--------|--------|------|-----------|-----------|-----------|
| 1      | 6      | 0    | -0.421676 | -1.859550 | -1.230320 |
| 2      | 6      | 0    | -1.737840 | -1.550108 | -1.349412 |
| 3      | 7      | 0    | -2.143524 | -1.004664 | -0.144230 |
| 4      | 6      | 0    | -1.067273 | -0.890191 | 0.666669  |
| 5      | 7      | 0    | -0.026615 | -1.485482 | 0.044106  |
| 6      | 6      | 0    | 1.367061  | -1.516307 | 0.515781  |
| 7      | 6      | 0    | 2.254309  | -0.506214 | -0.223935 |
| 8      | 1      | 0    | 0.263552  | -2.303918 | -1.933064 |
| 9      | 1      | 0    | -2.415386 | -1.662601 | -2.179752 |
| 10     | 1      | 0    | 1.352979  | -1.305219 | 1.586538  |
| 11     | 1      | 0    | 1.732930  | -2.541925 | 0.393495  |
| 12     | 1      | 0    | 2.351663  | -0.813053 | -1.274227 |
| 13     | 1      | 0    | 1.745007  | 0.465569  | -0.226685 |
| 14     | 35     | 0    | -0.631122 | 1.913147  | -0.198626 |
| 15     | 1      | 0    | -1.089731 | -0.555386 | 1.682691  |
| 16     | 6      | 0    | -3.406271 | -0.279385 | 0.056620  |
| 17     | 6      | 0    | -4.445754 | -0.411741 | -0.755790 |
| 18     | 1      | 0    | -3.418941 | 0.380995  | 0.934071  |
| 19     | 1      | 0    | -5.389171 | 0.130144  | -0.605742 |
| 20     | 1      | 0    | -4.433086 | -1.072124 | -1.633238 |
| 21     | 8      | 0    | 3.552589  | -0.406639 | 0.367211  |
| 22     | 1      | 0    | 4.126650  | 0.107775  | -0.205007 |

Distance matrix (angstroms):

|    |    | 1        | 2        | 3        | 4        | 5        |
|----|----|----------|----------|----------|----------|----------|
| 1  | C  | 0.000000 |          |          |          |          |
| 2  | C  | 1.357286 | 0.000000 |          |          |          |
| 3  | N  | 2.207981 | 1.383673 | 0.000000 |          |          |
| 4  | C  | 2.225987 | 2.224800 | 1.352397 | 0.000000 |          |
| 5  | N  | 1.385699 | 2.207795 | 2.178981 | 1.350898 | 0.000000 |
| 6  | C  | 2.523146 | 3.622223 | 3.608545 | 2.518089 | 1.471652 |
| 7  | C  | 3.163104 | 4.277110 | 4.426708 | 3.460278 | 2.496683 |
| 8  | H  | 1.077427 | 2.216856 | 3.268333 | 3.244739 | 2.159453 |
| 9  | H  | 2.217000 | 1.077584 | 2.156418 | 3.242860 | 3.268508 |
| 10 | H  | 3.375111 | 4.270004 | 3.912982 | 2.622218 | 2.077227 |
| 11 | H  | 2.782937 | 4.008450 | 4.204666 | 3.262512 | 2.081860 |
| 12 | H  | 2.964539 | 4.156072 | 4.638999 | 3.932194 | 2.801137 |
| 13 | H  | 3.332863 | 4.177762 | 4.158011 | 3.247320 | 2.649259 |
| 14 | Br | 3.916823 | 3.813564 | 3.286935 | 2.966086 | 3.460495 |
| 15 | H  | 3.260794 | 3.256251 | 2.156379 | 1.070000 | 2.163390 |
| 16 | C  | 3.613993 | 2.524940 | 1.470000 | 2.493222 | 3.588440 |
| 17 | C  | 4.302852 | 2.996843 | 2.454756 | 3.696815 | 4.617526 |

|    |    |          |          |          |          |          |
|----|----|----------|----------|----------|----------|----------|
| 18 | H  | 4.322988 | 3.430678 | 2.170131 | 2.686588 | 3.972864 |
| 19 | H  | 5.387484 | 4.087605 | 3.469151 | 4.619406 | 5.638223 |
| 20 | H  | 4.107772 | 2.751977 | 2.731994 | 4.080609 | 4.733005 |
| 21 | O  | 4.523034 | 5.678288 | 5.750210 | 4.654742 | 3.752200 |
| 22 | H  | 5.060524 | 6.200845 | 6.368382 | 5.360279 | 4.455349 |
|    |    | 6        | 7        | 8        | 9        | 10       |
| 6  | C  | 0.000000 |          |          |          |          |
| 7  | C  | 1.534496 | 0.000000 |          |          |          |
| 8  | H  | 2.799090 | 3.180562 | 0.000000 |          |          |
| 9  | H  | 4.646957 | 5.193121 | 2.765656 | 0.000000 |          |
| 10 | H  | 1.091456 | 2.174538 | 3.817309 | 5.339779 | 0.000000 |
| 11 | H  | 1.095767 | 2.190245 | 2.761991 | 4.960175 | 1.759874 |
| 12 | H  | 2.160587 | 1.098518 | 2.648953 | 4.926100 | 3.069784 |
| 13 | H  | 2.149868 | 1.097159 | 3.574423 | 5.064825 | 2.564596 |
| 14 | Br | 4.032898 | 3.765589 | 4.646757 | 4.460317 | 4.181070 |
| 15 | H  | 2.884593 | 3.849707 | 4.238210 | 4.231046 | 2.557015 |
| 16 | C  | 4.952323 | 5.672066 | 4.639523 | 2.810071 | 5.103278 |
| 17 | C  | 6.051924 | 6.721803 | 5.209978 | 2.777537 | 6.317445 |
| 18 | H  | 5.165320 | 5.857805 | 5.384233 | 3.857369 | 5.102964 |
| 19 | H  | 7.043812 | 7.679422 | 6.296008 | 3.812459 | 7.233460 |
| 20 | H  | 6.201394 | 6.857670 | 4.864732 | 2.172200 | 6.625696 |
| 21 | O  | 2.455600 | 1.430000 | 4.439448 | 6.609175 | 2.670672 |
| 22 | H  | 3.282150 | 1.970533 | 4.870931 | 7.059184 | 3.591578 |
|    |    | 11       | 12       | 13       | 14       | 15       |
| 11 | H  | 0.000000 |          |          |          |          |
| 12 | H  | 2.480549 | 0.000000 |          |          |          |
| 13 | H  | 3.070796 | 1.760753 | 0.000000 |          |          |
| 14 | Br | 5.078092 | 4.181637 | 2.782491 | 0.000000 |          |
| 15 | H  | 3.684533 | 4.544552 | 3.567044 | 3.137408 | 0.000000 |
| 16 | C  | 5.625296 | 5.933781 | 5.212570 | 3.545956 | 2.843702 |
| 17 | C  | 6.635863 | 6.828961 | 6.274962 | 4.501883 | 4.150869 |
| 18 | H  | 5.947895 | 6.293027 | 5.293473 | 3.376748 | 2.619629 |
| 19 | H  | 7.672206 | 7.826686 | 7.152111 | 5.097438 | 4.918543 |
| 20 | H  | 6.654902 | 6.799178 | 6.520102 | 5.042310 | 4.737133 |
| 21 | O  | 2.805583 | 2.074057 | 2.093039 | 4.817159 | 4.827396 |
| 22 | H  | 3.620636 | 2.267539 | 2.408466 | 5.088792 | 5.586933 |
|    |    | 16       | 17       | 18       | 19       | 20       |
| 16 | C  | 0.000000 |          |          |          |          |
| 17 | C  | 1.325916 | 0.000000 |          |          |          |
| 18 | H  | 1.098263 | 2.130353 | 0.000000 |          |          |
| 19 | H  | 2.130336 | 1.098267 | 2.513117 | 0.000000 |          |
| 20 | H  | 2.130353 | 1.098263 | 3.119474 | 1.848052 | 0.000000 |
| 21 | O  | 6.966950 | 8.076797 | 7.038745 | 9.010541 | 8.259278 |
| 22 | H  | 7.547399 | 8.605775 | 7.635973 | 9.524281 | 8.757915 |

```

          21      22
21  O    0.000000
22  H    0.960000  0.000000
Stoichiometry  C7H11BrN2O
Framework group C1[X(C7H11BrN2O)]
Deg. of freedom  60
Full point group          C1      NOp  1
Largest Abelian subgroup  C1      NOP  1
Largest concise Abelian subgroup C1      NOp  1

```

Standard orientation:

---

| Center<br>Number | Atomic<br>Number | Atomic<br>Type | Coordinates (Angstroms) |           |           |
|------------------|------------------|----------------|-------------------------|-----------|-----------|
|                  |                  |                | X                       | Y         | Z         |
| 1                | 6                | 0              | 0.116637                | -1.884609 | -0.893774 |
| 2                | 6                | 0              | -1.221655               | -1.658393 | -0.888518 |
| 3                | 7                | 0              | -1.529899               | -1.037803 | 0.309149  |
| 4                | 6                | 0              | -0.382550               | -0.797900 | 0.983697  |
| 5                | 7                | 0              | 0.621187                | -1.385111 | 0.296222  |
| 6                | 6                | 0              | 2.056438                | -1.300608 | 0.610346  |
| 7                | 6                | 0              | 2.793771                | -0.308458 | -0.298860 |
| 8                | 1                | 0              | 0.749569                | -2.347689 | -1.632559 |
| 9                | 1                | 0              | -1.975592               | -1.876183 | -1.626986 |
| 10               | 1                | 0              | 2.143564                | -1.002506 | 1.656682  |
| 11               | 1                | 0              | 2.471346                | -2.311339 | 0.526783  |
| 12               | 1                | 0              | 2.797523                | -0.695597 | -1.326892 |
| 13               | 1                | 0              | 2.226585                | 0.630504  | -0.319056 |
| 14               | 35               | 0              | -0.219798               | 1.943601  | -0.136727 |
| 15               | 1                | 0              | -0.317420               | -0.381689 | 1.967275  |
| 16               | 6                | 0              | -2.807317               | -0.368349 | 0.593638  |
| 17               | 6                | 0              | -3.917212               | -0.624166 | -0.085144 |
| 18               | 1                | 0              | -2.767905               | 0.360866  | 1.413926  |
| 19               | 1                | 0              | -4.871592               | -0.123990 | 0.127392  |
| 20               | 1                | 0              | -3.956625               | -1.353384 | -0.905430 |
| 21               | 8                | 0              | 4.138880                | -0.089495 | 0.134310  |
| 22               | 1                | 0              | 4.614747                | 0.406232  | -0.536068 |

---

Rotational constants (GHZ): 0.9554452 0.5504519 0.3819944

Standard basis: 6-311++G(d,p) (5D, 7F)

There are 358 symmetry adapted cartesian basis functions of A symmetry.

There are 345 symmetry adapted basis functions of A symmetry.

345 basis functions, 553 primitive gaussians, 358 cartesian basis functions

55 alpha electrons 55 beta electrons

nuclear repulsion energy 878.3387205814 Hartrees.

NAtoms= 22 NActive= 22 NUniq= 22 SFac= 1.00D+00 NAtFMM= 60 NAOKFM=F  
Big=F

Integral buffers will be 131072 words long.

Raffenetti 2 integral format.

Two-electron integral symmetry is turned on.

One-electron integrals computed using PRISM.

NBasis= 345 RedAO= T EigKep= 4.38D-06 NBF= 345

NBsUse= 345 1.00D-06 EigRej= -1.00D+00 NBFU= 345

ExpMin= 3.50D-02 ExpMax= 4.40D+05 ExpMxC= 1.51D+04 IAcc=3 IRadAn= 5 AccDes=  
0.00D+00

Harris functional with IExCor= 402 and IRadAn= 5 diagonalized for initial guess.

HarFok: IExCor= 402 AccDes= 0.00D+00 IRadAn= 5 IDoV= 1 UseB2=F ITyADJ=14

ICtDFT= 3500011 ScaDFX= 1.000000 1.000000 1.000000 1.000000

FoFCou: FMM=F IPFlag= 0 FMFlag= 100000 FMFlg1= 0

NFxFlg= 0 DoJE=T BraDBF=F KetDBF=T FulRan=T

wScrn= 0.000000 ICntrl= 500 IOpCl= 0 I1Cent= 200000004 NGrid=

0

NMat0= 1 NMatS0= 1 NMatT0= 0 NMatD0= 1 NMtDS0= 0

NMtDT0= 0

Petite list used in FoFCou.

Keep R1 ints in memory in canonical form, NReq=1804729152.

Requested convergence on RMS density matrix=1.00D-08 within 128 cycles.

Requested convergence on MAX density matrix=1.00D-06.

Requested convergence on energy=1.00D-06.

No special actions if energy rises.

SCF Done: E(RB3LYP) = -3032.32570154 A.U. after 15 cycles

NFock= 15 Conv=0.59D-08 -V/T= 2.0017

\*\*\*\*\*

Population analysis using the SCF density.

\*\*\*\*\*

Orbital symmetries:

Occupied (A)  
(A) (A) (A) (A) (A) (A) (A) (A) (A) (A) (A) (A)  
(A) (A) (A) (A) (A) (A) (A) (A) (A) (A) (A) (A)  
(A) (A) (A) (A) (A) (A) (A) (A) (A) (A) (A) (A)  
(A) (A) (A) (A) (A) (A)

Virtual (A)  
(A) (A) (A) (A) (A) (A) (A) (A) (A) (A) (A) (A)  
(A) (A) (A) (A) (A) (A) (A) (A) (A) (A) (A) (A)  
(A) (A) (A) (A) (A) (A) (A) (A) (A) (A) (A) (A)

(A) (A) (A) (A) (A) (A) (A) (A) (A) (A) (A) (A)  
 (A) (A) (A) (A) (A) (A) (A) (A) (A) (A) (A) (A)  
 (A) (A) (A) (A) (A) (A) (A) (A) (A) (A) (A) (A)  
 (A) (A) (A) (A) (A) (A) (A) (A) (A) (A) (A) (A)  
 (A) (A) (A) (A) (A) (A) (A) (A) (A) (A) (A) (A)  
 (A) (A) (A) (A) (A) (A) (A) (A) (A) (A) (A) (A)  
 (A) (A) (A) (A) (A) (A) (A) (A) (A) (A) (A) (A)  
 (A) (A) (A) (A) (A) (A) (A) (A) (A) (A) (A) (A)  
 (A) (A) (A) (A) (A) (A) (A) (A) (A) (A) (A) (A)  
 (A) (A) (A) (A) (A) (A) (A) (A) (A) (A) (A) (A)  
 (A) (A) (A) (A) (A) (A) (A) (A) (A) (A) (A) (A)  
 (A) (A) (A) (A) (A) (A) (A) (A) (A) (A) (A) (A)  
 (A) (A) (A) (A) (A) (A) (A) (A) (A) (A) (A) (A)  
 (A) (A) (A) (A) (A) (A) (A) (A) (A) (A) (A) (A)  
 (A) (A) (A) (A) (A) (A) (A) (A) (A) (A) (A) (A)  
 (A) (A) (A) (A) (A) (A) (A) (A) (A) (A) (A) (A)  
 (A) (A) (A) (A) (A) (A) (A) (A) (A) (A) (A) (A)  
 (A) (A) (A) (A) (A) (A) (A) (A) (A) (A) (A) (A)  
 (A) (A) (A) (A) (A) (A) (A) (A) (A) (A) (A) (A)  
 (A) (A) (A) (A) (A) (A) (A) (A) (A) (A) (A) (A)  
 (A) (A)

The electronic state is 1-A.

|       |                      |            |           |           |           |           |
|-------|----------------------|------------|-----------|-----------|-----------|-----------|
| Alpha | occ. eigenvalues --  | -482.69321 | -62.34644 | -56.16448 | -56.16404 | -56.16398 |
| Alpha | occ. eigenvalues --  | -19.13885  | -14.43304 | -14.43002 | -10.30781 | -10.25858 |
| Alpha | occ. eigenvalues --  | -10.25619  | -10.25508 | -10.25344 | -10.23437 | -10.20807 |
| Alpha | occ. eigenvalues --  | -8.55541   | -6.37926  | -6.37784  | -6.37760  | -2.49149  |
| Alpha | occ. eigenvalues --  | -2.49117   | -2.49098  | -2.48984  | -2.48984  | -1.09803  |
| Alpha | occ. eigenvalues --  | -1.03830   | -0.98340  | -0.83853  | -0.81444  | -0.78120  |
| Alpha | occ. eigenvalues --  | -0.69279   | -0.68602  | -0.64400  | -0.63172  | -0.62242  |
| Alpha | occ. eigenvalues --  | -0.58035   | -0.54358  | -0.52236  | -0.51291  | -0.50429  |
| Alpha | occ. eigenvalues --  | -0.50140   | -0.49111  | -0.47367  | -0.46488  | -0.44886  |
| Alpha | occ. eigenvalues --  | -0.41575   | -0.40973  | -0.38027  | -0.35556  | -0.30255  |
| Alpha | occ. eigenvalues --  | -0.29439   | -0.29000  | -0.19127  | -0.18983  | -0.18898  |
| Alpha | virt. eigenvalues -- | -0.06864   | -0.03714  | -0.02120  | -0.01382  | -0.00550  |
| Alpha | virt. eigenvalues -- | -0.00257   | 0.00244   | 0.00806   | 0.01465   | 0.02244   |
| Alpha | virt. eigenvalues -- | 0.03512    | 0.04149   | 0.04758   | 0.05563   | 0.05840   |
| Alpha | virt. eigenvalues -- | 0.06376    | 0.06946   | 0.07449   | 0.08159   | 0.08675   |
| Alpha | virt. eigenvalues -- | 0.08946    | 0.09142   | 0.09732   | 0.09895   | 0.10060   |
| Alpha | virt. eigenvalues -- | 0.10534    | 0.10943   | 0.11128   | 0.11563   | 0.12143   |
| Alpha | virt. eigenvalues -- | 0.12477    | 0.12740   | 0.13213   | 0.13664   | 0.14391   |
| Alpha | virt. eigenvalues -- | 0.14597    | 0.14821   | 0.15416   | 0.15544   | 0.16400   |
| Alpha | virt. eigenvalues -- | 0.16620    | 0.17262   | 0.17750   | 0.17976   | 0.18502   |
| Alpha | virt. eigenvalues -- | 0.19311    | 0.19582   | 0.20059   | 0.20341   | 0.21175   |
| Alpha | virt. eigenvalues -- | 0.21395    | 0.21615   | 0.22462   | 0.23366   | 0.24690   |

|                            |         |         |         |         |         |
|----------------------------|---------|---------|---------|---------|---------|
| Alpha virt. eigenvalues -- | 0.24995 | 0.25261 | 0.25918 | 0.26462 | 0.27031 |
| Alpha virt. eigenvalues -- | 0.27874 | 0.27905 | 0.28497 | 0.28630 | 0.29486 |
| Alpha virt. eigenvalues -- | 0.30426 | 0.30830 | 0.31249 | 0.32088 | 0.33067 |
| Alpha virt. eigenvalues -- | 0.33910 | 0.34787 | 0.35416 | 0.36634 | 0.38698 |
| Alpha virt. eigenvalues -- | 0.39320 | 0.39637 | 0.40250 | 0.42647 | 0.45162 |
| Alpha virt. eigenvalues -- | 0.46398 | 0.47868 | 0.49186 | 0.49829 | 0.50696 |
| Alpha virt. eigenvalues -- | 0.51821 | 0.52682 | 0.53269 | 0.54532 | 0.56145 |
| Alpha virt. eigenvalues -- | 0.56838 | 0.58521 | 0.59347 | 0.59910 | 0.60607 |
| Alpha virt. eigenvalues -- | 0.62331 | 0.63349 | 0.64291 | 0.65303 | 0.65561 |
| Alpha virt. eigenvalues -- | 0.66133 | 0.66779 | 0.67484 | 0.68351 | 0.69009 |
| Alpha virt. eigenvalues -- | 0.69727 | 0.70294 | 0.72116 | 0.73786 | 0.75255 |
| Alpha virt. eigenvalues -- | 0.75499 | 0.76736 | 0.77811 | 0.78491 | 0.79491 |
| Alpha virt. eigenvalues -- | 0.80725 | 0.81621 | 0.82625 | 0.83551 | 0.85095 |
| Alpha virt. eigenvalues -- | 0.86881 | 0.88408 | 0.89757 | 0.90480 | 0.93700 |
| Alpha virt. eigenvalues -- | 0.95151 | 0.97823 | 0.98573 | 0.99993 | 1.01552 |
| Alpha virt. eigenvalues -- | 1.01921 | 1.04448 | 1.04761 | 1.06875 | 1.09213 |
| Alpha virt. eigenvalues -- | 1.10954 | 1.11290 | 1.12293 | 1.15533 | 1.16988 |
| Alpha virt. eigenvalues -- | 1.19037 | 1.20842 | 1.22352 | 1.25511 | 1.30239 |
| Alpha virt. eigenvalues -- | 1.32559 | 1.35702 | 1.37642 | 1.39932 | 1.43528 |
| Alpha virt. eigenvalues -- | 1.45553 | 1.48028 | 1.50934 | 1.51616 | 1.52182 |
| Alpha virt. eigenvalues -- | 1.53688 | 1.55360 | 1.56121 | 1.57666 | 1.58501 |
| Alpha virt. eigenvalues -- | 1.59505 | 1.62040 | 1.62525 | 1.62666 | 1.63670 |
| Alpha virt. eigenvalues -- | 1.66014 | 1.66487 | 1.68780 | 1.70328 | 1.71275 |
| Alpha virt. eigenvalues -- | 1.73161 | 1.74454 | 1.75099 | 1.78080 | 1.79888 |
| Alpha virt. eigenvalues -- | 1.80933 | 1.81876 | 1.86122 | 1.88744 | 1.90068 |
| Alpha virt. eigenvalues -- | 1.90793 | 1.95640 | 1.98798 | 2.01408 | 2.03477 |
| Alpha virt. eigenvalues -- | 2.05226 | 2.06954 | 2.08007 | 2.08636 | 2.11464 |
| Alpha virt. eigenvalues -- | 2.12641 | 2.13535 | 2.15586 | 2.17115 | 2.18453 |
| Alpha virt. eigenvalues -- | 2.20610 | 2.23542 | 2.25944 | 2.26972 | 2.31760 |
| Alpha virt. eigenvalues -- | 2.34376 | 2.36192 | 2.42318 | 2.45035 | 2.45373 |
| Alpha virt. eigenvalues -- | 2.47666 | 2.47985 | 2.49972 | 2.52231 | 2.54519 |
| Alpha virt. eigenvalues -- | 2.55923 | 2.56431 | 2.58216 | 2.58626 | 2.59837 |
| Alpha virt. eigenvalues -- | 2.61427 | 2.63044 | 2.68087 | 2.70691 | 2.72622 |
| Alpha virt. eigenvalues -- | 2.74437 | 2.74916 | 2.77488 | 2.78668 | 2.79442 |
| Alpha virt. eigenvalues -- | 2.81646 | 2.83466 | 2.84283 | 2.87098 | 2.89729 |
| Alpha virt. eigenvalues -- | 2.92869 | 2.93883 | 2.95449 | 2.99235 | 3.08269 |
| Alpha virt. eigenvalues -- | 3.10060 | 3.11876 | 3.19245 | 3.21485 | 3.24103 |
| Alpha virt. eigenvalues -- | 3.33047 | 3.38651 | 3.47753 | 3.54072 | 3.54949 |
| Alpha virt. eigenvalues -- | 3.60522 | 3.64843 | 3.71181 | 3.74036 | 3.76196 |
| Alpha virt. eigenvalues -- | 3.80287 | 3.83554 | 3.85381 | 3.88462 | 3.93693 |
| Alpha virt. eigenvalues -- | 3.98060 | 4.03728 | 4.08693 | 4.18760 | 4.27630 |
| Alpha virt. eigenvalues -- | 4.30699 | 4.33470 | 4.37705 | 4.44671 | 4.69125 |
| Alpha virt. eigenvalues -- | 4.89779 | 4.96819 | 5.04812 | 5.22504 | 5.36583 |
| Alpha virt. eigenvalues -- | 5.65341 | 6.79632 | 7.68866 | 7.73180 | 7.76191 |



Alpha virt. eigenvalues -- 23.68243 23.73909 23.81174 23.85527 23.85900  
 Alpha virt. eigenvalues -- 24.15523 24.22610 35.43963 35.56434 48.07753  
 Alpha virt. eigenvalues -- 49.90429 289.89601 289.94049 289.96474 1020.87034

Condensed to atoms (all electrons):

|    |    | 1         | 2         | 3         | 4         | 5         | 6         |
|----|----|-----------|-----------|-----------|-----------|-----------|-----------|
| 1  | C  | 7.054411  | -1.134197 | 0.414817  | -0.122093 | -0.285269 | -0.154198 |
| 2  | C  | -1.134197 | 6.706233  | -0.086936 | -0.312854 | 0.513254  | 0.055094  |
| 3  | N  | 0.414817  | -0.086936 | 6.677760  | 0.183476  | -0.295688 | -0.132647 |
| 4  | C  | -0.122093 | -0.312854 | 0.183476  | 6.259537  | 0.187645  | -0.343635 |
| 5  | N  | -0.285269 | 0.513254  | -0.295688 | 0.187645  | 6.880375  | 0.255939  |
| 6  | C  | -0.154198 | 0.055094  | -0.132647 | -0.343635 | 0.255939  | 6.627643  |
| 7  | C  | -0.082695 | 0.119779  | 0.028481  | 0.081002  | -0.029295 | -0.640556 |
| 8  | H  | 0.518526  | -0.120927 | 0.064451  | 0.006285  | -0.103539 | -0.045430 |
| 9  | H  | -0.162327 | 0.558153  | -0.096982 | -0.000331 | 0.042867  | 0.017758  |
| 10 | H  | 0.069035  | -0.057050 | 0.035540  | 0.051278  | -0.083984 | 0.379211  |
| 11 | H  | -0.084921 | 0.070150  | -0.033898 | -0.033901 | 0.007574  | 0.379414  |
| 12 | H  | 0.058726  | -0.078166 | 0.016884  | 0.026440  | -0.054469 | 0.056814  |
| 13 | H  | -0.094074 | 0.066575  | -0.041004 | -0.018518 | 0.068864  | -0.025457 |
| 14 | Br | 0.085759  | -0.064205 | 0.025590  | -0.017337 | 0.009190  | 0.125450  |
| 15 | H  | 0.005482  | 0.029038  | -0.032388 | 0.367861  | -0.021990 | -0.009334 |
| 16 | C  | 0.233065  | -0.281471 | 0.164073  | 0.047208  | -0.116067 | -0.080875 |
| 17 | C  | 0.015513  | 0.013360  | 0.036355  | -0.281374 | -0.042293 | -0.038399 |
| 18 | H  | 0.002623  | -0.010069 | -0.074767 | 0.059299  | -0.007088 | -0.005292 |
| 19 | H  | -0.000854 | 0.003215  | 0.015015  | 0.002728  | -0.000177 | 0.000177  |
| 20 | H  | 0.005646  | 0.003584  | -0.029167 | -0.013812 | -0.001502 | -0.003596 |
| 21 | O  | 0.010047  | -0.004000 | 0.000642  | 0.009146  | 0.011448  | -0.173193 |
| 22 | H  | -0.001105 | 0.001647  | 0.000116  | -0.001087 | -0.002279 | 0.005854  |
|    |    | 7         | 8         | 9         | 10        | 11        | 12        |
| 1  | C  | -0.082695 | 0.518526  | -0.162327 | 0.069035  | -0.084921 | 0.058726  |
| 2  | C  | 0.119779  | -0.120927 | 0.558153  | -0.057050 | 0.070150  | -0.078166 |
| 3  | N  | 0.028481  | 0.064451  | -0.096982 | 0.035540  | -0.033898 | 0.016884  |
| 4  | C  | 0.081002  | 0.006285  | -0.000331 | 0.051278  | -0.033901 | 0.026440  |
| 5  | N  | -0.029295 | -0.103539 | 0.042867  | -0.083984 | 0.007574  | -0.054469 |
| 6  | C  | -0.640556 | -0.045430 | 0.017758  | 0.379211  | 0.379414  | 0.056814  |
| 7  | C  | 6.015517  | 0.004485  | -0.003950 | -0.069112 | -0.019314 | 0.271038  |
| 8  | H  | 0.004485  | 0.509832  | -0.014102 | 0.009222  | -0.021220 | 0.014705  |
| 9  | H  | -0.003950 | -0.014102 | 0.523578  | -0.000372 | 0.000414  | 0.000824  |
| 10 | H  | -0.069112 | 0.009222  | -0.000372 | 0.592865  | -0.096800 | 0.042999  |
| 11 | H  | -0.019314 | -0.021220 | 0.000414  | -0.096800 | 0.636173  | -0.070558 |
| 12 | H  | 0.271038  | 0.014705  | 0.000824  | 0.042999  | -0.070558 | 0.776549  |
| 13 | H  | 0.336791  | -0.013371 | 0.000239  | -0.059874 | 0.051684  | -0.118927 |
| 14 | Br | -0.153478 | 0.002744  | -0.000937 | -0.001583 | 0.000423  | -0.001111 |
| 15 | H  | -0.002191 | -0.000019 | 0.000359  | -0.016102 | 0.009601  | -0.003879 |
| 16 | C  | 0.030921  | 0.011873  | -0.012284 | 0.019997  | -0.015012 | 0.007423  |

|    |    |           |           |           |           |           |           |
|----|----|-----------|-----------|-----------|-----------|-----------|-----------|
| 17 | C  | 0.013033  | 0.006848  | -0.006493 | 0.001494  | 0.000584  | -0.000803 |
| 18 | H  | 0.002484  | 0.000101  | -0.000448 | 0.001742  | -0.000896 | 0.000453  |
| 19 | H  | -0.000149 | -0.000076 | 0.000377  | -0.000002 | -0.000014 | 0.000012  |
| 20 | H  | 0.001783  | 0.001884  | 0.001216  | 0.000180  | -0.000115 | -0.000036 |
| 21 | O  | 0.309187  | -0.000403 | -0.000108 | 0.010169  | 0.022977  | -0.060595 |
| 22 | H  | 0.009152  | -0.000400 | 0.000061  | 0.000555  | -0.001104 | -0.004476 |
|    |    | 13        | 14        | 15        | 16        | 17        | 18        |
| 1  | C  | -0.094074 | 0.085759  | 0.005482  | 0.233065  | 0.015513  | 0.002623  |
| 2  | C  | 0.066575  | -0.064205 | 0.029038  | -0.281471 | 0.013360  | -0.010069 |
| 3  | N  | -0.041004 | 0.025590  | -0.032388 | 0.164073  | 0.036355  | -0.074767 |
| 4  | C  | -0.018518 | -0.017337 | 0.367861  | 0.047208  | -0.281374 | 0.059299  |
| 5  | N  | 0.068864  | 0.009190  | -0.021990 | -0.116067 | -0.042293 | -0.007088 |
| 6  | C  | -0.025457 | 0.125450  | -0.009334 | -0.080875 | -0.038399 | -0.005292 |
| 7  | C  | 0.336791  | -0.153478 | -0.002191 | 0.030921  | 0.013033  | 0.002484  |
| 8  | H  | -0.013371 | 0.002744  | -0.000019 | 0.011873  | 0.006848  | 0.000101  |
| 9  | H  | 0.000239  | -0.000937 | 0.000359  | -0.012284 | -0.006493 | -0.000448 |
| 10 | H  | -0.059874 | -0.001583 | -0.016102 | 0.019997  | 0.001494  | 0.001742  |
| 11 | H  | 0.051684  | 0.000423  | 0.009601  | -0.015012 | 0.000584  | -0.000896 |
| 12 | H  | -0.118927 | -0.001111 | -0.003879 | 0.007423  | -0.000803 | 0.000453  |
| 13 | H  | 0.664134  | 0.055598  | 0.007678  | -0.020924 | -0.005421 | -0.001364 |
| 14 | Br | 0.055598  | 35.611223 | -0.003527 | -0.066345 | 0.046378  | 0.010279  |
| 15 | H  | 0.007678  | -0.003527 | 0.458020  | -0.010900 | 0.006431  | -0.005773 |
| 16 | C  | -0.020924 | -0.066345 | -0.010900 | 5.446478  | 0.226535  | 0.420766  |
| 17 | C  | -0.005421 | 0.046378  | 0.006431  | 0.226535  | 5.656502  | -0.052464 |
| 18 | H  | -0.001364 | 0.010279  | -0.005773 | 0.420766  | -0.052464 | 0.477190  |
| 19 | H  | 0.000053  | 0.002289  | -0.000144 | -0.043539 | 0.399017  | -0.005388 |
| 20 | H  | -0.000454 | -0.001518 | -0.000125 | 0.025541  | 0.350955  | 0.005550  |
| 21 | O  | -0.075364 | 0.000816  | -0.000723 | 0.000128  | -0.000022 | 0.000096  |
| 22 | H  | -0.007622 | -0.000474 | -0.000179 | 0.000123  | 0.000066  | -0.000005 |
|    |    | 19        | 20        | 21        | 22        |           |           |
| 1  | C  | -0.000854 | 0.005646  | 0.010047  | -0.001105 |           |           |
| 2  | C  | 0.003215  | 0.003584  | -0.004000 | 0.001647  |           |           |
| 3  | N  | 0.015015  | -0.029167 | 0.000642  | 0.000116  |           |           |
| 4  | C  | 0.002728  | -0.013812 | 0.009146  | -0.001087 |           |           |
| 5  | N  | -0.000177 | -0.001502 | 0.011448  | -0.002279 |           |           |
| 6  | C  | 0.000177  | -0.003596 | -0.173193 | 0.005854  |           |           |
| 7  | C  | -0.000149 | 0.001783  | 0.309187  | 0.009152  |           |           |
| 8  | H  | -0.000076 | 0.001884  | -0.000403 | -0.000400 |           |           |
| 9  | H  | 0.000377  | 0.001216  | -0.000108 | 0.000061  |           |           |
| 10 | H  | -0.000002 | 0.000180  | 0.010169  | 0.000555  |           |           |
| 11 | H  | -0.000014 | -0.000115 | 0.022977  | -0.001104 |           |           |
| 12 | H  | 0.000012  | -0.000036 | -0.060595 | -0.004476 |           |           |
| 13 | H  | 0.000053  | -0.000454 | -0.075364 | -0.007622 |           |           |
| 14 | Br | 0.002289  | -0.001518 | 0.000816  | -0.000474 |           |           |

|    |   |           |           |           |           |
|----|---|-----------|-----------|-----------|-----------|
| 15 | H | -0.000144 | -0.000125 | -0.000723 | -0.000179 |
| 16 | C | -0.043539 | 0.025541  | 0.000128  | 0.000123  |
| 17 | C | 0.399017  | 0.350955  | -0.000022 | 0.000066  |
| 18 | H | -0.005388 | 0.005550  | 0.000096  | -0.000005 |
| 19 | H | 0.471105  | -0.034267 | 0.000002  | 0.000000  |
| 20 | H | -0.034267 | 0.575380  | -0.000005 | 0.000006  |
| 21 | O | 0.000002  | -0.000005 | 7.996492  | 0.240468  |
| 22 | H | 0.000000  | 0.000006  | 0.240468  | 0.490303  |

Mulliken charges:

|    |    | 1         |
|----|----|-----------|
| 1  | C  | -0.351917 |
| 2  | C  | 0.009793  |
| 3  | N  | 0.160277  |
| 4  | C  | -0.136964 |
| 5  | N  | 0.066485  |
| 6  | C  | -0.250741 |
| 7  | C  | -0.222913 |
| 8  | H  | 0.168530  |
| 9  | H  | 0.152489  |
| 10 | H  | 0.170591  |
| 11 | H  | 0.198761  |
| 12 | H  | 0.120154  |
| 13 | H  | 0.230757  |
| 14 | Br | -0.665225 |
| 15 | H  | 0.222803  |
| 16 | C  | 0.013285  |
| 17 | C  | -0.345802 |
| 18 | H  | 0.182970  |
| 19 | H  | 0.190621  |
| 20 | H  | 0.112871  |
| 21 | O  | -0.297205 |
| 22 | H  | 0.270380  |

Sum of Mulliken charges = 0.00000

Mulliken charges with hydrogens summed into heavy atoms:

|    |    | 1         |
|----|----|-----------|
| 1  | C  | -0.183388 |
| 2  | C  | 0.162282  |
| 3  | N  | 0.160277  |
| 4  | C  | 0.085839  |
| 5  | N  | 0.066485  |
| 6  | C  | 0.118610  |
| 7  | C  | 0.127999  |
| 14 | Br | -0.665225 |
| 16 | C  | 0.196255  |

```

17 C -0.042310
21 O -0.026825
Electronic spatial extent (au): <R**2>= 2823.6477
Charge= 0.0000 electrons
Dipole moment (field-independent basis, Debye):
X= -1.2876 Y= -9.0282 Z= -0.0888
Tot= 9.1200
Quadrupole moment (field-independent basis, Debye-Ang):
XX= -66.3236 YY= -91.5734 ZZ= -73.5090
XY= 3.1554 XZ= -6.1440 YZ= 4.5643
Traceless Quadrupole moment (field-independent basis, Debye-Ang):
XX= 10.8117 YY= -14.4380 ZZ= 3.6263
XY= 3.1554 XZ= -6.1440 YZ= 4.5643
Octapole moment (field-independent basis, Debye-Ang**2):
XXX= -36.1207 YYY= 12.0633 ZZZ= 2.5551
XYY= 15.3435
XXY= 26.2880 XXZ= -36.8065 XZZ= 3.9104
YZZ= 4.3125
YYZ= -10.2422 XYZ= -12.5179
Hexadecapole moment (field-independent basis, Debye-Ang**3):
XXXX= -2048.1309 YYYY= -1102.4571 ZZZZ= -252.8162
XXXZ= -125.7871 YYYX= -25.1074 YYYZ= 11.9322
ZZZX= 0.0594
ZZZY= 7.4670 XXYY= -548.6433 XXZZ= -406.3423
YYZZ= -208.1943
XXYZ= 17.0032 YYXZ= 8.4985 ZZXY= -4.4454
N-N= 8.783387205814D+02 E-N=-8.978679142029D+03 KE= 3.027075206880D+03
Calling FoFJK, ICntrl= 2127 FMM=F ISym2X=0 l1Cent= 0 IOpClX= 0 NMat=1 NMatS=1
NMatT=0.

```

\*\*\*\*\* Axes restored to original set \*\*\*\*\*

```

-----
Center      Atomic      Forces (Hartrees/Bohr)
Number      Number      X           Y           Z
-----
1           6           -0.005914250  0.001126378  0.000384416
2           6           0.003262105  -0.004205771 -0.002157029
3           7           -0.023120519  0.018794569  0.004603255
4           6           0.003110723  -0.003431796 -0.018111028
5           7           0.002270720  0.003372816  0.004293616
6           6           0.006096997  -0.004822957  0.008626212
7           6           -0.001586603  0.013240655  -0.013198070
8           1           -0.001022802  0.000525917  0.000865048
9           1           0.002911109  0.000155773  0.001512918

```

|    |    |              |              |              |
|----|----|--------------|--------------|--------------|
| 10 | 1  | 0.001023251  | 0.001747958  | -0.000539357 |
| 11 | 1  | 0.000494861  | 0.002074573  | 0.000175261  |
| 12 | 1  | -0.001129678 | -0.002124082 | 0.000127218  |
| 13 | 1  | -0.000557675 | -0.001025952 | 0.001928161  |
| 14 | 35 | 0.000462653  | -0.000838601 | 0.003160618  |
| 15 | 1  | 0.001635608  | 0.003540243  | 0.002023711  |
| 16 | 6  | 0.013196234  | -0.007160644 | 0.007942216  |
| 17 | 6  | -0.008891440 | -0.005683506 | -0.009584197 |
| 18 | 1  | 0.005196420  | -0.007432009 | -0.009423375 |
| 19 | 1  | 0.012313289  | -0.002599943 | 0.002386724  |
| 20 | 1  | 0.000477775  | 0.005618053  | 0.007823442  |
| 21 | 8  | -0.007770902 | -0.012788790 | 0.008670426  |
| 22 | 1  | -0.002457877 | 0.001917116  | -0.001510186 |

-----  
Cartesian Forces: Max 0.023120519 RMS 0.006901382

GradGradGradGradGradGradGradGradGradGradGradGradGradGradGradGradGradGradGrad

Berny optimization.

FormGI is forming the generalized inverse of G from B-inverse, IUseBI=4.

Internal Forces: Max 0.027795801 RMS 0.005093083

Search for a local minimum.

Step number 1 out of a maximum of 116

All quantities printed in internal units (Hartrees-Bohrs-Radians)

Mixed Optimization -- RFO/linear search

Second derivative matrix not updated -- first step.

ITU= 0

|                 |         |         |         |         |         |
|-----------------|---------|---------|---------|---------|---------|
| Eigenvalues --- | 0.00230 | 0.00310 | 0.00744 | 0.00766 | 0.01295 |
| Eigenvalues --- | 0.01558 | 0.01846 | 0.01895 | 0.02007 | 0.02102 |
| Eigenvalues --- | 0.02166 | 0.02333 | 0.02391 | 0.02414 | 0.03069 |
| Eigenvalues --- | 0.03069 | 0.04134 | 0.04517 | 0.05242 | 0.05604 |
| Eigenvalues --- | 0.08680 | 0.09511 | 0.12817 | 0.13458 | 0.15578 |
| Eigenvalues --- | 0.15999 | 0.16000 | 0.16000 | 0.16000 | 0.16000 |
| Eigenvalues --- | 0.16000 | 0.18403 | 0.21941 | 0.22000 | 0.22672 |
| Eigenvalues --- | 0.23176 | 0.23392 | 0.24357 | 0.25000 | 0.29012 |
| Eigenvalues --- | 0.33847 | 0.33875 | 0.33875 | 0.33875 | 0.33998 |
| Eigenvalues --- | 0.34155 | 0.34645 | 0.35543 | 0.35740 | 0.36288 |
| Eigenvalues --- | 0.36307 | 0.37230 | 0.40989 | 0.42965 | 0.45774 |
| Eigenvalues --- | 0.49262 | 0.53438 | 0.54073 | 0.55473 | 0.60481 |

RFO step: Lambda=-1.89355569D-02 EMin= 2.30000000D-03

Linear search not attempted -- first point.

Iteration 1 RMS(Cart)= 0.18914693 RMS(Int)= 0.01327995

Iteration 2 RMS(Cart)= 0.01821417 RMS(Int)= 0.00070427

Iteration 3 RMS(Cart)= 0.00016552 RMS(Int)= 0.00070073

Iteration 4 RMS(Cart)= 0.00000011 RMS(Int)= 0.00070073

| Variable | Old X   | -DE/DX   | Delta X<br>(Linear) | Delta X<br>(Quad) | Delta X<br>(Total) | New X   |
|----------|---------|----------|---------------------|-------------------|--------------------|---------|
| R1       | 2.56490 | -0.00399 | 0.00000             | -0.00595          | -0.00591           | 2.55899 |
| R2       | 2.61859 | 0.00089  | 0.00000             | 0.00177           | 0.00169            | 2.62028 |
| R3       | 2.03604 | -0.00143 | 0.00000             | -0.00374          | -0.00374           | 2.03231 |
| R4       | 2.61476 | 0.00114  | 0.00000             | 0.00309           | 0.00320            | 2.61796 |
| R5       | 2.03634 | -0.00301 | 0.00000             | -0.00788          | -0.00788           | 2.02846 |
| R6       | 2.55566 | -0.00390 | 0.00000             | -0.00760          | -0.00757           | 2.54809 |
| R7       | 2.77790 | -0.02780 | 0.00000             | -0.07386          | -0.07386           | 2.70404 |
| R8       | 2.55283 | -0.01045 | 0.00000             | -0.01969          | -0.01980           | 2.53303 |
| R9       | 2.02201 | 0.00299  | 0.00000             | 0.00765           | 0.00765            | 2.02965 |
| R10      | 2.78102 | -0.00270 | 0.00000             | -0.00722          | -0.00722           | 2.77380 |
| R11      | 2.89978 | -0.00820 | 0.00000             | -0.02654          | -0.02654           | 2.87323 |
| R12      | 2.06255 | -0.00021 | 0.00000             | -0.00058          | -0.00058           | 2.06197 |
| R13      | 2.07070 | -0.00179 | 0.00000             | -0.00498          | -0.00498           | 2.06572 |
| R14      | 2.07590 | 0.00037  | 0.00000             | 0.00103           | 0.00103            | 2.07693 |
| R15      | 2.07333 | -0.00161 | 0.00000             | -0.00448          | -0.00448           | 2.06885 |
| R16      | 2.70231 | -0.00708 | 0.00000             | -0.01652          | -0.01652           | 2.68579 |
| R17      | 5.25815 | -0.00079 | 0.00000             | -0.02118          | -0.02118           | 5.23696 |
| R18      | 2.50562 | -0.00318 | 0.00000             | -0.00509          | -0.00509           | 2.50052 |
| R19      | 2.07542 | -0.01206 | 0.00000             | -0.03372          | -0.03372           | 2.04170 |
| R20      | 2.07542 | -0.01154 | 0.00000             | -0.03225          | -0.03225           | 2.04317 |
| R21      | 2.07542 | -0.00962 | 0.00000             | -0.02690          | -0.02690           | 2.04852 |
| R22      | 1.81414 | 0.00046  | 0.00000             | 0.00080           | 0.00080            | 1.81494 |
| A1       | 1.87089 | 0.00199  | 0.00000             | 0.00899           | 0.00839            | 1.87928 |
| A2       | 2.28302 | -0.00113 | 0.00000             | -0.00514          | -0.00524           | 2.27777 |
| A3       | 2.12926 | -0.00086 | 0.00000             | -0.00363          | -0.00375           | 2.12551 |
| A4       | 1.87314 | -0.00177 | 0.00000             | -0.00525          | -0.00541           | 1.86773 |
| A5       | 2.28303 | -0.00040 | 0.00000             | -0.00451          | -0.00443           | 2.27859 |
| A6       | 2.12699 | 0.00216  | 0.00000             | 0.00974           | 0.00981            | 2.13680 |
| A7       | 1.89895 | -0.00291 | 0.00000             | -0.01063          | -0.01091           | 1.88804 |
| A8       | 2.17166 | 0.00778  | 0.00000             | 0.03349           | 0.03357            | 2.20523 |
| A9       | 2.16509 | -0.00456 | 0.00000             | -0.01582          | -0.01587           | 2.14922 |
| A10      | 1.87488 | 0.00577  | 0.00000             | 0.01737           | 0.01686            | 1.89174 |
| A11      | 2.18846 | -0.00196 | 0.00000             | -0.00555          | -0.00548           | 2.18298 |
| A12      | 2.20391 | -0.00403 | 0.00000             | -0.01648          | -0.01638           | 2.18752 |
| A13      | 1.89988 | -0.00330 | 0.00000             | -0.01645          | -0.01691           | 1.88297 |
| A14      | 2.16411 | 0.00352  | 0.00000             | 0.01539           | 0.01560            | 2.17971 |
| A15      | 2.20316 | -0.00017 | 0.00000             | 0.00149           | 0.00175            | 2.20491 |
| A16      | 1.95981 | -0.00807 | 0.00000             | -0.03658          | -0.03663           | 1.92318 |
| A17      | 1.87356 | 0.00654  | 0.00000             | 0.03554           | 0.03485            | 1.90841 |
| A18      | 1.87553 | 0.00037  | 0.00000             | -0.00308          | -0.00291           | 1.87262 |
| A19      | 1.93165 | -0.00302 | 0.00000             | -0.02991          | -0.02965           | 1.90200 |
| A20      | 1.94901 | 0.00509  | 0.00000             | 0.02820           | 0.02829            | 1.97730 |

|     |          |          |         |          |          |          |
|-----|----------|----------|---------|----------|----------|----------|
| A21 | 1.87005  | -0.00043 | 0.00000 | 0.00886  | 0.00889  | 1.87895  |
| A22 | 1.90527  | 0.00330  | 0.00000 | 0.01944  | 0.02057  | 1.92584  |
| A23 | 1.89214  | -0.00261 | 0.00000 | -0.04167 | -0.04297 | 1.84917  |
| A24 | 1.95142  | -0.01455 | 0.00000 | -0.09049 | -0.09151 | 1.85991  |
| A25 | 1.86100  | 0.00323  | 0.00000 | 0.06293  | 0.06233  | 1.92333  |
| A26 | 1.91158  | 0.00456  | 0.00000 | 0.03699  | 0.03610  | 1.94768  |
| A27 | 1.93992  | 0.00686  | 0.00000 | 0.01968  | 0.01443  | 1.95436  |
| A28 | 2.60056  | -0.00289 | 0.00000 | -0.01075 | -0.01075 | 2.58981  |
| A29 | 2.14180  | 0.00440  | 0.00000 | 0.01840  | 0.01837  | 2.16017  |
| A30 | 1.99956  | -0.00723 | 0.00000 | -0.03732 | -0.03734 | 1.96221  |
| A31 | 2.14183  | 0.00283  | 0.00000 | 0.01892  | 0.01889  | 2.16072  |
| A32 | 2.14180  | -0.00717 | 0.00000 | -0.04007 | -0.04010 | 2.10170  |
| A33 | 2.14183  | 0.00293  | 0.00000 | 0.01639  | 0.01636  | 2.15819  |
| A34 | 1.99956  | 0.00424  | 0.00000 | 0.02367  | 0.02364  | 2.02319  |
| A35 | 1.91114  | -0.00553 | 0.00000 | -0.03092 | -0.03092 | 1.88021  |
| D1  | -0.01243 | 0.00112  | 0.00000 | 0.03111  | 0.03125  | 0.01881  |
| D2  | 3.12144  | 0.00070  | 0.00000 | 0.02775  | 0.02776  | -3.13398 |
| D3  | 3.13475  | -0.00044 | 0.00000 | -0.01265 | -0.01244 | 3.12232  |
| D4  | -0.01456 | -0.00085 | 0.00000 | -0.01601 | -0.01592 | -0.03048 |
| D5  | -0.05712 | -0.00200 | 0.00000 | -0.05633 | -0.05615 | -0.11327 |
| D6  | -3.01740 | -0.00213 | 0.00000 | -0.05844 | -0.05832 | -3.07573 |
| D7  | 3.07948  | -0.00061 | 0.00000 | -0.01729 | -0.01709 | 3.06239  |
| D8  | 0.11920  | -0.00075 | 0.00000 | -0.01940 | -0.01926 | 0.09994  |
| D9  | 0.07765  | -0.00003 | 0.00000 | 0.00437  | 0.00416  | 0.08181  |
| D10 | 2.90309  | -0.00022 | 0.00000 | 0.02275  | 0.02281  | 2.92590  |
| D11 | -3.05706 | 0.00035  | 0.00000 | 0.00744  | 0.00736  | -3.04970 |
| D12 | -0.23162 | 0.00016  | 0.00000 | 0.02581  | 0.02601  | -0.20561 |
| D13 | -0.11275 | -0.00172 | 0.00000 | -0.04091 | -0.04122 | -0.15396 |
| D14 | -3.07291 | -0.00014 | 0.00000 | -0.01318 | -0.01331 | -3.08622 |
| D15 | -2.93965 | -0.00427 | 0.00000 | -0.07015 | -0.07007 | -3.00972 |
| D16 | 0.38338  | -0.00270 | 0.00000 | -0.04242 | -0.04217 | 0.34121  |
| D17 | 0.36315  | 0.00069  | 0.00000 | 0.02787  | 0.02795  | 0.39110  |
| D18 | -2.77842 | 0.00121  | 0.00000 | 0.04127  | 0.04114  | -2.73727 |
| D19 | -3.14159 | 0.00127  | 0.00000 | 0.05190  | 0.05203  | -3.08956 |
| D20 | 0.00002  | 0.00179  | 0.00000 | 0.06531  | 0.06523  | 0.06525  |
| D21 | 0.10495  | 0.00235  | 0.00000 | 0.06004  | 0.06006  | 0.16501  |
| D22 | 3.06013  | 0.00296  | 0.00000 | 0.06397  | 0.06404  | 3.12417  |
| D23 | 3.06306  | 0.00104  | 0.00000 | 0.03350  | 0.03353  | 3.09659  |
| D24 | -0.26495 | 0.00165  | 0.00000 | 0.03743  | 0.03751  | -0.22745 |
| D25 | 1.15072  | 0.00553  | 0.00000 | 0.15285  | 0.15320  | 1.30392  |
| D26 | -3.00566 | 0.00116  | 0.00000 | 0.11682  | 0.11651  | -2.88914 |
| D27 | -0.99918 | 0.00406  | 0.00000 | 0.14307  | 0.14308  | -0.85610 |
| D28 | -1.77771 | 0.00559  | 0.00000 | 0.15180  | 0.15211  | -1.62559 |
| D29 | 0.34910  | 0.00122  | 0.00000 | 0.11577  | 0.11543  | 0.46453  |

|     |          |          |         |          |          |          |
|-----|----------|----------|---------|----------|----------|----------|
| D30 | 2.35557  | 0.00412  | 0.00000 | 0.14202  | 0.14200  | 2.49757  |
| D31 | -1.16979 | 0.00137  | 0.00000 | 0.09425  | 0.09464  | -1.07515 |
| D32 | 0.85100  | 0.00555  | 0.00000 | 0.15663  | 0.15553  | 1.00653  |
| D33 | 2.99554  | 0.00286  | 0.00000 | 0.09336  | 0.09510  | 3.09064  |
| D34 | 3.02004  | 0.00056  | 0.00000 | 0.09425  | 0.09399  | 3.11403  |
| D35 | -1.24236 | 0.00473  | 0.00000 | 0.15663  | 0.15488  | -1.08748 |
| D36 | 0.90218  | 0.00204  | 0.00000 | 0.09336  | 0.09445  | 0.99664  |
| D37 | 0.93828  | -0.00022 | 0.00000 | 0.08456  | 0.08457  | 1.02285  |
| D38 | 2.95907  | 0.00395  | 0.00000 | 0.14694  | 0.14546  | 3.10453  |
| D39 | -1.17957 | 0.00127  | 0.00000 | 0.08367  | 0.08503  | -1.09454 |
| D40 | -0.50822 | -0.00373 | 0.00000 | 0.08056  | 0.08038  | -0.42783 |
| D41 | 1.54113  | 0.00051  | 0.00000 | 0.11545  | 0.11437  | 1.65549  |
| D42 | -2.65970 | 0.01184  | 0.00000 | 0.20967  | 0.21094  | -2.44876 |
| D43 | 2.96654  | 0.00303  | 0.00000 | 0.05946  | 0.05912  | 3.02566  |
| D44 | 0.85235  | 0.00531  | 0.00000 | 0.06908  | 0.06990  | 0.92225  |
| D45 | -1.19951 | -0.00562 | 0.00000 | -0.04313 | -0.04362 | -1.24313 |
| D46 | -3.14157 | 0.00108  | 0.00000 | 0.02327  | 0.02336  | -3.11821 |
| D47 | 0.00003  | 0.00028  | 0.00000 | 0.00725  | 0.00734  | 0.00737  |
| D48 | 0.00000  | 0.00051  | 0.00000 | 0.00878  | 0.00868  | 0.00868  |
| D49 | -3.14159 | -0.00028 | 0.00000 | -0.00724 | -0.00734 | 3.13426  |

| Item                 | Value    | Threshold | Converged? |
|----------------------|----------|-----------|------------|
| Maximum Force        | 0.027796 | 0.000450  | NO         |
| RMS Force            | 0.005093 | 0.000300  | NO         |
| Maximum Displacement | 1.391131 | 0.001800  | NO         |
| RMS Displacement     | 0.194765 | 0.001200  | NO         |

Predicted change in Energy=-1.311278D-02

GradGradGradGradGradGradGradGradGradGradGradGradGradGradGradGradGrad

Input orientation:

| Center Number | Atomic Number | Atomic Type | Coordinates (Angstroms) |           |           |
|---------------|---------------|-------------|-------------------------|-----------|-----------|
|               |               |             | X                       | Y         | Z         |
| 1             | 6             | 0           | -0.435568               | -1.953352 | -1.239460 |
| 2             | 6             | 0           | -1.750210               | -1.658620 | -1.375845 |
| 3             | 7             | 0           | -2.127823               | -0.956321 | -0.242960 |
| 4             | 6             | 0           | -1.027603               | -0.745732 | 0.507591  |
| 5             | 7             | 0           | -0.016954               | -1.454035 | -0.015499 |
| 6             | 6             | 0           | 1.364065                | -1.495263 | 0.480106  |
| 7             | 6             | 0           | 2.211817                | -0.459969 | -0.241870 |
| 8             | 1             | 0           | 0.229001                | -2.497896 | -1.886308 |
| 9             | 1             | 0           | -2.435339               | -1.876905 | -2.172818 |
| 10            | 1             | 0           | 1.371114                | -1.276646 | 1.549108  |
| 11            | 1             | 0           | 1.726117                | -2.518271 | 0.348518  |



|    |    |   |           |           |           |
|----|----|---|-----------|-----------|-----------|
| 12 | 1  | 0 | 2.243193  | -0.675762 | -1.319083 |
| 13 | 1  | 0 | 1.725407  | 0.504485  | -0.063569 |
| 14 | 35 | 0 | -0.589200 | 1.904941  | 0.537529  |
| 15 | 1  | 0 | -1.018813 | -0.267995 | 1.469498  |
| 16 | 6  | 0 | -3.348960 | -0.232896 | -0.061300 |
| 17 | 6  | 0 | -4.452877 | -0.468079 | -0.751930 |
| 18 | 1  | 0 | -3.264518 | 0.535335  | 0.693682  |
| 19 | 1  | 0 | -5.340187 | 0.126748  | -0.585036 |
| 20 | 1  | 0 | -4.533036 | -1.235258 | -1.513592 |
| 21 | 8  | 0 | 3.506630  | -0.518491 | 0.341238  |
| 22 | 1  | 0 | 4.084092  | 0.053104  | -0.170848 |

-----  
Distance matrix (angstroms):

|    |    | 1        | 2        | 3        | 4        | 5        |
|----|----|----------|----------|----------|----------|----------|
| 1  | C  | 0.000000 |          |          |          |          |
| 2  | C  | 1.354161 | 0.000000 |          |          |          |
| 3  | N  | 2.202455 | 1.385367 | 0.000000 |          |          |
| 4  | C  | 2.204776 | 2.214240 | 1.348392 | 0.000000 |          |
| 5  | N  | 1.386591 | 2.212820 | 2.180648 | 1.340421 | 0.000000 |
| 6  | C  | 2.530896 | 3.629043 | 3.606462 | 2.506517 | 1.467834 |
| 7  | C  | 3.199066 | 4.291890 | 4.367934 | 3.337244 | 2.450883 |
| 8  | H  | 1.075450 | 2.209578 | 3.260624 | 3.221783 | 2.156401 |
| 9  | H  | 2.208186 | 1.073413 | 2.160183 | 3.232007 | 3.268246 |
| 10 | H  | 3.390891 | 4.294639 | 3.944196 | 2.668421 | 2.099094 |
| 11 | H  | 2.741111 | 3.974579 | 4.200284 | 3.278746 | 2.074464 |
| 12 | H  | 2.968895 | 4.112968 | 4.510270 | 3.746964 | 2.722738 |
| 13 | H  | 3.477571 | 4.298954 | 4.124745 | 3.077066 | 2.621819 |
| 14 | Br | 4.250614 | 4.208077 | 3.341160 | 2.686850 | 3.451960 |
| 15 | H  | 3.243309 | 3.250347 | 2.153186 | 1.074046 | 2.148402 |
| 16 | C  | 3.582720 | 2.513308 | 1.430916 | 2.444450 | 3.549020 |
| 17 | C  | 4.310741 | 3.018453 | 2.429672 | 3.660053 | 4.603461 |
| 18 | H  | 4.234803 | 3.374834 | 2.096286 | 2.584483 | 3.873914 |
| 19 | H  | 5.367529 | 4.086667 | 3.407247 | 4.533590 | 5.582119 |
| 20 | H  | 4.168939 | 2.818213 | 2.734476 | 4.075890 | 4.763102 |
| 21 | O  | 4.483119 | 5.646471 | 5.681553 | 4.542971 | 3.663079 |
| 22 | H  | 5.059163 | 6.198476 | 6.293809 | 5.218031 | 4.371976 |
|    |    | 6        | 7        | 8        | 9        | 10       |
| 6  | C  | 0.000000 |          |          |          |          |
| 7  | C  | 1.520449 | 0.000000 |          |          |          |
| 8  | H  | 2.809548 | 3.284643 | 0.000000 |          |          |
| 9  | H  | 4.649637 | 5.228033 | 2.750714 | 0.000000 |          |
| 10 | H  | 1.091150 | 2.140408 | 3.820728 | 5.357437 | 0.000000 |
| 11 | H  | 1.093134 | 2.195692 | 2.690022 | 4.907770 | 1.763257 |
| 12 | H  | 2.163684 | 1.099062 | 2.774687 | 4.905127 | 3.057467 |

|    |    |          |          |          |          |          |
|----|----|----------|----------|----------|----------|----------|
| 13 | H  | 2.103603 | 1.094787 | 3.817840 | 5.237534 | 2.428720 |
| 14 | Br | 3.921725 | 3.747794 | 5.092093 | 5.005654 | 3.871514 |
| 15 | H  | 2.857130 | 3.660957 | 4.217930 | 4.226299 | 2.595278 |
| 16 | C  | 4.909104 | 5.568340 | 4.611148 | 2.827715 | 5.095285 |
| 17 | C  | 6.034056 | 6.684188 | 5.227518 | 2.841508 | 6.314066 |
| 18 | H  | 5.058926 | 5.644124 | 5.297312 | 3.837090 | 5.050160 |
| 19 | H  | 6.979430 | 7.582530 | 6.292687 | 3.869601 | 7.180922 |
| 20 | H  | 6.230428 | 6.907343 | 4.940665 | 2.290550 | 6.651378 |
| 21 | O  | 2.358803 | 1.421260 | 4.429769 | 6.593388 | 2.567914 |
| 22 | H  | 3.196831 | 1.942602 | 4.930733 | 7.087722 | 3.476598 |
|    |    | 11       | 12       | 13       | 14       | 15       |
| 11 | H  | 0.000000 |          |          |          |          |
| 12 | H  | 2.538325 | 0.000000 |          |          |          |
| 13 | H  | 3.050716 | 1.799278 | 0.000000 |          |          |
| 14 | Br | 4.996121 | 4.257873 | 2.771281 | 0.000000 |          |
| 15 | H  | 3.722228 | 4.310817 | 3.236937 | 2.403078 | 0.000000 |
| 16 | C  | 5.580977 | 5.748941 | 5.127664 | 3.541924 | 2.788218 |
| 17 | C  | 6.602593 | 6.723254 | 6.292131 | 4.714014 | 4.094822 |
| 18 | H  | 5.860895 | 5.987726 | 5.047151 | 3.009574 | 2.508071 |
| 19 | H  | 7.602651 | 7.660972 | 7.094873 | 5.195575 | 4.801167 |
| 20 | H  | 6.655116 | 6.802070 | 6.655628 | 5.442590 | 4.710009 |
| 21 | O  | 2.677573 | 2.092289 | 2.093587 | 4.763127 | 4.670691 |
| 22 | H  | 3.527287 | 2.288798 | 2.403882 | 5.076491 | 5.369682 |
|    |    | 16       | 17       | 18       | 19       | 20       |
| 16 | C  | 0.000000 |          |          |          |          |
| 17 | C  | 1.323220 | 0.000000 |          |          |          |
| 18 | H  | 1.080420 | 2.123400 | 0.000000 |          |          |
| 19 | H  | 2.090126 | 1.081199 | 2.471935 | 0.000000 |          |
| 20 | H  | 2.125068 | 1.084028 | 3.100999 | 1.835420 | 0.000000 |
| 21 | O  | 6.873334 | 8.034383 | 6.861722 | 8.918547 | 8.281931 |
| 22 | H  | 7.439359 | 8.572580 | 7.414987 | 9.433664 | 8.815766 |
|    |    | 21       | 22       |          |          |          |
| 21 | O  | 0.000000 |          |          |          |          |
| 22 | H  | 0.960424 | 0.000000 |          |          |          |

Stoichiometry C7H11BrN2O

Framework group C1[X(C7H11BrN2O)]

Deg. of freedom 60

Full point group C1 NOp 1

Largest Abelian subgroup C1 NOp 1

Largest concise Abelian subgroup C1 NOp 1

Standard orientation:

-----

| Center | Atomic | Atomic | Coordinates (Angstroms) |   |   |
|--------|--------|--------|-------------------------|---|---|
| Number | Number | Type   | X                       | Y | Z |

|    |    |   |           |           |           |
|----|----|---|-----------|-----------|-----------|
| 1  | 6  | 0 | 0.006709  | -2.205639 | -0.547039 |
| 2  | 6  | 0 | -1.323601 | -1.962820 | -0.618225 |
| 3  | 7  | 0 | -1.593353 | -0.923494 | 0.257147  |
| 4  | 6  | 0 | -0.422871 | -0.485181 | 0.763124  |
| 5  | 7  | 0 | 0.544402  | -1.333688 | 0.387425  |
| 6  | 6  | 0 | 1.973036  | -1.219214 | 0.704342  |
| 7  | 6  | 0 | 2.700923  | -0.486107 | -0.411230 |
| 8  | 1  | 0 | 0.611159  | -2.937847 | -1.052118 |
| 9  | 1  | 0 | -2.086821 | -2.426724 | -1.213628 |
| 10 | 1  | 0 | 2.093435  | -0.660362 | 1.633749  |
| 11 | 1  | 0 | 2.350193  | -2.230994 | 0.874625  |
| 12 | 1  | 0 | 2.617672  | -1.045279 | -1.353745 |
| 13 | 1  | 0 | 2.207374  | 0.486705  | -0.503992 |
| 14 | 35 | 0 | -0.068052 | 2.023831  | -0.130253 |
| 15 | 1  | 0 | -0.321003 | 0.282960  | 1.506869  |
| 16 | 6  | 0 | -2.808578 | -0.171774 | 0.332411  |
| 17 | 6  | 0 | -3.975208 | -0.613516 | -0.108893 |
| 18 | 1  | 0 | -2.664068 | 0.801817  | 0.777996  |
| 19 | 1  | 0 | -4.856485 | 0.009506  | -0.044205 |
| 20 | 1  | 0 | -4.116250 | -1.588347 | -0.561584 |
| 21 | 8  | 0 | 4.054340  | -0.358476 | 0.003443  |
| 22 | 1  | 0 | 4.552100  | 0.008063  | -0.731607 |

Rotational constants (GHZ): 0.9068064 0.5736435 0.3724779

Standard basis: 6-311++G(d,p) (5D, 7F)

There are 358 symmetry adapted cartesian basis functions of A symmetry.

There are 345 symmetry adapted basis functions of A symmetry.

345 basis functions, 553 primitive gaussians, 358 cartesian basis functions  
55 alpha electrons 55 beta electrons

nuclear repulsion energy 882.3931666386 Hartrees.

NAtoms= 22 NActive= 22 NUniq= 22 SFac= 1.00D+00 NAtFMM= 60 NAOKFM=F

Big=F

Integral buffers will be 131072 words long.

Raffenetti 2 integral format.

Two-electron integral symmetry is turned on.

One-electron integrals computed using PRISM.

NBasis= 345 RedAO= T EigKep= 4.43D-06 NBF= 345

NBsUse= 345 1.00D-06 EigRej= -1.00D+00 NBFU= 345

Initial guess from the checkpoint file: "."

B after Tr= 0.000000 0.000000 0.000000

Rot= 0.998995 0.037985 -0.000480 0.023779 Ang= 5.14 deg.

ExpMin= 3.50D-02 ExpMax= 4.40D+05 ExpMxC= 1.51D+04 IAcc=3 IRadAn= 5 AccDes=  
0.00D+00

Harris functional with IExCor= 402 and IRadAn= 5 diagonalized for initial guess.  
 HarFok: IExCor= 402 AccDes= 0.00D+00 IRadAn= 5 IDoV= 1 UseB2=F ITyADJ=14  
 ICtDFT= 3500011 ScaDFX= 1.000000 1.000000 1.000000 1.000000  
 FoFCou: FMM=F IPFlag= 0 FMFlag= 100000 FMFlg1= 0  
 NFxFlg= 0 DoJE=T BraDBF=F KetDBF=T FulRan=T  
 wScrn= 0.000000 ICntrl= 500 IOpCl= 0 I1Cent= 200000004 NGrid= 0  
 NMat0= 1 NMatS0= 1 NMatT0= 0 NMatD0= 1 NMtDS0= 0  
 NMtDT0= 0

Petite list used in FoFCou.

Keep R1 ints in memory in canonical form, NReq=1804729152.

Requested convergence on RMS density matrix=1.00D-08 within 128 cycles.

Requested convergence on MAX density matrix=1.00D-06.

Requested convergence on energy=1.00D-06.

No special actions if energy rises.

SCF Done: E(RB3LYP) = -3032.33172231 A.U. after 15 cycles

NFock= 15 Conv=0.20D-08 -V/T= 2.0016

Calling FoFJK, ICntrl= 2127 FMM=F ISym2X=0 I1Cent= 0 IOpClX= 0 NMat=1 NMatS=1  
 NMatT=0.

\*\*\*\*\* Axes restored to original set \*\*\*\*\*

| Center<br>Number | Atomic<br>Number | Forces (Hartrees/Bohr) |              |              |
|------------------|------------------|------------------------|--------------|--------------|
|                  |                  | X                      | Y            | Z            |
| 1                | 6                | -0.003166454           | -0.006591672 | -0.003588083 |
| 2                | 6                | 0.005082323            | -0.004673894 | -0.004888225 |
| 3                | 7                | -0.010980342           | 0.013373676  | -0.004384521 |
| 4                | 6                | -0.000015461           | -0.004579558 | 0.018363268  |
| 5                | 7                | 0.002322527            | 0.002843360  | -0.001234563 |
| 6                | 6                | -0.003081934           | -0.003827644 | 0.001011127  |
| 7                | 6                | -0.001755860           | 0.001717539  | 0.002083207  |
| 8                | 1                | -0.000048073           | -0.000489634 | -0.000481504 |
| 9                | 1                | 0.000102150            | 0.000136375  | -0.000768251 |
| 10               | 1                | -0.002578412           | 0.000095350  | -0.000510682 |
| 11               | 1                | 0.002257906            | 0.001583034  | -0.000845024 |
| 12               | 1                | -0.000027895           | 0.000768447  | 0.000902382  |
| 13               | 1                | 0.002576899            | 0.002565545  | -0.004544927 |
| 14               | 35               | 0.002490948            | 0.011675221  | -0.002705970 |
| 15               | 1                | -0.001224603           | -0.006940928 | 0.000447305  |
| 16               | 6                | 0.007091045            | -0.007009810 | 0.003603990  |
| 17               | 6                | -0.005306079           | -0.002028392 | -0.004319111 |
| 18               | 1                | 0.000922618            | 0.001443702  | 0.000000416  |
| 19               | 1                | 0.001063340            | 0.001221177  | 0.001522744  |
| 20               | 1                | 0.000912928            | -0.000194771 | 0.000736022  |

|    |   |             |              |              |
|----|---|-------------|--------------|--------------|
| 21 | 8 | 0.001486595 | -0.002758843 | -0.002094877 |
| 22 | 1 | 0.001875837 | 0.001671720  | 0.001695278  |

-----

Cartesian Forces: Max 0.018363268 RMS 0.004459658

GradGradGradGradGradGradGradGradGradGradGradGradGradGradGradGradGradGradGrad

Berny optimization.

Using GEDIIS/GDIIS optimizer.

FormGI is forming the generalized inverse of G from B-inverse, IUseBI=4.

Internal Forces: Max 0.059742140 RMS 0.010489947

Search for a local minimum.

Step number 2 out of a maximum of 116

All quantities printed in internal units (Hartrees-Bohrs-Radians)

Mixed Optimization -- RFO/linear search

Update second derivatives using D2CorX and points 1 2

DE= -6.02D-03 DEPred=-1.31D-02 R= 4.59D-01

Trust test= 4.59D-01 RLast= 6.22D-01 DXMaxT set to 3.00D-01

ITU= 0 0

Use linear search instead of GDIIS.

|                 |         |         |         |         |         |
|-----------------|---------|---------|---------|---------|---------|
| Eigenvalues --- | 0.00245 | 0.00310 | 0.00754 | 0.01086 | 0.01276 |
| Eigenvalues --- | 0.01510 | 0.01822 | 0.01855 | 0.02036 | 0.02115 |
| Eigenvalues --- | 0.02198 | 0.02336 | 0.02410 | 0.02464 | 0.03060 |
| Eigenvalues --- | 0.03069 | 0.04214 | 0.04796 | 0.05328 | 0.05743 |
| Eigenvalues --- | 0.08342 | 0.09083 | 0.11335 | 0.13178 | 0.15324 |
| Eigenvalues --- | 0.15471 | 0.15983 | 0.15999 | 0.15999 | 0.16000 |
| Eigenvalues --- | 0.16038 | 0.17530 | 0.21692 | 0.22440 | 0.22742 |
| Eigenvalues --- | 0.23144 | 0.23544 | 0.24348 | 0.27840 | 0.30199 |
| Eigenvalues --- | 0.33839 | 0.33865 | 0.33875 | 0.33892 | 0.34151 |
| Eigenvalues --- | 0.34581 | 0.34646 | 0.35541 | 0.36279 | 0.36305 |
| Eigenvalues --- | 0.37197 | 0.40780 | 0.42960 | 0.45574 | 0.48376 |
| Eigenvalues --- | 0.53160 | 0.53341 | 0.55465 | 0.60070 | 0.70554 |

RFO step: Lambda=-2.39542645D-02 EMin= 2.45176711D-03

Quartic linear search produced a step of -0.28326.

Maximum step size ( 0.300) exceeded in Quadratic search.

-- Step size scaled by 0.915

Iteration 1 RMS(Cart)= 0.18567310 RMS(Int)= 0.01704051

Iteration 2 RMS(Cart)= 0.05859751 RMS(Int)= 0.00184204

Iteration 3 RMS(Cart)= 0.00199067 RMS(Int)= 0.00124622

Iteration 4 RMS(Cart)= 0.00000515 RMS(Int)= 0.00124622

Iteration 5 RMS(Cart)= 0.00000002 RMS(Int)= 0.00124622

| Variable | Old X   | -DE/DX   | Delta X<br>(Linear) | Delta X<br>(Quad) | Delta X<br>(Total) | New X   |
|----------|---------|----------|---------------------|-------------------|--------------------|---------|
| R1       | 2.55899 | -0.00203 | 0.00167             | -0.01038          | -0.00882           | 2.55017 |
| R2       | 2.62028 | 0.00627  | -0.00048            | 0.00788           | 0.00745            | 2.62773 |

|     |         |          |          |          |          |         |
|-----|---------|----------|----------|----------|----------|---------|
| R3  | 2.03231 | 0.00051  | 0.00106  | -0.00452 | -0.00346 | 2.02885 |
| R4  | 2.61796 | 0.00804  | -0.00091 | 0.01182  | 0.01081  | 2.62878 |
| R5  | 2.02846 | 0.00048  | 0.00223  | -0.01025 | -0.00802 | 2.02044 |
| R6  | 2.54809 | 0.00734  | 0.00214  | -0.00404 | -0.00181 | 2.54628 |
| R7  | 2.70404 | -0.00712 | 0.02092  | -0.11023 | -0.08931 | 2.61473 |
| R8  | 2.53303 | 0.00209  | 0.00561  | -0.02552 | -0.01982 | 2.51321 |
| R9  | 2.02965 | -0.00270 | -0.00217 | 0.00733  | 0.00516  | 2.03481 |
| R10 | 2.77380 | 0.00099  | 0.00204  | -0.00868 | -0.00664 | 2.76716 |
| R11 | 2.87323 | 0.01654  | 0.00752  | -0.01154 | -0.00403 | 2.86921 |
| R12 | 2.06197 | -0.00050 | 0.00016  | -0.00143 | -0.00127 | 2.06071 |
| R13 | 2.06572 | -0.00063 | 0.00141  | -0.00763 | -0.00622 | 2.05950 |
| R14 | 2.07693 | -0.00104 | -0.00029 | 0.00006  | -0.00023 | 2.07670 |
| R15 | 2.06885 | 0.00911  | 0.00127  | 0.00558  | 0.00685  | 2.07570 |
| R16 | 2.68579 | 0.00295  | 0.00468  | -0.01960 | -0.01492 | 2.67087 |
| R17 | 5.23696 | 0.00324  | 0.00600  | 0.01470  | 0.02070  | 5.25766 |
| R18 | 2.50052 | 0.00403  | 0.00144  | -0.00409 | -0.00265 | 2.49788 |
| R19 | 2.04170 | 0.00110  | 0.00955  | -0.04483 | -0.03528 | 2.00642 |
| R20 | 2.04317 | 0.00003  | 0.00914  | -0.04419 | -0.03506 | 2.00811 |
| R21 | 2.04852 | -0.00045 | 0.00762  | -0.03747 | -0.02985 | 2.01866 |
| R22 | 1.81494 | 0.00121  | -0.00023 | 0.00210  | 0.00187  | 1.81681 |
| A1  | 1.87928 | 0.00013  | -0.00238 | 0.01050  | 0.00840  | 1.88769 |
| A2  | 2.27777 | -0.00048 | 0.00149  | -0.00780 | -0.00639 | 2.27138 |
| A3  | 2.12551 | 0.00040  | 0.00106  | -0.00362 | -0.00264 | 2.12287 |
| A4  | 1.86773 | 0.00062  | 0.00153  | -0.00652 | -0.00489 | 1.86284 |
| A5  | 2.27859 | -0.00070 | 0.00126  | -0.00712 | -0.00595 | 2.27264 |
| A6  | 2.13680 | 0.00010  | -0.00278 | 0.01376  | 0.01090  | 2.14770 |
| A7  | 1.88804 | -0.00024 | 0.00309  | -0.01204 | -0.00905 | 1.87899 |
| A8  | 2.20523 | 0.00268  | -0.00951 | 0.05106  | 0.04131  | 2.24654 |
| A9  | 2.14922 | -0.00165 | 0.00450  | -0.02342 | -0.01969 | 2.12953 |
| A10 | 1.89174 | -0.00244 | -0.00477 | 0.01984  | 0.01546  | 1.90720 |
| A11 | 2.18298 | 0.00164  | 0.00155  | -0.00563 | -0.00460 | 2.17839 |
| A12 | 2.18752 | 0.00047  | 0.00464  | -0.02274 | -0.01840 | 2.16913 |
| A13 | 1.88297 | 0.00254  | 0.00479  | -0.01515 | -0.01051 | 1.87246 |
| A14 | 2.17971 | -0.00453 | -0.00442 | 0.01555  | 0.01037  | 2.19008 |
| A15 | 2.20491 | 0.00280  | -0.00050 | 0.00973  | 0.00850  | 2.21341 |
| A16 | 1.92318 | 0.03788  | 0.01038  | 0.02842  | 0.03845  | 1.96163 |
| A17 | 1.90841 | -0.01216 | -0.00987 | 0.04119  | 0.03109  | 1.93950 |
| A18 | 1.87262 | -0.01179 | 0.00083  | -0.03570 | -0.03442 | 1.83819 |
| A19 | 1.90200 | -0.00116 | 0.00840  | -0.01548 | -0.00837 | 1.89363 |
| A20 | 1.97730 | -0.01932 | -0.00801 | -0.02251 | -0.03037 | 1.94693 |
| A21 | 1.87895 | 0.00554  | -0.00252 | 0.00609  | 0.00361  | 1.88256 |
| A22 | 1.92584 | -0.00759 | -0.00583 | 0.00337  | -0.00770 | 1.91814 |
| A23 | 1.84917 | 0.05017  | 0.01217  | 0.11344  | 0.12388  | 1.97305 |
| A24 | 1.85991 | -0.01955 | 0.02592  | -0.15717 | -0.13027 | 1.72964 |

|     |          |          |          |          |          |          |
|-----|----------|----------|----------|----------|----------|----------|
| A25 | 1.92333  | -0.01302 | -0.01766 | 0.04120  | 0.02070  | 1.94403  |
| A26 | 1.94768  | 0.00685  | -0.01022 | 0.02168  | 0.00886  | 1.95654  |
| A27 | 1.95436  | -0.01488 | -0.00409 | -0.02422 | -0.02127 | 1.93308  |
| A28 | 2.58981  | 0.05974  | 0.00304  | 0.08756  | 0.09060  | 2.68042  |
| A29 | 2.16017  | 0.00164  | -0.00520 | 0.02787  | 0.02265  | 2.18281  |
| A30 | 1.96221  | -0.00135 | 0.01058  | -0.05258 | -0.04202 | 1.92019  |
| A31 | 2.16072  | -0.00029 | -0.00535 | 0.02449  | 0.01911  | 2.17984  |
| A32 | 2.10170  | -0.00232 | 0.01136  | -0.05898 | -0.04763 | 2.05407  |
| A33 | 2.15819  | 0.00010  | -0.00463 | 0.02188  | 0.01723  | 2.17543  |
| A34 | 2.02319  | 0.00222  | -0.00670 | 0.03690  | 0.03020  | 2.05339  |
| A35 | 1.88021  | 0.00376  | 0.00876  | -0.03134 | -0.02258 | 1.85763  |
| D1  | 0.01881  | -0.00265 | -0.00885 | 0.00527  | -0.00354 | 0.01528  |
| D2  | -3.13398 | -0.00107 | -0.00786 | 0.01814  | 0.01045  | -3.12354 |
| D3  | 3.12232  | -0.00108 | 0.00352  | -0.02297 | -0.01947 | 3.10284  |
| D4  | -0.03048 | 0.00050  | 0.00451  | -0.01010 | -0.00549 | -0.03597 |
| D5  | -0.11327 | 0.00372  | 0.01591  | -0.01458 | 0.00111  | -0.11216 |
| D6  | -3.07573 | -0.00127 | 0.01652  | -0.07269 | -0.05605 | -3.13177 |
| D7  | 3.06239  | 0.00233  | 0.00484  | 0.01083  | 0.01555  | 3.07794  |
| D8  | 0.09994  | -0.00265 | 0.00546  | -0.04728 | -0.04161 | 0.05832  |
| D9  | 0.08181  | 0.00033  | -0.00118 | 0.00523  | 0.00412  | 0.08592  |
| D10 | 2.92590  | 0.00272  | -0.00646 | 0.05443  | 0.04875  | 2.97465  |
| D11 | -3.04970 | -0.00108 | -0.00208 | -0.00621 | -0.00850 | -3.05820 |
| D12 | -0.20561 | 0.00131  | -0.00737 | 0.04299  | 0.03613  | -0.16947 |
| D13 | -0.15396 | 0.00234  | 0.01167  | -0.01701 | -0.00544 | -0.15941 |
| D14 | -3.08622 | 0.00396  | 0.00377  | 0.02744  | 0.03101  | -3.05521 |
| D15 | -3.00972 | -0.00085 | 0.01985  | -0.07970 | -0.05898 | -3.06871 |
| D16 | 0.34121  | 0.00077  | 0.01194  | -0.03526 | -0.02253 | 0.31868  |
| D17 | 0.39110  | -0.00096 | -0.00792 | 0.01239  | 0.00440  | 0.39550  |
| D18 | -2.73727 | -0.00052 | -0.01165 | 0.03008  | 0.01819  | -2.71909 |
| D19 | -3.08956 | 0.00215  | -0.01474 | 0.07298  | 0.05849  | -3.03108 |
| D20 | 0.06525  | 0.00259  | -0.01848 | 0.09068  | 0.07227  | 0.13752  |
| D21 | 0.16501  | -0.00380 | -0.01701 | 0.01950  | 0.00273  | 0.16774  |
| D22 | 3.12417  | 0.00032  | -0.01814 | 0.07938  | 0.06108  | -3.09794 |
| D23 | 3.09659  | -0.00525 | -0.00950 | -0.02250 | -0.03145 | 3.06513  |
| D24 | -0.22745 | -0.00113 | -0.01062 | 0.03738  | 0.02690  | -0.20055 |
| D25 | 1.30392  | -0.01096 | -0.04339 | 0.03459  | -0.00929 | 1.29463  |
| D26 | -2.88914 | 0.00331  | -0.03300 | 0.05874  | 0.02652  | -2.86263 |
| D27 | -0.85610 | -0.00296 | -0.04053 | 0.06793  | 0.02746  | -0.82864 |
| D28 | -1.62559 | -0.01662 | -0.04309 | -0.03191 | -0.07572 | -1.70131 |
| D29 | 0.46453  | -0.00235 | -0.03270 | -0.00776 | -0.03992 | 0.42461  |
| D30 | 2.49757  | -0.00862 | -0.04022 | 0.00143  | -0.03897 | 2.45860  |
| D31 | -1.07515 | -0.00170 | -0.02681 | 0.07834  | 0.05189  | -1.02326 |
| D32 | 1.00653  | 0.00806  | -0.04405 | 0.19570  | 0.15416  | 1.16069  |
| D33 | 3.09064  | 0.00639  | -0.02694 | 0.14681  | 0.11684  | -3.07571 |

|     |          |          |          |          |          |          |
|-----|----------|----------|----------|----------|----------|----------|
| D34 | 3.11403  | -0.00913 | -0.02662 | 0.02011  | -0.00593 | 3.10810  |
| D35 | -1.08748 | 0.00063  | -0.04387 | 0.13747  | 0.09635  | -0.99113 |
| D36 | 0.99664  | -0.00104 | -0.02675 | 0.08858  | 0.05902  | 1.05566  |
| D37 | 1.02285  | -0.00291 | -0.02396 | 0.03761  | 0.01394  | 1.03680  |
| D38 | 3.10453  | 0.00685  | -0.04120 | 0.15497  | 0.11622  | -3.06244 |
| D39 | -1.09454 | 0.00518  | -0.02409 | 0.10609  | 0.07889  | -1.01565 |
| D40 | -0.42783 | -0.00765 | -0.02277 | -0.02526 | -0.04977 | -0.47761 |
| D41 | 1.65549  | 0.00558  | -0.03240 | 0.06693  | 0.03678  | 1.69227  |
| D42 | -2.44876 | -0.00610 | -0.05975 | 0.10829  | 0.04803  | -2.40073 |
| D43 | 3.02566  | -0.01844 | -0.01675 | 0.00213  | -0.01551 | 3.01015  |
| D44 | 0.92225  | -0.00072 | -0.01980 | 0.08525  | 0.06469  | 0.98694  |
| D45 | -1.24313 | 0.02239  | 0.01235  | 0.03294  | 0.04694  | -1.19619 |
| D46 | -3.11821 | 0.00030  | -0.00662 | 0.02798  | 0.02144  | -3.09677 |
| D47 | 0.00737  | 0.00054  | -0.00208 | 0.01261  | 0.01060  | 0.01798  |
| D48 | 0.00868  | -0.00020 | -0.00246 | 0.00774  | 0.00521  | 0.01389  |
| D49 | 3.13426  | 0.00004  | 0.00208  | -0.00763 | -0.00563 | 3.12864  |

| Item                 | Value    | Threshold | Converged? |
|----------------------|----------|-----------|------------|
| Maximum Force        | 0.059742 | 0.000450  | NO         |
| RMS Force            | 0.010490 | 0.000300  | NO         |
| Maximum Displacement | 1.427368 | 0.001800  | NO         |
| RMS Displacement     | 0.238062 | 0.001200  | NO         |

Predicted change in Energy=-1.570201D-02

GradGradGradGradGradGradGradGradGradGradGradGradGradGradGradGradGradGrad

Input orientation:

| Center Number | Atomic Number | Atomic Type | Coordinates (Angstroms) |           |           |
|---------------|---------------|-------------|-------------------------|-----------|-----------|
|               |               |             | X                       | Y         | Z         |
| 1             | 6             | 0           | -0.453672               | -1.892900 | -1.304917 |
| 2             | 6             | 0           | -1.775376               | -1.664710 | -1.453793 |
| 3             | 7             | 0           | -2.194909               | -0.983617 | -0.315711 |
| 4             | 6             | 0           | -1.103766               | -0.725050 | 0.431371  |
| 5             | 7             | 0           | -0.060389               | -1.375473 | -0.075618 |
| 6             | 6             | 0           | 1.300732                | -1.406586 | 0.463469  |
| 7             | 6             | 0           | 2.217434                | -0.409302 | -0.222369 |
| 8             | 1             | 0           | 0.234605                | -2.415248 | -1.942167 |
| 9             | 1             | 0           | -2.435186               | -1.925888 | -2.253518 |
| 10            | 1             | 0           | 1.304189                | -1.200115 | 1.534218  |
| 11            | 1             | 0           | 1.644168                | -2.430821 | 0.319411  |
| 12            | 1             | 0           | 2.257895                | -0.618391 | -1.300477 |
| 13            | 1             | 0           | 1.939375                | 0.635243  | -0.027130 |
| 14            | 35            | 0           | 0.130893                | 2.660272  | 0.580725  |
| 15            | 1             | 0           | -1.120943               | -0.274751 | 1.409320  |



|    |   |   |           |           |           |
|----|---|---|-----------|-----------|-----------|
| 16 | 6 | 0 | -3.412117 | -0.372287 | -0.072430 |
| 17 | 6 | 0 | -4.545448 | -0.665805 | -0.686118 |
| 18 | 1 | 0 | -3.297533 | 0.386523  | 0.661324  |
| 19 | 1 | 0 | -5.404851 | -0.092716 | -0.436686 |
| 20 | 1 | 0 | -4.653720 | -1.422726 | -1.432083 |
| 21 | 8 | 0 | 3.429042  | -0.735143 | 0.428346  |
| 22 | 1 | 0 | 4.119926  | -0.237387 | -0.018012 |

-----  
Distance matrix (angstroms):

|    |    | 1        | 2        | 3        | 4        | 5        |
|----|----|----------|----------|----------|----------|----------|
| 1  | C  | 0.000000 |          |          |          |          |
| 2  | C  | 1.349494 | 0.000000 |          |          |          |
| 3  | N  | 2.199371 | 1.391088 | 0.000000 |          |          |
| 4  | C  | 2.191162 | 2.210851 | 1.347435 | 0.000000 |          |
| 5  | N  | 1.390532 | 2.219055 | 2.183432 | 1.329934 | 0.000000 |
| 6  | C  | 2.538036 | 3.633863 | 3.606319 | 2.499427 | 1.464320 |
| 7  | C  | 3.241571 | 4.362910 | 4.450542 | 3.399624 | 2.478608 |
| 8  | H  | 1.073620 | 2.200418 | 3.255375 | 3.206507 | 2.156886 |
| 9  | H  | 2.197118 | 1.069169 | 2.168111 | 3.228516 | 3.268924 |
| 10 | H  | 3.410384 | 4.315991 | 3.963937 | 2.690763 | 2.117639 |
| 11 | H  | 2.707164 | 3.927398 | 4.151662 | 3.236253 | 2.043360 |
| 12 | H  | 2.996163 | 4.169600 | 4.575000 | 3.783046 | 2.729083 |
| 13 | H  | 3.708224 | 4.596142 | 4.449302 | 3.364717 | 2.836262 |
| 14 | Br | 4.962735 | 5.145736 | 4.414848 | 3.606535 | 4.093240 |
| 15 | H  | 3.229666 | 3.249259 | 2.152121 | 1.076777 | 2.131057 |
| 16 | C  | 3.547349 | 2.501488 | 1.383656 | 2.388879 | 3.498639 |
| 17 | C  | 4.316399 | 3.043096 | 2.400674 | 3.619042 | 4.581713 |
| 18 | H  | 4.141185 | 3.316359 | 2.011879 | 2.470038 | 3.758565 |
| 19 | H  | 5.339351 | 4.083964 | 3.333477 | 4.433137 | 5.508096 |
| 20 | H  | 4.228195 | 2.888579 | 2.735846 | 4.069568 | 4.789668 |
| 21 | O  | 4.406822 | 5.611819 | 5.678397 | 4.532820 | 3.583313 |
| 22 | H  | 5.031366 | 6.233241 | 6.365738 | 5.265616 | 4.332850 |
|    |    | 6        | 7        | 8        | 9        | 10       |
| 6  | C  | 0.000000 |          |          |          |          |
| 7  | C  | 1.518319 | 0.000000 |          |          |          |
| 8  | H  | 2.817998 | 3.303504 | 0.000000 |          |          |
| 9  | H  | 4.648524 | 5.298346 | 2.732068 | 0.000000 |          |
| 10 | H  | 1.090480 | 2.131900 | 3.834816 | 5.371835 | 0.000000 |
| 11 | H  | 1.089843 | 2.169954 | 2.664929 | 4.849335 | 1.762379 |
| 12 | H  | 2.156135 | 1.098941 | 2.781037 | 4.964156 | 3.046876 |
| 13 | H  | 2.194907 | 1.098412 | 3.984859 | 5.536513 | 2.491948 |
| 14 | Br | 4.233392 | 3.797485 | 5.668919 | 5.970809 | 4.145884 |
| 15 | H  | 2.835524 | 3.718235 | 4.201393 | 4.227277 | 2.598685 |
| 16 | C  | 4.854679 | 5.631669 | 4.579103 | 2.850476 | 5.050758 |

|    |    |          |          |          |          |          |
|----|----|----------|----------|----------|----------|----------|
| 17 | C  | 6.004010 | 6.783615 | 5.242815 | 2.915091 | 6.279620 |
| 18 | H  | 4.939476 | 5.641729 | 5.206158 | 3.819318 | 4.945220 |
| 19 | H  | 6.892125 | 7.631867 | 6.282045 | 3.934503 | 7.079690 |
| 20 | H  | 6.248910 | 7.050049 | 5.014080 | 2.418640 | 6.659217 |
| 21 | O  | 2.231989 | 1.413363 | 4.318161 | 6.557396 | 2.440113 |
| 22 | H  | 3.089774 | 1.921143 | 4.851924 | 7.128675 | 3.356283 |
|    |    | 11       | 12       | 13       | 14       | 15       |
| 11 | H  | 0.000000 |          |          |          |          |
| 12 | H  | 2.507110 | 0.000000 |          |          |          |
| 13 | H  | 3.099675 | 1.815066 | 0.000000 |          |          |
| 14 | Br | 5.317661 | 4.337359 | 2.782236 | 0.000000 |          |
| 15 | H  | 3.671836 | 4.344840 | 3.501003 | 3.296669 | 0.000000 |
| 16 | C  | 5.473310 | 5.806695 | 5.445698 | 4.709135 | 2.730307 |
| 17 | C  | 6.514424 | 6.831190 | 6.646797 | 5.876721 | 4.033735 |
| 18 | H  | 5.698661 | 5.976729 | 5.287819 | 4.114674 | 2.394645 |
| 19 | H  | 7.465058 | 7.729175 | 7.391571 | 6.265663 | 4.668270 |
| 20 | H  | 6.614180 | 6.959504 | 7.048264 | 6.604150 | 4.676744 |
| 21 | O  | 2.464339 | 2.091422 | 2.074735 | 4.736016 | 4.677246 |
| 22 | H  | 3.324813 | 2.292823 | 2.348695 | 4.966618 | 5.431885 |
|    |    | 16       | 17       | 18       | 19       | 20       |
| 16 | C  | 0.000000 |          |          |          |          |
| 17 | C  | 1.321819 | 0.000000 |          |          |          |
| 18 | H  | 1.061752 | 2.116669 | 0.000000 |          |          |
| 19 | H  | 2.044953 | 1.062648 | 2.424064 | 0.000000 |          |
| 20 | H  | 2.119825 | 1.068231 | 3.081393 | 1.823169 | 0.000000 |
| 21 | O  | 6.869054 | 8.052287 | 6.823432 | 8.899363 | 8.322560 |
| 22 | H  | 7.533447 | 8.701644 | 7.474587 | 9.535072 | 8.965572 |
|    |    | 21       | 22       |          |          |          |
| 21 | O  | 0.000000 |          |          |          |          |
| 22 | H  | 0.961414 | 0.000000 |          |          |          |

Stoichiometry C7H11BrN2O

Framework group C1[X(C7H11BrN2O)]

Deg. of freedom 60

Full point group C1 NOp 1

Largest Abelian subgroup C1 NOP 1

Largest concise Abelian subgroup C1 NOp 1

Standard orientation:

| Center<br>Number | Atomic<br>Number | Atomic<br>Type | Coordinates (Angstroms) |           |           |
|------------------|------------------|----------------|-------------------------|-----------|-----------|
|                  |                  |                | X                       | Y         | Z         |
| 1                | 6                | 0              | -1.204684               | -2.000419 | -0.719494 |
| 2                | 6                | 0              | -2.326591               | -1.252410 | -0.773725 |
| 3                | 7                | 0              | -2.194007               | -0.260904 | 0.192952  |

|    |    |   |           |           |           |
|----|----|---|-----------|-----------|-----------|
| 4  | 6  | 0 | -0.960285 | -0.369840 | 0.723653  |
| 5  | 7  | 0 | -0.391485 | -1.489563 | 0.286147  |
| 6  | 6  | 0 | 0.925227  | -2.009358 | 0.660732  |
| 7  | 6  | 0 | 1.997472  | -1.653734 | -0.353721 |
| 8  | 1  | 0 | -0.929625 | -2.876840 | -1.275272 |
| 9  | 1  | 0 | -3.186768 | -1.342769 | -1.402259 |
| 10 | 1  | 0 | 1.233499  | -1.632484 | 1.636478  |
| 11 | 1  | 0 | 0.795670  | -3.088205 | 0.744761  |
| 12 | 1  | 0 | 1.725884  | -2.053340 | -1.340750 |
| 13 | 1  | 0 | 2.204199  | -0.575988 | -0.401011 |
| 14 | 35 | 0 | 1.518094  | 2.106802  | -0.131318 |
| 15 | 1  | 0 | -0.593031 | 0.214016  | 1.550506  |
| 16 | 6  | 0 | -2.988684 | 0.851501  | 0.406375  |
| 17 | 6  | 0 | -4.246178 | 0.972391  | 0.017404  |
| 18 | 1  | 0 | -2.432117 | 1.605438  | 0.905503  |
| 19 | 1  | 0 | -4.734918 | 1.896791  | 0.206713  |
| 20 | 1  | 0 | -4.798899 | 0.215138  | -0.494637 |
| 21 | 8  | 0 | 3.086836  | -2.348047 | 0.219699  |
| 22 | 1  | 0 | 3.808896  | -2.290976 | -0.412511 |

-----

Rotational constants (GHZ):      0.7105285      0.4963019      0.3081022

Standard basis: 6-311++G(d,p) (5D, 7F)

There are    358 symmetry adapted cartesian basis functions of A    symmetry.

There are    345 symmetry adapted basis functions of A    symmetry.

345 basis functions,    553 primitive gaussians,    358 cartesian basis functions

55 alpha electrons      55 beta electrons

nuclear repulsion energy      828.7660108736 Hartrees.

NAtoms=    22 NActive=    22 NUniq=    22 SFac= 1.00D+00 NatFMM=    60 NAOKFM=F

Big=F

Integral buffers will be    131072 words long.

Raffenetti 2 integral format.

Two-electron integral symmetry is turned on.

One-electron integrals computed using PRISM.

NBasis=    345 RedAO= T EigKep=    4.69D-06    NBF=    345

NBsUse=    345 1.00D-06 EigRej= -1.00D+00    NBFU=    345

Initial guess from the checkpoint file:    ""

B after Tr=    0.000000    0.000000    0.000000

Rot=    0.966487    -0.013635    0.011858    0.256078 Ang= -29.75 deg.

ExpMin= 3.50D-02 ExpMax= 4.40D+05 ExpMxC= 1.51D+04 IAcc=3 IRadAn=      5 AccDes=

0.00D+00

Harris functional with IExCor=    402 and IRadAn=      5 diagonalized for initial guess.

HarFok: IExCor=    402 AccDes= 0.00D+00 IRadAn=      5 IDoV= 1 UseB2=F ITyADJ=14

ICtDFT= 3500011 ScaDFX= 1.000000 1.000000 1.000000 1.000000

FoFCou: FMM=F IPFlag=      0 FMFlag=    100000 FMFlg1=      0

NFxFIlg= 0 DoJE=T BraDBF=F KetDBF=T FulRan=T  
wScrnr= 0.000000 ICntrl= 500 IOpCl= 0 l1Cent= 200000004 NGrid= 0  
0  
NMat0= 1 NMatS0= 1 NMatT0= 0 NMatD0= 1 NMtDS0= 0  
NMtDT0= 0

Petite list used in FoFCou.

Keep R1 ints in memory in canonical form, NReq=1804729152.

Requested convergence on RMS density matrix=1.00D-08 within 128 cycles.

Requested convergence on MAX density matrix=1.00D-06.

Requested convergence on energy=1.00D-06.

No special actions if energy rises.

SCF Done: E(RB3LYP) = -3032.31647411 A.U. after 14 cycles

NFock= 14 Conv=0.48D-08 -V/T= 2.0016

Calling FoFJK, ICntrl= 2127 FMM=F ISym2X=0 l1Cent= 0 IOpClX= 0 NMat=1 NMatS=1

NMatT=0.

\*\*\*\*\* Axes restored to original set \*\*\*\*\*

| Center Number | Atomic Number | Forces (Hartrees/Bohr) |              |              |
|---------------|---------------|------------------------|--------------|--------------|
|               |               | X                      | Y            | Z            |
| 1             | 6             | 0.006216762            | -0.008423227 | 0.003675097  |
| 2             | 6             | -0.000586708           | -0.002063175 | 0.003024367  |
| 3             | 7             | 0.026623470            | 0.003635247  | -0.013642802 |
| 4             | 6             | 0.000849815            | -0.011440657 | 0.019896453  |
| 5             | 7             | -0.008054992           | 0.009192214  | -0.009126969 |
| 6             | 6             | -0.009601516           | 0.000845705  | -0.003085140 |
| 7             | 6             | -0.000678991           | -0.005481717 | 0.005609883  |
| 8             | 1             | 0.001374574            | -0.000605759 | -0.001394196 |
| 9             | 1             | -0.003070011           | 0.000237715  | -0.002805547 |
| 10            | 1             | -0.005911733           | 0.000547933  | -0.000879985 |
| 11            | 1             | 0.005382162            | 0.000906032  | -0.000239050 |
| 12            | 1             | 0.000539115            | 0.002381825  | -0.000198685 |
| 13            | 1             | -0.006441770           | -0.002917040 | -0.002688715 |
| 14            | 35            | -0.003883451           | -0.010603008 | -0.000433218 |
| 15            | 1             | 0.000780730            | 0.006287096  | -0.002588547 |
| 16            | 6             | -0.014046007           | -0.000775072 | -0.002377987 |
| 17            | 6             | 0.003657359            | 0.003301519  | 0.003358431  |
| 18            | 1             | -0.005676115           | 0.012950419  | 0.010414886  |
| 19            | 1             | -0.012411110           | 0.005872714  | 0.002435424  |
| 20            | 1             | 0.000316362            | -0.007551762 | -0.006698093 |
| 21            | 8             | 0.019752999            | 0.003196162  | -0.007236088 |
| 22            | 1             | 0.004869055            | 0.000506836  | 0.004980482  |

Cartesian Forces: Max 0.026623470 RMS 0.007426648

GradGradGradGradGradGradGradGradGradGradGradGradGradGradGradGradGradGradGrad

Berny optimization.

Using GEDIIS/GDIIS optimizer.

FormGI is forming the generalized inverse of G from B-inverse, IUseBI=4.

Internal Forces: Max 0.052482729 RMS 0.010528099

Search for a local minimum.

Step number 3 out of a maximum of 116

All quantities printed in internal units (Hartrees-Bohrs-Radians)

Mixed Optimization -- RFO/linear search

Update second derivatives using D2CorX and points 3 2

DE= 1.52D-02 DEPred=-1.57D-02 R=-9.71D-01

Trust test=-9.71D-01 RLast= 4.41D-01 DXMaxT set to 1.50D-01

ITU= -1 0 0

Use linear search instead of GDIIS.

Energy rises -- skip Quadratic/GDIIS search.

Quartic linear search produced a step of -0.79215.

Iteration 1 RMS(Cart)= 0.16216851 RMS(Int)= 0.01174576

Iteration 2 RMS(Cart)= 0.03088221 RMS(Int)= 0.00039780

Iteration 3 RMS(Cart)= 0.00054016 RMS(Int)= 0.00018291

Iteration 4 RMS(Cart)= 0.00000021 RMS(Int)= 0.00018291

| Variable | Old X   | -DE/DX   | Delta X<br>(Linear) | Delta X<br>(Quad) | Delta X<br>(Total) | New X   |
|----------|---------|----------|---------------------|-------------------|--------------------|---------|
| R1       | 2.55017 | 0.00602  | 0.00699             | 0.00000           | 0.00700            | 2.55718 |
| R2       | 2.62773 | -0.00270 | -0.00590            | 0.00000           | -0.00590           | 2.62182 |
| R3       | 2.02885 | 0.00200  | 0.00274             | 0.00000           | 0.00274            | 2.03159 |
| R4       | 2.62878 | 0.00520  | -0.00856            | 0.00000           | -0.00855           | 2.62022 |
| R5       | 2.02044 | 0.00394  | 0.00635             | 0.00000           | 0.00635            | 2.02679 |
| R6       | 2.54628 | 0.00229  | 0.00143             | 0.00000           | 0.00142            | 2.54770 |
| R7       | 2.61473 | 0.03213  | 0.07075             | 0.00000           | 0.07075            | 2.68548 |
| R8       | 2.51321 | 0.00459  | 0.01570             | 0.00000           | 0.01569            | 2.52890 |
| R9       | 2.03481 | 0.00027  | -0.00409            | 0.00000           | -0.00409           | 2.03073 |
| R10      | 2.76716 | 0.00244  | 0.00526             | 0.00000           | 0.00526            | 2.77242 |
| R11      | 2.86921 | 0.00003  | 0.00319             | 0.00000           | 0.00319            | 2.87240 |
| R12      | 2.06071 | -0.00078 | 0.00100             | 0.00000           | 0.00100            | 2.06171 |
| R13      | 2.05950 | 0.00088  | 0.00493             | 0.00000           | 0.00493            | 2.06443 |
| R14      | 2.07670 | -0.00024 | 0.00018             | 0.00000           | 0.00018            | 2.07688 |
| R15      | 2.07570 | -0.01080 | -0.00543            | 0.00000           | -0.00543           | 2.07027 |
| R16      | 2.67087 | 0.01922  | 0.01182             | 0.00000           | 0.01182            | 2.68269 |
| R17      | 5.25766 | -0.00529 | -0.01640            | 0.00000           | -0.01640           | 5.24127 |
| R18      | 2.49788 | 0.00729  | 0.00210             | 0.00000           | 0.00210            | 2.49997 |
| R19      | 2.00642 | 0.01584  | 0.02795             | 0.00000           | 0.02795            | 2.03437 |
| R20      | 2.00811 | 0.01378  | 0.02777             | 0.00000           | 0.02777            | 2.03588 |
| R21      | 2.01866 | 0.00999  | 0.02365             | 0.00000           | 0.02365            | 2.04231 |

|     |          |          |          |         |          |          |
|-----|----------|----------|----------|---------|----------|----------|
| R22 | 1.81681  | 0.00145  | -0.00148 | 0.00000 | -0.00148 | 1.81533  |
| A1  | 1.88769  | -0.00466 | -0.00666 | 0.00000 | -0.00667 | 1.88101  |
| A2  | 2.27138  | 0.00254  | 0.00506  | 0.00000 | 0.00508  | 2.27646  |
| A3  | 2.12287  | 0.00226  | 0.00209  | 0.00000 | 0.00211  | 2.12498  |
| A4  | 1.86284  | 0.00274  | 0.00388  | 0.00000 | 0.00387  | 1.86671  |
| A5  | 2.27264  | -0.00029 | 0.00472  | 0.00000 | 0.00473  | 2.27737  |
| A6  | 2.14770  | -0.00245 | -0.00863 | 0.00000 | -0.00862 | 2.13908  |
| A7  | 1.87899  | -0.00104 | 0.00717  | 0.00000 | 0.00720  | 1.88619  |
| A8  | 2.24654  | -0.00242 | -0.03272 | 0.00000 | -0.03269 | 2.21385  |
| A9  | 2.12953  | 0.00408  | 0.01560  | 0.00000 | 0.01573  | 2.14526  |
| A10 | 1.90720  | -0.00249 | -0.01225 | 0.00000 | -0.01229 | 1.89491  |
| A11 | 2.17839  | 0.00169  | 0.00364  | 0.00000 | 0.00372  | 2.18211  |
| A12 | 2.16913  | 0.00271  | 0.01457  | 0.00000 | 0.01462  | 2.18375  |
| A13 | 1.87246  | 0.00652  | 0.00833  | 0.00000 | 0.00838  | 1.88083  |
| A14 | 2.19008  | 0.00666  | -0.00822 | 0.00000 | -0.00810 | 2.18198  |
| A15 | 2.21341  | -0.01342 | -0.00673 | 0.00000 | -0.00663 | 2.20678  |
| A16 | 1.96163  | -0.02027 | -0.03046 | 0.00000 | -0.03040 | 1.93123  |
| A17 | 1.93950  | -0.00273 | -0.02463 | 0.00000 | -0.02456 | 1.91494  |
| A18 | 1.83819  | 0.01515  | 0.02727  | 0.00000 | 0.02719  | 1.86538  |
| A19 | 1.89363  | 0.00570  | 0.00663  | 0.00000 | 0.00683  | 1.90046  |
| A20 | 1.94693  | 0.00477  | 0.02406  | 0.00000 | 0.02403  | 1.97096  |
| A21 | 1.88256  | -0.00196 | -0.00286 | 0.00000 | -0.00287 | 1.87969  |
| A22 | 1.91814  | 0.00917  | 0.00610  | 0.00000 | 0.00692  | 1.92506  |
| A23 | 1.97305  | -0.04683 | -0.09813 | 0.00000 | -0.09788 | 1.87517  |
| A24 | 1.72964  | 0.02984  | 0.10319  | 0.00000 | 0.10316  | 1.83280  |
| A25 | 1.94403  | 0.00881  | -0.01640 | 0.00000 | -0.01591 | 1.92812  |
| A26 | 1.95654  | -0.01014 | -0.00702 | 0.00000 | -0.00655 | 1.94998  |
| A27 | 1.93308  | 0.00980  | 0.01685  | 0.00000 | 0.01595  | 1.94904  |
| A28 | 2.68042  | -0.05248 | -0.07177 | 0.00000 | -0.07177 | 2.60864  |
| A29 | 2.18281  | -0.00195 | -0.01794 | 0.00000 | -0.01793 | 2.16488  |
| A30 | 1.92019  | 0.00858  | 0.03329  | 0.00000 | 0.03329  | 1.95348  |
| A31 | 2.17984  | -0.00663 | -0.01514 | 0.00000 | -0.01514 | 2.16470  |
| A32 | 2.05407  | 0.00369  | 0.03773  | 0.00000 | 0.03773  | 2.09180  |
| A33 | 2.17543  | -0.00326 | -0.01365 | 0.00000 | -0.01365 | 2.16178  |
| A34 | 2.05339  | -0.00040 | -0.02392 | 0.00000 | -0.02392 | 2.02947  |
| A35 | 1.85763  | 0.01126  | 0.01789  | 0.00000 | 0.01789  | 1.87552  |
| D1  | 0.01528  | 0.00012  | 0.00280  | 0.00000 | 0.00279  | 0.01807  |
| D2  | -3.12354 | -0.00200 | -0.00827 | 0.00000 | -0.00830 | -3.13184 |
| D3  | 3.10284  | 0.00310  | 0.01542  | 0.00000 | 0.01542  | 3.11826  |
| D4  | -0.03597 | 0.00098  | 0.00435  | 0.00000 | 0.00433  | -0.03164 |
| D5  | -0.11216 | 0.00315  | -0.00088 | 0.00000 | -0.00086 | -0.11302 |
| D6  | -3.13177 | 0.00618  | 0.04440  | 0.00000 | 0.04437  | -3.08740 |
| D7  | 3.07794  | 0.00044  | -0.01232 | 0.00000 | -0.01231 | 3.06563  |
| D8  | 0.05832  | 0.00347  | 0.03296  | 0.00000 | 0.03292  | 0.09125  |

|     |          |          |          |         |          |          |
|-----|----------|----------|----------|---------|----------|----------|
| D9  | 0.08592  | -0.00348 | -0.00326 | 0.00000 | -0.00326 | 0.08266  |
| D10 | 2.97465  | -0.00005 | -0.03862 | 0.00000 | -0.03875 | 2.93590  |
| D11 | -3.05820 | -0.00155 | 0.00673  | 0.00000 | 0.00677  | -3.05143 |
| D12 | -0.16947 | 0.00189  | -0.02862 | 0.00000 | -0.02872 | -0.19819 |
| D13 | -0.15941 | 0.00620  | 0.00431  | 0.00000 | 0.00434  | -0.15506 |
| D14 | -3.05521 | -0.00217 | -0.02456 | 0.00000 | -0.02453 | -3.07974 |
| D15 | -3.06871 | 0.00412  | 0.04672  | 0.00000 | 0.04658  | -3.02213 |
| D16 | 0.31868  | -0.00425 | 0.01785  | 0.00000 | 0.01771  | 0.33639  |
| D17 | 0.39550  | -0.00129 | -0.00349 | 0.00000 | -0.00348 | 0.39203  |
| D18 | -2.71909 | -0.00152 | -0.01441 | 0.00000 | -0.01436 | -2.73345 |
| D19 | -3.03108 | 0.00175  | -0.04633 | 0.00000 | -0.04638 | -3.07745 |
| D20 | 0.13752  | 0.00152  | -0.05725 | 0.00000 | -0.05726 | 0.08026  |
| D21 | 0.16774  | -0.00524 | -0.00216 | 0.00000 | -0.00220 | 0.16554  |
| D22 | -3.09794 | -0.00649 | -0.04838 | 0.00000 | -0.04836 | 3.13688  |
| D23 | 3.06513  | 0.00291  | 0.02491  | 0.00000 | 0.02483  | 3.08996  |
| D24 | -0.20055 | 0.00166  | -0.02131 | 0.00000 | -0.02134 | -0.22188 |
| D25 | 1.29463  | 0.00719  | 0.00736  | 0.00000 | 0.00742  | 1.30205  |
| D26 | -2.86263 | -0.00182 | -0.02100 | 0.00000 | -0.02112 | -2.88375 |
| D27 | -0.82864 | 0.00312  | -0.02175 | 0.00000 | -0.02176 | -0.85041 |
| D28 | -1.70131 | 0.00905  | 0.05998  | 0.00000 | 0.06009  | -1.64123 |
| D29 | 0.42461  | 0.00005  | 0.03162  | 0.00000 | 0.03155  | 0.45616  |
| D30 | 2.45860  | 0.00499  | 0.03087  | 0.00000 | 0.03090  | 2.48950  |
| D31 | -1.02326 | -0.00271 | -0.04110 | 0.00000 | -0.04115 | -1.06441 |
| D32 | 1.16069  | -0.01875 | -0.12212 | 0.00000 | -0.12251 | 1.03818  |
| D33 | -3.07571 | -0.00937 | -0.09255 | 0.00000 | -0.09214 | 3.11534  |
| D34 | 3.10810  | 0.01030  | 0.00469  | 0.00000 | 0.00464  | 3.11275  |
| D35 | -0.99113 | -0.00574 | -0.07632 | 0.00000 | -0.07671 | -1.06784 |
| D36 | 1.05566  | 0.00364  | -0.04676 | 0.00000 | -0.04635 | 1.00931  |
| D37 | 1.03680  | 0.00625  | -0.01104 | 0.00000 | -0.01106 | 1.02573  |
| D38 | -3.06244 | -0.00979 | -0.09206 | 0.00000 | -0.09242 | 3.12833  |
| D39 | -1.01565 | -0.00041 | -0.06249 | 0.00000 | -0.06205 | -1.07770 |
| D40 | -0.47761 | 0.01119  | 0.03943  | 0.00000 | 0.03975  | -0.43785 |
| D41 | 1.69227  | -0.00553 | -0.02913 | 0.00000 | -0.02947 | 1.66280  |
| D42 | -2.40073 | -0.00486 | -0.03805 | 0.00000 | -0.03804 | -2.43877 |
| D43 | 3.01015  | 0.02047  | 0.01229  | 0.00000 | 0.01249  | 3.02264  |
| D44 | 0.98694  | -0.00200 | -0.05125 | 0.00000 | -0.05118 | 0.93576  |
| D45 | -1.19619 | -0.01345 | -0.03718 | 0.00000 | -0.03746 | -1.23365 |
| D46 | -3.09677 | -0.00089 | -0.01698 | 0.00000 | -0.01700 | -3.11377 |
| D47 | 0.01798  | -0.00006 | -0.00840 | 0.00000 | -0.00842 | 0.00956  |
| D48 | 0.01389  | -0.00039 | -0.00413 | 0.00000 | -0.00411 | 0.00978  |
| D49 | 3.12864  | 0.00045  | 0.00446  | 0.00000 | 0.00447  | 3.13311  |

|  | Item          | Value    | Threshold | Converged? |
|--|---------------|----------|-----------|------------|
|  | Maximum Force | 0.052483 | 0.000450  | NO         |
|  | RMS Force     | 0.010528 | 0.000300  | NO         |

Maximum Displacement 1.106578 0.001800 NO

RMS Displacement 0.188413 0.001200 NO

Predicted change in Energy=-7.631934D-03

GradGradGradGradGradGradGradGradGradGradGradGradGradGradGradGradGradGradGrad

Input orientation:

| Center Number | Atomic Number | Atomic Type | Coordinates (Angstroms) |           |           |
|---------------|---------------|-------------|-------------------------|-----------|-----------|
|               |               |             | X                       | Y         | Z         |
| 1             | 6             | 0           | -0.438921               | -1.941638 | -1.253477 |
| 2             | 6             | 0           | -1.755275               | -1.660406 | -1.392292 |
| 3             | 7             | 0           | -2.141452               | -0.962573 | -0.258073 |
| 4             | 6             | 0           | -1.042870               | -0.742446 | 0.491770  |
| 5             | 7             | 0           | -0.025333               | -1.438891 | -0.028286 |
| 6             | 6             | 0           | 1.351649                | -1.478408 | 0.476444  |
| 7             | 6             | 0           | 2.214251                | -0.450996 | -0.238232 |
| 8             | 1             | 0           | 0.230488                | -2.481602 | -1.898541 |
| 9             | 1             | 0           | -2.435462               | -1.887362 | -2.189888 |
| 10            | 1             | 0           | 1.358053                | -1.262428 | 1.545844  |
| 11            | 1             | 0           | 1.709439                | -2.501836 | 0.342176  |
| 12            | 1             | 0           | 2.247898                | -0.664734 | -1.315759 |
| 13            | 1             | 0           | 1.770188                | 0.533908  | -0.056626 |
| 14            | 35            | 0           | -0.454682               | 2.077339  | 0.543707  |
| 15            | 1             | 0           | -1.039505               | -0.270565 | 1.457228  |
| 16            | 6             | 0           | -3.362619               | -0.262466 | -0.062870 |
| 17            | 6             | 0           | -4.473416               | -0.508668 | -0.737893 |
| 18            | 1             | 0           | -3.271504               | 0.502889  | 0.688707  |
| 19            | 1             | 0           | -5.355424               | 0.081629  | -0.552746 |
| 20            | 1             | 0           | -4.559743               | -1.272804 | -1.497270 |
| 21            | 8             | 0           | 3.496131                | -0.566609 | 0.360714  |
| 22            | 1             | 0           | 4.098460                | -0.008211 | -0.137485 |

Distance matrix (angstroms):

|   |   | 1        | 2        | 3        | 4        | 5        |
|---|---|----------|----------|----------|----------|----------|
| 1 | C | 0.000000 |          |          |          |          |
| 2 | C | 1.353200 | 0.000000 |          |          |          |
| 3 | N | 2.201820 | 1.386563 | 0.000000 |          |          |
| 4 | C | 2.201977 | 2.213563 | 1.348185 | 0.000000 |          |
| 5 | N | 1.387409 | 2.214109 | 2.181201 | 1.338235 | 0.000000 |
| 6 | C | 2.532459 | 3.630189 | 3.606571 | 2.505114 | 1.467104 |
| 7 | C | 3.208124 | 4.307165 | 4.385688 | 3.350625 | 2.456777 |
| 8 | H | 1.075070 | 2.207692 | 3.259552 | 3.218647 | 2.156512 |
| 9 | H | 2.205899 | 1.072531 | 2.161848 | 3.231321 | 3.268390 |



|    |    |          |          |          |          |          |
|----|----|----------|----------|----------|----------|----------|
| 10 | H  | 3.395091 | 4.299284 | 3.948489 | 2.673179 | 2.103042 |
| 11 | H  | 2.734114 | 3.964925 | 4.190345 | 3.270021 | 2.067977 |
| 12 | H  | 2.975459 | 4.125847 | 4.524798 | 3.755310 | 2.724791 |
| 13 | H  | 3.527172 | 4.362099 | 4.192966 | 3.137374 | 2.667702 |
| 14 | Br | 4.402532 | 4.405720 | 3.567787 | 2.880946 | 3.588229 |
| 15 | H  | 3.240542 | 3.250193 | 2.153003 | 1.074614 | 2.144827 |
| 16 | C  | 3.575637 | 2.511007 | 1.421093 | 2.432949 | 3.538736 |
| 17 | C  | 4.312352 | 3.023744 | 2.423698 | 3.651762 | 4.599380 |
| 18 | H  | 4.215604 | 3.362938 | 2.078699 | 2.560557 | 3.849962 |
| 19 | H  | 5.362522 | 4.086636 | 3.392168 | 4.513118 | 5.567487 |
| 20 | H  | 4.181860 | 2.833072 | 2.734956 | 4.075041 | 4.769316 |
| 21 | O  | 4.470006 | 5.643287 | 5.685247 | 4.544296 | 3.648686 |
| 22 | H  | 5.056817 | 6.210515 | 6.313624 | 5.231475 | 4.366284 |
|    |    | 6        | 7        | 8        | 9        | 10       |
| 6  | C  | 0.000000 |          |          |          |          |
| 7  | C  | 1.520006 | 0.000000 |          |          |          |
| 8  | H  | 2.811397 | 3.288663 | 0.000000 |          |          |
| 9  | H  | 4.649600 | 5.243276 | 2.746869 | 0.000000 |          |
| 10 | H  | 1.091011 | 2.138790 | 3.823817 | 5.360690 | 0.000000 |
| 11 | H  | 1.092450 | 2.190354 | 2.684869 | 4.895828 | 1.763072 |
| 12 | H  | 2.162712 | 1.099037 | 2.776794 | 4.918616 | 3.055788 |
| 13 | H  | 2.123383 | 1.095541 | 3.854429 | 5.301023 | 2.442251 |
| 14 | Br | 3.988820 | 3.758605 | 5.217084 | 5.207195 | 3.929927 |
| 15 | H  | 2.852795 | 3.673428 | 4.214588 | 4.226605 | 2.596138 |
| 16 | C  | 4.898336 | 5.582811 | 4.604853 | 2.832687 | 5.086515 |
| 17 | C  | 6.028796 | 6.706555 | 5.231279 | 2.856981 | 6.307903 |
| 18 | H  | 5.034295 | 5.644698 | 5.278729 | 3.833873 | 5.028302 |
| 19 | H  | 6.962598 | 7.594906 | 6.291560 | 3.883727 | 7.161100 |
| 20 | H  | 6.235574 | 6.938844 | 4.956665 | 2.317320 | 6.654395 |
| 21 | O  | 2.333147 | 1.419619 | 4.408612 | 6.590429 | 2.541668 |
| 22 | H  | 3.175430 | 1.938156 | 4.917335 | 7.101810 | 3.452026 |
|    |    | 11       | 12       | 13       | 14       | 15       |
| 11 | H  | 0.000000 |          |          |          |          |
| 12 | H  | 2.532515 | 0.000000 |          |          |          |
| 13 | H  | 3.062429 | 1.802878 | 0.000000 |          |          |
| 14 | Br | 5.068814 | 4.275572 | 2.773558 | 0.000000 |          |
| 15 | H  | 3.711954 | 4.318778 | 3.291399 | 2.586347 | 0.000000 |
| 16 | C  | 5.559192 | 5.762764 | 5.194224 | 3.781364 | 2.776261 |
| 17 | C  | 6.585359 | 6.747914 | 6.366606 | 4.947742 | 4.082523 |
| 18 | H  | 5.827370 | 5.987071 | 5.096581 | 3.230232 | 2.484084 |
| 19 | H  | 7.575451 | 7.677874 | 7.157167 | 5.403919 | 4.774013 |
| 20 | H  | 6.648062 | 6.837154 | 6.738523 | 5.678078 | 4.703788 |
| 21 | O  | 2.633955 | 2.092434 | 2.089064 | 4.757402 | 4.675680 |
| 22 | H  | 3.486497 | 2.289963 | 2.391920 | 5.054171 | 5.386151 |

|    |   |          |          |          |          |          |
|----|---|----------|----------|----------|----------|----------|
|    |   | 16       | 17       | 18       | 19       | 20       |
| 16 | C | 0.000000 |          |          |          |          |
| 17 | C | 1.322929 | 0.000000 |          |          |          |
| 18 | H | 1.076540 | 2.122035 | 0.000000 |          |          |
| 19 | H | 2.080781 | 1.077343 | 2.461989 | 0.000000 |          |
| 20 | H | 2.124004 | 1.080745 | 3.096957 | 1.832954 | 0.000000 |
| 21 | O | 6.878545 | 8.045121 | 6.859467 | 8.922144 | 8.297465 |
| 22 | H | 7.465783 | 8.607438 | 7.433719 | 9.463426 | 8.855094 |
|    |   | 21       | 22       |          |          |          |
| 21 | O | 0.000000 |          |          |          |          |
| 22 | H | 0.960630 | 0.000000 |          |          |          |

Stoichiometry C7H11BrN2O

Framework group C1[X(C7H11BrN2O)]

Deg. of freedom 60

Full point group C1 NOp 1

Largest Abelian subgroup C1 NOp 1

Largest concise Abelian subgroup C1 NOp 1

Standard orientation:

| Center Number | Atomic Number | Atomic Type | Coordinates (Angstroms) |           |           |
|---------------|---------------|-------------|-------------------------|-----------|-----------|
|               |               |             | X                       | Y         | Z         |
| 1             | 6             | 0           | -0.159870               | -2.228327 | -0.589419 |
| 2             | 6             | 0           | -1.476367               | -1.922235 | -0.654937 |
| 3             | 7             | 0           | -1.696933               | -0.890716 | 0.244994  |
| 4             | 6             | 0           | -0.506043               | -0.521255 | 0.757715  |
| 5             | 7             | 0           | 0.419719                | -1.403794 | 0.364061  |
| 6             | 6             | 0           | 1.849054                | -1.372706 | 0.693347  |
| 7             | 6             | 0           | 2.635449                | -0.665700 | -0.398506 |
| 8             | 1             | 0           | 0.408207                | -2.978649 | -1.109114 |
| 9             | 1             | 0           | -2.258787               | -2.338374 | -1.259065 |
| 10            | 1             | 0           | 1.998323                | -0.843131 | 1.635459  |
| 11            | 1             | 0           | 2.163075                | -2.408545 | 0.841255  |
| 12            | 1             | 0           | 2.524888                | -1.198070 | -1.353619 |
| 13            | 1             | 0           | 2.241127                | 0.353174  | -0.479840 |
| 14            | 35            | 0           | 0.148132                | 2.139556  | -0.132224 |
| 15            | 1             | 0           | -0.367359               | 0.220278  | 1.523019  |
| 16            | 6             | 0           | -2.866403               | -0.090798 | 0.354415  |
| 17            | 6             | 0           | -4.060343               | -0.461593 | -0.078205 |
| 18            | 1             | 0           | -2.661625               | 0.859471  | 0.817011  |
| 19            | 1             | 0           | -4.897382               | 0.210038  | 0.016375  |
| 20            | 1             | 0           | -4.261353               | -1.413363 | -0.549095 |
| 21            | 8             | 0           | 3.980922                | -0.672530 | 0.054235  |
| 22            | 1             | 0           | 4.526516                | -0.329790 | -0.658273 |

```

-----
Rotational constants (GHZ):      0.8309317      0.5704488      0.3581423
Standard basis: 6-311++G(d,p) (5D, 7F)
There are 358 symmetry adapted cartesian basis functions of A symmetry.
There are 345 symmetry adapted basis functions of A symmetry.
345 basis functions, 553 primitive gaussians, 358 cartesian basis functions
55 alpha electrons      55 beta electrons
nuclear repulsion energy      868.7387654095 Hartrees.
NAtoms= 22 NActive= 22 NUniq= 22 SFac= 1.00D+00 NAtFMM= 60 NAOKFM=F
Big=F
Integral buffers will be 131072 words long.
Raffenetti 2 integral format.
Two-electron integral symmetry is turned on.
One-electron integrals computed using PRISM.
NBasis= 345 RedAO= T EigKep= 4.47D-06 NBF= 345
NBsUse= 345 1.00D-06 EigRej= -1.00D+00 NBFU= 345
Lowest energy guess from the checkpoint file: "."
B after Tr= 0.000000 0.000000 0.000000
Rot= 0.999383 -0.004311 0.001878 0.034803 Ang= -4.03 deg.
B after Tr= 0.000000 0.000000 0.000000
Rot= 0.974859 0.009602 -0.009482 -0.222412 Ang= 25.75 deg.
Keep R1 ints in memory in canonical form, NReq=1804729152.
Requested convergence on RMS density matrix=1.00D-08 within 128 cycles.
Requested convergence on MAX density matrix=1.00D-06.
Requested convergence on energy=1.00D-06.
No special actions if energy rises.
SCF Done: E(RB3LYP) = -3032.33382694 A.U. after 11 cycles
NFOck= 11 Conv=0.76D-08 -V/T= 2.0016
Calling FoFJK, ICntrl= 2127 FMM=F ISym2X=0 l1Cent= 0 IOpCIX= 0 NMat=1 NMatS=1
NMatT=0.
***** Axes restored to original set *****

```

```

-----
Center      Atomic      Forces (Hartrees/Bohr)
Number      Number      X          Y          Z
-----
1          6          -0.000978352 -0.007050554 -0.001244571
2          6           0.003552661 -0.004010145 -0.003028040
3          7          -0.001738667 0.012899455 -0.005957812
4          6           0.000150609 -0.005494620 0.017370340
5          7          -0.000886793 0.005084265 -0.003096607
6          6          -0.003930771 -0.002866560 0.000140473
7          6          -0.001285169 0.000516343 0.003135344
8          1           0.000262886 -0.000523121 -0.000627161
9          1          -0.000558252 0.000222296 -0.001191681

```

|    |    |              |              |              |
|----|----|--------------|--------------|--------------|
| 10 | 1  | -0.003282344 | 0.000250993  | -0.000652336 |
| 11 | 1  | 0.002913445  | 0.001409621  | -0.000708141 |
| 12 | 1  | 0.000043477  | 0.001048236  | 0.000688229  |
| 13 | 1  | 0.000788960  | 0.000998800  | -0.004104612 |
| 14 | 35 | -0.000929253 | -0.000122125 | -0.001196135 |
| 15 | 1  | -0.000296412 | -0.000956655 | -0.001164297 |
| 16 | 6  | 0.003293892  | -0.005140920 | 0.002308576  |
| 17 | 6  | -0.003342712 | -0.000950826 | -0.002472737 |
| 18 | 1  | -0.000170675 | 0.004087046  | 0.002064329  |
| 19 | 1  | -0.001588550 | 0.002188906  | 0.001488331  |
| 20 | 1  | 0.000865089  | -0.001671923 | -0.000719649 |
| 21 | 8  | 0.004629747  | -0.001448601 | -0.003392305 |
| 22 | 1  | 0.002487187  | 0.001530088  | 0.002360463  |

-----  
Cartesian Forces: Max 0.017370340 RMS 0.003677530

GradGradGradGradGradGradGradGradGradGradGradGradGradGradGradGradGradGradGrad

Berny optimization.

Using GEDIIS/GDIIS optimizer.

FormGI is forming the generalized inverse of G from B-inverse, IUseBI=4.

Internal Forces: Max 0.007858193 RMS 0.002436486

Search for a local minimum.

Step number 4 out of a maximum of 116

All quantities printed in internal units (Hartrees-Bohrs-Radians)

Mixed Optimization -- RFO/linear search

Update second derivatives using D2CorX and points 3 2 4

ITU= 0 -1 0 0

Use linear search instead of GDIIS.

|                 |         |         |         |         |         |
|-----------------|---------|---------|---------|---------|---------|
| Eigenvalues --- | 0.00247 | 0.00361 | 0.00760 | 0.01085 | 0.01282 |
| Eigenvalues --- | 0.01587 | 0.01800 | 0.01861 | 0.02045 | 0.02138 |
| Eigenvalues --- | 0.02195 | 0.02409 | 0.02445 | 0.02491 | 0.03067 |
| Eigenvalues --- | 0.03071 | 0.04496 | 0.05304 | 0.05344 | 0.06121 |
| Eigenvalues --- | 0.08420 | 0.09162 | 0.12703 | 0.13411 | 0.15437 |
| Eigenvalues --- | 0.15696 | 0.15981 | 0.15999 | 0.16000 | 0.16000 |
| Eigenvalues --- | 0.16032 | 0.18214 | 0.21748 | 0.22643 | 0.22733 |
| Eigenvalues --- | 0.23044 | 0.23558 | 0.24376 | 0.28844 | 0.30999 |
| Eigenvalues --- | 0.33847 | 0.33875 | 0.33875 | 0.33891 | 0.34150 |
| Eigenvalues --- | 0.34531 | 0.34647 | 0.35541 | 0.36286 | 0.36307 |
| Eigenvalues --- | 0.37221 | 0.40971 | 0.42963 | 0.45509 | 0.49162 |
| Eigenvalues --- | 0.53320 | 0.53813 | 0.55470 | 0.60489 | 2.11778 |

RFO step: Lambda=-6.87859457D-03 EMin= 2.46980176D-03

Quartic linear search produced a step of -0.09097.

Iteration 1 RMS(Cart)= 0.13708153 RMS(Int)= 0.00703075

Iteration 2 RMS(Cart)= 0.01038504 RMS(Int)= 0.00051016

| Iteration 3 | RMS(Cart)= | 0.00005402 | RMS(Int)=           | 0.00050968        |                    |         |
|-------------|------------|------------|---------------------|-------------------|--------------------|---------|
| Iteration 4 | RMS(Cart)= | 0.00000001 | RMS(Int)=           | 0.00050968        |                    |         |
| Variable    | Old X      | -DE/DX     | Delta X<br>(Linear) | Delta X<br>(Quad) | Delta X<br>(Total) | New X   |
| R1          | 2.55718    | 0.00041    | 0.00017             | -0.00104          | -0.00061           | 2.55657 |
| R2          | 2.62182    | 0.00326    | -0.00014            | 0.00795           | 0.00748            | 2.62931 |
| R3          | 2.03159    | 0.00080    | 0.00007             | 0.00145           | 0.00152            | 2.03311 |
| R4          | 2.62022    | 0.00786    | -0.00021            | 0.01627           | 0.01654            | 2.63677 |
| R5          | 2.02679    | 0.00120    | 0.00015             | 0.00168           | 0.00183            | 2.02862 |
| R6          | 2.54770    | 0.00349    | 0.00004             | 0.00557           | 0.00563            | 2.55333 |
| R7          | 2.68548    | 0.00045    | 0.00169             | -0.01371          | -0.01202           | 2.67346 |
| R8          | 2.52890    | 0.00232    | 0.00038             | 0.00096           | 0.00088            | 2.52977 |
| R9          | 2.03073    | -0.00147   | -0.00010            | -0.00279          | -0.00288           | 2.02784 |
| R10         | 2.77242    | 0.00003    | 0.00013             | -0.00098          | -0.00086           | 2.77157 |
| R11         | 2.87240    | 0.00613    | 0.00008             | 0.01885           | 0.01893            | 2.89132 |
| R12         | 2.06171    | -0.00062   | 0.00002             | -0.00183          | -0.00181           | 2.05990 |
| R13         | 2.06443    | -0.00027   | 0.00012             | -0.00177          | -0.00165           | 2.06278 |
| R14         | 2.07688    | -0.00088   | 0.00000             | -0.00241          | -0.00241           | 2.07447 |
| R15         | 2.07027    | -0.00003   | -0.00013            | 0.00124           | 0.00111            | 2.07139 |
| R16         | 2.68269    | 0.00598    | 0.00028             | 0.01089           | 0.01117            | 2.69386 |
| R17         | 5.24127    | 0.00042    | -0.00039            | 0.00753           | 0.00713            | 5.24840 |
| R18         | 2.49997    | 0.00436    | 0.00005             | 0.00621           | 0.00626            | 2.50624 |
| R19         | 2.03437    | 0.00433    | 0.00067             | 0.00585           | 0.00652            | 2.04088 |
| R20         | 2.03588    | 0.00276    | 0.00066             | 0.00164           | 0.00231            | 2.03819 |
| R21         | 2.04231    | 0.00161    | 0.00056             | -0.00058          | -0.00002           | 2.04230 |
| R22         | 1.81533    | 0.00122    | -0.00004            | 0.00236           | 0.00232            | 1.81765 |
| A1          | 1.88101    | -0.00185   | -0.00016            | -0.00352          | -0.00540           | 1.87561 |
| A2          | 2.27646    | 0.00072    | 0.00012             | 0.00113           | 0.00140            | 2.27786 |
| A3          | 2.12498    | 0.00121    | 0.00005             | 0.00443           | 0.00462            | 2.12960 |
| A4          | 1.86671    | 0.00093    | 0.00009             | 0.00371           | 0.00325            | 1.86996 |
| A5          | 2.27737    | -0.00055   | 0.00011             | -0.00359          | -0.00322           | 2.27415 |
| A6          | 2.13908    | -0.00038   | -0.00021            | -0.00020          | -0.00016           | 2.13892 |
| A7          | 1.88619    | -0.00017   | 0.00017             | 0.00527           | 0.00351            | 1.88970 |
| A8          | 2.21385    | 0.00242    | -0.00078            | 0.02101           | 0.01955            | 2.23340 |
| A9          | 2.14526    | -0.00157   | 0.00036             | -0.00338          | -0.00390           | 2.14136 |
| A10         | 1.89491    | -0.00226   | -0.00029            | 0.00033           | -0.00287           | 1.89204 |
| A11         | 2.18211    | 0.00138    | 0.00008             | 0.01035           | 0.00995            | 2.19206 |
| A12         | 2.18375    | 0.00143    | 0.00034             | 0.00795           | 0.00775            | 2.19149 |
| A13         | 1.88083    | 0.00410    | 0.00019             | 0.01744           | 0.01567            | 1.89650 |
| A14         | 2.18198    | 0.00268    | -0.00021            | 0.01066           | 0.01137            | 2.19335 |
| A15         | 2.20678    | -0.00666   | -0.00017            | -0.02406          | -0.02342           | 2.18336 |
| A16         | 1.93123    | 0.00436    | -0.00073            | 0.02431           | 0.02352            | 1.95475 |
| A17         | 1.91494    | -0.00566   | -0.00059            | -0.04442          | -0.04481           | 1.87013 |
| A18         | 1.86538    | 0.00286    | 0.00066             | 0.03177           | 0.03262            | 1.89800 |

|     |          |          |          |          |          |          |
|-----|----------|----------|----------|----------|----------|----------|
| A19 | 1.90046  | 0.00191  | 0.00014  | 0.00368  | 0.00394  | 1.90441  |
| A20 | 1.97096  | -0.00491 | 0.00058  | -0.02497 | -0.02487 | 1.94609  |
| A21 | 1.87969  | 0.00118  | -0.00007 | 0.00790  | 0.00809  | 1.88778  |
| A22 | 1.92506  | 0.00041  | 0.00007  | -0.00680 | -0.00659 | 1.91847  |
| A23 | 1.87517  | 0.00162  | -0.00237 | 0.03238  | 0.02977  | 1.90494  |
| A24 | 1.83280  | 0.00021  | 0.00247  | -0.00861 | -0.00674 | 1.82607  |
| A25 | 1.92812  | -0.00311 | -0.00044 | -0.03859 | -0.03878 | 1.88934  |
| A26 | 1.94998  | -0.00081 | -0.00021 | -0.00553 | -0.00563 | 1.94435  |
| A27 | 1.94904  | 0.00198  | 0.00048  | 0.03035  | 0.03055  | 1.97959  |
| A28 | 2.60864  | -0.00304 | -0.00171 | 0.00493  | 0.00322  | 2.61186  |
| A29 | 2.16488  | 0.00098  | -0.00043 | 0.00752  | 0.00708  | 2.17196  |
| A30 | 1.95348  | 0.00041  | 0.00079  | -0.00334 | -0.00257 | 1.95092  |
| A31 | 2.16470  | -0.00139 | -0.00036 | -0.00436 | -0.00475 | 2.15995  |
| A32 | 2.09180  | -0.00111 | 0.00090  | -0.01322 | -0.01233 | 2.07947  |
| A33 | 2.16178  | -0.00061 | -0.00033 | -0.00077 | -0.00111 | 2.16067  |
| A34 | 2.02947  | 0.00173  | -0.00057 | 0.01410  | 0.01352  | 2.04300  |
| A35 | 1.87552  | 0.00523  | 0.00043  | 0.02571  | 0.02614  | 1.90166  |
| D1  | 0.01807  | -0.00119 | 0.00007  | -0.03027 | -0.02982 | -0.01175 |
| D2  | -3.13184 | -0.00160 | -0.00019 | -0.04014 | -0.04003 | 3.11131  |
| D3  | 3.11826  | 0.00110  | 0.00037  | 0.02744  | 0.02792  | -3.13700 |
| D4  | -0.03164 | 0.00070  | 0.00011  | 0.01757  | 0.01771  | -0.01394 |
| D5  | -0.11302 | 0.00318  | -0.00002 | 0.09846  | 0.09868  | -0.01433 |
| D6  | -3.08740 | 0.00311  | 0.00106  | 0.07630  | 0.07697  | -3.01043 |
| D7  | 3.06563  | 0.00113  | -0.00029 | 0.04688  | 0.04698  | 3.11261  |
| D8  | 0.09125  | 0.00106  | 0.00079  | 0.02471  | 0.02527  | 0.11651  |
| D9  | 0.08266  | -0.00143 | -0.00008 | -0.04884 | -0.04911 | 0.03356  |
| D10 | 2.93590  | 0.00074  | -0.00091 | 0.03489  | 0.03434  | 2.97024  |
| D11 | -3.05143 | -0.00107 | 0.00016  | -0.03991 | -0.03984 | -3.09127 |
| D12 | -0.19819 | 0.00110  | -0.00067 | 0.04382  | 0.04361  | -0.15458 |
| D13 | -0.15506 | 0.00387  | 0.00010  | 0.11259  | 0.11230  | -0.04276 |
| D14 | -3.07974 | 0.00112  | -0.00059 | 0.02301  | 0.02184  | -3.05789 |
| D15 | -3.02213 | 0.00101  | 0.00113  | 0.02803  | 0.02956  | -2.99257 |
| D16 | 0.33639  | -0.00174 | 0.00044  | -0.06154 | -0.06090 | 0.27549  |
| D17 | 0.39203  | -0.00076 | -0.00008 | -0.00455 | -0.00459 | 0.38744  |
| D18 | -2.73345 | -0.00039 | -0.00035 | 0.00749  | 0.00720  | -2.72624 |
| D19 | -3.07745 | 0.00205  | -0.00110 | 0.09281  | 0.09165  | -2.98580 |
| D20 | 0.08026  | 0.00242  | -0.00137 | 0.10485  | 0.10344  | 0.18370  |
| D21 | 0.16554  | -0.00417 | -0.00005 | -0.12976 | -0.13003 | 0.03551  |
| D22 | 3.13688  | -0.00293 | -0.00116 | -0.10285 | -0.10424 | 3.03264  |
| D23 | 3.08996  | -0.00142 | 0.00060  | -0.03971 | -0.03926 | 3.05070  |
| D24 | -0.22188 | -0.00019 | -0.00051 | -0.01280 | -0.01347 | -0.23536 |
| D25 | 1.30205  | -0.00123 | 0.00017  | 0.01854  | 0.01895  | 1.32100  |
| D26 | -2.88375 | 0.00025  | -0.00049 | 0.00989  | 0.00937  | -2.87438 |
| D27 | -0.85041 | 0.00029  | -0.00052 | 0.01375  | 0.01273  | -0.83768 |

|     |          |          |          |          |          |          |
|-----|----------|----------|----------|----------|----------|----------|
| D28 | -1.64123 | -0.00256 | 0.00142  | -0.01254 | -0.01068 | -1.65190 |
| D29 | 0.45616  | -0.00108 | 0.00076  | -0.02119 | -0.02026 | 0.43590  |
| D30 | 2.48950  | -0.00104 | 0.00073  | -0.01733 | -0.01690 | 2.47260  |
| D31 | -1.06441 | -0.00256 | -0.00098 | -0.12124 | -0.12206 | -1.18648 |
| D32 | 1.03818  | -0.00510 | -0.00288 | -0.15219 | -0.15500 | 0.88319  |
| D33 | 3.11534  | -0.00194 | -0.00225 | -0.10599 | -0.10810 | 3.00724  |
| D34 | 3.11275  | 0.00050  | 0.00012  | -0.08378 | -0.08363 | 3.02912  |
| D35 | -1.06784 | -0.00204 | -0.00179 | -0.11474 | -0.11656 | -1.18441 |
| D36 | 1.00931  | 0.00113  | -0.00115 | -0.06854 | -0.06966 | 0.93965  |
| D37 | 1.02573  | 0.00084  | -0.00026 | -0.08040 | -0.08077 | 0.94496  |
| D38 | 3.12833  | -0.00170 | -0.00216 | -0.11136 | -0.11370 | 3.01463  |
| D39 | -1.07770 | 0.00146  | -0.00153 | -0.06516 | -0.06680 | -1.14450 |
| D40 | -0.43785 | -0.00033 | 0.00091  | -0.04144 | -0.04001 | -0.47787 |
| D41 | 1.66280  | -0.00064 | -0.00066 | -0.05222 | -0.05290 | 1.60990  |
| D42 | -2.43877 | -0.00256 | -0.00091 | -0.06596 | -0.06737 | -2.50613 |
| D43 | 3.02264  | 0.00025  | 0.00027  | 0.03163  | 0.03188  | 3.05453  |
| D44 | 0.93576  | 0.00007  | -0.00123 | 0.04801  | 0.04674  | 0.98251  |
| D45 | -1.23365 | 0.00327  | -0.00086 | 0.08000  | 0.07920  | -1.15444 |
| D46 | -3.11377 | 0.00013  | -0.00040 | 0.00600  | 0.00559  | -3.10818 |
| D47 | 0.00956  | 0.00049  | -0.00020 | 0.01379  | 0.01359  | 0.02315  |
| D48 | 0.00978  | -0.00026 | -0.00010 | -0.00745 | -0.00754 | 0.00224  |
| D49 | 3.13311  | 0.00010  | 0.00010  | 0.00035  | 0.00046  | 3.13357  |

| Item                 | Value    | Threshold | Converged? |
|----------------------|----------|-----------|------------|
| Maximum Force        | 0.007858 | 0.000450  | NO         |
| RMS Force            | 0.002436 | 0.000300  | NO         |
| Maximum Displacement | 0.949743 | 0.001800  | NO         |
| RMS Displacement     | 0.140931 | 0.001200  | NO         |

Predicted change in Energy=-4.023874D-03

GradGradGradGradGradGradGradGradGradGradGradGradGradGradGradGradGradGrad

Input orientation:

| Center<br>Number | Atomic<br>Number | Atomic<br>Type | Coordinates (Angstroms) |           |           |
|------------------|------------------|----------------|-------------------------|-----------|-----------|
|                  |                  |                | X                       | Y         | Z         |
| 1                | 6                | 0              | -0.450770               | -1.986224 | -1.274752 |
| 2                | 6                | 0              | -1.751259               | -1.640763 | -1.414988 |
| 3                | 7                | 0              | -2.122031               | -0.956061 | -0.257136 |
| 4                | 6                | 0              | -1.037900               | -0.859593 | 0.543491  |
| 5                | 7                | 0              | -0.020662               | -1.502383 | -0.043162 |
| 6                | 6                | 0              | 1.362029                | -1.516666 | 0.445738  |
| 7                | 6                | 0              | 2.216930                | -0.437183 | -0.221214 |
| 8                | 1                | 0              | 0.207038                | -2.517063 | -1.940335 |
| 9                | 1                | 0              | -2.429583               | -1.806266 | -2.230396 |

|    |    |   |           |           |           |
|----|----|---|-----------|-----------|-----------|
| 10 | 1  | 0 | 1.325377  | -1.330370 | 1.519128  |
| 11 | 1  | 0 | 1.779890  | -2.512578 | 0.287327  |
| 12 | 1  | 0 | 2.358131  | -0.675215 | -1.283517 |
| 13 | 1  | 0 | 1.698580  | 0.526100  | -0.151204 |
| 14 | 35 | 0 | -0.668941 | 1.965349  | 0.041125  |
| 15 | 1  | 0 | -1.028201 | -0.449400 | 1.535037  |
| 16 | 6  | 0 | -3.316506 | -0.237405 | -0.015826 |
| 17 | 6  | 0 | -4.452739 | -0.428741 | -0.672550 |
| 18 | 1  | 0 | -3.186174 | 0.509942  | 0.752851  |
| 19 | 1  | 0 | -5.304804 | 0.190087  | -0.439447 |
| 20 | 1  | 0 | -4.581829 | -1.171591 | -1.446824 |
| 21 | 8  | 0 | 3.453325  | -0.468189 | 0.487660  |
| 22 | 1  | 0 | 4.070451  | 0.137334  | 0.066148  |

-----  
Distance matrix (angstroms):

|    |    | 1        | 2        | 3        | 4        | 5        |
|----|----|----------|----------|----------|----------|----------|
| 1  | C  | 0.000000 |          |          |          |          |
| 2  | C  | 1.352879 | 0.000000 |          |          |          |
| 3  | N  | 2.211310 | 1.395317 | 0.000000 |          |          |
| 4  | C  | 2.218113 | 2.225926 | 1.351166 | 0.000000 |          |
| 5  | N  | 1.391369 | 2.212695 | 2.181744 | 1.338698 | 0.000000 |
| 6  | C  | 2.542993 | 3.629086 | 3.598192 | 2.490173 | 1.466650 |
| 7  | C  | 3.259769 | 4.315116 | 4.370024 | 3.370033 | 2.484587 |
| 8  | H  | 1.075873 | 2.208805 | 3.270237 | 3.235192 | 2.163489 |
| 9  | H  | 2.204845 | 1.073501 | 2.170528 | 3.244598 | 3.267910 |
| 10 | H  | 3.374998 | 4.262754 | 3.896132 | 2.599726 | 2.069338 |
| 11 | H  | 2.773623 | 4.015838 | 4.236057 | 3.276876 | 2.090862 |
| 12 | H  | 3.099798 | 4.223346 | 4.604800 | 3.860697 | 2.807373 |
| 13 | H  | 3.491968 | 4.265423 | 4.099402 | 3.145007 | 2.661242 |
| 14 | Br | 4.170618 | 4.036796 | 3.276441 | 2.892888 | 3.528815 |
| 15 | H  | 3.254254 | 3.262638 | 2.159874 | 1.073088 | 2.148167 |
| 16 | C  | 3.585485 | 2.525285 | 1.414732 | 2.427344 | 3.530369 |
| 17 | C  | 4.336376 | 3.052574 | 2.425455 | 3.650413 | 4.603492 |
| 18 | H  | 4.221901 | 3.374024 | 2.074039 | 2.556274 | 3.834522 |
| 19 | H  | 5.384766 | 4.114775 | 3.387762 | 4.502718 | 5.562702 |
| 20 | H  | 4.214129 | 2.869366 | 2.740878 | 4.076534 | 4.783715 |
| 21 | O  | 4.544500 | 5.664158 | 5.646002 | 4.508594 | 3.663320 |
| 22 | H  | 5.171939 | 6.264799 | 6.296576 | 5.226564 | 4.408835 |
|    |    | 6        | 7        | 8        | 9        | 10       |
| 6  | C  | 0.000000 |          |          |          |          |
| 7  | C  | 1.530021 | 0.000000 |          |          |          |
| 8  | H  | 2.833398 | 3.364661 | 0.000000 |          |          |
| 9  | H  | 4.649934 | 5.244167 | 2.746113 | 0.000000 |          |
| 10 | H  | 1.090053 | 2.149754 | 3.824501 | 5.327770 | 0.000000 |



|    |    |          |          |          |          |          |
|----|----|----------|----------|----------|----------|----------|
| 11 | H  | 1.091578 | 2.181028 | 2.726969 | 4.955549 | 1.766786 |
| 12 | H  | 2.165775 | 1.097764 | 2.907062 | 5.009796 | 3.057880 |
| 13 | H  | 2.154646 | 1.096130 | 3.832300 | 5.177325 | 2.525029 |
| 14 | Br | 4.051293 | 3.764204 | 4.978508 | 4.741809 | 4.125962 |
| 15 | H  | 2.835283 | 3.689911 | 4.228387 | 4.240689 | 2.513104 |
| 16 | C  | 4.872190 | 5.540849 | 4.616919 | 2.855220 | 5.009763 |
| 17 | C  | 6.020438 | 6.684928 | 5.261358 | 2.901314 | 6.245239 |
| 18 | H  | 4.988748 | 5.571300 | 5.284875 | 3.851885 | 4.932344 |
| 19 | H  | 6.938532 | 7.550999 | 6.321529 | 3.931898 | 7.078637 |
| 20 | H  | 6.247425 | 6.947273 | 4.998709 | 2.376754 | 6.611896 |
| 21 | O  | 2.339782 | 1.425530 | 4.542182 | 6.617166 | 2.517031 |
| 22 | H  | 3.196147 | 1.961680 | 5.098799 | 7.162551 | 3.435220 |
|    |    | 11       | 12       | 13       | 14       | 15       |
| 11 | H  | 0.000000 |          |          |          |          |
| 12 | H  | 2.485521 | 0.000000 |          |          |          |
| 13 | H  | 3.071235 | 1.777723 | 0.000000 |          |          |
| 14 | Br | 5.109718 | 4.229707 | 2.777334 | 0.000000 |          |
| 15 | H  | 3.701197 | 4.411631 | 3.351171 | 2.862141 | 0.000000 |
| 16 | C  | 5.589415 | 5.830971 | 5.074677 | 3.444556 | 2.772446 |
| 17 | C  | 6.641491 | 6.842659 | 6.246779 | 4.534107 | 4.074472 |
| 18 | H  | 5.832163 | 6.024177 | 4.967736 | 2.993531 | 2.487769 |
| 19 | H  | 7.617446 | 7.757691 | 7.017363 | 4.987358 | 4.753616 |
| 20 | H  | 6.728818 | 6.959605 | 6.633575 | 5.231164 | 4.694819 |
| 21 | O  | 2.649536 | 2.092696 | 2.115629 | 4.807762 | 4.602329 |
| 22 | H  | 3.509647 | 2.326773 | 2.413329 | 5.079774 | 5.338366 |
|    |    | 16       | 17       | 18       | 19       | 20       |
| 16 | C  | 0.000000 |          |          |          |          |
| 17 | C  | 1.326244 | 0.000000 |          |          |          |
| 18 | H  | 1.079990 | 2.125342 | 0.000000 |          |          |
| 19 | H  | 2.077387 | 1.078564 | 2.452035 | 0.000000 |          |
| 20 | H  | 2.126383 | 1.080737 | 3.100641 | 1.841648 | 0.000000 |
| 21 | O  | 6.792449 | 7.990838 | 6.716399 | 8.831630 | 8.294619 |
| 22 | H  | 7.396910 | 8.573849 | 7.298562 | 9.389027 | 8.880559 |
|    |    | 21       | 22       |          |          |          |
| 21 | O  | 0.000000 |          |          |          |          |
| 22 | H  | 0.961860 | 0.000000 |          |          |          |

Stoichiometry C7H11BrN2O

Framework group C1[X(C7H11BrN2O)]

Deg. of freedom 60

Full point group C1 NOp 1

Largest Abelian subgroup C1 NOp 1

Largest concise Abelian subgroup C1 NOp 1

Standard orientation:

-----

| Center<br>Number | Atomic<br>Number | Atomic<br>Type | Coordinates (Angstroms) |           |           |
|------------------|------------------|----------------|-------------------------|-----------|-----------|
|                  |                  |                | X                       | Y         | Z         |
| 1                | 6                | 0              | 0.104940                | -2.120537 | -0.766652 |
| 2                | 6                | 0              | -1.224092               | -1.870075 | -0.801640 |
| 3                | 7                | 0              | -1.506468               | -0.999977 | 0.251974  |
| 4                | 6                | 0              | -0.346945               | -0.703965 | 0.879296  |
| 5                | 7                | 0              | 0.638735                | -1.395375 | 0.294060  |
| 6                | 6                | 0              | 2.066034                | -1.251873 | 0.599491  |
| 7                | 6                | 0              | 2.760569                | -0.276027 | -0.352512 |
| 8                | 1                | 0              | 0.717525                | -2.734054 | -1.403708 |
| 9                | 1                | 0              | -1.978357               | -2.217126 | -1.482114 |
| 10               | 1                | 0              | 2.140049                | -0.870581 | 1.617997  |
| 11               | 1                | 0              | 2.531867                | -2.238648 | 0.570904  |
| 12               | 1                | 0              | 2.795060                | -0.701005 | -1.364089 |
| 13               | 1                | 0              | 2.187291                | 0.657419  | -0.391669 |
| 14               | 35               | 0              | -0.237677               | 1.992054  | -0.163940 |
| 15               | 1                | 0              | -0.252150               | -0.116013 | 1.771957  |
| 16               | 6                | 0              | -2.712810               | -0.307046 | 0.508980  |
| 17               | 6                | 0              | -3.900745               | -0.671804 | 0.045638  |
| 18               | 1                | 0              | -2.547808               | 0.575954  | 1.108532  |
| 19               | 1                | 0              | -4.761728               | -0.061942 | 0.269412  |
| 20               | 1                | 0              | -4.065476               | -1.551376 | -0.560338 |
| 21               | 8                | 0              | 4.069376                | -0.114916 | 0.188971  |
| 22               | 1                | 0              | 4.589842                | 0.430230  | -0.408612 |

Rotational constants (GHZ): 0.9129079 0.5695641 0.3778747

Standard basis: 6-311++G(d,p) (5D, 7F)

There are 358 symmetry adapted cartesian basis functions of A symmetry.

There are 345 symmetry adapted basis functions of A symmetry.

345 basis functions, 553 primitive gaussians, 358 cartesian basis functions

55 alpha electrons 55 beta electrons

nuclear repulsion energy 879.8689953383 Hartrees.

NAtoms= 22 NActive= 22 NUniq= 22 SFac= 1.00D+00 NAtFMM= 60 NAOKFM=F

Big=F

Integral buffers will be 131072 words long.

Raffenetti 2 integral format.

Two-electron integral symmetry is turned on.

One-electron integrals computed using PRISM.

NBasis= 345 RedAO= T EigKep= 4.96D-06 NBF= 345

NBsUse= 345 1.00D-06 EigRej= -1.00D+00 NBFU= 345

Initial guess from the checkpoint file: "."

B after Tr= 0.000000 0.000000 0.000000

Rot= 0.998046 -0.012969 -0.004033 -0.060996 Ang= -7.17 deg.

ExpMin= 3.50D-02 ExpMax= 4.40D+05 ExpMxC= 1.51D+04 IAcc=3 IRadAn= 5 AccDes= 0.00D+00

Harris functional with IExCor= 402 and IRadAn= 5 diagonalized for initial guess.

HarFok: IExCor= 402 AccDes= 0.00D+00 IRadAn= 5 IDoV= 1 UseB2=F ITyADJ=14

ICtDFT= 3500011 ScaDFX= 1.000000 1.000000 1.000000 1.000000

FoFCou: FMM=F IPFlag= 0 FMFlag= 100000 FMFlg1= 0

NFxFlg= 0 DoJE=T BraDBF=F KetDBF=T FulRan=T

wScr= 0.000000 ICntrl= 500 IOPCl= 0 l1Cent= 200000004 NGrid=

0

NMat0= 1 NMatS0= 1 NMatT0= 0 NMatD0= 1 NMtDS0= 0

NMtDT0= 0

Petite list used in FoFCou.

Keep R1 ints in memory in canonical form, NReq=1804729152.

Requested convergence on RMS density matrix=1.00D-08 within 128 cycles.

Requested convergence on MAX density matrix=1.00D-06.

Requested convergence on energy=1.00D-06.

No special actions if energy rises.

SCF Done: E(RB3LYP) = -3032.33444160 A.U. after 13 cycles

NFock= 13 Conv=0.83D-08 -V/T= 2.0016

Calling FoFJK, ICntrl= 2127 FMM=F ISym2X=0 l1Cent= 0 IOPClX= 0 NMat=1 NMatS=1

NMatT=0.

\*\*\*\*\* Axes restored to original set \*\*\*\*\*

| Center<br>Number | Atomic<br>Number | Forces (Hartrees/Bohr) |              |              |
|------------------|------------------|------------------------|--------------|--------------|
|                  |                  | X                      | Y            | Z            |
| 1                | 6                | 0.000338154            | 0.003121825  | 0.000594201  |
| 2                | 6                | -0.000007281           | 0.001684511  | 0.003652557  |
| 3                | 7                | 0.001579213            | -0.006290076 | -0.001519027 |
| 4                | 6                | 0.000501047            | 0.005528684  | -0.007723666 |
| 5                | 7                | 0.000313686            | -0.006531442 | 0.000262046  |
| 6                | 6                | -0.002551150           | 0.000830209  | 0.002097219  |
| 7                | 6                | -0.001789327           | -0.000930656 | -0.000275386 |
| 8                | 1                | 0.000230318            | 0.000262005  | 0.000117789  |
| 9                | 1                | -0.000842160           | 0.000514548  | -0.000177230 |
| 10               | 1                | 0.001431936            | 0.000069066  | 0.000421313  |
| 11               | 1                | 0.000043414            | 0.000187563  | -0.000124092 |
| 12               | 1                | 0.000633403            | -0.000575460 | -0.000226717 |
| 13               | 1                | 0.001754140            | 0.000188593  | 0.001405981  |
| 14               | 35               | 0.001996304            | 0.001170781  | 0.001831441  |
| 15               | 1                | 0.000118561            | 0.001264010  | -0.000392401 |
| 16               | 6                | -0.002173379           | -0.002720810 | 0.001614990  |
| 17               | 6                | -0.000299435           | -0.000550815 | 0.000638693  |
| 18               | 1                | -0.000401754           | 0.002186391  | -0.000327447 |

|    |   |              |              |              |
|----|---|--------------|--------------|--------------|
| 19 | 1 | -0.001322158 | 0.001252561  | 0.000359470  |
| 20 | 1 | 0.000450233  | -0.001132885 | -0.001182229 |
| 21 | 8 | 0.000717823  | -0.000601495 | -0.001985546 |
| 22 | 1 | -0.000721588 | 0.001072893  | 0.000938041  |

-----  
Cartesian Forces: Max 0.007723666 RMS 0.002036999

GradGradGradGradGradGradGradGradGradGradGradGradGradGradGradGradGradGradGradGrad  
Berny optimization.

Using GEDIIS/GDIIS optimizer.

FormGI is forming the generalized inverse of G from B-inverse, IUseBI=4.

Internal Forces: Max 0.010781175 RMS 0.002659719

Search for a local minimum.

Step number 5 out of a maximum of 116

All quantities printed in internal units (Hartrees-Bohrs-Radians)

Mixed Optimization -- RFO/linear search

Update second derivatives using D2CorX and points 1 2 4 5

DE= -6.15D-04 DEPred=-4.02D-03 R= 1.53D-01

Trust test= 1.53D-01 RLast= 4.77D-01 DXMaxT set to 1.50D-01

ITU= 0 0 -1 0 0

Use linear search instead of GDIIS.

|                 |         |         |         |         |         |
|-----------------|---------|---------|---------|---------|---------|
| Eigenvalues --- | 0.00243 | 0.00454 | 0.00676 | 0.00876 | 0.01246 |
| Eigenvalues --- | 0.01572 | 0.01682 | 0.01861 | 0.02038 | 0.02147 |
| Eigenvalues --- | 0.02212 | 0.02377 | 0.02409 | 0.03066 | 0.03070 |
| Eigenvalues --- | 0.03651 | 0.04588 | 0.05426 | 0.05959 | 0.06619 |
| Eigenvalues --- | 0.08640 | 0.09245 | 0.13473 | 0.14160 | 0.15694 |
| Eigenvalues --- | 0.15805 | 0.15996 | 0.15997 | 0.15999 | 0.16051 |
| Eigenvalues --- | 0.16244 | 0.20644 | 0.21662 | 0.22512 | 0.22838 |
| Eigenvalues --- | 0.23495 | 0.24271 | 0.25542 | 0.28950 | 0.33407 |
| Eigenvalues --- | 0.33849 | 0.33875 | 0.33898 | 0.34101 | 0.34312 |
| Eigenvalues --- | 0.34645 | 0.34733 | 0.35994 | 0.36306 | 0.36446 |
| Eigenvalues --- | 0.37231 | 0.41077 | 0.42984 | 0.45941 | 0.48987 |
| Eigenvalues --- | 0.53437 | 0.54089 | 0.55452 | 0.60519 | 1.50594 |

RFO step: Lambda=-2.79127729D-03 EMin= 2.43333505D-03

Quartic linear search produced a step of -0.44437.

Iteration 1 RMS(Cart)= 0.15444011 RMS(Int)= 0.00837367

Iteration 2 RMS(Cart)= 0.01062094 RMS(Int)= 0.00025160

Iteration 3 RMS(Cart)= 0.00004433 RMS(Int)= 0.00025030

Iteration 4 RMS(Cart)= 0.00000000 RMS(Int)= 0.00025030

| Variable | Old X   | -DE/DX   | Delta X<br>(Linear) | Delta X<br>(Quad) | Delta X<br>(Total) | New X   |
|----------|---------|----------|---------------------|-------------------|--------------------|---------|
| R1       | 2.55657 | -0.00049 | 0.00027             | -0.00092          | -0.00083           | 2.55574 |
| R2       | 2.62931 | -0.00143 | -0.00333            | 0.00608           | 0.00275            | 2.63206 |
| R3       | 2.03311 | -0.00006 | -0.00067            | 0.00161           | 0.00094            | 2.03404 |

|     |         |          |          |          |          |         |
|-----|---------|----------|----------|----------|----------|---------|
| R4  | 2.63677 | -0.00502 | -0.00735 | 0.01274  | 0.00528  | 2.64204 |
| R5  | 2.02862 | 0.00058  | -0.00081 | 0.00303  | 0.00221  | 2.03084 |
| R6  | 2.55333 | 0.00086  | -0.00250 | 0.00637  | 0.00398  | 2.55732 |
| R7  | 2.67346 | 0.00286  | 0.00534  | -0.00866 | -0.00331 | 2.67014 |
| R8  | 2.52977 | 0.00131  | -0.00039 | 0.00202  | 0.00181  | 2.53159 |
| R9  | 2.02784 | 0.00013  | 0.00128  | -0.00251 | -0.00123 | 2.02661 |
| R10 | 2.77157 | 0.00276  | 0.00038  | 0.00304  | 0.00342  | 2.77499 |
| R11 | 2.89132 | 0.00098  | -0.00841 | 0.01883  | 0.01042  | 2.90174 |
| R12 | 2.05990 | 0.00038  | 0.00080  | -0.00147 | -0.00067 | 2.05924 |
| R13 | 2.06278 | -0.00014 | 0.00073  | -0.00214 | -0.00140 | 2.06138 |
| R14 | 2.07447 | 0.00043  | 0.00107  | -0.00191 | -0.00084 | 2.07363 |
| R15 | 2.07139 | -0.00037 | -0.00050 | -0.00247 | -0.00297 | 2.06842 |
| R16 | 2.69386 | -0.00055 | -0.00496 | 0.01230  | 0.00733  | 2.70120 |
| R17 | 5.24840 | -0.00097 | -0.00317 | -0.02507 | -0.02824 | 5.22016 |
| R18 | 2.50624 | 0.00115  | -0.00278 | 0.00815  | 0.00537  | 2.51160 |
| R19 | 2.04088 | 0.00123  | -0.00290 | 0.00967  | 0.00678  | 2.04766 |
| R20 | 2.03819 | 0.00184  | -0.00102 | 0.00579  | 0.00477  | 2.04296 |
| R21 | 2.04230 | 0.00157  | 0.00001  | 0.00262  | 0.00263  | 2.04493 |
| R22 | 1.81765 | -0.00019 | -0.00103 | 0.00246  | 0.00143  | 1.81908 |
| A1  | 1.87561 | 0.00166  | 0.00240  | -0.00529 | -0.00213 | 1.87348 |
| A2  | 2.27786 | -0.00049 | -0.00062 | 0.00192  | 0.00122  | 2.27908 |
| A3  | 2.12960 | -0.00112 | -0.00205 | 0.00314  | 0.00100  | 2.13061 |
| A4  | 1.86996 | 0.00067  | -0.00145 | 0.00319  | 0.00221  | 1.87218 |
| A5  | 2.27415 | 0.00047  | 0.00143  | -0.00053 | 0.00067  | 2.27481 |
| A6  | 2.13892 | -0.00112 | 0.00007  | -0.00266 | -0.00282 | 2.13611 |
| A7  | 1.88970 | -0.00059 | -0.00156 | 0.00002  | -0.00111 | 1.88859 |
| A8  | 2.23340 | -0.00231 | -0.00869 | 0.01800  | 0.00863  | 2.24202 |
| A9  | 2.14136 | 0.00289  | 0.00173  | 0.00249  | 0.00355  | 2.14491 |
| A10 | 1.89204 | 0.00111  | 0.00128  | -0.00486 | -0.00200 | 1.89004 |
| A11 | 2.19206 | -0.00107 | -0.00442 | 0.00456  | 0.00019  | 2.19225 |
| A12 | 2.19149 | -0.00044 | -0.00344 | 0.00488  | 0.00154  | 2.19303 |
| A13 | 1.89650 | -0.00301 | -0.00696 | 0.00952  | 0.00330  | 1.89981 |
| A14 | 2.19335 | -0.00390 | -0.00505 | 0.00908  | 0.00343  | 2.19677 |
| A15 | 2.18336 | 0.00700  | 0.01041  | -0.01247 | -0.00264 | 2.18072 |
| A16 | 1.95475 | 0.00864  | -0.01045 | 0.03319  | 0.02279  | 1.97754 |
| A17 | 1.87013 | 0.00171  | 0.01991  | -0.02512 | -0.00529 | 1.86484 |
| A18 | 1.89800 | -0.00613 | -0.01450 | 0.01692  | 0.00245  | 1.90045 |
| A19 | 1.90441 | -0.00377 | -0.00175 | -0.00316 | -0.00502 | 1.89939 |
| A20 | 1.94609 | -0.00159 | 0.01105  | -0.02896 | -0.01776 | 1.92833 |
| A21 | 1.88778 | 0.00107  | -0.00360 | 0.00648  | 0.00267  | 1.89045 |
| A22 | 1.91847 | -0.00145 | 0.00293  | 0.00138  | 0.00423  | 1.92271 |
| A23 | 1.90494 | 0.00498  | -0.01323 | 0.01882  | 0.00570  | 1.91064 |
| A24 | 1.82607 | 0.00027  | 0.00299  | -0.00392 | -0.00066 | 1.82540 |
| A25 | 1.88934 | 0.00193  | 0.01723  | -0.01658 | 0.00052  | 1.88986 |

|     |          |          |          |          |          |          |
|-----|----------|----------|----------|----------|----------|----------|
| A26 | 1.94435  | -0.00010 | 0.00250  | -0.01062 | -0.00816 | 1.93619  |
| A27 | 1.97959  | -0.00555 | -0.01358 | 0.01229  | -0.00118 | 1.97841  |
| A28 | 2.61186  | 0.01078  | -0.00143 | 0.00105  | -0.00038 | 2.61149  |
| A29 | 2.17196  | -0.00118 | -0.00314 | 0.00512  | 0.00191  | 2.17387  |
| A30 | 1.95092  | 0.00162  | 0.00114  | 0.00203  | 0.00311  | 1.95402  |
| A31 | 2.15995  | -0.00045 | 0.00211  | -0.00787 | -0.00583 | 2.15412  |
| A32 | 2.07947  | 0.00023  | 0.00548  | -0.01394 | -0.00846 | 2.07102  |
| A33 | 2.16067  | -0.00075 | 0.00049  | -0.00388 | -0.00338 | 2.15729  |
| A34 | 2.04300  | 0.00051  | -0.00601 | 0.01784  | 0.01184  | 2.05483  |
| A35 | 1.90166  | -0.00025 | -0.01162 | 0.02900  | 0.01739  | 1.91905  |
| D1  | -0.01175 | 0.00090  | 0.01325  | -0.00944 | 0.00361  | -0.00815 |
| D2  | 3.11131  | 0.00194  | 0.01779  | -0.00966 | 0.00802  | 3.11933  |
| D3  | -3.13700 | -0.00173 | -0.01241 | 0.00699  | -0.00552 | 3.14066  |
| D4  | -0.01394 | -0.00070 | -0.00787 | 0.00677  | -0.00110 | -0.01504 |
| D5  | -0.01433 | -0.00324 | -0.04385 | 0.04432  | 0.00036  | -0.01397 |
| D6  | -3.01043 | -0.00457 | -0.03420 | 0.00106  | -0.03304 | -3.04347 |
| D7  | 3.11261  | -0.00087 | -0.02088 | 0.02958  | 0.00855  | 3.12116  |
| D8  | 0.11651  | -0.00221 | -0.01123 | -0.01367 | -0.02486 | 0.09165  |
| D9  | 0.03356  | 0.00169  | 0.02182  | -0.02827 | -0.00634 | 0.02722  |
| D10 | 2.97024  | 0.00202  | -0.01526 | 0.08245  | 0.06712  | 3.03736  |
| D11 | -3.09127 | 0.00074  | 0.01771  | -0.02809 | -0.01037 | -3.10164 |
| D12 | -0.15458 | 0.00107  | -0.01938 | 0.08262  | 0.06309  | -0.09149 |
| D13 | -0.04276 | -0.00378 | -0.04990 | 0.05647  | 0.00671  | -0.03605 |
| D14 | -3.05789 | -0.00038 | -0.00971 | 0.01829  | 0.00877  | -3.04913 |
| D15 | -2.99257 | -0.00337 | -0.01314 | -0.04940 | -0.06254 | -3.05510 |
| D16 | 0.27549  | 0.00002  | 0.02706  | -0.08757 | -0.06048 | 0.21501  |
| D17 | 0.38744  | 0.00076  | 0.00204  | 0.04418  | 0.04605  | 0.43349  |
| D18 | -2.72624 | 0.00127  | -0.00320 | 0.07208  | 0.06876  | -2.65749 |
| D19 | -2.98580 | 0.00064  | -0.04073 | 0.16947  | 0.12887  | -2.85694 |
| D20 | 0.18370  | 0.00116  | -0.04596 | 0.19737  | 0.15158  | 0.33528  |
| D21 | 0.03551  | 0.00431  | 0.05778  | -0.06228 | -0.00438 | 0.03113  |
| D22 | 3.03264  | 0.00450  | 0.04632  | -0.01711 | 0.02927  | 3.06191  |
| D23 | 3.05070  | 0.00085  | 0.01745  | -0.02414 | -0.00656 | 3.04414  |
| D24 | -0.23536 | 0.00105  | 0.00599  | 0.02102  | 0.02709  | -0.20827 |
| D25 | 1.32100  | 0.00069  | -0.00842 | 0.09595  | 0.08744  | 1.40844  |
| D26 | -2.87438 | 0.00221  | -0.00416 | 0.09541  | 0.09124  | -2.78314 |
| D27 | -0.83768 | 0.00122  | -0.00566 | 0.09831  | 0.09281  | -0.74487 |
| D28 | -1.65190 | 0.00015  | 0.00475  | 0.04364  | 0.04826  | -1.60365 |
| D29 | 0.43590  | 0.00167  | 0.00900  | 0.04310  | 0.05206  | 0.48796  |
| D30 | 2.47260  | 0.00068  | 0.00751  | 0.04600  | 0.05363  | 2.52623  |
| D31 | -1.18648 | 0.00333  | 0.05424  | 0.06298  | 0.11718  | -1.06930 |
| D32 | 0.88319  | 0.00782  | 0.06888  | 0.05494  | 0.12382  | 1.00701  |
| D33 | 3.00724  | 0.00402  | 0.04804  | 0.07701  | 0.12503  | 3.13227  |
| D34 | 3.02912  | -0.00165 | 0.03716  | 0.07583  | 0.11300  | -3.14107 |

|     |          |          |          |          |          |          |
|-----|----------|----------|----------|----------|----------|----------|
| D35 | -1.18441 | 0.00284  | 0.05180  | 0.06779  | 0.11964  | -1.06477 |
| D36 | 0.93965  | -0.00096 | 0.03096  | 0.08987  | 0.12085  | 1.06050  |
| D37 | 0.94496  | 0.00045  | 0.03589  | 0.08779  | 0.12365  | 1.06862  |
| D38 | 3.01463  | 0.00494  | 0.05053  | 0.07975  | 0.13029  | -3.13827 |
| D39 | -1.14450 | 0.00114  | 0.02969  | 0.10183  | 0.13150  | -1.01300 |
| D40 | -0.47787 | 0.00098  | 0.01778  | 0.08436  | 0.10192  | -0.37595 |
| D41 | 1.60990  | 0.00324  | 0.02351  | 0.08715  | 0.11066  | 1.72056  |
| D42 | -2.50613 | 0.00072  | 0.02994  | 0.06956  | 0.09972  | -2.40642 |
| D43 | 3.05453  | -0.00072 | -0.01417 | 0.09194  | 0.07779  | 3.13231  |
| D44 | 0.98251  | 0.00089  | -0.02077 | 0.09805  | 0.07731  | 1.05981  |
| D45 | -1.15444 | 0.00253  | -0.03519 | 0.11889  | 0.08366  | -1.07079 |
| D46 | -3.10818 | 0.00044  | -0.00248 | 0.01797  | 0.01546  | -3.09272 |
| D47 | 0.02315  | 0.00013  | -0.00604 | 0.02148  | 0.01541  | 0.03856  |
| D48 | 0.00224  | -0.00010 | 0.00335  | -0.01300 | -0.00962 | -0.00738 |
| D49 | 3.13357  | -0.00042 | -0.00020 | -0.00949 | -0.00967 | 3.12390  |

| Item                 | Value    | Threshold | Converged? |
|----------------------|----------|-----------|------------|
| Maximum Force        | 0.010781 | 0.000450  | NO         |
| RMS Force            | 0.002660 | 0.000300  | NO         |
| Maximum Displacement | 0.930448 | 0.001800  | NO         |
| RMS Displacement     | 0.155001 | 0.001200  | NO         |

Predicted change in Energy=-3.085261D-03

GradGradGradGradGradGradGradGradGradGradGradGradGradGradGradGradGradGradGrad

Input orientation:

| Center Number | Atomic Number | Atomic Type | Coordinates (Angstroms) |           |           |
|---------------|---------------|-------------|-------------------------|-----------|-----------|
|               |               |             | X                       | Y         | Z         |
| 1             | 6             | 0           | -0.473715               | -2.025475 | -1.282925 |
| 2             | 6             | 0           | -1.770899               | -1.678488 | -1.444199 |
| 3             | 7             | 0           | -2.134737               | -0.906405 | -0.336851 |
| 4             | 6             | 0           | -1.048164               | -0.768588 | 0.457956  |
| 5             | 7             | 0           | -0.038379               | -1.460226 | -0.086707 |
| 6             | 6             | 0           | 1.337772                | -1.483419 | 0.425195  |
| 7             | 6             | 0           | 2.239852                | -0.414685 | -0.208784 |
| 8             | 1             | 0           | 0.176723                | -2.613305 | -1.907391 |
| 9             | 1             | 0           | -2.455834               | -1.898797 | -2.242477 |
| 10            | 1             | 0           | 1.278725                | -1.302366 | 1.498126  |
| 11            | 1             | 0           | 1.756290                | -2.478432 | 0.267987  |
| 12            | 1             | 0           | 2.314276                | -0.576372 | -1.291568 |
| 13            | 1             | 0           | 1.806798                | 0.576045  | -0.038543 |
| 14            | 35            | 0           | -0.389533               | 2.150752  | 0.533497  |
| 15            | 1             | 0           | -1.034623               | -0.296215 | 1.420659  |
| 16            | 6             | 0           | -3.347274               | -0.219025 | -0.104968 |

|    |   |   |           |           |           |
|----|---|---|-----------|-----------|-----------|
| 17 | 6 | 0 | -4.514127 | -0.543048 | -0.652622 |
| 18 | 1 | 0 | -3.208289 | 0.642157  | 0.537826  |
| 19 | 1 | 0 | -5.374703 | 0.077281  | -0.444419 |
| 20 | 1 | 0 | -4.652807 | -1.393226 | -1.307578 |
| 21 | 8 | 0 | 3.509459  | -0.594316 | 0.422920  |
| 22 | 1 | 0 | 4.143540  | 0.039273  | 0.072018  |

-----  
Distance matrix (angstroms):

|    |    | 1        | 2        | 3        | 4        | 5        |
|----|----|----------|----------|----------|----------|----------|
| 1  | C  | 0.000000 |          |          |          |          |
| 2  | C  | 1.352440 | 0.000000 |          |          |          |
| 3  | N  | 2.215032 | 1.398110 | 0.000000 |          |          |
| 4  | C  | 2.222706 | 2.229003 | 1.353274 | 0.000000 |          |
| 5  | N  | 1.392825 | 2.211798 | 2.182660 | 1.339659 | 0.000000 |
| 6  | C  | 2.548133 | 3.632701 | 3.601663 | 2.490932 | 1.468459 |
| 7  | C  | 3.333448 | 4.382873 | 4.404000 | 3.373549 | 2.509660 |
| 8  | H  | 1.076370 | 2.209448 | 3.274592 | 3.240092 | 2.165815 |
| 9  | H  | 2.205807 | 1.074672 | 2.172408 | 3.248268 | 3.268605 |
| 10 | H  | 3.365736 | 4.254286 | 3.895593 | 2.604090 | 2.066731 |
| 11 | H  | 2.753801 | 4.001569 | 4.239951 | 3.290078 | 2.093654 |
| 12 | H  | 3.142113 | 4.233983 | 4.562250 | 3.795232 | 2.787091 |
| 13 | H  | 3.676566 | 4.456311 | 4.221652 | 3.194582 | 2.748345 |
| 14 | Br | 4.554925 | 4.525763 | 3.626216 | 2.993667 | 3.680641 |
| 15 | H  | 3.257963 | 3.264995 | 2.161347 | 1.072435 | 2.149320 |
| 16 | C  | 3.592796 | 2.531508 | 1.412978 | 2.429982 | 3.534077 |
| 17 | C  | 4.349689 | 3.072640 | 2.427599 | 3.646526 | 4.603672 |
| 18 | H  | 4.231936 | 3.373411 | 2.077406 | 2.581225 | 3.854657 |
| 19 | H  | 5.398552 | 4.131548 | 3.387712 | 4.499858 | 5.564912 |
| 20 | H  | 4.226719 | 2.899213 | 2.742259 | 4.062110 | 4.773674 |
| 21 | O  | 4.563310 | 5.704712 | 5.703647 | 4.561087 | 3.687366 |
| 22 | H  | 5.236230 | 6.342729 | 6.362251 | 5.268337 | 4.445463 |
|    |    | 6        | 7        | 8        | 9        | 10       |
| 6  | C  | 0.000000 |          |          |          |          |
| 7  | C  | 1.535536 | 0.000000 |          |          |          |
| 8  | H  | 2.840006 | 3.460592 | 0.000000 |          |          |
| 9  | H  | 4.656228 | 5.328036 | 2.748302 | 0.000000 |          |
| 10 | H  | 1.089701 | 2.150648 | 3.811892 | 5.319283 | 0.000000 |
| 11 | H  | 1.090836 | 2.172601 | 2.691745 | 4.937651 | 1.767609 |
| 12 | H  | 2.173378 | 1.097317 | 3.016201 | 5.040535 | 3.062978 |
| 13 | H  | 2.162506 | 1.094560 | 4.040011 | 5.399278 | 2.483676 |
| 14 | Br | 4.025234 | 3.747814 | 5.382826 | 5.326769 | 3.954443 |
| 15 | H  | 2.833489 | 3.659414 | 4.232279 | 4.243427 | 2.523871 |
| 16 | C  | 4.881539 | 5.591515 | 4.625999 | 2.860986 | 5.014321 |
| 17 | C  | 6.024177 | 6.769764 | 5.278682 | 2.932961 | 6.225706 |



|    |    |          |          |          |          |          |
|----|----|----------|----------|----------|----------|----------|
| 18 | H  | 5.019704 | 5.599695 | 5.294849 | 3.840927 | 4.983637 |
| 19 | H  | 6.946174 | 7.634069 | 6.340180 | 3.956980 | 7.067179 |
| 20 | H  | 6.236800 | 7.047953 | 5.017243 | 2.440559 | 6.562264 |
| 21 | O  | 2.346643 | 1.429411 | 4.540241 | 6.662637 | 2.575573 |
| 22 | H  | 3.211801 | 1.977108 | 5.166224 | 7.257048 | 3.470007 |
|    |    | 11       | 12       | 13       | 14       | 15       |
| 11 | H  | 0.000000 |          |          |          |          |
| 12 | H  | 2.522180 | 0.000000 |          |          |          |
| 13 | H  | 3.070234 | 1.776421 | 0.000000 |          |          |
| 14 | Br | 5.109245 | 4.251900 | 2.762391 | 0.000000 |          |
| 15 | H  | 3.725577 | 4.318541 | 3.311161 | 2.681575 | 0.000000 |
| 16 | C  | 5.593781 | 5.795591 | 5.215459 | 3.843399 | 2.771615 |
| 17 | C  | 6.626565 | 6.858313 | 6.448532 | 5.067120 | 4.057877 |
| 18 | H  | 5.870088 | 5.943923 | 5.048532 | 3.197071 | 2.526808 |
| 19 | H  | 7.608565 | 7.763075 | 7.210234 | 5.487032 | 4.738598 |
| 20 | H  | 6.688543 | 7.014824 | 6.871316 | 5.841647 | 4.662399 |
| 21 | O  | 2.578274 | 2.090036 | 2.117013 | 4.769671 | 4.661870 |
| 22 | H  | 3.475084 | 2.363174 | 2.400148 | 5.021957 | 5.361414 |
|    |    | 16       | 17       | 18       | 19       | 20       |
| 16 | C  | 0.000000 |          |          |          |          |
| 17 | C  | 1.329083 | 0.000000 |          |          |          |
| 18 | H  | 1.083575 | 2.127696 | 0.000000 |          |          |
| 19 | H  | 2.076895 | 1.081087 | 2.444840 | 0.000000 |          |
| 20 | H  | 2.128247 | 1.082128 | 3.104019 | 1.851639 | 0.000000 |
| 21 | O  | 6.887256 | 8.095514 | 6.831559 | 8.951628 | 8.381853 |
| 22 | H  | 7.497356 | 8.707434 | 7.391200 | 9.532319 | 9.018374 |
|    |    | 21       | 22       |          |          |          |
| 21 | O  | 0.000000 |          |          |          |          |
| 22 | H  | 0.962614 | 0.000000 |          |          |          |

Stoichiometry C7H11BrN2O

Framework group C1[X(C7H11BrN2O)]

Deg. of freedom 60

Full point group C1 NOp 1

Largest Abelian subgroup C1 NOp 1

Largest concise Abelian subgroup C1 NOp 1

Standard orientation:

| Center<br>Number | Atomic<br>Number | Atomic<br>Type | Coordinates (Angstroms) |           |           |
|------------------|------------------|----------------|-------------------------|-----------|-----------|
|                  |                  |                | X                       | Y         | Z         |
| 1                | 6                | 0              | -0.307305               | -2.313109 | -0.589163 |
| 2                | 6                | 0              | -1.591460               | -1.901587 | -0.692549 |
| 3                | 7                | 0              | -1.747781               | -0.809658 | 0.166501  |
| 4                | 6                | 0              | -0.552939               | -0.555216 | 0.748706  |

|    |    |   |           |           |           |
|----|----|---|-----------|-----------|-----------|
| 5  | 7  | 0 | 0.326439  | -1.471148 | 0.321569  |
| 6  | 6  | 0 | 1.757634  | -1.480569 | 0.650145  |
| 7  | 6  | 0 | 2.621835  | -0.735984 | -0.377776 |
| 8  | 1  | 0 | 0.211791  | -3.117910 | -1.080496 |
| 9  | 1  | 0 | -2.394825 | -2.275184 | -1.300784 |
| 10 | 1  | 0 | 1.862667  | -0.991318 | 1.618158  |
| 11 | 1  | 0 | 2.090028  | -2.514637 | 0.750837  |
| 12 | 1  | 0 | 2.531739  | -1.211174 | -1.362754 |
| 13 | 1  | 0 | 2.276682  | 0.299220  | -0.463127 |
| 14 | 35 | 0 | 0.280966  | 2.180779  | -0.135022 |
| 15 | 1  | 0 | -0.374670 | 0.172239  | 1.516266  |
| 16 | 6  | 0 | -2.872253 | 0.031539  | 0.322895  |
| 17 | 6  | 0 | -4.122241 | -0.320586 | 0.040053  |
| 18 | 1  | 0 | -2.592602 | 1.023995  | 0.656004  |
| 19 | 1  | 0 | -4.906283 | 0.415196  | 0.152533  |
| 20 | 1  | 0 | -4.402672 | -1.306123 | -0.307909 |
| 21 | 8  | 0 | 3.955570  | -0.849081 | 0.123801  |
| 22 | 1  | 0 | 4.569559  | -0.410223 | -0.473733 |

-----

Rotational constants (GHZ):      0.7972368      0.5644655      0.3484152

Standard basis: 6-311++G(d,p) (5D, 7F)

There are    358 symmetry adapted cartesian basis functions of A    symmetry.

There are    345 symmetry adapted basis functions of A    symmetry.

345 basis functions,    553 primitive gaussians,    358 cartesian basis functions

55 alpha electrons      55 beta electrons

nuclear repulsion energy      859.9492840306 Hartrees.

NAtoms=    22 NActive=    22 NUniq=    22 SFac= 1.00D+00 NAtFMM=    60 NAOKFM=F

Big=F

Integral buffers will be    131072 words long.

Raffenetti 2 integral format.

Two-electron integral symmetry is turned on.

One-electron integrals computed using PRISM.

NBasis=    345 RedAO= T EigKep=    5.75D-06    NBF=    345

NBsUse=    345 1.00D-06 EigRej= -1.00D+00    NBFU=    345

Initial guess from the checkpoint file: ". "

B after Tr=    0.000000    0.000000    0.000000

Rot=    0.996403    0.010754    0.004424    0.083940 Ang=    9.72 deg.

ExpMin= 3.50D-02 ExpMax= 4.40D+05 ExpMxC= 1.51D+04 IAcc=3 IRadAn=      5 AccDes=

0.00D+00

Harris functional with IExCor=    402 and IRadAn=      5 diagonalized for initial guess.

HarFok: IExCor=    402 AccDes= 0.00D+00 IRadAn=      5 IDoV= 1 UseB2=F ITyADJ=14

ICtDFT= 3500011 ScaDFX=    1.000000    1.000000    1.000000    1.000000

FoFCou: FMM=F IPFlag=      0 FMFlag=    100000 FMFlg1=      0

NFxFlg=      0 DoJE=T BraDBF=F KetDBF=T FulRan=T

wScrn= 0.000000 ICntrl= 500 IOpCl= 0 l1Cent= 200000004 NGrid= 0  
 NMat0= 1 NMatS0= 1 NMatT0= 0 NMatD0= 1 NMtDS0= 0  
 NMtDT0= 0

Petite list used in FoFCou.

Keep R1 ints in memory in canonical form, NReq=1804729152.

Requested convergence on RMS density matrix=1.00D-08 within 128 cycles.

Requested convergence on MAX density matrix=1.00D-06.

Requested convergence on energy=1.00D-06.

No special actions if energy rises.

SCF Done: E(RB3LYP) = -3032.33603367 A.U. after 15 cycles

NFock= 15 Conv=0.37D-08 -V/T= 2.0017

Calling FoFJK, ICntrl= 2127 FMM=F ISym2X=0 l1Cent= 0 IOpClX= 0 NMat=1 NMatS=1  
 NMatT=0.

\*\*\*\*\* Axes restored to original set \*\*\*\*\*

| Center Number | Atomic Number | Forces (Hartrees/Bohr) |              |              |
|---------------|---------------|------------------------|--------------|--------------|
|               |               | X                      | Y            | Z            |
| 1             | 6             | 0.000852608            | 0.003555659  | 0.002616768  |
| 2             | 6             | -0.002689456           | 0.001377757  | 0.002081297  |
| 3             | 7             | 0.007827952            | -0.003127271 | -0.001352868 |
| 4             | 6             | -0.000574742           | -0.001308923 | -0.004220473 |
| 5             | 7             | 0.001549958            | -0.002957912 | -0.002343865 |
| 6             | 6             | 0.000740808            | 0.002975528  | 0.003407691  |
| 7             | 6             | -0.000305453           | -0.001207704 | -0.001369168 |
| 8             | 1             | 0.000202028            | 0.000728011  | 0.000128031  |
| 9             | 1             | -0.000493166           | 0.000794301  | 0.000149543  |
| 10            | 1             | 0.001630398            | -0.000474208 | 0.000682307  |
| 11            | 1             | -0.000859143           | -0.000494548 | -0.000381516 |
| 12            | 1             | -0.000111845           | -0.001302904 | -0.000732684 |
| 13            | 1             | 0.001202062            | 0.000376415  | 0.001786125  |
| 14            | 35            | -0.001868510           | -0.002937484 | -0.000149450 |
| 15            | 1             | 0.000393078            | 0.002613278  | -0.000383260 |
| 16            | 6             | -0.004943846           | 0.001556154  | -0.000388597 |
| 17            | 6             | 0.002108324            | 0.001078239  | 0.001441676  |
| 18            | 1             | 0.000383572            | 0.000475094  | 0.000161620  |
| 19            | 1             | -0.000550105           | -0.000412245 | -0.000438528 |
| 20            | 1             | -0.000081014           | -0.000699954 | -0.000192017 |
| 21            | 8             | -0.001596832           | -0.001707815 | -0.000872331 |
| 22            | 1             | -0.002816678           | 0.001100532  | 0.000369700  |

Cartesian Forces: Max 0.007827952 RMS 0.001952364

GradGradGradGradGradGradGradGradGradGradGradGradGradGradGradGradGradGradGrad

Berny optimization.

Using GEDIIS/GDIIS optimizer.

FormGI is forming the generalized inverse of G from B-inverse, IUseBI=4.

Internal Forces: Max 0.018106450 RMS 0.003333648

Search for a local minimum.

Step number 6 out of a maximum of 116

All quantities printed in internal units (Hartrees-Bohrs-Radians)

Mixed Optimization -- RFO/linear search

Update second derivatives using D2CorX and points 4 5 6

DE= -1.59D-03 DEPred=-3.09D-03 R= 5.16D-01

TightC=F SS= 1.41D+00 RLast= 5.38D-01 DXNew= 2.5227D-01 1.6153D+00

Trust test= 5.16D-01 RLast= 5.38D-01 DXMaxT set to 2.52D-01

ITU= 1 0 0-1 0 0

Use linear search instead of GDIIS.

|                 |         |         |         |         |         |
|-----------------|---------|---------|---------|---------|---------|
| Eigenvalues --- | 0.00246 | 0.00521 | 0.00645 | 0.01025 | 0.01293 |
| Eigenvalues --- | 0.01590 | 0.01685 | 0.01887 | 0.02041 | 0.02141 |
| Eigenvalues --- | 0.02220 | 0.02375 | 0.02409 | 0.03065 | 0.03071 |
| Eigenvalues --- | 0.03685 | 0.04522 | 0.05433 | 0.05938 | 0.06501 |
| Eigenvalues --- | 0.08664 | 0.09392 | 0.13589 | 0.14521 | 0.15712 |
| Eigenvalues --- | 0.15800 | 0.15994 | 0.15999 | 0.15999 | 0.16095 |
| Eigenvalues --- | 0.16567 | 0.20721 | 0.21962 | 0.22862 | 0.23043 |
| Eigenvalues --- | 0.23928 | 0.24654 | 0.25765 | 0.29499 | 0.33269 |
| Eigenvalues --- | 0.33850 | 0.33868 | 0.33888 | 0.34102 | 0.34295 |
| Eigenvalues --- | 0.34432 | 0.34656 | 0.36060 | 0.36306 | 0.36403 |
| Eigenvalues --- | 0.37235 | 0.42143 | 0.43152 | 0.45927 | 0.50093 |
| Eigenvalues --- | 0.53440 | 0.54257 | 0.55551 | 0.60618 | 1.88545 |

RFO step: Lambda=-1.18166332D-03 EMin= 2.46044615D-03

Quartic linear search produced a step of -0.27227.

Iteration 1 RMS(Cart)= 0.05609065 RMS(Int)= 0.00154371

Iteration 2 RMS(Cart)= 0.00212866 RMS(Int)= 0.00007977

Iteration 3 RMS(Cart)= 0.00000521 RMS(Int)= 0.00007970

Iteration 4 RMS(Cart)= 0.00000000 RMS(Int)= 0.00007970

| Variable | Old X   | -DE/DX   | Delta X<br>(Linear) | Delta X<br>(Quad) | Delta X<br>(Total) | New X   |
|----------|---------|----------|---------------------|-------------------|--------------------|---------|
| R1       | 2.55574 | 0.00128  | 0.00023             | 0.00051           | 0.00079            | 2.55653 |
| R2       | 2.63206 | -0.00334 | -0.00075            | -0.00264          | -0.00337           | 2.62868 |
| R3       | 2.03404 | -0.00035 | -0.00026            | -0.00041          | -0.00066           | 2.03338 |
| R4       | 2.64204 | -0.00412 | -0.00144            | -0.00519          | -0.00661           | 2.63543 |
| R5       | 2.03084 | 0.00004  | -0.00060            | 0.00056           | -0.00004           | 2.03079 |
| R6       | 2.55732 | -0.00371 | -0.00108            | -0.00191          | -0.00303           | 2.55429 |
| R7       | 2.67014 | 0.00370  | 0.00090             | 0.00378           | 0.00468            | 2.67483 |
| R8       | 2.53159 | -0.00171 | -0.00049            | -0.00074          | -0.00128           | 2.53031 |
| R9       | 2.02661 | 0.00081  | 0.00034             | 0.00064           | 0.00097            | 2.02758 |

|     |         |          |          |          |          |         |
|-----|---------|----------|----------|----------|----------|---------|
| R10 | 2.77499 | -0.00274 | -0.00093 | -0.00159 | -0.00252 | 2.77246 |
| R11 | 2.90174 | -0.00674 | -0.00284 | -0.00584 | -0.00868 | 2.89307 |
| R12 | 2.05924 | 0.00050  | 0.00018  | 0.00081  | 0.00099  | 2.06022 |
| R13 | 2.06138 | 0.00017  | 0.00038  | -0.00020 | 0.00018  | 2.06156 |
| R14 | 2.07363 | 0.00091  | 0.00023  | 0.00135  | 0.00158  | 2.07521 |
| R15 | 2.06842 | -0.00179 | 0.00081  | -0.00104 | -0.00023 | 2.06819 |
| R16 | 2.70120 | -0.00408 | -0.00200 | -0.00443 | -0.00642 | 2.69477 |
| R17 | 5.22016 | -0.00022 | 0.00769  | -0.00005 | 0.00764  | 5.22780 |
| R18 | 2.51160 | -0.00162 | -0.00146 | -0.00003 | -0.00149 | 2.51011 |
| R19 | 2.04766 | 0.00052  | -0.00184 | 0.00174  | -0.00011 | 2.04755 |
| R20 | 2.04296 | 0.00011  | -0.00130 | 0.00121  | -0.00009 | 2.04287 |
| R21 | 2.04493 | 0.00068  | -0.00072 | 0.00168  | 0.00096  | 2.04589 |
| R22 | 1.81908 | -0.00125 | -0.00039 | -0.00091 | -0.00130 | 1.81778 |
| A1  | 1.87348 | 0.00005  | 0.00058  | 0.00238  | 0.00277  | 1.87624 |
| A2  | 2.27908 | 0.00031  | -0.00033 | 0.00013  | -0.00015 | 2.27893 |
| A3  | 2.13061 | -0.00036 | -0.00027 | -0.00240 | -0.00263 | 2.12798 |
| A4  | 1.87218 | -0.00089 | -0.00060 | -0.00141 | -0.00218 | 1.86999 |
| A5  | 2.27481 | 0.00128  | -0.00018 | 0.00419  | 0.00408  | 2.27890 |
| A6  | 2.13611 | -0.00041 | 0.00077  | -0.00286 | -0.00202 | 2.13409 |
| A7  | 1.88859 | 0.00073  | 0.00030  | 0.00004  | 0.00032  | 1.88891 |
| A8  | 2.24202 | -0.00123 | -0.00235 | -0.00189 | -0.00390 | 2.23812 |
| A9  | 2.14491 | 0.00048  | -0.00097 | 0.00390  | 0.00328  | 2.14820 |
| A10 | 1.89004 | 0.00089  | 0.00054  | 0.00169  | 0.00187  | 1.89191 |
| A11 | 2.19225 | -0.00072 | -0.00005 | -0.00320 | -0.00316 | 2.18909 |
| A12 | 2.19303 | -0.00006 | -0.00042 | -0.00103 | -0.00138 | 2.19166 |
| A13 | 1.89981 | -0.00079 | -0.00090 | -0.00397 | -0.00513 | 1.89468 |
| A14 | 2.19677 | 0.00433  | -0.00093 | 0.00317  | 0.00233  | 2.19910 |
| A15 | 2.18072 | -0.00373 | 0.00072  | -0.00051 | 0.00031  | 2.18104 |
| A16 | 1.97754 | -0.01494 | -0.00621 | -0.00944 | -0.01568 | 1.96186 |
| A17 | 1.86484 | 0.00478  | 0.00144  | 0.01765  | 0.01913  | 1.88398 |
| A18 | 1.90045 | 0.00474  | -0.00067 | -0.00759 | -0.00834 | 1.89211 |
| A19 | 1.89939 | 0.00189  | 0.00137  | 0.00092  | 0.00236  | 1.90175 |
| A20 | 1.92833 | 0.00595  | 0.00484  | -0.00043 | 0.00429  | 1.93262 |
| A21 | 1.89045 | -0.00211 | -0.00073 | -0.00016 | -0.00084 | 1.88961 |
| A22 | 1.92271 | 0.00234  | -0.00115 | 0.00519  | 0.00405  | 1.92676 |
| A23 | 1.91064 | -0.01247 | -0.00155 | -0.00682 | -0.00842 | 1.90221 |
| A24 | 1.82540 | 0.00388  | 0.00018  | -0.00305 | -0.00293 | 1.82247 |
| A25 | 1.88986 | 0.00292  | -0.00014 | 0.01255  | 0.01245  | 1.90231 |
| A26 | 1.93619 | -0.00122 | 0.00222  | 0.00016  | 0.00240  | 1.93860 |
| A27 | 1.97841 | 0.00427  | 0.00032  | -0.00852 | -0.00826 | 1.97016 |
| A28 | 2.61149 | -0.01811 | 0.00010  | -0.00638 | -0.00628 | 2.60521 |
| A29 | 2.17387 | -0.00149 | -0.00052 | -0.00353 | -0.00403 | 2.16984 |
| A30 | 1.95402 | 0.00044  | -0.00085 | 0.00160  | 0.00078  | 1.95480 |
| A31 | 2.15412 | 0.00105  | 0.00159  | 0.00162  | 0.00322  | 2.15735 |

|     |          |          |          |          |          |          |
|-----|----------|----------|----------|----------|----------|----------|
| A32 | 2.07102  | 0.00115  | 0.00230  | 0.00110  | 0.00340  | 2.07441  |
| A33 | 2.15729  | -0.00064 | 0.00092  | -0.00288 | -0.00196 | 2.15533  |
| A34 | 2.05483  | -0.00051 | -0.00322 | 0.00180  | -0.00142 | 2.05341  |
| A35 | 1.91905  | -0.00398 | -0.00473 | -0.01009 | -0.01482 | 1.90423  |
| D1  | -0.00815 | 0.00091  | -0.00098 | 0.01920  | 0.01829  | 0.01014  |
| D2  | 3.11933  | -0.00001 | -0.00218 | 0.01295  | 0.01076  | 3.13010  |
| D3  | 3.14066  | 0.00090  | 0.00150  | 0.00110  | 0.00266  | -3.13987 |
| D4  | -0.01504 | -0.00002 | 0.00030  | -0.00515 | -0.00487 | -0.01991 |
| D5  | -0.01397 | -0.00109 | -0.00010 | -0.03854 | -0.03860 | -0.05257 |
| D6  | -3.04347 | 0.00102  | 0.00900  | -0.02609 | -0.01707 | -3.06054 |
| D7  | 3.12116  | -0.00108 | -0.00233 | -0.02231 | -0.02461 | 3.09655  |
| D8  | 0.09165  | 0.00104  | 0.00677  | -0.00985 | -0.00307 | 0.08858  |
| D9  | 0.02722  | -0.00040 | 0.00173  | 0.00634  | 0.00805  | 0.03526  |
| D10 | 3.03736  | -0.00052 | -0.01827 | 0.02418  | 0.00586  | 3.04322  |
| D11 | -3.10164 | 0.00042  | 0.00282  | 0.01192  | 0.01474  | -3.08690 |
| D12 | -0.09149 | 0.00029  | -0.01718 | 0.02976  | 0.01256  | -0.07893 |
| D13 | -0.03605 | -0.00032 | -0.00183 | -0.03054 | -0.03240 | -0.06845 |
| D14 | -3.04913 | -0.00125 | -0.00239 | -0.00989 | -0.01229 | -3.06142 |
| D15 | -3.05510 | -0.00005 | 0.01703  | -0.04666 | -0.02971 | -3.08481 |
| D16 | 0.21501  | -0.00098 | 0.01647  | -0.02601 | -0.00960 | 0.20540  |
| D17 | 0.43349  | 0.00058  | -0.01254 | 0.04578  | 0.03330  | 0.46679  |
| D18 | -2.65749 | 0.00047  | -0.01872 | 0.05236  | 0.03367  | -2.62382 |
| D19 | -2.85694 | 0.00043  | -0.03509 | 0.06564  | 0.03052  | -2.82642 |
| D20 | 0.33528  | 0.00032  | -0.04127 | 0.07221  | 0.03089  | 0.36616  |
| D21 | 0.03113  | 0.00086  | 0.00119  | 0.04262  | 0.04376  | 0.07489  |
| D22 | 3.06191  | -0.00060 | -0.00797 | 0.03060  | 0.02267  | 3.08458  |
| D23 | 3.04414  | 0.00172  | 0.00179  | 0.02176  | 0.02345  | 3.06759  |
| D24 | -0.20827 | 0.00027  | -0.00738 | 0.00974  | 0.00236  | -0.20591 |
| D25 | 1.40844  | 0.00143  | -0.02381 | -0.00813 | -0.03188 | 1.37656  |
| D26 | -2.78314 | -0.00192 | -0.02484 | -0.00079 | -0.02566 | -2.80880 |
| D27 | -0.74487 | 0.00059  | -0.02527 | 0.00460  | -0.02073 | -0.76560 |
| D28 | -1.60365 | 0.00357  | -0.01314 | 0.00641  | -0.00665 | -1.61030 |
| D29 | 0.48796  | 0.00022  | -0.01417 | 0.01375  | -0.00043 | 0.48753  |
| D30 | 2.52623  | 0.00274  | -0.01460 | 0.01914  | 0.00450  | 2.53073  |
| D31 | -1.06930 | -0.00005 | -0.03191 | 0.00063  | -0.03128 | -1.10057 |
| D32 | 1.00701  | -0.00273 | -0.03371 | 0.01498  | -0.01876 | 0.98825  |
| D33 | 3.13227  | -0.00199 | -0.03404 | -0.00044 | -0.03448 | 3.09779  |
| D34 | -3.14107 | 0.00200  | -0.03077 | -0.01624 | -0.04701 | 3.09510  |
| D35 | -1.06477 | -0.00069 | -0.03257 | -0.00190 | -0.03450 | -1.09926 |
| D36 | 1.06050  | 0.00006  | -0.03290 | -0.01732 | -0.05022 | 1.01028  |
| D37 | 1.06862  | -0.00013 | -0.03367 | -0.01636 | -0.05001 | 1.01861  |
| D38 | -3.13827 | -0.00281 | -0.03547 | -0.00202 | -0.03749 | 3.10743  |
| D39 | -1.01300 | -0.00207 | -0.03580 | -0.01744 | -0.05321 | -1.06622 |
| D40 | -0.37595 | 0.00042  | -0.02775 | -0.09200 | -0.11971 | -0.49566 |

|     |          |          |          |          |          |          |
|-----|----------|----------|----------|----------|----------|----------|
| D41 | 1.72056  | -0.00232 | -0.03013 | -0.08218 | -0.11231 | 1.60825  |
| D42 | -2.40642 | 0.00117  | -0.02715 | -0.07854 | -0.10573 | -2.51215 |
| D43 | 3.13231  | 0.00590  | -0.02118 | 0.06674  | 0.04554  | -3.10533 |
| D44 | 1.05981  | 0.00151  | -0.02105 | 0.06228  | 0.04122  | 1.10104  |
| D45 | -1.07079 | -0.00447 | -0.02278 | 0.05190  | 0.02915  | -1.04164 |
| D46 | -3.09272 | -0.00007 | -0.00421 | 0.00558  | 0.00138  | -3.09134 |
| D47 | 0.03856  | 0.00019  | -0.00420 | 0.00755  | 0.00337  | 0.04192  |
| D48 | -0.00738 | 0.00003  | 0.00262  | -0.00174 | 0.00087  | -0.00651 |
| D49 | 3.12390  | 0.00029  | 0.00263  | 0.00023  | 0.00285  | 3.12675  |

| Item                 | Value    | Threshold | Converged? |
|----------------------|----------|-----------|------------|
| Maximum Force        | 0.018106 | 0.000450  | NO         |
| RMS Force            | 0.003334 | 0.000300  | NO         |
| Maximum Displacement | 0.382509 | 0.001800  | NO         |
| RMS Displacement     | 0.055909 | 0.001200  | NO         |

Predicted change in Energy=-7.700671D-04

GradGradGradGradGradGradGradGradGradGradGradGradGradGradGradGradGradGrad

Input orientation:

| Center Number | Atomic Number | Atomic Type | Coordinates (Angstroms) |           |           |
|---------------|---------------|-------------|-------------------------|-----------|-----------|
|               |               |             | X                       | Y         | Z         |
| 1             | 6             | 0           | -0.462262               | -1.972185 | -1.306572 |
| 2             | 6             | 0           | -1.761927               | -1.628779 | -1.458763 |
| 3             | 7             | 0           | -2.124644               | -0.884703 | -0.336388 |
| 4             | 6             | 0           | -1.035096               | -0.750808 | 0.452261  |
| 5             | 7             | 0           | -0.032076               | -1.452844 | -0.089929 |
| 6             | 6             | 0           | 1.337534                | -1.503877 | 0.433535  |
| 7             | 6             | 0           | 2.244045                | -0.444983 | -0.199530 |
| 8             | 1             | 0           | 0.190735                | -2.541000 | -1.945212 |
| 9             | 1             | 0           | -2.448219               | -1.828302 | -2.261300 |
| 10            | 1             | 0           | 1.292412                | -1.334160 | 1.509522  |
| 11            | 1             | 0           | 1.734975                | -2.505196 | 0.261674  |
| 12            | 1             | 0           | 2.344245                | -0.622575 | -1.278585 |
| 13            | 1             | 0           | 1.801762                | 0.543437  | -0.040764 |
| 14            | 35            | 0           | -0.447789               | 2.110094  | 0.331082  |
| 15            | 1             | 0           | -1.020806               | -0.287101 | 1.419728  |
| 16            | 6             | 0           | -3.345868               | -0.213805 | -0.087330 |
| 17            | 6             | 0           | -4.514379               | -0.566026 | -0.611630 |
| 18            | 1             | 0           | -3.209676               | 0.656111  | 0.544104  |
| 19            | 1             | 0           | -5.385168               | 0.038062  | -0.398441 |
| 20            | 1             | 0           | -4.645762               | -1.428174 | -1.253146 |
| 21            | 8             | 0           | 3.495510                | -0.605674 | 0.464942  |
| 22            | 1             | 0           | 4.112803                | 0.055610  | 0.137897  |

-----

Distance matrix (angstroms):

|    |    | 1        | 2        | 3        | 4        | 5        |
|----|----|----------|----------|----------|----------|----------|
| 1  | C  | 0.000000 |          |          |          |          |
| 2  | C  | 1.352856 | 0.000000 |          |          |          |
| 3  | N  | 2.210744 | 1.394611 | 0.000000 |          |          |
| 4  | C  | 2.216618 | 2.225114 | 1.351670 | 0.000000 |          |
| 5  | N  | 1.391040 | 2.212926 | 2.182285 | 1.338982 | 0.000000 |
| 6  | C  | 2.546870 | 3.633600 | 3.600394 | 2.489345 | 1.467124 |
| 7  | C  | 3.298785 | 4.362895 | 4.392895 | 3.357250 | 2.491691 |
| 8  | H  | 1.076019 | 2.209450 | 3.269957 | 3.233470 | 2.162361 |
| 9  | H  | 2.208220 | 1.074649 | 2.168033 | 3.243659 | 3.270101 |
| 10 | H  | 3.378807 | 4.269251 | 3.909689 | 2.622097 | 2.080048 |
| 11 | H  | 2.751607 | 3.994538 | 4.228515 | 3.284432 | 2.086514 |
| 12 | H  | 3.114275 | 4.231496 | 4.574649 | 3.798976 | 2.783730 |
| 13 | H  | 3.613367 | 4.407848 | 4.188513 | 3.156883 | 2.711184 |
| 14 | Br | 4.398536 | 4.348526 | 3.496593 | 2.923076 | 3.611730 |
| 15 | H  | 3.253335 | 3.261146 | 2.158594 | 1.072949 | 2.148397 |
| 16 | C  | 3.590770 | 2.528210 | 1.415457 | 2.432940 | 3.537858 |
| 17 | C  | 4.345099 | 3.069702 | 2.426550 | 3.642996 | 4.598875 |
| 18 | H  | 4.228620 | 3.365736 | 2.080064 | 2.591651 | 3.866113 |
| 19 | H  | 5.394516 | 4.126805 | 3.389153 | 4.502126 | 5.565390 |
| 20 | H  | 4.219061 | 2.898107 | 2.737122 | 4.050203 | 4.758127 |
| 21 | O  | 4.546379 | 5.691048 | 5.683847 | 4.532948 | 3.670074 |
| 22 | H  | 5.208614 | 6.316561 | 6.325732 | 5.220153 | 4.416714 |
|    |    | 6        | 7        | 8        | 9        | 10       |
| 6  | C  | 0.000000 |          |          |          |          |
| 7  | C  | 1.530944 | 0.000000 |          |          |          |
| 8  | H  | 2.837113 | 3.414202 | 0.000000 |          |          |
| 9  | H  | 4.658252 | 5.308653 | 2.751714 | 0.000000 |          |
| 10 | H  | 1.090224 | 2.148744 | 3.821694 | 5.334378 | 0.000000 |
| 11 | H  | 1.090933 | 2.171714 | 2.693753 | 4.931804 | 1.767573 |
| 12 | H  | 2.172905 | 1.098152 | 2.960127 | 5.038573 | 3.063698 |
| 13 | H  | 2.152200 | 1.094438 | 3.966873 | 5.349603 | 2.487608 |
| 14 | Br | 4.032203 | 3.749124 | 5.217461 | 5.121828 | 4.034836 |
| 15 | H  | 2.831058 | 3.647763 | 4.227377 | 4.238251 | 2.540743 |
| 16 | C  | 4.885677 | 5.595815 | 4.623324 | 2.852809 | 5.031776 |
| 17 | C  | 6.018041 | 6.772058 | 5.274189 | 2.929807 | 6.229617 |
| 18 | H  | 5.035364 | 5.613240 | 5.289708 | 3.823927 | 5.016174 |
| 19 | H  | 6.947265 | 7.647077 | 6.335200 | 3.947053 | 7.079081 |
| 20 | H  | 6.216949 | 7.038906 | 5.010892 | 2.450647 | 6.550044 |
| 21 | O  | 2.337651 | 1.426012 | 4.525026 | 6.652452 | 2.544696 |
| 22 | H  | 3.197111 | 1.963851 | 5.144351 | 7.235487 | 3.430368 |
|    |    | 11       | 12       | 13       | 14       | 15       |



|    |    |          |          |          |          |          |
|----|----|----------|----------|----------|----------|----------|
| 11 | H  | 0.000000 |          |          |          |          |
| 12 | H  | 2.507563 | 0.000000 |          |          |          |
| 13 | H  | 3.064326 | 1.784957 | 0.000000 |          |          |
| 14 | Br | 5.105896 | 4.225395 | 2.766435 | 0.000000 |          |
| 15 | H  | 3.722280 | 4.326315 | 3.284771 | 2.694446 | 0.000000 |
| 16 | C  | 5.584553 | 5.827827 | 5.203237 | 3.738240 | 2.771734 |
| 17 | C  | 6.601323 | 6.891208 | 6.438201 | 4.958576 | 4.050835 |
| 18 | H  | 5.875645 | 5.983584 | 5.046709 | 3.128493 | 2.539196 |
| 19 | H  | 7.589489 | 7.807363 | 7.213549 | 5.404001 | 4.739106 |
| 20 | H  | 6.645935 | 7.036322 | 6.850378 | 5.714201 | 4.646139 |
| 21 | O  | 2.597881 | 2.089397 | 2.108312 | 4.789877 | 4.627117 |
| 22 | H  | 3.496730 | 2.365196 | 2.368714 | 5.005719 | 5.302309 |
|    |    | 16       | 17       | 18       | 19       | 20       |
| 16 | C  | 0.000000 |          |          |          |          |
| 17 | C  | 1.328295 | 0.000000 |          |          |          |
| 18 | H  | 1.083519 | 2.128753 | 0.000000 |          |          |
| 19 | H  | 2.078214 | 1.081039 | 2.450131 | 0.000000 |          |
| 20 | H  | 2.126862 | 1.082638 | 3.104303 | 1.851240 | 0.000000 |
| 21 | O  | 6.874810 | 8.082010 | 6.823334 | 8.945740 | 8.361138 |
| 22 | H  | 7.466933 | 8.681963 | 7.358281 | 9.513118 | 8.991611 |
|    |    | 21       | 22       |          |          |          |
| 21 | O  | 0.000000 |          |          |          |          |
| 22 | H  | 0.961928 | 0.000000 |          |          |          |

Stoichiometry C7H11BrN2O

Framework group C1[X(C7H11BrN2O)]

Deg. of freedom 60

Full point group C1 NOp 1

Largest Abelian subgroup C1 NOp 1

Largest concise Abelian subgroup C1 NOp 1

Standard orientation:

| Center<br>Number | Atomic<br>Number | Atomic<br>Type | Coordinates (Angstroms) |           |           |
|------------------|------------------|----------------|-------------------------|-----------|-----------|
|                  |                  |                | X                       | Y         | Z         |
| 1                | 6                | 0              | -0.166785               | -2.225387 | -0.687560 |
| 2                | 6                | 0              | -1.470198               | -1.870775 | -0.762273 |
| 3                | 7                | 0              | -1.673685               | -0.853996 | 0.170301  |
| 4                | 6                | 0              | -0.489270               | -0.578277 | 0.760345  |
| 5                | 7                | 0              | 0.424885                | -1.439328 | 0.295817  |
| 6                | 6                | 0              | 1.849950                | -1.421712 | 0.644144  |
| 7                | 6                | 0              | 2.681664                | -0.597767 | -0.342343 |
| 8                | 1                | 0              | 0.389725                | -2.965381 | -1.235760 |
| 9                | 1                | 0              | -2.257537               | -2.232197 | -1.398152 |
| 10               | 1                | 0              | 1.947165                | -0.986818 | 1.639134  |

|    |    |   |           |           |           |
|----|----|---|-----------|-----------|-----------|
| 11 | 1  | 0 | 2.207475  | -2.451599 | 0.684688  |
| 12 | 1  | 0 | 2.638547  | -1.043607 | -1.344993 |
| 13 | 1  | 0 | 2.277799  | 0.418461  | -0.386717 |
| 14 | 35 | 0 | 0.117963  | 2.131245  | -0.152963 |
| 15 | 1  | 0 | -0.343047 | 0.111109  | 1.569409  |
| 16 | 6  | 0 | -2.842637 | -0.086099 | 0.388027  |
| 17 | 6  | 0 | -4.074161 | -0.503311 | 0.116641  |
| 18 | 1  | 0 | -2.613359 | 0.906610  | 0.756772  |
| 19 | 1  | 0 | -4.901275 | 0.174709  | 0.274175  |
| 20 | 1  | 0 | -4.299869 | -1.491247 | -0.264334 |
| 21 | 8  | 0 | 4.006321  | -0.645512 | 0.183502  |
| 22 | 1  | 0 | 4.585325  | -0.116281 | -0.373253 |

-----

Rotational constants (GHZ):      0.8327088      0.5656686      0.3577358

Standard basis: 6-311++G(d,p) (5D, 7F)

There are    358 symmetry adapted cartesian basis functions of A    symmetry.

There are    345 symmetry adapted basis functions of A    symmetry.

    345 basis functions,    553 primitive gaussians,    358 cartesian basis functions

    55 alpha electrons      55 beta electrons

    nuclear repulsion energy      866.9915581269 Hartrees.

NAtoms=    22 NActive=    22 NUniq=    22 SFac= 1.00D+00 NAtFMM=    60 NAOKFM=F

Big=F

Integral buffers will be    131072 words long.

Raffenetti 2 integral format.

Two-electron integral symmetry is turned on.

One-electron integrals computed using PRISM.

NBasis=    345 RedAO= T EigKep=    5.78D-06    NBF=    345

NBsUse=    345 1.00D-06 EigRej= -1.00D+00    NBFU=    345

Initial guess from the checkpoint file: ". "

B after Tr=    0.000000    0.000000    0.000000

    Rot=    0.999635    -0.003952    -0.000808    -0.026703 Ang=    -3.10 deg.

ExpMin= 3.50D-02 ExpMax= 4.40D+05 ExpMxC= 1.51D+04 IAcc=3 IRadAn=      5 AccDes=

0.00D+00

Harris functional with IExCor=    402 and IRadAn=      5 diagonalized for initial guess.

HarFok: IExCor=    402 AccDes= 0.00D+00 IRadAn=      5 IDoV= 1 UseB2=F ITyADJ=14

ICtDFT=    3500011 ScaDFX=    1.000000    1.000000    1.000000    1.000000

FoFCou: FMM=F IPFlag=      0 FMFlag=      100000 FMFlg1=      0

    NFxFlg=      0 DoJE=T BraDBF=F KetDBF=T FulRan=T

    wScrn=    0.000000 ICntrl=      500 IOpCl=    0 I1Cent=    200000004 NGrid=

0

    NMat0=    1 NMatS0=      1 NMatT0=    0 NMatD0=    1 NMtDS0=    0

NMtDT0=    0

Petite list used in FoFCou.

Keep R1 ints in memory in canonical form, NReq=1804729152.

Requested convergence on RMS density matrix=1.00D-08 within 128 cycles.

Requested convergence on MAX density matrix=1.00D-06.

Requested convergence on energy=1.00D-06.

No special actions if energy rises.

SCF Done: E(RB3LYP) = -3032.33697657 A.U. after 12 cycles

NFock= 12 Conv=0.10D-07 -V/T= 2.0017

Calling FoFJK, ICntrl= 2127 FMM=F ISym2X=0 l1Cent= 0 IOpClX= 0 NMat=1 NMatS=1

NMatT=0.

\*\*\*\*\* Axes restored to original set \*\*\*\*\*

---

| Center<br>Number | Atomic<br>Number | Forces (Hartrees/Bohr) |              |              |
|------------------|------------------|------------------------|--------------|--------------|
|                  |                  | X                      | Y            | Z            |
| 1                | 6                | 0.000551368            | -0.000422339 | 0.001557907  |
| 2                | 6                | -0.001180889           | 0.001169086  | 0.000919902  |
| 3                | 7                | 0.004163561            | -0.001878208 | -0.000726863 |
| 4                | 6                | -0.001304315           | 0.000156740  | -0.000384187 |
| 5                | 7                | 0.000579513            | -0.000562570 | -0.001348226 |
| 6                | 6                | -0.000051283           | 0.001370892  | -0.000199083 |
| 7                | 6                | -0.000546848           | -0.000824448 | 0.000924304  |
| 8                | 1                | 0.000077973            | 0.000237678  | -0.000041627 |
| 9                | 1                | -0.000166752           | 0.000739705  | -0.000041331 |
| 10               | 1                | -0.000040300           | -0.000227169 | -0.000007123 |
| 11               | 1                | -0.000185215           | -0.000463995 | 0.000165350  |
| 12               | 1                | -0.000531103           | -0.000453399 | -0.000036682 |
| 13               | 1                | 0.001004969            | 0.000716868  | -0.000105822 |
| 14               | 35               | -0.000910072           | -0.001498806 | 0.000164876  |
| 15               | 1                | -0.000009021           | 0.000621409  | -0.000342807 |
| 16               | 6                | -0.002568977           | 0.001082184  | -0.000530561 |
| 17               | 6                | 0.001259037            | 0.000515743  | 0.000883435  |
| 18               | 1                | 0.000293422            | 0.000448896  | 0.000099235  |
| 19               | 1                | -0.000481124           | -0.000294305 | -0.000272947 |
| 20               | 1                | 0.000022795            | -0.000442421 | -0.000115021 |
| 21               | 8                | 0.001001200            | -0.000898494 | -0.001384949 |
| 22               | 1                | -0.000977941           | 0.000906952  | 0.000822221  |

---

Cartesian Forces: Max 0.004163561 RMS 0.000956424

GradGradGradGradGradGradGradGradGradGradGradGradGradGradGradGradGradGradGrad

Berny optimization.

Using GEDIIS/GDIIS optimizer.

FormGI is forming the generalized inverse of G from B-inverse, IUseBI=4.

Internal Forces: Max 0.009081717 RMS 0.001528894

Search for a local minimum.

Step number 7 out of a maximum of 116

All quantities printed in internal units (Hartrees-Bohrs-Radians)

Mixed Optimization -- RFO/linear search

Update second derivatives using D2CorX and points 5 6 7

DE= -9.43D-04 DEPred=-7.70D-04 R= 1.22D+00

TightC=F SS= 1.41D+00 RLast= 2.73D-01 DXNew= 4.2426D-01 8.1875D-01

Trust test= 1.22D+00 RLast= 2.73D-01 DXMaxT set to 4.24D-01

ITU= 1 1 0 0 -1 0 0

Use linear search instead of GDIIIS.

|                 |         |         |         |         |         |
|-----------------|---------|---------|---------|---------|---------|
| Eigenvalues --- | 0.00257 | 0.00495 | 0.00646 | 0.01019 | 0.01274 |
| Eigenvalues --- | 0.01557 | 0.01700 | 0.01871 | 0.02038 | 0.02142 |
| Eigenvalues --- | 0.02225 | 0.02405 | 0.02413 | 0.03064 | 0.03070 |
| Eigenvalues --- | 0.03742 | 0.04563 | 0.05435 | 0.06039 | 0.06978 |
| Eigenvalues --- | 0.08639 | 0.09286 | 0.13106 | 0.13876 | 0.15705 |
| Eigenvalues --- | 0.15734 | 0.15911 | 0.15997 | 0.15999 | 0.16127 |
| Eigenvalues --- | 0.16443 | 0.20581 | 0.21478 | 0.22779 | 0.22862 |
| Eigenvalues --- | 0.24104 | 0.24466 | 0.25675 | 0.29661 | 0.32922 |
| Eigenvalues --- | 0.33850 | 0.33874 | 0.33912 | 0.34093 | 0.34282 |
| Eigenvalues --- | 0.34385 | 0.34672 | 0.36024 | 0.36307 | 0.36384 |
| Eigenvalues --- | 0.37266 | 0.42467 | 0.42858 | 0.45642 | 0.49311 |
| Eigenvalues --- | 0.53502 | 0.54324 | 0.55555 | 0.60518 | 1.54373 |

RFO step: Lambda=-7.11525141D-04 EMin= 2.56865625D-03

Quartic linear search produced a step of 0.37345.

Iteration 1 RMS(Cart)= 0.04549366 RMS(Int)= 0.00156869

Iteration 2 RMS(Cart)= 0.00205183 RMS(Int)= 0.00003504

Iteration 3 RMS(Cart)= 0.00000433 RMS(Int)= 0.00003490

Iteration 4 RMS(Cart)= 0.00000000 RMS(Int)= 0.00003490

| Variable | Old X   | -DE/DX   | Delta X<br>(Linear) | Delta X<br>(Quad) | Delta X<br>(Total) | New X   |
|----------|---------|----------|---------------------|-------------------|--------------------|---------|
| R1       | 2.55653 | 0.00061  | 0.00029             | 0.00091           | 0.00122            | 2.55775 |
| R2       | 2.62868 | -0.00129 | -0.00126            | -0.00164          | -0.00289           | 2.62579 |
| R3       | 2.03338 | -0.00005 | -0.00025            | 0.00006           | -0.00019           | 2.03319 |
| R4       | 2.63543 | -0.00188 | -0.00247            | -0.00447          | -0.00694           | 2.62850 |
| R5       | 2.03079 | 0.00000  | -0.00002            | 0.00041           | 0.00039            | 2.03119 |
| R6       | 2.55429 | -0.00182 | -0.00113            | -0.00246          | -0.00361           | 2.55067 |
| R7       | 2.67483 | 0.00190  | 0.00175             | 0.00615           | 0.00790            | 2.68273 |
| R8       | 2.53031 | 0.00036  | -0.00048            | 0.00245           | 0.00196            | 2.53227 |
| R9       | 2.02758 | -0.00004 | 0.00036             | -0.00133          | -0.00096           | 2.02662 |
| R10      | 2.77246 | -0.00100 | -0.00094            | -0.00217          | -0.00311           | 2.76935 |
| R11      | 2.89307 | -0.00211 | -0.00324            | -0.00056          | -0.00380           | 2.88927 |
| R12      | 2.06022 | -0.00004 | 0.00037             | -0.00032          | 0.00005            | 2.06027 |
| R13      | 2.06156 | 0.00033  | 0.00007             | 0.00114           | 0.00121            | 2.06277 |
| R14      | 2.07521 | 0.00007  | 0.00059             | -0.00018          | 0.00041            | 2.07561 |
| R15      | 2.06819 | -0.00073 | -0.00009            | 0.00089           | 0.00080            | 2.06899 |

|     |         |          |          |          |          |          |
|-----|---------|----------|----------|----------|----------|----------|
| R16 | 2.69477 | -0.00025 | -0.00240 | 0.00075  | -0.00165 | 2.69313  |
| R17 | 5.22780 | -0.00008 | 0.00285  | 0.01506  | 0.01792  | 5.24572  |
| R18 | 2.51011 | -0.00084 | -0.00056 | -0.00070 | -0.00126 | 2.50886  |
| R19 | 2.04755 | 0.00045  | -0.00004 | 0.00298  | 0.00294  | 2.05049  |
| R20 | 2.04287 | 0.00017  | -0.00003 | 0.00165  | 0.00162  | 2.04449  |
| R21 | 2.04589 | 0.00042  | 0.00036  | 0.00230  | 0.00266  | 2.04854  |
| R22 | 1.81778 | -0.00027 | -0.00048 | -0.00033 | -0.00081 | 1.81697  |
| A1  | 1.87624 | -0.00039 | 0.00103  | -0.00079 | 0.00014  | 1.87638  |
| A2  | 2.27893 | 0.00026  | -0.00006 | 0.00078  | 0.00065  | 2.27958  |
| A3  | 2.12798 | 0.00013  | -0.00098 | 0.00021  | -0.00084 | 2.12714  |
| A4  | 1.86999 | -0.00009 | -0.00082 | -0.00017 | -0.00104 | 1.86895  |
| A5  | 2.27890 | 0.00052  | 0.00153  | 0.00417  | 0.00569  | 2.28459  |
| A6  | 2.13409 | -0.00044 | -0.00075 | -0.00415 | -0.00491 | 2.12918  |
| A7  | 1.88891 | 0.00070  | 0.00012  | 0.00297  | 0.00301  | 1.89192  |
| A8  | 2.23812 | -0.00116 | -0.00146 | -0.00597 | -0.00740 | 2.23073  |
| A9  | 2.14820 | 0.00043  | 0.00123  | 0.00372  | 0.00499  | 2.15319  |
| A10 | 1.89191 | -0.00022 | 0.00070  | -0.00240 | -0.00181 | 1.89010  |
| A11 | 2.18909 | -0.00003 | -0.00118 | 0.00048  | -0.00068 | 2.18842  |
| A12 | 2.19166 | 0.00034  | -0.00051 | 0.00295  | 0.00245  | 2.19411  |
| A13 | 1.89468 | 0.00001  | -0.00191 | 0.00116  | -0.00088 | 1.89379  |
| A14 | 2.19910 | 0.00102  | 0.00087  | -0.00085 | -0.00003 | 2.19908  |
| A15 | 2.18104 | -0.00111 | 0.00012  | -0.00143 | -0.00135 | 2.17968  |
| A16 | 1.96186 | -0.00605 | -0.00586 | -0.00714 | -0.01302 | 1.94884  |
| A17 | 1.88398 | 0.00156  | 0.00714  | 0.00257  | 0.00977  | 1.89375  |
| A18 | 1.89211 | 0.00193  | -0.00311 | -0.00249 | -0.00565 | 1.88646  |
| A19 | 1.90175 | 0.00093  | 0.00088  | 0.00536  | 0.00629  | 1.90805  |
| A20 | 1.93262 | 0.00267  | 0.00160  | 0.00241  | 0.00388  | 1.93650  |
| A21 | 1.88961 | -0.00092 | -0.00032 | -0.00053 | -0.00085 | 1.88876  |
| A22 | 1.92676 | 0.00054  | 0.00151  | -0.00535 | -0.00384 | 1.92292  |
| A23 | 1.90221 | -0.00602 | -0.00314 | -0.00030 | -0.00346 | 1.89876  |
| A24 | 1.82247 | 0.00322  | -0.00110 | 0.01172  | 0.01060  | 1.83307  |
| A25 | 1.90231 | 0.00140  | 0.00465  | -0.00276 | 0.00189  | 1.90419  |
| A26 | 1.93860 | -0.00088 | 0.00090  | -0.00141 | -0.00050 | 1.93810  |
| A27 | 1.97016 | 0.00161  | -0.00308 | -0.00159 | -0.00469 | 1.96546  |
| A28 | 2.60521 | -0.00908 | -0.00234 | -0.00954 | -0.01188 | 2.59332  |
| A29 | 2.16984 | -0.00131 | -0.00150 | -0.00791 | -0.00941 | 2.16043  |
| A30 | 1.95480 | 0.00044  | 0.00029  | 0.00263  | 0.00291  | 1.95771  |
| A31 | 2.15735 | 0.00088  | 0.00120  | 0.00543  | 0.00663  | 2.16398  |
| A32 | 2.07441 | 0.00090  | 0.00127  | 0.00630  | 0.00756  | 2.08197  |
| A33 | 2.15533 | -0.00056 | -0.00073 | -0.00523 | -0.00597 | 2.14936  |
| A34 | 2.05341 | -0.00034 | -0.00053 | -0.00102 | -0.00156 | 2.05186  |
| A35 | 1.90423 | -0.00095 | -0.00553 | -0.00386 | -0.00940 | 1.89483  |
| D1  | 0.01014 | -0.00006 | 0.00683  | -0.01742 | -0.01056 | -0.00042 |
| D2  | 3.13010 | -0.00046 | 0.00402  | -0.02554 | -0.02156 | 3.10854  |

|     |          |          |          |          |          |          |
|-----|----------|----------|----------|----------|----------|----------|
| D3  | -3.13987 | 0.00046  | 0.00099  | 0.01093  | 0.01196  | -3.12790 |
| D4  | -0.01991 | 0.00006  | -0.00182 | 0.00281  | 0.00096  | -0.01895 |
| D5  | -0.05257 | 0.00017  | -0.01442 | 0.01871  | 0.00431  | -0.04827 |
| D6  | -3.06054 | 0.00094  | -0.00638 | 0.02772  | 0.02134  | -3.03920 |
| D7  | 3.09655  | -0.00030 | -0.00919 | -0.00666 | -0.01584 | 3.08071  |
| D8  | 0.08858  | 0.00048  | -0.00115 | 0.00234  | 0.00120  | 0.08978  |
| D9  | 0.03526  | -0.00001 | 0.00300  | 0.01031  | 0.01332  | 0.04858  |
| D10 | 3.04322  | -0.00011 | 0.00219  | 0.01686  | 0.01903  | 3.06225  |
| D11 | -3.08690 | 0.00033  | 0.00551  | 0.01749  | 0.02297  | -3.06393 |
| D12 | -0.07893 | 0.00023  | 0.00469  | 0.02404  | 0.02868  | -0.05026 |
| D13 | -0.06845 | 0.00012  | -0.01210 | 0.00143  | -0.01069 | -0.07914 |
| D14 | -3.06142 | -0.00052 | -0.00459 | -0.00601 | -0.01061 | -3.07203 |
| D15 | -3.08481 | 0.00036  | -0.01109 | -0.00380 | -0.01494 | -3.09975 |
| D16 | 0.20540  | -0.00029 | -0.00359 | -0.01124 | -0.01486 | 0.19054  |
| D17 | 0.46679  | 0.00053  | 0.01244  | 0.07956  | 0.09200  | 0.55879  |
| D18 | -2.62382 | 0.00040  | 0.01258  | 0.07619  | 0.08877  | -2.53504 |
| D19 | -2.82642 | 0.00042  | 0.01140  | 0.08677  | 0.09816  | -2.72826 |
| D20 | 0.36616  | 0.00029  | 0.01154  | 0.08340  | 0.09493  | 0.46109  |
| D21 | 0.07489  | -0.00018 | 0.01634  | -0.01236 | 0.00395  | 0.07884  |
| D22 | 3.08458  | -0.00074 | 0.00847  | -0.02120 | -0.01272 | 3.07186  |
| D23 | 3.06759  | 0.00043  | 0.00876  | -0.00517 | 0.00354  | 3.07113  |
| D24 | -0.20591 | -0.00013 | 0.00088  | -0.01401 | -0.01313 | -0.21904 |
| D25 | 1.37656  | 0.00104  | -0.01191 | -0.00001 | -0.01184 | 1.36472  |
| D26 | -2.80880 | -0.00048 | -0.00958 | 0.00399  | -0.00560 | -2.81440 |
| D27 | -0.76560 | 0.00030  | -0.00774 | 0.00342  | -0.00438 | -0.76998 |
| D28 | -1.61030 | 0.00182  | -0.00248 | 0.01023  | 0.00781  | -1.60249 |
| D29 | 0.48753  | 0.00030  | -0.00016 | 0.01422  | 0.01405  | 0.50158  |
| D30 | 2.53073  | 0.00108  | 0.00168  | 0.01365  | 0.01528  | 2.54600  |
| D31 | -1.10057 | 0.00027  | -0.01168 | 0.03856  | 0.02687  | -1.07370 |
| D32 | 0.98825  | -0.00144 | -0.00701 | 0.03173  | 0.02472  | 1.01297  |
| D33 | 3.09779  | -0.00081 | -0.01288 | 0.03621  | 0.02334  | 3.12113  |
| D34 | 3.09510  | 0.00150  | -0.01756 | 0.03624  | 0.01869  | 3.11379  |
| D35 | -1.09926 | -0.00021 | -0.01288 | 0.02941  | 0.01654  | -1.08272 |
| D36 | 1.01028  | 0.00042  | -0.01875 | 0.03390  | 0.01516  | 1.02544  |
| D37 | 1.01861  | 0.00044  | -0.01868 | 0.03210  | 0.01341  | 1.03202  |
| D38 | 3.10743  | -0.00127 | -0.01400 | 0.02527  | 0.01126  | 3.11869  |
| D39 | -1.06622 | -0.00063 | -0.01987 | 0.02976  | 0.00988  | -1.05634 |
| D40 | -0.49566 | 0.00132  | -0.04471 | 0.00704  | -0.03765 | -0.53332 |
| D41 | 1.60825  | -0.00081 | -0.04194 | -0.00132 | -0.04327 | 1.56498  |
| D42 | -2.51215 | 0.00021  | -0.03949 | -0.00629 | -0.04579 | -2.55794 |
| D43 | -3.10533 | 0.00299  | 0.01701  | 0.09292  | 0.10993  | -2.99540 |
| D44 | 1.10104  | 0.00092  | 0.01539  | 0.09315  | 0.10854  | 1.20957  |
| D45 | -1.04164 | -0.00142 | 0.01088  | 0.09897  | 0.10986  | -0.93178 |
| D46 | -3.09134 | -0.00010 | 0.00052  | -0.00273 | -0.00222 | -3.09355 |

|     |          |         |         |         |         |          |
|-----|----------|---------|---------|---------|---------|----------|
| D47 | 0.04192  | 0.00009 | 0.00126 | 0.00491 | 0.00617 | 0.04809  |
| D48 | -0.00651 | 0.00002 | 0.00032 | 0.00088 | 0.00121 | -0.00531 |
| D49 | 3.12675  | 0.00020 | 0.00106 | 0.00853 | 0.00959 | 3.13634  |

| Item                 | Value    | Threshold | Converged? |
|----------------------|----------|-----------|------------|
| Maximum Force        | 0.009082 | 0.000450  | NO         |
| RMS Force            | 0.001529 | 0.000300  | NO         |
| Maximum Displacement | 0.204274 | 0.001800  | NO         |
| RMS Displacement     | 0.045457 | 0.001200  | NO         |

Predicted change in Energy=-4.231577D-04

GradGradGradGradGradGradGradGradGradGradGradGradGradGradGradGradGradGradGrad

Input orientation:

| Center Number | Atomic Number | Atomic Type | Coordinates (Angstroms) |           |           |
|---------------|---------------|-------------|-------------------------|-----------|-----------|
|               |               |             | X                       | Y         | Z         |
| 1             | 6             | 0           | -0.457019               | -1.967232 | -1.308023 |
| 2             | 6             | 0           | -1.747019               | -1.594170 | -1.477421 |
| 3             | 7             | 0           | -2.109992               | -0.857177 | -0.355009 |
| 4             | 6             | 0           | -1.029465               | -0.739844 | 0.445328  |
| 5             | 7             | 0           | -0.032061               | -1.459698 | -0.086320 |
| 6             | 6             | 0           | 1.332869                | -1.520238 | 0.443701  |
| 7             | 6             | 0           | 2.234870                | -0.465840 | -0.198388 |
| 8             | 1             | 0           | 0.197578                | -2.534413 | -1.946309 |
| 9             | 1             | 0           | -2.425873               | -1.759304 | -2.294250 |
| 10            | 1             | 0           | 1.293608                | -1.354040 | 1.520492  |
| 11            | 1             | 0           | 1.720583                | -2.525294 | 0.267432  |
| 12            | 1             | 0           | 2.307123                | -0.637518 | -1.280846 |
| 13            | 1             | 0           | 1.802050                | 0.524018  | -0.020705 |
| 14            | 35            | 0           | -0.460434               | 2.086927  | 0.359010  |
| 15            | 1             | 0           | -1.020046               | -0.275324 | 1.411898  |
| 16            | 6             | 0           | -3.335358               | -0.181143 | -0.116627 |
| 17            | 6             | 0           | -4.508869               | -0.594654 | -0.579750 |
| 18            | 1             | 0           | -3.194373               | 0.735690  | 0.446335  |
| 19            | 1             | 0           | -5.391934               | 0.001413  | -0.391601 |
| 20            | 1             | 0           | -4.633433               | -1.511208 | -1.145049 |
| 21            | 8             | 0           | 3.502491                | -0.630757 | 0.431665  |
| 22            | 1             | 0           | 4.075052                | 0.092925  | 0.161591  |

Distance matrix (angstroms):

|   |   | 1        | 2        | 3        | 4 | 5 |
|---|---|----------|----------|----------|---|---|
| 1 | C | 0.000000 |          |          |   |   |
| 2 | C | 1.353504 | 0.000000 |          |   |   |
| 3 | N | 2.207437 | 1.390941 | 0.000000 |   |   |

|    |    |          |          |          |          |          |
|----|----|----------|----------|----------|----------|----------|
| 4  | C  | 2.215494 | 2.222998 | 1.349757 | 0.000000 |          |
| 5  | N  | 1.389509 | 2.212313 | 2.180143 | 1.340021 | 0.000000 |
| 6  | C  | 2.544020 | 3.630687 | 3.595954 | 2.487899 | 1.465477 |
| 7  | C  | 3.275932 | 4.331801 | 4.365261 | 3.338463 | 2.477759 |
| 8  | H  | 1.075918 | 2.210288 | 3.266533 | 3.232033 | 2.160394 |
| 9  | H  | 2.211846 | 1.074858 | 2.162005 | 3.239527 | 3.270329 |
| 10 | H  | 3.382483 | 4.276747 | 3.917764 | 2.632467 | 2.085763 |
| 11 | H  | 2.745076 | 3.991963 | 4.224140 | 3.283633 | 2.081441 |
| 12 | H  | 3.067467 | 4.170119 | 4.518444 | 3.758054 | 2.752209 |
| 13 | H  | 3.600959 | 4.382309 | 4.162155 | 3.135604 | 2.702480 |
| 14 | Br | 4.383516 | 4.310250 | 3.449437 | 2.884768 | 3.600052 |
| 15 | H  | 3.252310 | 3.258222 | 2.156037 | 1.072439 | 2.150236 |
| 16 | C  | 3.590874 | 2.524129 | 1.419637 | 2.438254 | 3.542230 |
| 17 | C  | 4.339567 | 3.071263 | 2.423641 | 3.630167 | 4.586239 |
| 18 | H  | 4.228081 | 3.350212 | 2.086926 | 2.619929 | 3.886344 |
| 19 | H  | 5.391547 | 4.124354 | 3.392589 | 4.503448 | 5.563837 |
| 20 | H  | 4.204397 | 2.906671 | 2.723907 | 4.014086 | 4.721884 |
| 21 | O  | 4.526632 | 5.668345 | 5.671869 | 4.533290 | 3.667221 |
| 22 | H  | 5.190730 | 6.279265 | 6.278881 | 5.179779 | 4.397780 |
|    |    | 6        | 7        | 8        | 9        | 10       |
| 6  | C  | 0.000000 |          |          |          |          |
| 7  | C  | 1.528934 | 0.000000 |          |          |          |
| 8  | H  | 2.833652 | 3.388920 | 0.000000 |          |          |
| 9  | H  | 4.656357 | 5.271452 | 2.757599 | 0.000000 |          |
| 10 | H  | 1.090249 | 2.151609 | 3.822731 | 5.343316 | 0.000000 |
| 11 | H  | 1.091573 | 2.173208 | 2.687057 | 4.933766 | 1.767570 |
| 12 | H  | 2.168508 | 1.098367 | 2.913972 | 4.968565 | 3.064002 |
| 13 | H  | 2.148204 | 1.094861 | 3.954273 | 5.315815 | 2.482116 |
| 14 | Br | 4.029237 | 3.753928 | 5.206175 | 5.069145 | 4.033108 |
| 15 | H  | 2.832565 | 3.636454 | 4.226540 | 4.232502 | 2.555077 |
| 16 | C  | 4.888711 | 5.578099 | 4.622473 | 2.838978 | 5.048087 |
| 17 | C  | 6.002505 | 6.755742 | 5.270748 | 2.938501 | 6.217429 |
| 18 | H  | 5.058176 | 5.597859 | 5.284283 | 3.785022 | 5.065843 |
| 19 | H  | 6.945224 | 7.643547 | 6.331680 | 3.939253 | 7.084478 |
| 20 | H  | 6.174218 | 7.011601 | 5.002762 | 2.501107 | 6.500741 |
| 21 | O  | 2.344905 | 1.425141 | 4.494565 | 6.621912 | 2.566680 |
| 22 | H  | 3.193970 | 1.956546 | 5.136239 | 7.191935 | 3.417126 |
|    |    | 11       | 12       | 13       | 14       | 15       |
| 11 | H  | 0.000000 |          |          |          |          |
| 12 | H  | 2.510954 | 0.000000 |          |          |          |
| 13 | H  | 3.063978 | 1.786678 | 0.000000 |          |          |
| 14 | Br | 5.102726 | 4.215578 | 2.775915 | 0.000000 |          |
| 15 | H  | 3.726019 | 4.295592 | 3.264280 | 2.646124 | 0.000000 |
| 16 | C  | 5.586152 | 5.779384 | 5.186465 | 3.692637 | 2.775956 |



|    |   |          |          |          |          |          |
|----|---|----------|----------|----------|----------|----------|
| 17 | C | 6.576562 | 6.852089 | 6.433635 | 4.945905 | 4.029953 |
| 18 | H | 5.901086 | 5.927505 | 5.022667 | 3.050884 | 2.584987 |
| 19 | H | 7.576706 | 7.776534 | 7.222472 | 5.406708 | 4.737362 |
| 20 | H | 6.587639 | 6.996648 | 6.842641 | 5.711628 | 4.595862 |
| 21 | O | 2.606039 | 2.088455 | 2.104671 | 4.805815 | 4.641178 |
| 22 | H | 3.522754 | 2.395777 | 2.320692 | 4.958392 | 5.259173 |
|    |   | 16       | 17       | 18       | 19       | 20       |
| 16 | C | 0.000000 |          |          |          |          |
| 17 | C | 1.327630 | 0.000000 |          |          |          |
| 18 | H | 1.085074 | 2.133206 | 0.000000 |          |          |
| 19 | H | 2.082893 | 1.081897 | 2.463853 | 0.000000 |          |
| 20 | H | 2.124081 | 1.084043 | 3.106758 | 1.852304 | 0.000000 |
| 21 | O | 6.874516 | 8.075033 | 6.834866 | 8.954787 | 8.333935 |
| 22 | H | 7.420694 | 8.643266 | 7.303340 | 9.483577 | 8.950880 |
|    |   | 21       | 22       |          |          |          |
| 21 | O | 0.000000 |          |          |          |          |
| 22 | H | 0.961499 | 0.000000 |          |          |          |

Stoichiometry C7H11BrN2O

Framework group C1[X(C7H11BrN2O)]

Deg. of freedom 60

Full point group C1 NOp 1

Largest Abelian subgroup C1 NOp 1

Largest concise Abelian subgroup C1 NOp 1

Standard orientation:

| Center Number | Atomic Number | Atomic Type | Coordinates (Angstroms) |           |           |
|---------------|---------------|-------------|-------------------------|-----------|-----------|
|               |               |             | X                       | Y         | Z         |
| 1             | 6             | 0           | -0.128926               | -2.225287 | -0.674082 |
| 2             | 6             | 0           | -1.429863               | -1.866483 | -0.777983 |
| 3             | 7             | 0           | -1.648316               | -0.849710 | 0.145687  |
| 4             | 6             | 0           | -0.475545               | -0.563360 | 0.749389  |
| 5             | 7             | 0           | 0.446705                | -1.430300 | 0.309473  |
| 6             | 6             | 0           | 1.867505                | -1.395800 | 0.666907  |
| 7             | 6             | 0           | 2.681801                | -0.577046 | -0.335192 |
| 8             | 1             | 0           | 0.439866                | -2.961365 | -1.214697 |
| 9             | 1             | 0           | -2.206254               | -2.216735 | -1.433621 |
| 10            | 1             | 0           | 1.964246                | -0.952399 | 1.658209  |
| 11            | 1             | 0           | 2.229587                | -2.424385 | 0.716319  |
| 12            | 1             | 0           | 2.617073                | -1.028323 | -1.334476 |
| 13            | 1             | 0           | 2.275145                | 0.438761  | -0.373764 |
| 14            | 35            | 0           | 0.079040                | 2.121582  | -0.148058 |
| 15            | 1             | 0           | -0.344293               | 0.137318  | 1.550606  |
| 16            | 6             | 0           | -2.833667               | -0.094129 | 0.344214  |

|    |   |   |           |           |           |
|----|---|---|-----------|-----------|-----------|
| 17 | 6 | 0 | -4.056306 | -0.574803 | 0.152618  |
| 18 | 1 | 0 | -2.622583 | 0.932806  | 0.623915  |
| 19 | 1 | 0 | -4.908436 | 0.079013  | 0.282616  |
| 20 | 1 | 0 | -4.251393 | -1.602631 | -0.131386 |
| 21 | 8 | 0 | 4.018632  | -0.613785 | 0.157314  |
| 22 | 1 | 0 | 4.552859  | -0.005627 | -0.361557 |

-----

Rotational constants (GHZ): 0.8401314 0.5685336 0.3599859  
Standard basis: 6-311++G(d,p) (5D, 7F)  
There are 358 symmetry adapted cartesian basis functions of A symmetry.  
There are 345 symmetry adapted basis functions of A symmetry.  
345 basis functions, 553 primitive gaussians, 358 cartesian basis functions  
55 alpha electrons 55 beta electrons  
nuclear repulsion energy 869.6255049893 Hartrees.  
NAtoms= 22 NActive= 22 NUniq= 22 SFac= 1.00D+00 NATFMM= 60 NAOKFM=F  
Big=F  
Integral buffers will be 131072 words long.  
Raffenetti 2 integral format.  
Two-electron integral symmetry is turned on.  
One-electron integrals computed using PRISM.  
NBasis= 345 RedAO= T EigKep= 6.43D-06 NBF= 345  
NBsUse= 345 1.00D-06 EigRej= -1.00D+00 NBFU= 345  
Initial guess from the checkpoint file: ". "  
B after Tr= 0.000000 0.000000 0.000000  
Rot= 0.999978 0.000610 -0.000104 -0.006623 Ang= 0.76 deg.  
ExpMin= 3.50D-02 ExpMax= 4.40D+05 ExpMxC= 1.51D+04 IAcc=3 IRadAn= 5 AccDes=  
0.00D+00  
Harris functional with IExCor= 402 and IRadAn= 5 diagonalized for initial guess.  
HarFok: IExCor= 402 AccDes= 0.00D+00 IRadAn= 5 IDoV= 1 UseB2=F ITyADJ=14  
ICtDFT= 3500011 ScaDFX= 1.000000 1.000000 1.000000 1.000000  
FoFCou: FMM=F IPFlag= 0 FMFlag= 100000 FMFlg1= 0  
NFxFlg= 0 DoJE=T BraDBF=F KetDBF=T FulRan=T  
wScrn= 0.000000 ICntrl= 500 IOpCl= 0 I1Cent= 200000004 NGrid=  
0  
NMat0= 1 NMatS0= 1 NMatT0= 0 NMatD0= 1 NMtDS0= 0  
NMtDT0= 0  
Petite list used in FoFCou.  
Keep R1 ints in memory in canonical form, NReq=1804729152.  
Requested convergence on RMS density matrix=1.00D-08 within 128 cycles.  
Requested convergence on MAX density matrix=1.00D-06.  
Requested convergence on energy=1.00D-06.  
No special actions if energy rises.  
SCF Done: E(RB3LYP) = -3032.33748976 A.U. after 12 cycles  
NFock= 12 Conv=0.19D-08 -V/T= 2.0016

Calling FoFJK, ICntrl= 2127 FMM=F ISym2X=0 I1Cent= 0 IOpClX= 0 NMat=1 NMatS=1  
NMatT=0.

\*\*\*\*\* Axes restored to original set \*\*\*\*\*

---

| Center<br>Number | Atomic<br>Number | Forces (Hartrees/Bohr) |              |              |
|------------------|------------------|------------------------|--------------|--------------|
|                  |                  | X                      | Y            | Z            |
| 1                | 6                | 0.000918844            | -0.000041539 | -0.000763147 |
| 2                | 6                | -0.000570680           | -0.000629756 | -0.000040235 |
| 3                | 7                | 0.000432980            | 0.000292568  | 0.000258175  |
| 4                | 6                | -0.001159789           | -0.000582813 | 0.000853954  |
| 5                | 7                | -0.000979750           | 0.000378026  | 0.000431660  |
| 6                | 6                | 0.000555038            | -0.000206234 | -0.000966633 |
| 7                | 6                | -0.000099414           | -0.000101037 | 0.001277103  |
| 8                | 1                | -0.000005461           | -0.000024092 | -0.000049122 |
| 9                | 1                | -0.000001481           | -0.000003309 | 0.000090342  |
| 10               | 1                | -0.000699046           | -0.000001259 | -0.000197557 |
| 11               | 1                | 0.000401634            | -0.000010207 | 0.000367276  |
| 12               | 1                | -0.000421689           | -0.000052347 | 0.000015891  |
| 13               | 1                | 0.000800587            | 0.000354565  | -0.000728417 |
| 14               | 35               | -0.000099007           | 0.000444143  | -0.000132168 |
| 15               | 1                | -0.000072323           | -0.000267240 | 0.000222937  |
| 16               | 6                | -0.000870367           | 0.001271153  | -0.000296886 |
| 17               | 6                | 0.000250392            | -0.000458550 | 0.000118280  |
| 18               | 1                | 0.000602922            | -0.000293261 | -0.000011002 |
| 19               | 1                | 0.000240194            | -0.000222763 | -0.000261232 |
| 20               | 1                | 0.000066375            | 0.000229796  | 0.000204709  |
| 21               | 8                | 0.000726508            | -0.000773954 | -0.001382638 |
| 22               | 1                | -0.000016467           | 0.000698111  | 0.000988708  |

---

Cartesian Forces: Max 0.001382638 RMS 0.000547333

GradGradGradGradGradGradGradGradGradGradGradGradGradGradGradGradGradGradGrad

Berny optimization.

Using GEDIIS/GDIIS optimizer.

FormGI is forming the generalized inverse of G from B-inverse, IUseBI=4.

Internal Forces: Max 0.002120129 RMS 0.000511049

Search for a local minimum.

Step number 8 out of a maximum of 116

All quantities printed in internal units (Hartrees-Bohrs-Radians)

Mixed Optimization -- En-DIIS/RFO-DIIS

Update second derivatives using D2CorX and points 6 7 8

DE= -5.13D-04 DEPred=-4.23D-04 R= 1.21D+00

TightC=F SS= 1.41D+00 RLast= 2.94D-01 DXNew= 7.1352D-01 8.8124D-01

Trust test= 1.21D+00 RLast= 2.94D-01 DXMaxT set to 7.14D-01

ITU= 1 1 1 0 0-1 0 0

Use linear search instead of GDIIIS.

|                 |         |         |         |         |         |
|-----------------|---------|---------|---------|---------|---------|
| Eigenvalues --- | 0.00195 | 0.00400 | 0.00628 | 0.00967 | 0.01224 |
| Eigenvalues --- | 0.01527 | 0.01725 | 0.01871 | 0.02036 | 0.02187 |
| Eigenvalues --- | 0.02303 | 0.02414 | 0.02445 | 0.03062 | 0.03076 |
| Eigenvalues --- | 0.03789 | 0.04694 | 0.05439 | 0.06005 | 0.07029 |
| Eigenvalues --- | 0.08638 | 0.09177 | 0.13613 | 0.13844 | 0.15709 |
| Eigenvalues --- | 0.15737 | 0.15846 | 0.15993 | 0.16001 | 0.16181 |
| Eigenvalues --- | 0.16728 | 0.20719 | 0.21233 | 0.22858 | 0.22976 |
| Eigenvalues --- | 0.24210 | 0.24785 | 0.25782 | 0.30068 | 0.33147 |
| Eigenvalues --- | 0.33849 | 0.33873 | 0.33915 | 0.34088 | 0.34278 |
| Eigenvalues --- | 0.34397 | 0.34680 | 0.36134 | 0.36309 | 0.36427 |
| Eigenvalues --- | 0.37272 | 0.42769 | 0.43025 | 0.46010 | 0.49719 |
| Eigenvalues --- | 0.53483 | 0.54481 | 0.55705 | 0.60479 | 1.89455 |

RFO step: Lambda=-3.87995707D-04 EMin= 1.94616772D-03

Quartic linear search produced a step of 0.34328.

Iteration 1 RMS(Cart)= 0.04493128 RMS(Int)= 0.00219587

Iteration 2 RMS(Cart)= 0.00266642 RMS(Int)= 0.00003069

Iteration 3 RMS(Cart)= 0.00001199 RMS(Int)= 0.00002959

Iteration 4 RMS(Cart)= 0.00000000 RMS(Int)= 0.00002959

| Variable | Old X   | -DE/DX   | Delta X  | Delta X  | Delta X  | New X   |
|----------|---------|----------|----------|----------|----------|---------|
|          |         |          | (Linear) | (Quad)   | (Total)  |         |
| R1       | 2.55775 | 0.00035  | 0.00042  | 0.00121  | 0.00163  | 2.55938 |
| R2       | 2.62579 | 0.00037  | -0.00099 | 0.00008  | -0.00092 | 2.62488 |
| R3       | 2.03319 | 0.00004  | -0.00007 | 0.00005  | -0.00002 | 2.03317 |
| R4       | 2.62850 | 0.00044  | -0.00238 | 0.00005  | -0.00233 | 2.62617 |
| R5       | 2.03119 | -0.00007 | 0.00014  | 0.00018  | 0.00032  | 2.03151 |
| R6       | 2.55067 | -0.00037 | -0.00124 | -0.00183 | -0.00307 | 2.54760 |
| R7       | 2.68273 | -0.00005 | 0.00271  | 0.00036  | 0.00308  | 2.68580 |
| R8       | 2.53227 | 0.00051  | 0.00067  | 0.00056  | 0.00124  | 2.53351 |
| R9       | 2.02662 | 0.00009  | -0.00033 | 0.00053  | 0.00020  | 2.02681 |
| R10      | 2.76935 | 0.00076  | -0.00107 | 0.00145  | 0.00038  | 2.76973 |
| R11      | 2.88927 | 0.00094  | -0.00130 | 0.00093  | -0.00037 | 2.88889 |
| R12      | 2.06027 | -0.00017 | 0.00002  | -0.00042 | -0.00041 | 2.05986 |
| R13      | 2.06277 | 0.00009  | 0.00042  | 0.00007  | 0.00048  | 2.06326 |
| R14      | 2.07561 | -0.00003 | 0.00014  | 0.00035  | 0.00048  | 2.07610 |
| R15      | 2.06899 | 0.00031  | 0.00027  | -0.00047 | -0.00020 | 2.06879 |
| R16      | 2.69313 | 0.00046  | -0.00056 | 0.00036  | -0.00020 | 2.69292 |
| R17      | 5.24572 | 0.00032  | 0.00615  | 0.01333  | 0.01948  | 5.26520 |
| R18      | 2.50886 | -0.00037 | -0.00043 | -0.00024 | -0.00067 | 2.50819 |
| R19      | 2.05049 | -0.00018 | 0.00101  | 0.00079  | 0.00180  | 2.05229 |
| R20      | 2.04449 | -0.00037 | 0.00056  | -0.00066 | -0.00011 | 2.04438 |
| R21      | 2.04854 | -0.00030 | 0.00091  | -0.00039 | 0.00052  | 2.04907 |

|     |          |          |          |          |          |          |
|-----|----------|----------|----------|----------|----------|----------|
| R22 | 1.81697  | 0.00025  | -0.00028 | 0.00034  | 0.00006  | 1.81703  |
| A1  | 1.87638  | -0.00036 | 0.00005  | -0.00121 | -0.00120 | 1.87518  |
| A2  | 2.27958  | 0.00014  | 0.00022  | 0.00090  | 0.00110  | 2.28068  |
| A3  | 2.12714  | 0.00022  | -0.00029 | 0.00042  | 0.00011  | 2.12724  |
| A4  | 1.86895  | 0.00003  | -0.00036 | 0.00010  | -0.00038 | 1.86858  |
| A5  | 2.28459  | 0.00002  | 0.00195  | 0.00170  | 0.00355  | 2.28814  |
| A6  | 2.12918  | -0.00006 | -0.00168 | -0.00242 | -0.00420 | 2.12499  |
| A7  | 1.89192  | 0.00030  | 0.00103  | 0.00143  | 0.00242  | 1.89434  |
| A8  | 2.23073  | -0.00027 | -0.00254 | -0.00065 | -0.00323 | 2.22749  |
| A9  | 2.15319  | -0.00002 | 0.00171  | 0.00086  | 0.00254  | 2.15573  |
| A10 | 1.89010  | -0.00024 | -0.00062 | -0.00035 | -0.00101 | 1.88909  |
| A11 | 2.18842  | 0.00015  | -0.00023 | 0.00074  | 0.00048  | 2.18890  |
| A12 | 2.19411  | 0.00012  | 0.00084  | 0.00162  | 0.00243  | 2.19654  |
| A13 | 1.89379  | 0.00031  | -0.00030 | 0.00089  | 0.00054  | 1.89433  |
| A14 | 2.19908  | -0.00072 | -0.00001 | 0.00031  | 0.00026  | 2.19933  |
| A15 | 2.17968  | 0.00043  | -0.00047 | -0.00219 | -0.00269 | 2.17699  |
| A16 | 1.94884  | 0.00212  | -0.00447 | 0.00255  | -0.00193 | 1.94691  |
| A17 | 1.89375  | -0.00119 | 0.00336  | -0.00566 | -0.00229 | 1.89146  |
| A18 | 1.88646  | -0.00029 | -0.00194 | 0.00524  | 0.00330  | 1.88976  |
| A19 | 1.90805  | 0.00010  | 0.00216  | 0.00131  | 0.00347  | 1.91152  |
| A20 | 1.93650  | -0.00103 | 0.00133  | -0.00304 | -0.00173 | 1.93477  |
| A21 | 1.88876  | 0.00023  | -0.00029 | -0.00055 | -0.00084 | 1.88792  |
| A22 | 1.92292  | -0.00046 | -0.00132 | -0.00102 | -0.00235 | 1.92057  |
| A23 | 1.89876  | 0.00203  | -0.00119 | 0.00231  | 0.00112  | 1.89987  |
| A24 | 1.83307  | -0.00046 | 0.00364  | 0.00045  | 0.00409  | 1.83717  |
| A25 | 1.90419  | -0.00074 | 0.00065  | -0.00396 | -0.00332 | 1.90087  |
| A26 | 1.93810  | 0.00024  | -0.00017 | -0.00007 | -0.00023 | 1.93786  |
| A27 | 1.96546  | -0.00054 | -0.00161 | 0.00251  | 0.00089  | 1.96635  |
| A28 | 2.59332  | 0.00152  | -0.00408 | -0.00665 | -0.01073 | 2.58259  |
| A29 | 2.16043  | -0.00081 | -0.00323 | -0.00572 | -0.00895 | 2.15148  |
| A30 | 1.95771  | -0.00026 | 0.00100  | -0.00230 | -0.00130 | 1.95641  |
| A31 | 2.16398  | 0.00107  | 0.00228  | 0.00805  | 0.01033  | 2.17431  |
| A32 | 2.08197  | 0.00023  | 0.00259  | 0.00108  | 0.00367  | 2.08564  |
| A33 | 2.14936  | -0.00016 | -0.00205 | -0.00292 | -0.00498 | 2.14438  |
| A34 | 2.05186  | -0.00007 | -0.00053 | 0.00185  | 0.00131  | 2.05317  |
| A35 | 1.89483  | 0.00049  | -0.00323 | 0.00094  | -0.00229 | 1.89254  |
| D1  | -0.00042 | 0.00022  | -0.00362 | 0.02322  | 0.01957  | 0.01915  |
| D2  | 3.10854  | -0.00005 | -0.00740 | 0.00064  | -0.00686 | 3.10167  |
| D3  | -3.12790 | 0.00015  | 0.00411  | 0.01469  | 0.01882  | -3.10908 |
| D4  | -0.01895 | -0.00012 | 0.00033  | -0.00788 | -0.00761 | -0.02656 |
| D5  | -0.04827 | 0.00006  | 0.00148  | -0.01362 | -0.01214 | -0.06040 |
| D6  | -3.03920 | -0.00013 | 0.00732  | -0.00643 | 0.00092  | -3.03829 |
| D7  | 3.08071  | 0.00012  | -0.00544 | -0.00599 | -0.01146 | 3.06926  |
| D8  | 0.08978  | -0.00007 | 0.00041  | 0.00119  | 0.00160  | 0.09137  |

|     |          |          |          |          |          |          |
|-----|----------|----------|----------|----------|----------|----------|
| D9  | 0.04858  | -0.00041 | 0.00457  | -0.02477 | -0.02020 | 0.02838  |
| D10 | 3.06225  | -0.00036 | 0.00653  | -0.01049 | -0.00397 | 3.05828  |
| D11 | -3.06393 | -0.00017 | 0.00788  | -0.00474 | 0.00306  | -3.06087 |
| D12 | -0.05026 | -0.00012 | 0.00984  | 0.00954  | 0.01929  | -0.03097 |
| D13 | -0.07914 | 0.00046  | -0.00367 | 0.01645  | 0.01278  | -0.06636 |
| D14 | -3.07203 | 0.00024  | -0.00364 | 0.00222  | -0.00139 | -3.07342 |
| D15 | -3.09975 | 0.00044  | -0.00513 | 0.00308  | -0.00212 | -3.10188 |
| D16 | 0.19054  | 0.00022  | -0.00510 | -0.01115 | -0.01629 | 0.17425  |
| D17 | 0.55879  | 0.00015  | 0.03158  | 0.04938  | 0.08096  | 0.63975  |
| D18 | -2.53504 | 0.00005  | 0.03047  | 0.04848  | 0.07895  | -2.45609 |
| D19 | -2.72826 | 0.00022  | 0.03370  | 0.06564  | 0.09933  | -2.62893 |
| D20 | 0.46109  | 0.00013  | 0.03259  | 0.06473  | 0.09733  | 0.55842  |
| D21 | 0.07884  | -0.00032 | 0.00136  | -0.00194 | -0.00057 | 0.07827  |
| D22 | 3.07186  | -0.00025 | -0.00437 | -0.00876 | -0.01311 | 3.05875  |
| D23 | 3.07113  | -0.00009 | 0.00121  | 0.01226  | 0.01346  | 3.08459  |
| D24 | -0.21904 | -0.00003 | -0.00451 | 0.00543  | 0.00093  | -0.21811 |
| D25 | 1.36472  | -0.00045 | -0.00407 | 0.00083  | -0.00322 | 1.36149  |
| D26 | -2.81440 | 0.00021  | -0.00192 | 0.00031  | -0.00161 | -2.81601 |
| D27 | -0.76998 | -0.00032 | -0.00150 | -0.00054 | -0.00205 | -0.77203 |
| D28 | -1.60249 | -0.00064 | 0.00268  | 0.00885  | 0.01154  | -1.59095 |
| D29 | 0.50158  | 0.00002  | 0.00482  | 0.00833  | 0.01315  | 0.51473  |
| D30 | 2.54600  | -0.00051 | 0.00524  | 0.00748  | 0.01271  | 2.55872  |
| D31 | -1.07370 | -0.00013 | 0.00922  | 0.02297  | 0.03219  | -1.04151 |
| D32 | 1.01297  | -0.00006 | 0.00849  | 0.01893  | 0.02742  | 1.04039  |
| D33 | 3.12113  | 0.00009  | 0.00801  | 0.02332  | 0.03133  | -3.13072 |
| D34 | 3.11379  | -0.00006 | 0.00642  | 0.02756  | 0.03398  | -3.13541 |
| D35 | -1.08272 | 0.00001  | 0.00568  | 0.02352  | 0.02921  | -1.05351 |
| D36 | 1.02544  | 0.00016  | 0.00520  | 0.02791  | 0.03312  | 1.05856  |
| D37 | 1.03202  | 0.00023  | 0.00460  | 0.02929  | 0.03389  | 1.06590  |
| D38 | 3.11869  | 0.00030  | 0.00387  | 0.02525  | 0.02911  | -3.13538 |
| D39 | -1.05634 | 0.00046  | 0.00339  | 0.02964  | 0.03303  | -1.02331 |
| D40 | -0.53332 | -0.00013 | -0.01293 | -0.07833 | -0.09126 | -0.62458 |
| D41 | 1.56498  | 0.00008  | -0.01485 | -0.08056 | -0.09541 | 1.46957  |
| D42 | -2.55794 | -0.00053 | -0.01572 | -0.08180 | -0.09752 | -2.65546 |
| D43 | -2.99540 | -0.00020 | 0.03774  | 0.09756  | 0.13530  | -2.86011 |
| D44 | 1.20957  | 0.00050  | 0.03726  | 0.09854  | 0.13580  | 1.34537  |
| D45 | -0.93178 | 0.00168  | 0.03771  | 0.10194  | 0.13965  | -0.79213 |
| D46 | -3.09355 | 0.00009  | -0.00076 | 0.00550  | 0.00473  | -3.08882 |
| D47 | 0.04809  | 0.00002  | 0.00212  | 0.00447  | 0.00658  | 0.05468  |
| D48 | -0.00531 | 0.00015  | 0.00041  | 0.00617  | 0.00659  | 0.00128  |
| D49 | 3.13634  | 0.00008  | 0.00329  | 0.00514  | 0.00844  | -3.13841 |

|  | Item          | Value    | Threshold | Converged? |
|--|---------------|----------|-----------|------------|
|  | Maximum Force | 0.002120 | 0.000450  | NO         |
|  | RMS Force     | 0.000511 | 0.000300  | NO         |

Maximum Displacement 0.238354 0.001800 NO  
 RMS Displacement 0.045284 0.001200 NO

Predicted change in Energy=-2.269431D-04

GradGradGradGradGradGradGradGradGradGradGradGradGradGradGradGradGradGradGrad

Input orientation:

| Center Number | Atomic Number | Atomic Type | Coordinates (Angstroms) |           |           |
|---------------|---------------|-------------|-------------------------|-----------|-----------|
|               |               |             | X                       | Y         | Z         |
| 1             | 6             | 0           | -0.454913               | -1.960432 | -1.324505 |
| 2             | 6             | 0           | -1.744790               | -1.583668 | -1.493545 |
| 3             | 7             | 0           | -2.101880               | -0.839000 | -0.375848 |
| 4             | 6             | 0           | -1.028896               | -0.740725 | 0.434402  |
| 5             | 7             | 0           | -0.034997               | -1.467905 | -0.095490 |
| 6             | 6             | 0           | 1.327956                | -1.534401 | 0.439437  |
| 7             | 6             | 0           | 2.230941                | -0.474091 | -0.190955 |
| 8             | 1             | 0           | 0.201806                | -2.520868 | -1.966542 |
| 9             | 1             | 0           | -2.422321               | -1.731382 | -2.315016 |
| 10            | 1             | 0           | 1.281905                | -1.379459 | 1.517418  |
| 11            | 1             | 0           | 1.719222                | -2.537070 | 0.255989  |
| 12            | 1             | 0           | 2.278404                | -0.618580 | -1.279001 |
| 13            | 1             | 0           | 1.812929                | 0.515991  | 0.017609  |
| 14            | 35            | 0           | -0.454629               | 2.102918  | 0.338369  |
| 15            | 1             | 0           | -1.019855               | -0.273768 | 1.399914  |
| 16            | 6             | 0           | -3.325425               | -0.153918 | -0.144337 |
| 17            | 6             | 0           | -4.505479               | -0.618622 | -0.535726 |
| 18            | 1             | 0           | -3.171279               | 0.803802  | 0.343994  |
| 19            | 1             | 0           | -5.393675               | -0.023334 | -0.371045 |
| 20            | 1             | 0           | -4.627811               | -1.581590 | -1.018918 |
| 21            | 8             | 0           | 3.510029                | -0.667139 | 0.406862  |
| 22            | 1             | 0           | 4.043108                | 0.116361  | 0.244089  |

Distance matrix (angstroms):

|   |   | 1        | 2        | 3        | 4        | 5        |
|---|---|----------|----------|----------|----------|----------|
| 1 | C | 0.000000 |          |          |          |          |
| 2 | C | 1.354366 | 0.000000 |          |          |          |
| 3 | N | 2.206821 | 1.389709 | 0.000000 |          |          |
| 4 | C | 2.216053 | 2.222619 | 1.348131 | 0.000000 |          |
| 5 | N | 1.389025 | 2.211640 | 2.178561 | 1.340675 | 0.000000 |
| 6 | C | 2.543937 | 3.630512 | 3.593334 | 2.486905 | 1.465677 |
| 7 | C | 3.272302 | 4.328319 | 4.352090 | 3.329970 | 2.476138 |
| 8 | H | 1.075909 | 2.211630 | 3.265878 | 3.232346 | 2.160010 |
| 9 | H | 2.214558 | 1.075027 | 2.158565 | 3.237643 | 3.270326 |

|    |    |          |          |          |          |          |
|----|----|----------|----------|----------|----------|----------|
| 10 | H  | 3.380916 | 4.274164 | 3.914914 | 2.630723 | 2.084113 |
| 11 | H  | 2.749062 | 3.996151 | 4.228887 | 3.287984 | 2.084211 |
| 12 | H  | 3.045268 | 4.142887 | 4.477852 | 3.726781 | 2.733839 |
| 13 | H  | 3.616220 | 4.398809 | 4.161314 | 3.135127 | 2.713571 |
| 14 | Br | 4.390440 | 4.314087 | 3.446509 | 2.902639 | 3.621479 |
| 15 | H  | 3.253684 | 3.257833 | 2.154901 | 1.072542 | 2.152242 |
| 16 | C  | 3.591117 | 2.522489 | 1.421265 | 2.439944 | 3.543425 |
| 17 | C  | 4.339321 | 3.077359 | 2.418970 | 3.611467 | 4.571684 |
| 18 | H  | 4.219422 | 3.333381 | 2.088201 | 2.642640 | 3.897443 |
| 19 | H  | 5.390065 | 4.124198 | 3.391349 | 4.496076 | 5.556811 |
| 20 | H  | 4.201188 | 2.921829 | 2.710223 | 3.971320 | 4.686105 |
| 21 | O  | 4.515640 | 5.662570 | 5.668835 | 4.539604 | 3.668896 |
| 22 | H  | 5.196706 | 6.277678 | 6.249633 | 5.147430 | 4.388184 |
|    |    | 6        | 7        | 8        | 9        | 10       |
| 6  | C  | 0.000000 |          |          |          |          |
| 7  | C  | 1.528736 | 0.000000 |          |          |          |
| 8  | H  | 2.833737 | 3.385173 | 0.000000 |          |          |
| 9  | H  | 4.657294 | 5.267378 | 2.762384 | 0.000000 |          |
| 10 | H  | 1.090033 | 2.153811 | 3.821963 | 5.341600 | 0.000000 |
| 11 | H  | 1.091828 | 2.171981 | 2.691181 | 4.940808 | 1.767064 |
| 12 | H  | 2.166819 | 1.098623 | 2.898908 | 4.940492 | 3.064622 |
| 13 | H  | 2.148777 | 1.094758 | 3.969267 | 5.331901 | 2.474701 |
| 14 | Br | 4.051903 | 3.759448 | 5.207967 | 5.061040 | 4.066037 |
| 15 | H  | 2.832654 | 3.624731 | 4.227877 | 4.229924 | 2.556259 |
| 16 | C  | 4.888811 | 5.565778 | 4.622147 | 2.831225 | 5.048848 |
| 17 | C  | 5.984861 | 6.746786 | 5.274876 | 2.956968 | 6.187737 |
| 18 | H  | 5.071431 | 5.577021 | 5.269697 | 3.749457 | 5.096508 |
| 19 | H  | 6.936896 | 7.640052 | 6.331880 | 3.940228 | 7.068857 |
| 20 | H  | 6.131899 | 6.996754 | 5.010533 | 2.562518 | 6.434174 |
| 21 | O  | 2.348328 | 1.425033 | 4.473667 | 6.613169 | 2.589454 |
| 22 | H  | 3.183587 | 1.954954 | 5.157273 | 7.194786 | 3.388671 |
|    |    | 11       | 12       | 13       | 14       | 15       |
| 11 | H  | 0.000000 |          |          |          |          |
| 12 | H  | 2.519818 | 0.000000 |          |          |          |
| 13 | H  | 3.063787 | 1.784689 | 0.000000 |          |          |
| 14 | Br | 5.124638 | 4.182333 | 2.786225 | 0.000000 |          |
| 15 | H  | 3.732780 | 4.263097 | 3.249485 | 2.663643 | 0.000000 |
| 16 | C  | 5.593580 | 5.736398 | 5.184369 | 3.683447 | 2.777540 |
| 17 | C  | 6.561567 | 6.824480 | 6.443276 | 4.957843 | 4.001900 |
| 18 | H  | 5.923358 | 5.861427 | 5.003168 | 3.011298 | 2.627689 |
| 19 | H  | 7.570030 | 7.748516 | 7.237201 | 5.423873 | 4.725391 |
| 20 | H  | 6.543941 | 6.977882 | 6.852545 | 5.730033 | 4.536353 |
| 21 | O  | 2.593530 | 2.088395 | 2.105104 | 4.836985 | 4.654110 |
| 22 | H  | 3.527221 | 2.444202 | 2.276993 | 4.917819 | 5.207853 |



|    |   |          |          |          |          |          |
|----|---|----------|----------|----------|----------|----------|
|    |   | 16       | 17       | 18       | 19       | 20       |
| 16 | C | 0.000000 |          |          |          |          |
| 17 | C | 1.327277 | 0.000000 |          |          |          |
| 18 | H | 1.086027 | 2.139460 | 0.000000 |          |          |
| 19 | H | 2.084733 | 1.081841 | 2.476788 | 0.000000 |          |
| 20 | H | 2.121167 | 1.084319 | 3.109519 | 1.853227 | 0.000000 |
| 21 | O | 6.876819 | 8.070886 | 6.841600 | 8.960780 | 8.312251 |
| 22 | H | 7.383712 | 8.615489 | 7.247754 | 9.457843 | 8.925417 |
|    |   | 21       | 22       |          |          |          |
| 21 | O | 0.000000 |          |          |          |          |
| 22 | H | 0.961531 | 0.000000 |          |          |          |

Stoichiometry C7H11BrN2O

Framework group C1[X(C7H11BrN2O)]

Deg. of freedom 60

Full point group C1 NOp 1

Largest Abelian subgroup C1 NOp 1

Largest concise Abelian subgroup C1 NOp 1

Standard orientation:

| Center<br>Number | Atomic<br>Number | Atomic<br>Type | Coordinates (Angstroms) |           |           |
|------------------|------------------|----------------|-------------------------|-----------|-----------|
|                  |                  |                | X                       | Y         | Z         |
| 1                | 6                | 0              | -0.115273               | -2.219134 | -0.696202 |
| 2                | 6                | 0              | -1.418303               | -1.864507 | -0.799446 |
| 3                | 7                | 0              | -1.639068               | -0.849640 | 0.123916  |
| 4                | 6                | 0              | -0.474906               | -0.575512 | 0.746041  |
| 5                | 7                | 0              | 0.450208                | -1.439800 | 0.304928  |
| 6                | 6                | 0              | 1.869103                | -1.402916 | 0.670420  |
| 7                | 6                | 0              | 2.681286                | -0.563135 | -0.315563 |
| 8                | 1                | 0              | 0.460446                | -2.942142 | -1.247008 |
| 9                | 1                | 0              | -2.191138               | -2.199635 | -1.467352 |
| 10               | 1                | 0              | 1.955500                | -0.976250 | 1.669751  |
| 11               | 1                | 0              | 2.240529                | -2.429042 | 0.705039  |
| 12               | 1                | 0              | 2.594988                | -0.982312 | -1.327401 |
| 13               | 1                | 0              | 2.286490                | 0.457950  | -0.319636 |
| 14               | 35               | 0              | 0.066706                | 2.132931  | -0.146317 |
| 15               | 1                | 0              | -0.349516               | 0.122470  | 1.550680  |
| 16               | 6                | 0              | -2.828638               | -0.096344 | 0.317472  |
| 17               | 6                | 0              | -4.045261               | -0.614642 | 0.204079  |
| 18               | 1                | 0              | -2.620954               | 0.950049  | 0.520909  |
| 19               | 1                | 0              | -4.909777               | 0.026006  | 0.316163  |
| 20               | 1                | 0              | -4.220710               | -1.665624 | 0.003079  |
| 21               | 8                | 0              | 4.025447                | -0.630267 | 0.152885  |
| 22               | 1                | 0              | 4.529842                | 0.071302  | -0.268930 |

```

-----
Rotational constants (GHZ):      0.8327476      0.5695747      0.3592507
Standard basis: 6-311++G(d,p) (5D, 7F)
There are 358 symmetry adapted cartesian basis functions of A symmetry.
There are 345 symmetry adapted basis functions of A symmetry.
345 basis functions, 553 primitive gaussians, 358 cartesian basis functions
55 alpha electrons      55 beta electrons
nuclear repulsion energy      868.9658615625 Hartrees.
NAtoms= 22 NActive= 22 NUniq= 22 SFac= 1.00D+00 NAtFMM= 60 NAOKFM=F
Big=F
Integral buffers will be 131072 words long.
Raffenetti 2 integral format.
Two-electron integral symmetry is turned on.
One-electron integrals computed using PRISM.
NBasis= 345 RedAO= T EigKep= 6.78D-06 NBF= 345
NBsUse= 345 1.00D-06 EigRej= -1.00D+00 NBFU= 345
Initial guess from the checkpoint file: "."
B after Tr= 0.000000 0.000000 0.000000
Rot= 0.999996 -0.001655 0.000043 -0.002076 Ang= -0.30 deg.
ExpMin= 3.50D-02 ExpMax= 4.40D+05 ExpMxC= 1.51D+04 IAcc=3 IRadAn= 5 AccDes=
0.00D+00
Harris functional with IExCor= 402 and IRadAn= 5 diagonalized for initial guess.
HarFok: IExCor= 402 AccDes= 0.00D+00 IRadAn= 5 IDoV= 1 UseB2=F ITyADJ=14
ICtDFT= 3500011 ScaDFX= 1.000000 1.000000 1.000000 1.000000
FoFCou: FMM=F IPFlag= 0 FMFlag= 100000 FMFlg1= 0
NfxFlg= 0 DoJE=T BraDBF=F KetDBF=T FulRan=T
wScrn= 0.000000 ICntrl= 500 IOpCl= 0 l1Cent= 200000004 NGrid=
0
NMat0= 1 NMatS0= 1 NMatT0= 0 NMatD0= 1 NMtDS0= 0
NMtDT0= 0
Petite list used in FoFCou.
Keep R1 ints in memory in canonical form, NReq=1804729152.
Requested convergence on RMS density matrix=1.00D-08 within 128 cycles.
Requested convergence on MAX density matrix=1.00D-06.
Requested convergence on energy=1.00D-06.
No special actions if energy rises.
SCF Done: E(RB3LYP) = -3032.33774609 A.U. after 12 cycles
NFOck= 12 Conv=0.18D-08 -V/T= 2.0016
Calling FoFJK, ICntrl= 2127 FMM=F ISym2X=0 l1Cent= 0 IOpClX= 0 NMat=1 NMatS=1
NMatT=0.
***** Axes restored to original set *****

```

```

-----
Center      Atomic      Forces (Hartrees/Bohr)
Number      Number      X          Y          Z

```

|    |    |              |              |              |
|----|----|--------------|--------------|--------------|
| 1  | 6  | 0.000059925  | -0.001127489 | -0.000242224 |
| 2  | 6  | 0.000504110  | 0.001123260  | -0.001227749 |
| 3  | 7  | -0.000681720 | -0.001482293 | 0.001658867  |
| 4  | 6  | -0.000369572 | -0.000447125 | -0.000199485 |
| 5  | 7  | -0.000736891 | 0.001548551  | 0.000463800  |
| 6  | 6  | 0.000512220  | -0.000239875 | -0.000705952 |
| 7  | 6  | -0.000134185 | -0.000106510 | 0.000993450  |
| 8  | 1  | -0.000164375 | -0.000394291 | 0.000136610  |
| 9  | 1  | 0.000131902  | -0.000239401 | 0.000060448  |
| 10 | 1  | -0.000471879 | -0.000012505 | -0.000052404 |
| 11 | 1  | 0.000070815  | 0.000054612  | 0.000193253  |
| 12 | 1  | -0.000144408 | 0.000106786  | 0.000195621  |
| 13 | 1  | 0.000663310  | 0.000245481  | -0.000780549 |
| 14 | 35 | -0.000002817 | 0.000128436  | 0.000072789  |
| 15 | 1  | 0.000087086  | -0.000128395 | 0.000215746  |
| 16 | 6  | -0.000766699 | 0.001377670  | -0.000401903 |
| 17 | 6  | 0.000166537  | -0.000326657 | -0.000019016 |
| 18 | 1  | 0.000415446  | -0.000490531 | 0.000027206  |
| 19 | 1  | 0.000175612  | -0.000142677 | -0.000111184 |
| 20 | 1  | -0.000029278 | 0.000405613  | 0.000076367  |
| 21 | 8  | 0.000544005  | -0.000081393 | -0.001168838 |
| 22 | 1  | 0.000170856  | 0.000228735  | 0.000815146  |

Cartesian Forces: Max 0.001658867 RMS 0.000587830

GradGradGradGradGradGradGradGradGradGradGradGradGradGradGradGradGradGradGrad

Berny optimization.

Using GEDIIS/GDIIS optimizer.

FormGI is forming the generalized inverse of G from B-inverse, IUseBI=4.

Internal Forces: Max 0.001740974 RMS 0.000392176

Search for a local minimum.

Step number 9 out of a maximum of 116

All quantities printed in internal units (Hartrees-Bohrs-Radians)

Mixed Optimization -- En-DIIS/RFO-DIIS

Swapping is turned off.

Update second derivatives using D2CorX and points 8 9

DE= -2.56D-04 DEPred=-2.27D-04 R= 1.13D+00

TightC=F SS= 1.41D+00 RLast= 3.59D-01 DXNew= 1.2000D+00 1.0757D+00

Trust test= 1.13D+00 RLast= 3.59D-01 DXMaxT set to 1.08D+00

ITU= 1 1 1 1 0 0-1 0 0

Eigenvalues --- 0.00157 0.00390 0.00593 0.00905 0.01222

Eigenvalues --- 0.01514 0.01737 0.01895 0.02049 0.02196

Eigenvalues --- 0.02384 0.02416 0.02961 0.03071 0.03131

|                 |         |         |         |         |         |
|-----------------|---------|---------|---------|---------|---------|
| Eigenvalues --- | 0.03846 | 0.04690 | 0.05434 | 0.05980 | 0.06930 |
| Eigenvalues --- | 0.08640 | 0.09155 | 0.13609 | 0.13839 | 0.15725 |
| Eigenvalues --- | 0.15782 | 0.15802 | 0.15977 | 0.16001 | 0.16116 |
| Eigenvalues --- | 0.16620 | 0.20694 | 0.21353 | 0.22863 | 0.22941 |
| Eigenvalues --- | 0.24226 | 0.24733 | 0.25709 | 0.29924 | 0.33136 |
| Eigenvalues --- | 0.33867 | 0.33873 | 0.33916 | 0.34083 | 0.34233 |
| Eigenvalues --- | 0.34457 | 0.34682 | 0.36113 | 0.36308 | 0.36420 |
| Eigenvalues --- | 0.37269 | 0.42706 | 0.43005 | 0.45889 | 0.49806 |
| Eigenvalues --- | 0.53463 | 0.54435 | 0.55652 | 0.60467 | 1.86169 |

En-DIIS/RFO-DIIS IScMMF= 0 using points: 9 8

RFO step: Lambda=-4.09921387D-05.

DidBck=F Rises=F RFO-DIIS coefs: 1.21517 -0.21517

Iteration 1 RMS(Cart)= 0.02513475 RMS(Int)= 0.00137371

Iteration 2 RMS(Cart)= 0.00147399 RMS(Int)= 0.00002654

Iteration 3 RMS(Cart)= 0.00000791 RMS(Int)= 0.00002595

Iteration 4 RMS(Cart)= 0.00000000 RMS(Int)= 0.00002595

| Variable | Old X   | -DE/DX   | Delta X<br>(Linear) | Delta X<br>(Quad) | Delta X<br>(Total) | New X   |
|----------|---------|----------|---------------------|-------------------|--------------------|---------|
| R1       | 2.55938 | 0.00006  | 0.00035             | 0.00119           | 0.00151            | 2.56089 |
| R2       | 2.62488 | 0.00055  | -0.00020            | -0.00002          | -0.00025           | 2.62463 |
| R3       | 2.03317 | 0.00002  | 0.00000             | -0.00006          | -0.00006           | 2.03311 |
| R4       | 2.62617 | 0.00079  | -0.00050            | -0.00002          | -0.00050           | 2.62567 |
| R5       | 2.03151 | -0.00010 | 0.00007             | -0.00013          | -0.00006           | 2.03144 |
| R6       | 2.54760 | 0.00005  | -0.00066            | -0.00177          | -0.00239           | 2.54521 |
| R7       | 2.68580 | 0.00034  | 0.00066             | 0.00456           | 0.00522            | 2.69102 |
| R8       | 2.53351 | -0.00007 | 0.00027             | -0.00027          | 0.00000            | 2.53351 |
| R9       | 2.02681 | 0.00014  | 0.00004             | 0.00082           | 0.00086            | 2.02767 |
| R10      | 2.76973 | 0.00093  | 0.00008             | 0.00222           | 0.00230            | 2.77203 |
| R11      | 2.88889 | 0.00101  | -0.00008            | 0.00096           | 0.00088            | 2.88978 |
| R12      | 2.05986 | -0.00003 | -0.00009            | 0.00006           | -0.00003           | 2.05983 |
| R13      | 2.06326 | -0.00006 | 0.00010             | 0.00001           | 0.00011            | 2.06337 |
| R14      | 2.07610 | -0.00021 | 0.00010             | -0.00011          | -0.00001           | 2.07609 |
| R15      | 2.06879 | -0.00004 | -0.00004            | -0.00070          | -0.00074           | 2.06805 |
| R16      | 2.69292 | 0.00046  | -0.00004            | -0.00041          | -0.00045           | 2.69247 |
| R17      | 5.26520 | 0.00009  | 0.00419             | 0.01191           | 0.01610            | 5.28130 |
| R18      | 2.50819 | -0.00023 | -0.00014            | -0.00103          | -0.00117           | 2.50702 |
| R19      | 2.05229 | -0.00037 | 0.00039             | -0.00024          | 0.00015            | 2.05244 |
| R20      | 2.04438 | -0.00024 | -0.00002            | -0.00052          | -0.00055           | 2.04384 |
| R21      | 2.04907 | -0.00038 | 0.00011             | -0.00062          | -0.00051           | 2.04856 |
| R22      | 1.81703 | 0.00016  | 0.00001             | -0.00004          | -0.00003           | 1.81700 |
| A1       | 1.87518 | -0.00014 | -0.00026            | -0.00056          | -0.00089           | 1.87429 |
| A2       | 2.28068 | 0.00001  | 0.00024             | 0.00028           | 0.00052            | 2.28121 |
| A3       | 2.12724 | 0.00013  | 0.00002             | 0.00015           | 0.00018            | 2.12742 |
| A4       | 1.86858 | 0.00002  | -0.00008            | 0.00022           | 0.00011            | 1.86869 |

|     |          |          |          |          |          |          |
|-----|----------|----------|----------|----------|----------|----------|
| A5  | 2.28814  | -0.00020 | 0.00076  | 0.00063  | 0.00137  | 2.28951  |
| A6  | 2.12499  | 0.00020  | -0.00090 | -0.00028 | -0.00120 | 2.12378  |
| A7  | 1.89434  | -0.00011 | 0.00052  | -0.00018 | 0.00027  | 1.89461  |
| A8  | 2.22749  | 0.00015  | -0.00070 | -0.00248 | -0.00330 | 2.22419  |
| A9  | 2.15573  | -0.00009 | 0.00055  | -0.00030 | 0.00011  | 2.15584  |
| A10 | 1.88909  | 0.00011  | -0.00022 | 0.00091  | 0.00066  | 1.88976  |
| A11 | 2.18890  | 0.00011  | 0.00010  | 0.00108  | 0.00110  | 2.18999  |
| A12 | 2.19654  | -0.00020 | 0.00052  | 0.00009  | 0.00053  | 2.19707  |
| A13 | 1.89433  | 0.00015  | 0.00012  | 0.00048  | 0.00056  | 1.89490  |
| A14 | 2.19933  | -0.00078 | 0.00006  | -0.00100 | -0.00093 | 2.19840  |
| A15 | 2.17699  | 0.00068  | -0.00058 | 0.00096  | 0.00039  | 2.17738  |
| A16 | 1.94691  | 0.00174  | -0.00041 | 0.00063  | 0.00021  | 1.94712  |
| A17 | 1.89146  | -0.00077 | -0.00049 | -0.00309 | -0.00358 | 1.88788  |
| A18 | 1.88976  | -0.00053 | 0.00071  | 0.00078  | 0.00149  | 1.89125  |
| A19 | 1.91152  | -0.00014 | 0.00075  | 0.00236  | 0.00311  | 1.91463  |
| A20 | 1.93477  | -0.00056 | -0.00037 | 0.00047  | 0.00009  | 1.93486  |
| A21 | 1.88792  | 0.00020  | -0.00018 | -0.00132 | -0.00150 | 1.88642  |
| A22 | 1.92057  | -0.00021 | -0.00050 | -0.00042 | -0.00093 | 1.91965  |
| A23 | 1.89987  | 0.00099  | 0.00024  | -0.00014 | 0.00009  | 1.89996  |
| A24 | 1.83717  | 0.00001  | 0.00088  | 0.00458  | 0.00545  | 1.84262  |
| A25 | 1.90087  | -0.00035 | -0.00071 | -0.00367 | -0.00439 | 1.89649  |
| A26 | 1.93786  | -0.00001 | -0.00005 | -0.00102 | -0.00107 | 1.93680  |
| A27 | 1.96635  | -0.00038 | 0.00019  | 0.00094  | 0.00112  | 1.96747  |
| A28 | 2.58259  | 0.00057  | -0.00231 | -0.00856 | -0.01086 | 2.57173  |
| A29 | 2.15148  | -0.00003 | -0.00193 | -0.00394 | -0.00587 | 2.14561  |
| A30 | 1.95641  | -0.00048 | -0.00028 | -0.00352 | -0.00380 | 1.95261  |
| A31 | 2.17431  | 0.00052  | 0.00222  | 0.00765  | 0.00987  | 2.18418  |
| A32 | 2.08564  | 0.00002  | 0.00079  | 0.00273  | 0.00352  | 2.08916  |
| A33 | 2.14438  | 0.00007  | -0.00107 | -0.00160 | -0.00267 | 2.14171  |
| A34 | 2.05317  | -0.00010 | 0.00028  | -0.00113 | -0.00085 | 2.05232  |
| A35 | 1.89254  | 0.00078  | -0.00049 | 0.00121  | 0.00072  | 1.89326  |
| D1  | 0.01915  | -0.00060 | 0.00421  | -0.02184 | -0.01763 | 0.00152  |
| D2  | 3.10167  | -0.00017 | -0.00148 | -0.01037 | -0.01185 | 3.08982  |
| D3  | -3.10908 | -0.00037 | 0.00405  | -0.01022 | -0.00617 | -3.11525 |
| D4  | -0.02656 | 0.00006  | -0.00164 | 0.00125  | -0.00039 | -0.02695 |
| D5  | -0.06040 | 0.00062  | -0.00261 | 0.02120  | 0.01858  | -0.04182 |
| D6  | -3.03829 | 0.00023  | 0.00020  | 0.01821  | 0.01841  | -3.01988 |
| D7  | 3.06926  | 0.00041  | -0.00247 | 0.01083  | 0.00836  | 3.07761  |
| D8  | 0.09137  | 0.00002  | 0.00034  | 0.00783  | 0.00818  | 0.09955  |
| D9  | 0.02838  | 0.00037  | -0.00435 | 0.01507  | 0.01073  | 0.03911  |
| D10 | 3.05828  | -0.00010 | -0.00085 | -0.01425 | -0.01508 | 3.04320  |
| D11 | -3.06087 | 0.00000  | 0.00066  | 0.00487  | 0.00551  | -3.05536 |
| D12 | -0.03097 | -0.00047 | 0.00415  | -0.02445 | -0.02029 | -0.05126 |
| D13 | -0.06636 | 0.00001  | 0.00275  | -0.00194 | 0.00081  | -0.06555 |



Input orientation:

| Center Number | Atomic Number | Atomic Type | Coordinates (Angstroms) |           |           |
|---------------|---------------|-------------|-------------------------|-----------|-----------|
|               |               |             | X                       | Y         | Z         |
| 1             | 6             | 0           | -0.456828               | -1.980825 | -1.318977 |
| 2             | 6             | 0           | -1.742840               | -1.591432 | -1.495103 |
| 3             | 7             | 0           | -2.101808               | -0.851249 | -0.375362 |
| 4             | 6             | 0           | -1.031461               | -0.756082 | 0.436642  |
| 5             | 7             | 0           | -0.035594               | -1.480104 | -0.093879 |
| 6             | 6             | 0           | 1.331068                | -1.537007 | 0.436003  |
| 7             | 6             | 0           | 2.223966                | -0.468730 | -0.196438 |
| 8             | 1             | 0           | 0.198551                | -2.546918 | -1.957358 |
| 9             | 1             | 0           | -2.418005               | -1.731022 | -2.319892 |
| 10            | 1             | 0           | 1.284071                | -1.385282 | 1.514384  |
| 11            | 1             | 0           | 1.730190                | -2.536433 | 0.251421  |
| 12            | 1             | 0           | 2.235435                | -0.587326 | -1.288576 |
| 13            | 1             | 0           | 1.818698                | 0.518915  | 0.044293  |
| 14            | 35            | 0           | -0.452271               | 2.114288  | 0.373066  |
| 15            | 1             | 0           | -1.019315               | -0.278992 | 1.397661  |
| 16            | 6             | 0           | -3.318267               | -0.143167 | -0.159258 |
| 17            | 6             | 0           | -4.501933               | -0.612408 | -0.531769 |
| 18            | 1             | 0           | -3.146478               | 0.825134  | 0.301727  |
| 19            | 1             | 0           | -5.387392               | -0.008321 | -0.387562 |
| 20            | 1             | 0           | -4.629044               | -1.589905 | -0.982889 |
| 21            | 8             | 0           | 3.521395                | -0.680240 | 0.353089  |
| 22            | 1             | 0           | 4.018214                | 0.140228  | 0.285930  |

Distance matrix (angstroms):

|       | 1        | 2        | 3        | 4        | 5        |
|-------|----------|----------|----------|----------|----------|
| 1 C   | 0.000000 |          |          |          |          |
| 2 C   | 1.355165 | 0.000000 |          |          |          |
| 3 N   | 2.207331 | 1.389442 | 0.000000 |          |          |
| 4 C   | 2.216392 | 2.221600 | 1.346866 | 0.000000 |          |
| 5 N   | 1.388893 | 2.211449 | 2.178057 | 1.340676 | 0.000000 |
| 6 C   | 2.544307 | 3.630570 | 3.593496 | 2.488250 | 1.466894 |
| 7 C   | 3.276153 | 4.322330 | 4.346338 | 3.328839 | 2.477702 |
| 8 H   | 1.075878 | 2.212607 | 3.266444 | 3.232840 | 2.159970 |
| 9 H   | 2.215953 | 1.074993 | 2.157586 | 3.235968 | 3.270164 |
| 10 H  | 3.378363 | 4.273370 | 3.914142 | 2.630420 | 2.082551 |
| 11 H  | 2.749163 | 4.000663 | 4.232837 | 3.290999 | 2.086398 |
| 12 H  | 3.031673 | 4.108229 | 4.440190 | 3.698305 | 2.716970 |
| 13 H  | 3.644890 | 4.416770 | 4.174186 | 3.146897 | 2.730122 |
| 14 Br | 4.430912 | 4.346031 | 3.474986 | 2.928912 | 3.648467 |

|    |    |          |          |          |          |          |
|----|----|----------|----------|----------|----------|----------|
| 15 | H  | 3.254651 | 3.257925 | 2.154735 | 1.072996 | 2.152921 |
| 16 | C  | 3.593016 | 2.522682 | 1.424027 | 2.441360 | 3.545083 |
| 17 | C  | 4.342250 | 3.082060 | 2.417045 | 3.605917 | 4.570867 |
| 18 | H  | 4.211212 | 3.322437 | 2.088072 | 2.644190 | 3.892072 |
| 19 | H  | 5.391546 | 4.125003 | 3.392011 | 4.495841 | 5.558249 |
| 20 | H  | 4.203946 | 2.931304 | 2.702152 | 3.956379 | 4.679976 |
| 21 | O  | 4.507059 | 5.653163 | 5.672768 | 4.554254 | 3.673110 |
| 22 | H  | 5.205824 | 6.273793 | 6.234983 | 5.130820 | 4.382134 |
|    |    | 6        | 7        | 8        | 9        | 10       |
| 6  | C  | 0.000000 |          |          |          |          |
| 7  | C  | 1.529203 | 0.000000 |          |          |          |
| 8  | H  | 2.833847 | 3.394408 | 0.000000 |          |          |
| 9  | H  | 4.657053 | 5.258357 | 2.764684 | 0.000000 |          |
| 10 | H  | 1.090017 | 2.156475 | 3.818474 | 5.341027 | 0.000000 |
| 11 | H  | 1.091889 | 2.172507 | 2.687887 | 4.946499 | 1.766139 |
| 12 | H  | 2.166551 | 1.098618 | 2.904508 | 4.901647 | 3.065683 |
| 13 | H  | 2.148961 | 1.094366 | 4.003850 | 5.348012 | 2.464337 |
| 14 | Br | 4.064014 | 3.762786 | 5.251789 | 5.089454 | 4.069948 |
| 15 | H  | 2.834023 | 3.618843 | 4.228811 | 4.229057 | 2.557946 |
| 16 | C  | 4.890137 | 5.551911 | 4.623763 | 2.828444 | 5.052270 |
| 17 | C  | 5.984594 | 6.735786 | 5.279127 | 2.965036 | 6.185622 |
| 18 | H  | 5.064203 | 5.546523 | 5.259602 | 3.733295 | 5.097670 |
| 19 | H  | 6.939225 | 7.627665 | 6.333363 | 3.939398 | 7.072611 |
| 20 | H  | 6.126907 | 6.988511 | 5.017084 | 2.587699 | 6.422085 |
| 21 | O  | 2.353393 | 1.424794 | 4.456898 | 6.597381 | 2.617501 |
| 22 | H  | 3.171182 | 1.955208 | 5.181016 | 7.191439 | 3.363305 |
|    |    | 11       | 12       | 13       | 14       | 15       |
| 11 | H  | 0.000000 |          |          |          |          |
| 12 | H  | 2.534932 | 0.000000 |          |          |          |
| 13 | H  | 3.063640 | 1.781567 | 0.000000 |          |          |
| 14 | Br | 5.138788 | 4.157347 | 2.794746 | 0.000000 |          |
| 15 | H  | 3.737604 | 4.231351 | 3.243852 | 2.664418 | 0.000000 |
| 16 | C  | 5.602079 | 5.684737 | 5.183453 | 3.686923 | 2.779861 |
| 17 | C  | 6.569217 | 6.779787 | 6.446868 | 4.965215 | 3.995310 |
| 18 | H  | 5.923222 | 5.786976 | 4.981266 | 2.987601 | 2.635335 |
| 19 | H  | 7.580212 | 7.697698 | 7.238246 | 5.425813 | 4.726561 |
| 20 | H  | 6.546701 | 6.944039 | 6.861166 | 5.745006 | 4.518369 |
| 21 | O  | 2.581512 | 2.087436 | 2.105352 | 4.857963 | 4.676556 |
| 22 | H  | 3.521472 | 2.487310 | 2.244920 | 4.887713 | 5.175750 |
|    |    | 16       | 17       | 18       | 19       | 20       |
| 16 | C  | 0.000000 |          |          |          |          |
| 17 | C  | 1.326657 | 0.000000 |          |          |          |
| 18 | H  | 1.086105 | 2.144412 | 0.000000 |          |          |
| 19 | H  | 2.086045 | 1.081552 | 2.488265 | 0.000000 |          |



20 H 2.118858 1.084051 3.111375 1.852273 0.000000  
 21 O 6.879819 8.072259 6.835884 8.964738 8.309151  
 22 H 7.355437 8.592323 7.197372 9.430858 8.909453  
           21          22  
 21 O 0.000000  
 22 H 0.961514 0.000000

Stoichiometry C7H11BrN2O

Framework group C1[X(C7H11BrN2O)]

Deg. of freedom 60

Full point group C1 NOp 1

Largest Abelian subgroup C1 NOp 1

Largest concise Abelian subgroup C1 NOp 1

Standard orientation:

| Center<br>Number | Atomic<br>Number | Atomic<br>Type | Coordinates (Angstroms) |           |           |
|------------------|------------------|----------------|-------------------------|-----------|-----------|
|                  |                  |                | X                       | Y         | Z         |
| 1                | 6                | 0              | -0.114573               | -2.245067 | -0.673563 |
| 2                | 6                | 0              | -1.414837               | -1.882583 | -0.793538 |
| 3                | 7                | 0              | -1.640636               | -0.864162 | 0.124276  |
| 4                | 6                | 0              | -0.480725               | -0.586069 | 0.749833  |
| 5                | 7                | 0              | 0.448316                | -1.450060 | 0.316459  |
| 6                | 6                | 0              | 1.869267                | -1.400731 | 0.677354  |
| 7                | 6                | 0              | 2.672651                | -0.560738 | -0.316351 |
| 8                | 1                | 0              | 0.462476                | -2.976366 | -1.211827 |
| 9                | 1                | 0              | -2.183728               | -2.217170 | -1.466194 |
| 10               | 1                | 0              | 1.951819                | -0.968750 | 1.674707  |
| 11               | 1                | 0              | 2.249400                | -2.423488 | 0.718448  |
| 12               | 1                | 0              | 2.552964                | -0.963479 | -1.331455 |
| 13               | 1                | 0              | 2.293266                | 0.465631  | -0.299862 |
| 14               | 35               | 0              | 0.068703                | 2.149781  | -0.139987 |
| 15               | 1                | 0              | -0.355649               | 0.127141  | 1.541671  |
| 16               | 6                | 0              | -2.826499               | -0.092736 | 0.287008  |
| 17               | 6                | 0              | -4.043531               | -0.612641 | 0.194546  |
| 18               | 1                | 0              | -2.606353               | 0.958058  | 0.451306  |
| 19               | 1                | 0              | -4.908852               | 0.030928  | 0.276969  |
| 20               | 1                | 0              | -4.218079               | -1.670863 | 0.036853  |
| 21               | 8                | 0              | 4.028207                | -0.653501 | 0.112484  |
| 22               | 1                | 0              | 4.508180                | 0.106971  | -0.227835 |

Rotational constants (GHZ): 0.8213875 0.5708270 0.3571262

Standard basis: 6-311++G(d,p) (5D, 7F)

There are 358 symmetry adapted cartesian basis functions of A symmetry.

There are 345 symmetry adapted basis functions of A symmetry.

345 basis functions, 553 primitive gaussians, 358 cartesian basis functions  
 55 alpha electrons 55 beta electrons  
 nuclear repulsion energy 867.2952205396 Hartrees.  
 NAToms= 22 NActive= 22 NUniq= 22 SFac= 1.00D+00 NATFMM= 60 NAOKFM=F  
 Big=F  
 Integral buffers will be 131072 words long.  
 Raffenetti 2 integral format.  
 Two-electron integral symmetry is turned on.  
 One-electron integrals computed using PRISM.  
 NBasis= 345 RedAO= T EigKep= 7.03D-06 NBF= 345  
 NBsUse= 345 1.00D-06 EigRej= -1.00D+00 NBFU= 345  
 Initial guess from the checkpoint file: ". "  
 B after Tr= 0.000000 0.000000 0.000000  
 Rot= 1.000000 0.000247 -0.000018 0.000223 Ang= 0.04 deg.  
 ExpMin= 3.50D-02 ExpMax= 4.40D+05 ExpMxC= 1.51D+04 IAcc=3 IRadAn= 5 AccDes=  
 0.00D+00  
 Harris functional with IExCor= 402 and IRadAn= 5 diagonalized for initial guess.  
 HarFok: IExCor= 402 AccDes= 0.00D+00 IRadAn= 5 IDoV= 1 UseB2=F ITyADJ=14  
 ICtDFT= 3500011 ScaDFX= 1.000000 1.000000 1.000000 1.000000  
 FoFCou: FMM=F IPFlag= 0 FMFlag= 100000 FMFlg1= 0  
 NxFFlg= 0 DoJE=T BraDBF=F KetDBF=T FulRan=T  
 wScrn= 0.000000 ICntrl= 500 IOpCl= 0 l1Cent= 200000004 NGrid=  
 0  
 NMat0= 1 NMatS0= 1 NMatT0= 0 NMatD0= 1 NMtDS0= 0  
 NMtDT0= 0  
 Petite list used in FoFCou.  
 Keep R1 ints in memory in canonical form, NReq=1804729152.  
 Requested convergence on RMS density matrix=1.00D-08 within 128 cycles.  
 Requested convergence on MAX density matrix=1.00D-06.  
 Requested convergence on energy=1.00D-06.  
 No special actions if energy rises.  
 SCF Done: E(RB3LYP) = -3032.33791557 A.U. after 12 cycles  
 NFock= 12 Conv=0.39D-08 -V/T= 2.0017  
 Calling FoFJK, ICntrl= 2127 FMM=F ISym2X=0 l1Cent= 0 IOpClX= 0 NMat=1 NMatS=1  
 NMatT=0.  
 \*\*\*\*\* Axes restored to original set \*\*\*\*\*

| Center<br>Number | Atomic<br>Number | Forces (Hartrees/Bohr) |              |              |
|------------------|------------------|------------------------|--------------|--------------|
|                  |                  | X                      | Y            | Z            |
| 1                | 6                | -0.000039257           | 0.000674115  | -0.000841865 |
| 2                | 6                | 0.000550654            | -0.000380686 | -0.000621324 |
| 3                | 7                | -0.000963987           | 0.000247337  | 0.000855797  |
| 4                | 6                | 0.000480875            | -0.000534977 | -0.000005708 |

|    |    |              |              |              |
|----|----|--------------|--------------|--------------|
| 5  | 7  | -0.000801064 | 0.000480512  | 0.000748236  |
| 6  | 6  | -0.000037057 | -0.000457597 | 0.000139816  |
| 7  | 6  | -0.000446333 | 0.000023297  | 0.000419203  |
| 8  | 1  | -0.000076287 | -0.000239123 | 0.000048221  |
| 9  | 1  | 0.000033187  | -0.000582615 | 0.000124066  |
| 10 | 1  | -0.000156649 | -0.000009739 | -0.000005410 |
| 11 | 1  | -0.000012546 | 0.000131975  | -0.000124151 |
| 12 | 1  | 0.000091551  | -0.000001455 | 0.000292193  |
| 13 | 1  | 0.000533868  | 0.000332216  | -0.000740366 |
| 14 | 35 | -0.000091707 | -0.000303073 | 0.000131042  |
| 15 | 1  | 0.000105921  | 0.000104406  | -0.000033353 |
| 16 | 6  | 0.000375574  | 0.000467910  | -0.000029971 |
| 17 | 6  | -0.000069287 | -0.000186165 | -0.000256239 |
| 18 | 1  | -0.000003190 | -0.000166954 | -0.000031257 |
| 19 | 1  | 0.000085851  | 0.000105758  | 0.000109267  |
| 20 | 1  | -0.000055510 | 0.000205298  | -0.000046340 |
| 21 | 8  | 0.000375663  | 0.000150640  | -0.000658856 |
| 22 | 1  | 0.000119730  | -0.000061079 | 0.000526997  |

-----  
Cartesian Forces: Max 0.000963987 RMS 0.000377407

GradGradGradGradGradGradGradGradGradGradGradGradGradGradGradGradGradGradGrad

Berny optimization.

Using GEDIIS/GDIIS optimizer.

FormGI is forming the generalized inverse of G from B-inverse, IUseBI=4.

Internal Forces: Max 0.001410687 RMS 0.000267354

Search for a local minimum.

Step number 10 out of a maximum of 116

All quantities printed in internal units (Hartrees-Bohrs-Radians)

Mixed Optimization -- En-DIIS/RFO-DIIS

Swapping is turned off.

Update second derivatives using D2CorX and points 9 10

DE= -1.69D-04 DEPred=-1.39D-04 R= 1.22D+00

TightC=F SS= 1.41D+00 RLast= 2.77D-01 DXNew= 1.8091D+00 8.2954D-01

Trust test= 1.22D+00 RLast= 2.77D-01 DXMaxT set to 1.08D+00

ITU= 1 1 1 1 1 0 0-1 0 0

|                 |         |         |         |         |         |
|-----------------|---------|---------|---------|---------|---------|
| Eigenvalues --- | 0.00171 | 0.00347 | 0.00535 | 0.00780 | 0.01225 |
| Eigenvalues --- | 0.01407 | 0.01678 | 0.01868 | 0.02057 | 0.02182 |
| Eigenvalues --- | 0.02369 | 0.02418 | 0.03060 | 0.03079 | 0.03359 |
| Eigenvalues --- | 0.04162 | 0.04722 | 0.05438 | 0.05949 | 0.06981 |
| Eigenvalues --- | 0.08655 | 0.09198 | 0.13656 | 0.13846 | 0.15724 |
| Eigenvalues --- | 0.15834 | 0.15932 | 0.15984 | 0.15992 | 0.16009 |
| Eigenvalues --- | 0.16505 | 0.20691 | 0.21401 | 0.22826 | 0.22895 |
| Eigenvalues --- | 0.24210 | 0.24607 | 0.25425 | 0.29578 | 0.33137 |

|                 |         |         |         |         |         |
|-----------------|---------|---------|---------|---------|---------|
| Eigenvalues --- | 0.33848 | 0.33873 | 0.33900 | 0.34095 | 0.34236 |
| Eigenvalues --- | 0.34473 | 0.34683 | 0.35985 | 0.36309 | 0.36385 |
| Eigenvalues --- | 0.37273 | 0.42643 | 0.42909 | 0.45716 | 0.49611 |
| Eigenvalues --- | 0.53491 | 0.54476 | 0.55657 | 0.60475 | 1.90168 |

En-DIIS/RFO-DIIS IScMMF= 0 using points: 10 9 8

RFO step: Lambda=-2.32022419D-05.

DidBck=F Rises=F RFO-DIIS coefs: 1.26152 -0.25353 -0.00800

Iteration 1 RMS(Cart)= 0.02846359 RMS(Int)= 0.00073280

Iteration 2 RMS(Cart)= 0.00082604 RMS(Int)= 0.00002933

Iteration 3 RMS(Cart)= 0.00000180 RMS(Int)= 0.00002931

Iteration 4 RMS(Cart)= 0.00000000 RMS(Int)= 0.00002931

| Variable | Old X   | -DE/DX   | Delta X  | Delta X  | Delta X  | New X   |
|----------|---------|----------|----------|----------|----------|---------|
|          |         |          | (Linear) | (Quad)   | (Total)  |         |
| R1       | 2.56089 | -0.00035 | 0.00041  | -0.00025 | 0.00013  | 2.56103 |
| R2       | 2.62463 | 0.00043  | -0.00007 | 0.00068  | 0.00058  | 2.62521 |
| R3       | 2.03311 | 0.00005  | -0.00002 | 0.00011  | 0.00009  | 2.03321 |
| R4       | 2.62567 | 0.00100  | -0.00015 | 0.00229  | 0.00215  | 2.62782 |
| R5       | 2.03144 | -0.00004 | -0.00001 | -0.00020 | -0.00021 | 2.03123 |
| R6       | 2.54521 | 0.00027  | -0.00065 | -0.00012 | -0.00074 | 2.54447 |
| R7       | 2.69102 | -0.00013 | 0.00139  | 0.00168  | 0.00307  | 2.69409 |
| R8       | 2.53351 | -0.00052 | 0.00001  | -0.00138 | -0.00137 | 2.53214 |
| R9       | 2.02767 | 0.00002  | 0.00023  | 0.00032  | 0.00055  | 2.02822 |
| R10      | 2.77203 | 0.00033  | 0.00060  | 0.00159  | 0.00219  | 2.77422 |
| R11      | 2.88978 | 0.00051  | 0.00023  | 0.00253  | 0.00276  | 2.89254 |
| R12      | 2.05983 | 0.00000  | -0.00001 | 0.00008  | 0.00007  | 2.05990 |
| R13      | 2.06337 | -0.00011 | 0.00003  | -0.00031 | -0.00028 | 2.06309 |
| R14      | 2.07609 | -0.00028 | 0.00000  | -0.00090 | -0.00090 | 2.07519 |
| R15      | 2.06805 | -0.00026 | -0.00020 | -0.00044 | -0.00063 | 2.06742 |
| R16      | 2.69247 | 0.00037  | -0.00012 | 0.00022  | 0.00010  | 2.69257 |
| R17      | 5.28130 | -0.00007 | 0.00437  | 0.00544  | 0.00981  | 5.29112 |
| R18      | 2.50702 | 0.00006  | -0.00031 | -0.00045 | -0.00077 | 2.50625 |
| R19      | 2.05244 | -0.00017 | 0.00005  | -0.00065 | -0.00059 | 2.05185 |
| R20      | 2.04384 | 0.00000  | -0.00014 | -0.00026 | -0.00040 | 2.04343 |
| R21      | 2.04856 | -0.00015 | -0.00013 | -0.00064 | -0.00077 | 2.04779 |
| R22      | 1.81700 | -0.00001 | -0.00001 | -0.00018 | -0.00018 | 1.81681 |
| A1       | 1.87429 | 0.00002  | -0.00024 | -0.00009 | -0.00037 | 1.87392 |
| A2       | 2.28121 | -0.00005 | 0.00015  | -0.00002 | 0.00011  | 2.28132 |
| A3       | 2.12742 | 0.00003  | 0.00005  | 0.00041  | 0.00045  | 2.12787 |
| A4       | 1.86869 | -0.00007 | 0.00003  | -0.00006 | -0.00002 | 1.86867 |
| A5       | 2.28951 | -0.00025 | 0.00039  | -0.00155 | -0.00117 | 2.28834 |
| A6       | 2.12378 | 0.00032  | -0.00035 | 0.00168  | 0.00132  | 2.12511 |
| A7       | 1.89461 | -0.00024 | 0.00009  | -0.00060 | -0.00057 | 1.89404 |
| A8       | 2.22419 | 0.00042  | -0.00089 | -0.00013 | -0.00118 | 2.22301 |
| A9       | 2.15584 | -0.00019 | 0.00005  | -0.00164 | -0.00175 | 2.15409 |

|     |          |          |          |          |          |          |
|-----|----------|----------|----------|----------|----------|----------|
| A10 | 1.88976  | 0.00010  | 0.00017  | 0.00101  | 0.00115  | 1.89091  |
| A11 | 2.18999  | 0.00001  | 0.00029  | 0.00083  | 0.00101  | 2.19100  |
| A12 | 2.19707  | -0.00009 | 0.00016  | -0.00009 | -0.00004 | 2.19702  |
| A13 | 1.89490  | 0.00019  | 0.00015  | 0.00029  | 0.00044  | 1.89534  |
| A14 | 2.19840  | -0.00018 | -0.00024 | -0.00120 | -0.00145 | 2.19695  |
| A15 | 2.17738  | -0.00002 | 0.00008  | 0.00039  | 0.00046  | 2.17784  |
| A16 | 1.94712  | 0.00000  | 0.00004  | 0.00143  | 0.00147  | 1.94859  |
| A17 | 1.88788  | -0.00011 | -0.00095 | -0.00186 | -0.00282 | 1.88506  |
| A18 | 1.89125  | 0.00004  | 0.00042  | -0.00082 | -0.00040 | 1.89085  |
| A19 | 1.91463  | 0.00002  | 0.00084  | 0.00278  | 0.00363  | 1.91825  |
| A20 | 1.93486  | 0.00000  | 0.00001  | -0.00181 | -0.00180 | 1.93307  |
| A21 | 1.88642  | 0.00006  | -0.00040 | 0.00020  | -0.00020 | 1.88622  |
| A22 | 1.91965  | 0.00004  | -0.00026 | -0.00165 | -0.00190 | 1.91774  |
| A23 | 1.89996  | -0.00042 | 0.00003  | 0.00503  | 0.00504  | 1.90500  |
| A24 | 1.84262  | 0.00036  | 0.00146  | 0.00307  | 0.00452  | 1.84713  |
| A25 | 1.89649  | 0.00002  | -0.00117 | -0.00453 | -0.00570 | 1.89079  |
| A26 | 1.93680  | -0.00018 | -0.00028 | -0.00269 | -0.00297 | 1.93382  |
| A27 | 1.96747  | 0.00018  | 0.00030  | 0.00111  | 0.00138  | 1.96884  |
| A28 | 2.57173  | -0.00141 | -0.00293 | -0.00575 | -0.00868 | 2.56305  |
| A29 | 2.14561  | 0.00037  | -0.00161 | -0.00015 | -0.00176 | 2.14385  |
| A30 | 1.95261  | -0.00020 | -0.00100 | -0.00244 | -0.00345 | 1.94916  |
| A31 | 2.18418  | -0.00017 | 0.00266  | 0.00261  | 0.00527  | 2.18945  |
| A32 | 2.08916  | -0.00027 | 0.00095  | -0.00037 | 0.00058  | 2.08973  |
| A33 | 2.14171  | 0.00022  | -0.00074 | 0.00083  | 0.00009  | 2.14180  |
| A34 | 2.05232  | 0.00005  | -0.00021 | -0.00045 | -0.00067 | 2.05165  |
| A35 | 1.89326  | 0.00060  | 0.00017  | 0.00343  | 0.00360  | 1.89686  |
| D1  | 0.00152  | 0.00024  | -0.00445 | 0.00995  | 0.00550  | 0.00702  |
| D2  | 3.08982  | 0.00025  | -0.00315 | 0.01178  | 0.00863  | 3.09845  |
| D3  | -3.11525 | -0.00006 | -0.00146 | -0.00453 | -0.00600 | -3.12125 |
| D4  | -0.02695 | -0.00004 | -0.00016 | -0.00270 | -0.00287 | -0.02982 |
| D5  | -0.04182 | -0.00013 | 0.00476  | -0.00367 | 0.00109  | -0.04073 |
| D6  | -3.01988 | -0.00009 | 0.00482  | -0.00033 | 0.00448  | -3.01540 |
| D7  | 3.07761  | 0.00013  | 0.00209  | 0.00926  | 0.01135  | 3.08896  |
| D8  | 0.09955  | 0.00017  | 0.00215  | 0.01259  | 0.01474  | 0.11429  |
| D9  | 0.03911  | -0.00028 | 0.00264  | -0.01286 | -0.01021 | 0.02889  |
| D10 | 3.04320  | -0.00043 | -0.00398 | -0.03197 | -0.03595 | 3.00726  |
| D11 | -3.05536 | -0.00028 | 0.00147  | -0.01436 | -0.01290 | -3.06825 |
| D12 | -0.05126 | -0.00042 | -0.00515 | -0.03348 | -0.03863 | -0.08989 |
| D13 | -0.06555 | 0.00020  | 0.00031  | 0.01062  | 0.01093  | -0.05461 |
| D14 | -3.09169 | -0.00001 | -0.00479 | -0.00525 | -0.01005 | -3.10174 |
| D15 | -3.07623 | 0.00028  | 0.00669  | 0.02868  | 0.03538  | -3.04085 |
| D16 | 0.18082  | 0.00008  | 0.00159  | 0.01281  | 0.01439  | 0.19521  |
| D17 | 0.68829  | -0.00011 | 0.01334  | -0.00724 | 0.00608  | 0.69438  |
| D18 | -2.41270 | -0.00007 | 0.01198  | -0.00770 | 0.00428  | -2.40843 |

|     |          |          |          |          |          |          |
|-----|----------|----------|----------|----------|----------|----------|
| D19 | -2.60979 | -0.00027 | 0.00580  | -0.02890 | -0.02310 | -2.63289 |
| D20 | 0.57239  | -0.00023 | 0.00443  | -0.02935 | -0.02490 | 0.54749  |
| D21 | 0.06644  | -0.00004 | -0.00310 | -0.00434 | -0.00744 | 0.05900  |
| D22 | 3.04695  | -0.00010 | -0.00319 | -0.00781 | -0.01101 | 3.03594  |
| D23 | 3.09199  | 0.00018  | 0.00204  | 0.01168  | 0.01372  | 3.10572  |
| D24 | -0.21069 | 0.00012  | 0.00195  | 0.00822  | 0.01016  | -0.20053 |
| D25 | 1.36794  | 0.00011  | 0.00166  | -0.00482 | -0.00315 | 1.36479  |
| D26 | -2.80792 | 0.00006  | 0.00210  | -0.00170 | 0.00040  | -2.80752 |
| D27 | -0.76684 | 0.00009  | 0.00134  | -0.00291 | -0.00157 | -0.76841 |
| D28 | -1.58469 | 0.00014  | 0.00173  | -0.00092 | 0.00081  | -1.58388 |
| D29 | 0.52264  | 0.00009  | 0.00217  | 0.00219  | 0.00436  | 0.52700  |
| D30 | 2.56371  | 0.00012  | 0.00141  | 0.00098  | 0.00239  | 2.56610  |
| D31 | -1.00193 | 0.00000  | 0.01061  | 0.00505  | 0.01566  | -0.98627 |
| D32 | 1.07413  | -0.00020 | 0.00904  | 0.00160  | 0.01064  | 1.08476  |
| D33 | -3.09254 | -0.00001 | 0.01024  | 0.00735  | 0.01760  | -3.07494 |
| D34 | -3.09355 | 0.00013  | 0.01122  | 0.00463  | 0.01585  | -3.07771 |
| D35 | -1.01749 | -0.00007 | 0.00965  | 0.00118  | 0.01082  | -1.00667 |
| D36 | 1.09903  | 0.00012  | 0.01085  | 0.00693  | 0.01778  | 1.11681  |
| D37 | 1.10758  | 0.00005  | 0.01117  | 0.00374  | 0.01491  | 1.12249  |
| D38 | -3.09955 | -0.00015 | 0.00961  | 0.00029  | 0.00989  | -3.08966 |
| D39 | -0.98302 | 0.00004  | 0.01080  | 0.00604  | 0.01685  | -0.96618 |
| D40 | -0.68151 | 0.00035  | -0.01562 | 0.05188  | 0.03627  | -0.64524 |
| D41 | 1.40898  | 0.00017  | -0.01661 | 0.05017  | 0.03356  | 1.44254  |
| D42 | -2.71984 | 0.00007  | -0.01762 | 0.04420  | 0.02658  | -2.69326 |
| D43 | -2.74188 | 0.00035  | 0.03200  | 0.05757  | 0.08957  | -2.65231 |
| D44 | 1.46204  | 0.00019  | 0.03160  | 0.05915  | 0.09075  | 1.55279  |
| D45 | -0.66977 | 0.00017  | 0.03312  | 0.06622  | 0.09934  | -0.57043 |
| D46 | -3.08698 | -0.00004 | 0.00052  | -0.00117 | -0.00065 | -3.08763 |
| D47 | 0.05397  | -0.00007 | -0.00013 | -0.00276 | -0.00290 | 0.05108  |
| D48 | 0.00854  | -0.00007 | 0.00195  | -0.00078 | 0.00118  | 0.00972  |
| D49 | -3.13369 | -0.00011 | 0.00130  | -0.00238 | -0.00107 | -3.13476 |

| Item                 | Value    | Threshold | Converged? |
|----------------------|----------|-----------|------------|
| Maximum Force        | 0.001411 | 0.000450  | NO         |
| RMS Force            | 0.000267 | 0.000300  | YES        |
| Maximum Displacement | 0.133603 | 0.001800  | NO         |
| RMS Displacement     | 0.028392 | 0.001200  | NO         |

Predicted change in Energy=-9.097813D-05

GradGradGradGradGradGradGradGradGradGradGradGradGradGradGradGradGradGradGrad

Input orientation:

| -----  |        |        |                         |   |   |  |
|--------|--------|--------|-------------------------|---|---|--|
| Center | Atomic | Atomic | Coordinates (Angstroms) |   |   |  |
| Number | Number | Type   | X                       | Y | Z |  |
| -----  |        |        |                         |   |   |  |

|    |    |   |           |           |           |
|----|----|---|-----------|-----------|-----------|
| 1  | 6  | 0 | -0.457289 | -1.999667 | -1.311125 |
| 2  | 6  | 0 | -1.746933 | -1.619980 | -1.482358 |
| 3  | 7  | 0 | -2.104174 | -0.872868 | -0.365255 |
| 4  | 6  | 0 | -1.033015 | -0.775846 | 0.444808  |
| 5  | 7  | 0 | -0.034487 | -1.492505 | -0.088873 |
| 6  | 6  | 0 | 1.337539  | -1.534277 | 0.431687  |
| 7  | 6  | 0 | 2.218148  | -0.459695 | -0.210757 |
| 8  | 1  | 0 | 0.196490  | -2.570580 | -1.946932 |
| 9  | 1  | 0 | -2.425995 | -1.773118 | -2.301380 |
| 10 | 1  | 0 | 1.293524  | -1.382136 | 1.510174  |
| 11 | 1  | 0 | 1.745011  | -2.530049 | 0.246479  |
| 12 | 1  | 0 | 2.209690  | -0.573837 | -1.302920 |
| 13 | 1  | 0 | 1.816410  | 0.527739  | 0.035181  |
| 14 | 35 | 0 | -0.468389 | 2.093754  | 0.443766  |
| 15 | 1  | 0 | -1.015523 | -0.286605 | 1.399943  |
| 16 | 6  | 0 | -3.309107 | -0.137616 | -0.165188 |
| 17 | 6  | 0 | -4.496895 | -0.585248 | -0.549545 |
| 18 | 1  | 0 | -3.118573 | 0.827028  | 0.295355  |
| 19 | 1  | 0 | -5.372299 | 0.035779  | -0.418066 |
| 20 | 1  | 0 | -4.637419 | -1.560651 | -1.000245 |
| 21 | 8  | 0 | 3.528059  | -0.668291 | 0.309638  |
| 22 | 1  | 0 | 3.995577  | 0.171791  | 0.312768  |

-----  
Distance matrix (angstroms):

|    |    | 1        | 2        | 3        | 4        | 5        |
|----|----|----------|----------|----------|----------|----------|
| 1  | C  | 0.000000 |          |          |          |          |
| 2  | C  | 1.355237 | 0.000000 |          |          |          |
| 3  | N  | 2.208297 | 1.390582 | 0.000000 |          |          |
| 4  | C  | 2.216416 | 2.221759 | 1.346476 | 0.000000 |          |
| 5  | N  | 1.389200 | 2.211453 | 2.178059 | 1.339953 | 0.000000 |
| 6  | C  | 2.544679 | 3.631100 | 3.594158 | 2.488959 | 1.468054 |
| 7  | C  | 3.277238 | 4.322627 | 4.344772 | 3.331633 | 2.481111 |
| 8  | H  | 1.075927 | 2.212773 | 3.267566 | 3.233137 | 2.160551 |
| 9  | H  | 2.215340 | 1.074882 | 2.159305 | 3.236741 | 3.270052 |
| 10 | H  | 3.377339 | 4.272728 | 3.914197 | 2.629710 | 2.081525 |
| 11 | H  | 2.749102 | 4.001347 | 4.235173 | 3.291503 | 2.087000 |
| 12 | H  | 3.024208 | 4.096521 | 4.424710 | 3.689240 | 2.711861 |
| 13 | H  | 3.656505 | 4.428661 | 4.182467 | 3.160119 | 2.742734 |
| 14 | Br | 4.453747 | 4.374523 | 3.482981 | 2.924621 | 3.651469 |
| 15 | H  | 3.255165 | 3.258913 | 2.155177 | 1.073287 | 2.152487 |
| 16 | C  | 3.593505 | 2.524426 | 1.425653 | 2.441317 | 3.544671 |
| 17 | C  | 4.347298 | 3.082709 | 2.416982 | 3.608812 | 4.576944 |
| 18 | H  | 4.201598 | 3.321071 | 2.086878 | 2.634596 | 3.878074 |
| 19 | H  | 5.394249 | 4.125231 | 3.392502 | 4.498075 | 5.562038 |

|    |    |          |          |          |          |          |
|----|----|----------|----------|----------|----------|----------|
| 20 | H  | 4.214602 | 2.931017 | 2.700664 | 3.961796 | 4.692785 |
| 21 | O  | 4.503602 | 5.651770 | 5.676212 | 4.564344 | 3.678297 |
| 22 | H  | 5.213470 | 6.277687 | 6.225592 | 5.118807 | 4.378654 |
|    |    | 6        | 7        | 8        | 9        | 10       |
| 6  | C  | 0.000000 |          |          |          |          |
| 7  | C  | 1.530664 | 0.000000 |          |          |          |
| 8  | H  | 2.834387 | 3.399594 | 0.000000 |          |          |
| 9  | H  | 4.657348 | 5.259643 | 2.763875 | 0.000000 |          |
| 10 | H  | 1.090054 | 2.160424 | 3.816735 | 5.340003 | 0.000000 |
| 11 | H  | 1.091741 | 2.172393 | 2.685258 | 4.945889 | 1.765919 |
| 12 | H  | 2.166092 | 1.098143 | 2.907698 | 4.891296 | 3.066953 |
| 13 | H  | 2.153705 | 1.094031 | 4.019016 | 5.362038 | 2.469137 |
| 14 | Br | 4.052670 | 3.763772 | 5.283324 | 5.130375 | 4.040220 |
| 15 | H  | 2.833921 | 3.616759 | 4.229314 | 4.230714 | 2.558132 |
| 16 | C  | 4.888583 | 5.536819 | 4.624191 | 2.831620 | 5.053700 |
| 17 | C  | 5.992002 | 6.724755 | 5.284136 | 2.961180 | 6.197291 |
| 18 | H  | 5.044927 | 5.512930 | 5.249880 | 3.739446 | 5.081613 |
| 19 | H  | 6.943277 | 7.609426 | 6.335768 | 3.936964 | 7.082499 |
| 20 | H  | 6.144205 | 6.988147 | 5.028206 | 2.574586 | 6.442838 |
| 21 | O  | 2.358644 | 1.424848 | 4.450861 | 6.594605 | 2.635148 |
| 22 | H  | 3.160692 | 1.957577 | 5.201913 | 7.200904 | 3.339096 |
|    |    | 11       | 12       | 13       | 14       | 15       |
| 11 | H  | 0.000000 |          |          |          |          |
| 12 | H  | 2.538371 | 0.000000 |          |          |          |
| 13 | H  | 3.065911 | 1.777259 | 0.000000 |          |          |
| 14 | Br | 5.130070 | 4.164019 | 2.799938 | 0.000000 |          |
| 15 | H  | 3.739528 | 4.217816 | 3.247396 | 2.622926 | 0.000000 |
| 16 | C  | 5.606899 | 5.651712 | 5.172405 | 3.663266 | 2.780712 |
| 17 | C  | 6.586144 | 6.748776 | 6.437271 | 4.938884 | 4.001204 |
| 18 | H  | 5.909891 | 5.736488 | 4.950892 | 2.941105 | 2.623569 |
| 19 | H  | 7.594814 | 7.657752 | 7.219765 | 5.387611 | 4.731869 |
| 20 | H  | 6.574912 | 6.924473 | 6.861880 | 5.728932 | 4.527938 |
| 21 | O  | 2.578641 | 2.085033 | 2.106076 | 4.859885 | 4.688133 |
| 22 | H  | 3.517013 | 2.521071 | 2.225426 | 4.861902 | 5.148126 |
|    |    | 16       | 17       | 18       | 19       | 20       |
| 16 | C  | 0.000000 |          |          |          |          |
| 17 | C  | 1.326252 | 0.000000 |          |          |          |
| 18 | H  | 1.085791 | 2.146660 | 0.000000 |          |          |
| 19 | H  | 2.085851 | 1.081339 | 2.492855 | 0.000000 |          |
| 20 | H  | 2.118198 | 1.083646 | 3.112312 | 1.851369 | 0.000000 |
| 21 | O  | 6.874148 | 8.071243 | 6.812775 | 8.957770 | 8.317880 |
| 22 | H  | 7.326840 | 8.569642 | 7.144283 | 9.397326 | 8.902471 |
|    |    | 21       | 22       |          |          |          |
| 21 | O  | 0.000000 |          |          |          |          |



22 H 0.961416 0.000000  
 Stoichiometry C7H11BrN2O  
 Framework group C1[X(C7H11BrN2O)]  
 Deg. of freedom 60  
 Full point group C1 NOp 1  
 Largest Abelian subgroup C1 NOp 1  
 Largest concise Abelian subgroup C1 NOp 1

Standard orientation:

| Center<br>Number | Atomic<br>Number | Atomic<br>Type | Coordinates (Angstroms) |           |           |
|------------------|------------------|----------------|-------------------------|-----------|-----------|
|                  |                  |                | X                       | Y         | Z         |
| 1                | 6                | 0              | -0.103861               | -2.272798 | -0.633225 |
| 2                | 6                | 0              | -1.407980               | -1.924938 | -0.755429 |
| 3                | 7                | 0              | -1.637264               | -0.881715 | 0.134981  |
| 4                | 6                | 0              | -0.478790               | -0.585236 | 0.753881  |
| 5                | 7                | 0              | 0.455929                | -1.449394 | 0.335546  |
| 6                | 6                | 0              | 1.880162                | -1.376038 | 0.683919  |
| 7                | 6                | 0              | 2.669252                | -0.551763 | -0.336297 |
| 8                | 1                | 0              | 0.475194                | -3.017620 | -1.150481 |
| 9                | 1                | 0              | -2.177684               | -2.287717 | -1.412177 |
| 10               | 1                | 0              | 1.962546                | -0.921903 | 1.671437  |
| 11               | 1                | 0              | 2.271603                | -2.393343 | 0.745252  |
| 12               | 1                | 0              | 2.532815                | -0.972047 | -1.341615 |
| 13               | 1                | 0              | 2.290752                | 0.474706  | -0.338140 |
| 14               | 35               | 0              | 0.056601                | 2.149833  | -0.132777 |
| 15               | 1                | 0              | -0.352859               | 0.155214  | 1.520576  |
| 16               | 6                | 0              | -2.816513               | -0.089524 | 0.254531  |
| 17               | 6                | 0              | -4.037426               | -0.597729 | 0.154311  |
| 18               | 1                | 0              | -2.581358               | 0.961172  | 0.394816  |
| 19               | 1                | 0              | -4.896571               | 0.057084  | 0.203140  |
| 20               | 1                | 0              | -4.221667               | -1.657203 | 0.020679  |
| 21               | 8                | 0              | 4.033249                | -0.636729 | 0.066796  |
| 22               | 1                | 0              | 4.490486                | 0.157258  | -0.224478 |

Rotational constants (GHZ): 0.8202195 0.5727689 0.3567439

Standard basis: 6-311++G(d,p) (5D, 7F)

There are 358 symmetry adapted cartesian basis functions of A symmetry.

There are 345 symmetry adapted basis functions of A symmetry.

345 basis functions, 553 primitive gaussians, 358 cartesian basis functions

55 alpha electrons 55 beta electrons

nuclear repulsion energy 867.4277501161 Hartrees.

NAtoms= 22 NActive= 22 NUniq= 22 SFac= 1.00D+00 NAtFMM= 60 NAOKFM=F

Big=F

Integral buffers will be 131072 words long.  
 Raffenetti 2 integral format.  
 Two-electron integral symmetry is turned on.  
 One-electron integrals computed using PRISM.  
 NBasis= 345 RedAO= T EigKep= 6.92D-06 NBF= 345  
 NBsUse= 345 1.00D-06 EigRej= -1.00D+00 NBFU= 345  
 Initial guess from the checkpoint file: "."  
 B after Tr= 0.000000 0.000000 0.000000  
 Rot= 0.999995 0.002309 -0.000304 -0.001923 Ang= 0.35 deg.  
 ExpMin= 3.50D-02 ExpMax= 4.40D+05 ExpMxC= 1.51D+04 IAcc=3 IRadAn= 5 AccDes=  
 0.00D+00  
 Harris functional with IExCor= 402 and IRadAn= 5 diagonalized for initial guess.  
 HarFok: IExCor= 402 AccDes= 0.00D+00 IRadAn= 5 IDoV= 1 UseB2=F ITyADJ=14  
 ICtDFT= 3500011 ScaDFX= 1.000000 1.000000 1.000000 1.000000  
 FoFCou: FMM=F IPFlag= 0 FMFlag= 100000 FMFlg1= 0  
 NFxFlg= 0 DoJE=T BraDBF=F KetDBF=T FulRan=T  
 wScrn= 0.000000 ICntrl= 500 IOpCl= 0 l1Cent= 20000004 NGrid=  
 0  
 NMat0= 1 NMatS0= 1 NMatT0= 0 NMatD0= 1 NMtDS0= 0  
 NMtDT0= 0  
 Petite list used in FoFCou.  
 Keep R1 ints in memory in canonical form, NReq=1804729152.  
 Requested convergence on RMS density matrix=1.00D-08 within 128 cycles.  
 Requested convergence on MAX density matrix=1.00D-06.  
 Requested convergence on energy=1.00D-06.  
 No special actions if energy rises.  
 SCF Done: E(RB3LYP) = -3032.33800221 A.U. after 12 cycles  
 NFock= 12 Conv=0.22D-08 -V/T= 2.0017  
 Calling FoFJK, ICntrl= 2127 FMM=F ISym2X=0 l1Cent= 0 IOpClX= 0 NMat=1 NMatS=1  
 NMatT=0.

\*\*\*\*\* Axes restored to original set \*\*\*\*\*

| Center<br>Number | Atomic<br>Number | Forces (Hartrees/Bohr) |              |              |
|------------------|------------------|------------------------|--------------|--------------|
|                  |                  | X                      | Y            | Z            |
| 1                | 6                | -0.000603255           | 0.000202041  | -0.000330792 |
| 2                | 6                | 0.000895734            | 0.000184811  | -0.000524094 |
| 3                | 7                | -0.001356242           | 0.000411129  | 0.000122067  |
| 4                | 6                | 0.000701951            | -0.000192070 | 0.000367674  |
| 5                | 7                | 0.000196614            | -0.000065583 | 0.000202842  |
| 6                | 6                | -0.000461795           | -0.000177902 | 0.000510268  |
| 7                | 6                | -0.000531523           | 0.000053755  | -0.000088476 |
| 8                | 1                | -0.000034781           | -0.000130368 | 0.000034920  |
| 9                | 1                | 0.000025014            | -0.000288516 | 0.000001397  |

|    |    |              |              |              |
|----|----|--------------|--------------|--------------|
| 10 | 1  | 0.000117414  | 0.000125852  | -0.000066435 |
| 11 | 1  | 0.000043706  | 0.000091547  | -0.000178306 |
| 12 | 1  | 0.000233488  | -0.000257875 | 0.000012890  |
| 13 | 1  | 0.000253442  | 0.000120831  | -0.000089980 |
| 14 | 35 | 0.000246317  | 0.000685233  | -0.000035531 |
| 15 | 1  | -0.000037603 | -0.000117031 | -0.000083292 |
| 16 | 6  | 0.000919718  | -0.001005875 | 0.000311524  |
| 17 | 6  | -0.000333374 | 0.000067677  | -0.000277008 |
| 18 | 1  | -0.000220544 | 0.000208968  | 0.000020599  |
| 19 | 1  | -0.000005934 | 0.000245837  | 0.000114270  |
| 20 | 1  | -0.000097357 | -0.000092654 | -0.000057965 |
| 21 | 8  | 0.000172065  | 0.000029386  | -0.000206468 |
| 22 | 1  | -0.000123056 | -0.000099194 | 0.000239894  |

-----  
Cartesian Forces: Max 0.001356242 RMS 0.000361554

GradGradGradGradGradGradGradGradGradGradGradGradGradGradGradGradGradGradGrad

Berny optimization.

Using GEDIIS/GDIIS optimizer.

FormGI is forming the generalized inverse of G from B-inverse, IUseBI=4.

Internal Forces: Max 0.003558420 RMS 0.000633212

Search for a local minimum.

Step number 11 out of a maximum of 116

All quantities printed in internal units (Hartrees-Bohrs-Radians)

Mixed Optimization -- En-DIIS/RFO-DIIS

Swapping is turned off.

Update second derivatives using D2CorX and points 9 10 11

DE= -8.66D-05 DEPred=-9.10D-05 R= 9.52D-01

TightC=F SS= 1.41D+00 RLast= 1.96D-01 DXNew= 1.8091D+00 5.8942D-01

Trust test= 9.52D-01 RLast= 1.96D-01 DXMaxT set to 1.08D+00

ITU= 1 1 1 1 1 1 0 0 -1 0 0

|                 |         |         |         |         |         |
|-----------------|---------|---------|---------|---------|---------|
| Eigenvalues --- | 0.00140 | 0.00337 | 0.00519 | 0.00710 | 0.01231 |
| Eigenvalues --- | 0.01602 | 0.01680 | 0.01880 | 0.02071 | 0.02172 |
| Eigenvalues --- | 0.02365 | 0.02442 | 0.03066 | 0.03081 | 0.03389 |
| Eigenvalues --- | 0.04181 | 0.04712 | 0.05442 | 0.05924 | 0.07180 |
| Eigenvalues --- | 0.08692 | 0.09339 | 0.13676 | 0.13860 | 0.15714 |
| Eigenvalues --- | 0.15814 | 0.15903 | 0.15987 | 0.16003 | 0.16337 |
| Eigenvalues --- | 0.16505 | 0.20691 | 0.21477 | 0.22792 | 0.22878 |
| Eigenvalues --- | 0.24138 | 0.24561 | 0.25617 | 0.29744 | 0.33133 |
| Eigenvalues --- | 0.33868 | 0.33875 | 0.33905 | 0.34114 | 0.34344 |
| Eigenvalues --- | 0.34563 | 0.34695 | 0.36131 | 0.36309 | 0.36407 |
| Eigenvalues --- | 0.37276 | 0.42576 | 0.42924 | 0.45674 | 0.49323 |
| Eigenvalues --- | 0.53540 | 0.54541 | 0.55749 | 0.60557 | 2.11977 |

En-DIIS/RFO-DIIS IScMMF= 0 using points: 11 10 9 8

RFO step: Lambda=-3.69876696D-05.

DidBck=F Rises=F RFO-DIIS coefs: 0.88555 0.36771 -0.29452 0.04127

Iteration 1 RMS(Cart)= 0.00807372 RMS(Int)= 0.00015701

Iteration 2 RMS(Cart)= 0.00015876 RMS(Int)= 0.00001786

Iteration 3 RMS(Cart)= 0.00000007 RMS(Int)= 0.00001786

| Variable | Old X   | -DE/DX   | Delta X<br>(Linear) | Delta X<br>(Quad) | Delta X<br>(Total) | New X   |
|----------|---------|----------|---------------------|-------------------|--------------------|---------|
| R1       | 2.56103 | -0.00054 | 0.00030             | -0.00103          | -0.00074           | 2.56028 |
| R2       | 2.62521 | 0.00033  | -0.00009            | 0.00064           | 0.00052            | 2.62573 |
| R3       | 2.03321 | 0.00003  | -0.00003            | 0.00013           | 0.00010            | 2.03331 |
| R4       | 2.62782 | 0.00050  | -0.00028            | 0.00217           | 0.00191            | 2.62973 |
| R5       | 2.03123 | 0.00002  | -0.00001            | 0.00002           | 0.00001            | 2.03125 |
| R6       | 2.54447 | 0.00073  | -0.00039            | 0.00094           | 0.00056            | 2.54504 |
| R7       | 2.69409 | -0.00053 | 0.00084             | -0.00174          | -0.00090           | 2.69320 |
| R8       | 2.53214 | -0.00024 | 0.00011             | -0.00118          | -0.00108           | 2.53106 |
| R9       | 2.02822 | -0.00013 | 0.00015             | -0.00008          | 0.00006            | 2.02828 |
| R10      | 2.77422 | -0.00005 | 0.00032             | -0.00009          | 0.00023            | 2.77445 |
| R11      | 2.89254 | 0.00064  | -0.00008            | 0.00108           | 0.00100            | 2.89354 |
| R12      | 2.05990 | -0.00006 | 0.00000             | -0.00019          | -0.00019           | 2.05971 |
| R13      | 2.06309 | -0.00004 | 0.00004             | -0.00032          | -0.00027           | 2.06282 |
| R14      | 2.07519 | 0.00002  | 0.00008             | -0.00036          | -0.00028           | 2.07491 |
| R15      | 2.06742 | 0.00053  | -0.00011            | -0.00017          | -0.00028           | 2.06714 |
| R16      | 2.69257 | 0.00005  | -0.00012            | 0.00063           | 0.00052            | 2.69309 |
| R17      | 5.29112 | 0.00019  | 0.00215             | 0.00148           | 0.00363            | 5.29475 |
| R18      | 2.50625 | 0.00040  | -0.00018            | 0.00062           | 0.00044            | 2.50669 |
| R19      | 2.05185 | 0.00015  | 0.00003             | 0.00026           | 0.00029            | 2.05214 |
| R20      | 2.04343 | 0.00015  | -0.00009            | 0.00023           | 0.00014            | 2.04358 |
| R21      | 2.04779 | 0.00013  | -0.00006            | 0.00000           | -0.00007           | 2.04773 |
| R22      | 1.81681 | -0.00013 | 0.00001             | -0.00018          | -0.00017           | 1.81664 |
| A1       | 1.87392 | 0.00025  | -0.00013            | 0.00015           | 0.00001            | 1.87393 |
| A2       | 2.28132 | -0.00014 | 0.00007             | -0.00016          | -0.00008           | 2.28124 |
| A3       | 2.12787 | -0.00011 | -0.00001            | 0.00011           | 0.00011            | 2.12798 |
| A4       | 1.86867 | 0.00004  | 0.00004             | 0.00015           | 0.00020            | 1.86887 |
| A5       | 2.28834 | -0.00018 | 0.00034             | -0.00131          | -0.00100           | 2.28734 |
| A6       | 2.12511 | 0.00016  | -0.00028            | 0.00155           | 0.00123            | 2.12634 |
| A7       | 1.89404 | -0.00027 | 0.00003             | -0.00111          | -0.00110           | 1.89294 |
| A8       | 2.22301 | 0.00034  | -0.00057            | 0.00223           | 0.00156            | 2.22457 |
| A9       | 2.15409 | -0.00007 | 0.00012             | -0.00124          | -0.00123           | 2.15286 |
| A10      | 1.89091 | 0.00001  | 0.00008             | 0.00051           | 0.00059            | 1.89149 |
| A11      | 2.19100 | -0.00003 | 0.00014             | -0.00010          | -0.00001           | 2.19099 |
| A12      | 2.19702 | -0.00001 | 0.00004             | -0.00008          | -0.00009           | 2.19693 |
| A13      | 1.89534 | -0.00004 | 0.00007             | 0.00017           | 0.00022            | 1.89556 |
| A14      | 2.19695 | -0.00041 | -0.00008            | 0.00054           | 0.00047            | 2.19742 |
| A15      | 2.17784 | 0.00050  | 0.00016             | -0.00053          | -0.00037           | 2.17747 |

|     |          |          |          |          |          |          |
|-----|----------|----------|----------|----------|----------|----------|
| A16 | 1.94859  | 0.00220  | -0.00004 | 0.00123  | 0.00120  | 1.94979  |
| A17 | 1.88506  | -0.00042 | -0.00049 | 0.00020  | -0.00028 | 1.88478  |
| A18 | 1.89085  | -0.00082 | 0.00029  | -0.00005 | 0.00023  | 1.89108  |
| A19 | 1.91825  | -0.00028 | 0.00023  | 0.00021  | 0.00044  | 1.91869  |
| A20 | 1.93307  | -0.00111 | 0.00030  | -0.00321 | -0.00290 | 1.93016  |
| A21 | 1.88622  | 0.00039  | -0.00032 | 0.00172  | 0.00140  | 1.88761  |
| A22 | 1.91774  | -0.00038 | 0.00008  | 0.00060  | 0.00068  | 1.91842  |
| A23 | 1.90500  | 0.00284  | -0.00060 | 0.00231  | 0.00170  | 1.90671  |
| A24 | 1.84713  | -0.00120 | 0.00070  | -0.00165 | -0.00096 | 1.84617  |
| A25 | 1.89079  | -0.00046 | -0.00032 | 0.00075  | 0.00043  | 1.89122  |
| A26 | 1.93382  | 0.00032  | 0.00008  | -0.00167 | -0.00159 | 1.93223  |
| A27 | 1.96884  | -0.00106 | 0.00009  | -0.00028 | -0.00020 | 1.96865  |
| A28 | 2.56305  | 0.00356  | -0.00132 | -0.00209 | -0.00341 | 2.55964  |
| A29 | 2.14385  | 0.00063  | -0.00092 | 0.00284  | 0.00192  | 2.14577  |
| A30 | 1.94916  | -0.00004 | -0.00051 | -0.00061 | -0.00112 | 1.94804  |
| A31 | 2.18945  | -0.00059 | 0.00147  | -0.00239 | -0.00093 | 2.18853  |
| A32 | 2.08973  | -0.00033 | 0.00067  | -0.00287 | -0.00219 | 2.08754  |
| A33 | 2.14180  | 0.00024  | -0.00048 | 0.00158  | 0.00110  | 2.14290  |
| A34 | 2.05165  | 0.00009  | -0.00019 | 0.00129  | 0.00110  | 2.05274  |
| A35 | 1.89686  | 0.00004  | -0.00014 | 0.00196  | 0.00183  | 1.89869  |
| D1  | 0.00702  | -0.00019 | -0.00590 | 0.00134  | -0.00456 | 0.00246  |
| D2  | 3.09845  | 0.00020  | -0.00371 | 0.01042  | 0.00671  | 3.10516  |
| D3  | -3.12125 | -0.00032 | -0.00165 | -0.00715 | -0.00881 | -3.13006 |
| D4  | -0.02982 | 0.00007  | 0.00054  | 0.00193  | 0.00247  | -0.02735 |
| D5  | -0.04073 | 0.00002  | 0.00508  | -0.00228 | 0.00280  | -0.03793 |
| D6  | -3.01540 | -0.00031 | 0.00411  | -0.00335 | 0.00076  | -3.01464 |
| D7  | 3.08896  | 0.00013  | 0.00129  | 0.00530  | 0.00659  | 3.09556  |
| D8  | 0.11429  | -0.00020 | 0.00032  | 0.00423  | 0.00455  | 0.11884  |
| D9  | 0.02889  | 0.00028  | 0.00472  | 0.00001  | 0.00473  | 0.03362  |
| D10 | 3.00726  | 0.00029  | 0.00046  | -0.00097 | -0.00050 | 3.00676  |
| D11 | -3.06825 | -0.00006 | 0.00275  | -0.00795 | -0.00521 | -3.07346 |
| D12 | -0.08989 | -0.00004 | -0.00151 | -0.00892 | -0.01044 | -0.10032 |
| D13 | -0.05461 | -0.00027 | -0.00157 | -0.00144 | -0.00302 | -0.05763 |
| D14 | -3.10174 | 0.00004  | -0.00342 | -0.00514 | -0.00857 | -3.11031 |
| D15 | -3.04085 | -0.00033 | 0.00253  | -0.00091 | 0.00163  | -3.03921 |
| D16 | 0.19521  | -0.00002 | 0.00069  | -0.00461 | -0.00392 | 0.19129  |
| D17 | 0.69438  | -0.00014 | 0.00826  | -0.01284 | -0.00459 | 0.68979  |
| D18 | -2.40843 | -0.00004 | 0.00724  | -0.00851 | -0.00128 | -2.40970 |
| D19 | -2.63289 | -0.00013 | 0.00339  | -0.01387 | -0.01047 | -2.64337 |
| D20 | 0.54749  | -0.00004 | 0.00237  | -0.00954 | -0.00716 | 0.54033  |
| D21 | 0.05900  | 0.00015  | -0.00212 | 0.00231  | 0.00019  | 0.05920  |
| D22 | 3.03594  | 0.00037  | -0.00119 | 0.00350  | 0.00231  | 3.03825  |
| D23 | 3.10572  | -0.00016 | -0.00025 | 0.00603  | 0.00578  | 3.11149  |
| D24 | -0.20053 | 0.00006  | 0.00068  | 0.00721  | 0.00789  | -0.19264 |

|     |          |          |          |          |          |          |
|-----|----------|----------|----------|----------|----------|----------|
| D25 | 1.36479  | -0.00065 | 0.00213  | -0.00373 | -0.00160 | 1.36319  |
| D26 | -2.80752 | 0.00008  | 0.00207  | -0.00257 | -0.00051 | -2.80802 |
| D27 | -0.76841 | -0.00012 | 0.00158  | -0.00046 | 0.00111  | -0.76730 |
| D28 | -1.58388 | -0.00096 | 0.00102  | -0.00505 | -0.00403 | -1.58791 |
| D29 | 0.52700  | -0.00023 | 0.00096  | -0.00390 | -0.00294 | 0.52406  |
| D30 | 2.56610  | -0.00043 | 0.00047  | -0.00179 | -0.00132 | 2.56478  |
| D31 | -0.98627 | -0.00003 | 0.00690  | -0.00291 | 0.00399  | -0.98228 |
| D32 | 1.08476  | 0.00089  | 0.00619  | -0.00026 | 0.00594  | 1.09070  |
| D33 | -3.07494 | 0.00049  | 0.00636  | -0.00029 | 0.00607  | -3.06886 |
| D34 | -3.07771 | -0.00073 | 0.00739  | -0.00410 | 0.00328  | -3.07442 |
| D35 | -1.00667 | 0.00019  | 0.00668  | -0.00145 | 0.00523  | -1.00144 |
| D36 | 1.11681  | -0.00022 | 0.00685  | -0.00148 | 0.00537  | 1.12218  |
| D37 | 1.12249  | -0.00034 | 0.00745  | -0.00435 | 0.00310  | 1.12559  |
| D38 | -3.08966 | 0.00058  | 0.00674  | -0.00169 | 0.00505  | -3.08461 |
| D39 | -0.96618 | 0.00018  | 0.00691  | -0.00173 | 0.00518  | -0.96099 |
| D40 | -0.64524 | -0.00057 | -0.01480 | 0.00343  | -0.01138 | -0.65662 |
| D41 | 1.44254  | 0.00033  | -0.01525 | 0.00592  | -0.00932 | 1.43322  |
| D42 | -2.69326 | -0.00029 | -0.01532 | 0.00415  | -0.01118 | -2.70444 |
| D43 | -2.65231 | -0.00089 | 0.01411  | 0.03040  | 0.04450  | -2.60781 |
| D44 | 1.55279  | 0.00010  | 0.01356  | 0.03155  | 0.04511  | 1.59791  |
| D45 | -0.57043 | 0.00121  | 0.01386  | 0.03200  | 0.04586  | -0.52458 |
| D46 | -3.08763 | 0.00002  | 0.00035  | 0.00100  | 0.00134  | -3.08629 |
| D47 | 0.05108  | 0.00005  | -0.00012 | 0.00206  | 0.00193  | 0.05301  |
| D48 | 0.00972  | -0.00007 | 0.00143  | -0.00387 | -0.00243 | 0.00729  |
| D49 | -3.13476 | -0.00003 | 0.00097  | -0.00281 | -0.00184 | -3.13660 |

| Item                 | Value    | Threshold | Converged? |
|----------------------|----------|-----------|------------|
| Maximum Force        | 0.003558 | 0.000450  | NO         |
| RMS Force            | 0.000633 | 0.000300  | NO         |
| Maximum Displacement | 0.055547 | 0.001800  | NO         |
| RMS Displacement     | 0.008102 | 0.001200  | NO         |

Predicted change in Energy=-3.441641D-05

GradGradGradGradGradGradGradGradGradGradGradGradGradGradGradGradGradGrad

Input orientation:

| Center<br>Number | Atomic<br>Number | Atomic<br>Type | Coordinates (Angstroms) |           |           |
|------------------|------------------|----------------|-------------------------|-----------|-----------|
|                  |                  |                | X                       | Y         | Z         |
| 1                | 6                | 0              | -0.457755               | -2.000144 | -1.312536 |
| 2                | 6                | 0              | -1.747178               | -1.620935 | -1.483378 |
| 3                | 7                | 0              | -2.106355               | -0.877462 | -0.363211 |
| 4                | 6                | 0              | -1.033328               | -0.778057 | 0.444584  |
| 5                | 7                | 0              | -0.034332               | -1.491814 | -0.090670 |
| 6                | 6                | 0              | 1.338044                | -1.531809 | 0.429445  |

|    |    |   |           |           |           |
|----|----|---|-----------|-----------|-----------|
| 7  | 6  | 0 | 2.219599  | -0.458395 | -0.214915 |
| 8  | 1  | 0 | 0.194716  | -2.574410 | -1.946758 |
| 9  | 1  | 0 | -2.427532 | -1.780048 | -2.300193 |
| 10 | 1  | 0 | 1.294012  | -1.378464 | 1.507656  |
| 11 | 1  | 0 | 1.747049  | -2.526723 | 0.243862  |
| 12 | 1  | 0 | 2.208689  | -0.571445 | -1.307019 |
| 13 | 1  | 0 | 1.823080  | 0.530470  | 0.033077  |
| 14 | 35 | 0 | -0.460683 | 2.103735  | 0.432693  |
| 15 | 1  | 0 | -1.013537 | -0.284748 | 1.397617  |
| 16 | 6  | 0 | -3.310738 | -0.143085 | -0.160012 |
| 17 | 6  | 0 | -4.499298 | -0.584529 | -0.549892 |
| 18 | 1  | 0 | -3.118905 | 0.818902  | 0.305878  |
| 19 | 1  | 0 | -5.371839 | 0.039841  | -0.414639 |
| 20 | 1  | 0 | -4.643053 | -1.556227 | -1.007440 |
| 21 | 8  | 0 | 3.530704  | -0.672790 | 0.300844  |
| 22 | 1  | 0 | 3.988988  | 0.171258  | 0.342162  |

-----  
Distance matrix (angstroms):

|    |    | 1        | 2        | 3        | 4        | 5        |
|----|----|----------|----------|----------|----------|----------|
| 1  | C  | 0.000000 |          |          |          |          |
| 2  | C  | 1.354842 | 0.000000 |          |          |          |
| 3  | N  | 2.208963 | 1.391594 | 0.000000 |          |          |
| 4  | C  | 2.216360 | 2.221949 | 1.346775 | 0.000000 |          |
| 5  | N  | 1.389476 | 2.211368 | 2.178299 | 1.339380 | 0.000000 |
| 6  | C  | 2.545335 | 3.631174 | 3.594490 | 2.488328 | 1.468174 |
| 7  | C  | 3.278717 | 4.323865 | 4.348734 | 3.334465 | 2.482659 |
| 8  | H  | 1.075982 | 2.212417 | 3.268361 | 3.233186 | 2.160912 |
| 9  | H  | 2.214482 | 1.074889 | 2.160952 | 3.237529 | 3.269935 |
| 10 | H  | 3.377671 | 4.272460 | 3.913266 | 2.628141 | 2.081344 |
| 11 | H  | 2.749695 | 4.001679 | 4.235248 | 3.290687 | 2.087167 |
| 12 | H  | 3.025085 | 4.096512 | 4.427644 | 3.690729 | 2.712513 |
| 13 | H  | 3.662908 | 4.435642 | 4.192825 | 3.168698 | 2.748623 |
| 14 | Br | 4.459558 | 4.381730 | 3.497033 | 2.938161 | 3.658368 |
| 15 | H  | 3.255212 | 3.259410 | 2.155476 | 1.073321 | 2.151941 |
| 16 | C  | 3.593952 | 2.525877 | 1.425179 | 2.440353 | 3.543827 |
| 17 | C  | 4.349674 | 3.085401 | 2.418023 | 3.611009 | 4.579299 |
| 18 | H  | 4.200953 | 3.322029 | 2.085806 | 2.630428 | 3.874436 |
| 19 | H  | 5.395922 | 4.127777 | 3.392266 | 4.497766 | 5.562365 |
| 20 | H  | 4.219818 | 2.935438 | 2.703810 | 3.967876 | 4.699460 |
| 21 | O  | 4.502519 | 5.651413 | 5.679727 | 4.567508 | 3.678800 |
| 22 | H  | 5.217906 | 6.280776 | 6.224996 | 5.112274 | 4.374958 |
|    |    | 6        | 7        | 8        | 9        | 10       |
| 6  | C  | 0.000000 |          |          |          |          |
| 7  | C  | 1.531194 | 0.000000 |          |          |          |

|    |    |          |          |          |          |          |
|----|----|----------|----------|----------|----------|----------|
| 8  | H  | 2.835587 | 3.402492 | 0.000000 |          |          |
| 9  | H  | 4.657479 | 5.262222 | 2.762628 | 0.000000 |          |
| 10 | H  | 1.089952 | 2.161131 | 3.817292 | 5.339558 | 0.000000 |
| 11 | H  | 1.091595 | 2.170659 | 2.685299 | 4.945389 | 1.766612 |
| 12 | H  | 2.166940 | 1.097995 | 2.911567 | 4.893022 | 3.067623 |
| 13 | H  | 2.155311 | 1.093884 | 4.026363 | 5.371252 | 2.469479 |
| 14 | Br | 4.056182 | 3.764016 | 5.289270 | 5.140129 | 4.044776 |
| 15 | H  | 2.832394 | 3.617123 | 4.229335 | 4.231915 | 2.555994 |
| 16 | C  | 4.887452 | 5.539590 | 4.625150 | 2.835503 | 5.050842 |
| 17 | C  | 5.994248 | 6.728425 | 5.286268 | 2.963956 | 6.198894 |
| 18 | H  | 5.040388 | 5.513832 | 5.250621 | 3.744883 | 5.074104 |
| 19 | H  | 6.942989 | 7.610391 | 6.337841 | 3.941605 | 7.080987 |
| 20 | H  | 6.151322 | 6.994950 | 5.032199 | 2.574848 | 6.450275 |
| 21 | O  | 2.358434 | 1.425121 | 4.449348 | 6.594846 | 2.637644 |
| 22 | H  | 3.152072 | 1.958963 | 5.212902 | 7.208423 | 3.320077 |
|    |    | 11       | 12       | 13       | 14       | 15       |
| 11 | H  | 0.000000 |          |          |          |          |
| 12 | H  | 2.538002 | 0.000000 |          |          |          |
| 13 | H  | 3.065394 | 1.777293 | 0.000000 |          |          |
| 14 | Br | 5.133311 | 4.160376 | 2.801861 | 0.000000 |          |
| 15 | H  | 3.738775 | 4.216633 | 3.251607 | 2.634688 | 0.000000 |
| 16 | C  | 5.605894 | 5.653600 | 5.181413 | 3.677270 | 2.779102 |
| 17 | C  | 6.589311 | 6.750593 | 6.446359 | 4.950016 | 4.004147 |
| 18 | H  | 5.905469 | 5.737401 | 4.957906 | 2.955170 | 2.615819 |
| 19 | H  | 7.596015 | 7.657311 | 7.225512 | 5.394171 | 4.731218 |
| 20 | H  | 6.583390 | 6.928630 | 6.873708 | 5.741213 | 4.535895 |
| 21 | O  | 2.573274 | 2.084039 | 2.106066 | 4.863912 | 4.690802 |
| 22 | H  | 3.509281 | 2.537887 | 2.217144 | 4.852034 | 5.132951 |
|    |    | 16       | 17       | 18       | 19       | 20       |
| 16 | C  | 0.000000 |          |          |          |          |
| 17 | C  | 1.326483 | 0.000000 |          |          |          |
| 18 | H  | 1.085943 | 2.146496 | 0.000000 |          |          |
| 19 | H  | 2.084810 | 1.081415 | 2.490339 | 0.000000 |          |
| 20 | H  | 2.119002 | 1.083611 | 3.112727 | 1.852019 | 0.000000 |
| 21 | O  | 6.877376 | 8.075425 | 6.814872 | 8.959634 | 8.324805 |
| 22 | H  | 7.323728 | 8.568430 | 7.137430 | 9.392289 | 8.906052 |
|    |    | 21       | 22       |          |          |          |
| 21 | O  | 0.000000 |          |          |          |          |
| 22 | H  | 0.961326 | 0.000000 |          |          |          |

Stoichiometry C7H11BrN2O

Framework group C1[X(C7H11BrN2O)]

Deg. of freedom 60

Full point group C1 NOp 1

Largest Abelian subgroup C1 NOp 1



Largest concise Abelian subgroup C1 NOp 1

Standard orientation:

| Center<br>Number | Atomic<br>Number | Atomic<br>Type | Coordinates (Angstroms) |           |           |
|------------------|------------------|----------------|-------------------------|-----------|-----------|
|                  |                  |                | X                       | Y         | Z         |
| 1                | 6                | 0              | -0.111447               | -2.272002 | -0.638181 |
| 2                | 6                | 0              | -1.414266               | -1.920674 | -0.759957 |
| 3                | 7                | 0              | -1.643347               | -0.882812 | 0.138318  |
| 4                | 6                | 0              | -0.483197               | -0.590066 | 0.756503  |
| 5                | 7                | 0              | 0.449999                | -1.452716 | 0.333515  |
| 6                | 6                | 0              | 1.874330                | -1.382780 | 0.682692  |
| 7                | 6                | 0              | 2.667342                | -0.558378 | -0.335173 |
| 8                | 1                | 0              | 0.465145                | -3.019090 | -1.155036 |
| 9                | 1                | 0              | -2.185193               | -2.284059 | -1.414945 |
| 10               | 1                | 0              | 1.956780                | -0.931515 | 1.671406  |
| 11               | 1                | 0              | 2.264559                | -2.400640 | 0.739814  |
| 12               | 1                | 0              | 2.528455                | -0.973376 | -1.342188 |
| 13               | 1                | 0              | 2.296905                | 0.470870  | -0.332580 |
| 14               | 35               | 0              | 0.066787                | 2.155371  | -0.133939 |
| 15               | 1                | 0              | -0.354161               | 0.150403  | 1.522710  |
| 16               | 6                | 0              | -2.819757               | -0.088015 | 0.262790  |
| 17               | 6                | 0              | -4.043324               | -0.588281 | 0.152449  |
| 18               | 1                | 0              | -2.580110               | 0.960451  | 0.412988  |
| 19               | 1                | 0              | -4.897561               | 0.072745  | 0.205173  |
| 20               | 1                | 0              | -4.234187               | -1.645045 | 0.007421  |
| 21               | 8                | 0              | 4.031362                | -0.655282 | 0.066112  |
| 22               | 1                | 0              | 4.486258                | 0.153406  | -0.185365 |

Rotational constants (GHZ): 0.8166874 0.5720897 0.3559362

Standard basis: 6-311++G(d,p) (5D, 7F)

There are 358 symmetry adapted cartesian basis functions of A symmetry.

There are 345 symmetry adapted basis functions of A symmetry.

345 basis functions, 553 primitive gaussians, 358 cartesian basis functions

55 alpha electrons 55 beta electrons

nuclear repulsion energy 866.5752417039 Hartrees.

NAtoms= 22 NActive= 22 NUniq= 22 SFac= 1.00D+00 NAtFMM= 60 NAOKFM=F

Big=F

Integral buffers will be 131072 words long.

Raffenetti 2 integral format.

Two-electron integral symmetry is turned on.

One-electron integrals computed using PRISM.

NBasis= 345 RedAO= T EigKep= 6.91D-06 NBF= 345

NBsUse= 345 1.00D-06 EigRej= -1.00D+00 NBFU= 345

Initial guess from the checkpoint file: "."

B after Tr= 0.000000 0.000000 0.000000  
Rot= 0.999999 -0.000381 0.000103 0.001656 Ang= -0.20 deg.  
ExpMin= 3.50D-02 ExpMax= 4.40D+05 ExpMxC= 1.51D+04 IAcc=3 IRadAn= 5 AccDes=  
0.00D+00

Harris functional with IExCor= 402 and IRadAn= 5 diagonalized for initial guess.  
HarFok: IExCor= 402 AccDes= 0.00D+00 IRadAn= 5 IDoV= 1 UseB2=F ITyADJ=14  
ICtDFT= 3500011 ScaDFX= 1.000000 1.000000 1.000000 1.000000  
FoFCou: FMM=F IPFlag= 0 FMFlag= 100000 FMFlg1= 0  
NFxFlg= 0 DoJE=T BraDBF=F KetDBF=T FulRan=T  
wScrn= 0.000000 ICntrl= 500 IOpCl= 0 I1Cent= 200000004 NGrid=  
0

NMat0= 1 NMatS0= 1 NMatT0= 0 NMatD0= 1 NMtDS0= 0  
NMtDT0= 0

Petite list used in FoFCou.

Keep R1 ints in memory in canonical form, NReq=1804729152.

Requested convergence on RMS density matrix=1.00D-08 within 128 cycles.

Requested convergence on MAX density matrix=1.00D-06.

Requested convergence on energy=1.00D-06.

No special actions if energy rises.

SCF Done: E(RB3LYP) = -3032.33804165 A.U. after 10 cycles

NFock= 10 Conv=0.53D-08 -V/T= 2.0017

Calling FoFJK, ICntrl= 2127 FMM=F ISym2X=0 I1Cent= 0 IOpClX= 0 NMat=1 NMatS=1  
NMatT=0.

\*\*\*\*\* Axes restored to original set \*\*\*\*\*

| Center<br>Number | Atomic<br>Number | Forces (Hartrees/Bohr) |              |              |
|------------------|------------------|------------------------|--------------|--------------|
|                  |                  | X                      | Y            | Z            |
| 1                | 6                | -0.000261713           | 0.000332810  | -0.000053236 |
| 2                | 6                | 0.000118837            | -0.000111186 | 0.000194247  |
| 3                | 7                | -0.000419959           | 0.000396227  | -0.000440933 |
| 4                | 6                | 0.000375589            | -0.000076505 | 0.000073387  |
| 5                | 7                | 0.000286205            | -0.000331349 | 0.000097580  |
| 6                | 6                | -0.000446036           | 0.000056503  | 0.000140759  |
| 7                | 6                | -0.000349897           | -0.000003553 | 0.000193384  |
| 8                | 1                | 0.000019565            | 0.000058126  | -0.000013174 |
| 9                | 1                | -0.000019355           | -0.000088703 | 0.000011845  |
| 10               | 1                | 0.000163521            | 0.000071023  | -0.000041119 |
| 11               | 1                | -0.000034350           | -0.000055163 | -0.000049517 |
| 12               | 1                | 0.000190250            | -0.000219751 | 0.000048307  |
| 13               | 1                | 0.000128214            | 0.000085704  | -0.000152343 |
| 14               | 35               | 0.000067353            | 0.000089025  | 0.000065321  |
| 15               | 1                | -0.000046066           | 0.000054837  | -0.000056660 |

|    |   |              |              |              |
|----|---|--------------|--------------|--------------|
| 16 | 6 | 0.000710240  | -0.000670113 | 0.000066432  |
| 17 | 6 | -0.000041827 | 0.000259189  | -0.000017387 |
| 18 | 1 | -0.000369490 | 0.000145614  | 0.000006007  |
| 19 | 1 | -0.000055921 | 0.000090341  | 0.000068106  |
| 20 | 1 | -0.000081195 | -0.000066013 | -0.000084601 |
| 21 | 8 | 0.000261536  | 0.000045019  | -0.000143248 |
| 22 | 1 | -0.000195502 | -0.000062082 | 0.000086842  |

-----  
Cartesian Forces: Max 0.000710240 RMS 0.000216034

GradGradGradGradGradGradGradGradGradGradGradGradGradGradGradGradGradGradGrad

Berny optimization.

Using GEDIIS/GDIIS optimizer.

FormGI is forming the generalized inverse of G from B-inverse, IUseBI=4.

Internal Forces: Max 0.000608714 RMS 0.000150239

Search for a local minimum.

Step number 12 out of a maximum of 116

All quantities printed in internal units (Hartrees-Bohrs-Radians)

Mixed Optimization -- En-DIIS/RFO-DIIS

Swapping is turned off.

Update second derivatives using D2CorX and points 9 10 11 12

DE= -3.94D-05 DEPred=-3.44D-05 R= 1.15D+00

TightC=F SS= 1.41D+00 RLast= 8.70D-02 DXNew= 1.8091D+00 2.6094D-01

Trust test= 1.15D+00 RLast= 8.70D-02 DXMaxT set to 1.08D+00

ITU= 1 1 1 1 1 1 1 0 0-1 0 0

|                 |         |         |         |         |         |
|-----------------|---------|---------|---------|---------|---------|
| Eigenvalues --- | 0.00150 | 0.00290 | 0.00498 | 0.00703 | 0.01243 |
| Eigenvalues --- | 0.01596 | 0.01739 | 0.01915 | 0.02077 | 0.02160 |
| Eigenvalues --- | 0.02364 | 0.02419 | 0.03065 | 0.03074 | 0.03484 |
| Eigenvalues --- | 0.04340 | 0.04716 | 0.05434 | 0.05924 | 0.07036 |
| Eigenvalues --- | 0.08699 | 0.09259 | 0.13649 | 0.14126 | 0.15541 |
| Eigenvalues --- | 0.15755 | 0.15911 | 0.15993 | 0.16004 | 0.16285 |
| Eigenvalues --- | 0.16925 | 0.20775 | 0.21156 | 0.22781 | 0.22883 |
| Eigenvalues --- | 0.24100 | 0.24730 | 0.25597 | 0.29806 | 0.33129 |
| Eigenvalues --- | 0.33868 | 0.33878 | 0.33911 | 0.34113 | 0.34290 |
| Eigenvalues --- | 0.34511 | 0.34684 | 0.36132 | 0.36310 | 0.36419 |
| Eigenvalues --- | 0.37274 | 0.42648 | 0.43063 | 0.46099 | 0.49421 |
| Eigenvalues --- | 0.53477 | 0.54503 | 0.55690 | 0.60534 | 2.15401 |

En-DIIS/RFO-DIIS IScMMF= 0 using points: 12 11 10 9 8

RFO step: Lambda=-5.14502031D-06.

DidBck=F Rises=F RFO-DIIS coefs: 1.48383 -0.34244 -0.29336 0.15319 -

0.00122

Iteration 1 RMS(Cart)= 0.00975941 RMS(Int)= 0.00008715

Iteration 2 RMS(Cart)= 0.00015077 RMS(Int)= 0.00000846

Iteration 3 RMS(Cart)= 0.00000002 RMS(Int)= 0.00000846

| Variable | Old X   | -DE/DX   | Delta X<br>(Linear) | Delta X<br>(Quad) | Delta X<br>(Total) | New X   |
|----------|---------|----------|---------------------|-------------------|--------------------|---------|
| R1       | 2.56028 | -0.00017 | -0.00057            | -0.00006          | -0.00062           | 2.55966 |
| R2       | 2.62573 | 0.00001  | 0.00037             | -0.00003          | 0.00035            | 2.62608 |
| R3       | 2.03331 | -0.00001 | 0.00007             | -0.00006          | 0.00001            | 2.03332 |
| R4       | 2.62973 | -0.00015 | 0.00130             | -0.00057          | 0.00073            | 2.63046 |
| R5       | 2.03125 | 0.00002  | -0.00001            | 0.00002           | 0.00000            | 2.03125 |
| R6       | 2.54504 | 0.00033  | 0.00053             | 0.00033           | 0.00085            | 2.54588 |
| R7       | 2.69320 | -0.00028 | -0.00079            | -0.00041          | -0.00119           | 2.69201 |
| R8       | 2.53106 | -0.00008 | -0.00072            | -0.00005          | -0.00076           | 2.53030 |
| R9       | 2.02828 | -0.00003 | -0.00002            | 0.00012           | 0.00010            | 2.02838 |
| R10      | 2.77445 | -0.00017 | 0.00007             | -0.00031          | -0.00024           | 2.77421 |
| R11      | 2.89354 | 0.00002  | 0.00074             | -0.00025          | 0.00049            | 2.89403 |
| R12      | 2.05971 | -0.00004 | -0.00008            | -0.00019          | -0.00027           | 2.05944 |
| R13      | 2.06282 | 0.00004  | -0.00019            | 0.00020           | 0.00002            | 2.06283 |
| R14      | 2.07491 | -0.00002 | -0.00026            | -0.00006          | -0.00032           | 2.07459 |
| R15      | 2.06714 | 0.00008  | -0.00011            | -0.00009          | -0.00020           | 2.06694 |
| R16      | 2.69309 | 0.00003  | 0.00033             | 0.00013           | 0.00047            | 2.69355 |
| R17      | 5.29475 | 0.00002  | 0.00072             | 0.00175           | 0.00247            | 5.29722 |
| R18      | 2.50669 | 0.00009  | 0.00028             | -0.00004          | 0.00024            | 2.50693 |
| R19      | 2.05214 | 0.00006  | 0.00004             | 0.00010           | 0.00014            | 2.05227 |
| R20      | 2.04358 | 0.00010  | 0.00010             | 0.00012           | 0.00022            | 2.04379 |
| R21      | 2.04773 | 0.00012  | -0.00006            | 0.00022           | 0.00016            | 2.04788 |
| R22      | 1.81664 | -0.00013 | -0.00010            | -0.00023          | -0.00033           | 1.81631 |
| A1       | 1.87393 | 0.00017  | 0.00008             | 0.00046           | 0.00056            | 1.87449 |
| A2       | 2.28124 | -0.00007 | -0.00010            | -0.00013          | -0.00026           | 2.28099 |
| A3       | 2.12798 | -0.00010 | 0.00009             | -0.00034          | -0.00028           | 2.12770 |
| A4       | 1.86887 | 0.00002  | 0.00008             | -0.00009          | -0.00002           | 1.86884 |
| A5       | 2.28734 | -0.00003 | -0.00086            | 0.00015           | -0.00072           | 2.28662 |
| A6       | 2.12634 | 0.00002  | 0.00096             | 0.00000           | 0.00095            | 2.12729 |
| A7       | 1.89294 | -0.00009 | -0.00065            | -0.00012          | -0.00076           | 1.89218 |
| A8       | 2.22457 | 0.00011  | 0.00109             | 0.00052           | 0.00164            | 2.22621 |
| A9       | 2.15286 | -0.00001 | -0.00085            | 0.00016           | -0.00066           | 2.15221 |
| A10      | 1.89149 | 0.00004  | 0.00034             | 0.00031           | 0.00065            | 1.89215 |
| A11      | 2.19099 | -0.00009 | -0.00003            | -0.00054          | -0.00055           | 2.19045 |
| A12      | 2.19693 | 0.00004  | -0.00013            | 0.00030           | 0.00020            | 2.19712 |
| A13      | 1.89556 | -0.00015 | 0.00009             | -0.00059          | -0.00049           | 1.89507 |
| A14      | 2.19742 | 0.00002  | 0.00016             | 0.00045           | 0.00061            | 2.19803 |
| A15      | 2.17747 | 0.00013  | -0.00017            | 0.00014           | -0.00004           | 2.17743 |
| A16      | 1.94979 | 0.00030  | 0.00075             | 0.00007           | 0.00082            | 1.95061 |
| A17      | 1.88478 | 0.00008  | 0.00000             | 0.00081           | 0.00081            | 1.88559 |
| A18      | 1.89108 | -0.00018 | -0.00017            | -0.00007          | -0.00023           | 1.89085 |
| A19      | 1.91869 | -0.00013 | 0.00026             | -0.00059          | -0.00033           | 1.91836 |
| A20      | 1.93016 | -0.00014 | -0.00168            | -0.00024          | -0.00192           | 1.92824 |

|     |          |          |          |          |          |          |
|-----|----------|----------|----------|----------|----------|----------|
| A21 | 1.88761  | 0.00007  | 0.00087  | 0.00005  | 0.00092  | 1.88854  |
| A22 | 1.91842  | -0.00016 | 0.00020  | -0.00057 | -0.00037 | 1.91805  |
| A23 | 1.90671  | 0.00043  | 0.00153  | 0.00025  | 0.00178  | 1.90848  |
| A24 | 1.84617  | 0.00003  | -0.00065 | 0.00169  | 0.00104  | 1.84721  |
| A25 | 1.89122  | 0.00006  | 0.00006  | 0.00125  | 0.00131  | 1.89253  |
| A26 | 1.93223  | -0.00005 | -0.00103 | -0.00172 | -0.00275 | 1.92948  |
| A27 | 1.96865  | -0.00031 | -0.00007 | -0.00092 | -0.00098 | 1.96766  |
| A28 | 2.55964  | 0.00061  | -0.00124 | -0.00097 | -0.00221 | 2.55743  |
| A29 | 2.14577  | 0.00032  | 0.00156  | 0.00097  | 0.00253  | 2.14831  |
| A30 | 1.94804  | 0.00025  | -0.00046 | 0.00172  | 0.00126  | 1.94930  |
| A31 | 2.18853  | -0.00057 | -0.00119 | -0.00264 | -0.00383 | 2.18470  |
| A32 | 2.08754  | -0.00011 | -0.00151 | -0.00022 | -0.00173 | 2.08581  |
| A33 | 2.14290  | 0.00012  | 0.00094  | 0.00052  | 0.00147  | 2.14436  |
| A34 | 2.05274  | -0.00002 | 0.00057  | -0.00030 | 0.00027  | 2.05301  |
| A35 | 1.89869  | -0.00021 | 0.00128  | -0.00153 | -0.00025 | 1.89844  |
| D1  | 0.00246  | 0.00008  | 0.00127  | -0.00103 | 0.00024  | 0.00269  |
| D2  | 3.10516  | 0.00012  | 0.00626  | 0.00079  | 0.00704  | 3.11220  |
| D3  | -3.13006 | -0.00001 | -0.00415 | 0.00036  | -0.00379 | -3.13384 |
| D4  | -0.02735 | 0.00002  | 0.00084  | 0.00218  | 0.00301  | -0.02434 |
| D5  | -0.03793 | -0.00013 | -0.00133 | 0.00052  | -0.00080 | -0.03873 |
| D6  | -3.01464 | -0.00015 | -0.00180 | 0.00055  | -0.00124 | -3.01589 |
| D7  | 3.09556  | -0.00004 | 0.00351  | -0.00072 | 0.00279  | 3.09835  |
| D8  | 0.11884  | -0.00007 | 0.00304  | -0.00069 | 0.00235  | 0.12119  |
| D9  | 0.03362  | -0.00002 | -0.00081 | 0.00119  | 0.00038  | 0.03400  |
| D10 | 3.00676  | 0.00008  | -0.00304 | 0.00480  | 0.00176  | 3.00852  |
| D11 | -3.07346 | -0.00005 | -0.00518 | -0.00043 | -0.00562 | -3.07907 |
| D12 | -0.10032 | 0.00005  | -0.00740 | 0.00318  | -0.00424 | -0.10456 |
| D13 | -0.05763 | -0.00006 | -0.00002 | -0.00089 | -0.00091 | -0.05854 |
| D14 | -3.11031 | 0.00003  | -0.00279 | -0.00178 | -0.00456 | -3.11487 |
| D15 | -3.03921 | -0.00017 | 0.00189  | -0.00437 | -0.00249 | -3.04171 |
| D16 | 0.19129  | -0.00008 | -0.00088 | -0.00525 | -0.00614 | 0.18515  |
| D17 | 0.68979  | -0.00012 | -0.00864 | -0.00720 | -0.01584 | 0.67395  |
| D18 | -2.40970 | -0.00010 | -0.00651 | -0.00835 | -0.01486 | -2.42456 |
| D19 | -2.64337 | -0.00001 | -0.01112 | -0.00311 | -0.01423 | -2.65760 |
| D20 | 0.54033  | 0.00001  | -0.00899 | -0.00426 | -0.01326 | 0.52707  |
| D21 | 0.05920  | 0.00011  | 0.00084  | 0.00022  | 0.00106  | 0.06026  |
| D22 | 3.03825  | 0.00012  | 0.00134  | 0.00023  | 0.00157  | 3.03982  |
| D23 | 3.11149  | 0.00001  | 0.00363  | 0.00106  | 0.00468  | 3.11618  |
| D24 | -0.19264 | 0.00002  | 0.00413  | 0.00107  | 0.00519  | -0.18745 |
| D25 | 1.36319  | -0.00015 | -0.00220 | -0.00733 | -0.00953 | 1.35366  |
| D26 | -2.80802 | -0.00008 | -0.00142 | -0.00748 | -0.00890 | -2.81692 |
| D27 | -0.76730 | -0.00005 | -0.00047 | -0.00702 | -0.00750 | -0.77480 |
| D28 | -1.58791 | -0.00015 | -0.00277 | -0.00724 | -0.01001 | -1.59793 |
| D29 | 0.52406  | -0.00008 | -0.00199 | -0.00739 | -0.00938 | 0.51468  |

|     |          |          |          |          |          |          |
|-----|----------|----------|----------|----------|----------|----------|
| D30 | 2.56478  | -0.00005 | -0.00105 | -0.00693 | -0.00798 | 2.55681  |
| D31 | -0.98228 | 0.00000  | -0.00183 | -0.00182 | -0.00365 | -0.98594 |
| D32 | 1.09070  | 0.00024  | -0.00072 | -0.00048 | -0.00120 | 1.08950  |
| D33 | -3.06886 | 0.00013  | -0.00034 | -0.00045 | -0.00079 | -3.06966 |
| D34 | -3.07442 | -0.00020 | -0.00249 | -0.00249 | -0.00498 | -3.07941 |
| D35 | -1.00144 | 0.00004  | -0.00138 | -0.00115 | -0.00253 | -1.00397 |
| D36 | 1.12218  | -0.00008 | -0.00100 | -0.00112 | -0.00212 | 1.12006  |
| D37 | 1.12559  | -0.00012 | -0.00269 | -0.00203 | -0.00471 | 1.12088  |
| D38 | -3.08461 | 0.00013  | -0.00157 | -0.00069 | -0.00226 | -3.08687 |
| D39 | -0.96099 | 0.00001  | -0.00119 | -0.00066 | -0.00185 | -0.96284 |
| D40 | -0.65662 | 0.00006  | 0.00816  | 0.02140  | 0.02957  | -0.62705 |
| D41 | 1.43322  | 0.00016  | 0.00932  | 0.02160  | 0.03093  | 1.46415  |
| D42 | -2.70444 | -0.00007 | 0.00801  | 0.01970  | 0.02771  | -2.67672 |
| D43 | -2.60781 | -0.00011 | 0.01639  | 0.01932  | 0.03571  | -2.57210 |
| D44 | 1.59791  | 0.00008  | 0.01709  | 0.01992  | 0.03701  | 1.63492  |
| D45 | -0.52458 | 0.00026  | 0.01781  | 0.02019  | 0.03800  | -0.48658 |
| D46 | -3.08629 | -0.00005 | 0.00028  | -0.00187 | -0.00158 | -3.08787 |
| D47 | 0.05301  | -0.00002 | 0.00064  | -0.00133 | -0.00069 | 0.05232  |
| D48 | 0.00729  | -0.00005 | -0.00210 | -0.00043 | -0.00254 | 0.00475  |
| D49 | -3.13660 | -0.00002 | -0.00175 | 0.00010  | -0.00165 | -3.13825 |

| Item                 | Value    | Threshold | Converged? |
|----------------------|----------|-----------|------------|
| Maximum Force        | 0.000609 | 0.000450  | NO         |
| RMS Force            | 0.000150 | 0.000300  | YES        |
| Maximum Displacement | 0.039413 | 0.001800  | NO         |
| RMS Displacement     | 0.009770 | 0.001200  | NO         |

Predicted change in Energy=-1.438608D-05

GradGradGradGradGradGradGradGradGradGradGradGradGradGradGradGradGradGrad

#### Input orientation:

| Center Number | Atomic Number | Atomic Type | Coordinates (Angstroms) |           |           |
|---------------|---------------|-------------|-------------------------|-----------|-----------|
|               |               |             | X                       | Y         | Z         |
| 1             | 6             | 0           | -0.457534               | -1.997269 | -1.312421 |
| 2             | 6             | 0           | -1.747650               | -1.621172 | -1.482319 |
| 3             | 7             | 0           | -2.108112               | -0.879052 | -0.361188 |
| 4             | 6             | 0           | -1.033849               | -0.777663 | 0.445463  |
| 5             | 7             | 0           | -0.034047               | -1.489168 | -0.090272 |
| 6             | 6             | 0           | 1.338228                | -1.527544 | 0.429873  |
| 7             | 6             | 0           | 2.222929                | -0.461550 | -0.223054 |
| 8             | 1             | 0           | 0.194858                | -2.572192 | -1.946139 |
| 9             | 1             | 0           | -2.429172               | -1.786524 | -2.296922 |
| 10            | 1             | 0           | 1.295545                | -1.365796 | 1.506767  |
| 11            | 1             | 0           | 1.745716                | -2.524244 | 0.250596  |

|    |    |   |           |           |           |
|----|----|---|-----------|-----------|-----------|
| 12 | 1  | 0 | 2.214804  | -0.586130 | -1.313758 |
| 13 | 1  | 0 | 1.829659  | 0.531021  | 0.014626  |
| 14 | 35 | 0 | -0.452981 | 2.101668  | 0.439327  |
| 15 | 1  | 0 | -1.013447 | -0.281425 | 1.397023  |
| 16 | 6  | 0 | -3.313704 | -0.148994 | -0.154061 |
| 17 | 6  | 0 | -4.501317 | -0.583116 | -0.555317 |
| 18 | 1  | 0 | -3.126467 | 0.807181  | 0.325628  |
| 19 | 1  | 0 | -5.372839 | 0.041184  | -0.412474 |
| 20 | 1  | 0 | -4.645909 | -1.547365 | -1.028296 |
| 21 | 8  | 0 | 3.533819  | -0.673335 | 0.295006  |
| 22 | 1  | 0 | 3.981819  | 0.174606  | 0.359065  |

-----  
Distance matrix (angstroms):

|    |    | 1        | 2        | 3        | 4        | 5        |
|----|----|----------|----------|----------|----------|----------|
| 1  | C  | 0.000000 |          |          |          |          |
| 2  | C  | 1.354516 | 0.000000 |          |          |          |
| 3  | N  | 2.208996 | 1.391981 | 0.000000 |          |          |
| 4  | C  | 2.215792 | 2.222018 | 1.347222 | 0.000000 |          |
| 5  | N  | 1.389660 | 2.211708 | 2.178849 | 1.338975 | 0.000000 |
| 6  | C  | 2.545779 | 3.631513 | 3.594938 | 2.487833 | 1.468047 |
| 7  | C  | 3.275673 | 4.323883 | 4.353310 | 3.339677 | 2.483460 |
| 8  | H  | 1.075988 | 2.211991 | 3.268404 | 3.232618 | 2.160921 |
| 9  | H  | 2.213823 | 1.074891 | 2.161863 | 3.238117 | 3.270221 |
| 10 | H  | 3.379329 | 4.273276 | 3.912934 | 2.626469 | 2.081723 |
| 11 | H  | 2.752279 | 4.002767 | 4.234729 | 3.288540 | 2.086895 |
| 12 | H  | 3.022037 | 4.098874 | 4.436305 | 3.699364 | 2.714725 |
| 13 | H  | 3.658491 | 4.435078 | 4.199475 | 3.177728 | 2.750558 |
| 14 | Br | 4.457570 | 4.385024 | 3.502139 | 2.937345 | 3.653777 |
| 15 | H  | 3.254880 | 3.259538 | 2.155633 | 1.073375 | 2.151723 |
| 16 | C  | 3.593831 | 2.526678 | 1.424548 | 2.439753 | 3.543485 |
| 17 | C  | 4.350312 | 3.085381 | 2.419234 | 3.614242 | 4.581888 |
| 18 | H  | 4.203730 | 3.326666 | 2.086179 | 2.627764 | 3.874178 |
| 19 | H  | 5.396797 | 4.129163 | 3.392330 | 4.498155 | 5.563136 |
| 20 | H  | 4.222040 | 2.934534 | 2.707783 | 3.976354 | 4.706649 |
| 21 | O  | 4.501947 | 5.652539 | 5.683687 | 4.571336 | 3.680176 |
| 22 | H  | 5.217160 | 6.280313 | 6.222236 | 5.105997 | 4.370038 |
|    |    | 6        | 7        | 8        | 9        | 10       |
| 6  | C  | 0.000000 |          |          |          |          |
| 7  | C  | 1.531454 | 0.000000 |          |          |          |
| 8  | H  | 2.836198 | 3.396602 | 0.000000 |          |          |
| 9  | H  | 4.657873 | 5.262939 | 2.761495 | 0.000000 |          |
| 10 | H  | 1.089810 | 2.161015 | 3.819616 | 5.340279 | 0.000000 |
| 11 | H  | 1.091603 | 2.169512 | 2.689444 | 4.946086 | 1.767094 |
| 12 | H  | 2.166771 | 1.097825 | 2.902504 | 4.896333 | 3.067292 |

|    |    |          |          |          |          |          |
|----|----|----------|----------|----------|----------|----------|
| 13 | H  | 2.156763 | 1.093778 | 4.018346 | 5.371397 | 2.471777 |
| 14 | Br | 4.047184 | 3.764217 | 5.287260 | 5.148828 | 4.027416 |
| 15 | H  | 2.831707 | 3.623703 | 4.228989 | 4.232591 | 2.553301 |
| 16 | C  | 4.886905 | 5.545877 | 4.625304 | 2.838266 | 5.048180 |
| 17 | C  | 5.996902 | 6.733547 | 5.286290 | 2.962290 | 6.202289 |
| 18 | H  | 5.039376 | 5.525103 | 5.254739 | 3.753837 | 5.066666 |
| 19 | H  | 6.943261 | 7.614743 | 6.338857 | 3.944215 | 7.080283 |
| 20 | H  | 6.159265 | 7.000596 | 5.032467 | 2.565255 | 6.462227 |
| 21 | O  | 2.359763 | 1.425368 | 4.447140 | 6.596555 | 2.637753 |
| 22 | H  | 3.144980 | 1.958890 | 5.215356 | 7.211179 | 3.302443 |
|    |    | 11       | 12       | 13       | 14       | 15       |
| 11 | H  | 0.000000 |          |          |          |          |
| 12 | H  | 2.534469 | 0.000000 |          |          |          |
| 13 | H  | 3.065514 | 1.777911 | 0.000000 |          |          |
| 14 | Br | 5.125325 | 4.173086 | 2.803168 | 0.000000 |          |
| 15 | H  | 3.735975 | 4.226439 | 3.264099 | 2.628772 | 0.000000 |
| 16 | C  | 5.603864 | 5.665720 | 5.190863 | 3.687997 | 2.777514 |
| 17 | C  | 6.591123 | 6.758811 | 6.453480 | 4.958469 | 4.008477 |
| 18 | H  | 5.902728 | 5.758306 | 4.973547 | 2.972566 | 2.607260 |
| 19 | H  | 7.595716 | 7.666692 | 7.231758 | 5.401496 | 4.731031 |
| 20 | H  | 6.591110 | 6.933603 | 6.880433 | 5.748914 | 4.547478 |
| 21 | O  | 2.573936 | 2.082193 | 2.105528 | 4.859635 | 4.695281 |
| 22 | H  | 3.506524 | 2.549391 | 2.208498 | 4.836059 | 5.122304 |
|    |    | 16       | 17       | 18       | 19       | 20       |
| 16 | C  | 0.000000 |          |          |          |          |
| 17 | C  | 1.326610 | 0.000000 |          |          |          |
| 18 | H  | 1.086016 | 2.144576 | 0.000000 |          |          |
| 19 | H  | 2.083982 | 1.081529 | 2.485504 | 0.000000 |          |
| 20 | H  | 2.120024 | 1.083694 | 3.112187 | 1.852337 | 0.000000 |
| 21 | O  | 6.882235 | 8.080508 | 6.822923 | 8.963237 | 8.332047 |
| 22 | H  | 7.320701 | 8.565853 | 7.136456 | 9.387369 | 8.906607 |
|    |    | 21       | 22       |          |          |          |
| 21 | O  | 0.000000 |          |          |          |          |
| 22 | H  | 0.961151 | 0.000000 |          |          |          |

Stoichiometry C7H11BrN2O

Framework group C1[X(C7H11BrN2O)]

Deg. of freedom 60

Full point group C1 NOp 1

Largest Abelian subgroup C1 NOp 1

Largest concise Abelian subgroup C1 NOp 1

Standard orientation:

-----

| Center | Atomic | Atomic | Coordinates (Angstroms) |   |   |
|--------|--------|--------|-------------------------|---|---|
| Number | Number | Type   | X                       | Y | Z |



|    |    |   |           |           |           |
|----|----|---|-----------|-----------|-----------|
| 1  | 6  | 0 | -0.120950 | -2.270130 | -0.634935 |
| 2  | 6  | 0 | -1.423046 | -1.917398 | -0.756744 |
| 3  | 7  | 0 | -1.650497 | -0.877588 | 0.140291  |
| 4  | 6  | 0 | -0.488771 | -0.585728 | 0.756909  |
| 5  | 7  | 0 | 0.442581  | -1.450543 | 0.335562  |
| 6  | 6  | 0 | 1.866761  | -1.383007 | 0.685296  |
| 7  | 6  | 0 | 2.665494  | -0.573378 | -0.340316 |
| 8  | 1  | 0 | 0.453511  | -3.020889 | -1.148848 |
| 9  | 1  | 0 | -2.195556 | -2.285078 | -1.407461 |
| 10 | 1  | 0 | 1.951108  | -0.921998 | 1.669187  |
| 11 | 1  | 0 | 2.252748  | -2.401918 | 0.751870  |
| 12 | 1  | 0 | 2.528971  | -1.001078 | -1.342141 |
| 13 | 1  | 0 | 2.300532  | 0.457651  | -0.351741 |
| 14 | 35 | 0 | 0.080039  | 2.154693  | -0.134462 |
| 15 | 1  | 0 | -0.357421 | 0.158520  | 1.519127  |
| 16 | 6  | 0 | -2.825042 | -0.081521 | 0.267005  |
| 17 | 6  | 0 | -4.050623 | -0.574148 | 0.143864  |
| 18 | 1  | 0 | -2.584896 | 0.964966  | 0.430180  |
| 19 | 1  | 0 | -4.900758 | 0.091930  | 0.201436  |
| 20 | 1  | 0 | -4.247610 | -1.627807 | -0.015483 |
| 21 | 8  | 0 | 4.028910  | -0.670757 | 0.063773  |
| 22 | 1  | 0 | 4.479198  | 0.146269  | -0.167575 |

Rotational constants (GHZ): 0.8172623 0.5713390 0.3557519

Standard basis: 6-311++G(d,p) (5D, 7F)

There are 358 symmetry adapted cartesian basis functions of A symmetry.

There are 345 symmetry adapted basis functions of A symmetry.

345 basis functions, 553 primitive gaussians, 358 cartesian basis functions  
55 alpha electrons 55 beta electrons

nuclear repulsion energy 866.4421146724 Hartrees.

NAtoms= 22 NActive= 22 NUniq= 22 SFac= 1.00D+00 NAtFMM= 60 NAOKFM=F

Big=F

Integral buffers will be 131072 words long.

Raffenetti 2 integral format.

Two-electron integral symmetry is turned on.

One-electron integrals computed using PRISM.

NBasis= 345 RedAO= T EigKep= 6.84D-06 NBF= 345

NBsUse= 345 1.00D-06 EigRej= -1.00D+00 NBFU= 345

Initial guess from the checkpoint file: "."

B after Tr= 0.000000 0.000000 0.000000

Rot= 0.999998 0.000437 0.000157 0.002115 Ang= 0.25 deg.

ExpMin= 3.50D-02 ExpMax= 4.40D+05 ExpMxC= 1.51D+04 IAcc=3 IRadAn= 5 AccDes=  
0.00D+00

Harris functional with IExCor= 402 and IRadAn= 5 diagonalized for initial guess.  
 HarFok: IExCor= 402 AccDes= 0.00D+00 IRadAn= 5 IDoV= 1 UseB2=F ITyADJ=14  
 ICtDFT= 3500011 ScaDFX= 1.000000 1.000000 1.000000 1.000000  
 FoFCou: FMM=F IPFlag= 0 FMFlag= 100000 FMFlg1= 0  
 NFxFlg= 0 DoJE=T BraDBF=F KetDBF=T FulRan=T  
 wScrn= 0.000000 ICntrl= 500 IOpCl= 0 I1Cent= 200000004 NGrid= 0  
 NMat0= 1 NMatS0= 1 NMatT0= 0 NMatD0= 1 NMtDS0= 0  
 NMtDT0= 0

Petite list used in FoFCou.

Keep R1 ints in memory in canonical form, NReq=1804729152.

Requested convergence on RMS density matrix=1.00D-08 within 128 cycles.

Requested convergence on MAX density matrix=1.00D-06.

Requested convergence on energy=1.00D-06.

No special actions if energy rises.

SCF Done: E(RB3LYP) = -3032.33807180 A.U. after 11 cycles

NFock= 11 Conv=0.22D-08 -V/T= 2.0017

Calling FoFJK, ICntrl= 2127 FMM=F ISym2X=0 I1Cent= 0 IOpClX= 0 NMat=1 NMatS=1  
 NMatT=0.

\*\*\*\*\* Axes restored to original set \*\*\*\*\*

| Center<br>Number | Atomic<br>Number | Forces (Hartrees/Bohr) |              |              |
|------------------|------------------|------------------------|--------------|--------------|
|                  |                  | X                      | Y            | Z            |
| 1                | 6                | 0.000028937            | 0.000024788  | 0.000054720  |
| 2                | 6                | -0.000229770           | -0.000174578 | 0.000389431  |
| 3                | 7                | 0.000078115            | 0.000372528  | -0.000502134 |
| 4                | 6                | -0.000023411           | 0.000127124  | 0.000193540  |
| 5                | 7                | 0.000151796            | -0.000282838 | -0.000079606 |
| 6                | 6                | -0.000225629           | 0.000102146  | -0.000101826 |
| 7                | 6                | -0.000094031           | -0.000041958 | 0.000169642  |
| 8                | 1                | 0.000028339            | 0.000107881  | -0.000055386 |
| 9                | 1                | 0.000009271            | 0.000090577  | -0.000031494 |
| 10               | 1                | 0.000045410            | 0.000051645  | -0.000003068 |
| 11               | 1                | -0.000057074           | -0.000102589 | 0.000081436  |
| 12               | 1                | 0.000088778            | -0.000098142 | -0.000002806 |
| 13               | 1                | -0.000046256           | -0.000015653 | -0.000147003 |
| 14               | 35               | 0.000056816            | 0.000093275  | 0.000052993  |
| 15               | 1                | -0.000062210           | -0.000046661 | -0.000016774 |
| 16               | 6                | 0.000480023            | -0.000371582 | 0.000058120  |
| 17               | 6                | 0.000003487            | 0.000201765  | 0.000074216  |
| 18               | 1                | -0.000226085           | -0.000028710 | -0.000044927 |
| 19               | 1                | -0.000030665           | -0.000010456 | -0.000032985 |
| 20               | 1                | -0.000045467           | 0.000003392  | -0.000035550 |

|    |   |              |              |              |
|----|---|--------------|--------------|--------------|
| 21 | 8 | 0.000165763  | -0.000006106 | -0.000086345 |
| 22 | 1 | -0.000096136 | 0.000004154  | 0.000065805  |

-----  
Cartesian Forces: Max 0.000502134 RMS 0.000153230

GradGradGradGradGradGradGradGradGradGradGradGradGradGradGradGradGradGradGrad

Berny optimization.

Using GEDIIS/GDIIS optimizer.

FormGI is forming the generalized inverse of G from B-inverse, IUseBI=4.

Internal Forces: Max 0.000574193 RMS 0.000100427

Search for a local minimum.

Step number 13 out of a maximum of 116

All quantities printed in internal units (Hartrees-Bohrs-Radians)

Mixed Optimization -- En-DIIS/RFO-DIIS

Swapping is turned off.

Update second derivatives using D2CorX and points 9 10 11 12 13

DE= -3.02D-05 DEPred=-1.44D-05 R= 2.10D+00

TightC=F SS= 1.41D+00 RLast= 9.19D-02 DXNew= 1.8091D+00 2.7562D-01

Trust test= 2.10D+00 RLast= 9.19D-02 DXMaxT set to 1.08D+00

ITU= 1 1 1 1 1 1 1 1 0 0-1 0 0

|                 |         |         |         |         |         |
|-----------------|---------|---------|---------|---------|---------|
| Eigenvalues --- | 0.00106 | 0.00200 | 0.00488 | 0.00755 | 0.01247 |
| Eigenvalues --- | 0.01480 | 0.01706 | 0.01897 | 0.02075 | 0.02301 |
| Eigenvalues --- | 0.02393 | 0.02481 | 0.03063 | 0.03088 | 0.03562 |
| Eigenvalues --- | 0.04269 | 0.04737 | 0.05440 | 0.05918 | 0.07127 |
| Eigenvalues --- | 0.08712 | 0.09406 | 0.13655 | 0.14269 | 0.14953 |
| Eigenvalues --- | 0.15806 | 0.15916 | 0.15996 | 0.16010 | 0.16157 |
| Eigenvalues --- | 0.16622 | 0.20475 | 0.21903 | 0.22873 | 0.22999 |
| Eigenvalues --- | 0.24158 | 0.24749 | 0.25700 | 0.29748 | 0.33204 |
| Eigenvalues --- | 0.33865 | 0.33876 | 0.33928 | 0.34122 | 0.34247 |
| Eigenvalues --- | 0.34497 | 0.34681 | 0.36101 | 0.36311 | 0.36429 |
| Eigenvalues --- | 0.37280 | 0.42637 | 0.43548 | 0.45928 | 0.50587 |
| Eigenvalues --- | 0.53590 | 0.54613 | 0.55719 | 0.60581 | 2.14579 |

En-DIIS/RFO-DIIS IScMMF= 0 using points: 13 12 11 10 9

RFO step: Lambda=-2.91908910D-06.

DidBck=F Rises=F RFO-DIIS coefs: 2.24503 -1.43396 0.13587 0.11586 -

0.06279

Iteration 1 RMS(Cart)= 0.01540640 RMS(Int)= 0.00020664

Iteration 2 RMS(Cart)= 0.00042899 RMS(Int)= 0.00000598

Iteration 3 RMS(Cart)= 0.00000019 RMS(Int)= 0.00000598

| Variable | Old X   | -DE/DX   | Delta X<br>(Linear) | Delta X<br>(Quad) | Delta X<br>(Total) | New X   |
|----------|---------|----------|---------------------|-------------------|--------------------|---------|
| R1       | 2.55966 | 0.00001  | -0.00054            | 0.00004           | -0.00050           | 2.55916 |
| R2       | 2.62608 | -0.00007 | 0.00029             | -0.00002          | 0.00026            | 2.62633 |
| R3       | 2.03332 | -0.00001 | -0.00001            | 0.00004           | 0.00003            | 2.03335 |

|     |         |          |          |          |          |         |
|-----|---------|----------|----------|----------|----------|---------|
| R4  | 2.63046 | -0.00029 | 0.00040  | -0.00022 | 0.00019  | 2.63065 |
| R5  | 2.03125 | 0.00000  | 0.00001  | 0.00001  | 0.00002  | 2.03127 |
| R6  | 2.54588 | 0.00002  | 0.00084  | -0.00033 | 0.00051  | 2.54639 |
| R7  | 2.69201 | -0.00028 | -0.00115 | -0.00097 | -0.00212 | 2.68989 |
| R8  | 2.53030 | 0.00009  | -0.00067 | 0.00002  | -0.00066 | 2.52964 |
| R9  | 2.02838 | -0.00004 | 0.00014  | -0.00011 | 0.00003  | 2.02842 |
| R10 | 2.77421 | -0.00016 | -0.00031 | -0.00043 | -0.00075 | 2.77346 |
| R11 | 2.89403 | 0.00002  | 0.00033  | 0.00029  | 0.00062  | 2.89465 |
| R12 | 2.05944 | 0.00000  | -0.00030 | 0.00008  | -0.00022 | 2.05922 |
| R13 | 2.06283 | 0.00006  | 0.00009  | 0.00007  | 0.00016  | 2.06299 |
| R14 | 2.07459 | 0.00002  | -0.00030 | 0.00007  | -0.00023 | 2.07436 |
| R15 | 2.06694 | 0.00006  | -0.00021 | -0.00009 | -0.00030 | 2.06664 |
| R16 | 2.69355 | 0.00004  | 0.00045  | 0.00025  | 0.00070  | 2.69426 |
| R17 | 5.29722 | 0.00003  | 0.00288  | 0.00213  | 0.00500  | 5.30222 |
| R18 | 2.50693 | 0.00001  | 0.00018  | 0.00012  | 0.00030  | 2.50723 |
| R19 | 2.05227 | -0.00009 | 0.00016  | -0.00055 | -0.00039 | 2.05188 |
| R20 | 2.04379 | 0.00001  | 0.00023  | -0.00005 | 0.00018  | 2.04397 |
| R21 | 2.04788 | 0.00003  | 0.00022  | -0.00008 | 0.00014  | 2.04802 |
| R22 | 1.81631 | -0.00002 | -0.00037 | 0.00004  | -0.00033 | 1.81598 |
| A1  | 1.87449 | -0.00001 | 0.00066  | -0.00048 | 0.00018  | 1.87466 |
| A2  | 2.28099 | 0.00000  | -0.00028 | 0.00006  | -0.00021 | 2.28078 |
| A3  | 2.12770 | 0.00001  | -0.00038 | 0.00041  | 0.00004  | 2.12774 |
| A4  | 1.86884 | 0.00003  | -0.00006 | -0.00001 | -0.00007 | 1.86877 |
| A5  | 2.28662 | 0.00001  | -0.00056 | -0.00011 | -0.00068 | 2.28594 |
| A6  | 2.12729 | -0.00004 | 0.00080  | 0.00003  | 0.00082  | 2.12811 |
| A7  | 1.89218 | 0.00009  | -0.00069 | 0.00058  | -0.00012 | 1.89206 |
| A8  | 2.22621 | -0.00004 | 0.00161  | 0.00037  | 0.00194  | 2.22815 |
| A9  | 2.15221 | -0.00003 | -0.00048 | -0.00020 | -0.00072 | 2.15149 |
| A10 | 1.89215 | -0.00009 | 0.00068  | -0.00067 | 0.00001  | 1.89216 |
| A11 | 2.19045 | 0.00000  | -0.00066 | 0.00022  | -0.00046 | 2.18999 |
| A12 | 2.19712 | 0.00008  | 0.00030  | 0.00050  | 0.00078  | 2.19790 |
| A13 | 1.89507 | -0.00002 | -0.00065 | 0.00064  | -0.00001 | 1.89506 |
| A14 | 2.19803 | -0.00001 | 0.00069  | -0.00005 | 0.00064  | 2.19867 |
| A15 | 2.17743 | 0.00003  | 0.00002  | -0.00085 | -0.00083 | 2.17660 |
| A16 | 1.95061 | 0.00012  | 0.00073  | -0.00048 | 0.00024  | 1.95085 |
| A17 | 1.88559 | 0.00002  | 0.00099  | -0.00066 | 0.00033  | 1.88592 |
| A18 | 1.89085 | -0.00010 | -0.00022 | 0.00030  | 0.00008  | 1.89094 |
| A19 | 1.91836 | -0.00004 | -0.00049 | 0.00013  | -0.00037 | 1.91799 |
| A20 | 1.92824 | -0.00001 | -0.00174 | 0.00071  | -0.00103 | 1.92722 |
| A21 | 1.88854 | 0.00000  | 0.00080  | 0.00000  | 0.00080  | 1.88933 |
| A22 | 1.91805 | -0.00008 | -0.00055 | 0.00084  | 0.00029  | 1.91834 |
| A23 | 1.90848 | 0.00022  | 0.00163  | -0.00066 | 0.00097  | 1.90945 |
| A24 | 1.84721 | 0.00007  | 0.00158  | 0.00053  | 0.00210  | 1.84932 |
| A25 | 1.89253 | 0.00002  | 0.00158  | 0.00023  | 0.00180  | 1.89433 |

|     |          |          |          |          |          |          |
|-----|----------|----------|----------|----------|----------|----------|
| A26 | 1.92948  | -0.00003 | -0.00303 | -0.00026 | -0.00329 | 1.92619  |
| A27 | 1.96766  | -0.00020 | -0.00119 | -0.00064 | -0.00184 | 1.96582  |
| A28 | 2.55743  | 0.00057  | -0.00233 | 0.00014  | -0.00220 | 2.55524  |
| A29 | 2.14831  | 0.00009  | 0.00252  | 0.00046  | 0.00298  | 2.15129  |
| A30 | 1.94930  | 0.00018  | 0.00173  | 0.00034  | 0.00207  | 1.95137  |
| A31 | 2.18470  | -0.00027 | -0.00425 | -0.00085 | -0.00511 | 2.17959  |
| A32 | 2.08581  | 0.00004  | -0.00155 | 0.00029  | -0.00126 | 2.08455  |
| A33 | 2.14436  | 0.00002  | 0.00145  | 0.00007  | 0.00151  | 2.14587  |
| A34 | 2.05301  | -0.00006 | 0.00011  | -0.00035 | -0.00025 | 2.05276  |
| A35 | 1.89844  | -0.00013 | -0.00080 | 0.00029  | -0.00051 | 1.89793  |
| D1  | 0.00269  | 0.00007  | -0.00024 | 0.00186  | 0.00162  | 0.00431  |
| D2  | 3.11220  | -0.00001 | 0.00629  | -0.00170 | 0.00459  | 3.11679  |
| D3  | -3.13384 | 0.00008  | -0.00312 | 0.00377  | 0.00065  | -3.13320 |
| D4  | -0.02434 | 0.00001  | 0.00341  | 0.00021  | 0.00362  | -0.02072 |
| D5  | -0.03873 | -0.00006 | -0.00042 | -0.00089 | -0.00131 | -0.04005 |
| D6  | -3.01589 | -0.00006 | -0.00077 | 0.00084  | 0.00007  | -3.01581 |
| D7  | 3.09835  | -0.00007 | 0.00215  | -0.00260 | -0.00045 | 3.09790  |
| D8  | 0.12119  | -0.00007 | 0.00180  | -0.00086 | 0.00094  | 0.12213  |
| D9  | 0.03400  | -0.00005 | 0.00080  | -0.00219 | -0.00139 | 0.03261  |
| D10 | 3.00852  | 0.00007  | 0.00324  | 0.00271  | 0.00597  | 3.01449  |
| D11 | -3.07907 | 0.00002  | -0.00498 | 0.00098  | -0.00400 | -3.08308 |
| D12 | -0.10456 | 0.00013  | -0.00253 | 0.00588  | 0.00336  | -0.10120 |
| D13 | -0.05854 | 0.00001  | -0.00110 | 0.00167  | 0.00058  | -0.05797 |
| D14 | -3.11487 | 0.00006  | -0.00468 | 0.00100  | -0.00368 | -3.11855 |
| D15 | -3.04171 | -0.00009 | -0.00368 | -0.00304 | -0.00670 | -3.04841 |
| D16 | 0.18515  | -0.00004 | -0.00726 | -0.00371 | -0.01096 | 0.17420  |
| D17 | 0.67395  | -0.00009 | -0.01613 | -0.00729 | -0.02342 | 0.65053  |
| D18 | -2.42456 | -0.00009 | -0.01576 | -0.00614 | -0.02190 | -2.44646 |
| D19 | -2.65760 | 0.00004  | -0.01331 | -0.00164 | -0.01495 | -2.67255 |
| D20 | 0.52707  | 0.00005  | -0.01295 | -0.00048 | -0.01343 | 0.51365  |
| D21 | 0.06026  | 0.00003  | 0.00094  | -0.00050 | 0.00044  | 0.06070  |
| D22 | 3.03982  | 0.00002  | 0.00136  | -0.00212 | -0.00076 | 3.03906  |
| D23 | 3.11618  | -0.00003 | 0.00448  | 0.00016  | 0.00464  | 3.12081  |
| D24 | -0.18745 | -0.00004 | 0.00490  | -0.00146 | 0.00344  | -0.18401 |
| D25 | 1.35366  | -0.00010 | -0.01099 | -0.00946 | -0.02045 | 1.33320  |
| D26 | -2.81692 | -0.00007 | -0.01050 | -0.01004 | -0.02054 | -2.83747 |
| D27 | -0.77480 | -0.00011 | -0.00914 | -0.01025 | -0.01938 | -0.79418 |
| D28 | -1.59793 | -0.00009 | -0.01135 | -0.00761 | -0.01896 | -1.61688 |
| D29 | 0.51468  | -0.00006 | -0.01086 | -0.00819 | -0.01905 | 0.49563  |
| D30 | 2.55681  | -0.00010 | -0.00950 | -0.00839 | -0.01789 | 2.53892  |
| D31 | -0.98594 | 0.00000  | -0.00365 | 0.00101  | -0.00264 | -0.98858 |
| D32 | 1.08950  | 0.00011  | -0.00106 | 0.00140  | 0.00033  | 1.08983  |
| D33 | -3.06966 | 0.00004  | -0.00067 | 0.00057  | -0.00009 | -3.06975 |
| D34 | -3.07941 | -0.00007 | -0.00504 | 0.00207  | -0.00296 | -3.08237 |

|     |          |          |          |          |          |          |
|-----|----------|----------|----------|----------|----------|----------|
| D35 | -1.00397 | 0.00004  | -0.00245 | 0.00246  | 0.00001  | -1.00396 |
| D36 | 1.12006  | -0.00003 | -0.00205 | 0.00164  | -0.00042 | 1.11964  |
| D37 | 1.12088  | -0.00004 | -0.00463 | 0.00155  | -0.00307 | 1.11780  |
| D38 | -3.08687 | 0.00007  | -0.00204 | 0.00194  | -0.00010 | -3.08697 |
| D39 | -0.96284 | 0.00000  | -0.00165 | 0.00112  | -0.00053 | -0.96337 |
| D40 | -0.62705 | 0.00006  | 0.03346  | 0.01623  | 0.04969  | -0.57737 |
| D41 | 1.46415  | 0.00011  | 0.03469  | 0.01700  | 0.05169  | 1.51584  |
| D42 | -2.67672 | -0.00005 | 0.03116  | 0.01640  | 0.04756  | -2.62916 |
| D43 | -2.57210 | -0.00004 | 0.03873  | 0.01781  | 0.05654  | -2.51556 |
| D44 | 1.63492  | 0.00003  | 0.04007  | 0.01664  | 0.05671  | 1.69163  |
| D45 | -0.48658 | 0.00017  | 0.04105  | 0.01699  | 0.05803  | -0.42855 |
| D46 | -3.08787 | -0.00001 | -0.00207 | 0.00164  | -0.00044 | -3.08831 |
| D47 | 0.05232  | -0.00002 | -0.00111 | 0.00034  | -0.00077 | 0.05155  |
| D48 | 0.00475  | 0.00000  | -0.00231 | 0.00036  | -0.00195 | 0.00280  |
| D49 | -3.13825 | -0.00001 | -0.00135 | -0.00093 | -0.00228 | -3.14052 |

| Item                 | Value    | Threshold | Converged? |
|----------------------|----------|-----------|------------|
| Maximum Force        | 0.000574 | 0.000450  | NO         |
| RMS Force            | 0.000100 | 0.000300  | YES        |
| Maximum Displacement | 0.060016 | 0.001800  | NO         |
| RMS Displacement     | 0.015459 | 0.001200  | NO         |

Predicted change in Energy=-1.522908D-05

GradGradGradGradGradGradGradGradGradGradGradGradGradGradGradGradGradGrad

Input orientation:

| Center Number | Atomic Number | Atomic Type | Coordinates (Angstroms) |           |           |
|---------------|---------------|-------------|-------------------------|-----------|-----------|
|               |               |             | X                       | Y         | Z         |
| 1             | 6             | 0           | -0.456298               | -1.991635 | -1.311725 |
| 2             | 6             | 0           | -1.747199               | -1.618949 | -1.481051 |
| 3             | 7             | 0           | -2.109414               | -0.878740 | -0.359098 |
| 4             | 6             | 0           | -1.035426               | -0.776765 | 0.448296  |
| 5             | 7             | 0           | -0.034366               | -1.485307 | -0.088148 |
| 6             | 6             | 0           | 1.337306                | -1.520567 | 0.432691  |
| 7             | 6             | 0           | 2.226922                | -0.469171 | -0.237762 |
| 8             | 1             | 0           | 0.197544                | -2.563824 | -1.946448 |
| 9             | 1             | 0           | -2.428623               | -1.787850 | -2.295019 |
| 10            | 1             | 0           | 1.295517                | -1.340589 | 1.506607  |
| 11            | 1             | 0           | 1.741230                | -2.521523 | 0.269245  |
| 12            | 1             | 0           | 2.220913                | -0.613309 | -1.325944 |
| 13            | 1             | 0           | 1.838859                | 0.529194  | -0.017134 |
| 14            | 35            | 0           | -0.437457               | 2.100111  | 0.455317  |
| 15            | 1             | 0           | -1.015809               | -0.278848 | 1.399014  |
| 16            | 6             | 0           | -3.317868               | -0.157370 | -0.146005 |

|    |   |   |           |           |           |
|----|---|---|-----------|-----------|-----------|
| 17 | 6 | 0 | -4.503081 | -0.583959 | -0.562675 |
| 18 | 1 | 0 | -3.139188 | 0.790548  | 0.352496  |
| 19 | 1 | 0 | -5.375174 | 0.037613  | -0.410992 |
| 20 | 1 | 0 | -4.645884 | -1.537895 | -1.056802 |
| 21 | 8 | 0 | 3.538093  | -0.675574 | 0.282777  |
| 22 | 1 | 0 | 3.969754  | 0.177531  | 0.379515  |

-----  
Distance matrix (angstroms):

|    |    | 1        | 2        | 3        | 4        | 5        |
|----|----|----------|----------|----------|----------|----------|
| 1  | C  | 0.000000 |          |          |          |          |
| 2  | C  | 1.354250 | 0.000000 |          |          |          |
| 3  | N  | 2.208806 | 1.392080 | 0.000000 |          |          |
| 4  | C  | 2.215620 | 2.222223 | 1.347492 | 0.000000 |          |
| 5  | N  | 1.389796 | 2.211749 | 2.178798 | 1.338628 | 0.000000 |
| 6  | C  | 2.545959 | 3.631289 | 3.594266 | 2.486632 | 1.467651 |
| 7  | C  | 3.266643 | 4.319883 | 4.357325 | 3.347865 | 2.483614 |
| 8  | H  | 1.076003 | 2.211653 | 3.268217 | 3.232428 | 2.161078 |
| 9  | H  | 2.213247 | 1.074900 | 2.162444 | 3.238683 | 3.270211 |
| 10 | H  | 3.381673 | 4.273372 | 3.909951 | 2.621300 | 2.081532 |
| 11 | H  | 2.758510 | 4.005910 | 4.233321 | 3.284214 | 2.086676 |
| 12 | H  | 3.011219 | 4.096496 | 4.444882 | 3.711925 | 2.716396 |
| 13 | H  | 3.646682 | 4.429152 | 4.205720 | 3.191186 | 2.751769 |
| 14 | Br | 4.457036 | 4.392761 | 3.511733 | 2.938372 | 3.648706 |
| 15 | H  | 3.254965 | 3.259690 | 2.155644 | 1.073392 | 2.151842 |
| 16 | C  | 3.593330 | 2.526967 | 1.423428 | 2.438522 | 3.542337 |
| 17 | C  | 4.349607 | 3.083749 | 2.420327 | 3.617163 | 4.583341 |
| 18 | H  | 4.208096 | 3.332447 | 2.086462 | 2.625159 | 3.874739 |
| 19 | H  | 5.396713 | 4.129338 | 3.392284 | 4.498334 | 5.563070 |
| 20 | H  | 4.221789 | 2.930688 | 2.712002 | 3.984978 | 4.712446 |
| 21 | O  | 4.497734 | 5.651138 | 5.687497 | 4.577632 | 3.681809 |
| 22 | H  | 5.211094 | 6.274759 | 6.214301 | 5.095806 | 4.360816 |
|    |    | 6        | 7        | 8        | 9        | 10       |
| 6  | C  | 0.000000 |          |          |          |          |
| 7  | C  | 1.531782 | 0.000000 |          |          |          |
| 8  | H  | 2.836855 | 3.380170 | 0.000000 |          |          |
| 9  | H  | 4.657689 | 5.257882 | 2.760506 | 0.000000 |          |
| 10 | H  | 1.089694 | 2.160951 | 3.824321 | 5.340564 | 0.000000 |
| 11 | H  | 1.091688 | 2.169124 | 2.700750 | 4.949889 | 1.767577 |
| 12 | H  | 2.167182 | 1.097703 | 2.878117 | 4.892529 | 3.067351 |
| 13 | H  | 2.157642 | 1.093620 | 3.997866 | 5.363661 | 2.472468 |
| 14 | Br | 4.032320 | 3.765699 | 5.284315 | 5.161912 | 3.993348 |
| 15 | H  | 2.830688 | 3.637384 | 4.229120 | 4.233085 | 2.545800 |
| 16 | C  | 4.885063 | 5.554308 | 4.625012 | 2.840331 | 5.041276 |
| 17 | C  | 5.998175 | 6.738819 | 5.284938 | 2.958673 | 6.203077 |

|    |    |          |          |          |          |          |
|----|----|----------|----------|----------|----------|----------|
| 18 | H  | 5.038519 | 5.543503 | 5.260298 | 3.763293 | 5.053744 |
| 19 | H  | 6.942414 | 7.620939 | 6.338792 | 3.945128 | 7.076352 |
| 20 | H  | 6.165829 | 7.003460 | 5.030188 | 2.551843 | 6.473812 |
| 21 | O  | 2.362193 | 1.425740 | 4.437815 | 6.594232 | 2.639916 |
| 22 | H  | 3.133073 | 1.958754 | 5.211017 | 7.207988 | 3.275144 |
|    |    | 11       | 12       | 13       | 14       | 15       |
| 11 | H  | 0.000000 |          |          |          |          |
| 12 | H  | 2.532984 | 0.000000 |          |          |          |
| 13 | H  | 3.065685 | 1.778838 | 0.000000 |          |          |
| 14 | Br | 5.112808 | 4.195530 | 2.805816 | 0.000000 |          |
| 15 | H  | 3.729241 | 4.244247 | 3.287481 | 2.623833 | 0.000000 |
| 16 | C  | 5.599655 | 5.681394 | 5.203827 | 3.708716 | 2.775125 |
| 17 | C  | 6.590726 | 6.767240 | 6.461960 | 4.976931 | 4.012778 |
| 18 | H  | 5.898748 | 5.789530 | 4.998588 | 3.004143 | 2.597604 |
| 19 | H  | 7.593097 | 7.678631 | 7.241481 | 5.420834 | 4.730786 |
| 20 | H  | 6.597056 | 6.933989 | 6.885177 | 5.764759 | 4.560008 |
| 21 | O  | 2.576127 | 2.080102 | 2.104474 | 4.851721 | 4.705465 |
| 22 | H  | 3.501910 | 2.567579 | 2.195839 | 4.808905 | 5.109158 |
|    |    | 16       | 17       | 18       | 19       | 20       |
| 16 | C  | 0.000000 |          |          |          |          |
| 17 | C  | 1.326771 | 0.000000 |          |          |          |
| 18 | H  | 1.085808 | 2.141732 | 0.000000 |          |          |
| 19 | H  | 2.083445 | 1.081622 | 2.479811 | 0.000000 |          |
| 20 | H  | 2.121091 | 1.083766 | 3.110933 | 1.852340 | 0.000000 |
| 21 | O  | 6.888875 | 8.086017 | 6.836699 | 8.968628 | 8.337599 |
| 22 | H  | 7.314217 | 8.559003 | 7.135374 | 9.379348 | 8.901399 |
|    |    | 21       | 22       |          |          |          |
| 21 | O  | 0.000000 |          |          |          |          |
| 22 | H  | 0.960977 | 0.000000 |          |          |          |

Stoichiometry C7H11BrN2O

Framework group C1[X(C7H11BrN2O)]

Deg. of freedom 60

Full point group C1 NOp 1

Largest Abelian subgroup C1 NOp 1

Largest concise Abelian subgroup C1 NOp 1

Standard orientation:

| Center<br>Number | Atomic<br>Number | Atomic<br>Type | Coordinates (Angstroms) |           |           |
|------------------|------------------|----------------|-------------------------|-----------|-----------|
|                  |                  |                | X                       | Y         | Z         |
| 1                | 6                | 0              | -0.138239               | -2.267499 | -0.628346 |
| 2                | 6                | 0              | -1.438653               | -1.910315 | -0.752185 |
| 3                | 7                | 0              | -1.662509               | -0.866151 | 0.140842  |
| 4                | 6                | 0              | -0.500037               | -0.577693 | 0.758244  |



|    |    |   |           |           |           |
|----|----|---|-----------|-----------|-----------|
| 5  | 7  | 0 | 0.427654  | -1.447832 | 0.340904  |
| 6  | 6  | 0 | 1.851227  | -1.384251 | 0.692186  |
| 7  | 6  | 0 | 2.659216  | -0.603971 | -0.349290 |
| 8  | 1  | 0 | 0.433568  | -3.022129 | -1.139573 |
| 9  | 1  | 0 | -2.212368 | -2.279629 | -1.400554 |
| 10 | 1  | 0 | 1.937671  | -0.902296 | 1.665675  |
| 11 | 1  | 0 | 2.229051  | -2.404608 | 0.781092  |
| 12 | 1  | 0 | 2.523761  | -1.053897 | -1.341343 |
| 13 | 1  | 0 | 2.303907  | 0.429709  | -0.384869 |
| 14 | 35 | 0 | 0.105718  | 2.155392  | -0.134693 |
| 15 | 1  | 0 | -0.365982 | 0.170922  | 1.515724  |
| 16 | 6  | 0 | -2.834394 | -0.068622 | 0.270379  |
| 17 | 6  | 0 | -4.062273 | -0.551486 | 0.130824  |
| 18 | 1  | 0 | -2.594229 | 0.974964  | 0.449901  |
| 19 | 1  | 0 | -4.907832 | 0.120124  | 0.193089  |
| 20 | 1  | 0 | -4.266318 | -1.600940 | -0.046827 |
| 21 | 8  | 0 | 4.022015  | -0.701998 | 0.058023  |
| 22 | 1  | 0 | 4.465406  | 0.125965  | -0.145348 |

-----

Rotational constants (GHZ):      0.8170900      0.5704453      0.3554057

Standard basis: 6-311++G(d,p) (5D, 7F)

There are    358 symmetry adapted cartesian basis functions of A    symmetry.

There are    345 symmetry adapted basis functions of A    symmetry.

345 basis functions,    553 primitive gaussians,    358 cartesian basis functions

55 alpha electrons      55 beta electrons

nuclear repulsion energy      866.1687251868 Hartrees.

NAtoms=    22 NActive=    22 NUniq=    22 SFac= 1.00D+00 NAtFMM=    60 NAOKFM=F

Big=F

Integral buffers will be    131072 words long.

Raffenetti 2 integral format.

Two-electron integral symmetry is turned on.

One-electron integrals computed using PRISM.

NBasis=    345 RedAO= T EigKep=    6.77D-06    NBF=    345

NBsUse=    345 1.00D-06 EigRej= -1.00D+00    NBFU=    345

Initial guess from the checkpoint file: "."

B after Tr=      0.000000      0.000000      0.000000

Rot=    0.999991    0.000739    0.000336    0.004045 Ang=    0.47 deg.

ExpMin= 3.50D-02 ExpMax= 4.40D+05 ExpMxC= 1.51D+04 IAcc=3 IRadAn=      5 AccDes=

0.00D+00

Harris functional with IExCor=    402 and IRadAn=      5 diagonalized for initial guess.

HarFok: IExCor=    402 AccDes= 0.00D+00 IRadAn=      5 IDoV= 1 UseB2=F ITyADJ=14

ICtDFT= 3500011 ScaDFX= 1.000000 1.000000 1.000000 1.000000

FoFCou: FMM=F IPFlag=              0 FMFlag=    100000 FMFlg1=              0

NFxFlg=              0 DoJE=T BraDBF=F KetDBF=T FulRan=T

wScrn= 0.000000 ICntrl= 500 IOpCl= 0 l1Cent= 20000004 NGrid= 0  
 NMat0= 1 NMatS0= 1 NMatT0= 0 NMatD0= 1 NMtDS0= 0  
 NMtDT0= 0

Petite list used in FoFCou.

Keep R1 ints in memory in canonical form, NReq=1804729152.

Requested convergence on RMS density matrix=1.00D-08 within 128 cycles.

Requested convergence on MAX density matrix=1.00D-06.

Requested convergence on energy=1.00D-06.

No special actions if energy rises.

SCF Done: E(RB3LYP) = -3032.33810590 A.U. after 11 cycles

NFock= 11 Conv=0.39D-08 -V/T= 2.0017

Calling FoFJK, ICntrl= 2127 FMM=F ISym2X=0 l1Cent= 0 IOpClX= 0 NMat=1 NMatS=1  
 NMatT=0.

\*\*\*\*\* Axes restored to original set \*\*\*\*\*

| Center Number | Atomic Number | Forces (Hartrees/Bohr) |              |              |
|---------------|---------------|------------------------|--------------|--------------|
|               |               | X                      | Y            | Z            |
| 1             | 6             | 0.000232148            | -0.000186707 | 0.000222339  |
| 2             | 6             | -0.000459982           | -0.000123255 | 0.000335485  |
| 3             | 7             | 0.000321799            | 0.000216019  | -0.000319966 |
| 4             | 6             | -0.000273418           | 0.000223973  | 0.000046856  |
| 5             | 7             | 0.000024644            | -0.000128122 | -0.000139615 |
| 6             | 6             | 0.000084149            | 0.000015900  | -0.000299287 |
| 7             | 6             | 0.000283957            | -0.000046370 | 0.000306130  |
| 8             | 1             | 0.000005217            | 0.000082598  | -0.000032555 |
| 9             | 1             | 0.000034226            | 0.000215359  | -0.000053645 |
| 10            | 1             | -0.000046359           | 0.000049695  | -0.000003268 |
| 11            | 1             | -0.000030135           | -0.000085293 | 0.000169868  |
| 12            | 1             | 0.000026353            | -0.000003961 | 0.000028223  |
| 13            | 1             | -0.000268279           | -0.000098457 | -0.000208949 |
| 14            | 35            | 0.000003880            | -0.000017806 | 0.000040921  |
| 15            | 1             | -0.000029652           | -0.000120781 | 0.000043761  |
| 16            | 6             | -0.000005750           | 0.000018141  | -0.000067250 |
| 17            | 6             | 0.000030804            | 0.000106220  | 0.000073227  |
| 18            | 1             | 0.000006508            | -0.000097972 | -0.000017239 |
| 19            | 1             | 0.000010927            | -0.000089614 | -0.000073275 |
| 20            | 1             | 0.000004998            | 0.000051812  | 0.000027249  |
| 21            | 8             | 0.000028318            | -0.000019330 | -0.000131968 |
| 22            | 1             | 0.000015648            | 0.000037951  | 0.000052959  |

Cartesian Forces: Max 0.000459982 RMS 0.000150043

GradGradGradGradGradGradGradGradGradGradGradGradGradGradGradGradGradGradGradGrad

Berny optimization.

Using GEDIIS/GDIIS optimizer.

FormGI is forming the generalized inverse of G from B-inverse, IUseBI=4.

Internal Forces: Max 0.000400338 RMS 0.000103157

Search for a local minimum.

Step number 14 out of a maximum of 116

All quantities printed in internal units (Hartrees-Bohrs-Radians)

Mixed Optimization -- En-DIIS/RFO-DIIS

Swapping is turned off.

Update second derivatives using D2CorX and points 10 11 12 13 14

DE= -3.41D-05 DEPred=-1.52D-05 R= 2.24D+00

TightC=F SS= 1.41D+00 RLast= 1.46D-01 DXNew= 1.8091D+00 4.3825D-01

Trust test= 2.24D+00 RLast= 1.46D-01 DXMaxT set to 1.08D+00

ITU= 1 1 1 1 1 1 1 1 1 0 0 -1 0 0

|                 |         |         |         |         |         |
|-----------------|---------|---------|---------|---------|---------|
| Eigenvalues --- | 0.00067 | 0.00180 | 0.00496 | 0.00773 | 0.01240 |
| Eigenvalues --- | 0.01316 | 0.01687 | 0.01873 | 0.02073 | 0.02269 |
| Eigenvalues --- | 0.02381 | 0.02563 | 0.03068 | 0.03090 | 0.03531 |
| Eigenvalues --- | 0.04285 | 0.04758 | 0.05452 | 0.05912 | 0.07622 |
| Eigenvalues --- | 0.08727 | 0.09566 | 0.13777 | 0.14197 | 0.15529 |
| Eigenvalues --- | 0.15910 | 0.15956 | 0.15996 | 0.16012 | 0.16202 |
| Eigenvalues --- | 0.16660 | 0.20355 | 0.22413 | 0.22893 | 0.23140 |
| Eigenvalues --- | 0.24276 | 0.24841 | 0.25710 | 0.29819 | 0.33176 |
| Eigenvalues --- | 0.33857 | 0.33878 | 0.33912 | 0.34120 | 0.34358 |
| Eigenvalues --- | 0.34628 | 0.34719 | 0.36096 | 0.36312 | 0.36392 |
| Eigenvalues --- | 0.37281 | 0.42629 | 0.43503 | 0.45777 | 0.50533 |
| Eigenvalues --- | 0.53686 | 0.54938 | 0.56294 | 0.60629 | 2.26820 |

En-DIIS/RFO-DIIS IScMMF= 0 using points: 14 13 12 11 10

RFO step: Lambda=-2.24334931D-06.

DidBck=F Rises=F RFO-DIIS coefs: 1.67592 -0.66009 -0.20750 0.20053 -  
0.00886

Iteration 1 RMS(Cart)= 0.01481871 RMS(Int)= 0.00017615

Iteration 2 RMS(Cart)= 0.00046517 RMS(Int)= 0.00000416

Iteration 3 RMS(Cart)= 0.00000022 RMS(Int)= 0.00000415

| Variable | Old X   | -DE/DX   | Delta X  |          |          | New X   |
|----------|---------|----------|----------|----------|----------|---------|
|          |         |          | (Linear) | (Quad)   | (Total)  |         |
| R1       | 2.55916 | 0.00026  | -0.00021 | 0.00034  | 0.00014  | 2.55930 |
| R2       | 2.62633 | -0.00014 | 0.00009  | -0.00014 | -0.00006 | 2.62628 |
| R3       | 2.03335 | -0.00002 | 0.00000  | -0.00005 | -0.00005 | 2.03330 |
| R4       | 2.63065 | -0.00029 | -0.00021 | -0.00021 | -0.00042 | 2.63023 |
| R5       | 2.03127 | -0.00002 | 0.00001  | -0.00004 | -0.00004 | 2.03123 |
| R6       | 2.54639 | -0.00014 | 0.00024  | -0.00003 | 0.00022  | 2.54661 |
| R7       | 2.68989 | -0.00008 | -0.00125 | -0.00038 | -0.00163 | 2.68826 |
| R8       | 2.52964 | 0.00022  | -0.00026 | 0.00012  | -0.00014 | 2.52950 |

|     |         |          |          |          |          |         |
|-----|---------|----------|----------|----------|----------|---------|
| R9  | 2.02842 | -0.00002 | 0.00002  | -0.00001 | 0.00000  | 2.02842 |
| R10 | 2.77346 | 0.00006  | -0.00053 | 0.00049  | -0.00005 | 2.77341 |
| R11 | 2.89465 | -0.00004 | 0.00026  | 0.00021  | 0.00047  | 2.89511 |
| R12 | 2.05922 | 0.00000  | -0.00011 | -0.00005 | -0.00016 | 2.05906 |
| R13 | 2.06299 | 0.00004  | 0.00016  | 0.00000  | 0.00016  | 2.06316 |
| R14 | 2.07436 | -0.00002 | -0.00012 | -0.00014 | -0.00025 | 2.07410 |
| R15 | 2.06664 | -0.00003 | -0.00016 | -0.00002 | -0.00017 | 2.06647 |
| R16 | 2.69426 | -0.00001 | 0.00038  | -0.00011 | 0.00027  | 2.69453 |
| R17 | 5.30222 | 0.00001  | 0.00281  | 0.00230  | 0.00511  | 5.30734 |
| R18 | 2.50723 | -0.00006 | 0.00012  | 0.00006  | 0.00018  | 2.50741 |
| R19 | 2.05188 | -0.00010 | -0.00032 | -0.00017 | -0.00049 | 2.05139 |
| R20 | 2.04397 | -0.00008 | 0.00009  | -0.00019 | -0.00010 | 2.04387 |
| R21 | 2.04802 | -0.00005 | 0.00010  | -0.00013 | -0.00003 | 2.04799 |
| R22 | 1.81598 | 0.00006  | -0.00020 | 0.00004  | -0.00016 | 1.81582 |
| A1  | 1.87466 | -0.00006 | 0.00012  | 0.00011  | 0.00023  | 1.87489 |
| A2  | 2.28078 | 0.00002  | -0.00013 | -0.00013 | -0.00026 | 2.28052 |
| A3  | 2.12774 | 0.00004  | 0.00000  | 0.00001  | 0.00002  | 2.12776 |
| A4  | 1.86877 | 0.00002  | -0.00009 | 0.00001  | -0.00007 | 1.86870 |
| A5  | 2.28594 | 0.00005  | -0.00029 | 0.00004  | -0.00023 | 2.28571 |
| A6  | 2.12811 | -0.00007 | 0.00035  | -0.00007 | 0.00029  | 2.12840 |
| A7  | 1.89206 | 0.00009  | 0.00011  | -0.00018 | -0.00008 | 1.89199 |
| A8  | 2.22815 | -0.00011 | 0.00103  | 0.00023  | 0.00124  | 2.22940 |
| A9  | 2.15149 | 0.00003  | -0.00028 | 0.00022  | -0.00008 | 2.15141 |
| A10 | 1.89216 | -0.00002 | -0.00008 | 0.00030  | 0.00022  | 1.89238 |
| A11 | 2.18999 | 0.00003  | -0.00031 | 0.00002  | -0.00029 | 2.18969 |
| A12 | 2.19790 | -0.00001 | 0.00055  | -0.00046 | 0.00008  | 2.19799 |
| A13 | 1.89506 | -0.00002 | -0.00005 | -0.00028 | -0.00034 | 1.89473 |
| A14 | 2.19867 | 0.00011  | 0.00034  | 0.00034  | 0.00067  | 2.19934 |
| A15 | 2.17660 | -0.00009 | -0.00049 | -0.00025 | -0.00074 | 2.17586 |
| A16 | 1.95085 | -0.00030 | -0.00004 | -0.00003 | -0.00007 | 1.95078 |
| A17 | 1.88592 | 0.00000  | 0.00026  | -0.00099 | -0.00073 | 1.88519 |
| A18 | 1.89094 | 0.00015  | 0.00000  | 0.00125  | 0.00126  | 1.89219 |
| A19 | 1.91799 | 0.00004  | -0.00030 | -0.00065 | -0.00096 | 1.91704 |
| A20 | 1.92722 | 0.00018  | -0.00018 | 0.00043  | 0.00025  | 1.92747 |
| A21 | 1.88933 | -0.00007 | 0.00028  | -0.00002 | 0.00027  | 1.88960 |
| A22 | 1.91834 | 0.00003  | 0.00005  | 0.00008  | 0.00013  | 1.91847 |
| A23 | 1.90945 | -0.00040 | 0.00040  | -0.00038 | 0.00002  | 1.90947 |
| A24 | 1.84932 | 0.00030  | 0.00166  | 0.00101  | 0.00267  | 1.85199 |
| A25 | 1.89433 | 0.00006  | 0.00111  | -0.00013 | 0.00097  | 1.89530 |
| A26 | 1.92619 | -0.00011 | -0.00199 | -0.00105 | -0.00305 | 1.92314 |
| A27 | 1.96582 | 0.00012  | -0.00121 | 0.00050  | -0.00072 | 1.96511 |
| A28 | 2.55524 | -0.00008 | -0.00094 | 0.00051  | -0.00043 | 2.55480 |
| A29 | 2.15129 | -0.00011 | 0.00167  | 0.00017  | 0.00184  | 2.15313 |
| A30 | 1.95137 | 0.00003  | 0.00160  | -0.00040 | 0.00121  | 1.95257 |

|     |          |          |          |          |          |          |
|-----|----------|----------|----------|----------|----------|----------|
| A31 | 2.17959  | 0.00008  | -0.00329 | 0.00027  | -0.00302 | 2.17657  |
| A32 | 2.08455  | 0.00014  | -0.00046 | 0.00024  | -0.00021 | 2.08433  |
| A33 | 2.14587  | -0.00007 | 0.00084  | -0.00012 | 0.00072  | 2.14659  |
| A34 | 2.05276  | -0.00007 | -0.00038 | -0.00013 | -0.00050 | 2.05226  |
| A35 | 1.89793  | 0.00000  | -0.00067 | 0.00037  | -0.00030 | 1.89763  |
| D1  | 0.00431  | 0.00000  | 0.00202  | -0.00191 | 0.00012  | 0.00443  |
| D2  | 3.11679  | -0.00012 | 0.00201  | -0.00257 | -0.00056 | 3.11623  |
| D3  | -3.13320 | 0.00011  | 0.00201  | 0.00050  | 0.00251  | -3.13069 |
| D4  | -0.02072 | -0.00001 | 0.00200  | -0.00016 | 0.00184  | -0.01888 |
| D5  | -0.04005 | 0.00004  | -0.00143 | 0.00102  | -0.00041 | -0.04046 |
| D6  | -3.01581 | 0.00010  | -0.00008 | 0.00228  | 0.00221  | -3.01361 |
| D7  | 3.09790  | -0.00006 | -0.00142 | -0.00113 | -0.00255 | 3.09535  |
| D8  | 0.12213  | 0.00000  | -0.00007 | 0.00014  | 0.00007  | 0.12220  |
| D9  | 0.03261  | -0.00004 | -0.00193 | 0.00215  | 0.00021  | 0.03283  |
| D10 | 3.01449  | 0.00004  | 0.00384  | 0.00399  | 0.00784  | 3.02233  |
| D11 | -3.08308 | 0.00007  | -0.00191 | 0.00273  | 0.00082  | -3.08226 |
| D12 | -0.10120 | 0.00015  | 0.00386  | 0.00458  | 0.00845  | -0.09276 |
| D13 | -0.05797 | 0.00007  | 0.00105  | -0.00154 | -0.00049 | -0.05846 |
| D14 | -3.11855 | 0.00006  | -0.00101 | 0.00035  | -0.00065 | -3.11920 |
| D15 | -3.04841 | 0.00001  | -0.00457 | -0.00329 | -0.00784 | -3.05625 |
| D16 | 0.17420  | 0.00001  | -0.00662 | -0.00140 | -0.00801 | 0.16619  |
| D17 | 0.65053  | -0.00002 | -0.01515 | -0.00165 | -0.01680 | 0.63373  |
| D18 | -2.44646 | -0.00005 | -0.01476 | -0.00257 | -0.01733 | -2.46379 |
| D19 | -2.67255 | 0.00007  | -0.00853 | 0.00042  | -0.00811 | -2.68065 |
| D20 | 0.51365  | 0.00003  | -0.00813 | -0.00050 | -0.00864 | 0.50501  |
| D21 | 0.06070  | -0.00007 | 0.00021  | 0.00034  | 0.00055  | 0.06125  |
| D22 | 3.03906  | -0.00010 | -0.00103 | -0.00083 | -0.00186 | 3.03720  |
| D23 | 3.12081  | -0.00006 | 0.00222  | -0.00153 | 0.00069  | 3.12151  |
| D24 | -0.18401 | -0.00010 | 0.00099  | -0.00271 | -0.00172 | -0.18572 |
| D25 | 1.33320  | 0.00004  | -0.01370 | -0.00784 | -0.02154 | 1.31166  |
| D26 | -2.83747 | -0.00009 | -0.01393 | -0.00933 | -0.02325 | -2.86072 |
| D27 | -0.79418 | -0.00010 | -0.01345 | -0.00921 | -0.02266 | -0.81684 |
| D28 | -1.61688 | 0.00009  | -0.01219 | -0.00639 | -0.01858 | -1.63547 |
| D29 | 0.49563  | -0.00004 | -0.01242 | -0.00788 | -0.02030 | 0.47533  |
| D30 | 2.53892  | -0.00004 | -0.01194 | -0.00776 | -0.01970 | 2.51922  |
| D31 | -0.98858 | -0.00005 | -0.00247 | -0.00350 | -0.00597 | -0.99454 |
| D32 | 1.08983  | -0.00021 | -0.00084 | -0.00385 | -0.00469 | 1.08515  |
| D33 | -3.06975 | -0.00011 | -0.00108 | -0.00287 | -0.00395 | -3.07370 |
| D34 | -3.08237 | 0.00011  | -0.00257 | -0.00180 | -0.00437 | -3.08674 |
| D35 | -1.00396 | -0.00005 | -0.00094 | -0.00215 | -0.00309 | -1.00705 |
| D36 | 1.11964  | 0.00005  | -0.00119 | -0.00117 | -0.00235 | 1.11729  |
| D37 | 1.11780  | 0.00006  | -0.00261 | -0.00164 | -0.00425 | 1.11355  |
| D38 | -3.08697 | -0.00010 | -0.00098 | -0.00198 | -0.00297 | -3.08994 |
| D39 | -0.96337 | 0.00000  | -0.00123 | -0.00100 | -0.00223 | -0.96560 |

|     |          |          |          |          |          |          |
|-----|----------|----------|----------|----------|----------|----------|
| D40 | -0.57737 | 0.00017  | 0.03655  | 0.01799  | 0.05454  | -0.52283 |
| D41 | 1.51584  | 0.00000  | 0.03751  | 0.01778  | 0.05529  | 1.57113  |
| D42 | -2.62916 | -0.00002 | 0.03496  | 0.01667  | 0.05164  | -2.57753 |
| D43 | -2.51556 | 0.00015  | 0.03105  | 0.01669  | 0.04773  | -2.46783 |
| D44 | 1.69163  | 0.00000  | 0.03108  | 0.01656  | 0.04764  | 1.73927  |
| D45 | -0.42855 | -0.00008 | 0.03192  | 0.01715  | 0.04907  | -0.37948 |
| D46 | -3.08831 | -0.00002 | -0.00058 | -0.00062 | -0.00120 | -3.08951 |
| D47 | 0.05155  | -0.00001 | -0.00093 | 0.00017  | -0.00076 | 0.05079  |
| D48 | 0.00280  | 0.00002  | -0.00088 | 0.00041  | -0.00047 | 0.00233  |
| D49 | -3.14052 | 0.00003  | -0.00122 | 0.00119  | -0.00003 | -3.14055 |

| Item                 | Value    | Threshold | Converged? |
|----------------------|----------|-----------|------------|
| Maximum Force        | 0.000400 | 0.000450  | YES        |
| RMS Force            | 0.000103 | 0.000300  | YES        |
| Maximum Displacement | 0.064582 | 0.001800  | NO         |
| RMS Displacement     | 0.014856 | 0.001200  | NO         |

Predicted change in Energy=-8.870870D-06

GradGradGradGradGradGradGradGradGradGradGradGradGradGradGradGradGradGradGrad

Input orientation:

| Center Number | Atomic Number | Atomic Type | Coordinates (Angstroms) |           |           |
|---------------|---------------|-------------|-------------------------|-----------|-----------|
|               |               |             | X                       | Y         | Z         |
| 1             | 6             | 0           | -0.455013               | -1.984823 | -1.311520 |
| 2             | 6             | 0           | -1.746080               | -1.612739 | -1.481488 |
| 3             | 7             | 0           | -2.110284               | -0.876266 | -0.357996 |
| 4             | 6             | 0           | -1.037186               | -0.775598 | 0.450937  |
| 5             | 7             | 0           | -0.034922               | -1.481989 | -0.085907 |
| 6             | 6             | 0           | 1.336324                | -1.515024 | 0.436129  |
| 7             | 6             | 0           | 2.231164                | -0.478754 | -0.251272 |
| 8             | 1             | 0           | 0.200568                | -2.552868 | -1.948122 |
| 9             | 1             | 0           | -2.425915               | -1.779501 | -2.297198 |
| 10            | 1             | 0           | 1.294288                | -1.315398 | 1.506469  |
| 11            | 1             | 0           | 1.736478                | -2.520403 | 0.290999  |
| 12            | 1             | 0           | 2.229817                | -0.644449 | -1.336260 |
| 13            | 1             | 0           | 1.844909                | 0.524554  | -0.051309 |
| 14            | 35            | 0           | -0.423885               | 2.096990  | 0.466196  |
| 15            | 1             | 0           | -1.019248               | -0.279875 | 1.402835  |
| 16            | 6             | 0           | -3.321935               | -0.163689 | -0.139299 |
| 17            | 6             | 0           | -4.504615               | -0.586554 | -0.567116 |
| 18            | 1             | 0           | -3.150830               | 0.776780  | 0.375145  |
| 19            | 1             | 0           | -5.378838               | 0.029971  | -0.407669 |
| 20            | 1             | 0           | -4.643840               | -1.532370 | -1.077572 |
| 21            | 8             | 0           | 3.541567                | -0.676208 | 0.275037  |

22            1            0            3.957825      0.181334      0.396133

-----  
Distance matrix (angstroms):

|    |    | 1        | 2        | 3        | 4        | 5        |
|----|----|----------|----------|----------|----------|----------|
| 1  | C  | 0.000000 |          |          |          |          |
| 2  | C  | 1.354322 | 0.000000 |          |          |          |
| 3  | N  | 2.208626 | 1.391859 | 0.000000 |          |          |
| 4  | C  | 2.215267 | 2.222071 | 1.347607 | 0.000000 |          |
| 5  | N  | 1.389765 | 2.211968 | 2.179004 | 1.338552 | 0.000000 |
| 6  | C  | 2.546346 | 3.631531 | 3.594128 | 2.486066 | 1.467627 |
| 7  | C  | 3.256980 | 4.314837 | 4.360914 | 3.356088 | 2.483742 |
| 8  | H  | 1.075975 | 2.211566 | 3.267955 | 3.232059 | 2.161038 |
| 9  | H  | 2.213182 | 1.074881 | 2.162397 | 3.238616 | 3.270347 |
| 10 | H  | 3.383674 | 4.273188 | 3.906428 | 2.615589 | 2.080917 |
| 11 | H  | 2.767227 | 4.011704 | 4.233433 | 3.280722 | 2.087635 |
| 12 | H  | 3.000921 | 4.094684 | 4.455021 | 3.726202 | 2.719173 |
| 13 | H  | 3.629703 | 4.416858 | 4.207125 | 3.201424 | 2.749759 |
| 14 | Br | 4.452240 | 4.393605 | 3.516175 | 2.937368 | 3.642142 |
| 15 | H  | 3.254679 | 3.259468 | 2.155590 | 1.073394 | 2.151820 |
| 16 | C  | 3.593031 | 2.526764 | 1.422566 | 2.437804 | 3.541923 |
| 17 | C  | 4.348398 | 3.081988 | 2.420844 | 3.618733 | 4.583832 |
| 18 | H  | 4.211736 | 3.336197 | 2.086335 | 2.623568 | 3.876014 |
| 19 | H  | 5.396331 | 4.128985 | 3.392223 | 4.498453 | 5.563001 |
| 20 | H  | 4.219682 | 2.926879 | 2.714253 | 3.989610 | 4.714664 |
| 21 | O  | 4.494696 | 5.649928 | 5.690710 | 4.583209 | 3.683862 |
| 22 | H  | 5.203985 | 6.267271 | 6.205576 | 5.086144 | 4.352130 |
|    |    | 6        | 7        | 8        | 9        | 10       |
| 6  | C  | 0.000000 |          |          |          |          |
| 7  | C  | 1.532029 | 0.000000 |          |          |          |
| 8  | H  | 2.837554 | 3.362227 | 0.000000 |          |          |
| 9  | H  | 4.657840 | 5.250347 | 2.760139 | 0.000000 |          |
| 10 | H  | 1.089608 | 2.160408 | 3.829067 | 5.340711 | 0.000000 |
| 11 | H  | 1.091775 | 2.169586 | 2.715462 | 4.957138 | 1.767749 |
| 12 | H  | 2.167392 | 1.097568 | 2.852068 | 4.887493 | 3.067001 |
| 13 | H  | 2.157806 | 1.093528 | 3.971433 | 5.347207 | 2.472909 |
| 14 | Br | 4.018194 | 3.768090 | 5.276367 | 5.164461 | 3.959631 |
| 15 | H  | 2.829989 | 3.652506 | 4.228873 | 4.232947 | 2.536829 |
| 16 | C  | 4.884322 | 5.563157 | 4.624721 | 2.840814 | 5.034333 |
| 17 | C  | 5.998760 | 6.744041 | 5.283210 | 2.955892 | 6.201471 |
| 18 | H  | 5.038912 | 5.561890 | 5.264598 | 3.768486 | 5.041446 |
| 19 | H  | 6.942075 | 7.628590 | 6.338282 | 3.945156 | 7.071390 |
| 20 | H  | 6.168789 | 7.004181 | 5.026685 | 2.543178 | 6.479638 |
| 21 | O  | 2.364880 | 1.425884 | 4.430188 | 6.591244 | 2.641070 |
| 22 | H  | 3.122738 | 1.958624 | 5.204649 | 7.200767 | 3.250766 |

|    |    |          |          |          |          |          |
|----|----|----------|----------|----------|----------|----------|
|    |    | 11       | 12       | 13       | 14       | 15       |
| 11 | H  | 0.000000 |          |          |          |          |
| 12 | H  | 2.531907 | 0.000000 |          |          |          |
| 13 | H  | 3.066055 | 1.779276 | 0.000000 |          |          |
| 14 | Br | 5.100801 | 4.219771 | 2.808521 | 0.000000 |          |
| 15 | H  | 3.721582 | 4.265206 | 3.311350 | 2.623211 | 0.000000 |
| 16 | C  | 5.597035 | 5.699632 | 5.213224 | 3.725049 | 2.773814 |
| 17 | C  | 6.589945 | 6.778459 | 6.466612 | 4.992144 | 4.015288 |
| 18 | H  | 5.896124 | 5.822385 | 5.020248 | 3.031085 | 2.591584 |
| 19 | H  | 7.590801 | 7.694723 | 7.249422 | 5.439464 | 4.730745 |
| 20 | H  | 6.599822 | 6.935596 | 6.883895 | 5.776114 | 4.567146 |
| 21 | O  | 2.580631 | 2.077974 | 2.104039 | 4.842725 | 4.714875 |
| 22 | H  | 3.499260 | 2.582463 | 2.186874 | 4.782679 | 5.098766 |
|    |    | 16       | 17       | 18       | 19       | 20       |
| 16 | C  | 0.000000 |          |          |          |          |
| 17 | C  | 1.326866 | 0.000000 |          |          |          |
| 18 | H  | 1.085547 | 2.139922 | 0.000000 |          |          |
| 19 | H  | 2.083357 | 1.081569 | 2.476800 | 0.000000 |          |
| 20 | H  | 2.121573 | 1.083751 | 3.109925 | 1.851999 | 0.000000 |
| 21 | O  | 6.895072 | 8.090631 | 6.849042 | 8.974319 | 8.340471 |
| 22 | H  | 7.307574 | 8.551630 | 7.133580 | 9.372421 | 8.893662 |
|    |    | 21       | 22       |          |          |          |
| 21 | O  | 0.000000 |          |          |          |          |
| 22 | H  | 0.960892 | 0.000000 |          |          |          |

Stoichiometry C7H11BrN2O

Framework group C1[X(C7H11BrN2O)]

Deg. of freedom 60

Full point group C1 NOp 1

Largest Abelian subgroup C1 NOp 1

Largest concise Abelian subgroup C1 NOp 1

Standard orientation:

| Center<br>Number | Atomic<br>Number | Atomic<br>Type | Coordinates (Angstroms) |           |           |
|------------------|------------------|----------------|-------------------------|-----------|-----------|
|                  |                  |                | X                       | Y         | Z         |
| 1                | 6                | 0              | -0.151830               | -2.262645 | -0.624326 |
| 2                | 6                | 0              | -1.450582               | -1.900322 | -0.751420 |
| 3                | 7                | 0              | -1.672161               | -0.854769 | 0.140205  |
| 4                | 6                | 0              | -0.509705               | -0.570456 | 0.759808  |
| 5                | 7                | 0              | 0.415353                | -1.444797 | 0.345661  |
| 6                | 6                | 0              | 1.838559                | -1.384374 | 0.698878  |
| 7                | 6                | 0              | 2.654584                | -0.631572 | -0.356823 |
| 8                | 1                | 0              | 0.418394                | -3.018635 | -1.135253 |
| 9                | 1                | 0              | -2.223970               | -2.266802 | -1.401752 |



|    |    |   |           |           |           |
|----|----|---|-----------|-----------|-----------|
| 10 | 1  | 0 | 1.925761  | -0.881439 | 1.661530  |
| 11 | 1  | 0 | 2.209671  | -2.404984 | 0.811152  |
| 12 | 1  | 0 | 2.522871  | -1.104436 | -1.338508 |
| 13 | 1  | 0 | 2.303767  | 0.402350  | -0.417959 |
| 14 | 35 | 0 | 0.126611  | 2.153886  | -0.135285 |
| 15 | 1  | 0 | -0.374393 | 0.178648  | 1.516582  |
| 16 | 6  | 0 | -2.842858 | -0.057678 | 0.273651  |
| 17 | 6  | 0 | -4.071704 | -0.534827 | 0.122530  |
| 18 | 1  | 0 | -2.603481 | 0.983213  | 0.467704  |
| 19 | 1  | 0 | -4.915270 | 0.138660  | 0.190390  |
| 20 | 1  | 0 | -4.279001 | -1.581053 | -0.069707 |
| 21 | 8  | 0 | 4.016424  | -0.724479 | 0.055373  |
| 22 | 1  | 0 | 4.451737  | 0.112504  | -0.127045 |

-----

Rotational constants (GHZ):      0.8182556      0.5695121      0.3553815

Standard basis: 6-311++G(d,p) (5D, 7F)

There are    358 symmetry adapted cartesian basis functions of A    symmetry.

There are    345 symmetry adapted basis functions of A    symmetry.

    345 basis functions,    553 primitive gaussians,    358 cartesian basis functions

    55 alpha electrons      55 beta electrons

        nuclear repulsion energy      866.1168814213 Hartrees.

NAtoms=    22 NActive=    22 NUniq=    22 SFac= 1.00D+00 NAtFMM=    60 NAOKFM=F

Big=F

Integral buffers will be    131072 words long.

Raffenetti 2 integral format.

Two-electron integral symmetry is turned on.

One-electron integrals computed using PRISM.

NBasis=    345 RedAO= T EigKep=    6.75D-06    NBF=    345

NBsUse=    345 1.00D-06 EigRej= -1.00D+00    NBFU=    345

Initial guess from the checkpoint file:    ""

B after Tr=    0.000000    0.000000    0.000000

        Rot=    0.999995    0.000598    0.000322    0.003243 Ang=    0.38 deg.

ExpMin= 3.50D-02 ExpMax= 4.40D+05 ExpMxC= 1.51D+04 IAcc=3 IRadAn=      5 AccDes=

0.00D+00

Harris functional with IExCor=    402 and IRadAn=      5 diagonalized for initial guess.

HarFok: IExCor=    402 AccDes= 0.00D+00 IRadAn=      5 IDoV= 1 UseB2=F ITyADJ=14

ICtDFT= 3500011 ScaDFX= 1.000000 1.000000 1.000000 1.000000

FoFCou: FMM=F IPFlag=      0 FMFlag=    100000 FMFlg1=      0

        NxFlg=      0 DoJE=T BraDBF=F KetDBF=T FulRan=T

        wScrn= 0.000000 ICntrl=      500 IOpCl= 0 I1Cent=    200000004 NGrid=

0

        NMat0=    1 NMatS0=    1 NMatT0=    0 NMatD0=    1 NMtDS0=    0

NMtDT0=    0

Petite list used in FoFCou.

Keep R1 ints in memory in canonical form, NReq=1804729152.

Requested convergence on RMS density matrix=1.00D-08 within 128 cycles.

Requested convergence on MAX density matrix=1.00D-06.

Requested convergence on energy=1.00D-06.

No special actions if energy rises.

SCF Done: E(RB3LYP) = -3032.33812985 A.U. after 11 cycles

NFock= 11 Conv=0.34D-08 -V/T= 2.0017

Calling FoFJK, ICntrl= 2127 FMM=F ISym2X=0 l1Cent= 0 IOpCIX= 0 NMat=1 NMatS=1

NMatT=0.

\*\*\*\*\* Axes restored to original set \*\*\*\*\*

---

| Center | Atomic | Forces (Hartrees/Bohr) |              |              |
|--------|--------|------------------------|--------------|--------------|
| Number | Number | X                      | Y            | Z            |
| 1      | 6      | 0.000242288            | -0.000176367 | 0.000117333  |
| 2      | 6      | -0.000363961           | -0.000228474 | 0.000205825  |
| 3      | 7      | 0.000472846            | 0.000095037  | -0.000142307 |
| 4      | 6      | -0.000299845           | 0.000324950  | 0.000133606  |
| 5      | 7      | -0.000088326           | -0.000012096 | -0.000162161 |
| 6      | 6      | 0.000176801            | 0.000009187  | -0.000245393 |
| 7      | 6      | 0.000458552            | -0.000052384 | 0.000243714  |
| 8      | 1      | -0.000017027           | 0.000023483  | -0.000022973 |
| 9      | 1      | 0.000031719            | 0.000191418  | -0.000053254 |
| 10     | 1      | -0.000084289           | 0.000038311  | 0.000014402  |
| 11     | 1      | -0.000070184           | -0.000056016 | 0.000138076  |
| 12     | 1      | -0.000001993           | 0.000038139  | 0.000017553  |
| 13     | 1      | -0.000358295           | -0.000144743 | -0.000174760 |
| 14     | 35     | -0.000017417           | -0.000101705 | 0.000032440  |
| 15     | 1      | -0.000022020           | -0.000186847 | 0.000057695  |
| 16     | 6      | -0.000277865           | 0.000258206  | -0.000071522 |
| 17     | 6      | 0.000065001            | 0.000000290  | 0.000061798  |
| 18     | 1      | 0.000118045            | -0.000059913 | -0.000015701 |
| 19     | 1      | 0.000009003            | -0.000056532 | -0.000080544 |
| 20     | 1      | 0.000045144            | 0.000051812  | 0.000028268  |
| 21     | 8      | -0.000080211           | 0.000008374  | -0.000144155 |
| 22     | 1      | 0.000062036            | 0.000035872  | 0.000062061  |

---

Cartesian Forces: Max 0.000472846 RMS 0.000161959

GradGradGradGradGradGradGradGradGradGradGradGradGradGradGradGradGradGradGradGrad  
Berny optimization.

Using GEDIIS/GDIIS optimizer.

FormGI is forming the generalized inverse of G from B-inverse, IUseBI=4.

Internal Forces: Max 0.000787781 RMS 0.000165329

Search for a local minimum.

Step number 15 out of a maximum of 116

All quantities printed in internal units (Hartrees-Bohrs-Radians)

Mixed Optimization -- En-DIIS/RFO-DIIS

Swapping is turned off.

Update second derivatives using D2CorX and points 10 11 12 13 14  
15

DE= -2.40D-05 DEPred=-8.87D-06 R= 2.70D+00

TightC=F SS= 1.41D+00 RLast= 1.40D-01 DXNew= 1.8091D+00 4.1935D-01

Trust test= 2.70D+00 RLast= 1.40D-01 DXMaxT set to 1.08D+00

ITU= 1 1 1 1 1 1 1 1 1 1 0 0 -1 0 0

|                 |         |         |         |         |         |
|-----------------|---------|---------|---------|---------|---------|
| Eigenvalues --- | 0.00041 | 0.00170 | 0.00504 | 0.00735 | 0.01225 |
| Eigenvalues --- | 0.01253 | 0.01664 | 0.01859 | 0.02073 | 0.02223 |
| Eigenvalues --- | 0.02382 | 0.02565 | 0.03066 | 0.03100 | 0.03567 |
| Eigenvalues --- | 0.04285 | 0.04721 | 0.05451 | 0.05897 | 0.07552 |
| Eigenvalues --- | 0.08723 | 0.09536 | 0.13714 | 0.14180 | 0.15676 |
| Eigenvalues --- | 0.15882 | 0.15934 | 0.15993 | 0.16000 | 0.16364 |
| Eigenvalues --- | 0.17220 | 0.20208 | 0.22468 | 0.22909 | 0.23155 |
| Eigenvalues --- | 0.24300 | 0.25347 | 0.25850 | 0.30092 | 0.33136 |
| Eigenvalues --- | 0.33863 | 0.33878 | 0.33931 | 0.34120 | 0.34406 |
| Eigenvalues --- | 0.34619 | 0.34751 | 0.36227 | 0.36312 | 0.36443 |
| Eigenvalues --- | 0.37300 | 0.42643 | 0.43167 | 0.45870 | 0.49631 |
| Eigenvalues --- | 0.53810 | 0.54746 | 0.56160 | 0.60625 | 2.43136 |

En-DIIS/RFO-DIIS IScMMF= 0 using points: 15 14 13 12 11

RFO step: Lambda=-3.42024599D-06.

DidBck=F Rises=F RFO-DIIS coefs: 1.93866 -0.90202 -0.17646 -0.06731

0.20713

Iteration 1 RMS(Cart)= 0.01692189 RMS(Int)= 0.00025787

Iteration 2 RMS(Cart)= 0.00067747 RMS(Int)= 0.00000488

Iteration 3 RMS(Cart)= 0.00000047 RMS(Int)= 0.00000486

| Variable | Old X   | -DE/DX   | Delta X<br>(Linear) | Delta X<br>(Quad) | Delta X<br>(Total) | New X   |
|----------|---------|----------|---------------------|-------------------|--------------------|---------|
| R1       | 2.55930 | 0.00019  | 0.00035             | -0.00009          | 0.00026            | 2.55956 |
| R2       | 2.62628 | -0.00008 | -0.00020            | 0.00007           | -0.00014           | 2.62614 |
| R3       | 2.03330 | -0.00001 | -0.00007            | 0.00001           | -0.00006           | 2.03324 |
| R4       | 2.63023 | -0.00008 | -0.00088            | 0.00032           | -0.00056           | 2.62967 |
| R5       | 2.03123 | -0.00001 | -0.00004            | 0.00001           | -0.00003           | 2.03120 |
| R6       | 2.54661 | -0.00020 | -0.00001            | -0.00009          | -0.00010           | 2.54651 |
| R7       | 2.68826 | 0.00010  | -0.00125            | 0.00037           | -0.00089           | 2.68737 |
| R8       | 2.52950 | 0.00021  | 0.00017             | 0.00002           | 0.00019            | 2.52969 |
| R9       | 2.02842 | -0.00004 | -0.00002            | -0.00013          | -0.00015           | 2.02827 |
| R10      | 2.77341 | 0.00004  | -0.00008            | 0.00021           | 0.00012            | 2.77354 |
| R11      | 2.89511 | -0.00008 | 0.00018             | 0.00033           | 0.00052            | 2.89563 |
| R12      | 2.05906 | 0.00002  | -0.00008            | 0.00002           | -0.00007           | 2.05900 |

|     |         |          |          |          |          |         |
|-----|---------|----------|----------|----------|----------|---------|
| R13 | 2.06316 | 0.00000  | 0.00021  | -0.00009 | 0.00012  | 2.06328 |
| R14 | 2.07410 | -0.00002 | -0.00014 | -0.00007 | -0.00022 | 2.07388 |
| R15 | 2.06647 | -0.00010 | -0.00009 | -0.00010 | -0.00019 | 2.06628 |
| R16 | 2.69453 | -0.00007 | 0.00011  | -0.00037 | -0.00026 | 2.69427 |
| R17 | 5.30734 | -0.00003 | 0.00388  | 0.00215  | 0.00604  | 5.31337 |
| R18 | 2.50741 | -0.00010 | 0.00005  | -0.00004 | 0.00001  | 2.50743 |
| R19 | 2.05139 | -0.00005 | -0.00056 | 0.00011  | -0.00045 | 2.05094 |
| R20 | 2.04387 | -0.00006 | -0.00015 | 0.00004  | -0.00011 | 2.04376 |
| R21 | 2.04799 | -0.00005 | -0.00003 | -0.00001 | -0.00004 | 2.04796 |
| R22 | 1.81582 | 0.00008  | -0.00008 | -0.00002 | -0.00010 | 1.81572 |
| A1  | 1.87489 | -0.00012 | 0.00014  | -0.00020 | -0.00006 | 1.87483 |
| A2  | 2.28052 | 0.00003  | -0.00020 | -0.00013 | -0.00032 | 2.28020 |
| A3  | 2.12776 | 0.00009  | 0.00003  | 0.00033  | 0.00036  | 2.12812 |
| A4  | 1.86870 | 0.00001  | -0.00011 | 0.00000  | -0.00009 | 1.86860 |
| A5  | 2.28571 | 0.00004  | 0.00006  | -0.00010 | -0.00003 | 2.28568 |
| A6  | 2.12840 | -0.00006 | -0.00009 | 0.00008  | 0.00000  | 2.12840 |
| A7  | 1.89199 | 0.00012  | 0.00026  | 0.00016  | 0.00040  | 1.89238 |
| A8  | 2.22940 | -0.00014 | 0.00069  | -0.00022 | 0.00044  | 2.22984 |
| A9  | 2.15141 | 0.00002  | 0.00024  | 0.00001  | 0.00022  | 2.15163 |
| A10 | 1.89238 | -0.00009 | 0.00000  | -0.00028 | -0.00028 | 1.89211 |
| A11 | 2.18969 | 0.00009  | -0.00021 | 0.00039  | 0.00018  | 2.18987 |
| A12 | 2.19799 | 0.00000  | 0.00010  | -0.00021 | -0.00011 | 2.19788 |
| A13 | 1.89473 | 0.00009  | -0.00029 | 0.00038  | 0.00008  | 1.89481 |
| A14 | 2.19934 | 0.00013  | 0.00047  | -0.00002 | 0.00045  | 2.19979 |
| A15 | 2.17586 | -0.00023 | -0.00064 | -0.00049 | -0.00114 | 2.17472 |
| A16 | 1.95078 | -0.00057 | -0.00042 | -0.00035 | -0.00077 | 1.95002 |
| A17 | 1.88519 | 0.00004  | -0.00072 | -0.00057 | -0.00130 | 1.88389 |
| A18 | 1.89219 | 0.00024  | 0.00117  | 0.00010  | 0.00126  | 1.89346 |
| A19 | 1.91704 | 0.00009  | -0.00096 | -0.00001 | -0.00096 | 1.91607 |
| A20 | 1.92747 | 0.00031  | 0.00106  | 0.00042  | 0.00149  | 1.92895 |
| A21 | 1.88960 | -0.00010 | -0.00014 | 0.00041  | 0.00027  | 1.88987 |
| A22 | 1.91847 | 0.00012  | 0.00004  | 0.00047  | 0.00052  | 1.91900 |
| A23 | 1.90947 | -0.00079 | -0.00055 | -0.00080 | -0.00135 | 1.90813 |
| A24 | 1.85199 | 0.00041  | 0.00264  | 0.00131  | 0.00395  | 1.85594 |
| A25 | 1.89530 | 0.00010  | 0.00071  | 0.00005  | 0.00075  | 1.89606 |
| A26 | 1.92314 | -0.00014 | -0.00227 | -0.00099 | -0.00326 | 1.91988 |
| A27 | 1.96511 | 0.00029  | -0.00056 | -0.00001 | -0.00057 | 1.96454 |
| A28 | 2.55480 | -0.00053 | 0.00053  | 0.00000  | 0.00052  | 2.55532 |
| A29 | 2.15313 | -0.00023 | 0.00109  | -0.00046 | 0.00063  | 2.15376 |
| A30 | 1.95257 | -0.00002 | 0.00127  | -0.00046 | 0.00081  | 1.95338 |
| A31 | 2.17657 | 0.00024  | -0.00230 | 0.00087  | -0.00142 | 2.17514 |
| A32 | 2.08433 | 0.00014  | 0.00045  | 0.00018  | 0.00063  | 2.08496 |
| A33 | 2.14659 | -0.00011 | 0.00030  | -0.00033 | -0.00003 | 2.14656 |
| A34 | 2.05226 | -0.00003 | -0.00075 | 0.00015  | -0.00060 | 2.05166 |

|     |          |          |          |          |          |          |
|-----|----------|----------|----------|----------|----------|----------|
| A35 | 1.89763  | 0.00008  | -0.00064 | 0.00057  | -0.00007 | 1.89756  |
| D1  | 0.00443  | 0.00002  | 0.00108  | -0.00032 | 0.00076  | 0.00519  |
| D2  | 3.11623  | -0.00013 | -0.00273 | -0.00093 | -0.00365 | 3.11259  |
| D3  | -3.13069 | 0.00012  | 0.00473  | -0.00072 | 0.00401  | -3.12667 |
| D4  | -0.01888 | -0.00003 | 0.00092  | -0.00133 | -0.00040 | -0.01928 |
| D5  | -0.04046 | 0.00006  | -0.00090 | 0.00072  | -0.00018 | -0.04064 |
| D6  | -3.01361 | 0.00015  | 0.00209  | 0.00163  | 0.00373  | -3.00988 |
| D7  | 3.09535  | -0.00003 | -0.00416 | 0.00108  | -0.00309 | 3.09226  |
| D8  | 0.12220  | 0.00006  | -0.00117 | 0.00199  | 0.00082  | 0.12302  |
| D9  | 0.03283  | -0.00008 | -0.00088 | -0.00019 | -0.00108 | 0.03175  |
| D10 | 3.02233  | -0.00004 | 0.00744  | -0.00060 | 0.00684  | 3.02917  |
| D11 | -3.08226 | 0.00005  | 0.00249  | 0.00036  | 0.00285  | -3.07941 |
| D12 | -0.09276 | 0.00009  | 0.01081  | -0.00005 | 0.01077  | -0.08199 |
| D13 | -0.05846 | 0.00013  | 0.00032  | 0.00066  | 0.00098  | -0.05748 |
| D14 | -3.11920 | 0.00009  | 0.00166  | 0.00188  | 0.00355  | -3.11566 |
| D15 | -3.05625 | 0.00010  | -0.00760 | 0.00107  | -0.00653 | -3.06278 |
| D16 | 0.16619  | 0.00006  | -0.00625 | 0.00229  | -0.00396 | 0.16223  |
| D17 | 0.63373  | 0.00001  | -0.01346 | 0.00084  | -0.01261 | 0.62112  |
| D18 | -2.46379 | -0.00001 | -0.01472 | 0.00191  | -0.01282 | -2.47661 |
| D19 | -2.68065 | 0.00006  | -0.00400 | 0.00039  | -0.00360 | -2.68425 |
| D20 | 0.50501  | 0.00004  | -0.00526 | 0.00146  | -0.00381 | 0.50120  |
| D21 | 0.06125  | -0.00011 | 0.00034  | -0.00085 | -0.00051 | 0.06073  |
| D22 | 3.03720  | -0.00016 | -0.00247 | -0.00169 | -0.00416 | 3.03304  |
| D23 | 3.12151  | -0.00007 | -0.00103 | -0.00205 | -0.00308 | 3.11843  |
| D24 | -0.18572 | -0.00012 | -0.00384 | -0.00288 | -0.00673 | -0.19245 |
| D25 | 1.31166  | 0.00013  | -0.01930 | -0.00712 | -0.02643 | 1.28524  |
| D26 | -2.86072 | -0.00009 | -0.02123 | -0.00772 | -0.02895 | -2.88967 |
| D27 | -0.81684 | -0.00006 | -0.02116 | -0.00750 | -0.02865 | -0.84549 |
| D28 | -1.63547 | 0.00020  | -0.01590 | -0.00616 | -0.02207 | -1.65754 |
| D29 | 0.47533  | -0.00002 | -0.01783 | -0.00676 | -0.02459 | 0.45074  |
| D30 | 2.51922  | 0.00001  | -0.01776 | -0.00654 | -0.02430 | 2.49492  |
| D31 | -0.99454 | -0.00005 | -0.00601 | -0.00147 | -0.00748 | -1.00202 |
| D32 | 1.08515  | -0.00033 | -0.00545 | -0.00161 | -0.00706 | 1.07809  |
| D33 | -3.07370 | -0.00018 | -0.00486 | -0.00130 | -0.00616 | -3.07985 |
| D34 | -3.08674 | 0.00021  | -0.00419 | -0.00052 | -0.00471 | -3.09145 |
| D35 | -1.00705 | -0.00007 | -0.00363 | -0.00067 | -0.00430 | -1.01134 |
| D36 | 1.11729  | 0.00008  | -0.00304 | -0.00035 | -0.00339 | 1.11390  |
| D37 | 1.11355  | 0.00008  | -0.00408 | -0.00129 | -0.00537 | 1.10819  |
| D38 | -3.08994 | -0.00020 | -0.00352 | -0.00143 | -0.00495 | -3.09489 |
| D39 | -0.96560 | -0.00005 | -0.00293 | -0.00112 | -0.00405 | -0.96965 |
| D40 | -0.52283 | 0.00020  | 0.05124  | 0.01473  | 0.06597  | -0.45686 |
| D41 | 1.57113  | -0.00006 | 0.05140  | 0.01486  | 0.06626  | 1.63739  |
| D42 | -2.57753 | 0.00002  | 0.04865  | 0.01363  | 0.06228  | -2.51525 |
| D43 | -2.46783 | 0.00030  | 0.03266  | 0.02725  | 0.05991  | -2.40792 |

|     |          |          |          |          |          |          |
|-----|----------|----------|----------|----------|----------|----------|
| D44 | 1.73927  | -0.00001 | 0.03228  | 0.02646  | 0.05874  | 1.79801  |
| D45 | -0.37948 | -0.00024 | 0.03337  | 0.02711  | 0.06048  | -0.31900 |
| D46 | -3.08951 | 0.00001  | -0.00120 | 0.00142  | 0.00023  | -3.08928 |
| D47 | 0.05079  | 0.00000  | -0.00105 | 0.00068  | -0.00036 | 0.05043  |
| D48 | 0.00233  | 0.00003  | 0.00035  | 0.00018  | 0.00052  | 0.00286  |
| D49 | -3.14055 | 0.00002  | 0.00050  | -0.00056 | -0.00006 | -3.14061 |

| Item                 | Value    | Threshold | Converged? |
|----------------------|----------|-----------|------------|
| Maximum Force        | 0.000788 | 0.000450  | NO         |
| RMS Force            | 0.000165 | 0.000300  | YES        |
| Maximum Displacement | 0.077432 | 0.001800  | NO         |
| RMS Displacement     | 0.016958 | 0.001200  | NO         |

Predicted change in Energy=-8.581730D-06

GradGradGradGradGradGradGradGradGradGradGradGradGradGradGradGradGrad

Input orientation:

| -----  |        |        |                         |           |           |  |
|--------|--------|--------|-------------------------|-----------|-----------|--|
| Center | Atomic | Atomic | Coordinates (Angstroms) |           |           |  |
| Number | Number | Type   | X                       | Y         | Z         |  |
| -----  |        |        |                         |           |           |  |
| 1      | 6      | 0      | -0.453193               | -1.976969 | -1.311481 |  |
| 2      | 6      | 0      | -1.744353               | -1.604960 | -1.481988 |  |
| 3      | 7      | 0      | -2.110458               | -0.873092 | -0.356475 |  |
| 4      | 6      | 0      | -1.039260               | -0.775790 | 0.455293  |  |
| 5      | 7      | 0      | -0.035623               | -1.479338 | -0.082967 |  |
| 6      | 6      | 0      | 1.335397                | -1.509509 | 0.440021  |  |
| 7      | 6      | 0      | 2.235020                | -0.490783 | -0.267670 |  |
| 8      | 1      | 0      | 0.204379                | -2.539480 | -1.950882 |  |
| 9      | 1      | 0      | -2.421766               | -1.766001 | -2.300837 |  |
| 10     | 1      | 0      | 1.293052                | -1.286499 | 1.505687  |  |
| 11     | 1      | 0      | 1.730726                | -2.519799 | 0.316968  |  |
| 12     | 1      | 0      | 2.238921                | -0.681741 | -1.348374 |  |
| 13     | 1      | 0      | 1.848353                | 0.516846  | -0.092284 |  |
| 14     | 35     | 0      | -0.408701               | 2.092604  | 0.480808  |  |
| 15     | 1      | 0      | -1.024068               | -0.286579 | 1.410513  |  |
| 16     | 6      | 0      | -3.325317               | -0.168372 | -0.133210 |  |
| 17     | 6      | 0      | -4.505094               | -0.589622 | -0.570547 |  |
| 18     | 1      | 0      | -3.160756               | 0.765891  | 0.394018  |  |
| 19     | 1      | 0      | -5.382257               | 0.021424  | -0.406610 |  |
| 20     | 1      | 0      | -4.639272               | -1.529019 | -1.094002 |  |
| 21     | 8      | 0      | 3.544833                | -0.674378 | 0.264720  |  |
| 22     | 1      | 0      | 3.939790                | 0.188290  | 0.416452  |  |

Distance matrix (angstroms):

1            2            3            4            5

|    |    |          |          |          |          |          |
|----|----|----------|----------|----------|----------|----------|
| 1  | C  | 0.000000 |          |          |          |          |
| 2  | C  | 1.354458 | 0.000000 |          |          |          |
| 3  | N  | 2.208417 | 1.391562 | 0.000000 |          |          |
| 4  | C  | 2.215354 | 2.222102 | 1.347554 | 0.000000 |          |
| 5  | N  | 1.389693 | 2.211967 | 2.178825 | 1.338653 | 0.000000 |
| 6  | C  | 2.546631 | 3.631541 | 3.593515 | 2.485472 | 1.467693 |
| 7  | C  | 3.244191 | 4.307130 | 4.363166 | 3.365236 | 2.483380 |
| 8  | H  | 1.075944 | 2.211503 | 3.267638 | 3.232170 | 2.161159 |
| 9  | H  | 2.213281 | 1.074865 | 2.162115 | 3.238533 | 3.270290 |
| 10 | H  | 3.385640 | 4.272406 | 3.901594 | 2.608415 | 2.079997 |
| 11 | H  | 2.777772 | 4.018626 | 4.233186 | 3.276206 | 2.088659 |
| 12 | H  | 2.987717 | 4.091046 | 4.465151 | 3.742797 | 2.722309 |
| 13 | H  | 3.605921 | 4.397826 | 4.204035 | 3.210772 | 2.744850 |
| 14 | Br | 4.446988 | 4.394146 | 3.520280 | 2.936995 | 3.635354 |
| 15 | H  | 3.254622 | 3.259371 | 2.155571 | 1.073314 | 2.151785 |
| 16 | C  | 3.592831 | 2.526348 | 1.422097 | 2.437488 | 3.541643 |
| 17 | C  | 4.346449 | 3.079501 | 2.420840 | 3.619256 | 4.583176 |
| 18 | H  | 4.214606 | 3.338642 | 2.086296 | 2.623220 | 3.877502 |
| 19 | H  | 5.395186 | 4.127458 | 3.392247 | 4.498894 | 5.562690 |
| 20 | H  | 4.215592 | 2.921790 | 2.714607 | 3.990960 | 4.713623 |
| 21 | O  | 4.490586 | 5.647341 | 5.692775 | 4.589173 | 3.686260 |
| 22 | H  | 5.193496 | 6.255342 | 6.191078 | 5.071676 | 4.339852 |
|    |    | 6        | 7        | 8        | 9        | 10       |
| 6  | C  | 0.000000 |          |          |          |          |
| 7  | C  | 1.532303 | 0.000000 |          |          |          |
| 8  | H  | 2.838390 | 3.339740 | 0.000000 |          |          |
| 9  | H  | 4.657721 | 5.238855 | 2.759960 | 0.000000 |          |
| 10 | H  | 1.089573 | 2.159922 | 3.834455 | 5.340358 | 0.000000 |
| 11 | H  | 1.091839 | 2.170949 | 2.733728 | 4.966318 | 1.767948 |
| 12 | H  | 2.167929 | 1.097453 | 2.820207 | 4.879017 | 3.066931 |
| 13 | H  | 2.156986 | 1.093429 | 3.936771 | 5.321937 | 2.472635 |
| 14 | Br | 4.002344 | 3.771388 | 5.267370 | 5.165154 | 3.919780 |
| 15 | H  | 2.829220 | 3.671464 | 4.228903 | 4.232773 | 2.525459 |
| 16 | C  | 4.883594 | 5.571298 | 4.624374 | 2.840322 | 5.026482 |
| 17 | C  | 5.998231 | 6.747639 | 5.280759 | 2.952630 | 6.197974 |
| 18 | H  | 5.039340 | 5.579557 | 5.267653 | 3.770786 | 5.028372 |
| 19 | H  | 6.941715 | 7.635742 | 6.336680 | 3.943030 | 7.065925 |
| 20 | H  | 6.168491 | 7.001189 | 5.021577 | 2.535733 | 6.481487 |
| 21 | O  | 2.368498 | 1.425748 | 4.421100 | 6.585896 | 2.642954 |
| 22 | H  | 3.109010 | 1.958419 | 5.195988 | 7.188345 | 3.219729 |
|    |    | 11       | 12       | 13       | 14       | 15       |
| 11 | H  | 0.000000 |          |          |          |          |
| 12 | H  | 2.531814 | 0.000000 |          |          |          |
| 13 | H  | 3.066355 | 1.779583 | 0.000000 |          |          |

|    |    |          |          |          |          |          |
|----|----|----------|----------|----------|----------|----------|
| 14 | Br | 5.087067 | 4.248859 | 2.811715 | 0.000000 |          |
| 15 | H  | 3.711065 | 4.291236 | 3.339864 | 2.627458 | 0.000000 |
| 16 | C  | 5.594233 | 5.718471 | 5.219009 | 3.741080 | 2.773589 |
| 17 | C  | 6.587771 | 6.789348 | 6.466784 | 5.008006 | 4.016712 |
| 18 | H  | 5.893072 | 5.855603 | 5.038818 | 3.056388 | 2.589670 |
| 19 | H  | 7.587879 | 7.711272 | 7.254376 | 5.460179 | 4.731872 |
| 20 | H  | 6.599194 | 6.934849 | 6.875921 | 5.787392 | 4.570115 |
| 21 | O  | 2.588298 | 2.075460 | 2.103452 | 4.830457 | 4.726318 |
| 22 | H  | 3.496227 | 2.600869 | 2.177354 | 4.747623 | 5.084638 |
|    |    | 16       | 17       | 18       | 19       | 20       |
| 16 | C  | 0.000000 |          |          |          |          |
| 17 | C  | 1.326872 | 0.000000 |          |          |          |
| 18 | H  | 1.085310 | 2.138936 | 0.000000 |          |          |
| 19 | H  | 2.083692 | 1.081512 | 2.475945 | 0.000000 |          |
| 20 | H  | 2.121547 | 1.083732 | 3.109152 | 1.851596 | 0.000000 |
| 21 | O  | 6.900242 | 8.093589 | 6.859739 | 8.979296 | 8.340031 |
| 22 | H  | 7.294594 | 8.537879 | 7.124035 | 9.359799 | 8.878678 |
|    |    | 21       | 22       |          |          |          |
| 21 | O  | 0.000000 |          |          |          |          |
| 22 | H  | 0.960838 | 0.000000 |          |          |          |

Stoichiometry C7H11BrN2O

Framework group C1[X(C7H11BrN2O)]

Deg. of freedom 60

Full point group C1 NOp 1

Largest Abelian subgroup C1 NOp 1

Largest concise Abelian subgroup C1 NOp 1

Standard orientation:

| Center<br>Number | Atomic<br>Number | Atomic<br>Type | Coordinates (Angstroms) |           |           |
|------------------|------------------|----------------|-------------------------|-----------|-----------|
|                  |                  |                | X                       | Y         | Z         |
| 1                | 6                | 0              | -0.166314               | -2.257502 | -0.619243 |
| 2                | 6                | 0              | -1.463114               | -1.889175 | -0.750406 |
| 3                | 7                | 0              | -1.682085               | -0.841788 | 0.139244  |
| 4                | 6                | 0              | -0.520584               | -0.562859 | 0.762955  |
| 5                | 7                | 0              | 0.401632                | -1.441880 | 0.352067  |
| 6                | 6                | 0              | 1.824584                | -1.384215 | 0.707039  |
| 7                | 6                | 0              | 2.648105                | -0.663899 | -0.365765 |
| 8                | 1                | 0              | 0.402321                | -3.014645 | -1.130166 |
| 9                | 1                | 0              | -2.235428               | -2.250345 | -1.404946 |
| 10               | 1                | 0              | 1.912605                | -0.856042 | 1.655963  |
| 11               | 1                | 0              | 2.187904                | -2.404168 | 0.847782  |
| 12               | 1                | 0              | 2.520589                | -1.164011 | -1.334285 |
| 13               | 1                | 0              | 2.299578                | 0.368470  | -0.457032 |



|    |    |   |           |           |           |
|----|----|---|-----------|-----------|-----------|
| 14 | 35 | 0 | 0.149660  | 2.151798  | -0.135574 |
| 15 | 1  | 0 | -0.384767 | 0.184139  | 1.521606  |
| 16 | 6  | 0 | -2.851480 | -0.043871 | 0.274155  |
| 17 | 6  | 0 | -4.080857 | -0.516655 | 0.113848  |
| 18 | 1  | 0 | -2.611927 | 0.994839  | 0.478097  |
| 19 | 1  | 0 | -4.923400 | 0.157843  | 0.183426  |
| 20 | 1  | 0 | -4.289871 | -1.560647 | -0.088313 |
| 21 | 8  | 0 | 4.009208  | -0.746924 | 0.050485  |
| 22 | 1  | 0 | 4.431767  | 0.101778  | -0.105588 |

-----

Rotational constants (GHZ):      0.8196319      0.5687503      0.3554912

Standard basis: 6-311++G(d,p) (5D, 7F)

There are    358 symmetry adapted cartesian basis functions of A    symmetry.

There are    345 symmetry adapted basis functions of A    symmetry.

345 basis functions,    553 primitive gaussians,    358 cartesian basis functions

55 alpha electrons      55 beta electrons

    nuclear repulsion energy      866.1335830727 Hartrees.

NAtoms=    22 NActive=    22 NUniq=    22 SFac= 1.00D+00 NAtFMM=    60 NAOKFM=F

Big=F

Integral buffers will be    131072 words long.

Raffenetti 2 integral format.

Two-electron integral symmetry is turned on.

One-electron integrals computed using PRISM.

NBasis=    345 RedAO= T EigKep= 6.76D-06 NBF=    345

NBsUse=    345 1.00D-06 EigRej= -1.00D+00 NBFU=    345

Initial guess from the checkpoint file: ". "

B after Tr=    0.000000    0.000000    0.000000

    Rot=    0.999993    0.000709    0.000361    0.003549 Ang=    0.42 deg.

ExpMin= 3.50D-02 ExpMax= 4.40D+05 ExpMxC= 1.51D+04 IAcc=3 IRadAn=      5 AccDes=

0.00D+00

Harris functional with IExCor= 402 and IRadAn=      5 diagonalized for initial guess.

HarFok: IExCor= 402 AccDes= 0.00D+00 IRadAn=      5 IDoV= 1 UseB2=F ITyADJ=14

ICtDFT= 3500011 ScaDFX= 1.000000 1.000000 1.000000 1.000000

FoFCou: FMM=F IPFlag=      0 FMFlag=      100000 FMFlg1=      0

    NFxFlg=      0 DoJE=T BraDBF=F KetDBF=T FulRan=T

    wScrn= 0.000000 ICntrl=      500 IOpCl= 0 I1Cent= 200000004 NGrid=

0

    NMat0=    1 NMatS0=      1 NMatT0=    0 NMatD0=    1 NMtDS0=    0

NMtDT0=    0

Petite list used in FoFCou.

Keep R1 ints in memory in canonical form, NReq=1804729152.

Requested convergence on RMS density matrix=1.00D-08 within 128 cycles.

Requested convergence on MAX density matrix=1.00D-06.

Requested convergence on                    energy=1.00D-06.

No special actions if energy rises.

SCF Done: E(RB3LYP) = -3032.33815396 A.U. after 11 cycles

NFock= 11 Conv=0.38D-08 -V/T= 2.0017

Calling FoFJK, ICntrl= 2127 FMM=F ISym2X=0 l1Cent= 0 IOpClX= 0 NMat=1 NMatS=1

NMatT=0.

\*\*\*\*\* Axes restored to original set \*\*\*\*\*

| Center<br>Number | Atomic<br>Number | Forces (Hartrees/Bohr) |              |              |
|------------------|------------------|------------------------|--------------|--------------|
|                  |                  | X                      | Y            | Z            |
| 1                | 6                | 0.000134286            | -0.000084948 | 0.000064674  |
| 2                | 6                | -0.000143037           | -0.000161605 | -0.000010359 |
| 3                | 7                | 0.000232012            | -0.000042784 | 0.000137202  |
| 4                | 6                | -0.000114415           | 0.000332756  | -0.000034767 |
| 5                | 7                | -0.000106813           | 0.000088080  | -0.000047614 |
| 6                | 6                | 0.000143969            | -0.000090811 | -0.000131471 |
| 7                | 6                | 0.000481879            | 0.000007648  | 0.000191264  |
| 8                | 1                | -0.000026973           | -0.000040081 | 0.000013892  |
| 9                | 1                | 0.000016334            | 0.000105205  | -0.000026882 |
| 10               | 1                | -0.000069066           | 0.000026975  | 0.000004064  |
| 11               | 1                | -0.000040505           | -0.000015066 | 0.000067839  |
| 12               | 1                | 0.000007725            | 0.000033086  | 0.000058278  |
| 13               | 1                | -0.000389019           | -0.000135891 | -0.000151658 |
| 14               | 35               | -0.000049222           | -0.000247456 | 0.000032983  |
| 15               | 1                | -0.000005963           | -0.000149633 | 0.000041478  |
| 16               | 6                | -0.000321444           | 0.000371258  | -0.000103342 |
| 17               | 6                | 0.000015268            | -0.000068415 | -0.000017651 |
| 18               | 1                | 0.000162027            | -0.000008602 | -0.000003970 |
| 19               | 1                | 0.000020002            | -0.000010482 | -0.000028705 |
| 20               | 1                | 0.000060722            | 0.000041538  | 0.000031393  |
| 21               | 8                | -0.000081259           | 0.000032230  | -0.000165007 |
| 22               | 1                | 0.000073492            | 0.000016998  | 0.000078358  |

Cartesian Forces: Max 0.000481879 RMS 0.000138324

GradGradGradGradGradGradGradGradGradGradGradGradGradGradGradGradGradGradGrad

Berny optimization.

Using GEDIIS/GDIIS optimizer.

FormGI is forming the generalized inverse of G from B-inverse, IUseBI=4.

Internal Forces: Max 0.001300076 RMS 0.000262775

Search for a local minimum.

Step number 16 out of a maximum of 116

All quantities printed in internal units (Hartrees-Bohrs-Radians)

Mixed Optimization -- En-DIIS/RFO-DIIS

Swapping is turned off.

Update second derivatives using D2CorX and points 11 12 13 14 15  
16

DE= -2.41D-05 DEPred=-8.58D-06 R= 2.81D+00

TightC=F SS= 1.41D+00 RLast= 1.69D-01 DXNew= 1.8091D+00 5.0581D-01

Trust test= 2.81D+00 RLast= 1.69D-01 DXMaxT set to 1.08D+00

ITU= 1 1 1 1 1 1 1 1 1 1 1 0 0 -1 0 0

|                 |         |         |         |         |         |
|-----------------|---------|---------|---------|---------|---------|
| Eigenvalues --- | 0.00032 | 0.00179 | 0.00525 | 0.00705 | 0.01212 |
| Eigenvalues --- | 0.01324 | 0.01658 | 0.01862 | 0.02073 | 0.02165 |
| Eigenvalues --- | 0.02394 | 0.02537 | 0.03066 | 0.03088 | 0.03480 |
| Eigenvalues --- | 0.04291 | 0.04703 | 0.05451 | 0.05876 | 0.07124 |
| Eigenvalues --- | 0.08727 | 0.09301 | 0.13646 | 0.14215 | 0.15702 |
| Eigenvalues --- | 0.15734 | 0.15918 | 0.15994 | 0.16000 | 0.16328 |
| Eigenvalues --- | 0.17159 | 0.20007 | 0.21153 | 0.22846 | 0.22955 |
| Eigenvalues --- | 0.24177 | 0.24943 | 0.25616 | 0.29904 | 0.33144 |
| Eigenvalues --- | 0.33863 | 0.33878 | 0.33963 | 0.34119 | 0.34378 |
| Eigenvalues --- | 0.34454 | 0.34684 | 0.36205 | 0.36312 | 0.36468 |
| Eigenvalues --- | 0.37280 | 0.42621 | 0.43206 | 0.45955 | 0.49813 |
| Eigenvalues --- | 0.53619 | 0.54512 | 0.55782 | 0.60549 | 2.52117 |

En-DIIS/RFO-DIIS IScMMF= 0 using points: 16 15 14 13 12

RFO step: Lambda=-6.08886884D-06.

DidBck=F Rises=F RFO-DIIS coefs: 2.40544 -2.06782 -0.50176 2.10416 -

0.94002

Iteration 1 RMS(Cart)= 0.01138088 RMS(Int)= 0.00016975

Iteration 2 RMS(Cart)= 0.00022944 RMS(Int)= 0.00000941

Iteration 3 RMS(Cart)= 0.00000004 RMS(Int)= 0.00000941

| Variable | Old X   | -DE/DX   | Delta X<br>(Linear) | Delta X<br>(Quad) | Delta X<br>(Total) | New X   |
|----------|---------|----------|---------------------|-------------------|--------------------|---------|
| R1       | 2.55956 | 0.00014  | 0.00028             | -0.00001          | 0.00027            | 2.55983 |
| R2       | 2.62614 | -0.00005 | -0.00013            | 0.00002           | -0.00010           | 2.62604 |
| R3       | 2.03324 | 0.00000  | -0.00007            | 0.00002           | -0.00005           | 2.03319 |
| R4       | 2.62967 | 0.00010  | -0.00004            | -0.00007          | -0.00012           | 2.62955 |
| R5       | 2.03120 | -0.00001 | -0.00003            | 0.00001           | -0.00003           | 2.03118 |
| R6       | 2.54651 | -0.00015 | -0.00008            | -0.00021          | -0.00031           | 2.54620 |
| R7       | 2.68737 | 0.00018  | 0.00118             | -0.00065          | 0.00053            | 2.68790 |
| R8       | 2.52969 | 0.00011  | 0.00041             | 0.00005           | 0.00046            | 2.53015 |
| R9       | 2.02827 | -0.00003 | -0.00016            | -0.00018          | -0.00034           | 2.02793 |
| R10      | 2.77354 | 0.00006  | 0.00085             | -0.00023          | 0.00061            | 2.77415 |
| R11      | 2.89563 | -0.00015 | 0.00016             | 0.00064           | 0.00081            | 2.89644 |
| R12      | 2.05900 | 0.00001  | 0.00002             | -0.00002          | 0.00000            | 2.05899 |
| R13      | 2.06328 | -0.00001 | -0.00011            | 0.00010           | -0.00001           | 2.06327 |
| R14      | 2.07388 | -0.00006 | -0.00017            | -0.00014          | -0.00031           | 2.07358 |
| R15      | 2.06628 | -0.00020 | 0.00001             | -0.00009          | -0.00008           | 2.06620 |
| R16      | 2.69427 | -0.00006 | -0.00092            | 0.00009           | -0.00083           | 2.69344 |

|     |          |          |          |          |          |          |
|-----|----------|----------|----------|----------|----------|----------|
| R17 | 5.31337  | -0.00008 | 0.00159  | 0.00071  | 0.00230  | 5.31568  |
| R18 | 2.50743  | -0.00006 | -0.00023 | 0.00007  | -0.00016 | 2.50727  |
| R19 | 2.05094  | 0.00001  | 0.00028  | -0.00038 | -0.00010 | 2.05084  |
| R20 | 2.04376  | -0.00003 | -0.00009 | -0.00009 | -0.00018 | 2.04358  |
| R21 | 2.04796  | -0.00005 | -0.00004 | -0.00012 | -0.00016 | 2.04779  |
| R22 | 1.81572  | 0.00007  | 0.00003  | 0.00003  | 0.00006  | 1.81578  |
| A1  | 1.87483  | -0.00009 | 0.00008  | -0.00023 | -0.00014 | 1.87468  |
| A2  | 2.28020  | 0.00003  | -0.00028 | 0.00006  | -0.00022 | 2.27997  |
| A3  | 2.12812  | 0.00006  | 0.00020  | 0.00017  | 0.00036  | 2.12848  |
| A4  | 1.86860  | 0.00001  | -0.00003 | 0.00007  | 0.00003  | 1.86863  |
| A5  | 2.28568  | 0.00002  | 0.00023  | 0.00012  | 0.00033  | 2.28601  |
| A6  | 2.12840  | -0.00003 | -0.00026 | -0.00025 | -0.00052 | 2.12789  |
| A7  | 1.89238  | 0.00002  | 0.00003  | 0.00012  | 0.00018  | 1.89256  |
| A8  | 2.22984  | -0.00005 | -0.00093 | 0.00006  | -0.00082 | 2.22902  |
| A9  | 2.15163  | 0.00002  | 0.00059  | -0.00017 | 0.00047  | 2.15210  |
| A10 | 1.89211  | -0.00001 | 0.00006  | -0.00018 | -0.00014 | 1.89197  |
| A11 | 2.18987  | 0.00006  | 0.00047  | -0.00015 | 0.00031  | 2.19018  |
| A12 | 2.19788  | -0.00004 | -0.00093 | 0.00017  | -0.00077 | 2.19711  |
| A13 | 1.89481  | 0.00008  | -0.00012 | 0.00017  | 0.00006  | 1.89487  |
| A14 | 2.19979  | 0.00023  | 0.00001  | 0.00003  | 0.00004  | 2.19983  |
| A15 | 2.17472  | -0.00033 | -0.00018 | -0.00058 | -0.00077 | 2.17396  |
| A16 | 1.95002  | -0.00093 | -0.00055 | -0.00020 | -0.00075 | 1.94926  |
| A17 | 1.88389  | 0.00012  | -0.00096 | -0.00064 | -0.00160 | 1.88229  |
| A18 | 1.89346  | 0.00041  | 0.00063  | 0.00050  | 0.00113  | 1.89458  |
| A19 | 1.91607  | 0.00010  | -0.00061 | -0.00044 | -0.00104 | 1.91503  |
| A20 | 1.92895  | 0.00044  | 0.00132  | 0.00070  | 0.00202  | 1.93097  |
| A21 | 1.88987  | -0.00013 | 0.00015  | 0.00006  | 0.00021  | 1.89009  |
| A22 | 1.91900  | 0.00022  | -0.00004 | 0.00033  | 0.00029  | 1.91928  |
| A23 | 1.90813  | -0.00130 | -0.00137 | -0.00022 | -0.00159 | 1.90653  |
| A24 | 1.85594  | 0.00058  | 0.00231  | 0.00158  | 0.00389  | 1.85983  |
| A25 | 1.89606  | 0.00020  | -0.00045 | 0.00011  | -0.00034 | 1.89571  |
| A26 | 1.91988  | -0.00022 | -0.00131 | -0.00116 | -0.00247 | 1.91742  |
| A27 | 1.96454  | 0.00051  | 0.00089  | -0.00061 | 0.00028  | 1.96482  |
| A28 | 2.55532  | -0.00127 | 0.00150  | -0.00002 | 0.00148  | 2.55681  |
| A29 | 2.15376  | -0.00017 | -0.00143 | -0.00004 | -0.00147 | 2.15229  |
| A30 | 1.95338  | -0.00008 | -0.00088 | -0.00007 | -0.00095 | 1.95243  |
| A31 | 2.17514  | 0.00025  | 0.00234  | 0.00009  | 0.00243  | 2.17757  |
| A32 | 2.08496  | 0.00007  | 0.00087  | 0.00005  | 0.00092  | 2.08588  |
| A33 | 2.14656  | -0.00009 | -0.00090 | -0.00022 | -0.00112 | 2.14545  |
| A34 | 2.05166  | 0.00003  | 0.00003  | 0.00017  | 0.00020  | 2.05186  |
| A35 | 1.89756  | 0.00012  | 0.00047  | 0.00015  | 0.00061  | 1.89817  |
| D1  | 0.00519  | 0.00002  | -0.00067 | 0.00097  | 0.00030  | 0.00549  |
| D2  | 3.11259  | -0.00010 | -0.00349 | -0.00116 | -0.00466 | 3.10792  |
| D3  | -3.12667 | 0.00009  | -0.00033 | 0.00150  | 0.00117  | -3.12550 |

|     |          |          |          |          |          |          |
|-----|----------|----------|----------|----------|----------|----------|
| D4  | -0.01928 | -0.00003 | -0.00316 | -0.00063 | -0.00379 | -0.02308 |
| D5  | -0.04064 | 0.00005  | 0.00080  | -0.00118 | -0.00038 | -0.04102 |
| D6  | -3.00988 | 0.00019  | 0.00252  | 0.00125  | 0.00378  | -3.00610 |
| D7  | 3.09226  | -0.00001 | 0.00049  | -0.00165 | -0.00116 | 3.09110  |
| D8  | 0.12302  | 0.00013  | 0.00222  | 0.00078  | 0.00299  | 0.12601  |
| D9  | 0.03175  | -0.00008 | 0.00032  | -0.00044 | -0.00011 | 0.03164  |
| D10 | 3.02917  | -0.00011 | -0.00088 | -0.00042 | -0.00130 | 3.02786  |
| D11 | -3.07941 | 0.00003  | 0.00284  | 0.00145  | 0.00429  | -3.07512 |
| D12 | -0.08199 | 0.00000  | 0.00164  | 0.00147  | 0.00309  | -0.07889 |
| D13 | -0.05748 | 0.00011  | 0.00017  | -0.00029 | -0.00012 | -0.05760 |
| D14 | -3.11566 | 0.00005  | 0.00541  | 0.00163  | 0.00705  | -3.10861 |
| D15 | -3.06278 | 0.00014  | 0.00148  | -0.00033 | 0.00114  | -3.06164 |
| D16 | 0.16223  | 0.00008  | 0.00672  | 0.00159  | 0.00831  | 0.17053  |
| D17 | 0.62112  | 0.00006  | 0.00578  | 0.00486  | 0.01064  | 0.63176  |
| D18 | -2.47661 | 0.00004  | 0.00499  | 0.00529  | 0.01028  | -2.46633 |
| D19 | -2.68425 | 0.00003  | 0.00433  | 0.00491  | 0.00924  | -2.67501 |
| D20 | 0.50120  | 0.00001  | 0.00354  | 0.00534  | 0.00888  | 0.51008  |
| D21 | 0.06073  | -0.00010 | -0.00059 | 0.00090  | 0.00031  | 0.06104  |
| D22 | 3.03304  | -0.00017 | -0.00226 | -0.00141 | -0.00367 | 3.02937  |
| D23 | 3.11843  | -0.00003 | -0.00578 | -0.00105 | -0.00683 | 3.11160  |
| D24 | -0.19245 | -0.00010 | -0.00745 | -0.00336 | -0.01081 | -0.20326 |
| D25 | 1.28524  | 0.00026  | -0.00802 | -0.00354 | -0.01157 | 1.27367  |
| D26 | -2.88967 | -0.00010 | -0.00974 | -0.00463 | -0.01437 | -2.90404 |
| D27 | -0.84549 | 0.00003  | -0.00975 | -0.00464 | -0.01438 | -0.85987 |
| D28 | -1.65754 | 0.00038  | -0.00604 | -0.00083 | -0.00687 | -1.66441 |
| D29 | 0.45074  | 0.00002  | -0.00776 | -0.00191 | -0.00967 | 0.44107  |
| D30 | 2.49492  | 0.00015  | -0.00777 | -0.00192 | -0.00969 | 2.48523  |
| D31 | -1.00202 | -0.00008 | -0.00692 | -0.00271 | -0.00963 | -1.01165 |
| D32 | 1.07809  | -0.00050 | -0.00834 | -0.00251 | -0.01085 | 1.06723  |
| D33 | -3.07985 | -0.00027 | -0.00667 | -0.00243 | -0.00910 | -3.08895 |
| D34 | -3.09145 | 0.00030  | -0.00496 | -0.00149 | -0.00645 | -3.09790 |
| D35 | -1.01134 | -0.00012 | -0.00638 | -0.00129 | -0.00767 | -1.01901 |
| D36 | 1.11390  | 0.00010  | -0.00471 | -0.00120 | -0.00592 | 1.10799  |
| D37 | 1.10819  | 0.00011  | -0.00558 | -0.00173 | -0.00731 | 1.10087  |
| D38 | -3.09489 | -0.00030 | -0.00700 | -0.00153 | -0.00853 | -3.10343 |
| D39 | -0.96965 | -0.00008 | -0.00533 | -0.00144 | -0.00678 | -0.97643 |
| D40 | -0.45686 | 0.00024  | 0.02654  | 0.01004  | 0.03657  | -0.42028 |
| D41 | 1.63739  | -0.00014 | 0.02540  | 0.01037  | 0.03578  | 1.67317  |
| D42 | -2.51525 | 0.00006  | 0.02401  | 0.00858  | 0.03260  | -2.48265 |
| D43 | -2.40792 | 0.00049  | 0.02034  | 0.03145  | 0.05179  | -2.35613 |
| D44 | 1.79801  | 0.00001  | 0.01977  | 0.03076  | 0.05052  | 1.84854  |
| D45 | -0.31900 | -0.00044 | 0.02066  | 0.03185  | 0.05251  | -0.26649 |
| D46 | -3.08928 | -0.00001 | 0.00014  | 0.00065  | 0.00078  | -3.08850 |
| D47 | 0.05043  | 0.00000  | 0.00025  | 0.00052  | 0.00077  | 0.05120  |

D48            0.00286    0.00001    0.00092    0.00016    0.00109    0.00394  
 D49            -3.14061    0.00002    0.00104    0.00003    0.00107    -3.13954

| Item                 | Value    | Threshold | Converged? |
|----------------------|----------|-----------|------------|
| Maximum Force        | 0.001300 | 0.000450  | NO         |
| RMS Force            | 0.000263 | 0.000300  | YES        |
| Maximum Displacement | 0.056138 | 0.001800  | NO         |
| RMS Displacement     | 0.011326 | 0.001200  | NO         |

Predicted change in Energy=-5.433097D-07

GradGradGradGradGradGradGradGradGradGradGradGradGradGradGradGradGrad

Input orientation:

| Center Number | Atomic Number | Atomic Type | Coordinates (Angstroms) |           |           |
|---------------|---------------|-------------|-------------------------|-----------|-----------|
|               |               |             | X                       | Y         | Z         |
| 1             | 6             | 0           | -0.452412               | -1.974096 | -1.313627 |
| 2             | 6             | 0           | -1.743146               | -1.599957 | -1.483855 |
| 3             | 7             | 0           | -2.109101               | -0.871065 | -0.356440 |
| 4             | 6             | 0           | -1.038626               | -0.777503 | 0.456453  |
| 5             | 7             | 0           | -0.035344               | -1.480958 | -0.083193 |
| 6             | 6             | 0           | 1.336289                | -1.510358 | 0.439146  |
| 7             | 6             | 0           | 2.236686                | -0.497281 | -0.276547 |
| 8             | 1             | 0           | 0.204982                | -2.534674 | -1.954864 |
| 9             | 1             | 0           | -2.419253               | -1.754063 | -2.305097 |
| 10            | 1             | 0           | 1.293665                | -1.277449 | 1.502679  |
| 11            | 1             | 0           | 1.729678                | -2.522496 | 0.325458  |
| 12            | 1             | 0           | 2.246973                | -0.701177 | -1.354678 |
| 13            | 1             | 0           | 1.844028                | 0.510399  | -0.115620 |
| 14            | 35            | 0           | -0.412047               | 2.081017  | 0.480937  |
| 15            | 1             | 0           | -1.024946               | -0.296628 | 1.415721  |
| 16            | 6             | 0           | -3.323282               | -0.164530 | -0.133454 |
| 17            | 6             | 0           | -4.503663               | -0.589644 | -0.565139 |
| 18            | 1             | 0           | -3.155801               | 0.772460  | 0.387874  |
| 19            | 1             | 0           | -5.381385               | 0.021155  | -0.403936 |
| 20            | 1             | 0           | -4.637130               | -1.532898 | -1.081613 |
| 21            | 8             | 0           | 3.545917                | -0.666656 | 0.260789  |
| 22            | 1             | 0           | 3.918269                | 0.199523  | 0.446159  |

Distance matrix (angstroms):

|     | 1        | 2        | 3        | 4        | 5 |
|-----|----------|----------|----------|----------|---|
| 1 C | 0.000000 |          |          |          |   |
| 2 C | 1.354604 | 0.000000 |          |          |   |
| 3 N | 2.208507 | 1.391500 | 0.000000 |          |   |
| 4 C | 2.215551 | 2.222066 | 1.347392 | 0.000000 |   |

|    |    |          |          |          |          |          |
|----|----|----------|----------|----------|----------|----------|
| 5  | N  | 1.389640 | 2.211923 | 2.178785 | 1.338897 | 0.000000 |
| 6  | C  | 2.546904 | 3.631650 | 3.593378 | 2.485478 | 1.468018 |
| 7  | C  | 3.238482 | 4.302621 | 4.362564 | 3.368009 | 2.483370 |
| 8  | H  | 1.075918 | 2.211503 | 3.267650 | 3.232439 | 2.161302 |
| 9  | H  | 2.213569 | 1.074852 | 2.161745 | 3.238202 | 3.270239 |
| 10 | H  | 3.386102 | 4.271489 | 3.898755 | 2.604634 | 2.079103 |
| 11 | H  | 2.783677 | 4.023083 | 4.234198 | 3.275006 | 2.089760 |
| 12 | H  | 2.984742 | 4.092132 | 4.472217 | 3.752490 | 2.726481 |
| 13 | H  | 3.589091 | 4.381037 | 4.194481 | 3.208685 | 2.738356 |
| 14 | Br | 4.434640 | 4.379704 | 3.506563 | 2.926489 | 3.625992 |
| 15 | H  | 3.254387 | 3.259144 | 2.155440 | 1.073136 | 2.151440 |
| 16 | C  | 3.592942 | 2.526038 | 1.422375 | 2.437904 | 3.542040 |
| 17 | C  | 4.346214 | 3.079810 | 2.420058 | 3.617378 | 4.581767 |
| 18 | H  | 4.212717 | 3.335765 | 2.085846 | 2.624788 | 3.877763 |
| 19 | H  | 5.394752 | 4.126866 | 3.392073 | 4.498631 | 5.562318 |
| 20 | H  | 4.214303 | 2.922575 | 2.711979 | 3.985662 | 4.709138 |
| 21 | O  | 4.491640 | 5.647037 | 5.692275 | 4.590056 | 3.688745 |
| 22 | H  | 5.188866 | 6.246176 | 6.174101 | 5.052277 | 4.328428 |
|    |    | 6        | 7        | 8        | 9        | 10       |
| 6  | C  | 0.000000 |          |          |          |          |
| 7  | C  | 1.532729 | 0.000000 |          |          |          |
| 8  | H  | 2.839078 | 3.330997 | 0.000000 |          |          |
| 9  | H  | 4.657720 | 5.231852 | 2.760185 | 0.000000 |          |
| 10 | H  | 1.089571 | 2.159536 | 3.836724 | 5.339670 | 0.000000 |
| 11 | H  | 1.091835 | 2.172778 | 2.743121 | 4.972316 | 1.768078 |
| 12 | H  | 2.168392 | 1.097290 | 2.809210 | 4.877041 | 3.066818 |
| 13 | H  | 2.156159 | 1.093387 | 3.916856 | 5.300675 | 2.473497 |
| 14 | Br | 3.994546 | 3.773220 | 5.255327 | 5.147689 | 3.902910 |
| 15 | H  | 2.828828 | 3.679983 | 4.228760 | 4.232338 | 2.519033 |
| 16 | C  | 4.883720 | 5.571754 | 4.624258 | 2.838999 | 5.023119 |
| 17 | C  | 5.996778 | 6.747157 | 5.280702 | 2.954334 | 6.193380 |
| 18 | H  | 5.039122 | 5.579660 | 5.265018 | 3.765357 | 5.024207 |
| 19 | H  | 6.941431 | 7.636754 | 6.336019 | 3.942086 | 7.062425 |
| 20 | H  | 6.164005 | 6.997856 | 5.021172 | 2.542599 | 6.474423 |
| 21 | O  | 2.371941 | 1.425309 | 4.422721 | 6.584032 | 2.643482 |
| 22 | H  | 3.096832 | 1.958460 | 5.198967 | 7.179839 | 3.191587 |
|    |    | 11       | 12       | 13       | 14       | 15       |
| 11 | H  | 0.000000 |          |          |          |          |
| 12 | H  | 2.531334 | 0.000000 |          |          |          |
| 13 | H  | 3.066932 | 1.779198 | 0.000000 |          |          |
| 14 | Br | 5.079714 | 4.263857 | 2.812935 | 0.000000 |          |
| 15 | H  | 3.705551 | 4.306300 | 3.350718 | 2.627292 | 0.000000 |
| 16 | C  | 5.594909 | 5.727750 | 5.211233 | 3.727633 | 2.774841 |
| 17 | C  | 6.586624 | 6.797566 | 6.457968 | 4.996802 | 4.013868 |

|    |   |          |          |          |          |          |
|----|---|----------|----------|----------|----------|----------|
| 18 | H | 5.893091 | 5.864985 | 5.031945 | 3.041244 | 2.596143 |
| 19 | H | 7.587450 | 7.721239 | 7.247695 | 5.451638 | 4.731881 |
| 20 | H | 6.595104 | 6.939539 | 6.863936 | 5.775229 | 4.562117 |
| 21 | O | 2.597508 | 2.073206 | 2.103228 | 4.823242 | 4.729015 |
| 22 | H | 3.494838 | 2.616774 | 2.171340 | 4.721533 | 5.061778 |
|    |   | 16       | 17       | 18       | 19       | 20       |
| 16 | C | 0.000000 |          |          |          |          |
| 17 | C | 1.326790 | 0.000000 |          |          |          |
| 18 | H | 1.085257 | 2.140162 | 0.000000 |          |          |
| 19 | H | 2.084089 | 1.081415 | 2.478840 | 0.000000 |          |
| 20 | H | 2.120762 | 1.083645 | 3.109406 | 1.851552 | 0.000000 |
| 21 | O | 6.898801 | 8.092208 | 6.855671 | 8.978401 | 8.337547 |
| 22 | H | 7.273827 | 8.519064 | 7.097473 | 9.340132 | 8.861729 |
|    |   | 21       | 22       |          |          |          |
| 21 | O | 0.000000 |          |          |          |          |
| 22 | H | 0.960872 | 0.000000 |          |          |          |

Stoichiometry C7H11BrN2O

Framework group C1[X(C7H11BrN2O)]

Deg. of freedom 60

Full point group C1 NOp 1

Largest Abelian subgroup C1 NOp 1

Largest concise Abelian subgroup C1 NOp 1

Standard orientation:

| Center<br>Number | Atomic<br>Number | Atomic<br>Type | Coordinates (Angstroms) |           |           |
|------------------|------------------|----------------|-------------------------|-----------|-----------|
|                  |                  |                | X                       | Y         | Z         |
| 1                | 6                | 0              | -0.158731               | -2.254059 | -0.618546 |
| 2                | 6                | 0              | -1.455946               | -1.887357 | -0.751636 |
| 3                | 7                | 0              | -1.677956               | -0.841198 | 0.138608  |
| 4                | 6                | 0              | -0.518238               | -0.561202 | 0.764804  |
| 5                | 7                | 0              | 0.406081                | -1.438813 | 0.354831  |
| 6                | 6                | 0              | 1.829186                | -1.376163 | 0.709688  |
| 7                | 6                | 0              | 2.651221                | -0.663425 | -0.369905 |
| 8                | 1                | 0              | 0.411888                | -3.009311 | -1.130001 |
| 9                | 1                | 0              | -2.225771               | -2.245961 | -1.410482 |
| 10               | 1                | 0              | 1.914774                | -0.837172 | 1.652730  |
| 11               | 1                | 0              | 2.194299                | -2.393776 | 0.862194  |
| 12               | 1                | 0              | 2.532154                | -1.177550 | -1.331957 |
| 13               | 1                | 0              | 2.292339                | 0.363883  | -0.476378 |
| 14               | 35               | 0              | 0.141116                | 2.144031  | -0.135919 |
| 15               | 1                | 0              | -0.386033               | 0.180876  | 1.528652  |
| 16               | 6                | 0              | -2.848909               | -0.044552 | 0.270414  |
| 17               | 6                | 0              | -4.076892               | -0.522910 | 0.116783  |



|    |   |   |           |           |           |
|----|---|---|-----------|-----------|-----------|
| 18 | 1 | 0 | -2.610031 | 0.995892  | 0.465855  |
| 19 | 1 | 0 | -4.922164 | 0.148436  | 0.182117  |
| 20 | 1 | 0 | -4.281498 | -1.569478 | -0.075879 |
| 21 | 8 | 0 | 4.012449  | -0.726972 | 0.047858  |
| 22 | 1 | 0 | 4.414387  | 0.136928  | -0.076227 |

-----

Rotational constants (GHZ):      0.8244192      0.5690358      0.3565924

Standard basis: 6-311++G(d,p) (5D, 7F)

There are    358 symmetry adapted cartesian basis functions of A    symmetry.

There are    345 symmetry adapted basis functions of A    symmetry.

    345 basis functions,    553 primitive gaussians,    358 cartesian basis functions

    55 alpha electrons      55 beta electrons

        nuclear repulsion energy      867.0098347454 Hartrees.

NAtoms=    22 NActive=    22 NUniq=    22 SFac= 1.00D+00 NAtFMM=    60 NAOKFM=F

Big=F

Integral buffers will be    131072 words long.

Raffenetti 2 integral format.

Two-electron integral symmetry is turned on.

One-electron integrals computed using PRISM.

NBasis=    345 RedAO= T EigKep=    6.86D-06 NBF=    345

NBsUse=    345 1.00D-06 EigRej= -1.00D+00 NBFU=    345

Initial guess from the checkpoint file: ". "

B after Tr=    0.000000    0.000000    0.000000

        Rot=    0.999999    0.000348    0.000001    -0.001443 Ang=    0.17 deg.

ExpMin= 3.50D-02 ExpMax= 4.40D+05 ExpMxC= 1.51D+04 IAcc=3 IRadAn=      5 AccDes=

0.00D+00

Harris functional with IExCor=    402 and IRadAn=      5 diagonalized for initial guess.

HarFok: IExCor=    402 AccDes= 0.00D+00 IRadAn=      5 IDoV= 1 UseB2=F ITyADJ=14

ICtDFT=    3500011 ScaDFX=    1.000000    1.000000    1.000000    1.000000

FoFCou: FMM=F IPFlag=            0 FMFlag=      100000 FMFlg1=            0

        NFxFlg=            0 DoJE=T BraDBF=F KetDBF=T FulRan=T

        wScrn=    0.000000 ICntrl=      500 IOpCl=    0 I1Cent=    200000004 NGrid=

0

        NMat0=      1 NMatS0=      1 NMatT0=      0 NMatD0=      1 NMtDS0=      0

NMtDT0=    0

Petite list used in FoFCou.

Keep R1 ints in memory in canonical form, NReq=1804729152.

Requested convergence on RMS density matrix=1.00D-08 within 128 cycles.

Requested convergence on MAX density matrix=1.00D-06.

Requested convergence on            energy=1.00D-06.

No special actions if energy rises.

SCF Done: E(RB3LYP) = -3032.33817051      A.U. after    11 cycles

        NFock= 11 Conv=0.40D-08      -V/T= 2.0017

Calling FoFJK, ICntrl=      2127 FMM=F ISym2X=0 I1Cent= 0 IOpClX= 0 NMat=1 NMatS=1

NMatT=0.

\*\*\*\*\* Axes restored to original set \*\*\*\*\*

| Center<br>Number | Atomic<br>Number | Forces (Hartrees/Bohr) |              |              |
|------------------|------------------|------------------------|--------------|--------------|
|                  |                  | X                      | Y            | Z            |
| 1                | 6                | -0.000047987           | -0.000025028 | -0.000038601 |
| 2                | 6                | 0.000075570            | -0.000039524 | -0.000099880 |
| 3                | 7                | -0.000085709           | -0.000211096 | 0.000135606  |
| 4                | 6                | 0.000059927            | 0.000277306  | 0.000010086  |
| 5                | 7                | 0.000093481            | -0.000004448 | 0.000020154  |
| 6                | 6                | -0.000118380           | -0.000028035 | -0.000002561 |
| 7                | 6                | 0.000232647            | 0.000037138  | 0.000078810  |
| 8                | 1                | -0.000007717           | -0.000040053 | 0.000017912  |
| 9                | 1                | -0.000019367           | -0.000011523 | 0.000001457  |
| 10               | 1                | -0.000006365           | -0.000025929 | 0.000040944  |
| 11               | 1                | -0.000020936           | 0.000015884  | -0.000008365 |
| 12               | 1                | 0.000041741            | 0.000000542  | 0.000083146  |
| 13               | 1                | -0.000317572           | -0.000111644 | -0.000129224 |
| 14               | 35               | 0.000131457            | 0.000062828  | 0.000018213  |
| 15               | 1                | -0.000056218           | -0.000190028 | 0.000040396  |
| 16               | 6                | -0.000084602           | 0.000168467  | -0.000115231 |
| 17               | 6                | -0.000010829           | -0.000018181 | -0.000027577 |
| 18               | 1                | 0.000036755            | 0.000082587  | 0.000029710  |
| 19               | 1                | -0.000024634           | 0.000045229  | 0.000010073  |
| 20               | 1                | 0.000017879            | -0.000007529 | -0.000019564 |
| 21               | 8                | 0.000103140            | 0.000069840  | -0.000100847 |
| 22               | 1                | 0.000007717            | -0.000046805 | 0.000055343  |

Cartesian Forces: Max 0.000317572 RMS 0.000091999

GradGradGradGradGradGradGradGradGradGradGradGradGradGradGradGradGradGradGrad  
Berny optimization.

Using GEDIIS/GDIIS optimizer.

FormGI is forming the generalized inverse of G from B-inverse, IUseBI=4.

Internal Forces: Max 0.000619246 RMS 0.000078240

Search for a local minimum.

Step number 17 out of a maximum of 116

All quantities printed in internal units (Hartrees-Bohrs-Radians)

Mixed Optimization -- En-DIIS/RFO-DIIS

Swapping is turned off.

Update second derivatives using D2CorX and points 13 14 15 16 17

DE= -1.66D-05 DEPred=-5.43D-07 R= 3.05D+01

TightC=F SS= 1.41D+00 RLast= 1.18D-01 DXNew= 1.8091D+00 3.5356D-01

Trust test= 3.05D+01 RLast= 1.18D-01 DXMaxT set to 1.08D+00

ITU= 1 1 1 1 1 1 1 1 1 1 1 1 1 0 0-1 0 0

|                 |         |         |         |         |         |
|-----------------|---------|---------|---------|---------|---------|
| Eigenvalues --- | 0.00008 | 0.00181 | 0.00472 | 0.00733 | 0.01224 |
| Eigenvalues --- | 0.01541 | 0.01585 | 0.01923 | 0.02027 | 0.02092 |
| Eigenvalues --- | 0.02306 | 0.02437 | 0.03071 | 0.03103 | 0.03470 |
| Eigenvalues --- | 0.04295 | 0.04820 | 0.05450 | 0.05853 | 0.06796 |
| Eigenvalues --- | 0.08736 | 0.09318 | 0.13657 | 0.14221 | 0.15410 |
| Eigenvalues --- | 0.15737 | 0.15897 | 0.15989 | 0.15998 | 0.16094 |
| Eigenvalues --- | 0.16649 | 0.19153 | 0.20863 | 0.22799 | 0.22951 |
| Eigenvalues --- | 0.24305 | 0.25328 | 0.25583 | 0.29711 | 0.33267 |
| Eigenvalues --- | 0.33865 | 0.33879 | 0.33934 | 0.34120 | 0.34364 |
| Eigenvalues --- | 0.34681 | 0.34978 | 0.36120 | 0.36313 | 0.36426 |
| Eigenvalues --- | 0.37234 | 0.42801 | 0.43328 | 0.45880 | 0.50710 |
| Eigenvalues --- | 0.53677 | 0.54370 | 0.55752 | 0.60652 | 2.39081 |

Eigenvalue 1 is 8.23D-05 Eigenvector:

|   |          |          |          |          |          |
|---|----------|----------|----------|----------|----------|
|   | D45      | D43      | D44      | D40      | D41      |
| 1 | -0.43167 | -0.42135 | -0.41587 | -0.35468 | -0.35441 |
|   | D42      | D26      | D27      | D25      | D29      |
| 1 | -0.32572 | 0.13418  | 0.13144  | 0.12128  | 0.10689  |

En-DIIS/RFO-DIIS IScMMF= 0 using points: 17 16 15 14 13

RFO step: Lambda=-1.93658433D-06.

DidBck=F Rises=F RFO-DIIS coefs: 1.90397 0.69222 -1.57278 0.21018 -

0.23359

|             |            |            |           |            |
|-------------|------------|------------|-----------|------------|
| Iteration 1 | RMS(Cart)= | 0.04639147 | RMS(Int)= | 0.00424246 |
| Iteration 2 | RMS(Cart)= | 0.00740395 | RMS(Int)= | 0.00006766 |
| Iteration 3 | RMS(Cart)= | 0.00005934 | RMS(Int)= | 0.00001990 |
| Iteration 4 | RMS(Cart)= | 0.00000001 | RMS(Int)= | 0.00001990 |

| Variable | Old X   | -DE/DX   | Delta X<br>(Linear) | Delta X<br>(Quad) | Delta X<br>(Total) | New X   |
|----------|---------|----------|---------------------|-------------------|--------------------|---------|
| R1       | 2.55983 | -0.00001 | 0.00055             | -0.00004          | 0.00050            | 2.56032 |
| R2       | 2.62604 | 0.00007  | -0.00025            | 0.00022           | -0.00003           | 2.62601 |
| R3       | 2.03319 | 0.00001  | -0.00014            | 0.00000           | -0.00013           | 2.03306 |
| R4       | 2.62955 | 0.00010  | -0.00097            | 0.00076           | -0.00020           | 2.62935 |
| R5       | 2.03118 | 0.00001  | -0.00007            | 0.00002           | -0.00005           | 2.03113 |
| R6       | 2.54620 | 0.00011  | -0.00031            | 0.00037           | 0.00006            | 2.54627 |
| R7       | 2.68790 | 0.00015  | -0.00147            | 0.00060           | -0.00087           | 2.68703 |
| R8       | 2.53015 | 0.00010  | 0.00056             | -0.00001          | 0.00056            | 2.53070 |
| R9       | 2.02793 | -0.00005 | -0.00054            | -0.00025          | -0.00079           | 2.02715 |
| R10      | 2.77415 | 0.00004  | 0.00058             | 0.00058           | 0.00116            | 2.77532 |
| R11      | 2.89644 | 0.00017  | 0.00171             | 0.00151           | 0.00322            | 2.89966 |
| R12      | 2.05899 | 0.00003  | -0.00016            | -0.00001          | -0.00017           | 2.05882 |
| R13      | 2.06327 | -0.00002 | 0.00023             | -0.00010          | 0.00012            | 2.06339 |
| R14      | 2.07358 | -0.00008 | -0.00069            | -0.00069          | -0.00137           | 2.07220 |
| R15      | 2.06620 | 0.00002  | -0.00044            | -0.00013          | -0.00058           | 2.06563 |

|     |         |          |          |          |          |         |
|-----|---------|----------|----------|----------|----------|---------|
| R16 | 2.69344 | 0.00007  | -0.00099 | -0.00012 | -0.00111 | 2.69233 |
| R17 | 5.31568 | -0.00006 | 0.01301  | -0.00021 | 0.01279  | 5.32847 |
| R18 | 2.50727 | 0.00003  | -0.00004 | 0.00009  | 0.00004  | 2.50731 |
| R19 | 2.05084 | 0.00008  | -0.00091 | 0.00029  | -0.00062 | 2.05022 |
| R20 | 2.04358 | 0.00004  | -0.00030 | 0.00009  | -0.00021 | 2.04337 |
| R21 | 2.04779 | 0.00002  | -0.00017 | 0.00000  | -0.00018 | 2.04762 |
| R22 | 1.81578 | -0.00001 | -0.00019 | -0.00018 | -0.00037 | 1.81542 |
| A1  | 1.87468 | 0.00003  | -0.00018 | 0.00029  | 0.00011  | 1.87480 |
| A2  | 2.27997 | -0.00002 | -0.00077 | -0.00023 | -0.00102 | 2.27896 |
| A3  | 2.12848 | -0.00002 | 0.00092  | -0.00004 | 0.00086  | 2.12934 |
| A4  | 1.86863 | 0.00001  | -0.00014 | 0.00007  | -0.00008 | 1.86855 |
| A5  | 2.28601 | 0.00000  | 0.00009  | -0.00013 | -0.00008 | 2.28594 |
| A6  | 2.12789 | -0.00001 | -0.00026 | 0.00012  | -0.00018 | 2.12771 |
| A7  | 1.89256 | -0.00002 | 0.00077  | -0.00058 | 0.00019  | 1.89275 |
| A8  | 2.22902 | -0.00002 | 0.00045  | -0.00003 | 0.00038  | 2.22940 |
| A9  | 2.15210 | 0.00004  | 0.00061  | -0.00026 | 0.00031  | 2.15241 |
| A10 | 1.89197 | -0.00001 | -0.00055 | 0.00056  | 0.00001  | 1.89198 |
| A11 | 2.19018 | 0.00001  | 0.00045  | -0.00021 | 0.00017  | 2.19036 |
| A12 | 2.19711 | 0.00000  | -0.00068 | -0.00067 | -0.00141 | 2.19571 |
| A13 | 1.89487 | -0.00002 | 0.00017  | -0.00033 | -0.00017 | 1.89470 |
| A14 | 2.19983 | -0.00007 | 0.00092  | 0.00025  | 0.00111  | 2.20094 |
| A15 | 2.17396 | 0.00009  | -0.00272 | -0.00037 | -0.00314 | 2.17081 |
| A16 | 1.94926 | 0.00008  | -0.00185 | -0.00030 | -0.00216 | 1.94710 |
| A17 | 1.88229 | 0.00000  | -0.00347 | -0.00070 | -0.00419 | 1.87809 |
| A18 | 1.89458 | -0.00005 | 0.00309  | 0.00083  | 0.00392  | 1.89850 |
| A19 | 1.91503 | 0.00001  | -0.00259 | -0.00001 | -0.00263 | 1.91240 |
| A20 | 1.93097 | -0.00004 | 0.00396  | -0.00035 | 0.00362  | 1.93459 |
| A21 | 1.89009 | 0.00001  | 0.00082  | 0.00055  | 0.00138  | 1.89147 |
| A22 | 1.91928 | -0.00005 | 0.00117  | -0.00025 | 0.00096  | 1.92024 |
| A23 | 1.90653 | 0.00008  | -0.00337 | 0.00047  | -0.00291 | 1.90362 |
| A24 | 1.85983 | 0.00011  | 0.01038  | 0.00416  | 0.01454  | 1.87437 |
| A25 | 1.89571 | -0.00001 | 0.00134  | -0.00064 | 0.00068  | 1.89639 |
| A26 | 1.91742 | -0.00005 | -0.00827 | -0.00377 | -0.01207 | 1.90535 |
| A27 | 1.96482 | -0.00008 | -0.00110 | 0.00010  | -0.00103 | 1.96379 |
| A28 | 2.55681 | 0.00062  | 0.00165  | 0.00159  | 0.00324  | 2.56004 |
| A29 | 2.15229 | -0.00004 | 0.00041  | 0.00008  | 0.00049  | 2.15278 |
| A30 | 1.95243 | 0.00000  | 0.00094  | -0.00070 | 0.00025  | 1.95268 |
| A31 | 2.17757 | 0.00004  | -0.00134 | 0.00066  | -0.00068 | 2.17689 |
| A32 | 2.08588 | 0.00000  | 0.00153  | -0.00021 | 0.00132  | 2.08720 |
| A33 | 2.14545 | -0.00002 | -0.00069 | -0.00015 | -0.00084 | 2.14460 |
| A34 | 2.05186 | 0.00002  | -0.00085 | 0.00037  | -0.00048 | 2.05138 |
| A35 | 1.89817 | 0.00006  | 0.00032  | 0.00089  | 0.00121  | 1.89938 |
| D1  | 0.00549 | -0.00001 | 0.00187  | -0.00119 | 0.00068  | 0.00618 |
| D2  | 3.10792 | 0.00000  | -0.00898 | 0.00052  | -0.00846 | 3.09946 |

|     |          |          |          |          |          |          |
|-----|----------|----------|----------|----------|----------|----------|
| D3  | -3.12550 | -0.00002 | 0.00768  | -0.00290 | 0.00479  | -3.12072 |
| D4  | -0.02308 | -0.00001 | -0.00318 | -0.00118 | -0.00436 | -0.02744 |
| D5  | -0.04102 | 0.00002  | -0.00094 | 0.00097  | 0.00003  | -0.04099 |
| D6  | -3.00610 | -0.00001 | 0.00943  | 0.00371  | 0.01317  | -2.99293 |
| D7  | 3.09110  | 0.00003  | -0.00614 | 0.00250  | -0.00366 | 3.08744  |
| D8  | 0.12601  | 0.00000  | 0.00423  | 0.00523  | 0.00948  | 0.13549  |
| D9  | 0.03164  | 0.00000  | -0.00214 | 0.00099  | -0.00115 | 0.03049  |
| D10 | 3.02786  | -0.00003 | 0.01132  | -0.00562 | 0.00570  | 3.03357  |
| D11 | -3.07512 | -0.00001 | 0.00751  | -0.00052 | 0.00698  | -3.06814 |
| D12 | -0.07889 | -0.00004 | 0.02097  | -0.00713 | 0.01383  | -0.06506 |
| D13 | -0.05760 | 0.00002  | 0.00158  | -0.00041 | 0.00117  | -0.05642 |
| D14 | -3.10861 | 0.00007  | 0.01116  | 0.00330  | 0.01448  | -3.09413 |
| D15 | -3.06164 | 0.00005  | -0.01114 | 0.00582  | -0.00532 | -3.06696 |
| D16 | 0.17053  | 0.00011  | -0.00156 | 0.00953  | 0.00799  | 0.17852  |
| D17 | 0.63176  | 0.00003  | -0.01638 | 0.00526  | -0.01113 | 0.62064  |
| D18 | -2.46633 | 0.00002  | -0.01669 | 0.00421  | -0.01248 | -2.47881 |
| D19 | -2.67501 | -0.00001 | -0.00108 | -0.00228 | -0.00335 | -2.67836 |
| D20 | 0.51008  | -0.00002 | -0.00139 | -0.00332 | -0.00470 | 0.50538  |
| D21 | 0.06104  | -0.00002 | -0.00042 | -0.00033 | -0.00075 | 0.06029  |
| D22 | 3.02937  | -0.00001 | -0.01018 | -0.00293 | -0.01309 | 3.01628  |
| D23 | 3.11160  | -0.00008 | -0.00999 | -0.00403 | -0.01401 | 3.09760  |
| D24 | -0.20326 | -0.00007 | -0.01974 | -0.00663 | -0.02634 | -0.22960 |
| D25 | 1.27367  | -0.00002 | -0.05792 | -0.01104 | -0.06896 | 1.20471  |
| D26 | -2.90404 | 0.00003  | -0.06454 | -0.01169 | -0.07622 | -2.98026 |
| D27 | -0.85987 | 0.00001  | -0.06380 | -0.01098 | -0.07478 | -0.93465 |
| D28 | -1.66441 | -0.00005 | -0.04630 | -0.00791 | -0.05421 | -1.71862 |
| D29 | 0.44107  | 0.00001  | -0.05292 | -0.00856 | -0.06148 | 0.37959  |
| D30 | 2.48523  | -0.00001 | -0.05218 | -0.00785 | -0.06003 | 2.42520  |
| D31 | -1.01165 | 0.00004  | -0.02140 | -0.00756 | -0.02895 | -1.04060 |
| D32 | 1.06723  | 0.00004  | -0.02111 | -0.00821 | -0.02932 | 1.03791  |
| D33 | -3.08895 | 0.00006  | -0.01816 | -0.00534 | -0.02351 | -3.11246 |
| D34 | -3.09790 | -0.00002 | -0.01415 | -0.00649 | -0.02063 | -3.11853 |
| D35 | -1.01901 | -0.00001 | -0.01386 | -0.00713 | -0.02100 | -1.04002 |
| D36 | 1.10799  | 0.00000  | -0.01091 | -0.00427 | -0.01519 | 1.09280  |
| D37 | 1.10087  | -0.00001 | -0.01600 | -0.00694 | -0.02293 | 1.07795  |
| D38 | -3.10343 | 0.00000  | -0.01571 | -0.00759 | -0.02330 | -3.12673 |
| D39 | -0.97643 | 0.00001  | -0.01276 | -0.00472 | -0.01749 | -0.99392 |
| D40 | -0.42028 | 0.00010  | 0.15124  | 0.04859  | 0.19982  | -0.22047 |
| D41 | 1.67317  | 0.00008  | 0.15147  | 0.04818  | 0.19966  | 1.87283  |
| D42 | -2.48265 | -0.00004 | 0.14120  | 0.04303  | 0.18423  | -2.29842 |
| D43 | -2.35613 | -0.00002 | 0.15677  | 0.06158  | 0.21829  | -2.13783 |
| D44 | 1.84854  | 0.00000  | 0.15380  | 0.06151  | 0.21538  | 2.06392  |
| D45 | -0.26649 | 0.00010  | 0.15871  | 0.06491  | 0.22361  | -0.04288 |
| D46 | -3.08850 | -0.00002 | 0.00094  | -0.00153 | -0.00060 | -3.08909 |

|     |          |          |          |          |          |          |
|-----|----------|----------|----------|----------|----------|----------|
| D47 | 0.05120  | -0.00001 | -0.00008 | -0.00017 | -0.00024 | 0.05096  |
| D48 | 0.00394  | -0.00001 | 0.00135  | -0.00039 | 0.00096  | 0.00490  |
| D49 | -3.13954 | 0.00000  | 0.00034  | 0.00097  | 0.00131  | -3.13823 |

| Item                 | Value    | Threshold | Converged? |
|----------------------|----------|-----------|------------|
| Maximum Force        | 0.000619 | 0.000450  | NO         |
| RMS Force            | 0.000078 | 0.000300  | YES        |
| Maximum Displacement | 0.221590 | 0.001800  | NO         |
| RMS Displacement     | 0.047928 | 0.001200  | NO         |

Predicted change in Energy=-3.407302D-05

GradGradGradGradGradGradGradGradGradGradGradGradGradGradGradGradGradGrad

Input orientation:

| Center Number | Atomic Number | Atomic Type | Coordinates (Angstroms) |           |           |
|---------------|---------------|-------------|-------------------------|-----------|-----------|
|               |               |             | X                       | Y         | Z         |
| 1             | 6             | 0           | -0.447780               | -1.957293 | -1.316461 |
| 2             | 6             | 0           | -1.738981               | -1.583851 | -1.486755 |
| 3             | 7             | 0           | -2.110442               | -0.869707 | -0.351859 |
| 4             | 6             | 0           | -1.043533               | -0.784946 | 0.466724  |
| 5             | 7             | 0           | -0.036333               | -1.479205 | -0.078239 |
| 6             | 6             | 0           | 1.336189                | -1.497566 | 0.443997  |
| 7             | 6             | 0           | 2.244289                | -0.527048 | -0.322772 |
| 8             | 1             | 0           | 0.213489                | -2.505226 | -1.964490 |
| 9             | 1             | 0           | -2.409490               | -1.722958 | -2.315197 |
| 10            | 1             | 0           | 1.293614                | -1.206076 | 1.492896  |
| 11            | 1             | 0           | 1.720805                | -2.517816 | 0.385648  |
| 12            | 1             | 0           | 2.273737                | -0.799817 | -1.384458 |
| 13            | 1             | 0           | 1.841760                | 0.485236  | -0.232881 |
| 14            | 35            | 0           | -0.349219               | 2.091126  | 0.523073  |
| 15            | 1             | 0           | -1.037598               | -0.327365 | 1.436937  |
| 16            | 6             | 0           | -3.328954               | -0.173980 | -0.121576 |
| 17            | 6             | 0           | -4.505059               | -0.595366 | -0.568392 |
| 18            | 1             | 0           | -3.169538               | 0.752060  | 0.420744  |
| 19            | 1             | 0           | -5.387195               | 0.006812  | -0.399766 |
| 20            | 1             | 0           | -4.630510               | -1.528385 | -1.104883 |
| 21            | 8             | 0           | 3.553470                | -0.644423 | 0.226864  |
| 22            | 1             | 0           | 3.837628                | 0.218915  | 0.537997  |

Distance matrix (angstroms):

|   |   | 1        | 2        | 3        | 4 | 5 |
|---|---|----------|----------|----------|---|---|
| 1 | C | 0.000000 |          |          |   |   |
| 2 | C | 1.354866 | 0.000000 |          |   |   |
| 3 | N | 2.208561 | 1.391392 | 0.000000 |   |   |

|    |    |          |          |          |          |          |
|----|----|----------|----------|----------|----------|----------|
| 4  | C  | 2.215641 | 2.222156 | 1.347426 | 0.000000 |          |
| 5  | N  | 1.389622 | 2.212211 | 2.179055 | 1.339190 | 0.000000 |
| 6  | C  | 2.548157 | 3.632068 | 3.592612 | 2.484234 | 1.468634 |
| 7  | C  | 3.206283 | 4.282305 | 4.368289 | 3.391105 | 2.483473 |
| 8  | H  | 1.075849 | 2.211177 | 3.267439 | 3.232688 | 2.161730 |
| 9  | H  | 2.213751 | 1.074825 | 2.161518 | 3.238022 | 3.270363 |
| 10 | H  | 3.389581 | 4.268216 | 3.886369 | 2.587013 | 2.076493 |
| 11 | H  | 2.813205 | 4.043304 | 4.235402 | 3.263583 | 2.093189 |
| 12 | H  | 2.958214 | 4.089876 | 4.504683 | 3.798865 | 2.739380 |
| 13 | H  | 3.518819 | 4.321462 | 4.179704 | 3.229199 | 2.722164 |
| 14 | Br | 4.447841 | 4.413196 | 3.554426 | 2.959229 | 3.634107 |
| 15 | H  | 3.253575 | 3.258630 | 2.155208 | 1.072721 | 2.150587 |
| 16 | C  | 3.592927 | 2.525760 | 1.421914 | 2.437730 | 3.542152 |
| 17 | C  | 4.344648 | 3.077609 | 2.419988 | 3.617951 | 4.581586 |
| 18 | H  | 4.215025 | 3.337892 | 2.085361 | 2.623813 | 3.878723 |
| 19 | H  | 5.394058 | 4.125678 | 3.392299 | 4.499454 | 5.562674 |
| 20 | H  | 4.209983 | 2.917163 | 2.711391 | 3.986107 | 4.707746 |
| 21 | O  | 4.485028 | 5.641724 | 5.697857 | 4.605401 | 3.698193 |
| 22 | H  | 5.151660 | 6.200657 | 6.111994 | 4.983828 | 4.274451 |
|    |    | 6        | 7        | 8        | 9        | 10       |
| 6  | C  | 0.000000 |          |          |          |          |
| 7  | C  | 1.534433 | 0.000000 |          |          |          |
| 8  | H  | 2.841945 | 3.276062 | 0.000000 |          |          |
| 9  | H  | 4.657689 | 5.201694 | 2.759521 | 0.000000 |          |
| 10 | H  | 1.089480 | 2.159053 | 3.848114 | 5.336827 | 0.000000 |
| 11 | H  | 1.091899 | 2.176936 | 2.792009 | 4.998570 | 1.768941 |
| 12 | H  | 2.170046 | 1.096562 | 2.736691 | 4.863238 | 3.066733 |
| 13 | H  | 2.155289 | 1.093083 | 3.820027 | 5.223533 | 2.477762 |
| 14 | Br | 3.965547 | 3.781081 | 5.256526 | 5.181480 | 3.809330 |
| 15 | H  | 2.826688 | 3.729240 | 4.228239 | 4.231818 | 2.491950 |
| 16 | C  | 4.882143 | 5.588039 | 4.623846 | 2.838437 | 5.003987 |
| 17 | C  | 5.996589 | 6.754162 | 5.278386 | 2.951983 | 6.184374 |
| 18 | H  | 5.036162 | 5.612349 | 5.267269 | 3.766797 | 4.990344 |
| 19 | H  | 6.941108 | 7.650522 | 6.334537 | 3.940521 | 7.048863 |
| 20 | H  | 6.164533 | 6.991226 | 5.015722 | 2.536858 | 6.476695 |
| 21 | O  | 2.385652 | 1.424721 | 4.406824 | 6.571317 | 2.650516 |
| 22 | H  | 3.035183 | 1.958599 | 5.178587 | 7.137091 | 3.068295 |
|    |    | 11       | 12       | 13       | 14       | 15       |
| 11 | H  | 0.000000 |          |          |          |          |
| 12 | H  | 2.527950 | 0.000000 |          |          |          |
| 13 | H  | 3.068474 | 1.778791 | 0.000000 |          |          |
| 14 | Br | 5.054328 | 4.344667 | 2.819705 | 0.000000 |          |
| 15 | H  | 3.675877 | 4.375891 | 3.426268 | 2.675464 | 0.000000 |
| 16 | C  | 5.590252 | 5.777257 | 5.213755 | 3.798039 | 2.775393 |

|    |   |          |          |          |          |          |
|----|---|----------|----------|----------|----------|----------|
| 17 | C | 6.585392 | 6.830801 | 6.446889 | 5.067498 | 4.014531 |
| 18 | H | 5.882922 | 5.941071 | 5.060783 | 3.123742 | 2.596724 |
| 19 | H | 7.583817 | 7.765961 | 7.246691 | 5.529665 | 4.733302 |
| 20 | H | 6.598474 | 6.948208 | 6.834130 | 5.837855 | 4.562052 |
| 21 | O | 2.625542 | 2.063546 | 2.101773 | 4.775139 | 4.758435 |
| 22 | H | 3.463212 | 2.679440 | 2.156077 | 4.586402 | 4.987418 |
|    |   | 16       | 17       | 18       | 19       | 20       |
| 16 | C | 0.000000 |          |          |          |          |
| 17 | C | 1.326813 | 0.000000 |          |          |          |
| 18 | H | 1.084930 | 2.139523 | 0.000000 |          |          |
| 19 | H | 2.084809 | 1.081303 | 2.479240 | 0.000000 |          |
| 20 | H | 2.120224 | 1.083552 | 3.108441 | 1.851106 | 0.000000 |
| 21 | O | 6.907278 | 8.097822 | 6.869250 | 8.986226 | 8.338613 |
| 22 | H | 7.207586 | 8.455032 | 7.028397 | 9.274790 | 8.801219 |
|    |   | 21       | 22       |          |          |          |
| 21 | O | 0.000000 |          |          |          |          |
| 22 | H | 0.960678 | 0.000000 |          |          |          |

Stoichiometry C7H11BrN2O

Framework group C1[X(C7H11BrN2O)]

Deg. of freedom 60

Full point group C1 NOp 1

Largest Abelian subgroup C1 NOp 1

Largest concise Abelian subgroup C1 NOp 1

Standard orientation:

| Center<br>Number | Atomic<br>Number | Atomic<br>Type | Coordinates (Angstroms) |           |           |
|------------------|------------------|----------------|-------------------------|-----------|-----------|
|                  |                  |                | X                       | Y         | Z         |
| 1                | 6                | 0              | -0.230855               | -2.247247 | -0.607789 |
| 2                | 6                | 0              | -1.517964               | -1.849187 | -0.751177 |
| 3                | 7                | 0              | -1.721823               | -0.798652 | 0.138086  |
| 4                | 6                | 0              | -0.561251               | -0.547978 | 0.775104  |
| 5                | 7                | 0              | 0.345352                | -1.447190 | 0.371468  |
| 6                | 6                | 0              | 1.769271                | -1.407019 | 0.728857  |
| 7                | 6                | 0              | 2.614316                | -0.785008 | -0.390735 |
| 8                | 1                | 0              | 0.325730                | -3.013311 | -1.118483 |
| 9                | 1                | 0              | -2.288609               | -2.183668 | -1.421608 |
| 10               | 1                | 0              | 1.865091                | -0.808299 | 1.634019  |
| 11               | 1                | 0              | 2.104753                | -2.422176 | 0.950562  |
| 12               | 1                | 0              | 2.504643                | -1.368866 | -1.312435 |
| 13               | 1                | 0              | 2.264578                | 0.233485  | -0.578311 |
| 14               | 35               | 0              | 0.244111                | 2.149908  | -0.135849 |
| 15               | 1                | 0              | -0.420491               | 0.181026  | 1.549357  |
| 16               | 6                | 0              | -2.876052               | 0.021900  | 0.265728  |



|    |   |   |           |           |           |
|----|---|---|-----------|-----------|-----------|
| 17 | 6 | 0 | -4.112809 | -0.427520 | 0.095771  |
| 18 | 1 | 0 | -2.616935 | 1.054562  | 0.474395  |
| 19 | 1 | 0 | -4.944413 | 0.260666  | 0.159417  |
| 20 | 1 | 0 | -4.337795 | -1.467542 | -0.108732 |
| 21 | 8 | 0 | 3.974939  | -0.825899 | 0.029816  |
| 22 | 1 | 0 | 4.327420  | 0.067773  | 0.026577  |

-----

Rotational constants (GHZ): 0.8186181 0.5666829 0.3549945  
Standard basis: 6-311++G(d,p) (5D, 7F)  
There are 358 symmetry adapted cartesian basis functions of A symmetry.  
There are 345 symmetry adapted basis functions of A symmetry.  
345 basis functions, 553 primitive gaussians, 358 cartesian basis functions  
55 alpha electrons 55 beta electrons  
nuclear repulsion energy 865.0957244764 Hartrees.  
NAtoms= 22 NActive= 22 NUniq= 22 SFac= 1.00D+00 NATFMM= 60 NAOKFM=F  
Big=F  
Integral buffers will be 131072 words long.  
Raffenetti 2 integral format.  
Two-electron integral symmetry is turned on.  
One-electron integrals computed using PRISM.  
NBasis= 345 RedAO= T EigKep= 6.98D-06 NBF= 345  
NBsUse= 345 1.00D-06 EigRej= -1.00D+00 NBFU= 345  
Initial guess from the checkpoint file: ".  
B after Tr= 0.000000 0.000000 0.000000  
Rot= 0.999867 0.001420 0.001150 0.016196 Ang= 1.87 deg.  
ExpMin= 3.50D-02 ExpMax= 4.40D+05 ExpMxC= 1.51D+04 IAcc=3 IRadAn= 5 AccDes=  
0.00D+00  
Harris functional with IExCor= 402 and IRadAn= 5 diagonalized for initial guess.  
HarFok: IExCor= 402 AccDes= 0.00D+00 IRadAn= 5 IDoV= 1 UseB2=F ITyADJ=14  
ICtDFT= 3500011 ScaDFX= 1.000000 1.000000 1.000000 1.000000  
FoFCou: FMM=F IPFlag= 0 FMFlag= 100000 FMFlg1= 0  
NFxFlg= 0 DoJE=T BraDBF=F KetDBF=T FulRan=T  
wScrn= 0.000000 ICntrl= 500 IOpCl= 0 I1Cent= 200000004 NGrid=  
0  
NMat0= 1 NMatS0= 1 NMatT0= 0 NMatD0= 1 NMtDS0= 0  
NMtDT0= 0  
Petite list used in FoFCou.  
Keep R1 ints in memory in canonical form, NReq=1804729152.  
Requested convergence on RMS density matrix=1.00D-08 within 128 cycles.  
Requested convergence on MAX density matrix=1.00D-06.  
Requested convergence on energy=1.00D-06.  
No special actions if energy rises.  
SCF Done: E(RB3LYP) = -3032.33816582 A.U. after 11 cycles  
NFock= 11 Conv=0.87D-08 -V/T= 2.0017

Calling FoFJK, ICntrl= 2127 FMM=F ISym2X=0 l1Cent= 0 IOpClX= 0 NMat=1 NMatS=1  
NMatT=0.

\*\*\*\*\* Axes restored to original set \*\*\*\*\*

| Center<br>Number | Atomic<br>Number | Forces (Hartrees/Bohr) |              |              |
|------------------|------------------|------------------------|--------------|--------------|
|                  |                  | X                      | Y            | Z            |
| 1                | 6                | -0.000153152           | 0.000078360  | 0.000217024  |
| 2                | 6                | 0.000273414            | 0.000254801  | -0.000201547 |
| 3                | 7                | 0.000252544            | -0.000113743 | 0.000334139  |
| 4                | 6                | 0.000420477            | -0.000231095 | -0.000690815 |
| 5                | 7                | -0.000208805           | 0.000576788  | 0.000019979  |
| 6                | 6                | -0.000071944           | -0.000141499 | 0.000238169  |
| 7                | 6                | 0.000266247            | 0.000176647  | 0.000090173  |
| 8                | 1                | -0.000007914           | -0.000104619 | 0.000051697  |
| 9                | 1                | -0.000080755           | -0.000190168 | 0.000050684  |
| 10               | 1                | 0.000023666            | -0.000079286 | 0.000095744  |
| 11               | 1                | -0.000011274           | 0.000067174  | -0.000218293 |
| 12               | 1                | 0.000295359            | -0.000092334 | 0.000288008  |
| 13               | 1                | -0.000365929           | 0.000023282  | 0.000045366  |
| 14               | 35               | -0.000399007           | -0.001660710 | 0.000130448  |
| 15               | 1                | 0.000185999            | 0.000831430  | -0.000067710 |
| 16               | 6                | -0.000114446           | 0.000368866  | -0.000027164 |
| 17               | 6                | 0.000041999            | -0.000038803 | -0.000018006 |
| 18               | 1                | -0.000110840           | 0.000193607  | 0.000020551  |
| 19               | 1                | -0.000011973           | 0.000136054  | 0.000067396  |
| 20               | 1                | 0.000022880            | -0.000023492 | -0.000058670 |
| 21               | 8                | -0.000117986           | -0.000304452 | -0.000575891 |
| 22               | 1                | -0.000128560           | 0.000273189  | 0.000208718  |

Cartesian Forces: Max 0.001660710 RMS 0.000317020

GradGradGradGradGradGradGradGradGradGradGradGradGradGradGradGradGradGradGrad

Berny optimization.

Using GEDIIS/GDIIS optimizer.

FormGI is forming the generalized inverse of G from B-inverse, IUseBI=4.

Internal Forces: Max 0.008513194 RMS 0.001347858

Search for a local minimum.

Step number 18 out of a maximum of 116

All quantities printed in internal units (Hartrees-Bohrs-Radians)

Mixed Optimization -- RFO/linear search

Update second derivatives using D2CorX and points 13 14 15 16 18

17

DE= 4.68D-06 DEPred=-3.41D-05 R=-1.37D-01

Trust test=-1.37D-01 RLast= 5.40D-01 DXMaxT set to 5.38D-01

ITU= -1 1 1 1 1 1 1 1 1 1 1 1 1 0 0-1 0 0

Use linear search instead of GDIIIS.

Energy rises -- skip Quadratic/GDIIIS search.

Quartic linear search produced a step of -0.39324.

Iteration 1 RMS(Cart)= 0.01917354 RMS(Int)= 0.00046577

Iteration 2 RMS(Cart)= 0.00094808 RMS(Int)= 0.00000302

Iteration 3 RMS(Cart)= 0.00000096 RMS(Int)= 0.00000290

| Variable | Old X   | -DE/DX   | Delta X<br>(Linear) | Delta X<br>(Quad) | Delta X<br>(Total) | New X   |
|----------|---------|----------|---------------------|-------------------|--------------------|---------|
| R1       | 2.56032 | 0.00006  | -0.00019            | 0.00000           | -0.00019           | 2.56013 |
| R2       | 2.62601 | -0.00025 | 0.00001             | 0.00000           | 0.00001            | 2.62602 |
| R3       | 2.03306 | 0.00002  | 0.00005             | 0.00000           | 0.00005            | 2.03311 |
| R4       | 2.62935 | 0.00024  | 0.00008             | 0.00000           | 0.00008            | 2.62943 |
| R5       | 2.03113 | 0.00003  | 0.00002             | 0.00000           | 0.00002            | 2.03115 |
| R6       | 2.54627 | -0.00037 | -0.00003            | 0.00000           | -0.00003           | 2.54624 |
| R7       | 2.68703 | 0.00044  | 0.00034             | 0.00000           | 0.00034            | 2.68737 |
| R8       | 2.53070 | -0.00039 | -0.00022            | 0.00000           | -0.00022           | 2.53048 |
| R9       | 2.02715 | 0.00030  | 0.00031             | 0.00000           | 0.00031            | 2.02746 |
| R10      | 2.77532 | -0.00037 | -0.00046            | 0.00000           | -0.00046           | 2.77486 |
| R11      | 2.89966 | -0.00131 | -0.00127            | 0.00000           | -0.00127           | 2.89839 |
| R12      | 2.05882 | 0.00007  | 0.00007             | 0.00000           | 0.00007            | 2.05889 |
| R13      | 2.06339 | -0.00006 | -0.00005            | 0.00000           | -0.00005           | 2.06334 |
| R14      | 2.07220 | -0.00024 | 0.00054             | 0.00000           | 0.00054            | 2.07274 |
| R15      | 2.06563 | -0.00121 | 0.00023             | 0.00000           | 0.00023            | 2.06585 |
| R16      | 2.69233 | -0.00038 | 0.00044             | 0.00000           | 0.00044            | 2.69277 |
| R17      | 5.32847 | -0.00060 | -0.00503            | 0.00000           | -0.00503           | 5.32344 |
| R18      | 2.50731 | -0.00006 | -0.00002            | 0.00000           | -0.00002           | 2.50730 |
| R19      | 2.05022 | 0.00016  | 0.00024             | 0.00000           | 0.00024            | 2.05046 |
| R20      | 2.04337 | 0.00009  | 0.00008             | 0.00000           | 0.00008            | 2.04345 |
| R21      | 2.04762 | 0.00005  | 0.00007             | 0.00000           | 0.00007            | 2.04769 |
| R22      | 1.81542 | 0.00028  | 0.00014             | 0.00000           | 0.00014            | 1.81556 |
| A1       | 1.87480 | -0.00014 | -0.00005            | 0.00000           | -0.00005           | 1.87475 |
| A2       | 2.27896 | 0.00009  | 0.00040             | 0.00000           | 0.00040            | 2.27936 |
| A3       | 2.12934 | 0.00005  | -0.00034            | 0.00000           | -0.00033           | 2.12900 |
| A4       | 1.86855 | -0.00003 | 0.00003             | 0.00000           | 0.00003            | 1.86859 |
| A5       | 2.28594 | -0.00001 | 0.00003             | 0.00000           | 0.00003            | 2.28597 |
| A6       | 2.12771 | 0.00003  | 0.00007             | 0.00000           | 0.00007            | 2.12778 |
| A7       | 1.89275 | -0.00016 | -0.00007            | 0.00000           | -0.00008           | 1.89267 |
| A8       | 2.22940 | 0.00020  | -0.00015            | 0.00000           | -0.00015           | 2.22925 |
| A9       | 2.15241 | -0.00006 | -0.00012            | 0.00000           | -0.00012           | 2.15230 |
| A10      | 1.89198 | 0.00018  | 0.00000             | 0.00000           | 0.00000            | 1.89198 |
| A11      | 2.19036 | -0.00013 | -0.00007            | 0.00000           | -0.00006           | 2.19030 |
| A12      | 2.19571 | 0.00000  | 0.00055             | 0.00000           | 0.00056            | 2.19627 |

|     |          |          |          |         |          |          |
|-----|----------|----------|----------|---------|----------|----------|
| A13 | 1.89470  | 0.00014  | 0.00006  | 0.00000 | 0.00007  | 1.89477  |
| A14 | 2.20094  | 0.00121  | -0.00044 | 0.00000 | -0.00043 | 2.20051  |
| A15 | 2.17081  | -0.00144 | 0.00124  | 0.00000 | 0.00124  | 2.17206  |
| A16 | 1.94710  | -0.00420 | 0.00085  | 0.00000 | 0.00085  | 1.94795  |
| A17 | 1.87809  | 0.00081  | 0.00165  | 0.00000 | 0.00165  | 1.87974  |
| A18 | 1.89850  | 0.00180  | -0.00154 | 0.00000 | -0.00154 | 1.89696  |
| A19 | 1.91240  | 0.00024  | 0.00103  | 0.00000 | 0.00104  | 1.91344  |
| A20 | 1.93459  | 0.00191  | -0.00142 | 0.00000 | -0.00142 | 1.93317  |
| A21 | 1.89147  | -0.00050 | -0.00054 | 0.00000 | -0.00055 | 1.89092  |
| A22 | 1.92024  | 0.00132  | -0.00038 | 0.00000 | -0.00038 | 1.91986  |
| A23 | 1.90362  | -0.00631 | 0.00115  | 0.00000 | 0.00115  | 1.90476  |
| A24 | 1.87437  | 0.00229  | -0.00572 | 0.00000 | -0.00572 | 1.86865  |
| A25 | 1.89639  | 0.00133  | -0.00027 | 0.00000 | -0.00026 | 1.89613  |
| A26 | 1.90535  | -0.00108 | 0.00475  | 0.00000 | 0.00475  | 1.91010  |
| A27 | 1.96379  | 0.00245  | 0.00040  | 0.00000 | 0.00041  | 1.96420  |
| A28 | 2.56004  | -0.00851 | -0.00127 | 0.00000 | -0.00127 | 2.55877  |
| A29 | 2.15278  | 0.00004  | -0.00019 | 0.00000 | -0.00019 | 2.15258  |
| A30 | 1.95268  | 0.00013  | -0.00010 | 0.00000 | -0.00010 | 1.95258  |
| A31 | 2.17689  | -0.00017 | 0.00027  | 0.00000 | 0.00027  | 2.17716  |
| A32 | 2.08720  | -0.00013 | -0.00052 | 0.00000 | -0.00052 | 2.08668  |
| A33 | 2.14460  | 0.00004  | 0.00033  | 0.00000 | 0.00033  | 2.14494  |
| A34 | 2.05138  | 0.00009  | 0.00019  | 0.00000 | 0.00019  | 2.05157  |
| A35 | 1.89938  | -0.00030 | -0.00048 | 0.00000 | -0.00048 | 1.89891  |
| D1  | 0.00618  | 0.00019  | -0.00027 | 0.00000 | -0.00027 | 0.00591  |
| D2  | 3.09946  | 0.00003  | 0.00333  | 0.00000 | 0.00333  | 3.10279  |
| D3  | -3.12072 | 0.00020  | -0.00188 | 0.00000 | -0.00188 | -3.12260 |
| D4  | -0.02744 | 0.00004  | 0.00171  | 0.00000 | 0.00171  | -0.02572 |
| D5  | -0.04099 | -0.00009 | -0.00001 | 0.00000 | -0.00001 | -0.04100 |
| D6  | -2.99293 | 0.00059  | -0.00518 | 0.00000 | -0.00518 | -2.99812 |
| D7  | 3.08744  | -0.00011 | 0.00144  | 0.00000 | 0.00144  | 3.08888  |
| D8  | 0.13549  | 0.00058  | -0.00373 | 0.00000 | -0.00373 | 0.13176  |
| D9  | 0.03049  | -0.00022 | 0.00045  | 0.00000 | 0.00045  | 0.03094  |
| D10 | 3.03357  | -0.00037 | -0.00224 | 0.00000 | -0.00224 | 3.03132  |
| D11 | -3.06814 | -0.00008 | -0.00275 | 0.00000 | -0.00275 | -3.07088 |
| D12 | -0.06506 | -0.00023 | -0.00544 | 0.00000 | -0.00544 | -0.07050 |
| D13 | -0.05642 | 0.00016  | -0.00046 | 0.00000 | -0.00046 | -0.05689 |
| D14 | -3.09413 | -0.00038 | -0.00569 | 0.00000 | -0.00570 | -3.09983 |
| D15 | -3.06696 | 0.00028  | 0.00209  | 0.00000 | 0.00209  | -3.06487 |
| D16 | 0.17852  | -0.00026 | -0.00314 | 0.00000 | -0.00314 | 0.17538  |
| D17 | 0.62064  | 0.00008  | 0.00437  | 0.00000 | 0.00438  | 0.62501  |
| D18 | -2.47881 | 0.00011  | 0.00491  | 0.00000 | 0.00491  | -2.47390 |
| D19 | -2.67836 | -0.00009 | 0.00132  | 0.00000 | 0.00132  | -2.67705 |
| D20 | 0.50538  | -0.00006 | 0.00185  | 0.00000 | 0.00185  | 0.50723  |
| D21 | 0.06029  | -0.00003 | 0.00030  | 0.00000 | 0.00030  | 0.06059  |

|     |          |          |          |         |          |          |
|-----|----------|----------|----------|---------|----------|----------|
| D22 | 3.01628  | -0.00035 | 0.00515  | 0.00000 | 0.00514  | 3.02142  |
| D23 | 3.09760  | 0.00050  | 0.00551  | 0.00000 | 0.00551  | 3.10310  |
| D24 | -0.22960 | 0.00018  | 0.01036  | 0.00000 | 0.01035  | -0.21925 |
| D25 | 1.20471  | 0.00143  | 0.02712  | 0.00000 | 0.02712  | 1.23183  |
| D26 | -2.98026 | -0.00026 | 0.02997  | 0.00000 | 0.02997  | -2.95029 |
| D27 | -0.93465 | 0.00055  | 0.02941  | 0.00000 | 0.02941  | -0.90525 |
| D28 | -1.71862 | 0.00200  | 0.02132  | 0.00000 | 0.02132  | -1.69730 |
| D29 | 0.37959  | 0.00030  | 0.02418  | 0.00000 | 0.02417  | 0.40376  |
| D30 | 2.42520  | 0.00111  | 0.02361  | 0.00000 | 0.02361  | 2.44881  |
| D31 | -1.04060 | -0.00042 | 0.01138  | 0.00000 | 0.01138  | -1.02922 |
| D32 | 1.03791  | -0.00185 | 0.01153  | 0.00000 | 0.01153  | 1.04944  |
| D33 | -3.11246 | -0.00121 | 0.00925  | 0.00000 | 0.00925  | -3.10322 |
| D34 | -3.11853 | 0.00105  | 0.00811  | 0.00000 | 0.00811  | -3.11042 |
| D35 | -1.04002 | -0.00039 | 0.00826  | 0.00000 | 0.00826  | -1.03175 |
| D36 | 1.09280  | 0.00026  | 0.00597  | 0.00000 | 0.00597  | 1.09877  |
| D37 | 1.07795  | 0.00032  | 0.00902  | 0.00000 | 0.00901  | 1.08696  |
| D38 | -3.12673 | -0.00111 | 0.00916  | 0.00000 | 0.00916  | -3.11756 |
| D39 | -0.99392 | -0.00047 | 0.00688  | 0.00000 | 0.00688  | -0.98704 |
| D40 | -0.22047 | 0.00037  | -0.07858 | 0.00000 | -0.07857 | -0.29904 |
| D41 | 1.87283  | -0.00096 | -0.07852 | 0.00000 | -0.07852 | 1.79431  |
| D42 | -2.29842 | 0.00018  | -0.07245 | 0.00000 | -0.07245 | -2.37087 |
| D43 | -2.13783 | 0.00247  | -0.08584 | 0.00000 | -0.08583 | -2.22367 |
| D44 | 2.06392  | 0.00017  | -0.08470 | 0.00000 | -0.08471 | 1.97921  |
| D45 | -0.04288 | -0.00235 | -0.08793 | 0.00000 | -0.08793 | -0.13081 |
| D46 | -3.08909 | 0.00000  | 0.00023  | 0.00000 | 0.00023  | -3.08886 |
| D47 | 0.05096  | -0.00001 | 0.00010  | 0.00000 | 0.00010  | 0.05105  |
| D48 | 0.00490  | -0.00002 | -0.00038 | 0.00000 | -0.00038 | 0.00453  |
| D49 | -3.13823 | -0.00003 | -0.00052 | 0.00000 | -0.00052 | -3.13875 |

| Item                 | Value    | Threshold | Converged? |
|----------------------|----------|-----------|------------|
| Maximum Force        | 0.008513 | 0.000450  | NO         |
| RMS Force            | 0.001348 | 0.000300  | NO         |
| Maximum Displacement | 0.085834 | 0.001800  | NO         |
| RMS Displacement     | 0.019028 | 0.001200  | NO         |

Predicted change in Energy=-5.590759D-05

GradGradGradGradGradGradGradGradGradGradGradGradGradGradGradGradGradGradGrad

Input orientation:

| Center Number | Atomic Number | Atomic Type | Coordinates (Angstroms) |           |           |
|---------------|---------------|-------------|-------------------------|-----------|-----------|
|               |               |             | X                       | Y         | Z         |
| 1             | 6             | 0           | -0.449637               | -1.964129 | -1.315184 |
| 2             | 6             | 0           | -1.740583               | -1.590190 | -1.485511 |
| 3             | 7             | 0           | -2.109713               | -0.869899 | -0.353692 |

|    |    |   |           |           |           |
|----|----|---|-----------|-----------|-----------|
| 4  | 6  | 0 | -1.041368 | -0.781696 | 0.462629  |
| 5  | 7  | 0 | -0.035861 | -1.479908 | -0.080117 |
| 6  | 6  | 0 | 1.336339  | -1.502781 | 0.442109  |
| 7  | 6  | 0 | 2.241614  | -0.515575 | -0.305106 |
| 8  | 1  | 0 | 0.209985  | -2.517333 | -1.960453 |
| 9  | 1  | 0 | -2.413340 | -1.735266 | -2.311116 |
| 10 | 1  | 0 | 1.293817  | -1.233985 | 1.497090  |
| 11 | 1  | 0 | 1.724184  | -2.520313 | 0.362149  |
| 12 | 1  | 0 | 2.263461  | -0.761647 | -1.373772 |
| 13 | 1  | 0 | 1.843155  | 0.495603  | -0.187459 |
| 14 | 35 | 0 | -0.378502 | 2.082050  | 0.507634  |
| 15 | 1  | 0 | -1.032274 | -0.314700 | 1.428503  |
| 16 | 6  | 0 | -3.326379 | -0.169604 | -0.126388 |
| 17 | 6  | 0 | -4.504266 | -0.592359 | -0.567149 |
| 18 | 1  | 0 | -3.163586 | 0.760890  | 0.407494  |
| 19 | 1  | 0 | -5.384542 | 0.013445  | -0.401538 |
| 20 | 1  | 0 | -4.633075 | -1.529553 | -1.095581 |
| 21 | 8  | 0 | 3.550825  | -0.653666 | 0.240226  |
| 22 | 1  | 0 | 3.870097  | 0.213735  | 0.502388  |

-----  
Distance matrix (angstroms):

|    |    | 1        | 2        | 3        | 4        | 5        |
|----|----|----------|----------|----------|----------|----------|
| 1  | C  | 0.000000 |          |          |          |          |
| 2  | C  | 1.354763 | 0.000000 |          |          |          |
| 3  | N  | 2.208542 | 1.391435 | 0.000000 |          |          |
| 4  | C  | 2.215606 | 2.222119 | 1.347412 | 0.000000 |          |
| 5  | N  | 1.389629 | 2.212097 | 2.178949 | 1.339074 | 0.000000 |
| 6  | C  | 2.547671 | 3.631915 | 3.592925 | 2.484728 | 1.468392 |
| 7  | C  | 3.218912 | 4.290227 | 4.366000 | 3.382042 | 2.483435 |
| 8  | H  | 1.075876 | 2.211307 | 3.267525 | 3.232591 | 2.161563 |
| 9  | H  | 2.213682 | 1.074836 | 2.161610 | 3.238095 | 3.270316 |
| 10 | H  | 3.388454 | 4.269704 | 3.891268 | 2.593793 | 2.077523 |
| 11 | H  | 2.801479 | 4.035293 | 4.234981 | 3.268205 | 2.091841 |
| 12 | H  | 2.968214 | 4.090395 | 4.491874 | 3.780829 | 2.734287 |
| 13 | H  | 3.546680 | 4.344956 | 4.185379 | 3.220959 | 2.728529 |
| 14 | Br | 4.438388 | 4.394683 | 3.528877 | 2.939806 | 3.626349 |
| 15 | H  | 3.253905 | 3.258842 | 2.155305 | 1.072884 | 2.150926 |
| 16 | C  | 3.592937 | 2.525872 | 1.422095 | 2.437800 | 3.542111 |
| 17 | C  | 4.345265 | 3.078474 | 2.420015 | 3.617727 | 4.581658 |
| 18 | H  | 4.214127 | 3.337062 | 2.085552 | 2.624199 | 3.878351 |
| 19 | H  | 5.394333 | 4.126146 | 3.392210 | 4.499132 | 5.562536 |
| 20 | H  | 4.211678 | 2.919286 | 2.711622 | 3.985933 | 4.708291 |
| 21 | O  | 4.487795 | 5.643956 | 5.695716 | 4.599358 | 3.694538 |
| 22 | H  | 5.167858 | 6.219776 | 6.137203 | 5.011482 | 4.297004 |

|    |    | 6        | 7        | 8        | 9        | 10       |
|----|----|----------|----------|----------|----------|----------|
| 6  | C  | 0.000000 |          |          |          |          |
| 7  | C  | 1.533763 | 0.000000 |          |          |          |
| 8  | H  | 2.840826 | 3.297685 | 0.000000 |          |          |
| 9  | H  | 4.657723 | 5.213475 | 2.759787 | 0.000000 |          |
| 10 | H  | 1.089516 | 2.159246 | 3.843992 | 5.338232 | 0.000000 |
| 11 | H  | 1.091874 | 2.175302 | 2.772596 | 4.988161 | 1.768600 |
| 12 | H  | 2.169391 | 1.096848 | 2.764668 | 4.868163 | 3.066784 |
| 13 | H  | 2.155634 | 1.093202 | 3.858567 | 5.253993 | 2.476076 |
| 14 | Br | 3.974417 | 3.777991 | 5.252818 | 5.163121 | 3.843405 |
| 15 | H  | 2.827514 | 3.710000 | 4.228454 | 4.232032 | 2.502097 |
| 16 | C  | 4.882774 | 5.581593 | 4.624013 | 2.838657 | 5.011466 |
| 17 | C  | 5.996677 | 6.751404 | 5.279297 | 2.952902 | 6.187934 |
| 18 | H  | 5.037334 | 5.599406 | 5.266394 | 3.766233 | 5.003517 |
| 19 | H  | 6.941248 | 7.645091 | 6.335123 | 3.941132 | 7.054172 |
| 20 | H  | 6.164341 | 6.993879 | 5.017862 | 2.539107 | 6.475905 |
| 21 | O  | 2.380273 | 1.424952 | 4.413327 | 6.576508 | 2.647747 |
| 22 | H  | 3.061044 | 1.958544 | 5.188520 | 7.155137 | 3.118099 |
|    |    | 11       | 12       | 13       | 14       | 15       |
| 11 | H  | 0.000000 |          |          |          |          |
| 12 | H  | 2.529258 | 0.000000 |          |          |          |
| 13 | H  | 3.067893 | 1.778954 | 0.000000 |          |          |
| 14 | Br | 5.062035 | 4.313499 | 2.817043 | 0.000000 |          |
| 15 | H  | 3.687805 | 4.349067 | 3.396471 | 2.649496 | 0.000000 |
| 16 | C  | 5.592199 | 5.757846 | 5.212515 | 3.763231 | 2.775186 |
| 17 | C  | 6.585908 | 6.817729 | 6.451168 | 5.032847 | 4.014280 |
| 18 | H  | 5.887160 | 5.911334 | 5.048941 | 3.084183 | 2.596506 |
| 19 | H  | 7.585324 | 7.748416 | 7.246924 | 5.492372 | 4.732754 |
| 20 | H  | 6.597069 | 6.944730 | 6.845984 | 5.806493 | 4.562086 |
| 21 | O  | 2.614546 | 2.067355 | 2.102349 | 4.795338 | 4.746757 |
| 22 | H  | 3.478451 | 2.655678 | 2.159591 | 4.641252 | 5.016988 |
|    |    | 16       | 17       | 18       | 19       | 20       |
| 16 | C  | 0.000000 |          |          |          |          |
| 17 | C  | 1.326804 | 0.000000 |          |          |          |
| 18 | H  | 1.085059 | 2.139775 | 0.000000 |          |          |
| 19 | H  | 2.084526 | 1.081347 | 2.479083 | 0.000000 |          |
| 20 | H  | 2.120436 | 1.083589 | 3.108820 | 1.851281 | 0.000000 |
| 21 | O  | 6.903959 | 8.095684 | 6.863837 | 8.983189 | 8.338331 |
| 22 | H  | 7.234056 | 8.480781 | 7.055571 | 9.300835 | 8.825898 |
|    |    | 21       | 22       |          |          |          |
| 21 | O  | 0.000000 |          |          |          |          |
| 22 | H  | 0.960754 | 0.000000 |          |          |          |

Stoichiometry C7H11BrN2O

Framework group C1[X(C7H11BrN2O)]

Deg. of freedom 60  
 Full point group C1 NOp 1  
 Largest Abelian subgroup C1 NOp 1  
 Largest concise Abelian subgroup C1 NOp 1

Standard orientation:

| Center<br>Number | Atomic<br>Number | Atomic<br>Type | Coordinates (Angstroms) |           |           |
|------------------|------------------|----------------|-------------------------|-----------|-----------|
|                  |                  |                | X                       | Y         | Z         |
| 1                | 6                | 0              | -0.196092               | -2.250126 | -0.610464 |
| 2                | 6                | 0              | -1.488112               | -1.867296 | -0.750136 |
| 3                | 7                | 0              | -1.701268               | -0.817814 | 0.138258  |
| 4                | 6                | 0              | -0.541428               | -0.552372 | 0.770580  |
| 5                | 7                | 0              | 0.374065                | -1.441671 | 0.365441  |
| 6                | 6                | 0              | 1.797636                | -1.389186 | 0.721624  |
| 7                | 6                | 0              | 2.632545                | -0.730660 | -0.383681 |
| 8                | 1                | 0              | 0.367605                | -3.011392 | -1.120590 |
| 9                | 1                | 0              | -2.257873               | -2.213707 | -1.415522 |
| 10               | 1                | 0              | 1.887924                | -0.812312 | 1.641465  |
| 11               | 1                | 0              | 2.146967                | -2.404975 | 0.917403  |
| 12               | 1                | 0              | 2.520689                | -1.288791 | -1.321260 |
| 13               | 1                | 0              | 2.277003                | 0.291109  | -0.540743 |
| 14               | 35               | 0              | 0.195339                | 2.145416  | -0.135828 |
| 15               | 1                | 0              | -0.405431               | 0.183020  | 1.539855  |
| 16               | 6                | 0              | -2.863849               | -0.008945 | 0.266676  |
| 17               | 6                | 0              | -4.096288               | -0.472607 | 0.103830  |
| 18               | 1                | 0              | -2.614833               | 1.027620  | 0.468858  |
| 19               | 1                | 0              | -4.934752               | 0.207282  | 0.167404  |
| 20               | 1                | 0              | -4.311096               | -1.515966 | -0.094727 |
| 21               | 8                | 0              | 3.993390                | -0.776984 | 0.036371  |
| 22               | 1                | 0              | 4.363752                | 0.107990  | -0.015600 |

Rotational constants (GHZ): 0.8226282 0.5678583 0.3560149

Standard basis: 6-311++G(d,p) (5D, 7F)

There are 358 symmetry adapted cartesian basis functions of A symmetry.

There are 345 symmetry adapted basis functions of A symmetry.

345 basis functions, 553 primitive gaussians, 358 cartesian basis functions

55 alpha electrons 55 beta electrons

nuclear repulsion energy 866.2315215003 Hartrees.

NAtoms= 22 NActive= 22 NUniq= 22 SFac= 1.00D+00 NAtFMM= 60 NAOKFM=F

Big=F

Integral buffers will be 131072 words long.

Raffenetti 2 integral format.

Two-electron integral symmetry is turned on.



One-electron integrals computed using PRISM.

NBasis= 345 RedAO= T EigKep= 6.93D-06 NBF= 345

NBsUse= 345 1.00D-06 EigRej= -1.00D+00 NBFU= 345

Lowest energy guess from the checkpoint file: "."

B after Tr= 0.000000 0.000000 0.000000

Rot= 0.999963 0.001018 0.000643 0.008492 Ang= 0.98 deg.

B after Tr= 0.000000 0.000000 0.000000

Rot= 0.999970 -0.000404 -0.000509 -0.007702 Ang= -0.89 deg.

Keep R1 ints in memory in canonical form, NReq=1804729152.

Requested convergence on RMS density matrix=1.00D-08 within 128 cycles.

Requested convergence on MAX density matrix=1.00D-06.

Requested convergence on energy=1.00D-06.

No special actions if energy rises.

SCF Done: E(RB3LYP) = -3032.33819882 A.U. after 9 cycles

NFock= 9 Conv=0.72D-08 -V/T= 2.0017

Calling FoFJK, ICntrl= 2127 FMM=F ISym2X=0 l1Cent= 0 IOpClX= 0 NMat=1 NMatS=1

NMatT=0.

\*\*\*\*\* Axes restored to original set \*\*\*\*\*

| Center<br>Number | Atomic<br>Number | Forces (Hartrees/Bohr) |              |              |
|------------------|------------------|------------------------|--------------|--------------|
|                  |                  | X                      | Y            | Z            |
| 1                | 6                | -0.000135200           | 0.000039715  | 0.000060406  |
| 2                | 6                | 0.000224677            | 0.000122599  | -0.000187946 |
| 3                | 7                | 0.000021101            | -0.000191107 | 0.000256114  |
| 4                | 6                | 0.000273330            | 0.000026955  | -0.000328222 |
| 5                | 7                | -0.000042187           | 0.000272126  | 0.000034981  |
| 6                | 6                | -0.000136969           | -0.000076793 | 0.000144983  |
| 7                | 6                | 0.000222030            | 0.000121783  | 0.000055672  |
| 8                | 1                | -0.000004106           | -0.000074606 | 0.000039974  |
| 9                | 1                | -0.000055660           | -0.000122312 | 0.000032909  |
| 10               | 1                | 0.000026577            | -0.000065233 | 0.000063212  |
| 11               | 1                | -0.000011290           | 0.000049465  | -0.000130570 |
| 12               | 1                | 0.000164719            | -0.000055659 | 0.000180894  |
| 13               | 1                | -0.000338028           | -0.000057204 | -0.000009987 |
| 14               | 35               | -0.000126259           | -0.000745069 | 0.000062919  |
| 15               | 1                | 0.000052680            | 0.000298581  | -0.000014585 |
| 16               | 6                | -0.000075086           | 0.000259786  | -0.000069089 |
| 17               | 6                | 0.000008984            | -0.000034855 | -0.000027694 |
| 18               | 1                | -0.000035116           | 0.000149323  | 0.000024732  |
| 19               | 1                | -0.000017679           | 0.000101106  | 0.000042512  |
| 20               | 1                | 0.000019503            | -0.000019818 | -0.000042545 |
| 21               | 8                | 0.000034050            | -0.000084799 | -0.000328338 |
| 22               | 1                | -0.000070071           | 0.000086017  | 0.000139669  |

-----  
Cartesian Forces: Max 0.000745069 RMS 0.000163748

GradGradGradGradGradGradGradGradGradGradGradGradGradGradGradGradGradGradGrad

Berny optimization.

Using GEDIIS/GDIIS optimizer.

FormGI is forming the generalized inverse of G from B-inverse, IUseBI=4.

Internal Forces: Max 0.003710213 RMS 0.000616277

Search for a local minimum.

Step number 19 out of a maximum of 116

All quantities printed in internal units (Hartrees-Bohrs-Radians)

Mixed Optimization -- En-DIIS/RFO-DIIS

Update second derivatives using D2CorX and points 16 18 17 19

ITU= 0 -1 1 1 1 1 1 1 1 1 1 1 1 0 0 -1 0 0

Use linear search instead of GDIIS.

|                 |         |         |         |         |         |
|-----------------|---------|---------|---------|---------|---------|
| Eigenvalues --- | 0.00017 | 0.00224 | 0.00492 | 0.00851 | 0.01017 |
| Eigenvalues --- | 0.01273 | 0.01603 | 0.01772 | 0.01994 | 0.02078 |
| Eigenvalues --- | 0.02224 | 0.02426 | 0.03069 | 0.03093 | 0.03478 |
| Eigenvalues --- | 0.04287 | 0.04774 | 0.05451 | 0.05822 | 0.06847 |
| Eigenvalues --- | 0.08769 | 0.09312 | 0.13658 | 0.14265 | 0.15486 |
| Eigenvalues --- | 0.15729 | 0.15882 | 0.15972 | 0.15997 | 0.16060 |
| Eigenvalues --- | 0.16674 | 0.18800 | 0.20929 | 0.22799 | 0.22967 |
| Eigenvalues --- | 0.24244 | 0.25107 | 0.25590 | 0.29721 | 0.33107 |
| Eigenvalues --- | 0.33837 | 0.33869 | 0.33879 | 0.34119 | 0.34318 |
| Eigenvalues --- | 0.34576 | 0.34683 | 0.36107 | 0.36312 | 0.36378 |
| Eigenvalues --- | 0.37239 | 0.42690 | 0.43116 | 0.45815 | 0.49537 |
| Eigenvalues --- | 0.53631 | 0.54397 | 0.55759 | 0.60582 | 3.06059 |

RFO step: Lambda=-6.46927218D-05 EMin= 1.67988332D-04

Quartic linear search produced a step of -0.12128.

Iteration 1 RMS(Cart)= 0.02856576 RMS(Int)= 0.00196687

Iteration 2 RMS(Cart)= 0.00217183 RMS(Int)= 0.00000943

Iteration 3 RMS(Cart)= 0.00000784 RMS(Int)= 0.00000772

Iteration 4 RMS(Cart)= 0.00000000 RMS(Int)= 0.00000772

| Variable | Old X   | -DE/DX   | Delta X<br>(Linear) | Delta X<br>(Quad) | Delta X<br>(Total) | New X   |
|----------|---------|----------|---------------------|-------------------|--------------------|---------|
| R1       | 2.56013 | 0.00000  | -0.00004            | 0.00016           | 0.00012            | 2.56025 |
| R2       | 2.62602 | -0.00006 | 0.00000             | 0.00029           | 0.00029            | 2.62631 |
| R3       | 2.03311 | 0.00001  | 0.00001             | -0.00002          | -0.00001           | 2.03310 |
| R4       | 2.62943 | 0.00020  | 0.00001             | 0.00096           | 0.00098            | 2.63041 |
| R5       | 2.03115 | 0.00002  | 0.00000             | 0.00005           | 0.00006            | 2.03120 |
| R6       | 2.54624 | -0.00011 | 0.00000             | -0.00009          | -0.00008           | 2.54616 |
| R7       | 2.68737 | 0.00028  | 0.00006             | 0.00208           | 0.00215            | 2.68952 |
| R8       | 2.53048 | -0.00016 | -0.00004            | 0.00047           | 0.00043            | 2.53091 |
| R9       | 2.02746 | 0.00012  | 0.00006             | -0.00059          | -0.00053           | 2.02693 |

|     |         |          |          |          |          |         |
|-----|---------|----------|----------|----------|----------|---------|
| R10 | 2.77486 | -0.00016 | -0.00009 | 0.00148  | 0.00140  | 2.77626 |
| R11 | 2.89839 | -0.00054 | -0.00024 | 0.00356  | 0.00333  | 2.90172 |
| R12 | 2.05889 | 0.00004  | 0.00001  | 0.00011  | 0.00012  | 2.05901 |
| R13 | 2.06334 | -0.00004 | -0.00001 | -0.00026 | -0.00027 | 2.06307 |
| R14 | 2.07274 | -0.00016 | 0.00010  | -0.00164 | -0.00154 | 2.07120 |
| R15 | 2.06585 | -0.00056 | 0.00004  | -0.00053 | -0.00049 | 2.06536 |
| R16 | 2.69277 | -0.00012 | 0.00008  | -0.00142 | -0.00133 | 2.69144 |
| R17 | 5.32344 | -0.00030 | -0.00094 | 0.00094  | -0.00001 | 5.32343 |
| R18 | 2.50730 | -0.00001 | 0.00000  | -0.00019 | -0.00019 | 2.50710 |
| R19 | 2.05046 | 0.00013  | 0.00005  | 0.00051  | 0.00056  | 2.05102 |
| R20 | 2.04345 | 0.00007  | 0.00002  | -0.00001 | 0.00001  | 2.04346 |
| R21 | 2.04769 | 0.00004  | 0.00001  | -0.00010 | -0.00009 | 2.04760 |
| R22 | 1.81556 | 0.00010  | 0.00003  | -0.00012 | -0.00009 | 1.81547 |
| A1  | 1.87475 | -0.00004 | -0.00001 | 0.00002  | 0.00001  | 1.87477 |
| A2  | 2.27936 | 0.00004  | 0.00007  | -0.00052 | -0.00045 | 2.27891 |
| A3  | 2.12900 | 0.00000  | -0.00006 | 0.00052  | 0.00046  | 2.12946 |
| A4  | 1.86859 | -0.00001 | 0.00001  | 0.00009  | 0.00010  | 1.86869 |
| A5  | 2.28597 | 0.00000  | 0.00001  | 0.00038  | 0.00038  | 2.28635 |
| A6  | 2.12778 | 0.00001  | 0.00001  | -0.00058 | -0.00057 | 2.12721 |
| A7  | 1.89267 | -0.00009 | -0.00001 | -0.00028 | -0.00030 | 1.89237 |
| A8  | 2.22925 | 0.00011  | -0.00003 | -0.00142 | -0.00148 | 2.22777 |
| A9  | 2.15230 | -0.00003 | -0.00002 | 0.00016  | 0.00010  | 2.15240 |
| A10 | 1.89198 | 0.00009  | 0.00000  | 0.00034  | 0.00034  | 1.89231 |
| A11 | 2.19030 | -0.00007 | -0.00001 | 0.00011  | 0.00008  | 2.19038 |
| A12 | 2.19627 | 0.00000  | 0.00010  | -0.00142 | -0.00133 | 2.19494 |
| A13 | 1.89477 | 0.00006  | 0.00001  | -0.00006 | -0.00005 | 1.89471 |
| A14 | 2.20051 | 0.00056  | -0.00008 | 0.00029  | 0.00019  | 2.20070 |
| A15 | 2.17206 | -0.00066 | 0.00023  | -0.00171 | -0.00149 | 2.17056 |
| A16 | 1.94795 | -0.00201 | 0.00016  | -0.00110 | -0.00094 | 1.94701 |
| A17 | 1.87974 | 0.00042  | 0.00031  | -0.00279 | -0.00248 | 1.87726 |
| A18 | 1.89696 | 0.00084  | -0.00029 | 0.00182  | 0.00153  | 1.89850 |
| A19 | 1.91344 | 0.00013  | 0.00019  | -0.00056 | -0.00037 | 1.91307 |
| A20 | 1.93317 | 0.00089  | -0.00027 | 0.00158  | 0.00131  | 1.93448 |
| A21 | 1.89092 | -0.00024 | -0.00010 | 0.00101  | 0.00091  | 1.89183 |
| A22 | 1.91986 | 0.00057  | -0.00007 | 0.00052  | 0.00047  | 1.92033 |
| A23 | 1.90476 | -0.00295 | 0.00021  | -0.00120 | -0.00100 | 1.90376 |
| A24 | 1.86865 | 0.00118  | -0.00107 | 0.01228  | 0.01121  | 1.87986 |
| A25 | 1.89613 | 0.00063  | -0.00005 | -0.00104 | -0.00110 | 1.89503 |
| A26 | 1.91010 | -0.00054 | 0.00089  | -0.01030 | -0.00941 | 1.90068 |
| A27 | 1.96420 | 0.00110  | 0.00007  | -0.00011 | -0.00006 | 1.96415 |
| A28 | 2.55877 | -0.00371 | -0.00024 | 0.00246  | 0.00222  | 2.56099 |
| A29 | 2.15258 | 0.00003  | -0.00004 | -0.00243 | -0.00247 | 2.15012 |
| A30 | 1.95258 | 0.00005  | -0.00002 | -0.00185 | -0.00187 | 1.95071 |
| A31 | 2.17716 | -0.00008 | 0.00005  | 0.00431  | 0.00436  | 2.18152 |

|     |          |          |          |          |          |          |
|-----|----------|----------|----------|----------|----------|----------|
| A32 | 2.08668  | -0.00008 | -0.00010 | 0.00092  | 0.00082  | 2.08751  |
| A33 | 2.14494  | 0.00002  | 0.00006  | -0.00180 | -0.00174 | 2.14319  |
| A34 | 2.05157  | 0.00006  | 0.00004  | 0.00088  | 0.00092  | 2.05249  |
| A35 | 1.89891  | -0.00011 | -0.00009 | 0.00122  | 0.00113  | 1.90004  |
| D1  | 0.00591  | 0.00008  | -0.00005 | -0.00086 | -0.00091 | 0.00500  |
| D2  | 3.10279  | 0.00002  | 0.00062  | -0.00383 | -0.00321 | 3.09958  |
| D3  | -3.12260 | 0.00008  | -0.00035 | -0.00304 | -0.00339 | -3.12599 |
| D4  | -0.02572 | 0.00002  | 0.00032  | -0.00601 | -0.00569 | -0.03141 |
| D5  | -0.04100 | -0.00003 | 0.00000  | 0.00162  | 0.00162  | -0.03938 |
| D6  | -2.99812 | 0.00028  | -0.00097 | 0.01040  | 0.00943  | -2.98869 |
| D7  | 3.08888  | -0.00003 | 0.00027  | 0.00356  | 0.00383  | 3.09271  |
| D8  | 0.13176  | 0.00028  | -0.00070 | 0.01234  | 0.01165  | 0.14341  |
| D9  | 0.03094  | -0.00011 | 0.00008  | -0.00019 | -0.00010 | 0.03084  |
| D10 | 3.03132  | -0.00021 | -0.00042 | -0.01225 | -0.01266 | 3.01866  |
| D11 | -3.07088 | -0.00005 | -0.00051 | 0.00243  | 0.00191  | -3.06897 |
| D12 | -0.07050 | -0.00016 | -0.00102 | -0.00964 | -0.01065 | -0.08115 |
| D13 | -0.05689 | 0.00009  | -0.00009 | 0.00120  | 0.00111  | -0.05577 |
| D14 | -3.09983 | -0.00015 | -0.00106 | 0.01152  | 0.01046  | -3.08936 |
| D15 | -3.06487 | 0.00017  | 0.00039  | 0.01277  | 0.01317  | -3.05170 |
| D16 | 0.17538  | -0.00006 | -0.00059 | 0.02310  | 0.02252  | 0.19789  |
| D17 | 0.62501  | 0.00006  | 0.00082  | 0.02493  | 0.02574  | 0.65075  |
| D18 | -2.47390 | 0.00008  | 0.00092  | 0.02417  | 0.02509  | -2.44881 |
| D19 | -2.67705 | -0.00006 | 0.00025  | 0.01116  | 0.01141  | -2.66564 |
| D20 | 0.50723  | -0.00004 | 0.00035  | 0.01040  | 0.01075  | 0.51799  |
| D21 | 0.06059  | -0.00003 | 0.00006  | -0.00172 | -0.00167 | 0.05892  |
| D22 | 3.02142  | -0.00018 | 0.00096  | -0.01007 | -0.00910 | 3.01232  |
| D23 | 3.10310  | 0.00020  | 0.00103  | -0.01199 | -0.01095 | 3.09215  |
| D24 | -0.21925 | 0.00005  | 0.00194  | -0.02033 | -0.01838 | -0.23763 |
| D25 | 1.23183  | 0.00067  | 0.00507  | -0.02641 | -0.02134 | 1.21049  |
| D26 | -2.95029 | -0.00010 | 0.00561  | -0.02957 | -0.02396 | -2.97425 |
| D27 | -0.90525 | 0.00029  | 0.00550  | -0.02893 | -0.02342 | -0.92867 |
| D28 | -1.69730 | 0.00093  | 0.00399  | -0.01651 | -0.01252 | -1.70982 |
| D29 | 0.40376  | 0.00015  | 0.00452  | -0.01967 | -0.01514 | 0.38862  |
| D30 | 2.44881  | 0.00055  | 0.00442  | -0.01903 | -0.01461 | 2.43420  |
| D31 | -1.02922 | -0.00017 | 0.00213  | -0.02091 | -0.01878 | -1.04800 |
| D32 | 1.04944  | -0.00085 | 0.00216  | -0.02261 | -0.02046 | 1.02898  |
| D33 | -3.10322 | -0.00053 | 0.00173  | -0.01604 | -0.01431 | -3.11753 |
| D34 | -3.11042 | 0.00049  | 0.00152  | -0.01637 | -0.01485 | -3.12527 |
| D35 | -1.03175 | -0.00020 | 0.00155  | -0.01807 | -0.01653 | -1.04829 |
| D36 | 1.09877  | 0.00013  | 0.00112  | -0.01150 | -0.01038 | 1.08839  |
| D37 | 1.08696  | 0.00015  | 0.00169  | -0.01825 | -0.01656 | 1.07040  |
| D38 | -3.11756 | -0.00054 | 0.00171  | -0.01994 | -0.01824 | -3.13580 |
| D39 | -0.98704 | -0.00021 | 0.00129  | -0.01338 | -0.01209 | -0.99913 |
| D40 | -0.29904 | 0.00030  | -0.01470 | 0.10548  | 0.09077  | -0.20827 |

|     |          |          |          |         |         |          |
|-----|----------|----------|----------|---------|---------|----------|
| D41 | 1.79431  | -0.00037 | -0.01469 | 0.10478 | 0.09009 | 1.88440  |
| D42 | -2.37087 | 0.00010  | -0.01356 | 0.09100 | 0.07745 | -2.29342 |
| D43 | -2.22367 | 0.00117  | -0.01606 | 0.18758 | 0.17149 | -2.05218 |
| D44 | 1.97921  | 0.00010  | -0.01585 | 0.18553 | 0.16971 | 2.14892  |
| D45 | -0.13081 | -0.00105 | -0.01645 | 0.19408 | 0.17762 | 0.04681  |
| D46 | -3.08886 | 0.00000  | 0.00004  | 0.00079 | 0.00083 | -3.08803 |
| D47 | 0.05105  | -0.00001 | 0.00002  | 0.00098 | 0.00100 | 0.05205  |
| D48 | 0.00453  | -0.00001 | -0.00007 | 0.00146 | 0.00139 | 0.00591  |
| D49 | -3.13875 | -0.00002 | -0.00010 | 0.00165 | 0.00156 | -3.13719 |

| Item                 | Value    | Threshold | Converged? |
|----------------------|----------|-----------|------------|
| Maximum Force        | 0.003710 | 0.000450  | NO         |
| RMS Force            | 0.000616 | 0.000300  | NO         |
| Maximum Displacement | 0.175509 | 0.001800  | NO         |
| RMS Displacement     | 0.028080 | 0.001200  | NO         |

Predicted change in Energy=-2.180078D-05

GradGradGradGradGradGradGradGradGradGradGradGradGradGradGradGradGradGrad

Input orientation:

| Center Number | Atomic Number | Atomic Type | Coordinates (Angstroms) |           |           |
|---------------|---------------|-------------|-------------------------|-----------|-----------|
|               |               |             | X                       | Y         | Z         |
| 1             | 6             | 0           | -0.448350               | -1.965025 | -1.318422 |
| 2             | 6             | 0           | -1.739244               | -1.589940 | -1.487124 |
| 3             | 7             | 0           | -2.108522               | -0.874468 | -0.351666 |
| 4             | 6             | 0           | -1.040133               | -0.790556 | 0.464976  |
| 5             | 7             | 0           | -0.034096               | -1.485526 | -0.081501 |
| 6             | 6             | 0           | 1.340664                | -1.500701 | 0.436334  |
| 7             | 6             | 0           | 2.242646                | -0.521677 | -0.329023 |
| 8             | 1             | 0           | 0.209971                | -2.517842 | -1.965343 |
| 9             | 1             | 0           | -2.411732               | -1.729231 | -2.313981 |
| 10            | 1             | 0           | 1.299360                | -1.214885 | 1.486947  |
| 11            | 1             | 0           | 1.729429                | -2.518792 | 0.371317  |
| 12            | 1             | 0           | 2.275768                | -0.793209 | -1.390372 |
| 13            | 1             | 0           | 1.831216                | 0.486978  | -0.240346 |
| 14            | 35            | 0           | -0.364966               | 2.076016  | 0.526112  |
| 15            | 1             | 0           | -1.032979               | -0.336213 | 1.436573  |
| 16            | 6             | 0           | -3.320905               | -0.163156 | -0.128625 |
| 17            | 6             | 0           | -4.501882               | -0.587941 | -0.558730 |
| 18            | 1             | 0           | -3.148085               | 0.773636  | 0.391520  |
| 19            | 1             | 0           | -5.379646               | 0.023370  | -0.400153 |
| 20            | 1             | 0           | -4.634425               | -1.533167 | -1.071609 |
| 21            | 8             | 0           | 3.554771                | -0.625799 | 0.215005  |
| 22            | 1             | 0           | 3.801492                | 0.221248  | 0.595263  |

-----

Distance matrix (angstroms):

|    |    | 1        | 2        | 3        | 4        | 5        |
|----|----|----------|----------|----------|----------|----------|
| 1  | C  | 0.000000 |          |          |          |          |
| 2  | C  | 1.354827 | 0.000000 |          |          |          |
| 3  | N  | 2.209096 | 1.391952 | 0.000000 |          |          |
| 4  | C  | 2.215873 | 2.222266 | 1.347368 | 0.000000 |          |
| 5  | N  | 1.389784 | 2.212285 | 2.179363 | 1.339303 | 0.000000 |
| 6  | C  | 2.548595 | 3.632284 | 3.593048 | 2.484617 | 1.469132 |
| 7  | C  | 3.209926 | 4.282270 | 4.365506 | 3.388122 | 2.484719 |
| 8  | H  | 1.075872 | 2.211139 | 3.268034 | 3.233069 | 2.161969 |
| 9  | H  | 2.213957 | 1.074865 | 2.161767 | 3.238055 | 3.270552 |
| 10 | H  | 3.389292 | 4.268358 | 3.887164 | 2.587993 | 2.076387 |
| 11 | H  | 2.811512 | 4.043299 | 4.237496 | 3.265892 | 2.093491 |
| 12 | H  | 2.966336 | 4.094443 | 4.506386 | 3.799675 | 2.743705 |
| 13 | H  | 3.517241 | 4.314653 | 4.169828 | 3.220904 | 2.719447 |
| 14 | Br | 4.442889 | 4.402384 | 3.537773 | 2.945644 | 3.628119 |
| 15 | H  | 3.253432 | 3.258626 | 2.155066 | 1.072604 | 2.150171 |
| 16 | C  | 3.593595 | 2.526437 | 1.423231 | 2.438835 | 3.543162 |
| 17 | C  | 4.347944 | 3.081896 | 2.419327 | 3.615623 | 4.581977 |
| 18 | H  | 4.208650 | 3.331760 | 2.085488 | 2.625938 | 3.876143 |
| 19 | H  | 5.395796 | 4.127566 | 3.392450 | 4.499144 | 5.563561 |
| 20 | H  | 4.215524 | 2.925397 | 2.707838 | 3.978881 | 4.705912 |
| 21 | O  | 4.491091 | 5.643882 | 5.697003 | 4.604647 | 3.702298 |
| 22 | H  | 5.148119 | 6.190032 | 6.084861 | 4.947935 | 4.252390 |
|    |    | 6        | 7        | 8        | 9        | 10       |
| 6  | C  | 0.000000 |          |          |          |          |
| 7  | C  | 1.535523 | 0.000000 |          |          |          |
| 8  | H  | 2.842727 | 3.285420 | 0.000000 |          |          |
| 9  | H  | 4.657997 | 5.202066 | 2.759853 | 0.000000 |          |
| 10 | H  | 1.089580 | 2.160572 | 3.847438 | 5.337023 | 0.000000 |
| 11 | H  | 1.091731 | 2.177690 | 2.787245 | 4.998345 | 1.769114 |
| 12 | H  | 2.170673 | 1.096033 | 2.751812 | 4.868455 | 3.067597 |
| 13 | H  | 2.156248 | 1.092943 | 3.825310 | 5.216719 | 2.482489 |
| 14 | Br | 3.963601 | 3.778744 | 5.257512 | 5.170617 | 3.810933 |
| 15 | H  | 2.826781 | 3.725781 | 4.228176 | 4.231799 | 2.492871 |
| 16 | C  | 4.882462 | 5.578692 | 4.624410 | 2.838127 | 5.006302 |
| 17 | C  | 5.996551 | 6.748764 | 5.282484 | 2.958407 | 6.183224 |
| 18 | H  | 5.032244 | 5.590796 | 5.259769 | 3.758496 | 4.993390 |
| 19 | H  | 6.941546 | 7.642086 | 6.336513 | 3.942443 | 7.050074 |
| 20 | H  | 6.162518 | 6.990612 | 5.023596 | 2.553878 | 6.469723 |
| 21 | O  | 2.390964 | 1.424247 | 4.418306 | 6.573621 | 2.655511 |
| 22 | H  | 3.007664 | 1.958633 | 5.192142 | 7.132477 | 3.019643 |
|    |    | 11       | 12       | 13       | 14       | 15       |

|    |    |          |          |          |          |          |
|----|----|----------|----------|----------|----------|----------|
| 11 | H  | 0.000000 |          |          |          |          |
| 12 | H  | 2.525801 | 0.000000 |          |          |          |
| 13 | H  | 3.069063 | 1.777376 | 0.000000 |          |          |
| 14 | Br | 5.052001 | 4.344979 | 2.817040 | 0.000000 |          |
| 15 | H  | 3.678223 | 4.375874 | 3.419549 | 2.663462 | 0.000000 |
| 16 | C  | 5.595073 | 5.771631 | 5.194181 | 3.765653 | 2.777481 |
| 17 | C  | 6.589568 | 6.831567 | 6.431559 | 5.038612 | 4.009724 |
| 18 | H  | 5.884780 | 5.920163 | 5.027412 | 3.075721 | 2.607216 |
| 19 | H  | 7.589249 | 7.762261 | 7.227517 | 5.497120 | 4.732481 |
| 20 | H  | 6.599404 | 6.957005 | 6.824698 | 5.814395 | 4.549076 |
| 21 | O  | 2.634336 | 2.059395 | 2.101490 | 4.770841 | 4.756421 |
| 22 | H  | 3.442588 | 2.701796 | 2.156581 | 4.561175 | 4.938692 |
|    |    | 16       | 17       | 18       | 19       | 20       |
| 16 | C  | 0.000000 |          |          |          |          |
| 17 | C  | 1.326702 | 0.000000 |          |          |          |
| 18 | H  | 1.085355 | 2.142342 | 0.000000 |          |          |
| 19 | H  | 2.084930 | 1.081350 | 2.483849 | 0.000000 |          |
| 20 | H  | 2.119312 | 1.083543 | 3.109869 | 1.851760 | 0.000000 |
| 21 | O  | 6.899786 | 8.093809 | 6.849661 | 8.979067 | 8.339162 |
| 22 | H  | 7.169402 | 8.422143 | 6.974473 | 9.237061 | 8.776168 |
|    |    | 21       | 22       |          |          |          |
| 21 | O  | 0.000000 |          |          |          |          |
| 22 | H  | 0.960706 | 0.000000 |          |          |          |

Stoichiometry C7H11BrN2O

Framework group C1[X(C7H11BrN2O)]

Deg. of freedom 60

Full point group C1 NOp 1

Largest Abelian subgroup C1 NOp 1

Largest concise Abelian subgroup C1 NOp 1

Standard orientation:

| Center<br>Number | Atomic<br>Number | Atomic<br>Type | Coordinates (Angstroms) |           |           |
|------------------|------------------|----------------|-------------------------|-----------|-----------|
|                  |                  |                | X                       | Y         | Z         |
| 1                | 6                | 0              | -0.213505               | -2.254737 | -0.600943 |
| 2                | 6                | 0              | -1.502399               | -1.863115 | -0.745660 |
| 3                | 7                | 0              | -1.711186               | -0.809661 | 0.139875  |
| 4                | 6                | 0              | -0.551476               | -0.551203 | 0.775226  |
| 5                | 7                | 0              | 0.359644                | -1.447157 | 0.374154  |
| 6                | 6                | 0              | 1.784811                | -1.395461 | 0.727106  |
| 7                | 6                | 0              | 2.621227                | -0.762982 | -0.394593 |
| 8                | 1                | 0              | 0.345264                | -3.023103 | -1.105811 |
| 9                | 1                | 0              | -2.272215               | -2.204126 | -1.413815 |
| 10               | 1                | 0              | 1.877490                | -0.798127 | 1.633631  |

|    |    |   |           |           |           |
|----|----|---|-----------|-----------|-----------|
| 11 | 1  | 0 | 2.129808  | -2.408066 | 0.945012  |
| 12 | 1  | 0 | 2.519621  | -1.349507 | -1.314893 |
| 13 | 1  | 0 | 2.256231  | 0.249486  | -0.584885 |
| 14 | 35 | 0 | 0.219105  | 2.142373  | -0.134539 |
| 15 | 1  | 0 | -0.414574 | 0.178473  | 1.549378  |
| 16 | 6  | 0 | -2.864847 | 0.016276  | 0.251589  |
| 17 | 6  | 0 | -4.101628 | -0.439118 | 0.099516  |
| 18 | 1  | 0 | -2.601275 | 1.053678  | 0.431375  |
| 19 | 1  | 0 | -4.934086 | 0.249382  | 0.147466  |
| 20 | 1  | 0 | -4.324642 | -1.485021 | -0.074890 |
| 21 | 8  | 0 | 3.984439  | -0.783394 | 0.017374  |
| 22 | 1  | 0 | 4.301873  | 0.120779  | 0.085657  |

-----

Rotational constants (GHZ):      0.8229262      0.5682294      0.3562302

Standard basis: 6-311++G(d,p) (5D, 7F)

There are    358 symmetry adapted cartesian basis functions of A    symmetry.

There are    345 symmetry adapted basis functions of A    symmetry.

    345 basis functions,    553 primitive gaussians,    358 cartesian basis functions

    55 alpha electrons      55 beta electrons

    nuclear repulsion energy      866.1565126859 Hartrees.

NAtoms=    22 NActive=    22 NUniq=    22 SFac= 1.00D+00 NAtFMM=    60 NAOKFM=F

Big=F

Integral buffers will be    131072 words long.

Raffenetti 2 integral format.

Two-electron integral symmetry is turned on.

One-electron integrals computed using PRISM.

NBasis=    345 RedAO= T EigKep= 7.12D-06 NBF=    345

NBsUse=    345 1.00D-06 EigRej= -1.00D+00 NBFU=    345

Initial guess from the checkpoint file: ". "

B after Tr=    0.000000    0.000000    0.000000

    Rot=    0.999993    0.000816    0.000198    0.003751 Ang=    0.44 deg.

ExpMin= 3.50D-02 ExpMax= 4.40D+05 ExpMxC= 1.51D+04 IAcc=3 IRadAn=      5 AccDes=

0.00D+00

Harris functional with IExCor= 402 and IRadAn=      5 diagonalized for initial guess.

HarFok: IExCor= 402 AccDes= 0.00D+00 IRadAn=      5 IDoV= 1 UseB2=F ITyADJ=14

ICtDFT= 3500011 ScaDFX= 1.000000 1.000000 1.000000 1.000000

FoFCou: FMM=F IPFlag=      0 FMFlag=    100000 FMFlg1=      0

    NFxFlg=      0 DoJE=T BraDBF=F KetDBF=T FulRan=T

    wScrn= 0.000000 ICntrl=      500 IOpCl= 0 I1Cent= 200000004 NGrid=

0

    NMat0=    1 NMatS0=    1 NMatT0=    0 NMatD0=    1 NMtDS0=    0

NMtDT0=    0

Petite list used in FoFCou.

Keep R1 ints in memory in canonical form, NReq=1804729152.



Requested convergence on RMS density matrix=1.00D-08 within 128 cycles.

Requested convergence on MAX density matrix=1.00D-06.

Requested convergence on energy=1.00D-06.

No special actions if energy rises.

SCF Done: E(RB3LYP) = -3032.33823892 A.U. after 11 cycles

NFock= 11 Conv=0.66D-08 -V/T= 2.0017

Calling FoFJK, ICntrl= 2127 FMM=F ISym2X=0 l1Cent= 0 IOpClX= 0 NMat=1 NMatS=1

NMatT=0.

\*\*\*\*\* Axes restored to original set \*\*\*\*\*

| Center<br>Number | Atomic<br>Number | Forces (Hartrees/Bohr) |              |              |
|------------------|------------------|------------------------|--------------|--------------|
|                  |                  | X                      | Y            | Z            |
| 1                | 6                | -0.000170307           | 0.000071297  | 0.000207776  |
| 2                | 6                | 0.000178959            | 0.000335964  | 0.000058040  |
| 3                | 7                | 0.000110463            | 0.000010846  | -0.000058891 |
| 4                | 6                | 0.000370996            | -0.000247415 | -0.000538858 |
| 5                | 7                | -0.000035283           | 0.000263494  | 0.000088407  |
| 6                | 6                | -0.000330517           | -0.000063985 | 0.000067129  |
| 7                | 6                | 0.000033756            | 0.000144308  | 0.000192045  |
| 8                | 1                | 0.000050175            | 0.000029392  | 0.000005605  |
| 9                | 1                | -0.000074252           | -0.000180249 | 0.000056643  |
| 10               | 1                | 0.000049375            | -0.000111659 | 0.000095448  |
| 11               | 1                | 0.000009561            | 0.000007905  | -0.000175762 |
| 12               | 1                | 0.000384183            | -0.000224730 | 0.000298264  |
| 13               | 1                | -0.000312101           | 0.000108679  | 0.000050882  |
| 14               | 35               | -0.000189781           | -0.001060230 | 0.000102325  |
| 15               | 1                | 0.000116189            | 0.000749134  | -0.000068677 |
| 16               | 6                | 0.000350598            | -0.000099810 | 0.000057440  |
| 17               | 6                | 0.000041208            | 0.000124118  | 0.000040366  |
| 18               | 1                | -0.000309371           | 0.000112209  | -0.000010334 |
| 19               | 1                | -0.000032171           | 0.000101025  | 0.000040215  |
| 20               | 1                | -0.000054475           | -0.000031519 | -0.000082020 |
| 21               | 8                | -0.000028410           | -0.000409358 | -0.000617048 |
| 22               | 1                | -0.000158796           | 0.000370586  | 0.000191006  |

Cartesian Forces: Max 0.001060230 RMS 0.000254335

GradGradGradGradGradGradGradGradGradGradGradGradGradGradGradGradGradGradGrad

Berny optimization.

Using GEDIIS/GDIIS optimizer.

FormGI is forming the generalized inverse of G from B-inverse, IUseBI=4.

Internal Forces: Max 0.005302272 RMS 0.000857726

Search for a local minimum.

Step number 20 out of a maximum of 116

All quantities printed in internal units (Hartrees-Bohrs-Radians)

Mixed Optimization -- En-DIIS/RFO-DIIS

Swapping is turned off.

Update second derivatives using D2CorX and points 18 19 20

DE= -4.01D-05 DEPred=-2.18D-05 R= 1.84D+00

TightC=F SS= 1.41D+00 RLast= 3.47D-01 DXNew= 9.0455D-01 1.0408D+00

Trust test= 1.84D+00 RLast= 3.47D-01 DXMaxT set to 9.05D-01

ITU= 1 0 -1 1 1 1 1 1 1 1 1 1 1 1 0 0 -1 0 0

|                 |         |         |         |         |         |
|-----------------|---------|---------|---------|---------|---------|
| Eigenvalues --- | 0.00022 | 0.00260 | 0.00469 | 0.00731 | 0.01134 |
| Eigenvalues --- | 0.01342 | 0.01600 | 0.01767 | 0.02046 | 0.02084 |
| Eigenvalues --- | 0.02232 | 0.02444 | 0.03069 | 0.03093 | 0.03510 |
| Eigenvalues --- | 0.04312 | 0.04797 | 0.05455 | 0.05809 | 0.06989 |
| Eigenvalues --- | 0.08820 | 0.09306 | 0.13697 | 0.14315 | 0.15667 |
| Eigenvalues --- | 0.15739 | 0.15866 | 0.15984 | 0.15997 | 0.16111 |
| Eigenvalues --- | 0.16913 | 0.18812 | 0.21146 | 0.22799 | 0.22991 |
| Eigenvalues --- | 0.24247 | 0.25148 | 0.25634 | 0.29741 | 0.33084 |
| Eigenvalues --- | 0.33799 | 0.33878 | 0.33898 | 0.34120 | 0.34427 |
| Eigenvalues --- | 0.34543 | 0.34682 | 0.36245 | 0.36315 | 0.36450 |
| Eigenvalues --- | 0.37255 | 0.42827 | 0.43098 | 0.45964 | 0.49574 |
| Eigenvalues --- | 0.53661 | 0.54536 | 0.55844 | 0.60576 | 2.54668 |

En-DIIS/RFO-DIIS IScMMF= 0 using points: 20 19

RFO step: Lambda=-5.56281080D-05.

DidBck=F Rises=F RFO-DIIS coefs: 1.22727 -0.22727

Iteration 1 RMS(Cart)= 0.03706089 RMS(Int)= 0.00451377

Iteration 2 RMS(Cart)= 0.00479247 RMS(Int)= 0.00006879

Iteration 3 RMS(Cart)= 0.00006031 RMS(Int)= 0.00002101

Iteration 4 RMS(Cart)= 0.00000001 RMS(Int)= 0.00002101

| Variable | Old X   | -DE/DX   | Delta X<br>(Linear) | Delta X<br>(Quad) | Delta X<br>(Total) | New X   |
|----------|---------|----------|---------------------|-------------------|--------------------|---------|
| R1       | 2.56025 | -0.00001 | 0.00003             | -0.00036          | -0.00034           | 2.55991 |
| R2       | 2.62631 | -0.00025 | 0.00007             | 0.00036           | 0.00041            | 2.62672 |
| R3       | 2.03310 | 0.00001  | 0.00000             | 0.00008           | 0.00008            | 2.03319 |
| R4       | 2.63041 | -0.00009 | 0.00022             | 0.00072           | 0.00095            | 2.63136 |
| R5       | 2.03120 | 0.00002  | 0.00001             | 0.00006           | 0.00007            | 2.03127 |
| R6       | 2.54616 | -0.00023 | -0.00002            | -0.00005          | -0.00005           | 2.54610 |
| R7       | 2.68952 | 0.00010  | 0.00049             | 0.00144           | 0.00192            | 2.69144 |
| R8       | 2.53091 | -0.00031 | 0.00010             | 0.00036           | 0.00046            | 2.53138 |
| R9       | 2.02693 | 0.00026  | -0.00012            | -0.00007          | -0.00019           | 2.02674 |
| R10      | 2.77626 | -0.00044 | 0.00032             | 0.00044           | 0.00076            | 2.77702 |
| R11      | 2.90172 | -0.00090 | 0.00076             | 0.00397           | 0.00472            | 2.90644 |
| R12      | 2.05901 | 0.00006  | 0.00003             | 0.00037           | 0.00040            | 2.05940 |
| R13      | 2.06307 | 0.00000  | -0.00006            | -0.00029          | -0.00035           | 2.06272 |
| R14      | 2.07120 | -0.00022 | -0.00035            | -0.00258          | -0.00293           | 2.06827 |

|     |         |          |          |          |          |         |
|-----|---------|----------|----------|----------|----------|---------|
| R15 | 2.06536 | -0.00067 | -0.00011 | 0.00006  | -0.00005 | 2.06531 |
| R16 | 2.69144 | -0.00034 | -0.00030 | -0.00214 | -0.00244 | 2.68900 |
| R17 | 5.32343 | -0.00042 | 0.00000  | -0.01557 | -0.01557 | 5.30786 |
| R18 | 2.50710 | -0.00001 | -0.00004 | -0.00020 | -0.00025 | 2.50686 |
| R19 | 2.05102 | 0.00004  | 0.00013  | 0.00032  | 0.00044  | 2.05147 |
| R20 | 2.04346 | 0.00008  | 0.00000  | -0.00010 | -0.00010 | 2.04336 |
| R21 | 2.04760 | 0.00008  | -0.00002 | -0.00012 | -0.00014 | 2.04746 |
| R22 | 1.81547 | 0.00037  | -0.00002 | 0.00116  | 0.00114  | 1.81661 |
| A1  | 1.87477 | -0.00006 | 0.00000  | -0.00014 | -0.00014 | 1.87462 |
| A2  | 2.27891 | 0.00007  | -0.00010 | 0.00004  | -0.00007 | 2.27884 |
| A3  | 2.12946 | -0.00001 | 0.00010  | 0.00015  | 0.00025  | 2.12971 |
| A4  | 1.86869 | -0.00001 | 0.00002  | 0.00032  | 0.00036  | 1.86905 |
| A5  | 2.28635 | -0.00001 | 0.00009  | 0.00057  | 0.00065  | 2.28700 |
| A6  | 2.12721 | 0.00001  | -0.00013 | -0.00070 | -0.00084 | 2.12637 |
| A7  | 1.89237 | -0.00008 | -0.00007 | -0.00046 | -0.00055 | 1.89182 |
| A8  | 2.22777 | 0.00016  | -0.00034 | -0.00173 | -0.00215 | 2.22562 |
| A9  | 2.15240 | -0.00008 | 0.00002  | -0.00020 | -0.00027 | 2.15213 |
| A10 | 1.89231 | 0.00011  | 0.00008  | 0.00009  | 0.00017  | 1.89248 |
| A11 | 2.19038 | -0.00014 | 0.00002  | -0.00067 | -0.00070 | 2.18968 |
| A12 | 2.19494 | 0.00007  | -0.00030 | -0.00055 | -0.00090 | 2.19403 |
| A13 | 1.89471 | 0.00004  | -0.00001 | -0.00009 | -0.00011 | 1.89461 |
| A14 | 2.20070 | 0.00074  | 0.00004  | -0.00071 | -0.00068 | 2.20002 |
| A15 | 2.17056 | -0.00085 | -0.00034 | -0.00019 | -0.00054 | 2.17002 |
| A16 | 1.94701 | -0.00275 | -0.00021 | 0.00041  | 0.00020  | 1.94721 |
| A17 | 1.87726 | 0.00056  | -0.00056 | -0.00253 | -0.00309 | 1.87417 |
| A18 | 1.89850 | 0.00117  | 0.00035  | 0.00073  | 0.00108  | 1.89957 |
| A19 | 1.91307 | 0.00020  | -0.00008 | 0.00069  | 0.00061  | 1.91367 |
| A20 | 1.93448 | 0.00120  | 0.00030  | 0.00022  | 0.00051  | 1.93499 |
| A21 | 1.89183 | -0.00034 | 0.00021  | 0.00040  | 0.00061  | 1.89244 |
| A22 | 1.92033 | 0.00075  | 0.00011  | -0.00044 | -0.00028 | 1.92005 |
| A23 | 1.90376 | -0.00402 | -0.00023 | 0.00096  | 0.00070  | 1.90446 |
| A24 | 1.87986 | 0.00167  | 0.00255  | 0.01328  | 0.01582  | 1.89568 |
| A25 | 1.89503 | 0.00099  | -0.00025 | 0.00164  | 0.00136  | 1.89638 |
| A26 | 1.90068 | -0.00083 | -0.00214 | -0.01494 | -0.01708 | 1.88361 |
| A27 | 1.96415 | 0.00146  | -0.00001 | -0.00052 | -0.00061 | 1.96353 |
| A28 | 2.56099 | -0.00530 | 0.00050  | 0.00373  | 0.00423  | 2.56522 |
| A29 | 2.15012 | 0.00019  | -0.00056 | -0.00239 | -0.00295 | 2.14717 |
| A30 | 1.95071 | 0.00024  | -0.00043 | -0.00071 | -0.00113 | 1.94958 |
| A31 | 2.18152 | -0.00043 | 0.00099  | 0.00307  | 0.00406  | 2.18558 |
| A32 | 2.08751 | -0.00012 | 0.00019  | -0.00029 | -0.00010 | 2.08740 |
| A33 | 2.14319 | 0.00011  | -0.00040 | -0.00107 | -0.00146 | 2.14173 |
| A34 | 2.05249 | 0.00001  | 0.00021  | 0.00135  | 0.00156  | 2.05405 |
| A35 | 1.90004 | -0.00043 | 0.00026  | -0.00184 | -0.00159 | 1.89846 |
| D1  | 0.00500 | 0.00015  | -0.00021 | -0.00171 | -0.00192 | 0.00309 |

|     |          |          |          |          |          |          |
|-----|----------|----------|----------|----------|----------|----------|
| D2  | 3.09958  | 0.00009  | -0.00073 | 0.00314  | 0.00241  | 3.10199  |
| D3  | -3.12599 | 0.00014  | -0.00077 | -0.00637 | -0.00714 | -3.13313 |
| D4  | -0.03141 | 0.00008  | -0.00129 | -0.00153 | -0.00281 | -0.03422 |
| D5  | -0.03938 | -0.00014 | 0.00037  | -0.00132 | -0.00095 | -0.04034 |
| D6  | -2.98869 | 0.00031  | 0.00214  | 0.00416  | 0.00630  | -2.98238 |
| D7  | 3.09271  | -0.00013 | 0.00087  | 0.00285  | 0.00373  | 3.09644  |
| D8  | 0.14341  | 0.00031  | 0.00265  | 0.00833  | 0.01098  | 0.15440  |
| D9  | 0.03084  | -0.00011 | -0.00002 | 0.00414  | 0.00412  | 0.03496  |
| D10 | 3.01866  | -0.00017 | -0.00288 | -0.01298 | -0.01584 | 3.00282  |
| D11 | -3.06897 | -0.00005 | 0.00043  | -0.00020 | 0.00023  | -3.06874 |
| D12 | -0.08115 | -0.00012 | -0.00242 | -0.01732 | -0.01973 | -0.10088 |
| D13 | -0.05577 | 0.00001  | 0.00025  | -0.00500 | -0.00475 | -0.06052 |
| D14 | -3.08936 | -0.00032 | 0.00238  | 0.00595  | 0.00833  | -3.08104 |
| D15 | -3.05170 | 0.00005  | 0.00299  | 0.01138  | 0.01438  | -3.03732 |
| D16 | 0.19789  | -0.00028 | 0.00512  | 0.02233  | 0.02746  | 0.22536  |
| D17 | 0.65075  | -0.00001 | 0.00585  | 0.03134  | 0.03719  | 0.68794  |
| D18 | -2.44881 | 0.00002  | 0.00570  | 0.03198  | 0.03768  | -2.41113 |
| D19 | -2.66564 | -0.00008 | 0.00259  | 0.01183  | 0.01443  | -2.65121 |
| D20 | 0.51799  | -0.00005 | 0.00244  | 0.01247  | 0.01492  | 0.53291  |
| D21 | 0.05892  | 0.00008  | -0.00038 | 0.00395  | 0.00357  | 0.06249  |
| D22 | 3.01232  | -0.00014 | -0.00207 | -0.00149 | -0.00355 | 3.00877  |
| D23 | 3.09215  | 0.00040  | -0.00249 | -0.00705 | -0.00953 | 3.08262  |
| D24 | -0.23763 | 0.00018  | -0.00418 | -0.01248 | -0.01666 | -0.25429 |
| D25 | 1.21049  | 0.00087  | -0.00485 | 0.00475  | -0.00010 | 1.21040  |
| D26 | -2.97425 | -0.00017 | -0.00544 | 0.00423  | -0.00122 | -2.97546 |
| D27 | -0.92867 | 0.00036  | -0.00532 | 0.00371  | -0.00161 | -0.93028 |
| D28 | -1.70982 | 0.00125  | -0.00285 | 0.01106  | 0.00821  | -1.70161 |
| D29 | 0.38862  | 0.00022  | -0.00344 | 0.01054  | 0.00709  | 0.39571  |
| D30 | 2.43420  | 0.00074  | -0.00332 | 0.01002  | 0.00670  | 2.44090  |
| D31 | -1.04800 | -0.00032 | -0.00427 | -0.03600 | -0.04026 | -1.08826 |
| D32 | 1.02898  | -0.00112 | -0.00465 | -0.03368 | -0.03835 | 0.99063  |
| D33 | -3.11753 | -0.00073 | -0.00325 | -0.02559 | -0.02883 | 3.13682  |
| D34 | -3.12527 | 0.00057  | -0.00338 | -0.03356 | -0.03693 | 3.12098  |
| D35 | -1.04829 | -0.00022 | -0.00376 | -0.03124 | -0.03502 | -1.08330 |
| D36 | 1.08839  | 0.00017  | -0.00236 | -0.02316 | -0.02550 | 1.06289  |
| D37 | 1.07040  | 0.00011  | -0.00376 | -0.03464 | -0.03840 | 1.03201  |
| D38 | -3.13580 | -0.00068 | -0.00414 | -0.03232 | -0.03648 | 3.11090  |
| D39 | -0.99913 | -0.00029 | -0.00275 | -0.02423 | -0.02696 | -1.02609 |
| D40 | -0.20827 | 0.00033  | 0.02063  | 0.05043  | 0.07104  | -0.13723 |
| D41 | 1.88440  | -0.00053 | 0.02047  | 0.05143  | 0.07192  | 1.95632  |
| D42 | -2.29342 | 0.00003  | 0.01760  | 0.03346  | 0.05107  | -2.24235 |
| D43 | -2.05218 | 0.00152  | 0.03897  | 0.17456  | 0.21348  | -1.83870 |
| D44 | 2.14892  | 0.00014  | 0.03857  | 0.17583  | 0.21447  | 2.36339  |
| D45 | 0.04681  | -0.00147 | 0.04037  | 0.18430  | 0.22465  | 0.27146  |

|     |          |          |         |         |         |          |
|-----|----------|----------|---------|---------|---------|----------|
| D46 | -3.08803 | 0.00000  | 0.00019 | 0.00260 | 0.00279 | -3.08524 |
| D47 | 0.05205  | -0.00002 | 0.00023 | 0.00086 | 0.00109 | 0.05315  |
| D48 | 0.00591  | -0.00002 | 0.00031 | 0.00176 | 0.00208 | 0.00799  |
| D49 | -3.13719 | -0.00003 | 0.00035 | 0.00003 | 0.00038 | -3.13681 |

| Item                 | Value    | Threshold | Converged? |
|----------------------|----------|-----------|------------|
| Maximum Force        | 0.005302 | 0.000450  | NO         |
| RMS Force            | 0.000858 | 0.000300  | NO         |
| Maximum Displacement | 0.253601 | 0.001800  | NO         |
| RMS Displacement     | 0.037914 | 0.001200  | NO         |

Predicted change in Energy=-6.121680D-05

GradGradGradGradGradGradGradGradGradGradGradGradGradGradGradGradGradGradGrad

Input orientation:

| Center Number | Atomic Number | Atomic Type | Coordinates (Angstroms) |           |           |
|---------------|---------------|-------------|-------------------------|-----------|-----------|
|               |               |             | X                       | Y         | Z         |
| 1             | 6             | 0           | -0.448812               | -1.969295 | -1.324793 |
| 2             | 6             | 0           | -1.739255               | -1.591174 | -1.488638 |
| 3             | 7             | 0           | -2.104525               | -0.878332 | -0.349620 |
| 4             | 6             | 0           | -1.032129               | -0.794815 | 0.461746  |
| 5             | 7             | 0           | -0.029495               | -1.492304 | -0.088362 |
| 6             | 6             | 0           | 1.348766                | -1.504827 | 0.421312  |
| 7             | 6             | 0           | 2.244748                | -0.518942 | -0.347296 |
| 8             | 1             | 0           | 0.204799                | -2.526324 | -1.972948 |
| 9             | 1             | 0           | -2.415919               | -1.729178 | -2.312347 |
| 10            | 1             | 0           | 1.309635                | -1.221096 | 1.472791  |
| 11            | 1             | 0           | 1.740751                | -2.521238 | 0.352533  |
| 12            | 1             | 0           | 2.305152                | -0.810628 | -1.400465 |
| 13            | 1             | 0           | 1.810229                | 0.482019  | -0.286143 |
| 14            | 35            | 0           | -0.379352               | 2.054724  | 0.502328  |
| 15            | 1             | 0           | -1.023097               | -0.348869 | 1.437100  |
| 16            | 6             | 0           | -3.309379               | -0.151071 | -0.130754 |
| 17            | 6             | 0           | -4.496807               | -0.579866 | -0.538116 |
| 18            | 1             | 0           | -3.121785               | 0.797195  | 0.363313  |
| 19            | 1             | 0           | -5.369066               | 0.041494  | -0.388856 |
| 20            | 1             | 0           | -4.638259               | -1.537751 | -1.024275 |
| 21            | 8             | 0           | 3.557292                | -0.577173 | 0.199181  |
| 22            | 1             | 0           | 3.706859                | 0.210573  | 0.729463  |

Distance matrix (angstroms):

|   |   | 1        | 2        | 3 | 4 | 5 |
|---|---|----------|----------|---|---|---|
| 1 | C | 0.000000 |          |   |   |   |
| 2 | C | 1.354645 | 0.000000 |   |   |   |

|    |    |          |          |          |          |          |
|----|----|----------|----------|----------|----------|----------|
| 3  | N  | 2.209649 | 1.392454 | 0.000000 |          |          |
| 4  | C  | 2.216164 | 2.222209 | 1.347339 | 0.000000 |          |
| 5  | N  | 1.390003 | 2.212199 | 2.179671 | 1.339547 | 0.000000 |
| 6  | C  | 2.548705 | 3.631974 | 3.593334 | 2.484836 | 1.469533 |
| 7  | C  | 3.211587 | 4.280727 | 4.364097 | 3.386529 | 2.487300 |
| 8  | H  | 1.075916 | 2.210975 | 3.268647 | 3.233551 | 2.162350 |
| 9  | H  | 2.214143 | 1.074903 | 2.161759 | 3.237824 | 3.270663 |
| 10 | H  | 3.387981 | 4.266468 | 3.885249 | 2.586075 | 2.074614 |
| 11 | H  | 2.812872 | 4.045414 | 4.240083 | 3.268230 | 2.094484 |
| 12 | H  | 2.988739 | 4.119983 | 4.533665 | 3.821718 | 2.763489 |
| 13 | H  | 3.491562 | 4.282869 | 4.144863 | 3.204473 | 2.705856 |
| 14 | Br | 4.419947 | 4.371024 | 3.507828 | 2.923635 | 3.612855 |
| 15 | H  | 3.253250 | 3.258243 | 2.154573 | 1.072504 | 2.149820 |
| 16 | C  | 3.593676 | 2.526467 | 1.424249 | 2.439535 | 3.543775 |
| 17 | C  | 4.351509 | 3.087123 | 2.418186 | 3.612467 | 4.581669 |
| 18 | H  | 4.200947 | 3.323465 | 2.085781 | 2.628849 | 3.874026 |
| 19 | H  | 5.397050 | 4.129244 | 3.391880 | 4.497995 | 5.563618 |
| 20 | H  | 4.222322 | 2.936446 | 2.703665 | 3.970439 | 4.703053 |
| 21 | O  | 4.506592 | 5.650694 | 5.696319 | 4.602076 | 3.712841 |
| 22 | H  | 5.122636 | 6.150319 | 6.010184 | 4.851854 | 4.186761 |
|    |    | 6        | 7        | 8        | 9        | 10       |
| 6  | C  | 0.000000 |          |          |          |          |
| 7  | C  | 1.538022 | 0.000000 |          |          |          |
| 8  | H  | 2.843343 | 3.291462 | 0.000000 |          |          |
| 9  | H  | 4.657905 | 5.200761 | 2.760217 | 0.000000 |          |
| 10 | H  | 1.089790 | 2.163371 | 3.846739 | 5.335276 | 0.000000 |
| 11 | H  | 1.091547 | 2.180130 | 2.786940 | 5.000685 | 1.769522 |
| 12 | H  | 2.171511 | 1.094484 | 2.771793 | 4.895282 | 3.068409 |
| 13 | H  | 2.158935 | 1.092917 | 3.804320 | 5.182203 | 2.499009 |
| 14 | Br | 3.957697 | 3.772468 | 5.239678 | 5.136917 | 3.811230 |
| 15 | H  | 2.827330 | 3.727171 | 4.228176 | 4.231260 | 2.490721 |
| 16 | C  | 4.882187 | 5.570507 | 4.624387 | 2.836906 | 5.005158 |
| 17 | C  | 5.995563 | 6.744530 | 5.287016 | 2.966295 | 6.178162 |
| 18 | H  | 5.028767 | 5.571073 | 5.250720 | 3.746994 | 4.994189 |
| 19 | H  | 6.940947 | 7.634525 | 6.338061 | 3.944131 | 7.047333 |
| 20 | H  | 6.159162 | 6.990855 | 5.033137 | 2.575765 | 6.458565 |
| 21 | O  | 2.405717 | 1.422955 | 4.444834 | 6.581348 | 2.662458 |
| 22 | H  | 2.932262 | 1.956878 | 5.201736 | 7.106592 | 2.889445 |
|    |    | 11       | 12       | 13       | 14       | 15       |
| 11 | H  | 0.000000 |          |          |          |          |
| 12 | H  | 2.513511 | 0.000000 |          |          |          |
| 13 | H  | 3.071204 | 1.776963 | 0.000000 |          |          |
| 14 | Br | 5.045464 | 4.363190 | 2.808799 | 0.000000 |          |
| 15 | H  | 3.678903 | 4.397981 | 3.418725 | 2.658095 | 0.000000 |

|    |   |          |          |          |          |          |
|----|---|----------|----------|----------|----------|----------|
| 16 | C | 5.599560 | 5.793975 | 5.160944 | 3.721745 | 2.779277 |
| 17 | C | 6.593125 | 6.860287 | 6.400765 | 4.997702 | 4.002687 |
| 18 | H | 5.886966 | 5.928546 | 4.984566 | 3.020206 | 2.621254 |
| 19 | H | 7.593862 | 7.787367 | 7.193531 | 5.453856 | 4.730111 |
| 20 | H | 6.599592 | 6.991509 | 6.797596 | 5.777083 | 4.532241 |
| 21 | O | 2.665095 | 2.044803 | 2.099919 | 4.745098 | 4.750214 |
| 22 | H | 3.386805 | 2.746675 | 2.168488 | 4.488831 | 4.815205 |
|    |   | 16       | 17       | 18       | 19       | 20       |
| 16 | C | 0.000000 |          |          |          |          |
| 17 | C | 1.326572 | 0.000000 |          |          |          |
| 18 | H | 1.085589 | 2.144658 | 0.000000 |          |          |
| 19 | H | 2.084708 | 1.081297 | 2.487391 | 0.000000 |          |
| 20 | H | 2.118297 | 1.083468 | 3.110799 | 1.852526 | 0.000000 |
| 21 | O | 6.887786 | 8.087776 | 6.820990 | 8.967074 | 8.341860 |
| 22 | H | 7.078019 | 8.338566 | 6.863568 | 9.146127 | 8.704782 |
|    |   | 21       | 22       |          |          |          |
| 21 | O | 0.000000 |          |          |          |          |
| 22 | H | 0.961309 | 0.000000 |          |          |          |

Stoichiometry C7H11BrN2O

Framework group C1[X(C7H11BrN2O)]

Deg. of freedom 60

Full point group C1 NOp 1

Largest Abelian subgroup C1 NOp 1

Largest concise Abelian subgroup C1 NOp 1

Standard orientation:

| Center<br>Number | Atomic<br>Number | Atomic<br>Type | Coordinates (Angstroms) |           |           |
|------------------|------------------|----------------|-------------------------|-----------|-----------|
|                  |                  |                | X                       | Y         | Z         |
| 1                | 6                | 0              | -0.196265               | -2.254319 | -0.603062 |
| 2                | 6                | 0              | -1.485927               | -1.865652 | -0.747181 |
| 3                | 7                | 0              | -1.699232               | -0.816982 | 0.143729  |
| 4                | 6                | 0              | -0.539582               | -0.555279 | 0.777800  |
| 5                | 7                | 0              | 0.374127                | -1.448289 | 0.375241  |
| 6                | 6                | 0              | 1.800537                | -1.389139 | 0.723643  |
| 7                | 6                | 0              | 2.630381                | -0.743470 | -0.398847 |
| 8                | 1                | 0              | 0.363584                | -3.022393 | -1.107271 |
| 9                | 1                | 0              | -2.255493               | -2.207331 | -1.415343 |
| 10               | 1                | 0              | 1.889209                | -0.795043 | 1.632945  |
| 11               | 1                | 0              | 2.153674                | -2.399909 | 0.936042  |
| 12               | 1                | 0              | 2.562422                | -1.346955 | -1.309387 |
| 13               | 1                | 0              | 2.233705                | 0.252913  | -0.609411 |
| 14               | 35               | 0              | 0.192728                | 2.123622  | -0.135902 |
| 15               | 1                | 0              | -0.407218               | 0.166607  | 1.559865  |

|    |   |   |           |           |           |
|----|---|---|-----------|-----------|-----------|
| 16 | 6 | 0 | -2.850625 | 0.015307  | 0.244095  |
| 17 | 6 | 0 | -4.088174 | -0.443488 | 0.110778  |
| 18 | 1 | 0 | -2.581687 | 1.055859  | 0.397155  |
| 19 | 1 | 0 | -4.920131 | 0.246340  | 0.145225  |
| 20 | 1 | 0 | -4.310656 | -1.493603 | -0.036407 |
| 21 | 8 | 0 | 3.994440  | -0.712405 | 0.005106  |
| 22 | 1 | 0 | 4.225259  | 0.189113  | 0.246149  |

-----

Rotational constants (GHZ): 0.8336526 0.5698641 0.3589627

Standard basis: 6-311++G(d,p) (5D, 7F)

There are 358 symmetry adapted cartesian basis functions of A symmetry.

There are 345 symmetry adapted basis functions of A symmetry.

345 basis functions, 553 primitive gaussians, 358 cartesian basis functions

55 alpha electrons 55 beta electrons

nuclear repulsion energy 868.2138986408 Hartrees.

NAtoms= 22 NActive= 22 NUniq= 22 SFac= 1.00D+00 NAtFMM= 60 NAOKFM=F

Big=F

Integral buffers will be 131072 words long.

Raffenetti 2 integral format.

Two-electron integral symmetry is turned on.

One-electron integrals computed using PRISM.

NBasis= 345 RedAO= T EigKep= 7.33D-06 NBF= 345

NBsUse= 345 1.00D-06 EigRej= -1.00D+00 NBFU= 345

Initial guess from the checkpoint file: "."

B after Tr= 0.000000 0.000000 0.000000

Rot= 0.999991 0.000188 -0.000271 -0.004201 Ang= 0.48 deg.

ExpMin= 3.50D-02 ExpMax= 4.40D+05 ExpMxC= 1.51D+04 IAcc=3 IRadAn= 5 AccDes= 0.00D+00

Harris functional with IExCor= 402 and IRadAn= 5 diagonalized for initial guess.

HarFok: IExCor= 402 AccDes= 0.00D+00 IRadAn= 5 IDoV= 1 UseB2=F ITyADJ=14

ICtDFT= 3500011 ScaDFX= 1.000000 1.000000 1.000000 1.000000

FoFCou: FMM=F IPFlag= 0 FMFlag= 100000 FMFlg1= 0

NFxFlg= 0 DoJE=T BraDBF=F KetDBF=T FulRan=T

wScrn= 0.000000 ICntrl= 500 IOpCl= 0 l1Cent= 20000004 NGrid= 0

NMat0= 1 NMatS0= 1 NMatT0= 0 NMatD0= 1 NMtDS0= 0

NMtDT0= 0

Petite list used in FoFCou.

Keep R1 ints in memory in canonical form, NReq=1804729152.

Requested convergence on RMS density matrix=1.00D-08 within 128 cycles.

Requested convergence on MAX density matrix=1.00D-06.

Requested convergence on energy=1.00D-06.

No special actions if energy rises.

SCF Done: E(RB3LYP) = -3032.33829576 A.U. after 11 cycles



NFock= 11 Conv=0.10D-07 -V/T= 2.0017  
 Calling FoFJK, ICntrl= 2127 FMM=F ISym2X=0 l1Cent= 0 IOpClX= 0 NMat=1 NMatS=1  
 NMatT=0.

\*\*\*\*\* Axes restored to original set \*\*\*\*\*

| Center<br>Number | Atomic<br>Number | Forces (Hartrees/Bohr) |              |              |
|------------------|------------------|------------------------|--------------|--------------|
|                  |                  | X                      | Y            | Z            |
| 1                | 6                | -0.000183733           | -0.000020920 | 0.000186955  |
| 2                | 6                | -0.000083909           | 0.000195609  | 0.000329986  |
| 3                | 7                | 0.000078001            | 0.000299088  | -0.000558615 |
| 4                | 6                | 0.000224764            | -0.000387666 | -0.000121026 |
| 5                | 7                | 0.000410913            | 0.000062881  | -0.000020703 |
| 6                | 6                | -0.000365939           | 0.000247757  | -0.000026482 |
| 7                | 6                | -0.000025495           | -0.000043232 | 0.000081459  |
| 8                | 1                | 0.000103817            | 0.000190452  | -0.000038196 |
| 9                | 1                | -0.000049344           | -0.000143162 | 0.000037905  |
| 10               | 1                | 0.000108976            | -0.000169505 | 0.000169466  |
| 11               | 1                | -0.000040001           | -0.000058646 | -0.000065625 |
| 12               | 1                | 0.000156785            | -0.000263418 | 0.000067277  |
| 13               | 1                | -0.000270291           | 0.000167943  | -0.000039242 |
| 14               | 35               | 0.000091784            | -0.000324577 | 0.000190176  |
| 15               | 1                | 0.000068893            | 0.000538500  | -0.000129293 |
| 16               | 6                | 0.000576889            | -0.000632377 | 0.000025163  |
| 17               | 6                | 0.000078089            | 0.000334738  | 0.000017652  |
| 18               | 1                | -0.000415284           | 0.000118974  | 0.000040805  |
| 19               | 1                | -0.000153568           | 0.000047729  | 0.000058747  |
| 20               | 1                | -0.000159051           | -0.000082991 | -0.000117067 |
| 21               | 8                | -0.000027543           | -0.000427506 | -0.000206459 |
| 22               | 1                | -0.000124752           | 0.000350330  | 0.000117116  |

Cartesian Forces: Max 0.000632377 RMS 0.000231348

GradGradGradGradGradGradGradGradGradGradGradGradGradGradGradGradGradGradGrad

Berny optimization.

Using GEDIIS/GDIIS optimizer.

FormGI is forming the generalized inverse of G from B-inverse, IUseBI=4.

Internal Forces: Max 0.001526710 RMS 0.000288680

Search for a local minimum.

Step number 21 out of a maximum of 116

All quantities printed in internal units (Hartrees-Bohrs-Radians)

Mixed Optimization -- En-DIIS/RFO-DIIS

Swapping is turned off.

Update second derivatives using D2CorX and points 18 20 21

DE= -5.68D-05 DEPred=-6.12D-05 R= 9.29D-01

TightC=F SS= 1.41D+00 RLast= 4.15D-01 DXNew= 1.5213D+00 1.2450D+00

Trust test= 9.29D-01 RLast= 4.15D-01 DXMaxT set to 1.25D+00

ITU= 1 1 0-1 1 1 1 1 1 1 1 1 1 1 1 0 0-1 0

ITU= 0

|                 |         |         |         |         |         |
|-----------------|---------|---------|---------|---------|---------|
| Eigenvalues --- | 0.00026 | 0.00264 | 0.00518 | 0.00678 | 0.01217 |
| Eigenvalues --- | 0.01369 | 0.01633 | 0.01755 | 0.02036 | 0.02090 |
| Eigenvalues --- | 0.02262 | 0.02446 | 0.03070 | 0.03098 | 0.03505 |
| Eigenvalues --- | 0.04297 | 0.04816 | 0.05456 | 0.05765 | 0.07103 |
| Eigenvalues --- | 0.08927 | 0.09318 | 0.13710 | 0.14387 | 0.15739 |
| Eigenvalues --- | 0.15748 | 0.15840 | 0.15990 | 0.15999 | 0.16169 |
| Eigenvalues --- | 0.16984 | 0.18590 | 0.21136 | 0.22789 | 0.23084 |
| Eigenvalues --- | 0.24203 | 0.25230 | 0.25577 | 0.29881 | 0.33056 |
| Eigenvalues --- | 0.33811 | 0.33879 | 0.33895 | 0.34122 | 0.34444 |
| Eigenvalues --- | 0.34532 | 0.34685 | 0.36264 | 0.36315 | 0.36513 |
| Eigenvalues --- | 0.37253 | 0.42767 | 0.43109 | 0.46035 | 0.49610 |
| Eigenvalues --- | 0.53706 | 0.54545 | 0.55772 | 0.60575 | 2.19889 |

En-DIIS/RFO-DIIS IScMMF= 0 using points: 21 20 19

RFO step: Lambda=-1.10906442D-05.

DidBck=F Rises=F RFO-DIIS coefs: 0.91363 -0.42300 0.50937

Iteration 1 RMS(Cart)= 0.01244537 RMS(Int)= 0.00036811

Iteration 2 RMS(Cart)= 0.00036918 RMS(Int)= 0.00001502

Iteration 3 RMS(Cart)= 0.00000038 RMS(Int)= 0.00001502

| Variable | Old X   | -DE/DX   | Delta X<br>(Linear) | Delta X<br>(Quad) | Delta X<br>(Total) | New X   |
|----------|---------|----------|---------------------|-------------------|--------------------|---------|
| R1       | 2.55991 | -0.00003 | -0.00003            | -0.00015          | -0.00018           | 2.55973 |
| R2       | 2.62672 | -0.00014 | -0.00018            | 0.00021           | 0.00003            | 2.62676 |
| R3       | 2.03319 | -0.00001 | 0.00000             | 0.00000           | 0.00000            | 2.03318 |
| R4       | 2.63136 | -0.00041 | -0.00058            | 0.00020           | -0.00039           | 2.63097 |
| R5       | 2.03127 | 0.00002  | -0.00003            | 0.00003           | 0.00000            | 2.03127 |
| R6       | 2.54610 | 0.00018  | 0.00005             | 0.00060           | 0.00064            | 2.54674 |
| R7       | 2.69144 | -0.00006 | -0.00126            | -0.00018          | -0.00144           | 2.69000 |
| R8       | 2.53138 | -0.00010 | -0.00026            | 0.00010           | -0.00016           | 2.53122 |
| R9       | 2.02674 | 0.00011  | 0.00029             | -0.00007          | 0.00022            | 2.02696 |
| R10      | 2.77702 | -0.00038 | -0.00078            | -0.00029          | -0.00106           | 2.77595 |
| R11      | 2.90644 | -0.00052 | -0.00210            | 0.00042           | -0.00168           | 2.90476 |
| R12      | 2.05940 | 0.00011  | -0.00010            | 0.00027           | 0.00018            | 2.05958 |
| R13      | 2.06272 | 0.00004  | 0.00017             | -0.00007          | 0.00009            | 2.06282 |
| R14      | 2.06827 | 0.00002  | 0.00104             | -0.00032          | 0.00072            | 2.06899 |
| R15      | 2.06531 | -0.00005 | 0.00025             | 0.00023           | 0.00049            | 2.06580 |
| R16      | 2.68900 | -0.00018 | 0.00089             | -0.00053          | 0.00036            | 2.68935 |
| R17      | 5.30786 | -0.00019 | 0.00135             | -0.00583          | -0.00448           | 5.30338 |
| R18      | 2.50686 | 0.00013  | 0.00012             | 0.00025           | 0.00037            | 2.50723 |
| R19      | 2.05147 | 0.00005  | -0.00032            | 0.00020           | -0.00012           | 2.05134 |

|     |          |          |          |          |          |          |
|-----|----------|----------|----------|----------|----------|----------|
| R20 | 2.04336  | 0.00015  | 0.00001  | 0.00022  | 0.00022  | 2.04358  |
| R21 | 2.04746  | 0.00015  | 0.00006  | 0.00016  | 0.00021  | 2.04767  |
| R22 | 1.81661  | 0.00034  | -0.00005 | 0.00052  | 0.00047  | 1.81707  |
| A1  | 1.87462  | 0.00012  | 0.00001  | 0.00021  | 0.00022  | 1.87484  |
| A2  | 2.27884  | 0.00001  | 0.00023  | -0.00003 | 0.00020  | 2.27905  |
| A3  | 2.12971  | -0.00013 | -0.00025 | -0.00018 | -0.00043 | 2.12928  |
| A4  | 1.86905  | 0.00000  | -0.00008 | 0.00003  | -0.00007 | 1.86898  |
| A5  | 2.28700  | -0.00002 | -0.00025 | -0.00017 | -0.00042 | 2.28658  |
| A6  | 2.12637  | 0.00001  | 0.00036  | 0.00021  | 0.00058  | 2.12695  |
| A7  | 1.89182  | -0.00003 | 0.00020  | -0.00007 | 0.00015  | 1.89197  |
| A8  | 2.22562  | 0.00001  | 0.00094  | 0.00020  | 0.00119  | 2.22681  |
| A9  | 2.15213  | 0.00003  | -0.00003 | 0.00016  | 0.00019  | 2.15231  |
| A10 | 1.89248  | 0.00004  | -0.00019 | -0.00001 | -0.00020 | 1.89229  |
| A11 | 2.18968  | -0.00011 | 0.00002  | -0.00007 | -0.00001 | 2.18967  |
| A12 | 2.19403  | 0.00008  | 0.00076  | 0.00008  | 0.00087  | 2.19490  |
| A13 | 1.89461  | -0.00015 | 0.00004  | -0.00004 | 0.00000  | 1.89461  |
| A14 | 2.20002  | 0.00004  | -0.00004 | -0.00009 | -0.00011 | 2.19990  |
| A15 | 2.17002  | 0.00010  | 0.00081  | 0.00057  | 0.00139  | 2.17141  |
| A16 | 1.94721  | -0.00093 | 0.00046  | 0.00009  | 0.00056  | 1.94776  |
| A17 | 1.87417  | 0.00038  | 0.00153  | 0.00028  | 0.00181  | 1.87598  |
| A18 | 1.89957  | 0.00021  | -0.00087 | -0.00060 | -0.00147 | 1.89810  |
| A19 | 1.91367  | 0.00011  | 0.00014  | 0.00070  | 0.00084  | 1.91451  |
| A20 | 1.93499  | 0.00041  | -0.00071 | -0.00021 | -0.00092 | 1.93407  |
| A21 | 1.89244  | -0.00017 | -0.00051 | -0.00026 | -0.00078 | 1.89166  |
| A22 | 1.92005  | 0.00005  | -0.00021 | -0.00004 | -0.00029 | 1.91975  |
| A23 | 1.90446  | -0.00118 | 0.00045  | -0.00075 | -0.00027 | 1.90419  |
| A24 | 1.89568  | 0.00056  | -0.00708 | 0.00191  | -0.00516 | 1.89052  |
| A25 | 1.89638  | 0.00053  | 0.00044  | 0.00179  | 0.00226  | 1.89864  |
| A26 | 1.88361  | -0.00021 | 0.00627  | -0.00229 | 0.00399  | 1.88759  |
| A27 | 1.96353  | 0.00025  | 0.00008  | -0.00065 | -0.00051 | 1.96302  |
| A28 | 2.56522  | -0.00153 | -0.00149 | 0.00083  | -0.00066 | 2.56456  |
| A29 | 2.14717  | 0.00037  | 0.00151  | 0.00096  | 0.00247  | 2.14964  |
| A30 | 1.94958  | 0.00026  | 0.00105  | 0.00038  | 0.00143  | 1.95101  |
| A31 | 2.18558  | -0.00063 | -0.00257 | -0.00134 | -0.00391 | 2.18167  |
| A32 | 2.08740  | -0.00005 | -0.00041 | -0.00042 | -0.00083 | 2.08658  |
| A33 | 2.14173  | 0.00017  | 0.00101  | 0.00054  | 0.00156  | 2.14329  |
| A34 | 2.05405  | -0.00012 | -0.00060 | -0.00013 | -0.00073 | 2.05332  |
| A35 | 1.89846  | -0.00038 | -0.00044 | -0.00069 | -0.00113 | 1.89732  |
| D1  | 0.00309  | 0.00012  | 0.00063  | -0.00027 | 0.00036  | 0.00345  |
| D2  | 3.10199  | 0.00014  | 0.00142  | 0.00174  | 0.00316  | 3.10515  |
| D3  | -3.13313 | 0.00007  | 0.00234  | -0.00009 | 0.00225  | -3.13088 |
| D4  | -0.03422 | 0.00009  | 0.00314  | 0.00191  | 0.00505  | -0.02917 |
| D5  | -0.04034 | -0.00016 | -0.00074 | 0.00129  | 0.00055  | -0.03979 |
| D6  | -2.98238 | -0.00011 | -0.00535 | -0.00114 | -0.00649 | -2.98887 |

|     |          |          |          |          |          |          |
|-----|----------|----------|----------|----------|----------|----------|
| D7  | 3.09644  | -0.00012 | -0.00227 | 0.00113  | -0.00114 | 3.09530  |
| D8  | 0.15440  | -0.00007 | -0.00688 | -0.00130 | -0.00818 | 0.14621  |
| D9  | 0.03496  | -0.00004 | -0.00030 | -0.00085 | -0.00115 | 0.03381  |
| D10 | 3.00282  | 0.00005  | 0.00782  | 0.00097  | 0.00878  | 3.01160  |
| D11 | -3.06874 | -0.00006 | -0.00099 | -0.00262 | -0.00361 | -3.07235 |
| D12 | -0.10088 | 0.00003  | 0.00713  | -0.00080 | 0.00632  | -0.09456 |
| D13 | -0.06052 | -0.00006 | -0.00016 | 0.00167  | 0.00151  | -0.05901 |
| D14 | -3.08104 | -0.00019 | -0.00605 | 0.00166  | -0.00439 | -3.08543 |
| D15 | -3.03732 | -0.00015 | -0.00795 | -0.00006 | -0.00802 | -3.04534 |
| D16 | 0.22536  | -0.00027 | -0.01384 | -0.00007 | -0.01393 | 0.21143  |
| D17 | 0.68794  | -0.00014 | -0.01632 | -0.00668 | -0.02301 | 0.66494  |
| D18 | -2.41113 | -0.00014 | -0.01603 | -0.00669 | -0.02272 | -2.43386 |
| D19 | -2.65121 | -0.00004 | -0.00706 | -0.00464 | -0.01170 | -2.66290 |
| D20 | 0.53291  | -0.00004 | -0.00677 | -0.00465 | -0.01142 | 0.52149  |
| D21 | 0.06249  | 0.00013  | 0.00054  | -0.00184 | -0.00129 | 0.06119  |
| D22 | 3.00877  | 0.00007  | 0.00494  | 0.00045  | 0.00540  | 3.01416  |
| D23 | 3.08262  | 0.00024  | 0.00640  | -0.00184 | 0.00455  | 3.08717  |
| D24 | -0.25429 | 0.00018  | 0.01080  | 0.00045  | 0.01125  | -0.24304 |
| D25 | 1.21040  | 0.00022  | 0.01088  | 0.00026  | 0.01114  | 1.22154  |
| D26 | -2.97546 | 0.00005  | 0.01231  | 0.00136  | 0.01366  | -2.96180 |
| D27 | -0.93028 | 0.00017  | 0.01207  | 0.00088  | 0.01295  | -0.91733 |
| D28 | -1.70161 | 0.00031  | 0.00567  | -0.00245 | 0.00322  | -1.69839 |
| D29 | 0.39571  | 0.00014  | 0.00710  | -0.00136 | 0.00574  | 0.40146  |
| D30 | 2.44090  | 0.00026  | 0.00686  | -0.00183 | 0.00503  | 2.44593  |
| D31 | -1.08826 | 0.00005  | 0.01304  | -0.00858 | 0.00446  | -1.08380 |
| D32 | 0.99063  | 0.00002  | 0.01373  | -0.00686 | 0.00689  | 0.99752  |
| D33 | 3.13682  | -0.00005 | 0.00978  | -0.00692 | 0.00285  | 3.13968  |
| D34 | 3.12098  | 0.00009  | 0.01076  | -0.00943 | 0.00132  | 3.12230  |
| D35 | -1.08330 | 0.00005  | 0.01145  | -0.00772 | 0.00374  | -1.07957 |
| D36 | 1.06289  | -0.00002 | 0.00749  | -0.00778 | -0.00029 | 1.06259  |
| D37 | 1.03201  | -0.00003 | 0.01175  | -0.00942 | 0.00232  | 1.03433  |
| D38 | 3.11090  | -0.00007 | 0.01244  | -0.00771 | 0.00475  | 3.11565  |
| D39 | -1.02609 | -0.00014 | 0.00849  | -0.00777 | 0.00071  | -1.02538 |
| D40 | -0.13723 | 0.00029  | -0.05237 | 0.03131  | -0.02105 | -0.15828 |
| D41 | 1.95632  | -0.00003 | -0.05210 | 0.03189  | -0.02022 | 1.93610  |
| D42 | -2.24235 | 0.00022  | -0.04386 | 0.02982  | -0.01404 | -2.25639 |
| D43 | -1.83870 | 0.00037  | -0.10579 | 0.03344  | -0.07230 | -1.91100 |
| D44 | 2.36339  | 0.00012  | -0.10497 | 0.03371  | -0.07132 | 2.29207  |
| D45 | 0.27146  | -0.00056 | -0.10988 | 0.03339  | -0.07647 | 0.19499  |
| D46 | -3.08524 | -0.00008 | -0.00066 | -0.00112 | -0.00179 | -3.08702 |
| D47 | 0.05315  | -0.00004 | -0.00060 | -0.00009 | -0.00070 | 0.05245  |
| D48 | 0.00799  | -0.00005 | -0.00089 | -0.00106 | -0.00195 | 0.00604  |
| D49 | -3.13681 | -0.00001 | -0.00083 | -0.00003 | -0.00085 | -3.13767 |

Item                      Value              Threshold      Converged?

|                      |          |          |     |
|----------------------|----------|----------|-----|
| Maximum Force        | 0.001527 | 0.000450 | NO  |
| RMS Force            | 0.000289 | 0.000300 | YES |
| Maximum Displacement | 0.069907 | 0.001800 | NO  |
| RMS Displacement     | 0.012491 | 0.001200 | NO  |

Predicted change in Energy=-1.420910D-05

GradGradGradGradGradGradGradGradGradGradGradGradGradGradGradGradGradGradGrad

Input orientation:

| Center Number | Atomic Number | Atomic Type | Coordinates (Angstroms) |           |           |
|---------------|---------------|-------------|-------------------------|-----------|-----------|
|               |               |             | X                       | Y         | Z         |
| 1             | 6             | 0           | -0.450815               | -1.970874 | -1.322053 |
| 2             | 6             | 0           | -1.741430               | -1.593852 | -1.486296 |
| 3             | 7             | 0           | -2.105406               | -0.875534 | -0.350559 |
| 4             | 6             | 0           | -1.032292               | -0.788940 | 0.460097  |
| 5             | 7             | 0           | -0.030052               | -1.488167 | -0.088315 |
| 6             | 6             | 0           | 1.347131                | -1.505166 | 0.422521  |
| 7             | 6             | 0           | 2.245817                | -0.518677 | -0.340359 |
| 8             | 1             | 0           | 0.202887                | -2.529414 | -1.968813 |
| 9             | 1             | 0           | -2.419374               | -1.738268 | -2.307848 |
| 10            | 1             | 0           | 1.309109                | -1.228180 | 1.475935  |
| 11            | 1             | 0           | 1.736625                | -2.522169 | 0.347800  |
| 12            | 1             | 0           | 2.303272                | -0.803942 | -1.395844 |
| 13            | 1             | 0           | 1.816773                | 0.484296  | -0.269644 |
| 14            | 35            | 0           | -0.374157               | 2.055721  | 0.509128  |
| 15            | 1             | 0           | -1.021564               | -0.334995 | 1.431863  |
| 16            | 6             | 0           | -3.313123               | -0.155474 | -0.128635 |
| 17            | 6             | 0           | -4.498647               | -0.580348 | -0.546162 |
| 18            | 1             | 0           | -3.132677               | 0.787412  | 0.378085  |
| 19            | 1             | 0           | -5.372062               | 0.037951  | -0.390247 |
| 20            | 1             | 0           | -4.638661               | -1.531476 | -1.046062 |
| 21            | 8             | 0           | 3.556269                | -0.589827 | 0.210091  |
| 22            | 1             | 0           | 3.732726                | 0.223045  | 0.692470  |

Distance matrix (angstroms):

|   |   | 1        | 2        | 3        | 4        | 5        |
|---|---|----------|----------|----------|----------|----------|
| 1 | C | 0.000000 |          |          |          |          |
| 2 | C | 1.354551 | 0.000000 |          |          |          |
| 3 | N | 2.209353 | 1.392249 | 0.000000 |          |          |
| 4 | C | 2.216109 | 2.222432 | 1.347677 | 0.000000 |          |
| 5 | N | 1.390021 | 2.212314 | 2.179721 | 1.339462 | 0.000000 |
| 6 | C | 2.548143 | 3.631894 | 3.593619 | 2.485165 | 1.468971 |
| 7 | C | 3.216275 | 4.285710 | 4.365843 | 3.385228 | 2.486567 |

|    |    |          |          |          |          |          |
|----|----|----------|----------|----------|----------|----------|
| 8  | H  | 1.075914 | 2.210988 | 3.268376 | 3.233345 | 2.162112 |
| 9  | H  | 2.213848 | 1.074901 | 2.161913 | 3.238324 | 3.270740 |
| 10 | H  | 3.387870 | 4.267823 | 3.888360 | 2.589791 | 2.075529 |
| 11 | H  | 2.806640 | 4.040117 | 4.237961 | 3.268577 | 2.092965 |
| 12 | H  | 2.992018 | 4.122106 | 4.531466 | 3.817162 | 2.760832 |
| 13 | H  | 3.503909 | 4.296481 | 4.152008 | 3.204812 | 2.708182 |
| 14 | Br | 4.424090 | 4.378417 | 3.511201 | 2.920212 | 3.610330 |
| 15 | H  | 3.253599 | 3.258616 | 2.154977 | 1.072619 | 2.150312 |
| 16 | C  | 3.593429 | 2.526340 | 1.423488 | 2.439278 | 3.543480 |
| 17 | C  | 4.349771 | 3.084361 | 2.419297 | 3.615478 | 4.582805 |
| 18 | H  | 4.206066 | 3.328949 | 2.086048 | 2.627399 | 3.875831 |
| 19 | H  | 5.396509 | 4.128630 | 3.392207 | 4.498937 | 5.563925 |
| 20 | H  | 4.219869 | 2.931151 | 2.707650 | 3.978162 | 4.707275 |
| 21 | O  | 4.506826 | 5.652558 | 5.696535 | 4.599678 | 3.709145 |
| 22 | H  | 5.135524 | 6.165592 | 6.031465 | 4.876834 | 4.206705 |
|    |    | 6        | 7        | 8        | 9        | 10       |
| 6  | C  | 0.000000 |          |          |          |          |
| 7  | C  | 1.537134 | 0.000000 |          |          |          |
| 8  | H  | 2.841980 | 3.296738 | 0.000000 |          |          |
| 9  | H  | 4.657876 | 5.207919 | 2.759911 | 0.000000 |          |
| 10 | H  | 1.089884 | 2.163270 | 3.844895 | 5.336552 | 0.000000 |
| 11 | H  | 1.091597 | 2.178719 | 2.778326 | 4.993926 | 1.769143 |
| 12 | H  | 2.170800 | 1.094863 | 2.777978 | 4.899807 | 3.068460 |
| 13 | H  | 2.158151 | 1.093176 | 3.817623 | 5.199905 | 2.497467 |
| 14 | Br | 3.956040 | 3.770069 | 5.243723 | 5.149041 | 3.814722 |
| 15 | H  | 2.828213 | 3.721597 | 4.228398 | 4.231842 | 2.496348 |
| 16 | C  | 4.882971 | 5.574815 | 4.624302 | 2.837780 | 5.009029 |
| 17 | C  | 5.997228 | 6.747884 | 5.284620 | 2.961029 | 6.183735 |
| 18 | H  | 5.032550 | 5.581238 | 5.256924 | 3.755276 | 4.999734 |
| 19 | H  | 6.941855 | 7.638350 | 6.337451 | 3.943414 | 7.051507 |
| 20 | H  | 6.163370 | 6.994270 | 5.028712 | 2.561270 | 6.467490 |
| 21 | O  | 2.400680 | 1.423145 | 4.444636 | 6.585381 | 2.656987 |
| 22 | H  | 2.958150 | 1.956473 | 5.207515 | 7.120182 | 2.931517 |
|    |    | 11       | 12       | 13       | 14       | 15       |
| 11 | H  | 0.000000 |          |          |          |          |
| 12 | H  | 2.512705 | 0.000000 |          |          |          |
| 13 | H  | 3.070259 | 1.778922 | 0.000000 |          |          |
| 14 | Br | 5.043659 | 4.356056 | 2.806428 | 0.000000 |          |
| 15 | H  | 3.683277 | 4.389803 | 3.409182 | 2.643123 | 0.000000 |
| 16 | C  | 5.597159 | 5.793982 | 5.171559 | 3.732780 | 2.778242 |
| 17 | C  | 6.591544 | 6.858429 | 6.410496 | 5.007386 | 4.007853 |
| 18 | H  | 5.887643 | 5.935383 | 5.000849 | 3.038949 | 2.612861 |
| 19 | H  | 7.591597 | 7.786576 | 7.203688 | 5.464368 | 4.731385 |
| 20 | H  | 6.600651 | 6.988712 | 6.807261 | 5.785551 | 4.544786 |

|    |   |          |          |          |          |          |
|----|---|----------|----------|----------|----------|----------|
| 21 | O | 2.657821 | 2.048138 | 2.099935 | 4.747272 | 4.744915 |
| 22 | H | 3.411659 | 2.731134 | 2.159813 | 4.500978 | 4.843695 |
|    |   | 16       | 17       | 18       | 19       | 20       |
| 16 | C | 0.000000 |          |          |          |          |
| 17 | C | 1.326768 | 0.000000 |          |          |          |
| 18 | H | 1.085523 | 2.142633 | 0.000000 |          |          |
| 19 | H | 2.084486 | 1.081414 | 2.483319 | 0.000000 |          |
| 20 | H | 2.119459 | 1.083582 | 3.110214 | 1.852315 | 0.000000 |
| 21 | O | 6.891440 | 8.090344 | 6.831325 | 8.970484 | 8.343950 |
| 22 | H | 7.103625 | 8.362723 | 6.895731 | 9.170806 | 8.728171 |
|    |   | 21       | 22       |          |          |          |
| 21 | O | 0.000000 |          |          |          |          |
| 22 | H | 0.961555 | 0.000000 |          |          |          |

Stoichiometry C7H11BrN2O

Framework group C1[X(C7H11BrN2O)]

Deg. of freedom 60

Full point group C1 NOp 1

Largest Abelian subgroup C1 NOp 1

Largest concise Abelian subgroup C1 NOp 1

Standard orientation:

| Center<br>Number | Atomic<br>Number | Atomic<br>Type | Coordinates (Angstroms) |           |           |
|------------------|------------------|----------------|-------------------------|-----------|-----------|
|                  |                  |                | X                       | Y         | Z         |
| 1                | 6                | 0              | -0.205759               | -2.255681 | -0.599597 |
| 2                | 6                | 0              | -1.494886               | -1.865110 | -0.742479 |
| 3                | 7                | 0              | -1.703298               | -0.810720 | 0.142498  |
| 4                | 6                | 0              | -0.541425               | -0.548501 | 0.772994  |
| 5                | 7                | 0              | 0.369257                | -1.445391 | 0.372486  |
| 6                | 6                | 0              | 1.795206                | -1.393220 | 0.721513  |
| 7                | 6                | 0              | 2.628527                | -0.748838 | -0.397921 |
| 8                | 1                | 0              | 0.351693                | -3.026779 | -1.101838 |
| 9                | 1                | 0              | -2.267412               | -2.211011 | -1.405025 |
| 10               | 1                | 0              | 1.887710                | -0.804126 | 1.633796  |
| 11               | 1                | 0              | 2.142914                | -2.406841 | 0.929492  |
| 12               | 1                | 0              | 2.554831                | -1.347679 | -1.311531 |
| 13               | 1                | 0              | 2.240671                | 0.252777  | -0.601314 |
| 14               | 35               | 0              | 0.202525                | 2.125065  | -0.135976 |
| 15               | 1                | 0              | -0.404697               | 0.180381  | 1.547944  |
| 16               | 6                | 0              | -2.855169               | 0.018862  | 0.248819  |
| 17               | 6                | 0              | -4.093211               | -0.436512 | 0.106696  |
| 18               | 1                | 0              | -2.589210               | 1.058160  | 0.414608  |
| 19               | 1                | 0              | -4.923858               | 0.254654  | 0.148776  |
| 20               | 1                | 0              | -4.318485               | -1.484143 | -0.054149 |

|    |   |   |          |           |          |
|----|---|---|----------|-----------|----------|
| 21 | 8 | 0 | 3.991197 | -0.731613 | 0.012171 |
| 22 | 1 | 0 | 4.246498 | 0.177021  | 0.195999 |

-----

Rotational constants (GHZ):      0.8330085      0.5693385      0.3584418

Standard basis: 6-311++G(d,p) (5D, 7F)

There are 358 symmetry adapted cartesian basis functions of A symmetry.

There are 345 symmetry adapted basis functions of A symmetry.

345 basis functions, 553 primitive gaussians, 358 cartesian basis functions

55 alpha electrons      55 beta electrons

nuclear repulsion energy      868.0314302318 Hartrees.

NAtoms= 22 NActive= 22 NUniq= 22 SFac= 1.00D+00 NATFMM= 60 NAOKFM=F

Big=F

Integral buffers will be 131072 words long.

Raffenetti 2 integral format.

Two-electron integral symmetry is turned on.

One-electron integrals computed using PRISM.

NBasis= 345 RedAO= T EigKep= 7.21D-06 NBF= 345

NBsUse= 345 1.00D-06 EigRej= -1.00D+00 NBFU= 345

Initial guess from the checkpoint file: "."

B after Tr= 0.000000 0.000000 0.000000

Rot= 0.999999 0.000181 -0.000004 0.001650 Ang= 0.19 deg.

ExpMin= 3.50D-02 ExpMax= 4.40D+05 ExpMxC= 1.51D+04 IAcc=3 IRadAn= 5 AccDes= 0.00D+00

Harris functional with IExCor= 402 and IRadAn= 5 diagonalized for initial guess.

HarFok: IExCor= 402 AccDes= 0.00D+00 IRadAn= 5 IDoV= 1 UseB2=F ITyADJ=14

ICtDFT= 3500011 ScaDFX= 1.000000 1.000000 1.000000 1.000000

FoFCou: FMM=F IPFlag= 0 FMFlag= 100000 FMFlg1= 0

NFxFlg= 0 DoJE=T BraDBF=F KetDBF=T FulRan=T

wScrn= 0.000000 ICntrl= 500 IOpCl= 0 I1Cent= 200000004 NGrid= 0

NMat0= 1 NMatS0= 1 NMatT0= 0 NMatD0= 1 NMtDS0= 0

NMtDT0= 0

Petite list used in FoFCou.

Keep R1 ints in memory in canonical form, NReq=1804729152.

Requested convergence on RMS density matrix=1.00D-08 within 128 cycles.

Requested convergence on MAX density matrix=1.00D-06.

Requested convergence on energy=1.00D-06.

No special actions if energy rises.

SCF Done: E(RB3LYP) = -3032.33831386 A.U. after 11 cycles

NFock= 11 Conv=0.35D-08 -V/T= 2.0017

Calling FoFJK, ICntrl= 2127 FMM=F ISym2X=0 I1Cent= 0 IOpClX= 0 NMat=1 NMatS=1 NMatT=0.

\*\*\*\*\* Axes restored to original set \*\*\*\*\*

-----



| Center<br>Number | Atomic<br>Number | Forces (Hartrees/Bohr) |              |              |
|------------------|------------------|------------------------|--------------|--------------|
|                  |                  | X                      | Y            | Z            |
| 1                | 6                | -0.000057369           | 0.000032425  | 0.000164523  |
| 2                | 6                | -0.000110979           | 0.000087860  | 0.000195143  |
| 3                | 7                | 0.000132807            | 0.000172604  | -0.000313308 |
| 4                | 6                | 0.000128268            | -0.000370763 | -0.000130537 |
| 5                | 7                | 0.000027738            | -0.000055825 | -0.000113763 |
| 6                | 6                | -0.000278415           | 0.000075002  | 0.000133587  |
| 7                | 6                | -0.000086786           | 0.000041327  | 0.000182620  |
| 8                | 1                | 0.000064590            | 0.000123834  | -0.000029891 |
| 9                | 1                | -0.000012431           | -0.000053101 | 0.000009697  |
| 10               | 1                | 0.000102317            | -0.000064999 | 0.000003951  |
| 11               | 1                | -0.000015276           | -0.000063751 | -0.000010119 |
| 12               | 1                | -0.000023909           | -0.000078109 | 0.000014200  |
| 13               | 1                | -0.000249214           | -0.000063603 | -0.000227945 |
| 14               | 35               | 0.000121681            | -0.000035832 | 0.000110882  |
| 15               | 1                | 0.000036908            | 0.000308739  | -0.000095618 |
| 16               | 6                | 0.000291703            | -0.000320090 | 0.000012686  |
| 17               | 6                | 0.000095438            | 0.000213289  | 0.000059650  |
| 18               | 1                | -0.000233362           | 0.000015502  | 0.000019659  |
| 19               | 1                | -0.000066463           | 0.000015488  | 0.000001359  |
| 20               | 1                | -0.000079379           | -0.000011905 | -0.000060237 |
| 21               | 8                | 0.000290179            | 0.000166217  | 0.000090430  |
| 22               | 1                | -0.000078045           | -0.000134309 | -0.000016969 |

-----  
Cartesian Forces: Max 0.000370763 RMS 0.000141869

GradGradGradGradGradGradGradGradGradGradGradGradGradGradGradGradGradGradGrad  
Berny optimization.

Using GEDIIS/GDIIS optimizer.

FormGI is forming the generalized inverse of G from B-inverse, IUseBI=4.

Internal Forces: Max 0.000405091 RMS 0.000104254

Search for a local minimum.

Step number 22 out of a maximum of 116

All quantities printed in internal units (Hartrees-Bohrs-Radians)

Mixed Optimization -- En-DIIS/RFO-DIIS

Swapping is turned off.

Update second derivatives using D2CorX and points 18 20 21 22

DE= -1.81D-05 DEPred=-1.42D-05 R= 1.27D+00

TightC=F SS= 1.41D+00 RLast= 1.42D-01 DXNew= 2.0938D+00 4.2488D-01

Trust test= 1.27D+00 RLast= 1.42D-01 DXMaxT set to 1.25D+00

ITU= 1 1 1 0-1 1 1 1 1 1 1 1 1 1 1 1 0 0-1

ITU= 0 0

|                 |         |         |         |         |         |
|-----------------|---------|---------|---------|---------|---------|
| Eigenvalues --- | 0.00038 | 0.00233 | 0.00461 | 0.00701 | 0.01013 |
| Eigenvalues --- | 0.01336 | 0.01594 | 0.01749 | 0.01943 | 0.02079 |
| Eigenvalues --- | 0.02229 | 0.02417 | 0.03066 | 0.03091 | 0.03508 |
| Eigenvalues --- | 0.04272 | 0.04777 | 0.05449 | 0.05760 | 0.06952 |
| Eigenvalues --- | 0.08842 | 0.09315 | 0.13646 | 0.14288 | 0.15140 |
| Eigenvalues --- | 0.15764 | 0.15835 | 0.15987 | 0.15993 | 0.16085 |
| Eigenvalues --- | 0.16583 | 0.17582 | 0.20819 | 0.22761 | 0.22813 |
| Eigenvalues --- | 0.23980 | 0.24775 | 0.26079 | 0.29675 | 0.33088 |
| Eigenvalues --- | 0.33826 | 0.33877 | 0.33880 | 0.34137 | 0.34376 |
| Eigenvalues --- | 0.34472 | 0.34700 | 0.36127 | 0.36315 | 0.36401 |
| Eigenvalues --- | 0.37236 | 0.43041 | 0.43459 | 0.45788 | 0.49805 |
| Eigenvalues --- | 0.53376 | 0.54427 | 0.56489 | 0.60630 | 2.40644 |

En-DIIS/RFO-DIIS IScMMF= 0 using points: 22 21 20 19

RFO step: Lambda=-4.49943065D-06.

DidBck=T Rises=F RFO-DIIS coefs: 0.47671 0.61099 -1.07655 0.98885

Iteration 1 RMS(Cart)= 0.01080146 RMS(Int)= 0.00006719

Iteration 2 RMS(Cart)= 0.00011644 RMS(Int)= 0.00002087

Iteration 3 RMS(Cart)= 0.00000001 RMS(Int)= 0.00002087

| Variable | Old X   | -DE/DX   | Delta X<br>(Linear) | Delta X<br>(Quad) | Delta X<br>(Total) | New X   |
|----------|---------|----------|---------------------|-------------------|--------------------|---------|
| R1       | 2.55973 | 0.00001  | -0.00006            | -0.00035          | -0.00039           | 2.55934 |
| R2       | 2.62676 | -0.00014 | -0.00027            | 0.00048           | 0.00022            | 2.62698 |
| R3       | 2.03318 | -0.00001 | 0.00002             | -0.00001          | 0.00001            | 2.03319 |
| R4       | 2.63097 | -0.00025 | -0.00068            | 0.00038           | -0.00031           | 2.63066 |
| R5       | 2.03127 | 0.00001  | -0.00005            | 0.00007           | 0.00002            | 2.03129 |
| R6       | 2.54674 | -0.00003 | -0.00026            | 0.00143           | 0.00116            | 2.54790 |
| R7       | 2.69000 | -0.00006 | -0.00120            | -0.00078          | -0.00198           | 2.68802 |
| R8       | 2.53122 | -0.00022 | -0.00030            | 0.00006           | -0.00025           | 2.53097 |
| R9       | 2.02696 | 0.00004  | 0.00039             | -0.00014          | 0.00025            | 2.02721 |
| R10      | 2.77595 | -0.00012 | -0.00076            | -0.00070          | -0.00146           | 2.77449 |
| R11      | 2.90476 | -0.00011 | -0.00200            | 0.00141           | -0.00058           | 2.90418 |
| R12      | 2.05958 | -0.00002 | -0.00018            | 0.00062           | 0.00044            | 2.06003 |
| R13      | 2.06282 | 0.00005  | 0.00019             | -0.00013          | 0.00006            | 2.06288 |
| R14      | 2.06899 | 0.00001  | 0.00089             | -0.00097          | -0.00007           | 2.06892 |
| R15      | 2.06580 | -0.00004 | 0.00022             | 0.00049           | 0.00071            | 2.06652 |
| R16      | 2.68935 | 0.00021  | 0.00092             | -0.00126          | -0.00034           | 2.68901 |
| R17      | 5.30338 | -0.00008 | 0.00098             | -0.01495          | -0.01396           | 5.28942 |
| R18      | 2.50723 | -0.00002 | -0.00002            | 0.00061           | 0.00059            | 2.50781 |
| R19      | 2.05134 | -0.00002 | -0.00045            | 0.00035           | -0.00010           | 2.05125 |
| R20      | 2.04358 | 0.00006  | -0.00013            | 0.00051           | 0.00038            | 2.04395 |
| R21      | 2.04767 | 0.00006  | -0.00004            | 0.00037           | 0.00033            | 2.04800 |
| R22      | 1.81707 | -0.00013 | -0.00005            | 0.00125           | 0.00120            | 1.81827 |
| A1       | 1.87484 | 0.00005  | -0.00014            | 0.00055           | 0.00041            | 1.87525 |
| A2       | 2.27905 | 0.00001  | 0.00033             | -0.00011          | 0.00022            | 2.27927 |

|     |          |          |          |          |          |          |
|-----|----------|----------|----------|----------|----------|----------|
| A3  | 2.12928  | -0.00006 | -0.00021 | -0.00045 | -0.00065 | 2.12863  |
| A4  | 1.86898  | -0.00005 | -0.00003 | 0.00001  | -0.00004 | 1.86894  |
| A5  | 2.28658  | 0.00001  | -0.00010 | -0.00045 | -0.00056 | 2.28602  |
| A6  | 2.12695  | 0.00004  | 0.00019  | 0.00061  | 0.00079  | 2.12774  |
| A7  | 1.89197  | 0.00000  | 0.00017  | -0.00017 | 0.00002  | 1.89199  |
| A8  | 2.22681  | 0.00007  | 0.00065  | 0.00077  | 0.00148  | 2.22830  |
| A9  | 2.15231  | -0.00006 | -0.00022 | 0.00032  | 0.00017  | 2.15248  |
| A10 | 1.89229  | 0.00006  | -0.00021 | 0.00007  | -0.00015 | 1.89214  |
| A11 | 2.18967  | -0.00009 | -0.00014 | -0.00019 | -0.00028 | 2.18939  |
| A12 | 2.19490  | 0.00003  | 0.00079  | 0.00032  | 0.00115  | 2.19605  |
| A13 | 1.89461  | -0.00006 | 0.00005  | -0.00015 | -0.00011 | 1.89450  |
| A14 | 2.19990  | 0.00005  | -0.00019 | -0.00009 | -0.00027 | 2.19963  |
| A15 | 2.17141  | 0.00000  | 0.00070  | 0.00110  | 0.00181  | 2.17322  |
| A16 | 1.94776  | -0.00041 | 0.00066  | 0.00013  | 0.00078  | 1.94855  |
| A17 | 1.87598  | 0.00024  | 0.00124  | 0.00052  | 0.00176  | 1.87774  |
| A18 | 1.89810  | 0.00005  | -0.00065 | -0.00126 | -0.00192 | 1.89619  |
| A19 | 1.91451  | 0.00002  | -0.00002 | 0.00154  | 0.00152  | 1.91603  |
| A20 | 1.93407  | 0.00017  | -0.00077 | -0.00032 | -0.00109 | 1.93298  |
| A21 | 1.89166  | -0.00007 | -0.00044 | -0.00062 | -0.00105 | 1.89061  |
| A22 | 1.91975  | -0.00010 | -0.00034 | -0.00031 | -0.00071 | 1.91905  |
| A23 | 1.90419  | -0.00020 | 0.00119  | -0.00170 | -0.00047 | 1.90372  |
| A24 | 1.89052  | 0.00026  | -0.00700 | 0.00627  | -0.00072 | 1.88981  |
| A25 | 1.89864  | 0.00013  | 0.00003  | 0.00465  | 0.00471  | 1.90335  |
| A26 | 1.88759  | -0.00003 | 0.00572  | -0.00703 | -0.00130 | 1.88630  |
| A27 | 1.96302  | -0.00006 | 0.00027  | -0.00193 | -0.00157 | 1.96145  |
| A28 | 2.56456  | -0.00004 | -0.00147 | 0.00185  | 0.00038  | 2.56493  |
| A29 | 2.14964  | 0.00020  | 0.00089  | 0.00272  | 0.00360  | 2.15324  |
| A30 | 1.95101  | 0.00014  | 0.00100  | 0.00124  | 0.00224  | 1.95325  |
| A31 | 2.18167  | -0.00034 | -0.00191 | -0.00395 | -0.00586 | 2.17581  |
| A32 | 2.08658  | -0.00001 | -0.00039 | -0.00109 | -0.00148 | 2.08509  |
| A33 | 2.14329  | 0.00008  | 0.00078  | 0.00150  | 0.00228  | 2.14557  |
| A34 | 2.05332  | -0.00008 | -0.00039 | -0.00041 | -0.00080 | 2.05252  |
| A35 | 1.89732  | -0.00007 | -0.00066 | -0.00178 | -0.00244 | 1.89488  |
| D1  | 0.00345  | 0.00006  | 0.00054  | -0.00037 | 0.00016  | 0.00361  |
| D2  | 3.10515  | 0.00005  | 0.00173  | 0.00444  | 0.00616  | 3.11131  |
| D3  | -3.13088 | 0.00006  | 0.00155  | 0.00076  | 0.00230  | -3.12857 |
| D4  | -0.02917 | 0.00005  | 0.00274  | 0.00557  | 0.00830  | -0.02087 |
| D5  | -0.03979 | -0.00008 | -0.00197 | 0.00306  | 0.00109  | -0.03869 |
| D6  | -2.98887 | -0.00003 | -0.00538 | -0.00183 | -0.00721 | -2.99608 |
| D7  | 3.09530  | -0.00008 | -0.00287 | 0.00205  | -0.00082 | 3.09448  |
| D8  | 0.14621  | -0.00004 | -0.00627 | -0.00285 | -0.00912 | 0.13709  |
| D9  | 0.03381  | -0.00003 | 0.00107  | -0.00244 | -0.00138 | 0.03243  |
| D10 | 3.01160  | 0.00001  | 0.00654  | 0.00379  | 0.01032  | 3.02191  |
| D11 | -3.07235 | -0.00002 | 0.00002  | -0.00669 | -0.00667 | -3.07902 |

|     |          |          |          |          |          |          |
|-----|----------|----------|----------|----------|----------|----------|
| D12 | -0.09456 | 0.00002  | 0.00549  | -0.00046 | 0.00502  | -0.08954 |
| D13 | -0.05901 | -0.00002 | -0.00231 | 0.00438  | 0.00207  | -0.05694 |
| D14 | -3.08543 | -0.00011 | -0.00732 | 0.00261  | -0.00470 | -3.09013 |
| D15 | -3.04534 | -0.00008 | -0.00756 | -0.00158 | -0.00915 | -3.05449 |
| D16 | 0.21143  | -0.00017 | -0.01257 | -0.00334 | -0.01592 | 0.19551  |
| D17 | 0.66494  | -0.00008 | -0.01016 | -0.02021 | -0.03037 | 0.63457  |
| D18 | -2.43386 | -0.00009 | -0.00962 | -0.02020 | -0.02981 | -2.46367 |
| D19 | -2.66290 | -0.00003 | -0.00389 | -0.01316 | -0.01706 | -2.67996 |
| D20 | 0.52149  | -0.00003 | -0.00335 | -0.01315 | -0.01651 | 0.50498  |
| D21 | 0.06119  | 0.00006  | 0.00264  | -0.00462 | -0.00198 | 0.05921  |
| D22 | 3.01416  | 0.00002  | 0.00586  | 0.00002  | 0.00589  | 3.02005  |
| D23 | 3.08717  | 0.00014  | 0.00761  | -0.00289 | 0.00470  | 3.09188  |
| D24 | -0.24304 | 0.00010  | 0.01083  | 0.00174  | 0.01257  | -0.23047 |
| D25 | 1.22154  | 0.00005  | 0.01526  | -0.00277 | 0.01249  | 1.23403  |
| D26 | -2.96180 | -0.00001 | 0.01643  | -0.00047 | 0.01596  | -2.94584 |
| D27 | -0.91733 | 0.00006  | 0.01624  | -0.00159 | 0.01466  | -0.90267 |
| D28 | -1.69839 | 0.00010  | 0.01142  | -0.00826 | 0.00316  | -1.69522 |
| D29 | 0.40146  | 0.00004  | 0.01259  | -0.00595 | 0.00664  | 0.40809  |
| D30 | 2.44593  | 0.00011  | 0.01240  | -0.00707 | 0.00534  | 2.45126  |
| D31 | -1.08380 | 0.00010  | 0.01270  | -0.02385 | -0.01116 | -1.09495 |
| D32 | 0.99752  | 0.00008  | 0.01326  | -0.01939 | -0.00611 | 0.99141  |
| D33 | 3.13968  | 0.00004  | 0.01013  | -0.01889 | -0.00877 | 3.13091  |
| D34 | 3.12230  | 0.00004  | 0.01076  | -0.02559 | -0.01484 | 3.10747  |
| D35 | -1.07957 | 0.00002  | 0.01132  | -0.02113 | -0.00979 | -1.08936 |
| D36 | 1.06259  | -0.00002 | 0.00819  | -0.02062 | -0.01245 | 1.05014  |
| D37 | 1.03433  | 0.00001  | 0.01179  | -0.02560 | -0.01382 | 1.02051  |
| D38 | 3.11565  | -0.00001 | 0.01235  | -0.02114 | -0.00877 | 3.10688  |
| D39 | -1.02538 | -0.00005 | 0.00922  | -0.02064 | -0.01143 | -1.03681 |
| D40 | -0.15828 | 0.00024  | -0.07251 | 0.09139  | 0.01890  | -0.13938 |
| D41 | 1.93610  | 0.00008  | -0.07220 | 0.09279  | 0.02058  | 1.95668  |
| D42 | -2.25639 | 0.00009  | -0.06476 | 0.08590  | 0.02113  | -2.23527 |
| D43 | -1.91100 | 0.00007  | -0.11302 | 0.10922  | -0.00372 | -1.91473 |
| D44 | 2.29207  | 0.00006  | -0.11169 | 0.11003  | -0.00175 | 2.29032  |
| D45 | 0.19499  | -0.00004 | -0.11592 | 0.11012  | -0.00578 | 0.18920  |
| D46 | -3.08702 | -0.00003 | 0.00036  | -0.00272 | -0.00236 | -3.08938 |
| D47 | 0.05245  | -0.00003 | -0.00053 | -0.00034 | -0.00087 | 0.05158  |
| D48 | 0.00604  | -0.00001 | -0.00017 | -0.00257 | -0.00274 | 0.00331  |
| D49 | -3.13767 | -0.00001 | -0.00106 | -0.00019 | -0.00125 | -3.13892 |

| Item                 | Value    | Threshold | Converged? |
|----------------------|----------|-----------|------------|
| Maximum Force        | 0.000405 | 0.000450  | YES        |
| RMS Force            | 0.000104 | 0.000300  | YES        |
| Maximum Displacement | 0.046822 | 0.001800  | NO         |
| RMS Displacement     | 0.010793 | 0.001200  | NO         |

Predicted change in Energy=-6.926954D-06

GradGradGradGradGradGradGradGradGradGradGradGradGradGradGradGradGradGradGrad

Input orientation:

---

| Center<br>Number | Atomic<br>Number | Atomic<br>Type | Coordinates (Angstroms) |           |           |
|------------------|------------------|----------------|-------------------------|-----------|-----------|
|                  |                  |                | X                       | Y         | Z         |
| 1                | 6                | 0              | -0.453947               | -1.974612 | -1.319371 |
| 2                | 6                | 0              | -1.744958               | -1.599166 | -1.482401 |
| 3                | 7                | 0              | -2.105503               | -0.872586 | -0.351034 |
| 4                | 6                | 0              | -1.029886               | -0.781184 | 0.456789  |
| 5                | 7                | 0              | -0.029003               | -1.483013 | -0.090454 |
| 6                | 6                | 0              | 1.347897                | -1.504102 | 0.418763  |
| 7                | 6                | 0              | 2.248676                | -0.518187 | -0.341766 |
| 8                | 1                | 0              | 0.198637                | -2.536191 | -1.964634 |
| 9                | 1                | 0              | -2.426447               | -1.754323 | -2.299063 |
| 10               | 1                | 0              | 1.312966                | -1.233165 | 1.474098  |
| 11               | 1                | 0              | 1.734152                | -2.521941 | 0.338355  |
| 12               | 1                | 0              | 2.313649                | -0.808029 | -1.395526 |
| 13               | 1                | 0              | 1.818424                | 0.484834  | -0.273265 |
| 14               | 35               | 0              | -0.358506               | 2.054999  | 0.520577  |
| 15               | 1                | 0              | -1.015725               | -0.316665 | 1.423651  |
| 16               | 6                | 0              | -3.315907               | -0.160638 | -0.124353 |
| 17               | 6                | 0              | -4.500034               | -0.578683 | -0.553559 |
| 18               | 1                | 0              | -3.143715               | 0.775120  | 0.398099  |
| 19               | 1                | 0              | -5.373745               | 0.037010  | -0.387913 |
| 20               | 1                | 0              | -4.640296               | -1.520635 | -1.070839 |
| 21               | 8                | 0              | 3.555859                | -0.586340 | 0.216317  |
| 22               | 1                | 0              | 3.727761                | 0.230618  | 0.694682  |

---

Distance matrix (angstroms):

|    |   | 1        | 2        | 3        | 4        | 5        |
|----|---|----------|----------|----------|----------|----------|
| 1  | C | 0.000000 |          |          |          |          |
| 2  | C | 1.354344 | 0.000000 |          |          |          |
| 3  | N | 2.209021 | 1.392086 | 0.000000 |          |          |
| 4  | C | 2.216015 | 2.222810 | 1.348290 | 0.000000 |          |
| 5  | N | 1.390138 | 2.212580 | 2.179995 | 1.339330 | 0.000000 |
| 6  | C | 2.547377 | 3.631696 | 3.594075 | 2.485540 | 1.468196 |
| 7  | C | 3.221965 | 4.291699 | 4.368588 | 3.384646 | 2.486336 |
| 8  | H | 1.075919 | 2.210911 | 3.268081 | 3.233050 | 2.161841 |
| 9  | H | 2.213386 | 1.074913 | 2.162240 | 3.239152 | 3.270979 |
| 10 | H | 3.387505 | 4.269162 | 3.891922 | 2.593869 | 2.076325 |
| 11 | H | 2.799179 | 4.033717 | 4.235396 | 3.268664 | 2.090924 |
| 12 | H | 3.004380 | 4.135908 | 4.541369 | 3.822435 | 2.765290 |

|    |    |          |          |          |          |          |
|----|----|----------|----------|----------|----------|----------|
| 13 | H  | 3.508116 | 4.301483 | 4.152811 | 3.201351 | 2.705333 |
| 14 | Br | 4.430833 | 4.391708 | 3.518872 | 2.915262 | 3.605477 |
| 15 | H  | 3.254006 | 3.259100 | 2.155499 | 1.072754 | 2.150930 |
| 16 | C  | 3.592963 | 2.526171 | 1.422439 | 2.438995 | 3.543101 |
| 17 | C  | 4.348092 | 3.081328 | 2.420986 | 3.619909 | 4.585019 |
| 18 | H  | 4.212550 | 3.336171 | 2.086629 | 2.625605 | 3.878051 |
| 19 | H  | 5.396170 | 4.128326 | 3.392658 | 4.500231 | 5.564640 |
| 20 | H  | 4.218220 | 2.925497 | 2.713533 | 3.989424 | 4.714509 |
| 21 | O  | 4.512669 | 5.657749 | 5.696916 | 4.596177 | 3.708014 |
| 22 | H  | 5.138690 | 6.167532 | 6.028064 | 4.869860 | 4.203123 |
|    |    | 6        | 7        | 8        | 9        | 10       |
| 6  | C  | 0.000000 |          |          |          |          |
| 7  | C  | 1.536827 | 0.000000 |          |          |          |
| 8  | H  | 2.840174 | 3.302832 | 0.000000 |          |          |
| 9  | H  | 4.657774 | 5.216879 | 2.759389 | 0.000000 |          |
| 10 | H  | 1.090118 | 2.164280 | 3.842458 | 5.337749 | 0.000000 |
| 11 | H  | 1.091629 | 2.177689 | 2.767990 | 4.985559 | 1.768687 |
| 12 | H  | 2.169986 | 1.094824 | 2.789928 | 4.917353 | 3.068687 |
| 13 | H  | 2.157815 | 1.093554 | 3.822438 | 5.209281 | 2.502056 |
| 14 | Br | 3.948339 | 3.763286 | 5.250306 | 5.170850 | 3.809861 |
| 15 | H  | 2.829578 | 3.716668 | 4.228646 | 4.232683 | 2.503062 |
| 16 | C  | 4.883742 | 5.580295 | 4.624058 | 2.839073 | 5.013166 |
| 17 | C  | 6.000009 | 6.752304 | 5.282091 | 2.954434 | 6.191180 |
| 18 | H  | 5.036850 | 5.594455 | 5.264846 | 3.766596 | 5.005296 |
| 19 | H  | 6.943070 | 7.642753 | 6.337102 | 3.943087 | 7.056382 |
| 20 | H  | 6.170709 | 6.999599 | 5.024490 | 2.542494 | 6.480793 |
| 21 | O  | 2.399660 | 1.422965 | 4.453022 | 6.593884 | 2.651596 |
| 22 | H  | 2.957894 | 1.955154 | 5.213628 | 7.125783 | 2.929400 |
|    |    | 11       | 12       | 13       | 14       | 15       |
| 11 | H  | 0.000000 |          |          |          |          |
| 12 | H  | 2.505923 | 0.000000 |          |          |          |
| 13 | H  | 3.069507 | 1.782193 | 0.000000 |          |          |
| 14 | Br | 5.035951 | 4.359907 | 2.799040 | 0.000000 |          |
| 15 | H  | 3.688215 | 4.390208 | 3.399165 | 2.621502 | 0.000000 |
| 16 | C  | 5.594010 | 5.807486 | 5.176887 | 3.751160 | 2.776959 |
| 17 | C  | 6.590663 | 6.869336 | 6.413466 | 5.024172 | 4.014776 |
| 18 | H  | 5.887934 | 5.958713 | 5.015756 | 3.067650 | 2.602325 |
| 19 | H  | 7.589328 | 7.799064 | 7.207009 | 5.481811 | 4.732778 |
| 20 | H  | 6.604698 | 6.997898 | 6.809779 | 5.800991 | 4.561748 |
| 21 | O  | 2.660838 | 2.047015 | 2.098996 | 4.731966 | 4.736007 |
| 22 | H  | 3.417313 | 2.729006 | 2.155717 | 4.478421 | 4.830277 |
|    |    | 16       | 17       | 18       | 19       | 20       |
| 16 | C  | 0.000000 |          |          |          |          |
| 17 | C  | 1.327078 | 0.000000 |          |          |          |

18 H 1.085472 2.139635 0.000000  
 19 H 2.084040 1.081613 2.477025 0.000000  
 20 H 2.121187 1.083755 3.109345 1.852186 0.000000  
 21 O 6.893363 8.092601 6.838926 8.971705 8.349050  
 22 H 7.101912 8.361201 6.899393 9.167710 8.729739

21 22

21 O 0.000000  
 22 H 0.962187 0.000000

Stoichiometry C7H11BrN2O

Framework group C1[X(C7H11BrN2O)]

Deg. of freedom 60

Full point group C1 NOp 1

Largest Abelian subgroup C1 NOp 1

Largest concise Abelian subgroup C1 NOp 1

Standard orientation:

| Center Number | Atomic Number | Atomic Type | Coordinates (Angstroms) |           |           |
|---------------|---------------|-------------|-------------------------|-----------|-----------|
|               |               |             | X                       | Y         | Z         |
| 1             | 6             | 0           | -0.232539               | -2.259350 | -0.591048 |
| 2             | 6             | 0           | -1.518757               | -1.859709 | -0.733094 |
| 3             | 7             | 0           | -1.714964               | -0.794565 | 0.141477  |
| 4             | 6             | 0           | -0.548421               | -0.536415 | 0.766314  |
| 5             | 7             | 0           | 0.353387                | -1.444077 | 0.370464  |
| 6             | 6             | 0           | 1.779212                | -1.406909 | 0.718659  |
| 7             | 6             | 0           | 2.619768                | -0.772994 | -0.400919 |
| 8             | 1             | 0           | 0.317315                | -3.038969 | -1.088500 |
| 9             | 1             | 0           | -2.297679               | -2.209766 | -1.385917 |
| 10            | 1             | 0           | 1.879955                | -0.821036 | 1.632421  |
| 11            | 1             | 0           | 2.114699                | -2.425006 | 0.925011  |
| 12            | 1             | 0           | 2.548311                | -1.378494 | -1.310261 |
| 13            | 1             | 0           | 2.238657                | 0.230576  | -0.609392 |
| 14            | 35            | 0           | 0.231818                | 2.123548  | -0.136227 |
| 15            | 1             | 0           | -0.402197               | 0.202060  | 1.530561  |
| 16            | 6             | 0           | -2.862322               | 0.038806  | 0.252814  |
| 17            | 6             | 0           | -4.103871               | -0.404033 | 0.099236  |
| 18            | 1             | 0           | -2.594332               | 1.075111  | 0.433100  |
| 19            | 1             | 0           | -4.928010               | 0.294655  | 0.149391  |
| 20            | 1             | 0           | -4.339797               | -1.446938 | -0.077435 |
| 21            | 8             | 0           | 3.980450                | -0.760254 | 0.015267  |
| 22            | 1             | 0           | 4.238458                | 0.149794  | 0.191473  |

Rotational constants (GHZ): 0.8333669 0.5687012 0.3579649

Standard basis: 6-311++G(d,p) (5D, 7F)

There are 358 symmetry adapted cartesian basis functions of A symmetry.  
 There are 345 symmetry adapted basis functions of A symmetry.  
 345 basis functions, 553 primitive gaussians, 358 cartesian basis functions  
 55 alpha electrons 55 beta electrons  
 nuclear repulsion energy 867.9053079340 Hartrees.  
 NAToms= 22 NActive= 22 NUniq= 22 SFac= 1.00D+00 NATFMM= 60 NAOKFM=F  
 Big=F  
 Integral buffers will be 131072 words long.  
 Raffenetti 2 integral format.  
 Two-electron integral symmetry is turned on.  
 One-electron integrals computed using PRISM.  
 NBasis= 345 RedAO= T EigKep= 7.07D-06 NBF= 345  
 NBsUse= 345 1.00D-06 EigRej= -1.00D+00 NBFU= 345  
 Initial guess from the checkpoint file: ". "  
 B after Tr= 0.000000 0.000000 0.000000  
 Rot= 0.999988 0.000584 0.000077 0.004825 Ang= 0.56 deg.  
 ExpMin= 3.50D-02 ExpMax= 4.40D+05 ExpMxC= 1.51D+04 IAcc=3 IRadAn= 5 AccDes=  
 0.00D+00  
 Harris functional with IExCor= 402 and IRadAn= 5 diagonalized for initial guess.  
 HarFok: IExCor= 402 AccDes= 0.00D+00 IRadAn= 5 IDoV= 1 UseB2=F ITyADJ=14  
 ICtDFT= 3500011 ScaDFX= 1.000000 1.000000 1.000000 1.000000  
 FoFCou: FMM=F IPFlag= 0 FMFlag= 100000 FMFlg1= 0  
 NFxFlg= 0 DoJE=T BraDBF=F KetDBF=T FulRan=T  
 wScrn= 0.000000 ICntrl= 500 IOpCl= 0 I1Cent= 20000004 NGrid=  
 0  
 NMat0= 1 NMatS0= 1 NMatT0= 0 NMatD0= 1 NMtDS0= 0  
 NMtDT0= 0  
 Petite list used in FoFCou.  
 Keep R1 ints in memory in canonical form, NReq=1804729152.  
 Requested convergence on RMS density matrix=1.00D-08 within 128 cycles.  
 Requested convergence on MAX density matrix=1.00D-06.  
 Requested convergence on energy=1.00D-06.  
 No special actions if energy rises.  
 SCF Done: E(RB3LYP) = -3032.33832583 A.U. after 11 cycles  
 NFock= 11 Conv=0.23D-08 -V/T= 2.0017  
 Calling FoFJK, ICntrl= 2127 FMM=F ISym2X=0 I1Cent= 0 IOpCIX= 0 NMat=1 NMatS=1  
 NMatT=0.  
 \*\*\*\*\* Axes restored to original set \*\*\*\*\*

| Center<br>Number | Atomic<br>Number | Forces (Hartrees/Bohr) |              |             |
|------------------|------------------|------------------------|--------------|-------------|
|                  |                  | X                      | Y            | Z           |
| 1                | 6                | 0.000201753            | 0.000096914  | 0.000157714 |
| 2                | 6                | -0.000249685           | -0.000093756 | 0.000075750 |



|    |    |              |              |              |
|----|----|--------------|--------------|--------------|
| 3  | 7  | 0.000378812  | 0.000046944  | -0.000014992 |
| 4  | 6  | -0.000122111 | -0.000416683 | -0.000129430 |
| 5  | 7  | -0.000557111 | -0.000222229 | -0.000311912 |
| 6  | 6  | -0.000009548 | -0.000202935 | 0.000317045  |
| 7  | 6  | -0.000093371 | 0.000123656  | 0.000408845  |
| 8  | 1  | 0.000005865  | 0.000041781  | -0.000027109 |
| 9  | 1  | 0.000062988  | 0.000117405  | -0.000049748 |
| 10 | 1  | 0.000044030  | 0.000101856  | -0.000228014 |
| 11 | 1  | 0.000017129  | -0.000088800 | 0.000112066  |
| 12 | 1  | -0.000273423 | 0.000225596  | -0.000096388 |
| 13 | 1  | -0.000225266 | -0.000355932 | -0.000571465 |
| 14 | 35 | 0.000140408  | 0.000400349  | 0.000037302  |
| 15 | 1  | 0.000000986  | 0.000032566  | -0.000041993 |
| 16 | 6  | -0.000197074 | 0.000114605  | 0.000004218  |
| 17 | 6  | 0.000151856  | 0.000061047  | 0.000131434  |
| 18 | 1  | 0.000042266  | -0.000161281 | -0.000000378 |
| 19 | 1  | 0.000057634  | -0.000059500 | -0.000094366 |
| 20 | 1  | 0.000027455  | 0.000100449  | 0.000028074  |
| 21 | 8  | 0.000592689  | 0.000875956  | 0.000527722  |
| 22 | 1  | 0.000003717  | -0.000738007 | -0.000234374 |

-----  
Cartesian Forces: Max 0.000875956 RMS 0.000257374

GradGradGradGradGradGradGradGradGradGradGradGradGradGradGradGradGradGradGradGrad  
Berny optimization.

Using GEDIIS/GDIIS optimizer.

FormGI is forming the generalized inverse of G from B-inverse, IUseBI=4.

Internal Forces: Max 0.002011132 RMS 0.000297927

Search for a local minimum.

Step number 23 out of a maximum of 116

All quantities printed in internal units (Hartrees-Bohrs-Radians)

Mixed Optimization -- En-DIIS/RFO-DIIS

Swapping is turned off.

Update second derivatives using D2CorX and points 18 20 21 22 23

DE= -1.20D-05 DEPred=-6.93D-06 R= 1.73D+00

TightC=F SS= 1.41D+00 RLast= 8.25D-02 DXNew= 2.0938D+00 2.4764D-01

Trust test= 1.73D+00 RLast= 8.25D-02 DXMaxT set to 1.25D+00

ITU= 1 1 1 1 0-1 1 1 1 1 1 1 1 1 1 1 1 1 0 0

ITU= -1 0 0

|                 |         |         |         |         |         |
|-----------------|---------|---------|---------|---------|---------|
| Eigenvalues --- | 0.00037 | 0.00213 | 0.00447 | 0.00734 | 0.00989 |
| Eigenvalues --- | 0.01336 | 0.01605 | 0.01779 | 0.01928 | 0.02073 |
| Eigenvalues --- | 0.02231 | 0.02441 | 0.03066 | 0.03096 | 0.03506 |
| Eigenvalues --- | 0.04263 | 0.04773 | 0.05446 | 0.05779 | 0.07295 |
| Eigenvalues --- | 0.08856 | 0.09317 | 0.13660 | 0.14250 | 0.15221 |

|                 |         |         |         |         |         |
|-----------------|---------|---------|---------|---------|---------|
| Eigenvalues --- | 0.15758 | 0.15850 | 0.15991 | 0.15996 | 0.16087 |
| Eigenvalues --- | 0.16679 | 0.17538 | 0.20869 | 0.22770 | 0.22849 |
| Eigenvalues --- | 0.24031 | 0.24832 | 0.26695 | 0.29669 | 0.33092 |
| Eigenvalues --- | 0.33822 | 0.33878 | 0.33880 | 0.34141 | 0.34412 |
| Eigenvalues --- | 0.34564 | 0.34742 | 0.36150 | 0.36315 | 0.36400 |
| Eigenvalues --- | 0.37234 | 0.43060 | 0.43595 | 0.45995 | 0.50055 |
| Eigenvalues --- | 0.53511 | 0.54422 | 0.57057 | 0.60831 | 2.21524 |

En-DIIS/RFO-DIIS IScMMF= 0 using points: 23 22 21 20 19

RFO step: Lambda=-1.11453937D-05.

DidBck=F Rises=F RFO-DIIS coefs: 2.36002 -4.39767 2.60215 -0.19955

0.63505

|             |            |            |           |            |  |
|-------------|------------|------------|-----------|------------|--|
| Iteration 1 | RMS(Cart)= | 0.00905882 | RMS(Int)= | 0.00008514 |  |
| Iteration 2 | RMS(Cart)= | 0.00021025 | RMS(Int)= | 0.00003038 |  |
| Iteration 3 | RMS(Cart)= | 0.00000005 | RMS(Int)= | 0.00003038 |  |

| Variable | Old X   | -DE/DX   | Delta X<br>(Linear) | Delta X<br>(Quad) | Delta X<br>(Total) | New X   |
|----------|---------|----------|---------------------|-------------------|--------------------|---------|
| R1       | 2.55934 | 0.00010  | 0.00008             | -0.00002          | 0.00007            | 2.55941 |
| R2       | 2.62698 | -0.00017 | -0.00017            | -0.00007          | -0.00022           | 2.62676 |
| R3       | 2.03319 | 0.00000  | -0.00001            | 0.00002           | 0.00001            | 2.03320 |
| R4       | 2.63066 | -0.00008 | -0.00028            | 0.00017           | -0.00011           | 2.63055 |
| R5       | 2.03129 | -0.00002 | -0.00002            | 0.00000           | -0.00003           | 2.03126 |
| R6       | 2.54790 | -0.00040 | -0.00029            | 0.00000           | -0.00030           | 2.54760 |
| R7       | 2.68802 | -0.00004 | -0.00053            | 0.00016           | -0.00037           | 2.68765 |
| R8       | 2.53097 | -0.00036 | -0.00033            | -0.00010          | -0.00044           | 2.53053 |
| R9       | 2.02721 | -0.00002 | 0.00010             | 0.00005           | 0.00015            | 2.02736 |
| R10      | 2.77449 | 0.00025  | 0.00002             | 0.00006           | 0.00008            | 2.77457 |
| R11      | 2.90418 | 0.00044  | 0.00014             | 0.00068           | 0.00081            | 2.90500 |
| R12      | 2.06003 | -0.00020 | -0.00019            | 0.00008           | -0.00011           | 2.05991 |
| R13      | 2.06288 | 0.00008  | 0.00012             | 0.00001           | 0.00013            | 2.06301 |
| R14      | 2.06892 | 0.00002  | -0.00003            | -0.00035          | -0.00038           | 2.06854 |
| R15      | 2.06652 | 0.00005  | -0.00018            | 0.00036           | 0.00018            | 2.06670 |
| R16      | 2.68901 | 0.00065  | 0.00036             | -0.00061          | -0.00026           | 2.68876 |
| R17      | 5.28942 | 0.00013  | 0.00141             | -0.00489          | -0.00348           | 5.28594 |
| R18      | 2.50781 | -0.00026 | -0.00010            | -0.00003          | -0.00013           | 2.50769 |
| R19      | 2.05125 | -0.00014 | -0.00030            | 0.00003           | -0.00027           | 2.05097 |
| R20      | 2.04395 | -0.00010 | -0.00012            | 0.00006           | -0.00006           | 2.04389 |
| R21      | 2.04800 | -0.00010 | -0.00009            | 0.00001           | -0.00008           | 2.04792 |
| R22      | 1.81827 | -0.00074 | -0.00023            | 0.00013           | -0.00009           | 1.81818 |
| A1       | 1.87525 | -0.00008 | -0.00004            | -0.00001          | -0.00006           | 1.87519 |
| A2       | 2.27927 | 0.00003  | -0.00001            | -0.00008          | -0.00008           | 2.27919 |
| A3       | 2.12863 | 0.00005  | 0.00003             | 0.00008           | 0.00012            | 2.12875 |
| A4       | 1.86894 | -0.00013 | -0.00007            | -0.00003          | -0.00012           | 1.86881 |
| A5       | 2.28602 | 0.00005  | -0.00003            | -0.00029          | -0.00028           | 2.28574 |
| A6       | 2.12774 | 0.00007  | 0.00004             | 0.00032           | 0.00039            | 2.12812 |

|     |          |          |          |          |          |          |
|-----|----------|----------|----------|----------|----------|----------|
| A7  | 1.89199  | 0.00007  | 0.00001  | -0.00005 | 0.00001  | 1.89200  |
| A8  | 2.22830  | 0.00013  | 0.00028  | 0.00033  | 0.00074  | 2.22904  |
| A9  | 2.15248  | -0.00020 | -0.00028 | -0.00034 | -0.00047 | 2.15201  |
| A10 | 1.89214  | 0.00008  | 0.00011  | -0.00001 | 0.00008  | 1.89221  |
| A11 | 2.18939  | -0.00004 | -0.00010 | -0.00013 | -0.00016 | 2.18923  |
| A12 | 2.19605  | -0.00003 | 0.00016  | 0.00013  | 0.00036  | 2.19641  |
| A13 | 1.89450  | 0.00007  | -0.00006 | 0.00010  | 0.00006  | 1.89456  |
| A14 | 2.19963  | 0.00006  | 0.00016  | 0.00013  | 0.00035  | 2.19998  |
| A15 | 2.17322  | -0.00014 | -0.00056 | -0.00043 | -0.00094 | 2.17228  |
| A16 | 1.94855  | 0.00030  | -0.00011 | -0.00073 | -0.00084 | 1.94771  |
| A17 | 1.87774  | 0.00002  | -0.00018 | -0.00078 | -0.00095 | 1.87679  |
| A18 | 1.89619  | -0.00016 | 0.00042  | 0.00055  | 0.00096  | 1.89715  |
| A19 | 1.91603  | -0.00007 | -0.00051 | -0.00033 | -0.00083 | 1.91520  |
| A20 | 1.93298  | -0.00015 | 0.00027  | 0.00116  | 0.00143  | 1.93441  |
| A21 | 1.89061  | 0.00005  | 0.00009  | 0.00011  | 0.00020  | 1.89080  |
| A22 | 1.91905  | -0.00032 | -0.00025 | 0.00016  | -0.00014 | 1.91891  |
| A23 | 1.90372  | 0.00123  | 0.00051  | 0.00017  | 0.00072  | 1.90444  |
| A24 | 1.88981  | -0.00024 | 0.00068  | 0.00192  | 0.00262  | 1.89242  |
| A25 | 1.90335  | -0.00047 | -0.00035 | -0.00019 | -0.00051 | 1.90284  |
| A26 | 1.88630  | 0.00026  | -0.00047 | -0.00216 | -0.00262 | 1.88368  |
| A27 | 1.96145  | -0.00049 | -0.00028 | 0.00010  | -0.00009 | 1.96137  |
| A28 | 2.56493  | 0.00201  | -0.00072 | 0.00328  | 0.00256  | 2.56749  |
| A29 | 2.15324  | -0.00006 | 0.00025  | 0.00060  | 0.00085  | 2.15409  |
| A30 | 1.95325  | -0.00004 | 0.00039  | 0.00020  | 0.00058  | 1.95383  |
| A31 | 2.17581  | 0.00011  | -0.00064 | -0.00077 | -0.00142 | 2.17440  |
| A32 | 2.08509  | 0.00009  | 0.00002  | -0.00005 | -0.00003 | 2.08506  |
| A33 | 2.14557  | -0.00006 | 0.00012  | 0.00030  | 0.00042  | 2.14599  |
| A34 | 2.05252  | -0.00003 | -0.00014 | -0.00026 | -0.00039 | 2.05213  |
| A35 | 1.89488  | 0.00034  | 0.00010  | -0.00044 | -0.00034 | 1.89454  |
| D1  | 0.00361  | -0.00002 | 0.00054  | -0.00062 | -0.00009 | 0.00352  |
| D2  | 3.11131  | -0.00010 | -0.00023 | -0.00057 | -0.00080 | 3.11051  |
| D3  | -3.12857 | 0.00006  | 0.00155  | 0.00047  | 0.00201  | -3.12656 |
| D4  | -0.02087 | -0.00001 | 0.00079  | 0.00052  | 0.00130  | -0.01957 |
| D5  | -0.03869 | 0.00005  | -0.00079 | 0.00049  | -0.00030 | -0.03899 |
| D6  | -2.99608 | 0.00008  | 0.00118  | 0.00171  | 0.00287  | -2.99321 |
| D7  | 3.09448  | -0.00003 | -0.00170 | -0.00048 | -0.00218 | 3.09230  |
| D8  | 0.13709  | 0.00000  | 0.00028  | 0.00073  | 0.00099  | 0.13808  |
| D9  | 0.03243  | -0.00001 | -0.00010 | 0.00054  | 0.00044  | 0.03288  |
| D10 | 3.02191  | -0.00002 | 0.00231  | 0.00011  | 0.00240  | 3.02431  |
| D11 | -3.07902 | 0.00006  | 0.00058  | 0.00050  | 0.00109  | -3.07793 |
| D12 | -0.08954 | 0.00005  | 0.00299  | 0.00007  | 0.00305  | -0.08649 |
| D13 | -0.05694 | 0.00003  | -0.00040 | -0.00023 | -0.00063 | -0.05758 |
| D14 | -3.09013 | -0.00002 | -0.00332 | -0.00009 | -0.00342 | -3.09355 |
| D15 | -3.05449 | 0.00001  | -0.00270 | 0.00010  | -0.00262 | -3.05710 |

|     |          |          |          |          |          |          |
|-----|----------|----------|----------|----------|----------|----------|
| D16 | 0.19551  | -0.00004 | -0.00562 | 0.00025  | -0.00540 | 0.19011  |
| D17 | 0.63457  | -0.00002 | -0.00396 | -0.00889 | -0.01283 | 0.62174  |
| D18 | -2.46367 | -0.00005 | -0.00386 | -0.00950 | -0.01334 | -2.47701 |
| D19 | -2.67996 | -0.00001 | -0.00119 | -0.00934 | -0.01054 | -2.69051 |
| D20 | 0.50498  | -0.00004 | -0.00109 | -0.00995 | -0.01106 | 0.49392  |
| D21 | 0.05921  | -0.00005 | 0.00074  | -0.00015 | 0.00058  | 0.05979  |
| D22 | 3.02005  | -0.00005 | -0.00106 | -0.00128 | -0.00236 | 3.01769  |
| D23 | 3.09188  | 0.00001  | 0.00367  | -0.00032 | 0.00334  | 3.09522  |
| D24 | -0.23047 | 0.00000  | 0.00187  | -0.00144 | 0.00040  | -0.23007 |
| D25 | 1.23403  | -0.00023 | -0.00327 | -0.00115 | -0.00442 | 1.22960  |
| D26 | -2.94584 | -0.00012 | -0.00405 | -0.00250 | -0.00656 | -2.95240 |
| D27 | -0.90267 | -0.00013 | -0.00383 | -0.00250 | -0.00634 | -0.90901 |
| D28 | -1.69522 | -0.00022 | -0.00110 | 0.00019  | -0.00091 | -1.69613 |
| D29 | 0.40809  | -0.00011 | -0.00188 | -0.00116 | -0.00305 | 0.40505  |
| D30 | 2.45126  | -0.00012 | -0.00166 | -0.00117 | -0.00282 | 2.44844  |
| D31 | -1.09495 | 0.00016  | 0.00073  | -0.01290 | -0.01217 | -1.10713 |
| D32 | 0.99141  | 0.00016  | 0.00047  | -0.01293 | -0.01244 | 0.97897  |
| D33 | 3.13091  | 0.00017  | 0.00106  | -0.01151 | -0.01047 | 3.12044  |
| D34 | 3.10747  | -0.00001 | 0.00134  | -0.01124 | -0.00991 | 3.09755  |
| D35 | -1.08936 | -0.00001 | 0.00107  | -0.01128 | -0.01018 | -1.09953 |
| D36 | 1.05014  | 0.00000  | 0.00166  | -0.00986 | -0.00821 | 1.04193  |
| D37 | 1.02051  | 0.00007  | 0.00138  | -0.01190 | -0.01052 | 1.00999  |
| D38 | 3.10688  | 0.00006  | 0.00112  | -0.01193 | -0.01079 | 3.09609  |
| D39 | -1.03681 | 0.00007  | 0.00171  | -0.01051 | -0.00882 | -1.04563 |
| D40 | -0.13938 | 0.00018  | 0.00108  | 0.03884  | 0.03994  | -0.09944 |
| D41 | 1.95668  | 0.00025  | 0.00088  | 0.03902  | 0.03989  | 1.99658  |
| D42 | -2.23527 | -0.00004 | -0.00003 | 0.03625  | 0.03622  | -2.19905 |
| D43 | -1.91473 | -0.00043 | 0.01269  | 0.01200  | 0.02476  | -1.88997 |
| D44 | 2.29032  | -0.00006 | 0.01308  | 0.01194  | 0.02494  | 2.31526  |
| D45 | 0.18920  | 0.00065  | 0.01380  | 0.01356  | 0.02738  | 0.21658  |
| D46 | -3.08938 | 0.00003  | 0.00048  | -0.00039 | 0.00009  | -3.08929 |
| D47 | 0.05158  | -0.00002 | -0.00018 | -0.00094 | -0.00112 | 0.05046  |
| D48 | 0.00331  | 0.00005  | 0.00040  | 0.00033  | 0.00073  | 0.00403  |
| D49 | -3.13892 | 0.00000  | -0.00026 | -0.00022 | -0.00048 | -3.13940 |

| Item                 | Value    | Threshold | Converged? |
|----------------------|----------|-----------|------------|
| Maximum Force        | 0.002011 | 0.000450  | NO         |
| RMS Force            | 0.000298 | 0.000300  | YES        |
| Maximum Displacement | 0.035759 | 0.001800  | NO         |
| RMS Displacement     | 0.009086 | 0.001200  | NO         |

Predicted change in Energy=-1.346940D-05

GradGradGradGradGradGradGradGradGradGradGradGradGradGradGradGradGradGradGrad

Input orientation:

-----

| Center<br>Number | Atomic<br>Number | Atomic<br>Type | Coordinates (Angstroms) |           |           |
|------------------|------------------|----------------|-------------------------|-----------|-----------|
|                  |                  |                | X                       | Y         | Z         |
| 1                | 6                | 0              | -0.454366               | -1.977039 | -1.318398 |
| 2                | 6                | 0              | -1.745184               | -1.600460 | -1.480658 |
| 3                | 7                | 0              | -2.104501               | -0.874328 | -0.348685 |
| 4                | 6                | 0              | -1.028361               | -0.783881 | 0.458282  |
| 5                | 7                | 0              | -0.028587               | -1.486421 | -0.089508 |
| 6                | 6                | 0              | 1.348949                | -1.505556 | 0.418183  |
| 7                | 6                | 0              | 2.247730                | -0.520845 | -0.347127 |
| 8                | 1                | 0              | 0.197938                | -2.537361 | -1.965046 |
| 9                | 1                | 0              | -2.426741               | -1.754239 | -2.297505 |
| 10               | 1                | 0              | 1.314346                | -1.229419 | 1.472117  |
| 11               | 1                | 0              | 1.735758                | -2.523617 | 0.342431  |
| 12               | 1                | 0              | 2.321007                | -0.820950 | -1.397253 |
| 13               | 1                | 0              | 1.810545                | 0.480109  | -0.292074 |
| 14               | 35               | 0              | -0.351043               | 2.057441  | 0.522708  |
| 15               | 1                | 0              | -1.012679               | -0.317195 | 1.424166  |
| 16               | 6                | 0              | -3.314768               | -0.163529 | -0.118916 |
| 17               | 6                | 0              | -4.498094               | -0.574288 | -0.557063 |
| 18               | 1                | 0              | -3.144242               | 0.765832  | 0.415075  |
| 19               | 1                | 0              | -5.371131               | 0.041271  | -0.387630 |
| 20               | 1                | 0              | -4.638610               | -1.509427 | -1.086408 |
| 21               | 8                | 0              | 3.553545                | -0.573306 | 0.215488  |
| 22               | 1                | 0              | 3.708838                | 0.240328  | 0.704975  |

Distance matrix (angstroms):

|    |    | 1        | 2        | 3        | 4        | 5        |
|----|----|----------|----------|----------|----------|----------|
| 1  | C  | 0.000000 |          |          |          |          |
| 2  | C  | 1.354382 | 0.000000 |          |          |          |
| 3  | N  | 2.208904 | 1.392028 | 0.000000 |          |          |
| 4  | C  | 2.215781 | 2.222639 | 1.348129 | 0.000000 |          |
| 5  | N  | 1.390024 | 2.212468 | 2.179736 | 1.339098 | 0.000000 |
| 6  | C  | 2.547539 | 3.631565 | 3.593446 | 2.484759 | 1.468237 |
| 7  | C  | 3.219502 | 4.288802 | 4.366562 | 3.383880 | 2.486025 |
| 8  | H  | 1.075925 | 2.210913 | 3.267954 | 3.232803 | 2.161813 |
| 9  | H  | 2.213267 | 1.074898 | 2.162402 | 3.239046 | 3.270799 |
| 10 | H  | 3.387366 | 4.268170 | 3.889720 | 2.591263 | 2.075618 |
| 11 | H  | 2.802453 | 4.036438 | 4.236199 | 3.268097 | 2.091712 |
| 12 | H  | 3.007566 | 4.141074 | 4.548347 | 3.829183 | 2.770133 |
| 13 | H  | 3.495817 | 4.287739 | 4.143101 | 3.196888 | 2.700125 |
| 14 | Br | 4.435919 | 4.397425 | 3.525509 | 2.921647 | 3.610781 |
| 15 | H  | 3.253990 | 3.259039 | 2.155335 | 1.072835 | 2.150985 |
| 16 | C  | 3.592975 | 2.526402 | 1.422243 | 2.438371 | 3.542583 |

|    |    |          |          |          |          |          |
|----|----|----------|----------|----------|----------|----------|
| 17 | C  | 4.347306 | 3.079703 | 2.421308 | 3.621312 | 4.585530 |
| 18 | H  | 4.214700 | 3.339238 | 2.086747 | 2.623057 | 3.877442 |
| 19 | H  | 5.395783 | 4.127649 | 3.392743 | 4.500677 | 5.564665 |
| 20 | H  | 4.216679 | 2.921581 | 2.714645 | 3.993293 | 4.716637 |
| 21 | O  | 4.515155 | 5.657605 | 5.694066 | 4.593164 | 3.709241 |
| 22 | H  | 5.132545 | 6.157260 | 6.012284 | 4.852928 | 4.192995 |
|    |    | 6        | 7        | 8        | 9        | 10       |
| 6  | C  | 0.000000 |          |          |          |          |
| 7  | C  | 1.537258 | 0.000000 |          |          |          |
| 8  | H  | 2.840639 | 3.299341 | 0.000000 |          |          |
| 9  | H  | 4.657536 | 5.213052 | 2.759121 | 0.000000 |          |
| 10 | H  | 1.090058 | 2.164008 | 3.843328 | 5.336780 | 0.000000 |
| 11 | H  | 1.091699 | 2.179152 | 2.773000 | 4.988748 | 1.768821 |
| 12 | H  | 2.170112 | 1.094622 | 2.788526 | 4.921645 | 3.068142 |
| 13 | H  | 2.158796 | 1.093649 | 3.808472 | 5.193135 | 2.506206 |
| 14 | Br | 3.949158 | 3.762684 | 5.253809 | 5.176005 | 3.805042 |
| 15 | H  | 2.828691 | 3.716076 | 4.228651 | 4.232670 | 2.499900 |
| 16 | C  | 4.882599 | 5.578633 | 4.624108 | 2.839930 | 5.009611 |
| 17 | C  | 6.000523 | 6.749301 | 5.280983 | 2.951597 | 6.191222 |
| 18 | H  | 5.034678 | 5.595520 | 5.267468 | 3.771426 | 4.997737 |
| 19 | H  | 6.942729 | 7.639676 | 6.336569 | 3.942196 | 7.054709 |
| 20 | H  | 6.173709 | 6.996107 | 5.022036 | 2.533585 | 6.485534 |
| 21 | O  | 2.402170 | 1.422829 | 4.457841 | 6.593448 | 2.650211 |
| 22 | H  | 2.949480 | 1.954773 | 5.212580 | 7.116074 | 2.912431 |
|    |    | 11       | 12       | 13       | 14       | 15       |
| 11 | H  | 0.000000 |          |          |          |          |
| 12 | H  | 2.503615 | 0.000000 |          |          |          |
| 13 | H  | 3.070922 | 1.781782 | 0.000000 |          |          |
| 14 | Br | 5.037195 | 4.371640 | 2.797197 | 0.000000 |          |
| 15 | H  | 3.686782 | 4.396321 | 3.398790 | 2.624745 | 0.000000 |
| 16 | C  | 5.593807 | 5.816211 | 5.168471 | 3.758731 | 2.775667 |
| 17 | C  | 6.593169 | 6.875092 | 6.401633 | 5.028910 | 4.017397 |
| 18 | H  | 5.885589 | 5.972550 | 5.013144 | 3.079253 | 2.595144 |
| 19 | H  | 7.590752 | 7.805879 | 7.195706 | 5.485886 | 4.733624 |
| 20 | H  | 6.610805 | 7.000492 | 6.795648 | 5.804743 | 4.568564 |
| 21 | O  | 2.669116 | 2.044850 | 2.098893 | 4.718159 | 4.730423 |
| 22 | H  | 3.415241 | 2.733450 | 2.157572 | 4.451714 | 4.808409 |
|    |    | 16       | 17       | 18       | 19       | 20       |
| 16 | C  | 0.000000 |          |          |          |          |
| 17 | C  | 1.327010 | 0.000000 |          |          |          |
| 18 | H  | 1.085328 | 2.138665 | 0.000000 |          |          |
| 19 | H  | 2.083933 | 1.081579 | 2.475552 | 0.000000 |          |
| 20 | H  | 2.121330 | 1.083714 | 3.108761 | 1.851902 | 0.000000 |
| 21 | O  | 6.888648 | 8.088617 | 6.833263 | 8.966120 | 8.347615 |

22 H 7.083286 8.343265 6.879309 9.147636 8.714964  
 21 22  
 21 O 0.000000  
 22 H 0.962140 0.000000

Stoichiometry C7H11BrN2O  
 Framework group C1[X(C7H11BrN2O)]  
 Deg. of freedom 60

Full point group C1 NOp 1  
 Largest Abelian subgroup C1 NOp 1  
 Largest concise Abelian subgroup C1 NOp 1

Standard orientation:

| Center Number | Atomic Number | Atomic Type | Coordinates (Angstroms) |           |           |
|---------------|---------------|-------------|-------------------------|-----------|-----------|
|               |               |             | X                       | Y         | Z         |
| 1             | 6             | 0           | -0.244933               | -2.261327 | -0.589171 |
| 2             | 6             | 0           | -1.529015               | -1.854875 | -0.731580 |
| 3             | 7             | 0           | -1.719777               | -0.789035 | 0.143255  |
| 4             | 6             | 0           | -0.552059               | -0.536995 | 0.768045  |
| 5             | 7             | 0           | 0.344822                | -1.449383 | 0.372650  |
| 6             | 6             | 0           | 1.771155                | -1.416959 | 0.719410  |
| 7             | 6             | 0           | 2.612378                | -0.789386 | -0.403826 |
| 8             | 1             | 0           | 0.301401                | -3.042635 | -1.087862 |
| 9             | 1             | 0           | -2.309155               | -2.200456 | -1.385309 |
| 10            | 1             | 0           | 1.874355                | -0.826857 | 1.630099  |
| 11            | 1             | 0           | 2.103242                | -2.435264 | 0.930553  |
| 12            | 1             | 0           | 2.546993                | -1.404017 | -1.307237 |
| 13            | 1             | 0           | 2.227131                | 0.210194  | -0.624041 |
| 14            | 35            | 0           | 0.246270                | 2.123990  | -0.136308 |
| 15            | 1             | 0           | -0.401539               | 0.202644  | 1.530444  |
| 16            | 6             | 0           | -2.863126               | 0.049156  | 0.257117  |
| 17            | 6             | 0           | -4.106469               | -0.384273 | 0.092214  |
| 18            | 1             | 0           | -2.591296               | 1.081966  | 0.450383  |
| 19            | 1             | 0           | -4.926495               | 0.318966  | 0.145363  |
| 20            | 1             | 0           | -4.348217               | -1.423440 | -0.097858 |
| 21            | 8             | 0           | 3.972741                | -0.766045 | 0.012478  |
| 22            | 1             | 0           | 4.219303                | 0.144487  | 0.201824  |

Rotational constants (GHZ): 0.8321645 0.5689459 0.3578851

Standard basis: 6-311++G(d,p) (5D, 7F)

There are 358 symmetry adapted cartesian basis functions of A symmetry.

There are 345 symmetry adapted basis functions of A symmetry.

345 basis functions, 553 primitive gaussians, 358 cartesian basis functions

55 alpha electrons 55 beta electrons

nuclear repulsion energy 867.6792376319 Hartrees.  
 NAtoms= 22 NActive= 22 NUniq= 22 SFac= 1.00D+00 NAtFMM= 60 NAOKFM=F  
 Big=F  
 Integral buffers will be 131072 words long.  
 Raffenetti 2 integral format.  
 Two-electron integral symmetry is turned on.  
 One-electron integrals computed using PRISM.  
 NBasis= 345 RedAO= T EigKep= 7.02D-06 NBF= 345  
 NBsUse= 345 1.00D-06 EigRej= -1.00D+00 NBFU= 345  
 Initial guess from the checkpoint file: ". "  
 B after Tr= 0.000000 0.000000 0.000000  
 Rot= 0.999997 0.000059 0.000045 0.002353 Ang= 0.27 deg.  
 ExpMin= 3.50D-02 ExpMax= 4.40D+05 ExpMxC= 1.51D+04 IAcc=3 IRadAn= 5 AccDes=  
 0.00D+00  
 Harris functional with IExCor= 402 and IRadAn= 5 diagonalized for initial guess.  
 HarFok: IExCor= 402 AccDes= 0.00D+00 IRadAn= 5 IDoV= 1 UseB2=F ITyADJ=14  
 ICtDFT= 3500011 ScaDFX= 1.000000 1.000000 1.000000 1.000000  
 FoFCou: FMM=F IPFlag= 0 FMFlag= 100000 FMFlg1= 0  
 NFXFlg= 0 DoJE=T BraDBF=F KetDBF=T FulRan=T  
 wScrn= 0.000000 ICntrl= 500 IOpCl= 0 I1Cent= 20000004 NGrid=  
 0  
 NMat0= 1 NMatS0= 1 NMatT0= 0 NMatD0= 1 NMtDS0= 0  
 NMtDT0= 0  
 Petite list used in FoFCou.  
 Keep R1 ints in memory in canonical form, NReq=1804729152.  
 Requested convergence on RMS density matrix=1.00D-08 within 128 cycles.  
 Requested convergence on MAX density matrix=1.00D-06.  
 Requested convergence on energy=1.00D-06.  
 No special actions if energy rises.  
 SCF Done: E(RB3LYP) = -3032.33835081 A.U. after 10 cycles  
 NFock= 10 Conv=0.85D-08 -V/T= 2.0017  
 Calling FoFJK, ICntrl= 2127 FMM=F ISym2X=0 I1Cent= 0 IOpClX= 0 NMat=1 NMatS=1  
 NMatT=0.

\*\*\*\*\* Axes restored to original set \*\*\*\*\*

| Center<br>Number | Atomic<br>Number | Forces (Hartrees/Bohr) |              |              |
|------------------|------------------|------------------------|--------------|--------------|
|                  |                  | X                      | Y            | Z            |
| 1                | 6                | 0.000181225            | 0.000118685  | 0.000092167  |
| 2                | 6                | -0.000254685           | -0.000114010 | 0.000063915  |
| 3                | 7                | 0.000291254            | 0.000184962  | -0.000065969 |
| 4                | 6                | -0.000225722           | -0.000426016 | -0.000020542 |
| 5                | 7                | -0.000339961           | -0.000150713 | -0.000343989 |
| 6                | 6                | 0.000116928            | 0.000014242  | 0.000376195  |



|    |    |              |              |              |
|----|----|--------------|--------------|--------------|
| 7  | 6  | 0.000064233  | 0.000054476  | 0.000177983  |
| 8  | 1  | -0.000018697 | -0.000008158 | 0.000002266  |
| 9  | 1  | 0.000046857  | 0.000095742  | -0.000033058 |
| 10 | 1  | 0.000056878  | 0.000074084  | -0.000157099 |
| 11 | 1  | -0.000019726 | -0.000019232 | 0.000069102  |
| 12 | 1  | -0.000308170 | 0.000161699  | -0.000175311 |
| 13 | 1  | -0.000246218 | -0.000421605 | -0.000385911 |
| 14 | 35 | 0.000105270  | 0.000174258  | 0.000081210  |
| 15 | 1  | 0.000035429  | 0.000075446  | -0.000057644 |
| 16 | 6  | -0.000212488 | 0.000146629  | 0.000047988  |
| 17 | 6  | 0.000086894  | 0.000004815  | 0.000035993  |
| 18 | 1  | 0.000122688  | -0.000119968 | -0.000047915 |
| 19 | 1  | 0.000056147  | -0.000054783 | -0.000055230 |
| 20 | 1  | 0.000030476  | 0.000074073  | 0.000034226  |
| 21 | 8  | 0.000410372  | 0.000717518  | 0.000509920  |
| 22 | 1  | 0.000021017  | -0.000582144 | -0.000148297 |

-----  
Cartesian Forces: Max 0.000717518 RMS 0.000214074

GradGradGradGradGradGradGradGradGradGradGradGradGradGradGradGradGradGradGrad  
Berny optimization.

Using GEDIIS/GDIIS optimizer.

FormGI is forming the generalized inverse of G from B-inverse, IUseBI=4.

Internal Forces: Max 0.000840310 RMS 0.000152413

Search for a local minimum.

Step number 24 out of a maximum of 116

All quantities printed in internal units (Hartrees-Bohrs-Radians)

Mixed Optimization -- En-DIIS/RFO-DIIS

Swapping is turned off.

Update second derivatives using D2CorX and points 18 20 21 22 23  
24

DE= -2.50D-05 DEPred=-1.35D-05 R= 1.85D+00

TightC=F SS= 1.41D+00 RLast= 9.12D-02 DXNew= 2.0938D+00 2.7358D-01

Trust test= 1.85D+00 RLast= 9.12D-02 DXMaxT set to 1.25D+00

ITU= 1 1 1 1 1 0-1 1 1 1 1 1 1 1 1 1 1 1 0

ITU= 0-1 0 0

|                 |         |         |         |         |         |
|-----------------|---------|---------|---------|---------|---------|
| Eigenvalues --- | 0.00016 | 0.00152 | 0.00414 | 0.00710 | 0.00952 |
| Eigenvalues --- | 0.01240 | 0.01597 | 0.01776 | 0.01868 | 0.02070 |
| Eigenvalues --- | 0.02188 | 0.02413 | 0.03066 | 0.03096 | 0.03724 |
| Eigenvalues --- | 0.04358 | 0.04805 | 0.05460 | 0.06162 | 0.06677 |
| Eigenvalues --- | 0.09075 | 0.09314 | 0.13694 | 0.14173 | 0.15416 |
| Eigenvalues --- | 0.15820 | 0.15853 | 0.15992 | 0.15995 | 0.16536 |
| Eigenvalues --- | 0.16683 | 0.17207 | 0.20909 | 0.22716 | 0.22862 |
| Eigenvalues --- | 0.24019 | 0.24872 | 0.25378 | 0.29837 | 0.33215 |

Eigenvalues --- 0.33860 0.33880 0.33976 0.34139 0.34309  
 Eigenvalues --- 0.34514 0.34732 0.36263 0.36324 0.36585  
 Eigenvalues --- 0.37211 0.43171 0.43269 0.45769 0.48978  
 Eigenvalues --- 0.53358 0.54556 0.56004 0.60492 2.48259  
 En-DIIS/RFO-DIIS IScMMF= 0 using points: 24 23 22 21 20  
 RFO step: Lambda=-7.17142367D-06.  
 DidBck=F Rises=F RFO-DIIS coefs: 3.43141 0.27281 -6.28225 3.22473

0.35330

Iteration 1 RMS(Cart)= 0.05309575 RMS(Int)= 0.01906895  
 Iteration 2 RMS(Cart)= 0.02300374 RMS(Int)= 0.00070745  
 Iteration 3 RMS(Cart)= 0.00098116 RMS(Int)= 0.00002298  
 Iteration 4 RMS(Cart)= 0.00000136 RMS(Int)= 0.00002296  
 Iteration 5 RMS(Cart)= 0.00000000 RMS(Int)= 0.00002296

| Variable | Old X   | -DE/DX   | Delta X<br>(Linear) | Delta X<br>(Quad) | Delta X<br>(Total) | New X   |
|----------|---------|----------|---------------------|-------------------|--------------------|---------|
| R1       | 2.55941 | 0.00013  | -0.00013            | 0.00052           | 0.00038            | 2.55979 |
| R2       | 2.62676 | -0.00010 | -0.00019            | -0.00038          | -0.00056           | 2.62620 |
| R3       | 2.03320 | -0.00001 | 0.00004             | 0.00001           | 0.00005            | 2.03325 |
| R4       | 2.63055 | -0.00006 | -0.00005            | -0.00037          | -0.00043           | 2.63012 |
| R5       | 2.03126 | -0.00002 | -0.00002            | -0.00008          | -0.00010           | 2.03117 |
| R6       | 2.54760 | -0.00028 | 0.00013             | -0.00096          | -0.00084           | 2.54676 |
| R7       | 2.68765 | -0.00006 | -0.00179            | -0.00074          | -0.00253           | 2.68512 |
| R8       | 2.53053 | -0.00019 | -0.00133            | -0.00042          | -0.00174           | 2.52879 |
| R9       | 2.02736 | -0.00002 | 0.00035             | 0.00044           | 0.00079            | 2.02815 |
| R10      | 2.77457 | 0.00029  | -0.00023            | 0.00117           | 0.00094            | 2.77550 |
| R11      | 2.90500 | 0.00011  | 0.00475             | 0.00059           | 0.00534            | 2.91033 |
| R12      | 2.05991 | -0.00014 | 0.00014             | -0.00019          | -0.00005           | 2.05986 |
| R13      | 2.06301 | 0.00000  | 0.00027             | -0.00016          | 0.00011            | 2.06312 |
| R14      | 2.06854 | 0.00011  | -0.00266            | 0.00001           | -0.00265           | 2.06589 |
| R15      | 2.06670 | -0.00017 | 0.00064             | -0.00031          | 0.00033            | 2.06703 |
| R16      | 2.68876 | 0.00052  | -0.00197            | -0.00091          | -0.00288           | 2.68588 |
| R17      | 5.28594 | 0.00005  | -0.02469            | -0.00936          | -0.03405           | 5.25188 |
| R18      | 2.50769 | -0.00016 | 0.00004             | -0.00019          | -0.00015           | 2.50753 |
| R19      | 2.05097 | -0.00011 | -0.00063            | -0.00055          | -0.00118           | 2.04979 |
| R20      | 2.04389 | -0.00009 | 0.00010             | -0.00032          | -0.00022           | 2.04367 |
| R21      | 2.04792 | -0.00008 | -0.00002            | -0.00020          | -0.00022           | 2.04771 |
| R22      | 1.81818 | -0.00056 | 0.00095             | -0.00006          | 0.00088            | 1.81906 |
| A1       | 1.87519 | -0.00005 | 0.00025             | -0.00005          | 0.00018            | 1.87537 |
| A2       | 2.27919 | 0.00001  | -0.00030            | -0.00033          | -0.00063           | 2.27856 |
| A3       | 2.12875 | 0.00004  | -0.00001            | 0.00034           | 0.00032            | 2.12907 |
| A4       | 1.86881 | -0.00009 | -0.00030            | -0.00029          | -0.00060           | 1.86821 |
| A5       | 2.28574 | 0.00004  | -0.00095            | -0.00042          | -0.00135           | 2.28439 |
| A6       | 2.12812 | 0.00004  | 0.00130             | 0.00059           | 0.00192            | 2.13004 |
| A7       | 1.89200 | 0.00005  | -0.00025            | 0.00031           | 0.00009            | 1.89209 |

|     |          |          |          |          |          |          |
|-----|----------|----------|----------|----------|----------|----------|
| A8  | 2.22904  | 0.00008  | 0.00231  | 0.00162  | 0.00399  | 2.23303  |
| A9  | 2.15201  | -0.00013 | -0.00126 | -0.00070 | -0.00190 | 2.15011  |
| A10 | 1.89221  | 0.00008  | 0.00043  | 0.00037  | 0.00075  | 1.89297  |
| A11 | 2.18923  | -0.00003 | -0.00087 | 0.00007  | -0.00085 | 2.18838  |
| A12 | 2.19641  | -0.00005 | 0.00120  | 0.00105  | 0.00219  | 2.19861  |
| A13 | 1.89456  | 0.00001  | -0.00010 | 0.00000  | -0.00007 | 1.89448  |
| A14 | 2.19998  | 0.00012  | 0.00077  | 0.00108  | 0.00186  | 2.20184  |
| A15 | 2.17228  | -0.00014 | -0.00216 | -0.00209 | -0.00423 | 2.16806  |
| A16 | 1.94771  | -0.00013 | -0.00197 | -0.00311 | -0.00509 | 1.94262  |
| A17 | 1.87679  | 0.00015  | -0.00294 | -0.00068 | -0.00363 | 1.87316  |
| A18 | 1.89715  | -0.00003 | 0.00204  | 0.00110  | 0.00315  | 1.90030  |
| A19 | 1.91520  | -0.00004 | -0.00113 | -0.00067 | -0.00181 | 1.91339  |
| A20 | 1.93441  | 0.00006  | 0.00365  | 0.00255  | 0.00621  | 1.94062  |
| A21 | 1.89080  | 0.00000  | 0.00020  | 0.00082  | 0.00102  | 1.89182  |
| A22 | 1.91891  | -0.00013 | -0.00111 | 0.00123  | 0.00019  | 1.91910  |
| A23 | 1.90444  | 0.00033  | 0.00119  | -0.00273 | -0.00154 | 1.90290  |
| A24 | 1.89242  | -0.00004 | 0.01728  | 0.00404  | 0.02134  | 1.91376  |
| A25 | 1.90284  | -0.00020 | 0.00293  | -0.00037 | 0.00251  | 1.90535  |
| A26 | 1.88368  | 0.00021  | -0.01812 | -0.00130 | -0.01941 | 1.86427  |
| A27 | 1.96137  | -0.00017 | -0.00240 | -0.00077 | -0.00324 | 1.95813  |
| A28 | 2.56749  | 0.00084  | 0.00811  | 0.00514  | 0.01325  | 2.58074  |
| A29 | 2.15409  | -0.00009 | 0.00403  | 0.00065  | 0.00468  | 2.15877  |
| A30 | 1.95383  | -0.00010 | 0.00276  | -0.00044 | 0.00232  | 1.95615  |
| A31 | 2.17440  | 0.00019  | -0.00675 | -0.00020 | -0.00695 | 2.16745  |
| A32 | 2.08506  | 0.00007  | -0.00109 | 0.00016  | -0.00094 | 2.08413  |
| A33 | 2.14599  | -0.00005 | 0.00214  | 0.00041  | 0.00256  | 2.14855  |
| A34 | 2.05213  | -0.00001 | -0.00106 | -0.00057 | -0.00163 | 2.05050  |
| A35 | 1.89454  | 0.00030  | -0.00281 | -0.00065 | -0.00345 | 1.89109  |
| D1  | 0.00352  | 0.00002  | -0.00039 | 0.00065  | 0.00026  | 0.00378  |
| D2  | 3.11051  | -0.00008 | 0.00256  | -0.00348 | -0.00091 | 3.10960  |
| D3  | -3.12656 | 0.00006  | 0.00559  | 0.00399  | 0.00957  | -3.11700 |
| D4  | -0.01957 | -0.00003 | 0.00854  | -0.00015 | 0.00839  | -0.01118 |
| D5  | -0.03899 | 0.00004  | 0.00061  | 0.00253  | 0.00314  | -0.03585 |
| D6  | -2.99321 | 0.00010  | 0.00849  | 0.00852  | 0.01702  | -2.97620 |
| D7  | 3.09230  | 0.00000  | -0.00474 | -0.00046 | -0.00521 | 3.08710  |
| D8  | 0.13808  | 0.00005  | 0.00314  | 0.00553  | 0.00867  | 0.14675  |
| D9  | 0.03288  | -0.00007 | 0.00002  | -0.00358 | -0.00355 | 0.02932  |
| D10 | 3.02431  | -0.00006 | 0.00793  | 0.00537  | 0.01332  | 3.03763  |
| D11 | -3.07793 | 0.00002  | -0.00256 | 0.00013  | -0.00244 | -3.08037 |
| D12 | -0.08649 | 0.00003  | 0.00535  | 0.00907  | 0.01444  | -0.07205 |
| D13 | -0.05758 | 0.00009  | 0.00034  | 0.00517  | 0.00552  | -0.05206 |
| D14 | -3.09355 | -0.00003 | -0.00825 | -0.00964 | -0.01789 | -3.11144 |
| D15 | -3.05710 | 0.00006  | -0.00748 | -0.00353 | -0.01099 | -3.06809 |
| D16 | 0.19011  | -0.00006 | -0.01607 | -0.01834 | -0.03439 | 0.15572  |

|     |          |          |          |          |          |          |
|-----|----------|----------|----------|----------|----------|----------|
| D17 | 0.62174  | 0.00000  | -0.04414 | -0.01665 | -0.06078 | 0.56096  |
| D18 | -2.47701 | -0.00001 | -0.04507 | -0.01669 | -0.06176 | -2.53878 |
| D19 | -2.69051 | 0.00003  | -0.03501 | -0.00637 | -0.04138 | -2.73188 |
| D20 | 0.49392  | 0.00002  | -0.03594 | -0.00641 | -0.04236 | 0.45157  |
| D21 | 0.05979  | -0.00008 | -0.00059 | -0.00477 | -0.00537 | 0.05442  |
| D22 | 3.01769  | -0.00010 | -0.00788 | -0.01024 | -0.01812 | 2.99957  |
| D23 | 3.09522  | 0.00004  | 0.00791  | 0.01005  | 0.01798  | 3.11319  |
| D24 | -0.23007 | 0.00002  | 0.00062  | 0.00458  | 0.00523  | -0.22484 |
| D25 | 1.22960  | -0.00007 | -0.01682 | -0.01000 | -0.02683 | 1.20277  |
| D26 | -2.95240 | -0.00010 | -0.02125 | -0.01312 | -0.03437 | -2.98677 |
| D27 | -0.90901 | -0.00004 | -0.02154 | -0.01193 | -0.03347 | -0.94248 |
| D28 | -1.69613 | -0.00003 | -0.00807 | -0.00338 | -0.01145 | -1.70758 |
| D29 | 0.40505  | -0.00006 | -0.01250 | -0.00650 | -0.01899 | 0.38606  |
| D30 | 2.44844  | 0.00000  | -0.01279 | -0.00531 | -0.01809 | 2.43035  |
| D31 | -1.10713 | 0.00021  | -0.06150 | -0.01510 | -0.07659 | -1.18372 |
| D32 | 0.97897  | 0.00008  | -0.05785 | -0.01649 | -0.07435 | 0.90462  |
| D33 | 3.12044  | 0.00005  | -0.04917 | -0.01660 | -0.06576 | 3.05468  |
| D34 | 3.09755  | 0.00013  | -0.05588 | -0.01186 | -0.06774 | 3.02981  |
| D35 | -1.09953 | 0.00000  | -0.05223 | -0.01325 | -0.06550 | -1.16503 |
| D36 | 1.04193  | -0.00003 | -0.04356 | -0.01336 | -0.05691 | 0.98503  |
| D37 | 1.00999  | 0.00012  | -0.05771 | -0.01406 | -0.07176 | 0.93823  |
| D38 | 3.09609  | 0.00000  | -0.05405 | -0.01544 | -0.06952 | 3.02657  |
| D39 | -1.04563 | -0.00003 | -0.04538 | -0.01556 | -0.06093 | -1.10656 |
| D40 | -0.09944 | 0.00018  | 0.19845  | 0.08371  | 0.28214  | 0.18270  |
| D41 | 1.99658  | 0.00010  | 0.19960  | 0.08334  | 0.28295  | 2.27953  |
| D42 | -2.19905 | 0.00012  | 0.17740  | 0.08098  | 0.25839  | -1.94065 |
| D43 | -1.88997 | -0.00005 | 0.23341  | 0.04502  | 0.27838  | -1.61159 |
| D44 | 2.31526  | 0.00001  | 0.23531  | 0.04204  | 0.27746  | 2.59272  |
| D45 | 0.21658  | 0.00022  | 0.24518  | 0.04384  | 0.28896  | 0.50554  |
| D46 | -3.08929 | 0.00001  | -0.00075 | -0.00024 | -0.00100 | -3.09029 |
| D47 | 0.05046  | 0.00000  | -0.00297 | -0.00034 | -0.00331 | 0.04715  |
| D48 | 0.00403  | 0.00001  | 0.00058  | -0.00021 | 0.00038  | 0.00441  |
| D49 | -3.13940 | 0.00001  | -0.00163 | -0.00030 | -0.00193 | -3.14133 |

| Item                 | Value    | Threshold | Converged? |
|----------------------|----------|-----------|------------|
| Maximum Force        | 0.000840 | 0.000450  | NO         |
| RMS Force            | 0.000152 | 0.000300  | YES        |
| Maximum Displacement | 0.290753 | 0.001800  | NO         |
| RMS Displacement     | 0.060233 | 0.001200  | NO         |

Predicted change in Energy=-8.697317D-05

GradGradGradGradGradGradGradGradGradGradGradGradGradGradGradGradGrad

Input orientation:

-----  
Center      Atomic      Atomic      Coordinates (Angstroms)

| Number | Number | Type | X         | Y         | Z         |
|--------|--------|------|-----------|-----------|-----------|
| 1      | 6      | 0    | -0.456354 | -1.990923 | -1.315186 |
| 2      | 6      | 0    | -1.746686 | -1.610163 | -1.473184 |
| 3      | 7      | 0    | -2.099020 | -0.882926 | -0.340006 |
| 4      | 6      | 0    | -1.021120 | -0.800052 | 0.464682  |
| 5      | 7      | 0    | -0.024828 | -1.501974 | -0.087973 |
| 6      | 6      | 0    | 1.357229  | -1.506369 | 0.409093  |
| 7      | 6      | 0    | 2.241985  | -0.530568 | -0.388949 |
| 8      | 1      | 0    | 0.193848  | -2.546857 | -1.967754 |
| 9      | 1      | 0    | -2.430132 | -1.761776 | -2.288788 |
| 10     | 1      | 0    | 1.326928  | -1.201330 | 1.455134  |
| 11     | 1      | 0    | 1.747655  | -2.524666 | 0.358369  |
| 12     | 1      | 0    | 2.368885  | -0.893655 | -1.412274 |
| 13     | 1      | 0    | 1.758842  | 0.450469  | -0.413255 |
| 14     | 35     | 0    | -0.257451 | 2.105223  | 0.546005  |
| 15     | 1      | 0    | -0.997499 | -0.320404 | 1.424500  |
| 16     | 6      | 0    | -3.308861 | -0.179327 | -0.094642 |
| 17     | 6      | 0    | -4.489168 | -0.557127 | -0.568860 |
| 18     | 1      | 0    | -3.145992 | 0.720870  | 0.488195  |
| 19     | 1      | 0    | -5.359033 | 0.056728  | -0.378909 |
| 20     | 1      | 0    | -4.631951 | -1.460863 | -1.149429 |
| 21     | 8      | 0    | 3.538094  | -0.476444 | 0.191806  |
| 22     | 1      | 0    | 3.554978  | 0.245255  | 0.828579  |

Distance matrix (angstroms):

|    |    | 1        | 2        | 3        | 4        | 5        |
|----|----|----------|----------|----------|----------|----------|
| 1  | C  | 0.000000 |          |          |          |          |
| 2  | C  | 1.354584 | 0.000000 |          |          |          |
| 3  | N  | 2.208390 | 1.391799 | 0.000000 |          |          |
| 4  | C  | 2.214738 | 2.222172 | 1.347687 | 0.000000 |          |
| 5  | N  | 1.389726 | 2.212535 | 2.179224 | 1.338178 | 0.000000 |
| 6  | C  | 2.548924 | 3.631532 | 3.591029 | 2.481636 | 1.468732 |
| 7  | C  | 3.204931 | 4.272070 | 4.355557 | 3.383661 | 2.484483 |
| 8  | H  | 1.075950 | 2.210806 | 3.267334 | 3.231751 | 2.161753 |
| 9  | H  | 2.212738 | 1.074847 | 2.163276 | 3.239108 | 3.270562 |
| 10 | H  | 3.387953 | 4.264890 | 3.880854 | 2.579796 | 2.073357 |
| 11 | H  | 2.818390 | 4.049854 | 4.240277 | 3.263696 | 2.094472 |
| 12 | H  | 3.032392 | 4.177921 | 4.594786 | 3.876063 | 2.802443 |
| 13 | H  | 3.417743 | 4.202187 | 4.082451 | 3.172186 | 2.664454 |
| 14 | Br | 4.503555 | 4.483195 | 3.620142 | 3.005067 | 3.669865 |
| 15 | H  | 3.254129 | 3.259038 | 2.154823 | 1.073253 | 2.151690 |
| 16 | C  | 3.592827 | 2.527462 | 1.420905 | 2.435549 | 3.540383 |
| 17 | C  | 4.344694 | 3.073743 | 2.423081 | 3.626924 | 4.588499 |

|    |    |          |          |          |          |          |
|----|----|----------|----------|----------|----------|----------|
| 18 | H  | 4.223762 | 3.352430 | 2.086679 | 2.613205 | 3.874877 |
| 19 | H  | 5.394975 | 4.126138 | 3.392956 | 4.501468 | 5.564885 |
| 20 | H  | 4.212369 | 2.907208 | 2.721197 | 4.010003 | 4.727998 |
| 21 | O  | 4.529932 | 5.655653 | 5.676717 | 4.578823 | 3.718118 |
| 22 | H  | 5.068235 | 6.070282 | 5.882693 | 4.708053 | 4.087528 |
|    |    | 6        | 7        | 8        | 9        | 10       |
| 6  | C  | 0.000000 |          |          |          |          |
| 7  | C  | 1.540082 | 0.000000 |          |          |          |
| 8  | H  | 2.843496 | 3.279163 | 0.000000 |          |          |
| 9  | H  | 4.657027 | 5.191718 | 2.757660 | 0.000000 |          |
| 10 | H  | 1.090031 | 2.165154 | 3.848438 | 5.333531 | 0.000000 |
| 11 | H  | 1.091757 | 2.186154 | 2.797437 | 5.004333 | 1.769498 |
| 12 | H  | 2.171692 | 1.093220 | 2.787907 | 4.955046 | 3.066328 |
| 13 | H  | 2.160269 | 1.093824 | 3.721509 | 5.095012 | 2.530982 |
| 14 | Br | 3.958476 | 3.750828 | 5.307023 | 5.264055 | 3.777574 |
| 15 | H  | 2.825298 | 3.718470 | 4.228922 | 4.233025 | 2.485946 |
| 16 | C  | 4.877211 | 5.569729 | 4.624145 | 2.844396 | 4.993679 |
| 17 | C  | 6.003150 | 6.733609 | 5.276984 | 2.940911 | 6.191810 |
| 18 | H  | 5.024525 | 5.600516 | 5.278661 | 3.793102 | 4.963551 |
| 19 | H  | 6.940634 | 7.623680 | 6.335422 | 3.941199 | 7.046169 |
| 20 | H  | 6.188807 | 6.978164 | 5.013718 | 2.497337 | 6.508405 |
| 21 | O  | 2.421597 | 1.421304 | 4.487125 | 6.589776 | 2.647775 |
| 22 | H  | 2.841524 | 1.951468 | 5.187732 | 7.040433 | 2.729357 |
|    |    | 11       | 12       | 13       | 14       | 15       |
| 11 | H  | 0.000000 |          |          |          |          |
| 12 | H  | 2.486222 | 0.000000 |          |          |          |
| 13 | H  | 3.073590 | 1.782375 | 0.000000 |          |          |
| 14 | Br | 5.048913 | 4.441370 | 2.779177 | 0.000000 |          |
| 15 | H  | 3.678488 | 4.439420 | 3.401323 | 2.683857 | 0.000000 |
| 16 | C  | 5.592333 | 5.872242 | 5.116617 | 3.865320 | 2.769492 |
| 17 | C  | 6.605219 | 6.917911 | 6.330646 | 5.122349 | 4.027564 |
| 18 | H  | 5.873512 | 6.052466 | 4.994309 | 3.203661 | 2.564555 |
| 19 | H  | 7.596854 | 7.854413 | 7.128840 | 5.574760 | 4.734712 |
| 20 | H  | 6.641122 | 7.028693 | 6.710989 | 5.893023 | 4.597282 |
| 21 | O  | 2.725551 | 2.028346 | 2.095473 | 4.603979 | 4.702710 |
| 22 | H  | 3.340655 | 2.779452 | 2.193255 | 4.251346 | 4.626028 |
|    |    | 16       | 17       | 18       | 19       | 20       |
| 16 | C  | 0.000000 |          |          |          |          |
| 17 | C  | 1.326929 | 0.000000 |          |          |          |
| 18 | H  | 1.084702 | 2.134189 | 0.000000 |          |          |
| 19 | H  | 2.083204 | 1.081464 | 2.467895 | 0.000000 |          |
| 20 | H  | 2.122611 | 1.083599 | 3.106420 | 1.850792 | 0.000000 |
| 21 | O  | 6.859382 | 8.063625 | 6.796942 | 8.931342 | 8.337723 |
| 22 | H  | 6.938652 | 8.203958 | 6.726446 | 8.997398 | 8.593553 |

```

          21      22
21  O    0.000000
22  H    0.962608  0.000000
Stoichiometry  C7H11BrN2O
Framework group C1[X(C7H11BrN2O)]
Deg. of freedom  60
Full point group          C1      NOp  1
Largest Abelian subgroup  C1      NOP  1
Largest concise Abelian subgroup C1      NOp  1

```

Standard orientation:

---

| Center<br>Number | Atomic<br>Number | Atomic<br>Type | Coordinates (Angstroms) |           |           |
|------------------|------------------|----------------|-------------------------|-----------|-----------|
|                  |                  |                | X                       | Y         | Z         |
| 1                | 6                | 0              | -0.395844               | -2.271810 | -0.577804 |
| 2                | 6                | 0              | -1.654208               | -1.792553 | -0.725226 |
| 3                | 7                | 0              | -1.785750               | -0.716590 | 0.147760  |
| 4                | 6                | 0              | -0.609097               | -0.534444 | 0.779085  |
| 5                | 7                | 0              | 0.236144                | -1.494168 | 0.385110  |
| 6                | 6                | 0              | 1.664655                | -1.527233 | 0.724872  |
| 7                | 6                | 0              | 2.525497                | -0.963108 | -0.420801 |
| 8                | 1                | 0              | 0.108497                | -3.079032 | -1.079502 |
| 9                | 1                | 0              | -2.449425               | -2.094175 | -1.382455 |
| 10               | 1                | 0              | 1.799900                | -0.918111 | 1.618655  |
| 11               | 1                | 0              | 1.947664                | -2.554639 | 0.962098  |
| 12               | 1                | 0              | 2.483100                | -1.632695 | -1.283927 |
| 13               | 1                | 0              | 2.137685                | 0.018423  | -0.708290 |
| 14               | 35               | 0              | 0.428333                | 2.133521  | -0.135314 |
| 15               | 1                | 0              | -0.415468               | 0.206351  | 1.531150  |
| 16               | 6                | 0              | -2.881695               | 0.179288  | 0.271357  |
| 17               | 6                | 0              | -4.144026               | -0.167736 | 0.054945  |
| 18               | 1                | 0              | -2.560285               | 1.184654  | 0.521387  |
| 19               | 1                | 0              | -4.920087               | 0.582423  | 0.122439  |
| 20               | 1                | 0              | -4.445649               | -1.178367 | -0.193725 |
| 21               | 8                | 0              | 3.885599                | -0.904378 | -0.012415 |
| 22               | 1                | 0              | 4.053182                | -0.032180 | 0.358799  |

---

Rotational constants (GHZ): 0.8154138 0.5674660 0.3544595

Standard basis: 6-311++G(d,p) (5D, 7F)

There are 358 symmetry adapted cartesian basis functions of A symmetry.

There are 345 symmetry adapted basis functions of A symmetry.

345 basis functions, 553 primitive gaussians, 358 cartesian basis functions

55 alpha electrons 55 beta electrons

nuclear repulsion energy 863.6848723324 Hartrees.

NAtoms= 22 NActive= 22 NUniq= 22 SFac= 1.00D+00 NATFMM= 60 NAOKFM=F  
Big=F

Integral buffers will be 131072 words long.

Raffenetti 2 integral format.

Two-electron integral symmetry is turned on.

One-electron integrals computed using PRISM.

NBasis= 345 RedAO= T EigKep= 6.80D-06 NBF= 345

NBsUse= 345 1.00D-06 EigRej= -1.00D+00 NBFU= 345

Initial guess from the checkpoint file: "."

B after Tr= 0.000000 0.000000 0.000000

Rot= 0.999558 0.000002 0.000936 0.029716 Ang= 3.41 deg.

ExpMin= 3.50D-02 ExpMax= 4.40D+05 ExpMxC= 1.51D+04 IAcc=3 IRadAn= 5 AccDes=  
0.00D+00

Harris functional with IExCor= 402 and IRadAn= 5 diagonalized for initial guess.

HarFok: IExCor= 402 AccDes= 0.00D+00 IRadAn= 5 IDoV= 1 UseB2=F ITyADJ=14

ICtDFT= 3500011 ScaDFX= 1.000000 1.000000 1.000000 1.000000

FoFCou: FMM=F IPFlag= 0 FMFlag= 100000 FMFlg1= 0

NFxFlg= 0 DoJE=T BraDBF=F KetDBF=T FulRan=T

wScrn= 0.000000 ICntrl= 500 IOpCl= 0 I1Cent= 20000004 NGrid=

0

NMat0= 1 NMatS0= 1 NMatT0= 0 NMatD0= 1 NMtDS0= 0

NMtDT0= 0

Petite list used in FoFCou.

Keep R1 ints in memory in canonical form, NReq=1804729152.

Requested convergence on RMS density matrix=1.00D-08 within 128 cycles.

Requested convergence on MAX density matrix=1.00D-06.

Requested convergence on energy=1.00D-06.

No special actions if energy rises.

SCF Done: E(RB3LYP) = -3032.33819384 A.U. after 13 cycles

NFock= 13 Conv=0.11D-08 -V/T= 2.0017

Calling FoFJK, ICntrl= 2127 FMM=F ISym2X=0 I1Cent= 0 IOpClX= 0 NMat=1 NMatS=1

NMatT=0.

\*\*\*\*\* Axes restored to original set \*\*\*\*\*

```
-----  
Center      Atomic      Forces (Hartrees/Bohr)  
Number      Number      X           Y           Z  
-----  
1           6           0.000497878 0.000325336 0.000247891  
2           6           -0.000423230 0.000023074 0.000233989  
3           7           0.001064672 0.000195732 0.000116912  
4           6           -0.000389461 -0.000080856 -0.000839523  
5           7           -0.000358412 0.000489352 -0.000223953  
6           6           0.001241326 0.000203144 0.000200254  
7           6           0.000891457 0.000149108 -0.000458188
```



|    |    |              |              |              |
|----|----|--------------|--------------|--------------|
| 8  | 1  | -0.000125390 | -0.000231080 | 0.000114533  |
| 9  | 1  | 0.000005780  | 0.000106342  | -0.000000972 |
| 10 | 1  | -0.000233438 | 0.000077500  | 0.000041327  |
| 11 | 1  | -0.000168989 | 0.000058570  | 0.000067261  |
| 12 | 1  | -0.000262492 | -0.000002696 | -0.000311940 |
| 13 | 1  | -0.000197069 | -0.000080017 | -0.000053267 |
| 14 | 35 | -0.000862802 | -0.002806508 | 0.000610205  |
| 15 | 1  | 0.000542262  | 0.001244918  | -0.000221138 |
| 16 | 6  | -0.000845419 | 0.000719664  | 0.000161523  |
| 17 | 6  | 0.000061866  | -0.000176732 | -0.000126332 |
| 18 | 1  | 0.000223483  | 0.000030094  | -0.000107260 |
| 19 | 1  | 0.000057631  | -0.000039384 | 0.000032394  |
| 20 | 1  | 0.000093896  | 0.000050967  | 0.000053871  |
| 21 | 8  | -0.000980043 | -0.000951350 | 0.000636659  |
| 22 | 1  | 0.000166492  | 0.000694822  | -0.000174244 |

-----  
Cartesian Forces: Max 0.002806508 RMS 0.000567584

GradGradGradGradGradGradGradGradGradGradGradGradGradGradGradGradGradGradGradGrad  
Berny optimization.

Using GEDIIS/GDIIS optimizer.

FormGI is forming the generalized inverse of G from B-inverse, IUseBI=4.

Internal Forces: Max 0.014211654 RMS 0.002215306

Search for a local minimum.

Step number 25 out of a maximum of 116

All quantities printed in internal units (Hartrees-Bohrs-Radians)

Mixed Optimization -- RFO/linear search

Update second derivatives using D2CorX and points 18 20 21 22 23  
25 24

DE= 1.57D-04 DEPred=-8.70D-05 R=-1.80D+00

Trust test=-1.80D+00 RLast= 7.26D-01 DXMaxT set to 6.23D-01

ITU= -1 1 1 1 1 1 0-1 1 1 1 1 1 1 1 1 1 1 1 1

ITU= 0 0 -1 0 0

Use linear search instead of GDIIS.

Energy rises -- skip Quadratic/GDIIS search.

Quartic linear search produced a step of -0.54729.

Iteration 1 RMS(Cart)= 0.03326574 RMS(Int)= 0.00184485

Iteration 2 RMS(Cart)= 0.00325929 RMS(Int)= 0.00001485

Iteration 3 RMS(Cart)= 0.00001718 RMS(Int)= 0.00000752

Iteration 4 RMS(Cart)= 0.00000000 RMS(Int)= 0.00000752

| Variable | Old X   | -DE/DX   | Delta X<br>(Linear) | Delta X<br>(Quad) | Delta X<br>(Total) | New X   |
|----------|---------|----------|---------------------|-------------------|--------------------|---------|
| R1       | 2.55979 | 0.00048  | -0.00021            | 0.00000           | -0.00020           | 2.55959 |
| R2       | 2.62620 | -0.00052 | 0.00031             | 0.00000           | 0.00031            | 2.62651 |

|     |         |          |          |         |          |         |
|-----|---------|----------|----------|---------|----------|---------|
| R3  | 2.03325 | -0.00003 | -0.00003 | 0.00000 | -0.00003 | 2.03323 |
| R4  | 2.63012 | -0.00003 | 0.00024  | 0.00000 | 0.00024  | 2.63036 |
| R5  | 2.03117 | -0.00002 | 0.00005  | 0.00000 | 0.00005  | 2.03122 |
| R6  | 2.54676 | -0.00075 | 0.00046  | 0.00000 | 0.00045  | 2.54721 |
| R7  | 2.68512 | 0.00063  | 0.00138  | 0.00000 | 0.00138  | 2.68650 |
| R8  | 2.52879 | -0.00001 | 0.00095  | 0.00000 | 0.00095  | 2.52974 |
| R9  | 2.02815 | 0.00037  | -0.00043 | 0.00000 | -0.00043 | 2.02772 |
| R10 | 2.77550 | -0.00020 | -0.00051 | 0.00000 | -0.00051 | 2.77499 |
| R11 | 2.91033 | -0.00271 | -0.00292 | 0.00000 | -0.00292 | 2.90741 |
| R12 | 2.05986 | 0.00007  | 0.00003  | 0.00000 | 0.00003  | 2.05989 |
| R13 | 2.06312 | -0.00012 | -0.00006 | 0.00000 | -0.00006 | 2.06306 |
| R14 | 2.06589 | 0.00026  | 0.00145  | 0.00000 | 0.00145  | 2.06734 |
| R15 | 2.06703 | -0.00212 | -0.00018 | 0.00000 | -0.00018 | 2.06685 |
| R16 | 2.68588 | -0.00057 | 0.00158  | 0.00000 | 0.00158  | 2.68745 |
| R17 | 5.25188 | -0.00083 | 0.01864  | 0.00000 | 0.01864  | 5.27052 |
| R18 | 2.50753 | -0.00012 | 0.00008  | 0.00000 | 0.00008  | 2.50762 |
| R19 | 2.04979 | 0.00000  | 0.00065  | 0.00000 | 0.00065  | 2.05044 |
| R20 | 2.04367 | -0.00007 | 0.00012  | 0.00000 | 0.00012  | 2.04379 |
| R21 | 2.04771 | -0.00008 | 0.00012  | 0.00000 | 0.00012  | 2.04782 |
| R22 | 1.81906 | 0.00041  | -0.00048 | 0.00000 | -0.00048 | 1.81858 |
| A1  | 1.87537 | -0.00032 | -0.00010 | 0.00000 | -0.00010 | 1.87527 |
| A2  | 2.27856 | 0.00012  | 0.00035  | 0.00000 | 0.00035  | 2.27891 |
| A3  | 2.12907 | 0.00020  | -0.00018 | 0.00000 | -0.00017 | 2.12890 |
| A4  | 1.86821 | 0.00007  | 0.00033  | 0.00000 | 0.00033  | 1.86854 |
| A5  | 2.28439 | 0.00000  | 0.00074  | 0.00000 | 0.00074  | 2.28513 |
| A6  | 2.13004 | -0.00009 | -0.00105 | 0.00000 | -0.00105 | 2.12899 |
| A7  | 1.89209 | -0.00010 | -0.00005 | 0.00000 | -0.00005 | 1.89204 |
| A8  | 2.23303 | -0.00007 | -0.00218 | 0.00000 | -0.00217 | 2.23086 |
| A9  | 2.15011 | 0.00016  | 0.00104  | 0.00000 | 0.00106  | 2.15117 |
| A10 | 1.89297 | 0.00020  | -0.00041 | 0.00000 | -0.00041 | 1.89256 |
| A11 | 2.18838 | 0.00007  | 0.00047  | 0.00000 | 0.00050  | 2.18888 |
| A12 | 2.19861 | -0.00021 | -0.00120 | 0.00000 | -0.00117 | 2.19744 |
| A13 | 1.89448 | 0.00015  | 0.00004  | 0.00000 | 0.00004  | 1.89452 |
| A14 | 2.20184 | 0.00174  | -0.00102 | 0.00000 | -0.00100 | 2.20084 |
| A15 | 2.16806 | -0.00204 | 0.00231  | 0.00000 | 0.00232  | 2.17038 |
| A16 | 1.94262 | -0.00665 | 0.00278  | 0.00000 | 0.00279  | 1.94541 |
| A17 | 1.87316 | 0.00121  | 0.00198  | 0.00000 | 0.00199  | 1.87515 |
| A18 | 1.90030 | 0.00272  | -0.00173 | 0.00000 | -0.00173 | 1.89857 |
| A19 | 1.91339 | 0.00035  | 0.00099  | 0.00000 | 0.00100  | 1.91438 |
| A20 | 1.94062 | 0.00328  | -0.00340 | 0.00000 | -0.00340 | 1.93722 |
| A21 | 1.89182 | -0.00084 | -0.00056 | 0.00000 | -0.00056 | 1.89126 |
| A22 | 1.91910 | 0.00263  | -0.00010 | 0.00000 | -0.00012 | 1.91898 |
| A23 | 1.90290 | -0.01040 | 0.00084  | 0.00000 | 0.00085  | 1.90375 |
| A24 | 1.91376 | 0.00238  | -0.01168 | 0.00000 | -0.01168 | 1.90208 |

|     |          |          |          |         |          |          |
|-----|----------|----------|----------|---------|----------|----------|
| A25 | 1.90535  | 0.00228  | -0.00137 | 0.00000 | -0.00136 | 1.90399  |
| A26 | 1.86427  | -0.00107 | 0.01062  | 0.00000 | 0.01063  | 1.87489  |
| A27 | 1.95813  | 0.00449  | 0.00177  | 0.00000 | 0.00179  | 1.95992  |
| A28 | 2.58074  | -0.01421 | -0.00725 | 0.00000 | -0.00725 | 2.57349  |
| A29 | 2.15877  | -0.00038 | -0.00256 | 0.00000 | -0.00256 | 2.15621  |
| A30 | 1.95615  | -0.00002 | -0.00127 | 0.00000 | -0.00127 | 1.95488  |
| A31 | 2.16745  | 0.00040  | 0.00380  | 0.00000 | 0.00380  | 2.17125  |
| A32 | 2.08413  | 0.00004  | 0.00051  | 0.00000 | 0.00051  | 2.08464  |
| A33 | 2.14855  | -0.00011 | -0.00140 | 0.00000 | -0.00140 | 2.14715  |
| A34 | 2.05050  | 0.00007  | 0.00089  | 0.00000 | 0.00089  | 2.05139  |
| A35 | 1.89109  | -0.00005 | 0.00189  | 0.00000 | 0.00189  | 1.89298  |
| D1  | 0.00378  | 0.00036  | -0.00014 | 0.00000 | -0.00014 | 0.00364  |
| D2  | 3.10960  | -0.00006 | 0.00050  | 0.00000 | 0.00050  | 3.11009  |
| D3  | -3.11700 | 0.00031  | -0.00524 | 0.00000 | -0.00524 | -3.12223 |
| D4  | -0.01118 | -0.00011 | -0.00459 | 0.00000 | -0.00460 | -0.01578 |
| D5  | -0.03585 | -0.00023 | -0.00172 | 0.00000 | -0.00172 | -0.03757 |
| D6  | -2.97620 | 0.00085  | -0.00931 | 0.00000 | -0.00932 | -2.98552 |
| D7  | 3.08710  | -0.00018 | 0.00285  | 0.00000 | 0.00285  | 3.08995  |
| D8  | 0.14675  | 0.00090  | -0.00475 | 0.00000 | -0.00475 | 0.14200  |
| D9  | 0.02932  | -0.00036 | 0.00195  | 0.00000 | 0.00194  | 0.03127  |
| D10 | 3.03763  | -0.00042 | -0.00729 | 0.00000 | -0.00730 | 3.03033  |
| D11 | -3.08037 | 0.00001  | 0.00133  | 0.00000 | 0.00133  | -3.07903 |
| D12 | -0.07205 | -0.00006 | -0.00790 | 0.00000 | -0.00791 | -0.07996 |
| D13 | -0.05206 | 0.00022  | -0.00302 | 0.00000 | -0.00302 | -0.05508 |
| D14 | -3.11144 | -0.00057 | 0.00979  | 0.00000 | 0.00978  | -3.10165 |
| D15 | -3.06809 | 0.00030  | 0.00601  | 0.00000 | 0.00600  | -3.06209 |
| D16 | 0.15572  | -0.00049 | 0.01882  | 0.00000 | 0.01881  | 0.17452  |
| D17 | 0.56096  | 0.00014  | 0.03327  | 0.00000 | 0.03327  | 0.59423  |
| D18 | -2.53878 | 0.00015  | 0.03380  | 0.00000 | 0.03380  | -2.50497 |
| D19 | -2.73188 | 0.00005  | 0.02264  | 0.00000 | 0.02264  | -2.70924 |
| D20 | 0.45157  | 0.00006  | 0.02318  | 0.00000 | 0.02318  | 0.47475  |
| D21 | 0.05442  | 0.00002  | 0.00294  | 0.00000 | 0.00294  | 0.05736  |
| D22 | 2.99957  | -0.00050 | 0.00991  | 0.00000 | 0.00991  | 3.00948  |
| D23 | 3.11319  | 0.00083  | -0.00984 | 0.00000 | -0.00985 | 3.10335  |
| D24 | -0.22484 | 0.00031  | -0.00286 | 0.00000 | -0.00287 | -0.22771 |
| D25 | 1.20277  | 0.00225  | 0.01468  | 0.00000 | 0.01469  | 1.21746  |
| D26 | -2.98677 | -0.00045 | 0.01881  | 0.00000 | 0.01881  | -2.96797 |
| D27 | -0.94248 | 0.00064  | 0.01832  | 0.00000 | 0.01832  | -0.92416 |
| D28 | -1.70758 | 0.00315  | 0.00627  | 0.00000 | 0.00627  | -1.70131 |
| D29 | 0.38606  | 0.00045  | 0.01039  | 0.00000 | 0.01039  | 0.39645  |
| D30 | 2.43035  | 0.00154  | 0.00990  | 0.00000 | 0.00990  | 2.44025  |
| D31 | -1.18372 | -0.00048 | 0.04192  | 0.00000 | 0.04191  | -1.14180 |
| D32 | 0.90462  | -0.00248 | 0.04069  | 0.00000 | 0.04070  | 0.94532  |
| D33 | 3.05468  | -0.00214 | 0.03599  | 0.00000 | 0.03599  | 3.09067  |

|     |          |          |          |         |          |          |
|-----|----------|----------|----------|---------|----------|----------|
| D34 | 3.02981  | 0.00192  | 0.03707  | 0.00000 | 0.03707  | 3.06688  |
| D35 | -1.16503 | -0.00008 | 0.03585  | 0.00000 | 0.03585  | -1.12918 |
| D36 | 0.98503  | 0.00026  | 0.03115  | 0.00000 | 0.03114  | 1.01617  |
| D37 | 0.93823  | 0.00066  | 0.03927  | 0.00000 | 0.03927  | 0.97750  |
| D38 | 3.02657  | -0.00134 | 0.03805  | 0.00000 | 0.03805  | 3.06462  |
| D39 | -1.10656 | -0.00100 | 0.03335  | 0.00000 | 0.03334  | -1.07322 |
| D40 | 0.18270  | -0.00076 | -0.15441 | 0.00000 | -0.15440 | 0.02829  |
| D41 | 2.27953  | -0.00244 | -0.15486 | 0.00000 | -0.15486 | 2.12467  |
| D42 | -1.94065 | 0.00047  | -0.14142 | 0.00000 | -0.14142 | -2.08207 |
| D43 | -1.61159 | 0.00376  | -0.15235 | 0.00000 | -0.15233 | -1.76392 |
| D44 | 2.59272  | -0.00006 | -0.15185 | 0.00000 | -0.15188 | 2.44084  |
| D45 | 0.50554  | -0.00478 | -0.15814 | 0.00000 | -0.15813 | 0.34741  |
| D46 | -3.09029 | -0.00003 | 0.00055  | 0.00000 | 0.00054  | -3.08975 |
| D47 | 0.04715  | 0.00003  | 0.00181  | 0.00000 | 0.00181  | 0.04896  |
| D48 | 0.00441  | -0.00005 | -0.00021 | 0.00000 | -0.00021 | 0.00420  |
| D49 | -3.14133 | 0.00000  | 0.00106  | 0.00000 | 0.00106  | -3.14027 |

| Item                 | Value    | Threshold | Converged? |
|----------------------|----------|-----------|------------|
| Maximum Force        | 0.014212 | 0.000450  | NO         |
| RMS Force            | 0.002215 | 0.000300  | NO         |
| Maximum Displacement | 0.157129 | 0.001800  | NO         |
| RMS Displacement     | 0.033058 | 0.001200  | NO         |

Predicted change in Energy=-1.912424D-04

GradGradGradGradGradGradGradGradGradGradGradGradGradGradGradGradGradGrad

Input orientation:

| Center Number | Atomic Number | Atomic Type | Coordinates (Angstroms) |           |           |
|---------------|---------------|-------------|-------------------------|-----------|-----------|
|               |               |             | X                       | Y         | Z         |
| 1             | 6             | 0           | -0.455525               | -1.984147 | -1.316513 |
| 2             | 6             | 0           | -1.746023               | -1.605359 | -1.476945 |
| 3             | 7             | 0           | -2.101716               | -0.877601 | -0.344996 |
| 4             | 6             | 0           | -1.024598               | -0.790258 | 0.460667  |
| 5             | 7             | 0           | -0.026746               | -1.493354 | -0.088887 |
| 6             | 6             | 0           | 1.352950                | -1.505868 | 0.413767  |
| 7             | 6             | 0           | 2.245639                | -0.526114 | -0.367438 |
| 8             | 1             | 0           | 0.195515                | -2.543289 | -1.965471 |
| 9             | 1             | 0           | -2.428638               | -1.758631 | -2.292972 |
| 10            | 1             | 0           | 1.320645                | -1.215676 | 1.463979  |
| 11            | 1             | 0           | 1.740965                | -2.524330 | 0.350173  |
| 12            | 1             | 0           | 2.342643                | -0.856354 | -1.405869 |
| 13            | 1             | 0           | 1.787755                | 0.466988  | -0.349179 |
| 14            | 35            | 0           | -0.313348               | 2.071043  | 0.540266  |
| 15            | 1             | 0           | -1.004985               | -0.316849 | 1.423413  |

|    |   |   |           |           |           |
|----|---|---|-----------|-----------|-----------|
| 16 | 6 | 0 | -3.311519 | -0.169416 | -0.108559 |
| 17 | 6 | 0 | -4.493750 | -0.565527 | -0.562745 |
| 18 | 1 | 0 | -3.144001 | 0.747484  | 0.446918  |
| 19 | 1 | 0 | -5.365106 | 0.049820  | -0.384454 |
| 20 | 1 | 0 | -4.635765 | -1.487241 | -1.114648 |
| 21 | 8 | 0 | 3.547829  | -0.530428 | 0.204191  |
| 22 | 1 | 0 | 3.638127  | 0.248228  | 0.762458  |

-----  
Distance matrix (angstroms):

|    |    | 1        | 2        | 3        | 4        | 5        |
|----|----|----------|----------|----------|----------|----------|
| 1  | C  | 0.000000 |          |          |          |          |
| 2  | C  | 1.354476 | 0.000000 |          |          |          |
| 3  | N  | 2.208673 | 1.391925 | 0.000000 |          |          |
| 4  | C  | 2.215306 | 2.222427 | 1.347927 | 0.000000 |          |
| 5  | N  | 1.389890 | 2.212502 | 2.179506 | 1.338680 | 0.000000 |
| 6  | C  | 2.548176 | 3.631574 | 3.592376 | 2.483351 | 1.468461 |
| 7  | C  | 3.212925 | 4.281255 | 4.361599 | 3.383782 | 2.485332 |
| 8  | H  | 1.075937 | 2.210869 | 3.267679 | 3.232327 | 2.161789 |
| 9  | H  | 2.213031 | 1.074875 | 2.162799 | 3.239074 | 3.270695 |
| 10 | H  | 3.387693 | 4.266771 | 3.885775 | 2.586074 | 2.074599 |
| 11 | H  | 2.809663 | 4.042518 | 4.238062 | 3.266122 | 2.092961 |
| 12 | H  | 3.018219 | 4.157313 | 4.569271 | 3.850537 | 2.784639 |
| 13 | H  | 3.460651 | 4.249007 | 4.115328 | 3.185255 | 2.683861 |
| 14 | Br | 4.462333 | 4.431437 | 3.560401 | 2.949450 | 3.630827 |
| 15 | H  | 3.254071 | 3.259059 | 2.155118 | 1.073024 | 2.151318 |
| 16 | C  | 3.592924 | 2.526893 | 1.421637 | 2.437103 | 3.541601 |
| 17 | C  | 4.346023 | 3.076852 | 2.422113 | 3.623933 | 4.586887 |
| 18 | H  | 4.218934 | 3.345364 | 2.086717 | 2.618532 | 3.876303 |
| 19 | H  | 5.395345 | 4.126853 | 3.392843 | 4.501108 | 5.564786 |
| 20 | H  | 4.214507 | 2.914759 | 2.717614 | 4.000991 | 4.721788 |
| 21 | O  | 4.522464 | 5.657435 | 5.686783 | 4.586980 | 3.713584 |
| 22 | H  | 5.105252 | 6.118805 | 5.953129 | 4.786495 | 4.145985 |
|    |    | 6        | 7        | 8        | 9        | 10       |
| 6  | C  | 0.000000 |          |          |          |          |
| 7  | C  | 1.538536 | 0.000000 |          |          |          |
| 8  | H  | 2.841949 | 3.290245 | 0.000000 |          |          |
| 9  | H  | 4.657331 | 5.203426 | 2.758464 | 0.000000 |          |
| 10 | H  | 1.090046 | 2.164532 | 3.845725 | 5.335410 | 0.000000 |
| 11 | H  | 1.091726 | 2.182323 | 2.784059 | 4.995808 | 1.769127 |
| 12 | H  | 2.170815 | 1.093987 | 2.787304 | 4.936211 | 3.067511 |
| 13 | H  | 2.159469 | 1.093729 | 3.769535 | 5.148755 | 2.517359 |
| 14 | Br | 3.948018 | 3.757335 | 5.275389 | 5.212302 | 3.784931 |
| 15 | H  | 2.827191 | 3.717189 | 4.228802 | 4.232852 | 2.493610 |
| 16 | C  | 4.880185 | 5.574609 | 4.624141 | 2.841961 | 5.002448 |

|    |    |          |          |          |          |          |
|----|----|----------|----------|----------|----------|----------|
| 17 | C  | 6.001810 | 6.742334 | 5.279052 | 2.946502 | 6.191728 |
| 18 | H  | 5.030037 | 5.597629 | 5.272682 | 3.781449 | 4.982116 |
| 19 | H  | 6.941874 | 7.632525 | 6.335956 | 3.941546 | 7.051061 |
| 20 | H  | 6.180705 | 6.988262 | 5.018008 | 2.516647 | 6.496298 |
| 21 | O  | 2.410996 | 1.422139 | 4.471807 | 6.592607 | 2.648959 |
| 22 | H  | 2.901805 | 1.953277 | 5.204396 | 7.082991 | 2.829464 |
|    |    | 11       | 12       | 13       | 14       | 15       |
| 11 | H  | 0.000000 |          |          |          |          |
| 12 | H  | 2.495565 | 0.000000 |          |          |          |
| 13 | H  | 3.072340 | 1.782058 | 0.000000 |          |          |
| 14 | Br | 5.037241 | 4.405836 | 2.789039 | 0.000000 |          |
| 15 | H  | 3.683077 | 4.416165 | 3.399394 | 2.638246 | 0.000000 |
| 16 | C  | 5.593179 | 5.841614 | 5.144464 | 3.798640 | 2.772864 |
| 17 | C  | 6.598636 | 6.894325 | 6.369380 | 5.063981 | 4.022206 |
| 18 | H  | 5.880223 | 6.009025 | 5.003466 | 3.126200 | 2.581034 |
| 19 | H  | 7.593561 | 7.827761 | 7.165103 | 5.519123 | 4.734288 |
| 20 | H  | 6.624495 | 7.012917 | 6.757704 | 5.838101 | 4.581936 |
| 21 | O  | 2.694758 | 2.037399 | 2.097360 | 4.667900 | 4.718075 |
| 22 | H  | 3.384713 | 2.756814 | 2.169670 | 4.357313 | 4.723840 |
|    |    | 16       | 17       | 18       | 19       | 20       |
| 16 | C  | 0.000000 |          |          |          |          |
| 17 | C  | 1.326973 | 0.000000 |          |          |          |
| 18 | H  | 1.085045 | 2.136642 | 0.000000 |          |          |
| 19 | H  | 2.083603 | 1.081527 | 2.472088 | 0.000000 |          |
| 20 | H  | 2.121911 | 1.083662 | 3.107707 | 1.851400 | 0.000000 |
| 21 | O  | 6.875959 | 8.078145 | 6.817080 | 8.951179 | 8.344222 |
| 22 | H  | 7.016458 | 8.279238 | 6.807796 | 9.078160 | 8.659831 |
|    |    | 21       | 22       |          |          |          |
| 21 | O  | 0.000000 |          |          |          |          |
| 22 | H  | 0.962351 | 0.000000 |          |          |          |

Stoichiometry C7H11BrN2O

Framework group C1[X(C7H11BrN2O)]

Deg. of freedom 60

Full point group C1 NOp 1

Largest Abelian subgroup C1 NOp 1

Largest concise Abelian subgroup C1 NOp 1

Standard orientation:

| Center<br>Number | Atomic<br>Number | Atomic<br>Type | Coordinates (Angstroms) |           |           |
|------------------|------------------|----------------|-------------------------|-----------|-----------|
|                  |                  |                | X                       | Y         | Z         |
| 1                | 6                | 0              | -0.305181               | -2.269001 | -0.579259 |
| 2                | 6                | 0              | -1.579448               | -1.833562 | -0.725012 |
| 3                | 7                | 0              | -1.746081               | -0.759824 | 0.144916  |

|    |    |   |           |           |           |
|----|----|---|-----------|-----------|-----------|
| 4  | 6  | 0 | -0.574124 | -0.533653 | 0.771230  |
| 5  | 7  | 0 | 0.302143  | -1.466872 | 0.379667  |
| 6  | 6  | 0 | 1.729989  | -1.458709 | 0.722552  |
| 7  | 6  | 0 | 2.578406  | -0.861740 | -0.413631 |
| 8  | 1  | 0 | 0.224293  | -3.062757 | -1.076499 |
| 9  | 1  | 0 | -2.366111 | -2.164079 | -1.378675 |
| 10 | 1  | 0 | 1.846194  | -0.855903 | 1.623286  |
| 11 | 1  | 0 | 2.042834  | -2.479767 | 0.949337  |
| 12 | 1  | 0 | 2.525235  | -1.505135 | -1.296821 |
| 13 | 1  | 0 | 2.189168  | 0.128165  | -0.668236 |
| 14 | 35 | 0 | 0.318628  | 2.127178  | -0.135541 |
| 15 | 1  | 0 | -0.405906 | 0.210246  | 1.526013  |
| 16 | 6  | 0 | -2.870719 | 0.102095  | 0.260401  |
| 17 | 6  | 0 | -4.122498 | -0.296935 | 0.074168  |
| 18 | 1  | 0 | -2.578807 | 1.124787  | 0.475367  |
| 19 | 1  | 0 | -4.924956 | 0.425904  | 0.131321  |
| 20 | 1  | 0 | -4.389012 | -1.325581 | -0.138391 |
| 21 | 8  | 0 | 3.938550  | -0.816846 | -0.000753 |
| 22 | 1  | 0 | 4.145709  | 0.083555  | 0.268474  |

-----

Rotational constants (GHZ):      0.8262131      0.5689083      0.3567878

Standard basis: 6-311++G(d,p) (5D, 7F)

There are    358 symmetry adapted cartesian basis functions of A    symmetry.

There are    345 symmetry adapted basis functions of A    symmetry.

345 basis functions,    553 primitive gaussians,    358 cartesian basis functions

55 alpha electrons      55 beta electrons

nuclear repulsion energy      866.3535908782 Hartrees.

NAtoms=    22 NActive=    22 NUniq=    22 SFac= 1.00D+00 NAtFMM=    60 NAOKFM=F

Big=F

Integral buffers will be    131072 words long.

Raffenetti 2 integral format.

Two-electron integral symmetry is turned on.

One-electron integrals computed using PRISM.

NBasis=    345 RedAO= T EigKep=    6.93D-06    NBF=    345

NBsUse=    345 1.00D-06 EigRej= -1.00D+00    NBFU=    345

Lowest energy guess from the checkpoint file:    ". "

B after Tr=    0.000000    0.000000    0.000000

Rot=    0.999931    0.000410    0.000344    0.011772 Ang=    1.35 deg.

B after Tr=    0.000000    0.000000    0.000000

Rot=    0.999839    0.000406    -0.000596    -0.017941 Ang=    2.06 deg.

Keep R1 ints in memory in canonical form, NReq=1804729152.

Requested convergence on RMS density matrix=1.00D-08 within 128 cycles.

Requested convergence on MAX density matrix=1.00D-06.

Requested convergence on                    energy=1.00D-06.

No special actions if energy rises.

SCF Done: E(RB3LYP) = -3032.33840028 A.U. after 11 cycles

NFock= 11 Conv=0.45D-08 -V/T= 2.0017

Calling FoFJK, ICntrl= 2127 FMM=F ISym2X=0 l1Cent= 0 IOpClX= 0 NMat=1 NMatS=1

NMatT=0.

\*\*\*\*\* Axes restored to original set \*\*\*\*\*

| Center<br>Number | Atomic<br>Number | Forces (Hartrees/Bohr) |              |              |
|------------------|------------------|------------------------|--------------|--------------|
|                  |                  | X                      | Y            | Z            |
| 1                | 6                | 0.000288229            | 0.000206643  | 0.000100245  |
| 2                | 6                | -0.000294051           | -0.000075213 | 0.000087462  |
| 3                | 7                | 0.000531762            | 0.000213552  | -0.000007510 |
| 4                | 6                | -0.000347753           | -0.000381272 | -0.000192882 |
| 5                | 7                | -0.000307258           | 0.000073530  | -0.000305980 |
| 6                | 6                | 0.000521386            | 0.000100995  | 0.000314591  |
| 7                | 6                | 0.000396817            | 0.000062675  | -0.000033345 |
| 8                | 1                | -0.000072196           | -0.000110832 | 0.000050317  |
| 9                | 1                | 0.000030785            | 0.000098159  | -0.000021977 |
| 10               | 1                | -0.000051945           | 0.000081766  | -0.000078877 |
| 11               | 1                | -0.000072863           | 0.000024083  | 0.000060251  |
| 12               | 1                | -0.000265722           | 0.000091669  | -0.000205420 |
| 13               | 1                | -0.000258510           | -0.000340462 | -0.000260918 |
| 14               | 35               | -0.000159276           | -0.000771895 | 0.000252414  |
| 15               | 1                | 0.000196654            | 0.000455609  | -0.000111874 |
| 16               | 6                | -0.000455987           | 0.000373857  | 0.000089452  |
| 17               | 6                | 0.000055238            | -0.000082588 | -0.000042729 |
| 18               | 1                | 0.000204324            | -0.000055067 | -0.000074395 |
| 19               | 1                | 0.000055849            | -0.000047215 | -0.000018258 |
| 20               | 1                | 0.000060846            | 0.000059336  | 0.000047055  |
| 21               | 8                | -0.000133365           | 0.000151342  | 0.000473921  |
| 22               | 1                | 0.000077036            | -0.000128670 | -0.000121543 |

Cartesian Forces: Max 0.000771895 RMS 0.000237148

GradGradGradGradGradGradGradGradGradGradGradGradGradGradGradGradGradGradGradGrad

Berny optimization.

Using GEDIIS/GDIIS optimizer.

FormGI is forming the generalized inverse of G from B-inverse, IUseBI=4.

Internal Forces: Max 0.004166372 RMS 0.000673792

Search for a local minimum.

Step number 26 out of a maximum of 116

All quantities printed in internal units (Hartrees-Bohrs-Radians)

Mixed Optimization -- En-DIIS/RFO-DIIS



Update second derivatives using D2CorX and points 21 22 23 25 24

26

ITU= 0 -1 1 1 1 1 1 0 -1 1 1 1 1 1 1 1 1 1 1 1 1

ITU= 1 0 0 -1 0 0

Use linear search instead of GDIIIS.

|                 |         |         |         |         |         |
|-----------------|---------|---------|---------|---------|---------|
| Eigenvalues --- | 0.00060 | 0.00162 | 0.00412 | 0.00701 | 0.00939 |
| Eigenvalues --- | 0.01234 | 0.01600 | 0.01781 | 0.01883 | 0.02067 |
| Eigenvalues --- | 0.02184 | 0.02414 | 0.03066 | 0.03096 | 0.03695 |
| Eigenvalues --- | 0.04344 | 0.04824 | 0.05471 | 0.06029 | 0.06643 |
| Eigenvalues --- | 0.09092 | 0.09314 | 0.13684 | 0.14173 | 0.15488 |
| Eigenvalues --- | 0.15842 | 0.15880 | 0.15993 | 0.15996 | 0.16459 |
| Eigenvalues --- | 0.16732 | 0.17180 | 0.20938 | 0.22709 | 0.22879 |
| Eigenvalues --- | 0.24022 | 0.24864 | 0.25219 | 0.29820 | 0.33181 |
| Eigenvalues --- | 0.33851 | 0.33880 | 0.33911 | 0.34143 | 0.34281 |
| Eigenvalues --- | 0.34505 | 0.34726 | 0.36248 | 0.36320 | 0.36568 |
| Eigenvalues --- | 0.37211 | 0.43091 | 0.43192 | 0.45772 | 0.48899 |
| Eigenvalues --- | 0.53364 | 0.54520 | 0.55846 | 0.60479 | 3.23578 |

RFO step: Lambda=-2.65628531D-05 EMin= 5.99855409D-04

Quartic linear search produced a step of -0.10630.

Iteration 1 RMS(Cart)= 0.00760295 RMS(Int)= 0.00002779

Iteration 2 RMS(Cart)= 0.00003966 RMS(Int)= 0.00000458

Iteration 3 RMS(Cart)= 0.00000000 RMS(Int)= 0.00000458

| Variable | Old X   | -DE/DX   | Delta X<br>(Linear) | Delta X<br>(Quad) | Delta X<br>(Total) | New X   |
|----------|---------|----------|---------------------|-------------------|--------------------|---------|
| R1       | 2.55959 | 0.00024  | -0.00002            | 0.00040           | 0.00037            | 2.55996 |
| R2       | 2.62651 | -0.00020 | 0.00003             | -0.00047          | -0.00044           | 2.62607 |
| R3       | 2.03323 | -0.00002 | 0.00000             | 0.00001           | 0.00001            | 2.03323 |
| R4       | 2.63036 | -0.00003 | 0.00002             | -0.00038          | -0.00037           | 2.62999 |
| R5       | 2.03122 | -0.00002 | 0.00000             | -0.00005          | -0.00004           | 2.03118 |
| R6       | 2.54721 | -0.00041 | 0.00004             | -0.00091          | -0.00087           | 2.54635 |
| R7       | 2.68650 | 0.00017  | 0.00012             | -0.00012          | 0.00000            | 2.68650 |
| R8       | 2.52974 | -0.00007 | 0.00008             | -0.00079          | -0.00070           | 2.52904 |
| R9       | 2.02772 | 0.00010  | -0.00004            | 0.00032           | 0.00028            | 2.02800 |
| R10      | 2.77499 | 0.00018  | -0.00004            | 0.00068           | 0.00063            | 2.77562 |
| R11      | 2.90741 | -0.00080 | -0.00026            | 0.00046           | 0.00021            | 2.90762 |
| R12      | 2.05989 | -0.00005 | 0.00000             | -0.00043          | -0.00043           | 2.05946 |
| R13      | 2.06306 | -0.00006 | -0.00001            | 0.00014           | 0.00014            | 2.06320 |
| R14      | 2.06734 | 0.00015  | 0.00013             | 0.00011           | 0.00024            | 2.06757 |
| R15      | 2.06685 | -0.00082 | -0.00002            | -0.00042          | -0.00043           | 2.06642 |
| R16      | 2.68745 | 0.00008  | 0.00014             | 0.00061           | 0.00075            | 2.68820 |
| R17      | 5.27052 | -0.00024 | 0.00164             | -0.00703          | -0.00539           | 5.26513 |
| R18      | 2.50762 | -0.00012 | 0.00001             | -0.00032          | -0.00032           | 2.50730 |
| R19      | 2.05044 | -0.00006 | 0.00006             | -0.00036          | -0.00030           | 2.05014 |
| R20      | 2.04379 | -0.00008 | 0.00001             | -0.00016          | -0.00015           | 2.04364 |

|     |          |          |          |          |          |          |
|-----|----------|----------|----------|----------|----------|----------|
| R21 | 2.04782  | -0.00007 | 0.00001  | -0.00015 | -0.00014 | 2.04769  |
| R22 | 1.81858  | -0.00016 | -0.00004 | -0.00069 | -0.00074 | 1.81784  |
| A1  | 1.87527  | -0.00012 | -0.00001 | -0.00008 | -0.00009 | 1.87519  |
| A2  | 2.27891  | 0.00003  | 0.00003  | -0.00007 | -0.00004 | 2.27887  |
| A3  | 2.12890  | 0.00009  | -0.00002 | 0.00011  | 0.00009  | 2.12899  |
| A4  | 1.86854  | -0.00003 | 0.00003  | -0.00033 | -0.00030 | 1.86824  |
| A5  | 2.28513  | 0.00003  | 0.00006  | -0.00022 | -0.00015 | 2.28498  |
| A6  | 2.12899  | 0.00000  | -0.00009 | 0.00045  | 0.00036  | 2.12935  |
| A7  | 1.89204  | 0.00001  | 0.00000  | 0.00019  | 0.00019  | 1.89223  |
| A8  | 2.23086  | 0.00001  | -0.00019 | 0.00107  | 0.00088  | 2.23174  |
| A9  | 2.15117  | -0.00002 | 0.00009  | -0.00065 | -0.00057 | 2.15060  |
| A10 | 1.89256  | 0.00011  | -0.00004 | 0.00035  | 0.00030  | 1.89286  |
| A11 | 2.18888  | 0.00001  | 0.00004  | 0.00014  | 0.00015  | 2.18903  |
| A12 | 2.19744  | -0.00009 | -0.00011 | 0.00075  | 0.00061  | 2.19805  |
| A13 | 1.89452  | 0.00004  | 0.00000  | 0.00001  | 0.00002  | 1.89454  |
| A14 | 2.20084  | 0.00059  | -0.00009 | 0.00060  | 0.00050  | 2.20134  |
| A15 | 2.17038  | -0.00068 | 0.00020  | -0.00167 | -0.00147 | 2.16891  |
| A16 | 1.94541  | -0.00221 | 0.00024  | -0.00261 | -0.00236 | 1.94305  |
| A17 | 1.87515  | 0.00050  | 0.00017  | -0.00010 | 0.00008  | 1.87523  |
| A18 | 1.89857  | 0.00083  | -0.00015 | 0.00073  | 0.00058  | 1.89915  |
| A19 | 1.91438  | 0.00011  | 0.00009  | -0.00069 | -0.00060 | 1.91378  |
| A20 | 1.93722  | 0.00107  | -0.00030 | 0.00221  | 0.00191  | 1.93913  |
| A21 | 1.89126  | -0.00027 | -0.00005 | 0.00046  | 0.00042  | 1.89168  |
| A22 | 1.91898  | 0.00070  | -0.00001 | 0.00020  | 0.00019  | 1.91917  |
| A23 | 1.90375  | -0.00313 | 0.00007  | -0.00114 | -0.00107 | 1.90269  |
| A24 | 1.90208  | 0.00082  | -0.00103 | 0.00172  | 0.00069  | 1.90277  |
| A25 | 1.90399  | 0.00062  | -0.00012 | -0.00107 | -0.00119 | 1.90280  |
| A26 | 1.87489  | -0.00021 | 0.00093  | 0.00110  | 0.00203  | 1.87692  |
| A27 | 1.95992  | 0.00126  | 0.00015  | -0.00076 | -0.00060 | 1.95932  |
| A28 | 2.57349  | -0.00417 | -0.00064 | 0.00212  | 0.00148  | 2.57497  |
| A29 | 2.15621  | -0.00022 | -0.00023 | 0.00034  | 0.00011  | 2.15632  |
| A30 | 1.95488  | -0.00010 | -0.00011 | 0.00019  | 0.00008  | 1.95496  |
| A31 | 2.17125  | 0.00032  | 0.00033  | -0.00049 | -0.00015 | 2.17110  |
| A32 | 2.08464  | 0.00006  | 0.00005  | 0.00032  | 0.00036  | 2.08500  |
| A33 | 2.14715  | -0.00009 | -0.00012 | 0.00023  | 0.00011  | 2.14726  |
| A34 | 2.05139  | 0.00003  | 0.00008  | -0.00055 | -0.00047 | 2.05092  |
| A35 | 1.89298  | 0.00013  | 0.00017  | 0.00064  | 0.00081  | 1.89379  |
| D1  | 0.00364  | 0.00012  | -0.00001 | 0.00132  | 0.00131  | 0.00495  |
| D2  | 3.11009  | -0.00007 | 0.00004  | -0.00177 | -0.00172 | 3.10837  |
| D3  | -3.12223 | 0.00013  | -0.00046 | 0.00377  | 0.00331  | -3.11892 |
| D4  | -0.01578 | -0.00007 | -0.00040 | 0.00068  | 0.00028  | -0.01550 |
| D5  | -0.03757 | -0.00003 | -0.00015 | 0.00027  | 0.00012  | -0.03745 |
| D6  | -2.98552 | 0.00033  | -0.00082 | 0.00628  | 0.00546  | -2.98005 |
| D7  | 3.08995  | -0.00003 | 0.00025  | -0.00192 | -0.00167 | 3.08828  |

|               |          |          |           |            |          |          |
|---------------|----------|----------|-----------|------------|----------|----------|
| D8            | 0.14200  | 0.00033  | -0.00042  | 0.00409    | 0.00367  | 0.14567  |
| D9            | 0.03127  | -0.00017 | 0.00017   | -0.00245   | -0.00228 | 0.02899  |
| D10           | 3.03033  | -0.00017 | -0.00064  | 0.00224    | 0.00160  | 3.03193  |
| D11           | -3.07903 | 0.00000  | 0.00012   | 0.00032    | 0.00043  | -3.07860 |
| D12           | -0.07996 | 0.00000  | -0.00069  | 0.00500    | 0.00431  | -0.07565 |
| D13           | -0.05508 | 0.00015  | -0.00027  | 0.00262    | 0.00236  | -0.05272 |
| D14           | -3.10165 | -0.00021 | 0.00086   | -0.01101   | -0.01015 | -3.11180 |
| D15           | -3.06209 | 0.00015  | 0.00053   | -0.00197   | -0.00144 | -3.06352 |
| D16           | 0.17452  | -0.00020 | 0.00166   | -0.01560   | -0.01395 | 0.16058  |
| D17           | 0.59423  | 0.00006  | 0.00292   | -0.01287   | -0.00995 | 0.58428  |
| D18           | -2.50497 | 0.00006  | 0.00297   | -0.01378   | -0.01081 | -2.51578 |
| D19           | -2.70924 | 0.00006  | 0.00199   | -0.00746   | -0.00547 | -2.71471 |
| D20           | 0.47475  | 0.00005  | 0.00204   | -0.00836   | -0.00633 | 0.46842  |
| D21           | 0.05736  | -0.00007 | 0.00026   | -0.00180   | -0.00154 | 0.05581  |
| D22           | 3.00948  | -0.00025 | 0.00087   | -0.00737   | -0.00650 | 3.00298  |
| D23           | 3.10335  | 0.00030  | -0.00086  | 0.01188    | 0.01101  | 3.11436  |
| D24           | -0.22771 | 0.00011  | -0.00025  | 0.00630    | 0.00606  | -0.22166 |
| D25           | 1.21746  | 0.00065  | 0.00129   | -0.00321   | -0.00192 | 1.21554  |
| D26           | -2.96797 | -0.00021 | 0.00165   | -0.00566   | -0.00401 | -2.97197 |
| D27           | -0.92416 | 0.00019  | 0.00161   | -0.00478   | -0.00317 | -0.92733 |
| D28           | -1.70131 | 0.00096  | 0.00055   | 0.00347    | 0.00402  | -1.69729 |
| D29           | 0.39645  | 0.00010  | 0.00091   | 0.00102    | 0.00193  | 0.39838  |
| D30           | 2.44025  | 0.00049  | 0.00087   | 0.00190    | 0.00277  | 2.44302  |
| D31           | -1.14180 | 0.00002  | 0.00369   | 0.00018    | 0.00387  | -1.13793 |
| D32           | 0.94532  | -0.00072 | 0.00358   | -0.00171   | 0.00187  | 0.94719  |
| D33           | 3.09067  | -0.00062 | 0.00317   | -0.00227   | 0.00089  | 3.09156  |
| D34           | 3.06688  | 0.00071  | 0.00326   | 0.00238    | 0.00564  | 3.07252  |
| D35           | -1.12918 | -0.00002 | 0.00315   | 0.00049    | 0.00364  | -1.12554 |
| D36           | 1.01617  | 0.00007  | 0.00274   | -0.00008   | 0.00266  | 1.01883  |
| D37           | 0.97750  | 0.00030  | 0.00345   | 0.00085    | 0.00430  | 0.98180  |
| D38           | 3.06462  | -0.00043 | 0.00334   | -0.00104   | 0.00231  | 3.06693  |
| D39           | -1.07322 | -0.00034 | 0.00293   | -0.00160   | 0.00133  | -1.07189 |
| D40           | 0.02829  | 0.00007  | -0.01358  | 0.02639    | 0.01281  | 0.04111  |
| D41           | 2.12467  | -0.00058 | -0.01362  | 0.02531    | 0.01169  | 2.13637  |
| D42           | -2.08207 | 0.00036  | -0.01243  | 0.02550    | 0.01306  | -2.06901 |
| D43           | -1.76392 | 0.00120  | -0.01340  | 0.01872    | 0.00533  | -1.75860 |
| D44           | 2.44084  | 0.00003  | -0.01335  | 0.01691    | 0.00356  | 2.44440  |
| D45           | 0.34741  | -0.00136 | -0.01391  | 0.01797    | 0.00407  | 0.35147  |
| D46           | -3.08975 | -0.00001 | 0.00005   | -0.00025   | -0.00021 | -3.08995 |
| D47           | 0.04896  | 0.00002  | 0.00016   | -0.00101   | -0.00085 | 0.04811  |
| D48           | 0.00420  | -0.00002 | -0.00002  | 0.00078    | 0.00077  | 0.00497  |
| D49           | -3.14027 | 0.00001  | 0.00009   | 0.00003    | 0.00012  | -3.14016 |
| Item          |          | Value    | Threshold | Converged? |          |          |
| Maximum Force |          | 0.004166 | 0.000450  | NO         |          |          |

RMS Force 0.000674 0.000300 NO  
 Maximum Displacement 0.036061 0.001800 NO  
 RMS Displacement 0.007600 0.001200 NO

Predicted change in Energy=-1.268395D-05

GradGradGradGradGradGradGradGradGradGradGradGradGradGradGradGradGradGradGradGrad

Input orientation:

| Center Number | Atomic Number | Atomic Type | Coordinates (Angstroms) |           |           |
|---------------|---------------|-------------|-------------------------|-----------|-----------|
|               |               |             | X                       | Y         | Z         |
| 1             | 6             | 0           | -0.455491               | -1.991098 | -1.313190 |
| 2             | 6             | 0           | -1.745516               | -1.610481 | -1.474774 |
| 3             | 7             | 0           | -2.099670               | -0.879369 | -0.344744 |
| 4             | 6             | 0           | -1.023590               | -0.794354 | 0.461788  |
| 5             | 7             | 0           | -0.026729               | -1.499374 | -0.086195 |
| 6             | 6             | 0           | 1.353782                | -1.507146 | 0.415292  |
| 7             | 6             | 0           | 2.240134                | -0.525043 | -0.370384 |
| 8             | 1             | 0           | 0.195472                | -2.550717 | -1.961820 |
| 9             | 1             | 0           | -2.427414               | -1.762661 | -2.291574 |
| 10            | 1             | 0           | 1.321938                | -1.213407 | 1.464295  |
| 11            | 1             | 0           | 1.744803                | -2.524696 | 0.354337  |
| 12            | 1             | 0           | 2.332753                | -0.854775 | -1.409510 |
| 13            | 1             | 0           | 1.778112                | 0.465862  | -0.350727 |
| 14            | 35            | 0           | -0.312396               | 2.067225  | 0.559349  |
| 15            | 1             | 0           | -1.000991               | -0.311461 | 1.419913  |
| 16            | 6             | 0           | -3.308444               | -0.169514 | -0.108056 |
| 17            | 6             | 0           | -4.490094               | -0.559745 | -0.568313 |
| 18            | 1             | 0           | -3.140644               | 0.743099  | 0.454048  |
| 19            | 1             | 0           | -5.360592               | 0.056434  | -0.389195 |
| 20            | 1             | 0           | -4.632724               | -1.477321 | -1.126774 |
| 21            | 8             | 0           | 3.544819                | -0.522651 | 0.196538  |
| 22            | 1             | 0           | 3.632833                | 0.254314  | 0.756850  |

Distance matrix (angstroms):

|   |   | 1        | 2        | 3        | 4        | 5        |
|---|---|----------|----------|----------|----------|----------|
| 1 | C | 0.000000 |          |          |          |          |
| 2 | C | 1.354674 | 0.000000 |          |          |          |
| 3 | N | 2.208428 | 1.391732 | 0.000000 |          |          |
| 4 | C | 2.214833 | 2.222052 | 1.347468 | 0.000000 |          |
| 5 | N | 1.389657 | 2.212402 | 2.179068 | 1.338310 | 0.000000 |
| 6 | C | 2.548594 | 3.631622 | 3.591391 | 2.482365 | 1.468796 |
| 7 | C | 3.210077 | 4.275892 | 4.354320 | 3.378896 | 2.483697 |
| 8 | H | 1.075940 | 2.211039 | 3.267417 | 3.231842 | 2.161635 |

|    |    |          |          |          |          |          |
|----|----|----------|----------|----------|----------|----------|
| 9  | H  | 2.213120 | 1.074852 | 2.162815 | 3.238726 | 3.270520 |
| 10 | H  | 3.387991 | 4.266739 | 3.884792 | 2.584982 | 2.074777 |
| 11 | H  | 2.811880 | 4.045214 | 4.239786 | 3.266440 | 2.093724 |
| 12 | H  | 3.012443 | 4.148208 | 4.558586 | 3.843234 | 2.780976 |
| 13 | H  | 3.457163 | 4.241537 | 4.104495 | 3.177713 | 2.681339 |
| 14 | Br | 4.471786 | 4.440384 | 3.562885 | 2.950245 | 3.635789 |
| 15 | H  | 3.254014 | 3.258985 | 2.154909 | 1.073173 | 2.151439 |
| 16 | C  | 3.593029 | 2.527261 | 1.421637 | 2.436330 | 3.540997 |
| 17 | C  | 4.345301 | 3.075456 | 2.422039 | 3.623921 | 4.586608 |
| 18 | H  | 4.220073 | 3.347548 | 2.086648 | 2.616436 | 3.875179 |
| 19 | H  | 5.395013 | 4.126240 | 3.392833 | 4.500843 | 5.564390 |
| 20 | H  | 4.212837 | 2.911152 | 2.717624 | 4.001977 | 4.722127 |
| 21 | O  | 4.520851 | 5.653697 | 5.681592 | 4.584162 | 3.713473 |
| 22 | H  | 5.103071 | 6.114265 | 5.946456 | 4.782159 | 4.144700 |
|    |    | 6        | 7        | 8        | 9        | 10       |
| 6  | C  | 0.000000 |          |          |          |          |
| 7  | C  | 1.538647 | 0.000000 |          |          |          |
| 8  | H  | 2.842778 | 3.288870 | 0.000000 |          |          |
| 9  | H  | 4.657237 | 5.196987 | 2.758496 | 0.000000 |          |
| 10 | H  | 1.089818 | 2.164019 | 3.846503 | 5.335342 | 0.000000 |
| 11 | H  | 1.091797 | 2.183847 | 2.786698 | 4.998894 | 1.769266 |
| 12 | H  | 2.171146 | 1.094113 | 2.783745 | 4.925595 | 3.067429 |
| 13 | H  | 2.158611 | 1.093500 | 3.768304 | 5.140005 | 2.514427 |
| 14 | Br | 3.946268 | 3.754952 | 5.285793 | 5.221981 | 3.775251 |
| 15 | H  | 2.825577 | 3.708864 | 4.228701 | 4.232706 | 2.492283 |
| 16 | C  | 4.878474 | 5.566142 | 4.624284 | 2.842900 | 5.000244 |
| 17 | C  | 6.001329 | 6.733228 | 5.278292 | 2.944704 | 6.191809 |
| 18 | H  | 5.026428 | 5.589333 | 5.274023 | 3.784966 | 4.976259 |
| 19 | H  | 6.940807 | 7.622958 | 6.335632 | 3.941025 | 7.050115 |
| 20 | H  | 6.182000 | 6.979623 | 5.016070 | 2.510293 | 6.499330 |
| 21 | O  | 2.411996 | 1.422536 | 4.470982 | 6.587556 | 2.650575 |
| 22 | H  | 2.900599 | 1.953884 | 5.203346 | 7.077264 | 2.827529 |
|    |    | 11       | 12       | 13       | 14       | 15       |
| 11 | H  | 0.000000 |          |          |          |          |
| 12 | H  | 2.499096 | 0.000000 |          |          |          |
| 13 | H  | 3.072729 | 1.781216 | 0.000000 |          |          |
| 14 | Br | 5.035855 | 4.405826 | 2.786185 | 0.000000 |          |
| 15 | H  | 3.684189 | 4.406209 | 3.385677 | 2.621618 | 0.000000 |
| 16 | C  | 5.594282 | 5.829792 | 5.131827 | 3.797991 | 2.771133 |
| 17 | C  | 6.601989 | 6.880836 | 6.355284 | 5.062189 | 4.023498 |
| 18 | H  | 5.878437 | 5.998677 | 4.991862 | 3.124642 | 2.573540 |
| 19 | H  | 7.596164 | 7.814019 | 7.150539 | 5.516094 | 4.734378 |
| 20 | H  | 6.630501 | 6.998955 | 6.743666 | 5.837127 | 4.586321 |
| 21 | O  | 2.696877 | 2.039313 | 2.097119 | 4.660171 | 4.712285 |

|    |   |          |          |          |          |          |
|----|---|----------|----------|----------|----------|----------|
| 22 | H | 3.383722 | 2.759239 | 2.170591 | 4.346318 | 4.715090 |
|    |   | 16       | 17       | 18       | 19       | 20       |
| 16 | C | 0.000000 |          |          |          |          |
| 17 | C | 1.326806 | 0.000000 |          |          |          |
| 18 | H | 1.084887 | 2.136268 | 0.000000 |          |          |
| 19 | H | 2.083603 | 1.081446 | 2.471990 | 0.000000 |          |
| 20 | H | 2.121760 | 1.083590 | 3.107341 | 1.851005 | 0.000000 |
| 21 | O | 6.869112 | 8.071320 | 6.809100 | 8.943420 | 8.338750 |
| 22 | H | 7.007783 | 8.270471 | 6.797837 | 9.068310 | 8.652516 |
|    |   | 21       | 22       |          |          |          |
| 21 | O | 0.000000 |          |          |          |          |
| 22 | H | 0.961962 | 0.000000 |          |          |          |

Stoichiometry C7H11BrN2O

Framework group C1[X(C7H11BrN2O)]

Deg. of freedom 60

Full point group C1 NOp 1

Largest Abelian subgroup C1 NOp 1

Largest concise Abelian subgroup C1 NOp 1

Standard orientation:

| Center Number | Atomic Number | Atomic Type | Coordinates (Angstroms) |           |           |
|---------------|---------------|-------------|-------------------------|-----------|-----------|
|               |               |             | X                       | Y         | Z         |
| 1             | 6             | 0           | -0.311584               | -2.277023 | -0.567614 |
| 2             | 6             | 0           | -1.584433               | -1.838078 | -0.717028 |
| 3             | 7             | 0           | -1.746825               | -0.756997 | 0.144255  |
| 4             | 6             | 0           | -0.575239               | -0.532085 | 0.770730  |
| 5             | 7             | 0           | 0.297838                | -1.470603 | 0.386031  |
| 6             | 6             | 0           | 1.726763                | -1.459933 | 0.725769  |
| 7             | 6             | 0           | 2.569562                | -0.869456 | -0.418111 |
| 8             | 1             | 0           | 0.215839                | -3.074944 | -1.060354 |
| 9             | 1             | 0           | -2.371364               | -2.169475 | -1.369886 |
| 10            | 1             | 0           | 1.845156                | -0.849759 | 1.620964  |
| 11            | 1             | 0           | 2.040664                | -2.479126 | 0.959721  |
| 12            | 1             | 0           | 2.510252                | -1.516646 | -1.298287 |
| 13            | 1             | 0           | 2.178490                | 0.118786  | -0.675371 |
| 14            | 35            | 0           | 0.325640                | 2.127780  | -0.133417 |
| 15            | 1             | 0           | -0.402089               | 0.222569  | 1.513842  |
| 16            | 6             | 0           | -2.868268               | 0.109679  | 0.255114  |
| 17            | 6             | 0           | -4.120827               | -0.283829 | 0.063641  |
| 18            | 1             | 0           | -2.573090               | 1.130811  | 0.472228  |
| 19            | 1             | 0           | -4.920580               | 0.442122  | 0.117641  |
| 20            | 1             | 0           | -4.390950               | -1.311046 | -0.150895 |
| 21            | 8             | 0           | 3.932238                | -0.820959 | -0.012685 |

```

22          1          0          4.139450          0.079636          0.254450
-----
Rotational constants (GHZ):          0.8249621          0.5700118          0.3568296
Standard basis: 6-311++G(d,p) (5D, 7F)
There are 358 symmetry adapted cartesian basis functions of A symmetry.
There are 345 symmetry adapted basis functions of A symmetry.
345 basis functions, 553 primitive gaussians, 358 cartesian basis functions
55 alpha electrons          55 beta electrons
nuclear repulsion energy          866.4505856144 Hartrees.
NAtoms= 22 NActive= 22 NUniq= 22 SFac= 1.00D+00 NATFMM= 60 NAOKFM=F
Big=F
Integral buffers will be 131072 words long.
Raffenetti 2 integral format.
Two-electron integral symmetry is turned on.
One-electron integrals computed using PRISM.
NBasis= 345 RedAO= T EigKep= 6.89D-06 NBF= 345
NBsUse= 345 1.00D-06 EigRej= -1.00D+00 NBFU= 345
Initial guess from the checkpoint file: "."
B after Tr= 0.000000 0.000000 0.000000
Rot= 0.999999 0.000484 -0.000107 0.001212 Ang= 0.15 deg.
ExpMin= 3.50D-02 ExpMax= 4.40D+05 ExpMxC= 1.51D+04 IAcc=3 IRadAn= 5 AccDes=
0.00D+00
Harris functional with IExCor= 402 and IRadAn= 5 diagonalized for initial guess.
HarFok: IExCor= 402 AccDes= 0.00D+00 IRadAn= 5 IDoV= 1 UseB2=F ITyADJ=14
ICtDFT= 3500011 ScaDFX= 1.000000 1.000000 1.000000 1.000000
FoFCou: FMM=F IPFlag= 0 FMFlag= 100000 FMFlg1= 0
NFXFlg= 0 DoJE=T BraDBF=F KetDBF=T FulRan=T
wScrn= 0.000000 ICntrl= 500 IOpCl= 0 I1Cent= 200000004 NGrid=
0
NMat0= 1 NMatS0= 1 NMatT0= 0 NMatD0= 1 NMtDS0= 0
NMtDT0= 0
Petite list used in FoFCou.
Keep R1 ints in memory in canonical form, NReq=1804729152.
Requested convergence on RMS density matrix=1.00D-08 within 128 cycles.
Requested convergence on MAX density matrix=1.00D-06.
Requested convergence on energy=1.00D-06.
No special actions if energy rises.
SCF Done: E(RB3LYP) = -3032.33842115 A.U. after 10 cycles
NFOck= 10 Conv=0.71D-08 -V/T= 2.0017
Calling FoFJK, ICntrl= 2127 FMM=F ISym2X=0 I1Cent= 0 IOpClX= 0 NMat=1 NMatS=1
NMatT=0.
***** Axes restored to original set *****
-----
Center Atomic Forces (Hartrees/Bohr)

```

| Number | Number | X            | Y            | Z            |
|--------|--------|--------------|--------------|--------------|
| 1      | 6      | 0.000152535  | 0.000134979  | -0.000098533 |
| 2      | 6      | -0.000077734 | -0.000009901 | -0.000064152 |
| 3      | 7      | 0.000181735  | 0.000137310  | 0.000049080  |
| 4      | 6      | -0.000388470 | -0.000248864 | 0.000049237  |
| 5      | 7      | 0.000028784  | 0.000155996  | -0.000145670 |
| 6      | 6      | 0.000514428  | 0.000116533  | 0.000024552  |
| 7      | 6      | 0.000623643  | 0.000020131  | 0.000187997  |
| 8      | 1      | -0.000106724 | -0.000190338 | 0.000082876  |
| 9      | 1      | 0.000007498  | 0.000033996  | -0.000005130 |
| 10     | 1      | -0.000109776 | 0.000050218  | 0.000073687  |
| 11     | 1      | -0.000059622 | 0.000113404  | -0.000020768 |
| 12     | 1      | 0.000006412  | 0.000007127  | -0.000047548 |
| 13     | 1      | -0.000304825 | -0.000173484 | -0.000220610 |
| 14     | 35     | -0.000054940 | -0.000464111 | 0.000227278  |
| 15     | 1      | 0.000132194  | 0.000261608  | -0.000007002 |
| 16     | 6      | -0.000371616 | 0.000286899  | 0.000098115  |
| 17     | 6      | -0.000085862 | -0.000134643 | -0.000150243 |
| 18     | 1      | 0.000245548  | 0.000030206  | -0.000071439 |
| 19     | 1      | 0.000035251  | -0.000001803 | 0.000023689  |
| 20     | 1      | 0.000054339  | 0.000011240  | 0.000032404  |
| 21     | 8      | -0.000420718 | -0.000397293 | -0.000076879 |
| 22     | 1      | -0.000002080 | 0.000260790  | 0.000059060  |

-----  
Cartesian Forces: Max 0.000623643 RMS 0.000193303

GradGradGradGradGradGradGradGradGradGradGradGradGradGradGradGradGradGradGradGrad

Berny optimization.

Using GEDIIS/GDIIS optimizer.

FormGI is forming the generalized inverse of G from B-inverse, IUseBI=4.

Internal Forces: Max 0.002616835 RMS 0.000410843

Search for a local minimum.

Step number 27 out of a maximum of 116

All quantities printed in internal units (Hartrees-Bohrs-Radians)

Mixed Optimization -- En-DIIS/RFO-DIIS

Swapping is turned off.

Update second derivatives using D2CorX and points 21 22 23 25 24  
26 27

DE= -2.09D-05 DEPred=-1.27D-05 R= 1.65D+00

TightC=F SS= 1.41D+00 RLast= 4.03D-02 DXNew= 1.0469D+00 1.2094D-01

Trust test= 1.65D+00 RLast= 4.03D-02 DXMaxT set to 6.23D-01

ITU= 1 0 -1 1 1 1 1 1 0 -1 1 1 1 1 1 1 1 1 1 1

ITU= 1 1 0 0 -1 0 0



|                 |         |         |         |         |         |
|-----------------|---------|---------|---------|---------|---------|
| Eigenvalues --- | 0.00045 | 0.00132 | 0.00429 | 0.00673 | 0.00826 |
| Eigenvalues --- | 0.01164 | 0.01614 | 0.01763 | 0.02005 | 0.02066 |
| Eigenvalues --- | 0.02277 | 0.02446 | 0.03066 | 0.03104 | 0.03683 |
| Eigenvalues --- | 0.04439 | 0.04835 | 0.05459 | 0.05988 | 0.06774 |
| Eigenvalues --- | 0.09039 | 0.09279 | 0.13768 | 0.14152 | 0.15345 |
| Eigenvalues --- | 0.15701 | 0.15910 | 0.15981 | 0.16002 | 0.16158 |
| Eigenvalues --- | 0.16694 | 0.17510 | 0.20770 | 0.22789 | 0.22856 |
| Eigenvalues --- | 0.24018 | 0.24851 | 0.26253 | 0.29751 | 0.33209 |
| Eigenvalues --- | 0.33875 | 0.33880 | 0.33965 | 0.34134 | 0.34221 |
| Eigenvalues --- | 0.34492 | 0.34782 | 0.36196 | 0.36316 | 0.36554 |
| Eigenvalues --- | 0.37204 | 0.43104 | 0.45039 | 0.46037 | 0.49674 |
| Eigenvalues --- | 0.53307 | 0.54650 | 0.58049 | 0.60960 | 2.14742 |

En-DIIS/RFO-DIIS IScMMF= 0 using points: 27 26

RFO step: Lambda=-1.45118871D-05.

DidBck=F Rises=F RFO-DIIS coefs: 1.74236 -0.74236

Iteration 1 RMS(Cart)= 0.01571792 RMS(Int)= 0.00019488

Iteration 2 RMS(Cart)= 0.00040363 RMS(Int)= 0.00002211

Iteration 3 RMS(Cart)= 0.00000022 RMS(Int)= 0.00002211

| Variable | Old X   | -DE/DX   | Delta X<br>(Linear) | Delta X<br>(Quad) | Delta X<br>(Total) | New X   |
|----------|---------|----------|---------------------|-------------------|--------------------|---------|
| R1       | 2.55996 | 0.00013  | 0.00028             | 0.00028           | 0.00053            | 2.56050 |
| R2       | 2.62607 | 0.00003  | -0.00033            | -0.00010          | -0.00043           | 2.62564 |
| R3       | 2.03323 | -0.00001 | 0.00001             | 0.00000           | 0.00001            | 2.03324 |
| R4       | 2.62999 | 0.00009  | -0.00027            | 0.00006           | -0.00021           | 2.62978 |
| R5       | 2.03118 | -0.00001 | -0.00003            | -0.00002          | -0.00005           | 2.03113 |
| R6       | 2.54635 | -0.00007 | -0.00064            | -0.00036          | -0.00099           | 2.54536 |
| R7       | 2.68650 | 0.00017  | 0.00000             | -0.00009          | -0.00009           | 2.68641 |
| R8       | 2.52904 | 0.00024  | -0.00052            | -0.00022          | -0.00072           | 2.52832 |
| R9       | 2.02800 | 0.00011  | 0.00021             | 0.00061           | 0.00082            | 2.02882 |
| R10      | 2.77562 | 0.00024  | 0.00047             | 0.00103           | 0.00150            | 2.77712 |
| R11      | 2.90762 | -0.00059 | 0.00015             | -0.00026          | -0.00011           | 2.90751 |
| R12      | 2.05946 | 0.00009  | -0.00032            | 0.00008           | -0.00024           | 2.05922 |
| R13      | 2.06320 | -0.00013 | 0.00010             | -0.00028          | -0.00018           | 2.06301 |
| R14      | 2.06757 | 0.00005  | 0.00018             | -0.00001          | 0.00017            | 2.06774 |
| R15      | 2.06642 | -0.00041 | -0.00032            | 0.00014           | -0.00018           | 2.06624 |
| R16      | 2.68820 | -0.00040 | 0.00056             | -0.00110          | -0.00055           | 2.68766 |
| R17      | 5.26513 | -0.00014 | -0.00400            | -0.01113          | -0.01513           | 5.25000 |
| R18      | 2.50730 | 0.00007  | -0.00023            | 0.00009           | -0.00014           | 2.50716 |
| R19      | 2.05014 | 0.00002  | -0.00022            | -0.00012          | -0.00034           | 2.04980 |
| R20      | 2.04364 | -0.00003 | -0.00011            | -0.00006          | -0.00018           | 2.04346 |
| R21      | 2.04769 | -0.00003 | -0.00010            | -0.00007          | -0.00017           | 2.04752 |
| R22      | 1.81784 | 0.00025  | -0.00055            | 0.00020           | -0.00034           | 1.81750 |
| A1       | 1.87519 | -0.00003 | -0.00006            | 0.00000           | -0.00007           | 1.87512 |
| A2       | 2.27887 | -0.00003 | -0.00003            | -0.00026          | -0.00028           | 2.27859 |

|     |          |          |          |          |          |          |
|-----|----------|----------|----------|----------|----------|----------|
| A3  | 2.12899  | 0.00005  | 0.00007  | 0.00027  | 0.00034  | 2.12933  |
| A4  | 1.86824  | 0.00004  | -0.00022 | -0.00011 | -0.00034 | 1.86790  |
| A5  | 2.28498  | -0.00002 | -0.00011 | -0.00049 | -0.00060 | 2.28438  |
| A6  | 2.12935  | -0.00003 | 0.00027  | 0.00062  | 0.00088  | 2.13023  |
| A7  | 1.89223  | -0.00002 | 0.00014  | 0.00007  | 0.00023  | 1.89246  |
| A8  | 2.23174  | -0.00006 | 0.00065  | 0.00116  | 0.00178  | 2.23352  |
| A9  | 2.15060  | 0.00008  | -0.00042 | -0.00037 | -0.00083 | 2.14978  |
| A10 | 1.89286  | 0.00005  | 0.00022  | 0.00030  | 0.00047  | 1.89333  |
| A11 | 2.18903  | 0.00004  | 0.00011  | 0.00033  | 0.00030  | 2.18932  |
| A12 | 2.19805  | -0.00007 | 0.00045  | 0.00058  | 0.00089  | 2.19893  |
| A13 | 1.89454  | -0.00004 | 0.00001  | 0.00006  | 0.00009  | 1.89463  |
| A14 | 2.20134  | 0.00025  | 0.00037  | 0.00067  | 0.00102  | 2.20236  |
| A15 | 2.16891  | -0.00023 | -0.00109 | -0.00081 | -0.00192 | 2.16698  |
| A16 | 1.94305  | -0.00110 | -0.00175 | -0.00151 | -0.00326 | 1.93979  |
| A17 | 1.87523  | 0.00020  | 0.00006  | -0.00072 | -0.00066 | 1.87456  |
| A18 | 1.89915  | 0.00042  | 0.00043  | 0.00025  | 0.00068  | 1.89983  |
| A19 | 1.91378  | 0.00008  | -0.00045 | 0.00000  | -0.00046 | 1.91332  |
| A20 | 1.93913  | 0.00052  | 0.00142  | 0.00117  | 0.00259  | 1.94172  |
| A21 | 1.89168  | -0.00011 | 0.00031  | 0.00081  | 0.00112  | 1.89280  |
| A22 | 1.91917  | 0.00045  | 0.00014  | 0.00080  | 0.00094  | 1.92011  |
| A23 | 1.90269  | -0.00198 | -0.00079 | -0.00180 | -0.00259 | 1.90009  |
| A24 | 1.90277  | 0.00051  | 0.00051  | 0.00000  | 0.00051  | 1.90328  |
| A25 | 1.90280  | 0.00048  | -0.00089 | 0.00087  | -0.00002 | 1.90278  |
| A26 | 1.87692  | -0.00022 | 0.00151  | 0.00019  | 0.00170  | 1.87862  |
| A27 | 1.95932  | 0.00080  | -0.00045 | 0.00000  | -0.00044 | 1.95888  |
| A28 | 2.57497  | -0.00262 | 0.00110  | 0.00343  | 0.00453  | 2.57950  |
| A29 | 2.15632  | -0.00017 | 0.00008  | 0.00068  | 0.00077  | 2.15709  |
| A30 | 1.95496  | -0.00015 | 0.00006  | -0.00057 | -0.00051 | 1.95445  |
| A31 | 2.17110  | 0.00032  | -0.00011 | -0.00014 | -0.00026 | 2.17084  |
| A32 | 2.08500  | 0.00001  | 0.00027  | -0.00020 | 0.00007  | 2.08507  |
| A33 | 2.14726  | -0.00006 | 0.00008  | 0.00041  | 0.00049  | 2.14775  |
| A34 | 2.05092  | 0.00005  | -0.00035 | -0.00021 | -0.00056 | 2.05036  |
| A35 | 1.89379  | -0.00012 | 0.00060  | -0.00142 | -0.00082 | 1.89297  |
| D1  | 0.00495  | 0.00004  | 0.00097  | -0.00082 | 0.00015  | 0.00510  |
| D2  | 3.10837  | -0.00002 | -0.00128 | -0.00028 | -0.00156 | 3.10681  |
| D3  | -3.11892 | -0.00002 | 0.00246  | -0.00123 | 0.00123  | -3.11770 |
| D4  | -0.01550 | -0.00008 | 0.00020  | -0.00069 | -0.00048 | -0.01598 |
| D5  | -0.03745 | 0.00003  | 0.00009  | 0.00371  | 0.00379  | -0.03365 |
| D6  | -2.98005 | 0.00016  | 0.00406  | 0.00424  | 0.00831  | -2.97175 |
| D7  | 3.08828  | 0.00008  | -0.00124 | 0.00407  | 0.00282  | 3.09110  |
| D8  | 0.14567  | 0.00021  | 0.00273  | 0.00460  | 0.00734  | 0.15300  |
| D9  | 0.02899  | -0.00009 | -0.00169 | -0.00232 | -0.00401 | 0.02498  |
| D10 | 3.03193  | -0.00008 | 0.00119  | 0.00451  | 0.00571  | 3.03764  |
| D11 | -3.07860 | -0.00004 | 0.00032  | -0.00277 | -0.00245 | -3.08105 |

|     |          |          |          |          |          |          |
|-----|----------|----------|----------|----------|----------|----------|
| D12 | -0.07565 | -0.00003 | 0.00320  | 0.00406  | 0.00727  | -0.06838 |
| D13 | -0.05272 | 0.00011  | 0.00175  | 0.00466  | 0.00641  | -0.04631 |
| D14 | -3.11180 | -0.00011 | -0.00753 | -0.01070 | -0.01823 | -3.13003 |
| D15 | -3.06352 | 0.00012  | -0.00107 | -0.00194 | -0.00299 | -3.06652 |
| D16 | 0.16058  | -0.00010 | -0.01035 | -0.01729 | -0.02763 | 0.13295  |
| D17 | 0.58428  | 0.00007  | -0.00739 | -0.01281 | -0.02020 | 0.56407  |
| D18 | -2.51578 | 0.00008  | -0.00802 | -0.01222 | -0.02025 | -2.53602 |
| D19 | -2.71471 | 0.00007  | -0.00406 | -0.00500 | -0.00905 | -2.72376 |
| D20 | 0.46842  | 0.00008  | -0.00470 | -0.00441 | -0.00910 | 0.45932  |
| D21 | 0.05581  | -0.00008 | -0.00115 | -0.00517 | -0.00632 | 0.04950  |
| D22 | 3.00298  | -0.00014 | -0.00483 | -0.00549 | -0.01031 | 2.99267  |
| D23 | 3.11436  | 0.00014  | 0.00818  | 0.01027  | 0.01846  | 3.13282  |
| D24 | -0.22166 | 0.00008  | 0.00450  | 0.00996  | 0.01447  | -0.20719 |
| D25 | 1.21554  | 0.00039  | -0.00143 | 0.00209  | 0.00066  | 1.21620  |
| D26 | -2.97197 | -0.00004 | -0.00298 | 0.00074  | -0.00223 | -2.97421 |
| D27 | -0.92733 | 0.00016  | -0.00235 | 0.00144  | -0.00091 | -0.92824 |
| D28 | -1.69729 | 0.00050  | 0.00298  | 0.00257  | 0.00556  | -1.69174 |
| D29 | 0.39838  | 0.00008  | 0.00143  | 0.00123  | 0.00266  | 0.40104  |
| D30 | 2.44302  | 0.00027  | 0.00206  | 0.00193  | 0.00398  | 2.44701  |
| D31 | -1.13793 | -0.00001 | 0.00287  | -0.00653 | -0.00365 | -1.14159 |
| D32 | 0.94719  | -0.00036 | 0.00139  | -0.00609 | -0.00470 | 0.94249  |
| D33 | 3.09156  | -0.00031 | 0.00066  | -0.00722 | -0.00656 | 3.08500  |
| D34 | 3.07252  | 0.00037  | 0.00418  | -0.00470 | -0.00052 | 3.07201  |
| D35 | -1.12554 | 0.00002  | 0.00270  | -0.00426 | -0.00156 | -1.12711 |
| D36 | 1.01883  | 0.00007  | 0.00197  | -0.00540 | -0.00342 | 1.01541  |
| D37 | 0.98180  | 0.00013  | 0.00319  | -0.00645 | -0.00325 | 0.97855  |
| D38 | 3.06693  | -0.00022 | 0.00171  | -0.00601 | -0.00430 | 3.06262  |
| D39 | -1.07189 | -0.00017 | 0.00099  | -0.00714 | -0.00616 | -1.07805 |
| D40 | 0.04111  | 0.00009  | 0.00951  | 0.04555  | 0.05507  | 0.09617  |
| D41 | 2.13637  | -0.00026 | 0.00868  | 0.04596  | 0.05465  | 2.19101  |
| D42 | -2.06901 | 0.00029  | 0.00970  | 0.04678  | 0.05647  | -2.01254 |
| D43 | -1.75860 | 0.00072  | 0.00395  | -0.01182 | -0.00787 | -1.76646 |
| D44 | 2.44440  | 0.00002  | 0.00264  | -0.01289 | -0.01024 | 2.43416  |
| D45 | 0.35147  | -0.00092 | 0.00302  | -0.01409 | -0.01107 | 0.34041  |
| D46 | -3.08995 | -0.00001 | -0.00015 | -0.00028 | -0.00044 | -3.09039 |
| D47 | 0.04811  | 0.00004  | -0.00063 | 0.00040  | -0.00023 | 0.04788  |
| D48 | 0.00497  | -0.00004 | 0.00057  | -0.00096 | -0.00039 | 0.00458  |
| D49 | -3.14016 | 0.00001  | 0.00009  | -0.00027 | -0.00018 | -3.14034 |

| Item                 | Value    | Threshold | Converged? |
|----------------------|----------|-----------|------------|
| Maximum Force        | 0.002617 | 0.000450  | NO         |
| RMS Force            | 0.000411 | 0.000300  | NO         |
| Maximum Displacement | 0.086906 | 0.001800  | NO         |
| RMS Displacement     | 0.015648 | 0.001200  | NO         |

Predicted change in Energy=-1.579826D-05

GradGradGradGradGradGradGradGradGradGradGradGradGradGradGradGradGradGradGrad

Input orientation:

---

| Center<br>Number | Atomic<br>Number | Atomic<br>Type | Coordinates (Angstroms) |           |           |
|------------------|------------------|----------------|-------------------------|-----------|-----------|
|                  |                  |                | X                       | Y         | Z         |
| 1                | 6                | 0              | -0.457037               | -2.004512 | -1.308246 |
| 2                | 6                | 0              | -1.745766               | -1.619536 | -1.472183 |
| 3                | 7                | 0              | -2.097078               | -0.881966 | -0.345607 |
| 4                | 6                | 0              | -1.022800               | -0.801854 | 0.462956  |
| 5                | 7                | 0              | -0.027098               | -1.509016 | -0.083441 |
| 6                | 6                | 0              | 1.354929                | -1.510359 | 0.416251  |
| 7                | 6                | 0              | 2.232056                | -0.524539 | -0.374989 |
| 8                | 1                | 0              | 0.192099                | -2.568826 | -1.954642 |
| 9                | 1                | 0              | -2.427009               | -1.771954 | -2.289452 |
| 10               | 1                | 0              | 1.323022                | -1.212311 | 1.463903  |
| 11               | 1                | 0              | 1.750122                | -2.526349 | 0.357975  |
| 12               | 1                | 0              | 2.326368                | -0.857204 | -1.413121 |
| 13               | 1                | 0              | 1.759409                | 0.461292  | -0.358227 |
| 14               | 35               | 0              | -0.291217               | 2.069008  | 0.605337  |
| 15               | 1                | 0              | -0.994379               | -0.302032 | 1.412691  |
| 16               | 6                | 0              | -3.304678               | -0.170710 | -0.107420 |
| 17               | 6                | 0              | -4.485367               | -0.550396 | -0.578614 |
| 18               | 1                | 0              | -3.136446               | 0.734253  | 0.466453  |
| 19               | 1                | 0              | -5.354304               | 0.066922  | -0.396428 |
| 20               | 1                | 0              | -4.629248               | -1.460290 | -1.149022 |
| 21               | 8                | 0              | 3.536403                | -0.505748 | 0.191681  |
| 22               | 1                | 0              | 3.618368                | 0.279249  | 0.741300  |

---

Distance matrix (angstroms):

|    |   | 1        | 2        | 3        | 4        | 5        |
|----|---|----------|----------|----------|----------|----------|
| 1  | C | 0.000000 |          |          |          |          |
| 2  | C | 1.354956 | 0.000000 |          |          |          |
| 3  | N | 2.208283 | 1.391618 | 0.000000 |          |          |
| 4  | C | 2.214414 | 2.221721 | 1.346946 | 0.000000 |          |
| 5  | N | 1.389428 | 2.212384 | 2.178702 | 1.337928 | 0.000000 |
| 6  | C | 2.549764 | 3.632136 | 3.590495 | 2.481483 | 1.469589 |
| 7  | C | 3.208194 | 4.269183 | 4.343964 | 3.372409 | 2.481526 |
| 8  | H | 1.075944 | 2.211163 | 3.267234 | 3.231555 | 2.161628 |
| 9  | H | 2.213060 | 1.074826 | 2.163207 | 3.238618 | 3.270351 |
| 10 | H | 3.388362 | 4.266602 | 3.883366 | 2.583263 | 2.074881 |
| 11 | H | 2.814277 | 4.048830 | 4.242637 | 3.267109 | 2.094832 |
| 12 | H | 3.012417 | 4.143298 | 4.550502 | 3.839226 | 2.780595 |

|    |    |          |          |          |          |          |
|----|----|----------|----------|----------|----------|----------|
| 13 | H  | 3.448965 | 4.225755 | 4.083748 | 3.163948 | 2.673804 |
| 14 | Br | 4.503650 | 4.476289 | 3.587991 | 2.966031 | 3.653277 |
| 15 | H  | 3.254331 | 3.259279 | 2.154967 | 1.073605 | 2.151942 |
| 16 | C  | 3.593587 | 2.528217 | 1.421589 | 2.435290 | 3.540363 |
| 17 | C  | 4.344452 | 3.073587 | 2.422428 | 3.624565 | 4.586973 |
| 18 | H  | 4.222514 | 3.351510 | 2.086119 | 2.612879 | 3.873330 |
| 19 | H  | 5.394948 | 4.125885 | 3.393006 | 4.500582 | 5.564231 |
| 20 | H  | 4.210567 | 2.905901 | 2.718790 | 4.004807 | 4.724153 |
| 21 | O  | 4.521464 | 5.648918 | 5.671536 | 4.576855 | 3.712247 |
| 22 | H  | 5.101483 | 6.105639 | 5.932631 | 4.773541 | 4.143369 |
|    |    | 6        | 7        | 8        | 9        | 10       |
| 6  | C  | 0.000000 |          |          |          |          |
| 7  | C  | 1.538588 | 0.000000 |          |          |          |
| 8  | H  | 2.844935 | 3.291784 | 0.000000 |          |          |
| 9  | H  | 4.657501 | 5.189229 | 2.758048 | 0.000000 |          |
| 10 | H  | 1.089691 | 2.163538 | 3.847801 | 5.335129 | 0.000000 |
| 11 | H  | 1.091700 | 2.185576 | 2.788805 | 5.002639 | 1.769799 |
| 12 | H  | 2.171844 | 1.094203 | 2.788906 | 4.919279 | 3.067584 |
| 13 | H  | 2.156578 | 1.093407 | 3.766513 | 5.122803 | 2.512278 |
| 14 | Br | 3.944290 | 3.748925 | 5.319455 | 5.262547 | 3.756322 |
| 15 | H  | 2.823508 | 3.695294 | 4.229068 | 4.233080 | 2.490296 |
| 16 | C  | 4.876559 | 5.554477 | 4.625001 | 2.845268 | 4.996958 |
| 17 | C  | 6.001696 | 6.720559 | 5.276950 | 2.942110 | 6.192527 |
| 18 | H  | 5.021280 | 5.577939 | 5.277428 | 3.792016 | 4.966978 |
| 19 | H  | 6.939890 | 7.609411 | 6.335438 | 3.941327 | 7.048683 |
| 20 | H  | 6.185706 | 6.967945 | 5.012311 | 2.499515 | 6.505258 |
| 21 | O  | 2.412157 | 1.422247 | 4.477428 | 6.581913 | 2.648931 |
| 22 | H  | 2.903706 | 1.952955 | 5.207586 | 7.066786 | 2.831169 |
|    |    | 11       | 12       | 13       | 14       | 15       |
| 11 | H  | 0.000000 |          |          |          |          |
| 12 | H  | 2.500977 | 0.000000 |          |          |          |
| 13 | H  | 3.072301 | 1.781201 | 0.000000 |          |          |
| 14 | Br | 5.034438 | 4.414595 | 2.778179 | 0.000000 |          |
| 15 | H  | 3.686773 | 4.395542 | 3.361869 | 2.601555 | 0.000000 |
| 16 | C  | 5.596126 | 5.821065 | 5.109531 | 3.821689 | 2.768657 |
| 17 | C  | 6.607792 | 6.869518 | 6.330033 | 5.084675 | 4.026659 |
| 18 | H  | 5.875529 | 5.992318 | 4.972324 | 3.145821 | 2.560801 |
| 19 | H  | 7.600463 | 7.802588 | 7.124739 | 5.535949 | 4.734763 |
| 20 | H  | 6.641075 | 6.986705 | 6.718093 | 5.861078 | 4.595238 |
| 21 | O  | 2.702089 | 2.040367 | 2.096490 | 4.631539 | 4.696845 |
| 22 | H  | 3.392442 | 2.757230 | 2.167447 | 4.301928 | 4.697455 |
|    |    | 16       | 17       | 18       | 19       | 20       |
| 16 | C  | 0.000000 |          |          |          |          |
| 17 | C  | 1.326731 | 0.000000 |          |          |          |

18 H 1.084707 2.135902 0.000000  
 19 H 2.083497 1.081352 2.471596 0.000000  
 20 H 2.121895 1.083501 3.107127 1.850535 0.000000  
 21 O 6.855807 8.058793 6.792644 8.928521 8.329855  
 22 H 6.989374 8.252334 6.775698 9.047007 8.638430

21 22

21 O 0.000000  
 22 H 0.961779 0.000000

Stoichiometry C7H11BrN2O

Framework group C1[X(C7H11BrN2O)]

Deg. of freedom 60

Full point group C1 NOp 1

Largest Abelian subgroup C1 NOp 1

Largest concise Abelian subgroup C1 NOp 1

Standard orientation:

| Center Number | Atomic Number | Atomic Type | Coordinates (Angstroms) |           |           |
|---------------|---------------|-------------|-------------------------|-----------|-----------|
|               |               |             | X                       | Y         | Z         |
| 1             | 6             | 0           | -0.356525               | -2.292534 | -0.545360 |
| 2             | 6             | 0           | -1.621397               | -1.832781 | -0.702299 |
| 3             | 7             | 0           | -1.763603               | -0.735333 | 0.141495  |
| 4             | 6             | 0           | -0.589996               | -0.525118 | 0.768169  |
| 5             | 7             | 0           | 0.267225                | -1.482335 | 0.395397  |
| 6             | 6             | 0           | 1.698262                | -1.484369 | 0.729793  |
| 7             | 6             | 0           | 2.539210                | -0.916608 | -0.426799 |
| 8             | 1             | 0           | 0.156331                | -3.107226 | -1.025895 |
| 9             | 1             | 0           | -2.413369               | -2.159791 | -1.351217 |
| 10            | 1             | 0           | 1.826925                | -0.862638 | 1.615414  |
| 11            | 1             | 0           | 2.001481                | -2.503740 | 0.976269  |
| 12            | 1             | 0           | 2.470748                | -1.575094 | -1.297998 |
| 13            | 1             | 0           | 2.151653                | 0.070122  | -0.694575 |
| 14            | 35            | 0           | 0.376986                | 2.131436  | -0.129050 |
| 15            | 1             | 0           | -0.398656               | 0.247454  | 1.488689  |
| 16            | 6             | 0           | -2.870172               | 0.151117  | 0.244586  |
| 17            | 6             | 0           | -4.128410               | -0.219127 | 0.044659  |
| 18            | 1             | 0           | -2.557933               | 1.166532  | 0.463739  |
| 19            | 1             | 0           | -4.914956               | 0.521322  | 0.093692  |
| 20            | 1             | 0           | -4.416517               | -1.240911 | -0.171966 |
| 21            | 8             | 0           | 3.903800                | -0.869012 | -0.028783 |
| 22            | 1             | 0           | 4.118196                | 0.036016  | 0.216122  |

Rotational constants (GHZ): 0.8192036 0.5708585 0.3557306

Standard basis: 6-311++G(d,p) (5D, 7F)

There are 358 symmetry adapted cartesian basis functions of A symmetry.  
 There are 345 symmetry adapted basis functions of A symmetry.  
 345 basis functions, 553 primitive gaussians, 358 cartesian basis functions  
 55 alpha electrons 55 beta electrons  
 nuclear repulsion energy 865.6040445847 Hartrees.  
 NAToms= 22 NActive= 22 NUniq= 22 SFac= 1.00D+00 NATFMM= 60 NAOKFM=F  
 Big=F  
 Integral buffers will be 131072 words long.  
 Raffenetti 2 integral format.  
 Two-electron integral symmetry is turned on.  
 One-electron integrals computed using PRISM.  
 NBasis= 345 RedAO= T EigKep= 6.80D-06 NBF= 345  
 NBsUse= 345 1.00D-06 EigRej= -1.00D+00 NBFU= 345  
 Initial guess from the checkpoint file: ". "  
 B after Tr= 0.000000 0.000000 0.000000  
 Rot= 0.999963 0.000857 0.000024 0.008567 Ang= 0.99 deg.  
 ExpMin= 3.50D-02 ExpMax= 4.40D+05 ExpMxC= 1.51D+04 IAcc=3 IRadAn= 5 AccDes=  
 0.00D+00  
 Harris functional with IExCor= 402 and IRadAn= 5 diagonalized for initial guess.  
 HarFok: IExCor= 402 AccDes= 0.00D+00 IRadAn= 5 IDoV= 1 UseB2=F ITyADJ=14  
 ICtDFT= 3500011 ScaDFX= 1.000000 1.000000 1.000000 1.000000  
 FoFCou: FMM=F IPFlag= 0 FMFlag= 100000 FMFlg1= 0  
 NFxFlg= 0 DoJE=T BraDBF=F KetDBF=T FulRan=T  
 wScrn= 0.000000 ICntrl= 500 IOpCl= 0 I1Cent= 20000004 NGrid=  
 0  
 NMat0= 1 NMatS0= 1 NMatT0= 0 NMatD0= 1 NMtDS0= 0  
 NMtDT0= 0  
 Petite list used in FoFCou.  
 Keep R1 ints in memory in canonical form, NReq=1804729152.  
 Requested convergence on RMS density matrix=1.00D-08 within 128 cycles.  
 Requested convergence on MAX density matrix=1.00D-06.  
 Requested convergence on energy=1.00D-06.  
 No special actions if energy rises.  
 SCF Done: E(RB3LYP) = -3032.33845724 A.U. after 11 cycles  
 NFock= 11 Conv=0.98D-08 -V/T= 2.0017  
 Calling FoFJK, ICntrl= 2127 FMM=F ISym2X=0 I1Cent= 0 IOpClX= 0 NMat=1 NMatS=1  
 NMatT=0.

\*\*\*\*\* Axes restored to original set \*\*\*\*\*

```

-----
Center      Atomic      Forces (Hartrees/Bohr)
Number      Number      X           Y           Z
-----
1           6           0.000063868 0.000222337 -0.000198165
2           6           0.000058977 0.000009523 -0.000134159
  
```

|    |    |              |              |              |
|----|----|--------------|--------------|--------------|
| 3  | 7  | 0.000067847  | -0.000132226 | 0.000140174  |
| 4  | 6  | -0.000233580 | -0.000077381 | -0.000023303 |
| 5  | 7  | 0.000199483  | 0.000126896  | 0.000079523  |
| 6  | 6  | 0.000297608  | 0.000131845  | -0.000182709 |
| 7  | 6  | 0.000603216  | -0.000019802 | 0.000213783  |
| 8  | 1  | -0.000102932 | -0.000202231 | 0.000095851  |
| 9  | 1  | -0.000042600 | -0.000018617 | 0.000026803  |
| 10 | 1  | -0.000090153 | 0.000022554  | 0.000128137  |
| 11 | 1  | -0.000061328 | 0.000088778  | -0.000059422 |
| 12 | 1  | 0.000078013  | -0.000121774 | -0.000007151 |
| 13 | 1  | -0.000222296 | -0.000000976 | -0.000224943 |
| 14 | 35 | -0.000097966 | -0.000444929 | 0.000220689  |
| 15 | 1  | 0.000135611  | 0.000233227  | 0.000073451  |
| 16 | 6  | -0.000316503 | 0.000327583  | -0.000008620 |
| 17 | 6  | -0.000111519 | -0.000155566 | -0.000147352 |
| 18 | 1  | 0.000149668  | 0.000109432  | -0.000017590 |
| 19 | 1  | 0.000011105  | 0.000046055  | 0.000058145  |
| 20 | 1  | 0.000065850  | -0.000022852 | 0.000010665  |
| 21 | 8  | -0.000462102 | -0.000573456 | -0.000286365 |
| 22 | 1  | 0.000009733  | 0.000451580  | 0.000242559  |

-----  
Cartesian Forces: Max 0.000603216 RMS 0.000197957

GradGradGradGradGradGradGradGradGradGradGradGradGradGradGradGradGradGradGradGrad  
Berny optimization.

Using GEDIIS/GDIIS optimizer.

FormGI is forming the generalized inverse of G from B-inverse, IUseBI=4.

Internal Forces: Max 0.002607516 RMS 0.000388746

Search for a local minimum.

Step number 28 out of a maximum of 116

All quantities printed in internal units (Hartrees-Bohrs-Radians)

Mixed Optimization -- En-DIIS/RFO-DIIS

Swapping is turned off.

Update second derivatives using D2CorX and points 21 22 23 25 24  
26 27 28

DE= -3.61D-05 DEPred=-1.58D-05 R= 2.28D+00

TightC=F SS= 1.41D+00 RLast= 1.14D-01 DXNew= 1.0469D+00 3.4335D-01

Trust test= 2.28D+00 RLast= 1.14D-01 DXMaxT set to 6.23D-01

ITU= 1 1 0-1 1 1 1 1 1 0-1 1 1 1 1 1 1 1 1

ITU= 1 1 1 0 0-1 0 0

|                 |         |         |         |         |         |
|-----------------|---------|---------|---------|---------|---------|
| Eigenvalues --- | 0.00045 | 0.00125 | 0.00468 | 0.00627 | 0.00726 |
| Eigenvalues --- | 0.01112 | 0.01632 | 0.01744 | 0.02002 | 0.02070 |
| Eigenvalues --- | 0.02304 | 0.02440 | 0.03066 | 0.03109 | 0.03667 |
| Eigenvalues --- | 0.04417 | 0.04857 | 0.05437 | 0.05895 | 0.06891 |



|                 |         |         |         |         |         |
|-----------------|---------|---------|---------|---------|---------|
| Eigenvalues --- | 0.08989 | 0.09231 | 0.13667 | 0.14153 | 0.14926 |
| Eigenvalues --- | 0.15505 | 0.15961 | 0.15977 | 0.16000 | 0.16064 |
| Eigenvalues --- | 0.16532 | 0.17582 | 0.20667 | 0.22842 | 0.22904 |
| Eigenvalues --- | 0.24109 | 0.24829 | 0.26977 | 0.29711 | 0.33440 |
| Eigenvalues --- | 0.33860 | 0.33878 | 0.34010 | 0.34044 | 0.34273 |
| Eigenvalues --- | 0.34495 | 0.34834 | 0.35991 | 0.36313 | 0.36417 |
| Eigenvalues --- | 0.37245 | 0.43074 | 0.45092 | 0.46079 | 0.50223 |
| Eigenvalues --- | 0.53320 | 0.54617 | 0.59512 | 0.62180 | 1.55100 |

En-DIIS/RFO-DIIS IScMMF= 0 using points: 28 27 26

RFO step: Lambda=-1.56152575D-05.

DidBck=F Rises=F RFO-DIIS coefs: 1.44368 0.14589 -0.58957

Iteration 1 RMS(Cart)= 0.01359454 RMS(Int)= 0.00013736

Iteration 2 RMS(Cart)= 0.00025468 RMS(Int)= 0.00003910

Iteration 3 RMS(Cart)= 0.00000009 RMS(Int)= 0.00003910

| Variable | Old X   | -DE/DX   | Delta X<br>(Linear) | Delta X<br>(Quad) | Delta X<br>(Total) | New X   |
|----------|---------|----------|---------------------|-------------------|--------------------|---------|
| R1       | 2.56050 | 0.00005  | 0.00046             | -0.00003          | 0.00038            | 2.56088 |
| R2       | 2.62564 | 0.00010  | -0.00045            | 0.00022           | -0.00025           | 2.62539 |
| R3       | 2.03324 | -0.00001 | 0.00001             | -0.00001          | 0.00000            | 2.03324 |
| R4       | 2.62978 | 0.00012  | -0.00031            | 0.00025           | -0.00007           | 2.62971 |
| R5       | 2.03113 | 0.00001  | -0.00005            | 0.00003           | -0.00002           | 2.03111 |
| R6       | 2.54536 | 0.00008  | -0.00095            | 0.00020           | -0.00072           | 2.54464 |
| R7       | 2.68641 | 0.00029  | -0.00004            | 0.00084           | 0.00080            | 2.68722 |
| R8       | 2.52832 | 0.00026  | -0.00073            | 0.00019           | -0.00051           | 2.52781 |
| R9       | 2.02882 | 0.00018  | 0.00053             | 0.00057           | 0.00109            | 2.02991 |
| R10      | 2.77712 | 0.00006  | 0.00104             | 0.00027           | 0.00131            | 2.77843 |
| R11      | 2.90751 | -0.00056 | 0.00007             | -0.00021          | -0.00013           | 2.90738 |
| R12      | 2.05922 | 0.00013  | -0.00036            | 0.00031           | -0.00005           | 2.05917 |
| R13      | 2.06301 | -0.00011 | 0.00000             | -0.00020          | -0.00020           | 2.06281 |
| R14      | 2.06774 | 0.00005  | 0.00022             | -0.00005          | 0.00016            | 2.06791 |
| R15      | 2.06624 | -0.00025 | -0.00033            | 0.00051           | 0.00018            | 2.06642 |
| R16      | 2.68766 | -0.00044 | 0.00020             | -0.00088          | -0.00068           | 2.68698 |
| R17      | 5.25000 | -0.00010 | -0.00989            | -0.00483          | -0.01473           | 5.23527 |
| R18      | 2.50716 | 0.00010  | -0.00025            | 0.00012           | -0.00013           | 2.50703 |
| R19      | 2.04980 | 0.00010  | -0.00033            | 0.00030           | -0.00002           | 2.04978 |
| R20      | 2.04346 | 0.00002  | -0.00017            | 0.00010           | -0.00006           | 2.04339 |
| R21      | 2.04752 | 0.00001  | -0.00016            | 0.00004           | -0.00012           | 2.04740 |
| R22      | 1.81750 | 0.00051  | -0.00059            | 0.00083           | 0.00024            | 1.81774 |
| A1       | 1.87512 | 0.00001  | -0.00008            | 0.00005           | -0.00005           | 1.87507 |
| A2       | 2.27859 | -0.00003 | -0.00015            | -0.00008          | -0.00022           | 2.27837 |
| A3       | 2.12933 | 0.00002  | 0.00020             | 0.00010           | 0.00031            | 2.12964 |
| A4       | 1.86790 | 0.00006  | -0.00033            | 0.00006           | -0.00028           | 1.86762 |
| A5       | 2.28438 | 0.00000  | -0.00036            | 0.00005           | -0.00031           | 2.28407 |
| A6       | 2.13023 | -0.00006 | 0.00060             | 0.00001           | 0.00061            | 2.13084 |

|     |          |          |          |          |          |          |
|-----|----------|----------|----------|----------|----------|----------|
| A7  | 1.89246  | -0.00004 | 0.00021  | -0.00005 | 0.00020  | 1.89266  |
| A8  | 2.23352  | -0.00013 | 0.00131  | -0.00035 | 0.00091  | 2.23443  |
| A9  | 2.14978  | 0.00017  | -0.00070 | 0.00032  | -0.00043 | 2.14935  |
| A10 | 1.89333  | 0.00002  | 0.00038  | 0.00003  | 0.00031  | 1.89364  |
| A11 | 2.18932  | 0.00007  | 0.00022  | 0.00044  | 0.00040  | 2.18972  |
| A12 | 2.19893  | -0.00008 | 0.00075  | -0.00016 | 0.00034  | 2.19927  |
| A13 | 1.89463  | -0.00005 | 0.00005  | -0.00002 | 0.00008  | 1.89472  |
| A14 | 2.20236  | 0.00023  | 0.00075  | 0.00010  | 0.00081  | 2.20317  |
| A15 | 2.16698  | -0.00020 | -0.00172 | 0.00041  | -0.00135 | 2.16563  |
| A16 | 1.93979  | -0.00080 | -0.00284 | 0.00074  | -0.00210 | 1.93768  |
| A17 | 1.87456  | 0.00009  | -0.00025 | -0.00074 | -0.00100 | 1.87357  |
| A18 | 1.89983  | 0.00034  | 0.00064  | -0.00068 | -0.00004 | 1.89979  |
| A19 | 1.91332  | 0.00003  | -0.00056 | 0.00051  | -0.00006 | 1.91326  |
| A20 | 1.94172  | 0.00042  | 0.00227  | -0.00004 | 0.00223  | 1.94395  |
| A21 | 1.89280  | -0.00008 | 0.00074  | 0.00018  | 0.00092  | 1.89372  |
| A22 | 1.92011  | 0.00039  | 0.00053  | -0.00013 | 0.00039  | 1.92050  |
| A23 | 1.90009  | -0.00184 | -0.00178 | -0.00102 | -0.00281 | 1.89729  |
| A24 | 1.90328  | 0.00045  | 0.00063  | -0.00050 | 0.00013  | 1.90341  |
| A25 | 1.90278  | 0.00051  | -0.00071 | 0.00206  | 0.00135  | 1.90413  |
| A26 | 1.87862  | -0.00022 | 0.00195  | -0.00019 | 0.00176  | 1.88038  |
| A27 | 1.95888  | 0.00075  | -0.00055 | -0.00020 | -0.00075 | 1.95813  |
| A28 | 2.57950  | -0.00261 | 0.00288  | 0.00055  | 0.00344  | 2.58294  |
| A29 | 2.15709  | -0.00018 | 0.00041  | -0.00045 | -0.00004 | 2.15705  |
| A30 | 1.95445  | -0.00003 | -0.00018 | -0.00012 | -0.00030 | 1.95415  |
| A31 | 2.17084  | 0.00021  | -0.00021 | 0.00059  | 0.00039  | 2.17123  |
| A32 | 2.08507  | -0.00003 | 0.00024  | -0.00026 | -0.00002 | 2.08505  |
| A33 | 2.14775  | -0.00006 | 0.00028  | -0.00011 | 0.00017  | 2.14792  |
| A34 | 2.05036  | 0.00009  | -0.00052 | 0.00038  | -0.00015 | 2.05022  |
| A35 | 1.89297  | -0.00011 | 0.00012  | -0.00074 | -0.00063 | 1.89234  |
| D1  | 0.00510  | 0.00006  | 0.00084  | -0.00049 | 0.00035  | 0.00545  |
| D2  | 3.10681  | 0.00004  | -0.00171 | 0.00276  | 0.00106  | 3.10787  |
| D3  | -3.11770 | -0.00006 | 0.00250  | -0.00501 | -0.00251 | -3.12021 |
| D4  | -0.01598 | -0.00008 | -0.00005 | -0.00176 | -0.00180 | -0.01778 |
| D5  | -0.03365 | -0.00002 | 0.00175  | 0.00113  | 0.00288  | -0.03077 |
| D6  | -2.97175 | 0.00008  | 0.00691  | -0.00149 | 0.00543  | -2.96631 |
| D7  | 3.09110  | 0.00008  | 0.00027  | 0.00518  | 0.00544  | 3.09653  |
| D8  | 0.15300  | 0.00018  | 0.00542  | 0.00256  | 0.00799  | 0.16100  |
| D9  | 0.02498  | -0.00007 | -0.00312 | -0.00031 | -0.00343 | 0.02154  |
| D10 | 3.03764  | -0.00008 | 0.00348  | -0.00091 | 0.00258  | 3.04022  |
| D11 | -3.08105 | -0.00005 | -0.00083 | -0.00321 | -0.00404 | -3.08509 |
| D12 | -0.06838 | -0.00007 | 0.00577  | -0.00381 | 0.00197  | -0.06641 |
| D13 | -0.04631 | 0.00005  | 0.00424  | 0.00102  | 0.00526  | -0.04105 |
| D14 | -3.13003 | -0.00008 | -0.01407 | -0.00453 | -0.01860 | 3.13455  |
| D15 | -3.06652 | 0.00009  | -0.00218 | 0.00165  | -0.00051 | -3.06703 |

|     |          |          |          |          |          |          |
|-----|----------|----------|----------|----------|----------|----------|
| D16 | 0.13295  | -0.00004 | -0.02048 | -0.00391 | -0.02437 | 0.10857  |
| D17 | 0.56407  | 0.00009  | -0.01483 | 0.00301  | -0.01182 | 0.55225  |
| D18 | -2.53602 | 0.00009  | -0.01535 | 0.00237  | -0.01299 | -2.54901 |
| D19 | -2.72376 | 0.00005  | -0.00724 | 0.00230  | -0.00494 | -2.72870 |
| D20 | 0.45932  | 0.00005  | -0.00777 | 0.00165  | -0.00611 | 0.45322  |
| D21 | 0.04950  | -0.00002 | -0.00371 | -0.00133 | -0.00504 | 0.04446  |
| D22 | 2.99267  | -0.00006 | -0.00841 | 0.00118  | -0.00722 | 2.98545  |
| D23 | 3.13282  | 0.00012  | 0.01468  | 0.00429  | 0.01898  | -3.13138 |
| D24 | -0.20719 | 0.00009  | 0.00999  | 0.00680  | 0.01680  | -0.19039 |
| D25 | 1.21620  | 0.00037  | -0.00084 | 0.00679  | 0.00596  | 1.22216  |
| D26 | -2.97421 | 0.00000  | -0.00335 | 0.00738  | 0.00404  | -2.97017 |
| D27 | -0.92824 | 0.00014  | -0.00227 | 0.00683  | 0.00456  | -0.92369 |
| D28 | -1.69174 | 0.00047  | 0.00484  | 0.00384  | 0.00868  | -1.68306 |
| D29 | 0.40104  | 0.00010  | 0.00232  | 0.00443  | 0.00676  | 0.40780  |
| D30 | 2.44701  | 0.00023  | 0.00340  | 0.00388  | 0.00728  | 2.45428  |
| D31 | -1.14159 | -0.00009 | 0.00066  | -0.00586 | -0.00520 | -1.14678 |
| D32 | 0.94249  | -0.00036 | -0.00098 | -0.00405 | -0.00503 | 0.93746  |
| D33 | 3.08500  | -0.00032 | -0.00238 | -0.00526 | -0.00764 | 3.07737  |
| D34 | 3.07201  | 0.00027  | 0.00309  | -0.00573 | -0.00263 | 3.06937  |
| D35 | -1.12711 | 0.00000  | 0.00145  | -0.00391 | -0.00246 | -1.12957 |
| D36 | 1.01541  | 0.00004  | 0.00005  | -0.00512 | -0.00507 | 1.01034  |
| D37 | 0.97855  | 0.00008  | 0.00109  | -0.00625 | -0.00516 | 0.97339  |
| D38 | 3.06262  | -0.00019 | -0.00055 | -0.00444 | -0.00499 | 3.05763  |
| D39 | -1.07805 | -0.00015 | -0.00195 | -0.00564 | -0.00760 | -1.08565 |
| D40 | 0.09617  | 0.00003  | 0.03199  | 0.01315  | 0.04514  | 0.14132  |
| D41 | 2.19101  | -0.00029 | 0.03114  | 0.01361  | 0.04475  | 2.23576  |
| D42 | -2.01254 | 0.00024  | 0.03276  | 0.01461  | 0.04736  | -1.96517 |
| D43 | -1.76646 | 0.00068  | -0.00035 | -0.00217 | -0.00252 | -1.76898 |
| D44 | 2.43416  | 0.00008  | -0.00245 | -0.00162 | -0.00407 | 2.43009  |
| D45 | 0.34041  | -0.00085 | -0.00251 | -0.00393 | -0.00644 | 0.33397  |
| D46 | -3.09039 | -0.00003 | -0.00031 | -0.00105 | -0.00137 | -3.09175 |
| D47 | 0.04788  | 0.00002  | -0.00060 | -0.00006 | -0.00067 | 0.04721  |
| D48 | 0.00458  | -0.00004 | 0.00028  | -0.00035 | -0.00007 | 0.00451  |
| D49 | -3.14034 | 0.00001  | -0.00001 | 0.00064  | 0.00063  | -3.13971 |

| Item                 | Value    | Threshold | Converged? |
|----------------------|----------|-----------|------------|
| Maximum Force        | 0.002608 | 0.000450  | NO         |
| RMS Force            | 0.000389 | 0.000300  | NO         |
| Maximum Displacement | 0.079248 | 0.001800  | NO         |
| RMS Displacement     | 0.013519 | 0.001200  | NO         |

Predicted change in Energy=-1.624585D-05

GradGradGradGradGradGradGradGradGradGradGradGradGradGradGradGradGradGrad

Input orientation:

-----

| Center<br>Number | Atomic<br>Number | Atomic<br>Type | Coordinates (Angstroms) |           |           |
|------------------|------------------|----------------|-------------------------|-----------|-----------|
|                  |                  |                | X                       | Y         | Z         |
| 1                | 6                | 0              | -0.459155               | -2.017098 | -1.304949 |
| 2                | 6                | 0              | -1.746931               | -1.628741 | -1.470066 |
| 3                | 7                | 0              | -2.094623               | -0.883991 | -0.347145 |
| 4                | 6                | 0              | -1.021001               | -0.806755 | 0.461939  |
| 5                | 7                | 0              | -0.026931               | -1.516773 | -0.083063 |
| 6                | 6                | 0              | 1.356650                | -1.513701 | 0.414348  |
| 7                | 6                | 0              | 2.225852                | -0.522067 | -0.378235 |
| 8                | 1                | 0              | 0.186839                | -2.588790 | -1.948002 |
| 9                | 1                | 0              | -2.429216               | -1.784021 | -2.285913 |
| 10               | 1                | 0              | 1.324590                | -1.215929 | 1.462047  |
| 11               | 1                | 0              | 1.755173                | -2.528187 | 0.354596  |
| 12               | 1                | 0              | 2.323063                | -0.855098 | -1.416074 |
| 13               | 1                | 0              | 1.743117                | 0.458962  | -0.361005 |
| 14               | 35               | 0              | -0.275273               | 2.066602  | 0.647274  |
| 15               | 1                | 0              | -0.985376               | -0.289013 | 1.402441  |
| 16               | 6                | 0              | -3.300642               | -0.169139 | -0.109173 |
| 17               | 6                | 0              | -4.481284               | -0.542426 | -0.585378 |
| 18               | 1                | 0              | -3.130577               | 0.731983  | 0.470155  |
| 19               | 1                | 0              | -5.348684               | 0.076596  | -0.401864 |
| 20               | 1                | 0              | -4.626892               | -1.448879 | -1.160685 |
| 21               | 8                | 0              | 3.528799                | -0.489559 | 0.190131  |
| 22               | 1                | 0              | 3.602849                | 0.299144  | 0.735773  |

Distance matrix (angstroms):

|    |    | 1        | 2        | 3        | 4        | 5        |
|----|----|----------|----------|----------|----------|----------|
| 1  | C  | 0.000000 |          |          |          |          |
| 2  | C  | 1.355158 | 0.000000 |          |          |          |
| 3  | N  | 2.208184 | 1.391580 | 0.000000 |          |          |
| 4  | C  | 2.214157 | 2.221548 | 1.346568 | 0.000000 |          |
| 5  | N  | 1.389298 | 2.212401 | 2.178418 | 1.337658 | 0.000000 |
| 6  | C  | 2.550792 | 3.632694 | 3.589943 | 2.480980 | 1.470280 |
| 7  | C  | 3.209856 | 4.266125 | 4.335719 | 3.365857 | 2.480241 |
| 8  | H  | 1.075945 | 2.211240 | 3.267132 | 3.231461 | 2.161693 |
| 9  | H  | 2.213087 | 1.074816 | 2.163522 | 3.238642 | 3.270312 |
| 10 | H  | 3.388198 | 4.266374 | 3.882574 | 2.582526 | 2.074724 |
| 11 | H  | 2.813992 | 4.050077 | 4.244614 | 3.268332 | 2.095327 |
| 12 | H  | 3.017172 | 4.143222 | 4.545260 | 3.835627 | 2.781583 |
| 13 | H  | 3.445563 | 4.215324 | 4.065952 | 3.149544 | 2.667180 |
| 14 | Br | 4.530076 | 4.506048 | 3.606231 | 2.974331 | 3.665467 |
| 15 | H  | 3.254712 | 3.259775 | 2.155337 | 1.074184 | 2.152379 |
| 16 | C  | 3.594285 | 2.529128 | 1.422015 | 2.435054 | 3.540337 |

|    |    |          |          |          |          |          |
|----|----|----------|----------|----------|----------|----------|
| 17 | C  | 4.343957 | 3.072367 | 2.422720 | 3.624955 | 4.587258 |
| 18 | H  | 4.224326 | 3.354393 | 2.086276 | 2.611147 | 3.872412 |
| 19 | H  | 5.395055 | 4.125755 | 3.393322 | 4.500589 | 5.564307 |
| 20 | H  | 4.208767 | 2.902110 | 2.719068 | 4.005955 | 4.724989 |
| 21 | O  | 4.524645 | 5.646886 | 5.662784 | 4.568936 | 3.711202 |
| 22 | H  | 5.101902 | 6.099395 | 5.918928 | 4.762142 | 4.140453 |
|    |    | 6        | 7        | 8        | 9        | 10       |
| 6  | C  | 0.000000 |          |          |          |          |
| 7  | C  | 1.538517 | 0.000000 |          |          |          |
| 8  | H  | 2.846923 | 3.300467 | 0.000000 |          |          |
| 9  | H  | 4.658032 | 5.186657 | 2.757822 | 0.000000 |          |
| 10 | H  | 1.089665 | 2.163412 | 3.848072 | 5.334884 | 0.000000 |
| 11 | H  | 1.091592 | 2.187030 | 2.786629 | 5.003516 | 1.770275 |
| 12 | H  | 2.172132 | 1.094290 | 2.802158 | 4.919722 | 3.067691 |
| 13 | H  | 2.154513 | 1.093502 | 3.772181 | 5.113179 | 2.510766 |
| 14 | Br | 3.941573 | 3.742793 | 5.349923 | 5.298146 | 3.741447 |
| 15 | H  | 2.821573 | 3.679280 | 4.229483 | 4.233636 | 2.489712 |
| 16 | C  | 4.875684 | 5.544284 | 4.625854 | 2.847002 | 4.995726 |
| 17 | C  | 6.002025 | 6.710364 | 5.275957 | 2.940129 | 6.193039 |
| 18 | H  | 5.018108 | 5.566303 | 5.280176 | 3.797116 | 4.962532 |
| 19 | H  | 6.939507 | 7.598193 | 6.335364 | 3.941425 | 7.048218 |
| 20 | H  | 6.187706 | 6.959260 | 5.009119 | 2.491634 | 6.507928 |
| 21 | O  | 2.411922 | 1.421889 | 4.488550 | 6.580605 | 2.646492 |
| 22 | H  | 2.904330 | 1.952313 | 5.216506 | 7.060876 | 2.830792 |
|    |    | 11       | 12       | 13       | 14       | 15       |
| 11 | H  | 0.000000 |          |          |          |          |
| 12 | H  | 2.501400 | 0.000000 |          |          |          |
| 13 | H  | 3.071692 | 1.782206 | 0.000000 |          |          |
| 14 | Br | 5.031944 | 4.420982 | 2.770385 | 0.000000 |          |
| 15 | H  | 3.690865 | 4.382949 | 3.333749 | 2.573606 | 0.000000 |
| 16 | C  | 5.598344 | 5.814171 | 5.088953 | 3.837135 | 2.767636 |
| 17 | C  | 6.612125 | 6.861993 | 6.308431 | 5.100685 | 4.029518 |
| 18 | H  | 5.874743 | 5.984886 | 4.951592 | 3.156793 | 2.552151 |
| 19 | H  | 7.604072 | 7.794381 | 7.102219 | 5.549803 | 4.735784 |
| 20 | H  | 6.647686 | 6.979947 | 6.697489 | 5.879108 | 4.601689 |
| 21 | O  | 2.707177 | 2.041400 | 2.095734 | 4.605855 | 4.678428 |
| 22 | H  | 3.398972 | 2.756914 | 2.164964 | 4.262813 | 4.673562 |
|    |    | 16       | 17       | 18       | 19       | 20       |
| 16 | C  | 0.000000 |          |          |          |          |
| 17 | C  | 1.326661 | 0.000000 |          |          |          |
| 18 | H  | 1.084695 | 2.136043 | 0.000000 |          |          |
| 19 | H  | 2.083394 | 1.081318 | 2.471831 | 0.000000 |          |
| 20 | H  | 2.121874 | 1.083437 | 3.107210 | 1.850369 | 0.000000 |
| 21 | O  | 6.843502 | 8.047710 | 6.776272 | 8.915195 | 8.322277 |

22 H 6.970754 8.234494 6.752550 9.026278 8.624429  
 21 21 22  
 21 O 0.000000  
 22 H 0.961905 0.000000

Stoichiometry C7H11BrN2O  
 Framework group C1[X(C7H11BrN2O)]  
 Deg. of freedom 60

Full point group C1 NOp 1  
 Largest Abelian subgroup C1 NOp 1  
 Largest concise Abelian subgroup C1 NOp 1

Standard orientation:

| Center Number | Atomic Number | Atomic Type | Coordinates (Angstroms) |           |           |
|---------------|---------------|-------------|-------------------------|-----------|-----------|
|               |               |             | X                       | Y         | Z         |
| 1             | 6             | 0           | -0.395994               | -2.306170 | -0.524701 |
| 2             | 6             | 0           | -1.653902               | -1.829022 | -0.687336 |
| 3             | 7             | 0           | -1.777006               | -0.716005 | 0.138818  |
| 4             | 6             | 0           | -0.600785               | -0.516952 | 0.763419  |
| 5             | 7             | 0           | 0.241755                | -1.491091 | 0.402160  |
| 6             | 6             | 0           | 1.674701                | -1.505072 | 0.731086  |
| 7             | 6             | 0           | 2.513972                | -0.954429 | -0.434870 |
| 8             | 1             | 0           | 0.102288                | -3.137836 | -0.991287 |
| 9             | 1             | 0           | -2.451998               | -2.154550 | -1.329445 |
| 10            | 1             | 0           | 1.812423                | -0.876042 | 1.610133  |
| 11            | 1             | 0           | 1.968186                | -2.525182 | 0.985676  |
| 12            | 1             | 0           | 2.438686                | -1.621690 | -1.298910 |
| 13            | 1             | 0           | 2.128603                | 0.031388  | -0.709467 |
| 14            | 35            | 0           | 0.419500                | 2.131928  | -0.124891 |
| 15            | 1             | 0           | -0.391008               | 0.273324  | 1.460074  |
| 16            | 6             | 0           | -2.869968               | 0.188883  | 0.232298  |
| 17            | 6             | 0           | -4.133229               | -0.162716 | 0.030855  |
| 18            | 1             | 0           | -2.542065               | 1.200365  | 0.446652  |
| 19            | 1             | 0           | -4.908168               | 0.590209  | 0.073533  |
| 20            | 1             | 0           | -4.436937               | -1.181056 | -0.180287 |
| 21            | 8             | 0           | 3.879672                | -0.906860 | -0.041972 |
| 22            | 1             | 0           | 4.098119                | 0.001005  | 0.188948  |

Rotational constants (GHZ): 0.8156148 0.5716112 0.3549472

Standard basis: 6-311++G(d,p) (5D, 7F)

There are 358 symmetry adapted cartesian basis functions of A symmetry.

There are 345 symmetry adapted basis functions of A symmetry.

345 basis functions, 553 primitive gaussians, 358 cartesian basis functions

55 alpha electrons 55 beta electrons

nuclear repulsion energy 865.1222467899 Hartrees.  
 NAtoms= 22 NActive= 22 NUniq= 22 SFac= 1.00D+00 NAtFMM= 60 NAOKFM=F  
 Big=F  
 Integral buffers will be 131072 words long.  
 Raffenetti 2 integral format.  
 Two-electron integral symmetry is turned on.  
 One-electron integrals computed using PRISM.  
 NBasis= 345 RedAO= T EigKep= 6.73D-06 NBF= 345  
 NBsUse= 345 1.00D-06 EigRej= -1.00D+00 NBFU= 345  
 Initial guess from the checkpoint file: "."  
 B after Tr= 0.000000 0.000000 0.000000  
 Rot= 0.999974 0.000816 -0.000069 0.007217 Ang= 0.83 deg.  
 ExpMin= 3.50D-02 ExpMax= 4.40D+05 ExpMxC= 1.51D+04 IAcc=3 IRadAn= 5 AccDes=  
 0.00D+00  
 Harris functional with IExCor= 402 and IRadAn= 5 diagonalized for initial guess.  
 HarFok: IExCor= 402 AccDes= 0.00D+00 IRadAn= 5 IDoV= 1 UseB2=F ITyADJ=14  
 ICtDFT= 3500011 ScaDFX= 1.000000 1.000000 1.000000 1.000000  
 FoFCou: FMM=F IPFlag= 0 FMFlag= 100000 FMFlg1= 0  
 NFXFlg= 0 DoJE=T BraDBF=F KetDBF=T FulRan=T  
 wScrn= 0.000000 ICntrl= 500 IOpCl= 0 I1Cent= 200000004 NGrid=  
 0  
 NMat0= 1 NMatS0= 1 NMatT0= 0 NMatD0= 1 NMtDS0= 0  
 NMtDT0= 0  
 Petite list used in FoFCou.  
 Keep R1 ints in memory in canonical form, NReq=1804729152.  
 Requested convergence on RMS density matrix=1.00D-08 within 128 cycles.  
 Requested convergence on MAX density matrix=1.00D-06.  
 Requested convergence on energy=1.00D-06.  
 No special actions if energy rises.  
 SCF Done: E(RB3LYP) = -3032.33848429 A.U. after 11 cycles  
 NFock= 11 Conv=0.38D-08 -V/T= 2.0017  
 Calling FoFJK, ICntrl= 2127 FMM=F ISym2X=0 I1Cent= 0 IOpClX= 0 NMat=1 NMatS=1  
 NMatT=0.

\*\*\*\*\* Axes restored to original set \*\*\*\*\*

| Center<br>Number | Atomic<br>Number | Forces (Hartrees/Bohr) |              |              |
|------------------|------------------|------------------------|--------------|--------------|
|                  |                  | X                      | Y            | Z            |
| 1                | 6                | -0.000037882           | 0.000149954  | -0.000207613 |
| 2                | 6                | 0.000135688            | -0.000011973 | -0.000156639 |
| 3                | 7                | -0.000130436           | -0.000182400 | 0.000161488  |
| 4                | 6                | -0.000125390           | 0.000000218  | -0.000023104 |
| 5                | 7                | 0.000310402            | 0.000074158  | 0.000139081  |
| 6                | 6                | -0.000036724           | 0.000085161  | -0.000252727 |

|    |    |              |              |              |
|----|----|--------------|--------------|--------------|
| 7  | 6  | 0.000417097  | -0.000001484 | 0.000399817  |
| 8  | 1  | -0.000060123 | -0.000142068 | 0.000068875  |
| 9  | 1  | -0.000054061 | -0.000025536 | 0.000030650  |
| 10 | 1  | -0.000021307 | -0.000005374 | 0.000130165  |
| 11 | 1  | -0.000029845 | 0.000062571  | -0.000060932 |
| 12 | 1  | 0.000164877  | -0.000115004 | 0.000037277  |
| 13 | 1  | -0.000065990 | 0.000059754  | -0.000376516 |
| 14 | 35 | -0.000085683 | -0.000115814 | 0.000205150  |
| 15 | 1  | 0.000091696  | 0.000092684  | 0.000127165  |
| 16 | 6  | -0.000097821 | 0.000191316  | -0.000026280 |
| 17 | 6  | -0.000134531 | -0.000122302 | -0.000106811 |
| 18 | 1  | 0.000062552  | 0.000103095  | -0.000006226 |
| 19 | 1  | 0.000003674  | 0.000070975  | 0.000046535  |
| 20 | 1  | 0.000054572  | -0.000040789 | -0.000006134 |
| 21 | 8  | -0.000351887 | -0.000524009 | -0.000348123 |
| 22 | 1  | -0.000008878 | 0.000396868  | 0.000224904  |

-----  
Cartesian Forces: Max 0.000524009 RMS 0.000170662

GradGradGradGradGradGradGradGradGradGradGradGradGradGradGradGradGradGradGradGrad

Berny optimization.

Using GEDIIS/GDIIS optimizer.

FormGI is forming the generalized inverse of G from B-inverse, IUseBI=4.

Internal Forces: Max 0.001218819 RMS 0.000171497

Search for a local minimum.

Step number 29 out of a maximum of 116

All quantities printed in internal units (Hartrees-Bohrs-Radians)

Mixed Optimization -- En-DIIS/RFO-DIIS

Swapping is turned off.

Update second derivatives using D2CorX and points 23 25 24 26 27  
28 29

DE= -2.71D-05 DEPred=-1.62D-05 R= 1.67D+00

TightC=F SS= 1.41D+00 RLast= 9.67D-02 DXNew= 1.0469D+00 2.9021D-01

Trust test= 1.67D+00 RLast= 9.67D-02 DXMaxT set to 6.23D-01

ITU= 1 1 1 0 -1 1 1 1 1 1 0 -1 1 1 1 1 1 1 1 1

ITU= 1 1 1 1 0 0 -1 0 0

|                 |         |         |         |         |         |
|-----------------|---------|---------|---------|---------|---------|
| Eigenvalues --- | 0.00026 | 0.00120 | 0.00487 | 0.00606 | 0.00723 |
| Eigenvalues --- | 0.01098 | 0.01614 | 0.01848 | 0.02068 | 0.02071 |
| Eigenvalues --- | 0.02319 | 0.02400 | 0.03066 | 0.03106 | 0.03670 |
| Eigenvalues --- | 0.04434 | 0.04854 | 0.05490 | 0.05982 | 0.07006 |
| Eigenvalues --- | 0.08950 | 0.09232 | 0.13646 | 0.14201 | 0.15018 |
| Eigenvalues --- | 0.15686 | 0.15971 | 0.15998 | 0.16014 | 0.16238 |
| Eigenvalues --- | 0.16633 | 0.17726 | 0.20698 | 0.22847 | 0.23042 |
| Eigenvalues --- | 0.24199 | 0.24822 | 0.26925 | 0.29801 | 0.33372 |



|                 |         |         |         |         |         |
|-----------------|---------|---------|---------|---------|---------|
| Eigenvalues --- | 0.33873 | 0.33879 | 0.34012 | 0.34116 | 0.34308 |
| Eigenvalues --- | 0.34489 | 0.34831 | 0.35956 | 0.36313 | 0.36385 |
| Eigenvalues --- | 0.37253 | 0.43074 | 0.44936 | 0.45928 | 0.50276 |
| Eigenvalues --- | 0.53351 | 0.54612 | 0.59212 | 0.61830 | 1.50065 |

En-DIIS/RFO-DIIS IScMMF= 0 using points: 29 28 27 26

RFO step: Lambda=-4.38875784D-06.

DidBck=F Rises=F RFO-DIIS coefs: 1.40068 0.09487 -0.53266 0.03711

Iteration 1 RMS(Cart)= 0.01868854 RMS(Int)= 0.00032235

Iteration 2 RMS(Cart)= 0.00084464 RMS(Int)= 0.00005746

Iteration 3 RMS(Cart)= 0.00000082 RMS(Int)= 0.00005746

| Variable | Old X   | -DE/DX   | Delta X<br>(Linear) | Delta X<br>(Quad) | Delta X<br>(Total) | New X   |
|----------|---------|----------|---------------------|-------------------|--------------------|---------|
| R1       | 2.56088 | -0.00001 | 0.00040             | 0.00003           | 0.00037            | 2.56125 |
| R2       | 2.62539 | 0.00016  | -0.00030            | 0.00008           | -0.00024           | 2.62516 |
| R3       | 2.03324 | 0.00000  | 0.00000             | 0.00002           | 0.00003            | 2.03327 |
| R4       | 2.62971 | 0.00013  | -0.00012            | 0.00016           | 0.00003            | 2.62973 |
| R5       | 2.03111 | 0.00001  | -0.00003            | 0.00002           | -0.00001           | 2.03109 |
| R6       | 2.54464 | 0.00016  | -0.00074            | -0.00004          | -0.00073           | 2.54392 |
| R7       | 2.68722 | 0.00017  | 0.00028             | 0.00038           | 0.00065            | 2.68787 |
| R8       | 2.52781 | 0.00021  | -0.00054            | -0.00024          | -0.00073           | 2.52708 |
| R9       | 2.02991 | 0.00016  | 0.00083             | 0.00072           | 0.00156            | 2.03147 |
| R10      | 2.77843 | -0.00004 | 0.00124             | 0.00006           | 0.00130            | 2.77973 |
| R11      | 2.90738 | -0.00021 | -0.00012            | 0.00056           | 0.00045            | 2.90782 |
| R12      | 2.05917 | 0.00012  | -0.00012            | 0.00016           | 0.00004            | 2.05921 |
| R13      | 2.06281 | -0.00007 | -0.00018            | -0.00005          | -0.00023           | 2.06258 |
| R14      | 2.06791 | 0.00001  | 0.00014             | -0.00017          | -0.00003           | 2.06788 |
| R15      | 2.06642 | 0.00002  | 0.00000             | 0.00046           | 0.00047            | 2.06688 |
| R16      | 2.68698 | -0.00039 | -0.00057            | -0.00071          | -0.00128           | 2.68571 |
| R17      | 5.23527 | 0.00007  | -0.01320            | -0.00190          | -0.01510           | 5.22017 |
| R18      | 2.50703 | 0.00012  | -0.00011            | 0.00002           | -0.00010           | 2.50693 |
| R19      | 2.04978 | 0.00009  | -0.00017            | 0.00006           | -0.00010           | 2.04967 |
| R20      | 2.04339 | 0.00004  | -0.00011            | 0.00007           | -0.00004           | 2.04335 |
| R21      | 2.04740 | 0.00003  | -0.00013            | 0.00000           | -0.00012           | 2.04728 |
| R22      | 1.81774 | 0.00046  | -0.00005            | 0.00066           | 0.00061            | 1.81835 |
| A1       | 1.87507 | 0.00004  | -0.00005            | -0.00001          | -0.00008           | 1.87499 |
| A2       | 2.27837 | -0.00003 | -0.00023            | -0.00002          | -0.00024           | 2.27813 |
| A3       | 2.12964 | -0.00001 | 0.00029             | 0.00006           | 0.00036            | 2.13000 |
| A4       | 1.86762 | 0.00005  | -0.00027            | -0.00006          | -0.00034           | 1.86727 |
| A5       | 2.28407 | 0.00001  | -0.00041            | 0.00003           | -0.00038           | 2.28369 |
| A6       | 2.13084 | -0.00006 | 0.00067             | 0.00011           | 0.00078            | 2.13162 |
| A7       | 1.89266 | -0.00004 | 0.00019             | -0.00004          | 0.00021            | 1.89287 |
| A8       | 2.23443 | -0.00012 | 0.00122             | 0.00008           | 0.00123            | 2.23566 |
| A9       | 2.14935 | 0.00015  | -0.00056            | -0.00002          | -0.00065           | 2.14870 |
| A10      | 1.89364 | 0.00000  | 0.00034             | 0.00011           | 0.00030            | 1.89393 |

|     |          |          |          |          |          |          |
|-----|----------|----------|----------|----------|----------|----------|
| A11 | 2.18972  | 0.00008  | 0.00030  | 0.00037  | 0.00029  | 2.19002  |
| A12 | 2.19927  | -0.00008 | 0.00055  | -0.00022 | -0.00005 | 2.19923  |
| A13 | 1.89472  | -0.00006 | 0.00008  | 0.00002  | 0.00018  | 1.89490  |
| A14 | 2.20317  | 0.00008  | 0.00081  | 0.00055  | 0.00131  | 2.20448  |
| A15 | 2.16563  | -0.00002 | -0.00144 | -0.00044 | -0.00192 | 2.16372  |
| A16 | 1.93768  | 0.00001  | -0.00237 | 0.00051  | -0.00187 | 1.93582  |
| A17 | 1.87357  | -0.00005 | -0.00073 | -0.00068 | -0.00142 | 1.87214  |
| A18 | 1.89979  | 0.00002  | 0.00030  | -0.00037 | -0.00006 | 1.89973  |
| A19 | 1.91326  | -0.00004 | -0.00023 | -0.00017 | -0.00041 | 1.91285  |
| A20 | 1.94395  | 0.00004  | 0.00210  | 0.00071  | 0.00282  | 1.94677  |
| A21 | 1.89372  | 0.00001  | 0.00091  | -0.00007 | 0.00083  | 1.89455  |
| A22 | 1.92050  | 0.00013  | 0.00061  | -0.00019 | 0.00042  | 1.92092  |
| A23 | 1.89729  | -0.00064 | -0.00237 | -0.00052 | -0.00290 | 1.89439  |
| A24 | 1.90341  | 0.00014  | 0.00028  | 0.00134  | 0.00162  | 1.90502  |
| A25 | 1.90413  | 0.00024  | 0.00058  | 0.00171  | 0.00229  | 1.90642  |
| A26 | 1.88038  | -0.00013 | 0.00147  | -0.00176 | -0.00030 | 1.88008  |
| A27 | 1.95813  | 0.00028  | -0.00050 | -0.00057 | -0.00107 | 1.95706  |
| A28 | 2.58294  | -0.00122 | 0.00357  | 0.00072  | 0.00429  | 2.58723  |
| A29 | 2.15705  | -0.00011 | 0.00036  | 0.00005  | 0.00041  | 2.15746  |
| A30 | 1.95415  | 0.00001  | -0.00037 | 0.00048  | 0.00011  | 1.95426  |
| A31 | 2.17123  | 0.00009  | 0.00003  | -0.00051 | -0.00048 | 2.17075  |
| A32 | 2.08505  | -0.00005 | 0.00001  | -0.00037 | -0.00036 | 2.08469  |
| A33 | 2.14792  | -0.00004 | 0.00031  | 0.00014  | 0.00045  | 2.14837  |
| A34 | 2.05022  | 0.00009  | -0.00032 | 0.00023  | -0.00009 | 2.05013  |
| A35 | 1.89234  | -0.00011 | -0.00069 | -0.00047 | -0.00116 | 1.89119  |
| D1  | 0.00545  | 0.00002  | 0.00017  | 0.00002  | 0.00018  | 0.00563  |
| D2  | 3.10787  | 0.00005  | -0.00028 | 0.00216  | 0.00189  | 3.10976  |
| D3  | -3.12021 | -0.00008 | -0.00052 | -0.00273 | -0.00325 | -3.12346 |
| D4  | -0.01778 | -0.00006 | -0.00097 | -0.00058 | -0.00155 | -0.01934 |
| D5  | -0.03077 | -0.00002 | 0.00303  | 0.00040  | 0.00342  | -0.02736 |
| D6  | -2.96631 | -0.00003 | 0.00609  | -0.00022 | 0.00587  | -2.96044 |
| D7  | 3.09653  | 0.00007  | 0.00364  | 0.00286  | 0.00649  | 3.10303  |
| D8  | 0.16100  | 0.00006  | 0.00670  | 0.00224  | 0.00895  | 0.16994  |
| D9  | 0.02154  | -0.00002 | -0.00328 | -0.00042 | -0.00370 | 0.01785  |
| D10 | 3.04022  | -0.00004 | 0.00381  | -0.00020 | 0.00362  | 3.04385  |
| D11 | -3.08509 | -0.00004 | -0.00285 | -0.00234 | -0.00519 | -3.09028 |
| D12 | -0.06641 | -0.00006 | 0.00423  | -0.00212 | 0.00213  | -0.06428 |
| D13 | -0.04105 | 0.00000  | 0.00520  | 0.00067  | 0.00587  | -0.03518 |
| D14 | 3.13455  | -0.00001 | -0.01611 | -0.00744 | -0.02355 | 3.11101  |
| D15 | -3.06703 | 0.00005  | -0.00164 | 0.00045  | -0.00116 | -3.06819 |
| D16 | 0.10857  | 0.00003  | -0.02294 | -0.00765 | -0.03058 | 0.07800  |
| D17 | 0.55225  | 0.00007  | -0.01438 | -0.00441 | -0.01879 | 0.53347  |
| D18 | -2.54901 | 0.00007  | -0.01484 | -0.00500 | -0.01984 | -2.56885 |
| D19 | -2.72870 | 0.00002  | -0.00626 | -0.00416 | -0.01042 | -2.73912 |

|     |          |          |          |          |          |          |
|-----|----------|----------|----------|----------|----------|----------|
| D20 | 0.45322  | 0.00003  | -0.00672 | -0.00475 | -0.01147 | 0.44175  |
| D21 | 0.04446  | 0.00001  | -0.00509 | -0.00066 | -0.00575 | 0.03871  |
| D22 | 2.98545  | 0.00004  | -0.00776 | 0.00009  | -0.00767 | 2.97777  |
| D23 | -3.13138 | 0.00003  | 0.01635  | 0.00752  | 0.02387  | -3.10751 |
| D24 | -0.19039 | 0.00006  | 0.01368  | 0.00826  | 0.02194  | -0.16845 |
| D25 | 1.22216  | 0.00014  | 0.00279  | 0.00403  | 0.00682  | 1.22898  |
| D26 | -2.97017 | 0.00007  | 0.00066  | 0.00370  | 0.00437  | -2.96580 |
| D27 | -0.92369 | 0.00007  | 0.00149  | 0.00305  | 0.00455  | -0.91914 |
| D28 | -1.68306 | 0.00012  | 0.00608  | 0.00325  | 0.00932  | -1.67374 |
| D29 | 0.40780  | 0.00005  | 0.00395  | 0.00292  | 0.00687  | 0.41467  |
| D30 | 2.45428  | 0.00005  | 0.00479  | 0.00227  | 0.00705  | 2.46133  |
| D31 | -1.14678 | -0.00007 | -0.00404 | -0.01311 | -0.01715 | -1.16393 |
| D32 | 0.93746  | -0.00010 | -0.00441 | -0.01146 | -0.01587 | 0.92159  |
| D33 | 3.07737  | -0.00007 | -0.00634 | -0.01166 | -0.01800 | 3.05937  |
| D34 | 3.06937  | 0.00001  | -0.00152 | -0.01248 | -0.01400 | 3.05538  |
| D35 | -1.12957 | -0.00002 | -0.00190 | -0.01082 | -0.01272 | -1.14229 |
| D36 | 1.01034  | 0.00001  | -0.00383 | -0.01102 | -0.01485 | 0.99549  |
| D37 | 0.97339  | -0.00001 | -0.00384 | -0.01274 | -0.01658 | 0.95681  |
| D38 | 3.05763  | -0.00003 | -0.00422 | -0.01108 | -0.01530 | 3.04233  |
| D39 | -1.08565 | -0.00001 | -0.00615 | -0.01128 | -0.01743 | -1.10307 |
| D40 | 0.14132  | 0.00007  | 0.04490  | 0.03960  | 0.08451  | 0.22582  |
| D41 | 2.23576  | -0.00002 | 0.04457  | 0.04007  | 0.08464  | 2.32040  |
| D42 | -1.96517 | 0.00015  | 0.04648  | 0.03864  | 0.08511  | -1.88006 |
| D43 | -1.76898 | 0.00021  | -0.00510 | 0.02499  | 0.01988  | -1.74910 |
| D44 | 2.43009  | 0.00006  | -0.00684 | 0.02548  | 0.01864  | 2.44873  |
| D45 | 0.33397  | -0.00032 | -0.00822 | 0.02487  | 0.01665  | 0.35062  |
| D46 | -3.09175 | 0.00000  | -0.00076 | -0.00028 | -0.00103 | -3.09279 |
| D47 | 0.04721  | 0.00002  | -0.00035 | -0.00056 | -0.00091 | 0.04631  |
| D48 | 0.00451  | -0.00002 | -0.00025 | 0.00041  | 0.00016  | 0.00467  |
| D49 | -3.13971 | 0.00000  | 0.00016  | 0.00013  | 0.00029  | -3.13942 |

| Item                 | Value    | Threshold | Converged? |
|----------------------|----------|-----------|------------|
| Maximum Force        | 0.001219 | 0.000450  | NO         |
| RMS Force            | 0.000171 | 0.000300  | YES        |
| Maximum Displacement | 0.084570 | 0.001800  | NO         |
| RMS Displacement     | 0.018547 | 0.001200  | NO         |

Predicted change in Energy=-1.215288D-05

GradGradGradGradGradGradGradGradGradGradGradGradGradGradGradGradGrad

Input orientation:

| Center Number | Atomic Number | Atomic Type | Coordinates (Angstroms) |           |           |
|---------------|---------------|-------------|-------------------------|-----------|-----------|
|               |               |             | X                       | Y         | Z         |
| 1             | 6             | 0           | -0.462521               | -2.032304 | -1.302232 |

|    |    |   |           |           |           |
|----|----|---|-----------|-----------|-----------|
| 2  | 6  | 0 | -1.749419 | -1.640315 | -1.467239 |
| 3  | 7  | 0 | -2.091914 | -0.887802 | -0.347885 |
| 4  | 6  | 0 | -1.018096 | -0.813655 | 0.460586  |
| 5  | 7  | 0 | -0.026428 | -1.526532 | -0.084110 |
| 6  | 6  | 0 | 1.359139  | -1.518332 | 0.409741  |
| 7  | 6  | 0 | 2.219505  | -0.520080 | -0.384628 |
| 8  | 1  | 0 | 0.179219  | -2.612313 | -1.942111 |
| 9  | 1  | 0 | -2.433933 | -1.799359 | -2.280479 |
| 10 | 1  | 0 | 1.327301  | -1.220566 | 1.457470  |
| 11 | 1  | 0 | 1.761213  | -2.531210 | 0.348686  |
| 12 | 1  | 0 | 2.329122  | -0.859257 | -1.419217 |
| 13 | 1  | 0 | 1.720610  | 0.453217  | -0.375559 |
| 14 | 35 | 0 | -0.243691 | 2.075751  | 0.692026  |
| 15 | 1  | 0 | -0.972420 | -0.274279 | 1.389364  |
| 16 | 6  | 0 | -3.296079 | -0.169744 | -0.108116 |
| 17 | 6  | 0 | -4.476458 | -0.532663 | -0.592772 |
| 18 | 1  | 0 | -3.124834 | 0.724358  | 0.481545  |
| 19 | 1  | 0 | -5.341595 | 0.088429  | -0.405734 |
| 20 | 1  | 0 | -4.624305 | -1.432148 | -1.178231 |
| 21 | 8  | 0 | 3.517476  | -0.461797 | 0.191327  |
| 22 | 1  | 0 | 3.568458  | 0.323723  | 0.744721  |

-----  
Distance matrix (angstroms):

|    |    | 1        | 2        | 3        | 4        | 5        |
|----|----|----------|----------|----------|----------|----------|
| 1  | C  | 0.000000 |          |          |          |          |
| 2  | C  | 1.355356 | 0.000000 |          |          |          |
| 3  | N  | 2.208073 | 1.391594 | 0.000000 |          |          |
| 4  | C  | 2.213887 | 2.221421 | 1.346183 | 0.000000 |          |
| 5  | N  | 1.389173 | 2.212394 | 2.178023 | 1.337271 | 0.000000 |
| 6  | C  | 2.552148 | 3.633327 | 3.589057 | 2.480000 | 1.470970 |
| 7  | C  | 3.212800 | 4.263723 | 4.327229 | 3.358964 | 2.479410 |
| 8  | H  | 1.075959 | 2.211318 | 3.267039 | 3.231360 | 2.161800 |
| 9  | H  | 2.213074 | 1.074809 | 2.163986 | 3.238772 | 3.270252 |
| 10 | H  | 3.387969 | 4.265714 | 3.880860 | 2.580744 | 2.074287 |
| 11 | H  | 2.814148 | 4.051643 | 4.246480 | 3.269109 | 2.095794 |
| 12 | H  | 3.030346 | 4.152933 | 4.549081 | 3.839221 | 2.788617 |
| 13 | H  | 3.435491 | 4.197111 | 4.041589 | 3.131232 | 2.656406 |
| 14 | Br | 4.571768 | 4.553986 | 3.644172 | 3.000323 | 3.691346 |
| 15 | H  | 3.255048 | 3.260362 | 2.155855 | 1.075007 | 2.152711 |
| 16 | C  | 3.595010 | 2.530208 | 1.422360 | 2.434594 | 3.540066 |
| 17 | C  | 4.343264 | 3.070558 | 2.423250 | 3.626125 | 4.587949 |
| 18 | H  | 4.227169 | 3.358751 | 2.086609 | 2.608499 | 3.871252 |
| 19 | H  | 5.395051 | 4.125418 | 3.393640 | 4.500767 | 5.564399 |
| 20 | H  | 4.206663 | 2.896866 | 2.720072 | 4.009115 | 4.727206 |

|    |    |          |          |          |          |          |
|----|----|----------|----------|----------|----------|----------|
| 21 | O  | 4.531842 | 5.646232 | 5.651327 | 4.557162 | 3.710632 |
| 22 | H  | 5.098007 | 6.085231 | 5.890789 | 4.734009 | 4.127180 |
|    |    | 6        | 7        | 8        | 9        | 10       |
| 6  | C  | 0.000000 |          |          |          |          |
| 7  | C  | 1.538753 | 0.000000 |          |          |          |
| 8  | H  | 2.849599 | 3.311490 | 0.000000 |          |          |
| 9  | H  | 4.658718 | 5.185103 | 2.757527 | 0.000000 |          |
| 10 | H  | 1.089685 | 2.163339 | 3.848663 | 5.334243 | 0.000000 |
| 11 | H  | 1.091472 | 2.189161 | 2.785145 | 5.004734 | 1.770725 |
| 12 | H  | 2.172634 | 1.094273 | 2.822890 | 4.930747 | 3.067494 |
| 13 | H  | 2.152758 | 1.093748 | 3.771929 | 5.095395 | 2.513212 |
| 14 | Br | 3.945400 | 3.736958 | 5.394023 | 5.352516 | 3.730902 |
| 15 | H  | 2.818421 | 3.660035 | 4.229823 | 4.234340 | 2.487733 |
| 16 | C  | 4.874209 | 5.533612 | 4.626811 | 2.849229 | 4.993088 |
| 17 | C  | 6.002563 | 6.699209 | 5.274561 | 2.936798 | 6.193571 |
| 18 | H  | 5.014063 | 5.555254 | 5.284341 | 3.804638 | 4.955469 |
| 19 | H  | 6.938768 | 7.585576 | 6.335128 | 3.941181 | 7.046926 |
| 20 | H  | 6.191178 | 6.949778 | 5.005012 | 2.479420 | 6.512550 |
| 21 | O  | 2.412964 | 1.421214 | 4.507798 | 6.581654 | 2.641158 |
| 22 | H  | 2.895941 | 1.951181 | 5.227458 | 7.048973 | 2.813472 |
|    |    | 11       | 12       | 13       | 14       | 15       |
| 11 | H  | 0.000000 |          |          |          |          |
| 12 | H  | 2.498685 | 0.000000 |          |          |          |
| 13 | H  | 3.071316 | 1.783844 | 0.000000 |          |          |
| 14 | Br | 5.036031 | 4.437453 | 2.762396 | 0.000000 |          |
| 15 | H  | 3.694523 | 4.373844 | 3.301002 | 2.557336 | 0.000000 |
| 16 | C  | 5.600124 | 5.816984 | 5.062289 | 3.872925 | 2.766362 |
| 17 | C  | 6.617331 | 6.863352 | 6.278757 | 5.135255 | 4.034092 |
| 18 | H  | 5.872804 | 5.988854 | 4.928131 | 3.189287 | 2.540531 |
| 19 | H  | 7.607991 | 7.795201 | 7.071684 | 5.580605 | 4.737470 |
| 20 | H  | 6.656895 | 6.981149 | 6.667596 | 5.915488 | 4.611883 |
| 21 | O  | 2.718767 | 2.040591 | 2.094598 | 4.564672 | 4.650766 |
| 22 | H  | 3.402002 | 2.760077 | 2.164795 | 4.195815 | 4.625230 |
|    |    | 16       | 17       | 18       | 19       | 20       |
| 16 | C  | 0.000000 |          |          |          |          |
| 17 | C  | 1.326611 | 0.000000 |          |          |          |
| 18 | H  | 1.084640 | 2.135684 | 0.000000 |          |          |
| 19 | H  | 2.083114 | 1.081295 | 2.470971 | 0.000000 |          |
| 20 | H  | 2.122027 | 1.083373 | 3.107055 | 1.850246 | 0.000000 |
| 21 | O  | 6.826382 | 8.032609 | 6.753627 | 8.896200 | 8.312995 |
| 22 | H  | 6.934891 | 8.200180 | 6.710435 | 8.987099 | 8.596639 |
|    |    | 21       | 22       |          |          |          |
| 21 | O  | 0.000000 |          |          |          |          |
| 22 | H  | 0.962230 | 0.000000 |          |          |          |

Stoichiometry C7H11BrN2O  
 Framework group C1[X(C7H11BrN2O)]  
 Deg. of freedom 60  
 Full point group C1 NOp 1  
 Largest Abelian subgroup C1 NOp 1  
 Largest concise Abelian subgroup C1 NOp 1

Standard orientation:

| Center Number | Atomic Number | Atomic Type | Coordinates (Angstroms) |           |           |
|---------------|---------------|-------------|-------------------------|-----------|-----------|
|               |               |             | X                       | Y         | Z         |
| 1             | 6             | 0           | -0.467513               | -2.319004 | -0.504813 |
| 2             | 6             | 0           | -1.712540               | -1.810211 | -0.672225 |
| 3             | 7             | 0           | -1.802718               | -0.681626 | 0.136908  |
| 4             | 6             | 0           | -0.621686               | -0.507964 | 0.759173  |
| 5             | 7             | 0           | 0.194336                | -1.507503 | 0.407998  |
| 6             | 6             | 0           | 1.628885                | -1.549365 | 0.730596  |
| 7             | 6             | 0           | 2.471686                | -1.023035 | -0.444318 |
| 8             | 1             | 0           | 0.005630                | -3.172701 | -0.957610 |
| 9             | 1             | 0           | -2.521073               | -2.124888 | -1.306627 |
| 10            | 1             | 0           | 1.782708                | -0.915575 | 1.603558  |
| 11            | 1             | 0           | 1.901656                | -2.573248 | 0.992460  |
| 12            | 1             | 0           | 2.391582                | -1.702971 | -1.297959 |
| 13            | 1             | 0           | 2.091763                | -0.038336 | -0.731217 |
| 14            | 35            | 0           | 0.497356                | 2.133229  | -0.120476 |
| 15            | 1             | 0           | -0.381773               | 0.298197  | 1.428640  |
| 16            | 6             | 0           | -2.871211               | 0.253259  | 0.223054  |
| 17            | 6             | 0           | -4.142517               | -0.063185 | 0.014388  |
| 18            | 1             | 0           | -2.517153               | 1.255362  | 0.439558  |
| 19            | 1             | 0           | -4.896237               | 0.711169  | 0.052890  |
| 20            | 1             | 0           | -4.473570               | -1.072516 | -0.198569 |
| 21            | 8             | 0           | 3.837630                | -0.977149 | -0.054520 |
| 22            | 1             | 0           | 4.056025                | -0.069389 | 0.178206  |

Rotational constants (GHZ): 0.8086216 0.5713875 0.3531634

Standard basis: 6-311++G(d,p) (5D, 7F)

There are 358 symmetry adapted cartesian basis functions of A symmetry.

There are 345 symmetry adapted basis functions of A symmetry.

345 basis functions, 553 primitive gaussians, 358 cartesian basis functions

55 alpha electrons 55 beta electrons

nuclear repulsion energy 863.6710678604 Hartrees.

NAtoms= 22 NActive= 22 NUniq= 22 SFac= 1.00D+00 NATFMM= 60 NAOKFM=F

Big=F

Integral buffers will be 131072 words long.

Raffenetti 2 integral format.

Two-electron integral symmetry is turned on.

One-electron integrals computed using PRISM.

NBasis= 345 RedAO= T EigKep= 6.62D-06 NBF= 345

NBsUse= 345 1.00D-06 EigRej= -1.00D+00 NBFU= 345

Initial guess from the checkpoint file: "."

B after Tr= 0.000000 0.000000 0.000000

Rot= 0.999913 0.000558 0.000044 0.013193 Ang= 1.51 deg.

ExpMin= 3.50D-02 ExpMax= 4.40D+05 ExpMxC= 1.51D+04 IAcc=3 IRadAn= 5 AccDes= 0.00D+00

Harris functional with IExCor= 402 and IRadAn= 5 diagonalized for initial guess.

HarFok: IExCor= 402 AccDes= 0.00D+00 IRadAn= 5 IDoV= 1 UseB2=F ITyADJ=14

ICtDFT= 3500011 ScaDFX= 1.000000 1.000000 1.000000 1.000000

FoFCou: FMM=F IPFlag= 0 FMFlag= 100000 FMFlg1= 0

NFxFlg= 0 DoJE=T BraDBF=F KetDBF=T FulRan=T

wScrn= 0.000000 ICntrl= 500 IOpCl= 0 I1Cent= 200000004 NGrid=

0

NMat0= 1 NMatS0= 1 NMatT0= 0 NMatD0= 1 NMtDS0= 0

NMtDT0= 0

Petite list used in FoFCou.

Keep R1 ints in memory in canonical form, NReq=1804729152.

Requested convergence on RMS density matrix=1.00D-08 within 128 cycles.

Requested convergence on MAX density matrix=1.00D-06.

Requested convergence on energy=1.00D-06.

No special actions if energy rises.

SCF Done: E(RB3LYP) = -3032.33849663 A.U. after 12 cycles

NFock= 12 Conv=0.19D-08 -V/T= 2.0017

Calling FoFJK, ICntrl= 2127 FMM=F ISym2X=0 I1Cent= 0 IOpClX= 0 NMat=1 NMatS=1 NMatT=0.

\*\*\*\*\* Axes restored to original set \*\*\*\*\*

| Center<br>Number | Atomic<br>Number | Forces (Hartrees/Bohr) |              |              |
|------------------|------------------|------------------------|--------------|--------------|
|                  |                  | X                      | Y            | Z            |
| 1                | 6                | -0.000050463           | 0.000058801  | -0.000084737 |
| 2                | 6                | 0.000090340            | -0.000010983 | -0.000070568 |
| 3                | 7                | -0.000138691           | -0.000205718 | 0.000173105  |
| 4                | 6                | -0.000007990           | 0.000200598  | -0.000299081 |
| 5                | 7                | 0.000328129            | 0.000116020  | 0.000158399  |
| 6                | 6                | -0.000224325           | 0.000025963  | -0.000226690 |
| 7                | 6                | 0.000217582            | 0.000011327  | 0.000468724  |
| 8                | 1                | 0.000000040            | -0.000062763 | 0.000036800  |
| 9                | 1                | -0.000059554           | -0.000017741 | 0.000036821  |
| 10               | 1                | 0.000027804            | -0.000028552 | 0.000109164  |

|    |    |              |              |              |
|----|----|--------------|--------------|--------------|
| 11 | 1  | -0.000005712 | 0.000034435  | -0.000049494 |
| 12 | 1  | 0.000180026  | -0.000080635 | 0.000055755  |
| 13 | 1  | 0.000196908  | 0.000123609  | -0.000516554 |
| 14 | 35 | -0.000321777 | -0.000462683 | 0.000289301  |
| 15 | 1  | 0.000169414  | 0.000245292  | 0.000144900  |
| 16 | 6  | 0.000013459  | 0.000134210  | -0.000055257 |
| 17 | 6  | -0.000112458 | -0.000067811 | -0.000061956 |
| 18 | 1  | -0.000025886 | 0.000090045  | 0.000004732  |
| 19 | 1  | -0.000006960 | 0.000062634  | 0.000046956  |
| 20 | 1  | 0.000039180  | -0.000049127 | -0.000020496 |
| 21 | 8  | -0.000277493 | -0.000461729 | -0.000291442 |
| 22 | 1  | -0.000031575 | 0.000344808  | 0.000151618  |

-----  
Cartesian Forces: Max 0.000516554 RMS 0.000184430

GradGradGradGradGradGradGradGradGradGradGradGradGradGradGradGradGradGradGrad  
Berny optimization.

Using GEDIIS/GDIIS optimizer.

FormGI is forming the generalized inverse of G from B-inverse, IUseBI=4.

Internal Forces: Max 0.003174698 RMS 0.000432227

Search for a local minimum.

Step number 30 out of a maximum of 116

All quantities printed in internal units (Hartrees-Bohrs-Radians)

Mixed Optimization -- En-DIIS/RFO-DIIS

Swapping is turned off.

Update second derivatives using D2CorX and points 25 26 27 28 29  
30

DE= -1.23D-05 DEPred=-1.22D-05 R= 1.02D+00

TightC=F SS= 1.41D+00 RLast= 1.71D-01 DXNew= 1.0469D+00 5.1350D-01

Trust test= 1.02D+00 RLast= 1.71D-01 DXMaxT set to 6.23D-01

ITU= 1 1 1 1 0 -1 1 1 1 1 1 0 -1 1 1 1 1 1 1 1

ITU= 1 1 1 1 1 0 0 -1 0 0

|                 |         |         |         |         |         |
|-----------------|---------|---------|---------|---------|---------|
| Eigenvalues --- | 0.00052 | 0.00152 | 0.00478 | 0.00584 | 0.00846 |
| Eigenvalues --- | 0.01083 | 0.01642 | 0.01917 | 0.02069 | 0.02077 |
| Eigenvalues --- | 0.02305 | 0.02361 | 0.03066 | 0.03105 | 0.03692 |
| Eigenvalues --- | 0.04498 | 0.04989 | 0.05496 | 0.05957 | 0.06979 |
| Eigenvalues --- | 0.08962 | 0.09232 | 0.13671 | 0.14216 | 0.14990 |
| Eigenvalues --- | 0.15794 | 0.15975 | 0.16003 | 0.16042 | 0.16248 |
| Eigenvalues --- | 0.16628 | 0.17633 | 0.20727 | 0.22849 | 0.23079 |
| Eigenvalues --- | 0.24204 | 0.24850 | 0.26707 | 0.29871 | 0.33441 |
| Eigenvalues --- | 0.33869 | 0.33881 | 0.34037 | 0.34090 | 0.34262 |
| Eigenvalues --- | 0.34487 | 0.34799 | 0.35891 | 0.36312 | 0.36379 |
| Eigenvalues --- | 0.37393 | 0.43073 | 0.44885 | 0.45959 | 0.50015 |
| Eigenvalues --- | 0.53348 | 0.54613 | 0.58661 | 0.61224 | 1.82805 |



En-DIIS/RFO-DIIS IScMMF= 0 using points: 30 29 28 27 26  
 RFO step: Lambda=-1.65447058D-05.  
 DidBck=T Rises=F RFO-DIIS coefs: 0.62707 1.52226 -1.55518 0.23840  
 0.16744

Iteration 1 RMS(Cart)= 0.00723908 RMS(Int)= 0.00002295  
 Iteration 2 RMS(Cart)= 0.00002351 RMS(Int)= 0.00001179  
 Iteration 3 RMS(Cart)= 0.00000000 RMS(Int)= 0.00001179

| Variable | Old X   | -DE/DX   | Delta X<br>(Linear) | Delta X<br>(Quad) | Delta X<br>(Total) | New X   |
|----------|---------|----------|---------------------|-------------------|--------------------|---------|
| R1       | 2.56125 | 0.00006  | 0.00002             | 0.00007           | 0.00008            | 2.56133 |
| R2       | 2.62516 | 0.00005  | 0.00005             | 0.00008           | 0.00014            | 2.62529 |
| R3       | 2.03327 | 0.00001  | -0.00001            | 0.00005           | 0.00004            | 2.03331 |
| R4       | 2.62973 | 0.00009  | 0.00006             | 0.00021           | 0.00027            | 2.63000 |
| R5       | 2.03109 | 0.00001  | 0.00001             | 0.00001           | 0.00002            | 2.03112 |
| R6       | 2.54392 | 0.00009  | -0.00001            | -0.00001          | -0.00001           | 2.54391 |
| R7       | 2.68787 | 0.00015  | 0.00072             | -0.00020          | 0.00051            | 2.68838 |
| R8       | 2.52708 | 0.00014  | 0.00010             | -0.00023          | -0.00012           | 2.52696 |
| R9       | 2.03147 | 0.00026  | 0.00030             | 0.00061           | 0.00091            | 2.03238 |
| R10      | 2.77973 | -0.00023 | 0.00030             | -0.00018          | 0.00012            | 2.77985 |
| R11      | 2.90782 | -0.00044 | -0.00031            | 0.00031           | 0.00000            | 2.90782 |
| R12      | 2.05921 | 0.00010  | 0.00010             | 0.00004           | 0.00014            | 2.05935 |
| R13      | 2.06258 | -0.00003 | -0.00010            | -0.00002          | -0.00012           | 2.06247 |
| R14      | 2.06788 | -0.00001 | 0.00009             | 0.00003           | 0.00012            | 2.06800 |
| R15      | 2.06688 | -0.00025 | 0.00018             | 0.00020           | 0.00038            | 2.06726 |
| R16      | 2.68571 | -0.00034 | -0.00021            | -0.00028          | -0.00048           | 2.68522 |
| R17      | 5.22017 | 0.00007  | -0.00425            | 0.00885           | 0.00460            | 5.22477 |
| R18      | 2.50693 | 0.00010  | 0.00000             | 0.00008           | 0.00008            | 2.50701 |
| R19      | 2.04967 | 0.00007  | 0.00020             | -0.00005          | 0.00015            | 2.04982 |
| R20      | 2.04335 | 0.00005  | 0.00004             | 0.00004           | 0.00008            | 2.04343 |
| R21      | 2.04728 | 0.00004  | 0.00000             | 0.00003           | 0.00003            | 2.04730 |
| R22      | 1.81835 | 0.00036  | 0.00031             | 0.00013           | 0.00044            | 1.81879 |
| A1       | 1.87499 | -0.00001 | 0.00002             | -0.00008          | -0.00007           | 1.87492 |
| A2       | 2.27813 | 0.00002  | -0.00004            | 0.00015           | 0.00010            | 2.27824 |
| A3       | 2.13000 | -0.00001 | 0.00007             | -0.00006          | 0.00000            | 2.13000 |
| A4       | 1.86727 | 0.00006  | -0.00001            | 0.00001           | 0.00000            | 1.86727 |
| A5       | 2.28369 | 0.00002  | 0.00006             | 0.00007           | 0.00012            | 2.28381 |
| A6       | 2.13162 | -0.00008 | -0.00001            | -0.00004          | -0.00005           | 2.13157 |
| A7       | 1.89287 | -0.00007 | 0.00003             | -0.00010          | -0.00005           | 1.89283 |
| A8       | 2.23566 | -0.00007 | -0.00028            | 0.00024           | -0.00004           | 2.23562 |
| A9       | 2.14870 | 0.00014  | 0.00018             | -0.00016          | 0.00002            | 2.14872 |
| A10      | 1.89393 | 0.00003  | 0.00001             | 0.00011           | 0.00008            | 1.89401 |
| A11      | 2.19002 | 0.00009  | 0.00020             | 0.00043           | 0.00056            | 2.19058 |
| A12      | 2.19923 | -0.00012 | -0.00006            | -0.00051          | -0.00064           | 2.19858 |
| A13      | 1.89490 | -0.00002 | -0.00001            | 0.00008           | 0.00009            | 1.89499 |

|     |          |          |          |          |          |          |
|-----|----------|----------|----------|----------|----------|----------|
| A14 | 2.20448  | 0.00038  | -0.00006 | 0.00078  | 0.00072  | 2.20521  |
| A15 | 2.16372  | -0.00038 | 0.00019  | -0.00045 | -0.00027 | 2.16345  |
| A16 | 1.93582  | -0.00078 | 0.00000  | 0.00113  | 0.00113  | 1.93695  |
| A17 | 1.87214  | 0.00011  | -0.00036 | 0.00028  | -0.00008 | 1.87207  |
| A18 | 1.89973  | 0.00038  | -0.00039 | -0.00034 | -0.00073 | 1.89900  |
| A19 | 1.91285  | -0.00006 | 0.00037  | -0.00047 | -0.00009 | 1.91276  |
| A20 | 1.94677  | 0.00045  | 0.00015  | -0.00021 | -0.00007 | 1.94670  |
| A21 | 1.89455  | -0.00010 | 0.00022  | -0.00040 | -0.00019 | 1.89436  |
| A22 | 1.92092  | 0.00049  | -0.00012 | 0.00018  | 0.00006  | 1.92098  |
| A23 | 1.89439  | -0.00189 | -0.00091 | 0.00064  | -0.00028 | 1.89411  |
| A24 | 1.90502  | 0.00048  | -0.00078 | -0.00051 | -0.00129 | 1.90373  |
| A25 | 1.90642  | 0.00047  | 0.00091  | 0.00034  | 0.00125  | 1.90766  |
| A26 | 1.88008  | -0.00033 | 0.00110  | -0.00070 | 0.00041  | 1.88049  |
| A27 | 1.95706  | 0.00082  | -0.00018 | 0.00005  | -0.00014 | 1.95692  |
| A28 | 2.58723  | -0.00317 | 0.00027  | -0.00140 | -0.00114 | 2.58609  |
| A29 | 2.15746  | -0.00003 | -0.00053 | 0.00030  | -0.00023 | 2.15723  |
| A30 | 1.95426  | 0.00006  | -0.00019 | 0.00019  | 0.00000  | 1.95426  |
| A31 | 2.17075  | -0.00003 | 0.00075  | -0.00052 | 0.00023  | 2.17098  |
| A32 | 2.08469  | -0.00005 | 0.00002  | -0.00038 | -0.00036 | 2.08432  |
| A33 | 2.14837  | -0.00002 | -0.00019 | 0.00013  | -0.00006 | 2.14831  |
| A34 | 2.05013  | 0.00007  | 0.00017  | 0.00025  | 0.00042  | 2.05055  |
| A35 | 1.89119  | -0.00013 | -0.00009 | -0.00031 | -0.00040 | 1.89078  |
| D1  | 0.00563  | 0.00008  | 0.00005  | -0.00015 | -0.00009 | 0.00554  |
| D2  | 3.10976  | 0.00005  | 0.00143  | 0.00067  | 0.00210  | 3.11186  |
| D3  | -3.12346 | 0.00000  | -0.00273 | -0.00096 | -0.00369 | -3.12715 |
| D4  | -0.01934 | -0.00003 | -0.00135 | -0.00014 | -0.00149 | -0.02082 |
| D5  | -0.02736 | -0.00010 | 0.00047  | 0.00030  | 0.00077  | -0.02659 |
| D6  | -2.96044 | 0.00004  | -0.00023 | -0.00174 | -0.00198 | -2.96242 |
| D7  | 3.10303  | -0.00003 | 0.00296  | 0.00103  | 0.00399  | 3.10702  |
| D8  | 0.16994  | 0.00012  | 0.00226  | -0.00101 | 0.00124  | 0.17119  |
| D9  | 0.01785  | -0.00004 | -0.00056 | -0.00005 | -0.00061 | 0.01724  |
| D10 | 3.04385  | -0.00009 | -0.00097 | -0.00021 | -0.00120 | 3.04265  |
| D11 | -3.09028 | -0.00001 | -0.00179 | -0.00079 | -0.00258 | -3.09286 |
| D12 | -0.06428 | -0.00006 | -0.00220 | -0.00095 | -0.00316 | -0.06745 |
| D13 | -0.03518 | -0.00002 | 0.00086  | 0.00024  | 0.00110  | -0.03409 |
| D14 | 3.11101  | -0.00007 | -0.00350 | -0.00509 | -0.00860 | 3.10240  |
| D15 | -3.06819 | 0.00004  | 0.00130  | 0.00036  | 0.00165  | -3.06654 |
| D16 | 0.07800  | -0.00001 | -0.00306 | -0.00497 | -0.00805 | 0.06995  |
| D17 | 0.53347  | 0.00006  | 0.00329  | -0.00312 | 0.00017  | 0.53363  |
| D18 | -2.56885 | 0.00007  | 0.00250  | -0.00237 | 0.00013  | -2.56872 |
| D19 | -2.73912 | -0.00001 | 0.00280  | -0.00329 | -0.00050 | -2.73962 |
| D20 | 0.44175  | -0.00001 | 0.00201  | -0.00254 | -0.00054 | 0.44121  |
| D21 | 0.03871  | 0.00007  | -0.00083 | -0.00033 | -0.00115 | 0.03755  |
| D22 | 2.97777  | 0.00005  | -0.00017 | 0.00183  | 0.00166  | 2.97943  |

|     |          |          |          |          |          |          |
|-----|----------|----------|----------|----------|----------|----------|
| D23 | -3.10751 | 0.00013  | 0.00358  | 0.00504  | 0.00861  | -3.09891 |
| D24 | -0.16845 | 0.00010  | 0.00424  | 0.00720  | 0.01142  | -0.15703 |
| D25 | 1.22898  | 0.00047  | 0.00435  | 0.00573  | 0.01009  | 1.23906  |
| D26 | -2.96580 | 0.00002  | 0.00459  | 0.00599  | 0.01057  | -2.95523 |
| D27 | -0.91914 | 0.00016  | 0.00444  | 0.00548  | 0.00993  | -0.90921 |
| D28 | -1.67374 | 0.00058  | 0.00357  | 0.00330  | 0.00687  | -1.66687 |
| D29 | 0.41467  | 0.00012  | 0.00380  | 0.00356  | 0.00736  | 0.42203  |
| D30 | 2.46133  | 0.00026  | 0.00365  | 0.00306  | 0.00671  | 2.46804  |
| D31 | -1.16393 | -0.00018 | 0.00125  | -0.00481 | -0.00356 | -1.16749 |
| D32 | 0.92159  | -0.00046 | 0.00173  | -0.00390 | -0.00217 | 0.91942  |
| D33 | 3.05937  | -0.00035 | 0.00045  | -0.00376 | -0.00331 | 3.05606  |
| D34 | 3.05538  | 0.00020  | 0.00146  | -0.00555 | -0.00409 | 3.05128  |
| D35 | -1.14229 | -0.00009 | 0.00194  | -0.00464 | -0.00271 | -1.14500 |
| D36 | 0.99549  | 0.00002  | 0.00065  | -0.00450 | -0.00385 | 0.99164  |
| D37 | 0.95681  | 0.00008  | 0.00085  | -0.00460 | -0.00375 | 0.95306  |
| D38 | 3.04233  | -0.00021 | 0.00133  | -0.00369 | -0.00236 | 3.03997  |
| D39 | -1.10307 | -0.00010 | 0.00005  | -0.00355 | -0.00350 | -1.10658 |
| D40 | 0.22582  | -0.00011 | -0.00413 | 0.01521  | 0.01109  | 0.23691  |
| D41 | 2.32040  | -0.00037 | -0.00427 | 0.01600  | 0.01173  | 2.33213  |
| D42 | -1.88006 | 0.00005  | -0.00241 | 0.01539  | 0.01298  | -1.86708 |
| D43 | -1.74910 | 0.00070  | -0.00801 | -0.00210 | -0.01011 | -1.75920 |
| D44 | 2.44873  | 0.00003  | -0.00807 | -0.00162 | -0.00969 | 2.43904  |
| D45 | 0.35062  | -0.00083 | -0.00980 | -0.00161 | -0.01141 | 0.33921  |
| D46 | -3.09279 | 0.00000  | -0.00097 | 0.00108  | 0.00011  | -3.09268 |
| D47 | 0.04631  | 0.00000  | -0.00019 | 0.00034  | 0.00015  | 0.04646  |
| D48 | 0.00467  | -0.00001 | -0.00011 | 0.00025  | 0.00014  | 0.00481  |
| D49 | -3.13942 | 0.00000  | 0.00067  | -0.00049 | 0.00018  | -3.13924 |

| Item                 | Value    | Threshold | Converged? |
|----------------------|----------|-----------|------------|
| Maximum Force        | 0.003175 | 0.000450  | NO         |
| RMS Force            | 0.000432 | 0.000300  | NO         |
| Maximum Displacement | 0.039428 | 0.001800  | NO         |
| RMS Displacement     | 0.007235 | 0.001200  | NO         |

Predicted change in Energy=-1.059671D-05

GradGradGradGradGradGradGradGradGradGradGradGradGradGradGradGradGradGradGrad

Input orientation:

| Center Number | Atomic Number | Atomic Type | Coordinates (Angstroms) |           |           |
|---------------|---------------|-------------|-------------------------|-----------|-----------|
|               |               |             | X                       | Y         | Z         |
| 1             | 6             | 0           | -0.464868               | -2.038194 | -1.302382 |
| 2             | 6             | 0           | -1.751873               | -1.646064 | -1.466568 |
| 3             | 7             | 0           | -2.091790               | -0.888616 | -0.349584 |
| 4             | 6             | 0           | -1.016583               | -0.812481 | 0.456847  |

|    |    |   |           |           |           |
|----|----|---|-----------|-----------|-----------|
| 5  | 7  | 0 | -0.026160 | -1.527475 | -0.087185 |
| 6  | 6  | 0 | 1.359730  | -1.519631 | 0.405948  |
| 7  | 6  | 0 | 2.219686  | -0.517074 | -0.383427 |
| 8  | 1  | 0 | 0.174440  | -2.623784 | -1.939644 |
| 9  | 1  | 0 | -2.438699 | -1.809493 | -2.277002 |
| 10 | 1  | 0 | 1.327951  | -1.227094 | 1.455228  |
| 11 | 1  | 0 | 1.762362  | -2.531910 | 0.339961  |
| 12 | 1  | 0 | 2.332826  | -0.853064 | -1.418746 |
| 13 | 1  | 0 | 1.718776  | 0.455381  | -0.371557 |
| 14 | 35 | 0 | -0.242582 | 2.074430  | 0.712891  |
| 15 | 1  | 0 | -0.965829 | -0.263290 | 1.380149  |
| 16 | 6  | 0 | -3.294754 | -0.167596 | -0.111075 |
| 17 | 6  | 0 | -4.476238 | -0.530879 | -0.592870 |
| 18 | 1  | 0 | -3.121340 | 0.728644  | 0.474838  |
| 19 | 1  | 0 | -5.340098 | 0.092469  | -0.407202 |
| 20 | 1  | 0 | -4.625970 | -1.432622 | -1.174391 |
| 21 | 8  | 0 | 3.515391  | -0.458729 | 0.196975  |
| 22 | 1  | 0 | 3.565971  | 0.330194  | 0.745949  |

-----  
Distance matrix (angstroms):

|    |    | 1        | 2        | 3        | 4        | 5        |
|----|----|----------|----------|----------|----------|----------|
| 1  | C  | 0.000000 |          |          |          |          |
| 2  | C  | 1.355399 | 0.000000 |          |          |          |
| 3  | N  | 2.208219 | 1.391734 | 0.000000 |          |          |
| 4  | C  | 2.213967 | 2.221495 | 1.346180 | 0.000000 |          |
| 5  | N  | 1.389245 | 2.212430 | 2.178031 | 1.337207 | 0.000000 |
| 6  | C  | 2.552734 | 3.633783 | 3.589150 | 2.479821 | 1.471031 |
| 7  | C  | 3.219489 | 4.268618 | 4.327588 | 3.356599 | 2.480422 |
| 8  | H  | 1.075980 | 2.211429 | 3.267246 | 3.231490 | 2.161883 |
| 9  | H  | 2.213188 | 1.074822 | 2.164093 | 3.238886 | 3.270348 |
| 10 | H  | 3.387697 | 4.265882 | 3.881565 | 2.581764 | 2.074339 |
| 11 | H  | 2.810978 | 4.049460 | 4.246219 | 3.269960 | 2.095270 |
| 12 | H  | 3.040586 | 4.161238 | 4.552098 | 3.839015 | 2.791541 |
| 13 | H  | 3.442768 | 4.202444 | 4.040697 | 3.126646 | 2.656575 |
| 14 | Br | 4.585239 | 4.568379 | 3.650763 | 2.999815 | 3.696036 |
| 15 | H  | 3.255336 | 3.260940 | 2.156571 | 1.075487 | 2.152721 |
| 16 | C  | 3.595359 | 2.530556 | 1.422631 | 2.434847 | 3.540275 |
| 17 | C  | 4.343558 | 3.070692 | 2.423376 | 3.626350 | 4.588257 |
| 18 | H  | 4.227381 | 3.359128 | 2.086906 | 2.608715 | 3.871186 |
| 19 | H  | 5.395270 | 4.125543 | 3.393722 | 4.500922 | 5.564580 |
| 20 | H  | 4.206884 | 2.896783 | 2.719984 | 4.009138 | 4.727500 |
| 21 | O  | 4.537096 | 5.649886 | 5.650134 | 4.553181 | 3.710196 |
| 22 | H  | 5.104173 | 6.089359 | 5.890327 | 4.731710 | 4.128977 |
|    |    | 6        | 7        | 8        | 9        | 10       |

|    |    |          |          |          |          |          |
|----|----|----------|----------|----------|----------|----------|
| 6  | C  | 0.000000 |          |          |          |          |
| 7  | C  | 1.538752 | 0.000000 |          |          |          |
| 8  | H  | 2.850590 | 3.323112 | 0.000000 |          |          |
| 9  | H  | 4.659431 | 5.191967 | 2.757784 | 0.000000 |          |
| 10 | H  | 1.089760 | 2.163324 | 3.847919 | 5.334452 | 0.000000 |
| 11 | H  | 1.091410 | 2.189064 | 2.779665 | 5.001929 | 1.770615 |
| 12 | H  | 2.172725 | 1.094338 | 2.839967 | 4.941539 | 3.067474 |
| 13 | H  | 2.152696 | 1.093947 | 3.784855 | 5.103428 | 2.514082 |
| 14 | Br | 3.947011 | 3.739060 | 5.411383 | 5.370964 | 3.730644 |
| 15 | H  | 2.817034 | 3.649946 | 4.230032 | 4.234955 | 2.489173 |
| 16 | C  | 4.874375 | 5.532211 | 4.627292 | 2.849544 | 4.994522 |
| 17 | C  | 6.002815 | 6.699212 | 5.274737 | 2.936447 | 6.194193 |
| 18 | H  | 5.013928 | 5.551125 | 5.284947 | 3.805360 | 4.958051 |
| 19 | H  | 6.938859 | 7.584355 | 6.335340 | 3.941031 | 7.047891 |
| 20 | H  | 6.191417 | 6.951752 | 5.004839 | 2.478293 | 6.512013 |
| 21 | O  | 2.411651 | 1.420958 | 4.518247 | 6.587588 | 2.637893 |
| 22 | H  | 2.899130 | 1.950855 | 5.238404 | 7.054967 | 2.817261 |
|    |    | 11       | 12       | 13       | 14       | 15       |
| 11 | H  | 0.000000 |          |          |          |          |
| 12 | H  | 2.497399 | 0.000000 |          |          |          |
| 13 | H  | 3.071167 | 1.784850 | 0.000000 |          |          |
| 14 | Br | 5.037584 | 4.443740 | 2.764829 | 0.000000 |          |
| 15 | H  | 3.697520 | 4.366093 | 3.285128 | 2.536387 | 0.000000 |
| 16 | C  | 5.600700 | 5.818035 | 5.058798 | 3.875739 | 2.767093 |
| 17 | C  | 6.617736 | 6.866529 | 6.276933 | 5.139697 | 4.035762 |
| 18 | H  | 5.873667 | 5.986267 | 4.921157 | 3.186700 | 2.539636 |
| 19 | H  | 7.608584 | 7.796859 | 7.068287 | 5.582781 | 4.738715 |
| 20 | H  | 6.656762 | 6.987162 | 6.668201 | 5.922443 | 4.614070 |
| 21 | O  | 2.718756 | 2.040714 | 2.094433 | 4.561297 | 4.638904 |
| 22 | H  | 3.407268 | 2.758016 | 2.162549 | 4.189096 | 4.614286 |
|    |    | 16       | 17       | 18       | 19       | 20       |
| 16 | C  | 0.000000 |          |          |          |          |
| 17 | C  | 1.326651 | 0.000000 |          |          |          |
| 18 | H  | 1.084718 | 2.135918 | 0.000000 |          |          |
| 19 | H  | 2.082968 | 1.081337 | 2.470951 | 0.000000 |          |
| 20 | H  | 2.122043 | 1.083387 | 3.107240 | 1.850530 | 0.000000 |
| 21 | O  | 6.823323 | 8.030890 | 6.747834 | 8.893173 | 8.313295 |
| 22 | H  | 6.931943 | 8.198231 | 6.704655 | 8.983559 | 8.596692 |
|    |    | 21       | 22       |          |          |          |
| 21 | O  | 0.000000 |          |          |          |          |
| 22 | H  | 0.962461 | 0.000000 |          |          |          |

Stoichiometry C7H11BrN2O

Framework group C1[X(C7H11BrN2O)]

Deg. of freedom 60

Full point group C1 NOp 1  
 Largest Abelian subgroup C1 NOp 1  
 Largest concise Abelian subgroup C1 NOp 1

Standard orientation:

| Center Number | Atomic Number | Atomic Type | Coordinates (Angstroms) |           |           |
|---------------|---------------|-------------|-------------------------|-----------|-----------|
|               |               |             | X                       | Y         | Z         |
| 1             | 6             | 0           | -0.481820               | -2.326374 | -0.495659 |
| 2             | 6             | 0           | -1.724891               | -1.812858 | -0.663538 |
| 3             | 7             | 0           | -1.806622               | -0.676295 | 0.135504  |
| 4             | 6             | 0           | -0.622821               | -0.503350 | 0.752679  |
| 5             | 7             | 0           | 0.187230                | -1.509660 | 0.407309  |
| 6             | 6             | 0           | 1.622157                | -1.556426 | 0.727826  |
| 7             | 6             | 0           | 2.466532                | -1.034075 | -0.447733 |
| 8             | 1             | 0           | -0.015441               | -3.188307 | -0.939839 |
| 9             | 1             | 0           | -2.537868               | -2.130244 | -1.290894 |
| 10            | 1             | 0           | 1.779370                | -0.923006 | 1.600545  |
| 11            | 1             | 0           | 1.890875                | -2.581254 | 0.989923  |
| 12            | 1             | 0           | 2.386272                | -1.716031 | -1.299831 |
| 13            | 1             | 0           | 2.088698                | -0.048833 | -0.736280 |
| 14            | 35            | 0           | 0.509068                | 2.134601  | -0.118490 |
| 15            | 1             | 0           | -0.373416               | 0.311745  | 1.408492  |
| 16            | 6             | 0           | -2.869771               | 0.265602  | 0.215645  |
| 17            | 6             | 0           | -4.143343               | -0.045821 | 0.013081  |
| 18            | 1             | 0           | -2.509452               | 1.267708  | 0.421964  |
| 19            | 1             | 0           | -4.892471               | 0.733281  | 0.046190  |
| 20            | 1             | 0           | -4.480389               | -1.055322 | -0.189490 |
| 21            | 8             | 0           | 3.831568                | -0.989893 | -0.055501 |
| 22            | 1             | 0           | 4.053374                | -0.080122 | 0.166875  |

Rotational constants (GHZ): 0.8066993 0.5715010 0.3525333

Standard basis: 6-311++G(d,p) (5D, 7F)

There are 358 symmetry adapted cartesian basis functions of A symmetry.

There are 345 symmetry adapted basis functions of A symmetry.

345 basis functions, 553 primitive gaussians, 358 cartesian basis functions

55 alpha electrons 55 beta electrons

nuclear repulsion energy 863.3705849070 Hartrees.

NAtoms= 22 NActive= 22 NUniq= 22 SFac= 1.00D+00 NAtFMM= 60 NAOKFM=F

Big=F

Integral buffers will be 131072 words long.

Raffenetti 2 integral format.

Two-electron integral symmetry is turned on.

One-electron integrals computed using PRISM.

NBasis= 345 RedAO= T EigKep= 6.60D-06 NBF= 345  
 NBsUse= 345 1.00D-06 EigRej= -1.00D+00 NBFU= 345  
 Initial guess from the checkpoint file: ". "  
 B after Tr= 0.000000 0.000000 0.000000  
 Rot= 0.999998 0.000369 -0.000111 0.002138 Ang= 0.25 deg.  
 ExpMin= 3.50D-02 ExpMax= 4.40D+05 ExpMxC= 1.51D+04 IAcc=3 IRadAn= 5 AccDes=  
 0.00D+00  
 Harris functional with IExCor= 402 and IRadAn= 5 diagonalized for initial guess.  
 HarFok: IExCor= 402 AccDes= 0.00D+00 IRadAn= 5 IDoV= 1 UseB2=F ITyADJ=14  
 ICtDFT= 3500011 ScaDFX= 1.000000 1.000000 1.000000 1.000000  
 FoFCou: FMM=F IPFlag= 0 FMFlag= 100000 FMFlg1= 0  
 NfxFlg= 0 DoJE=T BraDBF=F KetDBF=T FulRan=T  
 wScrn= 0.000000 ICntrl= 500 IOpCl= 0 l1Cent= 200000004 NGrid=  
 0  
 NMat0= 1 NMatS0= 1 NMatT0= 0 NMatD0= 1 NMtDS0= 0  
 NMtDT0= 0  
 Petite list used in FoFCou.  
 Keep R1 ints in memory in canonical form, NReq=1804729152.  
 Requested convergence on RMS density matrix=1.00D-08 within 128 cycles.  
 Requested convergence on MAX density matrix=1.00D-06.  
 Requested convergence on energy=1.00D-06.  
 No special actions if energy rises.  
 SCF Done: E(RB3LYP) = -3032.33851074 A.U. after 10 cycles  
 NFock= 10 Conv=0.62D-08 -V/T= 2.0017  
 Calling FoFJK, ICntrl= 2127 FMM=F ISym2X=0 l1Cent= 0 IOpClX= 0 NMat=1 NMatS=1  
 NMatT=0.

\*\*\*\*\* Axes restored to original set \*\*\*\*\*

| Center<br>Number | Atomic<br>Number | Forces (Hartrees/Bohr) |              |              |
|------------------|------------------|------------------------|--------------|--------------|
|                  |                  | X                      | Y            | Z            |
| 1                | 6                | -0.000061191           | -0.000041121 | 0.000006006  |
| 2                | 6                | 0.000033895            | -0.000059764 | -0.000008452 |
| 3                | 7                | -0.000025899           | -0.000089994 | 0.000070640  |
| 4                | 6                | -0.000050409           | -0.000009409 | -0.000144430 |
| 5                | 7                | 0.000261612            | 0.000133210  | 0.000010310  |
| 6                | 6                | -0.000304605           | -0.000013783 | -0.000131362 |
| 7                | 6                | -0.000023373           | -0.000033015 | 0.000484138  |
| 8                | 1                | 0.000031011            | 0.000016581  | -0.000007069 |
| 9                | 1                | -0.000031152           | 0.000004973  | 0.000016907  |
| 10               | 1                | 0.000044238            | -0.000022501 | 0.000045382  |
| 11               | 1                | 0.000023453            | 0.000007917  | -0.000029254 |
| 12               | 1                | 0.000085453            | -0.000009449 | 0.000037512  |
| 13               | 1                | 0.000272656            | 0.000016113  | -0.000595476 |

|    |    |              |              |              |
|----|----|--------------|--------------|--------------|
| 14 | 35 | -0.000219135 | -0.000126729 | 0.000237643  |
| 15 | 1  | 0.000074379  | 0.000155246  | 0.000129587  |
| 16 | 6  | 0.000050674  | 0.000071312  | -0.000090286 |
| 17 | 6  | -0.000046753 | -0.000006582 | -0.000016275 |
| 18 | 1  | -0.000035828 | 0.000040472  | 0.000031706  |
| 19 | 1  | -0.000008675 | 0.000017594  | 0.000028049  |
| 20 | 1  | 0.000014903  | -0.000035220 | -0.000014326 |
| 21 | 8  | -0.000076325 | -0.000121119 | -0.000123273 |
| 22 | 1  | -0.000008928 | 0.000105269  | 0.000062323  |

-----  
Cartesian Forces: Max 0.000595476 RMS 0.000133109

GradGradGradGradGradGradGradGradGradGradGradGradGradGradGradGradGradGradGrad  
Berny optimization.

Using GEDIIS/GDIIS optimizer.

FormGI is forming the generalized inverse of G from B-inverse, IUseBI=4.

Internal Forces: Max 0.001566053 RMS 0.000187426

Search for a local minimum.

Step number 31 out of a maximum of 116

All quantities printed in internal units (Hartrees-Bohrs-Radians)

Mixed Optimization -- En-DIIS/RFO-DIIS

Swapping is turned off.

Update second derivatives using D2CorX and points 25 26 27 28 29  
30 31

DE= -1.41D-05 DEPred=-1.06D-05 R= 1.33D+00

TightC=F SS= 1.41D+00 RLast= 4.19D-02 DXNew= 1.0469D+00 1.2574D-01

Trust test= 1.33D+00 RLast= 4.19D-02 DXMaxT set to 6.23D-01

ITU= 1 1 1 1 1 0-1 1 1 1 1 1 0-1 1 1 1 1 1 1

ITU= 1 1 1 1 1 1 0 0-1 0 0

|                 |         |         |         |         |         |
|-----------------|---------|---------|---------|---------|---------|
| Eigenvalues --- | 0.00033 | 0.00142 | 0.00482 | 0.00558 | 0.00823 |
| Eigenvalues --- | 0.01064 | 0.01516 | 0.01844 | 0.02070 | 0.02088 |
| Eigenvalues --- | 0.02309 | 0.02519 | 0.03066 | 0.03103 | 0.03689 |
| Eigenvalues --- | 0.04483 | 0.04998 | 0.05516 | 0.06049 | 0.06632 |
| Eigenvalues --- | 0.09093 | 0.09313 | 0.13682 | 0.14211 | 0.15075 |
| Eigenvalues --- | 0.15959 | 0.15964 | 0.16003 | 0.16036 | 0.16260 |
| Eigenvalues --- | 0.17370 | 0.17928 | 0.20815 | 0.22613 | 0.22887 |
| Eigenvalues --- | 0.24131 | 0.24954 | 0.25519 | 0.29868 | 0.33230 |
| Eigenvalues --- | 0.33871 | 0.33905 | 0.33958 | 0.34147 | 0.34240 |
| Eigenvalues --- | 0.34480 | 0.34799 | 0.36098 | 0.36320 | 0.36387 |
| Eigenvalues --- | 0.37215 | 0.43066 | 0.44924 | 0.45878 | 0.49839 |
| Eigenvalues --- | 0.53357 | 0.54610 | 0.58343 | 0.60987 | 1.74893 |

En-DIIS/RFO-DIIS IScMMF= 0 using points: 31 30 29 28 27

RFO step: Lambda=-4.81852294D-06.

DidBck=F Rises=F RFO-DIIS coefs: 1.65486 -0.35235 0.35944 -0.83691



0.17496

Iteration 1 RMS(Cart)= 0.02099632 RMS(Int)= 0.00030029

Iteration 2 RMS(Cart)= 0.00061934 RMS(Int)= 0.00008303

Iteration 3 RMS(Cart)= 0.00000040 RMS(Int)= 0.00008303

| Variable | Old X   | -DE/DX   | Delta X<br>(Linear) | Delta X<br>(Quad) | Delta X<br>(Total) | New X   |
|----------|---------|----------|---------------------|-------------------|--------------------|---------|
| R1       | 2.56133 | 0.00001  | 0.00033             | 0.00006           | 0.00030            | 2.56163 |
| R2       | 2.62529 | 0.00002  | -0.00007            | 0.00000           | -0.00009           | 2.62520 |
| R3       | 2.03331 | 0.00001  | 0.00003             | 0.00007           | 0.00011            | 2.03341 |
| R4       | 2.63000 | 0.00003  | 0.00017             | 0.00011           | 0.00025            | 2.63025 |
| R5       | 2.03112 | 0.00001  | 0.00001             | 0.00001           | 0.00002            | 2.03114 |
| R6       | 2.54391 | 0.00002  | -0.00053            | -0.00011          | -0.00056           | 2.54335 |
| R7       | 2.68838 | 0.00006  | 0.00108             | 0.00002           | 0.00110            | 2.68949 |
| R8       | 2.52696 | 0.00006  | -0.00051            | -0.00026          | -0.00070           | 2.52626 |
| R9       | 2.03238 | 0.00019  | 0.00165             | 0.00104           | 0.00269            | 2.03507 |
| R10      | 2.77985 | -0.00020 | 0.00107             | -0.00037          | 0.00070            | 2.78055 |
| R11      | 2.90782 | -0.00015 | 0.00006             | 0.00025           | 0.00032            | 2.90814 |
| R12      | 2.05935 | 0.00004  | 0.00011             | 0.00005           | 0.00017            | 2.05951 |
| R13      | 2.06247 | 0.00000  | -0.00025            | 0.00002           | -0.00023           | 2.06224 |
| R14      | 2.06800 | -0.00002 | 0.00015             | -0.00007          | 0.00008            | 2.06808 |
| R15      | 2.06726 | -0.00013 | 0.00054             | 0.00005           | 0.00058            | 2.06784 |
| R16      | 2.68522 | -0.00010 | -0.00106            | -0.00035          | -0.00141           | 2.68381 |
| R17      | 5.22477 | 0.00017  | -0.00866            | 0.01424           | 0.00558            | 5.23035 |
| R18      | 2.50701 | 0.00004  | -0.00004            | 0.00006           | 0.00002            | 2.50703 |
| R19      | 2.04982 | 0.00005  | 0.00011             | 0.00003           | 0.00014            | 2.04996 |
| R20      | 2.04343 | 0.00002  | 0.00003             | 0.00007           | 0.00009            | 2.04352 |
| R21      | 2.04730 | 0.00003  | -0.00007            | 0.00009           | 0.00002            | 2.04733 |
| R22      | 1.81879 | 0.00012  | 0.00069             | 0.00018           | 0.00087            | 1.81966 |
| A1       | 1.87492 | -0.00001 | -0.00009            | -0.00011          | -0.00023           | 1.87469 |
| A2       | 2.27824 | 0.00002  | -0.00010            | 0.00021           | 0.00011            | 2.27835 |
| A3       | 2.13000 | -0.00002 | 0.00025             | -0.00010          | 0.00015            | 2.13015 |
| A4       | 1.86727 | 0.00002  | -0.00023            | -0.00005          | -0.00030           | 1.86697 |
| A5       | 2.28381 | 0.00002  | -0.00013            | 0.00005           | -0.00007           | 2.28374 |
| A6       | 2.13157 | -0.00005 | 0.00045             | 0.00002           | 0.00047            | 2.13205 |
| A7       | 1.89283 | -0.00001 | 0.00013             | 0.00005           | 0.00029            | 1.89312 |
| A8       | 2.23562 | -0.00003 | 0.00064             | 0.00028           | 0.00085            | 2.23647 |
| A9       | 2.14872 | 0.00004  | -0.00032            | -0.00023          | -0.00063           | 2.14809 |
| A10      | 1.89401 | 0.00000  | 0.00026             | -0.00001          | 0.00002            | 1.89403 |
| A11      | 2.19058 | 0.00004  | 0.00067             | 0.00027           | 0.00039            | 2.19097 |
| A12      | 2.19858 | -0.00004 | -0.00037            | -0.00031          | -0.00123           | 2.19736 |
| A13      | 1.89499 | 0.00000  | 0.00015             | 0.00019           | 0.00046            | 1.89545 |
| A14      | 2.20521 | 0.00015  | 0.00123             | 0.00075           | 0.00192            | 2.20712 |
| A15      | 2.16345 | -0.00015 | -0.00132            | -0.00026          | -0.00164           | 2.16180 |
| A16      | 1.93695 | -0.00024 | -0.00065            | 0.00103           | 0.00038            | 1.93733 |

|     |          |          |          |          |          |          |
|-----|----------|----------|----------|----------|----------|----------|
| A17 | 1.87207  | 0.00005  | -0.00102 | 0.00038  | -0.00065 | 1.87142  |
| A18 | 1.89900  | 0.00014  | -0.00064 | -0.00041 | -0.00105 | 1.89795  |
| A19 | 1.91276  | -0.00004 | -0.00014 | -0.00016 | -0.00031 | 1.91245  |
| A20 | 1.94670  | 0.00013  | 0.00183  | -0.00044 | 0.00139  | 1.94809  |
| A21 | 1.89436  | -0.00003 | 0.00054  | -0.00039 | 0.00014  | 1.89451  |
| A22 | 1.92098  | 0.00016  | 0.00026  | 0.00012  | 0.00039  | 1.92137  |
| A23 | 1.89411  | -0.00065 | -0.00246 | 0.00085  | -0.00161 | 1.89250  |
| A24 | 1.90373  | 0.00021  | -0.00036 | 0.00008  | -0.00029 | 1.90344  |
| A25 | 1.90766  | 0.00015  | 0.00241  | 0.00050  | 0.00290  | 1.91057  |
| A26 | 1.88049  | -0.00013 | 0.00104  | -0.00108 | -0.00004 | 1.88045  |
| A27 | 1.95692  | 0.00028  | -0.00083 | -0.00048 | -0.00132 | 1.95560  |
| A28 | 2.58609  | -0.00157 | 0.00204  | -0.00321 | -0.00117 | 2.58492  |
| A29 | 2.15723  | -0.00001 | -0.00019 | 0.00044  | 0.00025  | 2.15748  |
| A30 | 1.95426  | 0.00005  | -0.00008 | 0.00038  | 0.00030  | 1.95456  |
| A31 | 2.17098  | -0.00004 | 0.00031  | -0.00078 | -0.00048 | 2.17050  |
| A32 | 2.08432  | -0.00002 | -0.00037 | -0.00033 | -0.00070 | 2.08363  |
| A33 | 2.14831  | -0.00001 | 0.00012  | 0.00028  | 0.00041  | 2.14872  |
| A34 | 2.05055  | 0.00003  | 0.00025  | 0.00004  | 0.00029  | 2.05084  |
| A35 | 1.89078  | -0.00003 | -0.00089 | -0.00047 | -0.00136 | 1.88942  |
| D1  | 0.00554  | 0.00004  | 0.00020  | 0.00005  | 0.00025  | 0.00579  |
| D2  | 3.11186  | 0.00000  | 0.00292  | 0.00084  | 0.00376  | 3.11563  |
| D3  | -3.12715 | 0.00003  | -0.00528 | -0.00008 | -0.00535 | -3.13251 |
| D4  | -0.02082 | -0.00001 | -0.00255 | 0.00072  | -0.00184 | -0.02267 |
| D5  | -0.02659 | -0.00004 | 0.00278  | 0.00097  | 0.00374  | -0.02285 |
| D6  | -2.96242 | 0.00000  | 0.00262  | -0.00248 | 0.00013  | -2.96230 |
| D7  | 3.10702  | -0.00003 | 0.00768  | 0.00108  | 0.00876  | 3.11578  |
| D8  | 0.17119  | 0.00001  | 0.00753  | -0.00237 | 0.00515  | 0.17634  |
| D9  | 0.01724  | -0.00003 | -0.00309 | -0.00104 | -0.00413 | 0.01311  |
| D10 | 3.04265  | -0.00005 | 0.00102  | -0.00012 | 0.00090  | 3.04355  |
| D11 | -3.09286 | 0.00000  | -0.00550 | -0.00175 | -0.00726 | -3.10011 |
| D12 | -0.06745 | -0.00002 | -0.00140 | -0.00082 | -0.00222 | -0.06967 |
| D13 | -0.03409 | 0.00001  | 0.00485  | 0.00167  | 0.00651  | -0.02757 |
| D14 | 3.10240  | -0.00003 | -0.02188 | -0.00810 | -0.03002 | 3.07239  |
| D15 | -3.06654 | 0.00004  | 0.00091  | 0.00075  | 0.00168  | -3.06486 |
| D16 | 0.06995  | 0.00000  | -0.02582 | -0.00901 | -0.03485 | 0.03509  |
| D17 | 0.53363  | 0.00003  | -0.00986 | -0.00603 | -0.01590 | 0.51774  |
| D18 | -2.56872 | 0.00001  | -0.01097 | -0.00703 | -0.01800 | -2.58672 |
| D19 | -2.73962 | 0.00000  | -0.00517 | -0.00496 | -0.01012 | -2.74974 |
| D20 | 0.44121  | -0.00002 | -0.00627 | -0.00596 | -0.01223 | 0.42898  |
| D21 | 0.03755  | 0.00001  | -0.00473 | -0.00163 | -0.00635 | 0.03120  |
| D22 | 2.97943  | 0.00002  | -0.00421 | 0.00186  | -0.00235 | 2.97708  |
| D23 | -3.09891 | 0.00005  | 0.02219  | 0.00819  | 0.03034  | -3.06856 |
| D24 | -0.15703 | 0.00006  | 0.02271  | 0.01168  | 0.03434  | -0.12269 |
| D25 | 1.23906  | 0.00018  | 0.01250  | 0.00676  | 0.01926  | 1.25832  |

|     |          |          |          |          |          |          |
|-----|----------|----------|----------|----------|----------|----------|
| D26 | -2.95523 | 0.00002  | 0.01131  | 0.00739  | 0.01870  | -2.93652 |
| D27 | -0.90921 | 0.00008  | 0.01105  | 0.00691  | 0.01797  | -0.89124 |
| D28 | -1.66687 | 0.00019  | 0.01209  | 0.00273  | 0.01481  | -1.65206 |
| D29 | 0.42203  | 0.00004  | 0.01090  | 0.00336  | 0.01425  | 0.43628  |
| D30 | 2.46804  | 0.00009  | 0.01065  | 0.00288  | 0.01352  | 2.48156  |
| D31 | -1.16749 | -0.00006 | -0.01032 | -0.00480 | -0.01512 | -1.18260 |
| D32 | 0.91942  | -0.00018 | -0.00873 | -0.00360 | -0.01233 | 0.90709  |
| D33 | 3.05606  | -0.00012 | -0.01152 | -0.00361 | -0.01513 | 3.04093  |
| D34 | 3.05128  | 0.00005  | -0.00857 | -0.00579 | -0.01436 | 3.03693  |
| D35 | -1.14500 | -0.00007 | -0.00698 | -0.00459 | -0.01157 | -1.15657 |
| D36 | 0.99164  | -0.00001 | -0.00977 | -0.00460 | -0.01437 | 0.97727  |
| D37 | 0.95306  | 0.00004  | -0.01032 | -0.00491 | -0.01523 | 0.93784  |
| D38 | 3.03997  | -0.00008 | -0.00873 | -0.00371 | -0.01244 | 3.02753  |
| D39 | -1.10658 | -0.00002 | -0.01152 | -0.00372 | -0.01524 | -1.12181 |
| D40 | 0.23691  | 0.00002  | 0.05307  | 0.02080  | 0.07388  | 0.31079  |
| D41 | 2.33213  | -0.00009 | 0.05334  | 0.02176  | 0.07510  | 2.40723  |
| D42 | -1.86708 | 0.00002  | 0.05572  | 0.02043  | 0.07614  | -1.79094 |
| D43 | -1.75920 | 0.00024  | -0.00089 | 0.00678  | 0.00588  | -1.75332 |
| D44 | 2.43904  | 0.00001  | -0.00161 | 0.00721  | 0.00560  | 2.44465  |
| D45 | 0.33921  | -0.00026 | -0.00476 | 0.00760  | 0.00283  | 0.34204  |
| D46 | -3.09268 | -0.00003 | -0.00107 | -0.00088 | -0.00195 | -3.09463 |
| D47 | 0.04646  | -0.00001 | -0.00058 | -0.00061 | -0.00119 | 0.04527  |
| D48 | 0.00481  | 0.00000  | 0.00016  | 0.00028  | 0.00044  | 0.00525  |
| D49 | -3.13924 | 0.00001  | 0.00065  | 0.00055  | 0.00120  | -3.13804 |

| Item                 | Value    | Threshold | Converged? |
|----------------------|----------|-----------|------------|
| Maximum Force        | 0.001566 | 0.000450  | NO         |
| RMS Force            | 0.000187 | 0.000300  | YES        |
| Maximum Displacement | 0.116596 | 0.001800  | NO         |
| RMS Displacement     | 0.020868 | 0.001200  | NO         |

Predicted change in Energy=-1.502852D-05

GradGradGradGradGradGradGradGradGradGradGradGradGradGradGradGradGradGradGrad

Input orientation:

| Center Number | Atomic Number | Atomic Type | Coordinates (Angstroms) |           |           |
|---------------|---------------|-------------|-------------------------|-----------|-----------|
|               |               |             | X                       | Y         | Z         |
| 1             | 6             | 0           | -0.470580               | -2.057215 | -1.300017 |
| 2             | 6             | 0           | -1.757438               | -1.663443 | -1.462731 |
| 3             | 7             | 0           | -2.090034               | -0.893045 | -0.352251 |
| 4             | 6             | 0           | -1.012835               | -0.815398 | 0.450875  |
| 5             | 7             | 0           | -0.025523               | -1.534697 | -0.092225 |
| 6             | 6             | 0           | 1.361980                | -1.523625 | 0.397402  |
| 7             | 6             | 0           | 2.215468                | -0.511198 | -0.386708 |

|    |    |   |           |           |           |
|----|----|---|-----------|-----------|-----------|
| 8  | 1  | 0 | 0.163103  | -2.654993 | -1.931650 |
| 9  | 1  | 0 | -2.449151 | -1.836251 | -2.267053 |
| 10 | 1  | 0 | 1.330932  | -1.238228 | 1.448759  |
| 11 | 1  | 0 | 1.767903  | -2.533933 | 0.323812  |
| 12 | 1  | 0 | 2.340765  | -0.846491 | -1.420898 |
| 13 | 1  | 0 | 1.702429  | 0.455279  | -0.376294 |
| 14 | 35 | 0 | -0.215739 | 2.085224  | 0.774591  |
| 15 | 1  | 0 | -0.947690 | -0.236046 | 1.356327  |
| 16 | 6  | 0 | -3.290347 | -0.166311 | -0.114239 |
| 17 | 6  | 0 | -4.472742 | -0.521982 | -0.599494 |
| 18 | 1  | 0 | -3.114312 | 0.726410  | 0.476384  |
| 19 | 1  | 0 | -5.333641 | 0.104951  | -0.411874 |
| 20 | 1  | 0 | -4.626251 | -1.420619 | -1.184848 |
| 21 | 8  | 0 | 3.505163  | -0.436534 | 0.203305  |
| 22 | 1  | 0 | 3.538892  | 0.351266  | 0.755979  |

-----  
Distance matrix (angstroms):

|    |    | 1        | 2        | 3        | 4        | 5        |
|----|----|----------|----------|----------|----------|----------|
| 1  | C  | 0.000000 |          |          |          |          |
| 2  | C  | 1.355557 | 0.000000 |          |          |          |
| 3  | N  | 2.208208 | 1.391869 | 0.000000 |          |          |
| 4  | C  | 2.213995 | 2.221599 | 1.345882 | 0.000000 |          |
| 5  | N  | 1.389195 | 2.212327 | 2.177506 | 1.336837 | 0.000000 |
| 6  | C  | 2.554257 | 3.634614 | 3.588316 | 2.478748 | 1.471402 |
| 7  | C  | 3.230968 | 4.274281 | 4.322538 | 3.349033 | 2.481191 |
| 8  | H  | 1.076036 | 2.211682 | 3.267352 | 3.231620 | 2.161973 |
| 9  | H  | 2.213307 | 1.074831 | 2.164502 | 3.239178 | 3.270288 |
| 10 | H  | 3.387028 | 4.265632 | 3.881468 | 2.582208 | 2.074246 |
| 11 | H  | 2.806223 | 4.046914 | 4.246557 | 3.271393 | 2.094740 |
| 12 | H  | 3.063352 | 4.179047 | 4.558087 | 3.840721 | 2.799700 |
| 13 | H  | 3.447878 | 4.200002 | 4.025088 | 3.109902 | 2.650758 |
| 14 | Br | 4.639908 | 4.629790 | 3.694975 | 3.025519 | 3.727114 |
| 15 | H  | 3.255834 | 3.261939 | 2.157739 | 1.076910 | 2.152949 |
| 16 | C  | 3.596203 | 2.531728 | 1.423216 | 2.434693 | 3.540062 |
| 17 | C  | 4.343383 | 3.069362 | 2.424070 | 3.627717 | 4.589190 |
| 18 | H  | 4.230070 | 3.363432 | 2.087683 | 2.606536 | 3.869954 |
| 19 | H  | 5.395658 | 4.125621 | 3.394192 | 4.501194 | 5.564776 |
| 20 | H  | 4.205725 | 2.892450 | 2.721021 | 4.012314 | 4.730067 |
| 21 | O  | 4.548969 | 5.654729 | 5.641212 | 4.540610 | 3.709319 |
| 22 | H  | 5.109184 | 6.085462 | 5.870374 | 4.708759 | 4.120845 |
|    |    | 6        | 7        | 8        | 9        | 10       |
| 6  | C  | 0.000000 |          |          |          |          |
| 7  | C  | 1.538921 | 0.000000 |          |          |          |
| 8  | H  | 2.853381 | 3.345878 | 0.000000 |          |          |

|    |    |          |          |          |          |          |
|----|----|----------|----------|----------|----------|----------|
| 9  | H  | 4.660662 | 5.200974 | 2.758026 | 0.000000 |          |
| 10 | H  | 1.089847 | 2.163311 | 3.846845 | 5.334221 | 0.000000 |
| 11 | H  | 1.091289 | 2.190116 | 2.770766 | 4.998288 | 1.770679 |
| 12 | H  | 2.173188 | 1.094381 | 2.876415 | 4.963759 | 3.067271 |
| 13 | H  | 2.151876 | 1.094256 | 3.802953 | 5.105066 | 2.517298 |
| 14 | Br | 3.956673 | 3.741763 | 5.471464 | 5.442213 | 3.727201 |
| 15 | H  | 2.812823 | 3.622077 | 4.230362 | 4.236026 | 2.490990 |
| 16 | C  | 4.873215 | 5.523330 | 4.628481 | 2.851476 | 4.994816 |
| 17 | C  | 6.003422 | 6.691603 | 5.274034 | 2.933082 | 6.196046 |
| 18 | H  | 5.010598 | 5.539238 | 5.289043 | 3.812626 | 4.956361 |
| 19 | H  | 6.938194 | 7.574253 | 6.335709 | 3.940842 | 7.048590 |
| 20 | H  | 6.194598 | 6.947891 | 5.001930 | 2.466512 | 6.515918 |
| 21 | O  | 2.410949 | 1.420213 | 4.544113 | 6.596646 | 2.630808 |
| 22 | H  | 2.895296 | 1.949623 | 5.258982 | 7.055537 | 2.807404 |
|    |    | 11       | 12       | 13       | 14       | 15       |
| 11 | H  | 0.000000 |          |          |          |          |
| 12 | H  | 2.493922 | 0.000000 |          |          |          |
| 13 | H  | 3.070802 | 1.786974 | 0.000000 |          |          |
| 14 | Br | 5.047242 | 4.466637 | 2.767784 | 0.000000 |          |
| 15 | H  | 3.704162 | 4.347363 | 3.240839 | 2.502492 | 0.000000 |
| 16 | C  | 5.602090 | 5.820604 | 5.038141 | 3.913137 | 2.766852 |
| 17 | C  | 6.621638 | 6.870509 | 6.256005 | 5.177616 | 4.041410 |
| 18 | H  | 5.872746 | 5.985948 | 4.899140 | 3.215125 | 2.528809 |
| 19 | H  | 7.611627 | 7.798711 | 7.044876 | 5.614454 | 4.741243 |
| 20 | H  | 6.663387 | 6.994617 | 6.650184 | 5.965145 | 4.625213 |
| 21 | O  | 2.726110 | 2.040079 | 2.093112 | 4.531087 | 4.604081 |
| 22 | H  | 3.412850 | 2.758428 | 2.159967 | 4.135724 | 4.564512 |
|    |    | 16       | 17       | 18       | 19       | 20       |
| 16 | C  | 0.000000 |          |          |          |          |
| 17 | C  | 1.326663 | 0.000000 |          |          |          |
| 18 | H  | 1.084793 | 2.135727 | 0.000000 |          |          |
| 19 | H  | 2.082600 | 1.081385 | 2.469946 | 0.000000 |          |
| 20 | H  | 2.122295 | 1.083399 | 3.107312 | 1.850745 | 0.000000 |
| 21 | O  | 6.808290 | 8.018651 | 6.726401 | 8.876718 | 8.307545 |
| 22 | H  | 6.903888 | 8.172280 | 6.669635 | 8.952452 | 8.577643 |
|    |    | 21       | 22       |          |          |          |
| 21 | O  | 0.000000 |          |          |          |          |
| 22 | H  | 0.962920 | 0.000000 |          |          |          |

Stoichiometry C7H11BrN2O

Framework group C1[X(C7H11BrN2O)]

Deg. of freedom 60

Full point group C1 NOp 1

Largest Abelian subgroup C1 NOp 1

Largest concise Abelian subgroup C1 NOp 1

Standard orientation:

| Center<br>Number | Atomic<br>Number | Atomic<br>Type | Coordinates (Angstroms) |           |           |
|------------------|------------------|----------------|-------------------------|-----------|-----------|
|                  |                  |                | X                       | Y         | Z         |
| 1                | 6                | 0              | -0.562953               | -2.342200 | -0.469042 |
| 2                | 6                | 0              | -1.791839               | -1.796258 | -0.640284 |
| 3                | 7                | 0              | -1.833626               | -0.639297 | 0.132370  |
| 4                | 6                | 0              | -0.642513               | -0.489762 | 0.740882  |
| 5                | 7                | 0              | 0.136337                | -1.524620 | 0.409832  |
| 6                | 6                | 0              | 1.571789                | -1.603650 | 0.723287  |
| 7                | 6                | 0              | 2.422630                | -1.107150 | -0.459014 |
| 8                | 1                | 0              | -0.126897               | -3.230085 | -0.892560 |
| 9                | 1                | 0              | -2.619578               | -2.105810 | -1.252075 |
| 10               | 1                | 0              | 1.747883                | -0.969186 | 1.591741  |
| 11               | 1                | 0              | 1.816289                | -2.633155 | 0.990217  |
| 12               | 1                | 0              | 2.334442                | -1.799105 | -1.302277 |
| 13               | 1                | 0              | 2.057306                | -0.119859 | -0.757662 |
| 14               | 35               | 0              | 0.591680                | 2.137557  | -0.112187 |
| 15               | 1                | 0              | -0.354617               | 0.345765  | 1.356305  |
| 16               | 6                | 0              | -2.868028               | 0.335919  | 0.199527  |
| 17               | 6                | 0              | -4.150257               | 0.061592  | -0.002130 |
| 18               | 1                | 0              | -2.478048               | 1.328690  | 0.397257  |
| 19               | 1                | 0              | -4.874767               | 0.864010  | 0.022496  |
| 20               | 1                | 0              | -4.518207               | -0.938993 | -0.194989 |
| 21               | 8                | 0              | 3.787246                | -1.074461 | -0.066893 |
| 22               | 1                | 0              | 4.017502                | -0.164617 | 0.148475  |

Rotational constants (GHZ): 0.7975489 0.5705304 0.3497608

Standard basis: 6-311++G(d,p) (5D, 7F)

There are 358 symmetry adapted cartesian basis functions of A symmetry.

There are 345 symmetry adapted basis functions of A symmetry.

345 basis functions, 553 primitive gaussians, 358 cartesian basis functions

55 alpha electrons 55 beta electrons

nuclear repulsion energy 861.4071365728 Hartrees.

NAtoms= 22 NActive= 22 NUniq= 22 SFac= 1.00D+00 NAtFMM= 60 NAOKFM=F

Big=F

Integral buffers will be 131072 words long.

Raffenetti 2 integral format.

Two-electron integral symmetry is turned on.

One-electron integrals computed using PRISM.

NBasis= 345 RedAO= T EigKep= 6.48D-06 NBF= 345

NBsUse= 345 1.00D-06 EigRej= -1.00D+00 NBFU= 345

Initial guess from the checkpoint file: "."

B after Tr= 0.000000 0.000000 0.000000  
 Rot= 0.999898 0.000731 -0.000085 0.014289 Ang= 1.64 deg.  
 ExpMin= 3.50D-02 ExpMax= 4.40D+05 ExpMxC= 1.51D+04 IAcc=3 IRadAn= 5 AccDes=  
 0.00D+00  
 Harris functional with IExCor= 402 and IRadAn= 5 diagonalized for initial guess.  
 HarFok: IExCor= 402 AccDes= 0.00D+00 IRadAn= 5 IDoV= 1 UseB2=F ITyADJ=14  
 ICtDFT= 3500011 ScaDFX= 1.000000 1.000000 1.000000 1.000000  
 FoFCou: FMM=F IPFlag= 0 FMFlag= 100000 FMFlg1= 0  
 NfxFlg= 0 DoJE=T BraDBF=F KetDBF=T FulRan=T  
 wScrn= 0.000000 ICntrl= 500 IOpCl= 0 I1Cent= 200000004 NGrid=  
 0  
 NMat0= 1 NMatS0= 1 NMatT0= 0 NMatD0= 1 NMtDS0= 0  
 NMtDT0= 0

Petite list used in FoFCou.

Keep R1 ints in memory in canonical form, NReq=1804729152.

Requested convergence on RMS density matrix=1.00D-08 within 128 cycles.

Requested convergence on MAX density matrix=1.00D-06.

Requested convergence on energy=1.00D-06.

No special actions if energy rises.

SCF Done: E(RB3LYP) = -3032.33851885 A.U. after 11 cycles

NFock= 11 Conv=0.56D-08 -V/T= 2.0017

Calling FoFJK, ICntrl= 2127 FMM=F ISym2X=0 I1Cent= 0 IOpClX= 0 NMat=1 NMatS=1  
 NMatT=0.

\*\*\*\*\* Axes restored to original set \*\*\*\*\*

| Center<br>Number | Atomic<br>Number | Forces (Hartrees/Bohr) |              |              |
|------------------|------------------|------------------------|--------------|--------------|
|                  |                  | X                      | Y            | Z            |
| 1                | 6                | 0.000008298            | -0.000213848 | 0.000231885  |
| 2                | 6                | -0.000129337           | -0.000045673 | 0.000114180  |
| 3                | 7                | -0.000021541           | 0.000023141  | -0.000048283 |
| 4                | 6                | 0.000048991            | 0.000006138  | -0.000461877 |
| 5                | 7                | 0.000097759            | 0.000161229  | -0.000083589 |
| 6                | 6                | -0.000377546           | -0.000158086 | 0.000014554  |
| 7                | 6                | -0.000344609           | -0.000065315 | 0.000534957  |
| 8                | 1                | 0.000090714            | 0.000132749  | -0.000069413 |
| 9                | 1                | 0.000007485            | 0.000033766  | -0.000007708 |
| 10               | 1                | 0.000083521            | -0.000012614 | -0.000050445 |
| 11               | 1                | 0.000065915            | -0.000022709 | -0.000000781 |
| 12               | 1                | -0.000023154           | 0.000089197  | 0.000028435  |
| 13               | 1                | 0.000440641            | -0.000045143 | -0.000770475 |
| 14               | 35               | -0.000270330           | -0.000249468 | 0.000296386  |
| 15               | 1                | 0.000052876            | 0.000329863  | 0.000261821  |
| 16               | 6                | 0.000117913            | -0.000065398 | -0.000050988 |

|    |   |              |              |              |
|----|---|--------------|--------------|--------------|
| 17 | 6 | 0.000038783  | 0.000069087  | 0.000069233  |
| 18 | 1 | -0.000043235 | -0.000033684 | 0.000002972  |
| 19 | 1 | -0.000000706 | -0.000030385 | -0.000017630 |
| 20 | 1 | -0.000013236 | -0.000004336 | -0.000009342 |
| 21 | 8 | 0.000146902  | 0.000252205  | 0.000081056  |
| 22 | 1 | 0.000023896  | -0.000150715 | -0.000064949 |

-----  
Cartesian Forces: Max 0.000770475 RMS 0.000189679

GradGradGradGradGradGradGradGradGradGradGradGradGradGradGradGradGradGradGrad  
Berny optimization.

Using GEDIIS/GDIIS optimizer.

FormGI is forming the generalized inverse of G from B-inverse, IUseBI=4.

Internal Forces: Max 0.002269752 RMS 0.000292354

Search for a local minimum.

Step number 32 out of a maximum of 116

All quantities printed in internal units (Hartrees-Bohrs-Radians)

Mixed Optimization -- En-DIIS/RFO-DIIS

Swapping is turned off.

Update second derivatives using D2CorX and points 25 26 27 28 29  
30 31 32

DE= -8.11D-06 DEPred=-1.50D-05 R= 5.40D-01

TightC=F SS= 1.41D+00 RLast= 1.61D-01 DXNew= 1.0469D+00 4.8234D-01

Trust test= 5.40D-01 RLast= 1.61D-01 DXMaxT set to 6.23D-01

ITU= 1 1 1 1 1 1 0-1 1 1 1 1 1 0-1 1 1 1 1 1

ITU= 1 1 1 1 1 1 1 0 0-1 0 0

|                 |         |         |         |         |         |
|-----------------|---------|---------|---------|---------|---------|
| Eigenvalues --- | 0.00006 | 0.00147 | 0.00497 | 0.00546 | 0.00798 |
| Eigenvalues --- | 0.01134 | 0.01311 | 0.01744 | 0.02056 | 0.02095 |
| Eigenvalues --- | 0.02315 | 0.02751 | 0.03066 | 0.03122 | 0.03725 |
| Eigenvalues --- | 0.04480 | 0.04972 | 0.05463 | 0.06079 | 0.06484 |
| Eigenvalues --- | 0.09135 | 0.09362 | 0.13901 | 0.14456 | 0.15097 |
| Eigenvalues --- | 0.15717 | 0.15979 | 0.16015 | 0.16075 | 0.16184 |
| Eigenvalues --- | 0.16872 | 0.17850 | 0.20769 | 0.22427 | 0.23048 |
| Eigenvalues --- | 0.24671 | 0.25108 | 0.25281 | 0.29801 | 0.33495 |
| Eigenvalues --- | 0.33867 | 0.33901 | 0.33971 | 0.34078 | 0.34310 |
| Eigenvalues --- | 0.34487 | 0.34879 | 0.36039 | 0.36316 | 0.36384 |
| Eigenvalues --- | 0.38385 | 0.43063 | 0.45759 | 0.46044 | 0.50679 |
| Eigenvalues --- | 0.53399 | 0.54758 | 0.59791 | 0.63363 | 1.88232 |

Eigenvalue 1 is 5.52D-05 Eigenvector:

|   |          |          |          |          |          |
|---|----------|----------|----------|----------|----------|
|   | D42      | D41      | D40      | D16      | D24      |
| 1 | -0.46911 | -0.46295 | -0.45562 | 0.23046  | -0.22018 |
|   | D23      | D14      | D25      | D26      | D27      |
| 1 | -0.19761 | 0.19577  | -0.12705 | -0.12260 | -0.11952 |

En-DIIS/RFO-DIIS IScMMF= 0 using points: 32 31 30 29 28



RFO step: Lambda=-1.01926674D-05.

DidBck=T Rises=F RFO-DIIS coefs: 0.69173 1.69428 -0.79041 -0.21860 -

0.37699

Iteration 1 RMS(Cart)= 0.02604790 RMS(Int)= 0.00049828

Iteration 2 RMS(Cart)= 0.00098557 RMS(Int)= 0.00018918

Iteration 3 RMS(Cart)= 0.00000112 RMS(Int)= 0.00018918

Iteration 4 RMS(Cart)= 0.00000000 RMS(Int)= 0.00018918

| Variable | Old X   | -DE/DX   | Delta X<br>(Linear) | Delta X<br>(Quad) | Delta X<br>(Total) | New X   |
|----------|---------|----------|---------------------|-------------------|--------------------|---------|
| R1       | 2.56163 | 0.00009  | 0.00039             | 0.00003           | 0.00022            | 2.56186 |
| R2       | 2.62520 | -0.00013 | -0.00002            | 0.00002           | -0.00006           | 2.62514 |
| R3       | 2.03341 | 0.00002  | 0.00004             | 0.00011           | 0.00015            | 2.03356 |
| R4       | 2.63025 | -0.00007 | 0.00028             | 0.00016           | 0.00038            | 2.63063 |
| R5       | 2.03114 | 0.00000  | 0.00001             | 0.00002           | 0.00004            | 2.03117 |
| R6       | 2.54335 | -0.00006 | -0.00054            | -0.00009          | -0.00047           | 2.54288 |
| R7       | 2.68949 | -0.00011 | 0.00106             | 0.00027           | 0.00133            | 2.69082 |
| R8       | 2.52626 | -0.00002 | -0.00058            | -0.00033          | -0.00075           | 2.52551 |
| R9       | 2.03507 | 0.00040  | 0.00177             | 0.00183           | 0.00360            | 2.03867 |
| R10      | 2.78055 | -0.00022 | 0.00121             | -0.00066          | 0.00055            | 2.78110 |
| R11      | 2.90814 | -0.00019 | 0.00011             | 0.00046           | 0.00057            | 2.90871 |
| R12      | 2.05951 | -0.00006 | 0.00015             | 0.00013           | 0.00028            | 2.05979 |
| R13      | 2.06224 | 0.00005  | -0.00030            | 0.00004           | -0.00026           | 2.06197 |
| R14      | 2.06808 | -0.00006 | 0.00019             | -0.00021          | -0.00002           | 2.06806 |
| R15      | 2.06784 | -0.00035 | 0.00068             | 0.00011           | 0.00079            | 2.06864 |
| R16      | 2.68381 | 0.00017  | -0.00125            | -0.00061          | -0.00186           | 2.68195 |
| R17      | 5.23035 | 0.00016  | -0.00989            | 0.02279           | 0.01289            | 5.24324 |
| R18      | 2.50703 | -0.00005 | -0.00001            | 0.00009           | 0.00008            | 2.50711 |
| R19      | 2.04996 | -0.00003 | 0.00009             | 0.00015           | 0.00024            | 2.05020 |
| R20      | 2.04352 | -0.00002 | 0.00003             | 0.00013           | 0.00016            | 2.04368 |
| R21      | 2.04733 | 0.00001  | -0.00009            | 0.00017           | 0.00008            | 2.04740 |
| R22      | 1.81966 | -0.00016 | 0.00079             | 0.00045           | 0.00125            | 1.82090 |
| A1       | 1.87469 | -0.00003 | -0.00009            | -0.00016          | -0.00032           | 1.87436 |
| A2       | 2.27835 | 0.00005  | -0.00012            | 0.00034           | 0.00021            | 2.27856 |
| A3       | 2.13015 | -0.00002 | 0.00028             | -0.00017          | 0.00011            | 2.13025 |
| A4       | 1.86697 | -0.00001 | -0.00022            | -0.00009          | -0.00037           | 1.86660 |
| A5       | 2.28374 | 0.00002  | -0.00015            | 0.00013           | -0.00001           | 2.28373 |
| A6       | 2.13205 | -0.00001 | 0.00048             | 0.00001           | 0.00050            | 2.13255 |
| A7       | 1.89312 | 0.00001  | 0.00005             | 0.00016           | 0.00047            | 1.89359 |
| A8       | 2.23647 | 0.00005  | 0.00076             | 0.00024           | 0.00083            | 2.23730 |
| A9       | 2.14809 | -0.00006 | -0.00033            | -0.00031          | -0.00080           | 2.14730 |
| A10      | 1.89403 | 0.00000  | 0.00040             | -0.00015          | -0.00029           | 1.89374 |
| A11      | 2.19097 | -0.00001 | 0.00098             | 0.00015           | -0.00012           | 2.19084 |
| A12      | 2.19736 | 0.00001  | -0.00041            | -0.00061          | -0.00226           | 2.19510 |
| A13      | 1.89545 | 0.00003  | 0.00012             | 0.00034           | 0.00074            | 1.89619 |

|     |          |          |          |          |          |          |
|-----|----------|----------|----------|----------|----------|----------|
| A14 | 2.20712  | 0.00014  | 0.00150  | 0.00095  | 0.00231  | 2.20943  |
| A15 | 2.16180  | -0.00018 | -0.00152 | -0.00018 | -0.00186 | 2.15994  |
| A16 | 1.93733  | -0.00073 | -0.00046 | 0.00169  | 0.00123  | 1.93856  |
| A17 | 1.87142  | 0.00023  | -0.00113 | 0.00047  | -0.00066 | 1.87076  |
| A18 | 1.89795  | 0.00031  | -0.00074 | -0.00073 | -0.00147 | 1.89648  |
| A19 | 1.91245  | -0.00006 | -0.00030 | -0.00002 | -0.00033 | 1.91212  |
| A20 | 1.94809  | 0.00036  | 0.00200  | -0.00081 | 0.00118  | 1.94927  |
| A21 | 1.89451  | -0.00010 | 0.00054  | -0.00059 | -0.00006 | 1.89445  |
| A22 | 1.92137  | 0.00027  | 0.00036  | -0.00001 | 0.00035  | 1.92172  |
| A23 | 1.89250  | -0.00105 | -0.00267 | 0.00136  | -0.00132 | 1.89119  |
| A24 | 1.90344  | 0.00041  | -0.00069 | 0.00071  | 0.00000  | 1.90344  |
| A25 | 1.91057  | 0.00019  | 0.00271  | 0.00114  | 0.00385  | 1.91442  |
| A26 | 1.88045  | -0.00018 | 0.00106  | -0.00219 | -0.00113 | 1.87932  |
| A27 | 1.95560  | 0.00038  | -0.00071 | -0.00102 | -0.00174 | 1.95386  |
| A28 | 2.58492  | -0.00227 | 0.00264  | -0.00569 | -0.00305 | 2.58187  |
| A29 | 2.15748  | 0.00005  | -0.00017 | 0.00054  | 0.00037  | 2.15784  |
| A30 | 1.95456  | 0.00001  | -0.00014 | 0.00066  | 0.00051  | 1.95507  |
| A31 | 2.17050  | -0.00006 | 0.00033  | -0.00112 | -0.00079 | 2.16972  |
| A32 | 2.08363  | 0.00002  | -0.00051 | -0.00048 | -0.00099 | 2.08263  |
| A33 | 2.14872  | 0.00000  | 0.00012  | 0.00040  | 0.00053  | 2.14924  |
| A34 | 2.05084  | -0.00003 | 0.00039  | 0.00008  | 0.00046  | 2.05131  |
| A35 | 1.88942  | 0.00008  | -0.00106 | -0.00070 | -0.00177 | 1.88766  |
| D1  | 0.00579  | 0.00006  | 0.00003  | 0.00013  | 0.00018  | 0.00597  |
| D2  | 3.11563  | -0.00003 | 0.00328  | 0.00192  | 0.00521  | 3.12083  |
| D3  | -3.13251 | 0.00011  | -0.00634 | -0.00056 | -0.00691 | -3.13942 |
| D4  | -0.02267 | 0.00003  | -0.00310 | 0.00122  | -0.00189 | -0.02456 |
| D5  | -0.02285 | -0.00007 | 0.00303  | 0.00147  | 0.00447  | -0.01839 |
| D6  | -2.96230 | 0.00003  | 0.00276  | -0.00442 | -0.00171 | -2.96400 |
| D7  | 3.11578  | -0.00011 | 0.00875  | 0.00209  | 0.01083  | 3.12661  |
| D8  | 0.17634  | -0.00002 | 0.00847  | -0.00380 | 0.00466  | 0.18100  |
| D9  | 0.01311  | -0.00003 | -0.00307 | -0.00168 | -0.00474 | 0.00836  |
| D10 | 3.04355  | -0.00006 | 0.00119  | -0.00081 | 0.00039  | 3.04394  |
| D11 | -3.10011 | 0.00004  | -0.00595 | -0.00328 | -0.00923 | -3.10934 |
| D12 | -0.06967 | 0.00002  | -0.00169 | -0.00240 | -0.00410 | -0.07377 |
| D13 | -0.02757 | -0.00001 | 0.00499  | 0.00262  | 0.00760  | -0.01997 |
| D14 | 3.07239  | -0.00005 | -0.02371 | -0.01274 | -0.03652 | 3.03586  |
| D15 | -3.06486 | 0.00001  | 0.00089  | 0.00176  | 0.00267  | -3.06220 |
| D16 | 0.03509  | -0.00004 | -0.02781 | -0.01360 | -0.04145 | -0.00636 |
| D17 | 0.51774  | 0.00000  | -0.01051 | -0.00791 | -0.01842 | 0.49932  |
| D18 | -2.58672 | -0.00001 | -0.01098 | -0.01007 | -0.02105 | -2.60777 |
| D19 | -2.74974 | -0.00002 | -0.00564 | -0.00688 | -0.01252 | -2.76227 |
| D20 | 0.42898  | -0.00003 | -0.00610 | -0.00905 | -0.01515 | 0.41383  |
| D21 | 0.03120  | 0.00005  | -0.00497 | -0.00254 | -0.00748 | 0.02373  |
| D22 | 2.97708  | 0.00000  | -0.00427 | 0.00332  | -0.00094 | 2.97614  |

|     |          |          |          |          |          |          |
|-----|----------|----------|----------|----------|----------|----------|
| D23 | -3.06856 | 0.00009  | 0.02395  | 0.01287  | 0.03671  | -3.03185 |
| D24 | -0.12269 | 0.00005  | 0.02465  | 0.01873  | 0.04325  | -0.07943 |
| D25 | 1.25832  | 0.00033  | 0.01435  | 0.01099  | 0.02536  | 1.28368  |
| D26 | -2.93652 | -0.00002 | 0.01301  | 0.01223  | 0.02526  | -2.91126 |
| D27 | -0.89124 | 0.00014  | 0.01264  | 0.01140  | 0.02407  | -0.86717 |
| D28 | -1.65206 | 0.00041  | 0.01378  | 0.00417  | 0.01793  | -1.63413 |
| D29 | 0.43628  | 0.00006  | 0.01244  | 0.00541  | 0.01783  | 0.45411  |
| D30 | 2.48156  | 0.00022  | 0.01207  | 0.00458  | 0.01664  | 2.49820  |
| D31 | -1.18260 | -0.00001 | -0.01244 | -0.00802 | -0.02046 | -1.20306 |
| D32 | 0.90709  | -0.00025 | -0.01055 | -0.00580 | -0.01635 | 0.89074  |
| D33 | 3.04093  | -0.00019 | -0.01352 | -0.00577 | -0.01929 | 3.02164  |
| D34 | 3.03693  | 0.00019  | -0.01058 | -0.00961 | -0.02019 | 3.01674  |
| D35 | -1.15657 | -0.00005 | -0.00869 | -0.00740 | -0.01609 | -1.17265 |
| D36 | 0.97727  | 0.00001  | -0.01166 | -0.00737 | -0.01902 | 0.95825  |
| D37 | 0.93784  | 0.00012  | -0.01232 | -0.00834 | -0.02066 | 0.91718  |
| D38 | 3.02753  | -0.00013 | -0.01044 | -0.00612 | -0.01656 | 3.01097  |
| D39 | -1.12181 | -0.00006 | -0.01340 | -0.00609 | -0.01949 | -1.14131 |
| D40 | 0.31079  | 0.00000  | 0.05994  | 0.03349  | 0.09344  | 0.40423  |
| D41 | 2.40723  | -0.00019 | 0.06039  | 0.03497  | 0.09535  | 2.50258  |
| D42 | -1.79094 | -0.00005 | 0.06306  | 0.03234  | 0.09539  | -1.69555 |
| D43 | -1.75332 | 0.00043  | -0.00493 | 0.02091  | 0.01598  | -1.73734 |
| D44 | 2.44465  | -0.00002 | -0.00558 | 0.02179  | 0.01620  | 2.46085  |
| D45 | 0.34204  | -0.00037 | -0.00920 | 0.02244  | 0.01323  | 0.35527  |
| D46 | -3.09463 | 0.00000  | -0.00038 | -0.00198 | -0.00236 | -3.09699 |
| D47 | 0.04527  | -0.00001 | -0.00022 | -0.00123 | -0.00145 | 0.04382  |
| D48 | 0.00525  | 0.00001  | 0.00013  | 0.00050  | 0.00063  | 0.00588  |
| D49 | -3.13804 | 0.00000  | 0.00029  | 0.00124  | 0.00153  | -3.13651 |

| Item                 | Value    | Threshold | Converged? |
|----------------------|----------|-----------|------------|
| Maximum Force        | 0.002270 | 0.000450  | NO         |
| RMS Force            | 0.000292 | 0.000300  | YES        |
| Maximum Displacement | 0.136530 | 0.001800  | NO         |
| RMS Displacement     | 0.025909 | 0.001200  | NO         |

Predicted change in Energy=-2.146692D-05

GradGradGradGradGradGradGradGradGradGradGradGradGradGradGradGradGradGradGrad

Input orientation:

| Center Number | Atomic Number | Atomic Type | Coordinates (Angstroms) |           |           |
|---------------|---------------|-------------|-------------------------|-----------|-----------|
|               |               |             | X                       | Y         | Z         |
| 1             | 6             | 0           | -0.478029               | -2.079719 | -1.297806 |
| 2             | 6             | 0           | -1.765036               | -1.684952 | -1.457896 |
| 3             | 7             | 0           | -2.088533               | -0.898950 | -0.355439 |
| 4             | 6             | 0           | -1.008320               | -0.818134 | 0.442898  |

|    |    |   |           |           |           |
|----|----|---|-----------|-----------|-----------|
| 5  | 7  | 0 | -0.024793 | -1.542257 | -0.099686 |
| 6  | 6  | 0 | 1.364543  | -1.528020 | 0.385520  |
| 7  | 6  | 0 | 2.211292  | -0.503395 | -0.390602 |
| 8  | 1  | 0 | 0.148792  | -2.692068 | -1.922424 |
| 9  | 1  | 0 | -2.463377 | -1.870160 | -2.253711 |
| 10 | 1  | 0 | 1.334701  | -1.252887 | 1.439795  |
| 11 | 1  | 0 | 1.774079  | -2.535892 | 0.301357  |
| 12 | 1  | 0 | 2.353342  | -0.837613 | -1.422961 |
| 13 | 1  | 0 | 1.684223  | 0.456007  | -0.382771 |
| 14 | 35 | 0 | -0.176608 | 2.106401  | 0.846839  |
| 15 | 1  | 0 | -0.925393 | -0.202622 | 1.325004  |
| 16 | 6  | 0 | -3.285756 | -0.165577 | -0.118013 |
| 17 | 6  | 0 | -4.469374 | -0.512858 | -0.606469 |
| 18 | 1  | 0 | -3.106799 | 0.723462  | 0.477495  |
| 19 | 1  | 0 | -5.326714 | 0.118358  | -0.416440 |
| 20 | 1  | 0 | -4.627477 | -1.408263 | -1.195618 |
| 21 | 8  | 0 | 3.492722  | -0.409578 | 0.212182  |
| 22 | 1  | 0 | 3.502866  | 0.371837  | 0.775898  |

-----  
Distance matrix (angstroms):

|    |    | 1        | 2        | 3        | 4        | 5        |
|----|----|----------|----------|----------|----------|----------|
| 1  | C  | 0.000000 |          |          |          |          |
| 2  | C  | 1.355676 | 0.000000 |          |          |          |
| 3  | N  | 2.208165 | 1.392071 | 0.000000 |          |          |
| 4  | C  | 2.214239 | 2.221938 | 1.345634 | 0.000000 |          |
| 5  | N  | 1.389165 | 2.212136 | 2.176758 | 1.336442 | 0.000000 |
| 6  | C  | 2.555979 | 3.635530 | 3.587267 | 2.477440 | 1.471693 |
| 7  | C  | 3.246578 | 4.283268 | 4.318124 | 3.340611 | 2.482729 |
| 8  | H  | 1.076115 | 2.211969 | 3.267466 | 3.231916 | 2.162075 |
| 9  | H  | 2.213431 | 1.074850 | 2.164993 | 3.239699 | 3.270174 |
| 10 | H  | 3.385868 | 4.265169 | 3.881581 | 2.583131 | 2.074117 |
| 11 | H  | 2.799538 | 4.042822 | 4.246261 | 3.272991 | 2.093821 |
| 12 | H  | 3.094375 | 4.204788 | 4.568765 | 3.844812 | 2.811246 |
| 13 | H  | 3.455796 | 4.199642 | 4.008783 | 3.091108 | 2.644604 |
| 14 | Br | 4.713168 | 4.712671 | 3.759397 | 3.067216 | 3.772488 |
| 15 | H  | 3.256187 | 3.262949 | 2.159086 | 1.078815 | 2.153008 |
| 16 | C  | 3.597107 | 2.533056 | 1.423921 | 2.434577 | 3.539698 |
| 17 | C  | 4.343251 | 3.067927 | 2.424972 | 3.629498 | 4.590293 |
| 18 | H  | 4.233196 | 3.368460 | 2.088748 | 2.604099 | 3.868512 |
| 19 | H  | 5.396118 | 4.125786 | 3.394769 | 4.501556 | 5.564921 |
| 20 | H  | 4.204666 | 2.887718 | 2.722414 | 4.016377 | 4.733258 |
| 21 | O  | 4.564679 | 5.662134 | 5.631348 | 4.525431 | 3.708522 |
| 22 | H  | 5.114480 | 6.080379 | 5.844533 | 4.677363 | 4.107893 |
|    |    | 6        | 7        | 8        | 9        | 10       |

|    |    |          |          |          |          |          |
|----|----|----------|----------|----------|----------|----------|
| 6  | C  | 0.000000 |          |          |          |          |
| 7  | C  | 1.539223 | 0.000000 |          |          |          |
| 8  | H  | 2.856512 | 3.375007 | 0.000000 |          |          |
| 9  | H  | 4.662143 | 5.214572 | 2.758389 | 0.000000 |          |
| 10 | H  | 1.089993 | 2.163447 | 3.844755 | 5.333705 | 0.000000 |
| 11 | H  | 1.091150 | 2.191120 | 2.758832 | 4.992756 | 1.770648 |
| 12 | H  | 2.173704 | 1.094370 | 2.923783 | 4.995707 | 3.066831 |
| 13 | H  | 2.151471 | 1.094675 | 3.826023 | 5.110192 | 2.522742 |
| 14 | Br | 3.974541 | 3.747581 | 5.549776 | 5.536765 | 3.731014 |
| 15 | H  | 2.807689 | 3.587835 | 4.230484 | 4.237131 | 2.494847 |
| 16 | C  | 4.871866 | 5.514160 | 4.629813 | 2.853614 | 4.995762 |
| 17 | C  | 6.004097 | 6.684159 | 5.273343 | 2.929112 | 6.198559 |
| 18 | H  | 5.007048 | 5.526379 | 5.293801 | 3.821041 | 4.955694 |
| 19 | H  | 6.937335 | 7.563649 | 6.336217 | 3.940617 | 7.049850 |
| 20 | H  | 6.198278 | 6.945186 | 4.998915 | 2.452802 | 6.520515 |
| 21 | O  | 2.410416 | 1.419229 | 4.576917 | 6.609769 | 2.622071 |
| 22 | H  | 2.886915 | 1.948054 | 5.283774 | 7.056992 | 2.789521 |
|    |    | 11       | 12       | 13       | 14       | 15       |
| 11 | H  | 0.000000 |          |          |          |          |
| 12 | H  | 2.488567 | 0.000000 |          |          |          |
| 13 | H  | 3.070433 | 1.789739 | 0.000000 |          |          |
| 14 | Br | 5.064940 | 4.496650 | 2.774606 | 0.000000 |          |
| 15 | H  | 3.712028 | 4.324885 | 3.187536 | 2.474047 | 0.000000 |
| 16 | C  | 5.603231 | 5.827001 | 5.015691 | 3.969839 | 2.766764 |
| 17 | C  | 6.625521 | 6.879068 | 6.233418 | 5.234545 | 4.048041 |
| 18 | H  | 5.871745 | 5.988475 | 4.874986 | 3.261128 | 2.516830 |
| 19 | H  | 7.614561 | 7.804501 | 7.019144 | 5.663196 | 4.744184 |
| 20 | H  | 6.670263 | 7.007793 | 6.631273 | 6.027830 | 4.638160 |
| 21 | O  | 2.735488 | 2.038404 | 2.091381 | 4.494099 | 4.560805 |
| 22 | H  | 3.415959 | 2.760281 | 2.158022 | 4.068449 | 4.499000 |
|    |    | 16       | 17       | 18       | 19       | 20       |
| 16 | C  | 0.000000 |          |          |          |          |
| 17 | C  | 1.326705 | 0.000000 |          |          |          |
| 18 | H  | 1.084917 | 2.135433 | 0.000000 |          |          |
| 19 | H  | 2.082112 | 1.081470 | 2.468460 | 0.000000 |          |
| 20 | H  | 2.122667 | 1.083440 | 3.107414 | 1.851113 | 0.000000 |
| 21 | O  | 6.790900 | 8.004738 | 6.701332 | 8.857558 | 8.301621 |
| 22 | H  | 6.868281 | 8.139425 | 6.625735 | 8.913328 | 8.553252 |
|    |    | 21       | 22       |          |          |          |
| 21 | O  | 0.000000 |          |          |          |          |
| 22 | H  | 0.963580 | 0.000000 |          |          |          |

Stoichiometry C7H11BrN2O

Framework group C1[X(C7H11BrN2O)]

Deg. of freedom 60

Full point group C1 NOp 1  
 Largest Abelian subgroup C1 NOp 1  
 Largest concise Abelian subgroup C1 NOp 1

Standard orientation:

| Center Number | Atomic Number | Atomic Type | Coordinates (Angstroms) |           |           |
|---------------|---------------|-------------|-------------------------|-----------|-----------|
|               |               |             | X                       | Y         | Z         |
| 1             | 6             | 0           | -0.681197               | -2.353073 | -0.439911 |
| 2             | 6             | 0           | -1.887987               | -1.760325 | -0.613583 |
| 3             | 7             | 0           | -1.872393               | -0.582912 | 0.128923  |
| 4             | 6             | 0           | -0.671919               | -0.470966 | 0.726469  |
| 5             | 7             | 0           | 0.060766                | -1.543068 | 0.410480  |
| 6             | 6             | 0           | 1.494555                | -1.672627 | 0.715999  |
| 7             | 6             | 0           | 2.357458                | -1.210344 | -0.471814 |
| 8             | 1             | 0           | -0.289158               | -3.272111 | -0.839533 |
| 9             | 1             | 0           | -2.736040               | -2.052549 | -1.205796 |
| 10            | 1             | 0           | 1.697645                | -1.042217 | 1.581691  |
| 11            | 1             | 0           | 1.701790                | -2.709467 | 0.985490  |
| 12            | 1             | 0           | 2.256691                | -1.911985 | -1.305595 |
| 13            | 1             | 0           | 2.014558                | -0.217938 | -0.781434 |
| 14            | 35            | 0           | 0.712476                | 2.136827  | -0.104603 |
| 15            | 1             | 0           | -0.330532               | 0.381570  | 1.292578  |
| 16            | 6             | 0           | -2.863912               | 0.437698  | 0.181804  |
| 17            | 6             | 0           | -4.156710               | 0.217415  | -0.018928 |
| 18            | 1             | 0           | -2.432055               | 1.414910  | 0.370490  |
| 19            | 1             | 0           | -4.844839               | 1.051570  | -0.003347 |
| 20            | 1             | 0           | -4.568350               | -0.768037 | -0.201353 |
| 21            | 8             | 0           | 3.721030                | -1.201561 | -0.078362 |
| 22            | 1             | 0           | 3.965037                | -0.295025 | 0.138756  |

Rotational constants (GHZ): 0.7859740 0.5675375 0.3456806

Standard basis: 6-311++G(d,p) (5D, 7F)

There are 358 symmetry adapted cartesian basis functions of A symmetry.

There are 345 symmetry adapted basis functions of A symmetry.

345 basis functions, 553 primitive gaussians, 358 cartesian basis functions

55 alpha electrons 55 beta electrons

nuclear repulsion energy 858.4171505790 Hartrees.

NAtoms= 22 NActive= 22 NUniq= 22 SFac= 1.00D+00 NAtFMM= 60 NAOKFM=F

Big=F

Integral buffers will be 131072 words long.

Raffenetti 2 integral format.

Two-electron integral symmetry is turned on.

One-electron integrals computed using PRISM.

NBasis= 345 RedAO= T EigKep= 6.34D-06 NBF= 345  
 NBsUse= 345 1.00D-06 EigRej= -1.00D+00 NBFU= 345  
 Initial guess from the checkpoint file: ".  
 B after Tr= 0.000000 0.000000 0.000000  
 Rot= 0.999780 0.000564 -0.000027 0.020958 Ang= 2.40 deg.  
 ExpMin= 3.50D-02 ExpMax= 4.40D+05 ExpMxC= 1.51D+04 IAcc=3 IRadAn= 5 AccDes=  
 0.00D+00  
 Harris functional with IExCor= 402 and IRadAn= 5 diagonalized for initial guess.  
 HarFok: IExCor= 402 AccDes= 0.00D+00 IRadAn= 5 IDoV= 1 UseB2=F ITyADJ=14  
 ICtDFT= 3500011 ScaDFX= 1.000000 1.000000 1.000000 1.000000  
 FoFCou: FMM=F IPFlag= 0 FMFlag= 100000 FMFlg1= 0  
 NfxFlg= 0 DoJE=T BraDBF=F KetDBF=T FulRan=T  
 wScrn= 0.000000 ICntrl= 500 IOpCl= 0 l1Cent= 200000004 NGrid=  
 0  
 NMat0= 1 NMatS0= 1 NMatT0= 0 NMatD0= 1 NMtDS0= 0  
 NMtDT0= 0  
 Petite list used in FoFCou.  
 Keep R1 ints in memory in canonical form, NReq=1804729152.  
 Requested convergence on RMS density matrix=1.00D-08 within 128 cycles.  
 Requested convergence on MAX density matrix=1.00D-06.  
 Requested convergence on energy=1.00D-06.  
 No special actions if energy rises.  
 SCF Done: E(RB3LYP) = -3032.33852523 A.U. after 12 cycles  
 NFock= 12 Conv=0.23D-08 -V/T= 2.0017  
 Calling FoFJK, ICntrl= 2127 FMM=F ISym2X=0 l1Cent= 0 IOpClX= 0 NMat=1 NMatS=1  
 NMatT=0.

\*\*\*\*\* Axes restored to original set \*\*\*\*\*

| Center<br>Number | Atomic<br>Number | Forces (Hartrees/Bohr) |              |              |
|------------------|------------------|------------------------|--------------|--------------|
|                  |                  | X                      | Y            | Z            |
| 1                | 6                | 0.000191784            | -0.000414502 | 0.000635905  |
| 2                | 6                | -0.000444394           | 0.000034049  | 0.000360457  |
| 3                | 7                | -0.000096714           | 0.000125006  | -0.000202841 |
| 4                | 6                | 0.000291050            | 0.000252624  | -0.001244027 |
| 5                | 7                | -0.000174855           | 0.000132819  | -0.000219319 |
| 6                | 6                | -0.000344707           | -0.000357898 | 0.000244910  |
| 7                | 6                | -0.000693055           | -0.000073696 | 0.000551027  |
| 8                | 1                | 0.000132849            | 0.000264870  | -0.000127708 |
| 9                | 1                | 0.000065581            | 0.000078489  | -0.000044452 |
| 10               | 1                | 0.000166806            | 0.000031450  | -0.000205920 |
| 11               | 1                | 0.000109725            | -0.000057766 | 0.000044051  |
| 12               | 1                | -0.000195999           | 0.000249779  | -0.000012816 |
| 13               | 1                | 0.000537826            | -0.000163145 | -0.000959303 |

|    |    |              |              |              |
|----|----|--------------|--------------|--------------|
| 14 | 35 | -0.000329852 | -0.000928900 | 0.000413350  |
| 15 | 1  | 0.000011793  | 0.000766472  | 0.000584358  |
| 16 | 6  | 0.000154762  | -0.000195695 | 0.000002748  |
| 17 | 6  | 0.000176317  | 0.000174815  | 0.000186518  |
| 18 | 1  | 0.000012245  | -0.000128799 | -0.000101801 |
| 19 | 1  | 0.000010521  | -0.000108234 | -0.000082226 |
| 20 | 1  | -0.000043771 | 0.000053232  | 0.000016601  |
| 21 | 8  | 0.000370874  | 0.000730079  | 0.000437909  |
| 22 | 1  | 0.000091215  | -0.000465048 | -0.000277422 |

-----  
Cartesian Forces: Max 0.001244027 RMS 0.000366876

GradGradGradGradGradGradGradGradGradGradGradGradGradGradGradGradGradGradGradGrad  
Berny optimization.

Using GEDIIS/GDIIS optimizer.

FormGI is forming the generalized inverse of G from B-inverse, IUseBI=4.

Internal Forces: Max 0.005192626 RMS 0.000767991

Search for a local minimum.

Step number 33 out of a maximum of 116

All quantities printed in internal units (Hartrees-Bohrs-Radians)

Mixed Optimization -- En-DIIS/RFO-DIIS

Swapping is turned off.

Update second derivatives using D2CorX and points 25 29 30 31 32  
33

DE= -6.38D-06 DEPred=-2.15D-05 R= 2.97D-01

Trust test= 2.97D-01 RLast= 2.04D-01 DXMaxT set to 6.23D-01

ITU= 0 1 1 1 1 1 1 0 -1 1 1 1 1 1 0 -1 1 1 1 1

ITU= 1 1 1 1 1 1 1 1 0 0 -1 0 0

|                 |         |         |         |         |         |
|-----------------|---------|---------|---------|---------|---------|
| Eigenvalues --- | 0.00010 | 0.00092 | 0.00505 | 0.00579 | 0.00749 |
| Eigenvalues --- | 0.01133 | 0.01318 | 0.01675 | 0.02009 | 0.02075 |
| Eigenvalues --- | 0.02332 | 0.02536 | 0.03067 | 0.03108 | 0.03692 |
| Eigenvalues --- | 0.04423 | 0.05007 | 0.05429 | 0.06149 | 0.06702 |
| Eigenvalues --- | 0.08891 | 0.09216 | 0.13984 | 0.14521 | 0.14930 |
| Eigenvalues --- | 0.15703 | 0.15956 | 0.15987 | 0.16035 | 0.16123 |
| Eigenvalues --- | 0.16768 | 0.17419 | 0.20593 | 0.22380 | 0.23052 |
| Eigenvalues --- | 0.24371 | 0.24958 | 0.25842 | 0.29663 | 0.33144 |
| Eigenvalues --- | 0.33830 | 0.33877 | 0.33930 | 0.34087 | 0.34257 |
| Eigenvalues --- | 0.34495 | 0.34803 | 0.36115 | 0.36316 | 0.36427 |
| Eigenvalues --- | 0.38296 | 0.43150 | 0.44880 | 0.46142 | 0.50034 |
| Eigenvalues --- | 0.53394 | 0.54872 | 0.58217 | 0.61030 | 3.06555 |

En-DIIS/RFO-DIIS IScMMF= 0 using points: 33 32 31 30 29

RFO step: Lambda=-3.91634189D-05.

DidBck=F Rises=F RFO-DIIS coefs: 1.49114 -4.83329 6.64121 -2.00994 -  
0.28911



|             |            |            |                     |                   |                    |         |
|-------------|------------|------------|---------------------|-------------------|--------------------|---------|
| Iteration 1 | RMS(Cart)= | 0.05405114 | RMS(Int)=           | 0.00502388        |                    |         |
| Iteration 2 | RMS(Cart)= | 0.00801905 | RMS(Int)=           | 0.00010867        |                    |         |
| Iteration 3 | RMS(Cart)= | 0.00016117 | RMS(Int)=           | 0.00006127        |                    |         |
| Iteration 4 | RMS(Cart)= | 0.00000004 | RMS(Int)=           | 0.00006127        |                    |         |
| Variable    | Old X      | -DE/DX     | Delta X<br>(Linear) | Delta X<br>(Quad) | Delta X<br>(Total) | New X   |
| R1          | 2.56186    | 0.00029    | -0.00089            | -0.00016          | -0.00099           | 2.56087 |
| R2          | 2.62514    | -0.00043   | 0.00063             | -0.00011          | 0.00052            | 2.62566 |
| R3          | 2.03356    | 0.00000    | -0.00028            | -0.00005          | -0.00033           | 2.03323 |
| R4          | 2.63063    | -0.00029   | -0.00030            | -0.00012          | -0.00039           | 2.63024 |
| R5          | 2.03117    | -0.00002   | -0.00001            | 0.00003           | 0.00002            | 2.03120 |
| R6          | 2.54288    | -0.00016   | 0.00199             | -0.00005          | 0.00190            | 2.54478 |
| R7          | 2.69082    | -0.00036   | -0.00278            | 0.00077           | -0.00201           | 2.68881 |
| R8          | 2.52551    | 0.00001    | 0.00219             | 0.00035           | 0.00248            | 2.52799 |
| R9          | 2.03867    | 0.00092    | -0.00738            | 0.00071           | -0.00666           | 2.03200 |
| R10         | 2.78110    | -0.00020   | -0.00213            | -0.00054          | -0.00266           | 2.77843 |
| R11         | 2.90871    | -0.00064   | -0.00098            | 0.00010           | -0.00088           | 2.90783 |
| R12         | 2.05979    | -0.00019   | -0.00025            | 0.00003           | -0.00021           | 2.05957 |
| R13         | 2.06197    | 0.00009    | 0.00053             | 0.00008           | 0.00061            | 2.06258 |
| R14         | 2.06806    | -0.00009   | -0.00009            | -0.00020          | -0.00029           | 2.06776 |
| R15         | 2.06864    | -0.00106   | -0.00115            | -0.00052          | -0.00167           | 2.06697 |
| R16         | 2.68195    | 0.00051    | 0.00372             | -0.00022          | 0.00350            | 2.68546 |
| R17         | 5.24324    | -0.00015   | -0.01171            | 0.00850           | -0.00322           | 5.24003 |
| R18         | 2.50711    | -0.00020   | 0.00009             | -0.00004          | 0.00006            | 2.50717 |
| R19         | 2.05020    | -0.00016   | -0.00019            | 0.00034           | 0.00015            | 2.05035 |
| R20         | 2.04368    | -0.00009   | -0.00015            | 0.00011           | -0.00004           | 2.04364 |
| R21         | 2.04740    | -0.00005   | -0.00003            | 0.00016           | 0.00014            | 2.04754 |
| R22         | 1.82090    | -0.00054   | -0.00197            | 0.00000           | -0.00197           | 1.81893 |
| A1          | 1.87436    | -0.00004   | 0.00067             | 0.00005           | 0.00074            | 1.87510 |
| A2          | 2.27856    | 0.00007    | -0.00021            | 0.00005           | -0.00016           | 2.27840 |
| A3          | 2.13025    | -0.00003   | -0.00050            | -0.00010          | -0.00059           | 2.12966 |
| A4          | 1.86660    | -0.00003   | 0.00102             | 0.00000           | 0.00105            | 1.86765 |
| A5          | 2.28373    | -0.00001   | 0.00049             | 0.00036           | 0.00084            | 2.28457 |
| A6          | 2.13255    | 0.00004    | -0.00171            | -0.00039          | -0.00211           | 2.13044 |
| A7          | 1.89359    | 0.00002    | -0.00108            | 0.00019           | -0.00099           | 1.89260 |
| A8          | 2.23730    | 0.00013    | -0.00302            | -0.00080          | -0.00380           | 2.23350 |
| A9          | 2.14730    | -0.00015   | 0.00219             | 0.00028           | 0.00247            | 2.14977 |
| A10         | 1.89374    | 0.00001    | 0.00003             | -0.00023          | -0.00002           | 1.89373 |
| A11         | 2.19084    | -0.00016   | -0.00038            | -0.00034          | -0.00032           | 2.19052 |
| A12         | 2.19510    | 0.00014    | 0.00272             | 0.00052           | 0.00365            | 2.19874 |
| A13         | 1.89619    | 0.00004    | -0.00138            | 0.00005           | -0.00141           | 1.89477 |
| A14         | 2.20943    | 0.00032    | -0.00514            | 0.00011           | -0.00497           | 2.20446 |
| A15         | 2.15994    | -0.00041   | 0.00505             | 0.00039           | 0.00550            | 2.16545 |
| A16         | 1.93856    | -0.00235   | 0.00100             | 0.00091           | 0.00190            | 1.94046 |

|     |          |          |          |          |          |          |
|-----|----------|----------|----------|----------|----------|----------|
| A17 | 1.87076  | 0.00074  | 0.00190  | 0.00096  | 0.00285  | 1.87361  |
| A18 | 1.89648  | 0.00089  | 0.00214  | -0.00032 | 0.00182  | 1.89830  |
| A19 | 1.91212  | -0.00016 | 0.00085  | -0.00030 | 0.00054  | 1.91267  |
| A20 | 1.94927  | 0.00121  | -0.00482 | -0.00089 | -0.00571 | 1.94356  |
| A21 | 1.89445  | -0.00030 | -0.00084 | -0.00030 | -0.00114 | 1.89331  |
| A22 | 1.92172  | 0.00088  | -0.00125 | 0.00081  | -0.00043 | 1.92129  |
| A23 | 1.89119  | -0.00321 | 0.00487  | 0.00084  | 0.00571  | 1.89690  |
| A24 | 1.90344  | 0.00109  | -0.00125 | 0.00066  | -0.00060 | 1.90285  |
| A25 | 1.91442  | 0.00064  | -0.00719 | 0.00011  | -0.00708 | 1.90734  |
| A26 | 1.87932  | -0.00045 | 0.00045  | -0.00111 | -0.00066 | 1.87865  |
| A27 | 1.95386  | 0.00111  | 0.00426  | -0.00129 | 0.00297  | 1.95682  |
| A28 | 2.58187  | -0.00519 | 0.00222  | -0.00329 | -0.00106 | 2.58081  |
| A29 | 2.15784  | 0.00010  | -0.00133 | -0.00071 | -0.00204 | 2.15581  |
| A30 | 1.95507  | -0.00009 | -0.00103 | 0.00014  | -0.00088 | 1.95419  |
| A31 | 2.16972  | -0.00002 | 0.00208  | 0.00069  | 0.00279  | 2.17250  |
| A32 | 2.08263  | 0.00011  | 0.00161  | 0.00038  | 0.00198  | 2.08462  |
| A33 | 2.14924  | 0.00000  | -0.00152 | -0.00049 | -0.00200 | 2.14724  |
| A34 | 2.05131  | -0.00011 | -0.00010 | 0.00011  | 0.00002  | 2.05132  |
| A35 | 1.88766  | 0.00020  | 0.00378  | -0.00013 | 0.00365  | 1.89131  |
| D1  | 0.00597  | 0.00015  | -0.00117 | 0.00044  | -0.00072 | 0.00525  |
| D2  | 3.12083  | -0.00006 | -0.00839 | -0.00079 | -0.00918 | 3.11166  |
| D3  | -3.13942 | 0.00025  | 0.01044  | 0.00016  | 0.01060  | -3.12882 |
| D4  | -0.02456 | 0.00004  | 0.00321  | -0.00107 | 0.00215  | -0.02241 |
| D5  | -0.01839 | -0.00018 | -0.01127 | 0.00096  | -0.01031 | -0.02870 |
| D6  | -2.96400 | 0.00014  | -0.00424 | -0.00207 | -0.00628 | -2.97028 |
| D7  | 3.12661  | -0.00027 | -0.02168 | 0.00122  | -0.02046 | 3.10615  |
| D8  | 0.18100  | 0.00006  | -0.01465 | -0.00181 | -0.01643 | 0.16456  |
| D9  | 0.00836  | -0.00007 | 0.01313  | -0.00168 | 0.01145  | 0.01981  |
| D10 | 3.04394  | -0.00013 | -0.00542 | -0.00504 | -0.01044 | 3.03349  |
| D11 | -3.10934 | 0.00011  | 0.01954  | -0.00060 | 0.01894  | -3.09040 |
| D12 | -0.07377 | 0.00006  | 0.00099  | -0.00396 | -0.00295 | -0.07672 |
| D13 | -0.01997 | -0.00004 | -0.02034 | 0.00231  | -0.01802 | -0.03800 |
| D14 | 3.03586  | -0.00011 | 0.08581  | 0.00176  | 0.08759  | 3.12346  |
| D15 | -3.06220 | -0.00001 | -0.00251 | 0.00554  | 0.00304  | -3.05916 |
| D16 | -0.00636 | -0.00008 | 0.10363  | 0.00498  | 0.10865  | 0.10230  |
| D17 | 0.49932  | 0.00002  | 0.05493  | 0.01098  | 0.06591  | 0.56522  |
| D18 | -2.60777 | 0.00004  | 0.06240  | 0.00736  | 0.06976  | -2.53802 |
| D19 | -2.76227 | -0.00003 | 0.03365  | 0.00716  | 0.04081  | -2.72146 |
| D20 | 0.41383  | -0.00001 | 0.04112  | 0.00354  | 0.04466  | 0.45849  |
| D21 | 0.02373  | 0.00014  | 0.01959  | -0.00203 | 0.01756  | 0.04128  |
| D22 | 2.97614  | -0.00008 | 0.01134  | 0.00086  | 0.01222  | 2.98837  |
| D23 | -3.03185 | 0.00023  | -0.08703 | -0.00143 | -0.08844 | -3.12029 |
| D24 | -0.07943 | 0.00001  | -0.09528 | 0.00146  | -0.09377 | -0.17320 |
| D25 | 1.28368  | 0.00096  | -0.04602 | 0.00262  | -0.04340 | 1.24028  |

|     |          |          |          |          |          |          |
|-----|----------|----------|----------|----------|----------|----------|
| D26 | -2.91126 | -0.00013 | -0.04323 | 0.00337  | -0.03986 | -2.95113 |
| D27 | -0.86717 | 0.00038  | -0.04207 | 0.00337  | -0.03871 | -0.90589 |
| D28 | -1.63413 | 0.00127  | -0.03702 | -0.00080 | -0.03781 | -1.67194 |
| D29 | 0.45411  | 0.00018  | -0.03423 | -0.00005 | -0.03427 | 0.41984  |
| D30 | 2.49820  | 0.00069  | -0.03307 | -0.00005 | -0.03312 | 2.46508  |
| D31 | -1.20306 | 0.00004  | 0.04246  | 0.00048  | 0.04294  | -1.16012 |
| D32 | 0.89074  | -0.00063 | 0.03593  | 0.00161  | 0.03755  | 0.92828  |
| D33 | 3.02164  | -0.00059 | 0.04339  | 0.00096  | 0.04435  | 3.06600  |
| D34 | 3.01674  | 0.00066  | 0.03897  | -0.00106 | 0.03791  | 3.05465  |
| D35 | -1.17265 | 0.00000  | 0.03245  | 0.00006  | 0.03252  | -1.14014 |
| D36 | 0.95825  | 0.00004  | 0.03991  | -0.00059 | 0.03932  | 0.99758  |
| D37 | 0.91718  | 0.00037  | 0.04255  | 0.00009  | 0.04264  | 0.95982  |
| D38 | 3.01097  | -0.00030 | 0.03603  | 0.00122  | 0.03724  | 3.04821  |
| D39 | -1.14131 | -0.00026 | 0.04349  | 0.00056  | 0.04405  | -1.09726 |
| D40 | 0.40423  | -0.00020 | -0.22499 | 0.00136  | -0.22362 | 0.18060  |
| D41 | 2.50258  | -0.00070 | -0.22782 | 0.00293  | -0.22490 | 2.27768  |
| D42 | -1.69555 | -0.00013 | -0.22934 | 0.00079  | -0.22855 | -1.92410 |
| D43 | -1.73734 | 0.00134  | -0.03519 | 0.01492  | -0.02027 | -1.75761 |
| D44 | 2.46085  | -0.00007 | -0.03325 | 0.01422  | -0.01903 | 2.44182  |
| D45 | 0.35527  | -0.00124 | -0.02723 | 0.01560  | -0.01163 | 0.34364  |
| D46 | -3.09699 | 0.00003  | 0.00724  | -0.00367 | 0.00357  | -3.09342 |
| D47 | 0.04382  | 0.00000  | 0.00451  | -0.00099 | 0.00352  | 0.04734  |
| D48 | 0.00588  | 0.00001  | -0.00123 | 0.00038  | -0.00085 | 0.00503  |
| D49 | -3.13651 | -0.00002 | -0.00396 | 0.00306  | -0.00090 | -3.13741 |

| Item                 | Value    | Threshold | Converged? |
|----------------------|----------|-----------|------------|
| Maximum Force        | 0.005193 | 0.000450  | NO         |
| RMS Force            | 0.000768 | 0.000300  | NO         |
| Maximum Displacement | 0.301387 | 0.001800  | NO         |
| RMS Displacement     | 0.058592 | 0.001200  | NO         |

Predicted change in Energy=-7.517833D-05

GradGradGradGradGradGradGradGradGradGradGradGradGradGradGradGradGradGradGrad

Input orientation:

| Center Number | Atomic Number | Atomic Type | Coordinates (Angstroms) |           |           |
|---------------|---------------|-------------|-------------------------|-----------|-----------|
|               |               |             | X                       | Y         | Z         |
| 1             | 6             | 0           | -0.463644               | -2.027338 | -1.307077 |
| 2             | 6             | 0           | -1.751787               | -1.639315 | -1.470064 |
| 3             | 7             | 0           | -2.094728               | -0.885880 | -0.351130 |
| 4             | 6             | 0           | -1.018485               | -0.805278 | 0.454251  |
| 5             | 7             | 0           | -0.026174               | -1.518045 | -0.090612 |
| 6             | 6             | 0           | 1.358099                | -1.515566 | 0.404881  |
| 7             | 6             | 0           | 2.227268                | -0.516358 | -0.378636 |

|    |    |   |           |           |           |
|----|----|---|-----------|-----------|-----------|
| 8  | 1  | 0 | 0.177308  | -2.610114 | -1.945199 |
| 9  | 1  | 0 | -2.438751 | -1.802619 | -2.280462 |
| 10 | 1  | 0 | 1.326746  | -1.227182 | 1.455447  |
| 11 | 1  | 0 | 1.757454  | -2.529025 | 0.336109  |
| 12 | 1  | 0 | 2.337019  | -0.846687 | -1.416009 |
| 13 | 1  | 0 | 1.738737  | 0.462112  | -0.360903 |
| 14 | 35 | 0 | -0.263945 | 2.068169  | 0.687352  |
| 15 | 1  | 0 | -0.975228 | -0.272762 | 1.387419  |
| 16 | 6  | 0 | -3.297483 | -0.162296 | -0.118045 |
| 17 | 6  | 0 | -4.481663 | -0.540736 | -0.581433 |
| 18 | 1  | 0 | -3.121013 | 0.747233  | 0.446611  |
| 19 | 1  | 0 | -5.346639 | 0.083204  | -0.402430 |
| 20 | 1  | 0 | -4.631933 | -1.456886 | -1.140079 |
| 21 | 8  | 0 | 3.524456  | -0.477308 | 0.200377  |
| 22 | 1  | 0 | 3.584736  | 0.305800  | 0.756785  |

-----  
Distance matrix (angstroms):

|    |    | 1        | 2        | 3        | 4        | 5        |
|----|----|----------|----------|----------|----------|----------|
| 1  | C  | 0.000000 |          |          |          |          |
| 2  | C  | 1.355153 | 0.000000 |          |          |          |
| 3  | N  | 2.208437 | 1.391864 | 0.000000 |          |          |
| 4  | C  | 2.214397 | 2.221787 | 1.346638 | 0.000000 |          |
| 5  | N  | 1.389441 | 2.212540 | 2.178627 | 1.337757 | 0.000000 |
| 6  | C  | 2.551756 | 3.633473 | 3.590275 | 2.480948 | 1.470283 |
| 7  | C  | 3.222743 | 4.276111 | 4.337851 | 3.363345 | 2.482808 |
| 8  | H  | 1.075940 | 2.211246 | 3.267443 | 3.231828 | 2.161830 |
| 9  | H  | 2.213373 | 1.074863 | 2.163581 | 3.238903 | 3.270619 |
| 10 | H  | 3.387814 | 4.266830 | 3.884159 | 2.584667 | 2.074920 |
| 11 | H  | 2.808029 | 4.045816 | 4.244000 | 3.269725 | 2.094159 |
| 12 | H  | 3.041302 | 4.165275 | 4.558057 | 3.841743 | 2.791429 |
| 13 | H  | 3.455878 | 4.222558 | 4.063575 | 3.142138 | 2.666270 |
| 14 | Br | 4.559694 | 4.540216 | 3.627206 | 2.979994 | 3.677322 |
| 15 | H  | 3.255851 | 3.261245 | 2.156791 | 1.075289 | 2.153140 |
| 16 | C  | 3.594833 | 2.529568 | 1.422857 | 2.436141 | 3.541225 |
| 17 | C  | 4.345229 | 3.073884 | 2.422730 | 3.624393 | 4.587746 |
| 18 | H  | 4.223183 | 3.353212 | 2.087273 | 2.613612 | 3.872741 |
| 19 | H  | 5.395962 | 4.126726 | 3.393623 | 4.500690 | 5.564941 |
| 20 | H  | 4.210456 | 2.904722 | 2.717701 | 4.002935 | 4.724208 |
| 21 | O  | 4.536514 | 5.655031 | 5.660947 | 4.561834 | 3.711440 |
| 22 | H  | 5.108077 | 6.100886 | 5.907952 | 4.745068 | 4.133179 |
|    |    | 6        | 7        | 8        | 9        | 10       |
| 6  | C  | 0.000000 |          |          |          |          |
| 7  | C  | 1.538756 | 0.000000 |          |          |          |
| 8  | H  | 2.848715 | 3.322690 | 0.000000 |          |          |

|    |    |          |          |          |          |          |
|----|----|----------|----------|----------|----------|----------|
| 9  | H  | 4.659349 | 5.200302 | 2.758299 | 0.000000 |          |
| 10 | H  | 1.089880 | 2.163348 | 3.846830 | 5.335457 | 0.000000 |
| 11 | H  | 1.091473 | 2.186873 | 2.776293 | 4.998224 | 1.770091 |
| 12 | H  | 2.172860 | 1.094214 | 2.837969 | 4.946621 | 3.067684 |
| 13 | H  | 2.154651 | 1.093792 | 3.792971 | 5.124951 | 2.514474 |
| 14 | Br | 3.943853 | 3.744630 | 5.386219 | 5.340477 | 3.738931 |
| 15 | H  | 2.820348 | 3.665280 | 4.230590 | 4.235057 | 2.492916 |
| 16 | C  | 4.876396 | 5.542215 | 4.626497 | 2.846774 | 4.999335 |
| 17 | C  | 6.002160 | 6.712039 | 5.277138 | 2.941520 | 6.193359 |
| 18 | H  | 5.018411 | 5.557140 | 5.279342 | 3.795280 | 4.969771 |
| 19 | H  | 6.939836 | 7.597638 | 6.336251 | 3.941972 | 7.050027 |
| 20 | H  | 6.186343 | 6.965130 | 5.010684 | 2.496008 | 6.503489 |
| 21 | O  | 2.410997 | 1.421084 | 4.511736 | 6.593242 | 2.639592 |
| 22 | H  | 2.898124 | 1.951370 | 5.235822 | 7.067722 | 2.817212 |
|    |    | 11       | 12       | 13       | 14       | 15       |
| 11 | H  | 0.000000 |          |          |          |          |
| 12 | H  | 2.497213 | 0.000000 |          |          |          |
| 13 | H  | 3.071332 | 1.784417 | 0.000000 |          |          |
| 14 | Br | 5.034245 | 4.436838 | 2.772904 | 0.000000 |          |
| 15 | H  | 3.696421 | 4.377166 | 3.310934 | 2.544794 | 0.000000 |
| 16 | C  | 5.600005 | 5.822432 | 5.080589 | 3.850454 | 2.769746 |
| 17 | C  | 6.612243 | 6.876376 | 6.304579 | 5.119115 | 4.030294 |
| 18 | H  | 5.877544 | 5.983313 | 4.934627 | 3.156844 | 2.555367 |
| 19 | H  | 7.605085 | 7.805807 | 7.095622 | 5.564304 | 4.737035 |
| 20 | H  | 6.644764 | 7.001055 | 6.698889 | 5.902952 | 4.600205 |
| 21 | O  | 2.711137 | 2.039400 | 2.094358 | 4.590053 | 4.658119 |
| 22 | H  | 3.398847 | 2.757908 | 2.163648 | 4.233570 | 4.639581 |
|    |    | 16       | 17       | 18       | 19       | 20       |
| 16 | C  | 0.000000 |          |          |          |          |
| 17 | C  | 1.326735 | 0.000000 |          |          |          |
| 18 | H  | 1.084998 | 2.137079 | 0.000000 |          |          |
| 19 | H  | 2.083310 | 1.081446 | 2.472896 | 0.000000 |          |
| 20 | H  | 2.121621 | 1.083512 | 3.107830 | 1.851164 | 0.000000 |
| 21 | O  | 6.836628 | 8.044451 | 6.761833 | 8.909202 | 8.323646 |
| 22 | H  | 6.953373 | 8.220356 | 6.727417 | 9.009039 | 8.615034 |
|    |    | 21       | 22       |          |          |          |
| 21 | O  | 0.000000 |          |          |          |          |
| 22 | H  | 0.962539 | 0.000000 |          |          |          |

Stoichiometry C7H11BrN2O

Framework group C1[X(C7H11BrN2O)]

Deg. of freedom 60

Full point group C1 NOp 1

Largest Abelian subgroup C1 NOp 1

Largest concise Abelian subgroup C1 NOp 1

Standard orientation:

| Center<br>Number | Atomic<br>Number | Atomic<br>Type | Coordinates (Angstroms) |           |           |
|------------------|------------------|----------------|-------------------------|-----------|-----------|
|                  |                  |                | X                       | Y         | Z         |
| 1                | 6                | 0              | -0.436137               | -2.319873 | -0.508740 |
| 2                | 6                | 0              | -1.688374               | -1.828278 | -0.672071 |
| 3                | 7                | 0              | -1.791238               | -0.699549 | 0.135813  |
| 4                | 6                | 0              | -0.609187               | -0.507419 | 0.751666  |
| 5                | 7                | 0              | 0.218566                | -1.497808 | 0.400172  |
| 6                | 6                | 0              | 1.652128                | -1.527646 | 0.725354  |
| 7                | 6                | 0              | 2.498248                | -0.989100 | -0.441616 |
| 8                | 1                | 0              | 0.045585                | -3.170226 | -0.958727 |
| 9                | 1                | 0              | -2.496183               | -2.155197 | -1.301276 |
| 10               | 1                | 0              | 1.799291                | -0.899465 | 1.603745  |
| 11               | 1                | 0              | 1.932967                | -2.550948 | 0.980884  |
| 12               | 1                | 0              | 2.425903                | -1.663137 | -1.300536 |
| 13               | 1                | 0              | 2.118820                | -0.002732 | -0.723561 |
| 14               | 35               | 0              | 0.457942                | 2.134482  | -0.121236 |
| 15               | 1                | 0              | -0.380452               | 0.297278  | 1.427232  |
| 16               | 6                | 0              | -2.869291               | 0.225773  | 0.213945  |
| 17               | 6                | 0              | -4.139355               | -0.112002 | 0.032095  |
| 18               | 1                | 0              | -2.523387               | 1.237117  | 0.400375  |
| 19               | 1                | 0              | -4.902546               | 0.653607  | 0.062242  |
| 20               | 1                | 0              | -4.459279               | -1.131251 | -0.148955 |
| 21               | 8                | 0              | 3.861591                | -0.944100 | -0.043183 |
| 22               | 1                | 0              | 4.079104                | -0.036331 | 0.191606  |

Rotational constants (GHZ): 0.8111330 0.5713819 0.3534269

Standard basis: 6-311++G(d,p) (5D, 7F)

There are 358 symmetry adapted cartesian basis functions of A symmetry.

There are 345 symmetry adapted basis functions of A symmetry.

345 basis functions, 553 primitive gaussians, 358 cartesian basis functions

55 alpha electrons 55 beta electrons

nuclear repulsion energy 864.2033487301 Hartrees.

NAtoms= 22 NActive= 22 NUniq= 22 SFac= 1.00D+00 NAtFMM= 60 NAOKFM=F

Big=F

Integral buffers will be 131072 words long.

Raffenetti 2 integral format.

Two-electron integral symmetry is turned on.

One-electron integrals computed using PRISM.

NBasis= 345 RedAO= T EigKep= 6.75D-06 NBF= 345

NBsUse= 345 1.00D-06 EigRej= -1.00D+00 NBFU= 345

Initial guess from the checkpoint file: ""

B after Tr= 0.000000 0.000000 0.000000  
 Rot= 0.999035 -0.001531 0.000111 -0.043889 Ang= -5.03 deg.  
 ExpMin= 3.50D-02 ExpMax= 4.40D+05 ExpMxC= 1.51D+04 IAcc=3 IRadAn= 5 AccDes=  
 0.00D+00  
 Harris functional with IExCor= 402 and IRadAn= 5 diagonalized for initial guess.  
 HarFok: IExCor= 402 AccDes= 0.00D+00 IRadAn= 5 IDoV= 1 UseB2=F ITyADJ=14  
 ICtDFT= 3500011 ScaDFX= 1.000000 1.000000 1.000000 1.000000  
 FoFCou: FMM=F IPFlag= 0 FMFlag= 100000 FMFlg1= 0  
 NFxFlg= 0 DoJE=T BraDBF=F KetDBF=T FulRan=T  
 wScrn= 0.000000 ICntrl= 500 IOpCl= 0 I1Cent= 200000004 NGrid=  
 0  
 NMat0= 1 NMatS0= 1 NMatT0= 0 NMatD0= 1 NMtDS0= 0  
 NMtDT0= 0

Petite list used in FoFCou.

Keep R1 ints in memory in canonical form, NReq=1804729152.

Requested convergence on RMS density matrix=1.00D-08 within 128 cycles.

Requested convergence on MAX density matrix=1.00D-06.

Requested convergence on energy=1.00D-06.

No special actions if energy rises.

SCF Done: E(RB3LYP) = -3032.33850265 A.U. after 12 cycles

NFock= 12 Conv=0.78D-08 -V/T= 2.0017

Calling FoFJK, ICntrl= 2127 FMM=F ISym2X=0 I1Cent= 0 IOpClX= 0 NMat=1 NMatS=1  
 NMatT=0.

\*\*\*\*\* Axes restored to original set \*\*\*\*\*

| Center<br>Number | Atomic<br>Number | Forces (Hartrees/Bohr) |              |              |
|------------------|------------------|------------------------|--------------|--------------|
|                  |                  | X                      | Y            | Z            |
| 1                | 6                | 0.000027307            | -0.000094929 | 0.000050335  |
| 2                | 6                | -0.000043955           | -0.000027320 | -0.000026165 |
| 3                | 7                | 0.000249918            | 0.000188197  | -0.000069057 |
| 4                | 6                | -0.000133228           | -0.000258644 | 0.000319722  |
| 5                | 7                | -0.000068994           | 0.000190017  | -0.000038762 |
| 6                | 6                | -0.000004477           | -0.000078126 | -0.000030138 |
| 7                | 6                | -0.000000056           | 0.000040366  | 0.000376151  |
| 8                | 1                | 0.000042474            | 0.000039061  | -0.000044382 |
| 9                | 1                | 0.000013792            | 0.000033646  | -0.000011256 |
| 10               | 1                | -0.000072918           | 0.000001174  | -0.000019189 |
| 11               | 1                | 0.000016084            | -0.000003092 | 0.000015123  |
| 12               | 1                | -0.000091655           | 0.000000223  | -0.000028210 |
| 13               | 1                | -0.000010856           | -0.000095702 | -0.000596239 |
| 14               | 35               | -0.000065857           | 0.000206302  | 0.000114615  |
| 15               | 1                | 0.000037203            | -0.000061229 | -0.000248988 |
| 16               | 6                | -0.000034609           | -0.000022614 | 0.000111361  |

|    |   |              |              |              |
|----|---|--------------|--------------|--------------|
| 17 | 6 | 0.00002869   | -0.000011549 | 0.000035305  |
| 18 | 1 | -0.000022752 | -0.000041302 | 0.000020157  |
| 19 | 1 | 0.000035811  | 0.000000657  | -0.000052332 |
| 20 | 1 | -0.000004592 | 0.000021282  | -0.000005874 |
| 21 | 8 | 0.000096717  | 0.000031101  | 0.000172445  |
| 22 | 1 | 0.000031776  | -0.000057518 | -0.000044623 |

-----  
Cartesian Forces: Max 0.000596239 RMS 0.000127967

GradGradGradGradGradGradGradGradGradGradGradGradGradGradGradGradGradGradGrad

Berny optimization.

Using GEDIIS/GDIIS optimizer.

FormGI is forming the generalized inverse of G from B-inverse, IUseBI=4.

Internal Forces: Max 0.000550013 RMS 0.000110357

Search for a local minimum.

Step number 34 out of a maximum of 116

All quantities printed in internal units (Hartrees-Bohrs-Radians)

Mixed Optimization -- En-DIIS/RFO-DIIS

Swapping is turned off.

Update second derivatives using D2CorX and points 25 24 26 27 28  
29 30 31 32 33  
34

DE= 2.26D-05 DEPred=-7.52D-05 R=-3.00D-01

Trust test=-3.00D-01 RLast= 4.78D-01 DXMaxT set to 3.11D-01

ITU= -1 0 1 1 1 1 1 1 0 -1 1 1 1 1 0 -1 1 1 1

ITU= 1 1 1 1 1 1 1 1 1 0 0 -1 0 0

|                 |         |         |         |         |         |
|-----------------|---------|---------|---------|---------|---------|
| Eigenvalues --- | 0.00011 | 0.00070 | 0.00171 | 0.00421 | 0.00878 |
| Eigenvalues --- | 0.00947 | 0.01284 | 0.01615 | 0.01783 | 0.02083 |
| Eigenvalues --- | 0.02239 | 0.02345 | 0.03064 | 0.03110 | 0.03571 |
| Eigenvalues --- | 0.04343 | 0.05025 | 0.05319 | 0.05953 | 0.06756 |
| Eigenvalues --- | 0.08883 | 0.09207 | 0.13993 | 0.14587 | 0.14808 |
| Eigenvalues --- | 0.15465 | 0.15909 | 0.15981 | 0.16014 | 0.16089 |
| Eigenvalues --- | 0.16888 | 0.17132 | 0.20582 | 0.22129 | 0.22986 |
| Eigenvalues --- | 0.23921 | 0.24829 | 0.25848 | 0.29630 | 0.33170 |
| Eigenvalues --- | 0.33801 | 0.33881 | 0.33921 | 0.34054 | 0.34225 |
| Eigenvalues --- | 0.34372 | 0.34774 | 0.36068 | 0.36295 | 0.36433 |
| Eigenvalues --- | 0.38988 | 0.43148 | 0.44637 | 0.46081 | 0.49413 |
| Eigenvalues --- | 0.53357 | 0.54773 | 0.56830 | 0.60647 | 3.37489 |

En-DIIS/RFO-DIIS IScMMF= 0 using points: 34 33 32 31 30

RFO step: Lambda=-3.51865033D-06.

DidBck=T Rises=F RFO-DIIS coefs: 0.08681 1.21685 -2.97612 4.33403 -

1.66157

Iteration 1 RMS(Cart)= 0.02864019 RMS(Int)= 0.00056199

Iteration 2 RMS(Cart)= 0.00111473 RMS(Int)= 0.00006140



| Iteration 3 | RMS(Cart)= | 0.00000132 | RMS(Int)=           | 0.00006139        |                    |         |
|-------------|------------|------------|---------------------|-------------------|--------------------|---------|
| Iteration 4 | RMS(Cart)= | 0.00000000 | RMS(Int)=           | 0.00006139        |                    |         |
| Variable    | Old X      | -DE/DX     | Delta X<br>(Linear) | Delta X<br>(Quad) | Delta X<br>(Total) | New X   |
| R1          | 2.56087    | 0.00003    | 0.00031             | 0.00039           | 0.00076            | 2.56163 |
| R2          | 2.62566    | -0.00002   | -0.00001            | -0.00047          | -0.00047           | 2.62520 |
| R3          | 2.03323    | 0.00003    | 0.00013             | -0.00004          | 0.00009            | 2.03333 |
| R4          | 2.63024    | 0.00005    | 0.00023             | -0.00023          | 0.00002            | 2.63026 |
| R5          | 2.03120    | 0.00000    | -0.00002            | 0.00001           | -0.00001           | 2.03118 |
| R6          | 2.54478    | -0.00018   | -0.00038            | -0.00090          | -0.00133           | 2.54344 |
| R7          | 2.68881    | 0.00001    | 0.00014             | 0.00104           | 0.00118            | 2.68999 |
| R8          | 2.52799    | -0.00018   | -0.00082            | -0.00030          | -0.00118           | 2.52682 |
| R9          | 2.03200    | -0.00025   | 0.00150             | 0.00180           | 0.00329            | 2.03529 |
| R10         | 2.77843    | -0.00011   | 0.00092             | 0.00077           | 0.00170            | 2.78013 |
| R11         | 2.90783    | 0.00007    | 0.00012             | -0.00009          | 0.00004            | 2.90786 |
| R12         | 2.05957    | -0.00002   | 0.00007             | -0.00019          | -0.00012           | 2.05946 |
| R13         | 2.06258    | 0.00001    | -0.00022            | -0.00008          | -0.00030           | 2.06228 |
| R14         | 2.06776    | 0.00002    | 0.00025             | 0.00007           | 0.00032            | 2.06808 |
| R15         | 2.06697    | 0.00013    | 0.00083             | -0.00051          | 0.00032            | 2.06728 |
| R16         | 2.68546    | 0.00017    | -0.00080            | -0.00042          | -0.00122           | 2.68424 |
| R17         | 5.24003    | 0.00021    | -0.00044            | -0.00612          | -0.00655           | 5.23348 |
| R18         | 2.50717    | -0.00003   | 0.00004             | -0.00022          | -0.00018           | 2.50699 |
| R19         | 2.05035    | -0.00003   | -0.00020            | 0.00012           | -0.00008           | 2.05027 |
| R20         | 2.04364    | -0.00004   | -0.00003            | -0.00006          | -0.00008           | 2.04356 |
| R21         | 2.04754    | -0.00001   | -0.00011            | -0.00002          | -0.00013           | 2.04741 |
| R22         | 1.81893    | -0.00007   | 0.00058             | -0.00008          | 0.00050            | 1.81943 |
| A1          | 1.87510    | -0.00008   | -0.00027            | -0.00004          | -0.00029           | 1.87481 |
| A2          | 2.27840    | 0.00004    | 0.00009             | -0.00017          | -0.00009           | 2.27832 |
| A3          | 2.12966    | 0.00004    | 0.00017             | 0.00023           | 0.00040            | 2.13006 |
| A4          | 1.86765    | -0.00004   | -0.00027            | -0.00036          | -0.00061           | 1.86704 |
| A5          | 2.28457    | 0.00003    | -0.00037            | 0.00002           | -0.00035           | 2.28422 |
| A6          | 2.13044    | 0.00002    | 0.00072             | 0.00029           | 0.00102            | 2.13145 |
| A7          | 1.89260    | 0.00003    | 0.00019             | 0.00043           | 0.00052            | 1.89312 |
| A8          | 2.23350    | 0.00005    | 0.00139             | 0.00035           | 0.00179            | 2.23528 |
| A9          | 2.14977    | -0.00008   | -0.00079            | -0.00035          | -0.00111           | 2.14867 |
| A10         | 1.89373    | 0.00001    | 0.00000             | 0.00010           | 0.00026            | 1.89399 |
| A11         | 2.19052    | 0.00002    | 0.00014             | -0.00044          | 0.00010            | 2.19062 |
| A12         | 2.19874    | -0.00003   | -0.00181            | 0.00077           | -0.00064           | 2.19811 |
| A13         | 1.89477    | 0.00008    | 0.00043             | 0.00018           | 0.00052            | 1.89529 |
| A14         | 2.20446    | -0.00001   | 0.00133             | 0.00087           | 0.00224            | 2.20670 |
| A15         | 2.16545    | -0.00007   | -0.00165            | -0.00116          | -0.00274           | 2.16270 |
| A16         | 1.94046    | 0.00009    | -0.00051            | -0.00174          | -0.00225           | 1.93821 |
| A17         | 1.87361    | -0.00012   | -0.00120            | 0.00022           | -0.00099           | 1.87263 |
| A18         | 1.89830    | 0.00003    | -0.00052            | 0.00005           | -0.00047           | 1.89784 |

|     |          |          |          |          |          |          |
|-----|----------|----------|----------|----------|----------|----------|
| A19 | 1.91267  | 0.00015  | 0.00008  | -0.00076 | -0.00068 | 1.91198  |
| A20 | 1.94356  | -0.00017 | 0.00173  | 0.00151  | 0.00324  | 1.94680  |
| A21 | 1.89331  | 0.00001  | 0.00033  | 0.00073  | 0.00107  | 1.89438  |
| A22 | 1.92129  | -0.00021 | -0.00043 | 0.00130  | 0.00087  | 1.92215  |
| A23 | 1.89690  | 0.00055  | -0.00178 | -0.00176 | -0.00353 | 1.89337  |
| A24 | 1.90285  | -0.00018 | -0.00083 | 0.00033  | -0.00051 | 1.90234  |
| A25 | 1.90734  | -0.00021 | 0.00195  | 0.00057  | 0.00252  | 1.90986  |
| A26 | 1.87865  | 0.00014  | 0.00103  | 0.00142  | 0.00245  | 1.88110  |
| A27 | 1.95682  | -0.00010 | 0.00007  | -0.00177 | -0.00171 | 1.95511  |
| A28 | 2.58081  | 0.00035  | 0.00129  | 0.00006  | 0.00135  | 2.58216  |
| A29 | 2.15581  | -0.00003 | 0.00091  | -0.00072 | 0.00019  | 2.15600  |
| A30 | 1.95419  | 0.00003  | 0.00016  | -0.00034 | -0.00018 | 1.95401  |
| A31 | 2.17250  | 0.00000  | -0.00112 | 0.00116  | 0.00004  | 2.17254  |
| A32 | 2.08462  | 0.00000  | -0.00085 | 0.00047  | -0.00038 | 2.08424  |
| A33 | 2.14724  | 0.00001  | 0.00080  | -0.00037 | 0.00043  | 2.14768  |
| A34 | 2.05132  | -0.00001 | 0.00005  | -0.00010 | -0.00005 | 2.05127  |
| A35 | 1.89131  | 0.00006  | -0.00090 | -0.00030 | -0.00119 | 1.89011  |
| D1  | 0.00525  | -0.00005 | -0.00011 | 0.00064  | 0.00052  | 0.00576  |
| D2  | 3.11166  | -0.00005 | 0.00341  | -0.00109 | 0.00232  | 3.11398  |
| D3  | -3.12882 | 0.00004  | -0.00360 | -0.00076 | -0.00435 | -3.13317 |
| D4  | -0.02241 | 0.00004  | -0.00008 | -0.00249 | -0.00255 | -0.02496 |
| D5  | -0.02870 | 0.00006  | 0.00207  | 0.00361  | 0.00568  | -0.02302 |
| D6  | -2.97028 | 0.00005  | 0.00159  | 0.00434  | 0.00597  | -2.96432 |
| D7  | 3.10615  | -0.00001 | 0.00519  | 0.00486  | 0.01005  | 3.11619  |
| D8  | 0.16456  | -0.00003 | 0.00471  | 0.00560  | 0.01033  | 0.17489  |
| D9  | 0.01981  | 0.00001  | -0.00187 | -0.00463 | -0.00650 | 0.01331  |
| D10 | 3.03349  | 0.00004  | 0.00526  | -0.00092 | 0.00436  | 3.03785  |
| D11 | -3.09040 | 0.00001  | -0.00499 | -0.00308 | -0.00808 | -3.09848 |
| D12 | -0.07672 | 0.00004  | 0.00214  | 0.00062  | 0.00277  | -0.07394 |
| D13 | -0.03800 | 0.00003  | 0.00318  | 0.00693  | 0.01012  | -0.02788 |
| D14 | 3.12346  | -0.00003 | -0.02516 | -0.01586 | -0.04095 | 3.08251  |
| D15 | -3.05916 | -0.00001 | -0.00370 | 0.00338  | -0.00033 | -3.05949 |
| D16 | 0.10230  | -0.00007 | -0.03204 | -0.01941 | -0.05139 | 0.05090  |
| D17 | 0.56522  | -0.00006 | -0.02302 | -0.00191 | -0.02493 | 0.54029  |
| D18 | -2.53802 | -0.00005 | -0.02176 | -0.00473 | -0.02649 | -2.56451 |
| D19 | -2.72146 | -0.00002 | -0.01484 | 0.00235  | -0.01249 | -2.73394 |
| D20 | 0.45849  | -0.00001 | -0.01359 | -0.00046 | -0.01405 | 0.44444  |
| D21 | 0.04128  | -0.00006 | -0.00325 | -0.00653 | -0.00979 | 0.03150  |
| D22 | 2.98837  | -0.00003 | -0.00241 | -0.00697 | -0.00938 | 2.97899  |
| D23 | -3.12029 | 0.00000  | 0.02512  | 0.01637  | 0.04156  | -3.07873 |
| D24 | -0.17320 | 0.00003  | 0.02596  | 0.01594  | 0.04197  | -0.13123 |
| D25 | 1.24028  | -0.00021 | 0.01262  | 0.00685  | 0.01946  | 1.25974  |
| D26 | -2.95113 | -0.00005 | 0.01166  | 0.00505  | 0.01671  | -2.93442 |
| D27 | -0.90589 | -0.00008 | 0.01113  | 0.00607  | 0.01719  | -0.88870 |

|     |          |          |          |          |          |          |
|-----|----------|----------|----------|----------|----------|----------|
| D28 | -1.67194 | -0.00025 | 0.01180  | 0.00751  | 0.01932  | -1.65262 |
| D29 | 0.41984  | -0.00009 | 0.01084  | 0.00571  | 0.01656  | 0.43641  |
| D30 | 2.46508  | -0.00012 | 0.01031  | 0.00672  | 0.01704  | 2.48212  |
| D31 | -1.16012 | -0.00002 | -0.01094 | -0.00153 | -0.01246 | -1.17258 |
| D32 | 0.92828  | -0.00006 | -0.00990 | -0.00113 | -0.01104 | 0.91725  |
| D33 | 3.06600  | 0.00004  | -0.01144 | -0.00420 | -0.01564 | 3.05036  |
| D34 | 3.05465  | -0.00002 | -0.00918 | -0.00025 | -0.00943 | 3.04522  |
| D35 | -1.14014 | -0.00007 | -0.00815 | 0.00014  | -0.00801 | -1.14814 |
| D36 | 0.99758  | 0.00004  | -0.00968 | -0.00293 | -0.01261 | 0.98497  |
| D37 | 0.95982  | -0.00003 | -0.01075 | -0.00163 | -0.01238 | 0.94743  |
| D38 | 3.04821  | -0.00008 | -0.00972 | -0.00124 | -0.01096 | 3.03726  |
| D39 | -1.09726 | 0.00003  | -0.01125 | -0.00431 | -0.01556 | -1.11281 |
| D40 | 0.18060  | 0.00014  | 0.05356  | 0.04263  | 0.09620  | 0.27680  |
| D41 | 2.27768  | 0.00009  | 0.05312  | 0.04349  | 0.09662  | 2.37429  |
| D42 | -1.92410 | 0.00006  | 0.05574  | 0.04453  | 0.10027  | -1.82383 |
| D43 | -1.75761 | -0.00027 | -0.00916 | 0.00438  | -0.00478 | -1.76239 |
| D44 | 2.44182  | 0.00000  | -0.00877 | 0.00183  | -0.00694 | 2.43488  |
| D45 | 0.34364  | 0.00023  | -0.01190 | 0.00127  | -0.01063 | 0.33301  |
| D46 | -3.09342 | 0.00005  | 0.00140  | -0.00251 | -0.00111 | -3.09453 |
| D47 | 0.04734  | -0.00001 | -0.00025 | -0.00068 | -0.00092 | 0.04641  |
| D48 | 0.00503  | 0.00004  | 0.00002  | 0.00062  | 0.00064  | 0.00567  |
| D49 | -3.13741 | -0.00002 | -0.00162 | 0.00245  | 0.00083  | -3.13658 |

| Item                 | Value    | Threshold | Converged? |
|----------------------|----------|-----------|------------|
| Maximum Force        | 0.000550 | 0.000450  | NO         |
| RMS Force            | 0.000110 | 0.000300  | YES        |
| Maximum Displacement | 0.171979 | 0.001800  | NO         |
| RMS Displacement     | 0.028298 | 0.001200  | NO         |

Predicted change in Energy=-1.759400D-05

GradGradGradGradGradGradGradGradGradGradGradGradGradGradGradGradGradGrad

#### Input orientation:

| Center<br>Number | Atomic<br>Number | Atomic<br>Type | Coordinates (Angstroms) |           |           |
|------------------|------------------|----------------|-------------------------|-----------|-----------|
|                  |                  |                | X                       | Y         | Z         |
| 1                | 6                | 0              | -0.469886               | -2.054089 | -1.301275 |
| 2                | 6                | 0              | -1.756924               | -1.661323 | -1.464990 |
| 3                | 7                | 0              | -2.091055               | -0.891125 | -0.354822 |
| 4                | 6                | 0              | -1.014460               | -0.812340 | 0.449087  |
| 5                | 7                | 0              | -0.026001               | -1.531226 | -0.093202 |
| 6                | 6                | 0              | 1.360792                | -1.521557 | 0.397801  |
| 7                | 6                | 0              | 2.216855                | -0.509630 | -0.383858 |
| 8                | 1                | 0              | 0.164521                | -2.651825 | -1.932141 |
| 9                | 1                | 0              | -2.447852               | -1.833322 | -2.270192 |

|    |    |   |           |           |           |
|----|----|---|-----------|-----------|-----------|
| 10 | 1  | 0 | 1.330115  | -1.237695 | 1.449555  |
| 11 | 1  | 0 | 1.766309  | -2.531948 | 0.322773  |
| 12 | 1  | 0 | 2.335391  | -0.838269 | -1.420976 |
| 13 | 1  | 0 | 1.711023  | 0.460178  | -0.365033 |
| 14 | 35 | 0 | -0.226634 | 2.075082  | 0.778360  |
| 15 | 1  | 0 | -0.953808 | -0.239621 | 1.359203  |
| 16 | 6  | 0 | -3.290404 | -0.160584 | -0.122076 |
| 17 | 6  | 0 | -4.474938 | -0.527111 | -0.593788 |
| 18 | 1  | 0 | -3.110417 | 0.742635  | 0.451444  |
| 19 | 1  | 0 | -5.336227 | 0.101366  | -0.413143 |
| 20 | 1  | 0 | -4.629342 | -1.437439 | -1.160632 |
| 21 | 8  | 0 | 3.509408  | -0.447566 | 0.201885  |
| 22 | 1  | 0 | 3.553887  | 0.340529  | 0.753173  |

-----  
Distance matrix (angstroms):

|    |    | 1        | 2        | 3        | 4        | 5        |
|----|----|----------|----------|----------|----------|----------|
| 1  | C  | 0.000000 |          |          |          |          |
| 2  | C  | 1.355556 | 0.000000 |          |          |          |
| 3  | N  | 2.208267 | 1.391876 | 0.000000 |          |          |
| 4  | C  | 2.214107 | 2.221647 | 1.345932 | 0.000000 |          |
| 5  | N  | 1.389193 | 2.212424 | 2.177756 | 1.337134 | 0.000000 |
| 6  | C  | 2.553787 | 3.634511 | 3.588750 | 2.479403 | 1.471181 |
| 7  | C  | 3.231963 | 4.276232 | 4.324866 | 3.350646 | 2.481641 |
| 8  | H  | 1.075989 | 2.211623 | 3.267356 | 3.231710 | 2.161882 |
| 9  | H  | 2.213569 | 1.074856 | 2.164181 | 3.239058 | 3.270460 |
| 10 | H  | 3.387266 | 4.266596 | 3.883335 | 2.584356 | 2.074925 |
| 11 | H  | 2.804719 | 4.045646 | 4.246255 | 3.271954 | 2.094482 |
| 12 | H  | 3.059759 | 4.174493 | 4.553339 | 3.836575 | 2.796309 |
| 13 | H  | 3.457520 | 4.211570 | 4.035086 | 3.116143 | 2.656470 |
| 14 | Br | 4.629698 | 4.618996 | 3.682194 | 3.011029 | 3.715553 |
| 15 | H  | 3.256473 | 3.262254 | 2.157701 | 1.077032 | 2.153729 |
| 16 | C  | 3.595996 | 2.531244 | 1.423482 | 2.435351 | 3.540596 |
| 17 | C  | 4.344265 | 3.071324 | 2.423327 | 3.625445 | 4.588232 |
| 18 | H  | 4.226830 | 3.359119 | 2.087664 | 2.609787 | 3.870492 |
| 19 | H  | 5.395927 | 4.126120 | 3.394051 | 4.500663 | 5.564729 |
| 20 | H  | 4.207269 | 2.897162 | 2.718582 | 4.006160 | 4.726410 |
| 21 | O  | 4.546998 | 5.655611 | 5.645516 | 4.545279 | 3.709517 |
| 22 | H  | 5.113287 | 6.093633 | 5.883026 | 4.721374 | 4.127399 |
|    |    | 6        | 7        | 8        | 9        | 10       |
| 6  | C  | 0.000000 |          |          |          |          |
| 7  | C  | 1.538776 | 0.000000 |          |          |          |
| 8  | H  | 2.852578 | 3.346379 | 0.000000 |          |          |
| 9  | H  | 4.660596 | 5.202875 | 2.758391 | 0.000000 |          |
| 10 | H  | 1.089819 | 2.162819 | 3.846328 | 5.335197 | 0.000000 |

|    |    |          |          |          |          |          |
|----|----|----------|----------|----------|----------|----------|
| 11 | H  | 1.091313 | 2.189084 | 2.768525 | 4.997069 | 1.770591 |
| 12 | H  | 2.173632 | 1.094381 | 2.874534 | 4.958902 | 3.067584 |
| 13 | H  | 2.152173 | 1.093959 | 3.812093 | 5.117227 | 2.514079 |
| 14 | Br | 3.949754 | 3.741941 | 5.462917 | 5.431675 | 3.721352 |
| 15 | H  | 2.815142 | 3.628259 | 4.231115 | 4.236102 | 2.494117 |
| 16 | C  | 4.874027 | 5.524514 | 4.628080 | 2.849973 | 4.997938 |
| 17 | C  | 6.002326 | 6.695108 | 5.275432 | 2.936936 | 6.195065 |
| 18 | H  | 5.012100 | 5.535857 | 5.284795 | 3.805502 | 4.963493 |
| 19 | H  | 6.938412 | 7.577810 | 6.336059 | 3.941364 | 7.050024 |
| 20 | H  | 6.190112 | 6.952310 | 5.005106 | 2.479263 | 6.509079 |
| 21 | O  | 2.410061 | 1.420437 | 4.538843 | 6.597002 | 2.632547 |
| 22 | H  | 2.898848 | 1.950196 | 5.258602 | 7.063090 | 2.814409 |
|    |    | 11       | 12       | 13       | 14       | 15       |
| 11 | H  | 0.000000 |          |          |          |          |
| 12 | H  | 2.496610 | 0.000000 |          |          |          |
| 13 | H  | 3.070659 | 1.786285 | 0.000000 |          |          |
| 14 | Br | 5.040249 | 4.459671 | 2.769436 | 0.000000 |          |
| 15 | H  | 3.705129 | 4.348172 | 3.250236 | 2.494797 | 0.000000 |
| 16 | C  | 5.602820 | 5.813429 | 5.045656 | 3.898163 | 2.767692 |
| 17 | C  | 6.619110 | 6.867433 | 6.268427 | 5.167425 | 4.036730 |
| 18 | H  | 5.875534 | 5.971770 | 4.898234 | 3.193507 | 2.537680 |
| 19 | H  | 7.610645 | 7.794380 | 7.056542 | 5.605637 | 4.739523 |
| 20 | H  | 6.656034 | 6.995304 | 6.665895 | 5.956620 | 4.614530 |
| 21 | O  | 2.719864 | 2.040747 | 2.092746 | 4.544677 | 4.615509 |
| 22 | H  | 3.410543 | 2.757032 | 2.158900 | 4.159525 | 4.585102 |
|    |    | 16       | 17       | 18       | 19       | 20       |
| 16 | C  | 0.000000 |          |          |          |          |
| 17 | C  | 1.326641 | 0.000000 |          |          |          |
| 18 | H  | 1.084954 | 2.136980 | 0.000000 |          |          |
| 19 | H  | 2.082962 | 1.081403 | 2.472441 | 0.000000 |          |
| 20 | H  | 2.121724 | 1.083443 | 3.107836 | 1.851039 | 0.000000 |
| 21 | O  | 6.813571 | 8.024289 | 6.730598 | 8.883966 | 8.311171 |
| 22 | H  | 6.918200 | 8.187132 | 6.683238 | 8.969482 | 8.590056 |
|    |    | 21       | 22       |          |          |          |
| 21 | O  | 0.000000 |          |          |          |          |
| 22 | H  | 0.962803 | 0.000000 |          |          |          |

Stoichiometry C7H11BrN2O

Framework group C1[X(C7H11BrN2O)]

Deg. of freedom 60

Full point group C1 NOp 1

Largest Abelian subgroup C1 NOp 1

Largest concise Abelian subgroup C1 NOp 1

Standard orientation:

-----

| Center<br>Number | Atomic<br>Number | Atomic<br>Type | Coordinates (Angstroms) |           |           |
|------------------|------------------|----------------|-------------------------|-----------|-----------|
|                  |                  |                | X                       | Y         | Z         |
| 1                | 6                | 0              | -0.540904               | -2.343398 | -0.467334 |
| 2                | 6                | 0              | -1.774512               | -1.808553 | -0.639627 |
| 3                | 7                | 0              | -1.826232               | -0.650054 | 0.130129  |
| 4                | 6                | 0              | -0.636220               | -0.488465 | 0.737824  |
| 5                | 7                | 0              | 0.151621                | -1.517688 | 0.409290  |
| 6                | 6                | 0              | 1.587176                | -1.585623 | 0.723834  |
| 7                | 6                | 0              | 2.436254                | -1.085610 | -0.458065 |
| 8                | 1                | 0              | -0.097503               | -3.228787 | -0.888328 |
| 9                | 1                | 0              | -2.599520               | -2.125657 | -1.251284 |
| 10               | 1                | 0              | 1.759197                | -0.949017 | 1.591502  |
| 11               | 1                | 0              | 1.839096                | -2.613070 | 0.991886  |
| 12               | 1                | 0              | 2.346616                | -1.774010 | -1.304080 |
| 13               | 1                | 0              | 2.071993                | -0.097166 | -0.753087 |
| 14               | 35               | 0              | 0.567310                | 2.137609  | -0.111614 |
| 15               | 1                | 0              | -0.358870               | 0.347122  | 1.358202  |
| 16               | 6                | 0              | -2.867406               | 0.318845  | 0.189200  |
| 17               | 6                | 0              | -4.149035               | 0.029394  | 0.005839  |
| 18               | 1                | 0              | -2.482336               | 1.317968  | 0.364133  |
| 19               | 1                | 0              | -4.880922               | 0.825329  | 0.021996  |
| 20               | 1                | 0              | -4.508957               | -0.978513 | -0.162772 |
| 21               | 8                | 0              | 3.801303                | -1.055092 | -0.066465 |
| 22               | 1                | 0              | 4.035070                | -0.145136 | 0.144063  |

Rotational constants (GHZ): 0.7998659 0.5710415 0.3503022

Standard basis: 6-311++G(d,p) (5D, 7F)

There are 358 symmetry adapted cartesian basis functions of A symmetry.

There are 345 symmetry adapted basis functions of A symmetry.

345 basis functions, 553 primitive gaussians, 358 cartesian basis functions

55 alpha electrons 55 beta electrons

nuclear repulsion energy 862.0406804295 Hartrees.

NAtoms= 22 NActive= 22 NUniq= 22 SFac= 1.00D+00 NAtFMM= 60 NAOKFM=F

Big=F

Integral buffers will be 131072 words long.

Raffenetti 2 integral format.

Two-electron integral symmetry is turned on.

One-electron integrals computed using PRISM.

NBasis= 345 RedAO= T EigKep= 6.60D-06 NBF= 345

NBsUse= 345 1.00D-06 EigRej= -1.00D+00 NBFU= 345

Initial guess from the checkpoint file: ""

B after Tr= 0.000000 0.000000 0.000000

Rot= 0.999822 0.001251 -0.000126 0.018806 Ang= 2.16 deg.

ExpMin= 3.50D-02 ExpMax= 4.40D+05 ExpMxC= 1.51D+04 IAcc=3 IRadAn= 5 AccDes= 0.00D+00

Harris functional with IExCor= 402 and IRadAn= 5 diagonalized for initial guess.

HarFok: IExCor= 402 AccDes= 0.00D+00 IRadAn= 5 IDoV= 1 UseB2=F ITyADJ=14

ICtDFT= 3500011 ScaDFX= 1.000000 1.000000 1.000000 1.000000

FoFCou: FMM=F IPFlag= 0 FMFlag= 100000 FMFlg1= 0

NFxFlg= 0 DoJE=T BraDBF=F KetDBF=T FulRan=T

wScr= 0.000000 ICntrl= 500 IOpCl= 0 l1Cent= 200000004 NGrid=

0

NMat0= 1 NMatS0= 1 NMatT0= 0 NMatD0= 1 NMtDS0= 0

NMtDT0= 0

Petite list used in FoFCou.

Keep R1 ints in memory in canonical form, NReq=1804729152.

Requested convergence on RMS density matrix=1.00D-08 within 128 cycles.

Requested convergence on MAX density matrix=1.00D-06.

Requested convergence on energy=1.00D-06.

No special actions if energy rises.

SCF Done: E(RB3LYP) = -3032.33851541 A.U. after 12 cycles

NFock= 12 Conv=0.24D-08 -V/T= 2.0017

Calling FoFJK, ICntrl= 2127 FMM=F ISym2X=0 l1Cent= 0 IOpClX= 0 NMat=1 NMatS=1

NMatT=0.

\*\*\*\*\* Axes restored to original set \*\*\*\*\*

| Center | Atomic | Forces (Hartrees/Bohr) |              |              |
|--------|--------|------------------------|--------------|--------------|
| Number | Number | X                      | Y            | Z            |
| 1      | 6      | -0.000053465           | -0.000230198 | 0.000142704  |
| 2      | 6      | -0.000030201           | -0.000031988 | 0.000018873  |
| 3      | 7      | 0.000058100            | 0.000092415  | -0.000132881 |
| 4      | 6      | 0.000006399            | -0.000186156 | 0.000017298  |
| 5      | 7      | -0.000053530           | 0.000163526  | 0.000015378  |
| 6      | 6      | -0.000280764           | -0.000191205 | -0.000053348 |
| 7      | 6      | -0.000254088           | -0.000008639 | 0.000610828  |
| 8      | 1      | 0.000119329            | 0.000144854  | -0.000105665 |
| 9      | 1      | 0.000015816            | 0.000018638  | -0.000010502 |
| 10     | 1      | -0.000020629           | -0.000028005 | -0.000031984 |
| 11     | 1      | 0.000058913            | -0.000026816 | 0.000002203  |
| 12     | 1      | -0.000030991           | 0.000013802  | 0.000039674  |
| 13     | 1      | 0.000234537            | 0.000012771  | -0.000788539 |
| 14     | 35     | -0.000159253           | 0.000271074  | 0.000203194  |
| 15     | 1      | 0.000087768            | 0.000105049  | -0.000038883 |
| 16     | 6      | 0.000163979            | -0.000163317 | 0.000031949  |
| 17     | 6      | 0.000024329            | 0.000084596  | 0.000082208  |
| 18     | 1      | -0.000119757           | -0.000060356 | 0.000058732  |

|    |   |              |              |              |
|----|---|--------------|--------------|--------------|
| 19 | 1 | 0.000007480  | -0.000011594 | -0.000039273 |
| 20 | 1 | -0.000033437 | 0.000005780  | -0.000023204 |
| 21 | 8 | 0.000254788  | 0.000190747  | 0.000054283  |
| 22 | 1 | 0.000004677  | -0.000164978 | -0.000053044 |

-----  
Cartesian Forces: Max 0.000788539 RMS 0.000167456

GradGradGradGradGradGradGradGradGradGradGradGradGradGradGradGradGradGradGrad  
Berny optimization.

Using GEDIIS/GDIIS optimizer.

FormGI is forming the generalized inverse of G from B-inverse, IUseBI=4.

Internal Forces: Max 0.000683517 RMS 0.000127915

Search for a local minimum.

Step number 35 out of a maximum of 116

All quantities printed in internal units (Hartrees-Bohrs-Radians)

Mixed Optimization -- En-DIIS/RFO-DIIS

Swapping is turned off.

Update second derivatives using D2CorX and points 25 26 27 28 29  
30 31 32 33 34  
35

DE= -1.28D-05 DEPred=-1.76D-05 R= 7.25D-01

TightC=F SS= 1.41D+00 RLast= 2.06D-01 DXNew= 5.2346D-01 6.1784D-01

Trust test= 7.25D-01 RLast= 2.06D-01 DXMaxT set to 5.23D-01

ITU= 1 -1 0 1 1 1 1 1 1 0 -1 1 1 1 1 0 -1 1 1

ITU= 1 1 1 1 1 1 1 1 1 1 0 0 -1 0 0

|                 |          |         |         |         |         |
|-----------------|----------|---------|---------|---------|---------|
| Eigenvalues --- | -0.03692 | 0.00002 | 0.00148 | 0.00282 | 0.00519 |
| Eigenvalues --- | 0.00974  | 0.01145 | 0.01540 | 0.01766 | 0.02045 |
| Eigenvalues --- | 0.02082  | 0.02326 | 0.03061 | 0.03073 | 0.03464 |
| Eigenvalues --- | 0.04026  | 0.04855 | 0.05262 | 0.05795 | 0.06103 |
| Eigenvalues --- | 0.08634  | 0.09192 | 0.12314 | 0.14019 | 0.14426 |
| Eigenvalues --- | 0.15395  | 0.15903 | 0.15968 | 0.16006 | 0.16047 |
| Eigenvalues --- | 0.16597  | 0.17261 | 0.19950 | 0.21582 | 0.23016 |
| Eigenvalues --- | 0.24048  | 0.24630 | 0.25007 | 0.29192 | 0.33085 |
| Eigenvalues --- | 0.33619  | 0.33879 | 0.33902 | 0.34025 | 0.34229 |
| Eigenvalues --- | 0.34331  | 0.34789 | 0.35978 | 0.36288 | 0.36364 |
| Eigenvalues --- | 0.36754  | 0.43026 | 0.44821 | 0.45689 | 0.49700 |
| Eigenvalues --- | 0.53202  | 0.54631 | 0.57282 | 0.60757 | 1.44103 |

Eigenvalue 2 is 1.72D-05 Eigenvector:

|   |          |          |          |         |          |
|---|----------|----------|----------|---------|----------|
|   | D42      | D40      | D41      | D16     | D23      |
| 1 | -0.49388 | -0.47230 | -0.47156 | 0.24999 | -0.19562 |
|   | D14      | D24      | D18      | D17     | D28      |
| 1 | 0.19229  | -0.18575 | 0.13281  | 0.12678 | -0.08489 |

Use linear search instead of GDIIS.

RFO step: Lambda=-3.69302955D-02 EMin=-3.69247732D-02



I= 1 Eig= -3.69D-02 Dot1= 2.71D-04  
 I= 1 Stepn= 6.00D-01 RXN= 6.00D-01 EDone=F  
 Mixed 1 eigenvectors in step. Raw Step.Grad= 2.71D-04.  
 RFO eigenvector is Hessian eigenvector with negative curvature.  
 Taking step of 6.00D-01 in eigenvector direction(s). Step.Grad= -1.95D-05.  
 Skip linear search -- no minimum in search direction.

Iteration 1 RMS(Cart)= 0.12836480 RMS(Int)= 0.00860283  
 Iteration 2 RMS(Cart)= 0.01139400 RMS(Int)= 0.00046199  
 Iteration 3 RMS(Cart)= 0.00013110 RMS(Int)= 0.00045788  
 Iteration 4 RMS(Cart)= 0.00000002 RMS(Int)= 0.00045788

| Variable | Old X   | -DE/DX   | Delta X<br>(Linear) | Delta X<br>(Quad) | Delta X<br>(Total) | New X   |
|----------|---------|----------|---------------------|-------------------|--------------------|---------|
| R1       | 2.56163 | 0.00001  | 0.00000             | -0.00750          | -0.00734           | 2.55429 |
| R2       | 2.62520 | -0.00003 | 0.00000             | 0.00722           | 0.00721            | 2.63241 |
| R3       | 2.03333 | 0.00005  | 0.00000             | 0.00515           | 0.00515            | 2.03847 |
| R4       | 2.63026 | 0.00001  | 0.00000             | 0.00587           | 0.00597            | 2.63623 |
| R5       | 2.03118 | 0.00000  | 0.00000             | 0.00048           | 0.00048            | 2.03166 |
| R6       | 2.54344 | -0.00006 | 0.00000             | 0.02831           | 0.02820            | 2.57165 |
| R7       | 2.68999 | -0.00008 | 0.00000             | -0.02140          | -0.02140           | 2.66859 |
| R8       | 2.52682 | -0.00023 | 0.00000             | -0.00410          | -0.00425           | 2.52257 |
| R9       | 2.03529 | 0.00003  | 0.00000             | 0.05848           | 0.05848            | 2.09378 |
| R10      | 2.78013 | -0.00018 | 0.00000             | -0.03051          | -0.03051           | 2.74962 |
| R11      | 2.90786 | 0.00019  | 0.00000             | 0.02244           | 0.02244            | 2.93030 |
| R12      | 2.05946 | -0.00004 | 0.00000             | 0.00294           | 0.00294            | 2.06240 |
| R13      | 2.06228 | 0.00005  | 0.00000             | 0.00639           | 0.00639            | 2.06867 |
| R14      | 2.06808 | -0.00004 | 0.00000             | -0.01228          | -0.01228           | 2.05580 |
| R15      | 2.06728 | 0.00020  | 0.00000             | 0.02387           | 0.02387            | 2.09115 |
| R16      | 2.68424 | 0.00024  | 0.00000             | -0.00205          | -0.00205           | 2.68219 |
| R17      | 5.23348 | 0.00035  | 0.00000             | 0.29123           | 0.29123            | 5.52470 |
| R18      | 2.50699 | -0.00003 | 0.00000             | 0.00533           | 0.00533            | 2.51232 |
| R19      | 2.05027 | -0.00004 | 0.00000             | 0.00205           | 0.00205            | 2.05231 |
| R20      | 2.04356 | -0.00002 | 0.00000             | 0.00667           | 0.00667            | 2.05023 |
| R21      | 2.04741 | 0.00001  | 0.00000             | 0.00619           | 0.00619            | 2.05360 |
| R22      | 1.81943 | -0.00017 | 0.00000             | 0.00494           | 0.00494            | 1.82437 |
| A1       | 1.87481 | -0.00005 | 0.00000             | 0.00451           | 0.00411            | 1.87891 |
| A2       | 2.27832 | 0.00006  | 0.00000             | 0.01054           | 0.01066            | 2.28897 |
| A3       | 2.13006 | 0.00000  | 0.00000             | -0.01508          | -0.01496           | 2.11510 |
| A4       | 1.86704 | -0.00005 | 0.00000             | 0.00050           | 0.00019            | 1.86723 |
| A5       | 2.28422 | 0.00002  | 0.00000             | -0.00203          | -0.00196           | 2.28226 |
| A6       | 2.13145 | 0.00003  | 0.00000             | 0.00211           | 0.00218            | 2.13363 |
| A7       | 1.89312 | 0.00002  | 0.00000             | -0.00305          | -0.00366           | 1.88946 |
| A8       | 2.23528 | 0.00012  | 0.00000             | 0.01695           | 0.01701            | 2.25229 |
| A9       | 2.14867 | -0.00014 | 0.00000             | -0.01708          | -0.01692           | 2.13174 |
| A10      | 1.89399 | -0.00001 | 0.00000             | -0.00718          | -0.00795           | 1.88604 |

|     |          |          |         |          |          |          |
|-----|----------|----------|---------|----------|----------|----------|
| A11 | 2.19062  | 0.00005  | 0.00000 | 0.02515  | 0.02547  | 2.21609  |
| A12 | 2.19811  | -0.00005 | 0.00000 | -0.01745 | -0.01714 | 2.18096  |
| A13 | 1.89529  | 0.00009  | 0.00000 | 0.00273  | 0.00187  | 1.89716  |
| A14 | 2.20670  | -0.00007 | 0.00000 | -0.00647 | -0.00640 | 2.20030  |
| A15 | 2.16270  | -0.00001 | 0.00000 | 0.01081  | 0.01092  | 2.17363  |
| A16 | 1.93821  | 0.00020  | 0.00000 | 0.06387  | 0.06370  | 2.00191  |
| A17 | 1.87263  | -0.00007 | 0.00000 | 0.01731  | 0.01710  | 1.88973  |
| A18 | 1.89784  | -0.00004 | 0.00000 | -0.02291 | -0.02242 | 1.87541  |
| A19 | 1.91198  | 0.00007  | 0.00000 | -0.02016 | -0.02148 | 1.89050  |
| A20 | 1.94680  | -0.00018 | 0.00000 | -0.02335 | -0.02338 | 1.92343  |
| A21 | 1.89438  | 0.00002  | 0.00000 | -0.01478 | -0.01527 | 1.87910  |
| A22 | 1.92215  | -0.00026 | 0.00000 | -0.01531 | -0.01574 | 1.90641  |
| A23 | 1.89337  | 0.00068  | 0.00000 | 0.06735  | 0.06646  | 1.95982  |
| A24 | 1.90234  | -0.00007 | 0.00000 | 0.02855  | 0.02788  | 1.93022  |
| A25 | 1.90986  | -0.00021 | 0.00000 | 0.01502  | 0.01392  | 1.92378  |
| A26 | 1.88110  | 0.00006  | 0.00000 | -0.07921 | -0.07933 | 1.80177  |
| A27 | 1.95511  | -0.00022 | 0.00000 | -0.01756 | -0.01976 | 1.93535  |
| A28 | 2.58216  | 0.00017  | 0.00000 | -0.15521 | -0.15521 | 2.42695  |
| A29 | 2.15600  | 0.00011  | 0.00000 | 0.05328  | 0.05315  | 2.20915  |
| A30 | 1.95401  | 0.00005  | 0.00000 | 0.01873  | 0.01860  | 1.97261  |
| A31 | 2.17254  | -0.00016 | 0.00000 | -0.07102 | -0.07116 | 2.10139  |
| A32 | 2.08424  | 0.00000  | 0.00000 | -0.01610 | -0.01613 | 2.06811  |
| A33 | 2.14768  | 0.00004  | 0.00000 | 0.02110  | 0.02108  | 2.16875  |
| A34 | 2.05127  | -0.00004 | 0.00000 | -0.00499 | -0.00502 | 2.04625  |
| A35 | 1.89011  | 0.00006  | 0.00000 | -0.01539 | -0.01539 | 1.87473  |
| D1  | 0.00576  | -0.00003 | 0.00000 | 0.01546  | 0.01518  | 0.02094  |
| D2  | 3.11398  | -0.00003 | 0.00000 | 0.03587  | 0.03562  | -3.13359 |
| D3  | -3.13317 | 0.00008  | 0.00000 | 0.03429  | 0.03426  | -3.09891 |
| D4  | -0.02496 | 0.00007  | 0.00000 | 0.05471  | 0.05470  | 0.02974  |
| D5  | -0.02302 | 0.00000  | 0.00000 | -0.05582 | -0.05604 | -0.07906 |
| D6  | -2.96432 | -0.00002 | 0.00000 | -0.09515 | -0.09515 | -3.05947 |
| D7  | 3.11619  | -0.00009 | 0.00000 | -0.07266 | -0.07279 | 3.04340  |
| D8  | 0.17489  | -0.00011 | 0.00000 | -0.11199 | -0.11190 | 0.06299  |
| D9  | 0.01331  | 0.00004  | 0.00000 | 0.02959  | 0.02964  | 0.04296  |
| D10 | 3.03785  | 0.00004  | 0.00000 | -0.00221 | -0.00240 | 3.03545  |
| D11 | -3.09848 | 0.00004  | 0.00000 | 0.01145  | 0.01143  | -3.08705 |
| D12 | -0.07394 | 0.00005  | 0.00000 | -0.02034 | -0.02061 | -0.09455 |
| D13 | -0.02788 | -0.00003 | 0.00000 | -0.06476 | -0.06466 | -0.09254 |
| D14 | 3.08251  | -0.00005 | 0.00000 | -0.04784 | -0.04748 | 3.03503  |
| D15 | -3.05949 | -0.00006 | 0.00000 | -0.03760 | -0.03798 | -3.09747 |
| D16 | 0.05090  | -0.00008 | 0.00000 | -0.02068 | -0.02080 | 0.03010  |
| D17 | 0.54029  | -0.00008 | 0.00000 | -0.04034 | -0.03989 | 0.50040  |
| D18 | -2.56451 | -0.00009 | 0.00000 | -0.06697 | -0.06740 | -2.63191 |
| D19 | -2.73394 | -0.00006 | 0.00000 | -0.07506 | -0.07463 | -2.80857 |

|     |          |          |         |          |          |          |
|-----|----------|----------|---------|----------|----------|----------|
| D20 | 0.44444  | -0.00007 | 0.00000 | -0.10169 | -0.10213 | 0.34231  |
| D21 | 0.03150  | 0.00002  | 0.00000 | 0.07446  | 0.07419  | 0.10569  |
| D22 | 2.97899  | 0.00004  | 0.00000 | 0.11017  | 0.11015  | 3.08914  |
| D23 | -3.07873 | 0.00004  | 0.00000 | 0.05649  | 0.05649  | -3.02223 |
| D24 | -0.13123 | 0.00005  | 0.00000 | 0.09220  | 0.09245  | -0.03878 |
| D25 | 1.25974  | -0.00015 | 0.00000 | 0.11352  | 0.11296  | 1.37270  |
| D26 | -2.93442 | 0.00000  | 0.00000 | 0.13662  | 0.13713  | -2.79729 |
| D27 | -0.88870 | -0.00004 | 0.00000 | 0.11656  | 0.11647  | -0.77223 |
| D28 | -1.65262 | -0.00019 | 0.00000 | 0.06980  | 0.06934  | -1.58328 |
| D29 | 0.43641  | -0.00004 | 0.00000 | 0.09291  | 0.09351  | 0.52991  |
| D30 | 2.48212  | -0.00007 | 0.00000 | 0.07284  | 0.07285  | 2.55497  |
| D31 | -1.17258 | 0.00001  | 0.00000 | -0.00710 | -0.00710 | -1.17968 |
| D32 | 0.91725  | 0.00002  | 0.00000 | 0.04342  | 0.04274  | 0.95999  |
| D33 | 3.05036  | 0.00013  | 0.00000 | 0.08103  | 0.08165  | 3.13201  |
| D34 | 3.04522  | -0.00007 | 0.00000 | -0.05480 | -0.05448 | 2.99073  |
| D35 | -1.14814 | -0.00006 | 0.00000 | -0.00428 | -0.00464 | -1.15278 |
| D36 | 0.98497  | 0.00005  | 0.00000 | 0.03333  | 0.03427  | 1.01923  |
| D37 | 0.94743  | -0.00003 | 0.00000 | -0.00797 | -0.00823 | 0.93920  |
| D38 | 3.03726  | -0.00002 | 0.00000 | 0.04254  | 0.04161  | 3.07887  |
| D39 | -1.11281 | 0.00009  | 0.00000 | 0.08016  | 0.08052  | -1.03230 |
| D40 | 0.27680  | 0.00020  | 0.00000 | 0.00256  | 0.00180  | 0.27860  |
| D41 | 2.37429  | 0.00017  | 0.00000 | 0.03343  | 0.03412  | 2.40842  |
| D42 | -1.82383 | -0.00003 | 0.00000 | -0.06682 | -0.06675 | -1.89058 |
| D43 | -1.76239 | -0.00030 | 0.00000 | 0.03625  | 0.03658  | -1.72580 |
| D44 | 2.43488  | 0.00001  | 0.00000 | 0.08423  | 0.08517  | 2.52005  |
| D45 | 0.33301  | 0.00037  | 0.00000 | 0.12839  | 0.12711  | 0.46012  |
| D46 | -3.09453 | 0.00002  | 0.00000 | -0.03534 | -0.03493 | -3.12946 |
| D47 | 0.04641  | -0.00003 | 0.00000 | -0.02183 | -0.02143 | 0.02499  |
| D48 | 0.00567  | 0.00004  | 0.00000 | -0.00304 | -0.00345 | 0.00222  |
| D49 | -3.13658 | -0.00001 | 0.00000 | 0.01046  | 0.01006  | -3.12652 |

| Item                 | Value    | Threshold | Converged? |
|----------------------|----------|-----------|------------|
| Maximum Force        | 0.000684 | 0.000450  | NO         |
| RMS Force            | 0.000128 | 0.000300  | YES        |
| Maximum Displacement | 0.605059 | 0.001800  | NO         |
| RMS Displacement     | 0.128399 | 0.001200  | NO         |

Predicted change in Energy=-6.908740D-03

GradGradGradGradGradGradGradGradGradGradGradGradGradGradGradGradGradGrad

Input orientation:

| Center Number | Atomic Number | Atomic Type | Coordinates (Angstroms) |           |           |
|---------------|---------------|-------------|-------------------------|-----------|-----------|
|               |               |             | X                       | Y         | Z         |
| 1             | 6             | 0           | -0.491244               | -2.081851 | -1.306368 |

|    |    |   |           |           |           |
|----|----|---|-----------|-----------|-----------|
| 2  | 6  | 0 | -1.793827 | -1.756895 | -1.463521 |
| 3  | 7  | 0 | -2.133939 | -0.913572 | -0.405573 |
| 4  | 6  | 0 | -1.018365 | -0.697951 | 0.343383  |
| 5  | 7  | 0 | -0.039165 | -1.464075 | -0.142558 |
| 6  | 6  | 0 | 1.328761  | -1.467641 | 0.353316  |
| 7  | 6  | 0 | 2.278243  | -0.468687 | -0.357383 |
| 8  | 1  | 0 | 0.169952  | -2.678358 | -1.915157 |
| 9  | 1  | 0 | -2.499627 | -2.034641 | -2.225466 |
| 10 | 1  | 0 | 1.307864  | -1.223573 | 1.416844  |
| 11 | 1  | 0 | 1.711252  | -2.488544 | 0.254243  |
| 12 | 1  | 0 | 2.431008  | -0.789283 | -1.385669 |
| 13 | 1  | 0 | 1.891288  | 0.567763  | -0.333287 |
| 14 | 35 | 0 | -0.111503 | 2.144410  | 1.098543  |
| 15 | 1  | 0 | -0.915021 | -0.003153 | 1.200235  |
| 16 | 6  | 0 | -3.337803 | -0.210786 | -0.179765 |
| 17 | 6  | 0 | -4.552014 | -0.568246 | -0.586439 |
| 18 | 1  | 0 | -3.194165 | 0.709009  | 0.379540  |
| 19 | 1  | 0 | -5.389161 | 0.079513  | -0.348374 |
| 20 | 1  | 0 | -4.769132 | -1.479649 | -1.137040 |
| 21 | 8  | 0 | 3.581532  | -0.535379 | 0.200789  |
| 22 | 1  | 0 | 3.665413  | 0.194710  | 0.826859  |

-----  
Distance matrix (angstroms):

|    |    | 1        | 2        | 3        | 4        | 5        |
|----|----|----------|----------|----------|----------|----------|
| 1  | C  | 0.000000 |          |          |          |          |
| 2  | C  | 1.351672 | 0.000000 |          |          |          |
| 3  | N  | 2.207885 | 1.395035 | 0.000000 |          |          |
| 4  | C  | 2.216915 | 2.233294 | 1.360857 | 0.000000 |          |
| 5  | N  | 1.393010 | 2.215744 | 2.181813 | 1.334885 | 0.000000 |
| 6  | C  | 2.538548 | 3.624241 | 3.587924 | 2.470126 | 1.455035 |
| 7  | C  | 3.342593 | 4.411889 | 4.434815 | 3.378055 | 2.531269 |
| 8  | H  | 1.078714 | 2.215739 | 3.271273 | 3.230342 | 2.158777 |
| 9  | H  | 2.209202 | 1.075108 | 2.168533 | 3.252670 | 3.273824 |
| 10 | H  | 3.374806 | 4.266312 | 3.906829 | 2.615328 | 2.074624 |
| 11 | H  | 2.729815 | 3.971347 | 4.207301 | 3.265727 | 2.066626 |
| 12 | H  | 3.196338 | 4.334924 | 4.670629 | 3.859552 | 2.846476 |
| 13 | H  | 3.693751 | 4.501281 | 4.289759 | 3.244379 | 2.809162 |
| 14 | Br | 4.877405 | 4.961306 | 3.962810 | 3.077610 | 3.816639 |
| 15 | H  | 3.283844 | 3.308097 | 2.212067 | 1.107980 | 2.168988 |
| 16 | C  | 3.587899 | 2.534234 | 1.412156 | 2.427098 | 3.528899 |
| 17 | C  | 4.393081 | 3.128859 | 2.449296 | 3.656237 | 4.622267 |
| 18 | H  | 4.235206 | 3.382085 | 2.091232 | 2.591322 | 3.866382 |
| 19 | H  | 5.438643 | 4.188362 | 3.403816 | 4.492976 | 5.572027 |
| 20 | H  | 4.323383 | 3.005976 | 2.792800 | 4.107426 | 4.833407 |

|    |    |          |          |          |          |          |
|----|----|----------|----------|----------|----------|----------|
| 21 | O  | 4.609838 | 5.758169 | 5.759975 | 4.604978 | 3.753640 |
| 22 | H  | 5.197228 | 6.233610 | 6.031555 | 4.792533 | 4.173156 |
|    |    | 6        | 7        | 8        | 9        | 10       |
| 6  | C  | 0.000000 |          |          |          |          |
| 7  | C  | 1.550651 | 0.000000 |          |          |          |
| 8  | H  | 2.820398 | 3.428439 | 0.000000 |          |          |
| 9  | H  | 4.650609 | 5.363766 | 2.763570 | 0.000000 |          |
| 10 | H  | 1.091374 | 2.158557 | 3.809655 | 5.331158 | 0.000000 |
| 11 | H  | 1.094695 | 2.185266 | 2.667945 | 4.907798 | 1.764799 |
| 12 | H  | 2.167761 | 1.087884 | 2.993549 | 5.154352 | 3.050269 |
| 13 | H  | 2.220524 | 1.106590 | 4.000326 | 5.443619 | 2.571424 |
| 14 | Br | 3.959373 | 3.828691 | 5.693917 | 5.849499 | 3.668682 |
| 15 | H  | 2.810081 | 3.583270 | 4.247300 | 4.286414 | 2.545105 |
| 16 | C  | 4.862168 | 5.624769 | 4.626537 | 2.865986 | 5.015687 |
| 17 | C  | 6.022920 | 6.834821 | 5.339947 | 3.008158 | 6.227421 |
| 18 | H  | 5.019498 | 5.645996 | 5.296902 | 3.846564 | 5.007908 |
| 19 | H  | 6.929396 | 7.686981 | 6.400344 | 4.042589 | 7.047281 |
| 20 | H  | 6.277388 | 7.162080 | 5.141684 | 2.577467 | 6.596800 |
| 21 | O  | 2.442817 | 1.419355 | 4.550655 | 6.716770 | 2.668701 |
| 22 | H  | 2.906474 | 1.940816 | 5.290691 | 7.231487 | 2.813831 |
|    |    | 11       | 12       | 13       | 14       | 15       |
| 11 | H  | 0.000000 |          |          |          |          |
| 12 | H  | 2.468775 | 0.000000 |          |          |          |
| 13 | H  | 3.117469 | 1.800105 | 0.000000 |          |          |
| 14 | Br | 5.049707 | 4.608929 | 2.923547 | 0.000000 |          |
| 15 | H  | 3.737563 | 4.301257 | 3.248539 | 2.295215 | 0.000000 |
| 16 | C  | 5.556032 | 5.921828 | 5.288960 | 4.194047 | 2.795959 |
| 17 | C  | 6.604755 | 7.032086 | 6.547576 | 5.469534 | 4.091363 |
| 18 | H  | 5.856890 | 6.083044 | 5.137111 | 3.475651 | 2.524919 |
| 19 | H  | 7.574558 | 7.936362 | 7.296818 | 5.849021 | 4.735288 |
| 20 | H  | 6.704394 | 7.237433 | 7.014207 | 6.310716 | 4.743107 |
| 21 | O  | 2.704748 | 1.976113 | 2.087842 | 4.650348 | 4.636933 |
| 22 | H  | 3.368454 | 2.717955 | 2.152353 | 4.259136 | 4.599884 |
|    |    | 16       | 17       | 18       | 19       | 20       |
| 16 | C  | 0.000000 |          |          |          |          |
| 17 | C  | 1.329462 | 0.000000 |          |          |          |
| 18 | H  | 1.086037 | 2.099583 | 0.000000 |          |          |
| 19 | H  | 2.078647 | 1.084934 | 2.396691 | 0.000000 |          |
| 20 | H  | 2.138946 | 1.086719 | 3.093664 | 1.854027 | 0.000000 |
| 21 | O  | 6.937390 | 8.171621 | 6.891337 | 9.008497 | 8.509701 |
| 22 | H  | 7.086801 | 8.372910 | 6.893360 | 9.131251 | 8.820539 |
|    |    | 21       | 22       |          |          |          |
| 21 | O  | 0.000000 |          |          |          |          |
| 22 | H  | 0.965417 | 0.000000 |          |          |          |

Stoichiometry C7H11BrN2O  
 Framework group C1[X(C7H11BrN2O)]  
 Deg. of freedom 60  
 Full point group C1 NOp 1  
 Largest Abelian subgroup C1 NOp 1  
 Largest concise Abelian subgroup C1 NOp 1

Standard orientation:

| Center<br>Number | Atomic<br>Number | Atomic<br>Type | Coordinates (Angstroms) |           |           |
|------------------|------------------|----------------|-------------------------|-----------|-----------|
|                  |                  |                | X                       | Y         | Z         |
| 1                | 6                | 0              | -0.870885               | -2.359982 | -0.352324 |
| 2                | 6                | 0              | -2.072039               | -1.761830 | -0.514990 |
| 3                | 7                | 0              | -1.989137               | -0.509103 | 0.093226  |
| 4                | 6                | 0              | -0.723201               | -0.347478 | 0.565680  |
| 5                | 7                | 0              | -0.061560               | -1.491272 | 0.376243  |
| 6                | 6                | 0              | 1.343557                | -1.694065 | 0.695066  |
| 7                | 6                | 0              | 2.323096                | -1.380903 | -0.465515 |
| 8                | 1                | 0              | -0.499902               | -3.312610 | -0.696558 |
| 9                | 1                | 0              | -2.964124               | -2.101454 | -1.009659 |
| 10               | 1                | 0              | 1.598359                | -1.053604 | 1.541223  |
| 11               | 1                | 0              | 1.460219                | -2.733452 | 1.018210  |
| 12               | 1                | 0              | 2.184191                | -2.112256 | -1.258812 |
| 13               | 1                | 0              | 2.190104                | -0.356418 | -0.862106 |
| 14               | 35               | 0              | 0.929730                | 2.165126  | -0.087253 |
| 15               | 1                | 0              | -0.292568               | 0.567626  | 1.018184  |
| 16               | 6                | 0              | -2.932806               | 0.541443  | 0.098488  |
| 17               | 6                | 0              | -4.253342               | 0.420602  | 0.003341  |
| 18               | 1                | 0              | -2.475380               | 1.522847  | 0.182661  |
| 19               | 1                | 0              | -4.857364               | 1.321821  | 0.009829  |
| 20               | 1                | 0              | -4.777097               | -0.528749 | -0.069944 |
| 21               | 8                | 0              | 3.665500                | -1.595247 | -0.057376 |
| 22               | 1                | 0              | 4.037619                | -0.735294 | 0.175085  |

Rotational constants (GHZ): 0.7555616 0.5399151 0.3263380

Standard basis: 6-311++G(d,p) (5D, 7F)

There are 358 symmetry adapted cartesian basis functions of A symmetry.

There are 345 symmetry adapted basis functions of A symmetry.

345 basis functions, 553 primitive gaussians, 358 cartesian basis functions

55 alpha electrons 55 beta electrons

nuclear repulsion energy 846.3761428607 Hartrees.

NAtoms= 22 NActive= 22 NUniq= 22 SFac= 1.00D+00 NATFMM= 60 NAOKFM=F

Big=F

Integral buffers will be 131072 words long.

Raffenetti 2 integral format.

Two-electron integral symmetry is turned on.

One-electron integrals computed using PRISM.

NBasis= 345 RedAO= T EigKep= 6.37D-06 NBF= 345

NBsUse= 345 1.00D-06 EigRej= -1.00D+00 NBFU= 345

Initial guess from the checkpoint file: "."

B after Tr= 0.000000 0.000000 0.000000

Rot= 0.998230 0.005865 0.001744 0.059152 Ang= 6.82 deg.

ExpMin= 3.50D-02 ExpMax= 4.40D+05 ExpMxC= 1.51D+04 IAcc=3 IRadAn= 5 AccDes= 0.00D+00

Harris functional with IExCor= 402 and IRadAn= 5 diagonalized for initial guess.

HarFok: IExCor= 402 AccDes= 0.00D+00 IRadAn= 5 IDoV= 1 UseB2=F ITyADJ=14

ICtDFT= 3500011 ScaDFX= 1.000000 1.000000 1.000000 1.000000

FoFCou: FMM=F IPFlag= 0 FMFlag= 100000 FMFlg1= 0

NFxFlg= 0 DoJE=T BraDBF=F KetDBF=T FulRan=T

wScrn= 0.000000 ICntrl= 500 IOpCl= 0 I1Cent= 200000004 NGrid=

0

NMat0= 1 NMatS0= 1 NMatT0= 0 NMatD0= 1 NMtDS0= 0

NMtDT0= 0

Petite list used in FoFCou.

Keep R1 ints in memory in canonical form, NReq=1804729152.

Requested convergence on RMS density matrix=1.00D-08 within 128 cycles.

Requested convergence on MAX density matrix=1.00D-06.

Requested convergence on energy=1.00D-06.

No special actions if energy rises.

SCF Done: E(RB3LYP) = -3032.33438489 A.U. after 13 cycles

NFock= 13 Conv=0.92D-08 -V/T= 2.0017

Calling FoFJK, ICntrl= 2127 FMM=F ISym2X=0 I1Cent= 0 IOpClX= 0 NMat=1 NMatS=1 NMatT=0.

\*\*\*\*\* Axes restored to original set \*\*\*\*\*

| Center<br>Number | Atomic<br>Number | Forces (Hartrees/Bohr) |              |              |
|------------------|------------------|------------------------|--------------|--------------|
|                  |                  | X                      | Y            | Z            |
| 1                | 6                | 0.005452811            | -0.003868380 | 0.002140193  |
| 2                | 6                | -0.004166114           | 0.000539146  | 0.001236871  |
| 3                | 7                | 0.014894365            | 0.006273009  | 0.000162174  |
| 4                | 6                | -0.009865647           | -0.007364578 | 0.012244900  |
| 5                | 7                | -0.004891959           | 0.009727670  | -0.011459767 |
| 6                | 6                | 0.014393804            | 0.001543416  | 0.008322880  |
| 7                | 6                | 0.000813064            | 0.002800576  | -0.008658596 |
| 8                | 1                | -0.002404552           | -0.000673708 | 0.001084033  |
| 9                | 1                | -0.000049229           | 0.000637684  | -0.000291000 |
| 10               | 1                | -0.002349424           | -0.000403522 | -0.000459912 |

|    |    |              |              |              |
|----|----|--------------|--------------|--------------|
| 11 | 1  | 0.000816589  | 0.002456011  | -0.000040291 |
| 12 | 1  | -0.006571956 | 0.001183852  | -0.006478584 |
| 13 | 1  | -0.002599378 | -0.010456745 | 0.000799372  |
| 14 | 35 | 0.000755525  | 0.001114297  | 0.000295646  |
| 15 | 1  | -0.002390654 | -0.005195725 | -0.010826378 |
| 16 | 6  | -0.010244369 | 0.007106226  | 0.003661335  |
| 17 | 6  | 0.001298519  | -0.003763213 | -0.001757426 |
| 18 | 1  | 0.003758984  | -0.001683648 | 0.000152408  |
| 19 | 1  | 0.001850673  | -0.001344722 | -0.001249542 |
| 20 | 1  | 0.001312806  | 0.001523101  | 0.000898302  |
| 21 | 8  | -0.001493705 | 0.002876205  | 0.010342481  |
| 22 | 1  | 0.001679848  | -0.003026951 | -0.000119099 |

-----  
Cartesian Forces: Max 0.014894365 RMS 0.005456283

GradGradGradGradGradGradGradGradGradGradGradGradGradGradGradGradGradGradGradGrad  
Berny optimization.

Using GEDIIS/GDIIS optimizer.

FormGI is forming the generalized inverse of G from B-inverse, IUseBI=4.

Internal Forces: Max 0.011854341 RMS 0.003224136

Search for a local minimum.

Step number 36 out of a maximum of 116

All quantities printed in internal units (Hartrees-Bohrs-Radians)

Mixed Optimization -- RFO/linear search

Update second derivatives using D2CorX and points 25 29 30 31 32  
34 35 36 33

ITU= 0 1 -1 0 1 1 1 1 1 1 0 -1 1 1 1 1 1 0 -1 1

ITU= 1 1 1 1 1 1 1 1 1 1 1 0 0 -1 0 0

Use linear search instead of GDIIS.

Energy rises -- skip Quadratic/GDIIS search.

Quartic linear search produced a step of -0.94865.

Iteration 1 RMS(Cart)= 0.10300814 RMS(Int)= 0.01146804

Iteration 2 RMS(Cart)= 0.02059549 RMS(Int)= 0.00031860

Iteration 3 RMS(Cart)= 0.00047674 RMS(Int)= 0.00002458

Iteration 4 RMS(Cart)= 0.00000029 RMS(Int)= 0.00002458

| Variable | Old X   | -DE/DX   | Delta X<br>(Linear) | Delta X<br>(Quad) | Delta X<br>(Total) | New X   |
|----------|---------|----------|---------------------|-------------------|--------------------|---------|
| R1       | 2.55429 | 0.00183  | 0.00718             | 0.00000           | 0.00718            | 2.56147 |
| R2       | 2.63241 | -0.00181 | -0.00689            | 0.00000           | -0.00689           | 2.62552 |
| R3       | 2.03847 | -0.00171 | -0.00466            | 0.00000           | -0.00466           | 2.03382 |
| R4       | 2.63623 | -0.00118 | -0.00531            | 0.00000           | -0.00532           | 2.63092 |
| R5       | 2.03166 | 0.00007  | -0.00046            | 0.00000           | -0.00046           | 2.03120 |
| R6       | 2.57165 | -0.01108 | -0.02729            | 0.00000           | -0.02729           | 2.54436 |
| R7       | 2.66859 | 0.00290  | 0.02109             | 0.00000           | 0.02109            | 2.68968 |



|     |         |          |          |         |          |         |
|-----|---------|----------|----------|---------|----------|---------|
| R8  | 2.52257 | 0.00025  | 0.00279  | 0.00000 | 0.00280  | 2.52536 |
| R9  | 2.09378 | -0.01185 | -0.05228 | 0.00000 | -0.05228 | 2.04150 |
| R10 | 2.74962 | 0.00649  | 0.02986  | 0.00000 | 0.02986  | 2.77948 |
| R11 | 2.93030 | -0.00633 | -0.02049 | 0.00000 | -0.02049 | 2.90982 |
| R12 | 2.06240 | -0.00049 | -0.00248 | 0.00000 | -0.00248 | 2.05992 |
| R13 | 2.06867 | -0.00200 | -0.00636 | 0.00000 | -0.00636 | 2.06232 |
| R14 | 2.05580 | 0.00485  | 0.01163  | 0.00000 | 0.01163  | 2.06743 |
| R15 | 2.09115 | -0.00808 | -0.02136 | 0.00000 | -0.02136 | 2.06979 |
| R16 | 2.68219 | 0.00420  | -0.00022 | 0.00000 | -0.00022 | 2.68197 |
| R17 | 5.52470 | 0.00023  | -0.26700 | 0.00000 | -0.26700 | 5.25770 |
| R18 | 2.51232 | -0.00246 | -0.00494 | 0.00000 | -0.00494 | 2.50738 |
| R19 | 2.05231 | -0.00085 | -0.00201 | 0.00000 | -0.00201 | 2.05031 |
| R20 | 2.05023 | -0.00251 | -0.00621 | 0.00000 | -0.00621 | 2.04402 |
| R21 | 2.05360 | -0.00199 | -0.00588 | 0.00000 | -0.00588 | 2.04772 |
| R22 | 1.82437 | -0.00221 | -0.00329 | 0.00000 | -0.00329 | 1.82108 |
| A1  | 1.87891 | -0.00268 | -0.00432 | 0.00000 | -0.00429 | 1.87462 |
| A2  | 2.28897 | 0.00006  | -0.00988 | 0.00000 | -0.00988 | 2.27909 |
| A3  | 2.11510 | 0.00259  | 0.01438  | 0.00000 | 0.01437  | 2.12947 |
| A4  | 1.86723 | -0.00044 | -0.00059 | 0.00000 | -0.00058 | 1.86665 |
| A5  | 2.28226 | 0.00046  | 0.00140  | 0.00000 | 0.00139  | 2.28365 |
| A6  | 2.13363 | -0.00002 | -0.00103 | 0.00000 | -0.00103 | 2.13260 |
| A7  | 1.88946 | 0.00190  | 0.00392  | 0.00000 | 0.00394  | 1.89340 |
| A8  | 2.25229 | -0.00309 | -0.01422 | 0.00000 | -0.01421 | 2.23808 |
| A9  | 2.13174 | 0.00136  | 0.01476  | 0.00000 | 0.01476  | 2.14650 |
| A10 | 1.88604 | 0.00126  | 0.00731  | 0.00000 | 0.00737  | 1.89341 |
| A11 | 2.21609 | -0.00276 | -0.02395 | 0.00000 | -0.02393 | 2.19216 |
| A12 | 2.18096 | 0.00145  | 0.01341  | 0.00000 | 0.01344  | 2.19440 |
| A13 | 1.89716 | 0.00043  | -0.00092 | 0.00000 | -0.00089 | 1.89627 |
| A14 | 2.20030 | -0.00052 | 0.00866  | 0.00000 | 0.00866  | 2.20896 |
| A15 | 2.17363 | 0.00028  | -0.01298 | 0.00000 | -0.01299 | 2.16064 |
| A16 | 2.00191 | -0.00737 | -0.06009 | 0.00000 | -0.06009 | 1.94182 |
| A17 | 1.88973 | 0.00063  | -0.01800 | 0.00000 | -0.01799 | 1.87174 |
| A18 | 1.87541 | 0.00348  | 0.01998  | 0.00000 | 0.01996  | 1.89537 |
| A19 | 1.89050 | 0.00430  | 0.02051  | 0.00000 | 0.02058  | 1.91108 |
| A20 | 1.92343 | -0.00002 | 0.02452  | 0.00000 | 0.02453  | 1.94795 |
| A21 | 1.87910 | -0.00075 | 0.01456  | 0.00000 | 0.01459  | 1.89369 |
| A22 | 1.90641 | 0.00060  | 0.01452  | 0.00000 | 0.01454  | 1.92095 |
| A23 | 1.95982 | 0.00014  | -0.06511 | 0.00000 | -0.06507 | 1.89475 |
| A24 | 1.93022 | -0.00776 | -0.02540 | 0.00000 | -0.02537 | 1.90485 |
| A25 | 1.92378 | -0.00203 | -0.00888 | 0.00000 | -0.00883 | 1.91496 |
| A26 | 1.80177 | 0.00658  | 0.07357  | 0.00000 | 0.07358  | 1.87535 |
| A27 | 1.93535 | 0.00290  | 0.01756  | 0.00000 | 0.01767  | 1.95302 |
| A28 | 2.42695 | 0.00517  | 0.14697  | 0.00000 | 0.14697  | 2.57391 |
| A29 | 2.20915 | -0.00825 | -0.04867 | 0.00000 | -0.04867 | 2.16048 |

|     |          |          |          |         |          |          |
|-----|----------|----------|----------|---------|----------|----------|
| A30 | 1.97261  | 0.00002  | -0.01664 | 0.00000 | -0.01664 | 1.95597  |
| A31 | 2.10139  | 0.00823  | 0.06482  | 0.00000 | 0.06482  | 2.16621  |
| A32 | 2.06811  | 0.00103  | 0.01378  | 0.00000 | 0.01378  | 2.08189  |
| A33 | 2.16875  | -0.00146 | -0.01851 | 0.00000 | -0.01851 | 2.15025  |
| A34 | 2.04625  | 0.00044  | 0.00479  | 0.00000 | 0.00480  | 2.05105  |
| A35 | 1.87473  | 0.00440  | 0.01227  | 0.00000 | 0.01227  | 1.88699  |
| D1  | 0.02094  | -0.00106 | -0.01420 | 0.00000 | -0.01418 | 0.00676  |
| D2  | -3.13359 | -0.00140 | -0.02729 | 0.00000 | -0.02727 | 3.12232  |
| D3  | -3.09891 | 0.00026  | -0.03843 | 0.00000 | -0.03843 | -3.13734 |
| D4  | 0.02974  | -0.00008 | -0.05151 | 0.00000 | -0.05152 | -0.02177 |
| D5  | -0.07906 | 0.00340  | 0.05756  | 0.00000 | 0.05756  | -0.02150 |
| D6  | -3.05947 | 0.00216  | 0.09056  | 0.00000 | 0.09056  | -2.96891 |
| D7  | 3.04340  | 0.00221  | 0.07894  | 0.00000 | 0.07894  | 3.12234  |
| D8  | 0.06299  | 0.00097  | 0.11194  | 0.00000 | 0.11193  | 0.17492  |
| D9  | 0.04296  | -0.00133 | -0.03282 | 0.00000 | -0.03283 | 0.01013  |
| D10 | 3.03545  | 0.00019  | 0.00805  | 0.00000 | 0.00805  | 3.04350  |
| D11 | -3.08705 | -0.00103 | -0.02114 | 0.00000 | -0.02115 | -3.10820 |
| D12 | -0.09455 | 0.00049  | 0.01972  | 0.00000 | 0.01973  | -0.07482 |
| D13 | -0.09254 | 0.00338  | 0.06884  | 0.00000 | 0.06884  | -0.02370 |
| D14 | 3.03503  | -0.00081 | 0.00079  | 0.00000 | 0.00074  | 3.03577  |
| D15 | -3.09747 | 0.00245  | 0.03346  | 0.00000 | 0.03349  | -3.06398 |
| D16 | 0.03010  | -0.00174 | -0.03459 | 0.00000 | -0.03461 | -0.00451 |
| D17 | 0.50040  | -0.00153 | -0.00103 | 0.00000 | -0.00104 | 0.49936  |
| D18 | -2.63191 | -0.00122 | 0.02289  | 0.00000 | 0.02291  | -2.60899 |
| D19 | -2.80857 | 0.00014  | 0.04393  | 0.00000 | 0.04391  | -2.76466 |
| D20 | 0.34231  | 0.00046  | 0.06785  | 0.00000 | 0.06786  | 0.41017  |
| D21 | 0.10569  | -0.00400 | -0.07775 | 0.00000 | -0.07774 | 0.02795  |
| D22 | 3.08914  | -0.00287 | -0.10719 | 0.00000 | -0.10719 | 2.98195  |
| D23 | -3.02223 | 0.00012  | -0.00912 | 0.00000 | -0.00915 | -3.03139 |
| D24 | -0.03878 | 0.00125  | -0.03856 | 0.00000 | -0.03860 | -0.07739 |
| D25 | 1.37270  | -0.00081 | -0.08445 | 0.00000 | -0.08442 | 1.28828  |
| D26 | -2.79729 | 0.00029  | -0.10812 | 0.00000 | -0.10815 | -2.90544 |
| D27 | -0.77223 | 0.00155  | -0.09007 | 0.00000 | -0.09006 | -0.86229 |
| D28 | -1.58328 | -0.00224 | -0.04824 | 0.00000 | -0.04821 | -1.63150 |
| D29 | 0.52991  | -0.00114 | -0.07191 | 0.00000 | -0.07194 | 0.45797  |
| D30 | 2.55497  | 0.00012  | -0.05385 | 0.00000 | -0.05386 | 2.50112  |
| D31 | -1.17968 | 0.00239  | -0.02218 | 0.00000 | -0.02218 | -1.20186 |
| D32 | 0.95999  | 0.00032  | -0.06570 | 0.00000 | -0.06567 | 0.89432  |
| D33 | 3.13201  | -0.00164 | -0.10470 | 0.00000 | -0.10473 | 3.02728  |
| D34 | 2.99073  | 0.00330  | 0.02467  | 0.00000 | 0.02466  | 3.01539  |
| D35 | -1.15278 | 0.00123  | -0.01885 | 0.00000 | -0.01883 | -1.17162 |
| D36 | 1.01923  | -0.00072 | -0.05785 | 0.00000 | -0.05790 | 0.96134  |
| D37 | 0.93920  | 0.00169  | -0.02089 | 0.00000 | -0.02088 | 0.91832  |
| D38 | 3.07887  | -0.00038 | -0.06441 | 0.00000 | -0.06436 | 3.01450  |

|     |          |          |          |         |          |          |
|-----|----------|----------|----------|---------|----------|----------|
| D39 | -1.03230 | -0.00234 | -0.10341 | 0.00000 | -0.10343 | -1.13573 |
| D40 | 0.27860  | -0.00124 | 0.11918  | 0.00000 | 0.11921  | 0.39781  |
| D41 | 2.40842  | -0.00182 | 0.08933  | 0.00000 | 0.08930  | 2.49771  |
| D42 | -1.89058 | 0.00662  | 0.18502  | 0.00000 | 0.18502  | -1.70556 |
| D43 | -1.72580 | 0.00202  | -0.01095 | 0.00000 | -0.01096 | -1.73677 |
| D44 | 2.52005  | 0.00129  | -0.05616 | 0.00000 | -0.05620 | 2.46385  |
| D45 | 0.46012  | -0.00136 | -0.09947 | 0.00000 | -0.09941 | 0.36072  |
| D46 | -3.12946 | 0.00079  | 0.03080  | 0.00000 | 0.03078  | -3.09867 |
| D47 | 0.02499  | 0.00006  | 0.01786  | 0.00000 | 0.01784  | 0.04283  |
| D48 | 0.00222  | 0.00040  | 0.00346  | 0.00000 | 0.00348  | 0.00570  |
| D49 | -3.12652 | -0.00032 | -0.00948 | 0.00000 | -0.00946 | -3.13598 |

| Item                 | Value    | Threshold | Converged? |
|----------------------|----------|-----------|------------|
| Maximum Force        | 0.011854 | 0.000450  | NO         |
| RMS Force            | 0.003224 | 0.000300  | NO         |
| Maximum Displacement | 0.443347 | 0.001800  | NO         |
| RMS Displacement     | 0.116249 | 0.001200  | NO         |

Predicted change in Energy=-7.770107D-05

GradGradGradGradGradGradGradGradGradGradGradGradGradGradGradGradGradGradGradGrad

Input orientation:

| Center Number | Atomic Number | Atomic Type | Coordinates (Angstroms) |           |           |
|---------------|---------------|-------------|-------------------------|-----------|-----------|
|               |               |             | X                       | Y         | Z         |
| 1             | 6             | 0           | -0.478810               | -2.079263 | -1.299096 |
| 2             | 6             | 0           | -1.766748               | -1.688134 | -1.458874 |
| 3             | 7             | 0           | -2.091112               | -0.899857 | -0.358108 |
| 4             | 6             | 0           | -1.008871               | -0.812460 | 0.438101  |
| 5             | 7             | 0           | -0.025570               | -1.538394 | -0.102281 |
| 6             | 6             | 0           | 1.362763                | -1.525341 | 0.383235  |
| 7             | 6             | 0           | 2.214697                | -0.501278 | -0.389110 |
| 8             | 1             | 0           | 0.149883                | -2.690391 | -1.923258 |
| 9             | 1             | 0           | -2.465589               | -1.877717 | -2.253236 |
| 10            | 1             | 0           | 1.333591                | -1.252475 | 1.438191  |
| 11            | 1             | 0           | 1.770922                | -2.533841 | 0.297556  |
| 12            | 1             | 0           | 2.357126                | -0.834087 | -1.421519 |
| 13            | 1             | 0           | 1.694554                | 0.462580  | -0.379961 |
| 14            | 35            | 0           | -0.171073               | 2.109728  | 0.863934  |
| 15            | 1             | 0           | -0.924900               | -0.193479 | 1.319513  |
| 16            | 6             | 0           | -3.288799               | -0.168372 | -0.120819 |
| 17            | 6             | 0           | -4.474061               | -0.516160 | -0.605297 |
| 18            | 1             | 0           | -3.111740               | 0.721974  | 0.473406  |
| 19            | 1             | 0           | -5.330599               | 0.115530  | -0.412233 |
| 20            | 1             | 0           | -4.635087               | -1.412042 | -1.193237 |

|    |   |   |          |           |          |
|----|---|---|----------|-----------|----------|
| 21 | 8 | 0 | 3.497792 | -0.416098 | 0.211425 |
| 22 | 1 | 0 | 3.511983 | 0.362701  | 0.778822 |

-----  
Distance matrix (angstroms):

|    |    | 1        | 2        | 3        | 4        | 5        |
|----|----|----------|----------|----------|----------|----------|
| 1  | C  | 0.000000 |          |          |          |          |
| 2  | C  | 1.355469 | 0.000000 |          |          |          |
| 3  | N  | 2.208161 | 1.392220 | 0.000000 |          |          |
| 4  | C  | 2.214409 | 2.222543 | 1.346416 | 0.000000 |          |
| 5  | N  | 1.389364 | 2.212344 | 2.177071 | 1.336365 | 0.000000 |
| 6  | C  | 2.555084 | 3.635066 | 3.587488 | 2.477065 | 1.470838 |
| 7  | C  | 3.251628 | 4.290096 | 4.324328 | 3.342529 | 2.485292 |
| 8  | H  | 1.076249 | 2.212159 | 3.267685 | 3.231927 | 2.161907 |
| 9  | H  | 2.213209 | 1.074864 | 2.165168 | 3.240385 | 3.270389 |
| 10 | H  | 3.385426 | 4.265546 | 3.883249 | 2.584747 | 2.074155 |
| 11 | H  | 2.795931 | 4.039229 | 4.244420 | 3.272636 | 2.092407 |
| 12 | H  | 3.099674 | 4.211547 | 4.574056 | 3.845593 | 2.813126 |
| 13 | H  | 3.468325 | 4.215475 | 4.023429 | 3.098944 | 2.653267 |
| 14 | Br | 4.724516 | 4.729205 | 3.773267 | 3.069597 | 3.776710 |
| 15 | H  | 3.257651 | 3.265293 | 2.161813 | 1.080313 | 2.153854 |
| 16 | C  | 3.596649 | 2.533122 | 1.423317 | 2.434197 | 3.539204 |
| 17 | C  | 4.345881 | 3.071101 | 2.426267 | 3.630981 | 4.592065 |
| 18 | H  | 4.233322 | 3.369174 | 2.088883 | 2.603420 | 3.868478 |
| 19 | H  | 5.398472 | 4.129127 | 3.395322 | 4.501285 | 5.565506 |
| 20 | H  | 4.210823 | 2.893814 | 2.726092 | 4.021220 | 4.738543 |
| 21 | O  | 4.567400 | 5.667747 | 5.638638 | 4.529734 | 3.711070 |
| 22 | H  | 5.119312 | 6.089188 | 5.855027 | 4.683504 | 4.111543 |
|    |    | 6        | 7        | 8        | 9        | 10       |
| 6  | C  | 0.000000 |          |          |          |          |
| 7  | C  | 1.539810 | 0.000000 |          |          |          |
| 8  | H  | 2.854528 | 3.377763 | 0.000000 |          |          |
| 9  | H  | 4.661698 | 5.222511 | 2.758626 | 0.000000 |          |
| 10 | H  | 1.090064 | 2.163255 | 3.842929 | 5.333978 | 0.000000 |
| 11 | H  | 1.091332 | 2.190835 | 2.753959 | 4.988493 | 1.770368 |
| 12 | H  | 2.173414 | 1.094037 | 2.927376 | 5.003948 | 3.066042 |
| 13 | H  | 2.155083 | 1.095287 | 3.835231 | 5.127664 | 2.525349 |
| 14 | Br | 3.974601 | 3.752249 | 5.559911 | 5.557093 | 3.728029 |
| 15 | H  | 2.807824 | 3.587645 | 4.231465 | 4.239684 | 2.497266 |
| 16 | C  | 4.871598 | 5.520079 | 4.629677 | 2.854249 | 4.997227 |
| 17 | C  | 6.005344 | 6.692267 | 5.276852 | 2.933173 | 6.200550 |
| 18 | H  | 5.007967 | 5.532739 | 5.293999 | 3.822366 | 4.958853 |
| 19 | H  | 6.937313 | 7.570500 | 6.339722 | 3.945961 | 7.050314 |
| 20 | H  | 6.202604 | 6.956698 | 5.006301 | 2.459101 | 6.524951 |
| 21 | O  | 2.412113 | 1.419236 | 4.575781 | 6.616101 | 2.624547 |

|    |    |          |          |          |          |          |
|----|----|----------|----------|----------|----------|----------|
| 22 | H  | 2.887965 | 1.947685 | 5.284536 | 7.067122 | 2.790870 |
|    |    | 11       | 12       | 13       | 14       | 15       |
| 11 | H  | 0.000000 |          |          |          |          |
| 12 | H  | 2.487573 | 0.000000 |          |          |          |
| 13 | H  | 3.073011 | 1.790304 | 0.000000 |          |          |
| 14 | Br | 5.065063 | 4.503458 | 2.782254 | 0.000000 |          |
| 15 | H  | 3.713373 | 4.323809 | 3.190637 | 2.465882 | 0.000000 |
| 16 | C  | 5.601005 | 5.831935 | 5.029817 | 3.984934 | 2.768250 |
| 17 | C  | 6.624650 | 6.887119 | 6.249842 | 5.250680 | 4.050378 |
| 18 | H  | 5.871255 | 5.993376 | 4.888351 | 3.275041 | 2.517185 |
| 19 | H  | 7.612789 | 7.811628 | 7.033793 | 5.676807 | 4.743903 |
| 20 | H  | 6.672169 | 7.019771 | 6.651314 | 6.046672 | 4.643737 |
| 21 | O  | 2.733923 | 2.035274 | 2.091287 | 4.501793 | 4.564824 |
| 22 | H  | 3.413629 | 2.758169 | 2.157731 | 4.077285 | 4.504177 |
|    |    | 16       | 17       | 18       | 19       | 20       |
| 16 | C  | 0.000000 |          |          |          |          |
| 17 | C  | 1.326846 | 0.000000 |          |          |          |
| 18 | H  | 1.084975 | 2.133658 | 0.000000 |          |          |
| 19 | H  | 2.081938 | 1.081648 | 2.464846 | 0.000000 |          |
| 20 | H  | 2.123508 | 1.083608 | 3.106817 | 1.851264 | 0.000000 |
| 21 | O  | 6.799233 | 8.014205 | 6.711911 | 8.866344 | 8.313164 |
| 22 | H  | 6.880555 | 8.152612 | 6.640486 | 8.925859 | 8.568166 |
|    |    | 21       | 22       |          |          |          |
| 21 | O  | 0.000000 |          |          |          |          |
| 22 | H  | 0.963675 | 0.000000 |          |          |          |

Stoichiometry C7H11BrN2O

Framework group C1[X(C7H11BrN2O)]

Deg. of freedom 60

Full point group C1 NOp 1

Largest Abelian subgroup C1 NOp 1

Largest concise Abelian subgroup C1 NOp 1

Standard orientation:

| Center Number | Atomic Number | Atomic Type | Coordinates (Angstroms) |           |           |
|---------------|---------------|-------------|-------------------------|-----------|-----------|
|               |               |             | X                       | Y         | Z         |
| 1             | 6             | 0           | -0.696007               | -2.353485 | -0.434755 |
| 2             | 6             | 0           | -1.901530               | -1.758624 | -0.608392 |
| 3             | 7             | 0           | -1.880567               | -0.576591 | 0.126888  |
| 4             | 6             | 0           | -0.676454               | -0.463235 | 0.718580  |
| 5             | 7             | 0           | 0.050726                | -1.540941 | 0.409339  |
| 6             | 6             | 0           | 1.482932                | -1.676863 | 0.715403  |
| 7             | 6             | 0           | 2.352926                | -1.224000 | -0.471627 |
| 8             | 1             | 0           | -0.306521               | -3.275206 | -0.831040 |

|    |    |   |           |           |           |
|----|----|---|-----------|-----------|-----------|
| 9  | 1  | 0 | -2.752336 | -2.052529 | -1.195828 |
| 10 | 1  | 0 | 1.689933  | -1.045833 | 1.579805  |
| 11 | 1  | 0 | 1.683626  | -2.714359 | 0.988039  |
| 12 | 1  | 0 | 2.248898  | -1.927413 | -1.303074 |
| 13 | 1  | 0 | 2.022346  | -0.228343 | -0.786331 |
| 14 | 35 | 0 | 0.729316  | 2.138717  | -0.103661 |
| 15 | 1  | 0 | -0.329131 | 0.392627  | 1.278885  |
| 16 | 6  | 0 | -2.867944 | 0.447336  | 0.176778  |
| 17 | 6  | 0 | -4.162884 | 0.233794  | -0.018295 |
| 18 | 1  | 0 | -2.433112 | 1.424392  | 0.359677  |
| 19 | 1  | 0 | -4.845585 | 1.072635  | -0.003240 |
| 20 | 1  | 0 | -4.582066 | -0.749734 | -0.194835 |
| 21 | 8  | 0 | 3.716438  | -1.229157 | -0.077879 |
| 22 | 1  | 0 | 3.969034  | -0.324902 | 0.139350  |

-----

Rotational constants (GHZ):      0.7837687      0.5657765      0.3444034

Standard basis: 6-311++G(d,p) (5D, 7F)

There are    358 symmetry adapted cartesian basis functions of A    symmetry.

There are    345 symmetry adapted basis functions of A    symmetry.

345 basis functions,    553 primitive gaussians,    358 cartesian basis functions

55 alpha electrons      55 beta electrons

nuclear repulsion energy      857.5903109326 Hartrees.

NAtoms=    22 NActive=    22 NUniq=    22 SFac= 1.00D+00 NAtFMM=    60 NAOKFM=F

Big=F

Integral buffers will be    131072 words long.

Raffenetti 2 integral format.

Two-electron integral symmetry is turned on.

One-electron integrals computed using PRISM.

NBasis=    345 RedAO= T EigKep= 6.33D-06    NBF=    345

NBsUse=    345 1.00D-06 EigRej= -1.00D+00    NBFU=    345

Lowest energy guess from the checkpoint file:    "."

B after Tr=    0.000000    0.000000    0.000000

Rot=    0.999996    0.000337    0.000109    0.002736 Ang=    0.32 deg.

B after Tr=    0.000000    0.000000    0.000000

Rot=    0.999494    -0.005243    -0.001514    -0.031332 Ang=    -3.65 deg.

Keep R1 ints in memory in canonical form, NReq=1804729152.

Requested convergence on RMS density matrix=1.00D-08 within 128 cycles.

Requested convergence on MAX density matrix=1.00D-06.

Requested convergence on                    energy=1.00D-06.

No special actions if energy rises.

SCF Done: E(RB3LYP) = -3032.33853710      A.U. after    9 cycles

          NFock= 9 Conv=0.71D-08      -V/T= 2.0017

Calling FoFJK, ICtrl=            2127 FMM=F ISym2X=0 I1Cent= 0 IOpClX= 0 NMat=1 NMatS=1

NMatT=0.

\*\*\*\*\* Axes restored to original set \*\*\*\*\*

| Center<br>Number | Atomic<br>Number | Forces (Hartrees/Bohr) |              |              |
|------------------|------------------|------------------------|--------------|--------------|
|                  |                  | X                      | Y            | Z            |
| 1                | 6                | 0.000455908            | -0.000602403 | 0.000726111  |
| 2                | 6                | -0.000627931           | 0.000058219  | 0.000400986  |
| 3                | 7                | 0.000704662            | 0.000460688  | -0.000101094 |
| 4                | 6                | -0.000232131           | -0.000072474 | -0.000466054 |
| 5                | 7                | -0.000372251           | 0.000681898  | -0.000791936 |
| 6                | 6                | 0.000381071            | -0.000208704 | 0.000636562  |
| 7                | 6                | -0.000642662           | 0.000089130  | 0.000086838  |
| 8                | 1                | -0.000001807           | 0.000223268  | -0.000064701 |
| 9                | 1                | 0.000058928            | 0.000106245  | -0.000053315 |
| 10               | 1                | 0.000056542            | 0.000013123  | -0.000226059 |
| 11               | 1                | 0.000140595            | 0.000076212  | 0.000035176  |
| 12               | 1                | -0.000516160           | 0.000255481  | -0.000321029 |
| 13               | 1                | 0.000416387            | -0.000728452 | -0.000834817 |
| 14               | 35               | -0.000313924           | -0.000959345 | 0.000374946  |
| 15               | 1                | -0.000122771           | 0.000449256  | -0.000167551 |
| 16               | 6                | -0.000365018           | 0.000183714  | 0.000187579  |
| 17               | 6                | 0.000258834            | -0.000016502 | 0.000085985  |
| 18               | 1                | 0.000190744            | -0.000214803 | -0.000087647 |
| 19               | 1                | 0.000111844            | -0.000167786 | -0.000138870 |
| 20               | 1                | 0.000023884            | 0.000124266  | 0.000070636  |
| 21               | 8                | 0.000217532            | 0.000844157  | 0.000907040  |
| 22               | 1                | 0.000177724            | -0.000595189 | -0.000258786 |

Cartesian Forces: Max 0.000959345 RMS 0.000404173

GradGradGradGradGradGradGradGradGradGradGradGradGradGradGradGradGradGradGrad

Berny optimization.

Using GEDIIS/GDIIS optimizer.

FormGI is forming the generalized inverse of G from B-inverse, IUseBI=4.

Internal Forces: Max 0.005187510 RMS 0.000836424

Search for a local minimum.

Step number 37 out of a maximum of 116

All quantities printed in internal units (Hartrees-Bohrs-Radians)

Mixed Optimization -- En-DIIS/RFO-DIIS

Update second derivatives using D2CorX and points 25 29 30 31 32  
34 35 36 33 37

ITU= 0 0 1-1 0 1 1 1 1 1 1 0-1 1 1 1 1 1 0-1

ITU= 1 1 1 1 1 1 1 1 1 1 1 0 0-1 0 0

Use linear search instead of GDIIS.

|                 |         |         |         |         |         |
|-----------------|---------|---------|---------|---------|---------|
| Eigenvalues --- | 0.00001 | 0.00163 | 0.00356 | 0.00456 | 0.00626 |
| Eigenvalues --- | 0.00999 | 0.01240 | 0.01712 | 0.01758 | 0.02058 |
| Eigenvalues --- | 0.02246 | 0.02358 | 0.03062 | 0.03106 | 0.03714 |
| Eigenvalues --- | 0.04587 | 0.05018 | 0.05341 | 0.06265 | 0.06383 |
| Eigenvalues --- | 0.08588 | 0.09197 | 0.12228 | 0.14123 | 0.14971 |
| Eigenvalues --- | 0.15623 | 0.15816 | 0.15946 | 0.16020 | 0.16111 |
| Eigenvalues --- | 0.16838 | 0.17158 | 0.21024 | 0.22503 | 0.23102 |
| Eigenvalues --- | 0.23842 | 0.24862 | 0.25275 | 0.29592 | 0.33007 |
| Eigenvalues --- | 0.33849 | 0.33881 | 0.33995 | 0.34152 | 0.34266 |
| Eigenvalues --- | 0.34641 | 0.34830 | 0.36223 | 0.36330 | 0.36411 |
| Eigenvalues --- | 0.36635 | 0.43213 | 0.44490 | 0.45986 | 0.49886 |
| Eigenvalues --- | 0.53708 | 0.54599 | 0.57201 | 0.60839 | 2.51057 |

RFO step: Lambda=-1.68893333D-04 EMin= 1.47859162D-05

Quartic linear search produced a step of -0.01432.

|             |            |            |           |            |
|-------------|------------|------------|-----------|------------|
| Iteration 1 | RMS(Cart)= | 0.09694652 | RMS(Int)= | 0.02932647 |
| Iteration 2 | RMS(Cart)= | 0.04962929 | RMS(Int)= | 0.00272907 |
| Iteration 3 | RMS(Cart)= | 0.00372745 | RMS(Int)= | 0.00115950 |
| Iteration 4 | RMS(Cart)= | 0.00001528 | RMS(Int)= | 0.00115946 |
| Iteration 5 | RMS(Cart)= | 0.00000000 | RMS(Int)= | 0.00115946 |

| Variable | Old X   | -DE/DX   | Delta X<br>(Linear) | Delta X<br>(Quad) | Delta X<br>(Total) | New X   |
|----------|---------|----------|---------------------|-------------------|--------------------|---------|
| R1       | 2.56147 | 0.00037  | 0.00001             | 0.00095           | -0.00025           | 2.56121 |
| R2       | 2.62552 | -0.00055 | -0.00001            | -0.00015          | -0.00051           | 2.62501 |
| R3       | 2.03382 | -0.00009 | 0.00000             | 0.00137           | 0.00137            | 2.03518 |
| R4       | 2.63092 | -0.00031 | 0.00000             | 0.00154           | 0.00117            | 2.63209 |
| R5       | 2.03120 | -0.00002 | 0.00000             | 0.00016           | 0.00016            | 2.03135 |
| R6       | 2.54436 | -0.00078 | -0.00002            | 0.00070           | 0.00165            | 2.54601 |
| R7       | 2.68968 | -0.00021 | 0.00002             | 0.00176           | 0.00178            | 2.69146 |
| R8       | 2.52536 | 0.00003  | 0.00000             | -0.00465          | -0.00367           | 2.52169 |
| R9       | 2.04150 | 0.00011  | -0.00004            | 0.02443           | 0.02439            | 2.06589 |
| R10      | 2.77948 | 0.00005  | 0.00002             | -0.00025          | -0.00022           | 2.77926 |
| R11      | 2.90982 | -0.00108 | -0.00002            | 0.00403           | 0.00401            | 2.91383 |
| R12      | 2.05992 | -0.00021 | 0.00000             | 0.00055           | 0.00055            | 2.06047 |
| R13      | 2.06232 | -0.00002 | 0.00000             | -0.00009          | -0.00009           | 2.06223 |
| R14      | 2.06743 | 0.00016  | 0.00001             | -0.00103          | -0.00102           | 2.06641 |
| R15      | 2.06979 | -0.00154 | -0.00002            | 0.00580           | 0.00579            | 2.07558 |
| R16      | 2.68197 | 0.00065  | 0.00000             | -0.00572          | -0.00572           | 2.67625 |
| R17      | 5.25770 | -0.00019 | -0.00021            | 0.06739           | 0.06718            | 5.32488 |
| R18      | 2.50738 | -0.00034 | 0.00000             | 0.00048           | 0.00048            | 2.50786 |
| R19      | 2.05031 | -0.00019 | 0.00000             | 0.00062           | 0.00062            | 2.05093 |
| R20      | 2.04402 | -0.00021 | 0.00000             | 0.00116           | 0.00116            | 2.04518 |
| R21      | 2.04772 | -0.00014 | 0.00000             | 0.00092           | 0.00092            | 2.04864 |
| R22      | 1.82108 | -0.00063 | 0.00000             | 0.00374           | 0.00373            | 1.82481 |
| A1       | 1.87462 | -0.00020 | 0.00000             | -0.00093          | -0.00125           | 1.87338 |



|     |          |          |          |          |          |          |
|-----|----------|----------|----------|----------|----------|----------|
| A2  | 2.27909  | 0.00008  | -0.00001 | 0.00223  | 0.00229  | 2.28138  |
| A3  | 2.12947  | 0.00012  | 0.00001  | -0.00135 | -0.00127 | 2.12820  |
| A4  | 1.86665  | -0.00005 | 0.00000  | -0.00222 | -0.00252 | 1.86413  |
| A5  | 2.28365  | 0.00001  | 0.00000  | -0.00090 | -0.00080 | 2.28285  |
| A6  | 2.13260  | 0.00003  | 0.00000  | 0.00346  | 0.00356  | 2.13615  |
| A7  | 1.89340  | 0.00011  | 0.00000  | 0.00227  | 0.00390  | 1.89730  |
| A8  | 2.23808  | -0.00003 | -0.00001 | 0.00791  | 0.00688  | 2.24496  |
| A9  | 2.14650  | -0.00008 | 0.00001  | -0.00728 | -0.00829 | 2.13821  |
| A10 | 1.89341  | 0.00006  | 0.00000  | -0.00222 | -0.00528 | 1.88813  |
| A11 | 2.19216  | -0.00032 | -0.00002 | -0.00006 | -0.00797 | 2.18419  |
| A12 | 2.19440  | 0.00023  | 0.00001  | -0.01299 | -0.02029 | 2.17411  |
| A13 | 1.89627  | 0.00009  | 0.00000  | 0.00381  | 0.00550  | 1.90177  |
| A14 | 2.20896  | 0.00039  | 0.00001  | 0.00741  | 0.00659  | 2.21555  |
| A15 | 2.16064  | -0.00052 | -0.00001 | -0.00781 | -0.00884 | 2.15180  |
| A16 | 1.94182  | -0.00294 | -0.00005 | 0.00729  | 0.00724  | 1.94906  |
| A17 | 1.87174  | 0.00079  | -0.00001 | -0.00013 | -0.00014 | 1.87160  |
| A18 | 1.89537  | 0.00119  | 0.00002  | -0.00705 | -0.00705 | 1.88832  |
| A19 | 1.91108  | 0.00009  | 0.00001  | -0.00569 | -0.00567 | 1.90542  |
| A20 | 1.94795  | 0.00128  | 0.00002  | 0.00496  | 0.00499  | 1.95294  |
| A21 | 1.89369  | -0.00036 | 0.00001  | 0.00029  | 0.00030  | 1.89399  |
| A22 | 1.92095  | 0.00103  | 0.00001  | 0.00000  | -0.00002 | 1.92093  |
| A23 | 1.89475  | -0.00350 | -0.00005 | 0.00065  | 0.00057  | 1.89533  |
| A24 | 1.90485  | 0.00073  | -0.00002 | 0.00166  | 0.00163  | 1.90648  |
| A25 | 1.91496  | 0.00058  | -0.00001 | 0.01400  | 0.01397  | 1.92893  |
| A26 | 1.87535  | -0.00016 | 0.00006  | -0.00638 | -0.00630 | 1.86904  |
| A27 | 1.95302  | 0.00140  | 0.00001  | -0.00993 | -0.00991 | 1.94311  |
| A28 | 2.57391  | -0.00519 | 0.00011  | -0.03475 | -0.03464 | 2.53928  |
| A29 | 2.16048  | -0.00034 | -0.00004 | 0.00920  | 0.00914  | 2.16963  |
| A30 | 1.95597  | -0.00006 | -0.00001 | 0.00352  | 0.00348  | 1.95946  |
| A31 | 2.16621  | 0.00041  | 0.00005  | -0.01237 | -0.01234 | 2.15387  |
| A32 | 2.08189  | 0.00015  | 0.00001  | -0.00494 | -0.00493 | 2.07696  |
| A33 | 2.15025  | -0.00008 | -0.00001 | 0.00514  | 0.00513  | 2.15538  |
| A34 | 2.05105  | -0.00008 | 0.00000  | -0.00020 | -0.00020 | 2.05085  |
| A35 | 1.88699  | 0.00041  | 0.00001  | -0.00759 | -0.00758 | 1.87941  |
| D1  | 0.00676  | 0.00010  | -0.00001 | 0.00397  | 0.00411  | 0.01087  |
| D2  | 3.12232  | -0.00013 | -0.00002 | 0.01937  | 0.01954  | -3.14132 |
| D3  | -3.13734 | 0.00027  | -0.00003 | -0.01626 | -0.01645 | 3.12939  |
| D4  | -0.02177 | 0.00004  | -0.00004 | -0.00085 | -0.00103 | -0.02280 |
| D5  | -0.02150 | 0.00000  | 0.00004  | 0.01201  | 0.01169  | -0.00980 |
| D6  | -2.96891 | 0.00030  | 0.00007  | -0.00589 | -0.00629 | -2.97520 |
| D7  | 3.12234  | -0.00016 | 0.00006  | 0.03011  | 0.03006  | -3.13079 |
| D8  | 0.17492  | 0.00014  | 0.00009  | 0.01221  | 0.01208  | 0.18700  |
| D9  | 0.01013  | -0.00016 | -0.00003 | -0.01854 | -0.01846 | -0.00833 |
| D10 | 3.04350  | -0.00013 | 0.00001  | 0.01102  | 0.01112  | 3.05462  |

|     |          |          |          |          |          |          |
|-----|----------|----------|----------|----------|----------|----------|
| D11 | -3.10820 | 0.00005  | -0.00002 | -0.03224 | -0.03222 | -3.14042 |
| D12 | -0.07482 | 0.00007  | 0.00002  | -0.00268 | -0.00264 | -0.07747 |
| D13 | -0.02370 | 0.00016  | 0.00005  | 0.02628  | 0.02599  | 0.00228  |
| D14 | 3.03577  | -0.00015 | 0.00000  | -0.16973 | -0.17012 | 2.86565  |
| D15 | -3.06398 | 0.00013  | 0.00003  | -0.00249 | -0.00249 | -3.06647 |
| D16 | -0.00451 | -0.00018 | -0.00003 | -0.19851 | -0.19860 | -0.20310 |
| D17 | 0.49936  | -0.00006 | 0.00000  | -0.09315 | -0.09306 | 0.40629  |
| D18 | -2.60899 | -0.00002 | 0.00002  | -0.10412 | -0.10408 | -2.71307 |
| D19 | -2.76466 | -0.00002 | 0.00003  | -0.05899 | -0.05898 | -2.82365 |
| D20 | 0.41017  | 0.00001  | 0.00005  | -0.06997 | -0.07000 | 0.34017  |
| D21 | 0.02795  | -0.00010 | -0.00006 | -0.02377 | -0.02338 | 0.00457  |
| D22 | 2.98195  | -0.00026 | -0.00008 | -0.00446 | -0.00418 | 2.97777  |
| D23 | -3.03139 | 0.00025  | -0.00001 | 0.17180  | 0.17059  | -2.86080 |
| D24 | -0.07739 | 0.00008  | -0.00003 | 0.19111  | 0.18979  | 0.11241  |
| D25 | 1.28828  | 0.00095  | -0.00007 | 0.10803  | 0.10805  | 1.39634  |
| D26 | -2.90544 | -0.00016 | -0.00008 | 0.10523  | 0.10525  | -2.80019 |
| D27 | -0.86229 | 0.00046  | -0.00007 | 0.10183  | 0.10188  | -0.76041 |
| D28 | -1.63150 | 0.00121  | -0.00004 | 0.08603  | 0.08587  | -1.54562 |
| D29 | 0.45797  | 0.00010  | -0.00006 | 0.08323  | 0.08307  | 0.54104  |
| D30 | 2.50112  | 0.00072  | -0.00004 | 0.07983  | 0.07970  | 2.58081  |
| D31 | -1.20186 | 0.00009  | -0.00002 | -0.04783 | -0.04786 | -1.24972 |
| D32 | 0.89432  | -0.00075 | -0.00005 | -0.03033 | -0.03040 | 0.86393  |
| D33 | 3.02728  | -0.00076 | -0.00008 | -0.04107 | -0.04117 | 2.98611  |
| D34 | 3.01539  | 0.00086  | 0.00002  | -0.04853 | -0.04851 | 2.96688  |
| D35 | -1.17162 | 0.00002  | -0.00001 | -0.03103 | -0.03104 | -1.20266 |
| D36 | 0.96134  | 0.00002  | -0.00004 | -0.04177 | -0.04181 | 0.91953  |
| D37 | 0.91832  | 0.00044  | -0.00002 | -0.04829 | -0.04829 | 0.87003  |
| D38 | 3.01450  | -0.00040 | -0.00005 | -0.03079 | -0.03083 | 2.98368  |
| D39 | -1.13573 | -0.00040 | -0.00008 | -0.04152 | -0.04160 | -1.17732 |
| D40 | 0.39781  | -0.00035 | 0.00009  | 0.35388  | 0.35396  | 0.75176  |
| D41 | 2.49771  | -0.00090 | 0.00007  | 0.36265  | 0.36277  | 2.86048  |
| D42 | -1.70556 | 0.00018  | 0.00014  | 0.35761  | 0.35772  | -1.34784 |
| D43 | -1.73677 | 0.00156  | -0.00001 | -0.00201 | -0.00202 | -1.73878 |
| D44 | 2.46385  | 0.00001  | -0.00004 | 0.00075  | 0.00072  | 2.46457  |
| D45 | 0.36072  | -0.00144 | -0.00008 | -0.00640 | -0.00649 | 0.35423  |
| D46 | -3.09867 | 0.00008  | 0.00002  | -0.00981 | -0.00975 | -3.10843 |
| D47 | 0.04283  | 0.00001  | 0.00001  | -0.00751 | -0.00746 | 0.03537  |
| D48 | 0.00570  | 0.00003  | 0.00000  | 0.00285  | 0.00282  | 0.00852  |
| D49 | -3.13598 | -0.00004 | -0.00001 | 0.00515  | 0.00511  | -3.13087 |

| Item                 | Value    | Threshold | Converged? |
|----------------------|----------|-----------|------------|
| Maximum Force        | 0.005188 | 0.000450  | NO         |
| RMS Force            | 0.000836 | 0.000300  | NO         |
| Maximum Displacement | 0.680075 | 0.001800  | NO         |
| RMS Displacement     | 0.118190 | 0.001200  | NO         |

Predicted change in Energy=-1.118298D-04

GradGradGradGradGradGradGradGradGradGradGradGradGradGradGradGradGradGradGrad

Input orientation:

| Center<br>Number | Atomic<br>Number | Atomic<br>Type | Coordinates (Angstroms) |           |           |
|------------------|------------------|----------------|-------------------------|-----------|-----------|
|                  |                  |                | X                       | Y         | Z         |
| 1                | 6                | 0              | -0.509549               | -2.175905 | -1.282517 |
| 2                | 6                | 0              | -1.798221               | -1.786318 | -1.438988 |
| 3                | 7                | 0              | -2.091428               | -0.929933 | -0.380385 |
| 4                | 6                | 0              | -0.999305               | -0.818728 | 0.400697  |
| 5                | 7                | 0              | -0.031116               | -1.569644 | -0.127902 |
| 6                | 6                | 0              | 1.362359                | -1.537801 | 0.341385  |
| 7                | 6                | 0              | 2.186036                | -0.460772 | -0.392860 |
| 8                | 1                | 0              | 0.100445                | -2.839006 | -1.872498 |
| 9                | 1                | 0              | -2.518180               | -2.029680 | -2.199214 |
| 10               | 1                | 0              | 1.339278                | -1.306552 | 1.406686  |
| 11               | 1                | 0              | 1.788245                | -2.534207 | 0.212169  |
| 12               | 1                | 0              | 2.369296                | -0.768303 | -1.426094 |
| 13               | 1                | 0              | 1.628699                | 0.485281  | -0.365838 |
| 14               | 35               | 0              | 0.085700                | 2.226596  | 1.223814  |
| 15               | 1                | 0              | -0.840907               | -0.042692 | 1.154229  |
| 16               | 6                | 0              | -3.279857               | -0.180884 | -0.145711 |
| 17               | 6                | 0              | -4.469574               | -0.489237 | -0.646395 |
| 18               | 1                | 0              | -3.100680               | 0.690747  | 0.475609  |
| 19               | 1                | 0              | -5.310798               | 0.158785  | -0.437354 |
| 20               | 1                | 0              | -4.652119               | -1.364681 | -1.259203 |
| 21               | 8                | 0              | 3.449713                | -0.332318 | 0.233453  |
| 22               | 1                | 0              | 3.412313                | 0.438373  | 0.814071  |

Distance matrix (angstroms):

|    |   | 1        | 2        | 3        | 4        | 5        |
|----|---|----------|----------|----------|----------|----------|
| 1  | C | 0.000000 |          |          |          |          |
| 2  | C | 1.355337 | 0.000000 |          |          |          |
| 3  | N | 2.206498 | 1.392842 | 0.000000 |          |          |
| 4  | C | 2.216980 | 2.226868 | 1.347289 | 0.000000 |          |
| 5  | N | 1.389096 | 2.211008 | 2.172064 | 1.334422 | 0.000000 |
| 6  | C | 2.558960 | 3.636036 | 3.580377 | 2.469421 | 1.470720 |
| 7  | C | 3.316527 | 4.327328 | 4.303135 | 3.302160 | 2.493103 |
| 8  | H | 1.076974 | 2.213824 | 3.267303 | 3.233943 | 2.161527 |
| 9  | H | 2.212762 | 1.074946 | 2.167880 | 3.245447 | 3.269167 |
| 10 | H | 3.377240 | 4.262856 | 3.886542 | 2.592095 | 2.074165 |
| 11 | H | 2.764476 | 4.018507 | 4.239892 | 3.278543 | 2.087129 |

|    |    |          |          |          |          |          |
|----|----|----------|----------|----------|----------|----------|
| 12 | H  | 3.207757 | 4.290073 | 4.584506 | 3.832386 | 2.844193 |
| 13 | H  | 3.534730 | 4.249188 | 3.980250 | 3.032230 | 2.652229 |
| 14 | Br | 5.100788 | 5.171379 | 4.156563 | 3.335979 | 4.031405 |
| 15 | H  | 3.255477 | 3.268250 | 2.169341 | 1.093221 | 2.152023 |
| 16 | C  | 3.598200 | 2.538746 | 1.424257 | 2.430293 | 3.533170 |
| 17 | C  | 4.351012 | 3.073557 | 2.433219 | 3.639744 | 4.597393 |
| 18 | H  | 4.245310 | 3.390860 | 2.092347 | 2.588417 | 3.859509 |
| 19 | H  | 5.405282 | 4.138223 | 3.398955 | 4.499648 | 5.564015 |
| 20 | H  | 4.221317 | 2.890473 | 2.741982 | 4.049245 | 4.761882 |
| 21 | O  | 4.623066 | 5.696665 | 5.606977 | 4.478652 | 3.711836 |
| 22 | H  | 5.158597 | 6.097146 | 5.795701 | 4.605817 | 4.095930 |
|    |    | 6        | 7        | 8        | 9        | 10       |
| 6  | C  | 0.000000 |          |          |          |          |
| 7  | C  | 1.541932 | 0.000000 |          |          |          |
| 8  | H  | 2.861265 | 3.492136 | 0.000000 |          |          |
| 9  | H  | 4.664244 | 5.277692 | 2.760244 | 0.000000 |          |
| 10 | H  | 1.090355 | 2.161182 | 3.825724 | 5.329673 | 0.000000 |
| 11 | H  | 1.091283 | 2.196231 | 2.699520 | 4.961312 | 1.770756 |
| 12 | H  | 2.174864 | 1.093496 | 3.103993 | 5.106487 | 3.061910 |
| 13 | H  | 2.159621 | 1.098349 | 3.956825 | 5.184872 | 2.536981 |
| 14 | Br | 4.071760 | 3.774519 | 5.936976 | 6.050885 | 3.753403 |
| 15 | H  | 2.783962 | 3.425005 | 4.226889 | 4.243459 | 2.532644 |
| 16 | C  | 4.860932 | 5.478632 | 4.633988 | 2.866195 | 5.001348 |
| 17 | C  | 6.007216 | 6.660499 | 5.282974 | 2.931237 | 6.214975 |
| 18 | H  | 4.990306 | 5.479927 | 5.312246 | 3.859366 | 4.956746 |
| 19 | H  | 6.929348 | 7.522523 | 6.350428 | 3.961344 | 7.054871 |
| 20 | H  | 6.226219 | 6.951832 | 5.013644 | 2.424776 | 6.557987 |
| 21 | O  | 2.412859 | 1.416209 | 4.683600 | 6.664432 | 2.603755 |
| 22 | H  | 2.886348 | 1.941365 | 5.378413 | 7.095204 | 2.773703 |
|    |    | 11       | 12       | 13       | 14       | 15       |
| 11 | H  | 0.000000 |          |          |          |          |
| 12 | H  | 2.477891 | 0.000000 |          |          |          |
| 13 | H  | 3.078450 | 1.801139 | 0.000000 |          |          |
| 14 | Br | 5.156290 | 4.605024 | 2.817804 | 0.000000 |          |
| 15 | H  | 3.742668 | 4.182103 | 2.947594 | 2.452165 | 0.000000 |
| 16 | C  | 5.599274 | 5.822145 | 4.958442 | 4.358731 | 2.767204 |
| 17 | C  | 6.639228 | 6.888829 | 6.182017 | 5.623519 | 4.075399 |
| 18 | H  | 5.862705 | 5.972097 | 4.808042 | 3.615476 | 2.470836 |
| 19 | H  | 7.620400 | 7.798779 | 6.947541 | 6.013112 | 4.749069 |
| 20 | H  | 6.709025 | 7.048673 | 6.608263 | 6.442793 | 4.700814 |
| 21 | O  | 2.758485 | 2.027679 | 2.084158 | 4.341134 | 4.397855 |
| 22 | H  | 3.440365 | 2.749962 | 2.139080 | 3.798945 | 4.293833 |
|    |    | 16       | 17       | 18       | 19       | 20       |
| 16 | C  | 0.000000 |          |          |          |          |

```

17 C 1.327100 0.000000
18 H 1.085303 2.127234 0.000000
19 H 2.079700 1.082260 2.449715 0.000000
20 H 2.127051 1.084094 3.105048 1.852092 0.000000
21 O 6.741944 7.969559 6.634226 8.799871 8.302619
22 H 6.788946 8.069545 6.526662 8.816853 8.519656
      21      22
21 O 0.000000
22 H 0.965650 0.000000

```

Stoichiometry C7H11BrN2O

Framework group C1[X(C7H11BrN2O)]

Deg. of freedom 60

Full point group C1 NOp 1

Largest Abelian subgroup C1 NOp 1

Largest concise Abelian subgroup C1 NOp 1

Standard orientation:

| Center Number | Atomic Number | Atomic Type | Coordinates (Angstroms) |           |           |
|---------------|---------------|-------------|-------------------------|-----------|-----------|
|               |               |             | X                       | Y         | Z         |
| 1             | 6             | 0           | -1.401480               | -2.232216 | -0.301393 |
| 2             | 6             | 0           | -2.439167               | -1.380983 | -0.489924 |
| 3             | 7             | 0           | -2.082333               | -0.173052 | 0.104702  |
| 4             | 6             | 0           | -0.856611               | -0.304480 | 0.648318  |
| 5             | 7             | 0           | -0.428944               | -1.546912 | 0.415627  |
| 6             | 6             | 0           | 0.946445                | -1.991345 | 0.687297  |
| 7             | 6             | 0           | 1.872322                | -1.749507 | -0.521760 |
| 8             | 1             | 0           | -1.274900               | -3.261086 | -0.593415 |
| 9             | 1             | 0           | -3.379357               | -1.520042 | -0.992135 |
| 10            | 1             | 0           | 1.310286                | -1.414438 | 1.537986  |
| 11            | 1             | 0           | 0.914383                | -3.044601 | 0.971060  |
| 12            | 1             | 0           | 1.630574                | -2.450472 | -1.325464 |
| 13            | 1             | 0           | 1.740743                | -0.713488 | -0.861941 |
| 14            | 35            | 0           | 1.471672                | 1.975753  | -0.064698 |
| 15            | 1             | 0           | -0.215727               | 0.523360  | 0.963090  |
| 16            | 6             | 0           | -2.787627               | 1.064288  | 0.096978  |
| 17            | 6             | 0           | -4.094992               | 1.178911  | -0.100131 |
| 18            | 1             | 0           | -2.129581               | 1.913736  | 0.249612  |
| 19            | 1             | 0           | -4.538179               | 2.166082  | -0.119284 |
| 20            | 1             | 0           | -4.755062               | 0.330909  | -0.243166 |
| 21            | 8             | 0           | 3.212943                | -2.000138 | -0.140226 |
| 22            | 1             | 0           | 3.630341                | -1.148490 | 0.041308  |

Rotational constants (GHZ): 0.7594125 0.5223184 0.3211177

Standard basis: 6-311++G(d,p) (5D, 7F)  
 There are 358 symmetry adapted cartesian basis functions of A symmetry.  
 There are 345 symmetry adapted basis functions of A symmetry.  
 345 basis functions, 553 primitive gaussians, 358 cartesian basis functions  
 55 alpha electrons 55 beta electrons  
 nuclear repulsion energy 840.9140017899 Hartrees.  
 NAToms= 22 NActive= 22 NUniq= 22 SFac= 1.00D+00 NATFMM= 60 NAOKFM=F

Big=F

Integral buffers will be 131072 words long.

Raffenetti 2 integral format.

Two-electron integral symmetry is turned on.

One-electron integrals computed using PRISM.

NBasis= 345 RedAO= T EigKep= 5.83D-06 NBF= 345

NBsUse= 345 1.00D-06 EigRej= -1.00D+00 NBFU= 345

Initial guess from the checkpoint file: "."

B after Tr= 0.000000 0.000000 0.000000

Rot= 0.991701 0.001519 0.000428 0.128554 Ang= 14.77 deg.

ExpMin= 3.50D-02 ExpMax= 4.40D+05 ExpMxC= 1.51D+04 IAcc=3 IRadAn= 5 AccDes= 0.00D+00

Harris functional with IExCor= 402 and IRadAn= 5 diagonalized for initial guess.

HarFok: IExCor= 402 AccDes= 0.00D+00 IRadAn= 5 IDoV= 1 UseB2=F ITyADJ=14

ICtDFT= 3500011 ScaDFX= 1.000000 1.000000 1.000000 1.000000

FoFCou: FMM=F IPFlag= 0 FMFlag= 100000 FMFlg1= 0

NFxFlg= 0 DoJE=T BraDBF=F KetDBF=T FulRan=T

wScr= 0.000000 ICntrl= 500 IOpCl= 0 I1Cent= 200000004 NGrid=

0

NMat0= 1 NMatS0= 1 NMatT0= 0 NMatD0= 1 NMtDS0= 0

NMtDT0= 0

Petite list used in FoFCou.

Keep R1 ints in memory in canonical form, NReq=1804729152.

Requested convergence on RMS density matrix=1.00D-08 within 128 cycles.

Requested convergence on MAX density matrix=1.00D-06.

Requested convergence on energy=1.00D-06.

No special actions if energy rises.

SCF Done: E(RB3LYP) = -3032.33741105 A.U. after 13 cycles

NFock= 13 Conv=0.77D-08 -V/T= 2.0017

Calling FoFJK, ICntrl= 2127 FMM=F ISym2X=0 I1Cent= 0 IOpClX= 0 NMat=1 NMatS=1

NMatT=0.

\*\*\*\*\* Axes restored to original set \*\*\*\*\*

```

-----
Center      Atomic      Forces (Hartrees/Bohr)
Number      Number      X           Y           Z
-----
1           6           0.002108594 -0.001598436 0.003040544
  
```

|    |    |              |              |              |
|----|----|--------------|--------------|--------------|
| 2  | 6  | -0.002524218 | 0.001188230  | 0.001786002  |
| 3  | 7  | -0.000112203 | -0.000154343 | 0.000147986  |
| 4  | 6  | 0.001105909  | 0.006276096  | -0.006255658 |
| 5  | 7  | -0.000388452 | -0.000028183 | -0.001748939 |
| 6  | 6  | 0.002243452  | -0.000381083 | 0.002021557  |
| 7  | 6  | -0.001248605 | 0.000616401  | -0.000322591 |
| 8  | 1  | -0.000257758 | 0.000566506  | -0.000013862 |
| 9  | 1  | 0.000095629  | 0.000149038  | -0.000062366 |
| 10 | 1  | 0.000033724  | -0.000068100 | -0.000465616 |
| 11 | 1  | 0.000439841  | 0.000358673  | 0.000108518  |
| 12 | 1  | -0.001674666 | 0.000676372  | -0.001146519 |
| 13 | 1  | 0.001127062  | -0.002179919 | -0.001319238 |
| 14 | 35 | -0.001606762 | -0.006800934 | -0.000747040 |
| 15 | 1  | -0.000111228 | 0.000981463  | 0.003066757  |
| 16 | 6  | -0.001163450 | 0.000758624  | 0.000156379  |
| 17 | 6  | 0.000634981  | -0.000185947 | 0.000062635  |
| 18 | 1  | 0.000436399  | -0.000888319 | -0.000299087 |
| 19 | 1  | 0.000337183  | -0.000550288 | -0.000370154 |
| 20 | 1  | 0.000202678  | 0.000525607  | 0.000338108  |
| 21 | 8  | 0.000052405  | 0.002039276  | 0.002302077  |
| 22 | 1  | 0.000269484  | -0.001300733 | -0.000279494 |

-----  
Cartesian Forces: Max 0.006800934 RMS 0.001785406

GradGradGradGradGradGradGradGradGradGradGradGradGradGradGradGradGradGradGradGrad  
Berny optimization.

Using GEDIIS/GDIIS optimizer.

FormGI is forming the generalized inverse of G from B-inverse, IUseBI=4.

Internal Forces: Max 0.019649443 RMS 0.004086122

Search for a local minimum.

Step number 38 out of a maximum of 116

All quantities printed in internal units (Hartrees-Bohrs-Radians)

Mixed Optimization -- RFO/linear search

Update second derivatives using D2CorX and points 25 29 30 31 32  
34 35 36 33 38  
37

DE= 1.13D-03 DEPred=-1.12D-04 R=-1.01D+01

Trust test=-1.01D+01 RLast= 7.92D-01 DXMaxT set to 2.62D-01

ITU= -1 0 0 1-1 0 1 1 1 1 1 1 0-1 1 1 1 1 1 0

ITU= -1 1 1 1 1 1 1 1 1 1 1 1 0 0-1 0 0

Use linear search instead of GDIIS.

Energy rises -- skip Quadratic/GDIIS search.

Quartic linear search produced a step of -0.84244.

Iteration 1 RMS(Cart)= 0.08137608 RMS(Int)= 0.01677806

|             |            |            |                     |                   |                    |         |
|-------------|------------|------------|---------------------|-------------------|--------------------|---------|
| Iteration 2 | RMS(Cart)= | 0.02617658 | RMS(Int)=           | 0.00075194        |                    |         |
| Iteration 3 | RMS(Cart)= | 0.00121393 | RMS(Int)=           | 0.00015362        |                    |         |
| Iteration 4 | RMS(Cart)= | 0.00000167 | RMS(Int)=           | 0.00015362        |                    |         |
| Iteration 5 | RMS(Cart)= | 0.00000000 | RMS(Int)=           | 0.00015362        |                    |         |
| Variable    | Old X      | -DE/DX     | Delta X<br>(Linear) | Delta X<br>(Quad) | Delta X<br>(Total) | New X   |
| R1          | 2.56121    | 0.00250    | 0.00021             | 0.00000           | 0.00037            | 2.56159 |
| R2          | 2.62501    | -0.00268   | 0.00043             | 0.00000           | 0.00048            | 2.62549 |
| R3          | 2.03518    | -0.00049   | -0.00115            | 0.00000           | -0.00115           | 2.03403 |
| R4          | 2.63209    | -0.00118   | -0.00099            | 0.00000           | -0.00094           | 2.63115 |
| R5          | 2.03135    | -0.00005   | -0.00013            | 0.00000           | -0.00013           | 2.03122 |
| R6          | 2.54601    | -0.00100   | -0.00139            | 0.00000           | -0.00152           | 2.54449 |
| R7          | 2.69146    | -0.00057   | -0.00150            | 0.00000           | -0.00150           | 2.68996 |
| R8          | 2.52169    | 0.00233    | 0.00309             | 0.00000           | 0.00296            | 2.52465 |
| R9          | 2.06589    | 0.00279    | -0.02055            | 0.00000           | -0.02055           | 2.04534 |
| R10         | 2.77926    | -0.00045   | 0.00019             | 0.00000           | 0.00019            | 2.77945 |
| R11         | 2.91383    | -0.00578   | -0.00338            | 0.00000           | -0.00338           | 2.91045 |
| R12         | 2.06047    | -0.00047   | -0.00046            | 0.00000           | -0.00046           | 2.06001 |
| R13         | 2.06223    | -0.00017   | 0.00008             | 0.00000           | 0.00008            | 2.06230 |
| R14         | 2.06641    | 0.00061    | 0.00086             | 0.00000           | 0.00086            | 2.06727 |
| R15         | 2.07558    | -0.00755   | -0.00488            | 0.00000           | -0.00488           | 2.07070 |
| R16         | 2.67625    | 0.00125    | 0.00482             | 0.00000           | 0.00482            | 2.68107 |
| R17         | 5.32488    | -0.00374   | -0.05659            | 0.00000           | -0.05659           | 5.26828 |
| R18         | 2.50786    | -0.00102   | -0.00040            | 0.00000           | -0.00040           | 2.50745 |
| R19         | 2.05093    | -0.00081   | -0.00052            | 0.00000           | -0.00052           | 2.05040 |
| R20         | 2.04518    | -0.00066   | -0.00098            | 0.00000           | -0.00098           | 2.04420 |
| R21         | 2.04864    | -0.00065   | -0.00077            | 0.00000           | -0.00077           | 2.04787 |
| R22         | 1.82481    | -0.00122   | -0.00315            | 0.00000           | -0.00315           | 1.82167 |
| A1          | 1.87338    | -0.00072   | 0.00105             | 0.00000           | 0.00109            | 1.87447 |
| A2          | 2.28138    | 0.00024    | -0.00193            | 0.00000           | -0.00194           | 2.27944 |
| A3          | 2.12820    | 0.00049    | 0.00107             | 0.00000           | 0.00106            | 2.12926 |
| A4          | 1.86413    | 0.00068    | 0.00212             | 0.00000           | 0.00216            | 1.86629 |
| A5          | 2.28285    | -0.00034   | 0.00067             | 0.00000           | 0.00066            | 2.28351 |
| A6          | 2.13615    | -0.00034   | -0.00300            | 0.00000           | -0.00301           | 2.13314 |
| A7          | 1.89730    | -0.00035   | -0.00328            | 0.00000           | -0.00350           | 1.89380 |
| A8          | 2.24496    | -0.00035   | -0.00580            | 0.00000           | -0.00566           | 2.23930 |
| A9          | 2.13821    | 0.00071    | 0.00698             | 0.00000           | 0.00712            | 2.14533 |
| A10         | 1.88813    | 0.00013    | 0.00445             | 0.00000           | 0.00486            | 1.89299 |
| A11         | 2.18419    | 0.00005    | 0.00672             | 0.00000           | 0.00774            | 2.19193 |
| A12         | 2.17411    | 0.00014    | 0.01710             | 0.00000           | 0.01809            | 2.19220 |
| A13         | 1.90177    | 0.00026    | -0.00463            | 0.00000           | -0.00486           | 1.89691 |
| A14         | 2.21555    | 0.00489    | -0.00555            | 0.00000           | -0.00544           | 2.21011 |
| A15         | 2.15180    | -0.00534   | 0.00745             | 0.00000           | 0.00758            | 2.15938 |
| A16         | 1.94906    | -0.01348   | -0.00610            | 0.00000           | -0.00610           | 1.94296 |



|     |          |          |          |         |          |          |
|-----|----------|----------|----------|---------|----------|----------|
| A17 | 1.87160  | 0.00195  | 0.00012  | 0.00000 | 0.00012  | 1.87172  |
| A18 | 1.88832  | 0.00681  | 0.00594  | 0.00000 | 0.00594  | 1.89426  |
| A19 | 1.90542  | 0.00064  | 0.00477  | 0.00000 | 0.00477  | 1.91019  |
| A20 | 1.95294  | 0.00589  | -0.00420 | 0.00000 | -0.00420 | 1.94874  |
| A21 | 1.89399  | -0.00170 | -0.00025 | 0.00000 | -0.00025 | 1.89374  |
| A22 | 1.92093  | 0.00721  | 0.00002  | 0.00000 | 0.00002  | 1.92095  |
| A23 | 1.89533  | -0.01965 | -0.00048 | 0.00000 | -0.00048 | 1.89485  |
| A24 | 1.90648  | 0.00265  | -0.00137 | 0.00000 | -0.00137 | 1.90511  |
| A25 | 1.92893  | 0.00280  | -0.01177 | 0.00000 | -0.01177 | 1.91716  |
| A26 | 1.86904  | -0.00144 | 0.00531  | 0.00000 | 0.00531  | 1.87435  |
| A27 | 1.94311  | 0.00901  | 0.00835  | 0.00000 | 0.00835  | 1.95146  |
| A28 | 2.53928  | -0.01861 | 0.02918  | 0.00000 | 0.02918  | 2.56846  |
| A29 | 2.16963  | -0.00116 | -0.00770 | 0.00000 | -0.00770 | 2.16193  |
| A30 | 1.95946  | -0.00006 | -0.00293 | 0.00000 | -0.00293 | 1.95653  |
| A31 | 2.15387  | 0.00122  | 0.01040  | 0.00000 | 0.01040  | 2.16427  |
| A32 | 2.07696  | 0.00050  | 0.00416  | 0.00000 | 0.00416  | 2.08111  |
| A33 | 2.15538  | -0.00034 | -0.00432 | 0.00000 | -0.00432 | 2.15106  |
| A34 | 2.05085  | -0.00016 | 0.00017  | 0.00000 | 0.00017  | 2.05102  |
| A35 | 1.87941  | 0.00071  | 0.00639  | 0.00000 | 0.00639  | 1.88580  |
| D1  | 0.01087  | 0.00049  | -0.00346 | 0.00000 | -0.00348 | 0.00739  |
| D2  | -3.14132 | 0.00015  | -0.01646 | 0.00000 | -0.01647 | 3.12539  |
| D3  | 3.12939  | 0.00052  | 0.01386  | 0.00000 | 0.01387  | -3.13992 |
| D4  | -0.02280 | 0.00018  | 0.00087  | 0.00000 | 0.00089  | -0.02192 |
| D5  | -0.00980 | -0.00080 | -0.00985 | 0.00000 | -0.00982 | -0.01962 |
| D6  | -2.97520 | 0.00101  | 0.00530  | 0.00000 | 0.00534  | -2.96986 |
| D7  | -3.13079 | -0.00083 | -0.02532 | 0.00000 | -0.02531 | 3.12709  |
| D8  | 0.18700  | 0.00098  | -0.01017 | 0.00000 | -0.01015 | 0.17685  |
| D9  | -0.00833 | -0.00001 | 0.01555  | 0.00000 | 0.01556  | 0.00722  |
| D10 | 3.05462  | 0.00007  | -0.00937 | 0.00000 | -0.00936 | 3.04526  |
| D11 | -3.14042 | 0.00030  | 0.02715  | 0.00000 | 0.02715  | -3.11327 |
| D12 | -0.07747 | 0.00038  | 0.00223  | 0.00000 | 0.00223  | -0.07524 |
| D13 | 0.00228  | -0.00049 | -0.02189 | 0.00000 | -0.02187 | -0.01959 |
| D14 | 2.86565  | 0.00073  | 0.14331  | 0.00000 | 0.14340  | 3.00905  |
| D15 | -3.06647 | -0.00051 | 0.00210  | 0.00000 | 0.00208  | -3.06439 |
| D16 | -0.20310 | 0.00072  | 0.16730  | 0.00000 | 0.16736  | -0.03575 |
| D17 | 0.40629  | -0.00014 | 0.07840  | 0.00000 | 0.07839  | 0.48468  |
| D18 | -2.71307 | -0.00015 | 0.08768  | 0.00000 | 0.08768  | -2.62539 |
| D19 | -2.82365 | -0.00010 | 0.04969  | 0.00000 | 0.04969  | -2.77396 |
| D20 | 0.34017  | -0.00012 | 0.05897  | 0.00000 | 0.05898  | 0.39915  |
| D21 | 0.00457  | 0.00081  | 0.01970  | 0.00000 | 0.01967  | 0.02423  |
| D22 | 2.97777  | 0.00030  | 0.00352  | 0.00000 | 0.00350  | 2.98127  |
| D23 | -2.86080 | -0.00039 | -0.14371 | 0.00000 | -0.14359 | -3.00439 |
| D24 | 0.11241  | -0.00089 | -0.15989 | 0.00000 | -0.15976 | -0.04735 |
| D25 | 1.39634  | 0.00481  | -0.09103 | 0.00000 | -0.09104 | 1.30529  |

|     |          |          |          |         |          |          |
|-----|----------|----------|----------|---------|----------|----------|
| D26 | -2.80019 | -0.00101 | -0.08866 | 0.00000 | -0.08868 | -2.88887 |
| D27 | -0.76041 | 0.00152  | -0.08582 | 0.00000 | -0.08584 | -0.84626 |
| D28 | -1.54562 | 0.00614  | -0.07234 | 0.00000 | -0.07233 | -1.61795 |
| D29 | 0.54104  | 0.00032  | -0.06998 | 0.00000 | -0.06996 | 0.47108  |
| D30 | 2.58081  | 0.00285  | -0.06714 | 0.00000 | -0.06713 | 2.51369  |
| D31 | -1.24972 | -0.00170 | 0.04032  | 0.00000 | 0.04032  | -1.20940 |
| D32 | 0.86393  | -0.00622 | 0.02561  | 0.00000 | 0.02561  | 0.88953  |
| D33 | 2.98611  | -0.00571 | 0.03468  | 0.00000 | 0.03468  | 3.02079  |
| D34 | 2.96688  | 0.00370  | 0.04086  | 0.00000 | 0.04086  | 3.00774  |
| D35 | -1.20266 | -0.00082 | 0.02615  | 0.00000 | 0.02615  | -1.17651 |
| D36 | 0.91953  | -0.00031 | 0.03522  | 0.00000 | 0.03522  | 0.95475  |
| D37 | 0.87003  | 0.00165  | 0.04068  | 0.00000 | 0.04068  | 0.91071  |
| D38 | 2.98368  | -0.00286 | 0.02597  | 0.00000 | 0.02597  | 3.00965  |
| D39 | -1.17732 | -0.00235 | 0.03504  | 0.00000 | 0.03504  | -1.14228 |
| D40 | 0.75176  | -0.00551 | -0.29819 | 0.00000 | -0.29818 | 0.45358  |
| D41 | 2.86048  | -0.00742 | -0.30561 | 0.00000 | -0.30562 | 2.55487  |
| D42 | -1.34784 | -0.00161 | -0.30136 | 0.00000 | -0.30135 | -1.64920 |
| D43 | -1.73878 | 0.00902  | 0.00170  | 0.00000 | 0.00170  | -1.73708 |
| D44 | 2.46457  | -0.00019 | -0.00061 | 0.00000 | -0.00061 | 2.46396  |
| D45 | 0.35423  | -0.00803 | 0.00546  | 0.00000 | 0.00547  | 0.35969  |
| D46 | -3.10843 | 0.00007  | 0.00822  | 0.00000 | 0.00821  | -3.10021 |
| D47 | 0.03537  | -0.00003 | 0.00629  | 0.00000 | 0.00628  | 0.04165  |
| D48 | 0.00852  | 0.00006  | -0.00238 | 0.00000 | -0.00237 | 0.00615  |
| D49 | -3.13087 | -0.00004 | -0.00431 | 0.00000 | -0.00430 | -3.13517 |

| Item                 | Value    | Threshold | Converged? |
|----------------------|----------|-----------|------------|
| Maximum Force        | 0.019649 | 0.000450  | NO         |
| RMS Force            | 0.004086 | 0.000300  | NO         |
| Maximum Displacement | 0.557790 | 0.001800  | NO         |
| RMS Displacement     | 0.099570 | 0.001200  | NO         |

Predicted change in Energy=-6.024421D-04

GradGradGradGradGradGradGradGradGradGradGradGradGradGradGradGradGradGradGrad

Input orientation:

| Center Number | Atomic Number | Atomic Type | Coordinates (Angstroms) |           |           |
|---------------|---------------|-------------|-------------------------|-----------|-----------|
|               |               |             | X                       | Y         | Z         |
| 1             | 6             | 0           | -0.483260               | -2.094344 | -1.297520 |
| 2             | 6             | 0           | -1.771248               | -1.703087 | -1.457137 |
| 3             | 7             | 0           | -2.090902               | -0.904056 | -0.362610 |
| 4             | 6             | 0           | -1.007255               | -0.813504 | 0.431448  |
| 5             | 7             | 0           | -0.026216               | -1.543389 | -0.106787 |
| 6             | 6             | 0           | 1.362753                | -1.527729 | 0.376771  |
| 7             | 6             | 0           | 2.210804                | -0.495141 | -0.389138 |

|    |    |   |           |           |           |
|----|----|---|-----------|-----------|-----------|
| 8  | 1  | 0 | 0.142502  | -2.713855 | -1.916539 |
| 9  | 1  | 0 | -2.473219 | -1.900971 | -2.246718 |
| 10 | 1  | 0 | 1.334010  | -1.261603 | 1.433507  |
| 11 | 1  | 0 | 1.773651  | -2.534498 | 0.284214  |
| 12 | 1  | 0 | 2.360112  | -0.823963 | -1.421762 |
| 13 | 1  | 0 | 1.684856  | 0.466080  | -0.377185 |
| 14 | 35 | 0 | -0.137905 | 2.122731  | 0.928645  |
| 15 | 1  | 0 | -0.911552 | -0.168587 | 1.295391  |
| 16 | 6  | 0 | -3.287022 | -0.169577 | -0.125776 |
| 17 | 6  | 0 | -4.473045 | -0.510726 | -0.613213 |
| 18 | 1  | 0 | -3.109472 | 0.717636  | 0.473067  |
| 19 | 1  | 0 | -5.327063 | 0.123763  | -0.417645 |
| 20 | 1  | 0 | -4.637620 | -1.403250 | -1.205404 |
| 21 | 8  | 0 | 3.490771  | -0.403216 | 0.215933  |
| 22 | 1  | 0 | 3.496670  | 0.374409  | 0.785612  |

-----  
Distance matrix (angstroms):

|    |    | 1        | 2        | 3        | 4        | 5        |
|----|----|----------|----------|----------|----------|----------|
| 1  | C  | 0.000000 |          |          |          |          |
| 2  | C  | 1.355534 | 0.000000 |          |          |          |
| 3  | N  | 2.208021 | 1.392344 | 0.000000 |          |          |
| 4  | C  | 2.214600 | 2.223015 | 1.346484 | 0.000000 |          |
| 5  | N  | 1.389347 | 2.212258 | 2.176493 | 1.335989 | 0.000000 |
| 6  | C  | 2.555791 | 3.635372 | 3.586556 | 2.475893 | 1.470819 |
| 7  | C  | 3.261991 | 4.296102 | 4.321179 | 3.336258 | 2.486524 |
| 8  | H  | 1.076363 | 2.212497 | 3.267747 | 3.232077 | 2.161865 |
| 9  | H  | 2.213212 | 1.074877 | 2.165611 | 3.241020 | 3.270320 |
| 10 | H  | 3.384440 | 4.265367 | 3.883799 | 2.585814 | 2.074156 |
| 11 | H  | 2.790926 | 4.036069 | 4.243995 | 3.273673 | 2.091579 |
| 12 | H  | 3.116740 | 4.224008 | 4.575996 | 3.843651 | 2.818030 |
| 13 | H  | 3.479011 | 4.220928 | 4.016694 | 3.088476 | 2.653083 |
| 14 | Br | 4.781088 | 4.795482 | 3.826614 | 3.102330 | 3.811171 |
| 15 | H  | 3.258092 | 3.266524 | 2.163503 | 1.082347 | 2.154066 |
| 16 | C  | 3.597054 | 2.534117 | 1.423465 | 2.433614 | 3.538442 |
| 17 | C  | 4.346781 | 3.071423 | 2.427367 | 3.632449 | 4.593162 |
| 18 | H  | 4.235469 | 3.372896 | 2.089431 | 2.601045 | 3.867160 |
| 19 | H  | 5.399686 | 4.130587 | 3.395906 | 4.501130 | 5.565519 |
| 20 | H  | 4.212458 | 2.892985 | 2.728601 | 4.025746 | 4.742535 |
| 21 | O  | 4.576393 | 5.672537 | 5.633882 | 4.521839 | 3.711245 |
| 22 | H  | 5.125819 | 6.090720 | 5.845840 | 4.671393 | 4.109142 |
|    |    | 6        | 7        | 8        | 9        | 10       |
| 6  | C  | 0.000000 |          |          |          |          |
| 7  | C  | 1.540144 | 0.000000 |          |          |          |
| 8  | H  | 2.855727 | 3.396103 | 0.000000 |          |          |

|    |    |          |          |          |          |          |
|----|----|----------|----------|----------|----------|----------|
| 9  | H  | 4.662262 | 5.231351 | 2.758949 | 0.000000 |          |
| 10 | H  | 1.090110 | 2.162929 | 3.840772 | 5.333651 | 0.000000 |
| 11 | H  | 1.091324 | 2.191685 | 2.745201 | 4.984263 | 1.770429 |
| 12 | H  | 2.173645 | 1.093951 | 2.955383 | 5.020118 | 3.065448 |
| 13 | H  | 2.155800 | 1.095770 | 3.854926 | 5.136894 | 2.527170 |
| 14 | Br | 3.985272 | 3.755827 | 5.618386 | 5.632655 | 3.724934 |
| 15 | H  | 2.804210 | 3.562777 | 4.231538 | 4.241049 | 2.501261 |
| 16 | C  | 4.870066 | 5.513750 | 4.630532 | 2.856291 | 4.997781 |
| 17 | C  | 6.005905 | 6.687622 | 5.277851 | 2.932648 | 6.202802 |
| 18 | H  | 5.005170 | 5.524451 | 5.297233 | 3.828727 | 4.958262 |
| 19 | H  | 6.936293 | 7.563286 | 6.341522 | 3.948351 | 7.050950 |
| 20 | H  | 6.206709 | 6.956425 | 5.007291 | 2.452894 | 6.530258 |
| 21 | O  | 2.412231 | 1.418759 | 4.593190 | 6.623979 | 2.621247 |
| 22 | H  | 2.887712 | 1.946691 | 5.299947 | 7.071913 | 2.788082 |
|    |    | 11       | 12       | 13       | 14       | 15       |
| 11 | H  | 0.000000 |          |          |          |          |
| 12 | H  | 2.486005 | 0.000000 |          |          |          |
| 13 | H  | 3.073891 | 1.792017 | 0.000000 |          |          |
| 14 | Br | 5.075344 | 4.521891 | 2.787855 | 0.000000 |          |
| 15 | H  | 3.718915 | 4.303048 | 3.153037 | 2.446052 | 0.000000 |
| 16 | C  | 5.601014 | 5.830773 | 5.018649 | 4.035271 | 2.768135 |
| 17 | C  | 6.627385 | 6.887953 | 6.239359 | 5.301496 | 4.055127 |
| 18 | H  | 5.870002 | 5.990262 | 4.875632 | 3.318441 | 2.508477 |
| 19 | H  | 7.614401 | 7.810191 | 7.020386 | 5.721515 | 4.745176 |
| 20 | H  | 6.678553 | 7.025000 | 6.644850 | 6.101978 | 4.654239 |
| 21 | O  | 2.737796 | 2.034076 | 2.090166 | 4.478354 | 4.538803 |
| 22 | H  | 3.417884 | 2.756875 | 2.154802 | 4.035743 | 4.470698 |
|    |    | 16       | 17       | 18       | 19       | 20       |
| 16 | C  | 0.000000 |          |          |          |          |
| 17 | C  | 1.326886 | 0.000000 |          |          |          |
| 18 | H  | 1.085027 | 2.132653 | 0.000000 |          |          |
| 19 | H  | 2.081587 | 1.081744 | 2.462471 | 0.000000 |          |
| 20 | H  | 2.124067 | 1.083685 | 3.106550 | 1.851395 | 0.000000 |
| 21 | O  | 6.790422 | 8.007584 | 6.699674 | 8.856259 | 8.312100 |
| 22 | H  | 6.866224 | 8.139811 | 6.622432 | 8.908924 | 8.561009 |
|    |    | 21       | 22       |          |          |          |
| 21 | O  | 0.000000 |          |          |          |          |
| 22 | H  | 0.963986 | 0.000000 |          |          |          |

Stoichiometry C7H11BrN2O

Framework group C1[X(C7H11BrN2O)]

Deg. of freedom 60

Full point group C1 NOp 1

Largest Abelian subgroup C1 NOp 1

Largest concise Abelian subgroup C1 NOp 1

Standard orientation:

| Center<br>Number | Atomic<br>Number | Atomic<br>Type | Coordinates (Angstroms) |           |           |
|------------------|------------------|----------------|-------------------------|-----------|-----------|
|                  |                  |                | X                       | Y         | Z         |
| 1                | 6                | 0              | -0.794361               | -2.353705 | -0.409980 |
| 2                | 6                | 0              | -1.980428               | -1.721786 | -0.587166 |
| 3                | 7                | 0              | -1.912741               | -0.525913 | 0.122712  |
| 4                | 6                | 0              | -0.701885               | -0.442948 | 0.705775  |
| 5                | 7                | 0              | -0.013944               | -1.549760 | 0.411548  |
| 6                | 6                | 0              | 1.414916                | -1.727145 | 0.711887  |
| 7                | 6                | 0              | 2.294255                | -1.306781 | -0.480632 |
| 8                | 1                | 0              | -0.440131               | -3.297370 | -0.787571 |
| 9                | 1                | 0              | -2.846255               | -1.999870 | -1.160204 |
| 10               | 1                | 0              | 1.644847                | -1.097998 | 1.571914  |
| 11               | 1                | 0              | 1.584277                | -2.768848 | 0.989665  |
| 12               | 1                | 0              | 2.171742                | -2.015044 | -1.305304 |
| 13               | 1                | 0              | 1.989654                | -0.304649 | -0.802595 |
| 14               | 35               | 0              | 0.831982                | 2.131371  | -0.097086 |
| 15               | 1                | 0              | -0.311574               | 0.421741  | 1.226778  |
| 16               | 6                | 0              | -2.863956               | 0.532373  | 0.161096  |
| 17               | 6                | 0              | -4.165794               | 0.363910  | -0.032468 |
| 18               | 1                | 0              | -2.396105               | 1.495644  | 0.335757  |
| 19               | 1                | 0              | -4.817221               | 1.227481  | -0.024870 |
| 20               | 1                | 0              | -4.621010               | -0.605120 | -0.200198 |
| 21               | 8                | 0              | 3.657524                | -1.343095 | -0.089409 |
| 22               | 1                | 0              | 3.932510                | -0.442975 | 0.119005  |

Rotational constants (GHZ): 0.7765353 0.5618271 0.3410197

Standard basis: 6-311++G(d,p) (5D, 7F)

There are 358 symmetry adapted cartesian basis functions of A symmetry.

There are 345 symmetry adapted basis functions of A symmetry.

345 basis functions, 553 primitive gaussians, 358 cartesian basis functions

55 alpha electrons 55 beta electrons

nuclear repulsion energy 855.1908764210 Hartrees.

NAtoms= 22 NActive= 22 NUniq= 22 SFac= 1.00D+00 NAtFMM= 60 NAOKFM=F

Big=F

Integral buffers will be 131072 words long.

Raffenetti 2 integral format.

Two-electron integral symmetry is turned on.

One-electron integrals computed using PRISM.

NBasis= 345 RedAO= T EigKep= 6.24D-06 NBF= 345

NBsUse= 345 1.00D-06 EigRej= -1.00D+00 NBFU= 345

Lowest energy guess from the checkpoint file: "."



Berny optimization.

Using GEDIIS/GDIIS optimizer.

FormGI is forming the generalized inverse of G from B-inverse, IUseBI=4.

Internal Forces: Max 0.007367777 RMS 0.001230027

Search for a local minimum.

Step number 39 out of a maximum of 116

All quantities printed in internal units (Hartrees-Bohrs-Radians)

Mixed Optimization -- RFO/linear search

Update second derivatives using D2CorX and points 30 31 32 34 35  
33 37 39

ITU= 0 -1 0 0 1 -1 0 1 1 1 1 1 1 1 0 -1 1 1 1 1 1

ITU= 0 -1 1 1 1 1 1 1 1 1 1 1 1 1 0 0 -1 0 0

Use linear search instead of GDIIS.

|                 |         |         |         |         |         |
|-----------------|---------|---------|---------|---------|---------|
| Eigenvalues --- | 0.00032 | 0.00155 | 0.00251 | 0.00355 | 0.00494 |
| Eigenvalues --- | 0.00992 | 0.01313 | 0.01573 | 0.01778 | 0.02033 |
| Eigenvalues --- | 0.02074 | 0.02347 | 0.03032 | 0.03068 | 0.03467 |
| Eigenvalues --- | 0.04006 | 0.04919 | 0.05301 | 0.05755 | 0.06581 |
| Eigenvalues --- | 0.08153 | 0.09157 | 0.11229 | 0.14081 | 0.14597 |
| Eigenvalues --- | 0.15353 | 0.15886 | 0.15929 | 0.16015 | 0.16275 |
| Eigenvalues --- | 0.16828 | 0.17191 | 0.19853 | 0.21893 | 0.22911 |
| Eigenvalues --- | 0.23727 | 0.24783 | 0.25365 | 0.29132 | 0.32350 |
| Eigenvalues --- | 0.33566 | 0.33861 | 0.33882 | 0.34054 | 0.34233 |
| Eigenvalues --- | 0.34363 | 0.34773 | 0.35970 | 0.36274 | 0.36405 |
| Eigenvalues --- | 0.37265 | 0.43185 | 0.43830 | 0.46107 | 0.49405 |
| Eigenvalues --- | 0.53136 | 0.54708 | 0.56595 | 0.60616 | 3.67666 |

RFO step: Lambda=-1.49641489D-04 EMin= 3.21070181D-04

Quartic linear search produced a step of 0.26096.

Iteration 1 RMS(Cart)= 0.06641596 RMS(Int)= 0.00320583

Iteration 2 RMS(Cart)= 0.00421491 RMS(Int)= 0.00037871

Iteration 3 RMS(Cart)= 0.00002787 RMS(Int)= 0.00037831

Iteration 4 RMS(Cart)= 0.00000000 RMS(Int)= 0.00037831

| Variable | Old X   | -DE/DX   | Delta X<br>(Linear) | Delta X<br>(Quad) | Delta X<br>(Total) | New X   |
|----------|---------|----------|---------------------|-------------------|--------------------|---------|
| R1       | 2.56159 | 0.00053  | 0.00003             | 0.00125           | 0.00088            | 2.56247 |
| R2       | 2.62549 | -0.00077 | -0.00001            | -0.00198          | -0.00212           | 2.62337 |
| R3       | 2.03403 | -0.00016 | 0.00006             | 0.00019           | 0.00025            | 2.03428 |
| R4       | 2.63115 | -0.00045 | 0.00006             | -0.00084          | -0.00088           | 2.63027 |
| R5       | 2.03122 | -0.00002 | 0.00001             | 0.00004           | 0.00005            | 2.03127 |
| R6       | 2.54449 | -0.00092 | 0.00003             | -0.00224          | -0.00188           | 2.54261 |
| R7       | 2.68996 | -0.00028 | 0.00007             | 0.00067           | 0.00074            | 2.69070 |
| R8       | 2.52465 | 0.00022  | -0.00019            | -0.00189          | -0.00176           | 2.52289 |
| R9       | 2.04534 | 0.00036  | 0.00100             | 0.01052           | 0.01152            | 2.05686 |
| R10      | 2.77945 | 0.00013  | -0.00001            | 0.00238           | 0.00237            | 2.78181 |
| R11      | 2.91045 | -0.00166 | 0.00016             | -0.00024          | -0.00008           | 2.91037 |

|     |         |          |          |          |          |         |
|-----|---------|----------|----------|----------|----------|---------|
| R12 | 2.06001 | -0.00027 | 0.00002  | -0.00113 | -0.00111 | 2.05890 |
| R13 | 2.06230 | -0.00005 | 0.00000  | -0.00024 | -0.00024 | 2.06206 |
| R14 | 2.06727 | 0.00024  | -0.00004 | 0.00027  | 0.00023  | 2.06750 |
| R15 | 2.07070 | -0.00226 | 0.00024  | -0.00111 | -0.00087 | 2.06983 |
| R16 | 2.68107 | 0.00080  | -0.00024 | 0.00014  | -0.00009 | 2.68097 |
| R17 | 5.26828 | -0.00051 | 0.00276  | 0.00595  | 0.00871  | 5.27699 |
| R18 | 2.50745 | -0.00045 | 0.00002  | -0.00083 | -0.00081 | 2.50664 |
| R19 | 2.05040 | -0.00027 | 0.00003  | -0.00054 | -0.00052 | 2.04988 |
| R20 | 2.04420 | -0.00028 | 0.00005  | -0.00056 | -0.00051 | 2.04369 |
| R21 | 2.04787 | -0.00023 | 0.00004  | -0.00026 | -0.00023 | 2.04764 |
| R22 | 1.82167 | -0.00079 | 0.00015  | -0.00092 | -0.00076 | 1.82091 |
| A1  | 1.87447 | -0.00023 | -0.00004 | -0.00085 | -0.00102 | 1.87345 |
| A2  | 2.27944 | 0.00008  | 0.00009  | 0.00039  | 0.00054  | 2.27999 |
| A3  | 2.12926 | 0.00015  | -0.00005 | 0.00047  | 0.00048  | 2.12973 |
| A4  | 1.86629 | -0.00003 | -0.00009 | -0.00185 | -0.00205 | 1.86424 |
| A5  | 2.28351 | -0.00002 | -0.00004 | -0.00030 | -0.00029 | 2.28322 |
| A6  | 2.13314 | 0.00004  | 0.00014  | 0.00208  | 0.00227  | 2.13541 |
| A7  | 1.89380 | 0.00012  | 0.00010  | 0.00271  | 0.00329  | 1.89709 |
| A8  | 2.23930 | -0.00007 | 0.00032  | 0.00370  | 0.00365  | 2.24295 |
| A9  | 2.14533 | -0.00005 | -0.00031 | -0.00419 | -0.00489 | 2.14044 |
| A10 | 1.89299 | 0.00006  | -0.00011 | -0.00204 | -0.00322 | 1.88978 |
| A11 | 2.19193 | -0.00042 | -0.00006 | -0.00590 | -0.00843 | 2.18350 |
| A12 | 2.19220 | 0.00032  | -0.00057 | -0.00318 | -0.00629 | 2.18592 |
| A13 | 1.89691 | 0.00008  | 0.00017  | 0.00258  | 0.00327  | 1.90018 |
| A14 | 2.21011 | 0.00068  | 0.00030  | 0.00260  | 0.00263  | 2.21275 |
| A15 | 2.15938 | -0.00082 | -0.00033 | -0.00550 | -0.00609 | 2.15329 |
| A16 | 1.94296 | -0.00422 | 0.00030  | -0.00628 | -0.00599 | 1.93697 |
| A17 | 1.87172 | 0.00111  | -0.00001 | 0.00094  | 0.00091  | 1.87263 |
| A18 | 1.89426 | 0.00172  | -0.00029 | 0.00138  | 0.00110  | 1.89536 |
| A19 | 1.91019 | 0.00006  | -0.00023 | -0.00359 | -0.00383 | 1.90636 |
| A20 | 1.94874 | 0.00190  | 0.00020  | 0.00423  | 0.00444  | 1.95318 |
| A21 | 1.89374 | -0.00051 | 0.00001  | 0.00346  | 0.00348  | 1.89721 |
| A22 | 1.92095 | 0.00166  | 0.00000  | 0.00273  | 0.00273  | 1.92368 |
| A23 | 1.89485 | -0.00539 | 0.00002  | -0.00346 | -0.00345 | 1.89140 |
| A24 | 1.90511 | 0.00106  | 0.00007  | -0.00012 | -0.00007 | 1.90504 |
| A25 | 1.91716 | 0.00094  | 0.00058  | 0.00030  | 0.00089  | 1.91805 |
| A26 | 1.87435 | -0.00030 | -0.00026 | 0.00608  | 0.00582  | 1.88016 |
| A27 | 1.95146 | 0.00217  | -0.00041 | -0.00535 | -0.00577 | 1.94569 |
| A28 | 2.56846 | -0.00737 | -0.00142 | -0.01557 | -0.01700 | 2.55146 |
| A29 | 2.16193 | -0.00046 | 0.00038  | -0.00005 | 0.00032  | 2.16225 |
| A30 | 1.95653 | -0.00011 | 0.00014  | -0.00089 | -0.00074 | 1.95578 |
| A31 | 2.16427 | 0.00057  | -0.00051 | 0.00091  | 0.00040  | 2.16467 |
| A32 | 2.08111 | 0.00021  | -0.00020 | 0.00057  | 0.00037  | 2.08148 |
| A33 | 2.15106 | -0.00012 | 0.00021  | 0.00022  | 0.00043  | 2.15148 |



|     |          |          |          |          |          |          |
|-----|----------|----------|----------|----------|----------|----------|
| A34 | 2.05102  | -0.00009 | -0.00001 | -0.00079 | -0.00080 | 2.05022  |
| A35 | 1.88580  | 0.00053  | -0.00031 | -0.00036 | -0.00067 | 1.88513  |
| D1  | 0.00739  | 0.00015  | 0.00016  | 0.00084  | 0.00100  | 0.00839  |
| D2  | 3.12539  | -0.00015 | 0.00080  | -0.00319 | -0.00233 | 3.12306  |
| D3  | -3.13992 | 0.00034  | -0.00067 | 0.00163  | 0.00093  | -3.13899 |
| D4  | -0.02192 | 0.00004  | -0.00004 | -0.00240 | -0.00241 | -0.02433 |
| D5  | -0.01962 | -0.00005 | 0.00049  | 0.01288  | 0.01332  | -0.00630 |
| D6  | -2.96986 | 0.00041  | -0.00025 | 0.01534  | 0.01508  | -2.95478 |
| D7  | 3.12709  | -0.00022 | 0.00124  | 0.01218  | 0.01339  | 3.14048  |
| D8  | 0.17685  | 0.00024  | 0.00050  | 0.01463  | 0.01515  | 0.19200  |
| D9  | 0.00722  | -0.00020 | -0.00076 | -0.01418 | -0.01490 | -0.00767 |
| D10 | 3.04526  | -0.00019 | 0.00046  | 0.00975  | 0.01033  | 3.05559  |
| D11 | -3.11327 | 0.00007  | -0.00132 | -0.01055 | -0.01187 | -3.12514 |
| D12 | -0.07524 | 0.00008  | -0.00011 | 0.01338  | 0.01336  | -0.06188 |
| D13 | -0.01959 | 0.00018  | 0.00107  | 0.02242  | 0.02339  | 0.00380  |
| D14 | 3.00905  | -0.00017 | -0.00697 | -0.08098 | -0.08777 | 2.92129  |
| D15 | -3.06439 | 0.00017  | -0.00011 | -0.00048 | -0.00063 | -3.06502 |
| D16 | -0.03575 | -0.00018 | -0.00815 | -0.10388 | -0.11178 | -0.14753 |
| D17 | 0.48468  | -0.00005 | -0.00383 | -0.03580 | -0.03963 | 0.44505  |
| D18 | -2.62539 | 0.00000  | -0.00428 | -0.03461 | -0.03890 | -2.66429 |
| D19 | -2.77396 | -0.00003 | -0.00242 | -0.00830 | -0.01072 | -2.78467 |
| D20 | 0.39915  | 0.00002  | -0.00288 | -0.00712 | -0.00999 | 0.38917  |
| D21 | 0.02423  | -0.00008 | -0.00097 | -0.02189 | -0.02274 | 0.00149  |
| D22 | 2.98127  | -0.00032 | -0.00018 | -0.02320 | -0.02331 | 2.95796  |
| D23 | -3.00439 | 0.00033  | 0.00705  | 0.08176  | 0.08878  | -2.91561 |
| D24 | -0.04735 | 0.00009  | 0.00784  | 0.08044  | 0.08821  | 0.04086  |
| D25 | 1.30529  | 0.00148  | 0.00444  | 0.03229  | 0.03675  | 1.34204  |
| D26 | -2.88887 | -0.00020 | 0.00432  | 0.02486  | 0.02920  | -2.85967 |
| D27 | -0.84626 | 0.00068  | 0.00418  | 0.03015  | 0.03435  | -0.81191 |
| D28 | -1.61795 | 0.00188  | 0.00354  | 0.03409  | 0.03761  | -1.58034 |
| D29 | 0.47108  | 0.00020  | 0.00342  | 0.02666  | 0.03006  | 0.50114  |
| D30 | 2.51369  | 0.00108  | 0.00328  | 0.03195  | 0.03521  | 2.54890  |
| D31 | -1.20940 | 0.00007  | -0.00197 | 0.01911  | 0.01715  | -1.19224 |
| D32 | 0.88953  | -0.00112 | -0.00125 | 0.01898  | 0.01774  | 0.90727  |
| D33 | 3.02079  | -0.00116 | -0.00169 | 0.01021  | 0.00852  | 3.02932  |
| D34 | 3.00774  | 0.00125  | -0.00199 | 0.02407  | 0.02207  | 3.02981  |
| D35 | -1.17651 | 0.00005  | -0.00128 | 0.02394  | 0.02265  | -1.15386 |
| D36 | 0.95475  | 0.00001  | -0.00172 | 0.01517  | 0.01344  | 0.96819  |
| D37 | 0.91071  | 0.00064  | -0.00199 | 0.01942  | 0.01743  | 0.92815  |
| D38 | 3.00965  | -0.00056 | -0.00127 | 0.01929  | 0.01802  | 3.02766  |
| D39 | -1.14228 | -0.00060 | -0.00171 | 0.01051  | 0.00880  | -1.13348 |
| D40 | 0.45358  | -0.00070 | 0.01455  | 0.14226  | 0.15682  | 0.61040  |
| D41 | 2.55487  | -0.00143 | 0.01491  | 0.14364  | 0.15856  | 2.71343  |
| D42 | -1.64920 | 0.00019  | 0.01471  | 0.14804  | 0.16274  | -1.48645 |

|     |          |          |          |          |         |          |
|-----|----------|----------|----------|----------|---------|----------|
| D43 | -1.73708 | 0.00243  | -0.00008 | 0.01203  | 0.01194 | -1.72514 |
| D44 | 2.46396  | 0.00003  | 0.00003  | 0.00533  | 0.00536 | 2.46932  |
| D45 | 0.35969  | -0.00223 | -0.00027 | 0.00423  | 0.00397 | 0.36366  |
| D46 | -3.10021 | 0.00009  | -0.00040 | 0.00527  | 0.00487 | -3.09534 |
| D47 | 0.04165  | 0.00003  | -0.00031 | 0.00120  | 0.00089 | 0.04255  |
| D48 | 0.00615  | 0.00002  | 0.00012  | 0.00392  | 0.00404 | 0.01019  |
| D49 | -3.13517 | -0.00004 | 0.00021  | -0.00015 | 0.00006 | -3.13511 |

| Item                 | Value    | Threshold | Converged? |
|----------------------|----------|-----------|------------|
| Maximum Force        | 0.007368 | 0.000450  | NO         |
| RMS Force            | 0.001230 | 0.000300  | NO         |
| Maximum Displacement | 0.446865 | 0.001800  | NO         |
| RMS Displacement     | 0.065887 | 0.001200  | NO         |

Predicted change in Energy=-1.220375D-04

GradGradGradGradGradGradGradGradGradGradGradGradGradGradGradGradGradGradGrad

Input orientation:

| Center<br>Number | Atomic<br>Number | Atomic<br>Type | Coordinates (Angstroms) |           |           |
|------------------|------------------|----------------|-------------------------|-----------|-----------|
|                  |                  |                | X                       | Y         | Z         |
| 1                | 6                | 0              | -0.495247               | -2.149345 | -1.277992 |
| 2                | 6                | 0              | -1.780804               | -1.752036 | -1.445992 |
| 3                | 7                | 0              | -2.087079               | -0.916447 | -0.375800 |
| 4                | 6                | 0              | -1.007568               | -0.824169 | 0.422000  |
| 5                | 7                | 0              | -0.031457               | -1.565668 | -0.106928 |
| 6                | 6                | 0              | 1.361438                | -1.528806 | 0.367920  |
| 7                | 6                | 0              | 2.178072                | -0.472760 | -0.400063 |
| 8                | 1                | 0              | 0.123796                | -2.793079 | -1.879020 |
| 9                | 1                | 0              | -2.486104               | -1.966836 | -2.228185 |
| 10               | 1                | 0              | 1.336514                | -1.264347 | 1.424565  |
| 11               | 1                | 0              | 1.789971                | -2.527260 | 0.267146  |
| 12               | 1                | 0              | 2.309952                | -0.780723 | -1.441582 |
| 13               | 1                | 0              | 1.637520                | 0.478956  | -0.358363 |
| 14               | 35               | 0              | 0.003546                | 2.154367  | 1.165115  |
| 15               | 1                | 0              | -0.880831               | -0.097176 | 1.222079  |
| 16               | 6                | 0              | -3.277761               | -0.170190 | -0.146123 |
| 17               | 6                | 0              | -4.463580               | -0.498584 | -0.641579 |
| 18               | 1                | 0              | -3.094608               | 0.714544  | 0.454199  |
| 19               | 1                | 0              | -5.311438               | 0.146305  | -0.454934 |
| 20               | 1                | 0              | -4.633929               | -1.388915 | -1.235215 |
| 21               | 8                | 0              | 3.466088                | -0.364702 | 0.184811  |
| 22               | 1                | 0              | 3.463857                | 0.399992  | 0.771095  |

Distance matrix (angstroms):

|    |    | 1        | 2        | 3        | 4        | 5        |
|----|----|----------|----------|----------|----------|----------|
| 1  | C  | 0.000000 |          |          |          |          |
| 2  | C  | 1.356000 | 0.000000 |          |          |          |
| 3  | N  | 2.206335 | 1.391878 | 0.000000 |          |          |
| 4  | C  | 2.215522 | 2.224461 | 1.345490 | 0.000000 |          |
| 5  | N  | 1.388226 | 2.210891 | 2.172409 | 1.335057 | 0.000000 |
| 6  | C  | 2.557611 | 3.635078 | 3.580555 | 2.472171 | 1.472072 |
| 7  | C  | 3.275412 | 4.289896 | 4.288234 | 3.308712 | 2.482416 |
| 8  | H  | 1.076496 | 2.213320 | 3.266402 | 3.232845 | 2.161239 |
| 9  | H  | 2.213524 | 1.074901 | 2.166533 | 3.242720 | 3.268939 |
| 10 | H  | 3.382659 | 4.265631 | 3.883727 | 2.587202 | 2.075477 |
| 11 | H  | 2.784330 | 4.035622 | 4.247306 | 3.278830 | 2.093368 |
| 12 | H  | 3.125545 | 4.204492 | 4.526388 | 3.805360 | 2.807069 |
| 13 | H  | 3.507474 | 4.224357 | 3.977447 | 3.050179 | 2.651262 |
| 14 | Br | 4.973882 | 5.026109 | 4.021820 | 3.232066 | 3.931664 |
| 15 | H  | 3.257366 | 3.266056 | 2.163205 | 1.088443 | 2.155033 |
| 16 | C  | 3.597299 | 2.536292 | 1.423859 | 2.429861 | 3.533749 |
| 17 | C  | 4.344847 | 3.068470 | 2.427551 | 3.630595 | 4.590014 |
| 18 | H  | 4.237809 | 3.379471 | 2.089054 | 2.593147 | 3.859679 |
| 19 | H  | 5.398438 | 4.129319 | 3.395909 | 4.498236 | 5.561489 |
| 20 | H  | 4.208179 | 2.883853 | 2.729151 | 4.026883 | 4.742048 |
| 21 | O  | 4.584420 | 5.666929 | 5.608597 | 4.503439 | 3.709481 |
| 22 | H  | 5.135405 | 6.087131 | 5.819044 | 4.649095 | 4.105114 |
|    |    | 6        | 7        | 8        | 9        | 10       |
| 6  | C  | 0.000000 |          |          |          |          |
| 7  | C  | 1.540104 | 0.000000 |          |          |          |
| 8  | H  | 2.859875 | 3.433838 | 0.000000 |          |          |
| 9  | H  | 4.662104 | 5.227698 | 2.759741 | 0.000000 |          |
| 10 | H  | 1.089521 | 2.159651 | 3.836845 | 5.333711 | 0.000000 |
| 11 | H  | 1.091195 | 2.194711 | 2.729987 | 4.982526 | 1.772058 |
| 12 | H  | 2.175685 | 1.094073 | 3.003366 | 5.002776 | 3.065334 |
| 13 | H  | 2.152862 | 1.095307 | 3.912795 | 5.146105 | 2.511681 |
| 14 | Br | 4.005641 | 3.752352 | 5.810202 | 5.890430 | 3.678549 |
| 15 | H  | 2.794088 | 3.482714 | 4.230129 | 4.239912 | 2.513943 |
| 16 | C  | 4.861301 | 5.470113 | 4.631745 | 2.861754 | 4.995575 |
| 17 | C  | 6.000940 | 6.646091 | 5.276361 | 2.929760 | 6.204549 |
| 18 | H  | 4.989630 | 5.471801 | 5.301458 | 3.841258 | 4.948986 |
| 19 | H  | 6.928951 | 7.515252 | 6.341117 | 3.948708 | 7.051079 |
| 20 | H  | 6.207579 | 6.923884 | 5.002210 | 2.435802 | 6.537288 |
| 21 | O  | 2.412098 | 1.418710 | 4.618152 | 6.619514 | 2.623249 |
| 22 | H  | 2.881488 | 1.945907 | 5.326802 | 7.071039 | 2.778963 |
|    |    | 11       | 12       | 13       | 14       | 15       |
| 11 | H  | 0.000000 |          |          |          |          |
| 12 | H  | 2.498104 | 0.000000 |          |          |          |

|    |    |          |          |          |          |          |
|----|----|----------|----------|----------|----------|----------|
| 13 | H  | 3.074384 | 1.792294 | 0.000000 |          |          |
| 14 | Br | 5.090707 | 4.552926 | 2.792465 | 0.000000 |          |
| 15 | H  | 3.735023 | 4.212295 | 3.028501 | 2.419672 | 0.000000 |
| 16 | C  | 5.604326 | 5.768319 | 4.962501 | 4.229644 | 2.760902 |
| 17 | C  | 6.636882 | 6.826444 | 6.185403 | 5.500682 | 4.058378 |
| 18 | H  | 5.865441 | 5.919382 | 4.807160 | 3.489563 | 2.479785 |
| 19 | H  | 7.622294 | 7.740701 | 6.957586 | 5.908124 | 4.743620 |
| 20 | H  | 6.694730 | 6.973519 | 6.602187 | 6.310516 | 4.668257 |
| 21 | O  | 2.737298 | 2.038351 | 2.085775 | 4.392710 | 4.476963 |
| 22 | H  | 3.409496 | 2.760711 | 2.148818 | 3.899595 | 4.396235 |
|    |    | 16       | 17       | 18       | 19       | 20       |
| 16 | C  | 0.000000 |          |          |          |          |
| 17 | C  | 1.326456 | 0.000000 |          |          |          |
| 18 | H  | 1.084752 | 2.132250 | 0.000000 |          |          |
| 19 | H  | 2.081196 | 1.081472 | 2.462470 | 0.000000 |          |
| 20 | H  | 2.123818 | 1.083565 | 3.106151 | 1.850610 | 0.000000 |
| 21 | O  | 6.754764 | 7.973736 | 6.654327 | 8.815631 | 8.287083 |
| 22 | H  | 6.827577 | 8.102305 | 6.573647 | 8.864159 | 8.532268 |
|    |    | 21       | 22       |          |          |          |
| 21 | O  | 0.000000 |          |          |          |          |
| 22 | H  | 0.963582 | 0.000000 |          |          |          |

Stoichiometry C7H11BrN2O

Framework group C1[X(C7H11BrN2O)]

Deg. of freedom 60

Full point group C1 NOp 1

Largest Abelian subgroup C1 NOp 1

Largest concise Abelian subgroup C1 NOp 1

Standard orientation:

| Center Number | Atomic Number | Atomic Type | Coordinates (Angstroms) |           |           |
|---------------|---------------|-------------|-------------------------|-----------|-----------|
|               |               |             | X                       | Y         | Z         |
| 1             | 6             | 0           | -1.172022               | -2.298456 | -0.309244 |
| 2             | 6             | 0           | -2.268932               | -1.527719 | -0.512932 |
| 3             | 7             | 0           | -2.021704               | -0.304597 | 0.103650  |
| 4             | 6             | 0           | -0.803629               | -0.347329 | 0.673572  |
| 5             | 7             | 0           | -0.272004               | -1.548647 | 0.435689  |
| 6             | 6             | 0           | 1.135275                | -1.880561 | 0.712088  |
| 7             | 6             | 0           | 2.020426                | -1.595592 | -0.515601 |
| 8             | 1             | 0           | -0.955355               | -3.305821 | -0.620873 |
| 9             | 1             | 0           | -3.178183               | -1.727586 | -1.050267 |
| 10            | 1             | 0           | 1.459250                | -1.252712 | 1.541487  |
| 11            | 1             | 0           | 1.192092                | -2.925492 | 1.021274  |
| 12            | 1             | 0           | 1.784747                | -2.295935 | -1.322428 |

|    |    |   |           |           |           |
|----|----|---|-----------|-----------|-----------|
| 13 | 1  | 0 | 1.831578  | -0.568649 | -0.846393 |
| 14 | 35 | 0 | 1.236536  | 2.046762  | -0.069598 |
| 15 | 1  | 0 | -0.260856 | 0.515166  | 1.055943  |
| 16 | 6  | 0 | -2.823464 | 0.872021  | 0.092474  |
| 17 | 6  | 0 | -4.136816 | 0.870322  | -0.093505 |
| 18 | 1  | 0 | -2.229871 | 1.770705  | 0.221713  |
| 19 | 1  | 0 | -4.666620 | 1.812393  | -0.130809 |
| 20 | 1  | 0 | -4.718740 | -0.035543 | -0.215518 |
| 21 | 8  | 0 | 3.381261  | -1.785658 | -0.162414 |
| 22 | 1  | 0 | 3.764022  | -0.921365 | 0.024624  |

-----

Rotational constants (GHZ):      0.7648999      0.5411617      0.3299500

Standard basis: 6-311++G(d,p) (5D, 7F)

There are    358 symmetry adapted cartesian basis functions of A    symmetry.

There are    345 symmetry adapted basis functions of A    symmetry.

    345 basis functions,    553 primitive gaussians,    358 cartesian basis functions

    55 alpha electrons      55 beta electrons

        nuclear repulsion energy      847.5777866500 Hartrees.

NAtoms=    22 NActive=    22 NUniq=    22 SFac= 1.00D+00 NAtFMM=    60 NAOKFM=F

Big=F

Integral buffers will be    131072 words long.

Raffenetti 2 integral format.

Two-electron integral symmetry is turned on.

One-electron integrals computed using PRISM.

NBasis=    345 RedAO= T EigKep=    6.13D-06    NBF=    345

NBsUse=    345 1.00D-06 EigRej= -1.00D+00    NBFU=    345

Initial guess from the checkpoint file: ". "

B after Tr=    0.000000    0.000000    0.000000

        Rot=    0.997529    0.001962    -0.000042    0.070228 Ang=    8.06 deg.

ExpMin= 3.50D-02 ExpMax= 4.40D+05 ExpMxC= 1.51D+04 IAcc=3 IRadAn=      5 AccDes=

0.00D+00

Harris functional with IExCor=    402 and IRadAn=      5 diagonalized for initial guess.

HarFok: IExCor=    402 AccDes= 0.00D+00 IRadAn=      5 IDoV= 1 UseB2=F ITyADJ=14

ICtDFT= 3500011 ScaDFX= 1.000000 1.000000 1.000000 1.000000

FoFCou: FMM=F IPFlag=            0 FMFlag=      100000 FMFlg1=      0

        NFxFlg=            0 DoJE=T BraDBF=F KetDBF=T FulRan=T

        wScrn= 0.000000 ICntrl=      500 IOpCl= 0 I1Cent=    200000004 NGrid=

0

        NMat0=    1 NMatS0=      1 NMatT0=    0 NMatD0=    1 NMtDS0=    0

NMtDT0=    0

Petite list used in FoFCou.

Keep R1 ints in memory in canonical form, NReq=1804729152.

Requested convergence on RMS density matrix=1.00D-08 within 128 cycles.

Requested convergence on MAX density matrix=1.00D-06.

Requested convergence on energy=1.00D-06.  
 No special actions if energy rises.  
 SCF Done: E(RB3LYP) = -3032.33840018 A.U. after 12 cycles  
 NFock= 12 Conv=0.79D-08 -V/T= 2.0017  
 Calling FoFJK, ICntrl= 2127 FMM=F ISym2X=0 l1Cent= 0 IOpClX= 0 NMat=1 NMatS=1  
 NMatT=0.

\*\*\*\*\* Axes restored to original set \*\*\*\*\*

| Center<br>Number | Atomic<br>Number | Forces (Hartrees/Bohr) |              |              |
|------------------|------------------|------------------------|--------------|--------------|
|                  |                  | X                      | Y            | Z            |
| 1                | 6                | 0.000979424            | -0.000727394 | 0.001402705  |
| 2                | 6                | -0.001269457           | 0.000660344  | 0.000659317  |
| 3                | 7                | -0.000663058           | -0.000952742 | 0.000420875  |
| 4                | 6                | 0.001031469            | 0.003721055  | -0.004410573 |
| 5                | 7                | 0.000087746            | -0.000159472 | 0.000034346  |
| 6                | 6                | 0.001037920            | -0.000114935 | 0.000488547  |
| 7                | 6                | -0.000040582           | 0.000344638  | 0.000734592  |
| 8                | 1                | -0.000055543           | 0.000260531  | -0.000033786 |
| 9                | 1                | -0.000006082           | -0.000074207 | 0.000061300  |
| 10               | 1                | -0.000130387           | -0.000217802 | 0.000096152  |
| 11               | 1                | 0.000138076            | 0.000199033  | -0.000103018 |
| 12               | 1                | -0.000199389           | 0.000060250  | -0.000250342 |
| 13               | 1                | 0.000365196            | -0.000527912 | -0.000970643 |
| 14               | 35               | -0.001205614           | -0.004158321 | -0.000104508 |
| 15               | 1                | 0.000576768            | 0.001378521  | 0.002121948  |
| 16               | 6                | -0.000311706           | 0.000516745  | -0.000456430 |
| 17               | 6                | 0.000124547            | 0.000122322  | -0.000193966 |
| 18               | 1                | -0.000129018           | -0.000333299 | 0.000112097  |
| 19               | 1                | -0.000028767           | -0.000227985 | 0.000092790  |
| 20               | 1                | 0.000097648            | 0.000161532  | 0.000157952  |
| 21               | 8                | -0.000267600           | -0.000010040 | -0.000094403 |
| 22               | 1                | -0.000131591           | 0.000079137  | 0.000235047  |

Cartesian Forces: Max 0.004410573 RMS 0.001045106

GradGradGradGradGradGradGradGradGradGradGradGradGradGradGradGradGradGradGradGrad  
 Berny optimization.

Using GEDIIS/GDIIS optimizer.

FormGI is forming the generalized inverse of G from B-inverse, IUseBI=4.

Internal Forces: Max 0.014182899 RMS 0.002672574

Search for a local minimum.

Step number 40 out of a maximum of 116

All quantities printed in internal units (Hartrees-Bohrs-Radians)

Mixed Optimization -- RFO/linear search

Update second derivatives using D2CorX and points 30 31 32 34 35  
33 37 40 39

DE= 1.63D-04 DEPred=-1.22D-04 R=-1.34D+00

Trust test=-1.34D+00 RLast= 3.59D-01 DXMaxT set to 1.31D-01

ITU= -1 0 -1 0 0 1 -1 0 1 1 1 1 1 1 0 -1 1 1 1 1

ITU= 1 0 -1 1 1 1 1 1 1 1 1 1 1 1 0 0 -1 0 0

Use linear search instead of GDIIIS.

Energy rises -- skip Quadratic/GDIIIS search.

Quartic linear search produced a step of -0.62733.

Iteration 1 RMS(Cart)= 0.04058173 RMS(Int)= 0.00117879

Iteration 2 RMS(Cart)= 0.00175330 RMS(Int)= 0.00008685

Iteration 3 RMS(Cart)= 0.00000303 RMS(Int)= 0.00008683

Iteration 4 RMS(Cart)= 0.00000000 RMS(Int)= 0.00008683

| Variable | Old X   | -DE/DX   | Delta X<br>(Linear) | Delta X<br>(Quad) | Delta X<br>(Total) | New X   |
|----------|---------|----------|---------------------|-------------------|--------------------|---------|
| R1       | 2.56247 | 0.00155  | -0.00055            | 0.00000           | -0.00046           | 2.56201 |
| R2       | 2.62337 | -0.00116 | 0.00133             | 0.00000           | 0.00136            | 2.62473 |
| R3       | 2.03428 | -0.00017 | -0.00016            | 0.00000           | -0.00016           | 2.03412 |
| R4       | 2.63027 | -0.00039 | 0.00055             | 0.00000           | 0.00058            | 2.63084 |
| R5       | 2.03127 | -0.00002 | -0.00003            | 0.00000           | -0.00003           | 2.03124 |
| R6       | 2.54261 | 0.00020  | 0.00118             | 0.00000           | 0.00110            | 2.54371 |
| R7       | 2.69070 | 0.00030  | -0.00047            | 0.00000           | -0.00047           | 2.69024 |
| R8       | 2.52289 | 0.00118  | 0.00110             | 0.00000           | 0.00103            | 2.52392 |
| R9       | 2.05686 | 0.00255  | -0.00723            | 0.00000           | -0.00723           | 2.04963 |
| R10      | 2.78181 | -0.00051 | -0.00149            | 0.00000           | -0.00149           | 2.78033 |
| R11      | 2.91037 | -0.00346 | 0.00005             | 0.00000           | 0.00005            | 2.91042 |
| R12      | 2.05890 | 0.00004  | 0.00070             | 0.00000           | 0.00070            | 2.05959 |
| R13      | 2.06206 | -0.00011 | 0.00015             | 0.00000           | 0.00015            | 2.06221 |
| R14      | 2.06750 | 0.00020  | -0.00014            | 0.00000           | -0.00014           | 2.06735 |
| R15      | 2.06983 | -0.00371 | 0.00055             | 0.00000           | 0.00055            | 2.07038 |
| R16      | 2.68097 | -0.00030 | 0.00006             | 0.00000           | 0.00006            | 2.68103 |
| R17      | 5.27699 | -0.00185 | -0.00547            | 0.00000           | -0.00547           | 5.27153 |
| R18      | 2.50664 | -0.00022 | 0.00051             | 0.00000           | 0.00051            | 2.50715 |
| R19      | 2.04988 | -0.00023 | 0.00033             | 0.00000           | 0.00033            | 2.05021 |
| R20      | 2.04369 | -0.00009 | 0.00032             | 0.00000           | 0.00032            | 2.04401 |
| R21      | 2.04764 | -0.00024 | 0.00014             | 0.00000           | 0.00014            | 2.04778 |
| R22      | 1.82091 | 0.00020  | 0.00048             | 0.00000           | 0.00048            | 1.82139 |
| A1       | 1.87345 | -0.00025 | 0.00064             | 0.00000           | 0.00067            | 1.87412 |
| A2       | 2.27999 | 0.00009  | -0.00034            | 0.00000           | -0.00036           | 2.27963 |
| A3       | 2.12973 | 0.00017  | -0.00030            | 0.00000           | -0.00031           | 2.12942 |
| A4       | 1.86424 | 0.00041  | 0.00129             | 0.00000           | 0.00131            | 1.86555 |
| A5       | 2.28322 | -0.00021 | 0.00018             | 0.00000           | 0.00017            | 2.28339 |
| A6       | 2.13541 | -0.00021 | -0.00142            | 0.00000           | -0.00143           | 2.13398 |

|     |          |          |          |         |          |          |
|-----|----------|----------|----------|---------|----------|----------|
| A7  | 1.89709  | -0.00046 | -0.00206 | 0.00000 | -0.00217 | 1.89492  |
| A8  | 2.24295  | -0.00010 | -0.00229 | 0.00000 | -0.00221 | 2.24075  |
| A9  | 2.14044  | 0.00055  | 0.00306  | 0.00000 | 0.00316  | 2.14360  |
| A10 | 1.88978  | 0.00026  | 0.00202  | 0.00000 | 0.00226  | 1.89204  |
| A11 | 2.18350  | 0.00037  | 0.00529  | 0.00000 | 0.00586  | 2.18936  |
| A12 | 2.18592  | -0.00048 | 0.00394  | 0.00000 | 0.00452  | 2.19044  |
| A13 | 1.90018  | 0.00003  | -0.00205 | 0.00000 | -0.00217 | 1.89801  |
| A14 | 2.21275  | 0.00326  | -0.00165 | 0.00000 | -0.00159 | 2.21116  |
| A15 | 2.15329  | -0.00342 | 0.00382  | 0.00000 | 0.00388  | 2.15717  |
| A16 | 1.93697  | -0.00753 | 0.00376  | 0.00000 | 0.00376  | 1.94073  |
| A17 | 1.87263  | 0.00077  | -0.00057 | 0.00000 | -0.00056 | 1.87206  |
| A18 | 1.89536  | 0.00388  | -0.00069 | 0.00000 | -0.00069 | 1.89467  |
| A19 | 1.90636  | 0.00019  | 0.00240  | 0.00000 | 0.00241  | 1.90877  |
| A20 | 1.95318  | 0.00365  | -0.00279 | 0.00000 | -0.00279 | 1.95039  |
| A21 | 1.89721  | -0.00098 | -0.00218 | 0.00000 | -0.00218 | 1.89503  |
| A22 | 1.92368  | 0.00434  | -0.00171 | 0.00000 | -0.00171 | 1.92197  |
| A23 | 1.89140  | -0.01305 | 0.00216  | 0.00000 | 0.00217  | 1.89356  |
| A24 | 1.90504  | 0.00243  | 0.00005  | 0.00000 | 0.00005  | 1.90509  |
| A25 | 1.91805  | 0.00229  | -0.00056 | 0.00000 | -0.00056 | 1.91749  |
| A26 | 1.88016  | -0.00160 | -0.00365 | 0.00000 | -0.00365 | 1.87652  |
| A27 | 1.94569  | 0.00586  | 0.00362  | 0.00000 | 0.00362  | 1.94931  |
| A28 | 2.55146  | -0.01418 | 0.01066  | 0.00000 | 0.01066  | 2.56212  |
| A29 | 2.16225  | -0.00022 | -0.00020 | 0.00000 | -0.00020 | 2.16205  |
| A30 | 1.95578  | 0.00015  | 0.00047  | 0.00000 | 0.00047  | 1.95625  |
| A31 | 2.16467  | 0.00008  | -0.00025 | 0.00000 | -0.00025 | 2.16442  |
| A32 | 2.08148  | 0.00018  | -0.00023 | 0.00000 | -0.00023 | 2.08125  |
| A33 | 2.15148  | -0.00016 | -0.00027 | 0.00000 | -0.00027 | 2.15122  |
| A34 | 2.05022  | -0.00002 | 0.00050  | 0.00000 | 0.00050  | 2.05072  |
| A35 | 1.88513  | -0.00015 | 0.00042  | 0.00000 | 0.00042  | 1.88555  |
| D1  | 0.00839  | 0.00046  | -0.00063 | 0.00000 | -0.00063 | 0.00776  |
| D2  | 3.12306  | 0.00030  | 0.00146  | 0.00000 | 0.00145  | 3.12451  |
| D3  | -3.13899 | 0.00025  | -0.00058 | 0.00000 | -0.00058 | -3.13957 |
| D4  | -0.02433 | 0.00008  | 0.00151  | 0.00000 | 0.00151  | -0.02282 |
| D5  | -0.00630 | -0.00081 | -0.00835 | 0.00000 | -0.00835 | -0.01465 |
| D6  | -2.95478 | 0.00043  | -0.00946 | 0.00000 | -0.00946 | -2.96424 |
| D7  | 3.14048  | -0.00062 | -0.00840 | 0.00000 | -0.00839 | 3.13208  |
| D8  | 0.19200  | 0.00062  | -0.00950 | 0.00000 | -0.00951 | 0.18249  |
| D9  | -0.00767 | 0.00005  | 0.00934  | 0.00000 | 0.00934  | 0.00167  |
| D10 | 3.05559  | -0.00006 | -0.00648 | 0.00000 | -0.00651 | 3.04908  |
| D11 | -3.12514 | 0.00019  | 0.00745  | 0.00000 | 0.00745  | -3.11769 |
| D12 | -0.06188 | 0.00009  | -0.00838 | 0.00000 | -0.00840 | -0.07028 |
| D13 | 0.00380  | -0.00056 | -0.01467 | 0.00000 | -0.01465 | -0.01085 |
| D14 | 2.92129  | 0.00010  | 0.05506  | 0.00000 | 0.05502  | 2.97631  |
| D15 | -3.06502 | -0.00043 | 0.00039  | 0.00000 | 0.00040  | -3.06462 |



|     |          |          |          |         |          |          |
|-----|----------|----------|----------|---------|----------|----------|
| D16 | -0.14753 | 0.00023  | 0.07012  | 0.00000 | 0.07007  | -0.07745 |
| D17 | 0.44505  | 0.00005  | 0.02486  | 0.00000 | 0.02486  | 0.46991  |
| D18 | -2.66429 | -0.00016 | 0.02440  | 0.00000 | 0.02440  | -2.63989 |
| D19 | -2.78467 | -0.00012 | 0.00672  | 0.00000 | 0.00672  | -2.77795 |
| D20 | 0.38917  | -0.00033 | 0.00627  | 0.00000 | 0.00626  | 0.39543  |
| D21 | 0.00149  | 0.00085  | 0.01427  | 0.00000 | 0.01425  | 0.01574  |
| D22 | 2.95796  | 0.00054  | 0.01463  | 0.00000 | 0.01462  | 2.97257  |
| D23 | -2.91561 | 0.00005  | -0.05569 | 0.00000 | -0.05570 | -2.97131 |
| D24 | 0.04086  | -0.00025 | -0.05533 | 0.00000 | -0.05533 | -0.01447 |
| D25 | 1.34204  | 0.00327  | -0.02305 | 0.00000 | -0.02306 | 1.31898  |
| D26 | -2.85967 | -0.00032 | -0.01832 | 0.00000 | -0.01832 | -2.87799 |
| D27 | -0.81191 | 0.00098  | -0.02155 | 0.00000 | -0.02155 | -0.83346 |
| D28 | -1.58034 | 0.00418  | -0.02360 | 0.00000 | -0.02359 | -1.60393 |
| D29 | 0.50114  | 0.00059  | -0.01886 | 0.00000 | -0.01886 | 0.48228  |
| D30 | 2.54890  | 0.00189  | -0.02209 | 0.00000 | -0.02209 | 2.52681  |
| D31 | -1.19224 | -0.00136 | -0.01076 | 0.00000 | -0.01076 | -1.20301 |
| D32 | 0.90727  | -0.00406 | -0.01113 | 0.00000 | -0.01113 | 0.89614  |
| D33 | 3.02932  | -0.00343 | -0.00535 | 0.00000 | -0.00535 | 3.02397  |
| D34 | 3.02981  | 0.00209  | -0.01384 | 0.00000 | -0.01384 | 3.01597  |
| D35 | -1.15386 | -0.00061 | -0.01421 | 0.00000 | -0.01421 | -1.16806 |
| D36 | 0.96819  | 0.00001  | -0.00843 | 0.00000 | -0.00843 | 0.95976  |
| D37 | 0.92815  | 0.00084  | -0.01094 | 0.00000 | -0.01094 | 0.91721  |
| D38 | 3.02766  | -0.00186 | -0.01130 | 0.00000 | -0.01130 | 3.01636  |
| D39 | -1.13348 | -0.00123 | -0.00552 | 0.00000 | -0.00552 | -1.13900 |
| D40 | 0.61040  | -0.00296 | -0.09838 | 0.00000 | -0.09838 | 0.51202  |
| D41 | 2.71343  | -0.00433 | -0.09947 | 0.00000 | -0.09947 | 2.61396  |
| D42 | -1.48645 | -0.00110 | -0.10209 | 0.00000 | -0.10209 | -1.58854 |
| D43 | -1.72514 | 0.00564  | -0.00749 | 0.00000 | -0.00749 | -1.73263 |
| D44 | 2.46932  | -0.00001 | -0.00336 | 0.00000 | -0.00336 | 2.46596  |
| D45 | 0.36366  | -0.00533 | -0.00249 | 0.00000 | -0.00249 | 0.36117  |
| D46 | -3.09534 | -0.00030 | -0.00306 | 0.00000 | -0.00306 | -3.09840 |
| D47 | 0.04255  | -0.00009 | -0.00056 | 0.00000 | -0.00056 | 0.04198  |
| D48 | 0.01019  | -0.00007 | -0.00253 | 0.00000 | -0.00253 | 0.00766  |
| D49 | -3.13511 | 0.00014  | -0.00004 | 0.00000 | -0.00004 | -3.13515 |

| Item                 | Value    | Threshold | Converged? |
|----------------------|----------|-----------|------------|
| Maximum Force        | 0.014183 | 0.000450  | NO         |
| RMS Force            | 0.002673 | 0.000300  | NO         |
| Maximum Displacement | 0.275252 | 0.001800  | NO         |
| RMS Displacement     | 0.041234 | 0.001200  | NO         |

Predicted change in Energy=-1.270277D-04

GradGradGradGradGradGradGradGradGradGradGradGradGradGradGradGradGradGradGrad

Input orientation:

-----

| Center<br>Number | Atomic<br>Number | Atomic<br>Type | Coordinates (Angstroms) |           |           |
|------------------|------------------|----------------|-------------------------|-----------|-----------|
|                  |                  |                | X                       | Y         | Z         |
| 1                | 6                | 0              | -0.487687               | -2.115271 | -1.290278 |
| 2                | 6                | 0              | -1.774790               | -1.721640 | -1.453054 |
| 3                | 7                | 0              | -2.089387               | -0.908509 | -0.367688 |
| 4                | 6                | 0              | -1.007173               | -0.817324 | 0.427554  |
| 5                | 7                | 0              | -0.027997               | -1.551738 | -0.106942 |
| 6                | 6                | 0              | 1.362447                | -1.528099 | 0.373467  |
| 7                | 6                | 0              | 2.198966                | -0.486977 | -0.393540 |
| 8                | 1                | 0              | 0.135486                | -2.744125 | -1.902537 |
| 9                | 1                | 0              | -2.478038               | -1.926028 | -2.239849 |
| 10               | 1                | 0              | 1.335065                | -1.262259 | 1.430084  |
| 11               | 1                | 0              | 1.779902                | -2.531863 | 0.278216  |
| 12               | 1                | 0              | 2.341944                | -0.808315 | -1.429459 |
| 13               | 1                | 0              | 1.667515                | 0.470822  | -0.370854 |
| 14               | 35               | 0              | -0.088824               | 2.133358  | 1.019458  |
| 15               | 1                | 0              | -0.899911               | -0.140904 | 1.268595  |
| 16               | 6                | 0              | -3.283383               | -0.169424 | -0.133601 |
| 17               | 6                | 0              | -4.469443               | -0.505802 | -0.623818 |
| 18               | 1                | 0              | -3.103569               | 0.717009  | 0.465535  |
| 19               | 1                | 0              | -5.321092               | 0.132730  | -0.431666 |
| 20               | 1                | 0              | -4.636346               | -1.397653 | -1.216289 |
| 21               | 8                | 0              | 3.481954                | -0.388958 | 0.204089  |
| 22               | 1                | 0              | 3.484711                | 0.384092  | 0.779732  |

Distance matrix (angstroms):

|    |    | 1        | 2        | 3        | 4        | 5        |
|----|----|----------|----------|----------|----------|----------|
| 1  | C  | 0.000000 |          |          |          |          |
| 2  | C  | 1.355756 | 0.000000 |          |          |          |
| 3  | N  | 2.207462 | 1.392182 | 0.000000 |          |          |
| 4  | C  | 2.214832 | 2.223446 | 1.346073 | 0.000000 |          |
| 5  | N  | 1.388946 | 2.211825 | 2.175100 | 1.335603 | 0.000000 |
| 6  | C  | 2.556523 | 3.635366 | 3.584460 | 2.474515 | 1.471286 |
| 7  | C  | 3.267045 | 4.293914 | 4.309098 | 3.326056 | 2.484998 |
| 8  | H  | 1.076412 | 2.212841 | 3.267309 | 3.232269 | 2.161637 |
| 9  | H  | 2.213367 | 1.074886 | 2.165960 | 3.241560 | 3.269876 |
| 10 | H  | 3.383848 | 4.265526 | 3.883812 | 2.586332 | 2.074653 |
| 11 | H  | 2.788491 | 4.036036 | 4.245452 | 3.275627 | 2.092245 |
| 12 | H  | 3.119987 | 4.216897 | 4.557861 | 3.829513 | 2.813956 |
| 13 | H  | 3.489716 | 4.222264 | 4.002109 | 3.074205 | 2.652387 |
| 14 | Br | 4.852300 | 4.880246 | 3.896073 | 3.146464 | 3.853882 |
| 15 | H  | 3.258203 | 3.266728 | 2.163675 | 1.084619 | 2.154713 |
| 16 | C  | 3.597240 | 2.534992 | 1.423612 | 2.432242 | 3.536813 |

|    |    |          |          |          |          |          |
|----|----|----------|----------|----------|----------|----------|
| 17 | C  | 4.346141 | 3.070351 | 2.427436 | 3.631769 | 4.592123 |
| 18 | H  | 4.236452 | 3.375448 | 2.089291 | 2.598172 | 3.864465 |
| 19 | H  | 5.399308 | 4.130155 | 3.395908 | 4.500084 | 5.564148 |
| 20 | H  | 4.210917 | 2.889555 | 2.728807 | 4.026152 | 4.742497 |
| 21 | O  | 4.579447 | 5.670583 | 5.624651 | 4.515052 | 3.710599 |
| 22 | H  | 5.129493 | 6.089482 | 5.835919 | 4.663095 | 4.107644 |
|    |    | 6        | 7        | 8        | 9        | 10       |
| 6  | C  | 0.000000 |          |          |          |          |
| 7  | C  | 1.540129 | 0.000000 |          |          |          |
| 8  | H  | 2.857332 | 3.410240 | 0.000000 |          |          |
| 9  | H  | 4.662305 | 5.230114 | 2.759270 | 0.000000 |          |
| 10 | H  | 1.089890 | 2.161710 | 3.839438 | 5.333737 | 0.000000 |
| 11 | H  | 1.091276 | 2.192813 | 2.739497 | 4.983748 | 1.771037 |
| 12 | H  | 2.174407 | 1.093997 | 2.973150 | 5.013806 | 3.065429 |
| 13 | H  | 2.154708 | 1.095597 | 3.876732 | 5.140393 | 2.521403 |
| 14 | Br | 3.991209 | 3.754557 | 5.690186 | 5.728005 | 3.704900 |
| 15 | H  | 2.800683 | 3.533482 | 4.231416 | 4.241029 | 2.505720 |
| 16 | C  | 4.866913 | 5.497686 | 4.631078 | 2.858412 | 4.996945 |
| 17 | C  | 6.004216 | 6.672411 | 5.277366 | 2.931603 | 6.203472 |
| 18 | H  | 4.999428 | 5.504949 | 5.298933 | 3.833541 | 4.954728 |
| 19 | H  | 6.933706 | 7.545645 | 6.341451 | 3.948540 | 7.050996 |
| 20 | H  | 6.207242 | 6.944619 | 5.005428 | 2.446456 | 6.532945 |
| 21 | O  | 2.412186 | 1.418741 | 4.602557 | 6.622455 | 2.621993 |
| 22 | H  | 2.885399 | 1.946399 | 5.310143 | 7.071697 | 2.784674 |
|    |    | 11       | 12       | 13       | 14       | 15       |
| 11 | H  | 0.000000 |          |          |          |          |
| 12 | H  | 2.490515 | 0.000000 |          |          |          |
| 13 | H  | 3.074092 | 1.792119 | 0.000000 |          |          |
| 14 | Br | 5.079946 | 4.534233 | 2.789573 | 0.000000 |          |
| 15 | H  | 3.725443 | 4.270194 | 3.107038 | 2.427385 | 0.000000 |
| 16 | C  | 5.602460 | 5.807903 | 4.997759 | 4.103359 | 2.765485 |
| 17 | C  | 6.631207 | 6.865535 | 6.219328 | 5.371717 | 4.056592 |
| 18 | H  | 5.868436 | 5.964162 | 4.850092 | 3.376620 | 2.497404 |
| 19 | H  | 7.617618 | 7.784811 | 6.997045 | 5.786614 | 4.744745 |
| 20 | H  | 6.684924 | 7.006376 | 6.629074 | 6.176290 | 4.659937 |
| 21 | O  | 2.737611 | 2.035671 | 2.088533 | 4.447174 | 4.516132 |
| 22 | H  | 3.414774 | 2.758309 | 2.152573 | 3.985919 | 4.442918 |
|    |    | 16       | 17       | 18       | 19       | 20       |
| 16 | C  | 0.000000 |          |          |          |          |
| 17 | C  | 1.326726 | 0.000000 |          |          |          |
| 18 | H  | 1.084924 | 2.132503 | 0.000000 |          |          |
| 19 | H  | 2.081441 | 1.081643 | 2.462471 | 0.000000 |          |
| 20 | H  | 2.123974 | 1.083640 | 3.106402 | 1.851103 | 0.000000 |
| 21 | O  | 6.777316 | 7.995236 | 6.682861 | 8.841378 | 8.303116 |

22 H 6.851836 8.125911 6.604164 8.892291 8.550455  
 21 22  
 21 O 0.000000  
 22 H 0.963836 0.000000

Stoichiometry C7H11BrN2O

Framework group C1[X(C7H11BrN2O)]

Deg. of freedom 60

Full point group C1 NOp 1

Largest Abelian subgroup C1 NOp 1

Largest concise Abelian subgroup C1 NOp 1

Standard orientation:

| Center<br>Number | Atomic<br>Number | Atomic<br>Type | Coordinates (Angstroms) |           |           |
|------------------|------------------|----------------|-------------------------|-----------|-----------|
|                  |                  |                | X                       | Y         | Z         |
| 1                | 6                | 0              | -0.929266               | -2.343531 | -0.370791 |
| 2                | 6                | 0              | -2.085553               | -1.660981 | -0.558408 |
| 3                | 7                | 0              | -1.954078               | -0.449744 | 0.115232  |
| 4                | 6                | 0              | -0.738900               | -0.410186 | 0.692891  |
| 5                | 7                | 0              | -0.105313               | -1.554093 | 0.421080  |
| 6                | 6                | 0              | 1.318121                | -1.785504 | 0.712569  |
| 7                | 6                | 0              | 2.200877                | -1.415854 | -0.494121 |
| 8                | 1                | 0              | -0.623265               | -3.313670 | -0.722726 |
| 9                | 1                | 0              | -2.968011               | -1.913751 | -1.117652 |
| 10               | 1                | 0              | 1.581608                | -1.153167 | 1.560263  |
| 11               | 1                | 0              | 1.447774                | -2.829178 | 1.003805  |
| 12               | 1                | 0              | 2.037611                | -2.124892 | -1.311090 |
| 13               | 1                | 0              | 1.936725                | -0.404055 | -0.820955 |
| 14               | 35               | 0              | 0.976256                | 2.109901  | -0.086622 |
| 15               | 1                | 0              | -0.293563               | 0.460449  | 1.162005  |
| 16               | 6                | 0              | -2.853603               | 0.653512  | 0.133983  |
| 17               | 6                | 0              | -4.162104               | 0.544124  | -0.055915 |
| 18               | 1                | 0              | -2.339733               | 1.596190  | 0.290046  |
| 19               | 1                | 0              | -4.771172               | 1.437927  | -0.066067 |
| 20               | 1                | 0              | -4.663665               | -0.404826 | -0.204935 |
| 21               | 8                | 0              | 3.565706                | -1.505507 | -0.117254 |
| 22               | 1                | 0              | 3.879373                | -0.616112 | 0.081664  |

Rotational constants (GHZ): 0.7702698 0.5556903 0.3370161

Standard basis: 6-311++G(d,p) (5D, 7F)

There are 358 symmetry adapted cartesian basis functions of A symmetry.

There are 345 symmetry adapted basis functions of A symmetry.

345 basis functions, 553 primitive gaussians, 358 cartesian basis functions

55 alpha electrons 55 beta electrons

nuclear repulsion energy 852.4503255199 Hartrees.  
 NAToms= 22 NActive= 22 NUniq= 22 SFac= 1.00D+00 NATFMM= 60 NAOKFM=F  
 Big=F  
 Integral buffers will be 131072 words long.  
 Raffenetti 2 integral format.  
 Two-electron integral symmetry is turned on.  
 One-electron integrals computed using PRISM.  
 NBasis= 345 RedAO= T EigKep= 6.20D-06 NBF= 345  
 NBsUse= 345 1.00D-06 EigRej= -1.00D+00 NBFU= 345  
 Lowest energy guess from the checkpoint file: ". "  
 B after Tr= 0.000000 0.000000 0.000000  
 Rot= 0.999687 0.000875 -0.000003 0.024995 Ang= 2.87 deg.  
 B after Tr= 0.000000 0.000000 0.000000  
 Rot= 0.998974 -0.001095 0.000038 -0.045274 Ang= -5.19 deg.  
 Keep R1 ints in memory in canonical form, NReq=1804729152.  
 Requested convergence on RMS density matrix=1.00D-08 within 128 cycles.  
 Requested convergence on MAX density matrix=1.00D-06.  
 Requested convergence on energy=1.00D-06.  
 No special actions if energy rises.  
 SCF Done: E(RB3LYP) = -3032.33861705 A.U. after 10 cycles  
 NFock= 10 Conv=0.53D-08 -V/T= 2.0017  
 Calling FoFJK, ICntrl= 2127 FMM=F ISym2X=0 l1Cent= 0 IOpClX= 0 NMat=1 NMatS=1  
 NMatT=0.

\*\*\*\*\* Axes restored to original set \*\*\*\*\*

| Center Number | Atomic Number | Forces (Hartrees/Bohr) |              |              |
|---------------|---------------|------------------------|--------------|--------------|
|               |               | X                      | Y            | Z            |
| 1             | 6             | 0.000692910            | -0.000761850 | 0.001129667  |
| 2             | 6             | -0.000965247           | 0.000326258  | 0.000561805  |
| 3             | 7             | 0.000326701            | -0.000023013 | 0.000060150  |
| 4             | 6             | 0.000149324            | 0.001131180  | -0.001893364 |
| 5             | 7             | -0.000293361           | 0.000476788  | -0.000757304 |
| 6             | 6             | 0.000794523            | -0.000186669 | 0.000751198  |
| 7             | 6             | -0.000527891           | 0.000244271  | 0.000245330  |
| 8             | 1             | -0.000045878           | 0.000281377  | -0.000038941 |
| 9             | 1             | 0.000062177            | 0.000029627  | -0.000026003 |
| 10            | 1             | -0.000004523           | -0.000033407 | -0.000166540 |
| 11            | 1             | 0.000165733            | 0.000162518  | -0.000025777 |
| 12            | 1             | -0.000475310           | 0.000232206  | -0.000390472 |
| 13            | 1             | 0.000264465            | -0.000840292 | -0.000832653 |
| 14            | 35            | -0.000529295           | -0.002354161 | 0.000249669  |
| 15            | 1             | 0.000061358            | 0.001014993  | 0.000602629  |
| 16            | 6             | -0.000441169           | 0.000397868  | -0.000028724 |

|    |   |             |              |              |
|----|---|-------------|--------------|--------------|
| 17 | 6 | 0.000265211 | 0.000016497  | -0.000041075 |
| 18 | 1 | 0.000178384 | -0.000282861 | -0.000069747 |
| 19 | 1 | 0.000086143 | -0.000227463 | -0.000068888 |
| 20 | 1 | 0.000050105 | 0.000186055  | 0.000166684  |
| 21 | 8 | 0.000049092 | 0.000683100  | 0.000706633  |
| 22 | 1 | 0.000136548 | -0.000473023 | -0.000134279 |

-----  
Cartesian Forces: Max 0.002354161 RMS 0.000583345

GradGradGradGradGradGradGradGradGradGradGradGradGradGradGradGradGrad

Berny optimization.

Using GEDIIS/GDIIS optimizer.

FormGI is forming the generalized inverse of G from B-inverse, IUseBI=4.

Internal Forces: Max 0.009760850 RMS 0.001670966

Search for a local minimum.

Step number 41 out of a maximum of 116

All quantities printed in internal units (Hartrees-Bohrs-Radians)

Mixed Optimization -- RFO/linear search

Update second derivatives using D2CorX and points 32 35 33 38 37  
40 39 41

ITU= 0 -1 0 -1 0 0 1 -1 0 1 1 1 1 1 1 0 -1 1 1 1

ITU= 1 1 0 -1 1 1 1 1 1 1 1 1 1 1 1 1 0 0 -1 0

ITU= 0

Use linear search instead of GDIIS.

|                 |         |         |         |         |         |
|-----------------|---------|---------|---------|---------|---------|
| Eigenvalues --- | 0.00084 | 0.00148 | 0.00266 | 0.00473 | 0.00639 |
| Eigenvalues --- | 0.01034 | 0.01293 | 0.01485 | 0.01732 | 0.02032 |
| Eigenvalues --- | 0.02097 | 0.02312 | 0.03032 | 0.03085 | 0.03423 |
| Eigenvalues --- | 0.03930 | 0.04927 | 0.05423 | 0.05721 | 0.06391 |
| Eigenvalues --- | 0.08164 | 0.09129 | 0.11041 | 0.14069 | 0.14233 |
| Eigenvalues --- | 0.15327 | 0.15864 | 0.15943 | 0.16025 | 0.16205 |
| Eigenvalues --- | 0.16877 | 0.17188 | 0.19751 | 0.22195 | 0.22883 |
| Eigenvalues --- | 0.23744 | 0.24750 | 0.25222 | 0.29008 | 0.32361 |
| Eigenvalues --- | 0.33521 | 0.33856 | 0.33881 | 0.34041 | 0.34229 |
| Eigenvalues --- | 0.34345 | 0.34769 | 0.36109 | 0.36280 | 0.36460 |
| Eigenvalues --- | 0.37091 | 0.43063 | 0.43947 | 0.46123 | 0.49302 |
| Eigenvalues --- | 0.53066 | 0.54665 | 0.57012 | 0.60619 | 2.29010 |

RFO step: Lambda=-2.52273901D-04 EMin= 8.38544768D-04

Quartic linear search produced a step of -0.04465.

Iteration 1 RMS(Cart)= 0.04377124 RMS(Int)= 0.00087354

Iteration 2 RMS(Cart)= 0.00115165 RMS(Int)= 0.00009483

Iteration 3 RMS(Cart)= 0.00000102 RMS(Int)= 0.00009482

Iteration 4 RMS(Cart)= 0.00000000 RMS(Int)= 0.00009482

|          |       |        |          |         |         |       |
|----------|-------|--------|----------|---------|---------|-------|
| Variable | Old X | -DE/DX | Delta X  | Delta X | Delta X | New X |
|          |       |        | (Linear) | (Quad)  | (Total) |       |

|     |         |          |          |          |          |         |
|-----|---------|----------|----------|----------|----------|---------|
| R1  | 2.56201 | 0.00081  | -0.00002 | 0.00005  | -0.00007 | 2.56194 |
| R2  | 2.62473 | -0.00087 | 0.00003  | -0.00032 | -0.00032 | 2.62441 |
| R3  | 2.03412 | -0.00017 | 0.00000  | 0.00069  | 0.00069  | 2.03481 |
| R4  | 2.63084 | -0.00042 | 0.00001  | -0.00005 | -0.00007 | 2.63078 |
| R5  | 2.03124 | -0.00003 | 0.00000  | 0.00004  | 0.00004  | 2.03128 |
| R6  | 2.54371 | -0.00055 | 0.00003  | 0.00172  | 0.00184  | 2.54555 |
| R7  | 2.69024 | -0.00008 | -0.00001 | -0.00174 | -0.00176 | 2.68848 |
| R8  | 2.52392 | 0.00050  | 0.00003  | -0.00129 | -0.00117 | 2.52275 |
| R9  | 2.04963 | 0.00110  | -0.00019 | 0.01198  | 0.01179  | 2.06142 |
| R10 | 2.78033 | -0.00002 | -0.00004 | -0.00204 | -0.00208 | 2.77824 |
| R11 | 2.91042 | -0.00223 | 0.00000  | -0.00022 | -0.00022 | 2.91020 |
| R12 | 2.05959 | -0.00017 | 0.00002  | -0.00009 | -0.00007 | 2.05952 |
| R13 | 2.06221 | -0.00008 | 0.00000  | 0.00025  | 0.00025  | 2.06247 |
| R14 | 2.06735 | 0.00023  | 0.00000  | -0.00028 | -0.00028 | 2.06707 |
| R15 | 2.07038 | -0.00268 | 0.00001  | 0.00127  | 0.00129  | 2.07167 |
| R16 | 2.68103 | 0.00043  | 0.00000  | 0.00064  | 0.00065  | 2.68168 |
| R17 | 5.27153 | -0.00094 | -0.00014 | 0.06496  | 0.06482  | 5.33635 |
| R18 | 2.50715 | -0.00037 | 0.00001  | 0.00006  | 0.00008  | 2.50723 |
| R19 | 2.05021 | -0.00024 | 0.00001  | -0.00033 | -0.00032 | 2.04989 |
| R20 | 2.04401 | -0.00022 | 0.00001  | 0.00010  | 0.00010  | 2.04411 |
| R21 | 2.04778 | -0.00025 | 0.00000  | 0.00027  | 0.00027  | 2.04806 |
| R22 | 1.82139 | -0.00045 | 0.00001  | 0.00002  | 0.00003  | 1.82141 |
| A1  | 1.87412 | -0.00020 | 0.00002  | -0.00058 | -0.00058 | 1.87354 |
| A2  | 2.27963 | 0.00007  | -0.00001 | 0.00180  | 0.00179  | 2.28142 |
| A3  | 2.12942 | 0.00013  | -0.00001 | -0.00120 | -0.00121 | 2.12822 |
| A4  | 1.86555 | 0.00008  | 0.00003  | -0.00071 | -0.00070 | 1.86486 |
| A5  | 2.28339 | -0.00008 | 0.00001  | -0.00043 | -0.00042 | 2.28297 |
| A6  | 2.13398 | -0.00001 | -0.00004 | 0.00123  | 0.00119  | 2.13517 |
| A7  | 1.89492 | -0.00004 | -0.00005 | 0.00143  | 0.00151  | 1.89642 |
| A8  | 2.24075 | -0.00004 | -0.00006 | 0.00380  | 0.00363  | 2.24437 |
| A9  | 2.14360 | 0.00008  | 0.00008  | -0.00397 | -0.00401 | 2.13959 |
| A10 | 1.89204 | 0.00012  | 0.00004  | -0.00246 | -0.00264 | 1.88940 |
| A11 | 2.18936 | -0.00024 | 0.00011  | -0.00010 | -0.00063 | 2.18873 |
| A12 | 2.19044 | 0.00010  | 0.00008  | -0.00589 | -0.00639 | 2.18405 |
| A13 | 1.89801 | 0.00004  | -0.00005 | 0.00235  | 0.00242  | 1.90044 |
| A14 | 2.21116 | 0.00140  | -0.00005 | 0.00045  | 0.00031  | 2.21147 |
| A15 | 2.15717 | -0.00153 | 0.00010  | -0.00050 | -0.00051 | 2.15666 |
| A16 | 1.94073 | -0.00524 | 0.00010  | 0.00394  | 0.00404  | 1.94477 |
| A17 | 1.87206 | 0.00106  | -0.00002 | 0.00085  | 0.00083  | 1.87289 |
| A18 | 1.89467 | 0.00233  | -0.00002 | -0.00142 | -0.00143 | 1.89324 |
| A19 | 1.90877 | 0.00007  | 0.00006  | -0.00087 | -0.00081 | 1.90796 |
| A20 | 1.95039 | 0.00247  | -0.00007 | -0.00294 | -0.00301 | 1.94738 |
| A21 | 1.89503 | -0.00065 | -0.00006 | 0.00052  | 0.00046  | 1.89549 |
| A22 | 1.92197 | 0.00247  | -0.00005 | -0.00190 | -0.00194 | 1.92003 |

|     |          |          |          |          |          |          |
|-----|----------|----------|----------|----------|----------|----------|
| A23 | 1.89356  | -0.00782 | 0.00006  | 0.00492  | 0.00498  | 1.89854  |
| A24 | 1.90509  | 0.00157  | 0.00000  | -0.00173 | -0.00173 | 1.90336  |
| A25 | 1.91749  | 0.00143  | -0.00001 | 0.00069  | 0.00068  | 1.91816  |
| A26 | 1.87652  | -0.00076 | -0.00010 | 0.00013  | 0.00003  | 1.87655  |
| A27 | 1.94931  | 0.00329  | 0.00010  | -0.00225 | -0.00215 | 1.94716  |
| A28 | 2.56212  | -0.00976 | 0.00028  | -0.03425 | -0.03396 | 2.52816  |
| A29 | 2.16205  | -0.00033 | -0.00001 | 0.00496  | 0.00495  | 2.16700  |
| A30 | 1.95625  | -0.00008 | 0.00001  | 0.00203  | 0.00204  | 1.95829  |
| A31 | 2.16442  | 0.00040  | -0.00001 | -0.00687 | -0.00688 | 2.15754  |
| A32 | 2.08125  | 0.00019  | -0.00001 | -0.00156 | -0.00157 | 2.07968  |
| A33 | 2.15122  | -0.00012 | -0.00001 | 0.00268  | 0.00268  | 2.15389  |
| A34 | 2.05072  | -0.00008 | 0.00001  | -0.00113 | -0.00111 | 2.04960  |
| A35 | 1.88555  | 0.00034  | 0.00001  | -0.00085 | -0.00084 | 1.88471  |
| D1  | 0.00776  | 0.00026  | -0.00002 | 0.00080  | 0.00080  | 0.00856  |
| D2  | 3.12451  | -0.00002 | 0.00004  | 0.00473  | 0.00479  | 3.12930  |
| D3  | -3.13957 | 0.00033  | -0.00002 | 0.00402  | 0.00400  | -3.13557 |
| D4  | -0.02282 | 0.00005  | 0.00004  | 0.00796  | 0.00799  | -0.01483 |
| D5  | -0.01465 | -0.00028 | -0.00022 | 0.00064  | 0.00038  | -0.01427 |
| D6  | -2.96424 | 0.00042  | -0.00025 | -0.01228 | -0.01258 | -2.97681 |
| D7  | 3.13208  | -0.00034 | -0.00022 | -0.00226 | -0.00249 | 3.12959  |
| D8  | 0.18249  | 0.00035  | -0.00025 | -0.01518 | -0.01545 | 0.16705  |
| D9  | 0.00167  | -0.00014 | 0.00025  | -0.00198 | -0.00174 | -0.00007 |
| D10 | 3.04908  | -0.00020 | -0.00017 | 0.01285  | 0.01270  | 3.06178  |
| D11 | -3.11769 | 0.00011  | 0.00020  | -0.00547 | -0.00528 | -3.12298 |
| D12 | -0.07028 | 0.00005  | -0.00022 | 0.00936  | 0.00915  | -0.06112 |
| D13 | -0.01085 | -0.00003 | -0.00039 | 0.00242  | 0.00201  | -0.00884 |
| D14 | 2.97631  | -0.00014 | 0.00146  | -0.05521 | -0.05384 | 2.92247  |
| D15 | -3.06462 | 0.00003  | 0.00001  | -0.01190 | -0.01185 | -3.07647 |
| D16 | -0.07745 | -0.00008 | 0.00186  | -0.06953 | -0.06770 | -0.14516 |
| D17 | 0.46991  | 0.00002  | 0.00066  | -0.04134 | -0.04066 | 0.42925  |
| D18 | -2.63989 | -0.00002 | 0.00065  | -0.04521 | -0.04456 | -2.68445 |
| D19 | -2.77795 | -0.00005 | 0.00018  | -0.02426 | -0.02408 | -2.80204 |
| D20 | 0.39543  | -0.00009 | 0.00017  | -0.02813 | -0.02798 | 0.36745  |
| D21 | 0.01574  | 0.00019  | 0.00038  | -0.00191 | -0.00150 | 0.01424  |
| D22 | 2.97257  | -0.00009 | 0.00039  | 0.01063  | 0.01106  | 2.98363  |
| D23 | -2.97131 | 0.00034  | -0.00148 | 0.05513  | 0.05353  | -2.91778 |
| D24 | -0.01447 | 0.00005  | -0.00147 | 0.06767  | 0.06609  | 0.05161  |
| D25 | 1.31898  | 0.00207  | -0.00061 | 0.03494  | 0.03433  | 1.35332  |
| D26 | -2.87799 | -0.00021 | -0.00049 | 0.03668  | 0.03621  | -2.84178 |
| D27 | -0.83346 | 0.00081  | -0.00057 | 0.03701  | 0.03645  | -0.79701 |
| D28 | -1.60393 | 0.00264  | -0.00063 | 0.01992  | 0.01928  | -1.58465 |
| D29 | 0.48228  | 0.00036  | -0.00050 | 0.02167  | 0.02116  | 0.50344  |
| D30 | 2.52681  | 0.00138  | -0.00059 | 0.02199  | 0.02140  | 2.54821  |
| D31 | -1.20301 | -0.00032 | -0.00029 | 0.02737  | 0.02709  | -1.17592 |



|     |          |          |          |          |          |          |
|-----|----------|----------|----------|----------|----------|----------|
| D32 | 0.89614  | -0.00193 | -0.00030 | 0.03013  | 0.02983  | 0.92598  |
| D33 | 3.02397  | -0.00178 | -0.00014 | 0.02936  | 0.02922  | 3.05318  |
| D34 | 3.01597  | 0.00152  | -0.00037 | 0.02448  | 0.02411  | 3.04008  |
| D35 | -1.16806 | -0.00010 | -0.00038 | 0.02723  | 0.02686  | -1.14121 |
| D36 | 0.95976  | 0.00005  | -0.00022 | 0.02647  | 0.02624  | 0.98600  |
| D37 | 0.91721  | 0.00070  | -0.00029 | 0.02628  | 0.02599  | 0.94320  |
| D38 | 3.01636  | -0.00091 | -0.00030 | 0.02904  | 0.02874  | 3.04510  |
| D39 | -1.13900 | -0.00077 | -0.00015 | 0.02827  | 0.02812  | -1.11088 |
| D40 | 0.51202  | -0.00129 | -0.00261 | 0.00765  | 0.00504  | 0.51705  |
| D41 | 2.61396  | -0.00223 | -0.00264 | 0.00878  | 0.00614  | 2.62010  |
| D42 | -1.58854 | -0.00015 | -0.00271 | 0.00796  | 0.00525  | -1.58329 |
| D43 | -1.73263 | 0.00342  | -0.00020 | -0.02177 | -0.02197 | -1.75460 |
| D44 | 2.46596  | 0.00003  | -0.00009 | -0.01861 | -0.01870 | 2.44726  |
| D45 | 0.36117  | -0.00322 | -0.00007 | -0.01819 | -0.01826 | 0.34291  |
| D46 | -3.09840 | -0.00005 | -0.00008 | -0.00194 | -0.00201 | -3.10041 |
| D47 | 0.04198  | 0.00001  | -0.00001 | -0.00389 | -0.00390 | 0.03808  |
| D48 | 0.00766  | -0.00002 | -0.00007 | 0.00259  | 0.00252  | 0.01017  |
| D49 | -3.13515 | 0.00004  | 0.00000  | 0.00063  | 0.00063  | -3.13452 |

| Item                 | Value    | Threshold | Converged? |
|----------------------|----------|-----------|------------|
| Maximum Force        | 0.009761 | 0.000450  | NO         |
| RMS Force            | 0.001671 | 0.000300  | NO         |
| Maximum Displacement | 0.309401 | 0.001800  | NO         |
| RMS Displacement     | 0.044266 | 0.001200  | NO         |

Predicted change in Energy=-1.257466D-04

GradGradGradGradGradGradGradGradGradGradGradGradGradGradGradGradGradGradGrad

Input orientation:

| Center Number | Atomic Number | Atomic Type | Coordinates (Angstroms) |           |           |
|---------------|---------------|-------------|-------------------------|-----------|-----------|
|               |               |             | X                       | Y         | Z         |
| 1             | 6             | 0           | -0.495734               | -2.139946 | -1.277141 |
| 2             | 6             | 0           | -1.784400               | -1.753278 | -1.443906 |
| 3             | 7             | 0           | -2.093619               | -0.910259 | -0.380058 |
| 4             | 6             | 0           | -1.007666               | -0.795662 | 0.408681  |
| 5             | 7             | 0           | -0.031685               | -1.542768 | -0.112350 |
| 6             | 6             | 0           | 1.357594                | -1.515306 | 0.367847  |
| 7             | 6             | 0           | 2.196121                | -0.473108 | -0.395265 |
| 8             | 1             | 0           | 0.127892                | -2.782290 | -1.875416 |
| 9             | 1             | 0           | -2.492280               | -1.984002 | -2.219211 |
| 10            | 1             | 0           | 1.330118                | -1.251863 | 1.425024  |
| 11            | 1             | 0           | 1.777337                | -2.517980 | 0.269676  |
| 12            | 1             | 0           | 2.317738                | -0.781213 | -1.437755 |
| 13            | 1             | 0           | 1.683069                | 0.494628  | -0.349544 |

|    |    |   |           |           |           |
|----|----|---|-----------|-----------|-----------|
| 14 | 35 | 0 | -0.039872 | 2.124497  | 1.183186  |
| 15 | 1  | 0 | -0.878799 | -0.059935 | 1.203706  |
| 16 | 6  | 0 | -3.289941 | -0.176002 | -0.148313 |
| 17 | 6  | 0 | -4.475550 | -0.508249 | -0.642534 |
| 18 | 1  | 0 | -3.118171 | 0.706500  | 0.458628  |
| 19 | 1  | 0 | -5.326184 | 0.130410  | -0.446048 |
| 20 | 1  | 0 | -4.644603 | -1.394275 | -1.243340 |
| 21 | 8  | 0 | 3.489885  | -0.405423 | 0.183862  |
| 22 | 1  | 0 | 3.519099  | 0.368645  | 0.757424  |

-----  
Distance matrix (angstroms):

|    |    | 1        | 2        | 3        | 4        | 5        |
|----|----|----------|----------|----------|----------|----------|
| 1  | C  | 0.000000 |          |          |          |          |
| 2  | C  | 1.355721 | 0.000000 |          |          |          |
| 3  | N  | 2.206836 | 1.392147 | 0.000000 |          |          |
| 4  | C  | 2.216115 | 2.225404 | 1.347047 | 0.000000 |          |
| 5  | N  | 1.388777 | 2.211191 | 2.173318 | 1.334983 | 0.000000 |
| 6  | C  | 2.555580 | 3.634722 | 3.582781 | 2.472653 | 1.470184 |
| 7  | C  | 3.286660 | 4.310803 | 4.311983 | 3.318828 | 2.487434 |
| 8  | H  | 1.076777 | 2.214029 | 3.267371 | 3.233153 | 2.161083 |
| 9  | H  | 2.213145 | 1.074908 | 2.166643 | 3.243770 | 3.269263 |
| 10 | H  | 3.379959 | 4.264082 | 3.885484 | 2.589654 | 2.074283 |
| 11 | H  | 2.775321 | 4.025805 | 4.241607 | 3.277491 | 2.090346 |
| 12 | H  | 3.128511 | 4.215742 | 4.538221 | 3.803662 | 2.802936 |
| 13 | H  | 3.542401 | 4.274816 | 4.029642 | 3.078930 | 2.673504 |
| 14 | Br | 4.944340 | 4.998213 | 3.983887 | 3.172352 | 3.889385 |
| 15 | H  | 3.260028 | 3.270684 | 2.169596 | 1.090856 | 2.156015 |
| 16 | C  | 3.597071 | 2.536339 | 1.422682 | 2.429609 | 3.533494 |
| 17 | C  | 4.347884 | 3.071577 | 2.429835 | 3.635090 | 4.593394 |
| 18 | H  | 4.241736 | 3.383651 | 2.089739 | 2.590988 | 3.861557 |
| 19 | H  | 5.401710 | 4.133792 | 3.396590 | 4.498641 | 5.562608 |
| 20 | H  | 4.215481 | 2.889615 | 2.736246 | 4.039160 | 4.751863 |
| 21 | O  | 4.585658 | 5.681938 | 5.634571 | 4.520044 | 3.712512 |
| 22 | H  | 5.152802 | 6.121724 | 5.867884 | 4.687092 | 4.125296 |
|    |    | 6        | 7        | 8        | 9        | 10       |
| 6  | C  | 0.000000 |          |          |          |          |
| 7  | C  | 1.540014 | 0.000000 |          |          |          |
| 8  | H  | 2.854758 | 3.435220 | 0.000000 |          |          |
| 9  | H  | 4.661982 | 5.252683 | 2.760573 | 0.000000 |          |
| 10 | H  | 1.089853 | 2.160989 | 3.831508 | 5.331716 | 0.000000 |
| 11 | H  | 1.091411 | 2.190668 | 2.718814 | 4.970848 | 1.771408 |
| 12 | H  | 2.172779 | 1.093849 | 2.998546 | 5.019327 | 3.064704 |
| 13 | H  | 2.158800 | 1.096278 | 3.935105 | 5.203154 | 2.514736 |
| 14 | Br | 3.983197 | 3.773423 | 5.784440 | 5.871148 | 3.651735 |

|    |    |          |          |          |          |          |
|----|----|----------|----------|----------|----------|----------|
| 15 | H  | 2.796108 | 3.490351 | 4.231505 | 4.245199 | 2.519719 |
| 16 | C  | 4.864128 | 5.499648 | 4.632192 | 2.862472 | 4.997781 |
| 17 | C  | 6.005049 | 6.676344 | 5.280430 | 2.932085 | 6.207539 |
| 18 | H  | 4.997714 | 5.510200 | 5.306255 | 3.847254 | 4.955440 |
| 19 | H  | 6.931356 | 7.546647 | 6.346169 | 3.955485 | 7.051095 |
| 20 | H  | 6.215862 | 6.954371 | 5.010271 | 2.435692 | 6.545054 |
| 21 | O  | 2.410882 | 1.419083 | 4.603598 | 6.637241 | 2.630882 |
| 22 | H  | 2.893638 | 1.946153 | 5.325459 | 7.108585 | 2.804171 |
|    |    | 11       | 12       | 13       | 14       | 15       |
| 11 | H  | 0.000000 |          |          |          |          |
| 12 | H  | 2.494737 | 0.000000 |          |          |          |
| 13 | H  | 3.077033 | 1.792981 | 0.000000 |          |          |
| 14 | Br | 5.068466 | 4.568458 | 2.823873 | 0.000000 |          |
| 15 | H  | 3.737574 | 4.208968 | 3.046850 | 2.340078 | 0.000000 |
| 16 | C  | 5.597936 | 5.785759 | 5.022059 | 4.198588 | 2.766774 |
| 17 | C  | 6.630969 | 6.845119 | 6.246615 | 5.471732 | 4.067703 |
| 18 | H  | 5.865065 | 5.946316 | 4.873392 | 3.465780 | 2.481401 |
| 19 | H  | 7.614870 | 7.761706 | 7.019373 | 5.880126 | 4.747331 |
| 20 | H  | 6.692776 | 6.991983 | 6.663802 | 6.282781 | 4.685059 |
| 21 | O  | 2.720860 | 2.035875 | 2.087869 | 4.456269 | 4.499427 |
| 22 | H  | 3.406499 | 2.753952 | 2.147616 | 3.991311 | 4.441211 |
|    |    | 16       | 17       | 18       | 19       | 20       |
| 16 | C  | 0.000000 |          |          |          |          |
| 17 | C  | 1.326767 | 0.000000 |          |          |          |
| 18 | H  | 1.084755 | 2.128533 | 0.000000 |          |          |
| 19 | H  | 2.080581 | 1.081698 | 2.454718 | 0.000000 |          |
| 20 | H  | 2.125648 | 1.083784 | 3.104826 | 1.850646 | 0.000000 |
| 21 | O  | 6.791835 | 8.008849 | 6.706585 | 8.854772 | 8.317730 |
| 22 | H  | 6.890575 | 8.163531 | 6.652577 | 8.929957 | 8.588188 |
|    |    | 21       | 22       |          |          |          |
| 21 | O  | 0.000000 |          |          |          |          |
| 22 | H  | 0.963851 | 0.000000 |          |          |          |

Stoichiometry C7H11BrN2O

Framework group C1[X(C7H11BrN2O)]

Deg. of freedom 60

Full point group C1 NOp 1

Largest Abelian subgroup C1 NOp 1

Largest concise Abelian subgroup C1 NOp 1

Standard orientation:

| Center<br>Number | Atomic<br>Number | Atomic<br>Type | Coordinates (Angstroms) |           |           |
|------------------|------------------|----------------|-------------------------|-----------|-----------|
|                  |                  |                | X                       | Y         | Z         |
| 1                | 6                | 0              | -1.081920               | -2.328830 | -0.295501 |

|    |    |   |           |           |           |
|----|----|---|-----------|-----------|-----------|
| 2  | 6  | 0 | -2.209667 | -1.603594 | -0.495998 |
| 3  | 7  | 0 | -2.002346 | -0.362344 | 0.099308  |
| 4  | 6  | 0 | -0.771383 | -0.346900 | 0.646140  |
| 5  | 7  | 0 | -0.201577 | -1.534134 | 0.427102  |
| 6  | 6  | 0 | 1.212034  | -1.822006 | 0.710428  |
| 7  | 6  | 0 | 2.100594  | -1.537871 | -0.514876 |
| 8  | 1  | 0 | -0.828375 | -3.330947 | -0.597040 |
| 9  | 1  | 0 | -3.119087 | -1.847955 | -1.014331 |
| 10 | 1  | 0 | 1.515855  | -1.175764 | 1.533741  |
| 11 | 1  | 0 | 1.295243  | -2.860929 | 1.034303  |
| 12 | 1  | 0 | 1.875131  | -2.250029 | -1.313940 |
| 13 | 1  | 0 | 1.908235  | -0.515557 | -0.860850 |
| 14 | 35 | 0 | 1.137915  | 2.083394  | -0.069447 |
| 15 | 1  | 0 | -0.252386 | 0.541084  | 1.009584  |
| 16 | 6  | 0 | -2.850158 | 0.780069  | 0.087900  |
| 17 | 6  | 0 | -4.164016 | 0.731005  | -0.090094 |
| 18 | 1  | 0 | -2.295287 | 1.703565  | 0.214255  |
| 19 | 1  | 0 | -4.726310 | 1.654503  | -0.122431 |
| 20 | 1  | 0 | -4.715878 | -0.194057 | -0.209671 |
| 21 | 8  | 0 | 3.460725  | -1.718703 | -0.152746 |
| 22 | 1  | 0 | 3.844583  | -0.848977 | 0.006124  |

-----

Rotational constants (GHZ):      0.7631041      0.5449850      0.3305272

Standard basis: 6-311++G(d,p) (5D, 7F)

There are    358 symmetry adapted cartesian basis functions of A    symmetry.

There are    345 symmetry adapted basis functions of A    symmetry.

     345 basis functions,    553 primitive gaussians,    358 cartesian basis functions

     55 alpha electrons      55 beta electrons

     nuclear repulsion energy      848.7233492080 Hartrees.

NAtoms=    22 NActive=    22 NUniq=    22 SFac= 1.00D+00 NAtFMM=    60 NAOKFM=F

Big=F

Integral buffers will be    131072 words long.

Raffenetti 2 integral format.

Two-electron integral symmetry is turned on.

One-electron integrals computed using PRISM.

NBasis=    345 RedAO= T EigKep=    6.03D-06    NBF=    345

NBsUse=    345 1.00D-06 EigRej= -1.00D+00    NBFU=    345

Initial guess from the checkpoint file:    "."

B after Tr=      0.000000      0.000000      0.000000

     Rot=    0.999616      0.002559      -0.000216      0.027580 Ang=    3.17 deg.

ExpMin= 3.50D-02 ExpMax= 4.40D+05 ExpMxC= 1.51D+04 IAcc=3 IRadAn=      5 AccDes=

0.00D+00

Harris functional with IExCor=    402 and IRadAn=      5 diagonalized for initial guess.

HarFok: IExCor=    402 AccDes= 0.00D+00 IRadAn=      5 IDoV= 1 UseB2=F ITyADJ=14

ICtDFT= 3500011 ScaDFX= 1.000000 1.000000 1.000000 1.000000  
 FoFCou: FMM=F IPFlag= 0 FMFlag= 100000 FMFlg1= 0  
 NFxFlg= 0 DoJE=T BraDBF=F KetDBF=T FulRan=T  
 wScrn= 0.000000 ICntrl= 500 IOpCl= 0 l1Cent= 20000004 NGrid=  
 0  
 NMat0= 1 NMatS0= 1 NMatT0= 0 NMatD0= 1 NMtDS0= 0  
 NMtDT0= 0

Petite list used in FoFCou.

Keep R1 ints in memory in canonical form, NReq=1804729152.

Requested convergence on RMS density matrix=1.00D-08 within 128 cycles.

Requested convergence on MAX density matrix=1.00D-06.

Requested convergence on energy=1.00D-06.

No special actions if energy rises.

SCF Done: E(RB3LYP) = -3032.33881572 A.U. after 13 cycles  
 NFock= 13 Conv=0.29D-08 -V/T= 2.0017

Calling FoFJK, ICntrl= 2127 FMM=F ISym2X=0 l1Cent= 0 IOpClX= 0 NMat=1 NMatS=1  
 NMatT=0.

\*\*\*\*\* Axes restored to original set \*\*\*\*\*

| Center<br>Number | Atomic<br>Number | Forces (Hartrees/Bohr) |              |              |
|------------------|------------------|------------------------|--------------|--------------|
|                  |                  | X                      | Y            | Z            |
| 1                | 6                | 0.001137804            | -0.000920507 | 0.001346800  |
| 2                | 6                | -0.001539474           | 0.000266695  | 0.000527902  |
| 3                | 7                | 0.001067700            | 0.000015392  | 0.000314020  |
| 4                | 6                | -0.000521409           | 0.000870385  | -0.003002335 |
| 5                | 7                | -0.000445980           | 0.000636863  | -0.001517282 |
| 6                | 6                | 0.001706373            | 0.000169040  | 0.001383644  |
| 7                | 6                | -0.000363023           | 0.000343441  | 0.000085611  |
| 8                | 1                | -0.000383751           | 0.000159823  | 0.000077645  |
| 9                | 1                | 0.000063622            | 0.000002481  | -0.000037629 |
| 10               | 1                | -0.000080368           | -0.000120400 | -0.000120725 |
| 11               | 1                | 0.000169809            | 0.000303979  | -0.000073090 |
| 12               | 1                | -0.000564839           | 0.000333815  | -0.000667739 |
| 13               | 1                | 0.000189062            | -0.001555858 | -0.000755531 |
| 14               | 35               | -0.000286152           | -0.001782234 | 0.000054158  |
| 15               | 1                | 0.000015285            | 0.000815809  | 0.001791235  |
| 16               | 6                | -0.001034212           | 0.000892309  | -0.000128993 |
| 17               | 6                | 0.000227388            | -0.000162310 | -0.000394407 |
| 18               | 1                | 0.000395808            | -0.000482516 | 0.000062793  |
| 19               | 1                | 0.000096715            | -0.000310478 | -0.000023702 |
| 20               | 1                | 0.000196092            | 0.000247296  | 0.000275034  |
| 21               | 8                | -0.000165708           | 0.000975046  | 0.000697285  |
| 22               | 1                | 0.000119258            | -0.000698071 | 0.000105306  |

-----  
Cartesian Forces: Max 0.003002335 RMS 0.000798957

GradGradGradGradGradGradGradGradGradGradGradGradGradGradGradGradGradGradGrad

Berny optimization.

Using GEDIIS/GDIIS optimizer.

FormGI is forming the generalized inverse of G from B-inverse, IUseBI=4.

Internal Forces: Max 0.007165412 RMS 0.001325344

Search for a local minimum.

Step number 42 out of a maximum of 116

All quantities printed in internal units (Hartrees-Bohrs-Radians)

Mixed Optimization -- RFO/linear search

Update second derivatives using D2CorX and points 32 33 38 37 40  
39 41 42

DE= -1.99D-04 DEPred=-1.26D-04 R= 1.58D+00

TightC=F SS= 1.41D+00 RLast= 1.99D-01 DXNew= 2.2009D-01 5.9746D-01

Trust test= 1.58D+00 RLast= 1.99D-01 DXMaxT set to 2.20D-01

ITU= 1 0 -1 0 -1 0 0 1 -1 0 1 1 1 1 1 0 -1 1 1

ITU= 1 1 1 0 -1 1 1 1 1 1 1 1 1 1 1 1 0 0 -1

ITU= 0 0

Use linear search instead of GDIIS.

|                 |         |         |         |         |         |
|-----------------|---------|---------|---------|---------|---------|
| Eigenvalues --- | 0.00123 | 0.00185 | 0.00242 | 0.00559 | 0.00659 |
| Eigenvalues --- | 0.01061 | 0.01252 | 0.01332 | 0.01717 | 0.02060 |
| Eigenvalues --- | 0.02228 | 0.02401 | 0.02935 | 0.03073 | 0.03347 |
| Eigenvalues --- | 0.03872 | 0.04899 | 0.05479 | 0.05627 | 0.06066 |
| Eigenvalues --- | 0.08111 | 0.09119 | 0.10959 | 0.13320 | 0.14165 |
| Eigenvalues --- | 0.15226 | 0.15767 | 0.15947 | 0.16024 | 0.16154 |
| Eigenvalues --- | 0.17006 | 0.17330 | 0.19571 | 0.22144 | 0.22840 |
| Eigenvalues --- | 0.23787 | 0.24782 | 0.25087 | 0.28885 | 0.32043 |
| Eigenvalues --- | 0.33466 | 0.33840 | 0.33883 | 0.33990 | 0.34224 |
| Eigenvalues --- | 0.34340 | 0.34737 | 0.35529 | 0.36152 | 0.36326 |
| Eigenvalues --- | 0.36508 | 0.42860 | 0.43934 | 0.45957 | 0.48895 |
| Eigenvalues --- | 0.52895 | 0.54474 | 0.56916 | 0.60580 | 1.20548 |

RFO step: Lambda=-8.74151949D-04 EMin= 1.23067958D-03

Quartic linear search produced a step of 0.14987.

Iteration 1 RMS(Cart)= 0.05455924 RMS(Int)= 0.00251558

Iteration 2 RMS(Cart)= 0.00260959 RMS(Int)= 0.00009962

Iteration 3 RMS(Cart)= 0.00001299 RMS(Int)= 0.00009931

Iteration 4 RMS(Cart)= 0.00000000 RMS(Int)= 0.00009931

| Variable | Old X   | -DE/DX   | Delta X<br>(Linear) | Delta X<br>(Quad) | Delta X<br>(Total) | New X   |
|----------|---------|----------|---------------------|-------------------|--------------------|---------|
| R1       | 2.56194 | 0.00106  | -0.00001            | 0.00437           | 0.00430            | 2.56624 |
| R2       | 2.62441 | -0.00084 | -0.00005            | -0.00602          | -0.00611           | 2.61830 |
| R3       | 2.03481 | -0.00036 | 0.00010             | -0.00240          | -0.00230           | 2.03251 |

|     |         |          |          |          |          |         |
|-----|---------|----------|----------|----------|----------|---------|
| R4  | 2.63078 | -0.00051 | -0.00001 | -0.00508 | -0.00508 | 2.62569 |
| R5  | 2.03128 | -0.00001 | 0.00001  | -0.00015 | -0.00014 | 2.03114 |
| R6  | 2.54555 | -0.00080 | 0.00028  | -0.00885 | -0.00851 | 2.53704 |
| R7  | 2.68848 | 0.00016  | -0.00026 | 0.00453  | 0.00427  | 2.69274 |
| R8  | 2.52275 | 0.00084  | -0.00018 | 0.00403  | 0.00389  | 2.52664 |
| R9  | 2.06142 | 0.00185  | 0.00177  | 0.00472  | 0.00648  | 2.06790 |
| R10 | 2.77824 | 0.00088  | -0.00031 | 0.01010  | 0.00979  | 2.78804 |
| R11 | 2.91020 | -0.00197 | -0.00003 | -0.01128 | -0.01132 | 2.89889 |
| R12 | 2.05952 | -0.00015 | -0.00001 | -0.00220 | -0.00221 | 2.05732 |
| R13 | 2.06247 | -0.00020 | 0.00004  | -0.00280 | -0.00276 | 2.05971 |
| R14 | 2.06707 | 0.00048  | -0.00004 | 0.00382  | 0.00378  | 2.07085 |
| R15 | 2.07167 | -0.00293 | 0.00019  | -0.01756 | -0.01737 | 2.05430 |
| R16 | 2.68168 | 0.00030  | 0.00010  | 0.00516  | 0.00525  | 2.68693 |
| R17 | 5.33635 | -0.00082 | 0.00971  | 0.01610  | 0.02582  | 5.36216 |
| R18 | 2.50723 | -0.00036 | 0.00001  | -0.00300 | -0.00299 | 2.50423 |
| R19 | 2.04989 | -0.00029 | -0.00005 | -0.00300 | -0.00305 | 2.04684 |
| R20 | 2.04411 | -0.00026 | 0.00002  | -0.00441 | -0.00440 | 2.03972 |
| R21 | 2.04806 | -0.00039 | 0.00004  | -0.00374 | -0.00370 | 2.04435 |
| R22 | 1.82141 | -0.00049 | 0.00000  | -0.00443 | -0.00443 | 1.81699 |
| A1  | 1.87354 | -0.00017 | -0.00009 | -0.00224 | -0.00242 | 1.87112 |
| A2  | 2.28142 | -0.00014 | 0.00027  | -0.00312 | -0.00284 | 2.27859 |
| A3  | 2.12822 | 0.00031  | -0.00018 | 0.00539  | 0.00522  | 2.13343 |
| A4  | 1.86486 | 0.00003  | -0.00010 | -0.00167 | -0.00180 | 1.86305 |
| A5  | 2.28297 | -0.00007 | -0.00006 | 0.00151  | 0.00145  | 2.28442 |
| A6  | 2.13517 | 0.00004  | 0.00018  | 0.00007  | 0.00026  | 2.13543 |
| A7  | 1.89642 | 0.00008  | 0.00023  | 0.00524  | 0.00534  | 1.90176 |
| A8  | 2.24437 | -0.00047 | 0.00054  | -0.00585 | -0.00557 | 2.23881 |
| A9  | 2.13959 | 0.00040  | -0.00060 | 0.00312  | 0.00227  | 2.14186 |
| A10 | 1.88940 | 0.00018  | -0.00040 | -0.00332 | -0.00395 | 1.88545 |
| A11 | 2.18873 | -0.00007 | -0.00009 | -0.00931 | -0.00979 | 2.17895 |
| A12 | 2.18405 | -0.00006 | -0.00096 | 0.00587  | 0.00446  | 2.18851 |
| A13 | 1.90044 | -0.00011 | 0.00036  | 0.00253  | 0.00268  | 1.90312 |
| A14 | 2.21147 | 0.00136  | 0.00005  | 0.00363  | 0.00343  | 2.21490 |
| A15 | 2.15666 | -0.00127 | -0.00008 | -0.00008 | -0.00041 | 2.15624 |
| A16 | 1.94477 | -0.00404 | 0.00061  | -0.02035 | -0.01977 | 1.92500 |
| A17 | 1.87289 | 0.00071  | 0.00012  | -0.00197 | -0.00184 | 1.87105 |
| A18 | 1.89324 | 0.00191  | -0.00021 | 0.01097  | 0.01068  | 1.90392 |
| A19 | 1.90796 | 0.00023  | -0.00012 | 0.00830  | 0.00814  | 1.91610 |
| A20 | 1.94738 | 0.00172  | -0.00045 | -0.00383 | -0.00427 | 1.94311 |
| A21 | 1.89549 | -0.00050 | 0.00007  | 0.00756  | 0.00761  | 1.90310 |
| A22 | 1.92003 | 0.00216  | -0.00029 | 0.01122  | 0.01086  | 1.93089 |
| A23 | 1.89854 | -0.00598 | 0.00075  | -0.01626 | -0.01561 | 1.88293 |
| A24 | 1.90336 | 0.00080  | -0.00026 | -0.01030 | -0.01067 | 1.89268 |
| A25 | 1.91816 | 0.00085  | 0.00010  | -0.01204 | -0.01192 | 1.90624 |

|     |          |          |          |          |          |          |
|-----|----------|----------|----------|----------|----------|----------|
| A26 | 1.87655  | -0.00031 | 0.00000  | 0.02764  | 0.02764  | 1.90419  |
| A27 | 1.94716  | 0.00263  | -0.00032 | 0.00041  | -0.00010 | 1.94706  |
| A28 | 2.52816  | -0.00717 | -0.00509 | -0.01616 | -0.02125 | 2.50691  |
| A29 | 2.16700  | -0.00082 | 0.00074  | -0.02237 | -0.02163 | 2.14537  |
| A30 | 1.95829  | -0.00010 | 0.00031  | -0.00671 | -0.00640 | 1.95188  |
| A31 | 2.15754  | 0.00092  | -0.00103 | 0.02915  | 0.02812  | 2.18566  |
| A32 | 2.07968  | 0.00030  | -0.00023 | 0.00874  | 0.00850  | 2.08819  |
| A33 | 2.15389  | -0.00031 | 0.00040  | -0.00972 | -0.00932 | 2.14458  |
| A34 | 2.04960  | 0.00000  | -0.00017 | 0.00097  | 0.00080  | 2.05040  |
| A35 | 1.88471  | 0.00052  | -0.00013 | 0.00981  | 0.00969  | 1.89440  |
| D1  | 0.00856  | 0.00011  | 0.00012  | -0.01080 | -0.01074 | -0.00218 |
| D2  | 3.12930  | 0.00000  | 0.00072  | -0.01612 | -0.01546 | 3.11384  |
| D3  | -3.13557 | 0.00013  | 0.00060  | 0.00111  | 0.00165  | -3.13392 |
| D4  | -0.01483 | 0.00001  | 0.00120  | -0.00422 | -0.00306 | -0.01789 |
| D5  | -0.01427 | -0.00006 | 0.00006  | 0.02919  | 0.02930  | 0.01503  |
| D6  | -2.97681 | 0.00027  | -0.00188 | -0.00766 | -0.00955 | -2.98636 |
| D7  | 3.12959  | -0.00007 | -0.00037 | 0.01857  | 0.01818  | -3.13542 |
| D8  | 0.16705  | 0.00026  | -0.00231 | -0.01828 | -0.02067 | 0.14637  |
| D9  | -0.00007 | -0.00012 | -0.00026 | -0.01098 | -0.01126 | -0.01133 |
| D10 | 3.06178  | 0.00001  | 0.00190  | 0.02512  | 0.02698  | 3.08876  |
| D11 | -3.12298 | -0.00001 | -0.00079 | -0.00623 | -0.00706 | -3.13004 |
| D12 | -0.06112 | 0.00011  | 0.00137  | 0.02986  | 0.03117  | -0.02995 |
| D13 | -0.00884 | 0.00008  | 0.00030  | 0.02933  | 0.02959  | 0.02075  |
| D14 | 2.92247  | 0.00034  | -0.00807 | -0.00308 | -0.01093 | 2.91155  |
| D15 | -3.07647 | 0.00001  | -0.00178 | -0.00365 | -0.00564 | -3.08211 |
| D16 | -0.14516 | 0.00027  | -0.01015 | -0.03606 | -0.04616 | -0.19132 |
| D17 | 0.42925  | -0.00013 | -0.00609 | -0.02203 | -0.02811 | 0.40114  |
| D18 | -2.68445 | -0.00026 | -0.00668 | -0.02558 | -0.03222 | -2.71666 |
| D19 | -2.80204 | -0.00001 | -0.00361 | 0.01858  | 0.01493  | -2.78711 |
| D20 | 0.36745  | -0.00014 | -0.00419 | 0.01502  | 0.01082  | 0.37827  |
| D21 | 0.01424  | -0.00001 | -0.00022 | -0.03613 | -0.03638 | -0.02214 |
| D22 | 2.98363  | 0.00000  | 0.00166  | -0.00023 | 0.00135  | 2.98498  |
| D23 | -2.91778 | -0.00026 | 0.00802  | -0.00155 | 0.00658  | -2.91120 |
| D24 | 0.05161  | -0.00026 | 0.00990  | 0.03435  | 0.04431  | 0.09592  |
| D25 | 1.35332  | 0.00159  | 0.00515  | 0.03448  | 0.03957  | 1.39288  |
| D26 | -2.84178 | -0.00003 | 0.00543  | 0.03155  | 0.03699  | -2.80479 |
| D27 | -0.79701 | 0.00076  | 0.00546  | 0.04512  | 0.05060  | -0.74641 |
| D28 | -1.58465 | 0.00180  | 0.00289  | -0.00775 | -0.00490 | -1.58955 |
| D29 | 0.50344  | 0.00018  | 0.00317  | -0.01068 | -0.00748 | 0.49596  |
| D30 | 2.54821  | 0.00097  | 0.00321  | 0.00288  | 0.00613  | 2.55434  |
| D31 | -1.17592 | -0.00018 | 0.00406  | 0.06544  | 0.06948  | -1.10643 |
| D32 | 0.92598  | -0.00155 | 0.00447  | 0.04739  | 0.05174  | 0.97772  |
| D33 | 3.05318  | -0.00153 | 0.00438  | 0.03151  | 0.03589  | 3.08908  |
| D34 | 3.04008  | 0.00126  | 0.00361  | 0.07502  | 0.07868  | 3.11876  |



|     |          |          |          |          |          |          |
|-----|----------|----------|----------|----------|----------|----------|
| D35 | -1.14121 | -0.00010 | 0.00402  | 0.05697  | 0.06094  | -1.08027 |
| D36 | 0.98600  | -0.00009 | 0.00393  | 0.04109  | 0.04509  | 1.03109  |
| D37 | 0.94320  | 0.00063  | 0.00390  | 0.06253  | 0.06648  | 1.00969  |
| D38 | 3.04510  | -0.00073 | 0.00431  | 0.04448  | 0.04874  | 3.09384  |
| D39 | -1.11088 | -0.00072 | 0.00421  | 0.02860  | 0.03289  | -1.07799 |
| D40 | 0.51705  | -0.00117 | 0.00075  | -0.07722 | -0.07653 | 0.44053  |
| D41 | 2.62010  | -0.00172 | 0.00092  | -0.08088 | -0.07985 | 2.54025  |
| D42 | -1.58329 | 0.00011  | 0.00079  | -0.05398 | -0.05324 | -1.63653 |
| D43 | -1.75460 | 0.00296  | -0.00329 | 0.16584  | 0.16256  | -1.59205 |
| D44 | 2.44726  | 0.00011  | -0.00280 | 0.14233  | 0.13955  | 2.58681  |
| D45 | 0.34291  | -0.00231 | -0.00274 | 0.13907  | 0.13629  | 0.47920  |
| D46 | -3.10041 | -0.00018 | -0.00030 | 0.00769  | 0.00737  | -3.09304 |
| D47 | 0.03808  | -0.00001 | -0.00058 | 0.00391  | 0.00331  | 0.04140  |
| D48 | 0.01017  | -0.00006 | 0.00038  | 0.01095  | 0.01135  | 0.02152  |
| D49 | -3.13452 | 0.00011  | 0.00009  | 0.00718  | 0.00729  | -3.12723 |

| Item                 | Value    | Threshold | Converged? |
|----------------------|----------|-----------|------------|
| Maximum Force        | 0.007165 | 0.000450  | NO         |
| RMS Force            | 0.001325 | 0.000300  | NO         |
| Maximum Displacement | 0.237371 | 0.001800  | NO         |
| RMS Displacement     | 0.054487 | 0.001200  | NO         |

Predicted change in Energy=-5.220866D-04

GradGradGradGradGradGradGradGradGradGradGradGradGradGradGradGradGradGradGrad

Input orientation:

| Center<br>Number | Atomic<br>Number | Atomic<br>Type | Coordinates (Angstroms) |           |           |
|------------------|------------------|----------------|-------------------------|-----------|-----------|
|                  |                  |                | X                       | Y         | Z         |
| 1                | 6                | 0              | -0.504440               | -2.157453 | -1.249795 |
| 2                | 6                | 0              | -1.791581               | -1.760916 | -1.423526 |
| 3                | 7                | 0              | -2.082731               | -0.881353 | -0.388061 |
| 4                | 6                | 0              | -1.002028               | -0.761531 | 0.399435  |
| 5                | 7                | 0              | -0.027215               | -1.516283 | -0.118030 |
| 6                | 6                | 0              | 1.366969                | -1.490236 | 0.363918  |
| 7                | 6                | 0              | 2.182940                | -0.457131 | -0.423558 |
| 8                | 1                | 0              | 0.106089                | -2.825257 | -1.831278 |
| 9                | 1                | 0              | -2.505856               | -2.005182 | -2.188648 |
| 10               | 1                | 0              | 1.338737                | -1.212931 | 1.416316  |
| 11               | 1                | 0              | 1.795050                | -2.488247 | 0.270553  |
| 12               | 1                | 0              | 2.239863                | -0.735468 | -1.481940 |
| 13               | 1                | 0              | 1.682162                | 0.503445  | -0.332581 |
| 14               | 35               | 0              | -0.062779               | 2.024188  | 1.308797  |
| 15               | 1                | 0              | -0.868345               | 0.009266  | 1.164592  |
| 16               | 6                | 0              | -3.284530               | -0.149515 | -0.163243 |

|    |   |   |           |           |           |
|----|---|---|-----------|-----------|-----------|
| 17 | 6 | 0 | -4.456611 | -0.519848 | -0.658411 |
| 18 | 1 | 0 | -3.109867 | 0.739212  | 0.430769  |
| 19 | 1 | 0 | -5.325656 | 0.098444  | -0.492528 |
| 20 | 1 | 0 | -4.590355 | -1.424001 | -1.237174 |
| 21 | 8 | 0 | 3.497064  | -0.414570 | 0.117700  |
| 22 | 1 | 0 | 3.523472  | 0.258488  | 0.803844  |

-----  
Distance matrix (angstroms):

|    |    | 1        | 2        | 3        | 4        | 5        |
|----|----|----------|----------|----------|----------|----------|
| 1  | C  | 0.000000 |          |          |          |          |
| 2  | C  | 1.357997 | 0.000000 |          |          |          |
| 3  | N  | 2.204999 | 1.389456 | 0.000000 |          |          |
| 4  | C  | 2.217240 | 2.223815 | 1.342545 | 0.000000 |          |
| 5  | N  | 1.385545 | 2.208428 | 2.168224 | 1.337042 | 0.000000 |
| 6  | C  | 2.559574 | 3.639322 | 3.582826 | 2.478795 | 1.475365 |
| 7  | C  | 3.285692 | 4.300768 | 4.286860 | 3.303634 | 2.469805 |
| 8  | H  | 1.075560 | 2.213647 | 3.263828 | 3.234652 | 2.160186 |
| 9  | H  | 2.215920 | 1.074833 | 2.164288 | 3.241349 | 3.266519 |
| 10 | H  | 3.376028 | 4.261910 | 3.882288 | 2.591716 | 2.076551 |
| 11 | H  | 2.776424 | 4.032720 | 4.248890 | 3.289651 | 2.101514 |
| 12 | H  | 3.099537 | 4.160228 | 4.461241 | 3.748347 | 2.758544 |
| 13 | H  | 3.564111 | 4.287701 | 4.011878 | 3.056287 | 2.654676 |
| 14 | Br | 4.922152 | 4.978088 | 3.924500 | 3.077232 | 3.817333 |
| 15 | H  | 3.264409 | 3.268680 | 2.163023 | 1.094287 | 2.163312 |
| 16 | C  | 3.597404 | 2.532554 | 1.424939 | 2.429194 | 3.532733 |
| 17 | C  | 4.318697 | 3.037768 | 2.416419 | 3.620993 | 4.572137 |
| 18 | H  | 4.243020 | 3.380374 | 2.086078 | 2.587701 | 3.858909 |
| 19 | H  | 5.376490 | 4.100447 | 3.389318 | 4.497656 | 5.551672 |
| 20 | H  | 4.151242 | 2.825133 | 2.702524 | 3.999181 | 4.699281 |
| 21 | O  | 4.573808 | 5.670784 | 5.622081 | 4.521237 | 3.699984 |
| 22 | H  | 5.126234 | 6.106468 | 5.843747 | 4.656623 | 4.075174 |
|    |    | 6        | 7        | 8        | 9        | 10       |
| 6  | C  | 0.000000 |          |          |          |          |
| 7  | C  | 1.534025 | 0.000000 |          |          |          |
| 8  | H  | 2.861989 | 3.450073 | 0.000000 |          |          |
| 9  | H  | 4.666855 | 5.243741 | 2.760887 | 0.000000 |          |
| 10 | H  | 1.088685 | 2.160798 | 3.829606 | 5.329570 | 0.000000 |
| 11 | H  | 1.089952 | 2.181211 | 2.717325 | 4.977832 | 1.774098 |
| 12 | H  | 2.176880 | 1.095849 | 3.007033 | 4.963211 | 3.072439 |
| 13 | H  | 2.135233 | 1.087088 | 3.976223 | 5.222805 | 2.474374 |
| 14 | Br | 3.910007 | 3.768454 | 5.779767 | 5.868268 | 3.529128 |
| 15 | H  | 2.808241 | 3.471323 | 4.237839 | 4.240715 | 2.535418 |
| 16 | C  | 4.869484 | 5.482301 | 4.630144 | 2.855189 | 5.000046 |
| 17 | C  | 5.991735 | 6.643999 | 5.244879 | 2.890205 | 6.194425 |

|    |    |          |          |          |          |          |
|----|----|----------|----------|----------|----------|----------|
| 18 | H  | 5.001697 | 5.493170 | 5.307040 | 3.841598 | 4.957040 |
| 19 | H  | 6.931712 | 7.529437 | 6.312221 | 3.905552 | 7.055318 |
| 20 | H  | 6.169084 | 6.890162 | 4.936908 | 2.363939 | 6.499207 |
| 21 | O  | 2.398955 | 1.421863 | 4.594414 | 6.624526 | 2.642377 |
| 22 | H  | 2.811063 | 1.953369 | 5.303947 | 7.101550 | 2.704304 |
|    |    | 11       | 12       | 13       | 14       | 15       |
| 11 | H  | 0.000000 |          |          |          |          |
| 12 | H  | 2.518198 | 0.000000 |          |          |          |
| 13 | H  | 3.053970 | 1.779595 | 0.000000 |          |          |
| 14 | Br | 4.989143 | 4.550392 | 2.837535 | 0.000000 |          |
| 15 | H  | 3.759062 | 4.149664 | 2.998471 | 2.174774 | 0.000000 |
| 16 | C  | 5.608919 | 5.709748 | 5.012291 | 4.155907 | 2.761577 |
| 17 | C  | 6.619730 | 6.750367 | 6.232000 | 5.444978 | 4.059428 |
| 18 | H  | 5.873701 | 5.869646 | 4.858172 | 3.421526 | 2.468955 |
| 19 | H  | 7.614309 | 7.675377 | 7.021333 | 5.886521 | 4.756219 |
| 20 | H  | 6.646747 | 6.869197 | 6.624033 | 6.234655 | 4.655759 |
| 21 | O  | 2.687072 | 2.059703 | 2.083116 | 4.476464 | 4.509148 |
| 22 | H  | 3.288829 | 2.803642 | 2.177587 | 4.029127 | 4.413650 |
|    |    | 16       | 17       | 18       | 19       | 20       |
| 16 | C  | 0.000000 |          |          |          |          |
| 17 | C  | 1.325184 | 0.000000 |          |          |          |
| 18 | H  | 1.083140 | 2.141323 | 0.000000 |          |          |
| 19 | H  | 2.082332 | 1.079371 | 2.484508 | 0.000000 |          |
| 20 | H  | 2.117268 | 1.081826 | 3.106987 | 1.847432 | 0.000000 |
| 21 | O  | 6.792584 | 7.992144 | 6.714221 | 8.858665 | 8.262020 |
| 22 | H  | 6.888440 | 8.150197 | 6.661191 | 8.945013 | 8.534091 |
|    |    | 21       | 22       |          |          |          |
| 21 | O  | 0.000000 |          |          |          |          |
| 22 | H  | 0.961508 | 0.000000 |          |          |          |

Stoichiometry C7H11BrN2O

Framework group C1[X(C7H11BrN2O)]

Deg. of freedom 60

Full point group C1 NOp 1

Largest Abelian subgroup C1 NOp 1

Largest concise Abelian subgroup C1 NOp 1

Standard orientation:

| Center<br>Number | Atomic<br>Number | Atomic<br>Type | Coordinates (Angstroms) |           |           |
|------------------|------------------|----------------|-------------------------|-----------|-----------|
|                  |                  |                | X                       | Y         | Z         |
| 1                | 6                | 0              | -1.050333               | -2.349904 | -0.194515 |
| 2                | 6                | 0              | -2.189419               | -1.646413 | -0.421980 |
| 3                | 7                | 0              | -1.975551               | -0.366642 | 0.075046  |
| 4                | 6                | 0              | -0.742605               | -0.303925 | 0.602622  |

|    |    |   |           |           |           |
|----|----|---|-----------|-----------|-----------|
| 5  | 7  | 0 | -0.158732 | -1.494678 | 0.432678  |
| 6  | 6  | 0 | 1.267090  | -1.750834 | 0.712175  |
| 7  | 6  | 0 | 2.107433  | -1.514140 | -0.549186 |
| 8  | 1  | 0 | -0.799139 | -3.368998 | -0.429414 |
| 9  | 1  | 0 | -3.107770 | -1.930691 | -0.902692 |
| 10 | 1  | 0 | 1.571799  | -1.056725 | 1.493585  |
| 11 | 1  | 0 | 1.380760  | -2.771010 | 1.078667  |
| 12 | 1  | 0 | 1.827754  | -2.221676 | -1.337891 |
| 13 | 1  | 0 | 1.915490  | -0.500845 | -0.892919 |
| 14 | 35 | 0 | 1.090361  | 2.080021  | -0.050366 |
| 15 | 1  | 0 | -0.227277 | 0.620901  | 0.879386  |
| 16 | 6  | 0 | -2.848990 | 0.757993  | 0.022572  |
| 17 | 6  | 0 | -4.161501 | 0.644480  | -0.120751 |
| 18 | 1  | 0 | -2.306327 | 1.692994  | 0.089511  |
| 19 | 1  | 0 | -4.768828 | 1.533319  | -0.199235 |
| 20 | 1  | 0 | -4.666310 | -0.311044 | -0.170638 |
| 21 | 8  | 0 | 3.477447  | -1.703116 | -0.218970 |
| 22 | 1  | 0 | 3.847572  | -0.856348 | 0.046530  |

-----

Rotational constants (GHZ):      0.7734310      0.5516678      0.3340663

Standard basis: 6-311++G(d,p) (5D, 7F)

There are    358 symmetry adapted cartesian basis functions of A    symmetry.

There are    345 symmetry adapted basis functions of A    symmetry.

345 basis functions,    553 primitive gaussians,    358 cartesian basis functions

55 alpha electrons      55 beta electrons

nuclear repulsion energy      853.6354310184 Hartrees.

NAtoms=    22 NActive=    22 NUniq=    22 SFac= 1.00D+00 NAtFMM=    60 NAOKFM=F

Big=F

Integral buffers will be    131072 words long.

Raffenetti 2 integral format.

Two-electron integral symmetry is turned on.

One-electron integrals computed using PRISM.

NBasis=    345 RedAO= T EigKep=    6.08D-06    NBF=    345

NBsUse=    345 1.00D-06 EigRej= -1.00D+00    NBFU=    345

Initial guess from the checkpoint file: ". "

B after Tr=    0.000000    0.000000    0.000000

Rot=    0.999966    0.003353    -0.001325    -0.007462 Ang=    0.95 deg.

ExpMin= 3.50D-02 ExpMax= 4.40D+05 ExpMxC= 1.51D+04 IAcc=3 IRadAn=      5 AccDes=

0.00D+00

Harris functional with IExCor=    402 and IRadAn=      5 diagonalized for initial guess.

HarFok: IExCor=    402 AccDes= 0.00D+00 IRadAn=      5 IDoV= 1 UseB2=F ITyADJ=14

ICtDFT= 3500011 ScaDFX= 1.000000 1.000000 1.000000 1.000000

FoFCou: FMM=F IPFlag=      0 FMFlag=    100000 FMFlg1=      0

NFxFlg=      0 DoJE=T BraDBF=F KetDBF=T FulRan=T

wScrn= 0.000000 ICntrl= 500 IOpCl= 0 l1Cent= 200000004 NGrid= 0  
 NMat0= 1 NMatS0= 1 NMatT0= 0 NMatD0= 1 NMtDS0= 0  
 NMtDT0= 0

Petite list used in FoFCou.

Keep R1 ints in memory in canonical form, NReq=1804729152.

Requested convergence on RMS density matrix=1.00D-08 within 128 cycles.

Requested convergence on MAX density matrix=1.00D-06.

Requested convergence on energy=1.00D-06.

No special actions if energy rises.

SCF Done: E(RB3LYP) = -3032.33814413 A.U. after 13 cycles

NFock= 13 Conv=0.37D-08 -V/T= 2.0016

Calling FoFJK, ICntrl= 2127 FMM=F ISym2X=0 l1Cent= 0 IOpClX= 0 NMat=1 NMatS=1  
 NMatT=0.

\*\*\*\*\* Axes restored to original set \*\*\*\*\*

| Center<br>Number | Atomic<br>Number | Forces (Hartrees/Bohr) |              |              |
|------------------|------------------|------------------------|--------------|--------------|
|                  |                  | X                      | Y            | Z            |
| 1                | 6                | -0.001226838           | 0.001160696  | -0.001121775 |
| 2                | 6                | 0.000454347            | -0.001192292 | -0.000918407 |
| 3                | 7                | -0.003346038           | -0.001475459 | 0.000072367  |
| 4                | 6                | 0.001854627            | -0.001259793 | -0.005555549 |
| 5                | 7                | 0.000295293            | -0.002951215 | 0.004369550  |
| 6                | 6                | -0.003050066           | -0.000442529 | -0.002772287 |
| 7                | 6                | 0.002233115            | -0.001235133 | 0.004522757  |
| 8                | 1                | 0.000400523            | -0.000202461 | -0.000390378 |
| 9                | 1                | 0.000319822            | -0.000306547 | -0.000109582 |
| 10               | 1                | 0.000169766            | 0.000042585  | 0.000455756  |
| 11               | 1                | -0.000645288           | -0.000947101 | -0.000026050 |
| 12               | 1                | 0.002935525            | -0.000473408 | 0.001972454  |
| 13               | 1                | -0.001356378           | 0.004656152  | -0.001050000 |
| 14               | 35               | 0.001646058            | 0.004518289  | 0.001445809  |
| 15               | 1                | 0.000956161            | 0.000330504  | 0.004228533  |
| 16               | 6                | 0.002576881            | -0.002341476 | -0.001352569 |
| 17               | 6                | -0.000852796           | 0.001557148  | 0.000098130  |
| 18               | 1                | -0.001216245           | 0.000712764  | 0.000409954  |
| 19               | 1                | -0.001161199           | 0.000563917  | 0.000609249  |
| 20               | 1                | -0.000442238           | -0.000597370 | -0.000400708 |
| 21               | 8                | 0.000171335            | -0.002138717 | -0.005106384 |
| 22               | 1                | -0.000716367           | 0.002021445  | 0.000619132  |

Cartesian Forces: Max 0.005555549 RMS 0.002019456

GradGradGradGradGradGradGradGradGradGradGradGradGradGradGradGradGradGradGradGrad

Berny optimization.

Using GEDIIS/GDIIS optimizer.

FormGI is forming the generalized inverse of G from B-inverse, IUseBI=4.

Internal Forces: Max 0.014663505 RMS 0.003413771

Search for a local minimum.

Step number 43 out of a maximum of 116

All quantities printed in internal units (Hartrees-Bohrs-Radians)

Mixed Optimization -- RFO/linear search

Update second derivatives using D2CorX and points 32 33 38 37 40  
39 41 43 42

DE= 6.72D-04 DEPred=-5.22D-04 R=-1.29D+00

Trust test=-1.29D+00 RLast= 3.64D-01 DXMaxT set to 1.10D-01

ITU= -1 1 0 -1 0 -1 0 0 1 -1 0 1 1 1 1 1 1 0 -1 1

ITU= 1 1 1 1 0 -1 1 1 1 1 1 1 1 1 1 1 1 1 0 0

ITU= -1 0 0

Use linear search instead of GDIIS.

Energy rises -- skip Quadratic/GDIIS search.

Quartic linear search produced a step of -0.70447.

Iteration 1 RMS(Cart)= 0.03833833 RMS(Int)= 0.00125668

Iteration 2 RMS(Cart)= 0.00128981 RMS(Int)= 0.00001913

Iteration 3 RMS(Cart)= 0.00000297 RMS(Int)= 0.00001901

Iteration 4 RMS(Cart)= 0.00000000 RMS(Int)= 0.00001901

| Variable | Old X   | -DE/DX   | Delta X<br>(Linear) | Delta X<br>(Quad) | Delta X<br>(Total) | New X   |
|----------|---------|----------|---------------------|-------------------|--------------------|---------|
| R1       | 2.56624 | -0.00063 | -0.00303            | 0.00000           | -0.00302           | 2.56322 |
| R2       | 2.61830 | 0.00196  | 0.00430             | 0.00000           | 0.00431            | 2.62261 |
| R3       | 2.03251 | 0.00056  | 0.00162             | 0.00000           | 0.00162            | 2.03413 |
| R4       | 2.62569 | 0.00063  | 0.00358             | 0.00000           | 0.00358            | 2.62927 |
| R5       | 2.03114 | -0.00006 | 0.00010             | 0.00000           | 0.00010            | 2.03124 |
| R6       | 2.53704 | 0.00403  | 0.00599             | 0.00000           | 0.00598            | 2.54302 |
| R7       | 2.69274 | 0.00076  | -0.00300            | 0.00000           | -0.00300           | 2.68974 |
| R8       | 2.52664 | -0.00162 | -0.00274            | 0.00000           | -0.00275           | 2.52390 |
| R9       | 2.06790 | 0.00331  | -0.00457            | 0.00000           | -0.00457           | 2.06333 |
| R10      | 2.78804 | 0.00144  | -0.00690            | 0.00000           | -0.00690           | 2.78114 |
| R11      | 2.89889 | 0.00633  | 0.00797             | 0.00000           | 0.00797            | 2.90686 |
| R12      | 2.05732 | 0.00045  | 0.00155             | 0.00000           | 0.00155            | 2.05887 |
| R13      | 2.05971 | 0.00061  | 0.00194             | 0.00000           | 0.00194            | 2.06165 |
| R14      | 2.07085 | -0.00163 | -0.00266            | 0.00000           | -0.00266           | 2.06819 |
| R15      | 2.05430 | 0.00801  | 0.01223             | 0.00000           | 0.01223            | 2.06653 |
| R16      | 2.68693 | -0.00222 | -0.00370            | 0.00000           | -0.00370           | 2.68323 |
| R17      | 5.36216 | 0.00225  | -0.01819            | 0.00000           | -0.01819           | 5.34398 |
| R18      | 2.50423 | 0.00164  | 0.00211             | 0.00000           | 0.00211            | 2.50634 |
| R19      | 2.04684 | 0.00061  | 0.00215             | 0.00000           | 0.00215            | 2.04899 |

|     |          |          |          |         |          |          |
|-----|----------|----------|----------|---------|----------|----------|
| R20 | 2.03972  | 0.00135  | 0.00310  | 0.00000 | 0.00310  | 2.04281  |
| R21 | 2.04435  | 0.00077  | 0.00261  | 0.00000 | 0.00261  | 2.04696  |
| R22 | 1.81699  | 0.00184  | 0.00312  | 0.00000 | 0.00312  | 1.82011  |
| A1  | 1.87112  | 0.00173  | 0.00170  | 0.00000 | 0.00172  | 1.87285  |
| A2  | 2.27859  | -0.00083 | 0.00200  | 0.00000 | 0.00200  | 2.28058  |
| A3  | 2.13343  | -0.00090 | -0.00368 | 0.00000 | -0.00368 | 2.12976  |
| A4  | 1.86305  | -0.00051 | 0.00127  | 0.00000 | 0.00128  | 1.86433  |
| A5  | 2.28442  | -0.00019 | -0.00102 | 0.00000 | -0.00103 | 2.28340  |
| A6  | 2.13543  | 0.00071  | -0.00018 | 0.00000 | -0.00018 | 2.13524  |
| A7  | 1.90176  | -0.00080 | -0.00376 | 0.00000 | -0.00373 | 1.89803  |
| A8  | 2.23881  | 0.00109  | 0.00392  | 0.00000 | 0.00397  | 2.24278  |
| A9  | 2.14186  | -0.00030 | -0.00160 | 0.00000 | -0.00155 | 2.14031  |
| A10 | 1.88545  | 0.00082  | 0.00278  | 0.00000 | 0.00282  | 1.88828  |
| A11 | 2.17895  | 0.00116  | 0.00689  | 0.00000 | 0.00695  | 2.18590  |
| A12 | 2.18851  | -0.00153 | -0.00314 | 0.00000 | -0.00307 | 2.18544  |
| A13 | 1.90312  | -0.00122 | -0.00189 | 0.00000 | -0.00184 | 1.90128  |
| A14 | 2.21490  | -0.00402 | -0.00242 | 0.00000 | -0.00237 | 2.21253  |
| A15 | 2.15624  | 0.00531  | 0.00029  | 0.00000 | 0.00034  | 2.15659  |
| A16 | 1.92500  | 0.01076  | 0.01393  | 0.00000 | 0.01393  | 1.93894  |
| A17 | 1.87105  | -0.00081 | 0.00130  | 0.00000 | 0.00129  | 1.87235  |
| A18 | 1.90392  | -0.00633 | -0.00752 | 0.00000 | -0.00751 | 1.89641  |
| A19 | 1.91610  | -0.00126 | -0.00574 | 0.00000 | -0.00573 | 1.91037  |
| A20 | 1.94311  | -0.00367 | 0.00301  | 0.00000 | 0.00301  | 1.94612  |
| A21 | 1.90310  | 0.00131  | -0.00536 | 0.00000 | -0.00536 | 1.89774  |
| A22 | 1.93089  | -0.00567 | -0.00765 | 0.00000 | -0.00764 | 1.92325  |
| A23 | 1.88293  | 0.01466  | 0.01100  | 0.00000 | 0.01102  | 1.89395  |
| A24 | 1.89268  | 0.00096  | 0.00752  | 0.00000 | 0.00754  | 1.90023  |
| A25 | 1.90624  | -0.00099 | 0.00840  | 0.00000 | 0.00840  | 1.91464  |
| A26 | 1.90419  | -0.00078 | -0.01947 | 0.00000 | -0.01947 | 1.88471  |
| A27 | 1.94706  | -0.00819 | 0.00007  | 0.00000 | 0.00011  | 1.94717  |
| A28 | 2.50691  | 0.01399  | 0.01497  | 0.00000 | 0.01497  | 2.52188  |
| A29 | 2.14537  | 0.00362  | 0.01524  | 0.00000 | 0.01524  | 2.16061  |
| A30 | 1.95188  | -0.00045 | 0.00451  | 0.00000 | 0.00451  | 1.95639  |
| A31 | 2.18566  | -0.00316 | -0.01981 | 0.00000 | -0.01981 | 2.16585  |
| A32 | 2.08819  | -0.00027 | -0.00599 | 0.00000 | -0.00599 | 2.08220  |
| A33 | 2.14458  | 0.00049  | 0.00656  | 0.00000 | 0.00656  | 2.15114  |
| A34 | 2.05040  | -0.00022 | -0.00056 | 0.00000 | -0.00056 | 2.04984  |
| A35 | 1.89440  | -0.00182 | -0.00683 | 0.00000 | -0.00683 | 1.88758  |
| D1  | -0.00218 | -0.00006 | 0.00757  | 0.00000 | 0.00758  | 0.00540  |
| D2  | 3.11384  | 0.00035  | 0.01089  | 0.00000 | 0.01090  | 3.12474  |
| D3  | -3.13392 | -0.00054 | -0.00116 | 0.00000 | -0.00115 | -3.13507 |
| D4  | -0.01789 | -0.00013 | 0.00216  | 0.00000 | 0.00216  | -0.01573 |
| D5  | 0.01503  | -0.00040 | -0.02064 | 0.00000 | -0.02065 | -0.00562 |
| D6  | -2.98636 | -0.00153 | 0.00673  | 0.00000 | 0.00673  | -2.97964 |

|     |          |          |          |         |          |          |
|-----|----------|----------|----------|---------|----------|----------|
| D7  | -3.13542 | 0.00003  | -0.01280 | 0.00000 | -0.01280 | 3.13497  |
| D8  | 0.14637  | -0.00110 | 0.01456  | 0.00000 | 0.01458  | 0.16095  |
| D9  | -0.01133 | 0.00052  | 0.00793  | 0.00000 | 0.00794  | -0.00339 |
| D10 | 3.08876  | 0.00031  | -0.01901 | 0.00000 | -0.01900 | 3.06976  |
| D11 | -3.13004 | 0.00017  | 0.00498  | 0.00000 | 0.00498  | -3.12505 |
| D12 | -0.02995 | -0.00004 | -0.02196 | 0.00000 | -0.02195 | -0.05190 |
| D13 | 0.02075  | -0.00075 | -0.02085 | 0.00000 | -0.02084 | -0.00009 |
| D14 | 2.91155  | 0.00082  | 0.00770  | 0.00000 | 0.00765  | 2.91920  |
| D15 | -3.08211 | -0.00060 | 0.00397  | 0.00000 | 0.00402  | -3.07809 |
| D16 | -0.19132 | 0.00098  | 0.03252  | 0.00000 | 0.03251  | -0.15881 |
| D17 | 0.40114  | 0.00007  | 0.01980  | 0.00000 | 0.01980  | 0.42094  |
| D18 | -2.71666 | -0.00012 | 0.02270  | 0.00000 | 0.02269  | -2.69398 |
| D19 | -2.78711 | -0.00017 | -0.01051 | 0.00000 | -0.01051 | -2.79762 |
| D20 | 0.37827  | -0.00037 | -0.00762 | 0.00000 | -0.00762 | 0.37065  |
| D21 | -0.02214 | 0.00074  | 0.02563  | 0.00000 | 0.02563  | 0.00350  |
| D22 | 2.98498  | 0.00093  | -0.00095 | 0.00000 | -0.00093 | 2.98405  |
| D23 | -2.91120 | -0.00134 | -0.00464 | 0.00000 | -0.00466 | -2.91586 |
| D24 | 0.09592  | -0.00114 | -0.03121 | 0.00000 | -0.03123 | 0.06469  |
| D25 | 1.39288  | -0.00294 | -0.02787 | 0.00000 | -0.02786 | 1.36502  |
| D26 | -2.80479 | 0.00114  | -0.02606 | 0.00000 | -0.02606 | -2.83085 |
| D27 | -0.74641 | -0.00115 | -0.03565 | 0.00000 | -0.03565 | -0.78207 |
| D28 | -1.58955 | -0.00359 | 0.00346  | 0.00000 | 0.00346  | -1.58609 |
| D29 | 0.49596  | 0.00049  | 0.00527  | 0.00000 | 0.00527  | 0.50122  |
| D30 | 2.55434  | -0.00180 | -0.00432 | 0.00000 | -0.00433 | 2.55001  |
| D31 | -1.10643 | 0.00155  | -0.04895 | 0.00000 | -0.04895 | -1.15538 |
| D32 | 0.97772  | 0.00604  | -0.03645 | 0.00000 | -0.03643 | 0.94129  |
| D33 | 3.08908  | 0.00530  | -0.02528 | 0.00000 | -0.02529 | 3.06379  |
| D34 | 3.11876  | -0.00318 | -0.05543 | 0.00000 | -0.05543 | 3.06333  |
| D35 | -1.08027 | 0.00131  | -0.04293 | 0.00000 | -0.04292 | -1.12319 |
| D36 | 1.03109  | 0.00058  | -0.03176 | 0.00000 | -0.03177 | 0.99931  |
| D37 | 1.00969  | -0.00159 | -0.04684 | 0.00000 | -0.04685 | 0.96284  |
| D38 | 3.09384  | 0.00290  | -0.03434 | 0.00000 | -0.03433 | 3.05951  |
| D39 | -1.07799 | 0.00216  | -0.02317 | 0.00000 | -0.02319 | -1.10117 |
| D40 | 0.44053  | 0.00532  | 0.05391  | 0.00000 | 0.05392  | 0.49445  |
| D41 | 2.54025  | 0.00659  | 0.05625  | 0.00000 | 0.05623  | 2.59648  |
| D42 | -1.63653 | -0.00029 | 0.03751  | 0.00000 | 0.03752  | -1.59901 |
| D43 | -1.59205 | -0.00729 | -0.11452 | 0.00000 | -0.11452 | -1.70656 |
| D44 | 2.58681  | -0.00052 | -0.09831 | 0.00000 | -0.09832 | 2.48849  |
| D45 | 0.47920  | 0.00647  | -0.09601 | 0.00000 | -0.09600 | 0.38320  |
| D46 | -3.09304 | -0.00054 | -0.00519 | 0.00000 | -0.00519 | -3.09823 |
| D47 | 0.04140  | -0.00009 | -0.00233 | 0.00000 | -0.00233 | 0.03907  |
| D48 | 0.02152  | -0.00027 | -0.00799 | 0.00000 | -0.00800 | 0.01352  |
| D49 | -3.12723 | 0.00018  | -0.00513 | 0.00000 | -0.00514 | -3.13237 |

Item Value Threshold Converged?



|                      |          |          |    |
|----------------------|----------|----------|----|
| Maximum Force        | 0.014664 | 0.000450 | NO |
| RMS Force            | 0.003414 | 0.000300 | NO |
| Maximum Displacement | 0.165398 | 0.001800 | NO |
| RMS Displacement     | 0.038374 | 0.001200 | NO |

Predicted change in Energy=-1.685115D-04

GradGradGradGradGradGradGradGradGradGradGradGradGradGradGradGradGradGradGrad

Input orientation:

| Center Number | Atomic Number | Atomic Type | Coordinates (Angstroms) |           |           |
|---------------|---------------|-------------|-------------------------|-----------|-----------|
|               |               |             | X                       | Y         | Z         |
| 1             | 6             | 0           | -0.498385               | -2.145455 | -1.269181 |
| 2             | 6             | 0           | -1.786600               | -1.755765 | -1.437890 |
| 3             | 7             | 0           | -2.090352               | -0.901689 | -0.382359 |
| 4             | 6             | 0           | -1.005886               | -0.785571 | 0.405923  |
| 5             | 7             | 0           | -0.030315               | -1.535040 | -0.114034 |
| 6             | 6             | 0           | 1.360452                | -1.508095 | 0.366575  |
| 7             | 6             | 0           | 2.192376                | -0.468647 | -0.403907 |
| 8             | 1             | 0           | 0.121290                | -2.795492 | -1.862585 |
| 9             | 1             | 0           | -2.496449               | -1.990552 | -2.210138 |
| 10            | 1             | 0           | 1.332845                | -1.240466 | 1.422340  |
| 11            | 1             | 0           | 1.782575                | -2.509444 | 0.269880  |
| 12            | 1             | 0           | 2.294834                | -0.768126 | -1.451578 |
| 13            | 1             | 0           | 1.682705                | 0.497069  | -0.344701 |
| 14            | 35            | 0           | -0.046775               | 2.095101  | 1.221272  |
| 15            | 1             | 0           | -0.875501               | -0.039298 | 1.192215  |
| 16            | 6             | 0           | -3.288229               | -0.168014 | -0.152718 |
| 17            | 6             | 0           | -4.469973               | -0.511517 | -0.647243 |
| 18            | 1             | 0           | -3.115508               | 0.716411  | 0.450289  |
| 19            | 1             | 0           | -5.326086               | 0.121387  | -0.459933 |
| 20            | 1             | 0           | -4.628711               | -1.403155 | -1.241481 |
| 21            | 8             | 0           | 3.492360                | -0.408357 | 0.164013  |
| 22            | 1             | 0           | 3.519682                | 0.337836  | 0.772392  |

Distance matrix (angstroms):

|   |   | 1        | 2        | 3        | 4        | 5        |
|---|---|----------|----------|----------|----------|----------|
| 1 | C | 0.000000 |          |          |          |          |
| 2 | C | 1.356399 | 0.000000 |          |          |          |
| 3 | N | 2.206301 | 1.391351 | 0.000000 |          |          |
| 4 | C | 2.216487 | 2.224957 | 1.345711 | 0.000000 |          |
| 5 | N | 1.387826 | 2.210396 | 2.171839 | 1.335589 | 0.000000 |
| 6 | C | 2.556795 | 3.636120 | 3.582831 | 2.474499 | 1.471715 |
| 7 | C | 3.286423 | 4.307905 | 4.304620 | 3.314385 | 2.482253 |

|    |    |          |          |          |          |          |
|----|----|----------|----------|----------|----------|----------|
| 8  | H  | 1.076417 | 2.213921 | 3.266332 | 3.233642 | 2.160823 |
| 9  | H  | 2.213969 | 1.074886 | 2.165945 | 3.243075 | 3.268480 |
| 10 | H  | 3.378860 | 4.263495 | 3.884583 | 2.590309 | 2.074952 |
| 11 | H  | 2.775603 | 4.027843 | 4.243802 | 3.281122 | 2.093663 |
| 12 | H  | 3.119675 | 4.199252 | 4.515631 | 3.787527 | 2.789892 |
| 13 | H  | 3.548908 | 4.278598 | 4.024165 | 3.071990 | 2.667792 |
| 14 | Br | 4.938484 | 4.992725 | 3.965929 | 3.143718 | 3.867976 |
| 15 | H  | 3.261378 | 3.270140 | 2.167687 | 1.091870 | 2.158210 |
| 16 | C  | 3.597220 | 2.535253 | 1.423349 | 2.429515 | 3.533307 |
| 17 | C  | 4.339363 | 3.061661 | 2.425900 | 3.631000 | 4.587207 |
| 18 | H  | 4.242192 | 3.382732 | 2.088659 | 2.590062 | 3.860817 |
| 19 | H  | 5.394456 | 4.124083 | 3.394507 | 4.498489 | 5.559549 |
| 20 | H  | 4.196590 | 2.870628 | 2.726320 | 4.027432 | 4.736430 |
| 21 | O  | 4.582314 | 5.678822 | 5.631037 | 4.520513 | 3.708904 |
| 22 | H  | 5.145835 | 6.117609 | 5.860235 | 4.677298 | 4.110462 |
|    |    | 6        | 7        | 8        | 9        | 10       |
| 6  | C  | 0.000000 |          |          |          |          |
| 7  | C  | 1.538244 | 0.000000 |          |          |          |
| 8  | H  | 2.856933 | 3.439672 | 0.000000 |          |          |
| 9  | H  | 4.663465 | 5.250119 | 2.760667 | 0.000000 |          |
| 10 | H  | 1.089508 | 2.160944 | 3.831019 | 5.331138 | 0.000000 |
| 11 | H  | 1.090980 | 2.187871 | 2.718289 | 4.972905 | 1.772210 |
| 12 | H  | 2.174007 | 1.094440 | 3.000572 | 5.002613 | 3.067235 |
| 13 | H  | 2.151847 | 1.093562 | 3.947524 | 5.208978 | 2.502771 |
| 14 | Br | 3.961543 | 3.771977 | 5.784144 | 5.870949 | 3.615216 |
| 15 | H  | 2.799738 | 3.484798 | 4.233439 | 4.243922 | 2.524392 |
| 16 | C  | 4.865770 | 5.494589 | 4.631642 | 2.860339 | 4.998528 |
| 17 | C  | 6.001237 | 6.666929 | 5.270038 | 2.919757 | 6.203808 |
| 18 | H  | 4.998966 | 5.505239 | 5.306573 | 3.845616 | 4.956016 |
| 19 | H  | 6.931675 | 7.541787 | 6.336365 | 3.940857 | 7.052585 |
| 20 | H  | 6.202171 | 6.935565 | 4.988676 | 2.414513 | 6.531658 |
| 21 | O  | 2.407382 | 1.419904 | 4.601047 | 6.633685 | 2.634255 |
| 22 | H  | 2.869569 | 1.948291 | 5.320707 | 7.107089 | 2.774118 |
|    |    | 11       | 12       | 13       | 14       | 15       |
| 11 | H  | 0.000000 |          |          |          |          |
| 12 | H  | 2.501603 | 0.000000 |          |          |          |
| 13 | H  | 3.070310 | 1.789021 | 0.000000 |          |          |
| 14 | Br | 5.045147 | 4.563478 | 2.827911 | 0.000000 |          |
| 15 | H  | 3.744021 | 4.191880 | 3.032197 | 2.289823 | 0.000000 |
| 16 | C  | 5.601243 | 5.763485 | 5.018901 | 4.185279 | 2.765260 |
| 17 | C  | 6.627758 | 6.817287 | 6.242133 | 5.463560 | 4.065320 |
| 18 | H  | 5.867700 | 5.923913 | 4.868569 | 3.451423 | 2.477737 |
| 19 | H  | 7.614917 | 7.736473 | 7.019798 | 5.881592 | 4.750065 |
| 20 | H  | 6.679271 | 6.955780 | 6.651995 | 6.268739 | 4.676490 |

|    |   |          |          |          |          |          |
|----|---|----------|----------|----------|----------|----------|
| 21 | O | 2.710931 | 2.042949 | 2.086490 | 4.462127 | 4.502401 |
| 22 | H | 3.372991 | 2.769377 | 2.155861 | 4.001136 | 4.431266 |
|    |   | 16       | 17       | 18       | 19       | 20       |
| 16 | C | 0.000000 |          |          |          |          |
| 17 | C | 1.326299 | 0.000000 |          |          |          |
| 18 | H | 1.084278 | 2.132360 | 0.000000 |          |          |
| 19 | H | 2.081105 | 1.081010 | 2.463577 | 0.000000 |          |
| 20 | H | 2.123175 | 1.083206 | 3.105548 | 1.849697 | 0.000000 |
| 21 | O | 6.792236 | 8.004219 | 6.709023 | 8.856350 | 8.301616 |
| 22 | H | 6.889076 | 8.159127 | 6.653782 | 8.933817 | 8.572225 |
|    |   | 21       | 22       |          |          |          |
| 21 | O | 0.000000 |          |          |          |          |
| 22 | H | 0.963159 | 0.000000 |          |          |          |

Stoichiometry C7H11BrN2O

Framework group C1[X(C7H11BrN2O)]

Deg. of freedom 60

Full point group C1 NOp 1

Largest Abelian subgroup C1 NOp 1

Largest concise Abelian subgroup C1 NOp 1

Standard orientation:

| Center<br>Number | Atomic<br>Number | Atomic<br>Type | Coordinates (Angstroms) |           |           |
|------------------|------------------|----------------|-------------------------|-----------|-----------|
|                  |                  |                | X                       | Y         | Z         |
| 1                | 6                | 0              | -1.072802               | -2.336072 | -0.265389 |
| 2                | 6                | 0              | -2.203911               | -1.617084 | -0.473879 |
| 3                | 7                | 0              | -1.994246               | -0.363581 | 0.092361  |
| 4                | 6                | 0              | -0.762499               | -0.333953 | 0.633524  |
| 5                | 7                | 0              | -0.188615               | -1.522520 | 0.429165  |
| 6                | 6                | 0              | 1.228693                | -1.801006 | 0.711354  |
| 7                | 6                | 0              | 2.102824                | -1.530793 | -0.525204 |
| 8                | 1                | 0              | -0.820194               | -3.343754 | -0.547241 |
| 9                | 1                | 0              | -3.116217               | -1.873608 | -0.981098 |
| 10               | 1                | 0              | 1.533069                | -1.140206 | 1.522356  |
| 11               | 1                | 0              | 1.320934                | -2.834577 | 1.048192  |
| 12               | 1                | 0              | 1.861209                | -2.241822 | -1.321356 |
| 13               | 1                | 0              | 1.910226                | -0.511224 | -0.870550 |
| 14               | 35               | 0              | 1.123568                | 2.082522  | -0.063873 |
| 15               | 1                | 0              | -0.244227               | 0.565727  | 0.971386  |
| 16               | 6                | 0              | -2.849633               | 0.773814  | 0.068488  |
| 17               | 6                | 0              | -4.163461               | 0.705374  | -0.099559 |
| 18               | 1                | 0              | -2.298250               | 1.701103  | 0.176974  |
| 19               | 1                | 0              | -4.739164               | 1.619144  | -0.146186 |
| 20               | 1                | 0              | -4.701709               | -0.229440 | -0.198284 |

|    |   |   |          |           |           |
|----|---|---|----------|-----------|-----------|
| 21 | 8 | 0 | 3.466106 | -1.713688 | -0.172869 |
| 22 | 1 | 0 | 3.845366 | -0.849076 | 0.017611  |

-----  
 Rotational constants (GHZ):      0.7661359      0.5470077      0.3315570

Standard basis: 6-311++G(d,p) (5D, 7F)

There are 358 symmetry adapted cartesian basis functions of A symmetry.

There are 345 symmetry adapted basis functions of A symmetry.

345 basis functions, 553 primitive gaussians, 358 cartesian basis functions

55 alpha electrons      55 beta electrons

nuclear repulsion energy      850.1627746966 Hartrees.

NAtoms= 22 NActive= 22 NUniq= 22 SFac= 1.00D+00 NAtFMM= 60 NAOKFM=F

Big=F

Integral buffers will be 131072 words long.

Raffenetti 2 integral format.

Two-electron integral symmetry is turned on.

One-electron integrals computed using PRISM.

NBasis= 345 RedAO= T EigKep= 6.05D-06 NBF= 345

NBsUse= 345 1.00D-06 EigRej= -1.00D+00 NBFU= 345

Lowest energy guess from the checkpoint file: ". "

B after Tr= 0.000000 0.000000 0.000000

Rot= 0.999997 0.001025 -0.000409 -0.002244 Ang= 0.29 deg.

B after Tr= 0.000000 0.000000 0.000000

Rot= 0.999983 -0.002330 0.000918 0.005218 Ang= -0.66 deg.

Keep R1 ints in memory in canonical form, NReq=1804729152.

Requested convergence on RMS density matrix=1.00D-08 within 128 cycles.

Requested convergence on MAX density matrix=1.00D-06.

Requested convergence on energy=1.00D-06.

No special actions if energy rises.

SCF Done: E(RB3LYP) = -3032.33895077 A.U. after 9 cycles

NFock= 9 Conv=0.29D-08 -V/T= 2.0016

Calling FoFJK, ICntrl= 2127 FMM=F ISym2X=0 I1Cent= 0 IOpClX= 0 NMat=1 NMatS=1

NMatT=0.

\*\*\*\*\* Axes restored to original set \*\*\*\*\*

-----

| Center<br>Number | Atomic<br>Number | Forces (Hartrees/Bohr) |              |              |
|------------------|------------------|------------------------|--------------|--------------|
|                  |                  | X                      | Y            | Z            |
| 1                | 6                | 0.000437587            | -0.000268199 | 0.000647813  |
| 2                | 6                | -0.000939602           | -0.000138899 | 0.000108728  |
| 3                | 7                | -0.000243330           | -0.000421729 | 0.000251803  |
| 4                | 6                | 0.000247865            | 0.000390985  | -0.003601008 |
| 5                | 7                | -0.000232490           | -0.000463807 | 0.000203889  |
| 6                | 6                | 0.000316218            | 0.000012575  | 0.000158939  |
| 7                | 6                | 0.000388703            | -0.000075093 | 0.001415577  |

|    |    |              |              |              |
|----|----|--------------|--------------|--------------|
| 8  | 1  | -0.000151425 | 0.000057605  | -0.000062022 |
| 9  | 1  | 0.000133306  | -0.000087416 | -0.000054951 |
| 10 | 1  | -0.000007785 | -0.000075762 | 0.000043398  |
| 11 | 1  | -0.000074767 | -0.000059099 | -0.000056421 |
| 12 | 1  | 0.000461916  | 0.000121837  | 0.000167863  |
| 13 | 1  | -0.000259102 | 0.000240150  | -0.000891150 |
| 14 | 35 | 0.000222627  | -0.000068998 | 0.000346545  |
| 15 | 1  | 0.000291154  | 0.000618138  | 0.002435435  |
| 16 | 6  | 0.000026731  | -0.000067546 | -0.000498248 |
| 17 | 6  | -0.000068475 | 0.000342221  | -0.000246857 |
| 18 | 1  | -0.000076801 | -0.000125472 | 0.000164612  |
| 19 | 1  | -0.000264528 | -0.000049044 | 0.000173618  |
| 20 | 1  | 0.000006317  | 0.000000256  | 0.000069668  |
| 21 | 8  | -0.000107435 | -0.000010433 | -0.000941903 |
| 22 | 1  | -0.000106685 | 0.000127729  | 0.000164671  |

-----  
Cartesian Forces: Max 0.003601008 RMS 0.000640174

GradGradGradGradGradGradGradGradGradGradGradGradGradGradGradGradGradGradGrad

Berny optimization.

Using GEDIIS/GDIIS optimizer.

FormGI is forming the generalized inverse of G from B-inverse, IUseBI=4.

Internal Forces: Max 0.002208657 RMS 0.000381984

Search for a local minimum.

Step number 44 out of a maximum of 116

All quantities printed in internal units (Hartrees-Bohrs-Radians)

Mixed Optimization -- En-DIIS/RFO-DIIS

Update second derivatives using D2CorX and points 32 33 38 37 40  
39 41 43 42 44

ITU= 0 -1 1 0 -1 0 -1 0 0 1 -1 0 1 1 1 1 1 1 0 -1

ITU= 1 1 1 1 1 0 -1 1 1 1 1 1 1 1 1 1 1 1 0

ITU= 0 -1 0 0

Use linear search instead of GDIIS.

|                 |         |         |         |         |         |
|-----------------|---------|---------|---------|---------|---------|
| Eigenvalues --- | 0.00122 | 0.00179 | 0.00208 | 0.00493 | 0.00761 |
| Eigenvalues --- | 0.01102 | 0.01386 | 0.01693 | 0.01800 | 0.02096 |
| Eigenvalues --- | 0.02180 | 0.02375 | 0.03064 | 0.03167 | 0.03804 |
| Eigenvalues --- | 0.04583 | 0.04957 | 0.05429 | 0.06246 | 0.06624 |
| Eigenvalues --- | 0.08431 | 0.09285 | 0.12632 | 0.13824 | 0.14639 |
| Eigenvalues --- | 0.15330 | 0.15892 | 0.15948 | 0.16079 | 0.16436 |
| Eigenvalues --- | 0.16933 | 0.17273 | 0.21082 | 0.22533 | 0.22906 |
| Eigenvalues --- | 0.23941 | 0.24883 | 0.25827 | 0.29388 | 0.32843 |
| Eigenvalues --- | 0.33542 | 0.33863 | 0.33885 | 0.34052 | 0.34232 |
| Eigenvalues --- | 0.34669 | 0.34761 | 0.36132 | 0.36298 | 0.36475 |
| Eigenvalues --- | 0.39126 | 0.43132 | 0.44560 | 0.46830 | 0.49202 |

Eigenvalues --- 0.53704 0.54823 0.58648 0.61302 1.43475

RFO step: Lambda=-1.97064072D-04 EMin= 1.22136016D-03

Quartic linear search produced a step of -0.02955.

Iteration 1 RMS(Cart)= 0.04201713 RMS(Int)= 0.00096850

Iteration 2 RMS(Cart)= 0.00118739 RMS(Int)= 0.00002166

Iteration 3 RMS(Cart)= 0.00000119 RMS(Int)= 0.00002164

Iteration 4 RMS(Cart)= 0.00000000 RMS(Int)= 0.00002164

| Variable | Old X   | -DE/DX   | Delta X<br>(Linear) | Delta X<br>(Quad) | Delta X<br>(Total) | New X   |
|----------|---------|----------|---------------------|-------------------|--------------------|---------|
| R1       | 2.56322 | 0.00058  | -0.00004            | 0.00123           | 0.00117            | 2.56440 |
| R2       | 2.62261 | -0.00007 | 0.00005             | -0.00086          | -0.00080           | 2.62181 |
| R3       | 2.03413 | -0.00009 | 0.00002             | 0.00013           | 0.00015            | 2.03428 |
| R4       | 2.62927 | -0.00016 | 0.00004             | -0.00062          | -0.00059           | 2.62868 |
| R5       | 2.03124 | -0.00003 | 0.00000             | 0.00007           | 0.00008            | 2.03132 |
| R6       | 2.54302 | 0.00059  | 0.00007             | 0.00106           | 0.00115            | 2.54417 |
| R7       | 2.68974 | 0.00031  | -0.00004            | -0.00090          | -0.00094           | 2.68880 |
| R8       | 2.52390 | 0.00013  | -0.00003            | -0.00022          | -0.00023           | 2.52366 |
| R9       | 2.06333 | 0.00221  | -0.00006            | 0.01496           | 0.01490            | 2.07824 |
| R10      | 2.78114 | 0.00093  | -0.00009            | -0.00142          | -0.00151           | 2.77963 |
| R11      | 2.90686 | 0.00041  | 0.00010             | 0.00047           | 0.00057            | 2.90743 |
| R12      | 2.05887 | 0.00002  | 0.00002             | -0.00014          | -0.00012           | 2.05875 |
| R13      | 2.06165 | 0.00003  | 0.00002             | 0.00022           | 0.00024            | 2.06189 |
| R14      | 2.06819 | -0.00015 | -0.00003            | -0.00102          | -0.00105           | 2.06714 |
| R15      | 2.06653 | 0.00014  | 0.00015             | -0.00149          | -0.00134           | 2.06520 |
| R16      | 2.68323 | -0.00050 | -0.00005            | 0.00025           | 0.00020            | 2.68343 |
| R17      | 5.34398 | 0.00002  | -0.00023            | 0.07369           | 0.07347            | 5.41744 |
| R18      | 2.50634 | 0.00022  | 0.00003             | -0.00014          | -0.00012           | 2.50623 |
| R19      | 2.04899 | -0.00002 | 0.00003             | -0.00050          | -0.00047           | 2.04852 |
| R20      | 2.04281 | 0.00021  | 0.00004             | -0.00005          | -0.00001           | 2.04280 |
| R21      | 2.04696 | -0.00004 | 0.00003             | 0.00003           | 0.00007            | 2.04703 |
| R22      | 1.82011 | 0.00020  | 0.00004             | -0.00012          | -0.00008           | 1.82003 |
| A1       | 1.87285 | 0.00034  | 0.00002             | -0.00011          | -0.00007           | 1.87278 |
| A2       | 2.28058 | -0.00032 | 0.00002             | 0.00061           | 0.00062            | 2.28120 |
| A3       | 2.12976 | -0.00002 | -0.00005            | -0.00050          | -0.00056           | 2.12920 |
| A4       | 1.86433 | -0.00011 | 0.00002             | -0.00084          | -0.00083           | 1.86350 |
| A5       | 2.28340 | -0.00011 | -0.00001            | 0.00009           | 0.00007            | 2.28347 |
| A6       | 2.13524 | 0.00022  | 0.00000             | 0.00081           | 0.00081            | 2.13605 |
| A7       | 1.89803 | -0.00019 | -0.00005            | 0.00123           | 0.00119            | 1.89922 |
| A8       | 2.24278 | -0.00002 | 0.00005             | 0.00126           | 0.00127            | 2.24405 |
| A9       | 2.14031 | 0.00020  | -0.00002            | -0.00171          | -0.00177           | 2.13855 |
| A10      | 1.88828 | 0.00034  | 0.00003             | -0.00154          | -0.00150           | 1.88677 |
| A11      | 2.18590 | 0.00030  | 0.00008             | 0.00123           | 0.00122            | 2.18712 |
| A12      | 2.18544 | -0.00049 | -0.00004            | -0.00377          | -0.00389           | 2.18155 |
| A13      | 1.90128 | -0.00038 | -0.00002            | 0.00127           | 0.00122            | 1.90250 |

|     |          |          |          |          |          |          |
|-----|----------|----------|----------|----------|----------|----------|
| A14 | 2.21253  | 0.00001  | -0.00003 | 0.00090  | 0.00076  | 2.21329  |
| A15 | 2.15659  | 0.00038  | 0.00000  | 0.00141  | 0.00130  | 2.15789  |
| A16 | 1.93894  | 0.00021  | 0.00017  | 0.00332  | 0.00349  | 1.94243  |
| A17 | 1.87235  | 0.00015  | 0.00002  | 0.00227  | 0.00229  | 1.87464  |
| A18 | 1.89641  | -0.00036 | -0.00009 | -0.00042 | -0.00051 | 1.89590  |
| A19 | 1.91037  | -0.00022 | -0.00007 | -0.00128 | -0.00136 | 1.90901  |
| A20 | 1.94612  | 0.00020  | 0.00004  | -0.00392 | -0.00388 | 1.94223  |
| A21 | 1.89774  | 0.00002  | -0.00007 | 0.00022  | 0.00015  | 1.89789  |
| A22 | 1.92325  | 0.00001  | -0.00010 | 0.00185  | 0.00175  | 1.92500  |
| A23 | 1.89395  | -0.00033 | 0.00014  | 0.00436  | 0.00450  | 1.89845  |
| A24 | 1.90023  | 0.00086  | 0.00009  | 0.00375  | 0.00385  | 1.90408  |
| A25 | 1.91464  | 0.00029  | 0.00010  | 0.00029  | 0.00037  | 1.91501  |
| A26 | 1.88471  | -0.00051 | -0.00024 | -0.00539 | -0.00564 | 1.87907  |
| A27 | 1.94717  | -0.00031 | 0.00000  | -0.00481 | -0.00483 | 1.94234  |
| A28 | 2.52188  | -0.00155 | 0.00019  | -0.03977 | -0.03959 | 2.48229  |
| A29 | 2.16061  | 0.00046  | 0.00019  | 0.00200  | 0.00218  | 2.16279  |
| A30 | 1.95639  | -0.00019 | 0.00006  | 0.00180  | 0.00185  | 1.95824  |
| A31 | 2.16585  | -0.00026 | -0.00025 | -0.00362 | -0.00387 | 2.16198  |
| A32 | 2.08220  | 0.00013  | -0.00007 | 0.00029  | 0.00022  | 2.08241  |
| A33 | 2.15114  | -0.00008 | 0.00008  | 0.00059  | 0.00067  | 2.15181  |
| A34 | 2.04984  | -0.00005 | -0.00001 | -0.00088 | -0.00089 | 2.04895  |
| A35 | 1.88758  | -0.00017 | -0.00008 | 0.00001  | -0.00008 | 1.88750  |
| D1  | 0.00540  | 0.00006  | 0.00009  | -0.00058 | -0.00048 | 0.00492  |
| D2  | 3.12474  | 0.00010  | 0.00013  | 0.00239  | 0.00253  | 3.12727  |
| D3  | -3.13507 | -0.00007 | -0.00001 | 0.00365  | 0.00363  | -3.13144 |
| D4  | -0.01573 | -0.00003 | 0.00003  | 0.00662  | 0.00665  | -0.00908 |
| D5  | -0.00562 | -0.00017 | -0.00026 | 0.00238  | 0.00212  | -0.00350 |
| D6  | -2.97964 | -0.00025 | 0.00008  | -0.02097 | -0.02090 | -3.00053 |
| D7  | 3.13497  | -0.00005 | -0.00016 | -0.00141 | -0.00156 | 3.13341  |
| D8  | 0.16095  | -0.00014 | 0.00018  | -0.02475 | -0.02457 | 0.13638  |
| D9  | -0.00339 | 0.00006  | 0.00010  | -0.00140 | -0.00130 | -0.00469 |
| D10 | 3.06976  | 0.00008  | -0.00024 | 0.01152  | 0.01129  | 3.08105  |
| D11 | -3.12505 | 0.00004  | 0.00006  | -0.00405 | -0.00399 | -3.12905 |
| D12 | -0.05190 | 0.00006  | -0.00027 | 0.00886  | 0.00860  | -0.04330 |
| D13 | -0.00009 | -0.00016 | -0.00026 | 0.00289  | 0.00263  | 0.00255  |
| D14 | 2.91920  | 0.00047  | 0.00010  | -0.01664 | -0.01657 | 2.90263  |
| D15 | -3.07809 | -0.00017 | 0.00005  | -0.00924 | -0.00917 | -3.08727 |
| D16 | -0.15881 | 0.00046  | 0.00040  | -0.02877 | -0.02838 | -0.18718 |
| D17 | 0.42094  | -0.00007 | 0.00025  | -0.03517 | -0.03491 | 0.38603  |
| D18 | -2.69398 | -0.00022 | 0.00028  | -0.04251 | -0.04223 | -2.73621 |
| D19 | -2.79762 | -0.00007 | -0.00013 | -0.02052 | -0.02065 | -2.81826 |
| D20 | 0.37065  | -0.00021 | -0.00009 | -0.02787 | -0.02797 | 0.34267  |
| D21 | 0.00350  | 0.00020  | 0.00032  | -0.00326 | -0.00293 | 0.00056  |
| D22 | 2.98405  | 0.00024  | -0.00001 | 0.01912  | 0.01912  | 3.00317  |

|     |          |          |          |          |          |          |
|-----|----------|----------|----------|----------|----------|----------|
| D23 | -2.91586 | -0.00056 | -0.00006 | 0.01547  | 0.01538  | -2.90048 |
| D24 | 0.06469  | -0.00052 | -0.00039 | 0.03785  | 0.03744  | 0.10213  |
| D25 | 1.36502  | 0.00032  | -0.00035 | 0.03648  | 0.03614  | 1.40116  |
| D26 | -2.83085 | 0.00027  | -0.00032 | 0.03824  | 0.03793  | -2.79292 |
| D27 | -0.78207 | 0.00018  | -0.00044 | 0.03951  | 0.03908  | -0.74299 |
| D28 | -1.58609 | 0.00030  | 0.00004  | 0.00996  | 0.01000  | -1.57609 |
| D29 | 0.50122  | 0.00025  | 0.00007  | 0.01173  | 0.01179  | 0.51301  |
| D30 | 2.55001  | 0.00016  | -0.00005 | 0.01300  | 0.01294  | 2.56295  |
| D31 | -1.15538 | 0.00018  | -0.00061 | 0.01747  | 0.01686  | -1.13852 |
| D32 | 0.94129  | 0.00034  | -0.00045 | 0.02164  | 0.02118  | 0.96247  |
| D33 | 3.06379  | 0.00029  | -0.00031 | 0.02069  | 0.02038  | 3.08417  |
| D34 | 3.06333  | 0.00001  | -0.00069 | 0.01345  | 0.01277  | 3.07609  |
| D35 | -1.12319 | 0.00017  | -0.00053 | 0.01762  | 0.01709  | -1.10610 |
| D36 | 0.99931  | 0.00011  | -0.00039 | 0.01667  | 0.01629  | 1.01560  |
| D37 | 0.96284  | 0.00000  | -0.00058 | 0.01654  | 0.01595  | 0.97879  |
| D38 | 3.05951  | 0.00016  | -0.00043 | 0.02070  | 0.02027  | 3.07979  |
| D39 | -1.10117 | 0.00011  | -0.00029 | 0.01976  | 0.01947  | -1.08170 |
| D40 | 0.49445  | 0.00055  | 0.00067  | 0.02613  | 0.02679  | 0.52125  |
| D41 | 2.59648  | 0.00054  | 0.00070  | 0.03123  | 0.03193  | 2.62840  |
| D42 | -1.59901 | -0.00011 | 0.00046  | 0.02162  | 0.02209  | -1.57693 |
| D43 | -1.70656 | 0.00013  | -0.00142 | 0.07758  | 0.07616  | -1.63041 |
| D44 | 2.48849  | -0.00007 | -0.00122 | 0.07635  | 0.07515  | 2.56364  |
| D45 | 0.38320  | 0.00009  | -0.00119 | 0.08244  | 0.08124  | 0.46444  |
| D46 | -3.09823 | -0.00028 | -0.00006 | -0.00437 | -0.00443 | -3.10266 |
| D47 | 0.03907  | -0.00004 | -0.00003 | -0.00397 | -0.00399 | 0.03508  |
| D48 | 0.01352  | -0.00012 | -0.00010 | 0.00394  | 0.00384  | 0.01736  |
| D49 | -3.13237 | 0.00013  | -0.00006 | 0.00435  | 0.00428  | -3.12809 |

| Item                 | Value    | Threshold | Converged? |
|----------------------|----------|-----------|------------|
| Maximum Force        | 0.002209 | 0.000450  | NO         |
| RMS Force            | 0.000382 | 0.000300  | NO         |
| Maximum Displacement | 0.278347 | 0.001800  | NO         |
| RMS Displacement     | 0.042662 | 0.001200  | NO         |

Predicted change in Energy=-1.015134D-04

GradGradGradGradGradGradGradGradGradGradGradGradGradGradGradGradGradGradGrad

Input orientation:

| Center Number | Atomic Number | Atomic Type | Coordinates (Angstroms) |           |           |
|---------------|---------------|-------------|-------------------------|-----------|-----------|
|               |               |             | X                       | Y         | Z         |
| 1             | 6             | 0           | -0.507275               | -2.163006 | -1.257311 |
| 2             | 6             | 0           | -1.798965               | -1.783241 | -1.427062 |
| 3             | 7             | 0           | -2.096411               | -0.899346 | -0.394955 |
| 4             | 6             | 0           | -1.006298               | -0.756436 | 0.382090  |



|    |    |   |           |           |           |
|----|----|---|-----------|-----------|-----------|
| 5  | 7  | 0 | -0.032317 | -1.516111 | -0.125574 |
| 6  | 6  | 0 | 1.357169  | -1.489040 | 0.356288  |
| 7  | 6  | 0 | 2.195634  | -0.454367 | -0.414136 |
| 8  | 1  | 0 | 0.111602  | -2.825870 | -1.837354 |
| 9  | 1  | 0 | -2.514944 | -2.045640 | -2.184682 |
| 10 | 1  | 0 | 1.331009  | -1.219592 | 1.411559  |
| 11 | 1  | 0 | 1.778800  | -2.490832 | 0.260618  |
| 12 | 1  | 0 | 2.287411  | -0.746509 | -1.464285 |
| 13 | 1  | 0 | 1.704214  | 0.519229  | -0.343778 |
| 14 | 35 | 0 | 0.027971  | 2.092934  | 1.368567  |
| 15 | 1  | 0 | -0.864488 | 0.027334  | 1.140416  |
| 16 | 6  | 0 | -3.298224 | -0.172165 | -0.168329 |
| 17 | 6  | 0 | -4.478649 | -0.521140 | -0.662009 |
| 18 | 1  | 0 | -3.134346 | 0.710899  | 0.438681  |
| 19 | 1  | 0 | -5.338117 | 0.106505  | -0.472413 |
| 20 | 1  | 0 | -4.634042 | -1.412492 | -1.257622 |
| 21 | 8  | 0 | 3.503501  | -0.412774 | 0.137391  |
| 22 | 1  | 0 | 3.527117  | 0.284784  | 0.801053  |

-----  
Distance matrix (angstroms):

|    |    | 1        | 2        | 3        | 4        | 5        |
|----|----|----------|----------|----------|----------|----------|
| 1  | C  | 0.000000 |          |          |          |          |
| 2  | C  | 1.357020 | 0.000000 |          |          |          |
| 3  | N  | 2.205867 | 1.391039 | 0.000000 |          |          |
| 4  | C  | 2.217003 | 2.226137 | 1.346317 | 0.000000 |          |
| 5  | N  | 1.387403 | 2.210492 | 2.171048 | 1.335465 | 0.000000 |
| 6  | C  | 2.556185 | 3.637042 | 3.583200 | 2.474541 | 1.470916 |
| 7  | C  | 3.306979 | 4.329983 | 4.315093 | 3.313245 | 2.484821 |
| 8  | H  | 1.076497 | 2.214877 | 3.266088 | 3.233913 | 2.160179 |
| 9  | H  | 2.214617 | 1.074926 | 2.166168 | 3.244438 | 3.268603 |
| 10 | H  | 3.375231 | 4.262888 | 3.887578 | 2.595635 | 2.075899 |
| 11 | H  | 2.763642 | 4.018626 | 4.240267 | 3.283239 | 2.092695 |
| 12 | H  | 3.139995 | 4.216002 | 4.514944 | 3.775939 | 2.786677 |
| 13 | H  | 3.594386 | 4.329797 | 4.057059 | 3.082382 | 2.684355 |
| 14 | Br | 5.029389 | 5.116442 | 4.071456 | 3.187751 | 3.906571 |
| 15 | H  | 3.267153 | 3.277709 | 2.175715 | 1.099756 | 2.162744 |
| 16 | C  | 3.597045 | 2.535301 | 1.422851 | 2.428427 | 3.531879 |
| 17 | C  | 4.338424 | 3.059234 | 2.426812 | 3.633556 | 4.587766 |
| 18 | H  | 4.247026 | 3.388949 | 2.089293 | 2.585510 | 3.860122 |
| 19 | H  | 5.394793 | 4.124087 | 3.395054 | 4.498833 | 5.559199 |
| 20 | H  | 4.194459 | 2.864232 | 2.728934 | 4.034798 | 4.740057 |
| 21 | O  | 4.592911 | 5.695775 | 5.646164 | 4.529489 | 3.713289 |
| 22 | H  | 5.148287 | 6.132568 | 5.869981 | 4.670281 | 4.095294 |
|    |    | 6        | 7        | 8        | 9        | 10       |

|    |    |          |          |          |          |          |
|----|----|----------|----------|----------|----------|----------|
| 6  | C  | 0.000000 |          |          |          |          |
| 7  | C  | 1.538546 | 0.000000 |          |          |          |
| 8  | H  | 2.854929 | 3.463058 | 0.000000 |          |          |
| 9  | H  | 4.664717 | 5.277928 | 2.761908 | 0.000000 |          |
| 10 | H  | 1.089442 | 2.160164 | 3.823940 | 5.329789 | 0.000000 |
| 11 | H  | 1.091107 | 2.185460 | 2.700609 | 4.961242 | 1.772353 |
| 12 | H  | 2.175129 | 1.093884 | 3.032667 | 5.026860 | 3.067408 |
| 13 | H  | 2.154919 | 1.092855 | 3.994605 | 5.269608 | 2.498798 |
| 14 | Br | 3.952469 | 3.790189 | 5.871930 | 6.018288 | 3.559858 |
| 15 | H  | 2.801786 | 3.465980 | 4.238000 | 4.251765 | 2.539399 |
| 16 | C  | 4.866422 | 5.506590 | 4.631922 | 2.861663 | 5.002294 |
| 17 | C  | 6.002544 | 6.679218 | 5.269119 | 2.915266 | 6.208030 |
| 18 | H  | 5.002022 | 5.522122 | 5.312744 | 3.855412 | 4.961117 |
| 19 | H  | 6.932486 | 7.554825 | 6.337296 | 3.941307 | 7.055857 |
| 20 | H  | 6.205254 | 6.947946 | 4.985465 | 2.398102 | 6.537857 |
| 21 | O  | 2.411018 | 1.420010 | 4.607345 | 6.654319 | 2.644652 |
| 22 | H  | 2.837771 | 1.948301 | 5.320067 | 7.131058 | 2.731073 |
|    |    | 11       | 12       | 13       | 14       | 15       |
| 11 | H  | 0.000000 |          |          |          |          |
| 12 | H  | 2.505322 | 0.000000 |          |          |          |
| 13 | H  | 3.071046 | 1.788224 | 0.000000 |          |          |
| 14 | Br | 5.030295 | 4.603537 | 2.866787 | 0.000000 |          |
| 15 | H  | 3.755287 | 4.161462 | 3.007162 | 2.261690 | 0.000000 |
| 16 | C  | 5.597891 | 5.762698 | 5.053038 | 4.307702 | 2.770503 |
| 17 | C  | 6.624696 | 6.817184 | 6.277853 | 5.591623 | 4.075748 |
| 18 | H  | 5.867009 | 5.927964 | 4.905165 | 3.574207 | 2.472236 |
| 19 | H  | 7.611439 | 7.736932 | 7.055588 | 6.010825 | 4.756138 |
| 20 | H  | 6.677755 | 6.956490 | 6.688808 | 6.396816 | 4.693956 |
| 21 | O  | 2.703351 | 2.038534 | 2.082687 | 4.457991 | 4.503231 |
| 22 | H  | 3.324565 | 2.780682 | 2.165313 | 3.979385 | 4.412216 |
|    |    | 16       | 17       | 18       | 19       | 20       |
| 16 | C  | 0.000000 |          |          |          |          |
| 17 | C  | 1.326238 | 0.000000 |          |          |          |
| 18 | H  | 1.084029 | 2.129927 | 0.000000 |          |          |
| 19 | H  | 2.081175 | 1.081004 | 2.460080 | 0.000000 |          |
| 20 | H  | 2.123530 | 1.083241 | 3.104082 | 1.849223 | 0.000000 |
| 21 | O  | 6.812843 | 8.022812 | 6.739023 | 8.877822 | 8.316556 |
| 22 | H  | 6.908964 | 8.178164 | 6.684907 | 8.958007 | 8.586234 |
|    |    | 21       | 22       |          |          |          |
| 21 | O  | 0.000000 |          |          |          |          |
| 22 | H  | 0.963116 | 0.000000 |          |          |          |

Stoichiometry C7H11BrN2O

Framework group C1[X(C7H11BrN2O)]

Deg. of freedom 60

Full point group C1 NOp 1  
 Largest Abelian subgroup C1 NOp 1  
 Largest concise Abelian subgroup C1 NOp 1

Standard orientation:

| Center<br>Number | Atomic<br>Number | Atomic<br>Type | Coordinates (Angstroms) |           |           |
|------------------|------------------|----------------|-------------------------|-----------|-----------|
|                  |                  |                | X                       | Y         | Z         |
| 1                | 6                | 0              | -1.244348               | -2.293509 | -0.196812 |
| 2                | 6                | 0              | -2.342558               | -1.526367 | -0.413445 |
| 3                | 7                | 0              | -2.049129               | -0.257950 | 0.076460  |
| 4                | 6                | 0              | -0.801551               | -0.265768 | 0.582480  |
| 5                | 7                | 0              | -0.297877               | -1.492653 | 0.425852  |
| 6                | 6                | 0              | 1.103870                | -1.839806 | 0.705467  |
| 7                | 6                | 0              | 1.983284                | -1.662959 | -0.544526 |
| 8                | 1                | 0              | -1.052037               | -3.326341 | -0.431590 |
| 9                | 1                | 0              | -3.283198               | -1.760811 | -0.877880 |
| 10               | 1                | 0              | 1.454492                | -1.171959 | 1.491551  |
| 11               | 1                | 0              | 1.141849                | -2.865925 | 1.074455  |
| 12               | 1                | 0              | 1.686410                | -2.373993 | -1.320978 |
| 13               | 1                | 0              | 1.866062                | -0.641662 | -0.915394 |
| 14               | 35               | 0              | 1.313333                | 2.034426  | -0.048498 |
| 15               | 1                | 0              | -0.216119               | 0.627656  | 0.844258  |
| 16               | 6                | 0              | -2.846833               | 0.919164  | 0.025690  |
| 17               | 6                | 0              | -4.164408               | 0.914310  | -0.125571 |
| 18               | 1                | 0              | -2.251186               | 1.821345  | 0.105639  |
| 19               | 1                | 0              | -4.693130               | 1.854943  | -0.190628 |
| 20               | 1                | 0              | -4.751871               | 0.006654  | -0.192342 |
| 21               | 8                | 0              | 3.334617                | -1.935944 | -0.204221 |
| 22               | 1                | 0              | 3.759443                | -1.103433 | 0.028245  |

Rotational constants (GHZ): 0.7636795 0.5313754 0.3244201

Standard basis: 6-311++G(d,p) (5D, 7F)

There are 358 symmetry adapted cartesian basis functions of A symmetry.

There are 345 symmetry adapted basis functions of A symmetry.

345 basis functions, 553 primitive gaussians, 358 cartesian basis functions

55 alpha electrons 55 beta electrons

nuclear repulsion energy 845.6798846037 Hartrees.

NAtoms= 22 NActive= 22 NUniq= 22 SFac= 1.00D+00 NAtFMM= 60 NAOKFM=F

Big=F

Integral buffers will be 131072 words long.

Raffenetti 2 integral format.

Two-electron integral symmetry is turned on.

One-electron integrals computed using PRISM.

NBasis= 345 RedAO= T EigKep= 5.94D-06 NBF= 345  
 NBsUse= 345 1.00D-06 EigRej= -1.00D+00 NBFU= 345  
 Initial guess from the checkpoint file: ".  
 B after Tr= 0.000000 0.000000 0.000000  
 Rot= 0.999498 0.002268 -0.000093 0.031592 Ang= 3.63 deg.  
 ExpMin= 3.50D-02 ExpMax= 4.40D+05 ExpMxC= 1.51D+04 IAcc=3 IRadAn= 5 AccDes=  
 0.00D+00  
 Harris functional with IExCor= 402 and IRadAn= 5 diagonalized for initial guess.  
 HarFok: IExCor= 402 AccDes= 0.00D+00 IRadAn= 5 IDoV= 1 UseB2=F ITyADJ=14  
 ICtDFT= 3500011 ScaDFX= 1.000000 1.000000 1.000000 1.000000  
 FoFCou: FMM=F IPFlag= 0 FMFlag= 100000 FMFlg1= 0  
 NfxFlg= 0 DoJE=T BraDBF=F KetDBF=T FulRan=T  
 wScrn= 0.000000 ICntrl= 500 IOpCl= 0 l1Cent= 200000004 NGrid=  
 0  
 NMat0= 1 NMatS0= 1 NMatT0= 0 NMatD0= 1 NMtDS0= 0  
 NMtDT0= 0  
 Petite list used in FoFCou.  
 Keep R1 ints in memory in canonical form, NReq=1804729152.  
 Requested convergence on RMS density matrix=1.00D-08 within 128 cycles.  
 Requested convergence on MAX density matrix=1.00D-06.  
 Requested convergence on energy=1.00D-06.  
 No special actions if energy rises.  
 SCF Done: E(RB3LYP) = -3032.33910416 A.U. after 12 cycles  
 NFock= 12 Conv=0.97D-08 -V/T= 2.0017  
 Calling FoFJK, ICntrl= 2127 FMM=F ISym2X=0 l1Cent= 0 IOpClX= 0 NMat=1 NMatS=1  
 NMatT=0.

\*\*\*\*\* Axes restored to original set \*\*\*\*\*

| Center<br>Number | Atomic<br>Number | Forces (Hartrees/Bohr) |              |              |
|------------------|------------------|------------------------|--------------|--------------|
|                  |                  | X                      | Y            | Z            |
| 1                | 6                | 0.000265187            | -0.000108994 | 0.000544853  |
| 2                | 6                | -0.000685183           | -0.000329283 | 0.000187833  |
| 3                | 7                | 0.000321225            | -0.000339530 | 0.000365977  |
| 4                | 6                | 0.000121743            | 0.002166339  | -0.003257027 |
| 5                | 7                | -0.000939766           | -0.000403212 | 0.000367611  |
| 6                | 6                | 0.001580491            | 0.000263934  | 0.000167625  |
| 7                | 6                | 0.001257728            | 0.000164747  | 0.001414817  |
| 8                | 1                | -0.000305297           | -0.000119307 | 0.000026363  |
| 9                | 1                | 0.000227475            | -0.000097121 | -0.000088395 |
| 10               | 1                | -0.000339808           | -0.000075505 | 0.000139861  |
| 11               | 1                | -0.000258935           | -0.000008649 | -0.000110777 |
| 12               | 1                | 0.000362696            | -0.000025770 | 0.000044739  |
| 13               | 1                | -0.000897941           | 0.000462112  | -0.000842754 |

|    |    |              |              |              |
|----|----|--------------|--------------|--------------|
| 14 | 35 | 0.000042279  | -0.001058158 | 0.000145340  |
| 15 | 1  | 0.000625791  | -0.000323339 | 0.001892377  |
| 16 | 6  | -0.000350785 | 0.000025595  | -0.000291599 |
| 17 | 6  | -0.000164392 | 0.000208690  | -0.000449053 |
| 18 | 1  | 0.000011295  | -0.000206561 | 0.000160911  |
| 19 | 1  | -0.000224519 | -0.000042548 | 0.000209200  |
| 20 | 1  | 0.000049406  | 0.000059592  | 0.000065583  |
| 21 | 8  | -0.000544751 | -0.000834568 | -0.000958537 |
| 22 | 1  | -0.000153939 | 0.000621537  | 0.000265052  |

-----  
Cartesian Forces: Max 0.003257027 RMS 0.000723812

GradGradGradGradGradGradGradGradGradGradGradGradGradGradGradGradGradGradGradGrad  
Berny optimization.

Using GEDIIS/GDIIS optimizer.

FormGI is forming the generalized inverse of G from B-inverse, IUseBI=4.

Internal Forces: Max 0.004811456 RMS 0.000752898

Search for a local minimum.

Step number 45 out of a maximum of 116

All quantities printed in internal units (Hartrees-Bohrs-Radians)

Mixed Optimization -- En-DIIS/RFO-DIIS

Swapping is turned off.

Update second derivatives using D2CorX and points 33 38 37 40 39  
41 43 42 44 45

DE= -1.53D-04 DEPred=-1.02D-04 R= 1.51D+00

TightC=F SS= 1.41D+00 RLast= 2.10D-01 DXNew= 1.8507D-01 6.2955D-01

Trust test= 1.51D+00 RLast= 2.10D-01 DXMaxT set to 1.85D-01

ITU= 1 0 -1 1 0 -1 0 -1 0 0 1 -1 0 1 1 1 1 1 1 0

ITU= -1 1 1 1 1 1 0 -1 1 1 1 1 1 1 1 1 1 1 1 1

ITU= 0 0 -1 0 0

|                 |         |         |         |         |         |
|-----------------|---------|---------|---------|---------|---------|
| Eigenvalues --- | 0.00085 | 0.00154 | 0.00232 | 0.00527 | 0.00822 |
| Eigenvalues --- | 0.01180 | 0.01376 | 0.01476 | 0.01757 | 0.02142 |
| Eigenvalues --- | 0.02243 | 0.02381 | 0.03065 | 0.03169 | 0.03835 |
| Eigenvalues --- | 0.04528 | 0.04990 | 0.05465 | 0.06141 | 0.06496 |
| Eigenvalues --- | 0.08644 | 0.09326 | 0.12232 | 0.13835 | 0.14678 |
| Eigenvalues --- | 0.15560 | 0.15927 | 0.15986 | 0.16193 | 0.16378 |
| Eigenvalues --- | 0.17053 | 0.17880 | 0.21148 | 0.22629 | 0.22945 |
| Eigenvalues --- | 0.24446 | 0.25020 | 0.25630 | 0.29321 | 0.33068 |
| Eigenvalues --- | 0.33734 | 0.33862 | 0.33887 | 0.34101 | 0.34248 |
| Eigenvalues --- | 0.34723 | 0.34961 | 0.36282 | 0.36309 | 0.36935 |
| Eigenvalues --- | 0.37268 | 0.43161 | 0.44591 | 0.46620 | 0.49479 |
| Eigenvalues --- | 0.53736 | 0.54863 | 0.58427 | 0.61208 | 1.60711 |

En-DIIS/RFO-DIIS IScMMF= 0 using points: 45 44

RFO step: Lambda=-8.42040326D-05.

DidBck=F Rises=F RFO-DIIS coefs: 2.03979 -1.03979

Maximum step size ( 0.185) exceeded in Quadratic search.

-- Step size scaled by 0.526

Iteration 1 RMS(Cart)= 0.08583596 RMS(Int)= 0.00295146

Iteration 2 RMS(Cart)= 0.00478196 RMS(Int)= 0.00012216

Iteration 3 RMS(Cart)= 0.00001481 RMS(Int)= 0.00012173

Iteration 4 RMS(Cart)= 0.00000000 RMS(Int)= 0.00012173

| Variable | Old X   | -DE/DX   | Delta X<br>(Linear) | Delta X<br>(Quad) | Delta X<br>(Total) | New X   |
|----------|---------|----------|---------------------|-------------------|--------------------|---------|
| R1       | 2.56440 | 0.00025  | 0.00064             | 0.00083           | 0.00139            | 2.56579 |
| R2       | 2.62181 | -0.00020 | -0.00044            | -0.00152          | -0.00193           | 2.61988 |
| R3       | 2.03428 | -0.00012 | 0.00008             | 0.00001           | 0.00010            | 2.03438 |
| R4       | 2.62868 | 0.00010  | -0.00032            | -0.00090          | -0.00130           | 2.62739 |
| R5       | 2.03132 | -0.00007 | 0.00004             | -0.00011          | -0.00007           | 2.03125 |
| R6       | 2.54417 | 0.00038  | 0.00063             | 0.00129           | 0.00195            | 2.54613 |
| R7       | 2.68880 | 0.00055  | -0.00051            | -0.00173          | -0.00225           | 2.68655 |
| R8       | 2.52366 | 0.00009  | -0.00013            | -0.00075          | -0.00078           | 2.52289 |
| R9       | 2.07824 | 0.00116  | 0.00815             | 0.02006           | 0.02822            | 2.10645 |
| R10      | 2.77963 | 0.00106  | -0.00083            | 0.00005           | -0.00077           | 2.77886 |
| R11      | 2.90743 | -0.00044 | 0.00031             | -0.00122          | -0.00091           | 2.90652 |
| R12      | 2.05875 | 0.00012  | -0.00007            | -0.00025          | -0.00032           | 2.05843 |
| R13      | 2.06189 | -0.00008 | 0.00013             | 0.00000           | 0.00013            | 2.06202 |
| R14      | 2.06714 | 0.00000  | -0.00057            | -0.00011          | -0.00068           | 2.06646 |
| R15      | 2.06520 | -0.00019 | -0.00073            | -0.00194          | -0.00267           | 2.06252 |
| R16      | 2.68343 | -0.00092 | 0.00011             | 0.00070           | 0.00081            | 2.68424 |
| R17      | 5.41744 | -0.00052 | 0.04019             | 0.11689           | 0.15707            | 5.57451 |
| R18      | 2.50623 | 0.00030  | -0.00006            | -0.00010          | -0.00016           | 2.50607 |
| R19      | 2.04852 | -0.00007 | -0.00026            | -0.00155          | -0.00180           | 2.04672 |
| R20      | 2.04280 | 0.00019  | -0.00001            | -0.00035          | -0.00035           | 2.04245 |
| R21      | 2.04703 | -0.00010 | 0.00004             | -0.00041          | -0.00037           | 2.04666 |
| R22      | 1.82003 | 0.00062  | -0.00004            | -0.00039          | -0.00043           | 1.81959 |
| A1       | 1.87278 | 0.00013  | -0.00004            | -0.00046          | -0.00038           | 1.87240 |
| A2       | 2.28120 | -0.00031 | 0.00034             | 0.00015           | 0.00042            | 2.28162 |
| A3       | 2.12920 | 0.00018  | -0.00031            | 0.00030           | -0.00008           | 2.12912 |
| A4       | 1.86350 | 0.00001  | -0.00045            | -0.00133          | -0.00176           | 1.86175 |
| A5       | 2.28347 | -0.00025 | 0.00004             | -0.00118          | -0.00117           | 2.28230 |
| A6       | 2.13605 | 0.00025  | 0.00044             | 0.00263           | 0.00304            | 2.13909 |
| A7       | 1.89922 | -0.00021 | 0.00065             | 0.00235           | 0.00291            | 1.90213 |
| A8       | 2.24405 | -0.00015 | 0.00070             | 0.00177           | 0.00214            | 2.24620 |
| A9       | 2.13855 | 0.00037  | -0.00097            | -0.00250          | -0.00380           | 2.13475 |
| A10      | 1.88677 | 0.00013  | -0.00082            | -0.00325          | -0.00395           | 1.88282 |
| A11      | 2.18712 | 0.00094  | 0.00066             | 0.00730           | 0.00756            | 2.19467 |
| A12      | 2.18155 | -0.00088 | -0.00213            | -0.00876          | -0.01117           | 2.17038 |
| A13      | 1.90250 | -0.00007 | 0.00067             | 0.00270           | 0.00315            | 1.90565 |

|     |          |          |          |          |          |          |
|-----|----------|----------|----------|----------|----------|----------|
| A14 | 2.21329  | 0.00080  | 0.00041  | 0.00154  | 0.00131  | 2.21460  |
| A15 | 2.15789  | -0.00075 | 0.00071  | 0.00130  | 0.00137  | 2.15926  |
| A16 | 1.94243  | -0.00129 | 0.00191  | 0.00480  | 0.00671  | 1.94914  |
| A17 | 1.87464  | -0.00002 | 0.00125  | 0.00174  | 0.00298  | 1.87761  |
| A18 | 1.89590  | 0.00044  | -0.00028 | -0.00241 | -0.00268 | 1.89323  |
| A19 | 1.90901  | 0.00004  | -0.00075 | -0.00020 | -0.00098 | 1.90803  |
| A20 | 1.94223  | 0.00095  | -0.00212 | -0.00495 | -0.00708 | 1.93516  |
| A21 | 1.89789  | -0.00014 | 0.00008  | 0.00120  | 0.00128  | 1.89916  |
| A22 | 1.92500  | 0.00090  | 0.00096  | 0.00170  | 0.00265  | 1.92766  |
| A23 | 1.89845  | -0.00329 | 0.00246  | 0.00386  | 0.00631  | 1.90476  |
| A24 | 1.90408  | 0.00107  | 0.00211  | -0.00073 | 0.00139  | 1.90546  |
| A25 | 1.91501  | 0.00082  | 0.00020  | 0.00008  | 0.00024  | 1.91525  |
| A26 | 1.87907  | -0.00074 | -0.00309 | -0.00066 | -0.00376 | 1.87532  |
| A27 | 1.94234  | 0.00132  | -0.00264 | -0.00429 | -0.00695 | 1.93539  |
| A28 | 2.48229  | -0.00481 | -0.02166 | -0.06166 | -0.08332 | 2.39897  |
| A29 | 2.16279  | 0.00037  | 0.00119  | 0.00380  | 0.00496  | 2.16775  |
| A30 | 1.95824  | -0.00025 | 0.00101  | 0.00182  | 0.00280  | 1.96104  |
| A31 | 2.16198  | -0.00012 | -0.00212 | -0.00544 | -0.00759 | 2.15439  |
| A32 | 2.08241  | 0.00008  | 0.00012  | 0.00006  | 0.00018  | 2.08259  |
| A33 | 2.15181  | -0.00008 | 0.00037  | 0.00159  | 0.00196  | 2.15377  |
| A34 | 2.04895  | 0.00000  | -0.00049 | -0.00165 | -0.00214 | 2.04682  |
| A35 | 1.88750  | -0.00041 | -0.00004 | 0.00023  | 0.00018  | 1.88768  |
| D1  | 0.00492  | 0.00010  | -0.00026 | -0.00133 | -0.00154 | 0.00338  |
| D2  | 3.12727  | 0.00014  | 0.00139  | 0.00571  | 0.00712  | 3.13439  |
| D3  | -3.13144 | -0.00012 | 0.00199  | 0.00235  | 0.00434  | -3.12710 |
| D4  | -0.00908 | -0.00008 | 0.00364  | 0.00938  | 0.01300  | 0.00391  |
| D5  | -0.00350 | -0.00023 | 0.00116  | 0.00407  | 0.00520  | 0.00169  |
| D6  | -3.00053 | -0.00004 | -0.01143 | -0.03786 | -0.04936 | -3.04989 |
| D7  | 3.13341  | -0.00004 | -0.00085 | 0.00079  | -0.00005 | 3.13335  |
| D8  | 0.13638  | 0.00015  | -0.01344 | -0.04114 | -0.05461 | 0.08177  |
| D9  | -0.00469 | 0.00006  | -0.00071 | -0.00184 | -0.00259 | -0.00729 |
| D10 | 3.08105  | 0.00014  | 0.00617  | 0.03108  | 0.03730  | 3.11835  |
| D11 | -3.12905 | 0.00003  | -0.00219 | -0.00810 | -0.01032 | -3.13937 |
| D12 | -0.04330 | 0.00011  | 0.00470  | 0.02482  | 0.02957  | -0.01374 |
| D13 | 0.00255  | -0.00021 | 0.00144  | 0.00440  | 0.00584  | 0.00838  |
| D14 | 2.90263  | 0.00047  | -0.00906 | -0.01730 | -0.02655 | 2.87607  |
| D15 | -3.08727 | -0.00026 | -0.00502 | -0.02628 | -0.03121 | -3.11848 |
| D16 | -0.18718 | 0.00042  | -0.01552 | -0.04798 | -0.06360 | -0.25078 |
| D17 | 0.38603  | -0.00019 | -0.01910 | -0.09577 | -0.11480 | 0.27124  |
| D18 | -2.73621 | -0.00031 | -0.02310 | -0.10624 | -0.12933 | -2.86555 |
| D19 | -2.81826 | -0.00012 | -0.01129 | -0.05864 | -0.06994 | -2.88821 |
| D20 | 0.34267  | -0.00024 | -0.01530 | -0.06911 | -0.08448 | 0.25819  |
| D21 | 0.00056  | 0.00027  | -0.00161 | -0.00523 | -0.00681 | -0.00624 |
| D22 | 3.00317  | 0.00024  | 0.01046  | 0.03510  | 0.04564  | 3.04881  |

|     |          |          |          |          |          |          |
|-----|----------|----------|----------|----------|----------|----------|
| D23 | -2.90048 | -0.00072 | 0.00841  | 0.01360  | 0.02180  | -2.87868 |
| D24 | 0.10213  | -0.00075 | 0.02048  | 0.05394  | 0.07425  | 0.17637  |
| D25 | 1.40116  | 0.00089  | 0.01977  | 0.06060  | 0.08037  | 1.48153  |
| D26 | -2.79292 | 0.00018  | 0.02075  | 0.06424  | 0.08501  | -2.70791 |
| D27 | -0.74299 | 0.00023  | 0.02138  | 0.06533  | 0.08672  | -0.65627 |
| D28 | -1.57609 | 0.00103  | 0.00547  | 0.01282  | 0.01827  | -1.55782 |
| D29 | 0.51301  | 0.00032  | 0.00645  | 0.01646  | 0.02291  | 0.53592  |
| D30 | 2.56295  | 0.00037  | 0.00708  | 0.01755  | 0.02461  | 2.58756  |
| D31 | -1.13852 | -0.00027 | 0.00922  | 0.03679  | 0.04601  | -1.09251 |
| D32 | 0.96247  | -0.00078 | 0.01159  | 0.04035  | 0.05194  | 1.01441  |
| D33 | 3.08417  | -0.00054 | 0.01115  | 0.03702  | 0.04818  | 3.13235  |
| D34 | 3.07609  | 0.00052  | 0.00698  | 0.03183  | 0.03881  | 3.11490  |
| D35 | -1.10610 | 0.00000  | 0.00935  | 0.03539  | 0.04474  | -1.06136 |
| D36 | 1.01560  | 0.00025  | 0.00891  | 0.03207  | 0.04098  | 1.05658  |
| D37 | 0.97879  | 0.00006  | 0.00873  | 0.03360  | 0.04231  | 1.02110  |
| D38 | 3.07979  | -0.00045 | 0.01109  | 0.03716  | 0.04824  | 3.12803  |
| D39 | -1.08170 | -0.00021 | 0.01065  | 0.03383  | 0.04448  | -1.03722 |
| D40 | 0.52125  | -0.00018 | 0.01466  | 0.00351  | 0.01815  | 0.53940  |
| D41 | 2.62840  | -0.00062 | 0.01746  | 0.00803  | 0.02550  | 2.65390  |
| D42 | -1.57693 | -0.00019 | 0.01208  | 0.00458  | 0.01668  | -1.56025 |
| D43 | -1.63041 | 0.00117  | 0.04166  | 0.03123  | 0.07289  | -1.55751 |
| D44 | 2.56364  | -0.00008 | 0.04111  | 0.02999  | 0.07111  | 2.63475  |
| D45 | 0.46444  | -0.00140 | 0.04444  | 0.03287  | 0.07728  | 0.54172  |
| D46 | -3.10266 | -0.00029 | -0.00242 | -0.00811 | -0.01051 | -3.11316 |
| D47 | 0.03508  | -0.00005 | -0.00218 | -0.00790 | -0.01006 | 0.02502  |
| D48 | 0.01736  | -0.00015 | 0.00210  | 0.00366  | 0.00574  | 0.02310  |
| D49 | -3.12809 | 0.00008  | 0.00234  | 0.00387  | 0.00618  | -3.12190 |

| Item                 | Value    | Threshold | Converged? |
|----------------------|----------|-----------|------------|
| Maximum Force        | 0.004811 | 0.000450  | NO         |
| RMS Force            | 0.000753 | 0.000300  | NO         |
| Maximum Displacement | 0.557394 | 0.001800  | NO         |
| RMS Displacement     | 0.088260 | 0.001200  | NO         |

Predicted change in Energy=-2.503763D-04

GradGradGradGradGradGradGradGradGradGradGradGradGradGradGradGradGradGradGrad

Input orientation:

| Center Number | Atomic Number | Atomic Type | Coordinates (Angstroms) |           |           |
|---------------|---------------|-------------|-------------------------|-----------|-----------|
|               |               |             | X                       | Y         | Z         |
| 1             | 6             | 0           | -0.526547               | -2.197555 | -1.225135 |
| 2             | 6             | 0           | -1.824783               | -1.838724 | -1.396387 |
| 3             | 7             | 0           | -2.108479               | -0.890133 | -0.420287 |
| 4             | 6             | 0           | -1.006759               | -0.689041 | 0.328801  |



|    |    |   |           |           |           |
|----|----|---|-----------|-----------|-----------|
| 5  | 7  | 0 | -0.036980 | -1.471603 | -0.150254 |
| 6  | 6  | 0 | 1.349403  | -1.445766 | 0.339306  |
| 7  | 6  | 0 | 2.204971  | -0.425735 | -0.430878 |
| 8  | 1  | 0 | 0.088600  | -2.891003 | -1.772565 |
| 9  | 1  | 0 | -2.553134 | -2.162313 | -2.117623 |
| 10 | 1  | 0 | 1.321223  | -1.170167 | 1.392760  |
| 11 | 1  | 0 | 1.766640  | -2.449995 | 0.249322  |
| 12 | 1  | 0 | 2.268029  | -0.700403 | -1.487464 |
| 13 | 1  | 0 | 1.755578  | 0.564123  | -0.333577 |
| 14 | 35 | 0 | 0.165143  | 2.041971  | 1.663527  |
| 15 | 1  | 0 | -0.839314 | 0.165806  | 1.024306  |
| 16 | 6  | 0 | -3.321905 | -0.185554 | -0.191625 |
| 17 | 6  | 0 | -4.494114 | -0.533587 | -0.704931 |
| 18 | 1  | 0 | -3.183266 | 0.676631  | 0.449055  |
| 19 | 1  | 0 | -5.363348 | 0.075272  | -0.500269 |
| 20 | 1  | 0 | -4.635435 | -1.405846 | -1.331171 |
| 21 | 8  | 0 | 3.525878  | -0.435848 | 0.091369  |
| 22 | 1  | 0 | 3.568947  | 0.202592  | 0.810875  |

-----  
Distance matrix (angstroms):

|    |    | 1        | 2        | 3        | 4        | 5        |
|----|----|----------|----------|----------|----------|----------|
| 1  | C  | 0.000000 |          |          |          |          |
| 2  | C  | 1.357757 | 0.000000 |          |          |          |
| 3  | N  | 2.204460 | 1.390353 | 0.000000 |          |          |
| 4  | C  | 2.218318 | 2.228723 | 1.347351 | 0.000000 |          |
| 5  | N  | 1.386381 | 2.209947 | 2.168440 | 1.335054 | 0.000000 |
| 6  | C  | 2.555749 | 3.639025 | 3.583665 | 2.474721 | 1.470508 |
| 7  | C  | 3.351325 | 4.378089 | 4.338390 | 3.310839 | 2.489766 |
| 8  | H  | 1.076548 | 2.215815 | 3.264858 | 3.234840 | 2.159250 |
| 9  | H  | 2.214685 | 1.074889 | 2.167282 | 3.247583 | 3.267821 |
| 10 | H  | 3.364990 | 4.257190 | 3.889526 | 2.604418 | 2.077612 |
| 11 | H  | 2.737966 | 3.997540 | 4.230614 | 3.286186 | 2.090444 |
| 12 | H  | 3.181185 | 4.249139 | 4.508734 | 3.744754 | 2.774157 |
| 13 | H  | 3.691861 | 4.440971 | 4.129566 | 3.104782 | 2.718649 |
| 14 | Br | 5.176523 | 5.327540 | 4.255452 | 3.257802 | 3.959275 |
| 15 | H  | 3.277695 | 3.293789 | 2.193772 | 1.114688 | 2.168972 |
| 16 | C  | 3.595876 | 2.534916 | 1.421661 | 2.425746 | 3.527941 |
| 17 | C  | 4.333704 | 3.050708 | 2.428868 | 3.640660 | 4.588418 |
| 18 | H  | 4.256995 | 3.402667 | 2.089418 | 2.572294 | 3.856578 |
| 19 | H  | 5.393127 | 4.121632 | 3.395965 | 4.500155 | 5.557475 |
| 20 | H  | 4.185810 | 2.844539 | 2.735174 | 4.054208 | 4.748124 |
| 21 | O  | 4.610742 | 5.728093 | 5.675751 | 4.545908 | 3.718216 |
| 22 | H  | 5.165183 | 6.175055 | 5.911258 | 4.686629 | 4.090160 |
|    |    | 6        | 7        | 8        | 9        | 10       |

|    |    |          |          |          |          |          |
|----|----|----------|----------|----------|----------|----------|
| 6  | C  | 0.000000 |          |          |          |          |
| 7  | C  | 1.538064 | 0.000000 |          |          |          |
| 8  | H  | 2.852777 | 3.515209 | 0.000000 |          |          |
| 9  | H  | 4.666876 | 5.338574 | 2.762031 | 0.000000 |          |
| 10 | H  | 1.089272 | 2.158898 | 3.807875 | 5.321446 | 0.000000 |
| 11 | H  | 1.091174 | 2.180007 | 2.664269 | 4.934130 | 1.773078 |
| 12 | H  | 2.176357 | 1.093523 | 3.103211 | 5.077193 | 3.068030 |
| 13 | H  | 2.158101 | 1.091440 | 4.097243 | 5.401969 | 2.485289 |
| 14 | Br | 3.914121 | 3.825834 | 6.012223 | 6.273924 | 3.424568 |
| 15 | H  | 2.803011 | 3.425661 | 4.245891 | 4.269547 | 2.566808 |
| 16 | C  | 4.867355 | 5.537264 | 4.631455 | 2.864970 | 5.003836 |
| 17 | C  | 6.005763 | 6.705555 | 5.262938 | 2.901008 | 6.214796 |
| 18 | H  | 5.006166 | 5.569792 | 5.326229 | 3.878724 | 4.958998 |
| 19 | H  | 6.933936 | 7.585201 | 6.335714 | 3.939534 | 7.058198 |
| 20 | H  | 6.213725 | 6.968666 | 4.971623 | 2.350899 | 6.554168 |
| 21 | O  | 2.412146 | 1.420436 | 4.617024 | 6.694379 | 2.663334 |
| 22 | H  | 2.804609 | 1.948634 | 5.325157 | 7.186706 | 2.697280 |
|    |    | 11       | 12       | 13       | 14       | 15       |
| 11 | H  | 0.000000 |          |          |          |          |
| 12 | H  | 2.515728 | 0.000000 |          |          |          |
| 13 | H  | 3.069983 | 1.786921 | 0.000000 |          |          |
| 14 | Br | 4.974186 | 4.676696 | 2.949906 | 0.000000 |          |
| 15 | H  | 3.772799 | 4.088384 | 2.955667 | 2.222056 | 0.000000 |
| 16 | C  | 5.587076 | 5.761218 | 5.134492 | 4.534640 | 2.786611 |
| 17 | C  | 6.616665 | 6.809314 | 6.356219 | 5.826815 | 4.103288 |
| 18 | H  | 5.858092 | 5.946674 | 5.001735 | 3.814570 | 2.466975 |
| 19 | H  | 7.601025 | 7.733960 | 7.137638 | 6.254129 | 4.774872 |
| 20 | H  | 6.676434 | 6.941174 | 6.761733 | 6.625799 | 4.735916 |
| 21 | O  | 2.678928 | 2.035900 | 2.077133 | 4.461593 | 4.504138 |
| 22 | H  | 3.255744 | 2.791084 | 2.174576 | 3.961844 | 4.413578 |
|    |    | 16       | 17       | 18       | 19       | 20       |
| 16 | C  | 0.000000 |          |          |          |          |
| 17 | C  | 1.326154 | 0.000000 |          |          |          |
| 18 | H  | 1.083075 | 2.124766 | 0.000000 |          |          |
| 19 | H  | 2.081053 | 1.080817 | 2.452673 | 0.000000 |          |
| 20 | H  | 2.124392 | 1.083044 | 3.100760 | 1.847692 | 0.000000 |
| 21 | O  | 6.858197 | 8.060020 | 6.810151 | 8.923543 | 8.340956 |
| 22 | H  | 6.974203 | 8.237267 | 6.778495 | 9.028909 | 8.630604 |
|    |    | 21       | 22       |          |          |          |
| 21 | O  | 0.000000 |          |          |          |          |
| 22 | H  | 0.962886 | 0.000000 |          |          |          |

Stoichiometry C7H11BrN2O

Framework group C1[X(C7H11BrN2O)]

Deg. of freedom 60

Full point group C1 NOp 1  
 Largest Abelian subgroup C1 NOp 1  
 Largest concise Abelian subgroup C1 NOp 1

Standard orientation:

| Center<br>Number | Atomic<br>Number | Atomic<br>Type | Coordinates (Angstroms) |           |           |
|------------------|------------------|----------------|-------------------------|-----------|-----------|
|                  |                  |                | X                       | Y         | Z         |
| 1                | 6                | 0              | -1.503309               | -2.201757 | -0.048762 |
| 2                | 6                | 0              | -2.556304               | -1.375523 | -0.276891 |
| 3                | 7                | 0              | -2.131708               | -0.090740 | 0.042690  |
| 4                | 6                | 0              | -0.852797               | -0.143716 | 0.463328  |
| 5                | 7                | 0              | -0.455865               | -1.417234 | 0.408880  |
| 6                | 6                | 0              | 0.920361                | -1.855775 | 0.684702  |
| 7                | 6                | 0              | 1.785342                | -1.846236 | -0.587052 |
| 8                | 1                | 0              | -1.404421               | -3.265854 | -0.178660 |
| 9                | 1                | 0              | -3.546541               | -1.584180 | -0.639215 |
| 10               | 1                | 0              | 1.344921                | -1.167565 | 1.414517  |
| 11               | 1                | 0              | 0.883784                | -2.854558 | 1.122601  |
| 12               | 1                | 0              | 1.390410                | -2.552116 | -1.322956 |
| 13               | 1                | 0              | 1.791092                | -0.839367 | -1.008267 |
| 14               | 35               | 0              | 1.611454                | 1.932676  | -0.015565 |
| 15               | 1                | 0              | -0.163124               | 0.726441  | 0.561847  |
| 16               | 6                | 0              | -2.851767               | 1.131707  | -0.048198 |
| 17               | 6                | 0              | -4.168226               | 1.212968  | -0.186094 |
| 18               | 1                | 0              | -2.202526               | 1.997102  | 0.003076  |
| 19               | 1                | 0              | -4.632230               | 2.185148  | -0.274018 |
| 20               | 1                | 0              | -4.818743               | 0.347699  | -0.219604 |
| 21               | 8                | 0              | 3.102207                | -2.265456 | -0.258782 |
| 22               | 1                | 0              | 3.612038                | -1.486953 | -0.011488 |

Rotational constants (GHZ): 0.7676239 0.5015114 0.3123818

Standard basis: 6-311++G(d,p) (5D, 7F)

There are 358 symmetry adapted cartesian basis functions of A symmetry.

There are 345 symmetry adapted basis functions of A symmetry.

345 basis functions, 553 primitive gaussians, 358 cartesian basis functions

55 alpha electrons 55 beta electrons

nuclear repulsion energy 838.4540754159 Hartrees.

NAtoms= 22 NActive= 22 NUniq= 22 SFac= 1.00D+00 NAtFMM= 60 NAOKFM=F

Big=F

Integral buffers will be 131072 words long.

Raffenetti 2 integral format.

Two-electron integral symmetry is turned on.

One-electron integrals computed using PRISM.

NBasis= 345 RedAO= T EigKep= 5.50D-06 NBF= 345  
 NBsUse= 345 1.00D-06 EigRej= -1.00D+00 NBFU= 345  
 Initial guess from the checkpoint file: ".  
 B after Tr= 0.000000 0.000000 0.000000  
 Rot= 0.998858 0.004401 -0.000663 0.047571 Ang= 5.48 deg.  
 ExpMin= 3.50D-02 ExpMax= 4.40D+05 ExpMxC= 1.51D+04 IAcc=3 IRadAn= 5 AccDes=  
 0.00D+00  
 Harris functional with IExCor= 402 and IRadAn= 5 diagonalized for initial guess.  
 HarFok: IExCor= 402 AccDes= 0.00D+00 IRadAn= 5 IDoV= 1 UseB2=F ITyADJ=14  
 ICtDFT= 3500011 ScaDFX= 1.000000 1.000000 1.000000 1.000000  
 FoFCou: FMM=F IPFlag= 0 FMFlag= 100000 FMFlg1= 0  
 NfxFlg= 0 DoJE=T BraDBF=F KetDBF=T FulRan=T  
 wScrn= 0.000000 ICntrl= 500 IOpCl= 0 l1Cent= 200000004 NGrid=  
 0  
 NMat0= 1 NMatS0= 1 NMatT0= 0 NMatD0= 1 NMtDS0= 0  
 NMtDT0= 0  
 Petite list used in FoFCou.  
 Keep R1 ints in memory in canonical form, NReq=1804729152.  
 Requested convergence on RMS density matrix=1.00D-08 within 128 cycles.  
 Requested convergence on MAX density matrix=1.00D-06.  
 Requested convergence on energy=1.00D-06.  
 No special actions if energy rises.  
 SCF Done: E(RB3LYP) = -3032.33910719 A.U. after 13 cycles  
 NFock= 13 Conv=0.78D-08 -V/T= 2.0017  
 Calling FoFJK, ICntrl= 2127 FMM=F ISym2X=0 l1Cent= 0 IOpClX= 0 NMat=1 NMatS=1  
 NMatT=0.

\*\*\*\*\* Axes restored to original set \*\*\*\*\*

| Center<br>Number | Atomic<br>Number | Forces (Hartrees/Bohr) |              |              |
|------------------|------------------|------------------------|--------------|--------------|
|                  |                  | X                      | Y            | Z            |
| 1                | 6                | 0.000030261            | 0.000238877  | 0.000257610  |
| 2                | 6                | -0.000253639           | -0.000435850 | 0.000395452  |
| 3                | 7                | -0.000004595           | -0.000582141 | 0.001060620  |
| 4                | 6                | 0.000515951            | 0.006470255  | -0.004472704 |
| 5                | 7                | -0.001196661           | -0.000846942 | 0.001404577  |
| 6                | 6                | 0.003136204            | 0.000496100  | -0.000056613 |
| 7                | 6                | 0.002476494            | 0.000192438  | 0.001611098  |
| 8                | 1                | -0.000392617           | -0.000392842 | 0.000239204  |
| 9                | 1                | 0.000302216            | -0.000171449 | -0.000099286 |
| 10               | 1                | -0.000723845           | 0.000226064  | 0.000277431  |
| 11               | 1                | -0.000442737           | 0.000032392  | -0.000287622 |
| 12               | 1                | 0.000343728            | -0.000191332 | -0.000046238 |
| 13               | 1                | -0.002200872           | 0.000907862  | -0.000688589 |

|    |    |              |              |              |
|----|----|--------------|--------------|--------------|
| 14 | 35 | -0.000144812 | -0.002438098 | -0.000927495 |
| 15 | 1  | 0.000774738  | -0.003193868 | 0.002752849  |
| 16 | 6  | -0.000936637 | -0.000027096 | -0.000349264 |
| 17 | 6  | -0.000257550 | 0.000038197  | -0.000702537 |
| 18 | 1  | 0.000400143  | 0.000058058  | 0.000090220  |
| 19 | 1  | -0.000243739 | 0.000016575  | 0.000319951  |
| 20 | 1  | 0.000003257  | 0.000121367  | 0.000018385  |
| 21 | 8  | -0.001048338 | -0.001642189 | -0.001398528 |
| 22 | 1  | -0.000136949 | 0.001123619  | 0.000601477  |

-----  
Cartesian Forces: Max 0.006470255 RMS 0.001399914

GradGradGradGradGradGradGradGradGradGradGradGradGradGradGradGradGradGradGrad  
Berny optimization.

Using GEDIIS/GDIIS optimizer.

FormGI is forming the generalized inverse of G from B-inverse, IUseBI=4.

Internal Forces: Max 0.007669806 RMS 0.001497889

Search for a local minimum.

Step number 46 out of a maximum of 116

All quantities printed in internal units (Hartrees-Bohrs-Radians)

Mixed Optimization -- RFO/linear search

Update second derivatives using D2CorX and points 43 44 45 46

DE= -3.03D-06 DEPred=-2.50D-04 R= 1.21D-02

Trust test= 1.21D-02 RLast= 3.95D-01 DXMaxT set to 9.25D-02

ITU= -1 1 0 -1 1 0 -1 0 -1 0 0 1 -1 0 1 1 1 1 1 1

ITU= 0 -1 1 1 1 1 1 0 -1 1 1 1 1 1 1 1 1 1 1 1

ITU= 1 0 0 -1 0 0

Use linear search instead of GDIIS.

|                 |         |         |         |         |         |
|-----------------|---------|---------|---------|---------|---------|
| Eigenvalues --- | 0.00126 | 0.00220 | 0.00378 | 0.00570 | 0.00902 |
| Eigenvalues --- | 0.01184 | 0.01387 | 0.01497 | 0.01729 | 0.02130 |
| Eigenvalues --- | 0.02274 | 0.02468 | 0.03061 | 0.03158 | 0.03756 |
| Eigenvalues --- | 0.04232 | 0.04943 | 0.05528 | 0.06091 | 0.06197 |
| Eigenvalues --- | 0.08535 | 0.09324 | 0.11981 | 0.13523 | 0.14253 |
| Eigenvalues --- | 0.15505 | 0.15945 | 0.16009 | 0.16089 | 0.16447 |
| Eigenvalues --- | 0.17064 | 0.18212 | 0.20307 | 0.22548 | 0.22946 |
| Eigenvalues --- | 0.24619 | 0.25073 | 0.25679 | 0.29040 | 0.32614 |
| Eigenvalues --- | 0.33732 | 0.33857 | 0.33888 | 0.34127 | 0.34250 |
| Eigenvalues --- | 0.34614 | 0.34829 | 0.36283 | 0.36292 | 0.36859 |
| Eigenvalues --- | 0.37280 | 0.43034 | 0.44366 | 0.46616 | 0.49222 |
| Eigenvalues --- | 0.53369 | 0.54890 | 0.57904 | 0.60785 | 1.75188 |

RFO step: Lambda=-4.44843362D-04 EMin= 1.25518781D-03

Quartic linear search produced a step of -0.45213.

Maximum step size ( 0.093) exceeded in Quadratic search.

-- Step size scaled by 0.725

| Iteration 1 | RMS(Cart)= | 0.02476752 | RMS(Int)=           | 0.00054247        |                    |         |
|-------------|------------|------------|---------------------|-------------------|--------------------|---------|
| Iteration 2 | RMS(Cart)= | 0.00052065 | RMS(Int)=           | 0.00017993        |                    |         |
| Iteration 3 | RMS(Cart)= | 0.00000015 | RMS(Int)=           | 0.00017993        |                    |         |
| Variable    | Old X      | -DE/DX     | Delta X<br>(Linear) | Delta X<br>(Quad) | Delta X<br>(Total) | New X   |
| R1          | 2.56579    | 0.00016    | -0.00063            | 0.00117           | 0.00037            | 2.56616 |
| R2          | 2.61988    | -0.00046   | 0.00087             | -0.00012          | 0.00068            | 2.62056 |
| R3          | 2.03438    | -0.00009   | -0.00004            | -0.00001          | -0.00005           | 2.03433 |
| R4          | 2.62739    | 0.00060    | 0.00059             | 0.00006           | 0.00062            | 2.62800 |
| R5          | 2.03125    | -0.00009   | 0.00003             | -0.00004          | -0.00001           | 2.03123 |
| R6          | 2.54613    | 0.00063    | -0.00088            | 0.00197           | 0.00124            | 2.54736 |
| R7          | 2.68655    | 0.00088    | 0.00102             | -0.00172          | -0.00071           | 2.68584 |
| R8          | 2.52289    | 0.00043    | 0.00035             | -0.00060          | -0.00012           | 2.52276 |
| R9          | 2.10645    | -0.00062   | -0.01276            | 0.01070           | -0.00206           | 2.10440 |
| R10         | 2.77886    | 0.00086    | 0.00035             | -0.00213          | -0.00178           | 2.77707 |
| R11         | 2.90652    | -0.00134   | 0.00041             | 0.00216           | 0.00257            | 2.90909 |
| R12         | 2.05843    | 0.00035    | 0.00015             | 0.00003           | 0.00017            | 2.05860 |
| R13         | 2.06202    | -0.00018   | -0.00006            | 0.00085           | 0.00079            | 2.06281 |
| R14         | 2.06646    | 0.00011    | 0.00031             | -0.00185          | -0.00154           | 2.06492 |
| R15         | 2.06252    | -0.00057   | 0.00121             | -0.00003          | 0.00117            | 2.06370 |
| R16         | 2.68424    | -0.00139   | -0.00036            | 0.00033           | -0.00003           | 2.68421 |
| R17         | 5.57451    | -0.00177   | -0.07102            | 0.07310           | 0.00208            | 5.57660 |
| R18         | 2.50607    | 0.00054    | 0.00007             | 0.00031           | 0.00038            | 2.50644 |
| R19         | 2.04672    | 0.00015    | 0.00081             | -0.00034          | 0.00048            | 2.04720 |
| R20         | 2.04245    | 0.00027    | 0.00016             | 0.00067           | 0.00083            | 2.04328 |
| R21         | 2.04666    | -0.00011   | 0.00017             | 0.00044           | 0.00061            | 2.04727 |
| R22         | 1.81959    | 0.00119    | 0.00020             | -0.00041          | -0.00021           | 1.81938 |
| A1          | 1.87240    | -0.00013   | 0.00017             | 0.00127           | 0.00133            | 1.87373 |
| A2          | 2.28162    | -0.00018   | -0.00019            | -0.00048          | -0.00062           | 2.28099 |
| A3          | 2.12912    | 0.00031    | 0.00004             | -0.00087          | -0.00079           | 2.12833 |
| A4          | 1.86175    | 0.00039    | 0.00079             | -0.00018          | 0.00056            | 1.86231 |
| A5          | 2.28230    | -0.00055   | 0.00053             | -0.00110          | -0.00054           | 2.28176 |
| A6          | 2.13909    | 0.00016    | -0.00137            | 0.00126           | -0.00008           | 2.13901 |
| A7          | 1.90213    | -0.00056   | -0.00132            | -0.00139          | -0.00239           | 1.89973 |
| A8          | 2.24620    | -0.00013   | -0.00097            | 0.00066           | -0.00035           | 2.24584 |
| A9          | 2.13475    | 0.00070    | 0.00172             | 0.00078           | 0.00245            | 2.13720 |
| A10         | 1.88282    | -0.00001   | 0.00179             | 0.00186           | 0.00308            | 1.88590 |
| A11         | 2.19467    | 0.00218    | -0.00342            | 0.01371           | 0.00920            | 2.20387 |
| A12         | 2.17038    | -0.00169   | 0.00505             | 0.00145           | 0.00532            | 2.17570 |
| A13         | 1.90565    | 0.00031    | -0.00143            | -0.00150          | -0.00255           | 1.90310 |
| A14         | 2.21460    | 0.00224    | -0.00059            | -0.00149          | -0.00197           | 2.21263 |
| A15         | 2.15926    | -0.00259   | -0.00062            | 0.00465           | 0.00415            | 2.16341 |
| A16         | 1.94914    | -0.00319   | -0.00303            | 0.00466           | 0.00163            | 1.95077 |
| A17         | 1.87761    | -0.00061   | -0.00135            | 0.00356           | 0.00222            | 1.87984 |

|     |          |          |          |          |          |          |
|-----|----------|----------|----------|----------|----------|----------|
| A18 | 1.89323  | 0.00190  | 0.00121  | -0.00160 | -0.00040 | 1.89283  |
| A19 | 1.90803  | 0.00063  | 0.00044  | -0.00220 | -0.00175 | 1.90628  |
| A20 | 1.93516  | 0.00150  | 0.00320  | -0.00436 | -0.00116 | 1.93400  |
| A21 | 1.89916  | -0.00023 | -0.00058 | 0.00009  | -0.00048 | 1.89868  |
| A22 | 1.92766  | 0.00220  | -0.00120 | 0.00122  | 0.00004  | 1.92770  |
| A23 | 1.90476  | -0.00677 | -0.00285 | 0.00744  | 0.00456  | 1.90932  |
| A24 | 1.90546  | 0.00111  | -0.00063 | 0.00897  | 0.00833  | 1.91379  |
| A25 | 1.91525  | 0.00101  | -0.00011 | -0.00137 | -0.00148 | 1.91377  |
| A26 | 1.87532  | -0.00113 | 0.00170  | -0.01336 | -0.01166 | 1.86366  |
| A27 | 1.93539  | 0.00375  | 0.00314  | -0.00312 | -0.00004 | 1.93536  |
| A28 | 2.39897  | -0.00767 | 0.03767  | -0.04331 | -0.00564 | 2.39334  |
| A29 | 2.16775  | 0.00066  | -0.00224 | 0.00523  | 0.00300  | 2.17075  |
| A30 | 1.96104  | -0.00072 | -0.00126 | 0.00105  | -0.00020 | 1.96083  |
| A31 | 2.15439  | 0.00006  | 0.00343  | -0.00625 | -0.00281 | 2.15158  |
| A32 | 2.08259  | -0.00008 | -0.00008 | 0.00083  | 0.00074  | 2.08334  |
| A33 | 2.15377  | 0.00006  | -0.00089 | 0.00115  | 0.00026  | 2.15403  |
| A34 | 2.04682  | 0.00002  | 0.00097  | -0.00197 | -0.00100 | 2.04582  |
| A35 | 1.88768  | -0.00054 | -0.00008 | 0.00027  | 0.00019  | 1.88787  |
| D1  | 0.00338  | 0.00008  | 0.00070  | 0.00024  | 0.00090  | 0.00428  |
| D2  | 3.13439  | 0.00016  | -0.00322 | -0.00150 | -0.00471 | 3.12968  |
| D3  | -3.12710 | -0.00020 | -0.00196 | 0.00978  | 0.00780  | -3.11930 |
| D4  | 0.00391  | -0.00013 | -0.00588 | 0.00804  | 0.00219  | 0.00611  |
| D5  | 0.00169  | -0.00022 | -0.00235 | -0.00421 | -0.00655 | -0.00486 |
| D6  | -3.04989 | 0.00028  | 0.02232  | -0.02470 | -0.00235 | -3.05224 |
| D7  | 3.13335  | 0.00003  | 0.00002  | -0.01273 | -0.01271 | 3.12064  |
| D8  | 0.08177  | 0.00053  | 0.02469  | -0.03322 | -0.00851 | 0.07325  |
| D9  | -0.00729 | 0.00008  | 0.00117  | 0.00378  | 0.00500  | -0.00229 |
| D10 | 3.11835  | 0.00011  | -0.01686 | 0.00728  | -0.00955 | 3.10880  |
| D11 | -3.13937 | 0.00002  | 0.00467  | 0.00536  | 0.01004  | -3.12933 |
| D12 | -0.01374 | 0.00005  | -0.01337 | 0.00885  | -0.00450 | -0.01824 |
| D13 | 0.00838  | -0.00022 | -0.00264 | -0.00640 | -0.00910 | -0.00071 |
| D14 | 2.87607  | 0.00125  | 0.01201  | 0.05790  | 0.07014  | 2.94621  |
| D15 | -3.11848 | -0.00024 | 0.01411  | -0.00963 | 0.00439  | -3.11409 |
| D16 | -0.25078 | 0.00123  | 0.02875  | 0.05467  | 0.08362  | -0.16716 |
| D17 | 0.27124  | -0.00022 | 0.05190  | -0.03825 | 0.01362  | 0.28486  |
| D18 | -2.86555 | -0.00018 | 0.05848  | -0.04277 | 0.01570  | -2.84984 |
| D19 | -2.88821 | -0.00020 | 0.03162  | -0.03436 | -0.00273 | -2.89094 |
| D20 | 0.25819  | -0.00016 | 0.03820  | -0.03888 | -0.00065 | 0.25754  |
| D21 | -0.00624 | 0.00027  | 0.00308  | 0.00655  | 0.00966  | 0.00342  |
| D22 | 3.04881  | 0.00008  | -0.02063 | 0.02589  | 0.00524  | 3.05405  |
| D23 | -2.87868 | -0.00193 | -0.00986 | -0.05903 | -0.06875 | -2.94743 |
| D24 | 0.17637  | -0.00211 | -0.03357 | -0.03969 | -0.07317 | 0.10320  |
| D25 | 1.48153  | 0.00106  | -0.03634 | 0.00999  | -0.02636 | 1.45517  |
| D26 | -2.70791 | -0.00045 | -0.03844 | 0.01234  | -0.02611 | -2.73401 |

|     |          |          |          |          |          |          |
|-----|----------|----------|----------|----------|----------|----------|
| D27 | -0.65627 | -0.00004 | -0.03921 | 0.01353  | -0.02568 | -0.68195 |
| D28 | -1.55782 | 0.00144  | -0.00826 | -0.01294 | -0.02118 | -1.57901 |
| D29 | 0.53592  | -0.00007 | -0.01036 | -0.01058 | -0.02093 | 0.51499  |
| D30 | 2.58756  | 0.00034  | -0.01113 | -0.00939 | -0.02051 | 2.56705  |
| D31 | -1.09251 | -0.00131 | -0.02080 | 0.02472  | 0.00392  | -1.08859 |
| D32 | 1.01441  | -0.00302 | -0.02348 | 0.02855  | 0.00505  | 1.01946  |
| D33 | 3.13235  | -0.00192 | -0.02178 | 0.03486  | 0.01309  | -3.13774 |
| D34 | 3.11490  | 0.00101  | -0.01755 | 0.01883  | 0.00128  | 3.11619  |
| D35 | -1.06136 | -0.00069 | -0.02023 | 0.02265  | 0.00241  | -1.05895 |
| D36 | 1.05658  | 0.00041  | -0.01853 | 0.02897  | 0.01045  | 1.06703  |
| D37 | 1.02110  | -0.00004 | -0.01913 | 0.02285  | 0.00372  | 1.02482  |
| D38 | 3.12803  | -0.00174 | -0.02181 | 0.02667  | 0.00485  | 3.13287  |
| D39 | -1.03722 | -0.00064 | -0.02011 | 0.03299  | 0.01289  | -1.02433 |
| D40 | 0.53940  | -0.00160 | -0.00821 | -0.02881 | -0.03701 | 0.50239  |
| D41 | 2.65390  | -0.00251 | -0.01153 | -0.02348 | -0.03501 | 2.61889  |
| D42 | -1.56025 | -0.00096 | -0.00754 | -0.04277 | -0.05032 | -1.61057 |
| D43 | -1.55751 | 0.00243  | -0.03296 | 0.07763  | 0.04466  | -1.51286 |
| D44 | 2.63475  | -0.00018 | -0.03215 | 0.07889  | 0.04676  | 2.68151  |
| D45 | 0.54172  | -0.00289 | -0.03494 | 0.09069  | 0.05574  | 0.59746  |
| D46 | -3.11316 | -0.00024 | 0.00475  | -0.00549 | -0.00075 | -3.11391 |
| D47 | 0.02502  | -0.00002 | 0.00455  | -0.00350 | 0.00104  | 0.02606  |
| D48 | 0.02310  | -0.00029 | -0.00259 | -0.00046 | -0.00304 | 0.02006  |
| D49 | -3.12190 | -0.00007 | -0.00280 | 0.00153  | -0.00126 | -3.12316 |

| Item                 | Value    | Threshold | Converged? |
|----------------------|----------|-----------|------------|
| Maximum Force        | 0.007670 | 0.000450  | NO         |
| RMS Force            | 0.001498 | 0.000300  | NO         |
| Maximum Displacement | 0.116624 | 0.001800  | NO         |
| RMS Displacement     | 0.024926 | 0.001200  | NO         |

Predicted change in Energy=-3.104254D-04

GradGradGradGradGradGradGradGradGradGradGradGradGradGradGradGradGradGrad

Input orientation:

| Center Number | Atomic Number | Atomic Type | Coordinates (Angstroms) |           |           |
|---------------|---------------|-------------|-------------------------|-----------|-----------|
|               |               |             | X                       | Y         | Z         |
| 1             | 6             | 0           | -0.519526               | -2.178561 | -1.228627 |
| 2             | 6             | 0           | -1.820044               | -1.827061 | -1.399316 |
| 3             | 7             | 0           | -2.113582               | -0.890576 | -0.414014 |
| 4             | 6             | 0           | -1.011521               | -0.686479 | 0.334935  |
| 5             | 7             | 0           | -0.036243               | -1.462047 | -0.144146 |
| 6             | 6             | 0           | 1.348483                | -1.437165 | 0.347315  |
| 7             | 6             | 0           | 2.213751                | -0.432010 | -0.434222 |
| 8             | 1             | 0           | 0.103081                | -2.857198 | -1.786039 |



|    |    |   |           |           |           |
|----|----|---|-----------|-----------|-----------|
| 9  | 1  | 0 | -2.542673 | -2.145098 | -2.128721 |
| 10 | 1  | 0 | 1.322297  | -1.147614 | 1.397166  |
| 11 | 1  | 0 | 1.760394  | -2.445161 | 0.270827  |
| 12 | 1  | 0 | 2.274851  | -0.718451 | -1.486945 |
| 13 | 1  | 0 | 1.776804  | 0.565255  | -0.349738 |
| 14 | 35 | 0 | 0.141962  | 2.051540  | 1.606456  |
| 15 | 1  | 0 | -0.865940 | 0.122706  | 1.086021  |
| 16 | 6  | 0 | -3.329494 | -0.190059 | -0.188423 |
| 17 | 6  | 0 | -4.501067 | -0.538338 | -0.703526 |
| 18 | 1  | 0 | -3.194706 | 0.673490  | 0.451670  |
| 19 | 1  | 0 | -5.371883 | 0.069059  | -0.498916 |
| 20 | 1  | 0 | -4.641595 | -1.410679 | -1.330387 |
| 21 | 8  | 0 | 3.540485  | -0.448238 | 0.072836  |
| 22 | 1  | 0 | 3.586516  | 0.165806  | 0.812946  |

-----  
Distance matrix (angstroms):

|    |    | 1        | 2        | 3        | 4        | 5        |
|----|----|----------|----------|----------|----------|----------|
| 1  | C  | 0.000000 |          |          |          |          |
| 2  | C  | 1.357952 | 0.000000 |          |          |          |
| 3  | N  | 2.205338 | 1.390679 | 0.000000 |          |          |
| 4  | C  | 2.216551 | 2.227614 | 1.348006 | 0.000000 |          |
| 5  | N  | 1.386742 | 2.211478 | 2.171347 | 1.334988 | 0.000000 |
| 6  | C  | 2.553962 | 3.638998 | 3.586681 | 2.476551 | 1.469564 |
| 7  | C  | 3.339510 | 4.375966 | 4.351610 | 3.325468 | 2.491504 |
| 8  | H  | 1.076520 | 2.215659 | 3.265524 | 3.233093 | 2.159090 |
| 9  | H  | 2.214591 | 1.074882 | 2.167524 | 3.246783 | 3.269142 |
| 10 | H  | 3.368969 | 4.261017 | 3.892520 | 2.605319 | 2.078495 |
| 11 | H  | 2.741801 | 3.998870 | 4.230063 | 3.283380 | 2.089645 |
| 12 | H  | 3.163415 | 4.243213 | 4.520968 | 3.757727 | 2.774383 |
| 13 | H  | 3.684305 | 4.445459 | 4.154357 | 3.132151 | 2.727519 |
| 14 | Br | 5.135077 | 5.284664 | 4.222064 | 3.231723 | 3.929587 |
| 15 | H  | 3.282290 | 3.299819 | 2.198513 | 1.113599 | 2.170979 |
| 16 | C  | 3.596121 | 2.534655 | 1.421287 | 2.427619 | 3.530640 |
| 17 | C  | 4.338057 | 3.054966 | 2.430632 | 3.643800 | 4.593561 |
| 18 | H  | 4.256075 | 3.401264 | 2.089148 | 2.574769 | 3.858938 |
| 19 | H  | 5.397188 | 4.125718 | 3.397739 | 4.503210 | 5.562302 |
| 20 | H  | 4.194216 | 2.852941 | 2.738812 | 4.058965 | 4.755951 |
| 21 | O  | 4.601252 | 5.727448 | 5.692202 | 4.565766 | 3.723960 |
| 22 | H  | 5.150112 | 6.172237 | 5.925579 | 4.700726 | 4.085377 |
|    |    | 6        | 7        | 8        | 9        | 10       |
| 6  | C  | 0.000000 |          |          |          |          |
| 7  | C  | 1.539423 | 0.000000 |          |          |          |
| 8  | H  | 2.849336 | 3.487674 | 0.000000 |          |          |
| 9  | H  | 4.666157 | 5.331939 | 2.761256 | 0.000000 |          |

|    |    |          |          |          |          |          |
|----|----|----------|----------|----------|----------|----------|
| 10 | H  | 1.089364 | 2.158880 | 3.813391 | 5.325866 | 0.000000 |
| 11 | H  | 1.091593 | 2.180688 | 2.673417 | 4.936016 | 1.773188 |
| 12 | H  | 2.176974 | 1.092707 | 3.062724 | 5.065149 | 3.067513 |
| 13 | H  | 2.163106 | 1.092061 | 4.071546 | 5.400803 | 2.488408 |
| 14 | Br | 3.900281 | 3.824224 | 5.967096 | 6.226603 | 3.416369 |
| 15 | H  | 2.807589 | 3.478986 | 4.250594 | 4.276556 | 2.549295 |
| 16 | C  | 4.870910 | 5.553965 | 4.631261 | 2.864615 | 5.007011 |
| 17 | C  | 6.010774 | 6.721058 | 5.267554 | 2.906573 | 6.220586 |
| 18 | H  | 5.010621 | 5.590916 | 5.324330 | 3.876596 | 4.961219 |
| 19 | H  | 6.938886 | 7.602440 | 6.339944 | 3.945019 | 7.063106 |
| 20 | H  | 6.220645 | 6.982598 | 4.981163 | 2.362664 | 6.563288 |
| 21 | O  | 2.420369 | 1.420421 | 4.590670 | 6.688124 | 2.676441 |
| 22 | H  | 2.791974 | 1.948664 | 5.294108 | 7.180573 | 2.681991 |
|    |    | 11       | 12       | 13       | 14       | 15       |
| 11 | H  | 0.000000 |          |          |          |          |
| 12 | H  | 2.517133 | 0.000000 |          |          |          |
| 13 | H  | 3.073755 | 1.785830 | 0.000000 |          |          |
| 14 | Br | 4.962211 | 4.668103 | 2.951007 | 0.000000 |          |
| 15 | H  | 3.762460 | 4.146356 | 3.039958 | 2.237659 | 0.000000 |
| 16 | C  | 5.585996 | 5.777027 | 5.164378 | 4.505260 | 2.791259 |
| 17 | C  | 6.617494 | 6.823434 | 6.383945 | 5.796655 | 4.105315 |
| 18 | H  | 5.857618 | 5.967560 | 5.036852 | 3.790239 | 2.475665 |
| 19 | H  | 7.601524 | 7.750413 | 7.167439 | 6.226180 | 4.776864 |
| 20 | H  | 6.679782 | 6.952763 | 6.786886 | 6.595030 | 4.737707 |
| 21 | O  | 2.682467 | 2.026761 | 2.077573 | 4.488968 | 4.557313 |
| 22 | H  | 3.231990 | 2.791392 | 2.187796 | 4.006320 | 4.461030 |
|    |    | 16       | 17       | 18       | 19       | 20       |
| 16 | C  | 0.000000 |          |          |          |          |
| 17 | C  | 1.326353 | 0.000000 |          |          |          |
| 18 | H  | 1.083329 | 2.123578 | 0.000000 |          |          |
| 19 | H  | 2.082042 | 1.081256 | 2.451336 | 0.000000 |          |
| 20 | H  | 2.124995 | 1.083366 | 3.100479 | 1.847779 | 0.000000 |
| 21 | O  | 6.879791 | 8.079445 | 6.838464 | 8.945658 | 8.357138 |
| 22 | H  | 6.997183 | 8.258602 | 6.809789 | 9.054460 | 8.647600 |
|    |    | 21       | 22       |          |          |          |
| 21 | O  | 0.000000 |          |          |          |          |
| 22 | H  | 0.962772 | 0.000000 |          |          |          |

Stoichiometry C7H11BrN2O

Framework group C1[X(C7H11BrN2O)]

Deg. of freedom 60

Full point group C1 NOp 1

Largest Abelian subgroup C1 NOp 1

Largest concise Abelian subgroup C1 NOp 1

Standard orientation:

| Center<br>Number | Atomic<br>Number | Atomic<br>Type | Coordinates (Angstroms) |           |           |
|------------------|------------------|----------------|-------------------------|-----------|-----------|
|                  |                  |                | X                       | Y         | Z         |
| 1                | 6                | 0              | -1.427602               | -2.225265 | -0.073543 |
| 2                | 6                | 0              | -2.503347               | -1.427085 | -0.296510 |
| 3                | 7                | 0              | -2.121881               | -0.135796 | 0.051405  |
| 4                | 6                | 0              | -0.843220               | -0.159375 | 0.477538  |
| 5                | 7                | 0              | -0.407980               | -1.419645 | 0.410607  |
| 6                | 6                | 0              | 0.975619                | -1.826280 | 0.693306  |
| 7                | 6                | 0              | 1.847251                | -1.806002 | -0.575422 |
| 8                | 1                | 0              | -1.293583               | -3.282082 | -0.228691 |
| 9                | 1                | 0              | -3.481683               | -1.658537 | -0.676854 |
| 10               | 1                | 0              | 1.384691                | -1.126091 | 1.420704  |
| 11               | 1                | 0              | 0.958879                | -2.823753 | 1.136413  |
| 12               | 1                | 0              | 1.469143                | -2.521321 | -1.309834 |
| 13               | 1                | 0              | 1.840653                | -0.801552 | -1.003950 |
| 14               | 35               | 0              | 1.539209                | 1.965753  | -0.024359 |
| 15               | 1                | 0              | -0.193296               | 0.726192  | 0.660501  |
| 16               | 6                | 0              | -2.875346               | 1.066322  | -0.033797 |
| 17               | 6                | 0              | -4.192651               | 1.115667  | -0.180381 |
| 18               | 1                | 0              | -2.250636               | 1.949246  | 0.027721  |
| 19               | 1                | 0              | -4.681441               | 2.076667  | -0.262106 |
| 20               | 1                | 0              | -4.821363               | 0.234555  | -0.225589 |
| 21               | 8                | 0              | 3.170137                | -2.210224 | -0.252668 |
| 22               | 1                | 0              | 3.660013                | -1.432680 | 0.034346  |

Rotational constants (GHZ): 0.7658861 0.5059747 0.3140008

Standard basis: 6-311++G(d,p) (5D, 7F)

There are 358 symmetry adapted cartesian basis functions of A symmetry.

There are 345 symmetry adapted basis functions of A symmetry.

345 basis functions, 553 primitive gaussians, 358 cartesian basis functions

55 alpha electrons 55 beta electrons

nuclear repulsion energy 839.4412417077 Hartrees.

NAtoms= 22 NActive= 22 NUniq= 22 SFac= 1.00D+00 NAtFMM= 60 NAOKFM=F

Big=F

Integral buffers will be 131072 words long.

Raffenetti 2 integral format.

Two-electron integral symmetry is turned on.

One-electron integrals computed using PRISM.

NBasis= 345 RedAO= T EigKep= 5.50D-06 NBF= 345

NBsUse= 345 1.00D-06 EigRej= -1.00D+00 NBFU= 345

Initial guess from the checkpoint file: "."

B after Tr= 0.000000 0.000000 0.000000

Rot= 0.999916 0.000355 0.000144 -0.012988 Ang= 1.49 deg.  
 ExpMin= 3.50D-02 ExpMax= 4.40D+05 ExpMxC= 1.51D+04 IAcc=3 IRadAn= 5 AccDes= 0.00D+00  
 Harris functional with IExCor= 402 and IRadAn= 5 diagonalized for initial guess.  
 HarFok: IExCor= 402 AccDes= 0.00D+00 IRadAn= 5 IDoV= 1 UseB2=F ITyADJ=14  
 ICtDFT= 3500011 ScaDFX= 1.000000 1.000000 1.000000 1.000000  
 FoFCou: FMM=F IPFlag= 0 FMFlag= 100000 FMFlg1= 0  
 NFXFlg= 0 DoJE=T BraDBF=F KetDBF=T FulRan=T  
 wScrn= 0.000000 ICntrl= 500 IOpCl= 0 I1Cent= 200000004 NGrid= 0  
 NMat0= 1 NMatS0= 1 NMatT0= 0 NMatD0= 1 NMtDS0= 0  
 NMtDT0= 0

Petite list used in FoFCou.

Keep R1 ints in memory in canonical form, NReq=1804729152.

Requested convergence on RMS density matrix=1.00D-08 within 128 cycles.

Requested convergence on MAX density matrix=1.00D-06.

Requested convergence on energy=1.00D-06.

No special actions if energy rises.

SCF Done: E(RB3LYP) = -3032.33929518 A.U. after 12 cycles

NFock= 12 Conv=0.29D-08 -V/T= 2.0017

Calling FoFJK, ICntrl= 2127 FMM=F ISym2X=0 I1Cent= 0 IOpClX= 0 NMat=1 NMatS=1  
 NMatT=0.

\*\*\*\*\* Axes restored to original set \*\*\*\*\*

| Center Number | Atomic Number | Forces (Hartrees/Bohr) |              |              |
|---------------|---------------|------------------------|--------------|--------------|
|               |               | X                      | Y            | Z            |
| 1             | 6             | -0.000324867           | 0.000233101  | -0.000344003 |
| 2             | 6             | 0.000531230            | -0.000501501 | 0.000125837  |
| 3             | 7             | 0.001591008            | 0.000296779  | 0.000781536  |
| 4             | 6             | -0.000850546           | 0.003954028  | 0.000917313  |
| 5             | 7             | -0.002042538           | 0.000377185  | 0.000498316  |
| 6             | 6             | 0.004339753            | 0.000780596  | 0.000198845  |
| 7             | 6             | 0.002813959            | 0.000571193  | 0.000362501  |
| 8             | 1             | -0.000439628           | -0.000501125 | 0.000278785  |
| 9             | 1             | 0.000268016            | -0.000071840 | -0.000117311 |
| 10            | 1             | -0.001084596           | 0.000130608  | 0.000304464  |
| 11            | 1             | -0.000478234           | 0.000263743  | -0.000300200 |
| 12            | 1             | -0.000399008           | -0.000369960 | -0.000564304 |
| 13            | 1             | -0.002403068           | 0.000322415  | -0.000339972 |
| 14            | 35            | -0.000012508           | -0.001976424 | -0.000241713 |
| 15            | 1             | 0.000776069            | -0.002890985 | -0.001841974 |
| 16            | 6             | -0.001294257           | 0.000504573  | 0.000326484  |
| 17            | 6             | -0.000231632           | -0.000431652 | -0.000831462 |

|    |   |              |              |              |
|----|---|--------------|--------------|--------------|
| 18 | 1 | 0.000503981  | -0.000075237 | 0.000033640  |
| 19 | 1 | 0.000112678  | -0.000032448 | 0.000263904  |
| 20 | 1 | 0.000112565  | 0.000234241  | 0.000096603  |
| 21 | 8 | -0.001529286 | -0.002175036 | -0.000246935 |
| 22 | 1 | 0.000040909  | 0.001357746  | 0.000639645  |

-----  
Cartesian Forces: Max 0.004339753 RMS 0.001178503

GradGradGradGradGradGradGradGradGradGradGradGradGradGradGradGradGradGradGrad

Berny optimization.

Using GEDIIS/GDIIS optimizer.

FormGI is forming the generalized inverse of G from B-inverse, IUseBI=4.

Internal Forces: Max 0.007993782 RMS 0.001416651

Search for a local minimum.

Step number 47 out of a maximum of 116

All quantities printed in internal units (Hartrees-Bohrs-Radians)

Mixed Optimization -- RFO/linear search

Update second derivatives using D2CorX and points 43 44 45 46 47

DE= -1.88D-04 DEPred=-3.10D-04 R= 6.06D-01

TightC=F SS= 1.41D+00 RLast= 2.00D-01 DXNew= 1.5563D-01 6.0038D-01

Trust test= 6.06D-01 RLast= 2.00D-01 DXMaxT set to 1.56D-01

ITU= 1 -1 1 0 -1 1 0 -1 0 0 1 -1 0 1 1 1 1 1

ITU= 1 0 -1 1 1 1 1 0 -1 1 1 1 1 1 1 1 1 1

ITU= 1 1 0 0 -1 0 0

Use linear search instead of GDIIS.

|                 |         |         |         |         |         |
|-----------------|---------|---------|---------|---------|---------|
| Eigenvalues --- | 0.00147 | 0.00236 | 0.00337 | 0.00555 | 0.00941 |
| Eigenvalues --- | 0.01255 | 0.01380 | 0.01714 | 0.01893 | 0.02147 |
| Eigenvalues --- | 0.02343 | 0.02499 | 0.03057 | 0.03146 | 0.03847 |
| Eigenvalues --- | 0.04307 | 0.04965 | 0.05531 | 0.06085 | 0.06147 |
| Eigenvalues --- | 0.09121 | 0.09318 | 0.11776 | 0.13643 | 0.14405 |
| Eigenvalues --- | 0.15538 | 0.15930 | 0.16005 | 0.16081 | 0.16629 |
| Eigenvalues --- | 0.17098 | 0.18539 | 0.20452 | 0.22513 | 0.22946 |
| Eigenvalues --- | 0.24602 | 0.25152 | 0.25740 | 0.29206 | 0.32668 |
| Eigenvalues --- | 0.33830 | 0.33876 | 0.33922 | 0.34145 | 0.34287 |
| Eigenvalues --- | 0.34544 | 0.34862 | 0.36266 | 0.36303 | 0.36763 |
| Eigenvalues --- | 0.39872 | 0.43059 | 0.44293 | 0.46552 | 0.49215 |
| Eigenvalues --- | 0.53401 | 0.55668 | 0.57845 | 0.60756 | 2.11317 |

RFO step: Lambda=-1.72971349D-04 EMin= 1.47492071D-03

Quartic linear search produced a step of -0.19867.

Iteration 1 RMS(Cart)= 0.01893176 RMS(Int)= 0.00016209

Iteration 2 RMS(Cart)= 0.00016851 RMS(Int)= 0.00003796

Iteration 3 RMS(Cart)= 0.00000003 RMS(Int)= 0.00003796

|          |       |        |          |         |         |       |
|----------|-------|--------|----------|---------|---------|-------|
| Variable | Old X | -DE/DX | Delta X  | Delta X | Delta X | New X |
|          |       |        | (Linear) | (Quad)  | (Total) |       |

|     |         |          |          |          |          |         |
|-----|---------|----------|----------|----------|----------|---------|
| R1  | 2.56616 | -0.00069 | -0.00007 | 0.00005  | 0.00001  | 2.56617 |
| R2  | 2.62056 | -0.00013 | -0.00014 | -0.00036 | -0.00048 | 2.62008 |
| R3  | 2.03433 | -0.00008 | 0.00001  | -0.00014 | -0.00013 | 2.03420 |
| R4  | 2.62800 | 0.00072  | -0.00012 | 0.00040  | 0.00028  | 2.62829 |
| R5  | 2.03123 | -0.00008 | 0.00000  | -0.00013 | -0.00013 | 2.03111 |
| R6  | 2.54736 | -0.00088 | -0.00025 | -0.00053 | -0.00081 | 2.54655 |
| R7  | 2.68584 | 0.00077  | 0.00014  | 0.00118  | 0.00132  | 2.68717 |
| R8  | 2.52276 | -0.00029 | 0.00002  | -0.00043 | -0.00044 | 2.52232 |
| R9  | 2.10440 | -0.00324 | 0.00041  | 0.00002  | 0.00043  | 2.10483 |
| R10 | 2.77707 | 0.00114  | 0.00035  | 0.00241  | 0.00277  | 2.77984 |
| R11 | 2.90909 | -0.00213 | -0.00051 | -0.00124 | -0.00175 | 2.90734 |
| R12 | 2.05860 | 0.00036  | -0.00003 | 0.00019  | 0.00015  | 2.05875 |
| R13 | 2.06281 | -0.00040 | -0.00016 | -0.00037 | -0.00053 | 2.06229 |
| R14 | 2.06492 | 0.00062  | 0.00031  | 0.00090  | 0.00121  | 2.06613 |
| R15 | 2.06370 | -0.00059 | -0.00023 | 0.00008  | -0.00016 | 2.06354 |
| R16 | 2.68421 | -0.00124 | 0.00001  | -0.00048 | -0.00048 | 2.68373 |
| R17 | 5.57660 | -0.00115 | -0.00041 | 0.01328  | 0.01287  | 5.58947 |
| R18 | 2.50644 | 0.00025  | -0.00007 | 0.00008  | 0.00000  | 2.50645 |
| R19 | 2.04720 | 0.00002  | -0.00010 | -0.00012 | -0.00022 | 2.04698 |
| R20 | 2.04328 | -0.00006 | -0.00017 | -0.00003 | -0.00019 | 2.04308 |
| R21 | 2.04727 | -0.00026 | -0.00012 | -0.00042 | -0.00055 | 2.04672 |
| R22 | 1.81938 | 0.00136  | 0.00004  | 0.00036  | 0.00040  | 1.81978 |
| A1  | 1.87373 | -0.00045 | -0.00026 | -0.00005 | -0.00030 | 1.87343 |
| A2  | 2.28099 | -0.00005 | 0.00012  | -0.00087 | -0.00075 | 2.28024 |
| A3  | 2.12833 | 0.00051  | 0.00016  | 0.00095  | 0.00110  | 2.12942 |
| A4  | 1.86231 | 0.00022  | -0.00011 | -0.00008 | -0.00018 | 1.86212 |
| A5  | 2.28176 | -0.00039 | 0.00011  | -0.00130 | -0.00119 | 2.28056 |
| A6  | 2.13901 | 0.00017  | 0.00002  | 0.00139  | 0.00140  | 2.14041 |
| A7  | 1.89973 | -0.00017 | 0.00048  | -0.00025 | 0.00016  | 1.89990 |
| A8  | 2.24584 | -0.00017 | 0.00007  | -0.00005 | 0.00005  | 2.24589 |
| A9  | 2.13720 | 0.00034  | -0.00049 | 0.00038  | -0.00008 | 2.13713 |
| A10 | 1.88590 | -0.00009 | -0.00061 | 0.00034  | -0.00017 | 1.88573 |
| A11 | 2.20387 | 0.00139  | -0.00183 | 0.00602  | 0.00443  | 2.20830 |
| A12 | 2.17570 | -0.00130 | -0.00106 | -0.00412 | -0.00492 | 2.17078 |
| A13 | 1.90310 | 0.00049  | 0.00051  | 0.00005  | 0.00050  | 1.90359 |
| A14 | 2.21263 | 0.00159  | 0.00039  | 0.00088  | 0.00129  | 2.21392 |
| A15 | 2.16341 | -0.00211 | -0.00082 | -0.00025 | -0.00106 | 2.16234 |
| A16 | 1.95077 | -0.00303 | -0.00032 | 0.00016  | -0.00016 | 1.95061 |
| A17 | 1.87984 | -0.00042 | -0.00044 | -0.00186 | -0.00230 | 1.87754 |
| A18 | 1.89283 | 0.00141  | 0.00008  | -0.00180 | -0.00172 | 1.89111 |
| A19 | 1.90628 | 0.00062  | 0.00035  | 0.00138  | 0.00173  | 1.90801 |
| A20 | 1.93400 | 0.00163  | 0.00023  | 0.00009  | 0.00031  | 1.93431 |
| A21 | 1.89868 | -0.00021 | 0.00010  | 0.00202  | 0.00211  | 1.90079 |
| A22 | 1.92770 | 0.00177  | -0.00001 | 0.00015  | 0.00014  | 1.92784 |

|     |          |          |          |          |          |          |
|-----|----------|----------|----------|----------|----------|----------|
| A23 | 1.90932  | -0.00636 | -0.00091 | -0.00126 | -0.00217 | 1.90715  |
| A24 | 1.91379  | 0.00023  | -0.00165 | -0.00315 | -0.00480 | 1.90899  |
| A25 | 1.91377  | 0.00137  | 0.00029  | 0.00026  | 0.00055  | 1.91432  |
| A26 | 1.86366  | -0.00027 | 0.00232  | 0.00292  | 0.00523  | 1.86889  |
| A27 | 1.93536  | 0.00350  | 0.00001  | 0.00118  | 0.00118  | 1.93654  |
| A28 | 2.39334  | -0.00799 | 0.00112  | -0.00910 | -0.00798 | 2.38535  |
| A29 | 2.17075  | -0.00012 | -0.00060 | 0.00065  | 0.00005  | 2.17080  |
| A30 | 1.96083  | -0.00046 | 0.00004  | -0.00190 | -0.00186 | 1.95898  |
| A31 | 2.15158  | 0.00058  | 0.00056  | 0.00126  | 0.00182  | 2.15340  |
| A32 | 2.08334  | -0.00021 | -0.00015 | -0.00004 | -0.00019 | 2.08314  |
| A33 | 2.15403  | 0.00004  | -0.00005 | 0.00025  | 0.00019  | 2.15423  |
| A34 | 2.04582  | 0.00017  | 0.00020  | -0.00020 | 0.00000  | 2.04581  |
| A35 | 1.88787  | -0.00033 | -0.00004 | 0.00075  | 0.00071  | 1.88858  |
| D1  | 0.00428  | 0.00007  | -0.00018 | -0.00064 | -0.00081 | 0.00346  |
| D2  | 3.12968  | 0.00000  | 0.00094  | 0.00012  | 0.00105  | 3.13073  |
| D3  | -3.11930 | -0.00012 | -0.00155 | -0.00266 | -0.00421 | -3.12351 |
| D4  | 0.00611  | -0.00019 | -0.00044 | -0.00190 | -0.00235 | 0.00376  |
| D5  | -0.00486 | 0.00000  | 0.00130  | 0.00203  | 0.00333  | -0.00152 |
| D6  | -3.05224 | 0.00048  | 0.00047  | -0.00586 | -0.00541 | -3.05765 |
| D7  | 3.12064  | 0.00016  | 0.00253  | 0.00382  | 0.00635  | 3.12699  |
| D8  | 0.07325  | 0.00064  | 0.00169  | -0.00408 | -0.00239 | 0.07086  |
| D9  | -0.00229 | -0.00011 | -0.00099 | -0.00095 | -0.00195 | -0.00424 |
| D10 | 3.10880  | -0.00008 | 0.00190  | 0.00192  | 0.00380  | 3.11260  |
| D11 | -3.12933 | -0.00004 | -0.00200 | -0.00160 | -0.00360 | -3.13293 |
| D12 | -0.01824 | -0.00001 | 0.00089  | 0.00127  | 0.00215  | -0.01609 |
| D13 | -0.00071 | 0.00010  | 0.00181  | 0.00222  | 0.00404  | 0.00332  |
| D14 | 2.94621  | -0.00011 | -0.01393 | 0.01375  | -0.00023 | 2.94598  |
| D15 | -3.11409 | 0.00009  | -0.00087 | -0.00042 | -0.00128 | -3.11537 |
| D16 | -0.16716 | -0.00012 | -0.01661 | 0.01110  | -0.00555 | -0.17271 |
| D17 | 0.28486  | -0.00020 | -0.00271 | -0.02968 | -0.03238 | 0.25248  |
| D18 | -2.84984 | -0.00015 | -0.00312 | -0.03140 | -0.03451 | -2.88436 |
| D19 | -2.89094 | -0.00018 | 0.00054  | -0.02647 | -0.02593 | -2.91687 |
| D20 | 0.25754  | -0.00013 | 0.00013  | -0.02819 | -0.02806 | 0.22948  |
| D21 | 0.00342  | -0.00006 | -0.00192 | -0.00263 | -0.00455 | -0.00113 |
| D22 | 3.05405  | -0.00029 | -0.00104 | 0.00507  | 0.00403  | 3.05807  |
| D23 | -2.94743 | -0.00023 | 0.01366  | -0.01532 | -0.00168 | -2.94911 |
| D24 | 0.10320  | -0.00045 | 0.01454  | -0.00762 | 0.00690  | 0.11010  |
| D25 | 1.45517  | 0.00130  | 0.00524  | 0.01360  | 0.01883  | 1.47401  |
| D26 | -2.73401 | -0.00003 | 0.00519  | 0.01420  | 0.01938  | -2.71463 |
| D27 | -0.68195 | 0.00025  | 0.00510  | 0.01461  | 0.01972  | -0.66223 |
| D28 | -1.57901 | 0.00168  | 0.00421  | 0.00456  | 0.00877  | -1.57024 |
| D29 | 0.51499  | 0.00035  | 0.00416  | 0.00517  | 0.00932  | 0.52431  |
| D30 | 2.56705  | 0.00062  | 0.00407  | 0.00558  | 0.00966  | 2.57671  |
| D31 | -1.08859 | -0.00072 | -0.00078 | 0.00873  | 0.00795  | -1.08064 |

|     |          |          |          |          |          |          |
|-----|----------|----------|----------|----------|----------|----------|
| D32 | 1.01946  | -0.00199 | -0.00100 | 0.00833  | 0.00732  | 1.02678  |
| D33 | -3.13774 | -0.00158 | -0.00260 | 0.00697  | 0.00437  | -3.13337 |
| D34 | 3.11619  | 0.00129  | -0.00026 | 0.01004  | 0.00978  | 3.12597  |
| D35 | -1.05895 | 0.00001  | -0.00048 | 0.00964  | 0.00916  | -1.04979 |
| D36 | 1.06703  | 0.00043  | -0.00208 | 0.00828  | 0.00621  | 1.07324  |
| D37 | 1.02482  | 0.00015  | -0.00074 | 0.00660  | 0.00586  | 1.03069  |
| D38 | 3.13287  | -0.00113 | -0.00096 | 0.00620  | 0.00524  | 3.13811  |
| D39 | -1.02433 | -0.00072 | -0.00256 | 0.00485  | 0.00229  | -1.02204 |
| D40 | 0.50239  | -0.00119 | 0.00735  | -0.00172 | 0.00564  | 0.50802  |
| D41 | 2.61889  | -0.00217 | 0.00696  | -0.00216 | 0.00479  | 2.62368  |
| D42 | -1.61057 | 0.00046  | 0.01000  | 0.00229  | 0.01229  | -1.59828 |
| D43 | -1.51286 | 0.00219  | -0.00887 | -0.03178 | -0.04065 | -1.55351 |
| D44 | 2.68151  | 0.00011  | -0.00929 | -0.03193 | -0.04122 | 2.64029  |
| D45 | 0.59746  | -0.00335 | -0.01107 | -0.03468 | -0.04575 | 0.55171  |
| D46 | -3.11391 | -0.00015 | 0.00015  | -0.00493 | -0.00479 | -3.11870 |
| D47 | 0.02606  | -0.00004 | -0.00021 | -0.00203 | -0.00223 | 0.02382  |
| D48 | 0.02006  | -0.00021 | 0.00060  | -0.00304 | -0.00244 | 0.01762  |
| D49 | -3.12316 | -0.00009 | 0.00025  | -0.00014 | 0.00011  | -3.12305 |

| Item                 | Value    | Threshold | Converged? |
|----------------------|----------|-----------|------------|
| Maximum Force        | 0.007994 | 0.000450  | NO         |
| RMS Force            | 0.001417 | 0.000300  | NO         |
| Maximum Displacement | 0.097460 | 0.001800  | NO         |
| RMS Displacement     | 0.018949 | 0.001200  | NO         |

Predicted change in Energy=-9.713877D-05

GradGradGradGradGradGradGradGradGradGradGradGradGradGradGradGradGradGrad

Input orientation:

| Center Number | Atomic Number | Atomic Type | Coordinates (Angstroms) |           |           |
|---------------|---------------|-------------|-------------------------|-----------|-----------|
|               |               |             | X                       | Y         | Z         |
| 1             | 6             | 0           | -0.524597               | -2.192093 | -1.218932 |
| 2             | 6             | 0           | -1.825638               | -1.842047 | -1.388670 |
| 3             | 7             | 0           | -2.114260               | -0.892550 | -0.414216 |
| 4             | 6             | 0           | -1.009953               | -0.681292 | 0.328638  |
| 5             | 7             | 0           | -0.036479               | -1.460986 | -0.146754 |
| 6             | 6             | 0           | 1.349934                | -1.433638 | 0.344201  |
| 7             | 6             | 0           | 2.211517                | -0.425646 | -0.435927 |
| 8             | 1             | 0           | 0.093642                | -2.880977 | -1.768446 |
| 9             | 1             | 0           | -2.551037               | -2.170980 | -2.110353 |
| 10            | 1             | 0           | 1.321307                | -1.146316 | 1.394686  |
| 11            | 1             | 0           | 1.762737                | -2.440689 | 0.264146  |
| 12            | 1             | 0           | 2.265909                | -0.705752 | -1.491385 |
| 13            | 1             | 0           | 1.774605                | 0.570687  | -0.341874 |



|    |    |   |           |           |           |
|----|----|---|-----------|-----------|-----------|
| 14 | 35 | 0 | 0.156559  | 2.030480  | 1.658030  |
| 15 | 1  | 0 | -0.855942 | 0.135581  | 1.069995  |
| 16 | 6  | 0 | -3.330564 | -0.190963 | -0.189649 |
| 17 | 6  | 0 | -4.498564 | -0.528178 | -0.720006 |
| 18 | 1  | 0 | -3.197306 | 0.661387  | 0.465404  |
| 19 | 1  | 0 | -5.369968 | 0.076688  | -0.510996 |
| 20 | 1  | 0 | -4.635976 | -1.389810 | -1.361695 |
| 21 | 8  | 0 | 3.538108  | -0.448388 | 0.070548  |
| 22 | 1  | 0 | 3.596316  | 0.188601  | 0.790409  |

-----  
Distance matrix (angstroms):

|    |    | 1        | 2        | 3        | 4        | 5        |
|----|----|----------|----------|----------|----------|----------|
| 1  | C  | 0.000000 |          |          |          |          |
| 2  | C  | 1.357959 | 0.000000 |          |          |          |
| 3  | N  | 2.205314 | 1.390829 | 0.000000 |          |          |
| 4  | C  | 2.216543 | 2.227519 | 1.347575 | 0.000000 |          |
| 5  | N  | 1.386486 | 2.211031 | 2.170676 | 1.334755 | 0.000000 |
| 6  | C  | 2.555877 | 3.640591 | 3.587285 | 2.476960 | 1.471028 |
| 7  | C  | 3.349590 | 4.383210 | 4.350956 | 3.320811 | 2.491793 |
| 8  | H  | 1.076451 | 2.215230 | 3.265365 | 3.233311 | 2.159443 |
| 9  | H  | 2.213941 | 1.074815 | 2.168418 | 3.246967 | 3.268458 |
| 10 | H  | 3.366305 | 4.258448 | 3.890970 | 2.605279 | 2.078133 |
| 11 | H  | 2.737374 | 3.995824 | 4.229423 | 3.284425 | 2.089457 |
| 12 | H  | 3.173383 | 4.247644 | 4.514540 | 3.747580 | 2.771173 |
| 13 | H  | 3.699799 | 4.458567 | 4.155667 | 3.125828 | 2.728698 |
| 14 | Br | 5.154707 | 5.311116 | 4.242044 | 3.237552 | 3.935078 |
| 15 | H  | 3.281317 | 3.300963 | 2.200750 | 1.113827 | 2.168184 |
| 16 | C  | 3.596859 | 2.535455 | 1.421988 | 2.427814 | 3.530693 |
| 17 | C  | 4.337045 | 3.052523 | 2.431292 | 3.646026 | 4.594448 |
| 18 | H  | 4.257077 | 3.403857 | 2.088406 | 2.570215 | 3.856168 |
| 19 | H  | 5.396866 | 4.124818 | 3.398297 | 4.504359 | 5.562663 |
| 20 | H  | 4.191358 | 2.846620 | 2.739349 | 4.062914 | 4.757786 |
| 21 | O  | 4.605306 | 5.730740 | 5.690479 | 4.561328 | 3.721592 |
| 22 | H  | 5.165954 | 6.186235 | 5.935545 | 4.710378 | 4.098366 |
|    |    | 6        | 7        | 8        | 9        | 10       |
| 6  | C  | 0.000000 |          |          |          |          |
| 7  | C  | 1.538497 | 0.000000 |          |          |          |
| 8  | H  | 2.852427 | 3.505660 | 0.000000 |          |          |
| 9  | H  | 4.667557 | 5.341518 | 2.759587 | 0.000000 |          |
| 10 | H  | 1.089445 | 2.159394 | 3.810724 | 5.322620 | 0.000000 |
| 11 | H  | 1.091315 | 2.179887 | 2.666676 | 4.931494 | 1.774368 |
| 12 | H  | 2.176742 | 1.093347 | 3.086602 | 5.072769 | 3.068513 |
| 13 | H  | 2.160640 | 1.091978 | 4.095696 | 5.418066 | 2.483791 |
| 14 | Br | 3.892352 | 3.826233 | 5.988915 | 6.259717 | 3.393821 |

|    |    |          |          |          |          |          |
|----|----|----------|----------|----------|----------|----------|
| 15 | H  | 2.802698 | 3.462959 | 4.249480 | 4.278807 | 2.547371 |
| 16 | C  | 4.871991 | 5.552512 | 4.631842 | 2.866573 | 5.006268 |
| 17 | C  | 6.013096 | 6.716874 | 5.265287 | 2.902539 | 6.222935 |
| 18 | H  | 5.008114 | 5.590116 | 5.326233 | 3.882589 | 4.954716 |
| 19 | H  | 6.940427 | 7.598479 | 6.338769 | 3.944151 | 7.064030 |
| 20 | H  | 6.224397 | 6.976734 | 4.975773 | 2.348976 | 6.568573 |
| 21 | O  | 2.415308 | 1.420169 | 4.600406 | 6.693381 | 2.674818 |
| 22 | H  | 2.806598 | 1.949069 | 5.314017 | 7.195276 | 2.706071 |
|    |    | 11       | 12       | 13       | 14       | 15       |
| 11 | H  | 0.000000 |          |          |          |          |
| 12 | H  | 2.518944 | 0.000000 |          |          |          |
| 13 | H  | 3.071773 | 1.786631 | 0.000000 |          |          |
| 14 | Br | 4.951169 | 4.674948 | 2.957818 | 0.000000 |          |
| 15 | H  | 3.760856 | 4.124859 | 3.017030 | 2.227462 | 0.000000 |
| 16 | C  | 5.586493 | 5.768885 | 5.163916 | 4.528659 | 2.795905 |
| 17 | C  | 6.620434 | 6.810628 | 6.379901 | 5.819962 | 4.112587 |
| 18 | H  | 5.853665 | 5.961946 | 5.037839 | 3.813814 | 2.474668 |
| 19 | H  | 7.603519 | 7.738216 | 7.163627 | 6.250158 | 4.783244 |
| 20 | H  | 6.685150 | 6.936914 | 6.780791 | 6.617062 | 4.746429 |
| 21 | O  | 2.675573 | 2.030852 | 2.078112 | 4.483276 | 4.543963 |
| 22 | H  | 3.248405 | 2.788625 | 2.178689 | 3.997151 | 4.461343 |
|    |    | 16       | 17       | 18       | 19       | 20       |
| 16 | C  | 0.000000 |          |          |          |          |
| 17 | C  | 1.326355 | 0.000000 |          |          |          |
| 18 | H  | 1.083214 | 2.124508 | 0.000000 |          |          |
| 19 | H  | 2.081843 | 1.081153 | 2.452690 | 0.000000 |          |
| 20 | H  | 2.124859 | 1.083078 | 3.100882 | 1.847444 | 0.000000 |
| 21 | O  | 6.878417 | 8.075856 | 6.837639 | 8.942467 | 8.351841 |
| 22 | H  | 7.006158 | 8.265725 | 6.817804 | 9.060928 | 8.654107 |
|    |    | 21       | 22       |          |          |          |
| 21 | O  | 0.000000 |          |          |          |          |
| 22 | H  | 0.962986 | 0.000000 |          |          |          |

Stoichiometry C7H11BrN2O

Framework group C1[X(C7H11BrN2O)]

Deg. of freedom 60

Full point group C1 NOp 1

Largest Abelian subgroup C1 NOp 1

Largest concise Abelian subgroup C1 NOp 1

Standard orientation:

| Center<br>Number | Atomic<br>Number | Atomic<br>Type | Coordinates (Angstroms) |           |           |
|------------------|------------------|----------------|-------------------------|-----------|-----------|
|                  |                  |                | X                       | Y         | Z         |
| 1                | 6                | 0              | -1.463177               | -2.214202 | -0.042319 |

|    |    |   |           |           |           |
|----|----|---|-----------|-----------|-----------|
| 2  | 6  | 0 | -2.532504 | -1.407599 | -0.265884 |
| 3  | 7  | 0 | -2.130172 | -0.114191 | 0.049762  |
| 4  | 6  | 0 | -0.846826 | -0.145101 | 0.459671  |
| 5  | 7  | 0 | -0.426975 | -1.411088 | 0.408943  |
| 6  | 6  | 0 | 0.956128  | -1.828376 | 0.686111  |
| 7  | 6  | 0 | 1.818813  | -1.825887 | -0.587758 |
| 8  | 1  | 0 | -1.345992 | -3.276047 | -0.174605 |
| 9  | 1  | 0 | -3.519202 | -1.636204 | -0.625599 |
| 10 | 1  | 0 | 1.373931  | -1.125216 | 1.405763  |
| 11 | 1  | 0 | 0.931540  | -2.822268 | 1.136156  |
| 12 | 1  | 0 | 1.424549  | -2.538064 | -1.317667 |
| 13 | 1  | 0 | 1.822981  | -0.822356 | -1.018252 |
| 14 | 35 | 0 | 1.575394  | 1.949622  | -0.016491 |
| 15 | 1  | 0 | -0.179696 | 0.732912  | 0.616648  |
| 16 | 6  | 0 | -2.871865 | 1.095327  | -0.045141 |
| 17 | 6  | 0 | -4.187262 | 1.156738  | -0.203814 |
| 18 | 1  | 0 | -2.238162 | 1.971240  | 0.022305  |
| 19 | 1  | 0 | -4.666490 | 2.122239  | -0.287716 |
| 20 | 1  | 0 | -4.823597 | 0.281784  | -0.254702 |
| 21 | 8  | 0 | 3.136624  | -2.245669 | -0.265210 |
| 22 | 1  | 0 | 3.648532  | -1.467878 | -0.019577 |

-----

Rotational constants (GHZ):      0.7673294          0.5028156          0.3128935

Standard basis: 6-311++G(d,p) (5D, 7F)

There are    358 symmetry adapted cartesian basis functions of A    symmetry.

There are    345 symmetry adapted basis functions of A    symmetry.

     345 basis functions,    553 primitive gaussians,    358 cartesian basis functions

     55 alpha electrons          55 beta electrons

     nuclear repulsion energy          838.8681765319 Hartrees.

NAtoms=    22 NActive=    22 NUniq=    22 SFac= 1.00D+00 NAtFMM=    60 NAOKFM=F

Big=F

Integral buffers will be    131072 words long.

Raffenetti 2 integral format.

Two-electron integral symmetry is turned on.

One-electron integrals computed using PRISM.

NBasis=    345 RedAO= T EigKep=    5.32D-06    NBF=    345

NBsUse=    345 1.00D-06 EigRej= -1.00D+00    NBFU=    345

Initial guess from the checkpoint file:    "."

B after Tr=      0.000000      0.000000      0.000000

     Rot=    0.999982      0.000405     -0.000224      0.006060 Ang=    0.70 deg.

ExpMin= 3.50D-02 ExpMax= 4.40D+05 ExpMxC= 1.51D+04 IAcc=3 IRadAn=            5 AccDes=

0.00D+00

Harris functional with IExCor=    402 and IRadAn=            5 diagonalized for initial guess.

HarFok: IExCor=    402 AccDes= 0.00D+00 IRadAn=            5 IDoV= 1 UseB2=F ITyADJ=14

ICtDFT= 3500011 ScaDFX= 1.000000 1.000000 1.000000 1.000000  
 FoFCou: FMM=F IPFlag= 0 FMFlag= 100000 FMFlg1= 0  
 NFXFlg= 0 DoJE=T BraDBF=F KetDBF=T FulRan=T  
 wScrn= 0.000000 ICntrl= 500 IOpCl= 0 l1Cent= 200000004 NGrid=  
 0  
 NMat0= 1 NMatS0= 1 NMatT0= 0 NMatD0= 1 NMtDS0= 0

NMtDT0= 0

Petite list used in FoFCou.

Keep R1 ints in memory in canonical form, NReq=1804729152.

Requested convergence on RMS density matrix=1.00D-08 within 128 cycles.

Requested convergence on MAX density matrix=1.00D-06.

Requested convergence on energy=1.00D-06.

No special actions if energy rises.

SCF Done: E(RB3LYP) = -3032.33945663 A.U. after 12 cycles

NFock= 12 Conv=0.23D-08 -V/T= 2.0017

Calling FoFJK, ICntrl= 2127 FMM=F ISym2X=0 l1Cent= 0 IOpClX= 0 NMat=1 NMatS=1  
 NMatT=0.

\*\*\*\*\* Axes restored to original set \*\*\*\*\*

| Center<br>Number | Atomic<br>Number | Forces (Hartrees/Bohr) |              |              |
|------------------|------------------|------------------------|--------------|--------------|
|                  |                  | X                      | Y            | Z            |
| 1                | 6                | -0.000385310           | 0.000342206  | -0.000363804 |
| 2                | 6                | 0.000554693            | -0.000387611 | 0.000135986  |
| 3                | 7                | 0.000714474            | 0.000133021  | 0.000616661  |
| 4                | 6                | -0.000263443           | 0.004003978  | -0.000022775 |
| 5                | 7                | -0.001545843           | -0.000168555 | 0.000840948  |
| 6                | 6                | 0.003117740            | 0.000590096  | 0.000070690  |
| 7                | 6                | 0.002431673            | 0.000385884  | 0.000673104  |
| 8                | 1                | -0.000312390           | -0.000435567 | 0.000239822  |
| 9                | 1                | 0.000195187            | -0.000068173 | -0.000081750 |
| 10               | 1                | -0.000725646           | 0.000148327  | 0.000203036  |
| 11               | 1                | -0.000348820           | 0.000161671  | -0.000220174 |
| 12               | 1                | -0.000197641           | -0.000279959 | -0.000241157 |
| 13               | 1                | -0.002208893           | 0.000436746  | -0.000484583 |
| 14               | 35               | 0.000100775            | -0.001911173 | -0.000364973 |
| 15               | 1                | 0.000476949            | -0.002412095 | -0.000972249 |
| 16               | 6                | -0.000720717           | 0.000085899  | 0.000288494  |
| 17               | 6                | -0.000163830           | -0.000274009 | -0.000502694 |
| 18               | 1                | 0.000309400            | 0.000020935  | -0.000038225 |
| 19               | 1                | 0.000072641            | 0.000046773  | 0.000191027  |
| 20               | 1                | 0.000055287            | 0.000150770  | -0.000006103 |
| 21               | 8                | -0.001061917           | -0.001516109 | -0.000485728 |
| 22               | 1                | -0.000094369           | 0.000946945  | 0.000524446  |

-----  
Cartesian Forces: Max 0.004003978 RMS 0.000961539

GradGradGradGradGradGradGradGradGradGradGradGradGradGradGradGradGradGradGrad

Berny optimization.

Using GEDIIS/GDIIS optimizer.

FormGI is forming the generalized inverse of G from B-inverse, IUseBI=4.

Internal Forces: Max 0.007408910 RMS 0.001259645

Search for a local minimum.

Step number 48 out of a maximum of 116

All quantities printed in internal units (Hartrees-Bohrs-Radians)

Mixed Optimization -- RFO/linear search

Update second derivatives using D2CorX and points 43 45 46 47 48

DE= -1.61D-04 DEPred=-9.71D-05 R= 1.66D+00

TightC=F SS= 1.41D+00 RLast= 1.09D-01 DXNew= 2.6173D-01 3.2648D-01

Trust test= 1.66D+00 RLast= 1.09D-01 DXMaxT set to 2.62D-01

ITU= 1 1 -1 1 0 -1 1 0 -1 0 0 1 -1 0 1 1 1 1

ITU= 1 1 0 -1 1 1 1 1 0 -1 1 1 1 1 1 1 1 1

ITU= 1 1 1 0 0 -1 0 0

Use linear search instead of GDIIS.

|                 |         |         |         |         |         |
|-----------------|---------|---------|---------|---------|---------|
| Eigenvalues --- | 0.00130 | 0.00222 | 0.00345 | 0.00586 | 0.00938 |
| Eigenvalues --- | 0.01144 | 0.01370 | 0.01727 | 0.01859 | 0.02147 |
| Eigenvalues --- | 0.02336 | 0.02504 | 0.03046 | 0.03173 | 0.03887 |
| Eigenvalues --- | 0.04455 | 0.04983 | 0.05506 | 0.06039 | 0.06349 |
| Eigenvalues --- | 0.08732 | 0.09303 | 0.11733 | 0.13822 | 0.14553 |
| Eigenvalues --- | 0.15240 | 0.15821 | 0.15969 | 0.16089 | 0.16642 |
| Eigenvalues --- | 0.17098 | 0.17469 | 0.20846 | 0.22433 | 0.22949 |
| Eigenvalues --- | 0.24585 | 0.25031 | 0.25885 | 0.29273 | 0.32612 |
| Eigenvalues --- | 0.33225 | 0.33864 | 0.33892 | 0.34001 | 0.34239 |
| Eigenvalues --- | 0.34508 | 0.34766 | 0.35392 | 0.36301 | 0.36355 |
| Eigenvalues --- | 0.38600 | 0.43164 | 0.44214 | 0.46516 | 0.49267 |
| Eigenvalues --- | 0.53593 | 0.55114 | 0.57848 | 0.60803 | 1.41558 |

RFO step: Lambda=-3.93506163D-04 EMin= 1.29603952D-03

Quartic linear search produced a step of 2.00000.

Iteration 1 RMS(Cart)= 0.09435127 RMS(Int)= 0.00388873

Iteration 2 RMS(Cart)= 0.00483470 RMS(Int)= 0.00021403

Iteration 3 RMS(Cart)= 0.00001279 RMS(Int)= 0.00021394

Iteration 4 RMS(Cart)= 0.00000000 RMS(Int)= 0.00021394

| Variable | Old X   | -DE/DX   | Delta X<br>(Linear) | Delta X<br>(Quad) | Delta X<br>(Total) | New X   |
|----------|---------|----------|---------------------|-------------------|--------------------|---------|
| R1       | 2.56617 | -0.00056 | 0.00003             | -0.00074          | -0.00083           | 2.56534 |
| R2       | 2.62008 | -0.00009 | -0.00097            | -0.00056          | -0.00154           | 2.61854 |
| R3       | 2.03420 | -0.00002 | -0.00026            | 0.00028           | 0.00002            | 2.03422 |
| R4       | 2.62829 | 0.00058  | 0.00057             | 0.00135           | 0.00186            | 2.63015 |

|     |         |          |          |          |          |         |
|-----|---------|----------|----------|----------|----------|---------|
| R5  | 2.03111 | -0.00006 | -0.00025 | -0.00043 | -0.00068 | 2.03042 |
| R6  | 2.54655 | -0.00046 | -0.00163 | -0.00020 | -0.00175 | 2.54480 |
| R7  | 2.68717 | 0.00039  | 0.00265  | -0.00117 | 0.00148  | 2.68865 |
| R8  | 2.52232 | -0.00002 | -0.00088 | -0.00114 | -0.00190 | 2.52042 |
| R9  | 2.10483 | -0.00235 | 0.00086  | 0.00593  | 0.00679  | 2.11162 |
| R10 | 2.77984 | 0.00083  | 0.00553  | 0.00568  | 0.01121  | 2.79105 |
| R11 | 2.90734 | -0.00167 | -0.00350 | -0.00010 | -0.00360 | 2.90374 |
| R12 | 2.05875 | 0.00026  | 0.00031  | 0.00048  | 0.00079  | 2.05954 |
| R13 | 2.06229 | -0.00026 | -0.00105 | -0.00049 | -0.00155 | 2.06074 |
| R14 | 2.06613 | 0.00029  | 0.00242  | -0.00113 | 0.00130  | 2.06742 |
| R15 | 2.06354 | -0.00058 | -0.00031 | 0.00088  | 0.00057  | 2.06411 |
| R16 | 2.68373 | -0.00105 | -0.00095 | -0.00229 | -0.00324 | 2.68049 |
| R17 | 5.58947 | -0.00125 | 0.02574  | 0.04507  | 0.07081  | 5.66027 |
| R18 | 2.50645 | 0.00018  | 0.00001  | 0.00017  | 0.00017  | 2.50662 |
| R19 | 2.04698 | 0.00003  | -0.00044 | -0.00109 | -0.00153 | 2.04545 |
| R20 | 2.04308 | 0.00000  | -0.00039 | -0.00015 | -0.00054 | 2.04255 |
| R21 | 2.04672 | -0.00012 | -0.00109 | -0.00063 | -0.00172 | 2.04500 |
| R22 | 1.81978 | 0.00101  | 0.00081  | 0.00127  | 0.00208  | 1.82186 |
| A1  | 1.87343 | -0.00030 | -0.00060 | 0.00002  | -0.00054 | 1.87289 |
| A2  | 2.28024 | -0.00004 | -0.00150 | -0.00192 | -0.00346 | 2.27678 |
| A3  | 2.12942 | 0.00035  | 0.00219  | 0.00194  | 0.00408  | 2.13351 |
| A4  | 1.86212 | 0.00025  | -0.00037 | -0.00014 | -0.00051 | 1.86161 |
| A5  | 2.28056 | -0.00034 | -0.00239 | -0.00440 | -0.00681 | 2.27375 |
| A6  | 2.14041 | 0.00009  | 0.00280  | 0.00461  | 0.00740  | 2.14781 |
| A7  | 1.89990 | -0.00018 | 0.00033  | -0.00054 | -0.00016 | 1.89974 |
| A8  | 2.24589 | -0.00002 | 0.00010  | 0.00279  | 0.00264  | 2.24854 |
| A9  | 2.13713 | 0.00020  | -0.00015 | -0.00184 | -0.00223 | 2.13490 |
| A10 | 1.88573 | -0.00011 | -0.00034 | 0.00016  | -0.00029 | 1.88544 |
| A11 | 2.20830 | 0.00111  | 0.00886  | 0.02290  | 0.03129  | 2.23960 |
| A12 | 2.17078 | -0.00095 | -0.00985 | -0.01167 | -0.02234 | 2.14843 |
| A13 | 1.90359 | 0.00035  | 0.00099  | 0.00052  | 0.00149  | 1.90508 |
| A14 | 2.21392 | 0.00139  | 0.00258  | -0.00005 | 0.00206  | 2.21598 |
| A15 | 2.16234 | -0.00177 | -0.00212 | 0.00153  | -0.00104 | 2.16131 |
| A16 | 1.95061 | -0.00279 | -0.00032 | 0.00389  | 0.00358  | 1.95419 |
| A17 | 1.87754 | -0.00022 | -0.00460 | -0.00462 | -0.00923 | 1.86830 |
| A18 | 1.89111 | 0.00134  | -0.00344 | -0.00553 | -0.00897 | 1.88214 |
| A19 | 1.90801 | 0.00040  | 0.00346  | 0.00078  | 0.00424  | 1.91225 |
| A20 | 1.93431 | 0.00148  | 0.00063  | -0.00096 | -0.00034 | 1.93397 |
| A21 | 1.90079 | -0.00021 | 0.00423  | 0.00644  | 0.01062  | 1.91141 |
| A22 | 1.92784 | 0.00162  | 0.00029  | 0.00094  | 0.00125  | 1.92909 |
| A23 | 1.90715 | -0.00582 | -0.00434 | -0.00206 | -0.00641 | 1.90074 |
| A24 | 1.90899 | 0.00060  | -0.00960 | 0.00290  | -0.00672 | 1.90228 |
| A25 | 1.91432 | 0.00122  | 0.00110  | 0.00394  | 0.00502  | 1.91934 |
| A26 | 1.86889 | -0.00046 | 0.01047  | -0.00555 | 0.00490  | 1.87379 |

|     |          |          |          |          |          |          |
|-----|----------|----------|----------|----------|----------|----------|
| A27 | 1.93654  | 0.00302  | 0.00236  | -0.00017 | 0.00211  | 1.93865  |
| A28 | 2.38535  | -0.00741 | -0.01596 | -0.06417 | -0.08014 | 2.30522  |
| A29 | 2.17080  | 0.00009  | 0.00010  | 0.00717  | 0.00727  | 2.17807  |
| A30 | 1.95898  | -0.00035 | -0.00371 | -0.00352 | -0.00723 | 1.95175  |
| A31 | 2.15340  | 0.00025  | 0.00364  | -0.00366 | -0.00003 | 2.15337  |
| A32 | 2.08314  | -0.00023 | -0.00038 | -0.00214 | -0.00252 | 2.08062  |
| A33 | 2.15423  | 0.00009  | 0.00039  | 0.00344  | 0.00382  | 2.15805  |
| A34 | 2.04581  | 0.00013  | 0.00000  | -0.00129 | -0.00130 | 2.04451  |
| A35 | 1.88858  | -0.00044 | 0.00142  | -0.00285 | -0.00143 | 1.88715  |
| D1  | 0.00346  | 0.00008  | -0.00163 | -0.00184 | -0.00363 | -0.00017 |
| D2  | 3.13073  | 0.00006  | 0.00210  | 0.00325  | 0.00530  | 3.13603  |
| D3  | -3.12351 | -0.00013 | -0.00842 | -0.00507 | -0.01348 | -3.13699 |
| D4  | 0.00376  | -0.00015 | -0.00469 | 0.00001  | -0.00456 | -0.00080 |
| D5  | -0.00152 | -0.00011 | 0.00667  | -0.00134 | 0.00547  | 0.00394  |
| D6  | -3.05765 | 0.00037  | -0.01082 | -0.02702 | -0.03764 | -3.09529 |
| D7  | 3.12699  | 0.00008  | 0.01270  | 0.00152  | 0.01426  | 3.14125  |
| D8  | 0.07086  | 0.00056  | -0.00478 | -0.02416 | -0.02885 | 0.04201  |
| D9  | -0.00424 | -0.00002 | -0.00390 | 0.00437  | 0.00061  | -0.00362 |
| D10 | 3.11260  | -0.00003 | 0.00760  | 0.02353  | 0.03146  | -3.13912 |
| D11 | -3.13293 | 0.00000  | -0.00720 | -0.00012 | -0.00737 | -3.14030 |
| D12 | -0.01609 | 0.00000  | 0.00430  | 0.01904  | 0.02347  | 0.00738  |
| D13 | 0.00332  | -0.00005 | 0.00808  | -0.00524 | 0.00278  | 0.00610  |
| D14 | 2.94598  | 0.00009  | -0.00046 | 0.05369  | 0.05411  | 3.00009  |
| D15 | -3.11537 | -0.00004 | -0.00257 | -0.02304 | -0.02573 | -3.14111 |
| D16 | -0.17271 | 0.00010  | -0.01111 | 0.03588  | 0.02560  | -0.14712 |
| D17 | 0.25248  | -0.00017 | -0.06476 | -0.11647 | -0.18132 | 0.07116  |
| D18 | -2.88436 | -0.00006 | -0.06903 | -0.11401 | -0.18311 | -3.06747 |
| D19 | -2.91687 | -0.00018 | -0.05186 | -0.09496 | -0.14674 | -3.06361 |
| D20 | 0.22948  | -0.00007 | -0.05612 | -0.09250 | -0.14854 | 0.08095  |
| D21 | -0.00113 | 0.00010  | -0.00910 | 0.00407  | -0.00508 | -0.00622 |
| D22 | 3.05807  | -0.00018 | 0.00805  | 0.02873  | 0.03656  | 3.09463  |
| D23 | -2.94911 | -0.00032 | -0.00336 | -0.05812 | -0.06053 | -3.00964 |
| D24 | 0.11010  | -0.00061 | 0.01380  | -0.03346 | -0.01889 | 0.09121  |
| D25 | 1.47401  | 0.00115  | 0.03767  | 0.04385  | 0.08146  | 1.55546  |
| D26 | -2.71463 | -0.00016 | 0.03877  | 0.04415  | 0.08284  | -2.63179 |
| D27 | -0.66223 | 0.00018  | 0.03944  | 0.04632  | 0.08570  | -0.57653 |
| D28 | -1.57024 | 0.00157  | 0.01754  | 0.01467  | 0.03228  | -1.53795 |
| D29 | 0.52431  | 0.00026  | 0.01865  | 0.01497  | 0.03367  | 0.55798  |
| D30 | 2.57671  | 0.00060  | 0.01932  | 0.01714  | 0.03653  | 2.61324  |
| D31 | -1.08064 | -0.00067 | 0.01589  | 0.02783  | 0.04372  | -1.03692 |
| D32 | 1.02678  | -0.00187 | 0.01465  | 0.03198  | 0.04661  | 1.07339  |
| D33 | -3.13337 | -0.00143 | 0.00875  | 0.03230  | 0.04107  | -3.09230 |
| D34 | 3.12597  | 0.00108  | 0.01957  | 0.03065  | 0.05023  | -3.10699 |
| D35 | -1.04979 | -0.00012 | 0.01832  | 0.03481  | 0.05311  | -0.99668 |

|     |          |          |          |          |          |          |
|-----|----------|----------|----------|----------|----------|----------|
| D36 | 1.07324  | 0.00032  | 0.01242  | 0.03513  | 0.04757  | 1.12082  |
| D37 | 1.03069  | 0.00016  | 0.01173  | 0.02277  | 0.03449  | 1.06518  |
| D38 | 3.13811  | -0.00104 | 0.01048  | 0.02692  | 0.03737  | -3.10770 |
| D39 | -1.02204 | -0.00060 | 0.00458  | 0.02724  | 0.03184  | -0.99020 |
| D40 | 0.50802  | -0.00097 | 0.01127  | 0.02382  | 0.03509  | 0.54312  |
| D41 | 2.62368  | -0.00187 | 0.00958  | 0.02615  | 0.03572  | 2.65940  |
| D42 | -1.59828 | 0.00017  | 0.02457  | 0.02167  | 0.04626  | -1.55203 |
| D43 | -1.55351 | 0.00214  | -0.08131 | 0.07489  | -0.00643 | -1.55994 |
| D44 | 2.64029  | 0.00013  | -0.08244 | 0.07538  | -0.00702 | 2.63327  |
| D45 | 0.55171  | -0.00279 | -0.09150 | 0.07411  | -0.01741 | 0.53429  |
| D46 | -3.11870 | -0.00004 | -0.00957 | -0.00385 | -0.01343 | -3.13212 |
| D47 | 0.02382  | -0.00003 | -0.00447 | -0.00795 | -0.01242 | 0.01140  |
| D48 | 0.01762  | -0.00015 | -0.00487 | -0.00658 | -0.01145 | 0.00617  |
| D49 | -3.12305 | -0.00015 | 0.00023  | -0.01067 | -0.01044 | -3.13349 |

| Item                 | Value    | Threshold | Converged? |
|----------------------|----------|-----------|------------|
| Maximum Force        | 0.007409 | 0.000450  | NO         |
| RMS Force            | 0.001260 | 0.000300  | NO         |
| Maximum Displacement | 0.504918 | 0.001800  | NO         |
| RMS Displacement     | 0.095927 | 0.001200  | NO         |

Predicted change in Energy=-3.493850D-04

GradGradGradGradGradGradGradGradGradGradGradGradGradGradGradGradGradGradGrad

Input orientation:

| Center Number | Atomic Number | Atomic Type | Coordinates (Angstroms) |           |           |
|---------------|---------------|-------------|-------------------------|-----------|-----------|
|               |               |             | X                       | Y         | Z         |
| 1             | 6             | 0           | -0.544221               | -2.244090 | -1.165649 |
| 2             | 6             | 0           | -1.850647               | -1.915566 | -1.333510 |
| 3             | 7             | 0           | -2.126748               | -0.899426 | -0.423361 |
| 4             | 6             | 0           | -1.009682               | -0.628431 | 0.278199  |
| 5             | 7             | 0           | -0.040308               | -1.431352 | -0.162844 |
| 6             | 6             | 0           | 1.351514                | -1.387413 | 0.329415  |
| 7             | 6             | 0           | 2.208945                | -0.385810 | -0.459716 |
| 8             | 1             | 0           | 0.062540                | -2.975459 | -1.671329 |
| 9             | 1             | 0           | -2.584335               | -2.309773 | -2.012297 |
| 10            | 1             | 0           | 1.310767                | -1.087516 | 1.376410  |
| 11            | 1             | 0           | 1.764253                | -2.394007 | 0.254588  |
| 12            | 1             | 0           | 2.231735                | -0.652497 | -1.520501 |
| 13            | 1             | 0           | 1.788677                | 0.614705  | -0.335546 |
| 14            | 35            | 0           | 0.304257                | 1.902016  | 1.925221  |
| 15            | 1             | 0           | -0.830133               | 0.205305  | 1.000194  |
| 16            | 6             | 0           | -3.351989               | -0.212176 | -0.198078 |
| 17            | 6             | 0           | -4.500188               | -0.495286 | -0.798868 |



|    |   |   |           |           |           |
|----|---|---|-----------|-----------|-----------|
| 18 | 1 | 0 | -3.240007 | 0.582541  | 0.528206  |
| 19 | 1 | 0 | -5.376627 | 0.092667  | -0.565536 |
| 20 | 1 | 0 | -4.618718 | -1.293310 | -1.520118 |
| 21 | 8 | 0 | 3.542801  | -0.441880 | 0.019542  |
| 22 | 1 | 0 | 3.628462  | 0.189881  | 0.742732  |

-----  
Distance matrix (angstroms):

|    |    | 1        | 2        | 3        | 4        | 5        |
|----|----|----------|----------|----------|----------|----------|
| 1  | C  | 0.000000 |          |          |          |          |
| 2  | C  | 1.357518 | 0.000000 |          |          |          |
| 3  | N  | 2.205336 | 1.391813 | 0.000000 |          |          |
| 4  | C  | 2.216237 | 2.227452 | 1.346649 | 0.000000 |          |
| 5  | N  | 1.385673 | 2.209581 | 2.168882 | 1.333749 | 0.000000 |
| 6  | C  | 2.561820 | 3.646656 | 3.592090 | 2.480710 | 1.476962 |
| 7  | C  | 3.395801 | 4.425376 | 4.366161 | 3.311033 | 2.498085 |
| 8  | H  | 1.076462 | 2.213093 | 3.265015 | 3.234016 | 2.161104 |
| 9  | H  | 2.209795 | 1.074454 | 2.173288 | 3.248510 | 3.265605 |
| 10 | H  | 3.352717 | 4.245452 | 3.884722 | 2.607932 | 2.076759 |
| 11 | H  | 2.714516 | 3.977242 | 4.222946 | 3.288241 | 2.087436 |
| 12 | H  | 3.219475 | 4.277400 | 4.501230 | 3.707113 | 2.758990 |
| 13 | H  | 3.782088 | 4.543443 | 4.198912 | 3.122960 | 2.749793 |
| 14 | Br | 5.240572 | 5.462314 | 4.390183 | 3.292762 | 3.948428 |
| 15 | H  | 3.282097 | 3.314470 | 2.219944 | 1.117421 | 2.157574 |
| 16 | C  | 3.598393 | 2.538655 | 1.422772 | 2.426213 | 3.529145 |
| 17 | C  | 4.340798 | 3.053376 | 2.436709 | 3.655330 | 4.601226 |
| 18 | H  | 4.257494 | 3.411282 | 2.083519 | 2.550158 | 3.843356 |
| 19 | H  | 5.401178 | 4.129809 | 3.400908 | 4.505783 | 5.564270 |
| 20 | H  | 4.198947 | 2.843280 | 2.750987 | 4.086704 | 4.777351 |
| 21 | O  | 4.621297 | 5.752546 | 5.705200 | 4.563640 | 3.721692 |
| 22 | H  | 5.193979 | 6.226100 | 5.972337 | 4.732632 | 4.111975 |
|    |    | 6        | 7        | 8        | 9        | 10       |
| 6  | C  | 0.000000 |          |          |          |          |
| 7  | C  | 1.536595 | 0.000000 |          |          |          |
| 8  | H  | 2.861175 | 3.575100 | 0.000000 |          |          |
| 9  | H  | 4.671753 | 5.393299 | 2.750518 | 0.000000 |          |
| 10 | H  | 1.089861 | 2.161128 | 3.796197 | 5.305570 | 0.000000 |
| 11 | H  | 1.090497 | 2.177346 | 2.634970 | 4.904700 | 1.780745 |
| 12 | H  | 2.176484 | 1.094033 | 3.181872 | 5.116929 | 3.070752 |
| 13 | H  | 2.154475 | 1.092279 | 4.201564 | 5.521531 | 2.461046 |
| 14 | Br | 3.803116 | 3.814434 | 6.064929 | 6.448813 | 3.201806 |
| 15 | H  | 2.783214 | 3.422973 | 4.248666 | 4.298598 | 2.529106 |
| 16 | C  | 4.876717 | 5.569792 | 4.633056 | 2.877602 | 4.998652 |
| 17 | C  | 6.025889 | 6.718592 | 5.266017 | 2.904353 | 6.232959 |
| 18 | H  | 5.000230 | 5.621812 | 5.329553 | 3.905066 | 4.921187 |

|    |    |          |          |          |          |          |
|----|----|----------|----------|----------|----------|----------|
| 19 | H  | 6.946903 | 7.601384 | 6.341981 | 3.957490 | 7.062947 |
| 20 | H  | 6.250864 | 6.968858 | 4.976612 | 2.326832 | 6.602349 |
| 21 | O  | 2.406615 | 1.418452 | 4.624964 | 6.720060 | 2.690709 |
| 22 | H  | 2.800568 | 1.947391 | 5.344424 | 7.241361 | 2.721213 |
|    |    | 11       | 12       | 13       | 14       | 15       |
| 11 | H  | 0.000000 |          |          |          |          |
| 12 | H  | 2.530284 | 0.000000 |          |          |          |
| 13 | H  | 3.066137 | 1.790592 | 0.000000 |          |          |
| 14 | Br | 4.835123 | 4.702522 | 2.995286 | 0.000000 |          |
| 15 | H  | 3.747424 | 4.057680 | 2.968160 | 2.240836 | 0.000000 |
| 16 | C  | 5.580432 | 5.755055 | 5.208558 | 4.727192 | 2.823102 |
| 17 | C  | 6.630093 | 6.772316 | 6.402857 | 6.020832 | 4.146898 |
| 18 | H  | 5.829006 | 5.971807 | 5.102427 | 4.031684 | 2.484466 |
| 19 | H  | 7.605808 | 7.704181 | 7.187976 | 6.461429 | 4.809866 |
| 20 | H  | 6.715908 | 6.880360 | 6.789583 | 6.805597 | 4.790740 |
| 21 | O  | 2.651280 | 2.033467 | 2.078319 | 4.428728 | 4.528033 |
| 22 | H  | 3.223358 | 2.789744 | 2.174389 | 3.921737 | 4.466049 |
|    |    | 16       | 17       | 18       | 19       | 20       |
| 16 | C  | 0.000000 |          |          |          |          |
| 17 | C  | 1.326447 | 0.000000 |          |          |          |
| 18 | H  | 1.082406 | 2.123887 | 0.000000 |          |          |
| 19 | H  | 2.080172 | 1.080869 | 2.449774 | 0.000000 |          |
| 20 | H  | 2.126321 | 1.082170 | 3.100853 | 1.845694 | 0.000000 |
| 21 | O  | 6.902047 | 8.084697 | 6.878565 | 8.954567 | 8.349005 |
| 22 | H  | 7.055031 | 8.301864 | 6.883027 | 9.100146 | 8.679650 |
|    |    | 21       | 22       |          |          |          |
| 21 | O  | 0.000000 |          |          |          |          |
| 22 | H  | 0.964087 | 0.000000 |          |          |          |

Stoichiometry C7H11BrN2O

Framework group C1[X(C7H11BrN2O)]

Deg. of freedom 60

Full point group C1 NOp 1

Largest Abelian subgroup C1 NOp 1

Largest concise Abelian subgroup C1 NOp 1

Standard orientation:

| Center<br>Number | Atomic<br>Number | Atomic<br>Type | Coordinates (Angstroms) |           |           |
|------------------|------------------|----------------|-------------------------|-----------|-----------|
|                  |                  |                | X                       | Y         | Z         |
| 1                | 6                | 0              | -1.630236               | -2.129387 | 0.127839  |
| 2                | 6                | 0              | -2.679552               | -1.298529 | -0.099020 |
| 3                | 7                | 0              | -2.196702               | -0.000063 | 0.035089  |
| 4                | 6                | 0              | -0.886214               | -0.052639 | 0.340570  |
| 5                | 7                | 0              | -0.526399               | -1.335751 | 0.395746  |

|    |    |   |           |           |           |
|----|----|---|-----------|-----------|-----------|
| 6  | 6  | 0 | 0.855133  | -1.792226 | 0.649556  |
| 7  | 6  | 0 | 1.668469  | -1.912230 | -0.648600 |
| 8  | 1  | 0 | -1.575705 | -3.204418 | 0.117516  |
| 9  | 1  | 0 | -3.701957 | -1.521427 | -0.342855 |
| 10 | 1  | 0 | 1.319793  | -1.055428 | 1.304549  |
| 11 | 1  | 0 | 0.800578  | -2.752883 | 1.162727  |
| 12 | 1  | 0 | 1.195913  | -2.622904 | -1.333100 |
| 13 | 1  | 0 | 1.732568  | -0.928182 | -1.118295 |
| 14 | 35 | 0 | 1.788883  | 1.840767  | 0.022532  |
| 15 | 1  | 0 | -0.153969 | 0.789435  | 0.398525  |
| 16 | 6  | 0 | -2.897145 | 1.230783  | -0.101580 |
| 17 | 6  | 0 | -4.201424 | 1.339541  | -0.317197 |
| 18 | 1  | 0 | -2.235400 | 2.082578  | -0.011353 |
| 19 | 1  | 0 | -4.639639 | 2.322685  | -0.415551 |
| 20 | 1  | 0 | -4.868116 | 0.491245  | -0.400910 |
| 21 | 8  | 0 | 2.958386  | -2.415313 | -0.340335 |
| 22 | 1  | 0 | 3.535452  | -1.666213 | -0.152435 |

-----

Rotational constants (GHZ):      0.7884949      0.4770122      0.3058497

Standard basis: 6-311++G(d,p) (5D, 7F)

There are    358 symmetry adapted cartesian basis functions of A    symmetry.

There are    345 symmetry adapted basis functions of A    symmetry.

    345 basis functions,    553 primitive gaussians,    358 cartesian basis functions

    55 alpha electrons      55 beta electrons

        nuclear repulsion energy      835.1180000502 Hartrees.

NAtoms=    22 NActive=    22 NUniq=    22 SFac= 1.00D+00 NAtFMM=    60 NAOKFM=F

Big=F

Integral buffers will be    131072 words long.

Raffenetti 2 integral format.

Two-electron integral symmetry is turned on.

One-electron integrals computed using PRISM.

NBasis=    345 RedAO= T EigKep= 4.57D-06    NBF=    345

NBsUse=    345 1.00D-06 EigRej= -1.00D+00 NBFU=    345

Initial guess from the checkpoint file:    ""

B after Tr=      0.000000      0.000000      0.000000

        Rot=    0.999503      0.003372      -0.001207      0.031329 Ang=    3.61 deg.

ExpMin= 3.50D-02 ExpMax= 4.40D+05 ExpMxC= 1.51D+04 IAcc=3 IRadAn=            5 AccDes=

0.00D+00

Harris functional with IExCor=    402 and IRadAn=            5 diagonalized for initial guess.

HarFok: IExCor=    402 AccDes= 0.00D+00 IRadAn=            5 IDoV= 1 UseB2=F ITyADJ=14

ICtDFT= 3500011 ScaDFX= 1.000000 1.000000 1.000000 1.000000

FoFCou: FMM=F IPFlag=            0 FMFlag=            100000 FMFlg1=            0

        NFXFlg=            0 DoJE=T BraDBF=F KetDBF=T FulRan=T

        wScrn= 0.000000 ICntrl=            500 IOpCl=    0 I1Cent=    20000004 NGrid=

0

NMat0= 1 NMatS0= 1 NMatT0= 0 NMatD0= 1 NMtDS0= 0  
NMtDT0= 0

Petite list used in FoFCou.

Keep R1 ints in memory in canonical form, NReq=1804729152.

Requested convergence on RMS density matrix=1.00D-08 within 128 cycles.

Requested convergence on MAX density matrix=1.00D-06.

Requested convergence on energy=1.00D-06.

No special actions if energy rises.

EnCoef did 2 forward-backward iterations

SCF Done: E(RB3LYP) = -3032.33981254 A.U. after 13 cycles

NFock= 13 Conv=0.51D-08 -V/T= 2.0017

Calling FoFJK, ICntrl= 2127 FMM=F ISym2X=0 l1Cent= 0 IOpCIX= 0 NMat=1 NMatS=1

NMatT=0.

\*\*\*\*\* Axes restored to original set \*\*\*\*\*

| Center<br>Number | Atomic<br>Number | Forces (Hartrees/Bohr) |              |              |
|------------------|------------------|------------------------|--------------|--------------|
|                  |                  | X                      | Y            | Z            |
| 1                | 6                | -0.000310937           | 0.000847571  | -0.000429723 |
| 2                | 6                | 0.000514745            | 0.000182495  | 0.000301880  |
| 3                | 7                | -0.001484453           | -0.000206699 | 0.000263656  |
| 4                | 6                | 0.002318401            | 0.004135831  | 0.000215643  |
| 5                | 7                | 0.000711350            | -0.000903150 | 0.001595009  |
| 6                | 6                | -0.000259590           | -0.000097892 | -0.000507425 |
| 7                | 6                | 0.001106575            | -0.000156708 | 0.001162562  |
| 8                | 1                | 0.000085874            | -0.000110144 | 0.000292426  |
| 9                | 1                | -0.000469512           | 0.000059709  | 0.000235619  |
| 10               | 1                | 0.000453807            | 0.000216449  | 0.000117437  |
| 11               | 1                | 0.000104447            | -0.000102772 | -0.000005411 |
| 12               | 1                | -0.000062398           | -0.000017181 | 0.000094121  |
| 13               | 1                | -0.001593465           | 0.000587535  | -0.001021518 |
| 14               | 35               | -0.000168700           | -0.002717717 | -0.001344497 |
| 15               | 1                | -0.001001668           | -0.002243075 | -0.000822299 |
| 16               | 6                | 0.000363070            | -0.000105640 | -0.000267081 |
| 17               | 6                | 0.000255571            | -0.000052653 | 0.000216456  |
| 18               | 1                | -0.000288957           | 0.000507140  | -0.000059944 |
| 19               | 1                | -0.000086504           | 0.000160335  | 0.000164734  |
| 20               | 1                | 0.000111955            | -0.000198223 | -0.000328970 |
| 21               | 8                | -0.000119442           | 0.000094189  | -0.000031576 |
| 22               | 1                | -0.000180170           | 0.000120598  | 0.000158899  |

Cartesian Forces: Max 0.004135831 RMS 0.000909289

GradGradGradGradGradGradGradGradGradGradGradGradGradGradGradGradGradGradGrad

Berny optimization.

Using GEDIIS/GDIIS optimizer.

FormGI is forming the generalized inverse of G from B-inverse, IUseBI=4.

Internal Forces: Max 0.008953541 RMS 0.001586299

Search for a local minimum.

Step number 49 out of a maximum of 116

All quantities printed in internal units (Hartrees-Bohrs-Radians)

Mixed Optimization -- RFO/linear search

Update second derivatives using D2CorX and points 46 47 48 49

DE= -3.56D-04 DEPred=-3.49D-04 R= 1.02D+00

TightC=F SS= 1.41D+00 RLast= 4.30D-01 DXNew= 4.4018D-01 1.2896D+00

Trust test= 1.02D+00 RLast= 4.30D-01 DXMaxT set to 4.40D-01

ITU= 1 1 1 -1 1 0 -1 1 0 -1 0 0 1 -1 0 1 1 1

ITU= 1 1 1 0 -1 1 1 1 1 0 -1 1 1 1 1 1 1 1

ITU= 1 1 1 1 0 0 -1 0 0

Use linear search instead of GDIIS.

|                 |         |         |         |         |         |
|-----------------|---------|---------|---------|---------|---------|
| Eigenvalues --- | 0.00160 | 0.00245 | 0.00309 | 0.00588 | 0.00946 |
| Eigenvalues --- | 0.01063 | 0.01442 | 0.01729 | 0.01915 | 0.02159 |
| Eigenvalues --- | 0.02313 | 0.02409 | 0.03019 | 0.03160 | 0.03745 |
| Eigenvalues --- | 0.04417 | 0.05055 | 0.05422 | 0.06065 | 0.06531 |
| Eigenvalues --- | 0.08698 | 0.09319 | 0.11560 | 0.13807 | 0.14608 |
| Eigenvalues --- | 0.14763 | 0.15905 | 0.15988 | 0.16096 | 0.16574 |
| Eigenvalues --- | 0.17011 | 0.17272 | 0.20933 | 0.22510 | 0.23037 |
| Eigenvalues --- | 0.24427 | 0.25063 | 0.25904 | 0.29304 | 0.31618 |
| Eigenvalues --- | 0.33151 | 0.33863 | 0.33889 | 0.33993 | 0.34239 |
| Eigenvalues --- | 0.34479 | 0.34749 | 0.35299 | 0.36303 | 0.36356 |
| Eigenvalues --- | 0.38933 | 0.43256 | 0.44300 | 0.46436 | 0.49232 |
| Eigenvalues --- | 0.53597 | 0.55125 | 0.57721 | 0.60769 | 1.24024 |

RFO step: Lambda=-6.14406414D-04 EMin= 1.59878524D-03

Quartic linear search produced a step of -0.04975.

Iteration 1 RMS(Cart)= 0.02964369 RMS(Int)= 0.00046843

Iteration 2 RMS(Cart)= 0.00056666 RMS(Int)= 0.00013359

Iteration 3 RMS(Cart)= 0.00000025 RMS(Int)= 0.00013359

| Variable | Old X   | -DE/DX   | Delta X  |          |          | New X   |
|----------|---------|----------|----------|----------|----------|---------|
|          |         |          | (Linear) | (Quad)   | (Total)  |         |
| R1       | 2.56534 | 0.00038  | 0.00004  | -0.00194 | -0.00201 | 2.56332 |
| R2       | 2.61854 | -0.00038 | 0.00008  | 0.00082  | 0.00086  | 2.61941 |
| R3       | 2.03422 | -0.00001 | 0.00000  | 0.00004  | 0.00004  | 2.03426 |
| R4       | 2.63015 | -0.00017 | -0.00009 | 0.00147  | 0.00134  | 2.63149 |
| R5       | 2.03042 | 0.00015  | 0.00003  | -0.00011 | -0.00008 | 2.03035 |
| R6       | 2.54480 | 0.00040  | 0.00009  | -0.00072 | -0.00054 | 2.54426 |
| R7       | 2.68865 | -0.00020 | -0.00007 | 0.00157  | 0.00149  | 2.69014 |
| R8       | 2.52042 | 0.00070  | 0.00009  | -0.00066 | -0.00047 | 2.51995 |

|     |         |          |          |          |          |         |
|-----|---------|----------|----------|----------|----------|---------|
| R9  | 2.11162 | -0.00237 | -0.00034 | -0.01571 | -0.01605 | 2.09557 |
| R10 | 2.79105 | -0.00119 | -0.00056 | 0.00685  | 0.00629  | 2.79735 |
| R11 | 2.90374 | -0.00145 | 0.00018  | -0.00058 | -0.00040 | 2.90334 |
| R12 | 2.05954 | 0.00016  | -0.00004 | 0.00145  | 0.00141  | 2.06095 |
| R13 | 2.06074 | 0.00014  | 0.00008  | -0.00059 | -0.00052 | 2.06022 |
| R14 | 2.06742 | -0.00009 | -0.00006 | 0.00076  | 0.00070  | 2.06812 |
| R15 | 2.06411 | -0.00155 | -0.00003 | 0.00371  | 0.00369  | 2.06779 |
| R16 | 2.68049 | -0.00024 | 0.00016  | -0.00305 | -0.00288 | 2.67760 |
| R17 | 5.66027 | -0.00210 | -0.00352 | -0.04554 | -0.04907 | 5.61121 |
| R18 | 2.50662 | -0.00025 | -0.00001 | 0.00017  | 0.00016  | 2.50678 |
| R19 | 2.04545 | 0.00030  | 0.00008  | 0.00064  | 0.00071  | 2.04617 |
| R20 | 2.04255 | 0.00019  | 0.00003  | 0.00058  | 0.00061  | 2.04316 |
| R21 | 2.04500 | 0.00035  | 0.00009  | 0.00005  | 0.00014  | 2.04514 |
| R22 | 1.82186 | 0.00018  | -0.00010 | 0.00230  | 0.00219  | 1.82405 |
| A1  | 1.87289 | -0.00014 | 0.00003  | 0.00091  | 0.00089  | 1.87378 |
| A2  | 2.27678 | 0.00028  | 0.00017  | -0.00207 | -0.00192 | 2.27486 |
| A3  | 2.13351 | -0.00013 | -0.00020 | 0.00122  | 0.00099  | 2.13450 |
| A4  | 1.86161 | 0.00046  | 0.00003  | 0.00076  | 0.00077  | 1.86238 |
| A5  | 2.27375 | 0.00022  | 0.00034  | -0.00168 | -0.00134 | 2.27242 |
| A6  | 2.14781 | -0.00068 | -0.00037 | 0.00094  | 0.00058  | 2.14838 |
| A7  | 1.89974 | -0.00039 | 0.00001  | -0.00227 | -0.00210 | 1.89764 |
| A8  | 2.24854 | -0.00022 | -0.00013 | -0.00043 | -0.00067 | 2.24787 |
| A9  | 2.13490 | 0.00061  | 0.00011  | 0.00276  | 0.00277  | 2.13766 |
| A10 | 1.88544 | 0.00008  | 0.00001  | 0.00272  | 0.00243  | 1.88787 |
| A11 | 2.23960 | -0.00042 | -0.00156 | 0.01435  | 0.01209  | 2.25169 |
| A12 | 2.14843 | 0.00040  | 0.00111  | -0.00824 | -0.00791 | 2.14052 |
| A13 | 1.90508 | 0.00000  | -0.00007 | -0.00210 | -0.00198 | 1.90310 |
| A14 | 2.21598 | 0.00248  | -0.00010 | 0.00073  | 0.00054  | 2.21652 |
| A15 | 2.16131 | -0.00250 | 0.00005  | 0.00159  | 0.00157  | 2.16288 |
| A16 | 1.95419 | -0.00367 | -0.00018 | 0.00664  | 0.00647  | 1.96065 |
| A17 | 1.86830 | 0.00013  | 0.00046  | -0.00532 | -0.00487 | 1.86343 |
| A18 | 1.88214 | 0.00247  | 0.00045  | -0.00727 | -0.00683 | 1.87531 |
| A19 | 1.91225 | -0.00006 | -0.00021 | 0.00114  | 0.00094  | 1.91319 |
| A20 | 1.93397 | 0.00158  | 0.00002  | 0.00027  | 0.00030  | 1.93427 |
| A21 | 1.91141 | -0.00044 | -0.00053 | 0.00432  | 0.00378  | 1.91519 |
| A22 | 1.92909 | 0.00251  | -0.00006 | -0.00143 | -0.00149 | 1.92760 |
| A23 | 1.90074 | -0.00688 | 0.00032  | -0.00079 | -0.00047 | 1.90027 |
| A24 | 1.90228 | 0.00101  | 0.00033  | -0.00664 | -0.00631 | 1.89596 |
| A25 | 1.91934 | 0.00082  | -0.00025 | 0.00449  | 0.00424  | 1.92358 |
| A26 | 1.87379 | -0.00076 | -0.00024 | 0.00320  | 0.00295  | 1.87674 |
| A27 | 1.93865 | 0.00350  | -0.00011 | 0.00110  | 0.00098  | 1.93963 |
| A28 | 2.30522 | -0.00895 | 0.00399  | -0.02641 | -0.02243 | 2.28279 |
| A29 | 2.17807 | -0.00051 | -0.00036 | 0.00143  | 0.00107  | 2.17913 |
| A30 | 1.95175 | 0.00067  | 0.00036  | -0.00296 | -0.00260 | 1.94915 |

|     |          |          |          |          |          |          |
|-----|----------|----------|----------|----------|----------|----------|
| A31 | 2.15337  | -0.00015 | 0.00000  | 0.00151  | 0.00151  | 2.15487  |
| A32 | 2.08062  | -0.00012 | 0.00013  | -0.00273 | -0.00260 | 2.07802  |
| A33 | 2.15805  | -0.00006 | -0.00019 | 0.00141  | 0.00122  | 2.15927  |
| A34 | 2.04451  | 0.00018  | 0.00006  | 0.00131  | 0.00138  | 2.04589  |
| A35 | 1.88715  | -0.00034 | 0.00007  | -0.00277 | -0.00270 | 1.88445  |
| D1  | -0.00017 | 0.00026  | 0.00018  | 0.00058  | 0.00070  | 0.00053  |
| D2  | 3.13603  | 0.00018  | -0.00026 | 0.00518  | 0.00491  | 3.14094  |
| D3  | -3.13699 | 0.00005  | 0.00067  | -0.01444 | -0.01376 | 3.13243  |
| D4  | -0.00080 | -0.00003 | 0.00023  | -0.00984 | -0.00955 | -0.01034 |
| D5  | 0.00394  | -0.00030 | -0.00027 | -0.00321 | -0.00343 | 0.00052  |
| D6  | -3.09529 | 0.00036  | 0.00187  | -0.00907 | -0.00709 | -3.10238 |
| D7  | 3.14125  | -0.00011 | -0.00071 | 0.01029  | 0.00960  | -3.13234 |
| D8  | 0.04201  | 0.00055  | 0.00144  | 0.00443  | 0.00594  | 0.04795  |
| D9  | -0.00362 | -0.00013 | -0.00003 | 0.00222  | 0.00223  | -0.00139 |
| D10 | -3.13912 | -0.00023 | -0.00156 | -0.00757 | -0.00902 | 3.13504  |
| D11 | -3.14030 | -0.00007 | 0.00037  | -0.00196 | -0.00160 | 3.14128  |
| D12 | 0.00738  | -0.00017 | -0.00117 | -0.01175 | -0.01285 | -0.00547 |
| D13 | 0.00610  | -0.00005 | -0.00014 | -0.00422 | -0.00438 | 0.00172  |
| D14 | 3.00009  | 0.00041  | -0.00269 | 0.06145  | 0.05913  | 3.05922  |
| D15 | -3.14111 | 0.00004  | 0.00128  | 0.00479  | 0.00601  | -3.13510 |
| D16 | -0.14712 | 0.00050  | -0.00127 | 0.07046  | 0.06952  | -0.07760 |
| D17 | 0.07116  | 0.00008  | 0.00902  | -0.05476 | -0.04576 | 0.02540  |
| D18 | -3.06747 | 0.00019  | 0.00911  | -0.04960 | -0.04052 | -3.10799 |
| D19 | -3.06361 | -0.00003 | 0.00730  | -0.06570 | -0.05837 | -3.12199 |
| D20 | 0.08095  | 0.00008  | 0.00739  | -0.06055 | -0.05314 | 0.02781  |
| D21 | -0.00622 | 0.00021  | 0.00025  | 0.00459  | 0.00482  | -0.00139 |
| D22 | 3.09463  | -0.00028 | -0.00182 | 0.01020  | 0.00832  | 3.10296  |
| D23 | -3.00964 | -0.00014 | 0.00301  | -0.05915 | -0.05576 | -3.06540 |
| D24 | 0.09121  | -0.00063 | 0.00094  | -0.05353 | -0.05226 | 0.03895  |
| D25 | 1.55546  | 0.00130  | -0.00405 | 0.01896  | 0.01488  | 1.57035  |
| D26 | -2.63179 | -0.00086 | -0.00412 | 0.02084  | 0.01668  | -2.61511 |
| D27 | -0.57653 | -0.00003 | -0.00426 | 0.01935  | 0.01508  | -0.56145 |
| D28 | -1.53795 | 0.00197  | -0.00161 | 0.01238  | 0.01079  | -1.52716 |
| D29 | 0.55798  | -0.00019 | -0.00167 | 0.01426  | 0.01260  | 0.57057  |
| D30 | 2.61324  | 0.00064  | -0.00182 | 0.01277  | 0.01099  | 2.62423  |
| D31 | -1.03692 | -0.00139 | -0.00218 | -0.00168 | -0.00385 | -1.04077 |
| D32 | 1.07339  | -0.00322 | -0.00232 | 0.00247  | 0.00015  | 1.07354  |
| D33 | -3.09230 | -0.00254 | -0.00204 | -0.00073 | -0.00277 | -3.09507 |
| D34 | -3.10699 | 0.00079  | -0.00250 | 0.00006  | -0.00244 | -3.10943 |
| D35 | -0.99668 | -0.00104 | -0.00264 | 0.00421  | 0.00156  | -0.99512 |
| D36 | 1.12082  | -0.00036 | -0.00237 | 0.00101  | -0.00136 | 1.11946  |
| D37 | 1.06518  | 0.00037  | -0.00172 | -0.00626 | -0.00797 | 1.05721  |
| D38 | -3.10770 | -0.00147 | -0.00186 | -0.00210 | -0.00396 | -3.11166 |
| D39 | -0.99020 | -0.00079 | -0.00158 | -0.00530 | -0.00689 | -0.99709 |

|     |          |          |          |          |          |          |
|-----|----------|----------|----------|----------|----------|----------|
| D40 | 0.54312  | -0.00222 | -0.00175 | -0.03001 | -0.03176 | 0.51136  |
| D41 | 2.65940  | -0.00298 | -0.00178 | -0.02949 | -0.03127 | 2.62813  |
| D42 | -1.55203 | -0.00121 | -0.00230 | -0.02196 | -0.02426 | -1.57628 |
| D43 | -1.55994 | 0.00298  | 0.00032  | -0.04480 | -0.04449 | -1.60442 |
| D44 | 2.63327  | -0.00014 | 0.00035  | -0.04123 | -0.04088 | 2.59239  |
| D45 | 0.53429  | -0.00272 | 0.00087  | -0.04938 | -0.04852 | 0.48577  |
| D46 | -3.13212 | 0.00003  | 0.00067  | -0.00849 | -0.00782 | -3.13994 |
| D47 | 0.01140  | -0.00007 | 0.00062  | -0.00702 | -0.00640 | 0.00500  |
| D48 | 0.00617  | -0.00009 | 0.00057  | -0.01423 | -0.01366 | -0.00749 |
| D49 | -3.13349 | -0.00019 | 0.00052  | -0.01275 | -0.01224 | 3.13746  |

| Item                 | Value    | Threshold | Converged? |
|----------------------|----------|-----------|------------|
| Maximum Force        | 0.008954 | 0.000450  | NO         |
| RMS Force            | 0.001586 | 0.000300  | NO         |
| Maximum Displacement | 0.153332 | 0.001800  | NO         |
| RMS Displacement     | 0.029622 | 0.001200  | NO         |

Predicted change in Energy=-3.178955D-04

GradGradGradGradGradGradGradGradGradGradGradGradGradGradGradGradGradGrad

Input orientation:

| Center Number | Atomic Number | Atomic Type | Coordinates (Angstroms) |           |           |
|---------------|---------------|-------------|-------------------------|-----------|-----------|
|               |               |             | X                       | Y         | Z         |
| 1             | 6             | 0           | -0.549520               | -2.253318 | -1.150605 |
| 2             | 6             | 0           | -1.857773               | -1.932446 | -1.310221 |
| 3             | 7             | 0           | -2.130727               | -0.905408 | -0.410325 |
| 4             | 6             | 0           | -1.006935               | -0.620458 | 0.274215  |
| 5             | 7             | 0           | -0.038592               | -1.426796 | -0.162086 |
| 6             | 6             | 0           | 1.358980                | -1.377322 | 0.323310  |
| 7             | 6             | 0           | 2.215916                | -0.375299 | -0.465413 |
| 8             | 1             | 0           | 0.051078                | -2.996776 | -1.645955 |
| 9             | 1             | 0           | -2.595985               | -2.341402 | -1.975174 |
| 10            | 1             | 0           | 1.317639                | -1.078447 | 1.371353  |
| 11            | 1             | 0           | 1.768526                | -2.384554 | 0.243667  |
| 12            | 1             | 0           | 2.239742                | -0.644360 | -1.525956 |
| 13            | 1             | 0           | 1.795176                | 0.626863  | -0.338980 |
| 14            | 35            | 0           | 0.270123                | 1.820876  | 1.911668  |
| 15            | 1             | 0           | -0.827163               | 0.182253  | 1.017893  |
| 16            | 6             | 0           | -3.355704               | -0.214290 | -0.190520 |
| 17            | 6             | 0           | -4.494191               | -0.469953 | -0.821527 |
| 18            | 1             | 0           | -3.248518               | 0.561854  | 0.556830  |
| 19            | 1             | 0           | -5.370684               | 0.115831  | -0.581544 |
| 20            | 1             | 0           | -4.604981               | -1.242109 | -1.571695 |
| 21            | 8             | 0           | 3.545610                | -0.436103 | 0.020278  |



22            1            0            3.638333       0.224482       0.717942

-----  
Distance matrix (angstroms):

|    |    | 1        | 2        | 3        | 4        | 5        |
|----|----|----------|----------|----------|----------|----------|
| 1  | C  | 0.000000 |          |          |          |          |
| 2  | C  | 1.356452 | 0.000000 |          |          |          |
| 3  | N  | 2.205695 | 1.392524 | 0.000000 |          |          |
| 4  | C  | 2.214852 | 2.226134 | 1.346365 | 0.000000 |          |
| 5  | N  | 1.386130 | 2.209822 | 2.170368 | 1.333502 | 0.000000 |
| 6  | C  | 2.565574 | 3.650218 | 3.597080 | 2.484514 | 1.480293 |
| 7  | C  | 3.412342 | 4.442223 | 4.379196 | 3.315708 | 2.506084 |
| 8  | H  | 1.076485 | 2.211160 | 3.265099 | 3.233161 | 2.162116 |
| 9  | H  | 2.208097 | 1.074413 | 2.174234 | 3.247533 | 3.265585 |
| 10 | H  | 3.350653 | 4.243041 | 3.885299 | 2.610960 | 2.076571 |
| 11 | H  | 2.708238 | 3.971022 | 4.221345 | 3.288792 | 2.085093 |
| 12 | H  | 3.241853 | 4.300621 | 4.518161 | 3.712425 | 2.768240 |
| 13 | H  | 3.801549 | 4.564802 | 4.214934 | 3.127883 | 2.758897 |
| 14 | Br | 5.162208 | 5.384788 | 4.311422 | 3.205034 | 3.865635 |
| 15 | H  | 3.272840 | 3.309717 | 2.218580 | 1.108928 | 2.145515 |
| 16 | C  | 3.599176 | 2.539604 | 1.423562 | 2.428511 | 3.531885 |
| 17 | C  | 4.341556 | 3.054244 | 2.438169 | 3.658449 | 4.604646 |
| 18 | H  | 4.257361 | 3.411977 | 2.082716 | 2.549985 | 3.843851 |
| 19 | H  | 5.401881 | 4.131217 | 3.401406 | 4.507410 | 5.566583 |
| 20 | H  | 4.200789 | 2.844659 | 2.753921 | 4.091426 | 4.782574 |
| 21 | O  | 4.630693 | 5.762449 | 5.711958 | 4.563347 | 3.723067 |
| 22 | H  | 5.212396 | 6.242834 | 5.985959 | 4.742293 | 4.125645 |
|    |    | 6        | 7        | 8        | 9        | 10       |
| 6  | C  | 0.000000 |          |          |          |          |
| 7  | C  | 1.536382 | 0.000000 |          |          |          |
| 8  | H  | 2.865528 | 3.598937 | 0.000000 |          |          |
| 9  | H  | 4.674851 | 5.412885 | 2.746787 | 0.000000 |          |
| 10 | H  | 1.090609 | 2.162181 | 3.793193 | 5.301957 | 0.000000 |
| 11 | H  | 1.090224 | 2.177167 | 2.625856 | 4.896333 | 1.783505 |
| 12 | H  | 2.175491 | 1.094401 | 3.215356 | 5.144511 | 3.071336 |
| 13 | H  | 2.155378 | 1.094229 | 4.228573 | 5.547073 | 2.461984 |
| 14 | Br | 3.733224 | 3.776217 | 5.992866 | 6.375474 | 3.129745 |
| 15 | H  | 2.773796 | 3.430946 | 4.239531 | 4.296047 | 2.512862 |
| 16 | C  | 4.883126 | 5.580720 | 4.633215 | 2.878675 | 5.002634 |
| 17 | C  | 6.032709 | 6.720216 | 5.265357 | 2.904550 | 6.241502 |
| 18 | H  | 5.004395 | 5.637665 | 5.329488 | 3.907140 | 4.919738 |
| 19 | H  | 6.952456 | 7.603367 | 6.341671 | 3.959691 | 7.069212 |
| 20 | H  | 6.259247 | 6.964184 | 4.976269 | 2.325362 | 6.615568 |
| 21 | O  | 2.399806 | 1.416926 | 4.641674 | 6.732843 | 2.683629 |
| 22 | H  | 2.813709 | 1.945080 | 5.369629 | 7.259708 | 2.740473 |

|    |    |          |          |          |          |          |
|----|----|----------|----------|----------|----------|----------|
|    |    | 11       | 12       | 13       | 14       | 15       |
| 11 | H  | 0.000000 |          |          |          |          |
| 12 | H  | 2.526239 | 0.000000 |          |          |          |
| 13 | H  | 3.067380 | 1.795148 | 0.000000 |          |          |
| 14 | Br | 4.765825 | 4.666267 | 2.969322 | 0.000000 |          |
| 15 | H  | 3.731693 | 4.069443 | 2.985875 | 2.165168 | 0.000000 |
| 16 | C  | 5.581783 | 5.768653 | 5.221221 | 4.659154 | 2.830376 |
| 17 | C  | 6.634905 | 6.772923 | 6.402499 | 5.951213 | 4.154026 |
| 18 | H  | 5.826673 | 5.992824 | 5.123041 | 3.975116 | 2.493919 |
| 19 | H  | 7.609285 | 7.706386 | 7.188153 | 6.398592 | 4.817281 |
| 20 | H  | 6.724754 | 6.870926 | 6.780462 | 6.729215 | 4.796528 |
| 21 | O  | 2.646581 | 2.034577 | 2.079178 | 4.404557 | 4.527553 |
| 22 | H  | 3.244716 | 2.783167 | 2.162457 | 3.913860 | 4.475758 |
|    |    | 16       | 17       | 18       | 19       | 20       |
| 16 | C  | 0.000000 |          |          |          |          |
| 17 | C  | 1.326531 | 0.000000 |          |          |          |
| 18 | H  | 1.082784 | 2.125134 | 0.000000 |          |          |
| 19 | H  | 2.078947 | 1.081191 | 2.449168 | 0.000000 |          |
| 20 | H  | 2.127145 | 1.082243 | 3.102401 | 1.846808 | 0.000000 |
| 21 | O  | 6.908094 | 8.083821 | 6.887958 | 8.953609 | 8.343630 |
| 22 | H  | 7.066426 | 8.306031 | 6.896992 | 9.102904 | 8.680182 |
|    |    | 21       | 22       |          |          |          |
| 21 | O  | 0.000000 |          |          |          |          |
| 22 | H  | 0.965248 | 0.000000 |          |          |          |

Stoichiometry C7H11BrN2O

Framework group C1[X(C7H11BrN2O)]

Deg. of freedom 60

Full point group C1 NOp 1

Largest Abelian subgroup C1 NOp 1

Largest concise Abelian subgroup C1 NOp 1

Standard orientation:

| Center<br>Number | Atomic<br>Number | Atomic<br>Type | Coordinates (Angstroms) |           |           |
|------------------|------------------|----------------|-------------------------|-----------|-----------|
|                  |                  |                | X                       | Y         | Z         |
| 1                | 6                | 0              | -1.542691               | -2.164208 | 0.155189  |
| 2                | 6                | 0              | -2.621088               | -1.370656 | -0.062292 |
| 3                | 7                | 0              | -2.178085               | -0.054872 | 0.045334  |
| 4                | 6                | 0              | -0.860798               | -0.063669 | 0.323502  |
| 5                | 7                | 0              | -0.458916               | -1.333293 | 0.392607  |
| 6                | 6                | 0              | 0.942376                | -1.744244 | 0.635021  |
| 7                | 6                | 0              | 1.754236                | -1.846283 | -0.665341 |
| 8                | 1                | 0              | -1.458544               | -3.237315 | 0.168577  |
| 9                | 1                | 0              | -3.640609               | -1.630430 | -0.280141 |

|    |    |   |           |           |           |
|----|----|---|-----------|-----------|-----------|
| 10 | 1  | 0 | 1.384352  | -0.987506 | 1.284201  |
| 11 | 1  | 0 | 0.916854  | -2.703589 | 1.152314  |
| 12 | 1  | 0 | 1.303050  | -2.579386 | -1.341139 |
| 13 | 1  | 0 | 1.784953  | -0.861669 | -1.141711 |
| 14 | 35 | 0 | 1.682459  | 1.864591  | 0.030413  |
| 15 | 1  | 0 | -0.159531 | 0.791174  | 0.408302  |
| 16 | 6  | 0 | -2.919748 | 1.150975  | -0.104314 |
| 17 | 6  | 0 | -4.220463 | 1.214617  | -0.356852 |
| 18 | 1  | 0 | -2.289361 | 2.024483  | 0.005303  |
| 19 | 1  | 0 | -4.689771 | 2.183773  | -0.454128 |
| 20 | 1  | 0 | -4.853584 | 0.344320  | -0.470834 |
| 21 | 8  | 0 | 3.058268  | -2.302228 | -0.350233 |
| 22 | 1  | 0 | 3.618032  | -1.528758 | -0.208418 |

-----

Rotational constants (GHZ):      0.8002457      0.4856124      0.3113346

Standard basis: 6-311++G(d,p) (5D, 7F)

There are    358 symmetry adapted cartesian basis functions of A    symmetry.

There are    345 symmetry adapted basis functions of A    symmetry.

    345 basis functions,    553 primitive gaussians,    358 cartesian basis functions

    55 alpha electrons      55 beta electrons

        nuclear repulsion energy      839.9974408583 Hartrees.

NAtoms=    22 NActive=    22 NUniq=    22 SFac= 1.00D+00 NAtFMM=    60 NAOKFM=F

Big=F

Integral buffers will be    131072 words long.

Raffenetti 2 integral format.

Two-electron integral symmetry is turned on.

One-electron integrals computed using PRISM.

NBasis=    345 RedAO= T EigKep= 4.43D-06 NBF=    345

NBsUse=    345 1.00D-06 EigRej= -1.00D+00 NBFU=    345

Initial guess from the checkpoint file: ". "

B after Tr=    0.000000    0.000000    0.000000

        Rot=    0.999851    0.000159    0.000043    -0.017242 Ang=    1.98 deg.

ExpMin= 3.50D-02 ExpMax= 4.40D+05 ExpMxC= 1.51D+04 IAcc=3 IRadAn=      5 AccDes=

0.00D+00

Harris functional with IExCor= 402 and IRadAn=      5 diagonalized for initial guess.

HarFok: IExCor= 402 AccDes= 0.00D+00 IRadAn=      5 IDoV= 1 UseB2=F ITyADJ=14

ICtDFT= 3500011 ScaDFX= 1.000000 1.000000 1.000000 1.000000

FoFCou: FMM=F IPFlag=      0 FMFlag=    100000 FMFlg1=      0

        NFXFlg=      0 DoJE=T BraDBF=F KetDBF=T FulRan=T

        wScrn= 0.000000 ICntrl=      500 IOpCl= 0 I1Cent=    200000004 NGrid=

0

        NMat0=    1 NMatS0=      1 NMatT0=    0 NMatD0=    1 NMtDS0=    0

NMtDT0=    0

Petite list used in FoFCou.

Keep R1 ints in memory in canonical form, NReq=1804729152.

Requested convergence on RMS density matrix=1.00D-08 within 128 cycles.

Requested convergence on MAX density matrix=1.00D-06.

Requested convergence on energy=1.00D-06.

No special actions if energy rises.

SCF Done: E(RB3LYP) = -3032.33982289 A.U. after 12 cycles

NFock= 12 Conv=0.30D-08 -V/T= 2.0016

Calling FoFJK, ICntrl= 2127 FMM=F ISym2X=0 l1Cent= 0 IOpCIX= 0 NMat=1 NMatS=1

NMatT=0.

\*\*\*\*\* Axes restored to original set \*\*\*\*\*

---

| Center<br>Number | Atomic<br>Number | Forces (Hartrees/Bohr) |              |              |
|------------------|------------------|------------------------|--------------|--------------|
|                  |                  | X                      | Y            | Z            |
| 1                | 6                | 0.000472785            | 0.000123446  | -0.000294609 |
| 2                | 6                | -0.000335334           | 0.000371374  | -0.000175113 |
| 3                | 7                | -0.001276799           | -0.000087322 | -0.001003200 |
| 4                | 6                | 0.000642862            | -0.003232209 | -0.000555716 |
| 5                | 7                | 0.001375998            | -0.000465123 | 0.000148222  |
| 6                | 6                | -0.002733607           | -0.000575202 | -0.000056563 |
| 7                | 6                | -0.000976076           | 0.000005656  | 0.001008355  |
| 8                | 1                | 0.000268032            | 0.000210138  | 0.000021780  |
| 9                | 1                | -0.000511286           | 0.000134873  | 0.000164576  |
| 10               | 1                | 0.000972487            | 0.000028276  | -0.000425640 |
| 11               | 1                | 0.000613416            | -0.000099259 | 0.000243786  |
| 12               | 1                | -0.000178170           | 0.000401374  | 0.000123800  |
| 13               | 1                | -0.001120099           | -0.000825520 | -0.001568602 |
| 14               | 35               | 0.001707221            | 0.001077193  | 0.001181237  |
| 15               | 1                | -0.001395650           | 0.002459994  | 0.000389093  |
| 16               | 6                | 0.001476026            | -0.000253616 | 0.000006711  |
| 17               | 6                | 0.000117308            | 0.000046422  | 0.000655651  |
| 18               | 1                | -0.000579816           | 0.000216302  | -0.000110246 |
| 19               | 1                | 0.000035815            | 0.000096211  | -0.000188006 |
| 20               | 1                | 0.000115005            | -0.000194093 | -0.000139650 |
| 21               | 8                | 0.001336880            | 0.001832759  | 0.001115383  |
| 22               | 1                | -0.000027000           | -0.001271673 | -0.000541247 |

---

Cartesian Forces: Max 0.003232209 RMS 0.000937854

GradGradGradGradGradGradGradGradGradGradGradGradGradGradGradGradGradGradGrad  
Berny optimization.

Using GEDIIS/GDIIS optimizer.

FormGI is forming the generalized inverse of G from B-inverse, IUseBI=4.

Internal Forces: Max 0.004040697 RMS 0.001167585

Search for a local minimum.

Step number 50 out of a maximum of 116

All quantities printed in internal units (Hartrees-Bohrs-Radians)

Mixed Optimization -- RFO/linear search

Update second derivatives using D2CorX and points 48 49 50

DE= -1.04D-05 DEPred=-3.18D-04 R= 3.26D-02

Trust test= 3.26D-02 RLast= 1.98D-01 DXMaxT set to 2.20D-01

ITU= -1 1 1 1 -1 1 0 -1 1 0 -1 0 0 1 -1 0 1 1

ITU= 1 1 1 1 0 -1 1 1 1 1 1 0 -1 1 1 1 1 1 1

ITU= 1 1 1 1 1 0 0 -1 0 0

Use linear search instead of GDIIIS.

|                 |         |         |         |         |         |
|-----------------|---------|---------|---------|---------|---------|
| Eigenvalues --- | 0.00124 | 0.00182 | 0.00365 | 0.00611 | 0.00854 |
| Eigenvalues --- | 0.00999 | 0.01440 | 0.01733 | 0.02014 | 0.02157 |
| Eigenvalues --- | 0.02333 | 0.02883 | 0.03074 | 0.03230 | 0.03822 |
| Eigenvalues --- | 0.04401 | 0.05114 | 0.05621 | 0.05986 | 0.06723 |
| Eigenvalues --- | 0.08780 | 0.09461 | 0.11350 | 0.13885 | 0.14627 |
| Eigenvalues --- | 0.15478 | 0.15977 | 0.16046 | 0.16106 | 0.16985 |
| Eigenvalues --- | 0.17231 | 0.19461 | 0.21380 | 0.22548 | 0.23318 |
| Eigenvalues --- | 0.24784 | 0.25102 | 0.28213 | 0.29308 | 0.33071 |
| Eigenvalues --- | 0.33608 | 0.33863 | 0.33888 | 0.34012 | 0.34250 |
| Eigenvalues --- | 0.34686 | 0.34890 | 0.35231 | 0.36305 | 0.36358 |
| Eigenvalues --- | 0.38822 | 0.43373 | 0.44690 | 0.46449 | 0.49192 |
| Eigenvalues --- | 0.53607 | 0.55634 | 0.57726 | 0.60799 | 1.26180 |

RFO step: Lambda=-4.80335386D-04 EMin= 1.23516983D-03

Quartic linear search produced a step of -0.48356.

Iteration 1 RMS(Cart)= 0.07302310 RMS(Int)= 0.00341690

Iteration 2 RMS(Cart)= 0.00444945 RMS(Int)= 0.00004253

Iteration 3 RMS(Cart)= 0.00002453 RMS(Int)= 0.00004076

Iteration 4 RMS(Cart)= 0.00000000 RMS(Int)= 0.00004076

| Variable | Old X   | -DE/DX   | Delta X  | Delta X  | Delta X  | New X   |
|----------|---------|----------|----------|----------|----------|---------|
|          |         |          | (Linear) | (Quad)   | (Total)  |         |
| R1       | 2.56332 | 0.00038  | 0.00097  | -0.00021 | 0.00075  | 2.56408 |
| R2       | 2.61941 | 0.00045  | -0.00042 | -0.00157 | -0.00198 | 2.61742 |
| R3       | 2.03426 | -0.00001 | -0.00002 | -0.00035 | -0.00037 | 2.03389 |
| R4       | 2.63149 | -0.00104 | -0.00065 | 0.00011  | -0.00055 | 2.63094 |
| R5       | 2.03035 | 0.00020  | 0.00004  | -0.00012 | -0.00008 | 2.03027 |
| R6       | 2.54426 | 0.00046  | 0.00026  | -0.00275 | -0.00249 | 2.54178 |
| R7       | 2.69014 | -0.00101 | -0.00072 | 0.00458  | 0.00386  | 2.69400 |
| R8       | 2.51995 | 0.00073  | 0.00023  | 0.00112  | 0.00136  | 2.52132 |
| R9       | 2.09557 | 0.00181  | 0.00776  | -0.01092 | -0.00316 | 2.09241 |
| R10      | 2.79735 | 0.00000  | -0.00304 | 0.01321  | 0.01017  | 2.80752 |
| R11      | 2.90334 | 0.00051  | 0.00019  | -0.00312 | -0.00292 | 2.90042 |
| R12      | 2.06095 | -0.00044 | -0.00068 | 0.00121  | 0.00053  | 2.06148 |
| R13      | 2.06022 | 0.00030  | 0.00025  | -0.00142 | -0.00117 | 2.05905 |

|     |         |          |          |          |          |         |
|-----|---------|----------|----------|----------|----------|---------|
| R14 | 2.06812 | -0.00023 | -0.00034 | 0.00100  | 0.00067  | 2.06878 |
| R15 | 2.06779 | -0.00004 | -0.00178 | 0.00051  | -0.00127 | 2.06652 |
| R16 | 2.67760 | 0.00141  | 0.00139  | -0.00416 | -0.00277 | 2.67483 |
| R17 | 5.61121 | 0.00045  | 0.02373  | -0.07862 | -0.05490 | 5.55631 |
| R18 | 2.50678 | -0.00037 | -0.00008 | -0.00077 | -0.00085 | 2.50593 |
| R19 | 2.04617 | 0.00002  | -0.00035 | 0.00003  | -0.00032 | 2.04585 |
| R20 | 2.04316 | -0.00002 | -0.00029 | -0.00015 | -0.00044 | 2.04271 |
| R21 | 2.04514 | 0.00023  | -0.00007 | -0.00065 | -0.00072 | 2.04443 |
| R22 | 1.82405 | -0.00126 | -0.00106 | 0.00256  | 0.00150  | 1.82556 |
| A1  | 1.87378 | 0.00065  | -0.00043 | 0.00080  | 0.00036  | 1.87414 |
| A2  | 2.27486 | -0.00004 | 0.00093  | -0.00369 | -0.00279 | 2.27208 |
| A3  | 2.13450 | -0.00061 | -0.00048 | 0.00271  | 0.00220  | 2.13671 |
| A4  | 1.86238 | -0.00031 | -0.00037 | -0.00009 | -0.00046 | 1.86193 |
| A5  | 2.27242 | 0.00065  | 0.00065  | -0.00197 | -0.00133 | 2.27109 |
| A6  | 2.14838 | -0.00035 | -0.00028 | 0.00206  | 0.00178  | 2.15016 |
| A7  | 1.89764 | 0.00048  | 0.00101  | -0.00075 | 0.00028  | 1.89792 |
| A8  | 2.24787 | -0.00027 | 0.00032  | -0.00268 | -0.00238 | 2.24549 |
| A9  | 2.13766 | -0.00021 | -0.00134 | 0.00346  | 0.00209  | 2.13976 |
| A10 | 1.88787 | 0.00007  | -0.00118 | 0.00167  | 0.00046  | 1.88833 |
| A11 | 2.25169 | -0.00216 | -0.00585 | 0.01893  | 0.01299  | 2.26468 |
| A12 | 2.14052 | 0.00204  | 0.00383  | -0.01457 | -0.01085 | 2.12967 |
| A13 | 1.90310 | -0.00089 | 0.00096  | -0.00163 | -0.00066 | 1.90244 |
| A14 | 2.21652 | -0.00316 | -0.00026 | 0.00095  | 0.00064  | 2.21716 |
| A15 | 2.16288 | 0.00404  | -0.00076 | 0.00121  | 0.00040  | 2.16329 |
| A16 | 1.96065 | -0.00102 | -0.00313 | -0.00420 | -0.00734 | 1.95331 |
| A17 | 1.86343 | 0.00232  | 0.00235  | -0.00597 | -0.00363 | 1.85980 |
| A18 | 1.87531 | -0.00072 | 0.00330  | -0.00654 | -0.00322 | 1.87209 |
| A19 | 1.91319 | -0.00032 | -0.00045 | 0.00035  | -0.00015 | 1.91304 |
| A20 | 1.93427 | 0.00002  | -0.00014 | 0.00596  | 0.00579  | 1.94006 |
| A21 | 1.91519 | -0.00021 | -0.00183 | 0.01026  | 0.00843  | 1.92361 |
| A22 | 1.92760 | -0.00215 | 0.00072  | 0.00305  | 0.00378  | 1.93138 |
| A23 | 1.90027 | 0.00335  | 0.00023  | -0.01269 | -0.01248 | 1.88779 |
| A24 | 1.89596 | 0.00108  | 0.00305  | -0.00462 | -0.00161 | 1.89435 |
| A25 | 1.92358 | 0.00009  | -0.00205 | 0.00695  | 0.00491  | 1.92849 |
| A26 | 1.87674 | 0.00049  | -0.00143 | 0.00912  | 0.00770  | 1.88444 |
| A27 | 1.93963 | -0.00295 | -0.00048 | -0.00165 | -0.00218 | 1.93745 |
| A28 | 2.28279 | 0.00125  | 0.01084  | -0.05020 | -0.03935 | 2.24344 |
| A29 | 2.17913 | -0.00070 | -0.00052 | -0.00329 | -0.00381 | 2.17533 |
| A30 | 1.94915 | 0.00099  | 0.00126  | -0.00457 | -0.00331 | 1.94584 |
| A31 | 2.15487 | -0.00029 | -0.00073 | 0.00785  | 0.00713  | 2.16200 |
| A32 | 2.07802 | 0.00018  | 0.00126  | -0.00048 | 0.00078  | 2.07879 |
| A33 | 2.15927 | -0.00024 | -0.00059 | -0.00067 | -0.00126 | 2.15801 |
| A34 | 2.04589 | 0.00006  | -0.00067 | 0.00115  | 0.00049  | 2.04638 |
| A35 | 1.88445 | 0.00045  | 0.00130  | -0.00351 | -0.00220 | 1.88224 |

|     |          |          |          |          |          |          |
|-----|----------|----------|----------|----------|----------|----------|
| D1  | 0.00053  | 0.00012  | -0.00034 | -0.00006 | -0.00043 | 0.00010  |
| D2  | 3.14094  | 0.00001  | -0.00237 | 0.00581  | 0.00342  | -3.13883 |
| D3  | 3.13243  | 0.00018  | 0.00665  | -0.02223 | -0.01556 | 3.11687  |
| D4  | -0.01034 | 0.00007  | 0.00462  | -0.01636 | -0.01171 | -0.02206 |
| D5  | 0.00052  | -0.00005 | 0.00166  | 0.00133  | 0.00302  | 0.00354  |
| D6  | -3.10238 | 0.00010  | 0.00343  | -0.01347 | -0.01000 | -3.11237 |
| D7  | -3.13234 | -0.00011 | -0.00464 | 0.02137  | 0.01675  | -3.11559 |
| D8  | 0.04795  | 0.00005  | -0.00287 | 0.00657  | 0.00373  | 0.05168  |
| D9  | -0.00139 | -0.00015 | -0.00108 | -0.00123 | -0.00228 | -0.00367 |
| D10 | 3.13504  | -0.00023 | 0.00436  | 0.00547  | 0.00986  | -3.13828 |
| D11 | 3.14128  | -0.00005 | 0.00077  | -0.00657 | -0.00579 | 3.13549  |
| D12 | -0.00547 | -0.00012 | 0.00621  | 0.00012  | 0.00635  | 0.00088  |
| D13 | 0.00172  | 0.00012  | 0.00212  | 0.00207  | 0.00418  | 0.00590  |
| D14 | 3.05922  | -0.00035 | -0.02859 | 0.08255  | 0.05414  | 3.11337  |
| D15 | -3.13510 | 0.00019  | -0.00290 | -0.00410 | -0.00706 | 3.14103  |
| D16 | -0.07760 | -0.00028 | -0.03362 | 0.07638  | 0.04291  | -0.03469 |
| D17 | 0.02540  | 0.00016  | 0.02213  | -0.12732 | -0.10522 | -0.07982 |
| D18 | -3.10799 | 0.00020  | 0.01960  | -0.12629 | -0.10671 | 3.06848  |
| D19 | -3.12199 | 0.00008  | 0.02823  | -0.11982 | -0.09158 | 3.06962  |
| D20 | 0.02781  | 0.00012  | 0.02570  | -0.11879 | -0.09307 | -0.06526 |
| D21 | -0.00139 | -0.00004 | -0.00233 | -0.00211 | -0.00445 | -0.00585 |
| D22 | 3.10296  | -0.00038 | -0.00402 | 0.01214  | 0.00808  | 3.11103  |
| D23 | -3.06540 | 0.00063  | 0.02696  | -0.07825 | -0.05109 | -3.11650 |
| D24 | 0.03895  | 0.00029  | 0.02527  | -0.06400 | -0.03856 | 0.00038  |
| D25 | 1.57035  | -0.00064 | -0.00720 | 0.07012  | 0.06291  | 1.63326  |
| D26 | -2.61511 | -0.00012 | -0.00807 | 0.06420  | 0.05614  | -2.55897 |
| D27 | -0.56145 | 0.00047  | -0.00729 | 0.06977  | 0.06246  | -0.49900 |
| D28 | -1.52716 | -0.00033 | -0.00522 | 0.05331  | 0.04810  | -1.47906 |
| D29 | 0.57057  | 0.00019  | -0.00609 | 0.04739  | 0.04133  | 0.61190  |
| D30 | 2.62423  | 0.00078  | -0.00531 | 0.05296  | 0.04764  | 2.67187  |
| D31 | -1.04077 | 0.00198  | 0.00186  | -0.01120 | -0.00933 | -1.05010 |
| D32 | 1.07354  | 0.00291  | -0.00007 | -0.00885 | -0.00893 | 1.06462  |
| D33 | -3.09507 | 0.00199  | 0.00134  | -0.02126 | -0.01990 | -3.11497 |
| D34 | -3.10943 | -0.00007 | 0.00118  | -0.00132 | -0.00013 | -3.10956 |
| D35 | -0.99512 | 0.00085  | -0.00076 | 0.00103  | 0.00027  | -0.99485 |
| D36 | 1.11946  | -0.00007 | 0.00066  | -0.01138 | -0.01071 | 1.10875  |
| D37 | 1.05721  | 0.00038  | 0.00385  | -0.01825 | -0.01441 | 1.04280  |
| D38 | -3.11166 | 0.00131  | 0.00192  | -0.01590 | -0.01401 | -3.12567 |
| D39 | -0.99709 | 0.00039  | 0.00333  | -0.02831 | -0.02499 | -1.02207 |
| D40 | 0.51136  | 0.00394  | 0.01536  | 0.10724  | 0.12262  | 0.63398  |
| D41 | 2.62813  | 0.00348  | 0.01512  | 0.10724  | 0.12236  | 2.75049  |
| D42 | -1.57628 | 0.00227  | 0.01173  | 0.12207  | 0.13377  | -1.44251 |
| D43 | -1.60442 | -0.00127 | 0.02151  | 0.00482  | 0.02634  | -1.57809 |
| D44 | 2.59239  | 0.00041  | 0.01977  | -0.00143 | 0.01834  | 2.61073  |

|     |          |          |         |          |          |          |
|-----|----------|----------|---------|----------|----------|----------|
| D45 | 0.48577  | 0.00175  | 0.02346 | -0.01478 | 0.00867  | 0.49445  |
| D46 | -3.13994 | 0.00021  | 0.00378 | -0.01319 | -0.00941 | 3.13383  |
| D47 | 0.00500  | 0.00001  | 0.00309 | -0.01272 | -0.00963 | -0.00463 |
| D48 | -0.00749 | 0.00017  | 0.00661 | -0.01440 | -0.00779 | -0.01528 |
| D49 | 3.13746  | -0.00003 | 0.00592 | -0.01394 | -0.00802 | 3.12944  |

| Item                 | Value    | Threshold | Converged? |
|----------------------|----------|-----------|------------|
| Maximum Force        | 0.004041 | 0.000450  | NO         |
| RMS Force            | 0.001168 | 0.000300  | NO         |
| Maximum Displacement | 0.389251 | 0.001800  | NO         |
| RMS Displacement     | 0.072498 | 0.001200  | NO         |

Predicted change in Energy=-4.028604D-04

GradGradGradGradGradGradGradGradGradGradGradGradGradGradGradGradGradGradGrad

Input orientation:

| -----  |        |        |                         |           |           |  |
|--------|--------|--------|-------------------------|-----------|-----------|--|
| Center | Atomic | Atomic | Coordinates (Angstroms) |           |           |  |
| Number | Number | Type   | X                       | Y         | Z         |  |
| -----  |        |        |                         |           |           |  |
| 1      | 6      | 0      | -0.566967               | -2.296527 | -1.111802 |  |
| 2      | 6      | 0      | -1.877118               | -1.980336 | -1.268556 |  |
| 3      | 7      | 0      | -2.136364               | -0.914567 | -0.411091 |  |
| 4      | 6      | 0      | -1.005139               | -0.604418 | 0.247162  |  |
| 5      | 7      | 0      | -0.042000               | -1.428994 | -0.168274 |  |
| 6      | 6      | 0      | 1.364335                | -1.368132 | 0.306851  |  |
| 7      | 6      | 0      | 2.192266                | -0.345502 | -0.483389 |  |
| 8      | 1      | 0      | 0.020578                | -3.070955 | -1.573806 |  |
| 9      | 1      | 0      | -2.624187               | -2.419540 | -1.903583 |  |
| 10     | 1      | 0      | 1.325354                | -1.074690 | 1.356808  |  |
| 11     | 1      | 0      | 1.781603                | -2.370115 | 0.211194  |  |
| 12     | 1      | 0      | 2.215547                | -0.606098 | -1.546418 |  |
| 13     | 1      | 0      | 1.742059                | 0.640822  | -0.340747 |  |
| 14     | 35     | 0      | 0.476105                | 1.745117  | 2.072362  |  |
| 15     | 1      | 0      | -0.813821               | 0.195575  | 0.988391  |  |
| 16     | 6      | 0      | -3.363115               | -0.219781 | -0.199664 |  |
| 17     | 6      | 0      | -4.480194               | -0.438641 | -0.879907 |  |
| 18     | 1      | 0      | -3.269967               | 0.519357  | 0.585864  |  |
| 19     | 1      | 0      | -5.363300               | 0.136634  | -0.639804 |  |
| 20     | 1      | 0      | -4.566135               | -1.170862 | -1.671676 |  |
| 21     | 8      | 0      | 3.521711                | -0.371452 | 0.001823  |  |
| 22     | 1      | 0      | 3.589096                | 0.276226  | 0.715415  |  |

Distance matrix (angstroms):

| ----- |          |   |   |   |   |
|-------|----------|---|---|---|---|
|       | 1        | 2 | 3 | 4 | 5 |
| 1 C   | 0.000000 |   |   |   |   |



|    |    |          |          |          |          |          |
|----|----|----------|----------|----------|----------|----------|
| 2  | C  | 1.356851 | 0.000000 |          |          |          |
| 3  | N  | 2.205405 | 1.392234 | 0.000000 |          |          |
| 4  | C  | 2.214048 | 2.225061 | 1.345050 | 0.000000 |          |
| 5  | N  | 1.385081 | 2.209583 | 2.170243 | 1.334222 | 0.000000 |
| 6  | C  | 2.569907 | 3.655642 | 3.602229 | 2.490226 | 1.485674 |
| 7  | C  | 3.437262 | 4.455228 | 4.366474 | 3.290006 | 2.503037 |
| 8  | H  | 1.076289 | 2.209950 | 3.264094 | 3.232928 | 2.162284 |
| 9  | H  | 2.207759 | 1.074370 | 2.174958 | 3.246796 | 3.264991 |
| 10 | H  | 3.341826 | 4.238933 | 3.890321 | 2.623674 | 2.078716 |
| 11 | H  | 2.696575 | 3.965833 | 4.225674 | 3.299229 | 2.086919 |
| 12 | H  | 3.284635 | 4.326158 | 4.508131 | 3.686428 | 2.770010 |
| 13 | H  | 3.814990 | 4.563961 | 4.179276 | 3.073004 | 2.738020 |
| 14 | Br | 5.249932 | 5.529773 | 4.479560 | 3.323516 | 3.919677 |
| 15 | H  | 3.268381 | 3.310437 | 2.222630 | 1.107254 | 2.138412 |
| 16 | C  | 3.600460 | 2.539738 | 1.425605 | 2.430566 | 3.534542 |
| 17 | C  | 4.338071 | 3.050225 | 2.437178 | 3.657017 | 4.602694 |
| 18 | H  | 4.256463 | 3.409892 | 2.082094 | 2.550890 | 3.845071 |
| 19 | H  | 5.398876 | 4.126785 | 3.401537 | 4.508818 | 5.566846 |
| 20 | H  | 4.192126 | 2.836999 | 2.749281 | 4.084543 | 4.774374 |
| 21 | O  | 4.654392 | 5.774922 | 5.699060 | 4.539475 | 3.721205 |
| 22 | H  | 5.218299 | 6.237604 | 5.955493 | 4.701254 | 4.107741 |
|    |    | 6        | 7        | 8        | 9        | 10       |
| 6  | C  | 0.000000 |          |          |          |          |
| 7  | C  | 1.534835 | 0.000000 |          |          |          |
| 8  | H  | 2.870917 | 3.651484 | 0.000000 |          |          |
| 9  | H  | 4.679721 | 5.432937 | 2.743697 | 0.000000 |          |
| 10 | H  | 1.090889 | 2.160921 | 3.778361 | 5.295058 | 0.000000 |
| 11 | H  | 1.089602 | 2.179483 | 2.603577 | 4.887301 | 1.788497 |
| 12 | H  | 2.177122 | 1.094753 | 3.300629 | 5.180652 | 3.072580 |
| 13 | H  | 2.144284 | 1.093558 | 4.273315 | 5.556291 | 2.449146 |
| 14 | Br | 3.687587 | 3.721258 | 6.057772 | 6.539443 | 3.030603 |
| 15 | H  | 2.766593 | 3.390495 | 4.234536 | 4.298809 | 2.515029 |
| 16 | C  | 4.891222 | 5.564042 | 4.633232 | 2.878940 | 5.013503 |
| 17 | C  | 6.035799 | 6.684880 | 5.259993 | 2.901144 | 6.253946 |
| 18 | H  | 5.011708 | 5.632697 | 5.327495 | 3.905316 | 4.924664 |
| 19 | H  | 6.958560 | 7.572549 | 6.336176 | 3.953973 | 7.084621 |
| 20 | H  | 6.254915 | 6.911529 | 4.965669 | 2.320375 | 6.624998 |
| 21 | O  | 2.395972 | 1.415460 | 4.693384 | 6.752577 | 2.674793 |
| 22 | H  | 2.796497 | 1.942887 | 5.401710 | 7.261624 | 2.713096 |
|    |    | 11       | 12       | 13       | 14       | 15       |
| 11 | H  | 0.000000 |          |          |          |          |
| 12 | H  | 2.527698 | 0.000000 |          |          |          |
| 13 | H  | 3.061363 | 1.797956 | 0.000000 |          |          |
| 14 | Br | 4.701426 | 4.652896 | 2.940272 | 0.000000 |          |

|    |   |          |          |          |          |          |
|----|---|----------|----------|----------|----------|----------|
| 15 | H | 3.731357 | 4.030509 | 2.915025 | 2.289101 | 0.000000 |
| 16 | C | 5.591142 | 5.751909 | 5.179126 | 4.874684 | 2.843043 |
| 17 | C | 6.643132 | 6.730915 | 6.338167 | 6.168435 | 4.163539 |
| 18 | H | 5.831620 | 5.992006 | 5.098408 | 4.212508 | 2.509884 |
| 19 | H | 7.619556 | 7.668932 | 7.129500 | 6.636394 | 4.832417 |
| 20 | H | 6.728833 | 6.806310 | 6.696781 | 6.924229 | 4.798225 |
| 21 | O | 2.658282 | 2.039160 | 2.075865 | 4.247671 | 4.482374 |
| 22 | H | 3.244131 | 2.789448 | 2.158693 | 3.699955 | 4.412108 |
|    |   | 16       | 17       | 18       | 19       | 20       |
| 16 | C | 0.000000 |          |          |          |          |
| 17 | C | 1.326083 | 0.000000 |          |          |          |
| 18 | H | 1.082615 | 2.128590 | 0.000000 |          |          |
| 19 | H | 2.078821 | 1.080957 | 2.455765 | 0.000000 |          |
| 20 | H | 2.125707 | 1.081865 | 3.103768 | 1.846558 | 0.000000 |
| 21 | O | 6.889444 | 8.050618 | 6.874703 | 8.922627 | 8.297765 |
| 22 | H | 7.029697 | 8.256484 | 6.864594 | 9.055469 | 8.619748 |
|    |   | 21       | 22       |          |          |          |
| 21 | O | 0.000000 |          |          |          |          |
| 22 | H | 0.966043 | 0.000000 |          |          |          |

Stoichiometry C7H11BrN2O

Framework group C1[X(C7H11BrN2O)]

Deg. of freedom 60

Full point group C1 NOp 1

Largest Abelian subgroup C1 NOp 1

Largest concise Abelian subgroup C1 NOp 1

Standard orientation:

| Center<br>Number | Atomic<br>Number | Atomic<br>Type | Coordinates (Angstroms) |           |           |
|------------------|------------------|----------------|-------------------------|-----------|-----------|
|                  |                  |                | X                       | Y         | Z         |
| 1                | 6                | 0              | -1.714427               | -2.061846 | 0.260933  |
| 2                | 6                | 0              | -2.760701               | -1.226233 | 0.041605  |
| 3                | 7                | 0              | -2.246158               | 0.067427  | 0.043513  |
| 4                | 6                | 0              | -0.920796               | 0.005072  | 0.264169  |
| 5                | 7                | 0              | -0.580000               | -1.278356 | 0.393859  |
| 6                | 6                | 0              | 0.812290                | -1.749211 | 0.610768  |
| 7                | 6                | 0              | 1.578690                | -1.899312 | -0.710527 |
| 8                | 1                | 0              | -1.689267               | -3.133961 | 0.352221  |
| 9                | 1                | 0              | -3.801710               | -1.444990 | -0.109121 |
| 10               | 1                | 0              | 1.300684                | -0.998892 | 1.234090  |
| 11               | 1                | 0              | 0.753429                | -2.699078 | 1.141354  |
| 12               | 1                | 0              | 1.084161                | -2.625606 | -1.363537 |
| 13               | 1                | 0              | 1.622463                | -0.918672 | -1.192501 |
| 14               | 35               | 0              | 1.915000                | 1.726041  | 0.058544  |

|    |   |   |           |           |           |
|----|---|---|-----------|-----------|-----------|
| 15 | 1 | 0 | -0.171582 | 0.819037  | 0.310543  |
| 16 | 6 | 0 | -2.937048 | 1.300863  | -0.139945 |
| 17 | 6 | 0 | -4.225214 | 1.406333  | -0.436594 |
| 18 | 1 | 0 | -2.275653 | 2.148539  | -0.013231 |
| 19 | 1 | 0 | -4.660148 | 2.389542  | -0.548844 |
| 20 | 1 | 0 | -4.880424 | 0.556329  | -0.573059 |
| 21 | 8 | 0 | 2.877989  | -2.382707 | -0.424730 |
| 22 | 1 | 0 | 3.455483  | -1.619533 | -0.293175 |

-----

Rotational constants (GHZ):      0.8362919      0.4573123      0.3053511

Standard basis: 6-311++G(d,p) (5D, 7F)

There are    358 symmetry adapted cartesian basis functions of A    symmetry.

There are    345 symmetry adapted basis functions of A    symmetry.

345 basis functions,    553 primitive gaussians,    358 cartesian basis functions

55 alpha electrons      55 beta electrons

          nuclear repulsion energy      836.2959513495 Hartrees.

NAtoms=    22 NActive=    22 NUniq=    22 SFac= 1.00D+00 NAtFMM=    60 NAOKFM=F

Big=F

Integral buffers will be    131072 words long.

Raffenetti 2 integral format.

Two-electron integral symmetry is turned on.

One-electron integrals computed using PRISM.

NBasis=    345 RedAO= T EigKep= 4.53D-06 NBF=    345

NBsUse=    345 1.00D-06 EigRej= -1.00D+00 NBFU=    345

Initial guess from the checkpoint file: "."

B after Tr=    0.000000    0.000000    0.000000

          Rot=    0.999460    0.000069    -0.001263    0.032824 Ang=    3.76 deg.

ExpMin= 3.50D-02 ExpMax= 4.40D+05 ExpMxC= 1.51D+04 IAcc=3 IRadAn=      5 AccDes=

0.00D+00

Harris functional with IExCor= 402 and IRadAn=      5 diagonalized for initial guess.

HarFok: IExCor= 402 AccDes= 0.00D+00 IRadAn=      5 IDoV= 1 UseB2=F ITyADJ=14

ICtDFT= 3500011 ScaDFX= 1.000000 1.000000 1.000000 1.000000

FoFCou: FMM=F IPFlag=      0 FMFlag=      100000 FMFlg1=      0

          NFxFlg=      0 DoJE=T BraDBF=F KetDBF=T FulRan=T

          wScrn= 0.000000 ICntrl=      500 IOpCl= 0 l1Cent=    200000004 NGrid=

0

          NMat0=    1 NMatS0=    1 NMatT0=    0 NMatD0=    1 NMtDS0=    0

NMtDT0=    0

Petite list used in FoFCou.

Keep R1 ints in memory in canonical form, NReq=1804729152.

Requested convergence on RMS density matrix=1.00D-08 within 128 cycles.

Requested convergence on MAX density matrix=1.00D-06.

Requested convergence on                    energy=1.00D-06.

No special actions if energy rises.

SCF Done: E(RB3LYP) = -3032.33999200 A.U. after 13 cycles

NFock= 13 Conv=0.45D-08 -V/T= 2.0017

Calling FoFJK, ICntrl= 2127 FMM=F ISym2X=0 l1Cent= 0 IOpCIX= 0 NMat=1 NMatS=1  
NMatT=0.

\*\*\*\*\* Axes restored to original set \*\*\*\*\*

| Center<br>Number | Atomic<br>Number | Forces (Hartrees/Bohr) |              |              |
|------------------|------------------|------------------------|--------------|--------------|
|                  |                  | X                      | Y            | Z            |
| 1                | 6                | 0.000063085            | 0.000396740  | 0.000024326  |
| 2                | 6                | 0.000194685            | 0.000837442  | -0.000186190 |
| 3                | 7                | -0.003378490           | 0.000277081  | -0.000638937 |
| 4                | 6                | 0.004612783            | -0.001328696 | 0.001528839  |
| 5                | 7                | 0.002356308            | -0.000714105 | 0.001365457  |
| 6                | 6                | -0.005242036           | -0.001238772 | -0.000911981 |
| 7                | 6                | -0.001058478           | 0.000153439  | 0.002308611  |
| 8                | 1                | 0.000711829            | 0.000535306  | -0.000222746 |
| 9                | 1                | -0.000734042           | 0.000217683  | 0.000426576  |
| 10               | 1                | 0.001477836            | 0.000136982  | -0.000360248 |
| 11               | 1                | 0.000645531            | -0.000393340 | 0.000370995  |
| 12               | 1                | 0.000348653            | 0.000338476  | 0.000471628  |
| 13               | 1                | -0.000566399           | 0.000211695  | -0.002192193 |
| 14               | 35               | -0.000550028           | -0.002584920 | -0.001295690 |
| 15               | 1                | -0.001367252           | 0.002654683  | -0.000740016 |
| 16               | 6                | 0.002867848            | -0.000975586 | -0.000184602 |
| 17               | 6                | -0.000092716           | 0.000359117  | 0.001147909  |
| 18               | 1                | -0.001309367           | 0.000475197  | -0.000327747 |
| 19               | 1                | -0.000087404           | 0.000261867  | -0.000208106 |
| 20               | 1                | 0.000048666            | -0.000318180 | -0.000286650 |
| 21               | 8                | 0.001476484            | 0.001804225  | 0.000324281  |
| 22               | 1                | -0.000417494           | -0.001106336 | -0.000413515 |

Cartesian Forces: Max 0.005242036 RMS 0.001408843

GradGradGradGradGradGradGradGradGradGradGradGradGradGradGradGradGradGradGradGrad  
Berny optimization.

Using GEDIIS/GDIIS optimizer.

FormGI is forming the generalized inverse of G from B-inverse, IUseBI=4.

Internal Forces: Max 0.008198160 RMS 0.001690350

Search for a local minimum.

Step number 51 out of a maximum of 116

All quantities printed in internal units (Hartrees-Bohrs-Radians)

Mixed Optimization -- RFO/linear search

Update second derivatives using D2CorX and points 49 50 51

DE= -1.69D-04 DEPred=-4.03D-04 R= 4.20D-01

Trust test= 4.20D-01 RLast= 3.51D-01 DXMaxT set to 2.20D-01

ITU= 0 -1 1 1 1 -1 1 0 -1 1 0 -1 0 0 1 -1 0 1

ITU= 1 1 1 1 1 0 -1 1 1 1 1 1 0 -1 1 1 1 1 1 1

ITU= 1 1 1 1 1 1 0 0 -1 0 0

Use linear search instead of GDIIIS.

|                 |         |         |         |         |         |
|-----------------|---------|---------|---------|---------|---------|
| Eigenvalues --- | 0.00170 | 0.00188 | 0.00384 | 0.00596 | 0.00904 |
| Eigenvalues --- | 0.01002 | 0.01531 | 0.01774 | 0.02096 | 0.02201 |
| Eigenvalues --- | 0.02345 | 0.02884 | 0.03076 | 0.03237 | 0.03800 |
| Eigenvalues --- | 0.04375 | 0.05267 | 0.05693 | 0.05937 | 0.07091 |
| Eigenvalues --- | 0.08899 | 0.09442 | 0.11127 | 0.13994 | 0.14643 |
| Eigenvalues --- | 0.15522 | 0.15971 | 0.16064 | 0.16295 | 0.17045 |
| Eigenvalues --- | 0.17404 | 0.19623 | 0.20970 | 0.22529 | 0.23375 |
| Eigenvalues --- | 0.24631 | 0.25101 | 0.27286 | 0.29471 | 0.33093 |
| Eigenvalues --- | 0.33855 | 0.33888 | 0.33906 | 0.34014 | 0.34251 |
| Eigenvalues --- | 0.34581 | 0.34932 | 0.35347 | 0.36304 | 0.36337 |
| Eigenvalues --- | 0.38903 | 0.43235 | 0.44461 | 0.46460 | 0.49216 |
| Eigenvalues --- | 0.53673 | 0.55709 | 0.57688 | 0.60802 | 1.27672 |

RFO step: Lambda=-3.01081879D-04 EMin= 1.69895647D-03

Quartic linear search produced a step of -0.35419.

Iteration 1 RMS(Cart)= 0.02193571 RMS(Int)= 0.00018535

Iteration 2 RMS(Cart)= 0.00023014 RMS(Int)= 0.00001186

Iteration 3 RMS(Cart)= 0.00000003 RMS(Int)= 0.00001186

| Variable | Old X   | -DE/DX   | Delta X<br>(Linear) | Delta X<br>(Quad) | Delta X<br>(Total) | New X   |
|----------|---------|----------|---------------------|-------------------|--------------------|---------|
| R1       | 2.56408 | 0.00126  | -0.00027            | 0.00064           | 0.00038            | 2.56445 |
| R2       | 2.61742 | -0.00063 | 0.00070             | -0.00024          | 0.00047            | 2.61789 |
| R3       | 2.03389 | 0.00010  | 0.00013             | 0.00011           | 0.00024            | 2.03413 |
| R4       | 2.63094 | -0.00043 | 0.00019             | -0.00084          | -0.00064           | 2.63030 |
| R5       | 2.03027 | 0.00017  | 0.00003             | 0.00024           | 0.00027            | 2.03054 |
| R6       | 2.54178 | 0.00109  | 0.00088             | 0.00112           | 0.00199            | 2.54377 |
| R7       | 2.69400 | -0.00129 | -0.00137            | -0.00102          | -0.00239           | 2.69161 |
| R8       | 2.52132 | -0.00002 | -0.00048            | 0.00060           | 0.00011            | 2.52143 |
| R9       | 2.09241 | 0.00119  | 0.00112             | -0.00102          | 0.00010            | 2.09251 |
| R10      | 2.80752 | -0.00433 | -0.00360            | -0.00133          | -0.00494           | 2.80258 |
| R11      | 2.90042 | -0.00079 | 0.00104             | 0.00103           | 0.00206            | 2.90248 |
| R12      | 2.06148 | -0.00036 | -0.00019            | 0.00011           | -0.00007           | 2.06141 |
| R13      | 2.05905 | 0.00058  | 0.00042             | 0.00027           | 0.00068            | 2.05973 |
| R14      | 2.06878 | -0.00053 | -0.00024            | -0.00090          | -0.00113           | 2.06765 |
| R15      | 2.06652 | -0.00214 | 0.00045             | 0.00021           | 0.00066            | 2.06718 |
| R16      | 2.67483 | 0.00095  | 0.00098             | -0.00047          | 0.00052            | 2.67535 |
| R17      | 5.55631 | -0.00180 | 0.01944             | -0.06827          | -0.04883           | 5.50748 |
| R18      | 2.50593 | -0.00028 | 0.00030             | -0.00003          | 0.00027            | 2.50620 |
| R19      | 2.04585 | -0.00002 | 0.00011             | 0.00000           | 0.00012            | 2.04596 |

|     |          |          |          |          |          |          |
|-----|----------|----------|----------|----------|----------|----------|
| R20 | 2.04271  | 0.00017  | 0.00016  | 0.00017  | 0.00033  | 2.04304  |
| R21 | 2.04443  | 0.00042  | 0.00025  | 0.00042  | 0.00067  | 2.04510  |
| R22 | 1.82556  | -0.00108 | -0.00053 | 0.00040  | -0.00013 | 1.82542  |
| A1  | 1.87414  | -0.00035 | -0.00013 | 0.00025  | 0.00013  | 1.87427  |
| A2  | 2.27208  | 0.00079  | 0.00099  | 0.00124  | 0.00224  | 2.27431  |
| A3  | 2.13671  | -0.00045 | -0.00078 | -0.00158 | -0.00235 | 2.13436  |
| A4  | 1.86193  | 0.00027  | 0.00016  | 0.00016  | 0.00032  | 1.86224  |
| A5  | 2.27109  | 0.00067  | 0.00047  | 0.00226  | 0.00273  | 2.27382  |
| A6  | 2.15016  | -0.00093 | -0.00063 | -0.00242 | -0.00305 | 2.14711  |
| A7  | 1.89792  | -0.00031 | -0.00010 | -0.00009 | -0.00020 | 1.89772  |
| A8  | 2.24549  | 0.00024  | 0.00084  | -0.00087 | -0.00002 | 2.24547  |
| A9  | 2.13976  | 0.00008  | -0.00074 | 0.00097  | 0.00024  | 2.14000  |
| A10 | 1.88833  | -0.00008 | -0.00016 | -0.00003 | -0.00017 | 1.88816  |
| A11 | 2.26468  | -0.00219 | -0.00460 | -0.00397 | -0.00850 | 2.25618  |
| A12 | 2.12967  | 0.00225  | 0.00384  | 0.00385  | 0.00776  | 2.13743  |
| A13 | 1.90244  | 0.00048  | 0.00023  | -0.00027 | -0.00006 | 1.90238  |
| A14 | 2.21716  | 0.00297  | -0.00023 | -0.00003 | -0.00025 | 2.21691  |
| A15 | 2.16329  | -0.00346 | -0.00014 | 0.00025  | 0.00011  | 2.16340  |
| A16 | 1.95331  | -0.00372 | 0.00260  | -0.00120 | 0.00140  | 1.95471  |
| A17 | 1.85980  | 0.00066  | 0.00129  | 0.00200  | 0.00330  | 1.86310  |
| A18 | 1.87209  | 0.00284  | 0.00114  | 0.00114  | 0.00227  | 1.87436  |
| A19 | 1.91304  | -0.00085 | 0.00005  | -0.00451 | -0.00444 | 1.90860  |
| A20 | 1.94006  | 0.00168  | -0.00205 | 0.00254  | 0.00049  | 1.94054  |
| A21 | 1.92361  | -0.00060 | -0.00298 | 0.00013  | -0.00286 | 1.92076  |
| A22 | 1.93138  | 0.00285  | -0.00134 | 0.00178  | 0.00044  | 1.93182  |
| A23 | 1.88779  | -0.00615 | 0.00442  | -0.00005 | 0.00437  | 1.89216  |
| A24 | 1.89435  | 0.00123  | 0.00057  | 0.00170  | 0.00230  | 1.89664  |
| A25 | 1.92849  | 0.00031  | -0.00174 | 0.00179  | 0.00004  | 1.92852  |
| A26 | 1.88444  | -0.00112 | -0.00273 | -0.00152 | -0.00424 | 1.88019  |
| A27 | 1.93745  | 0.00302  | 0.00077  | -0.00370 | -0.00291 | 1.93454  |
| A28 | 2.24344  | -0.00820 | 0.01394  | -0.00593 | 0.00801  | 2.25145  |
| A29 | 2.17533  | -0.00010 | 0.00135  | -0.00131 | 0.00004  | 2.17536  |
| A30 | 1.94584  | 0.00150  | 0.00117  | 0.00343  | 0.00460  | 1.95044  |
| A31 | 2.16200  | -0.00140 | -0.00252 | -0.00213 | -0.00465 | 2.15735  |
| A32 | 2.07879  | 0.00014  | -0.00027 | 0.00008  | -0.00020 | 2.07860  |
| A33 | 2.15801  | -0.00016 | 0.00045  | -0.00078 | -0.00033 | 2.15768  |
| A34 | 2.04638  | 0.00002  | -0.00017 | 0.00071  | 0.00053  | 2.04691  |
| A35 | 1.88224  | -0.00035 | 0.00078  | -0.00297 | -0.00219 | 1.88005  |
| D1  | 0.00010  | 0.00043  | 0.00015  | 0.00209  | 0.00225  | 0.00235  |
| D2  | -3.13883 | 0.00017  | -0.00121 | 0.00428  | 0.00307  | -3.13575 |
| D3  | 3.11687  | 0.00046  | 0.00551  | -0.00233 | 0.00317  | 3.12004  |
| D4  | -0.02206 | 0.00020  | 0.00415  | -0.00015 | 0.00399  | -0.01806 |
| D5  | 0.00354  | -0.00052 | -0.00107 | -0.00299 | -0.00406 | -0.00053 |
| D6  | -3.11237 | 0.00020  | 0.00354  | -0.00044 | 0.00310  | -3.10927 |

|     |          |          |          |          |          |          |
|-----|----------|----------|----------|----------|----------|----------|
| D7  | -3.11559 | -0.00057 | -0.00593 | 0.00097  | -0.00497 | -3.12056 |
| D8  | 0.05168  | 0.00015  | -0.00132 | 0.00353  | 0.00219  | 0.05388  |
| D9  | -0.00367 | -0.00019 | 0.00081  | -0.00051 | 0.00029  | -0.00338 |
| D10 | -3.13828 | -0.00046 | -0.00349 | -0.00211 | -0.00561 | 3.13930  |
| D11 | 3.13549  | 0.00005  | 0.00205  | -0.00250 | -0.00045 | 3.13504  |
| D12 | 0.00088  | -0.00023 | -0.00225 | -0.00410 | -0.00634 | -0.00547 |
| D13 | 0.00590  | -0.00014 | -0.00148 | -0.00135 | -0.00283 | 0.00308  |
| D14 | 3.11337  | -0.00086 | -0.01918 | -0.00644 | -0.02564 | 3.08773  |
| D15 | 3.14103  | 0.00012  | 0.00250  | 0.00013  | 0.00264  | -3.13952 |
| D16 | -0.03469 | -0.00060 | -0.01520 | -0.00496 | -0.02017 | -0.05486 |
| D17 | -0.07982 | 0.00036  | 0.03727  | -0.01402 | 0.02325  | -0.05657 |
| D18 | 3.06848  | 0.00044  | 0.03780  | -0.01258 | 0.02521  | 3.09370  |
| D19 | 3.06962  | 0.00005  | 0.03244  | -0.01582 | 0.01661  | 3.08624  |
| D20 | -0.06526 | 0.00014  | 0.03296  | -0.01438 | 0.01858  | -0.04668 |
| D21 | -0.00585 | 0.00040  | 0.00158  | 0.00268  | 0.00425  | -0.00159 |
| D22 | 3.11103  | -0.00017 | -0.00286 | 0.00021  | -0.00265 | 3.10838  |
| D23 | -3.11650 | 0.00116  | 0.01810  | 0.00747  | 0.02555  | -3.09095 |
| D24 | 0.00038  | 0.00058  | 0.01366  | 0.00500  | 0.01865  | 0.01903  |
| D25 | 1.63326  | 0.00170  | -0.02228 | 0.02390  | 0.00162  | 1.63487  |
| D26 | -2.55897 | -0.00105 | -0.01988 | 0.01898  | -0.00091 | -2.55988 |
| D27 | -0.49900 | 0.00002  | -0.02212 | 0.02073  | -0.00139 | -0.50039 |
| D28 | -1.47906 | 0.00245  | -0.01704 | 0.02682  | 0.00979  | -1.46927 |
| D29 | 0.61190  | -0.00031 | -0.01464 | 0.02190  | 0.00726  | 0.61916  |
| D30 | 2.67187  | 0.00076  | -0.01687 | 0.02365  | 0.00678  | 2.67865  |
| D31 | -1.05010 | -0.00168 | 0.00330  | -0.03536 | -0.03206 | -1.08216 |
| D32 | 1.06462  | -0.00348 | 0.00316  | -0.03210 | -0.02894 | 1.03568  |
| D33 | -3.11497 | -0.00273 | 0.00705  | -0.03559 | -0.02855 | 3.13967  |
| D34 | -3.10956 | 0.00035  | 0.00005  | -0.03420 | -0.03415 | 3.13947  |
| D35 | -0.99485 | -0.00145 | -0.00009 | -0.03094 | -0.03103 | -1.02588 |
| D36 | 1.10875  | -0.00070 | 0.00379  | -0.03443 | -0.03064 | 1.07811  |
| D37 | 1.04280  | 0.00057  | 0.00510  | -0.03298 | -0.02787 | 1.01492  |
| D38 | -3.12567 | -0.00123 | 0.00496  | -0.02972 | -0.02475 | 3.13276  |
| D39 | -1.02207 | -0.00048 | 0.00885  | -0.03321 | -0.02436 | -1.04643 |
| D40 | 0.63398  | -0.00272 | -0.04343 | 0.05596  | 0.01252  | 0.64650  |
| D41 | 2.75049  | -0.00294 | -0.04334 | 0.05921  | 0.01588  | 2.76636  |
| D42 | -1.44251 | -0.00217 | -0.04738 | 0.05608  | 0.00871  | -1.43379 |
| D43 | -1.57809 | 0.00317  | -0.00933 | 0.03462  | 0.02529  | -1.55280 |
| D44 | 2.61073  | -0.00030 | -0.00649 | 0.03239  | 0.02590  | 2.63663  |
| D45 | 0.49445  | -0.00181 | -0.00307 | 0.03342  | 0.03034  | 0.52479  |
| D46 | 3.13383  | 0.00031  | 0.00333  | 0.00079  | 0.00412  | 3.13795  |
| D47 | -0.00463 | 0.00005  | 0.00341  | -0.00172 | 0.00169  | -0.00295 |
| D48 | -0.01528 | 0.00023  | 0.00276  | -0.00080 | 0.00196  | -0.01332 |
| D49 | 3.12944  | -0.00003 | 0.00284  | -0.00331 | -0.00047 | 3.12897  |

Item Value Threshold Converged?

|                      |          |          |    |
|----------------------|----------|----------|----|
| Maximum Force        | 0.008198 | 0.000450 | NO |
| RMS Force            | 0.001690 | 0.000300 | NO |
| Maximum Displacement | 0.115822 | 0.001800 | NO |
| RMS Displacement     | 0.021950 | 0.001200 | NO |

Predicted change in Energy=-2.356462D-04

GradGradGradGradGradGradGradGradGradGradGradGradGradGradGradGradGradGrad

Input orientation:

| Center Number | Atomic Number | Atomic Type | Coordinates (Angstroms) |           |           |
|---------------|---------------|-------------|-------------------------|-----------|-----------|
|               |               |             | X                       | Y         | Z         |
| 1             | 6             | 0           | -0.566678               | -2.294507 | -1.121227 |
| 2             | 6             | 0           | -1.876545               | -1.974124 | -1.273509 |
| 3             | 7             | 0           | -2.132354               | -0.914517 | -0.407963 |
| 4             | 6             | 0           | -0.998476               | -0.611313 | 0.251113  |
| 5             | 7             | 0           | -0.038702               | -1.437165 | -0.169735 |
| 6             | 6             | 0           | 1.366704                | -1.381827 | 0.300632  |
| 7             | 6             | 0           | 2.193994                | -0.348852 | -0.478869 |
| 8             | 1             | 0           | 0.020995                | -3.064491 | -1.590734 |
| 9             | 1             | 0           | -2.627862               | -2.405422 | -1.909185 |
| 10            | 1             | 0           | 1.334823                | -1.099150 | 1.353737  |
| 11            | 1             | 0           | 1.785339                | -2.382612 | 0.194837  |
| 12            | 1             | 0           | 2.242005                | -0.613049 | -1.539562 |
| 13            | 1             | 0           | 1.730704                | 0.633614  | -0.349441 |
| 14            | 35            | 0           | 0.442611                | 1.757324  | 2.011072  |
| 15            | 1             | 0           | -0.807368               | 0.199188  | 0.980973  |
| 16            | 6             | 0           | -3.354800               | -0.215418 | -0.194350 |
| 17            | 6             | 0           | -4.478184               | -0.439730 | -0.862603 |
| 18            | 1             | 0           | -3.257772               | 0.535134  | 0.579889  |
| 19            | 1             | 0           | -5.357049               | 0.142977  | -0.624087 |
| 20            | 1             | 0           | -4.572424               | -1.182168 | -1.644338 |
| 21            | 8             | 0           | 3.516410                | -0.352660 | 0.026603  |
| 22            | 1             | 0           | 3.554978                | 0.281890  | 0.753901  |

Distance matrix (angstroms):

|   |   | 1        | 2        | 3        | 4        | 5        |
|---|---|----------|----------|----------|----------|----------|
| 1 | C | 0.000000 |          |          |          |          |
| 2 | C | 1.357051 | 0.000000 |          |          |          |
| 3 | N | 2.205553 | 1.391897 | 0.000000 |          |          |
| 4 | C | 2.214252 | 2.225474 | 1.346103 | 0.000000 |          |
| 5 | N | 1.385328 | 2.210047 | 2.171011 | 1.334282 | 0.000000 |
| 6 | C | 2.567612 | 3.653409 | 3.600540 | 2.488015 | 1.483062 |
| 7 | C | 3.437951 | 4.454464 | 4.363747 | 3.285365 | 2.502982 |



|    |    |          |          |          |          |          |
|----|----|----------|----------|----------|----------|----------|
| 8  | H  | 1.076415 | 2.211377 | 3.264697 | 3.232616 | 2.161248 |
| 9  | H  | 2.209448 | 1.074513 | 2.173015 | 3.246631 | 3.266031 |
| 10 | H  | 3.342160 | 4.240387 | 3.893455 | 2.626413 | 2.078892 |
| 11 | H  | 2.696622 | 3.966396 | 4.226936 | 3.300044 | 2.086602 |
| 12 | H  | 3.300152 | 4.345775 | 4.528400 | 3.702328 | 2.785178 |
| 13 | H  | 3.800988 | 4.546036 | 4.162132 | 3.059236 | 2.729691 |
| 14 | Br | 5.219895 | 5.485496 | 4.429549 | 3.283996 | 3.897735 |
| 15 | H  | 3.270428 | 3.308945 | 2.219250 | 1.107308 | 2.143041 |
| 16 | C  | 3.599352 | 2.538281 | 1.424340 | 2.430521 | 3.534087 |
| 17 | C  | 4.336700 | 3.048234 | 2.436193 | 3.657618 | 4.602601 |
| 18 | H  | 4.259420 | 3.411634 | 2.084204 | 2.554771 | 3.848936 |
| 19 | H  | 5.397790 | 4.125261 | 3.400539 | 4.509112 | 5.566696 |
| 20 | H  | 4.190102 | 2.834162 | 2.748491 | 4.085550 | 4.774318 |
| 21 | O  | 4.664749 | 5.779567 | 5.693247 | 4.527858 | 3.722032 |
| 22 | H  | 5.209796 | 6.221047 | 5.926808 | 4.667392 | 4.089351 |
|    |    | 6        | 7        | 8        | 9        | 10       |
| 6  | C  | 0.000000 |          |          |          |          |
| 7  | C  | 1.535926 | 0.000000 |          |          |          |
| 8  | H  | 2.866977 | 3.651419 | 0.000000 |          |          |
| 9  | H  | 4.678418 | 5.433744 | 2.748131 | 0.000000 |          |
| 10 | H  | 1.090849 | 2.158603 | 3.776059 | 5.296780 | 0.000000 |
| 11 | H  | 1.089963 | 2.181068 | 2.601179 | 4.889148 | 1.786977 |
| 12 | H  | 2.177955 | 1.094154 | 3.308334 | 5.202386 | 3.070904 |
| 13 | H  | 2.148742 | 1.093906 | 4.259095 | 5.537656 | 2.461708 |
| 14 | Br | 3.692400 | 3.701774 | 6.033297 | 6.490353 | 3.063915 |
| 15 | H  | 2.772915 | 3.382257 | 4.236917 | 4.295487 | 2.532512 |
| 16 | C  | 4.888569 | 5.557686 | 4.632828 | 2.874929 | 5.016983 |
| 17 | C  | 6.033521 | 6.683821 | 5.259482 | 2.895336 | 6.256041 |
| 18 | H  | 5.013830 | 5.623536 | 5.330967 | 3.903735 | 4.935752 |
| 19 | H  | 6.956219 | 7.568437 | 6.336057 | 3.948959 | 7.087723 |
| 20 | H  | 6.252681 | 6.916441 | 4.964425 | 2.312535 | 6.625022 |
| 21 | O  | 2.399065 | 1.415733 | 4.710385 | 6.761152 | 2.660423 |
| 22 | H  | 2.786028 | 1.941607 | 5.402279 | 7.248530 | 2.682566 |
|    |    | 11       | 12       | 13       | 14       | 15       |
| 11 | H  | 0.000000 |          |          |          |          |
| 12 | H  | 2.519532 | 0.000000 |          |          |          |
| 13 | H  | 3.065427 | 1.797772 | 0.000000 |          |          |
| 14 | Br | 4.716004 | 4.632870 | 2.914435 | 0.000000 |          |
| 15 | H  | 3.742437 | 4.038750 | 2.898368 | 2.247518 | 0.000000 |
| 16 | C  | 5.591889 | 5.769915 | 5.158222 | 4.814138 | 2.835964 |
| 17 | C  | 6.642641 | 6.756422 | 6.321842 | 6.107314 | 4.157148 |
| 18 | H  | 5.839047 | 6.004826 | 5.075257 | 4.151490 | 2.505635 |
| 19 | H  | 7.619905 | 7.691248 | 7.110021 | 6.571624 | 4.824829 |
| 20 | H  | 6.726424 | 6.838956 | 6.686048 | 6.866820 | 4.793334 |

|    |   |          |          |          |          |          |
|----|---|----------|----------|----------|----------|----------|
| 21 | O | 2.673128 | 2.035874 | 2.074341 | 4.223552 | 4.462109 |
| 22 | H | 3.247113 | 2.790123 | 2.160799 | 3.666635 | 4.369035 |
|    |   | 16       | 17       | 18       | 19       | 20       |
| 16 | C | 0.000000 |          |          |          |          |
| 17 | C | 1.326224 | 0.000000 |          |          |          |
| 18 | H | 1.082677 | 2.126158 | 0.000000 |          |          |
| 19 | H | 2.078972 | 1.081130 | 2.451594 | 0.000000 |          |
| 20 | H | 2.125954 | 1.082222 | 3.102357 | 1.847311 | 0.000000 |
| 21 | O | 6.876131 | 8.044364 | 6.854476 | 8.911079 | 8.301167 |
| 22 | H | 6.992247 | 8.225905 | 6.819675 | 9.019001 | 8.599400 |
|    |   | 21       | 22       |          |          |          |
| 21 | O | 0.000000 |          |          |          |          |
| 22 | H | 0.965973 | 0.000000 |          |          |          |

Stoichiometry C7H11BrN2O

Framework group C1[X(C7H11BrN2O)]

Deg. of freedom 60

Full point group C1 NOp 1

Largest Abelian subgroup C1 NOp 1

Largest concise Abelian subgroup C1 NOp 1

Standard orientation:

| Center<br>Number | Atomic<br>Number | Atomic<br>Type | Coordinates (Angstroms) |           |           |
|------------------|------------------|----------------|-------------------------|-----------|-----------|
|                  |                  |                | X                       | Y         | Z         |
| 1                | 6                | 0              | -1.684456               | -2.085044 | 0.230660  |
| 2                | 6                | 0              | -2.734361               | -1.252635 | 0.015298  |
| 3                | 7                | 0              | -2.229525               | 0.044117  | 0.046166  |
| 4                | 6                | 0              | -0.905067               | -0.013074 | 0.279687  |
| 5                | 7                | 0              | -0.557259               | -1.296236 | 0.392968  |
| 6                | 6                | 0              | 0.833730                | -1.761073 | 0.613306  |
| 7                | 6                | 0              | 1.617683                | -1.874373 | -0.702616 |
| 8                | 1                | 0              | -1.649925               | -3.158635 | 0.300517  |
| 9                | 1                | 0              | -3.772970               | -1.472867 | -0.150139 |
| 10               | 1                | 0              | 1.313479                | -1.022989 | 1.257529  |
| 11               | 1                | 0              | 0.778941                | -2.722846 | 1.123216  |
| 12               | 1                | 0              | 1.155516                | -2.612003 | -1.365547 |
| 13               | 1                | 0              | 1.636914                | -0.889935 | -1.179208 |
| 14               | 35               | 0              | 1.862143                | 1.740905  | 0.054437  |
| 15               | 1                | 0              | -0.165284               | 0.809574  | 0.325546  |
| 16               | 6                | 0              | -2.925847               | 1.274336  | -0.128304 |
| 17               | 6                | 0              | -4.215829               | 1.375735  | -0.419054 |
| 18               | 1                | 0              | -2.270923               | 2.127326  | -0.003119 |
| 19               | 1                | 0              | -4.654439               | 2.357815  | -0.528514 |
| 20               | 1                | 0              | -4.868263               | 0.523118  | -0.555351 |

|    |   |   |          |           |           |
|----|---|---|----------|-----------|-----------|
| 21 | 8 | 0 | 2.929962 | -2.318778 | -0.411532 |
| 22 | 1 | 0 | 3.474632 | -1.538419 | -0.245769 |

-----

Rotational constants (GHZ):      0.8385849      0.4641032      0.3084044

Standard basis: 6-311++G(d,p) (5D, 7F)

There are 358 symmetry adapted cartesian basis functions of A symmetry.

There are 345 symmetry adapted basis functions of A symmetry.

345 basis functions, 553 primitive gaussians, 358 cartesian basis functions

55 alpha electrons      55 beta electrons

nuclear repulsion energy      838.6996491651 Hartrees.

NAtoms= 22 NActive= 22 NUniq= 22 SFac= 1.00D+00 NATFMM= 60 NAOKFM=F

Big=F

Integral buffers will be 131072 words long.

Raffenetti 2 integral format.

Two-electron integral symmetry is turned on.

One-electron integrals computed using PRISM.

NBasis= 345 RedAO= T EigKep= 4.48D-06 NBF= 345

NBsUse= 345 1.00D-06 EigRej= -1.00D+00 NBFU= 345

Initial guess from the checkpoint file: "."

B after Tr= 0.000000 0.000000 0.000000

Rot= 0.999975 -0.001460 0.000570 -0.006855 Ang= -0.81 deg.

ExpMin= 3.50D-02 ExpMax= 4.40D+05 ExpMxC= 1.51D+04 IAcc=3 IRadAn= 5 AccDes=

0.00D+00

Harris functional with IExCor= 402 and IRadAn= 5 diagonalized for initial guess.

HarFok: IExCor= 402 AccDes= 0.00D+00 IRadAn= 5 IDoV= 1 UseB2=F ITyADJ=14

ICtDFT= 3500011 ScaDFX= 1.000000 1.000000 1.000000 1.000000

FoFCou: FMM=F IPFlag= 0 FMFlag= 100000 FMFlg1= 0

NFxFlg= 0 DoJE=T BraDBF=F KetDBF=T FulRan=T

wScrn= 0.000000 ICntrl= 500 IOpCl= 0 I1Cent= 200000004 NGrid=

0

NMat0= 1 NMatS0= 1 NMatT0= 0 NMatD0= 1 NMtDS0= 0

NMtDT0= 0

Petite list used in FoFCou.

Keep R1 ints in memory in canonical form, NReq=1804729152.

Requested convergence on RMS density matrix=1.00D-08 within 128 cycles.

Requested convergence on MAX density matrix=1.00D-06.

Requested convergence on energy=1.00D-06.

No special actions if energy rises.

SCF Done: E(RB3LYP) = -3032.34035385 A.U. after 11 cycles

NFock= 11 Conv=0.58D-08 -V/T= 2.0017

Calling FoFJK, ICntrl= 2127 FMM=F ISym2X=0 I1Cent= 0 IOpClX= 0 NMat=1 NMatS=1

NMatT=0.

\*\*\*\*\* Axes restored to original set \*\*\*\*\*

-----

| Center Number | Atomic Number | Forces (Hartrees/Bohr) |              |              |
|---------------|---------------|------------------------|--------------|--------------|
|               |               | X                      | Y            | Z            |
| 1             | 6             | -0.000039395           | 0.000010987  | 0.000194849  |
| 2             | 6             | 0.000012061            | 0.000587518  | -0.000309516 |
| 3             | 7             | -0.001736454           | 0.000194874  | -0.000458773 |
| 4             | 6             | 0.002473066            | -0.001766334 | 0.000150186  |
| 5             | 7             | 0.001400541            | -0.000262404 | 0.000883303  |
| 6             | 6             | -0.003636634           | -0.000527135 | -0.000562594 |
| 7             | 6             | -0.000498314           | 0.000350695  | 0.001954008  |
| 8             | 1             | 0.000426914            | 0.000428205  | -0.000191058 |
| 9             | 1             | -0.000366991           | 0.000063717  | 0.000281743  |
| 10            | 1             | 0.001028620            | -0.000071424 | -0.000410760 |
| 11            | 1             | 0.000483361            | -0.000199708 | 0.000344510  |
| 12            | 1             | 0.000062272            | 0.000272819  | 0.000156021  |
| 13            | 1             | -0.000878986           | -0.000320038 | -0.002052398 |
| 14            | 35            | 0.000097569            | -0.001444570 | -0.000363812 |
| 15            | 1             | -0.000746750           | 0.002300878  | 0.000224021  |
| 16            | 6             | 0.001948723            | -0.000546369 | -0.000270633 |
| 17            | 6             | -0.000115196           | 0.000242558  | 0.000798299  |
| 18            | 1             | -0.000749687           | 0.000237926  | -0.000212443 |
| 19            | 1             | -0.000021196           | 0.000098280  | -0.000215651 |
| 20            | 1             | -0.000047785           | -0.000162698 | -0.000092756 |
| 21            | 8             | 0.001101403            | 0.001269378  | 0.000532441  |
| 22            | 1             | -0.000197142           | -0.000757153 | -0.000378984 |

-----  
Cartesian Forces: Max 0.003636634 RMS 0.000944582

GradGradGradGradGradGradGradGradGradGradGradGradGradGradGradGradGradGradGrad  
Berny optimization.

Using GEDIIS/GDIIS optimizer.

FormGI is forming the generalized inverse of G from B-inverse, IUseBI=4.

Internal Forces: Max 0.005803041 RMS 0.001027765

Search for a local minimum.

Step number 52 out of a maximum of 116

All quantities printed in internal units (Hartrees-Bohrs-Radians)

Mixed Optimization -- RFO/linear search

Update second derivatives using D2CorX and points 49 50 51 52

DE= -3.62D-04 DEPred=-2.36D-04 R= 1.54D+00

TightC=F SS= 1.41D+00 RLast= 1.32D-01 DXNew= 3.7014D-01 3.9727D-01

Trust test= 1.54D+00 RLast= 1.32D-01 DXMaxT set to 3.70D-01

ITU= 1 0-1 1 1 1-1 1 0-1 1 0-1 0-1 0 0 1-1 0

ITU= 1 1 1 1 1 1 0-1 1 1 1 1 0-1 1 1 1 1 1

ITU= 1 1 1 1 1 1 1 0 0-1 0 0

Use linear search instead of GDIIIS.

|                 |         |         |         |         |         |
|-----------------|---------|---------|---------|---------|---------|
| Eigenvalues --- | 0.00097 | 0.00186 | 0.00365 | 0.00615 | 0.00961 |
| Eigenvalues --- | 0.00996 | 0.01566 | 0.01758 | 0.02112 | 0.02184 |
| Eigenvalues --- | 0.02362 | 0.02761 | 0.03090 | 0.03194 | 0.03838 |
| Eigenvalues --- | 0.04185 | 0.05123 | 0.05643 | 0.05750 | 0.07258 |
| Eigenvalues --- | 0.08528 | 0.09268 | 0.10750 | 0.14002 | 0.14637 |
| Eigenvalues --- | 0.15426 | 0.15723 | 0.15996 | 0.16068 | 0.16513 |
| Eigenvalues --- | 0.17150 | 0.18407 | 0.21011 | 0.22506 | 0.23441 |
| Eigenvalues --- | 0.24793 | 0.25268 | 0.26538 | 0.29408 | 0.33110 |
| Eigenvalues --- | 0.33214 | 0.33864 | 0.33891 | 0.34069 | 0.34229 |
| Eigenvalues --- | 0.34332 | 0.34764 | 0.35332 | 0.36306 | 0.36356 |
| Eigenvalues --- | 0.39388 | 0.43088 | 0.44332 | 0.46476 | 0.49239 |
| Eigenvalues --- | 0.53622 | 0.55245 | 0.57808 | 0.60805 | 0.96869 |

RFO step: Lambda=-6.26883669D-04 EMin= 9.69562591D-04

Quartic linear search produced a step of 0.81464.

|             |            |            |           |            |
|-------------|------------|------------|-----------|------------|
| Iteration 1 | RMS(Cart)= | 0.08276770 | RMS(Int)= | 0.00438260 |
| Iteration 2 | RMS(Cart)= | 0.00566038 | RMS(Int)= | 0.00004064 |
| Iteration 3 | RMS(Cart)= | 0.00003723 | RMS(Int)= | 0.00003576 |
| Iteration 4 | RMS(Cart)= | 0.00000000 | RMS(Int)= | 0.00003576 |

| Variable | Old X   | -DE/DX   | Delta X<br>(Linear) | Delta X<br>(Quad) | Delta X<br>(Total) | New X   |
|----------|---------|----------|---------------------|-------------------|--------------------|---------|
| R1       | 2.56445 | 0.00064  | 0.00031             | 0.00126           | 0.00154            | 2.56600 |
| R2       | 2.61789 | -0.00027 | 0.00038             | -0.00174          | -0.00137           | 2.61652 |
| R3       | 2.03413 | 0.00001  | 0.00020             | 0.00022           | 0.00041            | 2.03454 |
| R4       | 2.63030 | -0.00033 | -0.00052            | -0.00215          | -0.00267           | 2.62763 |
| R5       | 2.03054 | 0.00006  | 0.00022             | 0.00026           | 0.00048            | 2.03101 |
| R6       | 2.54377 | 0.00048  | 0.00162             | 0.00328           | 0.00492            | 2.54869 |
| R7       | 2.69161 | -0.00092 | -0.00195            | -0.00331          | -0.00526           | 2.68635 |
| R8       | 2.52143 | -0.00024 | 0.00009             | -0.00051          | -0.00040           | 2.52103 |
| R9       | 2.09251 | 0.00170  | 0.00008             | 0.01125           | 0.01133            | 2.10384 |
| R10      | 2.80258 | -0.00261 | -0.00402            | -0.00192          | -0.00594           | 2.79664 |
| R11      | 2.90248 | -0.00053 | 0.00168             | 0.00115           | 0.00283            | 2.90531 |
| R12      | 2.06141 | -0.00044 | -0.00006            | -0.00074          | -0.00080           | 2.06060 |
| R13      | 2.05973 | 0.00034  | 0.00056             | 0.00062           | 0.00118            | 2.06091 |
| R14      | 2.06765 | -0.00021 | -0.00092            | -0.00148          | -0.00240           | 2.06525 |
| R15      | 2.06718 | -0.00155 | 0.00054             | -0.00118          | -0.00064           | 2.06654 |
| R16      | 2.67535 | 0.00090  | 0.00042             | -0.00022          | 0.00020            | 2.67554 |
| R17      | 5.50748 | -0.00090 | -0.03978            | -0.09867          | -0.13845           | 5.36903 |
| R18      | 2.50620 | -0.00012 | 0.00022             | -0.00006          | 0.00016            | 2.50636 |
| R19      | 2.04596 | -0.00005 | 0.00010             | -0.00076          | -0.00067           | 2.04530 |
| R20      | 2.04304 | 0.00003  | 0.00027             | 0.00029           | 0.00056            | 2.04360 |
| R21      | 2.04510 | 0.00018  | 0.00055             | 0.00063           | 0.00118            | 2.04629 |
| R22      | 1.82542 | -0.00079 | -0.00011            | 0.00047           | 0.00036            | 1.82579 |
| A1       | 1.87427 | -0.00012 | 0.00010             | 0.00116           | 0.00125            | 1.87552 |

|     |          |          |          |          |          |          |
|-----|----------|----------|----------|----------|----------|----------|
| A2  | 2.27431  | 0.00043  | 0.00182  | 0.00246  | 0.00429  | 2.27860  |
| A3  | 2.13436  | -0.00031 | -0.00191 | -0.00372 | -0.00563 | 2.12873  |
| A4  | 1.86224  | -0.00003 | 0.00026  | -0.00111 | -0.00087 | 1.86138  |
| A5  | 2.27382  | 0.00041  | 0.00222  | 0.00366  | 0.00588  | 2.27970  |
| A6  | 2.14711  | -0.00039 | -0.00248 | -0.00257 | -0.00505 | 2.14206  |
| A7  | 1.89772  | -0.00001 | -0.00016 | 0.00091  | 0.00078  | 1.89850  |
| A8  | 2.24547  | 0.00025  | -0.00001 | -0.00046 | -0.00050 | 2.24497  |
| A9  | 2.14000  | -0.00023 | 0.00019  | -0.00045 | -0.00028 | 2.13972  |
| A10 | 1.88816  | -0.00006 | -0.00014 | -0.00133 | -0.00157 | 1.88659  |
| A11 | 2.25618  | -0.00140 | -0.00693 | 0.00702  | -0.00009 | 2.25609  |
| A12 | 2.13743  | 0.00144  | 0.00632  | -0.00348 | 0.00265  | 2.14008  |
| A13 | 1.90238  | 0.00023  | -0.00005 | 0.00038  | 0.00034  | 1.90272  |
| A14 | 2.21691  | 0.00129  | -0.00020 | 0.00077  | 0.00053  | 2.21745  |
| A15 | 2.16340  | -0.00153 | 0.00009  | -0.00066 | -0.00061 | 2.16279  |
| A16 | 1.95471  | -0.00296 | 0.00114  | 0.00190  | 0.00304  | 1.95775  |
| A17 | 1.86310  | 0.00096  | 0.00269  | 0.00624  | 0.00893  | 1.87203  |
| A18 | 1.87436  | 0.00173  | 0.00185  | 0.00082  | 0.00265  | 1.87701  |
| A19 | 1.90860  | -0.00039 | -0.00362 | -0.01446 | -0.01809 | 1.89051  |
| A20 | 1.94054  | 0.00121  | 0.00040  | 0.00253  | 0.00290  | 1.94344  |
| A21 | 1.92076  | -0.00053 | -0.00233 | 0.00352  | 0.00114  | 1.92190  |
| A22 | 1.93182  | 0.00129  | 0.00036  | 0.00548  | 0.00582  | 1.93764  |
| A23 | 1.89216  | -0.00358 | 0.00356  | 0.00245  | 0.00601  | 1.89817  |
| A24 | 1.89664  | 0.00117  | 0.00187  | 0.00304  | 0.00493  | 1.90157  |
| A25 | 1.92852  | 0.00036  | 0.00003  | 0.00104  | 0.00098  | 1.92951  |
| A26 | 1.88019  | -0.00059 | -0.00346 | -0.00060 | -0.00410 | 1.87609  |
| A27 | 1.93454  | 0.00144  | -0.00237 | -0.01143 | -0.01382 | 1.92072  |
| A28 | 2.25145  | -0.00580 | 0.00653  | -0.10456 | -0.09804 | 2.15341  |
| A29 | 2.17536  | 0.00014  | 0.00003  | 0.00287  | 0.00290  | 2.17826  |
| A30 | 1.95044  | 0.00075  | 0.00375  | 0.00588  | 0.00963  | 1.96007  |
| A31 | 2.15735  | -0.00089 | -0.00379 | -0.00873 | -0.01252 | 2.14483  |
| A32 | 2.07860  | 0.00014  | -0.00016 | 0.00073  | 0.00056  | 2.07915  |
| A33 | 2.15768  | -0.00005 | -0.00027 | -0.00022 | -0.00050 | 2.15718  |
| A34 | 2.04691  | -0.00009 | 0.00043  | -0.00050 | -0.00008 | 2.04683  |
| A35 | 1.88005  | -0.00014 | -0.00179 | -0.00854 | -0.01032 | 1.86973  |
| D1  | 0.00235  | 0.00023  | 0.00183  | 0.00346  | 0.00528  | 0.00763  |
| D2  | -3.13575 | 0.00005  | 0.00250  | 0.00990  | 0.01244  | -3.12331 |
| D3  | 3.12004  | 0.00039  | 0.00258  | -0.00131 | 0.00124  | 3.12129  |
| D4  | -0.01806 | 0.00020  | 0.00325  | 0.00513  | 0.00841  | -0.00965 |
| D5  | -0.00053 | -0.00022 | -0.00331 | -0.00815 | -0.01145 | -0.01198 |
| D6  | -3.10927 | 0.00030  | 0.00253  | -0.02455 | -0.02202 | -3.13129 |
| D7  | -3.12056 | -0.00038 | -0.00405 | -0.00394 | -0.00799 | -3.12855 |
| D8  | 0.05388  | 0.00015  | 0.00179  | -0.02034 | -0.01856 | 0.03532  |
| D9  | -0.00338 | -0.00016 | 0.00024  | 0.00233  | 0.00258  | -0.00080 |
| D10 | 3.13930  | -0.00033 | -0.00457 | 0.00759  | 0.00304  | -3.14085 |

|     |          |          |          |          |          |          |
|-----|----------|----------|----------|----------|----------|----------|
| D11 | 3.13504  | 0.00001  | -0.00036 | -0.00352 | -0.00386 | 3.13118  |
| D12 | -0.00547 | -0.00016 | -0.00517 | 0.00174  | -0.00340 | -0.00887 |
| D13 | 0.00308  | 0.00003  | -0.00230 | -0.00742 | -0.00972 | -0.00664 |
| D14 | 3.08773  | -0.00050 | -0.02089 | 0.03677  | 0.01596  | 3.10369  |
| D15 | -3.13952 | 0.00018  | 0.00215  | -0.01229 | -0.01014 | 3.13352  |
| D16 | -0.05486 | -0.00035 | -0.01643 | 0.03190  | 0.01553  | -0.03933 |
| D17 | -0.05657 | 0.00030  | 0.01894  | -0.10182 | -0.08288 | -0.13946 |
| D18 | 3.09370  | 0.00032  | 0.02054  | -0.10501 | -0.08448 | 3.00922  |
| D19 | 3.08624  | 0.00011  | 0.01353  | -0.09591 | -0.08237 | 3.00387  |
| D20 | -0.04668 | 0.00014  | 0.01514  | -0.09910 | -0.08396 | -0.13064 |
| D21 | -0.00159 | 0.00012  | 0.00346  | 0.00961  | 0.01306  | 0.01146  |
| D22 | 3.10838  | -0.00032 | -0.00216 | 0.02544  | 0.02324  | 3.13163  |
| D23 | -3.09095 | 0.00071  | 0.02081  | -0.03134 | -0.01045 | -3.10139 |
| D24 | 0.01903  | 0.00027  | 0.01519  | -0.01552 | -0.00026 | 0.01877  |
| D25 | 1.63487  | 0.00094  | 0.00132  | 0.09526  | 0.09657  | 1.73145  |
| D26 | -2.55988 | -0.00063 | -0.00074 | 0.08263  | 0.08187  | -2.47800 |
| D27 | -0.50039 | 0.00012  | -0.00113 | 0.09036  | 0.08922  | -0.41117 |
| D28 | -1.46927 | 0.00150  | 0.00797  | 0.07653  | 0.08452  | -1.38476 |
| D29 | 0.61916  | -0.00008 | 0.00591  | 0.06391  | 0.06982  | 0.68898  |
| D30 | 2.67865  | 0.00068  | 0.00552  | 0.07163  | 0.07717  | 2.75581  |
| D31 | -1.08216 | -0.00054 | -0.02612 | -0.02196 | -0.04809 | -1.13025 |
| D32 | 1.03568  | -0.00160 | -0.02357 | -0.01571 | -0.03928 | 0.99640  |
| D33 | 3.13967  | -0.00128 | -0.02325 | -0.02628 | -0.04954 | 3.09013  |
| D34 | 3.13947  | 0.00035  | -0.02782 | -0.02153 | -0.04935 | 3.09012  |
| D35 | -1.02588 | -0.00072 | -0.02528 | -0.01528 | -0.04054 | -1.06641 |
| D36 | 1.07811  | -0.00040 | -0.02496 | -0.02585 | -0.05080 | 1.02731  |
| D37 | 1.01492  | 0.00049  | -0.02271 | -0.01787 | -0.04059 | 0.97434  |
| D38 | 3.13276  | -0.00058 | -0.02016 | -0.01161 | -0.03177 | 3.10099  |
| D39 | -1.04643 | -0.00026 | -0.01984 | -0.02219 | -0.04204 | -1.08847 |
| D40 | 0.64650  | -0.00062 | 0.01020  | 0.09885  | 0.10902  | 0.75552  |
| D41 | 2.76636  | -0.00110 | 0.01293  | 0.10782  | 0.12075  | 2.88711  |
| D42 | -1.43379 | -0.00068 | 0.00710  | 0.10039  | 0.10751  | -1.32628 |
| D43 | -1.55280 | 0.00176  | 0.02060  | 0.06881  | 0.08941  | -1.46338 |
| D44 | 2.63663  | -0.00010 | 0.02110  | 0.06089  | 0.08203  | 2.71865  |
| D45 | 0.52479  | -0.00104 | 0.02472  | 0.06687  | 0.09154  | 0.61634  |
| D46 | 3.13795  | 0.00020  | 0.00335  | -0.00653 | -0.00317 | 3.13478  |
| D47 | -0.00295 | 0.00006  | 0.00137  | -0.01272 | -0.01134 | -0.01429 |
| D48 | -0.01332 | 0.00018  | 0.00160  | -0.00289 | -0.00129 | -0.01462 |
| D49 | 3.12897  | 0.00004  | -0.00039 | -0.00908 | -0.00946 | 3.11951  |

|     | Item                 | Value    | Threshold | Converged? |
|-----|----------------------|----------|-----------|------------|
|     | Maximum Force        | 0.005803 | 0.000450  | NO         |
| RMS | Force                | 0.001028 | 0.000300  | NO         |
|     | Maximum Displacement | 0.378412 | 0.001800  | NO         |
| RMS | Displacement         | 0.081927 | 0.001200  | NO         |

Predicted change in Energy=-5.210996D-04

GradGradGradGradGradGradGradGradGradGradGradGradGradGradGradGradGradGradGrad

Input orientation:

| Center<br>Number | Atomic<br>Number | Atomic<br>Type | Coordinates (Angstroms) |           |           |
|------------------|------------------|----------------|-------------------------|-----------|-----------|
|                  |                  |                | X                       | Y         | Z         |
| 1                | 6                | 0              | -0.587755               | -2.341887 | -1.080993 |
| 2                | 6                | 0              | -1.901617               | -2.029293 | -1.221899 |
| 3                | 7                | 0              | -2.136686               | -0.922481 | -0.413721 |
| 4                | 6                | 0              | -0.985241               | -0.580424 | 0.199616  |
| 5                | 7                | 0              | -0.038959               | -1.437214 | -0.187952 |
| 6                | 6                | 0              | 1.367974                | -1.374904 | 0.266825  |
| 7                | 6                | 0              | 2.174937                | -0.305995 | -0.488103 |
| 8                | 1                | 0              | -0.006532               | -3.136266 | -1.517205 |
| 9                | 1                | 0              | -2.672683               | -2.495091 | -1.808085 |
| 10               | 1                | 0              | 1.354647                | -1.110666 | 1.324665  |
| 11               | 1                | 0              | 1.800837                | -2.366983 | 0.133448  |
| 12               | 1                | 0              | 2.260625                | -0.555861 | -1.548583 |
| 13               | 1                | 0              | 1.682310                | 0.661929  | -0.360319 |
| 14               | 35               | 0              | 0.642858                | 1.571263  | 2.122603  |
| 15               | 1                | 0              | -0.780076               | 0.267940  | 0.890724  |
| 16               | 6                | 0              | -3.352331               | -0.214119 | -0.210621 |
| 17               | 6                | 0              | -4.469189               | -0.414681 | -0.897274 |
| 18               | 1                | 0              | -3.269886               | 0.526689  | 0.574129  |
| 19               | 1                | 0              | -5.345150               | 0.173892  | -0.661140 |
| 20               | 1                | 0              | -4.558713               | -1.138573 | -1.697601 |
| 21               | 8                | 0              | 3.485691                | -0.257657 | 0.044985  |
| 22               | 1                | 0              | 3.455287                | 0.313504  | 0.823656  |

Distance matrix (angstroms):

|    |   | 1        | 2        | 3        | 4        | 5        |
|----|---|----------|----------|----------|----------|----------|
| 1  | C | 0.000000 |          |          |          |          |
| 2  | C | 1.357868 | 0.000000 |          |          |          |
| 3  | N | 2.204348 | 1.390482 | 0.000000 |          |          |
| 4  | C | 2.213754 | 2.227032 | 1.348707 | 0.000000 |          |
| 5  | N | 1.384605 | 2.211131 | 2.171723 | 1.334073 | 0.000000 |
| 6  | C | 2.564477 | 3.651678 | 3.598676 | 2.484620 | 1.479920 |
| 7  | C | 3.482649 | 4.486258 | 4.356108 | 3.245766 | 2.504213 |
| 8  | H | 1.076633 | 2.214485 | 3.264364 | 3.230739 | 2.157485 |
| 9  | H | 2.213382 | 1.074767 | 2.169019 | 3.247194 | 3.268093 |
| 10 | H | 3.328066 | 4.234634 | 3.904716 | 2.649900 | 2.082494 |
| 11 | H | 2.679714 | 3.957167 | 4.229665 | 3.310348 | 2.086293 |



|    |    |          |          |          |          |          |
|----|----|----------|----------|----------|----------|----------|
| 12 | H  | 3.394377 | 4.427413 | 4.556167 | 3.686794 | 2.813572 |
| 13 | H  | 3.833468 | 4.563938 | 4.134965 | 2.995463 | 2.720088 |
| 14 | Br | 5.204823 | 5.533901 | 4.514152 | 3.313359 | 3.854151 |
| 15 | H  | 3.276561 | 3.316370 | 2.226897 | 1.113304 | 2.149500 |
| 16 | C  | 3.595529 | 2.534188 | 1.421556 | 2.430141 | 3.531984 |
| 17 | C  | 4.337443 | 3.050373 | 2.435622 | 3.656300 | 4.601701 |
| 18 | H  | 4.261689 | 3.410414 | 2.088082 | 2.566235 | 3.857017 |
| 19 | H  | 5.397984 | 4.126304 | 3.399631 | 4.507626 | 5.565540 |
| 20 | H  | 4.194840 | 2.842504 | 2.749774 | 4.084197 | 4.774558 |
| 21 | O  | 4.712197 | 5.810919 | 5.680099 | 4.485234 | 3.724080 |
| 22 | H  | 5.198555 | 6.194305 | 5.859088 | 4.572398 | 4.037093 |
|    |    | 6        | 7        | 8        | 9        | 10       |
| 6  | C  | 0.000000 |          |          |          |          |
| 7  | C  | 1.537424 | 0.000000 |          |          |          |
| 8  | H  | 2.859095 | 3.718642 | 0.000000 |          |          |
| 9  | H  | 4.678352 | 5.480321 | 2.757549 | 0.000000 |          |
| 10 | H  | 1.090424 | 2.146276 | 3.745943 | 5.286789 | 0.000000 |
| 11 | H  | 1.090587 | 2.184936 | 2.565743 | 4.878354 | 1.787852 |
| 12 | H  | 2.182514 | 1.092883 | 3.435037 | 5.307116 | 3.063358 |
| 13 | H  | 2.154253 | 1.093567 | 4.314726 | 5.570347 | 2.467514 |
| 14 | Br | 3.556629 | 3.561903 | 5.985879 | 6.555788 | 2.887230 |
| 15 | H  | 2.775302 | 3.310992 | 4.240886 | 4.301148 | 2.577965 |
| 16 | C  | 4.884327 | 5.534992 | 4.630386 | 2.866469 | 5.031555 |
| 17 | C  | 6.029065 | 6.657601 | 5.263710 | 2.895707 | 6.272039 |
| 18 | H  | 5.021976 | 5.609617 | 5.332954 | 3.893938 | 4.962917 |
| 19 | H  | 6.951684 | 7.537370 | 6.339624 | 3.947282 | 7.104984 |
| 20 | H  | 6.248235 | 6.891888 | 4.974502 | 2.325824 | 6.640986 |
| 21 | O  | 2.404617 | 1.415837 | 4.787740 | 6.809225 | 2.628032 |
| 22 | H  | 2.741835 | 1.934886 | 5.418924 | 7.236455 | 2.586882 |
|    |    | 11       | 12       | 13       | 14       | 15       |
| 11 | H  | 0.000000 |          |          |          |          |
| 12 | H  | 2.514119 | 0.000000 |          |          |          |
| 13 | H  | 3.071182 | 1.797062 | 0.000000 |          |          |
| 14 | Br | 4.561517 | 4.540863 | 2.841171 | 0.000000 |          |
| 15 | H  | 3.765288 | 3.984310 | 2.789925 | 2.289306 | 0.000000 |
| 16 | C  | 5.595386 | 5.780329 | 5.112482 | 4.959139 | 2.839338 |
| 17 | C  | 6.647338 | 6.762731 | 6.268042 | 6.260724 | 4.156015 |
| 18 | H  | 5.854893 | 6.021991 | 5.041402 | 4.335721 | 2.523161 |
| 19 | H  | 7.625782 | 7.692067 | 7.050806 | 6.749675 | 4.822554 |
| 20 | H  | 6.730944 | 6.845811 | 6.631779 | 6.999537 | 4.791222 |
| 21 | O  | 2.701077 | 2.032037 | 2.064484 | 3.967763 | 4.380444 |
| 22 | H  | 3.224686 | 2.794733 | 2.160241 | 3.343497 | 4.236138 |
|    |    | 16       | 17       | 18       | 19       | 20       |
| 16 | C  | 0.000000 |          |          |          |          |

```

17 C 1.326306 0.000000
18 H 1.082325 2.118851 0.000000
19 H 2.079626 1.081427 2.440712 0.000000
20 H 2.126284 1.082848 3.097569 1.848053 0.000000
21 O 6.842936 8.012030 6.821512 8.869532 8.277986
22 H 6.905923 8.141816 6.733176 8.925906 8.525811
      21      22
21 O 0.000000
22 H 0.966166 0.000000

```

Stoichiometry C7H11BrN2O

Framework group C1[X(C7H11BrN2O)]

Deg. of freedom 60

Full point group C1 NOp 1

Largest Abelian subgroup C1 NOp 1

Largest concise Abelian subgroup C1 NOp 1

Standard orientation:

| Center Number | Atomic Number | Atomic Type | Coordinates (Angstroms) |           |           |
|---------------|---------------|-------------|-------------------------|-----------|-----------|
|               |               |             | X                       | Y         | Z         |
| 1             | 6             | 0           | -1.744316               | -2.023319 | 0.345032  |
| 2             | 6             | 0           | -2.798771               | -1.193624 | 0.136383  |
| 3             | 7             | 0           | -2.280047               | 0.092657  | 0.037157  |
| 4             | 6             | 0           | -0.940757               | 0.033208  | 0.184732  |
| 5             | 7             | 0           | -0.601761               | -1.242041 | 0.381132  |
| 6             | 6             | 0           | 0.790277                | -1.706381 | 0.572921  |
| 7             | 6             | 0           | 1.552929                | -1.818584 | -0.757284 |
| 8             | 1             | 0           | -1.710816               | -3.089302 | 0.492334  |
| 9             | 1             | 0           | -3.850091               | -1.403688 | 0.060731  |
| 10            | 1             | 0           | 1.294898                | -0.967364 | 1.196006  |
| 11            | 1             | 0           | 0.748508                | -2.666302 | 1.088854  |
| 12            | 1             | 0           | 1.113518                | -2.587727 | -1.397386 |
| 13            | 1             | 0           | 1.533354                | -0.846047 | -1.256961 |
| 14            | 35            | 0           | 1.969338                | 1.614833  | 0.094423  |
| 15            | 1             | 0           | -0.189073               | 0.852780  | 0.132611  |
| 16            | 6             | 0           | -2.973112               | 1.314715  | -0.179768 |
| 17            | 6             | 0           | -4.261864               | 1.411544  | -0.477812 |
| 18            | 1             | 0           | -2.326201               | 2.176853  | -0.081528 |
| 19            | 1             | 0           | -4.697583               | 2.391356  | -0.617820 |
| 20            | 1             | 0           | -4.914922               | 0.556232  | -0.598289 |
| 21            | 8             | 0           | 2.889929                | -2.200149 | -0.490015 |
| 22            | 1             | 0           | 3.378497                | -1.394434 | -0.276469 |

Rotational constants (GHZ): 0.9101431 0.4446239 0.3096270

Standard basis: 6-311++G(d,p) (5D, 7F)  
 There are 358 symmetry adapted cartesian basis functions of A symmetry.  
 There are 345 symmetry adapted basis functions of A symmetry.  
 345 basis functions, 553 primitive gaussians, 358 cartesian basis functions  
 55 alpha electrons 55 beta electrons  
 nuclear repulsion energy 842.4530923705 Hartrees.  
 NAToms= 22 NActive= 22 NUniq= 22 SFac= 1.00D+00 NATFMM= 60 NAOKFM=F

Big=F

Integral buffers will be 131072 words long.

Raffenetti 2 integral format.

Two-electron integral symmetry is turned on.

One-electron integrals computed using PRISM.

NBasis= 345 RedAO= T EigKep= 4.81D-06 NBF= 345

NBsUse= 345 1.00D-06 EigRej= -1.00D+00 NBFU= 345

Initial guess from the checkpoint file: "."

B after Tr= 0.000000 0.000000 0.000000

Rot= 0.999936 -0.001918 -0.000995 0.011112 Ang= -1.30 deg.

ExpMin= 3.50D-02 ExpMax= 4.40D+05 ExpMxC= 1.51D+04 IAcc=3 IRadAn= 5 AccDes= 0.00D+00

Harris functional with IExCor= 402 and IRadAn= 5 diagonalized for initial guess.

HarFok: IExCor= 402 AccDes= 0.00D+00 IRadAn= 5 IDoV= 1 UseB2=F ITyADJ=14

ICtDFT= 3500011 ScaDFX= 1.000000 1.000000 1.000000 1.000000

FoFCou: FMM=F IPFlag= 0 FMFlag= 100000 FMFlg1= 0

NFxFlg= 0 DoJE=T BraDBF=F KetDBF=T FulRan=T

wScr= 0.000000 ICntrl= 500 IOpCl= 0 I1Cent= 200000004 NGrid=

0

NMat0= 1 NMatS0= 1 NMatT0= 0 NMatD0= 1 NMtDS0= 0

NMtDT0= 0

Petite list used in FoFCou.

Keep R1 ints in memory in canonical form, NReq=1804729152.

Requested convergence on RMS density matrix=1.00D-08 within 128 cycles.

Requested convergence on MAX density matrix=1.00D-06.

Requested convergence on energy=1.00D-06.

No special actions if energy rises.

SCF Done: E(RB3LYP) = -3032.34073182 A.U. after 13 cycles

NFock= 13 Conv=0.41D-08 -V/T= 2.0017

Calling FoFJK, ICntrl= 2127 FMM=F ISym2X=0 I1Cent= 0 IOpClX= 0 NMat=1 NMatS=1

NMatT=0.

\*\*\*\*\* Axes restored to original set \*\*\*\*\*

```

-----
Center      Atomic      Forces (Hartrees/Bohr)
Number      Number      X           Y           Z
-----
1           6           -0.000135756 -0.000706732 0.000666810
  
```

|    |    |              |              |              |
|----|----|--------------|--------------|--------------|
| 2  | 6  | 0.000184211  | 0.000494831  | -0.000452006 |
| 3  | 7  | 0.000602182  | 0.001324016  | 0.000679197  |
| 4  | 6  | 0.001151596  | 0.001629440  | 0.001811064  |
| 5  | 7  | 0.000468168  | 0.001195242  | 0.000430979  |
| 6  | 6  | 0.000266731  | -0.000087358 | -0.000811863 |
| 7  | 6  | 0.001709581  | 0.000757630  | 0.001316716  |
| 8  | 1  | -0.000093989 | 0.000247051  | -0.000114458 |
| 9  | 1  | 0.000072700  | -0.000171158 | 0.000211213  |
| 10 | 1  | -0.000355445 | -0.000349988 | 0.000157465  |
| 11 | 1  | -0.000016297 | 0.000145446  | -0.000144539 |
| 12 | 1  | -0.000050058 | -0.000185260 | -0.000527508 |
| 13 | 1  | -0.001921695 | -0.000951023 | -0.002102354 |
| 14 | 35 | -0.000707127 | -0.000478394 | 0.000227285  |
| 15 | 1  | -0.000472357 | -0.002943758 | -0.001349071 |
| 16 | 6  | -0.000406696 | 0.000559836  | -0.000394339 |
| 17 | 6  | -0.000168798 | -0.000216997 | -0.000217947 |
| 18 | 1  | 0.000310444  | 0.000061598  | 0.000072967  |
| 19 | 1  | 0.000131100  | -0.000120205 | -0.000136094 |
| 20 | 1  | -0.000091359 | -0.000054414 | 0.000268957  |
| 21 | 8  | -0.000219027 | -0.000734862 | -0.000339823 |
| 22 | 1  | -0.000258111 | 0.000585058  | 0.000747348  |

-----  
Cartesian Forces: Max 0.002943758 RMS 0.000807663

GradGradGradGradGradGradGradGradGradGradGradGradGradGradGradGradGradGradGrad  
Berny optimization.

Using GEDIIS/GDIIS optimizer.

FormGI is forming the generalized inverse of G from B-inverse, IUseBI=4.

Internal Forces: Max 0.003339752 RMS 0.001006305

Search for a local minimum.

Step number 53 out of a maximum of 116

All quantities printed in internal units (Hartrees-Bohrs-Radians)

Mixed Optimization -- RFO/linear search

Update second derivatives using D2CorX and points 51 52 53

DE= -3.78D-04 DEPred=-5.21D-04 R= 7.25D-01

TightC=F SS= 1.41D+00 RLast= 4.26D-01 DXNew= 6.2250D-01 1.2786D+00

Trust test= 7.25D-01 RLast= 4.26D-01 DXMaxT set to 6.23D-01

ITU= 1 1 0-1 1 1 1-1 1 0-1 1 0-1 0-1 0 0 1-1

ITU= 0 1 1 1 1 1 1 0-1 1 1 1 1 0-1 1 1 1 1

ITU= 1 1 1 1 1 1 1 1 0 0-1 0 0

Use linear search instead of GDIIS.

Eigenvalues --- 0.00075 0.00249 0.00341 0.00621 0.00973

Eigenvalues --- 0.01013 0.01563 0.01809 0.02098 0.02182

Eigenvalues --- 0.02392 0.02939 0.03073 0.03203 0.03884

|                 |         |         |         |         |         |
|-----------------|---------|---------|---------|---------|---------|
| Eigenvalues --- | 0.04437 | 0.05270 | 0.05718 | 0.06292 | 0.07012 |
| Eigenvalues --- | 0.08615 | 0.09301 | 0.11061 | 0.14056 | 0.14335 |
| Eigenvalues --- | 0.15347 | 0.15575 | 0.15987 | 0.16075 | 0.16505 |
| Eigenvalues --- | 0.17153 | 0.18346 | 0.21005 | 0.22769 | 0.23500 |
| Eigenvalues --- | 0.25024 | 0.25325 | 0.26587 | 0.29333 | 0.32943 |
| Eigenvalues --- | 0.33219 | 0.33866 | 0.33896 | 0.34067 | 0.34223 |
| Eigenvalues --- | 0.34324 | 0.34748 | 0.35302 | 0.36314 | 0.36373 |
| Eigenvalues --- | 0.40211 | 0.43034 | 0.44293 | 0.46600 | 0.49259 |
| Eigenvalues --- | 0.53500 | 0.55393 | 0.57816 | 0.60805 | 0.81629 |

RFO step: Lambda=-8.99484125D-04 EMin= 7.53470107D-04

Quartic linear search produced a step of -0.11915.

Iteration 1 RMS(Cart)= 0.09013447 RMS(Int)= 0.00346994

Iteration 2 RMS(Cart)= 0.00752221 RMS(Int)= 0.00009418

Iteration 3 RMS(Cart)= 0.00004684 RMS(Int)= 0.00008572

Iteration 4 RMS(Cart)= 0.00000000 RMS(Int)= 0.00008572

| Variable | Old X   | -DE/DX   | Delta X<br>(Linear) | Delta X<br>(Quad) | Delta X<br>(Total) | New X   |
|----------|---------|----------|---------------------|-------------------|--------------------|---------|
| R1       | 2.56600 | 0.00025  | -0.00018            | 0.00217           | 0.00195            | 2.56795 |
| R2       | 2.61652 | -0.00043 | 0.00016             | -0.00034          | -0.00019           | 2.61633 |
| R3       | 2.03454 | -0.00019 | -0.00005            | -0.00043          | -0.00048           | 2.03406 |
| R4       | 2.62763 | 0.00053  | 0.00032             | -0.00157          | -0.00126           | 2.62637 |
| R5       | 2.03101 | -0.00009 | -0.00006            | 0.00046           | 0.00040            | 2.03142 |
| R6       | 2.54869 | -0.00092 | -0.00059            | 0.00061           | 0.00006            | 2.54874 |
| R7       | 2.68635 | 0.00026  | 0.00063             | 0.00125           | 0.00188            | 2.68823 |
| R8       | 2.52103 | -0.00093 | 0.00005             | 0.00020           | 0.00027            | 2.52130 |
| R9       | 2.10384 | -0.00316 | -0.00135            | -0.00952          | -0.01087           | 2.09297 |
| R10      | 2.79664 | -0.00198 | 0.00071             | -0.00964          | -0.00893           | 2.78772 |
| R11      | 2.90531 | -0.00111 | -0.00034            | 0.00335           | 0.00301            | 2.90832 |
| R12      | 2.06060 | 0.00008  | 0.00010             | -0.00085          | -0.00075           | 2.05985 |
| R13      | 2.06091 | -0.00012 | -0.00014            | 0.00009           | -0.00005           | 2.06086 |
| R14      | 2.06525 | 0.00056  | 0.00029             | -0.00036          | -0.00008           | 2.06517 |
| R15      | 2.06654 | -0.00030 | 0.00008             | 0.00004           | 0.00011            | 2.06665 |
| R16      | 2.67554 | -0.00029 | -0.00002            | -0.00155          | -0.00158           | 2.67397 |
| R17      | 5.36903 | 0.00029  | 0.01650             | -0.18597          | -0.16947           | 5.19956 |
| R18      | 2.50636 | 0.00021  | -0.00002            | 0.00076           | 0.00074            | 2.50710 |
| R19      | 2.04530 | 0.00012  | 0.00008             | 0.00163           | 0.00171            | 2.04701 |
| R20      | 2.04360 | -0.00020 | -0.00007            | 0.00030           | 0.00023            | 2.04383 |
| R21      | 2.04629 | -0.00016 | -0.00014            | 0.00095           | 0.00081            | 2.04709 |
| R22      | 1.82579 | 0.00095  | -0.00004            | 0.00227           | 0.00223            | 1.82802 |
| A1       | 1.87552 | -0.00069 | -0.00015            | -0.00034          | -0.00047           | 1.87505 |
| A2       | 2.27860 | 0.00030  | -0.00051            | 0.00405           | 0.00353            | 2.28213 |
| A3       | 2.12873 | 0.00040  | 0.00067             | -0.00384          | -0.00318           | 2.12555 |
| A4       | 1.86138 | 0.00024  | 0.00010             | 0.00075           | 0.00089            | 1.86226 |
| A5       | 2.27970 | -0.00021 | -0.00070            | 0.00769           | 0.00697            | 2.28667 |

|     |          |          |          |          |          |          |
|-----|----------|----------|----------|----------|----------|----------|
| A6  | 2.14206  | -0.00003 | 0.00060  | -0.00846 | -0.00788 | 2.13418  |
| A7  | 1.89850  | -0.00050 | -0.00009 | -0.00100 | -0.00114 | 1.89735  |
| A8  | 2.24497  | -0.00010 | 0.00006  | -0.00457 | -0.00469 | 2.24028  |
| A9  | 2.13972  | 0.00060  | 0.00003  | 0.00561  | 0.00544  | 2.14516  |
| A10 | 1.88659  | 0.00043  | 0.00019  | 0.00135  | 0.00158  | 1.88817  |
| A11 | 2.25609  | 0.00009  | 0.00001  | -0.01828 | -0.01837 | 2.23771  |
| A12 | 2.14008  | -0.00053 | -0.00032 | 0.01633  | 0.01585  | 2.15593  |
| A13 | 1.90272  | 0.00053  | -0.00004 | -0.00081 | -0.00088 | 1.90184  |
| A14 | 2.21745  | 0.00281  | -0.00006 | 0.00742  | 0.00719  | 2.22464  |
| A15 | 2.16279  | -0.00334 | 0.00007  | -0.00714 | -0.00720 | 2.15559  |
| A16 | 1.95775  | -0.00320 | -0.00036 | -0.00971 | -0.01010 | 1.94765  |
| A17 | 1.87203  | -0.00065 | -0.00106 | 0.00407  | 0.00291  | 1.87494  |
| A18 | 1.87701  | 0.00233  | -0.00032 | 0.01083  | 0.01052  | 1.88753  |
| A19 | 1.89051  | 0.00111  | 0.00215  | -0.01157 | -0.00943 | 1.88108  |
| A20 | 1.94344  | 0.00080  | -0.00034 | 0.01124  | 0.01093  | 1.95437  |
| A21 | 1.92190  | -0.00045 | -0.00014 | -0.00509 | -0.00521 | 1.91669  |
| A22 | 1.93764  | 0.00123  | -0.00069 | 0.00402  | 0.00333  | 1.94097  |
| A23 | 1.89817  | -0.00299 | -0.00072 | -0.00149 | -0.00220 | 1.89597  |
| A24 | 1.90157  | -0.00027 | -0.00059 | 0.00391  | 0.00332  | 1.90489  |
| A25 | 1.92951  | -0.00020 | -0.00012 | -0.00038 | -0.00049 | 1.92902  |
| A26 | 1.87609  | -0.00001 | 0.00049  | 0.00076  | 0.00124  | 1.87733  |
| A27 | 1.92072  | 0.00234  | 0.00165  | -0.00685 | -0.00520 | 1.91552  |
| A28 | 2.15341  | -0.00148 | 0.01168  | 0.02855  | 0.04023  | 2.19364  |
| A29 | 2.17826  | -0.00030 | -0.00035 | -0.00917 | -0.00951 | 2.16875  |
| A30 | 1.96007  | -0.00015 | -0.00115 | 0.00618  | 0.00503  | 1.96510  |
| A31 | 2.14483  | 0.00045  | 0.00149  | 0.00298  | 0.00447  | 2.14931  |
| A32 | 2.07915  | 0.00009  | -0.00007 | 0.00321  | 0.00315  | 2.08230  |
| A33 | 2.15718  | -0.00001 | 0.00006  | -0.00628 | -0.00622 | 2.15096  |
| A34 | 2.04683  | -0.00008 | 0.00001  | 0.00306  | 0.00307  | 2.04990  |
| A35 | 1.86973  | -0.00041 | 0.00123  | -0.01098 | -0.00975 | 1.85998  |
| D1  | 0.00763  | -0.00010 | -0.00063 | 0.00222  | 0.00156  | 0.00919  |
| D2  | -3.12331 | -0.00014 | -0.00148 | 0.00551  | 0.00406  | -3.11925 |
| D3  | 3.12129  | 0.00029  | -0.00015 | -0.00303 | -0.00316 | 3.11813  |
| D4  | -0.00965 | 0.00024  | -0.00100 | 0.00026  | -0.00066 | -0.01031 |
| D5  | -0.01198 | 0.00040  | 0.00136  | -0.00325 | -0.00185 | -0.01383 |
| D6  | -3.13129 | 0.00058  | 0.00262  | 0.02300  | 0.02583  | -3.10546 |
| D7  | -3.12855 | 0.00005  | 0.00095  | 0.00131  | 0.00223  | -3.12632 |
| D8  | 0.03532  | 0.00023  | 0.00221  | 0.02756  | 0.02991  | 0.06524  |
| D9  | -0.00080 | -0.00023 | -0.00031 | -0.00045 | -0.00075 | -0.00155 |
| D10 | -3.14085 | -0.00019 | -0.00036 | -0.03194 | -0.03212 | 3.11022  |
| D11 | 3.13118  | -0.00019 | 0.00046  | -0.00331 | -0.00287 | 3.12831  |
| D12 | -0.00887 | -0.00015 | 0.00040  | -0.03479 | -0.03424 | -0.04311 |
| D13 | -0.00664 | 0.00048  | 0.00116  | -0.00157 | -0.00040 | -0.00705 |
| D14 | 3.10369  | 0.00027  | -0.00190 | -0.02281 | -0.02442 | 3.07927  |

|     |          |          |          |          |          |          |
|-----|----------|----------|----------|----------|----------|----------|
| D15 | 3.13352  | 0.00044  | 0.00121  | 0.02761  | 0.02888  | -3.12078 |
| D16 | -0.03933 | 0.00023  | -0.00185 | 0.00637  | 0.00487  | -0.03446 |
| D17 | -0.13946 | 0.00028  | 0.00988  | 0.10783  | 0.11768  | -0.02177 |
| D18 | 3.00922  | 0.00024  | 0.01007  | 0.10868  | 0.11872  | 3.12794  |
| D19 | 3.00387  | 0.00033  | 0.00981  | 0.07246  | 0.08230  | 3.08617  |
| D20 | -0.13064 | 0.00029  | 0.01000  | 0.07331  | 0.08334  | -0.04731 |
| D21 | 0.01146  | -0.00053 | -0.00156 | 0.00297  | 0.00139  | 0.01286  |
| D22 | 3.13163  | -0.00061 | -0.00277 | -0.02205 | -0.02474 | 3.10689  |
| D23 | -3.10139 | -0.00036 | 0.00124  | 0.02323  | 0.02475  | -3.07664 |
| D24 | 0.01877  | -0.00044 | 0.00003  | -0.00180 | -0.00138 | 0.01739  |
| D25 | 1.73145  | 0.00048  | -0.01151 | 0.05495  | 0.04341  | 1.77486  |
| D26 | -2.47800 | -0.00043 | -0.00975 | 0.03774  | 0.02795  | -2.45006 |
| D27 | -0.41117 | -0.00008 | -0.01063 | 0.03960  | 0.02895  | -0.38222 |
| D28 | -1.38476 | 0.00063  | -0.01007 | 0.08474  | 0.07470  | -1.31006 |
| D29 | 0.68898  | -0.00028 | -0.00832 | 0.06754  | 0.05923  | 0.74821  |
| D30 | 2.75581  | 0.00007  | -0.00919 | 0.06939  | 0.06023  | 2.81605  |
| D31 | -1.13025 | -0.00145 | 0.00573  | -0.13960 | -0.13384 | -1.26409 |
| D32 | 0.99640  | -0.00290 | 0.00468  | -0.13849 | -0.13378 | 0.86262  |
| D33 | 3.09013  | -0.00200 | 0.00590  | -0.14536 | -0.13943 | 2.95070  |
| D34 | 3.09012  | 0.00055  | 0.00588  | -0.13145 | -0.12560 | 2.96452  |
| D35 | -1.06641 | -0.00090 | 0.00483  | -0.13034 | -0.12554 | -1.19196 |
| D36 | 1.02731  | 0.00000  | 0.00605  | -0.13720 | -0.13119 | 0.89612  |
| D37 | 0.97434  | -0.00012 | 0.00484  | -0.12453 | -0.11968 | 0.85466  |
| D38 | 3.10099  | -0.00158 | 0.00379  | -0.12342 | -0.11963 | 2.98136  |
| D39 | -1.08847 | -0.00067 | 0.00501  | -0.13028 | -0.12527 | -1.21374 |
| D40 | 0.75552  | -0.00121 | -0.01299 | 0.16256  | 0.14958  | 0.90510  |
| D41 | 2.88711  | -0.00178 | -0.01439 | 0.16635  | 0.15196  | 3.03907  |
| D42 | -1.32628 | -0.00045 | -0.01281 | 0.16276  | 0.14995  | -1.17634 |
| D43 | -1.46338 | 0.00125  | -0.01065 | 0.04224  | 0.03159  | -1.43179 |
| D44 | 2.71865  | -0.00006 | -0.00977 | 0.03475  | 0.02497  | 2.74363  |
| D45 | 0.61634  | -0.00117 | -0.01091 | 0.03873  | 0.02782  | 0.64416  |
| D46 | 3.13478  | 0.00003  | 0.00038  | 0.00912  | 0.00949  | -3.13891 |
| D47 | -0.01429 | 0.00018  | 0.00135  | 0.00841  | 0.00976  | -0.00453 |
| D48 | -0.01462 | 0.00007  | 0.00015  | 0.00818  | 0.00834  | -0.00628 |
| D49 | 3.11951  | 0.00023  | 0.00113  | 0.00748  | 0.00861  | 3.12811  |

| Item                 | Value    | Threshold | Converged? |
|----------------------|----------|-----------|------------|
| Maximum Force        | 0.003340 | 0.000450  | NO         |
| RMS Force            | 0.001006 | 0.000300  | NO         |
| Maximum Displacement | 0.358432 | 0.001800  | NO         |
| RMS Displacement     | 0.092821 | 0.001200  | NO         |

Predicted change in Energy=-6.071255D-04

GradGradGradGradGradGradGradGradGradGradGradGradGradGradGradGradGradGradGrad

Input orientation:

| Center Number | Atomic Number | Atomic Type | Coordinates (Angstroms) |           |           |
|---------------|---------------|-------------|-------------------------|-----------|-----------|
|               |               |             | X                       | Y         | Z         |
| 1             | 6             | 0           | -0.596741               | -2.363801 | -1.107728 |
| 2             | 6             | 0           | -1.904514               | -2.016829 | -1.234030 |
| 3             | 7             | 0           | -2.109057               | -0.921343 | -0.403569 |
| 4             | 6             | 0           | -0.946070               | -0.619984 | 0.209405  |
| 5             | 7             | 0           | -0.022031               | -1.491375 | -0.199197 |
| 6             | 6             | 0           | 1.388294                | -1.444387 | 0.230896  |
| 7             | 6             | 0           | 2.156394                | -0.309302 | -0.469230 |
| 8             | 1             | 0           | -0.035079               | -3.163332 | -1.559252 |
| 9             | 1             | 0           | -2.695512               | -2.448544 | -1.820141 |
| 10            | 1             | 0           | 1.396408                | -1.240667 | 1.301684  |
| 11            | 1             | 0           | 1.835306                | -2.419994 | 0.036737  |
| 12            | 1             | 0           | 2.337949                | -0.544747 | -1.520853 |
| 13            | 1             | 0           | 1.576549                | 0.613397  | -0.377449 |
| 14            | 35            | 0           | 0.578585                | 1.655629  | 1.965310  |
| 15            | 1             | 0           | -0.731077               | 0.223485  | 0.894245  |
| 16            | 6             | 0           | -3.301737               | -0.170430 | -0.210464 |
| 17            | 6             | 0           | -4.443208               | -0.405523 | -0.844421 |
| 18            | 1             | 0           | -3.178415               | 0.628313  | 0.510779  |
| 19            | 1             | 0           | -5.302022               | 0.218432  | -0.637372 |
| 20            | 1             | 0           | -4.564863               | -1.196187 | -1.574854 |
| 21            | 8             | 0           | 3.415578                | -0.146914 | 0.155524  |
| 22            | 1             | 0           | 3.265612                | 0.397226  | 0.941133  |

Distance matrix (angstroms):

|    |    | 1        | 2        | 3        | 4        | 5        |
|----|----|----------|----------|----------|----------|----------|
| 1  | C  | 0.000000 |          |          |          |          |
| 2  | C  | 1.358901 | 0.000000 |          |          |          |
| 3  | N  | 2.205362 | 1.389817 | 0.000000 |          |          |
| 4  | C  | 2.213089 | 2.225600 | 1.348737 | 0.000000 |          |
| 5  | N  | 1.384503 | 2.211499 | 2.173104 | 1.334213 | 0.000000 |
| 6  | C  | 2.564683 | 3.649148 | 3.592712 | 2.475754 | 1.475196 |
| 7  | C  | 3.494052 | 4.471190 | 4.309638 | 3.190980 | 2.493140 |
| 8  | H  | 1.076377 | 2.216986 | 3.265502 | 3.229035 | 2.155311 |
| 9  | H  | 2.218006 | 1.074979 | 2.164012 | 3.243953 | 3.269730 |
| 10 | H  | 3.322550 | 4.234190 | 3.911284 | 2.658106 | 2.080256 |
| 11 | H  | 2.688459 | 3.970346 | 4.242384 | 3.317515 | 2.089904 |
| 12 | H  | 3.477361 | 4.499754 | 4.600653 | 3.712713 | 2.865726 |
| 13 | H  | 3.757686 | 4.446304 | 3.992467 | 2.868664 | 2.649017 |
| 14 | Br | 5.194301 | 5.467038 | 4.413138 | 3.253643 | 3.866453 |
| 15 | H  | 3.274139 | 3.305376 | 2.212189 | 1.107550 | 2.153857 |



|    |    |          |          |          |          |          |
|----|----|----------|----------|----------|----------|----------|
| 16 | C  | 3.596242 | 2.531621 | 1.422548 | 2.434657 | 3.535745 |
| 17 | C  | 4.324291 | 3.032008 | 2.430778 | 3.658759 | 4.598065 |
| 18 | H  | 4.270521 | 3.415253 | 2.093082 | 2.575352 | 3.867804 |
| 19 | H  | 5.387841 | 4.110408 | 3.398349 | 4.516004 | 5.567203 |
| 20 | H  | 4.162634 | 2.804830 | 2.734672 | 4.075691 | 4.755723 |
| 21 | O  | 4.754902 | 5.807824 | 5.606596 | 4.387559 | 3.708174 |
| 22 | H  | 5.170965 | 6.106489 | 5.695078 | 4.394134 | 3.959262 |
|    |    | 6        | 7        | 8        | 9        | 10       |
| 6  | C  | 0.000000 |          |          |          |          |
| 7  | C  | 1.539017 | 0.000000 |          |          |          |
| 8  | H  | 2.861012 | 3.759813 | 0.000000 |          |          |
| 9  | H  | 4.678947 | 5.471956 | 2.767108 | 0.000000 |          |
| 10 | H  | 1.090026 | 2.140364 | 3.732393 | 5.286641 | 0.000000 |
| 11 | H  | 1.090562 | 2.194111 | 2.568672 | 4.896644 | 1.784247 |
| 12 | H  | 2.186280 | 1.092843 | 3.534081 | 5.389782 | 3.055735 |
| 13 | H  | 2.154066 | 1.093626 | 4.272901 | 5.450444 | 2.507886 |
| 14 | Br | 3.643339 | 3.503915 | 6.001792 | 6.472525 | 3.081844 |
| 15 | H  | 2.777330 | 3.237347 | 4.239645 | 4.285631 | 2.614563 |
| 16 | C  | 4.879974 | 5.466026 | 4.631170 | 2.854535 | 5.050204 |
| 17 | C  | 6.020129 | 6.610959 | 5.248628 | 2.860141 | 6.277289 |
| 18 | H  | 5.022873 | 5.504519 | 5.342486 | 3.890171 | 5.004761 |
| 19 | H  | 6.948322 | 7.478954 | 6.326680 | 3.912237 | 7.124456 |
| 20 | H  | 6.225947 | 6.869081 | 4.938506 | 2.263413 | 6.619155 |
| 21 | O  | 2.408111 | 1.415002 | 4.893492 | 6.822475 | 2.566519 |
| 22 | H  | 2.724023 | 1.928386 | 5.461141 | 7.159472 | 2.511297 |
|    |    | 11       | 12       | 13       | 14       | 15       |
| 11 | H  | 0.000000 |          |          |          |          |
| 12 | H  | 2.489033 | 0.000000 |          |          |          |
| 13 | H  | 3.072453 | 1.796775 | 0.000000 |          |          |
| 14 | Br | 4.680752 | 4.482225 | 2.751490 | 0.000000 |          |
| 15 | H  | 3.782806 | 3.980175 | 2.663526 | 2.216626 | 0.000000 |
| 16 | C  | 5.613453 | 5.802007 | 4.943676 | 4.808885 | 2.825569 |
| 17 | C  | 6.652389 | 6.816234 | 6.123213 | 6.112392 | 4.147111 |
| 18 | H  | 5.886790 | 5.994487 | 4.837236 | 4.157654 | 2.510059 |
| 19 | H  | 7.639187 | 7.728657 | 6.894802 | 6.589463 | 4.820728 |
| 20 | H  | 6.712459 | 6.933694 | 6.513472 | 6.864450 | 4.775964 |
| 21 | O  | 2.770967 | 2.032189 | 2.060137 | 3.817462 | 4.228197 |
| 22 | H  | 3.286402 | 2.794503 | 2.153677 | 3.138891 | 4.000739 |
|    |    | 16       | 17       | 18       | 19       | 20       |
| 16 | C  | 0.000000 |          |          |          |          |
| 17 | C  | 1.326698 | 0.000000 |          |          |          |
| 18 | H  | 1.083231 | 2.122518 | 0.000000 |          |          |
| 19 | H  | 2.081972 | 1.081550 | 2.448665 | 0.000000 |          |
| 20 | H  | 2.123494 | 1.083274 | 3.098532 | 1.850250 | 0.000000 |

|    |   |          |          |          |          |          |
|----|---|----------|----------|----------|----------|----------|
| 21 | O | 6.727319 | 7.926367 | 6.648904 | 8.761205 | 8.233020 |
| 22 | H | 6.691673 | 7.953523 | 6.462515 | 8.713668 | 8.377679 |
|    |   | 21       | 22       |          |          |          |
| 21 | O | 0.000000 |          |          |          |          |
| 22 | H | 0.967347 | 0.000000 |          |          |          |

Stoichiometry C7H11BrN2O

Framework group C1[X(C7H11BrN2O)]

Deg. of freedom 60

Full point group C1 NOp 1

Largest Abelian subgroup C1 NOp 1

Largest concise Abelian subgroup C1 NOp 1

Standard orientation:

| Center Number | Atomic Number | Atomic Type | Coordinates (Angstroms) |           |           |
|---------------|---------------|-------------|-------------------------|-----------|-----------|
|               |               |             | X                       | Y         | Z         |
| 1             | 6             | 0           | -1.770197               | -2.055344 | 0.254397  |
| 2             | 6             | 0           | -2.790941               | -1.181297 | 0.052564  |
| 3             | 7             | 0           | -2.231860               | 0.091095  | 0.046326  |
| 4             | 6             | 0           | -0.902100               | -0.019653 | 0.242705  |
| 5             | 7             | 0           | -0.607928               | -1.313699 | 0.380665  |
| 6             | 6             | 0           | 0.764284                | -1.821266 | 0.569374  |
| 7             | 6             | 0           | 1.567476                | -1.783780 | -0.742895 |
| 8             | 1             | 0           | -1.771040               | -3.127886 | 0.345168  |
| 9             | 1             | 0           | -3.845734               | -1.345525 | -0.074017 |
| 10            | 1             | 0           | 1.260686                | -1.162916 | 1.282336  |
| 11            | 1             | 0           | 0.700035                | -2.829569 | 0.979891  |
| 12            | 1             | 0           | 1.226421                | -2.555593 | -1.437368 |
| 13            | 1             | 0           | 1.460420                | -0.791403 | -1.189824 |
| 14            | 35            | 0           | 1.914263                | 1.602268  | 0.088872  |
| 15            | 1             | 0           | -0.140175               | 0.784174  | 0.241967  |
| 16            | 6             | 0           | -2.880795               | 1.339478  | -0.163597 |
| 17            | 6             | 0           | -4.175651               | 1.474498  | -0.419026 |
| 18            | 1             | 0           | -2.198872               | 2.178758  | -0.100522 |
| 19            | 1             | 0           | -4.585459               | 2.464232  | -0.568141 |
| 20            | 1             | 0           | -4.856684               | 0.635455  | -0.494417 |
| 21            | 8             | 0           | 2.930710                | -2.036236 | -0.459891 |
| 22            | 1             | 0           | 3.311595                | -1.196814 | -0.166537 |

Rotational constants (GHZ): 0.9194700 0.4593147 0.3168295

Standard basis: 6-311++G(d,p) (5D, 7F)

There are 358 symmetry adapted cartesian basis functions of A symmetry.

There are 345 symmetry adapted basis functions of A symmetry.

345 basis functions, 553 primitive gaussians, 358 cartesian basis functions

55 alpha electrons            55 beta electrons  
nuclear repulsion energy        848.0054350129 Hartrees.  
NAtoms= 22 NActive= 22 NUniq= 22 SFac= 1.00D+00 NAtFMM= 60 NAOKFM=F  
Big=F  
Integral buffers will be 131072 words long.  
Raffenetti 2 integral format.  
Two-electron integral symmetry is turned on.  
One-electron integrals computed using PRISM.  
NBasis= 345 RedAO= T EigKep= 4.59D-06 NBF= 345  
NBsUse= 345 1.00D-06 EigRej= -1.00D+00 NBFU= 345  
Initial guess from the checkpoint file: ". "  
B after Tr= 0.000000 0.000000 0.000000  
Rot= 0.999964 -0.008254 0.001843 -0.001200 Ang= -0.98 deg.  
ExpMin= 3.50D-02 ExpMax= 4.40D+05 ExpMxC= 1.51D+04 IAcc=3 IRadAn= 5 AccDes=  
0.00D+00  
Harris functional with IExCor= 402 and IRadAn= 5 diagonalized for initial guess.  
HarFok: IExCor= 402 AccDes= 0.00D+00 IRadAn= 5 IDoV= 1 UseB2=F ITyADJ=14  
ICtDFT= 3500011 ScaDFX= 1.000000 1.000000 1.000000 1.000000  
FoFCou: FMM=F IPFlag= 0 FMFlag= 100000 FMFlg1= 0  
NFXFlg= 0 DoJE=T BraDBF=F KetDBF=T FulRan=T  
wScr= 0.000000 ICntrl= 500 IOpCl= 0 I1Cent= 200000004 NGrid=  
0  
NMat0= 1 NMatS0= 1 NMatT0= 0 NMatD0= 1 NMtDS0= 0  
NMtDT0= 0  
Petite list used in FoFCou.  
Keep R1 ints in memory in canonical form, NReq=1804729152.  
Requested convergence on RMS density matrix=1.00D-08 within 128 cycles.  
Requested convergence on MAX density matrix=1.00D-06.  
Requested convergence on energy=1.00D-06.  
No special actions if energy rises.  
SCF Done: E(RB3LYP) = -3032.34095985 A.U. after 13 cycles  
NFOck= 13 Conv=0.24D-08 -V/T= 2.0016  
Calling FoFJK, ICntrl= 2127 FMM=F ISym2X=0 I1Cent= 0 IOpClX= 0 NMat=1 NMatS=1  
NMatT=0.  
\*\*\*\*\* Axes restored to original set \*\*\*\*\*

```

-----
Center      Atomic      Forces (Hartrees/Bohr)
Number      Number      X           Y           Z
-----
1           6           -0.001105247 -0.001323073 0.000875437
2           6           0.000209513 -0.000278182 -0.000390704
3           7           0.001999324 0.001222205 -0.000125317
4           6           -0.003097206 -0.001382651 -0.001210545
5           7           -0.002051867 0.000890202 -0.000103660

```

|    |    |              |              |              |
|----|----|--------------|--------------|--------------|
| 6  | 6  | 0.001584711  | 0.002074812  | 0.000108708  |
| 7  | 6  | 0.003217118  | 0.001126185  | 0.000967670  |
| 8  | 1  | -0.000278229 | 0.000093284  | -0.000522725 |
| 9  | 1  | 0.001117777  | -0.000613531 | -0.000357617 |
| 10 | 1  | -0.000675880 | -0.001065082 | 0.000240800  |
| 11 | 1  | -0.000533249 | 0.000136615  | 0.000044082  |
| 12 | 1  | -0.000073799 | -0.000404109 | -0.000343120 |
| 13 | 1  | -0.001370764 | -0.001119858 | -0.002343607 |
| 14 | 35 | 0.000811700  | 0.000966938  | 0.002217357  |
| 15 | 1  | 0.001044133  | 0.000197908  | 0.001118991  |
| 16 | 6  | -0.000267217 | -0.000191933 | -0.000143440 |
| 17 | 6  | 0.000089887  | 0.000082043  | -0.000013882 |
| 18 | 1  | 0.000551158  | -0.000611457 | -0.000190390 |
| 19 | 1  | 0.000223439  | -0.000311338 | -0.000129619 |
| 20 | 1  | -0.000691250 | 0.000510238  | 0.000426485  |
| 21 | 8  | -0.000606454 | -0.001748634 | -0.000781769 |
| 22 | 1  | -0.000097597 | 0.001749419  | 0.000656864  |

-----  
Cartesian Forces: Max 0.003217118 RMS 0.001088756

GradGradGradGradGradGradGradGradGradGradGradGradGradGradGradGradGradGradGradGrad

Berny optimization.

Using GEDIIS/GDIIS optimizer.

FormGI is forming the generalized inverse of G from B-inverse, IUseBI=4.

Internal Forces: Max 0.003699501 RMS 0.000996253

Search for a local minimum.

Step number 54 out of a maximum of 116

All quantities printed in internal units (Hartrees-Bohrs-Radians)

Mixed Optimization -- En-DIIS/RFO-DIIS

Update second derivatives using D2CorX and points 53 54

DE= -2.28D-04 DEPred=-6.07D-04 R= 3.76D-01

Trust test= 3.76D-01 RLast= 5.62D-01 DXMaxT set to 6.23D-01

ITU= 0 1 1 0-1 1 1 1-1 1 0-1 1 0-1 0-1 0 0 1

ITU= -1 0 1 1 1 1 1 1 0-1 1 1 1 1 0-1 1 1 1

ITU= 1 1 1 1 1 1 1 1 0 0-1 0 0

Use linear search instead of GDIIS.

|                 |         |         |         |         |         |
|-----------------|---------|---------|---------|---------|---------|
| Eigenvalues --- | 0.00088 | 0.00280 | 0.00383 | 0.00706 | 0.00967 |
| Eigenvalues --- | 0.01028 | 0.01602 | 0.01810 | 0.02126 | 0.02191 |
| Eigenvalues --- | 0.02389 | 0.02997 | 0.03085 | 0.03206 | 0.03882 |
| Eigenvalues --- | 0.04391 | 0.05238 | 0.05697 | 0.06228 | 0.07708 |
| Eigenvalues --- | 0.08559 | 0.09266 | 0.11798 | 0.14155 | 0.14291 |
| Eigenvalues --- | 0.15516 | 0.15613 | 0.16000 | 0.16083 | 0.16761 |
| Eigenvalues --- | 0.17664 | 0.18336 | 0.21684 | 0.22884 | 0.23483 |
| Eigenvalues --- | 0.24905 | 0.25438 | 0.27729 | 0.29336 | 0.33095 |

|                 |         |         |         |         |         |
|-----------------|---------|---------|---------|---------|---------|
| Eigenvalues --- | 0.33530 | 0.33866 | 0.33894 | 0.34053 | 0.34193 |
| Eigenvalues --- | 0.34322 | 0.34755 | 0.35496 | 0.36324 | 0.36357 |
| Eigenvalues --- | 0.40080 | 0.43077 | 0.44420 | 0.46474 | 0.49499 |
| Eigenvalues --- | 0.53600 | 0.55640 | 0.57819 | 0.60802 | 0.79483 |

RFO step: Lambda=-4.85170753D-04 EMin= 8.81828577D-04

Quartic linear search produced a step of -0.33492.

Iteration 1 RMS(Cart)= 0.04146556 RMS(Int)= 0.00083093

Iteration 2 RMS(Cart)= 0.00133887 RMS(Int)= 0.00004999

Iteration 3 RMS(Cart)= 0.00000147 RMS(Int)= 0.00004998

Iteration 4 RMS(Cart)= 0.00000000 RMS(Int)= 0.00004998

| Variable | Old X   | -DE/DX   | Delta X<br>(Linear) | Delta X<br>(Quad) | Delta X<br>(Total) | New X   |
|----------|---------|----------|---------------------|-------------------|--------------------|---------|
| R1       | 2.56795 | -0.00144 | -0.00065            | -0.00027          | -0.00097           | 2.56699 |
| R2       | 2.61633 | 0.00071  | 0.00006             | -0.00014          | -0.00007           | 2.61626 |
| R3       | 2.03406 | 0.00000  | 0.00016             | -0.00007          | 0.00009            | 2.03415 |
| R4       | 2.62637 | 0.00091  | 0.00042             | 0.00050           | 0.00089            | 2.62727 |
| R5       | 2.03142 | -0.00038 | -0.00013            | -0.00030          | -0.00044           | 2.03098 |
| R6       | 2.54874 | -0.00117 | -0.00002            | -0.00020          | -0.00020           | 2.54854 |
| R7       | 2.68823 | -0.00019 | -0.00063            | 0.00019           | -0.00043           | 2.68779 |
| R8       | 2.52130 | -0.00082 | -0.00009            | -0.00039          | -0.00044           | 2.52086 |
| R9       | 2.09297 | 0.00105  | 0.00364             | -0.00191          | 0.00173            | 2.09470 |
| R10      | 2.78772 | 0.00244  | 0.00299             | 0.00010           | 0.00309            | 2.79081 |
| R11      | 2.90832 | 0.00117  | -0.00101            | 0.00322           | 0.00221            | 2.91053 |
| R12      | 2.05985 | 0.00003  | 0.00025             | 0.00073           | 0.00098            | 2.06083 |
| R13      | 2.06086 | -0.00034 | 0.00002             | -0.00065          | -0.00064           | 2.06023 |
| R14      | 2.06517 | 0.00041  | 0.00003             | 0.00060           | 0.00062            | 2.06580 |
| R15      | 2.06665 | 0.00015  | -0.00004            | 0.00053           | 0.00050            | 2.06715 |
| R16      | 2.67397 | -0.00068 | 0.00053             | -0.00359          | -0.00306           | 2.67090 |
| R17      | 5.19956 | 0.00196  | 0.05676             | -0.01319          | 0.04357            | 5.24314 |
| R18      | 2.50710 | 0.00013  | -0.00025            | 0.00043           | 0.00018            | 2.50727 |
| R19      | 2.04701 | -0.00051 | -0.00057            | -0.00009          | -0.00067           | 2.04634 |
| R20      | 2.04383 | -0.00038 | -0.00008            | -0.00030          | -0.00038           | 2.04346 |
| R21      | 2.04709 | -0.00059 | -0.00027            | -0.00050          | -0.00077           | 2.04632 |
| R22      | 1.82802 | 0.00153  | -0.00075            | 0.00402           | 0.00328            | 1.83130 |
| A1       | 1.87505 | 0.00017  | 0.00016             | 0.00027           | 0.00044            | 1.87549 |
| A2       | 2.28213 | -0.00055 | -0.00118            | 0.00004           | -0.00115           | 2.28098 |
| A3       | 2.12555 | 0.00039  | 0.00107             | -0.00045          | 0.00061            | 2.12616 |
| A4       | 1.86226 | -0.00040 | -0.00030            | 0.00049           | 0.00016            | 1.86242 |
| A5       | 2.28667 | -0.00107 | -0.00233            | -0.00072          | -0.00305           | 2.28361 |
| A6       | 2.13418 | 0.00147  | 0.00264             | 0.00013           | 0.00277            | 2.13695 |
| A7       | 1.89735 | 0.00027  | 0.00038             | -0.00137          | -0.00091           | 1.89644 |
| A8       | 2.24028 | 0.00139  | 0.00157             | 0.00028           | 0.00188            | 2.24216 |
| A9       | 2.14516 | -0.00165 | -0.00182            | 0.00091           | -0.00088           | 2.14429 |
| A10      | 1.88817 | 0.00005  | -0.00053            | 0.00146           | 0.00084            | 1.88901 |

|     |          |          |          |          |          |          |
|-----|----------|----------|----------|----------|----------|----------|
| A11 | 2.23771  | 0.00102  | 0.00615  | 0.00484  | 0.01077  | 2.24848  |
| A12 | 2.15593  | -0.00107 | -0.00531 | -0.00482 | -0.01037 | 2.14556  |
| A13 | 1.90184  | -0.00009 | 0.00029  | -0.00089 | -0.00058 | 1.90126  |
| A14 | 2.22464  | -0.00173 | -0.00241 | 0.00466  | 0.00214  | 2.22678  |
| A15 | 2.15559  | 0.00182  | 0.00241  | -0.00300 | -0.00069 | 2.15490  |
| A16 | 1.94765  | 0.00162  | 0.00338  | 0.00699  | 0.01038  | 1.95803  |
| A17 | 1.87494  | -0.00026 | -0.00097 | 0.00010  | -0.00087 | 1.87406  |
| A18 | 1.88753  | -0.00156 | -0.00352 | -0.00511 | -0.00863 | 1.87890  |
| A19 | 1.88108  | 0.00092  | 0.00316  | -0.00200 | 0.00114  | 1.88223  |
| A20 | 1.95437  | -0.00061 | -0.00366 | 0.00183  | -0.00182 | 1.95255  |
| A21 | 1.91669  | -0.00010 | 0.00174  | -0.00191 | -0.00018 | 1.91651  |
| A22 | 1.94097  | -0.00178 | -0.00111 | 0.00214  | 0.00103  | 1.94200  |
| A23 | 1.89597  | 0.00065  | 0.00074  | -0.00343 | -0.00271 | 1.89325  |
| A24 | 1.90489  | 0.00140  | -0.00111 | -0.00137 | -0.00249 | 1.90240  |
| A25 | 1.92902  | 0.00093  | 0.00016  | 0.00688  | 0.00704  | 1.93606  |
| A26 | 1.87733  | 0.00020  | -0.00041 | 0.00301  | 0.00261  | 1.87994  |
| A27 | 1.91552  | -0.00142 | 0.00174  | -0.00742 | -0.00569 | 1.90983  |
| A28 | 2.19364  | -0.00370 | -0.01347 | -0.03373 | -0.04720 | 2.14644  |
| A29 | 2.16875  | 0.00221  | 0.00319  | 0.00190  | 0.00509  | 2.17384  |
| A30 | 1.96510  | -0.00179 | -0.00168 | -0.00172 | -0.00340 | 1.96170  |
| A31 | 2.14931  | -0.00042 | -0.00150 | -0.00017 | -0.00167 | 2.14763  |
| A32 | 2.08230  | -0.00035 | -0.00105 | -0.00168 | -0.00274 | 2.07956  |
| A33 | 2.15096  | 0.00094  | 0.00208  | 0.00078  | 0.00286  | 2.15383  |
| A34 | 2.04990  | -0.00059 | -0.00103 | 0.00091  | -0.00012 | 2.04978  |
| A35 | 1.85998  | -0.00006 | 0.00326  | -0.00695 | -0.00369 | 1.85629  |
| D1  | 0.00919  | -0.00032 | -0.00052 | -0.00235 | -0.00292 | 0.00628  |
| D2  | -3.11925 | -0.00030 | -0.00136 | 0.00698  | 0.00558  | -3.11367 |
| D3  | 3.11813  | 0.00023  | 0.00106  | -0.00763 | -0.00658 | 3.11155  |
| D4  | -0.01031 | 0.00025  | 0.00022  | 0.00170  | 0.00192  | -0.00839 |
| D5  | -0.01383 | 0.00050  | 0.00062  | -0.00159 | -0.00094 | -0.01477 |
| D6  | -3.10546 | 0.00033  | -0.00865 | -0.01847 | -0.02713 | -3.13259 |
| D7  | -3.12632 | 0.00003  | -0.00075 | 0.00310  | 0.00236  | -3.12396 |
| D8  | 0.06524  | -0.00015 | -0.01002 | -0.01378 | -0.02382 | 0.04141  |
| D9  | -0.00155 | 0.00003  | 0.00025  | 0.00547  | 0.00576  | 0.00421  |
| D10 | 3.11022  | 0.00026  | 0.01076  | -0.00127 | 0.00951  | 3.11973  |
| D11 | 3.12831  | -0.00001 | 0.00096  | -0.00286 | -0.00191 | 3.12640  |
| D12 | -0.04311 | 0.00022  | 0.01147  | -0.00960 | 0.00184  | -0.04127 |
| D13 | -0.00705 | 0.00028  | 0.00014  | -0.00652 | -0.00641 | -0.01345 |
| D14 | 3.07927  | 0.00016  | 0.00818  | 0.02330  | 0.03163  | 3.11090  |
| D15 | -3.12078 | 0.00001  | -0.00967 | -0.00022 | -0.00996 | -3.13074 |
| D16 | -0.03446 | -0.00011 | -0.00163 | 0.02960  | 0.02807  | -0.00639 |
| D17 | -0.02177 | 0.00002  | -0.03941 | 0.01032  | -0.02911 | -0.05088 |
| D18 | 3.12794  | -0.00010 | -0.03976 | 0.00828  | -0.03150 | 3.09644  |
| D19 | 3.08617  | 0.00031  | -0.02756 | 0.00268  | -0.02486 | 3.06130  |

|     |          |          |          |          |          |          |
|-----|----------|----------|----------|----------|----------|----------|
| D20 | -0.04731 | 0.00019  | -0.02791 | 0.00064  | -0.02725 | -0.07456 |
| D21 | 0.01286  | -0.00049 | -0.00047 | 0.00504  | 0.00457  | 0.01742  |
| D22 | 3.10689  | -0.00044 | 0.00828  | 0.02136  | 0.02954  | 3.13643  |
| D23 | -3.07664 | -0.00045 | -0.00829 | -0.02343 | -0.03153 | -3.10817 |
| D24 | 0.01739  | -0.00040 | 0.00046  | -0.00710 | -0.00656 | 0.01084  |
| D25 | 1.77486  | -0.00095 | -0.01454 | 0.07934  | 0.06478  | 1.83964  |
| D26 | -2.45006 | 0.00092  | -0.00936 | 0.08091  | 0.07155  | -2.37851 |
| D27 | -0.38222 | -0.00017 | -0.00970 | 0.07598  | 0.06630  | -0.31592 |
| D28 | -1.31006 | -0.00108 | -0.02502 | 0.06009  | 0.03507  | -1.27499 |
| D29 | 0.74821  | 0.00079  | -0.01984 | 0.06167  | 0.04184  | 0.79005  |
| D30 | 2.81605  | -0.00030 | -0.02017 | 0.05674  | 0.03658  | 2.85263  |
| D31 | -1.26409 | 0.00127  | 0.04482  | -0.08618 | -0.04136 | -1.30544 |
| D32 | 0.86262  | 0.00174  | 0.04481  | -0.07852 | -0.03372 | 0.82890  |
| D33 | 2.95070  | 0.00122  | 0.04670  | -0.09032 | -0.04362 | 2.90708  |
| D34 | 2.96452  | 0.00010  | 0.04207  | -0.08905 | -0.04698 | 2.91754  |
| D35 | -1.19196 | 0.00057  | 0.04205  | -0.08139 | -0.03934 | -1.23130 |
| D36 | 0.89612  | 0.00005  | 0.04394  | -0.09319 | -0.04924 | 0.84688  |
| D37 | 0.85466  | -0.00001 | 0.04008  | -0.08648 | -0.04640 | 0.80826  |
| D38 | 2.98136  | 0.00045  | 0.04007  | -0.07882 | -0.03876 | 2.94260  |
| D39 | -1.21374 | -0.00007 | 0.04196  | -0.09062 | -0.04866 | -1.26240 |
| D40 | 0.90510  | 0.00289  | -0.05010 | 0.12453  | 0.07444  | 0.97954  |
| D41 | 3.03907  | 0.00170  | -0.05089 | 0.12931  | 0.07842  | 3.11749  |
| D42 | -1.17634 | 0.00164  | -0.05022 | 0.13261  | 0.08238  | -1.09396 |
| D43 | -1.43179 | -0.00129 | -0.01058 | -0.01345 | -0.02404 | -1.45584 |
| D44 | 2.74363  | -0.00007 | -0.00836 | -0.01703 | -0.02539 | 2.71823  |
| D45 | 0.64416  | -0.00051 | -0.00932 | -0.02287 | -0.03218 | 0.61198  |
| D46 | -3.13891 | -0.00009 | -0.00318 | -0.00146 | -0.00464 | 3.13963  |
| D47 | -0.00453 | 0.00009  | -0.00327 | -0.00026 | -0.00353 | -0.00805 |
| D48 | -0.00628 | 0.00003  | -0.00279 | 0.00078  | -0.00201 | -0.00828 |
| D49 | 3.12811  | 0.00021  | -0.00288 | 0.00199  | -0.00089 | 3.12722  |

| Item                 | Value    | Threshold | Converged? |
|----------------------|----------|-----------|------------|
| Maximum Force        | 0.003700 | 0.000450  | NO         |
| RMS Force            | 0.000996 | 0.000300  | NO         |
| Maximum Displacement | 0.184431 | 0.001800  | NO         |
| RMS Displacement     | 0.041473 | 0.001200  | NO         |

Predicted change in Energy=-3.467413D-04

GradGradGradGradGradGradGradGradGradGradGradGradGradGradGradGradGrad

Input orientation:

| Center Number | Atomic Number | Atomic Type | Coordinates (Angstroms) |           |           |
|---------------|---------------|-------------|-------------------------|-----------|-----------|
|               |               |             | X                       | Y         | Z         |
| 1             | 6             | 0           | -0.610779               | -2.384541 | -1.102603 |

|    |    |   |           |           |           |
|----|----|---|-----------|-----------|-----------|
| 2  | 6  | 0 | -1.919556 | -2.040633 | -1.221154 |
| 3  | 7  | 0 | -2.112977 | -0.921469 | -0.419303 |
| 4  | 6  | 0 | -0.939802 | -0.599962 | 0.163021  |
| 5  | 7  | 0 | -0.022355 | -1.484989 | -0.230072 |
| 6  | 6  | 0 | 1.388427  | -1.443128 | 0.204638  |
| 7  | 6  | 0 | 2.169513  | -0.296817 | -0.464723 |
| 8  | 1  | 0 | -0.057594 | -3.200429 | -1.535044 |
| 9  | 1  | 0 | -2.717735 | -2.494553 | -1.779682 |
| 10 | 1  | 0 | 1.392520  | -1.266516 | 1.280778  |
| 11 | 1  | 0 | 1.830066  | -2.416125 | -0.011745 |
| 12 | 1  | 0 | 2.395914  | -0.528025 | -1.508903 |
| 13 | 1  | 0 | 1.575941  | 0.618735  | -0.387080 |
| 14 | 35 | 0 | 0.676181  | 1.634763  | 2.032887  |
| 15 | 1  | 0 | -0.709616 | 0.245292  | 0.842177  |
| 16 | 6  | 0 | -3.304071 | -0.169556 | -0.222044 |
| 17 | 6  | 0 | -4.452690 | -0.402494 | -0.843970 |
| 18 | 1  | 0 | -3.173035 | 0.630019  | 0.496382  |
| 19 | 1  | 0 | -5.306433 | 0.224228  | -0.625649 |
| 20 | 1  | 0 | -4.586600 | -1.192134 | -1.572764 |
| 21 | 8  | 0 | 3.397394  | -0.119803 | 0.212494  |
| 22 | 1  | 0 | 3.207633  | 0.441259  | 0.979511  |

-----  
Distance matrix (angstroms):

|    |    | 1        | 2        | 3        | 4        | 5        |
|----|----|----------|----------|----------|----------|----------|
| 1  | C  | 0.000000 |          |          |          |          |
| 2  | C  | 1.358390 | 0.000000 |          |          |          |
| 3  | N  | 2.205465 | 1.390289 | 0.000000 |          |          |
| 4  | C  | 2.212415 | 2.225172 | 1.348631 | 0.000000 |          |
| 5  | N  | 1.384466 | 2.211415 | 2.173490 | 1.333980 | 0.000000 |
| 6  | C  | 2.567482 | 3.651390 | 3.594616 | 2.476553 | 1.476832 |
| 7  | C  | 3.534899 | 4.509276 | 4.328045 | 3.186503 | 2.504216 |
| 8  | H  | 1.076425 | 2.215977 | 3.265445 | 3.228644 | 2.155674 |
| 9  | H  | 2.215807 | 1.074749 | 2.165861 | 3.244165 | 3.268881 |
| 10 | H  | 3.308125 | 4.222413 | 3.911245 | 2.670843 | 2.081411 |
| 11 | H  | 2.673704 | 3.957693 | 4.236471 | 3.316800 | 2.084741 |
| 12 | H  | 3.556956 | 4.581928 | 4.655333 | 3.731958 | 2.898140 |
| 13 | H  | 3.783304 | 4.470617 | 3.997672 | 2.849000 | 2.646669 |
| 14 | Br | 5.257601 | 5.552943 | 4.508543 | 3.331937 | 3.916859 |
| 15 | H  | 3.272302 | 3.308587 | 2.218577 | 1.108465 | 2.148469 |
| 16 | C  | 3.596577 | 2.532989 | 1.422319 | 2.433781 | 3.535546 |
| 17 | C  | 4.330783 | 3.040154 | 2.433914 | 3.659700 | 4.601797 |
| 18 | H  | 4.267257 | 3.413726 | 2.090292 | 2.571247 | 3.863648 |
| 19 | H  | 5.392803 | 4.117664 | 3.399024 | 4.513175 | 5.567708 |
| 20 | H  | 4.177324 | 2.820763 | 2.742726 | 4.082003 | 4.766646 |



|    |    |          |          |          |          |          |
|----|----|----------|----------|----------|----------|----------|
| 21 | O  | 4.787899 | 5.832229 | 5.604108 | 4.363975 | 3.708677 |
| 22 | H  | 5.186581 | 6.106618 | 5.667680 | 4.353392 | 3.950487 |
|    |    | 6        | 7        | 8        | 9        | 10       |
| 6  | C  | 0.000000 |          |          |          |          |
| 7  | C  | 1.540185 | 0.000000 |          |          |          |
| 8  | H  | 2.864538 | 3.812684 | 0.000000 |          |          |
| 9  | H  | 4.680127 | 5.517640 | 2.763052 | 0.000000 |          |
| 10 | H  | 1.090544 | 2.142617 | 3.711025 | 5.269600 | 0.000000 |
| 11 | H  | 1.090224 | 2.193600 | 2.549282 | 4.879984 | 1.784282 |
| 12 | H  | 2.188303 | 1.093173 | 3.627965 | 5.485431 | 3.055240 |
| 13 | H  | 2.153270 | 1.093888 | 4.309556 | 5.483389 | 2.523800 |
| 14 | Br | 3.650096 | 3.492720 | 6.053730 | 6.565485 | 3.081595 |
| 15 | H  | 2.767491 | 3.207999 | 4.236663 | 4.291088 | 2.626197 |
| 16 | C  | 4.880941 | 5.480439 | 4.631390 | 2.859307 | 5.051709 |
| 17 | C  | 6.025044 | 6.633896 | 5.255748 | 2.874428 | 6.279137 |
| 18 | H  | 5.018964 | 5.506866 | 5.339007 | 3.892392 | 5.005638 |
| 19 | H  | 6.949144 | 7.495809 | 6.332896 | 3.927457 | 7.122692 |
| 20 | H  | 6.238839 | 6.904666 | 4.954449 | 2.287305 | 6.625565 |
| 21 | O  | 2.405660 | 1.413382 | 4.947837 | 6.855874 | 2.544741 |
| 22 | H  | 2.731457 | 1.925685 | 5.499690 | 7.165342 | 2.510358 |
|    |    | 11       | 12       | 13       | 14       | 15       |
| 11 | H  | 0.000000 |          |          |          |          |
| 12 | H  | 2.475194 | 0.000000 |          |          |          |
| 13 | H  | 3.068523 | 1.801639 | 0.000000 |          |          |
| 14 | Br | 4.682057 | 4.492150 | 2.774548 | 0.000000 |          |
| 15 | H  | 3.776547 | 3.971136 | 2.621889 | 2.295398 | 0.000000 |
| 16 | C  | 5.608089 | 5.854429 | 4.946024 | 4.917590 | 2.834759 |
| 17 | C  | 6.649837 | 6.881953 | 6.131562 | 6.223508 | 4.156119 |
| 18 | H  | 5.879474 | 6.031205 | 4.830467 | 4.264602 | 2.517146 |
| 19 | H  | 7.634000 | 7.789234 | 6.897798 | 6.696947 | 4.825524 |
| 20 | H  | 6.716289 | 7.014316 | 6.531616 | 6.977746 | 4.788438 |
| 21 | O  | 2.789246 | 2.032933 | 2.054901 | 3.714476 | 4.171011 |
| 22 | H  | 3.323391 | 2.791166 | 2.135764 | 2.990368 | 3.924552 |
|    |    | 16       | 17       | 18       | 19       | 20       |
| 16 | C  | 0.000000 |          |          |          |          |
| 17 | C  | 1.326793 | 0.000000 |          |          |          |
| 18 | H  | 1.082879 | 2.121354 | 0.000000 |          |          |
| 19 | H  | 2.080244 | 1.081351 | 2.444382 | 0.000000 |          |
| 20 | H  | 2.124851 | 1.082869 | 3.098350 | 1.849667 | 0.000000 |
| 21 | O  | 6.715723 | 7.925898 | 6.619167 | 8.750854 | 8.251134 |
| 22 | H  | 6.649746 | 7.919442 | 6.401717 | 8.666773 | 8.362545 |
|    |    | 21       | 22       |          |          |          |
| 21 | O  | 0.000000 |          |          |          |          |
| 22 | H  | 0.969080 | 0.000000 |          |          |          |

Stoichiometry C7H11BrN2O  
 Framework group C1[X(C7H11BrN2O)]  
 Deg. of freedom 60  
 Full point group C1 NOp 1  
 Largest Abelian subgroup C1 NOp 1  
 Largest concise Abelian subgroup C1 NOp 1

Standard orientation:

| Center Number | Atomic Number | Atomic Type | Coordinates (Angstroms) |           |           |
|---------------|---------------|-------------|-------------------------|-----------|-----------|
|               |               |             | X                       | Y         | Z         |
| 1             | 6             | 0           | -1.847055               | -2.019817 | 0.287623  |
| 2             | 6             | 0           | -2.854298               | -1.129132 | 0.094323  |
| 3             | 7             | 0           | -2.268372               | 0.130278  | 0.035313  |
| 4             | 6             | 0           | -0.935118               | -0.006693 | 0.185232  |
| 5             | 7             | 0           | -0.664875               | -1.302219 | 0.352818  |
| 6             | 6             | 0           | 0.700835                | -1.831428 | 0.542044  |
| 7             | 6             | 0           | 1.521745                | -1.801867 | -0.760800 |
| 8             | 1             | 0           | -1.869826               | -3.088666 | 0.413062  |
| 9             | 1             | 0           | -3.915937               | -1.275421 | 0.013030  |
| 10            | 1             | 0           | 1.201523                | -1.188911 | 1.267143  |
| 11            | 1             | 0           | 0.611473                | -2.841309 | 0.942974  |
| 12            | 1             | 0           | 1.205151                | -2.591776 | -1.446978 |
| 13            | 1             | 0           | 1.407115                | -0.815881 | -1.220456 |
| 14            | 35            | 0           | 2.011319                | 1.546848  | 0.102634  |
| 15            | 1             | 0           | -0.149538               | 0.775073  | 0.165185  |
| 16            | 6             | 0           | -2.895740               | 1.388882  | -0.177567 |
| 17            | 6             | 0           | -4.190568               | 1.553564  | -0.415640 |
| 18            | 1             | 0           | -2.194549               | 2.212712  | -0.130022 |
| 19            | 1             | 0           | -4.576038               | 2.553035  | -0.563261 |
| 20            | 1             | 0           | -4.894508               | 0.733025  | -0.477186 |
| 21            | 8             | 0           | 2.883409                | -2.020986 | -0.451757 |
| 22            | 1             | 0           | 3.245621                | -1.161151 | -0.189837 |

Rotational constants (GHZ): 0.9397834 0.4445382 0.3119072

Standard basis: 6-311++G(d,p) (5D, 7F)

There are 358 symmetry adapted cartesian basis functions of A symmetry.

There are 345 symmetry adapted basis functions of A symmetry.

345 basis functions, 553 primitive gaussians, 358 cartesian basis functions

55 alpha electrons 55 beta electrons

nuclear repulsion energy 845.2192268598 Hartrees.

NAtoms= 22 NActive= 22 NUniq= 22 SFac= 1.00D+00 NATFMM= 60 NAOKFM=F

Big=F

Integral buffers will be 131072 words long.

Raffenetti 2 integral format.

Two-electron integral symmetry is turned on.

One-electron integrals computed using PRISM.

NBasis= 345 RedAO= T EigKep= 4.74D-06 NBF= 345

NBsUse= 345 1.00D-06 EigRej= -1.00D+00 NBFU= 345

Initial guess from the checkpoint file: "."

B after Tr= 0.000000 0.000000 0.000000

Rot= 0.999931 -0.001266 -0.000196 0.011677 Ang= -1.35 deg.

ExpMin= 3.50D-02 ExpMax= 4.40D+05 ExpMxC= 1.51D+04 IAcc=3 IRadAn= 5 AccDes= 0.00D+00

Harris functional with IExCor= 402 and IRadAn= 5 diagonalized for initial guess.

HarFok: IExCor= 402 AccDes= 0.00D+00 IRadAn= 5 IDoV= 1 UseB2=F ITyADJ=14

ICtDFT= 3500011 ScaDFX= 1.000000 1.000000 1.000000 1.000000

FoFCou: FMM=F IPFlag= 0 FMFlag= 100000 FMFlg1= 0

NFxFlg= 0 DoJE=T BraDBF=F KetDBF=T FulRan=T

wScrn= 0.000000 ICntrl= 500 IOpCl= 0 I1Cent= 200000004 NGrid=

0

NMat0= 1 NMatS0= 1 NMatT0= 0 NMatD0= 1 NMtDS0= 0

NMtDT0= 0

Petite list used in FoFCou.

Keep R1 ints in memory in canonical form, NReq=1804729152.

Requested convergence on RMS density matrix=1.00D-08 within 128 cycles.

Requested convergence on MAX density matrix=1.00D-06.

Requested convergence on energy=1.00D-06.

No special actions if energy rises.

SCF Done: E(RB3LYP) = -3032.34135247 A.U. after 12 cycles

NFock= 12 Conv=0.48D-08 -V/T= 2.0017

Calling FoFJK, ICntrl= 2127 FMM=F ISym2X=0 I1Cent= 0 IOpClX= 0 NMat=1 NMatS=1 NMatT=0.

\*\*\*\*\* Axes restored to original set \*\*\*\*\*

| Center<br>Number | Atomic<br>Number | Forces (Hartrees/Bohr) |              |              |
|------------------|------------------|------------------------|--------------|--------------|
|                  |                  | X                      | Y            | Z            |
| 1                | 6                | -0.000364693           | -0.001141415 | 0.001188584  |
| 2                | 6                | -0.000086880           | -0.000132878 | 0.000223723  |
| 3                | 7                | 0.001786855            | 0.001765590  | -0.000622569 |
| 4                | 6                | -0.000456958           | -0.000038502 | 0.001517538  |
| 5                | 7                | -0.001687606           | 0.001281456  | -0.000625497 |
| 6                | 6                | 0.001493546            | 0.000724764  | 0.000151232  |
| 7                | 6                | 0.002313317            | 0.001583960  | 0.002247933  |
| 8                | 1                | -0.000194160           | 0.000214606  | -0.000535795 |
| 9                | 1                | 0.000666103            | -0.000324939 | -0.000366197 |
| 10               | 1                | -0.000501344           | -0.000723097 | -0.000216495 |

|    |    |              |              |              |
|----|----|--------------|--------------|--------------|
| 11 | 1  | -0.000127597 | -0.000083997 | 0.000358181  |
| 12 | 1  | -0.000506435 | -0.000007595 | -0.000191843 |
| 13 | 1  | -0.001347682 | -0.001108977 | -0.003272385 |
| 14 | 35 | -0.000312324 | -0.001281882 | 0.000313682  |
| 15 | 1  | -0.000108388 | -0.000439648 | -0.000075841 |
| 16 | 6  | -0.000393930 | 0.000136049  | -0.000078156 |
| 17 | 6  | 0.000512301  | 0.000046448  | 0.000194238  |
| 18 | 1  | 0.000323447  | -0.000323557 | -0.000070476 |
| 19 | 1  | 0.000048045  | -0.000232264 | -0.000188967 |
| 20 | 1  | -0.000483692 | 0.000235994  | 0.000253146  |
| 21 | 8  | -0.000099416 | -0.001423387 | -0.001003863 |
| 22 | 1  | -0.000472509 | 0.001273270  | 0.000799826  |

-----  
Cartesian Forces: Max 0.003272385 RMS 0.000933414

GradGradGradGradGradGradGradGradGradGradGradGradGradGradGradGradGradGradGrad

Berny optimization.

Using GEDIIS/GDIIS optimizer.

FormGI is forming the generalized inverse of G from B-inverse, IUseBI=4.

Internal Forces: Max 0.005200241 RMS 0.001034929

Search for a local minimum.

Step number 55 out of a maximum of 116

All quantities printed in internal units (Hartrees-Bohrs-Radians)

Mixed Optimization -- RFO/linear search

Update second derivatives using D2CorX and points 54 55

DE= -3.93D-04 DEPred=-3.47D-04 R= 1.13D+00

TightC=F SS= 1.41D+00 RLast= 2.63D-01 DXNew= 1.0469D+00 7.8877D-01

Trust test= 1.13D+00 RLast= 2.63D-01 DXMaxT set to 7.89D-01

ITU= 1 0 1 1 0-1 1 1 1-1 1 0-1 1 0-1 0-1 0 0

ITU= 1-1 0 1 1 1 1 1 0-1 1 1 1 1 0-1 1 1

ITU= 1 1 1 1 1 1 1 1 1 0 0-1 0 0

Use linear search instead of GDIIS.

|                 |         |         |         |         |         |
|-----------------|---------|---------|---------|---------|---------|
| Eigenvalues --- | 0.00091 | 0.00273 | 0.00384 | 0.00699 | 0.00973 |
| Eigenvalues --- | 0.00997 | 0.01548 | 0.01759 | 0.02114 | 0.02224 |
| Eigenvalues --- | 0.02357 | 0.03024 | 0.03067 | 0.03207 | 0.03886 |
| Eigenvalues --- | 0.04387 | 0.05164 | 0.05612 | 0.06236 | 0.07707 |
| Eigenvalues --- | 0.08589 | 0.09311 | 0.10603 | 0.13947 | 0.14382 |
| Eigenvalues --- | 0.15081 | 0.15574 | 0.15920 | 0.16068 | 0.16191 |
| Eigenvalues --- | 0.17075 | 0.18333 | 0.21045 | 0.22858 | 0.23619 |
| Eigenvalues --- | 0.25013 | 0.25370 | 0.26052 | 0.29377 | 0.32863 |
| Eigenvalues --- | 0.33191 | 0.33865 | 0.33893 | 0.34054 | 0.34215 |
| Eigenvalues --- | 0.34368 | 0.34804 | 0.35299 | 0.36314 | 0.36356 |
| Eigenvalues --- | 0.40005 | 0.43119 | 0.44233 | 0.46459 | 0.49248 |
| Eigenvalues --- | 0.53528 | 0.54727 | 0.57867 | 0.60801 | 1.10705 |

RFO step: Lambda=-3.95935301D-04 EMin= 9.05949105D-04

Quartic linear search produced a step of 0.18162.

Iteration 1 RMS(Cart)= 0.03035425 RMS(Int)= 0.00063957

Iteration 2 RMS(Cart)= 0.00073573 RMS(Int)= 0.00002818

Iteration 3 RMS(Cart)= 0.00000031 RMS(Int)= 0.00002818

| Variable | Old X   | -DE/DX   | Delta X<br>(Linear) | Delta X<br>(Quad) | Delta X<br>(Total) | New X   |
|----------|---------|----------|---------------------|-------------------|--------------------|---------|
| R1       | 2.56699 | -0.00045 | -0.00018            | -0.00026          | -0.00044           | 2.56654 |
| R2       | 2.61626 | -0.00019 | -0.00001            | -0.00086          | -0.00087           | 2.61539 |
| R3       | 2.03415 | -0.00005 | 0.00002             | -0.00026          | -0.00024           | 2.03391 |
| R4       | 2.62727 | 0.00089  | 0.00016             | -0.00023          | -0.00008           | 2.62719 |
| R5       | 2.03098 | -0.00017 | -0.00008            | -0.00047          | -0.00055           | 2.03043 |
| R6       | 2.54854 | -0.00140 | -0.00004            | -0.00242          | -0.00245           | 2.54609 |
| R7       | 2.68779 | -0.00005 | -0.00008            | -0.00122          | -0.00130           | 2.68650 |
| R8       | 2.52086 | -0.00048 | -0.00008            | -0.00079          | -0.00086           | 2.52000 |
| R9       | 2.09470 | -0.00040 | 0.00031             | 0.00317           | 0.00348            | 2.09818 |
| R10      | 2.79081 | 0.00015  | 0.00056             | 0.00279           | 0.00336            | 2.79416 |
| R11      | 2.91053 | -0.00046 | 0.00040             | 0.00221           | 0.00261            | 2.91314 |
| R12      | 2.06083 | -0.00033 | 0.00018             | -0.00175          | -0.00158           | 2.05925 |
| R13      | 2.06023 | -0.00005 | -0.00012            | -0.00001          | -0.00013           | 2.06010 |
| R14      | 2.06580 | 0.00008  | 0.00011             | 0.00080           | 0.00092            | 2.06671 |
| R15      | 2.06715 | -0.00132 | 0.00009             | -0.00302          | -0.00293           | 2.06422 |
| R16      | 2.67090 | -0.00061 | -0.00056            | -0.00143          | -0.00199           | 2.66892 |
| R17      | 5.24314 | -0.00010 | 0.00791             | 0.00821           | 0.01613            | 5.25927 |
| R18      | 2.50727 | -0.00020 | 0.00003             | -0.00060          | -0.00057           | 2.50670 |
| R19      | 2.04634 | -0.00024 | -0.00012            | -0.00130          | -0.00142           | 2.04492 |
| R20      | 2.04346 | -0.00021 | -0.00007            | -0.00072          | -0.00079           | 2.04267 |
| R21      | 2.04632 | -0.00029 | -0.00014            | -0.00091          | -0.00105           | 2.04527 |
| R22      | 1.83130 | 0.00146  | 0.00059             | 0.00263           | 0.00323            | 1.83452 |
| A1       | 1.87549 | -0.00061 | 0.00008             | -0.00022          | -0.00017           | 1.87532 |
| A2       | 2.28098 | -0.00003 | -0.00021            | -0.00152          | -0.00181           | 2.27917 |
| A3       | 2.12616 | 0.00067  | 0.00011             | 0.00241           | 0.00244            | 2.12860 |
| A4       | 1.86242 | -0.00003 | 0.00003             | -0.00058          | -0.00053           | 1.86189 |
| A5       | 2.28361 | -0.00077 | -0.00055            | -0.00453          | -0.00511           | 2.27851 |
| A6       | 2.13695 | 0.00080  | 0.00050             | 0.00527           | 0.00575            | 2.14270 |
| A7       | 1.89644 | 0.00013  | -0.00017            | 0.00064           | 0.00047            | 1.89691 |
| A8       | 2.24216 | 0.00082  | 0.00034             | 0.00404           | 0.00432            | 2.24647 |
| A9       | 2.14429 | -0.00094 | -0.00016            | -0.00428          | -0.00451           | 2.13978 |
| A10      | 1.88901 | -0.00022 | 0.00015             | 0.00000           | 0.00013            | 1.88914 |
| A11      | 2.24848 | 0.00013  | 0.00196             | -0.00235          | -0.00049           | 2.24798 |
| A12      | 2.14556 | 0.00008  | -0.00188            | 0.00247           | 0.00049            | 2.14605 |
| A13      | 1.90126 | 0.00074  | -0.00010            | 0.00028           | 0.00019            | 1.90145 |
| A14      | 2.22678 | 0.00161  | 0.00039             | 0.00309           | 0.00342            | 2.23020 |
| A15      | 2.15490 | -0.00236 | -0.00013            | -0.00328          | -0.00346           | 2.15144 |

|     |          |          |          |          |          |          |
|-----|----------|----------|----------|----------|----------|----------|
| A16 | 1.95803  | -0.00326 | 0.00188  | -0.00624 | -0.00435 | 1.95368  |
| A17 | 1.87406  | -0.00041 | -0.00016 | 0.00147  | 0.00131  | 1.87538  |
| A18 | 1.87890  | 0.00188  | -0.00157 | 0.00023  | -0.00133 | 1.87757  |
| A19 | 1.88223  | 0.00137  | 0.00021  | 0.00479  | 0.00499  | 1.88722  |
| A20 | 1.95255  | 0.00106  | -0.00033 | 0.00364  | 0.00330  | 1.95585  |
| A21 | 1.91651  | -0.00070 | -0.00003 | -0.00408 | -0.00412 | 1.91239  |
| A22 | 1.94200  | 0.00118  | 0.00019  | 0.00066  | 0.00082  | 1.94282  |
| A23 | 1.89325  | -0.00379 | -0.00049 | -0.00561 | -0.00612 | 1.88713  |
| A24 | 1.90240  | 0.00049  | -0.00045 | 0.00152  | 0.00103  | 1.90342  |
| A25 | 1.93606  | 0.00032  | 0.00128  | -0.00168 | -0.00039 | 1.93567  |
| A26 | 1.87994  | -0.00021 | 0.00047  | 0.01004  | 0.01051  | 1.89045  |
| A27 | 1.90983  | 0.00211  | -0.00103 | -0.00491 | -0.00596 | 1.90387  |
| A28 | 2.14644  | -0.00520 | -0.00857 | -0.02579 | -0.03437 | 2.11207  |
| A29 | 2.17384  | 0.00090  | 0.00092  | 0.00501  | 0.00593  | 2.17977  |
| A30 | 1.96170  | -0.00085 | -0.00062 | -0.00404 | -0.00467 | 1.95703  |
| A31 | 2.14763  | -0.00005 | -0.00030 | -0.00094 | -0.00125 | 2.14639  |
| A32 | 2.07956  | -0.00005 | -0.00050 | 0.00075  | 0.00025  | 2.07981  |
| A33 | 2.15383  | 0.00054  | 0.00052  | 0.00292  | 0.00343  | 2.15726  |
| A34 | 2.04978  | -0.00048 | -0.00002 | -0.00365 | -0.00367 | 2.04611  |
| A35 | 1.85629  | -0.00053 | -0.00067 | -0.00669 | -0.00736 | 1.84894  |
| D1  | 0.00628  | -0.00017 | -0.00053 | -0.00307 | -0.00361 | 0.00267  |
| D2  | -3.11367 | -0.00043 | 0.00101  | -0.01207 | -0.01101 | -3.12468 |
| D3  | 3.11155  | 0.00050  | -0.00119 | 0.01883  | 0.01759  | 3.12914  |
| D4  | -0.00839 | 0.00024  | 0.00035  | 0.00983  | 0.01018  | 0.00179  |
| D5  | -0.01477 | 0.00052  | -0.00017 | 0.00645  | 0.00629  | -0.00848 |
| D6  | -3.13259 | 0.00064  | -0.00493 | 0.00215  | -0.00279 | -3.13537 |
| D7  | -3.12396 | -0.00006 | 0.00043  | -0.01300 | -0.01259 | -3.13654 |
| D8  | 0.04141  | 0.00005  | -0.00433 | -0.01730 | -0.02166 | 0.01975  |
| D9  | 0.00421  | -0.00024 | 0.00105  | -0.00129 | -0.00025 | 0.00397  |
| D10 | 3.11973  | 0.00002  | 0.00173  | 0.01621  | 0.01799  | 3.13773  |
| D11 | 3.12640  | -0.00003 | -0.00035 | 0.00664  | 0.00629  | 3.13269  |
| D12 | -0.04127 | 0.00023  | 0.00033  | 0.02413  | 0.02453  | -0.01674 |
| D13 | -0.01345 | 0.00057  | -0.00116 | 0.00532  | 0.00416  | -0.00929 |
| D14 | 3.11090  | 0.00009  | 0.00574  | 0.01309  | 0.01885  | 3.12975  |
| D15 | -3.13074 | 0.00030  | -0.00181 | -0.01113 | -0.01288 | 3.13956  |
| D16 | -0.00639 | -0.00019 | 0.00510  | -0.00337 | 0.00180  | -0.00458 |
| D17 | -0.05088 | 0.00000  | -0.00529 | 0.02344  | 0.01815  | -0.03274 |
| D18 | 3.09644  | -0.00008 | -0.00572 | 0.01837  | 0.01265  | 3.10908  |
| D19 | 3.06130  | 0.00032  | -0.00452 | 0.04326  | 0.03875  | 3.10005  |
| D20 | -0.07456 | 0.00023  | -0.00495 | 0.03819  | 0.03324  | -0.04132 |
| D21 | 0.01742  | -0.00067 | 0.00083  | -0.00726 | -0.00644 | 0.01098  |
| D22 | 3.13643  | -0.00072 | 0.00536  | -0.00307 | 0.00225  | 3.13868  |
| D23 | -3.10817 | -0.00022 | -0.00573 | -0.01441 | -0.02007 | -3.12824 |
| D24 | 0.01084  | -0.00027 | -0.00119 | -0.01022 | -0.01138 | -0.00055 |

|     |          |          |          |          |          |          |
|-----|----------|----------|----------|----------|----------|----------|
| D25 | 1.83964  | 0.00030  | 0.01177  | 0.01233  | 0.02409  | 1.86373  |
| D26 | -2.37851 | -0.00016 | 0.01299  | 0.01553  | 0.02852  | -2.34999 |
| D27 | -0.31592 | -0.00022 | 0.01204  | 0.01164  | 0.02368  | -0.29225 |
| D28 | -1.27499 | 0.00039  | 0.00637  | 0.00739  | 0.01376  | -1.26123 |
| D29 | 0.79005  | -0.00008 | 0.00760  | 0.01059  | 0.01819  | 0.80823  |
| D30 | 2.85263  | -0.00013 | 0.00664  | 0.00670  | 0.01335  | 2.86598  |
| D31 | -1.30544 | -0.00075 | -0.00751 | -0.00690 | -0.01441 | -1.31985 |
| D32 | 0.82890  | -0.00214 | -0.00612 | -0.01234 | -0.01846 | 0.81044  |
| D33 | 2.90708  | -0.00151 | -0.00792 | -0.02063 | -0.02855 | 2.87853  |
| D34 | 2.91754  | 0.00079  | -0.00853 | -0.00811 | -0.01664 | 2.90091  |
| D35 | -1.23130 | -0.00060 | -0.00714 | -0.01355 | -0.02069 | -1.25199 |
| D36 | 0.84688  | 0.00003  | -0.00894 | -0.02184 | -0.03078 | 0.81610  |
| D37 | 0.80826  | 0.00011  | -0.00843 | -0.00844 | -0.01687 | 0.79139  |
| D38 | 2.94260  | -0.00128 | -0.00704 | -0.01388 | -0.02093 | 2.92168  |
| D39 | -1.26240 | -0.00065 | -0.00884 | -0.02217 | -0.03101 | -1.29341 |
| D40 | 0.97954  | -0.00120 | 0.01352  | 0.01803  | 0.03156  | 1.01110  |
| D41 | 3.11749  | -0.00205 | 0.01424  | 0.01404  | 0.02828  | -3.13741 |
| D42 | -1.09396 | -0.00079 | 0.01496  | 0.02231  | 0.03725  | -1.05671 |
| D43 | -1.45584 | 0.00125  | -0.00437 | -0.05867 | -0.06302 | -1.51886 |
| D44 | 2.71823  | -0.00033 | -0.00461 | -0.06629 | -0.07092 | 2.64732  |
| D45 | 0.61198  | -0.00181 | -0.00584 | -0.06743 | -0.07326 | 0.53872  |
| D46 | 3.13963  | -0.00004 | -0.00084 | 0.00087  | 0.00003  | 3.13965  |
| D47 | -0.00805 | 0.00010  | -0.00064 | 0.00324  | 0.00260  | -0.00545 |
| D48 | -0.00828 | 0.00005  | -0.00036 | 0.00646  | 0.00609  | -0.00219 |
| D49 | 3.12722  | 0.00019  | -0.00016 | 0.00883  | 0.00867  | 3.13589  |

| Item                 | Value    | Threshold | Converged? |
|----------------------|----------|-----------|------------|
| Maximum Force        | 0.005200 | 0.000450  | NO         |
| RMS Force            | 0.001035 | 0.000300  | NO         |
| Maximum Displacement | 0.143540 | 0.001800  | NO         |
| RMS Displacement     | 0.030199 | 0.001200  | NO         |

Predicted change in Energy=-2.154404D-04

GradGradGradGradGradGradGradGradGradGradGradGradGradGradGradGradGradGrad

Input orientation:

| Center Number | Atomic Number | Atomic Type | Coordinates (Angstroms) |           |           |
|---------------|---------------|-------------|-------------------------|-----------|-----------|
|               |               |             | X                       | Y         | Z         |
| 1             | 6             | 0           | -0.614001               | -2.398094 | -1.101021 |
| 2             | 6             | 0           | -1.918915               | -2.044309 | -1.229968 |
| 3             | 7             | 0           | -2.105412               | -0.913578 | -0.442912 |
| 4             | 6             | 0           | -0.933289               | -0.595630 | 0.140482  |
| 5             | 7             | 0           | -0.020945               | -1.490265 | -0.241022 |
| 6             | 6             | 0           | 1.388489                | -1.451846 | 0.204288  |

|    |    |   |           |           |           |
|----|----|---|-----------|-----------|-----------|
| 7  | 6  | 0 | 2.170466  | -0.300061 | -0.457784 |
| 8  | 1  | 0 | -0.064416 | -3.216555 | -1.532871 |
| 9  | 1  | 0 | -2.713433 | -2.498522 | -1.792896 |
| 10 | 1  | 0 | 1.386538  | -1.285323 | 1.281197  |
| 11 | 1  | 0 | 1.829350  | -2.424692 | -0.014014 |
| 12 | 1  | 0 | 2.415113  | -0.532104 | -1.498164 |
| 13 | 1  | 0 | 1.562253  | 0.604967  | -0.392918 |
| 14 | 35 | 0 | 0.708264  | 1.585387  | 2.067779  |
| 15 | 1  | 0 | -0.702764 | 0.248334  | 0.824125  |
| 16 | 6  | 0 | -3.291686 | -0.156595 | -0.240988 |
| 17 | 6  | 0 | -4.456737 | -0.401260 | -0.826113 |
| 18 | 1  | 0 | -3.141753 | 0.658245  | 0.455108  |
| 19 | 1  | 0 | -5.301948 | 0.234645  | -0.603270 |
| 20 | 1  | 0 | -4.616648 | -1.209932 | -1.527454 |
| 21 | 8  | 0 | 3.377271  | -0.096909 | 0.247219  |
| 22 | 1  | 0 | 3.164553  | 0.517217  | 0.968348  |

-----  
Distance matrix (angstroms):

|    |    | 1        | 2        | 3        | 4        | 5        |
|----|----|----------|----------|----------|----------|----------|
| 1  | C  | 0.000000 |          |          |          |          |
| 2  | C  | 1.358157 | 0.000000 |          |          |          |
| 3  | N  | 2.204813 | 1.390249 | 0.000000 |          |          |
| 4  | C  | 2.211820 | 2.224469 | 1.347335 | 0.000000 |          |
| 5  | N  | 1.384005 | 2.210717 | 2.172172 | 1.333525 | 0.000000 |
| 6  | C  | 2.570833 | 3.653358 | 3.593876 | 2.475445 | 1.478607 |
| 7  | C  | 3.545244 | 4.512395 | 4.319694 | 3.174678 | 2.503168 |
| 8  | H  | 1.076298 | 2.214740 | 3.264564 | 3.228668 | 2.156581 |
| 9  | H  | 2.212779 | 1.074457 | 2.168916 | 3.244667 | 3.267169 |
| 10 | H  | 3.303843 | 4.219956 | 3.912092 | 2.675538 | 2.083305 |
| 11 | H  | 2.674371 | 3.958879 | 4.236717 | 3.316852 | 2.085252 |
| 12 | H  | 3.579829 | 4.598096 | 4.657706 | 3.728403 | 2.903938 |
| 13 | H  | 3.775694 | 4.453970 | 3.969917 | 2.820227 | 2.630510 |
| 14 | Br | 5.259068 | 5.563443 | 4.523845 | 3.341558 | 3.914325 |
| 15 | H  | 3.273782 | 3.309764 | 2.218749 | 1.110309 | 2.149917 |
| 16 | C  | 3.596382 | 2.534965 | 1.421633 | 2.429055 | 3.532198 |
| 17 | C  | 4.339302 | 3.050123 | 2.436810 | 3.658794 | 4.604837 |
| 18 | H  | 4.260548 | 3.411541 | 2.085922 | 2.559005 | 3.852289 |
| 19 | H  | 5.399622 | 4.126900 | 3.400290 | 4.508626 | 5.567364 |
| 20 | H  | 4.196994 | 2.839445 | 2.751430 | 4.089806 | 4.780585 |
| 21 | O  | 4.800360 | 5.833012 | 5.585968 | 4.340627 | 3.705089 |
| 22 | H  | 5.201807 | 6.102103 | 5.640156 | 4.326211 | 3.954738 |
|    |    | 6        | 7        | 8        | 9        | 10       |
| 6  | C  | 0.000000 |          |          |          |          |
| 7  | C  | 1.541569 | 0.000000 |          |          |          |



|    |    |          |          |          |          |          |
|----|----|----------|----------|----------|----------|----------|
| 8  | H  | 2.871037 | 3.828374 | 0.000000 |          |          |
| 9  | H  | 4.680817 | 5.519804 | 2.756896 | 0.000000 |          |
| 10 | H  | 1.089710 | 2.146937 | 3.708625 | 5.266086 | 0.000000 |
| 11 | H  | 1.090158 | 2.197123 | 2.553493 | 4.879217 | 1.780959 |
| 12 | H  | 2.190484 | 1.093657 | 3.654524 | 5.500514 | 3.057802 |
| 13 | H  | 2.148796 | 1.092340 | 4.306921 | 5.465627 | 2.531153 |
| 14 | Br | 3.627684 | 3.474395 | 6.051476 | 6.579600 | 3.052826 |
| 15 | H  | 2.765529 | 3.193663 | 4.238912 | 4.293811 | 2.631769 |
| 16 | C  | 4.876472 | 5.468335 | 4.631154 | 2.868348 | 5.047460 |
| 17 | C  | 6.027614 | 6.638203 | 5.264777 | 2.893490 | 6.274248 |
| 18 | H  | 5.003847 | 5.474614 | 5.332554 | 3.898995 | 4.996529 |
| 19 | H  | 6.946824 | 7.492934 | 6.340874 | 3.947889 | 7.113183 |
| 20 | H  | 6.254529 | 6.930872 | 4.974875 | 2.313688 | 6.628156 |
| 21 | O  | 2.406855 | 1.412330 | 4.974547 | 6.857586 | 2.538593 |
| 22 | H  | 2.759602 | 1.920939 | 5.533841 | 7.160299 | 2.551150 |
|    |    | 11       | 12       | 13       | 14       | 15       |
| 11 | H  | 0.000000 |          |          |          |          |
| 12 | H  | 2.475421 | 0.000000 |          |          |          |
| 13 | H  | 3.064921 | 1.800519 | 0.000000 |          |          |
| 14 | Br | 4.655258 | 4.484758 | 2.783083 | 0.000000 |          |
| 15 | H  | 3.776129 | 3.965258 | 2.595898 | 2.307680 | 0.000000 |
| 16 | C  | 5.605425 | 5.855685 | 4.915667 | 4.936041 | 2.828595 |
| 17 | C  | 6.653471 | 6.905874 | 6.117875 | 6.244887 | 4.151816 |
| 18 | H  | 5.868257 | 6.009239 | 4.780131 | 4.275854 | 2.500573 |
| 19 | H  | 7.633788 | 7.806521 | 6.877401 | 6.714287 | 4.815614 |
| 20 | H  | 6.731793 | 7.064416 | 6.539102 | 7.006725 | 4.793220 |
| 21 | O  | 2.807646 | 2.039976 | 2.048583 | 3.642548 | 4.135057 |
| 22 | H  | 3.376778 | 2.783239 | 2.104308 | 2.895357 | 3.879335 |
|    |    | 16       | 17       | 18       | 19       | 20       |
| 16 | C  | 0.000000 |          |          |          |          |
| 17 | C  | 1.326491 | 0.000000 |          |          |          |
| 18 | H  | 1.082125 | 2.119732 | 0.000000 |          |          |
| 19 | H  | 2.079777 | 1.080933 | 2.442549 | 0.000000 |          |
| 20 | H  | 2.126039 | 1.082313 | 3.097734 | 1.846769 | 0.000000 |
| 21 | O  | 6.687069 | 7.913049 | 6.565907 | 8.727090 | 8.263838 |
| 22 | H  | 6.602995 | 7.883385 | 6.328728 | 8.615769 | 8.352196 |
|    |    | 21       | 22       |          |          |          |
| 21 | O  | 0.000000 |          |          |          |          |
| 22 | H  | 0.970787 | 0.000000 |          |          |          |

Stoichiometry C7H11BrN2O

Framework group C1[X(C7H11BrN2O)]

Deg. of freedom 60

Full point group C1 NOp 1

Largest Abelian subgroup C1 NOp 1

Largest concise Abelian subgroup C1 NOp 1

Standard orientation:

| Center<br>Number | Atomic<br>Number | Atomic<br>Type | Coordinates (Angstroms) |           |           |
|------------------|------------------|----------------|-------------------------|-----------|-----------|
|                  |                  |                | X                       | Y         | Z         |
| 1                | 6                | 0              | -1.861572               | -2.011367 | 0.312636  |
| 2                | 6                | 0              | -2.866338               | -1.121257 | 0.105900  |
| 3                | 7                | 0              | -2.274972               | 0.133511  | 0.012975  |
| 4                | 6                | 0              | -0.942532               | -0.005602 | 0.156374  |
| 5                | 7                | 0              | -0.675981               | -1.298180 | 0.347374  |
| 6                | 6                | 0              | 0.692332                | -1.824324 | 0.540173  |
| 7                | 6                | 0              | 1.508503                | -1.799398 | -0.767373 |
| 8                | 1                | 0              | -1.888603               | -3.078645 | 0.449034  |
| 9                | 1                | 0              | -3.927663               | -1.270942 | 0.030797  |
| 10               | 1                | 0              | 1.191268                | -1.180046 | 1.263662  |
| 11               | 1                | 0              | 0.603378                | -2.831316 | 0.948215  |
| 12               | 1                | 0              | 1.201644                | -2.602855 | -1.442933 |
| 13               | 1                | 0              | 1.370244                | -0.822268 | -1.235677 |
| 14               | 35               | 0              | 2.029744                | 1.520754  | 0.113714  |
| 15               | 1                | 0              | -0.154390               | 0.775947  | 0.128099  |
| 16               | 6                | 0              | -2.894394               | 1.394446  | -0.204743 |
| 17               | 6                | 0              | -4.194003               | 1.578410  | -0.396451 |
| 18               | 1                | 0              | -2.179241               | 2.206544  | -0.197837 |
| 19               | 1                | 0              | -4.566802               | 2.581046  | -0.551879 |
| 20               | 1                | 0              | -4.917263               | 0.773363  | -0.410406 |
| 21               | 8                | 0              | 2.875917                | -1.975240 | -0.460890 |
| 22               | 1                | 0              | 3.223745                | -1.088074 | -0.275474 |

Rotational constants (GHZ): 0.9553223 0.4417275 0.3123565

Standard basis: 6-311++G(d,p) (5D, 7F)

There are 358 symmetry adapted cartesian basis functions of A symmetry.

There are 345 symmetry adapted basis functions of A symmetry.

345 basis functions, 553 primitive gaussians, 358 cartesian basis functions

55 alpha electrons 55 beta electrons

nuclear repulsion energy 846.2945609738 Hartrees.

NAtoms= 22 NActive= 22 NUniq= 22 SFac= 1.00D+00 NATFMM= 60 NAOKFM=F

Big=F

Integral buffers will be 131072 words long.

Raffenetti 2 integral format.

Two-electron integral symmetry is turned on.

One-electron integrals computed using PRISM.

NBasis= 345 RedAO= T EigKep= 4.74D-06 NBF= 345

NBsUse= 345 1.00D-06 EigRej= -1.00D+00 NBFU= 345

Initial guess from the checkpoint file: "."

B after Tr= 0.000000 0.000000 0.000000

Rot= 0.999997 -0.001024 -0.000161 0.002227 Ang= -0.28 deg.

ExpMin= 3.50D-02 ExpMax= 4.40D+05 ExpMxC= 1.51D+04 IAcc=3 IRadAn= 5 AccDes= 0.00D+00

Harris functional with IExCor= 402 and IRadAn= 5 diagonalized for initial guess.

HarFok: IExCor= 402 AccDes= 0.00D+00 IRadAn= 5 IDoV= 1 UseB2=F ITyADJ=14

ICtDFT= 3500011 ScaDFX= 1.000000 1.000000 1.000000 1.000000

FoFCou: FMM=F IPFlag= 0 FMFlag= 100000 FMFlg1= 0

NFxFlg= 0 DoJE=T BraDBF=F KetDBF=T FulRan=T

wScrn= 0.000000 ICntrl= 500 IOpCl= 0 I1Cent= 20000004 NGrid=

0

NMat0= 1 NMatS0= 1 NMatT0= 0 NMatD0= 1 NMtDS0= 0

NMtDT0= 0

Petite list used in FoFCou.

Keep R1 ints in memory in canonical form, NReq=1804729152.

Requested convergence on RMS density matrix=1.00D-08 within 128 cycles.

Requested convergence on MAX density matrix=1.00D-06.

Requested convergence on energy=1.00D-06.

No special actions if energy rises.

SCF Done: E(RB3LYP) = -3032.34157097 A.U. after 11 cycles

NFock= 11 Conv=0.99D-08 -V/T= 2.0017

Calling FoFJK, ICntrl= 2127 FMM=F ISym2X=0 I1Cent= 0 IOpClX= 0 NMat=1 NMatS=1

NMatT=0.

\*\*\*\*\* Axes restored to original set \*\*\*\*\*

| Center<br>Number | Atomic<br>Number | Forces (Hartrees/Bohr) |              |              |
|------------------|------------------|------------------------|--------------|--------------|
|                  |                  | X                      | Y            | Z            |
| 1                | 6                | 0.000050592            | -0.000324370 | 0.000224099  |
| 2                | 6                | 0.000021149            | -0.000260768 | 0.000052439  |
| 3                | 7                | 0.000207125            | 0.000979778  | -0.000537538 |
| 4                | 6                | 0.000680959            | 0.001302373  | 0.002560699  |
| 5                | 7                | -0.000497111           | 0.000842660  | 0.000537923  |
| 6                | 6                | 0.001214556            | -0.000127292 | -0.000978198 |
| 7                | 6                | 0.001689649            | 0.000930171  | 0.003445306  |
| 8                | 1                | -0.000061594           | -0.000007512 | -0.000140812 |
| 9                | 1                | 0.000038831            | -0.000039115 | -0.000208737 |
| 10               | 1                | -0.000403338           | 0.000114633  | 0.000077766  |
| 11               | 1                | -0.000052151           | -0.000142725 | -0.000010220 |
| 12               | 1                | -0.000199326           | -0.000127860 | 0.000110762  |
| 13               | 1                | -0.001884365           | -0.000347294 | -0.003893629 |
| 14               | 35               | -0.000449843           | -0.000946302 | 0.000036662  |
| 15               | 1                | -0.000118590           | -0.001493640 | -0.001131215 |

|    |   |              |              |              |
|----|---|--------------|--------------|--------------|
| 16 | 6 | -0.000515438 | 0.000196032  | 0.000068829  |
| 17 | 6 | 0.000418169  | -0.000191799 | -0.000085886 |
| 18 | 1 | 0.000117131  | 0.000288940  | 0.000142294  |
| 19 | 1 | -0.000083086 | 0.000071891  | 0.000039454  |
| 20 | 1 | -0.000105290 | -0.000168365 | -0.000061713 |
| 21 | 8 | 0.000161246  | -0.000160627 | -0.001445226 |
| 22 | 1 | -0.000229275 | -0.000388809 | 0.001196944  |

-----  
Cartesian Forces: Max 0.003893629 RMS 0.000935832

GradGradGradGradGradGradGradGradGradGradGradGradGradGradGradGradGradGradGrad

Berny optimization.

Using GEDIIS/GDIIS optimizer.

FormGI is forming the generalized inverse of G from B-inverse, IUseBI=4.

Internal Forces: Max 0.002845722 RMS 0.000863549

Search for a local minimum.

Step number 56 out of a maximum of 116

All quantities printed in internal units (Hartrees-Bohrs-Radians)

Mixed Optimization -- En-DIIS/RFO-DIIS

Update second derivatives using D2CorX and points 54 55 56

DE= -2.18D-04 DEPred=-2.15D-04 R= 1.01D+00

TightC=F SS= 1.41D+00 RLast= 1.83D-01 DXNew= 1.3266D+00 5.4884D-01

Trust test= 1.01D+00 RLast= 1.83D-01 DXMaxT set to 7.89D-01

ITU= 1 1 0 1 1 0-1 1 1 1-1 1 0-1 1 0-1 0-1 0

ITU= 0 1-1 0 1 1 1 1 1 1 0-1 1 1 1 1 0-1 1

ITU= 1 1 1 1 1 1 1 1 1 1 0 0-1 0 0

Use linear search instead of GDIIS.

|                 |         |         |         |         |         |
|-----------------|---------|---------|---------|---------|---------|
| Eigenvalues --- | 0.00076 | 0.00311 | 0.00431 | 0.00869 | 0.00936 |
| Eigenvalues --- | 0.01064 | 0.01563 | 0.01707 | 0.02119 | 0.02225 |
| Eigenvalues --- | 0.02335 | 0.03009 | 0.03034 | 0.03206 | 0.03888 |
| Eigenvalues --- | 0.04390 | 0.04991 | 0.05529 | 0.06407 | 0.07873 |
| Eigenvalues --- | 0.08629 | 0.09137 | 0.09634 | 0.13486 | 0.14307 |
| Eigenvalues --- | 0.14725 | 0.15584 | 0.15901 | 0.16069 | 0.16164 |
| Eigenvalues --- | 0.17083 | 0.18344 | 0.21511 | 0.22917 | 0.23722 |
| Eigenvalues --- | 0.24808 | 0.25307 | 0.25782 | 0.29377 | 0.32707 |
| Eigenvalues --- | 0.33376 | 0.33874 | 0.33900 | 0.34057 | 0.34263 |
| Eigenvalues --- | 0.34502 | 0.34805 | 0.35325 | 0.36315 | 0.36356 |
| Eigenvalues --- | 0.40561 | 0.43112 | 0.44272 | 0.46522 | 0.49096 |
| Eigenvalues --- | 0.53592 | 0.54432 | 0.57908 | 0.60803 | 1.15265 |

RFO step: Lambda=-4.24897840D-04 EMin= 7.55869676D-04

Quartic linear search produced a step of 0.01852.

Iteration 1 RMS(Cart)= 0.05206744 RMS(Int)= 0.00182202

Iteration 2 RMS(Cart)= 0.00311365 RMS(Int)= 0.00005064

Iteration 3 RMS(Cart)= 0.00000750 RMS(Int)= 0.00005023

| Iteration | 4 RMS(Cart)= | 0.00000000 | RMS(Int)=           | 0.00005023        |                    |         |
|-----------|--------------|------------|---------------------|-------------------|--------------------|---------|
| Variable  | Old X        | -DE/DX     | Delta X<br>(Linear) | Delta X<br>(Quad) | Delta X<br>(Total) | New X   |
| R1        | 2.56654      | 0.00019    | -0.00001            | -0.00087          | -0.00091           | 2.56563 |
| R2        | 2.61539      | -0.00010   | -0.00002            | -0.00054          | -0.00056           | 2.61483 |
| R3        | 2.03391      | 0.00003    | 0.00000             | -0.00009          | -0.00009           | 2.03382 |
| R4        | 2.62719      | 0.00072    | 0.00000             | 0.00099           | 0.00097            | 2.62816 |
| R5        | 2.03043      | 0.00010    | -0.00001            | -0.00046          | -0.00047           | 2.02996 |
| R6        | 2.54609      | 0.00001    | -0.00005            | -0.00116          | -0.00119           | 2.54491 |
| R7        | 2.68650      | 0.00026    | -0.00002            | 0.00189           | 0.00187            | 2.68836 |
| R8        | 2.52000      | -0.00010   | -0.00002            | -0.00127          | -0.00125           | 2.51875 |
| R9        | 2.09818      | -0.00186   | 0.00006             | 0.00010           | 0.00016            | 2.09834 |
| R10       | 2.79416      | -0.00062   | 0.00006             | 0.00419           | 0.00425            | 2.79841 |
| R11       | 2.91314      | -0.00101   | 0.00005             | 0.00456           | 0.00461            | 2.91775 |
| R12       | 2.05925      | 0.00009    | -0.00003            | 0.00002           | -0.00001           | 2.05924 |
| R13       | 2.06010      | 0.00011    | 0.00000             | -0.00044          | -0.00044           | 2.05966 |
| R14       | 2.06671      | -0.00012   | 0.00002             | -0.00037          | -0.00035           | 2.06636 |
| R15       | 2.06422      | 0.00000    | -0.00005            | 0.00065           | 0.00059            | 2.06482 |
| R16       | 2.66892      | -0.00026   | -0.00004            | -0.00679          | -0.00683           | 2.66209 |
| R17       | 5.25927      | -0.00016   | 0.00030             | 0.04019           | 0.04049            | 5.29976 |
| R18       | 2.50670      | -0.00010   | -0.00001            | 0.00002           | 0.00001            | 2.50672 |
| R19       | 2.04492      | 0.00033    | -0.00003            | -0.00032          | -0.00035           | 2.04457 |
| R20       | 2.04267      | 0.00012    | -0.00001            | -0.00002          | -0.00004           | 2.04263 |
| R21       | 2.04527      | 0.00018    | -0.00002            | -0.00060          | -0.00062           | 2.04465 |
| R22       | 1.83452      | 0.00069    | 0.00006             | 0.00760           | 0.00766            | 1.84218 |
| A1        | 1.87532      | -0.00042   | 0.00000             | 0.00005           | 0.00004            | 1.87536 |
| A2        | 2.27917      | 0.00009    | -0.00003            | -0.00241          | -0.00249           | 2.27668 |
| A3        | 2.12860      | 0.00033    | 0.00005             | 0.00254           | 0.00254            | 2.13114 |
| A4        | 1.86189      | 0.00017    | -0.00001            | -0.00011          | -0.00012           | 1.86178 |
| A5        | 2.27851      | -0.00020   | -0.00009            | -0.00573          | -0.00582           | 2.27268 |
| A6        | 2.14270      | 0.00004    | 0.00011             | 0.00584           | 0.00595            | 2.14865 |
| A7        | 1.89691      | -0.00020   | 0.00001             | -0.00064          | -0.00060           | 1.89630 |
| A8        | 2.24647      | -0.00007   | 0.00008             | 0.00230           | 0.00233            | 2.24880 |
| A9        | 2.13978      | 0.00027    | -0.00008            | -0.00157          | -0.00171           | 2.13807 |
| A10       | 1.88914      | -0.00012   | 0.00000             | 0.00072           | 0.00066            | 1.88981 |
| A11       | 2.24798      | 0.00035    | -0.00001            | 0.00735           | 0.00711            | 2.25509 |
| A12       | 2.14605      | -0.00024   | 0.00001             | -0.00799          | -0.00820           | 2.13785 |
| A13       | 1.90145      | 0.00058    | 0.00000             | 0.00002           | 0.00005            | 1.90149 |
| A14       | 2.23020      | 0.00169    | 0.00006             | 0.00511           | 0.00506            | 2.23526 |
| A15       | 2.15144      | -0.00227   | -0.00006            | -0.00485          | -0.00503           | 2.14641 |
| A16       | 1.95368      | -0.00242   | -0.00008            | -0.00002          | -0.00009           | 1.95359 |
| A17       | 1.87538      | -0.00061   | 0.00002             | -0.00503          | -0.00501           | 1.87037 |
| A18       | 1.87757      | 0.00178    | -0.00002            | -0.00471          | -0.00473           | 1.87284 |
| A19       | 1.88722      | 0.00067    | 0.00009             | 0.00623           | 0.00631            | 1.89353 |

|     |          |          |          |          |          |          |
|-----|----------|----------|----------|----------|----------|----------|
| A20 | 1.95585  | 0.00078  | 0.00006  | 0.00555  | 0.00560  | 1.96145  |
| A21 | 1.91239  | -0.00025 | -0.00008 | -0.00259 | -0.00271 | 1.90968  |
| A22 | 1.94282  | 0.00136  | 0.00002  | -0.00131 | -0.00130 | 1.94152  |
| A23 | 1.88713  | -0.00280 | -0.00011 | -0.00724 | -0.00735 | 1.87978  |
| A24 | 1.90342  | -0.00053 | 0.00002  | 0.00607  | 0.00609  | 1.90952  |
| A25 | 1.93567  | -0.00049 | -0.00001 | 0.00329  | 0.00327  | 1.93894  |
| A26 | 1.89045  | -0.00032 | 0.00019  | -0.00146 | -0.00127 | 1.88918  |
| A27 | 1.90387  | 0.00285  | -0.00011 | 0.00084  | 0.00074  | 1.90461  |
| A28 | 2.11207  | -0.00276 | -0.00064 | -0.07261 | -0.07325 | 2.03882  |
| A29 | 2.17977  | -0.00046 | 0.00011  | 0.00504  | 0.00515  | 2.18491  |
| A30 | 1.95703  | 0.00018  | -0.00009 | -0.00448 | -0.00458 | 1.95246  |
| A31 | 2.14639  | 0.00028  | -0.00002 | -0.00056 | -0.00059 | 2.14579  |
| A32 | 2.07981  | -0.00007 | 0.00000  | -0.00081 | -0.00082 | 2.07900  |
| A33 | 2.15726  | 0.00010  | 0.00006  | 0.00357  | 0.00363  | 2.16089  |
| A34 | 2.04611  | -0.00003 | -0.00007 | -0.00274 | -0.00281 | 2.04330  |
| A35 | 1.84894  | 0.00030  | -0.00014 | -0.01137 | -0.01150 | 1.83743  |
| D1  | 0.00267  | -0.00005 | -0.00007 | -0.00468 | -0.00478 | -0.00211 |
| D2  | -3.12468 | -0.00024 | -0.00020 | -0.00558 | -0.00577 | -3.13045 |
| D3  | 3.12914  | 0.00025  | 0.00033  | 0.00988  | 0.01016  | 3.13930  |
| D4  | 0.00179  | 0.00005  | 0.00019  | 0.00898  | 0.00917  | 0.01097  |
| D5  | -0.00848 | 0.00028  | 0.00012  | 0.00533  | 0.00548  | -0.00300 |
| D6  | -3.13537 | 0.00043  | -0.00005 | -0.01600 | -0.01606 | 3.13175  |
| D7  | -3.13654 | 0.00002  | -0.00023 | -0.00766 | -0.00789 | 3.13875  |
| D8  | 0.01975  | 0.00017  | -0.00040 | -0.02898 | -0.02944 | -0.00968 |
| D9  | 0.00397  | -0.00020 | 0.00000  | 0.00247  | 0.00250  | 0.00646  |
| D10 | 3.13773  | -0.00009 | 0.00033  | 0.01488  | 0.01528  | -3.13018 |
| D11 | 3.13269  | -0.00003 | 0.00012  | 0.00317  | 0.00328  | 3.13597  |
| D12 | -0.01674 | 0.00008  | 0.00045  | 0.01558  | 0.01606  | -0.00068 |
| D13 | -0.00929 | 0.00038  | 0.00008  | 0.00082  | 0.00089  | -0.00840 |
| D14 | 3.12975  | -0.00003 | 0.00035  | 0.03458  | 0.03506  | -3.11837 |
| D15 | 3.13956  | 0.00028  | -0.00024 | -0.01069 | -0.01094 | 3.12862  |
| D16 | -0.00458 | -0.00013 | 0.00003  | 0.02306  | 0.02323  | 0.01865  |
| D17 | -0.03274 | 0.00003  | 0.00034  | 0.01639  | 0.01671  | -0.01603 |
| D18 | 3.10908  | 0.00005  | 0.00023  | 0.00927  | 0.00949  | 3.11858  |
| D19 | 3.10005  | 0.00015  | 0.00072  | 0.03034  | 0.03107  | 3.13112  |
| D20 | -0.04132 | 0.00017  | 0.00062  | 0.02323  | 0.02386  | -0.01746 |
| D21 | 0.01098  | -0.00041 | -0.00012 | -0.00377 | -0.00391 | 0.00708  |
| D22 | 3.13868  | -0.00051 | 0.00004  | 0.01649  | 0.01641  | -3.12810 |
| D23 | -3.12824 | -0.00003 | -0.00037 | -0.03515 | -0.03532 | 3.11962  |
| D24 | -0.00055 | -0.00013 | -0.00021 | -0.01489 | -0.01500 | -0.01555 |
| D25 | 1.86373  | 0.00042  | 0.00045  | 0.06370  | 0.06413  | 1.92786  |
| D26 | -2.34999 | -0.00054 | 0.00053  | 0.06813  | 0.06863  | -2.28136 |
| D27 | -0.29225 | -0.00023 | 0.00044  | 0.06000  | 0.06043  | -0.23181 |
| D28 | -1.26123 | 0.00056  | 0.00025  | 0.03952  | 0.03978  | -1.22145 |

|     |          |          |          |          |          |          |
|-----|----------|----------|----------|----------|----------|----------|
| D29 | 0.80823  | -0.00040 | 0.00034  | 0.04395  | 0.04429  | 0.85253  |
| D30 | 2.86598  | -0.00008 | 0.00025  | 0.03582  | 0.03609  | 2.90207  |
| D31 | -1.31985 | -0.00117 | -0.00027 | -0.05884 | -0.05911 | -1.37896 |
| D32 | 0.81044  | -0.00279 | -0.00034 | -0.06039 | -0.06072 | 0.74972  |
| D33 | 2.87853  | -0.00128 | -0.00053 | -0.06012 | -0.06065 | 2.81788  |
| D34 | 2.90091  | 0.00057  | -0.00031 | -0.05659 | -0.05690 | 2.84401  |
| D35 | -1.25199 | -0.00104 | -0.00038 | -0.05814 | -0.05851 | -1.31050 |
| D36 | 0.81610  | 0.00047  | -0.00057 | -0.05787 | -0.05844 | 0.75766  |
| D37 | 0.79139  | -0.00004 | -0.00031 | -0.06099 | -0.06131 | 0.73008  |
| D38 | 2.92168  | -0.00166 | -0.00039 | -0.06253 | -0.06292 | 2.85876  |
| D39 | -1.29341 | -0.00015 | -0.00057 | -0.06227 | -0.06285 | -1.35627 |
| D40 | 1.01110  | -0.00140 | 0.00058  | 0.09744  | 0.09803  | 1.10913  |
| D41 | -3.13741 | -0.00186 | 0.00052  | 0.09311  | 0.09363  | -3.04379 |
| D42 | -1.05671 | -0.00076 | 0.00069  | 0.09384  | 0.09453  | -0.96218 |
| D43 | -1.51886 | 0.00169  | -0.00117 | 0.09020  | 0.08903  | -1.42983 |
| D44 | 2.64732  | 0.00054  | -0.00131 | 0.08906  | 0.08774  | 2.73506  |
| D45 | 0.53872  | -0.00035 | -0.00136 | 0.08545  | 0.08410  | 0.62282  |
| D46 | 3.13965  | 0.00000  | 0.00000  | -0.00455 | -0.00455 | 3.13510  |
| D47 | -0.00545 | 0.00008  | 0.00005  | 0.00219  | 0.00223  | -0.00322 |
| D48 | -0.00219 | -0.00002 | 0.00011  | 0.00331  | 0.00342  | 0.00123  |
| D49 | 3.13589  | 0.00006  | 0.00016  | 0.01004  | 0.01021  | -3.13709 |

| Item                 | Value    | Threshold | Converged? |
|----------------------|----------|-----------|------------|
| Maximum Force        | 0.002846 | 0.000450  | NO         |
| RMS Force            | 0.000864 | 0.000300  | NO         |
| Maximum Displacement | 0.230773 | 0.001800  | NO         |
| RMS Displacement     | 0.051970 | 0.001200  | NO         |

Predicted change in Energy=-2.374967D-04

GradGradGradGradGradGradGradGradGradGradGradGradGradGradGradGradGradGradGrad

Input orientation:

| Center Number | Atomic Number | Atomic Type | Coordinates (Angstroms) |           |           |
|---------------|---------------|-------------|-------------------------|-----------|-----------|
|               |               |             | X                       | Y         | Z         |
| 1             | 6             | 0           | -0.623166               | -2.419863 | -1.097822 |
| 2             | 6             | 0           | -1.925416               | -2.058727 | -1.228215 |
| 3             | 7             | 0           | -2.097344               | -0.905154 | -0.470634 |
| 4             | 6             | 0           | -0.918309               | -0.580678 | 0.093468  |
| 5             | 7             | 0           | -0.015671               | -1.490888 | -0.271621 |
| 6             | 6             | 0           | 1.393763                | -1.455274 | 0.181325  |
| 7             | 6             | 0           | 2.174183                | -0.284115 | -0.453730 |
| 8             | 1             | 0           | -0.083517               | -3.250561 | -1.518572 |
| 9             | 1             | 0           | -2.722991               | -2.525154 | -1.776159 |
| 10            | 1             | 0           | 1.380824                | -1.316271 | 1.262049  |

|    |    |   |           |           |           |
|----|----|---|-----------|-----------|-----------|
| 11 | 1  | 0 | 1.834564  | -2.423868 | -0.054159 |
| 12 | 1  | 0 | 2.475489  | -0.518272 | -1.478458 |
| 13 | 1  | 0 | 1.530554  | 0.598389  | -0.425026 |
| 14 | 35 | 0 | 0.812416  | 1.558627  | 2.110225  |
| 15 | 1  | 0 | -0.674750 | 0.260362  | 0.776337  |
| 16 | 6  | 0 | -3.278906 | -0.139641 | -0.266307 |
| 17 | 6  | 0 | -4.462898 | -0.403316 | -0.803179 |
| 18 | 1  | 0 | -3.106642 | 0.698361  | 0.396015  |
| 19 | 1  | 0 | -5.299154 | 0.242714  | -0.575807 |
| 20 | 1  | 0 | -4.651763 | -1.239248 | -1.463662 |
| 21 | 8  | 0 | 3.336650  | -0.032335 | 0.301094  |
| 22 | 1  | 0 | 3.042433  | 0.518034  | 1.049991  |

-----  
Distance matrix (angstroms):

|    |    | 1        | 2        | 3        | 4        | 5        |
|----|----|----------|----------|----------|----------|----------|
| 1  | C  | 0.000000 |          |          |          |          |
| 2  | C  | 1.357673 | 0.000000 |          |          |          |
| 3  | N  | 2.204746 | 1.390762 | 0.000000 |          |          |
| 4  | C  | 2.211081 | 2.223902 | 1.346707 | 0.000000 |          |
| 5  | N  | 1.383710 | 2.210122 | 2.171648 | 1.332865 | 0.000000 |
| 6  | C  | 2.575782 | 3.656215 | 3.593816 | 2.473523 | 1.480856 |
| 7  | C  | 3.577909 | 4.533849 | 4.316470 | 3.154501 | 2.506975 |
| 8  | H  | 1.076249 | 2.213000 | 3.264139 | 3.228595 | 2.157762 |
| 9  | H  | 2.209184 | 1.074208 | 2.172609 | 3.245516 | 3.265414 |
| 10 | H  | 3.286774 | 4.205221 | 3.907539 | 2.681920 | 2.081546 |
| 11 | H  | 2.670147 | 3.955905 | 4.235545 | 3.316241 | 2.083533 |
| 12 | H  | 3.655488 | 4.669431 | 4.698530 | 3.740682 | 2.933993 |
| 13 | H  | 3.768422 | 4.432731 | 3.927386 | 2.766941 | 2.603732 |
| 14 | Br | 5.308563 | 5.632598 | 4.604102 | 3.411649 | 3.957078 |
| 15 | H  | 3.270893 | 3.310675 | 2.221967 | 1.110396 | 2.144640 |
| 16 | C  | 3.597747 | 2.537734 | 1.422621 | 2.428244 | 3.531940 |
| 17 | C  | 4.347047 | 3.059388 | 2.440958 | 3.660539 | 4.609035 |
| 18 | H  | 4.257055 | 3.411004 | 2.083512 | 2.552699 | 3.846121 |
| 19 | H  | 5.406170 | 4.135743 | 3.402977 | 4.507516 | 5.568940 |
| 20 | H  | 4.213939 | 2.856562 | 2.760938 | 4.098420 | 4.793499 |
| 21 | O  | 4.830880 | 5.842464 | 5.557487 | 4.295167 | 3.700464 |
| 22 | H  | 5.165361 | 6.042304 | 5.545726 | 4.220140 | 3.890299 |
|    |    | 6        | 7        | 8        | 9        | 10       |
| 6  | C  | 0.000000 |          |          |          |          |
| 7  | C  | 1.544008 | 0.000000 |          |          |          |
| 8  | H  | 2.880115 | 3.876970 | 0.000000 |          |          |
| 9  | H  | 4.682313 | 5.545574 | 2.749435 | 0.000000 |          |
| 10 | H  | 1.089703 | 2.153755 | 3.690207 | 5.247229 | 0.000000 |
| 11 | H  | 1.089923 | 2.203076 | 2.550874 | 4.873074 | 1.779060 |



|    |    |          |          |          |          |          |
|----|----|----------|----------|----------|----------|----------|
| 12 | H  | 2.191570 | 1.093472 | 3.743731 | 5.580358 | 3.057036 |
| 13 | H  | 2.145670 | 1.092654 | 4.314566 | 5.447452 | 2.556279 |
| 14 | Br | 3.625220 | 3.438601 | 6.090908 | 6.654349 | 3.050825 |
| 15 | H  | 2.752489 | 3.150546 | 4.235888 | 4.297631 | 2.635731 |
| 16 | C  | 4.874946 | 5.458221 | 4.632117 | 2.877389 | 5.043155 |
| 17 | C  | 6.031281 | 6.647343 | 5.272340 | 2.911385 | 6.264802 |
| 18 | H  | 4.993784 | 5.438238 | 5.329063 | 3.905967 | 4.994608 |
| 19 | H  | 6.946333 | 7.492877 | 6.347806 | 3.967185 | 7.101426 |
| 20 | H  | 6.269054 | 6.966044 | 4.991720 | 2.339096 | 6.620237 |
| 21 | O  | 2.411204 | 1.408717 | 5.036438 | 6.873746 | 2.529265 |
| 22 | H  | 2.714154 | 1.912715 | 5.529140 | 7.105508 | 2.484067 |
|    |    | 11       | 12       | 13       | 14       | 15       |
| 11 | H  | 0.000000 |          |          |          |          |
| 12 | H  | 2.463881 | 0.000000 |          |          |          |
| 13 | H  | 3.060065 | 1.802651 | 0.000000 |          |          |
| 14 | Br | 4.646463 | 4.467434 | 2.804510 | 0.000000 |          |
| 15 | H  | 3.767157 | 3.951503 | 2.533950 | 2.382523 | 0.000000 |
| 16 | C  | 5.604487 | 5.892854 | 4.868345 | 5.027021 | 2.833502 |
| 17 | C  | 6.655951 | 6.972118 | 6.088340 | 6.337672 | 4.157572 |
| 18 | H  | 5.862293 | 6.012821 | 4.710380 | 4.363208 | 2.500117 |
| 19 | H  | 7.633656 | 7.863774 | 6.840625 | 6.804240 | 4.818061 |
| 20 | H  | 6.742585 | 7.163640 | 6.532741 | 7.103381 | 4.804483 |
| 21 | O  | 2.846383 | 2.035814 | 2.046227 | 3.489394 | 4.050044 |
| 22 | H  | 3.366435 | 2.790772 | 2.113743 | 2.679535 | 3.736139 |
|    |    | 16       | 17       | 18       | 19       | 20       |
| 16 | C  | 0.000000 |          |          |          |          |
| 17 | C  | 1.326497 | 0.000000 |          |          |          |
| 18 | H  | 1.081939 | 2.119243 | 0.000000 |          |          |
| 19 | H  | 2.079275 | 1.080914 | 2.441139 | 0.000000 |          |
| 20 | H  | 2.127799 | 1.081984 | 3.098407 | 1.844888 | 0.000000 |
| 21 | O  | 6.640711 | 7.886063 | 6.485286 | 8.684567 | 8.269567 |
| 22 | H  | 6.490339 | 7.785443 | 6.186382 | 8.503005 | 8.282943 |
|    |    | 21       | 22       |          |          |          |
| 21 | O  | 0.000000 |          |          |          |          |
| 22 | H  | 0.974841 | 0.000000 |          |          |          |

Stoichiometry C7H11BrN2O

Framework group C1[X(C7H11BrN2O)]

Deg. of freedom 60

Full point group C1 NOp 1

Largest Abelian subgroup C1 NOp 1

Largest concise Abelian subgroup C1 NOp 1

Standard orientation:

-----  
Center Atomic Atomic Coordinates (Angstroms)

| Number | Number | Type | X         | Y         | Z         |
|--------|--------|------|-----------|-----------|-----------|
| 1      | 6      | 0    | -1.926649 | -1.981206 | 0.341544  |
| 2      | 6      | 0    | -2.917553 | -1.077380 | 0.130632  |
| 3      | 7      | 0    | -2.303435 | 0.162561  | -0.009455 |
| 4      | 6      | 0    | -0.971786 | -0.000721 | 0.107458  |
| 5      | 7      | 0    | -0.726607 | -1.292508 | 0.325869  |
| 6      | 6      | 0    | 0.638561  | -1.832176 | 0.520823  |
| 7      | 6      | 0    | 1.464873  | -1.795367 | -0.782947 |
| 8      | 1      | 0    | -1.973796 | -3.044701 | 0.499871  |
| 9      | 1      | 0    | -3.981929 | -1.213876 | 0.081696  |
| 10     | 1      | 0    | 1.131233  | -1.201238 | 1.260177  |
| 11     | 1      | 0    | 0.534417  | -2.841866 | 0.917827  |
| 12     | 1      | 0    | 1.197128  | -2.623291 | -1.445168 |
| 13     | 1      | 0    | 1.282657  | -0.831735 | -1.264719 |
| 14     | 35     | 0    | 2.113007  | 1.456317  | 0.128341  |
| 15     | 1      | 0    | -0.165294 | 0.761679  | 0.071460  |
| 16     | 6      | 0    | -2.900953 | 1.434095  | -0.233111 |
| 17     | 6      | 0    | -4.202139 | 1.654206  | -0.367499 |
| 18     | 1      | 0    | -2.163003 | 2.224127  | -0.276374 |
| 19     | 1      | 0    | -4.550766 | 2.664541  | -0.528928 |
| 20     | 1      | 0    | -4.952228 | 0.875719  | -0.322633 |
| 21     | 8      | 0    | 2.834570  | -1.904410 | -0.472269 |
| 22     | 1      | 0    | 3.113934  | -1.004254 | -0.223292 |

-----

Rotational constants (GHZ):      0.9864826      0.4297936      0.3095833

Standard basis: 6-311++G(d,p) (5D, 7F)

There are    358 symmetry adapted cartesian basis functions of A    symmetry.

There are    345 symmetry adapted basis functions of A    symmetry.

    345 basis functions,    553 primitive gaussians,    358 cartesian basis functions

    55 alpha electrons      55 beta electrons

        nuclear repulsion energy      845.8919040543 Hartrees.

NAtoms=    22 NActive=    22 NUniq=    22 SFac= 1.00D+00 NAtFMM=    60 NAOKFM=F

Big=F

Integral buffers will be    131072 words long.

Raffenetti 2 integral format.

Two-electron integral symmetry is turned on.

One-electron integrals computed using PRISM.

NBasis=    345 RedAO= T EigKep= 4.91D-06    NBF=    345

NBsUse=    345 1.00D-06 EigRej= -1.00D+00    NBFU=    345

Initial guess from the checkpoint file: ". "

B after Tr=    0.000000    0.000000    0.000000

        Rot=    0.999948    -0.002830    -0.000361    0.009765 Ang=    -1.17 deg.

ExpMin= 3.50D-02 ExpMax= 4.40D+05 ExpMxC= 1.51D+04 IAcc=3 IRadAn=      5 AccDes=

0.00D+00

Harris functional with IExCor= 402 and IRadAn= 5 diagonalized for initial guess.  
HarFok: IExCor= 402 AccDes= 0.00D+00 IRadAn= 5 IDoV= 1 UseB2=F ITyADJ=14  
ICtDFT= 3500011 ScaDFX= 1.000000 1.000000 1.000000 1.000000  
FoFCou: FMM=F IPFlag= 0 FMFlag= 100000 FMFlg1= 0  
NFxFlg= 0 DoJE=T BraDBF=F KetDBF=T FulRan=T  
wScrn= 0.000000 ICntrl= 500 IOpCl= 0 l1Cent= 20000004 NGrid=  
0  
NMat0= 1 NMatS0= 1 NMatT0= 0 NMatD0= 1 NMtDS0= 0  
NMtDT0= 0

Petite list used in FoFCou.

Keep R1 ints in memory in canonical form, NReq=1804729152.

Requested convergence on RMS density matrix=1.00D-08 within 128 cycles.

Requested convergence on MAX density matrix=1.00D-06.

Requested convergence on energy=1.00D-06.

No special actions if energy rises.

SCF Done: E(RB3LYP) = -3032.34166922 A.U. after 12 cycles

NFock= 12 Conv=0.48D-08 -V/T= 2.0017

Calling FoFJK, ICntrl= 2127 FMM=F ISym2X=0 l1Cent= 0 IOpClX= 0 NMat=1 NMatS=1  
NMatT=0.

\*\*\*\*\* Axes restored to original set \*\*\*\*\*

| Center | Atomic | Forces (Hartrees/Bohr) |              |              |
|--------|--------|------------------------|--------------|--------------|
| Number | Number | X                      | Y            | Z            |
| 1      | 6      | 0.000871415            | 0.000426043  | -0.000432457 |
| 2      | 6      | -0.000013649           | -0.000090793 | 0.000469294  |
| 3      | 7      | -0.001590639           | 0.001135090  | -0.000593873 |
| 4      | 6      | 0.002769745            | 0.002298641  | 0.004480809  |
| 5      | 7      | 0.000385590            | 0.000231564  | 0.001083417  |
| 6      | 6      | 0.000354728            | -0.001423305 | -0.001576194 |
| 7      | 6      | 0.001323873            | 0.000397147  | 0.004038978  |
| 8      | 1      | 0.000127336            | -0.000058341 | 0.000147816  |
| 9      | 1      | -0.000591276           | 0.000437058  | -0.000127261 |
| 10     | 1      | 0.000101720            | 0.000679649  | 0.000009622  |
| 11     | 1      | 0.000302810            | -0.000174705 | -0.000135968 |
| 12     | 1      | -0.000587332           | 0.000224120  | 0.000064902  |
| 13     | 1      | -0.001181693           | 0.000174416  | -0.004481178 |
| 14     | 35     | -0.001636280           | -0.002233345 | -0.000856685 |
| 15     | 1      | -0.001142992           | -0.001758393 | -0.002298712 |
| 16     | 6      | -0.000074415           | 0.000003246  | 0.000328490  |
| 17     | 6      | 0.000511459            | -0.000359051 | 0.000071689  |
| 18     | 1      | -0.000164130           | 0.000603360  | 0.000062492  |
| 19     | 1      | -0.000007164           | 0.000257893  | 0.000054720  |

|    |   |              |              |              |
|----|---|--------------|--------------|--------------|
| 20 | 1 | 0.000269700  | -0.000385572 | -0.000325076 |
| 21 | 8 | -0.000373775 | -0.000981754 | -0.000574355 |
| 22 | 1 | 0.000344970  | 0.000597032  | 0.000589529  |

-----  
Cartesian Forces: Max 0.004481178 RMS 0.001276559

GradGradGradGradGradGradGradGradGradGradGradGradGradGradGradGradGradGradGrad

Berny optimization.

Using GEDIIS/GDIIS optimizer.

FormGI is forming the generalized inverse of G from B-inverse, IUseBI=4.

Internal Forces: Max 0.005026979 RMS 0.001604534

Search for a local minimum.

Step number 57 out of a maximum of 116

All quantities printed in internal units (Hartrees-Bohrs-Radians)

Mixed Optimization -- RFO/linear search

Update second derivatives using D2CorX and points 55 56 57

DE= -9.82D-05 DEPred=-2.37D-04 R= 4.14D-01

Trust test= 4.14D-01 RLast= 3.40D-01 DXMaxT set to 7.89D-01

ITU= 0 1 1 0 1 1 0-1 1 1 1-1 1 0-1 1 0-1 0-1

ITU= 0 0 1-1 0 1 1 1 1 1 1 0-1 1 1 1 1 0-1

ITU= 1 1 1 1 1 1 1 1 1 1 1 0 0-1 0 0

Use linear search instead of GDIIS.

|                 |         |         |         |         |         |
|-----------------|---------|---------|---------|---------|---------|
| Eigenvalues --- | 0.00141 | 0.00219 | 0.00576 | 0.00865 | 0.01018 |
| Eigenvalues --- | 0.01065 | 0.01569 | 0.01684 | 0.02140 | 0.02219 |
| Eigenvalues --- | 0.02384 | 0.03021 | 0.03151 | 0.03235 | 0.03896 |
| Eigenvalues --- | 0.04335 | 0.04780 | 0.05420 | 0.06202 | 0.08182 |
| Eigenvalues --- | 0.08460 | 0.08846 | 0.09435 | 0.13122 | 0.14261 |
| Eigenvalues --- | 0.14711 | 0.15604 | 0.15905 | 0.16090 | 0.16155 |
| Eigenvalues --- | 0.17210 | 0.18334 | 0.21751 | 0.23001 | 0.23796 |
| Eigenvalues --- | 0.24407 | 0.25289 | 0.25614 | 0.29419 | 0.32609 |
| Eigenvalues --- | 0.33348 | 0.33874 | 0.33900 | 0.34058 | 0.34272 |
| Eigenvalues --- | 0.34688 | 0.34809 | 0.35374 | 0.36315 | 0.36356 |
| Eigenvalues --- | 0.40786 | 0.43141 | 0.44255 | 0.46537 | 0.48985 |
| Eigenvalues --- | 0.53521 | 0.54120 | 0.58085 | 0.60803 | 1.20809 |

RFO step: Lambda=-4.28133299D-04 EMin= 1.40704394D-03

Quartic linear search produced a step of -0.34374.

Iteration 1 RMS(Cart)= 0.04578906 RMS(Int)= 0.00107714

Iteration 2 RMS(Cart)= 0.00154611 RMS(Int)= 0.00002681

Iteration 3 RMS(Cart)= 0.00000116 RMS(Int)= 0.00002679

Iteration 4 RMS(Cart)= 0.00000000 RMS(Int)= 0.00002679

| Variable | Old X   | -DE/DX   | Delta X<br>(Linear) | Delta X<br>(Quad) | Delta X<br>(Total) | New X   |
|----------|---------|----------|---------------------|-------------------|--------------------|---------|
| R1       | 2.56563 | 0.00121  | 0.00031             | -0.00079          | -0.00045           | 2.56518 |
| R2       | 2.61483 | -0.00071 | 0.00019             | 0.00023           | 0.00043            | 2.61526 |

|     |         |          |          |          |          |         |
|-----|---------|----------|----------|----------|----------|---------|
| R3  | 2.03382 | 0.00005  | 0.00003  | -0.00009 | -0.00006 | 2.03376 |
| R4  | 2.62816 | 0.00036  | -0.00033 | 0.00109  | 0.00076  | 2.62892 |
| R5  | 2.02996 | 0.00031  | 0.00016  | -0.00042 | -0.00026 | 2.02970 |
| R6  | 2.54491 | 0.00045  | 0.00041  | -0.00174 | -0.00135 | 2.54355 |
| R7  | 2.68836 | -0.00036 | -0.00064 | -0.00011 | -0.00075 | 2.68761 |
| R8  | 2.51875 | 0.00073  | 0.00043  | -0.00058 | -0.00017 | 2.51857 |
| R9  | 2.09834 | -0.00300 | -0.00006 | 0.00440  | 0.00435  | 2.10269 |
| R10 | 2.79841 | -0.00225 | -0.00146 | 0.00378  | 0.00232  | 2.80073 |
| R11 | 2.91775 | -0.00194 | -0.00158 | 0.00376  | 0.00217  | 2.91993 |
| R12 | 2.05924 | 0.00009  | 0.00000  | -0.00114 | -0.00114 | 2.05810 |
| R13 | 2.05966 | 0.00031  | 0.00015  | 0.00013  | 0.00028  | 2.05993 |
| R14 | 2.06636 | -0.00027 | 0.00012  | 0.00046  | 0.00058  | 2.06695 |
| R15 | 2.06482 | -0.00014 | -0.00020 | 0.00005  | -0.00016 | 2.06466 |
| R16 | 2.66209 | -0.00008 | 0.00235  | -0.00476 | -0.00241 | 2.65968 |
| R17 | 5.29976 | -0.00112 | -0.01392 | 0.13687  | 0.12295  | 5.42271 |
| R18 | 2.50672 | -0.00051 | 0.00000  | -0.00078 | -0.00079 | 2.50593 |
| R19 | 2.04457 | 0.00048  | 0.00012  | -0.00047 | -0.00035 | 2.04422 |
| R20 | 2.04263 | 0.00017  | 0.00001  | -0.00042 | -0.00041 | 2.04223 |
| R21 | 2.04465 | 0.00045  | 0.00021  | -0.00060 | -0.00039 | 2.04427 |
| R22 | 1.84218 | 0.00069  | -0.00263 | 0.00693  | 0.00430  | 1.84648 |
| A1  | 1.87536 | -0.00075 | -0.00001 | 0.00006  | 0.00000  | 1.87536 |
| A2  | 2.27668 | 0.00054  | 0.00085  | -0.00351 | -0.00278 | 2.27391 |
| A3  | 2.13114 | 0.00022  | -0.00087 | 0.00346  | 0.00246  | 2.13360 |
| A4  | 1.86178 | 0.00058  | 0.00004  | -0.00030 | -0.00024 | 1.86153 |
| A5  | 2.27268 | 0.00037  | 0.00200  | -0.00772 | -0.00577 | 2.26692 |
| A6  | 2.14865 | -0.00094 | -0.00205 | 0.00818  | 0.00608  | 2.15473 |
| A7  | 1.89630 | -0.00044 | 0.00021  | -0.00009 | 0.00010  | 1.89641 |
| A8  | 2.24880 | -0.00066 | -0.00080 | 0.00460  | 0.00379  | 2.25259 |
| A9  | 2.13807 | 0.00110  | 0.00059  | -0.00458 | -0.00400 | 2.13407 |
| A10 | 1.88981 | -0.00019 | -0.00023 | 0.00059  | 0.00038  | 1.89018 |
| A11 | 2.25509 | -0.00057 | -0.00244 | -0.00082 | -0.00320 | 2.25189 |
| A12 | 2.13785 | 0.00078  | 0.00282  | 0.00017  | 0.00305  | 2.14090 |
| A13 | 1.90149 | 0.00081  | -0.00002 | -0.00023 | -0.00023 | 1.90127 |
| A14 | 2.23526 | 0.00340  | -0.00174 | 0.00292  | 0.00121  | 2.23647 |
| A15 | 2.14641 | -0.00420 | 0.00173  | -0.00273 | -0.00098 | 2.14543 |
| A16 | 1.95359 | -0.00424 | 0.00003  | -0.00545 | -0.00542 | 1.94817 |
| A17 | 1.87037 | -0.00072 | 0.00172  | -0.00105 | 0.00068  | 1.87105 |
| A18 | 1.87284 | 0.00362  | 0.00163  | -0.00189 | -0.00027 | 1.87257 |
| A19 | 1.89353 | 0.00045  | -0.00217 | 0.01226  | 0.01010  | 1.90363 |
| A20 | 1.96145 | 0.00115  | -0.00193 | 0.00230  | 0.00037  | 1.96182 |
| A21 | 1.90968 | -0.00030 | 0.00093  | -0.00666 | -0.00572 | 1.90396 |
| A22 | 1.94152 | 0.00291  | 0.00045  | -0.00701 | -0.00659 | 1.93493 |
| A23 | 1.87978 | -0.00449 | 0.00253  | -0.00502 | -0.00254 | 1.87724 |
| A24 | 1.90952 | -0.00128 | -0.00209 | 0.00697  | 0.00487  | 1.91439 |

|     |          |          |          |          |          |          |
|-----|----------|----------|----------|----------|----------|----------|
| A25 | 1.93894  | -0.00108 | -0.00112 | -0.00641 | -0.00757 | 1.93137  |
| A26 | 1.88918  | -0.00050 | 0.00044  | 0.00318  | 0.00364  | 1.89281  |
| A27 | 1.90461  | 0.00451  | -0.00025 | 0.00879  | 0.00853  | 1.91314  |
| A28 | 2.03882  | -0.00212 | 0.02518  | -0.04246 | -0.01728 | 2.02154  |
| A29 | 2.18491  | -0.00177 | -0.00177 | 0.00534  | 0.00357  | 2.18849  |
| A30 | 1.95246  | 0.00120  | 0.00157  | -0.00612 | -0.00455 | 1.94791  |
| A31 | 2.14579  | 0.00056  | 0.00020  | 0.00075  | 0.00095  | 2.14675  |
| A32 | 2.07900  | 0.00000  | 0.00028  | -0.00042 | -0.00014 | 2.07886  |
| A33 | 2.16089  | -0.00035 | -0.00125 | 0.00505  | 0.00381  | 2.16469  |
| A34 | 2.04330  | 0.00035  | 0.00097  | -0.00465 | -0.00369 | 2.03961  |
| A35 | 1.83743  | 0.00100  | 0.00395  | -0.00297 | 0.00098  | 1.83842  |
| D1  | -0.00211 | 0.00010  | 0.00164  | -0.00630 | -0.00464 | -0.00676 |
| D2  | -3.13045 | -0.00019 | 0.00198  | -0.01964 | -0.01759 | 3.13515  |
| D3  | 3.13930  | 0.00018  | -0.00349 | 0.02632  | 0.02279  | -3.12110 |
| D4  | 0.01097  | -0.00012 | -0.00315 | 0.01298  | 0.00984  | 0.02081  |
| D5  | -0.00300 | 0.00009  | -0.00188 | 0.00841  | 0.00652  | 0.00351  |
| D6  | 3.13175  | 0.00031  | 0.00552  | 0.00166  | 0.00720  | 3.13895  |
| D7  | 3.13875  | 0.00002  | 0.00271  | -0.02090 | -0.01822 | 3.12053  |
| D8  | -0.00968 | 0.00024  | 0.01012  | -0.02765 | -0.01754 | -0.02722 |
| D9  | 0.00646  | -0.00026 | -0.00086 | 0.00212  | 0.00125  | 0.00771  |
| D10 | -3.13018 | -0.00028 | -0.00525 | 0.01815  | 0.01290  | -3.11729 |
| D11 | 3.13597  | 0.00002  | -0.00113 | 0.01414  | 0.01305  | -3.13417 |
| D12 | -0.00068 | 0.00000  | -0.00552 | 0.03017  | 0.02470  | 0.02402  |
| D13 | -0.00840 | 0.00032  | -0.00030 | 0.00309  | 0.00280  | -0.00560 |
| D14 | -3.11837 | -0.00029 | -0.01205 | 0.00515  | -0.00694 | -3.12531 |
| D15 | 3.12862  | 0.00034  | 0.00376  | -0.01168 | -0.00787 | 3.12075  |
| D16 | 0.01865  | -0.00028 | -0.00799 | -0.00962 | -0.01761 | 0.00104  |
| D17 | -0.01603 | -0.00002 | -0.00574 | 0.09203  | 0.08629  | 0.07026  |
| D18 | 3.11858  | 0.00015  | -0.00326 | 0.08664  | 0.08338  | -3.08123 |
| D19 | 3.13112  | -0.00004 | -0.01068 | 0.11002  | 0.09933  | -3.05274 |
| D20 | -0.01746 | 0.00013  | -0.00820 | 0.10463  | 0.09642  | 0.07896  |
| D21 | 0.00708  | -0.00025 | 0.00134  | -0.00707 | -0.00574 | 0.00134  |
| D22 | -3.12810 | -0.00049 | -0.00564 | -0.00077 | -0.00639 | -3.13448 |
| D23 | 3.11962  | 0.00028  | 0.01214  | -0.00899 | 0.00312  | 3.12274  |
| D24 | -0.01555 | 0.00004  | 0.00516  | -0.00268 | 0.00247  | -0.01308 |
| D25 | 1.92786  | 0.00094  | -0.02204 | -0.00520 | -0.02724 | 1.90062  |
| D26 | -2.28136 | -0.00140 | -0.02359 | 0.00599  | -0.01760 | -2.29895 |
| D27 | -0.23181 | -0.00028 | -0.02077 | -0.00327 | -0.02405 | -0.25586 |
| D28 | -1.22145 | 0.00121  | -0.01368 | -0.01279 | -0.02647 | -1.24791 |
| D29 | 0.85253  | -0.00113 | -0.01522 | -0.00160 | -0.01683 | 0.83570  |
| D30 | 2.90207  | -0.00001 | -0.01241 | -0.01087 | -0.02328 | 2.87879  |
| D31 | -1.37896 | -0.00254 | 0.02032  | -0.01527 | 0.00503  | -1.37393 |
| D32 | 0.74972  | -0.00503 | 0.02087  | -0.03084 | -0.00996 | 0.73975  |
| D33 | 2.81788  | -0.00291 | 0.02085  | -0.01934 | 0.00151  | 2.81939  |

|     |          |          |          |          |          |          |
|-----|----------|----------|----------|----------|----------|----------|
| D34 | 2.84401  | 0.00058  | 0.01956  | -0.01852 | 0.00102  | 2.84503  |
| D35 | -1.31050 | -0.00191 | 0.02011  | -0.03410 | -0.01397 | -1.32447 |
| D36 | 0.75766  | 0.00021  | 0.02009  | -0.02260 | -0.00250 | 0.75516  |
| D37 | 0.73008  | -0.00007 | 0.02107  | -0.02000 | 0.00106  | 0.73114  |
| D38 | 2.85876  | -0.00257 | 0.02163  | -0.03557 | -0.01393 | 2.84482  |
| D39 | -1.35627 | -0.00045 | 0.02160  | -0.02407 | -0.00246 | -1.35873 |
| D40 | 1.10913  | -0.00470 | -0.03370 | 0.00287  | -0.03085 | 1.07828  |
| D41 | -3.04379 | -0.00471 | -0.03218 | -0.01305 | -0.04521 | -3.08899 |
| D42 | -0.96218 | -0.00311 | -0.03249 | -0.00747 | -0.03997 | -1.00216 |
| D43 | -1.42983 | 0.00187  | -0.03060 | -0.01214 | -0.04276 | -1.47259 |
| D44 | 2.73506  | -0.00061 | -0.03016 | -0.00974 | -0.03990 | 2.69516  |
| D45 | 0.62282  | -0.00168 | -0.02891 | -0.00909 | -0.03799 | 0.58483  |
| D46 | 3.13510  | 0.00018  | 0.00157  | 0.00520  | 0.00676  | -3.14132 |
| D47 | -0.00322 | 0.00001  | -0.00077 | 0.01103  | 0.01026  | 0.00704  |
| D48 | 0.00123  | -0.00001 | -0.00118 | 0.01118  | 0.01000  | 0.01124  |
| D49 | -3.13709 | -0.00018 | -0.00351 | 0.01701  | 0.01351  | -3.12358 |

| Item                 | Value    | Threshold | Converged? |
|----------------------|----------|-----------|------------|
| Maximum Force        | 0.005027 | 0.000450  | NO         |
| RMS Force            | 0.001605 | 0.000300  | NO         |
| Maximum Displacement | 0.216374 | 0.001800  | NO         |
| RMS Displacement     | 0.046126 | 0.001200  | NO         |

Predicted change in Energy=-2.820337D-04

GradGradGradGradGradGradGradGradGradGradGradGradGradGradGradGradGradGradGrad

Input orientation:

| Center Number | Atomic Number | Atomic Type | Coordinates (Angstroms) |           |           |
|---------------|---------------|-------------|-------------------------|-----------|-----------|
|               |               |             | X                       | Y         | Z         |
| 1             | 6             | 0           | -0.615137               | -2.407153 | -1.113496 |
| 2             | 6             | 0           | -1.912006               | -2.035113 | -1.263002 |
| 3             | 7             | 0           | -2.088987               | -0.888511 | -0.495327 |
| 4             | 6             | 0           | -0.918122               | -0.578414 | 0.091704  |
| 5             | 7             | 0           | -0.014303               | -1.488331 | -0.270850 |
| 6             | 6             | 0           | 1.390594                | -1.460514 | 0.200375  |
| 7             | 6             | 0           | 2.185823                | -0.305188 | -0.447965 |
| 8             | 1             | 0           | -0.071705               | -3.227202 | -1.549895 |
| 9             | 1             | 0           | -2.696243               | -2.487942 | -1.840535 |
| 10            | 1             | 0           | 1.365632                | -1.313785 | 1.279258  |
| 11            | 1             | 0           | 1.824510                | -2.436655 | -0.016696 |
| 12            | 1             | 0           | 2.488048                | -0.563987 | -1.466807 |
| 13            | 1             | 0           | 1.542341                | 0.577785  | -0.449310 |
| 14            | 35            | 0           | 0.726502                | 1.533971  | 2.130334  |
| 15            | 1             | 0           | -0.682027               | 0.259693  | 0.784473  |

|    |   |   |           |           |           |
|----|---|---|-----------|-----------|-----------|
| 16 | 6 | 0 | -3.268658 | -0.121395 | -0.288854 |
| 17 | 6 | 0 | -4.472373 | -0.422703 | -0.756587 |
| 18 | 1 | 0 | -3.073795 | 0.753960  | 0.316107  |
| 19 | 1 | 0 | -5.301355 | 0.235097  | -0.537496 |
| 20 | 1 | 0 | -4.689055 | -1.301425 | -1.349162 |
| 21 | 8 | 0 | 3.344262  | -0.044432 | 0.307624  |
| 22 | 1 | 0 | 3.056403  | 0.555366  | 1.023260  |

-----  
Distance matrix (angstroms):

|    |    | 1        | 2        | 3        | 4        | 5        |
|----|----|----------|----------|----------|----------|----------|
| 1  | C  | 0.000000 |          |          |          |          |
| 2  | C  | 1.357437 | 0.000000 |          |          |          |
| 3  | N  | 2.204686 | 1.391166 | 0.000000 |          |          |
| 4  | C  | 2.211016 | 2.223737 | 1.345990 | 0.000000 |          |
| 5  | N  | 1.383938 | 2.210116 | 2.171287 | 1.332772 | 0.000000 |
| 6  | C  | 2.577855 | 3.657705 | 3.594256 | 2.473880 | 1.482081 |
| 7  | C  | 3.564627 | 4.522072 | 4.314685 | 3.162336 | 2.504347 |
| 8  | H  | 1.076217 | 2.211355 | 3.263589 | 3.229140 | 2.159380 |
| 9  | H  | 2.205928 | 1.074070 | 2.176355 | 3.246776 | 3.264343 |
| 10 | H  | 3.293049 | 4.210263 | 3.906968 | 2.677048 | 2.082672 |
| 11 | H  | 2.675017 | 3.959301 | 4.235717 | 3.314640 | 2.084502 |
| 12 | H  | 3.626547 | 4.643945 | 4.690238 | 3.745818 | 2.923437 |
| 13 | H  | 3.742420 | 4.407022 | 3.916463 | 2.771889 | 2.593034 |
| 14 | Br | 5.277772 | 5.587022 | 4.548570 | 3.364962 | 3.930495 |
| 15 | H  | 3.273961 | 3.312270 | 2.221665 | 1.112696 | 2.148290 |
| 16 | C  | 3.598041 | 2.540037 | 1.422225 | 2.424605 | 3.529825 |
| 17 | C  | 4.352436 | 3.067866 | 2.442492 | 3.657396 | 4.609327 |
| 18 | H  | 4.252223 | 3.409145 | 2.079900 | 2.544112 | 3.838343 |
| 19 | H  | 5.410536 | 4.143416 | 3.403466 | 4.502269 | 5.567245 |
| 20 | H  | 4.227882 | 2.873625 | 2.767650 | 4.101070 | 4.801145 |
| 21 | O  | 4.824818 | 5.835926 | 5.556743 | 4.301124 | 3.701275 |
| 22 | H  | 5.179039 | 6.051666 | 5.555711 | 4.236756 | 3.909048 |
|    |    | 6        | 7        | 8        | 9        | 10       |
| 6  | C  | 0.000000 |          |          |          |          |
| 7  | C  | 1.545158 | 0.000000 |          |          |          |
| 8  | H  | 2.884952 | 3.853420 | 0.000000 |          |          |
| 9  | H  | 4.682218 | 5.526141 | 2.742112 | 0.000000 |          |
| 10 | H  | 1.089101 | 2.161778 | 3.705565 | 5.254577 | 0.000000 |
| 11 | H  | 1.090070 | 2.204471 | 2.563454 | 4.875062 | 1.775079 |
| 12 | H  | 2.188073 | 1.093780 | 3.694855 | 5.542396 | 3.059884 |
| 13 | H  | 2.144710 | 1.092571 | 4.277190 | 5.412927 | 2.568503 |
| 14 | Br | 3.623907 | 3.487083 | 6.070419 | 6.607478 | 3.040153 |
| 15 | H  | 2.756092 | 3.172153 | 4.240307 | 4.300840 | 2.629363 |
| 16 | C  | 4.872496 | 5.459896 | 4.632146 | 2.887199 | 5.035614 |



|    |    |          |          |          |          |          |
|----|----|----------|----------|----------|----------|----------|
| 17 | C  | 6.030524 | 6.666381 | 5.278299 | 2.931688 | 6.246679 |
| 18 | H  | 4.984783 | 5.419334 | 5.323924 | 3.911979 | 4.991166 |
| 19 | H  | 6.942747 | 7.507180 | 6.353086 | 3.987412 | 7.081549 |
| 20 | H  | 6.276027 | 7.004898 | 5.006879 | 2.370774 | 6.600605 |
| 21 | O  | 2.415286 | 1.407440 | 5.024861 | 6.860978 | 2.543680 |
| 22 | H  | 2.741502 | 1.913888 | 5.542022 | 7.110273 | 2.533371 |
|    |    | 11       | 12       | 13       | 14       | 15       |
| 11 | H  | 0.000000 |          |          |          |          |
| 12 | H  | 2.459674 | 0.000000 |          |          |          |
| 13 | H  | 3.058370 | 1.798139 | 0.000000 |          |          |
| 14 | Br | 4.645560 | 4.521493 | 2.869573 | 0.000000 |          |
| 15 | H  | 3.767610 | 3.974429 | 2.563438 | 2.327892 | 0.000000 |
| 16 | C  | 5.601327 | 5.892633 | 4.864186 | 4.955200 | 2.826291 |
| 17 | C  | 6.652382 | 6.997988 | 6.105095 | 6.260287 | 4.148163 |
| 18 | H  | 5.855269 | 5.987475 | 4.682479 | 4.282767 | 2.486810 |
| 19 | H  | 7.628069 | 7.885236 | 6.852838 | 6.718590 | 4.804831 |
| 20 | H  | 6.744682 | 7.215848 | 6.570499 | 7.033820 | 4.800600 |
| 21 | O  | 2.852641 | 2.037559 | 2.051103 | 3.558974 | 4.065818 |
| 22 | H  | 3.398715 | 2.788622 | 2.112190 | 2.758935 | 3.757699 |
|    |    | 16       | 17       | 18       | 19       | 20       |
| 16 | C  | 0.000000 |          |          |          |          |
| 17 | C  | 1.326081 | 0.000000 |          |          |          |
| 18 | H  | 1.081756 | 2.119252 | 0.000000 |          |          |
| 19 | H  | 2.078645 | 1.080700 | 2.441287 | 0.000000 |          |
| 20 | H  | 2.129379 | 1.081781 | 3.099483 | 1.842447 | 0.000000 |
| 21 | O  | 6.640212 | 7.897811 | 6.467531 | 8.691320 | 8.298141 |
| 22 | H  | 6.495079 | 7.797881 | 6.174045 | 8.508269 | 8.310727 |
|    |    | 21       | 22       |          |          |          |
| 21 | O  | 0.000000 |          |          |          |          |
| 22 | H  | 0.977116 | 0.000000 |          |          |          |

Stoichiometry C7H11BrN2O

Framework group C1[X(C7H11BrN2O)]

Deg. of freedom 60

Full point group C1 NOp 1

Largest Abelian subgroup C1 NOP 1

Largest concise Abelian subgroup C1 NOp 1

Standard orientation:

| Center<br>Number | Atomic<br>Number | Atomic<br>Type | Coordinates (Angstroms) |           |           |
|------------------|------------------|----------------|-------------------------|-----------|-----------|
|                  |                  |                | X                       | Y         | Z         |
| 1                | 6                | 0              | -1.891261               | -2.000421 | 0.343431  |
| 2                | 6                | 0              | -2.886579               | -1.108247 | 0.106782  |
| 3                | 7                | 0              | -2.280945               | 0.135788  | -0.037881 |

|    |    |   |           |           |           |
|----|----|---|-----------|-----------|-----------|
| 4  | 6  | 0 | -0.950490 | -0.014392 | 0.100056  |
| 5  | 7  | 0 | -0.696576 | -1.301926 | 0.332578  |
| 6  | 6  | 0 | 0.672928  | -1.827463 | 0.544319  |
| 7  | 6  | 0 | 1.491892  | -1.826896 | -0.765953 |
| 8  | 1  | 0 | -1.932549 | -3.065185 | 0.494483  |
| 9  | 1  | 0 | -3.946946 | -1.262739 | 0.033428  |
| 10 | 1  | 0 | 1.159687  | -1.175674 | 1.268459  |
| 11 | 1  | 0 | 0.574511  | -2.825151 | 0.972321  |
| 12 | 1  | 0 | 1.217497  | -2.676953 | -1.397195 |
| 13 | 1  | 0 | 1.290526  | -0.884118 | -1.280086 |
| 14 | 35 | 0 | 2.056296  | 1.496047  | 0.128052  |
| 15 | 1  | 0 | -0.150467 | 0.757958  | 0.060936  |
| 16 | 6  | 0 | -2.881924 | 1.403499  | -0.271235 |
| 17 | 6  | 0 | -4.186221 | 1.637523  | -0.321569 |
| 18 | 1  | 0 | -2.138834 | 2.179479  | -0.397208 |
| 19 | 1  | 0 | -4.532982 | 2.644262  | -0.506350 |
| 20 | 1  | 0 | -4.943419 | 0.877628  | -0.182068 |
| 21 | 8  | 0 | 2.864239  | -1.918483 | -0.467352 |
| 22 | 1  | 0 | 3.151287  | -1.001942 | -0.287598 |

-----

Rotational constants (GHZ):      0.9653302      0.4387101      0.3119283

Standard basis: 6-311++G(d,p) (5D, 7F)

There are    358 symmetry adapted cartesian basis functions of A    symmetry.

There are    345 symmetry adapted basis functions of A    symmetry.

345 basis functions,    553 primitive gaussians,    358 cartesian basis functions

55 alpha electrons      55 beta electrons

nuclear repulsion energy      846.3602460850 Hartrees.

NAtoms=    22 NActive=    22 NUniq=    22 SFac= 1.00D+00 NatFMM=    60 NAOKFM=F

Big=F

Integral buffers will be    131072 words long.

Raffenetti 2 integral format.

Two-electron integral symmetry is turned on.

One-electron integrals computed using PRISM.

NBasis=    345 RedAO= T EigKep=    5.23D-06    NBF=    345

NBsUse=    345 1.00D-06 EigRej= -1.00D+00    NBFU=    345

Initial guess from the checkpoint file:    ""

B after Tr=    0.000000    0.000000    0.000000

Rot=    0.999981    0.002132    0.000396    -0.005778 Ang=    0.71 deg.

ExpMin= 3.50D-02 ExpMax= 4.40D+05 ExpMxC= 1.51D+04 IAcc=3 IRadAn=      5 AccDes=

0.00D+00

Harris functional with IExCor=    402 and IRadAn=      5 diagonalized for initial guess.

HarFok: IExCor=    402 AccDes= 0.00D+00 IRadAn=      5 IDoV= 1 UseB2=F ITyADJ=14

ICtDFT= 3500011 ScaDFX= 1.000000 1.000000 1.000000 1.000000

FoFCou: FMM=F IPFlag=      0 FMFlag=    100000 FMFlg1=      0

NFxFIlg= 0 DoJE=T BraDBF=F KetDBF=T FulRan=T  
wScrnr= 0.000000 ICntrl= 500 IOpCl= 0 l1Cent= 200000004 NGrid= 0  
0  
NMat0= 1 NMatS0= 1 NMatT0= 0 NMatD0= 1 NMtDS0= 0  
NMtDT0= 0

Petite list used in FoFCou.

Keep R1 ints in memory in canonical form, NReq=1804729152.

Requested convergence on RMS density matrix=1.00D-08 within 128 cycles.

Requested convergence on MAX density matrix=1.00D-06.

Requested convergence on energy=1.00D-06.

No special actions if energy rises.

SCF Done: E(RB3LYP) = -3032.34190843 A.U. after 12 cycles

NFock= 12 Conv=0.26D-08 -V/T= 2.0017

Calling FoFJK, ICntrl= 2127 FMM=F ISym2X=0 l1Cent= 0 IOpClX= 0 NMat=1 NMatS=1

NMatT=0.

\*\*\*\*\* Axes restored to original set \*\*\*\*\*

| Center Number | Atomic Number | Forces (Hartrees/Bohr) |              |              |
|---------------|---------------|------------------------|--------------|--------------|
|               |               | X                      | Y            | Z            |
| 1             | 6             | 0.001270927            | 0.001156900  | -0.001531670 |
| 2             | 6             | 0.000043564            | -0.000434312 | 0.000561843  |
| 3             | 7             | -0.002112018           | -0.000095183 | -0.000780473 |
| 4             | 6             | 0.002577026            | 0.002953644  | 0.003843008  |
| 5             | 7             | 0.000915559            | -0.000378326 | 0.002113976  |
| 6             | 6             | -0.000120485           | -0.001904286 | -0.002226234 |
| 7             | 6             | -0.000689796           | -0.000767202 | 0.003445939  |
| 8             | 1             | 0.000215496            | -0.000339261 | 0.000658766  |
| 9             | 1             | -0.001185226           | 0.000734916  | 0.000093737  |
| 10            | 1             | 0.000203657            | 0.001628779  | 0.000213063  |
| 11            | 1             | 0.000335088            | -0.000107997 | -0.000508217 |
| 12            | 1             | -0.000113706           | 0.000342049  | 0.000141342  |
| 13            | 1             | -0.000680963           | 0.000439607  | -0.003794437 |
| 14            | 35            | -0.000503125           | -0.001482566 | -0.001047622 |
| 15            | 1             | -0.000839684           | -0.002280152 | -0.002270572 |
| 16            | 6             | 0.000345092            | 0.000260670  | 0.000415034  |
| 17            | 6             | 0.000010219            | -0.000446906 | -0.000238491 |
| 18            | 1             | -0.000510223           | 0.000846933  | 0.000158466  |
| 19            | 1             | -0.000065725           | 0.000456479  | 0.000265345  |
| 20            | 1             | 0.000709382            | -0.000646661 | -0.000531546 |
| 21            | 8             | -0.001170255           | 0.002610093  | 0.001894587  |
| 22            | 1             | 0.001365198            | -0.002547219 | -0.000875845 |

Cartesian Forces: Max 0.003843008 RMS 0.001389818

GradGradGradGradGradGradGradGradGradGradGradGradGradGradGradGradGradGradGrad

Berny optimization.

Using GEDIIS/GDIIS optimizer.

FormGI is forming the generalized inverse of G from B-inverse, IUseBI=4.

Internal Forces: Max 0.003423479 RMS 0.001196343

Search for a local minimum.

Step number 58 out of a maximum of 116

All quantities printed in internal units (Hartrees-Bohrs-Radians)

Mixed Optimization -- RFO/linear search

Update second derivatives using D2CorX and points 55 56 57 58

DE= -2.39D-04 DEPred=-2.82D-04 R= 8.48D-01

TightC=F SS= 1.41D+00 RLast= 2.58D-01 DXNew= 1.3266D+00 7.7270D-01

Trust test= 8.48D-01 RLast= 2.58D-01 DXMaxT set to 7.89D-01

ITU= 1 0 1 1 0 1 1 0 -1 1 1 1 -1 1 0 -1 1 0 -1 0

ITU= -1 0 0 1 -1 0 1 1 1 1 1 1 0 -1 1 1 1 1 1 0

ITU= -1 1 1 1 1 1 1 1 1 1 1 1 1 0 0 -1 0 0

Use linear search instead of GDIIS.

|                 |         |         |         |         |         |
|-----------------|---------|---------|---------|---------|---------|
| Eigenvalues --- | 0.00102 | 0.00294 | 0.00565 | 0.00855 | 0.01064 |
| Eigenvalues --- | 0.01298 | 0.01529 | 0.01674 | 0.02144 | 0.02269 |
| Eigenvalues --- | 0.02389 | 0.03033 | 0.03158 | 0.03251 | 0.03902 |
| Eigenvalues --- | 0.04449 | 0.04803 | 0.05497 | 0.06081 | 0.07758 |
| Eigenvalues --- | 0.08445 | 0.09313 | 0.09462 | 0.13272 | 0.14306 |
| Eigenvalues --- | 0.14715 | 0.15741 | 0.15899 | 0.16102 | 0.16144 |
| Eigenvalues --- | 0.17567 | 0.18335 | 0.22537 | 0.23354 | 0.23862 |
| Eigenvalues --- | 0.24949 | 0.25300 | 0.27484 | 0.29444 | 0.32612 |
| Eigenvalues --- | 0.33365 | 0.33874 | 0.33902 | 0.34058 | 0.34273 |
| Eigenvalues --- | 0.34647 | 0.34870 | 0.35372 | 0.36321 | 0.36375 |
| Eigenvalues --- | 0.41661 | 0.43195 | 0.45095 | 0.46896 | 0.49019 |
| Eigenvalues --- | 0.53606 | 0.56062 | 0.58832 | 0.60843 | 1.05190 |

RFO step: Lambda=-2.98233031D-04 EMin= 1.01595243D-03

Quartic linear search produced a step of -0.09364.

Iteration 1 RMS(Cart)= 0.03213284 RMS(Int)= 0.00058203

Iteration 2 RMS(Cart)= 0.00108019 RMS(Int)= 0.00000425

Iteration 3 RMS(Cart)= 0.00000076 RMS(Int)= 0.00000420

| Variable | Old X   | -DE/DX   | Delta X<br>(Linear) | Delta X<br>(Quad) | Delta X<br>(Total) | New X   |
|----------|---------|----------|---------------------|-------------------|--------------------|---------|
| R1       | 2.56518 | 0.00137  | 0.00004             | 0.00053           | 0.00057            | 2.56576 |
| R2       | 2.61526 | -0.00042 | -0.00004            | -0.00001          | -0.00006           | 2.61521 |
| R3       | 2.03376 | 0.00010  | 0.00001             | 0.00006           | 0.00007            | 2.03383 |
| R4       | 2.62892 | -0.00018 | -0.00007            | -0.00040          | -0.00047           | 2.62845 |
| R5       | 2.02970 | 0.00051  | 0.00002             | 0.00024           | 0.00027            | 2.02997 |
| R6       | 2.54355 | 0.00126  | 0.00013             | 0.00078           | 0.00090            | 2.54446 |
| R7       | 2.68761 | -0.00014 | 0.00007             | -0.00188          | -0.00181           | 2.68581 |

|     |         |          |          |          |          |         |
|-----|---------|----------|----------|----------|----------|---------|
| R8  | 2.51857 | 0.00081  | 0.00002  | 0.00043  | 0.00045  | 2.51903 |
| R9  | 2.10269 | -0.00331 | -0.00041 | -0.00067 | -0.00108 | 2.10162 |
| R10 | 2.80073 | -0.00222 | -0.00022 | 0.00086  | 0.00064  | 2.80137 |
| R11 | 2.91993 | -0.00187 | -0.00020 | 0.00166  | 0.00146  | 2.92138 |
| R12 | 2.05810 | 0.00042  | 0.00011  | -0.00028 | -0.00018 | 2.05793 |
| R13 | 2.05993 | 0.00033  | -0.00003 | 0.00036  | 0.00033  | 2.06027 |
| R14 | 2.06695 | -0.00024 | -0.00005 | -0.00014 | -0.00020 | 2.06675 |
| R15 | 2.06466 | -0.00014 | 0.00001  | 0.00032  | 0.00033  | 2.06499 |
| R16 | 2.65968 | 0.00072  | 0.00023  | -0.00331 | -0.00309 | 2.65659 |
| R17 | 5.42271 | -0.00129 | -0.01151 | 0.01370  | 0.00219  | 5.42490 |
| R18 | 2.50593 | -0.00027 | 0.00007  | -0.00055 | -0.00047 | 2.50546 |
| R19 | 2.04422 | 0.00068  | 0.00003  | -0.00016 | -0.00013 | 2.04409 |
| R20 | 2.04223 | 0.00038  | 0.00004  | -0.00002 | 0.00002  | 2.04225 |
| R21 | 2.04427 | 0.00067  | 0.00004  | 0.00026  | 0.00030  | 2.04456 |
| R22 | 1.84648 | -0.00261 | -0.00040 | 0.00253  | 0.00213  | 1.84861 |
| A1  | 1.87536 | -0.00046 | 0.00000  | 0.00026  | 0.00026  | 1.87562 |
| A2  | 2.27391 | 0.00063  | 0.00026  | -0.00055 | -0.00029 | 2.27362 |
| A3  | 2.13360 | -0.00016 | -0.00023 | 0.00008  | -0.00015 | 2.13345 |
| A4  | 1.86153 | 0.00049  | 0.00002  | 0.00014  | 0.00016  | 1.86169 |
| A5  | 2.26692 | 0.00108  | 0.00054  | -0.00060 | -0.00006 | 2.26686 |
| A6  | 2.15473 | -0.00157 | -0.00057 | 0.00046  | -0.00011 | 2.15462 |
| A7  | 1.89641 | -0.00030 | -0.00001 | -0.00026 | -0.00026 | 1.89614 |
| A8  | 2.25259 | -0.00148 | -0.00035 | 0.00020  | -0.00015 | 2.25244 |
| A9  | 2.13407 | 0.00178  | 0.00037  | -0.00003 | 0.00034  | 2.13441 |
| A10 | 1.89018 | -0.00026 | -0.00004 | 0.00028  | 0.00024  | 1.89042 |
| A11 | 2.25189 | -0.00009 | 0.00030  | -0.00246 | -0.00217 | 2.24972 |
| A12 | 2.14090 | 0.00036  | -0.00029 | 0.00204  | 0.00174  | 2.14264 |
| A13 | 1.90127 | 0.00053  | 0.00002  | -0.00042 | -0.00039 | 1.90087 |
| A14 | 2.23647 | 0.00191  | -0.00011 | 0.00155  | 0.00143  | 2.23790 |
| A15 | 2.14543 | -0.00243 | 0.00009  | -0.00111 | -0.00102 | 2.14441 |
| A16 | 1.94817 | -0.00167 | 0.00051  | -0.00404 | -0.00354 | 1.94463 |
| A17 | 1.87105 | -0.00059 | -0.00006 | -0.00027 | -0.00035 | 1.87071 |
| A18 | 1.87257 | 0.00216  | 0.00003  | 0.00192  | 0.00195  | 1.87452 |
| A19 | 1.90363 | -0.00068 | -0.00095 | -0.00205 | -0.00300 | 1.90063 |
| A20 | 1.96182 | 0.00037  | -0.00003 | 0.00478  | 0.00475  | 1.96658 |
| A21 | 1.90396 | 0.00043  | 0.00054  | -0.00047 | 0.00007  | 1.90403 |
| A22 | 1.93493 | 0.00208  | 0.00062  | -0.00137 | -0.00076 | 1.93417 |
| A23 | 1.87724 | -0.00158 | 0.00024  | -0.00005 | 0.00019  | 1.87743 |
| A24 | 1.91439 | -0.00186 | -0.00046 | 0.00293  | 0.00247  | 1.91686 |
| A25 | 1.93137 | -0.00142 | 0.00071  | -0.00510 | -0.00439 | 1.92698 |
| A26 | 1.89281 | 0.00000  | -0.00034 | 0.00257  | 0.00222  | 1.89504 |
| A27 | 1.91314 | 0.00278  | -0.00080 | 0.00108  | 0.00028  | 1.91342 |
| A28 | 2.02154 | -0.00205 | 0.00162  | -0.04285 | -0.04123 | 1.98030 |
| A29 | 2.18849 | -0.00275 | -0.00033 | -0.00086 | -0.00120 | 2.18729 |

|     |          |          |          |          |          |          |
|-----|----------|----------|----------|----------|----------|----------|
| A30 | 1.94791  | 0.00209  | 0.00043  | 0.00140  | 0.00183  | 1.94974  |
| A31 | 2.14675  | 0.00066  | -0.00009 | -0.00053 | -0.00062 | 2.14612  |
| A32 | 2.07886  | 0.00006  | 0.00001  | -0.00012 | -0.00011 | 2.07875  |
| A33 | 2.16469  | -0.00088 | -0.00036 | 0.00077  | 0.00041  | 2.16511  |
| A34 | 2.03961  | 0.00082  | 0.00035  | -0.00064 | -0.00030 | 2.03931  |
| A35 | 1.83842  | 0.00167  | -0.00009 | -0.00037 | -0.00046 | 1.83795  |
| D1  | -0.00676 | 0.00024  | 0.00043  | -0.00005 | 0.00039  | -0.00637 |
| D2  | 3.13515  | 0.00005  | 0.00165  | -0.00715 | -0.00551 | 3.12964  |
| D3  | -3.12110 | -0.00011 | -0.00213 | 0.00939  | 0.00727  | -3.11383 |
| D4  | 0.02081  | -0.00031 | -0.00092 | 0.00229  | 0.00137  | 0.02217  |
| D5  | 0.00351  | -0.00014 | -0.00061 | -0.00064 | -0.00126 | 0.00226  |
| D6  | 3.13895  | 0.00012  | -0.00067 | 0.00314  | 0.00246  | 3.14141  |
| D7  | 3.12053  | 0.00019  | 0.00171  | -0.00917 | -0.00746 | 3.11307  |
| D8  | -0.02722 | 0.00045  | 0.00164  | -0.00539 | -0.00374 | -0.03097 |
| D9  | 0.00771  | -0.00026 | -0.00012 | 0.00071  | 0.00059  | 0.00830  |
| D10 | -3.11729 | -0.00031 | -0.00121 | 0.00613  | 0.00491  | -3.11237 |
| D11 | -3.13417 | -0.00008 | -0.00122 | 0.00724  | 0.00602  | -3.12815 |
| D12 | 0.02402  | -0.00013 | -0.00231 | 0.01266  | 0.01034  | 0.03436  |
| D13 | -0.00560 | 0.00018  | -0.00026 | -0.00112 | -0.00138 | -0.00699 |
| D14 | -3.12531 | -0.00011 | 0.00065  | 0.00652  | 0.00716  | -3.11815 |
| D15 | 3.12075  | 0.00019  | 0.00074  | -0.00609 | -0.00536 | 3.11539  |
| D16 | 0.00104  | -0.00010 | 0.00165  | 0.00155  | 0.00319  | 0.00423  |
| D17 | 0.07026  | -0.00019 | -0.00808 | 0.03709  | 0.02901  | 0.09927  |
| D18 | -3.08123 | -0.00001 | -0.00781 | 0.03802  | 0.03022  | -3.05101 |
| D19 | -3.05274 | -0.00022 | -0.00930 | 0.04316  | 0.03386  | -3.01888 |
| D20 | 0.07896  | -0.00005 | -0.00903 | 0.04410  | 0.03507  | 0.11403  |
| D21 | 0.00134  | -0.00003 | 0.00054  | 0.00109  | 0.00163  | 0.00297  |
| D22 | -3.13448 | -0.00029 | 0.00060  | -0.00246 | -0.00186 | -3.13634 |
| D23 | 3.12274  | 0.00024  | -0.00029 | -0.00603 | -0.00634 | 3.11640  |
| D24 | -0.01308 | -0.00002 | -0.00023 | -0.00958 | -0.00982 | -0.02291 |
| D25 | 1.90062  | 0.00069  | 0.00255  | 0.01594  | 0.01849  | 1.91911  |
| D26 | -2.29895 | -0.00148 | 0.00165  | 0.01093  | 0.01258  | -2.28637 |
| D27 | -0.25586 | -0.00019 | 0.00225  | 0.01122  | 0.01348  | -0.24239 |
| D28 | -1.24791 | 0.00099  | 0.00248  | 0.02021  | 0.02268  | -1.22523 |
| D29 | 0.83570  | -0.00118 | 0.00158  | 0.01520  | 0.01677  | 0.85247  |
| D30 | 2.87879  | 0.00012  | 0.00218  | 0.01549  | 0.01767  | 2.89646  |
| D31 | -1.37393 | -0.00193 | -0.00047 | -0.05189 | -0.05236 | -1.42629 |
| D32 | 0.73975  | -0.00342 | 0.00093  | -0.05901 | -0.05807 | 0.68168  |
| D33 | 2.81939  | -0.00205 | -0.00014 | -0.05610 | -0.05624 | 2.76315  |
| D34 | 2.84503  | 0.00025  | -0.00010 | -0.04781 | -0.04791 | 2.79712  |
| D35 | -1.32447 | -0.00125 | 0.00131  | -0.05493 | -0.05363 | -1.37810 |
| D36 | 0.75516  | 0.00013  | 0.00023  | -0.05202 | -0.05179 | 0.70337  |
| D37 | 0.73114  | -0.00007 | -0.00010 | -0.04893 | -0.04902 | 0.68212  |
| D38 | 2.84482  | -0.00156 | 0.00130  | -0.05604 | -0.05474 | 2.79008  |

|     |          |          |          |          |          |          |
|-----|----------|----------|----------|----------|----------|----------|
| D39 | -1.35873 | -0.00019 | 0.00023  | -0.05313 | -0.05290 | -1.41163 |
| D40 | 1.07828  | -0.00291 | 0.00289  | 0.05520  | 0.05809  | 1.13637  |
| D41 | -3.08899 | -0.00221 | 0.00423  | 0.05044  | 0.05467  | -3.03432 |
| D42 | -1.00216 | -0.00132 | 0.00374  | 0.05111  | 0.05486  | -0.94730 |
| D43 | -1.47259 | 0.00166  | 0.00400  | 0.00983  | 0.01384  | -1.45875 |
| D44 | 2.69516  | 0.00024  | 0.00374  | 0.00814  | 0.01187  | 2.70703  |
| D45 | 0.58483  | 0.00029  | 0.00356  | 0.01214  | 0.01570  | 0.60053  |
| D46 | -3.14132 | 0.00009  | -0.00063 | 0.00450  | 0.00386  | -3.13746 |
| D47 | 0.00704  | -0.00011 | -0.00096 | 0.00410  | 0.00314  | 0.01019  |
| D48 | 0.01124  | -0.00010 | -0.00094 | 0.00345  | 0.00252  | 0.01375  |
| D49 | -3.12358 | -0.00030 | -0.00126 | 0.00306  | 0.00179  | -3.12179 |

| Item                 | Value    | Threshold | Converged? |
|----------------------|----------|-----------|------------|
| Maximum Force        | 0.003423 | 0.000450  | NO         |
| RMS Force            | 0.001196 | 0.000300  | NO         |
| Maximum Displacement | 0.162562 | 0.001800  | NO         |
| RMS Displacement     | 0.032267 | 0.001200  | NO         |

Predicted change in Energy=-1.583473D-04

GradGradGradGradGradGradGradGradGradGradGradGradGradGradGradGradGradGradGrad

Input orientation:

| Center Number | Atomic Number | Atomic Type | Coordinates (Angstroms) |           |           |
|---------------|---------------|-------------|-------------------------|-----------|-----------|
|               |               |             | X                       | Y         | Z         |
| 1             | 6             | 0           | -0.618294               | -2.412994 | -1.120253 |
| 2             | 6             | 0           | -1.912600               | -2.031359 | -1.270533 |
| 3             | 7             | 0           | -2.081176               | -0.882377 | -0.504982 |
| 4             | 6             | 0           | -0.907390               | -0.579715 | 0.081192  |
| 5             | 7             | 0           | -0.010460               | -1.497810 | -0.278719 |
| 6             | 6             | 0           | 1.395252                | -1.476863 | 0.191505  |
| 7             | 6             | 0           | 2.184775                | -0.307897 | -0.441004 |
| 8             | 1             | 0           | -0.079704               | -3.234492 | -1.560008 |
| 9             | 1             | 0           | -2.698993               | -2.476592 | -1.851296 |
| 10            | 1             | 0           | 1.371131                | -1.342431 | 1.271914  |
| 11            | 1             | 0           | 1.830098                | -2.450140 | -0.037142 |
| 12            | 1             | 0           | 2.529766                | -0.570154 | -1.445160 |
| 13            | 1             | 0           | 1.518091                | 0.556992  | -0.480931 |
| 14            | 35            | 0           | 0.755077                | 1.532527  | 2.108904  |
| 15            | 1             | 0           | -0.668769               | 0.254595  | 0.776759  |
| 16            | 6             | 0           | -3.255741               | -0.109896 | -0.295992 |
| 17            | 6             | 0           | -4.467567               | -0.423970 | -0.732639 |
| 18            | 1             | 0           | -3.050742               | 0.782049  | 0.280600  |
| 19            | 1             | 0           | -5.292152               | 0.240973  | -0.518522 |
| 20            | 1             | 0           | -4.695564               | -1.319618 | -1.295150 |

|    |   |   |          |           |          |
|----|---|---|----------|-----------|----------|
| 21 | 8 | 0 | 3.304933 | -0.004534 | 0.352411 |
| 22 | 1 | 0 | 2.970379 | 0.586828  | 1.056201 |

-----  
Distance matrix (angstroms):

|    |    | 1        | 2        | 3        | 4        | 5        |
|----|----|----------|----------|----------|----------|----------|
| 1  | C  | 0.000000 |          |          |          |          |
| 2  | C  | 1.357740 | 0.000000 |          |          |          |
| 3  | N  | 2.204852 | 1.390915 | 0.000000 |          |          |
| 4  | C  | 2.210873 | 2.223708 | 1.346469 | 0.000000 |          |
| 5  | N  | 1.383909 | 2.210544 | 2.172054 | 1.333011 | 0.000000 |
| 6  | C  | 2.579034 | 3.658812 | 3.595005 | 2.473703 | 1.482422 |
| 7  | C  | 3.570716 | 4.521827 | 4.304935 | 3.147707 | 2.502256 |
| 8  | H  | 1.076254 | 2.211523 | 3.263651 | 3.229001 | 2.159296 |
| 9  | H  | 2.206303 | 1.074212 | 2.176185 | 3.246920 | 3.264846 |
| 10 | H  | 3.290347 | 4.209697 | 3.909916 | 2.681644 | 2.082643 |
| 11 | H  | 2.677524 | 3.962880 | 4.239673 | 3.317580 | 2.086372 |
| 12 | H  | 3.662227 | 4.679768 | 4.716164 | 3.760835 | 2.945145 |
| 13 | H  | 3.713986 | 4.369516 | 3.876479 | 2.736977 | 2.568963 |
| 14 | Br | 5.280222 | 5.589130 | 4.550658 | 3.367043 | 3.933158 |
| 15 | H  | 3.273719 | 3.311209 | 2.220464 | 1.112127 | 2.149030 |
| 16 | C  | 3.597192 | 2.538853 | 1.421269 | 2.424407 | 3.529653 |
| 17 | C  | 4.350100 | 3.066087 | 2.440661 | 3.655330 | 4.607058 |
| 18 | H  | 4.252940 | 3.408320 | 2.080267 | 2.547180 | 3.841082 |
| 19 | H  | 5.408379 | 4.141302 | 3.401832 | 4.501035 | 5.565711 |
| 20 | H  | 4.224949 | 2.872642 | 2.765966 | 4.097809 | 4.797404 |
| 21 | O  | 4.833336 | 5.827917 | 5.524121 | 4.260054 | 3.690533 |
| 22 | H  | 5.158920 | 6.009332 | 5.487629 | 4.165160 | 3.874678 |
|    |    | 6        | 7        | 8        | 9        | 10       |
| 6  | C  | 0.000000 |          |          |          |          |
| 7  | C  | 1.545929 | 0.000000 |          |          |          |
| 8  | H  | 2.886615 | 3.865875 | 0.000000 |          |          |
| 9  | H  | 4.683517 | 5.526604 | 2.742251 | 0.000000 |          |
| 10 | H  | 1.089008 | 2.160178 | 3.701972 | 5.254206 | 0.000000 |
| 11 | H  | 1.090247 | 2.208644 | 2.565476 | 4.878987 | 1.775190 |
| 12 | H  | 2.188130 | 1.093675 | 3.731115 | 5.580266 | 3.053087 |
| 13 | H  | 2.145653 | 1.092746 | 4.253552 | 5.372553 | 2.588798 |
| 14 | Br | 3.625283 | 3.454451 | 6.073075 | 6.609600 | 3.057035 |
| 15 | H  | 2.756928 | 3.153103 | 4.240425 | 4.299752 | 2.637587 |
| 16 | C  | 4.872164 | 5.446049 | 4.631204 | 2.886207 | 5.038395 |
| 17 | C  | 6.027875 | 6.659744 | 5.276071 | 2.931298 | 6.241170 |
| 18 | H  | 4.987734 | 5.396234 | 5.324238 | 3.909917 | 5.004907 |
| 19 | H  | 6.940927 | 7.497446 | 6.350840 | 3.985714 | 7.078995 |
| 20 | H  | 6.271595 | 7.006584 | 5.004304 | 2.373644 | 6.587498 |
| 21 | O  | 2.416718 | 1.405806 | 5.054280 | 6.856714 | 2.524885 |



|    |    |          |          |          |          |          |
|----|----|----------|----------|----------|----------|----------|
| 22 | H  | 2.736338 | 1.912937 | 5.545272 | 7.069643 | 2.515187 |
|    |    | 11       | 12       | 13       | 14       | 15       |
| 11 | H  | 0.000000 |          |          |          |          |
| 12 | H  | 2.450795 | 0.000000 |          |          |          |
| 13 | H  | 3.055674 | 1.795461 | 0.000000 |          |          |
| 14 | Br | 4.650035 | 4.494681 | 2.870732 | 0.000000 |          |
| 15 | H  | 3.771255 | 3.980924 | 2.540784 | 2.331321 | 0.000000 |
| 16 | C  | 5.604418 | 5.916461 | 4.823735 | 4.956585 | 2.824194 |
| 17 | C  | 6.652043 | 7.035035 | 6.070729 | 6.259254 | 4.143622 |
| 18 | H  | 5.862646 | 5.995729 | 4.637329 | 4.288376 | 2.489615 |
| 19 | H  | 7.628910 | 7.918268 | 6.817675 | 6.718664 | 4.801417 |
| 20 | H  | 6.741286 | 7.265644 | 6.541722 | 7.030775 | 4.794376 |
| 21 | O  | 2.882340 | 2.037664 | 2.050018 | 3.456818 | 4.004688 |
| 22 | H  | 3.423276 | 2.790977 | 2.114900 | 2.628706 | 3.664951 |
|    |    | 16       | 17       | 18       | 19       | 20       |
| 16 | C  | 0.000000 |          |          |          |          |
| 17 | C  | 1.325830 | 0.000000 |          |          |          |
| 18 | H  | 1.081688 | 2.118615 | 0.000000 |          |          |
| 19 | H  | 2.078364 | 1.080710 | 2.440343 | 0.000000 |          |
| 20 | H  | 2.129515 | 1.081937 | 3.099263 | 1.842420 | 0.000000 |
| 21 | O  | 6.593479 | 7.859073 | 6.404567 | 8.644574 | 8.273564 |
| 22 | H  | 6.409245 | 7.716521 | 6.074008 | 8.418360 | 8.241970 |
|    |    | 21       | 22       |          |          |          |
| 21 | O  | 0.000000 |          |          |          |          |
| 22 | H  | 0.978241 | 0.000000 |          |          |          |

Stoichiometry C7H11BrN2O

Framework group C1[X(C7H11BrN2O)]

Deg. of freedom 60

Full point group C1 NOp 1

Largest Abelian subgroup C1 NOp 1

Largest concise Abelian subgroup C1 NOp 1

Standard orientation:

| Center<br>Number | Atomic<br>Number | Atomic<br>Type | Coordinates (Angstroms) |           |           |
|------------------|------------------|----------------|-------------------------|-----------|-----------|
|                  |                  |                | X                       | Y         | Z         |
| 1                | 6                | 0              | -1.911226               | -1.995720 | 0.330766  |
| 2                | 6                | 0              | -2.897777               | -1.094020 | 0.091784  |
| 3                | 7                | 0              | -2.280852               | 0.144837  | -0.047075 |
| 4                | 6                | 0              | -0.951893               | -0.017731 | 0.095819  |
| 5                | 7                | 0              | -0.710289               | -1.308011 | 0.327605  |
| 6                | 6                | 0              | 0.654771                | -1.845092 | 0.541450  |
| 7                | 6                | 0              | 1.482993                | -1.817940 | -0.763620 |
| 8                | 1                | 0              | -1.962233               | -3.061302 | 0.473094  |

|    |    |   |           |           |           |
|----|----|---|-----------|-----------|-----------|
| 9  | 1  | 0 | -3.958786 | -1.239804 | 0.008486  |
| 10 | 1  | 0 | 1.139167  | -1.207938 | 1.279918  |
| 11 | 1  | 0 | 0.549343  | -2.849758 | 0.951535  |
| 12 | 1  | 0 | 1.246973  | -2.681515 | -1.391839 |
| 13 | 1  | 0 | 1.243417  | -0.889117 | -1.287056 |
| 14 | 35 | 0 | 2.069903  | 1.467057  | 0.129443  |
| 15 | 1  | 0 | -0.147436 | 0.749659  | 0.067759  |
| 16 | 6  | 0 | -2.869952 | 1.418118  | -0.274499 |
| 17 | 6  | 0 | -4.171859 | 1.668184  | -0.292701 |
| 18 | 1  | 0 | -2.121362 | 2.183890  | -0.426993 |
| 19 | 1  | 0 | -4.510743 | 2.677196  | -0.479750 |
| 20 | 1  | 0 | -4.934916 | 0.919720  | -0.124975 |
| 21 | 8  | 0 | 2.854948  | -1.847715 | -0.458421 |
| 22 | 1  | 0 | 3.098036  | -0.918873 | -0.271030 |

-----

Rotational constants (GHZ):      0.9830915      0.4382173      0.3132686  
Standard basis: 6-311++G(d,p) (5D, 7F)  
There are    358 symmetry adapted cartesian basis functions of A    symmetry.  
There are    345 symmetry adapted basis functions of A    symmetry.  
345 basis functions,    553 primitive gaussians,    358 cartesian basis functions  
55 alpha electrons      55 beta electrons  
nuclear repulsion energy      848.4235687983 Hartrees.  
NAtoms=    22 NActive=    22 NUniq=    22 SFac= 1.00D+00 NAtFMM=    60 NAOKFM=F  
Big=F  
Integral buffers will be    131072 words long.  
Raffenetti 2 integral format.  
Two-electron integral symmetry is turned on.  
One-electron integrals computed using PRISM.  
NBasis=    345 RedAO= T EigKep= 5.47D-06 NBF=    345  
NBsUse=    345 1.00D-06 EigRej= -1.00D+00 NBFU=    345  
Initial guess from the checkpoint file: ". "  
B after Tr=    0.000000    0.000000    0.000000  
Rot=    0.999994    -0.002424    0.000163    0.002543 Ang=    -0.40 deg.  
ExpMin= 3.50D-02 ExpMax= 4.40D+05 ExpMxC= 1.51D+04 IAcc=3 IRadAn=      5 AccDes=  
0.00D+00  
Harris functional with IExCor=    402 and IRadAn=      5 diagonalized for initial guess.  
HarFok: IExCor=    402 AccDes= 0.00D+00 IRadAn=      5 IDoV= 1 UseB2=F ITyADJ=14  
ICtDFT= 3500011 ScaDFX= 1.000000 1.000000 1.000000 1.000000  
FoFCou: FMM=F IPFlag=            0 FMFlag=    100000 FMFlg1=            0  
NFXFlg=            0 DoJE=T BraDBF=F KetDBF=T FulRan=T  
wScrn= 0.000000 ICntrl=            500 IOpCl= 0 I1Cent=    200000004 NGrid=  
0  
NMat0=    1 NMatS0=            1 NMatT0=    0 NMatD0=    1 NMtDS0=    0  
NMtDT0=    0

Petite list used in FoFCou.

Keep R1 ints in memory in canonical form, NReq=1804729152.

Requested convergence on RMS density matrix=1.00D-08 within 128 cycles.

Requested convergence on MAX density matrix=1.00D-06.

Requested convergence on energy=1.00D-06.

No special actions if energy rises.

SCF Done: E(RB3LYP) = -3032.34212652 A.U. after 11 cycles

NFock= 11 Conv=0.57D-08 -V/T= 2.0017

Calling FoFJK, ICntrl= 2127 FMM=F ISym2X=0 l1Cent= 0 IOpCIX= 0 NMat=1 NMatS=1

NMatT=0.

\*\*\*\*\* Axes restored to original set \*\*\*\*\*

| Center<br>Number | Atomic<br>Number | Forces (Hartrees/Bohr) |              |              |
|------------------|------------------|------------------------|--------------|--------------|
|                  |                  | X                      | Y            | Z            |
| 1                | 6                | 0.001220465            | 0.001300518  | -0.001647506 |
| 2                | 6                | 0.000180001            | -0.000578200 | 0.000414686  |
| 3                | 7                | -0.001133207           | -0.000370162 | -0.000454088 |
| 4                | 6                | 0.002136262            | 0.002296349  | 0.004107169  |
| 5                | 7                | 0.000541603            | -0.000579008 | 0.001940797  |
| 6                | 6                | -0.000666241           | -0.001340073 | -0.001964474 |
| 7                | 6                | 0.000033732            | -0.000421868 | 0.003412953  |
| 8                | 1                | 0.000161850            | -0.000409098 | 0.000783227  |
| 9                | 1                | -0.001126535           | 0.000768450  | 0.000166682  |
| 10               | 1                | 0.000139800            | 0.001386979  | 0.000227068  |
| 11               | 1                | 0.000115666            | 0.000035992  | -0.000555229 |
| 12               | 1                | 0.000078031            | 0.000292513  | 0.000138560  |
| 13               | 1                | -0.000477267           | 0.000360896  | -0.003663287 |
| 14               | 35               | -0.000927808           | -0.001120566 | -0.000498524 |
| 15               | 1                | -0.000659005           | -0.002093695 | -0.002535860 |
| 16               | 6                | 0.000061722            | 0.000585363  | 0.000271645  |
| 17               | 6                | -0.000440951           | -0.000430493 | -0.000451729 |
| 18               | 1                | -0.000415500           | 0.000812268  | 0.000249853  |
| 19               | 1                | -0.000089894           | 0.000421085  | 0.000312119  |
| 20               | 1                | 0.000775678            | -0.000592591 | -0.000462970 |
| 21               | 8                | -0.000386314           | 0.001524367  | 0.000515103  |
| 22               | 1                | 0.000877912            | -0.001849025 | -0.000306197 |

Cartesian Forces: Max 0.004107169 RMS 0.001230749

GradGradGradGradGradGradGradGradGradGradGradGradGradGradGradGradGradGradGrad

Berny optimization.

Using GEDIIS/GDIIS optimizer.

FormGI is forming the generalized inverse of G from B-inverse, IUseBI=4.

Internal Forces: Max 0.003298576 RMS 0.001080330

Search for a local minimum.

Step number 59 out of a maximum of 116

All quantities printed in internal units (Hartrees-Bohrs-Radians)

Mixed Optimization -- RFO/linear search

Update second derivatives using D2CorX and points 56 57 58 59

DE= -2.18D-04 DEPred=-1.58D-04 R= 1.38D+00

TightC=F SS= 1.41D+00 RLast= 2.09D-01 DXNew= 1.3266D+00 6.2659D-01

Trust test= 1.38D+00 RLast= 2.09D-01 DXMaxT set to 7.89D-01

ITU= 1 1 0 1 1 0 1 1 0-1 1 1 1-1 1 0-1 1 0-1

ITU= 0-1 0 0 1-1 0 1 1 1 1 1 1 0-1 1 1 1 1 1

ITU= 0-1 1 1 1 1 1 1 1 1 1 1 1 0 0-1 0 0

Use linear search instead of GDIIIS.

|                 |         |         |         |         |         |
|-----------------|---------|---------|---------|---------|---------|
| Eigenvalues --- | 0.00165 | 0.00245 | 0.00522 | 0.00804 | 0.01106 |
| Eigenvalues --- | 0.01217 | 0.01571 | 0.01887 | 0.02143 | 0.02285 |
| Eigenvalues --- | 0.02451 | 0.03040 | 0.03168 | 0.03379 | 0.03898 |
| Eigenvalues --- | 0.04436 | 0.04615 | 0.05390 | 0.05792 | 0.07618 |
| Eigenvalues --- | 0.08485 | 0.09345 | 0.09997 | 0.13289 | 0.14317 |
| Eigenvalues --- | 0.14719 | 0.15806 | 0.15878 | 0.16059 | 0.16166 |
| Eigenvalues --- | 0.17222 | 0.18532 | 0.22324 | 0.23084 | 0.23520 |
| Eigenvalues --- | 0.24964 | 0.25565 | 0.28102 | 0.29968 | 0.32615 |
| Eigenvalues --- | 0.33788 | 0.33885 | 0.33980 | 0.34220 | 0.34381 |
| Eigenvalues --- | 0.34509 | 0.34847 | 0.35393 | 0.36327 | 0.36367 |
| Eigenvalues --- | 0.41692 | 0.43105 | 0.45210 | 0.46355 | 0.49223 |
| Eigenvalues --- | 0.53640 | 0.56149 | 0.58952 | 0.60884 | 0.69517 |

RFO step: Lambda=-5.92936373D-04 EMin= 1.65228483D-03

Quartic linear search produced a step of 0.43593.

Iteration 1 RMS(Cart)= 0.03996131 RMS(Int)= 0.00091260

Iteration 2 RMS(Cart)= 0.00132798 RMS(Int)= 0.00002917

Iteration 3 RMS(Cart)= 0.00000112 RMS(Int)= 0.00002916

Iteration 4 RMS(Cart)= 0.00000000 RMS(Int)= 0.00002916

| Variable | Old X   | -DE/DX   | Delta X<br>(Linear) | Delta X<br>(Quad) | Delta X<br>(Total) | New X   |
|----------|---------|----------|---------------------|-------------------|--------------------|---------|
| R1       | 2.56576 | 0.00108  | 0.00025             | 0.00012           | 0.00038            | 2.56613 |
| R2       | 2.61521 | -0.00048 | -0.00002            | 0.00047           | 0.00044            | 2.61565 |
| R3       | 2.03383 | 0.00007  | 0.00003             | 0.00012           | 0.00015            | 2.03397 |
| R4       | 2.62845 | -0.00014 | -0.00021            | 0.00012           | -0.00008           | 2.62837 |
| R5       | 2.02997 | 0.00042  | 0.00012             | 0.00040           | 0.00051            | 2.03048 |
| R6       | 2.54446 | 0.00095  | 0.00039             | 0.00082           | 0.00121            | 2.54567 |
| R7       | 2.68581 | 0.00051  | -0.00079            | 0.00173           | 0.00094            | 2.68675 |
| R8       | 2.51903 | 0.00052  | 0.00020             | 0.00015           | 0.00034            | 2.51936 |
| R9       | 2.10162 | -0.00330 | -0.00047            | -0.00095          | -0.00142           | 2.10020 |
| R10      | 2.80137 | -0.00203 | 0.00028             | 0.00227           | 0.00255            | 2.80392 |
| R11      | 2.92138 | -0.00115 | 0.00064             | 0.00202           | 0.00266            | 2.92404 |

|     |         |          |          |          |          |         |
|-----|---------|----------|----------|----------|----------|---------|
| R12 | 2.05793 | 0.00039  | -0.00008 | 0.00027  | 0.00019  | 2.05812 |
| R13 | 2.06027 | 0.00013  | 0.00015  | 0.00022  | 0.00037  | 2.06064 |
| R14 | 2.06675 | -0.00017 | -0.00009 | -0.00022 | -0.00031 | 2.06644 |
| R15 | 2.06499 | 0.00041  | 0.00014  | 0.00240  | 0.00255  | 2.06754 |
| R16 | 2.65659 | 0.00044  | -0.00135 | -0.00606 | -0.00741 | 2.64918 |
| R17 | 5.42490 | -0.00058 | 0.00096  | 0.16605  | 0.16701  | 5.59191 |
| R18 | 2.50546 | 0.00012  | -0.00021 | -0.00040 | -0.00060 | 2.50485 |
| R19 | 2.04409 | 0.00072  | -0.00006 | 0.00056  | 0.00050  | 2.04460 |
| R20 | 2.04225 | 0.00039  | 0.00001  | 0.00064  | 0.00064  | 2.04289 |
| R21 | 2.04456 | 0.00057  | 0.00013  | 0.00063  | 0.00076  | 2.04532 |
| R22 | 1.84861 | -0.00164 | 0.00093  | 0.00335  | 0.00428  | 1.85289 |
| A1  | 1.87562 | -0.00047 | 0.00011  | -0.00011 | 0.00000  | 1.87562 |
| A2  | 2.27362 | 0.00063  | -0.00013 | -0.00171 | -0.00188 | 2.27174 |
| A3  | 2.13345 | -0.00015 | -0.00007 | 0.00148  | 0.00137  | 2.13482 |
| A4  | 1.86169 | 0.00041  | 0.00007  | 0.00008  | 0.00015  | 1.86183 |
| A5  | 2.26686 | 0.00112  | -0.00003 | -0.00156 | -0.00164 | 2.26522 |
| A6  | 2.15462 | -0.00153 | -0.00005 | 0.00142  | 0.00132  | 2.15595 |
| A7  | 1.89614 | -0.00024 | -0.00011 | 0.00015  | 0.00003  | 1.89618 |
| A8  | 2.25244 | -0.00157 | -0.00007 | -0.00191 | -0.00200 | 2.25044 |
| A9  | 2.13441 | 0.00181  | 0.00015  | 0.00161  | 0.00174  | 2.13615 |
| A10 | 1.89042 | -0.00028 | 0.00010  | -0.00038 | -0.00028 | 1.89014 |
| A11 | 2.24972 | 0.00003  | -0.00095 | 0.00133  | 0.00037  | 2.25009 |
| A12 | 2.14264 | 0.00026  | 0.00076  | -0.00078 | -0.00003 | 2.14261 |
| A13 | 1.90087 | 0.00058  | -0.00017 | 0.00029  | 0.00011  | 1.90099 |
| A14 | 2.23790 | 0.00157  | 0.00062  | -0.00169 | -0.00108 | 2.23682 |
| A15 | 2.14441 | -0.00215 | -0.00045 | 0.00142  | 0.00095  | 2.14535 |
| A16 | 1.94463 | -0.00047 | -0.00154 | -0.00327 | -0.00482 | 1.93981 |
| A17 | 1.87071 | -0.00085 | -0.00015 | -0.00592 | -0.00607 | 1.86464 |
| A18 | 1.87452 | 0.00148  | 0.00085  | 0.00056  | 0.00142  | 1.87594 |
| A19 | 1.90063 | -0.00075 | -0.00131 | 0.00473  | 0.00339  | 1.90402 |
| A20 | 1.96658 | 0.00005  | 0.00207  | 0.00224  | 0.00430  | 1.97088 |
| A21 | 1.90403 | 0.00053  | 0.00003  | 0.00124  | 0.00126  | 1.90529 |
| A22 | 1.93417 | 0.00208  | -0.00033 | -0.00593 | -0.00628 | 1.92789 |
| A23 | 1.87743 | -0.00168 | 0.00008  | 0.00048  | 0.00039  | 1.87782 |
| A24 | 1.91686 | -0.00158 | 0.00108  | 0.00957  | 0.01056  | 1.92742 |
| A25 | 1.92698 | -0.00132 | -0.00191 | -0.01244 | -0.01436 | 1.91262 |
| A26 | 1.89504 | -0.00040 | 0.00097  | -0.00729 | -0.00625 | 1.88879 |
| A27 | 1.91342 | 0.00293  | 0.00012  | 0.01612  | 0.01616  | 1.92958 |
| A28 | 1.98030 | -0.00044 | -0.01797 | -0.06502 | -0.08299 | 1.89732 |
| A29 | 2.18729 | -0.00255 | -0.00052 | -0.00316 | -0.00368 | 2.18361 |
| A30 | 1.94974 | 0.00188  | 0.00080  | 0.00181  | 0.00260  | 1.95234 |
| A31 | 2.14612 | 0.00067  | -0.00027 | 0.00133  | 0.00106  | 2.14718 |
| A32 | 2.07875 | 0.00012  | -0.00005 | 0.00089  | 0.00084  | 2.07959 |
| A33 | 2.16511 | -0.00097 | 0.00018  | 0.00040  | 0.00058  | 2.16568 |

|     |          |          |          |          |          |          |
|-----|----------|----------|----------|----------|----------|----------|
| A34 | 2.03931  | 0.00085  | -0.00013 | -0.00131 | -0.00144 | 2.03787  |
| A35 | 1.83795  | 0.00107  | -0.00020 | 0.00306  | 0.00286  | 1.84081  |
| D1  | -0.00637 | 0.00022  | 0.00017  | 0.00070  | 0.00087  | -0.00550 |
| D2  | 3.12964  | 0.00004  | -0.00240 | -0.01138 | -0.01377 | 3.11587  |
| D3  | -3.11383 | -0.00018 | 0.00317  | 0.01200  | 0.01515  | -3.09868 |
| D4  | 0.02217  | -0.00036 | 0.00060  | -0.00008 | 0.00051  | 0.02269  |
| D5  | 0.00226  | -0.00010 | -0.00055 | 0.00282  | 0.00227  | 0.00453  |
| D6  | 3.14141  | 0.00010  | 0.00107  | 0.01092  | 0.01199  | -3.12978 |
| D7  | 3.11307  | 0.00028  | -0.00325 | -0.00745 | -0.01071 | 3.10235  |
| D8  | -0.03097 | 0.00048  | -0.00163 | 0.00065  | -0.00100 | -0.03196 |
| D9  | 0.00830  | -0.00027 | 0.00026  | -0.00394 | -0.00368 | 0.00462  |
| D10 | -3.11237 | -0.00035 | 0.00214  | 0.00417  | 0.00630  | -3.10607 |
| D11 | -3.12815 | -0.00012 | 0.00262  | 0.00718  | 0.00982  | -3.11834 |
| D12 | 0.03436  | -0.00021 | 0.00451  | 0.01530  | 0.01980  | 0.05416  |
| D13 | -0.00699 | 0.00021  | -0.00060 | 0.00574  | 0.00514  | -0.00185 |
| D14 | -3.11815 | -0.00026 | 0.00312  | -0.00063 | 0.00248  | -3.11567 |
| D15 | 3.11539  | 0.00025  | -0.00234 | -0.00176 | -0.00411 | 3.11128  |
| D16 | 0.00423  | -0.00022 | 0.00139  | -0.00814 | -0.00676 | -0.00254 |
| D17 | 0.09927  | -0.00020 | 0.01265  | 0.05335  | 0.06599  | 0.16526  |
| D18 | -3.05101 | -0.00009 | 0.01317  | 0.05140  | 0.06457  | -2.98644 |
| D19 | -3.01888 | -0.00027 | 0.01476  | 0.06246  | 0.07722  | -2.94165 |
| D20 | 0.11403  | -0.00016 | 0.01529  | 0.06052  | 0.07580  | 0.18983  |
| D21 | 0.00297  | -0.00007 | 0.00071  | -0.00530 | -0.00460 | -0.00162 |
| D22 | -3.13634 | -0.00026 | -0.00081 | -0.01288 | -0.01369 | 3.13315  |
| D23 | 3.11640  | 0.00036  | -0.00276 | 0.00064  | -0.00213 | 3.11427  |
| D24 | -0.02291 | 0.00017  | -0.00428 | -0.00693 | -0.01123 | -0.03414 |
| D25 | 1.91911  | 0.00054  | 0.00806  | -0.03598 | -0.02793 | 1.89118  |
| D26 | -2.28637 | -0.00117 | 0.00548  | -0.03577 | -0.03027 | -2.31664 |
| D27 | -0.24239 | -0.00023 | 0.00587  | -0.03706 | -0.03118 | -0.27357 |
| D28 | -1.22523 | 0.00076  | 0.00989  | -0.02685 | -0.01698 | -1.24221 |
| D29 | 0.85247  | -0.00095 | 0.00731  | -0.02665 | -0.01932 | 0.83315  |
| D30 | 2.89646  | -0.00001 | 0.00770  | -0.02794 | -0.02024 | 2.87622  |
| D31 | -1.42629 | -0.00173 | -0.02283 | -0.01189 | -0.03473 | -1.46102 |
| D32 | 0.68168  | -0.00317 | -0.02532 | -0.03034 | -0.05566 | 0.62602  |
| D33 | 2.76315  | -0.00153 | -0.02452 | -0.00525 | -0.02975 | 2.73340  |
| D34 | 2.79712  | 0.00007  | -0.02089 | -0.00563 | -0.02652 | 2.77059  |
| D35 | -1.37810 | -0.00137 | -0.02338 | -0.02408 | -0.04745 | -1.42556 |
| D36 | 0.70337  | 0.00027  | -0.02258 | 0.00101  | -0.02154 | 0.68183  |
| D37 | 0.68212  | -0.00012 | -0.02137 | -0.01195 | -0.03334 | 0.64878  |
| D38 | 2.79008  | -0.00156 | -0.02386 | -0.03040 | -0.05427 | 2.73581  |
| D39 | -1.41163 | 0.00008  | -0.02306 | -0.00530 | -0.02836 | -1.43998 |
| D40 | 1.13637  | -0.00301 | 0.02532  | -0.02553 | -0.00020 | 1.13617  |
| D41 | -3.03432 | -0.00230 | 0.02383  | -0.03985 | -0.01596 | -3.05028 |
| D42 | -0.94730 | -0.00177 | 0.02391  | -0.04642 | -0.02256 | -0.96986 |

|     |          |          |         |         |         |          |
|-----|----------|----------|---------|---------|---------|----------|
| D43 | -1.45875 | 0.00152  | 0.00603 | 0.08582 | 0.09177 | -1.36698 |
| D44 | 2.70703  | 0.00019  | 0.00518 | 0.09180 | 0.09697 | 2.80400  |
| D45 | 0.60053  | 0.00028  | 0.00684 | 0.10175 | 0.10869 | 0.70922  |
| D46 | -3.13746 | -0.00001 | 0.00168 | 0.00177 | 0.00345 | -3.13401 |
| D47 | 0.01019  | -0.00013 | 0.00137 | 0.00598 | 0.00735 | 0.01754  |
| D48 | 0.01375  | -0.00014 | 0.00110 | 0.00392 | 0.00502 | 0.01877  |
| D49 | -3.12179 | -0.00027 | 0.00078 | 0.00814 | 0.00892 | -3.11287 |

| Item                 | Value    | Threshold | Converged? |
|----------------------|----------|-----------|------------|
| Maximum Force        | 0.003299 | 0.000450  | NO         |
| RMS Force            | 0.001080 | 0.000300  | NO         |
| Maximum Displacement | 0.171786 | 0.001800  | NO         |
| RMS Displacement     | 0.040109 | 0.001200  | NO         |

Predicted change in Energy=-3.643960D-04

GradGradGradGradGradGradGradGradGradGradGradGradGradGradGradGradGradGradGrad

Input orientation:

| Center Number | Atomic Number | Atomic Type | Coordinates (Angstroms) |           |           |
|---------------|---------------|-------------|-------------------------|-----------|-----------|
|               |               |             | X                       | Y         | Z         |
| 1             | 6             | 0           | -0.612694               | -2.399022 | -1.125629 |
| 2             | 6             | 0           | -1.903346               | -2.009271 | -1.287833 |
| 3             | 7             | 0           | -2.073780               | -0.863029 | -0.518674 |
| 4             | 6             | 0           | -0.905396               | -0.572155 | 0.085455  |
| 5             | 7             | 0           | -0.008914               | -1.491808 | -0.272245 |
| 6             | 6             | 0           | 1.396936                | -1.474796 | 0.201964  |
| 7             | 6             | 0           | 2.192100                | -0.318852 | -0.450534 |
| 8             | 1             | 0           | -0.072300               | -3.214710 | -1.574091 |
| 9             | 1             | 0           | -2.681825               | -2.441695 | -1.889078 |
| 10            | 1             | 0           | 1.364475                | -1.320982 | 1.279670  |
| 11            | 1             | 0           | 1.825020                | -2.455703 | -0.006912 |
| 12            | 1             | 0           | 2.562781                | -0.617823 | -1.434902 |
| 13            | 1             | 0           | 1.511823                | 0.531337  | -0.557515 |
| 14            | 35            | 0           | 0.731894                | 1.467990  | 2.138912  |
| 15            | 1             | 0           | -0.670445               | 0.254791  | 0.789811  |
| 16            | 6             | 0           | -3.249756               | -0.090434 | -0.314705 |
| 17            | 6             | 0           | -4.468510               | -0.440600 | -0.700709 |
| 18            | 1             | 0           | -3.039822               | 0.831772  | 0.210739  |
| 19            | 1             | 0           | -5.295884               | 0.226054  | -0.501468 |
| 20            | 1             | 0           | -4.701732               | -1.369854 | -1.204245 |
| 21            | 8             | 0           | 3.292673                | 0.028448  | 0.345335  |
| 22            | 1             | 0           | 2.927050                | 0.573463  | 1.073808  |

Distance matrix (angstroms):

|    |    | 1        | 2        | 3        | 4        | 5        |
|----|----|----------|----------|----------|----------|----------|
| 1  | C  | 0.000000 |          |          |          |          |
| 2  | C  | 1.357939 | 0.000000 |          |          |          |
| 3  | N  | 2.205095 | 1.390872 | 0.000000 |          |          |
| 4  | C  | 2.211300 | 2.224214 | 1.347108 | 0.000000 |          |
| 5  | N  | 1.384143 | 2.210895 | 2.172502 | 1.333189 | 0.000000 |
| 6  | C  | 2.579789 | 3.660193 | 3.597144 | 2.475695 | 1.483771 |
| 7  | C  | 3.556646 | 4.509020 | 4.300989 | 3.153717 | 2.500415 |
| 8  | H  | 1.076332 | 2.210827 | 3.263469 | 3.229743 | 2.160373 |
| 9  | H  | 2.205896 | 1.074484 | 2.177134 | 3.248024 | 3.265101 |
| 10 | H  | 3.294971 | 4.212417 | 3.907090 | 2.671929 | 2.079379 |
| 11 | H  | 2.682759 | 3.967464 | 4.242541 | 3.318352 | 2.088734 |
| 12 | H  | 3.654034 | 4.680176 | 4.732578 | 3.787060 | 2.954528 |
| 13 | H  | 3.663787 | 4.318730 | 3.847378 | 2.733872 | 2.546986 |
| 14 | Br | 5.236309 | 5.547830 | 4.513116 | 3.325597 | 3.888815 |
| 15 | H  | 3.273373 | 3.310985 | 2.220586 | 1.111377 | 2.148533 |
| 16 | C  | 3.597398 | 2.538058 | 1.421769 | 2.426563 | 3.531106 |
| 17 | C  | 4.345491 | 3.063579 | 2.438507 | 3.651184 | 4.601806 |
| 18 | H  | 4.256156 | 3.407172 | 2.082698 | 2.557827 | 3.849507 |
| 19 | H  | 5.404893 | 4.138159 | 3.401228 | 4.500889 | 5.563780 |
| 20 | H  | 4.217298 | 2.871726 | 2.762790 | 4.088009 | 4.786026 |
| 21 | O  | 4.827861 | 5.815337 | 5.508181 | 4.248770 | 3.686877 |
| 22 | H  | 5.118885 | 5.964946 | 5.441306 | 4.120306 | 3.833678 |
|    |    | 6        | 7        | 8        | 9        | 10       |
| 6  | C  | 0.000000 |          |          |          |          |
| 7  | C  | 1.547335 | 0.000000 |          |          |          |
| 8  | H  | 2.887962 | 3.843941 | 0.000000 |          |          |
| 9  | H  | 4.684404 | 5.507360 | 2.739780 | 0.000000 |          |
| 10 | H  | 1.089111 | 2.163986 | 3.714092 | 5.260181 | 0.000000 |
| 11 | H  | 1.090442 | 2.213071 | 2.575261 | 4.884097 | 1.776228 |
| 12 | H  | 2.184703 | 1.093512 | 3.702276 | 5.571237 | 3.049470 |
| 13 | H  | 2.148157 | 1.094095 | 4.192343 | 5.310241 | 2.613053 |
| 14 | Br | 3.585253 | 3.468463 | 6.029992 | 6.569917 | 2.986105 |
| 15 | H  | 2.758822 | 3.172016 | 4.240666 | 4.300364 | 2.619908 |
| 16 | C  | 4.875977 | 5.448341 | 4.630700 | 2.886109 | 5.034620 |
| 17 | C  | 6.023939 | 6.666419 | 5.271162 | 2.934083 | 6.222595 |
| 18 | H  | 5.000515 | 5.397612 | 5.325957 | 3.905506 | 5.017449 |
| 19 | H  | 6.941293 | 7.507957 | 6.346275 | 3.984425 | 7.065844 |
| 20 | H  | 6.259568 | 7.014100 | 4.997191 | 2.387019 | 6.555234 |
| 21 | O  | 2.423658 | 1.401887 | 5.052258 | 6.840236 | 2.532171 |
| 22 | H  | 2.701245 | 1.913112 | 5.509784 | 7.023485 | 2.464334 |
|    |    | 11       | 12       | 13       | 14       | 15       |
| 11 | H  | 0.000000 |          |          |          |          |
| 12 | H  | 2.441567 | 0.000000 |          |          |          |



|    |    |          |          |          |          |          |
|----|----|----------|----------|----------|----------|----------|
| 13 | H  | 3.053468 | 1.787425 | 0.000000 |          |          |
| 14 | Br | 4.603786 | 4.524921 | 2.959109 | 0.000000 |          |
| 15 | H  | 3.769468 | 4.020517 | 2.579547 | 2.293138 | 0.000000 |
| 16 | C  | 5.607369 | 5.942942 | 4.808138 | 4.929752 | 2.827009 |
| 17 | C  | 6.644586 | 7.071740 | 6.060491 | 6.224979 | 4.138903 |
| 18 | H  | 5.875504 | 6.016528 | 4.625791 | 4.283511 | 2.506427 |
| 19 | H  | 7.625201 | 7.958771 | 6.814779 | 6.696874 | 4.802386 |
| 20 | H  | 6.723925 | 7.306976 | 6.530012 | 6.982432 | 4.781946 |
| 21 | O  | 2.906732 | 2.029693 | 2.058995 | 3.441916 | 3.994383 |
| 22 | H  | 3.399745 | 2.800978 | 2.160059 | 2.598718 | 3.622731 |
|    |    | 16       | 17       | 18       | 19       | 20       |
| 16 | C  | 0.000000 |          |          |          |          |
| 17 | C  | 1.325511 | 0.000000 |          |          |          |
| 18 | H  | 1.081955 | 2.119155 | 0.000000 |          |          |
| 19 | H  | 2.078866 | 1.081051 | 2.442120 | 0.000000 |          |
| 20 | H  | 2.129890 | 1.082337 | 3.100207 | 1.842236 | 0.000000 |
| 21 | O  | 6.576713 | 7.845392 | 6.384664 | 8.632464 | 8.262382 |
| 22 | H  | 6.365662 | 7.672779 | 6.034498 | 8.379668 | 8.195384 |
|    |    | 21       | 22       |          |          |          |
| 21 | O  | 0.000000 |          |          |          |          |
| 22 | H  | 0.980506 | 0.000000 |          |          |          |

Stoichiometry C7H11BrN2O

Framework group C1[X(C7H11BrN2O)]

Deg. of freedom 60

Full point group C1 NOp 1

Largest Abelian subgroup C1 NOp 1

Largest concise Abelian subgroup C1 NOp 1

Standard orientation:

| Center Number | Atomic Number | Atomic Type | Coordinates (Angstroms) |           |           |
|---------------|---------------|-------------|-------------------------|-----------|-----------|
|               |               |             | X                       | Y         | Z         |
| 1             | 6             | 0           | -1.877244               | -1.999550 | 0.352190  |
| 2             | 6             | 0           | -2.872244               | -1.113126 | 0.090990  |
| 3             | 7             | 0           | -2.267863               | 0.129132  | -0.070390 |
| 4             | 6             | 0           | -0.937689               | -0.015584 | 0.085804  |
| 5             | 7             | 0           | -0.683436               | -1.299154 | 0.341138  |
| 6             | 6             | 0           | 0.688130                | -1.821778 | 0.558500  |
| 7             | 6             | 0           | 1.496689                | -1.833033 | -0.760724 |
| 8             | 1             | 0           | -1.918230               | -3.064426 | 0.503349  |
| 9             | 1             | 0           | -3.930031               | -1.275453 | -0.005197 |
| 10            | 1             | 0           | 1.172383                | -1.151628 | 1.267415  |
| 11            | 1             | 0           | 0.594419                | -2.810987 | 1.007664  |
| 12            | 1             | 0           | 1.278817                | -2.737824 | -1.334877 |

|    |    |   |           |           |           |
|----|----|---|-----------|-----------|-----------|
| 13 | 1  | 0 | 1.200088  | -0.952136 | -1.337865 |
| 14 | 35 | 0 | 2.035306  | 1.473823  | 0.136401  |
| 15 | 1  | 0 | -0.141956 | 0.759411  | 0.049069  |
| 16 | 6  | 0 | -2.872667 | 1.391580  | -0.319114 |
| 17 | 6  | 0 | -4.174359 | 1.636560  | -0.268506 |
| 18 | 1  | 0 | -2.138143 | 2.151670  | -0.550119 |
| 19 | 1  | 0 | -4.531138 | 2.634332  | -0.482586 |
| 20 | 1  | 0 | -4.921533 | 0.895884  | -0.014372 |
| 21 | 8  | 0 | 2.872277  | -1.805125 | -0.491901 |
| 22 | 1  | 0 | 3.076796  | -0.871885 | -0.271382 |

-----

Rotational constants (GHZ):      0.9868375      0.4427769      0.3165643

Standard basis: 6-311++G(d,p) (5D, 7F)

There are    358 symmetry adapted cartesian basis functions of A    symmetry.

There are    345 symmetry adapted basis functions of A    symmetry.

    345 basis functions,    553 primitive gaussians,    358 cartesian basis functions

    55 alpha electrons      55 beta electrons

        nuclear repulsion energy      850.7626030257 Hartrees.

NAtoms=    22 NActive=    22 NUniq=    22 SFac= 1.00D+00 NAtFMM=    60 NAOKFM=F

Big=F

Integral buffers will be    131072 words long.

Raffenetti 2 integral format.

Two-electron integral symmetry is turned on.

One-electron integrals computed using PRISM.

NBasis=    345 RedAO= T EigKep=    6.01D-06    NBF=    345

NBsUse=    345 1.00D-06 EigRej= -1.00D+00 NBFU=    345

Initial guess from the checkpoint file: ". "

B after Tr=      0.000000      0.000000      0.000000

        Rot=    0.999988      0.001532      -0.000205      -0.004587 Ang=    0.55 deg.

ExpMin= 3.50D-02 ExpMax= 4.40D+05 ExpMxC= 1.51D+04 IAcc=3 IRadAn=      5 AccDes=

0.00D+00

Harris functional with IExCor=    402 and IRadAn=      5 diagonalized for initial guess.

HarFok: IExCor=    402 AccDes= 0.00D+00 IRadAn=      5 IDoV= 1 UseB2=F ITyADJ=14

ICtDFT= 3500011 ScaDFX= 1.000000 1.000000 1.000000 1.000000

FoFCou: FMM=F IPFlag=      0 FMFlag=      100000 FMFlg1=      0

        NFxFlg=      0 DoJE=T BraDBF=F KetDBF=T FulRan=T

        wScrn= 0.000000 ICntrl=      500 IOpCl= 0 I1Cent=    200000004 NGrid=

0

        NMat0=    1 NMatS0=    1 NMatT0=    0 NMatD0=    1 NMtDS0=    0

NMtDT0=    0

Petite list used in FoFCou.

Keep R1 ints in memory in canonical form, NReq=1804729152.

Requested convergence on RMS density matrix=1.00D-08 within 128 cycles.

Requested convergence on MAX density matrix=1.00D-06.

Requested convergence on energy=1.00D-06.

No special actions if energy rises.

SCF Done: E(RB3LYP) = -3032.34253278 A.U. after 12 cycles

NFock= 12 Conv=0.22D-08 -V/T= 2.0017

Calling FoFJK, ICntrl= 2127 FMM=F ISym2X=0 l1Cent= 0 IOpClX= 0 NMat=1 NMatS=1

NMatT=0.

\*\*\*\*\* Axes restored to original set \*\*\*\*\*

| Center<br>Number | Atomic<br>Number | Forces (Hartrees/Bohr) |              |              |
|------------------|------------------|------------------------|--------------|--------------|
|                  |                  | X                      | Y            | Z            |
| 1                | 6                | 0.001141244            | 0.001717554  | -0.002082084 |
| 2                | 6                | 0.000434501            | -0.000631279 | 0.000017073  |
| 3                | 7                | -0.000937503           | -0.000956293 | 0.000289373  |
| 4                | 6                | 0.001238758            | 0.001709757  | 0.002455774  |
| 5                | 7                | 0.000845319            | -0.001397164 | 0.002008629  |
| 6                | 6                | -0.002042552           | -0.000920477 | -0.001522231 |
| 7                | 6                | -0.001050831           | -0.001227584 | 0.000827509  |
| 8                | 1                | 0.000184948            | -0.000514359 | 0.001090030  |
| 9                | 1                | -0.001193837           | 0.000885249  | 0.000429557  |
| 10               | 1                | 0.000619215            | 0.001374680  | 0.000178065  |
| 11               | 1                | 0.000040116            | 0.000243203  | -0.000739358 |
| 12               | 1                | 0.000395846            | 0.000324209  | -0.000024273 |
| 13               | 1                | 0.000295690            | 0.000526859  | -0.002098700 |
| 14               | 35               | -0.000156827           | -0.000227582 | 0.000273469  |
| 15               | 1                | -0.000444461           | -0.001694658 | -0.002132931 |
| 16               | 6                | 0.000578262            | 0.000426717  | 0.000224276  |
| 17               | 6                | -0.001328833           | -0.000401170 | -0.000557638 |
| 18               | 1                | -0.000363554           | 0.000543016  | 0.000203820  |
| 19               | 1                | 0.000106210            | 0.000381669  | 0.000281298  |
| 20               | 1                | 0.001028964            | -0.000385354 | -0.000416902 |
| 21               | 8                | -0.000848409           | 0.001787558  | 0.003227243  |
| 22               | 1                | 0.001457734            | -0.001564552 | -0.001931999 |

Cartesian Forces: Max 0.003227243 RMS 0.001141470

GradGradGradGradGradGradGradGradGradGradGradGradGradGradGradGradGradGradGradGrad

Berny optimization.

Using GEDIIS/GDIIS optimizer.

FormGI is forming the generalized inverse of G from B-inverse, IUseBI=4.

Internal Forces: Max 0.002849760 RMS 0.000770244

Search for a local minimum.

Step number 60 out of a maximum of 116

All quantities printed in internal units (Hartrees-Bohrs-Radians)

Mixed Optimization -- En-DIIS/RFO-DIIS

Update second derivatives using D2CorX and points 58 59 60

DE= -4.06D-04 DEPred=-3.64D-04 R= 1.11D+00

TightC=F SS= 1.41D+00 RLast= 3.25D-01 DXNew= 1.3266D+00 9.7377D-01

Trust test= 1.11D+00 RLast= 3.25D-01 DXMaxT set to 9.74D-01

ITU= 1 1 1 0 1 1 0 1 1 0-1 1 1 1-1 1 0-1 1 0

ITU= -1 0-1 0 0 1-1 0 1 1 1 1 1 1 0-1 1 1 1 1

ITU= 1 0-1 1 1 1 1 1 1 1 1 1 1 1 0 0-1 0 0

Use linear search instead of GDIIIS.

|                 |         |         |         |         |         |
|-----------------|---------|---------|---------|---------|---------|
| Eigenvalues --- | 0.00158 | 0.00304 | 0.00498 | 0.00774 | 0.01068 |
| Eigenvalues --- | 0.01323 | 0.01559 | 0.01928 | 0.02141 | 0.02269 |
| Eigenvalues --- | 0.02449 | 0.03045 | 0.03168 | 0.03385 | 0.03903 |
| Eigenvalues --- | 0.04320 | 0.04702 | 0.05249 | 0.05706 | 0.07116 |
| Eigenvalues --- | 0.08635 | 0.09312 | 0.10052 | 0.13476 | 0.14330 |
| Eigenvalues --- | 0.14695 | 0.15596 | 0.15981 | 0.16011 | 0.16205 |
| Eigenvalues --- | 0.16793 | 0.18566 | 0.21536 | 0.22965 | 0.23593 |
| Eigenvalues --- | 0.24938 | 0.25639 | 0.27859 | 0.29816 | 0.32639 |
| Eigenvalues --- | 0.33778 | 0.33886 | 0.33952 | 0.34214 | 0.34235 |
| Eigenvalues --- | 0.34700 | 0.34855 | 0.35389 | 0.36326 | 0.36352 |
| Eigenvalues --- | 0.39947 | 0.43057 | 0.44323 | 0.45954 | 0.49408 |
| Eigenvalues --- | 0.53631 | 0.55224 | 0.57898 | 0.60897 | 0.70108 |

RFO step: Lambda=-5.29480443D-04 EMin= 1.58045188D-03

Quartic linear search produced a step of 0.25688.

Iteration 1 RMS(Cart)= 0.03636036 RMS(Int)= 0.00101863

Iteration 2 RMS(Cart)= 0.00180526 RMS(Int)= 0.00002725

Iteration 3 RMS(Cart)= 0.00000212 RMS(Int)= 0.00002722

Iteration 4 RMS(Cart)= 0.00000000 RMS(Int)= 0.00002722

| Variable | Old X   | -DE/DX   | Delta X<br>(Linear) | Delta X<br>(Quad) | Delta X<br>(Total) | New X   |
|----------|---------|----------|---------------------|-------------------|--------------------|---------|
| R1       | 2.56613 | 0.00071  | 0.00010             | 0.00142           | 0.00153            | 2.56766 |
| R2       | 2.61565 | -0.00038 | 0.00011             | 0.00011           | 0.00023            | 2.61588 |
| R3       | 2.03397 | 0.00003  | 0.00004             | 0.00022           | 0.00026            | 2.03423 |
| R4       | 2.62837 | -0.00050 | -0.00002            | -0.00147          | -0.00149           | 2.62688 |
| R5       | 2.03048 | 0.00027  | 0.00013             | 0.00078           | 0.00091            | 2.03139 |
| R6       | 2.54567 | 0.00059  | 0.00031             | 0.00356           | 0.00386            | 2.54952 |
| R7       | 2.68675 | 0.00025  | 0.00024             | -0.00113          | -0.00088           | 2.68587 |
| R8       | 2.51936 | 0.00024  | 0.00009             | 0.00167           | 0.00175            | 2.52111 |
| R9       | 2.10020 | -0.00271 | -0.00036            | -0.00499          | -0.00535           | 2.09484 |
| R10      | 2.80392 | -0.00180 | 0.00065             | -0.00393          | -0.00327           | 2.80065 |
| R11      | 2.92404 | -0.00033 | 0.00068             | 0.00045           | 0.00113            | 2.92517 |
| R12      | 2.05812 | 0.00035  | 0.00005             | 0.00083           | 0.00088            | 2.05900 |
| R13      | 2.06064 | -0.00006 | 0.00009             | 0.00020           | 0.00029            | 2.06093 |
| R14      | 2.06644 | 0.00007  | -0.00008            | -0.00019          | -0.00027           | 2.06617 |
| R15      | 2.06754 | 0.00033  | 0.00065             | 0.00269           | 0.00334            | 2.07088 |

|     |          |          |          |          |          |         |
|-----|----------|----------|----------|----------|----------|---------|
| R16 | 2.64918  | 0.00127  | -0.00190 | -0.00200 | -0.00390 | 2.64528 |
| R17 | 5.59191  | 0.00022  | 0.04290  | 0.05418  | 0.09708  | 5.68898 |
| R18 | 2.50485  | 0.00049  | -0.00016 | 0.00051  | 0.00035  | 2.50520 |
| R19 | 2.04460  | 0.00049  | 0.00013  | 0.00094  | 0.00107  | 2.04567 |
| R20 | 2.04289  | 0.00020  | 0.00017  | 0.00067  | 0.00084  | 2.04373 |
| R21 | 2.04532  | 0.00030  | 0.00019  | 0.00117  | 0.00136  | 2.04668 |
| R22 | 1.85289  | -0.00285 | 0.00110  | -0.00117 | -0.00007 | 1.85282 |
| A1  | 1.87562  | -0.00020 | 0.00000  | 0.00045  | 0.00041  | 1.87603 |
| A2  | 2.27174  | 0.00067  | -0.00048 | 0.00382  | 0.00325  | 2.27499 |
| A3  | 2.13482  | -0.00043 | 0.00035  | -0.00324 | -0.00297 | 2.13185 |
| A4  | 1.86183  | 0.00018  | 0.00004  | 0.00052  | 0.00057  | 1.86241 |
| A5  | 2.26522  | 0.00144  | -0.00042 | 0.00844  | 0.00800  | 2.27322 |
| A6  | 2.15595  | -0.00162 | 0.00034  | -0.00886 | -0.00854 | 2.14741 |
| A7  | 1.89618  | -0.00003 | 0.00001  | -0.00011 | -0.00013 | 1.89604 |
| A8  | 2.25044  | -0.00153 | -0.00051 | -0.00653 | -0.00709 | 2.24336 |
| A9  | 2.13615  | 0.00157  | 0.00045  | 0.00713  | 0.00754  | 2.14369 |
| A10 | 1.89014  | -0.00019 | -0.00007 | -0.00057 | -0.00064 | 1.88950 |
| A11 | 2.25009  | 0.00008  | 0.00010  | -0.00149 | -0.00140 | 2.24869 |
| A12 | 2.14261  | 0.00012  | -0.00001 | 0.00207  | 0.00206  | 2.14467 |
| A13 | 1.90099  | 0.00025  | 0.00003  | -0.00025 | -0.00024 | 1.90075 |
| A14 | 2.23682  | 0.00005  | -0.00028 | -0.00224 | -0.00256 | 2.23426 |
| A15 | 2.14535  | -0.00030 | 0.00024  | 0.00242  | 0.00262  | 2.14797 |
| A16 | 1.93981  | 0.00211  | -0.00124 | 0.00562  | 0.00437  | 1.94418 |
| A17 | 1.86464  | -0.00042 | -0.00156 | 0.00185  | 0.00029  | 1.86493 |
| A18 | 1.87594  | -0.00029 | 0.00036  | 0.00164  | 0.00199  | 1.87793 |
| A19 | 1.90402  | -0.00143 | 0.00087  | -0.01478 | -0.01391 | 1.89010 |
| A20 | 1.97088  | -0.00084 | 0.00111  | 0.00149  | 0.00258  | 1.97345 |
| A21 | 1.90529  | 0.00091  | 0.00032  | 0.00453  | 0.00485  | 1.91014 |
| A22 | 1.92789  | 0.00067  | -0.00161 | 0.00169  | 0.00008  | 1.92797 |
| A23 | 1.87782  | 0.00078  | 0.00010  | 0.00511  | 0.00514  | 1.88296 |
| A24 | 1.92742  | -0.00130 | 0.00271  | -0.00148 | 0.00118  | 1.92860 |
| A25 | 1.91262  | -0.00074 | -0.00369 | -0.00645 | -0.01012 | 1.90249 |
| A26 | 1.88879  | 0.00016  | -0.00161 | -0.00200 | -0.00358 | 1.88521 |
| A27 | 1.92958  | 0.00043  | 0.00415  | 0.00311  | 0.00721  | 1.93679 |
| A28 | 1.89732  | -0.00103 | -0.02132 | -0.05993 | -0.08125 | 1.81607 |
| A29 | 2.18361  | -0.00211 | -0.00094 | -0.00867 | -0.00963 | 2.17398 |
| A30 | 1.95234  | 0.00154  | 0.00067  | 0.00866  | 0.00932  | 1.96166 |
| A31 | 2.14718  | 0.00057  | 0.00027  | 0.00010  | 0.00036  | 2.14754 |
| A32 | 2.07959  | 0.00014  | 0.00021  | 0.00059  | 0.00080  | 2.08039 |
| A33 | 2.16568  | -0.00117 | 0.00015  | -0.00517 | -0.00503 | 2.16065 |
| A34 | 2.03787  | 0.00103  | -0.00037 | 0.00464  | 0.00426  | 2.04214 |
| A35 | 1.84081  | 0.00081  | 0.00073  | 0.00250  | 0.00323  | 1.84404 |
| D1  | -0.00550 | 0.00017  | 0.00022  | 0.00539  | 0.00561  | 0.00011 |
| D2  | 3.11587  | 0.00021  | -0.00354 | 0.01068  | 0.00720  | 3.12307 |

|     |          |          |          |          |          |          |
|-----|----------|----------|----------|----------|----------|----------|
| D3  | -3.09868 | -0.00045 | 0.00389  | -0.01917 | -0.01535 | -3.11403 |
| D4  | 0.02269  | -0.00041 | 0.00013  | -0.01388 | -0.01377 | 0.00892  |
| D5  | 0.00453  | -0.00022 | 0.00058  | -0.01060 | -0.01002 | -0.00549 |
| D6  | -3.12978 | -0.00005 | 0.00308  | 0.00132  | 0.00438  | -3.12540 |
| D7  | 3.10235  | 0.00038  | -0.00275 | 0.01184  | 0.00905  | 3.11140  |
| D8  | -0.03196 | 0.00055  | -0.00026 | 0.02376  | 0.02345  | -0.00851 |
| D9  | 0.00462  | -0.00008 | -0.00095 | 0.00155  | 0.00061  | 0.00523  |
| D10 | -3.10607 | -0.00027 | 0.00162  | -0.01695 | -0.01526 | -3.12134 |
| D11 | -3.11834 | -0.00015 | 0.00252  | -0.00356 | -0.00106 | -3.11940 |
| D12 | 0.05416  | -0.00035 | 0.00509  | -0.02207 | -0.01693 | 0.03723  |
| D13 | -0.00185 | -0.00006 | 0.00132  | -0.00818 | -0.00685 | -0.00870 |
| D14 | -3.11567 | -0.00025 | 0.00064  | -0.00834 | -0.00774 | -3.12340 |
| D15 | 3.11128  | 0.00006  | -0.00105 | 0.00859  | 0.00762  | 3.11890  |
| D16 | -0.00254 | -0.00013 | -0.00174 | 0.00842  | 0.00674  | 0.00420  |
| D17 | 0.16526  | -0.00033 | 0.01695  | -0.01580 | 0.00115  | 0.16641  |
| D18 | -2.98644 | -0.00018 | 0.01659  | -0.00699 | 0.00960  | -2.97683 |
| D19 | -2.94165 | -0.00052 | 0.01984  | -0.03641 | -0.01658 | -2.95823 |
| D20 | 0.18983  | -0.00037 | 0.01947  | -0.02761 | -0.00813 | 0.18170  |
| D21 | -0.00162 | 0.00017  | -0.00118 | 0.01159  | 0.01040  | 0.00878  |
| D22 | 3.13315  | 0.00001  | -0.00352 | 0.00040  | -0.00316 | 3.12999  |
| D23 | 3.11427  | 0.00035  | -0.00055 | 0.01168  | 0.01116  | 3.12543  |
| D24 | -0.03414 | 0.00019  | -0.00288 | 0.00049  | -0.00241 | -0.03654 |
| D25 | 1.89118  | -0.00001 | -0.00717 | 0.01028  | 0.00310  | 1.89428  |
| D26 | -2.31664 | -0.00081 | -0.00778 | -0.00332 | -0.01111 | -2.32775 |
| D27 | -0.27357 | -0.00012 | -0.00801 | 0.00370  | -0.00432 | -0.27789 |
| D28 | -1.24221 | 0.00018  | -0.00436 | 0.02373  | 0.01937  | -1.22283 |
| D29 | 0.83315  | -0.00063 | -0.00496 | 0.01012  | 0.00517  | 0.83831  |
| D30 | 2.87622  | 0.00006  | -0.00520 | 0.01715  | 0.01195  | 2.88818  |
| D31 | -1.46102 | -0.00068 | -0.00892 | -0.07660 | -0.08553 | -1.54655 |
| D32 | 0.62602  | -0.00071 | -0.01430 | -0.08033 | -0.09464 | 0.53138  |
| D33 | 2.73340  | -0.00047 | -0.00764 | -0.07424 | -0.08188 | 2.65152  |
| D34 | 2.77059  | -0.00053 | -0.00681 | -0.07308 | -0.07989 | 2.69070  |
| D35 | -1.42556 | -0.00056 | -0.01219 | -0.07681 | -0.08900 | -1.51456 |
| D36 | 0.68183  | -0.00033 | -0.00553 | -0.07072 | -0.07624 | 0.60559  |
| D37 | 0.64878  | -0.00012 | -0.00856 | -0.06936 | -0.07793 | 0.57085  |
| D38 | 2.73581  | -0.00014 | -0.01394 | -0.07310 | -0.08704 | 2.64877  |
| D39 | -1.43998 | 0.00009  | -0.00728 | -0.06701 | -0.07428 | -1.51426 |
| D40 | 1.13617  | -0.00103 | -0.00005 | 0.05744  | 0.05741  | 1.19358  |
| D41 | -3.05028 | -0.00018 | -0.00410 | 0.05882  | 0.05474  | -2.99554 |
| D42 | -0.96986 | -0.00018 | -0.00580 | 0.05422  | 0.04839  | -0.92148 |
| D43 | -1.36698 | -0.00008 | 0.02357  | -0.00383 | 0.01972  | -1.34727 |
| D44 | 2.80400  | -0.00021 | 0.02491  | -0.00374 | 0.02117  | 2.82516  |
| D45 | 0.70922  | 0.00034  | 0.02792  | 0.00354  | 0.03150  | 0.74072  |
| D46 | -3.13401 | 0.00002  | 0.00089  | 0.00497  | 0.00585  | -3.12816 |

|     |          |          |         |          |          |          |
|-----|----------|----------|---------|----------|----------|----------|
| D47 | 0.01754  | -0.00021 | 0.00189 | -0.00225 | -0.00037 | 0.01716  |
| D48 | 0.01877  | -0.00015 | 0.00129 | -0.00481 | -0.00352 | 0.01526  |
| D49 | -3.11287 | -0.00038 | 0.00229 | -0.01204 | -0.00974 | -3.12261 |

| Item                 | Value    | Threshold | Converged? |
|----------------------|----------|-----------|------------|
| Maximum Force        | 0.002850 | 0.000450  | NO         |
| RMS Force            | 0.000770 | 0.000300  | NO         |
| Maximum Displacement | 0.195375 | 0.001800  | NO         |
| RMS Displacement     | 0.036514 | 0.001200  | NO         |

Predicted change in Energy=-3.090190D-04

GradGradGradGradGradGradGradGradGradGradGradGradGradGradGradGradGradGradGrad

Input orientation:

| Center Number | Atomic Number | Atomic Type | Coordinates (Angstroms) |           |           |
|---------------|---------------|-------------|-------------------------|-----------|-----------|
|               |               |             | X                       | Y         | Z         |
| 1             | 6             | 0           | -0.618461               | -2.396033 | -1.128930 |
| 2             | 6             | 0           | -1.910588               | -2.002684 | -1.276836 |
| 3             | 7             | 0           | -2.072138               | -0.860965 | -0.500491 |
| 4             | 6             | 0           | -0.895778               | -0.574316 | 0.094669  |
| 5             | 7             | 0           | -0.006233               | -1.499090 | -0.270527 |
| 6             | 6             | 0           | 1.403758                | -1.489674 | 0.185842  |
| 7             | 6             | 0           | 2.196668                | -0.324514 | -0.454311 |
| 8             | 1             | 0           | -0.084368               | -3.216956 | -1.575715 |
| 9             | 1             | 0           | -2.701662               | -2.425144 | -1.869528 |
| 10            | 1             | 0           | 1.385552                | -1.338888 | 1.264780  |
| 11            | 1             | 0           | 1.828894                | -2.469027 | -0.036716 |
| 12            | 1             | 0           | 2.629908                | -0.635832 | -1.408693 |
| 13            | 1             | 0           | 1.497758                | 0.500651  | -0.631910 |
| 14            | 35            | 0           | 0.771538                | 1.450977  | 2.130784  |
| 15            | 1             | 0           | -0.653349               | 0.250907  | 0.794029  |
| 16            | 6             | 0           | -3.245820               | -0.084563 | -0.301073 |
| 17            | 6             | 0           | -4.458857               | -0.438688 | -0.701833 |
| 18            | 1             | 0           | -3.043900               | 0.841227  | 0.222375  |
| 19            | 1             | 0           | -5.291216               | 0.226070  | -0.515012 |
| 20            | 1             | 0           | -4.677333               | -1.369214 | -1.211149 |
| 21            | 8             | 0           | 3.242314                | 0.076585  | 0.385476  |
| 22            | 1             | 0           | 2.823662                | 0.612293  | 1.091923  |

Distance matrix (angstroms):

|   |   | 1        | 2        | 3        | 4 | 5 |
|---|---|----------|----------|----------|---|---|
| 1 | C | 0.000000 |          |          |   |   |
| 2 | C | 1.358746 | 0.000000 |          |   |   |
| 3 | N | 2.205572 | 1.390083 | 0.000000 |   |   |

|    |    |          |          |          |          |          |  |  |  |  |
|----|----|----------|----------|----------|----------|----------|--|--|--|--|
| 4  | C  | 2.211957 | 2.225107 | 1.349150 | 0.000000 |          |  |  |  |  |
| 5  | N  | 1.384264 | 2.211974 | 2.174408 | 1.334116 | 0.000000 |  |  |  |  |
| 6  | C  | 2.576719 | 3.658893 | 3.598358 | 2.476703 | 1.482038 |  |  |  |  |
| 7  | C  | 3.559670 | 4.512466 | 4.302629 | 3.150714 | 2.503233 |  |  |  |  |
| 8  | H  | 1.076469 | 2.213338 | 3.264664 | 3.229879 | 2.158862 |  |  |  |  |
| 9  | H  | 2.211122 | 1.074967 | 2.171916 | 3.247284 | 3.267983 |  |  |  |  |
| 10 | H  | 3.295978 | 4.214851 | 3.911548 | 2.675480 | 2.078437 |  |  |  |  |
| 11 | H  | 2.681008 | 3.967253 | 4.244879 | 3.321299 | 2.088812 |  |  |  |  |
| 12 | H  | 3.705196 | 4.743604 | 4.794242 | 3.833320 | 2.998312 |  |  |  |  |
| 13 | H  | 3.621629 | 4.277784 | 3.823013 | 2.722588 | 2.528152 |  |  |  |  |
| 14 | Br | 5.230423 | 5.543776 | 4.511671 | 3.320771 | 3.882540 |  |  |  |  |
| 15 | H  | 3.271893 | 3.308746 | 2.219235 | 1.108543 | 2.148145 |  |  |  |  |
| 16 | C  | 3.596005 | 2.532616 | 1.421301 | 2.432934 | 3.535073 |  |  |  |  |
| 17 | C  | 4.331542 | 3.044731 | 2.432136 | 3.653539 | 4.597427 |  |  |  |  |
| 18 | H  | 4.264814 | 3.408792 | 2.089095 | 2.575753 | 3.866194 |  |  |  |  |
| 19 | H  | 5.393234 | 4.120239 | 3.397694 | 4.509125 | 5.564800 |  |  |  |  |
| 20 | H  | 4.187549 | 2.839098 | 2.747799 | 4.078871 | 4.766636 |  |  |  |  |
| 21 | O  | 4.828338 | 5.799917 | 5.468760 | 4.199053 | 3.669625 |  |  |  |  |
| 22 | H  | 5.082364 | 5.904425 | 5.354916 | 4.029489 | 3.784509 |  |  |  |  |
|    |    | 6        | 7        | 8        | 9        | 10       |  |  |  |  |
| 6  | C  | 0.000000 |          |          |          |          |  |  |  |  |
| 7  | C  | 1.547933 | 0.000000 |          |          |          |  |  |  |  |
| 8  | H  | 2.881164 | 3.850570 | 0.000000 |          |          |  |  |  |  |
| 9  | H  | 4.685523 | 5.514446 | 2.750185 | 0.000000 |          |  |  |  |  |
| 10 | H  | 1.089576 | 2.154562 | 3.708937 | 5.263948 | 0.000000 |  |  |  |  |
| 11 | H  | 1.090598 | 2.215531 | 2.566805 | 4.887439 | 1.779791 |  |  |  |  |
| 12 | H  | 2.185185 | 1.093371 | 3.749319 | 5.642663 | 3.031529 |  |  |  |  |
| 13 | H  | 2.153822 | 1.095863 | 4.149036 | 5.265653 | 2.644604 |  |  |  |  |
| 14 | Br | 3.581889 | 3.444718 | 6.021654 | 6.564292 | 2.985017 |  |  |  |  |
| 15 | H  | 2.762464 | 3.164184 | 4.238573 | 4.295506 | 2.627960 |  |  |  |  |
| 16 | C  | 4.881598 | 5.449929 | 4.629403 | 2.869578 | 5.047259 |  |  |  |  |
| 17 | C  | 6.021860 | 6.661104 | 5.255340 | 2.897802 | 6.231777 |  |  |  |  |
| 18 | H  | 5.021564 | 5.411138 | 5.334867 | 3.893888 | 5.045747 |  |  |  |  |
| 19 | H  | 6.946774 | 7.508345 | 6.331729 | 3.945813 | 7.084913 |  |  |  |  |
| 20 | H  | 6.240655 | 6.994004 | 4.964110 | 2.334893 | 6.549025 |  |  |  |  |
| 21 | O  | 2.423491 | 1.399821 | 5.075480 | 6.831877 | 2.494856 |  |  |  |  |
| 22 | H  | 2.693580 | 1.913522 | 5.498734 | 6.966018 | 2.430051 |  |  |  |  |
|    |    | 11       | 12       | 13       | 14       | 15       |  |  |  |  |
| 11 | H  | 0.000000 |          |          |          |          |  |  |  |  |
| 12 | H  | 2.425809 | 0.000000 |          |          |          |  |  |  |  |
| 13 | H  | 3.046784 | 1.782344 | 0.000000 |          |          |  |  |  |  |
| 14 | Br | 4.602444 | 4.509569 | 3.010481 | 0.000000 |          |  |  |  |  |
| 15 | H  | 3.774878 | 4.051922 | 2.592863 | 2.292899 | 0.000000 |  |  |  |  |
| 16 | C  | 5.613222 | 6.004573 | 4.790977 | 4.940746 | 2.834200 |  |  |  |  |



|    |   |          |          |          |          |          |
|----|---|----------|----------|----------|----------|----------|
| 17 | C | 6.640818 | 7.126648 | 6.030631 | 6.241121 | 4.146690 |
| 18 | H | 5.896527 | 6.085572 | 4.633838 | 4.309454 | 2.527845 |
| 19 | H | 7.628125 | 8.017840 | 6.795531 | 6.727379 | 4.819131 |
| 20 | H | 6.702229 | 7.346608 | 6.477937 | 6.986573 | 4.778910 |
| 21 | O | 2.942132 | 2.025245 | 2.063585 | 3.322618 | 3.920905 |
| 22 | H | 3.428982 | 2.801506 | 2.177633 | 2.448231 | 3.508411 |
|    |   | 16       | 17       | 18       | 19       | 20       |
| 16 | C | 0.000000 |          |          |          |          |
| 17 | C | 1.325697 | 0.000000 |          |          |          |
| 18 | H | 1.082523 | 2.120010 | 0.000000 |          |          |
| 19 | H | 2.079883 | 1.081493 | 2.443888 | 0.000000 |          |
| 20 | H | 2.127863 | 1.083058 | 3.099862 | 1.845642 | 0.000000 |
| 21 | O | 6.526346 | 7.794600 | 6.334648 | 8.582212 | 8.207336 |
| 22 | H | 6.266151 | 7.573454 | 5.936060 | 8.281465 | 8.092925 |
|    |   | 21       | 22       |          |          |          |
| 21 | O | 0.000000 |          |          |          |          |
| 22 | H | 0.980469 | 0.000000 |          |          |          |

Stoichiometry C7H11BrN2O

Framework group C1[X(C7H11BrN2O)]

Deg. of freedom 60

Full point group C1 NOp 1

Largest Abelian subgroup C1 NOp 1

Largest concise Abelian subgroup C1 NOp 1

Standard orientation:

| Center Number | Atomic Number | Atomic Type | Coordinates (Angstroms) |           |           |
|---------------|---------------|-------------|-------------------------|-----------|-----------|
|               |               |             | X                       | Y         | Z         |
| 1             | 6             | 0           | -1.892308               | -1.988442 | 0.341875  |
| 2             | 6             | 0           | -2.880345               | -1.090107 | 0.090937  |
| 3             | 7             | 0           | -2.266102               | 0.147707  | -0.060230 |
| 4             | 6             | 0           | -0.934810               | -0.010295 | 0.091107  |
| 5             | 7             | 0           | -0.692534               | -1.297987 | 0.342137  |
| 6             | 6             | 0           | 0.671642                | -1.838685 | 0.549760  |
| 7             | 6             | 0           | 1.487062                | -1.834284 | -0.765979 |
| 8             | 1             | 0           | -1.940705               | -3.052713 | 0.496056  |
| 9             | 1             | 0           | -3.941422               | -1.233391 | -0.004662 |
| 10            | 1             | 0           | 1.167639                | -1.179709 | 1.261739  |
| 11            | 1             | 0           | 0.569348                | -2.833062 | 0.985825  |
| 12            | 1             | 0           | 1.328374                | -2.765124 | -1.317175 |
| 13            | 1             | 0           | 1.136847                | -0.994082 | -1.376163 |
| 14            | 35            | 0           | 2.051601                | 1.441104  | 0.139120  |
| 15            | 1             | 0           | -0.134926               | 0.756246  | 0.052782  |
| 16            | 6             | 0           | -2.868366               | 1.410144  | -0.312479 |

|    |   |   |           |           |           |
|----|---|---|-----------|-----------|-----------|
| 17 | 6 | 0 | -4.172793 | 1.642902  | -0.270480 |
| 18 | 1 | 0 | -2.139298 | 2.175835  | -0.544930 |
| 19 | 1 | 0 | -4.538727 | 2.636622  | -0.490117 |
| 20 | 1 | 0 | -4.911353 | 0.890434  | -0.022820 |
| 21 | 8 | 0 | 2.855494  | -1.719965 | -0.494273 |
| 22 | 1 | 0 | 3.004174  | -0.775420 | -0.277364 |

-----

Rotational constants (GHZ): 1.0093730 0.4415091 0.3181703  
Standard basis: 6-311++G(d,p) (5D, 7F)  
There are 358 symmetry adapted cartesian basis functions of A symmetry.  
There are 345 symmetry adapted basis functions of A symmetry.  
345 basis functions, 553 primitive gaussians, 358 cartesian basis functions  
55 alpha electrons 55 beta electrons  
nuclear repulsion energy 853.2868399775 Hartrees.  
NAtoms= 22 NActive= 22 NUniq= 22 SFac= 1.00D+00 NATFMM= 60 NAOKFM=F  
Big=F  
Integral buffers will be 131072 words long.  
Raffenetti 2 integral format.  
Two-electron integral symmetry is turned on.  
One-electron integrals computed using PRISM.  
NBasis= 345 RedAO= T EigKep= 5.80D-06 NBF= 345  
NBsUse= 345 1.00D-06 EigRej= -1.00D+00 NBFU= 345  
Initial guess from the checkpoint file: ". "  
B after Tr= 0.000000 0.000000 0.000000  
Rot= 0.999995 -0.002056 -0.000115 0.002234 Ang= -0.35 deg.  
ExpMin= 3.50D-02 ExpMax= 4.40D+05 ExpMxC= 1.51D+04 IAcc=3 IRadAn= 5 AccDes=  
0.00D+00  
Harris functional with IExCor= 402 and IRadAn= 5 diagonalized for initial guess.  
HarFok: IExCor= 402 AccDes= 0.00D+00 IRadAn= 5 IDoV= 1 UseB2=F ITyADJ=14  
ICtDFT= 3500011 ScaDFX= 1.000000 1.000000 1.000000 1.000000  
FoFCou: FMM=F IPFlag= 0 FMFlag= 100000 FMFlg1= 0  
NFxFlg= 0 DoJE=T BraDBF=F KetDBF=T FulRan=T  
wScrn= 0.000000 ICntrl= 500 IOpCl= 0 I1Cent= 200000004 NGrid=  
0  
NMat0= 1 NMatS0= 1 NMatT0= 0 NMatD0= 1 NMtDS0= 0  
NMtDT0= 0  
Petite list used in FoFCou.  
Keep R1 ints in memory in canonical form, NReq=1804729152.  
Requested convergence on RMS density matrix=1.00D-08 within 128 cycles.  
Requested convergence on MAX density matrix=1.00D-06.  
Requested convergence on energy=1.00D-06.  
No special actions if energy rises.  
SCF Done: E(RB3LYP) = -3032.34279973 A.U. after 11 cycles  
NFock= 11 Conv=0.69D-08 -V/T= 2.0016

Calling FoFJK, ICntrl= 2127 FMM=F ISym2X=0 I1Cent= 0 IOpClX= 0 NMat=1 NMatS=1  
NMatT=0.

\*\*\*\*\* Axes restored to original set \*\*\*\*\*

---

| Center<br>Number | Atomic<br>Number | Forces (Hartrees/Bohr) |              |              |
|------------------|------------------|------------------------|--------------|--------------|
|                  |                  | X                      | Y            | Z            |
| 1                | 6                | 0.000226377            | 0.000938751  | -0.000891315 |
| 2                | 6                | 0.000637099            | -0.000725256 | -0.000205297 |
| 3                | 7                | 0.001679083            | 0.000071741  | 0.000646371  |
| 4                | 6                | -0.000489197           | -0.000217346 | 0.001465661  |
| 5                | 7                | -0.000549948           | -0.000735726 | 0.000570193  |
| 6                | 6                | -0.001973989           | 0.000367065  | 0.000084902  |
| 7                | 6                | 0.000280348            | -0.000301814 | -0.000664416 |
| 8                | 1                | -0.000028472           | -0.000271582 | 0.000694329  |
| 9                | 1                | -0.000182109           | 0.000413281  | 0.000306885  |
| 10               | 1                | 0.000281275            | 0.000163873  | -0.000032516 |
| 11               | 1                | -0.000293353           | 0.000349512  | -0.000436429 |
| 12               | 1                | 0.000282297            | 0.000126110  | -0.000193653 |
| 13               | 1                | 0.000646305            | 0.000082079  | -0.001073467 |
| 14               | 35               | -0.001078042           | 0.000513340  | 0.001084774  |
| 15               | 1                | -0.000227404           | -0.000994576 | -0.001316613 |
| 16               | 6                | 0.000139355            | 0.000364466  | -0.000170065 |
| 17               | 6                | -0.001580095           | 0.000021191  | -0.000591446 |
| 18               | 1                | 0.000114516            | -0.000182850 | 0.000263077  |
| 19               | 1                | 0.000203769            | -0.000066955 | 0.000198041  |
| 20               | 1                | 0.000543252            | 0.000198969  | 0.000078734  |
| 21               | 8                | 0.000988786            | -0.000048895 | 0.000237001  |
| 22               | 1                | 0.000380148            | -0.000065377 | -0.000054748 |

---

Cartesian Forces: Max 0.001973989 RMS 0.000644343

GradGradGradGradGradGradGradGradGradGradGradGradGradGradGradGradGradGradGrad

Berny optimization.

Using GEDIIS/GDIIS optimizer.

FormGI is forming the generalized inverse of G from B-inverse, IUseBI=4.

Internal Forces: Max 0.003277143 RMS 0.000637115

Search for a local minimum.

Step number 61 out of a maximum of 116

All quantities printed in internal units (Hartrees-Bohrs-Radians)

Mixed Optimization -- En-DIIS/RFO-DIIS

Swapping is turned off.

Update second derivatives using D2CorX and points 59 60 61

DE= -2.67D-04 DEPred=-3.09D-04 R= 8.64D-01

TightC=F SS= 1.41D+00 RLast= 3.05D-01 DXNew= 1.6377D+00 9.1643D-01

Trust test= 8.64D-01 RLast= 3.05D-01 DXMaxT set to 9.74D-01

ITU= 1 1 1 1 0 1 1 0 1 1 0-1 1 1 1-1 1 0-1 1

ITU= 0-1 0-1 0 0 1-1 0 1 1 1 1 1 1 0-1 1 1 1

ITU= 1 1 0-1 1 1 1 1 1 1 1 1 1 1 1 0 0-1 0

ITU= 0

|                 |         |         |         |         |         |
|-----------------|---------|---------|---------|---------|---------|
| Eigenvalues --- | 0.00195 | 0.00313 | 0.00437 | 0.00712 | 0.01030 |
| Eigenvalues --- | 0.01371 | 0.01520 | 0.01907 | 0.02139 | 0.02258 |
| Eigenvalues --- | 0.02479 | 0.03040 | 0.03163 | 0.03434 | 0.03905 |
| Eigenvalues --- | 0.04483 | 0.04924 | 0.05207 | 0.05717 | 0.07552 |
| Eigenvalues --- | 0.08703 | 0.09232 | 0.11635 | 0.13519 | 0.14358 |
| Eigenvalues --- | 0.14517 | 0.15160 | 0.15950 | 0.16001 | 0.16189 |
| Eigenvalues --- | 0.16549 | 0.18733 | 0.21490 | 0.23018 | 0.23698 |
| Eigenvalues --- | 0.25040 | 0.25769 | 0.26707 | 0.29649 | 0.32686 |
| Eigenvalues --- | 0.33639 | 0.33869 | 0.33893 | 0.34093 | 0.34247 |
| Eigenvalues --- | 0.34814 | 0.34954 | 0.35422 | 0.36314 | 0.36411 |
| Eigenvalues --- | 0.38518 | 0.43118 | 0.43855 | 0.45916 | 0.49250 |
| Eigenvalues --- | 0.53660 | 0.56033 | 0.57543 | 0.60913 | 0.71197 |

En-DIIS/RFO-DIIS IScMMF= 0 using points: 61 60

RFO step: Lambda=-1.11687135D-04.

DidBck=F Rises=F RFO-DIIS coefs: 0.86329 0.13671

Iteration 1 RMS(Cart)= 0.03356198 RMS(Int)= 0.00045867

Iteration 2 RMS(Cart)= 0.00124826 RMS(Int)= 0.00001821

Iteration 3 RMS(Cart)= 0.00000100 RMS(Int)= 0.00001820

Iteration 4 RMS(Cart)= 0.00000000 RMS(Int)= 0.00001820

| Variable | Old X   | -DE/DX   | Delta X<br>(Linear) | Delta X<br>(Quad) | Delta X<br>(Total) | New X   |
|----------|---------|----------|---------------------|-------------------|--------------------|---------|
| R1       | 2.56766 | -0.00046 | -0.00021            | -0.00004          | -0.00025           | 2.56741 |
| R2       | 2.61588 | -0.00052 | -0.00003            | 0.00043           | 0.00041            | 2.61629 |
| R3       | 2.03423 | -0.00009 | -0.00004            | -0.00001          | -0.00004           | 2.03419 |
| R4       | 2.62688 | 0.00011  | 0.00020             | -0.00013          | 0.00006            | 2.62694 |
| R5       | 2.03139 | -0.00020 | -0.00012            | 0.00016           | 0.00004            | 2.03143 |
| R6       | 2.54952 | -0.00124 | -0.00053            | 0.00118           | 0.00065            | 2.55017 |
| R7       | 2.68587 | 0.00063  | 0.00012             | -0.00087          | -0.00075           | 2.68512 |
| R8       | 2.52111 | -0.00078 | -0.00024            | 0.00021           | -0.00002           | 2.52109 |
| R9       | 2.09484 | -0.00162 | 0.00073             | -0.00489          | -0.00416           | 2.09069 |
| R10      | 2.80065 | -0.00078 | 0.00045             | -0.00251          | -0.00206           | 2.79859 |
| R11      | 2.92517 | 0.00129  | -0.00015            | 0.00129           | 0.00114            | 2.92631 |
| R12      | 2.05900 | -0.00001 | -0.00012            | 0.00087           | 0.00075            | 2.05975 |
| R13      | 2.06093 | -0.00034 | -0.00004            | -0.00018          | -0.00022           | 2.06071 |
| R14      | 2.06617 | 0.00025  | 0.00004             | 0.00020           | 0.00023            | 2.06640 |
| R15      | 2.07088 | 0.00073  | -0.00046            | 0.00240           | 0.00194            | 2.07282 |
| R16      | 2.64528 | 0.00110  | 0.00053             | -0.00088          | -0.00035           | 2.64493 |
| R17      | 5.68898 | 0.00142  | -0.01327            | 0.19327           | 0.18000            | 5.86898 |

|     |          |          |          |          |          |          |
|-----|----------|----------|----------|----------|----------|----------|
| R18 | 2.50520  | 0.00082  | -0.00005 | 0.00082  | 0.00077  | 2.50597  |
| R19 | 2.04567  | -0.00001 | -0.00015 | 0.00004  | -0.00011 | 2.04557  |
| R20 | 2.04373  | -0.00017 | -0.00011 | 0.00004  | -0.00008 | 2.04365  |
| R21 | 2.04668  | -0.00032 | -0.00019 | 0.00004  | -0.00014 | 2.04654  |
| R22 | 1.85282  | -0.00024 | 0.00001  | -0.00223 | -0.00222 | 1.85060  |
| A1  | 1.87603  | -0.00030 | -0.00006 | -0.00008 | -0.00014 | 1.87589  |
| A2  | 2.27499  | 0.00039  | -0.00044 | 0.00190  | 0.00143  | 2.27641  |
| A3  | 2.13185  | -0.00009 | 0.00041  | -0.00144 | -0.00106 | 2.13079  |
| A4  | 1.86241  | -0.00014 | -0.00008 | 0.00027  | 0.00019  | 1.86259  |
| A5  | 2.27322  | 0.00058  | -0.00109 | 0.00459  | 0.00350  | 2.27672  |
| A6  | 2.14741  | -0.00044 | 0.00117  | -0.00485 | -0.00368 | 2.14373  |
| A7  | 1.89604  | 0.00010  | 0.00002  | -0.00001 | 0.00002  | 1.89606  |
| A8  | 2.24336  | -0.00009 | 0.00097  | -0.00339 | -0.00242 | 2.24094  |
| A9  | 2.14369  | -0.00001 | -0.00103 | 0.00346  | 0.00243  | 2.14612  |
| A10 | 1.88950  | -0.00002 | 0.00009  | -0.00041 | -0.00032 | 1.88918  |
| A11 | 2.24869  | 0.00004  | 0.00019  | 0.00034  | 0.00050  | 2.24919  |
| A12 | 2.14467  | -0.00001 | -0.00028 | 0.00035  | 0.00004  | 2.14471  |
| A13 | 1.90075  | 0.00036  | 0.00003  | 0.00021  | 0.00024  | 1.90099  |
| A14 | 2.23426  | -0.00024 | 0.00035  | -0.00536 | -0.00506 | 2.22920  |
| A15 | 2.14797  | -0.00012 | -0.00036 | 0.00479  | 0.00438  | 2.15235  |
| A16 | 1.94418  | 0.00262  | -0.00060 | 0.00696  | 0.00637  | 1.95055  |
| A17 | 1.86493  | -0.00063 | -0.00004 | -0.00115 | -0.00118 | 1.86375  |
| A18 | 1.87793  | -0.00093 | -0.00027 | -0.00072 | -0.00099 | 1.87694  |
| A19 | 1.89010  | -0.00056 | 0.00190  | -0.00559 | -0.00369 | 1.88641  |
| A20 | 1.97345  | -0.00102 | -0.00035 | -0.00366 | -0.00401 | 1.96944  |
| A21 | 1.91014  | 0.00052  | -0.00066 | 0.00439  | 0.00372  | 1.91386  |
| A22 | 1.92797  | 0.00047  | -0.00001 | -0.00163 | -0.00164 | 1.92633  |
| A23 | 1.88296  | 0.00022  | -0.00070 | 0.00349  | 0.00272  | 1.88568  |
| A24 | 1.92860  | -0.00044 | -0.00016 | 0.00265  | 0.00243  | 1.93103  |
| A25 | 1.90249  | -0.00057 | 0.00138  | -0.01123 | -0.00982 | 1.89268  |
| A26 | 1.88521  | -0.00045 | 0.00049  | -0.00826 | -0.00775 | 1.87746  |
| A27 | 1.93679  | 0.00078  | -0.00099 | 0.01486  | 0.01384  | 1.95063  |
| A28 | 1.81607  | 0.00328  | 0.01111  | -0.04871 | -0.03761 | 1.77846  |
| A29 | 2.17398  | 0.00021  | 0.00132  | -0.00375 | -0.00243 | 2.17155  |
| A30 | 1.96166  | -0.00028 | -0.00127 | 0.00355  | 0.00227  | 1.96393  |
| A31 | 2.14754  | 0.00006  | -0.00005 | 0.00021  | 0.00016  | 2.14770  |
| A32 | 2.08039  | 0.00010  | -0.00011 | 0.00007  | -0.00004 | 2.08035  |
| A33 | 2.16065  | -0.00054 | 0.00069  | -0.00330 | -0.00262 | 2.15804  |
| A34 | 2.04214  | 0.00044  | -0.00058 | 0.00324  | 0.00266  | 2.04480  |
| A35 | 1.84404  | 0.00057  | -0.00044 | 0.01231  | 0.01187  | 1.85591  |
| D1  | 0.00011  | -0.00006 | -0.00077 | 0.00355  | 0.00278  | 0.00289  |
| D2  | 3.12307  | 0.00001  | -0.00098 | 0.00426  | 0.00328  | 3.12634  |
| D3  | -3.11403 | -0.00026 | 0.00210  | -0.01232 | -0.01024 | -3.12428 |
| D4  | 0.00892  | -0.00020 | 0.00188  | -0.01161 | -0.00974 | -0.00082 |

|     |          |          |          |          |          |          |
|-----|----------|----------|----------|----------|----------|----------|
| D5  | -0.00549 | 0.00017  | 0.00137  | -0.00411 | -0.00274 | -0.00823 |
| D6  | -3.12540 | 0.00015  | -0.00060 | 0.01419  | 0.01355  | -3.11185 |
| D7  | 3.11140  | 0.00036  | -0.00124 | 0.01024  | 0.00901  | 3.12041  |
| D8  | -0.00851 | 0.00034  | -0.00321 | 0.02854  | 0.02529  | 0.01678  |
| D9  | 0.00523  | -0.00007 | -0.00008 | -0.00181 | -0.00188 | 0.00334  |
| D10 | -3.12134 | -0.00009 | 0.00209  | -0.00695 | -0.00487 | -3.12620 |
| D11 | -3.11940 | -0.00014 | 0.00014  | -0.00257 | -0.00243 | -3.12182 |
| D12 | 0.03723  | -0.00016 | 0.00231  | -0.00771 | -0.00541 | 0.03182  |
| D13 | -0.00870 | 0.00017  | 0.00094  | -0.00073 | 0.00020  | -0.00850 |
| D14 | -3.12340 | -0.00019 | 0.00106  | -0.01285 | -0.01181 | -3.13521 |
| D15 | 3.11890  | 0.00019  | -0.00104 | 0.00399  | 0.00294  | 3.12184  |
| D16 | 0.00420  | -0.00018 | -0.00092 | -0.00813 | -0.00907 | -0.00487 |
| D17 | 0.16641  | -0.00024 | -0.00016 | -0.00595 | -0.00610 | 0.16031  |
| D18 | -2.97683 | -0.00034 | -0.00131 | -0.00196 | -0.00327 | -2.98011 |
| D19 | -2.95823 | -0.00026 | 0.00227  | -0.01171 | -0.00945 | -2.96768 |
| D20 | 0.18170  | -0.00036 | 0.00111  | -0.00772 | -0.00661 | 0.17509  |
| D21 | 0.00878  | -0.00021 | -0.00142 | 0.00297  | 0.00155  | 0.01033  |
| D22 | 3.12999  | -0.00019 | 0.00043  | -0.01438 | -0.01400 | 3.11599  |
| D23 | 3.12543  | 0.00013  | -0.00153 | 0.01421  | 0.01269  | 3.13812  |
| D24 | -0.03654 | 0.00015  | 0.00033  | -0.00315 | -0.00286 | -0.03941 |
| D25 | 1.89428  | -0.00042 | -0.00042 | -0.05644 | -0.05686 | 1.83742  |
| D26 | -2.32775 | -0.00003 | 0.00152  | -0.06004 | -0.05852 | -2.38628 |
| D27 | -0.27789 | -0.00022 | 0.00059  | -0.05589 | -0.05530 | -0.33319 |
| D28 | -1.22283 | -0.00045 | -0.00265 | -0.03571 | -0.03836 | -1.26119 |
| D29 | 0.83831  | -0.00006 | -0.00071 | -0.03931 | -0.04002 | 0.79830  |
| D30 | 2.88818  | -0.00025 | -0.00163 | -0.03515 | -0.03679 | 2.85139  |
| D31 | -1.54655 | -0.00011 | 0.01169  | -0.01836 | -0.00667 | -1.55321 |
| D32 | 0.53138  | -0.00040 | 0.01294  | -0.03080 | -0.01787 | 0.51351  |
| D33 | 2.65152  | 0.00044  | 0.01119  | -0.00873 | 0.00247  | 2.65400  |
| D34 | 2.69070  | -0.00050 | 0.01092  | -0.01754 | -0.00661 | 2.68409  |
| D35 | -1.51456 | -0.00080 | 0.01217  | -0.02998 | -0.01781 | -1.53237 |
| D36 | 0.60559  | 0.00004  | 0.01042  | -0.00791 | 0.00252  | 0.60811  |
| D37 | 0.57085  | -0.00011 | 0.01065  | -0.01680 | -0.00615 | 0.56470  |
| D38 | 2.64877  | -0.00040 | 0.01190  | -0.02925 | -0.01735 | 2.63142  |
| D39 | -1.51426 | 0.00044  | 0.01015  | -0.00717 | 0.00298  | -1.51128 |
| D40 | 1.19358  | -0.00104 | -0.00785 | -0.04158 | -0.04940 | 1.14418  |
| D41 | -2.99554 | -0.00068 | -0.00748 | -0.04791 | -0.05538 | -3.05092 |
| D42 | -0.92148 | -0.00112 | -0.00661 | -0.05614 | -0.06280 | -0.98427 |
| D43 | -1.34727 | -0.00018 | -0.00270 | 0.05134  | 0.04862  | -1.29865 |
| D44 | 2.82516  | -0.00020 | -0.00289 | 0.05695  | 0.05405  | 2.87921  |
| D45 | 0.74072  | 0.00032  | -0.00431 | 0.06707  | 0.06281  | 0.80352  |
| D46 | -3.12816 | -0.00021 | -0.00080 | 0.00125  | 0.00045  | -3.12771 |
| D47 | 0.01716  | -0.00014 | 0.00005  | -0.00007 | -0.00002 | 0.01715  |
| D48 | 0.01526  | -0.00010 | 0.00048  | -0.00316 | -0.00268 | 0.01258  |

D49            -3.12261   -0.00003   0.00133   -0.00447   -0.00314   -3.12574

| Item                 | Value    | Threshold | Converged? |
|----------------------|----------|-----------|------------|
| Maximum Force        | 0.003277 | 0.000450  | NO         |
| RMS Force            | 0.000637 | 0.000300  | NO         |
| Maximum Displacement | 0.147569 | 0.001800  | NO         |
| RMS Displacement     | 0.034152 | 0.001200  | NO         |

Predicted change in Energy=-2.494878D-04

GradGradGradGradGradGradGradGradGradGradGradGradGradGradGradGradGradGradGrad

Input orientation:

| Center Number | Atomic Number | Atomic Type | Coordinates (Angstroms) |           |           |
|---------------|---------------|-------------|-------------------------|-----------|-----------|
|               |               |             | X                       | Y         | Z         |
| 1             | 6             | 0           | -0.610998               | -2.375006 | -1.126832 |
| 2             | 6             | 0           | -1.904309               | -1.986397 | -1.275691 |
| 3             | 7             | 0           | -2.075847               | -0.856201 | -0.484709 |
| 4             | 6             | 0           | -0.904343               | -0.572736 | 0.122214  |
| 5             | 7             | 0           | -0.008670               | -1.488615 | -0.250306 |
| 6             | 6             | 0           | 1.402854                | -1.475417 | 0.197619  |
| 7             | 6             | 0           | 2.208778                | -0.338559 | -0.477664 |
| 8             | 1             | 0           | -0.071441               | -3.191558 | -1.575003 |
| 9             | 1             | 0           | -2.692763               | -2.402406 | -1.876421 |
| 10            | 1             | 0           | 1.390560                | -1.289627 | 1.271568  |
| 11            | 1             | 0           | 1.819272                | -2.463919 | 0.001114  |
| 12            | 1             | 0           | 2.641459                | -0.686408 | -1.419746 |
| 13            | 1             | 0           | 1.517372                | 0.484432  | -0.696319 |
| 14            | 35            | 0           | 0.693448                | 1.402909  | 2.153789  |
| 15            | 1             | 0           | -0.667409               | 0.247951  | 0.825302  |
| 16            | 6             | 0           | -3.254724               | -0.087999 | -0.287027 |
| 17            | 6             | 0           | -4.459982               | -0.441649 | -0.712276 |
| 18            | 1             | 0           | -3.065377               | 0.830443  | 0.253667  |
| 19            | 1             | 0           | -5.298775               | 0.215093  | -0.526122 |
| 20            | 1             | 0           | -4.662682               | -1.364547 | -1.241448 |
| 21            | 8             | 0           | 3.263409                | 0.074297  | 0.344703  |
| 22            | 1             | 0           | 2.860516                | 0.599043  | 1.066742  |

Distance matrix (angstroms):

|   |   | 1        | 2        | 3        | 4        | 5        |
|---|---|----------|----------|----------|----------|----------|
| 1 | C | 0.000000 |          |          |          |          |
| 2 | C | 1.358613 | 0.000000 |          |          |          |
| 3 | N | 2.205646 | 1.390115 | 0.000000 |          |          |
| 4 | C | 2.212317 | 2.225423 | 1.349492 | 0.000000 |          |
| 5 | N | 1.384480 | 2.211933 | 2.174422 | 1.334105 | 0.000000 |

|    |    |          |          |          |          |          |
|----|----|----------|----------|----------|----------|----------|
| 6  | C  | 2.572747 | 3.656373 | 3.598660 | 2.478644 | 1.480949 |
| 7  | C  | 3.538314 | 4.502188 | 4.315786 | 3.179028 | 2.508265 |
| 8  | H  | 1.076446 | 2.213912 | 3.265008 | 3.229938 | 2.158420 |
| 9  | H  | 2.212776 | 1.074988 | 2.169838 | 3.246641 | 3.268580 |
| 10 | H  | 3.307054 | 4.222580 | 3.910031 | 2.664870 | 2.076907 |
| 11 | H  | 2.680742 | 3.965263 | 4.241783 | 3.318029 | 2.087055 |
| 12 | H  | 3.676361 | 4.730193 | 4.812078 | 3.868239 | 3.005712 |
| 13 | H  | 3.590499 | 4.260114 | 3.841002 | 2.766280 | 2.533899 |
| 14 | Br | 5.170754 | 5.476958 | 4.442324 | 3.253215 | 3.825384 |
| 15 | H  | 3.270155 | 3.307023 | 2.217877 | 1.106344 | 2.146283 |
| 16 | C  | 3.595130 | 2.530809 | 1.420903 | 2.434489 | 3.535526 |
| 17 | C  | 4.327170 | 3.038938 | 2.430584 | 3.654603 | 4.596056 |
| 18 | H  | 4.266691 | 3.409047 | 2.090248 | 2.579972 | 3.869816 |
| 19 | H  | 5.389315 | 4.114707 | 3.396565 | 4.511324 | 5.564522 |
| 20 | H  | 4.177357 | 2.827807 | 2.742770 | 4.075739 | 4.759998 |
| 21 | O  | 4.814097 | 5.794605 | 5.482828 | 4.223543 | 3.674674 |
| 22 | H  | 5.070320 | 5.905510 | 5.375166 | 4.054549 | 3.784859 |
|    |    | 6        | 7        | 8        | 9        | 10       |
| 6  | C  | 0.000000 |          |          |          |          |
| 7  | C  | 1.548537 | 0.000000 |          |          |          |
| 8  | H  | 2.874173 | 3.813548 | 0.000000 |          |          |
| 9  | H  | 4.683484 | 5.499189 | 2.754078 | 0.000000 |          |
| 10 | H  | 1.089971 | 2.152632 | 3.722600 | 5.274622 | 0.000000 |
| 11 | H  | 1.090483 | 2.213165 | 2.566787 | 4.887471 | 1.782360 |
| 12 | H  | 2.184615 | 1.093494 | 3.695904 | 5.622021 | 3.028497 |
| 13 | H  | 2.157139 | 1.096889 | 4.099916 | 5.239438 | 2.652536 |
| 14 | Br | 3.551707 | 3.500498 | 5.966412 | 6.495340 | 2.917882 |
| 15 | H  | 2.765858 | 3.211567 | 4.236374 | 4.292523 | 2.607400 |
| 16 | C  | 4.883937 | 5.472565 | 4.628634 | 2.863294 | 5.044977 |
| 17 | C  | 6.022410 | 6.673681 | 5.250294 | 2.884937 | 6.235667 |
| 18 | H  | 5.028441 | 5.451433 | 5.337057 | 3.889399 | 5.038472 |
| 19 | H  | 6.949349 | 7.528096 | 6.326962 | 3.932672 | 7.088235 |
| 20 | H  | 6.234896 | 6.989490 | 4.952649 | 2.315367 | 6.554587 |
| 21 | O  | 2.425884 | 1.399638 | 5.047009 | 6.822275 | 2.495382 |
| 22 | H  | 2.680212 | 1.920690 | 5.472097 | 6.964898 | 2.402041 |
|    |    | 11       | 12       | 13       | 14       | 15       |
| 11 | H  | 0.000000 |          |          |          |          |
| 12 | H  | 2.419583 | 0.000000 |          |          |          |
| 13 | H  | 3.044722 | 1.777015 | 0.000000 |          |          |
| 14 | Br | 4.566602 | 4.574948 | 3.105732 | 0.000000 |          |
| 15 | H  | 3.770557 | 4.106321 | 2.672924 | 2.225026 | 0.000000 |
| 16 | C  | 5.610120 | 6.033748 | 4.823701 | 4.875290 | 2.836254 |
| 17 | C  | 6.635324 | 7.140789 | 6.048689 | 6.178557 | 4.150097 |
| 18 | H  | 5.897151 | 6.137517 | 4.692951 | 4.250523 | 2.533045 |



|    |   |          |          |          |          |          |
|----|---|----------|----------|----------|----------|----------|
| 19 | H | 7.623757 | 8.041056 | 6.823589 | 6.670799 | 4.824622 |
| 20 | H | 6.690912 | 7.337720 | 6.473713 | 6.919146 | 4.778474 |
| 21 | O | 2.940430 | 2.019597 | 2.073785 | 3.412141 | 3.963895 |
| 22 | H | 3.406096 | 2.807667 | 2.219360 | 2.554223 | 3.553563 |
|    |   | 16       | 17       | 18       | 19       | 20       |
| 16 | C | 0.000000 |          |          |          |          |
| 17 | C | 1.326104 | 0.000000 |          |          |          |
| 18 | H | 1.082468 | 2.120421 | 0.000000 |          |          |
| 19 | H | 2.080186 | 1.081452 | 2.444339 | 0.000000 |          |
| 20 | H | 2.126697 | 1.082982 | 3.099150 | 1.847043 | 0.000000 |
| 21 | O | 6.550686 | 7.812437 | 6.374447 | 8.607506 | 8.210303 |
| 22 | H | 6.300863 | 7.605106 | 5.985887 | 8.322179 | 8.110606 |
|    |   | 21       | 22       |          |          |          |
| 21 | O | 0.000000 |          |          |          |          |
| 22 | H | 0.979297 | 0.000000 |          |          |          |

Stoichiometry C7H11BrN2O

Framework group C1[X(C7H11BrN2O)]

Deg. of freedom 60

Full point group C1 NOp 1

Largest Abelian subgroup C1 NOp 1

Largest concise Abelian subgroup C1 NOp 1

Standard orientation:

| Center<br>Number | Atomic<br>Number | Atomic<br>Type | Coordinates (Angstroms) |           |           |
|------------------|------------------|----------------|-------------------------|-----------|-----------|
|                  |                  |                | X                       | Y         | Z         |
| 1                | 6                | 0              | -1.827528               | -2.004908 | 0.360888  |
| 2                | 6                | 0              | -2.832395               | -1.128189 | 0.101205  |
| 3                | 7                | 0              | -2.242582               | 0.120564  | -0.057405 |
| 4                | 6                | 0              | -0.908680               | -0.009337 | 0.100579  |
| 5                | 7                | 0              | -0.641929               | -1.289970 | 0.362612  |
| 6                | 6                | 0              | 0.729832                | -1.810557 | 0.563788  |
| 7                | 6                | 0              | 1.524094                | -1.863932 | -0.764469 |
| 8                | 1                | 0              | -1.854725               | -3.067482 | 0.530985  |
| 9                | 1                | 0              | -3.890761               | -1.289383 | 0.003858  |
| 10               | 1                | 0              | 1.235722                | -1.114433 | 1.232759  |
| 11               | 1                | 0              | 0.644139                | -2.785259 | 1.045209  |
| 12               | 1                | 0              | 1.367123                | -2.824167 | -1.263505 |
| 13               | 1                | 0              | 1.147211                | -1.067583 | -1.417886 |
| 14               | 35               | 0              | 1.979808                | 1.486819  | 0.140120  |
| 15               | 1                | 0              | -0.124409               | 0.769321  | 0.049523  |
| 16               | 6                | 0              | -2.871707               | 1.366100  | -0.325373 |
| 17               | 6                | 0              | -4.182601               | 1.564684  | -0.299444 |
| 18               | 1                | 0              | -2.160527               | 2.148413  | -0.557638 |

|    |   |   |           |           |           |
|----|---|---|-----------|-----------|-----------|
| 19 | 1 | 0 | -4.572024 | 2.546821  | -0.530300 |
| 20 | 1 | 0 | -4.901691 | 0.792811  | -0.054555 |
| 21 | 8 | 0 | 2.896629  | -1.732003 | -0.524206 |
| 22 | 1 | 0 | 3.049114  | -0.789005 | -0.308509 |

-----

Rotational constants (GHZ):      0.9913596      0.4504084      0.3215160  
Standard basis: 6-311++G(d,p) (5D, 7F)  
There are    358 symmetry adapted cartesian basis functions of A    symmetry.  
There are    345 symmetry adapted basis functions of A    symmetry.  
345 basis functions,    553 primitive gaussians,    358 cartesian basis functions  
55 alpha electrons      55 beta electrons  
nuclear repulsion energy      854.3598721077 Hartrees.  
NAtoms=    22 NActive=    22 NUniq=    22 SFac= 1.00D+00 NATFMM=    60 NAOKFM=F  
Big=F  
Integral buffers will be    131072 words long.  
Raffenetti 2 integral format.  
Two-electron integral symmetry is turned on.  
One-electron integrals computed using PRISM.  
NBasis=    345 RedAO= T EigKep= 5.58D-06    NBF=    345  
NBsUse=    345 1.00D-06 EigRej= -1.00D+00    NBFU=    345  
Initial guess from the checkpoint file: ". "  
B after Tr=    0.000000    0.000000    0.000000  
Rot=    0.999947    0.003949    0.000035    -0.009476 Ang=    1.18 deg.  
ExpMin= 3.50D-02 ExpMax= 4.40D+05 ExpMxC= 1.51D+04 IAcc=3 IRadAn=      5 AccDes=  
0.00D+00  
Harris functional with IExCor=    402 and IRadAn=      5 diagonalized for initial guess.  
HarFok: IExCor=    402 AccDes= 0.00D+00 IRadAn=      5 IDoV= 1 UseB2=F ITyADJ=14  
ICtDFT= 3500011 ScaDFX= 1.000000 1.000000 1.000000 1.000000  
FoFCou: FMM=F IPFlag=      0 FMFlag=    100000 FMFlg1=      0  
NFXFlg=      0 DoJE=T BraDBF=F KetDBF=T FulRan=T  
wScrn= 0.000000 ICntrl=      500 IOpCl= 0 I1Cent=    200000004 NGrid=  
0  
NMat0=    1 NMatS0=      1 NMatT0=    0 NMatD0=    1 NMtDS0=    0  
NMtDT0=    0  
Petite list used in FoFCou.  
Keep R1 ints in memory in canonical form, NReq=1804729152.  
Requested convergence on RMS density matrix=1.00D-08 within 128 cycles.  
Requested convergence on MAX density matrix=1.00D-06.  
Requested convergence on      energy=1.00D-06.  
No special actions if energy rises.  
SCF Done: E(RB3LYP) = -3032.34287130      A.U. after    11 cycles  
NFOck= 11 Conv=0.87D-08    -V/T= 2.0016  
Calling FoFJK, ICntrl=      2127 FMM=F ISym2X=0 I1Cent= 0 IOpClX= 0 NMat=1 NMatS=1  
NMatT=0.

\*\*\*\*\* Axes restored to original set \*\*\*\*\*

| Center<br>Number | Atomic<br>Number | Forces (Hartrees/Bohr) |              |              |
|------------------|------------------|------------------------|--------------|--------------|
|                  |                  | X                      | Y            | Z            |
| 1                | 6                | -0.000194232           | 0.000344514  | -0.000514924 |
| 2                | 6                | 0.000398153            | -0.000691091 | -0.000414139 |
| 3                | 7                | 0.002371126            | -0.000368526 | 0.000522907  |
| 4                | 6                | -0.002144890           | -0.001843701 | -0.001056633 |
| 5                | 7                | -0.000284012           | -0.000391323 | -0.000318477 |
| 6                | 6                | -0.001477253           | 0.000666523  | 0.000698785  |
| 7                | 6                | -0.001296797           | -0.001130131 | -0.002392365 |
| 8                | 1                | -0.000067951           | -0.000163290 | 0.000380055  |
| 9                | 1                | 0.000137710            | 0.000068245  | 0.000211080  |
| 10               | 1                | 0.000088682            | -0.000341989 | -0.000229676 |
| 11               | 1                | -0.000237926           | 0.000216790  | -0.000173983 |
| 12               | 1                | 0.000375223            | 0.000115315  | -0.000108255 |
| 13               | 1                | 0.001108730            | 0.000402756  | 0.000469112  |
| 14               | 35               | 0.001315375            | 0.001769730  | 0.001927240  |
| 15               | 1                | 0.000113500            | 0.000307175  | 0.000243138  |
| 16               | 6                | -0.000191957           | 0.000234195  | -0.000389260 |
| 17               | 6                | -0.001100284           | 0.000259141  | -0.000346294 |
| 18               | 1                | 0.000286899            | -0.000274792 | 0.000390172  |
| 19               | 1                | 0.000122687            | -0.000160395 | 0.000100228  |
| 20               | 1                | 0.000213899            | 0.000245050  | 0.000129174  |
| 21               | 8                | 0.000372182            | 0.001174615  | 0.002324191  |
| 22               | 1                | 0.000091135            | -0.000438812 | -0.001452073 |

Cartesian Forces: Max 0.002392365 RMS 0.000878519

GradGradGradGradGradGradGradGradGradGradGradGradGradGradGradGradGradGradGrad

Berny optimization.

Using GEDIIS/GDIIS optimizer.

FormGI is forming the generalized inverse of G from B-inverse, IUseBI=4.

Internal Forces: Max 0.004928874 RMS 0.001335528

Search for a local minimum.

Step number 62 out of a maximum of 116

All quantities printed in internal units (Hartrees-Bohrs-Radians)

Mixed Optimization -- RFO/linear search

Update second derivatives using D2CorX and points 60 61 62

DE= -7.16D-05 DEPred=-2.49D-04 R= 2.87D-01

Trust test= 2.87D-01 RLast= 2.65D-01 DXMaxT set to 9.74D-01

ITU= 0 1 1 1 1 0 1 1 0 1 1 0-1 1 1 1-1 1 0-1

ITU= 1 0-1 0-1 0 0 1-1 0 1 1 1 1 1 1 0-1 1 1

ITU= 1 1 1 0-1 1 1 1 1 1 1 1 1 1 1 1 1 0 0-1

ITU= 0 0

Use linear search instead of GDIIIS.

|                 |         |         |         |         |         |
|-----------------|---------|---------|---------|---------|---------|
| Eigenvalues --- | 0.00157 | 0.00348 | 0.00377 | 0.00717 | 0.00983 |
| Eigenvalues --- | 0.01380 | 0.01508 | 0.01878 | 0.02151 | 0.02249 |
| Eigenvalues --- | 0.02504 | 0.03033 | 0.03183 | 0.03776 | 0.03968 |
| Eigenvalues --- | 0.04477 | 0.04916 | 0.05356 | 0.05834 | 0.08167 |
| Eigenvalues --- | 0.08679 | 0.09192 | 0.12048 | 0.13668 | 0.14371 |
| Eigenvalues --- | 0.14945 | 0.15033 | 0.15913 | 0.16033 | 0.16176 |
| Eigenvalues --- | 0.17260 | 0.19025 | 0.22010 | 0.23126 | 0.23828 |
| Eigenvalues --- | 0.25040 | 0.25757 | 0.26148 | 0.29689 | 0.32938 |
| Eigenvalues --- | 0.33771 | 0.33862 | 0.33941 | 0.34200 | 0.34324 |
| Eigenvalues --- | 0.34783 | 0.35004 | 0.35697 | 0.36314 | 0.36406 |
| Eigenvalues --- | 0.38828 | 0.43181 | 0.43691 | 0.45915 | 0.49076 |
| Eigenvalues --- | 0.53676 | 0.56045 | 0.57490 | 0.60927 | 0.93476 |

RFO step: Lambda=-2.33890563D-04 EMin= 1.56550809D-03

Quartic linear search produced a step of -0.41705.

Iteration 1 RMS(Cart)= 0.02660108 RMS(Int)= 0.00034219

Iteration 2 RMS(Cart)= 0.00057186 RMS(Int)= 0.00001054

Iteration 3 RMS(Cart)= 0.00000020 RMS(Int)= 0.00001054

| Variable | Old X   | -DE/DX   | Delta X<br>(Linear) | Delta X<br>(Quad) | Delta X<br>(Total) | New X   |
|----------|---------|----------|---------------------|-------------------|--------------------|---------|
| R1       | 2.56741 | -0.00101 | 0.00011             | -0.00042          | -0.00030           | 2.56710 |
| R2       | 2.61629 | 0.00021  | -0.00017            | -0.00049          | -0.00066           | 2.61563 |
| R3       | 2.03419 | -0.00007 | 0.00002             | -0.00011          | -0.00009           | 2.03410 |
| R4       | 2.62694 | -0.00003 | -0.00003            | -0.00006          | -0.00008           | 2.62685 |
| R5       | 2.03143 | -0.00025 | -0.00002            | -0.00031          | -0.00032           | 2.03111 |
| R6       | 2.55017 | -0.00132 | -0.00027            | -0.00041          | -0.00068           | 2.54949 |
| R7       | 2.68512 | 0.00069  | 0.00031             | 0.00176           | 0.00208            | 2.68720 |
| R8       | 2.52109 | -0.00077 | 0.00001             | 0.00001           | 0.00001            | 2.52111 |
| R9       | 2.09069 | 0.00041  | 0.00173             | -0.00412          | -0.00239           | 2.08830 |
| R10      | 2.79859 | 0.00066  | 0.00086             | -0.00240          | -0.00154           | 2.79705 |
| R11      | 2.92631 | 0.00209  | -0.00048            | 0.00336           | 0.00288            | 2.92919 |
| R12      | 2.05975 | -0.00028 | -0.00031            | 0.00043           | 0.00012            | 2.05986 |
| R13      | 2.06071 | -0.00026 | 0.00009             | -0.00052          | -0.00043           | 2.06029 |
| R14      | 2.06640 | 0.00021  | -0.00010            | -0.00005          | -0.00015           | 2.06626 |
| R15      | 2.07282 | -0.00036 | -0.00081            | 0.00084           | 0.00003            | 2.07285 |
| R16      | 2.64493 | 0.00108  | 0.00014             | -0.00082          | -0.00068           | 2.64425 |
| R17      | 5.86898 | 0.00194  | -0.07507            | 0.11443           | 0.03936            | 5.90834 |
| R18      | 2.50597 | 0.00065  | -0.00032            | 0.00100           | 0.00068            | 2.50665 |
| R19      | 2.04557 | 0.00001  | 0.00004             | 0.00018           | 0.00022            | 2.04579 |
| R20      | 2.04365 | -0.00018 | 0.00003             | -0.00006          | -0.00003           | 2.04362 |
| R21      | 2.04654 | -0.00031 | 0.00006             | -0.00024          | -0.00018           | 2.04636 |
| R22      | 1.85060 | -0.00134 | 0.00092             | -0.00031          | 0.00062            | 1.85122 |

|     |          |          |          |          |          |          |
|-----|----------|----------|----------|----------|----------|----------|
| A1  | 1.87589  | 0.00029  | 0.00006  | -0.00019 | -0.00015 | 1.87574  |
| A2  | 2.27641  | -0.00005 | -0.00060 | 0.00210  | 0.00146  | 2.27787  |
| A3  | 2.13079  | -0.00023 | 0.00044  | -0.00162 | -0.00122 | 2.12957  |
| A4  | 1.86259  | -0.00053 | -0.00008 | 0.00022  | 0.00015  | 1.86274  |
| A5  | 2.27672  | 0.00029  | -0.00146 | 0.00377  | 0.00229  | 2.27901  |
| A6  | 2.14373  | 0.00024  | 0.00153  | -0.00386 | -0.00234 | 2.14139  |
| A7  | 1.89606  | 0.00047  | -0.00001 | -0.00012 | -0.00014 | 1.89592  |
| A8  | 2.24094  | 0.00034  | 0.00101  | -0.00212 | -0.00113 | 2.23981  |
| A9  | 2.14612  | -0.00081 | -0.00102 | 0.00236  | 0.00133  | 2.14745  |
| A10 | 1.88918  | 0.00008  | 0.00013  | -0.00013 | 0.00001  | 1.88919  |
| A11 | 2.24919  | -0.00002 | -0.00021 | 0.00068  | 0.00049  | 2.24968  |
| A12 | 2.14471  | -0.00006 | -0.00002 | -0.00046 | -0.00046 | 2.14425  |
| A13 | 1.90099  | -0.00030 | -0.00010 | 0.00020  | 0.00011  | 1.90110  |
| A14 | 2.22920  | -0.00294 | 0.00211  | -0.00267 | -0.00055 | 2.22865  |
| A15 | 2.15235  | 0.00324  | -0.00183 | 0.00240  | 0.00059  | 2.15294  |
| A16 | 1.95055  | 0.00363  | -0.00266 | 0.00915  | 0.00649  | 1.95704  |
| A17 | 1.86375  | 0.00048  | 0.00049  | 0.00027  | 0.00076  | 1.86451  |
| A18 | 1.87694  | -0.00277 | 0.00041  | -0.00434 | -0.00393 | 1.87300  |
| A19 | 1.88641  | -0.00031 | 0.00154  | -0.00393 | -0.00240 | 1.88401  |
| A20 | 1.96944  | -0.00136 | 0.00167  | -0.00238 | -0.00070 | 1.96874  |
| A21 | 1.91386  | 0.00041  | -0.00155 | 0.00139  | -0.00016 | 1.91370  |
| A22 | 1.92633  | -0.00258 | 0.00069  | 0.00161  | 0.00230  | 1.92863  |
| A23 | 1.88568  | 0.00344  | -0.00114 | -0.00437 | -0.00548 | 1.88020  |
| A24 | 1.93103  | 0.00129  | -0.00101 | 0.00293  | 0.00194  | 1.93297  |
| A25 | 1.89268  | 0.00079  | 0.00409  | -0.00143 | 0.00266  | 1.89534  |
| A26 | 1.87746  | 0.00063  | 0.00323  | -0.00513 | -0.00191 | 1.87555  |
| A27 | 1.95063  | -0.00368 | -0.00577 | 0.00641  | 0.00065  | 1.95128  |
| A28 | 1.77846  | -0.00164 | 0.01568  | -0.03005 | -0.01437 | 1.76410  |
| A29 | 2.17155  | 0.00092  | 0.00101  | -0.00050 | 0.00051  | 2.17206  |
| A30 | 1.96393  | -0.00083 | -0.00095 | 0.00050  | -0.00045 | 1.96348  |
| A31 | 2.14770  | -0.00009 | -0.00007 | 0.00001  | -0.00006 | 2.14764  |
| A32 | 2.08035  | 0.00009  | 0.00002  | 0.00011  | 0.00013  | 2.08047  |
| A33 | 2.15804  | -0.00020 | 0.00109  | -0.00262 | -0.00153 | 2.15650  |
| A34 | 2.04480  | 0.00012  | -0.00111 | 0.00252  | 0.00141  | 2.04620  |
| A35 | 1.85591  | -0.00104 | -0.00495 | 0.00077  | -0.00418 | 1.85173  |
| D1  | 0.00289  | -0.00012 | -0.00116 | 0.00251  | 0.00136  | 0.00425  |
| D2  | 3.12634  | 0.00000  | -0.00137 | 0.01063  | 0.00928  | 3.13562  |
| D3  | -3.12428 | -0.00021 | 0.00427  | -0.02009 | -0.01583 | -3.14010 |
| D4  | -0.00082 | -0.00008 | 0.00406  | -0.01198 | -0.00791 | -0.00873 |
| D5  | -0.00823 | 0.00021  | 0.00114  | -0.00342 | -0.00228 | -0.01050 |
| D6  | -3.11185 | 0.00003  | -0.00565 | -0.00147 | -0.00709 | -3.11895 |
| D7  | 3.12041  | 0.00029  | -0.00376 | 0.01693  | 0.01316  | 3.13357  |
| D8  | 0.01678  | 0.00011  | -0.01055 | 0.01888  | 0.00834  | 0.02512  |
| D9  | 0.00334  | -0.00001 | 0.00079  | -0.00078 | 0.00000  | 0.00335  |

|     |          |          |          |          |          |          |
|-----|----------|----------|----------|----------|----------|----------|
| D10 | -3.12620 | -0.00001 | 0.00203  | -0.01125 | -0.00922 | -3.13542 |
| D11 | -3.12182 | -0.00012 | 0.00101  | -0.00822 | -0.00720 | -3.12902 |
| D12 | 0.03182  | -0.00012 | 0.00226  | -0.01869 | -0.01642 | 0.01539  |
| D13 | -0.00850 | 0.00014  | -0.00008 | -0.00134 | -0.00142 | -0.00992 |
| D14 | -3.13521 | -0.00006 | 0.00492  | -0.00868 | -0.00375 | -3.13896 |
| D15 | 3.12184  | 0.00015  | -0.00123 | 0.00840  | 0.00719  | 3.12903  |
| D16 | -0.00487 | -0.00005 | 0.00378  | 0.00107  | 0.00486  | -0.00001 |
| D17 | 0.16031  | -0.00021 | 0.00255  | -0.03877 | -0.03623 | 0.12408  |
| D18 | -2.98011 | -0.00037 | 0.00136  | -0.03980 | -0.03843 | -3.01854 |
| D19 | -2.96768 | -0.00022 | 0.00394  | -0.05058 | -0.04664 | -3.01432 |
| D20 | 0.17509  | -0.00038 | 0.00276  | -0.05160 | -0.04885 | 0.12624  |
| D21 | 0.01033  | -0.00022 | -0.00065 | 0.00293  | 0.00228  | 0.01261  |
| D22 | 3.11599  | -0.00020 | 0.00584  | 0.00095  | 0.00682  | 3.12280  |
| D23 | 3.13812  | -0.00004 | -0.00529 | 0.00975  | 0.00445  | -3.14061 |
| D24 | -0.03941 | -0.00002 | 0.00119  | 0.00777  | 0.00898  | -0.03042 |
| D25 | 1.83742  | -0.00122 | 0.02371  | -0.01032 | 0.01339  | 1.85081  |
| D26 | -2.38628 | 0.00072  | 0.02441  | -0.00985 | 0.01456  | -2.37172 |
| D27 | -0.33319 | 0.00005  | 0.02306  | -0.01028 | 0.01278  | -0.32041 |
| D28 | -1.26119 | -0.00133 | 0.01600  | -0.00805 | 0.00795  | -1.25325 |
| D29 | 0.79830  | 0.00060  | 0.01669  | -0.00757 | 0.00912  | 0.80742  |
| D30 | 2.85139  | -0.00007 | 0.01534  | -0.00801 | 0.00734  | 2.85873  |
| D31 | -1.55321 | 0.00205  | 0.00278  | -0.03690 | -0.03412 | -1.58734 |
| D32 | 0.51351  | 0.00359  | 0.00745  | -0.04033 | -0.03288 | 0.48064  |
| D33 | 2.65400  | 0.00209  | -0.00103 | -0.03341 | -0.03445 | 2.61955  |
| D34 | 2.68409  | -0.00043 | 0.00276  | -0.04005 | -0.03729 | 2.64680  |
| D35 | -1.53237 | 0.00111  | 0.00743  | -0.04347 | -0.03604 | -1.56841 |
| D36 | 0.60811  | -0.00039 | -0.00105 | -0.03656 | -0.03761 | 0.57050  |
| D37 | 0.56470  | 0.00013  | 0.00257  | -0.03755 | -0.03498 | 0.52971  |
| D38 | 2.63142  | 0.00167  | 0.00724  | -0.04098 | -0.03374 | 2.59769  |
| D39 | -1.51128 | 0.00017  | -0.00124 | -0.03406 | -0.03531 | -1.54659 |
| D40 | 1.14418  | 0.00493  | 0.02060  | 0.02283  | 0.04342  | 1.18760  |
| D41 | -3.05092 | 0.00425  | 0.02309  | 0.02147  | 0.04455  | -3.00637 |
| D42 | -0.98427 | 0.00333  | 0.02619  | 0.01806  | 0.04427  | -0.94000 |
| D43 | -1.29865 | -0.00185 | -0.02028 | 0.02282  | 0.00255  | -1.29609 |
| D44 | 2.87921  | 0.00014  | -0.02254 | 0.02232  | -0.00021 | 2.87900  |
| D45 | 0.80352  | 0.00092  | -0.02619 | 0.02358  | -0.00263 | 0.80089  |
| D46 | -3.12771 | -0.00021 | -0.00019 | -0.00514 | -0.00533 | -3.13304 |
| D47 | 0.01715  | -0.00012 | 0.00001  | -0.00531 | -0.00531 | 0.01184  |
| D48 | 0.01258  | -0.00003 | 0.00112  | -0.00401 | -0.00289 | 0.00969  |
| D49 | -3.12574 | 0.00006  | 0.00131  | -0.00418 | -0.00287 | -3.12862 |

| Item                 | Value    | Threshold | Converged? |
|----------------------|----------|-----------|------------|
| Maximum Force        | 0.004929 | 0.000450  | NO         |
| RMS Force            | 0.001336 | 0.000300  | NO         |
| Maximum Displacement | 0.098808 | 0.001800  | NO         |

RMS Displacement 0.026749 0.001200 NO

Predicted change in Energy=-1.956715D-04

GradGradGradGradGradGradGradGradGradGradGradGradGradGradGradGradGradGrad

Input orientation:

| Center Number | Atomic Number | Atomic Type | Coordinates (Angstroms) |           |           |
|---------------|---------------|-------------|-------------------------|-----------|-----------|
|               |               |             | X                       | Y         | Z         |
| 1             | 6             | 0           | -0.615028               | -2.380731 | -1.127994 |
| 2             | 6             | 0           | -1.910822               | -1.996339 | -1.264202 |
| 3             | 7             | 0           | -2.078452               | -0.866690 | -0.471680 |
| 4             | 6             | 0           | -0.902312               | -0.579494 | 0.123608  |
| 5             | 7             | 0           | -0.007817               | -1.493530 | -0.256223 |
| 6             | 6             | 0           | 1.405204                | -1.481575 | 0.184266  |
| 7             | 6             | 0           | 2.213727                | -0.337020 | -0.478284 |
| 8             | 1             | 0           | -0.079277               | -3.202709 | -1.570663 |
| 9             | 1             | 0           | -2.706829               | -2.416932 | -1.851319 |
| 10            | 1             | 0           | 1.398801                | -1.308892 | 1.260515  |
| 11            | 1             | 0           | 1.819083                | -2.468003 | -0.026264 |
| 12            | 1             | 0           | 2.674083                | -0.681866 | -1.408183 |
| 13            | 1             | 0           | 1.513299                | 0.473464  | -0.714321 |
| 14            | 35            | 0           | 0.736251                | 1.449691  | 2.152481  |
| 15            | 1             | 0           | -0.660139               | 0.242760  | 0.821071  |
| 16            | 6             | 0           | -3.257131               | -0.096816 | -0.271434 |
| 17            | 6             | 0           | -4.457101               | -0.429038 | -0.728826 |
| 18            | 1             | 0           | -3.072186               | 0.802205  | 0.302628  |
| 19            | 1             | 0           | -5.295972               | 0.224792  | -0.533104 |
| 20            | 1             | 0           | -4.653553               | -1.331772 | -1.293735 |
| 21            | 8             | 0           | 3.243415                | 0.095124  | 0.364911  |
| 22            | 1             | 0           | 2.813109                | 0.616494  | 1.073905  |

Distance matrix (angstroms):

|    |   | 1        | 2        | 3        | 4        | 5        |
|----|---|----------|----------|----------|----------|----------|
| 1  | C | 0.000000 |          |          |          |          |
| 2  | C | 1.358452 | 0.000000 |          |          |          |
| 3  | N | 2.205601 | 1.390071 | 0.000000 |          |          |
| 4  | C | 2.212124 | 2.224985 | 1.349130 | 0.000000 |          |
| 5  | N | 1.384130 | 2.211395 | 2.174138 | 1.334112 | 0.000000 |
| 6  | C | 2.571351 | 3.655006 | 3.597805 | 2.478318 | 1.480135 |
| 7  | C | 3.549751 | 4.514744 | 4.324742 | 3.182886 | 2.514375 |
| 8  | H | 1.076398 | 2.214454 | 3.265187 | 3.229426 | 2.157348 |
| 9  | H | 2.213626 | 1.074817 | 2.168297 | 3.245427 | 3.268282 |
| 10 | H | 3.302926 | 4.219050 | 3.909901 | 2.668277 | 2.076815 |

|    |    |          |          |          |          |          |
|----|----|----------|----------|----------|----------|----------|
| 11 | H  | 2.673261 | 3.958175 | 4.237142 | 3.315859 | 2.083277 |
| 12 | H  | 3.712533 | 4.771784 | 4.847451 | 3.891974 | 3.029587 |
| 13 | H  | 3.584317 | 4.257570 | 3.841296 | 2.765144 | 2.528381 |
| 14 | Br | 5.221074 | 5.527734 | 4.491592 | 3.304362 | 3.875312 |
| 15 | H  | 3.268577 | 3.305471 | 2.216686 | 1.105081 | 2.144945 |
| 16 | C  | 3.595925 | 2.531072 | 1.422003 | 2.436023 | 3.536818 |
| 17 | C  | 4.327813 | 3.037531 | 2.432208 | 3.658662 | 4.599198 |
| 18 | H  | 4.267949 | 3.411095 | 2.090998 | 2.578661 | 3.869505 |
| 19 | H  | 5.390165 | 4.114264 | 3.398168 | 4.514687 | 5.567214 |
| 20 | H  | 4.175820 | 2.822250 | 2.742850 | 4.080024 | 4.762926 |
| 21 | O  | 4.821432 | 5.796066 | 5.472406 | 4.207183 | 3.671530 |
| 22 | H  | 5.058047 | 5.882956 | 5.340041 | 4.017189 | 3.765510 |
|    |    | 6        | 7        | 8        | 9        | 10       |
| 6  | C  | 0.000000 |          |          |          |          |
| 7  | C  | 1.550061 | 0.000000 |          |          |          |
| 8  | H  | 2.871543 | 3.829273 | 0.000000 |          |          |
| 9  | H  | 4.682661 | 5.515717 | 2.756854 | 0.000000 |          |
| 10 | H  | 1.090033 | 2.152222 | 3.713061 | 5.269484 | 0.000000 |
| 11 | H  | 1.090256 | 2.213855 | 2.555138 | 4.880299 | 1.782127 |
| 12 | H  | 2.187574 | 1.093416 | 3.736582 | 5.671070 | 3.023483 |
| 13 | H  | 2.154372 | 1.096903 | 4.096812 | 5.239907 | 2.662682 |
| 14 | Br | 3.593563 | 3.506594 | 6.014293 | 6.544921 | 2.973947 |
| 15 | H  | 2.764867 | 3.206801 | 4.234270 | 4.290055 | 2.615333 |
| 16 | C  | 4.884935 | 5.480034 | 4.629614 | 2.860386 | 5.049129 |
| 17 | C  | 6.025627 | 6.676165 | 5.250455 | 2.876658 | 6.246856 |
| 18 | H  | 5.027592 | 5.463381 | 5.339106 | 3.890477 | 5.036269 |
| 19 | H  | 6.952127 | 7.530884 | 6.327574 | 3.926838 | 7.098538 |
| 20 | H  | 6.238226 | 6.986704 | 4.949858 | 2.297435 | 6.569301 |
| 21 | O  | 2.428504 | 1.399279 | 5.065810 | 6.828433 | 2.485149 |
| 22 | H  | 2.678721 | 1.917743 | 5.472289 | 6.944662 | 2.396289 |
|    |    | 11       | 12       | 13       | 14       | 15       |
| 11 | H  | 0.000000 |          |          |          |          |
| 12 | H  | 2.414748 | 0.000000 |          |          |          |
| 13 | H  | 3.036306 | 1.778665 | 0.000000 |          |          |
| 14 | Br | 4.611701 | 4.580072 | 3.126560 | 0.000000 |          |
| 15 | H  | 3.769981 | 4.116010 | 2.671046 | 2.275794 | 0.000000 |
| 16 | C  | 5.608083 | 6.067436 | 4.824766 | 4.920788 | 2.837825 |
| 17 | C  | 6.636374 | 7.167931 | 6.038244 | 6.229163 | 4.155769 |
| 18 | H  | 5.892957 | 6.176484 | 4.708389 | 4.283152 | 2.529770 |
| 19 | H  | 7.624437 | 8.069050 | 6.816220 | 6.715688 | 4.829603 |
| 20 | H  | 6.692722 | 7.357291 | 6.451718 | 6.975882 | 4.785281 |
| 21 | O  | 2.958269 | 2.017848 | 2.073929 | 3.363946 | 3.932888 |
| 22 | H  | 3.422364 | 2.804608 | 2.215337 | 2.484127 | 3.502435 |
|    |    | 16       | 17       | 18       | 19       | 20       |



```

16 C    0.000000
17 C    1.326464  0.000000
18 H    1.082585  2.120813  0.000000
19 H    2.080571  1.081437  2.444806  0.000000
20 H    2.126079  1.082886  3.098863  1.847742  0.000000
21 O    6.534438  7.795444  6.355365  8.587455  8.194464
22 H    6.258320  7.562998  5.938523  8.276056  8.071710
      21      22
21 O    0.000000
22 H    0.979624  0.000000

```

Stoichiometry C7H11BrN2O

Framework group C1[X(C7H11BrN2O)]

Deg. of freedom 60

Full point group C1 NOp 1

Largest Abelian subgroup C1 NOp 1

Largest concise Abelian subgroup C1 NOp 1

Standard orientation:

| Center<br>Number | Atomic<br>Number | Atomic<br>Type | Coordinates (Angstroms) |           |           |
|------------------|------------------|----------------|-------------------------|-----------|-----------|
|                  |                  |                | X                       | Y         | Z         |
| 1                | 6                | 0              | -1.876110               | -1.989683 | 0.346460  |
| 2                | 6                | 0              | -2.866652               | -1.092606 | 0.102594  |
| 3                | 7                | 0              | -2.256428               | 0.148133  | -0.040552 |
| 4                | 6                | 0              | -0.924779               | -0.006505 | 0.110942  |
| 5                | 7                | 0              | -0.679124               | -1.294734 | 0.355836  |
| 6                | 6                | 0              | 0.682508                | -1.840238 | 0.553784  |
| 7                | 6                | 0              | 1.492749                | -1.881478 | -0.767010 |
| 8                | 1                | 0              | -1.920571               | -3.051932 | 0.514634  |
| 9                | 1                | 0              | -3.928712               | -1.231052 | 0.012628  |
| 10               | 1                | 0              | 1.195111                | -1.167477 | 1.241391  |
| 11               | 1                | 0              | 0.574743                | -2.822619 | 1.014189  |
| 12               | 1                | 0              | 1.355062                | -2.842037 | -1.270922 |
| 13               | 1                | 0              | 1.109846                | -1.086564 | -1.418696 |
| 14               | 35               | 0              | 2.034733                | 1.462994  | 0.136847  |
| 15               | 1                | 0              | -0.127808               | 0.757653  | 0.065070  |
| 16               | 6                | 0              | -2.866372               | 1.406374  | -0.299178 |
| 17               | 6                | 0              | -4.176052               | 1.616034  | -0.316136 |
| 18               | 1                | 0              | -2.140790               | 2.188553  | -0.482800 |
| 19               | 1                | 0              | -4.548825               | 2.608261  | -0.530685 |
| 20               | 1                | 0              | -4.908668               | 0.842520  | -0.122246 |
| 21               | 8                | 0              | 2.860892                | -1.732270 | -0.514214 |
| 22               | 1                | 0              | 2.994950                | -0.787127 | -0.294224 |

Rotational constants (GHZ):        0.9940586        0.4439376        0.3182065  
 Standard basis: 6-311++G(d,p) (5D, 7F)  
 There are    358 symmetry adapted cartesian basis functions of A    symmetry.  
 There are    345 symmetry adapted basis functions of A    symmetry.  
       345 basis functions,    553 primitive gaussians,    358 cartesian basis functions  
       55 alpha electrons        55 beta electrons  
       nuclear repulsion energy        852.1929943195 Hartrees.  
 NAtoms=    22 NActive=    22 NUniq=    22 SFac= 1.00D+00 NAtFMM=    60 NAOKFM=F  
 Big=F  
 Integral buffers will be    131072 words long.  
 Raffenetti 2 integral format.  
 Two-electron integral symmetry is turned on.  
 One-electron integrals computed using PRISM.  
 NBasis=    345 RedAO= T EigKep= 5.25D-06 NBF=    345  
 NBsUse=    345 1.00D-06 EigRej= -1.00D+00 NBFU=    345  
 Initial guess from the checkpoint file: "."  
 B after Tr=    0.000000    0.000000    0.000000  
       Rot=    0.999971    -0.001376    -0.000103    0.007430 Ang=    -0.87 deg.  
 ExpMin= 3.50D-02 ExpMax= 4.40D+05 ExpMxC= 1.51D+04 IAcc=3 IRadAn=        5 AccDes=  
 0.00D+00  
 Harris functional with IExCor=    402 and IRadAn=        5 diagonalized for initial guess.  
 HarFok: IExCor=    402 AccDes= 0.00D+00 IRadAn=        5 IDoV= 1 UseB2=F ITyADJ=14  
 ICtDFT= 3500011 ScaDFX= 1.000000 1.000000 1.000000 1.000000  
 FoFCou: FMM=F IPFlag=        0 FMFlag=        100000 FMFlg1=        0  
       NFxFlg=        0 DoJE=T BraDBF=F KetDBF=T FulRan=T  
       wScrn= 0.000000 ICntrl=        500 IOpCl= 0 I1Cent=    200000004 NGrid=  
 0  
       NMat0=    1 NMatS0=    1 NMatT0=    0 NMatD0=    1 NMtDS0=    0  
 NMtDT0=    0  
 Petite list used in FoFCou.  
 Keep R1 ints in memory in canonical form, NReq=1804729152.  
 Requested convergence on RMS density matrix=1.00D-08 within 128 cycles.  
 Requested convergence on MAX density matrix=1.00D-06.  
 Requested convergence on        energy=1.00D-06.  
 No special actions if energy rises.  
 SCF Done: E(RB3LYP) = -3032.34307940    A.U. after    11 cycles  
       NFock= 11 Conv=0.63D-08    -V/T= 2.0017  
 Calling FoFJK, ICntrl=        2127 FMM=F ISym2X=0 I1Cent= 0 IOpClX= 0 NMat=1 NMatS=1  
 NMatT=0.  
 \*\*\*\*\* Axes restored to original set \*\*\*\*\*

-----  

| Center | Atomic | Forces (Hartrees/Bohr) |   |   |
|--------|--------|------------------------|---|---|
| Number | Number | X                      | Y | Z |
| -----  |        |                        |   |   |

|    |    |              |              |              |
|----|----|--------------|--------------|--------------|
| 1  | 6  | -0.000275935 | -0.000118924 | 0.000125068  |
| 2  | 6  | 0.000192460  | -0.000416933 | -0.000264280 |
| 3  | 7  | 0.001624246  | 0.000504441  | 0.000192449  |
| 4  | 6  | -0.001083181 | -0.001428004 | -0.000165213 |
| 5  | 7  | -0.000369450 | 0.000217059  | -0.000407859 |
| 6  | 6  | -0.000523021 | 0.000329382  | 0.001091291  |
| 7  | 6  | -0.001077786 | -0.000809005 | -0.002170124 |
| 8  | 1  | -0.000055564 | 0.000018532  | 0.000018501  |
| 9  | 1  | 0.000296175  | -0.000091293 | 0.000006510  |
| 10 | 1  | 0.000104405  | -0.000464947 | -0.000234822 |
| 11 | 1  | -0.000040296 | 0.000050122  | 0.000151286  |
| 12 | 1  | -0.000158984 | -0.000014347 | -0.000218885 |
| 13 | 1  | 0.001354652  | 0.000852349  | 0.000089954  |
| 14 | 35 | -0.000054299 | 0.000227492  | 0.000530648  |
| 15 | 1  | -0.000025348 | 0.000520142  | 0.000355351  |
| 16 | 6  | -0.000107010 | -0.000044970 | -0.000145500 |
| 17 | 6  | -0.000386367 | 0.000246481  | -0.000098879 |
| 18 | 1  | 0.000315112  | -0.000280333 | 0.000216873  |
| 19 | 1  | 0.000143833  | -0.000167154 | 0.000001059  |
| 20 | 1  | -0.000029716 | 0.000266768  | 0.000119060  |
| 21 | 8  | 0.000100023  | 0.000003366  | 0.001000295  |
| 22 | 1  | 0.000056050  | 0.000599777  | -0.000192784 |

-----  
Cartesian Forces: Max 0.002170124 RMS 0.000561591

GradGradGradGradGradGradGradGradGradGradGradGradGradGradGradGradGradGradGradGrad

Berny optimization.

Using GEDIIS/GDIIS optimizer.

FormGI is forming the generalized inverse of G from B-inverse, IUseBI=4.

Internal Forces: Max 0.001809437 RMS 0.000449536

Search for a local minimum.

Step number 63 out of a maximum of 116

All quantities printed in internal units (Hartrees-Bohrs-Radians)

Mixed Optimization -- En-DIIS/RFO-DIIS

Update second derivatives using D2CorX and points 60 61 62 63

DE= -2.08D-04 DEPred=-1.96D-04 R= 1.06D+00

TightC=F SS= 1.41D+00 RLast= 1.69D-01 DXNew= 1.6377D+00 5.0602D-01

Trust test= 1.06D+00 RLast= 1.69D-01 DXMaxT set to 9.74D-01

ITU= 1 0 1 1 1 1 0 1 1 0 1 1 0-1 1 1 1-1 1 0

ITU= -1 1 0-1 0-1 0 0 1-1 0 1 1 1 1 1 1 0-1 1

ITU= 1 1 1 1 0-1 1 1 1 1 1 1 1 1 1 1 1 0 0

ITU= -1 0 0

Use linear search instead of GDIIS.

Eigenvalues --- 0.00195 0.00282 0.00376 0.00707 0.00970

|                 |         |         |         |         |         |
|-----------------|---------|---------|---------|---------|---------|
| Eigenvalues --- | 0.01365 | 0.01484 | 0.01844 | 0.02147 | 0.02300 |
| Eigenvalues --- | 0.02513 | 0.03031 | 0.03182 | 0.03847 | 0.04086 |
| Eigenvalues --- | 0.04577 | 0.04939 | 0.05357 | 0.05810 | 0.08231 |
| Eigenvalues --- | 0.08895 | 0.09393 | 0.12068 | 0.13831 | 0.14386 |
| Eigenvalues --- | 0.14956 | 0.15165 | 0.16013 | 0.16051 | 0.16428 |
| Eigenvalues --- | 0.17408 | 0.19117 | 0.22204 | 0.23114 | 0.23680 |
| Eigenvalues --- | 0.25089 | 0.26005 | 0.28412 | 0.29674 | 0.32907 |
| Eigenvalues --- | 0.33778 | 0.33850 | 0.33955 | 0.34231 | 0.34418 |
| Eigenvalues --- | 0.34611 | 0.34916 | 0.35784 | 0.36317 | 0.36413 |
| Eigenvalues --- | 0.39489 | 0.43150 | 0.43594 | 0.46125 | 0.48880 |
| Eigenvalues --- | 0.53689 | 0.56794 | 0.57419 | 0.60982 | 0.80910 |

RFO step: Lambda=-1.35463988D-04 EMin= 1.95462594D-03

Quartic linear search produced a step of 0.03811.

Iteration 1 RMS(Cart)= 0.02808091 RMS(Int)= 0.00057240

Iteration 2 RMS(Cart)= 0.00081950 RMS(Int)= 0.00000474

Iteration 3 RMS(Cart)= 0.00000033 RMS(Int)= 0.00000473

| Variable | Old X   | -DE/DX   | Delta X<br>(Linear) | Delta X<br>(Quad) | Delta X<br>(Total) | New X   |
|----------|---------|----------|---------------------|-------------------|--------------------|---------|
| R1       | 2.56710 | -0.00055 | -0.00001            | -0.00048          | -0.00049           | 2.56661 |
| R2       | 2.61563 | -0.00001 | -0.00003            | -0.00019          | -0.00021           | 2.61542 |
| R3       | 2.03410 | -0.00005 | 0.00000             | -0.00012          | -0.00012           | 2.03397 |
| R4       | 2.62685 | 0.00042  | 0.00000             | 0.00053           | 0.00053            | 2.62738 |
| R5       | 2.03111 | -0.00019 | -0.00001            | -0.00034          | -0.00036           | 2.03075 |
| R6       | 2.54949 | -0.00137 | -0.00003            | -0.00121          | -0.00124           | 2.54825 |
| R7       | 2.68720 | 0.00008  | 0.00008             | -0.00046          | -0.00038           | 2.68682 |
| R8       | 2.52111 | -0.00072 | 0.00000             | -0.00092          | -0.00092           | 2.52018 |
| R9       | 2.08830 | 0.00061  | -0.00009            | -0.00030          | -0.00039           | 2.08792 |
| R10      | 2.79705 | -0.00021 | -0.00006            | -0.00230          | -0.00236           | 2.79469 |
| R11      | 2.92919 | 0.00117  | 0.00011             | 0.00231           | 0.00242            | 2.93161 |
| R12      | 2.05986 | -0.00030 | 0.00000             | -0.00041          | -0.00040           | 2.05946 |
| R13      | 2.06029 | -0.00009 | -0.00002            | -0.00014          | -0.00016           | 2.06013 |
| R14      | 2.06626 | 0.00013  | -0.00001            | 0.00010           | 0.00009            | 2.06635 |
| R15      | 2.07285 | -0.00016 | 0.00000             | -0.00075          | -0.00075           | 2.07210 |
| R16      | 2.64425 | 0.00079  | -0.00003            | 0.00232           | 0.00230            | 2.64655 |
| R17      | 5.90834 | 0.00057  | 0.00150             | 0.04321           | 0.04472            | 5.95306 |
| R18      | 2.50665 | 0.00015  | 0.00003             | 0.00061           | 0.00063            | 2.50729 |
| R19      | 2.04579 | -0.00006 | 0.00001             | -0.00003          | -0.00003           | 2.04576 |
| R20      | 2.04362 | -0.00021 | 0.00000             | -0.00032          | -0.00032           | 2.04330 |
| R21      | 2.04636 | -0.00028 | -0.00001            | -0.00042          | -0.00042           | 2.04594 |
| R22      | 1.85122 | 0.00015  | 0.00002             | -0.00143          | -0.00140           | 1.84982 |
| A1       | 1.87574 | -0.00014 | -0.00001            | -0.00013          | -0.00014           | 1.87560 |
| A2       | 2.27787 | 0.00004  | 0.00006             | 0.00104           | 0.00108            | 2.27895 |
| A3       | 2.12957 | 0.00010  | -0.00005            | -0.00094          | -0.00100           | 2.12857 |
| A4       | 1.86274 | -0.00036 | 0.00001             | -0.00040          | -0.00040           | 1.86234 |

|     |          |          |          |          |          |          |
|-----|----------|----------|----------|----------|----------|----------|
| A5  | 2.27901  | -0.00007 | 0.00009  | 0.00094  | 0.00102  | 2.28004  |
| A6  | 2.14139  | 0.00043  | -0.00009 | -0.00049 | -0.00059 | 2.14080  |
| A7  | 1.89592  | 0.00030  | -0.00001 | 0.00022  | 0.00022  | 1.89614  |
| A8  | 2.23981  | 0.00086  | -0.00004 | 0.00202  | 0.00198  | 2.24179  |
| A9  | 2.14745  | -0.00116 | 0.00005  | -0.00224 | -0.00219 | 2.14525  |
| A10 | 1.88919  | 0.00001  | 0.00000  | 0.00002  | 0.00001  | 1.88920  |
| A11 | 2.24968  | -0.00019 | 0.00002  | -0.00060 | -0.00060 | 2.24908  |
| A12 | 2.14425  | 0.00018  | -0.00002 | 0.00068  | 0.00065  | 2.14490  |
| A13 | 1.90110  | 0.00019  | 0.00000  | 0.00031  | 0.00032  | 1.90142  |
| A14 | 2.22865  | -0.00035 | -0.00002 | -0.00180 | -0.00182 | 2.22683  |
| A15 | 2.15294  | 0.00016  | 0.00002  | 0.00137  | 0.00139  | 2.15433  |
| A16 | 1.95704  | 0.00068  | 0.00025  | 0.00386  | 0.00410  | 1.96115  |
| A17 | 1.86451  | 0.00000  | 0.00003  | 0.00122  | 0.00125  | 1.86576  |
| A18 | 1.87300  | -0.00042 | -0.00015 | -0.00097 | -0.00111 | 1.87189  |
| A19 | 1.88401  | 0.00029  | -0.00009 | -0.00139 | -0.00149 | 1.88252  |
| A20 | 1.96874  | -0.00043 | -0.00003 | -0.00228 | -0.00231 | 1.96643  |
| A21 | 1.91370  | -0.00011 | -0.00001 | -0.00028 | -0.00029 | 1.91341  |
| A22 | 1.92863  | -0.00058 | 0.00009  | 0.00269  | 0.00278  | 1.93141  |
| A23 | 1.88020  | 0.00181  | -0.00021 | 0.00379  | 0.00357  | 1.88377  |
| A24 | 1.93297  | -0.00035 | 0.00007  | -0.00297 | -0.00290 | 1.93007  |
| A25 | 1.89534  | -0.00015 | 0.00010  | 0.00071  | 0.00080  | 1.89614  |
| A26 | 1.87555  | 0.00053  | -0.00007 | 0.00190  | 0.00183  | 1.87738  |
| A27 | 1.95128  | -0.00130 | 0.00002  | -0.00604 | -0.00602 | 1.94526  |
| A28 | 1.76410  | -0.00008 | -0.00055 | -0.01003 | -0.01058 | 1.75352  |
| A29 | 2.17206  | 0.00102  | 0.00002  | 0.00357  | 0.00359  | 2.17565  |
| A30 | 1.96348  | -0.00091 | -0.00002 | -0.00204 | -0.00206 | 1.96142  |
| A31 | 2.14764  | -0.00011 | 0.00000  | -0.00153 | -0.00153 | 2.14611  |
| A32 | 2.08047  | -0.00003 | 0.00000  | -0.00060 | -0.00059 | 2.07988  |
| A33 | 2.15650  | 0.00011  | -0.00006 | -0.00018 | -0.00024 | 2.15626  |
| A34 | 2.04620  | -0.00007 | 0.00005  | 0.00078  | 0.00084  | 2.04704  |
| A35 | 1.85173  | 0.00013  | -0.00016 | 0.00280  | 0.00264  | 1.85436  |
| D1  | 0.00425  | -0.00015 | 0.00005  | 0.00037  | 0.00042  | 0.00467  |
| D2  | 3.13562  | -0.00013 | 0.00035  | 0.00597  | 0.00633  | -3.14123 |
| D3  | -3.14010 | 0.00004  | -0.00060 | -0.00866 | -0.00927 | 3.13381  |
| D4  | -0.00873 | 0.00007  | -0.00030 | -0.00306 | -0.00336 | -0.01209 |
| D5  | -0.01050 | 0.00029  | -0.00009 | 0.00057  | 0.00048  | -0.01002 |
| D6  | -3.11895 | 0.00023  | -0.00027 | 0.00446  | 0.00419  | -3.11476 |
| D7  | 3.13357  | 0.00012  | 0.00050  | 0.00866  | 0.00916  | -3.14046 |
| D8  | 0.02512  | 0.00005  | 0.00032  | 0.01256  | 0.01287  | 0.03798  |
| D9  | 0.00335  | -0.00004 | 0.00000  | -0.00117 | -0.00117 | 0.00217  |
| D10 | -3.13542 | 0.00002  | -0.00035 | -0.00249 | -0.00284 | -3.13826 |
| D11 | -3.12902 | -0.00006 | -0.00027 | -0.00624 | -0.00651 | -3.13553 |
| D12 | 0.01539  | 0.00001  | -0.00063 | -0.00755 | -0.00818 | 0.00722  |
| D13 | -0.00992 | 0.00022  | -0.00005 | 0.00154  | 0.00149  | -0.00843 |



Input orientation:

| Center Number | Atomic Number | Atomic Type | Coordinates (Angstroms) |           |           |
|---------------|---------------|-------------|-------------------------|-----------|-----------|
|               |               |             | X                       | Y         | Z         |
| 1             | 6             | 0           | -0.613196               | -2.383204 | -1.120906 |
| 2             | 6             | 0           | -1.911015               | -2.005083 | -1.252739 |
| 3             | 7             | 0           | -2.082107               | -0.878902 | -0.455546 |
| 4             | 6             | 0           | -0.906916               | -0.588950 | 0.138792  |
| 5             | 7             | 0           | -0.008877               | -1.496257 | -0.247046 |
| 6             | 6             | 0           | 1.405423                | -1.477751 | 0.184830  |
| 7             | 6             | 0           | 2.214350                | -0.339879 | -0.491588 |
| 8             | 1             | 0           | -0.075211               | -3.204886 | -1.561248 |
| 9             | 1             | 0           | -2.707964               | -2.429699 | -1.835318 |
| 10            | 1             | 0           | 1.406221                | -1.295309 | 1.259270  |
| 11            | 1             | 0           | 1.818731                | -2.465689 | -0.019214 |
| 12            | 1             | 0           | 2.678323                | -0.693489 | -1.416442 |
| 13            | 1             | 0           | 1.517267                | 0.470270  | -0.736673 |
| 14            | 35            | 0           | 0.734573                | 1.446195  | 2.154497  |
| 15            | 1             | 0           | -0.666568               | 0.235081  | 0.834463  |
| 16            | 6             | 0           | -3.261632               | -0.112023 | -0.250261 |
| 17            | 6             | 0           | -4.452193               | -0.409336 | -0.754804 |
| 18            | 1             | 0           | -3.085946               | 0.755633  | 0.372850  |
| 19            | 1             | 0           | -5.290781               | 0.240028  | -0.544475 |
| 20            | 1             | 0           | -4.639957               | -1.278007 | -1.373119 |
| 21            | 8             | 0           | 3.239665                | 0.104403  | 0.352643  |
| 22            | 1             | 0           | 2.808160                | 0.639976  | 1.049186  |

Distance matrix (angstroms):

|    |    | 1        | 2        | 3        | 4        | 5        |
|----|----|----------|----------|----------|----------|----------|
| 1  | C  | 0.000000 |          |          |          |          |
| 2  | C  | 1.358193 | 0.000000 |          |          |          |
| 3  | N  | 2.205296 | 1.390351 | 0.000000 |          |          |
| 4  | C  | 2.211890 | 2.224861 | 1.348474 | 0.000000 |          |
| 5  | N  | 1.384018 | 2.210984 | 2.173220 | 1.333623 | 0.000000 |
| 6  | C  | 2.568971 | 3.652868 | 3.596049 | 2.477700 | 1.478886 |
| 7  | C  | 3.544888 | 4.513412 | 4.330287 | 3.194012 | 2.517886 |
| 8  | H  | 1.076332 | 2.214696 | 3.265029 | 3.228775 | 2.156604 |
| 9  | H  | 2.213730 | 1.074628 | 2.168051 | 3.244880 | 3.267873 |
| 10 | H  | 3.305571 | 4.221140 | 3.909274 | 2.665524 | 2.076505 |
| 11 | H  | 2.671104 | 3.955344 | 4.233771 | 3.313045 | 2.081311 |
| 12 | H  | 3.711680 | 4.775887 | 4.859979 | 3.909427 | 3.038580 |
| 13 | H  | 3.581734 | 4.259907 | 3.854191 | 2.786584 | 2.536943 |
| 14 | Br | 5.216229 | 5.524465 | 4.489107 | 3.301419 | 3.870162 |

|    |    |          |          |          |          |          |
|----|----|----------|----------|----------|----------|----------|
| 15 | H  | 3.268292 | 3.305057 | 2.215588 | 1.104877 | 2.144703 |
| 16 | C  | 3.595900 | 2.532352 | 1.421803 | 2.433826 | 3.535043 |
| 17 | C  | 4.332214 | 3.041699 | 2.434615 | 3.660568 | 4.602420 |
| 18 | H  | 4.265922 | 3.412412 | 2.089410 | 2.571159 | 3.863112 |
| 19 | H  | 5.393831 | 4.118857 | 3.399338 | 4.513571 | 5.567913 |
| 20 | H  | 4.183285 | 2.826704 | 2.746602 | 4.086106 | 4.771014 |
| 21 | O  | 4.817061 | 5.792814 | 5.471866 | 4.209586 | 3.670799 |
| 22 | H  | 5.055154 | 5.879269 | 5.337220 | 4.017570 | 3.765555 |
|    |    | 6        | 7        | 8        | 9        | 10       |
| 6  | C  | 0.000000 |          |          |          |          |
| 7  | C  | 1.551340 | 0.000000 |          |          |          |
| 8  | H  | 2.867763 | 3.820279 | 0.000000 |          |          |
| 9  | H  | 4.680509 | 5.513813 | 2.758155 | 0.000000 |          |
| 10 | H  | 1.089820 | 2.152074 | 3.714357 | 5.271607 | 0.000000 |
| 11 | H  | 1.090174 | 2.213305 | 2.551725 | 4.877551 | 1.781706 |
| 12 | H  | 2.190756 | 1.093466 | 3.729616 | 5.674678 | 3.023221 |
| 13 | H  | 2.157884 | 1.096509 | 4.089338 | 5.241128 | 2.667094 |
| 14 | Br | 3.588745 | 3.518744 | 6.007917 | 6.541578 | 2.961147 |
| 15 | H  | 2.765676 | 3.223147 | 4.233499 | 4.289066 | 2.611323 |
| 16 | C  | 4.882204 | 5.486030 | 4.630094 | 2.861918 | 5.046554 |
| 17 | C  | 6.027942 | 6.672098 | 5.255799 | 2.879533 | 6.257991 |
| 18 | H  | 5.019537 | 5.480924 | 5.337693 | 3.894254 | 5.017138 |
| 19 | H  | 6.951388 | 7.527687 | 6.332727 | 3.932513 | 7.103562 |
| 20 | H  | 6.246096 | 6.974145 | 4.958342 | 2.296218 | 6.594395 |
| 21 | O  | 2.428131 | 1.400494 | 5.059919 | 6.825185 | 2.478444 |
| 22 | H  | 2.683197 | 1.920080 | 5.469109 | 6.940525 | 2.398936 |
|    |    | 11       | 12       | 13       | 14       | 15       |
| 11 | H  | 0.000000 |          |          |          |          |
| 12 | H  | 2.414919 | 0.000000 |          |          |          |
| 13 | H  | 3.037348 | 1.778897 | 0.000000 |          |          |
| 14 | Br | 4.604699 | 4.594346 | 3.150222 | 0.000000 |          |
| 15 | H  | 3.768240 | 4.137283 | 2.700540 | 2.274309 | 0.000000 |
| 16 | C  | 5.603857 | 6.081212 | 4.838753 | 4.917373 | 2.833984 |
| 17 | C  | 6.640344 | 7.166781 | 6.033944 | 6.229732 | 4.155960 |
| 18 | H  | 5.881027 | 6.207118 | 4.743631 | 4.271710 | 2.517429 |
| 19 | H  | 7.625087 | 8.070836 | 6.814650 | 6.711496 | 4.825437 |
| 20 | H  | 6.705095 | 7.341713 | 6.432180 | 6.982186 | 4.790686 |
| 21 | O  | 2.960187 | 2.020248 | 2.070537 | 3.364903 | 3.938005 |
| 22 | H  | 3.430102 | 2.806120 | 2.210089 | 2.484243 | 3.504822 |
|    |    | 16       | 17       | 18       | 19       | 20       |
| 16 | C  | 0.000000 |          |          |          |          |
| 17 | C  | 1.326798 | 0.000000 |          |          |          |
| 18 | H  | 1.082571 | 2.120233 | 0.000000 |          |          |
| 19 | H  | 2.080372 | 1.081269 | 2.443078 | 0.000000 |          |



|    |   |          |          |          |          |          |
|----|---|----------|----------|----------|----------|----------|
| 20 | H | 2.126054 | 1.082662 | 3.098233 | 1.847878 | 0.000000 |
| 21 | O | 6.532779 | 7.788135 | 6.359077 | 8.578562 | 8.183994 |
| 22 | H | 6.252714 | 7.554346 | 5.933910 | 8.263931 | 8.063539 |
|    |   | 21       | 22       |          |          |          |
| 21 | O | 0.000000 |          |          |          |          |
| 22 | H | 0.978880 | 0.000000 |          |          |          |

Stoichiometry C7H11BrN2O

Framework group C1[X(C7H11BrN2O)]

Deg. of freedom 60

Full point group C1 NOp 1

Largest Abelian subgroup C1 NOp 1

Largest concise Abelian subgroup C1 NOp 1

Standard orientation:

| Center Number | Atomic Number | Atomic Type | Coordinates (Angstroms) |           |           |
|---------------|---------------|-------------|-------------------------|-----------|-----------|
|               |               |             | X                       | Y         | Z         |
| 1             | 6             | 0           | -1.870863               | -1.989393 | 0.352316  |
| 2             | 6             | 0           | -2.863868               | -1.093906 | 0.114129  |
| 3             | 7             | 0           | -2.256378               | 0.149001  | -0.024490 |
| 4             | 6             | 0           | -0.924909               | -0.002890 | 0.125524  |
| 5             | 7             | 0           | -0.675852               | -1.291299 | 0.363272  |
| 6             | 6             | 0           | 0.685785                | -1.836693 | 0.551940  |
| 7             | 6             | 0           | 1.488813                | -1.891287 | -0.774266 |
| 8             | 1             | 0           | -1.911929               | -3.051244 | 0.523420  |
| 9             | 1             | 0           | -3.926150               | -1.232789 | 0.029908  |
| 10            | 1             | 0           | 1.206448                | -1.161171 | 1.230385  |
| 11            | 1             | 0           | 0.579977                | -2.815740 | 1.019647  |
| 12            | 1             | 0           | 1.353810                | -2.857784 | -1.267546 |
| 13            | 1             | 0           | 1.104696                | -1.104314 | -1.434161 |
| 14            | 35            | 0           | 2.032891                | 1.463624  | 0.136843  |
| 15            | 1             | 0           | -0.129923               | 0.762848  | 0.076579  |
| 16            | 6             | 0           | -2.866501               | 1.407657  | -0.279551 |
| 17            | 6             | 0           | -4.175551               | 1.609771  | -0.356567 |
| 18            | 1             | 0           | -2.139724               | 2.199991  | -0.405888 |
| 19            | 1             | 0           | -4.543961               | 2.605978  | -0.559021 |
| 20            | 1             | 0           | -4.910694               | 0.825932  | -0.224961 |
| 21            | 8             | 0           | 2.858003                | -1.730114 | -0.527840 |
| 22            | 1             | 0           | 2.990418                | -0.781088 | -0.327782 |

Rotational constants (GHZ): 0.9924015 0.4442481 0.3184998

Standard basis: 6-311++G(d,p) (5D, 7F)

There are 358 symmetry adapted cartesian basis functions of A symmetry.

There are 345 symmetry adapted basis functions of A symmetry.

345 basis functions, 553 primitive gaussians, 358 cartesian basis functions  
 55 alpha electrons 55 beta electrons  
 nuclear repulsion energy 852.2053397706 Hartrees.  
 NAToms= 22 NActive= 22 NUniq= 22 SFac= 1.00D+00 NATFMM= 60 NAOKFM=F  
 Big=F  
 Integral buffers will be 131072 words long.  
 Raffenetti 2 integral format.  
 Two-electron integral symmetry is turned on.  
 One-electron integrals computed using PRISM.  
 NBasis= 345 RedAO= T EigKep= 4.93D-06 NBF= 345  
 NBsUse= 345 1.00D-06 EigRej= -1.00D+00 NBFU= 345  
 Initial guess from the checkpoint file: ". "  
 B after Tr= 0.000000 0.000000 0.000000  
 Rot= 1.000000 0.000479 -0.000141 -0.000224 Ang= 0.06 deg.  
 ExpMin= 3.50D-02 ExpMax= 4.40D+05 ExpMxC= 1.51D+04 IAcc=3 IRadAn= 5 AccDes=  
 0.00D+00  
 Harris functional with IExCor= 402 and IRadAn= 5 diagonalized for initial guess.  
 HarFok: IExCor= 402 AccDes= 0.00D+00 IRadAn= 5 IDoV= 1 UseB2=F ITyADJ=14  
 ICtDFT= 3500011 ScaDFX= 1.000000 1.000000 1.000000 1.000000  
 FoFCou: FMM=F IPFlag= 0 FMFlag= 100000 FMFlg1= 0  
 NFXFlg= 0 DoJE=T BraDBF=F KetDBF=T FulRan=T  
 wScrn= 0.000000 ICntrl= 500 IOpCl= 0 l1Cent= 200000004 NGrid=  
 0  
 NMat0= 1 NMatS0= 1 NMatT0= 0 NMatD0= 1 NMtDS0= 0  
 NMtDT0= 0  
 Petite list used in FoFCou.  
 Keep R1 ints in memory in canonical form, NReq=1804729152.  
 Requested convergence on RMS density matrix=1.00D-08 within 128 cycles.  
 Requested convergence on MAX density matrix=1.00D-06.  
 Requested convergence on energy=1.00D-06.  
 No special actions if energy rises.  
 SCF Done: E(RB3LYP) = -3032.34317224 A.U. after 10 cycles  
 NFock= 10 Conv=0.49D-08 -V/T= 2.0016  
 Calling FoFJK, ICntrl= 2127 FMM=F ISym2X=0 l1Cent= 0 IOpClX= 0 NMat=1 NMatS=1  
 NMatT=0.  
 \*\*\*\*\* Axes restored to original set \*\*\*\*\*

| Center<br>Number | Atomic<br>Number | Forces (Hartrees/Bohr) |              |              |
|------------------|------------------|------------------------|--------------|--------------|
|                  |                  | X                      | Y            | Z            |
| 1                | 6                | -0.000295487           | -0.000311085 | 0.000293109  |
| 2                | 6                | -0.000082396           | -0.000123832 | -0.000198933 |
| 3                | 7                | 0.000872891            | 0.000334587  | -0.000094430 |
| 4                | 6                | -0.000837825           | -0.001046589 | -0.000172714 |

|    |    |              |              |              |
|----|----|--------------|--------------|--------------|
| 5  | 7  | -0.000158514 | 0.000236223  | -0.000593187 |
| 6  | 6  | 0.000341746  | 0.000360069  | 0.000810246  |
| 7  | 6  | -0.001094793 | -0.000144166 | -0.000715696 |
| 8  | 1  | -0.000061406 | 0.000078577  | -0.000214734 |
| 9  | 1  | 0.000253044  | -0.000230228 | -0.000061729 |
| 10 | 1  | 0.000009507  | -0.000396145 | -0.000181069 |
| 11 | 1  | 0.000044087  | -0.000045352 | 0.000204392  |
| 12 | 1  | -0.000137920 | -0.000087645 | 0.000014748  |
| 13 | 1  | 0.000677455  | 0.000532779  | -0.000284589 |
| 14 | 35 | -0.000020892 | 0.000429224  | 0.000453027  |
| 15 | 1  | 0.000084226  | 0.000434244  | 0.000490558  |
| 16 | 6  | -0.000424834 | 0.000109928  | -0.000076011 |
| 17 | 6  | 0.000290154  | 0.000083611  | 0.000083738  |
| 18 | 1  | 0.000300166  | -0.000176384 | 0.000119581  |
| 19 | 1  | 0.000061756  | -0.000113083 | -0.000052311 |
| 20 | 1  | -0.000154508 | 0.000150274  | 0.000038655  |
| 21 | 8  | 0.000773025  | -0.000479078 | -0.000215366 |
| 22 | 1  | -0.000439481 | 0.000404070  | 0.000352714  |

-----  
Cartesian Forces: Max 0.001094793 RMS 0.000390260

GradGradGradGradGradGradGradGradGradGradGradGradGradGradGradGradGradGradGrad

Berny optimization.

Using GEDIIS/GDIIS optimizer.

FormGI is forming the generalized inverse of G from B-inverse, IUseBI=4.

Internal Forces: Max 0.001516860 RMS 0.000348531

Search for a local minimum.

Step number 64 out of a maximum of 116

All quantities printed in internal units (Hartrees-Bohrs-Radians)

Mixed Optimization -- En-DIIS/RFO-DIIS

Swapping is turned off.

Update second derivatives using D2CorX and points 61 62 63 64

DE= -9.28D-05 DEPred=-7.00D-05 R= 1.33D+00

TightC=F SS= 1.41D+00 RLast= 1.32D-01 DXNew= 1.6377D+00 3.9732D-01

Trust test= 1.33D+00 RLast= 1.32D-01 DXMaxT set to 9.74D-01

ITU= 1 1 0 1 1 1 1 0 1 1 0 1 1 0-1 1 1 1-1 1

ITU= 0-1 1 0-1 0-1 0 0 1-1 0 1 1 1 1 1 1 0-1

ITU= 1 1 1 1 1 0-1 1 1 1 1 1 1 1 1 1 1 1 0

ITU= 0-1 0 0

|                 |         |         |         |         |         |
|-----------------|---------|---------|---------|---------|---------|
| Eigenvalues --- | 0.00188 | 0.00232 | 0.00373 | 0.00689 | 0.00990 |
| Eigenvalues --- | 0.01318 | 0.01512 | 0.01851 | 0.02157 | 0.02306 |
| Eigenvalues --- | 0.02508 | 0.03028 | 0.03189 | 0.03803 | 0.04068 |
| Eigenvalues --- | 0.04379 | 0.04840 | 0.05391 | 0.05791 | 0.08623 |
| Eigenvalues --- | 0.08953 | 0.09451 | 0.12715 | 0.13946 | 0.14396 |

|                 |         |         |         |         |         |
|-----------------|---------|---------|---------|---------|---------|
| Eigenvalues --- | 0.14885 | 0.15372 | 0.16009 | 0.16056 | 0.16412 |
| Eigenvalues --- | 0.17490 | 0.18675 | 0.21692 | 0.23119 | 0.23425 |
| Eigenvalues --- | 0.24819 | 0.26076 | 0.28567 | 0.29928 | 0.32779 |
| Eigenvalues --- | 0.33797 | 0.33843 | 0.33970 | 0.34243 | 0.34482 |
| Eigenvalues --- | 0.34622 | 0.34964 | 0.36316 | 0.36342 | 0.36418 |
| Eigenvalues --- | 0.39489 | 0.43007 | 0.43908 | 0.45729 | 0.48873 |
| Eigenvalues --- | 0.53563 | 0.55386 | 0.58040 | 0.61169 | 0.75057 |

En-DIIS/RFO-DIIS IScMMF= 0 using points: 64 63

RFO step: Lambda=-2.55628953D-05.

DidBck=F Rises=F RFO-DIIS coefs: 1.57408 -0.57408

Iteration 1 RMS(Cart)= 0.03611487 RMS(Int)= 0.00094493

Iteration 2 RMS(Cart)= 0.00136026 RMS(Int)= 0.00000583

Iteration 3 RMS(Cart)= 0.00000099 RMS(Int)= 0.00000578

| Variable | Old X   | -DE/DX   | Delta X<br>(Linear) | Delta X<br>(Quad) | Delta X<br>(Total) | New X   |
|----------|---------|----------|---------------------|-------------------|--------------------|---------|
| R1       | 2.56661 | -0.00026 | -0.00028            | -0.00025          | -0.00053           | 2.56608 |
| R2       | 2.61542 | 0.00024  | -0.00012            | 0.00049           | 0.00037            | 2.61578 |
| R3       | 2.03397 | 0.00000  | -0.00007            | 0.00001           | -0.00006           | 2.03391 |
| R4       | 2.62738 | 0.00032  | 0.00030             | 0.00070           | 0.00101            | 2.62839 |
| R5       | 2.03075 | -0.00006 | -0.00021            | -0.00014          | -0.00034           | 2.03041 |
| R6       | 2.54825 | -0.00070 | -0.00071            | -0.00125          | -0.00196           | 2.54629 |
| R7       | 2.68682 | -0.00002 | -0.00022            | 0.00002           | -0.00020           | 2.68662 |
| R8       | 2.52018 | -0.00037 | -0.00053            | -0.00037          | -0.00090           | 2.51928 |
| R9       | 2.08792 | 0.00065  | -0.00022            | 0.00069           | 0.00047            | 2.08838 |
| R10      | 2.79469 | 0.00028  | -0.00136            | 0.00079           | -0.00057           | 2.79412 |
| R11      | 2.93161 | 0.00054  | 0.00139             | 0.00047           | 0.00185            | 2.93346 |
| R12      | 2.05946 | -0.00024 | -0.00023            | -0.00050          | -0.00074           | 2.05873 |
| R13      | 2.06013 | 0.00002  | -0.00009            | 0.00005           | -0.00004           | 2.06009 |
| R14      | 2.06635 | -0.00004 | 0.00005             | -0.00040          | -0.00035           | 2.06600 |
| R15      | 2.07210 | 0.00026  | -0.00043            | -0.00026          | -0.00069           | 2.07141 |
| R16      | 2.64655 | 0.00030  | 0.00132             | 0.00075           | 0.00207            | 2.64862 |
| R17      | 5.95306 | 0.00055  | 0.02567             | 0.02496           | 0.05063            | 6.00369 |
| R18      | 2.50729 | -0.00023 | 0.00036             | -0.00050          | -0.00013           | 2.50715 |
| R19      | 2.04576 | -0.00002 | -0.00001            | -0.00007          | -0.00008           | 2.04568 |
| R20      | 2.04330 | -0.00013 | -0.00018            | -0.00023          | -0.00042           | 2.04289 |
| R21      | 2.04594 | -0.00012 | -0.00024            | -0.00022          | -0.00046           | 2.04547 |
| R22      | 1.84982 | 0.00066  | -0.00081            | 0.00089           | 0.00009            | 1.84990 |
| A1       | 1.87560 | 0.00000  | -0.00008            | 0.00009           | 0.00000            | 1.87560 |
| A2       | 2.27895 | -0.00013 | 0.00062             | -0.00093          | -0.00032           | 2.27863 |
| A3       | 2.12857 | 0.00013  | -0.00058            | 0.00085           | 0.00026            | 2.12882 |
| A4       | 1.86234 | -0.00026 | -0.00023            | -0.00036          | -0.00059           | 1.86175 |
| A5       | 2.28004 | -0.00022 | 0.00059             | -0.00210          | -0.00153           | 2.27851 |
| A6       | 2.14080 | 0.00048  | -0.00034            | 0.00248           | 0.00213            | 2.14292 |
| A7       | 1.89614 | 0.00021  | 0.00013             | 0.00013           | 0.00026            | 1.89640 |

|     |          |          |          |          |          |          |
|-----|----------|----------|----------|----------|----------|----------|
| A8  | 2.24179  | 0.00062  | 0.00113  | 0.00276  | 0.00389  | 2.24568  |
| A9  | 2.14525  | -0.00083 | -0.00126 | -0.00289 | -0.00415 | 2.14111  |
| A10 | 1.88920  | 0.00007  | 0.00001  | 0.00048  | 0.00047  | 1.88967  |
| A11 | 2.24908  | -0.00007 | -0.00034 | 0.00027  | -0.00011 | 2.24897  |
| A12 | 2.14490  | 0.00000  | 0.00037  | -0.00072 | -0.00038 | 2.14452  |
| A13 | 1.90142  | -0.00001 | 0.00018  | -0.00030 | -0.00011 | 1.90131  |
| A14 | 2.22683  | -0.00009 | -0.00105 | 0.00136  | 0.00030  | 2.22713  |
| A15 | 2.15433  | 0.00011  | 0.00080  | -0.00109 | -0.00031 | 2.15402  |
| A16 | 1.96115  | 0.00011  | 0.00236  | -0.00042 | 0.00193  | 1.96308  |
| A17 | 1.86576  | 0.00011  | 0.00072  | 0.00006  | 0.00077  | 1.86653  |
| A18 | 1.87189  | -0.00020 | -0.00064 | 0.00012  | -0.00051 | 1.87138  |
| A19 | 1.88252  | 0.00041  | -0.00086 | 0.00265  | 0.00178  | 1.88430  |
| A20 | 1.96643  | -0.00025 | -0.00133 | -0.00018 | -0.00150 | 1.96493  |
| A21 | 1.91341  | -0.00017 | -0.00016 | -0.00232 | -0.00249 | 1.91093  |
| A22 | 1.93141  | -0.00072 | 0.00159  | -0.00190 | -0.00032 | 1.93109  |
| A23 | 1.88377  | 0.00152  | 0.00205  | 0.00006  | 0.00210  | 1.88587  |
| A24 | 1.93007  | -0.00021 | -0.00166 | -0.00010 | -0.00177 | 1.92830  |
| A25 | 1.89614  | -0.00024 | 0.00046  | 0.00083  | 0.00128  | 1.89741  |
| A26 | 1.87738  | 0.00028  | 0.00105  | -0.00114 | -0.00009 | 1.87729  |
| A27 | 1.94526  | -0.00067 | -0.00345 | 0.00226  | -0.00119 | 1.94407  |
| A28 | 1.75352  | 0.00082  | -0.00607 | 0.00694  | 0.00087  | 1.75439  |
| A29 | 2.17565  | 0.00049  | 0.00206  | 0.00239  | 0.00445  | 2.18010  |
| A30 | 1.96142  | -0.00059 | -0.00118 | -0.00330 | -0.00448 | 1.95694  |
| A31 | 2.14611  | 0.00011  | -0.00088 | 0.00092  | 0.00004  | 2.14615  |
| A32 | 2.07988  | -0.00004 | -0.00034 | -0.00080 | -0.00114 | 2.07874  |
| A33 | 2.15626  | 0.00021  | -0.00014 | 0.00179  | 0.00165  | 2.15792  |
| A34 | 2.04704  | -0.00017 | 0.00048  | -0.00099 | -0.00051 | 2.04653  |
| A35 | 1.85436  | -0.00032 | 0.00151  | -0.00249 | -0.00098 | 1.85339  |
| D1  | 0.00467  | -0.00011 | 0.00024  | -0.00047 | -0.00023 | 0.00444  |
| D2  | -3.14123 | -0.00011 | 0.00363  | 0.00285  | 0.00648  | -3.13475 |
| D3  | 3.13381  | 0.00013  | -0.00532 | 0.00016  | -0.00517 | 3.12864  |
| D4  | -0.01209 | 0.00013  | -0.00193 | 0.00348  | 0.00154  | -0.01055 |
| D5  | -0.01002 | 0.00023  | 0.00028  | 0.00158  | 0.00186  | -0.00816 |
| D6  | -3.11476 | 0.00017  | 0.00241  | 0.00281  | 0.00522  | -3.10954 |
| D7  | -3.14046 | 0.00001  | 0.00526  | 0.00103  | 0.00629  | -3.13418 |
| D8  | 0.03798  | -0.00004 | 0.00739  | 0.00227  | 0.00965  | 0.04763  |
| D9  | 0.00217  | -0.00005 | -0.00067 | -0.00078 | -0.00145 | 0.00072  |
| D10 | -3.13826 | 0.00001  | -0.00163 | 0.00089  | -0.00074 | -3.13900 |
| D11 | -3.13553 | -0.00004 | -0.00374 | -0.00377 | -0.00751 | 3.14014  |
| D12 | 0.00722  | 0.00002  | -0.00469 | -0.00209 | -0.00679 | 0.00042  |
| D13 | -0.00843 | 0.00019  | 0.00085  | 0.00177  | 0.00262  | -0.00581 |
| D14 | 3.13774  | 0.00003  | -0.00372 | -0.00481 | -0.00853 | 3.12920  |
| D15 | 3.13208  | 0.00013  | 0.00175  | 0.00022  | 0.00196  | 3.13404  |
| D16 | -0.00493 | -0.00002 | -0.00283 | -0.00636 | -0.00919 | -0.01413 |

|     |          |          |          |          |          |          |
|-----|----------|----------|----------|----------|----------|----------|
| D17 | 0.06972  | -0.00011 | -0.03121 | -0.03539 | -0.06659 | 0.00313  |
| D18 | -3.07300 | -0.00014 | -0.03127 | -0.03329 | -0.06455 | -3.13756 |
| D19 | -3.07057 | -0.00004 | -0.03229 | -0.03350 | -0.06579 | -3.13636 |
| D20 | 0.06990  | -0.00007 | -0.03235 | -0.03140 | -0.06375 | 0.00615  |
| D21 | 0.01139  | -0.00026 | -0.00070 | -0.00207 | -0.00277 | 0.00862  |
| D22 | 3.11799  | -0.00021 | -0.00276 | -0.00318 | -0.00594 | 3.11204  |
| D23 | -3.13445 | -0.00011 | 0.00354  | 0.00403  | 0.00757  | -3.12688 |
| D24 | -0.02785 | -0.00006 | 0.00147  | 0.00293  | 0.00440  | -0.02345 |
| D25 | 1.83353  | -0.00051 | -0.00992 | -0.01836 | -0.02828 | 1.80524  |
| D26 | -2.38773 | 0.00012  | -0.00919 | -0.01534 | -0.02453 | -2.41225 |
| D27 | -0.33668 | -0.00012 | -0.00934 | -0.01794 | -0.02728 | -0.36396 |
| D28 | -1.26629 | -0.00057 | -0.00749 | -0.01699 | -0.02448 | -1.29077 |
| D29 | 0.79564  | 0.00006  | -0.00676 | -0.01397 | -0.02072 | 0.77492  |
| D30 | 2.84669  | -0.00018 | -0.00691 | -0.01657 | -0.02348 | 2.82321  |
| D31 | -1.59446 | 0.00028  | -0.00409 | 0.00051  | -0.00358 | -1.59804 |
| D32 | 0.47822  | 0.00050  | -0.00139 | 0.00045  | -0.00093 | 0.47728  |
| D33 | 2.61022  | 0.00052  | -0.00535 | 0.00321  | -0.00214 | 2.60808  |
| D34 | 2.63672  | -0.00018 | -0.00579 | -0.00099 | -0.00678 | 2.62994  |
| D35 | -1.57379 | 0.00004  | -0.00309 | -0.00105 | -0.00413 | -1.57792 |
| D36 | 0.55822  | 0.00007  | -0.00705 | 0.00171  | -0.00534 | 0.55288  |
| D37 | 0.52247  | -0.00008 | -0.00416 | 0.00023  | -0.00393 | 0.51853  |
| D38 | 2.59515  | 0.00013  | -0.00146 | 0.00017  | -0.00128 | 2.59386  |
| D39 | -1.55603 | 0.00016  | -0.00542 | 0.00293  | -0.00249 | -1.55853 |
| D40 | 1.17763  | 0.00066  | -0.00573 | 0.00076  | -0.00497 | 1.17266  |
| D41 | -3.01052 | 0.00054  | -0.00239 | -0.00102 | -0.00340 | -3.01392 |
| D42 | -0.94499 | 0.00033  | -0.00287 | -0.00055 | -0.00342 | -0.94841 |
| D43 | -1.30374 | -0.00077 | -0.00439 | 0.00554  | 0.00115  | -1.30259 |
| D44 | 2.86854  | 0.00005  | -0.00601 | 0.00864  | 0.00263  | 2.87117  |
| D45 | 0.79179  | 0.00056  | -0.00522 | 0.00704  | 0.00182  | 0.79361  |
| D46 | -3.13745 | -0.00002 | -0.00253 | -0.00036 | -0.00289 | -3.14033 |
| D47 | 0.00649  | -0.00003 | -0.00307 | -0.00272 | -0.00579 | 0.00071  |
| D48 | 0.00539  | 0.00001  | -0.00246 | -0.00267 | -0.00514 | 0.00025  |
| D49 | -3.13385 | 0.00000  | -0.00301 | -0.00503 | -0.00804 | 3.14129  |

| Item                 | Value    | Threshold | Converged? |
|----------------------|----------|-----------|------------|
| Maximum Force        | 0.001517 | 0.000450  | NO         |
| RMS Force            | 0.000349 | 0.000300  | NO         |
| Maximum Displacement | 0.173234 | 0.001800  | NO         |
| RMS Displacement     | 0.036304 | 0.001200  | NO         |

Predicted change in Energy=-5.086591D-05

GradGradGradGradGradGradGradGradGradGradGradGradGradGradGradGradGradGrad

Input orientation:

-----  
Center      Atomic      Atomic      Coordinates (Angstroms)

| Number | Number | Type | X         | Y         | Z         |
|--------|--------|------|-----------|-----------|-----------|
| 1      | 6      | 0    | -0.608579 | -2.384553 | -1.118766 |
| 2      | 6      | 0    | -1.908638 | -2.013704 | -1.246207 |
| 3      | 7      | 0    | -2.085888 | -0.896147 | -0.437379 |
| 4      | 6      | 0    | -0.913438 | -0.606063 | 0.159947  |
| 5      | 7      | 0    | -0.009399 | -1.501999 | -0.236652 |
| 6      | 6      | 0    | 1.405992  | -1.474365 | 0.190107  |
| 7      | 6      | 0    | 2.213552  | -0.345626 | -0.505232 |
| 8      | 1      | 0    | -0.066833 | -3.200902 | -1.564304 |
| 9      | 1      | 0    | -2.703308 | -2.442100 | -1.828796 |
| 10     | 1      | 0    | 1.410691  | -1.279490 | 1.261956  |
| 11     | 1      | 0    | 1.820233  | -2.464407 | -0.001357 |
| 12     | 1      | 0    | 2.678486  | -0.713943 | -1.423623 |
| 13     | 1      | 0    | 1.517438  | 0.461077  | -0.762502 |
| 14     | 35     | 0    | 0.717312  | 1.483477  | 2.137140  |
| 15     | 1      | 0    | -0.676094 | 0.216737  | 0.858491  |
| 16     | 6      | 0    | -3.266800 | -0.134760 | -0.220663 |
| 17     | 6      | 0    | -4.443905 | -0.383495 | -0.779914 |
| 18     | 1      | 0    | -3.101578 | 0.688195  | 0.462942  |
| 19     | 1      | 0    | -5.282028 | 0.259081  | -0.549022 |
| 20     | 1      | 0    | -4.621243 | -1.202714 | -1.464791 |
| 21     | 8      | 0    | 3.238833  | 0.112139  | 0.333641  |
| 22     | 1      | 0    | 2.805542  | 0.656686  | 1.022136  |

Distance matrix (angstroms):

|    |    | 1        | 2        | 3        | 4        | 5        |
|----|----|----------|----------|----------|----------|----------|
| 1  | C  | 0.000000 |          |          |          |          |
| 2  | C  | 1.357911 | 0.000000 |          |          |          |
| 3  | N  | 2.205013 | 1.390883 | 0.000000 |          |          |
| 4  | C  | 2.211577 | 2.224667 | 1.347437 | 0.000000 |          |
| 5  | N  | 1.384213 | 2.210917 | 2.172362 | 1.333146 | 0.000000 |
| 6  | C  | 2.569064 | 3.652487 | 3.594622 | 2.476815 | 1.478587 |
| 7  | C  | 3.535261 | 4.508212 | 4.335074 | 3.207546 | 2.520088 |
| 8  | H  | 1.076299 | 2.214243 | 3.264727 | 3.228462 | 2.156903 |
| 9  | H  | 2.212543 | 1.074446 | 2.169613 | 3.244960 | 3.267394 |
| 10 | H  | 3.311564 | 4.224677 | 3.906502 | 2.658853 | 2.076533 |
| 11 | H  | 2.674716 | 3.956925 | 4.231706 | 3.309443 | 2.080659 |
| 12 | H  | 3.699821 | 4.771012 | 4.868792 | 3.926990 | 3.042147 |
| 13 | H  | 3.569941 | 4.253999 | 3.864159 | 2.810490 | 2.541931 |
| 14 | Br | 5.226908 | 5.529279 | 4.488729 | 3.306784 | 3.882791 |
| 15 | H  | 3.268152 | 3.305116 | 2.214794 | 1.105123 | 2.144265 |
| 16 | C  | 3.596428 | 2.535109 | 1.421699 | 2.430083 | 3.532741 |
| 17 | C  | 4.339214 | 3.050015 | 2.437290 | 3.660201 | 4.605543 |

|    |    |          |          |          |          |          |
|----|----|----------|----------|----------|----------|----------|
| 18 | H  | 4.261293 | 3.412412 | 2.086226 | 2.560247 | 3.853304 |
| 19 | H  | 5.399494 | 4.126909 | 3.400342 | 4.509511 | 5.567728 |
| 20 | H  | 4.197375 | 2.839668 | 2.752741 | 4.091893 | 4.781946 |
| 21 | O  | 4.810980 | 5.788919 | 5.473917 | 4.217503 | 3.671741 |
| 22 | H  | 5.048646 | 5.873658 | 5.335501 | 4.021035 | 3.764088 |
|    |    | 6        | 7        | 8        | 9        | 10       |
| 6  | C  | 0.000000 |          |          |          |          |
| 7  | C  | 1.552321 | 0.000000 |          |          |          |
| 8  | H  | 2.868467 | 3.804522 | 0.000000 |          |          |
| 9  | H  | 4.679619 | 5.506591 | 2.756218 | 0.000000 |          |
| 10 | H  | 1.089431 | 2.153983 | 3.723258 | 5.275358 | 0.000000 |
| 11 | H  | 1.090154 | 2.213102 | 2.558563 | 4.878776 | 1.779807 |
| 12 | H  | 2.191257 | 1.093282 | 3.706957 | 5.666957 | 3.023158 |
| 13 | H  | 2.160051 | 1.096144 | 4.069753 | 5.232602 | 2.671965 |
| 14 | Br | 3.607499 | 3.544923 | 6.021543 | 6.545186 | 2.980051 |
| 15 | H  | 2.764353 | 3.244386 | 4.233367 | 4.289584 | 2.599259 |
| 16 | C  | 4.878346 | 5.491785 | 4.631025 | 2.868351 | 5.038599 |
| 17 | C  | 6.029281 | 6.663228 | 5.264201 | 2.892695 | 6.264848 |
| 18 | H  | 5.006924 | 5.500613 | 5.333336 | 3.899926 | 4.987060 |
| 19 | H  | 6.948436 | 7.520060 | 6.340390 | 3.947657 | 7.102065 |
| 20 | H  | 6.256201 | 6.954839 | 4.974466 | 2.312369 | 6.620066 |
| 21 | O  | 2.428353 | 1.401590 | 5.050333 | 6.819774 | 2.478004 |
| 22 | H  | 2.681863 | 1.920400 | 5.460879 | 6.933811 | 2.398312 |
|    |    | 11       | 12       | 13       | 14       | 15       |
| 11 | H  | 0.000000 |          |          |          |          |
| 12 | H  | 2.413206 | 0.000000 |          |          |          |
| 13 | H  | 3.038006 | 1.779266 | 0.000000 |          |          |
| 14 | Br | 4.623352 | 4.621028 | 3.177016 | 0.000000 |          |
| 15 | H  | 3.762913 | 4.162621 | 2.738412 | 2.276215 | 0.000000 |
| 16 | C  | 5.599397 | 6.093356 | 4.851550 | 4.904190 | 2.828406 |
| 17 | C  | 6.646485 | 7.159051 | 6.020898 | 6.215541 | 4.152234 |
| 18 | H  | 5.863334 | 6.239732 | 4.784203 | 4.244919 | 2.502340 |
| 19 | H  | 7.626233 | 8.067310 | 6.805814 | 6.686306 | 4.816380 |
| 20 | H  | 6.725037 | 7.316190 | 6.398814 | 6.977801 | 4.793400 |
| 21 | O  | 2.960276 | 2.020984 | 2.070383 | 3.389874 | 3.951336 |
| 22 | H  | 3.429226 | 2.806512 | 2.209617 | 2.507493 | 3.513136 |
|    |    | 16       | 17       | 18       | 19       | 20       |
| 16 | C  | 0.000000 |          |          |          |          |
| 17 | C  | 1.326728 | 0.000000 |          |          |          |
| 18 | H  | 1.082528 | 2.120153 | 0.000000 |          |          |
| 19 | H  | 2.079441 | 1.081049 | 2.441838 | 0.000000 |          |
| 20 | H  | 2.126711 | 1.082417 | 3.098560 | 1.847191 | 0.000000 |
| 21 | O  | 6.533871 | 7.778824 | 6.367838 | 8.567715 | 8.169699 |
| 22 | H  | 6.248542 | 7.542138 | 5.933613 | 8.248358 | 8.049803 |



```

          21      22
21 O      0.000000
22 H      0.978927  0.000000
Stoichiometry C7H11BrN2O
Framework group C1[X(C7H11BrN2O)]
Deg. of freedom 60
Full point group C1 NOp 1
Largest Abelian subgroup C1 NOP 1
Largest concise Abelian subgroup C1 NOp 1

```

Standard orientation:

---

| Center Number | Atomic Number | Atomic Type | Coordinates (Angstroms) |           |           |
|---------------|---------------|-------------|-------------------------|-----------|-----------|
|               |               |             | X                       | Y         | Z         |
| 1             | 6             | 0           | -1.874468               | -1.993102 | 0.340862  |
| 2             | 6             | 0           | -2.865017               | -1.093327 | 0.110342  |
| 3             | 7             | 0           | -2.254935               | 0.151491  | -0.002720 |
| 4             | 6             | 0           | -0.925976               | -0.003770 | 0.156494  |
| 5             | 7             | 0           | -0.679038               | -1.295960 | 0.372237  |
| 6             | 6             | 0           | 0.681335                | -1.845451 | 0.555717  |
| 7             | 6             | 0           | 1.479331                | -1.910781 | -0.774183 |
| 8             | 1             | 0           | -1.918077               | -3.056988 | 0.497909  |
| 9             | 1             | 0           | -3.926899               | -1.230960 | 0.021469  |
| 10            | 1             | 0           | 1.207677                | -1.171389 | 1.230597  |
| 11            | 1             | 0           | 0.573951                | -2.822152 | 1.027902  |
| 12            | 1             | 0           | 1.341136                | -2.880715 | -1.259358 |
| 13            | 1             | 0           | 1.096775                | -1.127458 | -1.438704 |
| 14            | 35            | 0           | 2.033137                | 1.471949  | 0.129650  |
| 15            | 1             | 0           | -0.129239               | 0.761186  | 0.119760  |
| 16            | 6             | 0           | -2.856660               | 1.417195  | -0.241779 |
| 17            | 6             | 0           | -4.158052               | 1.621630  | -0.399228 |
| 18            | 1             | 0           | -2.125803               | 2.214660  | -0.283788 |
| 19            | 1             | 0           | -4.514602               | 2.626363  | -0.578252 |
| 20            | 1             | 0           | -4.898073               | 0.832690  | -0.359614 |
| 21            | 8             | 0           | 2.850494                | -1.750731 | -0.531793 |
| 22            | 1             | 0           | 2.984243                | -0.800688 | -0.337298 |

---

Rotational constants (GHZ): 0.9806942 0.4455882 0.3180555

Standard basis: 6-311++G(d,p) (5D, 7F)

There are 358 symmetry adapted cartesian basis functions of A symmetry.

There are 345 symmetry adapted basis functions of A symmetry.

345 basis functions, 553 primitive gaussians, 358 cartesian basis functions

55 alpha electrons 55 beta electrons

nuclear repulsion energy 851.1286154922 Hartrees.

NAtoms= 22 NActive= 22 NUniq= 22 SFac= 1.00D+00 NATFMM= 60 NAOKFM=F  
Big=F

Integral buffers will be 131072 words long.

Raffenetti 2 integral format.

Two-electron integral symmetry is turned on.

One-electron integrals computed using PRISM.

NBasis= 345 RedAO= T EigKep= 4.73D-06 NBF= 345

NBsUse= 345 1.00D-06 EigRej= -1.00D+00 NBFU= 345

Initial guess from the checkpoint file: "."

B after Tr= 0.000000 0.000000 0.000000

Rot= 0.999999 0.000560 0.000023 0.000978 Ang= 0.13 deg.

ExpMin= 3.50D-02 ExpMax= 4.40D+05 ExpMxC= 1.51D+04 IAcc=3 IRadAn= 5 AccDes=  
0.00D+00

Harris functional with IExCor= 402 and IRadAn= 5 diagonalized for initial guess.

HarFok: IExCor= 402 AccDes= 0.00D+00 IRadAn= 5 IDoV= 1 UseB2=F ITyADJ=14

ICtDFT= 3500011 ScaDFX= 1.000000 1.000000 1.000000 1.000000

FoFCou: FMM=F IPFlag= 0 FMFlag= 100000 FMFlg1= 0

NFxFlg= 0 DoJE=T BraDBF=F KetDBF=T FulRan=T

wScrn= 0.000000 ICntrl= 500 IOpCl= 0 I1Cent= 200000004 NGrid=

0

NMat0= 1 NMatS0= 1 NMatT0= 0 NMatD0= 1 NMtDS0= 0

NMtDT0= 0

Petite list used in FoFCou.

Keep R1 ints in memory in canonical form, NReq=1804729152.

Requested convergence on RMS density matrix=1.00D-08 within 128 cycles.

Requested convergence on MAX density matrix=1.00D-06.

Requested convergence on energy=1.00D-06.

No special actions if energy rises.

SCF Done: E(RB3LYP) = -3032.34322828 A.U. after 11 cycles

NFock= 11 Conv=0.60D-08 -V/T= 2.0017

Calling FoFJK, ICntrl= 2127 FMM=F ISym2X=0 I1Cent= 0 IOpClX= 0 NMat=1 NMatS=1

NMatT=0.

\*\*\*\*\* Axes restored to original set \*\*\*\*\*

| Center<br>Number | Atomic<br>Number | Forces (Hartrees/Bohr) |              |              |
|------------------|------------------|------------------------|--------------|--------------|
|                  |                  | X                      | Y            | Z            |
| 1                | 6                | -0.000005778           | -0.000303803 | 0.000291519  |
| 2                | 6                | -0.000158959           | 0.000215667  | -0.000076475 |
| 3                | 7                | -0.000074450           | -0.000045176 | -0.000363710 |
| 4                | 6                | -0.000070735           | -0.000715323 | 0.000189125  |
| 5                | 7                | 0.000120175            | 0.000003273  | -0.000549460 |
| 6                | 6                | 0.000664961            | 0.000221116  | 0.000355376  |
| 7                | 6                | -0.001038370           | -0.000341882 | 0.000142749  |

|    |    |              |              |              |
|----|----|--------------|--------------|--------------|
| 8  | 1  | -0.000005372 | 0.000107613  | -0.000286912 |
| 9  | 1  | -0.000027839 | -0.000151137 | -0.000041133 |
| 10 | 1  | -0.000064258 | -0.000113623 | -0.000029107 |
| 11 | 1  | 0.000111460  | -0.000084577 | 0.000171975  |
| 12 | 1  | -0.000113581 | -0.000027362 | -0.000033696 |
| 13 | 1  | 0.000400315  | 0.000525194  | -0.000394101 |
| 14 | 35 | 0.000159604  | -0.000053692 | -0.000046969 |
| 15 | 1  | 0.000049391  | 0.000551059  | 0.000469184  |
| 16 | 6  | -0.000302189 | 0.000343043  | 0.000038359  |
| 17 | 6  | 0.000510496  | -0.000103059 | 0.000089467  |
| 18 | 1  | 0.000047415  | 0.000036473  | 0.000026186  |
| 19 | 1  | -0.000066971 | -0.000013512 | -0.000026289 |
| 20 | 1  | -0.000056620 | -0.000062322 | -0.000040302 |
| 21 | 8  | 0.000062938  | -0.000288108 | -0.000122197 |
| 22 | 1  | -0.000141631 | 0.000300139  | 0.000236409  |

-----  
Cartesian Forces: Max 0.001038370 RMS 0.000281276

GradGradGradGradGradGradGradGradGradGradGradGradGradGradGradGradGradGradGrad

Berny optimization.

Using GEDIIS/GDIIS optimizer.

FormGI is forming the generalized inverse of G from B-inverse, IUseBI=4.

Internal Forces: Max 0.000969693 RMS 0.000207568

Search for a local minimum.

Step number 65 out of a maximum of 116

All quantities printed in internal units (Hartrees-Bohrs-Radians)

Mixed Optimization -- En-DIIS/RFO-DIIS

Swapping is turned off.

Update second derivatives using D2CorX and points 61 62 63 64 65

DE= -5.60D-05 DEPred=-5.09D-05 R= 1.10D+00

TightC=F SS= 1.41D+00 RLast= 1.56D-01 DXNew= 1.6377D+00 4.6830D-01

Trust test= 1.10D+00 RLast= 1.56D-01 DXMaxT set to 9.74D-01

ITU= 1 1 1 0 1 1 1 1 0 1 1 0 1 1 0-1 1 1 1-1

ITU= 1 0-1 1 0-1 0-1 0 0 1-1 0 1 1 1 1 1 1 0

ITU= -1 1 1 1 1 1 0-1 1 1 1 1 1 1 1 1 1 1 1

ITU= 0 0-1 0 0

Eigenvalues --- 0.00162 0.00231 0.00386 0.00670 0.00974

Eigenvalues --- 0.01315 0.01507 0.01857 0.02159 0.02296

Eigenvalues --- 0.02505 0.03028 0.03187 0.03718 0.04041

Eigenvalues --- 0.04366 0.05003 0.05511 0.05869 0.08623

Eigenvalues --- 0.08937 0.09568 0.13490 0.14072 0.14399

Eigenvalues --- 0.15008 0.15330 0.15994 0.16080 0.16362

Eigenvalues --- 0.17457 0.19426 0.21372 0.23212 0.23293

Eigenvalues --- 0.24634 0.26730 0.27374 0.30133 0.32717

|                 |         |         |         |         |         |  |
|-----------------|---------|---------|---------|---------|---------|--|
| Eigenvalues --- | 0.33812 | 0.33859 | 0.33956 | 0.34251 | 0.34397 |  |
| Eigenvalues --- | 0.34813 | 0.35034 | 0.36266 | 0.36317 | 0.36528 |  |
| Eigenvalues --- | 0.39073 | 0.43036 | 0.43891 | 0.45550 | 0.48958 |  |
| Eigenvalues --- | 0.53576 | 0.54960 | 0.58453 | 0.61090 | 0.73831 |  |

En-DIIS/RFO-DIIS IScMMF= 0 using points: 65 64 63

RFO step: Lambda=-9.39492829D-06.

DidBck=F Rises=F RFO-DIIS coefs: 0.94789 0.27309 -0.22098

Iteration 1 RMS(Cart)= 0.01044381 RMS(Int)= 0.00004282

Iteration 2 RMS(Cart)= 0.00007013 RMS(Int)= 0.00000256

Iteration 3 RMS(Cart)= 0.00000000 RMS(Int)= 0.00000256

| Variable | Old X   | -DE/DX   | Delta X<br>(Linear) | Delta X<br>(Quad) | Delta X<br>(Total) | New X   |
|----------|---------|----------|---------------------|-------------------|--------------------|---------|
| R1       | 2.56608 | 0.00013  | -0.00008            | 0.00030           | 0.00022            | 2.56630 |
| R2       | 2.61578 | 0.00017  | -0.00007            | 0.00009           | 0.00002            | 2.61580 |
| R3       | 2.03391 | 0.00003  | -0.00002            | 0.00004           | 0.00002            | 2.03393 |
| R4       | 2.62839 | 0.00002  | 0.00006             | -0.00008          | -0.00001           | 2.62837 |
| R5       | 2.03041 | 0.00010  | -0.00006            | 0.00019           | 0.00013            | 2.03054 |
| R6       | 2.54629 | 0.00013  | -0.00017            | -0.00015          | -0.00032           | 2.54596 |
| R7       | 2.68662 | 0.00001  | -0.00007            | 0.00097           | 0.00090            | 2.68752 |
| R8       | 2.51928 | 0.00012  | -0.00016            | 0.00021           | 0.00006            | 2.51934 |
| R9       | 2.08838 | 0.00072  | -0.00011            | 0.00172           | 0.00161            | 2.08999 |
| R10      | 2.79412 | 0.00012  | -0.00049            | 0.00043           | -0.00006           | 2.79407 |
| R11      | 2.93346 | -0.00017 | 0.00044             | -0.00045          | -0.00002           | 2.93345 |
| R12      | 2.05873 | -0.00005 | -0.00005            | -0.00022          | -0.00027           | 2.05846 |
| R13      | 2.06009 | 0.00009  | -0.00003            | 0.00019           | 0.00016            | 2.06025 |
| R14      | 2.06600 | -0.00001 | 0.00004             | 0.00000           | 0.00004            | 2.06605 |
| R15      | 2.07141 | 0.00010  | -0.00013            | -0.00011          | -0.00024           | 2.07117 |
| R16      | 2.64862 | 0.00001  | 0.00040             | 0.00002           | 0.00042            | 2.64904 |
| R17      | 6.00369 | -0.00010 | 0.00724             | 0.01503           | 0.02227            | 6.02596 |
| R18      | 2.50715 | -0.00032 | 0.00015             | -0.00054          | -0.00039           | 2.50676 |
| R19      | 2.04568 | 0.00005  | 0.00000             | 0.00019           | 0.00019            | 2.04587 |
| R20      | 2.04289 | 0.00004  | -0.00005            | 0.00015           | 0.00010            | 2.04298 |
| R21      | 2.04547 | 0.00008  | -0.00007            | 0.00022           | 0.00015            | 2.04562 |
| R22      | 1.84990 | 0.00039  | -0.00032            | 0.00064           | 0.00032            | 1.85022 |
| A1       | 1.87560 | -0.00001 | -0.00003            | -0.00006          | -0.00010           | 1.87551 |
| A2       | 2.27863 | -0.00011 | 0.00026             | -0.00065          | -0.00041           | 2.27822 |
| A3       | 2.12882 | 0.00012  | -0.00024            | 0.00078           | 0.00053            | 2.12936 |
| A4       | 1.86175 | -0.00001 | -0.00006            | -0.00006          | -0.00011           | 1.86164 |
| A5       | 2.27851 | -0.00010 | 0.00031             | -0.00063          | -0.00032           | 2.27818 |
| A6       | 2.14292 | 0.00011  | -0.00024            | 0.00068           | 0.00044            | 2.14336 |
| A7       | 1.89640 | 0.00007  | 0.00004             | 0.00017           | 0.00021            | 1.89661 |
| A8       | 2.24568 | -0.00005 | 0.00023             | -0.00023          | 0.00000            | 2.24568 |
| A9       | 2.14111 | -0.00002 | -0.00027            | 0.00006           | -0.00021           | 2.14090 |
| A10      | 1.88967 | -0.00005 | -0.00002            | -0.00003          | -0.00006           | 1.88961 |

|     |          |          |          |          |          |          |
|-----|----------|----------|----------|----------|----------|----------|
| A11 | 2.24897  | -0.00009 | -0.00013 | -0.00003 | -0.00017 | 2.24880  |
| A12 | 2.14452  | 0.00013  | 0.00016  | 0.00005  | 0.00020  | 2.14473  |
| A13 | 1.90131  | 0.00000  | 0.00008  | -0.00001 | 0.00007  | 1.90138  |
| A14 | 2.22713  | 0.00019  | -0.00042 | 0.00121  | 0.00079  | 2.22791  |
| A15 | 2.15402  | -0.00019 | 0.00032  | -0.00130 | -0.00099 | 2.15303  |
| A16 | 1.96308  | -0.00047 | 0.00081  | -0.00151 | -0.00070 | 1.96237  |
| A17 | 1.86653  | 0.00010  | 0.00024  | -0.00023 | 0.00000  | 1.86653  |
| A18 | 1.87138  | 0.00019  | -0.00022 | 0.00081  | 0.00059  | 1.87197  |
| A19 | 1.88430  | 0.00034  | -0.00042 | 0.00164  | 0.00122  | 1.88552  |
| A20 | 1.96493  | -0.00001 | -0.00043 | 0.00011  | -0.00032 | 1.96461  |
| A21 | 1.91093  | -0.00015 | 0.00007  | -0.00088 | -0.00081 | 1.91011  |
| A22 | 1.93109  | -0.00034 | 0.00063  | -0.00107 | -0.00044 | 1.93065  |
| A23 | 1.88587  | 0.00097  | 0.00068  | 0.00201  | 0.00269  | 1.88856  |
| A24 | 1.92830  | -0.00026 | -0.00055 | 0.00009  | -0.00045 | 1.92785  |
| A25 | 1.89741  | -0.00020 | 0.00011  | -0.00121 | -0.00110 | 1.89632  |
| A26 | 1.87729  | 0.00024  | 0.00041  | -0.00043 | -0.00002 | 1.87727  |
| A27 | 1.94407  | -0.00043 | -0.00127 | 0.00053  | -0.00073 | 1.94334  |
| A28 | 1.75439  | -0.00065 | -0.00238 | -0.00766 | -0.01004 | 1.74435  |
| A29 | 2.18010  | -0.00047 | 0.00056  | -0.00202 | -0.00146 | 2.17865  |
| A30 | 1.95694  | 0.00020  | -0.00022 | -0.00002 | -0.00024 | 1.95670  |
| A31 | 2.14615  | 0.00028  | -0.00034 | 0.00204  | 0.00170  | 2.14784  |
| A32 | 2.07874  | 0.00006  | -0.00007 | 0.00083  | 0.00075  | 2.07950  |
| A33 | 2.15792  | 0.00001  | -0.00014 | -0.00026 | -0.00040 | 2.15752  |
| A34 | 2.04653  | -0.00007 | 0.00021  | -0.00057 | -0.00035 | 2.04617  |
| A35 | 1.85339  | 0.00005  | 0.00063  | -0.00051 | 0.00012  | 1.85351  |
| D1  | 0.00444  | -0.00003 | 0.00010  | -0.00014 | -0.00003 | 0.00440  |
| D2  | -3.13475 | -0.00008 | 0.00106  | -0.00084 | 0.00022  | -3.13453 |
| D3  | 3.12864  | 0.00018  | -0.00178 | 0.00405  | 0.00227  | 3.13091  |
| D4  | -0.01055 | 0.00013  | -0.00082 | 0.00335  | 0.00252  | -0.00803 |
| D5  | -0.00816 | 0.00012  | 0.00001  | 0.00085  | 0.00086  | -0.00730 |
| D6  | -3.10954 | 0.00013  | 0.00065  | 0.00366  | 0.00432  | -3.10522 |
| D7  | -3.13418 | -0.00006 | 0.00170  | -0.00288 | -0.00119 | -3.13537 |
| D8  | 0.04763  | -0.00006 | 0.00234  | -0.00007 | 0.00227  | 0.04990  |
| D9  | 0.00072  | -0.00008 | -0.00018 | -0.00061 | -0.00079 | -0.00007 |
| D10 | -3.13900 | -0.00006 | -0.00059 | -0.00336 | -0.00395 | 3.14023  |
| D11 | 3.14014  | -0.00003 | -0.00105 | 0.00002  | -0.00103 | 3.13912  |
| D12 | 0.00042  | -0.00002 | -0.00145 | -0.00273 | -0.00418 | -0.00376 |
| D13 | -0.00581 | 0.00015  | 0.00019  | 0.00115  | 0.00134  | -0.00447 |
| D14 | 3.12920  | 0.00000  | -0.00099 | -0.00117 | -0.00216 | 3.12705  |
| D15 | 3.13404  | 0.00014  | 0.00057  | 0.00370  | 0.00427  | 3.13831  |
| D16 | -0.01413 | -0.00001 | -0.00061 | 0.00138  | 0.00077  | -0.01335 |
| D17 | 0.00313  | 0.00003  | -0.00854 | 0.00126  | -0.00729 | -0.00416 |
| D18 | -3.13756 | 0.00002  | -0.00867 | 0.00087  | -0.00781 | 3.13782  |
| D19 | -3.13636 | 0.00004  | -0.00900 | -0.00184 | -0.01084 | 3.13599  |

|     |          |          |          |          |          |          |
|-----|----------|----------|----------|----------|----------|----------|
| D20 | 0.00615  | 0.00003  | -0.00913 | -0.00223 | -0.01136 | -0.00522 |
| D21 | 0.00862  | -0.00017 | -0.00013 | -0.00124 | -0.00136 | 0.00726  |
| D22 | 3.11204  | -0.00017 | -0.00075 | -0.00384 | -0.00459 | 3.10745  |
| D23 | -3.12688 | -0.00003 | 0.00097  | 0.00092  | 0.00188  | -3.12499 |
| D24 | -0.02345 | -0.00002 | 0.00034  | -0.00169 | -0.00135 | -0.02480 |
| D25 | 1.80524  | -0.00028 | -0.00235 | -0.01417 | -0.01652 | 1.78873  |
| D26 | -2.41225 | -0.00006 | -0.00226 | -0.01317 | -0.01543 | -2.42768 |
| D27 | -0.36396 | -0.00009 | -0.00217 | -0.01390 | -0.01607 | -0.38003 |
| D28 | -1.29077 | -0.00028 | -0.00161 | -0.01102 | -0.01263 | -1.30340 |
| D29 | 0.77492  | -0.00006 | -0.00152 | -0.01002 | -0.01154 | 0.76338  |
| D30 | 2.82321  | -0.00009 | -0.00144 | -0.01075 | -0.01219 | 2.81103  |
| D31 | -1.59804 | 0.00004  | -0.00139 | 0.00450  | 0.00311  | -1.59493 |
| D32 | 0.47728  | 0.00019  | -0.00049 | 0.00364  | 0.00316  | 0.48044  |
| D33 | 2.60808  | 0.00012  | -0.00195 | 0.00566  | 0.00371  | 2.61179  |
| D34 | 2.62994  | -0.00004 | -0.00188 | 0.00462  | 0.00274  | 2.63267  |
| D35 | -1.57792 | 0.00012  | -0.00097 | 0.00376  | 0.00279  | -1.57513 |
| D36 | 0.55288  | 0.00005  | -0.00244 | 0.00577  | 0.00334  | 0.55621  |
| D37 | 0.51853  | -0.00007 | -0.00140 | 0.00453  | 0.00313  | 0.52166  |
| D38 | 2.59386  | 0.00008  | -0.00049 | 0.00367  | 0.00318  | 2.59704  |
| D39 | -1.55853 | 0.00001  | -0.00196 | 0.00569  | 0.00373  | -1.55480 |
| D40 | 1.17266  | 0.00018  | -0.00195 | -0.00474 | -0.00669 | 1.16597  |
| D41 | -3.01392 | 0.00022  | -0.00074 | -0.00555 | -0.00629 | -3.02021 |
| D42 | -0.94841 | 0.00014  | -0.00093 | -0.00652 | -0.00744 | -0.95585 |
| D43 | -1.30259 | -0.00045 | -0.00175 | 0.00340  | 0.00165  | -1.30094 |
| D44 | 2.87117  | -0.00003 | -0.00245 | 0.00492  | 0.00247  | 2.87364  |
| D45 | 0.79361  | 0.00031  | -0.00211 | 0.00635  | 0.00425  | 0.79786  |
| D46 | -3.14033 | 0.00000  | -0.00082 | -0.00060 | -0.00143 | 3.14143  |
| D47 | 0.00071  | 0.00001  | -0.00088 | -0.00016 | -0.00104 | -0.00033 |
| D48 | 0.00025  | 0.00000  | -0.00068 | -0.00017 | -0.00085 | -0.00060 |
| D49 | 3.14129  | 0.00002  | -0.00074 | 0.00027  | -0.00047 | 3.14083  |

| Item                 | Value    | Threshold | Converged? |
|----------------------|----------|-----------|------------|
| Maximum Force        | 0.000970 | 0.000450  | NO         |
| RMS Force            | 0.000208 | 0.000300  | YES        |
| Maximum Displacement | 0.037225 | 0.001800  | NO         |
| RMS Displacement     | 0.010444 | 0.001200  | NO         |

Predicted change in Energy=-1.429041D-05

GradGradGradGradGradGradGradGradGradGradGradGradGradGradGradGradGrad

Input orientation:

| Center<br>Number | Atomic<br>Number | Atomic<br>Type | Coordinates (Angstroms) |           |           |
|------------------|------------------|----------------|-------------------------|-----------|-----------|
|                  |                  |                | X                       | Y         | Z         |
| 1                | 6                | 0              | -0.607088               | -2.382285 | -1.117489 |

|    |    |   |           |           |           |
|----|----|---|-----------|-----------|-----------|
| 2  | 6  | 0 | -1.907674 | -2.012887 | -1.245000 |
| 3  | 7  | 0 | -2.087728 | -0.899558 | -0.430988 |
| 4  | 6  | 0 | -0.917047 | -0.611027 | 0.170161  |
| 5  | 7  | 0 | -0.010688 | -1.502947 | -0.230275 |
| 6  | 6  | 0 | 1.404862  | -1.470939 | 0.195543  |
| 7  | 6  | 0 | 2.210882  | -0.348220 | -0.511215 |
| 8  | 1  | 0 | -0.063298 | -3.194634 | -1.567843 |
| 9  | 1  | 0 | -2.700705 | -2.440132 | -1.830786 |
| 10 | 1  | 0 | 1.409962  | -1.267211 | 1.265598  |
| 11 | 1  | 0 | 1.820019  | -2.462359 | 0.012923  |
| 12 | 1  | 0 | 2.672509  | -0.724497 | -1.428073 |
| 13 | 1  | 0 | 1.516747  | 0.458320  | -0.773745 |
| 14 | 35 | 0 | 0.725880  | 1.475421  | 2.143185  |
| 15 | 1  | 0 | -0.681722 | 0.210399  | 0.872342  |
| 16 | 6  | 0 | -3.269416 | -0.138155 | -0.215449 |
| 17 | 6  | 0 | -4.441267 | -0.379674 | -0.788238 |
| 18 | 1  | 0 | -3.108316 | 0.676309  | 0.479376  |
| 19 | 1  | 0 | -5.281880 | 0.259784  | -0.557501 |
| 20 | 1  | 0 | -4.612191 | -1.190732 | -1.484489 |
| 21 | 8  | 0 | 3.239551  | 0.114633  | 0.321063  |
| 22 | 1  | 0 | 2.808958  | 0.663511  | 1.008052  |

-----  
Distance matrix (angstroms):

|    |    | 1        | 2        | 3        | 4        | 5        |
|----|----|----------|----------|----------|----------|----------|
| 1  | C  | 0.000000 |          |          |          |          |
| 2  | C  | 1.358028 | 0.000000 |          |          |          |
| 3  | N  | 2.205007 | 1.390876 | 0.000000 |          |          |
| 4  | C  | 2.211667 | 2.224688 | 1.347266 | 0.000000 |          |
| 5  | N  | 1.384224 | 2.210942 | 2.172202 | 1.333176 | 0.000000 |
| 6  | C  | 2.569542 | 3.652639 | 3.594051 | 2.476157 | 1.478556 |
| 7  | C  | 3.527881 | 4.502451 | 4.334565 | 3.212052 | 2.519463 |
| 8  | H  | 1.076307 | 2.214154 | 3.264679 | 3.228710 | 2.157234 |
| 9  | H  | 2.212549 | 1.074515 | 2.169918 | 3.245128 | 3.267437 |
| 10 | H  | 3.315266 | 4.226802 | 3.904794 | 2.654342 | 2.076404 |
| 11 | H  | 2.678636 | 3.959810 | 4.232008 | 3.308124 | 2.081131 |
| 12 | H  | 3.687882 | 4.761464 | 4.866691 | 3.930920 | 3.039778 |
| 13 | H  | 3.563406 | 4.249188 | 3.866982 | 2.820959 | 2.544599 |
| 14 | Br | 5.224049 | 5.530253 | 4.492581 | 3.308368 | 3.878985 |
| 15 | H  | 3.269099 | 3.305918 | 2.215294 | 1.105973 | 2.145135 |
| 16 | C  | 3.596913 | 2.535534 | 1.422173 | 2.430215 | 3.533013 |
| 17 | C  | 4.338178 | 3.048788 | 2.436607 | 3.659533 | 4.604682 |
| 18 | H  | 4.261586 | 3.412739 | 2.086557 | 2.560178 | 3.853318 |
| 19 | H  | 5.398870 | 4.125888 | 3.400395 | 4.509942 | 5.567744 |
| 20 | H  | 4.194680 | 2.836847 | 2.750920 | 4.089990 | 4.779578 |

|    |    |          |          |          |          |          |
|----|----|----------|----------|----------|----------|----------|
| 21 | O  | 4.806315 | 5.785570 | 5.474858 | 4.222163 | 3.672138 |
| 22 | H  | 5.046203 | 5.872476 | 5.337748 | 4.026117 | 3.765289 |
|    |    | 6        | 7        | 8        | 9        | 10       |
| 6  | C  | 0.000000 |          |          |          |          |
| 7  | C  | 1.552313 | 0.000000 |          |          |          |
| 8  | H  | 2.869869 | 3.793472 | 0.000000 |          |          |
| 9  | H  | 4.679853 | 5.499187 | 2.755781 | 0.000000 |          |
| 10 | H  | 1.089288 | 2.154781 | 3.730126 | 5.278345 | 0.000000 |
| 11 | H  | 1.090238 | 2.212934 | 2.565527 | 4.882285 | 1.779247 |
| 12 | H  | 2.190944 | 1.093304 | 3.688597 | 5.654822 | 3.023976 |
| 13 | H  | 2.161962 | 1.096016 | 4.058473 | 5.225443 | 2.673534 |
| 14 | Br | 3.596577 | 3.546369 | 6.016971 | 6.547174 | 2.959757 |
| 15 | H  | 2.763835 | 3.254756 | 4.234524 | 4.290514 | 2.590970 |
| 16 | C  | 4.877920 | 5.492291 | 4.631438 | 2.869119 | 5.036353 |
| 17 | C  | 6.027927 | 6.657989 | 5.262926 | 2.891703 | 6.264412 |
| 18 | H  | 5.005998 | 5.506795 | 5.333614 | 3.900667 | 4.980990 |
| 19 | H  | 6.948021 | 7.517532 | 6.339353 | 3.946298 | 7.101842 |
| 20 | H  | 6.253475 | 6.943444 | 4.971418 | 2.309697 | 6.620813 |
| 21 | O  | 2.428143 | 1.401813 | 5.042621 | 6.814978 | 2.479725 |
| 22 | H  | 2.680958 | 1.920798 | 5.456223 | 6.931666 | 2.398168 |
|    |    | 11       | 12       | 13       | 14       | 15       |
| 11 | H  | 0.000000 |          |          |          |          |
| 12 | H  | 2.413166 | 0.000000 |          |          |          |
| 13 | H  | 3.039931 | 1.778479 | 0.000000 |          |          |
| 14 | Br | 4.608825 | 4.624164 | 3.188801 | 0.000000 |          |
| 15 | H  | 3.760445 | 4.173344 | 2.757595 | 2.279620 | 0.000000 |
| 16 | C  | 5.599681 | 6.092678 | 4.855392 | 4.912145 | 2.828593 |
| 17 | C  | 6.647040 | 7.150811 | 6.016674 | 6.223666 | 4.152095 |
| 18 | H  | 5.861511 | 6.246483 | 4.796774 | 4.255337 | 2.501970 |
| 19 | H  | 7.627085 | 8.062196 | 6.804962 | 6.698109 | 4.817505 |
| 20 | H  | 6.725519 | 7.299822 | 6.386580 | 6.983079 | 4.792328 |
| 21 | O  | 2.958193 | 2.021177 | 2.069971 | 3.389752 | 3.960992 |
| 22 | H  | 3.426273 | 2.807115 | 2.210592 | 2.507377 | 3.522581 |
|    |    | 16       | 17       | 18       | 19       | 20       |
| 16 | C  | 0.000000 |          |          |          |          |
| 17 | C  | 1.326520 | 0.000000 |          |          |          |
| 18 | H  | 1.082630 | 2.121015 | 0.000000 |          |          |
| 19 | H  | 2.079752 | 1.081100 | 2.443970 | 0.000000 |          |
| 20 | H  | 2.126365 | 1.082495 | 3.099072 | 1.847102 | 0.000000 |
| 21 | O  | 6.535931 | 7.776236 | 6.374634 | 8.567832 | 8.161731 |
| 22 | H  | 6.251900 | 7.541927 | 5.940858 | 8.250795 | 8.045150 |
|    |    | 21       | 22       |          |          |          |
| 21 | O  | 0.000000 |          |          |          |          |
| 22 | H  | 0.979097 | 0.000000 |          |          |          |



Stoichiometry C7H11BrN2O  
 Framework group C1[X(C7H11BrN2O)]  
 Deg. of freedom 60  
 Full point group C1 NOp 1  
 Largest Abelian subgroup C1 NOp 1  
 Largest concise Abelian subgroup C1 NOp 1

Standard orientation:

| Center Number | Atomic Number | Atomic Type | Coordinates (Angstroms) |           |           |
|---------------|---------------|-------------|-------------------------|-----------|-----------|
|               |               |             | X                       | Y         | Z         |
| 1             | 6             | 0           | -1.871651               | -1.990572 | 0.344526  |
| 2             | 6             | 0           | -2.864200               | -1.093023 | 0.113248  |
| 3             | 7             | 0           | -2.257027               | 0.153454  | 0.002920  |
| 4             | 6             | 0           | -0.928227               | 0.001748  | 0.165403  |
| 5             | 7             | 0           | -0.678161               | -1.290235 | 0.378958  |
| 6             | 6             | 0           | 0.684222                | -1.835721 | 0.559193  |
| 7             | 6             | 0           | 1.472761                | -1.913167 | -0.775679 |
| 8             | 1             | 0           | -1.913029               | -3.055035 | 0.498290  |
| 9             | 1             | 0           | -3.925598               | -1.233641 | 0.022455  |
| 10            | 1             | 0           | 1.213462                | -1.154610 | 1.224430  |
| 11            | 1             | 0           | 0.582078                | -2.808001 | 1.041746  |
| 12            | 1             | 0           | 1.329916                | -2.887200 | -1.251251 |
| 13            | 1             | 0           | 1.088288                | -1.136020 | -1.446106 |
| 14            | 35            | 0           | 2.036748                | 1.469034  | 0.129510  |
| 15            | 1             | 0           | -0.132849               | 0.769382  | 0.129520  |
| 16            | 6             | 0           | -2.861204               | 1.417770  | -0.240083 |
| 17            | 6             | 0           | -4.161564               | 1.615446  | -0.412253 |
| 18            | 1             | 0           | -2.132946               | 2.218262  | -0.270743 |
| 19            | 1             | 0           | -4.522441               | 2.618610  | -0.591718 |
| 20            | 1             | 0           | -4.897285               | 0.821898  | -0.384093 |
| 21            | 8             | 0           | 2.845934                | -1.753171 | -0.543562 |
| 22            | 1             | 0           | 2.982242                | -0.801895 | -0.356145 |

Rotational constants (GHZ): 0.9823818 0.4448870 0.3181115

Standard basis: 6-311++G(d,p) (5D, 7F)

There are 358 symmetry adapted cartesian basis functions of A symmetry.

There are 345 symmetry adapted basis functions of A symmetry.

345 basis functions, 553 primitive gaussians, 358 cartesian basis functions

55 alpha electrons 55 beta electrons

nuclear repulsion energy 851.1627138175 Hartrees.

NAtoms= 22 NActive= 22 NUniq= 22 SFac= 1.00D+00 NATFMM= 60 NAOKFM=F

Big=F

Integral buffers will be 131072 words long.

Raffenetti 2 integral format.

Two-electron integral symmetry is turned on.

One-electron integrals computed using PRISM.

NBasis= 345 RedAO= T EigKep= 4.71D-06 NBF= 345

NBsUse= 345 1.00D-06 EigRej= -1.00D+00 NBFU= 345

Initial guess from the checkpoint file: "."

B after Tr= 0.000000 0.000000 0.000000

Rot= 1.000000 0.000532 -0.000251 0.000156 Ang= 0.07 deg.

ExpMin= 3.50D-02 ExpMax= 4.40D+05 ExpMxC= 1.51D+04 IAcc=3 IRadAn= 5 AccDes= 0.00D+00

Harris functional with IExCor= 402 and IRadAn= 5 diagonalized for initial guess.

HarFok: IExCor= 402 AccDes= 0.00D+00 IRadAn= 5 IDoV= 1 UseB2=F ITyADJ=14

ICtDFT= 3500011 ScaDFX= 1.000000 1.000000 1.000000 1.000000

FoFCou: FMM=F IPFlag= 0 FMFlag= 100000 FMFlg1= 0

NFxFlg= 0 DoJE=T BraDBF=F KetDBF=T FulRan=T

wScrn= 0.000000 ICntrl= 500 IOpCl= 0 I1Cent= 200000004 NGrid=

0

NMat0= 1 NMatS0= 1 NMatT0= 0 NMatD0= 1 NMtDS0= 0

NMtDT0= 0

Petite list used in FoFCou.

Keep R1 ints in memory in canonical form, NReq=1804729152.

Requested convergence on RMS density matrix=1.00D-08 within 128 cycles.

Requested convergence on MAX density matrix=1.00D-06.

Requested convergence on energy=1.00D-06.

No special actions if energy rises.

SCF Done: E(RB3LYP) = -3032.34324493 A.U. after 11 cycles

NFock= 11 Conv=0.18D-08 -V/T= 2.0017

Calling FoFJK, ICntrl= 2127 FMM=F ISym2X=0 I1Cent= 0 IOpClX= 0 NMat=1 NMatS=1 NMatT=0.

\*\*\*\*\* Axes restored to original set \*\*\*\*\*

| Center<br>Number | Atomic<br>Number | Forces (Hartrees/Bohr) |              |              |
|------------------|------------------|------------------------|--------------|--------------|
|                  |                  | X                      | Y            | Z            |
| 1                | 6                | -0.000054710           | -0.000150183 | 0.000195878  |
| 2                | 6                | -0.000047021           | 0.000217258  | -0.000101299 |
| 3                | 7                | -0.000395082           | 0.000130210  | -0.000334980 |
| 4                | 6                | 0.000106282            | -0.000232587 | 0.000457596  |
| 5                | 7                | 0.000138883            | 0.000039107  | -0.000315584 |
| 6                | 6                | 0.000669911            | 0.000054989  | 0.000126543  |
| 7                | 6                | -0.000740958           | -0.000375739 | 0.000295077  |
| 8                | 1                | 0.000016544            | 0.000081219  | -0.000198051 |
| 9                | 1                | -0.000006469           | -0.000110135 | 0.000006107  |
| 10               | 1                | -0.000082226           | 0.000041514  | 0.000011080  |

|    |    |              |              |              |
|----|----|--------------|--------------|--------------|
| 11 | 1  | 0.000090874  | -0.000047515 | 0.000070275  |
| 12 | 1  | -0.000051390 | -0.000026182 | -0.000026121 |
| 13 | 1  | 0.000107914  | 0.000428075  | -0.000316493 |
| 14 | 35 | 0.000071819  | 0.000043470  | -0.000084980 |
| 15 | 1  | 0.000064108  | 0.000066757  | 0.000060281  |
| 16 | 6  | 0.000076108  | 0.000015540  | 0.000123344  |
| 17 | 6  | 0.000200573  | -0.000081393 | 0.000065340  |
| 18 | 1  | -0.000043143 | 0.000012537  | -0.000073618 |
| 19 | 1  | -0.000010545 | 0.000013055  | -0.000040316 |
| 20 | 1  | -0.000048652 | -0.000012636 | -0.000004363 |
| 21 | 8  | 0.000023311  | -0.000173981 | -0.000109476 |
| 22 | 1  | -0.000086132 | 0.000066620  | 0.000193759  |

-----  
Cartesian Forces: Max 0.000740958 RMS 0.000199753

GradGradGradGradGradGradGradGradGradGradGradGradGradGradGradGradGradGradGrad

Berny optimization.

Using GEDIIS/GDIIS optimizer.

FormGI is forming the generalized inverse of G from B-inverse, IUseBI=4.

Internal Forces: Max 0.000756874 RMS 0.000148338

Search for a local minimum.

Step number 66 out of a maximum of 116

All quantities printed in internal units (Hartrees-Bohrs-Radians)

Mixed Optimization -- En-DIIS/RFO-DIIS

Swapping is turned off.

Update second derivatives using D2CorX and points 61 62 63 64 65

66

DE= -1.67D-05 DEPred=-1.43D-05 R= 1.17D+00

TightC=F SS= 1.41D+00 RLast= 5.08D-02 DXNew= 1.6377D+00 1.5246D-01

Trust test= 1.17D+00 RLast= 5.08D-02 DXMaxT set to 9.74D-01

ITU= 1 1 1 1 0 1 1 1 1 0 1 1 0 1 1 0-1 1 1 1

ITU= -1 1 0-1 1 0-1 0-1 0 0 1-1 0 1 1 1 1 1 1 1

ITU= 0-1 1 1 1 1 1 0-1 1 1 1 1 1 1 1 1 1 1

ITU= 1 0 0-1 0 0

Eigenvalues --- 0.00146 0.00227 0.00382 0.00597 0.01044

Eigenvalues --- 0.01335 0.01608 0.01854 0.02154 0.02227

Eigenvalues --- 0.02522 0.03032 0.03189 0.03747 0.04114

Eigenvalues --- 0.04334 0.05009 0.05418 0.05830 0.08614

Eigenvalues --- 0.08879 0.09680 0.13292 0.13864 0.14575

Eigenvalues --- 0.15019 0.15525 0.15973 0.16059 0.16541

Eigenvalues --- 0.17563 0.19473 0.20248 0.22776 0.23291

Eigenvalues --- 0.23821 0.25325 0.27317 0.29847 0.32701

Eigenvalues --- 0.33764 0.33855 0.33953 0.34132 0.34307

Eigenvalues --- 0.34747 0.34844 0.36059 0.36324 0.36410

|                                   |                 |           |            |          |          |         |
|-----------------------------------|-----------------|-----------|------------|----------|----------|---------|
| Eigenvalues ---                   | 0.42017         | 0.43038   | 0.43730    | 0.45794  | 0.48886  |         |
| Eigenvalues ---                   | 0.54091         | 0.55334   | 0.57896    | 0.60870  | 0.73792  |         |
| En-DIIS/RFO-DIIS IScMMF=          | 0 using points: |           | 66         | 65       | 64       | 63      |
| RFO step: Lambda=-6.14033699D-06. |                 |           |            |          |          |         |
| DidBck=F Rises=F RFO-DIIS coefs:  | 1.65000         | -0.45369  | -0.29679   | 0.10048  |          |         |
| Iteration 1 RMS(Cart)=            | 0.01902275      | RMS(Int)= | 0.00013651 |          |          |         |
| Iteration 2 RMS(Cart)=            | 0.00021170      | RMS(Int)= | 0.00000646 |          |          |         |
| Iteration 3 RMS(Cart)=            | 0.00000002      | RMS(Int)= | 0.00000646 |          |          |         |
| Variable                          | Old X           | -DE/DX    | Delta X    | Delta X  | Delta X  | New X   |
|                                   |                 |           | (Linear)   | (Quad)   | (Total)  |         |
| R1                                | 2.56630         | 0.00010   | 0.00009    | 0.00014  | 0.00022  | 2.56652 |
| R2                                | 2.61580         | 0.00008   | 0.00011    | -0.00005 | 0.00005  | 2.61586 |
| R3                                | 2.03393         | 0.00003   | 0.00001    | 0.00005  | 0.00006  | 2.03398 |
| R4                                | 2.62837         | 0.00000   | 0.00014    | -0.00014 | -0.00001 | 2.62837 |
| R5                                | 2.03054         | 0.00004   | 0.00005    | 0.00001  | 0.00007  | 2.03060 |
| R6                                | 2.54596         | 0.00029   | -0.00047   | 0.00030  | -0.00016 | 2.54580 |
| R7                                | 2.68752         | -0.00016  | 0.00058    | -0.00045 | 0.00013  | 2.68765 |
| R8                                | 2.51934         | 0.00005   | -0.00005   | -0.00002 | -0.00006 | 2.51927 |
| R9                                | 2.08999         | 0.00010   | 0.00117    | 0.00047  | 0.00164  | 2.09163 |
| R10                               | 2.79407         | 0.00005   | 0.00009    | -0.00021 | -0.00012 | 2.79395 |
| R11                               | 2.93345         | -0.00036  | 0.00011    | -0.00095 | -0.00084 | 2.93260 |
| R12                               | 2.05846         | 0.00002   | -0.00028   | -0.00008 | -0.00036 | 2.05810 |
| R13                               | 2.06025         | 0.00007   | 0.00011    | 0.00010  | 0.00021  | 2.06046 |
| R14                               | 2.06605         | 0.00001   | -0.00005   | 0.00027  | 0.00022  | 2.06626 |
| R15                               | 2.07117         | 0.00033   | -0.00022   | 0.00029  | 0.00007  | 2.07124 |
| R16                               | 2.64904         | -0.00003  | 0.00045    | 0.00055  | 0.00100  | 2.65004 |
| R17                               | 6.02596         | -0.00008  | 0.01992    | -0.00563 | 0.01429  | 6.04025 |
| R18                               | 2.50676         | -0.00012  | -0.00034   | -0.00001 | -0.00035 | 2.50641 |
| R19                               | 2.04587         | -0.00004  | 0.00011    | -0.00035 | -0.00024 | 2.04563 |
| R20                               | 2.04298         | 0.00001   | 0.00001    | -0.00007 | -0.00006 | 2.04293 |
| R21                               | 2.04562         | 0.00002   | 0.00005    | -0.00016 | -0.00011 | 2.04551 |
| R22                               | 1.85022         | 0.00021   | 0.00037    | -0.00008 | 0.00029  | 1.85051 |
| A1                                | 1.87551         | 0.00002   | -0.00005   | -0.00009 | -0.00014 | 1.87537 |
| A2                                | 2.27822         | -0.00007  | -0.00044   | -0.00020 | -0.00064 | 2.27759 |
| A3                                | 2.12936         | 0.00005   | 0.00050    | 0.00033  | 0.00083  | 2.13019 |
| A4                                | 1.86164         | 0.00004   | -0.00015   | 0.00024  | 0.00009  | 1.86172 |
| A5                                | 2.27818         | -0.00009  | -0.00061   | -0.00041 | -0.00103 | 2.27716 |
| A6                                | 2.14336         | 0.00005   | 0.00076    | 0.00017  | 0.00094  | 2.14430 |
| A7                                | 1.89661         | -0.00005  | 0.00016    | -0.00027 | -0.00010 | 1.89650 |
| A8                                | 2.24568         | -0.00001  | 0.00057    | 0.00031  | 0.00087  | 2.24655 |
| A9                                | 2.14090         | 0.00006   | -0.00073   | -0.00004 | -0.00077 | 2.14013 |
| A10                               | 1.88961         | 0.00000   | 0.00005    | 0.00014  | 0.00019  | 1.88980 |
| A11                               | 2.24880         | 0.00004   | -0.00007   | -0.00048 | -0.00059 | 2.24822 |
| A12                               | 2.14473         | -0.00004  | -0.00001   | 0.00026  | 0.00022  | 2.14495 |

|     |          |          |          |          |          |          |
|-----|----------|----------|----------|----------|----------|----------|
| A13 | 1.90138  | -0.00001 | -0.00001 | -0.00002 | -0.00002 | 1.90136  |
| A14 | 2.22791  | 0.00024  | 0.00075  | 0.00142  | 0.00216  | 2.23007  |
| A15 | 2.15303  | -0.00023 | -0.00084 | -0.00166 | -0.00252 | 2.15051  |
| A16 | 1.96237  | -0.00039 | -0.00049 | -0.00125 | -0.00174 | 1.96063  |
| A17 | 1.86653  | 0.00002  | 0.00003  | -0.00083 | -0.00080 | 1.86573  |
| A18 | 1.87197  | 0.00022  | 0.00040  | 0.00155  | 0.00195  | 1.87392  |
| A19 | 1.88552  | 0.00023  | 0.00129  | 0.00016  | 0.00145  | 1.88697  |
| A20 | 1.96461  | -0.00003 | -0.00027 | 0.00058  | 0.00031  | 1.96492  |
| A21 | 1.91011  | -0.00006 | -0.00099 | -0.00029 | -0.00128 | 1.90883  |
| A22 | 1.93065  | -0.00023 | -0.00063 | 0.00017  | -0.00046 | 1.93019  |
| A23 | 1.88856  | 0.00076  | 0.00180  | 0.00172  | 0.00352  | 1.89208  |
| A24 | 1.92785  | -0.00033 | -0.00035 | -0.00141 | -0.00176 | 1.92609  |
| A25 | 1.89632  | -0.00025 | -0.00054 | -0.00053 | -0.00108 | 1.89524  |
| A26 | 1.87727  | 0.00019  | -0.00021 | 0.00085  | 0.00063  | 1.87790  |
| A27 | 1.94334  | -0.00015 | -0.00011 | -0.00081 | -0.00092 | 1.94242  |
| A28 | 1.74435  | 0.00015  | -0.00529 | 0.00264  | -0.00265 | 1.74169  |
| A29 | 2.17865  | -0.00019 | -0.00043 | -0.00036 | -0.00079 | 2.17785  |
| A30 | 1.95670  | 0.00015  | -0.00083 | 0.00040  | -0.00043 | 1.95627  |
| A31 | 2.14784  | 0.00004  | 0.00126  | -0.00004 | 0.00122  | 2.14906  |
| A32 | 2.07950  | 0.00000  | 0.00033  | 0.00023  | 0.00056  | 2.08006  |
| A33 | 2.15752  | 0.00004  | 0.00009  | -0.00010 | -0.00001 | 2.15751  |
| A34 | 2.04617  | -0.00005 | -0.00041 | -0.00014 | -0.00055 | 2.04562  |
| A35 | 1.85351  | 0.00003  | -0.00038 | 0.00072  | 0.00034  | 1.85385  |
| D1  | 0.00440  | -0.00003 | -0.00011 | -0.00015 | -0.00026 | 0.00414  |
| D2  | -3.13453 | -0.00003 | 0.00078  | 0.00093  | 0.00170  | -3.13283 |
| D3  | 3.13091  | 0.00011  | 0.00139  | 0.00326  | 0.00465  | 3.13556  |
| D4  | -0.00803 | 0.00011  | 0.00228  | 0.00433  | 0.00661  | -0.00142 |
| D5  | -0.00730 | 0.00007  | 0.00088  | 0.00007  | 0.00095  | -0.00635 |
| D6  | -3.10522 | 0.00008  | 0.00341  | 0.00653  | 0.00996  | -3.09526 |
| D7  | -3.13537 | -0.00005 | -0.00046 | -0.00297 | -0.00344 | -3.13881 |
| D8  | 0.04990  | -0.00005 | 0.00208  | 0.00348  | 0.00557  | 0.05547  |
| D9  | -0.00007 | -0.00003 | -0.00068 | 0.00018  | -0.00051 | -0.00058 |
| D10 | 3.14023  | -0.00001 | -0.00243 | -0.00030 | -0.00273 | 3.13751  |
| D11 | 3.13912  | -0.00003 | -0.00149 | -0.00080 | -0.00229 | 3.13683  |
| D12 | -0.00376 | -0.00001 | -0.00323 | -0.00127 | -0.00451 | -0.00827 |
| D13 | -0.00447 | 0.00008  | 0.00124  | -0.00013 | 0.00110  | -0.00337 |
| D14 | 3.12705  | -0.00001 | -0.00243 | -0.00883 | -0.01124 | 3.11580  |
| D15 | 3.13831  | 0.00006  | 0.00285  | 0.00031  | 0.00316  | 3.14147  |
| D16 | -0.01335 | -0.00003 | -0.00081 | -0.00839 | -0.00919 | -0.02254 |
| D17 | -0.00416 | 0.00002  | -0.01235 | 0.00367  | -0.00867 | -0.01283 |
| D18 | 3.13782  | 0.00005  | -0.01227 | 0.00505  | -0.00722 | 3.13060  |
| D19 | 3.13599  | 0.00005  | -0.01431 | 0.00314  | -0.01117 | 3.12481  |
| D20 | -0.00522 | 0.00008  | -0.01424 | 0.00452  | -0.00972 | -0.01494 |
| D21 | 0.00726  | -0.00009 | -0.00131 | 0.00004  | -0.00127 | 0.00599  |

|     |          |          |          |          |          |          |
|-----|----------|----------|----------|----------|----------|----------|
| D22 | 3.10745  | -0.00008 | -0.00367 | -0.00599 | -0.00964 | 3.09781  |
| D23 | -3.12499 | -0.00002 | 0.00209  | 0.00811  | 0.01020  | -3.11480 |
| D24 | -0.02480 | 0.00000  | -0.00027 | 0.00208  | 0.00182  | -0.02298 |
| D25 | 1.78873  | -0.00020 | -0.01455 | -0.01889 | -0.03344 | 1.75528  |
| D26 | -2.42768 | -0.00012 | -0.01323 | -0.01994 | -0.03317 | -2.46085 |
| D27 | -0.38003 | -0.00007 | -0.01417 | -0.01991 | -0.03408 | -0.41411 |
| D28 | -1.30340 | -0.00021 | -0.01170 | -0.01163 | -0.02334 | -1.32674 |
| D29 | 0.76338  | -0.00013 | -0.01038 | -0.01268 | -0.02306 | 0.74032  |
| D30 | 2.81103  | -0.00007 | -0.01132 | -0.01265 | -0.02397 | 2.78705  |
| D31 | -1.59493 | -0.00006 | 0.00203  | -0.00323 | -0.00120 | -1.59613 |
| D32 | 0.48044  | -0.00004 | 0.00211  | -0.00273 | -0.00062 | 0.47982  |
| D33 | 2.61179  | 0.00006  | 0.00293  | -0.00349 | -0.00057 | 2.61122  |
| D34 | 2.63267  | -0.00001 | 0.00146  | -0.00158 | -0.00011 | 2.63256  |
| D35 | -1.57513 | 0.00001  | 0.00154  | -0.00108 | 0.00046  | -1.57467 |
| D36 | 0.55621  | 0.00011  | 0.00235  | -0.00184 | 0.00051  | 0.55673  |
| D37 | 0.52166  | -0.00008 | 0.00199  | -0.00169 | 0.00030  | 0.52197  |
| D38 | 2.59704  | -0.00005 | 0.00207  | -0.00119 | 0.00088  | 2.59792  |
| D39 | -1.55480 | 0.00005  | 0.00288  | -0.00195 | 0.00093  | -1.55387 |
| D40 | 1.16597  | 0.00016  | -0.00432 | 0.00341  | -0.00090 | 1.16507  |
| D41 | -3.02021 | 0.00019  | -0.00434 | 0.00431  | -0.00003 | -3.02024 |
| D42 | -0.95585 | 0.00017  | -0.00501 | 0.00453  | -0.00047 | -0.95632 |
| D43 | -1.30094 | -0.00029 | 0.00206  | -0.00530 | -0.00324 | -1.30418 |
| D44 | 2.87364  | 0.00007  | 0.00317  | -0.00520 | -0.00203 | 2.87161  |
| D45 | 0.79786  | 0.00034  | 0.00403  | -0.00461 | -0.00058 | 0.79728  |
| D46 | 3.14143  | 0.00005  | -0.00105 | 0.00123  | 0.00018  | -3.14158 |
| D47 | -0.00033 | 0.00003  | -0.00127 | 0.00096  | -0.00032 | -0.00065 |
| D48 | -0.00060 | 0.00002  | -0.00113 | -0.00030 | -0.00143 | -0.00203 |
| D49 | 3.14083  | 0.00000  | -0.00136 | -0.00057 | -0.00192 | 3.13890  |

| Item                 | Value    | Threshold | Converged? |
|----------------------|----------|-----------|------------|
| Maximum Force        | 0.000757 | 0.000450  | NO         |
| RMS Force            | 0.000148 | 0.000300  | YES        |
| Maximum Displacement | 0.062319 | 0.001800  | NO         |
| RMS Displacement     | 0.019061 | 0.001200  | NO         |

Predicted change in Energy=-1.564114D-05

GradGradGradGradGradGradGradGradGradGradGradGradGradGradGradGradGradGradGrad

Input orientation:

| Center Number | Atomic Number | Atomic Type | Coordinates (Angstroms) |           |           |
|---------------|---------------|-------------|-------------------------|-----------|-----------|
|               |               |             | X                       | Y         | Z         |
| 1             | 6             | 0           | -0.602610               | -2.376043 | -1.123414 |
| 2             | 6             | 0           | -1.903215               | -2.006455 | -1.251417 |
| 3             | 7             | 0           | -2.088737               | -0.905828 | -0.421523 |

|    |    |   |           |           |           |
|----|----|---|-----------|-----------|-----------|
| 4  | 6  | 0 | -0.921501 | -0.625314 | 0.189840  |
| 5  | 7  | 0 | -0.011658 | -1.509137 | -0.220417 |
| 6  | 6  | 0 | 1.403605  | -1.471637 | 0.205688  |
| 7  | 6  | 0 | 2.207708  | -0.358136 | -0.516689 |
| 8  | 1  | 0 | -0.055201 | -3.178670 | -1.586704 |
| 9  | 1  | 0 | -2.692630 | -2.427580 | -1.846509 |
| 10 | 1  | 0 | 1.407267  | -1.253952 | 1.272805  |
| 11 | 1  | 0 | 1.820470  | -2.465078 | 0.037867  |
| 12 | 1  | 0 | 2.670102  | -0.747251 | -1.427922 |
| 13 | 1  | 0 | 1.515282  | 0.445648  | -0.792027 |
| 14 | 35 | 0 | 0.723017  | 1.501581  | 2.118996  |
| 15 | 1  | 0 | -0.688568 | 0.192170  | 0.898753  |
| 16 | 6  | 0 | -3.271229 | -0.146815 | -0.201566 |
| 17 | 6  | 0 | -4.436595 | -0.373241 | -0.793017 |
| 18 | 1  | 0 | -3.115341 | 0.651827  | 0.512354  |
| 19 | 1  | 0 | -5.279165 | 0.262012  | -0.557983 |
| 20 | 1  | 0 | -4.600572 | -1.167774 | -1.509605 |
| 21 | 8  | 0 | 3.235545  | 0.116404  | 0.310913  |
| 22 | 1  | 0 | 2.804378  | 0.676392  | 0.988731  |

-----  
Distance matrix (angstroms):

|    |    | 1        | 2        | 3        | 4        | 5        |
|----|----|----------|----------|----------|----------|----------|
| 1  | C  | 0.000000 |          |          |          |          |
| 2  | C  | 1.358143 | 0.000000 |          |          |          |
| 3  | N  | 2.205166 | 1.390871 | 0.000000 |          |          |
| 4  | C  | 2.211647 | 2.224531 | 1.347180 | 0.000000 |          |
| 5  | N  | 1.384253 | 2.210944 | 2.172253 | 1.333143 | 0.000000 |
| 6  | C  | 2.570869 | 3.652978 | 3.593047 | 2.474395 | 1.478493 |
| 7  | C  | 3.512542 | 4.489595 | 4.332257 | 3.219086 | 2.517571 |
| 8  | H  | 1.076338 | 2.213969 | 3.264770 | 3.228965 | 2.157771 |
| 9  | H  | 2.212171 | 1.074549 | 2.170484 | 3.245271 | 3.267312 |
| 10 | H  | 3.322734 | 4.230514 | 3.900510 | 2.644080 | 2.075615 |
| 11 | H  | 2.688460 | 3.967167 | 4.233697 | 3.305485 | 2.082600 |
| 12 | H  | 3.668288 | 4.746786 | 4.866675 | 3.941019 | 3.038153 |
| 13 | H  | 3.543618 | 4.232018 | 3.866874 | 2.837065 | 2.545481 |
| 14 | Br | 5.225560 | 5.528389 | 4.489522 | 3.309042 | 3.882914 |
| 15 | H  | 3.269904 | 3.306441 | 2.215672 | 1.106840 | 2.145972 |
| 16 | C  | 3.597331 | 2.536122 | 1.422241 | 2.429688 | 3.532858 |
| 17 | C  | 4.338182 | 3.048858 | 2.436000 | 3.658612 | 4.604151 |
| 18 | H  | 4.261168 | 3.412712 | 2.086224 | 2.558914 | 3.852216 |
| 19 | H  | 5.399001 | 4.125995 | 3.400192 | 4.509526 | 5.567545 |
| 20 | H  | 4.194372 | 2.836509 | 2.749883 | 4.088758 | 4.778773 |
| 21 | O  | 4.795938 | 5.775314 | 5.470776 | 4.224432 | 3.670016 |
| 22 | H  | 5.038461 | 5.863221 | 5.332429 | 4.026765 | 3.764124 |

|    |    | 6        | 7        | 8        | 9        | 10       |
|----|----|----------|----------|----------|----------|----------|
| 6  | C  | 0.000000 |          |          |          |          |
| 7  | C  | 1.551868 | 0.000000 |          |          |          |
| 8  | H  | 2.873108 | 3.771087 | 0.000000 |          |          |
| 9  | H  | 4.680223 | 5.483094 | 2.754572 | 0.000000 |          |
| 10 | H  | 1.089099 | 2.155338 | 3.744348 | 5.283624 | 0.000000 |
| 11 | H  | 1.090351 | 2.212846 | 2.581973 | 4.890843 | 1.778380 |
| 12 | H  | 2.190304 | 1.093419 | 3.655720 | 5.635389 | 3.024140 |
| 13 | H  | 2.164230 | 1.096054 | 4.029096 | 5.203258 | 2.676535 |
| 14 | Br | 3.600551 | 3.551012 | 6.020181 | 6.544477 | 2.962633 |
| 15 | H  | 2.761482 | 3.270280 | 4.235708 | 4.291366 | 2.573657 |
| 16 | C  | 4.875970 | 5.492059 | 4.631802 | 2.870976 | 5.028703 |
| 17 | C  | 6.025930 | 6.650064 | 5.262793 | 2.893367 | 6.260511 |
| 18 | H  | 5.002401 | 5.514871 | 5.333218 | 3.902008 | 4.966313 |
| 19 | H  | 6.946089 | 7.512626 | 6.339272 | 3.947705 | 7.096359 |
| 20 | H  | 6.251777 | 6.927775 | 4.970920 | 2.311030 | 6.621432 |
| 21 | O  | 2.426715 | 1.402342 | 5.028665 | 6.802174 | 2.479054 |
| 22 | H  | 2.681295 | 1.921602 | 5.447161 | 6.920283 | 2.399759 |
|    |    | 11       | 12       | 13       | 14       | 15       |
| 11 | H  | 0.000000 |          |          |          |          |
| 12 | H  | 2.412746 | 0.000000 |          |          |          |
| 13 | H  | 3.042070 | 1.777915 | 0.000000 |          |          |
| 14 | Br | 4.611928 | 4.629148 | 3.196362 | 0.000000 |          |
| 15 | H  | 3.754646 | 4.192445 | 2.789256 | 2.279500 | 0.000000 |
| 16 | C  | 5.599738 | 6.096219 | 4.859048 | 4.904714 | 2.827676 |
| 17 | C  | 6.649588 | 7.144798 | 6.007947 | 6.214207 | 4.150841 |
| 18 | H  | 5.856831 | 6.260467 | 4.815246 | 4.246925 | 2.499963 |
| 19 | H  | 7.628687 | 8.060165 | 6.800957 | 6.687969 | 4.816693 |
| 20 | H  | 6.731081 | 7.283283 | 6.365668 | 6.973722 | 4.790972 |
| 21 | O  | 2.956525 | 2.022171 | 2.069827 | 3.391264 | 3.968622 |
| 22 | H  | 3.426521 | 2.808025 | 2.210455 | 2.508086 | 3.527497 |
|    |    | 16       | 17       | 18       | 19       | 20       |
| 16 | C  | 0.000000 |          |          |          |          |
| 17 | C  | 1.326334 | 0.000000 |          |          |          |
| 18 | H  | 1.082503 | 2.121431 | 0.000000 |          |          |
| 19 | H  | 2.079899 | 1.081070 | 2.445344 | 0.000000 |          |
| 20 | H  | 2.126141 | 1.082436 | 3.099222 | 1.846716 | 0.000000 |
| 21 | O  | 6.532230 | 7.766605 | 6.376599 | 8.560167 | 8.146663 |
| 22 | H  | 6.245596 | 7.530475 | 5.938907 | 8.240613 | 8.029689 |
|    |    | 21       | 22       |          |          |          |
| 21 | O  | 0.000000 |          |          |          |          |
| 22 | H  | 0.979249 | 0.000000 |          |          |          |

Stoichiometry C7H11BrN2O

Framework group C1[X(C7H11BrN2O)]



Deg. of freedom 60  
 Full point group C1 NOp 1  
 Largest Abelian subgroup C1 NOp 1  
 Largest concise Abelian subgroup C1 NOp 1

Standard orientation:

| Center Number | Atomic Number | Atomic Type | Coordinates (Angstroms) |           |           |
|---------------|---------------|-------------|-------------------------|-----------|-----------|
|               |               |             | X                       | Y         | Z         |
| 1             | 6             | 0           | -1.871063               | -1.993738 | 0.324368  |
| 2             | 6             | 0           | -2.861643               | -1.093770 | 0.093370  |
| 3             | 7             | 0           | -2.255192               | 0.155396  | 0.013844  |
| 4             | 6             | 0           | -0.928932               | 0.002998  | 0.194685  |
| 5             | 7             | 0           | -0.679524               | -1.292141 | 0.388799  |
| 6             | 6             | 0           | 0.683331                | -1.836397 | 0.568668  |
| 7             | 6             | 0           | 1.466287                | -1.919892 | -0.768606 |
| 8             | 1             | 0           | -1.913132               | -3.061256 | 0.455289  |
| 9             | 1             | 0           | -3.921367               | -1.235312 | -0.014377 |
| 10            | 1             | 0           | 1.213166                | -1.151376 | 1.229091  |
| 11            | 1             | 0           | 0.584672                | -2.806105 | 1.057337  |
| 12            | 1             | 0           | 1.322621                | -2.896931 | -1.237989 |
| 13            | 1             | 0           | 1.080824                | -1.147644 | -1.444168 |
| 14            | 35            | 0           | 2.036131                | 1.470233  | 0.121348  |
| 15            | 1             | 0           | -0.133155               | 0.772048  | 0.174778  |
| 16            | 6             | 0           | -2.856496               | 1.422973  | -0.219507 |
| 17            | 6             | 0           | -4.152564               | 1.620015  | -0.420864 |
| 18            | 1             | 0           | -2.129469               | 2.224994  | -0.217004 |
| 19            | 1             | 0           | -4.512850               | 2.625164  | -0.589918 |
| 20            | 1             | 0           | -4.885851               | 0.823826  | -0.427394 |
| 21            | 8             | 0           | 2.840331                | -1.757156 | -0.540393 |
| 22            | 1             | 0           | 2.976779                | -0.804221 | -0.360876 |

Rotational constants (GHZ): 0.9797785 0.4460499 0.3183400

Standard basis: 6-311++G(d,p) (5D, 7F)

There are 358 symmetry adapted cartesian basis functions of A symmetry.

There are 345 symmetry adapted basis functions of A symmetry.

345 basis functions, 553 primitive gaussians, 358 cartesian basis functions

55 alpha electrons 55 beta electrons

nuclear repulsion energy 851.1855958746 Hartrees.

NAtoms= 22 NActive= 22 NUniq= 22 SFac= 1.00D+00 NAtFMM= 60 NAOKFM=F

Big=F

Integral buffers will be 131072 words long.

Raffenetti 2 integral format.

Two-electron integral symmetry is turned on.

One-electron integrals computed using PRISM.

NBasis= 345 RedAO= T EigKep= 4.67D-06 NBF= 345

NBsUse= 345 1.00D-06 EigRej= -1.00D+00 NBFU= 345

Initial guess from the checkpoint file: "."

B after Tr= 0.000000 0.000000 0.000000

Rot= 1.000000 0.000178 -0.000052 0.000377 Ang= 0.05 deg.

ExpMin= 3.50D-02 ExpMax= 4.40D+05 ExpMxC= 1.51D+04 IAcc=3 IRadAn= 5 AccDes=

0.00D+00

Harris functional with IExCor= 402 and IRadAn= 5 diagonalized for initial guess.

HarFok: IExCor= 402 AccDes= 0.00D+00 IRadAn= 5 IDoV= 1 UseB2=F ITyADJ=14

ICtDFT= 3500011 ScaDFX= 1.000000 1.000000 1.000000 1.000000

FoFCou: FMM=F IPFlag= 0 FMFlag= 100000 FMFlg1= 0

NFxFlg= 0 DoJE=T BraDBF=F KetDBF=T FulRan=T

wScrn= 0.000000 ICntrl= 500 IOpCl= 0 I1Cent= 20000004 NGrid=

0

NMat0= 1 NMatS0= 1 NMatT0= 0 NMatD0= 1 NMtDS0= 0

NMtDT0= 0

Petite list used in FoFCou.

Keep R1 ints in memory in canonical form, NReq=1804729152.

Requested convergence on RMS density matrix=1.00D-08 within 128 cycles.

Requested convergence on MAX density matrix=1.00D-06.

Requested convergence on energy=1.00D-06.

No special actions if energy rises.

SCF Done: E(RB3LYP) = -3032.34326659 A.U. after 11 cycles

NFock= 11 Conv=0.53D-08 -V/T= 2.0017

Calling FoFJK, ICntrl= 2127 FMM=F ISym2X=0 I1Cent= 0 IOpClX= 0 NMat=1 NMatS=1

NMatT=0.

\*\*\*\*\* Axes restored to original set \*\*\*\*\*

| Center | Atomic | Forces (Hartrees/Bohr) |              |              |
|--------|--------|------------------------|--------------|--------------|
| Number | Number | X                      | Y            | Z            |
| 1      | 6      | -0.000004574           | 0.000021203  | -0.000015389 |
| 2      | 6      | 0.000040808            | 0.000109942  | -0.000096593 |
| 3      | 7      | -0.000364638           | 0.000137818  | -0.000223749 |
| 4      | 6      | 0.000155654            | 0.000079795  | 0.000718431  |
| 5      | 7      | 0.000016593            | 0.000073029  | -0.000081289 |
| 6      | 6      | 0.000384658            | -0.000068878 | -0.000093513 |
| 7      | 6      | -0.000197142           | -0.000185376 | 0.000529671  |
| 8      | 1      | 0.000020198            | 0.000013348  | -0.000042243 |
| 9      | 1      | -0.000045336           | -0.000023130 | 0.000024568  |
| 10     | 1      | -0.000019385           | 0.000154989  | 0.000032090  |
| 11     | 1      | 0.000013957            | -0.000003249 | -0.000031596 |
| 12     | 1      | 0.000049452            | 0.000009188  | 0.000062994  |

|    |    |              |              |              |
|----|----|--------------|--------------|--------------|
| 13 | 1  | -0.000111021 | 0.000201406  | -0.000180239 |
| 14 | 35 | 0.000056739  | -0.000006042 | -0.000135208 |
| 15 | 1  | 0.000007400  | -0.000224954 | -0.000295128 |
| 16 | 6  | 0.000218521  | -0.000177218 | 0.000048040  |
| 17 | 6  | -0.000040208 | -0.000058911 | 0.000048136  |
| 18 | 1  | -0.000102132 | 0.000107409  | -0.000051065 |
| 19 | 1  | -0.000002684 | 0.000060961  | -0.000011758 |
| 20 | 1  | -0.000023095 | -0.000061198 | -0.000023270 |
| 21 | 8  | 0.000024210  | -0.000065715 | -0.000284832 |
| 22 | 1  | -0.000077976 | -0.000094417 | 0.000101942  |

-----  
Cartesian Forces: Max 0.000718431 RMS 0.000165918

GradGradGradGradGradGradGradGradGradGradGradGradGradGradGradGradGradGradGrad

Berny optimization.

Using GEDIIS/GDIIS optimizer.

FormGI is forming the generalized inverse of G from B-inverse, IUseBI=4.

Internal Forces: Max 0.000355412 RMS 0.000096191

Search for a local minimum.

Step number 67 out of a maximum of 116

All quantities printed in internal units (Hartrees-Bohrs-Radians)

Mixed Optimization -- En-DIIS/RFO-DIIS

Swapping is turned off.

Update second derivatives using D2CorX and points 62 63 64 65 66  
67

DE= -2.17D-05 DEPred=-1.56D-05 R= 1.38D+00

TightC=F SS= 1.41D+00 RLast= 7.96D-02 DXNew= 1.6377D+00 2.3882D-01

Trust test= 1.38D+00 RLast= 7.96D-02 DXMaxT set to 9.74D-01

ITU= 1 1 1 1 1 0 1 1 1 1 0 1 1 0 1 1 0-1 1 1

ITU= 1-1 1 0-1 1 0-1 0-1 0 0 1-1 0 1 1 1 1 1

ITU= 1 0-1 1 1 1 1 1 0-1 1 1 1 1 1 1 1 1 1

ITU= 1 1 0 0-1 0 0

|                 |         |         |         |         |         |
|-----------------|---------|---------|---------|---------|---------|
| Eigenvalues --- | 0.00138 | 0.00239 | 0.00307 | 0.00528 | 0.01038 |
| Eigenvalues --- | 0.01366 | 0.01605 | 0.01853 | 0.02125 | 0.02295 |
| Eigenvalues --- | 0.02539 | 0.03034 | 0.03182 | 0.03778 | 0.04125 |
| Eigenvalues --- | 0.04364 | 0.04922 | 0.05332 | 0.05775 | 0.08588 |
| Eigenvalues --- | 0.08949 | 0.09743 | 0.13199 | 0.14011 | 0.14745 |
| Eigenvalues --- | 0.15049 | 0.15498 | 0.16007 | 0.16055 | 0.16838 |
| Eigenvalues --- | 0.17475 | 0.20244 | 0.20432 | 0.22719 | 0.23240 |
| Eigenvalues --- | 0.23640 | 0.25103 | 0.27567 | 0.29697 | 0.32788 |
| Eigenvalues --- | 0.33763 | 0.33845 | 0.33954 | 0.34154 | 0.34353 |
| Eigenvalues --- | 0.34707 | 0.34850 | 0.35737 | 0.36319 | 0.36442 |
| Eigenvalues --- | 0.42481 | 0.43352 | 0.43701 | 0.46051 | 0.48913 |
| Eigenvalues --- | 0.53933 | 0.54917 | 0.57528 | 0.61030 | 0.71289 |

En-DIIS/RFO-DIIS IScMMF= 0 using points: 67 66 65 64 63  
RFO step: Lambda=-2.90895087D-06.  
DidBck=F Rises=F RFO-DIIS coefs: 1.81556 -0.81446 -0.12670 -0.01736  
0.14296

Iteration 1 RMS(Cart)= 0.01935867 RMS(Int)= 0.00013096  
Iteration 2 RMS(Cart)= 0.00019041 RMS(Int)= 0.00000992  
Iteration 3 RMS(Cart)= 0.00000001 RMS(Int)= 0.00000992

| Variable | Old X   | -DE/DX   | Delta X<br>(Linear) | Delta X<br>(Quad) | Delta X<br>(Total) | New X   |
|----------|---------|----------|---------------------|-------------------|--------------------|---------|
| R1       | 2.56652 | 0.00003  | 0.00031             | -0.00019          | 0.00012            | 2.56664 |
| R2       | 2.61586 | 0.00003  | 0.00003             | -0.00006          | -0.00003           | 2.61583 |
| R3       | 2.03398 | 0.00002  | 0.00007             | -0.00001          | 0.00006            | 2.03405 |
| R4       | 2.62837 | -0.00002 | -0.00021            | -0.00001          | -0.00023           | 2.62813 |
| R5       | 2.03060 | 0.00003  | 0.00015             | -0.00007          | 0.00007            | 2.03068 |
| R6       | 2.54580 | 0.00036  | 0.00029             | 0.00004           | 0.00034            | 2.54614 |
| R7       | 2.68765 | -0.00011 | 0.00018             | -0.00007          | 0.00012            | 2.68776 |
| R8       | 2.51927 | 0.00009  | 0.00019             | -0.00015          | 0.00005            | 2.51933 |
| R9       | 2.09163 | -0.00035 | 0.00134             | -0.00066          | 0.00067            | 2.09230 |
| R10      | 2.79395 | 0.00012  | 0.00031             | 0.00005           | 0.00036            | 2.79430 |
| R11      | 2.93260 | -0.00029 | -0.00126            | 0.00017           | -0.00109           | 2.93151 |
| R12      | 2.05810 | 0.00006  | -0.00014            | -0.00010          | -0.00024           | 2.05786 |
| R13      | 2.06046 | 0.00001  | 0.00020             | -0.00001          | 0.00019            | 2.06066 |
| R14      | 2.06626 | -0.00004 | 0.00021             | -0.00005          | 0.00016            | 2.06642 |
| R15      | 2.07124 | 0.00026  | 0.00025             | 0.00008           | 0.00033            | 2.07157 |
| R16      | 2.65004 | -0.00020 | 0.00023             | -0.00024          | -0.00002           | 2.65003 |
| R17      | 6.04025 | -0.00014 | -0.00107            | 0.01061           | 0.00954            | 6.04979 |
| R18      | 2.50641 | 0.00006  | -0.00036            | 0.00021           | -0.00015           | 2.50626 |
| R19      | 2.04563 | 0.00003  | -0.00018            | 0.00006           | -0.00012           | 2.04551 |
| R20      | 2.04293 | 0.00004  | 0.00005             | -0.00004          | 0.00001            | 2.04294 |
| R21      | 2.04551 | 0.00006  | 0.00003             | 0.00001           | 0.00004            | 2.04555 |
| R22      | 1.85051 | 0.00005  | 0.00043             | -0.00001          | 0.00041            | 1.85092 |
| A1       | 1.87537 | 0.00006  | -0.00009            | 0.00003           | -0.00007           | 1.87530 |
| A2       | 2.27759 | -0.00003 | -0.00063            | 0.00004           | -0.00061           | 2.27698 |
| A3       | 2.13019 | -0.00003 | 0.00079             | -0.00006          | 0.00071            | 2.13090 |
| A4       | 1.86172 | 0.00006  | 0.00020             | -0.00006          | 0.00014            | 1.86187 |
| A5       | 2.27716 | -0.00001 | -0.00079            | 0.00003           | -0.00076           | 2.27640 |
| A6       | 2.14430 | -0.00005 | 0.00058             | 0.00003           | 0.00061            | 2.14491 |
| A7       | 1.89650 | -0.00006 | -0.00015            | 0.00007           | -0.00007           | 1.89643 |
| A8       | 2.24655 | -0.00015 | -0.00006            | -0.00012          | -0.00019           | 2.24636 |
| A9       | 2.14013 | 0.00021  | 0.00021             | 0.00005           | 0.00025            | 2.14038 |
| A10      | 1.88980 | -0.00003 | 0.00009             | -0.00013          | -0.00005           | 1.88975 |
| A11      | 2.24822 | 0.00008  | -0.00038            | -0.00009          | -0.00052           | 2.24770 |
| A12      | 2.14495 | -0.00005 | 0.00013             | 0.00007           | 0.00015            | 2.14510 |
| A13      | 1.90136 | -0.00001 | -0.00005            | 0.00010           | 0.00005            | 1.90141 |

|     |          |          |          |          |          |          |
|-----|----------|----------|----------|----------|----------|----------|
| A14 | 2.23007  | -0.00004 | 0.00198  | -0.00053 | 0.00141  | 2.23148  |
| A15 | 2.15051  | 0.00005  | -0.00222 | 0.00022  | -0.00203 | 2.14849  |
| A16 | 1.96063  | -0.00005 | -0.00225 | 0.00067  | -0.00158 | 1.95905  |
| A17 | 1.86573  | -0.00001 | -0.00093 | 0.00021  | -0.00072 | 1.86501  |
| A18 | 1.87392  | 0.00006  | 0.00181  | -0.00038 | 0.00144  | 1.87536  |
| A19 | 1.88697  | 0.00001  | 0.00118  | -0.00015 | 0.00103  | 1.88800  |
| A20 | 1.96492  | -0.00006 | 0.00078  | -0.00021 | 0.00057  | 1.96549  |
| A21 | 1.90883  | 0.00005  | -0.00069 | -0.00014 | -0.00083 | 1.90800  |
| A22 | 1.93019  | -0.00006 | -0.00073 | 0.00012  | -0.00061 | 1.92958  |
| A23 | 1.89208  | 0.00022  | 0.00210  | -0.00016 | 0.00194  | 1.89402  |
| A24 | 1.92609  | -0.00008 | -0.00080 | 0.00085  | 0.00005  | 1.92614  |
| A25 | 1.89524  | -0.00011 | -0.00115 | -0.00002 | -0.00117 | 1.89407  |
| A26 | 1.87790  | -0.00002 | 0.00026  | -0.00105 | -0.00079 | 1.87711  |
| A27 | 1.94242  | 0.00004  | 0.00026  | 0.00025  | 0.00051  | 1.94293  |
| A28 | 1.74169  | 0.00011  | -0.00077 | -0.00444 | -0.00522 | 1.73648  |
| A29 | 2.17785  | -0.00007 | -0.00172 | 0.00079  | -0.00093 | 2.17692  |
| A30 | 1.95627  | 0.00017  | 0.00051  | 0.00001  | 0.00052  | 1.95679  |
| A31 | 2.14906  | -0.00010 | 0.00121  | -0.00080 | 0.00041  | 2.14947  |
| A32 | 2.08006  | -0.00004 | 0.00069  | -0.00014 | 0.00055  | 2.08060  |
| A33 | 2.15751  | 0.00003  | -0.00018 | 0.00013  | -0.00005 | 2.15746  |
| A34 | 2.04562  | 0.00001  | -0.00050 | 0.00001  | -0.00050 | 2.04512  |
| A35 | 1.85385  | -0.00008 | 0.00002  | -0.00068 | -0.00065 | 1.85320  |
| D1  | 0.00414  | -0.00001 | -0.00024 | 0.00004  | -0.00020 | 0.00394  |
| D2  | -3.13283 | 0.00000  | -0.00033 | 0.00055  | 0.00022  | -3.13261 |
| D3  | 3.13556  | 0.00002  | 0.00577  | 0.00041  | 0.00618  | -3.14145 |
| D4  | -0.00142 | 0.00003  | 0.00568  | 0.00092  | 0.00660  | 0.00518  |
| D5  | -0.00635 | 0.00003  | 0.00047  | 0.00033  | 0.00080  | -0.00555 |
| D6  | -3.09526 | 0.00002  | 0.00687  | 0.00483  | 0.01173  | -3.08353 |
| D7  | -3.13881 | 0.00000  | -0.00491 | -0.00001 | -0.00493 | 3.13945  |
| D8  | 0.05547  | -0.00001 | 0.00149  | 0.00450  | 0.00601  | 0.06148  |
| D9  | -0.00058 | -0.00002 | -0.00006 | -0.00038 | -0.00045 | -0.00103 |
| D10 | 3.13751  | 0.00000  | -0.00173 | -0.00032 | -0.00205 | 3.13546  |
| D11 | 3.13683  | -0.00002 | 0.00001  | -0.00084 | -0.00084 | 3.13599  |
| D12 | -0.00827 | -0.00001 | -0.00166 | -0.00078 | -0.00243 | -0.01070 |
| D13 | -0.00337 | 0.00003  | 0.00036  | 0.00059  | 0.00095  | -0.00242 |
| D14 | 3.11580  | -0.00004 | -0.00717 | -0.00760 | -0.01476 | 3.10104  |
| D15 | 3.14147  | 0.00002  | 0.00190  | 0.00053  | 0.00243  | -3.13928 |
| D16 | -0.02254 | -0.00006 | -0.00564 | -0.00765 | -0.01328 | -0.03582 |
| D17 | -0.01283 | 0.00005  | 0.00905  | 0.00913  | 0.01818  | 0.00535  |
| D18 | 3.13060  | 0.00008  | 0.00999  | 0.00891  | 0.01890  | -3.13368 |
| D19 | 3.12481  | 0.00007  | 0.00718  | 0.00920  | 0.01638  | 3.14120  |
| D20 | -0.01494 | 0.00010  | 0.00812  | 0.00898  | 0.01711  | 0.00217  |
| D21 | 0.00599  | -0.00004 | -0.00051 | -0.00057 | -0.00108 | 0.00491  |
| D22 | 3.09781  | -0.00003 | -0.00643 | -0.00486 | -0.01127 | 3.08654  |

|     |          |          |          |          |          |          |
|-----|----------|----------|----------|----------|----------|----------|
| D23 | -3.11480 | 0.00003  | 0.00649  | 0.00703  | 0.01352  | -3.10128 |
| D24 | -0.02298 | 0.00003  | 0.00057  | 0.00274  | 0.00333  | -0.01965 |
| D25 | 1.75528  | -0.00010 | -0.02127 | -0.01859 | -0.03986 | 1.71542  |
| D26 | -2.46085 | -0.00012 | -0.02170 | -0.01826 | -0.03995 | -2.50080 |
| D27 | -0.41411 | -0.00003 | -0.02206 | -0.01850 | -0.04056 | -0.45467 |
| D28 | -1.32674 | -0.00011 | -0.01411 | -0.01348 | -0.02759 | -1.35433 |
| D29 | 0.74032  | -0.00013 | -0.01453 | -0.01315 | -0.02768 | 0.71264  |
| D30 | 2.78705  | -0.00004 | -0.01490 | -0.01339 | -0.02829 | 2.75877  |
| D31 | -1.59613 | -0.00005 | 0.00050  | -0.00283 | -0.00233 | -1.59846 |
| D32 | 0.47982  | -0.00008 | -0.00004 | -0.00288 | -0.00292 | 0.47690  |
| D33 | 2.61122  | 0.00006  | 0.00114  | -0.00214 | -0.00100 | 2.61022  |
| D34 | 2.63256  | -0.00002 | 0.00220  | -0.00338 | -0.00118 | 2.63138  |
| D35 | -1.57467 | -0.00005 | 0.00167  | -0.00343 | -0.00177 | -1.57644 |
| D36 | 0.55673  | 0.00009  | 0.00285  | -0.00269 | 0.00016  | 0.55688  |
| D37 | 0.52197  | -0.00005 | 0.00178  | -0.00298 | -0.00120 | 0.52077  |
| D38 | 2.59792  | -0.00009 | 0.00124  | -0.00303 | -0.00179 | 2.59613  |
| D39 | -1.55387 | 0.00006  | 0.00243  | -0.00229 | 0.00014  | -1.55373 |
| D40 | 1.16507  | 0.00011  | 0.00131  | -0.00063 | 0.00068  | 1.16575  |
| D41 | -3.02024 | 0.00011  | 0.00099  | -0.00059 | 0.00040  | -3.01984 |
| D42 | -0.95632 | 0.00004  | 0.00075  | -0.00174 | -0.00099 | -0.95731 |
| D43 | -1.30418 | -0.00004 | -0.00169 | 0.00556  | 0.00387  | -1.30031 |
| D44 | 2.87161  | 0.00009  | -0.00049 | 0.00556  | 0.00508  | 2.87669  |
| D45 | 0.79728  | 0.00021  | 0.00060  | 0.00609  | 0.00669  | 0.80397  |
| D46 | -3.14158 | 0.00006  | 0.00113  | 0.00095  | 0.00208  | -3.13950 |
| D47 | -0.00065 | 0.00004  | 0.00123  | 0.00080  | 0.00203  | 0.00138  |
| D48 | -0.00203 | 0.00003  | 0.00009  | 0.00119  | 0.00128  | -0.00074 |
| D49 | 3.13890  | 0.00000  | 0.00019  | 0.00104  | 0.00123  | 3.14013  |

| Item                 | Value    | Threshold | Converged? |
|----------------------|----------|-----------|------------|
| Maximum Force        | 0.000355 | 0.000450  | YES        |
| RMS Force            | 0.000096 | 0.000300  | YES        |
| Maximum Displacement | 0.056608 | 0.001800  | NO         |
| RMS Displacement     | 0.019383 | 0.001200  | NO         |

Predicted change in Energy=-1.094945D-05

GradGradGradGradGradGradGradGradGradGradGradGradGradGradGradGradGradGradGrad

Input orientation:

| Center Number | Atomic Number | Atomic Type | Coordinates (Angstroms) |           |           |
|---------------|---------------|-------------|-------------------------|-----------|-----------|
|               |               |             | X                       | Y         | Z         |
| 1             | 6             | 0           | -0.596796               | -2.362780 | -1.134529 |
| 2             | 6             | 0           | -1.896483               | -1.990942 | -1.265960 |
| 3             | 7             | 0           | -2.089121               | -0.906359 | -0.416988 |
| 4             | 6             | 0           | -0.926945               | -0.637626 | 0.209510  |

|    |    |   |           |           |           |
|----|----|---|-----------|-----------|-----------|
| 5  | 7  | 0 | -0.013358 | -1.512900 | -0.210727 |
| 6  | 6  | 0 | 1.401027  | -1.472708 | 0.218691  |
| 7  | 6  | 0 | 2.207612  | -0.371748 | -0.518744 |
| 8  | 1  | 0 | -0.044720 | -3.153474 | -1.612638 |
| 9  | 1  | 0 | -2.680580 | -2.401569 | -1.875319 |
| 10 | 1  | 0 | 1.401602  | -1.239277 | 1.282352  |
| 11 | 1  | 0 | 1.817016  | -2.469343 | 0.067823  |
| 12 | 1  | 0 | 2.672690  | -0.776403 | -1.421907 |
| 13 | 1  | 0 | 1.517779  | 0.428561  | -0.810904 |
| 14 | 35 | 0 | 0.724227  | 1.526666  | 2.089694  |
| 15 | 1  | 0 | -0.697083 | 0.174272  | 0.926356  |
| 16 | 6  | 0 | -3.273231 | -0.150595 | -0.194166 |
| 17 | 6  | 0 | -4.437471 | -0.377912 | -0.787316 |
| 18 | 1  | 0 | -3.119439 | 0.646025  | 0.522364  |
| 19 | 1  | 0 | -5.281768 | 0.255073  | -0.552337 |
| 20 | 1  | 0 | -4.599184 | -1.171322 | -1.505695 |
| 21 | 8  | 0 | 3.233936  | 0.114733  | 0.303772  |
| 22 | 1  | 0 | 2.800640  | 0.682751  | 0.973822  |

-----  
Distance matrix (angstroms):

|    |    | 1        | 2        | 3        | 4        | 5        |
|----|----|----------|----------|----------|----------|----------|
| 1  | C  | 0.000000 |          |          |          |          |
| 2  | C  | 1.358207 | 0.000000 |          |          |          |
| 3  | N  | 2.205235 | 1.390749 | 0.000000 |          |          |
| 4  | C  | 2.211695 | 2.224518 | 1.347357 | 0.000000 |          |
| 5  | N  | 1.384235 | 2.210928 | 2.172379 | 1.333171 | 0.000000 |
| 6  | C  | 2.571912 | 3.653263 | 3.592489 | 2.473237 | 1.478682 |
| 7  | C  | 3.494009 | 4.474787 | 4.331060 | 3.229008 | 2.515911 |
| 8  | H  | 1.076370 | 2.213751 | 3.264764 | 3.229247 | 2.158200 |
| 9  | H  | 2.211884 | 1.074589 | 2.170761 | 3.245496 | 3.267212 |
| 10 | H  | 3.331240 | 4.235122 | 3.896632 | 2.633458 | 2.075153 |
| 11 | H  | 2.698795 | 3.974660 | 4.235076 | 3.302209 | 2.083900 |
| 12 | H  | 3.645369 | 4.730409 | 4.868429 | 3.954510 | 3.037143 |
| 13 | H  | 3.516780 | 4.209306 | 3.866124 | 2.855639 | 2.544379 |
| 14 | Br | 5.221926 | 5.522871 | 4.485309 | 3.308417 | 3.882644 |
| 15 | H  | 3.270159 | 3.306503 | 2.215876 | 1.107197 | 2.146390 |
| 16 | C  | 3.597409 | 2.535952 | 1.422303 | 2.430064 | 3.533118 |
| 17 | C  | 4.337170 | 3.047554 | 2.435394 | 3.658539 | 4.603632 |
| 18 | H  | 4.261682 | 3.412817 | 2.086584 | 2.559818 | 3.853066 |
| 19 | H  | 5.398247 | 4.124802 | 3.400035 | 4.510189 | 5.567636 |
| 20 | H  | 4.192428 | 2.834403 | 2.748800 | 4.088044 | 4.777387 |
| 21 | O  | 4.783439 | 5.763604 | 5.467821 | 4.229404 | 3.668626 |
| 22 | H  | 5.026228 | 5.850489 | 5.326292 | 4.027711 | 3.760667 |
|    |    | 6        | 7        | 8        | 9        | 10       |

|    |    |          |          |          |          |          |
|----|----|----------|----------|----------|----------|----------|
| 6  | C  | 0.000000 |          |          |          |          |
| 7  | C  | 1.551291 | 0.000000 |          |          |          |
| 8  | H  | 2.875574 | 3.742673 | 0.000000 |          |          |
| 9  | H  | 4.680511 | 5.463963 | 2.753565 | 0.000000 |          |
| 10 | H  | 1.088974 | 2.155506 | 3.759915 | 5.290181 | 0.000000 |
| 11 | H  | 1.090453 | 2.212810 | 2.599624 | 4.899874 | 1.777839 |
| 12 | H  | 2.189413 | 1.093502 | 3.615406 | 5.612864 | 3.023728 |
| 13 | H  | 2.165299 | 1.096230 | 3.989380 | 5.173861 | 2.678974 |
| 14 | Br | 3.599299 | 3.550825 | 6.016831 | 6.537972 | 2.959912 |
| 15 | H  | 2.759602 | 3.289940 | 4.236268 | 4.291690 | 2.555256 |
| 16 | C  | 4.875154 | 5.494897 | 4.631698 | 2.871306 | 5.021891 |
| 17 | C  | 6.024840 | 6.650511 | 5.261289 | 2.892336 | 6.254618 |
| 18 | H  | 5.001586 | 5.522430 | 5.333697 | 3.902475 | 4.956990 |
| 19 | H  | 6.945464 | 7.515640 | 6.337910 | 3.946417 | 7.089894 |
| 20 | H  | 6.250351 | 6.924295 | 4.968250 | 2.308933 | 6.617194 |
| 21 | O  | 2.426266 | 1.402334 | 5.010329 | 6.786878 | 2.479599 |
| 22 | H  | 2.678645 | 1.921303 | 5.431618 | 6.904665 | 2.397226 |
|    |    | 11       | 12       | 13       | 14       | 15       |
| 11 | H  | 0.000000 |          |          |          |          |
| 12 | H  | 2.411953 | 0.000000 |          |          |          |
| 13 | H  | 3.042950 | 1.777380 | 0.000000 |          |          |
| 14 | Br | 4.609798 | 4.629468 | 3.201411 | 0.000000 |          |
| 15 | H  | 3.747863 | 4.215863 | 2.826368 | 2.280887 | 0.000000 |
| 16 | C  | 5.599629 | 6.103520 | 4.865138 | 4.899887 | 2.828011 |
| 17 | C  | 6.650109 | 7.149538 | 6.009656 | 6.208682 | 4.151154 |
| 18 | H  | 5.854973 | 6.273137 | 4.829978 | 4.243326 | 2.500713 |
| 19 | H  | 7.628878 | 8.068054 | 6.806673 | 6.683506 | 4.817924 |
| 20 | H  | 6.732640 | 7.283072 | 6.360786 | 6.967401 | 4.790813 |
| 21 | O  | 2.956482 | 2.021655 | 2.070311 | 3.388467 | 3.980461 |
| 22 | H  | 3.424039 | 2.808028 | 2.212598 | 2.503768 | 3.534809 |
|    |    | 16       | 17       | 18       | 19       | 20       |
| 16 | C  | 0.000000 |          |          |          |          |
| 17 | C  | 1.326256 | 0.000000 |          |          |          |
| 18 | H  | 1.082438 | 2.121537 | 0.000000 |          |          |
| 19 | H  | 2.080162 | 1.081075 | 2.446118 | 0.000000 |          |
| 20 | H  | 2.126063 | 1.082460 | 3.099262 | 1.846461 | 0.000000 |
| 21 | O  | 6.531582 | 7.764255 | 6.379296 | 8.559780 | 8.141615 |
| 22 | H  | 6.241039 | 7.524418 | 5.937381 | 8.236345 | 8.021408 |
|    |    | 21       | 22       |          |          |          |
| 21 | O  | 0.000000 |          |          |          |          |
| 22 | H  | 0.979467 | 0.000000 |          |          |          |

Stoichiometry C7H11BrN2O

Framework group C1[X(C7H11BrN2O)]

Deg. of freedom 60



Full point group C1 NOp 1  
 Largest Abelian subgroup C1 NOp 1  
 Largest concise Abelian subgroup C1 NOp 1

Standard orientation:

| Center<br>Number | Atomic<br>Number | Atomic<br>Type | Coordinates (Angstroms) |           |           |
|------------------|------------------|----------------|-------------------------|-----------|-----------|
|                  |                  |                | X                       | Y         | Z         |
| 1                | 6                | 0              | -1.864903               | -1.998052 | 0.297348  |
| 2                | 6                | 0              | -2.855127               | -1.098443 | 0.063075  |
| 3                | 7                | 0              | -2.253640               | 0.154736  | 0.019055  |
| 4                | 6                | 0              | -0.930453               | 0.005217  | 0.224460  |
| 5                | 7                | 0              | -0.678429               | -1.292274 | 0.398662  |
| 6                | 6                | 0              | 0.685799                | -1.832334 | 0.582283  |
| 7                | 6                | 0              | 1.465922                | -1.924481 | -0.755410 |
| 8                | 1                | 0              | -1.904248               | -3.068556 | 0.402456  |
| 9                | 1                | 0              | -3.911732               | -1.243586 | -0.068305 |
| 10               | 1                | 0              | 1.213963                | -1.140335 | 1.236533  |
| 11               | 1                | 0              | 0.590972                | -2.798049 | 1.079766  |
| 12               | 1                | 0              | 1.325002                | -2.906553 | -1.215216 |
| 13               | 1                | 0              | 1.076618                | -1.160879 | -1.438838 |
| 14               | 35               | 0              | 2.032898                | 1.471964  | 0.111225  |
| 15               | 1                | 0              | -0.136732               | 0.777154  | 0.222536  |
| 16               | 6                | 0              | -2.856523               | 1.423287  | -0.205123 |
| 17               | 6                | 0              | -4.151974               | 1.618197  | -0.411938 |
| 18               | 1                | 0              | -2.131728               | 2.227120  | -0.191174 |
| 19               | 1                | 0              | -4.514800               | 2.623410  | -0.575121 |
| 20               | 1                | 0              | -4.882880               | 0.819941  | -0.428721 |
| 21               | 8                | 0              | 2.839932                | -1.755615 | -0.531536 |
| 22               | 1                | 0              | 2.972700                | -0.801065 | -0.356712 |

Rotational constants (GHZ): 0.9796352 0.4470822 0.3186092

Standard basis: 6-311++G(d,p) (5D, 7F)

There are 358 symmetry adapted cartesian basis functions of A symmetry.

There are 345 symmetry adapted basis functions of A symmetry.

345 basis functions, 553 primitive gaussians, 358 cartesian basis functions

55 alpha electrons 55 beta electrons

nuclear repulsion energy 851.4371875211 Hartrees.

NAtoms= 22 NActive= 22 NUniq= 22 SFac= 1.00D+00 NAtFMM= 60 NAOKFM=F

Big=F

Integral buffers will be 131072 words long.

Raffenetti 2 integral format.

Two-electron integral symmetry is turned on.

One-electron integrals computed using PRISM.

NBasis= 345 RedAO= T EigKep= 4.64D-06 NBF= 345  
 NBsUse= 345 1.00D-06 EigRej= -1.00D+00 NBFU= 345  
 Initial guess from the checkpoint file: ". "  
 B after Tr= 0.000000 0.000000 0.000000  
 Rot= 1.000000 0.000305 -0.000048 -0.000446 Ang= 0.06 deg.  
 ExpMin= 3.50D-02 ExpMax= 4.40D+05 ExpMxC= 1.51D+04 IAcc=3 IRadAn= 5 AccDes=  
 0.00D+00  
 Harris functional with IExCor= 402 and IRadAn= 5 diagonalized for initial guess.  
 HarFok: IExCor= 402 AccDes= 0.00D+00 IRadAn= 5 IDoV= 1 UseB2=F ITyADJ=14  
 ICtDFT= 3500011 ScaDFX= 1.000000 1.000000 1.000000 1.000000  
 FoFCou: FMM=F IPFlag= 0 FMFlag= 100000 FMFlg1= 0  
 NFxFlg= 0 DoJE=T BraDBF=F KetDBF=T FulRan=T  
 wScrn= 0.000000 ICntrl= 500 IOpCl= 0 l1Cent= 200000004 NGrid=  
 0  
 NMat0= 1 NMatS0= 1 NMatT0= 0 NMatD0= 1 NMtDS0= 0  
 NMtDT0= 0  
 Petite list used in FoFCou.  
 Keep R1 ints in memory in canonical form, NReq=1804729152.  
 Requested convergence on RMS density matrix=1.00D-08 within 128 cycles.  
 Requested convergence on MAX density matrix=1.00D-06.  
 Requested convergence on energy=1.00D-06.  
 No special actions if energy rises.  
 SCF Done: E(RB3LYP) = -3032.34328503 A.U. after 11 cycles  
 NFock= 11 Conv=0.51D-08 -V/T= 2.0017  
 Calling FoFJK, ICntrl= 2127 FMM=F ISym2X=0 l1Cent= 0 IOpClX= 0 NMat=1 NMatS=1  
 NMatT=0.

\*\*\*\*\* Axes restored to original set \*\*\*\*\*

| Center<br>Number | Atomic<br>Number | Forces (Hartrees/Bohr) |              |              |
|------------------|------------------|------------------------|--------------|--------------|
|                  |                  | X                      | Y            | Z            |
| 1                | 6                | 0.000067189            | 0.000147677  | -0.000232074 |
| 2                | 6                | 0.000125165            | -0.000068654 | -0.000056039 |
| 3                | 7                | -0.000294589           | 0.000221557  | -0.000003140 |
| 4                | 6                | 0.000067989            | 0.000294135  | 0.000657074  |
| 5                | 7                | 0.000026654            | 0.000208812  | 0.000237511  |
| 6                | 6                | 0.000091174            | -0.000301768 | -0.000176170 |
| 7                | 6                | 0.000183687            | -0.000102994 | 0.000186846  |
| 8                | 1                | 0.000017533            | -0.000068794 | 0.000118481  |
| 9                | 1                | -0.000040444           | 0.000065798  | 0.000013205  |
| 10               | 1                | -0.000010749           | 0.000175772  | 0.000024417  |
| 11               | 1                | -0.000030310           | 0.000026270  | -0.000097029 |
| 12               | 1                | 0.000050070            | 0.000011920  | 0.000058245  |
| 13               | 1                | -0.000167871           | 0.000082464  | 0.000009289  |

|    |    |              |              |              |
|----|----|--------------|--------------|--------------|
| 14 | 35 | 0.000014910  | 0.000007129  | -0.000083244 |
| 15 | 1  | -0.000050910 | -0.000424620 | -0.000538360 |
| 16 | 6  | 0.000265525  | -0.000319505 | -0.000003740 |
| 17 | 6  | -0.000198566 | -0.000031520 | -0.000003633 |
| 18 | 1  | -0.000074629 | 0.000120693  | -0.000022828 |
| 19 | 1  | 0.000019789  | 0.000075432  | 0.000026357  |
| 20 | 1  | -0.000003719 | -0.000051043 | -0.000016269 |
| 21 | 8  | -0.000089331 | 0.000003589  | -0.000112839 |
| 22 | 1  | 0.000031435  | -0.000072349 | 0.000013941  |

-----  
Cartesian Forces: Max 0.000657074 RMS 0.000171104

GradGradGradGradGradGradGradGradGradGradGradGradGradGradGradGradGradGradGrad  
Berny optimization.

Using GEDIIS/GDIIS optimizer.

FormGI is forming the generalized inverse of G from B-inverse, IUseBI=4.

Internal Forces: Max 0.000671015 RMS 0.000104006

Search for a local minimum.

Step number 68 out of a maximum of 116

All quantities printed in internal units (Hartrees-Bohrs-Radians)

Mixed Optimization -- En-DIIS/RFO-DIIS

Swapping is turned off.

Update second derivatives using D2CorX and points 62 63 64 65 66  
67 68

DE= -1.84D-05 DEPred=-1.09D-05 R= 1.68D+00

TightC=F SS= 1.41D+00 RLast= 9.84D-02 DXNew= 1.6377D+00 2.9529D-01

Trust test= 1.68D+00 RLast= 9.84D-02 DXMaxT set to 9.74D-01

ITU= 1 1 1 1 1 1 0 1 1 1 1 0 1 1 0 1 1 0-1 1

ITU= 1 1-1 1 0-1 1 0-1 0-1 0 0 1-1 0 1 1 1 1

ITU= 1 1 0-1 1 1 1 1 1 0-1 1 1 1 1 1 1 1 1

ITU= 1 1 1 0 0-1 0 0

|                 |         |         |         |         |         |
|-----------------|---------|---------|---------|---------|---------|
| Eigenvalues --- | 0.00132 | 0.00205 | 0.00255 | 0.00492 | 0.01026 |
| Eigenvalues --- | 0.01331 | 0.01494 | 0.01863 | 0.02144 | 0.02365 |
| Eigenvalues --- | 0.02527 | 0.03026 | 0.03179 | 0.03850 | 0.04109 |
| Eigenvalues --- | 0.04378 | 0.04839 | 0.05377 | 0.05744 | 0.08608 |
| Eigenvalues --- | 0.09090 | 0.09758 | 0.13178 | 0.14140 | 0.14671 |
| Eigenvalues --- | 0.15139 | 0.15525 | 0.16012 | 0.16103 | 0.16749 |
| Eigenvalues --- | 0.17743 | 0.20241 | 0.21497 | 0.23306 | 0.23355 |
| Eigenvalues --- | 0.24693 | 0.25211 | 0.27475 | 0.29472 | 0.32752 |
| Eigenvalues --- | 0.33767 | 0.33870 | 0.33959 | 0.34174 | 0.34422 |
| Eigenvalues --- | 0.34566 | 0.34851 | 0.35983 | 0.36319 | 0.36460 |
| Eigenvalues --- | 0.42669 | 0.43513 | 0.44886 | 0.45804 | 0.49134 |
| Eigenvalues --- | 0.53688 | 0.54903 | 0.57494 | 0.61190 | 0.76286 |

En-DIIS/RFO-DIIS IScMMF= 0 using points: 68 67 66 65 64

RFO step: Lambda=-2.30236536D-06.

DidBck=F Rises=F RFO-DIIS coefs: 1.75081 -0.95036 -0.25311 0.39094

0.06172

Iteration 1 RMS(Cart)= 0.01615719 RMS(Int)= 0.00008025

Iteration 2 RMS(Cart)= 0.00011405 RMS(Int)= 0.00000292

Iteration 3 RMS(Cart)= 0.00000001 RMS(Int)= 0.00000292

| Variable | Old X   | -DE/DX   | Delta X<br>(Linear) | Delta X<br>(Quad) | Delta X<br>(Total) | New X   |
|----------|---------|----------|---------------------|-------------------|--------------------|---------|
| R1       | 2.56664 | -0.00002 | -0.00002            | 0.00001           | -0.00001           | 2.56663 |
| R2       | 2.61583 | -0.00001 | -0.00007            | 0.00007           | 0.00000            | 2.61583 |
| R3       | 2.03405 | 0.00001  | 0.00003             | 0.00001           | 0.00004            | 2.03409 |
| R4       | 2.62813 | 0.00003  | -0.00023            | 0.00021           | -0.00002           | 2.62812 |
| R5       | 2.03068 | 0.00000  | 0.00001             | 0.00002           | 0.00003            | 2.03071 |
| R6       | 2.54614 | 0.00022  | 0.00055             | -0.00006          | 0.00049            | 2.54663 |
| R7       | 2.68776 | -0.00012 | -0.00033            | -0.00011          | -0.00044           | 2.68732 |
| R8       | 2.51933 | 0.00008  | 0.00008             | 0.00009           | 0.00018            | 2.51950 |
| R9       | 2.09230 | -0.00067 | -0.00058            | -0.00063          | -0.00121           | 2.09109 |
| R10      | 2.79430 | 0.00002  | 0.00035             | -0.00021          | 0.00014            | 2.79445 |
| R11      | 2.93151 | -0.00009 | -0.00076            | 0.00028           | -0.00048           | 2.93104 |
| R12      | 2.05786 | 0.00006  | 0.00006             | -0.00010          | -0.00004           | 2.05782 |
| R13      | 2.06066 | -0.00002 | 0.00003             | 0.00003           | 0.00006            | 2.06072 |
| R14      | 2.06642 | -0.00003 | 0.00008             | -0.00008          | 0.00000            | 2.06642 |
| R15      | 2.07157 | 0.00018  | 0.00039             | -0.00002          | 0.00037            | 2.07194 |
| R16      | 2.65003 | -0.00012 | -0.00053            | 0.00023           | -0.00030           | 2.64973 |
| R17      | 6.04979 | -0.00007 | -0.00889            | 0.00087           | -0.00802           | 6.04177 |
| R18      | 2.50626 | 0.00016  | 0.00015             | 0.00000           | 0.00015            | 2.50641 |
| R19      | 2.04551 | 0.00006  | -0.00013            | 0.00029           | 0.00016            | 2.04567 |
| R20      | 2.04294 | 0.00003  | 0.00000             | 0.00006           | 0.00006            | 2.04300 |
| R21      | 2.04555 | 0.00005  | 0.00002             | 0.00012           | 0.00013            | 2.04569 |
| R22      | 1.85092 | -0.00004 | 0.00010             | 0.00003           | 0.00013            | 1.85105 |
| A1       | 1.87530 | 0.00005  | 0.00002             | -0.00001          | 0.00001            | 1.87531 |
| A2       | 2.27698 | 0.00003  | -0.00013            | 0.00016           | 0.00004            | 2.27702 |
| A3       | 2.13090 | -0.00008 | 0.00011             | -0.00016          | -0.00005           | 2.13085 |
| A4       | 1.86187 | 0.00005  | 0.00018             | 0.00002           | 0.00019            | 1.86206 |
| A5       | 2.27640 | 0.00005  | -0.00012            | 0.00020           | 0.00008            | 2.27648 |
| A6       | 2.14491 | -0.00010 | -0.00005            | -0.00022          | -0.00027           | 2.14464 |
| A7       | 1.89643 | -0.00008 | -0.00014            | -0.00005          | -0.00019           | 1.89624 |
| A8       | 2.24636 | -0.00010 | -0.00056            | 0.00008           | -0.00047           | 2.24589 |
| A9       | 2.14038 | 0.00018  | 0.00069             | -0.00003          | 0.00066            | 2.14104 |
| A10      | 1.88975 | 0.00000  | -0.00008            | 0.00006           | -0.00002           | 1.88973 |
| A11      | 2.24770 | 0.00006  | -0.00019            | -0.00033          | -0.00053           | 2.24717 |
| A12      | 2.14510 | -0.00006 | 0.00000             | 0.00013           | 0.00013            | 2.14522 |
| A13      | 1.90141 | -0.00002 | 0.00002             | -0.00002          | 0.00000            | 1.90142 |
| A14      | 2.23148 | -0.00032 | 0.00025             | -0.00108          | -0.00083           | 2.23065 |

|     |          |          |          |          |          |          |
|-----|----------|----------|----------|----------|----------|----------|
| A15 | 2.14849  | 0.00034  | -0.00055 | 0.00099  | 0.00044  | 2.14893  |
| A16 | 1.95905  | 0.00015  | -0.00064 | -0.00003 | -0.00067 | 1.95839  |
| A17 | 1.86501  | -0.00004 | -0.00043 | -0.00008 | -0.00051 | 1.86450  |
| A18 | 1.87536  | -0.00005 | 0.00045  | -0.00004 | 0.00042  | 1.87577  |
| A19 | 1.88800  | -0.00009 | -0.00018 | 0.00003  | -0.00015 | 1.88785  |
| A20 | 1.96549  | -0.00007 | 0.00060  | -0.00003 | 0.00057  | 1.96606  |
| A21 | 1.90800  | 0.00010  | 0.00016  | 0.00015  | 0.00031  | 1.90831  |
| A22 | 1.92958  | 0.00001  | -0.00015 | -0.00017 | -0.00032 | 1.92926  |
| A23 | 1.89402  | -0.00003 | -0.00059 | 0.00029  | -0.00031 | 1.89372  |
| A24 | 1.92614  | 0.00000  | 0.00070  | -0.00039 | 0.00032  | 1.92646  |
| A25 | 1.89407  | -0.00001 | -0.00024 | 0.00018  | -0.00006 | 1.89401  |
| A26 | 1.87711  | -0.00005 | -0.00070 | 0.00031  | -0.00039 | 1.87671  |
| A27 | 1.94293  | 0.00007  | 0.00097  | -0.00021 | 0.00076  | 1.94369  |
| A28 | 1.73648  | 0.00017  | 0.00110  | 0.00031  | 0.00142  | 1.73790  |
| A29 | 2.17692  | 0.00012  | -0.00016 | 0.00026  | 0.00011  | 2.17703  |
| A30 | 1.95679  | 0.00005  | 0.00086  | -0.00033 | 0.00053  | 1.95732  |
| A31 | 2.14947  | -0.00017 | -0.00071 | 0.00007  | -0.00064 | 2.14883  |
| A32 | 2.08060  | -0.00009 | 0.00003  | -0.00041 | -0.00039 | 2.08022  |
| A33 | 2.15746  | 0.00003  | 0.00004  | 0.00019  | 0.00024  | 2.15769  |
| A34 | 2.04512  | 0.00005  | -0.00007 | 0.00022  | 0.00015  | 2.04527  |
| A35 | 1.85320  | 0.00004  | -0.00055 | 0.00070  | 0.00015  | 1.85335  |
| D1  | 0.00394  | 0.00000  | -0.00007 | 0.00015  | 0.00008  | 0.00402  |
| D2  | -3.13261 | 0.00002  | -0.00068 | -0.00012 | -0.00079 | -3.13341 |
| D3  | -3.14145 | -0.00007 | 0.00300  | -0.00175 | 0.00125  | -3.14020 |
| D4  | 0.00518  | -0.00005 | 0.00240  | -0.00202 | 0.00038  | 0.00556  |
| D5  | -0.00555 | -0.00002 | -0.00009 | -0.00041 | -0.00051 | -0.00606 |
| D6  | -3.08353 | -0.00004 | 0.00454  | 0.00140  | 0.00593  | -3.07760 |
| D7  | 3.13945  | 0.00005  | -0.00286 | 0.00129  | -0.00156 | 3.13789  |
| D8  | 0.06148  | 0.00002  | 0.00178  | 0.00310  | 0.00487  | 0.06635  |
| D9  | -0.00103 | 0.00002  | 0.00021  | 0.00016  | 0.00037  | -0.00066 |
| D10 | 3.13546  | 0.00003  | 0.00084  | 0.00010  | 0.00094  | 3.13640  |
| D11 | 3.13599  | 0.00000  | 0.00076  | 0.00041  | 0.00116  | 3.13716  |
| D12 | -0.01070 | 0.00001  | 0.00139  | 0.00034  | 0.00173  | -0.00897 |
| D13 | -0.00242 | -0.00003 | -0.00027 | -0.00042 | -0.00069 | -0.00311 |
| D14 | 3.10104  | -0.00006 | -0.00733 | -0.00449 | -0.01183 | 3.08922  |
| D15 | -3.13928 | -0.00004 | -0.00086 | -0.00036 | -0.00122 | -3.14050 |
| D16 | -0.03582 | -0.00007 | -0.00792 | -0.00443 | -0.01235 | -0.04817 |
| D17 | 0.00535  | 0.00005  | 0.02279  | 0.00724  | 0.03003  | 0.03538  |
| D18 | -3.13368 | 0.00007  | 0.02315  | 0.00698  | 0.03014  | -3.10355 |
| D19 | 3.14120  | 0.00006  | 0.02350  | 0.00717  | 0.03067  | -3.11132 |
| D20 | 0.00217  | 0.00008  | 0.02386  | 0.00691  | 0.03077  | 0.03294  |
| D21 | 0.00491  | 0.00003  | 0.00023  | 0.00052  | 0.00074  | 0.00565  |
| D22 | 3.08654  | 0.00003  | -0.00409 | -0.00128 | -0.00538 | 3.08116  |
| D23 | -3.10128 | 0.00005  | 0.00679  | 0.00431  | 0.01110  | -3.09018 |

|     |          |          |          |          |          |          |
|-----|----------|----------|----------|----------|----------|----------|
| D24 | -0.01965 | 0.00005  | 0.00248  | 0.00251  | 0.00498  | -0.01467 |
| D25 | 1.71542  | -0.00002 | -0.01403 | -0.00782 | -0.02185 | 1.69357  |
| D26 | -2.50080 | -0.00007 | -0.01488 | -0.00785 | -0.02273 | -2.52353 |
| D27 | -0.45467 | 0.00000  | -0.01469 | -0.00773 | -0.02242 | -0.47709 |
| D28 | -1.35433 | -0.00003 | -0.00883 | -0.00573 | -0.01456 | -1.36889 |
| D29 | 0.71264  | -0.00008 | -0.00968 | -0.00576 | -0.01544 | 0.69720  |
| D30 | 2.75877  | -0.00001 | -0.00949 | -0.00564 | -0.01513 | 2.74363  |
| D31 | -1.59846 | -0.00003 | -0.00270 | -0.00052 | -0.00321 | -1.60167 |
| D32 | 0.47690  | -0.00005 | -0.00344 | -0.00022 | -0.00366 | 0.47324  |
| D33 | 2.61022  | 0.00002  | -0.00218 | -0.00055 | -0.00273 | 2.60749  |
| D34 | 2.63138  | -0.00001 | -0.00168 | -0.00042 | -0.00210 | 2.62928  |
| D35 | -1.57644 | -0.00003 | -0.00243 | -0.00013 | -0.00255 | -1.57899 |
| D36 | 0.55688  | 0.00004  | -0.00117 | -0.00045 | -0.00162 | 0.55527  |
| D37 | 0.52077  | -0.00003 | -0.00213 | -0.00061 | -0.00274 | 0.51803  |
| D38 | 2.59613  | -0.00005 | -0.00288 | -0.00032 | -0.00320 | 2.59294  |
| D39 | -1.55373 | 0.00002  | -0.00162 | -0.00064 | -0.00226 | -1.55599 |
| D40 | 1.16575  | 0.00004  | 0.00403  | -0.00055 | 0.00348  | 1.16923  |
| D41 | -3.01984 | 0.00004  | 0.00336  | -0.00048 | 0.00288  | -3.01696 |
| D42 | -0.95731 | 0.00001  | 0.00293  | -0.00012 | 0.00281  | -0.95451 |
| D43 | -1.30031 | 0.00003  | 0.00274  | -0.00390 | -0.00117 | -1.30147 |
| D44 | 2.87669  | 0.00004  | 0.00294  | -0.00366 | -0.00072 | 2.87596  |
| D45 | 0.80397  | 0.00004  | 0.00310  | -0.00394 | -0.00084 | 0.80313  |
| D46 | -3.13950 | 0.00005  | 0.00235  | 0.00004  | 0.00239  | -3.13711 |
| D47 | 0.00138  | 0.00003  | 0.00241  | 0.00040  | 0.00281  | 0.00419  |
| D48 | -0.00074 | 0.00002  | 0.00195  | 0.00033  | 0.00228  | 0.00154  |
| D49 | 3.14013  | 0.00000  | 0.00201  | 0.00069  | 0.00270  | -3.14035 |

| Item                 | Value    | Threshold | Converged? |
|----------------------|----------|-----------|------------|
| Maximum Force        | 0.000671 | 0.000450  | NO         |
| RMS Force            | 0.000104 | 0.000300  | YES        |
| Maximum Displacement | 0.050586 | 0.001800  | NO         |
| RMS Displacement     | 0.016157 | 0.001200  | NO         |

Predicted change in Energy=-5.104380D-06

GradGradGradGradGradGradGradGradGradGradGradGradGradGradGradGradGradGrad

Input orientation:

| Center Number | Atomic Number | Atomic Type | Coordinates (Angstroms) |           |           |
|---------------|---------------|-------------|-------------------------|-----------|-----------|
|               |               |             | X                       | Y         | Z         |
| 1             | 6             | 0           | -0.592570               | -2.350480 | -1.145635 |
| 2             | 6             | 0           | -1.891031               | -1.975779 | -1.280963 |
| 3             | 7             | 0           | -2.088601               | -0.901777 | -0.419779 |
| 4             | 6             | 0           | -0.930021               | -0.641702 | 0.217503  |
| 5             | 7             | 0           | -0.014536               | -1.512924 | -0.207293 |

|    |    |   |           |           |           |
|----|----|---|-----------|-----------|-----------|
| 6  | 6  | 0 | 1.398759  | -1.475844 | 0.226235  |
| 7  | 6  | 0 | 2.210896  | -0.382068 | -0.515255 |
| 8  | 1  | 0 | -0.037716 | -3.134977 | -1.630738 |
| 9  | 1  | 0 | -2.671312 | -2.377455 | -1.901117 |
| 10 | 1  | 0 | 1.396503  | -1.235582 | 1.288348  |
| 11 | 1  | 0 | 1.811551  | -2.474952 | 0.082892  |
| 12 | 1  | 0 | 2.679457  | -0.794582 | -1.413047 |
| 13 | 1  | 0 | 1.523570  | 0.417100  | -0.817017 |
| 14 | 35 | 0 | 0.723714  | 1.546940  | 2.064921  |
| 15 | 1  | 0 | -0.702018 | 0.166811  | 0.937773  |
| 16 | 6  | 0 | -3.274047 | -0.149069 | -0.195199 |
| 17 | 6  | 0 | -4.442911 | -0.389447 | -0.774113 |
| 18 | 1  | 0 | -3.117841 | 0.657640  | 0.509553  |
| 19 | 1  | 0 | -5.287195 | 0.244088  | -0.540421 |
| 20 | 1  | 0 | -4.608576 | -1.194224 | -1.478926 |
| 21 | 8  | 0 | 3.234539  | 0.108342  | 0.308004  |
| 22 | 1  | 0 | 2.799734  | 0.683062  | 0.971427  |

-----  
Distance matrix (angstroms):

|    |    | 1        | 2        | 3        | 4        | 5        |
|----|----|----------|----------|----------|----------|----------|
| 1  | C  | 0.000000 |          |          |          |          |
| 2  | C  | 1.358203 | 0.000000 |          |          |          |
| 3  | N  | 2.205384 | 1.390739 | 0.000000 |          |          |
| 4  | C  | 2.211773 | 2.224568 | 1.347618 | 0.000000 |          |
| 5  | N  | 1.384236 | 2.210936 | 2.172648 | 1.333264 | 0.000000 |
| 6  | C  | 2.571460 | 3.652985 | 3.592850 | 2.473679 | 1.478758 |
| 7  | C  | 3.483022 | 4.466769 | 4.331846 | 3.235693 | 2.515198 |
| 8  | H  | 1.076394 | 2.213788 | 3.264925 | 3.229338 | 2.158192 |
| 9  | H  | 2.211933 | 1.074604 | 2.170608 | 3.245533 | 3.267249 |
| 10 | H  | 3.335218 | 4.237585 | 3.895520 | 2.629090 | 2.074823 |
| 11 | H  | 2.702696 | 3.977233 | 4.235416 | 3.300780 | 2.084298 |
| 12 | H  | 3.632972 | 4.722502 | 4.871596 | 3.963634 | 3.037672 |
| 13 | H  | 3.499363 | 4.195309 | 3.865879 | 2.865555 | 2.542150 |
| 14 | Br | 5.218252 | 5.517371 | 4.480967 | 3.307257 | 3.882104 |
| 15 | H  | 3.269452 | 3.305636 | 2.215274 | 1.106556 | 2.146000 |
| 16 | C  | 3.597201 | 2.535446 | 1.422071 | 2.430528 | 3.533363 |
| 17 | C  | 4.336912 | 3.047202 | 2.435325 | 3.658870 | 4.603693 |
| 18 | H  | 4.262092 | 3.412610 | 2.086809 | 2.561276 | 3.854311 |
| 19 | H  | 5.397923 | 4.124336 | 3.399788 | 4.510436 | 5.567674 |
| 20 | H  | 4.192412 | 2.834621 | 2.749108 | 4.088389 | 4.777429 |
| 21 | O  | 4.775524 | 5.756721 | 5.466793 | 4.232531 | 3.667495 |
| 22 | H  | 5.019169 | 5.843456 | 5.323814 | 4.029203 | 3.759236 |
|    |    | 6        | 7        | 8        | 9        | 10       |
| 6  | C  | 0.000000 |          |          |          |          |

|    |    |          |          |          |          |          |
|----|----|----------|----------|----------|----------|----------|
| 7  | C  | 1.551039 | 0.000000 |          |          |          |
| 8  | H  | 2.874810 | 3.725462 | 0.000000 |          |          |
| 9  | H  | 4.680172 | 5.453268 | 2.753684 | 0.000000 |          |
| 10 | H  | 1.088951 | 2.155158 | 3.766397 | 5.293740 | 0.000000 |
| 11 | H  | 1.090487 | 2.213012 | 2.606137 | 4.903250 | 1.778041 |
| 12 | H  | 2.188961 | 1.093502 | 3.592752 | 5.601288 | 3.022910 |
| 13 | H  | 2.164992 | 1.096424 | 3.964468 | 5.155759 | 2.679564 |
| 14 | Br | 3.601899 | 3.548252 | 6.013154 | 6.531197 | 2.966165 |
| 15 | H  | 2.760048 | 3.301155 | 4.235605 | 4.290769 | 2.548215 |
| 16 | C  | 4.875762 | 5.499211 | 4.631442 | 2.870392 | 5.019507 |
| 17 | C  | 6.025451 | 6.658845 | 5.260940 | 2.891518 | 6.250475 |
| 18 | H  | 5.003169 | 5.525094 | 5.334038 | 3.901605 | 4.956824 |
| 19 | H  | 6.946071 | 7.524232 | 6.337500 | 3.945482 | 7.085593 |
| 20 | H  | 6.250997 | 6.934945 | 4.968132 | 2.308955 | 6.612147 |
| 21 | O  | 2.426194 | 1.402177 | 4.998549 | 6.777792 | 2.479029 |
| 22 | H  | 2.679351 | 1.921317 | 5.422160 | 6.895696 | 2.398060 |
|    |    | 11       | 12       | 13       | 14       | 15       |
| 11 | H  | 0.000000 |          |          |          |          |
| 12 | H  | 2.411377 | 0.000000 |          |          |          |
| 13 | H  | 3.042488 | 1.777498 | 0.000000 |          |          |
| 14 | Br | 4.613832 | 4.626436 | 3.197166 | 0.000000 |          |
| 15 | H  | 3.745366 | 4.229066 | 2.845202 | 2.282090 | 0.000000 |
| 16 | C  | 5.599140 | 6.110977 | 4.870763 | 4.895578 | 2.828204 |
| 17 | C  | 6.648465 | 7.162436 | 6.020902 | 6.205137 | 4.151416 |
| 18 | H  | 5.856115 | 6.278057 | 4.833254 | 4.238817 | 2.502096 |
| 19 | H  | 7.627181 | 8.081327 | 6.818575 | 6.679540 | 4.818181 |
| 20 | H  | 6.730348 | 7.299279 | 6.374772 | 6.964636 | 4.791038 |
| 21 | O  | 2.957867 | 2.021238 | 2.070849 | 3.385345 | 3.987042 |
| 22 | H  | 3.426231 | 2.807778 | 2.213111 | 2.500374 | 3.539762 |
|    |    | 16       | 17       | 18       | 19       | 20       |
| 16 | C  | 0.000000 |          |          |          |          |
| 17 | C  | 1.326336 | 0.000000 |          |          |          |
| 18 | H  | 1.082523 | 2.121320 | 0.000000 |          |          |
| 19 | H  | 2.080028 | 1.081108 | 2.445315 | 0.000000 |          |
| 20 | H  | 2.126329 | 1.082531 | 3.099313 | 1.846634 | 0.000000 |
| 21 | O  | 6.533082 | 7.769299 | 6.379269 | 8.564940 | 8.148880 |
| 22 | H  | 6.240535 | 7.526825 | 5.935627 | 8.238738 | 8.025678 |
|    |    | 21       | 22       |          |          |          |
| 21 | O  | 0.000000 |          |          |          |          |
| 22 | H  | 0.979535 | 0.000000 |          |          |          |

Stoichiometry C7H11BrN2O

Framework group C1[X(C7H11BrN2O)]

Deg. of freedom 60

Full point group C1 NOp 1



Largest Abelian subgroup C1 NOp 1

Largest concise Abelian subgroup C1 NOp 1

Standard orientation:

| Center<br>Number | Atomic<br>Number | Atomic<br>Type | Coordinates (Angstroms) |           |           |
|------------------|------------------|----------------|-------------------------|-----------|-----------|
|                  |                  |                | X                       | Y         | Z         |
| 1                | 6                | 0              | -1.858603               | -2.002610 | 0.273173  |
| 2                | 6                | 0              | -2.848881               | -1.103939 | 0.035569  |
| 3                | 7                | 0              | -2.252210               | 0.152159  | 0.016733  |
| 4                | 6                | 0              | -0.931330               | 0.005123  | 0.239738  |
| 5                | 7                | 0              | -0.676713               | -1.293557 | 0.401585  |
| 6                | 6                | 0              | 0.687306                | -1.832000 | 0.591997  |
| 7                | 6                | 0              | 1.472145                | -1.925722 | -0.742532 |
| 8                | 1                | 0              | -1.894917               | -3.074644 | 0.362882  |
| 9                | 1                | 0              | -3.902697               | -1.251499 | -0.114332 |
| 10               | 1                | 0              | 1.211916                | -1.137414 | 1.246327  |
| 11               | 1                | 0              | 0.591778                | -2.796603 | 1.091573  |
| 12               | 1                | 0              | 1.336288                | -2.909975 | -1.199189 |
| 13               | 1                | 0              | 1.081656                | -1.166006 | -1.429916 |
| 14               | 35               | 0              | 2.028139                | 1.475107  | 0.103237  |
| 15               | 1                | 0              | -0.140174               | 0.778714  | 0.249479  |
| 16               | 6                | 0              | -2.857783               | 1.420598  | -0.199211 |
| 17               | 6                | 0              | -4.155796               | 1.615738  | -0.389602 |
| 18               | 1                | 0              | -2.133223               | 2.224864  | -0.194241 |
| 19               | 1                | 0              | -4.519882               | 2.620990  | -0.549924 |
| 20               | 1                | 0              | -4.887494               | 0.817953  | -0.395086 |
| 21               | 8                | 0              | 2.844736                | -1.751580 | -0.515003 |
| 22               | 1                | 0              | 2.974097                | -0.795825 | -0.343871 |

Rotational constants (GHZ): 0.9798940 0.4478885 0.3186785

Standard basis: 6-311++G(d,p) (5D, 7F)

There are 358 symmetry adapted cartesian basis functions of A symmetry.

There are 345 symmetry adapted basis functions of A symmetry.

345 basis functions, 553 primitive gaussians, 358 cartesian basis functions

55 alpha electrons 55 beta electrons

nuclear repulsion energy 851.6200934857 Hartrees.

NAtoms= 22 NActive= 22 NUniq= 22 SFac= 1.00D+00 NATFMM= 60 NAOKFM=F

Big=F

Integral buffers will be 131072 words long.

Raffenetti 2 integral format.

Two-electron integral symmetry is turned on.

One-electron integrals computed using PRISM.

NBasis= 345 RedAO= T EigKep= 4.65D-06 NBF= 345

NBsUse= 345 1.00D-06 EigRej= -1.00D+00 NBFU= 345  
 Initial guess from the checkpoint file: ". "  
 B after Tr= 0.000000 0.000000 0.000000  
 Rot= 1.000000 0.000049 0.000084 -0.000823 Ang= 0.09 deg.  
 ExpMin= 3.50D-02 ExpMax= 4.40D+05 ExpMxC= 1.51D+04 IAcc=3 IRadAn= 5 AccDes=  
 0.00D+00  
 Harris functional with IExCor= 402 and IRadAn= 5 diagonalized for initial guess.  
 HarFok: IExCor= 402 AccDes= 0.00D+00 IRadAn= 5 IDoV= 1 UseB2=F ITyADJ=14  
 ICtDFT= 3500011 ScaDFX= 1.000000 1.000000 1.000000 1.000000  
 FoFCou: FMM=F IPFlag= 0 FMFlag= 100000 FMFlg1= 0  
 NFxFlg= 0 DoJE=T BraDBF=F KetDBF=T FulRan=T  
 wScrn= 0.000000 ICntrl= 500 IOpCl= 0 l1Cent= 200000004 NGrid=  
 0  
 NMat0= 1 NMatS0= 1 NMatT0= 0 NMatD0= 1 NMtDS0= 0  
 NMtDT0= 0  
 Petite list used in FoFCou.  
 Keep R1 ints in memory in canonical form, NReq=1804729152.  
 Requested convergence on RMS density matrix=1.00D-08 within 128 cycles.  
 Requested convergence on MAX density matrix=1.00D-06.  
 Requested convergence on energy=1.00D-06.  
 No special actions if energy rises.  
 SCF Done: E(RB3LYP) = -3032.34329573 A.U. after 11 cycles  
 NFock= 11 Conv=0.47D-08 -V/T= 2.0017  
 Calling FoFJK, ICntrl= 2127 FMM=F ISym2X=0 l1Cent= 0 IOpClX= 0 NMat=1 NMatS=1  
 NMatT=0.  
 \*\*\*\*\* Axes restored to original set \*\*\*\*\*

| Center<br>Number | Atomic<br>Number | Forces (Hartrees/Bohr) |              |              |
|------------------|------------------|------------------------|--------------|--------------|
|                  |                  | X                      | Y            | Z            |
| 1                | 6                | 0.000026657            | 0.000106006  | -0.000197493 |
| 2                | 6                | 0.000084587            | -0.000175326 | 0.000019944  |
| 3                | 7                | 0.000010602            | 0.000155974  | 0.000025380  |
| 4                | 6                | -0.000018145           | 0.000116781  | 0.000318069  |
| 5                | 7                | -0.000024226           | 0.000242018  | 0.000215176  |
| 6                | 6                | -0.000112650           | -0.000225855 | -0.000065234 |
| 7                | 6                | 0.000195950            | -0.000031348 | -0.000047048 |
| 8                | 1                | 0.000001231            | -0.000068362 | 0.000126521  |
| 9                | 1                | -0.000012855           | 0.000087777  | -0.000019472 |
| 10               | 1                | 0.000021171            | 0.000084860  | 0.000002440  |
| 11               | 1                | -0.000042937           | 0.000036650  | -0.000063337 |
| 12               | 1                | 0.000043029            | 0.000010573  | 0.000026357  |
| 13               | 1                | -0.000038282           | 0.000040402  | 0.000090034  |
| 14               | 35               | 0.000002186            | 0.000005984  | -0.000024116 |

|    |   |              |              |              |
|----|---|--------------|--------------|--------------|
| 15 | 1 | -0.000056904 | -0.000272443 | -0.000334438 |
| 16 | 6 | 0.000122120  | -0.000164421 | 0.000016586  |
| 17 | 6 | -0.000149102 | -0.000015352 | -0.000020639 |
| 18 | 1 | -0.000034556 | 0.000041446  | -0.000016264 |
| 19 | 1 | 0.000016282  | 0.000038309  | 0.000017650  |
| 20 | 1 | 0.000010490  | -0.000011315 | 0.000011431  |
| 21 | 8 | -0.000050492 | 0.000045157  | -0.000048596 |
| 22 | 1 | 0.000005845  | -0.000047516 | -0.000032949 |

-----  
Cartesian Forces: Max 0.000334438 RMS 0.000108229

GradGradGradGradGradGradGradGradGradGradGradGradGradGradGradGradGradGradGrad

Berny optimization.

Using GEDIIS/GDIIS optimizer.

FormGI is forming the generalized inverse of G from B-inverse, IUseBI=4.

Internal Forces: Max 0.000429184 RMS 0.000072562

Search for a local minimum.

Step number 69 out of a maximum of 116

All quantities printed in internal units (Hartrees-Bohrs-Radians)

Mixed Optimization -- En-DIIS/RFO-DIIS

Swapping is turned off.

Update second derivatives using D2CorX and points 62 63 64 65 66  
67 68 69

DE= -1.07D-05 DEPred=-5.10D-06 R= 2.09D+00

TightC=F SS= 1.41D+00 RLast= 8.13D-02 DXNew= 1.6377D+00 2.4396D-01

Trust test= 2.09D+00 RLast= 8.13D-02 DXMaxT set to 9.74D-01

ITU= 1 1 1 1 1 1 1 0 1 1 1 1 0 1 1 0 1 1 0-1

ITU= 1 1 1-1 1 0-1 1 0-1 0-1 0 0 1-1 0 1 1 1

ITU= 1 1 1 0-1 1 1 1 1 0-1 1 1 1 1 1 1 1 1

ITU= 1 1 1 1 0 0-1 0 0

|                 |         |         |         |         |         |
|-----------------|---------|---------|---------|---------|---------|
| Eigenvalues --- | 0.00133 | 0.00174 | 0.00246 | 0.00496 | 0.01006 |
| Eigenvalues --- | 0.01331 | 0.01470 | 0.01870 | 0.02154 | 0.02309 |
| Eigenvalues --- | 0.02512 | 0.03023 | 0.03178 | 0.03761 | 0.04074 |
| Eigenvalues --- | 0.04352 | 0.04983 | 0.05462 | 0.05711 | 0.08601 |
| Eigenvalues --- | 0.09053 | 0.09758 | 0.13156 | 0.14103 | 0.14598 |
| Eigenvalues --- | 0.15110 | 0.15564 | 0.15987 | 0.16095 | 0.16554 |
| Eigenvalues --- | 0.17700 | 0.20225 | 0.21194 | 0.23127 | 0.23357 |
| Eigenvalues --- | 0.24230 | 0.25641 | 0.27265 | 0.29796 | 0.32792 |
| Eigenvalues --- | 0.33772 | 0.33874 | 0.33958 | 0.34216 | 0.34349 |
| Eigenvalues --- | 0.34615 | 0.34848 | 0.36297 | 0.36324 | 0.36479 |
| Eigenvalues --- | 0.39770 | 0.43111 | 0.43841 | 0.45705 | 0.49057 |
| Eigenvalues --- | 0.53774 | 0.55314 | 0.57951 | 0.61029 | 0.77612 |

En-DIIS/RFO-DIIS IScMMF= 0 using points: 69 68 67 66 65

RFO step: Lambda=-1.1156536D-06.

DidBck=F Rises=F RFO-DIIS coefs: 1.64358 -0.79629 -0.05276 0.28369 -  
 0.07822

Iteration 1 RMS(Cart)= 0.00847819 RMS(Int)= 0.00003293  
 Iteration 2 RMS(Cart)= 0.00004746 RMS(Int)= 0.00000537  
 Iteration 3 RMS(Cart)= 0.00000000 RMS(Int)= 0.00000537

| Variable | Old X   | -DE/DX   | Delta X<br>(Linear) | Delta X<br>(Quad) | Delta X<br>(Total) | New X   |
|----------|---------|----------|---------------------|-------------------|--------------------|---------|
| R1       | 2.56663 | -0.00007 | -0.00005            | -0.00010          | -0.00015           | 2.56649 |
| R2       | 2.61583 | 0.00001  | 0.00000             | 0.00005           | 0.00005            | 2.61587 |
| R3       | 2.03409 | -0.00001 | 0.00001             | -0.00003          | -0.00002           | 2.03407 |
| R4       | 2.62812 | 0.00004  | 0.00002             | 0.00007           | 0.00009            | 2.62821 |
| R5       | 2.03071 | -0.00001 | 0.00000             | -0.00002          | -0.00001           | 2.03069 |
| R6       | 2.54663 | 0.00000  | 0.00027             | -0.00018          | 0.00010            | 2.54672 |
| R7       | 2.68732 | -0.00003 | -0.00026            | -0.00006          | -0.00032           | 2.68701 |
| R8       | 2.51950 | -0.00004 | 0.00012             | -0.00024          | -0.00012           | 2.51938 |
| R9       | 2.09109 | -0.00043 | -0.00109            | -0.00040          | -0.00149           | 2.08960 |
| R10      | 2.79445 | -0.00002 | 0.00006             | -0.00017          | -0.00011           | 2.79434 |
| R11      | 2.93104 | 0.00010  | 0.00003             | 0.00029           | 0.00032            | 2.93136 |
| R12      | 2.05782 | 0.00002  | 0.00006             | -0.00006          | 0.00000            | 2.05782 |
| R13      | 2.06072 | -0.00004 | -0.00002            | -0.00007          | -0.00009           | 2.06064 |
| R14      | 2.06642 | -0.00001 | -0.00007            | 0.00003           | -0.00004           | 2.06638 |
| R15      | 2.07194 | 0.00003  | 0.00015             | -0.00008          | 0.00007            | 2.07202 |
| R16      | 2.64973 | -0.00008 | -0.00036            | 0.00006           | -0.00030           | 2.64943 |
| R17      | 6.04177 | -0.00002 | -0.00781            | -0.00047          | -0.00828           | 6.03349 |
| R18      | 2.50641 | 0.00010  | 0.00016             | 0.00001           | 0.00018            | 2.50659 |
| R19      | 2.04567 | 0.00001  | 0.00019             | -0.00014          | 0.00005            | 2.04572 |
| R20      | 2.04300 | 0.00001  | 0.00006             | -0.00002          | 0.00004            | 2.04304 |
| R21      | 2.04569 | 0.00000  | 0.00011             | -0.00012          | 0.00000            | 2.04568 |
| R22      | 1.85105 | -0.00005 | -0.00001            | -0.00007          | -0.00008           | 1.85097 |
| A1       | 1.87531 | 0.00002  | 0.00004             | 0.00002           | 0.00006            | 1.87537 |
| A2       | 2.27702 | 0.00004  | 0.00022             | 0.00008           | 0.00031            | 2.27732 |
| A3       | 2.13085 | -0.00006 | -0.00027            | -0.00010          | -0.00037           | 2.13049 |
| A4       | 1.86206 | -0.00001 | 0.00008             | -0.00012          | -0.00004           | 1.86202 |
| A5       | 2.27648 | 0.00006  | 0.00035             | 0.00017           | 0.00052            | 2.27699 |
| A6       | 2.14464 | -0.00006 | -0.00043            | -0.00005          | -0.00047           | 2.14417 |
| A7       | 1.89624 | -0.00001 | -0.00007            | 0.00007           | -0.00001           | 1.89623 |
| A8       | 2.24589 | -0.00004 | -0.00045            | 0.00011           | -0.00034           | 2.24555 |
| A9       | 2.14104 | 0.00005  | 0.00053             | -0.00017          | 0.00036            | 2.14140 |
| A10      | 1.88973 | 0.00000  | -0.00005            | 0.00002           | -0.00002           | 1.88970 |
| A11      | 2.24717 | 0.00001  | -0.00016            | -0.00009          | -0.00022           | 2.24695 |
| A12      | 2.14522 | -0.00001 | 0.00003             | 0.00001           | 0.00006            | 2.14529 |
| A13      | 1.90142 | 0.00000  | 0.00000             | 0.00001           | 0.00002            | 1.90143 |
| A14      | 2.23065 | -0.00030 | -0.00113            | -0.00047          | -0.00158           | 2.22907 |
| A15      | 2.14893 | 0.00031  | 0.00103             | 0.00044           | 0.00149            | 2.15042 |

|     |          |          |          |          |          |          |
|-----|----------|----------|----------|----------|----------|----------|
| A16 | 1.95839  | 0.00019  | 0.00011  | 0.00003  | 0.00014  | 1.95853  |
| A17 | 1.86450  | -0.00002 | -0.00005 | 0.00019  | 0.00013  | 1.86463  |
| A18 | 1.87577  | -0.00009 | -0.00031 | -0.00009 | -0.00039 | 1.87538  |
| A19 | 1.88785  | -0.00009 | -0.00046 | -0.00011 | -0.00057 | 1.88729  |
| A20 | 1.96606  | -0.00005 | 0.00019  | -0.00006 | 0.00013  | 1.96619  |
| A21 | 1.90831  | 0.00007  | 0.00052  | 0.00006  | 0.00059  | 1.90890  |
| A22 | 1.92926  | 0.00003  | -0.00005 | 0.00042  | 0.00037  | 1.92963  |
| A23 | 1.89372  | -0.00005 | -0.00101 | 0.00009  | -0.00092 | 1.89280  |
| A24 | 1.92646  | 0.00004  | 0.00052  | -0.00025 | 0.00027  | 1.92673  |
| A25 | 1.89401  | 0.00004  | 0.00027  | 0.00048  | 0.00075  | 1.89476  |
| A26 | 1.87671  | -0.00003 | -0.00026 | 0.00011  | -0.00015 | 1.87656  |
| A27 | 1.94369  | -0.00002 | 0.00054  | -0.00083 | -0.00029 | 1.94339  |
| A28 | 1.73790  | 0.00005  | 0.00147  | 0.00070  | 0.00217  | 1.74007  |
| A29 | 2.17703  | 0.00011  | 0.00026  | 0.00020  | 0.00046  | 2.17749  |
| A30 | 1.95732  | -0.00001 | 0.00033  | -0.00005 | 0.00029  | 1.95760  |
| A31 | 2.14883  | -0.00010 | -0.00059 | -0.00016 | -0.00075 | 2.14809  |
| A32 | 2.08022  | -0.00005 | -0.00039 | -0.00005 | -0.00044 | 2.07978  |
| A33 | 2.15769  | 0.00001  | 0.00013  | -0.00001 | 0.00012  | 2.15781  |
| A34 | 2.04527  | 0.00004  | 0.00026  | 0.00006  | 0.00032  | 2.04559  |
| A35 | 1.85335  | -0.00003 | 0.00013  | -0.00044 | -0.00031 | 1.85304  |
| D1  | 0.00402  | 0.00000  | 0.00013  | 0.00006  | 0.00019  | 0.00421  |
| D2  | -3.13341 | -0.00001 | -0.00088 | -0.00115 | -0.00202 | -3.13543 |
| D3  | -3.14020 | -0.00006 | -0.00092 | -0.00040 | -0.00132 | -3.14152 |
| D4  | 0.00556  | -0.00007 | -0.00192 | -0.00161 | -0.00354 | 0.00203  |
| D5  | -0.00606 | 0.00000  | -0.00058 | 0.00047  | -0.00010 | -0.00616 |
| D6  | -3.07760 | -0.00003 | 0.00031  | 0.00068  | 0.00098  | -3.07662 |
| D7  | 3.13789  | 0.00005  | 0.00036  | 0.00089  | 0.00126  | 3.13914  |
| D8  | 0.06635  | 0.00002  | 0.00125  | 0.00110  | 0.00234  | 0.06869  |
| D9  | -0.00066 | 0.00000  | 0.00035  | -0.00057 | -0.00022 | -0.00088 |
| D10 | 3.13640  | 0.00002  | 0.00117  | 0.00092  | 0.00208  | 3.13848  |
| D11 | 3.13716  | 0.00001  | 0.00127  | 0.00052  | 0.00179  | 3.13895  |
| D12 | -0.00897 | 0.00003  | 0.00209  | 0.00201  | 0.00409  | -0.00488 |
| D13 | -0.00311 | -0.00001 | -0.00071 | 0.00087  | 0.00016  | -0.00295 |
| D14 | 3.08922  | -0.00003 | -0.00322 | -0.00056 | -0.00379 | 3.08543  |
| D15 | -3.14050 | -0.00002 | -0.00147 | -0.00051 | -0.00198 | 3.14071  |
| D16 | -0.04817 | -0.00004 | -0.00397 | -0.00194 | -0.00592 | -0.05409 |
| D17 | 0.03538  | 0.00001  | 0.01776  | -0.00118 | 0.01658  | 0.05196  |
| D18 | -3.10355 | 0.00002  | 0.01738  | -0.00081 | 0.01657  | -3.08697 |
| D19 | -3.11132 | 0.00003  | 0.01868  | 0.00049  | 0.01917  | -3.09214 |
| D20 | 0.03294  | 0.00004  | 0.01830  | 0.00087  | 0.01917  | 0.05211  |
| D21 | 0.00565  | 0.00001  | 0.00080  | -0.00083 | -0.00004 | 0.00562  |
| D22 | 3.08116  | 0.00001  | -0.00012 | -0.00108 | -0.00121 | 3.07995  |
| D23 | -3.09018 | 0.00002  | 0.00313  | 0.00050  | 0.00364  | -3.08654 |
| D24 | -0.01467 | 0.00003  | 0.00221  | 0.00026  | 0.00246  | -0.01220 |

|     |          |          |          |          |          |          |
|-----|----------|----------|----------|----------|----------|----------|
| D25 | 1.69357  | 0.00001  | -0.00239 | -0.00319 | -0.00558 | 1.68799  |
| D26 | -2.52353 | -0.00001 | -0.00292 | -0.00319 | -0.00611 | -2.52964 |
| D27 | -0.47709 | 0.00001  | -0.00249 | -0.00307 | -0.00556 | -0.48265 |
| D28 | -1.36889 | -0.00001 | -0.00135 | -0.00293 | -0.00427 | -1.37316 |
| D29 | 0.69720  | -0.00003 | -0.00187 | -0.00293 | -0.00480 | 0.69240  |
| D30 | 2.74363  | -0.00001 | -0.00144 | -0.00281 | -0.00425 | 2.73938  |
| D31 | -1.60167 | 0.00001  | -0.00122 | 0.00060  | -0.00062 | -1.60230 |
| D32 | 0.47324  | 0.00004  | -0.00154 | 0.00149  | -0.00005 | 0.47319  |
| D33 | 2.60749  | 0.00001  | -0.00120 | 0.00036  | -0.00084 | 2.60666  |
| D34 | 2.62928  | -0.00002 | -0.00094 | 0.00043  | -0.00051 | 2.62878  |
| D35 | -1.57899 | 0.00001  | -0.00125 | 0.00132  | 0.00007  | -1.57893 |
| D36 | 0.55527  | -0.00002 | -0.00091 | 0.00019  | -0.00072 | 0.55454  |
| D37 | 0.51803  | -0.00001 | -0.00140 | 0.00046  | -0.00094 | 0.51709  |
| D38 | 2.59294  | 0.00002  | -0.00172 | 0.00135  | -0.00037 | 2.59257  |
| D39 | -1.55599 | -0.00001 | -0.00137 | 0.00022  | -0.00115 | -1.55715 |
| D40 | 1.16923  | 0.00000  | 0.00180  | -0.00160 | 0.00020  | 1.16943  |
| D41 | -3.01696 | 0.00002  | 0.00131  | -0.00076 | 0.00055  | -3.01641 |
| D42 | -0.95451 | -0.00001 | 0.00147  | -0.00082 | 0.00066  | -0.95385 |
| D43 | -1.30147 | 0.00004  | -0.00055 | 0.00119  | 0.00065  | -1.30083 |
| D44 | 2.87596  | 0.00001  | -0.00063 | 0.00076  | 0.00013  | 2.87609  |
| D45 | 0.80313  | -0.00001 | -0.00111 | 0.00059  | -0.00052 | 0.80261  |
| D46 | -3.13711 | 0.00002  | 0.00107  | 0.00043  | 0.00150  | -3.13561 |
| D47 | 0.00419  | 0.00001  | 0.00148  | 0.00023  | 0.00171  | 0.00590  |
| D48 | 0.00154  | 0.00001  | 0.00150  | 0.00002  | 0.00151  | 0.00305  |
| D49 | -3.14035 | 0.00000  | 0.00191  | -0.00018 | 0.00172  | -3.13863 |

| Item                 | Value    | Threshold | Converged? |
|----------------------|----------|-----------|------------|
| Maximum Force        | 0.000429 | 0.000450  | YES        |
| RMS Force            | 0.000073 | 0.000300  | YES        |
| Maximum Displacement | 0.035985 | 0.001800  | NO         |
| RMS Displacement     | 0.008473 | 0.001200  | NO         |

Predicted change in Energy=-2.383482D-06

GradGradGradGradGradGradGradGradGradGradGradGradGradGradGradGradGradGradGrad

Input orientation:

| Center<br>Number | Atomic<br>Number | Atomic<br>Type | Coordinates (Angstroms) |           |           |
|------------------|------------------|----------------|-------------------------|-----------|-----------|
|                  |                  |                | X                       | Y         | Z         |
| 1                | 6                | 0              | -0.590934               | -2.344599 | -1.150089 |
| 2                | 6                | 0              | -1.888743               | -1.968843 | -1.287942 |
| 3                | 7                | 0              | -2.088299               | -0.897653 | -0.423637 |
| 4                | 6                | 0              | -0.931477               | -0.640520 | 0.218123  |
| 5                | 7                | 0              | -0.015257               | -1.510707 | -0.207009 |
| 6                | 6                | 0              | 1.397449                | -1.476870 | 0.228499  |

|    |    |   |           |           |           |
|----|----|---|-----------|-----------|-----------|
| 7  | 6  | 0 | 2.213756  | -0.385879 | -0.512872 |
| 8  | 1  | 0 | -0.035042 | -3.128296 | -1.635274 |
| 9  | 1  | 0 | -2.667262 | -2.366503 | -1.912866 |
| 10 | 1  | 0 | 1.394460  | -1.235015 | 1.290250  |
| 11 | 1  | 0 | 1.807458  | -2.477276 | 0.086572  |
| 12 | 1  | 0 | 2.683244  | -0.800301 | -1.409277 |
| 13 | 1  | 0 | 1.528250  | 0.414354  | -0.816090 |
| 14 | 35 | 0 | 0.724726  | 1.551659  | 2.057018  |
| 15 | 1  | 0 | -0.704628 | 0.166799  | 0.938887  |
| 16 | 6  | 0 | -3.274732 | -0.146955 | -0.198612 |
| 17 | 6  | 0 | -4.447177 | -0.397360 | -0.766136 |
| 18 | 1  | 0 | -3.116726 | 0.667983  | 0.496242  |
| 19 | 1  | 0 | -5.291209 | 0.236988  | -0.533648 |
| 20 | 1  | 0 | -4.615917 | -1.211061 | -1.459884 |
| 21 | 8  | 0 | 3.236771  | 0.103512  | 0.311500  |
| 22 | 1  | 0 | 2.801639  | 0.679665  | 0.973399  |

-----  
Distance matrix (angstroms):

|    |    | 1        | 2        | 3        | 4        | 5        |
|----|----|----------|----------|----------|----------|----------|
| 1  | C  | 0.000000 |          |          |          |          |
| 2  | C  | 1.358125 | 0.000000 |          |          |          |
| 3  | N  | 2.205331 | 1.390789 | 0.000000 |          |          |
| 4  | C  | 2.211754 | 2.224642 | 1.347669 | 0.000000 |          |
| 5  | N  | 1.384261 | 2.210939 | 2.172618 | 1.333200 | 0.000000 |
| 6  | C  | 2.570432 | 3.652490 | 3.593218 | 2.474568 | 1.478699 |
| 7  | C  | 3.479786 | 4.465087 | 4.333307 | 3.239087 | 2.515410 |
| 8  | H  | 1.076384 | 2.213861 | 3.264919 | 3.229196 | 2.157991 |
| 9  | H  | 2.212114 | 1.074596 | 2.170374 | 3.245471 | 3.267333 |
| 10 | H  | 3.335898 | 4.238513 | 3.896258 | 2.629232 | 2.074872 |
| 11 | H  | 2.701706 | 3.976141 | 4.234672 | 3.300416 | 2.083923 |
| 12 | H  | 3.629362 | 4.720516 | 4.873252 | 3.967388 | 3.038425 |
| 13 | H  | 3.494898 | 4.192625 | 3.867145 | 2.869253 | 2.541506 |
| 14 | Br | 5.215105 | 5.514790 | 4.479497 | 3.306084 | 3.879624 |
| 15 | H  | 3.268618 | 3.304823 | 2.214514 | 1.105768 | 2.145306 |
| 16 | C  | 3.596904 | 2.535130 | 1.421903 | 2.430662 | 3.533280 |
| 17 | C  | 4.337023 | 3.047527 | 2.435550 | 3.658966 | 4.603703 |
| 18 | H  | 4.262122 | 3.412346 | 2.086877 | 2.562195 | 3.854915 |
| 19 | H  | 5.397887 | 4.124491 | 3.399727 | 4.510260 | 5.567478 |
| 20 | H  | 4.193015 | 2.835715 | 2.749706 | 4.088560 | 4.777610 |
| 21 | O  | 4.772925 | 5.755325 | 5.468010 | 4.235162 | 3.667457 |
| 22 | H  | 5.016465 | 5.841912 | 5.324579 | 4.031065 | 3.758457 |
|    |    | 6        | 7        | 8        | 9        | 10       |
| 6  | C  | 0.000000 |          |          |          |          |
| 7  | C  | 1.551208 | 0.000000 |          |          |          |

|    |    |          |          |          |          |          |
|----|----|----------|----------|----------|----------|----------|
| 8  | H  | 2.872784 | 3.719909 | 0.000000 |          |          |
| 9  | H  | 4.679612 | 5.450430 | 2.754264 | 0.000000 |          |
| 10 | H  | 1.088953 | 2.154885 | 3.766521 | 5.295073 | 0.000000 |
| 11 | H  | 1.090442 | 2.213222 | 2.604494 | 4.902361 | 1.778375 |
| 12 | H  | 2.189366 | 1.093483 | 3.586044 | 5.597723 | 3.022811 |
| 13 | H  | 2.164487 | 1.096464 | 3.957943 | 5.151544 | 2.678617 |
| 14 | Br | 3.601114 | 3.546209 | 6.009346 | 6.528212 | 2.966821 |
| 15 | H  | 2.761345 | 3.306058 | 4.234654 | 4.289760 | 2.548472 |
| 16 | C  | 4.876512 | 5.502667 | 4.631197 | 2.869509 | 5.020153 |
| 17 | C  | 6.026134 | 6.665755 | 5.261211 | 2.891472 | 6.249408 |
| 18 | H  | 5.004983 | 5.526570 | 5.334030 | 3.900503 | 4.960106 |
| 19 | H  | 6.946677 | 7.530796 | 6.337666 | 3.945315 | 7.084601 |
| 20 | H  | 6.251549 | 6.944220 | 4.969001 | 2.310303 | 6.609723 |
| 21 | O  | 2.426438 | 1.402018 | 4.993924 | 6.775425 | 2.478653 |
| 22 | H  | 2.679042 | 1.920936 | 5.417795 | 6.893370 | 2.397196 |
|    |    | 11       | 12       | 13       | 14       | 15       |
| 11 | H  | 0.000000 |          |          |          |          |
| 12 | H  | 2.411806 | 0.000000 |          |          |          |
| 13 | H  | 3.042085 | 1.777996 | 0.000000 |          |          |
| 14 | Br | 4.613814 | 4.624144 | 3.192783 | 0.000000 |          |
| 15 | H  | 3.745417 | 4.234009 | 2.850784 | 2.282785 | 0.000000 |
| 16 | C  | 5.598248 | 6.114740 | 4.874934 | 4.895796 | 2.828034 |
| 17 | C  | 6.646323 | 7.170696 | 6.030513 | 6.206243 | 4.151150 |
| 18 | H  | 5.857309 | 6.279053 | 4.833461 | 4.239536 | 2.503066 |
| 19 | H  | 7.625154 | 8.089165 | 6.827610 | 6.680673 | 4.817677 |
| 20 | H  | 6.727152 | 7.310884 | 6.388053 | 6.965895 | 4.790697 |
| 21 | O  | 2.958715 | 2.020976 | 2.070538 | 3.384424 | 3.991522 |
| 22 | H  | 3.426533 | 2.807394 | 2.212280 | 2.499634 | 3.543746 |
|    |    | 16       | 17       | 18       | 19       | 20       |
| 16 | C  | 0.000000 |          |          |          |          |
| 17 | C  | 1.326428 | 0.000000 |          |          |          |
| 18 | H  | 1.082549 | 2.121002 | 0.000000 |          |          |
| 19 | H  | 2.079866 | 1.081129 | 2.444342 | 0.000000 |          |
| 20 | H  | 2.126477 | 1.082529 | 3.099162 | 1.846829 | 0.000000 |
| 21 | O  | 6.536254 | 7.775296 | 6.381198 | 8.570796 | 8.156630 |
| 22 | H  | 6.243332 | 7.532018 | 5.937581 | 8.243867 | 8.032176 |
|    |    | 21       | 22       |          |          |          |
| 21 | O  | 0.000000 |          |          |          |          |
| 22 | H  | 0.979491 | 0.000000 |          |          |          |

Stoichiometry C7H11BrN2O

Framework group C1[X(C7H11BrN2O)]

Deg. of freedom 60

Full point group C1 NOp 1

Largest Abelian subgroup C1 NOp 1



Largest concise Abelian subgroup C1 NOP 1

Standard orientation:

| Center Number | Atomic Number | Atomic Type | Coordinates (Angstroms) |           |           |
|---------------|---------------|-------------|-------------------------|-----------|-----------|
|               |               |             | X                       | Y         | Z         |
| 1             | 6             | 0           | -1.854116               | -2.004464 | 0.264836  |
| 2             | 6             | 0           | -2.845590               | -1.107803 | 0.025078  |
| 3             | 7             | 0           | -2.252130               | 0.149951  | 0.012704  |
| 4             | 6             | 0           | -0.931947               | 0.005744  | 0.241901  |
| 5             | 7             | 0           | -0.674736               | -1.292674 | 0.401203  |
| 6             | 6             | 0           | 0.689000                | -1.830279 | 0.595504  |
| 7             | 6             | 0           | 1.477377                | -1.925188 | -0.737051 |
| 8             | 1             | 0           | -1.887841               | -3.076748 | 0.352418  |
| 9             | 1             | 0           | -3.898053               | -1.257345 | -0.132132 |
| 10            | 1             | 0           | 1.212005                | -1.134546 | 1.249904  |
| 11            | 1             | 0           | 0.592262                | -2.794307 | 1.095858  |
| 12            | 1             | 0           | 1.343857                | -2.910104 | -1.192921 |
| 13            | 1             | 0           | 1.087619                | -1.166128 | -1.425637 |
| 14            | 35            | 0           | 2.025437                | 1.476827  | 0.100519  |
| 15            | 1             | 0           | -0.143106               | 0.780531  | 0.254484  |
| 16            | 6             | 0           | -2.860749               | 1.417246  | -0.200258 |
| 17            | 6             | 0           | -4.161021               | 1.611807  | -0.375899 |
| 18            | 1             | 0           | -2.136766               | 2.222057  | -0.206666 |
| 19            | 1             | 0           | -4.526395               | 2.616556  | -0.536590 |
| 20            | 1             | 0           | -4.892995               | 0.814294  | -0.368561 |
| 21            | 8             | 0           | 2.849105                | -1.749179 | -0.506754 |
| 22            | 1             | 0           | 2.976635                | -0.793102 | -0.336300 |

Rotational constants (GHZ): 0.9807186 0.4480083 0.3186478

Standard basis: 6-311++G(d,p) (5D, 7F)

There are 358 symmetry adapted cartesian basis functions of A symmetry.

There are 345 symmetry adapted basis functions of A symmetry.

345 basis functions, 553 primitive gaussians, 358 cartesian basis functions

55 alpha electrons 55 beta electrons

nuclear repulsion energy 851.7152723544 Hartrees.

NAtoms= 22 NActive= 22 NUniq= 22 SFac= 1.00D+00 NATFMM= 60 NAOKFM=F

Big=F

Integral buffers will be 131072 words long.

Raffenetti 2 integral format.

Two-electron integral symmetry is turned on.

One-electron integrals computed using PRISM.

NBasis= 345 RedAO= T EigKep= 4.67D-06 NBF= 345

NBsUse= 345 1.00D-06 EigRej= -1.00D+00 NBFU= 345

Initial guess from the checkpoint file: ".."

B after Tr= 0.000000 0.000000 0.000000

Rot= 1.000000 0.000083 0.000046 -0.000652 Ang= 0.08 deg.

ExpMin= 3.50D-02 ExpMax= 4.40D+05 ExpMxC= 1.51D+04 IAcc=3 IRadAn= 5 AccDes= 0.00D+00

Harris functional with IExCor= 402 and IRadAn= 5 diagonalized for initial guess.

HarFok: IExCor= 402 AccDes= 0.00D+00 IRadAn= 5 IDoV= 1 UseB2=F ITyADJ=14

ICtDFT= 3500011 ScaDFX= 1.000000 1.000000 1.000000 1.000000

FoFCou: FMM=F IPFlag= 0 FMFlag= 100000 FMFlg1= 0

NFxFlg= 0 DoJE=T BraDBF=F KetDBF=T FulRan=T

wScrn= 0.000000 ICntrl= 500 IOpCl= 0 I1Cent= 200000004 NGrid=

0

NMat0= 1 NMatS0= 1 NMatT0= 0 NMatD0= 1 NMtDS0= 0

NMtDT0= 0

Petite list used in FoFCou.

Keep R1 ints in memory in canonical form, NReq=1804729152.

Requested convergence on RMS density matrix=1.00D-08 within 128 cycles.

Requested convergence on MAX density matrix=1.00D-06.

Requested convergence on energy=1.00D-06.

No special actions if energy rises.

SCF Done: E(RB3LYP) = -3032.34329879 A.U. after 10 cycles

NFock= 10 Conv=0.94D-08 -V/T= 2.0017

Calling FoFJK, ICntrl= 2127 FMM=F ISym2X=0 I1Cent= 0 IOpClX= 0 NMat=1 NMatS=1

NMatT=0.

\*\*\*\*\* Axes restored to original set \*\*\*\*\*

| Center Number | Atomic Number | Forces (Hartrees/Bohr) |              |              |
|---------------|---------------|------------------------|--------------|--------------|
|               |               | X                      | Y            | Z            |
| 1             | 6             | 0.000004674            | 0.000025074  | -0.000108413 |
| 2             | 6             | 0.000022904            | -0.000106212 | 0.000031159  |
| 3             | 7             | 0.000045438            | 0.000017496  | 0.000033105  |
| 4             | 6             | -0.000042265           | -0.000002406 | 0.000004399  |
| 5             | 7             | 0.000012144            | 0.000088540  | 0.000104967  |
| 6             | 6             | -0.000081057           | -0.000079027 | -0.000013576 |
| 7             | 6             | 0.000023884            | -0.000007274 | -0.000087923 |
| 8             | 1             | 0.000000036            | -0.000033158 | 0.000055589  |
| 9             | 1             | -0.000001652           | 0.000048461  | -0.000021533 |
| 10            | 1             | 0.000010230            | 0.000014623  | -0.000003242 |
| 11            | 1             | -0.000009297           | 0.000012424  | -0.000015607 |
| 12            | 1             | -0.000002599           | -0.000002378 | 0.000006912  |
| 13            | 1             | 0.000016690            | 0.000021685  | 0.000014594  |
| 14            | 35            | 0.000016072            | 0.000037000  | 0.000020151  |
| 15            | 1             | -0.000005648           | -0.000047693 | -0.000054532 |

|    |   |              |              |              |
|----|---|--------------|--------------|--------------|
| 16 | 6 | -0.000013842 | -0.000012600 | 0.000010214  |
| 17 | 6 | -0.000031422 | 0.000002010  | -0.000009531 |
| 18 | 1 | 0.000001794  | 0.000006513  | 0.000006466  |
| 19 | 1 | 0.000004241  | 0.000000412  | 0.000008305  |
| 20 | 1 | 0.000006133  | -0.000009068 | 0.000003798  |
| 21 | 8 | 0.000010622  | 0.000006106  | 0.000028403  |
| 22 | 1 | 0.000012921  | 0.000019470  | -0.000013705 |

-----  
Cartesian Forces: Max 0.000108413 RMS 0.000037031

GradGradGradGradGradGradGradGradGradGradGradGradGradGradGradGradGradGradGradGrad

Berny optimization.

Using GEDIIS/GDIIS optimizer.

FormGI is forming the generalized inverse of G from B-inverse, IUseBI=4.

Internal Forces: Max 0.000152858 RMS 0.000035145

Search for a local minimum.

Step number 70 out of a maximum of 116

All quantities printed in internal units (Hartrees-Bohrs-Radians)

Mixed Optimization -- En-DIIS/RFO-DIIS

Swapping is turned off.

Update second derivatives using D2CorX and points 62 63 64 65 66  
67 68 69 70

DE= -3.06D-06 DEPred=-2.38D-06 R= 1.28D+00

TightC=F SS= 1.41D+00 RLast= 4.09D-02 DXNew= 1.6377D+00 1.2260D-01

Trust test= 1.28D+00 RLast= 4.09D-02 DXMaxT set to 9.74D-01

ITU= 1 1 1 1 1 1 1 1 0 1 1 1 1 0 1 1 0 1 1 0

ITU= -1 1 1 1 -1 1 0 -1 1 0 -1 0 0 1 -1 0 1 1

ITU= 1 1 1 1 0 -1 1 1 1 1 1 0 -1 1 1 1 1 1 1 1

ITU= 1 1 1 1 1 0 0 -1 0 0

|                 |         |         |         |         |         |
|-----------------|---------|---------|---------|---------|---------|
| Eigenvalues --- | 0.00132 | 0.00181 | 0.00250 | 0.00474 | 0.00999 |
| Eigenvalues --- | 0.01360 | 0.01517 | 0.01874 | 0.02035 | 0.02157 |
| Eigenvalues --- | 0.02523 | 0.03024 | 0.03179 | 0.03792 | 0.04058 |
| Eigenvalues --- | 0.04391 | 0.05006 | 0.05360 | 0.05705 | 0.08609 |
| Eigenvalues --- | 0.08857 | 0.09690 | 0.13182 | 0.13880 | 0.14617 |
| Eigenvalues --- | 0.14978 | 0.15519 | 0.15932 | 0.16058 | 0.16570 |
| Eigenvalues --- | 0.17733 | 0.19374 | 0.20362 | 0.22844 | 0.23374 |
| Eigenvalues --- | 0.23620 | 0.25250 | 0.27368 | 0.29731 | 0.32868 |
| Eigenvalues --- | 0.33778 | 0.33834 | 0.33961 | 0.34176 | 0.34291 |
| Eigenvalues --- | 0.34677 | 0.34843 | 0.35653 | 0.36313 | 0.36398 |
| Eigenvalues --- | 0.38449 | 0.43002 | 0.43785 | 0.45867 | 0.48930 |
| Eigenvalues --- | 0.53776 | 0.55630 | 0.57782 | 0.61033 | 0.71464 |

En-DIIS/RFO-DIIS IScMMF= 0 using points: 70 69 68 67 66

RFO step: Lambda=-2.10064472D-07.

DidBck=F Rises=F RFO-DIIS coefs: 1.23316 -0.12422 -0.26042 0.29388 -

0.14240

Iteration 1 RMS(Cart)= 0.00282052 RMS(Int)= 0.00000321

Iteration 2 RMS(Cart)= 0.00000393 RMS(Int)= 0.00000178

Iteration 3 RMS(Cart)= 0.00000000 RMS(Int)= 0.00000178

| Variable | Old X   | -DE/DX   | Delta X<br>(Linear) | Delta X<br>(Quad) | Delta X<br>(Total) | New X   |
|----------|---------|----------|---------------------|-------------------|--------------------|---------|
| R1       | 2.56649 | -0.00003 | -0.00002            | -0.00004          | -0.00006           | 2.56643 |
| R2       | 2.61587 | 0.00004  | 0.00002             | 0.00007           | 0.00009            | 2.61596 |
| R3       | 2.03407 | 0.00000  | 0.00000             | 0.00000           | 0.00000            | 2.03407 |
| R4       | 2.62821 | 0.00003  | 0.00005             | 0.00004           | 0.00009            | 2.62830 |
| R5       | 2.03069 | 0.00000  | 0.00000             | 0.00000           | -0.00001           | 2.03069 |
| R6       | 2.54672 | -0.00002 | 0.00000             | -0.00006          | -0.00006           | 2.54667 |
| R7       | 2.68701 | 0.00002  | -0.00012            | 0.00016           | 0.00004            | 2.68704 |
| R8       | 2.51938 | -0.00002 | -0.00003            | -0.00004          | -0.00007           | 2.51931 |
| R9       | 2.08960 | -0.00007 | -0.00035            | -0.00006          | -0.00041           | 2.08919 |
| R10      | 2.79434 | -0.00002 | -0.00008            | -0.00011          | -0.00019           | 2.79415 |
| R11      | 2.93136 | 0.00009  | 0.00007             | 0.00017           | 0.00023            | 2.93159 |
| R12      | 2.05782 | 0.00000  | -0.00002            | -0.00002          | -0.00003           | 2.05779 |
| R13      | 2.06064 | -0.00001 | -0.00001            | -0.00001          | -0.00002           | 2.06061 |
| R14      | 2.06638 | -0.00001 | 0.00000             | -0.00004          | -0.00005           | 2.06634 |
| R15      | 2.07202 | 0.00001  | 0.00002             | -0.00005          | -0.00003           | 2.07198 |
| R16      | 2.64943 | 0.00004  | 0.00004             | 0.00010           | 0.00014            | 2.64957 |
| R17      | 6.03349 | 0.00003  | -0.00222            | 0.00139           | -0.00082           | 6.03266 |
| R18      | 2.50659 | 0.00002  | 0.00003             | -0.00001          | 0.00002            | 2.50661 |
| R19      | 2.04572 | 0.00001  | 0.00001             | 0.00002           | 0.00004            | 2.04576 |
| R20      | 2.04304 | 0.00000  | 0.00001             | -0.00002          | -0.00001           | 2.04303 |
| R21      | 2.04568 | 0.00000  | -0.00001            | 0.00003           | 0.00002            | 2.04570 |
| R22      | 1.85097 | 0.00000  | -0.00003            | -0.00001          | -0.00003           | 1.85093 |
| A1       | 1.87537 | 0.00000  | 0.00000             | -0.00003          | -0.00002           | 1.87535 |
| A2       | 2.27732 | 0.00002  | 0.00008             | 0.00010           | 0.00018            | 2.27750 |
| A3       | 2.13049 | -0.00002 | -0.00008            | -0.00008          | -0.00016           | 2.13033 |
| A4       | 1.86202 | -0.00001 | 0.00000             | -0.00003          | -0.00002           | 1.86200 |
| A5       | 2.27699 | 0.00003  | 0.00010             | 0.00018           | 0.00027            | 2.27727 |
| A6       | 2.14417 | -0.00002 | -0.00010            | -0.00015          | -0.00025           | 2.14392 |
| A7       | 1.89623 | 0.00001  | -0.00003            | 0.00005           | 0.00003            | 1.89626 |
| A8       | 2.24555 | -0.00002 | 0.00002             | -0.00013          | -0.00011           | 2.24543 |
| A9       | 2.14140 | 0.00001  | 0.00001             | 0.00008           | 0.00009            | 2.14149 |
| A10      | 1.88970 | 0.00000  | 0.00003             | -0.00004          | -0.00001           | 1.88969 |
| A11      | 2.24695 | 0.00001  | -0.00011            | 0.00005           | -0.00007           | 2.24688 |
| A12      | 2.14529 | -0.00001 | 0.00004             | -0.00003          | 0.00000            | 2.14528 |
| A13      | 1.90143 | 0.00000  | -0.00001            | 0.00003           | 0.00003            | 1.90146 |
| A14      | 2.22907 | -0.00015 | -0.00037            | -0.00026          | -0.00063           | 2.22844 |
| A15      | 2.15042 | 0.00015  | 0.00034             | 0.00020           | 0.00054            | 2.15096 |
| A16      | 1.95853 | 0.00011  | -0.00005            | 0.00020           | 0.00015            | 1.95868 |

|     |          |          |          |          |          |          |
|-----|----------|----------|----------|----------|----------|----------|
| A17 | 1.86463  | 0.00000  | -0.00003 | 0.00018  | 0.00015  | 1.86478  |
| A18 | 1.87538  | -0.00007 | 0.00001  | -0.00013 | -0.00012 | 1.87526  |
| A19 | 1.88729  | -0.00003 | -0.00010 | -0.00009 | -0.00019 | 1.88709  |
| A20 | 1.96619  | -0.00004 | 0.00005  | -0.00013 | -0.00008 | 1.96611  |
| A21 | 1.90890  | 0.00002  | 0.00011  | -0.00002 | 0.00010  | 1.90899  |
| A22 | 1.92963  | -0.00005 | 0.00008  | -0.00009 | -0.00001 | 1.92962  |
| A23 | 1.89280  | 0.00006  | -0.00004 | -0.00008 | -0.00012 | 1.89268  |
| A24 | 1.92673  | 0.00002  | -0.00016 | 0.00012  | -0.00004 | 1.92669  |
| A25 | 1.89476  | 0.00001  | 0.00019  | 0.00002  | 0.00021  | 1.89497  |
| A26 | 1.87656  | 0.00001  | 0.00013  | -0.00011 | 0.00002  | 1.87658  |
| A27 | 1.94339  | -0.00006 | -0.00019 | 0.00015  | -0.00004 | 1.94335  |
| A28 | 1.74007  | 0.00001  | 0.00107  | -0.00039 | 0.00068  | 1.74075  |
| A29 | 2.17749  | 0.00001  | 0.00015  | -0.00015 | 0.00000  | 2.17749  |
| A30 | 1.95760  | 0.00000  | -0.00002 | 0.00003  | 0.00002  | 1.95762  |
| A31 | 2.14809  | 0.00000  | -0.00013 | 0.00012  | -0.00001 | 2.14808  |
| A32 | 2.07978  | 0.00000  | -0.00015 | 0.00007  | -0.00007 | 2.07971  |
| A33 | 2.15781  | -0.00001 | 0.00006  | -0.00010 | -0.00004 | 2.15777  |
| A34 | 2.04559  | 0.00001  | 0.00009  | 0.00003  | 0.00012  | 2.04571  |
| A35 | 1.85304  | 0.00002  | 0.00009  | -0.00001 | 0.00009  | 1.85313  |
| D1  | 0.00421  | 0.00000  | 0.00005  | 0.00008  | 0.00013  | 0.00434  |
| D2  | -3.13543 | -0.00001 | -0.00035 | -0.00061 | -0.00096 | -3.13639 |
| D3  | -3.14152 | -0.00003 | -0.00045 | -0.00062 | -0.00106 | 3.14061  |
| D4  | 0.00203  | -0.00004 | -0.00084 | -0.00131 | -0.00215 | -0.00012 |
| D5  | -0.00616 | 0.00000  | -0.00007 | -0.00016 | -0.00023 | -0.00639 |
| D6  | -3.07662 | -0.00002 | 0.00052  | 0.00017  | 0.00069  | -3.07593 |
| D7  | 3.13914  | 0.00002  | 0.00038  | 0.00046  | 0.00084  | 3.13998  |
| D8  | 0.06869  | 0.00001  | 0.00096  | 0.00079  | 0.00176  | 0.07045  |
| D9  | -0.00088 | 0.00001  | -0.00001 | 0.00003  | 0.00001  | -0.00086 |
| D10 | 3.13848  | 0.00001  | 0.00051  | -0.00031 | 0.00020  | 3.13869  |
| D11 | 3.13895  | 0.00002  | 0.00035  | 0.00065  | 0.00100  | 3.13995  |
| D12 | -0.00488 | 0.00002  | 0.00087  | 0.00032  | 0.00119  | -0.00369 |
| D13 | -0.00295 | -0.00001 | -0.00003 | -0.00013 | -0.00016 | -0.00311 |
| D14 | 3.08543  | 0.00000  | -0.00154 | -0.00041 | -0.00195 | 3.08348  |
| D15 | 3.14071  | -0.00001 | -0.00051 | 0.00018  | -0.00033 | 3.14038  |
| D16 | -0.05409 | -0.00001 | -0.00202 | -0.00010 | -0.00212 | -0.05622 |
| D17 | 0.05196  | 0.00000  | 0.00315  | -0.00059 | 0.00256  | 0.05452  |
| D18 | -3.08697 | 0.00000  | 0.00326  | -0.00067 | 0.00259  | -3.08439 |
| D19 | -3.09214 | 0.00000  | 0.00374  | -0.00097 | 0.00277  | -3.08937 |
| D20 | 0.05211  | 0.00000  | 0.00385  | -0.00105 | 0.00280  | 0.05491  |
| D21 | 0.00562  | 0.00001  | 0.00006  | 0.00018  | 0.00024  | 0.00585  |
| D22 | 3.07995  | 0.00000  | -0.00053 | -0.00015 | -0.00069 | 3.07927  |
| D23 | -3.08654 | 0.00000  | 0.00146  | 0.00044  | 0.00191  | -3.08463 |
| D24 | -0.01220 | 0.00000  | 0.00087  | 0.00011  | 0.00098  | -0.01122 |
| D25 | 1.68799  | -0.00003 | -0.00241 | -0.00216 | -0.00457 | 1.68342  |

|     |          |          |          |          |          |          |
|-----|----------|----------|----------|----------|----------|----------|
| D26 | -2.52964 | 0.00001  | -0.00257 | -0.00205 | -0.00462 | -2.53426 |
| D27 | -0.48265 | 0.00000  | -0.00245 | -0.00204 | -0.00449 | -0.48714 |
| D28 | -1.37316 | -0.00003 | -0.00173 | -0.00178 | -0.00350 | -1.37666 |
| D29 | 0.69240  | 0.00000  | -0.00189 | -0.00166 | -0.00356 | 0.68884  |
| D30 | 2.73938  | -0.00001 | -0.00177 | -0.00165 | -0.00342 | 2.73596  |
| D31 | -1.60230 | 0.00004  | -0.00031 | 0.00001  | -0.00030 | -1.60260 |
| D32 | 0.47319  | 0.00006  | -0.00006 | -0.00007 | -0.00013 | 0.47306  |
| D33 | 2.60666  | 0.00005  | -0.00042 | 0.00013  | -0.00029 | 2.60637  |
| D34 | 2.62878  | -0.00001 | -0.00019 | -0.00027 | -0.00046 | 2.62832  |
| D35 | -1.57893 | 0.00001  | 0.00007  | -0.00036 | -0.00029 | -1.57921 |
| D36 | 0.55454  | -0.00001 | -0.00029 | -0.00015 | -0.00044 | 0.55410  |
| D37 | 0.51709  | 0.00000  | -0.00029 | -0.00011 | -0.00040 | 0.51669  |
| D38 | 2.59257  | 0.00002  | -0.00004 | -0.00019 | -0.00023 | 2.59234  |
| D39 | -1.55715 | 0.00001  | -0.00040 | 0.00002  | -0.00039 | -1.55753 |
| D40 | 1.16943  | 0.00008  | 0.00019  | 0.00003  | 0.00023  | 1.16966  |
| D41 | -3.01641 | 0.00006  | 0.00038  | -0.00012 | 0.00026  | -3.01615 |
| D42 | -0.95385 | 0.00004  | 0.00054  | -0.00015 | 0.00039  | -0.95346 |
| D43 | -1.30083 | -0.00005 | -0.00102 | -0.00009 | -0.00111 | -1.30194 |
| D44 | 2.87609  | 0.00000  | -0.00111 | 0.00003  | -0.00108 | 2.87501  |
| D45 | 0.80261  | 0.00001  | -0.00131 | -0.00001 | -0.00132 | 0.80129  |
| D46 | -3.13561 | 0.00000  | 0.00032  | -0.00015 | 0.00017  | -3.13544 |
| D47 | 0.00590  | 0.00000  | 0.00035  | -0.00007 | 0.00028  | 0.00618  |
| D48 | 0.00305  | 0.00000  | 0.00020  | -0.00007 | 0.00014  | 0.00319  |
| D49 | -3.13863 | 0.00000  | 0.00024  | 0.00001  | 0.00025  | -3.13838 |

| Item                 | Value    | Threshold | Converged? |
|----------------------|----------|-----------|------------|
| Maximum Force        | 0.000153 | 0.000450  | YES        |
| RMS Force            | 0.000035 | 0.000300  | YES        |
| Maximum Displacement | 0.008998 | 0.001800  | NO         |
| RMS Displacement     | 0.002821 | 0.001200  | NO         |

Predicted change in Energy=-3.473107D-07

GradGradGradGradGradGradGradGradGradGradGradGradGradGradGradGradGradGradGrad

Input orientation:

| Center Number | Atomic Number | Atomic Type | Coordinates (Angstroms) |           |           |
|---------------|---------------|-------------|-------------------------|-----------|-----------|
|               |               |             | X                       | Y         | Z         |
| 1             | 6             | 0           | -0.590080               | -2.341988 | -1.151853 |
| 2             | 6             | 0           | -1.887838               | -1.966333 | -1.290157 |
| 3             | 7             | 0           | -2.088618               | -0.897238 | -0.423469 |
| 4             | 6             | 0           | -0.932571               | -0.641252 | 0.220081  |
| 5             | 7             | 0           | -0.015707               | -1.510226 | -0.206030 |
| 6             | 6             | 0           | 1.396781                | -1.477134 | 0.229905  |
| 7             | 6             | 0           | 2.214673                | -0.387991 | -0.512691 |

|    |    |   |           |           |           |
|----|----|---|-----------|-----------|-----------|
| 8  | 1  | 0 | -0.033502 | -3.124850 | -1.637597 |
| 9  | 1  | 0 | -2.665529 | -2.361989 | -1.917373 |
| 10 | 1  | 0 | 1.393816  | -1.233697 | 1.291276  |
| 11 | 1  | 0 | 1.805771  | -2.478152 | 0.089455  |
| 12 | 1  | 0 | 2.684357  | -0.804264 | -1.408105 |
| 13 | 1  | 0 | 1.530058  | 0.412411  | -0.817412 |
| 14 | 35 | 0 | 0.725538  | 1.556420  | 2.052269  |
| 15 | 1  | 0 | -0.706373 | 0.165290  | 0.941587  |
| 16 | 6  | 0 | -3.275666 | -0.147666 | -0.197810 |
| 17 | 6  | 0 | -4.448120 | -0.399048 | -0.764912 |
| 18 | 1  | 0 | -3.118133 | 0.667318  | 0.497126  |
| 19 | 1  | 0 | -5.292556 | 0.234610  | -0.532031 |
| 20 | 1  | 0 | -4.616406 | -1.212941 | -1.458558 |
| 21 | 8  | 0 | 3.237642  | 0.101716  | 0.311678  |
| 22 | 1  | 0 | 2.802810  | 0.680127  | 0.971775  |

-----  
Distance matrix (angstroms):

|    |    | 1        | 2        | 3        | 4        | 5        |
|----|----|----------|----------|----------|----------|----------|
| 1  | C  | 0.000000 |          |          |          |          |
| 2  | C  | 1.358094 | 0.000000 |          |          |          |
| 3  | N  | 2.205326 | 1.390835 | 0.000000 |          |          |
| 4  | C  | 2.211787 | 2.224678 | 1.347639 | 0.000000 |          |
| 5  | N  | 1.384309 | 2.210936 | 2.172555 | 1.333164 | 0.000000 |
| 6  | C  | 2.569989 | 3.652208 | 3.593214 | 2.474808 | 1.478600 |
| 7  | C  | 3.477538 | 4.463878 | 4.334237 | 3.241333 | 2.515561 |
| 8  | H  | 1.076382 | 2.213919 | 3.264944 | 3.229171 | 2.157940 |
| 9  | H  | 2.212219 | 1.074593 | 2.170270 | 3.245426 | 3.267377 |
| 10 | H  | 3.336620 | 4.239080 | 3.896268 | 2.628788 | 2.074886 |
| 11 | H  | 2.701756 | 3.975932 | 4.234224 | 3.299967 | 2.083741 |
| 12 | H  | 3.626596 | 4.719034 | 4.874366 | 3.969852 | 3.038702 |
| 13 | H  | 3.491926 | 4.190933 | 3.868487 | 2.872479 | 2.541596 |
| 14 | Br | 5.214866 | 5.514647 | 4.479865 | 3.306963 | 3.879907 |
| 15 | H  | 3.268403 | 3.304596 | 2.214260 | 1.105553 | 2.145088 |
| 16 | C  | 3.596890 | 2.535120 | 1.421922 | 2.430711 | 3.533266 |
| 17 | C  | 4.336959 | 3.047508 | 2.435575 | 3.658956 | 4.603624 |
| 18 | H  | 4.262171 | 3.412348 | 2.086919 | 2.562380 | 3.855019 |
| 19 | H  | 5.397807 | 4.124441 | 3.399718 | 4.510242 | 5.567394 |
| 20 | H  | 4.192865 | 2.835674 | 2.749689 | 4.088435 | 4.777409 |
| 21 | O  | 4.771275 | 5.754411 | 5.468766 | 4.236870 | 3.667514 |
| 22 | H  | 5.015444 | 5.841426 | 5.325492 | 4.032885 | 3.758844 |
|    |    | 6        | 7        | 8        | 9        | 10       |
| 6  | C  | 0.000000 |          |          |          |          |
| 7  | C  | 1.551332 | 0.000000 |          |          |          |
| 8  | H  | 2.871975 | 3.716194 | 0.000000 |          |          |

|    |    |          |          |          |          |          |
|----|----|----------|----------|----------|----------|----------|
| 9  | H  | 4.679331 | 5.448502 | 2.754596 | 0.000000 |          |
| 10 | H  | 1.088935 | 2.154838 | 3.767226 | 5.295919 | 0.000000 |
| 11 | H  | 1.090430 | 2.213269 | 2.604583 | 4.902385 | 1.778412 |
| 12 | H  | 2.189448 | 1.093459 | 3.581137 | 5.595279 | 3.022675 |
| 13 | H  | 2.164490 | 1.096446 | 3.953433 | 5.148802 | 2.678582 |
| 14 | Br | 3.601948 | 3.546446 | 6.008788 | 6.527735 | 2.968242 |
| 15 | H  | 2.761758 | 3.309616 | 4.234379 | 4.289416 | 2.547596 |
| 16 | C  | 4.876698 | 5.504609 | 4.631223 | 2.869214 | 5.020050 |
| 17 | C  | 6.026176 | 6.667574 | 5.261219 | 2.891182 | 6.249221 |
| 18 | H  | 5.005450 | 5.529216 | 5.334091 | 3.900174 | 4.960062 |
| 19 | H  | 6.946787 | 7.533027 | 6.337657 | 3.944968 | 7.084346 |
| 20 | H  | 6.251330 | 6.945420 | 4.968950 | 2.310139 | 6.609447 |
| 21 | O  | 2.426566 | 1.402092 | 4.991070 | 6.773917 | 2.478434 |
| 22 | H  | 2.679751 | 1.921047 | 5.415841 | 6.892343 | 2.397930 |
|    |    | 11       | 12       | 13       | 14       | 15       |
| 11 | H  | 0.000000 |          |          |          |          |
| 12 | H  | 2.411742 | 0.000000 |          |          |          |
| 13 | H  | 3.042003 | 1.778095 | 0.000000 |          |          |
| 14 | Br | 4.614902 | 4.624283 | 3.192347 | 0.000000 |          |
| 15 | H  | 3.744969 | 4.237705 | 2.856006 | 2.284563 | 0.000000 |
| 16 | C  | 5.597740 | 6.117010 | 4.877763 | 4.896570 | 2.827973 |
| 17 | C  | 6.645583 | 7.172874 | 6.033227 | 6.207020 | 4.151058 |
| 18 | H  | 5.857048 | 6.282066 | 4.837217 | 4.240610 | 2.503230 |
| 19 | H  | 7.624407 | 8.091842 | 6.830894 | 6.681560 | 4.817617 |
| 20 | H  | 6.726178 | 7.312367 | 6.389981 | 6.966465 | 4.790467 |
| 21 | O  | 2.958945 | 2.021034 | 2.070560 | 3.384744 | 3.994507 |
| 22 | H  | 3.427434 | 2.807361 | 2.211959 | 2.500084 | 3.546877 |
|    |    | 16       | 17       | 18       | 19       | 20       |
| 16 | C  | 0.000000 |          |          |          |          |
| 17 | C  | 1.326441 | 0.000000 |          |          |          |
| 18 | H  | 1.082568 | 2.121024 | 0.000000 |          |          |
| 19 | H  | 2.079828 | 1.081124 | 2.444283 | 0.000000 |          |
| 20 | H  | 2.126472 | 1.082538 | 3.099177 | 1.846899 | 0.000000 |
| 21 | O  | 6.537962 | 7.776937 | 6.383586 | 8.572852 | 8.157704 |
| 22 | H  | 6.245081 | 7.533703 | 5.939951 | 8.245901 | 8.033368 |
|    |    | 21       | 22       |          |          |          |
| 21 | O  | 0.000000 |          |          |          |          |
| 22 | H  | 0.979472 | 0.000000 |          |          |          |

Stoichiometry C7H11BrN2O

Framework group C1[X(C7H11BrN2O)]

Deg. of freedom 60

Full point group C1 NOp 1

Largest Abelian subgroup C1 NOp 1

Largest concise Abelian subgroup C1 NOp 1



Standard orientation:

| Center<br>Number | Atomic<br>Number | Atomic<br>Type | Coordinates (Angstroms) |           |           |
|------------------|------------------|----------------|-------------------------|-----------|-----------|
|                  |                  |                | X                       | Y         | Z         |
| 1                | 6                | 0              | -1.852965               | -2.004996 | 0.260149  |
| 2                | 6                | 0              | -2.844681               | -1.108666 | 0.020330  |
| 3                | 7                | 0              | -2.252389               | 0.149729  | 0.013000  |
| 4                | 6                | 0              | -0.932686               | 0.006189  | 0.245187  |
| 5                | 7                | 0              | -0.674650               | -1.292365 | 0.401715  |
| 6                | 6                | 0              | 0.688797                | -1.829976 | 0.597274  |
| 7                | 6                | 0              | 1.478302                | -1.925971 | -0.734679 |
| 8                | 1                | 0              | -1.885809               | -3.077483 | 0.345542  |
| 9                | 1                | 0              | -3.896475               | -1.258589 | -0.140921 |
| 10               | 1                | 0              | 1.211596                | -1.133951 | 1.251498  |
| 11               | 1                | 0              | 0.591471                | -2.793672 | 1.098128  |
| 12               | 1                | 0              | 1.345248                | -2.911283 | -1.189772 |
| 13               | 1                | 0              | 1.089042                | -1.167412 | -1.424070 |
| 14               | 35               | 0              | 2.025338                | 1.477467  | 0.098770  |
| 15               | 1                | 0              | -0.144594               | 0.781386  | 0.260300  |
| 16               | 6                | 0              | -2.861868               | 1.416994  | -0.197802 |
| 17               | 6                | 0              | -4.162268               | 1.610960  | -0.373250 |
| 18               | 1                | 0              | -2.138439               | 2.222337  | -0.202742 |
| 19               | 1                | 0              | -4.528230               | 2.615741  | -0.532363 |
| 20               | 1                | 0              | -4.893689               | 0.812916  | -0.367141 |
| 21               | 8                | 0              | 2.849892                | -1.749608 | -0.503378 |
| 22               | 1                | 0              | 2.977410                | -0.793241 | -0.334657 |

Rotational constants (GHZ): 0.9806341 0.4479837 0.3185659

Standard basis: 6-311++G(d,p) (5D, 7F)

There are 358 symmetry adapted cartesian basis functions of A symmetry.

There are 345 symmetry adapted basis functions of A symmetry.

345 basis functions, 553 primitive gaussians, 358 cartesian basis functions

55 alpha electrons 55 beta electrons

nuclear repulsion energy 851.6635159892 Hartrees.

NAtoms= 22 NActive= 22 NUniq= 22 SFac= 1.00D+00 NAtFMM= 60 NAOKFM=F

Big=F

Integral buffers will be 131072 words long.

Raffenetti 2 integral format.

Two-electron integral symmetry is turned on.

One-electron integrals computed using PRISM.

NBasis= 345 RedAO= T EigKep= 4.67D-06 NBF= 345

NBsUse= 345 1.00D-06 EigRej= -1.00D+00 NBFU= 345

Initial guess from the checkpoint file: "."

B after Tr= 0.000000 0.000000 0.000000  
Rot= 1.000000 0.000062 0.000011 -0.000108 Ang= 0.01 deg.

Keep R1 ints in memory in canonical form, NReq=1804729152.

Requested convergence on RMS density matrix=1.00D-08 within 128 cycles.

Requested convergence on MAX density matrix=1.00D-06.

Requested convergence on energy=1.00D-06.

No special actions if energy rises.

SCF Done: E(RB3LYP) = -3032.34329884 A.U. after 9 cycles

NFock= 9 Conv=0.96D-08 -V/T= 2.0017

Calling FoFJK, ICntrl= 2127 FMM=F ISym2X=0 l1Cent= 0 IOpClX= 0 NMat=1 NMatS=1  
NMatT=0.

\*\*\*\*\* Axes restored to original set \*\*\*\*\*

| Center<br>Number | Atomic<br>Number | Forces (Hartrees/Bohr) |              |              |
|------------------|------------------|------------------------|--------------|--------------|
|                  |                  | X                      | Y            | Z            |
| 1                | 6                | -0.000005115           | 0.000000890  | -0.000033611 |
| 2                | 6                | 0.000003382            | -0.000044059 | 0.000033505  |
| 3                | 7                | 0.000009454            | 0.000021477  | -0.000000012 |
| 4                | 6                | -0.000006641           | -0.000021531 | -0.000000582 |
| 5                | 7                | 0.000023722            | 0.000032926  | 0.000034751  |
| 6                | 6                | -0.000021371           | -0.000014840 | -0.000003083 |
| 7                | 6                | -0.000003488           | -0.000002991 | -0.000023479 |
| 8                | 1                | -0.000000036           | -0.000010808 | 0.000019744  |
| 9                | 1                | 0.000003132            | 0.000015254  | -0.000008230 |
| 10               | 1                | -0.000001855           | -0.000000386 | 0.000000645  |
| 11               | 1                | 0.000003873            | 0.000003310  | 0.000001763  |
| 12               | 1                | 0.000002186            | -0.000003888 | -0.000003579 |
| 13               | 1                | 0.000020524            | 0.000023055  | 0.000003031  |
| 14               | 35               | -0.000002141           | -0.000002211 | -0.000005140 |
| 15               | 1                | 0.000004252            | 0.000008338  | -0.000011164 |
| 16               | 6                | -0.000007956           | 0.000000917  | 0.000007103  |
| 17               | 6                | -0.000006246           | -0.000000468 | -0.000000890 |
| 18               | 1                | 0.000000568            | -0.000003284 | -0.000000901 |
| 19               | 1                | -0.000003085           | -0.000002585 | 0.000002387  |
| 20               | 1                | -0.000000064           | -0.000000902 | 0.000006565  |
| 21               | 8                | -0.000006202           | -0.000005485 | -0.000014480 |
| 22               | 1                | -0.000006892           | 0.000007272  | -0.000004344 |

Cartesian Forces: Max 0.000044059 RMS 0.000013555

GradGradGradGradGradGradGradGradGradGradGradGradGradGradGradGradGradGradGrad

Berny optimization.

Using GEDIIS/GDIIS optimizer.

FormGI is forming the generalized inverse of G from B-inverse, IUseBI=4.

Internal Forces: Max 0.000026819 RMS 0.000007796

Search for a local minimum.

Step number 71 out of a maximum of 116

All quantities printed in internal units (Hartrees-Bohrs-Radians)

Mixed Optimization -- En-DIIS/RFO-DIIS

Swapping is turned off.

Update second derivatives using D2CorX and points 62 63 64 65 66  
67 68 69 70 71

DE= -5.17D-08 DEPred=-3.47D-07 R= 1.49D-01

Trust test= 1.49D-01 RLast= 1.28D-02 DXMaxT set to 9.74D-01

ITU= 0 1 1 1 1 1 1 1 1 0 1 1 1 1 0 1 1 0 1 1

ITU= 0 -1 1 1 1 -1 1 0 -1 1 0 -1 0 0 1 -1 0 1

ITU= 1 1 1 1 1 0 -1 1 1 1 1 1 0 -1 1 1 1 1 1 1

ITU= 1 1 1 1 1 1 0 0 -1 0 0

|                 |         |         |         |         |         |
|-----------------|---------|---------|---------|---------|---------|
| Eigenvalues --- | 0.00138 | 0.00173 | 0.00252 | 0.00532 | 0.00983 |
| Eigenvalues --- | 0.01361 | 0.01503 | 0.01706 | 0.01879 | 0.02156 |
| Eigenvalues --- | 0.02538 | 0.03023 | 0.03179 | 0.03862 | 0.04048 |
| Eigenvalues --- | 0.04379 | 0.04789 | 0.05352 | 0.05692 | 0.08585 |
| Eigenvalues --- | 0.08782 | 0.09778 | 0.13160 | 0.13866 | 0.14648 |
| Eigenvalues --- | 0.14877 | 0.15432 | 0.15988 | 0.16078 | 0.16725 |
| Eigenvalues --- | 0.17839 | 0.19060 | 0.20486 | 0.22788 | 0.23362 |
| Eigenvalues --- | 0.23558 | 0.25171 | 0.27283 | 0.29370 | 0.32708 |
| Eigenvalues --- | 0.33774 | 0.33807 | 0.33972 | 0.34079 | 0.34297 |
| Eigenvalues --- | 0.34458 | 0.34846 | 0.35550 | 0.36313 | 0.36399 |
| Eigenvalues --- | 0.38518 | 0.42924 | 0.44042 | 0.45706 | 0.48974 |
| Eigenvalues --- | 0.53728 | 0.54769 | 0.57695 | 0.61069 | 0.70069 |

En-DIIS/RFO-DIIS IScMMF= 0 using points: 71 70 69 68 67

RFO step: Lambda=-2.07116134D-08.

DidBck=F Rises=F RFO-DIIS coefs: 1.00981 0.11711 -0.23852 0.10958  
0.00201

Iteration 1 RMS(Cart)= 0.00107557 RMS(Int)= 0.00000093

Iteration 2 RMS(Cart)= 0.00000060 RMS(Int)= 0.00000079

| Variable | Old X   | -DE/DX   | Delta X<br>(Linear) | Delta X<br>(Quad) | Delta X<br>(Total) | New X   |
|----------|---------|----------|---------------------|-------------------|--------------------|---------|
| R1       | 2.56643 | -0.00001 | -0.00002            | 0.00000           | -0.00002           | 2.56641 |
| R2       | 2.61596 | 0.00001  | 0.00001             | 0.00003           | 0.00004            | 2.61600 |
| R3       | 2.03407 | 0.00000  | -0.00001            | 0.00000           | 0.00000            | 2.03407 |
| R4       | 2.62830 | 0.00001  | 0.00002             | 0.00003           | 0.00004            | 2.62834 |
| R5       | 2.03069 | 0.00000  | -0.00001            | 0.00000           | -0.00001           | 2.03068 |
| R6       | 2.54667 | 0.00000  | -0.00004            | 0.00004           | 0.00000            | 2.54667 |
| R7       | 2.68704 | 0.00001  | 0.00001             | 0.00002           | 0.00003            | 2.68707 |
| R8       | 2.51931 | -0.00001 | -0.00004            | 0.00001           | -0.00002           | 2.51929 |
| R9       | 2.08919 | 0.00000  | -0.00006            | 0.00006           | 0.00000            | 2.08919 |

|     |         |          |          |          |          |         |
|-----|---------|----------|----------|----------|----------|---------|
| R10 | 2.79415 | -0.00002 | -0.00003 | -0.00007 | -0.00010 | 2.79405 |
| R11 | 2.93159 | 0.00002  | 0.00010  | -0.00003 | 0.00006  | 2.93166 |
| R12 | 2.05779 | 0.00000  | 0.00001  | 0.00001  | 0.00001  | 2.05780 |
| R13 | 2.06061 | 0.00000  | -0.00002 | 0.00001  | -0.00001 | 2.06061 |
| R14 | 2.06634 | 0.00000  | -0.00001 | 0.00000  | -0.00001 | 2.06633 |
| R15 | 2.07198 | 0.00000  | -0.00003 | 0.00002  | -0.00001 | 2.07198 |
| R16 | 2.64957 | -0.00002 | 0.00000  | 0.00001  | 0.00001  | 2.64958 |
| R17 | 6.03266 | 0.00000  | -0.00018 | -0.00018 | -0.00037 | 6.03229 |
| R18 | 2.50661 | 0.00001  | 0.00001  | 0.00001  | 0.00002  | 2.50663 |
| R19 | 2.04576 | 0.00000  | -0.00001 | 0.00001  | 0.00000  | 2.04576 |
| R20 | 2.04303 | 0.00000  | 0.00000  | 0.00001  | 0.00001  | 2.04304 |
| R21 | 2.04570 | 0.00000  | -0.00002 | 0.00001  | 0.00000  | 2.04570 |
| R22 | 1.85093 | 0.00001  | -0.00003 | 0.00001  | -0.00002 | 1.85092 |
| A1  | 1.87535 | 0.00000  | 0.00001  | -0.00002 | -0.00001 | 1.87534 |
| A2  | 2.27750 | 0.00001  | 0.00004  | 0.00004  | 0.00008  | 2.27758 |
| A3  | 2.13033 | -0.00001 | -0.00004 | -0.00003 | -0.00007 | 2.13026 |
| A4  | 1.86200 | 0.00000  | -0.00003 | 0.00004  | 0.00002  | 1.86202 |
| A5  | 2.27727 | 0.00000  | 0.00006  | 0.00000  | 0.00006  | 2.27733 |
| A6  | 2.14392 | -0.00001 | -0.00003 | -0.00004 | -0.00008 | 2.14384 |
| A7  | 1.89626 | -0.00001 | 0.00002  | -0.00005 | -0.00003 | 1.89623 |
| A8  | 2.24543 | 0.00000  | 0.00001  | -0.00001 | 0.00000  | 2.24543 |
| A9  | 2.14149 | 0.00001  | -0.00003 | 0.00006  | 0.00003  | 2.14152 |
| A10 | 1.88969 | 0.00000  | 0.00000  | 0.00002  | 0.00002  | 1.88971 |
| A11 | 2.24688 | 0.00000  | 0.00003  | 0.00005  | 0.00009  | 2.24697 |
| A12 | 2.14528 | 0.00000  | -0.00001 | -0.00008 | -0.00009 | 2.14520 |
| A13 | 1.90146 | 0.00000  | 0.00000  | 0.00000  | 0.00000  | 1.90146 |
| A14 | 2.22844 | -0.00002 | -0.00012 | -0.00001 | -0.00013 | 2.22831 |
| A15 | 2.15096 | 0.00002  | 0.00015  | 0.00002  | 0.00017  | 2.15113 |
| A16 | 1.95868 | 0.00002  | 0.00010  | 0.00001  | 0.00011  | 1.95878 |
| A17 | 1.86478 | -0.00001 | 0.00008  | -0.00008 | -0.00001 | 1.86477 |
| A18 | 1.87526 | 0.00000  | -0.00010 | 0.00010  | 0.00000  | 1.87526 |
| A19 | 1.88709 | 0.00000  | -0.00006 | 0.00002  | -0.00004 | 1.88706 |
| A20 | 1.96611 | 0.00000  | -0.00005 | -0.00005 | -0.00010 | 1.96601 |
| A21 | 1.90899 | 0.00000  | 0.00004  | 0.00001  | 0.00005  | 1.90904 |
| A22 | 1.92962 | 0.00001  | 0.00008  | -0.00005 | 0.00003  | 1.92965 |
| A23 | 1.89268 | 0.00002  | -0.00009 | 0.00024  | 0.00015  | 1.89283 |
| A24 | 1.92669 | -0.00002 | 0.00000  | -0.00014 | -0.00014 | 1.92654 |
| A25 | 1.89497 | 0.00000  | 0.00011  | 0.00000  | 0.00011  | 1.89508 |
| A26 | 1.87658 | 0.00000  | 0.00003  | -0.00001 | 0.00002  | 1.87659 |
| A27 | 1.94335 | -0.00001 | -0.00012 | -0.00004 | -0.00016 | 1.94319 |
| A28 | 1.74075 | -0.00002 | 0.00013  | 0.00001  | 0.00014  | 1.74089 |
| A29 | 2.17749 | 0.00000  | 0.00005  | -0.00001 | 0.00004  | 2.17753 |
| A30 | 1.95762 | 0.00000  | -0.00002 | 0.00001  | -0.00002 | 1.95760 |
| A31 | 2.14808 | 0.00000  | -0.00002 | 0.00000  | -0.00003 | 2.14805 |

|     |          |          |          |          |          |          |
|-----|----------|----------|----------|----------|----------|----------|
| A32 | 2.07971  | 0.00000  | -0.00001 | 0.00001  | 0.00000  | 2.07970  |
| A33 | 2.15777  | 0.00000  | -0.00001 | 0.00000  | -0.00002 | 2.15775  |
| A34 | 2.04571  | 0.00000  | 0.00003  | -0.00001 | 0.00002  | 2.04573  |
| A35 | 1.85313  | -0.00001 | -0.00005 | 0.00001  | -0.00004 | 1.85309  |
| D1  | 0.00434  | 0.00000  | 0.00002  | 0.00008  | 0.00009  | 0.00443  |
| D2  | -3.13639 | -0.00001 | -0.00018 | -0.00024 | -0.00042 | -3.13681 |
| D3  | 3.14061  | 0.00000  | -0.00033 | -0.00006 | -0.00038 | 3.14022  |
| D4  | -0.00012 | -0.00001 | -0.00053 | -0.00037 | -0.00090 | -0.00102 |
| D5  | -0.00639 | 0.00000  | 0.00004  | -0.00008 | -0.00004 | -0.00643 |
| D6  | -3.07593 | 0.00000  | -0.00055 | -0.00006 | -0.00062 | -3.07654 |
| D7  | 3.13998  | 0.00000  | 0.00035  | 0.00004  | 0.00039  | 3.14037  |
| D8  | 0.07045  | 0.00000  | -0.00024 | 0.00005  | -0.00019 | 0.07026  |
| D9  | -0.00086 | 0.00000  | -0.00007 | -0.00005 | -0.00012 | -0.00098 |
| D10 | 3.13869  | 0.00000  | 0.00017  | 0.00003  | 0.00019  | 3.13888  |
| D11 | 3.13995  | 0.00001  | 0.00011  | 0.00024  | 0.00035  | 3.14029  |
| D12 | -0.00369 | 0.00001  | 0.00034  | 0.00031  | 0.00066  | -0.00303 |
| D13 | -0.00311 | 0.00000  | 0.00009  | 0.00000  | 0.00009  | -0.00302 |
| D14 | 3.08348  | 0.00000  | 0.00085  | -0.00021 | 0.00064  | 3.08412  |
| D15 | 3.14038  | 0.00000  | -0.00012 | -0.00007 | -0.00020 | 3.14018  |
| D16 | -0.05622 | -0.00001 | 0.00063  | -0.00028 | 0.00035  | -0.05586 |
| D17 | 0.05452  | 0.00000  | -0.00126 | -0.00002 | -0.00128 | 0.05324  |
| D18 | -3.08439 | 0.00000  | -0.00127 | -0.00004 | -0.00131 | -3.08570 |
| D19 | -3.08937 | 0.00000  | -0.00099 | 0.00006  | -0.00093 | -3.09031 |
| D20 | 0.05491  | 0.00000  | -0.00101 | 0.00005  | -0.00096 | 0.05394  |
| D21 | 0.00585  | 0.00000  | -0.00008 | 0.00005  | -0.00003 | 0.00582  |
| D22 | 3.07927  | 0.00000  | 0.00046  | 0.00003  | 0.00050  | 3.07976  |
| D23 | -3.08463 | 0.00001  | -0.00079 | 0.00024  | -0.00055 | -3.08518 |
| D24 | -0.01122 | 0.00001  | -0.00024 | 0.00022  | -0.00002 | -0.01124 |
| D25 | 1.68342  | 0.00001  | 0.00177  | 0.00000  | 0.00177  | 1.68519  |
| D26 | -2.53426 | 0.00001  | 0.00180  | -0.00002 | 0.00178  | -2.53248 |
| D27 | -0.48714 | 0.00000  | 0.00183  | 0.00000  | 0.00183  | -0.48531 |
| D28 | -1.37666 | 0.00001  | 0.00110  | 0.00002  | 0.00113  | -1.37554 |
| D29 | 0.68884  | 0.00001  | 0.00113  | 0.00000  | 0.00114  | 0.68998  |
| D30 | 2.73596  | 0.00000  | 0.00117  | 0.00002  | 0.00119  | 2.73715  |
| D31 | -1.60260 | -0.00001 | 0.00028  | 0.00021  | 0.00049  | -1.60211 |
| D32 | 0.47306  | 0.00001  | 0.00041  | 0.00032  | 0.00073  | 0.47379  |
| D33 | 2.60637  | -0.00001 | 0.00020  | 0.00034  | 0.00053  | 2.60690  |
| D34 | 2.62832  | -0.00001 | 0.00017  | 0.00029  | 0.00046  | 2.62878  |
| D35 | -1.57921 | 0.00001  | 0.00029  | 0.00041  | 0.00070  | -1.57851 |
| D36 | 0.55410  | 0.00000  | 0.00008  | 0.00042  | 0.00051  | 0.55461  |
| D37 | 0.51669  | 0.00000  | 0.00019  | 0.00030  | 0.00048  | 0.51717  |
| D38 | 2.59234  | 0.00001  | 0.00031  | 0.00042  | 0.00073  | 2.59307  |
| D39 | -1.55753 | 0.00000  | 0.00010  | 0.00043  | 0.00053  | -1.55700 |
| D40 | 1.16966  | -0.00003 | -0.00036 | -0.00035 | -0.00071 | 1.16895  |

|     |          |          |          |          |          |          |
|-----|----------|----------|----------|----------|----------|----------|
| D41 | -3.01615 | -0.00001 | -0.00025 | -0.00027 | -0.00052 | -3.01667 |
| D42 | -0.95346 | -0.00001 | -0.00022 | -0.00030 | -0.00053 | -0.95399 |
| D43 | -1.30194 | 0.00000  | 0.00019  | -0.00014 | 0.00005  | -1.30188 |
| D44 | 2.87501  | 0.00000  | 0.00008  | 0.00001  | 0.00009  | 2.87510  |
| D45 | 0.80129  | 0.00000  | 0.00000  | 0.00004  | 0.00004  | 0.80133  |
| D46 | -3.13544 | 0.00000  | -0.00008 | -0.00004 | -0.00012 | -3.13556 |
| D47 | 0.00618  | 0.00000  | -0.00010 | 0.00000  | -0.00010 | 0.00608  |
| D48 | 0.00319  | 0.00000  | -0.00006 | -0.00003 | -0.00009 | 0.00310  |
| D49 | -3.13838 | 0.00000  | -0.00008 | 0.00002  | -0.00007 | -3.13845 |

| Item                 | Value    | Threshold | Converged? |
|----------------------|----------|-----------|------------|
| Maximum Force        | 0.000027 | 0.000450  | YES        |
| RMS Force            | 0.000008 | 0.000300  | YES        |
| Maximum Displacement | 0.003829 | 0.001800  | NO         |
| RMS Displacement     | 0.001075 | 0.001200  | YES        |

Predicted change in Energy=-5.968132D-08

GradGradGradGradGradGradGradGradGradGradGradGradGradGradGradGradGrad

Input orientation:

| Center Number | Atomic Number | Atomic Type | Coordinates (Angstroms) |           |           |
|---------------|---------------|-------------|-------------------------|-----------|-----------|
|               |               |             | X                       | Y         | Z         |
| 1             | 6             | 0           | -0.590351               | -2.342598 | -1.151156 |
| 2             | 6             | 0           | -1.888186               | -1.967183 | -1.289309 |
| 3             | 7             | 0           | -2.088691               | -0.897145 | -0.423688 |
| 4             | 6             | 0           | -0.932419               | -0.640489 | 0.219188  |
| 5             | 7             | 0           | -0.015669               | -1.509833 | -0.206377 |
| 6             | 6             | 0           | 1.396830                | -1.476810 | 0.229346  |
| 7             | 6             | 0           | 2.214660                | -0.387265 | -0.512801 |
| 8             | 1             | 0           | -0.033941               | -3.126125 | -1.636015 |
| 9             | 1             | 0           | -2.666050               | -2.363259 | -1.916041 |
| 10            | 1             | 0           | 1.393994                | -1.233873 | 1.290838  |
| 11            | 1             | 0           | 1.805906                | -2.477708 | 0.088310  |
| 12            | 1             | 0           | 2.683891                | -0.802940 | -1.408727 |
| 13            | 1             | 0           | 1.530261                | 0.413708  | -0.816487 |
| 14            | 35            | 0           | 0.725834                | 1.554474  | 2.054295  |
| 15            | 1             | 0           | -0.706029               | 0.166459  | 0.940179  |
| 16            | 6             | 0           | -3.275774               | -0.147552 | -0.198191 |
| 17            | 6             | 0           | -4.448198               | -0.398915 | -0.765385 |
| 18            | 1             | 0           | -3.118304               | 0.667441  | 0.496750  |
| 19            | 1             | 0           | -5.292661               | 0.234716  | -0.532507 |
| 20            | 1             | 0           | -4.616418               | -1.212778 | -1.459080 |
| 21            | 8             | 0           | 3.238066                | 0.101441  | 0.311627  |
| 22            | 1             | 0           | 2.803598                | 0.679357  | 0.972383  |

-----

Distance matrix (angstroms):

|    |    | 1        | 2        | 3        | 4        | 5        |
|----|----|----------|----------|----------|----------|----------|
| 1  | C  | 0.000000 |          |          |          |          |
| 2  | C  | 1.358086 | 0.000000 |          |          |          |
| 3  | N  | 2.205349 | 1.390857 | 0.000000 |          |          |
| 4  | C  | 2.211792 | 2.224673 | 1.347638 | 0.000000 |          |
| 5  | N  | 1.384328 | 2.210935 | 2.172564 | 1.333152 | 0.000000 |
| 6  | C  | 2.569877 | 3.652138 | 3.593234 | 2.474861 | 1.478546 |
| 7  | C  | 3.478349 | 4.464577 | 4.334369 | 3.240993 | 2.515636 |
| 8  | H  | 1.076381 | 2.213950 | 3.264979 | 3.229152 | 2.157916 |
| 9  | H  | 2.212239 | 1.074589 | 2.170242 | 3.245399 | 3.267386 |
| 10 | H  | 3.336200 | 4.238821 | 3.896419 | 2.629208 | 2.074839 |
| 11 | H  | 2.701218 | 3.975523 | 4.234172 | 3.300140 | 2.083689 |
| 12 | H  | 3.627334 | 4.719492 | 4.874087 | 3.969155 | 3.038580 |
| 13 | H  | 3.493740 | 4.192610 | 3.869037 | 2.872063 | 2.542075 |
| 14 | Br | 5.214827 | 5.514967 | 4.480222 | 3.306854 | 3.879489 |
| 15 | H  | 3.268398 | 3.304624 | 2.214304 | 1.105552 | 2.145027 |
| 16 | C  | 3.596924 | 2.535152 | 1.421937 | 2.430741 | 3.533293 |
| 17 | C  | 4.337016 | 3.047561 | 2.435624 | 3.659023 | 4.603688 |
| 18 | H  | 4.262214 | 3.412395 | 2.086921 | 2.562385 | 3.855029 |
| 19 | H  | 5.397869 | 4.124507 | 3.399760 | 4.510292 | 5.567446 |
| 20 | H  | 4.192913 | 2.835701 | 2.749739 | 4.088514 | 4.777489 |
| 21 | O  | 4.771775 | 5.755055 | 5.469205 | 4.236973 | 3.667604 |
| 22 | H  | 5.016026 | 5.842282 | 5.326244 | 4.033252 | 3.759028 |
|    |    | 6        | 7        | 8        | 9        | 10       |
| 6  | C  | 0.000000 |          |          |          |          |
| 7  | C  | 1.551366 | 0.000000 |          |          |          |
| 8  | H  | 2.871745 | 3.717414 | 0.000000 |          |          |
| 9  | H  | 4.679260 | 5.449309 | 2.754701 | 0.000000 |          |
| 10 | H  | 1.088941 | 2.154844 | 3.766442 | 5.295616 | 0.000000 |
| 11 | H  | 1.090427 | 2.213225 | 2.603609 | 4.901930 | 1.778446 |
| 12 | H  | 2.189500 | 1.093456 | 3.582661 | 5.595877 | 3.022779 |
| 13 | H  | 2.164632 | 1.096442 | 3.955853 | 5.150689 | 2.678416 |
| 14 | Br | 3.601299 | 3.546397 | 6.008631 | 6.528176 | 2.967184 |
| 15 | H  | 2.761817 | 3.308805 | 4.234334 | 4.289423 | 2.548330 |
| 16 | C  | 4.876776 | 5.504663 | 4.631276 | 2.869169 | 5.020361 |
| 17 | C  | 6.026252 | 6.667655 | 5.261306 | 2.891143 | 6.249513 |
| 18 | H  | 5.005572 | 5.529205 | 5.334147 | 3.900159 | 4.960484 |
| 19 | H  | 6.946872 | 7.533068 | 6.337753 | 3.944962 | 7.084680 |
| 20 | H  | 6.251372 | 6.945542 | 4.969034 | 2.310055 | 6.609655 |
| 21 | O  | 2.426477 | 1.402096 | 4.991645 | 6.774646 | 2.478410 |
| 22 | H  | 2.679581 | 1.921016 | 5.416370 | 6.893298 | 2.397675 |
|    |    | 11       | 12       | 13       | 14       | 15       |

|    |    |          |          |          |          |          |
|----|----|----------|----------|----------|----------|----------|
| 11 | H  | 0.000000 |          |          |          |          |
| 12 | H  | 2.411810 | 0.000000 |          |          |          |
| 13 | H  | 3.042191 | 1.778157 | 0.000000 |          |          |
| 14 | Br | 4.614124 | 4.624273 | 3.192153 | 0.000000 |          |
| 15 | H  | 3.745279 | 4.236585 | 2.854471 | 2.284310 | 0.000000 |
| 16 | C  | 5.597783 | 6.116579 | 4.878040 | 4.897290 | 2.828087 |
| 17 | C  | 6.645600 | 7.172435 | 6.033651 | 6.207813 | 4.151196 |
| 18 | H  | 5.857186 | 6.281586 | 4.837161 | 4.241482 | 2.503334 |
| 19 | H  | 7.624455 | 8.091345 | 6.831175 | 6.682484 | 4.817743 |
| 20 | H  | 6.726122 | 7.311978 | 6.390622 | 6.967148 | 4.790603 |
| 21 | O  | 2.958540 | 2.021047 | 2.070447 | 3.385188 | 3.994394 |
| 22 | H  | 3.426957 | 2.807351 | 2.211790 | 2.500693 | 3.547053 |
|    |    | 16       | 17       | 18       | 19       | 20       |
| 16 | C  | 0.000000 |          |          |          |          |
| 17 | C  | 1.326451 | 0.000000 |          |          |          |
| 18 | H  | 1.082568 | 2.121018 | 0.000000 |          |          |
| 19 | H  | 2.079839 | 1.081128 | 2.444268 | 0.000000 |          |
| 20 | H  | 2.126470 | 1.082536 | 3.099168 | 1.846911 | 0.000000 |
| 21 | O  | 6.538502 | 7.777465 | 6.384204 | 8.573425 | 8.158155 |
| 22 | H  | 6.246021 | 7.534657 | 5.940984 | 8.246927 | 8.034229 |
|    |    | 21       | 22       |          |          |          |
| 21 | O  | 0.000000 |          |          |          |          |
| 22 | H  | 0.979463 | 0.000000 |          |          |          |

Stoichiometry C7H11BrN2O

Framework group C1[X(C7H11BrN2O)]

Deg. of freedom 60

Full point group C1 NOp 1

Largest Abelian subgroup C1 NOp 1

Largest concise Abelian subgroup C1 NOp 1

Standard orientation:

| Center<br>Number | Atomic<br>Number | Atomic<br>Type | Coordinates (Angstroms) |           |           |
|------------------|------------------|----------------|-------------------------|-----------|-----------|
|                  |                  |                | X                       | Y         | Z         |
| 1                | 6                | 0              | -1.852977               | -2.004770 | 0.261946  |
| 2                | 6                | 0              | -2.844936               | -1.108684 | 0.022270  |
| 3                | 7                | 0              | -2.252596               | 0.149697  | 0.012664  |
| 4                | 6                | 0              | -0.932640               | 0.006366  | 0.243529  |
| 5                | 7                | 0              | -0.674460               | -1.291997 | 0.401298  |
| 6                | 6                | 0              | 0.688990                | -1.829559 | 0.596565  |
| 7                | 6                | 0              | 1.478350                | -1.925642 | -0.735506 |
| 8                | 1                | 0              | -1.885737               | -3.077123 | 0.349012  |
| 9                | 1                | 0              | -3.896876               | -1.258715 | -0.137907 |
| 10               | 1                | 0              | 1.211914                | -1.133502 | 1.250666  |



|    |    |   |           |           |           |
|----|----|---|-----------|-----------|-----------|
| 11 | 1  | 0 | 0.591782  | -2.793267 | 1.097412  |
| 12 | 1  | 0 | 1.344868  | -2.910804 | -1.190791 |
| 13 | 1  | 0 | 1.089622  | -1.166684 | -1.424751 |
| 14 | 35 | 0 | 2.025502  | 1.477383  | 0.099347  |
| 15 | 1  | 0 | -0.144502 | 0.781540  | 0.257320  |
| 16 | 6  | 0 | -2.862333 | 1.416758  | -0.198718 |
| 17 | 6  | 0 | -4.162812 | 1.610481  | -0.373924 |
| 18 | 1  | 0 | -2.139017 | 2.222199  | -0.204304 |
| 19 | 1  | 0 | -4.528939 | 2.615146  | -0.533412 |
| 20 | 1  | 0 | -4.894120 | 0.812340  | -0.367232 |
| 21 | 8  | 0 | 2.850009  | -1.749930 | -0.504093 |
| 22 | 1  | 0 | 2.977890  | -0.793667 | -0.335111 |

-----  
Rotational constants (GHZ): 0.9807504 0.4478907 0.3185454

Standard basis: 6-311++G(d,p) (5D, 7F)

There are 358 symmetry adapted cartesian basis functions of A symmetry.

There are 345 symmetry adapted basis functions of A symmetry.

345 basis functions, 553 primitive gaussians, 358 cartesian basis functions

55 alpha electrons 55 beta electrons

nuclear repulsion energy 851.6537666465 Hartrees.

NAtoms= 22 NActive= 22 NUniq= 22 SFac= 1.00D+00 NAtFMM= 60 NAOKFM=F

Big=F

Integral buffers will be 131072 words long.

Raffenetti 2 integral format.

Two-electron integral symmetry is turned on.

One-electron integrals computed using PRISM.

NBasis= 345 RedAO= T EigKep= 4.67D-06 NBF= 345

NBsUse= 345 1.00D-06 EigRej= -1.00D+00 NBFU= 345

Initial guess from the checkpoint file: ""

B after Tr= 0.000000 0.000000 0.000000

Rot= 1.000000 0.000016 -0.000007 -0.000011 Ang= 0.00 deg.

Keep R1 ints in memory in canonical form, NReq=1804729152.

Requested convergence on RMS density matrix=1.00D-08 within 128 cycles.

Requested convergence on MAX density matrix=1.00D-06.

Requested convergence on energy=1.00D-06.

No special actions if energy rises.

SCF Done: E(RB3LYP) = -3032.34329903 A.U. after 8 cycles

NFock= 8 Conv=0.78D-08 -V/T= 2.0017

Calling FoFJK, ICntrl= 2127 FMM=F ISym2X=0 l1Cent= 0 IOpClX= 0 NMat=1 NMatS=1

NMatT=0.

\*\*\*\*\* Axes restored to original set \*\*\*\*\*

-----  
Center Atomic Forces (Hartrees/Bohr  
Number Number X Y Z

|    |    |              |              |              |
|----|----|--------------|--------------|--------------|
| 1  | 6  | -0.000009753 | -0.000000289 | -0.000004293 |
| 2  | 6  | -0.000005820 | -0.000011533 | 0.000012285  |
| 3  | 7  | 0.000005747  | -0.000001772 | -0.000003160 |
| 4  | 6  | -0.000002191 | -0.000004774 | -0.000006534 |
| 5  | 7  | 0.000001393  | -0.000000357 | -0.000001998 |
| 6  | 6  | 0.000002118  | 0.000012001  | -0.000000570 |
| 7  | 6  | -0.000011587 | -0.000009162 | 0.000004436  |
| 8  | 1  | -0.000001967 | -0.000004271 | 0.000006518  |
| 9  | 1  | 0.000001553  | -0.000000550 | -0.000000224 |
| 10 | 1  | 0.000003007  | 0.000001903  | 0.000000465  |
| 11 | 1  | 0.000001652  | 0.000002366  | 0.000001917  |
| 12 | 1  | -0.000001415 | -0.000001805 | -0.000005900 |
| 13 | 1  | 0.000004324  | 0.000005410  | -0.000007135 |
| 14 | 35 | 0.000005415  | 0.000007867  | -0.000004876 |
| 15 | 1  | 0.000002182  | 0.000006929  | 0.000008230  |
| 16 | 6  | -0.000003913 | 0.000002096  | 0.000002012  |
| 17 | 6  | 0.000006720  | -0.000001727 | 0.000004747  |
| 18 | 1  | 0.000001282  | -0.000003248 | -0.000001677 |
| 19 | 1  | -0.000000518 | -0.000003883 | 0.000000661  |
| 20 | 1  | -0.000002642 | -0.000001211 | 0.000005972  |
| 21 | 8  | 0.000005609  | 0.000003099  | -0.000005370 |
| 22 | 1  | -0.000001195 | 0.000002909  | -0.000005505 |

Cartesian Forces: Max 0.000012285 RMS 0.000005055

GradGradGradGradGradGradGradGradGradGradGradGradGradGradGradGradGradGradGradGrad

Berny optimization.

Using GEDIIS/GDIIS optimizer.

FormGI is forming the generalized inverse of G from B-inverse, IUseBI=4.

Internal Forces: Max 0.000014829 RMS 0.000004046

Search for a local minimum.

Step number 72 out of a maximum of 116

All quantities printed in internal units (Hartrees-Bohrs-Radians)

Mixed Optimization -- En-DIIS/RFO-DIIS

Swapping is turned off.

Update second derivatives using D2CorX and points 62 63 64 65 66  
67 68 69 70 71  
72

DE= -1.90D-07 DEPred=-5.97D-08 R= 3.18D+00

Trust test= 3.18D+00 RLast= 5.17D-03 DXMaxT set to 9.74D-01

ITU= 0 0 1 1 1 1 1 1 1 1 0 1 1 1 1 0 1 1 0 1

ITU= 1 0 -1 1 1 1 -1 1 0 -1 1 0 -1 0 0 1 -1 0

ITU= 1 1 1 1 1 1 0 -1 1 1 1 1 0 -1 1 1 1 1 1

ITU= 1 1 1 1 1 1 1 0 0-1 0 0

|                 |         |         |         |         |         |
|-----------------|---------|---------|---------|---------|---------|
| Eigenvalues --- | 0.00140 | 0.00173 | 0.00245 | 0.00517 | 0.00969 |
| Eigenvalues --- | 0.01352 | 0.01476 | 0.01591 | 0.01928 | 0.02157 |
| Eigenvalues --- | 0.02533 | 0.03023 | 0.03182 | 0.03839 | 0.04045 |
| Eigenvalues --- | 0.04394 | 0.04788 | 0.05395 | 0.05759 | 0.08594 |
| Eigenvalues --- | 0.08935 | 0.09821 | 0.13255 | 0.14126 | 0.14609 |
| Eigenvalues --- | 0.14993 | 0.15461 | 0.15994 | 0.16111 | 0.16656 |
| Eigenvalues --- | 0.18009 | 0.19693 | 0.20707 | 0.23144 | 0.23447 |
| Eigenvalues --- | 0.23669 | 0.25215 | 0.27129 | 0.29398 | 0.32755 |
| Eigenvalues --- | 0.33784 | 0.33863 | 0.33976 | 0.34169 | 0.34339 |
| Eigenvalues --- | 0.34367 | 0.34845 | 0.35752 | 0.36313 | 0.36407 |
| Eigenvalues --- | 0.38525 | 0.42990 | 0.44148 | 0.45590 | 0.48928 |
| Eigenvalues --- | 0.53736 | 0.54384 | 0.57767 | 0.61218 | 0.70288 |

En-DIIS/RFO-DIIS IScMMF= 0 using points: 72 71 70 69 68

RFO step: Lambda=-2.94919821D-09.

DidBck=F Rises=F RFO-DIIS coefs: 1.00759 0.05800 -0.07551 0.00035

0.00957

Iteration 1 RMS(Cart)= 0.00018400 RMS(Int)= 0.00000008

Iteration 2 RMS(Cart)= 0.00000003 RMS(Int)= 0.00000008

| Variable | Old X   | -DE/DX   | Delta X  | Delta X  | Delta X  | New X   |
|----------|---------|----------|----------|----------|----------|---------|
|          |         |          | (Linear) | (Quad)   | (Total)  |         |
| R1       | 2.56641 | -0.00001 | 0.00000  | -0.00001 | -0.00001 | 2.56640 |
| R2       | 2.61600 | 0.00001  | 0.00001  | 0.00001  | 0.00002  | 2.61602 |
| R3       | 2.03407 | 0.00000  | 0.00000  | 0.00000  | 0.00000  | 2.03406 |
| R4       | 2.62834 | 0.00000  | 0.00001  | 0.00000  | 0.00000  | 2.62834 |
| R5       | 2.03068 | 0.00000  | 0.00000  | 0.00000  | 0.00000  | 2.03068 |
| R6       | 2.54667 | 0.00000  | -0.00001 | 0.00000  | 0.00000  | 2.54666 |
| R7       | 2.68707 | 0.00000  | 0.00001  | -0.00002 | -0.00001 | 2.68706 |
| R8       | 2.51929 | 0.00000  | -0.00001 | -0.00001 | -0.00001 | 2.51928 |
| R9       | 2.08919 | 0.00001  | 0.00000  | 0.00001  | 0.00001  | 2.08920 |
| R10      | 2.79405 | 0.00001  | -0.00001 | 0.00001  | 0.00000  | 2.79405 |
| R11      | 2.93166 | 0.00000  | 0.00002  | -0.00004 | -0.00002 | 2.93163 |
| R12      | 2.05780 | 0.00000  | 0.00000  | 0.00000  | 0.00000  | 2.05780 |
| R13      | 2.06061 | 0.00000  | 0.00000  | 0.00000  | 0.00000  | 2.06061 |
| R14      | 2.06633 | 0.00000  | 0.00000  | 0.00001  | 0.00001  | 2.06634 |
| R15      | 2.07198 | 0.00000  | -0.00001 | 0.00000  | 0.00000  | 2.07197 |
| R16      | 2.64958 | 0.00000  | 0.00002  | 0.00001  | 0.00002  | 2.64960 |
| R17      | 6.03229 | 0.00000  | 0.00010  | -0.00050 | -0.00040 | 6.03190 |
| R18      | 2.50663 | -0.00001 | 0.00000  | -0.00001 | -0.00001 | 2.50662 |
| R19      | 2.04576 | 0.00000  | 0.00000  | -0.00001 | -0.00001 | 2.04574 |
| R20      | 2.04304 | 0.00000  | 0.00000  | 0.00000  | -0.00001 | 2.04303 |
| R21      | 2.04570 | 0.00000  | 0.00000  | -0.00001 | -0.00001 | 2.04569 |
| R22      | 1.85092 | 0.00000  | 0.00000  | 0.00000  | 0.00000  | 1.85091 |
| A1       | 1.87534 | 0.00000  | 0.00000  | 0.00001  | 0.00001  | 1.87534 |

|     |          |          |          |          |          |          |
|-----|----------|----------|----------|----------|----------|----------|
| A2  | 2.27758  | 0.00000  | 0.00001  | -0.00001 | 0.00000  | 2.27758  |
| A3  | 2.13026  | 0.00000  | -0.00001 | 0.00000  | -0.00001 | 2.13025  |
| A4  | 1.86202  | 0.00000  | 0.00000  | -0.00001 | -0.00001 | 1.86201  |
| A5  | 2.27733  | 0.00000  | 0.00001  | -0.00001 | 0.00000  | 2.27733  |
| A6  | 2.14384  | 0.00000  | -0.00001 | 0.00002  | 0.00001  | 2.14385  |
| A7  | 1.89623  | 0.00001  | 0.00000  | 0.00001  | 0.00001  | 1.89625  |
| A8  | 2.24543  | 0.00000  | 0.00000  | -0.00001 | -0.00001 | 2.24543  |
| A9  | 2.14152  | 0.00000  | 0.00000  | 0.00000  | -0.00001 | 2.14151  |
| A10 | 1.88971  | 0.00000  | 0.00000  | 0.00000  | 0.00000  | 1.88971  |
| A11 | 2.24697  | 0.00000  | 0.00000  | 0.00001  | 0.00002  | 2.24698  |
| A12 | 2.14520  | 0.00000  | 0.00000  | -0.00001 | -0.00001 | 2.14519  |
| A13 | 1.90146  | 0.00000  | 0.00000  | 0.00000  | 0.00000  | 1.90146  |
| A14 | 2.22831  | 0.00000  | -0.00002 | 0.00003  | 0.00001  | 2.22832  |
| A15 | 2.15113  | 0.00000  | 0.00002  | -0.00002 | -0.00001 | 2.15112  |
| A16 | 1.95878  | 0.00001  | 0.00002  | 0.00000  | 0.00001  | 1.95880  |
| A17 | 1.86477  | 0.00000  | 0.00001  | 0.00001  | 0.00002  | 1.86479  |
| A18 | 1.87526  | -0.00001 | -0.00001 | 0.00001  | 0.00001  | 1.87526  |
| A19 | 1.88706  | 0.00000  | -0.00001 | 0.00001  | 0.00000  | 1.88706  |
| A20 | 1.96601  | -0.00001 | -0.00001 | -0.00002 | -0.00003 | 1.96598  |
| A21 | 1.90904  | 0.00000  | 0.00000  | 0.00000  | 0.00000  | 1.90904  |
| A22 | 1.92965  | -0.00001 | 0.00000  | 0.00000  | 0.00000  | 1.92966  |
| A23 | 1.89283  | 0.00001  | 0.00001  | 0.00003  | 0.00004  | 1.89287  |
| A24 | 1.92654  | 0.00000  | -0.00001 | -0.00001 | -0.00002 | 1.92652  |
| A25 | 1.89508  | 0.00000  | 0.00001  | -0.00001 | 0.00000  | 1.89508  |
| A26 | 1.87659  | 0.00000  | 0.00001  | 0.00000  | 0.00001  | 1.87660  |
| A27 | 1.94319  | -0.00001 | -0.00001 | -0.00002 | -0.00003 | 1.94316  |
| A28 | 1.74089  | 0.00000  | 0.00001  | 0.00008  | 0.00009  | 1.74098  |
| A29 | 2.17753  | 0.00000  | -0.00001 | 0.00000  | 0.00000  | 2.17752  |
| A30 | 1.95760  | 0.00000  | -0.00001 | 0.00000  | -0.00001 | 1.95759  |
| A31 | 2.14805  | 0.00000  | 0.00001  | 0.00000  | 0.00001  | 2.14807  |
| A32 | 2.07970  | 0.00000  | 0.00000  | 0.00001  | 0.00001  | 2.07972  |
| A33 | 2.15775  | 0.00000  | -0.00001 | 0.00001  | 0.00000  | 2.15776  |
| A34 | 2.04573  | 0.00000  | 0.00000  | -0.00002 | -0.00002 | 2.04571  |
| A35 | 1.85309  | 0.00000  | 0.00001  | -0.00003 | -0.00002 | 1.85306  |
| D1  | 0.00443  | 0.00000  | 0.00001  | 0.00002  | 0.00002  | 0.00446  |
| D2  | -3.13681 | 0.00000  | -0.00004 | -0.00013 | -0.00017 | -3.13697 |
| D3  | 3.14022  | 0.00000  | -0.00007 | 0.00003  | -0.00004 | 3.14018  |
| D4  | -0.00102 | 0.00000  | -0.00012 | -0.00011 | -0.00023 | -0.00125 |
| D5  | -0.00643 | 0.00000  | -0.00001 | 0.00001  | 0.00001  | -0.00643 |
| D6  | -3.07654 | 0.00000  | -0.00003 | 0.00001  | -0.00002 | -3.07656 |
| D7  | 3.14037  | 0.00000  | 0.00006  | 0.00000  | 0.00006  | 3.14043  |
| D8  | 0.07026  | 0.00000  | 0.00004  | -0.00001 | 0.00004  | 0.07030  |
| D9  | -0.00098 | 0.00000  | 0.00000  | -0.00004 | -0.00004 | -0.00102 |
| D10 | 3.13888  | 0.00000  | -0.00002 | 0.00005  | 0.00004  | 3.13891  |

|     |          |          |          |          |          |          |
|-----|----------|----------|----------|----------|----------|----------|
| D11 | 3.14029  | 0.00000  | 0.00004  | 0.00009  | 0.00013  | 3.14042  |
| D12 | -0.00303 | 0.00000  | 0.00003  | 0.00018  | 0.00021  | -0.00283 |
| D13 | -0.00302 | 0.00000  | 0.00000  | 0.00005  | 0.00004  | -0.00297 |
| D14 | 3.08412  | 0.00000  | 0.00003  | 0.00006  | 0.00008  | 3.08420  |
| D15 | 3.14018  | 0.00000  | 0.00001  | -0.00003 | -0.00003 | 3.14016  |
| D16 | -0.05586 | 0.00000  | 0.00004  | -0.00003 | 0.00001  | -0.05585 |
| D17 | 0.05324  | 0.00000  | -0.00029 | -0.00004 | -0.00034 | 0.05290  |
| D18 | -3.08570 | 0.00000  | -0.00029 | -0.00004 | -0.00034 | -3.08603 |
| D19 | -3.09031 | 0.00000  | -0.00031 | 0.00006  | -0.00025 | -3.09056 |
| D20 | 0.05394  | 0.00000  | -0.00031 | 0.00006  | -0.00025 | 0.05369  |
| D21 | 0.00582  | 0.00000  | 0.00001  | -0.00004 | -0.00003 | 0.00579  |
| D22 | 3.07976  | 0.00000  | 0.00002  | -0.00003 | -0.00001 | 3.07976  |
| D23 | -3.08518 | 0.00000  | -0.00002 | -0.00005 | -0.00007 | -3.08525 |
| D24 | -0.01124 | 0.00000  | -0.00001 | -0.00004 | -0.00004 | -0.01128 |
| D25 | 1.68519  | 0.00000  | -0.00002 | -0.00009 | -0.00012 | 1.68507  |
| D26 | -2.53248 | 0.00000  | -0.00001 | -0.00008 | -0.00009 | -2.53258 |
| D27 | -0.48531 | 0.00000  | -0.00001 | -0.00008 | -0.00009 | -0.48540 |
| D28 | -1.37554 | -0.00001 | -0.00004 | -0.00011 | -0.00015 | -1.37568 |
| D29 | 0.68998  | 0.00000  | -0.00003 | -0.00009 | -0.00012 | 0.68986  |
| D30 | 2.73715  | 0.00000  | -0.00003 | -0.00009 | -0.00012 | 2.73703  |
| D31 | -1.60211 | 0.00001  | 0.00002  | 0.00023  | 0.00025  | -1.60186 |
| D32 | 0.47379  | 0.00001  | 0.00003  | 0.00024  | 0.00028  | 0.47406  |
| D33 | 2.60690  | 0.00001  | 0.00002  | 0.00023  | 0.00025  | 2.60715  |
| D34 | 2.62878  | 0.00000  | 0.00000  | 0.00022  | 0.00021  | 2.62899  |
| D35 | -1.57851 | 0.00000  | 0.00001  | 0.00023  | 0.00024  | -1.57827 |
| D36 | 0.55461  | 0.00000  | 0.00000  | 0.00022  | 0.00022  | 0.55482  |
| D37 | 0.51717  | 0.00000  | 0.00001  | 0.00023  | 0.00024  | 0.51741  |
| D38 | 2.59307  | 0.00000  | 0.00002  | 0.00025  | 0.00027  | 2.59334  |
| D39 | -1.55700 | 0.00000  | 0.00001  | 0.00023  | 0.00024  | -1.55676 |
| D40 | 1.16895  | 0.00001  | -0.00003 | -0.00012 | -0.00014 | 1.16881  |
| D41 | -3.01667 | 0.00001  | -0.00002 | -0.00010 | -0.00012 | -3.01678 |
| D42 | -0.95399 | 0.00001  | -0.00001 | -0.00011 | -0.00012 | -0.95411 |
| D43 | -1.30188 | -0.00001 | -0.00007 | 0.00006  | 0.00000  | -1.30189 |
| D44 | 2.87510  | 0.00000  | -0.00006 | 0.00006  | 0.00000  | 2.87510  |
| D45 | 0.80133  | 0.00001  | -0.00007 | 0.00008  | 0.00001  | 0.80134  |
| D46 | -3.13556 | 0.00000  | -0.00003 | 0.00001  | -0.00001 | -3.13557 |
| D47 | 0.00608  | 0.00000  | -0.00003 | 0.00001  | -0.00002 | 0.00607  |
| D48 | 0.00310  | 0.00000  | -0.00003 | 0.00001  | -0.00002 | 0.00308  |
| D49 | -3.13845 | 0.00000  | -0.00003 | 0.00001  | -0.00002 | -3.13847 |

| Item                 | Value    | Threshold | Converged? |
|----------------------|----------|-----------|------------|
| Maximum Force        | 0.000015 | 0.000450  | YES        |
| RMS Force            | 0.000004 | 0.000300  | YES        |
| Maximum Displacement | 0.000738 | 0.001800  | YES        |
| RMS Displacement     | 0.000184 | 0.001200  | YES        |

Predicted change in Energy=-4.990683D-09

Optimization completed.

-- Stationary point found.

| -----                       |            |          |                  |   |
|-----------------------------|------------|----------|------------------|---|
| ! Optimized Parameters !    |            |          |                  |   |
| ! (Angstroms and Degrees) ! |            |          |                  |   |
| -----                       |            |          |                  |   |
| ! Name                      | Definition | Value    | Derivative Info. | ! |
| -----                       |            |          |                  |   |
| ! R1                        | R(1,2)     | 1.3581   | -DE/DX = 0.0     | ! |
| ! R2                        | R(1,5)     | 1.3843   | -DE/DX = 0.0     | ! |
| ! R3                        | R(1,8)     | 1.0764   | -DE/DX = 0.0     | ! |
| ! R4                        | R(2,3)     | 1.3909   | -DE/DX = 0.0     | ! |
| ! R5                        | R(2,9)     | 1.0746   | -DE/DX = 0.0     | ! |
| ! R6                        | R(3,4)     | 1.3476   | -DE/DX = 0.0     | ! |
| ! R7                        | R(3,16)    | 1.4219   | -DE/DX = 0.0     | ! |
| ! R8                        | R(4,5)     | 1.3332   | -DE/DX = 0.0     | ! |
| ! R9                        | R(4,15)    | 1.1056   | -DE/DX = 0.0     | ! |
| ! R10                       | R(5,6)     | 1.4785   | -DE/DX = 0.0     | ! |
| ! R11                       | R(6,7)     | 1.5514   | -DE/DX = 0.0     | ! |
| ! R12                       | R(6,10)    | 1.0889   | -DE/DX = 0.0     | ! |
| ! R13                       | R(6,11)    | 1.0904   | -DE/DX = 0.0     | ! |
| ! R14                       | R(7,12)    | 1.0935   | -DE/DX = 0.0     | ! |
| ! R15                       | R(7,13)    | 1.0964   | -DE/DX = 0.0     | ! |
| ! R16                       | R(7,21)    | 1.4021   | -DE/DX = 0.0     | ! |
| ! R17                       | R(13,14)   | 3.1922   | -DE/DX = 0.0     | ! |
| ! R18                       | R(16,17)   | 1.3265   | -DE/DX = 0.0     | ! |
| ! R19                       | R(16,18)   | 1.0826   | -DE/DX = 0.0     | ! |
| ! R20                       | R(17,19)   | 1.0811   | -DE/DX = 0.0     | ! |
| ! R21                       | R(17,20)   | 1.0825   | -DE/DX = 0.0     | ! |
| ! R22                       | R(21,22)   | 0.9795   | -DE/DX = 0.0     | ! |
| ! A1                        | A(2,1,5)   | 107.4488 | -DE/DX = 0.0     | ! |
| ! A2                        | A(2,1,8)   | 130.4957 | -DE/DX = 0.0     | ! |
| ! A3                        | A(5,1,8)   | 122.0547 | -DE/DX = 0.0     | ! |
| ! A4                        | A(1,2,3)   | 106.6856 | -DE/DX = 0.0     | ! |
| ! A5                        | A(1,2,9)   | 130.4813 | -DE/DX = 0.0     | ! |
| ! A6                        | A(3,2,9)   | 122.8331 | -DE/DX = 0.0     | ! |
| ! A7                        | A(2,3,4)   | 108.6462 | -DE/DX = 0.0     | ! |
| ! A8                        | A(2,3,16)  | 128.6538 | -DE/DX = 0.0     | ! |
| ! A9                        | A(4,3,16)  | 122.6999 | -DE/DX = 0.0     | ! |
| ! A10                       | A(3,4,5)   | 108.2726 | -DE/DX = 0.0     | ! |
| ! A11                       | A(3,4,15)  | 128.7417 | -DE/DX = 0.0     | ! |
| ! A12                       | A(5,4,15)  | 122.9108 | -DE/DX = 0.0     | ! |
| ! A13                       | A(1,5,4)   | 108.9455 | -DE/DX = 0.0     | ! |

|       |              |           |          |     |   |
|-------|--------------|-----------|----------|-----|---|
| ! A14 | A(1,5,6)     | 127.6728  | -DE/DX = | 0.0 | ! |
| ! A15 | A(4,5,6)     | 123.2506  | -DE/DX = | 0.0 | ! |
| ! A16 | A(5,6,7)     | 112.2301  | -DE/DX = | 0.0 | ! |
| ! A17 | A(5,6,10)    | 106.8437  | -DE/DX = | 0.0 | ! |
| ! A18 | A(5,6,11)    | 107.4442  | -DE/DX = | 0.0 | ! |
| ! A19 | A(7,6,10)    | 108.1204  | -DE/DX = | 0.0 | ! |
| ! A20 | A(7,6,11)    | 112.6442  | -DE/DX = | 0.0 | ! |
| ! A21 | A(10,6,11)   | 109.3802  | -DE/DX = | 0.0 | ! |
| ! A22 | A(6,7,12)    | 110.5609  | -DE/DX = | 0.0 | ! |
| ! A23 | A(6,7,13)    | 108.4511  | -DE/DX = | 0.0 | ! |
| ! A24 | A(6,7,21)    | 110.3828  | -DE/DX = | 0.0 | ! |
| ! A25 | A(12,7,13)   | 108.5799  | -DE/DX = | 0.0 | ! |
| ! A26 | A(12,7,21)   | 107.521   | -DE/DX = | 0.0 | ! |
| ! A27 | A(13,7,21)   | 111.3365  | -DE/DX = | 0.0 | ! |
| ! A28 | A(7,13,14)   | 99.7455   | -DE/DX = | 0.0 | ! |
| ! A29 | A(3,16,17)   | 124.7632  | -DE/DX = | 0.0 | ! |
| ! A30 | A(3,16,18)   | 112.1624  | -DE/DX = | 0.0 | ! |
| ! A31 | A(17,16,18)  | 123.0742  | -DE/DX = | 0.0 | ! |
| ! A32 | A(16,17,19)  | 119.1583  | -DE/DX = | 0.0 | ! |
| ! A33 | A(16,17,20)  | 123.6301  | -DE/DX = | 0.0 | ! |
| ! A34 | A(19,17,20)  | 117.2116  | -DE/DX = | 0.0 | ! |
| ! A35 | A(7,21,22)   | 106.174   | -DE/DX = | 0.0 | ! |
| ! D1  | D(5,1,2,3)   | 0.2541    | -DE/DX = | 0.0 | ! |
| ! D2  | D(5,1,2,9)   | -179.7257 | -DE/DX = | 0.0 | ! |
| ! D3  | D(8,1,2,3)   | 179.9214  | -DE/DX = | 0.0 | ! |
| ! D4  | D(8,1,2,9)   | -0.0584   | -DE/DX = | 0.0 | ! |
| ! D5  | D(2,1,5,4)   | -0.3687   | -DE/DX = | 0.0 | ! |
| ! D6  | D(2,1,5,6)   | -176.273  | -DE/DX = | 0.0 | ! |
| ! D7  | D(8,1,5,4)   | 179.9298  | -DE/DX = | 0.0 | ! |
| ! D8  | D(8,1,5,6)   | 4.0256    | -DE/DX = | 0.0 | ! |
| ! D9  | D(1,2,3,4)   | -0.0561   | -DE/DX = | 0.0 | ! |
| ! D10 | D(1,2,3,16)  | 179.8445  | -DE/DX = | 0.0 | ! |
| ! D11 | D(9,2,3,4)   | 179.9256  | -DE/DX = | 0.0 | ! |
| ! D12 | D(9,2,3,16)  | -0.1738   | -DE/DX = | 0.0 | ! |
| ! D13 | D(2,3,4,5)   | -0.173    | -DE/DX = | 0.0 | ! |
| ! D14 | D(2,3,4,15)  | 176.707   | -DE/DX = | 0.0 | ! |
| ! D15 | D(16,3,4,5)  | 179.9192  | -DE/DX = | 0.0 | ! |
| ! D16 | D(16,3,4,15) | -3.2008   | -DE/DX = | 0.0 | ! |
| ! D17 | D(2,3,16,17) | 3.0504    | -DE/DX = | 0.0 | ! |
| ! D18 | D(2,3,16,18) | -176.7973 | -DE/DX = | 0.0 | ! |
| ! D19 | D(4,3,16,17) | -177.0615 | -DE/DX = | 0.0 | ! |
| ! D20 | D(4,3,16,18) | 3.0908    | -DE/DX = | 0.0 | ! |
| ! D21 | D(3,4,5,1)   | 0.3336    | -DE/DX = | 0.0 | ! |
| ! D22 | D(3,4,5,6)   | 176.4575  | -DE/DX = | 0.0 | ! |

|       |                |           |          |     |   |
|-------|----------------|-----------|----------|-----|---|
| ! D23 | D(15,4,5,1)    | -176.7679 | -DE/DX = | 0.0 | ! |
| ! D24 | D(15,4,5,6)    | -0.644    | -DE/DX = | 0.0 | ! |
| ! D25 | D(1,5,6,7)     | 96.5542   | -DE/DX = | 0.0 | ! |
| ! D26 | D(1,5,6,10)    | -145.1005 | -DE/DX = | 0.0 | ! |
| ! D27 | D(1,5,6,11)    | -27.8065  | -DE/DX = | 0.0 | ! |
| ! D28 | D(4,5,6,7)     | -78.8125  | -DE/DX = | 0.0 | ! |
| ! D29 | D(4,5,6,10)    | 39.5329   | -DE/DX = | 0.0 | ! |
| ! D30 | D(4,5,6,11)    | 156.8269  | -DE/DX = | 0.0 | ! |
| ! D31 | D(5,6,7,12)    | -91.7942  | -DE/DX = | 0.0 | ! |
| ! D32 | D(5,6,7,13)    | 27.1459   | -DE/DX = | 0.0 | ! |
| ! D33 | D(5,6,7,21)    | 149.3646  | -DE/DX = | 0.0 | ! |
| ! D34 | D(10,6,7,12)   | 150.6178  | -DE/DX = | 0.0 | ! |
| ! D35 | D(10,6,7,13)   | -90.4421  | -DE/DX = | 0.0 | ! |
| ! D36 | D(10,6,7,21)   | 31.7765   | -DE/DX = | 0.0 | ! |
| ! D37 | D(11,6,7,12)   | 29.6317   | -DE/DX = | 0.0 | ! |
| ! D38 | D(11,6,7,13)   | 148.5718  | -DE/DX = | 0.0 | ! |
| ! D39 | D(11,6,7,21)   | -89.2095  | -DE/DX = | 0.0 | ! |
| ! D40 | D(6,7,13,14)   | 66.9758   | -DE/DX = | 0.0 | ! |
| ! D41 | D(12,7,13,14)  | -172.8423 | -DE/DX = | 0.0 | ! |
| ! D42 | D(21,7,13,14)  | -54.6596  | -DE/DX = | 0.0 | ! |
| ! D43 | D(6,7,21,22)   | -74.5924  | -DE/DX = | 0.0 | ! |
| ! D44 | D(12,7,21,22)  | 164.7311  | -DE/DX = | 0.0 | ! |
| ! D45 | D(13,7,21,22)  | 45.9129   | -DE/DX = | 0.0 | ! |
| ! D46 | D(3,16,17,19)  | -179.6544 | -DE/DX = | 0.0 | ! |
| ! D47 | D(3,16,17,20)  | 0.3485    | -DE/DX = | 0.0 | ! |
| ! D48 | D(18,16,17,19) | 0.1774    | -DE/DX = | 0.0 | ! |
| ! D49 | D(18,16,17,20) | -179.8198 | -DE/DX = | 0.0 | ! |

-----  
GradGradGradGradGradGradGradGradGradGradGradGradGradGradGradGradGradGradGrad

Input orientation:

| Center<br>Number | Atomic<br>Number | Atomic<br>Type | Coordinates (Angstroms) |           |           |
|------------------|------------------|----------------|-------------------------|-----------|-----------|
|                  |                  |                | X                       | Y         | Z         |
| 1                | 6                | 0              | -0.590351               | -2.342598 | -1.151156 |
| 2                | 6                | 0              | -1.888186               | -1.967183 | -1.289309 |
| 3                | 7                | 0              | -2.088691               | -0.897145 | -0.423688 |
| 4                | 6                | 0              | -0.932419               | -0.640489 | 0.219188  |
| 5                | 7                | 0              | -0.015669               | -1.509833 | -0.206377 |
| 6                | 6                | 0              | 1.396830                | -1.476810 | 0.229346  |
| 7                | 6                | 0              | 2.214660                | -0.387265 | -0.512801 |
| 8                | 1                | 0              | -0.033941               | -3.126125 | -1.636015 |
| 9                | 1                | 0              | -2.666050               | -2.363259 | -1.916041 |



|    |    |   |           |           |           |
|----|----|---|-----------|-----------|-----------|
| 10 | 1  | 0 | 1.393994  | -1.233873 | 1.290838  |
| 11 | 1  | 0 | 1.805906  | -2.477708 | 0.088310  |
| 12 | 1  | 0 | 2.683891  | -0.802940 | -1.408727 |
| 13 | 1  | 0 | 1.530261  | 0.413708  | -0.816487 |
| 14 | 35 | 0 | 0.725834  | 1.554474  | 2.054295  |
| 15 | 1  | 0 | -0.706029 | 0.166459  | 0.940179  |
| 16 | 6  | 0 | -3.275774 | -0.147552 | -0.198191 |
| 17 | 6  | 0 | -4.448198 | -0.398915 | -0.765385 |
| 18 | 1  | 0 | -3.118304 | 0.667441  | 0.496750  |
| 19 | 1  | 0 | -5.292661 | 0.234716  | -0.532507 |
| 20 | 1  | 0 | -4.616418 | -1.212778 | -1.459080 |
| 21 | 8  | 0 | 3.238066  | 0.101441  | 0.311627  |
| 22 | 1  | 0 | 2.803598  | 0.679357  | 0.972383  |

-----  
Distance matrix (angstroms):

|    |    | 1        | 2        | 3        | 4        | 5        |
|----|----|----------|----------|----------|----------|----------|
| 1  | C  | 0.000000 |          |          |          |          |
| 2  | C  | 1.358086 | 0.000000 |          |          |          |
| 3  | N  | 2.205349 | 1.390857 | 0.000000 |          |          |
| 4  | C  | 2.211792 | 2.224673 | 1.347638 | 0.000000 |          |
| 5  | N  | 1.384328 | 2.210935 | 2.172564 | 1.333152 | 0.000000 |
| 6  | C  | 2.569877 | 3.652138 | 3.593234 | 2.474861 | 1.478546 |
| 7  | C  | 3.478349 | 4.464577 | 4.334369 | 3.240993 | 2.515636 |
| 8  | H  | 1.076381 | 2.213950 | 3.264979 | 3.229152 | 2.157916 |
| 9  | H  | 2.212239 | 1.074589 | 2.170242 | 3.245399 | 3.267386 |
| 10 | H  | 3.336200 | 4.238821 | 3.896419 | 2.629208 | 2.074839 |
| 11 | H  | 2.701218 | 3.975523 | 4.234172 | 3.300140 | 2.083689 |
| 12 | H  | 3.627334 | 4.719492 | 4.874087 | 3.969155 | 3.038580 |
| 13 | H  | 3.493740 | 4.192610 | 3.869037 | 2.872063 | 2.542075 |
| 14 | Br | 5.214827 | 5.514967 | 4.480222 | 3.306854 | 3.879489 |
| 15 | H  | 3.268398 | 3.304624 | 2.214304 | 1.105552 | 2.145027 |
| 16 | C  | 3.596924 | 2.535152 | 1.421937 | 2.430741 | 3.533293 |
| 17 | C  | 4.337016 | 3.047561 | 2.435624 | 3.659023 | 4.603688 |
| 18 | H  | 4.262214 | 3.412395 | 2.086921 | 2.562385 | 3.855029 |
| 19 | H  | 5.397869 | 4.124507 | 3.399760 | 4.510292 | 5.567446 |
| 20 | H  | 4.192913 | 2.835701 | 2.749739 | 4.088514 | 4.777489 |
| 21 | O  | 4.771775 | 5.755055 | 5.469205 | 4.236973 | 3.667604 |
| 22 | H  | 5.016026 | 5.842282 | 5.326244 | 4.033252 | 3.759028 |
|    |    | 6        | 7        | 8        | 9        | 10       |
| 6  | C  | 0.000000 |          |          |          |          |
| 7  | C  | 1.551366 | 0.000000 |          |          |          |
| 8  | H  | 2.871745 | 3.717414 | 0.000000 |          |          |
| 9  | H  | 4.679260 | 5.449309 | 2.754701 | 0.000000 |          |
| 10 | H  | 1.088941 | 2.154844 | 3.766442 | 5.295616 | 0.000000 |

|    |    |          |          |          |          |          |
|----|----|----------|----------|----------|----------|----------|
| 11 | H  | 1.090427 | 2.213225 | 2.603609 | 4.901930 | 1.778446 |
| 12 | H  | 2.189500 | 1.093456 | 3.582661 | 5.595877 | 3.022779 |
| 13 | H  | 2.164632 | 1.096442 | 3.955853 | 5.150689 | 2.678416 |
| 14 | Br | 3.601299 | 3.546397 | 6.008631 | 6.528176 | 2.967184 |
| 15 | H  | 2.761817 | 3.308805 | 4.234334 | 4.289423 | 2.548330 |
| 16 | C  | 4.876776 | 5.504663 | 4.631276 | 2.869169 | 5.020361 |
| 17 | C  | 6.026252 | 6.667655 | 5.261306 | 2.891143 | 6.249513 |
| 18 | H  | 5.005572 | 5.529205 | 5.334147 | 3.900159 | 4.960484 |
| 19 | H  | 6.946872 | 7.533068 | 6.337753 | 3.944962 | 7.084680 |
| 20 | H  | 6.251372 | 6.945542 | 4.969034 | 2.310055 | 6.609655 |
| 21 | O  | 2.426477 | 1.402096 | 4.991645 | 6.774646 | 2.478410 |
| 22 | H  | 2.679581 | 1.921016 | 5.416370 | 6.893298 | 2.397675 |
|    |    | 11       | 12       | 13       | 14       | 15       |
| 11 | H  | 0.000000 |          |          |          |          |
| 12 | H  | 2.411810 | 0.000000 |          |          |          |
| 13 | H  | 3.042191 | 1.778157 | 0.000000 |          |          |
| 14 | Br | 4.614124 | 4.624273 | 3.192153 | 0.000000 |          |
| 15 | H  | 3.745279 | 4.236585 | 2.854471 | 2.284310 | 0.000000 |
| 16 | C  | 5.597783 | 6.116579 | 4.878040 | 4.897290 | 2.828087 |
| 17 | C  | 6.645600 | 7.172435 | 6.033651 | 6.207813 | 4.151196 |
| 18 | H  | 5.857186 | 6.281586 | 4.837161 | 4.241482 | 2.503334 |
| 19 | H  | 7.624455 | 8.091345 | 6.831175 | 6.682484 | 4.817743 |
| 20 | H  | 6.726122 | 7.311978 | 6.390622 | 6.967148 | 4.790603 |
| 21 | O  | 2.958540 | 2.021047 | 2.070447 | 3.385188 | 3.994394 |
| 22 | H  | 3.426957 | 2.807351 | 2.211790 | 2.500693 | 3.547053 |
|    |    | 16       | 17       | 18       | 19       | 20       |
| 16 | C  | 0.000000 |          |          |          |          |
| 17 | C  | 1.326451 | 0.000000 |          |          |          |
| 18 | H  | 1.082568 | 2.121018 | 0.000000 |          |          |
| 19 | H  | 2.079839 | 1.081128 | 2.444268 | 0.000000 |          |
| 20 | H  | 2.126470 | 1.082536 | 3.099168 | 1.846911 | 0.000000 |
| 21 | O  | 6.538502 | 7.777465 | 6.384204 | 8.573425 | 8.158155 |
| 22 | H  | 6.246021 | 7.534657 | 5.940984 | 8.246927 | 8.034229 |
|    |    | 21       | 22       |          |          |          |
| 21 | O  | 0.000000 |          |          |          |          |
| 22 | H  | 0.979463 | 0.000000 |          |          |          |

Stoichiometry C7H11BrN2O

Framework group C1[X(C7H11BrN2O)]

Deg. of freedom 60

Full point group C1 NOp 1

Largest Abelian subgroup C1 NOp 1

Largest concise Abelian subgroup C1 NOp 1

Standard orientation:

-----

| Center<br>Number | Atomic<br>Number | Atomic<br>Type | Coordinates (Angstroms) |           |           |
|------------------|------------------|----------------|-------------------------|-----------|-----------|
|                  |                  |                | X                       | Y         | Z         |
| 1                | 6                | 0              | -1.852977               | -2.004770 | 0.261946  |
| 2                | 6                | 0              | -2.844936               | -1.108684 | 0.022270  |
| 3                | 7                | 0              | -2.252596               | 0.149697  | 0.012664  |
| 4                | 6                | 0              | -0.932640               | 0.006366  | 0.243529  |
| 5                | 7                | 0              | -0.674460               | -1.291997 | 0.401298  |
| 6                | 6                | 0              | 0.688990                | -1.829559 | 0.596565  |
| 7                | 6                | 0              | 1.478350                | -1.925642 | -0.735506 |
| 8                | 1                | 0              | -1.885737               | -3.077123 | 0.349012  |
| 9                | 1                | 0              | -3.896876               | -1.258715 | -0.137907 |
| 10               | 1                | 0              | 1.211914                | -1.133502 | 1.250666  |
| 11               | 1                | 0              | 0.591782                | -2.793267 | 1.097412  |
| 12               | 1                | 0              | 1.344868                | -2.910804 | -1.190791 |
| 13               | 1                | 0              | 1.089622                | -1.166684 | -1.424751 |
| 14               | 35               | 0              | 2.025502                | 1.477383  | 0.099347  |
| 15               | 1                | 0              | -0.144502               | 0.781540  | 0.257320  |
| 16               | 6                | 0              | -2.862333               | 1.416758  | -0.198718 |
| 17               | 6                | 0              | -4.162812               | 1.610481  | -0.373924 |
| 18               | 1                | 0              | -2.139017               | 2.222199  | -0.204304 |
| 19               | 1                | 0              | -4.528939               | 2.615146  | -0.533412 |
| 20               | 1                | 0              | -4.894120               | 0.812340  | -0.367232 |
| 21               | 8                | 0              | 2.850009                | -1.749930 | -0.504093 |
| 22               | 1                | 0              | 2.977890                | -0.793667 | -0.335111 |

Rotational constants (GHZ):      0.9807504      0.4478907      0.3185454

\*\*\*\*\*

Population analysis using the SCF density.

\*\*\*\*\*

Orbital symmetries:

```

Occupied (A) (A)
          (A) (A) (A) (A) (A) (A) (A) (A) (A) (A) (A) (A)
          (A) (A) (A) (A) (A) (A) (A) (A) (A) (A) (A) (A)
          (A) (A) (A) (A) (A) (A) (A) (A) (A) (A) (A) (A)
          (A) (A) (A) (A) (A) (A) (A)
Virtual  (A) (A)
          (A) (A) (A) (A) (A) (A) (A) (A) (A) (A) (A) (A)
          (A) (A) (A) (A) (A) (A) (A) (A) (A) (A) (A) (A)
          (A) (A) (A) (A) (A) (A) (A) (A) (A) (A) (A) (A)

```

(A)  
 (A) (A) (A) (A) (A) (A) (A) (A) (A) (A) (A) (A)  
 (A) (A) (A) (A) (A) (A) (A) (A) (A) (A) (A) (A)  
 (A) (A) (A) (A) (A) (A) (A) (A) (A) (A) (A) (A)  
 (A) (A) (A) (A) (A) (A) (A) (A) (A) (A) (A) (A)  
 (A) (A) (A) (A) (A) (A) (A) (A) (A) (A) (A) (A)  
 (A) (A) (A) (A) (A) (A) (A) (A) (A) (A) (A) (A)  
 (A) (A) (A) (A) (A) (A) (A) (A) (A) (A) (A) (A)  
 (A) (A) (A) (A) (A) (A) (A) (A) (A) (A) (A) (A)  
 (A) (A) (A) (A) (A) (A) (A) (A) (A) (A) (A) (A)  
 (A) (A) (A) (A) (A) (A) (A) (A) (A) (A) (A) (A)  
 (A) (A) (A) (A) (A) (A) (A) (A) (A) (A) (A) (A)  
 (A) (A) (A) (A) (A) (A) (A) (A) (A) (A) (A) (A)  
 (A) (A) (A) (A) (A) (A) (A) (A) (A) (A) (A) (A)  
 (A) (A) (A) (A) (A) (A) (A) (A) (A) (A) (A) (A)  
 (A) (A) (A) (A) (A) (A) (A) (A) (A) (A) (A) (A)  
 (A) (A) (A) (A) (A) (A) (A) (A) (A) (A) (A) (A)  
 (A) (A) (A) (A) (A) (A) (A) (A) (A) (A) (A) (A)  
 (A) (A) (A) (A) (A) (A) (A) (A) (A) (A) (A) (A)  
 (A) (A) (A) (A) (A) (A) (A) (A) (A) (A) (A) (A)  
 (A) (A)

The electronic state is 1-A.

|       |                      |            |           |           |           |           |
|-------|----------------------|------------|-----------|-----------|-----------|-----------|
| Alpha | occ. eigenvalues --  | -482.70344 | -62.35689 | -56.17473 | -56.17453 | -56.17451 |
| Alpha | occ. eigenvalues --  | -19.11011  | -14.46076 | -14.44739 | -10.30312 | -10.27890 |
| Alpha | occ. eigenvalues --  | -10.27819  | -10.27687 | -10.24359 | -10.23038 | -10.22789 |
| Alpha | occ. eigenvalues --  | -8.56605   | -6.38938  | -6.38881  | -6.38847  | -2.50174  |
| Alpha | occ. eigenvalues --  | -2.50171   | -2.50137  | -2.50093  | -2.50092  | -1.12313  |
| Alpha | occ. eigenvalues --  | -1.02041   | -1.00671  | -0.86175  | -0.83162  | -0.78464  |
| Alpha | occ. eigenvalues --  | -0.72065   | -0.68880  | -0.65898  | -0.64273  | -0.63841  |
| Alpha | occ. eigenvalues --  | -0.59189   | -0.54909  | -0.54010  | -0.52699  | -0.51722  |
| Alpha | occ. eigenvalues --  | -0.50204   | -0.49937  | -0.48672  | -0.47004  | -0.45009  |
| Alpha | occ. eigenvalues --  | -0.44338   | -0.40510  | -0.39518  | -0.34166  | -0.31967  |
| Alpha | occ. eigenvalues --  | -0.31057   | -0.27540  | -0.20763  | -0.20491  | -0.19986  |
| Alpha | virt. eigenvalues -- | -0.09100   | -0.05220  | -0.03532  | -0.02036  | -0.01421  |
| Alpha | virt. eigenvalues -- | -0.00985   | 0.00400   | 0.00793   | 0.00842   | 0.02278   |
| Alpha | virt. eigenvalues -- | 0.03379    | 0.03644   | 0.04392   | 0.04680   | 0.05467   |
| Alpha | virt. eigenvalues -- | 0.05953    | 0.06501   | 0.07162   | 0.07629   | 0.07894   |
| Alpha | virt. eigenvalues -- | 0.08288    | 0.08468   | 0.09001   | 0.09186   | 0.10028   |
| Alpha | virt. eigenvalues -- | 0.10375    | 0.10867   | 0.11154   | 0.11587   | 0.11959   |
| Alpha | virt. eigenvalues -- | 0.12475    | 0.12623   | 0.13089   | 0.13420   | 0.13605   |
| Alpha | virt. eigenvalues -- | 0.14194    | 0.14564   | 0.14842   | 0.15220   | 0.15700   |
| Alpha | virt. eigenvalues -- | 0.16083    | 0.16268   | 0.16788   | 0.17299   | 0.18029   |
| Alpha | virt. eigenvalues -- | 0.18578    | 0.19172   | 0.19738   | 0.20700   | 0.20756   |
| Alpha | virt. eigenvalues -- | 0.21591    | 0.21827   | 0.22300   | 0.22956   | 0.23280   |

|                            |         |         |         |         |         |
|----------------------------|---------|---------|---------|---------|---------|
| Alpha virt. eigenvalues -- | 0.24269 | 0.24413 | 0.24754 | 0.25256 | 0.26908 |
| Alpha virt. eigenvalues -- | 0.27110 | 0.27866 | 0.28258 | 0.28679 | 0.29736 |
| Alpha virt. eigenvalues -- | 0.30186 | 0.31292 | 0.32181 | 0.33073 | 0.33928 |
| Alpha virt. eigenvalues -- | 0.34858 | 0.35216 | 0.35612 | 0.35804 | 0.38156 |
| Alpha virt. eigenvalues -- | 0.39211 | 0.40300 | 0.41249 | 0.42702 | 0.45710 |
| Alpha virt. eigenvalues -- | 0.46666 | 0.47702 | 0.49104 | 0.50266 | 0.51665 |
| Alpha virt. eigenvalues -- | 0.51968 | 0.53026 | 0.53249 | 0.54363 | 0.54904 |
| Alpha virt. eigenvalues -- | 0.55958 | 0.57493 | 0.58068 | 0.58990 | 0.60253 |
| Alpha virt. eigenvalues -- | 0.61041 | 0.61756 | 0.62385 | 0.63576 | 0.63887 |
| Alpha virt. eigenvalues -- | 0.65452 | 0.67064 | 0.68067 | 0.68365 | 0.69308 |
| Alpha virt. eigenvalues -- | 0.69572 | 0.72003 | 0.73094 | 0.73201 | 0.74386 |
| Alpha virt. eigenvalues -- | 0.75203 | 0.76112 | 0.76450 | 0.77044 | 0.78981 |
| Alpha virt. eigenvalues -- | 0.79374 | 0.80365 | 0.80771 | 0.82384 | 0.84062 |
| Alpha virt. eigenvalues -- | 0.85240 | 0.87544 | 0.88743 | 0.90058 | 0.91918 |
| Alpha virt. eigenvalues -- | 0.93511 | 0.96003 | 0.98271 | 0.98891 | 1.00184 |
| Alpha virt. eigenvalues -- | 1.02546 | 1.03282 | 1.03625 | 1.04982 | 1.07433 |
| Alpha virt. eigenvalues -- | 1.09678 | 1.10699 | 1.11830 | 1.13486 | 1.14762 |
| Alpha virt. eigenvalues -- | 1.16489 | 1.20122 | 1.24470 | 1.27431 | 1.28251 |
| Alpha virt. eigenvalues -- | 1.32073 | 1.35984 | 1.38102 | 1.40326 | 1.43557 |
| Alpha virt. eigenvalues -- | 1.45373 | 1.47553 | 1.48143 | 1.49226 | 1.50097 |
| Alpha virt. eigenvalues -- | 1.52444 | 1.53983 | 1.54433 | 1.57413 | 1.58531 |
| Alpha virt. eigenvalues -- | 1.59100 | 1.60376 | 1.60915 | 1.63131 | 1.65745 |
| Alpha virt. eigenvalues -- | 1.68186 | 1.68577 | 1.69475 | 1.70096 | 1.71318 |
| Alpha virt. eigenvalues -- | 1.72837 | 1.74721 | 1.75744 | 1.76834 | 1.80296 |
| Alpha virt. eigenvalues -- | 1.80587 | 1.84014 | 1.85155 | 1.85482 | 1.89170 |
| Alpha virt. eigenvalues -- | 1.93059 | 1.94312 | 1.96185 | 2.00102 | 2.02965 |
| Alpha virt. eigenvalues -- | 2.04157 | 2.04779 | 2.07261 | 2.08765 | 2.09394 |
| Alpha virt. eigenvalues -- | 2.10324 | 2.12093 | 2.14354 | 2.15672 | 2.16053 |
| Alpha virt. eigenvalues -- | 2.18935 | 2.21478 | 2.25524 | 2.26977 | 2.28165 |
| Alpha virt. eigenvalues -- | 2.34675 | 2.38722 | 2.41907 | 2.43739 | 2.44265 |
| Alpha virt. eigenvalues -- | 2.45841 | 2.48559 | 2.50293 | 2.51250 | 2.55175 |
| Alpha virt. eigenvalues -- | 2.55556 | 2.57379 | 2.58431 | 2.59925 | 2.60216 |
| Alpha virt. eigenvalues -- | 2.62918 | 2.66273 | 2.70243 | 2.70772 | 2.71499 |
| Alpha virt. eigenvalues -- | 2.72838 | 2.74243 | 2.74955 | 2.78158 | 2.78824 |
| Alpha virt. eigenvalues -- | 2.79940 | 2.81590 | 2.83872 | 2.86225 | 2.88815 |
| Alpha virt. eigenvalues -- | 2.92808 | 2.94018 | 2.95003 | 3.00257 | 3.07407 |
| Alpha virt. eigenvalues -- | 3.10195 | 3.13701 | 3.14703 | 3.24918 | 3.26417 |
| Alpha virt. eigenvalues -- | 3.34433 | 3.36426 | 3.48329 | 3.53525 | 3.58802 |
| Alpha virt. eigenvalues -- | 3.62563 | 3.63708 | 3.70872 | 3.74755 | 3.75638 |
| Alpha virt. eigenvalues -- | 3.81061 | 3.82791 | 3.84163 | 3.86766 | 3.88868 |
| Alpha virt. eigenvalues -- | 4.04590 | 4.05654 | 4.07703 | 4.18389 | 4.26048 |
| Alpha virt. eigenvalues -- | 4.28825 | 4.31159 | 4.34263 | 4.40830 | 4.68000 |
| Alpha virt. eigenvalues -- | 4.90310 | 5.01493 | 5.08850 | 5.21787 | 5.42004 |
| Alpha virt. eigenvalues -- | 5.65783 | 6.77203 | 7.67771 | 7.71848 | 7.73522 |

Alpha virt. eigenvalues -- 23.68647 23.73544 23.81872 23.86775 23.87493  
 Alpha virt. eigenvalues -- 24.12680 24.21589 35.42994 35.55942 48.05394  
 Alpha virt. eigenvalues -- 49.93631 289.88506 289.92678 289.939621020.84375

Condensed to atoms (all electrons):

|    |    | 1         | 2         | 3         | 4         | 5         | 6         |
|----|----|-----------|-----------|-----------|-----------|-----------|-----------|
| 1  | C  | 9.001856  | -3.090748 | 0.792057  | -1.147260 | -0.669792 | 0.573366  |
| 2  | C  | -3.090748 | 8.588925  | -0.564681 | 0.988740  | 0.903402  | -0.597729 |
| 3  | N  | 0.792057  | -0.564681 | 6.899395  | -0.171518 | -0.462845 | 0.145747  |
| 4  | C  | -1.147260 | 0.988740  | -0.171518 | 7.232453  | 0.815326  | -0.425745 |
| 5  | N  | -0.669792 | 0.903402  | -0.462845 | 0.815326  | 7.016248  | -0.124695 |
| 6  | C  | 0.573366  | -0.597729 | 0.145747  | -0.425745 | -0.124695 | 6.159868  |
| 7  | C  | -0.154926 | 0.176042  | -0.074333 | 0.006855  | 0.058244  | -0.087755 |
| 8  | H  | 0.556402  | -0.168238 | 0.042471  | -0.002945 | -0.091510 | 0.010863  |
| 9  | H  | -0.129448 | 0.531118  | -0.081759 | -0.000015 | 0.029167  | 0.000371  |
| 10 | H  | 0.095707  | -0.098641 | 0.030461  | -0.022639 | -0.079430 | 0.494107  |
| 11 | H  | -0.123533 | 0.123952  | 0.002113  | 0.026442  | -0.020459 | 0.265022  |
| 12 | H  | 0.095183  | -0.111469 | 0.016461  | -0.044752 | -0.047625 | 0.103179  |
| 13 | H  | -0.166390 | 0.154509  | -0.043098 | 0.093357  | 0.069180  | -0.150875 |
| 14 | Br | -0.018266 | 0.003702  | 0.002446  | -0.205136 | -0.023741 | 0.070408  |
| 15 | H  | 0.127192  | -0.239601 | 0.095881  | -0.574012 | -0.204641 | 0.066613  |
| 16 | C  | 0.606604  | -0.580996 | 0.290393  | -0.500787 | -0.149555 | 0.015365  |
| 17 | C  | -0.181072 | 0.066291  | -0.023358 | -0.180137 | -0.070536 | -0.037205 |
| 18 | H  | -0.025671 | 0.042403  | -0.088474 | 0.123329  | 0.025733  | -0.007070 |
| 19 | H  | -0.003339 | 0.004123  | 0.022249  | -0.003832 | -0.000568 | 0.000723  |
| 20 | H  | -0.003026 | 0.007890  | -0.035751 | 0.007444  | 0.002182  | -0.001734 |
| 21 | O  | -0.022738 | 0.021648  | -0.005104 | 0.010007  | 0.017361  | -0.163419 |
| 22 | H  | -0.006479 | 0.004749  | -0.000929 | 0.013254  | -0.000930 | 0.021194  |
|    |    | 7         | 8         | 9         | 10        | 11        | 12        |
| 1  | C  | -0.154926 | 0.556402  | -0.129448 | 0.095707  | -0.123533 | 0.095183  |
| 2  | C  | 0.176042  | -0.168238 | 0.531118  | -0.098641 | 0.123952  | -0.111469 |
| 3  | N  | -0.074333 | 0.042471  | -0.081759 | 0.030461  | 0.002113  | 0.016461  |
| 4  | C  | 0.006855  | -0.002945 | -0.000015 | -0.022639 | 0.026442  | -0.044752 |
| 5  | N  | 0.058244  | -0.091510 | 0.029167  | -0.079430 | -0.020459 | -0.047625 |
| 6  | C  | -0.087755 | 0.010863  | 0.000371  | 0.494107  | 0.265022  | 0.103179  |
| 7  | C  | 5.656262  | -0.000645 | -0.000387 | -0.057987 | -0.128785 | 0.350653  |
| 8  | H  | -0.000645 | 0.490710  | -0.010988 | 0.007945  | -0.029989 | 0.005703  |
| 9  | H  | -0.000387 | -0.010988 | 0.500643  | -0.000256 | 0.004351  | -0.001170 |
| 10 | H  | -0.057987 | 0.007945  | -0.000256 | 0.487326  | -0.077823 | 0.023462  |
| 11 | H  | -0.128785 | -0.029989 | 0.004351  | -0.077823 | 0.772583  | -0.031998 |
| 12 | H  | 0.350653  | 0.005703  | -0.001170 | 0.023462  | -0.031998 | 0.656810  |
| 13 | H  | 0.342474  | -0.007650 | 0.001508  | -0.041553 | 0.045976  | -0.104605 |
| 14 | Br | 0.020008  | -0.001565 | -0.000865 | -0.025304 | 0.023095  | 0.006328  |
| 15 | H  | -0.041270 | -0.003469 | -0.004035 | -0.009940 | 0.014883  | 0.020580  |
| 16 | C  | -0.024295 | 0.013755  | 0.008223  | 0.018184  | -0.006570 | 0.003601  |

|    |    |           |           |           |           |           |           |
|----|----|-----------|-----------|-----------|-----------|-----------|-----------|
| 17 | C  | -0.002142 | -0.002460 | -0.014125 | -0.004112 | 0.000937  | 0.000684  |
| 18 | H  | 0.003797  | 0.000451  | 0.001600  | 0.001007  | -0.002570 | -0.000670 |
| 19 | H  | -0.000265 | -0.000263 | -0.000424 | -0.000137 | 0.000273  | -0.000013 |
| 20 | H  | 0.000407  | 0.000855  | 0.004217  | 0.000089  | -0.000674 | 0.000025  |
| 21 | O  | 0.281328  | -0.001909 | 0.000006  | -0.054282 | 0.039234  | -0.104606 |
| 22 | H  | -0.038288 | -0.000256 | 0.000167  | 0.016160  | 0.007868  | 0.009875  |
|    |    | 13        | 14        | 15        | 16        | 17        | 18        |
| 1  | C  | -0.166390 | -0.018266 | 0.127192  | 0.606604  | -0.181072 | -0.025671 |
| 2  | C  | 0.154509  | 0.003702  | -0.239601 | -0.580996 | 0.066291  | 0.042403  |
| 3  | N  | -0.043098 | 0.002446  | 0.095881  | 0.290393  | -0.023358 | -0.088474 |
| 4  | C  | 0.093357  | -0.205136 | -0.574012 | -0.500787 | -0.180137 | 0.123329  |
| 5  | N  | 0.069180  | -0.023741 | -0.204641 | -0.149555 | -0.070536 | 0.025733  |
| 6  | C  | -0.150875 | 0.070408  | 0.066613  | 0.015365  | -0.037205 | -0.007070 |
| 7  | C  | 0.342474  | 0.020008  | -0.041270 | -0.024295 | -0.002142 | 0.003797  |
| 8  | H  | -0.007650 | -0.001565 | -0.003469 | 0.013755  | -0.002460 | 0.000451  |
| 9  | H  | 0.001508  | -0.000865 | -0.004035 | 0.008223  | -0.014125 | 0.001600  |
| 10 | H  | -0.041553 | -0.025304 | -0.009940 | 0.018184  | -0.004112 | 0.001007  |
| 11 | H  | 0.045976  | 0.023095  | 0.014883  | -0.006570 | 0.000937  | -0.002570 |
| 12 | H  | -0.104605 | 0.006328  | 0.020580  | 0.003601  | 0.000684  | -0.000670 |
| 13 | H  | 0.695274  | -0.017474 | -0.060877 | -0.020042 | -0.000606 | 0.001163  |
| 14 | Br | -0.017474 | 35.521855 | 0.269529  | 0.020508  | 0.031102  | -0.006875 |
| 15 | H  | -0.060877 | 0.269529  | 1.377869  | 0.058817  | 0.151323  | -0.068199 |
| 16 | C  | -0.020042 | 0.020508  | 0.058817  | 6.194639  | -0.363285 | 0.420386  |
| 17 | C  | -0.000606 | 0.031102  | 0.151323  | -0.363285 | 6.385109  | -0.102313 |
| 18 | H  | 0.001163  | -0.006875 | -0.068199 | 0.420386  | -0.102313 | 0.469315  |
| 19 | H  | 0.000159  | -0.000249 | 0.003645  | -0.088629 | 0.443742  | -0.009619 |
| 20 | H  | -0.000180 | 0.000408  | 0.002881  | 0.064286  | 0.308239  | 0.004557  |
| 21 | O  | 0.008371  | -0.080035 | 0.002681  | -0.000065 | 0.000488  | 0.000081  |
| 22 | H  | -0.010733 | 0.054406  | -0.032746 | -0.002482 | -0.000701 | 0.000404  |
|    |    | 19        | 20        | 21        | 22        |           |           |
| 1  | C  | -0.003339 | -0.003026 | -0.022738 | -0.006479 |           |           |
| 2  | C  | 0.004123  | 0.007890  | 0.021648  | 0.004749  |           |           |
| 3  | N  | 0.022249  | -0.035751 | -0.005104 | -0.000929 |           |           |
| 4  | C  | -0.003832 | 0.007444  | 0.010007  | 0.013254  |           |           |
| 5  | N  | -0.000568 | 0.002182  | 0.017361  | -0.000930 |           |           |
| 6  | C  | 0.000723  | -0.001734 | -0.163419 | 0.021194  |           |           |
| 7  | C  | -0.000265 | 0.000407  | 0.281328  | -0.038288 |           |           |
| 8  | H  | -0.000263 | 0.000855  | -0.001909 | -0.000256 |           |           |
| 9  | H  | -0.000424 | 0.004217  | 0.000006  | 0.000167  |           |           |
| 10 | H  | -0.000137 | 0.000089  | -0.054282 | 0.016160  |           |           |
| 11 | H  | 0.000273  | -0.000674 | 0.039234  | 0.007868  |           |           |
| 12 | H  | -0.000013 | 0.000025  | -0.104606 | 0.009875  |           |           |
| 13 | H  | 0.000159  | -0.000180 | 0.008371  | -0.010733 |           |           |
| 14 | Br | -0.000249 | 0.000408  | -0.080035 | 0.054406  |           |           |

|    |   |           |           |           |           |
|----|---|-----------|-----------|-----------|-----------|
| 15 | H | 0.003645  | 0.002881  | 0.002681  | -0.032746 |
| 16 | C | -0.088629 | 0.064286  | -0.000065 | -0.002482 |
| 17 | C | 0.443742  | 0.308239  | 0.000488  | -0.000701 |
| 18 | H | -0.009619 | 0.004557  | 0.000081  | 0.000404  |
| 19 | H | 0.462928  | -0.021880 | -0.000002 | 0.000001  |
| 20 | H | -0.021880 | 0.533576  | 0.000009  | -0.000028 |
| 21 | O | -0.000002 | 0.000009  | 8.011925  | 0.244299  |
| 22 | H | 0.000001  | -0.000028 | 0.244299  | 0.480646  |

Mulliken charges:

|    |    | 1         |
|----|----|-----------|
| 1  | C  | -0.105679 |
| 2  | C  | -0.165389 |
| 3  | N  | 0.212175  |
| 4  | C  | -0.038430 |
| 5  | N  | 0.009484  |
| 6  | C  | -0.330599 |
| 7  | C  | -0.284993 |
| 8  | H  | 0.192733  |
| 9  | H  | 0.162099  |
| 10 | H  | 0.297656  |
| 11 | H  | 0.095672  |
| 12 | H  | 0.154365  |
| 13 | H  | 0.212112  |
| 14 | Br | -0.644286 |
| 15 | H  | 0.046899  |
| 16 | C  | 0.021944  |
| 17 | C  | -0.405862 |
| 18 | H  | 0.217234  |
| 19 | H  | 0.191378  |
| 20 | H  | 0.126210  |
| 21 | O  | -0.205274 |
| 22 | H  | 0.240551  |

Sum of Mulliken charges = 0.00000

Mulliken charges with hydrogens summed into heavy atoms:

|    |    | 1         |
|----|----|-----------|
| 1  | C  | 0.087053  |
| 2  | C  | -0.003289 |
| 3  | N  | 0.212175  |
| 4  | C  | 0.008469  |
| 5  | N  | 0.009484  |
| 6  | C  | 0.062729  |
| 7  | C  | 0.081484  |
| 14 | Br | -0.644286 |
| 16 | C  | 0.239178  |



```

17 C -0.088274
21 O 0.035277
Electronic spatial extent (au): <R**2>= 3206.9553
Charge= 0.0000 electrons
Dipole moment (field-independent basis, Debye):
X= -13.0430 Y= -5.1781 Z= 0.3424
Tot= 14.0374
Quadrupole moment (field-independent basis, Debye-Ang):
XX= -79.8169 YY= -77.6950 ZZ= -83.8935
XY= -5.2877 XZ= 2.3249 YZ= -3.3506
Traceless Quadrupole moment (field-independent basis, Debye-Ang):
XX= 0.6515 YY= 2.7735 ZZ= -3.4251
XY= -5.2877 XZ= 2.3249 YZ= -3.3506
Octapole moment (field-independent basis, Debye-Ang**2):
XXX= -79.0609 YYY= 4.0755 ZZZ= 2.8410
XYY= -36.4695
XXY= 17.3660 XXZ= -4.3327 XZZ= 24.6484
YZZ= 5.9461
YYZ= 2.6467 XYZ= -0.8545
Hexadecapole moment (field-independent basis, Debye-Ang**3):
XXXX= -2395.0034 YYYY= -1129.5204 ZZZZ= -187.5030
XXXY= 64.4104
XXXZ= 58.0491 YYYY= 45.3594 YYYZ= -17.3619
ZZZX= -2.7305
ZZZY= 5.8415 XXYY= -650.6553 XXZZ= -512.4103
YYZZ= -241.8027
XXYZ= -28.4103 YYXZ= 11.7179 ZZXY= 19.9296
N-N= 8.516537666465D+02 E-N=-8.924479410266D+03 KE= 3.027345417297D+03
1\1\GINC-CN004\FOpt\RB3LYP\6-311++G(d,p)\C7H11Br1N2O1\SYWANG\17-Jul-20
24\0\# opt b3lyp/6-311++g(d,p)\oh\0,1\C,-0.5903513936,-2.3425976974
,-1.1511557446\C,-1.8881856651,-1.9671829416,-1.2893092811\N,-2.088691
3986,-0.8971453559,-0.4236879911\C,-0.9324188073,-0.6404888238,0.21918
75491\N,-0.0156689265,-1.5098327489,-0.2063765756\C,1.3968304869,-1.47
68100587,0.2293461475\C,2.2146604268,-0.387265335,-0.5128010194\H,-0.0
339409631,-3.1261247975,-1.6360150768\H,-2.6660501053,-2.3632589804,-1
.9160413981\H,1.3939936111,-1.2338729219,1.2908383565\H,1.8059061832,-
2.4777078875,0.0883102713\H,2.6838911354,-0.8029398666,-1.4087268585\H
,1.5302611762,0.4137080316,-0.8164872025\Br,0.7258344509,1.5544737195,
2.0542949251\H,-0.7060291385,0.1664586154,0.9401792119\C,-3.2757737978
,-0.1475522001,-0.1981905918\C,-4.4481982793,-0.3989150612,-0.76538493
44\H,-3.1183038447,0.6674411832,0.4967495449\H,-5.2926607776,0.2347157
257,-0.5325065338\H,-4.6164180047,-1.2127782897,-1.4590800636\O,3.2380
655227,0.1014406302,0.3116274166\H,2.8035980389,0.6793567806,0.9723834
283\Version=EM64L-G09RevD.01\State=1-A\HF=-3032.343299\RMSD=7.813e-09

```

\RMSF=5.055e-06\Dipole=-3.1505972,-3.3903698,-3.0132901\Quadrupole=4.0  
793817,-0.7575616,-3.3218201,-3.8145587,1.1863284,-0.2254718\PG=C01 [X  
(C7H11Br1N2O1)]\@\

THE ONLY TROUBLE WITH A SURE THING IS THE UNCERTAINTY.

-- FROM A TEABAG (BELONGING TO W.H.?)

Job cpu time: 0 days 15 hours 25 minutes 51.3 seconds.

File lengths (MBytes): RWF= 54 Int= 0 D2E= 0 Chk= 10 Scr= 1

Normal termination of Gaussian 09 at Wed Jul 17 23:44:55 2024.

Entering Gaussian System, Link 0=g09

Input=coohpo.gjf

Output=coohpo.log

Initial command:

/apps/gaussian/09\_D01/g09/l1.exe "/scr/tmp/sywang/91540/Gau-12118.inp" -

scrdir="/scr/tmp/sywang/91540/"

Entering Link 1 = /apps/gaussian/09\_D01/g09/l1.exe PID= 12119.

Copyright (c) 1988,1990,1992,1993,1995,1998,2003,2009,2013,  
Gaussian, Inc. All Rights Reserved.

This is part of the Gaussian(R) 09 program. It is based on the Gaussian(R) 03 system (copyright 2003, Gaussian, Inc.), the Gaussian(R) 98 system (copyright 1998, Gaussian, Inc.), the Gaussian(R) 94 system (copyright 1995, Gaussian, Inc.), the Gaussian 92(TM) system (copyright 1992, Gaussian, Inc.), the Gaussian 90(TM) system (copyright 1990, Gaussian, Inc.), the Gaussian 88(TM) system (copyright 1988, Gaussian, Inc.), the Gaussian 86(TM) system (copyright 1986, Carnegie Mellon University), and the Gaussian 82(TM) system (copyright 1983, Carnegie Mellon University). Gaussian is a federally registered trademark of Gaussian, Inc.

This software contains proprietary and confidential information, including trade secrets, belonging to Gaussian, Inc.

This software is provided under written license and may be used, copied, transmitted, or stored only in accord with that written license.

The following legend is applicable only to US Government contracts under FAR:

## RESTRICTED RIGHTS LEGEND

Use, reproduction and disclosure by the US Government is subject to restrictions as set forth in subparagraphs (a) and (c) of the Commercial Computer Software - Restricted Rights clause in FAR 52.227-19.

Gaussian, Inc.

340 Quinnipiac St., Bldg. 40, Wallingford CT 06492

-----  
Warning -- This program may not be used in any manner that competes with the business of Gaussian, Inc. or will provide assistance to any competitor of Gaussian, Inc. The licensee of this program is prohibited from giving any competitor of Gaussian, Inc. access to this program. By using this program, the user acknowledges that Gaussian, Inc. is engaged in the business of creating and licensing software in the field of computational chemistry and represents and warrants to the licensee that it is not a competitor of Gaussian, Inc. and that it will not use this program in any manner prohibited above.  
-----

Cite this work as:

Gaussian 09, Revision D.01,

M. J. Frisch, G. W. Trucks, H. B. Schlegel, G. E. Scuseria,  
M. A. Robb, J. R. Cheeseman, G. Scalmani, V. Barone, B. Mennucci,  
G. A. Petersson, H. Nakatsuji, M. Caricato, X. Li, H. P. Hratchian,  
A. F. Izmaylov, J. Bloino, G. Zheng, J. L. Sonnenberg, M. Hada,  
M. Ehara, K. Toyota, R. Fukuda, J. Hasegawa, M. Ishida, T. Nakajima,  
Y. Honda, O. Kitao, H. Nakai, T. Vreven, J. A. Montgomery, Jr.,  
J. E. Peralta, F. Ogliaro, M. Bearpark, J. J. Heyd, E. Brothers,  
K. N. Kudin, V. N. Staroverov, T. Keith, R. Kobayashi, J. Normand,  
K. Raghavachari, A. Rendell, J. C. Burant, S. S. Iyengar, J. Tomasi,  
M. Cossi, N. Rega, J. M. Millam, M. Klene, J. E. Knox, J. B. Cross,  
V. Bakken, C. Adamo, J. Jaramillo, R. Gomperts, R. E. Stratmann,  
O. Yazyev, A. J. Austin, R. Cammi, C. Pomelli, J. W. Ochterski,  
R. L. Martin, K. Morokuma, V. G. Zakrzewski, G. A. Voth,  
P. Salvador, J. J. Dannenberg, S. Dapprich, A. D. Daniels,  
O. Farkas, J. B. Foresman, J. V. Ortiz, J. Cioslowski,  
and D. J. Fox, Gaussian, Inc., Wallingford CT, 2013.

\*\*\*\*\*

Gaussian 09: EM64L-G09RevD.01 24-Apr-2013

22-Jul-2024

\*\*\*\*\*

%chk=./coohpo.chk

%mem=40000MB

%nprocl=1

Will use up to 1 processors via Linda.

%nprocs=28

Will use up to 28 processors via shared memory.

-----

# opt b3lyp/6-311++g(d,p)

-----

1/14=-1,18=20,19=15,26=3,38=1/1,3;

2/9=110,12=2,17=6,18=5,40=1/2;

3/5=4,6=6,7=1111,11=2,16=1,25=1,30=1,71=1,74=-5/1,2,3;

4//1;

5/5=2,38=5/2;

6/7=2,8=2,9=2,10=2,28=1/1;

7//1,2,3,16;

1/14=-1,18=20,19=15,26=3/3(2);

2/9=110/2;

99//99;

2/9=110/2;

3/5=4,6=6,7=1111,11=2,16=1,25=1,30=1,71=1,74=-5/1,2,3;

4/5=5,16=3,69=1/1;

5/5=2,38=5/2;

7//1,2,3,16;

1/14=-1,18=20,19=15,26=3/3(-5);

2/9=110/2;

6/7=2,8=2,9=2,10=2,19=2,28=1/1;

99/9=1/99;

-----

coohpo

-----

Symbolic Z-matrix:

Charge = 0 Multiplicity = 1

|   |          |         |         |
|---|----------|---------|---------|
| C | -0.77922 | 1.02656 | 1.29428 |
| C | -1.67954 | 0.01913 | 1.40352 |
| N | -2.83723 | 0.43343 | 0.7507  |
| C | -2.62996 | 1.66277 | 0.25318 |
| N | -1.39665 | 2.0536  | 0.5918  |
| C | -0.78206 | 3.28912 | 0.10907 |
| H | 0.24415  | 1.09159 | 1.61862 |

|    |          |          |          |
|----|----------|----------|----------|
| H  | -1.59565 | -0.95715 | 1.84533  |
| H  | -1.57343 | 4.00119  | -0.11908 |
| H  | -0.16137 | 3.71831  | 0.89864  |
| Br | -0.55106 | -2.14655 | -0.81344 |
| H  | -3.31028 | 2.19158  | -0.40226 |
| C  | -4.01261 | -0.33124 | 0.47334  |
| C  | -4.47289 | -1.27168 | 1.28812  |
| H  | -4.45085 | -0.0644  | -0.48573 |
| H  | -5.34207 | -1.84678 | 0.99773  |
| H  | -4.017   | -1.50122 | 2.24427  |
| C  | 3.39288  | -0.64931 | 0.68001  |
| C  | 4.42475  | 0.06634  | 1.44968  |
| O  | 3.38483  | 0.80092  | 0.76676  |
| H  | 3.65828  | -1.02962 | -0.30468 |
| H  | 2.53806  | -1.13038 | 1.15403  |
| H  | 4.31436  | 0.10275  | 2.53281  |
| C  | 5.824    | 0.26498  | 0.93197  |
| H  | 6.22389  | 1.22605  | 1.26108  |
| H  | 6.47842  | -0.52275 | 1.31317  |
| H  | 5.83802  | 0.23554  | -0.15795 |
| C  | 0.04762  | 3.12691  | -1.17815 |
| H  | 0.47107  | 4.07095  | -1.45088 |
| H  | -0.58411 | 2.77781  | -1.96805 |
| C  | 1.17707  | 2.10844  | -0.93595 |
| O  | 1.24321  | 0.91497  | -1.22718 |
| O  | 2.24106  | 2.66108  | -0.30041 |
| H  | 2.93738  | 1.99875  | -0.16036 |

Add virtual bond connecting atoms H34 and O20 Dist= 2.98D+00.  
Add virtual bond connecting atoms Br11 and H8 Dist= 5.85D+00.

GradGradGradGradGradGradGradGradGradGradGradGradGradGradGradGradGradGradGrad

Berny optimization.

Initialization pass.

```

-----
!   Initial Parameters   !
! (Angstroms and Degrees) !
-----
! Name  Definition          Value      Derivative Info.      !
-----
! R1    R(1,2)              1.3555    estimate D2E/DX2     !
! R2    R(1,5)              1.3891    estimate D2E/DX2     !
! R3    R(1,7)              1.0755    estimate D2E/DX2     !
! R4    R(2,3)              1.3921    estimate D2E/DX2     !

```

|       |           |          |                  |   |
|-------|-----------|----------|------------------|---|
| ! R5  | R(2,8)    | 1.0749   | estimate D2E/DX2 | ! |
| ! R6  | R(3,4)    | 1.3423   | estimate D2E/DX2 | ! |
| ! R7  | R(3,13)   | 1.4294   | estimate D2E/DX2 | ! |
| ! R8  | R(4,5)    | 1.3373   | estimate D2E/DX2 | ! |
| ! R9  | R(4,12)   | 1.0826   | estimate D2E/DX2 | ! |
| ! R10 | R(5,6)    | 1.4619   | estimate D2E/DX2 | ! |
| ! R11 | R(6,9)    | 1.0887   | estimate D2E/DX2 | ! |
| ! R12 | R(6,10)   | 1.0922   | estimate D2E/DX2 | ! |
| ! R13 | R(6,28)   | 1.54     | estimate D2E/DX2 | ! |
| ! R14 | R(8,11)   | 3.0943   | estimate D2E/DX2 | ! |
| ! R15 | R(13,14)  | 1.3267   | estimate D2E/DX2 | ! |
| ! R16 | R(13,15)  | 1.0877   | estimate D2E/DX2 | ! |
| ! R17 | R(14,16)  | 1.0819   | estimate D2E/DX2 | ! |
| ! R18 | R(14,17)  | 1.0839   | estimate D2E/DX2 | ! |
| ! R19 | R(18,19)  | 1.4729   | estimate D2E/DX2 | ! |
| ! R20 | R(18,20)  | 1.4528   | estimate D2E/DX2 | ! |
| ! R21 | R(18,21)  | 1.0884   | estimate D2E/DX2 | ! |
| ! R22 | R(18,22)  | 1.0894   | estimate D2E/DX2 | ! |
| ! R23 | R(19,20)  | 1.4448   | estimate D2E/DX2 | ! |
| ! R24 | R(19,23)  | 1.0893   | estimate D2E/DX2 | ! |
| ! R25 | R(19,24)  | 1.5051   | estimate D2E/DX2 | ! |
| ! R26 | R(20,34)  | 1.5794   | estimate D2E/DX2 | ! |
| ! R27 | R(24,25)  | 1.0917   | estimate D2E/DX2 | ! |
| ! R28 | R(24,26)  | 1.0927   | estimate D2E/DX2 | ! |
| ! R29 | R(24,27)  | 1.0904   | estimate D2E/DX2 | ! |
| ! R30 | R(28,29)  | 1.07     | estimate D2E/DX2 | ! |
| ! R31 | R(28,30)  | 1.07     | estimate D2E/DX2 | ! |
| ! R32 | R(28,31)  | 1.54     | estimate D2E/DX2 | ! |
| ! R33 | R(31,32)  | 1.2303   | estimate D2E/DX2 | ! |
| ! R34 | R(31,33)  | 1.357    | estimate D2E/DX2 | ! |
| ! R35 | R(33,34)  | 0.9712   | estimate D2E/DX2 | ! |
| ! A1  | A(2,1,5)  | 107.1598 | estimate D2E/DX2 | ! |
| ! A2  | A(2,1,7)  | 130.7398 | estimate D2E/DX2 | ! |
| ! A3  | A(5,1,7)  | 122.0563 | estimate D2E/DX2 | ! |
| ! A4  | A(1,2,3)  | 107.0596 | estimate D2E/DX2 | ! |
| ! A5  | A(1,2,8)  | 131.0198 | estimate D2E/DX2 | ! |
| ! A6  | A(3,2,8)  | 121.8671 | estimate D2E/DX2 | ! |
| ! A7  | A(2,3,4)  | 108.5393 | estimate D2E/DX2 | ! |
| ! A8  | A(2,3,13) | 127.9956 | estimate D2E/DX2 | ! |
| ! A9  | A(4,3,13) | 123.0241 | estimate D2E/DX2 | ! |
| ! A10 | A(3,4,5)  | 108.4336 | estimate D2E/DX2 | ! |
| ! A11 | A(3,4,12) | 125.0795 | estimate D2E/DX2 | ! |
| ! A12 | A(5,4,12) | 126.1614 | estimate D2E/DX2 | ! |
| ! A13 | A(1,5,4)  | 108.7769 | estimate D2E/DX2 | ! |

|       |             |          |                  |   |
|-------|-------------|----------|------------------|---|
| ! A14 | A(1,5,6)    | 127.2284 | estimate D2E/DX2 | ! |
| ! A15 | A(4,5,6)    | 123.4404 | estimate D2E/DX2 | ! |
| ! A16 | A(5,6,9)    | 108.4433 | estimate D2E/DX2 | ! |
| ! A17 | A(5,6,10)   | 109.4083 | estimate D2E/DX2 | ! |
| ! A18 | A(5,6,28)   | 114.4233 | estimate D2E/DX2 | ! |
| ! A19 | A(9,6,10)   | 107.9122 | estimate D2E/DX2 | ! |
| ! A20 | A(9,6,28)   | 106.5787 | estimate D2E/DX2 | ! |
| ! A21 | A(10,6,28)  | 109.8447 | estimate D2E/DX2 | ! |
| ! A22 | A(2,8,11)   | 91.2774  | estimate D2E/DX2 | ! |
| ! A23 | A(3,13,14)  | 123.0467 | estimate D2E/DX2 | ! |
| ! A24 | A(3,13,15)  | 111.7876 | estimate D2E/DX2 | ! |
| ! A25 | A(14,13,15) | 125.1437 | estimate D2E/DX2 | ! |
| ! A26 | A(13,14,16) | 119.3852 | estimate D2E/DX2 | ! |
| ! A27 | A(13,14,17) | 123.0908 | estimate D2E/DX2 | ! |
| ! A28 | A(16,14,17) | 117.5239 | estimate D2E/DX2 | ! |
| ! A29 | A(19,18,21) | 118.145  | estimate D2E/DX2 | ! |
| ! A30 | A(19,18,22) | 122.4732 | estimate D2E/DX2 | ! |
| ! A31 | A(20,18,21) | 113.8385 | estimate D2E/DX2 | ! |
| ! A32 | A(20,18,22) | 114.2339 | estimate D2E/DX2 | ! |
| ! A33 | A(21,18,22) | 115.5103 | estimate D2E/DX2 | ! |
| ! A34 | A(18,19,23) | 117.6989 | estimate D2E/DX2 | ! |
| ! A35 | A(18,19,24) | 122.391  | estimate D2E/DX2 | ! |
| ! A36 | A(20,19,23) | 112.3366 | estimate D2E/DX2 | ! |
| ! A37 | A(20,19,24) | 116.0694 | estimate D2E/DX2 | ! |
| ! A38 | A(23,19,24) | 115.5821 | estimate D2E/DX2 | ! |
| ! A39 | A(18,20,34) | 136.3485 | estimate D2E/DX2 | ! |
| ! A40 | A(19,20,34) | 150.1083 | estimate D2E/DX2 | ! |
| ! A41 | A(19,24,25) | 110.6722 | estimate D2E/DX2 | ! |
| ! A42 | A(19,24,26) | 109.9757 | estimate D2E/DX2 | ! |
| ! A43 | A(19,24,27) | 110.6223 | estimate D2E/DX2 | ! |
| ! A44 | A(25,24,26) | 108.0632 | estimate D2E/DX2 | ! |
| ! A45 | A(25,24,27) | 108.6857 | estimate D2E/DX2 | ! |
| ! A46 | A(26,24,27) | 108.7551 | estimate D2E/DX2 | ! |
| ! A47 | A(6,28,29)  | 109.4712 | estimate D2E/DX2 | ! |
| ! A48 | A(6,28,30)  | 109.4712 | estimate D2E/DX2 | ! |
| ! A49 | A(6,28,31)  | 109.4712 | estimate D2E/DX2 | ! |
| ! A50 | A(29,28,30) | 109.4712 | estimate D2E/DX2 | ! |
| ! A51 | A(29,28,31) | 109.4713 | estimate D2E/DX2 | ! |
| ! A52 | A(30,28,31) | 109.4712 | estimate D2E/DX2 | ! |
| ! A53 | A(28,31,32) | 130.0733 | estimate D2E/DX2 | ! |
| ! A54 | A(28,31,33) | 112.2947 | estimate D2E/DX2 | ! |
| ! A55 | A(32,31,33) | 117.632  | estimate D2E/DX2 | ! |
| ! A56 | A(31,33,34) | 110.6079 | estimate D2E/DX2 | ! |
| ! A57 | A(20,34,33) | 143.6104 | estimate D2E/DX2 | ! |

|       |                |           |                  |   |
|-------|----------------|-----------|------------------|---|
| ! D1  | D(5,1,2,3)     | 0.7263    | estimate D2E/DX2 | ! |
| ! D2  | D(5,1,2,8)     | 178.0396  | estimate D2E/DX2 | ! |
| ! D3  | D(7,1,2,3)     | -176.8406 | estimate D2E/DX2 | ! |
| ! D4  | D(7,1,2,8)     | 0.4727    | estimate D2E/DX2 | ! |
| ! D5  | D(2,1,5,4)     | -1.5812   | estimate D2E/DX2 | ! |
| ! D6  | D(2,1,5,6)     | -173.2019 | estimate D2E/DX2 | ! |
| ! D7  | D(7,1,5,4)     | 176.2437  | estimate D2E/DX2 | ! |
| ! D8  | D(7,1,5,6)     | 4.623     | estimate D2E/DX2 | ! |
| ! D9  | D(1,2,3,4)     | 0.3676    | estimate D2E/DX2 | ! |
| ! D10 | D(1,2,3,13)    | 172.841   | estimate D2E/DX2 | ! |
| ! D11 | D(8,2,3,4)     | -177.2458 | estimate D2E/DX2 | ! |
| ! D12 | D(8,2,3,13)    | -4.7724   | estimate D2E/DX2 | ! |
| ! D13 | D(1,2,8,11)    | -88.2966  | estimate D2E/DX2 | ! |
| ! D14 | D(3,2,8,11)    | 88.6788   | estimate D2E/DX2 | ! |
| ! D15 | D(2,3,4,5)     | -1.3616   | estimate D2E/DX2 | ! |
| ! D16 | D(2,3,4,12)    | 172.4143  | estimate D2E/DX2 | ! |
| ! D17 | D(13,3,4,5)    | -174.2897 | estimate D2E/DX2 | ! |
| ! D18 | D(13,3,4,12)   | -0.5138   | estimate D2E/DX2 | ! |
| ! D19 | D(2,3,13,14)   | 34.233    | estimate D2E/DX2 | ! |
| ! D20 | D(2,3,13,15)   | -144.1395 | estimate D2E/DX2 | ! |
| ! D21 | D(4,3,13,14)   | -154.2849 | estimate D2E/DX2 | ! |
| ! D22 | D(4,3,13,15)   | 27.3425   | estimate D2E/DX2 | ! |
| ! D23 | D(3,4,5,1)     | 1.8215    | estimate D2E/DX2 | ! |
| ! D24 | D(3,4,5,6)     | 173.8286  | estimate D2E/DX2 | ! |
| ! D25 | D(12,4,5,1)    | -171.8693 | estimate D2E/DX2 | ! |
| ! D26 | D(12,4,5,6)    | 0.1379    | estimate D2E/DX2 | ! |
| ! D27 | D(1,5,6,9)     | -162.7188 | estimate D2E/DX2 | ! |
| ! D28 | D(1,5,6,10)    | -45.2515  | estimate D2E/DX2 | ! |
| ! D29 | D(1,5,6,28)    | 78.4791   | estimate D2E/DX2 | ! |
| ! D30 | D(4,5,6,9)     | 26.7982   | estimate D2E/DX2 | ! |
| ! D31 | D(4,5,6,10)    | 144.2655  | estimate D2E/DX2 | ! |
| ! D32 | D(4,5,6,28)    | -92.0039  | estimate D2E/DX2 | ! |
| ! D33 | D(5,6,28,29)   | -179.1381 | estimate D2E/DX2 | ! |
| ! D34 | D(5,6,28,30)   | 60.8619   | estimate D2E/DX2 | ! |
| ! D35 | D(5,6,28,31)   | -59.1381  | estimate D2E/DX2 | ! |
| ! D36 | D(9,6,28,29)   | 61.0124   | estimate D2E/DX2 | ! |
| ! D37 | D(9,6,28,30)   | -58.9875  | estimate D2E/DX2 | ! |
| ! D38 | D(9,6,28,31)   | -178.9875 | estimate D2E/DX2 | ! |
| ! D39 | D(10,6,28,29)  | -55.6417  | estimate D2E/DX2 | ! |
| ! D40 | D(10,6,28,30)  | -175.6417 | estimate D2E/DX2 | ! |
| ! D41 | D(10,6,28,31)  | 64.3584   | estimate D2E/DX2 | ! |
| ! D42 | D(3,13,14,16)  | -177.1421 | estimate D2E/DX2 | ! |
| ! D43 | D(3,13,14,17)  | 2.7111    | estimate D2E/DX2 | ! |
| ! D44 | D(15,13,14,16) | 1.0097    | estimate D2E/DX2 | ! |



|       |                |           |                  |   |
|-------|----------------|-----------|------------------|---|
| ! D45 | D(15,13,14,17) | -179.137  | estimate D2E/DX2 | ! |
| ! D46 | D(21,18,19,23) | -156.6265 | estimate D2E/DX2 | ! |
| ! D47 | D(21,18,19,24) | -1.0377   | estimate D2E/DX2 | ! |
| ! D48 | D(22,18,19,23) | 0.2129    | estimate D2E/DX2 | ! |
| ! D49 | D(22,18,19,24) | 155.8016  | estimate D2E/DX2 | ! |
| ! D50 | D(21,18,20,34) | 39.1834   | estimate D2E/DX2 | ! |
| ! D51 | D(22,18,20,34) | -96.4792  | estimate D2E/DX2 | ! |
| ! D52 | D(23,19,20,34) | 115.7285  | estimate D2E/DX2 | ! |
| ! D53 | D(24,19,20,34) | -20.3853  | estimate D2E/DX2 | ! |
| ! D54 | D(18,19,24,25) | 145.7162  | estimate D2E/DX2 | ! |
| ! D55 | D(18,19,24,26) | -94.9585  | estimate D2E/DX2 | ! |
| ! D56 | D(18,19,24,27) | 25.1949   | estimate D2E/DX2 | ! |
| ! D57 | D(20,19,24,25) | 76.473    | estimate D2E/DX2 | ! |
| ! D58 | D(20,19,24,26) | -164.2016 | estimate D2E/DX2 | ! |
| ! D59 | D(20,19,24,27) | -44.0482  | estimate D2E/DX2 | ! |
| ! D60 | D(23,19,24,25) | -58.2184  | estimate D2E/DX2 | ! |
| ! D61 | D(23,19,24,26) | 61.1069   | estimate D2E/DX2 | ! |
| ! D62 | D(23,19,24,27) | -178.7397 | estimate D2E/DX2 | ! |
| ! D63 | D(18,20,34,33) | 103.2228  | estimate D2E/DX2 | ! |
| ! D64 | D(19,20,34,33) | -142.0276 | estimate D2E/DX2 | ! |
| ! D65 | D(6,28,31,32)  | 99.1254   | estimate D2E/DX2 | ! |
| ! D66 | D(6,28,31,33)  | -80.8715  | estimate D2E/DX2 | ! |
| ! D67 | D(29,28,31,32) | -140.8746 | estimate D2E/DX2 | ! |
| ! D68 | D(29,28,31,33) | 39.1285   | estimate D2E/DX2 | ! |
| ! D69 | D(30,28,31,32) | -20.8746  | estimate D2E/DX2 | ! |
| ! D70 | D(30,28,31,33) | 159.1285  | estimate D2E/DX2 | ! |
| ! D71 | D(28,31,33,34) | 179.9996  | estimate D2E/DX2 | ! |
| ! D72 | D(32,31,33,34) | 0.0023    | estimate D2E/DX2 | ! |
| ! D73 | D(31,33,34,20) | -80.134   | estimate D2E/DX2 | ! |

Trust Radius=3.00D-01 FncErr=1.00D-07 GrdErr=1.00D-06

Number of steps in this run= 175 maximum allowed number of steps= 204.

GradGradGradGradGradGradGradGradGradGradGradGradGradGradGradGradGradGradGrad

Input orientation:

| Center<br>Number | Atomic<br>Number | Atomic<br>Type | Coordinates (Angstroms) |          |          |
|------------------|------------------|----------------|-------------------------|----------|----------|
|                  |                  |                | X                       | Y        | Z        |
| 1                | 6                | 0              | -0.779220               | 1.026560 | 1.294278 |
| 2                | 6                | 0              | -1.679541               | 0.019132 | 1.403519 |
| 3                | 7                | 0              | -2.837226               | 0.433426 | 0.750697 |
| 4                | 6                | 0              | -2.629963               | 1.662768 | 0.253183 |
| 5                | 7                | 0              | -1.396651               | 2.053605 | 0.591805 |

|    |    |   |           |           |           |
|----|----|---|-----------|-----------|-----------|
| 6  | 6  | 0 | -0.782064 | 3.289120  | 0.109066  |
| 7  | 1  | 0 | 0.244150  | 1.091587  | 1.618623  |
| 8  | 1  | 0 | -1.595647 | -0.957147 | 1.845331  |
| 9  | 1  | 0 | -1.573426 | 4.001190  | -0.119085 |
| 10 | 1  | 0 | -0.161366 | 3.718311  | 0.898640  |
| 11 | 35 | 0 | -0.551058 | -2.146547 | -0.813439 |
| 12 | 1  | 0 | -3.310281 | 2.191578  | -0.402256 |
| 13 | 6  | 0 | -4.012606 | -0.331241 | 0.473336  |
| 14 | 6  | 0 | -4.472893 | -1.271676 | 1.288121  |
| 15 | 1  | 0 | -4.450851 | -0.064401 | -0.485730 |
| 16 | 1  | 0 | -5.342070 | -1.846775 | 0.997734  |
| 17 | 1  | 0 | -4.016995 | -1.501220 | 2.244274  |
| 18 | 6  | 0 | 3.392878  | -0.649305 | 0.680009  |
| 19 | 6  | 0 | 4.424751  | 0.066344  | 1.449679  |
| 20 | 8  | 0 | 3.384832  | 0.800919  | 0.766761  |
| 21 | 1  | 0 | 3.658283  | -1.029624 | -0.304675 |
| 22 | 1  | 0 | 2.538061  | -1.130377 | 1.154034  |
| 23 | 1  | 0 | 4.314357  | 0.102746  | 2.532808  |
| 24 | 6  | 0 | 5.823997  | 0.264982  | 0.931971  |
| 25 | 1  | 0 | 6.223895  | 1.226053  | 1.261077  |
| 26 | 1  | 0 | 6.478416  | -0.522747 | 1.313173  |
| 27 | 1  | 0 | 5.838022  | 0.235540  | -0.157951 |
| 28 | 6  | 0 | 0.047618  | 3.126912  | -1.178147 |
| 29 | 1  | 0 | 0.471067  | 4.070949  | -1.450883 |
| 30 | 1  | 0 | -0.584111 | 2.777812  | -1.968051 |
| 31 | 6  | 0 | 1.177067  | 2.108438  | -0.935953 |
| 32 | 8  | 0 | 1.243211  | 0.914968  | -1.227183 |
| 33 | 8  | 0 | 2.241059  | 2.661085  | -0.300411 |
| 34 | 1  | 0 | 2.937378  | 1.998751  | -0.160365 |

-----  
Distance matrix (angstroms):

|    |    | 1        | 2        | 3        | 4        | 5        |
|----|----|----------|----------|----------|----------|----------|
| 1  | C  | 0.000000 |          |          |          |          |
| 2  | C  | 1.355514 | 0.000000 |          |          |          |
| 3  | N  | 2.209678 | 1.392139 | 0.000000 |          |          |
| 4  | C  | 2.216729 | 2.219935 | 1.342296 | 0.000000 |          |
| 5  | N  | 1.389068 | 2.208616 | 2.173818 | 1.337340 | 0.000000 |
| 6  | C  | 2.554196 | 3.629586 | 3.576363 | 2.465872 | 1.461934 |
| 7  | H  | 1.075507 | 2.212920 | 3.268234 | 3.232832 | 2.161495 |
| 8  | H  | 2.214792 | 1.074876 | 2.161813 | 3.235537 | 3.267347 |
| 9  | H  | 3.387740 | 4.264547 | 3.883639 | 2.592889 | 2.080793 |
| 10 | H  | 2.789946 | 4.030345 | 4.239409 | 3.276560 | 2.095549 |
| 11 | Br | 3.816168 | 3.298264 | 3.785412 | 4.468826 | 4.508993 |
| 12 | H  | 3.262171 | 3.261848 | 2.155035 | 1.082623 | 2.160827 |

|    |    |          |          |          |          |          |
|----|----|----------|----------|----------|----------|----------|
| 13 | C  | 3.601715 | 2.535981 | 1.429392 | 2.436440 | 3.541856 |
| 14 | C  | 4.350304 | 3.079338 | 2.423139 | 3.616414 | 4.583188 |
| 15 | H  | 4.223682 | 3.355056 | 2.092933 | 2.616245 | 3.869776 |
| 16 | H  | 5.400332 | 4.130423 | 3.396261 | 4.497418 | 5.562740 |
| 17 | H  | 4.216082 | 2.912393 | 2.713942 | 3.987370 | 4.715256 |
| 18 | C  | 4.537869 | 5.167176 | 6.323884 | 6.465484 | 5.500281 |
| 19 | C  | 5.294099 | 6.104649 | 7.304768 | 7.331382 | 6.210787 |
| 20 | O  | 4.203393 | 5.163769 | 6.232922 | 6.097893 | 4.945949 |
| 21 | H  | 5.145482 | 5.701770 | 6.741363 | 6.863106 | 5.988517 |
| 22 | H  | 3.959344 | 4.378559 | 5.612654 | 5.943204 | 5.092721 |
| 23 | H  | 5.322774 | 6.099926 | 7.377697 | 7.473549 | 6.339476 |
| 24 | C  | 6.656857 | 7.522358 | 8.664757 | 8.595580 | 7.446653 |
| 25 | H  | 7.006035 | 7.996326 | 9.110031 | 8.921736 | 7.694510 |
| 26 | H  | 7.421186 | 8.176433 | 9.381462 | 9.426698 | 8.317129 |
| 27 | H  | 6.820746 | 7.681066 | 8.724949 | 8.597255 | 7.497199 |
| 28 | C  | 3.347839 | 4.393901 | 4.392907 | 3.370736 | 2.524011 |
| 29 | H  | 4.285724 | 5.402771 | 5.387330 | 4.280136 | 3.424999 |
| 30 | H  | 3.707794 | 4.491966 | 4.238426 | 3.219117 | 2.781647 |
| 31 | C  | 3.157760 | 4.242468 | 4.665298 | 4.013246 | 2.993505 |
| 32 | O  | 3.234261 | 4.033062 | 4.560028 | 4.213332 | 3.402070 |
| 33 | O  | 3.786396 | 5.025375 | 5.644136 | 5.002995 | 3.794472 |
| 34 | H  | 4.107828 | 5.261232 | 6.051969 | 5.592781 | 4.399157 |
|    |    | 6        | 7        | 8        | 9        | 10       |
| 6  | C  | 0.000000 |          |          |          |          |
| 7  | H  | 2.856752 | 0.000000 |          |          |          |
| 8  | H  | 4.659111 | 2.762890 | 0.000000 |          |          |
| 9  | H  | 1.088738 | 3.845647 | 5.333341 | 0.000000 |          |
| 10 | H  | 1.092199 | 2.753634 | 4.981294 | 1.763434 | 0.000000 |
| 11 | Br | 5.518229 | 4.127080 | 3.094333 | 6.270728 | 6.122061 |
| 12 | H  | 2.803201 | 4.234137 | 4.231558 | 2.524193 | 3.733485 |
| 13 | C  | 4.865810 | 4.632072 | 2.848828 | 5.007047 | 5.604624 |
| 14 | C  | 5.984418 | 5.286278 | 2.947534 | 6.179826 | 6.606129 |
| 15 | H  | 5.005985 | 5.273295 | 3.792497 | 4.994300 | 5.884307 |
| 16 | H  | 6.925374 | 6.342344 | 3.942783 | 7.046180 | 7.603926 |
| 17 | H  | 6.162082 | 5.027071 | 2.513583 | 6.467844 | 6.627225 |
| 18 | C  | 5.767782 | 3.718359 | 5.132068 | 6.850535 | 5.635292 |
| 19 | C  | 6.268529 | 4.307794 | 6.119581 | 7.343171 | 5.888376 |
| 20 | O  | 4.897624 | 3.267115 | 5.390666 | 5.967476 | 4.593918 |
| 21 | H  | 6.208012 | 4.455886 | 5.677285 | 7.260462 | 6.211326 |
| 22 | H  | 5.625580 | 3.227228 | 4.194693 | 6.697622 | 5.555350 |
| 23 | H  | 6.480818 | 4.287205 | 6.043521 | 7.542969 | 5.981213 |
| 24 | C  | 7.311813 | 5.682381 | 7.574889 | 8.353791 | 6.910221 |
| 25 | H  | 7.393702 | 5.991934 | 8.139591 | 8.390735 | 6.863983 |
| 26 | H  | 8.288231 | 6.447127 | 8.103233 | 9.346097 | 7.889557 |

|    |    |           |           |           |           |           |
|----|----|-----------|-----------|-----------|-----------|-----------|
| 27 | H  | 7.295285  | 5.931310  | 7.790705  | 8.313314  | 7.017032  |
| 28 | C  | 1.540000  | 3.464548  | 5.340531  | 2.124561  | 2.169440  |
| 29 | H  | 2.148263  | 4.283685  | 6.357522  | 2.441005  | 2.458573  |
| 30 | H  | 2.148263  | 4.048901  | 5.432771  | 2.427771  | 3.046501  |
| 31 | C  | 2.514809  | 2.903477  | 4.982098  | 3.437294  | 2.783671  |
| 32 | O  | 3.394686  | 3.021246  | 4.583041  | 4.322741  | 3.788230  |
| 33 | O  | 3.114702  | 3.183342  | 5.693516  | 4.047104  | 2.885671  |
| 34 | H  | 3.946124  | 3.352794  | 5.771349  | 4.935466  | 3.698729  |
|    |    | 11        | 12        | 13        | 14        | 15        |
| 11 | Br | 0.000000  |           |           |           |           |
| 12 | H  | 5.157685  | 0.000000  |           |           |           |
| 13 | C  | 4.115027  | 2.761256  | 0.000000  |           |           |
| 14 | C  | 4.534616  | 4.025316  | 1.326709  | 0.000000  |           |
| 15 | H  | 4.432957  | 2.529289  | 1.087690  | 2.145821  | 0.000000  |
| 16 | H  | 5.130692  | 4.732487  | 2.083101  | 1.081911  | 2.484310  |
| 17 | H  | 4.666774  | 4.597860  | 2.122520  | 1.083864  | 3.115382  |
| 18 | C  | 4.475126  | 7.360317  | 7.415193  | 7.913754  | 7.951424  |
| 19 | C  | 5.897225  | 8.232679  | 8.502960  | 8.999137  | 9.085109  |
| 20 | O  | 5.164864  | 6.937223  | 7.489324  | 8.143175  | 7.982194  |
| 21 | H  | 4.384622  | 7.677666  | 7.741808  | 8.289247  | 8.168384  |
| 22 | H  | 3.800817  | 6.903661  | 6.634246  | 7.013660  | 7.257412  |
| 23 | H  | 6.318936  | 8.432848  | 8.588835  | 8.980759  | 9.271913  |
| 24 | C  | 7.035855  | 9.430110  | 9.865323  | 10.417010 | 10.377420 |
| 25 | H  | 7.847167  | 9.726224  | 10.384202 | 10.984564 | 10.893429 |
| 26 | H  | 7.521483  | 10.301886 | 10.526327 | 10.976916 | 11.085802 |
| 27 | H  | 6.850135  | 9.358270  | 9.887095  | 10.520351 | 10.298461 |
| 28 | C  | 5.319849  | 3.571043  | 5.583156  | 6.772376  | 5.558789  |
| 29 | H  | 6.333113  | 4.350891  | 6.571546  | 7.777437  | 6.500608  |
| 30 | H  | 5.058016  | 3.198029  | 5.232701  | 6.490272  | 5.022661  |
| 31 | C  | 4.594162  | 4.519739  | 5.905153  | 6.949369  | 6.049577  |
| 32 | O  | 3.572598  | 4.800471  | 5.662898  | 6.616797  | 5.825053  |
| 33 | O  | 5.583228  | 5.572090  | 6.975746  | 7.941486  | 7.228020  |
| 34 | H  | 5.457031  | 6.255313  | 7.357494  | 8.228361  | 7.677785  |
|    |    | 16        | 17        | 18        | 19        | 20        |
| 16 | H  | 0.000000  |           |           |           |           |
| 17 | H  | 1.851781  | 0.000000  |           |           |           |
| 18 | C  | 8.822369  | 7.620952  | 0.000000  |           |           |
| 19 | C  | 9.962684  | 8.622744  | 1.472857  | 0.000000  |           |
| 20 | O  | 9.122633  | 7.891130  | 1.452839  | 1.444787  | 0.000000  |
| 21 | H  | 9.130737  | 8.101200  | 1.088433  | 2.205986  | 2.138607  |
| 22 | H  | 7.914172  | 6.655443  | 1.089422  | 2.253696  | 2.144039  |
| 23 | H  | 9.970138  | 8.489251  | 2.201719  | 1.089349  | 2.114328  |
| 24 | C  | 11.364193 | 10.083984 | 2.609549  | 1.505114  | 2.502808  |
| 25 | H  | 11.970094 | 10.643332 | 3.445180  | 2.148816  | 2.912965  |

|    |   |           |           |          |          |          |
|----|---|-----------|-----------|----------|----------|----------|
| 26 | H | 11.898589 | 10.581966 | 3.152373 | 2.140841 | 3.408947 |
| 27 | H | 11.430927 | 10.291180 | 2.732006 | 2.147193 | 2.681956 |
| 28 | C | 7.649886  | 7.046534  | 5.376181 | 5.952465 | 4.508869 |
| 29 | H | 8.649147  | 8.052698  | 5.946300 | 6.331014 | 4.909283 |
| 30 | H | 7.267796  | 6.916537  | 5.879949 | 6.642412 | 5.209588 |
| 31 | C | 7.866511  | 7.079672  | 3.889255 | 4.517615 | 3.079459 |
| 32 | O | 7.479532  | 6.749722  | 3.271911 | 4.243578 | 2.928372 |
| 33 | O | 8.916828  | 7.934951  | 3.639587 | 3.816282 | 2.430492 |
| 34 | H | 9.202093  | 8.148337  | 2.815299 | 2.922108 | 1.579423 |
|    |   | 21        | 22        | 23       | 24       | 25       |
| 21 | H | 0.000000  |           |          |          |          |
| 22 | H | 1.841977  | 0.000000  |          |          |          |
| 23 | H | 3.124741  | 2.564534  | 0.000000 |          |          |
| 24 | C | 2.809913  | 3.576830  | 2.206357 | 0.000000 |          |
| 25 | H | 3.757928  | 4.376024  | 2.554496 | 1.091735 | 0.000000 |
| 26 | H | 3.290517  | 3.990104  | 2.561621 | 1.092748 | 1.767992 |
| 27 | H | 2.524565  | 3.804836  | 3.095056 | 1.090410 | 1.773036 |
| 28 | C | 5.574643  | 5.455812  | 6.412630 | 6.783051 | 6.907204 |
| 29 | H | 6.122743  | 6.173479  | 6.810822 | 6.986933 | 6.967294 |
| 30 | H | 5.938122  | 5.896551  | 7.169985 | 7.469155 | 7.693124 |
| 31 | C | 4.049986  | 4.087821  | 5.088977 | 5.336799 | 5.574587 |
| 32 | O | 3.234971  | 3.395625  | 4.922314 | 5.105686 | 5.576327 |
| 33 | O | 3.953464  | 4.071708  | 4.344053 | 4.483025 | 4.512266 |
| 34 | H | 3.116341  | 3.417388  | 3.569885 | 3.540016 | 3.663161 |
|    |   | 26        | 27        | 28       | 29       | 30       |
| 26 | H | 0.000000  |           |          |          |          |
| 27 | H | 1.774630  | 0.000000  |          |          |          |
| 28 | C | 7.802682  | 6.552069  | 0.000000 |          |          |
| 29 | H | 8.051726  | 6.722071  | 1.070000 | 0.000000 |          |
| 30 | H | 8.458097  | 7.140266  | 1.070000 | 1.747303 | 0.000000 |
| 31 | C | 6.331351  | 5.083064  | 1.540000 | 2.148263 | 2.148263 |
| 32 | O | 5.993981  | 4.766253  | 2.514864 | 3.256756 | 2.712596 |
| 33 | O | 5.540364  | 4.340704  | 2.408027 | 2.538537 | 3.282717 |
| 34 | H | 4.590012  | 3.394503  | 3.264865 | 3.470178 | 4.034297 |
|    |   | 31        | 32        | 33       | 34       |          |
| 31 | C | 0.000000  |           |          |          |          |
| 32 | O | 1.230269  | 0.000000  |          |          |          |
| 33 | O | 1.356986  | 2.214392  | 0.000000 |          |          |
| 34 | H | 1.926724  | 2.276596  | 0.971165 | 0.000000 |          |

Stoichiometry C<sub>11</sub>H<sub>17</sub>BrN<sub>2</sub>O<sub>3</sub>

Framework group C1[X(C<sub>11</sub>H<sub>17</sub>BrN<sub>2</sub>O<sub>3</sub>)]

Deg. of freedom 96

Full point group C1 NOp 1

Largest Abelian subgroup C1 NOp 1

Largest concise Abelian subgroup C1      NOp    1

Standard orientation:

| -----  |        |        |                         |           |           |  |
|--------|--------|--------|-------------------------|-----------|-----------|--|
| Center | Atomic | Atomic | Coordinates (Angstroms) |           |           |  |
| Number | Number | Type   | X                       | Y         | Z         |  |
| -----  |        |        |                         |           |           |  |
| 1      | 6      | 0      | -0.766421               | 0.874750  | 1.177483  |  |
| 2      | 6      | 0      | -1.810730               | 0.022399  | 1.320087  |  |
| 3      | 7      | 0      | -2.901515               | 0.601896  | 0.677886  |  |
| 4      | 6      | 0      | -2.514240               | 1.775428  | 0.153864  |  |
| 5      | 7      | 0      | -1.228969               | 1.974099  | 0.465450  |  |
| 6      | 6      | 0      | -0.438192               | 3.090283  | -0.050360 |  |
| 7      | 1      | 0      | 0.260410                | 0.784255  | 1.484314  |  |
| 8      | 1      | 0      | -1.872012               | -0.947649 | 1.779009  |  |
| 9      | 1      | 0      | -1.112845               | 3.913507  | -0.279475 |  |
| 10     | 1      | 0      | 0.256443                | 3.429974  | 0.720996  |  |
| 11     | 35     | 0      | -1.075423               | -2.328972 | -0.872837 |  |
| 12     | 1      | 0      | -3.115768               | 2.393336  | -0.500678 |  |
| 13     | 6      | 0      | -4.186770               | 0.025985  | 0.433738  |  |
| 14     | 6      | 0      | -4.772945               | -0.817494 | 1.273440  |  |
| 15     | 1      | 0      | -4.595756               | 0.342377  | -0.523183 |  |
| 16     | 1      | 0      | -5.726462               | -1.254284 | 1.007821  |  |
| 17     | 1      | 0      | -4.340760               | -1.099862 | 2.226459  |  |
| 18     | 6      | 0      | 3.080908                | -1.442621 | 0.529324  |  |
| 19     | 6      | 0      | 4.225940                | -0.884646 | 1.268831  |  |
| 20     | 8      | 0      | 3.300877                | -0.007754 | 0.588590  |  |
| 21     | 1      | 0      | 3.265365                | -1.875777 | -0.452021 |  |
| 22     | 1      | 0      | 2.170453                | -1.776323 | 1.025868  |  |
| 23     | 1      | 0      | 4.142730                | -0.813761 | 2.352682  |  |
| 24     | 6      | 0      | 5.629174                | -0.915702 | 0.725382  |  |
| 25     | 1      | 0      | 6.180192                | -0.023736 | 1.029785  |  |
| 26     | 1      | 0      | 6.159624                | -1.789737 | 1.111107  |  |
| 27     | 1      | 0      | 5.618172                | -0.964757 | -0.363868 |  |
| 28     | 6      | 0      | 0.331944                | 2.779362  | -1.347210 |  |
| 29     | 1      | 0      | 0.892376                | 3.641003  | -1.644514 |  |
| 30     | 1      | 0      | -0.361094               | 2.520485  | -2.120244 |  |
| 31     | 6      | 0      | 1.292930                | 1.600912  | -1.103572 |  |
| 32     | 8      | 0      | 1.166602                | 0.407186  | -1.373056 |  |
| 33     | 8      | 0      | 2.441754                | 1.990700  | -0.495558 |  |
| 34     | 1      | 0      | 3.028669                | 1.230015  | -0.353964 |  |

-----  
Rotational constants (GHZ):      0.4142027      0.2141096      0.1652131

Standard basis: 6-311++G(d,p) (5D, 7F)

There are    538 symmetry adapted cartesian basis functions of A    symmetry.

There are 519 symmetry adapted basis functions of A symmetry.  
519 basis functions, 823 primitive gaussians, 538 cartesian basis functions  
78 alpha electrons 78 beta electrons  
nuclear repulsion energy 1583.4062796134 Hartrees.

NAtoms= 34 NActive= 34 NUniq= 34 SFac= 1.00D+00 NATFMM= 60 NAOKFM=F  
Big=F

Integral buffers will be 131072 words long.

Raffenetti 2 integral format.

Two-electron integral symmetry is turned on.

One-electron integrals computed using PRISM.

NBasis= 519 RedAO= T EigKep= 2.98D-06 NBF= 519

NBsUse= 519 1.00D-06 EigRej= -1.00D+00 NBFU= 519

ExpMin= 3.50D-02 ExpMax= 4.40D+05 ExpMxC= 1.51D+04 IAcc=3 IRadAn= 5 AccDes=  
0.00D+00

Harris functional with IExCor= 402 and IRadAn= 5 diagonalized for initial guess.

HarFok: IExCor= 402 AccDes= 0.00D+00 IRadAn= 5 IDoV= 1 UseB2=F ITyADJ=14

ICtDFT= 3500011 ScaDFX= 1.000000 1.000000 1.000000 1.000000

FoFCou: FMM=F IPFlag= 0 FMFlag= 100000 FMFlg1= 0

NFxFlg= 0 DoJE=T BraDBF=F KetDBF=T FulRan=T

wScrn= 0.000000 ICntrl= 500 IOpCl= 0 I1Cent= 20000004 NGrid=

0

NMat0= 1 NMatS0= 1 NMatT0= 0 NMatD0= 1 NMtDS0= 0

NMtDT0= 0

Petite list used in FoFCou.

Requested convergence on RMS density matrix=1.00D-08 within 128 cycles.

Requested convergence on MAX density matrix=1.00D-06.

Requested convergence on energy=1.00D-06.

No special actions if energy rises.

EnCoef did 6 forward-backward iterations

EnCoef did 100 forward-backward iterations

Restarting incremental Fock formation.

SCF Done: E(RB3LYP) = -3338.86246820 A.U. after 23 cycles

NFock= 23 Conv=0.18D-08 -V/T= 2.0019

\*\*\*\*\*

Population analysis using the SCF density.

\*\*\*\*\*

Orbital symmetries:

Occupied (A) (A)

(A) (A) (A) (A) (A) (A) (A) (A) (A) (A) (A) (A)

(A) (A) (A) (A) (A) (A) (A) (A) (A) (A) (A) (A)





|       |                      |           |           |           |           |           |
|-------|----------------------|-----------|-----------|-----------|-----------|-----------|
| Alpha | occ. eigenvalues --  | -10.30941 | -10.30645 | -10.27656 | -10.25936 | -10.25449 |
| Alpha | occ. eigenvalues --  | -10.25343 | -10.24099 | -10.22495 | -10.22085 | -10.21160 |
| Alpha | occ. eigenvalues --  | -10.17815 | -8.51620  | -6.33963  | -6.33905  | -6.33838  |
| Alpha | occ. eigenvalues --  | -2.45200  | -2.45193  | -2.45140  | -2.45094  | -2.45085  |
| Alpha | occ. eigenvalues --  | -1.11265  | -1.09691  | -1.08054  | -1.00181  | -0.99585  |
| Alpha | occ. eigenvalues --  | -0.86057  | -0.82193  | -0.80935  | -0.76170  | -0.73548  |
| Alpha | occ. eigenvalues --  | -0.70223  | -0.68003  | -0.65917  | -0.64081  | -0.62055  |
| Alpha | occ. eigenvalues --  | -0.60431  | -0.58836  | -0.58514  | -0.55292  | -0.52698  |
| Alpha | occ. eigenvalues --  | -0.52226  | -0.51972  | -0.50666  | -0.50296  | -0.49249  |
| Alpha | occ. eigenvalues --  | -0.48744  | -0.48108  | -0.47105  | -0.46366  | -0.45067  |
| Alpha | occ. eigenvalues --  | -0.43885  | -0.42865  | -0.42137  | -0.41788  | -0.41152  |
| Alpha | occ. eigenvalues --  | -0.38967  | -0.38332  | -0.37915  | -0.37244  | -0.32260  |
| Alpha | occ. eigenvalues --  | -0.30823  | -0.30424  | -0.29546  | -0.29285  | -0.26953  |
| Alpha | occ. eigenvalues --  | -0.15321  | -0.15220  | -0.14764  |           |           |
| Alpha | virt. eigenvalues -- | -0.08143  | -0.04091  | -0.03568  | -0.01736  | -0.01137  |
| Alpha | virt. eigenvalues -- | -0.00865  | -0.00432  | 0.00159   | 0.00490   | 0.00848   |
| Alpha | virt. eigenvalues -- | 0.01186   | 0.01683   | 0.02304   | 0.02961   | 0.03404   |
| Alpha | virt. eigenvalues -- | 0.03654   | 0.03885   | 0.04432   | 0.05043   | 0.05528   |
| Alpha | virt. eigenvalues -- | 0.05968   | 0.06105   | 0.06629   | 0.06952   | 0.07015   |
| Alpha | virt. eigenvalues -- | 0.07429   | 0.07620   | 0.08185   | 0.08338   | 0.08695   |
| Alpha | virt. eigenvalues -- | 0.09183   | 0.09333   | 0.09887   | 0.10077   | 0.10482   |
| Alpha | virt. eigenvalues -- | 0.10829   | 0.11257   | 0.11405   | 0.11568   | 0.11823   |
| Alpha | virt. eigenvalues -- | 0.12299   | 0.12623   | 0.12718   | 0.12816   | 0.12989   |
| Alpha | virt. eigenvalues -- | 0.13416   | 0.13570   | 0.13830   | 0.13920   | 0.14138   |
| Alpha | virt. eigenvalues -- | 0.14331   | 0.14831   | 0.15027   | 0.15443   | 0.15821   |
| Alpha | virt. eigenvalues -- | 0.16027   | 0.16434   | 0.16858   | 0.17063   | 0.17358   |
| Alpha | virt. eigenvalues -- | 0.17520   | 0.17598   | 0.17984   | 0.18600   | 0.18772   |
| Alpha | virt. eigenvalues -- | 0.19013   | 0.19410   | 0.19926   | 0.20039   | 0.20340   |
| Alpha | virt. eigenvalues -- | 0.20715   | 0.21123   | 0.21470   | 0.21665   | 0.21994   |
| Alpha | virt. eigenvalues -- | 0.22317   | 0.22497   | 0.22846   | 0.23385   | 0.23659   |
| Alpha | virt. eigenvalues -- | 0.23859   | 0.24527   | 0.25561   | 0.25754   | 0.26212   |
| Alpha | virt. eigenvalues -- | 0.26410   | 0.27087   | 0.27431   | 0.27772   | 0.28474   |
| Alpha | virt. eigenvalues -- | 0.29079   | 0.29620   | 0.29734   | 0.30043   | 0.30512   |
| Alpha | virt. eigenvalues -- | 0.30527   | 0.31410   | 0.31945   | 0.32412   | 0.33126   |
| Alpha | virt. eigenvalues -- | 0.33795   | 0.34051   | 0.34568   | 0.34762   | 0.35087   |
| Alpha | virt. eigenvalues -- | 0.35491   | 0.35855   | 0.36013   | 0.36965   | 0.37952   |
| Alpha | virt. eigenvalues -- | 0.38504   | 0.39507   | 0.39931   | 0.40231   | 0.41098   |
| Alpha | virt. eigenvalues -- | 0.41497   | 0.42048   | 0.42508   | 0.43564   | 0.45625   |
| Alpha | virt. eigenvalues -- | 0.46458   | 0.46523   | 0.48625   | 0.48979   | 0.49468   |
| Alpha | virt. eigenvalues -- | 0.50026   | 0.51038   | 0.52879   | 0.52927   | 0.54220   |
| Alpha | virt. eigenvalues -- | 0.54310   | 0.54650   | 0.55022   | 0.56161   | 0.56993   |
| Alpha | virt. eigenvalues -- | 0.57346   | 0.57693   | 0.58702   | 0.59731   | 0.60236   |
| Alpha | virt. eigenvalues -- | 0.60452   | 0.61345   | 0.61906   | 0.62463   | 0.62842   |
| Alpha | virt. eigenvalues -- | 0.63456   | 0.63940   | 0.64178   | 0.65168   | 0.65328   |

|                            |         |         |         |         |         |
|----------------------------|---------|---------|---------|---------|---------|
| Alpha virt. eigenvalues -- | 0.66052 | 0.66438 | 0.67356 | 0.67502 | 0.68453 |
| Alpha virt. eigenvalues -- | 0.68978 | 0.69578 | 0.69980 | 0.70710 | 0.70842 |
| Alpha virt. eigenvalues -- | 0.71837 | 0.72004 | 0.73065 | 0.73748 | 0.74181 |
| Alpha virt. eigenvalues -- | 0.74546 | 0.74946 | 0.75135 | 0.76578 | 0.77130 |
| Alpha virt. eigenvalues -- | 0.77628 | 0.78094 | 0.79239 | 0.79660 | 0.80119 |
| Alpha virt. eigenvalues -- | 0.81668 | 0.82743 | 0.83626 | 0.84274 | 0.84536 |
| Alpha virt. eigenvalues -- | 0.86169 | 0.87817 | 0.88572 | 0.89697 | 0.90605 |
| Alpha virt. eigenvalues -- | 0.92228 | 0.92493 | 0.92975 | 0.95466 | 0.96016 |
| Alpha virt. eigenvalues -- | 0.97813 | 0.99729 | 1.00011 | 1.02018 | 1.03119 |
| Alpha virt. eigenvalues -- | 1.03758 | 1.04532 | 1.06148 | 1.07033 | 1.08254 |
| Alpha virt. eigenvalues -- | 1.09416 | 1.11083 | 1.11893 | 1.12644 | 1.13679 |
| Alpha virt. eigenvalues -- | 1.14531 | 1.16809 | 1.18543 | 1.19793 | 1.21307 |
| Alpha virt. eigenvalues -- | 1.21899 | 1.23108 | 1.23435 | 1.24311 | 1.27287 |
| Alpha virt. eigenvalues -- | 1.27408 | 1.30555 | 1.31515 | 1.32847 | 1.34407 |
| Alpha virt. eigenvalues -- | 1.35333 | 1.38056 | 1.40215 | 1.41244 | 1.41407 |
| Alpha virt. eigenvalues -- | 1.42150 | 1.44742 | 1.45358 | 1.47260 | 1.48360 |
| Alpha virt. eigenvalues -- | 1.49478 | 1.50624 | 1.52332 | 1.52546 | 1.53487 |
| Alpha virt. eigenvalues -- | 1.55550 | 1.56236 | 1.56874 | 1.57380 | 1.57776 |
| Alpha virt. eigenvalues -- | 1.58726 | 1.59476 | 1.59663 | 1.60567 | 1.61589 |
| Alpha virt. eigenvalues -- | 1.62156 | 1.63382 | 1.63873 | 1.64321 | 1.65036 |
| Alpha virt. eigenvalues -- | 1.65201 | 1.66885 | 1.68366 | 1.69351 | 1.70428 |
| Alpha virt. eigenvalues -- | 1.70878 | 1.71202 | 1.72222 | 1.72538 | 1.72980 |
| Alpha virt. eigenvalues -- | 1.75580 | 1.76898 | 1.76951 | 1.78289 | 1.79814 |
| Alpha virt. eigenvalues -- | 1.80355 | 1.82529 | 1.82983 | 1.84749 | 1.85593 |
| Alpha virt. eigenvalues -- | 1.86999 | 1.87683 | 1.89135 | 1.90221 | 1.90667 |
| Alpha virt. eigenvalues -- | 1.93406 | 1.94583 | 1.95904 | 1.98568 | 2.00856 |
| Alpha virt. eigenvalues -- | 2.02585 | 2.03165 | 2.06379 | 2.07169 | 2.07699 |
| Alpha virt. eigenvalues -- | 2.09380 | 2.10012 | 2.10884 | 2.12353 | 2.13361 |
| Alpha virt. eigenvalues -- | 2.15927 | 2.16634 | 2.18670 | 2.18915 | 2.19917 |
| Alpha virt. eigenvalues -- | 2.21201 | 2.21815 | 2.22233 | 2.23842 | 2.26456 |
| Alpha virt. eigenvalues -- | 2.28031 | 2.29843 | 2.31529 | 2.33550 | 2.34655 |
| Alpha virt. eigenvalues -- | 2.38260 | 2.40736 | 2.42248 | 2.44495 | 2.47166 |
| Alpha virt. eigenvalues -- | 2.47254 | 2.48841 | 2.49212 | 2.51626 | 2.52966 |
| Alpha virt. eigenvalues -- | 2.53451 | 2.54057 | 2.54410 | 2.55730 | 2.56164 |
| Alpha virt. eigenvalues -- | 2.58525 | 2.59325 | 2.59641 | 2.62470 | 2.63238 |
| Alpha virt. eigenvalues -- | 2.65493 | 2.66375 | 2.67113 | 2.67711 | 2.68688 |
| Alpha virt. eigenvalues -- | 2.71109 | 2.73236 | 2.73819 | 2.74592 | 2.75131 |
| Alpha virt. eigenvalues -- | 2.76062 | 2.76462 | 2.77582 | 2.79362 | 2.79848 |
| Alpha virt. eigenvalues -- | 2.81318 | 2.82087 | 2.82613 | 2.83507 | 2.84600 |
| Alpha virt. eigenvalues -- | 2.85602 | 2.86395 | 2.88242 | 2.90165 | 2.91180 |
| Alpha virt. eigenvalues -- | 2.93872 | 2.94026 | 2.95485 | 2.96803 | 2.98165 |
| Alpha virt. eigenvalues -- | 3.02128 | 3.06426 | 3.08471 | 3.11701 | 3.12971 |
| Alpha virt. eigenvalues -- | 3.13674 | 3.15524 | 3.19001 | 3.20149 | 3.23321 |
| Alpha virt. eigenvalues -- | 3.24067 | 3.28083 | 3.31341 | 3.35821 | 3.39281 |

|                            |            |          |           |           |           |
|----------------------------|------------|----------|-----------|-----------|-----------|
| Alpha virt. eigenvalues -- | 3.41844    | 3.48671  | 3.54654   | 3.55813   | 3.61986   |
| Alpha virt. eigenvalues -- | 3.62474    | 3.64536  | 3.68183   | 3.69977   | 3.72818   |
| Alpha virt. eigenvalues -- | 3.74331    | 3.76300  | 3.79388   | 3.80389   | 3.82545   |
| Alpha virt. eigenvalues -- | 3.84047    | 3.84911  | 3.86542   | 3.89759   | 3.92547   |
| Alpha virt. eigenvalues -- | 3.96204    | 4.03847  | 4.09794   | 4.10539   | 4.10846   |
| Alpha virt. eigenvalues -- | 4.15172    | 4.17935  | 4.32838   | 4.33299   | 4.34160   |
| Alpha virt. eigenvalues -- | 4.37193    | 4.40974  | 4.50748   | 4.68328   | 4.92213   |
| Alpha virt. eigenvalues -- | 5.00125    | 5.06618  | 5.08857   | 5.15258   | 5.22065   |
| Alpha virt. eigenvalues -- | 5.23888    | 5.41733  | 5.49446   | 5.56723   | 5.67987   |
| Alpha virt. eigenvalues -- | 5.91939    | 6.79415  | 7.73346   | 7.76663   | 7.78153   |
| Alpha virt. eigenvalues -- | 23.71172   | 23.74675 | 23.77483  | 23.84127  | 23.85384  |
| Alpha virt. eigenvalues -- | 23.86935   | 23.90342 | 23.92171  | 23.97170  | 24.16654  |
| Alpha virt. eigenvalues -- | 24.22924   | 35.43477 | 35.57508  | 48.08165  | 49.90049  |
| Alpha virt. eigenvalues -- | 49.94372   | 50.01216 | 289.94105 | 289.97236 | 289.98732 |
| Alpha virt. eigenvalues -- | 1020.86521 |          |           |           |           |

Condensed to atoms (all electrons):

|    |    | 1         | 2         | 3         | 4         | 5         | 6         |
|----|----|-----------|-----------|-----------|-----------|-----------|-----------|
| 1  | C  | 16.062245 | -9.934904 | 1.083289  | 0.147164  | -1.218865 | -0.652060 |
| 2  | C  | -9.934904 | 15.751297 | -0.778893 | -0.475453 | 1.239040  | 0.384296  |
| 3  | N  | 1.083289  | -0.778893 | 6.739883  | 0.412440  | -0.505262 | -0.094376 |
| 4  | C  | 0.147164  | -0.475453 | 0.412440  | 5.622111  | 0.486711  | -0.310276 |
| 5  | N  | -1.218865 | 1.239040  | -0.505262 | 0.486711  | 7.112904  | 0.206036  |
| 6  | C  | -0.652060 | 0.384296  | -0.094376 | -0.310276 | 0.206036  | 6.668440  |
| 7  | H  | 0.842580  | -0.381807 | 0.072656  | -0.010733 | -0.181462 | -0.089633 |
| 8  | H  | -0.176119 | 0.573299  | -0.083698 | -0.006953 | 0.037735  | 0.010912  |
| 9  | H  | 0.071185  | -0.069546 | 0.008748  | 0.037132  | -0.081484 | 0.386089  |
| 10 | H  | -0.038936 | 0.043443  | -0.011835 | -0.053488 | -0.051585 | 0.557624  |
| 11 | Br | -0.107956 | 0.289484  | -0.022349 | -0.037651 | -0.030631 | -0.004172 |
| 12 | H  | 0.020360  | 0.007061  | -0.049346 | 0.435846  | -0.039352 | -0.042136 |
| 13 | C  | 0.982171  | -1.175953 | 0.334514  | -0.128377 | -0.229740 | -0.103357 |
| 14 | C  | -0.318792 | 0.431651  | -0.208825 | -0.074731 | 0.002342  | -0.010617 |
| 15 | H  | -0.003091 | 0.011462  | -0.093231 | 0.024200  | -0.000209 | 0.009501  |
| 16 | H  | 0.011278  | -0.007962 | 0.020569  | -0.002628 | -0.001577 | -0.000965 |
| 17 | H  | -0.037088 | 0.039046  | -0.035313 | -0.004530 | 0.000650  | 0.000912  |
| 18 | C  | 0.011445  | -0.058555 | 0.001418  | -0.002858 | 0.002360  | 0.002001  |
| 19 | C  | 0.022886  | 0.032663  | -0.002416 | 0.001751  | -0.000363 | 0.001501  |
| 20 | O  | 0.001319  | -0.005253 | -0.000596 | -0.000794 | -0.002539 | 0.004033  |
| 21 | H  | -0.006088 | 0.006695  | -0.000975 | -0.000354 | 0.001796  | 0.001566  |
| 22 | H  | -0.027963 | 0.034804  | 0.000110  | 0.001033  | -0.001458 | -0.003422 |
| 23 | H  | -0.002676 | 0.004094  | -0.000718 | -0.000387 | 0.001195  | 0.000862  |
| 24 | C  | -0.010542 | 0.005959  | 0.000236  | -0.000106 | -0.000294 | 0.000258  |
| 25 | H  | -0.000711 | 0.000366  | 0.000016  | -0.000024 | -0.000052 | 0.000222  |
| 26 | H  | 0.000121  | -0.000114 | 0.000006  | -0.000010 | -0.000017 | 0.000032  |
| 27 | H  | 0.001351  | -0.000912 | 0.000000  | -0.000024 | -0.000109 | 0.000130  |

|    |    |           |           |           |           |           |           |
|----|----|-----------|-----------|-----------|-----------|-----------|-----------|
| 28 | C  | -0.323465 | 0.487441  | -0.054585 | -0.042959 | -0.027174 | -0.148915 |
| 29 | H  | -0.030122 | 0.025418  | -0.004242 | -0.009586 | 0.021662  | -0.030225 |
| 30 | H  | 0.003657  | -0.007636 | -0.002330 | -0.021562 | -0.001849 | 0.054829  |
| 31 | C  | -0.182142 | -0.055347 | 0.015018  | 0.103719  | 0.050536  | -0.469882 |
| 32 | O  | -0.021818 | -0.032480 | -0.007621 | -0.003564 | 0.024411  | 0.069373  |
| 33 | O  | -0.025428 | 0.009601  | -0.000033 | 0.005714  | 0.017295  | -0.018809 |
| 34 | H  | 0.024164  | -0.023969 | 0.001342  | 0.008355  | 0.006303  | -0.037975 |
|    |    | 7         | 8         | 9         | 10        | 11        | 12        |
| 1  | C  | 0.842580  | -0.176119 | 0.071185  | -0.038936 | -0.107956 | 0.020360  |
| 2  | C  | -0.381807 | 0.573299  | -0.069546 | 0.043443  | 0.289484  | 0.007061  |
| 3  | N  | 0.072656  | -0.083698 | 0.008748  | -0.011835 | -0.022349 | -0.049346 |
| 4  | C  | -0.010733 | -0.006953 | 0.037132  | -0.053488 | -0.037651 | 0.435846  |
| 5  | N  | -0.181462 | 0.037735  | -0.081484 | -0.051585 | -0.030631 | -0.039352 |
| 6  | C  | -0.089633 | 0.010912  | 0.386089  | 0.557624  | -0.004172 | -0.042136 |
| 7  | H  | 0.559728  | -0.012460 | -0.001942 | -0.007532 | 0.020882  | -0.000305 |
| 8  | H  | -0.012460 | 0.448200  | -0.001429 | 0.001468  | 0.022850  | 0.000060  |
| 9  | H  | -0.001942 | -0.001429 | 0.600545  | -0.047430 | -0.001200 | -0.005002 |
| 10 | H  | -0.007532 | 0.001468  | -0.047430 | 0.515681  | 0.001970  | 0.000566  |
| 11 | Br | 0.020882  | 0.022850  | -0.001200 | 0.001970  | 35.685481 | -0.002743 |
| 12 | H  | -0.000305 | 0.000060  | -0.005002 | 0.000566  | -0.002743 | 0.478266  |
| 13 | C  | 0.041977  | -0.029700 | 0.004255  | -0.006544 | 0.016930  | -0.011540 |
| 14 | C  | -0.009775 | 0.012360  | 0.000227  | -0.000270 | -0.012558 | 0.007801  |
| 15 | H  | 0.001861  | 0.002906  | 0.000304  | -0.000022 | 0.005083  | -0.003803 |
| 16 | H  | 0.000322  | 0.000474  | 0.000046  | -0.000097 | -0.002271 | 0.000425  |
| 17 | H  | 0.000268  | -0.003811 | -0.000096 | 0.000164  | 0.005622  | -0.000233 |
| 18 | C  | 0.061116  | -0.004342 | -0.000098 | -0.002285 | -0.005683 | -0.000223 |
| 19 | C  | -0.063124 | 0.003510  | 0.000473  | 0.000049  | 0.010503  | 0.000166  |
| 20 | O  | 0.011572  | -0.000646 | 0.000017  | 0.001197  | 0.000861  | -0.000038 |
| 21 | H  | -0.004827 | 0.000546  | -0.000017 | -0.000056 | -0.004273 | 0.000000  |
| 22 | H  | -0.001923 | -0.000580 | 0.000206  | -0.000368 | 0.007675  | 0.000028  |
| 23 | H  | -0.005461 | 0.000851  | -0.000088 | -0.000218 | 0.000769  | 0.000011  |
| 24 | C  | 0.004116  | -0.000176 | -0.000105 | 0.000788  | -0.002301 | -0.000002 |
| 25 | H  | 0.000212  | 0.000010  | 0.000018  | 0.000057  | 0.000045  | -0.000003 |
| 26 | H  | 0.000103  | -0.000007 | 0.000004  | 0.000017  | -0.000076 | -0.000001 |
| 27 | H  | 0.000207  | 0.000012  | 0.000012  | -0.000038 | 0.000223  | -0.000002 |
| 28 | C  | 0.007198  | 0.008932  | -0.021559 | -0.041904 | 0.019188  | 0.001090  |
| 29 | H  | -0.001364 | 0.000529  | -0.015509 | 0.000792  | -0.000051 | 0.001595  |
| 30 | H  | -0.003192 | 0.000125  | -0.019144 | 0.019441  | 0.001436  | -0.003888 |
| 31 | C  | -0.029733 | -0.001875 | -0.009488 | -0.122259 | -0.059242 | 0.010510  |
| 32 | O  | -0.010359 | 0.000125  | -0.005028 | 0.009560  | -0.019167 | 0.000068  |
| 33 | O  | -0.005338 | -0.000758 | -0.002995 | 0.000571  | -0.001345 | 0.000862  |
| 34 | H  | 0.004880  | -0.001354 | -0.001635 | -0.003561 | 0.000074  | 0.000649  |
|    |    | 13        | 14        | 15        | 16        | 17        | 18        |
| 1  | C  | 0.982171  | -0.318792 | -0.003091 | 0.011278  | -0.037088 | 0.011445  |

|    |    |           |           |           |           |           |           |
|----|----|-----------|-----------|-----------|-----------|-----------|-----------|
| 2  | C  | -1.175953 | 0.431651  | 0.011462  | -0.007962 | 0.039046  | -0.058555 |
| 3  | N  | 0.334514  | -0.208825 | -0.093231 | 0.020569  | -0.035313 | 0.001418  |
| 4  | C  | -0.128377 | -0.074731 | 0.024200  | -0.002628 | -0.004530 | -0.002858 |
| 5  | N  | -0.229740 | 0.002342  | -0.000209 | -0.001577 | 0.000650  | 0.002360  |
| 6  | C  | -0.103357 | -0.010617 | 0.009501  | -0.000965 | 0.000912  | 0.002001  |
| 7  | H  | 0.041977  | -0.009775 | 0.001861  | 0.000322  | 0.000268  | 0.061116  |
| 8  | H  | -0.029700 | 0.012360  | 0.002906  | 0.000474  | -0.003811 | -0.004342 |
| 9  | H  | 0.004255  | 0.000227  | 0.000304  | 0.000046  | -0.000096 | -0.000098 |
| 10 | H  | -0.006544 | -0.000270 | -0.000022 | -0.000097 | 0.000164  | -0.002285 |
| 11 | Br | 0.016930  | -0.012558 | 0.005083  | -0.002271 | 0.005622  | -0.005683 |
| 12 | H  | -0.011540 | 0.007801  | -0.003803 | 0.000425  | -0.000233 | -0.000223 |
| 13 | C  | 6.045076  | -0.069821 | 0.426421  | -0.039552 | -0.001746 | 0.002066  |
| 14 | C  | -0.069821 | 5.774804  | -0.055157 | 0.400080  | 0.384534  | -0.000593 |
| 15 | H  | 0.426421  | -0.055157 | 0.508769  | -0.007769 | 0.005232  | 0.000136  |
| 16 | H  | -0.039552 | 0.400080  | -0.007769 | 0.486376  | -0.023551 | 0.000019  |
| 17 | H  | -0.001746 | 0.384534  | 0.005232  | -0.023551 | 0.527112  | -0.000049 |
| 18 | C  | 0.002066  | -0.000593 | 0.000136  | 0.000019  | -0.000049 | 7.139706  |
| 19 | C  | -0.002214 | 0.000808  | -0.000135 | -0.000007 | -0.000027 | -1.867957 |
| 20 | O  | -0.000151 | 0.000009  | -0.000003 | -0.000001 | -0.000011 | 0.161455  |
| 21 | H  | -0.000724 | 0.000032  | 0.000001  | 0.000005  | -0.000016 | 0.243208  |
| 22 | H  | -0.000754 | 0.000948  | -0.000132 | -0.000009 | 0.000149  | 0.424870  |
| 23 | H  | -0.000410 | 0.000118  | -0.000010 | 0.000001  | -0.000008 | -0.037490 |
| 24 | C  | 0.000111  | -0.000027 | 0.000009  | -0.000002 | 0.000016  | 0.245302  |
| 25 | H  | -0.000002 | 0.000001  | 0.000000  | 0.000000  | 0.000000  | -0.002327 |
| 26 | H  | 0.000005  | -0.000002 | 0.000000  | 0.000000  | 0.000000  | 0.015742  |
| 27 | H  | 0.000007  | -0.000001 | 0.000000  | 0.000000  | -0.000001 | -0.026973 |
| 28 | C  | -0.032662 | 0.005469  | -0.001261 | 0.000012  | 0.000213  | -0.030450 |
| 29 | H  | -0.002028 | 0.000202  | 0.000060  | -0.000017 | 0.000019  | -0.002102 |
| 30 | H  | -0.001655 | 0.000674  | -0.000056 | -0.000029 | 0.000090  | 0.000590  |
| 31 | C  | 0.030750  | -0.001993 | 0.000498  | 0.000193  | 0.000024  | -0.027906 |
| 32 | O  | -0.002924 | 0.000258  | 0.000073  | -0.000057 | 0.000126  | -0.011161 |
| 33 | O  | 0.000689  | 0.000047  | -0.000046 | -0.000005 | 0.000012  | 0.011613  |
| 34 | H  | 0.001457  | -0.000093 | -0.000036 | -0.000001 | -0.000007 | 0.055459  |
|    |    | 19        | 20        | 21        | 22        | 23        | 24        |
| 1  | C  | 0.022886  | 0.001319  | -0.006088 | -0.027963 | -0.002676 | -0.010542 |
| 2  | C  | 0.032663  | -0.005253 | 0.006695  | 0.034804  | 0.004094  | 0.005959  |
| 3  | N  | -0.002416 | -0.000596 | -0.000975 | 0.000110  | -0.000718 | 0.000236  |
| 4  | C  | 0.001751  | -0.000794 | -0.000354 | 0.001033  | -0.000387 | -0.000106 |
| 5  | N  | -0.000363 | -0.002539 | 0.001796  | -0.001458 | 0.001195  | -0.000294 |
| 6  | C  | 0.001501  | 0.004033  | 0.001566  | -0.003422 | 0.000862  | 0.000258  |
| 7  | H  | -0.063124 | 0.011572  | -0.004827 | -0.001923 | -0.005461 | 0.004116  |
| 8  | H  | 0.003510  | -0.000646 | 0.000546  | -0.000580 | 0.000851  | -0.000176 |
| 9  | H  | 0.000473  | 0.000017  | -0.000017 | 0.000206  | -0.000088 | -0.000105 |
| 10 | H  | 0.000049  | 0.001197  | -0.000056 | -0.000368 | -0.000218 | 0.000788  |

|    |    |           |           |           |           |           |           |
|----|----|-----------|-----------|-----------|-----------|-----------|-----------|
| 11 | Br | 0.010503  | 0.000861  | -0.004273 | 0.007675  | 0.000769  | -0.002301 |
| 12 | H  | 0.000166  | -0.000038 | 0.000000  | 0.000028  | 0.000011  | -0.000002 |
| 13 | C  | -0.002214 | -0.000151 | -0.000724 | -0.000754 | -0.000410 | 0.000111  |
| 14 | C  | 0.000808  | 0.000009  | 0.000032  | 0.000948  | 0.000118  | -0.000027 |
| 15 | H  | -0.000135 | -0.000003 | 0.000001  | -0.000132 | -0.000010 | 0.000009  |
| 16 | H  | -0.000007 | -0.000001 | 0.000005  | -0.000009 | 0.000001  | -0.000002 |
| 17 | H  | -0.000027 | -0.000011 | -0.000016 | 0.000149  | -0.000008 | 0.000016  |
| 18 | C  | -1.867957 | 0.161455  | 0.243208  | 0.424870  | -0.037490 | 0.245302  |
| 19 | C  | 7.816550  | -0.095729 | 0.146244  | -0.040867 | 0.384638  | -0.256117 |
| 20 | O  | -0.095729 | 8.304582  | -0.046773 | -0.031715 | -0.017079 | -0.057983 |
| 21 | H  | 0.146244  | -0.046773 | 0.504806  | -0.004275 | 0.006612  | -0.032380 |
| 22 | H  | -0.040867 | -0.031715 | -0.004275 | 0.464117  | -0.002270 | 0.001067  |
| 23 | H  | 0.384638  | -0.017079 | 0.006612  | -0.002270 | 0.543316  | -0.060267 |
| 24 | C  | -0.256117 | -0.057983 | -0.032380 | 0.001067  | -0.060267 | 5.484780  |
| 25 | H  | -0.000621 | -0.021865 | -0.003197 | 0.000017  | -0.001551 | 0.378364  |
| 26 | H  | -0.111073 | 0.017921  | -0.002419 | 0.001309  | -0.001359 | 0.445919  |
| 27 | H  | -0.024991 | 0.004866  | 0.002910  | 0.001037  | 0.006938  | 0.393996  |
| 28 | C  | -0.009744 | -0.004812 | -0.008163 | 0.008832  | -0.006056 | 0.014119  |
| 29 | H  | 0.002543  | -0.000184 | 0.000378  | -0.000594 | 0.000393  | 0.000103  |
| 30 | H  | -0.000984 | 0.000528  | 0.000140  | 0.000039  | -0.000058 | -0.000130 |
| 31 | C  | 0.018321  | 0.033202  | 0.003660  | -0.006557 | 0.001010  | 0.009314  |
| 32 | O  | 0.013761  | -0.005476 | 0.002739  | -0.004768 | -0.001714 | -0.000389 |
| 33 | O  | -0.016751 | -0.029237 | 0.001025  | -0.001186 | 0.003573  | 0.000561  |
| 34 | H  | -0.064264 | -0.001181 | -0.002380 | -0.001711 | -0.000266 | 0.014315  |
|    |    | 25        | 26        | 27        | 28        | 29        | 30        |
| 1  | C  | -0.000711 | 0.000121  | 0.001351  | -0.323465 | -0.030122 | 0.003657  |
| 2  | C  | 0.000366  | -0.000114 | -0.000912 | 0.487441  | 0.025418  | -0.007636 |
| 3  | N  | 0.000016  | 0.000006  | 0.000000  | -0.054585 | -0.004242 | -0.002330 |
| 4  | C  | -0.000024 | -0.000010 | -0.000024 | -0.042959 | -0.009586 | -0.021562 |
| 5  | N  | -0.000052 | -0.000017 | -0.000109 | -0.027174 | 0.021662  | -0.001849 |
| 6  | C  | 0.000222  | 0.000032  | 0.000130  | -0.148915 | -0.030225 | 0.054829  |
| 7  | H  | 0.000212  | 0.000103  | 0.000207  | 0.007198  | -0.001364 | -0.003192 |
| 8  | H  | 0.000010  | -0.000007 | 0.000012  | 0.008932  | 0.000529  | 0.000125  |
| 9  | H  | 0.000018  | 0.000004  | 0.000012  | -0.021559 | -0.015509 | -0.019144 |
| 10 | H  | 0.000057  | 0.000017  | -0.000038 | -0.041904 | 0.000792  | 0.019441  |
| 11 | Br | 0.000045  | -0.000076 | 0.000223  | 0.019188  | -0.000051 | 0.001436  |
| 12 | H  | -0.000003 | -0.000001 | -0.000002 | 0.001090  | 0.001595  | -0.003888 |
| 13 | C  | -0.000002 | 0.000005  | 0.000007  | -0.032662 | -0.002028 | -0.001655 |
| 14 | C  | 0.000001  | -0.000002 | -0.000001 | 0.005469  | 0.000202  | 0.000674  |
| 15 | H  | 0.000000  | 0.000000  | 0.000000  | -0.001261 | 0.000060  | -0.000056 |
| 16 | H  | 0.000000  | 0.000000  | 0.000000  | 0.000012  | -0.000017 | -0.000029 |
| 17 | H  | 0.000000  | 0.000000  | -0.000001 | 0.000213  | 0.000019  | 0.000090  |
| 18 | C  | -0.002327 | 0.015742  | -0.026973 | -0.030450 | -0.002102 | 0.000590  |
| 19 | C  | -0.000621 | -0.111073 | -0.024991 | -0.009744 | 0.002543  | -0.000984 |

|    |    |           |           |           |           |           |           |
|----|----|-----------|-----------|-----------|-----------|-----------|-----------|
| 20 | O  | -0.021865 | 0.017921  | 0.004866  | -0.004812 | -0.000184 | 0.000528  |
| 21 | H  | -0.003197 | -0.002419 | 0.002910  | -0.008163 | 0.000378  | 0.000140  |
| 22 | H  | 0.000017  | 0.001309  | 0.001037  | 0.008832  | -0.000594 | 0.000039  |
| 23 | H  | -0.001551 | -0.001359 | 0.006938  | -0.006056 | 0.000393  | -0.000058 |
| 24 | C  | 0.378364  | 0.445919  | 0.393996  | 0.014119  | 0.000103  | -0.000130 |
| 25 | H  | 0.570402  | -0.041640 | -0.030565 | 0.001045  | -0.000104 | 0.000053  |
| 26 | H  | -0.041640 | 0.555642  | -0.025817 | 0.000699  | -0.000032 | 0.000010  |
| 27 | H  | -0.030565 | -0.025817 | 0.552710  | -0.002060 | -0.000007 | 0.000016  |
| 28 | C  | 0.001045  | 0.000699  | -0.002060 | 7.865426  | 0.343208  | 0.412343  |
| 29 | H  | -0.000104 | -0.000032 | -0.000007 | 0.343208  | 0.509063  | -0.029422 |
| 30 | H  | 0.000053  | 0.000010  | 0.000016  | 0.412343  | -0.029422 | 0.512900  |
| 31 | C  | 0.002490  | -0.000024 | -0.000338 | -1.431452 | 0.013463  | -0.142971 |
| 32 | O  | 0.000686  | -0.000012 | -0.000700 | -0.104610 | -0.005658 | 0.015662  |
| 33 | O  | -0.002958 | 0.000169  | 0.001477  | -0.426801 | 0.002754  | 0.008505  |
| 34 | H  | -0.003103 | -0.000192 | -0.002085 | -0.062789 | 0.002506  | -0.002731 |
|    |    | 31        | 32        | 33        | 34        |           |           |
| 1  | C  | -0.182142 | -0.021818 | -0.025428 | 0.024164  |           |           |
| 2  | C  | -0.055347 | -0.032480 | 0.009601  | -0.023969 |           |           |
| 3  | N  | 0.015018  | -0.007621 | -0.000033 | 0.001342  |           |           |
| 4  | C  | 0.103719  | -0.003564 | 0.005714  | 0.008355  |           |           |
| 5  | N  | 0.050536  | 0.024411  | 0.017295  | 0.006303  |           |           |
| 6  | C  | -0.469882 | 0.069373  | -0.018809 | -0.037975 |           |           |
| 7  | H  | -0.029733 | -0.010359 | -0.005338 | 0.004880  |           |           |
| 8  | H  | -0.001875 | 0.000125  | -0.000758 | -0.001354 |           |           |
| 9  | H  | -0.009488 | -0.005028 | -0.002995 | -0.001635 |           |           |
| 10 | H  | -0.122259 | 0.009560  | 0.000571  | -0.003561 |           |           |
| 11 | Br | -0.059242 | -0.019167 | -0.001345 | 0.000074  |           |           |
| 12 | H  | 0.010510  | 0.000068  | 0.000862  | 0.000649  |           |           |
| 13 | C  | 0.030750  | -0.002924 | 0.000689  | 0.001457  |           |           |
| 14 | C  | -0.001993 | 0.000258  | 0.000047  | -0.000093 |           |           |
| 15 | H  | 0.000498  | 0.000073  | -0.000046 | -0.000036 |           |           |
| 16 | H  | 0.000193  | -0.000057 | -0.000005 | -0.000001 |           |           |
| 17 | H  | 0.000024  | 0.000126  | 0.000012  | -0.000007 |           |           |
| 18 | C  | -0.027906 | -0.011161 | 0.011613  | 0.055459  |           |           |
| 19 | C  | 0.018321  | 0.013761  | -0.016751 | -0.064264 |           |           |
| 20 | O  | 0.033202  | -0.005476 | -0.029237 | -0.001181 |           |           |
| 21 | H  | 0.003660  | 0.002739  | 0.001025  | -0.002380 |           |           |
| 22 | H  | -0.006557 | -0.004768 | -0.001186 | -0.001711 |           |           |
| 23 | H  | 0.001010  | -0.001714 | 0.003573  | -0.000266 |           |           |
| 24 | C  | 0.009314  | -0.000389 | 0.000561  | 0.014315  |           |           |
| 25 | H  | 0.002490  | 0.000686  | -0.002958 | -0.003103 |           |           |
| 26 | H  | -0.000024 | -0.000012 | 0.000169  | -0.000192 |           |           |
| 27 | H  | -0.000338 | -0.000700 | 0.001477  | -0.002085 |           |           |
| 28 | C  | -1.431452 | -0.104610 | -0.426801 | -0.062789 |           |           |

|    |   |           |           |           |           |
|----|---|-----------|-----------|-----------|-----------|
| 29 | H | 0.013463  | -0.005658 | 0.002754  | 0.002506  |
| 30 | H | -0.142971 | 0.015662  | 0.008505  | -0.002731 |
| 31 | C | 7.499497  | 0.476600  | 0.387723  | 0.001535  |
| 32 | O | 0.476600  | 7.902730  | -0.196893 | -0.004245 |
| 33 | O | 0.387723  | -0.196893 | 8.069306  | 0.319612  |
| 34 | H | 0.001535  | -0.004245 | 0.319612  | 0.345252  |

Mulliken charges:

|    |    | 1         |
|----|----|-----------|
| 1  | C  | -0.166450 |
| 2  | C  | -0.368334 |
| 3  | N  | 0.266397  |
| 4  | C  | -0.099127 |
| 5  | N  | 0.163048  |
| 6  | C  | -0.341795 |
| 7  | H  | 0.191295  |
| 8  | H  | 0.199005  |
| 9  | H  | 0.174532  |
| 10 | H  | 0.235043  |
| 11 | Br | -0.775408 |
| 12 | H  | 0.193252  |
| 13 | C  | -0.046577 |
| 14 | C  | -0.259112 |
| 15 | H  | 0.168446  |
| 16 | H  | 0.166699  |
| 17 | H  | 0.142297  |
| 18 | C  | -0.297454 |
| 19 | C  | 0.101015  |
| 20 | O  | -0.219497 |
| 21 | H  | 0.194554  |
| 22 | H  | 0.184308  |
| 23 | H  | 0.183701  |
| 24 | C  | -0.578513 |
| 25 | H  | 0.154719  |
| 26 | H  | 0.145094  |
| 27 | H  | 0.148729  |
| 28 | C  | -0.393793 |
| 29 | H  | 0.206557  |
| 30 | H  | 0.206601  |
| 31 | C  | -0.116856 |
| 32 | O  | -0.077526 |
| 33 | O  | -0.112528 |
| 34 | H  | 0.427675  |

Sum of Mulliken charges = 0.00000

Mulliken charges with hydrogens summed into heavy atoms:



1

|    |    |           |  |  |  |
|----|----|-----------|--|--|--|
| 1  | C  | 0.024844  |  |  |  |
| 2  | C  | -0.169330 |  |  |  |
| 3  | N  | 0.266397  |  |  |  |
| 4  | C  | 0.094125  |  |  |  |
| 5  | N  | 0.163048  |  |  |  |
| 6  | C  | 0.067780  |  |  |  |
| 11 | Br | -0.775408 |  |  |  |
| 13 | C  | 0.121869  |  |  |  |
| 14 | C  | 0.049884  |  |  |  |
| 18 | C  | 0.081408  |  |  |  |
| 19 | C  | 0.284717  |  |  |  |
| 20 | O  | -0.219497 |  |  |  |
| 24 | C  | -0.129971 |  |  |  |
| 28 | C  | 0.019366  |  |  |  |
| 31 | C  | -0.116856 |  |  |  |
| 32 | O  | -0.077526 |  |  |  |
| 33 | O  | 0.315147  |  |  |  |

Electronic spatial extent (au):  $\langle R^{**2} \rangle =$  6648.4524

Charge= 0.0000 electrons

Dipole moment (field-independent basis, Debye):

|    |         |    |         |    |        |
|----|---------|----|---------|----|--------|
| X= | -1.5135 | Y= | 11.6168 | Z= | 5.8070 |
|----|---------|----|---------|----|--------|

Tot= 13.0753

Quadrupole moment (field-independent basis, Debye-Ang):

|     |          |     |           |     |           |
|-----|----------|-----|-----------|-----|-----------|
| XX= | -77.7868 | YY= | -121.1208 | ZZ= | -114.8198 |
| XY= | -21.9284 | XZ= | -1.4139   | YZ= | -17.1784  |

Traceless Quadrupole moment (field-independent basis, Debye-Ang):

|     |          |     |          |     |          |
|-----|----------|-----|----------|-----|----------|
| XX= | 26.7890  | YY= | -16.5450 | ZZ= | -10.2440 |
| XY= | -21.9284 | XZ= | -1.4139  | YZ= | -17.1784 |

Octapole moment (field-independent basis, Debye-Ang<sup>\*\*2</sup>):

|      |          |      |         |      |          |
|------|----------|------|---------|------|----------|
| XXX= | -37.8783 | YYY= | 67.7049 | ZZZ= | -11.3989 |
| YYY= | 6.6186   |      |         |      |          |
| XXY= | -42.3143 | XXZ= | 16.8091 | XZZ= | 3.8868   |
| YZZ= | -5.6049  |      |         |      |          |
| YYZ= | -0.8926  | XYZ= | 23.1759 |      |          |

Hexadecapole moment (field-independent basis, Debye-Ang<sup>\*\*3</sup>):

|       |            |        |            |        |            |
|-------|------------|--------|------------|--------|------------|
| XXXX= | -4660.6702 | YYYY=  | -2251.8018 | ZZZZ=  | -770.5609  |
| XXXZ= | 87.8806    | YYYYX= | -80.7753   | YYYYZ= | -50.9934   |
| ZZZX= | 18.8685    |        |            |        |            |
| ZZZY= | -6.7852    | XXYY=  | -1292.4752 | XXZZ=  | -1014.3577 |
| YYZZ= | -499.8649  |        |            |        |            |
| XXYZ= | -84.0828   | YYXZ=  | -8.3220    | ZZXY=  | 28.8128    |

N-N= 1.583406279613D+03 E-N=-1.110741232087D+04 KE= 3.332617027656D+03

Calling FoFJK, ICntrl= 2127 FMM=F ISym2X=0 I1Cent= 0 IOpClX= 0 NMat=1 NMatS=1  
NMatT=0.

\*\*\*\*\* Axes restored to original set \*\*\*\*\*

---

| Center<br>Number | Atomic<br>Number | Forces (Hartrees/Bohr) |              |              |
|------------------|------------------|------------------------|--------------|--------------|
|                  |                  | X                      | Y            | Z            |
| 1                | 6                | -0.002159762           | 0.009582924  | 0.003314720  |
| 2                | 6                | -0.006228727           | -0.006215020 | -0.002934853 |
| 3                | 7                | 0.001078549            | -0.000887451 | 0.000450545  |
| 4                | 6                | 0.001980937            | -0.003221616 | -0.004996461 |
| 5                | 7                | 0.000218770            | -0.002292551 | -0.005067092 |
| 6                | 6                | 0.005793236            | 0.012902327  | -0.004407380 |
| 7                | 1                | -0.000041068           | -0.000047284 | -0.000174796 |
| 8                | 1                | 0.001193477            | -0.000310287 | -0.002727860 |
| 9                | 1                | -0.004101255           | 0.000033253  | 0.005041511  |
| 10               | 1                | -0.001801712           | -0.002829491 | 0.001127066  |
| 11               | 35               | -0.003853944           | 0.000608421  | 0.005452320  |
| 12               | 1                | 0.002351674            | -0.000336246 | 0.005164260  |
| 13               | 6                | 0.002488779            | 0.001012585  | 0.002358285  |
| 14               | 6                | -0.001571297           | 0.002141836  | -0.002546649 |
| 15               | 1                | -0.000611817           | -0.003907135 | 0.003943987  |
| 16               | 1                | 0.000411808            | -0.000041020 | 0.000120443  |
| 17               | 1                | 0.000915014            | -0.000227726 | -0.001789325 |
| 18               | 6                | 0.001242953            | 0.001533604  | -0.002952002 |
| 19               | 6                | -0.000579787           | -0.001360299 | 0.000180901  |
| 20               | 8                | 0.007972411            | -0.013658281 | 0.010656949  |
| 21               | 1                | -0.002796372           | 0.000331905  | 0.001842511  |
| 22               | 1                | 0.003462327            | 0.000823889  | -0.001413465 |
| 23               | 1                | -0.000179458           | -0.000264338 | -0.000459393 |
| 24               | 6                | -0.001563744           | -0.001569597 | 0.001107427  |
| 25               | 1                | 0.000538456            | 0.001074189  | 0.000340487  |
| 26               | 1                | 0.000873146            | -0.000508230 | -0.000024843 |
| 27               | 1                | 0.000420653            | -0.000251350 | -0.001015473 |
| 28               | 6                | 0.008608478            | -0.029815172 | 0.019099683  |
| 29               | 1                | 0.005812112            | 0.012754250  | -0.001243559 |
| 30               | 1                | -0.006273231           | -0.006749060 | -0.011177818 |
| 31               | 6                | 0.039814055            | -0.038194235 | -0.005946386 |
| 32               | 8                | -0.025490659           | 0.041427617  | -0.003084645 |
| 33               | 8                | -0.028414639           | 0.040614767  | -0.012208486 |
| 34               | 1                | 0.000490636            | -0.012155176 | 0.003969389  |

---

Cartesian Forces: Max 0.041427617 RMS 0.010414584

GradGradGradGradGradGradGradGradGradGradGradGradGradGradGradGradGradGradGradGrad

Berny optimization.

FormGI is forming the generalized inverse of G from B-inverse, IUseBI=4.

GSVD: received Info= 1 from GESDD.

Internal Forces: Max 0.040832356 RMS 0.006908953

Search for a local minimum.

Step number 1 out of a maximum of 175

All quantities printed in internal units (Hartrees-Bohrs-Radians)

Mixed Optimization -- RFO/linear search

Second derivative matrix not updated -- first step.

ITU= 0

|                 |         |         |         |         |         |
|-----------------|---------|---------|---------|---------|---------|
| Eigenvalues --- | 0.00230 | 0.00237 | 0.00237 | 0.00435 | 0.00640 |
| Eigenvalues --- | 0.00698 | 0.00873 | 0.01281 | 0.01303 | 0.01410 |
| Eigenvalues --- | 0.01519 | 0.01607 | 0.01813 | 0.01917 | 0.02114 |
| Eigenvalues --- | 0.02261 | 0.02267 | 0.02268 | 0.02293 | 0.02409 |
| Eigenvalues --- | 0.02506 | 0.03007 | 0.03058 | 0.03058 | 0.03761 |
| Eigenvalues --- | 0.03963 | 0.04356 | 0.05173 | 0.05410 | 0.05463 |
| Eigenvalues --- | 0.05804 | 0.05894 | 0.08669 | 0.09503 | 0.09628 |
| Eigenvalues --- | 0.11947 | 0.12376 | 0.12596 | 0.13026 | 0.13636 |
| Eigenvalues --- | 0.15432 | 0.15851 | 0.15970 | 0.15983 | 0.15996 |
| Eigenvalues --- | 0.16000 | 0.16000 | 0.16000 | 0.16000 | 0.16000 |
| Eigenvalues --- | 0.16000 | 0.16986 | 0.21983 | 0.22001 | 0.22037 |
| Eigenvalues --- | 0.22784 | 0.23494 | 0.24587 | 0.24683 | 0.25000 |
| Eigenvalues --- | 0.25000 | 0.25000 | 0.25000 | 0.28519 | 0.28519 |
| Eigenvalues --- | 0.29090 | 0.31847 | 0.32654 | 0.34497 | 0.34560 |
| Eigenvalues --- | 0.34613 | 0.34765 | 0.34879 | 0.34888 | 0.34959 |
| Eigenvalues --- | 0.34994 | 0.35081 | 0.35531 | 0.35679 | 0.35764 |
| Eigenvalues --- | 0.36543 | 0.36621 | 0.36723 | 0.37230 | 0.37230 |
| Eigenvalues --- | 0.37717 | 0.41077 | 0.42393 | 0.45693 | 0.49311 |
| Eigenvalues --- | 0.53140 | 0.53562 | 0.55299 | 0.56121 | 0.60290 |
| Eigenvalues --- | 0.90974 |         |         |         |         |

RFO step: Lambda=-3.25428785D-02 EMin= 2.30000000D-03

Linear search not attempted -- first point.

Maximum step size ( 0.300) exceeded in Quadratic search.

-- Step size scaled by 0.904

Iteration 1 RMS(Cart)= 0.19417223 RMS(Int)= 0.01704665

Iteration 2 RMS(Cart)= 0.07162061 RMS(Int)= 0.00171268

Iteration 3 RMS(Cart)= 0.00294674 RMS(Int)= 0.00057213

Iteration 4 RMS(Cart)= 0.00000706 RMS(Int)= 0.00057213

Iteration 5 RMS(Cart)= 0.00000001 RMS(Int)= 0.00057213

| Variable | Old X   | -DE/DX   | Delta X<br>(Linear) | Delta X<br>(Quad) | Delta X<br>(Total) | New X   |
|----------|---------|----------|---------------------|-------------------|--------------------|---------|
| R1       | 2.56155 | 0.00650  | 0.00000             | 0.01070           | 0.01065            | 2.57220 |
| R2       | 2.62496 | -0.00196 | 0.00000             | -0.00345          | -0.00334           | 2.62162 |

|     |         |          |         |          |          |         |
|-----|---------|----------|---------|----------|----------|---------|
| R3  | 2.03241 | -0.00010 | 0.00000 | -0.00022 | -0.00022 | 2.03220 |
| R4  | 2.63076 | -0.00636 | 0.00000 | -0.01119 | -0.01132 | 2.61944 |
| R5  | 2.03122 | 0.00064  | 0.00000 | 0.00146  | 0.00146  | 2.03268 |
| R6  | 2.53657 | 0.00221  | 0.00000 | 0.00305  | 0.00302  | 2.53960 |
| R7  | 2.70116 | -0.00119 | 0.00000 | -0.00242 | -0.00242 | 2.69874 |
| R8  | 2.52721 | 0.00067  | 0.00000 | 0.00061  | 0.00071  | 2.52792 |
| R9  | 2.04586 | -0.00477 | 0.00000 | -0.01107 | -0.01107 | 2.03479 |
| R10 | 2.76266 | 0.00534  | 0.00000 | 0.01207  | 0.01207  | 2.77473 |
| R11 | 2.05742 | 0.00195  | 0.00000 | 0.00460  | 0.00460  | 2.06202 |
| R12 | 2.06396 | -0.00132 | 0.00000 | -0.00316 | -0.00316 | 2.06080 |
| R13 | 2.91018 | 0.00467  | 0.00000 | 0.01327  | 0.01327  | 2.92345 |
| R14 | 5.84744 | -0.00621 | 0.00000 | -0.12381 | -0.12381 | 5.72363 |
| R15 | 2.50712 | -0.00382 | 0.00000 | -0.00544 | -0.00544 | 2.50168 |
| R16 | 2.05544 | -0.00419 | 0.00000 | -0.00987 | -0.00987 | 2.04556 |
| R17 | 2.04452 | -0.00034 | 0.00000 | -0.00078 | -0.00078 | 2.04373 |
| R18 | 2.04821 | -0.00115 | 0.00000 | -0.00267 | -0.00267 | 2.04553 |
| R19 | 2.78330 | -0.00072 | 0.00000 | -0.00255 | -0.00253 | 2.78077 |
| R20 | 2.74547 | -0.00184 | 0.00000 | -0.00493 | -0.00491 | 2.74056 |
| R21 | 2.05684 | -0.00246 | 0.00000 | -0.00582 | -0.00582 | 2.05102 |
| R22 | 2.05871 | -0.00370 | 0.00000 | -0.00877 | -0.00877 | 2.04994 |
| R23 | 2.73025 | 0.00119  | 0.00000 | 0.00422  | 0.00419  | 2.73444 |
| R24 | 2.05857 | -0.00045 | 0.00000 | -0.00106 | -0.00106 | 2.05751 |
| R25 | 2.84425 | -0.00005 | 0.00000 | -0.00013 | -0.00013 | 2.84412 |
| R26 | 2.98468 | 0.01797  | 0.00000 | 0.12731  | 0.12731  | 3.11199 |
| R27 | 2.06308 | 0.00125  | 0.00000 | 0.00299  | 0.00299  | 2.06607 |
| R28 | 2.06499 | 0.00088  | 0.00000 | 0.00210  | 0.00210  | 2.06709 |
| R29 | 2.06058 | 0.00103  | 0.00000 | 0.00244  | 0.00244  | 2.06301 |
| R30 | 2.02201 | 0.01387  | 0.00000 | 0.03095  | 0.03095  | 2.05296 |
| R31 | 2.02201 | 0.01416  | 0.00000 | 0.03160  | 0.03160  | 2.05360 |
| R32 | 2.91018 | -0.01635 | 0.00000 | -0.04649 | -0.04649 | 2.86369 |
| R33 | 2.32487 | -0.04083 | 0.00000 | -0.03915 | -0.03915 | 2.28572 |
| R34 | 2.56433 | -0.00853 | 0.00000 | -0.01357 | -0.01357 | 2.55076 |
| R35 | 1.83524 | 0.02655  | 0.00000 | 0.04254  | 0.04254  | 1.87777 |
| A1  | 1.87029 | 0.00225  | 0.00000 | 0.00775  | 0.00779  | 1.87808 |
| A2  | 2.28184 | -0.00099 | 0.00000 | -0.00258 | -0.00322 | 2.27862 |
| A3  | 2.13028 | -0.00113 | 0.00000 | -0.00320 | -0.00386 | 2.12643 |
| A4  | 1.86854 | -0.00132 | 0.00000 | -0.00455 | -0.00474 | 1.86380 |
| A5  | 2.28673 | 0.00273  | 0.00000 | 0.01281  | 0.01228  | 2.29900 |
| A6  | 2.12698 | -0.00128 | 0.00000 | -0.00610 | -0.00662 | 2.12036 |
| A7  | 1.89437 | 0.00006  | 0.00000 | -0.00058 | -0.00042 | 1.89395 |
| A8  | 2.23394 | -0.00466 | 0.00000 | -0.01348 | -0.01371 | 2.22024 |
| A9  | 2.14718 | 0.00475  | 0.00000 | 0.01690  | 0.01670  | 2.16387 |
| A10 | 1.89252 | 0.00275  | 0.00000 | 0.00794  | 0.00776  | 1.90028 |
| A11 | 2.18305 | -0.00011 | 0.00000 | 0.00437  | 0.00351  | 2.18656 |

|     |         |          |         |          |          |         |
|-----|---------|----------|---------|----------|----------|---------|
| A12 | 2.20193 | -0.00223 | 0.00000 | -0.00568 | -0.00657 | 2.19536 |
| A13 | 1.89852 | -0.00381 | 0.00000 | -0.01147 | -0.01172 | 1.88680 |
| A14 | 2.22055 | -0.00001 | 0.00000 | 0.00340  | 0.00224  | 2.22279 |
| A15 | 2.15444 | 0.00435  | 0.00000 | 0.01789  | 0.01680  | 2.17124 |
| A16 | 1.89269 | -0.00735 | 0.00000 | -0.03183 | -0.03300 | 1.85969 |
| A17 | 1.90953 | -0.00806 | 0.00000 | -0.03944 | -0.03995 | 1.86958 |
| A18 | 1.99706 | 0.01638  | 0.00000 | 0.06174  | 0.06168  | 2.05874 |
| A19 | 1.88342 | 0.00135  | 0.00000 | -0.00723 | -0.00812 | 1.87530 |
| A20 | 1.86015 | -0.00038 | 0.00000 | 0.01505  | 0.01528  | 1.87543 |
| A21 | 1.91715 | -0.00244 | 0.00000 | -0.00063 | -0.00003 | 1.91712 |
| A22 | 1.59309 | 0.00892  | 0.00000 | 0.02852  | 0.02852  | 1.62161 |
| A23 | 2.14757 | 0.00044  | 0.00000 | 0.00152  | 0.00151  | 2.14908 |
| A24 | 1.95106 | 0.00355  | 0.00000 | 0.01685  | 0.01684  | 1.96790 |
| A25 | 2.18417 | -0.00400 | 0.00000 | -0.01862 | -0.01863 | 2.16554 |
| A26 | 2.08366 | 0.00071  | 0.00000 | 0.00332  | 0.00326  | 2.08692 |
| A27 | 2.14834 | -0.00112 | 0.00000 | -0.00527 | -0.00534 | 2.14300 |
| A28 | 2.05118 | 0.00041  | 0.00000 | 0.00191  | 0.00185  | 2.05303 |
| A29 | 2.06202 | 0.00253  | 0.00000 | 0.01294  | 0.01304  | 2.07506 |
| A30 | 2.13756 | -0.00161 | 0.00000 | -0.00661 | -0.00671 | 2.13085 |
| A31 | 1.98686 | 0.00098  | 0.00000 | 0.00083  | 0.00083  | 1.98768 |
| A32 | 1.99376 | -0.00097 | 0.00000 | 0.00045  | 0.00044  | 1.99420 |
| A33 | 2.01604 | -0.00102 | 0.00000 | -0.00643 | -0.00643 | 2.00960 |
| A34 | 2.05423 | 0.00133  | 0.00000 | 0.00415  | 0.00419  | 2.05842 |
| A35 | 2.13613 | -0.00116 | 0.00000 | -0.00599 | -0.00601 | 2.13011 |
| A36 | 1.96064 | 0.00006  | 0.00000 | -0.00043 | -0.00042 | 1.96022 |
| A37 | 2.02579 | 0.00096  | 0.00000 | 0.00616  | 0.00616  | 2.03195 |
| A38 | 2.01729 | -0.00029 | 0.00000 | -0.00031 | -0.00033 | 2.01695 |
| A39 | 2.37973 | -0.00232 | 0.00000 | -0.01854 | -0.01835 | 2.36138 |
| A40 | 2.61988 | 0.00235  | 0.00000 | 0.01109  | 0.01094  | 2.63083 |
| A41 | 1.93159 | -0.00003 | 0.00000 | -0.00005 | -0.00005 | 1.93154 |
| A42 | 1.91944 | 0.00058  | 0.00000 | 0.00264  | 0.00264  | 1.92207 |
| A43 | 1.93072 | 0.00040  | 0.00000 | 0.00184  | 0.00184  | 1.93256 |
| A44 | 1.88606 | -0.00026 | 0.00000 | -0.00118 | -0.00118 | 1.88488 |
| A45 | 1.89692 | -0.00016 | 0.00000 | -0.00058 | -0.00058 | 1.89634 |
| A46 | 1.89814 | -0.00056 | 0.00000 | -0.00282 | -0.00282 | 1.89531 |
| A47 | 1.91063 | -0.00966 | 0.00000 | -0.05019 | -0.04947 | 1.86116 |
| A48 | 1.91063 | 0.00082  | 0.00000 | 0.02559  | 0.02532  | 1.93595 |
| A49 | 1.91063 | 0.01765  | 0.00000 | 0.06547  | 0.06525  | 1.97588 |
| A50 | 1.91063 | 0.00318  | 0.00000 | 0.00378  | 0.00370  | 1.91434 |
| A51 | 1.91063 | -0.00400 | 0.00000 | -0.01960 | -0.01881 | 1.89182 |
| A52 | 1.91063 | -0.00799 | 0.00000 | -0.02505 | -0.02676 | 1.88388 |
| A53 | 2.27021 | -0.02803 | 0.00000 | -0.08963 | -0.09024 | 2.17996 |
| A54 | 1.95991 | -0.00560 | 0.00000 | -0.01791 | -0.01869 | 1.94123 |
| A55 | 2.05307 | 0.03363  | 0.00000 | 0.10754  | 0.10660  | 2.15967 |

|     |          |          |         |          |          |          |
|-----|----------|----------|---------|----------|----------|----------|
| A56 | 1.93047  | -0.01635 | 0.00000 | -0.07672 | -0.07672 | 1.85375  |
| A57 | 2.50648  | 0.01845  | 0.00000 | 0.05902  | 0.05902  | 2.56549  |
| D1  | 0.01268  | 0.00121  | 0.00000 | 0.01690  | 0.01711  | 0.02978  |
| D2  | 3.10738  | 0.00430  | 0.00000 | 0.07065  | 0.07099  | -3.10481 |
| D3  | -3.08645 | -0.00227 | 0.00000 | -0.03738 | -0.03719 | -3.12364 |
| D4  | 0.00825  | 0.00081  | 0.00000 | 0.01638  | 0.01670  | 0.02495  |
| D5  | -0.02760 | -0.00189 | 0.00000 | -0.02682 | -0.02688 | -0.05448 |
| D6  | -3.02294 | -0.00619 | 0.00000 | -0.10197 | -0.10140 | -3.12434 |
| D7  | 3.07603  | 0.00122  | 0.00000 | 0.02169  | 0.02165  | 3.09769  |
| D8  | 0.08069  | -0.00308 | 0.00000 | -0.05346 | -0.05286 | 0.02783  |
| D9  | 0.00642  | -0.00006 | 0.00000 | -0.00118 | -0.00124 | 0.00518  |
| D10 | 3.01664  | 0.00168  | 0.00000 | 0.02442  | 0.02406  | 3.04070  |
| D11 | -3.09352 | -0.00294 | 0.00000 | -0.04955 | -0.04902 | 3.14065  |
| D12 | -0.08329 | -0.00120 | 0.00000 | -0.02395 | -0.02372 | -0.10701 |
| D13 | -1.54107 | -0.00754 | 0.00000 | -0.17207 | -0.17207 | -1.71314 |
| D14 | 1.54774  | -0.00404 | 0.00000 | -0.11142 | -0.11142 | 1.43631  |
| D15 | -0.02376 | -0.00118 | 0.00000 | -0.01580 | -0.01589 | -0.03965 |
| D16 | 3.00920  | 0.00263  | 0.00000 | 0.04701  | 0.04729  | 3.05649  |
| D17 | -3.04193 | -0.00198 | 0.00000 | -0.03717 | -0.03746 | -3.07939 |
| D18 | -0.00897 | 0.00183  | 0.00000 | 0.02563  | 0.02572  | 0.01675  |
| D19 | 0.59748  | -0.00177 | 0.00000 | -0.03230 | -0.03233 | 0.56515  |
| D20 | -2.51571 | -0.00116 | 0.00000 | -0.02304 | -0.02297 | -2.53868 |
| D21 | -2.69278 | -0.00026 | 0.00000 | -0.00496 | -0.00503 | -2.69780 |
| D22 | 0.47722  | 0.00036  | 0.00000 | 0.00431  | 0.00434  | 0.48155  |
| D23 | 0.03179  | 0.00188  | 0.00000 | 0.02626  | 0.02630  | 0.05809  |
| D24 | 3.03388  | 0.00557  | 0.00000 | 0.09660  | 0.09670  | 3.13058  |
| D25 | -2.99968 | -0.00216 | 0.00000 | -0.03821 | -0.03808 | -3.03777 |
| D26 | 0.00241  | 0.00154  | 0.00000 | 0.03213  | 0.03232  | 0.03473  |
| D27 | -2.83998 | 0.00754  | 0.00000 | 0.10293  | 0.10238  | -2.73759 |
| D28 | -0.78979 | 0.00047  | 0.00000 | 0.05405  | 0.05514  | -0.73465 |
| D29 | 1.36972  | 0.00285  | 0.00000 | 0.06729  | 0.06757  | 1.43729  |
| D30 | 0.46772  | 0.00334  | 0.00000 | 0.02003  | 0.01894  | 0.48665  |
| D31 | 2.51791  | -0.00373 | 0.00000 | -0.02884 | -0.02830 | 2.48960  |
| D32 | -1.60577 | -0.00134 | 0.00000 | -0.01561 | -0.01588 | -1.62165 |
| D33 | -3.12655 | 0.00024  | 0.00000 | 0.01730  | 0.01764  | -3.10891 |
| D34 | 1.06224  | 0.00175  | 0.00000 | 0.02774  | 0.02848  | 1.09072  |
| D35 | -1.03215 | 0.00023  | 0.00000 | 0.00265  | 0.00207  | -1.03008 |
| D36 | 1.06487  | -0.00018 | 0.00000 | 0.00946  | 0.00925  | 1.07412  |
| D37 | -1.02953 | 0.00134  | 0.00000 | 0.01989  | 0.02009  | -1.00944 |
| D38 | -3.12392 | -0.00019 | 0.00000 | -0.00519 | -0.00632 | -3.13024 |
| D39 | -0.97113 | -0.00031 | 0.00000 | 0.01000  | 0.01038  | -0.96075 |
| D40 | -3.06553 | 0.00120  | 0.00000 | 0.02043  | 0.02122  | -3.04431 |
| D41 | 1.12327  | -0.00032 | 0.00000 | -0.00465 | -0.00519 | 1.11808  |
| D42 | -3.09171 | 0.00049  | 0.00000 | 0.00788  | 0.00784  | -3.08387 |

|     |          |          |         |          |          |          |
|-----|----------|----------|---------|----------|----------|----------|
| D43 | 0.04732  | -0.00101 | 0.00000 | -0.01347 | -0.01351 | 0.03380  |
| D44 | 0.01762  | -0.00007 | 0.00000 | -0.00200 | -0.00195 | 0.01567  |
| D45 | -3.12653 | -0.00157 | 0.00000 | -0.02335 | -0.02331 | 3.13335  |
| D46 | -2.73365 | -0.00055 | 0.00000 | -0.00756 | -0.00757 | -2.74122 |
| D47 | -0.01811 | -0.00091 | 0.00000 | -0.01325 | -0.01327 | -0.03138 |
| D48 | 0.00372  | -0.00103 | 0.00000 | -0.00912 | -0.00913 | -0.00542 |
| D49 | 2.71925  | -0.00139 | 0.00000 | -0.01481 | -0.01483 | 2.70442  |
| D50 | 0.68388  | -0.00078 | 0.00000 | -0.01159 | -0.01149 | 0.67239  |
| D51 | -1.68388 | 0.00078  | 0.00000 | -0.00303 | -0.00294 | -1.68681 |
| D52 | 2.01984  | 0.00190  | 0.00000 | 0.02787  | 0.02793  | 2.04777  |
| D53 | -0.35579 | 0.00122  | 0.00000 | 0.02206  | 0.02210  | -0.33369 |
| D54 | 2.54323  | -0.00033 | 0.00000 | 0.00035  | 0.00032  | 2.54355  |
| D55 | -1.65734 | -0.00031 | 0.00000 | 0.00054  | 0.00051  | -1.65683 |
| D56 | 0.43973  | -0.00037 | 0.00000 | -0.00010 | -0.00013 | 0.43961  |
| D57 | 1.33471  | 0.00057  | 0.00000 | 0.00189  | 0.00192  | 1.33663  |
| D58 | -2.86586 | 0.00059  | 0.00000 | 0.00208  | 0.00211  | -2.86375 |
| D59 | -0.76879 | 0.00052  | 0.00000 | 0.00145  | 0.00148  | -0.76731 |
| D60 | -1.01610 | -0.00031 | 0.00000 | -0.00419 | -0.00419 | -1.02029 |
| D61 | 1.06652  | -0.00029 | 0.00000 | -0.00400 | -0.00400 | 1.06252  |
| D62 | -3.11960 | -0.00035 | 0.00000 | -0.00463 | -0.00463 | -3.12423 |
| D63 | 1.80158  | 0.00029  | 0.00000 | 0.00191  | 0.00195  | 1.80352  |
| D64 | -2.47885 | -0.00112 | 0.00000 | -0.02344 | -0.02348 | -2.50233 |
| D65 | 1.73006  | 0.00482  | 0.00000 | 0.06920  | 0.07008  | 1.80015  |
| D66 | -1.41147 | 0.00798  | 0.00000 | 0.14247  | 0.14110  | -1.27037 |
| D67 | -2.45873 | 0.00135  | 0.00000 | 0.03582  | 0.03676  | -2.42196 |
| D68 | 0.68292  | 0.00451  | 0.00000 | 0.10910  | 0.10778  | 0.79071  |
| D69 | -0.36433 | -0.00210 | 0.00000 | 0.01311  | 0.01466  | -0.34967 |
| D70 | 2.77732  | 0.00106  | 0.00000 | 0.08638  | 0.08569  | 2.86300  |
| D71 | 3.14159  | -0.00272 | 0.00000 | -0.05380 | -0.05718 | 3.08441  |
| D72 | 0.00004  | 0.00001  | 0.00000 | 0.00949  | 0.01287  | 0.01291  |
| D73 | -1.39860 | 0.00415  | 0.00000 | 0.08035  | 0.08035  | -1.31825 |

| Item                 | Value    | Threshold | Converged? |
|----------------------|----------|-----------|------------|
| Maximum Force        | 0.040832 | 0.000450  | NO         |
| RMS Force            | 0.006909 | 0.000300  | NO         |
| Maximum Displacement | 1.256549 | 0.001800  | NO         |
| RMS Displacement     | 0.258346 | 0.001200  | NO         |

Predicted change in Energy=-2.024539D-02

GradGradGradGradGradGradGradGradGradGradGradGradGradGradGradGradGradGradGrad

Input orientation:

| Center Number | Atomic Number | Atomic Type | Coordinates (Angstroms) |   |   |
|---------------|---------------|-------------|-------------------------|---|---|
|               |               |             | X                       | Y | Z |
| -----         |               |             |                         |   |   |

|    |    |   |           |           |           |
|----|----|---|-----------|-----------|-----------|
| 1  | 6  | 0 | -0.840774 | 1.070667  | 1.341698  |
| 2  | 6  | 0 | -1.752002 | 0.074511  | 1.515097  |
| 3  | 7  | 0 | -2.859695 | 0.407761  | 0.751316  |
| 4  | 6  | 0 | -2.614304 | 1.573669  | 0.129625  |
| 5  | 7  | 0 | -1.411478 | 2.020856  | 0.507408  |
| 6  | 6  | 0 | -0.798583 | 3.263840  | 0.022306  |
| 7  | 1  | 0 | 0.149908  | 1.189649  | 1.742771  |
| 8  | 1  | 0 | -1.725478 | -0.825494 | 2.103574  |
| 9  | 1  | 0 | -1.619301 | 3.934367  | -0.237459 |
| 10 | 1  | 0 | -0.266458 | 3.709025  | 0.863677  |
| 11 | 35 | 0 | -0.937345 | -2.536762 | -0.267951 |
| 12 | 1  | 0 | -3.263483 | 2.043755  | -0.589409 |
| 13 | 6  | 0 | -4.023722 | -0.388029 | 0.524890  |
| 14 | 6  | 0 | -4.510852 | -1.229623 | 1.423196  |
| 15 | 1  | 0 | -4.435763 | -0.254359 | -0.467121 |
| 16 | 1  | 0 | -5.364697 | -1.843763 | 1.171368  |
| 17 | 1  | 0 | -4.077306 | -1.351974 | 2.407456  |
| 18 | 6  | 0 | 3.534277  | -0.650871 | 0.274990  |
| 19 | 6  | 0 | 4.386416  | -0.101526 | 1.341501  |
| 20 | 8  | 0 | 3.386811  | 0.727013  | 0.702651  |
| 21 | 1  | 0 | 3.947479  | -0.759538 | -0.722729 |
| 22 | 1  | 0 | 2.675664  | -1.278324 | 0.489097  |
| 23 | 1  | 0 | 4.129441  | -0.338382 | 2.372677  |
| 24 | 6  | 0 | 5.823160  | 0.276525  | 1.100666  |
| 25 | 1  | 0 | 6.099632  | 1.145957  | 1.703156  |
| 26 | 1  | 0 | 6.481925  | -0.551051 | 1.379363  |
| 27 | 1  | 0 | 5.988954  | 0.514129  | 0.048115  |
| 28 | 6  | 0 | 0.138094  | 3.179349  | -1.206017 |
| 29 | 1  | 0 | 0.510297  | 4.184508  | -1.383060 |
| 30 | 1  | 0 | -0.401322 | 2.829190  | -2.082018 |
| 31 | 6  | 0 | 1.324300  | 2.261260  | -0.990470 |
| 32 | 8  | 0 | 1.425155  | 1.143382  | -1.441231 |
| 33 | 8  | 0 | 2.225700  | 2.816002  | -0.152784 |
| 34 | 1  | 0 | 2.938419  | 2.135995  | -0.022360 |

-----  
Distance matrix (angstroms):

|   |   | 1        | 2        | 3        | 4        | 5        |
|---|---|----------|----------|----------|----------|----------|
| 1 | C | 0.000000 |          |          |          |          |
| 2 | C | 1.361150 | 0.000000 |          |          |          |
| 3 | N | 2.205456 | 1.386147 | 0.000000 |          |          |
| 4 | C | 2.206251 | 2.215982 | 1.343896 | 0.000000 |          |
| 5 | N | 1.387301 | 2.218030 | 2.181490 | 1.337718 | 0.000000 |
| 6 | C | 2.559802 | 3.648185 | 3.596780 | 2.482951 | 1.468323 |
| 7 | H | 1.075392 | 2.216446 | 3.263747 | 3.223443 | 2.157534 |



|    |    |          |          |          |          |          |
|----|----|----------|----------|----------|----------|----------|
| 8  | H  | 2.226787 | 1.075647 | 2.153130 | 3.231481 | 3.278422 |
| 9  | H  | 3.361640 | 4.241174 | 3.866937 | 2.587988 | 2.063866 |
| 10 | H  | 2.742130 | 3.980061 | 4.199506 | 3.257447 | 2.070728 |
| 11 | Br | 3.951435 | 3.265222 | 3.661222 | 4.457117 | 4.647350 |
| 12 | H  | 3.247397 | 3.254450 | 2.153384 | 1.076765 | 2.152546 |
| 13 | C  | 3.595292 | 2.520946 | 1.428114 | 2.447642 | 3.553429 |
| 14 | C  | 4.332141 | 3.052944 | 2.420489 | 3.623350 | 4.583710 |
| 15 | H  | 4.236917 | 3.352599 | 2.099281 | 2.648680 | 3.908019 |
| 16 | H  | 5.384124 | 4.104813 | 3.394236 | 4.508739 | 5.568129 |
| 17 | H  | 4.180929 | 2.870227 | 2.705928 | 3.986010 | 4.700299 |
| 18 | C  | 4.821061 | 5.478027 | 6.498497 | 6.540241 | 5.626067 |
| 19 | C  | 5.357010 | 6.143395 | 7.287923 | 7.299658 | 6.230232 |
| 20 | O  | 4.289401 | 5.243398 | 6.254848 | 6.087575 | 4.973503 |
| 21 | H  | 5.526199 | 6.179610 | 7.062082 | 7.016221 | 6.161350 |
| 22 | H  | 4.313934 | 4.742053 | 5.792395 | 6.020535 | 5.252585 |
| 23 | H  | 5.267958 | 5.957961 | 7.213430 | 7.359710 | 6.304524 |
| 24 | C  | 6.715414 | 7.589179 | 8.690871 | 8.591642 | 7.465563 |
| 25 | H  | 6.950220 | 7.926633 | 9.039938 | 8.865192 | 7.655850 |
| 26 | H  | 7.500220 | 8.258771 | 9.411674 | 9.424312 | 8.347503 |
| 27 | H  | 6.973398 | 7.890988 | 8.877184 | 8.668640 | 7.566212 |
| 28 | C  | 3.448997 | 4.540589 | 4.527648 | 3.455119 | 2.584396 |
| 29 | H  | 4.352667 | 5.514471 | 5.493289 | 4.343711 | 3.456657 |
| 30 | H  | 3.873932 | 4.727772 | 4.464828 | 3.371199 | 2.894640 |
| 31 | C  | 3.397656 | 4.530273 | 4.896436 | 4.152108 | 3.128244 |
| 32 | O  | 3.589487 | 4.469529 | 4.869121 | 4.355453 | 3.551569 |
| 33 | O  | 3.831832 | 5.110745 | 5.698970 | 5.004876 | 3.781160 |
| 34 | H  | 4.156667 | 5.349162 | 6.099466 | 5.583193 | 4.383550 |
|    |    | 6        | 7        | 8        | 9        | 10       |
| 6  | C  | 0.000000 |          |          |          |          |
| 7  | H  | 2.856904 | 0.000000 |          |          |          |
| 8  | H  | 4.681182 | 2.776339 | 0.000000 |          |          |
| 9  | H  | 1.091175 | 3.819017 | 5.305468 | 0.000000 |          |
| 10 | H  | 1.090528 | 2.700634 | 4.922190 | 1.758825 | 0.000000 |
| 11 | Br | 5.809517 | 4.371643 | 3.028815 | 6.507035 | 6.382831 |
| 12 | H  | 2.817541 | 4.221350 | 4.224950 | 2.530142 | 3.723807 |
| 13 | C  | 4.897986 | 4.625094 | 2.822329 | 5.004551 | 5.569350 |
| 14 | C  | 5.994551 | 5.260959 | 2.895607 | 6.147002 | 6.535915 |
| 15 | H  | 5.083931 | 5.291235 | 3.778930 | 5.052785 | 5.904451 |
| 16 | H  | 6.946751 | 6.319728 | 3.892273 | 7.028483 | 7.544546 |
| 17 | H  | 6.143673 | 4.977047 | 2.429119 | 6.401779 | 6.520700 |
| 18 | C  | 5.844868 | 4.122602 | 5.571286 | 6.917107 | 5.813848 |
| 19 | C  | 6.320615 | 4.447038 | 6.201624 | 7.406091 | 6.033063 |
| 20 | O  | 4.941244 | 3.431242 | 5.523438 | 6.019310 | 4.718549 |
| 21 | H  | 6.266398 | 4.929458 | 6.338357 | 7.297757 | 6.343658 |

|    |    |          |           |           |           |           |
|----|----|----------|-----------|-----------|-----------|-----------|
| 22 | H  | 5.737555 | 3.747270  | 4.709739  | 6.793140  | 5.802590  |
| 23 | H  | 6.541075 | 4.309100  | 5.881308  | 7.623466  | 6.162996  |
| 24 | C  | 7.344004 | 5.782031  | 7.694297  | 8.400036  | 6.994403  |
| 25 | H  | 7.409187 | 5.950016  | 8.079561  | 8.433454  | 6.913837  |
| 26 | H  | 8.330713 | 6.576970  | 8.243862  | 9.400156  | 7.997177  |
| 27 | H  | 7.323403 | 6.117405  | 8.095182  | 8.346563  | 7.071258  |
| 28 | C  | 1.547023 | 3.557302  | 5.519517  | 2.143967  | 2.174362  |
| 29 | H  | 2.129753 | 4.343947  | 6.500417  | 2.431081  | 2.424305  |
| 30 | H  | 2.185158 | 4.197732  | 5.712204  | 2.471292  | 3.077242  |
| 31 | C  | 2.556856 | 3.161985  | 5.329381  | 3.468587  | 2.839788  |
| 32 | O  | 3.403424 | 3.430198  | 5.135037  | 4.302020  | 3.841443  |
| 33 | O  | 3.062271 | 3.247624  | 5.827817  | 4.005239  | 2.835760  |
| 34 | H  | 3.903743 | 3.433227  | 5.919624  | 4.904408  | 3.678413  |
|    |    | 11       | 12        | 13        | 14        | 15        |
| 11 | Br | 0.000000 |           |           |           |           |
| 12 | H  | 5.147366 | 0.000000  |           |           |           |
| 13 | C  | 3.843355 | 2.780863  | 0.000000  |           |           |
| 14 | C  | 4.163957 | 4.039989  | 1.323831  | 0.000000  |           |
| 15 | H  | 4.181861 | 2.582735  | 1.082465  | 2.128397  | 0.000000  |
| 16 | H  | 4.706732 | 4.756914  | 2.082140  | 1.081498  | 2.464501  |
| 17 | H  | 4.291955 | 4.601574  | 2.115683  | 1.082450  | 3.097812  |
| 18 | C  | 4.883316 | 7.363269  | 7.566696  | 8.147234  | 8.014330  |
| 19 | C  | 6.071503 | 8.176282  | 8.454547  | 8.968872  | 9.006960  |
| 20 | O  | 5.503873 | 6.901423  | 7.496061  | 8.168273  | 7.970203  |
| 21 | H  | 5.217935 | 7.737841  | 8.076795  | 8.738954  | 8.402338  |
| 22 | H  | 3.900080 | 6.890054  | 6.758379  | 7.247132  | 7.248121  |
| 23 | H  | 6.121937 | 8.312873  | 8.360075  | 8.737877  | 9.024092  |
| 24 | C  | 7.449304 | 9.409917  | 9.886063  | 10.448172 | 10.391598 |
| 25 | H  | 8.183320 | 9.681416  | 10.306490 | 10.876770 | 10.847375 |
| 26 | H  | 7.855078 | 10.275312 | 10.541599 | 11.013787 | 11.076707 |
| 27 | H  | 7.575055 | 9.399669  | 10.064536 | 10.732075 | 10.465695 |
| 28 | C  | 5.891559 | 3.638751  | 5.748299  | 6.925641  | 5.766845  |
| 29 | H  | 6.965242 | 4.410683  | 6.716078  | 7.899356  | 6.708651  |
| 30 | H  | 5.689604 | 3.322161  | 5.501658  | 6.756383  | 5.328497  |
| 31 | C  | 5.353325 | 4.610413  | 6.157629  | 7.215334  | 6.307184  |
| 32 | O  | 4.527852 | 4.849701  | 5.991754  | 7.005160  | 6.103519  |
| 33 | O  | 6.218536 | 5.560407  | 7.055518  | 8.014482  | 7.341731  |
| 34 | H  | 6.075896 | 6.228454  | 7.425738  | 8.301123  | 7.764674  |
|    |    | 16       | 17        | 18        | 19        | 20        |
| 16 | H  | 0.000000 |           |           |           |           |
| 17 | H  | 1.851255 | 0.000000  |           |           |           |
| 18 | C  | 9.023204 | 7.935688  | 0.000000  |           |           |
| 19 | C  | 9.906994 | 8.621745  | 1.471518  | 0.000000  |           |
| 20 | O  | 9.133317 | 7.933574  | 1.450243  | 1.447002  | 0.000000  |

|    |   |           |           |          |          |          |
|----|---|-----------|-----------|----------|----------|----------|
| 21 | H | 9.564505  | 8.634015  | 1.085351 | 2.210586 | 2.134453 |
| 22 | H | 8.089043  | 7.020551  | 1.084783 | 2.244576 | 2.138390 |
| 23 | H | 9.687516  | 8.269177  | 2.202761 | 1.088788 | 2.115550 |
| 24 | C | 11.387219 | 10.118248 | 2.603995 | 1.505044 | 2.509412 |
| 25 | H | 11.859682 | 10.502656 | 3.442281 | 2.149911 | 2.921630 |
| 26 | H | 11.918758 | 10.639352 | 3.149322 | 2.143516 | 3.416300 |
| 27 | H | 11.650182 | 10.506114 | 2.726562 | 2.149420 | 2.691632 |
| 28 | C | 7.820763  | 7.166567  | 5.328980 | 5.941568 | 4.495679 |
| 29 | H | 8.796630  | 8.128145  | 5.939232 | 6.388867 | 4.957701 |
| 30 | H | 7.553548  | 7.151948  | 5.758060 | 6.575106 | 5.150096 |
| 31 | C | 8.140481  | 7.333397  | 3.868578 | 4.516348 | 3.078072 |
| 32 | O | 7.864528  | 7.163538  | 3.257784 | 4.249995 | 2.935590 |
| 33 | O | 9.004494  | 7.978392  | 3.730224 | 3.926010 | 2.538469 |
| 34 | H | 9.284675  | 8.203069  | 2.865325 | 2.993879 | 1.646793 |
|    |   | 21        | 22        | 23       | 24       | 25       |
| 21 | H | 0.000000  |           |          |          |          |
| 22 | H | 1.831713  | 0.000000  |          |          |          |
| 23 | H | 3.129220  | 2.558287  | 0.000000 |          |          |
| 24 | C | 2.813606  | 3.563468  | 2.205630 | 0.000000 |          |
| 25 | H | 3.761329  | 4.367452  | 2.556007 | 1.093318 | 0.000000 |
| 26 | H | 3.299344  | 3.976068  | 2.562436 | 1.093857 | 1.769414 |
| 27 | H | 2.526667  | 3.792789  | 3.096474 | 1.091700 | 1.774998 |
| 28 | C | 5.500891  | 5.402178  | 6.411890 | 6.787278 | 6.938148 |
| 29 | H | 6.057544  | 6.167359  | 6.903644 | 7.047534 | 7.070939 |
| 30 | H | 5.799888  | 5.740222  | 7.099692 | 7.442429 | 7.708646 |
| 31 | C | 4.009734  | 4.067427  | 5.092908 | 5.343385 | 5.594937 |
| 32 | O | 3.240287  | 3.339850  | 4.904557 | 5.153167 | 5.633641 |
| 33 | O | 4.009219  | 4.168691  | 4.466802 | 4.578406 | 4.608787 |
| 34 | H | 3.145286  | 3.462398  | 3.643800 | 3.611170 | 3.735084 |
|    |   | 26        | 27        | 28       | 29       | 30       |
| 26 | H | 0.000000  |           |          |          |          |
| 27 | H | 1.774781  | 0.000000  |          |          |          |
| 28 | C | 7.800273  | 6.550481  | 0.000000 |          |          |
| 29 | H | 8.106592  | 6.748009  | 1.086381 | 0.000000 |          |
| 30 | H | 8.413457  | 7.122682  | 1.086720 | 1.776649 | 0.000000 |
| 31 | C | 6.334531  | 5.088234  | 1.515398 | 2.124997 | 2.119385 |
| 32 | O | 6.033056  | 4.841732  | 2.420127 | 3.176287 | 2.566822 |
| 33 | O | 5.639146  | 4.416001  | 2.366309 | 2.515749 | 3.259350 |
| 34 | H | 4.662775  | 3.455601  | 3.214257 | 3.455964 | 3.984543 |
|    |   | 31        | 32        | 33       | 34       |          |
| 31 | C | 0.000000  |           |          |          |          |
| 32 | O | 1.209549  | 0.000000  |          |          |          |
| 33 | O | 1.349806  | 2.258013  | 0.000000 |          |          |
| 34 | H | 1.886347  | 2.299661  | 0.993674 | 0.000000 |          |

Stoichiometry C11H17BrN2O3  
 Framework group C1[X(C11H17BrN2O3)]  
 Deg. of freedom 96  
 Full point group C1 NOp 1  
 Largest Abelian subgroup C1 NOp 1  
 Largest concise Abelian subgroup C1 NOp 1

Standard orientation:

| Center<br>Number | Atomic<br>Number | Atomic<br>Type | Coordinates (Angstroms) |           |           |
|------------------|------------------|----------------|-------------------------|-----------|-----------|
|                  |                  |                | X                       | Y         | Z         |
| 1                | 6                | 0              | -0.689552               | 0.929674  | 1.199530  |
| 2                | 6                | 0              | -1.815080               | 0.169782  | 1.291623  |
| 3                | 7                | 0              | -2.799934               | 0.823652  | 0.567800  |
| 4                | 6                | 0              | -2.273873               | 1.946092  | 0.048719  |
| 5                | 7                | 0              | -1.004417               | 2.057520  | 0.455604  |
| 6                | 6                | 0              | -0.105047               | 3.154584  | 0.076715  |
| 7                | 1                | 0              | 0.295061                | 0.772560  | 1.602420  |
| 8                | 1                | 0              | -2.013046               | -0.757827 | 1.798937  |
| 9                | 1                | 0              | -0.737667               | 4.022169  | -0.117580 |
| 10               | 1                | 0              | 0.506262                | 3.384676  | 0.949991  |
| 11               | 35               | 0              | -1.624104               | -2.396117 | -0.718691 |
| 12               | 1                | 0              | -2.781465               | 2.618513  | -0.621820 |
| 13               | 6                | 0              | -4.117296               | 0.352724  | 0.280929  |
| 14               | 6                | 0              | -4.804314               | -0.422127 | 1.105636  |
| 15               | 1                | 0              | -4.471347               | 0.666641  | -0.692640 |
| 16               | 1                | 0              | -5.776704               | -0.789543 | 0.807140  |
| 17               | 1                | 0              | -4.426567               | -0.729581 | 2.072320  |
| 18               | 6                | 0              | 3.160833                | -1.691215 | -0.044700 |
| 19               | 6                | 0              | 4.104582                | -1.456596 | 1.059682  |
| 20               | 8                | 0              | 3.341455                | -0.360514 | 0.502854  |
| 21               | 1                | 0              | 3.550026                | -1.808925 | -1.051010 |
| 22               | 1                | 0              | 2.174064                | -2.110711 | 0.119813  |
| 23               | 1                | 0              | 3.783883                | -1.713341 | 2.067995  |
| 24               | 6                | 0              | 5.593297                | -1.414513 | 0.842627  |
| 25               | 1                | 0              | 6.061323                | -0.692221 | 1.516859  |
| 26               | 1                | 0              | 6.030830                | -2.396786 | 1.043197  |
| 27               | 1                | 0              | 5.825955                | -1.133340 | -0.186266 |
| 28               | 6                | 0              | 0.801386                | 2.954761  | -1.160916 |
| 29               | 1                | 0              | 1.405820                | 3.852861  | -1.252021 |
| 30               | 1                | 0              | 0.206231                | 2.821304  | -2.060326 |
| 31               | 6                | 0              | 1.730198                | 1.764020  | -1.034914 |
| 32               | 8                | 0              | 1.566886                | 0.697912  | -1.582411 |
| 33               | 8                | 0              | 2.726285                | 2.011868  | -0.158354 |

```

34          1          0          3.253610          1.172200          -0.092962
-----
Rotational constants (GHZ):          0.3890756          0.2054060          0.1524787
Standard basis: 6-311++G(d,p) (5D, 7F)
There are 538 symmetry adapted cartesian basis functions of A symmetry.
There are 519 symmetry adapted basis functions of A symmetry.
519 basis functions, 823 primitive gaussians, 538 cartesian basis functions
78 alpha electrons          78 beta electrons
nuclear repulsion energy          1553.1641954351 Hartrees.
NAtoms= 34 NActive= 34 NUniq= 34 SFac= 1.00D+00 NATFMM= 60 NAOKFM=F
Big=F
Integral buffers will be 131072 words long.
Raffenetti 2 integral format.
Two-electron integral symmetry is turned on.
One-electron integrals computed using PRISM.
NBasis= 519 RedAO= T EigKep= 3.49D-06 NBF= 519
NBsUse= 519 1.00D-06 EigRej= -1.00D+00 NBFU= 519
Initial guess from the checkpoint file: "./coohpo.chk"
B after Tr= 0.000000 0.000000 0.000000
Rot= 0.998664 -0.014138 -0.000454 0.049697 Ang= -5.92 deg.
ExpMin= 3.50D-02 ExpMax= 4.40D+05 ExpMxC= 1.51D+04 IAcc=3 IRadAn= 5 AccDes=
0.00D+00
Harris functional with IExCor= 402 and IRadAn= 5 diagonalized for initial guess.
HarFok: IExCor= 402 AccDes= 0.00D+00 IRadAn= 5 IDoV= 1 UseB2=F ITyADJ=14
ICtDFT= 3500011 ScaDFX= 1.000000 1.000000 1.000000 1.000000
FoFCou: FMM=F IPFlag= 0 FMFlag= 100000 FMFlg1= 0
NfxFlg= 0 DoJE=T BraDBF=F KetDBF=T FulRan=T
wScrn= 0.000000 ICntrl= 500 IOpCl= 0 I1Cent= 200000004 NGrid=
0
NMat0= 1 NMatS0= 1 NMatT0= 0 NMatD0= 1 NMtDS0= 0
NMtDT0= 0
Petite list used in FoFCou.
Requested convergence on RMS density matrix=1.00D-08 within 128 cycles.
Requested convergence on MAX density matrix=1.00D-06.
Requested convergence on energy=1.00D-06.
No special actions if energy rises.
SCF Done: E(RB3LYP) = -3338.87859586 A.U. after 17 cycles
NFOck= 17 Conv=0.27D-08 -V/T= 2.0019
Calling FoFJK, ICntrl= 2127 FMM=F ISym2X=0 I1Cent= 0 IOpClX= 0 NMat=1 NMatS=1
NMatT=0.
***** Axes restored to original set *****

```

```

-----
Center      Atomic      Forces (Hartrees/Bohr)
Number      Number          X          Y          Z

```

---

|    |    |              |              |              |
|----|----|--------------|--------------|--------------|
| 1  | 6  | -0.001501069 | 0.006207430  | 0.007315362  |
| 2  | 6  | -0.001177563 | -0.002350005 | -0.001178410 |
| 3  | 7  | 0.001005533  | 0.002323947  | -0.001872149 |
| 4  | 6  | 0.000147427  | -0.002546854 | -0.000703678 |
| 5  | 7  | 0.002395499  | -0.008898569 | -0.010186368 |
| 6  | 6  | 0.002375110  | 0.009217778  | -0.001216363 |
| 7  | 1  | 0.000528655  | -0.000216589 | -0.000337411 |
| 8  | 1  | 0.002968575  | -0.000700621 | -0.004081030 |
| 9  | 1  | -0.000707456 | 0.000266795  | 0.002014293  |
| 10 | 1  | 0.000332855  | -0.000803893 | 0.000154132  |
| 11 | 35 | -0.001244790 | 0.003165119  | 0.003392203  |
| 12 | 1  | -0.000503917 | 0.000882948  | 0.001818081  |
| 13 | 6  | 0.001017972  | 0.001458455  | 0.000893716  |
| 14 | 6  | -0.000693130 | 0.000484462  | -0.000378768 |
| 15 | 1  | -0.000498040 | -0.001219403 | 0.000830904  |
| 16 | 1  | 0.000279674  | 0.000139211  | 0.000049507  |
| 17 | 1  | 0.000481825  | -0.000764256 | -0.000509160 |
| 18 | 6  | -0.001145530 | 0.001760004  | -0.000134657 |
| 19 | 6  | 0.000736309  | -0.001005735 | -0.001968355 |
| 20 | 8  | 0.005164989  | -0.006673724 | 0.005129180  |
| 21 | 1  | 0.000297276  | -0.000019504 | -0.000059031 |
| 22 | 1  | -0.000046335 | -0.000353477 | 0.000979933  |
| 23 | 1  | -0.000559714 | -0.000663472 | -0.000774977 |
| 24 | 6  | -0.000723201 | -0.000091095 | 0.000590240  |
| 25 | 1  | 0.000385151  | 0.000209131  | 0.000099020  |
| 26 | 1  | 0.000078794  | -0.000081840 | 0.000021165  |
| 27 | 1  | 0.000285955  | -0.000018782 | -0.000223804 |
| 28 | 6  | -0.002900601 | -0.010178413 | 0.003832513  |
| 29 | 1  | -0.000759770 | 0.004400025  | -0.000908686 |
| 30 | 1  | -0.001920752 | -0.000435778 | -0.001691043 |
| 31 | 6  | 0.004103693  | -0.009090558 | 0.007491026  |
| 32 | 8  | -0.002055140 | 0.012154284  | -0.003035707 |
| 33 | 8  | -0.000566974 | 0.001122790  | -0.011206530 |
| 34 | 1  | -0.005581312 | 0.002320190  | 0.005854851  |

---

Cartesian Forces: Max 0.012154284 RMS 0.003497928

GradGradGradGradGradGradGradGradGradGradGradGradGradGradGradGradGradGradGrad

Berny optimization.

Using GEDIIS/GDIIS optimizer.

FormGI is forming the generalized inverse of G from B-inverse, IUseBI=4.

Internal Forces: Max 0.011570463 RMS 0.002514157

Search for a local minimum.

Step number 2 out of a maximum of 175

All quantities printed in internal units (Hartrees-Bohrs-Radians)

Mixed Optimization -- RFO/linear search

Update second derivatives using D2CorX and points 1 2

DE= -1.61D-02 DEPred=-2.02D-02 R= 7.97D-01

TightC=F SS= 1.41D+00 RLast= 5.04D-01 DXNew= 5.0454D-01 1.5125D+00

Trust test= 7.97D-01 RLast= 5.04D-01 DXMaxT set to 5.05D-01

ITU= 1 0

Use linear search instead of GDIIIS.

|                 |         |         |         |         |         |
|-----------------|---------|---------|---------|---------|---------|
| Eigenvalues --- | 0.00227 | 0.00233 | 0.00244 | 0.00478 | 0.00698 |
| Eigenvalues --- | 0.00767 | 0.00873 | 0.01269 | 0.01303 | 0.01428 |
| Eigenvalues --- | 0.01546 | 0.01630 | 0.01812 | 0.01910 | 0.02124 |
| Eigenvalues --- | 0.02198 | 0.02264 | 0.02277 | 0.02354 | 0.02481 |
| Eigenvalues --- | 0.02644 | 0.03013 | 0.03057 | 0.03060 | 0.03589 |
| Eigenvalues --- | 0.03777 | 0.04098 | 0.05079 | 0.05329 | 0.05357 |
| Eigenvalues --- | 0.05791 | 0.05877 | 0.08805 | 0.09316 | 0.10257 |
| Eigenvalues --- | 0.11975 | 0.12544 | 0.12589 | 0.13380 | 0.13619 |
| Eigenvalues --- | 0.15470 | 0.15869 | 0.15975 | 0.15997 | 0.15998 |
| Eigenvalues --- | 0.16000 | 0.16000 | 0.16000 | 0.16000 | 0.16000 |
| Eigenvalues --- | 0.16232 | 0.16936 | 0.21167 | 0.22002 | 0.22375 |
| Eigenvalues --- | 0.22793 | 0.23372 | 0.23915 | 0.24782 | 0.24949 |
| Eigenvalues --- | 0.24992 | 0.25000 | 0.27578 | 0.28430 | 0.29083 |
| Eigenvalues --- | 0.31847 | 0.32209 | 0.32617 | 0.34497 | 0.34563 |
| Eigenvalues --- | 0.34611 | 0.34764 | 0.34885 | 0.34923 | 0.34962 |
| Eigenvalues --- | 0.35027 | 0.35090 | 0.35531 | 0.35686 | 0.35765 |
| Eigenvalues --- | 0.36542 | 0.36582 | 0.36788 | 0.37098 | 0.37351 |
| Eigenvalues --- | 0.37725 | 0.41074 | 0.42559 | 0.45623 | 0.49303 |
| Eigenvalues --- | 0.52453 | 0.53568 | 0.55498 | 0.56156 | 0.60279 |
| Eigenvalues --- | 0.88096 |         |         |         |         |

RFO step: Lambda=-1.34556305D-02 EMin= 2.27455378D-03

Quartic linear search produced a step of 0.19577.

Iteration 1 RMS(Cart)= 0.48495849 RMS(Int)= 0.01425357

Iteration 2 RMS(Cart)= 0.06467144 RMS(Int)= 0.00050601

Iteration 3 RMS(Cart)= 0.00110187 RMS(Int)= 0.00037242

Iteration 4 RMS(Cart)= 0.00000096 RMS(Int)= 0.00037242

| Variable | Old X   | -DE/DX   | Delta X<br>(Linear) | Delta X<br>(Quad) | Delta X<br>(Total) | New X   |
|----------|---------|----------|---------------------|-------------------|--------------------|---------|
| R1       | 2.57220 | -0.00204 | 0.00208             | -0.00298          | -0.00098           | 2.57122 |
| R2       | 2.62162 | -0.00218 | -0.00065            | -0.00551          | -0.00611           | 2.61551 |
| R3       | 2.03220 | 0.00034  | -0.00004            | 0.00097           | 0.00092            | 2.03312 |
| R4       | 2.61944 | 0.00012  | -0.00222            | -0.00105          | -0.00339           | 2.61605 |
| R5       | 2.03268 | -0.00239 | 0.00029             | -0.00686          | -0.00658           | 2.02610 |
| R6       | 2.53960 | -0.00144 | 0.00059             | -0.00225          | -0.00162           | 2.53797 |
| R7       | 2.69874 | -0.00068 | -0.00047            | -0.00207          | -0.00255           | 2.69620 |

|     |         |          |          |          |          |         |
|-----|---------|----------|----------|----------|----------|---------|
| R8  | 2.52792 | -0.00064 | 0.00014  | -0.00105 | -0.00079 | 2.52713 |
| R9  | 2.03479 | -0.00052 | -0.00217 | -0.00289 | -0.00505 | 2.02974 |
| R10 | 2.77473 | -0.00125 | 0.00236  | -0.00225 | 0.00012  | 2.77485 |
| R11 | 2.06202 | 0.00022  | 0.00090  | 0.00121  | 0.00211  | 2.06413 |
| R12 | 2.06080 | -0.00005 | -0.00062 | -0.00052 | -0.00114 | 2.05966 |
| R13 | 2.92345 | -0.00596 | 0.00260  | -0.02071 | -0.01811 | 2.90534 |
| R14 | 5.72363 | -0.00477 | -0.02424 | -0.20616 | -0.23040 | 5.49323 |
| R15 | 2.50168 | -0.00050 | -0.00106 | -0.00157 | -0.00263 | 2.49905 |
| R16 | 2.04556 | -0.00072 | -0.00193 | -0.00338 | -0.00531 | 2.04025 |
| R17 | 2.04373 | -0.00031 | -0.00015 | -0.00103 | -0.00119 | 2.04255 |
| R18 | 2.04553 | -0.00018 | -0.00052 | -0.00086 | -0.00139 | 2.04415 |
| R19 | 2.78077 | -0.00077 | -0.00050 | -0.00305 | -0.00350 | 2.77727 |
| R20 | 2.74056 | -0.00109 | -0.00096 | -0.00378 | -0.00475 | 2.73581 |
| R21 | 2.05102 | 0.00017  | -0.00114 | -0.00017 | -0.00131 | 2.04971 |
| R22 | 2.04994 | 0.00044  | -0.00172 | 0.00031  | -0.00141 | 2.04853 |
| R23 | 2.73444 | 0.00032  | 0.00082  | 0.00186  | 0.00264  | 2.73708 |
| R24 | 2.05751 | -0.00046 | -0.00021 | -0.00153 | -0.00174 | 2.05577 |
| R25 | 2.84412 | -0.00005 | -0.00003 | -0.00018 | -0.00020 | 2.84392 |
| R26 | 3.11199 | 0.00877  | 0.02492  | 0.10307  | 0.12799  | 3.23998 |
| R27 | 2.06607 | 0.00032  | 0.00059  | 0.00134  | 0.00193  | 2.06800 |
| R28 | 2.06709 | 0.00011  | 0.00041  | 0.00060  | 0.00101  | 2.06810 |
| R29 | 2.06301 | 0.00025  | 0.00048  | 0.00107  | 0.00155  | 2.06456 |
| R30 | 2.05296 | 0.00396  | 0.00606  | 0.01511  | 0.02117  | 2.07413 |
| R31 | 2.05360 | 0.00246  | 0.00619  | 0.01085  | 0.01703  | 2.07064 |
| R32 | 2.86369 | 0.00095  | -0.00910 | -0.00186 | -0.01096 | 2.85272 |
| R33 | 2.28572 | -0.01027 | -0.00767 | -0.01719 | -0.02486 | 2.26086 |
| R34 | 2.55076 | -0.00360 | -0.00266 | -0.00895 | -0.01160 | 2.53916 |
| R35 | 1.87777 | 0.00361  | 0.00833  | 0.01251  | 0.02084  | 1.89861 |
| A1  | 1.87808 | -0.00087 | 0.00152  | -0.00293 | -0.00192 | 1.87616 |
| A2  | 2.27862 | 0.00046  | -0.00063 | 0.00193  | 0.00096  | 2.27958 |
| A3  | 2.12643 | 0.00042  | -0.00076 | 0.00157  | 0.00052  | 2.12695 |
| A4  | 1.86380 | 0.00024  | -0.00093 | 0.00109  | -0.00027 | 1.86353 |
| A5  | 2.29900 | -0.00187 | 0.00240  | -0.01078 | -0.00840 | 2.29060 |
| A6  | 2.12036 | 0.00163  | -0.00130 | 0.00961  | 0.00830  | 2.12866 |
| A7  | 1.89395 | 0.00047  | -0.00008 | 0.00318  | 0.00289  | 1.89683 |
| A8  | 2.22024 | -0.00161 | -0.00268 | -0.00884 | -0.01149 | 2.20875 |
| A9  | 2.16387 | 0.00116  | 0.00327  | 0.00654  | 0.00986  | 2.17373 |
| A10 | 1.90028 | -0.00177 | 0.00152  | -0.00644 | -0.00509 | 1.89519 |
| A11 | 2.18656 | 0.00098  | 0.00069  | 0.00457  | 0.00507  | 2.19163 |
| A12 | 2.19536 | 0.00080  | -0.00129 | 0.00222  | 0.00072  | 2.19608 |
| A13 | 1.88680 | 0.00205  | -0.00229 | 0.00879  | 0.00566  | 1.89246 |
| A14 | 2.22279 | -0.00838 | 0.00044  | -0.03493 | -0.03540 | 2.18739 |
| A15 | 2.17124 | 0.00642  | 0.00329  | 0.02971  | 0.03210  | 2.20333 |
| A16 | 1.85969 | 0.00455  | -0.00646 | 0.03326  | 0.02720  | 1.88689 |



|     |          |          |          |          |          |          |
|-----|----------|----------|----------|----------|----------|----------|
| A17 | 1.86958  | 0.00153  | -0.00782 | -0.02427 | -0.03298 | 1.83660  |
| A18 | 2.05874  | -0.01157 | 0.01208  | -0.05185 | -0.04023 | 2.01851  |
| A19 | 1.87530  | -0.00167 | -0.00159 | 0.00391  | 0.00208  | 1.87738  |
| A20 | 1.87543  | 0.00407  | 0.00299  | 0.03887  | 0.04208  | 1.91751  |
| A21 | 1.91712  | 0.00368  | -0.00001 | 0.00515  | 0.00363  | 1.92075  |
| A22 | 1.62161  | -0.00331 | 0.00558  | -0.01074 | -0.00516 | 1.61645  |
| A23 | 2.14908  | 0.00001  | 0.00030  | 0.00016  | 0.00043  | 2.14951  |
| A24 | 1.96790  | 0.00138  | 0.00330  | 0.01067  | 0.01394  | 1.98184  |
| A25 | 2.16554  | -0.00141 | -0.00365 | -0.01122 | -0.01490 | 2.15065  |
| A26 | 2.08692  | -0.00006 | 0.00064  | -0.00014 | 0.00037  | 2.08729  |
| A27 | 2.14300  | 0.00010  | -0.00104 | -0.00009 | -0.00126 | 2.14174  |
| A28 | 2.05303  | -0.00005 | 0.00036  | -0.00026 | -0.00003 | 2.05300  |
| A29 | 2.07506  | 0.00064  | 0.00255  | 0.00290  | 0.00551  | 2.08057  |
| A30 | 2.13085  | -0.00139 | -0.00131 | -0.01007 | -0.01147 | 2.11939  |
| A31 | 1.98768  | 0.00009  | 0.00016  | 0.00169  | 0.00184  | 1.98953  |
| A32 | 1.99420  | -0.00039 | 0.00009  | 0.00198  | 0.00209  | 1.99629  |
| A33 | 2.00960  | 0.00054  | -0.00126 | 0.00334  | 0.00205  | 2.01165  |
| A34 | 2.05842  | -0.00067 | 0.00082  | -0.00747 | -0.00663 | 2.05179  |
| A35 | 2.13011  | 0.00059  | -0.00118 | 0.00322  | 0.00202  | 2.13213  |
| A36 | 1.96022  | -0.00013 | -0.00008 | 0.00029  | 0.00019  | 1.96041  |
| A37 | 2.03195  | 0.00038  | 0.00121  | 0.00383  | 0.00504  | 2.03699  |
| A38 | 2.01695  | 0.00005  | -0.00007 | 0.00177  | 0.00167  | 2.01863  |
| A39 | 2.36138  | -0.00052 | -0.00359 | -0.01167 | -0.01507 | 2.34631  |
| A40 | 2.63083  | 0.00127  | 0.00214  | 0.01374  | 0.01585  | 2.64668  |
| A41 | 1.93154  | 0.00043  | -0.00001 | 0.00308  | 0.00306  | 1.93460  |
| A42 | 1.92207  | -0.00014 | 0.00052  | -0.00110 | -0.00058 | 1.92149  |
| A43 | 1.93256  | 0.00027  | 0.00036  | 0.00205  | 0.00240  | 1.93496  |
| A44 | 1.88488  | -0.00018 | -0.00023 | -0.00153 | -0.00176 | 1.88313  |
| A45 | 1.89634  | -0.00024 | -0.00011 | -0.00074 | -0.00086 | 1.89548  |
| A46 | 1.89531  | -0.00015 | -0.00055 | -0.00193 | -0.00248 | 1.89283  |
| A47 | 1.86116  | -0.00179 | -0.00969 | -0.02001 | -0.02953 | 1.83163  |
| A48 | 1.93595  | 0.00247  | 0.00496  | 0.00942  | 0.01431  | 1.95026  |
| A49 | 1.97588  | -0.00436 | 0.01277  | -0.01404 | -0.00131 | 1.97457  |
| A50 | 1.91434  | -0.00070 | 0.00072  | -0.00100 | -0.00015 | 1.91418  |
| A51 | 1.89182  | 0.00487  | -0.00368 | 0.04225  | 0.03881  | 1.93063  |
| A52 | 1.88388  | -0.00036 | -0.00524 | -0.01513 | -0.02065 | 1.86323  |
| A53 | 2.17996  | -0.00824 | -0.01767 | -0.04531 | -0.06313 | 2.11684  |
| A54 | 1.94123  | 0.00615  | -0.00366 | 0.02390  | 0.02002  | 1.96125  |
| A55 | 2.15967  | 0.00209  | 0.02087  | 0.02117  | 0.04175  | 2.20142  |
| A56 | 1.85375  | 0.00066  | -0.01502 | -0.00424 | -0.01926 | 1.83449  |
| A57 | 2.56549  | 0.00597  | 0.01155  | 0.03206  | 0.04362  | 2.60911  |
| D1  | 0.02978  | -0.00185 | 0.00335  | -0.05835 | -0.05476 | -0.02498 |
| D2  | -3.10481 | -0.00154 | 0.01390  | -0.04487 | -0.03108 | -3.13589 |
| D3  | -3.12364 | -0.00005 | -0.00728 | -0.00225 | -0.00890 | -3.13254 |

|     |          |          |          |          |          |          |
|-----|----------|----------|----------|----------|----------|----------|
| D4  | 0.02495  | 0.00026  | 0.00327  | 0.01123  | 0.01478  | 0.03973  |
| D5  | -0.05448 | 0.00208  | -0.00526 | 0.06744  | 0.06221  | 0.00772  |
| D6  | -3.12434 | 0.00040  | -0.01985 | 0.01146  | -0.00673 | -3.13108 |
| D7  | 3.09769  | 0.00047  | 0.00424  | 0.01727  | 0.02121  | 3.11890  |
| D8  | 0.02783  | -0.00121 | -0.01035 | -0.03871 | -0.04773 | -0.01990 |
| D9  | 0.00518  | 0.00093  | -0.00024 | 0.02885  | 0.02845  | 0.03362  |
| D10 | 3.04070  | 0.00117  | 0.00471  | 0.03849  | 0.04303  | 3.08374  |
| D11 | 3.14065  | 0.00064  | -0.00960 | 0.01696  | 0.00738  | -3.13516 |
| D12 | -0.10701 | 0.00089  | -0.00464 | 0.02659  | 0.02196  | -0.08505 |
| D13 | -1.71314 | -0.00017 | -0.03369 | -0.00451 | -0.03806 | -1.75120 |
| D14 | 1.43631  | 0.00019  | -0.02181 | 0.01066  | -0.01129 | 1.42502  |
| D15 | -0.03965 | 0.00044  | -0.00311 | 0.01350  | 0.01043  | -0.02923 |
| D16 | 3.05649  | 0.00050  | 0.00926  | 0.02158  | 0.03141  | 3.08790  |
| D17 | -3.07939 | 0.00041  | -0.00733 | 0.00539  | -0.00221 | -3.08160 |
| D18 | 0.01675  | 0.00047  | 0.00503  | 0.01347  | 0.01877  | 0.03552  |
| D19 | 0.56515  | -0.00084 | -0.00633 | -0.03446 | -0.04092 | 0.52423  |
| D20 | -2.53868 | -0.00046 | -0.00450 | -0.02311 | -0.02760 | -2.56628 |
| D21 | -2.69780 | -0.00063 | -0.00098 | -0.02384 | -0.02482 | -2.72263 |
| D22 | 0.48155  | -0.00026 | 0.00085  | -0.01248 | -0.01150 | 0.47005  |
| D23 | 0.05809  | -0.00153 | 0.00515  | -0.04973 | -0.04468 | 0.01340  |
| D24 | 3.13058  | -0.00067 | 0.01893  | 0.00094  | 0.02159  | -3.13101 |
| D25 | -3.03777 | -0.00159 | -0.00746 | -0.05793 | -0.06588 | -3.10364 |
| D26 | 0.03473  | -0.00073 | 0.00633  | -0.00726 | 0.00040  | 0.03513  |
| D27 | -2.73759 | 0.00212  | 0.02004  | 0.10378  | 0.12374  | -2.61386 |
| D28 | -0.73465 | 0.00309  | 0.01080  | 0.11272  | 0.12297  | -0.61167 |
| D29 | 1.43729  | 0.00083  | 0.01323  | 0.06070  | 0.07447  | 1.51176  |
| D30 | 0.48665  | 0.00050  | 0.00371  | 0.04069  | 0.04437  | 0.53102  |
| D31 | 2.48960  | 0.00147  | -0.00554 | 0.04963  | 0.04360  | 2.53320  |
| D32 | -1.62165 | -0.00079 | -0.00311 | -0.00240 | -0.00490 | -1.62655 |
| D33 | -3.10891 | 0.00229  | 0.00345  | 0.13063  | 0.13401  | -2.97490 |
| D34 | 1.09072  | 0.00284  | 0.00558  | 0.13872  | 0.14430  | 1.23501  |
| D35 | -1.03008 | 0.00459  | 0.00041  | 0.16143  | 0.16158  | -0.86851 |
| D36 | 1.07412  | 0.00085  | 0.00181  | 0.09072  | 0.09272  | 1.16684  |
| D37 | -1.00944 | 0.00140  | 0.00393  | 0.09882  | 0.10301  | -0.90643 |
| D38 | -3.13024 | 0.00315  | -0.00124 | 0.12153  | 0.12029  | -3.00995 |
| D39 | -0.96075 | -0.00141 | 0.00203  | 0.06153  | 0.06356  | -0.89719 |
| D40 | -3.04431 | -0.00085 | 0.00415  | 0.06962  | 0.07385  | -2.97045 |
| D41 | 1.11808  | 0.00089  | -0.00102 | 0.09233  | 0.09113  | 1.20921  |
| D42 | -3.08387 | 0.00022  | 0.00153  | 0.00745  | 0.00892  | -3.07495 |
| D43 | 0.03380  | -0.00070 | -0.00265 | -0.01726 | -0.01997 | 0.01384  |
| D44 | 0.01567  | -0.00013 | -0.00038 | -0.00469 | -0.00501 | 0.01066  |
| D45 | 3.13335  | -0.00105 | -0.00456 | -0.02940 | -0.03390 | 3.09945  |
| D46 | -2.74122 | 0.00005  | -0.00148 | 0.00515  | 0.00365  | -2.73757 |
| D47 | -0.03138 | -0.00001 | -0.00260 | -0.00111 | -0.00371 | -0.03509 |

|     |          |          |          |          |          |          |
|-----|----------|----------|----------|----------|----------|----------|
| D48 | -0.00542 | -0.00042 | -0.00179 | -0.00498 | -0.00678 | -0.01219 |
| D49 | 2.70442  | -0.00048 | -0.00290 | -0.01124 | -0.01414 | 2.69028  |
| D50 | 0.67239  | 0.00064  | -0.00225 | 0.01000  | 0.00783  | 0.68022  |
| D51 | -1.68681 | 0.00013  | -0.00057 | 0.00089  | 0.00036  | -1.68645 |
| D52 | 2.04777  | 0.00114  | 0.00547  | 0.02482  | 0.03032  | 2.07809  |
| D53 | -0.33369 | 0.00078  | 0.00433  | 0.01740  | 0.02175  | -0.31194 |
| D54 | 2.54355  | 0.00010  | 0.00006  | 0.00344  | 0.00350  | 2.54705  |
| D55 | -1.65683 | 0.00006  | 0.00010  | 0.00279  | 0.00288  | -1.65395 |
| D56 | 0.43961  | -0.00005 | -0.00002 | 0.00099  | 0.00095  | 0.44056  |
| D57 | 1.33663  | 0.00018  | 0.00038  | 0.00224  | 0.00264  | 1.33927  |
| D58 | -2.86375 | 0.00014  | 0.00041  | 0.00159  | 0.00202  | -2.86173 |
| D59 | -0.76731 | 0.00002  | 0.00029  | -0.00021 | 0.00009  | -0.76722 |
| D60 | -1.02029 | -0.00012 | -0.00082 | -0.00482 | -0.00565 | -1.02594 |
| D61 | 1.06252  | -0.00017 | -0.00078 | -0.00547 | -0.00626 | 1.05625  |
| D62 | -3.12423 | -0.00028 | -0.00091 | -0.00728 | -0.00819 | -3.13242 |
| D63 | 1.80352  | -0.00202 | 0.00038  | -0.11524 | -0.11480 | 1.68873  |
| D64 | -2.50233 | -0.00131 | -0.00460 | -0.11975 | -0.12441 | -2.62674 |
| D65 | 1.80015  | 0.00261  | 0.01372  | 0.13830  | 0.15239  | 1.95254  |
| D66 | -1.27037 | 0.00254  | 0.02762  | 0.14080  | 0.16799  | -1.10237 |
| D67 | -2.42196 | 0.00096  | 0.00720  | 0.13290  | 0.14052  | -2.28145 |
| D68 | 0.79071  | 0.00090  | 0.02110  | 0.13541  | 0.15612  | 0.94683  |
| D69 | -0.34967 | 0.00262  | 0.00287  | 0.14659  | 0.14988  | -0.19979 |
| D70 | 2.86300  | 0.00256  | 0.01677  | 0.14910  | 0.16548  | 3.02849  |
| D71 | 3.08441  | -0.00562 | -0.01119 | -0.17122 | -0.18353 | 2.90087  |
| D72 | 0.01291  | -0.00518 | 0.00252  | -0.16554 | -0.16190 | -0.14899 |
| D73 | -1.31825 | -0.00044 | 0.01573  | -0.01520 | 0.00053  | -1.31772 |

|     | Item                 | Value    | Threshold | Converged? |
|-----|----------------------|----------|-----------|------------|
|     | Maximum Force        | 0.011570 | 0.000450  | NO         |
| RMS | Force                | 0.002514 | 0.000300  | NO         |
|     | Maximum Displacement | 1.792002 | 0.001800  | NO         |
| RMS | Displacement         | 0.532256 | 0.001200  | NO         |

Predicted change in Energy=-9.526170D-03

GradGradGradGradGradGradGradGradGradGradGradGradGradGradGradGradGradGrad

Input orientation:

| Center<br>Number | Atomic<br>Number | Atomic<br>Type | Coordinates (Angstroms) |          |          |
|------------------|------------------|----------------|-------------------------|----------|----------|
|                  |                  |                | X                       | Y        | Z        |
| 1                | 6                | 0              | -0.580094               | 1.449873 | 1.329393 |
| 2                | 6                | 0              | -1.273991               | 0.297844 | 1.535923 |
| 3                | 7                | 0              | -2.408876               | 0.368034 | 0.746276 |
| 4                | 6                | 0              | -2.377180               | 1.515174 | 0.048557 |
| 5                | 7                | 0              | -1.278581               | 2.194509 | 0.394899 |

|    |    |   |           |           |           |
|----|----|---|-----------|-----------|-----------|
| 6  | 6  | 0 | -0.869504 | 3.506078  | -0.123364 |
| 7  | 1  | 0 | 0.354480  | 1.787941  | 1.741465  |
| 8  | 1  | 0 | -1.080629 | -0.538181 | 2.178741  |
| 9  | 1  | 0 | -1.771604 | 4.067672  | -0.376204 |
| 10 | 1  | 0 | -0.393004 | 4.010194  | 0.717318  |
| 11 | 35 | 0 | -0.013541 | -2.137757 | -0.001330 |
| 12 | 1  | 0 | -3.101547 | 1.821856  | -0.682818 |
| 13 | 6  | 0 | -3.399318 | -0.646966 | 0.589866  |
| 14 | 6  | 0 | -3.700344 | -1.516340 | 1.539823  |
| 15 | 1  | 0 | -3.843109 | -0.668679 | -0.394121 |
| 16 | 1  | 0 | -4.416410 | -2.300514 | 1.338329  |
| 17 | 1  | 0 | -3.222900 | -1.510301 | 2.510453  |
| 18 | 6  | 0 | 2.881558  | -0.708197 | 0.224042  |
| 19 | 6  | 0 | 3.730931  | -0.368994 | 1.374448  |
| 20 | 8  | 0 | 2.896359  | 0.639045  | 0.753793  |
| 21 | 1  | 0 | 3.332780  | -0.800946 | -0.757935 |
| 22 | 1  | 0 | 1.939148  | -1.228637 | 0.351103  |
| 23 | 1  | 0 | 3.374340  | -0.649089 | 2.363310  |
| 24 | 6  | 0 | 5.219376  | -0.188014 | 1.245557  |
| 25 | 1  | 0 | 5.578926  | 0.583120  | 1.933780  |
| 26 | 1  | 0 | 5.734230  | -1.122554 | 1.488988  |
| 27 | 1  | 0 | 5.489540  | 0.100443  | 0.227027  |
| 28 | 6  | 0 | 0.083313  | 3.477399  | -1.329612 |
| 29 | 1  | 0 | 0.408747  | 4.517727  | -1.458048 |
| 30 | 1  | 0 | -0.423052 | 3.134347  | -2.238757 |
| 31 | 6  | 0 | 1.272218  | 2.569947  | -1.124878 |
| 32 | 8  | 0 | 1.400820  | 1.562284  | -1.756891 |
| 33 | 8  | 0 | 2.057356  | 2.976144  | -0.112949 |
| 34 | 1  | 0 | 2.662635  | 2.197252  | 0.077804  |

-----  
Distance matrix (angstroms):

|    |    | 1        | 2        | 3        | 4        | 5        |
|----|----|----------|----------|----------|----------|----------|
| 1  | C  | 0.000000 |          |          |          |          |
| 2  | C  | 1.360632 | 0.000000 |          |          |          |
| 3  | N  | 2.203371 | 1.384353 | 0.000000 |          |          |
| 4  | C  | 2.207787 | 2.216118 | 1.343036 | 0.000000 |          |
| 5  | N  | 1.384069 | 2.213435 | 2.176475 | 1.337299 | 0.000000 |
| 6  | C  | 2.534214 | 3.634503 | 3.601841 | 2.503266 | 1.468385 |
| 7  | H  | 1.075882 | 2.216879 | 3.262311 | 3.225260 | 2.155325 |
| 8  | H  | 2.219073 | 1.072166 | 2.153467 | 3.230324 | 3.269384 |
| 9  | H  | 3.343895 | 4.256226 | 3.918342 | 2.657516 | 2.084805 |
| 10 | H  | 2.639107 | 3.902281 | 4.162921 | 3.257195 | 2.045706 |
| 11 | Br | 3.868190 | 3.143888 | 3.546200 | 4.351227 | 4.530546 |
| 12 | H  | 3.247321 | 3.253519 | 2.153068 | 1.074091 | 2.150244 |

|    |    |          |          |          |          |          |
|----|----|----------|----------|----------|----------|----------|
| 13 | C  | 3.590495 | 2.510917 | 1.426767 | 2.452067 | 3.550988 |
| 14 | C  | 4.310296 | 3.029598 | 2.418361 | 3.628321 | 4.576700 |
| 15 | H  | 4.255118 | 3.355533 | 2.105304 | 2.667232 | 3.923927 |
| 16 | H  | 5.364960 | 4.082316 | 3.391440 | 4.514582 | 5.562487 |
| 17 | H  | 4.140284 | 2.831491 | 2.702424 | 3.991200 | 4.688450 |
| 18 | C  | 4.226359 | 4.472331 | 5.423993 | 5.712136 | 5.075594 |
| 19 | C  | 4.679236 | 5.051732 | 6.215709 | 6.528177 | 5.711941 |
| 20 | O  | 3.615866 | 4.256756 | 5.312158 | 5.392140 | 4.469720 |
| 21 | H  | 4.973300 | 5.262268 | 6.049445 | 6.214377 | 5.618401 |
| 22 | H  | 3.805004 | 3.749428 | 4.648746 | 5.123546 | 4.698258 |
| 23 | H  | 4.594799 | 4.815416 | 6.090561 | 6.566742 | 5.797445 |
| 24 | C  | 6.026903 | 6.517990 | 7.664770 | 7.876631 | 6.973054 |
| 25 | H  | 6.249006 | 6.870382 | 8.078454 | 8.229363 | 7.210418 |
| 26 | H  | 6.820084 | 7.150867 | 8.311657 | 8.650284 | 7.834504 |
| 27 | H  | 6.314795 | 6.891845 | 7.919987 | 7.994910 | 7.086660 |
| 28 | C  | 3.409001 | 4.490339 | 4.493158 | 3.435652 | 2.544504 |
| 29 | H  | 4.261380 | 5.440853 | 5.478868 | 4.364237 | 3.417283 |
| 30 | H  | 3.948900 | 4.797714 | 4.528400 | 3.416451 | 2.924272 |
| 31 | C  | 3.272472 | 4.327297 | 4.679753 | 3.975877 | 2.992866 |
| 32 | O  | 3.669034 | 4.426743 | 4.712310 | 4.187499 | 3.494152 |
| 33 | O  | 3.371350 | 4.581479 | 5.242875 | 4.671790 | 3.463717 |
| 34 | H  | 3.555326 | 4.607699 | 5.432598 | 5.085845 | 3.953953 |
|    |    | 6        | 7        | 8        | 9        | 10       |
| 6  | C  | 0.000000 |          |          |          |          |
| 7  | H  | 2.815620 | 0.000000 |          |          |          |
| 8  | H  | 4.658357 | 2.767958 | 0.000000 |          |          |
| 9  | H  | 1.092292 | 3.768545 | 5.312163 | 0.000000 |          |
| 10 | H  | 1.089923 | 2.558519 | 4.826624 | 1.760578 | 0.000000 |
| 11 | Br | 5.709679 | 4.310902 | 2.906894 | 6.460547 | 6.201431 |
| 12 | H  | 2.851598 | 4.221661 | 4.224027 | 2.628013 | 3.753054 |
| 13 | C  | 4.914919 | 4.620168 | 2.812948 | 5.080409 | 5.544665 |
| 14 | C  | 6.000377 | 5.234551 | 2.868434 | 6.210667 | 6.492887 |
| 15 | H  | 5.132664 | 5.311823 | 3.777293 | 5.169573 | 5.918647 |
| 16 | H  | 6.959425 | 6.295980 | 3.865171 | 7.105521 | 7.509893 |
| 17 | H  | 6.135106 | 4.926194 | 2.375789 | 6.446149 | 6.457516 |
| 18 | C  | 5.652546 | 3.862565 | 4.421389 | 6.694860 | 5.764486 |
| 19 | C  | 6.198679 | 4.023368 | 4.881252 | 7.281942 | 6.051111 |
| 20 | O  | 4.813627 | 2.959157 | 4.385519 | 5.901039 | 4.710189 |
| 21 | H  | 6.050812 | 4.671146 | 5.307664 | 7.064269 | 6.261382 |
| 22 | H  | 5.525502 | 3.680221 | 3.596672 | 6.507653 | 5.746164 |
| 23 | H  | 6.438880 | 3.930059 | 4.460170 | 7.498901 | 6.213782 |
| 24 | C  | 7.252222 | 5.274234 | 6.378363 | 8.343547 | 7.028712 |
| 25 | H  | 7.372773 | 5.365018 | 6.757736 | 8.456265 | 6.992036 |
| 26 | H  | 8.223941 | 6.121800 | 6.874559 | 9.314233 | 8.030166 |

|    |    |           |          |          |          |          |
|----|----|-----------|----------|----------|----------|----------|
| 27 | H  | 7.222088  | 5.613378 | 6.883615 | 8.296204 | 7.080315 |
| 28 | C  | 1.537438  | 3.515582 | 5.457856 | 2.167516 | 2.168103 |
| 29 | H  | 2.106831  | 4.206133 | 6.403645 | 2.475250 | 2.373312 |
| 30 | H  | 2.193716  | 4.273117 | 5.782228 | 2.481691 | 3.083243 |
| 31 | C  | 2.542901  | 3.109613 | 5.109818 | 3.473981 | 2.870707 |
| 32 | O  | 3.406041  | 3.658448 | 5.104777 | 4.271714 | 3.915581 |
| 33 | O  | 2.974466  | 2.783966 | 5.239205 | 3.990197 | 2.786192 |
| 34 | H  | 3.772201  | 2.874523 | 5.090045 | 4.833950 | 3.610079 |
|    |    | 11        | 12       | 13       | 14       | 15       |
| 11 | Br | 0.000000  |          |          |          |          |
| 12 | H  | 5.067419  | 0.000000 |          |          |          |
| 13 | C  | 3.746392  | 2.793470 | 0.000000 |          |          |
| 14 | C  | 4.043986  | 4.054904 | 1.322439 | 0.000000 |          |
| 15 | H  | 4.120445  | 2.614580 | 1.079654 | 2.116376 | 0.000000 |
| 16 | H  | 4.605044  | 4.775755 | 2.080599 | 1.080870 | 2.448048 |
| 17 | H  | 4.123437  | 4.616815 | 2.113084 | 1.081716 | 3.086994 |
| 18 | C  | 3.236670  | 6.559049 | 6.291819 | 6.760607 | 6.753136 |
| 19 | C  | 4.363755  | 7.464243 | 7.178669 | 7.521143 | 7.783555 |
| 20 | O  | 4.092476  | 6.279950 | 6.427772 | 6.984269 | 6.960480 |
| 21 | H  | 3.682035  | 6.948763 | 6.867418 | 7.433459 | 7.186324 |
| 22 | H  | 2.182591  | 5.981899 | 5.375367 | 5.770589 | 5.856912 |
| 23 | H  | 4.391513  | 7.571102 | 7.001968 | 7.175054 | 7.726279 |
| 24 | C  | 5.721857  | 8.774735 | 8.655776 | 9.022884 | 9.222159 |
| 25 | H  | 6.513333  | 9.150501 | 9.161227 | 9.521963 | 9.785749 |
| 26 | H  | 6.023998  | 9.563328 | 9.190011 | 9.442925 | 9.771260 |
| 27 | H  | 5.945215  | 8.808965 | 8.927601 | 9.422918 | 9.384866 |
| 28 | C  | 5.770935  | 3.647259 | 5.729180 | 6.891092 | 5.786355 |
| 29 | H  | 6.826112  | 4.493425 | 6.735678 | 7.891883 | 6.790363 |
| 30 | H  | 5.741851  | 3.364211 | 5.581899 | 6.829875 | 5.437139 |
| 31 | C  | 5.007795  | 4.459247 | 5.925548 | 6.965970 | 6.098301 |
| 32 | O  | 4.332749  | 4.635982 | 5.781815 | 6.809414 | 5.859449 |
| 33 | O  | 5.518429  | 5.317087 | 6.587577 | 7.487668 | 6.941130 |
| 34 | H  | 5.095143  | 5.826257 | 6.715583 | 7.511043 | 7.124674 |
|    |    | 16        | 17       | 18       | 19       | 20       |
| 16 | H  | 0.000000  |          |          |          |          |
| 17 | H  | 1.850075  | 0.000000 |          |          |          |
| 18 | C  | 7.552314  | 6.567758 | 0.000000 |          |          |
| 19 | C  | 8.373246  | 7.137846 | 1.469669 | 0.000000 |          |
| 20 | O  | 7.903118  | 6.719440 | 1.447728 | 1.448401 | 0.000000 |
| 21 | H  | 8.166577  | 7.359516 | 1.084658 | 2.211823 | 2.132923 |
| 22 | H  | 6.520480  | 5.602577 | 1.084038 | 2.235331 | 2.136972 |
| 23 | H  | 8.029544  | 6.654841 | 2.196086 | 1.087869 | 2.116199 |
| 24 | C  | 9.865071  | 8.638311 | 2.603743 | 1.504937 | 2.514412 |
| 25 | H  | 10.420012 | 9.065710 | 3.444778 | 2.152779 | 2.931154 |

|    |   |           |          |          |          |          |
|----|---|-----------|----------|----------|----------|----------|
| 26 | H | 10.219872 | 9.023519 | 3.147938 | 2.143403 | 3.420125 |
| 27 | H | 10.253167 | 9.149597 | 2.730472 | 2.151662 | 2.700400 |
| 28 | C | 7.794209  | 7.110155 | 5.269083 | 5.950782 | 4.506669 |
| 29 | H | 8.808534  | 8.079293 | 6.021171 | 6.552860 | 5.111225 |
| 30 | H | 7.634145  | 7.208807 | 5.634800 | 6.525658 | 5.118630 |
| 31 | C | 7.883480  | 7.076025 | 3.893044 | 4.574852 | 3.145730 |
| 32 | O | 7.638178  | 7.002127 | 3.357345 | 4.354828 | 3.064725 |
| 33 | O | 8.476967  | 7.408882 | 3.790415 | 4.025314 | 2.630057 |
| 34 | H | 8.481256  | 7.369074 | 2.917353 | 3.067272 | 1.714525 |
|    |   | 21        | 22       | 23       | 24       | 25       |
| 21 | H | 0.000000  |          |          |          |          |
| 22 | H | 1.831691  | 0.000000 |          |          |          |
| 23 | H | 3.125213  | 2.538627 | 0.000000 |          |          |
| 24 | C | 2.819381  | 3.555677 | 2.205928 | 0.000000 |          |
| 25 | H | 3.769103  | 4.362948 | 2.561842 | 1.094338 | 0.000000 |
| 26 | H | 3.304399  | 3.963418 | 2.560798 | 1.094394 | 1.769543 |
| 27 | H | 2.536585  | 3.793036 | 3.098318 | 1.092521 | 1.775943 |
| 28 | C | 5.402785  | 5.330639 | 6.441773 | 6.815123 | 7.016291 |
| 29 | H | 6.109698  | 6.215774 | 7.077676 | 7.252285 | 7.329146 |
| 30 | H | 5.637875  | 5.596695 | 7.064955 | 7.417245 | 7.742258 |
| 31 | C | 3.967805  | 4.129474 | 5.191200 | 5.367063 | 5.643633 |
| 32 | O | 3.211734  | 3.538739 | 5.075530 | 5.163294 | 5.660069 |
| 33 | O | 4.038456  | 4.231962 | 4.583516 | 4.675020 | 4.724100 |
| 34 | H | 3.183825  | 3.512099 | 3.719101 | 3.686470 | 3.815078 |
|    |   | 26        | 27       | 28       | 29       | 30       |
| 26 | H | 0.000000  |          |          |          |          |
| 27 | H | 1.774300  | 0.000000 |          |          |          |
| 28 | C | 7.812614  | 6.561574 | 0.000000 |          |          |
| 29 | H | 8.298105  | 6.940197 | 1.097581 | 0.000000 |          |
| 30 | H | 8.362380  | 7.088258 | 1.095734 | 1.793080 | 0.000000 |
| 31 | C | 6.354243  | 5.070690 | 1.509597 | 2.156486 | 2.105520 |
| 32 | O | 6.043386  | 4.773943 | 2.363485 | 3.131798 | 2.455623 |
| 33 | O | 5.734539  | 4.490560 | 2.372419 | 2.627485 | 3.270552 |
| 34 | H | 4.737852  | 3.522820 | 3.205075 | 3.580986 | 3.970651 |
|    |   | 31        | 32       | 33       | 34       |          |
| 31 | C | 0.000000  |          |          |          |          |
| 32 | O | 1.196396  | 0.000000 |          |          |          |
| 33 | O | 1.343666  | 2.265521 | 0.000000 |          |          |
| 34 | H | 1.875795  | 2.315484 | 1.004701 | 0.000000 |          |

Stoichiometry C<sub>11</sub>H<sub>17</sub>BrN<sub>2</sub>O<sub>3</sub>

Framework group C<sub>1</sub>[X(C<sub>11</sub>H<sub>17</sub>BrN<sub>2</sub>O<sub>3</sub>)]

Deg. of freedom 96

Full point group C<sub>1</sub> NOp 1

Largest Abelian subgroup C<sub>1</sub> NOp 1

Largest concise Abelian subgroup C1      NOp    1

Standard orientation:

| Center<br>Number | Atomic<br>Number | Atomic<br>Type | Coordinates (Angstroms) |           |           |
|------------------|------------------|----------------|-------------------------|-----------|-----------|
|                  |                  |                | X                       | Y         | Z         |
| 1                | 6                | 0              | -0.707565               | 0.976107  | 1.274882  |
| 2                | 6                | 0              | -1.576900               | -0.069640 | 1.230289  |
| 3                | 7                | 0              | -2.655321               | 0.339728  | 0.464875  |
| 4                | 6                | 0              | -2.421024               | 1.586333  | 0.023481  |
| 5                | 7                | 0              | -1.246301               | 1.997874  | 0.512385  |
| 6                | 6                | 0              | -0.621413               | 3.306818  | 0.283617  |
| 7                | 1                | 0              | 0.250461                | 1.070382  | 1.755318  |
| 8                | 1                | 0              | -1.539266               | -1.039949 | 1.684848  |
| 9                | 1                | 0              | -1.416373               | 4.043490  | 0.147766  |
| 10               | 1                | 0              | -0.107482               | 3.545380  | 1.214689  |
| 11               | 35               | 0              | -0.642727               | -2.303908 | -0.774554 |
| 12               | 1                | 0              | -3.060292               | 2.147375  | -0.632445 |
| 13               | 6                | 0              | -3.782074               | -0.452165 | 0.092051  |
| 14               | 6                | 0              | -4.249987               | -1.440013 | 0.836404  |
| 15               | 1                | 0              | -4.184334               | -0.200473 | -0.877737 |
| 16               | 1                | 0              | -5.068761               | -2.042949 | 0.469856  |
| 17               | 1                | 0              | -3.816356               | -1.709397 | 1.790084  |
| 18               | 6                | 0              | 2.425357                | -1.426121 | -0.233828 |
| 19               | 6                | 0              | 3.269945                | -1.469413 | 0.968138  |
| 20               | 8                | 0              | 2.624514                | -0.236456 | 0.566765  |
| 21               | 1                | 0              | 2.895970                | -1.384545 | -1.210188 |
| 22               | 1                | 0              | 1.410224                | -1.806350 | -0.225436 |
| 23               | 1                | 0              | 2.835578                | -1.887408 | 1.873712  |
| 24               | 6                | 0              | 4.772516                | -1.502731 | 0.890649  |
| 25               | 1                | 0              | 5.217817                | -0.956448 | 1.727821  |
| 26               | 1                | 0              | 5.128518                | -2.536594 | 0.936337  |
| 27               | 1                | 0              | 5.124000                | -1.056924 | -0.042794 |
| 28               | 6                | 0              | 0.363245                | 3.377394  | -0.895019 |
| 29               | 1                | 0              | 0.848562                | 4.357264  | -0.800115 |
| 30               | 1                | 0              | -0.152852               | 3.313194  | -1.859465 |
| 31               | 6                | 0              | 1.390533                | 2.271398  | -0.876695 |
| 32               | 8                | 0              | 1.388911                | 1.408147  | -1.705041 |
| 33               | 8                | 0              | 2.187447                | 2.331460  | 0.203471  |
| 34               | 1                | 0              | 2.658608                | 1.444512  | 0.230937  |

Rotational constants (GHZ):      0.3665767      0.2862239      0.1865301

Standard basis: 6-311++G(d,p) (5D, 7F)

There are    538 symmetry adapted cartesian basis functions of A    symmetry.



There are 519 symmetry adapted basis functions of A symmetry.  
 519 basis functions, 823 primitive gaussians, 538 cartesian basis functions  
 78 alpha electrons 78 beta electrons  
 nuclear repulsion energy 1633.9445801731 Hartrees.

NAtoms= 34 NActive= 34 NUniq= 34 SFac= 1.00D+00 NATFMM= 60 NAOKFM=F  
 Big=F

Integral buffers will be 131072 words long.

Raffenetti 2 integral format.

Two-electron integral symmetry is turned on.

One-electron integrals computed using PRISM.

NBasis= 519 RedAO= T EigKep= 2.69D-06 NBF= 519

NBsUse= 519 1.00D-06 EigRej= -1.00D+00 NBFU= 519

Initial guess from the checkpoint file: "./coohpo.chk"

B after Tr= 0.000000 0.000000 0.000000

Rot= 0.996578 -0.046056 0.023200 -0.064592 Ang= -9.48 deg.

ExpMin= 3.50D-02 ExpMax= 4.40D+05 ExpMxC= 1.51D+04 IAcc=3 IRadAn= 5 AccDes=  
 0.00D+00

Harris functional with IExCor= 402 and IRadAn= 5 diagonalized for initial guess.

HarFok: IExCor= 402 AccDes= 0.00D+00 IRadAn= 5 IDoV= 1 UseB2=F ITyADJ=14

ICtDFT= 3500011 ScaDFX= 1.000000 1.000000 1.000000 1.000000

FoFCou: FMM=F IPFlag= 0 FMFlag= 100000 FMFlg1= 0

NFxFlg= 0 DoJE=T BraDBF=F KetDBF=T FulRan=T

wScrn= 0.000000 ICntrl= 500 IOpCl= 0 I1Cent= 200000004 NGrid=

0

NMat0= 1 NMatS0= 1 NMatT0= 0 NMatD0= 1 NMtDS0= 0

NMtDT0= 0

Petite list used in FoFCou.

Requested convergence on RMS density matrix=1.00D-08 within 128 cycles.

Requested convergence on MAX density matrix=1.00D-06.

Requested convergence on energy=1.00D-06.

No special actions if energy rises.

SCF Done: E(RB3LYP) = -3338.88086252 A.U. after 15 cycles

NFock= 15 Conv=0.15D-08 -V/T= 2.0018

Calling FoFJK, ICntrl= 2127 FMM=F ISym2X=0 I1Cent= 0 IOpClX= 0 NMat=1 NMatS=1

NMatT=0.

\*\*\*\*\* Axes restored to original set \*\*\*\*\*

| Center<br>Number | Atomic<br>Number | Forces (Hartrees/Bohr) |              |              |
|------------------|------------------|------------------------|--------------|--------------|
|                  |                  | X                      | Y            | Z            |
| 1                | 6                | -0.000281692           | 0.001549930  | 0.004163428  |
| 2                | 6                | -0.001999995           | 0.002395943  | 0.001908772  |
| 3                | 7                | -0.000584563           | -0.000912278 | -0.001422735 |
| 4                | 6                | 0.003816740            | -0.001505367 | -0.001237123 |

|    |    |              |              |              |
|----|----|--------------|--------------|--------------|
| 5  | 7  | -0.002571440 | -0.004100786 | -0.002651601 |
| 6  | 6  | 0.001211942  | 0.004037302  | 0.002810751  |
| 7  | 1  | 0.000695252  | -0.000910834 | -0.001363403 |
| 8  | 1  | 0.002153580  | -0.001523819 | -0.002181281 |
| 9  | 1  | 0.000005575  | -0.001360288 | 0.000384341  |
| 10 | 1  | 0.000699800  | 0.001459419  | -0.000971653 |
| 11 | 35 | -0.015975594 | -0.007827192 | -0.000044348 |
| 12 | 1  | -0.001364048 | 0.000579184  | -0.000381459 |
| 13 | 6  | 0.000652749  | 0.001700616  | 0.000276139  |
| 14 | 6  | 0.000338703  | -0.001274930 | 0.000795264  |
| 15 | 1  | -0.000716677 | 0.000638838  | -0.001118185 |
| 16 | 1  | -0.000283913 | 0.000105020  | 0.000051363  |
| 17 | 1  | -0.000163002 | -0.000253499 | 0.000369439  |
| 18 | 6  | 0.007365863  | -0.001294448 | 0.001695330  |
| 19 | 6  | 0.002083168  | -0.001054484 | -0.005421507 |
| 20 | 8  | 0.002456886  | 0.007375003  | 0.005546806  |
| 21 | 1  | 0.002475284  | 0.000859697  | -0.000931832 |
| 22 | 1  | 0.002443076  | 0.000251849  | 0.000261375  |
| 23 | 1  | -0.000546184 | -0.000482657 | 0.000109003  |
| 24 | 6  | -0.000177686 | 0.001757014  | 0.001321066  |
| 25 | 1  | 0.000868584  | 0.000092892  | 0.000058225  |
| 26 | 1  | -0.000252579 | -0.000075355 | -0.000024448 |
| 27 | 1  | -0.000189737 | -0.000145892 | 0.000148950  |
| 28 | 6  | -0.006094118 | 0.006165513  | -0.002097553 |
| 29 | 1  | 0.000190518  | -0.002533524 | -0.002647137 |
| 30 | 1  | 0.000311714  | 0.002730997  | 0.003402880  |
| 31 | 6  | -0.008849877 | 0.007086835  | 0.007185562  |
| 32 | 8  | 0.009280913  | -0.008511054 | -0.006941240 |
| 33 | 8  | 0.007677452  | -0.012016919 | -0.004613847 |
| 34 | 1  | -0.004676693 | 0.006997271  | 0.003560658  |

-----  
Cartesian Forces: Max 0.015975594 RMS 0.003797136

GradGradGradGradGradGradGradGradGradGradGradGradGradGradGradGradGradGradGrad

Berny optimization.

Using GEDIIS/GDIIS optimizer.

FormGI is forming the generalized inverse of G from B-inverse, IUseBI=4.

GSVD: received Info= 1 from GESDD.

Internal Forces: Max 0.097556897 RMS 0.018789897

Search for a local minimum.

Step number 3 out of a maximum of 175

All quantities printed in internal units (Hartrees-Bohrs-Radians)

Mixed Optimization -- RFO/linear search

Update second derivatives using D2CorX and points 2 3

DE= -2.27D-03 DEPred=-9.53D-03 R= 2.38D-01

Trust test= 2.38D-01 RLast= 7.17D-01 DXMaxT set to 5.05D-01

ITU= 0 1 0

Use linear search instead of GDIIIS.

|                 |         |         |         |         |         |
|-----------------|---------|---------|---------|---------|---------|
| Eigenvalues --- | 0.00207 | 0.00231 | 0.00304 | 0.00447 | 0.00698 |
| Eigenvalues --- | 0.00758 | 0.00937 | 0.01302 | 0.01397 | 0.01428 |
| Eigenvalues --- | 0.01524 | 0.01587 | 0.01811 | 0.01914 | 0.02100 |
| Eigenvalues --- | 0.02258 | 0.02265 | 0.02348 | 0.02464 | 0.02507 |
| Eigenvalues --- | 0.03014 | 0.03045 | 0.03063 | 0.03320 | 0.03777 |
| Eigenvalues --- | 0.03844 | 0.04969 | 0.05115 | 0.05339 | 0.05761 |
| Eigenvalues --- | 0.05871 | 0.06744 | 0.07596 | 0.09265 | 0.09982 |
| Eigenvalues --- | 0.11970 | 0.12497 | 0.12589 | 0.13409 | 0.13623 |
| Eigenvalues --- | 0.15454 | 0.15768 | 0.15986 | 0.15992 | 0.15999 |
| Eigenvalues --- | 0.16000 | 0.16000 | 0.16000 | 0.16000 | 0.16069 |
| Eigenvalues --- | 0.16868 | 0.18521 | 0.20051 | 0.22003 | 0.22346 |
| Eigenvalues --- | 0.22883 | 0.23433 | 0.23926 | 0.24837 | 0.24996 |
| Eigenvalues --- | 0.25000 | 0.26311 | 0.28386 | 0.29120 | 0.29659 |
| Eigenvalues --- | 0.31847 | 0.32543 | 0.34497 | 0.34561 | 0.34610 |
| Eigenvalues --- | 0.34764 | 0.34884 | 0.34890 | 0.34959 | 0.35006 |
| Eigenvalues --- | 0.35072 | 0.35531 | 0.35675 | 0.35763 | 0.36484 |
| Eigenvalues --- | 0.36545 | 0.36651 | 0.36895 | 0.37255 | 0.37714 |
| Eigenvalues --- | 0.41070 | 0.42302 | 0.45522 | 0.48976 | 0.52358 |
| Eigenvalues --- | 0.53359 | 0.55363 | 0.56069 | 0.60279 | 0.87024 |
| Eigenvalues --- | 1.16247 |         |         |         |         |

RFO step: Lambda=-5.50374567D-02 EMin= 2.07086409D-03

Quartic linear search produced a step of -0.34606.

Iteration 1 RMS(Cart)= 0.33233717 RMS(Int)= 0.01694148

Iteration 2 RMS(Cart)= 0.03506752 RMS(Int)= 0.00079470

Iteration 3 RMS(Cart)= 0.00108939 RMS(Int)= 0.00051587

Iteration 4 RMS(Cart)= 0.00000146 RMS(Int)= 0.00051587

Iteration 5 RMS(Cart)= 0.00000000 RMS(Int)= 0.00051587

| Variable | Old X   | -DE/DX   | Delta X<br>(Linear) | Delta X<br>(Quad) | Delta X<br>(Total) | New X   |
|----------|---------|----------|---------------------|-------------------|--------------------|---------|
| R1       | 2.57122 | 0.02001  | 0.00034             | 0.00463           | 0.00479            | 2.57601 |
| R2       | 2.61551 | 0.00836  | 0.00211             | -0.00314          | -0.00087           | 2.61465 |
| R3       | 2.03312 | -0.00020 | -0.00032            | 0.00142           | 0.00110            | 2.03423 |
| R4       | 2.61605 | -0.00795 | 0.00117             | -0.00549          | -0.00455           | 2.61149 |
| R5       | 2.02610 | 0.00347  | 0.00228             | -0.00874          | -0.00646           | 2.01964 |
| R6       | 2.53797 | -0.01081 | 0.00056             | -0.00977          | -0.00920           | 2.52877 |
| R7       | 2.69620 | -0.00058 | 0.00088             | -0.00348          | -0.00260           | 2.69360 |
| R8       | 2.52713 | 0.00064  | 0.00027             | -0.00169          | -0.00116           | 2.52596 |
| R9       | 2.02974 | 0.00135  | 0.00175             | -0.00280          | -0.00105           | 2.02869 |
| R10      | 2.77485 | 0.01364  | -0.00004            | 0.00465           | 0.00461            | 2.77945 |
| R11      | 2.06413 | -0.00079 | -0.00073            | 0.00101           | 0.00028            | 2.06441 |

|     |         |          |          |          |          |         |
|-----|---------|----------|----------|----------|----------|---------|
| R12 | 2.05966 | 0.00023  | 0.00040  | -0.00043 | -0.00003 | 2.05962 |
| R13 | 2.90534 | 0.00828  | 0.00627  | -0.02693 | -0.02066 | 2.88467 |
| R14 | 5.49323 | -0.00153 | 0.07973  | -0.29567 | -0.21594 | 5.27729 |
| R15 | 2.49905 | 0.00183  | 0.00091  | -0.00125 | -0.00034 | 2.49871 |
| R16 | 2.04025 | 0.00130  | 0.00184  | -0.00370 | -0.00187 | 2.03838 |
| R17 | 2.04255 | 0.00010  | 0.00041  | -0.00152 | -0.00111 | 2.04144 |
| R18 | 2.04415 | 0.00026  | 0.00048  | -0.00099 | -0.00051 | 2.04364 |
| R19 | 2.77727 | -0.00310 | 0.00121  | -0.00829 | -0.00713 | 2.77015 |
| R20 | 2.73581 | 0.00131  | 0.00164  | -0.00390 | -0.00224 | 2.73357 |
| R21 | 2.04971 | 0.00180  | 0.00045  | 0.00145  | 0.00190  | 2.05161 |
| R22 | 2.04853 | -0.00221 | 0.00049  | -0.00038 | 0.00011  | 2.04864 |
| R23 | 2.73708 | 0.00085  | -0.00091 | 0.00368  | 0.00279  | 2.73987 |
| R24 | 2.05577 | 0.00041  | 0.00060  | -0.00207 | -0.00147 | 2.05430 |
| R25 | 2.84392 | 0.00031  | 0.00007  | -0.00004 | 0.00003  | 2.84395 |
| R26 | 3.23998 | -0.00326 | -0.04429 | 0.14608  | 0.10178  | 3.34177 |
| R27 | 2.06800 | 0.00039  | -0.00067 | 0.00218  | 0.00152  | 2.06951 |
| R28 | 2.06810 | -0.00006 | -0.00035 | 0.00076  | 0.00040  | 2.06851 |
| R29 | 2.06456 | -0.00023 | -0.00054 | 0.00136  | 0.00082  | 2.06539 |
| R30 | 2.07413 | -0.00204 | -0.00732 | 0.02031  | 0.01298  | 2.08711 |
| R31 | 2.07064 | -0.00382 | -0.00590 | 0.01226  | 0.00637  | 2.07701 |
| R32 | 2.85272 | 0.01549  | 0.00379  | 0.01344  | 0.01724  | 2.86996 |
| R33 | 2.26086 | 0.01184  | 0.00860  | -0.02071 | -0.01211 | 2.24875 |
| R34 | 2.53916 | 0.01341  | 0.00402  | -0.00676 | -0.00275 | 2.53641 |
| R35 | 1.89861 | -0.00273 | -0.00721 | 0.01512  | 0.00791  | 1.90652 |
| A1  | 1.87616 | -0.00780 | 0.00066  | -0.01198 | -0.01116 | 1.86500 |
| A2  | 2.27958 | 0.00416  | -0.00033 | 0.00571  | 0.00529  | 2.28487 |
| A3  | 2.12695 | 0.00389  | -0.00018 | 0.00492  | 0.00460  | 2.13155 |
| A4  | 1.86353 | 0.00239  | 0.00009  | 0.00415  | 0.00399  | 1.86751 |
| A5  | 2.29060 | 0.01545  | 0.00291  | 0.00326  | 0.00625  | 2.29685 |
| A6  | 2.12866 | -0.01789 | -0.00287 | -0.00815 | -0.01092 | 2.11774 |
| A7  | 1.89683 | -0.00012 | -0.00100 | 0.00152  | 0.00047  | 1.89730 |
| A8  | 2.20875 | 0.00122  | 0.00398  | -0.01030 | -0.00629 | 2.20246 |
| A9  | 2.17373 | -0.00118 | -0.00341 | 0.00964  | 0.00625  | 2.17999 |
| A10 | 1.89519 | 0.01002  | 0.00176  | -0.00381 | -0.00198 | 1.89321 |
| A11 | 2.19163 | -0.00492 | -0.00175 | 0.00409  | 0.00179  | 2.19342 |
| A12 | 2.19608 | -0.00484 | -0.00025 | 0.00102  | 0.00021  | 2.19629 |
| A13 | 1.89246 | -0.00460 | -0.00196 | 0.00860  | 0.00627  | 1.89873 |
| A14 | 2.18739 | 0.05422  | 0.01225  | -0.00627 | 0.00469  | 2.19208 |
| A15 | 2.20333 | -0.04959 | -0.01111 | -0.00204 | -0.01420 | 2.18914 |
| A16 | 1.88689 | -0.04356 | -0.00941 | -0.01192 | -0.02159 | 1.86529 |
| A17 | 1.83660 | 0.00062  | 0.01141  | -0.00787 | 0.00379  | 1.84040 |
| A18 | 2.01851 | 0.06806  | 0.01392  | -0.01221 | 0.00185  | 2.02037 |
| A19 | 1.87738 | 0.00823  | -0.00072 | 0.00101  | 0.00034  | 1.87772 |
| A20 | 1.91751 | -0.00979 | -0.01456 | 0.04318  | 0.02862  | 1.94613 |

|     |          |          |          |          |          |          |
|-----|----------|----------|----------|----------|----------|----------|
| A21 | 1.92075  | -0.02635 | -0.00126 | -0.01375 | -0.01441 | 1.90634  |
| A22 | 1.61645  | 0.01798  | 0.00179  | -0.00221 | -0.00042 | 1.61603  |
| A23 | 2.14951  | 0.00073  | -0.00015 | 0.00086  | 0.00071  | 2.15021  |
| A24 | 1.98184  | -0.00075 | -0.00482 | 0.01473  | 0.00990  | 1.99174  |
| A25 | 2.15065  | 0.00004  | 0.00515  | -0.01632 | -0.01117 | 2.13948  |
| A26 | 2.08729  | -0.00029 | -0.00013 | -0.00103 | -0.00120 | 2.08609  |
| A27 | 2.14174  | 0.00055  | 0.00044  | 0.00062  | 0.00102  | 2.14276  |
| A28 | 2.05300  | -0.00025 | 0.00001  | -0.00110 | -0.00113 | 2.05187  |
| A29 | 2.08057  | -0.00539 | -0.00191 | -0.00315 | -0.00501 | 2.07555  |
| A30 | 2.11939  | 0.00380  | 0.00397  | -0.01076 | -0.00690 | 2.11249  |
| A31 | 1.98953  | -0.00091 | -0.00064 | 0.00167  | 0.00104  | 1.99057  |
| A32 | 1.99629  | 0.00029  | -0.00072 | 0.00341  | 0.00267  | 1.99896  |
| A33 | 2.01165  | 0.00125  | -0.00071 | 0.00720  | 0.00645  | 2.01810  |
| A34 | 2.05179  | 0.00171  | 0.00230  | -0.00847 | -0.00615 | 2.04564  |
| A35 | 2.13213  | -0.00174 | -0.00070 | 0.00320  | 0.00247  | 2.13460  |
| A36 | 1.96041  | -0.00059 | -0.00007 | -0.00102 | -0.00107 | 1.95934  |
| A37 | 2.03699  | 0.00005  | -0.00174 | 0.00577  | 0.00400  | 2.04099  |
| A38 | 2.01863  | -0.00006 | -0.00058 | 0.00193  | 0.00135  | 2.01998  |
| A39 | 2.34631  | 0.00080  | 0.00522  | -0.01981 | -0.01459 | 2.33172  |
| A40 | 2.64668  | -0.00473 | -0.00549 | 0.00896  | 0.00324  | 2.64992  |
| A41 | 1.93460  | 0.00130  | -0.00106 | 0.00661  | 0.00554  | 1.94014  |
| A42 | 1.92149  | -0.00057 | 0.00020  | -0.00266 | -0.00246 | 1.91903  |
| A43 | 1.93496  | -0.00036 | -0.00083 | 0.00255  | 0.00171  | 1.93667  |
| A44 | 1.88313  | -0.00029 | 0.00061  | -0.00258 | -0.00197 | 1.88115  |
| A45 | 1.89548  | -0.00030 | 0.00030  | -0.00145 | -0.00116 | 1.89432  |
| A46 | 1.89283  | 0.00020  | 0.00086  | -0.00277 | -0.00191 | 1.89092  |
| A47 | 1.83163  | -0.01053 | 0.01022  | -0.04925 | -0.03890 | 1.79273  |
| A48 | 1.95026  | -0.01893 | -0.00495 | 0.00836  | 0.00243  | 1.95269  |
| A49 | 1.97457  | 0.05553  | 0.00045  | 0.03497  | 0.03506  | 2.00964  |
| A50 | 1.91418  | 0.00545  | 0.00005  | -0.00813 | -0.00823 | 1.90595  |
| A51 | 1.93063  | -0.03734 | -0.01343 | 0.00051  | -0.01244 | 1.91819  |
| A52 | 1.86323  | 0.00399  | 0.00715  | 0.01215  | 0.01864  | 1.88187  |
| A53 | 2.11684  | 0.03352  | 0.02185  | -0.03129 | -0.01226 | 2.10457  |
| A54 | 1.96125  | -0.04741 | -0.00693 | -0.00231 | -0.01210 | 1.94915  |
| A55 | 2.20142  | 0.01641  | -0.01445 | 0.04434  | 0.02696  | 2.22838  |
| A56 | 1.83449  | 0.09756  | 0.00666  | 0.12688  | 0.13355  | 1.96804  |
| A57 | 2.60911  | 0.08163  | -0.01509 | 0.12277  | 0.10768  | 2.71679  |
| D1  | -0.02498 | 0.00453  | 0.01895  | -0.06490 | -0.04601 | -0.07099 |
| D2  | -3.13589 | 0.00697  | 0.01075  | -0.03684 | -0.02581 | 3.12149  |
| D3  | -3.13254 | -0.00446 | 0.00308  | -0.01855 | -0.01589 | 3.13476  |
| D4  | 0.03973  | -0.00202 | -0.00512 | 0.00951  | 0.00432  | 0.04405  |
| D5  | 0.00772  | -0.00946 | -0.02153 | 0.06061  | 0.03910  | 0.04682  |
| D6  | -3.13108 | -0.01712 | 0.00233  | -0.04758 | -0.04655 | 3.10556  |
| D7  | 3.11890  | -0.00139 | -0.00734 | 0.01923  | 0.01227  | 3.13117  |

|     |          |          |          |          |          |          |
|-----|----------|----------|----------|----------|----------|----------|
| D8  | -0.01990 | -0.00905 | 0.01652  | -0.08895 | -0.07337 | -0.09327 |
| D9  | 0.03362  | 0.00195  | -0.00984 | 0.04711  | 0.03749  | 0.07112  |
| D10 | 3.08374  | 0.00082  | -0.01489 | 0.05791  | 0.04310  | 3.12684  |
| D11 | -3.13516 | 0.00047  | -0.00255 | 0.02246  | 0.02014  | -3.11502 |
| D12 | -0.08505 | -0.00067 | -0.00760 | 0.03326  | 0.02575  | -0.05930 |
| D13 | -1.75120 | -0.04897 | 0.01317  | -0.25133 | -0.23824 | -1.98944 |
| D14 | 1.42502  | -0.04663 | 0.00391  | -0.21988 | -0.21589 | 1.20913  |
| D15 | -0.02923 | -0.00802 | -0.00361 | -0.00950 | -0.01311 | -0.04233 |
| D16 | 3.08790  | 0.00340  | -0.01087 | 0.04619  | 0.03495  | 3.12285  |
| D17 | -3.08160 | -0.00706 | 0.00077  | -0.01876 | -0.01782 | -3.09942 |
| D18 | 0.03552  | 0.00436  | -0.00650 | 0.03694  | 0.03024  | 0.06576  |
| D19 | 0.52423  | 0.00028  | 0.01416  | -0.04858 | -0.03435 | 0.48988  |
| D20 | -2.56628 | 0.00008  | 0.00955  | -0.03272 | -0.02307 | -2.58935 |
| D21 | -2.72263 | -0.00095 | 0.00859  | -0.03679 | -0.02831 | -2.75093 |
| D22 | 0.47005  | -0.00115 | 0.00398  | -0.02093 | -0.01703 | 0.45302  |
| D23 | 0.01340  | 0.01070  | 0.01546  | -0.03138 | -0.01610 | -0.00269 |
| D24 | -3.13101 | 0.01866  | -0.00747 | 0.07806  | 0.06941  | -3.06160 |
| D25 | -3.10364 | -0.00076 | 0.02280  | -0.08730 | -0.06428 | 3.11526  |
| D26 | 0.03513  | 0.00721  | -0.00014 | 0.02213  | 0.02122  | 0.05635  |
| D27 | -2.61386 | -0.00210 | -0.04282 | 0.11780  | 0.07479  | -2.53907 |
| D28 | -0.61167 | -0.01200 | -0.04256 | 0.10977  | 0.06736  | -0.54431 |
| D29 | 1.51176  | -0.00306 | -0.02577 | 0.07905  | 0.05299  | 1.56475  |
| D30 | 0.53102  | -0.01123 | -0.01535 | -0.00947 | -0.02480 | 0.50622  |
| D31 | 2.53320  | -0.02113 | -0.01509 | -0.01750 | -0.03223 | 2.50098  |
| D32 | -1.62655 | -0.01219 | 0.00170  | -0.04823 | -0.04659 | -1.67314 |
| D33 | -2.97490 | -0.02695 | -0.04637 | 0.06661  | 0.02049  | -2.95441 |
| D34 | 1.23501  | -0.01723 | -0.04994 | 0.10160  | 0.05173  | 1.28674  |
| D35 | -0.86851 | -0.04828 | -0.05592 | 0.05468  | -0.00135 | -0.86986 |
| D36 | 1.16684  | -0.01126 | -0.03209 | 0.05684  | 0.02483  | 1.19167  |
| D37 | -0.90643 | -0.00154 | -0.03565 | 0.09183  | 0.05607  | -0.85036 |
| D38 | -3.00995 | -0.03259 | -0.04163 | 0.04491  | 0.00299  | -3.00696 |
| D39 | -0.89719 | 0.00060  | -0.02200 | 0.03767  | 0.01590  | -0.88128 |
| D40 | -2.97045 | 0.01032  | -0.02556 | 0.07266  | 0.04714  | -2.92331 |
| D41 | 1.20921  | -0.02073 | -0.03154 | 0.02574  | -0.00594 | 1.20327  |
| D42 | -3.07495 | -0.00036 | -0.00309 | 0.00935  | 0.00624  | -3.06871 |
| D43 | 0.01384  | -0.00001 | 0.00691  | -0.02516 | -0.01827 | -0.00443 |
| D44 | 0.01066  | -0.00017 | 0.00173  | -0.00708 | -0.00533 | 0.00532  |
| D45 | 3.09945  | 0.00018  | 0.01173  | -0.04159 | -0.02985 | 3.06960  |
| D46 | -2.73757 | 0.00065  | -0.00126 | 0.00812  | 0.00683  | -2.73074 |
| D47 | -0.03509 | 0.00044  | 0.00128  | -0.00014 | 0.00112  | -0.03397 |
| D48 | -0.01219 | -0.00009 | 0.00235  | -0.00876 | -0.00642 | -0.01862 |
| D49 | 2.69028  | -0.00030 | 0.00489  | -0.01702 | -0.01213 | 2.67815  |
| D50 | 0.68022  | -0.00269 | -0.00271 | 0.00200  | -0.00062 | 0.67960  |
| D51 | -1.68645 | -0.00395 | -0.00013 | -0.01477 | -0.01483 | -1.70128 |

|     |          |          |          |          |          |          |
|-----|----------|----------|----------|----------|----------|----------|
| D52 | 2.07809  | 0.00333  | -0.01049 | 0.05382  | 0.04337  | 2.12146  |
| D53 | -0.31194 | 0.00406  | -0.00753 | 0.04536  | 0.03787  | -0.27406 |
| D54 | 2.54705  | 0.00025  | -0.00121 | 0.00520  | 0.00400  | 2.55104  |
| D55 | -1.65395 | 0.00035  | -0.00100 | 0.00446  | 0.00346  | -1.65049 |
| D56 | 0.44056  | -0.00001 | -0.00033 | 0.00091  | 0.00057  | 0.44113  |
| D57 | 1.33927  | -0.00051 | -0.00091 | 0.00222  | 0.00131  | 1.34058  |
| D58 | -2.86173 | -0.00041 | -0.00070 | 0.00148  | 0.00078  | -2.86095 |
| D59 | -0.76722 | -0.00077 | -0.00003 | -0.00208 | -0.00211 | -0.76933 |
| D60 | -1.02594 | 0.00046  | 0.00195  | -0.00535 | -0.00340 | -1.02933 |
| D61 | 1.05625  | 0.00056  | 0.00217  | -0.00609 | -0.00393 | 1.05232  |
| D62 | -3.13242 | 0.00021  | 0.00284  | -0.00965 | -0.00682 | -3.13924 |
| D63 | 1.68873  | 0.01939  | 0.03973  | -0.06854 | -0.02886 | 1.65987  |
| D64 | -2.62674 | 0.00765  | 0.04305  | -0.10968 | -0.06658 | -2.69332 |
| D65 | 1.95254  | 0.01742  | -0.05274 | 0.26632  | 0.21327  | 2.16581  |
| D66 | -1.10237 | -0.01276 | -0.05814 | 0.13765  | 0.08038  | -1.02199 |
| D67 | -2.28145 | 0.01468  | -0.04863 | 0.22695  | 0.17776  | -2.10369 |
| D68 | 0.94683  | -0.01550 | -0.05403 | 0.09827  | 0.04487  | 0.99170  |
| D69 | -0.19979 | 0.00288  | -0.05187 | 0.22473  | 0.17196  | -0.02783 |
| D70 | 3.02849  | -0.02729 | -0.05727 | 0.09605  | 0.03907  | 3.06755  |
| D71 | 2.90087  | 0.05759  | 0.06351  | -0.02047 | 0.04456  | 2.94543  |
| D72 | -0.14899 | 0.02488  | 0.05603  | -0.15195 | -0.09744 | -0.24642 |
| D73 | -1.31772 | 0.00449  | -0.00018 | 0.00148  | 0.00130  | -1.31642 |

| Item                 | Value    | Threshold | Converged? |
|----------------------|----------|-----------|------------|
| Maximum Force        | 0.097557 | 0.000450  | NO         |
| RMS Force            | 0.018790 | 0.000300  | NO         |
| Maximum Displacement | 2.053764 | 0.001800  | NO         |
| RMS Displacement     | 0.348720 | 0.001200  | NO         |

Predicted change in Energy=-3.247864D-02

GradGradGradGradGradGradGradGradGradGradGradGradGradGradGradGradGradGrad

Input orientation:

| Center Number | Atomic Number | Atomic Type | Coordinates (Angstroms) |           |           |
|---------------|---------------|-------------|-------------------------|-----------|-----------|
|               |               |             | X                       | Y         | Z         |
| 1             | 6             | 0           | -0.756236               | 1.359494  | 1.339199  |
| 2             | 6             | 0           | -1.535134               | 0.255690  | 1.521284  |
| 3             | 7             | 0           | -2.655920               | 0.416885  | 0.729058  |
| 4             | 6             | 0           | -2.519851               | 1.541487  | 0.016701  |
| 5             | 7             | 0           | -1.372347               | 2.129671  | 0.368831  |
| 6             | 6             | 0           | -0.900952               | 3.436611  | -0.113883 |
| 7             | 1             | 0           | 0.191757                | 1.632277  | 1.770100  |
| 8             | 1             | 0           | -1.422165               | -0.595305 | 2.157887  |
| 9             | 1             | 0           | -1.789567               | 4.030383  | -0.340203 |

|    |    |   |           |           |           |
|----|----|---|-----------|-----------|-----------|
| 10 | 1  | 0 | -0.404269 | 3.899139  | 0.738918  |
| 11 | 35 | 0 | -1.100346 | -2.330326 | -0.006571 |
| 12 | 1  | 0 | -3.225576 | 1.918409  | -0.699092 |
| 13 | 6  | 0 | -3.732622 | -0.507642 | 0.595979  |
| 14 | 6  | 0 | -4.084844 | -1.351170 | 1.551371  |
| 15 | 1  | 0 | -4.199695 | -0.503286 | -0.376310 |
| 16 | 1  | 0 | -4.866334 | -2.072809 | 1.362894  |
| 17 | 1  | 0 | -3.575878 | -1.402088 | 2.504204  |
| 18 | 6  | 0 | 3.437306  | -0.822290 | 0.176893  |
| 19 | 6  | 0 | 4.200358  | -0.403861 | 1.356522  |
| 20 | 8  | 0 | 3.188391  | 0.464975  | 0.788023  |
| 21 | 1  | 0 | 3.907414  | -0.764809 | -0.800021 |
| 22 | 1  | 0 | 2.617996  | -1.527063 | 0.262267  |
| 23 | 1  | 0 | 3.897779  | -0.815744 | 2.315982  |
| 24 | 6  | 0 | 5.628321  | 0.062773  | 1.266743  |
| 25 | 1  | 0 | 5.837638  | 0.840146  | 2.009178  |
| 26 | 1  | 0 | 6.307477  | -0.774012 | 1.458329  |
| 27 | 1  | 0 | 5.847216  | 0.462934  | 0.273511  |
| 28 | 6  | 0 | 0.062891  | 3.398556  | -1.297003 |
| 29 | 1  | 0 | 0.425702  | 4.440437  | -1.348612 |
| 30 | 1  | 0 | -0.450665 | 3.147664  | -2.235802 |
| 31 | 6  | 0 | 1.237919  | 2.448967  | -1.141782 |
| 32 | 8  | 0 | 1.441788  | 1.600636  | -1.951006 |
| 33 | 8  | 0 | 1.976621  | 2.746682  | -0.061403 |
| 34 | 1  | 0 | 2.648900  | 2.028300  | 0.161801  |

-----  
Distance matrix (angstroms):

|    |    | 1        | 2        | 3        | 4        | 5        |
|----|----|----------|----------|----------|----------|----------|
| 1  | C  | 0.000000 |          |          |          |          |
| 2  | C  | 1.363166 | 0.000000 |          |          |          |
| 3  | N  | 2.206713 | 1.381944 | 0.000000 |          |          |
| 4  | C  | 2.211890 | 2.210590 | 1.338169 | 0.000000 |          |
| 5  | N  | 1.383611 | 2.206004 | 2.170475 | 1.336683 | 0.000000 |
| 6  | C  | 2.539056 | 3.632384 | 3.592939 | 2.495873 | 1.470822 |
| 7  | H  | 1.076466 | 2.222399 | 3.266530 | 3.230398 | 2.158096 |
| 8  | H  | 2.221475 | 1.068746 | 2.142016 | 3.217992 | 3.260169 |
| 9  | H  | 3.319911 | 4.216417 | 3.866685 | 2.618262 | 2.071112 |
| 10 | H  | 2.633251 | 3.894313 | 4.146821 | 3.248970 | 2.050648 |
| 11 | Br | 3.942624 | 3.034940 | 3.241625 | 4.123891 | 4.484026 |
| 12 | H  | 3.250331 | 3.248429 | 2.149114 | 1.073535 | 2.149313 |
| 13 | C  | 3.591301 | 2.503561 | 1.425393 | 2.450573 | 3.546536 |
| 14 | C  | 4.297946 | 3.013954 | 2.417444 | 3.629308 | 4.568620 |
| 15 | H  | 4.274380 | 3.358093 | 2.109927 | 2.675338 | 3.934666 |
| 16 | H  | 5.354827 | 4.067418 | 3.389138 | 4.514572 | 5.554903 |



|    |    |          |          |          |          |          |
|----|----|----------|----------|----------|----------|----------|
| 17 | H  | 4.115088 | 2.806955 | 2.702985 | 3.995935 | 4.678535 |
| 18 | C  | 4.867950 | 5.262564 | 6.242423 | 6.410992 | 5.646563 |
| 19 | C  | 5.260946 | 5.775640 | 6.933678 | 7.123251 | 6.200755 |
| 20 | O  | 4.082161 | 4.784679 | 5.844806 | 5.859849 | 4.873116 |
| 21 | H  | 5.553248 | 6.004266 | 6.841918 | 6.877192 | 6.133523 |
| 22 | H  | 4.569184 | 4.691676 | 5.640126 | 5.989472 | 5.413492 |
| 23 | H  | 5.229305 | 5.594288 | 6.854829 | 7.213127 | 6.343587 |
| 24 | C  | 6.515314 | 7.170572 | 8.309222 | 8.375077 | 7.354432 |
| 25 | H  | 6.648141 | 7.411976 | 8.599906 | 8.620294 | 7.505831 |
| 26 | H  | 7.379843 | 7.910170 | 9.071525 | 9.239131 | 8.282395 |
| 27 | H  | 6.748711 | 7.489926 | 8.515455 | 8.440204 | 7.410074 |
| 28 | C  | 3.431953 | 4.513760 | 4.515221 | 3.441668 | 2.538696 |
| 29 | H  | 4.255997 | 5.439971 | 5.477415 | 4.352501 | 3.394440 |
| 30 | H  | 4.008934 | 4.863669 | 4.594637 | 3.454722 | 2.944472 |
| 31 | C  | 3.364353 | 4.426308 | 4.774032 | 4.035645 | 3.032719 |
| 32 | O  | 3.964203 | 4.767362 | 5.037382 | 4.423794 | 3.685224 |
| 33 | O  | 3.369642 | 4.587195 | 5.245305 | 4.655841 | 3.432403 |
| 34 | H  | 3.664495 | 4.743046 | 5.573111 | 5.193653 | 4.027849 |
|    |    | 6        | 7        | 8        | 9        | 10       |
| 6  | C  | 0.000000 |          |          |          |          |
| 7  | H  | 2.828255 | 0.000000 |          |          |          |
| 8  | H  | 4.657140 | 2.777993 | 0.000000 |          |          |
| 9  | H  | 1.092439 | 3.758981 | 5.269955 | 0.000000 |          |
| 10 | H  | 1.089906 | 2.560712 | 4.821785 | 1.760903 | 0.000000 |
| 11 | Br | 5.771382 | 4.530819 | 2.792624 | 6.406634 | 6.312410 |
| 12 | H  | 2.837479 | 4.225748 | 4.211101 | 2.579023 | 3.735095 |
| 13 | C  | 4.907076 | 4.621533 | 2.790243 | 5.024497 | 5.524318 |
| 14 | C  | 5.986074 | 5.219014 | 2.833558 | 6.148777 | 6.463161 |
| 15 | H  | 5.145227 | 5.334094 | 3.761023 | 5.134605 | 5.918643 |
| 16 | H  | 6.946858 | 6.283134 | 3.831100 | 7.043862 | 7.480878 |
| 17 | H  | 6.117403 | 4.892990 | 2.325793 | 6.386963 | 6.424822 |
| 18 | C  | 6.086318 | 4.369988 | 5.252649 | 7.150945 | 6.112729 |
| 19 | C  | 6.552456 | 4.515062 | 5.682570 | 7.643337 | 6.332443 |
| 20 | O  | 5.134859 | 3.362570 | 4.925236 | 6.226162 | 4.970220 |
| 21 | H  | 6.422079 | 5.114455 | 6.097735 | 7.460623 | 6.535392 |
| 22 | H  | 6.096109 | 4.259298 | 4.558997 | 7.118623 | 6.229362 |
| 23 | H  | 6.856718 | 4.474974 | 5.326856 | 7.930080 | 6.574562 |
| 24 | C  | 7.477989 | 5.680927 | 7.136986 | 8.564419 | 7.168573 |
| 25 | H  | 7.527125 | 5.706189 | 7.401849 | 8.594851 | 7.066286 |
| 26 | H  | 8.494860 | 6.579472 | 7.763291 | 9.585356 | 8.209958 |
| 27 | H  | 7.384484 | 5.965849 | 7.583842 | 8.451260 | 7.148788 |
| 28 | C  | 1.526504 | 3.541676 | 5.485671 | 2.178594 | 2.147974 |
| 29 | H  | 2.071770 | 4.203196 | 6.408498 | 2.468289 | 2.310765 |
| 30 | H  | 2.188330 | 4.330861 | 5.853044 | 2.482971 | 3.068522 |

|    |    |           |           |           |           |           |
|----|----|-----------|-----------|-----------|-----------|-----------|
| 31 | C  | 2.570367  | 3.200077  | 5.218377  | 3.508430  | 2.887354  |
| 32 | O  | 3.497751  | 3.925584  | 5.468765  | 4.352013  | 3.990831  |
| 33 | O  | 2.959591  | 2.789631  | 5.257934  | 3.988708  | 2.763568  |
| 34 | H  | 3.828941  | 2.963277  | 5.238439  | 4.894930  | 3.626974  |
|    |    | 11        | 12        | 13        | 14        | 15        |
| 11 | Br | 0.000000  |           |           |           |           |
| 12 | H  | 4.800827  | 0.000000  |           |           |           |
| 13 | C  | 3.257932  | 2.796431  | 0.000000  |           |           |
| 14 | C  | 3.506160  | 4.061165  | 1.322260  | 0.000000  |           |
| 15 | H  | 3.616731  | 2.630152  | 1.078666  | 2.109040  | 0.000000  |
| 16 | H  | 4.015521  | 4.782645  | 2.079233  | 1.080284  | 2.435702  |
| 17 | H  | 3.646077  | 4.627041  | 2.113273  | 1.081448  | 3.081290  |
| 18 | C  | 4.785198  | 7.257601  | 7.189054  | 7.664961  | 7.663652  |
| 19 | C  | 5.802306  | 8.047545  | 7.970029  | 8.341458  | 8.577498  |
| 20 | O  | 5.180575  | 6.742622  | 6.991658  | 7.535318  | 7.541684  |
| 21 | H  | 5.306418  | 7.621640  | 7.770786  | 8.351590  | 8.122385  |
| 22 | H  | 3.813604  | 6.851483  | 6.440570  | 6.827941  | 6.923641  |
| 23 | H  | 5.715721  | 8.204173  | 7.827922  | 8.037013  | 8.539037  |
| 24 | C  | 7.254187  | 9.257396  | 9.402264  | 9.819665  | 9.980478  |
| 25 | H  | 7.889915  | 9.520463  | 9.767474  | 10.171877 | 10.404009 |
| 26 | H  | 7.709986  | 10.138179 | 10.080585 | 10.408750 | 10.669575 |
| 27 | H  | 7.493289  | 9.240126  | 9.634278  | 10.176921 | 10.114162 |
| 28 | C  | 5.986521  | 3.655455  | 5.766081  | 6.919309  | 5.851640  |
| 29 | H  | 7.069168  | 4.484901  | 6.749561  | 7.892884  | 6.839595  |
| 30 | H  | 5.949784  | 3.401864  | 5.670228  | 6.912990  | 5.553590  |
| 31 | C  | 5.440389  | 4.516664  | 6.038843  | 7.072899  | 6.234532  |
| 32 | O  | 5.069096  | 4.842784  | 6.140561  | 7.177984  | 6.223542  |
| 33 | O  | 5.936897  | 5.306179  | 6.604410  | 7.492315  | 6.986296  |
| 34 | H  | 5.751767  | 5.938239  | 6.880650  | 7.661268  | 7.321321  |
|    |    | 16        | 17        | 18        | 19        | 20        |
| 16 | H  | 0.000000  |           |           |           |           |
| 17 | H  | 1.848710  | 0.000000  |           |           |           |
| 18 | C  | 8.480614  | 7.411969  | 0.000000  |           |           |
| 19 | C  | 9.219019  | 7.923602  | 1.465898  | 0.000000  |           |
| 20 | O  | 8.464597  | 7.224025  | 1.446544  | 1.449878  | 0.000000  |
| 21 | H  | 9.130593  | 8.205102  | 1.085665  | 2.206078  | 2.133365  |
| 22 | H  | 7.584485  | 6.588321  | 1.084095  | 2.227744  | 2.137753  |
| 23 | H  | 8.904957  | 7.498985  | 2.188100  | 1.087090  | 2.116160  |
| 24 | C  | 10.710170 | 9.401830  | 2.602242  | 1.504955  | 2.518770  |
| 25 | H  | 11.112065 | 9.689527  | 3.447109  | 2.157360  | 2.941171  |
| 26 | H  | 11.249445 | 9.958365  | 3.143611  | 2.141804  | 3.422440  |
| 27 | H  | 11.063313 | 9.861491  | 2.732912  | 2.153228  | 2.708151  |
| 28 | C  | 7.829952  | 7.122920  | 5.601302  | 6.214355  | 4.766757  |
| 29 | H  | 8.819313  | 8.061757  | 6.252457  | 6.710663  | 5.291687  |

|    |   |          |          |          |          |          |
|----|---|----------|----------|----------|----------|----------|
| 30 | H | 7.726712 | 7.275634 | 6.057883 | 6.866596 | 5.439031 |
| 31 | C | 7.998860 | 7.162156 | 4.156600 | 4.812089 | 3.385958 |
| 32 | O | 8.016766 | 7.351341 | 3.792178 | 4.750522 | 3.441311 |
| 33 | O | 8.490121 | 7.390864 | 3.863670 | 4.108703 | 2.719576 |
| 34 | H | 8.645257 | 7.483467 | 2.957647 | 3.122466 | 1.768386 |
|    |   | 21       | 22       | 23       | 24       | 25       |
| 21 | H | 0.000000 |          |          |          |          |
| 22 | H | 1.836325 | 0.000000 |          |          |          |
| 23 | H | 3.116435 | 2.522214 | 0.000000 |          |          |
| 24 | C | 2.813881 | 3.549452 | 2.206235 | 0.000000 |          |
| 25 | H | 3.767392 | 4.361361 | 2.568881 | 1.095140 | 0.000000 |
| 26 | H | 3.295532 | 3.950939 | 2.558115 | 1.094608 | 1.769092 |
| 27 | H | 2.534296 | 3.793162 | 3.099518 | 1.092956 | 1.776210 |
| 28 | C | 5.688669 | 5.763819 | 6.746877 | 6.976694 | 7.129095 |
| 29 | H | 6.286322 | 6.558364 | 7.287798 | 7.285003 | 7.316140 |
| 30 | H | 6.030071 | 6.124549 | 7.438837 | 7.664101 | 7.930148 |
| 31 | C | 4.191820 | 4.436753 | 5.448791 | 5.547121 | 5.802954 |
| 32 | O | 3.605469 | 4.008060 | 5.484339 | 5.499636 | 5.965308 |
| 33 | O | 4.074811 | 4.333708 | 4.694006 | 4.722527 | 4.778037 |
| 34 | H | 3.210984 | 3.556917 | 3.780051 | 3.736462 | 3.872023 |
|    |   | 26       | 27       | 28       | 29       | 30       |
| 26 | H | 0.000000 |          |          |          |          |
| 27 | H | 1.773603 | 0.000000 |          |          |          |
| 28 | C | 7.999814 | 6.674040 | 0.000000 |          |          |
| 29 | H | 8.346536 | 6.916981 | 1.104450 | 0.000000 |          |
| 30 | H | 8.642836 | 7.291621 | 1.099105 | 1.796214 | 0.000000 |
| 31 | C | 6.545883 | 5.214691 | 1.518718 | 2.160655 | 2.129876 |
| 32 | O | 6.398237 | 5.064646 | 2.358304 | 3.075675 | 2.460850 |
| 33 | O | 5.784564 | 4.506571 | 2.369390 | 2.632691 | 3.283369 |
| 34 | H | 4.787392 | 3.562594 | 3.270039 | 3.611421 | 4.075387 |
|    |   | 31       | 32       | 33       | 34       |          |
| 31 | C | 0.000000 |          |          |          |          |
| 32 | O | 1.189988 | 0.000000 |          |          |          |
| 33 | O | 1.342213 | 2.273778 | 0.000000 |          |          |
| 34 | H | 1.966509 | 2.470621 | 1.008887 | 0.000000 |          |

Stoichiometry C<sub>11</sub>H<sub>17</sub>BrN<sub>2</sub>O<sub>3</sub>

Framework group C1[X(C<sub>11</sub>H<sub>17</sub>BrN<sub>2</sub>O<sub>3</sub>)]

Deg. of freedom 96

Full point group C1 NOp 1

Largest Abelian subgroup C1 NOp 1

Largest concise Abelian subgroup C1 NOp 1

Standard orientation:

-----  
Center Atomic Atomic Coordinates (Angstroms)

| Number | Number | Type | X         | Y         | Z         |
|--------|--------|------|-----------|-----------|-----------|
| 1      | 6      | 0    | -0.532991 | 0.982337  | 1.304135  |
| 2      | 6      | 0    | -1.559655 | 0.086073  | 1.274269  |
| 3      | 7      | 0    | -2.585468 | 0.670522  | 0.556011  |
| 4      | 6      | 0    | -2.162240 | 1.849402  | 0.085038  |
| 5      | 7      | 0    | -0.917443 | 2.058929  | 0.524696  |
| 6      | 6      | 0    | -0.131573 | 3.283239  | 0.308385  |
| 7      | 1      | 0    | 0.440045  | 0.924770  | 1.760936  |
| 8      | 1      | 0    | -1.673222 | -0.877948 | 1.721464  |
| 9      | 1      | 0    | -0.844198 | 4.107247  | 0.227150  |
| 10     | 1      | 0    | 0.437223  | 3.429107  | 1.226583  |
| 11     | 35     | 0    | -1.716777 | -2.162821 | -0.757639 |
| 12     | 1      | 0    | -2.735625 | 2.522800  | -0.523439 |
| 13     | 6      | 0    | -3.848846 | 0.080271  | 0.260666  |
| 14     | 6      | 0    | -4.421055 | -0.829005 | 1.031488  |
| 15     | 1      | 0    | -4.273065 | 0.394542  | -0.679968 |
| 16     | 1      | 0    | -5.347589 | -1.286789 | 0.716873  |
| 17     | 1      | 0    | -3.966848 | -1.193631 | 1.942681  |
| 18     | 6      | 0    | 3.043311  | -1.865006 | -0.369075 |
| 19     | 6      | 0    | 3.850540  | -1.891651 | 0.854251  |
| 20     | 8      | 0    | 3.094288  | -0.707385 | 0.496838  |
| 21     | 1      | 0    | 3.541225  | -1.725741 | -1.323725 |
| 22     | 1      | 0    | 2.076300  | -2.353228 | -0.411395 |
| 23     | 1      | 0    | 3.430317  | -2.404140 | 1.715953  |
| 24     | 6      | 0    | 5.350820  | -1.775520 | 0.830530  |
| 25     | 1      | 0    | 5.719806  | -1.239079 | 1.711105  |
| 26     | 1      | 0    | 5.802714  | -2.772492 | 0.832779  |
| 27     | 1      | 0    | 5.688004  | -1.247088 | -0.064802 |
| 28     | 6      | 0    | 0.828241  | 3.254445  | -0.878267 |
| 29     | 1      | 0    | 1.432588  | 4.165964  | -0.724296 |
| 30     | 1      | 0    | 0.296502  | 3.330932  | -1.837138 |
| 31     | 6      | 0    | 1.735085  | 2.038041  | -0.945352 |
| 32     | 8      | 0    | 1.751780  | 1.348022  | -1.914716 |
| 33     | 8      | 0    | 2.492468  | 1.922872  | 0.156756  |
| 34     | 1      | 0    | 2.965297  | 1.033501  | 0.214232  |

Rotational constants (GHZ): 0.3760964 0.2228585 0.1607386

Standard basis: 6-311++G(d,p) (5D, 7F)

There are 538 symmetry adapted cartesian basis functions of A symmetry.

There are 519 symmetry adapted basis functions of A symmetry.

519 basis functions, 823 primitive gaussians, 538 cartesian basis functions

78 alpha electrons 78 beta electrons

nuclear repulsion energy 1577.1627809505 Hartrees.

NAtoms= 34 NActive= 34 NUniq= 34 SFac= 1.00D+00 NATFMM= 60 NAOKFM=F  
Big=F

Integral buffers will be 131072 words long.

Raffenetti 2 integral format.

Two-electron integral symmetry is turned on.

One-electron integrals computed using PRISM.

NBasis= 519 RedAO= T EigKep= 3.56D-06 NBF= 519

NBsUse= 519 1.00D-06 EigRej= -1.00D+00 NBFU= 519

Initial guess from the checkpoint file: "./coohpo.chk"

B after Tr= 0.000000 0.000000 0.000000

Rot= 0.997074 -0.000424 -0.027763 0.071221 Ang= -8.77 deg.

ExpMin= 3.50D-02 ExpMax= 4.40D+05 ExpMxC= 1.51D+04 IAcc=3 IRadAn= 5 AccDes=  
0.00D+00

Harris functional with IExCor= 402 and IRadAn= 5 diagonalized for initial guess.

HarFok: IExCor= 402 AccDes= 0.00D+00 IRadAn= 5 IDoV= 1 UseB2=F ITyADJ=14

ICtDFT= 3500011 ScaDFX= 1.000000 1.000000 1.000000 1.000000

FoFCou: FMM=F IPFlag= 0 FMFlag= 100000 FMFlg1= 0

NFxFlg= 0 DoJE=T BraDBF=F KetDBF=T FulRan=T

wScrn= 0.000000 ICntrl= 500 IOpCl= 0 I1Cent= 20000004 NGrid=

0

NMat0= 1 NMatS0= 1 NMatT0= 0 NMatD0= 1 NMtDS0= 0

NMtDT0= 0

Petite list used in FoFCou.

Requested convergence on RMS density matrix=1.00D-08 within 128 cycles.

Requested convergence on MAX density matrix=1.00D-06.

Requested convergence on energy=1.00D-06.

No special actions if energy rises.

SCF Done: E(RB3LYP) = -3338.88255236 A.U. after 15 cycles

NFock= 15 Conv=0.41D-08 -V/T= 2.0018

Calling FoFJK, ICntrl= 2127 FMM=F ISym2X=0 I1Cent= 0 IOpClX= 0 NMat=1 NMatS=1

NMatT=0.

\*\*\*\*\* Axes restored to original set \*\*\*\*\*

```
-----  
Center      Atomic      Forces (Hartrees/Bohr)  
Number      Number      X           Y           Z  
-----  
1           6           -0.000193190 -0.004364016 0.000771276  
2           6           -0.002063898 0.004715968 0.005521588  
3           7           -0.002183270 -0.001482813 -0.001827040  
4           6           0.002847586 -0.001210506 0.001722398  
5           7           -0.002813112 0.003982243 -0.002657611  
6           6           -0.000604093 -0.001185889 0.008430111  
7           1           -0.000350840 -0.000514909 -0.001690832  
8           1           0.002311619 -0.002702171 0.000280219
```

|    |    |              |              |              |
|----|----|--------------|--------------|--------------|
| 9  | 1  | 0.001969835  | 0.000513178  | -0.001843935 |
| 10 | 1  | -0.000418498 | 0.001058245  | 0.000299595  |
| 11 | 35 | 0.006804415  | -0.004838945 | -0.002376128 |
| 12 | 1  | -0.001013668 | 0.000313680  | -0.001397817 |
| 13 | 6  | -0.002467856 | 0.000844244  | 0.000230193  |
| 14 | 6  | -0.000367345 | 0.000605196  | 0.002200622  |
| 15 | 1  | 0.000007016  | 0.001766527  | -0.001695428 |
| 16 | 1  | -0.000396732 | -0.000003561 | -0.000022518 |
| 17 | 1  | -0.000616814 | -0.000024936 | 0.000477191  |
| 18 | 6  | -0.001650101 | -0.000997645 | -0.002257298 |
| 19 | 6  | 0.001712603  | 0.001238678  | -0.000886882 |
| 20 | 8  | 0.001226834  | 0.001561882  | 0.002357134  |
| 21 | 1  | 0.000123241  | 0.000157146  | -0.000338941 |
| 22 | 1  | -0.001643661 | -0.000168325 | 0.000395161  |
| 23 | 1  | -0.000599692 | -0.000084219 | 0.000402021  |
| 24 | 6  | 0.000213425  | 0.000921801  | 0.000246484  |
| 25 | 1  | -0.000489567 | -0.000646766 | -0.000500185 |
| 26 | 1  | -0.000279590 | 0.000056670  | 0.000042542  |
| 27 | 1  | -0.000217828 | -0.000172535 | 0.000392684  |
| 28 | 6  | -0.006653738 | 0.010850829  | -0.001824180 |
| 29 | 1  | 0.001640792  | -0.006508949 | -0.005475623 |
| 30 | 1  | 0.003330718  | 0.000996166  | 0.005313316  |
| 31 | 6  | -0.006183952 | 0.019174827  | 0.003462965  |
| 32 | 8  | 0.011976268  | -0.019503667 | -0.008111533 |
| 33 | 8  | 0.010369680  | -0.011875485 | 0.008612238  |
| 34 | 1  | -0.013326586 | 0.007528056  | -0.008251787 |

-----  
Cartesian Forces: Max 0.019503667 RMS 0.004715553

GradGradGradGradGradGradGradGradGradGradGradGradGradGradGradGradGradGradGrad

Berny optimization.

Using GEDIIS/GDIIS optimizer.

FormGI is forming the generalized inverse of G from B-inverse, IUseBI=4.

GSVD: received Info= 1 from GESDD.

Internal Forces: Max 0.021477997 RMS 0.004473308

Search for a local minimum.

Step number 4 out of a maximum of 175

All quantities printed in internal units (Hartrees-Bohrs-Radians)

Mixed Optimization -- RFO/linear search

Update second derivatives using D2CorX and points 3 4

DE= -1.69D-03 DEPred=-3.25D-02 R= 5.20D-02

Trust test= 5.20D-02 RLast= 6.28D-01 DXMaxT set to 2.52D-01

ITU= -1 0 1 0

Use linear search instead of GDIIS.

|                 |         |         |         |         |         |
|-----------------|---------|---------|---------|---------|---------|
| Eigenvalues --- | 0.00222 | 0.00232 | 0.00349 | 0.00520 | 0.00698 |
| Eigenvalues --- | 0.00788 | 0.00963 | 0.01302 | 0.01383 | 0.01430 |
| Eigenvalues --- | 0.01543 | 0.01598 | 0.01816 | 0.01920 | 0.02091 |
| Eigenvalues --- | 0.02256 | 0.02259 | 0.02352 | 0.02467 | 0.02499 |
| Eigenvalues --- | 0.03012 | 0.03049 | 0.03072 | 0.03211 | 0.03710 |
| Eigenvalues --- | 0.03822 | 0.04875 | 0.05051 | 0.05381 | 0.05725 |
| Eigenvalues --- | 0.05874 | 0.06971 | 0.07592 | 0.09534 | 0.10032 |
| Eigenvalues --- | 0.11949 | 0.12536 | 0.12743 | 0.13427 | 0.13643 |
| Eigenvalues --- | 0.15431 | 0.15787 | 0.15950 | 0.15992 | 0.15999 |
| Eigenvalues --- | 0.15999 | 0.16000 | 0.16000 | 0.16000 | 0.16035 |
| Eigenvalues --- | 0.16882 | 0.19169 | 0.20205 | 0.22005 | 0.22353 |
| Eigenvalues --- | 0.22907 | 0.23421 | 0.23884 | 0.24771 | 0.24875 |
| Eigenvalues --- | 0.24962 | 0.26308 | 0.28402 | 0.29129 | 0.29725 |
| Eigenvalues --- | 0.31847 | 0.32513 | 0.34497 | 0.34560 | 0.34609 |
| Eigenvalues --- | 0.34763 | 0.34882 | 0.34889 | 0.34957 | 0.35005 |
| Eigenvalues --- | 0.35066 | 0.35530 | 0.35667 | 0.35763 | 0.36488 |
| Eigenvalues --- | 0.36546 | 0.36710 | 0.36886 | 0.37244 | 0.37712 |
| Eigenvalues --- | 0.41070 | 0.42232 | 0.45583 | 0.48849 | 0.52093 |
| Eigenvalues --- | 0.53177 | 0.55366 | 0.56076 | 0.60276 | 0.87005 |
| Eigenvalues --- | 1.15474 |         |         |         |         |

RFO step: Lambda=-5.74740856D-02 EMin= 2.22384152D-03

Quartic linear search produced a step of -0.61923.

Maximum step size ( 0.252) exceeded in Quadratic search.

-- Step size scaled by 0.587

|             |            |            |           |            |
|-------------|------------|------------|-----------|------------|
| Iteration 1 | RMS(Cart)= | 0.19892677 | RMS(Int)= | 0.01701779 |
| Iteration 2 | RMS(Cart)= | 0.05065070 | RMS(Int)= | 0.00294470 |
| Iteration 3 | RMS(Cart)= | 0.00577565 | RMS(Int)= | 0.00073395 |
| Iteration 4 | RMS(Cart)= | 0.00004488 | RMS(Int)= | 0.00073314 |
| Iteration 5 | RMS(Cart)= | 0.00000001 | RMS(Int)= | 0.00073314 |

| Variable | Old X   | -DE/DX   | Delta X  | Delta X  | Delta X  | New X   |
|----------|---------|----------|----------|----------|----------|---------|
|          |         |          | (Linear) | (Quad)   | (Total)  |         |
| R1       | 2.57601 | -0.00142 | -0.00296 | 0.00671  | 0.00366  | 2.57967 |
| R2       | 2.61465 | 0.00233  | 0.00054  | 0.00802  | 0.00864  | 2.62328 |
| R3       | 2.03423 | -0.00111 | -0.00068 | -0.00166 | -0.00234 | 2.03189 |
| R4       | 2.61149 | 0.00699  | 0.00282  | 0.00459  | 0.00727  | 2.61877 |
| R5       | 2.01964 | 0.00572  | 0.00400  | 0.01046  | 0.01446  | 2.03410 |
| R6       | 2.52877 | 0.00280  | 0.00570  | -0.00148 | 0.00426  | 2.53304 |
| R7       | 2.69360 | 0.00071  | 0.00161  | 0.00161  | 0.00321  | 2.69682 |
| R8       | 2.52596 | -0.00091 | 0.00072  | -0.00053 | 0.00030  | 2.52627 |
| R9       | 2.02869 | 0.00171  | 0.00065  | 0.00478  | 0.00543  | 2.03412 |
| R10      | 2.77945 | 0.00258  | -0.00285 | 0.00871  | 0.00585  | 2.78530 |
| R11      | 2.06441 | -0.00094 | -0.00017 | -0.00236 | -0.00253 | 2.06188 |
| R12      | 2.05962 | 0.00049  | 0.00002  | 0.00116  | 0.00118  | 2.06081 |
| R13      | 2.88467 | 0.00466  | 0.01280  | 0.01932  | 0.03212  | 2.91679 |

|     |         |          |          |          |          |         |
|-----|---------|----------|----------|----------|----------|---------|
| R14 | 5.27729 | 0.00563  | 0.13372  | 0.17732  | 0.31103  | 5.58833 |
| R15 | 2.49871 | 0.00193  | 0.00021  | 0.00313  | 0.00334  | 2.50205 |
| R16 | 2.03838 | 0.00153  | 0.00116  | 0.00472  | 0.00588  | 2.04426 |
| R17 | 2.04144 | 0.00029  | 0.00069  | 0.00091  | 0.00159  | 2.04303 |
| R18 | 2.04364 | 0.00014  | 0.00031  | 0.00092  | 0.00124  | 2.04488 |
| R19 | 2.77015 | 0.00244  | 0.00441  | 0.00334  | 0.00779  | 2.77793 |
| R20 | 2.73357 | -0.00009 | 0.00139  | 0.00265  | 0.00402  | 2.73759 |
| R21 | 2.05161 | 0.00036  | -0.00118 | 0.00184  | 0.00066  | 2.05227 |
| R22 | 2.04864 | 0.00139  | -0.00007 | 0.00107  | 0.00101  | 2.04965 |
| R23 | 2.73987 | -0.00176 | -0.00173 | -0.00300 | -0.00475 | 2.73512 |
| R24 | 2.05430 | 0.00055  | 0.00091  | 0.00160  | 0.00251  | 2.05681 |
| R25 | 2.84395 | -0.00070 | -0.00002 | -0.00054 | -0.00056 | 2.84339 |
| R26 | 3.34177 | -0.00218 | -0.06303 | -0.07305 | -0.13608 | 3.20569 |
| R27 | 2.06951 | -0.00089 | -0.00094 | -0.00168 | -0.00261 | 2.06690 |
| R28 | 2.06851 | -0.00021 | -0.00025 | -0.00073 | -0.00098 | 2.06753 |
| R29 | 2.06539 | -0.00046 | -0.00051 | -0.00133 | -0.00184 | 2.06355 |
| R30 | 2.08711 | -0.00535 | -0.00804 | -0.01630 | -0.02433 | 2.06277 |
| R31 | 2.07701 | -0.00632 | -0.00394 | -0.01610 | -0.02004 | 2.05696 |
| R32 | 2.86996 | 0.00227  | -0.01067 | 0.01573  | 0.00506  | 2.87502 |
| R33 | 2.24875 | 0.02148  | 0.00750  | 0.02426  | 0.03175  | 2.28051 |
| R34 | 2.53641 | -0.00290 | 0.00170  | 0.00806  | 0.00976  | 2.54618 |
| R35 | 1.90652 | -0.01849 | -0.00490 | -0.02456 | -0.02946 | 1.87706 |
| A1  | 1.86500 | 0.00416  | 0.00691  | 0.00444  | 0.01090  | 1.87590 |
| A2  | 2.28487 | -0.00166 | -0.00327 | -0.00038 | -0.00389 | 2.28098 |
| A3  | 2.13155 | -0.00260 | -0.00285 | -0.00226 | -0.00532 | 2.12623 |
| A4  | 1.86751 | -0.00296 | -0.00247 | -0.00158 | -0.00439 | 1.86313 |
| A5  | 2.29685 | -0.00639 | -0.00387 | 0.00176  | -0.00195 | 2.29490 |
| A6  | 2.11774 | 0.00932  | 0.00676  | -0.00001 | 0.00693  | 2.12467 |
| A7  | 1.89730 | -0.00101 | -0.00029 | -0.00285 | -0.00335 | 1.89395 |
| A8  | 2.20246 | 0.00623  | 0.00389  | 0.01519  | 0.01923  | 2.22169 |
| A9  | 2.17999 | -0.00508 | -0.00387 | -0.01203 | -0.01581 | 2.16418 |
| A10 | 1.89321 | 0.00196  | 0.00122  | 0.01041  | 0.01161  | 1.90482 |
| A11 | 2.19342 | -0.00107 | -0.00111 | -0.00622 | -0.00727 | 2.18615 |
| A12 | 2.19629 | -0.00090 | -0.00013 | -0.00405 | -0.00414 | 2.19215 |
| A13 | 1.89873 | -0.00225 | -0.00388 | -0.00817 | -0.01284 | 1.88588 |
| A14 | 2.19208 | -0.00340 | -0.00290 | 0.04567  | 0.04190  | 2.23397 |
| A15 | 2.18914 | 0.00572  | 0.00879  | -0.03394 | -0.02592 | 2.16322 |
| A16 | 1.86529 | 0.00562  | 0.01337  | -0.03262 | -0.01838 | 1.84691 |
| A17 | 1.84040 | 0.00113  | -0.00235 | 0.02053  | 0.01738  | 1.85778 |
| A18 | 2.02037 | -0.00757 | -0.00115 | 0.05296  | 0.05155  | 2.07191 |
| A19 | 1.87772 | -0.00089 | -0.00021 | 0.00102  | 0.00050  | 1.87822 |
| A20 | 1.94613 | -0.00142 | -0.01772 | -0.03055 | -0.04804 | 1.89809 |
| A21 | 1.90634 | 0.00357  | 0.00892  | -0.01148 | -0.00400 | 1.90234 |
| A22 | 1.61603 | 0.01536  | 0.00026  | 0.03477  | 0.03503  | 1.65105 |



|     |          |          |          |          |          |          |
|-----|----------|----------|----------|----------|----------|----------|
| A23 | 2.15021  | 0.00075  | -0.00044 | 0.00152  | 0.00102  | 2.15123  |
| A24 | 1.99174  | -0.00220 | -0.00613 | -0.01119 | -0.01738 | 1.97435  |
| A25 | 2.13948  | 0.00154  | 0.00692  | 0.01053  | 0.01739  | 2.15687  |
| A26 | 2.08609  | -0.00042 | 0.00074  | -0.00081 | -0.00018 | 2.08591  |
| A27 | 2.14276  | 0.00078  | -0.00063 | 0.00252  | 0.00177  | 2.14453  |
| A28 | 2.05187  | -0.00031 | 0.00070  | -0.00043 | 0.00015  | 2.05202  |
| A29 | 2.07555  | 0.00074  | 0.00310  | -0.00424 | -0.00110 | 2.07445  |
| A30 | 2.11249  | -0.00048 | 0.00427  | 0.00847  | 0.01264  | 2.12514  |
| A31 | 1.99057  | 0.00039  | -0.00065 | -0.00206 | -0.00270 | 1.98787  |
| A32 | 1.99896  | -0.00023 | -0.00166 | -0.00294 | -0.00457 | 1.99439  |
| A33 | 2.01810  | 0.00014  | -0.00399 | -0.00021 | -0.00426 | 2.01384  |
| A34 | 2.04564  | -0.00048 | 0.00381  | 0.00456  | 0.00841  | 2.05405  |
| A35 | 2.13460  | 0.00054  | -0.00153 | -0.00156 | -0.00312 | 2.13148  |
| A36 | 1.95934  | -0.00027 | 0.00066  | -0.00147 | -0.00082 | 1.95852  |
| A37 | 2.04099  | 0.00012  | -0.00248 | -0.00235 | -0.00482 | 2.03617  |
| A38 | 2.01998  | 0.00008  | -0.00084 | -0.00081 | -0.00168 | 2.01830  |
| A39 | 2.33172  | -0.00119 | 0.00904  | 0.00821  | 0.01743  | 2.34915  |
| A40 | 2.64992  | 0.00030  | -0.00200 | -0.00836 | -0.01041 | 2.63950  |
| A41 | 1.94014  | -0.00043 | -0.00343 | -0.00177 | -0.00521 | 1.93494  |
| A42 | 1.91903  | -0.00017 | 0.00152  | -0.00013 | 0.00139  | 1.92042  |
| A43 | 1.93667  | -0.00005 | -0.00106 | -0.00153 | -0.00259 | 1.93408  |
| A44 | 1.88115  | 0.00026  | 0.00122  | 0.00119  | 0.00241  | 1.88357  |
| A45 | 1.89432  | 0.00024  | 0.00072  | 0.00052  | 0.00123  | 1.89555  |
| A46 | 1.89092  | 0.00018  | 0.00118  | 0.00190  | 0.00309  | 1.89401  |
| A47 | 1.79273  | 0.00695  | 0.02409  | 0.02913  | 0.05331  | 1.84604  |
| A48 | 1.95269  | 0.00236  | -0.00150 | -0.01781 | -0.01868 | 1.93401  |
| A49 | 2.00964  | -0.00773 | -0.02171 | 0.02393  | 0.00239  | 2.01203  |
| A50 | 1.90595  | -0.00234 | 0.00510  | -0.00049 | 0.00453  | 1.91048  |
| A51 | 1.91819  | 0.00019  | 0.00770  | -0.04472 | -0.03757 | 1.88062  |
| A52 | 1.88187  | 0.00081  | -0.01154 | 0.00791  | -0.00342 | 1.87845  |
| A53 | 2.10457  | 0.01152  | 0.00759  | 0.06487  | 0.07008  | 2.17465  |
| A54 | 1.94915  | 0.00263  | 0.00749  | -0.03345 | -0.02805 | 1.92110  |
| A55 | 2.22838  | -0.01389 | -0.01670 | -0.02807 | -0.04657 | 2.18181  |
| A56 | 1.96804  | -0.01922 | -0.08270 | 0.03406  | -0.04863 | 1.91941  |
| A57 | 2.71679  | -0.00677 | -0.06668 | 0.01610  | -0.05057 | 2.66621  |
| D1  | -0.07099 | -0.00108 | 0.02849  | 0.03502  | 0.06383  | -0.00716 |
| D2  | 3.12149  | -0.00081 | 0.01598  | 0.03091  | 0.04687  | -3.11483 |
| D3  | 3.13476  | 0.00075  | 0.00984  | 0.00246  | 0.01315  | -3.13528 |
| D4  | 0.04405  | 0.00103  | -0.00267 | -0.00165 | -0.00382 | 0.04024  |
| D5  | 0.04682  | 0.00091  | -0.02421 | -0.04295 | -0.06707 | -0.02025 |
| D6  | 3.10556  | 0.00218  | 0.02882  | 0.00017  | 0.03141  | 3.13697  |
| D7  | 3.13117  | -0.00071 | -0.00760 | -0.01385 | -0.02185 | 3.10932  |
| D8  | -0.09327 | 0.00055  | 0.04543  | 0.02927  | 0.07663  | -0.01664 |
| D9  | 0.07112  | 0.00084  | -0.02322 | -0.01559 | -0.03904 | 0.03208  |

|     |          |          |          |          |          |          |
|-----|----------|----------|----------|----------|----------|----------|
| D10 | 3.12684  | 0.00232  | -0.02669 | -0.01247 | -0.03915 | 3.08769  |
| D11 | -3.11502 | 0.00009  | -0.01247 | -0.01193 | -0.02437 | -3.13939 |
| D12 | -0.05930 | 0.00157  | -0.01594 | -0.00881 | -0.02447 | -0.08378 |
| D13 | -1.98944 | 0.01529  | 0.14753  | 0.17947  | 0.32718  | -1.66225 |
| D14 | 1.20913  | 0.01597  | 0.13369  | 0.17490  | 0.30840  | 1.51753  |
| D15 | -0.04233 | -0.00046 | 0.00812  | -0.01151 | -0.00321 | -0.04554 |
| D16 | 3.12285  | -0.00011 | -0.02164 | -0.01736 | -0.03819 | 3.08466  |
| D17 | -3.09942 | -0.00260 | 0.01103  | -0.01623 | -0.00522 | -3.10464 |
| D18 | 0.06576  | -0.00225 | -0.01873 | -0.02208 | -0.04020 | 0.02556  |
| D19 | 0.48988  | 0.00086  | 0.02127  | 0.02892  | 0.04998  | 0.53985  |
| D20 | -2.58935 | -0.00068 | 0.01428  | 0.01314  | 0.02739  | -2.56196 |
| D21 | -2.75093 | 0.00289  | 0.01753  | 0.03326  | 0.05082  | -2.70012 |
| D22 | 0.45302  | 0.00135  | 0.01054  | 0.01748  | 0.02824  | 0.48126  |
| D23 | -0.00269 | -0.00014 | 0.00997  | 0.03380  | 0.04348  | 0.04079  |
| D24 | -3.06160 | -0.00086 | -0.04298 | -0.01394 | -0.05404 | -3.11565 |
| D25 | 3.11526  | -0.00049 | 0.03981  | 0.03963  | 0.07856  | -3.08937 |
| D26 | 0.05635  | -0.00122 | -0.01314 | -0.00812 | -0.01897 | 0.03738  |
| D27 | -2.53907 | -0.00096 | -0.04631 | -0.05740 | -0.10377 | -2.64283 |
| D28 | -0.54431 | 0.00103  | -0.04171 | -0.06120 | -0.10356 | -0.64787 |
| D29 | 1.56475  | 0.00176  | -0.03282 | -0.02851 | -0.06111 | 1.50364  |
| D30 | 0.50622  | 0.00005  | 0.01535  | -0.00517 | 0.01045  | 0.51667  |
| D31 | 2.50098  | 0.00204  | 0.01996  | -0.00898 | 0.01065  | 2.51163  |
| D32 | -1.67314 | 0.00277  | 0.02885  | 0.02371  | 0.05310  | -1.62004 |
| D33 | -2.95441 | 0.00208  | -0.01269 | -0.05451 | -0.06767 | -3.02208 |
| D34 | 1.28674  | -0.00019 | -0.03203 | -0.06226 | -0.09450 | 1.19225  |
| D35 | -0.86986 | 0.00289  | 0.00084  | -0.07724 | -0.07649 | -0.94634 |
| D36 | 1.19167  | 0.00149  | -0.01538 | -0.02622 | -0.04147 | 1.15020  |
| D37 | -0.85036 | -0.00077 | -0.03472 | -0.03398 | -0.06830 | -0.91866 |
| D38 | -3.00696 | 0.00231  | -0.00185 | -0.04895 | -0.05029 | -3.05725 |
| D39 | -0.88128 | 0.00118  | -0.00985 | -0.00136 | -0.01152 | -0.89280 |
| D40 | -2.92331 | -0.00109 | -0.02919 | -0.00912 | -0.03835 | -2.96166 |
| D41 | 1.20327  | 0.00199  | 0.00368  | -0.02409 | -0.02034 | 1.18293  |
| D42 | -3.06871 | -0.00101 | -0.00387 | -0.01021 | -0.01416 | -3.08287 |
| D43 | -0.00443 | -0.00028 | 0.01131  | 0.00977  | 0.02100  | 0.01657  |
| D44 | 0.00532  | 0.00052  | 0.00330  | 0.00610  | 0.00948  | 0.01480  |
| D45 | 3.06960  | 0.00125  | 0.01848  | 0.02607  | 0.04464  | 3.11424  |
| D46 | -2.73074 | -0.00058 | -0.00423 | -0.00529 | -0.00956 | -2.74030 |
| D47 | -0.03397 | -0.00021 | -0.00069 | 0.00014  | -0.00056 | -0.03454 |
| D48 | -0.01862 | 0.00049  | 0.00398  | 0.00523  | 0.00920  | -0.00941 |
| D49 | 2.67815  | 0.00086  | 0.00751  | 0.01066  | 0.01820  | 2.69634  |
| D50 | 0.67960  | 0.00078  | 0.00038  | -0.00194 | -0.00148 | 0.67813  |
| D51 | -1.70128 | 0.00038  | 0.00918  | 0.00403  | 0.01325  | -1.68803 |
| D52 | 2.12146  | 0.00014  | -0.02685 | -0.02117 | -0.04798 | 2.07348  |
| D53 | -0.27406 | 0.00020  | -0.02345 | -0.01541 | -0.03883 | -0.31290 |

|     |          |          |          |          |          |          |
|-----|----------|----------|----------|----------|----------|----------|
| D54 | 2.55104  | -0.00008 | -0.00247 | -0.00254 | -0.00502 | 2.54602  |
| D55 | -1.65049 | -0.00014 | -0.00215 | -0.00226 | -0.00442 | -1.65490 |
| D56 | 0.44113  | -0.00006 | -0.00035 | -0.00096 | -0.00132 | 0.43981  |
| D57 | 1.34058  | -0.00007 | -0.00081 | -0.00217 | -0.00297 | 1.33761  |
| D58 | -2.86095 | -0.00013 | -0.00048 | -0.00189 | -0.00236 | -2.86331 |
| D59 | -0.76933 | -0.00004 | 0.00131  | -0.00059 | 0.00073  | -0.76860 |
| D60 | -1.02933 | 0.00015  | 0.00210  | 0.00410  | 0.00619  | -1.02314 |
| D61 | 1.05232  | 0.00009  | 0.00243  | 0.00437  | 0.00680  | 1.05912  |
| D62 | -3.13924 | 0.00018  | 0.00422  | 0.00568  | 0.00990  | -3.12935 |
| D63 | 1.65987  | -0.00341 | 0.01787  | 0.03491  | 0.05282  | 1.71269  |
| D64 | -2.69332 | -0.00179 | 0.04123  | 0.04393  | 0.08513  | -2.60819 |
| D65 | 2.16581  | -0.00320 | -0.13206 | -0.12316 | -0.25653 | 1.90928  |
| D66 | -1.02199 | 0.00191  | -0.04978 | -0.05256 | -0.10118 | -1.12317 |
| D67 | -2.10369 | 0.00093  | -0.11007 | -0.10220 | -0.21376 | -2.31745 |
| D68 | 0.99170  | 0.00603  | -0.02778 | -0.03160 | -0.05841 | 0.93329  |
| D69 | -0.02783 | -0.00131 | -0.10648 | -0.12350 | -0.23089 | -0.25872 |
| D70 | 3.06755  | 0.00380  | -0.02419 | -0.05290 | -0.07553 | 2.99202  |
| D71 | 2.94543  | -0.00698 | -0.02759 | 0.04721  | 0.02351  | 2.96894  |
| D72 | -0.24642 | -0.00055 | 0.06034  | 0.12703  | 0.18347  | -0.06295 |
| D73 | -1.31642 | -0.00307 | -0.00081 | -0.00726 | -0.00807 | -1.32449 |

| Item                 | Value    | Threshold | Converged? |
|----------------------|----------|-----------|------------|
| Maximum Force        | 0.021478 | 0.000450  | NO         |
| RMS Force            | 0.004473 | 0.000300  | NO         |
| Maximum Displacement | 0.956342 | 0.001800  | NO         |
| RMS Displacement     | 0.216280 | 0.001200  | NO         |

Predicted change in Energy=-8.656585D-03

GradGradGradGradGradGradGradGradGradGradGradGradGradGradGradGradGradGradGrad

Input orientation:

| Center Number | Atomic Number | Atomic Type | Coordinates (Angstroms) |           |           |
|---------------|---------------|-------------|-------------------------|-----------|-----------|
|               |               |             | X                       | Y         | Z         |
| 1             | 6             | 0           | -0.830715               | 1.158852  | 1.376800  |
| 2             | 6             | 0           | -1.713073               | 0.130505  | 1.542475  |
| 3             | 7             | 0           | -2.810937               | 0.414014  | 0.745773  |
| 4             | 6             | 0           | -2.576150               | 1.558801  | 0.089207  |
| 5             | 7             | 0           | -1.394999               | 2.051400  | 0.475696  |
| 6             | 6             | 0           | -0.830357               | 3.319592  | -0.019590 |
| 7             | 1             | 0           | 0.140499                | 1.325414  | 1.807049  |
| 8             | 1             | 0           | -1.675695               | -0.748172 | 2.163089  |
| 9             | 1             | 0           | -1.686051               | 3.953530  | -0.257098 |
| 10            | 1             | 0           | -0.306629               | 3.773916  | 0.822169  |
| 11            | 35            | 0           | -0.594272               | -2.494954 | 0.036026  |

|    |   |   |           |           |           |
|----|---|---|-----------|-----------|-----------|
| 12 | 1 | 0 | -3.231340 | 2.002027  | -0.640815 |
| 13 | 6 | 0 | -3.964817 | -0.400606 | 0.541928  |
| 14 | 6 | 0 | -4.446636 | -1.220612 | 1.463061  |
| 15 | 1 | 0 | -4.379822 | -0.308054 | -0.452781 |
| 16 | 1 | 0 | -5.292384 | -1.850706 | 1.225302  |
| 17 | 1 | 0 | -4.007335 | -1.322068 | 2.446761  |
| 18 | 6 | 0 | 3.521925  | -0.739736 | 0.200244  |
| 19 | 6 | 0 | 4.332354  | -0.247479 | 1.323564  |
| 20 | 8 | 0 | 3.314145  | 0.592545  | 0.729871  |
| 21 | 1 | 0 | 3.958483  | -0.754746 | -0.794047 |
| 22 | 1 | 0 | 2.686684  | -1.414930 | 0.351579  |
| 23 | 1 | 0 | 4.061670  | -0.576834 | 2.325019  |
| 24 | 6 | 0 | 5.759749  | 0.194565  | 1.147116  |
| 25 | 1 | 0 | 5.997519  | 1.022007  | 1.821733  |
| 26 | 1 | 0 | 6.439062  | -0.632047 | 1.375756  |
| 27 | 1 | 0 | 5.941413  | 0.518917  | 0.120364  |
| 28 | 6 | 0 | 0.114722  | 3.284211  | -1.239412 |
| 29 | 1 | 0 | 0.500344  | 4.299875  | -1.345498 |
| 30 | 1 | 0 | -0.427951 | 3.006284  | -2.141128 |
| 31 | 6 | 0 | 1.306091  | 2.346729  | -1.111308 |
| 32 | 8 | 0 | 1.437415  | 1.317391  | -1.727396 |
| 33 | 8 | 0 | 2.116706  | 2.762146  | -0.118453 |
| 34 | 1 | 0 | 2.803454  | 2.069940  | 0.070934  |

-----  
Distance matrix (angstroms):

|    |    | 1        | 2        | 3        | 4        | 5        |
|----|----|----------|----------|----------|----------|----------|
| 1  | C  | 0.000000 |          |          |          |          |
| 2  | C  | 1.365101 | 0.000000 |          |          |          |
| 3  | N  | 2.207772 | 1.385791 | 0.000000 |          |          |
| 4  | C  | 2.205539 | 2.212899 | 1.340426 | 0.000000 |          |
| 5  | N  | 1.388181 | 2.220141 | 2.181480 | 1.336842 | 0.000000 |
| 6  | C  | 2.572683 | 3.659168 | 3.598730 | 2.481938 | 1.473920 |
| 7  | H  | 1.075227 | 2.221156 | 3.266180 | 3.222675 | 2.158080 |
| 8  | H  | 2.229122 | 1.076398 | 2.155977 | 3.230160 | 3.280806 |
| 9  | H  | 3.348350 | 4.225484 | 3.846984 | 2.578164 | 2.059077 |
| 10 | H  | 2.724122 | 3.971318 | 4.191221 | 3.254949 | 2.066798 |
| 11 | Br | 3.899216 | 3.227095 | 3.725512 | 4.512604 | 4.637219 |
| 12 | H  | 3.247263 | 3.251844 | 2.149686 | 1.076408 | 2.149694 |
| 13 | C  | 3.598821 | 2.520620 | 1.427094 | 2.443895 | 3.552560 |
| 14 | C  | 4.329455 | 3.050278 | 2.421161 | 3.620957 | 4.581860 |
| 15 | H  | 4.253862 | 3.359305 | 2.102216 | 2.651816 | 3.916409 |
| 16 | H  | 5.383947 | 4.103324 | 3.393595 | 4.504817 | 5.565784 |
| 17 | H  | 4.170215 | 2.862051 | 2.709005 | 3.988202 | 4.699965 |
| 18 | C  | 4.892280 | 5.473948 | 6.460177 | 6.517831 | 5.660606 |

|    |    |          |          |          |          |          |
|----|----|----------|----------|----------|----------|----------|
| 19 | C  | 5.351437 | 6.061186 | 7.197084 | 7.246634 | 6.229469 |
| 20 | O  | 4.233094 | 5.113387 | 6.127704 | 6.003306 | 4.936486 |
| 21 | H  | 5.595610 | 6.197544 | 7.040035 | 6.988137 | 6.176282 |
| 22 | H  | 4.477447 | 4.812948 | 5.807259 | 6.050565 | 5.356396 |
| 23 | H  | 5.277041 | 5.870295 | 7.120992 | 7.322599 | 6.332681 |
| 24 | C  | 6.664595 | 7.483548 | 8.582884 | 8.512786 | 7.422200 |
| 25 | H  | 6.844083 | 7.766981 | 8.894731 | 8.763424 | 7.584246 |
| 26 | H  | 7.487122 | 8.189420 | 9.330253 | 9.366381 | 8.329676 |
| 27 | H  | 6.917360 | 7.795153 | 8.775293 | 8.580863 | 7.503179 |
| 28 | C  | 3.500795 | 4.585367 | 4.553951 | 3.461656 | 2.596281 |
| 29 | H  | 4.364476 | 5.533828 | 5.517056 | 4.363105 | 3.459005 |
| 30 | H  | 3.993876 | 4.846708 | 4.553316 | 3.418240 | 2.948687 |
| 31 | C  | 3.488219 | 4.590159 | 4.912642 | 4.139307 | 3.146694 |
| 32 | O  | 3.847802 | 4.693221 | 4.998114 | 4.412145 | 3.662642 |
| 33 | O  | 3.673366 | 4.934716 | 5.526506 | 4.849130 | 3.631837 |
| 34 | H  | 3.967688 | 5.130873 | 5.892273 | 5.403863 | 4.217959 |
|    |    | 6        | 7        | 8        | 9        | 10       |
| 6  | C  | 0.000000 |          |          |          |          |
| 7  | H  | 2.873311 | 0.000000 |          |          |          |
| 8  | H  | 4.693121 | 2.779404 | 0.000000 |          |          |
| 9  | H  | 1.091100 | 3.808410 | 5.288045 | 0.000000 |          |
| 10 | H  | 1.090532 | 2.676766 | 4.911384 | 1.760649 | 0.000000 |
| 11 | Br | 5.819602 | 4.274532 | 2.957215 | 6.546819 | 6.324515 |
| 12 | H  | 2.808312 | 4.221273 | 4.224395 | 2.518634 | 3.719388 |
| 13 | C  | 4.896938 | 4.629610 | 2.826489 | 4.978927 | 5.557652 |
| 14 | C  | 5.990758 | 5.257603 | 2.896783 | 6.111589 | 6.518874 |
| 15 | H  | 5.093738 | 5.311153 | 3.787979 | 5.045372 | 5.905834 |
| 16 | H  | 6.942004 | 6.319999 | 3.895569 | 6.992303 | 7.527061 |
| 17 | H  | 6.141748 | 4.962148 | 2.417926 | 6.366407 | 6.504119 |
| 18 | C  | 5.955572 | 4.275595 | 5.555906 | 7.025591 | 5.951275 |
| 19 | C  | 6.417292 | 4.503265 | 6.087048 | 7.507873 | 6.159803 |
| 20 | O  | 5.017507 | 3.430662 | 5.361916 | 6.105104 | 4.820751 |
| 21 | H  | 6.335061 | 5.066534 | 6.363070 | 7.370003 | 6.427450 |
| 22 | H  | 5.909572 | 4.013843 | 4.770376 | 6.950659 | 6.008785 |
| 23 | H  | 6.679166 | 4.388898 | 5.742207 | 7.760659 | 6.345835 |
| 24 | C  | 7.386237 | 5.769775 | 7.563517 | 8.458225 | 7.051119 |
| 25 | H  | 7.435675 | 5.864892 | 7.882150 | 8.482489 | 6.950857 |
| 26 | H  | 8.390882 | 6.609808 | 8.153691 | 9.471600 | 8.076096 |
| 27 | H  | 7.329409 | 6.094747 | 7.987401 | 8.373605 | 7.079942 |
| 28 | C  | 1.543500 | 3.621944 | 5.571600 | 2.157710 | 2.160431 |
| 29 | H  | 2.118904 | 4.349191 | 6.521358 | 2.466758 | 2.372050 |
| 30 | H  | 2.181976 | 4.328575 | 5.846289 | 2.455537 | 3.063512 |
| 31 | C  | 2.588961 | 3.304315 | 5.402883 | 3.502056 | 2.894142 |
| 32 | O  | 3.473931 | 3.764884 | 5.393874 | 4.343621 | 3.946705 |

|    |    |           |           |           |           |           |
|----|----|-----------|-----------|-----------|-----------|-----------|
| 33 | O  | 3.000950  | 3.110812  | 5.648900  | 3.987428  | 2.789444  |
| 34 | H  | 3.843749  | 3.264926  | 5.690488  | 4.879669  | 3.624983  |
|    |    | 11        | 12        | 13        | 14        | 15        |
| 11 | Br | 0.000000  |           |           |           |           |
| 12 | H  | 5.256908  | 0.000000  |           |           |           |
| 13 | C  | 4.000350  | 2.776602  | 0.000000  |           |           |
| 14 | C  | 4.301289  | 4.035920  | 1.324027  | 0.000000  |           |
| 15 | H  | 4.399074  | 2.586666  | 1.081777  | 2.123129  | 0.000000  |
| 16 | H  | 4.888935  | 4.751195  | 2.081400  | 1.081127  | 2.455303  |
| 17 | H  | 4.340081  | 4.602706  | 2.116432  | 1.082102  | 3.094239  |
| 18 | C  | 4.477816  | 7.336978  | 7.502204  | 8.082322  | 7.940428  |
| 19 | C  | 5.566016  | 8.131945  | 8.335312  | 8.833862  | 8.891629  |
| 20 | O  | 5.028896  | 6.834383  | 7.348806  | 8.003427  | 7.836253  |
| 21 | H  | 4.944180  | 7.701742  | 8.042942  | 8.715365  | 8.357231  |
| 22 | H  | 3.468530  | 6.905320  | 6.731088  | 7.222009  | 7.197755  |
| 23 | H  | 5.531408  | 8.284606  | 8.224048  | 8.576054  | 8.890849  |
| 24 | C  | 6.988678  | 9.343624  | 9.761540  | 10.308873 | 10.277314 |
| 25 | H  | 7.681763  | 9.601897  | 10.144450 | 10.688235 | 10.706618 |
| 26 | H  | 7.398182  | 10.223580 | 10.439805 | 10.901948 | 10.977102 |
| 27 | H  | 7.197618  | 9.323004  | 9.957742  | 10.617927 | 10.370162 |
| 28 | C  | 5.960550  | 3.632966  | 5.778726  | 6.957211  | 5.807243  |
| 29 | H  | 7.019721  | 4.438710  | 6.752374  | 7.926941  | 6.770965  |
| 30 | H  | 5.918723  | 3.334436  | 5.595990  | 6.856141  | 5.427028  |
| 31 | C  | 5.326316  | 4.574763  | 6.169562  | 7.242042  | 6.309606  |
| 32 | O  | 4.665981  | 4.842175  | 6.106181  | 7.158389  | 6.173083  |
| 33 | O  | 5.916955  | 5.426991  | 6.886509  | 7.838431  | 7.193244  |
| 34 | H  | 5.690695  | 6.077000  | 7.220451  | 8.082670  | 7.584759  |
|    |    | 16        | 17        | 18        | 19        | 20        |
| 16 | H  | 0.000000  |           |           |           |           |
| 17 | H  | 1.850073  | 0.000000  |           |           |           |
| 18 | C  | 8.942989  | 7.878813  | 0.000000  |           |           |
| 19 | C  | 9.757846  | 8.483320  | 1.470020  | 0.000000  |           |
| 20 | O  | 8.960316  | 7.759995  | 1.448672  | 1.447363  | 0.000000  |
| 21 | H  | 9.531916  | 8.618523  | 1.086012  | 2.209383  | 2.133703  |
| 22 | H  | 8.038583  | 7.014862  | 1.084627  | 2.239626  | 2.137000  |
| 23 | H  | 9.504234  | 8.104260  | 2.198302  | 1.088419  | 2.114412  |
| 24 | C  | 11.240058 | 9.969212  | 2.603333  | 1.504658  | 2.512660  |
| 25 | H  | 11.664910 | 10.294778 | 3.444058  | 2.152335  | 2.928668  |
| 26 | H  | 11.795533 | 10.523801 | 3.146921  | 2.142158  | 3.417880  |
| 27 | H  | 11.534045 | 10.381663 | 2.728463  | 2.150377  | 2.698047  |
| 28 | C  | 7.853597  | 7.197015  | 5.465693  | 6.068780  | 4.621629  |
| 29 | H  | 8.831442  | 8.142888  | 6.075932  | 6.518176  | 5.095972  |
| 30 | H  | 7.654144  | 7.252264  | 5.925893  | 6.726928  | 5.298307  |
| 31 | C  | 8.161990  | 7.372409  | 4.019497  | 4.670844  | 3.240275  |

|    |   |          |          |          |          |          |
|----|---|----------|----------|----------|----------|----------|
| 32 | O | 8.002840 | 7.350892 | 3.506102 | 4.487520 | 3.175795 |
| 33 | O | 8.830554 | 7.795190 | 3.786738 | 4.005789 | 2.619290 |
| 34 | H | 9.068992 | 7.971017 | 2.902964 | 3.045824 | 1.696378 |
|    |   | 21       | 22       | 23       | 24       | 25       |
| 21 | H | 0.000000 |          |          |          |          |
| 22 | H | 1.834604 | 0.000000 |          |          |          |
| 23 | H | 3.125840 | 2.547049 | 0.000000 |          |          |
| 24 | C | 2.813160 | 3.559085 | 2.205898 | 0.000000 |          |
| 25 | H | 3.762556 | 4.365964 | 2.560684 | 1.093756 | 0.000000 |
| 26 | H | 3.297935 | 3.967643 | 2.560496 | 1.094089 | 1.769111 |
| 27 | H | 2.527919 | 3.792952 | 3.097516 | 1.091982 | 1.775079 |
| 28 | C | 5.593391 | 5.588217 | 6.572004 | 6.863509 | 7.006817 |
| 29 | H | 6.149147 | 6.349736 | 7.066685 | 7.122361 | 7.141058 |
| 30 | H | 5.933024 | 5.954970 | 7.276119 | 7.550228 | 7.805657 |
| 31 | C | 4.093285 | 4.265695 | 5.286661 | 5.437588 | 5.689211 |
| 32 | O | 3.394212 | 3.653544 | 5.186219 | 5.310944 | 5.786028 |
| 33 | O | 4.027046 | 4.241906 | 4.571895 | 4.633131 | 4.674732 |
| 34 | H | 3.171929 | 3.498101 | 3.697218 | 3.662633 | 3.790187 |
|    |   | 26       | 27       | 28       | 29       | 30       |
| 26 | H | 0.000000 |          |          |          |          |
| 27 | H | 1.774368 | 0.000000 |          |          |          |
| 28 | C | 7.885015 | 6.591371 | 0.000000 |          |          |
| 29 | H | 8.185197 | 6.785987 | 1.091573 | 0.000000 |          |
| 30 | H | 8.530053 | 7.202092 | 1.088498 | 1.779926 | 0.000000 |
| 31 | C | 6.434749 | 5.132653 | 1.521395 | 2.125759 | 2.121896 |
| 32 | O | 6.200511 | 4.933333 | 2.419923 | 3.149469 | 2.550122 |
| 33 | O | 5.695259 | 4.440439 | 2.353092 | 2.546149 | 3.259769 |
| 34 | H | 4.713910 | 3.500700 | 3.228117 | 3.504740 | 4.026405 |
|    |   | 31       | 32       | 33       | 34       |          |
| 31 | C | 0.000000 |          |          |          |          |
| 32 | O | 1.206792 | 0.000000 |          |          |          |
| 33 | O | 1.347379 | 2.266594 | 0.000000 |          |          |
| 34 | H | 1.927798 | 2.380416 | 0.993297 | 0.000000 |          |

Stoichiometry C<sub>11</sub>H<sub>17</sub>BrN<sub>2</sub>O<sub>3</sub>

Framework group C1[X(C<sub>11</sub>H<sub>17</sub>BrN<sub>2</sub>O<sub>3</sub>)]

Deg. of freedom 96

Full point group C1 NOp 1

Largest Abelian subgroup C1 NOp 1

Largest concise Abelian subgroup C1 NOp 1

Standard orientation:

```

-----
Center      Atomic      Atomic      Coordinates (Angstroms)
Number      Number      Type        X           Y           Z
-----

```

|    |    |   |           |           |           |
|----|----|---|-----------|-----------|-----------|
| 1  | 6  | 0 | -0.814039 | 0.889324  | 1.240395  |
| 2  | 6  | 0 | -1.876872 | 0.032719  | 1.229726  |
| 3  | 7  | 0 | -2.873808 | 0.642515  | 0.484954  |
| 4  | 6  | 0 | -2.407656 | 1.812975  | 0.027279  |
| 5  | 7  | 0 | -1.170478 | 2.005380  | 0.495804  |
| 6  | 6  | 0 | -0.363372 | 3.207270  | 0.219256  |
| 7  | 1  | 0 | 0.155047  | 0.798394  | 1.697253  |
| 8  | 1  | 0 | -2.025194 | -0.925450 | 1.697215  |
| 9  | 1  | 0 | -1.077813 | 4.020940  | 0.085039  |
| 10 | 1  | 0 | 0.204658  | 3.413262  | 1.127094  |
| 11 | 35 | 0 | -1.209670 | -2.479333 | -0.683014 |
| 12 | 1  | 0 | -2.942706 | 2.483335  | -0.623101 |
| 13 | 6  | 0 | -4.150396 | 0.103606  | 0.143638  |
| 14 | 6  | 0 | -4.808592 | -0.748211 | 0.914504  |
| 15 | 1  | 0 | -4.504917 | 0.431547  | -0.824355 |
| 16 | 1  | 0 | -5.747199 | -1.160974 | 0.571754  |
| 17 | 1  | 0 | -4.431461 | -1.087585 | 1.870298  |
| 18 | 6  | 0 | 3.151608  | -1.581172 | -0.210363 |
| 19 | 6  | 0 | 3.998050  | -1.437775 | 0.982924  |
| 20 | 8  | 0 | 3.175010  | -0.336505 | 0.530520  |
| 21 | 1  | 0 | 3.613451  | -1.518019 | -1.191247 |
| 22 | 1  | 0 | 2.200924  | -2.102214 | -0.176725 |
| 23 | 1  | 0 | 3.635113  | -1.866969 | 1.914978  |
| 24 | 6  | 0 | 5.488021  | -1.250186 | 0.889166  |
| 25 | 1  | 0 | 5.850312  | -0.601922 | 1.692162  |
| 26 | 1  | 0 | 5.993907  | -2.215846 | 0.981963  |
| 27 | 1  | 0 | 5.763523  | -0.804990 | -0.069126 |
| 28 | 6  | 0 | 0.602242  | 3.191123  | -0.984788 |
| 29 | 1  | 0 | 1.172753  | 4.119484  | -0.920017 |
| 30 | 1  | 0 | 0.050420  | 3.169244  | -1.922787 |
| 31 | 6  | 0 | 1.594107  | 2.037709  | -1.006763 |
| 32 | 8  | 0 | 1.554810  | 1.114857  | -1.783389 |
| 33 | 8  | 0 | 2.431221  | 2.127619  | 0.045181  |
| 34 | 1  | 0 | 2.970701  | 1.297087  | 0.121454  |

-----  
Rotational constants (GHZ):      0.3713439      0.2189097      0.1561099

Standard basis: 6-311++G(d,p) (5D, 7F)

There are 538 symmetry adapted cartesian basis functions of A symmetry.

There are 519 symmetry adapted basis functions of A symmetry.

519 basis functions, 823 primitive gaussians, 538 cartesian basis functions

78 alpha electrons      78 beta electrons

nuclear repulsion energy      1555.1715730412 Hartrees.

NAtoms= 34 NActive= 34 NUniq= 34 SFac= 1.00D+00 NAtFMM= 60 NAOKFM=F

Big=F



Integral buffers will be 131072 words long.  
 Raffenetti 2 integral format.  
 Two-electron integral symmetry is turned on.  
 One-electron integrals computed using PRISM.  
 NBasis= 519 RedAO= T EigKep= 3.65D-06 NBF= 519  
 NBsUse= 519 1.00D-06 EigRej= -1.00D+00 NBFU= 519  
 Initial guess from the checkpoint file: "/coohpo.chk"  
 B after Tr= 0.000000 0.000000 0.000000  
 Rot= 0.998653 0.027911 0.013358 -0.041652 Ang= 5.95 deg.  
 ExpMin= 3.50D-02 ExpMax= 4.40D+05 ExpMxC= 1.51D+04 IAcc=3 IRadAn= 5 AccDes= 0.00D+00  
 Harris functional with IExCor= 402 and IRadAn= 5 diagonalized for initial guess.  
 HarFok: IExCor= 402 AccDes= 0.00D+00 IRadAn= 5 IDoV= 1 UseB2=F ITyADJ=14  
 ICtDFT= 3500011 ScaDFX= 1.000000 1.000000 1.000000 1.000000  
 FoFCou: FMM=F IPFlag= 0 FMFlag= 100000 FMFlg1= 0  
 NFxFlg= 0 DoJE=T BraDBF=F KetDBF=T FulRan=T  
 wScrn= 0.000000 ICntrl= 500 IOpCl= 0 I1Cent= 20000004 NGrid= 0  
 NMat0= 1 NMatS0= 1 NMatT0= 0 NMatD0= 1 NMtDS0= 0  
 NMtDT0= 0  
 Petite list used in FoFCou.  
 Requested convergence on RMS density matrix=1.00D-08 within 128 cycles.  
 Requested convergence on MAX density matrix=1.00D-06.  
 Requested convergence on energy=1.00D-06.  
 No special actions if energy rises.  
 SCF Done: E(RB3LYP) = -3338.88347927 A.U. after 15 cycles  
 NFock= 15 Conv=0.38D-08 -V/T= 2.0019  
 Calling FoFJK, ICntrl= 2127 FMM=F ISym2X=0 I1Cent= 0 IOpClX= 0 NMat=1 NMatS=1  
 NMatT=0.  
 \*\*\*\*\* Axes restored to original set \*\*\*\*\*

| Center Number | Atomic Number | Forces (Hartrees/Bohr) |              |              |
|---------------|---------------|------------------------|--------------|--------------|
|               |               | X                      | Y            | Z            |
| 1             | 6             | -0.002450413           | 0.003494264  | 0.003470217  |
| 2             | 6             | 0.000707777            | 0.000744769  | 0.002202284  |
| 3             | 7             | 0.001276465            | -0.001637550 | -0.001104612 |
| 4             | 6             | -0.000196992           | 0.001540735  | -0.003304025 |
| 5             | 7             | 0.001341503            | -0.007240603 | -0.007913672 |
| 6             | 6             | 0.004906469            | 0.005415033  | 0.004971316  |
| 7             | 1             | 0.000877192            | -0.000671050 | -0.000788198 |
| 8             | 1             | 0.003063747            | -0.000143573 | -0.004246840 |
| 9             | 1             | 0.000837055            | 0.001165346  | 0.000081864  |
| 10            | 1             | -0.000579246           | -0.000553631 | 0.000568522  |

|    |    |              |              |              |
|----|----|--------------|--------------|--------------|
| 11 | 35 | -0.001070154 | 0.003067657  | 0.002988498  |
| 12 | 1  | -0.000339900 | 0.000466803  | 0.000905306  |
| 13 | 6  | 0.001147891  | 0.000663875  | 0.000981755  |
| 14 | 6  | 0.000481171  | -0.000706629 | -0.000640599 |
| 15 | 1  | -0.000541382 | -0.000108470 | 0.000257094  |
| 16 | 1  | -0.000187524 | 0.000145871  | 0.000075008  |
| 17 | 1  | 0.000170820  | -0.000203025 | -0.000024999 |
| 18 | 6  | -0.001571859 | -0.000143451 | -0.000760262 |
| 19 | 6  | 0.000437756  | -0.000426409 | -0.001774699 |
| 20 | 8  | 0.002738520  | -0.000730018 | 0.003193034  |
| 21 | 1  | 0.000336703  | 0.000182423  | 0.000107697  |
| 22 | 1  | -0.001155281 | -0.000531010 | 0.000877545  |
| 23 | 1  | -0.000459885 | -0.000583892 | -0.000627729 |
| 24 | 6  | -0.000364028 | 0.000323821  | 0.000460461  |
| 25 | 1  | 0.000165012  | 0.000056410  | 0.000057423  |
| 26 | 1  | 0.000000207  | -0.000070732 | -0.000004573 |
| 27 | 1  | 0.000219541  | -0.000020015 | -0.000117591 |
| 28 | 6  | -0.002401290 | -0.006077838 | -0.003355471 |
| 29 | 1  | -0.001980832 | 0.002046860  | -0.001424041 |
| 30 | 1  | -0.000703972 | 0.000277643  | -0.001309634 |
| 31 | 6  | -0.004039815 | -0.011689963 | 0.013247414  |
| 32 | 8  | 0.001820849  | 0.010965351  | -0.001708402 |
| 33 | 8  | 0.003191084  | 0.001828977  | -0.004673251 |
| 34 | 1  | -0.005677189 | -0.000847984 | -0.000666842 |

-----  
Cartesian Forces: Max 0.013247414 RMS 0.003013479

GradGradGradGradGradGradGradGradGradGradGradGradGradGradGradGradGradGradGradGrad

Berny optimization.

Using GEDIIS/GDIIS optimizer.

FormGI is forming the generalized inverse of G from B-inverse, IUseBI=4.

Internal Forces: Max 0.018682720 RMS 0.003555331

Search for a local minimum.

Step number 5 out of a maximum of 175

All quantities printed in internal units (Hartrees-Bohrs-Radians)

Mixed Optimization -- RFO/linear search

Update second derivatives using D2CorX and points 2 3 4 5

DE= -9.27D-04 DEPred=-8.66D-03 R= 1.07D-01

Trust test= 1.07D-01 RLast= 8.30D-01 DXMaxT set to 2.52D-01

ITU= 0 -1 0 1 0

Use linear search instead of GDIIS.

|                 |         |         |         |         |         |
|-----------------|---------|---------|---------|---------|---------|
| Eigenvalues --- | 0.00201 | 0.00236 | 0.00280 | 0.00651 | 0.00698 |
| Eigenvalues --- | 0.00823 | 0.01137 | 0.01302 | 0.01411 | 0.01554 |
| Eigenvalues --- | 0.01597 | 0.01713 | 0.01832 | 0.01973 | 0.02154 |

|                 |         |         |         |         |         |
|-----------------|---------|---------|---------|---------|---------|
| Eigenvalues --- | 0.02256 | 0.02267 | 0.02378 | 0.02474 | 0.02616 |
| Eigenvalues --- | 0.03010 | 0.03051 | 0.03070 | 0.03355 | 0.03602 |
| Eigenvalues --- | 0.03793 | 0.04888 | 0.05231 | 0.05278 | 0.05739 |
| Eigenvalues --- | 0.05813 | 0.05880 | 0.07829 | 0.09707 | 0.10382 |
| Eigenvalues --- | 0.11969 | 0.12570 | 0.12950 | 0.13592 | 0.13602 |
| Eigenvalues --- | 0.15456 | 0.15750 | 0.15997 | 0.15998 | 0.16000 |
| Eigenvalues --- | 0.16000 | 0.16000 | 0.16000 | 0.16001 | 0.16116 |
| Eigenvalues --- | 0.16899 | 0.18250 | 0.19794 | 0.22002 | 0.22484 |
| Eigenvalues --- | 0.22875 | 0.23338 | 0.24063 | 0.24683 | 0.24989 |
| Eigenvalues --- | 0.25021 | 0.26312 | 0.28615 | 0.29115 | 0.29621 |
| Eigenvalues --- | 0.31848 | 0.32563 | 0.34497 | 0.34561 | 0.34611 |
| Eigenvalues --- | 0.34764 | 0.34884 | 0.34892 | 0.34957 | 0.35001 |
| Eigenvalues --- | 0.35070 | 0.35531 | 0.35669 | 0.35765 | 0.36540 |
| Eigenvalues --- | 0.36559 | 0.36621 | 0.36981 | 0.37243 | 0.37710 |
| Eigenvalues --- | 0.41081 | 0.42341 | 0.45555 | 0.49047 | 0.51932 |
| Eigenvalues --- | 0.53179 | 0.55398 | 0.56095 | 0.60268 | 0.87005 |
| Eigenvalues --- | 1.48695 |         |         |         |         |

RFO step: Lambda=-7.45369823D-03 EMin= 2.00551446D-03

Quartic linear search produced a step of -0.51249.

|             |            |            |           |            |
|-------------|------------|------------|-----------|------------|
| Iteration 1 | RMS(Cart)= | 0.15075099 | RMS(Int)= | 0.02806450 |
| Iteration 2 | RMS(Cart)= | 0.08264103 | RMS(Int)= | 0.00254326 |
| Iteration 3 | RMS(Cart)= | 0.00522008 | RMS(Int)= | 0.00062800 |
| Iteration 4 | RMS(Cart)= | 0.00001313 | RMS(Int)= | 0.00062796 |
| Iteration 5 | RMS(Cart)= | 0.00000001 | RMS(Int)= | 0.00062796 |

| Variable | Old X   | -DE/DX   | Delta X<br>(Linear) | Delta X<br>(Quad) | Delta X<br>(Total) | New X   |
|----------|---------|----------|---------------------|-------------------|--------------------|---------|
| R1       | 2.57967 | -0.00563 | -0.00187            | 0.00285           | 0.00081            | 2.58047 |
| R2       | 2.62328 | -0.00304 | -0.00443            | 0.00357           | -0.00074           | 2.62254 |
| R3       | 2.03189 | 0.00037  | 0.00120             | -0.00168          | -0.00048           | 2.03141 |
| R4       | 2.61877 | 0.00094  | -0.00373            | 0.00777           | 0.00384            | 2.62261 |
| R5       | 2.03410 | -0.00304 | -0.00741            | 0.00811           | 0.00070            | 2.03480 |
| R6       | 2.53304 | 0.00276  | -0.00219            | -0.00020          | -0.00235           | 2.53069 |
| R7       | 2.69682 | -0.00085 | -0.00165            | -0.00100          | -0.00265           | 2.69417 |
| R8       | 2.52627 | -0.00066 | -0.00015            | -0.00230          | -0.00222           | 2.52405 |
| R9       | 2.03412 | -0.00021 | -0.00278            | 0.00319           | 0.00041            | 2.03453 |
| R10      | 2.78530 | -0.00356 | -0.00300            | 0.01047           | 0.00747            | 2.79278 |
| R11      | 2.06188 | 0.00000  | 0.00130             | -0.00221          | -0.00091           | 2.06097 |
| R12      | 2.06081 | -0.00007 | -0.00061            | 0.00091           | 0.00030            | 2.06111 |
| R13      | 2.91679 | -0.00686 | -0.01646            | 0.00070           | -0.01576           | 2.90103 |
| R14      | 5.58833 | -0.00436 | -0.15940            | -0.09370          | -0.25310           | 5.33523 |
| R15      | 2.50205 | -0.00011 | -0.00171            | 0.00286           | 0.00115            | 2.50320 |
| R16      | 2.04426 | -0.00004 | -0.00301            | 0.00294           | -0.00007           | 2.04419 |
| R17      | 2.04303 | 0.00004  | -0.00082            | 0.00039           | -0.00042           | 2.04261 |
| R18      | 2.04488 | 0.00007  | -0.00063            | 0.00023           | -0.00040           | 2.04447 |

|     |         |          |          |          |          |         |
|-----|---------|----------|----------|----------|----------|---------|
| R19 | 2.77793 | 0.00016  | -0.00399 | 0.00169  | -0.00226 | 2.77568 |
| R20 | 2.73759 | -0.00020 | -0.00206 | -0.00012 | -0.00220 | 2.73539 |
| R21 | 2.05227 | 0.00003  | -0.00034 | 0.00211  | 0.00177  | 2.05403 |
| R22 | 2.04965 | 0.00135  | -0.00052 | 0.00332  | 0.00280  | 2.05245 |
| R23 | 2.73512 | -0.00033 | 0.00244  | -0.00318 | -0.00077 | 2.73435 |
| R24 | 2.05681 | -0.00028 | -0.00129 | 0.00056  | -0.00073 | 2.05609 |
| R25 | 2.84339 | 0.00005  | 0.00029  | -0.00142 | -0.00113 | 2.84226 |
| R26 | 3.20569 | 0.00237  | 0.06974  | 0.03335  | 0.10309  | 3.30878 |
| R27 | 2.06690 | 0.00011  | 0.00134  | -0.00097 | 0.00037  | 2.06727 |
| R28 | 2.06753 | 0.00005  | 0.00050  | -0.00016 | 0.00034  | 2.06787 |
| R29 | 2.06355 | 0.00014  | 0.00094  | -0.00056 | 0.00038  | 2.06393 |
| R30 | 2.06277 | 0.00134  | 0.01247  | -0.00471 | 0.00776  | 2.07053 |
| R31 | 2.05696 | 0.00137  | 0.01027  | -0.00966 | 0.00061  | 2.05757 |
| R32 | 2.87502 | -0.00171 | -0.00259 | 0.01500  | 0.01240  | 2.88742 |
| R33 | 2.28051 | -0.00828 | -0.01627 | 0.01236  | -0.00392 | 2.27659 |
| R34 | 2.54618 | -0.00448 | -0.00500 | -0.00490 | -0.00990 | 2.53628 |
| R35 | 1.87706 | -0.00158 | 0.01510  | -0.02649 | -0.01139 | 1.86567 |
| A1  | 1.87590 | 0.00054  | -0.00558 | 0.00555  | -0.00004 | 1.87586 |
| A2  | 2.28098 | -0.00039 | 0.00200  | -0.00094 | 0.00071  | 2.28169 |
| A3  | 2.12623 | -0.00017 | 0.00273  | -0.00494 | -0.00258 | 2.12366 |
| A4  | 1.86313 | 0.00021  | 0.00225  | -0.00613 | -0.00402 | 1.85911 |
| A5  | 2.29490 | -0.00231 | 0.00100  | -0.01897 | -0.01802 | 2.27688 |
| A6  | 2.12467 | 0.00213  | -0.00355 | 0.02452  | 0.02085  | 2.14552 |
| A7  | 1.89395 | 0.00043  | 0.00172  | -0.00017 | 0.00145  | 1.89540 |
| A8  | 2.22169 | -0.00164 | -0.00985 | 0.01390  | 0.00369  | 2.22537 |
| A9  | 2.16418 | 0.00122  | 0.00810  | -0.01039 | -0.00265 | 2.16154 |
| A10 | 1.90482 | -0.00416 | -0.00595 | 0.00477  | -0.00119 | 1.90363 |
| A11 | 2.18615 | 0.00209  | 0.00372  | -0.00173 | 0.00116  | 2.18731 |
| A12 | 2.19215 | 0.00206  | 0.00212  | -0.00253 | -0.00124 | 2.19091 |
| A13 | 1.88588 | 0.00304  | 0.00658  | -0.00457 | 0.00181  | 1.88770 |
| A14 | 2.23397 | -0.01287 | -0.02147 | 0.00658  | -0.01604 | 2.21794 |
| A15 | 2.16322 | 0.00983  | 0.01328  | -0.00128 | 0.01089  | 2.17411 |
| A16 | 1.84691 | 0.00942  | 0.00942  | 0.00090  | 0.01014  | 1.85705 |
| A17 | 1.85778 | 0.00253  | -0.00891 | 0.00562  | -0.00306 | 1.85472 |
| A18 | 2.07191 | -0.01868 | -0.02642 | -0.00844 | -0.03477 | 2.03715 |
| A19 | 1.87822 | -0.00249 | -0.00026 | 0.00247  | 0.00223  | 1.88045 |
| A20 | 1.89809 | 0.00316  | 0.02462  | -0.00304 | 0.02151  | 1.91959 |
| A21 | 1.90234 | 0.00696  | 0.00205  | 0.00343  | 0.00585  | 1.90819 |
| A22 | 1.65105 | -0.00262 | -0.01795 | 0.05777  | 0.03981  | 1.69087 |
| A23 | 2.15123 | 0.00006  | -0.00052 | 0.00374  | 0.00325  | 2.15448 |
| A24 | 1.97435 | 0.00051  | 0.00891  | -0.00402 | 0.00492  | 1.97928 |
| A25 | 2.15687 | -0.00058 | -0.00891 | 0.00090  | -0.00798 | 2.14889 |
| A26 | 2.08591 | 0.00000  | 0.00009  | -0.00204 | -0.00189 | 2.08402 |
| A27 | 2.14453 | 0.00001  | -0.00091 | 0.00383  | 0.00298  | 2.14751 |

|     |          |          |          |          |          |          |
|-----|----------|----------|----------|----------|----------|----------|
| A28 | 2.05202  | -0.00001 | -0.00008 | -0.00172 | -0.00174 | 2.05027  |
| A29 | 2.07445  | 0.00083  | 0.00057  | -0.00129 | -0.00060 | 2.07385  |
| A30 | 2.12514  | -0.00135 | -0.00648 | -0.00295 | -0.00951 | 2.11562  |
| A31 | 1.98787  | -0.00008 | 0.00138  | -0.00127 | 0.00014  | 1.98800  |
| A32 | 1.99439  | -0.00017 | 0.00234  | -0.00355 | -0.00123 | 1.99315  |
| A33 | 2.01384  | 0.00054  | 0.00218  | 0.00577  | 0.00798  | 2.02183  |
| A34 | 2.05405  | -0.00092 | -0.00431 | -0.00664 | -0.01090 | 2.04314  |
| A35 | 2.13148  | 0.00083  | 0.00160  | 0.00528  | 0.00684  | 2.13832  |
| A36 | 1.95852  | -0.00001 | 0.00042  | -0.00235 | -0.00190 | 1.95663  |
| A37 | 2.03617  | -0.00005 | 0.00247  | 0.00104  | 0.00347  | 2.03964  |
| A38 | 2.01830  | 0.00010  | 0.00086  | 0.00145  | 0.00231  | 2.02062  |
| A39 | 2.34915  | -0.00054 | -0.00893 | -0.01704 | -0.02575 | 2.32340  |
| A40 | 2.63950  | 0.00146  | 0.00534  | 0.00821  | 0.01335  | 2.65286  |
| A41 | 1.93494  | 0.00018  | 0.00267  | 0.00147  | 0.00413  | 1.93907  |
| A42 | 1.92042  | -0.00017 | -0.00071 | -0.00244 | -0.00315 | 1.91727  |
| A43 | 1.93408  | 0.00025  | 0.00133  | 0.00102  | 0.00234  | 1.93642  |
| A44 | 1.88357  | -0.00005 | -0.00124 | -0.00023 | -0.00146 | 1.88210  |
| A45 | 1.89555  | -0.00013 | -0.00063 | 0.00035  | -0.00028 | 1.89527  |
| A46 | 1.89401  | -0.00010 | -0.00158 | -0.00020 | -0.00179 | 1.89222  |
| A47 | 1.84604  | 0.00114  | -0.02732 | 0.01672  | -0.01065 | 1.83540  |
| A48 | 1.93401  | 0.00578  | 0.00957  | 0.00804  | 0.01755  | 1.95156  |
| A49 | 2.01203  | -0.01439 | -0.00123 | 0.00194  | 0.00064  | 2.01267  |
| A50 | 1.91048  | -0.00246 | -0.00232 | -0.01553 | -0.01769 | 1.89279  |
| A51 | 1.88062  | 0.00839  | 0.01926  | -0.01678 | 0.00258  | 1.88320  |
| A52 | 1.87845  | 0.00189  | 0.00175  | 0.00358  | 0.00529  | 1.88373  |
| A53 | 2.17465  | -0.00670 | -0.03591 | 0.03763  | -0.00234 | 2.17231  |
| A54 | 1.92110  | 0.01037  | 0.01438  | -0.00885 | 0.00160  | 1.92270  |
| A55 | 2.18181  | -0.00355 | 0.02387  | -0.01702 | 0.00304  | 2.18485  |
| A56 | 1.91941  | -0.01470 | 0.02492  | -0.00752 | 0.01741  | 1.93681  |
| A57 | 2.66621  | -0.00557 | 0.02592  | 0.06579  | 0.09171  | 2.75792  |
| D1  | -0.00716 | -0.00056 | -0.03271 | -0.02337 | -0.05612 | -0.06327 |
| D2  | -3.11483 | -0.00132 | -0.02402 | -0.00346 | -0.02791 | 3.14044  |
| D3  | -3.13528 | 0.00112  | -0.00674 | 0.00526  | -0.00136 | -3.13663 |
| D4  | 0.04024  | 0.00036  | 0.00196  | 0.02517  | 0.02685  | 0.06708  |
| D5  | -0.02025 | 0.00119  | 0.03437  | 0.01492  | 0.04927  | 0.02902  |
| D6  | 3.13697  | 0.00124  | -0.01610 | -0.03658 | -0.05276 | 3.08421  |
| D7  | 3.10932  | -0.00031 | 0.01120  | -0.01060 | 0.00055  | 3.10987  |
| D8  | -0.01664 | -0.00027 | -0.03927 | -0.06210 | -0.10148 | -0.11812 |
| D9  | 0.03208  | -0.00031 | 0.02001  | 0.02373  | 0.04374  | 0.07582  |
| D10 | 3.08769  | -0.00003 | 0.02006  | 0.06554  | 0.08575  | -3.10975 |
| D11 | -3.13939 | 0.00026  | 0.01249  | 0.00525  | 0.01730  | -3.12209 |
| D12 | -0.08378 | 0.00054  | 0.01254  | 0.04705  | 0.05931  | -0.02447 |
| D13 | -1.66225 | 0.00197  | -0.16768 | 0.04410  | -0.12362 | -1.78587 |
| D14 | 1.51753  | 0.00116  | -0.15805 | 0.06717  | -0.09084 | 1.42669  |

|     |          |          |          |          |          |          |
|-----|----------|----------|----------|----------|----------|----------|
| D15 | -0.04554 | 0.00122  | 0.00165  | -0.01498 | -0.01344 | -0.05899 |
| D16 | 3.08466  | 0.00024  | 0.01957  | 0.03137  | 0.05090  | 3.13556  |
| D17 | -3.10464 | 0.00112  | 0.00267  | -0.05654 | -0.05394 | 3.12460  |
| D18 | 0.02556  | 0.00014  | 0.02060  | -0.01019 | 0.01040  | 0.03597  |
| D19 | 0.53985  | -0.00106 | -0.02561 | -0.02591 | -0.05148 | 0.48837  |
| D20 | -2.56196 | -0.00081 | -0.01404 | -0.04273 | -0.05687 | -2.61883 |
| D21 | -2.70012 | -0.00081 | -0.02604 | 0.02265  | -0.00329 | -2.70340 |
| D22 | 0.48126  | -0.00056 | -0.01447 | 0.00583  | -0.00868 | 0.47258  |
| D23 | 0.04079  | -0.00150 | -0.02228 | 0.00008  | -0.02198 | 0.01881  |
| D24 | -3.11565 | -0.00179 | 0.02770  | 0.04910  | 0.07657  | -3.03908 |
| D25 | -3.08937 | -0.00052 | -0.04026 | -0.04647 | -0.08651 | 3.10731  |
| D26 | 0.03738  | -0.00081 | 0.00972  | 0.00255  | 0.01204  | 0.04942  |
| D27 | -2.64283 | 0.00030  | 0.05318  | 0.05904  | 0.11225  | -2.53058 |
| D28 | -0.64787 | 0.00287  | 0.05307  | 0.06474  | 0.11800  | -0.52987 |
| D29 | 1.50364  | 0.00106  | 0.03132  | 0.06811  | 0.09937  | 1.60301  |
| D30 | 0.51667  | 0.00046  | -0.00535 | 0.00003  | -0.00540 | 0.51127  |
| D31 | 2.51163  | 0.00302  | -0.00546 | 0.00573  | 0.00035  | 2.51198  |
| D32 | -1.62004 | 0.00122  | -0.02721 | 0.00910  | -0.01828 | -1.63833 |
| D33 | -3.02208 | 0.00345  | 0.03468  | -0.00837 | 0.02639  | -2.99569 |
| D34 | 1.19225  | 0.00266  | 0.04843  | -0.00389 | 0.04463  | 1.23688  |
| D35 | -0.94634 | 0.00633  | 0.03920  | -0.01659 | 0.02261  | -0.92373 |
| D36 | 1.15020  | 0.00159  | 0.02125  | -0.00091 | 0.02031  | 1.17051  |
| D37 | -0.91866 | 0.00080  | 0.03500  | 0.00357  | 0.03855  | -0.88011 |
| D38 | -3.05725 | 0.00447  | 0.02578  | -0.00913 | 0.01653  | -3.04072 |
| D39 | -0.89280 | -0.00109 | 0.00590  | -0.00406 | 0.00186  | -0.89094 |
| D40 | -2.96166 | -0.00187 | 0.01965  | 0.00042  | 0.02010  | -2.94156 |
| D41 | 1.18293  | 0.00179  | 0.01042  | -0.01228 | -0.00192 | 1.18102  |
| D42 | -3.08287 | -0.00010 | 0.00726  | -0.01617 | -0.00885 | -3.09172 |
| D43 | 0.01657  | -0.00009 | -0.01076 | -0.01406 | -0.02476 | -0.00819 |
| D44 | 0.01480  | -0.00035 | -0.00486 | 0.00230  | -0.00262 | 0.01219  |
| D45 | 3.11424  | -0.00034 | -0.02288 | 0.00441  | -0.01853 | 3.09572  |
| D46 | -2.74030 | -0.00013 | 0.00490  | -0.00116 | 0.00372  | -2.73658 |
| D47 | -0.03454 | -0.00010 | 0.00029  | -0.00073 | -0.00047 | -0.03501 |
| D48 | -0.00941 | 0.00007  | -0.00472 | 0.00446  | -0.00029 | -0.00971 |
| D49 | 2.69634  | 0.00010  | -0.00932 | 0.00489  | -0.00448 | 2.69187  |
| D50 | 0.67813  | 0.00110  | 0.00076  | 0.00538  | 0.00625  | 0.68438  |
| D51 | -1.68803 | 0.00054  | -0.00679 | 0.00172  | -0.00495 | -1.69298 |
| D52 | 2.07348  | 0.00071  | 0.02459  | 0.03518  | 0.05983  | 2.13331  |
| D53 | -0.31290 | 0.00061  | 0.01990  | 0.03446  | 0.05443  | -0.25846 |
| D54 | 2.54602  | 0.00018  | 0.00257  | 0.00135  | 0.00392  | 2.54994  |
| D55 | -1.65490 | 0.00013  | 0.00226  | 0.00043  | 0.00268  | -1.65222 |
| D56 | 0.43981  | 0.00005  | 0.00068  | -0.00076 | -0.00009 | 0.43972  |
| D57 | 1.33761  | 0.00002  | 0.00152  | -0.00101 | 0.00052  | 1.33814  |
| D58 | -2.86331 | -0.00004 | 0.00121  | -0.00193 | -0.00071 | -2.86402 |

|     |          |          |          |          |          |          |
|-----|----------|----------|----------|----------|----------|----------|
| D59 | -0.76860 | -0.00011 | -0.00037 | -0.00312 | -0.00348 | -0.77208 |
| D60 | -1.02314 | -0.00003 | -0.00317 | -0.00013 | -0.00330 | -1.02644 |
| D61 | 1.05912  | -0.00009 | -0.00348 | -0.00105 | -0.00454 | 1.05459  |
| D62 | -3.12935 | -0.00016 | -0.00507 | -0.00224 | -0.00731 | -3.13666 |
| D63 | 1.71269  | -0.00357 | -0.02707 | -0.12615 | -0.15320 | 1.55949  |
| D64 | -2.60819 | -0.00170 | -0.04363 | -0.14781 | -0.19146 | -2.79966 |
| D65 | 1.90928  | 0.00271  | 0.13147  | 0.28161  | 0.41368  | 2.32296  |
| D66 | -1.12317 | 0.00165  | 0.05185  | 0.16966  | 0.22081  | -0.90236 |
| D67 | -2.31745 | 0.00125  | 0.10955  | 0.29212  | 0.40244  | -1.91502 |
| D68 | 0.93329  | 0.00019  | 0.02993  | 0.18018  | 0.20957  | 1.14286  |
| D69 | -0.25872 | 0.00380  | 0.11833  | 0.26687  | 0.38579  | 0.12707  |
| D70 | 2.99202  | 0.00273  | 0.03871  | 0.15493  | 0.19292  | -3.09824 |
| D71 | 2.96894  | -0.00596 | -0.01205 | -0.00725 | -0.02155 | 2.94739  |
| D72 | -0.06295 | -0.00679 | -0.09403 | -0.12393 | -0.21570 | -0.27866 |
| D73 | -1.32449 | -0.00201 | 0.00414  | -0.08200 | -0.07786 | -1.40235 |

| Item                 | Value    | Threshold | Converged? |
|----------------------|----------|-----------|------------|
| Maximum Force        | 0.018683 | 0.000450  | NO         |
| RMS Force            | 0.003555 | 0.000300  | NO         |
| Maximum Displacement | 0.651907 | 0.001800  | NO         |
| RMS Displacement     | 0.140725 | 0.001200  | NO         |

Predicted change in Energy=-5.262263D-03

GradGradGradGradGradGradGradGradGradGradGradGradGradGradGradGradGradGradGrad

Input orientation:

| Center Number | Atomic Number | Atomic Type | Coordinates (Angstroms) |           |           |
|---------------|---------------|-------------|-------------------------|-----------|-----------|
|               |               |             | X                       | Y         | Z         |
| 1             | 6             | 0           | -0.831512               | 1.266370  | 1.386843  |
| 2             | 6             | 0           | -1.653444               | 0.187589  | 1.545981  |
| 3             | 7             | 0           | -2.735003               | 0.387288  | 0.699572  |
| 4             | 6             | 0           | -2.519158               | 1.499719  | -0.014093 |
| 5             | 7             | 0           | -1.378045               | 2.063484  | 0.390920  |
| 6             | 6             | 0           | -0.875586               | 3.371194  | -0.079762 |
| 7             | 1             | 0           | 0.109388                | 1.505469  | 1.848480  |
| 8             | 1             | 0           | -1.579919               | -0.654402 | 2.213124  |
| 9             | 1             | 0           | -1.754177               | 3.965530  | -0.333322 |
| 10            | 1             | 0           | -0.393488               | 3.840269  | 0.778816  |
| 11            | 35            | 0           | -0.631306               | -2.511803 | 0.310204  |
| 12            | 1             | 0           | -3.186337               | 1.901765  | -0.757297 |
| 13            | 6             | 0           | -3.877364               | -0.450357 | 0.538453  |
| 14            | 6             | 0           | -4.348521               | -1.234562 | 1.496416  |
| 15            | 1             | 0           | -4.303665               | -0.409242 | -0.454893 |
| 16            | 1             | 0           | -5.191780               | -1.878088 | 1.288714  |

|    |   |   |           |           |           |
|----|---|---|-----------|-----------|-----------|
| 17 | 1 | 0 | -3.896183 | -1.305364 | 2.476652  |
| 18 | 6 | 0 | 3.464842  | -0.799293 | 0.196992  |
| 19 | 6 | 0 | 4.314221  | -0.367116 | 1.314681  |
| 20 | 8 | 0 | 3.235474  | 0.474844  | 0.844485  |
| 21 | 1 | 0 | 3.849326  | -0.715551 | -0.816228 |
| 22 | 1 | 0 | 2.667797  | -1.522578 | 0.342637  |
| 23 | 1 | 0 | 4.102638  | -0.796140 | 2.291916  |
| 24 | 6 | 0 | 5.713698  | 0.146502  | 1.115056  |
| 25 | 1 | 0 | 5.956835  | 0.921935  | 1.847396  |
| 26 | 1 | 0 | 6.430842  | -0.670336 | 1.241186  |
| 27 | 1 | 0 | 5.837640  | 0.562818  | 0.112966  |
| 28 | 6 | 0 | 0.102538  | 3.349642  | -1.262779 |
| 29 | 1 | 0 | 0.465932  | 4.379366  | -1.352920 |
| 30 | 1 | 0 | -0.393332 | 3.076583  | -2.192876 |
| 31 | 6 | 0 | 1.315762  | 2.436833  | -1.090946 |
| 32 | 8 | 0 | 1.709846  | 1.662365  | -1.925360 |
| 33 | 8 | 0 | 1.931295  | 2.699571  | 0.072423  |
| 34 | 1 | 0 | 2.603819  | 2.007408  | 0.280552  |

-----  
Distance matrix (angstroms):

|    |    | 1        | 2        | 3        | 4        | 5        |
|----|----|----------|----------|----------|----------|----------|
| 1  | C  | 0.000000 |          |          |          |          |
| 2  | C  | 1.365528 | 0.000000 |          |          |          |
| 3  | N  | 2.206447 | 1.387825 | 0.000000 |          |          |
| 4  | C  | 2.205725 | 2.214718 | 1.339182 | 0.000000 |          |
| 5  | N  | 1.387787 | 2.220133 | 2.178586 | 1.335667 | 0.000000 |
| 6  | C  | 2.565766 | 3.658339 | 3.601179 | 2.491598 | 1.477874 |
| 7  | H  | 1.074974 | 2.221686 | 3.265100 | 3.221563 | 2.155996 |
| 8  | H  | 2.220860 | 1.076770 | 2.170294 | 3.237731 | 3.278427 |
| 9  | H  | 3.331027 | 4.220753 | 3.851325 | 2.601409 | 2.069729 |
| 10 | H  | 2.680768 | 3.939302 | 4.172775 | 3.259655 | 2.068037 |
| 11 | Br | 3.933679 | 3.139845 | 3.603037 | 4.445386 | 4.636528 |
| 12 | H  | 3.247502 | 3.254727 | 2.149375 | 1.076625 | 2.148133 |
| 13 | C  | 3.597796 | 2.523472 | 1.425692 | 2.439842 | 3.547924 |
| 14 | C  | 4.316945 | 3.047689 | 2.422560 | 3.620013 | 4.574161 |
| 15 | H  | 4.272647 | 3.373926 | 2.104269 | 2.650075 | 3.922885 |
| 16 | H  | 5.376726 | 4.105244 | 3.393342 | 4.499977 | 5.557572 |
| 17 | H  | 4.146530 | 2.850428 | 2.715037 | 3.996060 | 4.694724 |
| 18 | C  | 4.913386 | 5.384288 | 6.332348 | 6.413912 | 5.629090 |
| 19 | C  | 5.399264 | 5.997852 | 7.116112 | 7.207343 | 6.258039 |
| 20 | O  | 4.178641 | 4.947336 | 5.972877 | 5.907903 | 4.900414 |
| 21 | H  | 5.540016 | 6.056086 | 6.845969 | 6.790319 | 6.041991 |
| 22 | H  | 4.594971 | 4.800608 | 5.741536 | 6.013820 | 5.406571 |
| 23 | H  | 5.423923 | 5.886988 | 7.119648 | 7.378132 | 6.467544 |



|    |    |          |          |          |          |          |
|----|----|----------|----------|----------|----------|----------|
| 24 | C  | 6.645882 | 7.379849 | 8.462338 | 8.419388 | 7.381871 |
| 25 | H  | 6.812664 | 7.651566 | 8.783586 | 8.697208 | 7.564715 |
| 26 | H  | 7.517568 | 8.135393 | 9.242544 | 9.294480 | 8.317178 |
| 27 | H  | 6.826078 | 7.636143 | 8.594482 | 8.410113 | 7.375322 |
| 28 | C  | 3.497566 | 4.579430 | 4.547307 | 3.443069 | 2.565355 |
| 29 | H  | 4.345159 | 5.519635 | 5.513202 | 4.358393 | 3.435773 |
| 30 | H  | 4.035252 | 4.890114 | 4.591512 | 3.428226 | 2.944831 |
| 31 | C  | 3.481409 | 4.563843 | 4.880091 | 4.091993 | 3.097081 |
| 32 | O  | 4.193567 | 5.053404 | 5.317214 | 4.643691 | 3.880866 |
| 33 | O  | 3.378589 | 4.618634 | 5.245408 | 4.610170 | 3.384934 |
| 34 | H  | 3.684361 | 4.799723 | 5.594943 | 5.156497 | 3.983788 |
|    |    | 6        | 7        | 8        | 9        | 10       |
| 6  | C  | 0.000000 |          |          |          |          |
| 7  | H  | 2.858185 | 0.000000 |          |          |          |
| 8  | H  | 4.686025 | 2.766183 | 0.000000 |          |          |
| 9  | H  | 1.090619 | 3.779554 | 5.278117 | 0.000000 |          |
| 10 | H  | 1.090691 | 2.616936 | 4.864866 | 1.761821 | 0.000000 |
| 11 | Br | 5.900966 | 4.365020 | 2.823280 | 6.605362 | 6.373772 |
| 12 | H  | 2.820965 | 4.220063 | 4.235324 | 2.547540 | 3.730609 |
| 13 | C  | 4.898685 | 4.629862 | 2.850335 | 4.976743 | 5.532146 |
| 14 | C  | 5.979849 | 5.244489 | 2.918117 | 6.092578 | 6.473881 |
| 15 | H  | 5.117044 | 5.333543 | 3.820629 | 5.064908 | 5.905071 |
| 16 | H  | 6.932331 | 6.313809 | 3.923962 | 6.971082 | 7.482192 |
| 17 | H  | 6.126129 | 4.933557 | 2.420388 | 6.345586 | 6.452059 |
| 18 | C  | 6.025684 | 4.392996 | 5.434647 | 7.086813 | 6.062241 |
| 19 | C  | 6.546261 | 4.633804 | 5.969140 | 7.636307 | 6.336542 |
| 20 | O  | 5.113110 | 3.441309 | 5.131898 | 6.202317 | 4.949724 |
| 21 | H  | 6.290363 | 5.101053 | 6.217509 | 7.317443 | 6.426596 |
| 22 | H  | 6.056648 | 4.240530 | 4.721816 | 7.080261 | 6.190464 |
| 23 | H  | 6.911891 | 4.630344 | 5.684871 | 7.991724 | 6.633318 |
| 24 | C  | 7.432691 | 5.813175 | 7.419168 | 8.511870 | 7.145257 |
| 25 | H  | 7.509646 | 5.876491 | 7.708518 | 8.571972 | 7.070017 |
| 26 | H  | 8.453565 | 6.712952 | 8.069524 | 9.537550 | 8.193340 |
| 27 | H  | 7.279528 | 6.059165 | 7.804645 | 8.331465 | 7.071916 |
| 28 | C  | 1.535161 | 3.616760 | 5.562817 | 2.165779 | 2.157513 |
| 29 | H  | 2.106422 | 4.316871 | 6.499307 | 2.477847 | 2.360832 |
| 30 | H  | 2.187376 | 4.365053 | 5.894155 | 2.469832 | 3.068251 |
| 31 | C  | 2.587958 | 3.311043 | 5.371925 | 3.512184 | 2.896062 |
| 32 | O  | 3.607047 | 4.102189 | 5.772089 | 4.454056 | 4.059538 |
| 33 | O  | 2.890124 | 2.810624 | 5.306634 | 3.917905 | 2.684175 |
| 34 | H  | 3.754464 | 2.988734 | 5.322004 | 4.816971 | 3.548450 |
|    |    | 11       | 12       | 13       | 14       | 15       |
| 11 | Br | 0.000000 |          |          |          |          |
| 12 | H  | 5.210310 | 0.000000 |          |          |          |

|    |   |           |           |           |           |           |
|----|---|-----------|-----------|-----------|-----------|-----------|
| 13 | C | 3.852084  | 2.772899  | 0.000000  |           |           |
| 14 | C | 4.105622  | 4.033167  | 1.324634  | 0.000000  |           |
| 15 | H | 4.300274  | 2.584691  | 1.081739  | 2.119144  | 0.000000  |
| 16 | H | 4.707123  | 4.742916  | 2.080623  | 1.080904  | 2.446717  |
| 17 | H | 4.099807  | 4.609554  | 2.118491  | 1.081889  | 3.092415  |
| 18 | C | 4.441163  | 7.241862  | 7.358420  | 7.932628  | 7.805561  |
| 19 | C | 5.483329  | 8.105510  | 8.228702  | 8.707961  | 8.797791  |
| 20 | O | 4.915028  | 6.770633  | 7.179284  | 7.801542  | 7.701208  |
| 21 | H | 4.956958  | 7.506956  | 7.849028  | 8.533603  | 8.166740  |
| 22 | H | 3.444372  | 6.870726  | 6.635295  | 7.116381  | 7.104706  |
| 23 | H | 5.411183  | 8.348985  | 8.177691  | 8.499830  | 8.852151  |
| 24 | C | 6.926287  | 9.262683  | 9.626900  | 10.163711 | 10.154859 |
| 25 | H | 7.586640  | 9.557305  | 10.015388 | 10.534420 | 10.599548 |
| 26 | H | 7.357422  | 10.153806 | 10.334474 | 10.797136 | 10.870809 |
| 27 | H | 7.165156  | 9.164186  | 9.776957  | 10.435630 | 10.203599 |
| 28 | C | 6.113047  | 3.628851  | 5.789996  | 6.959885  | 5.847778  |
| 29 | H | 7.173431  | 4.453352  | 6.765186  | 7.925519  | 6.818084  |
| 30 | H | 6.127976  | 3.352903  | 5.660207  | 6.916672  | 5.519263  |
| 31 | C | 5.499390  | 4.546044  | 6.161118  | 7.228947  | 6.331087  |
| 32 | O | 5.282273  | 5.039275  | 6.461493  | 7.536878  | 6.528104  |
| 33 | O | 5.812218  | 5.245482  | 6.624180  | 7.545942  | 6.986952  |
| 34 | H | 5.557893  | 5.883383  | 6.936343  | 7.766834  | 7.354890  |
|    |   | 16        | 17        | 18        | 19        | 20        |
| 16 | H | 0.000000  |           |           |           |           |
| 17 | H | 1.848724  | 0.000000  |           |           |           |
| 18 | C | 8.791630  | 7.722542  | 0.000000  |           |           |
| 19 | C | 9.625372  | 8.345132  | 1.468827  | 0.000000  |           |
| 20 | O | 8.760835  | 7.529518  | 1.447508  | 1.446954  | 0.000000  |
| 21 | H | 9.355420  | 8.437053  | 1.086948  | 2.208689  | 2.133500  |
| 22 | H | 7.924292  | 6.905581  | 1.086109  | 2.233982  | 2.136305  |
| 23 | H | 9.410804  | 8.017143  | 2.189863  | 1.088034  | 2.112446  |
| 24 | C | 11.093177 | 9.813852  | 2.606669  | 1.504058  | 2.514481  |
| 25 | H | 11.508426 | 10.121205 | 3.449128  | 2.154905  | 2.934540  |
| 26 | H | 11.685302 | 10.420033 | 3.147082  | 2.139492  | 3.417482  |
| 27 | H | 11.357312 | 10.189428 | 2.737258  | 2.151674  | 2.704465  |
| 28 | C | 7.865690  | 7.186251  | 5.536215  | 6.180280  | 4.745557  |
| 29 | H | 8.839890  | 8.124643  | 6.181763  | 6.667422  | 5.267281  |
| 30 | H | 7.726275  | 7.299035  | 5.968198  | 6.806106  | 5.400263  |
| 31 | C | 8.162685  | 7.341401  | 4.092657  | 4.758144  | 3.358659  |
| 32 | O | 8.396280  | 7.720925  | 3.693799  | 4.625952  | 3.377838  |
| 33 | O | 8.554094  | 7.468556  | 3.822216  | 4.077513  | 2.691910  |
| 34 | H | 8.768400  | 7.618881  | 2.936990  | 3.103749  | 1.750931  |
|    |   | 21        | 22        | 23        | 24        | 25        |
| 21 | H | 0.000000  |           |           |           |           |

|    |   |          |          |          |          |          |
|----|---|----------|----------|----------|----------|----------|
| 22 | H | 1.841269 | 0.000000 |          |          |          |
| 23 | H | 3.119491 | 2.527088 | 0.000000 |          |          |
| 24 | C | 2.819375 | 3.558086 | 2.206601 | 0.000000 |          |
| 25 | H | 3.770656 | 4.365514 | 2.566598 | 1.093953 | 0.000000 |
| 26 | H | 3.301396 | 3.961592 | 2.557420 | 1.094271 | 1.768474 |
| 27 | H | 2.539886 | 3.801254 | 3.099165 | 1.092184 | 1.775224 |
| 28 | C | 5.546497 | 5.735542 | 6.769355 | 6.884717 | 7.059727 |
| 29 | H | 6.139509 | 6.523501 | 7.300433 | 7.179631 | 7.235044 |
| 30 | H | 5.854536 | 6.078784 | 7.438083 | 7.538143 | 7.828852 |
| 31 | C | 4.053634 | 4.422679 | 5.446333 | 5.427145 | 5.698099 |
| 32 | O | 3.385563 | 4.025586 | 5.436462 | 5.250981 | 5.728773 |
| 33 | O | 4.016417 | 4.294414 | 4.675562 | 4.681007 | 4.745049 |
| 34 | H | 3.188843 | 3.531111 | 3.761904 | 3.718967 | 3.856937 |
|    |   | 26       | 27       | 28       | 29       | 30       |
| 26 | H | 0.000000 |          |          |          |          |
| 27 | H | 1.773538 | 0.000000 |          |          |          |
| 28 | C | 7.904271 | 6.523071 | 0.000000 |          |          |
| 29 | H | 8.234624 | 6.750564 | 1.095679 | 0.000000 |          |
| 30 | H | 8.508909 | 7.103586 | 1.088820 | 1.772316 | 0.000000 |
| 31 | C | 6.423191 | 5.040706 | 1.527959 | 2.136416 | 2.131790 |
| 32 | O | 6.144617 | 4.733124 | 2.422676 | 3.042549 | 2.548516 |
| 33 | O | 5.741795 | 4.452740 | 2.355782 | 2.645865 | 3.267660 |
| 34 | H | 4.768567 | 3.545776 | 3.231079 | 3.586778 | 4.030371 |
|    |   | 31       | 32       | 33       | 34       |          |
| 31 | C | 0.000000 |          |          |          |          |
| 32 | O | 1.204720 | 0.000000 |          |          |          |
| 33 | O | 1.342140 | 2.261852 | 0.000000 |          |          |
| 34 | H | 1.929898 | 2.405055 | 0.987268 | 0.000000 |          |

Stoichiometry C<sub>11</sub>H<sub>17</sub>BrN<sub>2</sub>O<sub>3</sub>

Framework group C1[X(C<sub>11</sub>H<sub>17</sub>BrN<sub>2</sub>O<sub>3</sub>)]

Deg. of freedom 96

Full point group C1 NOp 1

Largest Abelian subgroup C1 NOp 1

Largest concise Abelian subgroup C1 NOp 1

Standard orientation:

| Center<br>Number | Atomic<br>Number | Atomic<br>Type | Coordinates (Angstroms) |          |           |
|------------------|------------------|----------------|-------------------------|----------|-----------|
|                  |                  |                | X                       | Y        | Z         |
| 1                | 6                | 0              | -0.792283               | 0.936654 | 1.262291  |
| 2                | 6                | 0              | -1.819222               | 0.041187 | 1.171739  |
| 3                | 7                | 0              | -2.795391               | 0.638336 | 0.386523  |
| 4                | 6                | 0              | -2.326991               | 1.811291 | -0.058659 |
| 5                | 7                | 0              | -1.118496               | 2.026737 | 0.467774  |

|    |    |   |           |           |           |
|----|----|---|-----------|-----------|-----------|
| 6  | 6  | 0 | -0.343013 | 3.274166  | 0.304507  |
| 7  | 1  | 0 | 0.152857  | 0.871028  | 1.770202  |
| 8  | 1  | 0 | -1.948297 | -0.922919 | 1.633555  |
| 9  | 1  | 0 | -1.071988 | 4.076730  | 0.186452  |
| 10 | 1  | 0 | 0.178769  | 3.435331  | 1.248633  |
| 11 | 35 | 0 | -1.293079 | -2.473909 | -0.632726 |
| 12 | 1  | 0 | -2.862570 | 2.493991  | -0.695994 |
| 13 | 6  | 0 | -4.071856 | 0.108576  | 0.036394  |
| 14 | 6  | 0 | -4.737218 | -0.752234 | 0.792011  |
| 15 | 1  | 0 | -4.430807 | 0.452164  | -0.924470 |
| 16 | 1  | 0 | -5.680000 | -1.147942 | 0.441399  |
| 17 | 1  | 0 | -4.358024 | -1.126621 | 1.733568  |
| 18 | 6  | 0 | 3.062137  | -1.655184 | -0.339954 |
| 19 | 6  | 0 | 3.922986  | -1.661121 | 0.850153  |
| 20 | 8  | 0 | 3.058264  | -0.533951 | 0.575525  |
| 21 | 1  | 0 | 3.506212  | -1.432828 | -1.306810 |
| 22 | 1  | 0 | 2.130905  | -2.213638 | -0.363868 |
| 23 | 1  | 0 | 3.581314  | -2.240494 | 1.705375  |
| 24 | 6  | 0 | 5.404887  | -1.414437 | 0.777313  |
| 25 | 1  | 0 | 5.760057  | -0.884416 | 1.665945  |
| 26 | 1  | 0 | 5.938044  | -2.368350 | 0.720555  |
| 27 | 1  | 0 | 5.659509  | -0.823790 | -0.105392 |
| 28 | 6  | 0 | 0.669718  | 3.311431  | -0.848623 |
| 29 | 1  | 0 | 1.234633  | 4.239042  | -0.703987 |
| 30 | 1  | 0 | 0.177030  | 3.355724  | -1.818585 |
| 31 | 6  | 0 | 1.667025  | 2.154257  | -0.880010 |
| 32 | 8  | 0 | 1.940872  | 1.516797  | -1.864896 |
| 33 | 8  | 0 | 2.263012  | 2.024634  | 0.315539  |
| 34 | 1  | 0 | 2.773145  | 1.180909  | 0.366424  |

-----  
Rotational constants (GHZ):      0.3607105      0.2247632      0.1557018

Standard basis: 6-311++G(d,p) (5D, 7F)

There are 538 symmetry adapted cartesian basis functions of A symmetry.

There are 519 symmetry adapted basis functions of A symmetry.

519 basis functions, 823 primitive gaussians, 538 cartesian basis functions

78 alpha electrons      78 beta electrons

nuclear repulsion energy      1556.3641117261 Hartrees.

NAtoms= 34 NActive= 34 NUniq= 34 SFac= 1.00D+00 NATFMM= 60 NAOKFM=F

Big=F

Integral buffers will be 131072 words long.

Raffenetti 2 integral format.

Two-electron integral symmetry is turned on.

One-electron integrals computed using PRISM.

NBasis= 519 RedAO= T EigKep= 3.69D-06 NBF= 519

NBsUse= 519 1.00D-06 EigRej= -1.00D+00 NBFU= 519  
 Initial guess from the checkpoint file: "./coohpo.chk"  
 B after Tr= 0.000000 0.000000 0.000000  
 Rot= 0.999819 -0.015959 0.003872 0.009556 Ang= -2.18 deg.  
 ExpMin= 3.50D-02 ExpMax= 4.40D+05 ExpMxC= 1.51D+04 IAcc=3 IRadAn= 5 AccDes=  
 0.00D+00  
 Harris functional with IExCor= 402 and IRadAn= 5 diagonalized for initial guess.  
 HarFok: IExCor= 402 AccDes= 0.00D+00 IRadAn= 5 IDoV= 1 UseB2=F ITyADJ=14  
 ICtDFT= 3500011 ScaDFX= 1.000000 1.000000 1.000000 1.000000  
 FoFCou: FMM=F IPFlag= 0 FMFlag= 100000 FMFlg1= 0  
 NFxFlg= 0 DoJE=T BraDBF=F KetDBF=T FulRan=T  
 wScrn= 0.000000 ICntrl= 500 IOpCl= 0 I1Cent= 200000004 NGrid=

0  
 NMat0= 1 NMatS0= 1 NMatT0= 0 NMatD0= 1 NMtDS0= 0  
 NMtDT0= 0

Petite list used in FoFCou.  
 Requested convergence on RMS density matrix=1.00D-08 within 128 cycles.  
 Requested convergence on MAX density matrix=1.00D-06.  
 Requested convergence on energy=1.00D-06.  
 No special actions if energy rises.  
 SCF Done: E(RB3LYP) = -3338.88864346 A.U. after 16 cycles  
 NFock= 16 Conv=0.17D-08 -V/T= 2.0019  
 Calling FoFJK, ICntrl= 2127 FMM=F ISym2X=0 I1Cent= 0 IOpClX= 0 NMat=1 NMatS=1  
 NMatT=0.  
 \*\*\*\*\* Axes restored to original set \*\*\*\*\*

| Center Number | Atomic Number | Forces (Hartrees/Bohr) |              |              |
|---------------|---------------|------------------------|--------------|--------------|
|               |               | X                      | Y            | Z            |
| 1             | 6             | 0.000033446            | -0.000847584 | -0.000894480 |
| 2             | 6             | -0.001314174           | 0.004760711  | 0.005774824  |
| 3             | 7             | 0.001702056            | -0.004595421 | -0.000497034 |
| 4             | 6             | -0.000883901           | 0.003383288  | -0.002056125 |
| 5             | 7             | -0.000591719           | -0.000545959 | -0.002097123 |
| 6             | 6             | 0.002758547            | 0.000294938  | 0.004824123  |
| 7             | 1             | 0.000758187            | -0.000592980 | -0.000765806 |
| 8             | 1             | 0.000543046            | -0.000226991 | -0.004579733 |
| 9             | 1             | 0.000524021            | 0.001055619  | -0.000603079 |
| 10            | 1             | -0.000882907           | -0.000875804 | 0.000022056  |
| 11            | 35            | 0.000458827            | 0.002021795  | 0.001296010  |
| 12            | 1             | 0.000171465            | -0.000448786 | 0.000088880  |
| 13            | 6             | 0.000575883            | -0.000724220 | 0.000732119  |
| 14            | 6             | 0.001541097            | -0.000880240 | -0.000948182 |
| 15            | 1             | -0.000220377           | 0.000545518  | 0.000098692  |

|    |   |              |              |              |
|----|---|--------------|--------------|--------------|
| 16 | 1 | -0.000317039 | 0.000055457  | -0.000032317 |
| 17 | 1 | 0.000058064  | 0.000320611  | 0.000084960  |
| 18 | 6 | -0.001433200 | -0.001077245 | -0.001628050 |
| 19 | 6 | -0.000239878 | -0.000062871 | -0.000792837 |
| 20 | 8 | 0.000838918  | 0.002239165  | 0.002191924  |
| 21 | 1 | -0.000228049 | 0.000122009  | 0.000456651  |
| 22 | 1 | -0.000649063 | -0.000014046 | 0.000360392  |
| 23 | 1 | -0.000151478 | -0.000118389 | -0.000049550 |
| 24 | 6 | 0.000193800  | 0.000014132  | -0.000086532 |
| 25 | 1 | -0.000246676 | -0.000069090 | 0.000051694  |
| 26 | 1 | 0.000066629  | 0.000004076  | 0.000052147  |
| 27 | 1 | -0.000092972 | 0.000014736  | -0.000046158 |
| 28 | 6 | -0.002656859 | -0.005551282 | 0.000077681  |
| 29 | 1 | 0.000799317  | -0.001056581 | -0.002295320 |
| 30 | 1 | -0.000431820 | -0.000576653 | -0.000724816 |
| 31 | 6 | 0.005732527  | 0.007046781  | -0.004521949 |
| 32 | 8 | -0.004314473 | 0.001292439  | 0.003991835  |
| 33 | 8 | -0.002956138 | -0.001928186 | 0.005129169  |
| 34 | 1 | 0.000854895  | -0.002978947 | -0.002614066 |

-----  
Cartesian Forces: Max 0.007046781 RMS 0.002059820

GradGradGradGradGradGradGradGradGradGradGradGradGradGradGradGradGradGradGrad

Berny optimization.

Using GEDIIS/GDIIS optimizer.

FormGI is forming the generalized inverse of G from B-inverse, IUseBI=4.

GSVD: received Info= 1 from GESDD.

Internal Forces: Max 0.015769712 RMS 0.003154536

Search for a local minimum.

Step number 6 out of a maximum of 175

All quantities printed in internal units (Hartrees-Bohrs-Radians)

Mixed Optimization -- RFO/linear search

Update second derivatives using D2CorX and points 4 5 6

DE= -5.16D-03 DEPred=-5.26D-03 R= 9.81D-01

TightC=F SS= 1.41D+00 RLast= 9.74D-01 DXNew= 4.2426D-01 2.9222D+00

Trust test= 9.81D-01 RLast= 9.74D-01 DXMaxT set to 4.24D-01

ITU= 1 0 -1 0 1 0

Use linear search instead of GDIIS.

|                 |         |         |         |         |         |
|-----------------|---------|---------|---------|---------|---------|
| Eigenvalues --- | 0.00153 | 0.00236 | 0.00291 | 0.00698 | 0.00768 |
| Eigenvalues --- | 0.00970 | 0.01091 | 0.01308 | 0.01483 | 0.01583 |
| Eigenvalues --- | 0.01673 | 0.01790 | 0.01955 | 0.02053 | 0.02250 |
| Eigenvalues --- | 0.02257 | 0.02379 | 0.02470 | 0.02496 | 0.02993 |
| Eigenvalues --- | 0.03050 | 0.03072 | 0.03104 | 0.03328 | 0.03745 |
| Eigenvalues --- | 0.03799 | 0.04792 | 0.04994 | 0.05275 | 0.05489 |

|                 |         |         |         |         |         |
|-----------------|---------|---------|---------|---------|---------|
| Eigenvalues --- | 0.05737 | 0.05888 | 0.07819 | 0.09580 | 0.10138 |
| Eigenvalues --- | 0.11941 | 0.12557 | 0.12812 | 0.13443 | 0.13625 |
| Eigenvalues --- | 0.15409 | 0.15796 | 0.15943 | 0.15967 | 0.15999 |
| Eigenvalues --- | 0.16000 | 0.16000 | 0.16000 | 0.16007 | 0.16284 |
| Eigenvalues --- | 0.16911 | 0.18061 | 0.19844 | 0.21886 | 0.22021 |
| Eigenvalues --- | 0.22740 | 0.23043 | 0.23714 | 0.24486 | 0.24971 |
| Eigenvalues --- | 0.25286 | 0.26246 | 0.28648 | 0.29165 | 0.29751 |
| Eigenvalues --- | 0.31847 | 0.32525 | 0.34497 | 0.34575 | 0.34609 |
| Eigenvalues --- | 0.34763 | 0.34879 | 0.34895 | 0.34959 | 0.35012 |
| Eigenvalues --- | 0.35058 | 0.35530 | 0.35666 | 0.35764 | 0.36506 |
| Eigenvalues --- | 0.36558 | 0.36628 | 0.37020 | 0.37284 | 0.37705 |
| Eigenvalues --- | 0.41087 | 0.42423 | 0.45719 | 0.48974 | 0.51020 |
| Eigenvalues --- | 0.53624 | 0.55401 | 0.56092 | 0.60280 | 0.85107 |
| Eigenvalues --- | 1.20648 |         |         |         |         |

RFO step: Lambda=-7.06363040D-03 EMin= 1.53330347D-03

Quartic linear search produced a step of 0.09126.

|             |            |            |           |            |
|-------------|------------|------------|-----------|------------|
| Iteration 1 | RMS(Cart)= | 0.27756100 | RMS(Int)= | 0.01066680 |
| Iteration 2 | RMS(Cart)= | 0.03988832 | RMS(Int)= | 0.00082083 |
| Iteration 3 | RMS(Cart)= | 0.00111713 | RMS(Int)= | 0.00073039 |
| Iteration 4 | RMS(Cart)= | 0.00000102 | RMS(Int)= | 0.00073039 |
| Iteration 5 | RMS(Cart)= | 0.00000000 | RMS(Int)= | 0.00073039 |

| Variable | Old X   | -DE/DX   | Delta X  |          |          | New X   |
|----------|---------|----------|----------|----------|----------|---------|
|          |         |          | (Linear) | (Quad)   | (Total)  |         |
| R1       | 2.58047 | -0.00504 | 0.00007  | -0.00606 | -0.00590 | 2.57458 |
| R2       | 2.62254 | -0.00182 | -0.00007 | 0.00119  | 0.00113  | 2.62367 |
| R3       | 2.03141 | 0.00020  | -0.00004 | -0.00137 | -0.00141 | 2.02999 |
| R4       | 2.62261 | -0.00070 | 0.00035  | 0.00724  | 0.00760  | 2.63021 |
| R5       | 2.03480 | -0.00337 | 0.00006  | 0.00217  | 0.00224  | 2.03704 |
| R6       | 2.53069 | 0.00363  | -0.00021 | 0.00613  | 0.00587  | 2.53655 |
| R7       | 2.69417 | -0.00091 | -0.00024 | -0.00168 | -0.00192 | 2.69225 |
| R8       | 2.52405 | 0.00012  | -0.00020 | -0.00105 | -0.00131 | 2.52273 |
| R9       | 2.03453 | -0.00033 | 0.00004  | 0.00351  | 0.00355  | 2.03807 |
| R10      | 2.79278 | -0.00407 | 0.00068  | 0.00026  | 0.00094  | 2.79372 |
| R11      | 2.06097 | 0.00029  | -0.00008 | -0.00184 | -0.00192 | 2.05905 |
| R12      | 2.06111 | -0.00075 | 0.00003  | -0.00053 | -0.00050 | 2.06061 |
| R13      | 2.90103 | -0.00274 | -0.00144 | -0.00140 | -0.00284 | 2.89820 |
| R14      | 5.33523 | -0.00205 | -0.02310 | -0.10255 | -0.12564 | 5.20958 |
| R15      | 2.50320 | -0.00081 | 0.00010  | 0.00208  | 0.00218  | 2.50538 |
| R16      | 2.04419 | 0.00002  | -0.00001 | 0.00398  | 0.00398  | 2.04817 |
| R17      | 2.04261 | 0.00022  | -0.00004 | 0.00106  | 0.00102  | 2.04363 |
| R18      | 2.04447 | 0.00008  | -0.00004 | 0.00071  | 0.00067  | 2.04515 |
| R19      | 2.77568 | 0.00088  | -0.00021 | 0.00423  | 0.00407  | 2.77975 |
| R20      | 2.73539 | 0.00024  | -0.00020 | 0.00177  | 0.00157  | 2.73696 |
| R21      | 2.05403 | -0.00050 | 0.00016  | 0.00107  | 0.00123  | 2.05526 |

|     |         |          |          |          |          |         |
|-----|---------|----------|----------|----------|----------|---------|
| R22 | 2.05245 | 0.00054  | 0.00026  | 0.00445  | 0.00471  | 2.05716 |
| R23 | 2.73435 | -0.00078 | -0.00007 | -0.00514 | -0.00525 | 2.72910 |
| R24 | 2.05609 | 0.00003  | -0.00007 | 0.00103  | 0.00097  | 2.05705 |
| R25 | 2.84226 | -0.00009 | -0.00010 | -0.00151 | -0.00161 | 2.84064 |
| R26 | 3.30878 | -0.00143 | 0.00941  | -0.01081 | -0.00140 | 3.30738 |
| R27 | 2.06727 | -0.00007 | 0.00003  | -0.00161 | -0.00158 | 2.06569 |
| R28 | 2.06787 | 0.00005  | 0.00003  | -0.00033 | -0.00030 | 2.06757 |
| R29 | 2.06393 | 0.00004  | 0.00003  | -0.00086 | -0.00083 | 2.06310 |
| R30 | 2.07053 | -0.00054 | 0.00071  | -0.01104 | -0.01033 | 2.06020 |
| R31 | 2.05757 | 0.00096  | 0.00006  | -0.01137 | -0.01132 | 2.04626 |
| R32 | 2.88742 | -0.00446 | 0.00113  | 0.00494  | 0.00608  | 2.89350 |
| R33 | 2.27659 | -0.00500 | -0.00036 | 0.01358  | 0.01322  | 2.28981 |
| R34 | 2.53628 | 0.00001  | -0.00090 | -0.00148 | -0.00238 | 2.53389 |
| R35 | 1.86567 | 0.00019  | -0.00104 | -0.02832 | -0.02936 | 1.83630 |
| A1  | 1.87586 | 0.00062  | 0.00000  | 0.00497  | 0.00492  | 1.88078 |
| A2  | 2.28169 | -0.00045 | 0.00007  | -0.00218 | -0.00260 | 2.27909 |
| A3  | 2.12366 | -0.00027 | -0.00024 | -0.00508 | -0.00572 | 2.11794 |
| A4  | 1.85911 | 0.00106  | -0.00037 | -0.00228 | -0.00278 | 1.85633 |
| A5  | 2.27688 | -0.00085 | -0.00164 | -0.01658 | -0.01874 | 2.25814 |
| A6  | 2.14552 | -0.00007 | 0.00190  | 0.02173  | 0.02314  | 2.16866 |
| A7  | 1.89540 | -0.00003 | 0.00013  | 0.00032  | 0.00040  | 1.89580 |
| A8  | 2.22537 | -0.00172 | 0.00034  | 0.00929  | 0.00942  | 2.23480 |
| A9  | 2.16154 | 0.00175  | -0.00024 | -0.00859 | -0.00904 | 2.15249 |
| A10 | 1.90363 | -0.00321 | -0.00011 | -0.00159 | -0.00171 | 1.90192 |
| A11 | 2.18731 | 0.00141  | 0.00011  | -0.00078 | -0.00078 | 2.18653 |
| A12 | 2.19091 | 0.00192  | -0.00011 | 0.00230  | 0.00211  | 2.19302 |
| A13 | 1.88770 | 0.00171  | 0.00017  | 0.00013  | 0.00024  | 1.88794 |
| A14 | 2.21794 | -0.01007 | -0.00146 | -0.01728 | -0.01893 | 2.19900 |
| A15 | 2.17411 | 0.00850  | 0.00099  | 0.01683  | 0.01755  | 2.19166 |
| A16 | 1.85705 | 0.00829  | 0.00093  | 0.02418  | 0.02447  | 1.88152 |
| A17 | 1.85472 | 0.00199  | -0.00028 | 0.01581  | 0.01570  | 1.87042 |
| A18 | 2.03715 | -0.01577 | -0.00317 | -0.05443 | -0.05763 | 1.97952 |
| A19 | 1.88045 | -0.00199 | 0.00020  | 0.00313  | 0.00304  | 1.88349 |
| A20 | 1.91959 | 0.00231  | 0.00196  | -0.00798 | -0.00605 | 1.91355 |
| A21 | 1.90819 | 0.00583  | 0.00053  | 0.02322  | 0.02392  | 1.93211 |
| A22 | 1.69087 | -0.00268 | 0.00363  | 0.04266  | 0.04629  | 1.73716 |
| A23 | 2.15448 | -0.00050 | 0.00030  | 0.00128  | 0.00157  | 2.15605 |
| A24 | 1.97928 | 0.00007  | 0.00045  | -0.00742 | -0.00698 | 1.97229 |
| A25 | 2.14889 | 0.00042  | -0.00073 | 0.00641  | 0.00567  | 2.15456 |
| A26 | 2.08402 | 0.00008  | -0.00017 | -0.00161 | -0.00181 | 2.08221 |
| A27 | 2.14751 | -0.00027 | 0.00027  | 0.00283  | 0.00308  | 2.15059 |
| A28 | 2.05027 | 0.00020  | -0.00016 | -0.00057 | -0.00075 | 2.04952 |
| A29 | 2.07385 | 0.00095  | -0.00005 | 0.00032  | 0.00035  | 2.07421 |
| A30 | 2.11562 | -0.00090 | -0.00087 | -0.00314 | -0.00411 | 2.11151 |



|     |          |          |          |          |          |          |
|-----|----------|----------|----------|----------|----------|----------|
| A31 | 1.98800  | 0.00006  | 0.00001  | -0.00215 | -0.00212 | 1.98588  |
| A32 | 1.99315  | -0.00007 | -0.00011 | -0.00453 | -0.00466 | 1.98849  |
| A33 | 2.02183  | 0.00014  | 0.00073  | 0.00602  | 0.00674  | 2.02857  |
| A34 | 2.04314  | -0.00021 | -0.00100 | -0.00630 | -0.00726 | 2.03588  |
| A35 | 2.13832  | 0.00014  | 0.00062  | 0.00619  | 0.00679  | 2.14511  |
| A36 | 1.95663  | 0.00012  | -0.00017 | -0.00210 | -0.00224 | 1.95439  |
| A37 | 2.03964  | -0.00026 | 0.00032  | -0.00160 | -0.00130 | 2.03834  |
| A38 | 2.02062  | 0.00009  | 0.00021  | 0.00136  | 0.00156  | 2.02218  |
| A39 | 2.32340  | -0.00078 | -0.00235 | -0.01936 | -0.02148 | 2.30192  |
| A40 | 2.65286  | 0.00120  | 0.00122  | 0.00919  | 0.01025  | 2.66311  |
| A41 | 1.93907  | -0.00038 | 0.00038  | -0.00128 | -0.00090 | 1.93817  |
| A42 | 1.91727  | 0.00015  | -0.00029 | -0.00127 | -0.00156 | 1.91571  |
| A43 | 1.93642  | -0.00008 | 0.00021  | -0.00016 | 0.00005  | 1.93648  |
| A44 | 1.88210  | 0.00009  | -0.00013 | 0.00059  | 0.00045  | 1.88256  |
| A45 | 1.89527  | 0.00018  | -0.00003 | 0.00124  | 0.00121  | 1.89648  |
| A46 | 1.89222  | 0.00004  | -0.00016 | 0.00098  | 0.00082  | 1.89304  |
| A47 | 1.83540  | 0.00399  | -0.00097 | 0.04007  | 0.03886  | 1.87426  |
| A48 | 1.95156  | 0.00360  | 0.00160  | 0.01579  | 0.01727  | 1.96883  |
| A49 | 2.01267  | -0.01083 | 0.00006  | -0.03420 | -0.03394 | 1.97873  |
| A50 | 1.89279  | -0.00187 | -0.00161 | -0.02007 | -0.02207 | 1.87072  |
| A51 | 1.88320  | 0.00407  | 0.00024  | -0.01371 | -0.01306 | 1.87015  |
| A52 | 1.88373  | 0.00147  | 0.00048  | 0.01108  | 0.01172  | 1.89546  |
| A53 | 2.17231  | -0.00488 | -0.00021 | 0.03536  | 0.03054  | 2.20285  |
| A54 | 1.92270  | 0.00809  | 0.00015  | 0.01337  | 0.00906  | 1.93176  |
| A55 | 2.18485  | -0.00258 | 0.00028  | -0.03473 | -0.03878 | 2.14607  |
| A56 | 1.93681  | -0.01231 | 0.00159  | -0.04472 | -0.04313 | 1.89368  |
| A57 | 2.75792  | -0.01038 | 0.00837  | 0.01171  | 0.02008  | 2.77800  |
| D1  | -0.06327 | 0.00067  | -0.00512 | 0.01347  | 0.00842  | -0.05485 |
| D2  | 3.14044  | -0.00185 | -0.00255 | -0.04049 | -0.04229 | 3.09816  |
| D3  | -3.13663 | 0.00241  | -0.00012 | 0.05302  | 0.05281  | -3.08382 |
| D4  | 0.06708  | -0.00011 | 0.00245  | -0.00094 | 0.00210  | 0.06919  |
| D5  | 0.02902  | 0.00065  | 0.00450  | -0.00279 | 0.00171  | 0.03073  |
| D6  | 3.08421  | 0.00296  | -0.00481 | -0.00575 | -0.01036 | 3.07386  |
| D7  | 3.10987  | -0.00091 | 0.00005  | -0.03791 | -0.03766 | 3.07221  |
| D8  | -0.11812 | 0.00140  | -0.00926 | -0.04088 | -0.04972 | -0.16784 |
| D9  | 0.07582  | -0.00179 | 0.00399  | -0.01953 | -0.01563 | 0.06018  |
| D10 | -3.10975 | -0.00170 | 0.00782  | 0.00594  | 0.01378  | -3.09597 |
| D11 | -3.12209 | 0.00045  | 0.00158  | 0.02778  | 0.03001  | -3.09208 |
| D12 | -0.02447 | 0.00055  | 0.00541  | 0.05325  | 0.05942  | 0.03495  |
| D13 | -1.78587 | 0.00471  | -0.01128 | -0.10844 | -0.11967 | -1.90555 |
| D14 | 1.42669  | 0.00181  | -0.00829 | -0.16906 | -0.17740 | 1.24930  |
| D15 | -0.05899 | 0.00236  | -0.00123 | 0.01807  | 0.01693  | -0.04206 |
| D16 | 3.13556  | -0.00011 | 0.00464  | 0.01935  | 0.02401  | -3.12362 |
| D17 | 3.12460  | 0.00238  | -0.00492 | -0.00680 | -0.01134 | 3.11326  |

|     |          |          |          |          |          |          |
|-----|----------|----------|----------|----------|----------|----------|
| D18 | 0.03597  | -0.00009 | 0.00095  | -0.00552 | -0.00427 | 0.03170  |
| D19 | 0.48837  | -0.00108 | -0.00470 | -0.04402 | -0.04868 | 0.43969  |
| D20 | -2.61883 | -0.00076 | -0.00519 | -0.05304 | -0.05816 | -2.67699 |
| D21 | -2.70340 | -0.00103 | -0.00030 | -0.01465 | -0.01501 | -2.71842 |
| D22 | 0.47258  | -0.00071 | -0.00079 | -0.02367 | -0.02450 | 0.44808  |
| D23 | 0.01881  | -0.00183 | -0.00201 | -0.00938 | -0.01144 | 0.00736  |
| D24 | -3.03908 | -0.00294 | 0.00699  | -0.00444 | 0.00279  | -3.03629 |
| D25 | 3.10731  | 0.00062  | -0.00789 | -0.01078 | -0.01866 | 3.08864  |
| D26 | 0.04942  | -0.00049 | 0.00110  | -0.00584 | -0.00442 | 0.04499  |
| D27 | -2.53058 | -0.00120 | 0.01024  | -0.02036 | -0.01037 | -2.54095 |
| D28 | -0.52987 | 0.00123  | 0.01077  | 0.00147  | 0.01238  | -0.51749 |
| D29 | 1.60301  | -0.00007 | 0.00907  | 0.00795  | 0.01718  | 1.62019  |
| D30 | 0.51127  | 0.00094  | -0.00049 | -0.02494 | -0.02572 | 0.48556  |
| D31 | 2.51198  | 0.00337  | 0.00003  | -0.00311 | -0.00296 | 2.50901  |
| D32 | -1.63833 | 0.00207  | -0.00167 | 0.00337  | 0.00183  | -1.63650 |
| D33 | -2.99569 | 0.00352  | 0.00241  | -0.06464 | -0.06170 | -3.05739 |
| D34 | 1.23688  | 0.00154  | 0.00407  | -0.07253 | -0.06835 | 1.16852  |
| D35 | -0.92373 | 0.00517  | 0.00206  | -0.07355 | -0.07134 | -0.99507 |
| D36 | 1.17051  | 0.00210  | 0.00185  | -0.05069 | -0.04875 | 1.12176  |
| D37 | -0.88011 | 0.00012  | 0.00352  | -0.05858 | -0.05540 | -0.93551 |
| D38 | -3.04072 | 0.00375  | 0.00151  | -0.05960 | -0.05839 | -3.09911 |
| D39 | -0.89094 | -0.00035 | 0.00017  | -0.06370 | -0.06334 | -0.95428 |
| D40 | -2.94156 | -0.00233 | 0.00183  | -0.07159 | -0.06999 | -3.01155 |
| D41 | 1.18102  | 0.00130  | -0.00017 | -0.07262 | -0.07298 | 1.10804  |
| D42 | -3.09172 | -0.00002 | -0.00081 | -0.01468 | -0.01550 | -3.10722 |
| D43 | -0.00819 | 0.00038  | -0.00226 | -0.00117 | -0.00344 | -0.01163 |
| D44 | 0.01219  | -0.00039 | -0.00024 | -0.00507 | -0.00529 | 0.00690  |
| D45 | 3.09572  | 0.00002  | -0.00169 | 0.00844  | 0.00676  | 3.10248  |
| D46 | -2.73658 | -0.00035 | 0.00034  | -0.00336 | -0.00304 | -2.73962 |
| D47 | -0.03501 | -0.00027 | -0.00004 | 0.00003  | -0.00004 | -0.03505 |
| D48 | -0.00971 | 0.00021  | -0.00003 | 0.00686  | 0.00681  | -0.00290 |
| D49 | 2.69187  | 0.00029  | -0.00041 | 0.01025  | 0.00981  | 2.70168  |
| D50 | 0.68438  | 0.00085  | 0.00057  | 0.00541  | 0.00608  | 0.69046  |
| D51 | -1.69298 | 0.00063  | -0.00045 | 0.00344  | 0.00310  | -1.68988 |
| D52 | 2.13331  | 0.00016  | 0.00546  | 0.03803  | 0.04354  | 2.17685  |
| D53 | -0.25846 | 0.00017  | 0.00497  | 0.04014  | 0.04516  | -0.21330 |
| D54 | 2.54994  | -0.00003 | 0.00036  | -0.00019 | 0.00014  | 2.55008  |
| D55 | -1.65222 | -0.00005 | 0.00024  | -0.00109 | -0.00086 | -1.65309 |
| D56 | 0.43972  | 0.00005  | -0.00001 | -0.00079 | -0.00082 | 0.43890  |
| D57 | 1.33814  | -0.00003 | 0.00005  | -0.00236 | -0.00230 | 1.33584  |
| D58 | -2.86402 | -0.00005 | -0.00006 | -0.00326 | -0.00330 | -2.86732 |
| D59 | -0.77208 | 0.00005  | -0.00032 | -0.00296 | -0.00326 | -0.77534 |
| D60 | -1.02644 | -0.00002 | -0.00030 | 0.00135  | 0.00105  | -1.02539 |
| D61 | 1.05459  | -0.00004 | -0.00041 | 0.00046  | 0.00005  | 1.05463  |

|     |          |          |          |          |          |          |
|-----|----------|----------|----------|----------|----------|----------|
| D62 | -3.13666 | 0.00006  | -0.00067 | 0.00075  | 0.00009  | -3.13657 |
| D63 | 1.55949  | -0.00356 | -0.01398 | -0.09067 | -0.10461 | 1.45488  |
| D64 | -2.79966 | -0.00203 | -0.01747 | -0.11377 | -0.13128 | -2.93094 |
| D65 | 2.32296  | -0.00378 | 0.03775  | 0.03607  | 0.07284  | 2.39580  |
| D66 | -0.90236 | 0.00410  | 0.02015  | 0.21031  | 0.23120  | -0.67116 |
| D67 | -1.91502 | -0.00247 | 0.03673  | 0.05632  | 0.09233  | -1.82268 |
| D68 | 1.14286  | 0.00540  | 0.01912  | 0.23057  | 0.25069  | 1.39354  |
| D69 | 0.12707  | -0.00174 | 0.03521  | 0.03133  | 0.06566  | 0.19273  |
| D70 | -3.09824 | 0.00613  | 0.01761  | 0.20557  | 0.22401  | -2.87423 |
| D71 | 2.94739  | -0.00968 | -0.00197 | -0.13850 | -0.13749 | 2.80991  |
| D72 | -0.27866 | -0.00186 | -0.01968 | 0.04141  | 0.01874  | -0.25992 |
| D73 | -1.40235 | -0.00397 | -0.00711 | -0.18212 | -0.18923 | -1.59158 |

| Item                 | Value    | Threshold | Converged? |
|----------------------|----------|-----------|------------|
| Maximum Force        | 0.015770 | 0.000450  | NO         |
| RMS Force            | 0.003155 | 0.000300  | NO         |
| Maximum Displacement | 1.134381 | 0.001800  | NO         |
| RMS Displacement     | 0.287250 | 0.001200  | NO         |

Predicted change in Energy=-4.833901D-03

GradGradGradGradGradGradGradGradGradGradGradGradGradGradGradGradGrad

Input orientation:

| Center Number | Atomic Number | Atomic Type | Coordinates (Angstroms) |           |           |
|---------------|---------------|-------------|-------------------------|-----------|-----------|
|               |               |             | X                       | Y         | Z         |
| 1             | 6             | 0           | -0.629785               | 1.368951  | 1.320498  |
| 2             | 6             | 0           | -1.357869               | 0.231169  | 1.497982  |
| 3             | 7             | 0           | -2.468504               | 0.342749  | 0.666551  |
| 4             | 6             | 0           | -2.361813               | 1.478361  | -0.041075 |
| 5             | 7             | 0           | -1.257380               | 2.124635  | 0.339332  |
| 6             | 6             | 0           | -0.851800               | 3.473087  | -0.110959 |
| 7             | 1             | 0           | 0.317228                | 1.664060  | 1.732856  |
| 8             | 1             | 0           | -1.166061               | -0.609672 | 2.144650  |
| 9             | 1             | 0           | -1.756091               | 4.025947  | -0.363620 |
| 10            | 1             | 0           | -0.382222               | 3.968638  | 0.739310  |
| 11            | 35            | 0           | -0.506049               | -2.500980 | 0.250648  |
| 12            | 1             | 0           | -3.084851               | 1.836689  | -0.756604 |
| 13            | 6             | 0           | -3.556856               | -0.566189 | 0.528610  |
| 14            | 6             | 0           | -3.933180               | -1.408076 | 1.481145  |
| 15            | 1             | 0           | -4.030226               | -0.515513 | -0.445077 |
| 16            | 1             | 0           | -4.749676               | -2.091326 | 1.291345  |
| 17            | 1             | 0           | -3.435525               | -1.479929 | 2.439493  |
| 18            | 6             | 0           | 2.977495                | -0.771519 | 0.398099  |
| 19            | 6             | 0           | 3.991144                | -0.387989 | 1.392682  |

|    |   |   |           |           |           |
|----|---|---|-----------|-----------|-----------|
| 20 | 8 | 0 | 2.962716  | 0.546280  | 0.998827  |
| 21 | 1 | 0 | 3.249038  | -0.770429 | -0.655056 |
| 22 | 1 | 0 | 2.127520  | -1.392682 | 0.675142  |
| 23 | 1 | 0 | 3.842564  | -0.753611 | 2.407165  |
| 24 | 6 | 0 | 5.404828  | -0.034726 | 1.023464  |
| 25 | 1 | 0 | 5.802739  | 0.737292  | 1.687209  |
| 26 | 1 | 0 | 6.043194  | -0.918475 | 1.115980  |
| 27 | 1 | 0 | 5.461041  | 0.326230  | -0.005352 |
| 28 | 6 | 0 | 0.094588  | 3.453751  | -1.317643 |
| 29 | 1 | 0 | 0.397284  | 4.483133  | -1.510797 |
| 30 | 1 | 0 | -0.380993 | 3.085799  | -2.218176 |
| 31 | 6 | 0 | 1.372132  | 2.645432  | -1.074753 |
| 32 | 8 | 0 | 1.891624  | 1.876329  | -1.853766 |
| 33 | 8 | 0 | 1.815794  | 2.825918  | 0.177662  |
| 34 | 1 | 0 | 2.421021  | 2.098377  | 0.398219  |

-----  
Distance matrix (angstroms):

|    |    | 1        | 2        | 3        | 4        | 5        |
|----|----|----------|----------|----------|----------|----------|
| 1  | C  | 0.000000 |          |          |          |          |
| 2  | C  | 1.362408 | 0.000000 |          |          |          |
| 3  | N  | 2.204909 | 1.391848 | 0.000000 |          |          |
| 4  | C  | 2.205849 | 2.220831 | 1.342287 | 0.000000 |          |
| 5  | N  | 1.388387 | 2.222112 | 2.179222 | 1.334972 | 0.000000 |
| 6  | C  | 2.554553 | 3.654425 | 3.607945 | 2.502789 | 1.478371 |
| 7  | H  | 1.074226 | 2.216820 | 3.262388 | 3.218474 | 2.152540 |
| 8  | H  | 2.209473 | 1.077954 | 2.188206 | 3.250708 | 3.277796 |
| 9  | H  | 3.341323 | 4.245525 | 3.890338 | 2.638395 | 2.087544 |
| 10 | H  | 2.675338 | 3.936514 | 4.183890 | 3.275554 | 2.079959 |
| 11 | Br | 4.016996 | 3.121871 | 3.480086 | 4.400468 | 4.687076 |
| 12 | H  | 3.249689 | 3.262410 | 2.153395 | 1.078501 | 2.150265 |
| 13 | C  | 3.597165 | 2.531997 | 1.424678 | 2.435746 | 3.544566 |
| 14 | C  | 4.318577 | 3.052808 | 2.423680 | 3.621860 | 4.576427 |
| 15 | H  | 4.269831 | 3.387404 | 2.100311 | 2.631037 | 3.908241 |
| 16 | H  | 5.380322 | 4.115949 | 3.393941 | 4.496654 | 5.556688 |
| 17 | H  | 4.152161 | 2.851483 | 2.720406 | 4.007188 | 4.706152 |
| 18 | C  | 4.294753 | 4.583722 | 5.565300 | 5.810597 | 5.130821 |
| 19 | C  | 4.944193 | 5.385758 | 6.541277 | 6.774879 | 5.913530 |
| 20 | O  | 3.699504 | 4.360723 | 5.445180 | 5.504615 | 4.553609 |
| 21 | H  | 4.850261 | 5.182891 | 5.972947 | 6.075827 | 5.447752 |
| 22 | H  | 3.955481 | 3.932161 | 4.912762 | 5.376798 | 4.893039 |
| 23 | H  | 5.068336 | 5.370373 | 6.637870 | 7.033482 | 6.210448 |
| 24 | C  | 6.202830 | 6.784537 | 7.890452 | 7.983946 | 7.036754 |
| 25 | H  | 6.473859 | 7.180966 | 8.343313 | 8.378309 | 7.320299 |
| 26 | H  | 7.057110 | 7.499556 | 8.616361 | 8.816334 | 7.947458 |

|    |    |          |          |          |          |          |
|----|----|----------|----------|----------|----------|----------|
| 27 | H  | 6.320072 | 6.983308 | 7.957978 | 7.907321 | 6.963495 |
| 28 | C  | 3.439606 | 4.519116 | 4.492749 | 3.400837 | 2.517922 |
| 29 | H  | 4.332347 | 5.496591 | 5.486016 | 4.336052 | 3.423946 |
| 30 | H  | 3.941024 | 4.786756 | 4.494850 | 3.353695 | 2.869275 |
| 31 | C  | 3.372581 | 4.461002 | 4.804683 | 4.046343 | 3.030710 |
| 32 | O  | 4.085448 | 4.949745 | 5.264464 | 4.640684 | 3.845460 |
| 33 | O  | 3.067520 | 4.306751 | 4.975977 | 4.395014 | 3.156317 |
| 34 | H  | 3.269568 | 4.356140 | 5.202085 | 4.842819 | 3.678966 |
|    |    | 6        | 7        | 8        | 9        | 10       |
| 6  | C  | 0.000000 |          |          |          |          |
| 7  | H  | 2.835288 | 0.000000 |          |          |          |
| 8  | H  | 4.674982 | 2.745829 | 0.000000 |          |          |
| 9  | H  | 1.089603 | 3.777879 | 5.303633 | 0.000000 |          |
| 10 | H  | 1.090427 | 2.605272 | 4.852866 | 1.762740 | 0.000000 |
| 11 | Br | 5.994979 | 4.496919 | 2.756793 | 6.673882 | 6.489228 |
| 12 | H  | 2.842740 | 4.219165 | 4.252495 | 2.590924 | 3.753287 |
| 13 | C  | 4.903277 | 4.629551 | 2.886066 | 5.012639 | 5.539617 |
| 14 | C  | 5.987942 | 5.250461 | 2.955442 | 6.137710 | 6.486036 |
| 15 | H  | 5.111062 | 5.328629 | 3.862512 | 5.079683 | 5.900704 |
| 16 | H  | 6.937044 | 6.322291 | 3.970608 | 7.008672 | 7.490164 |
| 17 | H  | 6.141075 | 4.946428 | 2.448417 | 6.402547 | 6.473033 |
| 18 | C  | 5.739278 | 3.845860 | 4.499521 | 6.782531 | 5.820070 |
| 19 | C  | 6.373614 | 4.221882 | 5.216451 | 7.456416 | 6.207530 |
| 20 | O  | 4.934405 | 2.964260 | 4.438010 | 6.019260 | 4.792546 |
| 21 | H  | 5.926241 | 4.497151 | 5.230420 | 6.938405 | 6.130992 |
| 22 | H  | 5.759340 | 3.706695 | 3.690560 | 6.747073 | 5.920023 |
| 23 | H  | 6.800219 | 4.327565 | 5.017564 | 7.865517 | 6.552114 |
| 24 | C  | 7.262029 | 5.410434 | 6.690606 | 8.348163 | 7.042558 |
| 25 | H  | 7.416257 | 5.563436 | 7.112506 | 8.494532 | 7.042291 |
| 26 | H  | 8.266325 | 6.311633 | 7.288819 | 9.352292 | 8.081567 |
| 27 | H  | 7.054489 | 5.591956 | 7.029716 | 8.118082 | 6.925705 |
| 28 | C  | 1.533659 | 3.543742 | 5.485263 | 2.159301 | 2.173364 |
| 29 | H  | 2.130716 | 4.298240 | 6.460883 | 2.482349 | 2.436251 |
| 30 | H  | 2.193631 | 4.256702 | 5.771230 | 2.492820 | 3.086443 |
| 31 | C  | 2.561208 | 3.155723 | 5.234758 | 3.492465 | 2.849467 |
| 32 | O  | 3.621241 | 3.922709 | 5.613998 | 4.488565 | 4.033879 |
| 33 | O  | 2.760106 | 2.452396 | 4.956186 | 3.806759 | 2.540183 |
| 34 | H  | 3.586146 | 2.528998 | 4.821899 | 4.663066 | 3.387091 |
|    |    | 11       | 12       | 13       | 14       | 15       |
| 11 | Br | 0.000000 |          |          |          |          |
| 12 | H  | 5.145887 | 0.000000 |          |          |          |
| 13 | C  | 3.623272 | 2.765572 | 0.000000 |          |          |
| 14 | C  | 3.801814 | 4.031834 | 1.325788 | 0.000000 |          |
| 15 | H  | 4.104381 | 2.554141 | 1.083843 | 2.125187 | 0.000000 |

|    |   |           |          |          |          |           |
|----|---|-----------|----------|----------|----------|-----------|
| 16 | H | 4.388535  | 4.732340 | 2.081015 | 1.081444 | 2.452745  |
| 17 | H | 3.796764  | 4.619303 | 2.121583 | 1.082245 | 3.099115  |
| 18 | C | 3.892024  | 6.699860 | 6.538879 | 7.023932 | 7.062906  |
| 19 | C | 5.098403  | 7.722586 | 7.599387 | 7.990201 | 8.230189  |
| 20 | O | 4.677381  | 6.428046 | 6.630499 | 7.183698 | 7.218969  |
| 21 | H | 4.232704  | 6.850221 | 6.911076 | 7.520252 | 7.286752  |
| 22 | H | 2.888633  | 6.296630 | 5.746015 | 6.114078 | 6.319980  |
| 23 | H | 5.158904  | 8.044139 | 7.636459 | 7.857991 | 8.376920  |
| 24 | C | 6.451210  | 8.873866 | 8.991058 | 9.449548 | 9.560754  |
| 25 | H | 7.235394  | 9.282789 | 9.520685 | 9.971619 | 10.139200 |
| 26 | H | 6.793062  | 9.716929 | 9.624451 | 9.995053 | 10.201621 |
| 27 | H | 6.607936  | 8.710806 | 9.077665 | 9.667931 | 9.538660  |
| 28 | C | 6.187012  | 3.610884 | 5.735993 | 6.906047 | 5.790554  |
| 29 | H | 7.259238  | 4.438213 | 6.729789 | 7.900062 | 6.762031  |
| 30 | H | 6.109242  | 3.317728 | 5.564887 | 6.818938 | 5.424963  |
| 31 | C | 5.636472  | 4.540924 | 6.097558 | 7.149117 | 6.290750  |
| 32 | O | 5.416478  | 5.096140 | 6.428651 | 7.472435 | 6.540154  |
| 33 | O | 5.811379  | 5.086034 | 6.363562 | 7.257856 | 6.762315  |
| 34 | H | 5.453770  | 5.631760 | 6.546139 | 7.337834 | 7.011573  |
|    |   | 16        | 17       | 18       | 19       | 20        |
| 16 | H | 0.000000  |          |          |          |           |
| 17 | H | 1.849066  | 0.000000 |          |          |           |
| 18 | C | 7.889801  | 6.767271 | 0.000000 |          |           |
| 19 | C | 8.905817  | 7.579153 | 1.470978 | 0.000000 |           |
| 20 | O | 8.156196  | 6.864294 | 1.448339 | 1.444176 | 0.000000  |
| 21 | H | 8.337426  | 7.400203 | 1.087599 | 2.211383 | 2.133315  |
| 22 | H | 6.940002  | 5.836781 | 1.088602 | 2.235480 | 2.135860  |
| 23 | H | 8.767047  | 7.314312 | 2.187468 | 1.088546 | 2.108854  |
| 24 | C | 10.364136 | 9.068936 | 2.612641 | 1.503203 | 2.510396  |
| 25 | H | 10.932121 | 9.530348 | 3.452582 | 2.152877 | 2.928495  |
| 26 | H | 10.857826 | 9.587128 | 3.152056 | 2.137495 | 3.413001  |
| 27 | H | 10.572831 | 9.401509 | 2.745146 | 2.150630 | 2.701560  |
| 28 | C | 7.811631  | 7.135752 | 5.395167 | 6.106389 | 4.695272  |
| 29 | H | 8.807196  | 8.115006 | 6.157332 | 6.713707 | 5.327144  |
| 30 | H | 7.629204  | 7.202077 | 5.744844 | 6.649894 | 5.289485  |
| 31 | C | 8.093938  | 7.244453 | 4.052411 | 4.706284 | 3.352034  |
| 32 | O | 8.351100  | 7.620699 | 3.641581 | 4.480464 | 3.324690  |
| 33 | O | 8.277981  | 7.157691 | 3.786779 | 4.066648 | 2.680764  |
| 34 | H | 8.352855  | 7.160321 | 2.923349 | 3.104233 | 1.750192  |
|    |   | 21        | 22       | 23       | 24       | 25        |
| 21 | H | 0.000000  |          |          |          |           |
| 22 | H | 1.847817  | 0.000000 |          |          |           |
| 23 | H | 3.119256  | 2.519860 | 0.000000 |          |           |
| 24 | C | 2.829509  | 3.564565 | 2.207283 | 0.000000 |           |

|    |   |          |          |          |          |          |
|----|---|----------|----------|----------|----------|----------|
| 25 | H | 3.778997 | 4.366728 | 2.565817 | 1.093117 | 0.000000 |
| 26 | H | 3.311464 | 3.968843 | 2.556778 | 1.094112 | 1.767961 |
| 27 | H | 2.552986 | 3.811837 | 3.099318 | 1.091747 | 1.774963 |
| 28 | C | 5.313499 | 5.620668 | 6.754511 | 6.771182 | 6.999377 |
| 29 | H | 6.038601 | 6.503633 | 7.392149 | 7.204792 | 7.312832 |
| 30 | H | 5.521862 | 5.892428 | 7.346651 | 7.329504 | 7.681540 |
| 31 | C | 3.920080 | 4.465323 | 5.457132 | 5.277158 | 5.558751 |
| 32 | O | 3.206994 | 4.139741 | 5.373853 | 4.926783 | 5.397475 |
| 33 | O | 3.959964 | 4.259254 | 4.678837 | 4.666887 | 4.747297 |
| 34 | H | 3.166236 | 3.514303 | 3.767027 | 3.720775 | 3.866532 |
|    |   | 26       | 27       | 28       | 29       | 30       |
| 26 | H | 0.000000 |          |          |          |          |
| 27 | H | 1.773578 | 0.000000 |          |          |          |
| 28 | C | 7.773338 | 6.348410 | 0.000000 |          |          |
| 29 | H | 8.243399 | 6.722190 | 1.090212 | 0.000000 |          |
| 30 | H | 8.271697 | 6.829434 | 1.082832 | 1.748897 | 0.000000 |
| 31 | C | 6.270531 | 4.820943 | 1.531174 | 2.125466 | 2.138875 |
| 32 | O | 5.819438 | 4.308153 | 2.450515 | 3.024253 | 2.600076 |
| 33 | O | 5.724669 | 4.423772 | 2.364880 | 2.758518 | 3.260897 |
| 34 | H | 4.768303 | 3.541906 | 3.192727 | 3.664275 | 3.958763 |
|    |   | 31       | 32       | 33       | 34       |          |
| 31 | C | 0.000000 |          |          |          |          |
| 32 | O | 1.211715 | 0.000000 |          |          |          |
| 33 | O | 1.340878 | 2.243695 | 0.000000 |          |          |
| 34 | H | 1.889202 | 2.324006 | 0.971731 | 0.000000 |          |

Stoichiometry C<sub>11</sub>H<sub>17</sub>BrN<sub>2</sub>O<sub>3</sub>

Framework group C1[X(C<sub>11</sub>H<sub>17</sub>BrN<sub>2</sub>O<sub>3</sub>)]

Deg. of freedom 96

Full point group C1 NOp 1

Largest Abelian subgroup C1 NOp 1

Largest concise Abelian subgroup C1 NOp 1

Standard orientation:

| Center<br>Number | Atomic<br>Number | Atomic<br>Type | Coordinates (Angstroms) |           |           |
|------------------|------------------|----------------|-------------------------|-----------|-----------|
|                  |                  |                | X                       | Y         | Z         |
| 1                | 6                | 0              | -0.490631               | 1.051975  | 1.227976  |
| 2                | 6                | 0              | -1.538789               | 0.184551  | 1.156603  |
| 3                | 7                | 0              | -2.511938               | 0.808495  | 0.381416  |
| 4                | 6                | 0              | -2.024003               | 1.978997  | -0.058558 |
| 5                | 7                | 0              | -0.800099               | 2.155583  | 0.444459  |
| 6                | 6                | 0              | 0.021428                | 3.376106  | 0.299561  |
| 7                | 1                | 0              | 0.475121                | 0.944914  | 1.686040  |
| 8                | 1                | 0              | -1.649796               | -0.791979 | 1.599382  |

|    |    |   |           |           |           |
|----|----|---|-----------|-----------|-----------|
| 9  | 1  | 0 | -0.655855 | 4.221829  | 0.184344  |
| 10 | 1  | 0 | 0.568025  | 3.508935  | 1.233702  |
| 11 | 35 | 0 | -1.483851 | -2.344838 | -0.672401 |
| 12 | 1  | 0 | -2.560534 | 2.687150  | -0.669966 |
| 13 | 6  | 0 | -3.814604 | 0.331773  | 0.056603  |
| 14 | 6  | 0 | -4.484338 | -0.535421 | 0.803024  |
| 15 | 1  | 0 | -4.191761 | 0.732707  | -0.877057 |
| 16 | 1  | 0 | -5.456916 | -0.875905 | 0.474872  |
| 17 | 1  | 0 | -4.089602 | -0.960212 | 1.716802  |
| 18 | 6  | 0 | 2.345081  | -1.849748 | -0.180444 |
| 19 | 6  | 0 | 3.366563  | -2.019642 | 0.864298  |
| 20 | 8  | 0 | 2.695313  | -0.751940 | 0.696963  |
| 21 | 1  | 0 | 2.666005  | -1.707994 | -1.209902 |
| 22 | 1  | 0 | 1.331863  | -2.221925 | -0.039275 |
| 23 | 1  | 0 | 3.054259  | -2.529002 | 1.774216  |
| 24 | 6  | 0 | 4.840045  | -2.050282 | 0.568441  |
| 25 | 1  | 0 | 5.413417  | -1.599283 | 1.382534  |
| 26 | 1  | 0 | 5.173511  | -3.086356 | 0.456929  |
| 27 | 1  | 0 | 5.063940  | -1.513648 | -0.355575 |
| 28 | 6  | 0 | 0.987031  | 3.323157  | -0.890782 |
| 29 | 1  | 0 | 1.598676  | 4.224896  | -0.854473 |
| 30 | 1  | 0 | 0.476418  | 3.321169  | -1.845662 |
| 31 | 6  | 0 | 1.942349  | 2.127419  | -0.845266 |
| 32 | 8  | 0 | 2.249149  | 1.420240  | -1.780159 |
| 33 | 8  | 0 | 2.344891  | 1.890460  | 0.411620  |
| 34 | 1  | 0 | 2.686658  | 0.982093  | 0.459845  |

-----  
Rotational constants (GHZ):      0.3547240      0.2549784      0.1678192

Standard basis: 6-311++G(d,p) (5D, 7F)

There are 538 symmetry adapted cartesian basis functions of A symmetry.

There are 519 symmetry adapted basis functions of A symmetry.

519 basis functions, 823 primitive gaussians, 538 cartesian basis functions

78 alpha electrons      78 beta electrons

nuclear repulsion energy      1591.4062598086 Hartrees.

NAtoms= 34 NActive= 34 NUniq= 34 SFac= 1.00D+00 NATFMM= 60 NAOKFM=F

Big=F

Integral buffers will be 131072 words long.

Raffenetti 2 integral format.

Two-electron integral symmetry is turned on.

One-electron integrals computed using PRISM.

NBasis= 519 RedAO= T EigKep= 3.11D-06 NBF= 519

NBsUse= 519 1.00D-06 EigRej= -1.00D+00 NBFU= 519

Initial guess from the checkpoint file: "./coohpo.chk"

B after Tr= 0.000000 0.000000 0.000000



Rot= 0.998723 -0.005587 0.000605 0.050214 Ang= -5.79 deg.  
 ExpMin= 3.50D-02 ExpMax= 4.40D+05 ExpMxC= 1.51D+04 IAcc=3 IRadAn= 5 AccDes= 0.00D+00  
 Harris functional with IExCor= 402 and IRadAn= 5 diagonalized for initial guess.  
 HarFok: IExCor= 402 AccDes= 0.00D+00 IRadAn= 5 IDoV= 1 UseB2=F ITyADJ=14  
 ICtDFT= 3500011 ScaDFX= 1.000000 1.000000 1.000000 1.000000  
 FoFCou: FMM=F IPFlag= 0 FMFlag= 100000 FMFlg1= 0  
 NFxFlg= 0 DoJE=T BraDBF=F KetDBF=T FulRan=T  
 wScrn= 0.000000 ICntrl= 500 IOpCl= 0 I1Cent= 200000004 NGrid= 0  
 NMat0= 1 NMatS0= 1 NMatT0= 0 NMatD0= 1 NMtDS0= 0  
 NMtDT0= 0

Petite list used in FoFCou.

Requested convergence on RMS density matrix=1.00D-08 within 128 cycles.

Requested convergence on MAX density matrix=1.00D-06.

Requested convergence on energy=1.00D-06.

No special actions if energy rises.

SCF Done: E(RB3LYP) = -3338.89024787 A.U. after 14 cycles

NFock= 14 Conv=0.27D-08 -V/T= 2.0019

Calling FoFJK, ICntrl= 2127 FMM=F ISym2X=0 I1Cent= 0 IOpClX= 0 NMat=1 NMatS=1

NMatT=0.

\*\*\*\*\* Axes restored to original set \*\*\*\*\*

| Center Number | Atomic Number | Forces (Hartrees/Bohr) |              |              |
|---------------|---------------|------------------------|--------------|--------------|
|               |               | X                      | Y            | Z            |
| 1             | 6             | 0.001119958            | -0.001369232 | -0.000907048 |
| 2             | 6             | -0.002922736           | 0.005119584  | 0.003070362  |
| 3             | 7             | 0.002275555            | -0.000908073 | 0.000386240  |
| 4             | 6             | -0.001815909           | 0.000546543  | 0.000262861  |
| 5             | 7             | -0.001154105           | 0.003037269  | 0.003026493  |
| 6             | 6             | 0.001651050            | -0.002476335 | -0.002800762 |
| 7             | 1             | -0.000364016           | -0.000167467 | 0.000732398  |
| 8             | 1             | -0.002756791           | -0.000476595 | -0.005087067 |
| 9             | 1             | -0.001562580           | -0.000332651 | 0.000219937  |
| 10            | 1             | -0.000320654           | -0.001780426 | -0.001008933 |
| 11            | 35            | 0.001762542            | -0.000426247 | 0.000676279  |
| 12            | 1             | 0.001100729            | -0.001053294 | 0.000823909  |
| 13            | 6             | -0.001122108           | -0.001244722 | 0.001151320  |
| 14            | 6             | 0.000747042            | 0.000842813  | -0.001828119 |
| 15            | 1             | 0.000221914            | -0.000385897 | 0.001621320  |
| 16            | 1             | 0.000331771            | -0.000088630 | -0.000144017 |
| 17            | 1             | 0.000293800            | 0.000257972  | -0.000653615 |
| 18            | 6             | -0.000222358           | -0.002782831 | -0.000377954 |

|    |   |              |              |              |
|----|---|--------------|--------------|--------------|
| 19 | 6 | -0.001090157 | -0.001294187 | -0.001025679 |
| 20 | 8 | -0.001247402 | 0.005711538  | 0.003079716  |
| 21 | 1 | -0.000578744 | 0.000008329  | 0.001072140  |
| 22 | 1 | 0.000779390  | -0.000499082 | -0.002177864 |
| 23 | 1 | 0.000504273  | 0.000058815  | 0.000005221  |
| 24 | 6 | 0.000050448  | -0.000633027 | -0.000296023 |
| 25 | 1 | 0.000094418  | 0.000433122  | 0.000389899  |
| 26 | 1 | 0.000230308  | -0.000049039 | -0.000028318 |
| 27 | 1 | -0.000098963 | 0.000051202  | -0.000234851 |
| 28 | 6 | 0.010035039  | -0.000621968 | 0.002364249  |
| 29 | 1 | -0.000041864 | 0.003956356  | -0.000948585 |
| 30 | 1 | -0.002529378 | -0.003328691 | -0.003193340 |
| 31 | 6 | 0.000932432  | -0.015729269 | -0.003652338 |
| 32 | 8 | -0.009806471 | 0.013964461  | 0.002467078  |
| 33 | 8 | -0.008468697 | 0.012431705  | -0.000110379 |
| 34 | 1 | 0.013972264  | -0.010772046 | 0.003125467  |

-----  
Cartesian Forces: Max 0.015729269 RMS 0.003803521

GradGradGradGradGradGradGradGradGradGradGradGradGradGradGradGradGrad  
Berny optimization.

Using GEDIIS/GDIIS optimizer.

FormGI is forming the generalized inverse of G from B-inverse, IUseBI=4.

GSVD: received Info= 1 from GESDD.

Internal Forces: Max 0.015828470 RMS 0.002732600

Search for a local minimum.

Step number 7 out of a maximum of 175

All quantities printed in internal units (Hartrees-Bohrs-Radians)

Mixed Optimization -- RFO/linear search

Update second derivatives using D2CorX and points 6 7

DE= -1.60D-03 DEPred=-4.83D-03 R= 3.32D-01

Trust test= 3.32D-01 RLast= 6.43D-01 DXMaxT set to 4.24D-01

ITU= 0 1 0-1 0 1 0

Use linear search instead of GDIIS.

|                 |         |         |         |         |         |
|-----------------|---------|---------|---------|---------|---------|
| Eigenvalues --- | 0.00225 | 0.00242 | 0.00288 | 0.00698 | 0.00784 |
| Eigenvalues --- | 0.00955 | 0.01294 | 0.01425 | 0.01554 | 0.01587 |
| Eigenvalues --- | 0.01704 | 0.01754 | 0.01960 | 0.02112 | 0.02248 |
| Eigenvalues --- | 0.02261 | 0.02378 | 0.02477 | 0.02553 | 0.02972 |
| Eigenvalues --- | 0.03050 | 0.03069 | 0.03235 | 0.03738 | 0.03816 |
| Eigenvalues --- | 0.04183 | 0.04852 | 0.05091 | 0.05464 | 0.05540 |
| Eigenvalues --- | 0.05741 | 0.05901 | 0.07767 | 0.09438 | 0.09670 |
| Eigenvalues --- | 0.11924 | 0.12613 | 0.12619 | 0.13235 | 0.13704 |
| Eigenvalues --- | 0.15363 | 0.15805 | 0.15867 | 0.15958 | 0.15999 |
| Eigenvalues --- | 0.16000 | 0.16000 | 0.16001 | 0.16006 | 0.16285 |

|                 |         |         |         |         |         |
|-----------------|---------|---------|---------|---------|---------|
| Eigenvalues --- | 0.16866 | 0.18098 | 0.19189 | 0.21999 | 0.22512 |
| Eigenvalues --- | 0.22913 | 0.23050 | 0.23659 | 0.24485 | 0.25173 |
| Eigenvalues --- | 0.25444 | 0.27968 | 0.28640 | 0.29218 | 0.30775 |
| Eigenvalues --- | 0.31848 | 0.32484 | 0.34497 | 0.34559 | 0.34617 |
| Eigenvalues --- | 0.34765 | 0.34885 | 0.34897 | 0.34966 | 0.35010 |
| Eigenvalues --- | 0.35135 | 0.35536 | 0.35714 | 0.35765 | 0.36539 |
| Eigenvalues --- | 0.36621 | 0.36680 | 0.37182 | 0.37362 | 0.37888 |
| Eigenvalues --- | 0.41078 | 0.42384 | 0.45607 | 0.49008 | 0.52484 |
| Eigenvalues --- | 0.54689 | 0.55402 | 0.56095 | 0.60346 | 0.86887 |
| Eigenvalues --- | 0.97172 |         |         |         |         |

RFO step: Lambda=-3.71823157D-03 EMin= 2.24939403D-03

Quartic linear search produced a step of -0.34625.

Iteration 1 RMS(Cart)= 0.16557261 RMS(Int)= 0.00441107

Iteration 2 RMS(Cart)= 0.00783315 RMS(Int)= 0.00019551

Iteration 3 RMS(Cart)= 0.00005000 RMS(Int)= 0.00019353

Iteration 4 RMS(Cart)= 0.00000000 RMS(Int)= 0.00019353

| Variable | Old X   | -DE/DX   | Delta X<br>(Linear) | Delta X<br>(Quad) | Delta X<br>(Total) | New X   |
|----------|---------|----------|---------------------|-------------------|--------------------|---------|
| R1       | 2.57458 | -0.00166 | 0.00204             | -0.00588          | -0.00384           | 2.57074 |
| R2       | 2.62367 | -0.00035 | -0.00039            | -0.00161          | -0.00196           | 2.62171 |
| R3       | 2.02999 | -0.00009 | 0.00049             | -0.00009          | 0.00040            | 2.03039 |
| R4       | 2.63021 | -0.00368 | -0.00263            | -0.00638          | -0.00904           | 2.62117 |
| R5       | 2.03704 | -0.00212 | -0.00077            | -0.00782          | -0.00860           | 2.02844 |
| R6       | 2.53655 | -0.00078 | -0.00203            | 0.00295           | 0.00090            | 2.53745 |
| R7       | 2.69225 | 0.00002  | 0.00066             | -0.00174          | -0.00108           | 2.69117 |
| R8       | 2.52273 | 0.00113  | 0.00046             | 0.00166           | 0.00213            | 2.52486 |
| R9       | 2.03807 | -0.00163 | -0.00123            | -0.00312          | -0.00435           | 2.03372 |
| R10      | 2.79372 | -0.00178 | -0.00033            | -0.00631          | -0.00663           | 2.78708 |
| R11      | 2.05905 | 0.00108  | 0.00066             | 0.00219           | 0.00285            | 2.06190 |
| R12      | 2.06061 | -0.00174 | 0.00017             | -0.00450          | -0.00433           | 2.05628 |
| R13      | 2.89820 | 0.00116  | 0.00098             | -0.00090          | 0.00009            | 2.89828 |
| R14      | 5.20958 | 0.00025  | 0.04350             | -0.06729          | -0.02379           | 5.18580 |
| R15      | 2.50538 | -0.00292 | -0.00076            | -0.00359          | -0.00434           | 2.50103 |
| R16      | 2.04817 | -0.00157 | -0.00138            | -0.00243          | -0.00380           | 2.04436 |
| R17      | 2.04363 | -0.00017 | -0.00035            | 0.00015           | -0.00020           | 2.04343 |
| R18      | 2.04515 | -0.00046 | -0.00023            | -0.00066          | -0.00090           | 2.04425 |
| R19      | 2.77975 | 0.00015  | -0.00141            | -0.00135          | -0.00281           | 2.77694 |
| R20      | 2.73696 | 0.00318  | -0.00054            | 0.00745           | 0.00693            | 2.74389 |
| R21      | 2.05526 | -0.00119 | -0.00043            | -0.00268          | -0.00310           | 2.05216 |
| R22      | 2.05716 | -0.00088 | -0.00163            | -0.00086          | -0.00249           | 2.05467 |
| R23      | 2.72910 | 0.00063  | 0.00182             | 0.00017           | 0.00202            | 2.73111 |
| R24      | 2.05705 | -0.00008 | -0.00034            | 0.00007           | -0.00026           | 2.05679 |
| R25      | 2.84064 | 0.00025  | 0.00056             | 0.00007           | 0.00062            | 2.84127 |
| R26      | 3.30738 | -0.00124 | 0.00048             | -0.01040          | -0.00992           | 3.29747 |

|     |         |          |          |          |          |         |
|-----|---------|----------|----------|----------|----------|---------|
| R27 | 2.06569 | 0.00058  | 0.00055  | 0.00086  | 0.00141  | 2.06710 |
| R28 | 2.06757 | 0.00017  | 0.00010  | 0.00043  | 0.00054  | 2.06811 |
| R29 | 2.06310 | 0.00023  | 0.00029  | 0.00042  | 0.00071  | 2.06381 |
| R30 | 2.06020 | 0.00389  | 0.00358  | 0.00534  | 0.00891  | 2.06911 |
| R31 | 2.04626 | 0.00490  | 0.00392  | 0.00879  | 0.01270  | 2.05896 |
| R32 | 2.89350 | -0.00425 | -0.00210 | -0.01551 | -0.01762 | 2.87588 |
| R33 | 2.28981 | -0.01465 | -0.00458 | -0.01269 | -0.01727 | 2.27254 |
| R34 | 2.53389 | 0.00490  | 0.00083  | 0.00594  | 0.00677  | 2.54066 |
| R35 | 1.83630 | 0.01583  | 0.01017  | 0.01634  | 0.02651  | 1.86281 |
| A1  | 1.88078 | -0.00101 | -0.00170 | -0.00315 | -0.00484 | 1.87594 |
| A2  | 2.27909 | -0.00009 | 0.00090  | -0.00131 | -0.00025 | 2.27884 |
| A3  | 2.11794 | 0.00108  | 0.00198  | 0.00276  | 0.00483  | 2.12277 |
| A4  | 1.85633 | 0.00205  | 0.00096  | 0.00722  | 0.00754  | 1.86387 |
| A5  | 2.25814 | 0.00016  | 0.00649  | 0.00376  | 0.00975  | 2.26789 |
| A6  | 2.16866 | -0.00220 | -0.00801 | -0.01014 | -0.01853 | 2.15013 |
| A7  | 1.89580 | -0.00023 | -0.00014 | -0.00042 | -0.00067 | 1.89513 |
| A8  | 2.23480 | -0.00194 | -0.00326 | -0.00757 | -0.01072 | 2.22408 |
| A9  | 2.15249 | 0.00217  | 0.00313  | 0.00806  | 0.01132  | 2.16382 |
| A10 | 1.90192 | -0.00033 | 0.00059  | -0.00329 | -0.00318 | 1.89874 |
| A11 | 2.18653 | -0.00017 | 0.00027  | 0.00060  | 0.00055  | 2.18708 |
| A12 | 2.19302 | 0.00059  | -0.00073 | 0.00533  | 0.00428  | 2.19730 |
| A13 | 1.88794 | -0.00043 | -0.00008 | 0.00311  | 0.00288  | 1.89082 |
| A14 | 2.19900 | -0.00053 | 0.00656  | -0.01392 | -0.00745 | 2.19156 |
| A15 | 2.19166 | 0.00099  | -0.00608 | 0.01276  | 0.00664  | 2.19830 |
| A16 | 1.88152 | -0.00194 | -0.00847 | -0.00361 | -0.01186 | 1.86966 |
| A17 | 1.87042 | -0.00292 | -0.00544 | 0.00407  | -0.00153 | 1.86888 |
| A18 | 1.97952 | 0.00578  | 0.01995  | -0.01213 | 0.00778  | 1.98730 |
| A19 | 1.88349 | 0.00105  | -0.00105 | 0.00161  | 0.00066  | 1.88415 |
| A20 | 1.91355 | -0.00201 | 0.00209  | -0.00897 | -0.00684 | 1.90671 |
| A21 | 1.93211 | -0.00016 | -0.00828 | 0.01934  | 0.01096  | 1.94307 |
| A22 | 1.73716 | 0.00537  | -0.01603 | 0.01903  | 0.00300  | 1.74016 |
| A23 | 2.15605 | -0.00074 | -0.00054 | -0.00291 | -0.00351 | 2.15254 |
| A24 | 1.97229 | 0.00097  | 0.00242  | 0.00259  | 0.00495  | 1.97724 |
| A25 | 2.15456 | -0.00024 | -0.00196 | -0.00004 | -0.00205 | 2.15250 |
| A26 | 2.08221 | 0.00028  | 0.00063  | 0.00095  | 0.00158  | 2.08379 |
| A27 | 2.15059 | -0.00072 | -0.00107 | -0.00303 | -0.00409 | 2.14650 |
| A28 | 2.04952 | 0.00042  | 0.00026  | 0.00204  | 0.00231  | 2.05183 |
| A29 | 2.07421 | -0.00009 | -0.00012 | -0.00144 | -0.00148 | 2.07273 |
| A30 | 2.11151 | 0.00117  | 0.00142  | 0.00403  | 0.00537  | 2.11688 |
| A31 | 1.98588 | -0.00036 | 0.00073  | -0.00285 | -0.00213 | 1.98376 |
| A32 | 1.98849 | 0.00138  | 0.00161  | 0.00492  | 0.00653  | 1.99502 |
| A33 | 2.02857 | -0.00113 | -0.00233 | -0.00250 | -0.00483 | 2.02373 |
| A34 | 2.03588 | 0.00127  | 0.00251  | 0.00226  | 0.00480  | 2.04068 |
| A35 | 2.14511 | -0.00148 | -0.00235 | -0.00109 | -0.00347 | 2.14165 |

|     |          |          |          |          |          |          |
|-----|----------|----------|----------|----------|----------|----------|
| A36 | 1.95439  | 0.00065  | 0.00078  | -0.00005 | 0.00074  | 1.95513  |
| A37 | 2.03834  | -0.00114 | 0.00045  | -0.00177 | -0.00135 | 2.03699  |
| A38 | 2.02218  | 0.00002  | -0.00054 | -0.00114 | -0.00168 | 2.02050  |
| A39 | 2.30192  | -0.00048 | 0.00744  | -0.02399 | -0.01658 | 2.28534  |
| A40 | 2.66311  | 0.00076  | -0.00355 | 0.00613  | 0.00233  | 2.66544  |
| A41 | 1.93817  | -0.00020 | 0.00031  | -0.00174 | -0.00143 | 1.93674  |
| A42 | 1.91571  | 0.00031  | 0.00054  | 0.00151  | 0.00205  | 1.91776  |
| A43 | 1.93648  | -0.00018 | -0.00002 | -0.00112 | -0.00114 | 1.93534  |
| A44 | 1.88256  | -0.00002 | -0.00016 | 0.00026  | 0.00010  | 1.88266  |
| A45 | 1.89648  | 0.00013  | -0.00042 | 0.00073  | 0.00031  | 1.89679  |
| A46 | 1.89304  | -0.00003 | -0.00028 | 0.00045  | 0.00017  | 1.89321  |
| A47 | 1.87426  | -0.00250 | -0.01346 | 0.01084  | -0.00267 | 1.87159  |
| A48 | 1.96883  | -0.00297 | -0.00598 | -0.00422 | -0.01012 | 1.95870  |
| A49 | 1.97873  | 0.00852  | 0.01175  | 0.01258  | 0.02424  | 2.00296  |
| A50 | 1.87072  | 0.00151  | 0.00764  | -0.01062 | -0.00289 | 1.86783  |
| A51 | 1.87015  | -0.00062 | 0.00452  | -0.00298 | 0.00130  | 1.87145  |
| A52 | 1.89546  | -0.00411 | -0.00406 | -0.00661 | -0.01067 | 1.88479  |
| A53 | 2.20285  | -0.01310 | -0.01057 | -0.03436 | -0.04450 | 2.15835  |
| A54 | 1.93176  | 0.00788  | -0.00314 | 0.02528  | 0.02258  | 1.95433  |
| A55 | 2.14607  | 0.00544  | 0.01343  | 0.01057  | 0.02442  | 2.17050  |
| A56 | 1.89368  | -0.00117 | 0.01494  | -0.00905 | 0.00589  | 1.89957  |
| A57 | 2.77800  | -0.00466 | -0.00695 | -0.00728 | -0.01423 | 2.76377  |
| D1  | -0.05485 | 0.00035  | -0.00292 | 0.03799  | 0.03508  | -0.01977 |
| D2  | 3.09816  | -0.00045 | 0.01464  | -0.04460 | -0.03092 | 3.06723  |
| D3  | -3.08382 | 0.00044  | -0.01829 | 0.05556  | 0.03754  | -3.04628 |
| D4  | 0.06919  | -0.00036 | -0.00073 | -0.02704 | -0.02847 | 0.04072  |
| D5  | 0.03073  | 0.00049  | -0.00059 | -0.00686 | -0.00739 | 0.02335  |
| D6  | 3.07386  | 0.00094  | 0.00359  | 0.01499  | 0.01852  | 3.09238  |
| D7  | 3.07221  | 0.00034  | 0.01304  | -0.02275 | -0.00989 | 3.06232  |
| D8  | -0.16784 | 0.00079  | 0.01722  | -0.00089 | 0.01601  | -0.15183 |
| D9  | 0.06018  | -0.00112 | 0.00541  | -0.05615 | -0.05075 | 0.00944  |
| D10 | -3.09597 | -0.00090 | -0.00477 | -0.05047 | -0.05516 | 3.13206  |
| D11 | -3.09208 | -0.00036 | -0.01039 | 0.02120  | 0.00994  | -3.08214 |
| D12 | 0.03495  | -0.00014 | -0.02057 | 0.02688  | 0.00553  | 0.04048  |
| D13 | -1.90555 | 0.00465  | 0.04144  | 0.12747  | 0.16875  | -1.73680 |
| D14 | 1.24930  | 0.00370  | 0.06142  | 0.03146  | 0.09304  | 1.34233  |
| D15 | -0.04206 | 0.00154  | -0.00586 | 0.05330  | 0.04719  | 0.00513  |
| D16 | -3.12362 | -0.00011 | -0.00831 | 0.00685  | -0.00148 | -3.12510 |
| D17 | 3.11326  | 0.00138  | 0.00393  | 0.04810  | 0.05164  | -3.11829 |
| D18 | 0.03170  | -0.00027 | 0.00148  | 0.00165  | 0.00296  | 0.03466  |
| D19 | 0.43969  | -0.00116 | 0.01686  | -0.07083 | -0.05405 | 0.38564  |
| D20 | -2.67699 | -0.00056 | 0.02014  | -0.05477 | -0.03468 | -2.71168 |
| D21 | -2.71842 | -0.00094 | 0.00520  | -0.06448 | -0.05922 | -2.77764 |
| D22 | 0.44808  | -0.00034 | 0.00848  | -0.04842 | -0.03986 | 0.40823  |

|     |          |          |          |          |          |          |
|-----|----------|----------|----------|----------|----------|----------|
| D23 | 0.00736  | -0.00128 | 0.00396  | -0.02898 | -0.02489 | -0.01753 |
| D24 | -3.03629 | -0.00162 | -0.00097 | -0.04883 | -0.04992 | -3.08621 |
| D25 | 3.08864  | 0.00034  | 0.00646  | 0.01748  | 0.02398  | 3.11263  |
| D26 | 0.04499  | 0.00000  | 0.00153  | -0.00237 | -0.00105 | 0.04395  |
| D27 | -2.54095 | 0.00158  | 0.00359  | 0.01228  | 0.01594  | -2.52501 |
| D28 | -0.51749 | 0.00035  | -0.00429 | 0.01441  | 0.01008  | -0.50741 |
| D29 | 1.62019  | 0.00177  | -0.00595 | 0.03398  | 0.02797  | 1.64816  |
| D30 | 0.48556  | 0.00201  | 0.00890  | 0.03692  | 0.04591  | 0.53147  |
| D31 | 2.50901  | 0.00078  | 0.00103  | 0.03905  | 0.04006  | 2.54907  |
| D32 | -1.63650 | 0.00220  | -0.00063 | 0.05862  | 0.05795  | -1.57854 |
| D33 | -3.05739 | -0.00095 | 0.02136  | -0.08796 | -0.06681 | -3.12420 |
| D34 | 1.16852  | 0.00051  | 0.02367  | -0.07942 | -0.05584 | 1.11268  |
| D35 | -0.99507 | 0.00165  | 0.02470  | -0.07713 | -0.05249 | -1.04756 |
| D36 | 1.12176  | -0.00091 | 0.01688  | -0.06881 | -0.05196 | 1.06980  |
| D37 | -0.93551 | 0.00055  | 0.01918  | -0.06027 | -0.04100 | -0.97651 |
| D38 | -3.09911 | 0.00169  | 0.02022  | -0.05798 | -0.03764 | -3.13675 |
| D39 | -0.95428 | -0.00083 | 0.02193  | -0.07708 | -0.05519 | -1.00946 |
| D40 | -3.01155 | 0.00062  | 0.02423  | -0.06855 | -0.04422 | -3.05577 |
| D41 | 1.10804  | 0.00176  | 0.02527  | -0.06626 | -0.04087 | 1.06717  |
| D42 | -3.10722 | 0.00062  | 0.00537  | 0.00843  | 0.01379  | -3.09343 |
| D43 | -0.01163 | 0.00011  | 0.00119  | 0.00762  | 0.00880  | -0.00284 |
| D44 | 0.00690  | -0.00003 | 0.00183  | -0.00926 | -0.00741 | -0.00052 |
| D45 | 3.10248  | -0.00054 | -0.00234 | -0.01007 | -0.01240 | 3.09008  |
| D46 | -2.73962 | 0.00005  | 0.00105  | -0.00319 | -0.00214 | -2.74177 |
| D47 | -0.03505 | -0.00040 | 0.00001  | -0.00333 | -0.00333 | -0.03837 |
| D48 | -0.00290 | -0.00035 | -0.00236 | -0.00354 | -0.00592 | -0.00881 |
| D49 | 2.70168  | -0.00079 | -0.00340 | -0.00368 | -0.00710 | 2.69458  |
| D50 | 0.69046  | 0.00025  | -0.00211 | -0.00344 | -0.00547 | 0.68498  |
| D51 | -1.68988 | 0.00087  | -0.00107 | -0.00183 | -0.00281 | -1.69270 |
| D52 | 2.17685  | 0.00062  | -0.01508 | 0.05147  | 0.03642  | 2.21327  |
| D53 | -0.21330 | 0.00112  | -0.01564 | 0.05534  | 0.03974  | -0.17356 |
| D54 | 2.55008  | 0.00013  | -0.00005 | -0.00080 | -0.00085 | 2.54923  |
| D55 | -1.65309 | 0.00018  | 0.00030  | -0.00061 | -0.00031 | -1.65340 |
| D56 | 0.43890  | 0.00023  | 0.00029  | 0.00021  | 0.00049  | 0.43939  |
| D57 | 1.33584  | -0.00029 | 0.00080  | -0.00373 | -0.00293 | 1.33291  |
| D58 | -2.86732 | -0.00025 | 0.00114  | -0.00354 | -0.00240 | -2.86972 |
| D59 | -0.77534 | -0.00020 | 0.00113  | -0.00272 | -0.00159 | -0.77693 |
| D60 | -1.02539 | -0.00002 | -0.00037 | -0.00016 | -0.00052 | -1.02591 |
| D61 | 1.05463  | 0.00003  | -0.00002 | 0.00003  | 0.00002  | 1.05465  |
| D62 | -3.13657 | 0.00008  | -0.00003 | 0.00086  | 0.00082  | -3.13574 |
| D63 | 1.45488  | 0.00121  | 0.03622  | -0.01530 | 0.02087  | 1.47575  |
| D64 | -2.93094 | -0.00078 | 0.04545  | -0.06761 | -0.02210 | -2.95304 |
| D65 | 2.39580  | 0.00148  | -0.02522 | 0.11033  | 0.08497  | 2.48077  |
| D66 | -0.67116 | -0.00228 | -0.08005 | 0.08730  | 0.00738  | -0.66378 |

|     |          |          |          |          |          |          |
|-----|----------|----------|----------|----------|----------|----------|
| D67 | -1.82268 | 0.00296  | -0.03197 | 0.12911  | 0.09698  | -1.72570 |
| D68 | 1.39354  | -0.00080 | -0.08680 | 0.10607  | 0.01939  | 1.41294  |
| D69 | 0.19273  | 0.00234  | -0.02273 | 0.11182  | 0.08897  | 0.28170  |
| D70 | -2.87423 | -0.00142 | -0.07756 | 0.08879  | 0.01138  | -2.86284 |
| D71 | 2.80991  | 0.00205  | 0.04760  | 0.04356  | 0.09157  | 2.90148  |
| D72 | -0.25992 | -0.00062 | -0.00649 | 0.02372  | 0.01683  | -0.24309 |
| D73 | -1.59158 | 0.00176  | 0.06552  | -0.08290 | -0.01738 | -1.60896 |

| Item                 | Value    | Threshold | Converged? |
|----------------------|----------|-----------|------------|
| Maximum Force        | 0.015828 | 0.000450  | NO         |
| RMS Force            | 0.002733 | 0.000300  | NO         |
| Maximum Displacement | 0.596837 | 0.001800  | NO         |
| RMS Displacement     | 0.165510 | 0.001200  | NO         |

Predicted change in Energy=-2.911811D-03

GradGradGradGradGradGradGradGradGradGradGradGradGradGradGradGradGradGradGrad

Input orientation:

| Center<br>Number | Atomic<br>Number | Atomic<br>Type | Coordinates (Angstroms) |           |           |
|------------------|------------------|----------------|-------------------------|-----------|-----------|
|                  |                  |                | X                       | Y         | Z         |
| 1                | 6                | 0              | -0.816720               | 1.390725  | 1.417195  |
| 2                | 6                | 0              | -1.605991               | 0.295785  | 1.586856  |
| 3                | 7                | 0              | -2.645751               | 0.406206  | 0.675457  |
| 4                | 6                | 0              | -2.476605               | 1.534879  | -0.031998 |
| 5                | 7                | 0              | -1.365006               | 2.144570  | 0.389654  |
| 6                | 6                | 0              | -0.858690               | 3.446422  | -0.083671 |
| 7                | 1                | 0              | 0.124716                | 1.649733  | 1.865559  |
| 8                | 1                | 0              | -1.481893               | -0.549061 | 2.237267  |
| 9                | 1                | 0              | -1.725908               | 4.043812  | -0.369299 |
| 10               | 1                | 0              | -0.382001               | 3.931836  | 0.765554  |
| 11               | 35               | 0              | -0.454502               | -2.361157 | 0.450806  |
| 12               | 1                | 0              | -3.137664               | 1.890650  | -0.803122 |
| 13               | 6                | 0              | -3.718256               | -0.508114 | 0.470931  |
| 14               | 6                | 0              | -4.116305               | -1.378408 | 1.385137  |
| 15               | 1                | 0              | -4.146380               | -0.450225 | -0.520894 |
| 16               | 1                | 0              | -4.908826               | -2.074139 | 1.146053  |
| 17               | 1                | 0              | -3.653350               | -1.462560 | 2.359210  |
| 18               | 6                | 0              | 3.195041                | -0.806853 | 0.383309  |
| 19               | 6                | 0              | 4.216731                | -0.389126 | 1.353392  |
| 20               | 8                | 0              | 3.133050                | 0.502493  | 1.007878  |
| 21               | 1                | 0              | 3.435165                | -0.773845 | -0.675252 |
| 22               | 1                | 0              | 2.387181                | -1.476863 | 0.667280  |
| 23               | 1                | 0              | 4.120861                | -0.774418 | 2.366796  |
| 24               | 6                | 0              | 5.599291                | 0.037277  | 0.944346  |

|    |   |   |           |           |           |
|----|---|---|-----------|-----------|-----------|
| 25 | 1 | 0 | 5.979715  | 0.819855  | 1.607207  |
| 26 | 1 | 0 | 6.283990  | -0.814468 | 1.002834  |
| 27 | 1 | 0 | 5.603130  | 0.414612  | -0.080511 |
| 28 | 6 | 0 | 0.099165  | 3.342971  | -1.277011 |
| 29 | 1 | 0 | 0.419478  | 4.360202  | -1.525021 |
| 30 | 1 | 0 | -0.388432 | 2.937271  | -2.162892 |
| 31 | 6 | 0 | 1.356148  | 2.525581  | -1.016429 |
| 32 | 8 | 0 | 1.858645  | 1.797488  | -1.831025 |
| 33 | 8 | 0 | 1.833673  | 2.719113  | 0.225377  |
| 34 | 1 | 0 | 2.499373  | 2.019469  | 0.423015  |

-----  
Distance matrix (angstroms):

|    |    | 1        | 2        | 3        | 4        | 5        |
|----|----|----------|----------|----------|----------|----------|
| 1  | C  | 0.000000 |          |          |          |          |
| 2  | C  | 1.360378 | 0.000000 |          |          |          |
| 3  | N  | 2.205631 | 1.387062 | 0.000000 |          |          |
| 4  | C  | 2.208202 | 2.216757 | 1.342761 | 0.000000 |          |
| 5  | N  | 1.387350 | 2.215711 | 2.178050 | 1.336101 | 0.000000 |
| 6  | C  | 2.545634 | 3.643574 | 3.607322 | 2.504858 | 1.474860 |
| 7  | H  | 1.074438 | 2.214994 | 3.261623 | 3.221922 | 2.154630 |
| 8  | H  | 2.208561 | 1.073405 | 2.169412 | 3.237564 | 3.268483 |
| 9  | H  | 3.325215 | 4.229495 | 3.894843 | 2.640466 | 2.076868 |
| 10 | H  | 2.659109 | 3.923462 | 4.190793 | 3.281594 | 2.074107 |
| 11 | Br | 3.891237 | 3.110607 | 3.536996 | 4.416004 | 4.597209 |
| 12 | H  | 3.250617 | 3.256011 | 2.152150 | 1.076199 | 2.151629 |
| 13 | C  | 3.594429 | 2.520556 | 1.424107 | 2.443043 | 3.546988 |
| 14 | C  | 4.307712 | 3.024117 | 2.418889 | 3.630996 | 4.579521 |
| 15 | H  | 4.269886 | 3.384186 | 2.101576 | 2.639661 | 3.911279 |
| 16 | H  | 5.368811 | 4.088956 | 3.390440 | 4.508716 | 5.561323 |
| 17 | H  | 4.132202 | 2.807131 | 2.709717 | 4.010891 | 4.703940 |
| 18 | C  | 4.689616 | 5.070922 | 5.972580 | 6.150102 | 5.431847 |
| 19 | C  | 5.339248 | 5.867512 | 6.941599 | 7.100834 | 6.205174 |
| 20 | O  | 4.069052 | 4.778750 | 5.789155 | 5.797878 | 4.828159 |
| 21 | H  | 5.209821 | 5.628010 | 6.339912 | 6.379107 | 5.717763 |
| 22 | H  | 4.364678 | 4.464675 | 5.373678 | 5.763331 | 5.222141 |
| 23 | H  | 5.474422 | 5.877965 | 7.074004 | 7.390103 | 6.521067 |
| 24 | C  | 6.574239 | 7.238491 | 8.257671 | 8.271406 | 7.297246 |
| 25 | H  | 6.823015 | 7.603816 | 8.685501 | 8.643356 | 7.561894 |
| 26 | H  | 7.446789 | 7.989090 | 9.018730 | 9.128983 | 8.224295 |
| 27 | H  | 6.664112 | 7.400382 | 8.283453 | 8.157172 | 7.195048 |
| 28 | C  | 3.450921 | 4.516042 | 4.468924 | 3.384353 | 2.521454 |
| 29 | H  | 4.359198 | 5.505069 | 5.465511 | 4.312640 | 3.429196 |
| 30 | H  | 3.923297 | 4.745578 | 4.422443 | 3.296646 | 2.845622 |
| 31 | C  | 3.454241 | 4.530271 | 4.834194 | 4.079288 | 3.086571 |



|    |    |          |          |          |          |          |
|----|----|----------|----------|----------|----------|----------|
| 32 | O  | 4.227762 | 5.093204 | 5.339260 | 4.701047 | 3.929860 |
| 33 | O  | 3.195251 | 4.422379 | 5.061359 | 4.477404 | 3.254018 |
| 34 | H  | 3.518549 | 4.602133 | 5.398022 | 5.020181 | 3.866547 |
|    |    | 6        | 7        | 8        | 9        | 10       |
| 6  | C  | 0.000000 |          |          |          |          |
| 7  | H  | 2.827486 | 0.000000 |          |          |          |
| 8  | H  | 4.662512 | 2.748464 | 0.000000 |          |          |
| 9  | H  | 1.091112 | 3.761784 | 5.286607 | 0.000000 |          |
| 10 | H  | 1.088138 | 2.583557 | 4.842947 | 1.762532 | 0.000000 |
| 11 | Br | 5.846110 | 4.292348 | 2.744206 | 6.581237 | 6.301276 |
| 12 | H  | 2.851624 | 4.221732 | 4.235296 | 2.611008 | 3.771057 |
| 13 | C  | 4.911523 | 4.622740 | 2.850077 | 5.039392 | 5.561525 |
| 14 | C  | 6.004035 | 5.233230 | 2.890340 | 6.180009 | 6.521319 |
| 15 | H  | 5.117024 | 5.324213 | 3.836237 | 5.106666 | 5.918443 |
| 16 | H  | 6.956466 | 6.302496 | 3.906467 | 7.060920 | 7.530516 |
| 17 | H  | 6.154339 | 4.919739 | 2.358935 | 6.440491 | 6.506994 |
| 18 | C  | 5.894163 | 4.202235 | 5.037592 | 6.950620 | 5.949497 |
| 19 | C  | 6.521999 | 4.600418 | 5.768980 | 7.611410 | 6.337554 |
| 20 | O  | 5.078601 | 3.331944 | 4.890282 | 6.168228 | 4.916777 |
| 21 | H  | 6.049613 | 4.825819 | 5.719332 | 7.066832 | 6.228171 |
| 22 | H  | 5.944606 | 4.041067 | 4.277313 | 6.962029 | 6.077174 |
| 23 | H  | 6.972533 | 4.700736 | 5.608780 | 8.055201 | 6.707352 |
| 24 | C  | 7.374593 | 5.780971 | 7.222092 | 8.452014 | 7.139707 |
| 25 | H  | 7.518093 | 5.919161 | 7.612260 | 8.583538 | 7.131917 |
| 26 | H  | 8.387703 | 6.689786 | 7.867859 | 9.468057 | 8.186522 |
| 27 | H  | 7.137717 | 5.943545 | 7.516536 | 8.183477 | 6.993459 |
| 28 | C  | 1.533705 | 3.569798 | 5.477025 | 2.155462 | 2.179532 |
| 29 | H  | 2.132181 | 4.350811 | 6.470771 | 2.457332 | 2.464265 |
| 30 | H  | 2.191698 | 4.260223 | 5.719403 | 2.496047 | 3.092734 |
| 31 | C  | 2.573615 | 3.254135 | 5.300419 | 3.496123 | 2.859053 |
| 32 | O  | 3.627139 | 4.085717 | 5.763375 | 4.475672 | 4.039574 |
| 33 | O  | 2.805942 | 2.598905 | 5.071651 | 3.844358 | 2.582964 |
| 34 | H  | 3.683682 | 2.802969 | 5.073394 | 4.751708 | 3.475168 |
|    |    | 11       | 12       | 13       | 14       | 15       |
| 11 | Br | 0.000000 |          |          |          |          |
| 12 | H  | 5.181656 | 0.000000 |          |          |          |
| 13 | C  | 3.753167 | 2.777475 | 0.000000 |          |          |
| 14 | C  | 3.904813 | 4.053758 | 1.323491 | 0.000000 |          |
| 15 | H  | 4.269172 | 2.564539 | 1.081831 | 2.120231 | 0.000000 |
| 16 | H  | 4.517383 | 4.759816 | 2.079827 | 1.081338 | 2.448904 |
| 17 | H  | 3.831724 | 4.637919 | 2.116785 | 1.081770 | 3.092393 |
| 18 | C  | 3.967314 | 6.984790 | 6.920304 | 7.401764 | 7.405487 |
| 19 | C  | 5.150144 | 7.995940 | 7.984793 | 8.391613 | 8.570782 |
| 20 | O  | 4.623997 | 6.672972 | 6.946225 | 7.498883 | 7.498995 |

|    |   |           |           |           |           |           |
|----|---|-----------|-----------|-----------|-----------|-----------|
| 21 | H | 4.349377  | 7.093516  | 7.249537  | 7.850822  | 7.590019  |
| 22 | H | 2.983957  | 6.635219  | 6.184933  | 6.543725  | 6.719610  |
| 23 | H | 5.207945  | 8.356862  | 8.069509  | 8.317413  | 8.763055  |
| 24 | C | 6.530274  | 9.100716  | 9.345495  | 9.828086  | 9.867254  |
| 25 | H | 7.270162  | 9.491201  | 9.854201  | 10.334955 | 10.424957 |
| 26 | H | 6.935723  | 9.967282  | 10.021063 | 10.422587 | 10.547372 |
| 27 | H | 6.684466  | 8.893949  | 9.383163  | 9.991519  | 9.797695  |
| 28 | C | 5.985730  | 3.579228  | 5.697268  | 6.866487  | 5.743231  |
| 29 | H | 7.060056  | 4.390112  | 6.693666  | 7.872356  | 6.707872  |
| 30 | H | 5.908394  | 3.240782  | 5.467672  | 6.716445  | 5.319160  |
| 31 | C | 5.414004  | 4.543455  | 6.096321  | 7.138375  | 6.275253  |
| 32 | O | 5.277474  | 5.101800  | 6.458841  | 7.491998  | 6.544386  |
| 33 | O | 5.576352  | 5.143769  | 6.426447  | 7.316896  | 6.809014  |
| 34 | H | 5.283562  | 5.770285  | 6.711921  | 7.499229  | 7.152369  |
|    |   | 16        | 17        | 18        | 19        | 20        |
| 16 | H | 0.000000  |           |           |           |           |
| 17 | H | 1.849864  | 0.000000  |           |           |           |
| 18 | C | 8.237745  | 7.157834  | 0.000000  |           |           |
| 19 | C | 9.282136  | 8.006379  | 1.469493  | 0.000000  |           |
| 20 | O | 8.445702  | 7.193243  | 1.452004  | 1.445243  | 0.000000  |
| 21 | H | 8.638872  | 7.741404  | 1.085956  | 2.207771  | 2.133832  |
| 22 | H | 7.336053  | 6.273025  | 1.087286  | 2.236331  | 2.142469  |
| 23 | H | 9.204060  | 7.804611  | 2.189158  | 1.088406  | 2.110196  |
| 24 | C | 10.720042 | 9.479595  | 2.609164  | 1.503533  | 2.510540  |
| 25 | H | 11.276001 | 9.928286  | 3.449423  | 2.152712  | 2.926332  |
| 26 | H | 11.264387 | 10.050398 | 3.150473  | 2.139479  | 3.415089  |
| 27 | H | 10.871962 | 9.754918  | 2.739708  | 2.150389  | 2.700668  |
| 28 | C | 7.765069  | 7.099056  | 5.437108  | 6.148326  | 4.742730  |
| 29 | H | 8.770758  | 8.098131  | 6.167976  | 6.727592  | 5.353594  |
| 30 | H | 7.516470  | 7.104056  | 5.774330  | 6.681070  | 5.327548  |
| 31 | C | 8.067444  | 7.238458  | 4.055356  | 4.721705  | 3.368692  |
| 32 | O | 8.345727  | 7.652978  | 3.670399  | 4.525745  | 3.370534  |
| 33 | O | 8.323714  | 7.221292  | 3.782949  | 4.075847  | 2.685906  |
| 34 | H | 8.494811  | 7.330032  | 2.910950  | 3.101007  | 1.744944  |
|    |   | 21        | 22        | 23        | 24        | 25        |
| 21 | H | 0.000000  |           |           |           |           |
| 22 | H | 1.842525  | 0.000000  |           |           |           |
| 23 | H | 3.118370  | 2.527336  | 0.000000  |           |           |
| 24 | C | 2.822137  | 3.561887  | 2.206348  | 0.000000  |           |
| 25 | H | 3.771503  | 4.366312  | 2.563986  | 1.093863  | 0.000000  |
| 26 | H | 3.306573  | 3.966924  | 2.557562  | 1.094396  | 1.768859  |
| 27 | H | 2.542876  | 3.805154  | 3.098423  | 1.092121  | 1.776072  |
| 28 | C | 5.332840  | 5.678563  | 6.812067  | 6.790687  | 7.018953  |
| 29 | H | 6.014558  | 6.538299  | 7.430396  | 7.184421  | 7.298023  |

|    |   |          |          |          |          |          |
|----|---|----------|----------|----------|----------|----------|
| 30 | H | 5.532211 | 5.932831 | 7.391105 | 7.342869 | 7.697429 |
| 31 | C | 3.914707 | 4.462898 | 5.475385 | 5.295334 | 5.583041 |
| 32 | O | 3.230013 | 4.152380 | 5.417936 | 4.979304 | 5.455313 |
| 33 | O | 3.946729 | 4.255333 | 4.692724 | 4.678572 | 4.765113 |
| 34 | H | 3.143963 | 3.506649 | 3.770055 | 3.716230 | 3.867062 |
|    |   | 26       | 27       | 28       | 29       | 30       |
| 26 | H | 0.000000 |          |          |          |          |
| 27 | H | 1.774217 | 0.000000 |          |          |          |
| 28 | C | 7.793205 | 6.348269 | 0.000000 |          |          |
| 29 | H | 8.219474 | 6.672670 | 1.094928 | 0.000000 |          |
| 30 | H | 8.283634 | 6.826341 | 1.089554 | 1.756226 | 0.000000 |
| 31 | C | 6.286253 | 4.834148 | 1.521852 | 2.121756 | 2.127775 |
| 32 | O | 5.868284 | 4.358648 | 2.406494 | 2.955053 | 2.541377 |
| 33 | O | 5.735499 | 4.428667 | 2.378001 | 2.785141 | 3.269431 |
| 34 | H | 4.763477 | 3.530214 | 3.225328 | 3.687795 | 3.983553 |
|    |   | 31       | 32       | 33       | 34       |          |
| 31 | C | 0.000000 |          |          |          |          |
| 32 | O | 1.202576 | 0.000000 |          |          |          |
| 33 | O | 1.344458 | 2.253621 | 0.000000 |          |          |
| 34 | H | 1.906597 | 2.353828 | 0.985758 | 0.000000 |          |

Stoichiometry C11H17BrN2O3

Framework group C1[X(C11H17BrN2O3)]

Deg. of freedom 96

Full point group C1 NOp 1

Largest Abelian subgroup C1 NOp 1

Largest concise Abelian subgroup C1 NOp 1

Standard orientation:

| Center<br>Number | Atomic<br>Number | Atomic<br>Type | Coordinates (Angstroms) |           |           |
|------------------|------------------|----------------|-------------------------|-----------|-----------|
|                  |                  |                | X                       | Y         | Z         |
| 1                | 6                | 0              | -0.817280               | 0.979896  | 1.284492  |
| 2                | 6                | 0              | -1.803546               | 0.048845  | 1.179357  |
| 3                | 7                | 0              | -2.759731               | 0.573048  | 0.322116  |
| 4                | 6                | 0              | -2.349994               | 1.784786  | -0.086311 |
| 5                | 7                | 0              | -1.165957               | 2.049864  | 0.473114  |
| 6                | 6                | 0              | -0.404358               | 3.305234  | 0.334467  |
| 7                | 1                | 0              | 0.133289                | 0.937574  | 1.783535  |
| 8                | 1                | 0              | -1.869996               | -0.935420 | 1.602447  |
| 9                | 1                | 0              | -1.130698               | 4.108866  | 0.203579  |
| 10               | 1                | 0              | 0.112972                | 3.470968  | 1.277306  |
| 11               | 35               | 0              | -1.112892               | -2.426310 | -0.573491 |
| 12               | 1                | 0              | -2.895641               | 2.435918  | -0.746992 |
| 13               | 6                | 0              | -3.972442               | -0.041654 | -0.101621 |

|    |   |   |           |           |           |
|----|---|---|-----------|-----------|-----------|
| 14 | 6 | 0 | -4.568708 | -1.013436 | 0.570490  |
| 15 | 1 | 0 | -4.334276 | 0.334524  | -1.049209 |
| 16 | 1 | 0 | -5.464352 | -1.465604 | 0.167179  |
| 17 | 1 | 0 | -4.176722 | -1.417012 | 1.494449  |
| 18 | 6 | 0 | 2.760934  | -1.631942 | -0.254074 |
| 19 | 6 | 0 | 3.794749  | -1.664342 | 0.789758  |
| 20 | 8 | 0 | 2.913538  | -0.524808 | 0.672901  |
| 21 | 1 | 0 | 3.053494  | -1.391645 | -1.271899 |
| 22 | 1 | 0 | 1.829934  | -2.182690 | -0.144048 |
| 23 | 1 | 0 | 3.580439  | -2.256610 | 1.677405  |
| 24 | 6 | 0 | 5.250474  | -1.425556 | 0.499142  |
| 25 | 1 | 0 | 5.737506  | -0.913734 | 1.334231  |
| 26 | 1 | 0 | 5.761301  | -2.381421 | 0.347221  |
| 27 | 1 | 0 | 5.373533  | -0.820432 | -0.401640 |
| 28 | 6 | 0 | 0.573680  | 3.310386  | -0.846917 |
| 29 | 1 | 0 | 1.089022  | 4.276407  | -0.837214 |
| 30 | 1 | 0 | 0.062221  | 3.231415  | -1.805719 |
| 31 | 6 | 0 | 1.642841  | 2.228660  | -0.794011 |
| 32 | 8 | 0 | 2.039711  | 1.635726  | -1.762057 |
| 33 | 8 | 0 | 2.087906  | 2.021977  | 0.457694  |
| 34 | 1 | 0 | 2.601687  | 1.180945  | 0.478002  |

-----

Rotational constants (GHZ):      0.3659357      0.2435028      0.1633775

Standard basis: 6-311++G(d,p) (5D, 7F)

There are    538 symmetry adapted cartesian basis functions of A    symmetry.

There are    519 symmetry adapted basis functions of A    symmetry.

519 basis functions,    823 primitive gaussians,    538 cartesian basis functions

78 alpha electrons      78 beta electrons

nuclear repulsion energy      1581.5145582394 Hartrees.

NAtoms=    34 NActive=    34 NUniq=    34 SFac= 1.00D+00 NAtFMM=    60 NAOKFM=F

Big=F

Integral buffers will be    131072 words long.

Raffenetti 2 integral format.

Two-electron integral symmetry is turned on.

One-electron integrals computed using PRISM.

NBasis=    519 RedAO= T EigKep=    2.93D-06    NBF=    519

NBsUse=    519 1.00D-06 EigRej= -1.00D+00    NBFU=    519

Initial guess from the checkpoint file:    "./coohpo.chk"

B after Tr=      0.000000      0.000000      0.000000

Rot=    0.998178    -0.000469    0.004229    -0.060186 Ang=    -6.92 deg.

ExpMin= 3.50D-02 ExpMax= 4.40D+05 ExpMxC= 1.51D+04 IAcc=3 IRadAn=      5 AccDes=

0.00D+00

Harris functional with IExCor=    402 and IRadAn=      5 diagonalized for initial guess.

HarFok: IExCor=    402 AccDes= 0.00D+00 IRadAn=      5 IDoV= 1 UseB2=F ITyADJ=14

ICtDFT= 3500011 ScaDFX= 1.000000 1.000000 1.000000 1.000000  
 FoFCou: FMM=F IPFlag= 0 FMFlag= 100000 FMFlg1= 0  
 NFxFlg= 0 DoJE=T BraDBF=F KetDBF=T FulRan=T  
 wScrn= 0.000000 ICntrl= 500 IOpCl= 0 l1Cent= 200000004 NGrid= 0  
 NMat0= 1 NMatS0= 1 NMatT0= 0 NMatD0= 1 NMtDS0= 0

NMtDT0= 0

Petite list used in FoFCou.

Requested convergence on RMS density matrix=1.00D-08 within 128 cycles.

Requested convergence on MAX density matrix=1.00D-06.

Requested convergence on energy=1.00D-06.

No special actions if energy rises.

SCF Done: E(RB3LYP) = -3338.89326358 A.U. after 14 cycles

NFock= 14 Conv=0.25D-08 -V/T= 2.0019

Calling FoFJK, ICntrl= 2127 FMM=F ISym2X=0 l1Cent= 0 IOpClX= 0 NMat=1 NMatS=1

NMatT=0.

\*\*\*\*\* Axes restored to original set \*\*\*\*\*

| Center<br>Number | Atomic<br>Number | Forces (Hartrees/Bohr) |              |              |
|------------------|------------------|------------------------|--------------|--------------|
|                  |                  | X                      | Y            | Z            |
| 1                | 6                | -0.000184043           | 0.000528782  | -0.000908210 |
| 2                | 6                | 0.000215503            | 0.000661331  | -0.000198249 |
| 3                | 7                | -0.001375432           | 0.001719466  | 0.002584955  |
| 4                | 6                | 0.002402636            | -0.001336182 | -0.002928077 |
| 5                | 7                | -0.000372646           | 0.001493581  | 0.003948799  |
| 6                | 6                | -0.001951199           | -0.000526418 | -0.004607297 |
| 7                | 1                | -0.000181364           | 0.000645276  | 0.000598906  |
| 8                | 1                | -0.000440428           | -0.001754711 | -0.002012571 |
| 9                | 1                | -0.000455094           | 0.000470191  | 0.000645885  |
| 10               | 1                | 0.000898656            | -0.000798139 | -0.000211149 |
| 11               | 35               | 0.001215999            | -0.000566535 | 0.000705851  |
| 12               | 1                | 0.000161917            | -0.000117675 | -0.000081028 |
| 13               | 6                | 0.000425040            | 0.000847734  | 0.000551920  |
| 14               | 6                | 0.000049167            | -0.001355200 | -0.000170103 |
| 15               | 1                | -0.000414588           | 0.000526728  | 0.000346398  |
| 16               | 1                | 0.000202751            | -0.000055436 | 0.000054213  |
| 17               | 1                | -0.000150416           | -0.000045211 | -0.000119445 |
| 18               | 6                | -0.000623072           | -0.001140278 | 0.000190284  |
| 19               | 6                | -0.000523434           | -0.000256630 | -0.000957128 |
| 20               | 8                | -0.000570288           | 0.002335090  | 0.001851193  |
| 21               | 1                | -0.000111665           | 0.000144971  | -0.000060766 |
| 22               | 1                | -0.000417985           | 0.000593359  | -0.000698558 |
| 23               | 1                | 0.000131550            | -0.000054506 | -0.000025781 |

|    |   |              |              |              |
|----|---|--------------|--------------|--------------|
| 24 | 6 | 0.000342533  | -0.000223334 | -0.000095270 |
| 25 | 1 | 0.000000089  | 0.000098863  | 0.000039251  |
| 26 | 1 | 0.000056884  | 0.000052379  | -0.000021118 |
| 27 | 1 | -0.000037606 | 0.000046572  | -0.000009029 |
| 28 | 6 | 0.002128692  | 0.001476074  | 0.002591462  |
| 29 | 1 | -0.000273688 | 0.000924640  | -0.000244962 |
| 30 | 1 | -0.000567535 | -0.001291033 | 0.000291055  |
| 31 | 6 | 0.000673116  | -0.001731605 | 0.001170530  |
| 32 | 8 | -0.000154762 | 0.000621262  | -0.001940200 |
| 33 | 8 | -0.004427261 | 0.001215790  | -0.001098863 |
| 34 | 1 | 0.004327978  | -0.003149198 | 0.000817099  |

-----  
Cartesian Forces: Max 0.004607297 RMS 0.001327238

GradGradGradGradGradGradGradGradGradGradGradGradGradGradGradGradGradGradGrad  
Berny optimization.

Using GEDIIS/GDIIS optimizer.

FormGI is forming the generalized inverse of G from B-inverse, IUseBI=4.

GSVD: received Info= 1 from GESDD.

Internal Forces: Max 0.006826413 RMS 0.001222576

Search for a local minimum.

Step number 8 out of a maximum of 175

All quantities printed in internal units (Hartrees-Bohrs-Radians)

Mixed Optimization -- RFO/linear search

Update second derivatives using D2CorX and points 7 8

DE= -3.02D-03 DEPred=-2.91D-03 R= 1.04D+00

TightC=F SS= 1.41D+00 RLast= 3.79D-01 DXNew= 7.1352D-01 1.1384D+00

Trust test= 1.04D+00 RLast= 3.79D-01 DXMaxT set to 7.14D-01

ITU= 1 0 1 0-1 0 1 0

Use linear search instead of GDIIS.

|                 |         |         |         |         |         |
|-----------------|---------|---------|---------|---------|---------|
| Eigenvalues --- | 0.00211 | 0.00240 | 0.00314 | 0.00698 | 0.00763 |
| Eigenvalues --- | 0.00953 | 0.01195 | 0.01428 | 0.01485 | 0.01618 |
| Eigenvalues --- | 0.01736 | 0.01850 | 0.02031 | 0.02181 | 0.02260 |
| Eigenvalues --- | 0.02270 | 0.02387 | 0.02470 | 0.02607 | 0.02976 |
| Eigenvalues --- | 0.03050 | 0.03070 | 0.03202 | 0.03680 | 0.03823 |
| Eigenvalues --- | 0.04456 | 0.04697 | 0.04986 | 0.05300 | 0.05516 |
| Eigenvalues --- | 0.05757 | 0.05893 | 0.07937 | 0.09588 | 0.09754 |
| Eigenvalues --- | 0.11924 | 0.12593 | 0.12708 | 0.13213 | 0.13750 |
| Eigenvalues --- | 0.15350 | 0.15796 | 0.15877 | 0.15995 | 0.15999 |
| Eigenvalues --- | 0.16000 | 0.16000 | 0.16003 | 0.16008 | 0.16244 |
| Eigenvalues --- | 0.16863 | 0.18109 | 0.18993 | 0.21987 | 0.22280 |
| Eigenvalues --- | 0.22783 | 0.23503 | 0.23710 | 0.24517 | 0.25110 |
| Eigenvalues --- | 0.25740 | 0.26868 | 0.28641 | 0.29229 | 0.30021 |
| Eigenvalues --- | 0.31850 | 0.32418 | 0.34497 | 0.34553 | 0.34612 |

|                 |         |         |         |         |         |
|-----------------|---------|---------|---------|---------|---------|
| Eigenvalues --- | 0.34764 | 0.34881 | 0.34889 | 0.34949 | 0.35008 |
| Eigenvalues --- | 0.35107 | 0.35531 | 0.35699 | 0.35763 | 0.36532 |
| Eigenvalues --- | 0.36609 | 0.36890 | 0.36970 | 0.37292 | 0.37771 |
| Eigenvalues --- | 0.41079 | 0.42325 | 0.45589 | 0.48982 | 0.51949 |
| Eigenvalues --- | 0.53034 | 0.55522 | 0.56097 | 0.60433 | 0.89819 |
| Eigenvalues --- | 0.97769 |         |         |         |         |

RFO step: Lambda=-2.64072606D-03 EMin= 2.11441292D-03

Quartic linear search produced a step of 0.12539.

Iteration 1 RMS(Cart)= 0.13476242 RMS(Int)= 0.00573287

Iteration 2 RMS(Cart)= 0.01269231 RMS(Int)= 0.00014202

Iteration 3 RMS(Cart)= 0.00004121 RMS(Int)= 0.00014115

Iteration 4 RMS(Cart)= 0.00000001 RMS(Int)= 0.00014115

| Variable | Old X   | -DE/DX   | Delta X<br>(Linear) | Delta X<br>(Quad) | Delta X<br>(Total) | New X   |
|----------|---------|----------|---------------------|-------------------|--------------------|---------|
| R1       | 2.57074 | -0.00003 | -0.00048            | 0.00437           | 0.00388            | 2.57463 |
| R2       | 2.62171 | -0.00066 | -0.00025            | 0.00173           | 0.00151            | 2.62323 |
| R3       | 2.03039 | 0.00025  | 0.00005             | 0.00015           | 0.00020            | 2.03060 |
| R4       | 2.62117 | -0.00049 | -0.00113            | -0.00455          | -0.00572           | 2.61545 |
| R5       | 2.02844 | 0.00112  | -0.00108            | 0.00368           | 0.00260            | 2.03104 |
| R6       | 2.53745 | 0.00076  | 0.00011             | -0.00085          | -0.00076           | 2.53669 |
| R7       | 2.69117 | -0.00012 | -0.00014            | -0.00146          | -0.00159           | 2.68958 |
| R8       | 2.52486 | -0.00056 | 0.00027             | -0.00088          | -0.00059           | 2.52428 |
| R9       | 2.03372 | -0.00008 | -0.00055            | -0.00035          | -0.00090           | 2.03282 |
| R10      | 2.78708 | -0.00083 | -0.00083            | 0.00326           | 0.00243            | 2.78951 |
| R11      | 2.06190 | 0.00045  | 0.00036             | 0.00150           | 0.00186            | 2.06376 |
| R12      | 2.05628 | -0.00012 | -0.00054            | -0.00201          | -0.00255           | 2.05373 |
| R13      | 2.89828 | -0.00144 | 0.00001             | -0.00105          | -0.00104           | 2.89724 |
| R14      | 5.18580 | 0.00037  | -0.00298            | -0.00581          | -0.00880           | 5.17700 |
| R15      | 2.50103 | 0.00075  | -0.00054            | 0.00100           | 0.00046            | 2.50149 |
| R16      | 2.04436 | -0.00012 | -0.00048            | -0.00029          | -0.00076           | 2.04360 |
| R17      | 2.04343 | -0.00012 | -0.00002            | -0.00020          | -0.00022           | 2.04321 |
| R18      | 2.04425 | -0.00018 | -0.00011            | -0.00071          | -0.00082           | 2.04343 |
| R19      | 2.77694 | 0.00067  | -0.00035            | -0.00031          | -0.00066           | 2.77628 |
| R20      | 2.74389 | 0.00003  | 0.00087             | 0.00427           | 0.00514            | 2.74904 |
| R21      | 2.05216 | 0.00004  | -0.00039            | 0.00018           | -0.00021           | 2.05195 |
| R22      | 2.05467 | -0.00024 | -0.00031            | -0.00132          | -0.00163           | 2.05304 |
| R23      | 2.73111 | -0.00022 | 0.00025             | -0.00057          | -0.00033           | 2.73078 |
| R24      | 2.05679 | -0.00001 | -0.00003            | 0.00028           | 0.00025            | 2.05704 |
| R25      | 2.84127 | 0.00034  | 0.00008             | 0.00098           | 0.00106            | 2.84233 |
| R26      | 3.29747 | -0.00194 | -0.00124            | -0.02348          | -0.02472           | 3.27275 |
| R27      | 2.06710 | 0.00010  | 0.00018             | 0.00064           | 0.00082            | 2.06792 |
| R28      | 2.06811 | -0.00001 | 0.00007             | 0.00012           | 0.00019            | 2.06830 |
| R29      | 2.06381 | 0.00002  | 0.00009             | 0.00003           | 0.00012            | 2.06393 |
| R30      | 2.06911 | 0.00084  | 0.00112             | 0.00320           | 0.00432            | 2.07344 |

|     |         |          |          |          |          |         |
|-----|---------|----------|----------|----------|----------|---------|
| R31 | 2.05896 | 0.00049  | 0.00159  | 0.00161  | 0.00321  | 2.06217 |
| R32 | 2.87588 | -0.00046 | -0.00221 | 0.00237  | 0.00016  | 2.87605 |
| R33 | 2.27254 | 0.00087  | -0.00217 | 0.00082  | -0.00135 | 2.27119 |
| R34 | 2.54066 | -0.00074 | 0.00085  | 0.00352  | 0.00437  | 2.54502 |
| R35 | 1.86281 | 0.00305  | 0.00332  | 0.00613  | 0.00945  | 1.87227 |
| A1  | 1.87594 | 0.00033  | -0.00061 | -0.00180 | -0.00236 | 1.87358 |
| A2  | 2.27884 | -0.00004 | -0.00003 | 0.00170  | 0.00163  | 2.28047 |
| A3  | 2.12277 | -0.00033 | 0.00061  | 0.00025  | 0.00084  | 2.12362 |
| A4  | 1.86387 | -0.00039 | 0.00095  | 0.00120  | 0.00205  | 1.86592 |
| A5  | 2.26789 | -0.00003 | 0.00122  | 0.00836  | 0.00950  | 2.27739 |
| A6  | 2.15013 | 0.00045  | -0.00232 | -0.00933 | -0.01172 | 2.13840 |
| A7  | 1.89513 | 0.00025  | -0.00008 | -0.00038 | -0.00066 | 1.89447 |
| A8  | 2.22408 | -0.00034 | -0.00134 | -0.00075 | -0.00225 | 2.22183 |
| A9  | 2.16382 | 0.00008  | 0.00142  | 0.00056  | 0.00183  | 2.16564 |
| A10 | 1.89874 | -0.00045 | -0.00040 | 0.00248  | 0.00206  | 1.90080 |
| A11 | 2.18708 | 0.00024  | 0.00007  | -0.00191 | -0.00191 | 2.18518 |
| A12 | 2.19730 | 0.00020  | 0.00054  | -0.00064 | -0.00016 | 2.19714 |
| A13 | 1.89082 | 0.00025  | 0.00036  | -0.00125 | -0.00114 | 1.88968 |
| A14 | 2.19156 | -0.00212 | -0.00093 | 0.01676  | 0.01549  | 2.20705 |
| A15 | 2.19830 | 0.00194  | 0.00083  | -0.01270 | -0.01223 | 2.18607 |
| A16 | 1.86966 | 0.00218  | -0.00149 | -0.00838 | -0.00999 | 1.85967 |
| A17 | 1.86888 | -0.00081 | -0.00019 | -0.01051 | -0.01065 | 1.85824 |
| A18 | 1.98730 | -0.00236 | 0.00098  | 0.02498  | 0.02597  | 2.01327 |
| A19 | 1.88415 | -0.00015 | 0.00008  | 0.00448  | 0.00450  | 1.88865 |
| A20 | 1.90671 | 0.00064  | -0.00086 | 0.00279  | 0.00192  | 1.90863 |
| A21 | 1.94307 | 0.00062  | 0.00137  | -0.01406 | -0.01261 | 1.93046 |
| A22 | 1.74016 | 0.00499  | 0.00038  | 0.05458  | 0.05495  | 1.79511 |
| A23 | 2.15254 | 0.00102  | -0.00044 | 0.00502  | 0.00452  | 2.15706 |
| A24 | 1.97724 | -0.00055 | 0.00062  | -0.00308 | -0.00252 | 1.97472 |
| A25 | 2.15250 | -0.00049 | -0.00026 | -0.00260 | -0.00292 | 2.14958 |
| A26 | 2.08379 | 0.00003  | 0.00020  | 0.00005  | 0.00025  | 2.08404 |
| A27 | 2.14650 | 0.00009  | -0.00051 | 0.00038  | -0.00013 | 2.14637 |
| A28 | 2.05183 | -0.00012 | 0.00029  | -0.00049 | -0.00021 | 2.05162 |
| A29 | 2.07273 | 0.00024  | -0.00019 | -0.00394 | -0.00391 | 2.06881 |
| A30 | 2.11688 | 0.00035  | 0.00067  | 0.01259  | 0.01299  | 2.12987 |
| A31 | 1.98376 | 0.00013  | -0.00027 | -0.00511 | -0.00538 | 1.97838 |
| A32 | 1.99502 | -0.00021 | 0.00082  | -0.00439 | -0.00358 | 1.99144 |
| A33 | 2.02373 | -0.00035 | -0.00061 | -0.00233 | -0.00301 | 2.02072 |
| A34 | 2.04068 | 0.00056  | 0.00060  | 0.00402  | 0.00471  | 2.04540 |
| A35 | 2.14165 | -0.00048 | -0.00043 | -0.00277 | -0.00329 | 2.13836 |
| A36 | 1.95513 | 0.00003  | 0.00009  | -0.00114 | -0.00100 | 1.95413 |
| A37 | 2.03699 | 0.00014  | -0.00017 | 0.00064  | 0.00042  | 2.03741 |
| A38 | 2.02050 | -0.00010 | -0.00021 | -0.00133 | -0.00155 | 2.01895 |
| A39 | 2.28534 | -0.00093 | -0.00208 | -0.02725 | -0.02901 | 2.25633 |



|     |          |          |          |          |          |          |
|-----|----------|----------|----------|----------|----------|----------|
| A40 | 2.66544  | 0.00055  | 0.00029  | 0.00868  | 0.00840  | 2.67383  |
| A41 | 1.93674  | -0.00005 | -0.00018 | 0.00000  | -0.00018 | 1.93656  |
| A42 | 1.91776  | 0.00014  | 0.00026  | 0.00102  | 0.00128  | 1.91903  |
| A43 | 1.93534  | -0.00006 | -0.00014 | -0.00108 | -0.00122 | 1.93411  |
| A44 | 1.88266  | -0.00002 | 0.00001  | 0.00002  | 0.00004  | 1.88269  |
| A45 | 1.89679  | 0.00001  | 0.00004  | -0.00033 | -0.00030 | 1.89650  |
| A46 | 1.89321  | -0.00001 | 0.00002  | 0.00040  | 0.00042  | 1.89362  |
| A47 | 1.87159  | -0.00047 | -0.00033 | 0.00623  | 0.00559  | 1.87718  |
| A48 | 1.95870  | 0.00009  | -0.00127 | -0.02067 | -0.02171 | 1.93700  |
| A49 | 2.00296  | -0.00043 | 0.00304  | 0.03779  | 0.04076  | 2.04372  |
| A50 | 1.86783  | 0.00032  | -0.00036 | -0.00153 | -0.00198 | 1.86585  |
| A51 | 1.87145  | 0.00221  | 0.00016  | -0.00606 | -0.00641 | 1.86504  |
| A52 | 1.88479  | -0.00153 | -0.00134 | -0.01714 | -0.01825 | 1.86654  |
| A53 | 2.15835  | -0.00222 | -0.00558 | -0.00020 | -0.00610 | 2.15225  |
| A54 | 1.95433  | 0.00097  | 0.00283  | -0.01478 | -0.01228 | 1.94205  |
| A55 | 2.17050  | 0.00125  | 0.00306  | 0.01490  | 0.01763  | 2.18813  |
| A56 | 1.89957  | -0.00299 | 0.00074  | 0.04261  | 0.04334  | 1.94291  |
| A57 | 2.76377  | -0.00683 | -0.00178 | 0.02777  | 0.02599  | 2.78976  |
| D1  | -0.01977 | -0.00084 | 0.00440  | -0.00582 | -0.00139 | -0.02115 |
| D2  | 3.06723  | -0.00026 | -0.00388 | -0.00132 | -0.00532 | 3.06191  |
| D3  | -3.04628 | -0.00039 | 0.00471  | -0.00740 | -0.00253 | -3.04881 |
| D4  | 0.04072  | 0.00019  | -0.00357 | -0.00290 | -0.00646 | 0.03426  |
| D5  | 0.02335  | 0.00052  | -0.00093 | -0.01252 | -0.01345 | 0.00990  |
| D6  | 3.09238  | 0.00151  | 0.00232  | 0.02729  | 0.03003  | 3.12241  |
| D7  | 3.06232  | 0.00013  | -0.00124 | -0.01099 | -0.01234 | 3.04998  |
| D8  | -0.15183 | 0.00113  | 0.00201  | 0.02883  | 0.03114  | -0.12070 |
| D9  | 0.00944  | 0.00088  | -0.00636 | 0.02208  | 0.01565  | 0.02509  |
| D10 | 3.13206  | 0.00023  | -0.00692 | -0.01066 | -0.01753 | 3.11453  |
| D11 | -3.08214 | 0.00036  | 0.00125  | 0.01730  | 0.01842  | -3.06372 |
| D12 | 0.04048  | -0.00029 | 0.00069  | -0.01544 | -0.01476 | 0.02572  |
| D13 | -1.73680 | 0.00251  | 0.02116  | 0.01236  | 0.03353  | -1.70327 |
| D14 | 1.34233  | 0.00315  | 0.01167  | 0.01792  | 0.02957  | 1.37191  |
| D15 | 0.00513  | -0.00057 | 0.00592  | -0.03026 | -0.02435 | -0.01922 |
| D16 | -3.12510 | -0.00070 | -0.00019 | -0.02353 | -0.02359 | 3.13449  |
| D17 | -3.11829 | 0.00005  | 0.00647  | 0.00110  | 0.00757  | -3.11072 |
| D18 | 0.03466  | -0.00007 | 0.00037  | 0.00784  | 0.00833  | 0.04299  |
| D19 | 0.38564  | -0.00070 | -0.00678 | -0.07929 | -0.08611 | 0.29953  |
| D20 | -2.71168 | -0.00042 | -0.00435 | -0.06292 | -0.06729 | -2.77897 |
| D21 | -2.77764 | -0.00144 | -0.00743 | -0.11673 | -0.12413 | -2.90177 |
| D22 | 0.40823  | -0.00116 | -0.00500 | -0.10035 | -0.10531 | 0.30291  |
| D23 | -0.01753 | 0.00004  | -0.00312 | 0.02649  | 0.02337  | 0.00585  |
| D24 | -3.08621 | -0.00074 | -0.00626 | -0.01508 | -0.02089 | -3.10710 |
| D25 | 3.11263  | 0.00017  | 0.00301  | 0.01969  | 0.02259  | 3.13522  |
| D26 | 0.04395  | -0.00061 | -0.00013 | -0.02187 | -0.02167 | 0.02227  |

|     |          |          |          |          |          |          |
|-----|----------|----------|----------|----------|----------|----------|
| D27 | -2.52501 | 0.00060  | 0.00200  | 0.04033  | 0.04225  | -2.48276 |
| D28 | -0.50741 | 0.00109  | 0.00126  | 0.03627  | 0.03755  | -0.46986 |
| D29 | 1.64816  | -0.00027 | 0.00351  | 0.02710  | 0.03060  | 1.67876  |
| D30 | 0.53147  | 0.00165  | 0.00576  | 0.08782  | 0.09354  | 0.62501  |
| D31 | 2.54907  | 0.00215  | 0.00502  | 0.08375  | 0.08884  | 2.63791  |
| D32 | -1.57854 | 0.00078  | 0.00727  | 0.07459  | 0.08189  | -1.49666 |
| D33 | -3.12420 | 0.00180  | -0.00838 | 0.04280  | 0.03435  | -3.08985 |
| D34 | 1.11268  | 0.00164  | -0.00700 | 0.05236  | 0.04536  | 1.15804  |
| D35 | -1.04756 | 0.00399  | -0.00658 | 0.06258  | 0.05621  | -0.99135 |
| D36 | 1.06980  | 0.00010  | -0.00652 | 0.03516  | 0.02848  | 1.09828  |
| D37 | -0.97651 | -0.00005 | -0.00514 | 0.04472  | 0.03950  | -0.93701 |
| D38 | -3.13675 | 0.00229  | -0.00472 | 0.05494  | 0.05034  | -3.08641 |
| D39 | -1.00946 | -0.00050 | -0.00692 | 0.03651  | 0.02946  | -0.98001 |
| D40 | -3.05577 | -0.00066 | -0.00555 | 0.04607  | 0.04047  | -3.01530 |
| D41 | 1.06717  | 0.00169  | -0.00512 | 0.05629  | 0.05132  | 1.11849  |
| D42 | -3.09343 | 0.00029  | 0.00173  | 0.01182  | 0.01354  | -3.07989 |
| D43 | -0.00284 | 0.00017  | 0.00110  | 0.01045  | 0.01155  | 0.00871  |
| D44 | -0.00052 | -0.00001 | -0.00093 | -0.00617 | -0.00709 | -0.00760 |
| D45 | 3.09008  | -0.00013 | -0.00155 | -0.00753 | -0.00908 | 3.08100  |
| D46 | -2.74177 | -0.00033 | -0.00027 | -0.00746 | -0.00779 | -2.74955 |
| D47 | -0.03837 | -0.00040 | -0.00042 | -0.00790 | -0.00838 | -0.04676 |
| D48 | -0.00881 | 0.00028  | -0.00074 | 0.00955  | 0.00878  | -0.00003 |
| D49 | 2.69458  | 0.00020  | -0.00089 | 0.00911  | 0.00819  | 2.70277  |
| D50 | 0.68498  | 0.00048  | -0.00069 | 0.00326  | 0.00286  | 0.68784  |
| D51 | -1.69270 | 0.00110  | -0.00035 | 0.01742  | 0.01727  | -1.67542 |
| D52 | 2.21327  | 0.00051  | 0.00457  | 0.05251  | 0.05719  | 2.27046  |
| D53 | -0.17356 | 0.00047  | 0.00498  | 0.05524  | 0.06034  | -0.11322 |
| D54 | 2.54923  | -0.00012 | -0.00011 | -0.00039 | -0.00051 | 2.54871  |
| D55 | -1.65340 | -0.00009 | -0.00004 | 0.00030  | 0.00024  | -1.65316 |
| D56 | 0.43939  | -0.00005 | 0.00006  | 0.00076  | 0.00080  | 0.44020  |
| D57 | 1.33291  | 0.00006  | -0.00037 | -0.00229 | -0.00263 | 1.33028  |
| D58 | -2.86972 | 0.00009  | -0.00030 | -0.00160 | -0.00188 | -2.87160 |
| D59 | -0.77693 | 0.00013  | -0.00020 | -0.00114 | -0.00131 | -0.77824 |
| D60 | -1.02591 | -0.00004 | -0.00007 | 0.00042  | 0.00036  | -1.02555 |
| D61 | 1.05465  | -0.00001 | 0.00000  | 0.00111  | 0.00111  | 1.05576  |
| D62 | -3.13574 | 0.00003  | 0.00010  | 0.00157  | 0.00168  | -3.13407 |
| D63 | 1.47575  | -0.00108 | 0.00262  | -0.11158 | -0.10899 | 1.36676  |
| D64 | -2.95304 | -0.00154 | -0.00277 | -0.16322 | -0.16596 | -3.11900 |
| D65 | 2.48077  | -0.00079 | 0.01065  | 0.10990  | 0.12036  | 2.60114  |
| D66 | -0.66378 | 0.00081  | 0.00093  | 0.08259  | 0.08361  | -0.58017 |
| D67 | -1.72570 | -0.00009 | 0.01216  | 0.13655  | 0.14855  | -1.57715 |
| D68 | 1.41294  | 0.00150  | 0.00243  | 0.10925  | 0.11179  | 1.52473  |
| D69 | 0.28170  | 0.00064  | 0.01116  | 0.12327  | 0.13437  | 0.41607  |
| D70 | -2.86284 | 0.00223  | 0.00143  | 0.09596  | 0.09761  | -2.76524 |

|     |          |          |          |          |          |          |
|-----|----------|----------|----------|----------|----------|----------|
| D71 | 2.90148  | -0.00378 | 0.01148  | -0.00737 | 0.00450  | 2.90598  |
| D72 | -0.24309 | -0.00218 | 0.00211  | -0.03494 | -0.03322 | -0.27631 |
| D73 | -1.60896 | -0.00100 | -0.00218 | -0.08271 | -0.08489 | -1.69385 |

| Item                 | Value    | Threshold | Converged? |
|----------------------|----------|-----------|------------|
| Maximum Force        | 0.006826 | 0.000450  | NO         |
| RMS Force            | 0.001223 | 0.000300  | NO         |
| Maximum Displacement | 0.771793 | 0.001800  | NO         |
| RMS Displacement     | 0.138096 | 0.001200  | NO         |

Predicted change in Energy=-1.682598D-03

GradGradGradGradGradGradGradGradGradGradGradGradGradGradGradGradGradGradGrad

Input orientation:

| -----  |        |        |                         |           |           |  |
|--------|--------|--------|-------------------------|-----------|-----------|--|
| Center | Atomic | Atomic | Coordinates (Angstroms) |           |           |  |
| Number | Number | Type   | X                       | Y         | Z         |  |
| -----  |        |        |                         |           |           |  |
| 1      | 6      | 0      | -0.909398               | 1.511614  | 1.522639  |  |
| 2      | 6      | 0      | -1.675980               | 0.394637  | 1.667342  |  |
| 3      | 7      | 0      | -2.636941               | 0.434197  | 0.672083  |  |
| 4      | 6      | 0      | -2.434151               | 1.531667  | -0.073815 |  |
| 5      | 7      | 0      | -1.394073               | 2.206672  | 0.423117  |  |
| 6      | 6      | 0      | -0.885316               | 3.491291  | -0.096425 |  |
| 7      | 1      | 0      | -0.018995               | 1.821350  | 2.038288  |  |
| 8      | 1      | 0      | -1.586668               | -0.429115 | 2.351894  |  |
| 9      | 1      | 0      | -1.756968               | 4.060603  | -0.426238 |  |
| 10     | 1      | 0      | -0.440149               | 4.010591  | 0.748124  |  |
| 11     | 35     | 0      | -0.287743               | -2.323808 | 0.859222  |  |
| 12     | 1      | 0      | -3.024974               | 1.820806  | -0.924995 |  |
| 13     | 6      | 0      | -3.643692               | -0.536064 | 0.406141  |  |
| 14     | 6      | 0      | -4.012571               | -1.465376 | 1.273652  |  |
| 15     | 1      | 0      | -4.035086               | -0.477576 | -0.600275 |  |
| 16     | 1      | 0      | -4.744520               | -2.205054 | 0.980114  |  |
| 17     | 1      | 0      | -3.579711               | -1.554307 | 2.260572  |  |
| 18     | 6      | 0      | 3.120462                | -0.849881 | 0.463609  |  |
| 19     | 6      | 0      | 4.223143                | -0.431369 | 1.339579  |  |
| 20     | 8      | 0      | 3.123616                | 0.468956  | 1.077521  |  |
| 21     | 1      | 0      | 3.273593                | -0.824751 | -0.611092 |  |
| 22     | 1      | 0      | 2.322459                | -1.499542 | 0.812093  |  |
| 23     | 1      | 0      | 4.212249                | -0.800037 | 2.363725  |  |
| 24     | 6      | 0      | 5.570363                | -0.027224 | 0.806693  |  |
| 25     | 1      | 0      | 6.014523                | 0.760791  | 1.422515  |  |
| 26     | 1      | 0      | 6.249433                | -0.885507 | 0.818374  |  |
| 27     | 1      | 0      | 5.488604                | 0.335972  | -0.220085 |  |
| 28     | 6      | 0      | 0.116781                | 3.381588  | -1.251558 |  |

|    |   |   |           |          |           |
|----|---|---|-----------|----------|-----------|
| 29 | 1 | 0 | 0.448747  | 4.397611 | -1.499299 |
| 30 | 1 | 0 | -0.360313 | 2.976781 | -2.145618 |
| 31 | 6 | 0 | 1.370878  | 2.555238 | -1.005228 |
| 32 | 8 | 0 | 1.939839  | 1.945056 | -1.870351 |
| 33 | 8 | 0 | 1.770451  | 2.644244 | 0.277817  |
| 34 | 1 | 0 | 2.445180  | 1.951658 | 0.493852  |

-----  
Distance matrix (angstroms):

|    |    | 1        | 2        | 3        | 4        | 5        |
|----|----|----------|----------|----------|----------|----------|
| 1  | C  | 0.000000 |          |          |          |          |
| 2  | C  | 1.362433 | 0.000000 |          |          |          |
| 3  | N  | 2.206507 | 1.384034 | 0.000000 |          |          |
| 4  | C  | 2.207700 | 2.213434 | 1.342359 | 0.000000 |          |
| 5  | N  | 1.388151 | 2.216086 | 2.179076 | 1.335791 | 0.000000 |
| 6  | C  | 2.557551 | 3.650382 | 3.606192 | 2.497905 | 1.476145 |
| 7  | H  | 1.074546 | 2.217817 | 3.262568 | 3.221471 | 2.155943 |
| 8  | H  | 2.216481 | 1.074782 | 2.161052 | 3.232176 | 3.271796 |
| 9  | H  | 3.318711 | 4.222433 | 3.889921 | 2.641647 | 2.071270 |
| 10 | H  | 2.657998 | 3.930313 | 4.197889 | 3.285833 | 2.066331 |
| 11 | Br | 3.941706 | 3.157564 | 3.627719 | 4.510246 | 4.683952 |
| 12 | H  | 3.249949 | 3.251761 | 2.150329 | 1.075723 | 2.150845 |
| 13 | C  | 3.593871 | 2.515695 | 1.423263 | 2.443124 | 3.547347 |
| 14 | C  | 4.307452 | 3.012357 | 2.421285 | 3.645455 | 4.589540 |
| 15 | H  | 4.270077 | 3.386476 | 2.098818 | 2.622443 | 3.902238 |
| 16 | H  | 5.368064 | 4.080026 | 3.391522 | 4.517926 | 5.567681 |
| 17 | H  | 4.132189 | 2.788278 | 2.714085 | 4.035456 | 4.722098 |
| 18 | C  | 4.789361 | 5.099378 | 5.902543 | 6.067482 | 5.452081 |
| 19 | C  | 5.491054 | 5.965683 | 6.946619 | 7.083133 | 6.273140 |
| 20 | O  | 4.189328 | 4.836273 | 5.774911 | 5.774401 | 4.884405 |
| 21 | H  | 5.244886 | 5.583587 | 6.177856 | 6.198364 | 5.660939 |
| 22 | H  | 4.474018 | 4.506315 | 5.324903 | 5.709501 | 5.263073 |
| 23 | H  | 5.681763 | 6.048425 | 7.162150 | 7.453395 | 6.651099 |
| 24 | C  | 6.698352 | 7.309458 | 8.221367 | 8.202298 | 7.323988 |
| 25 | H  | 6.965231 | 7.703107 | 8.690089 | 8.614718 | 7.614241 |
| 26 | H  | 7.582285 | 8.072899 | 8.985024 | 9.057780 | 8.254756 |
| 27 | H  | 6.734512 | 7.409257 | 8.174967 | 8.013809 | 7.161318 |
| 28 | C  | 3.499431 | 4.544870 | 4.468836 | 3.364007 | 2.543157 |
| 29 | H  | 4.393819 | 5.528642 | 5.472204 | 4.307754 | 3.448461 |
| 30 | H  | 3.988022 | 4.789271 | 4.425744 | 3.268261 | 2.874044 |
| 31 | C  | 3.560747 | 4.592839 | 4.834749 | 4.048886 | 3.131553 |
| 32 | O  | 4.451787 | 5.290861 | 5.449181 | 4.746601 | 4.055047 |
| 33 | O  | 3.164494 | 4.343892 | 4.946196 | 4.363502 | 3.197936 |
| 34 | H  | 3.536275 | 4.559096 | 5.306826 | 4.930164 | 3.848364 |
|    |    | 6        | 7        | 8        | 9        | 10       |

|    |    |          |          |          |          |          |
|----|----|----------|----------|----------|----------|----------|
| 6  | C  | 0.000000 |          |          |          |          |
| 7  | H  | 2.845384 | 0.000000 |          |          |          |
| 8  | H  | 4.675013 | 2.760533 | 0.000000 |          |          |
| 9  | H  | 1.092095 | 3.756154 | 5.282480 | 0.000000 |          |
| 10 | H  | 1.086789 | 2.575785 | 4.857734 | 1.765118 | 0.000000 |
| 11 | Br | 5.923321 | 4.317958 | 2.739551 | 6.676207 | 6.337207 |
| 12 | H  | 2.838166 | 4.221013 | 4.227159 | 2.621696 | 3.778334 |
| 13 | C  | 4.907219 | 4.621659 | 2.833503 | 5.038048 | 5.572406 |
| 14 | C  | 6.018752 | 5.228373 | 2.849815 | 6.205950 | 6.559313 |
| 15 | H  | 5.091838 | 5.326918 | 3.835675 | 5.080864 | 5.906386 |
| 16 | H  | 6.964247 | 6.297797 | 3.873986 | 7.082496 | 7.564104 |
| 17 | H  | 6.186538 | 4.911534 | 2.290549 | 6.486027 | 6.566006 |
| 18 | C  | 5.933437 | 4.412627 | 5.089179 | 6.978110 | 6.031840 |
| 19 | C  | 6.598918 | 4.853728 | 5.897347 | 7.684898 | 6.467389 |
| 20 | O  | 5.155985 | 3.553596 | 4.961586 | 6.243502 | 5.035087 |
| 21 | H  | 6.015781 | 4.986201 | 5.705958 | 7.014799 | 6.246590 |
| 22 | H  | 6.001970 | 4.244324 | 4.335675 | 7.006454 | 6.164225 |
| 23 | H  | 7.103028 | 4.988086 | 5.810780 | 8.187874 | 6.884557 |
| 24 | C  | 7.407521 | 6.014564 | 7.332958 | 8.480580 | 7.241108 |
| 25 | H  | 7.574337 | 6.156891 | 7.749693 | 8.643074 | 7.258016 |
| 26 | H  | 8.420087 | 6.936026 | 7.997779 | 9.492920 | 8.290189 |
| 27 | H  | 7.113240 | 6.135164 | 7.567028 | 8.149459 | 7.042043 |
| 28 | C  | 1.533155 | 3.643606 | 5.514351 | 2.157116 | 2.168997 |
| 29 | H  | 2.137567 | 4.401184 | 6.501684 | 2.475927 | 2.447617 |
| 30 | H  | 2.177049 | 4.353916 | 5.773361 | 2.466086 | 3.073903 |
| 31 | C  | 2.606248 | 3.425394 | 5.378077 | 3.519201 | 2.910690 |
| 32 | O  | 3.676840 | 4.373761 | 5.991686 | 4.497486 | 4.097218 |
| 33 | O  | 2.812586 | 2.641690 | 5.001758 | 3.865805 | 2.640993 |
| 34 | H  | 3.716329 | 2.911086 | 5.037480 | 4.790852 | 3.553728 |
|    |    | 11       | 12       | 13       | 14       | 15       |
| 11 | Br | 0.000000 |          |          |          |          |
| 12 | H  | 5.277659 | 0.000000 |          |          |          |
| 13 | C  | 3.829322 | 2.776611 | 0.000000 |          |          |
| 14 | C  | 3.844867 | 4.075339 | 1.323733 | 0.000000 |          |
| 15 | H  | 4.425074 | 2.531467 | 1.081427 | 2.118457 | 0.000000 |
| 16 | H  | 4.459998 | 4.774288 | 2.080095 | 1.081221 | 2.446448 |
| 17 | H  | 3.659640 | 4.674073 | 2.116560 | 1.081336 | 3.090496 |
| 18 | C  | 3.734278 | 6.843039 | 6.771674 | 7.205218 | 7.243779 |
| 19 | C  | 4.915300 | 7.920593 | 7.922712 | 8.300633 | 8.483131 |
| 20 | O  | 4.414132 | 6.606264 | 6.874392 | 7.396301 | 7.413361 |
| 21 | H  | 4.134261 | 6.838820 | 6.997638 | 7.553201 | 7.316928 |
| 22 | H  | 2.737661 | 6.529718 | 6.057065 | 6.351913 | 6.592235 |
| 23 | H  | 4.983507 | 8.370298 | 8.100471 | 8.323377 | 8.769710 |
| 24 | C  | 6.292414 | 8.960680 | 9.236784 | 9.701493 | 9.718386 |

|    |   |           |          |          |           |           |
|----|---|-----------|----------|----------|-----------|-----------|
| 25 | H | 7.039220  | 9.399305 | 9.797753 | 10.272322 | 10.325690 |
| 26 | H | 6.693658  | 9.817234 | 9.907874 | 10.288453 | 10.389913 |
| 27 | H | 6.450234  | 8.670792 | 9.195185 | 9.785113  | 9.565933  |
| 28 | C | 6.096768  | 3.523252 | 5.677774 | 6.849912  | 5.705726  |
| 29 | H | 7.161181  | 4.363082 | 6.687294 | 7.871927  | 6.684343  |
| 30 | H | 6.093487  | 3.150653 | 5.443540 | 6.690527  | 5.274905  |
| 31 | C | 5.480172  | 4.457504 | 6.057559 | 7.095079  | 6.211794  |
| 32 | O | 5.534969  | 5.055541 | 6.520290 | 7.546322  | 6.571298  |
| 33 | O | 5.408857  | 5.012075 | 6.280427 | 7.164077  | 6.649891  |
| 34 | H | 5.087433  | 5.652683 | 6.578055 | 7.347568  | 7.006578  |
|    |   | 16        | 17       | 18       | 19        | 20        |
| 16 | H | 0.000000  |          |          |           |           |
| 17 | H | 1.849277  | 0.000000 |          |           |           |
| 18 | C | 7.997576  | 6.972633 | 0.000000 |           |           |
| 19 | C | 9.148452  | 7.936860 | 1.469143 | 0.000000  |           |
| 20 | O | 8.310679  | 7.101252 | 1.454727 | 1.445068  | 0.000000  |
| 21 | H | 8.290194  | 7.466357 | 1.085847 | 2.204884  | 2.132507  |
| 22 | H | 7.104095  | 6.077556 | 1.086421 | 2.243176  | 2.141797  |
| 23 | H | 9.171269  | 7.829061 | 2.192014 | 1.088536  | 2.109452  |
| 24 | C | 10.543711 | 9.389867 | 2.607007 | 1.504095  | 2.511198  |
| 25 | H | 11.169108 | 9.905117 | 3.448094 | 2.153407  | 2.926010  |
| 26 | H | 11.074041 | 9.956872 | 3.149220 | 2.140969  | 3.416499  |
| 27 | H | 10.611980 | 9.589637 | 2.735284 | 2.150059  | 2.700858  |
| 28 | C | 7.734544  | 7.096630 | 5.465276 | 6.173722  | 4.790521  |
| 29 | H | 8.758579  | 8.111130 | 6.207032 | 6.754579  | 5.406408  |
| 30 | H | 7.472810  | 7.092939 | 5.793722 | 6.691050  | 5.368014  |
| 31 | C | 8.000004  | 7.215409 | 4.100410 | 4.749037  | 3.429651  |
| 32 | O | 8.368346  | 7.731461 | 3.827913 | 4.600492  | 3.502877  |
| 33 | O | 8.151917  | 7.084022 | 3.750461 | 4.074608  | 2.683739  |
| 34 | H | 8.319044  | 7.191133 | 2.881934 | 3.091152  | 1.731863  |
|    |   | 21        | 22       | 23       | 24        | 25        |
| 21 | H | 0.000000  |          |          |           |           |
| 22 | H | 1.839961  | 0.000000 |          |           |           |
| 23 | H | 3.119491  | 2.543261 | 0.000000 |           |           |
| 24 | C | 2.814483  | 3.566039 | 2.205916 | 0.000000  |           |
| 25 | H | 3.763269  | 4.371849 | 2.563250 | 1.094295  | 0.000000  |
| 26 | H | 3.301922  | 3.974696 | 2.558425 | 1.094497  | 1.769313  |
| 27 | H | 2.531094  | 3.802497 | 3.097689 | 1.092186  | 1.776287  |
| 28 | C | 5.298014  | 5.740131 | 6.879617 | 6.752627  | 6.985887  |
| 29 | H | 6.003476  | 6.605281 | 7.490157 | 7.150365  | 7.262322  |
| 30 | H | 5.478293  | 5.998566 | 7.450292 | 7.274140  | 7.634181  |
| 31 | C | 3.898717  | 4.544161 | 5.539053 | 5.252413  | 5.538720  |
| 32 | O | 3.322117  | 4.382597 | 5.534147 | 4.923125  | 5.371081  |
| 33 | O | 3.883751  | 4.214395 | 4.709189 | 4.675018  | 4.782247  |

|    |   |          |          |          |          |          |
|----|---|----------|----------|----------|----------|----------|
| 34 | H | 3.100905 | 3.468014 | 3.767066 | 3.712225 | 3.875667 |
|    |   | 26       | 27       | 28       | 29       | 30       |
| 26 | H | 0.000000 |          |          |          |          |
| 27 | H | 1.774618 | 0.000000 |          |          |          |
| 28 | C | 7.752558 | 6.260687 | 0.000000 |          |          |
| 29 | H | 8.181131 | 6.597989 | 1.097215 | 0.000000 |          |
| 30 | H | 8.209218 | 6.700103 | 1.091251 | 1.758142 | 0.000000 |
| 31 | C | 6.242159 | 4.743127 | 1.521938 | 2.118672 | 2.115469 |
| 32 | O | 5.814975 | 4.231579 | 2.402097 | 2.894143 | 2.535927 |
| 33 | O | 5.728231 | 4.404621 | 2.370082 | 2.824772 | 3.244036 |
| 34 | H | 4.756802 | 3.518888 | 3.242314 | 3.733775 | 3.986034 |
|    |   | 31       | 32       | 33       | 34       |          |
| 31 | C | 0.000000 |          |          |          |          |
| 32 | O | 1.201864 | 0.000000 |          |          |          |
| 33 | O | 1.346768 | 2.265432 | 0.000000 |          |          |
| 34 | H | 1.940534 | 2.417616 | 0.990760 | 0.000000 |          |

Stoichiometry C<sub>11</sub>H<sub>17</sub>BrN<sub>2</sub>O<sub>3</sub>

Framework group C1[X(C<sub>11</sub>H<sub>17</sub>BrN<sub>2</sub>O<sub>3</sub>)]

Deg. of freedom 96

Full point group C1 NOp 1

Largest Abelian subgroup C1 NOp 1

Largest concise Abelian subgroup C1 NOp 1

Standard orientation:

| Center<br>Number | Atomic<br>Number | Atomic<br>Type | Coordinates (Angstroms) |           |           |
|------------------|------------------|----------------|-------------------------|-----------|-----------|
|                  |                  |                | X                       | Y         | Z         |
| 1                | 6                | 0              | -0.978138               | 1.005198  | 1.360692  |
| 2                | 6                | 0              | -1.917172               | 0.039760  | 1.154859  |
| 3                | 7                | 0              | -2.797518               | 0.530206  | 0.206174  |
| 4                | 6                | 0              | -2.380596               | 1.748264  | -0.173878 |
| 5                | 7                | 0              | -1.280186               | 2.063475  | 0.514655  |
| 6                | 6                | 0              | -0.546231               | 3.339956  | 0.410203  |
| 7                | 1                | 0              | -0.083480               | 0.996198  | 1.955801  |
| 8                | 1                | 0              | -1.999628               | -0.951553 | 1.561868  |
| 9                | 1                | 0              | -1.296455               | 4.118491  | 0.256190  |
| 10               | 1                | 0              | -0.077869               | 3.506041  | 1.376724  |
| 11               | 35               | 0              | -0.923831               | -2.513422 | -0.415091 |
| 12               | 1                | 0              | -2.865869               | 2.369324  | -0.905981 |
| 13               | 6                | 0              | -3.925307               | -0.136317 | -0.350170 |
| 14               | 6                | 0              | -4.487132               | -1.204062 | 0.194386  |
| 15               | 1                | 0              | -4.240517               | 0.279919  | -1.297204 |
| 16               | 1                | 0              | -5.306310               | -1.691456 | -0.315941 |
| 17               | 1                | 0              | -4.134607               | -1.650158 | 1.114175  |

|    |   |   |          |           |           |
|----|---|---|----------|-----------|-----------|
| 18 | 6 | 0 | 2.690493 | -1.580343 | -0.310867 |
| 19 | 6 | 0 | 3.789391 | -1.628360 | 0.663041  |
| 20 | 8 | 0 | 2.862084 | -0.520088 | 0.670277  |
| 21 | 1 | 0 | 2.911056 | -1.266550 | -1.326716 |
| 22 | 1 | 0 | 1.781022 | -2.160606 | -0.182539 |
| 23 | 1 | 0 | 3.658479 | -2.274404 | 1.529297  |
| 24 | 6 | 0 | 5.213218 | -1.316870 | 0.291566  |
| 25 | 1 | 0 | 5.736538 | -0.830526 | 1.120473  |
| 26 | 1 | 0 | 5.747892 | -2.241660 | 0.053215  |
| 27 | 1 | 0 | 5.252095 | -0.659700 | -0.579918 |
| 28 | 6 | 0 | 0.495125 | 3.408438  | -0.712940 |
| 29 | 1 | 0 | 0.996230 | 4.381864  | -0.640719 |
| 30 | 1 | 0 | 0.016198 | 3.369993  | -1.692726 |
| 31 | 6 | 0 | 1.587329 | 2.348540  | -0.711200 |
| 32 | 8 | 0 | 2.105789 | 1.933284  | -1.712817 |
| 33 | 8 | 0 | 1.916734 | 1.988465  | 0.544039  |
| 34 | 1 | 0 | 2.460523 | 1.160297  | 0.550262  |

-----

Rotational constants (GHZ):      0.3547222      0.2527239      0.1627992

Standard basis: 6-311++G(d,p) (5D, 7F)

There are    538 symmetry adapted cartesian basis functions of A    symmetry.

There are    519 symmetry adapted basis functions of A    symmetry.

    519 basis functions,    823 primitive gaussians,    538 cartesian basis functions

    78 alpha electrons      78 beta electrons

    nuclear repulsion energy      1580.8946754281 Hartrees.

NAtoms=    34 NActive=    34 NUniq=    34 SFac= 1.00D+00 NAtFMM=    60 NAOKFM=F

Big=F

Integral buffers will be    131072 words long.

Raffenetti 2 integral format.

Two-electron integral symmetry is turned on.

One-electron integrals computed using PRISM.

NBasis=    519 RedAO= T EigKep= 2.63D-06    NBF=    519

NBsUse=    519 1.00D-06 EigRej= -1.00D+00    NBFU=    519

Initial guess from the checkpoint file:    "/coohpo.chk"

B after Tr=    0.000000    0.000000    0.000000

    Rot=    0.999821    -0.005495    0.006928    -0.016736 Ang=    -2.17 deg.

ExpMin= 3.50D-02 ExpMax= 4.40D+05 ExpMxC= 1.51D+04 IAcc=3 IRadAn=      5 AccDes=

0.00D+00

Harris functional with IExCor=    402 and IRadAn=      5 diagonalized for initial guess.

HarFok: IExCor=    402 AccDes= 0.00D+00 IRadAn=      5 IDoV= 1 UseB2=F ITyADJ=14

ICtDFT= 3500011 ScaDFX= 1.000000 1.000000 1.000000 1.000000

FoFCou: FMM=F IPFlag=            0 FMFlag=      100000 FMFlg1=      0

    NFXFlg=            0 DoJE=T BraDBF=F KetDBF=T FulRan=T

    wScrn= 0.000000 ICntrl=      500 IOpCl=    0 I1Cent=    200000004 NGrid=



0

NMat0= 1 NMatS0= 1 NMatT0= 0 NMatD0= 1 NMatDS0= 0  
NMatDT0= 0

Petite list used in FoFCou.

Requested convergence on RMS density matrix=1.00D-08 within 128 cycles.

Requested convergence on MAX density matrix=1.00D-06.

Requested convergence on energy=1.00D-06.

No special actions if energy rises.

SCF Done: E(RB3LYP) = -3338.89450256 A.U. after 14 cycles

NFock= 14 Conv=0.35D-08 -V/T= 2.0019

Calling FoFJK, ICntrl= 2127 FMM=F ISym2X=0 I1Cent= 0 IOpClX= 0 NMat=1 NMatS=1

NMatT=0.

\*\*\*\*\* Axes restored to original set \*\*\*\*\*

```
-----
```

| Center<br>Number | Atomic<br>Number | Forces (Hartrees/Bohr) |              |              |
|------------------|------------------|------------------------|--------------|--------------|
|                  |                  | X                      | Y            | Z            |
| 1                | 6                | -0.001073801           | 0.000050672  | -0.001401655 |
| 2                | 6                | 0.001212483            | 0.001494131  | 0.002462624  |
| 3                | 7                | -0.000696773           | -0.000067786 | -0.000375792 |
| 4                | 6                | 0.000158582            | -0.000040692 | -0.001884100 |
| 5                | 7                | 0.001919275            | -0.001297396 | -0.000302938 |
| 6                | 6                | 0.000768131            | 0.000452626  | 0.000415070  |
| 7                | 1                | -0.000326466           | 0.000554652  | 0.000363782  |
| 8                | 1                | 0.001113242            | -0.000693080 | -0.001633339 |
| 9                | 1                | 0.000929672            | 0.001109941  | 0.000510203  |
| 10               | 1                | 0.000254150            | 0.000424221  | 0.001057992  |
| 11               | 35               | -0.000818985           | -0.000297118 | 0.000920570  |
| 12               | 1                | -0.000304334           | 0.000351811  | -0.000067986 |
| 13               | 6                | 0.000398000            | 0.000294635  | -0.000360888 |
| 14               | 6                | 0.000647714            | -0.000931802 | 0.000226306  |
| 15               | 1                | -0.000834315           | 0.000827736  | 0.000100128  |
| 16               | 1                | -0.000064366           | 0.000159760  | 0.000087448  |
| 17               | 1                | -0.000163414           | -0.000437606 | -0.000088132 |
| 18               | 6                | -0.000376133           | 0.000132443  | 0.000149111  |
| 19               | 6                | -0.000250379           | -0.000150633 | -0.000964750 |
| 20               | 8                | -0.000353092           | 0.002955714  | 0.001373138  |
| 21               | 1                | 0.000438423            | 0.000000309  | -0.000488272 |
| 22               | 1                | -0.000144801           | -0.000203377 | 0.000205249  |
| 23               | 1                | -0.000218243           | -0.000298051 | -0.000281304 |
| 24               | 6                | 0.000240194            | 0.000256173  | 0.000042290  |
| 25               | 1                | -0.000035009           | -0.000078783 | -0.000087561 |
| 26               | 1                | -0.000058504           | 0.000026478  | 0.000021433  |
| 27               | 1                | 0.000047142            | 0.000058422  | 0.000028073  |

```
-----
```

|    |   |              |              |              |
|----|---|--------------|--------------|--------------|
| 28 | 6 | -0.002378666 | -0.001928244 | -0.003042905 |
| 29 | 1 | -0.001372163 | -0.000500555 | 0.000274340  |
| 30 | 1 | 0.000307602  | 0.000254702  | -0.000595301 |
| 31 | 6 | 0.002801740  | 0.002395113  | 0.008267609  |
| 32 | 8 | -0.000331041 | -0.001522982 | -0.000461423 |
| 33 | 8 | -0.003793827 | -0.001502207 | -0.002201364 |
| 34 | 1 | 0.002357964  | -0.001849227 | -0.002267658 |

-----  
Cartesian Forces: Max 0.008267609 RMS 0.001371184

GradGradGradGradGradGradGradGradGradGradGradGradGradGradGradGradGradGradGrad

Berny optimization.

Using GEDIIS/GDIIS optimizer.

FormGI is forming the generalized inverse of G from B-inverse, IUseBI=4.

GSVD: received Info= 1 from GESDD.

Internal Forces: Max 0.004906671 RMS 0.000970221

Search for a local minimum.

Step number 9 out of a maximum of 175

All quantities printed in internal units (Hartrees-Bohrs-Radians)

Mixed Optimization -- En-DIIS/RFO-DIIS

Update second derivatives using D2CorX and points 8 9

DE= -1.24D-03 DEPred=-1.68D-03 R= 7.36D-01

TightC=F SS= 1.41D+00 RLast= 4.93D-01 DXNew= 1.2000D+00 1.4783D+00

Trust test= 7.36D-01 RLast= 4.93D-01 DXMaxT set to 1.20D+00

ITU= 1 1 0 1 0 -1 0 1 0

Use linear search instead of GDIIS.

|                 |         |         |         |         |         |
|-----------------|---------|---------|---------|---------|---------|
| Eigenvalues --- | 0.00218 | 0.00239 | 0.00403 | 0.00661 | 0.00698 |
| Eigenvalues --- | 0.00921 | 0.00996 | 0.01425 | 0.01496 | 0.01650 |
| Eigenvalues --- | 0.01756 | 0.01825 | 0.02137 | 0.02228 | 0.02280 |
| Eigenvalues --- | 0.02327 | 0.02432 | 0.02552 | 0.02645 | 0.02955 |
| Eigenvalues --- | 0.03045 | 0.03068 | 0.03091 | 0.03627 | 0.03798 |
| Eigenvalues --- | 0.04366 | 0.04654 | 0.05197 | 0.05372 | 0.05757 |
| Eigenvalues --- | 0.05886 | 0.06690 | 0.07643 | 0.09887 | 0.09986 |
| Eigenvalues --- | 0.11929 | 0.12639 | 0.12869 | 0.13325 | 0.13831 |
| Eigenvalues --- | 0.15332 | 0.15808 | 0.15874 | 0.15990 | 0.15999 |
| Eigenvalues --- | 0.16000 | 0.16000 | 0.16003 | 0.16020 | 0.16226 |
| Eigenvalues --- | 0.16769 | 0.18536 | 0.18761 | 0.21844 | 0.22132 |
| Eigenvalues --- | 0.22910 | 0.23102 | 0.23583 | 0.24772 | 0.25147 |
| Eigenvalues --- | 0.26023 | 0.26941 | 0.28653 | 0.29230 | 0.30353 |
| Eigenvalues --- | 0.31848 | 0.32368 | 0.34497 | 0.34601 | 0.34632 |
| Eigenvalues --- | 0.34765 | 0.34881 | 0.34898 | 0.34962 | 0.35026 |
| Eigenvalues --- | 0.35135 | 0.35530 | 0.35711 | 0.35763 | 0.36527 |
| Eigenvalues --- | 0.36600 | 0.36857 | 0.37096 | 0.37322 | 0.37783 |
| Eigenvalues --- | 0.41080 | 0.42617 | 0.45581 | 0.48976 | 0.51692 |

Eigenvalues --- 0.54425 0.55514 0.56117 0.60444 0.89537

Eigenvalues --- 0.95469

RFO step: Lambda=-1.89245962D-03 EMin= 2.18336053D-03

Quartic linear search produced a step of -0.05605.

Iteration 1 RMS(Cart)= 0.07816721 RMS(Int)= 0.00193838

Iteration 2 RMS(Cart)= 0.00327446 RMS(Int)= 0.00007129

Iteration 3 RMS(Cart)= 0.00000398 RMS(Int)= 0.00007124

Iteration 4 RMS(Cart)= 0.00000000 RMS(Int)= 0.00007124

| Variable | Old X   | -DE/DX   | Delta X<br>(Linear) | Delta X<br>(Quad) | Delta X<br>(Total) | New X   |
|----------|---------|----------|---------------------|-------------------|--------------------|---------|
| R1       | 2.57463 | -0.00051 | -0.00022            | -0.00319          | -0.00343           | 2.57120 |
| R2       | 2.62323 | -0.00123 | -0.00008            | -0.00350          | -0.00359           | 2.61964 |
| R3       | 2.03060 | 0.00006  | -0.00001            | 0.00042           | 0.00041            | 2.03100 |
| R4       | 2.61545 | 0.00158  | 0.00032             | 0.00028           | 0.00061            | 2.61605 |
| R5       | 2.03104 | 0.00033  | -0.00015            | 0.00150           | 0.00135            | 2.03239 |
| R6       | 2.53669 | 0.00042  | 0.00004             | 0.00307           | 0.00313            | 2.53982 |
| R7       | 2.68958 | 0.00009  | 0.00009             | -0.00040          | -0.00031           | 2.68926 |
| R8       | 2.52428 | 0.00017  | 0.00003             | 0.00016           | 0.00021            | 2.52448 |
| R9       | 2.03282 | 0.00032  | 0.00005             | -0.00020          | -0.00015           | 2.03267 |
| R10      | 2.78951 | -0.00106 | -0.00014            | -0.00641          | -0.00654           | 2.78297 |
| R11      | 2.06376 | -0.00032 | -0.00010            | 0.00105           | 0.00094            | 2.06470 |
| R12      | 2.05373 | 0.00113  | 0.00014             | 0.00063           | 0.00077            | 2.05450 |
| R13      | 2.89724 | -0.00191 | 0.00006             | -0.00765          | -0.00759           | 2.88965 |
| R14      | 5.17700 | -0.00068 | 0.00049             | -0.01865          | -0.01816           | 5.15884 |
| R15      | 2.50149 | 0.00087  | -0.00003            | 0.00100           | 0.00097            | 2.50247 |
| R16      | 2.04360 | 0.00026  | 0.00004             | -0.00024          | -0.00019           | 2.04341 |
| R17      | 2.04321 | -0.00009 | 0.00001             | -0.00038          | -0.00037           | 2.04284 |
| R18      | 2.04343 | -0.00012 | 0.00005             | -0.00094          | -0.00089           | 2.04253 |
| R19      | 2.77628 | 0.00004  | 0.00004             | -0.00073          | -0.00076           | 2.77552 |
| R20      | 2.74904 | 0.00009  | -0.00029            | 0.00524           | 0.00499            | 2.75402 |
| R21      | 2.05195 | 0.00054  | 0.00001             | 0.00043           | 0.00045            | 2.05240 |
| R22      | 2.05304 | 0.00029  | 0.00009             | -0.00015          | -0.00006           | 2.05298 |
| R23      | 2.73078 | -0.00033 | 0.00002             | -0.00045          | -0.00041           | 2.73038 |
| R24      | 2.05704 | -0.00016 | -0.00001            | -0.00020          | -0.00021           | 2.05682 |
| R25      | 2.84233 | 0.00024  | -0.00006            | 0.00150           | 0.00144            | 2.84377 |
| R26      | 3.27275 | -0.00259 | 0.00139             | -0.05222          | -0.05083           | 3.22191 |
| R27      | 2.06792 | -0.00012 | -0.00005            | 0.00010           | 0.00005            | 2.06797 |
| R28      | 2.06830 | -0.00006 | -0.00001            | -0.00008          | -0.00009           | 2.06821 |
| R29      | 2.06393 | -0.00001 | -0.00001            | 0.00002           | 0.00001            | 2.06394 |
| R30      | 2.07344 | -0.00094 | -0.00024            | 0.00013           | -0.00011           | 2.07332 |
| R31      | 2.06217 | 0.00025  | -0.00018            | 0.00353           | 0.00335            | 2.06551 |
| R32      | 2.87605 | 0.00069  | -0.00001            | -0.00357          | -0.00358           | 2.87247 |
| R33      | 2.27119 | 0.00095  | 0.00008             | -0.00072          | -0.00065           | 2.27054 |
| R34      | 2.54502 | -0.00491 | -0.00024            | -0.00527          | -0.00552           | 2.53951 |

|     |         |          |          |          |          |         |
|-----|---------|----------|----------|----------|----------|---------|
| R35 | 1.87227 | 0.00003  | -0.00053 | 0.00993  | 0.00940  | 1.88167 |
| A1  | 1.87358 | 0.00043  | 0.00013  | 0.00061  | 0.00071  | 1.87428 |
| A2  | 2.28047 | 0.00002  | -0.00009 | 0.00090  | 0.00083  | 2.28130 |
| A3  | 2.12362 | -0.00039 | -0.00005 | -0.00138 | -0.00141 | 2.12220 |
| A4  | 1.86592 | -0.00049 | -0.00011 | -0.00053 | -0.00075 | 1.86516 |
| A5  | 2.27739 | 0.00072  | -0.00053 | 0.00438  | 0.00379  | 2.28118 |
| A6  | 2.13840 | -0.00021 | 0.00066  | -0.00273 | -0.00213 | 2.13627 |
| A7  | 1.89447 | -0.00001 | 0.00004  | 0.00060  | 0.00055  | 1.89503 |
| A8  | 2.22183 | 0.00065  | 0.00013  | -0.00071 | -0.00065 | 2.22118 |
| A9  | 2.16564 | -0.00064 | -0.00010 | -0.00109 | -0.00126 | 2.16438 |
| A10 | 1.90080 | -0.00072 | -0.00012 | -0.00398 | -0.00410 | 1.89670 |
| A11 | 2.18518 | 0.00048  | 0.00011  | 0.00145  | 0.00156  | 2.18673 |
| A12 | 2.19714 | 0.00023  | 0.00001  | 0.00255  | 0.00256  | 2.19970 |
| A13 | 1.88968 | 0.00079  | 0.00006  | 0.00264  | 0.00265  | 1.89232 |
| A14 | 2.20705 | 0.00005  | -0.00087 | -0.00788 | -0.00878 | 2.19826 |
| A15 | 2.18607 | -0.00084 | 0.00069  | 0.00583  | 0.00649  | 2.19256 |
| A16 | 1.85967 | 0.00130  | 0.00056  | 0.01797  | 0.01858  | 1.87825 |
| A17 | 1.85824 | 0.00128  | 0.00060  | -0.00405 | -0.00350 | 1.85473 |
| A18 | 2.01327 | -0.00340 | -0.00146 | -0.02163 | -0.02309 | 1.99018 |
| A19 | 1.88865 | -0.00080 | -0.00025 | -0.00079 | -0.00106 | 1.88758 |
| A20 | 1.90863 | 0.00067  | -0.00011 | 0.00326  | 0.00324  | 1.91187 |
| A21 | 1.93046 | 0.00104  | 0.00071  | 0.00635  | 0.00693  | 1.93738 |
| A22 | 1.79511 | 0.00475  | -0.00308 | 0.04577  | 0.04269  | 1.83780 |
| A23 | 2.15706 | 0.00069  | -0.00025 | 0.00534  | 0.00508  | 2.16213 |
| A24 | 1.97472 | -0.00044 | 0.00014  | -0.00448 | -0.00435 | 1.97038 |
| A25 | 2.14958 | -0.00025 | 0.00016  | -0.00143 | -0.00127 | 2.14831 |
| A26 | 2.08404 | -0.00029 | -0.00001 | -0.00126 | -0.00128 | 2.08276 |
| A27 | 2.14637 | 0.00058  | 0.00001  | 0.00257  | 0.00257  | 2.14895 |
| A28 | 2.05162 | -0.00029 | 0.00001  | -0.00150 | -0.00149 | 2.05013 |
| A29 | 2.06881 | -0.00030 | 0.00022  | -0.00426 | -0.00382 | 2.06500 |
| A30 | 2.12987 | 0.00006  | -0.00073 | 0.00896  | 0.00800  | 2.13787 |
| A31 | 1.97838 | -0.00002 | 0.00030  | -0.00203 | -0.00173 | 1.97665 |
| A32 | 1.99144 | 0.00012  | 0.00020  | -0.00072 | -0.00053 | 1.99092 |
| A33 | 2.02072 | 0.00019  | 0.00017  | -0.00222 | -0.00205 | 2.01867 |
| A34 | 2.04540 | -0.00005 | -0.00026 | 0.00150  | 0.00129  | 2.04668 |
| A35 | 2.13836 | -0.00006 | 0.00018  | -0.00144 | -0.00131 | 2.13704 |
| A36 | 1.95413 | 0.00000  | 0.00006  | 0.00088  | 0.00099  | 1.95512 |
| A37 | 2.03741 | -0.00010 | -0.00002 | -0.00119 | -0.00128 | 2.03614 |
| A38 | 2.01895 | 0.00010  | 0.00009  | -0.00067 | -0.00059 | 2.01836 |
| A39 | 2.25633 | -0.00030 | 0.00163  | -0.03154 | -0.02983 | 2.22650 |
| A40 | 2.67383 | -0.00009 | -0.00047 | 0.00409  | 0.00299  | 2.67683 |
| A41 | 1.93656 | 0.00001  | 0.00001  | -0.00130 | -0.00129 | 1.93528 |
| A42 | 1.91903 | -0.00006 | -0.00007 | 0.00122  | 0.00115  | 1.92019 |
| A43 | 1.93411 | 0.00009  | 0.00007  | -0.00063 | -0.00056 | 1.93355 |

|     |          |          |          |          |          |          |
|-----|----------|----------|----------|----------|----------|----------|
| A44 | 1.88269  | 0.00001  | 0.00000  | 0.00025  | 0.00025  | 1.88294  |
| A45 | 1.89650  | -0.00006 | 0.00002  | -0.00023 | -0.00021 | 1.89628  |
| A46 | 1.89362  | 0.00001  | -0.00002 | 0.00073  | 0.00071  | 1.89433  |
| A47 | 1.87718  | -0.00027 | -0.00031 | -0.00001 | -0.00029 | 1.87689  |
| A48 | 1.93700  | 0.00154  | 0.00122  | 0.00062  | 0.00180  | 1.93880  |
| A49 | 2.04372  | -0.00302 | -0.00228 | -0.00405 | -0.00634 | 2.03739  |
| A50 | 1.86585  | -0.00058 | 0.00011  | -0.00402 | -0.00389 | 1.86196  |
| A51 | 1.86504  | 0.00113  | 0.00036  | 0.01291  | 0.01331  | 1.87835  |
| A52 | 1.86654  | 0.00133  | 0.00102  | -0.00509 | -0.00409 | 1.86245  |
| A53 | 2.15225  | -0.00108 | 0.00034  | -0.01939 | -0.01904 | 2.13321  |
| A54 | 1.94205  | 0.00191  | 0.00069  | 0.01835  | 0.01905  | 1.96110  |
| A55 | 2.18813  | -0.00083 | -0.00099 | 0.00116  | 0.00018  | 2.18831  |
| A56 | 1.94291  | -0.00348 | -0.00243 | -0.02768 | -0.03011 | 1.91280  |
| A57 | 2.78976  | 0.00092  | -0.00146 | -0.02440 | -0.02586 | 2.76390  |
| D1  | -0.02115 | 0.00002  | 0.00008  | -0.02250 | -0.02242 | -0.04358 |
| D2  | 3.06191  | 0.00052  | 0.00030  | -0.00058 | -0.00023 | 3.06169  |
| D3  | -3.04881 | -0.00051 | 0.00014  | -0.02370 | -0.02360 | -3.07241 |
| D4  | 0.03426  | 0.00000  | 0.00036  | -0.00178 | -0.00140 | 0.03285  |
| D5  | 0.00990  | -0.00005 | 0.00075  | 0.01330  | 0.01406  | 0.02396  |
| D6  | 3.12241  | -0.00025 | -0.00168 | 0.03536  | 0.03357  | -3.12721 |
| D7  | 3.04998  | 0.00044  | 0.00069  | 0.01454  | 0.01527  | 3.06525  |
| D8  | -0.12070 | 0.00024  | -0.00175 | 0.03660  | 0.03478  | -0.08592 |
| D9  | 0.02509  | 0.00003  | -0.00088 | 0.02394  | 0.02307  | 0.04816  |
| D10 | 3.11453  | 0.00001  | 0.00098  | -0.00124 | -0.00027 | 3.11426  |
| D11 | -3.06372 | -0.00046 | -0.00103 | 0.00388  | 0.00291  | -3.06081 |
| D12 | 0.02572  | -0.00048 | 0.00083  | -0.02129 | -0.02044 | 0.00528  |
| D13 | -1.70327 | -0.00165 | -0.00188 | 0.00699  | 0.00509  | -1.69817 |
| D14 | 1.37191  | -0.00108 | -0.00166 | 0.03198  | 0.03033  | 1.40224  |
| D15 | -0.01922 | -0.00007 | 0.00136  | -0.01587 | -0.01451 | -0.03373 |
| D16 | 3.13449  | 0.00019  | 0.00132  | -0.01794 | -0.01665 | 3.11784  |
| D17 | -3.11072 | -0.00009 | -0.00042 | 0.00829  | 0.00788  | -3.10284 |
| D18 | 0.04299  | 0.00017  | -0.00047 | 0.00623  | 0.00574  | 0.04873  |
| D19 | 0.29953  | -0.00109 | 0.00483  | -0.11753 | -0.11269 | 0.18684  |
| D20 | -2.77897 | -0.00119 | 0.00377  | -0.10754 | -0.10377 | -2.88273 |
| D21 | -2.90177 | -0.00109 | 0.00696  | -0.14630 | -0.13934 | -3.04111 |
| D22 | 0.30291  | -0.00119 | 0.00590  | -0.13631 | -0.13042 | 0.17250  |
| D23 | 0.00585  | 0.00008  | -0.00131 | 0.00168  | 0.00038  | 0.00622  |
| D24 | -3.10710 | 0.00026  | 0.00117  | -0.01977 | -0.01873 | -3.12583 |
| D25 | 3.13522  | -0.00018 | -0.00127 | 0.00375  | 0.00253  | 3.13775  |
| D26 | 0.02227  | 0.00000  | 0.00121  | -0.01769 | -0.01658 | 0.00570  |
| D27 | -2.48276 | -0.00013 | -0.00237 | 0.03192  | 0.02952  | -2.45323 |
| D28 | -0.46986 | 0.00016  | -0.00210 | 0.03753  | 0.03539  | -0.43447 |
| D29 | 1.67876  | 0.00022  | -0.00172 | 0.02833  | 0.02672  | 1.70548  |
| D30 | 0.62501  | -0.00034 | -0.00524 | 0.05747  | 0.05217  | 0.67718  |

|     |          |          |          |          |          |          |
|-----|----------|----------|----------|----------|----------|----------|
| D31 | 2.63791  | -0.00005 | -0.00498 | 0.06308  | 0.05803  | 2.69594  |
| D32 | -1.49666 | 0.00001  | -0.00459 | 0.05387  | 0.04936  | -1.44730 |
| D33 | -3.08985 | -0.00038 | -0.00193 | -0.05254 | -0.05445 | 3.13889  |
| D34 | 1.15804  | -0.00037 | -0.00254 | -0.04805 | -0.05058 | 1.10746  |
| D35 | -0.99135 | -0.00113 | -0.00315 | -0.03838 | -0.04153 | -1.03289 |
| D36 | 1.09828  | -0.00027 | -0.00160 | -0.06362 | -0.06520 | 1.03308  |
| D37 | -0.93701 | -0.00026 | -0.00221 | -0.05913 | -0.06133 | -0.99835 |
| D38 | -3.08641 | -0.00102 | -0.00282 | -0.04946 | -0.05229 | -3.13869 |
| D39 | -0.98001 | -0.00034 | -0.00165 | -0.06856 | -0.07022 | -1.05022 |
| D40 | -3.01530 | -0.00033 | -0.00227 | -0.06407 | -0.06635 | -3.08165 |
| D41 | 1.11849  | -0.00108 | -0.00288 | -0.05440 | -0.05730 | 1.06119  |
| D42 | -3.07989 | -0.00021 | -0.00076 | 0.00553  | 0.00477  | -3.07512 |
| D43 | 0.00871  | -0.00021 | -0.00065 | 0.00118  | 0.00054  | 0.00925  |
| D44 | -0.00760 | -0.00010 | 0.00040  | -0.00551 | -0.00512 | -0.01272 |
| D45 | 3.08100  | -0.00010 | 0.00051  | -0.00986 | -0.00935 | 3.07165  |
| D46 | -2.74955 | 0.00012  | 0.00044  | 0.00047  | 0.00087  | -2.74869 |
| D47 | -0.04676 | 0.00011  | 0.00047  | -0.00126 | -0.00083 | -0.04759 |
| D48 | -0.00003 | 0.00003  | -0.00049 | 0.00720  | 0.00666  | 0.00663  |
| D49 | 2.70277  | 0.00002  | -0.00046 | 0.00547  | 0.00497  | 2.70773  |
| D50 | 0.68784  | 0.00022  | -0.00016 | -0.00051 | -0.00045 | 0.68739  |
| D51 | -1.67542 | -0.00019 | -0.00097 | 0.00582  | 0.00508  | -1.67034 |
| D52 | 2.27046  | 0.00065  | -0.00321 | 0.07046  | 0.06734  | 2.33780  |
| D53 | -0.11322 | 0.00061  | -0.00338 | 0.07184  | 0.06855  | -0.04467 |
| D54 | 2.54871  | 0.00005  | 0.00003  | 0.00098  | 0.00100  | 2.54972  |
| D55 | -1.65316 | 0.00002  | -0.00001 | 0.00126  | 0.00124  | -1.65192 |
| D56 | 0.44020  | 0.00005  | -0.00005 | 0.00257  | 0.00251  | 0.44271  |
| D57 | 1.33028  | -0.00001 | 0.00015  | -0.00099 | -0.00083 | 1.32945  |
| D58 | -2.87160 | -0.00003 | 0.00011  | -0.00071 | -0.00059 | -2.87219 |
| D59 | -0.77824 | 0.00000  | 0.00007  | 0.00060  | 0.00068  | -0.77756 |
| D60 | -1.02555 | 0.00000  | -0.00002 | -0.00021 | -0.00023 | -1.02578 |
| D61 | 1.05576  | -0.00002 | -0.00006 | 0.00007  | 0.00001  | 1.05577  |
| D62 | -3.13407 | 0.00001  | -0.00009 | 0.00137  | 0.00128  | -3.13279 |
| D63 | 1.36676  | 0.00037  | 0.00611  | 0.00215  | 0.00817  | 1.37494  |
| D64 | -3.11900 | -0.00025 | 0.00930  | -0.06604 | -0.05664 | 3.10755  |
| D65 | 2.60114  | 0.00082  | -0.00675 | 0.04663  | 0.03992  | 2.64105  |
| D66 | -0.58017 | 0.00085  | -0.00469 | 0.05013  | 0.04545  | -0.53472 |
| D67 | -1.57715 | -0.00064 | -0.00833 | 0.05397  | 0.04566  | -1.53150 |
| D68 | 1.52473  | -0.00061 | -0.00627 | 0.05747  | 0.05119  | 1.57591  |
| D69 | 0.41607  | -0.00015 | -0.00753 | 0.05305  | 0.04551  | 0.46158  |
| D70 | -2.76524 | -0.00012 | -0.00547 | 0.05655  | 0.05104  | -2.71419 |
| D71 | 2.90598  | 0.00249  | -0.00025 | 0.06134  | 0.06105  | 2.96703  |
| D72 | -0.27631 | 0.00251  | 0.00186  | 0.06438  | 0.06628  | -0.21003 |
| D73 | -1.69385 | 0.00018  | 0.00476  | -0.04275 | -0.03799 | -1.73184 |

Item Value Threshold Converged?

|                      |          |          |    |
|----------------------|----------|----------|----|
| Maximum Force        | 0.004907 | 0.000450 | NO |
| RMS Force            | 0.000970 | 0.000300 | NO |
| Maximum Displacement | 0.425936 | 0.001800 | NO |
| RMS Displacement     | 0.078386 | 0.001200 | NO |

Predicted change in Energy=-1.113940D-03

GradGradGradGradGradGradGradGradGradGradGradGradGradGradGradGradGradGrad

Input orientation:

| -----  |        |        |                         |           |           |
|--------|--------|--------|-------------------------|-----------|-----------|
| Center | Atomic | Atomic | Coordinates (Angstroms) |           |           |
| Number | Number | Type   | X                       | Y         | Z         |
| -----  |        |        |                         |           |           |
| 1      | 6      | 0      | -0.975618               | 1.576777  | 1.560227  |
| 2      | 6      | 0      | -1.731101               | 0.452802  | 1.691422  |
| 3      | 7      | 0      | -2.669237               | 0.478370  | 0.673737  |
| 4      | 6      | 0      | -2.443713               | 1.561491  | -0.089390 |
| 5      | 7      | 0      | -1.422538               | 2.246997  | 0.432059  |
| 6      | 6      | 0      | -0.876116               | 3.507723  | -0.097832 |
| 7      | 1      | 0      | -0.112050               | 1.908729  | 2.107191  |
| 8      | 1      | 0      | -1.661966               | -0.361019 | 2.391143  |
| 9      | 1      | 0      | -1.717317               | 4.113354  | -0.443307 |
| 10     | 1      | 0      | -0.415006               | 4.017636  | 0.744405  |
| 11     | 35     | 0      | -0.278897               | -2.318743 | 1.084617  |
| 12     | 1      | 0      | -3.003642               | 1.830479  | -0.967534 |
| 13     | 6      | 0      | -3.657860               | -0.504649 | 0.388247  |
| 14     | 6      | 0      | -3.953075               | -1.511213 | 1.196522  |
| 15     | 1      | 0      | -4.097215               | -0.386879 | -0.592751 |
| 16     | 1      | 0      | -4.673943               | -2.251548 | 0.878926  |
| 17     | 1      | 0      | -3.468617               | -1.664316 | 2.150527  |
| 18     | 6      | 0      | 3.122773                | -0.835725 | 0.455070  |
| 19     | 6      | 0      | 4.246996                | -0.439097 | 1.312982  |
| 20     | 8      | 0      | 3.142389                | 0.468686  | 1.104721  |
| 21     | 1      | 0      | 3.252049                | -0.780381 | -0.621870 |
| 22     | 1      | 0      | 2.327932                | -1.490848 | 0.800445  |
| 23     | 1      | 0      | 4.264422                | -0.834834 | 2.326765  |
| 24     | 6      | 0      | 5.580031                | -0.019942 | 0.754480  |
| 25     | 1      | 0      | 6.039658                | 0.751751  | 1.379603  |
| 26     | 1      | 0      | 6.259882                | -0.877095 | 0.724362  |
| 27     | 1      | 0      | 5.469760                | 0.371573  | -0.259145 |
| 28     | 6      | 0      | 0.123451                | 3.321778  | -1.240002 |
| 29     | 1      | 0      | 0.457555                | 4.318984  | -1.552579 |
| 30     | 1      | 0      | -0.354266               | 2.863917  | -2.109973 |
| 31     | 6      | 0      | 1.362641                | 2.495458  | -0.936451 |
| 32     | 8      | 0      | 1.936435                | 1.866045  | -1.783947 |

|    |   |   |          |          |          |
|----|---|---|----------|----------|----------|
| 33 | 8 | 0 | 1.741058 | 2.594692 | 0.349194 |
| 34 | 1 | 0 | 2.448219 | 1.920758 | 0.542126 |

-----

Distance matrix (angstroms):

|    |    | 1        | 2        | 3        | 4        | 5        |
|----|----|----------|----------|----------|----------|----------|
| 1  | C  | 0.000000 |          |          |          |          |
| 2  | C  | 1.360620 | 0.000000 |          |          |          |
| 3  | N  | 2.204701 | 1.384354 | 0.000000 |          |          |
| 4  | C  | 2.208342 | 2.215469 | 1.344014 | 0.000000 |          |
| 5  | N  | 1.386252 | 2.213672 | 2.177316 | 1.335899 | 0.000000 |
| 6  | C  | 2.547080 | 3.642112 | 3.603829 | 2.499051 | 1.472682 |
| 7  | H  | 1.074761 | 2.216735 | 3.261889 | 3.222141 | 2.153571 |
| 8  | H  | 2.217329 | 1.075497 | 2.160707 | 3.234226 | 3.270639 |
| 9  | H  | 3.316397 | 4.237559 | 3.920083 | 2.676736 | 2.082415 |
| 10 | H  | 2.633941 | 3.916247 | 4.196779 | 3.292950 | 2.061030 |
| 11 | Br | 3.985812 | 3.187251 | 3.702214 | 4.595752 | 4.751813 |
| 12 | H  | 3.250665 | 3.253830 | 2.152626 | 1.075645 | 2.152263 |
| 13 | C  | 3.591697 | 2.515428 | 1.423097 | 2.443608 | 3.545439 |
| 14 | C  | 4.305022 | 3.006568 | 2.424868 | 3.656946 | 4.594797 |
| 15 | H  | 4.270319 | 3.394262 | 2.095655 | 2.604531 | 3.891200 |
| 16 | H  | 5.366362 | 4.078477 | 3.393140 | 4.522258 | 5.568503 |
| 17 | H  | 4.131366 | 2.777036 | 2.722319 | 4.058754 | 4.736870 |
| 18 | C  | 4.882453 | 5.171939 | 5.943235 | 6.085133 | 5.492136 |
| 19 | C  | 5.603621 | 6.056099 | 7.006044 | 7.122822 | 6.335198 |
| 20 | O  | 4.288745 | 4.908704 | 5.827593 | 5.815898 | 4.945040 |
| 21 | H  | 5.309511 | 5.630616 | 6.190693 | 6.181392 | 5.668116 |
| 22 | H  | 4.571765 | 4.587741 | 5.372669 | 5.733862 | 5.307845 |
| 23 | H  | 5.819061 | 6.165060 | 7.247940 | 7.521919 | 6.740112 |
| 24 | C  | 6.795239 | 7.386068 | 8.264700 | 8.221528 | 7.367425 |
| 25 | H  | 7.065932 | 7.782756 | 8.741729 | 8.647613 | 7.669288 |
| 26 | H  | 7.685871 | 8.158409 | 9.031556 | 9.075321 | 8.298492 |
| 27 | H  | 6.804816 | 7.460811 | 8.192982 | 8.004235 | 7.176263 |
| 28 | C  | 3.477681 | 4.501515 | 4.421139 | 3.318561 | 2.518139 |
| 29 | H  | 4.388991 | 5.501011 | 5.429883 | 4.261696 | 3.430258 |
| 30 | H  | 3.938677 | 4.707415 | 4.335778 | 3.185099 | 2.825548 |
| 31 | C  | 3.541868 | 4.544161 | 4.787211 | 4.009755 | 3.113162 |
| 32 | O  | 4.443785 | 5.246548 | 5.401672 | 4.706376 | 4.042092 |
| 33 | O  | 3.143737 | 4.294783 | 4.902535 | 4.332686 | 3.183724 |
| 34 | H  | 3.588525 | 4.576297 | 5.318474 | 4.945593 | 3.886040 |
|    |    | 6        | 7        | 8        | 9        | 10       |
| 6  | C  | 0.000000 |          |          |          |          |
| 7  | H  | 2.828905 | 0.000000 |          |          |          |
| 8  | H  | 4.666875 | 2.763082 | 0.000000 |          |          |
| 9  | H  | 1.092594 | 3.733938 | 5.296904 | 0.000000 |          |



|    |    |          |          |          |          |          |
|----|----|----------|----------|----------|----------|----------|
| 10 | H  | 1.087196 | 2.529122 | 4.841413 | 1.765173 | 0.000000 |
| 11 | Br | 5.975163 | 4.352587 | 2.729940 | 6.765758 | 6.346966 |
| 12 | H  | 2.845328 | 4.221535 | 4.228886 | 2.672258 | 3.796765 |
| 13 | C  | 4.906476 | 4.620814 | 2.831221 | 5.077710 | 5.576200 |
| 14 | C  | 6.027666 | 5.222910 | 2.828294 | 6.270838 | 6.579553 |
| 15 | H  | 5.078223 | 5.333014 | 3.851589 | 5.092970 | 5.894608 |
| 16 | H  | 6.967550 | 6.295030 | 3.864312 | 7.141562 | 7.580191 |
| 17 | H  | 6.206945 | 4.902558 | 2.240640 | 6.570883 | 6.601992 |
| 18 | C  | 5.929786 | 4.552539 | 5.183382 | 6.980469 | 6.012878 |
| 19 | C  | 6.619219 | 5.014413 | 6.007025 | 7.705997 | 6.474567 |
| 20 | O  | 5.179794 | 3.697303 | 5.042333 | 6.268712 | 5.037850 |
| 21 | H  | 5.975299 | 5.098652 | 5.779417 | 6.976756 | 6.191523 |
| 22 | H  | 6.004876 | 4.383859 | 4.441410 | 7.022681 | 6.153880 |
| 23 | H  | 7.152735 | 5.169997 | 5.945648 | 8.242516 | 6.924405 |
| 24 | C  | 7.406261 | 6.160308 | 7.432464 | 8.471725 | 7.227905 |
| 25 | H  | 7.589870 | 6.301706 | 7.847068 | 8.648355 | 7.261692 |
| 26 | H  | 8.415765 | 7.090455 | 8.111730 | 9.481758 | 8.277253 |
| 27 | H  | 7.080367 | 6.254518 | 7.643444 | 8.104870 | 6.995095 |
| 28 | C  | 1.529138 | 3.640861 | 5.471373 | 2.156327 | 2.170720 |
| 29 | H  | 2.133802 | 4.419015 | 6.476708 | 2.450069 | 2.475542 |
| 30 | H  | 2.176126 | 4.330765 | 5.689494 | 2.489333 | 3.079323 |
| 31 | C  | 2.596150 | 3.432597 | 5.327344 | 3.513818 | 2.881376 |
| 32 | O  | 3.667224 | 4.397621 | 5.944719 | 4.494176 | 4.068314 |
| 33 | O  | 2.807678 | 2.644827 | 4.948369 | 3.859372 | 2.613345 |
| 34 | H  | 3.738878 | 3.000759 | 5.051633 | 4.809392 | 3.554697 |

11 12 13 14 15

|    |    |          |          |          |           |           |
|----|----|----------|----------|----------|-----------|-----------|
| 11 | Br | 0.000000 |          |          |           |           |
| 12 | H  | 5.371369 | 0.000000 |          |           |           |
| 13 | C  | 3.897853 | 2.778303 | 0.000000 |           |           |
| 14 | C  | 3.763537 | 4.092857 | 1.324248 | 0.000000  |           |
| 15 | H  | 4.596218 | 2.500608 | 1.081324 | 2.118114  | 0.000000  |
| 16 | H  | 4.400369 | 4.781450 | 2.079626 | 1.081024  | 2.444471  |
| 17 | H  | 3.426186 | 4.706602 | 2.118082 | 1.080863  | 3.090721  |
| 18 | C  | 3.763912 | 6.831208 | 6.789039 | 7.146584  | 7.309420  |
| 19 | C  | 4.906009 | 7.932432 | 7.959031 | 8.270680  | 8.559229  |
| 20 | O  | 4.413090 | 6.627399 | 6.906815 | 7.367091  | 7.485003  |
| 21 | H  | 4.212628 | 6.787469 | 6.988791 | 7.466892  | 7.359849  |
| 22 | H  | 2.749859 | 6.525538 | 6.080477 | 6.293516  | 6.666503  |
| 23 | H  | 4.938286 | 8.413148 | 8.162685 | 8.322391  | 8.867989  |
| 24 | C  | 6.302421 | 8.948119 | 9.257845 | 9.659161  | 9.777463  |
| 25 | H  | 7.031293 | 9.404997 | 9.828691 | 10.247401 | 10.389555 |
| 26 | H  | 6.705502 | 9.798282 | 9.930422 | 10.243511 | 10.452012 |
| 27 | H  | 6.487724 | 8.627210 | 9.192406 | 9.718728  | 9.602789  |
| 28 | C  | 6.114018 | 3.475186 | 5.620591 | 6.775877  | 5.655713  |

|    |   |           |          |          |          |          |
|----|---|-----------|----------|----------|----------|----------|
| 29 | H | 7.180292  | 4.302885 | 6.631055 | 7.810404 | 6.619090 |
| 30 | H | 6.088600  | 3.064694 | 5.338733 | 6.559428 | 5.184525 |
| 31 | C | 5.473198  | 4.416739 | 5.996740 | 6.989980 | 6.183528 |
| 32 | O | 5.536136  | 5.007210 | 6.452499 | 7.414539 | 6.549774 |
| 33 | O | 5.363107  | 4.982967 | 6.225412 | 7.071037 | 6.622874 |
| 34 | H | 5.069993  | 5.657739 | 6.571946 | 7.292683 | 7.032485 |
|    |   | 16        | 17       | 18       | 19       | 20       |
| 16 | H | 0.000000  |          |          |          |          |
| 17 | H | 1.847869  | 0.000000 |          |          |          |
| 18 | C | 7.935552  | 6.856206 | 0.000000 |          |          |
| 19 | C | 9.113535  | 7.857056 | 1.468742 | 0.000000 |          |
| 20 | O | 8.279233  | 7.024871 | 1.457367 | 1.444852 | 0.000000 |
| 21 | H | 8.199882  | 7.323584 | 1.086083 | 2.202283 | 2.133849 |
| 22 | H | 7.043513  | 5.954225 | 1.086389 | 2.247594 | 2.143757 |
| 23 | H | 9.165025  | 7.779396 | 2.192397 | 1.088424 | 2.109861 |
| 24 | C | 10.494738 | 9.302201 | 2.606389 | 1.504859 | 2.510682 |
| 25 | H | 11.137851 | 9.840681 | 3.447181 | 2.153183 | 2.924013 |
| 26 | H | 11.020958 | 9.863942 | 3.148917 | 2.142435 | 3.416805 |
| 27 | H | 10.539007 | 9.478710 | 2.734231 | 2.150331 | 2.699299 |
| 28 | C | 7.652895  | 7.018531 | 5.399447 | 6.137225 | 4.769890 |
| 29 | H | 8.684260  | 8.057773 | 6.140445 | 6.723886 | 5.393920 |
| 30 | H | 7.332196  | 6.953843 | 5.688286 | 6.618016 | 5.319586 |
| 31 | C | 7.891134  | 7.083375 | 4.016364 | 4.689464 | 3.382558 |
| 32 | O | 8.230586  | 7.560299 | 3.704073 | 4.499260 | 3.428023 |
| 33 | O | 8.057226  | 6.965965 | 3.699745 | 4.051234 | 2.656023 |
| 34 | H | 8.261160  | 7.102722 | 2.839155 | 3.065735 | 1.704963 |
|    |   | 21        | 22       | 23       | 24       | 25       |
| 21 | H | 0.000000  |          |          |          |          |
| 22 | H | 1.838949  | 0.000000 |          |          |          |
| 23 | H | 3.118063  | 2.551470 | 0.000000 |          |          |
| 24 | C | 2.809290  | 3.569569 | 2.206117 | 0.000000 |          |
| 25 | H | 3.758203  | 4.375109 | 2.562387 | 1.094324 | 0.000000 |
| 26 | H | 3.296779  | 3.980289 | 2.559558 | 1.094447 | 1.769457 |
| 27 | H | 2.525235  | 3.802949 | 3.097610 | 1.092190 | 1.776179 |
| 28 | C | 5.195952  | 5.673141 | 6.866360 | 6.702188 | 6.961959 |
| 29 | H | 5.888882  | 6.541344 | 7.490219 | 7.098490 | 7.244495 |
| 30 | H | 5.338620  | 5.884615 | 7.395789 | 7.192887 | 7.584237 |
| 31 | C | 3.794726  | 4.454125 | 5.491791 | 5.193541 | 5.502646 |
| 32 | O | 3.175662  | 4.254536 | 5.441712 | 4.824557 | 5.299636 |
| 33 | O | 3.823242  | 4.152070 | 4.694658 | 4.662434 | 4.789169 |
| 34 | H | 3.049128  | 3.423485 | 3.751909 | 3.690482 | 3.868640 |
|    |   | 26        | 27       | 28       | 29       | 30       |
| 26 | H | 0.000000  |          |          |          |          |
| 27 | H | 1.775035  | 0.000000 |          |          |          |

|    |   |          |          |          |          |          |
|----|---|----------|----------|----------|----------|----------|
| 28 | C | 7.690581 | 6.184562 | 0.000000 |          |          |
| 29 | H | 8.114844 | 6.509779 | 1.097156 | 0.000000 |          |
| 30 | H | 8.110214 | 6.599744 | 1.093023 | 1.756975 | 0.000000 |
| 31 | C | 6.173766 | 4.673121 | 1.520046 | 2.126979 | 2.112033 |
| 32 | O | 5.701633 | 4.128299 | 2.387874 | 2.873591 | 2.519792 |
| 33 | O | 5.710852 | 4.383555 | 2.381354 | 2.870069 | 3.241969 |
| 34 | H | 4.731803 | 3.488799 | 3.247058 | 3.755265 | 3.972040 |
|    |   | 31       | 32       | 33       | 34       |          |
| 31 | C | 0.000000 |          |          |          |          |
| 32 | O | 1.201520 | 0.000000 |          |          |          |
| 33 | O | 1.343848 | 2.262606 | 0.000000 |          |          |
| 34 | H | 1.922225 | 2.382337 | 0.995735 | 0.000000 |          |

Stoichiometry C11H17BrN2O3

Framework group C1[X(C11H17BrN2O3)]

Deg. of freedom 96

Full point group C1 NOp 1

Largest Abelian subgroup C1 NOp 1

Largest concise Abelian subgroup C1 NOp 1

Standard orientation:

| Center Number | Atomic Number | Atomic Type | Coordinates (Angstroms) |           |           |
|---------------|---------------|-------------|-------------------------|-----------|-----------|
|               |               |             | X                       | Y         | Z         |
| 1             | 6             | 0           | -1.055985               | 1.037633  | 1.376643  |
| 2             | 6             | 0           | -1.966192               | 0.056460  | 1.131477  |
| 3             | 7             | 0           | -2.827520               | 0.540769  | 0.161944  |
| 4             | 6             | 0           | -2.408024               | 1.761569  | -0.212281 |
| 5             | 7             | 0           | -1.335857               | 2.087019  | 0.515159  |
| 6             | 6             | 0           | -0.588925               | 3.352889  | 0.423197  |
| 7             | 1             | 0           | -0.190049               | 1.047336  | 2.013175  |
| 8             | 1             | 0           | -2.053303               | -0.936344 | 1.535763  |
| 9             | 1             | 0           | -1.315525               | 4.155689  | 0.277161  |
| 10            | 1             | 0           | -0.114347               | 3.497464  | 1.390601  |
| 11            | 35            | 0           | -0.876535               | -2.570453 | -0.307462 |
| 12            | 1             | 0           | -2.870415               | 2.373401  | -0.966514 |
| 13            | 6             | 0           | -3.923120               | -0.142500 | -0.436396 |
| 14            | 6             | 0           | -4.403695               | -1.295185 | 0.004053  |
| 15            | 1             | 0           | -4.280913               | 0.341648  | -1.334643 |
| 16            | 1             | 0           | -5.199104               | -1.781173 | -0.543445 |
| 17            | 1             | 0           | -4.004546               | -1.810787 | 0.866085  |
| 18            | 6             | 0           | 2.729644                | -1.494858 | -0.382292 |
| 19            | 6             | 0           | 3.843084                | -1.561258 | 0.573241  |
| 20            | 8             | 0           | 2.889450                | -0.478530 | 0.649919  |
| 21            | 1             | 0           | 2.931202                | -1.124780 | -1.383288 |

|    |   |   |           |           |           |
|----|---|---|-----------|-----------|-----------|
| 22 | 1 | 0 | 1.832188  | -2.097679 | -0.275420 |
| 23 | 1 | 0 | 3.743368  | -2.252764 | 1.407833  |
| 24 | 6 | 0 | 5.253012  | -1.193889 | 0.196754  |
| 25 | 1 | 0 | 5.775638  | -0.735583 | 1.041953  |
| 26 | 1 | 0 | 5.808411  | -2.090451 | -0.095693 |
| 27 | 1 | 0 | 5.260359  | -0.492411 | -0.640357 |
| 28 | 6 | 0 | 0.443566  | 3.386149  | -0.704242 |
| 29 | 1 | 0 | 0.930856  | 4.368788  | -0.677406 |
| 30 | 1 | 0 | -0.038530 | 3.301572  | -1.681549 |
| 31 | 6 | 0 | 1.535646  | 2.329657  | -0.662709 |
| 32 | 8 | 0 | 2.067871  | 1.918859  | -1.658516 |
| 33 | 8 | 0 | 1.844492  | 1.962624  | 0.592612  |
| 34 | 1 | 0 | 2.438519  | 1.163796  | 0.570392  |

-----

Rotational constants (GHZ):      0.3540677      0.2539715      0.1620816

Standard basis: 6-311++G(d,p) (5D, 7F)

There are    538 symmetry adapted cartesian basis functions of A    symmetry.

There are    519 symmetry adapted basis functions of A    symmetry.

519 basis functions,    823 primitive gaussians,    538 cartesian basis functions

78 alpha electrons      78 beta electrons

          nuclear repulsion energy      1581.0162057999 Hartrees.

NAtoms=    34 NActive=    34 NUniq=    34 SFac= 1.00D+00 NAtFMM=    60 NAOKFM=F

Big=F

Integral buffers will be    131072 words long.

Raffenetti 2 integral format.

Two-electron integral symmetry is turned on.

One-electron integrals computed using PRISM.

NBasis=    519 RedAO= T EigKep=    2.48D-06    NBF=    519

NBsUse=    519 1.00D-06 EigRej= -1.00D+00 NBFU=    519

Initial guess from the checkpoint file: "./coohpo.chk"

B after Tr=    0.000000    0.000000    0.000000

          Rot=    0.999962    0.002377    0.000791    -0.008299 Ang=    0.99 deg.

ExpMin= 3.50D-02 ExpMax= 4.40D+05 ExpMxC= 1.51D+04 IAcc=3 IRadAn=      5 AccDes=

0.00D+00

Harris functional with IExCor=    402 and IRadAn=      5 diagonalized for initial guess.

HarFok: IExCor=    402 AccDes= 0.00D+00 IRadAn=      5 IDoV= 1 UseB2=F ITyADJ=14

ICtDFT= 3500011 ScaDFX= 1.000000 1.000000 1.000000 1.000000

FoFCou: FMM=F IPFlag=            0 FMFlag=    100000 FMFlg1=            0

          NFxFlg=            0 DoJE=T BraDBF=F KetDBF=T FulRan=T

          wScrn= 0.000000 ICntrl=      500 IOpCl=    0 I1Cent=    200000004 NGrid=

0

          NMat0=    1 NMatS0=      1 NMatT0=    0 NMatD0=    1 NMtDS0=    0

NMtDT0=    0

Petite list used in FoFCou.

Requested convergence on RMS density matrix=1.00D-08 within 128 cycles.

Requested convergence on MAX density matrix=1.00D-06.

Requested convergence on energy=1.00D-06.

No special actions if energy rises.

SCF Done: E(RB3LYP) = -3338.89589060 A.U. after 14 cycles

NFock= 14 Conv=0.19D-08 -V/T= 2.0019

Calling FoFJK, ICntrl= 2127 FMM=F ISym2X=0 l1Cent= 0 IOpClX= 0 NMat=1 NMatS=1

NMatT=0.

\*\*\*\*\* Axes restored to original set \*\*\*\*\*

```
-----
```

| Center | Atomic | Forces (Hartrees/Bohr) |              |              |
|--------|--------|------------------------|--------------|--------------|
| Number | Number | X                      | Y            | Z            |
| 1      | 6      | 0.001181488            | -0.000432019 | -0.001704287 |
| 2      | 6      | -0.002095599           | 0.001123969  | 0.004272128  |
| 3      | 7      | 0.000382809            | -0.001769989 | -0.002290904 |
| 4      | 6      | -0.000211632           | -0.000543300 | 0.000015247  |
| 5      | 7      | -0.000283789           | -0.000248336 | 0.000867097  |
| 6      | 6      | 0.000417033            | 0.000800743  | 0.000198112  |
| 7      | 1      | -0.000063346           | 0.000051206  | -0.000072737 |
| 8      | 1      | 0.001464363            | -0.000219622 | -0.001576098 |
| 9      | 1      | 0.000230910            | -0.000170210 | 0.000942745  |
| 10     | 1      | 0.000591046            | 0.000845420  | 0.000333438  |
| 11     | 35     | -0.001047849           | 0.000238155  | 0.000992717  |
| 12     | 1      | -0.000318768           | 0.000406823  | -0.000019212 |
| 13     | 6      | 0.000696549            | 0.000474098  | -0.001254295 |
| 14     | 6      | 0.001086879            | -0.000723342 | 0.000577034  |
| 15     | 1      | -0.001119839           | 0.000811627  | 0.000087143  |
| 16     | 1      | -0.000389600           | 0.000198604  | 0.000015228  |
| 17     | 1      | 0.000126238            | -0.000632319 | -0.000139361 |
| 18     | 6      | -0.000678765           | 0.001133129  | -0.000700390 |
| 19     | 6      | 0.000093255            | -0.000333541 | -0.000742563 |
| 20     | 8      | 0.000091885            | 0.001277783  | 0.001031458  |
| 21     | 1      | 0.000415182            | 0.000299887  | -0.000418903 |
| 22     | 1      | 0.000087820            | -0.000407179 | 0.001326347  |
| 23     | 1      | -0.000383309           | -0.000188329 | -0.000197605 |
| 24     | 6      | -0.000045082           | 0.000238301  | 0.000122799  |
| 25     | 1      | -0.000031310           | -0.000132730 | -0.000092840 |
| 26     | 1      | -0.000102635           | -0.000003724 | 0.000037880  |
| 27     | 1      | 0.000068149            | 0.000008777  | 0.000009319  |
| 28     | 6      | -0.002965106           | 0.000020101  | -0.002369664 |
| 29     | 1      | -0.000004940           | -0.000950464 | 0.000267474  |
| 30     | 1      | 0.000464999            | 0.000805304  | 0.000343797  |
| 31     | 6      | 0.000921440            | 0.004263039  | 0.006087885  |

```
-----
```

|    |   |              |              |              |
|----|---|--------------|--------------|--------------|
| 32 | 8 | 0.002504146  | -0.003351442 | -0.001804884 |
| 33 | 8 | -0.000518937 | -0.002510188 | -0.004485521 |
| 34 | 1 | -0.000563685 | -0.000380233 | 0.000341416  |

-----  
Cartesian Forces: Max 0.006087885 RMS 0.001342814

GradGradGradGradGradGradGradGradGradGradGradGradGradGradGradGradGradGradGrad

Berny optimization.

Using GEDIIS/GDIIS optimizer.

FormGI is forming the generalized inverse of G from B-inverse, IUseBI=4.

Internal Forces: Max 0.004224530 RMS 0.000942122

Search for a local minimum.

Step number 10 out of a maximum of 175

All quantities printed in internal units (Hartrees-Bohrs-Radians)

Mixed Optimization -- En-DIIS/RFO-DIIS

Swapping is turned off.

Update second derivatives using D2CorX and points 9 10

DE= -1.39D-03 DEPred=-1.11D-03 R= 1.25D+00

TightC=F SS= 1.41D+00 RLast= 3.92D-01 DXNew= 2.0182D+00 1.1771D+00

Trust test= 1.25D+00 RLast= 3.92D-01 DXMaxT set to 1.20D+00

ITU= 1 1 1 0 1 0-1 0 1 0

|                 |         |         |         |         |         |
|-----------------|---------|---------|---------|---------|---------|
| Eigenvalues --- | 0.00140 | 0.00270 | 0.00351 | 0.00445 | 0.00698 |
| Eigenvalues --- | 0.00873 | 0.01082 | 0.01437 | 0.01510 | 0.01684 |
| Eigenvalues --- | 0.01780 | 0.01829 | 0.02207 | 0.02285 | 0.02291 |
| Eigenvalues --- | 0.02418 | 0.02467 | 0.02592 | 0.02905 | 0.03000 |
| Eigenvalues --- | 0.03052 | 0.03095 | 0.03299 | 0.03777 | 0.03897 |
| Eigenvalues --- | 0.04352 | 0.04647 | 0.05221 | 0.05233 | 0.05764 |
| Eigenvalues --- | 0.05880 | 0.06377 | 0.07801 | 0.09740 | 0.09896 |
| Eigenvalues --- | 0.11931 | 0.12627 | 0.12770 | 0.13395 | 0.13965 |
| Eigenvalues --- | 0.15318 | 0.15802 | 0.15881 | 0.15953 | 0.15997 |
| Eigenvalues --- | 0.16000 | 0.16000 | 0.16001 | 0.16004 | 0.16247 |
| Eigenvalues --- | 0.16722 | 0.18144 | 0.19371 | 0.21766 | 0.22233 |
| Eigenvalues --- | 0.22534 | 0.23027 | 0.23757 | 0.24534 | 0.25074 |
| Eigenvalues --- | 0.25702 | 0.28299 | 0.28852 | 0.29700 | 0.31272 |
| Eigenvalues --- | 0.31873 | 0.32397 | 0.34497 | 0.34535 | 0.34613 |
| Eigenvalues --- | 0.34764 | 0.34884 | 0.34904 | 0.34965 | 0.35002 |
| Eigenvalues --- | 0.35122 | 0.35533 | 0.35699 | 0.35767 | 0.36534 |
| Eigenvalues --- | 0.36840 | 0.37014 | 0.37079 | 0.37501 | 0.38149 |
| Eigenvalues --- | 0.41107 | 0.42324 | 0.45770 | 0.48985 | 0.51727 |
| Eigenvalues --- | 0.53280 | 0.55515 | 0.56139 | 0.60397 | 0.90042 |
| Eigenvalues --- | 0.96686 |         |         |         |         |

En-DIIS/RFO-DIIS IScMMF= 0 using points: 10 9

RFO step: Lambda=-5.30251245D-04.

DidBck=F Rises=F RFO-DIIS coefs: 1.75793 -0.75793

Iteration 1 RMS(Cart)= 0.31892978 RMS(Int)= 0.09433149  
 Iteration 2 RMS(Cart)= 0.24665531 RMS(Int)= 0.05080583  
 Iteration 3 RMS(Cart)= 0.18301726 RMS(Int)= 0.01227179  
 Iteration 4 RMS(Cart)= 0.02670118 RMS(Int)= 0.00124361  
 Iteration 5 RMS(Cart)= 0.00064009 RMS(Int)= 0.00119016  
 Iteration 6 RMS(Cart)= 0.00000049 RMS(Int)= 0.00119016

| Variable | Old X   | -DE/DX   | Delta X<br>(Linear) | Delta X<br>(Quad) | Delta X<br>(Total) | New X   |
|----------|---------|----------|---------------------|-------------------|--------------------|---------|
| R1       | 2.57120 | 0.00098  | -0.00260            | -0.00208          | -0.00462           | 2.56658 |
| R2       | 2.61964 | -0.00028 | -0.00272            | -0.00776          | -0.01029           | 2.60935 |
| R3       | 2.03100 | -0.00007 | 0.00031             | -0.00035          | -0.00004           | 2.03096 |
| R4       | 2.61605 | 0.00153  | 0.00046             | 0.00581           | 0.00613            | 2.62218 |
| R5       | 2.03239 | -0.00037 | 0.00102             | 0.00406           | 0.00508            | 2.03748 |
| R6       | 2.53982 | -0.00007 | 0.00237             | 0.00569           | 0.00790            | 2.54772 |
| R7       | 2.68926 | -0.00021 | -0.00024            | -0.00316          | -0.00340           | 2.68586 |
| R8       | 2.52448 | 0.00056  | 0.00016             | 0.00146           | 0.00166            | 2.52614 |
| R9       | 2.03267 | 0.00029  | -0.00011            | -0.00001          | -0.00012           | 2.03255 |
| R10      | 2.78297 | 0.00123  | -0.00496            | -0.00395          | -0.00891           | 2.77406 |
| R11      | 2.06470 | -0.00057 | 0.00071             | 0.00028           | 0.00100            | 2.06570 |
| R12      | 2.05450 | 0.00090  | 0.00058             | 0.00401           | 0.00459            | 2.05910 |
| R13      | 2.88965 | 0.00050  | -0.00575            | -0.01358          | -0.01933           | 2.87032 |
| R14      | 5.15884 | -0.00118 | -0.01377            | -0.26688          | -0.28064           | 4.87820 |
| R15      | 2.50247 | 0.00097  | 0.00074             | 0.00463           | 0.00536            | 2.50783 |
| R16      | 2.04341 | 0.00047  | -0.00015            | 0.00073           | 0.00058            | 2.04399 |
| R17      | 2.04284 | 0.00012  | -0.00028            | -0.00050          | -0.00078           | 2.04206 |
| R18      | 2.04253 | 0.00002  | -0.00068            | -0.00295          | -0.00362           | 2.03891 |
| R19      | 2.77552 | -0.00007 | -0.00057            | -0.00367          | -0.00540           | 2.77012 |
| R20      | 2.75402 | -0.00080 | 0.00378             | 0.01301           | 0.01749            | 2.77151 |
| R21      | 2.05240 | 0.00048  | 0.00034             | 0.00305           | 0.00339            | 2.05578 |
| R22      | 2.05298 | 0.00060  | -0.00005            | 0.00251           | 0.00247            | 2.05544 |
| R23      | 2.73038 | -0.00033 | -0.00031            | -0.00235          | -0.00221           | 2.72817 |
| R24      | 2.05682 | -0.00012 | -0.00016            | -0.00098          | -0.00114           | 2.05568 |
| R25      | 2.84377 | -0.00010 | 0.00109             | 0.00265           | 0.00375            | 2.84752 |
| R26      | 3.22191 | -0.00169 | -0.03853            | -0.12778          | -0.16631           | 3.05561 |
| R27      | 2.06797 | -0.00015 | 0.00004             | -0.00004          | 0.00000            | 2.06797 |
| R28      | 2.06821 | -0.00006 | -0.00007            | -0.00022          | -0.00029           | 2.06791 |
| R29      | 2.06394 | -0.00002 | 0.00001             | 0.00013           | 0.00014            | 2.06408 |
| R30      | 2.07332 | -0.00094 | -0.00008            | 0.00086           | 0.00078            | 2.07410 |
| R31      | 2.06551 | -0.00081 | 0.00254             | 0.00747           | 0.01001            | 2.07553 |
| R32      | 2.87247 | 0.00166  | -0.00271            | 0.00246           | -0.00025           | 2.87222 |
| R33      | 2.27054 | 0.00422  | -0.00049            | 0.00387           | 0.00338            | 2.27393 |
| R34      | 2.53951 | -0.00408 | -0.00418            | -0.02554          | -0.02972           | 2.50979 |
| R35      | 1.88167 | -0.00164 | 0.00712             | 0.02045           | 0.02757            | 1.90924 |
| A1       | 1.87428 | 0.00032  | 0.00054             | 0.00599           | 0.00648            | 1.88076 |

|     |         |          |          |          |          |         |
|-----|---------|----------|----------|----------|----------|---------|
| A2  | 2.28130 | -0.00007 | 0.00063  | 0.00296  | 0.00299  | 2.28428 |
| A3  | 2.12220 | -0.00018 | -0.00107 | -0.00377 | -0.00547 | 2.11673 |
| A4  | 1.86516 | -0.00041 | -0.00057 | -0.00324 | -0.00404 | 1.86113 |
| A5  | 2.28118 | 0.00017  | 0.00287  | 0.00446  | 0.00701  | 2.28820 |
| A6  | 2.13627 | 0.00023  | -0.00161 | -0.00048 | -0.00242 | 2.13385 |
| A7  | 1.89503 | -0.00024 | 0.00042  | 0.00043  | 0.00063  | 1.89566 |
| A8  | 2.22118 | 0.00095  | -0.00049 | 0.00812  | 0.00760  | 2.22878 |
| A9  | 2.16438 | -0.00068 | -0.00096 | -0.00819 | -0.00916 | 2.15523 |
| A10 | 1.89670 | 0.00044  | -0.00311 | -0.00232 | -0.00554 | 1.89116 |
| A11 | 2.18673 | -0.00007 | 0.00118  | 0.00107  | 0.00208  | 2.18882 |
| A12 | 2.19970 | -0.00037 | 0.00194  | 0.00152  | 0.00331  | 2.20301 |
| A13 | 1.89232 | -0.00005 | 0.00201  | 0.00135  | 0.00300  | 1.89532 |
| A14 | 2.19826 | 0.00105  | -0.00666 | -0.00614 | -0.01361 | 2.18465 |
| A15 | 2.19256 | -0.00100 | 0.00492  | 0.00524  | 0.00926  | 2.20182 |
| A16 | 1.87825 | -0.00026 | 0.01408  | 0.02452  | 0.03911  | 1.91736 |
| A17 | 1.85473 | 0.00144  | -0.00266 | 0.00082  | -0.00223 | 1.85251 |
| A18 | 1.99018 | -0.00174 | -0.01750 | -0.05327 | -0.07070 | 1.91949 |
| A19 | 1.88758 | -0.00047 | -0.00081 | -0.00384 | -0.00508 | 1.88251 |
| A20 | 1.91187 | 0.00127  | 0.00246  | 0.02031  | 0.02332  | 1.93519 |
| A21 | 1.93738 | -0.00021 | 0.00525  | 0.01302  | 0.01726  | 1.95465 |
| A22 | 1.83780 | 0.00379  | 0.03235  | 0.19016  | 0.22251  | 2.06031 |
| A23 | 2.16213 | -0.00004 | 0.00385  | 0.01414  | 0.01793  | 2.18006 |
| A24 | 1.97038 | 0.00007  | -0.00329 | -0.00848 | -0.01183 | 1.95854 |
| A25 | 2.14831 | -0.00002 | -0.00097 | -0.00649 | -0.00752 | 2.14079 |
| A26 | 2.08276 | -0.00047 | -0.00097 | -0.00880 | -0.00988 | 2.07288 |
| A27 | 2.14895 | 0.00067  | 0.00195  | 0.01354  | 0.01538  | 2.16433 |
| A28 | 2.05013 | -0.00020 | -0.00113 | -0.00596 | -0.00720 | 2.04293 |
| A29 | 2.06500 | 0.00002  | -0.00289 | -0.01056 | -0.00913 | 2.05586 |
| A30 | 2.13787 | -0.00092 | 0.00607  | 0.00651  | 0.00814  | 2.14601 |
| A31 | 1.97665 | -0.00005 | -0.00131 | -0.00707 | -0.00859 | 1.96807 |
| A32 | 1.99092 | -0.00027 | -0.00040 | 0.00278  | 0.00237  | 1.99329 |
| A33 | 2.01867 | 0.00082  | -0.00155 | 0.00565  | 0.00412  | 2.02279 |
| A34 | 2.04668 | -0.00033 | 0.00097  | -0.00177 | -0.00040 | 2.04629 |
| A35 | 2.13704 | 0.00028  | -0.00100 | -0.00189 | -0.00331 | 2.13374 |
| A36 | 1.95512 | -0.00005 | 0.00075  | 0.00145  | 0.00344  | 1.95856 |
| A37 | 2.03614 | 0.00010  | -0.00097 | -0.00179 | -0.00424 | 2.03190 |
| A38 | 2.01836 | 0.00009  | -0.00045 | 0.00071  | 0.00023  | 2.01859 |
| A39 | 2.22650 | -0.00022 | -0.02261 | -0.10663 | -0.12795 | 2.09855 |
| A40 | 2.67683 | 0.00009  | 0.00227  | 0.01107  | 0.00198  | 2.67881 |
| A41 | 1.93528 | 0.00004  | -0.00098 | -0.00231 | -0.00329 | 1.93199 |
| A42 | 1.92019 | -0.00016 | 0.00087  | 0.00079  | 0.00166  | 1.92185 |
| A43 | 1.93355 | 0.00013  | -0.00043 | 0.00016  | -0.00028 | 1.93327 |
| A44 | 1.88294 | 0.00003  | 0.00019  | 0.00010  | 0.00029  | 1.88323 |
| A45 | 1.89628 | -0.00005 | -0.00016 | -0.00040 | -0.00056 | 1.89572 |



|     |          |          |          |          |          |          |
|-----|----------|----------|----------|----------|----------|----------|
| A46 | 1.89433  | 0.00002  | 0.00054  | 0.00173  | 0.00227  | 1.89660  |
| A47 | 1.87689  | 0.00122  | -0.00022 | 0.00871  | 0.00849  | 1.88538  |
| A48 | 1.93880  | 0.00098  | 0.00136  | 0.00805  | 0.00934  | 1.94814  |
| A49 | 2.03739  | -0.00352 | -0.00480 | -0.00724 | -0.01205 | 2.02533  |
| A50 | 1.86196  | -0.00060 | -0.00295 | -0.01756 | -0.02046 | 1.84151  |
| A51 | 1.87835  | 0.00031  | 0.01009  | 0.01107  | 0.02121  | 1.89956  |
| A52 | 1.86245  | 0.00175  | -0.00310 | -0.00433 | -0.00741 | 1.85504  |
| A53 | 2.13321  | 0.00281  | -0.01443 | -0.03749 | -0.05192 | 2.08129  |
| A54 | 1.96110  | -0.00225 | 0.01444  | 0.02858  | 0.04301  | 2.00411  |
| A55 | 2.18831  | -0.00054 | 0.00014  | 0.00869  | 0.00882  | 2.19713  |
| A56 | 1.91280  | 0.00214  | -0.02282 | -0.03446 | -0.05728 | 1.85551  |
| A57 | 2.76390  | 0.00013  | -0.01960 | -0.00925 | -0.02885 | 2.73505  |
| D1  | -0.04358 | 0.00105  | -0.01700 | 0.02692  | 0.00993  | -0.03365 |
| D2  | 3.06169  | 0.00075  | -0.00017 | 0.05040  | 0.05042  | 3.11210  |
| D3  | -3.07241 | 0.00029  | -0.01789 | -0.02669 | -0.04487 | -3.11728 |
| D4  | 0.03285  | -0.00001 | -0.00106 | -0.00320 | -0.00438 | 0.02847  |
| D5  | 0.02396  | -0.00057 | 0.01066  | 0.00228  | 0.01302  | 0.03698  |
| D6  | -3.12721 | -0.00042 | 0.02544  | 0.05148  | 0.07645  | -3.05076 |
| D7  | 3.06525  | 0.00011  | 0.01157  | 0.05041  | 0.06205  | 3.12730  |
| D8  | -0.08592 | 0.00026  | 0.02636  | 0.09961  | 0.12548  | 0.03956  |
| D9  | 0.04816  | -0.00117 | 0.01749  | -0.04680 | -0.02932 | 0.01884  |
| D10 | 3.11426  | -0.00072 | -0.00021 | -0.04195 | -0.04231 | 3.07194  |
| D11 | -3.06081 | -0.00090 | 0.00220  | -0.06803 | -0.06565 | -3.12646 |
| D12 | 0.00528  | -0.00046 | -0.01549 | -0.06317 | -0.07864 | -0.07336 |
| D13 | -1.69817 | -0.00098 | 0.00386  | 0.08353  | 0.08730  | -1.61087 |
| D14 | 1.40224  | -0.00133 | 0.02299  | 0.11013  | 0.13320  | 1.53544  |
| D15 | -0.03373 | 0.00080  | -0.01100 | 0.04873  | 0.03769  | 0.00396  |
| D16 | 3.11784  | 0.00058  | -0.01262 | 0.02028  | 0.00749  | 3.12533  |
| D17 | -3.10284 | 0.00029  | 0.00598  | 0.04322  | 0.04914  | -3.05369 |
| D18 | 0.04873  | 0.00007  | 0.00435  | 0.01477  | 0.01895  | 0.06767  |
| D19 | 0.18684  | -0.00156 | -0.08541 | -0.53512 | -0.62049 | -0.43365 |
| D20 | -2.88273 | -0.00179 | -0.07865 | -0.52215 | -0.60076 | 2.79969  |
| D21 | -3.04111 | -0.00102 | -0.10561 | -0.52907 | -0.63472 | 2.60736  |
| D22 | 0.17250  | -0.00125 | -0.09885 | -0.51610 | -0.61499 | -0.44249 |
| D23 | 0.00622  | -0.00013 | 0.00029  | -0.03160 | -0.03131 | -0.02509 |
| D24 | -3.12583 | -0.00031 | -0.01420 | -0.08052 | -0.09537 | 3.06199  |
| D25 | 3.13775  | 0.00008  | 0.00192  | -0.00289 | -0.00081 | 3.13694  |
| D26 | 0.00570  | -0.00009 | -0.01257 | -0.05180 | -0.06487 | -0.05917 |
| D27 | -2.45323 | -0.00014 | 0.02238  | 0.15396  | 0.17613  | -2.27711 |
| D28 | -0.43447 | -0.00010 | 0.02682  | 0.16161  | 0.18819  | -0.24628 |
| D29 | 1.70548  | -0.00043 | 0.02025  | 0.14501  | 0.16593  | 1.87141  |
| D30 | 0.67718  | 0.00005  | 0.03954  | 0.21134  | 0.25053  | 0.92771  |
| D31 | 2.69594  | 0.00009  | 0.04399  | 0.21900  | 0.26259  | 2.95854  |
| D32 | -1.44730 | -0.00024 | 0.03741  | 0.20239  | 0.24034  | -1.20696 |

|     |          |          |          |          |          |          |
|-----|----------|----------|----------|----------|----------|----------|
| D33 | 3.13889  | -0.00019 | -0.04127 | -0.17236 | -0.21366 | 2.92522  |
| D34 | 1.10746  | -0.00073 | -0.03834 | -0.16075 | -0.19914 | 0.90832  |
| D35 | -1.03289 | -0.00120 | -0.03148 | -0.15600 | -0.18750 | -1.22039 |
| D36 | 1.03308  | 0.00040  | -0.04942 | -0.18267 | -0.23193 | 0.80115  |
| D37 | -0.99835 | -0.00013 | -0.04649 | -0.17106 | -0.21741 | -1.21576 |
| D38 | -3.13869 | -0.00061 | -0.03963 | -0.16631 | -0.20578 | 2.93872  |
| D39 | -1.05022 | 0.00031  | -0.05322 | -0.19903 | -0.25235 | -1.30257 |
| D40 | -3.08165 | -0.00023 | -0.05029 | -0.18741 | -0.23783 | 2.96371  |
| D41 | 1.06119  | -0.00070 | -0.04343 | -0.18266 | -0.22619 | 0.83500  |
| D42 | -3.07512 | -0.00048 | 0.00362  | -0.01196 | -0.00835 | -3.08347 |
| D43 | 0.00925  | -0.00055 | 0.00041  | -0.03797 | -0.03756 | -0.02831 |
| D44 | -0.01272 | -0.00023 | -0.00388 | -0.02618 | -0.03007 | -0.04279 |
| D45 | 3.07165  | -0.00030 | -0.00709 | -0.05219 | -0.05927 | 3.01237  |
| D46 | -2.74869 | -0.00006 | 0.00066  | 0.00069  | 0.00062  | -2.74806 |
| D47 | -0.04759 | 0.00006  | -0.00063 | -0.00671 | -0.00811 | -0.05570 |
| D48 | 0.00663  | -0.00012 | 0.00505  | 0.00657  | 0.01086  | 0.01749  |
| D49 | 2.70773  | 0.00001  | 0.00376  | -0.00083 | 0.00213  | 2.70986  |
| D50 | 0.68739  | 0.00013  | -0.00034 | -0.00016 | 0.00375  | 0.69114  |
| D51 | -1.67034 | -0.00077 | 0.00385  | -0.00417 | 0.00410  | -1.66624 |
| D52 | 2.33780  | 0.00046  | 0.05104  | 0.24582  | 0.29769  | 2.63549  |
| D53 | -0.04467 | 0.00026  | 0.05195  | 0.24503  | 0.29810  | 0.25343  |
| D54 | 2.54972  | -0.00003 | 0.00076  | 0.00603  | 0.00667  | 2.55639  |
| D55 | -1.65192 | -0.00008 | 0.00094  | 0.00520  | 0.00602  | -1.64590 |
| D56 | 0.44271  | -0.00008 | 0.00190  | 0.00797  | 0.00975  | 0.45246  |
| D57 | 1.32945  | 0.00015  | -0.00063 | -0.00075 | -0.00120 | 1.32825  |
| D58 | -2.87219 | 0.00010  | -0.00045 | -0.00158 | -0.00185 | -2.87404 |
| D59 | -0.77756 | 0.00010  | 0.00052  | 0.00119  | 0.00188  | -0.77568 |
| D60 | -1.02578 | 0.00000  | -0.00018 | -0.00183 | -0.00206 | -1.02784 |
| D61 | 1.05577  | -0.00005 | 0.00001  | -0.00266 | -0.00271 | 1.05305  |
| D62 | -3.13279 | -0.00005 | 0.00097  | 0.00011  | 0.00102  | -3.13177 |
| D63 | 1.37494  | -0.00076 | 0.00619  | -0.45077 | -0.44673 | 0.92820  |
| D64 | 3.10755  | -0.00059 | -0.04293 | -0.67705 | -0.71783 | 2.38972  |
| D65 | 2.64105  | -0.00023 | 0.03025  | 0.01918  | 0.04948  | 2.69053  |
| D66 | -0.53472 | 0.00024  | 0.03445  | 0.01266  | 0.04715  | -0.48758 |
| D67 | -1.53150 | -0.00077 | 0.03460  | 0.03430  | 0.06893  | -1.46257 |
| D68 | 1.57591  | -0.00029 | 0.03880  | 0.02777  | 0.06659  | 1.64251  |
| D69 | 0.46158  | -0.00046 | 0.03449  | 0.01723  | 0.05165  | 0.51323  |
| D70 | -2.71419 | 0.00001  | 0.03869  | 0.01070  | 0.04932  | -2.66487 |
| D71 | 2.96703  | -0.00039 | 0.04627  | 0.09941  | 0.14568  | 3.11272  |
| D72 | -0.21003 | 0.00018  | 0.05024  | 0.09159  | 0.14183  | -0.06820 |
| D73 | -1.73184 | -0.00144 | -0.02880 | -0.26303 | -0.29182 | -2.02366 |

|  | Item          | Value    | Threshold | Converged? |
|--|---------------|----------|-----------|------------|
|  | Maximum Force | 0.004225 | 0.000450  | NO         |
|  | RMS Force     | 0.000942 | 0.000300  | NO         |

Maximum Displacement 2.810710 0.001800 NO  
RMS Displacement 0.658112 0.001200 NO

Predicted change in Energy=-3.329092D-03

GradGradGradGradGradGradGradGradGradGradGradGradGradGradGradGradGradGrad

Input orientation:

| Center<br>Number | Atomic<br>Number | Atomic<br>Type | Coordinates (Angstroms) |           |           |
|------------------|------------------|----------------|-------------------------|-----------|-----------|
|                  |                  |                | X                       | Y         | Z         |
| 1                | 6                | 0              | -1.224266               | 1.709076  | 1.705729  |
| 2                | 6                | 0              | -1.940689               | 0.555382  | 1.725084  |
| 3                | 7                | 0              | -2.662602               | 0.516173  | 0.540716  |
| 4                | 6                | 0              | -2.363545               | 1.614251  | -0.182072 |
| 5                | 7                | 0              | -1.475100               | 2.340502  | 0.503641  |
| 6                | 6                | 0              | -0.813502               | 3.565264  | 0.037622  |
| 7                | 1                | 0              | -0.525212               | 2.114917  | 2.414022  |
| 8                | 1                | 0              | -2.004050               | -0.227340 | 2.463878  |
| 9                | 1                | 0              | -1.562466               | 4.286632  | -0.299415 |
| 10               | 1                | 0              | -0.310437               | 3.987419  | 0.907104  |
| 11               | 35               | 0              | -0.407414               | -2.243008 | 2.236669  |
| 12               | 1                | 0              | -2.761282               | 1.848232  | -1.153633 |
| 13               | 6                | 0              | -3.498763               | -0.530858 | 0.066749  |
| 14               | 6                | 0              | -3.387273               | -1.807277 | 0.412407  |
| 15               | 1                | 0              | -4.193521               | -0.189250 | -0.688592 |
| 16               | 1                | 0              | -4.043022               | -2.530648 | -0.050682 |
| 17               | 1                | 0              | -2.626952               | -2.188489 | 1.076270  |
| 18               | 6                | 0              | 2.953939                | -0.501359 | 1.365522  |
| 19               | 6                | 0              | 4.395064                | -0.244174 | 1.289097  |
| 20               | 8                | 0              | 3.477981                | 0.868439  | 1.361751  |
| 21               | 1                | 0              | 2.434539                | -0.755842 | 0.444147  |
| 22               | 1                | 0              | 2.451417                | -0.784089 | 2.287809  |
| 23               | 1                | 0              | 4.971274                | -0.362696 | 2.204131  |
| 24               | 6                | 0              | 5.171129                | -0.390640 | 0.005805  |
| 25               | 1                | 0              | 5.981684                | 0.343031  | -0.041844 |
| 26               | 1                | 0              | 5.616690                | -1.388399 | -0.052730 |
| 27               | 1                | 0              | 4.519792                | -0.247324 | -0.859217 |
| 28               | 6                | 0              | 0.161603                | 3.235548  | -1.079312 |
| 29               | 1                | 0              | 0.467853                | 4.177640  | -1.551887 |
| 30               | 1                | 0              | -0.317787               | 2.649935  | -1.875272 |
| 31               | 6                | 0              | 1.405952                | 2.463381  | -0.672500 |
| 32               | 8                | 0              | 1.964538                | 1.776772  | -1.487672 |
| 33               | 8                | 0              | 1.798949                | 2.659374  | 0.580914  |
| 34               | 1                | 0              | 2.608551                | 2.071137  | 0.719754  |

-----

Distance matrix (angstroms):

|    |    | 1        | 2        | 3        | 4        | 5        |
|----|----|----------|----------|----------|----------|----------|
| 1  | C  | 0.000000 |          |          |          |          |
| 2  | C  | 1.358177 | 0.000000 |          |          |          |
| 3  | N  | 2.202063 | 1.387597 | 0.000000 |          |          |
| 4  | C  | 2.206975 | 2.221993 | 1.348195 | 0.000000 |          |
| 5  | N  | 1.380809 | 2.212544 | 2.177088 | 1.336778 | 0.000000 |
| 6  | C  | 2.529178 | 3.630078 | 3.601282 | 2.501470 | 1.467967 |
| 7  | H  | 1.074738 | 2.215933 | 3.260935 | 3.220223 | 2.145398 |
| 8  | H  | 2.220937 | 1.078186 | 2.164499 | 3.243724 | 3.273550 |
| 9  | H  | 3.283105 | 4.261910 | 4.016526 | 2.792332 | 2.107120 |
| 10 | H  | 2.581421 | 3.886604 | 4.209094 | 3.321669 | 2.057076 |
| 11 | Br | 4.070395 | 3.231662 | 3.946545 | 4.955320 | 5.015167 |
| 12 | H  | 3.249267 | 3.260652 | 2.157530 | 1.075581 | 2.154797 |
| 13 | C  | 3.588439 | 2.521426 | 1.421297 | 2.439697 | 3.539886 |
| 14 | C  | 4.326201 | 3.065597 | 2.437218 | 3.620536 | 4.568238 |
| 15 | H  | 4.260621 | 3.384607 | 2.086272 | 2.618777 | 3.900112 |
| 16 | H  | 5.385687 | 4.134820 | 3.396827 | 4.474158 | 5.534401 |
| 17 | H  | 4.189840 | 2.901852 | 2.757406 | 4.014179 | 4.708123 |
| 18 | C  | 4.739111 | 5.020296 | 5.767254 | 5.928447 | 5.332486 |
| 19 | C  | 5.963694 | 6.400870 | 7.137847 | 7.162183 | 6.461913 |
| 20 | O  | 4.789167 | 5.439853 | 6.205236 | 6.087943 | 5.237971 |
| 21 | H  | 4.588493 | 4.743703 | 5.254350 | 5.388051 | 4.987601 |
| 22 | H  | 4.479434 | 4.626168 | 5.558436 | 5.919138 | 5.325773 |
| 23 | H  | 6.551746 | 6.989105 | 7.862279 | 7.962528 | 7.194073 |
| 24 | C  | 6.942595 | 7.377590 | 7.904163 | 7.799115 | 7.202731 |
| 25 | H  | 7.539616 | 8.119798 | 8.665624 | 8.442660 | 7.738932 |
| 26 | H  | 7.712666 | 8.003305 | 8.516235 | 8.527414 | 8.031671 |
| 27 | H  | 6.587917 | 7.004339 | 7.357277 | 7.162703 | 6.670304 |
| 28 | C  | 3.465142 | 4.412206 | 4.242125 | 3.132095 | 2.446558 |
| 29 | H  | 4.423702 | 5.446133 | 5.252150 | 4.057607 | 3.372735 |
| 30 | H  | 3.811888 | 4.470294 | 3.985988 | 2.850385 | 2.663522 |
| 31 | C  | 3.625327 | 4.537497 | 4.670829 | 3.894952 | 3.114301 |
| 32 | O  | 4.513409 | 5.202344 | 5.207100 | 4.523638 | 4.014253 |
| 33 | O  | 3.362753 | 4.440810 | 4.949784 | 4.358989 | 3.290448 |
| 34 | H  | 3.974132 | 4.899366 | 5.498639 | 5.073832 | 4.098228 |
|    |    | 6        | 7        | 8        | 9        | 10       |
| 6  | C  | 0.000000 |          |          |          |          |
| 7  | H  | 2.798910 | 0.000000 |          |          |          |
| 8  | H  | 4.657034 | 2.770490 | 0.000000 |          |          |
| 9  | H  | 1.093121 | 3.626980 | 5.311001 | 0.000000 |          |
| 10 | H  | 1.089628 | 2.413130 | 4.801673 | 1.764311 | 0.000000 |
| 11 | Br | 6.223884 | 4.363122 | 2.581431 | 7.099441 | 6.371450 |

|    |    |          |          |          |          |           |
|----|----|----------|----------|----------|----------|-----------|
| 12 | H  | 2.856770 | 4.218921 | 4.238843 | 2.848270 | 3.850896  |
| 13 | C  | 4.897927 | 4.620803 | 2.841218 | 5.204953 | 5.593429  |
| 14 | C  | 5.969000 | 5.251805 | 2.935650 | 6.400964 | 6.579525  |
| 15 | H  | 5.103753 | 5.328404 | 3.838399 | 5.206480 | 5.921922  |
| 16 | H  | 6.899112 | 6.327008 | 3.973116 | 7.258811 | 7.571971  |
| 17 | H  | 6.121525 | 4.972544 | 2.481848 | 6.704688 | 6.598235  |
| 18 | C  | 5.700382 | 4.477583 | 5.085580 | 6.789315 | 5.569150  |
| 19 | C  | 6.573216 | 5.571344 | 6.506077 | 7.651388 | 6.339877  |
| 20 | O  | 5.238607 | 4.322793 | 5.698076 | 6.312656 | 4.928170  |
| 21 | H  | 5.420976 | 4.569659 | 4.905068 | 6.477305 | 5.499796  |
| 22 | H  | 5.885567 | 4.156979 | 4.493567 | 6.965428 | 5.683438  |
| 23 | H  | 7.320264 | 6.032742 | 6.981471 | 8.400819 | 6.964356  |
| 24 | C  | 7.173980 | 6.672752 | 7.586302 | 8.204348 | 7.072999  |
| 25 | H  | 7.520881 | 7.177085 | 8.389035 | 8.516603 | 7.332998  |
| 26 | H  | 8.117531 | 7.488728 | 8.109072 | 9.154623 | 8.059252  |
| 27 | H  | 6.616960 | 6.461141 | 7.321466 | 7.606839 | 6.662136  |
| 28 | C  | 1.518909 | 3.732414 | 5.407018 | 2.164586 | 2.175772  |
| 29 | H  | 2.131528 | 4.579240 | 6.452947 | 2.388045 | 2.586224  |
| 30 | H  | 2.177779 | 4.327507 | 5.472698 | 2.590623 | 3.087156  |
| 31 | C  | 2.577672 | 3.657519 | 5.357701 | 3.503562 | 2.786366  |
| 32 | O  | 3.639056 | 4.640734 | 5.948184 | 4.488998 | 3.974597  |
| 33 | O  | 2.817925 | 3.009725 | 5.132394 | 3.836933 | 2.513884  |
| 34 | H  | 3.795809 | 3.562714 | 5.440685 | 4.831616 | 3.496818  |
|    |    | 11       | 12       | 13       | 14       | 15        |
| 11 | Br | 0.000000 |          |          |          |           |
| 12 | H  | 5.811462 | 0.000000 |          |          |           |
| 13 | C  | 4.146861 | 2.773676 | 0.000000 |          |           |
| 14 | C  | 3.520988 | 4.025804 | 1.327086 | 0.000000 |           |
| 15 | H  | 5.206697 | 2.533556 | 1.081631 | 2.116660 | 0.000000  |
| 16 | H  | 4.304923 | 4.694033 | 2.075854 | 1.080613 | 2.431404  |
| 17 | H  | 2.505165 | 4.613635 | 2.127658 | 1.078945 | 3.092869  |
| 18 | C  | 3.884705 | 6.673116 | 6.582177 | 6.544068 | 7.443319  |
| 19 | C  | 5.287440 | 7.845915 | 7.993049 | 7.986028 | 8.813516  |
| 20 | O  | 5.053996 | 6.798202 | 7.232567 | 7.429160 | 8.010903  |
| 21 | H  | 3.674437 | 6.027491 | 5.949548 | 5.916081 | 6.747985  |
| 22 | H  | 3.209980 | 6.778264 | 6.356247 | 6.217261 | 7.305340  |
| 23 | H  | 5.697975 | 8.715228 | 8.737175 | 8.669625 | 9.612045  |
| 24 | C  | 6.287143 | 8.323460 | 8.671240 | 8.684378 | 9.392519  |
| 25 | H  | 7.259462 | 8.940982 | 9.521258 | 9.623280 | 10.209623 |
| 26 | H  | 6.500887 | 9.048657 | 9.156481 | 9.025695 | 9.903663  |
| 27 | H  | 6.151798 | 7.582352 | 8.076821 | 8.159176 | 8.715177  |
| 28 | C  | 6.429159 | 3.236268 | 5.375645 | 6.344276 | 5.554189  |
| 29 | H  | 7.506262 | 4.001507 | 6.365845 | 7.385099 | 6.445418  |
| 30 | H  | 6.391947 | 2.670985 | 4.899745 | 5.875540 | 4.948788  |

|    |   |           |          |          |          |          |
|----|---|-----------|----------|----------|----------|----------|
| 31 | C | 5.822513  | 4.239780 | 5.793806 | 6.510803 | 6.196032 |
| 32 | O | 5.971223  | 4.738149 | 6.130990 | 6.715474 | 6.513483 |
| 33 | O | 5.625203  | 4.945939 | 6.205457 | 6.846624 | 6.755442 |
| 34 | H | 5.478040  | 5.691606 | 6.670539 | 7.147480 | 7.304860 |
|    |   | 16        | 17       | 18       | 19       | 20       |
| 16 | H | 0.000000  |          |          |          |          |
| 17 | H | 1.841832  | 0.000000 |          |          |          |
| 18 | C | 7.421665  | 5.837502 | 0.000000 |          |          |
| 19 | C | 8.844448  | 7.289332 | 1.465887 | 0.000000 |          |
| 20 | O | 8.373425  | 6.833485 | 1.466622 | 1.443685 | 0.000000 |
| 21 | H | 6.734507  | 5.298183 | 1.087874 | 2.195314 | 2.137535 |
| 22 | H | 7.120164  | 5.406477 | 1.087694 | 2.250932 | 2.154591 |
| 23 | H | 9.541579  | 7.895482 | 2.189094 | 1.087820 | 2.110739 |
| 24 | C | 9.459567  | 8.073923 | 2.603271 | 1.506841 | 2.508111 |
| 25 | H | 10.428463 | 9.042532 | 3.443967 | 2.152575 | 2.917989 |
| 26 | H | 9.727013  | 8.358973 | 3.144602 | 2.145256 | 3.415868 |
| 27 | H | 8.898825  | 7.654423 | 2.732378 | 2.151934 | 2.694994 |
| 28 | C | 7.210130  | 6.468598 | 5.266767 | 5.969926 | 4.749774 |
| 29 | H | 8.222089  | 7.550671 | 6.048548 | 6.560992 | 5.338630 |
| 30 | H | 6.636637  | 6.119983 | 5.580107 | 6.371818 | 5.297160 |
| 31 | C | 7.417432  | 6.400188 | 3.916565 | 4.484809 | 3.312902 |
| 32 | O | 7.530577  | 6.586264 | 3.782792 | 4.207390 | 3.351834 |
| 33 | O | 7.839890  | 6.582990 | 3.455409 | 3.958779 | 2.576103 |
| 34 | H | 8.124865  | 6.758847 | 2.674704 | 2.979336 | 1.616957 |
|    |   | 21        | 22       | 23       | 24       | 25       |
| 21 | H | 0.000000  |          |          |          |          |
| 22 | H | 1.843956  | 0.000000 |          |          |          |
| 23 | H | 3.112416  | 2.556219 | 0.000000 |          |          |
| 24 | C | 2.795433  | 3.572000 | 2.207569 | 0.000000 |          |
| 25 | H | 3.745123  | 4.377267 | 2.561909 | 1.094323 | 0.000000 |
| 26 | H | 3.282241  | 3.982747 | 2.561650 | 1.094292 | 1.769517 |
| 27 | H | 2.511101  | 3.803954 | 3.098588 | 1.092265 | 1.775879 |
| 28 | C | 4.839252  | 5.721733 | 6.845531 | 6.278699 | 6.581514 |
| 29 | H | 5.673733  | 6.580011 | 7.416409 | 6.739168 | 6.883806 |
| 30 | H | 4.955231  | 6.065662 | 7.327458 | 6.550705 | 6.954610 |
| 31 | C | 3.559254  | 4.516911 | 5.382679 | 4.773058 | 5.082414 |
| 32 | O | 3.219776  | 4.587953 | 5.219884 | 4.148539 | 4.503720 |
| 33 | O | 3.476548  | 3.898287 | 4.672407 | 4.583114 | 4.821675 |
| 34 | H | 2.845707  | 3.261257 | 3.702617 | 3.624482 | 3.865799 |
|    |   | 26        | 27       | 28       | 29       | 30       |
| 26 | H | 0.000000  |          |          |          |          |
| 27 | H | 1.776418  | 0.000000 |          |          |          |
| 28 | C | 7.224454  | 5.583247 | 0.000000 |          |          |
| 29 | H | 7.729087  | 6.039727 | 1.097567 | 0.000000 |          |

|    |   |          |          |          |          |          |
|----|---|----------|----------|----------|----------|----------|
| 30 | H | 7.405931 | 5.729629 | 1.098321 | 1.748053 | 0.000000 |
| 31 | C | 5.740265 | 4.132648 | 1.519915 | 2.142904 | 2.110151 |
| 32 | O | 5.041387 | 3.319826 | 2.354858 | 2.829904 | 2.474197 |
| 33 | O | 5.600101 | 4.233894 | 2.401922 | 2.936969 | 3.242454 |
| 34 | H | 4.649088 | 3.394297 | 3.252699 | 3.765674 | 3.953811 |

31 32 33 34

|    |   |          |          |          |          |  |
|----|---|----------|----------|----------|----------|--|
| 31 | C | 0.000000 |          |          |          |  |
| 32 | O | 1.203309 | 0.000000 |          |          |  |
| 33 | O | 1.328122 | 2.255095 | 0.000000 |          |  |
| 34 | H | 1.881083 | 2.318217 | 1.010325 | 0.000000 |  |

Stoichiometry C11H17BrN2O3

Framework group C1[X(C11H17BrN2O3)]

Deg. of freedom 96

Full point group C1 NOp 1

Largest Abelian subgroup C1 NOP 1

Largest concise Abelian subgroup C1 NOp 1

Standard orientation:

| Center Number | Atomic Number | Atomic Type | Coordinates (Angstroms) |           |           |
|---------------|---------------|-------------|-------------------------|-----------|-----------|
|               |               |             | X                       | Y         | Z         |
| 1             | 6             | 0           | -1.166486               | 1.155232  | 1.416049  |
| 2             | 6             | 0           | -2.120584               | 0.312971  | 0.941771  |
| 3             | 7             | 0           | -2.709172               | 0.949312  | -0.141770 |
| 4             | 6             | 0           | -2.100818               | 2.138420  | -0.324957 |
| 5             | 7             | 0           | -1.146846               | 2.270476  | 0.602122  |
| 6             | 6             | 0           | -0.184759               | 3.374563  | 0.703643  |
| 7             | 1             | 0           | -0.469949               | 1.043849  | 2.226908  |
| 8             | 1             | 0           | -2.431649               | -0.664561 | 1.273663  |
| 9             | 1             | 0           | -0.715639               | 4.330080  | 0.711879  |
| 10            | 1             | 0           | 0.309077                | 3.258323  | 1.667958  |
| 11            | 35            | 0           | -1.310762               | -2.725603 | 0.196859  |
| 12            | 1             | 0           | -2.335699               | 2.845706  | -1.100490 |
| 13            | 6             | 0           | -3.705538               | 0.435399  | -1.015401 |
| 14            | 6             | 0           | -3.917471               | -0.853266 | -1.251166 |
| 15            | 1             | 0           | -4.226259               | 1.219581  | -1.548161 |
| 16            | 1             | 0           | -4.667772               | -1.132643 | -1.976922 |
| 17            | 1             | 0           | -3.332760               | -1.650056 | -0.818314 |
| 18            | 6             | 0           | 2.425131                | -1.662086 | 0.142401  |
| 19            | 6             | 0           | 3.887430                | -1.758422 | 0.177419  |
| 20            | 8             | 0           | 3.239392                | -0.590002 | 0.724291  |
| 21            | 1             | 0           | 1.958154                | -1.373446 | -0.796795 |
| 22            | 1             | 0           | 1.781345                | -2.170794 | 0.856428  |
| 23            | 1             | 0           | 4.326845                | -2.384837 | 0.950640  |

|    |   |   |          |           |           |
|----|---|---|----------|-----------|-----------|
| 24 | 6 | 0 | 4.737172 | -1.541973 | -1.048003 |
| 25 | 1 | 0 | 5.691619 | -1.078644 | -0.779861 |
| 26 | 1 | 0 | 4.952295 | -2.500148 | -1.530804 |
| 27 | 1 | 0 | 4.225391 | -0.896283 | -1.765085 |
| 28 | 6 | 0 | 0.800171 | 3.312473  | -0.450974 |
| 29 | 1 | 0 | 1.355310 | 4.258989  | -0.475081 |
| 30 | 1 | 0 | 0.285341 | 3.249189  | -1.419093 |
| 31 | 6 | 0 | 1.792900 | 2.161960  | -0.420125 |
| 32 | 8 | 0 | 2.263757 | 1.763813  | -1.453433 |
| 33 | 8 | 0 | 2.090618 | 1.714711  | 0.794469  |
| 34 | 1 | 0 | 2.730099 | 0.943472  | 0.664041  |

-----

Rotational constants (GHZ):      0.3272633          0.2553274          0.1598728

Standard basis: 6-311++G(d,p) (5D, 7F)

There are    538 symmetry adapted cartesian basis functions of A    symmetry.

There are    519 symmetry adapted basis functions of A    symmetry.

519 basis functions,    823 primitive gaussians,    538 cartesian basis functions

78 alpha electrons          78 beta electrons

nuclear repulsion energy          1570.1564698773 Hartrees.

NAtoms=    34 NActive=    34 NUniq=    34 SFac= 1.00D+00 NATFMM=    60 NAOKFM=F

Big=F

Integral buffers will be    131072 words long.

Raffenetti 2 integral format.

Two-electron integral symmetry is turned on.

One-electron integrals computed using PRISM.

NBasis=    519 RedAO= T EigKep= 4.77D-06    NBF=    519

NBsUse=    519 1.00D-06 EigRej= -1.00D+00    NBFU=    519

Initial guess from the checkpoint file:    "/coohpo.chk"

B after Tr=    0.000000    0.000000    0.000000

Rot=    0.998743    -0.001600    0.000331    0.050091 Ang=    -5.75 deg.

ExpMin= 3.50D-02 ExpMax= 4.40D+05 ExpMxC= 1.51D+04 IAcc=3 IRadAn=          5 AccDes=

0.00D+00

Harris functional with IExCor=    402 and IRadAn=          5 diagonalized for initial guess.

HarFok: IExCor=    402 AccDes= 0.00D+00 IRadAn=          5 IDoV= 1 UseB2=F ITyADJ=14

ICtDFT= 3500011 ScaDFX= 1.000000 1.000000 1.000000 1.000000

FoFCou: FMM=F IPFlag=          0 FMFlag=    100000 FMFlg1=          0

NFxFlg=          0 DoJE=T BraDBF=F KetDBF=T FulRan=T

wScrn= 0.000000 ICntrl=          500 IOpCl= 0 I1Cent=    200000004 NGrid=

0

NMat0=    1 NMatS0=          1 NMatT0=    0 NMatD0=    1 NMtDS0=    0

NMtDT0=    0

Petite list used in FoFCou.

Requested convergence on RMS density matrix=1.00D-08 within 128 cycles.

Requested convergence on MAX density matrix=1.00D-06.



Requested convergence on energy=1.00D-06.

No special actions if energy rises.

SCF Done: E(RB3LYP) = -3338.89556271 A.U. after 18 cycles

NFock= 18 Conv=0.35D-08 -V/T= 2.0018

Calling FoFJK, ICntrl= 2127 FMM=F ISym2X=0 l1Cent= 0 IOpClX= 0 NMat=1 NMatS=1

NMatT=0.

\*\*\*\*\* Axes restored to original set \*\*\*\*\*

```
-----
```

| Center<br>Number | Atomic<br>Number | Forces (Hartrees/Bohr) |              |              |
|------------------|------------------|------------------------|--------------|--------------|
|                  |                  | X                      | Y            | Z            |
| 1                | 6                | 0.003993475            | 0.000277978  | 0.000167332  |
| 2                | 6                | -0.008053162           | -0.000258919 | 0.001554864  |
| 3                | 7                | 0.005901816            | 0.004712769  | 0.002003735  |
| 4                | 6                | 0.000933990            | -0.003802195 | 0.002325124  |
| 5                | 7                | -0.006945906           | 0.001746236  | 0.004164872  |
| 6                | 6                | -0.002059879           | 0.000226031  | 0.000809047  |
| 7                | 1                | 0.000575290            | -0.000891819 | 0.000450103  |
| 8                | 1                | 0.002627999            | -0.001601541 | -0.001430046 |
| 9                | 1                | -0.001623139           | -0.002495114 | 0.000613402  |
| 10               | 1                | 0.001123501            | 0.000596789  | -0.001980979 |
| 11               | 35               | 0.003202439            | -0.000722032 | 0.001466581  |
| 12               | 1                | 0.000416388            | -0.000366911 | -0.000460684 |
| 13               | 6                | -0.004343656           | -0.005364277 | -0.007310539 |
| 14               | 6                | -0.002646044           | 0.002093231  | -0.003648706 |
| 15               | 1                | -0.002383973           | 0.001260075  | 0.000319440  |
| 16               | 1                | -0.003103326           | 0.000587985  | -0.001108907 |
| 17               | 1                | 0.005774584            | 0.000231331  | 0.007152887  |
| 18               | 6                | -0.003054260           | 0.004122336  | -0.002330962 |
| 19               | 6                | 0.002608053            | -0.001232644 | -0.002221940 |
| 20               | 8                | 0.000735563            | -0.002593074 | 0.004700101  |
| 21               | 1                | -0.000459409           | -0.001093023 | 0.002847650  |
| 22               | 1                | 0.002340555            | -0.001542789 | -0.002651155 |
| 23               | 1                | 0.000007371            | 0.000608527  | 0.000486518  |
| 24               | 6                | -0.000470225           | 0.000021826  | 0.000348799  |
| 25               | 1                | -0.000350616           | -0.000189912 | 0.000182520  |
| 26               | 1                | -0.000234155           | -0.000027828 | 0.000408782  |
| 27               | 1                | 0.000177526            | 0.000141219  | 0.000393172  |
| 28               | 6                | -0.001479472           | 0.005729689  | -0.004218590 |
| 29               | 1                | 0.003407729            | -0.001680815 | 0.001556505  |
| 30               | 1                | 0.000944067            | 0.002881997  | 0.003425846  |
| 31               | 6                | -0.006601019           | 0.007748071  | -0.007336511 |
| 32               | 8                | 0.008552574            | -0.007887460 | -0.002105655 |
| 33               | 8                | 0.007556962            | -0.004570243 | -0.004453472 |

```
-----
```

34 1 -0.007071641 0.003334507 0.005880864

-----  
Cartesian Forces: Max 0.008552574 RMS 0.003416346

GradGradGradGradGradGradGradGradGradGradGradGradGradGradGradGradGradGradGradGrad

Berny optimization.

Using GEDIIS/GDIIS optimizer.

FormGI is forming the generalized inverse of G from B-inverse, IUseBI=4.

GSVD: received Info= 1 from GESDD.

Internal Forces: Max 0.013098926 RMS 0.002832105

Search for a local minimum.

Step number 11 out of a maximum of 175

All quantities printed in internal units (Hartrees-Bohrs-Radians)

Mixed Optimization -- RFO/linear search

Update second derivatives using D2CorX and points 9 11 10

DE= 3.28D-04 DEPred=-3.33D-03 R=-9.85D-02

Trust test=-9.85D-02 RLast= 1.89D+00 DXMaxT set to 6.00D-01

ITU=-1 1 1 1 0 1 0-1 0 1 0

Use linear search instead of GDIIS.

Energy rises -- skip Quadratic/GDIIS search.

Quartic linear search produced a step of -0.45803.

Iteration 1 RMS(Cart)= 0.22268845 RMS(Int)= 0.02649352

Iteration 2 RMS(Cart)= 0.09741319 RMS(Int)= 0.00280764

Iteration 3 RMS(Cart)= 0.00587512 RMS(Int)= 0.00027544

Iteration 4 RMS(Cart)= 0.00002254 RMS(Int)= 0.00027521

Iteration 5 RMS(Cart)= 0.00000001 RMS(Int)= 0.00027521

| Variable | Old X   | -DE/DX   | Delta X<br>(Linear) | Delta X<br>(Quad) | Delta X<br>(Total) | New X   |
|----------|---------|----------|---------------------|-------------------|--------------------|---------|
| R1       | 2.56658 | 0.00194  | 0.00211             | 0.00000           | 0.00210            | 2.56868 |
| R2       | 2.60935 | 0.00120  | 0.00471             | 0.00000           | 0.00466            | 2.61401 |
| R3       | 2.03096 | 0.00033  | 0.00002             | 0.00000           | 0.00002            | 2.03098 |
| R4       | 2.62218 | 0.00182  | -0.00281            | 0.00000           | -0.00277           | 2.61941 |
| R5       | 2.03748 | 0.00137  | -0.00233            | 0.00000           | -0.00233           | 2.03515 |
| R6       | 2.54772 | -0.00159 | -0.00362            | 0.00000           | -0.00358           | 2.54414 |
| R7       | 2.68586 | 0.00634  | 0.00156             | 0.00000           | 0.00156            | 2.68742 |
| R8       | 2.52614 | 0.00010  | -0.00076            | 0.00000           | -0.00077           | 2.52538 |
| R9       | 2.03255 | 0.00018  | 0.00006             | 0.00000           | 0.00006            | 2.03261 |
| R10      | 2.77406 | 0.00534  | 0.00408             | 0.00000           | 0.00408            | 2.77814 |
| R11      | 2.06570 | -0.00072 | -0.00046            | 0.00000           | -0.00046           | 2.06524 |
| R12      | 2.05910 | -0.00083 | -0.00210            | 0.00000           | -0.00210           | 2.05699 |
| R13      | 2.87032 | 0.00717  | 0.00885             | 0.00000           | 0.00885            | 2.87918 |
| R14      | 4.87820 | 0.00241  | 0.12854             | 0.00000           | 0.12854            | 5.00674 |
| R15      | 2.50783 | -0.00218 | -0.00246            | 0.00000           | -0.00246           | 2.50537 |
| R16      | 2.04399 | 0.00171  | -0.00027            | 0.00000           | -0.00027           | 2.04372 |

|     |         |          |          |         |          |         |
|-----|---------|----------|----------|---------|----------|---------|
| R17 | 2.04206 | 0.00196  | 0.00036  | 0.00000 | 0.00036  | 2.04242 |
| R18 | 2.03891 | 0.00839  | 0.00166  | 0.00000 | 0.00166  | 2.04057 |
| R19 | 2.77012 | 0.00108  | 0.00247  | 0.00000 | 0.00281  | 2.77293 |
| R20 | 2.77151 | -0.00058 | -0.00801 | 0.00000 | -0.00820 | 2.76331 |
| R21 | 2.05578 | -0.00194 | -0.00155 | 0.00000 | -0.00155 | 2.05423 |
| R22 | 2.05544 | -0.00293 | -0.00113 | 0.00000 | -0.00113 | 2.05431 |
| R23 | 2.72817 | 0.00016  | 0.00101  | 0.00000 | 0.00086  | 2.72903 |
| R24 | 2.05568 | 0.00035  | 0.00052  | 0.00000 | 0.00052  | 2.05620 |
| R25 | 2.84752 | -0.00159 | -0.00172 | 0.00000 | -0.00172 | 2.84580 |
| R26 | 3.05561 | 0.00291  | 0.07617  | 0.00000 | 0.07617  | 3.13178 |
| R27 | 2.06797 | -0.00040 | 0.00000  | 0.00000 | 0.00000  | 2.06797 |
| R28 | 2.06791 | -0.00009 | 0.00013  | 0.00000 | 0.00013  | 2.06805 |
| R29 | 2.06408 | -0.00040 | -0.00006 | 0.00000 | -0.00006 | 2.06402 |
| R30 | 2.07410 | -0.00116 | -0.00036 | 0.00000 | -0.00036 | 2.07374 |
| R31 | 2.07553 | -0.00443 | -0.00459 | 0.00000 | -0.00459 | 2.07094 |
| R32 | 2.87222 | 0.00312  | 0.00011  | 0.00000 | 0.00011  | 2.87234 |
| R33 | 2.27393 | 0.00990  | -0.00155 | 0.00000 | -0.00155 | 2.27238 |
| R34 | 2.50979 | 0.00348  | 0.01361  | 0.00000 | 0.01361  | 2.52340 |
| R35 | 1.90924 | -0.00441 | -0.01263 | 0.00000 | -0.01263 | 1.89661 |
| A1  | 1.88076 | 0.00033  | -0.00297 | 0.00000 | -0.00296 | 1.87780 |
| A2  | 2.28428 | -0.00104 | -0.00137 | 0.00000 | -0.00122 | 2.28306 |
| A3  | 2.11673 | 0.00067  | 0.00251  | 0.00000 | 0.00267  | 2.11940 |
| A4  | 1.86113 | -0.00092 | 0.00185  | 0.00000 | 0.00188  | 1.86301 |
| A5  | 2.28820 | -0.00532 | -0.00321 | 0.00000 | -0.00314 | 2.28505 |
| A6  | 2.13385 | 0.00624  | 0.00111  | 0.00000 | 0.00118  | 2.13503 |
| A7  | 1.89566 | -0.00008 | -0.00029 | 0.00000 | -0.00025 | 1.89541 |
| A8  | 2.22878 | 0.00189  | -0.00348 | 0.00000 | -0.00349 | 2.22529 |
| A9  | 2.15523 | -0.00175 | 0.00419  | 0.00000 | 0.00418  | 2.15941 |
| A10 | 1.89116 | 0.00173  | 0.00254  | 0.00000 | 0.00257  | 1.89373 |
| A11 | 2.18882 | -0.00095 | -0.00095 | 0.00000 | -0.00091 | 2.18790 |
| A12 | 2.20301 | -0.00077 | -0.00152 | 0.00000 | -0.00148 | 2.20153 |
| A13 | 1.89532 | -0.00106 | -0.00137 | 0.00000 | -0.00130 | 1.89402 |
| A14 | 2.18465 | -0.00182 | 0.00623  | 0.00000 | 0.00643  | 2.19109 |
| A15 | 2.20182 | 0.00284  | -0.00424 | 0.00000 | -0.00404 | 2.19778 |
| A16 | 1.91736 | -0.00316 | -0.01791 | 0.00000 | -0.01803 | 1.89933 |
| A17 | 1.85251 | -0.00254 | 0.00102  | 0.00000 | 0.00111  | 1.85362 |
| A18 | 1.91949 | 0.00827  | 0.03238  | 0.00000 | 0.03236  | 1.95185 |
| A19 | 1.88251 | 0.00159  | 0.00233  | 0.00000 | 0.00243  | 1.88493 |
| A20 | 1.93519 | -0.00027 | -0.01068 | 0.00000 | -0.01080 | 1.92439 |
| A21 | 1.95465 | -0.00417 | -0.00791 | 0.00000 | -0.00768 | 1.94696 |
| A22 | 2.06031 | 0.00115  | -0.10192 | 0.00000 | -0.10192 | 1.95839 |
| A23 | 2.18006 | -0.00427 | -0.00821 | 0.00000 | -0.00820 | 2.17186 |
| A24 | 1.95854 | 0.00175  | 0.00542  | 0.00000 | 0.00543  | 1.96397 |
| A25 | 2.14079 | 0.00271  | 0.00345  | 0.00000 | 0.00346  | 2.14424 |

|     |          |          |          |         |          |          |
|-----|----------|----------|----------|---------|----------|----------|
| A26 | 2.07288  | -0.00104 | 0.00453  | 0.00000 | 0.00456  | 2.07743  |
| A27 | 2.16433  | -0.00255 | -0.00705 | 0.00000 | -0.00702 | 2.15731  |
| A28 | 2.04293  | 0.00378  | 0.00330  | 0.00000 | 0.00332  | 2.04626  |
| A29 | 2.05586  | 0.00087  | 0.00418  | 0.00000 | 0.00320  | 2.05906  |
| A30 | 2.14601  | -0.00050 | -0.00373 | 0.00000 | -0.00272 | 2.14329  |
| A31 | 1.96807  | 0.00162  | 0.00393  | 0.00000 | 0.00398  | 1.97204  |
| A32 | 1.99329  | 0.00036  | -0.00109 | 0.00000 | -0.00107 | 1.99222  |
| A33 | 2.02279  | -0.00103 | -0.00189 | 0.00000 | -0.00190 | 2.02090  |
| A34 | 2.04629  | 0.00011  | 0.00018  | 0.00000 | 0.00007  | 2.04636  |
| A35 | 2.13374  | -0.00005 | 0.00152  | 0.00000 | 0.00164  | 2.13537  |
| A36 | 1.95856  | -0.00046 | -0.00157 | 0.00000 | -0.00185 | 1.95670  |
| A37 | 2.03190  | 0.00073  | 0.00194  | 0.00000 | 0.00229  | 2.03418  |
| A38 | 2.01859  | 0.00000  | -0.00010 | 0.00000 | -0.00010 | 2.01849  |
| A39 | 2.09855  | -0.00078 | 0.05860  | 0.00000 | 0.05846  | 2.15701  |
| A40 | 2.67881  | -0.00122 | -0.00091 | 0.00000 | 0.00176  | 2.68057  |
| A41 | 1.93199  | -0.00016 | 0.00150  | 0.00000 | 0.00151  | 1.93350  |
| A42 | 1.92185  | -0.00060 | -0.00076 | 0.00000 | -0.00076 | 1.92109  |
| A43 | 1.93327  | -0.00002 | 0.00013  | 0.00000 | 0.00013  | 1.93340  |
| A44 | 1.88323  | 0.00035  | -0.00013 | 0.00000 | -0.00013 | 1.88310  |
| A45 | 1.89572  | 0.00011  | 0.00026  | 0.00000 | 0.00026  | 1.89598  |
| A46 | 1.89660  | 0.00035  | -0.00104 | 0.00000 | -0.00104 | 1.89557  |
| A47 | 1.88538  | 0.00258  | -0.00389 | 0.00000 | -0.00389 | 1.88149  |
| A48 | 1.94814  | 0.00061  | -0.00428 | 0.00000 | -0.00426 | 1.94387  |
| A49 | 2.02533  | -0.00383 | 0.00552  | 0.00000 | 0.00552  | 2.03085  |
| A50 | 1.84151  | 0.00004  | 0.00937  | 0.00000 | 0.00936  | 1.85086  |
| A51 | 1.89956  | -0.00008 | -0.00971 | 0.00000 | -0.00972 | 1.88984  |
| A52 | 1.85504  | 0.00095  | 0.00339  | 0.00000 | 0.00339  | 1.85843  |
| A53 | 2.08129  | 0.01191  | 0.02378  | 0.00000 | 0.02378  | 2.10507  |
| A54 | 2.00411  | -0.00901 | -0.01970 | 0.00000 | -0.01970 | 1.98441  |
| A55 | 2.19713  | -0.00278 | -0.00404 | 0.00000 | -0.00404 | 2.19309  |
| A56 | 1.85551  | 0.01310  | 0.02624  | 0.00000 | 0.02624  | 1.88175  |
| A57 | 2.73505  | 0.00211  | 0.01321  | 0.00000 | 0.01321  | 2.74826  |
| D1  | -0.03365 | -0.00031 | -0.00455 | 0.00000 | -0.00455 | -0.03820 |
| D2  | 3.11210  | -0.00144 | -0.02309 | 0.00000 | -0.02313 | 3.08897  |
| D3  | -3.11728 | 0.00043  | 0.02055  | 0.00000 | 0.02062  | -3.09666 |
| D4  | 0.02847  | -0.00070 | 0.00200  | 0.00000 | 0.00203  | 0.03051  |
| D5  | 0.03698  | -0.00036 | -0.00596 | 0.00000 | -0.00598 | 0.03100  |
| D6  | -3.05076 | 0.00036  | -0.03502 | 0.00000 | -0.03492 | -3.08568 |
| D7  | 3.12730  | -0.00108 | -0.02842 | 0.00000 | -0.02843 | 3.09887  |
| D8  | 0.03956  | -0.00037 | -0.05747 | 0.00000 | -0.05737 | -0.01781 |
| D9  | 0.01884  | 0.00086  | 0.01343  | 0.00000 | 0.01343  | 0.03228  |
| D10 | 3.07194  | 0.00153  | 0.01938  | 0.00000 | 0.01942  | 3.09136  |
| D11 | -3.12646 | 0.00183  | 0.03007  | 0.00000 | 0.03004  | -3.09642 |
| D12 | -0.07336 | 0.00251  | 0.03602  | 0.00000 | 0.03602  | -0.03734 |

|     |          |          |          |         |          |          |
|-----|----------|----------|----------|---------|----------|----------|
| D13 | -1.61087 | 0.00635  | -0.03999 | 0.00000 | -0.03997 | -1.65084 |
| D14 | 1.53544  | 0.00509  | -0.06101 | 0.00000 | -0.06103 | 1.47441  |
| D15 | 0.00396  | -0.00108 | -0.01726 | 0.00000 | -0.01725 | -0.01329 |
| D16 | 3.12533  | -0.00040 | -0.00343 | 0.00000 | -0.00339 | 3.12193  |
| D17 | -3.05369 | -0.00194 | -0.02251 | 0.00000 | -0.02249 | -3.07619 |
| D18 | 0.06767  | -0.00126 | -0.00868 | 0.00000 | -0.00864 | 0.05904  |
| D19 | -0.43365 | 0.00179  | 0.28420  | 0.00000 | 0.28420  | -0.14945 |
| D20 | 2.79969  | -0.00060 | 0.27517  | 0.00000 | 0.27516  | 3.07485  |
| D21 | 2.60736  | 0.00267  | 0.29072  | 0.00000 | 0.29073  | 2.89809  |
| D22 | -0.44249 | 0.00029  | 0.28169  | 0.00000 | 0.28169  | -0.16080 |
| D23 | -0.02509 | 0.00089  | 0.01434  | 0.00000 | 0.01434  | -0.01075 |
| D24 | 3.06199  | -0.00002 | 0.04368  | 0.00000 | 0.04382  | 3.10581  |
| D25 | 3.13694  | 0.00020  | 0.00037  | 0.00000 | 0.00034  | 3.13728  |
| D26 | -0.05917 | -0.00071 | 0.02971  | 0.00000 | 0.02982  | -0.02935 |
| D27 | -2.27711 | 0.00068  | -0.08067 | 0.00000 | -0.08063 | -2.35773 |
| D28 | -0.24628 | -0.00043 | -0.08620 | 0.00000 | -0.08614 | -0.33242 |
| D29 | 1.87141  | -0.00233 | -0.07600 | 0.00000 | -0.07615 | 1.79526  |
| D30 | 0.92771  | 0.00167  | -0.11475 | 0.00000 | -0.11468 | 0.81303  |
| D31 | 2.95854  | 0.00056  | -0.12028 | 0.00000 | -0.12019 | 2.83835  |
| D32 | -1.20696 | -0.00134 | -0.11008 | 0.00000 | -0.11020 | -1.31716 |
| D33 | 2.92522  | 0.00315  | 0.09786  | 0.00000 | 0.09787  | 3.02310  |
| D34 | 0.90832  | 0.00124  | 0.09121  | 0.00000 | 0.09123  | 0.99954  |
| D35 | -1.22039 | 0.00241  | 0.08588  | 0.00000 | 0.08589  | -1.13450 |
| D36 | 0.80115  | 0.00175  | 0.10623  | 0.00000 | 0.10620  | 0.90734  |
| D37 | -1.21576 | -0.00016 | 0.09958  | 0.00000 | 0.09955  | -1.11621 |
| D38 | 2.93872  | 0.00100  | 0.09425  | 0.00000 | 0.09421  | 3.03293  |
| D39 | -1.30257 | 0.00275  | 0.11558  | 0.00000 | 0.11561  | -1.18696 |
| D40 | 2.96371  | 0.00083  | 0.10893  | 0.00000 | 0.10897  | 3.07267  |
| D41 | 0.83500  | 0.00200  | 0.10360  | 0.00000 | 0.10363  | 0.93862  |
| D42 | -3.08347 | -0.00234 | 0.00382  | 0.00000 | 0.00383  | -3.07964 |
| D43 | -0.02831 | 0.00043  | 0.01720  | 0.00000 | 0.01720  | -0.01110 |
| D44 | -0.04279 | 0.00018  | 0.01377  | 0.00000 | 0.01377  | -0.02902 |
| D45 | 3.01237  | 0.00295  | 0.02715  | 0.00000 | 0.02715  | 3.03952  |
| D46 | -2.74806 | 0.00072  | -0.00029 | 0.00000 | -0.00012 | -2.74819 |
| D47 | -0.05570 | 0.00087  | 0.00371  | 0.00000 | 0.00389  | -0.05181 |
| D48 | 0.01749  | -0.00151 | -0.00497 | 0.00000 | -0.00480 | 0.01270  |
| D49 | 2.70986  | -0.00136 | -0.00098 | 0.00000 | -0.00078 | 2.70908  |
| D50 | 0.69114  | -0.00146 | -0.00172 | 0.00000 | -0.00268 | 0.68846  |
| D51 | -1.66624 | -0.00198 | -0.00188 | 0.00000 | -0.00289 | -1.66913 |
| D52 | 2.63549  | 0.00018  | -0.13635 | 0.00000 | -0.13656 | 2.49893  |
| D53 | 0.25343  | -0.00011 | -0.13654 | 0.00000 | -0.13682 | 0.11661  |
| D54 | 2.55639  | -0.00009 | -0.00306 | 0.00000 | -0.00303 | 2.55335  |
| D55 | -1.64590 | -0.00014 | -0.00276 | 0.00000 | -0.00273 | -1.64864 |
| D56 | 0.45246  | -0.00011 | -0.00447 | 0.00000 | -0.00445 | 0.44801  |

|     |          |          |          |         |          |          |
|-----|----------|----------|----------|---------|----------|----------|
| D57 | 1.32825  | 0.00019  | 0.00055  | 0.00000 | 0.00052  | 1.32876  |
| D58 | -2.87404 | 0.00014  | 0.00085  | 0.00000 | 0.00082  | -2.87323 |
| D59 | -0.77568 | 0.00018  | -0.00086 | 0.00000 | -0.00089 | -0.77657 |
| D60 | -1.02784 | 0.00008  | 0.00094  | 0.00000 | 0.00095  | -1.02689 |
| D61 | 1.05305  | 0.00003  | 0.00124  | 0.00000 | 0.00125  | 1.05431  |
| D62 | -3.13177 | 0.00007  | -0.00047 | 0.00000 | -0.00046 | -3.13223 |
| D63 | 0.92820  | 0.00097  | 0.20462  | 0.00000 | 0.20507  | 1.13327  |
| D64 | 2.38972  | 0.00024  | 0.32879  | 0.00000 | 0.32834  | 2.71806  |
| D65 | 2.69053  | -0.00157 | -0.02266 | 0.00000 | -0.02267 | 2.66786  |
| D66 | -0.48758 | 0.00181  | -0.02160 | 0.00000 | -0.02160 | -0.50918 |
| D67 | -1.46257 | -0.00094 | -0.03157 | 0.00000 | -0.03157 | -1.49415 |
| D68 | 1.64251  | 0.00244  | -0.03050 | 0.00000 | -0.03051 | 1.61200  |
| D69 | 0.51323  | -0.00046 | -0.02366 | 0.00000 | -0.02364 | 0.48959  |
| D70 | -2.66487 | 0.00292  | -0.02259 | 0.00000 | -0.02258 | -2.68745 |
| D71 | 3.11272  | -0.00534 | -0.06673 | 0.00000 | -0.06673 | 3.04598  |
| D72 | -0.06820 | -0.00136 | -0.06496 | 0.00000 | -0.06496 | -0.13316 |
| D73 | -2.02366 | 0.00163  | 0.13366  | 0.00000 | 0.13366  | -1.89000 |

| Item                 | Value    | Threshold | Converged? |
|----------------------|----------|-----------|------------|
| Maximum Force        | 0.013099 | 0.000450  | NO         |
| RMS Force            | 0.002832 | 0.000300  | NO         |
| Maximum Displacement | 1.215083 | 0.001800  | NO         |
| RMS Displacement     | 0.305417 | 0.001200  | NO         |

Predicted change in Energy=-3.089498D-03

GradGradGradGradGradGradGradGradGradGradGradGradGradGradGradGradGradGrad

Input orientation:

| Center<br>Number | Atomic<br>Number | Atomic<br>Type | Coordinates (Angstroms) |           |           |
|------------------|------------------|----------------|-------------------------|-----------|-----------|
|                  |                  |                | X                       | Y         | Z         |
| 1                | 6                | 0              | -1.123489               | 1.658840  | 1.649957  |
| 2                | 6                | 0              | -1.864536               | 0.521191  | 1.715255  |
| 3                | 7                | 0              | -2.681897               | 0.512250  | 0.595792  |
| 4                | 6                | 0              | -2.406193               | 1.601487  | -0.145882 |
| 5                | 7                | 0              | -1.455299               | 2.306943  | 0.473811  |
| 6                | 6                | 0              | -0.838031               | 3.545261  | -0.023002 |
| 7                | 1                | 0              | -0.347629               | 2.029705  | 2.294616  |
| 8                | 1                | 0              | -1.873269               | -0.274363 | 2.441098  |
| 9                | 1                | 0              | -1.626347               | 4.216468  | -0.372893 |
| 10               | 1                | 0              | -0.356727               | 4.010371  | 0.835416  |
| 11               | 35               | 0              | -0.310981               | -2.293507 | 1.732636  |
| 12               | 1                | 0              | -2.872885               | 1.851397  | -1.082194 |
| 13               | 6                | 0              | -3.594010               | -0.503709 | 0.197916  |
| 14               | 6                | 0              | -3.685342               | -1.695692 | 0.771104  |

|    |   |   |           |           |           |
|----|---|---|-----------|-----------|-----------|
| 15 | 1 | 0 | -4.158365 | -0.231786 | -0.683664 |
| 16 | 1 | 0 | -4.370679 | -2.423784 | 0.360830  |
| 17 | 1 | 0 | -3.062841 | -2.012036 | 1.594778  |
| 18 | 6 | 0 | 2.970610  | -0.704546 | 0.951316  |
| 19 | 6 | 0 | 4.342384  | -0.332636 | 1.316146  |
| 20 | 8 | 0 | 3.306630  | 0.673673  | 1.306099  |
| 21 | 1 | 0 | 2.738904  | -0.826940 | -0.103681 |
| 22 | 1 | 0 | 2.287366  | -1.188297 | 1.644814  |
| 23 | 1 | 0 | 4.671615  | -0.571448 | 2.325367  |
| 24 | 6 | 0 | 5.436160  | -0.183073 | 0.291880  |
| 25 | 1 | 0 | 6.136053  | 0.605959  | 0.583636  |
| 26 | 1 | 0 | 5.999676  | -1.117175 | 0.205082  |
| 27 | 1 | 0 | 5.019234  | 0.064661  | -0.686776 |
| 28 | 6 | 0 | 0.157947  | 3.272081  | -1.143153 |
| 29 | 1 | 0 | 0.484355  | 4.239579  | -1.545204 |
| 30 | 1 | 0 | -0.314760 | 2.741323  | -1.977317 |
| 31 | 6 | 0 | 1.393564  | 2.470768  | -0.767023 |
| 32 | 8 | 0 | 1.964637  | 1.804094  | -1.588852 |
| 33 | 8 | 0 | 1.768361  | 2.627731  | 0.504976  |
| 34 | 1 | 0 | 2.528858  | 1.996922  | 0.681106  |

-----  
Distance matrix (angstroms):

|    |    | 1        | 2        | 3        | 4        | 5        |
|----|----|----------|----------|----------|----------|----------|
| 1  | C  | 0.000000 |          |          |          |          |
| 2  | C  | 1.359286 | 0.000000 |          |          |          |
| 3  | N  | 2.203308 | 1.386130 | 0.000000 |          |          |
| 4  | C  | 2.207635 | 2.219068 | 1.346302 | 0.000000 |          |
| 5  | N  | 1.383276 | 2.213045 | 2.177233 | 1.336371 | 0.000000 |
| 6  | C  | 2.537491 | 3.635966 | 3.603041 | 2.500497 | 1.470127 |
| 7  | H  | 1.074749 | 2.216366 | 3.261515 | 3.221348 | 2.149214 |
| 8  | H  | 2.219312 | 1.076954 | 2.162821 | 3.239643 | 3.272316 |
| 9  | H  | 3.299432 | 4.251137 | 3.971621 | 2.738215 | 2.095818 |
| 10 | H  | 2.604055 | 3.901536 | 4.207218 | 3.311492 | 2.058952 |
| 11 | Br | 4.035845 | 3.215020 | 3.845247 | 4.805176 | 4.904920 |
| 12 | H  | 3.249940 | 3.257597 | 2.155326 | 1.075610 | 2.153654 |
| 13 | C  | 3.590058 | 2.518694 | 1.422121 | 2.441507 | 3.542594 |
| 14 | C  | 4.311421 | 3.020153 | 2.431592 | 3.653556 | 4.591575 |
| 15 | H  | 4.269745 | 3.403445 | 2.090587 | 2.592336 | 3.884773 |
| 16 | H  | 5.373445 | 4.097329 | 3.395216 | 4.507635 | 5.558056 |
| 17 | H  | 4.152043 | 2.804940 | 2.741370 | 4.064312 | 4.742820 |
| 18 | C  | 4.778634 | 5.046253 | 5.792911 | 5.952448 | 5.374546 |
| 19 | C  | 5.826935 | 6.278069 | 7.111488 | 7.170889 | 6.425731 |
| 20 | O  | 4.551346 | 5.189568 | 6.032665 | 5.967029 | 5.102572 |
| 21 | H  | 4.916547 | 5.130072 | 5.627413 | 5.689557 | 5.267452 |

|    |    |          |          |          |          |          |
|----|----|----------|----------|----------|----------|----------|
| 22 | H  | 4.442988 | 4.490612 | 5.355920 | 5.746214 | 5.253140 |
| 23 | H  | 6.246087 | 6.654875 | 7.631512 | 7.805389 | 7.018011 |
| 24 | C  | 6.947375 | 7.471421 | 8.153446 | 8.054737 | 7.329766 |
| 25 | H  | 7.412595 | 8.080666 | 8.818457 | 8.630947 | 7.780362 |
| 26 | H  | 7.780322 | 8.173780 | 8.841798 | 8.841546 | 8.208133 |
| 27 | H  | 6.762749 | 7.305097 | 7.820021 | 7.602063 | 6.949414 |
| 28 | C  | 3.470748 | 4.452901 | 4.324964 | 3.218734 | 2.479643 |
| 29 | H  | 4.410718 | 5.474878 | 5.338726 | 4.156067 | 3.402023 |
| 30 | H  | 3.870779 | 4.578851 | 4.146444 | 3.004575 | 2.738164 |
| 31 | C  | 3.582817 | 4.536272 | 4.722546 | 3.947102 | 3.111676 |
| 32 | O  | 4.477444 | 5.217808 | 5.294507 | 4.607316 | 4.025344 |
| 33 | O  | 3.257688 | 4.370380 | 4.928317 | 4.347838 | 3.239731 |
| 34 | H  | 3.793760 | 4.748595 | 5.418810 | 5.019463 | 4.001573 |
|    |    | 6        | 7        | 8        | 9        | 10       |
| 6  | C  | 0.000000 |          |          |          |          |
| 7  | H  | 2.812251 | 0.000000 |          |          |          |
| 8  | H  | 4.661870 | 2.767266 | 0.000000 |          |          |
| 9  | H  | 1.092880 | 3.678676 | 5.305382 | 0.000000 |          |
| 10 | H  | 1.088514 | 2.460160 | 4.820483 | 1.764772 | 0.000000 |
| 11 | Br | 6.119743 | 4.359739 | 2.649453 | 6.967296 | 6.367572 |
| 12 | H  | 2.851612 | 4.220374 | 4.234581 | 2.765959 | 3.830071 |
| 13 | C  | 4.902895 | 4.620966 | 2.836445 | 5.145639 | 5.591362 |
| 14 | C  | 6.017089 | 5.228766 | 2.844761 | 6.364104 | 6.606282 |
| 15 | H  | 5.072196 | 5.339119 | 3.871384 | 5.127831 | 5.895418 |
| 16 | H  | 6.946685 | 6.305397 | 3.896741 | 7.222373 | 7.598382 |
| 17 | H  | 6.200850 | 4.919128 | 2.269548 | 6.688012 | 6.645982 |
| 18 | C  | 5.789292 | 4.504586 | 5.086027 | 6.863084 | 5.771919 |
| 19 | C  | 6.608184 | 5.341749 | 6.316902 | 7.692396 | 6.416732 |
| 20 | O  | 5.214474 | 4.021144 | 5.386868 | 6.301165 | 4.977477 |
| 21 | H  | 5.649523 | 4.841378 | 5.296544 | 6.675617 | 5.819314 |
| 22 | H  | 5.912384 | 4.209629 | 4.333615 | 6.971354 | 5.888336 |
| 23 | H  | 7.267623 | 5.653297 | 6.552645 | 8.358773 | 6.963997 |
| 24 | C  | 7.305142 | 6.508422 | 7.619397 | 8.347269 | 7.172025 |
| 25 | H  | 7.592454 | 6.855118 | 8.268880 | 8.614267 | 7.335503 |
| 26 | H  | 8.279165 | 7.386291 | 8.227597 | 9.324057 | 8.191026 |
| 27 | H  | 6.845635 | 6.446186 | 7.576616 | 7.842179 | 6.840077 |
| 28 | C  | 1.523594 | 3.690171 | 5.435987 | 2.160758 | 2.173637 |
| 29 | H  | 2.132576 | 4.507766 | 6.467199 | 2.414521 | 2.535213 |
| 30 | H  | 2.177033 | 4.330923 | 5.571867 | 2.543716 | 3.086050 |
| 31 | C  | 2.586139 | 3.549637 | 5.338537 | 3.510366 | 2.828728 |
| 32 | O  | 3.652190 | 4.525350 | 5.940538 | 4.493693 | 4.016648 |
| 33 | O  | 2.813166 | 2.835112 | 5.043033 | 3.849518 | 2.556732 |
| 34 | H  | 3.772143 | 3.298283 | 5.256903 | 4.827321 | 3.521986 |
|    |    | 11       | 12       | 13       | 14       | 15       |



|    |    |           |          |          |           |           |
|----|----|-----------|----------|----------|-----------|-----------|
| 11 | Br | 0.000000  |          |          |           |           |
| 12 | H  | 5.627330  | 0.000000 |          |           |           |
| 13 | C  | 4.041908  | 2.775829 | 0.000000 |           |           |
| 14 | C  | 3.559247  | 4.083704 | 1.325786 | 0.000000  |           |
| 15 | H  | 4.989144  | 2.480108 | 1.081490 | 2.117338  | 0.000000  |
| 16 | H  | 4.287187  | 4.754249 | 2.077605 | 1.080801  | 2.437397  |
| 17 | H  | 2.769651  | 4.704081 | 2.123302 | 1.079824  | 3.092048  |
| 18 | C  | 3.728820  | 6.694359 | 6.610763 | 6.731756  | 7.329320  |
| 19 | C  | 5.066782  | 7.910887 | 8.016611 | 8.160844  | 8.733392  |
| 20 | O  | 4.698213  | 6.728847 | 7.087534 | 7.401877  | 7.778506  |
| 21 | H  | 3.850283  | 6.294692 | 6.348326 | 6.541476  | 6.947150  |
| 22 | H  | 2.824997  | 6.580615 | 6.095306 | 6.057562  | 6.919838  |
| 23 | H  | 5.305005  | 8.625610 | 8.535292 | 8.574287  | 9.334784  |
| 24 | C  | 6.289621  | 8.664143 | 9.036350 | 9.258481  | 9.644115  |
| 25 | H  | 7.161799  | 9.245922 | 9.800729 | 10.089230 | 10.405907 |
| 26 | H  | 6.598604  | 9.444143 | 9.613283 | 9.718778  | 10.235212 |
| 27 | H  | 6.310760  | 8.101501 | 8.677194 | 8.999661  | 9.182385  |
| 28 | C  | 6.282183  | 3.347835 | 5.489284 | 6.566126  | 5.578419  |
| 29 | H  | 7.352415  | 4.145944 | 6.493867 | 7.614400  | 6.503091  |
| 30 | H  | 6.254061  | 2.852581 | 5.100525 | 6.213030  | 5.028540  |
| 31 | C  | 5.643765  | 4.322677 | 5.886809 | 6.746889  | 6.175326  |
| 32 | O  | 5.744654  | 4.864212 | 6.278300 | 7.052670  | 6.515774  |
| 33 | O  | 5.481733  | 4.966183 | 6.217333 | 6.964603  | 6.686986  |
| 34 | H  | 5.251493  | 5.684121 | 6.631452 | 7.229093  | 7.179741  |
|    |    | 16        | 17       | 18       | 19        | 20        |
| 16 | H  | 0.000000  |          |          |           |           |
| 17 | H  | 1.844615  | 0.000000 |          |           |           |
| 18 | C  | 7.563001  | 6.206940 | 0.000000 |           |           |
| 19 | C  | 9.011271  | 7.598380 | 1.467373 | 0.000000  |           |
| 20 | O  | 8.332398  | 6.918565 | 1.462282 | 1.444141  | 0.000000  |
| 21 | H  | 7.301497  | 6.160313 | 1.087054 | 2.198043  | 2.135798  |
| 22 | H  | 6.892359  | 5.413480 | 1.087096 | 2.250173  | 2.149549  |
| 23 | H  | 9.436824  | 7.901321 | 2.190697 | 1.088096  | 2.110076  |
| 24 | C  | 10.059803 | 8.790658 | 2.604943 | 1.505933  | 2.509492  |
| 25 | H  | 10.937112 | 9.617483 | 3.445671 | 2.152854  | 2.920988  |
| 26 | H  | 10.453505 | 9.212017 | 3.146803 | 2.143964  | 3.416412  |
| 27 | H  | 9.770379  | 8.650901 | 2.733474 | 2.151201  | 2.697305  |
| 28 | C  | 7.430565  | 6.766951 | 5.302021 | 6.045795  | 4.760752  |
| 29 | H  | 8.461958  | 7.843773 | 6.071116 | 6.631505  | 5.367574  |
| 30 | H  | 6.971065  | 6.550285 | 5.589684 | 6.479592  | 5.307586  |
| 31 | C  | 7.645600  | 6.747828 | 3.939846 | 4.571018  | 3.344728  |
| 32 | O  | 7.862089  | 7.069220 | 3.709138 | 4.319526  | 3.385193  |
| 33 | O  | 7.951504  | 6.786429 | 3.570531 | 4.005916  | 2.612741  |
| 34 | H  | 8.200539  | 6.940724 | 2.750652 | 3.019767  | 1.657267  |

|    |   |          |          |          |          |          |
|----|---|----------|----------|----------|----------|----------|
|    |   | 21       | 22       | 23       | 24       | 25       |
| 21 | H | 0.000000 |          |          |          |          |
| 22 | H | 1.841657 | 0.000000 |          |          |          |
| 23 | H | 3.114631 | 2.555054 | 0.000000 |          |          |
| 24 | C | 2.801111 | 3.571528 | 2.206906 | 0.000000 |          |
| 25 | H | 3.750497 | 4.376969 | 2.562127 | 1.094323 | 0.000000 |
| 26 | H | 3.288192 | 3.982353 | 2.560697 | 1.094363 | 1.769489 |
| 27 | H | 2.516914 | 3.803856 | 3.098141 | 1.092231 | 1.776017 |
| 28 | C | 4.954171 | 5.674694 | 6.868519 | 6.469694 | 6.769620 |
| 29 | H | 5.729799 | 6.548962 | 7.460594 | 6.888766 | 7.048181 |
| 30 | H | 5.056469 | 5.944141 | 7.372347 | 6.839184 | 7.261629 |
| 31 | C | 3.622822 | 4.472650 | 5.437240 | 4.950427 | 5.271907 |
| 32 | O | 3.118903 | 4.417596 | 5.319027 | 4.420120 | 4.853447 |
| 33 | O | 3.639667 | 4.016300 | 4.688013 | 4.625881 | 4.813573 |
| 34 | H | 2.938402 | 3.336566 | 3.727134 | 3.654624 | 3.867316 |
|    |   | 26       | 27       | 28       | 29       | 30       |
| 26 | H | 0.000000 |          |          |          |          |
| 27 | H | 1.775785 | 0.000000 |          |          |          |
| 28 | C | 7.430282 | 5.841911 | 0.000000 |          |          |
| 29 | H | 7.885244 | 6.223501 | 1.097378 | 0.000000 |          |
| 30 | H | 7.715114 | 6.105859 | 1.095894 | 1.752163 | 0.000000 |
| 31 | C | 5.919003 | 4.352157 | 1.519975 | 2.135631 | 2.111015 |
| 32 | O | 5.294672 | 3.629040 | 2.370181 | 2.850391 | 2.494986 |
| 33 | O | 5.658470 | 4.307874 | 2.392687 | 2.906882 | 3.242542 |
| 34 | H | 4.687299 | 3.436089 | 3.251949 | 3.763770 | 3.963271 |
|    |   | 31       | 32       | 33       | 34       |          |
| 31 | C | 0.000000 |          |          |          |          |
| 32 | O | 1.202490 | 0.000000 |          |          |          |
| 33 | O | 1.335325 | 2.258544 | 0.000000 |          |          |
| 34 | H | 1.900132 | 2.346964 | 1.003642 | 0.000000 |          |

Stoichiometry C<sub>11</sub>H<sub>17</sub>BrN<sub>2</sub>O<sub>3</sub>

Framework group C<sub>1</sub>[X(C<sub>11</sub>H<sub>17</sub>BrN<sub>2</sub>O<sub>3</sub>)]

Deg. of freedom 96

Full point group C<sub>1</sub> NOp 1

Largest Abelian subgroup C<sub>1</sub> NOP 1

Largest concise Abelian subgroup C<sub>1</sub> NOp 1

Standard orientation:

| Center Number | Atomic Number | Atomic Type | Coordinates (Angstroms) |          |           |
|---------------|---------------|-------------|-------------------------|----------|-----------|
|               |               |             | X                       | Y        | Z         |
| 1             | 6             | 0           | -1.151831               | 1.096654 | 1.398719  |
| 2             | 6             | 0           | -2.077533               | 0.172490 | 1.029050  |
| 3             | 7             | 0           | -2.801479               | 0.727741 | -0.014480 |

|    |    |   |           |           |           |
|----|----|---|-----------|-----------|-----------|
| 4  | 6  | 0 | -2.292446 | 1.942955  | -0.291377 |
| 5  | 7  | 0 | -1.283190 | 2.182054  | 0.551309  |
| 6  | 6  | 0 | -0.430901 | 3.379897  | 0.558526  |
| 7  | 1  | 0 | -0.373067 | 1.053926  | 2.138169  |
| 8  | 1  | 0 | -2.273293 | -0.818458 | 1.402588  |
| 9  | 1  | 0 | -1.066808 | 4.265582  | 0.483888  |
| 10 | 1  | 0 | 0.058838  | 3.398398  | 1.530471  |
| 11 | 35 | 0 | -1.028304 | -2.684256 | -0.007519 |
| 12 | 1  | 0 | -2.641140 | 2.601931  | -1.066683 |
| 13 | 6  | 0 | -3.841226 | 0.116790  | -0.768199 |
| 14 | 6  | 0 | -4.174247 | -1.163817 | -0.685418 |
| 15 | 1  | 0 | -4.286144 | 0.793608  | -1.484849 |
| 16 | 1  | 0 | -4.941463 | -1.549670 | -1.341640 |
| 17 | 1  | 0 | -3.675509 | -1.870447 | -0.038925 |
| 18 | 6  | 0 | 2.522708  | -1.552409 | -0.122981 |
| 19 | 6  | 0 | 3.907615  | -1.600646 | 0.359604  |
| 20 | 8  | 0 | 3.060654  | -0.489480 | 0.724995  |
| 21 | 1  | 0 | 2.350538  | -1.232099 | -1.147406 |
| 22 | 1  | 0 | 1.719091  | -2.123199 | 0.335469  |
| 23 | 1  | 0 | 4.117803  | -2.251106 | 1.206172  |
| 24 | 6  | 0 | 5.082091  | -1.287874 | -0.529560 |
| 25 | 1  | 0 | 5.882502  | -0.805460 | 0.039793  |
| 26 | 1  | 0 | 5.484113  | -2.210609 | -0.959175 |
| 27 | 1  | 0 | 4.785006  | -0.624421 | -1.344752 |
| 28 | 6  | 0 | 0.582815  | 3.360893  | -0.578732 |
| 29 | 1  | 0 | 1.096513  | 4.330580  | -0.586501 |
| 30 | 1  | 0 | 0.088658  | 3.272054  | -1.552848 |
| 31 | 6  | 0 | 1.634452  | 2.264663  | -0.527146 |
| 32 | 8  | 0 | 2.142334  | 1.855322  | -1.537333 |
| 33 | 8  | 0 | 1.937427  | 1.869461  | 0.711852  |
| 34 | 1  | 0 | 2.565395  | 1.089800  | 0.640563  |

-----  
Rotational constants (GHZ): 0.3413111 0.2567545 0.1602731

Standard basis: 6-311++G(d,p) (5D, 7F)

There are 538 symmetry adapted cartesian basis functions of A symmetry.

There are 519 symmetry adapted basis functions of A symmetry.

519 basis functions, 823 primitive gaussians, 538 cartesian basis functions

78 alpha electrons 78 beta electrons

nuclear repulsion energy 1577.1475450522 Hartrees.

NAtoms= 34 NActive= 34 NUniq= 34 SFac= 1.00D+00 NAtFMM= 60 NAOKFM=F

Big=F

Integral buffers will be 131072 words long.

Raffenetti 2 integral format.

Two-electron integral symmetry is turned on.

One-electron integrals computed using PRISM.

NBasis= 519 RedAO= T EigKep= 3.20D-06 NBF= 519

NBsUse= 519 1.00D-06 EigRej= -1.00D+00 NBFU= 519

Lowest energy guess from the checkpoint file: "/.coohpo.chk"

B after Tr= 0.000000 0.000000 0.000000

Rot= 0.999850 0.001201 -0.000261 0.017295 Ang= 1.99 deg.

B after Tr= 0.000000 0.000000 0.000000

Rot= 0.999458 0.003006 -0.000388 -0.032769 Ang= 3.77 deg.

Requested convergence on RMS density matrix=1.00D-08 within 128 cycles.

Requested convergence on MAX density matrix=1.00D-06.

Requested convergence on energy=1.00D-06.

No special actions if energy rises.

SCF Done: E(RB3LYP) = -3338.89812759 A.U. after 14 cycles

NFock= 14 Conv=0.18D-08 -V/T= 2.0018

Calling FoFJK, ICntrl= 2127 FMM=F ISym2X=0 l1Cent= 0 IOpClX= 0 NMat=1 NMatS=1

NMatT=0.

\*\*\*\*\* Axes restored to original set \*\*\*\*\*

```
-----
```

| Center | Atomic | Forces (Hartrees/Bohr) |              |              |
|--------|--------|------------------------|--------------|--------------|
| Number | Number | X                      | Y            | Z            |
| 1      | 6      | 0.002932562            | -0.000136093 | -0.001110115 |
| 2      | 6      | -0.005525516           | 0.000566346  | 0.003156468  |
| 3      | 7      | 0.002118043            | 0.000615449  | -0.000466770 |
| 4      | 6      | 0.000391564            | -0.002311688 | 0.001004053  |
| 5      | 7      | -0.003591076           | 0.001112852  | 0.002758407  |
| 6      | 6      | -0.000641418           | 0.000462399  | 0.000603332  |
| 7      | 1      | 0.000364687            | -0.000396441 | 0.000161569  |
| 8      | 1      | 0.002085095            | -0.000159830 | -0.001409588 |
| 9      | 1      | -0.000725536           | -0.001467000 | 0.000774870  |
| 10     | 1      | 0.000935734            | 0.000691811  | -0.000937793 |
| 11     | 35     | -0.000189006           | -0.000647105 | 0.001253042  |
| 12     | 1      | 0.000054445            | 0.000014131  | -0.000285997 |
| 13     | 6      | -0.001062473           | -0.001686608 | -0.003963796 |
| 14     | 6      | -0.000724480           | 0.000367965  | 0.000770536  |
| 15     | 1      | -0.001254770           | 0.001156037  | -0.000049682 |
| 16     | 1      | -0.001509116           | 0.000292923  | -0.000697862 |
| 17     | 1      | 0.003168925            | -0.000533457 | 0.001653016  |
| 18     | 6      | -0.001234648           | 0.002480097  | -0.000638196 |
| 19     | 6      | 0.001458708            | -0.000523214 | -0.001353147 |
| 20     | 8      | 0.000228285            | -0.000283579 | 0.002332912  |
| 21     | 1      | -0.000517946           | -0.000701988 | 0.000999952  |
| 22     | 1      | 0.001655722            | -0.000952261 | -0.001408545 |
| 23     | 1      | -0.000220071           | 0.000186394  | 0.000280285  |

```
-----
```

|    |   |              |              |              |
|----|---|--------------|--------------|--------------|
| 24 | 6 | -0.000271266 | 0.000270387  | 0.000220702  |
| 25 | 1 | -0.000153491 | -0.000187579 | -0.000003436 |
| 26 | 1 | -0.000204225 | -0.000055956 | 0.000182115  |
| 27 | 1 | 0.000053650  | -0.000027126 | 0.000224937  |
| 28 | 6 | -0.002461589 | 0.003095190  | -0.003125390 |
| 29 | 1 | 0.001739640  | -0.001366980 | 0.000965025  |
| 30 | 1 | 0.000606412  | 0.001752602  | 0.002032726  |
| 31 | 6 | -0.002854411 | 0.006685200  | -0.000597463 |
| 32 | 8 | 0.005731917  | -0.005933920 | -0.002111089 |
| 33 | 8 | 0.003689091  | -0.004237336 | -0.004560907 |
| 34 | 1 | -0.004073444 | 0.001858379  | 0.003345831  |

-----  
Cartesian Forces: Max 0.006685200 RMS 0.002012243

GradGradGradGradGradGradGradGradGradGradGradGradGradGradGradGradGradGradGrad  
Berny optimization.

Using GEDIIS/GDIIS optimizer.

FormGI is forming the generalized inverse of G from B-inverse, IUseBI=4.

GSVD: received Info= 1 from GESDD.

Internal Forces: Max 0.007449199 RMS 0.001755183

Search for a local minimum.

Step number 12 out of a maximum of 175

All quantities printed in internal units (Hartrees-Bohrs-Radians)

Mixed Optimization -- RFO/linear search

Update second derivatives using D2CorX and points 10 12

ITU= 0 -1 1 1 1 0 1 0 -1 0 1 0

Use linear search instead of GDIIS.

|                 |         |         |         |         |         |
|-----------------|---------|---------|---------|---------|---------|
| Eigenvalues --- | 0.00098 | 0.00317 | 0.00330 | 0.00568 | 0.00698 |
| Eigenvalues --- | 0.00897 | 0.01083 | 0.01493 | 0.01625 | 0.01753 |
| Eigenvalues --- | 0.01812 | 0.01914 | 0.02209 | 0.02277 | 0.02315 |
| Eigenvalues --- | 0.02426 | 0.02468 | 0.02764 | 0.02938 | 0.03004 |
| Eigenvalues --- | 0.03078 | 0.03158 | 0.03391 | 0.03749 | 0.04107 |
| Eigenvalues --- | 0.04339 | 0.04584 | 0.05188 | 0.05270 | 0.05776 |
| Eigenvalues --- | 0.05878 | 0.06971 | 0.07853 | 0.09482 | 0.09859 |
| Eigenvalues --- | 0.11920 | 0.12640 | 0.12756 | 0.13316 | 0.14220 |
| Eigenvalues --- | 0.15341 | 0.15811 | 0.15939 | 0.15967 | 0.15997 |
| Eigenvalues --- | 0.16000 | 0.16000 | 0.16004 | 0.16070 | 0.16450 |
| Eigenvalues --- | 0.16835 | 0.18163 | 0.19409 | 0.21731 | 0.22389 |
| Eigenvalues --- | 0.22533 | 0.23027 | 0.23801 | 0.24953 | 0.25546 |
| Eigenvalues --- | 0.26336 | 0.28202 | 0.28895 | 0.29983 | 0.31125 |
| Eigenvalues --- | 0.31914 | 0.32307 | 0.34497 | 0.34536 | 0.34612 |
| Eigenvalues --- | 0.34765 | 0.34884 | 0.34942 | 0.34959 | 0.35079 |
| Eigenvalues --- | 0.35113 | 0.35695 | 0.35739 | 0.35969 | 0.36538 |
| Eigenvalues --- | 0.36878 | 0.36996 | 0.37083 | 0.37703 | 0.38262 |

Eigenvalues --- 0.41288 0.42300 0.45781 0.48994 0.51872  
 Eigenvalues --- 0.52985 0.55515 0.56117 0.60378 0.89825  
 Eigenvalues --- 1.00689

RFO step: Lambda=-3.53014033D-03 EMin= 9.81726714D-04

Quartic linear search produced a step of 0.01620.

Iteration 1 RMS(Cart)= 0.17941599 RMS(Int)= 0.01081425  
 Iteration 2 RMS(Cart)= 0.01521072 RMS(Int)= 0.00018434  
 Iteration 3 RMS(Cart)= 0.00012120 RMS(Int)= 0.00017311  
 Iteration 4 RMS(Cart)= 0.00000002 RMS(Int)= 0.00017311

| Variable | Old X   | -DE/DX   | Delta X<br>(Linear) | Delta X<br>(Quad) | Delta X<br>(Total) | New X   |
|----------|---------|----------|---------------------|-------------------|--------------------|---------|
| R1       | 2.56868 | 0.00214  | -0.00004            | 0.00164           | 0.00158            | 2.57026 |
| R2       | 2.61401 | 0.00082  | -0.00009            | -0.00154          | -0.00155           | 2.61247 |
| R3       | 2.03098 | 0.00022  | 0.00000             | 0.00026           | 0.00026            | 2.03124 |
| R4       | 2.61941 | 0.00103  | 0.00005             | 0.00574           | 0.00571            | 2.62511 |
| R5       | 2.03515 | 0.00047  | 0.00004             | 0.00208           | 0.00212            | 2.03727 |
| R6       | 2.54414 | -0.00097 | 0.00007             | -0.00042          | -0.00039           | 2.54376 |
| R7       | 2.68742 | 0.00183  | -0.00003            | 0.00186           | 0.00183            | 2.68925 |
| R8       | 2.52538 | 0.00072  | 0.00001             | 0.00102           | 0.00110            | 2.52647 |
| R9       | 2.03261 | 0.00023  | 0.00000             | 0.00203           | 0.00202            | 2.03463 |
| R10      | 2.77814 | 0.00357  | -0.00008            | 0.00416           | 0.00408            | 2.78222 |
| R11      | 2.06524 | -0.00063 | 0.00001             | -0.00221          | -0.00220           | 2.06305 |
| R12      | 2.05699 | -0.00002 | 0.00004             | 0.00301           | 0.00305            | 2.06004 |
| R13      | 2.87918 | 0.00406  | -0.00017            | -0.00065          | -0.00082           | 2.87835 |
| R14      | 5.00674 | 0.00005  | -0.00246            | -0.11102          | -0.11348           | 4.89326 |
| R15      | 2.50537 | 0.00056  | 0.00005             | 0.00328           | 0.00333            | 2.50870 |
| R16      | 2.04372 | 0.00099  | 0.00001             | 0.00344           | 0.00345            | 2.04717 |
| R17      | 2.04242 | 0.00103  | -0.00001            | 0.00166           | 0.00165            | 2.04407 |
| R18      | 2.04057 | 0.00324  | -0.00003            | 0.00502           | 0.00499            | 2.04556 |
| R19      | 2.77293 | 0.00044  | -0.00004            | -0.00209          | -0.00255           | 2.77039 |
| R20      | 2.76331 | -0.00014 | 0.00015             | 0.00488           | 0.00521            | 2.76852 |
| R21      | 2.05423 | -0.00078 | 0.00003             | 0.00111           | 0.00114            | 2.05537 |
| R22      | 2.05431 | -0.00152 | 0.00002             | -0.00043          | -0.00041           | 2.05390 |
| R23      | 2.72903 | -0.00011 | -0.00002            | -0.00054          | -0.00033           | 2.72870 |
| R24      | 2.05620 | 0.00015  | -0.00001            | -0.00018          | -0.00019           | 2.05601 |
| R25      | 2.84580 | -0.00083 | 0.00003             | -0.00060          | -0.00057           | 2.84523 |
| R26      | 3.13178 | 0.00051  | -0.00146            | -0.05058          | -0.05204           | 3.07974 |
| R27      | 2.06797 | -0.00023 | 0.00000             | -0.00079          | -0.00079           | 2.06718 |
| R28      | 2.06805 | -0.00007 | 0.00000             | -0.00044          | -0.00044           | 2.06760 |
| R29      | 2.06402 | -0.00022 | 0.00000             | -0.00060          | -0.00060           | 2.06342 |
| R30      | 2.07374 | -0.00104 | 0.00001             | -0.00527          | -0.00526           | 2.06849 |
| R31      | 2.07094 | -0.00266 | 0.00009             | -0.00512          | -0.00503           | 2.06591 |
| R32      | 2.87234 | 0.00265  | 0.00000             | 0.01444           | 0.01444            | 2.88678 |
| R33      | 2.27238 | 0.00745  | 0.00003             | 0.01045           | 0.01048            | 2.28286 |

|     |         |          |          |          |          |         |
|-----|---------|----------|----------|----------|----------|---------|
| R34 | 2.52340 | -0.00053 | -0.00026 | -0.01132 | -0.01158 | 2.51182 |
| R35 | 1.89661 | -0.00305 | 0.00024  | -0.00374 | -0.00350 | 1.89311 |
| A1  | 1.87780 | 0.00009  | 0.00006  | 0.00214  | 0.00171  | 1.87951 |
| A2  | 2.28306 | -0.00036 | 0.00003  | 0.00071  | 0.00044  | 2.28350 |
| A3  | 2.11940 | 0.00036  | -0.00005 | 0.00067  | 0.00033  | 2.11973 |
| A4  | 1.86301 | -0.00047 | -0.00003 | -0.00188 | -0.00219 | 1.86082 |
| A5  | 2.28505 | -0.00112 | 0.00006  | -0.00252 | -0.00232 | 2.28273 |
| A6  | 2.13503 | 0.00159  | -0.00002 | 0.00443  | 0.00454  | 2.13957 |
| A7  | 1.89541 | -0.00005 | 0.00001  | 0.00069  | 0.00029  | 1.89570 |
| A8  | 2.22529 | 0.00079  | 0.00007  | 0.00778  | 0.00789  | 2.23318 |
| A9  | 2.15941 | -0.00068 | -0.00008 | -0.00643 | -0.00648 | 2.15292 |
| A10 | 1.89373 | 0.00126  | -0.00005 | 0.00017  | -0.00004 | 1.89369 |
| A11 | 2.18790 | -0.00056 | 0.00002  | 0.00005  | 0.00014  | 2.18804 |
| A12 | 2.20153 | -0.00069 | 0.00003  | -0.00027 | -0.00017 | 2.20136 |
| A13 | 1.89402 | -0.00078 | 0.00003  | 0.00089  | 0.00084  | 1.89486 |
| A14 | 2.19109 | 0.00095  | -0.00012 | 0.00485  | 0.00472  | 2.19581 |
| A15 | 2.19778 | -0.00016 | 0.00008  | -0.00606 | -0.00599 | 2.19179 |
| A16 | 1.89933 | -0.00357 | 0.00034  | 0.00013  | 0.00048  | 1.89980 |
| A17 | 1.85362 | -0.00123 | -0.00002 | 0.00465  | 0.00462  | 1.85824 |
| A18 | 1.95185 | 0.00726  | -0.00062 | -0.00252 | -0.00315 | 1.94870 |
| A19 | 1.88493 | 0.00109  | -0.00004 | -0.00257 | -0.00260 | 1.88233 |
| A20 | 1.92439 | -0.00074 | 0.00020  | 0.00697  | 0.00718  | 1.93157 |
| A21 | 1.94696 | -0.00303 | 0.00016  | -0.00673 | -0.00657 | 1.94039 |
| A22 | 1.95839 | 0.00704  | 0.00195  | 0.08625  | 0.08821  | 2.04660 |
| A23 | 2.17186 | -0.00248 | 0.00016  | -0.00122 | -0.00113 | 2.17073 |
| A24 | 1.96397 | 0.00088  | -0.00010 | -0.00175 | -0.00192 | 1.96205 |
| A25 | 2.14424 | 0.00168  | -0.00007 | 0.00460  | 0.00446  | 2.14871 |
| A26 | 2.07743 | -0.00084 | -0.00009 | -0.00724 | -0.00735 | 2.07008 |
| A27 | 2.15731 | -0.00060 | 0.00014  | 0.00380  | 0.00390  | 2.16121 |
| A28 | 2.04626 | 0.00141  | -0.00006 | 0.00261  | 0.00252  | 2.04877 |
| A29 | 2.05906 | 0.00006  | -0.00010 | -0.00387 | -0.00363 | 2.05543 |
| A30 | 2.14329 | 0.00016  | 0.00009  | -0.00433 | -0.00471 | 2.13859 |
| A31 | 1.97204 | 0.00050  | -0.00007 | 0.00242  | 0.00225  | 1.97429 |
| A32 | 1.99222 | 0.00076  | 0.00002  | 0.01173  | 0.01173  | 2.00395 |
| A33 | 2.02090 | -0.00063 | 0.00004  | 0.00111  | 0.00103  | 2.02193 |
| A34 | 2.04636 | 0.00008  | -0.00001 | -0.00137 | -0.00140 | 2.04496 |
| A35 | 2.13537 | -0.00007 | -0.00003 | -0.00022 | -0.00025 | 2.13513 |
| A36 | 1.95670 | -0.00005 | 0.00003  | -0.00022 | -0.00009 | 1.95661 |
| A37 | 2.03418 | 0.00007  | -0.00003 | -0.00118 | -0.00140 | 2.03279 |
| A38 | 2.01849 | 0.00002  | 0.00000  | 0.00095  | 0.00097  | 2.01946 |
| A39 | 2.15701 | -0.00044 | -0.00113 | -0.03557 | -0.03737 | 2.11964 |
| A40 | 2.68057 | -0.00103 | 0.00006  | -0.01078 | -0.01182 | 2.66875 |
| A41 | 1.93350 | 0.00000  | -0.00003 | -0.00011 | -0.00014 | 1.93336 |
| A42 | 1.92109 | -0.00038 | 0.00001  | -0.00221 | -0.00220 | 1.91889 |

|     |          |          |          |          |          |          |
|-----|----------|----------|----------|----------|----------|----------|
| A43 | 1.93340  | 0.00003  | 0.00000  | 0.00062  | 0.00062  | 1.93402  |
| A44 | 1.88310  | 0.00016  | 0.00000  | 0.00040  | 0.00040  | 1.88350  |
| A45 | 1.89598  | 0.00004  | 0.00000  | 0.00005  | 0.00005  | 1.89603  |
| A46 | 1.89557  | 0.00016  | 0.00002  | 0.00130  | 0.00132  | 1.89688  |
| A47 | 1.88149  | 0.00071  | 0.00007  | 0.00108  | 0.00104  | 1.88253  |
| A48 | 1.94387  | 0.00007  | 0.00008  | 0.00957  | 0.00967  | 1.95355  |
| A49 | 2.03085  | -0.00033 | -0.00011 | -0.01214 | -0.01229 | 2.01856  |
| A50 | 1.85086  | 0.00018  | -0.00018 | -0.00215 | -0.00231 | 1.84856  |
| A51 | 1.88984  | -0.00143 | 0.00019  | -0.00874 | -0.00862 | 1.88122  |
| A52 | 1.85843  | 0.00078  | -0.00007 | 0.01257  | 0.01255  | 1.87097  |
| A53 | 2.10507  | 0.00713  | -0.00046 | 0.01580  | 0.01487  | 2.11994  |
| A54 | 1.98441  | -0.00514 | 0.00038  | -0.00161 | -0.00170 | 1.98271  |
| A55 | 2.19309  | -0.00195 | 0.00008  | -0.01233 | -0.01272 | 2.18037  |
| A56 | 1.88175  | 0.00743  | -0.00050 | 0.02131  | 0.02081  | 1.90256  |
| A57 | 2.74826  | 0.00506  | -0.00025 | 0.02643  | 0.02618  | 2.77444  |
| D1  | -0.03820 | 0.00142  | 0.00009  | 0.04750  | 0.04759  | 0.00939  |
| D2  | 3.08897  | 0.00147  | 0.00044  | 0.05042  | 0.05089  | 3.13987  |
| D3  | -3.09666 | 0.00001  | -0.00039 | -0.00251 | -0.00293 | -3.09959 |
| D4  | 0.03051  | 0.00006  | -0.00004 | 0.00041  | 0.00038  | 0.03088  |
| D5  | 0.03100  | -0.00142 | 0.00011  | -0.02892 | -0.02888 | 0.00212  |
| D6  | -3.08568 | -0.00155 | 0.00067  | -0.01537 | -0.01469 | -3.10037 |
| D7  | 3.09887  | -0.00021 | 0.00054  | 0.01542  | 0.01592  | 3.11479  |
| D8  | -0.01781 | -0.00034 | 0.00110  | 0.02897  | 0.03011  | 0.01231  |
| D9  | 0.03228  | -0.00094 | -0.00026 | -0.04966 | -0.04990 | -0.01763 |
| D10 | 3.09136  | -0.00012 | -0.00037 | -0.02277 | -0.02299 | 3.06837  |
| D11 | -3.09642 | -0.00096 | -0.00058 | -0.05220 | -0.05281 | 3.13396  |
| D12 | -0.03734 | -0.00014 | -0.00069 | -0.02531 | -0.02589 | -0.06323 |
| D13 | -1.65084 | 0.00038  | 0.00077  | 0.02910  | 0.02984  | -1.62100 |
| D14 | 1.47441  | 0.00042  | 0.00117  | 0.03235  | 0.03354  | 1.50795  |
| D15 | -0.01329 | 0.00005  | 0.00033  | 0.03213  | 0.03249  | 0.01920  |
| D16 | 3.12193  | 0.00062  | 0.00007  | 0.02474  | 0.02479  | -3.13646 |
| D17 | -3.07619 | -0.00081 | 0.00043  | 0.00568  | 0.00627  | -3.06992 |
| D18 | 0.05904  | -0.00024 | 0.00017  | -0.00171 | -0.00143 | 0.05761  |
| D19 | -0.14945 | -0.00101 | -0.00545 | -0.20349 | -0.20895 | -0.35840 |
| D20 | 3.07485  | -0.00205 | -0.00527 | -0.22544 | -0.23069 | 2.84416  |
| D21 | 2.89809  | -0.00003 | -0.00557 | -0.17239 | -0.17798 | 2.72011  |
| D22 | -0.16080 | -0.00107 | -0.00540 | -0.19434 | -0.19972 | -0.36051 |
| D23 | -0.01075 | 0.00083  | -0.00027 | -0.00222 | -0.00250 | -0.01325 |
| D24 | 3.10581  | 0.00098  | -0.00083 | -0.01564 | -0.01646 | 3.08935  |
| D25 | 3.13728  | 0.00025  | -0.00001 | 0.00524  | 0.00527  | -3.14064 |
| D26 | -0.02935 | 0.00040  | -0.00057 | -0.00818 | -0.00869 | -0.03804 |
| D27 | -2.35773 | 0.00097  | 0.00155  | 0.06173  | 0.06326  | -2.29447 |
| D28 | -0.33242 | -0.00014 | 0.00165  | 0.06123  | 0.06288  | -0.26955 |
| D29 | 1.79526  | -0.00038 | 0.00145  | 0.05450  | 0.05594  | 1.85121  |



|     |          |          |          |          |          |          |
|-----|----------|----------|----------|----------|----------|----------|
| D30 | 0.81303  | 0.00083  | 0.00220  | 0.07746  | 0.07967  | 0.89270  |
| D31 | 2.83835  | -0.00029 | 0.00231  | 0.07696  | 0.07928  | 2.91763  |
| D32 | -1.31716 | -0.00053 | 0.00211  | 0.07024  | 0.07235  | -1.24480 |
| D33 | 3.02310  | 0.00053  | -0.00188 | 0.04672  | 0.04483  | 3.06793  |
| D34 | 0.99954  | -0.00015 | -0.00175 | 0.04343  | 0.04167  | 1.04121  |
| D35 | -1.13450 | -0.00101 | -0.00165 | 0.02779  | 0.02615  | -1.10835 |
| D36 | 0.90734  | 0.00069  | -0.00204 | 0.04342  | 0.04138  | 0.94873  |
| D37 | -1.11621 | 0.00001  | -0.00191 | 0.04013  | 0.03822  | -1.07799 |
| D38 | 3.03293  | -0.00085 | -0.00181 | 0.02450  | 0.02270  | 3.05563  |
| D39 | -1.18696 | 0.00179  | -0.00221 | 0.04639  | 0.04418  | -1.14278 |
| D40 | 3.07267  | 0.00111  | -0.00209 | 0.04310  | 0.04102  | 3.11369  |
| D41 | 0.93862  | 0.00025  | -0.00199 | 0.02747  | 0.02550  | 0.96413  |
| D42 | -3.07964 | -0.00118 | -0.00007 | -0.03226 | -0.03235 | -3.11200 |
| D43 | -0.01110 | -0.00165 | -0.00033 | -0.04610 | -0.04645 | -0.05755 |
| D44 | -0.02902 | -0.00010 | -0.00026 | -0.00844 | -0.00869 | -0.03770 |
| D45 | 3.03952  | -0.00057 | -0.00052 | -0.02228 | -0.02278 | 3.01674  |
| D46 | -2.74819 | 0.00039  | 0.00001  | 0.00609  | 0.00605  | -2.74214 |
| D47 | -0.05181 | 0.00049  | -0.00007 | 0.00469  | 0.00456  | -0.04725 |
| D48 | 0.01270  | -0.00099 | 0.00010  | -0.01533 | -0.01527 | -0.00257 |
| D49 | 2.70908  | -0.00090 | 0.00002  | -0.01672 | -0.01676 | 2.69232  |
| D50 | 0.68846  | -0.00096 | 0.00002  | -0.00822 | -0.00781 | 0.68065  |
| D51 | -1.66913 | -0.00134 | 0.00002  | -0.02479 | -0.02441 | -1.69354 |
| D52 | 2.49893  | 0.00047  | 0.00261  | 0.08474  | 0.08734  | 2.58627  |
| D53 | 0.11661  | 0.00041  | 0.00261  | 0.08481  | 0.08747  | 0.20408  |
| D54 | 2.55335  | -0.00003 | 0.00006  | 0.00374  | 0.00383  | 2.55718  |
| D55 | -1.64864 | -0.00007 | 0.00005  | 0.00275  | 0.00284  | -1.64580 |
| D56 | 0.44801  | -0.00010 | 0.00009  | 0.00333  | 0.00345  | 0.45146  |
| D57 | 1.32876  | 0.00012  | -0.00001 | 0.00120  | 0.00116  | 1.32992  |
| D58 | -2.87323 | 0.00007  | -0.00002 | 0.00021  | 0.00017  | -2.87306 |
| D59 | -0.77657 | 0.00005  | 0.00002  | 0.00079  | 0.00078  | -0.77580 |
| D60 | -1.02689 | 0.00008  | -0.00002 | 0.00182  | 0.00180  | -1.02509 |
| D61 | 1.05431  | 0.00004  | -0.00002 | 0.00084  | 0.00081  | 1.05512  |
| D62 | -3.13223 | 0.00001  | 0.00001  | 0.00141  | 0.00142  | -3.13081 |
| D63 | 1.13327  | 0.00160  | -0.00391 | 0.04497  | 0.04064  | 1.17391  |
| D64 | 2.71806  | 0.00057  | -0.00631 | -0.03874 | -0.04463 | 2.67344  |
| D65 | 2.66786  | 0.00033  | 0.00043  | 0.06096  | 0.06121  | 2.72908  |
| D66 | -0.50918 | 0.00128  | 0.00041  | 0.11482  | 0.11532  | -0.39386 |
| D67 | -1.49415 | -0.00009 | 0.00060  | 0.04712  | 0.04765  | -1.44649 |
| D68 | 1.61200  | 0.00087  | 0.00058  | 0.10099  | 0.10175  | 1.71375  |
| D69 | 0.48959  | -0.00017 | 0.00045  | 0.04672  | 0.04703  | 0.53663  |
| D70 | -2.68745 | 0.00079  | 0.00043  | 0.10058  | 0.10114  | -2.58631 |
| D71 | 3.04598  | 0.00044  | 0.00128  | 0.03503  | 0.03669  | 3.08267  |
| D72 | -0.13316 | 0.00166  | 0.00125  | 0.09277  | 0.09364  | -0.03952 |
| D73 | -1.89000 | 0.00208  | -0.00256 | 0.01368  | 0.01112  | -1.87888 |

| Item                 | Value    | Threshold | Converged? |
|----------------------|----------|-----------|------------|
| Maximum Force        | 0.007449 | 0.000450  | NO         |
| RMS Force            | 0.001755 | 0.000300  | NO         |
| Maximum Displacement | 1.237278 | 0.001800  | NO         |
| RMS Displacement     | 0.183155 | 0.001200  | NO         |

Predicted change in Energy=-2.343257D-03

GradGradGradGradGradGradGradGradGradGradGradGradGradGradGradGradGradGrad

Input orientation:

| Center Number | Atomic Number | Atomic Type | Coordinates (Angstroms) |           |           |
|---------------|---------------|-------------|-------------------------|-----------|-----------|
|               |               |             | X                       | Y         | Z         |
| 1             | 6             | 0           | -1.169491               | 1.761509  | 1.703007  |
| 2             | 6             | 0           | -1.925054               | 0.634725  | 1.800045  |
| 3             | 7             | 0           | -2.663019               | 0.548947  | 0.626253  |
| 4             | 6             | 0           | -2.370612               | 1.613525  | -0.143910 |
| 5             | 7             | 0           | -1.457053               | 2.356791  | 0.488868  |
| 6             | 6             | 0           | -0.825534               | 3.575272  | -0.044163 |
| 7             | 1             | 0           | -0.438193               | 2.177167  | 2.372197  |
| 8             | 1             | 0           | -1.992475               | -0.102756 | 2.583516  |
| 9             | 1             | 0           | -1.606511               | 4.253497  | -0.393351 |
| 10            | 1             | 0           | -0.318658               | 4.052867  | 0.794502  |
| 11            | 35            | 0           | -0.465257               | -2.184612 | 2.387376  |
| 12            | 1             | 0           | -2.795000               | 1.817587  | -1.112153 |
| 13            | 6             | 0           | -3.538966               | -0.495479 | 0.217512  |
| 14            | 6             | 0           | -3.507997               | -1.731698 | 0.700403  |
| 15            | 1             | 0           | -4.202867               | -0.188792 | -0.581706 |
| 16            | 1             | 0           | -4.200750               | -2.460766 | 0.302188  |
| 17            | 1             | 0           | -2.776641               | -2.080056 | 1.418384  |
| 18            | 6             | 0           | 2.970215                | -0.800195 | 0.708249  |
| 19            | 6             | 0           | 4.282608                | -0.426297 | 1.244023  |
| 20            | 8             | 0           | 3.202657                | 0.531801  | 1.272244  |
| 21            | 1             | 0           | 2.842268                | -0.790255 | -0.371811 |
| 22            | 1             | 0           | 2.265592                | -1.414005 | 1.263268  |
| 23            | 1             | 0           | 4.534725                | -0.788470 | 2.238507  |
| 24            | 6             | 0           | 5.450947                | -0.094594 | 0.354145  |
| 25            | 1             | 0           | 6.082343                | 0.672142  | 0.812490  |
| 26            | 1             | 0           | 6.065051                | -0.986313 | 0.196566  |
| 27            | 1             | 0           | 5.108188                | 0.270031  | -0.616339 |
| 28            | 6             | 0           | 0.151566                | 3.256208  | -1.168210 |
| 29            | 1             | 0           | 0.525192                | 4.204422  | -1.567502 |
| 30            | 1             | 0           | -0.339011               | 2.751269  | -2.004588 |
| 31            | 6             | 0           | 1.359157                | 2.407772  | -0.773884 |

|    |   |   |          |          |           |
|----|---|---|----------|----------|-----------|
| 32 | 8 | 0 | 1.958363 | 1.746775 | -1.588371 |
| 33 | 8 | 0 | 1.647022 | 2.461916 | 0.522639  |
| 34 | 1 | 0 | 2.410268 | 1.841777 | 0.713594  |

-----  
Distance matrix (angstroms):

|    |    | 1        | 2        | 3        | 4        | 5        |
|----|----|----------|----------|----------|----------|----------|
| 1  | C  | 0.000000 |          |          |          |          |
| 2  | C  | 1.360123 | 0.000000 |          |          |          |
| 3  | N  | 2.204616 | 1.389150 | 0.000000 |          |          |
| 4  | C  | 2.208098 | 2.221606 | 1.346098 | 0.000000 |          |
| 5  | N  | 1.382457 | 2.214435 | 2.177505 | 1.336952 | 0.000000 |
| 6  | C  | 2.541780 | 3.640998 | 3.603394 | 2.499133 | 1.472288 |
| 7  | H  | 1.074887 | 2.217486 | 3.263322 | 3.222224 | 2.148783 |
| 8  | H  | 2.219929 | 1.078077 | 2.169152 | 3.244605 | 3.274691 |
| 9  | H  | 3.285682 | 4.243579 | 3.984908 | 2.759623 | 2.097174 |
| 10 | H  | 2.607608 | 3.908366 | 4.219217 | 3.322878 | 2.065437 |
| 11 | Br | 4.066469 | 3.228718 | 3.924799 | 4.946072 | 5.021188 |
| 12 | H  | 3.251239 | 3.261421 | 2.156137 | 1.076681 | 2.155020 |
| 13 | C  | 3.593759 | 2.527150 | 1.423088 | 2.437945 | 3.541672 |
| 14 | C  | 4.321612 | 3.052029 | 2.433275 | 3.632772 | 4.578959 |
| 15 | H  | 4.269070 | 3.396962 | 2.091544 | 2.607139 | 3.894306 |
| 16 | H  | 5.383162 | 4.123643 | 3.395292 | 4.488681 | 5.547214 |
| 17 | H  | 4.173914 | 2.870696 | 2.748096 | 4.030901 | 4.721326 |
| 18 | C  | 4.968807 | 5.216769 | 5.793119 | 5.922555 | 5.442003 |
| 19 | C  | 5.892584 | 6.322183 | 7.040914 | 7.095955 | 6.423360 |
| 20 | O  | 4.562172 | 5.155831 | 5.901166 | 5.851235 | 5.065291 |
| 21 | H  | 5.187541 | 5.429078 | 5.753067 | 5.744930 | 5.397113 |
| 22 | H  | 4.698622 | 4.695417 | 5.343236 | 5.713185 | 5.355062 |
| 23 | H  | 6.271143 | 6.629214 | 7.496370 | 7.689550 | 6.989658 |
| 24 | C  | 7.006764 | 7.551683 | 8.143993 | 8.021379 | 7.331296 |
| 25 | H  | 7.387072 | 8.068152 | 8.748212 | 8.558818 | 7.732094 |
| 26 | H  | 7.884065 | 8.309073 | 8.872477 | 8.833770 | 8.236737 |
| 27 | H  | 6.856611 | 7.445697 | 7.874864 | 7.613187 | 6.976994 |
| 28 | C  | 3.496171 | 4.471585 | 4.297820 | 3.179463 | 2.478410 |
| 29 | H  | 4.419956 | 5.485146 | 5.323510 | 4.138242 | 3.401719 |
| 30 | H  | 3.926268 | 4.633630 | 4.143979 | 2.980602 | 2.760970 |
| 31 | C  | 3.598153 | 4.533746 | 4.646882 | 3.865084 | 3.086775 |
| 32 | O  | 4.540579 | 5.272471 | 5.262749 | 4.565551 | 4.043774 |
| 33 | O  | 3.133142 | 4.210715 | 4.716634 | 4.159980 | 3.106038 |
| 34 | H  | 3.714843 | 4.629511 | 5.236151 | 4.862533 | 3.907930 |
|    |    | 6        | 7        | 8        | 9        | 10       |
| 6  | C  | 0.000000 |          |          |          |          |
| 7  | H  | 2.818426 | 0.000000 |          |          |          |
| 8  | H  | 4.668440 | 2.767399 | 0.000000 |          |          |

|    |    |          |          |          |          |           |
|----|----|----------|----------|----------|----------|-----------|
| 9  | H  | 1.091717 | 3.650255 | 5.290335 | 0.000000 |           |
| 10 | H  | 1.090128 | 2.453907 | 4.824048 | 1.763466 | 0.000000  |
| 11 | Br | 6.262462 | 4.361890 | 2.589400 | 7.105219 | 6.439323  |
| 12 | H  | 2.847605 | 4.221911 | 4.241431 | 2.804075 | 3.842406  |
| 13 | C  | 4.899203 | 4.626067 | 2.853742 | 5.163361 | 5.602745  |
| 14 | C  | 5.992822 | 5.243837 | 2.914854 | 6.374520 | 6.606204  |
| 15 | H  | 5.085618 | 5.338172 | 3.861588 | 5.148832 | 5.913772  |
| 16 | H  | 6.924290 | 6.320775 | 3.954889 | 7.231540 | 7.598712  |
| 17 | H  | 6.158619 | 4.949954 | 2.425317 | 6.690700 | 6.636539  |
| 18 | C  | 5.841109 | 4.821894 | 5.350827 | 6.906501 | 5.863134  |
| 19 | C  | 6.615519 | 5.507883 | 6.424609 | 7.698259 | 6.437129  |
| 20 | O  | 5.217468 | 4.144022 | 5.395508 | 6.305024 | 5.002580  |
| 21 | H  | 5.711213 | 5.205440 | 5.708008 | 6.725439 | 5.899794  |
| 22 | H  | 6.013096 | 4.629978 | 4.646888 | 7.061030 | 6.065046  |
| 23 | H  | 7.279094 | 5.791614 | 6.572182 | 8.370358 | 7.005642  |
| 24 | C  | 7.281537 | 6.626870 | 7.770116 | 8.323002 | 7.119248  |
| 25 | H  | 7.541935 | 6.871331 | 8.302993 | 8.567300 | 7.238953  |
| 26 | H  | 8.267174 | 7.552031 | 8.449967 | 9.308946 | 8.154913  |
| 27 | H  | 6.816235 | 6.582618 | 7.797273 | 7.810564 | 6.763947  |
| 28 | C  | 1.523158 | 3.747883 | 5.473117 | 2.164678 | 2.169797  |
| 29 | H  | 2.130928 | 4.534215 | 6.490099 | 2.434173 | 2.512791  |
| 30 | H  | 2.181502 | 4.415391 | 5.650673 | 2.541521 | 3.086985  |
| 31 | C  | 2.582329 | 3.630629 | 5.367339 | 3.513786 | 2.825108  |
| 32 | O  | 3.671248 | 4.649174 | 6.036102 | 4.518856 | 4.022558  |
| 33 | O  | 2.770263 | 2.801797 | 4.906190 | 3.825477 | 2.543409  |
| 34 | H  | 3.748282 | 3.313183 | 5.163523 | 4.814170 | 3.513190  |
|    |    | 11       | 12       | 13       | 14       | 15        |
| 11 | Br | 0.000000 |          |          |          |           |
| 12 | H  | 5.804481 | 0.000000 |          |          |           |
| 13 | C  | 4.124217 | 2.769796 | 0.000000 |          |           |
| 14 | C  | 3.508458 | 4.048599 | 1.327547 | 0.000000 |           |
| 15 | H  | 5.173825 | 2.507792 | 1.083314 | 2.123018 | 0.000000  |
| 16 | H  | 4.286978 | 4.720254 | 2.075448 | 1.081675 | 2.437855  |
| 17 | H  | 2.508460 | 4.647104 | 2.129347 | 1.082466 | 3.100219  |
| 18 | C  | 4.066761 | 6.588199 | 6.534762 | 6.544845 | 7.313748  |
| 19 | C  | 5.190486 | 7.789681 | 7.888950 | 7.917899 | 8.682913  |
| 20 | O  | 4.698512 | 6.581071 | 6.900526 | 7.105161 | 7.667997  |
| 21 | H  | 4.527368 | 6.255217 | 6.415165 | 6.508596 | 7.073877  |
| 22 | H  | 3.052046 | 6.457199 | 5.969103 | 5.809654 | 6.837107  |
| 23 | H  | 5.193380 | 8.470144 | 8.327950 | 8.242623 | 9.201018  |
| 24 | C  | 6.595731 | 8.590816 | 8.999884 | 9.113873 | 9.699526  |
| 25 | H  | 7.315215 | 9.155519 | 9.710146 | 9.887651 | 10.414919 |
| 26 | H  | 6.991458 | 9.384834 | 9.616574 | 9.615233 | 10.328208 |
| 27 | H  | 6.790497 | 8.068528 | 8.720928 | 8.943119 | 9.322417  |

|    |   |           |          |          |          |          |
|----|---|-----------|----------|----------|----------|----------|
| 28 | C | 6.528796  | 3.279486 | 5.442004 | 6.462455 | 5.583288 |
| 29 | H | 7.579037  | 4.114365 | 6.464729 | 7.526456 | 6.528910 |
| 30 | H | 6.608192  | 2.774903 | 5.071372 | 6.120167 | 5.059441 |
| 31 | C | 5.866177  | 4.209485 | 5.779562 | 6.557280 | 6.141270 |
| 32 | O | 6.093955  | 4.777684 | 6.205606 | 6.871634 | 6.536096 |
| 33 | O | 5.434076  | 4.776952 | 5.977772 | 6.647723 | 6.516674 |
| 34 | H | 5.223217  | 5.516227 | 6.411104 | 6.913448 | 7.038080 |
|    |   | 16        | 17       | 18       | 19       | 20       |
| 16 | H | 0.000000  |          |          |          |          |
| 17 | H | 1.849032  | 0.000000 |          |          |          |
| 18 | C | 7.371914  | 5.930320 | 0.000000 |          |          |
| 19 | C | 8.774593  | 7.252470 | 1.466025 | 0.000000 |          |
| 20 | O | 8.044060  | 6.526497 | 1.465038 | 1.443968 | 0.000000 |
| 21 | H | 7.269730  | 6.036598 | 1.087657 | 2.194986 | 2.140241 |
| 22 | H | 6.620646  | 5.088398 | 1.086878 | 2.245951 | 2.159707 |
| 23 | H | 9.102441  | 7.469730 | 2.188497 | 1.087995 | 2.109783 |
| 24 | C | 9.937641  | 8.530408 | 2.603323 | 1.505631 | 2.508004 |
| 25 | H | 10.761855 | 9.296413 | 3.444413 | 2.152170 | 2.919531 |
| 26 | H | 10.371684 | 8.992476 | 3.142367 | 2.141935 | 3.413950 |
| 27 | H | 9.744602  | 8.475466 | 2.733284 | 2.151139 | 2.695611 |
| 28 | C | 7.334066  | 6.613666 | 5.283966 | 6.036988 | 4.763126 |
| 29 | H | 8.381826  | 7.701447 | 6.016925 | 6.592906 | 5.359210 |
| 30 | H | 6.884734  | 6.403161 | 5.560878 | 6.481493 | 5.311034 |
| 31 | C | 7.468143  | 6.484710 | 3.883720 | 4.544278 | 3.332327 |
| 32 | O | 7.694952  | 6.790101 | 3.575663 | 4.259907 | 3.347768 |
| 33 | O | 7.647080  | 6.403176 | 3.525148 | 3.975989 | 2.589837 |
| 34 | H | 7.898525  | 6.540759 | 2.700664 | 2.988507 | 1.629727 |
|    |   | 21        | 22       | 23       | 24       | 25       |
| 21 | H | 0.000000  |          |          |          |          |
| 22 | H | 1.842581  | 0.000000 |          |          |          |
| 23 | H | 3.110976  | 2.547813 | 0.000000 |          |          |
| 24 | C | 2.795740  | 3.565647 | 2.207204 | 0.000000 |          |
| 25 | H | 3.746900  | 4.372963 | 2.561647 | 1.093904 | 0.000000 |
| 26 | H | 3.278387  | 3.969467 | 2.559407 | 1.094129 | 1.769219 |
| 27 | H | 2.513641  | 3.801217 | 3.098295 | 1.091913 | 1.775450 |
| 28 | C | 4.924225  | 5.673807 | 6.868568 | 6.452044 | 6.765699 |
| 29 | H | 5.634299  | 6.527556 | 7.449231 | 6.814494 | 7.001664 |
| 30 | H | 5.032781  | 5.900199 | 7.367965 | 6.869219 | 7.313855 |
| 31 | C | 3.548050  | 4.424658 | 5.419843 | 4.927172 | 5.276124 |
| 32 | O | 2.949208  | 4.268110 | 5.264038 | 4.400244 | 4.891439 |
| 33 | O | 3.578446  | 3.994237 | 4.674189 | 4.586282 | 4.791595 |
| 34 | H | 2.879639  | 3.305026 | 3.709027 | 3.622770 | 3.855122 |
|    |   | 26        | 27       | 28       | 29       | 30       |
| 26 | H | 0.000000  |          |          |          |          |

|    |   |          |          |          |          |          |
|----|---|----------|----------|----------|----------|----------|
| 27 | H | 1.776176 | 0.000000 |          |          |          |
| 28 | C | 7.404789 | 5.812909 | 0.000000 |          |          |
| 29 | H | 7.793953 | 6.114573 | 1.094596 | 0.000000 |          |
| 30 | H | 7.734766 | 6.144571 | 1.093232 | 1.746294 | 0.000000 |
| 31 | C | 5.882773 | 4.318563 | 1.527617 | 2.133842 | 2.125181 |
| 32 | O | 5.246013 | 3.612065 | 2.391535 | 2.845074 | 2.541687 |
| 33 | O | 5.613875 | 4.252211 | 2.392960 | 2.943386 | 3.227216 |
| 34 | H | 4.650037 | 3.393800 | 3.262443 | 3.786688 | 3.971677 |
|    |   | 31       | 32       | 33       | 34       |          |
| 31 | C | 0.000000 |          |          |          |          |
| 32 | O | 1.208038 | 0.000000 |          |          |          |
| 33 | O | 1.329199 | 2.250494 | 0.000000 |          |          |
| 34 | H | 1.907295 | 2.347825 | 1.001789 | 0.000000 |          |

Stoichiometry C<sub>11</sub>H<sub>17</sub>BrN<sub>2</sub>O<sub>3</sub>

Framework group C1[X(C<sub>11</sub>H<sub>17</sub>BrN<sub>2</sub>O<sub>3</sub>)]

Deg. of freedom 96

Full point group C1 NOp 1

Largest Abelian subgroup C1 NOp 1

Largest concise Abelian subgroup C1 NOp 1

Standard orientation:

| Center<br>Number | Atomic<br>Number | Atomic<br>Type | Coordinates (Angstroms) |           |           |
|------------------|------------------|----------------|-------------------------|-----------|-----------|
|                  |                  |                | X                       | Y         | Z         |
| 1                | 6                | 0              | -1.130511               | 1.149292  | 1.411964  |
| 2                | 6                | 0              | -2.103323               | 0.317204  | 0.952398  |
| 3                | 7                | 0              | -2.676249               | 0.944643  | -0.146608 |
| 4                | 6                | 0              | -2.073369               | 2.134974  | -0.324454 |
| 5                | 7                | 0              | -1.124032               | 2.273026  | 0.606751  |
| 6                | 6                | 0              | -0.193607               | 3.408440  | 0.719789  |
| 7                | 1                | 0              | -0.428841               | 1.032730  | 2.217851  |
| 8                | 1                | 0              | -2.423981               | -0.651429 | 1.300506  |
| 9                | 1                | 0              | -0.767079               | 4.337281  | 0.704609  |
| 10               | 1                | 0              | 0.279708                | 3.323917  | 1.698159  |
| 11               | 35               | 0              | -1.334602               | -2.727307 | 0.200974  |
| 12               | 1                | 0              | -2.311863               | 2.844917  | -1.097980 |
| 13               | 6                | 0              | -3.680254               | 0.438054  | -1.018686 |
| 14               | 6                | 0              | -3.964788               | -0.850268 | -1.165818 |
| 15               | 1                | 0              | -4.153497               | 1.218953  | -1.601617 |
| 16               | 1                | 0              | -4.729091               | -1.133949 | -1.876725 |
| 17               | 1                | 0              | -3.423411               | -1.647165 | -0.672262 |
| 18               | 6                | 0              | 2.505442                | -1.615065 | -0.544363 |
| 19               | 6                | 0              | 3.780583                | -1.848470 | 0.140302  |
| 20               | 8                | 0              | 2.921908                | -0.774411 | 0.580889  |

|    |   |   |          |           |           |
|----|---|---|----------|-----------|-----------|
| 21 | 1 | 0 | 2.530704 | -1.094193 | -1.498854 |
| 22 | 1 | 0 | 1.622743 | -2.221409 | -0.358636 |
| 23 | 1 | 0 | 3.816586 | -2.664802 | 0.858660  |
| 24 | 6 | 0 | 5.102029 | -1.448015 | -0.459981 |
| 25 | 1 | 0 | 5.806189 | -1.143851 | 0.319935  |
| 26 | 1 | 0 | 5.539834 | -2.294714 | -0.997147 |
| 27 | 1 | 0 | 4.975321 | -0.618381 | -1.158498 |
| 28 | 6 | 0 | 0.843378 | 3.398493  | -0.395816 |
| 29 | 1 | 0 | 1.451028 | 4.303601  | -0.297423 |
| 30 | 1 | 0 | 0.380061 | 3.454491  | -1.384430 |
| 31 | 6 | 0 | 1.790269 | 2.199801  | -0.407976 |
| 32 | 8 | 0 | 2.349669 | 1.848380  | -1.419376 |
| 33 | 8 | 0 | 1.903484 | 1.599073  | 0.772310  |
| 34 | 1 | 0 | 2.493033 | 0.795111  | 0.674032  |

-----

Rotational constants (GHZ):      0.3279702      0.2558542      0.1583981  
Standard basis: 6-311++G(d,p) (5D, 7F)  
There are    538 symmetry adapted cartesian basis functions of A    symmetry.  
There are    519 symmetry adapted basis functions of A    symmetry.  
519 basis functions,    823 primitive gaussians,    538 cartesian basis functions  
78 alpha electrons      78 beta electrons  
nuclear repulsion energy      1570.5136681816 Hartrees.  
NAtoms=    34 NActive=    34 NUniq=    34 SFac= 1.00D+00 NAtFMM=    60 NAOKFM=F  
Big=F  
Integral buffers will be    131072 words long.  
Raffenetti 2 integral format.  
Two-electron integral symmetry is turned on.  
One-electron integrals computed using PRISM.  
NBasis=    519 RedAO= T EigKep= 4.62D-06 NBF=    519  
NBsUse=    519 1.00D-06 EigRej= -1.00D+00 NBFU=    519  
Initial guess from the checkpoint file:    "/coohpo.chk"  
B after Tr=    0.000000    0.000000    0.000000  
Rot=    0.999362    -0.009710    0.008408    0.033338 Ang=    -4.09 deg.  
ExpMin= 3.50D-02 ExpMax= 4.40D+05 ExpMxC= 1.51D+04 IAcc=3 IRadAn=      5 AccDes=  
0.00D+00  
Harris functional with IExCor=    402 and IRadAn=      5 diagonalized for initial guess.  
HarFok: IExCor=    402 AccDes= 0.00D+00 IRadAn=      5 IDoV= 1 UseB2=F ITyADJ=14  
ICtDFT= 3500011 ScaDFX= 1.000000 1.000000 1.000000 1.000000  
FoFCou: FMM=F IPFlag=      0 FMFlag=    100000 FMFlg1=      0  
NFXFlg=      0 DoJE=T BraDBF=F KetDBF=T FulRan=T  
wScrn= 0.000000 ICntrl=      500 IOpCl= 0 I1Cent=    200000004 NGrid=  
0  
NMat0=    1 NMatS0=      1 NMatT0=    0 NMatD0=    1 NMtDS0=    0  
NMtDT0=    0

Petite list used in FoFCou.

Requested convergence on RMS density matrix=1.00D-08 within 128 cycles.

Requested convergence on MAX density matrix=1.00D-06.

Requested convergence on energy=1.00D-06.

No special actions if energy rises.

SCF Done: E(RB3LYP) = -3338.89856457 A.U. after 14 cycles

NFock= 14 Conv=0.37D-08 -V/T= 2.0018

Calling FoFJK, ICntrl= 2127 FMM=F ISym2X=0 l1Cent= 0 IOpCIX= 0 NMat=1 NMatS=1

NMatT=0.

\*\*\*\*\* Axes restored to original set \*\*\*\*\*

```
-----
```

| Center | Atomic | Forces (Hartrees/Bohr) |              |              |
|--------|--------|------------------------|--------------|--------------|
| Number | Number | X                      | Y            | Z            |
| 1      | 6      | -0.000455197           | 0.001510731  | 0.001122035  |
| 2      | 6      | -0.003956443           | 0.000163814  | -0.000478882 |
| 3      | 7      | 0.002092641            | 0.004820646  | 0.002193370  |
| 4      | 6      | 0.001190457            | -0.002975729 | 0.000765146  |
| 5      | 7      | -0.002426843           | 0.001595247  | 0.000920780  |
| 6      | 6      | -0.000113019           | -0.000715333 | 0.002139895  |
| 7      | 1      | 0.000200832            | -0.000826228 | 0.000131868  |
| 8      | 1      | 0.002769638            | -0.002023216 | -0.002217549 |
| 9      | 1      | -0.001102805           | -0.001009696 | 0.000010696  |
| 10     | 1      | -0.000136895           | -0.000479764 | -0.001324561 |
| 11     | 35     | 0.003543210            | -0.001339293 | 0.000896564  |
| 12     | 1      | 0.000738711            | -0.000503771 | 0.000185306  |
| 13     | 6      | -0.003910737           | -0.004425597 | -0.003426739 |
| 14     | 6      | -0.002495339           | 0.001315582  | -0.003340545 |
| 15     | 1      | -0.001068967           | 0.000851024  | 0.000843961  |
| 16     | 1      | -0.001703302           | 0.000515728  | -0.001115985 |
| 17     | 1      | 0.003927267            | 0.000879828  | 0.004898550  |
| 18     | 6      | -0.001196823           | 0.002114670  | -0.001726409 |
| 19     | 6      | 0.002548829            | 0.000024467  | -0.000764264 |
| 20     | 8      | -0.001151644           | -0.004877327 | 0.001261244  |
| 21     | 1      | -0.000258328           | 0.000721846  | 0.000772001  |
| 22     | 1      | 0.000545016            | 0.001150783  | 0.002027736  |
| 23     | 1      | -0.000412855           | 0.000302754  | 0.000292163  |
| 24     | 6      | -0.000297243           | -0.000131599 | 0.000352766  |
| 25     | 1      | -0.000019167           | -0.000136202 | 0.000091304  |
| 26     | 1      | 0.000066665            | -0.000078629 | -0.000000396 |
| 27     | 1      | -0.000034135           | -0.000065340 | -0.000066634 |
| 28     | 6      | 0.003316433            | 0.002669369  | -0.000797534 |
| 29     | 1      | 0.001587122            | 0.000294224  | -0.000115234 |
| 30     | 1      | 0.000327112            | 0.000159588  | 0.001141035  |

```
-----
```



|    |   |              |              |              |
|----|---|--------------|--------------|--------------|
| 31 | 6 | -0.003652364 | -0.003641933 | -0.004617628 |
| 32 | 8 | 0.001474665  | 0.001179169  | -0.000617122 |
| 33 | 8 | 0.003398541  | 0.003717049  | -0.001588963 |
| 34 | 1 | -0.003335030 | -0.000756865 | 0.002152028  |

-----  
Cartesian Forces: Max 0.004898550 RMS 0.001972900

GradGradGradGradGradGradGradGradGradGradGradGradGradGradGradGradGradGradGrad

Berny optimization.

Using GEDIIS/GDIIS optimizer.

FormGI is forming the generalized inverse of G from B-inverse, IUseBI=4.

GSVD: received Info= 1 from GESDD.

Internal Forces: Max 0.009989576 RMS 0.002398354

Search for a local minimum.

Step number 13 out of a maximum of 175

All quantities printed in internal units (Hartrees-Bohrs-Radians)

Mixed Optimization -- RFO/linear search

Update second derivatives using D2CorX and points 12 13

DE= -4.37D-04 DEPred=-2.34D-03 R= 1.86D-01

Trust test= 1.86D-01 RLast= 5.76D-01 DXMaxT set to 6.00D-01

ITU= 0 0-1 1 1 1 0 1 0-1 0 1 0

Use linear search instead of GDIIS.

|                 |         |         |         |         |         |
|-----------------|---------|---------|---------|---------|---------|
| Eigenvalues --- | 0.00172 | 0.00326 | 0.00375 | 0.00619 | 0.00698 |
| Eigenvalues --- | 0.00918 | 0.01077 | 0.01474 | 0.01625 | 0.01798 |
| Eigenvalues --- | 0.01832 | 0.02008 | 0.02192 | 0.02327 | 0.02336 |
| Eigenvalues --- | 0.02443 | 0.02569 | 0.02847 | 0.02915 | 0.03014 |
| Eigenvalues --- | 0.03080 | 0.03302 | 0.03576 | 0.03971 | 0.04196 |
| Eigenvalues --- | 0.04393 | 0.04803 | 0.05171 | 0.05347 | 0.05776 |
| Eigenvalues --- | 0.05891 | 0.06752 | 0.07894 | 0.09462 | 0.09752 |
| Eigenvalues --- | 0.11899 | 0.12601 | 0.12716 | 0.13296 | 0.14368 |
| Eigenvalues --- | 0.15343 | 0.15773 | 0.15849 | 0.15989 | 0.15998 |
| Eigenvalues --- | 0.16000 | 0.16002 | 0.16004 | 0.16073 | 0.16221 |
| Eigenvalues --- | 0.16809 | 0.18117 | 0.19501 | 0.20497 | 0.21850 |
| Eigenvalues --- | 0.22395 | 0.23046 | 0.23821 | 0.24896 | 0.25276 |
| Eigenvalues --- | 0.25856 | 0.28339 | 0.28707 | 0.29933 | 0.31836 |
| Eigenvalues --- | 0.32062 | 0.33264 | 0.34497 | 0.34608 | 0.34635 |
| Eigenvalues --- | 0.34764 | 0.34885 | 0.34920 | 0.34987 | 0.35046 |
| Eigenvalues --- | 0.35314 | 0.35584 | 0.35734 | 0.35757 | 0.36544 |
| Eigenvalues --- | 0.36734 | 0.36932 | 0.37070 | 0.37313 | 0.37966 |
| Eigenvalues --- | 0.41165 | 0.42430 | 0.45618 | 0.49018 | 0.51781 |
| Eigenvalues --- | 0.53365 | 0.55519 | 0.56088 | 0.60516 | 0.88992 |
| Eigenvalues --- | 1.00747 |         |         |         |         |

RFO step: Lambda=-3.37445770D-03 EMin= 1.71509654D-03

Quartic linear search produced a step of -0.42051.

|             |            |            |                     |                   |                    |         |
|-------------|------------|------------|---------------------|-------------------|--------------------|---------|
| Iteration 1 | RMS(Cart)= | 0.12596368 | RMS(Int)=           | 0.00335617        |                    |         |
| Iteration 2 | RMS(Cart)= | 0.00913551 | RMS(Int)=           | 0.00010782        |                    |         |
| Iteration 3 | RMS(Cart)= | 0.00003845 | RMS(Int)=           | 0.00010720        |                    |         |
| Iteration 4 | RMS(Cart)= | 0.00000000 | RMS(Int)=           | 0.00010720        |                    |         |
| Variable    | Old X      | -DE/DX     | Delta X<br>(Linear) | Delta X<br>(Quad) | Delta X<br>(Total) | New X   |
| R1          | 2.57026    | 0.00030    | -0.00067            | 0.00441           | 0.00376            | 2.57402 |
| R2          | 2.61247    | -0.00017   | 0.00065             | -0.00061          | 0.00002            | 2.61248 |
| R3          | 2.03124    | -0.00010   | -0.00011            | 0.00068           | 0.00057            | 2.03181 |
| R4          | 2.62511    | 0.00065    | -0.00240            | 0.00403           | 0.00166            | 2.62677 |
| R5          | 2.03727    | 0.00095    | -0.00089            | 0.00122           | 0.00033            | 2.03760 |
| R6          | 2.54376    | -0.00106   | 0.00016             | -0.00368          | -0.00352           | 2.54024 |
| R7          | 2.68925    | 0.00447    | -0.00077            | 0.01015           | 0.00938            | 2.69863 |
| R8          | 2.52647    | 0.00022    | -0.00046            | 0.00165           | 0.00115            | 2.52763 |
| R9          | 2.03463    | -0.00055   | -0.00085            | -0.00011          | -0.00096           | 2.03368 |
| R10         | 2.78222    | 0.00153    | -0.00172            | 0.01031           | 0.00859            | 2.79082 |
| R11         | 2.06305    | 0.00016    | 0.00092             | -0.00237          | -0.00144           | 2.06160 |
| R12         | 2.06004    | -0.00130   | -0.00128            | 0.00038           | -0.00091           | 2.05914 |
| R13         | 2.87835    | 0.00296    | 0.00035             | 0.01058           | 0.01093            | 2.88928 |
| R14         | 4.89326    | 0.00310    | 0.04772             | -0.00315          | 0.04457            | 4.93783 |
| R15         | 2.50870    | -0.00237   | -0.00140            | -0.00078          | -0.00218           | 2.50652 |
| R16         | 2.04717    | 0.00027    | -0.00145            | 0.00325           | 0.00181            | 2.04897 |
| R17         | 2.04407    | 0.00115    | -0.00069            | 0.00440           | 0.00371            | 2.04778 |
| R18         | 2.04556    | 0.00562    | -0.00210            | 0.01762           | 0.01552            | 2.06108 |
| R19         | 2.77039    | 0.00101    | 0.00107             | -0.00024          | 0.00109            | 2.77148 |
| R20         | 2.76852    | -0.00392   | -0.00219            | -0.00515          | -0.00746           | 2.76106 |
| R21         | 2.05537    | -0.00073   | -0.00048            | -0.00216          | -0.00264           | 2.05274 |
| R22         | 2.05390    | 0.00003    | 0.00017             | -0.00393          | -0.00375           | 2.05015 |
| R23         | 2.72870    | 0.00044    | 0.00014             | 0.00240           | 0.00239            | 2.73110 |
| R24         | 2.05601    | 0.00007    | 0.00008             | -0.00007          | 0.00001            | 2.05602 |
| R25         | 2.84523    | -0.00053   | 0.00024             | -0.00290          | -0.00265           | 2.84257 |
| R26         | 3.07974    | 0.00145    | 0.02189             | 0.01222           | 0.03410            | 3.11384 |
| R27         | 2.06718    | -0.00007   | 0.00033             | -0.00062          | -0.00029           | 2.06689 |
| R28         | 2.06760    | 0.00010    | 0.00019             | 0.00001           | 0.00020            | 2.06780 |
| R29         | 2.06342    | 0.00005    | 0.00025             | -0.00039          | -0.00014           | 2.06328 |
| R30         | 2.06849    | 0.00084    | 0.00221             | -0.00122          | 0.00099            | 2.06948 |
| R31         | 2.06591    | -0.00109   | 0.00212             | -0.00523          | -0.00311           | 2.06279 |
| R32         | 2.88678    | -0.00220   | -0.00607            | 0.00634           | 0.00026            | 2.88704 |
| R33         | 2.28286    | 0.00051    | -0.00441            | 0.00434           | -0.00007           | 2.28279 |
| R34         | 2.51182    | 0.00277    | 0.00487             | -0.00556          | -0.00069           | 2.51113 |
| R35         | 1.89311    | -0.00079   | 0.00147             | -0.00568          | -0.00420           | 1.88890 |
| A1          | 1.87951    | 0.00046    | -0.00072            | 0.00080           | 0.00023            | 1.87974 |
| A2          | 2.28350    | -0.00095   | -0.00018            | -0.00447          | -0.00457           | 2.27893 |
| A3          | 2.11973    | 0.00040    | -0.00014            | 0.00376           | 0.00371            | 2.12344 |

|     |         |          |          |          |          |         |
|-----|---------|----------|----------|----------|----------|---------|
| A4  | 1.86082 | -0.00023 | 0.00092  | -0.00184 | -0.00088 | 1.85994 |
| A5  | 2.28273 | -0.00443 | 0.00097  | -0.01456 | -0.01366 | 2.26908 |
| A6  | 2.13957 | 0.00465  | -0.00191 | 0.01627  | 0.01428  | 2.15386 |
| A7  | 1.89570 | -0.00044 | -0.00012 | -0.00039 | -0.00045 | 1.89525 |
| A8  | 2.23318 | 0.00151  | -0.00332 | 0.00598  | 0.00263  | 2.23582 |
| A9  | 2.15292 | -0.00110 | 0.00273  | -0.00418 | -0.00148 | 2.15144 |
| A10 | 1.89369 | 0.00112  | 0.00002  | 0.00309  | 0.00303  | 1.89671 |
| A11 | 2.18804 | -0.00061 | -0.00006 | -0.00031 | -0.00046 | 2.18758 |
| A12 | 2.20136 | -0.00051 | 0.00007  | -0.00250 | -0.00252 | 2.19884 |
| A13 | 1.89486 | -0.00087 | -0.00035 | -0.00143 | -0.00178 | 1.89308 |
| A14 | 2.19581 | -0.00125 | -0.00199 | 0.00675  | 0.00478  | 2.20059 |
| A15 | 2.19179 | 0.00207  | 0.00252  | -0.00556 | -0.00302 | 2.18877 |
| A16 | 1.89980 | 0.00097  | -0.00020 | -0.01317 | -0.01362 | 1.88618 |
| A17 | 1.85824 | 0.00103  | -0.00194 | -0.00343 | -0.00527 | 1.85297 |
| A18 | 1.94870 | -0.00385 | 0.00132  | 0.02204  | 0.02334  | 1.97204 |
| A19 | 1.88233 | -0.00019 | 0.00109  | -0.00066 | 0.00042  | 1.88275 |
| A20 | 1.93157 | 0.00264  | -0.00302 | 0.01509  | 0.01207  | 1.94364 |
| A21 | 1.94039 | -0.00054 | 0.00276  | -0.02129 | -0.01844 | 1.92195 |
| A22 | 2.04660 | -0.00039 | -0.03709 | 0.04254  | 0.00545  | 2.05205 |
| A23 | 2.17073 | -0.00220 | 0.00047  | -0.01437 | -0.01426 | 2.15648 |
| A24 | 1.96205 | 0.00070  | 0.00081  | 0.00678  | 0.00722  | 1.96927 |
| A25 | 2.14871 | 0.00156  | -0.00188 | 0.01092  | 0.00868  | 2.15739 |
| A26 | 2.07008 | -0.00055 | 0.00309  | -0.00766 | -0.00459 | 2.06549 |
| A27 | 2.16121 | -0.00223 | -0.00164 | -0.00936 | -0.01103 | 2.15019 |
| A28 | 2.04877 | 0.00289  | -0.00106 | 0.01776  | 0.01668  | 2.06545 |
| A29 | 2.05543 | 0.00049  | 0.00153  | 0.00453  | 0.00591  | 2.06134 |
| A30 | 2.13859 | -0.00135 | 0.00198  | -0.01438 | -0.01227 | 2.12632 |
| A31 | 1.97429 | 0.00032  | -0.00094 | 0.00535  | 0.00444  | 1.97873 |
| A32 | 2.00395 | -0.00199 | -0.00493 | 0.01069  | 0.00579  | 2.00974 |
| A33 | 2.02193 | 0.00113  | -0.00043 | 0.00032  | -0.00014 | 2.02178 |
| A34 | 2.04496 | -0.00069 | 0.00059  | -0.00261 | -0.00198 | 2.04298 |
| A35 | 2.13513 | 0.00128  | 0.00010  | 0.00134  | 0.00142  | 2.13655 |
| A36 | 1.95661 | -0.00066 | 0.00004  | -0.00262 | -0.00264 | 1.95397 |
| A37 | 2.03279 | 0.00180  | 0.00059  | 0.00221  | 0.00291  | 2.03570 |
| A38 | 2.01946 | -0.00033 | -0.00041 | 0.00194  | 0.00152  | 2.02098 |
| A39 | 2.11964 | -0.00050 | 0.01571  | -0.00736 | 0.00887  | 2.12851 |
| A40 | 2.66875 | -0.00034 | 0.00497  | -0.02261 | -0.01718 | 2.65157 |
| A41 | 1.93336 | -0.00010 | 0.00006  | 0.00064  | 0.00070  | 1.93405 |
| A42 | 1.91889 | -0.00001 | 0.00092  | -0.00340 | -0.00247 | 1.91642 |
| A43 | 1.93402 | 0.00001  | -0.00026 | 0.00144  | 0.00118  | 1.93520 |
| A44 | 1.88350 | 0.00000  | -0.00017 | 0.00012  | -0.00005 | 1.88345 |
| A45 | 1.89603 | 0.00011  | -0.00002 | 0.00065  | 0.00063  | 1.89665 |
| A46 | 1.89688 | -0.00001 | -0.00055 | 0.00056  | 0.00001  | 1.89689 |
| A47 | 1.88253 | 0.00429  | -0.00044 | -0.00123 | -0.00192 | 1.88060 |

|     |          |          |          |          |          |          |
|-----|----------|----------|----------|----------|----------|----------|
| A48 | 1.95355  | 0.00118  | -0.00407 | 0.01507  | 0.01106  | 1.96460  |
| A49 | 2.01856  | -0.00886 | 0.00517  | -0.02791 | -0.02283 | 1.99574  |
| A50 | 1.84856  | -0.00089 | 0.00097  | 0.01127  | 0.01223  | 1.86079  |
| A51 | 1.88122  | 0.00248  | 0.00363  | -0.01261 | -0.00919 | 1.87203  |
| A52 | 1.87097  | 0.00242  | -0.00528 | 0.01750  | 0.01231  | 1.88329  |
| A53 | 2.11994  | 0.00483  | -0.00625 | 0.02699  | 0.02093  | 2.14088  |
| A54 | 1.98271  | -0.00960 | 0.00072  | -0.03493 | -0.03402 | 1.94869  |
| A55 | 2.18037  | 0.00477  | 0.00535  | 0.00748  | 0.01302  | 2.19339  |
| A56 | 1.90256  | 0.00999  | -0.00875 | 0.06203  | 0.05328  | 1.95584  |
| A57 | 2.77444  | -0.00493 | -0.01101 | 0.04940  | 0.03839  | 2.81283  |
| D1  | 0.00939  | -0.00276 | -0.02001 | 0.00998  | -0.01002 | -0.00062 |
| D2  | 3.13987  | -0.00357 | -0.02140 | -0.00415 | -0.02540 | 3.11446  |
| D3  | -3.09959 | 0.00044  | 0.00123  | 0.00648  | 0.00766  | -3.09193 |
| D4  | 0.03088  | -0.00037 | -0.00016 | -0.00765 | -0.00773 | 0.02316  |
| D5  | 0.00212  | 0.00182  | 0.01214  | -0.01942 | -0.00720 | -0.00508 |
| D6  | -3.10037 | 0.00308  | 0.00618  | -0.01275 | -0.00654 | -3.10690 |
| D7  | 3.11479  | -0.00104 | -0.00670 | -0.01649 | -0.02315 | 3.09164  |
| D8  | 0.01231  | 0.00022  | -0.01266 | -0.00982 | -0.02249 | -0.01018 |
| D9  | -0.01763 | 0.00274  | 0.02099  | 0.00277  | 0.02372  | 0.00609  |
| D10 | 3.06837  | 0.00221  | 0.00967  | 0.03089  | 0.04046  | 3.10883  |
| D11 | 3.13396  | 0.00354  | 0.02221  | 0.01570  | 0.03805  | -3.11118 |
| D12 | -0.06323 | 0.00302  | 0.01089  | 0.04382  | 0.05479  | -0.00844 |
| D13 | -1.62100 | 0.00562  | -0.01255 | 0.07608  | 0.06354  | -1.55746 |
| D14 | 1.50795  | 0.00465  | -0.01410 | 0.05987  | 0.04575  | 1.55370  |
| D15 | 0.01920  | -0.00163 | -0.01366 | -0.01490 | -0.02857 | -0.00937 |
| D16 | -3.13646 | -0.00161 | -0.01042 | 0.00639  | -0.00402 | -3.14048 |
| D17 | -3.06992 | -0.00123 | -0.00264 | -0.04182 | -0.04448 | -3.11440 |
| D18 | 0.05761  | -0.00121 | 0.00060  | -0.02054 | -0.01993 | 0.03767  |
| D19 | -0.35840 | 0.00149  | 0.08787  | -0.04685 | 0.04100  | -0.31740 |
| D20 | 2.84416  | 0.00013  | 0.09701  | -0.10704 | -0.01000 | 2.83416  |
| D21 | 2.72011  | 0.00092  | 0.07484  | -0.01477 | 0.06004  | 2.78015  |
| D22 | -0.36051 | -0.00043 | 0.08398  | -0.07497 | 0.00904  | -0.35148 |
| D23 | -0.01325 | -0.00011 | 0.00105  | 0.02115  | 0.02220  | 0.00895  |
| D24 | 3.08935  | -0.00146 | 0.00692  | 0.01485  | 0.02176  | 3.11111  |
| D25 | -3.14064 | -0.00013 | -0.00222 | -0.00036 | -0.00257 | 3.13998  |
| D26 | -0.03804 | -0.00148 | 0.00365  | -0.00666 | -0.00301 | -0.04104 |
| D27 | -2.29447 | -0.00147 | -0.02660 | -0.01714 | -0.04382 | -2.33829 |
| D28 | -0.26955 | -0.00067 | -0.02644 | -0.02624 | -0.05265 | -0.32219 |
| D29 | 1.85121  | -0.00294 | -0.02353 | -0.04158 | -0.06504 | 1.78616  |
| D30 | 0.89270  | 0.00008  | -0.03350 | -0.00952 | -0.04312 | 0.84959  |
| D31 | 2.91763  | 0.00088  | -0.03334 | -0.01862 | -0.05195 | 2.86568  |
| D32 | -1.24480 | -0.00139 | -0.03043 | -0.03397 | -0.06434 | -1.30915 |
| D33 | 3.06793  | 0.00193  | -0.01885 | 0.07120  | 0.05244  | 3.12036  |
| D34 | 1.04121  | -0.00025 | -0.01752 | 0.04989  | 0.03246  | 1.07367  |

|     |          |          |          |          |          |          |
|-----|----------|----------|----------|----------|----------|----------|
| D35 | -1.10835 | 0.00250  | -0.01100 | 0.03558  | 0.02474  | -1.08361 |
| D36 | 0.94873  | 0.00150  | -0.01740 | 0.06242  | 0.04490  | 0.99362  |
| D37 | -1.07799 | -0.00069 | -0.01607 | 0.04111  | 0.02492  | -1.05307 |
| D38 | 3.05563  | 0.00207  | -0.00955 | 0.02679  | 0.01720  | 3.07284  |
| D39 | -1.14278 | 0.00033  | -0.01858 | 0.06724  | 0.04861  | -1.09417 |
| D40 | 3.11369  | -0.00185 | -0.01725 | 0.04593  | 0.02864  | -3.14086 |
| D41 | 0.96413  | 0.00091  | -0.01072 | 0.03162  | 0.02092  | 0.98505  |
| D42 | -3.11200 | -0.00107 | 0.01361  | -0.05954 | -0.04596 | 3.12523  |
| D43 | -0.05755 | 0.00049  | 0.01953  | -0.04850 | -0.02900 | -0.08655 |
| D44 | -0.03770 | 0.00038  | 0.00365  | 0.00663  | 0.01030  | -0.02740 |
| D45 | 3.01674  | 0.00194  | 0.00958  | 0.01767  | 0.02727  | 3.04401  |
| D46 | -2.74214 | -0.00082 | -0.00254 | 0.00217  | -0.00037 | -2.74251 |
| D47 | -0.04725 | -0.00025 | -0.00192 | 0.00432  | 0.00241  | -0.04484 |
| D48 | -0.00257 | 0.00020  | 0.00642  | -0.02479 | -0.01832 | -0.02089 |
| D49 | 2.69232  | 0.00077  | 0.00705  | -0.02264 | -0.01554 | 2.67678  |
| D50 | 0.68065  | -0.00068 | 0.00328  | -0.02912 | -0.02595 | 0.65470  |
| D51 | -1.69354 | -0.00060 | 0.01026  | -0.04724 | -0.03715 | -1.73069 |
| D52 | 2.58627  | -0.00022 | -0.03673 | 0.01416  | -0.02254 | 2.56373  |
| D53 | 0.20408  | -0.00095 | -0.03678 | 0.01164  | -0.02514 | 0.17894  |
| D54 | 2.55718  | -0.00047 | -0.00161 | 0.00242  | 0.00079  | 2.55797  |
| D55 | -1.64580 | -0.00054 | -0.00119 | 0.00080  | -0.00041 | -1.64621 |
| D56 | 0.45146  | -0.00055 | -0.00145 | 0.00022  | -0.00125 | 0.45021  |
| D57 | 1.32992  | 0.00064  | -0.00049 | 0.00411  | 0.00365  | 1.33357  |
| D58 | -2.87306 | 0.00058  | -0.00007 | 0.00250  | 0.00245  | -2.87061 |
| D59 | -0.77580 | 0.00056  | -0.00033 | 0.00191  | 0.00161  | -0.77419 |
| D60 | -1.02509 | -0.00001 | -0.00076 | 0.00346  | 0.00270  | -1.02238 |
| D61 | 1.05512  | -0.00008 | -0.00034 | 0.00184  | 0.00150  | 1.05662  |
| D62 | -3.13081 | -0.00009 | -0.00060 | 0.00126  | 0.00066  | -3.13014 |
| D63 | 1.17391  | -0.00332 | -0.01709 | 0.00991  | -0.00692 | 1.16699  |
| D64 | 2.67344  | -0.00179 | 0.01877  | -0.01375 | 0.00476  | 2.67819  |
| D65 | 2.72908  | -0.00262 | -0.02574 | -0.01195 | -0.03772 | 2.69136  |
| D66 | -0.39386 | -0.00235 | -0.04849 | 0.01429  | -0.03434 | -0.42820 |
| D67 | -1.44649 | -0.00106 | -0.02004 | -0.04139 | -0.06130 | -1.50779 |
| D68 | 1.71375  | -0.00079 | -0.04279 | -0.01515 | -0.05791 | 1.65584  |
| D69 | 0.53663  | 0.00028  | -0.01978 | -0.02591 | -0.04563 | 0.49100  |
| D70 | -2.58631 | 0.00054  | -0.04253 | 0.00033  | -0.04225 | -2.62856 |
| D71 | 3.08267  | -0.00705 | -0.01543 | -0.04043 | -0.05601 | 3.02666  |
| D72 | -0.03952 | -0.00677 | -0.03938 | -0.01335 | -0.05258 | -0.09210 |
| D73 | -1.87888 | -0.00592 | -0.00468 | 0.01394  | 0.00927  | -1.86961 |

|     | Item                 | Value    | Threshold | Converged? |
|-----|----------------------|----------|-----------|------------|
|     | Maximum Force        | 0.009990 | 0.000450  | NO         |
| RMS | Force                | 0.002398 | 0.000300  | NO         |
|     | Maximum Displacement | 0.617432 | 0.001800  | NO         |
| RMS | Displacement         | 0.130374 | 0.001200  | NO         |

Predicted change in Energy=-2.478892D-03

GradGradGradGradGradGradGradGradGradGradGradGradGradGradGradGradGradGradGrad

Input orientation:

| Center<br>Number | Atomic<br>Number | Atomic<br>Type | Coordinates (Angstroms) |           |           |
|------------------|------------------|----------------|-------------------------|-----------|-----------|
|                  |                  |                | X                       | Y         | Z         |
| 1                | 6                | 0              | -1.025548               | 1.647068  | 1.620176  |
| 2                | 6                | 0              | -1.790833               | 0.525244  | 1.726026  |
| 3                | 7                | 0              | -2.638686               | 0.518457  | 0.624536  |
| 4                | 6                | 0              | -2.379140               | 1.605292  | -0.122727 |
| 5                | 7                | 0              | -1.406810               | 2.308801  | 0.467803  |
| 6                | 6                | 0              | -0.810035               | 3.552838  | -0.058769 |
| 7                | 1                | 0              | -0.222277               | 2.006499  | 2.237913  |
| 8                | 1                | 0              | -1.777995               | -0.254994 | 2.470127  |
| 9                | 1                | 0              | -1.621987               | 4.224231  | -0.341871 |
| 10               | 1                | 0              | -0.274264               | 4.008322  | 0.773588  |
| 11               | 35               | 0              | -0.192109               | -2.290916 | 2.060645  |
| 12               | 1                | 0              | -2.881568               | 1.865827  | -1.038063 |
| 13               | 6                | 0              | -3.605666               | -0.468196 | 0.262874  |
| 14               | 6                | 0              | -3.606283               | -1.704713 | 0.742823  |
| 15               | 1                | 0              | -4.333003               | -0.101894 | -0.452979 |
| 16               | 1                | 0              | -4.390186               | -2.380666 | 0.422113  |
| 17               | 1                | 0              | -2.821999               | -2.093019 | 1.393741  |
| 18               | 6                | 0              | 2.929863                | -0.784786 | 0.802780  |
| 19               | 6                | 0              | 4.239035                | -0.383032 | 1.327742  |
| 20               | 8                | 0              | 3.151624                | 0.568696  | 1.306456  |
| 21               | 1                | 0              | 2.802029                | -0.827934 | -0.275071 |
| 22               | 1                | 0              | 2.239908                | -1.386204 | 1.385231  |
| 23               | 1                | 0              | 4.484189                | -0.697981 | 2.339893  |
| 24               | 6                | 0              | 5.410995                | -0.088115 | 0.432070  |
| 25               | 1                | 0              | 6.038145                | 0.699548  | 0.859347  |
| 26               | 1                | 0              | 6.027164                | -0.985437 | 0.320274  |
| 27               | 1                | 0              | 5.074661                | 0.230628  | -0.556562 |
| 28               | 6                | 0              | 0.144325                | 3.308956  | -1.228117 |
| 29               | 1                | 0              | 0.517445                | 4.282506  | -1.563189 |
| 30               | 1                | 0              | -0.352744               | 2.852969  | -2.086344 |
| 31               | 6                | 0              | 1.360746                | 2.452594  | -0.880261 |
| 32               | 8                | 0              | 1.951381                | 1.794240  | -1.703054 |
| 33               | 8                | 0              | 1.647908                | 2.512285  | 0.415798  |
| 34               | 1                | 0              | 2.374788                | 1.874599  | 0.669044  |

Distance matrix (angstroms):

|    |    | 1        | 2        | 3        | 4        | 5        |
|----|----|----------|----------|----------|----------|----------|
| 1  | C  | 0.000000 |          |          |          |          |
| 2  | C  | 1.362115 | 0.000000 |          |          |          |
| 3  | N  | 2.206190 | 1.390029 | 0.000000 |          |          |
| 4  | C  | 2.207185 | 2.220473 | 1.344238 | 0.000000 |          |
| 5  | N  | 1.382467 | 2.216230 | 2.178855 | 1.337563 | 0.000000 |
| 6  | C  | 2.548972 | 3.648806 | 3.608092 | 2.501822 | 1.476836 |
| 7  | H  | 1.075190 | 2.217321 | 3.264396 | 3.222677 | 2.151231 |
| 8  | H  | 2.215047 | 1.078249 | 2.178353 | 3.247296 | 3.274160 |
| 9  | H  | 3.293498 | 4.241133 | 3.962370 | 2.734985 | 2.090632 |
| 10 | H  | 2.618521 | 3.916497 | 4.218040 | 3.317896 | 2.065075 |
| 11 | Br | 4.049241 | 3.255556 | 3.992583 | 4.972992 | 5.016975 |
| 12 | H  | 3.249446 | 3.259917 | 2.153748 | 1.076175 | 2.153780 |
| 13 | C  | 3.601892 | 2.534040 | 1.428053 | 2.439756 | 3.548052 |
| 14 | C  | 4.320229 | 3.038956 | 2.427493 | 3.634720 | 4.584933 |
| 15 | H  | 4.277394 | 3.406463 | 2.101567 | 2.615555 | 3.901524 |
| 16 | H  | 5.383195 | 4.111099 | 3.393176 | 4.497668 | 5.558211 |
| 17 | H  | 4.155330 | 2.833552 | 2.728570 | 4.021605 | 4.715521 |
| 18 | C  | 4.714587 | 4.985332 | 5.721796 | 5.895299 | 5.337530 |
| 19 | C  | 5.650014 | 6.110884 | 6.972103 | 7.060987 | 6.313559 |
| 20 | O  | 4.325514 | 4.960425 | 5.830543 | 5.805725 | 4.950821 |
| 21 | H  | 4.936390 | 5.189400 | 5.676569 | 5.726108 | 5.301443 |
| 22 | H  | 4.463086 | 4.473997 | 5.292170 | 5.706013 | 5.271934 |
| 23 | H  | 6.031123 | 6.422539 | 7.426810 | 7.646884 | 6.873815 |
| 24 | C  | 6.771376 | 7.342810 | 8.074796 | 7.991347 | 7.226960 |
| 25 | H  | 7.167454 | 7.878731 | 8.681896 | 8.522647 | 7.626949 |
| 26 | H  | 7.639409 | 8.085752 | 8.800638 | 8.807615 | 8.132512 |
| 27 | H  | 6.630010 | 7.240995 | 7.808556 | 7.591907 | 6.883138 |
| 28 | C  | 3.499035 | 4.496761 | 4.354808 | 3.239172 | 2.506487 |
| 29 | H  | 4.411368 | 5.501282 | 5.377301 | 4.199120 | 3.423916 |
| 30 | H  | 3.955395 | 4.692608 | 4.245508 | 3.085250 | 2.816174 |
| 31 | C  | 3.549007 | 4.521047 | 4.690496 | 3.908776 | 3.081773 |
| 32 | O  | 4.464036 | 5.231931 | 5.302264 | 4.613734 | 4.031729 |
| 33 | O  | 3.057203 | 4.182102 | 4.732210 | 4.162903 | 3.061930 |
| 34 | H  | 3.538178 | 4.504484 | 5.193844 | 4.826930 | 3.811760 |
|    |    | 6        | 7        | 8        | 9        | 10       |
| 6  | C  | 0.000000 |          |          |          |          |
| 7  | H  | 2.830437 | 0.000000 |          |          |          |
| 8  | H  | 4.672456 | 2.754729 | 0.000000 |          |          |
| 9  | H  | 1.090954 | 3.678696 | 5.291042 | 0.000000 |          |
| 10 | H  | 1.089649 | 2.480775 | 4.828593 | 1.762732 | 0.000000 |
| 11 | Br | 6.246855 | 4.301175 | 2.612984 | 7.089694 | 6.429903 |
| 12 | H  | 2.845395 | 4.221805 | 4.245369 | 2.762842 | 3.830195 |
| 13 | C  | 4.907924 | 4.633813 | 2.873640 | 5.130260 | 5.603417 |

|    |    |          |          |          |          |           |
|----|----|----------|----------|----------|----------|-----------|
| 14 | C  | 6.008610 | 5.240218 | 2.903085 | 6.345578 | 6.613778  |
| 15 | H  | 5.091538 | 5.346427 | 3.885364 | 5.106594 | 5.905226  |
| 16 | H  | 6.946595 | 6.317896 | 3.941622 | 7.202170 | 7.608121  |
| 17 | H  | 6.167130 | 4.927193 | 2.372106 | 6.660332 | 6.640927  |
| 18 | C  | 5.791726 | 4.448244 | 5.022415 | 6.864388 | 5.765515  |
| 19 | C  | 6.550312 | 5.142138 | 6.125854 | 7.639768 | 6.321467  |
| 20 | O  | 5.144287 | 3.783927 | 5.131641 | 6.234363 | 4.883819  |
| 21 | H  | 5.681986 | 4.847219 | 5.370382 | 6.715709 | 5.826889  |
| 22 | H  | 5.981757 | 4.277833 | 4.312793 | 7.026670 | 5.982982  |
| 23 | H  | 7.200823 | 5.429128 | 6.279183 | 8.288872 | 6.873534  |
| 24 | C  | 7.224865 | 6.275527 | 7.474163 | 8.286021 | 7.015668  |
| 25 | H  | 7.475411 | 6.542282 | 8.037276 | 8.517272 | 7.127541  |
| 26 | H  | 8.215042 | 7.189196 | 8.128710 | 9.278394 | 8.053019  |
| 27 | H  | 6.776026 | 6.246628 | 7.507034 | 7.800003 | 6.682160  |
| 28 | C  | 1.528940 | 3.720774 | 5.483983 | 2.177847 | 2.161285  |
| 29 | H  | 2.134925 | 4.491746 | 6.490423 | 2.464181 | 2.482440  |
| 30 | H  | 2.193169 | 4.408257 | 5.696683 | 2.556271 | 3.085483  |
| 31 | C  | 2.568595 | 3.525333 | 5.329900 | 3.510735 | 2.797993  |
| 32 | O  | 3.663572 | 4.505670 | 5.960121 | 4.530633 | 3.998676  |
| 33 | O  | 2.710987 | 2.659609 | 4.859518 | 3.767896 | 2.461887  |
| 34 | H  | 3.672777 | 3.037021 | 5.002467 | 4.745200 | 3.403113  |
|    |    | 11       | 12       | 13       | 14       | 15        |
| 11 | Br | 0.000000 |          |          |          |           |
| 12 | H  | 5.840693 | 0.000000 |          |          |           |
| 13 | C  | 4.266926 | 2.768469 | 0.000000 |          |           |
| 14 | C  | 3.706329 | 4.055308 | 1.326395 | 0.000000 |           |
| 15 | H  | 5.315742 | 2.514142 | 1.084270 | 2.127696 | 0.000000  |
| 16 | H  | 4.507404 | 4.737166 | 2.073250 | 1.083638 | 2.441691  |
| 17 | H  | 2.720339 | 4.646471 | 2.129095 | 1.090678 | 3.107747  |
| 18 | C  | 3.687460 | 6.647345 | 6.565430 | 6.600839 | 7.402195  |
| 19 | C  | 4.879776 | 7.833096 | 7.917104 | 7.977343 | 8.759557  |
| 20 | O  | 4.463937 | 6.601419 | 6.915576 | 7.152299 | 7.717833  |
| 21 | H  | 4.069490 | 6.335755 | 6.440292 | 6.547620 | 7.174083  |
| 22 | H  | 2.681305 | 6.532808 | 6.022721 | 5.889999 | 6.944899  |
| 23 | H  | 4.948048 | 8.499298 | 8.355391 | 8.307820 | 9.268134  |
| 24 | C  | 6.236936 | 8.645564 | 9.026255 | 9.166312 | 9.784119  |
| 25 | H  | 7.014418 | 9.193565 | 9.732548 | 9.940274 | 10.484522 |
| 26 | H  | 6.588819 | 9.452000 | 9.646878 | 9.669500 | 10.426487 |
| 27 | H  | 6.398970 | 8.136787 | 8.746880 | 8.988478 | 9.414108  |
| 28 | C  | 6.502900 | 3.357793 | 5.527420 | 6.564187 | 5.681655  |
| 29 | H  | 7.539596 | 4.203497 | 6.550094 | 7.626901 | 6.631921  |
| 30 | H  | 6.609302 | 2.910033 | 5.208691 | 6.273928 | 5.219344  |
| 31 | C  | 5.793201 | 4.285607 | 5.873928 | 6.677499 | 6.255139  |
| 32 | O  | 5.953862 | 4.879009 | 6.313815 | 7.008039 | 6.682177  |



|    |   |           |          |          |          |          |
|----|---|-----------|----------|----------|----------|----------|
| 33 | O | 5.400178  | 4.800810 | 6.042078 | 6.745113 | 6.584831 |
| 34 | H | 5.086947  | 5.526624 | 6.435798 | 6.970662 | 7.082366 |
|    |   | 16        | 17       | 18       | 19       | 20       |
| 16 | H | 0.000000  |          |          |          |          |
| 17 | H | 1.867087  | 0.000000 |          |          |          |
| 18 | C | 7.501658  | 5.928291 | 0.000000 |          |          |
| 19 | C | 8.903604  | 7.265440 | 1.466602 | 0.000000 |          |
| 20 | O | 8.146147  | 6.540376 | 1.461089 | 1.445234 | 0.000000 |
| 21 | H | 7.390873  | 6.001256 | 1.086263 | 2.198166 | 2.138696 |
| 22 | H | 6.773087  | 5.111024 | 1.084892 | 2.237447 | 2.158486 |
| 23 | H | 9.233842  | 7.498114 | 2.187733 | 1.087999 | 2.109073 |
| 24 | C | 10.065736 | 8.527992 | 2.603611 | 1.504226 | 2.510121 |
| 25 | H | 10.882508 | 9.305168 | 3.444976 | 2.151318 | 2.923872 |
| 26 | H | 10.510863 | 8.982581 | 3.141074 | 2.138993 | 3.414179 |
| 27 | H | 9.867116  | 8.459330 | 2.734782 | 2.150686 | 2.698740 |
| 28 | C | 7.460352  | 6.697355 | 5.351868 | 6.076993 | 4.793426 |
| 29 | H | 8.510237  | 7.780916 | 6.090568 | 6.631361 | 5.382021 |
| 30 | H | 7.069952  | 6.532306 | 5.688217 | 6.573592 | 5.386055 |
| 31 | C | 7.624291  | 6.582481 | 3.971824 | 4.604410 | 3.396770 |
| 32 | O | 7.884265  | 6.891014 | 3.726661 | 4.377167 | 3.464057 |
| 33 | O | 7.771718  | 6.491939 | 3.558629 | 3.991045 | 2.613804 |
| 34 | H | 7.995820  | 6.578281 | 2.719986 | 3.001033 | 1.647772 |
|    |   | 21        | 22       | 23       | 24       | 25       |
| 21 | H | 0.000000  |          |          |          |          |
| 22 | H | 1.839633  | 0.000000 |          |          |          |
| 23 | H | 3.112006  | 2.534132 | 0.000000 |          |          |
| 24 | C | 2.802514  | 3.556592 | 2.206965 | 0.000000 |          |
| 25 | H | 3.754004  | 4.365033 | 2.561227 | 1.093752 | 0.000000 |
| 26 | H | 3.283404  | 3.954498 | 2.557785 | 1.094235 | 1.769151 |
| 27 | H | 2.522824  | 3.797437 | 3.098455 | 1.091838 | 1.775665 |
| 28 | C | 5.008548  | 5.767632 | 6.900772 | 6.483373 | 6.775221 |
| 29 | H | 5.744142  | 6.617728 | 7.468223 | 6.857858 | 7.013158 |
| 30 | H | 5.175167  | 6.061704 | 7.456322 | 6.943563 | 7.359196 |
| 31 | C | 3.633926  | 4.543319 | 5.481916 | 4.958017 | 5.289372 |
| 32 | O | 3.104598  | 4.442518 | 5.382536 | 4.480060 | 4.946300 |
| 33 | O | 3.600883  | 4.060600 | 4.696002 | 4.574185 | 4.770422 |
| 34 | H | 2.894404  | 3.341250 | 3.722832 | 3.623114 | 3.851901 |
|    |   | 26        | 27       | 28       | 29       | 30       |
| 26 | H | 0.000000  |          |          |          |          |
| 27 | H | 1.776209  | 0.000000 |          |          |          |
| 28 | C | 7.446283  | 5.851094 | 0.000000 |          |          |
| 29 | H | 7.852112  | 6.180552 | 1.095121 | 0.000000 |          |
| 30 | H | 7.824858  | 6.218812 | 1.091584 | 1.753424 | 0.000000 |
| 31 | C | 5.919189  | 4.339939 | 1.527757 | 2.127469 | 2.133304 |

|    |   |          |          |          |          |          |
|----|---|----------|----------|----------|----------|----------|
| 32 | O | 5.332210 | 3.676167 | 2.405282 | 2.875274 | 2.564529 |
| 33 | O | 5.605450 | 4.230139 | 2.365989 | 2.885831 | 3.221706 |
| 34 | H | 4.652021 | 3.390290 | 3.260608 | 3.772347 | 3.998599 |
|    |   | 31       | 32       | 33       | 34       |          |
| 31 | C | 0.000000 |          |          |          |          |
| 32 | O | 1.208002 | 0.000000 |          |          |          |
| 33 | O | 1.328831 | 2.257702 | 0.000000 |          |          |
| 34 | H | 1.939769 | 2.410929 | 0.999565 | 0.000000 |          |

Stoichiometry C<sub>11</sub>H<sub>17</sub>BrN<sub>2</sub>O<sub>3</sub>

Framework group C1[X(C<sub>11</sub>H<sub>17</sub>BrN<sub>2</sub>O<sub>3</sub>)]

Deg. of freedom 96

Full point group C1 NOp 1

Largest Abelian subgroup C1 NOp 1

Largest concise Abelian subgroup C1 NOp 1

Standard orientation:

| Center<br>Number | Atomic<br>Number | Atomic<br>Type | Coordinates (Angstroms) |           |           |
|------------------|------------------|----------------|-------------------------|-----------|-----------|
|                  |                  |                | X                       | Y         | Z         |
| 1                | 6                | 0              | -1.095906               | 1.025535  | 1.363878  |
| 2                | 6                | 0              | -2.035137               | 0.122309  | 0.967160  |
| 3                | 7                | 0              | -2.776179               | 0.735850  | -0.036137 |
| 4                | 6                | 0              | -2.285202               | 1.970960  | -0.237188 |
| 5                | 7                | 0              | -1.267914               | 2.170260  | 0.608080  |
| 6                | 6                | 0              | -0.439193               | 3.390722  | 0.676946  |
| 7                | 1                | 0              | -0.301648               | 0.938250  | 2.083301  |
| 8                | 1                | 0              | -2.209421               | -0.888229 | 1.300416  |
| 9                | 1                | 0              | -1.107599               | 4.252474  | 0.705197  |
| 10               | 1                | 0              | 0.088775                | 3.345633  | 1.629075  |
| 11               | 35               | 0              | -0.936257               | -2.806094 | 0.064075  |
| 12               | 1                | 0              | -2.660079               | 2.680773  | -0.953977 |
| 13               | 6                | 0              | -3.852520               | 0.187172  | -0.797569 |
| 14               | 6                | 0              | -4.089616               | -1.113834 | -0.900009 |
| 15               | 1                | 0              | -4.448960               | 0.946581  | -1.290720 |
| 16               | 1                | 0              | -4.940234               | -1.436988 | -1.488474 |
| 17               | 1                | 0              | -3.435087               | -1.875440 | -0.474420 |
| 18               | 6                | 0              | 2.480455                | -1.495948 | -0.390857 |
| 19               | 6                | 0              | 3.786995                | -1.597105 | 0.267659  |
| 20               | 8                | 0              | 2.869572                | -0.548196 | 0.650841  |
| 21               | 1                | 0              | 2.439943                | -1.053944 | -1.382299 |
| 22               | 1                | 0              | 1.656897                | -2.153042 | -0.132071 |
| 23               | 1                | 0              | 3.891913                | -2.350116 | 1.045932  |
| 24               | 6                | 0              | 5.063006                | -1.165650 | -0.401920 |
| 25               | 1                | 0              | 5.767982                | -0.760432 | 0.329586  |

|    |   |   |          |           |           |
|----|---|---|----------|-----------|-----------|
| 26 | 1 | 0 | 5.536826 | -2.025220 | -0.885639 |
| 27 | 1 | 0 | 4.866983 | -0.402886 | -1.158146 |
| 28 | 6 | 0 | 0.560952 | 3.499151  | -0.474406 |
| 29 | 1 | 0 | 1.110537 | 4.438429  | -0.351912 |
| 30 | 1 | 0 | 0.073186 | 3.547824  | -1.449737 |
| 31 | 6 | 0 | 1.592468 | 2.373158  | -0.520799 |
| 32 | 8 | 0 | 2.139679 | 2.031957  | -1.542274 |
| 33 | 8 | 0 | 1.773692 | 1.824648  | 0.675899  |
| 34 | 1 | 0 | 2.366290 | 1.020751  | 0.634579  |

-----

Rotational constants (GHZ):      0.3256183      0.2670036      0.1604463  
Standard basis: 6-311++G(d,p) (5D, 7F)  
There are    538 symmetry adapted cartesian basis functions of A    symmetry.  
There are    519 symmetry adapted basis functions of A    symmetry.  
519 basis functions,    823 primitive gaussians,    538 cartesian basis functions  
78 alpha electrons      78 beta electrons  
nuclear repulsion energy      1576.4570121335 Hartrees.  
NAtoms=    34 NActive=    34 NUniq=    34 SFac= 1.00D+00 NAtFMM=    60 NAOKFM=F  
Big=F  
Integral buffers will be    131072 words long.  
Raffenetti 2 integral format.  
Two-electron integral symmetry is turned on.  
One-electron integrals computed using PRISM.  
NBasis=    519 RedAO= T EigKep= 4.07D-06 NBF=    519  
NBsUse=    519 1.00D-06 EigRej= -1.00D+00 NBFU=    519  
Initial guess from the checkpoint file: "./coohpo.chk"  
B after Tr=    0.000000    0.000000    0.000000  
Rot=    0.999180    -0.000543    -0.007448    -0.039787 Ang=    -4.64 deg.  
ExpMin= 3.50D-02 ExpMax= 4.40D+05 ExpMxC= 1.51D+04 IAcc=3 IRadAn=      5 AccDes=  
0.00D+00  
Harris functional with IExCor= 402 and IRadAn=      5 diagonalized for initial guess.  
HarFok: IExCor= 402 AccDes= 0.00D+00 IRadAn=      5 IDoV= 1 UseB2=F ITyADJ=14  
ICtDFT= 3500011 ScaDFX= 1.000000 1.000000 1.000000 1.000000  
FoFCou: FMM=F IPFlag=      0 FMFlag=      100000 FMFlg1=      0  
NfxFlg=      0 DoJE=T BraDBF=F KetDBF=T FulRan=T  
wScrn= 0.000000 ICntrl=      500 IOpCl= 0 I1Cent=    200000004 NGrid=  
0  
NMat0=    1 NMatS0=      1 NMatT0=    0 NMatD0=    1 NMtDS0=    0  
NMtDT0=    0  
Petite list used in FoFCou.  
Requested convergence on RMS density matrix=1.00D-08 within 128 cycles.  
Requested convergence on MAX density matrix=1.00D-06.  
Requested convergence on      energy=1.00D-06.  
No special actions if energy rises.

SCF Done: E(RB3LYP) = -3338.90033865 A.U. after 12 cycles

NFock= 12 Conv=0.86D-08 -V/T= 2.0019

Calling FoFJK, ICntrl= 2127 FMM=F ISym2X=0 l1Cent= 0 IOpCIX= 0 NMat=1 NMatS=1  
NMatT=0.

\*\*\*\*\* Axes restored to original set \*\*\*\*\*

| Center<br>Number | Atomic<br>Number | Forces (Hartrees/Bohr) |              |              |
|------------------|------------------|------------------------|--------------|--------------|
|                  |                  | X                      | Y            | Z            |
| 1                | 6                | -0.000989200           | -0.000692124 | 0.001191745  |
| 2                | 6                | -0.002639262           | 0.002963197  | -0.000125719 |
| 3                | 7                | 0.001922985            | 0.000950205  | -0.000176969 |
| 4                | 6                | 0.000035999            | 0.000389580  | 0.001165384  |
| 5                | 7                | -0.000177718           | 0.000799802  | -0.002484764 |
| 6                | 6                | 0.000381715            | -0.000393029 | 0.002704693  |
| 7                | 1                | -0.000356369           | -0.000481125 | -0.000124942 |
| 8                | 1                | 0.001224455            | -0.002032045 | -0.002548600 |
| 9                | 1                | -0.000623878           | -0.000501327 | -0.001197593 |
| 10               | 1                | -0.000917110           | -0.000093318 | -0.001015681 |
| 11               | 35               | -0.001762301           | -0.000990794 | 0.000809795  |
| 12               | 1                | 0.000344494            | -0.000204645 | -0.000159074 |
| 13               | 6                | -0.001582299           | -0.000890070 | 0.001235674  |
| 14               | 6                | 0.001064797            | -0.001580753 | -0.000197372 |
| 15               | 1                | 0.000394926            | 0.000368531  | 0.001110605  |
| 16               | 1                | 0.000793258            | 0.000143013  | -0.000110680 |
| 17               | 1                | -0.000312991           | 0.001276619  | 0.000130806  |
| 18               | 6                | 0.002065001            | -0.000390416 | -0.000928384 |
| 19               | 6                | 0.001550713            | 0.000072120  | -0.002020412 |
| 20               | 8                | -0.002109870           | -0.000535450 | 0.002050521  |
| 21               | 1                | 0.000000306            | 0.000673930  | -0.000290989 |
| 22               | 1                | -0.001313937           | 0.000894712  | 0.001302571  |
| 23               | 1                | -0.000263655           | 0.000166225  | 0.000193566  |
| 24               | 6                | 0.000206641            | 0.000291955  | 0.000520284  |
| 25               | 1                | 0.000276209            | 0.000069303  | -0.000009723 |
| 26               | 1                | 0.000084034            | -0.000012801 | -0.000108864 |
| 27               | 1                | -0.000061540           | -0.000074931 | -0.000097170 |
| 28               | 6                | 0.002055531            | 0.001665809  | 0.000891265  |
| 29               | 1                | -0.000118871           | 0.000420965  | -0.000431558 |
| 30               | 1                | -0.000050962           | -0.000242081 | 0.000491033  |
| 31               | 6                | -0.002730995           | -0.005613478 | -0.004997408 |
| 32               | 8                | -0.000135866           | 0.002874135  | 0.001717823  |
| 33               | 8                | 0.004043057            | 0.002541026  | 0.003683002  |
| 34               | 1                | -0.000297297           | -0.001832745 | -0.002172865 |

Cartesian Forces: Max 0.005613478 RMS 0.001493010

GradGradGradGradGradGradGradGradGradGradGradGradGradGradGradGradGradGradGradGrad  
Berny optimization.

Using GEDIIS/GDIIS optimizer.

FormGI is forming the generalized inverse of G from B-inverse, IUseBI=4.

Internal Forces: Max 0.010371561 RMS 0.002004086

Search for a local minimum.

Step number 14 out of a maximum of 175

All quantities printed in internal units (Hartrees-Bohrs-Radians)

Mixed Optimization -- RFO/linear search

Update second derivatives using D2CorX and points 12 13 14

DE= -1.77D-03 DEPred=-2.48D-03 R= 7.16D-01

TightC=F SS= 1.41D+00 RLast= 3.07D-01 DXNew= 1.0091D+00 9.2170D-01

Trust test= 7.16D-01 RLast= 3.07D-01 DXMaxT set to 9.22D-01

ITU= 1 0 0-1 1 1 1 0 1 0-1 0 1 0

Use linear search instead of GDIIS.

|                 |         |         |         |         |         |
|-----------------|---------|---------|---------|---------|---------|
| Eigenvalues --- | 0.00167 | 0.00297 | 0.00360 | 0.00627 | 0.00698 |
| Eigenvalues --- | 0.00945 | 0.01077 | 0.01431 | 0.01647 | 0.01795 |
| Eigenvalues --- | 0.01853 | 0.02010 | 0.02216 | 0.02323 | 0.02347 |
| Eigenvalues --- | 0.02458 | 0.02508 | 0.02857 | 0.02953 | 0.03057 |
| Eigenvalues --- | 0.03096 | 0.03519 | 0.03621 | 0.04001 | 0.04242 |
| Eigenvalues --- | 0.04516 | 0.04987 | 0.05181 | 0.05644 | 0.05795 |
| Eigenvalues --- | 0.05905 | 0.06444 | 0.07709 | 0.09542 | 0.09668 |
| Eigenvalues --- | 0.11907 | 0.12623 | 0.12777 | 0.13304 | 0.14351 |
| Eigenvalues --- | 0.15075 | 0.15411 | 0.15886 | 0.15983 | 0.15989 |
| Eigenvalues --- | 0.16000 | 0.16001 | 0.16004 | 0.16021 | 0.16418 |
| Eigenvalues --- | 0.16984 | 0.17979 | 0.19065 | 0.20477 | 0.21825 |
| Eigenvalues --- | 0.22799 | 0.23147 | 0.23832 | 0.24863 | 0.25664 |
| Eigenvalues --- | 0.25918 | 0.28453 | 0.29190 | 0.29907 | 0.31838 |
| Eigenvalues --- | 0.32353 | 0.34497 | 0.34580 | 0.34611 | 0.34764 |
| Eigenvalues --- | 0.34863 | 0.34894 | 0.34976 | 0.35007 | 0.35180 |
| Eigenvalues --- | 0.35242 | 0.35704 | 0.35750 | 0.36543 | 0.36673 |
| Eigenvalues --- | 0.36841 | 0.37036 | 0.37241 | 0.37674 | 0.40348 |
| Eigenvalues --- | 0.41089 | 0.43212 | 0.46020 | 0.49029 | 0.51661 |
| Eigenvalues --- | 0.53385 | 0.55575 | 0.56174 | 0.60516 | 0.89715 |
| Eigenvalues --- | 1.10356 |         |         |         |         |

RFO step: Lambda=-1.47319107D-03 EMin= 1.67052011D-03

Quartic linear search produced a step of -0.20448.

Iteration 1 RMS(Cart)= 0.12555232 RMS(Int)= 0.00480991

Iteration 2 RMS(Cart)= 0.00835560 RMS(Int)= 0.00005818

Iteration 3 RMS(Cart)= 0.00003853 RMS(Int)= 0.00005632

Iteration 4 RMS(Cart)= 0.00000001 RMS(Int)= 0.00005632

| Variable | Old X | -DE/DX | Delta X | Delta X | Delta X | New X |
|----------|-------|--------|---------|---------|---------|-------|
|----------|-------|--------|---------|---------|---------|-------|

|     |         |          | (Linear) | (Quad)   | (Total)  |         |
|-----|---------|----------|----------|----------|----------|---------|
| R1  | 2.57402 | 0.00015  | -0.00077 | 0.00145  | 0.00068  | 2.57471 |
| R2  | 2.61248 | 0.00208  | 0.00000  | 0.00200  | 0.00199  | 2.61448 |
| R3  | 2.03181 | -0.00050 | -0.00012 | -0.00045 | -0.00057 | 2.03125 |
| R4  | 2.62677 | -0.00434 | -0.00034 | -0.00381 | -0.00415 | 2.62263 |
| R5  | 2.03760 | 0.00098  | -0.00007 | 0.00391  | 0.00385  | 2.04144 |
| R6  | 2.54024 | -0.00063 | 0.00072  | -0.00156 | -0.00084 | 2.53940 |
| R7  | 2.69863 | -0.00032 | -0.00192 | 0.00545  | 0.00353  | 2.70216 |
| R8  | 2.52763 | 0.00013  | -0.00024 | 0.00095  | 0.00072  | 2.52835 |
| R9  | 2.03368 | -0.00008 | 0.00020  | -0.00018 | 0.00001  | 2.03369 |
| R10 | 2.79082 | 0.00070  | -0.00176 | 0.00534  | 0.00358  | 2.79440 |
| R11 | 2.06160 | 0.00047  | 0.00029  | 0.00003  | 0.00033  | 2.06193 |
| R12 | 2.05914 | -0.00127 | 0.00019  | -0.00250 | -0.00232 | 2.05682 |
| R13 | 2.88928 | 0.00201  | -0.00223 | 0.00865  | 0.00641  | 2.89569 |
| R14 | 4.93783 | -0.00043 | -0.00911 | -0.00993 | -0.01905 | 4.91878 |
| R15 | 2.50652 | 0.00008  | 0.00045  | 0.00000  | 0.00044  | 2.50696 |
| R16 | 2.04897 | -0.00087 | -0.00037 | 0.00024  | -0.00013 | 2.04884 |
| R17 | 2.04778 | -0.00063 | -0.00076 | 0.00135  | 0.00059  | 2.04837 |
| R18 | 2.06108 | -0.00060 | -0.00317 | 0.00937  | 0.00619  | 2.06728 |
| R19 | 2.77148 | 0.00030  | -0.00022 | 0.00216  | 0.00173  | 2.77320 |
| R20 | 2.76106 | -0.00147 | 0.00153  | -0.00599 | -0.00439 | 2.75667 |
| R21 | 2.05274 | 0.00026  | 0.00054  | -0.00077 | -0.00023 | 2.05251 |
| R22 | 2.05015 | 0.00104  | 0.00077  | -0.00029 | 0.00048  | 2.05063 |
| R23 | 2.73110 | 0.00093  | -0.00049 | 0.00216  | 0.00179  | 2.73289 |
| R24 | 2.05602 | 0.00007  | 0.00000  | 0.00016  | 0.00016  | 2.05618 |
| R25 | 2.84257 | 0.00027  | 0.00054  | -0.00088 | -0.00034 | 2.84224 |
| R26 | 3.11384 | -0.00047 | -0.00697 | -0.00532 | -0.01230 | 3.10154 |
| R27 | 2.06689 | 0.00020  | 0.00006  | -0.00007 | -0.00001 | 2.06688 |
| R28 | 2.06780 | 0.00007  | -0.00004 | 0.00015  | 0.00011  | 2.06791 |
| R29 | 2.06328 | 0.00009  | 0.00003  | -0.00009 | -0.00006 | 2.06322 |
| R30 | 2.06948 | 0.00047  | -0.00020 | 0.00014  | -0.00006 | 2.06941 |
| R31 | 2.06279 | -0.00026 | 0.00064  | -0.00327 | -0.00263 | 2.06016 |
| R32 | 2.88704 | 0.00128  | -0.00005 | 0.00431  | 0.00425  | 2.89129 |
| R33 | 2.28279 | -0.00280 | 0.00001  | 0.00117  | 0.00118  | 2.28397 |
| R34 | 2.51113 | 0.00305  | 0.00014  | -0.00080 | -0.00066 | 2.51047 |
| R35 | 1.88890 | 0.00014  | 0.00086  | -0.00218 | -0.00133 | 1.88758 |
| A1  | 1.87974 | -0.00059 | -0.00005 | 0.00099  | 0.00095  | 1.88069 |
| A2  | 2.27893 | -0.00002 | 0.00093  | -0.00363 | -0.00269 | 2.27624 |
| A3  | 2.12344 | 0.00065  | -0.00076 | 0.00263  | 0.00187  | 2.12531 |
| A4  | 1.85994 | 0.00070  | 0.00018  | -0.00101 | -0.00082 | 1.85913 |
| A5  | 2.26908 | 0.00397  | 0.00279  | 0.00568  | 0.00847  | 2.27755 |
| A6  | 2.15386 | -0.00466 | -0.00292 | -0.00464 | -0.00756 | 2.14629 |
| A7  | 1.89525 | 0.00108  | 0.00009  | 0.00182  | 0.00193  | 1.89718 |
| A8  | 2.23582 | -0.00504 | -0.00054 | -0.00954 | -0.01007 | 2.22575 |

|     |         |          |          |          |          |         |
|-----|---------|----------|----------|----------|----------|---------|
| A9  | 2.15144 | 0.00395  | 0.00030  | 0.00780  | 0.00810  | 2.15954 |
| A10 | 1.89671 | 0.00013  | -0.00062 | 0.00092  | 0.00034  | 1.89705 |
| A11 | 2.18758 | -0.00003 | 0.00009  | 0.00010  | 0.00021  | 2.18779 |
| A12 | 2.19884 | -0.00010 | 0.00052  | -0.00108 | -0.00055 | 2.19829 |
| A13 | 1.89308 | -0.00132 | 0.00036  | -0.00283 | -0.00247 | 1.89062 |
| A14 | 2.20059 | 0.00369  | -0.00098 | 0.00485  | 0.00387  | 2.20445 |
| A15 | 2.18877 | -0.00233 | 0.00062  | -0.00186 | -0.00125 | 2.18752 |
| A16 | 1.88618 | -0.00371 | 0.00278  | -0.01450 | -0.01163 | 1.87455 |
| A17 | 1.85297 | -0.00055 | 0.00108  | 0.00336  | 0.00437  | 1.85734 |
| A18 | 1.97204 | 0.00682  | -0.00477 | 0.01639  | 0.01160  | 1.98364 |
| A19 | 1.88275 | 0.00112  | -0.00009 | 0.00223  | 0.00216  | 1.88491 |
| A20 | 1.94364 | -0.00278 | -0.00247 | -0.00467 | -0.00711 | 1.93653 |
| A21 | 1.92195 | -0.00101 | 0.00377  | -0.00308 | 0.00060  | 1.92255 |
| A22 | 2.05205 | 0.00809  | -0.00111 | 0.06055  | 0.05943  | 2.11148 |
| A23 | 2.15648 | -0.00310 | 0.00292  | -0.01658 | -0.01362 | 2.14286 |
| A24 | 1.96927 | 0.00103  | -0.00148 | 0.00407  | 0.00264  | 1.97192 |
| A25 | 2.15739 | 0.00207  | -0.00177 | 0.01274  | 0.01101  | 2.16840 |
| A26 | 2.06549 | 0.00086  | 0.00094  | -0.00109 | -0.00015 | 2.06534 |
| A27 | 2.15019 | -0.00143 | 0.00225  | -0.01135 | -0.00909 | 2.14109 |
| A28 | 2.06545 | 0.00057  | -0.00341 | 0.01303  | 0.00963  | 2.07508 |
| A29 | 2.06134 | -0.00097 | -0.00121 | 0.00313  | 0.00196  | 2.06330 |
| A30 | 2.12632 | 0.00088  | 0.00251  | -0.00005 | 0.00237  | 2.12868 |
| A31 | 1.97873 | 0.00000  | -0.00091 | -0.00122 | -0.00218 | 1.97655 |
| A32 | 2.00974 | -0.00146 | -0.00118 | -0.00938 | -0.01058 | 1.99915 |
| A33 | 2.02178 | 0.00049  | 0.00003  | 0.00171  | 0.00169  | 2.02347 |
| A34 | 2.04298 | -0.00025 | 0.00040  | -0.00138 | -0.00102 | 2.04196 |
| A35 | 2.13655 | 0.00063  | -0.00029 | 0.00286  | 0.00258  | 2.13914 |
| A36 | 1.95397 | -0.00080 | 0.00054  | -0.00493 | -0.00437 | 1.94960 |
| A37 | 2.03570 | 0.00128  | -0.00059 | 0.00240  | 0.00175  | 2.03744 |
| A38 | 2.02098 | -0.00022 | -0.00031 | 0.00107  | 0.00077  | 2.02175 |
| A39 | 2.12851 | -0.00033 | -0.00181 | -0.01411 | -0.01638 | 2.11213 |
| A40 | 2.65157 | -0.00173 | 0.00351  | -0.02145 | -0.01815 | 2.63342 |
| A41 | 1.93405 | 0.00027  | -0.00014 | 0.00093  | 0.00078  | 1.93484 |
| A42 | 1.91642 | 0.00010  | 0.00051  | -0.00110 | -0.00059 | 1.91582 |
| A43 | 1.93520 | -0.00013 | -0.00024 | -0.00002 | -0.00026 | 1.93494 |
| A44 | 1.88345 | -0.00016 | 0.00001  | -0.00039 | -0.00038 | 1.88307 |
| A45 | 1.89665 | -0.00002 | -0.00013 | 0.00066  | 0.00053  | 1.89719 |
| A46 | 1.89689 | -0.00007 | 0.00000  | -0.00010 | -0.00010 | 1.89679 |
| A47 | 1.88060 | -0.00195 | 0.00039  | 0.00573  | 0.00617  | 1.88677 |
| A48 | 1.96460 | -0.00379 | -0.00226 | -0.00655 | -0.00878 | 1.95582 |
| A49 | 1.99574 | 0.01037  | 0.00467  | 0.00914  | 0.01382  | 2.00956 |
| A50 | 1.86079 | 0.00134  | -0.00250 | 0.00319  | 0.00069  | 1.86148 |
| A51 | 1.87203 | -0.00399 | 0.00188  | -0.00716 | -0.00532 | 1.86671 |
| A52 | 1.88329 | -0.00253 | -0.00252 | -0.00467 | -0.00719 | 1.87610 |

|     |          |          |          |          |          |          |
|-----|----------|----------|----------|----------|----------|----------|
| A53 | 2.14088  | -0.00197 | -0.00428 | 0.00584  | 0.00144  | 2.14232  |
| A54 | 1.94869  | 0.00455  | 0.00696  | -0.00233 | 0.00451  | 1.95320  |
| A55 | 2.19339  | -0.00249 | -0.00266 | -0.00296 | -0.00573 | 2.18765  |
| A56 | 1.95584  | -0.00246 | -0.01089 | 0.00599  | -0.00490 | 1.95094  |
| A57 | 2.81283  | 0.00515  | -0.00785 | 0.03003  | 0.02218  | 2.83501  |
| D1  | -0.00062 | 0.00064  | 0.00205  | -0.00353 | -0.00148 | -0.00210 |
| D2  | 3.11446  | 0.00090  | 0.00519  | -0.00259 | 0.00259  | 3.11706  |
| D3  | -3.09193 | -0.00031 | -0.00157 | -0.00325 | -0.00480 | -3.09674 |
| D4  | 0.02316  | -0.00005 | 0.00158  | -0.00231 | -0.00073 | 0.02243  |
| D5  | -0.00508 | -0.00065 | 0.00147  | -0.00317 | -0.00171 | -0.00678 |
| D6  | -3.10690 | -0.00159 | 0.00134  | -0.00722 | -0.00590 | -3.11281 |
| D7  | 3.09164  | 0.00018  | 0.00473  | -0.00363 | 0.00112  | 3.09276  |
| D8  | -0.01018 | -0.00076 | 0.00460  | -0.00768 | -0.00308 | -0.01326 |
| D9  | 0.00609  | -0.00041 | -0.00485 | 0.00900  | 0.00416  | 0.01025  |
| D10 | 3.10883  | -0.00040 | -0.00827 | 0.01150  | 0.00323  | 3.11206  |
| D11 | -3.11118 | -0.00080 | -0.00778 | 0.00796  | 0.00017  | -3.11101 |
| D12 | -0.00844 | -0.00080 | -0.01120 | 0.01045  | -0.00076 | -0.00919 |
| D13 | -1.55746 | -0.00320 | -0.01299 | 0.02277  | 0.00978  | -1.54768 |
| D14 | 1.55370  | -0.00280 | -0.00936 | 0.02393  | 0.01457  | 1.56828  |
| D15 | -0.00937 | 0.00000  | 0.00584  | -0.01115 | -0.00531 | -0.01468 |
| D16 | -3.14048 | 0.00024  | 0.00082  | -0.00608 | -0.00527 | 3.13743  |
| D17 | -3.11440 | 0.00024  | 0.00910  | -0.01304 | -0.00394 | -3.11834 |
| D18 | 0.03767  | 0.00047  | 0.00408  | -0.00797 | -0.00390 | 0.03377  |
| D19 | -0.31740 | -0.00078 | -0.00838 | -0.08608 | -0.09448 | -0.41188 |
| D20 | 2.83416  | -0.00033 | 0.00205  | -0.11009 | -0.10802 | 2.72614  |
| D21 | 2.78015  | -0.00087 | -0.01228 | -0.08345 | -0.09574 | 2.68440  |
| D22 | -0.35148 | -0.00042 | -0.00185 | -0.10746 | -0.10929 | -0.46077 |
| D23 | 0.00895  | 0.00039  | -0.00454 | 0.00887  | 0.00433  | 0.01328  |
| D24 | 3.11111  | 0.00149  | -0.00445 | 0.01308  | 0.00862  | 3.11973  |
| D25 | 3.13998  | 0.00015  | 0.00052  | 0.00378  | 0.00430  | -3.13891 |
| D26 | -0.04104 | 0.00125  | 0.00061  | 0.00798  | 0.00859  | -0.03246 |
| D27 | -2.33829 | 0.00030  | 0.00896  | 0.02421  | 0.03318  | -2.30511 |
| D28 | -0.32219 | -0.00044 | 0.01077  | 0.02155  | 0.03229  | -0.28991 |
| D29 | 1.78616  | 0.00196  | 0.01330  | 0.02966  | 0.04298  | 1.82915  |
| D30 | 0.84959  | -0.00084 | 0.00882  | 0.01947  | 0.02830  | 0.87788  |
| D31 | 2.86568  | -0.00159 | 0.01062  | 0.01681  | 0.02740  | 2.89308  |
| D32 | -1.30915 | 0.00081  | 0.01316  | 0.02493  | 0.03810  | -1.27105 |
| D33 | 3.12036  | -0.00324 | -0.01072 | 0.02824  | 0.01746  | 3.13782  |
| D34 | 1.07367  | -0.00146 | -0.00664 | 0.02446  | 0.01780  | 1.09147  |
| D35 | -1.08361 | -0.00320 | -0.00506 | 0.02887  | 0.02379  | -1.05981 |
| D36 | 0.99362  | -0.00126 | -0.00918 | 0.03876  | 0.02958  | 1.02320  |
| D37 | -1.05307 | 0.00051  | -0.00510 | 0.03499  | 0.02992  | -1.02315 |
| D38 | 3.07284  | -0.00123 | -0.00352 | 0.03939  | 0.03592  | 3.10875  |
| D39 | -1.09417 | -0.00021 | -0.00994 | 0.04101  | 0.03105  | -1.06311 |



|     |          |          |          |          |          |          |
|-----|----------|----------|----------|----------|----------|----------|
| D40 | -3.14086 | 0.00157  | -0.00586 | 0.03723  | 0.03139  | -3.10947 |
| D41 | 0.98505  | -0.00018 | -0.00428 | 0.04163  | 0.03739  | 1.02244  |
| D42 | 3.12523  | 0.00071  | 0.00940  | -0.01938 | -0.01000 | 3.11523  |
| D43 | -0.08655 | 0.00081  | 0.00593  | -0.00873 | -0.00281 | -0.08936 |
| D44 | -0.02740 | 0.00021  | -0.00211 | 0.00711  | 0.00502  | -0.02238 |
| D45 | 3.04401  | 0.00030  | -0.00558 | 0.01776  | 0.01220  | 3.05622  |
| D46 | -2.74251 | -0.00047 | 0.00008  | -0.00912 | -0.00904 | -2.75155 |
| D47 | -0.04484 | -0.00016 | -0.00049 | -0.00241 | -0.00291 | -0.04775 |
| D48 | -0.02089 | 0.00074  | 0.00375  | 0.00428  | 0.00803  | -0.01287 |
| D49 | 2.67678  | 0.00106  | 0.00318  | 0.01099  | 0.01416  | 2.69093  |
| D50 | 0.65470  | -0.00095 | 0.00531  | -0.02857 | -0.02320 | 0.63151  |
| D51 | -1.73069 | -0.00009 | 0.00760  | -0.01930 | -0.01165 | -1.74234 |
| D52 | 2.56373  | 0.00016  | 0.00461  | 0.02427  | 0.02884  | 2.59256  |
| D53 | 0.17894  | 0.00000  | 0.00514  | 0.02560  | 0.03072  | 0.20965  |
| D54 | 2.55797  | -0.00016 | -0.00016 | 0.00022  | 0.00008  | 2.55805  |
| D55 | -1.64621 | -0.00013 | 0.00008  | -0.00038 | -0.00027 | -1.64649 |
| D56 | 0.45021  | -0.00023 | 0.00026  | -0.00122 | -0.00094 | 0.44926  |
| D57 | 1.33357  | 0.00009  | -0.00075 | 0.00236  | 0.00159  | 1.33516  |
| D58 | -2.87061 | 0.00012  | -0.00050 | 0.00176  | 0.00124  | -2.86938 |
| D59 | -0.77419 | 0.00002  | -0.00033 | 0.00092  | 0.00057  | -0.77362 |
| D60 | -1.02238 | 0.00014  | -0.00055 | 0.00627  | 0.00572  | -1.01666 |
| D61 | 1.05662  | 0.00017  | -0.00031 | 0.00567  | 0.00536  | 1.06198  |
| D62 | -3.13014 | 0.00007  | -0.00014 | 0.00483  | 0.00469  | -3.12545 |
| D63 | 1.16699  | 0.00128  | 0.00142  | -0.05467 | -0.05345 | 1.11354  |
| D64 | 2.67819  | 0.00033  | -0.00097 | -0.08782 | -0.08860 | 2.58960  |
| D65 | 2.69136  | 0.00120  | 0.00771  | -0.05162 | -0.04386 | 2.64749  |
| D66 | -0.42820 | -0.00283 | 0.00702  | -0.07740 | -0.07037 | -0.49857 |
| D67 | -1.50779 | 0.00232  | 0.01253  | -0.04380 | -0.03129 | -1.53908 |
| D68 | 1.65584  | -0.00171 | 0.01184  | -0.06958 | -0.05780 | 1.59804  |
| D69 | 0.49100  | 0.00065  | 0.00933  | -0.04594 | -0.03657 | 0.45443  |
| D70 | -2.62856 | -0.00338 | 0.00864  | -0.07172 | -0.06308 | -2.69164 |
| D71 | 3.02666  | 0.00477  | 0.01145  | -0.00607 | 0.00533  | 3.03199  |
| D72 | -0.09210 | 0.00059  | 0.01075  | -0.03293 | -0.02212 | -0.11422 |
| D73 | -1.86961 | 0.00090  | -0.00190 | -0.03014 | -0.03203 | -1.90165 |

| Item                 | Value    | Threshold | Converged? |
|----------------------|----------|-----------|------------|
| Maximum Force        | 0.010372 | 0.000450  | NO         |
| RMS Force            | 0.002004 | 0.000300  | NO         |
| Maximum Displacement | 0.593700 | 0.001800  | NO         |
| RMS Displacement     | 0.129152 | 0.001200  | NO         |

Predicted change in Energy=-9.333169D-04

GradGradGradGradGradGradGradGradGradGradGradGradGradGradGradGradGradGrad

Input orientation:

-----

| Center<br>Number | Atomic<br>Number | Atomic<br>Type | Coordinates (Angstroms) |           |           |
|------------------|------------------|----------------|-------------------------|-----------|-----------|
|                  |                  |                | X                       | Y         | Z         |
| 1                | 6                | 0              | -1.112957               | 1.676551  | 1.659069  |
| 2                | 6                | 0              | -1.870793               | 0.546895  | 1.735896  |
| 3                | 7                | 0              | -2.642485               | 0.510215  | 0.582974  |
| 4                | 6                | 0              | -2.344136               | 1.582866  | -0.169479 |
| 5                | 7                | 0              | -1.423109               | 2.312639  | 0.470233  |
| 6                | 6                | 0              | -0.813464               | 3.559168  | -0.040791 |
| 7                | 1                | 0              | -0.359612               | 2.057005  | 2.324739  |
| 8                | 1                | 0              | -1.906854               | -0.223547 | 2.492289  |
| 9                | 1                | 0              | -1.626624               | 4.214254  | -0.357323 |
| 10               | 1                | 0              | -0.314690               | 4.027246  | 0.805845  |
| 11               | 35               | 0              | -0.330177               | -2.291253 | 2.374817  |
| 12               | 1                | 0              | -2.784509               | 1.816330  | -1.123280 |
| 13               | 6                | 0              | -3.573391               | -0.501465 | 0.189788  |
| 14               | 6                | 0              | -3.508560               | -1.749371 | 0.635287  |
| 15               | 1                | 0              | -4.327506               | -0.138103 | -0.499245 |
| 16               | 1                | 0              | -4.266761               | -2.452077 | 0.309269  |
| 17               | 1                | 0              | -2.692185               | -2.108715 | 1.268646  |
| 18               | 6                | 0              | 2.908205                | -0.742094 | 0.950897  |
| 19               | 6                | 0              | 4.281739                | -0.362328 | 1.301306  |
| 20               | 8                | 0              | 3.224879                | 0.623380  | 1.354884  |
| 21               | 1                | 0              | 2.652015                | -0.829481 | -0.100974 |
| 22               | 1                | 0              | 2.266681                | -1.279280 | 1.641851  |
| 23               | 1                | 0              | 4.630505                | -0.632809 | 2.295854  |
| 24               | 6                | 0              | 5.352293                | -0.150997 | 0.266217  |
| 25               | 1                | 0              | 6.047570                | 0.633040  | 0.579524  |
| 26               | 1                | 0              | 5.924680                | -1.073942 | 0.131983  |
| 27               | 1                | 0              | 4.914972                | 0.131918  | -0.693342 |
| 28               | 6                | 0              | 0.183821                | 3.332910  | -1.181965 |
| 29               | 1                | 0              | 0.574145                | 4.308234  | -1.491167 |
| 30               | 1                | 0              | -0.290975               | 2.893857  | -2.059643 |
| 31               | 6                | 0              | 1.390404                | 2.461455  | -0.827505 |
| 32               | 8                | 0              | 1.974081                | 1.789273  | -1.644984 |
| 33               | 8                | 0              | 1.702132                | 2.546843  | 0.461061  |
| 34               | 1                | 0              | 2.423740                | 1.903096  | 0.711260  |

Distance matrix (angstroms):

|     | 1        | 2        | 3        | 4        | 5 |
|-----|----------|----------|----------|----------|---|
| 1 C | 0.000000 |          |          |          |   |
| 2 C | 1.362475 | 0.000000 |          |          |   |
| 3 N | 2.204036 | 1.387834 | 0.000000 |          |   |
| 4 C | 2.206393 | 2.219852 | 1.343793 | 0.000000 |   |

|    |    |          |          |          |          |          |
|----|----|----------|----------|----------|----------|----------|
| 5  | N  | 1.383521 | 2.218146 | 2.179064 | 1.337944 | 0.000000 |
| 6  | C  | 2.554108 | 3.653539 | 3.609781 | 2.503056 | 1.478732 |
| 7  | H  | 1.074890 | 2.216040 | 3.261566 | 3.222463 | 2.153036 |
| 8  | H  | 2.221464 | 1.080284 | 2.173716 | 3.246437 | 3.279475 |
| 9  | H  | 3.281711 | 4.229741 | 3.954244 | 2.733919 | 2.083845 |
| 10 | H  | 2.625069 | 3.924192 | 4.223483 | 3.323387 | 2.069083 |
| 11 | Br | 4.107130 | 3.291930 | 4.050394 | 5.053541 | 5.100761 |
| 12 | H  | 3.248860 | 3.259023 | 2.153465 | 1.076183 | 2.153838 |
| 13 | C  | 3.599484 | 2.527519 | 1.429923 | 2.446339 | 3.552682 |
| 14 | C  | 4.303951 | 3.027617 | 2.420445 | 3.620405 | 4.569056 |
| 15 | H  | 4.276052 | 3.391242 | 2.104950 | 2.646552 | 3.921932 |
| 16 | H  | 5.367868 | 4.095090 | 3.389448 | 4.495158 | 5.551106 |
| 17 | H  | 4.120028 | 2.818736 | 2.707657 | 3.977073 | 4.668660 |
| 18 | C  | 4.745640 | 5.011640 | 5.702088 | 5.852159 | 5.321908 |
| 19 | C  | 5.778216 | 6.234517 | 7.015855 | 7.060398 | 6.355424 |
| 20 | O  | 4.474206 | 5.110469 | 5.919004 | 5.853053 | 5.023942 |
| 21 | H  | 4.853139 | 5.071912 | 5.504025 | 5.548480 | 5.177434 |
| 22 | H  | 4.489899 | 4.523544 | 5.331362 | 5.721226 | 5.281015 |
| 23 | H  | 6.223022 | 6.631149 | 7.558892 | 7.722222 | 6.975299 |
| 24 | C  | 6.861445 | 7.404051 | 8.028325 | 7.901337 | 7.212294 |
| 25 | H  | 7.316248 | 8.002817 | 8.690923 | 8.478437 | 7.657939 |
| 26 | H  | 7.708797 | 8.122133 | 8.724063 | 8.690387 | 8.097737 |
| 27 | H  | 6.652493 | 7.219418 | 7.673802 | 7.421208 | 6.802993 |
| 28 | C  | 3.535057 | 4.527386 | 4.366992 | 3.237028 | 2.520503 |
| 29 | H  | 4.438024 | 5.526239 | 5.392005 | 4.206050 | 3.437807 |
| 30 | H  | 3.998288 | 4.733938 | 4.265534 | 3.083324 | 2.831928 |
| 31 | C  | 3.614684 | 4.568585 | 4.696912 | 3.892520 | 3.101955 |
| 32 | O  | 4.523193 | 5.268482 | 5.283225 | 4.568010 | 4.035957 |
| 33 | O  | 3.180779 | 4.288447 | 4.799834 | 4.207032 | 3.134017 |
| 34 | H  | 3.668500 | 4.618676 | 5.255779 | 4.859104 | 3.876089 |
|    |    | 6        | 7        | 8        | 9        | 10       |
| 6  | C  | 0.000000 |          |          |          |          |
| 7  | H  | 2.838698 | 0.000000 |          |          |          |
| 8  | H  | 4.681979 | 2.760969 | 0.000000 |          |          |
| 9  | H  | 1.091128 | 3.667765 | 5.281373 | 0.000000 |          |
| 10 | H  | 1.088423 | 2.488153 | 4.842347 | 1.763265 | 0.000000 |
| 11 | Br | 6.347925 | 4.348646 | 2.602906 | 7.174050 | 6.510403 |
| 12 | H  | 2.845045 | 4.222189 | 4.243079 | 2.770817 | 3.835320 |
| 13 | C  | 4.915191 | 4.629488 | 2.855888 | 5.131008 | 5.613188 |
| 14 | C  | 5.991762 | 5.220979 | 2.888262 | 6.331808 | 6.602969 |
| 15 | H  | 5.121376 | 5.342057 | 3.849174 | 5.124249 | 5.929257 |
| 16 | H  | 6.941388 | 6.297599 | 3.911659 | 7.201017 | 7.605726 |
| 17 | H  | 6.113028 | 4.889729 | 2.380736 | 6.615069 | 6.596717 |
| 18 | C  | 5.773657 | 4.516749 | 5.082280 | 6.844085 | 5.758011 |

|    |    |          |          |          |          |           |
|----|----|----------|----------|----------|----------|-----------|
| 19 | C  | 6.568139 | 5.333173 | 6.303681 | 7.655385 | 6.375030  |
| 20 | O  | 5.184108 | 3.980512 | 5.324065 | 6.274003 | 4.941285  |
| 21 | H  | 5.592263 | 4.825534 | 5.279721 | 6.619043 | 5.762938  |
| 22 | H  | 5.977387 | 4.300529 | 4.388190 | 7.023777 | 5.960000  |
| 23 | H  | 7.257368 | 5.668969 | 6.553102 | 8.347757 | 6.956378  |
| 24 | C  | 7.202509 | 6.460545 | 7.593147 | 8.255271 | 7.061417  |
| 25 | H  | 7.484705 | 6.791571 | 8.225890 | 8.520330 | 7.214583  |
| 26 | H  | 8.179129 | 7.355497 | 8.223573 | 9.231827 | 8.087395  |
| 27 | H  | 6.707223 | 6.374638 | 7.537368 | 7.718216 | 6.691077  |
| 28 | C  | 1.532334 | 3.770971 | 5.524441 | 2.175893 | 2.163794  |
| 29 | H  | 2.142464 | 4.527811 | 6.523827 | 2.477462 | 2.478962  |
| 30 | H  | 2.188926 | 4.464060 | 5.748858 | 2.534817 | 3.081583  |
| 31 | C  | 2.584749 | 3.628054 | 5.394644 | 3.520772 | 2.833175  |
| 32 | O  | 3.671018 | 4.612646 | 6.019147 | 4.528099 | 4.031571  |
| 33 | O  | 2.757695 | 2.822060 | 4.982543 | 3.811906 | 2.525478  |
| 34 | H  | 3.713172 | 3.220877 | 5.142832 | 4.784221 | 3.466981  |
|    |    | 11       | 12       | 13       | 14       | 15        |
| 11 | Br | 0.000000 |          |          |          |           |
| 12 | H  | 5.927282 | 0.000000 |          |          |           |
| 13 | C  | 4.300713 | 2.778247 | 0.000000 |          |           |
| 14 | C  | 3.663566 | 4.041168 | 1.326628 | 0.000000 |           |
| 15 | H  | 5.373540 | 2.567113 | 1.084199 | 2.134015 | 0.000000  |
| 16 | H  | 4.448488 | 4.740102 | 2.073625 | 1.083952 | 2.451909  |
| 17 | H  | 2.614578 | 4.597370 | 2.126901 | 1.093955 | 3.111756  |
| 18 | C  | 3.861938 | 6.576833 | 6.530565 | 6.503007 | 7.404272  |
| 19 | C  | 5.113018 | 7.781840 | 7.934602 | 7.940796 | 8.798373  |
| 20 | O  | 4.708904 | 6.608871 | 6.988505 | 7.175442 | 7.813845  |
| 21 | H  | 4.142438 | 6.131983 | 6.240819 | 6.272237 | 7.024979  |
| 22 | H  | 2.881840 | 6.537834 | 6.067943 | 5.881120 | 7.026371  |
| 23 | H  | 5.231161 | 8.524740 | 8.470932 | 8.381443 | 9.396983  |
| 24 | C  | 6.427858 | 8.485789 | 8.932889 | 9.011422 | 9.710026  |
| 25 | H  | 7.242253 | 9.072228 | 9.695457 | 9.848787 | 10.459475 |
| 26 | H  | 6.755398 | 9.261713 | 9.515484 | 9.470773 | 10.314145 |
| 27 | H  | 6.541938 | 7.893294 | 8.557652 | 8.732720 | 9.248459  |
| 28 | C  | 6.674287 | 3.333832 | 5.540828 | 6.539546 | 5.732897  |
| 29 | H  | 7.701744 | 4.198271 | 6.569694 | 7.608211 | 6.691787  |
| 30 | H  | 6.822855 | 2.873248 | 5.230909 | 6.259000 | 5.284053  |
| 31 | C  | 5.983603 | 4.234804 | 5.869672 | 6.623494 | 6.289671  |
| 32 | O  | 6.174067 | 4.787179 | 6.276011 | 6.912380 | 6.688610  |
| 33 | O  | 5.585689 | 4.813910 | 6.098927 | 6.755673 | 6.669907  |
| 34 | H  | 5.286214 | 5.522583 | 6.482240 | 6.966956 | 7.156197  |
|    |    | 16       | 17       | 18       | 19       | 20        |
| 16 | H  | 0.000000 |          |          |          |           |
| 17 | H  | 1.875524 | 0.000000 |          |          |           |

|    |   |           |          |          |          |          |
|----|---|-----------|----------|----------|----------|----------|
| 18 | C | 7.403774  | 5.773473 | 0.000000 |          |          |
| 19 | C | 8.855961  | 7.189337 | 1.467517 | 0.000000 |          |
| 20 | O | 8.165563  | 6.517931 | 1.458768 | 1.446183 | 0.000000 |
| 21 | H | 7.118327  | 5.663283 | 1.086142 | 2.200142 | 2.135064 |
| 22 | H | 6.770310  | 5.041587 | 1.085145 | 2.239918 | 2.149560 |
| 23 | H | 9.296107  | 7.540242 | 2.187960 | 1.088083 | 2.106946 |
| 24 | C | 9.890552  | 8.339733 | 2.606098 | 1.504046 | 2.512119 |
| 25 | H | 10.769234 | 9.185610 | 3.447393 | 2.151716 | 2.927261 |
| 26 | H | 10.285727 | 8.752893 | 3.143226 | 2.138449 | 3.415452 |
| 27 | H | 9.590958  | 8.169374 | 2.737614 | 2.150321 | 2.700588 |
| 28 | C | 7.449666  | 6.624816 | 5.345748 | 6.050979 | 4.798457 |
| 29 | H | 8.507511  | 7.711207 | 6.075963 | 6.584702 | 5.357662 |
| 30 | H | 7.070901  | 6.470629 | 5.702477 | 6.542815 | 5.401416 |
| 31 | C | 7.578824  | 6.476715 | 3.966000 | 4.567866 | 3.392144 |
| 32 | O | 7.794630  | 6.742224 | 3.744196 | 4.316861 | 3.452971 |
| 33 | O | 7.787164  | 6.452630 | 3.537182 | 3.977897 | 2.611013 |
| 34 | H | 7.993243  | 6.525182 | 2.699845 | 2.988722 | 1.641265 |
|    |   | 21        | 22       | 23       | 24       | 25       |
| 21 | H | 0.000000  |          |          |          |          |
| 22 | H | 1.840718  | 0.000000 |          |          |          |
| 23 | H | 3.114144  | 2.536397 | 0.000000 |          |          |
| 24 | C | 2.808322  | 3.561796 | 2.207385 | 0.000000 |          |
| 25 | H | 3.759234  | 4.368138 | 2.560515 | 1.093748 | 0.000000 |
| 26 | H | 3.290041  | 3.962679 | 2.559654 | 1.094292 | 1.768949 |
| 27 | H | 2.529063  | 3.802374 | 3.098552 | 1.091808 | 1.775975 |
| 28 | C | 4.958429  | 5.795217 | 6.898924 | 6.399058 | 6.691464 |
| 29 | H | 5.713693  | 6.625767 | 7.430309 | 6.767853 | 6.910368 |
| 30 | H | 5.134279  | 6.136590 | 7.458465 | 6.821087 | 7.228668 |
| 31 | C | 3.598578  | 4.567130 | 5.461510 | 4.870081 | 5.197309 |
| 32 | O | 3.114712  | 4.506097 | 5.334161 | 4.339314 | 4.783160 |
| 33 | O | 3.552143  | 4.043785 | 4.695959 | 4.543124 | 4.749685 |
| 34 | H | 2.859862  | 3.319366 | 3.716392 | 3.604689 | 3.842205 |
|    |   | 26        | 27       | 28       | 29       | 30       |
| 26 | H | 0.000000  |          |          |          |          |
| 27 | H | 1.776168  | 0.000000 |          |          |          |
| 28 | C | 7.355561  | 5.733140 | 0.000000 |          |          |
| 29 | H | 7.760841  | 6.076258 | 1.095087 | 0.000000 |          |
| 30 | H | 7.692920  | 6.049543 | 1.090191 | 1.752729 | 0.000000 |
| 31 | C | 5.829177  | 4.226975 | 1.530007 | 2.125399 | 2.128890 |
| 32 | O | 5.192576  | 3.507319 | 2.408783 | 2.885939 | 2.553924 |
| 33 | O | 5.572100  | 4.181728 | 2.371224 | 2.861127 | 3.232157 |
| 34 | H | 4.631944  | 3.363958 | 3.262807 | 3.749183 | 4.003647 |
|    |   | 31        | 32       | 33       | 34       |          |
| 31 | C | 0.000000  |          |          |          |          |

32 O 1.208627 0.000000  
 33 O 1.328482 2.254616 0.000000  
 34 H 1.935806 2.401465 0.998864 0.000000

Stoichiometry C11H17BrN2O3

Framework group C1[X(C11H17BrN2O3)]

Deg. of freedom 96

Full point group C1 NOp 1

Largest Abelian subgroup C1 NOP 1

Largest concise Abelian subgroup C1 NOp 1

Standard orientation:

| Center<br>Number | Atomic<br>Number | Atomic<br>Type | Coordinates (Angstroms) |           |           |
|------------------|------------------|----------------|-------------------------|-----------|-----------|
|                  |                  |                | X                       | Y         | Z         |
| 1                | 6                | 0              | -1.058920               | 1.132831  | 1.374089  |
| 2                | 6                | 0              | -2.066660               | 0.342458  | 0.909212  |
| 3                | 7                | 0              | -2.661030               | 1.034983  | -0.136358 |
| 4                | 6                | 0              | -2.017023               | 2.202887  | -0.300781 |
| 5                | 7                | 0              | -1.044645               | 2.288895  | 0.614192  |
| 6                | 6                | 0              | -0.092702               | 3.412586  | 0.747505  |
| 7                | 1                | 0              | -0.334345               | 0.955227  | 2.147934  |
| 8                | 1                | 0              | -2.387124               | -0.641182 | 1.220288  |
| 9                | 1                | 0              | -0.676184               | 4.334459  | 0.763580  |
| 10               | 1                | 0              | 0.383263                | 3.298850  | 1.719712  |
| 11               | 35               | 0              | -1.345965               | -2.783633 | 0.170998  |
| 12               | 1                | 0              | -2.255579               | 2.946643  | -1.041110 |
| 13               | 6                | 0              | -3.743371               | 0.601600  | -0.964245 |
| 14               | 6                | 0              | -4.038015               | -0.678580 | -1.149357 |
| 15               | 1                | 0              | -4.288786               | 1.424191  | -1.412971 |
| 16               | 1                | 0              | -4.889954               | -0.925550 | -1.772379 |
| 17               | 1                | 0              | -3.424201               | -1.490008 | -0.747418 |
| 18               | 6                | 0              | 2.330242                | -1.714738 | -0.336475 |
| 19               | 6                | 0              | 3.693981                | -1.922327 | 0.164250  |
| 20               | 8                | 0              | 2.904393                | -0.816433 | 0.659219  |
| 21               | 1                | 0              | 2.205922                | -1.251382 | -1.310923 |
| 22               | 1                | 0              | 1.491738                | -2.304750 | 0.018963  |
| 23               | 1                | 0              | 3.830099                | -2.690724 | 0.922513  |
| 24               | 6                | 0              | 4.914450                | -1.574506 | -0.642986 |
| 25               | 1                | 0              | 5.726918                | -1.235309 | 0.005955  |
| 26               | 1                | 0              | 5.263928                | -2.458504 | -1.185100 |
| 27               | 1                | 0              | 4.691361                | -0.786848 | -1.365392 |
| 28               | 6                | 0              | 0.967733                | 3.454415  | -0.357834 |
| 29               | 1                | 0              | 1.616882                | 4.317019  | -0.174164 |
| 30               | 1                | 0              | 0.525943                | 3.600154  | -1.343785 |

|    |   |   |          |          |           |
|----|---|---|----------|----------|-----------|
| 31 | 6 | 0 | 1.873060 | 2.223542 | -0.436929 |
| 32 | 8 | 0 | 2.385767 | 1.854203 | -1.467219 |
| 33 | 8 | 0 | 2.018176 | 1.638023 | 0.746699  |
| 34 | 1 | 0 | 2.525304 | 0.780361 | 0.676242  |

-----

Rotational constants (GHZ): 0.3177449 0.2592678 0.1570185  
Standard basis: 6-311++G(d,p) (5D, 7F)  
There are 538 symmetry adapted cartesian basis functions of A symmetry.  
There are 519 symmetry adapted basis functions of A symmetry.  
519 basis functions, 823 primitive gaussians, 538 cartesian basis functions  
78 alpha electrons 78 beta electrons  
nuclear repulsion energy 1564.1030091018 Hartrees.  
NAtoms= 34 NActive= 34 NUniq= 34 SFac= 1.00D+00 NAtFMM= 60 NAOKFM=F  
Big=F  
Integral buffers will be 131072 words long.  
Raffenetti 2 integral format.  
Two-electron integral symmetry is turned on.  
One-electron integrals computed using PRISM.  
NBasis= 519 RedAO= T EigKep= 4.72D-06 NBF= 519  
NBsUse= 519 1.00D-06 EigRej= -1.00D+00 NBFU= 519  
Initial guess from the checkpoint file: "./coohpo.chk"  
B after Tr= 0.000000 0.000000 0.000000  
Rot= 0.998646 -0.002570 0.003018 0.051863 Ang= -5.96 deg.  
ExpMin= 3.50D-02 ExpMax= 4.40D+05 ExpMxC= 1.51D+04 IAcc=3 IRadAn= 5 AccDes=  
0.00D+00  
Harris functional with IExCor= 402 and IRadAn= 5 diagonalized for initial guess.  
HarFok: IExCor= 402 AccDes= 0.00D+00 IRadAn= 5 IDoV= 1 UseB2=F ITyADJ=14  
ICtDFT= 3500011 ScaDFX= 1.000000 1.000000 1.000000 1.000000  
FoFCou: FMM=F IPFlag= 0 FMFlag= 100000 FMFlg1= 0  
NFxFlg= 0 DoJE=T BraDBF=F KetDBF=T FulRan=T  
wScrn= 0.000000 ICntrl= 500 IOpCl= 0 I1Cent= 200000004 NGrid=  
0  
NMat0= 1 NMatS0= 1 NMatT0= 0 NMatD0= 1 NMtDS0= 0  
NMtDT0= 0  
Petite list used in FoFCou.  
Requested convergence on RMS density matrix=1.00D-08 within 128 cycles.  
Requested convergence on MAX density matrix=1.00D-06.  
Requested convergence on energy=1.00D-06.  
No special actions if energy rises.  
SCF Done: E(RB3LYP) = -3338.90110615 A.U. after 13 cycles  
NFock= 13 Conv=0.39D-08 -V/T= 2.0019  
Calling FoFJK, ICntrl= 2127 FMM=F ISym2X=0 I1Cent= 0 IOpClX= 0 NMat=1 NMatS=1  
NMatT=0.  
\*\*\*\*\* Axes restored to original set \*\*\*\*\*

| Center<br>Number | Atomic<br>Number | Forces (Hartrees/Bohr) |              |              |
|------------------|------------------|------------------------|--------------|--------------|
|                  |                  | X                      | Y            | Z            |
| 1                | 6                | -0.000137549           | -0.000590876 | 0.000620966  |
| 2                | 6                | -0.002598763           | 0.003071196  | 0.000549514  |
| 3                | 7                | 0.002437939            | 0.001553982  | -0.001260235 |
| 4                | 6                | -0.000951118           | 0.000581788  | 0.001249092  |
| 5                | 7                | 0.001798018            | -0.000128549 | -0.002700123 |
| 6                | 6                | 0.000462305            | -0.000423240 | 0.001644882  |
| 7                | 1                | 0.000050587            | -0.000081257 | 0.000076863  |
| 8                | 1                | 0.002347493            | -0.001532418 | -0.002439372 |
| 9                | 1                | 0.000175184            | 0.000419867  | -0.001049090 |
| 10               | 1                | -0.000561532           | -0.000287105 | 0.000078455  |
| 11               | 35               | -0.000022856           | 0.000181353  | 0.000185171  |
| 12               | 1                | 0.000228281            | -0.000216166 | -0.000130348 |
| 13               | 6                | -0.001982311           | -0.001368690 | 0.001277312  |
| 14               | 6                | 0.001095564            | -0.000868553 | -0.001269625 |
| 15               | 1                | 0.000380312            | 0.000088409  | 0.000766143  |
| 16               | 1                | 0.000989646            | 0.000040413  | 0.000107455  |
| 17               | 1                | -0.001616215           | 0.000657112  | 0.000740648  |
| 18               | 6                | 0.000144200            | 0.000171884  | -0.000069844 |
| 19               | 6                | 0.000665292            | 0.000108852  | -0.001200518 |
| 20               | 8                | -0.000981172           | 0.000349065  | 0.002387678  |
| 21               | 1                | 0.000066815            | -0.000206343 | -0.000193995 |
| 22               | 1                | -0.000529436           | -0.000511529 | 0.000380872  |
| 23               | 1                | -0.000112507           | -0.000060617 | -0.000008029 |
| 24               | 6                | -0.000005603           | -0.000043074 | 0.000081960  |
| 25               | 1                | 0.000057603            | 0.000028634  | 0.000050314  |
| 26               | 1                | 0.000046467            | 0.000000131  | -0.000065435 |
| 27               | 1                | -0.000099934           | 0.000031652  | -0.000026836 |
| 28               | 6                | 0.001584950            | -0.001567776 | 0.001353769  |
| 29               | 1                | -0.000770056           | 0.000689253  | 0.000214891  |
| 30               | 1                | -0.000365871           | -0.000334087 | -0.000571666 |
| 31               | 6                | -0.000778644           | -0.002935690 | -0.003837364 |
| 32               | 8                | -0.001875068           | 0.002167606  | 0.001290165  |
| 33               | 8                | 0.000270177            | 0.002518387  | 0.003590369  |
| 34               | 1                | 0.000587801            | -0.001503614 | -0.001824042 |

Cartesian Forces: Max 0.003837364 RMS 0.001223906

GradGradGradGradGradGradGradGradGradGradGradGradGradGradGradGradGradGradGradGrad  
 Berny optimization.  
 Using GEDIIS/GDIIS optimizer.



FormGI is forming the generalized inverse of G from B-inverse, IUseBI=4.

GSVD: received Info= 1 from GESDD.

Internal Forces: Max 0.005645213 RMS 0.001067126

Search for a local minimum.

Step number 15 out of a maximum of 175

All quantities printed in internal units (Hartrees-Bohrs-Radians)

Mixed Optimization -- RFO/linear search

Update second derivatives using D2CorX and points 13 14 15

DE= -7.67D-04 DEPred=-9.33D-04 R= 8.22D-01

TightC=F SS= 1.41D+00 RLast= 3.10D-01 DXNew= 1.5501D+00 9.2979D-01

Trust test= 8.22D-01 RLast= 3.10D-01 DXMaxT set to 9.30D-01

ITU= 1 1 0 0-1 1 1 1 0 1 0-1 0 1 0

Use linear search instead of GDIIIS.

|                 |         |         |         |         |         |
|-----------------|---------|---------|---------|---------|---------|
| Eigenvalues --- | 0.00170 | 0.00336 | 0.00364 | 0.00626 | 0.00698 |
| Eigenvalues --- | 0.00950 | 0.01070 | 0.01354 | 0.01641 | 0.01761 |
| Eigenvalues --- | 0.01953 | 0.02020 | 0.02225 | 0.02319 | 0.02363 |
| Eigenvalues --- | 0.02451 | 0.02666 | 0.02851 | 0.02924 | 0.03068 |
| Eigenvalues --- | 0.03150 | 0.03311 | 0.03626 | 0.03991 | 0.04090 |
| Eigenvalues --- | 0.04338 | 0.04884 | 0.05203 | 0.05541 | 0.05758 |
| Eigenvalues --- | 0.05906 | 0.06161 | 0.07582 | 0.09664 | 0.09754 |
| Eigenvalues --- | 0.11937 | 0.12678 | 0.12743 | 0.13535 | 0.14299 |
| Eigenvalues --- | 0.14813 | 0.15443 | 0.15888 | 0.15966 | 0.15992 |
| Eigenvalues --- | 0.15999 | 0.16001 | 0.16003 | 0.16007 | 0.16445 |
| Eigenvalues --- | 0.16969 | 0.17721 | 0.19890 | 0.20655 | 0.21797 |
| Eigenvalues --- | 0.22583 | 0.23312 | 0.23870 | 0.24786 | 0.25208 |
| Eigenvalues --- | 0.25996 | 0.28732 | 0.29385 | 0.30219 | 0.31844 |
| Eigenvalues --- | 0.32380 | 0.34497 | 0.34516 | 0.34608 | 0.34764 |
| Eigenvalues --- | 0.34880 | 0.34936 | 0.34951 | 0.35059 | 0.35073 |
| Eigenvalues --- | 0.35604 | 0.35709 | 0.35850 | 0.36538 | 0.36768 |
| Eigenvalues --- | 0.36847 | 0.37207 | 0.37534 | 0.38218 | 0.40725 |
| Eigenvalues --- | 0.41051 | 0.42678 | 0.46020 | 0.49051 | 0.51599 |
| Eigenvalues --- | 0.53744 | 0.55564 | 0.56164 | 0.60526 | 0.89708 |
| Eigenvalues --- | 1.25520 |         |         |         |         |

RFO step: Lambda=-9.67403381D-04 EMin= 1.70314522D-03

Quartic linear search produced a step of -0.09207.

Iteration 1 RMS(Cart)= 0.05788926 RMS(Int)= 0.00064771

Iteration 2 RMS(Cart)= 0.00093507 RMS(Int)= 0.00006523

Iteration 3 RMS(Cart)= 0.00000241 RMS(Int)= 0.00006522

Iteration 4 RMS(Cart)= 0.00000000 RMS(Int)= 0.00006522

| Variable | Old X   | -DE/DX   | Delta X<br>(Linear) | Delta X<br>(Quad) | Delta X<br>(Total) | New X   |
|----------|---------|----------|---------------------|-------------------|--------------------|---------|
| R1       | 2.57471 | -0.00215 | -0.00006            | -0.00242          | -0.00242           | 2.57228 |
| R2       | 2.61448 | -0.00045 | -0.00018            | 0.00223           | 0.00204            | 2.61651 |
| R3       | 2.03125 | 0.00006  | 0.00005             | -0.00061          | -0.00056           | 2.03069 |

|     |         |          |          |          |          |         |
|-----|---------|----------|----------|----------|----------|---------|
| R4  | 2.62263 | -0.00144 | 0.00038  | -0.00642 | -0.00600 | 2.61663 |
| R5  | 2.04144 | -0.00069 | -0.00035 | 0.00174  | 0.00138  | 2.04282 |
| R6  | 2.53940 | -0.00027 | 0.00008  | -0.00067 | -0.00062 | 2.53878 |
| R7  | 2.70216 | 0.00131  | -0.00033 | 0.00516  | 0.00483  | 2.70700 |
| R8  | 2.52835 | 0.00000  | -0.00007 | 0.00079  | 0.00066  | 2.52901 |
| R9  | 2.03369 | -0.00002 | 0.00000  | -0.00025 | -0.00025 | 2.03344 |
| R10 | 2.79440 | -0.00278 | -0.00033 | -0.00174 | -0.00206 | 2.79233 |
| R11 | 2.06193 | 0.00043  | -0.00003 | 0.00129  | 0.00126  | 2.06319 |
| R12 | 2.05682 | -0.00032 | 0.00021  | -0.00323 | -0.00302 | 2.05381 |
| R13 | 2.89569 | -0.00234 | -0.00059 | 0.00305  | 0.00246  | 2.89815 |
| R14 | 4.91878 | -0.00017 | 0.00175  | 0.00181  | 0.00357  | 4.92234 |
| R15 | 2.50696 | 0.00004  | -0.00004 | 0.00003  | -0.00001 | 2.50695 |
| R16 | 2.04884 | -0.00072 | 0.00001  | -0.00208 | -0.00207 | 2.04677 |
| R17 | 2.04837 | -0.00075 | -0.00005 | -0.00133 | -0.00139 | 2.04698 |
| R18 | 2.06728 | -0.00099 | -0.00057 | 0.00165  | 0.00108  | 2.06835 |
| R19 | 2.77320 | 0.00031  | -0.00016 | 0.00149  | 0.00122  | 2.77443 |
| R20 | 2.75667 | 0.00038  | 0.00040  | -0.00198 | -0.00153 | 2.75514 |
| R21 | 2.05251 | 0.00019  | 0.00002  | -0.00037 | -0.00035 | 2.05216 |
| R22 | 2.05063 | 0.00081  | -0.00004 | 0.00191  | 0.00186  | 2.05249 |
| R23 | 2.73289 | 0.00026  | -0.00017 | 0.00229  | 0.00220  | 2.73508 |
| R24 | 2.05618 | -0.00003 | -0.00001 | 0.00032  | 0.00031  | 2.05649 |
| R25 | 2.84224 | -0.00003 | 0.00003  | -0.00086 | -0.00083 | 2.84140 |
| R26 | 3.10154 | 0.00027  | 0.00113  | 0.00568  | 0.00682  | 3.10836 |
| R27 | 2.06688 | 0.00007  | 0.00000  | 0.00011  | 0.00012  | 2.06700 |
| R28 | 2.06791 | 0.00003  | -0.00001 | 0.00023  | 0.00022  | 2.06813 |
| R29 | 2.06322 | 0.00007  | 0.00001  | 0.00010  | 0.00010  | 2.06332 |
| R30 | 2.06941 | 0.00028  | 0.00001  | 0.00053  | 0.00053  | 2.06995 |
| R31 | 2.06016 | 0.00076  | 0.00024  | -0.00086 | -0.00061 | 2.05955 |
| R32 | 2.89129 | -0.00194 | -0.00039 | -0.00453 | -0.00492 | 2.88638 |
| R33 | 2.28397 | -0.00298 | -0.00011 | -0.00177 | -0.00188 | 2.28209 |
| R34 | 2.51047 | 0.00309  | 0.00006  | 0.00678  | 0.00684  | 2.51731 |
| R35 | 1.88758 | 0.00082  | 0.00012  | -0.00176 | -0.00164 | 1.88594 |
| A1  | 1.88069 | -0.00045 | -0.00009 | -0.00031 | -0.00036 | 1.88033 |
| A2  | 2.27624 | 0.00010  | 0.00025  | -0.00276 | -0.00266 | 2.27359 |
| A3  | 2.12531 | 0.00030  | -0.00017 | 0.00208  | 0.00174  | 2.12705 |
| A4  | 1.85913 | 0.00091  | 0.00008  | 0.00177  | 0.00171  | 1.86084 |
| A5  | 2.27755 | -0.00046 | -0.00078 | 0.00358  | 0.00239  | 2.27994 |
| A6  | 2.14629 | -0.00047 | 0.00070  | -0.00624 | -0.00593 | 2.14037 |
| A7  | 1.89718 | 0.00006  | -0.00018 | 0.00090  | 0.00081  | 1.89799 |
| A8  | 2.22575 | -0.00229 | 0.00093  | -0.01516 | -0.01428 | 2.21146 |
| A9  | 2.15954 | 0.00222  | -0.00075 | 0.01416  | 0.01337  | 2.17292 |
| A10 | 1.89705 | -0.00089 | -0.00003 | -0.00003 | -0.00011 | 1.89694 |
| A11 | 2.18779 | 0.00041  | -0.00002 | 0.00017  | 0.00011  | 2.18790 |
| A12 | 2.19829 | 0.00049  | 0.00005  | 0.00003  | 0.00003  | 2.19833 |

|     |         |          |          |          |          |         |
|-----|---------|----------|----------|----------|----------|---------|
| A13 | 1.89062 | 0.00038  | 0.00023  | -0.00222 | -0.00198 | 1.88864 |
| A14 | 2.20445 | -0.00274 | -0.00036 | -0.00486 | -0.00522 | 2.19923 |
| A15 | 2.18752 | 0.00235  | 0.00012  | 0.00700  | 0.00710  | 2.19462 |
| A16 | 1.87455 | 0.00312  | 0.00107  | -0.00003 | 0.00100  | 1.87555 |
| A17 | 1.85734 | 0.00077  | -0.00040 | 0.00157  | 0.00118  | 1.85851 |
| A18 | 1.98364 | -0.00565 | -0.00107 | -0.00297 | -0.00405 | 1.97959 |
| A19 | 1.88491 | -0.00058 | -0.00020 | 0.00476  | 0.00457  | 1.88948 |
| A20 | 1.93653 | 0.00078  | 0.00065  | -0.00822 | -0.00757 | 1.92895 |
| A21 | 1.92255 | 0.00175  | -0.00006 | 0.00557  | 0.00553  | 1.92808 |
| A22 | 2.11148 | 0.00051  | -0.00547 | 0.03954  | 0.03407  | 2.14555 |
| A23 | 2.14286 | -0.00060 | 0.00125  | -0.01384 | -0.01259 | 2.13028 |
| A24 | 1.97192 | 0.00004  | -0.00024 | 0.00228  | 0.00204  | 1.97396 |
| A25 | 2.16840 | 0.00057  | -0.00101 | 0.01156  | 0.01055  | 2.17895 |
| A26 | 2.06534 | 0.00058  | 0.00001  | 0.00411  | 0.00399  | 2.06932 |
| A27 | 2.14109 | -0.00015 | 0.00084  | -0.00776 | -0.00706 | 2.13403 |
| A28 | 2.07508 | -0.00037 | -0.00089 | 0.00535  | 0.00433  | 2.07941 |
| A29 | 2.06330 | -0.00076 | -0.00018 | 0.00017  | 0.00001  | 2.06331 |
| A30 | 2.12868 | 0.00078  | -0.00022 | 0.00205  | 0.00180  | 2.13049 |
| A31 | 1.97655 | 0.00004  | 0.00020  | 0.00088  | 0.00105  | 1.97760 |
| A32 | 1.99915 | 0.00014  | 0.00097  | -0.00512 | -0.00414 | 1.99502 |
| A33 | 2.02347 | -0.00008 | -0.00016 | -0.00025 | -0.00040 | 2.02307 |
| A34 | 2.04196 | -0.00018 | 0.00009  | -0.00139 | -0.00133 | 2.04063 |
| A35 | 2.13914 | 0.00006  | -0.00024 | 0.00245  | 0.00223  | 2.14137 |
| A36 | 1.94960 | -0.00021 | 0.00040  | -0.00352 | -0.00311 | 1.94649 |
| A37 | 2.03744 | 0.00011  | -0.00016 | 0.00079  | 0.00061  | 2.03805 |
| A38 | 2.02175 | 0.00011  | -0.00007 | 0.00088  | 0.00082  | 2.02256 |
| A39 | 2.11213 | -0.00003 | 0.00151  | -0.00924 | -0.00801 | 2.10413 |
| A40 | 2.63342 | -0.00127 | 0.00167  | -0.02789 | -0.02628 | 2.60714 |
| A41 | 1.93484 | -0.00002 | -0.00007 | 0.00036  | 0.00029  | 1.93512 |
| A42 | 1.91582 | 0.00013  | 0.00005  | 0.00028  | 0.00034  | 1.91616 |
| A43 | 1.93494 | -0.00013 | 0.00002  | -0.00112 | -0.00109 | 1.93385 |
| A44 | 1.88307 | -0.00004 | 0.00003  | -0.00018 | -0.00015 | 1.88293 |
| A45 | 1.89719 | 0.00006  | -0.00005 | 0.00083  | 0.00078  | 1.89796 |
| A46 | 1.89679 | 0.00000  | 0.00001  | -0.00015 | -0.00014 | 1.89665 |
| A47 | 1.88677 | 0.00013  | -0.00057 | 0.00660  | 0.00601  | 1.89279 |
| A48 | 1.95582 | 0.00089  | 0.00081  | -0.00673 | -0.00593 | 1.94989 |
| A49 | 2.00956 | -0.00325 | -0.00127 | 0.00452  | 0.00322  | 2.01278 |
| A50 | 1.86148 | -0.00031 | -0.00006 | 0.00043  | 0.00039  | 1.86186 |
| A51 | 1.86671 | 0.00235  | 0.00049  | 0.00315  | 0.00361  | 1.87032 |
| A52 | 1.87610 | 0.00045  | 0.00066  | -0.00772 | -0.00707 | 1.86903 |
| A53 | 2.14232 | -0.00084 | -0.00013 | 0.00215  | 0.00194  | 2.14426 |
| A54 | 1.95320 | -0.00047 | -0.00042 | -0.00226 | -0.00275 | 1.95045 |
| A55 | 2.18765 | 0.00132  | 0.00053  | -0.00001 | 0.00044  | 2.18810 |
| A56 | 1.95094 | -0.00056 | 0.00045  | -0.00863 | -0.00818 | 1.94276 |

|     |          |          |          |          |          |          |
|-----|----------|----------|----------|----------|----------|----------|
| A57 | 2.83501  | -0.00175 | -0.00204 | 0.01277  | 0.01073  | 2.84574  |
| D1  | -0.00210 | -0.00057 | 0.00014  | -0.00188 | -0.00175 | -0.00385 |
| D2  | 3.11706  | -0.00172 | -0.00024 | -0.04770 | -0.04806 | 3.06900  |
| D3  | -3.09674 | 0.00059  | 0.00044  | 0.02272  | 0.02315  | -3.07358 |
| D4  | 0.02243  | -0.00055 | 0.00007  | -0.02310 | -0.02316 | -0.00073 |
| D5  | -0.00678 | 0.00082  | 0.00016  | 0.00554  | 0.00569  | -0.00109 |
| D6  | -3.11281 | 0.00124  | 0.00054  | 0.00774  | 0.00828  | -3.10453 |
| D7  | 3.09276  | -0.00023 | -0.00010 | -0.01664 | -0.01681 | 3.07594  |
| D8  | -0.01326 | 0.00019  | 0.00028  | -0.01444 | -0.01423 | -0.02749 |
| D9  | 0.01025  | 0.00013  | -0.00038 | -0.00241 | -0.00279 | 0.00746  |
| D10 | 3.11206  | -0.00017 | -0.00030 | -0.00479 | -0.00503 | 3.10703  |
| D11 | -3.11101 | 0.00117  | -0.00002 | 0.03898  | 0.03882  | -3.07219 |
| D12 | -0.00919 | 0.00087  | 0.00007  | 0.03660  | 0.03657  | 0.02738  |
| D13 | -1.54768 | 0.00102  | -0.00090 | 0.01262  | 0.01168  | -1.53600 |
| D14 | 1.56828  | -0.00027 | -0.00134 | -0.03963 | -0.04092 | 1.52736  |
| D15 | -0.01468 | 0.00039  | 0.00049  | 0.00593  | 0.00641  | -0.00827 |
| D16 | 3.13743  | -0.00055 | 0.00049  | -0.01102 | -0.01054 | 3.12690  |
| D17 | -3.11834 | 0.00080  | 0.00036  | 0.00899  | 0.00935  | -3.10899 |
| D18 | 0.03377  | -0.00014 | 0.00036  | -0.00795 | -0.00759 | 0.02618  |
| D19 | -0.41188 | 0.00029  | 0.00870  | -0.01971 | -0.01103 | -0.42291 |
| D20 | 2.72614  | 0.00064  | 0.00995  | -0.01935 | -0.00942 | 2.71672  |
| D21 | 2.68440  | -0.00011 | 0.00882  | -0.02284 | -0.01400 | 2.67040  |
| D22 | -0.46077 | 0.00023  | 0.01006  | -0.02247 | -0.01240 | -0.47317 |
| D23 | 0.01328  | -0.00075 | -0.00040 | -0.00710 | -0.00748 | 0.00580  |
| D24 | 3.11973  | -0.00129 | -0.00079 | -0.00957 | -0.01037 | 3.10936  |
| D25 | -3.13891 | 0.00020  | -0.00040 | 0.00997  | 0.00959  | -3.12932 |
| D26 | -0.03246 | -0.00034 | -0.00079 | 0.00751  | 0.00670  | -0.02576 |
| D27 | -2.30511 | -0.00114 | -0.00306 | -0.03611 | -0.03918 | -2.34429 |
| D28 | -0.28991 | 0.00005  | -0.00297 | -0.02989 | -0.03287 | -0.32277 |
| D29 | 1.82915  | -0.00068 | -0.00396 | -0.02365 | -0.02762 | 1.80152  |
| D30 | 0.87788  | -0.00059 | -0.00261 | -0.03332 | -0.03592 | 0.84196  |
| D31 | 2.89308  | 0.00060  | -0.00252 | -0.02710 | -0.02960 | 2.86348  |
| D32 | -1.27105 | -0.00013 | -0.00351 | -0.02086 | -0.02436 | -1.29541 |
| D33 | 3.13782  | 0.00092  | -0.00161 | 0.03248  | 0.03087  | -3.11449 |
| D34 | 1.09147  | 0.00071  | -0.00164 | 0.03171  | 0.03009  | 1.12156  |
| D35 | -1.05981 | 0.00193  | -0.00219 | 0.04418  | 0.04201  | -1.01781 |
| D36 | 1.02320  | 0.00030  | -0.00272 | 0.04073  | 0.03799  | 1.06119  |
| D37 | -1.02315 | 0.00008  | -0.00275 | 0.03997  | 0.03721  | -0.98595 |
| D38 | 3.10875  | 0.00130  | -0.00331 | 0.05244  | 0.04912  | -3.12531 |
| D39 | -1.06311 | -0.00061 | -0.00286 | 0.03644  | 0.03358  | -1.02954 |
| D40 | -3.10947 | -0.00083 | -0.00289 | 0.03568  | 0.03280  | -3.07668 |
| D41 | 1.02244  | 0.00040  | -0.00344 | 0.04815  | 0.04471  | 1.06715  |
| D42 | 3.11523  | 0.00060  | 0.00092  | 0.01047  | 0.01139  | 3.12661  |
| D43 | -0.08936 | 0.00161  | 0.00026  | 0.04252  | 0.04278  | -0.04658 |

|     |          |          |          |          |          |          |
|-----|----------|----------|----------|----------|----------|----------|
| D44 | -0.02238 | 0.00022  | -0.00046 | 0.01008  | 0.00961  | -0.01277 |
| D45 | 3.05622  | 0.00123  | -0.00112 | 0.04214  | 0.04101  | 3.09722  |
| D46 | -2.75155 | 0.00026  | 0.00083  | -0.00285 | -0.00200 | -2.75355 |
| D47 | -0.04775 | 0.00028  | 0.00027  | 0.00233  | 0.00260  | -0.04515 |
| D48 | -0.01287 | 0.00006  | -0.00074 | 0.00266  | 0.00193  | -0.01094 |
| D49 | 2.69093  | 0.00008  | -0.00130 | 0.00784  | 0.00653  | 2.69746  |
| D50 | 0.63151  | -0.00056 | 0.00214  | -0.03157 | -0.02943 | 0.60208  |
| D51 | -1.74234 | -0.00064 | 0.00107  | -0.02656 | -0.02546 | -1.76779 |
| D52 | 2.59256  | -0.00008 | -0.00266 | 0.01297  | 0.01028  | 2.60284  |
| D53 | 0.20965  | -0.00013 | -0.00283 | 0.01475  | 0.01190  | 0.22156  |
| D54 | 2.55805  | 0.00006  | -0.00001 | 0.00104  | 0.00105  | 2.55910  |
| D55 | -1.64649 | 0.00008  | 0.00003  | 0.00122  | 0.00126  | -1.64523 |
| D56 | 0.44926  | 0.00008  | 0.00009  | 0.00051  | 0.00061  | 0.44987  |
| D57 | 1.33516  | -0.00007 | -0.00015 | 0.00189  | 0.00173  | 1.33689  |
| D58 | -2.86938 | -0.00004 | -0.00011 | 0.00207  | 0.00194  | -2.86744 |
| D59 | -0.77362 | -0.00004 | -0.00005 | 0.00135  | 0.00129  | -0.77234 |
| D60 | -1.01666 | 0.00001  | -0.00053 | 0.00563  | 0.00510  | -1.01156 |
| D61 | 1.06198  | 0.00003  | -0.00049 | 0.00581  | 0.00531  | 1.06730  |
| D62 | -3.12545 | 0.00003  | -0.00043 | 0.00509  | 0.00466  | -3.12079 |
| D63 | 1.11354  | 0.00007  | 0.00492  | 0.09838  | 0.10321  | 1.21675  |
| D64 | 2.58960  | -0.00054 | 0.00816  | 0.07137  | 0.07963  | 2.66922  |
| D65 | 2.64749  | -0.00056 | 0.00404  | -0.04537 | -0.04134 | 2.60616  |
| D66 | -0.49857 | -0.00001 | 0.00648  | -0.07163 | -0.06515 | -0.56373 |
| D67 | -1.53908 | -0.00074 | 0.00288  | -0.03190 | -0.02901 | -1.56808 |
| D68 | 1.59804  | -0.00019 | 0.00532  | -0.05816 | -0.05282 | 1.54522  |
| D69 | 0.45443  | 0.00025  | 0.00337  | -0.03356 | -0.03020 | 0.42423  |
| D70 | -2.69164 | 0.00080  | 0.00581  | -0.05982 | -0.05401 | -2.74566 |
| D71 | 3.03199  | -0.00207 | -0.00049 | -0.02219 | -0.02269 | 3.00930  |
| D72 | -0.11422 | -0.00151 | 0.00204  | -0.04926 | -0.04722 | -0.16144 |
| D73 | -1.90165 | -0.00073 | 0.00295  | -0.01801 | -0.01506 | -1.91670 |

| Item                 | Value    | Threshold | Converged? |
|----------------------|----------|-----------|------------|
| Maximum Force        | 0.005645 | 0.000450  | NO         |
| RMS Force            | 0.001067 | 0.000300  | NO         |
| Maximum Displacement | 0.242840 | 0.001800  | NO         |
| RMS Displacement     | 0.057787 | 0.001200  | NO         |

Predicted change in Energy=-5.287887D-04

GradGradGradGradGradGradGradGradGradGradGradGradGradGradGradGradGradGrad

Input orientation:

| Center Number | Atomic Number | Atomic Type | Coordinates (Angstroms) |          |          |
|---------------|---------------|-------------|-------------------------|----------|----------|
|               |               |             | X                       | Y        | Z        |
| 1             | 6             | 0           | -1.089300               | 1.699365 | 1.642562 |

|    |    |   |           |           |           |
|----|----|---|-----------|-----------|-----------|
| 2  | 6  | 0 | -1.831063 | 0.560853  | 1.722708  |
| 3  | 7  | 0 | -2.615630 | 0.518296  | 0.582564  |
| 4  | 6  | 0 | -2.345112 | 1.599000  | -0.168295 |
| 5  | 7  | 0 | -1.421123 | 2.336500  | 0.458896  |
| 6  | 6  | 0 | -0.822345 | 3.587065  | -0.051953 |
| 7  | 1  | 0 | -0.319974 | 2.074292  | 2.292422  |
| 8  | 1  | 0 | -1.823205 | -0.234340 | 2.454964  |
| 9  | 1  | 0 | -1.639337 | 4.226126  | -0.392746 |
| 10 | 1  | 0 | -0.344171 | 4.069161  | 0.796650  |
| 11 | 35 | 0 | -0.251372 | -2.304118 | 2.280893  |
| 12 | 1  | 0 | -2.795490 | 1.825282  | -1.118998 |
| 13 | 6  | 0 | -3.530799 | -0.519268 | 0.211178  |
| 14 | 6  | 0 | -3.405661 | -1.761882 | 0.658589  |
| 15 | 1  | 0 | -4.312868 | -0.177447 | -0.455633 |
| 16 | 1  | 0 | -4.138256 | -2.498778 | 0.352569  |
| 17 | 1  | 0 | -2.574308 | -2.071186 | 1.299814  |
| 18 | 6  | 0 | 2.840878  | -0.751509 | 0.935409  |
| 19 | 6  | 0 | 4.214565  | -0.393550 | 1.310049  |
| 20 | 8  | 0 | 3.165163  | 0.601316  | 1.371694  |
| 21 | 1  | 0 | 2.596804  | -0.815449 | -0.120831 |
| 22 | 1  | 0 | 2.181966  | -1.292412 | 1.608418  |
| 23 | 1  | 0 | 4.546233  | -0.686217 | 2.304344  |
| 24 | 6  | 0 | 5.301081  | -0.169888 | 0.295019  |
| 25 | 1  | 0 | 6.000463  | 0.599002  | 0.635739  |
| 26 | 1  | 0 | 5.865586  | -1.095624 | 0.146457  |
| 27 | 1  | 0 | 4.878843  | 0.139614  | -0.663147 |
| 28 | 6  | 0 | 0.190440  | 3.361145  | -1.181230 |
| 29 | 1  | 0 | 0.601597  | 4.332226  | -1.477513 |
| 30 | 1  | 0 | -0.281612 | 2.937771  | -2.067644 |
| 31 | 6  | 0 | 1.372194  | 2.460080  | -0.828377 |
| 32 | 8  | 0 | 1.928880  | 1.761357  | -1.640941 |
| 33 | 8  | 0 | 1.715588  | 2.575596  | 0.453511  |
| 34 | 1  | 0 | 2.404415  | 1.899336  | 0.706852  |

-----  
Distance matrix (angstroms):

|   |   | 1        | 2        | 3        | 4        | 5        |
|---|---|----------|----------|----------|----------|----------|
| 1 | C | 0.000000 |          |          |          |          |
| 2 | C | 1.361193 | 0.000000 |          |          |          |
| 3 | N | 2.201863 | 1.384660 | 0.000000 |          |          |
| 4 | C | 2.205978 | 2.217631 | 1.343462 | 0.000000 |          |
| 5 | N | 1.384598 | 2.217700 | 2.178991 | 1.338294 | 0.000000 |
| 6 | C | 2.550698 | 3.650328 | 3.610516 | 2.506942 | 1.477639 |
| 7 | H | 1.074593 | 2.213247 | 3.258032 | 3.222144 | 2.154785 |
| 8 | H | 2.222123 | 1.081015 | 2.168013 | 3.242686 | 3.279508 |

|    |    |          |          |          |          |          |
|----|----|----------|----------|----------|----------|----------|
| 9  | H  | 3.290827 | 4.236287 | 3.956309 | 2.729522 | 2.084130 |
| 10 | H  | 2.624255 | 3.921308 | 4.220663 | 3.322135 | 2.067854 |
| 11 | Br | 4.139743 | 3.318894 | 4.054634 | 5.061284 | 5.120872 |
| 12 | H  | 3.248561 | 3.256408 | 2.153108 | 1.076048 | 2.154061 |
| 13 | C  | 3.596124 | 2.518032 | 1.432481 | 2.457013 | 3.559144 |
| 14 | C  | 4.279482 | 3.001134 | 2.414362 | 3.619949 | 4.557960 |
| 15 | H  | 4.279747 | 3.383727 | 2.107731 | 2.666532 | 3.939350 |
| 16 | H  | 5.346458 | 4.069614 | 3.387333 | 4.503160 | 5.547434 |
| 17 | H  | 4.066912 | 2.767468 | 2.687298 | 3.959563 | 4.632998 |
| 18 | C  | 4.685419 | 4.916215 | 5.613411 | 5.799788 | 5.284649 |
| 19 | C  | 5.711553 | 6.134394 | 6.929088 | 7.013210 | 6.319700 |
| 20 | O  | 4.402219 | 5.008705 | 5.834996 | 5.807759 | 4.987793 |
| 21 | H  | 4.798042 | 4.989875 | 5.426151 | 5.500396 | 5.139514 |
| 22 | H  | 4.433179 | 4.421771 | 5.229528 | 5.657862 | 5.241436 |
| 23 | H  | 6.155338 | 6.524062 | 7.463756 | 7.669862 | 6.939152 |
| 24 | C  | 6.793155 | 7.310251 | 7.951767 | 7.861800 | 7.176132 |
| 25 | H  | 7.244946 | 7.906691 | 8.616635 | 8.443642 | 7.624311 |
| 26 | H  | 7.643346 | 8.029128 | 8.644417 | 8.647290 | 8.060597 |
| 27 | H  | 6.585427 | 7.133905 | 7.606729 | 7.386488 | 6.765712 |
| 28 | C  | 3.517535 | 4.512313 | 4.366553 | 3.249649 | 2.517350 |
| 29 | H  | 4.418819 | 5.512033 | 5.398197 | 4.227017 | 3.438604 |
| 30 | H  | 3.993950 | 4.734692 | 4.280783 | 3.107711 | 2.836092 |
| 31 | C  | 3.569759 | 4.513973 | 4.654462 | 3.872406 | 3.078143 |
| 32 | O  | 4.460341 | 5.185799 | 5.209774 | 4.523500 | 3.995325 |
| 33 | O  | 3.170019 | 4.271860 | 4.796727 | 4.222519 | 3.145815 |
| 34 | H  | 3.622373 | 4.556619 | 5.208029 | 4.838811 | 3.858411 |
|    |    | 6        | 7        | 8        | 9        | 10       |
| 6  | C  | 0.000000 |          |          |          |          |
| 7  | H  | 2.834952 | 0.000000 |          |          |          |
| 8  | H  | 4.678621 | 2.759693 | 0.000000 |          |          |
| 9  | H  | 1.091794 | 3.685272 | 5.295188 | 0.000000 |          |
| 10 | H  | 1.086828 | 2.493475 | 4.843312 | 1.765434 | 0.000000 |
| 11 | Br | 6.361936 | 4.378963 | 2.604793 | 7.191584 | 6.544484 |
| 12 | H  | 2.852327 | 4.222318 | 4.237993 | 2.761917 | 3.835840 |
| 13 | C  | 4.926148 | 4.622502 | 2.834014 | 5.144037 | 5.617032 |
| 14 | C  | 5.982444 | 5.187206 | 2.839809 | 6.330991 | 6.587325 |
| 15 | H  | 5.149589 | 5.344655 | 3.830566 | 5.152007 | 5.945792 |
| 16 | H  | 6.942362 | 6.265403 | 3.860985 | 7.212796 | 7.598033 |
| 17 | H  | 6.075562 | 4.822061 | 2.296199 | 6.587493 | 6.552140 |
| 18 | C  | 5.763446 | 4.451699 | 4.932564 | 6.827384 | 5.779502 |
| 19 | C  | 6.562835 | 5.255221 | 6.147426 | 7.649123 | 6.400112 |
| 20 | O  | 5.180896 | 3.894044 | 5.172583 | 6.271818 | 4.967096 |
| 21 | H  | 5.574716 | 4.762562 | 5.148679 | 6.590623 | 5.774991 |
| 22 | H  | 5.965904 | 4.249973 | 4.228186 | 7.004375 | 5.982207 |

|    |    |          |          |          |          |           |
|----|----|----------|----------|----------|----------|-----------|
| 23 | H  | 7.254977 | 5.594687 | 6.387223 | 8.346656 | 6.985900  |
| 24 | C  | 7.192456 | 6.373557 | 7.444795 | 8.244232 | 7.077431  |
| 25 | H  | 7.480117 | 6.698434 | 8.075508 | 8.519410 | 7.233413  |
| 26 | H  | 8.166723 | 7.274249 | 8.073941 | 9.216053 | 8.103014  |
| 27 | H  | 6.690442 | 6.285386 | 7.401346 | 7.698010 | 6.697180  |
| 28 | C  | 1.533636 | 3.739355 | 5.495834 | 2.172092 | 2.167742  |
| 29 | H  | 2.148277 | 4.489985 | 6.495966 | 2.491939 | 2.476994  |
| 30 | H  | 2.185631 | 4.444912 | 5.735223 | 2.511684 | 3.080282  |
| 31 | C  | 2.586297 | 3.570946 | 5.315149 | 3.518240 | 2.859329  |
| 32 | O  | 3.664332 | 4.541653 | 5.902321 | 4.512787 | 4.053957  |
| 33 | O  | 2.778429 | 2.788622 | 4.942127 | 3.833526 | 2.567311  |
| 34 | H  | 3.719704 | 3.157046 | 5.047895 | 4.793224 | 3.502988  |
|    |    | 11       | 12       | 13       | 14       | 15        |
| 11 | Br | 0.000000 |          |          |          |           |
| 12 | H  | 5.923153 | 0.000000 |          |          |           |
| 13 | C  | 4.268964 | 2.794094 | 0.000000 |          |           |
| 14 | C  | 3.588235 | 4.049675 | 1.326622 | 0.000000 |           |
| 15 | H  | 5.339200 | 2.598733 | 1.083102 | 2.138913 | 0.000000  |
| 16 | H  | 4.343293 | 4.760885 | 2.075441 | 1.083217 | 2.464195  |
| 17 | H  | 2.532351 | 4.591518 | 2.123312 | 1.094526 | 3.112946  |
| 18 | C  | 3.712537 | 6.529095 | 6.416908 | 6.333777 | 7.310309  |
| 19 | C  | 4.953524 | 7.743665 | 7.823936 | 7.769464 | 8.710995  |
| 20 | O  | 4.576123 | 6.575030 | 6.887554 | 7.019184 | 7.737347  |
| 21 | H  | 4.012047 | 6.086595 | 6.143734 | 6.126403 | 6.947136  |
| 22 | H  | 2.719725 | 6.475637 | 5.931754 | 5.687192 | 6.905528  |
| 23 | H  | 5.063118 | 8.481025 | 8.345517 | 8.191348 | 9.293007  |
| 24 | C  | 6.271233 | 8.457814 | 8.839185 | 8.858554 | 9.643213  |
| 25 | H  | 7.086613 | 9.052715 | 9.606026 | 9.697911 | 10.399940 |
| 26 | H  | 6.590405 | 9.227530 | 9.414267 | 9.309253 | 10.237503 |
| 27 | H  | 6.399868 | 7.870493 | 8.480604 | 8.602074 | 9.199518  |
| 28 | C  | 6.654074 | 3.358352 | 5.553740 | 6.523978 | 5.773033  |
| 29 | H  | 7.674258 | 4.237157 | 6.592827 | 7.599948 | 6.747841  |
| 30 | H  | 6.810880 | 2.908117 | 5.263209 | 6.267278 | 5.343612  |
| 31 | C  | 5.916173 | 4.225756 | 5.830654 | 6.547055 | 6.278169  |
| 32 | O  | 6.054945 | 4.753544 | 6.199975 | 6.793995 | 6.642539  |
| 33 | O  | 5.569548 | 4.835864 | 6.096022 | 6.714385 | 6.689400  |
| 34 | H  | 5.215346 | 5.511644 | 6.428227 | 6.867593 | 7.126450  |
|    |    | 16       | 17       | 18       | 19       | 20        |
| 16 | H  | 0.000000 |          |          |          |           |
| 17 | H  | 1.877776 | 0.000000 |          |          |           |
| 18 | C  | 7.218099 | 5.585568 | 0.000000 |          |           |
| 19 | C  | 8.667085 | 6.993093 | 1.468164 | 0.000000 |           |
| 20 | O  | 7.999320 | 6.331584 | 1.457959 | 1.447344 | 0.000000  |
| 21 | H  | 6.958357 | 5.507768 | 1.085957 | 2.200583 | 2.134921  |



|    |   |           |          |          |          |          |
|----|---|-----------|----------|----------|----------|----------|
| 22 | H | 6.555736  | 4.829479 | 1.086132 | 2.242417 | 2.146840 |
| 23 | H | 9.083785  | 7.323204 | 2.187803 | 1.088247 | 2.105928 |
| 24 | C | 9.722558  | 8.163719 | 2.607870 | 1.503605 | 2.513192 |
| 25 | H | 10.605190 | 9.005421 | 3.449154 | 2.151578 | 2.929260 |
| 26 | H | 10.103869 | 8.574017 | 3.144792 | 2.138393 | 3.416592 |
| 27 | H | 9.449914  | 8.018124 | 2.739121 | 2.149194 | 2.700083 |
| 28 | C | 7.445055  | 6.581005 | 5.330938 | 6.041340 | 4.794064 |
| 29 | H | 8.513403  | 7.668351 | 6.056479 | 6.569399 | 5.348788 |
| 30 | H | 7.091347  | 6.456460 | 5.690260 | 6.536216 | 5.400770 |
| 31 | C | 7.506661  | 6.374672 | 3.947439 | 4.560169 | 3.392646 |
| 32 | O | 7.676781  | 6.604175 | 3.712656 | 4.310025 | 3.456885 |
| 33 | O | 7.747706  | 6.380597 | 3.545156 | 3.974213 | 2.615742 |
| 34 | H | 7.891481  | 6.395649 | 2.696241 | 2.982920 | 1.644872 |
|    |   | 21        | 22       | 23       | 24       | 25       |
| 21 | H | 0.000000  |          |          |          |          |
| 22 | H | 1.841164  | 0.000000 |          |          |          |
| 23 | H | 3.114233  | 2.538020 | 0.000000 |          |          |
| 24 | C | 2.811191  | 3.565664 | 2.207664 | 0.000000 |          |
| 25 | H | 3.762707  | 4.370867 | 2.559457 | 1.093809 | 0.000000 |
| 26 | H | 3.291637  | 3.968011 | 2.562184 | 1.094406 | 1.768997 |
| 27 | H | 2.532579  | 3.805766 | 3.098166 | 1.091861 | 1.776562 |
| 28 | C | 4.935481  | 5.779611 | 6.892263 | 6.384838 | 6.684846 |
| 29 | H | 5.685068  | 6.607351 | 7.419391 | 6.745076 | 6.895690 |
| 30 | H | 5.114883  | 6.121854 | 7.453566 | 6.812208 | 7.227903 |
| 31 | C | 3.567826  | 4.546966 | 5.457806 | 4.859517 | 5.198858 |
| 32 | O | 3.065418  | 4.466306 | 5.329768 | 4.341588 | 4.807507 |
| 33 | O | 3.550437  | 4.063596 | 4.698676 | 4.518690 | 4.722318 |
| 34 | H | 2.844667  | 3.324088 | 3.718124 | 3.583569 | 3.824590 |
|    |   | 26        | 27       | 28       | 29       | 30       |
| 26 | H | 0.000000  |          |          |          |          |
| 27 | H | 1.776213  | 0.000000 |          |          |          |
| 28 | C | 7.337085  | 5.712074 | 0.000000 |          |          |
| 29 | H | 7.733590  | 6.044503 | 1.095369 | 0.000000 |          |
| 30 | H | 7.678448  | 6.035941 | 1.089866 | 1.752945 | 0.000000 |
| 31 | C | 5.812392  | 4.208141 | 1.527405 | 2.126060 | 2.121095 |
| 32 | O | 5.182160  | 3.505483 | 2.406829 | 2.897888 | 2.540138 |
| 33 | O | 5.549290  | 4.145735 | 2.369713 | 2.838235 | 3.236696 |
| 34 | H | 4.611240  | 3.331113 | 3.256290 | 3.733706 | 3.998865 |
|    |   | 31        | 32       | 33       | 34       |          |
| 31 | C | 0.000000  |          |          |          |          |
| 32 | O | 1.207631  | 0.000000 |          |          |          |
| 33 | O | 1.332104  | 2.257256 | 0.000000 |          |          |
| 34 | H | 1.933092  | 2.399438 | 0.997994 | 0.000000 |          |

Stoichiometry C11H17BrN2O3

Framework group C1[X(C11H17BrN2O3)]

Deg. of freedom 96

Full point group C1 NOp 1

Largest Abelian subgroup C1 NOp 1

Largest concise Abelian subgroup C1 NOp 1

Standard orientation:

| Center<br>Number | Atomic<br>Number | Atomic<br>Type | Coordinates (Angstroms) |           |           |
|------------------|------------------|----------------|-------------------------|-----------|-----------|
|                  |                  |                | X                       | Y         | Z         |
| 1                | 6                | 0              | -1.061880               | 1.150680  | 1.374460  |
| 2                | 6                | 0              | -2.041736               | 0.318620  | 0.926793  |
| 3                | 7                | 0              | -2.670722               | 0.973821  | -0.118372 |
| 4                | 6                | 0              | -2.077540               | 2.165416  | -0.300378 |
| 5                | 7                | 0              | -1.096834               | 2.298240  | 0.600512  |
| 6                | 6                | 0              | -0.177778               | 3.449855  | 0.712480  |
| 7                | 1                | 0              | -0.313970               | 0.999121  | 2.131039  |
| 8                | 1                | 0              | -2.300028               | -0.688334 | 1.223307  |
| 9                | 1                | 0              | -0.784744               | 4.357037  | 0.687431  |
| 10               | 1                | 0              | 0.287929                | 3.378676  | 1.691891  |
| 11               | 35               | 0              | -1.217126               | -2.801585 | 0.152589  |
| 12               | 1                | 0              | -2.346785               | 2.886662  | -1.052170 |
| 13               | 6                | 0              | -3.740722               | 0.468421  | -0.925635 |
| 14               | 6                | 0              | -3.949938               | -0.832045 | -1.083566 |
| 15               | 1                | 0              | -4.339944               | 1.250694  | -1.375181 |
| 16               | 1                | 0              | -4.784635               | -1.151791 | -1.695449 |
| 17               | 1                | 0              | -3.292697               | -1.587581 | -0.641764 |
| 18               | 6                | 0              | 2.283177                | -1.658362 | -0.320539 |
| 19               | 6                | 0              | 3.645645                | -1.858416 | 0.188544  |
| 20               | 8                | 0              | 2.843527                | -0.758753 | 0.680637  |
| 21               | 1                | 0              | 2.162061                | -1.194752 | -1.295064 |
| 22               | 1                | 0              | 1.443486                | -2.250925 | 0.030844  |
| 23               | 1                | 0              | 3.779996                | -2.625927 | 0.948252  |
| 24               | 6                | 0              | 4.870482                | -1.500510 | -0.606758 |
| 25               | 1                | 0              | 5.675899                | -1.159696 | 0.050178  |
| 26               | 1                | 0              | 5.229468                | -2.380034 | -1.150165 |
| 27               | 1                | 0              | 4.647827                | -0.711150 | -1.327518 |
| 28               | 6                | 0              | 0.890006                | 3.486874  | -0.387749 |
| 29               | 1                | 0              | 1.539338                | 4.351279  | -0.211663 |
| 30               | 1                | 0              | 0.447867                | 3.623677  | -1.374464 |
| 31               | 6                | 0              | 1.790268                | 2.255474  | -0.466154 |
| 32               | 8                | 0              | 2.273240                | 1.861746  | -1.500604 |
| 33               | 8                | 0              | 1.991307                | 1.713689  | 0.734076  |
| 34               | 1                | 0              | 2.476731                | 0.844605  | 0.663031  |

```

-----
Rotational constants (GHZ):      0.3166937      0.2688070      0.1599249
Standard basis: 6-311++G(d,p) (5D, 7F)
There are 538 symmetry adapted cartesian basis functions of A symmetry.
There are 519 symmetry adapted basis functions of A symmetry.
519 basis functions, 823 primitive gaussians, 538 cartesian basis functions
78 alpha electrons      78 beta electrons
nuclear repulsion energy      1572.5535389851 Hartrees.
NAtoms= 34 NActive= 34 NUniq= 34 SFac= 1.00D+00 NAtFMM= 60 NAOKFM=F
Big=F
Integral buffers will be 131072 words long.
Raffenetti 2 integral format.
Two-electron integral symmetry is turned on.
One-electron integrals computed using PRISM.
NBasis= 519 RedAO= T EigKep= 4.59D-06 NBF= 519
NBsUse= 519 1.00D-06 EigRej= -1.00D+00 NBFU= 519
Initial guess from the checkpoint file: "./coohpo.chk"
B after Tr= 0.000000 0.000000 0.000000
Rot= 0.999916 0.003569 -0.001161 -0.012421 Ang= 1.49 deg.
ExpMin= 3.50D-02 ExpMax= 4.40D+05 ExpMxC= 1.51D+04 IAcc=3 IRadAn= 5 AccDes=
0.00D+00
Harris functional with IExCor= 402 and IRadAn= 5 diagonalized for initial guess.
HarFok: IExCor= 402 AccDes= 0.00D+00 IRadAn= 5 IDoV= 1 UseB2=F ITyADJ=14
ICtDFT= 3500011 ScaDFX= 1.000000 1.000000 1.000000 1.000000
FoFCou: FMM=F IPFlag= 0 FMFlag= 100000 FMFlg1= 0
NFxFlg= 0 DoJE=T BraDBF=F KetDBF=T FulRan=T
wScrn= 0.000000 ICntrl= 500 IOpCl= 0 I1Cent= 200000004 NGrid=
0
NMat0= 1 NMatS0= 1 NMatT0= 0 NMatD0= 1 NMtDS0= 0
NMtDT0= 0
Petite list used in FoFCou.
Requested convergence on RMS density matrix=1.00D-08 within 128 cycles.
Requested convergence on MAX density matrix=1.00D-06.
Requested convergence on energy=1.00D-06.
No special actions if energy rises.
SCF Done: E(RB3LYP) = -3338.90143362 A.U. after 13 cycles
NFock= 13 Conv=0.14D-08 -V/T= 2.0019
Calling FoFJK, ICntrl= 2127 FMM=F ISym2X=0 I1Cent= 0 IOpClX= 0 NMat=1 NMatS=1
NMatT=0.
***** Axes restored to original set *****

```

```

-----
Center      Atomic      Forces (Hartrees/Bohr)
Number      Number      X              Y              Z
-----

```

|    |    |              |              |              |
|----|----|--------------|--------------|--------------|
| 1  | 6  | 0.001110634  | -0.000585911 | -0.000001168 |
| 2  | 6  | -0.000671515 | 0.001782930  | 0.001206618  |
| 3  | 7  | 0.000323533  | 0.001287703  | -0.001249330 |
| 4  | 6  | -0.001012400 | -0.000289070 | 0.000238439  |
| 5  | 7  | 0.001294086  | -0.000435239 | -0.000376292 |
| 6  | 6  | 0.000051122  | -0.000629588 | -0.000790809 |
| 7  | 1  | -0.000086853 | 0.000599344  | 0.000277577  |
| 8  | 1  | 0.001855322  | -0.000343108 | -0.001446711 |
| 9  | 1  | 0.000492198  | 0.000444801  | -0.000229636 |
| 10 | 1  | -0.000037306 | 0.000213699  | 0.000791293  |
| 11 | 35 | -0.000294877 | -0.000204039 | 0.001269081  |
| 12 | 1  | -0.000108915 | 0.000075363  | -0.000072028 |
| 13 | 6  | -0.000388051 | -0.000791619 | 0.000510628  |
| 14 | 6  | -0.000942052 | 0.000954155  | 0.000247291  |
| 15 | 1  | 0.000397465  | -0.000098349 | -0.000401508 |
| 16 | 1  | 0.000601345  | -0.000196384 | 0.000150219  |
| 17 | 1  | -0.001144557 | -0.001181779 | -0.001197552 |
| 18 | 6  | 0.000593865  | -0.000505993 | 0.000523563  |
| 19 | 6  | -0.000313056 | 0.000137168  | -0.000581243 |
| 20 | 8  | -0.000617515 | 0.001735830  | 0.001796586  |
| 21 | 1  | 0.000100404  | -0.000096471 | -0.000487470 |
| 22 | 1  | 0.000195542  | -0.000638316 | -0.000302445 |
| 23 | 1  | -0.000018039 | -0.000155350 | -0.000212175 |
| 24 | 6  | -0.000024095 | -0.000035202 | -0.000058156 |
| 25 | 1  | 0.000053375  | 0.000051516  | -0.000001059 |
| 26 | 1  | -0.000007632 | 0.000046642  | -0.000065179 |
| 27 | 1  | 0.000005722  | 0.000009151  | -0.000085643 |
| 28 | 6  | 0.000176150  | -0.002440863 | 0.000298228  |
| 29 | 1  | -0.000873931 | 0.000542790  | 0.000726874  |
| 30 | 1  | -0.000775876 | -0.000082584 | -0.000915505 |
| 31 | 6  | 0.001804429  | 0.001062828  | -0.001035606 |
| 32 | 8  | -0.002144269 | 0.000493728  | 0.001166993  |
| 33 | 8  | -0.001731812 | 0.000749492  | 0.001061676  |
| 34 | 1  | 0.002137555  | -0.001477276 | -0.000755553 |

-----  
Cartesian Forces: Max 0.002440863 RMS 0.000843818

GradGradGradGradGradGradGradGradGradGradGradGradGradGradGradGradGradGradGrad

Berny optimization.

Using GEDIIS/GDIIS optimizer.

FormGI is forming the generalized inverse of G from B-inverse, IUseBI=4.

GSVD: received Info= 1 from GESDD.

Internal Forces: Max 0.006248428 RMS 0.001169941

Search for a local minimum.

Step number 16 out of a maximum of 175

All quantities printed in internal units (Hartrees-Bohrs-Radians)

Mixed Optimization -- RFO/linear search

Update second derivatives using D2CorX and points 14 15 16

DE= -3.27D-04 DEPred=-5.29D-04 R= 6.19D-01

TightC=F SS= 1.41D+00 RLast= 2.68D-01 DXNew= 1.5637D+00 8.0269D-01

Trust test= 6.19D-01 RLast= 2.68D-01 DXMaxT set to 9.30D-01

ITU= 1 1 1 0 0-1 1 1 1 0 1 0-1 0 1 0

Use linear search instead of GDIIIS.

|                 |         |         |         |         |         |
|-----------------|---------|---------|---------|---------|---------|
| Eigenvalues --- | 0.00192 | 0.00247 | 0.00365 | 0.00656 | 0.00698 |
| Eigenvalues --- | 0.00925 | 0.01034 | 0.01384 | 0.01683 | 0.01782 |
| Eigenvalues --- | 0.01962 | 0.02102 | 0.02238 | 0.02333 | 0.02349 |
| Eigenvalues --- | 0.02428 | 0.02596 | 0.02849 | 0.02891 | 0.03045 |
| Eigenvalues --- | 0.03137 | 0.03584 | 0.03666 | 0.03950 | 0.04178 |
| Eigenvalues --- | 0.04600 | 0.04948 | 0.05164 | 0.05501 | 0.05759 |
| Eigenvalues --- | 0.05906 | 0.06159 | 0.07573 | 0.09667 | 0.09725 |
| Eigenvalues --- | 0.11948 | 0.12571 | 0.12689 | 0.13506 | 0.14003 |
| Eigenvalues --- | 0.14862 | 0.15444 | 0.15897 | 0.15962 | 0.15982 |
| Eigenvalues --- | 0.15997 | 0.16001 | 0.16003 | 0.16011 | 0.16635 |
| Eigenvalues --- | 0.17204 | 0.17342 | 0.19588 | 0.20898 | 0.22283 |
| Eigenvalues --- | 0.23240 | 0.23385 | 0.23920 | 0.24915 | 0.25731 |
| Eigenvalues --- | 0.28475 | 0.29197 | 0.30117 | 0.31841 | 0.32359 |
| Eigenvalues --- | 0.33037 | 0.34497 | 0.34607 | 0.34746 | 0.34775 |
| Eigenvalues --- | 0.34878 | 0.34906 | 0.34961 | 0.35036 | 0.35090 |
| Eigenvalues --- | 0.35603 | 0.35720 | 0.35835 | 0.36560 | 0.36773 |
| Eigenvalues --- | 0.36926 | 0.37148 | 0.37435 | 0.38244 | 0.39684 |
| Eigenvalues --- | 0.41091 | 0.44818 | 0.48820 | 0.49028 | 0.52241 |
| Eigenvalues --- | 0.53622 | 0.55807 | 0.56601 | 0.60549 | 0.88895 |
| Eigenvalues --- | 1.26619 |         |         |         |         |

RFO step: Lambda=-6.95797006D-04 EMin= 1.92109031D-03

Quartic linear search produced a step of -0.25769.

Iteration 1 RMS(Cart)= 0.06891026 RMS(Int)= 0.00229926

Iteration 2 RMS(Cart)= 0.00306313 RMS(Int)= 0.00010407

Iteration 3 RMS(Cart)= 0.00000957 RMS(Int)= 0.00010397

Iteration 4 RMS(Cart)= 0.00000000 RMS(Int)= 0.00010397

| Variable | Old X   | -DE/DX   | Delta X<br>(Linear) | Delta X<br>(Quad) | Delta X<br>(Total) | New X   |
|----------|---------|----------|---------------------|-------------------|--------------------|---------|
| R1       | 2.57228 | 0.00040  | 0.00062             | -0.00201          | -0.00140           | 2.57088 |
| R2       | 2.61651 | -0.00032 | -0.00052            | -0.00017          | -0.00069           | 2.61582 |
| R3       | 2.03069 | 0.00032  | 0.00014             | 0.00040           | 0.00054            | 2.03123 |
| R4       | 2.61663 | 0.00243  | 0.00155             | -0.00300          | -0.00146           | 2.61517 |
| R5       | 2.04282 | 0.00029  | -0.00036            | 0.00156           | 0.00121            | 2.04403 |
| R6       | 2.53878 | -0.00121 | 0.00016             | -0.00148          | -0.00131           | 2.53747 |
| R7       | 2.70700 | 0.00206  | -0.00125            | 0.00856           | 0.00731            | 2.71431 |

|     |         |          |          |          |          |         |
|-----|---------|----------|----------|----------|----------|---------|
| R8  | 2.52901 | -0.00015 | -0.00017 | 0.00038  | 0.00022  | 2.52923 |
| R9  | 2.03344 | 0.00013  | 0.00007  | -0.00036 | -0.00029 | 2.03315 |
| R10 | 2.79233 | -0.00118 | 0.00053  | -0.00474 | -0.00421 | 2.78813 |
| R11 | 2.06319 | -0.00004 | -0.00032 | 0.00148  | 0.00116  | 2.06435 |
| R12 | 2.05381 | 0.00069  | 0.00078  | -0.00180 | -0.00102 | 2.05279 |
| R13 | 2.89815 | -0.00164 | -0.00063 | -0.00569 | -0.00632 | 2.89183 |
| R14 | 4.92234 | -0.00010 | -0.00092 | -0.06706 | -0.06797 | 4.85437 |
| R15 | 2.50695 | -0.00002 | 0.00000  | 0.00043  | 0.00043  | 2.50738 |
| R16 | 2.04677 | -0.00007 | 0.00053  | -0.00206 | -0.00152 | 2.04524 |
| R17 | 2.04698 | -0.00032 | 0.00036  | -0.00162 | -0.00127 | 2.04572 |
| R18 | 2.06835 | -0.00124 | -0.00028 | 0.00069  | 0.00041  | 2.06876 |
| R19 | 2.77443 | -0.00061 | -0.00032 | -0.00123 | -0.00196 | 2.77247 |
| R20 | 2.75514 | 0.00124  | 0.00039  | 0.00067  | 0.00124  | 2.75638 |
| R21 | 2.05216 | 0.00046  | 0.00009  | 0.00081  | 0.00090  | 2.05307 |
| R22 | 2.05249 | 0.00001  | -0.00048 | 0.00221  | 0.00173  | 2.05422 |
| R23 | 2.73508 | 0.00021  | -0.00057 | 0.00295  | 0.00263  | 2.73771 |
| R24 | 2.05649 | -0.00016 | -0.00008 | -0.00026 | -0.00034 | 2.05615 |
| R25 | 2.84140 | 0.00017  | 0.00021  | -0.00008 | 0.00013  | 2.84153 |
| R26 | 3.10836 | -0.00021 | -0.00176 | -0.00810 | -0.00986 | 3.09850 |
| R27 | 2.06700 | 0.00007  | -0.00003 | 0.00042  | 0.00040  | 2.06739 |
| R28 | 2.06813 | -0.00003 | -0.00006 | 0.00021  | 0.00015  | 2.06828 |
| R29 | 2.06332 | 0.00007  | -0.00003 | 0.00038  | 0.00035  | 2.06367 |
| R30 | 2.06995 | -0.00004 | -0.00014 | 0.00205  | 0.00191  | 2.07186 |
| R31 | 2.05955 | 0.00112  | 0.00016  | 0.00268  | 0.00284  | 2.06239 |
| R32 | 2.88638 | -0.00055 | 0.00127  | -0.00595 | -0.00469 | 2.88169 |
| R33 | 2.28209 | -0.00206 | 0.00049  | -0.00441 | -0.00392 | 2.27817 |
| R34 | 2.51731 | 0.00088  | -0.00176 | 0.00441  | 0.00264  | 2.51996 |
| R35 | 1.88594 | 0.00204  | 0.00042  | 0.00451  | 0.00494  | 1.89087 |
| A1  | 1.88033 | -0.00056 | 0.00009  | -0.00219 | -0.00210 | 1.87823 |
| A2  | 2.27359 | 0.00062  | 0.00068  | -0.00006 | 0.00066  | 2.27424 |
| A3  | 2.12705 | 0.00001  | -0.00045 | 0.00206  | 0.00165  | 2.12870 |
| A4  | 1.86084 | 0.00003  | -0.00044 | 0.00226  | 0.00184  | 1.86268 |
| A5  | 2.27994 | -0.00124 | -0.00062 | -0.00143 | -0.00198 | 2.27796 |
| A6  | 2.14037 | 0.00125  | 0.00153  | -0.00238 | -0.00080 | 2.13957 |
| A7  | 1.89799 | -0.00067 | -0.00021 | 0.00015  | -0.00009 | 1.89790 |
| A8  | 2.21146 | 0.00364  | 0.00368  | -0.00629 | -0.00263 | 2.20884 |
| A9  | 2.17292 | -0.00294 | -0.00345 | 0.00655  | 0.00309  | 2.17601 |
| A10 | 1.89694 | 0.00053  | 0.00003  | -0.00126 | -0.00121 | 1.89572 |
| A11 | 2.18790 | -0.00025 | -0.00003 | 0.00086  | 0.00084  | 2.18874 |
| A12 | 2.19833 | -0.00027 | -0.00001 | 0.00037  | 0.00037  | 2.19869 |
| A13 | 1.88864 | 0.00068  | 0.00051  | 0.00108  | 0.00158  | 1.89022 |
| A14 | 2.19923 | 0.00116  | 0.00135  | -0.00608 | -0.00474 | 2.19449 |
| A15 | 2.19462 | -0.00181 | -0.00183 | 0.00516  | 0.00333  | 2.19795 |
| A16 | 1.87555 | -0.00079 | -0.00026 | 0.00472  | 0.00445  | 1.88000 |

|     |          |          |          |          |          |          |
|-----|----------|----------|----------|----------|----------|----------|
| A17 | 1.85851  | -0.00038 | -0.00030 | -0.00014 | -0.00043 | 1.85808  |
| A18 | 1.97959  | 0.00213  | 0.00104  | -0.01037 | -0.00933 | 1.97026  |
| A19 | 1.88948  | 0.00017  | -0.00118 | 0.00427  | 0.00309  | 1.89256  |
| A20 | 1.92895  | -0.00111 | 0.00195  | -0.00437 | -0.00242 | 1.92654  |
| A21 | 1.92808  | -0.00008 | -0.00143 | 0.00659  | 0.00516  | 1.93324  |
| A22 | 2.14555  | 0.00625  | -0.00878 | 0.07669  | 0.06791  | 2.21346  |
| A23 | 2.13028  | 0.00431  | 0.00324  | 0.00068  | 0.00391  | 2.13418  |
| A24 | 1.97396  | -0.00221 | -0.00053 | -0.00459 | -0.00512 | 1.96884  |
| A25 | 2.17895  | -0.00210 | -0.00272 | 0.00393  | 0.00120  | 2.18014  |
| A26 | 2.06932  | -0.00034 | -0.00103 | 0.00089  | -0.00011 | 2.06921  |
| A27 | 2.13403  | 0.00169  | 0.00182  | -0.00084 | 0.00101  | 2.13504  |
| A28 | 2.07941  | -0.00137 | -0.00112 | 0.00037  | -0.00071 | 2.07869  |
| A29 | 2.06331  | -0.00099 | 0.00000  | -0.00242 | -0.00227 | 2.06103  |
| A30 | 2.13049  | 0.00085  | -0.00047 | 0.00139  | 0.00074  | 2.13123  |
| A31 | 1.97760  | -0.00027 | -0.00027 | -0.00015 | -0.00052 | 1.97709  |
| A32 | 1.99502  | 0.00065  | 0.00107  | -0.00319 | -0.00212 | 1.99290  |
| A33 | 2.02307  | -0.00004 | 0.00010  | 0.00176  | 0.00188  | 2.02494  |
| A34 | 2.04063  | 0.00009  | 0.00034  | -0.00267 | -0.00243 | 2.03820  |
| A35 | 2.14137  | -0.00039 | -0.00058 | 0.00179  | 0.00128  | 2.14265  |
| A36 | 1.94649  | 0.00008  | 0.00080  | -0.00209 | -0.00124 | 1.94526  |
| A37 | 2.03805  | -0.00047 | -0.00016 | 0.00040  | 0.00011  | 2.03816  |
| A38 | 2.02256  | 0.00021  | -0.00021 | 0.00138  | 0.00119  | 2.02376  |
| A39 | 2.10413  | 0.00020  | 0.00206  | -0.02377 | -0.02261 | 2.08152  |
| A40 | 2.60714  | -0.00135 | 0.00677  | -0.03923 | -0.03286 | 2.57428  |
| A41 | 1.93512  | 0.00002  | -0.00007 | 0.00063  | 0.00055  | 1.93567  |
| A42 | 1.91616  | 0.00007  | -0.00009 | 0.00053  | 0.00044  | 1.91660  |
| A43 | 1.93385  | 0.00003  | 0.00028  | -0.00081 | -0.00053 | 1.93332  |
| A44 | 1.88293  | -0.00003 | 0.00004  | -0.00042 | -0.00039 | 1.88254  |
| A45 | 1.89796  | -0.00003 | -0.00020 | 0.00059  | 0.00039  | 1.89835  |
| A46 | 1.89665  | -0.00007 | 0.00004  | -0.00052 | -0.00048 | 1.89617  |
| A47 | 1.89279  | -0.00182 | -0.00155 | -0.00499 | -0.00655 | 1.88624  |
| A48 | 1.94989  | -0.00073 | 0.00153  | -0.00508 | -0.00356 | 1.94633  |
| A49 | 2.01278  | 0.00264  | -0.00083 | 0.00455  | 0.00373  | 2.01651  |
| A50 | 1.86186  | 0.00051  | -0.00010 | 0.00089  | 0.00076  | 1.86262  |
| A51 | 1.87032  | -0.00077 | -0.00093 | 0.00646  | 0.00555  | 1.87587  |
| A52 | 1.86903  | 0.00006  | 0.00182  | -0.00152 | 0.00031  | 1.86934  |
| A53 | 2.14426  | -0.00162 | -0.00050 | -0.00799 | -0.00846 | 2.13580  |
| A54 | 1.95045  | 0.00160  | 0.00071  | 0.00236  | 0.00309  | 1.95354  |
| A55 | 2.18810  | 0.00001  | -0.00011 | 0.00544  | 0.00535  | 2.19345  |
| A56 | 1.94276  | -0.00082 | 0.00211  | -0.00675 | -0.00464 | 1.93812  |
| A57 | 2.84574  | 0.00374  | -0.00276 | 0.02172  | 0.01896  | 2.86470  |
| D1  | -0.00385 | 0.00039  | 0.00045  | 0.00218  | 0.00263  | -0.00122 |
| D2  | 3.06900  | 0.00120  | 0.01238  | -0.02397 | -0.01156 | 3.05744  |
| D3  | -3.07358 | -0.00067 | -0.00597 | 0.00518  | -0.00078 | -3.07436 |

|     |          |          |          |          |          |          |
|-----|----------|----------|----------|----------|----------|----------|
| D4  | -0.00073 | 0.00013  | 0.00597  | -0.02097 | -0.01497 | -0.01570 |
| D5  | -0.00109 | -0.00050 | -0.00147 | 0.00026  | -0.00120 | -0.00230 |
| D6  | -3.10453 | -0.00122 | -0.00213 | -0.00432 | -0.00644 | -3.11097 |
| D7  | 3.07594  | 0.00049  | 0.00433  | -0.00252 | 0.00183  | 3.07778  |
| D8  | -0.02749 | -0.00023 | 0.00367  | -0.00710 | -0.00341 | -0.03090 |
| D9  | 0.00746  | -0.00015 | 0.00072  | -0.00386 | -0.00315 | 0.00431  |
| D10 | 3.10703  | 0.00049  | 0.00130  | 0.00695  | 0.00820  | 3.11523  |
| D11 | -3.07219 | -0.00075 | -0.01000 | 0.01967  | 0.00972  | -3.06247 |
| D12 | 0.02738  | -0.00012 | -0.00942 | 0.03048  | 0.02107  | 0.04845  |
| D13 | -1.53600 | 0.00031  | -0.00301 | 0.06976  | 0.06676  | -1.46924 |
| D14 | 1.52736  | 0.00117  | 0.01054  | 0.04016  | 0.05070  | 1.57805  |
| D15 | -0.00827 | -0.00017 | -0.00165 | 0.00411  | 0.00246  | -0.00581 |
| D16 | 3.12690  | 0.00056  | 0.00271  | -0.00155 | 0.00117  | 3.12807  |
| D17 | -3.10899 | -0.00097 | -0.00241 | -0.00603 | -0.00846 | -3.11745 |
| D18 | 0.02618  | -0.00025 | 0.00196  | -0.01169 | -0.00975 | 0.01643  |
| D19 | -0.42291 | -0.00044 | 0.00284  | -0.10382 | -0.10097 | -0.52387 |
| D20 | 2.71672  | -0.00020 | 0.00243  | -0.09481 | -0.09239 | 2.62433  |
| D21 | 2.67040  | 0.00037  | 0.00361  | -0.09161 | -0.08799 | 2.58241  |
| D22 | -0.47317 | 0.00061  | 0.00319  | -0.08260 | -0.07941 | -0.55258 |
| D23 | 0.00580  | 0.00042  | 0.00193  | -0.00270 | -0.00078 | 0.00501  |
| D24 | 3.10936  | 0.00122  | 0.00267  | 0.00155  | 0.00425  | 3.11361  |
| D25 | -3.12932 | -0.00032 | -0.00247 | 0.00299  | 0.00051  | -3.12881 |
| D26 | -0.02576 | 0.00049  | -0.00173 | 0.00725  | 0.00554  | -0.02022 |
| D27 | -2.34429 | 0.00036  | 0.01010  | -0.00827 | 0.00183  | -2.34246 |
| D28 | -0.32277 | -0.00001 | 0.00847  | -0.00114 | 0.00732  | -0.31545 |
| D29 | 1.80152  | 0.00094  | 0.00712  | 0.00063  | 0.00776  | 1.80928  |
| D30 | 0.84196  | -0.00056 | 0.00926  | -0.01348 | -0.00424 | 0.83773  |
| D31 | 2.86348  | -0.00092 | 0.00763  | -0.00636 | 0.00126  | 2.86474  |
| D32 | -1.29541 | 0.00003  | 0.00628  | -0.00459 | 0.00170  | -1.29371 |
| D33 | -3.11449 | -0.00109 | -0.00796 | 0.00453  | -0.00340 | -3.11790 |
| D34 | 1.12156  | -0.00016 | -0.00775 | 0.00949  | 0.00174  | 1.12329  |
| D35 | -1.01781 | -0.00168 | -0.01083 | 0.01216  | 0.00134  | -1.01646 |
| D36 | 1.06119  | -0.00075 | -0.00979 | 0.00880  | -0.00098 | 1.06021  |
| D37 | -0.98595 | 0.00018  | -0.00959 | 0.01376  | 0.00416  | -0.98179 |
| D38 | -3.12531 | -0.00134 | -0.01266 | 0.01644  | 0.00377  | -3.12154 |
| D39 | -1.02954 | -0.00020 | -0.00865 | 0.00204  | -0.00660 | -1.03614 |
| D40 | -3.07668 | 0.00073  | -0.00845 | 0.00700  | -0.00146 | -3.07814 |
| D41 | 1.06715  | -0.00079 | -0.01152 | 0.00968  | -0.00186 | 1.06529  |
| D42 | 3.12661  | 0.00035  | -0.00293 | 0.01558  | 0.01265  | 3.13927  |
| D43 | -0.04658 | -0.00040 | -0.01103 | 0.03133  | 0.02031  | -0.02626 |
| D44 | -0.01277 | 0.00008  | -0.00248 | 0.00550  | 0.00302  | -0.00975 |
| D45 | 3.09722  | -0.00067 | -0.01057 | 0.02125  | 0.01068  | 3.10790  |
| D46 | -2.75355 | 0.00044  | 0.00052  | 0.00032  | 0.00086  | -2.75269 |
| D47 | -0.04515 | 0.00025  | -0.00067 | 0.00188  | 0.00122  | -0.04393 |



|     |          |          |          |          |          |          |
|-----|----------|----------|----------|----------|----------|----------|
| D48 | -0.01094 | -0.00009 | -0.00050 | 0.00277  | 0.00226  | -0.00868 |
| D49 | 2.69746  | -0.00029 | -0.00168 | 0.00434  | 0.00261  | 2.70008  |
| D50 | 0.60208  | -0.00068 | 0.00758  | -0.04041 | -0.03272 | 0.56935  |
| D51 | -1.76779 | -0.00102 | 0.00656  | -0.03950 | -0.03276 | -1.80055 |
| D52 | 2.60284  | 0.00001  | -0.00265 | 0.04208  | 0.03932  | 2.64216  |
| D53 | 0.22156  | 0.00011  | -0.00307 | 0.04186  | 0.03873  | 0.26029  |
| D54 | 2.55910  | 0.00020  | -0.00027 | 0.00351  | 0.00328  | 2.56238  |
| D55 | -1.64523 | 0.00022  | -0.00032 | 0.00371  | 0.00343  | -1.64180 |
| D56 | 0.44987  | 0.00020  | -0.00016 | 0.00289  | 0.00278  | 0.45265  |
| D57 | 1.33689  | -0.00019 | -0.00044 | 0.00284  | 0.00235  | 1.33924  |
| D58 | -2.86744 | -0.00017 | -0.00050 | 0.00304  | 0.00250  | -2.86494 |
| D59 | -0.77234 | -0.00019 | -0.00033 | 0.00222  | 0.00184  | -0.77049 |
| D60 | -1.01156 | -0.00002 | -0.00131 | 0.00413  | 0.00281  | -1.00875 |
| D61 | 1.06730  | 0.00000  | -0.00137 | 0.00433  | 0.00295  | 1.07025  |
| D62 | -3.12079 | -0.00002 | -0.00120 | 0.00351  | 0.00230  | -3.11849 |
| D63 | 1.21675  | 0.00165  | -0.02660 | 0.07146  | 0.04445  | 1.26119  |
| D64 | 2.66922  | 0.00031  | -0.02052 | 0.01466  | -0.00544 | 2.66378  |
| D65 | 2.60616  | 0.00087  | 0.01065  | -0.05347 | -0.04282 | 2.56334  |
| D66 | -0.56373 | 0.00043  | 0.01679  | -0.06019 | -0.04340 | -0.60713 |
| D67 | -1.56808 | -0.00032 | 0.00747  | -0.05218 | -0.04470 | -1.61279 |
| D68 | 1.54522  | -0.00076 | 0.01361  | -0.05890 | -0.04528 | 1.49993  |
| D69 | 0.42423  | -0.00007 | 0.00778  | -0.04881 | -0.04103 | 0.38320  |
| D70 | -2.74566 | -0.00051 | 0.01392  | -0.05553 | -0.04161 | -2.78726 |
| D71 | 3.00930  | 0.00325  | 0.00585  | -0.00432 | 0.00153  | 3.01083  |
| D72 | -0.16144 | 0.00276  | 0.01217  | -0.01151 | 0.00066  | -0.16078 |
| D73 | -1.91670 | 0.00158  | 0.00388  | -0.04716 | -0.04328 | -1.95998 |

| Item                 | Value    | Threshold | Converged? |
|----------------------|----------|-----------|------------|
| Maximum Force        | 0.006248 | 0.000450  | NO         |
| RMS Force            | 0.001170 | 0.000300  | NO         |
| Maximum Displacement | 0.422515 | 0.001800  | NO         |
| RMS Displacement     | 0.069223 | 0.001200  | NO         |

Predicted change in Energy=-4.133069D-04

GradGradGradGradGradGradGradGradGradGradGradGradGradGradGradGradGradGrad

Input orientation:

| Center Number | Atomic Number | Atomic Type | Coordinates (Angstroms) |          |           |
|---------------|---------------|-------------|-------------------------|----------|-----------|
|               |               |             | X                       | Y        | Z         |
| 1             | 6             | 0           | -1.109984               | 1.702669 | 1.643807  |
| 2             | 6             | 0           | -1.858489               | 0.569009 | 1.717194  |
| 3             | 7             | 0           | -2.624271               | 0.522172 | 0.565445  |
| 4             | 6             | 0           | -2.339952               | 1.598232 | -0.185749 |
| 5             | 7             | 0           | -1.422547               | 2.334616 | 0.452571  |

|    |    |   |           |           |           |
|----|----|---|-----------|-----------|-----------|
| 6  | 6  | 0 | -0.813646 | 3.582395  | -0.046558 |
| 7  | 1  | 0 | -0.350107 | 2.078131  | 2.304854  |
| 8  | 1  | 0 | -1.857660 | -0.227477 | 2.449029  |
| 9  | 1  | 0 | -1.620611 | 4.226621  | -0.403116 |
| 10 | 1  | 0 | -0.345338 | 4.060159  | 0.809274  |
| 11 | 35 | 0 | -0.295148 | -2.265695 | 2.504478  |
| 12 | 1  | 0 | -2.774751 | 1.821915  | -1.144114 |
| 13 | 6  | 0 | -3.546433 | -0.514083 | 0.192759  |
| 14 | 6  | 0 | -3.381321 | -1.776987 | 0.564706  |
| 15 | 1  | 0 | -4.363709 | -0.149386 | -0.415862 |
| 16 | 1  | 0 | -4.114891 | -2.508860 | 0.251423  |
| 17 | 1  | 0 | -2.520650 | -2.105336 | 1.156224  |
| 18 | 6  | 0 | 2.849988  | -0.729670 | 1.014430  |
| 19 | 6  | 0 | 4.245083  | -0.377626 | 1.301205  |
| 20 | 8  | 0 | 3.206623  | 0.625698  | 1.418583  |
| 21 | 1  | 0 | 2.543836  | -0.801082 | -0.025529 |
| 22 | 1  | 0 | 2.228495  | -1.259356 | 1.731958  |
| 23 | 1  | 0 | 4.632743  | -0.665137 | 2.276371  |
| 24 | 6  | 0 | 5.270137  | -0.168525 | 0.221121  |
| 25 | 1  | 0 | 5.995457  | 0.596305  | 0.514070  |
| 26 | 1  | 0 | 5.817315  | -1.099659 | 0.043684  |
| 27 | 1  | 0 | 4.792676  | 0.138973  | -0.711641 |
| 28 | 6  | 0 | 0.208068  | 3.342089  | -1.160177 |
| 29 | 1  | 0 | 0.626168  | 4.312292  | -1.453341 |
| 30 | 1  | 0 | -0.261922 | 2.920773  | -2.050508 |
| 31 | 6  | 0 | 1.375675  | 2.431421  | -0.795798 |
| 32 | 8  | 0 | 1.897717  | 1.698784  | -1.598344 |
| 33 | 8  | 0 | 1.746168  | 2.581538  | 0.476377  |
| 34 | 1  | 0 | 2.428353  | 1.896800  | 0.735163  |

-----  
Distance matrix (angstroms):

|    |    | 1        | 2        | 3        | 4        | 5        |
|----|----|----------|----------|----------|----------|----------|
| 1  | C  | 0.000000 |          |          |          |          |
| 2  | C  | 1.360452 | 0.000000 |          |          |          |
| 3  | N  | 2.202159 | 1.383886 | 0.000000 |          |          |
| 4  | C  | 2.207035 | 2.216370 | 1.342770 | 0.000000 |          |
| 5  | N  | 1.384231 | 2.215103 | 2.177575 | 1.338411 | 0.000000 |
| 6  | C  | 2.545293 | 3.644586 | 3.608029 | 2.507167 | 1.475413 |
| 7  | H  | 1.074880 | 2.213145 | 3.258585 | 3.223800 | 2.155659 |
| 8  | H  | 2.221006 | 1.081654 | 2.167385 | 3.241585 | 3.277116 |
| 9  | H  | 3.289524 | 4.234433 | 3.958331 | 2.733703 | 2.085933 |
| 10 | H  | 2.615126 | 3.911786 | 4.215488 | 3.321091 | 2.065216 |
| 11 | Br | 4.141573 | 3.331576 | 4.117872 | 5.133076 | 5.161803 |
| 12 | H  | 3.249334 | 3.255210 | 2.152804 | 1.075894 | 2.154233 |

|    |    |          |          |          |          |          |
|----|----|----------|----------|----------|----------|----------|
| 13 | C  | 3.599419 | 2.519155 | 1.436351 | 2.461857 | 3.562791 |
| 14 | C  | 4.293185 | 3.025053 | 2.420591 | 3.611057 | 4.555727 |
| 15 | H  | 4.273064 | 3.367810 | 2.107035 | 2.683787 | 3.946501 |
| 16 | H  | 5.357721 | 4.088167 | 3.392302 | 4.495523 | 5.545126 |
| 17 | H  | 4.090064 | 2.811631 | 2.695099 | 3.943343 | 4.627540 |
| 18 | C  | 4.689751 | 4.934592 | 5.633490 | 5.813349 | 5.287730 |
| 19 | C  | 5.755150 | 6.190538 | 6.966994 | 7.034041 | 6.340226 |
| 20 | O  | 4.454626 | 5.074224 | 5.893886 | 5.855272 | 5.028201 |
| 21 | H  | 4.733482 | 4.928966 | 5.367456 | 5.443691 | 5.078718 |
| 22 | H  | 4.463945 | 4.477341 | 5.299428 | 5.719626 | 5.280490 |
| 23 | H  | 6.243841 | 6.631130 | 7.549915 | 7.733262 | 6.999378 |
| 24 | C  | 6.799363 | 7.321168 | 7.932042 | 7.823070 | 7.149217 |
| 25 | H  | 7.279261 | 7.945611 | 8.620200 | 8.424527 | 7.619206 |
| 26 | H  | 7.642049 | 8.031380 | 8.611792 | 8.594898 | 8.023531 |
| 27 | H  | 6.544821 | 7.093813 | 7.535841 | 7.299342 | 6.693672 |
| 28 | C  | 3.505322 | 4.498876 | 4.353371 | 3.237739 | 2.504968 |
| 29 | H  | 4.406436 | 5.498907 | 5.385708 | 4.215541 | 3.426505 |
| 30 | H  | 3.981325 | 4.719682 | 4.263471 | 3.089442 | 2.820645 |
| 31 | C  | 3.558265 | 4.499280 | 4.636570 | 3.856456 | 3.065590 |
| 32 | O  | 4.422423 | 5.135978 | 5.149250 | 4.468040 | 3.954073 |
| 33 | O  | 3.208255 | 4.310852 | 4.832148 | 4.254607 | 3.178410 |
| 34 | H  | 3.658298 | 4.593956 | 5.239028 | 4.865589 | 3.885997 |
|    |    | 6        | 7        | 8        | 9        | 10       |
| 6  | C  | 0.000000 |          |          |          |          |
| 7  | H  | 2.829632 | 0.000000 |          |          |          |
| 8  | H  | 4.672585 | 2.758502 | 0.000000 |          |          |
| 9  | H  | 1.092407 | 3.682837 | 5.294329 | 0.000000 |          |
| 10 | H  | 1.086288 | 2.482985 | 4.833192 | 1.767462 | 0.000000 |
| 11 | Br | 6.401311 | 4.348758 | 2.568822 | 7.236099 | 6.549249 |
| 12 | H  | 2.854794 | 4.223734 | 4.236950 | 2.768344 | 3.837644 |
| 13 | C  | 4.930165 | 4.625691 | 2.832817 | 5.151518 | 5.617009 |
| 14 | C  | 5.974075 | 5.203682 | 2.876317 | 6.330884 | 6.584017 |
| 15 | H  | 5.163867 | 5.336022 | 3.807097 | 5.164706 | 5.947145 |
| 16 | H  | 6.934724 | 6.279384 | 3.889636 | 7.212251 | 7.594257 |
| 17 | H  | 6.058946 | 4.850980 | 2.374290 | 6.582955 | 6.547189 |
| 18 | C  | 5.756892 | 4.448544 | 4.946940 | 6.823526 | 5.761480 |
| 19 | C  | 6.564219 | 5.306018 | 6.211563 | 7.649194 | 6.403741 |
| 20 | O  | 5.201083 | 3.942761 | 5.238004 | 6.291854 | 4.978274 |
| 21 | H  | 5.521594 | 4.700581 | 5.081892 | 6.539342 | 5.716283 |
| 22 | H  | 5.988346 | 4.256315 | 4.275000 | 7.033499 | 5.981070 |
| 23 | H  | 7.287021 | 5.688156 | 6.507433 | 8.379342 | 7.018695 |
| 24 | C  | 7.152165 | 6.401292 | 7.468101 | 8.196913 | 7.054165 |
| 25 | H  | 7.456200 | 6.757876 | 8.129829 | 8.486749 | 7.231259 |
| 26 | H  | 8.117845 | 7.297146 | 8.090218 | 9.159238 | 8.073918 |

|    |    |           |          |          |          |           |
|----|----|-----------|----------|----------|----------|-----------|
| 27 | H  | 6.612892  | 6.269593 | 7.372319 | 7.611459 | 6.639885  |
| 28 | C  | 1.530291  | 3.730360 | 5.480456 | 2.167857 | 2.168092  |
| 29 | H  | 2.141226  | 4.479801 | 6.481311 | 2.481597 | 2.475241  |
| 30 | H  | 2.181274  | 4.437003 | 5.718715 | 2.503033 | 3.079531  |
| 31 | C  | 2.584420  | 3.566115 | 5.296517 | 3.514921 | 2.861980  |
| 32 | O  | 3.647947  | 4.520129 | 5.847612 | 4.494125 | 4.050187  |
| 33 | O  | 2.797824  | 2.826855 | 4.976896 | 3.849026 | 2.582932  |
| 34 | H  | 3.736693  | 3.196349 | 5.081318 | 4.808103 | 3.518377  |
|    |    | 11        | 12       | 13       | 14       | 15        |
| 11 | Br | 0.000000  |          |          |          |           |
| 12 | H  | 6.014084  | 0.000000 |          |          |           |
| 13 | C  | 4.356953  | 2.799931 | 0.000000 |          |           |
| 14 | C  | 3.677773  | 4.029900 | 1.326851 | 0.000000 |           |
| 15 | H  | 5.436942  | 2.634609 | 1.082296 | 2.139085 | 0.000000  |
| 16 | H  | 4.441376  | 4.743323 | 2.075022 | 1.082547 | 2.464609  |
| 17 | H  | 2.606983  | 4.558445 | 2.124283 | 1.094742 | 3.113528  |
| 18 | C  | 3.804142  | 6.542750 | 6.452582 | 6.334692 | 7.376983  |
| 19 | C  | 5.062250  | 7.752138 | 7.871150 | 7.788625 | 8.781327  |
| 20 | O  | 4.669232  | 6.616282 | 6.957408 | 7.064206 | 7.827891  |
| 21 | H  | 4.075029  | 6.034792 | 6.100934 | 6.033925 | 6.949190  |
| 22 | H  | 2.824585  | 6.542056 | 6.022820 | 5.753300 | 7.021561  |
| 23 | H  | 5.186321  | 8.529719 | 8.441752 | 8.269899 | 9.404800  |
| 24 | C  | 6.370576  | 8.399163 | 8.823385 | 8.806413 | 9.654900  |
| 25 | H  | 7.191974  | 9.009342 | 9.611653 | 9.672593 | 10.427519 |
| 26 | H  | 6.691589  | 9.152599 | 9.383225 | 9.238244 | 10.235597 |
| 27 | H  | 6.481652  | 7.764360 | 8.413392 | 8.492008 | 9.165698  |
| 28 | C  | 6.717898  | 3.347894 | 5.549484 | 6.485667 | 5.800478  |
| 29 | H  | 7.731951  | 4.226565 | 6.588941 | 7.563848 | 6.773611  |
| 30 | H  | 6.902786  | 2.888486 | 5.255331 | 6.216023 | 5.377974  |
| 31 | C  | 5.978827  | 4.209377 | 5.820686 | 6.495435 | 6.304399  |
| 32 | O  | 6.112193  | 4.696109 | 6.143583 | 6.680420 | 6.634715  |
| 33 | O  | 5.637005  | 4.862276 | 6.137991 | 6.730207 | 6.751639  |
| 34 | H  | 5.279611  | 5.532592 | 6.465650 | 6.875905 | 7.186365  |
|    |    | 16        | 17       | 18       | 19       | 20        |
| 16 | H  | 0.000000  |          |          |          |           |
| 17 | H  | 1.876992  | 0.000000 |          |          |           |
| 18 | C  | 7.228916  | 5.545838 | 0.000000 |          |           |
| 19 | C  | 8.690993  | 6.984350 | 1.467129 | 0.000000 |           |
| 20 | O  | 8.049366  | 6.350515 | 1.458613 | 1.448736 | 0.000000  |
| 21 | H  | 6.879815  | 5.361590 | 1.086436 | 2.198586 | 2.135521  |
| 22 | H  | 6.632631  | 4.858141 | 1.087045 | 2.242682 | 2.146710  |
| 23 | H  | 9.166287  | 7.382407 | 2.185149 | 1.088067 | 2.106151  |
| 24 | C  | 9.672478  | 8.082204 | 2.607939 | 1.503675 | 2.514516  |
| 25 | H  | 10.579706 | 8.957417 | 3.450007 | 2.152193 | 2.931996  |

|    |   |           |          |          |          |          |
|----|---|-----------|----------|----------|----------|----------|
| 26 | H | 10.033829 | 8.471765 | 3.143927 | 2.138833 | 3.418028 |
| 27 | H | 9.342551  | 7.874680 | 2.740055 | 2.149019 | 2.700059 |
| 28 | C | 7.410410  | 6.518133 | 5.318634 | 6.015993 | 4.797929 |
| 29 | H | 8.480093  | 7.609090 | 6.037934 | 6.532947 | 5.338321 |
| 30 | H | 7.044514  | 6.375481 | 5.692412 | 6.513564 | 5.415974 |
| 31 | C | 7.459850  | 6.290779 | 3.929760 | 4.530085 | 3.393596 |
| 32 | O | 7.568181  | 6.448329 | 3.691991 | 4.269543 | 3.459278 |
| 33 | O | 7.766258  | 6.374536 | 3.531574 | 3.959996 | 2.616485 |
| 34 | H | 7.903030  | 6.378638 | 2.674717 | 2.965456 | 1.639655 |
|    |   | 21        | 22       | 23       | 24       | 25       |
| 21 | H | 0.000000  |          |          |          |          |
| 22 | H | 1.843425  | 0.000000 |          |          |          |
| 23 | H | 3.111391  | 2.535722 | 0.000000 |          |          |
| 24 | C | 2.809569  | 3.567089 | 2.208381 | 0.000000 |          |
| 25 | H | 3.762651  | 4.372268 | 2.560064 | 1.094018 | 0.000000 |
| 26 | H | 3.287796  | 3.969308 | 2.564549 | 1.094485 | 1.768981 |
| 27 | H | 2.532140  | 3.808087 | 3.098449 | 1.092048 | 1.777133 |
| 28 | C | 4.889694  | 5.798264 | 6.888067 | 6.313235 | 6.620899 |
| 29 | H | 5.644705  | 6.614895 | 7.398526 | 6.666933 | 6.819716 |
| 30 | H | 5.081833  | 6.163011 | 7.452407 | 6.731102 | 7.150874 |
| 31 | C | 3.522356  | 4.553975 | 5.443839 | 4.791730 | 5.140602 |
| 32 | O | 3.023334  | 4.466645 | 5.299236 | 4.262689 | 4.740172 |
| 33 | O | 3.511453  | 4.069593 | 4.702466 | 4.477316 | 4.690312 |
| 34 | H | 2.805451  | 3.315850 | 3.714590 | 3.550429 | 3.803209 |
|    |   | 26        | 27       | 28       | 29       | 30       |
| 26 | H | 0.000000  |          |          |          |          |
| 27 | H | 1.776122  | 0.000000 |          |          |          |
| 28 | C | 7.255485  | 5.610684 | 0.000000 |          |          |
| 29 | H | 7.647111  | 5.943611 | 1.096379 | 0.000000 |          |
| 30 | H | 7.583313  | 5.922832 | 1.091369 | 1.755459 | 0.000000 |
| 31 | C | 5.735976  | 4.115617 | 1.524924 | 2.128802 | 2.120256 |
| 32 | O | 5.088300  | 3.405884 | 2.397364 | 2.910032 | 2.522251 |
| 33 | O | 5.505695  | 4.081511 | 2.371181 | 2.823778 | 3.245405 |
| 34 | H | 4.576240  | 3.282259 | 3.257428 | 3.724516 | 4.005753 |
|    |   | 31        | 32       | 33       | 34       |          |
| 31 | C | 0.000000  |          |          |          |          |
| 32 | O | 1.205556  | 0.000000 |          |          |          |
| 33 | O | 1.333503  | 2.259799 | 0.000000 |          |          |
| 34 | H | 1.933337  | 2.401258 | 1.000606 | 0.000000 |          |

Stoichiometry C<sub>11</sub>H<sub>17</sub>BrN<sub>2</sub>O<sub>3</sub>

Framework group C<sub>1</sub>[X(C<sub>11</sub>H<sub>17</sub>BrN<sub>2</sub>O<sub>3</sub>)]

Deg. of freedom 96

Full point group C<sub>1</sub> NOp 1

Largest Abelian subgroup C<sub>1</sub> NOp 1

Largest concise Abelian subgroup C1      NOp    1

Standard orientation:

| -----  |        |        |                         |           |           |  |
|--------|--------|--------|-------------------------|-----------|-----------|--|
| Center | Atomic | Atomic | Coordinates (Angstroms) |           |           |  |
| Number | Number | Type   | X                       | Y         | Z         |  |
| -----  |        |        |                         |           |           |  |
| 1      | 6      | 0      | -1.045706               | 1.158741  | 1.359014  |  |
| 2      | 6      | 0      | -2.049040               | 0.377214  | 0.875934  |  |
| 3      | 7      | 0      | -2.634417               | 1.078207  | -0.163818 |  |
| 4      | 6      | 0      | -1.995831               | 2.250689  | -0.307093 |  |
| 5      | 7      | 0      | -1.026108               | 2.324230  | 0.612458  |  |
| 6      | 6      | 0      | -0.069599               | 3.435752  | 0.775101  |  |
| 7      | 1      | 0      | -0.317773               | 0.961182  | 2.124816  |  |
| 8      | 1      | 0      | -2.343468               | -0.630066 | 1.137993  |  |
| 9      | 1      | 0      | -0.638532               | 4.368244  | 0.763810  |  |
| 10     | 1      | 0      | 0.375895                | 3.317026  | 1.758696  |  |
| 11     | 35     | 0      | -1.344409               | -2.813095 | 0.224147  |  |
| 12     | 1      | 0      | -2.225010               | 2.999180  | -1.045190 |  |
| 13     | 6      | 0      | -3.718471               | 0.631373  | -0.993436 |  |
| 14     | 6      | 0      | -3.917700               | -0.651124 | -1.269194 |  |
| 15     | 1      | 0      | -4.329688               | 1.445955  | -1.359817 |  |
| 16     | 1      | 0      | -4.755320               | -0.920823 | -1.899720 |  |
| 17     | 1      | 0      | -3.253627               | -1.439326 | -0.900135 |  |
| 18     | 6      | 0      | 2.255635                | -1.714116 | -0.326692 |  |
| 19     | 6      | 0      | 3.640164                | -1.937906 | 0.103964  |  |
| 20     | 8      | 0      | 2.869560                | -0.854159 | 0.678853  |  |
| 21     | 1      | 0      | 2.089961                | -1.213446 | -1.276547 |  |
| 22     | 1      | 0      | 1.430291                | -2.315642 | 0.045655  |  |
| 23     | 1      | 0      | 3.806283                | -2.734793 | 0.825951  |  |
| 24     | 6      | 0      | 4.826115                | -1.554128 | -0.737032 |  |
| 25     | 1      | 0      | 5.666639                | -1.245000 | -0.108672 |  |
| 26     | 1      | 0      | 5.150914                | -2.412149 | -1.333859 |  |
| 27     | 1      | 0      | 4.572681                | -0.734649 | -1.412897 |  |
| 28     | 6      | 0      | 1.009056                | 3.456342  | -0.310197 |  |
| 29     | 1      | 0      | 1.686357                | 4.292674  | -0.100772 |  |
| 30     | 1      | 0      | 0.580440                | 3.638971  | -1.297122 |  |
| 31     | 6      | 0      | 1.858658                | 2.194506  | -0.416688 |  |
| 32     | 8      | 0      | 2.294860                | 1.796864  | -1.467865 |  |
| 33     | 8      | 0      | 2.072656                | 1.636151  | 0.775233  |  |
| 34     | 1      | 0      | 2.525665                | 0.749026  | 0.680345  |  |

-----  
Rotational constants (GHZ):      0.3130766      0.2647142      0.1585716

Standard basis: 6-311++G(d,p) (5D, 7F)

There are    538 symmetry adapted cartesian basis functions of A    symmetry.

There are 519 symmetry adapted basis functions of A symmetry.  
 519 basis functions, 823 primitive gaussians, 538 cartesian basis functions  
 78 alpha electrons 78 beta electrons  
 nuclear repulsion energy 1566.5418797811 Hartrees.

NAtoms= 34 NActive= 34 NUniq= 34 SFac= 1.00D+00 NATFMM= 60 NAOKFM=F

Big=F

Integral buffers will be 131072 words long.

Raffenetti 2 integral format.

Two-electron integral symmetry is turned on.

One-electron integrals computed using PRISM.

NBasis= 519 RedAO= T EigKep= 5.13D-06 NBF= 519

NBsUse= 519 1.00D-06 EigRej= -1.00D+00 NBFU= 519

Initial guess from the checkpoint file: "./coohpo.chk"

B after Tr= 0.000000 0.000000 0.000000

Rot= 0.999880 -0.003531 0.000204 0.015058 Ang= -1.77 deg.

ExpMin= 3.50D-02 ExpMax= 4.40D+05 ExpMxC= 1.51D+04 IAcc=3 IRadAn= 5 AccDes= 0.00D+00

Harris functional with IExCor= 402 and IRadAn= 5 diagonalized for initial guess.

HarFok: IExCor= 402 AccDes= 0.00D+00 IRadAn= 5 IDoV= 1 UseB2=F ITyADJ=14

ICtDFT= 3500011 ScaDFX= 1.000000 1.000000 1.000000 1.000000

FoFCou: FMM=F IPFlag= 0 FMFlag= 100000 FMFlg1= 0

NFxFlg= 0 DoJE=T BraDBF=F KetDBF=T FulRan=T

wScrn= 0.000000 ICntrl= 500 IOpCl= 0 I1Cent= 200000004 NGrid=

0

NMat0= 1 NMatS0= 1 NMatT0= 0 NMatD0= 1 NMtDS0= 0

NMtDT0= 0

Petite list used in FoFCou.

Requested convergence on RMS density matrix=1.00D-08 within 128 cycles.

Requested convergence on MAX density matrix=1.00D-06.

Requested convergence on energy=1.00D-06.

No special actions if energy rises.

SCF Done: E(RB3LYP) = -3338.90175839 A.U. after 13 cycles

NFock= 13 Conv=0.50D-08 -V/T= 2.0019

Calling FoFJK, ICntrl= 2127 FMM=F ISym2X=0 I1Cent= 0 IOpClX= 0 NMat=1 NMatS=1

NMatT=0.

\*\*\*\*\* Axes restored to original set \*\*\*\*\*

| Center Number | Atomic Number | Forces (Hartrees/Bohr) |              |              |
|---------------|---------------|------------------------|--------------|--------------|
|               |               | X                      | Y            | Z            |
| 1             | 6             | 0.000830560            | -0.000548384 | -0.000325111 |
| 2             | 6             | -0.000392740           | 0.000450170  | 0.001594925  |
| 3             | 7             | -0.000468221           | -0.000033317 | -0.000077217 |
| 4             | 6             | -0.000976825           | 0.000330042  | -0.000006952 |

|    |    |              |              |              |
|----|----|--------------|--------------|--------------|
| 5  | 7  | 0.000165527  | -0.000375170 | 0.000593678  |
| 6  | 6  | -0.000644796 | -0.000931504 | -0.001278276 |
| 7  | 1  | -0.000136857 | 0.000538535  | 0.000208841  |
| 8  | 1  | 0.001835240  | -0.001085291 | -0.000642247 |
| 9  | 1  | 0.000624617  | 0.000206133  | 0.000332421  |
| 10 | 1  | 0.000266308  | 0.000599759  | 0.000902278  |
| 11 | 35 | -0.000679393 | 0.000286219  | 0.000112572  |
| 12 | 1  | -0.000175478 | 0.000150273  | -0.000193583 |
| 13 | 6  | 0.001164458  | -0.000075595 | -0.000505283 |
| 14 | 6  | 0.001101221  | 0.001719045  | 0.000069008  |
| 15 | 1  | -0.000385113 | -0.000391123 | -0.000712582 |
| 16 | 1  | -0.000108609 | -0.000359932 | 0.000523165  |
| 17 | 1  | -0.001263248 | -0.000545407 | -0.000211511 |
| 18 | 6  | -0.000624554 | -0.000656148 | 0.000546792  |
| 19 | 6  | -0.000053837 | 0.000402156  | -0.000054545 |
| 20 | 8  | -0.000493998 | 0.001066317  | 0.001498647  |
| 21 | 1  | -0.000132127 | -0.000205272 | -0.000009791 |
| 22 | 1  | 0.000478987  | -0.000575125 | -0.000838923 |
| 23 | 1  | 0.000172423  | 0.000024573  | -0.000163394 |
| 24 | 6  | -0.000094893 | -0.000077190 | -0.000248242 |
| 25 | 1  | -0.000165646 | -0.000038974 | 0.000018361  |
| 26 | 1  | -0.000066661 | 0.000059577  | 0.000009254  |
| 27 | 1  | 0.000066687  | -0.000011701 | 0.000002026  |
| 28 | 6  | -0.000273645 | -0.000008673 | -0.001550362 |
| 29 | 1  | -0.000431869 | -0.000273411 | 0.000524492  |
| 30 | 1  | -0.000121234 | 0.000282358  | -0.000149988 |
| 31 | 6  | 0.000147551  | 0.003663627  | 0.001279725  |
| 32 | 8  | 0.000663028  | -0.002436756 | -0.000171981 |
| 33 | 8  | -0.001336279 | -0.001085134 | -0.000401284 |
| 34 | 1  | 0.001509415  | -0.000064679 | -0.000674915 |

-----  
Cartesian Forces: Max 0.003663627 RMS 0.000781639

GradGradGradGradGradGradGradGradGradGradGradGradGradGradGradGradGradGradGrad

Berny optimization.

Using GEDIIS/GDIIS optimizer.

FormGI is forming the generalized inverse of G from B-inverse, IUseBI=4.

GSVD: received Info= 1 from GESDD.

Internal Forces: Max 0.003259555 RMS 0.000577458

Search for a local minimum.

Step number 17 out of a maximum of 175

All quantities printed in internal units (Hartrees-Bohrs-Radians)

Mixed Optimization -- En-DIIS/RFO-DIIS

Update second derivatives using D2CorX and points 15 16 17



DE= -3.25D-04 DEPred=-4.13D-04 R= 7.86D-01

TightC=F SS= 1.41D+00 RLast= 2.73D-01 DXNew= 1.5637D+00 8.1808D-01

Trust test= 7.86D-01 RLast= 2.73D-01 DXMaxT set to 9.30D-01

ITU= 1 1 1 1 0 0-1 1 1 1 0 1 0-1 0 1 0

Use linear search instead of GDIIIS.

|                 |         |         |         |         |         |
|-----------------|---------|---------|---------|---------|---------|
| Eigenvalues --- | 0.00148 | 0.00351 | 0.00435 | 0.00656 | 0.00698 |
| Eigenvalues --- | 0.00817 | 0.01011 | 0.01415 | 0.01698 | 0.01735 |
| Eigenvalues --- | 0.01922 | 0.02102 | 0.02260 | 0.02338 | 0.02389 |
| Eigenvalues --- | 0.02420 | 0.02535 | 0.02780 | 0.02889 | 0.03098 |
| Eigenvalues --- | 0.03190 | 0.03493 | 0.03680 | 0.03952 | 0.04175 |
| Eigenvalues --- | 0.04625 | 0.05012 | 0.05280 | 0.05736 | 0.05901 |
| Eigenvalues --- | 0.06010 | 0.06334 | 0.07568 | 0.09598 | 0.09661 |
| Eigenvalues --- | 0.11921 | 0.12354 | 0.12692 | 0.13365 | 0.13537 |
| Eigenvalues --- | 0.15004 | 0.15448 | 0.15890 | 0.15963 | 0.15986 |
| Eigenvalues --- | 0.15998 | 0.16002 | 0.16005 | 0.16021 | 0.16263 |
| Eigenvalues --- | 0.16918 | 0.17271 | 0.20478 | 0.21546 | 0.22493 |
| Eigenvalues --- | 0.23187 | 0.23458 | 0.23894 | 0.24921 | 0.26181 |
| Eigenvalues --- | 0.28711 | 0.29135 | 0.30168 | 0.31832 | 0.32304 |
| Eigenvalues --- | 0.32961 | 0.34497 | 0.34607 | 0.34724 | 0.34764 |
| Eigenvalues --- | 0.34884 | 0.34945 | 0.35010 | 0.35048 | 0.35192 |
| Eigenvalues --- | 0.35520 | 0.35737 | 0.35834 | 0.36572 | 0.36859 |
| Eigenvalues --- | 0.36913 | 0.37173 | 0.37333 | 0.37850 | 0.40647 |
| Eigenvalues --- | 0.41487 | 0.44799 | 0.48406 | 0.49042 | 0.52216 |
| Eigenvalues --- | 0.53291 | 0.55605 | 0.56331 | 0.60644 | 0.90556 |
| Eigenvalues --- | 1.27381 |         |         |         |         |

RFO step: Lambda=-4.78543167D-04 EMin= 1.47858173D-03

Quartic linear search produced a step of -0.14907.

Iteration 1 RMS(Cart)= 0.03463218 RMS(Int)= 0.00058215

Iteration 2 RMS(Cart)= 0.00088899 RMS(Int)= 0.00003350

Iteration 3 RMS(Cart)= 0.00000062 RMS(Int)= 0.00003350

| Variable | Old X   | -DE/DX   | Delta X<br>(Linear) | Delta X<br>(Quad) | Delta X<br>(Total) | New X   |
|----------|---------|----------|---------------------|-------------------|--------------------|---------|
| R1       | 2.57088 | 0.00017  | 0.00021             | -0.00062          | -0.00041           | 2.57048 |
| R2       | 2.61582 | 0.00023  | 0.00010             | 0.00200           | 0.00210            | 2.61792 |
| R3       | 2.03123 | 0.00022  | -0.00008            | 0.00045           | 0.00037            | 2.03160 |
| R4       | 2.61517 | 0.00123  | 0.00022             | -0.00023          | 0.00000            | 2.61516 |
| R5       | 2.04403 | 0.00023  | -0.00018            | 0.00215           | 0.00197            | 2.04600 |
| R6       | 2.53747 | -0.00027 | 0.00019             | -0.00241          | -0.00222           | 2.53525 |
| R7       | 2.71431 | -0.00037 | -0.00109            | 0.00588           | 0.00479            | 2.71910 |
| R8       | 2.52923 | -0.00006 | -0.00003            | 0.00000           | -0.00004           | 2.52919 |
| R9       | 2.03315 | 0.00027  | 0.00004             | 0.00068           | 0.00072            | 2.03387 |
| R10      | 2.78813 | -0.00012 | 0.00063             | -0.00237          | -0.00175           | 2.78638 |
| R11      | 2.06435 | -0.00045 | -0.00017            | -0.00019          | -0.00036           | 2.06399 |
| R12      | 2.05279 | 0.00109  | 0.00015             | 0.00087           | 0.00102            | 2.05381 |

|     |         |          |          |          |          |         |
|-----|---------|----------|----------|----------|----------|---------|
| R13 | 2.89183 | -0.00022 | 0.00094  | -0.00094 | 0.00001  | 2.89184 |
| R14 | 4.85437 | -0.00064 | 0.01013  | -0.05277 | -0.04264 | 4.81173 |
| R15 | 2.50738 | -0.00070 | -0.00006 | -0.00089 | -0.00095 | 2.50643 |
| R16 | 2.04524 | 0.00056  | 0.00023  | -0.00031 | -0.00008 | 2.04516 |
| R17 | 2.04572 | 0.00016  | 0.00019  | -0.00100 | -0.00081 | 2.04490 |
| R18 | 2.06876 | -0.00094 | -0.00006 | -0.00205 | -0.00211 | 2.06665 |
| R19 | 2.77247 | 0.00009  | 0.00029  | -0.00102 | -0.00063 | 2.77185 |
| R20 | 2.75638 | 0.00136  | -0.00018 | 0.00175  | 0.00152  | 2.75790 |
| R21 | 2.05307 | 0.00006  | -0.00013 | 0.00085  | 0.00072  | 2.05378 |
| R22 | 2.05422 | -0.00055 | -0.00026 | 0.00107  | 0.00082  | 2.05503 |
| R23 | 2.73771 | -0.00028 | -0.00039 | 0.00223  | 0.00178  | 2.73950 |
| R24 | 2.05615 | -0.00009 | 0.00005  | -0.00028 | -0.00023 | 2.05592 |
| R25 | 2.84153 | -0.00003 | -0.00002 | -0.00031 | -0.00033 | 2.84120 |
| R26 | 3.09850 | -0.00011 | 0.00147  | 0.00350  | 0.00496  | 3.10346 |
| R27 | 2.06739 | -0.00013 | -0.00006 | -0.00006 | -0.00012 | 2.06727 |
| R28 | 2.06828 | -0.00008 | -0.00002 | -0.00008 | -0.00010 | 2.06818 |
| R29 | 2.06367 | -0.00003 | -0.00005 | 0.00017  | 0.00012  | 2.06379 |
| R30 | 2.07186 | -0.00055 | -0.00028 | -0.00067 | -0.00096 | 2.07090 |
| R31 | 2.06239 | 0.00007  | -0.00042 | 0.00015  | -0.00027 | 2.06212 |
| R32 | 2.88169 | 0.00021  | 0.00070  | -0.00195 | -0.00125 | 2.88044 |
| R33 | 2.27817 | 0.00188  | 0.00058  | -0.00054 | 0.00005  | 2.27822 |
| R34 | 2.51996 | -0.00064 | -0.00039 | 0.00505  | 0.00466  | 2.52461 |
| R35 | 1.89087 | 0.00048  | -0.00074 | 0.00016  | -0.00057 | 1.89030 |
| A1  | 1.87823 | -0.00016 | 0.00031  | -0.00195 | -0.00162 | 1.87661 |
| A2  | 2.27424 | 0.00036  | -0.00010 | 0.00124  | 0.00113  | 2.27538 |
| A3  | 2.12870 | -0.00020 | -0.00025 | 0.00089  | 0.00063  | 2.12933 |
| A4  | 1.86268 | -0.00039 | -0.00027 | 0.00058  | 0.00027  | 1.86295 |
| A5  | 2.27796 | 0.00042  | 0.00029  | 0.00089  | 0.00110  | 2.27906 |
| A6  | 2.13957 | -0.00006 | 0.00012  | -0.00325 | -0.00321 | 2.13636 |
| A7  | 1.89790 | 0.00032  | 0.00001  | 0.00131  | 0.00133  | 1.89924 |
| A8  | 2.20884 | 0.00038  | 0.00039  | -0.00409 | -0.00371 | 2.20513 |
| A9  | 2.17601 | -0.00070 | -0.00046 | 0.00303  | 0.00256  | 2.17856 |
| A10 | 1.89572 | -0.00034 | 0.00018  | -0.00105 | -0.00088 | 1.89484 |
| A11 | 2.18874 | 0.00021  | -0.00013 | 0.00102  | 0.00089  | 2.18963 |
| A12 | 2.19869 | 0.00013  | -0.00005 | -0.00002 | -0.00009 | 2.19861 |
| A13 | 1.89022 | 0.00058  | -0.00024 | 0.00116  | 0.00091  | 1.89114 |
| A14 | 2.19449 | -0.00031 | 0.00071  | -0.00171 | -0.00101 | 2.19348 |
| A15 | 2.19795 | -0.00027 | -0.00050 | 0.00087  | 0.00035  | 2.19831 |
| A16 | 1.88000 | 0.00075  | -0.00066 | 0.00262  | 0.00196  | 1.88196 |
| A17 | 1.85808 | 0.00009  | 0.00006  | 0.00101  | 0.00107  | 1.85915 |
| A18 | 1.97026 | -0.00105 | 0.00139  | -0.00081 | 0.00057  | 1.97083 |
| A19 | 1.89256 | -0.00034 | -0.00046 | 0.00051  | 0.00005  | 1.89262 |
| A20 | 1.92654 | 0.00042  | 0.00036  | -0.00644 | -0.00608 | 1.92046 |
| A21 | 1.93324 | 0.00014  | -0.00077 | 0.00342  | 0.00265  | 1.93589 |

|     |          |          |          |          |          |          |
|-----|----------|----------|----------|----------|----------|----------|
| A22 | 2.21346  | 0.00151  | -0.01012 | 0.04360  | 0.03348  | 2.24694  |
| A23 | 2.13418  | 0.00004  | -0.00058 | -0.00130 | -0.00188 | 2.13230  |
| A24 | 1.96884  | 0.00053  | 0.00076  | -0.00024 | 0.00053  | 1.96936  |
| A25 | 2.18014  | -0.00057 | -0.00018 | 0.00155  | 0.00137  | 2.18152  |
| A26 | 2.06921  | -0.00003 | 0.00002  | 0.00175  | 0.00166  | 2.07087  |
| A27 | 2.13504  | 0.00101  | -0.00015 | 0.00328  | 0.00301  | 2.13805  |
| A28 | 2.07869  | -0.00096 | 0.00011  | -0.00442 | -0.00443 | 2.07426  |
| A29 | 2.06103  | -0.00055 | 0.00034  | -0.00176 | -0.00146 | 2.05958  |
| A30 | 2.13123  | 0.00072  | -0.00011 | -0.00083 | -0.00091 | 2.13033  |
| A31 | 1.97709  | -0.00010 | 0.00008  | 0.00081  | 0.00090  | 1.97798  |
| A32 | 1.99290  | 0.00087  | 0.00032  | 0.00213  | 0.00245  | 1.99535  |
| A33 | 2.02494  | -0.00032 | -0.00028 | 0.00056  | 0.00027  | 2.02522  |
| A34 | 2.03820  | 0.00019  | 0.00036  | -0.00103 | -0.00068 | 2.03752  |
| A35 | 2.14265  | -0.00045 | -0.00019 | 0.00019  | 0.00001  | 2.14266  |
| A36 | 1.94526  | 0.00018  | 0.00018  | -0.00082 | -0.00065 | 1.94461  |
| A37 | 2.03816  | -0.00055 | -0.00002 | -0.00034 | -0.00033 | 2.03783  |
| A38 | 2.02376  | 0.00017  | -0.00018 | 0.00097  | 0.00079  | 2.02455  |
| A39 | 2.08152  | 0.00001  | 0.00337  | -0.00168 | 0.00186  | 2.08338  |
| A40 | 2.57428  | -0.00113 | 0.00490  | -0.04471 | -0.03968 | 2.53460  |
| A41 | 1.93567  | -0.00014 | -0.00008 | 0.00019  | 0.00011  | 1.93579  |
| A42 | 1.91660  | -0.00001 | -0.00007 | 0.00024  | 0.00018  | 1.91678  |
| A43 | 1.93332  | 0.00010  | 0.00008  | -0.00003 | 0.00005  | 1.93337  |
| A44 | 1.88254  | 0.00008  | 0.00006  | -0.00001 | 0.00005  | 1.88259  |
| A45 | 1.89835  | 0.00000  | -0.00006 | 0.00043  | 0.00037  | 1.89873  |
| A46 | 1.89617  | -0.00003 | 0.00007  | -0.00086 | -0.00078 | 1.89539  |
| A47 | 1.88624  | 0.00033  | 0.00098  | -0.00583 | -0.00485 | 1.88139  |
| A48 | 1.94633  | 0.00101  | 0.00053  | -0.00331 | -0.00277 | 1.94355  |
| A49 | 2.01651  | -0.00326 | -0.00056 | -0.00430 | -0.00486 | 2.01165  |
| A50 | 1.86262  | -0.00035 | -0.00011 | 0.00409  | 0.00395  | 1.86658  |
| A51 | 1.87587  | 0.00125  | -0.00083 | 0.00614  | 0.00529  | 1.88116  |
| A52 | 1.86934  | 0.00120  | -0.00005 | 0.00427  | 0.00421  | 1.87355  |
| A53 | 2.13580  | 0.00151  | 0.00126  | 0.00469  | 0.00593  | 2.14172  |
| A54 | 1.95354  | -0.00056 | -0.00046 | 0.00091  | 0.00042  | 1.95396  |
| A55 | 2.19345  | -0.00092 | -0.00080 | -0.00524 | -0.00606 | 2.18739  |
| A56 | 1.93812  | 0.00043  | 0.00069  | -0.00777 | -0.00708 | 1.93104  |
| A57 | 2.86470  | -0.00032 | -0.00283 | 0.01212  | 0.00930  | 2.87400  |
| D1  | -0.00122 | -0.00002 | -0.00039 | 0.00458  | 0.00418  | 0.00297  |
| D2  | 3.05744  | -0.00038 | 0.00172  | -0.02023 | -0.01855 | 3.03890  |
| D3  | -3.07436 | -0.00001 | 0.00012  | 0.00158  | 0.00170  | -3.07267 |
| D4  | -0.01570 | -0.00037 | 0.00223  | -0.02324 | -0.02103 | -0.03674 |
| D5  | -0.00230 | 0.00010  | 0.00018  | 0.00053  | 0.00071  | -0.00158 |
| D6  | -3.11097 | 0.00028  | 0.00096  | -0.00973 | -0.00876 | -3.11974 |
| D7  | 3.07778  | 0.00011  | -0.00027 | 0.00327  | 0.00298  | 3.08076  |
| D8  | -0.03090 | 0.00029  | 0.00051  | -0.00699 | -0.00650 | -0.03739 |

|     |          |          |          |          |          |          |
|-----|----------|----------|----------|----------|----------|----------|
| D9  | 0.00431  | -0.00006 | 0.00047  | -0.00811 | -0.00765 | -0.00334 |
| D10 | 3.11523  | -0.00022 | -0.00122 | 0.00064  | -0.00059 | 3.11465  |
| D11 | -3.06247 | 0.00023  | -0.00145 | 0.01405  | 0.01256  | -3.04991 |
| D12 | 0.04845  | 0.00007  | -0.00314 | 0.02280  | 0.01962  | 0.06807  |
| D13 | -1.46924 | -0.00024 | -0.00995 | 0.02180  | 0.01184  | -1.45740 |
| D14 | 1.57805  | -0.00065 | -0.00756 | -0.00622 | -0.01378 | 1.56428  |
| D15 | -0.00581 | 0.00013  | -0.00037 | 0.00857  | 0.00820  | 0.00239  |
| D16 | 3.12807  | -0.00004 | -0.00017 | 0.00069  | 0.00052  | 3.12859  |
| D17 | -3.11745 | 0.00026  | 0.00126  | 0.00017  | 0.00141  | -3.11604 |
| D18 | 0.01643  | 0.00009  | 0.00145  | -0.00771 | -0.00627 | 0.01016  |
| D19 | -0.52387 | 0.00093  | 0.01505  | 0.02813  | 0.04318  | -0.48069 |
| D20 | 2.62433  | 0.00065  | 0.01377  | 0.02531  | 0.03908  | 2.66341  |
| D21 | 2.58241  | 0.00077  | 0.01312  | 0.03816  | 0.05127  | 2.63368  |
| D22 | -0.55258 | 0.00049  | 0.01184  | 0.03533  | 0.04718  | -0.50540 |
| D23 | 0.00501  | -0.00014 | 0.00012  | -0.00565 | -0.00553 | -0.00051 |
| D24 | 3.11361  | -0.00032 | -0.00063 | 0.00458  | 0.00395  | 3.11756  |
| D25 | -3.12881 | 0.00002  | -0.00008 | 0.00229  | 0.00220  | -3.12661 |
| D26 | -0.02022 | -0.00016 | -0.00083 | 0.01251  | 0.01168  | -0.00854 |
| D27 | -2.34246 | -0.00019 | -0.00027 | -0.02700 | -0.02727 | -2.36974 |
| D28 | -0.31545 | -0.00018 | -0.00109 | -0.02462 | -0.02572 | -0.34117 |
| D29 | 1.80928  | -0.00058 | -0.00116 | -0.02018 | -0.02134 | 1.78795  |
| D30 | 0.83773  | 0.00000  | 0.00063  | -0.03902 | -0.03839 | 0.79934  |
| D31 | 2.86474  | 0.00002  | -0.00019 | -0.03665 | -0.03683 | 2.82791  |
| D32 | -1.29371 | -0.00039 | -0.00025 | -0.03220 | -0.03245 | -1.32616 |
| D33 | -3.11790 | 0.00064  | 0.00051  | 0.02999  | 0.03049  | -3.08740 |
| D34 | 1.12329  | 0.00029  | -0.00026 | 0.03045  | 0.03020  | 1.15349  |
| D35 | -1.01646 | 0.00036  | -0.00020 | 0.03072  | 0.03052  | -0.98594 |
| D36 | 1.06021  | 0.00009  | 0.00015  | 0.03177  | 0.03191  | 1.09212  |
| D37 | -0.98179 | -0.00026 | -0.00062 | 0.03223  | 0.03161  | -0.95018 |
| D38 | -3.12154 | -0.00019 | -0.00056 | 0.03250  | 0.03194  | -3.08960 |
| D39 | -1.03614 | 0.00015  | 0.00098  | 0.03312  | 0.03410  | -1.00204 |
| D40 | -3.07814 | -0.00020 | 0.00022  | 0.03358  | 0.03380  | -3.04434 |
| D41 | 1.06529  | -0.00013 | 0.00028  | 0.03385  | 0.03413  | 1.09942  |
| D42 | 3.13927  | -0.00056 | -0.00189 | -0.00026 | -0.00214 | 3.13712  |
| D43 | -0.02626 | 0.00017  | -0.00303 | 0.02960  | 0.02657  | 0.00031  |
| D44 | -0.00975 | -0.00024 | -0.00045 | 0.00291  | 0.00246  | -0.00729 |
| D45 | 3.10790  | 0.00049  | -0.00159 | 0.03277  | 0.03118  | 3.13908  |
| D46 | -2.75269 | 0.00035  | -0.00013 | 0.00190  | 0.00177  | -2.75092 |
| D47 | -0.04393 | 0.00017  | -0.00018 | 0.00245  | 0.00227  | -0.04166 |
| D48 | -0.00868 | -0.00018 | -0.00034 | -0.00382 | -0.00415 | -0.01283 |
| D49 | 2.70008  | -0.00036 | -0.00039 | -0.00327 | -0.00365 | 2.69643  |
| D50 | 0.56935  | -0.00064 | 0.00488  | -0.04961 | -0.04475 | 0.52460  |
| D51 | -1.80055 | -0.00099 | 0.00488  | -0.05365 | -0.04881 | -1.84936 |
| D52 | 2.64216  | -0.00034 | -0.00586 | -0.00833 | -0.01420 | 2.62797  |

|     |          |          |          |          |          |          |
|-----|----------|----------|----------|----------|----------|----------|
| D53 | 0.26029  | -0.00021 | -0.00577 | -0.00855 | -0.01434 | 0.24595  |
| D54 | 2.56238  | 0.00015  | -0.00049 | 0.00124  | 0.00074  | 2.56312  |
| D55 | -1.64180 | 0.00016  | -0.00051 | 0.00151  | 0.00099  | -1.64081 |
| D56 | 0.45265  | 0.00018  | -0.00041 | 0.00059  | 0.00016  | 0.45281  |
| D57 | 1.33924  | -0.00018 | -0.00035 | 0.00075  | 0.00041  | 1.33965  |
| D58 | -2.86494 | -0.00018 | -0.00037 | 0.00102  | 0.00066  | -2.86428 |
| D59 | -0.77049 | -0.00016 | -0.00027 | 0.00009  | -0.00017 | -0.77067 |
| D60 | -1.00875 | -0.00002 | -0.00042 | 0.00133  | 0.00091  | -1.00784 |
| D61 | 1.07025  | -0.00002 | -0.00044 | 0.00160  | 0.00116  | 1.07141  |
| D62 | -3.11849 | 0.00000  | -0.00034 | 0.00067  | 0.00033  | -3.11816 |
| D63 | 1.26119  | 0.00040  | -0.00663 | 0.07578  | 0.06930  | 1.33050  |
| D64 | 2.66378  | -0.00031 | 0.00081  | 0.05737  | 0.05803  | 2.72181  |
| D65 | 2.56334  | -0.00030 | 0.00638  | -0.07969 | -0.07332 | 2.49001  |
| D66 | -0.60713 | 0.00091  | 0.00647  | -0.06643 | -0.05994 | -0.66707 |
| D67 | -1.61279 | -0.00105 | 0.00666  | -0.08543 | -0.07879 | -1.69158 |
| D68 | 1.49993  | 0.00015  | 0.00675  | -0.07216 | -0.06541 | 1.43452  |
| D69 | 0.38320  | -0.00028 | 0.00612  | -0.07570 | -0.06958 | 0.31362  |
| D70 | -2.78726 | 0.00092  | 0.00620  | -0.06243 | -0.05620 | -2.84346 |
| D71 | 3.01083  | -0.00043 | -0.00023 | -0.01090 | -0.01109 | 2.99974  |
| D72 | -0.16078 | 0.00087  | -0.00010 | 0.00309  | 0.00295  | -0.15783 |
| D73 | -1.95998 | 0.00004  | 0.00645  | 0.00709  | 0.01354  | -1.94644 |

| Item                 | Value    | Threshold | Converged? |
|----------------------|----------|-----------|------------|
| Maximum Force        | 0.003260 | 0.000450  | NO         |
| RMS Force            | 0.000577 | 0.000300  | NO         |
| Maximum Displacement | 0.160358 | 0.001800  | NO         |
| RMS Displacement     | 0.034624 | 0.001200  | NO         |

Predicted change in Energy=-2.682147D-04

GradGradGradGradGradGradGradGradGradGradGradGradGradGradGradGradGradGradGrad

Input orientation:

| Center Number | Atomic Number | Atomic Type | Coordinates (Angstroms) |           |           |
|---------------|---------------|-------------|-------------------------|-----------|-----------|
|               |               |             | X                       | Y         | Z         |
| 1             | 6             | 0           | -1.088294               | 1.691893  | 1.625109  |
| 2             | 6             | 0           | -1.841170               | 0.561530  | 1.700640  |
| 3             | 7             | 0           | -2.613200               | 0.519409  | 0.552888  |
| 4             | 6             | 0           | -2.336783               | 1.598748  | -0.194439 |
| 5             | 7             | 0           | -1.409949               | 2.328685  | 0.437589  |
| 6             | 6             | 0           | -0.807947               | 3.580329  | -0.057489 |
| 7             | 1             | 0           | -0.322173               | 2.063432  | 2.281469  |
| 8             | 1             | 0           | -1.828188               | -0.246519 | 2.421143  |
| 9             | 1             | 0           | -1.614637               | 4.213753  | -0.432931 |
| 10            | 1             | 0           | -0.359331               | 4.069141  | 0.803325  |

|    |    |   |           |           |           |
|----|----|---|-----------|-----------|-----------|
| 11 | 35 | 0 | -0.313855 | -2.292226 | 2.494011  |
| 12 | 1  | 0 | -2.778112 | 1.826708  | -1.149235 |
| 13 | 6  | 0 | -3.541622 | -0.517284 | 0.187256  |
| 14 | 6  | 0 | -3.400302 | -1.769733 | 0.600292  |
| 15 | 1  | 0 | -4.341651 | -0.159769 | -0.447885 |
| 16 | 1  | 0 | -4.134856 | -2.503030 | 0.294218  |
| 17 | 1  | 0 | -2.572944 | -2.087355 | 1.241082  |
| 18 | 6  | 0 | 2.843532  | -0.743335 | 1.005180  |
| 19 | 6  | 0 | 4.234331  | -0.379852 | 1.296818  |
| 20 | 8  | 0 | 3.182380  | 0.606745  | 1.443779  |
| 21 | 1  | 0 | 2.536763  | -0.793283 | -0.036245 |
| 22 | 1  | 0 | 2.233357  | -1.303364 | 1.709922  |
| 23 | 1  | 0 | 4.628371  | -0.687410 | 2.263132  |
| 24 | 6  | 0 | 5.252628  | -0.128325 | 0.219638  |
| 25 | 1  | 0 | 5.968862  | 0.637860  | 0.530613  |
| 26 | 1  | 0 | 5.811290  | -1.046960 | 0.015220  |
| 27 | 1  | 0 | 4.767868  | 0.197187  | -0.703268 |
| 28 | 6  | 0 | 0.230973  | 3.347911  | -1.156775 |
| 29 | 1  | 0 | 0.661657  | 4.320197  | -1.421549 |
| 30 | 1  | 0 | -0.230104 | 2.947382  | -2.061075 |
| 31 | 6  | 0 | 1.378262  | 2.417305  | -0.781172 |
| 32 | 8  | 0 | 1.863897  | 1.634863  | -1.559225 |
| 33 | 8  | 0 | 1.772633  | 2.595554  | 0.482753  |
| 34 | 1  | 0 | 2.431385  | 1.891526  | 0.749204  |

-----  
Distance matrix (angstroms):

|    |    | 1        | 2        | 3        | 4        | 5        |
|----|----|----------|----------|----------|----------|----------|
| 1  | C  | 0.000000 |          |          |          |          |
| 2  | C  | 1.360238 | 0.000000 |          |          |          |
| 3  | N  | 2.202207 | 1.383885 | 0.000000 |          |          |
| 4  | C  | 2.208655 | 2.216479 | 1.341596 | 0.000000 |          |
| 5  | N  | 1.385341 | 2.214517 | 2.175911 | 1.338390 | 0.000000 |
| 6  | C  | 2.544783 | 3.643036 | 3.605653 | 2.506542 | 1.474490 |
| 7  | H  | 1.075077 | 2.213690 | 3.258957 | 3.225632 | 2.157199 |
| 8  | H  | 2.222286 | 1.082699 | 2.166395 | 3.241134 | 3.277360 |
| 9  | H  | 3.297324 | 4.235821 | 3.951854 | 2.723348 | 2.086429 |
| 10 | H  | 2.618783 | 3.912078 | 4.212273 | 3.317934 | 2.065610 |
| 11 | Br | 4.150656 | 3.332575 | 4.118281 | 5.143898 | 5.175241 |
| 12 | H  | 3.251252 | 3.255814 | 2.152545 | 1.076277 | 2.154498 |
| 13 | C  | 3.600930 | 2.519068 | 1.438883 | 2.464736 | 3.564581 |
| 14 | C  | 4.287014 | 3.012714 | 2.421146 | 3.620683 | 4.559059 |
| 15 | H  | 4.279053 | 3.374736 | 2.109591 | 2.678828 | 3.946055 |
| 16 | H  | 5.352587 | 4.078057 | 3.393742 | 4.505158 | 5.548978 |
| 17 | H  | 4.078526 | 2.786266 | 2.696377 | 3.962809 | 4.636763 |

|    |    |          |          |          |          |          |
|----|----|----------|----------|----------|----------|----------|
| 18 | C  | 4.666252 | 4.912512 | 5.619165 | 5.810345 | 5.277459 |
| 19 | C  | 5.721035 | 6.161249 | 6.946279 | 7.022695 | 6.319204 |
| 20 | O  | 4.410111 | 5.030316 | 5.864304 | 5.842002 | 5.006694 |
| 21 | H  | 4.698641 | 4.900875 | 5.347182 | 5.431232 | 5.054477 |
| 22 | H  | 4.473491 | 4.481036 | 5.305690 | 5.738904 | 5.299461 |
| 23 | H  | 6.224822 | 6.612957 | 7.538017 | 7.731723 | 6.992191 |
| 24 | C  | 6.745060 | 7.279508 | 7.899485 | 7.794446 | 7.104529 |
| 25 | H  | 7.218889 | 7.897556 | 8.582909 | 8.392422 | 7.570627 |
| 26 | H  | 7.595875 | 7.999251 | 8.585723 | 8.569412 | 7.982460 |
| 27 | H  | 6.476891 | 7.042081 | 7.494126 | 7.259431 | 6.634023 |
| 28 | C  | 3.495960 | 4.496945 | 4.360355 | 3.252542 | 2.504684 |
| 29 | H  | 4.387760 | 5.489971 | 5.391575 | 4.231161 | 3.422582 |
| 30 | H  | 3.987568 | 4.736911 | 4.290339 | 3.121095 | 2.831632 |
| 31 | C  | 3.521407 | 4.468560 | 4.616654 | 3.849136 | 3.044232 |
| 32 | O  | 4.342657 | 5.050375 | 5.074413 | 4.416974 | 3.897015 |
| 33 | O  | 3.210372 | 4.322046 | 4.852920 | 4.282466 | 3.194071 |
| 34 | H  | 3.632521 | 4.574806 | 5.231547 | 4.869456 | 3.878667 |
|    |    | 6        | 7        | 8        | 9        | 10       |
| 6  | C  | 0.000000 |          |          |          |          |
| 7  | H  | 2.829784 | 0.000000 |          |          |          |
| 8  | H  | 4.672181 | 2.761062 | 0.000000 |          |          |
| 9  | H  | 1.092214 | 3.696256 | 5.299564 | 0.000000 |          |
| 10 | H  | 1.086827 | 2.491818 | 4.837334 | 1.767777 | 0.000000 |
| 11 | Br | 6.421930 | 4.360849 | 2.546259 | 7.251675 | 6.582361 |
| 12 | H  | 2.854583 | 4.225802 | 4.236535 | 2.750409 | 3.832948 |
| 13 | C  | 4.931867 | 4.627166 | 2.828324 | 5.145932 | 5.616209 |
| 14 | C  | 5.981317 | 5.195613 | 2.847319 | 6.329160 | 6.586439 |
| 15 | H  | 5.160214 | 5.343052 | 3.815278 | 5.154079 | 5.942060 |
| 16 | H  | 6.942570 | 6.272025 | 3.864760 | 7.210786 | 7.596526 |
| 17 | H  | 6.076524 | 4.835019 | 2.309953 | 6.589738 | 6.556993 |
| 18 | C  | 5.758181 | 4.419112 | 4.906806 | 6.820276 | 5.784376 |
| 19 | C  | 6.552996 | 5.263166 | 6.167335 | 7.635684 | 6.413954 |
| 20 | O  | 5.197954 | 3.886587 | 5.175818 | 6.288396 | 4.994205 |
| 21 | H  | 5.505998 | 4.658984 | 5.038899 | 6.516279 | 5.721485 |
| 22 | H  | 6.018615 | 4.265292 | 4.256631 | 7.059565 | 6.033884 |
| 23 | H  | 7.290571 | 5.663511 | 6.473523 | 8.382440 | 7.045068 |
| 24 | C  | 7.110660 | 6.335089 | 7.416101 | 8.151001 | 7.032317 |
| 25 | H  | 7.411419 | 6.683927 | 8.071569 | 8.439484 | 7.203755 |
| 26 | H  | 8.076595 | 7.240842 | 8.049273 | 9.111550 | 8.054325 |
| 27 | H  | 6.553808 | 6.188704 | 7.312098 | 7.546010 | 6.599243 |
| 28 | C  | 1.530295 | 3.711789 | 5.473716 | 2.163310 | 2.170397 |
| 29 | H  | 2.137242 | 4.446713 | 6.466878 | 2.483992 | 2.460795 |
| 30 | H  | 2.179193 | 4.432554 | 5.731070 | 2.484247 | 3.078933 |
| 31 | C  | 2.579894 | 3.520863 | 5.256625 | 3.507983 | 2.873747 |

|    |    |           |          |          |          |           |
|----|----|-----------|----------|----------|----------|-----------|
| 32 | O  | 3.630262  | 4.439990 | 5.745818 | 4.474307 | 4.055871  |
| 33 | O  | 2.814434  | 2.811894 | 4.980026 | 3.864020 | 2.611416  |
| 34 | H  | 3.741134  | 3.155863 | 5.050800 | 4.812534 | 3.540202  |
|    |    | 11        | 12       | 13       | 14       | 15        |
| 11 | Br | 0.000000  |          |          |          |           |
| 12 | H  | 6.025896  | 0.000000 |          |          |           |
| 13 | C  | 4.346264  | 2.804186 | 0.000000 |          |           |
| 14 | C  | 3.658596  | 4.047513 | 1.326348 | 0.000000 |           |
| 15 | H  | 5.424506  | 2.623479 | 1.082252 | 2.139346 | 0.000000  |
| 16 | H  | 4.414021  | 4.761402 | 2.075224 | 1.082116 | 2.466648  |
| 17 | H  | 2.591387  | 4.590817 | 2.124619 | 1.093625 | 3.113924  |
| 18 | C  | 3.819002  | 6.545954 | 6.441295 | 6.340575 | 7.353830  |
| 19 | C  | 5.077051  | 7.747673 | 7.855918 | 7.791312 | 8.754422  |
| 20 | O  | 4.661618  | 6.613584 | 6.932134 | 7.049172 | 7.795960  |
| 21 | H  | 4.095735  | 6.029178 | 6.088751 | 6.050403 | 6.919781  |
| 22 | H  | 2.842698  | 6.564065 | 6.023854 | 5.760807 | 7.013892  |
| 23 | H  | 5.201378  | 8.533523 | 8.431309 | 8.270190 | 9.385591  |
| 24 | C  | 6.390694  | 8.377872 | 8.802906 | 8.815459 | 9.617524  |
| 25 | H  | 7.205059  | 8.985811 | 9.586530 | 9.673810 | 10.387510 |
| 26 | H  | 6.724024  | 9.131908 | 9.369478 | 9.258410 | 10.202147 |
| 27 | H  | 6.499514  | 7.732790 | 8.387558 | 8.502180 | 9.120087  |
| 28 | C  | 6.740639  | 3.371751 | 5.565844 | 6.516420 | 5.806482  |
| 29 | H  | 7.746443  | 4.257188 | 6.607347 | 7.594380 | 6.786105  |
| 30 | H  | 6.943293  | 2.929113 | 5.293869 | 6.275684 | 5.400147  |
| 31 | C  | 5.980783  | 4.214228 | 5.809898 | 6.501877 | 6.282500  |
| 32 | O  | 6.049244  | 4.664027 | 6.074666 | 6.630731 | 6.554740  |
| 33 | O  | 5.682340  | 4.895282 | 6.165905 | 6.769698 | 6.770700  |
| 34 | H  | 5.299479  | 5.545009 | 6.464902 | 6.887349 | 7.177385  |
|    |    | 16        | 17       | 18       | 19       | 20        |
| 16 | H  | 0.000000  |          |          |          |           |
| 17 | H  | 1.873208  | 0.000000 |          |          |           |
| 18 | C  | 7.231867  | 5.585719 | 0.000000 |          |           |
| 19 | C  | 8.692318  | 7.018381 | 1.466797 | 0.000000 |           |
| 20 | O  | 8.033314  | 6.357910 | 1.459419 | 1.449680 | 0.000000  |
| 21 | H  | 6.895139  | 5.423587 | 1.086815 | 2.197662 | 2.137140  |
| 22 | H  | 6.633066  | 4.892339 | 1.087477 | 2.242192 | 2.149417  |
| 23 | H  | 9.163364  | 7.406981 | 2.184312 | 1.087944 | 2.106434  |
| 24 | C  | 9.683473  | 8.131465 | 2.607500 | 1.503499 | 2.514911  |
| 25 | H  | 10.583298 | 8.994110 | 3.449725 | 2.152070 | 2.932460  |
| 26 | H  | 10.056034 | 8.537010 | 3.143214 | 2.138767 | 3.418580  |
| 27 | H  | 9.356530  | 7.930142 | 2.739790 | 2.148949 | 2.700245  |
| 28 | C  | 7.443074  | 6.569154 | 5.313926 | 5.995265 | 4.794546  |
| 29 | H  | 8.515094  | 7.655650 | 6.024031 | 6.499537 | 5.324836  |
| 30 | H  | 7.106440  | 6.460783 | 5.698294 | 6.502085 | 5.422881  |



|    |   |          |          |          |          |          |
|----|---|----------|----------|----------|----------|----------|
| 31 | C | 7.467304 | 6.324042 | 3.915063 | 4.505470 | 3.388714 |
| 32 | O | 7.519472 | 6.432899 | 3.632036 | 4.223152 | 3.437071 |
| 33 | O | 7.805738 | 6.433409 | 3.545129 | 3.946606 | 2.620366 |
| 34 | H | 7.914207 | 6.412235 | 2.679158 | 2.951213 | 1.642282 |
|    |   | 21       | 22       | 23       | 24       | 25       |
| 21 | H | 0.000000 |          |          |          |          |
| 22 | H | 1.844271 | 0.000000 |          |          |          |
| 23 | H | 3.110171 | 2.534074 | 0.000000 |          |          |
| 24 | C | 2.807769 | 3.566183 | 2.208651 | 0.000000 |          |
| 25 | H | 3.761490 | 4.371855 | 2.560250 | 1.093954 | 0.000000 |
| 26 | H | 3.284742 | 3.967287 | 2.565478 | 1.094432 | 1.768920 |
| 27 | H | 2.530570 | 3.807740 | 3.098629 | 1.092111 | 1.777369 |
| 28 | C | 4.870497 | 5.819093 | 6.878712 | 6.260650 | 6.566203 |
| 29 | H | 5.619854 | 6.625767 | 7.374810 | 6.599989 | 6.748108 |
| 30 | H | 5.074255 | 6.193375 | 7.450856 | 6.687449 | 7.104782 |
| 31 | C | 3.493553 | 4.558521 | 5.428651 | 4.742633 | 5.095176 |
| 32 | O | 2.944165 | 4.411009 | 5.257916 | 4.213868 | 4.712979 |
| 33 | O | 3.512473 | 4.113365 | 4.701366 | 4.427088 | 4.630679 |
| 34 | H | 2.799327 | 3.342083 | 3.710746 | 3.509936 | 3.759415 |
|    |   | 26       | 27       | 28       | 29       | 30       |
| 26 | H | 0.000000 |          |          |          |          |
| 27 | H | 1.775629 | 0.000000 |          |          |          |
| 28 | C | 7.199194 | 5.542215 | 0.000000 |          |          |
| 29 | H | 7.575579 | 5.863114 | 1.095872 | 0.000000 |          |
| 30 | H | 7.534203 | 5.864038 | 1.091226 | 1.757513 | 0.000000 |
| 31 | C | 5.682175 | 4.052706 | 1.524262 | 2.131807 | 2.122728 |
| 32 | O | 5.025233 | 3.351510 | 2.400612 | 2.945395 | 2.521785 |
| 33 | O | 5.458685 | 4.016247 | 2.372932 | 2.799112 | 3.256655 |
| 34 | H | 4.538413 | 3.231039 | 3.255092 | 3.707094 | 4.011985 |
|    |   | 31       | 32       | 33       | 34       |          |
| 31 | C | 0.000000 |          |          |          |          |
| 32 | O | 1.205580 | 0.000000 |          |          |          |
| 33 | O | 1.335967 | 2.258524 | 0.000000 |          |          |
| 34 | H | 1.930690 | 2.390975 | 1.000303 | 0.000000 |          |

Stoichiometry C11H17BrN2O3

Framework group C1[X(C11H17BrN2O3)]

Deg. of freedom 96

Full point group C1 NOp 1

Largest Abelian subgroup C1 NOp 1

Largest concise Abelian subgroup C1 NOp 1

Standard orientation:

-----

| Center Number | Atomic Number | Atomic Type | Coordinates (Angstroms) |   |   |
|---------------|---------------|-------------|-------------------------|---|---|
|               |               |             | X                       | Y | Z |

---

|    |    |   |           |           |           |
|----|----|---|-----------|-----------|-----------|
| 1  | 6  | 0 | -0.984971 | 1.186612  | 1.343669  |
| 2  | 6  | 0 | -2.012847 | 0.432305  | 0.869602  |
| 3  | 7  | 0 | -2.589743 | 1.149259  | -0.163987 |
| 4  | 6  | 0 | -1.929934 | 2.308537  | -0.307538 |
| 5  | 7  | 0 | -0.947065 | 2.354638  | 0.599728  |
| 6  | 6  | 0 | 0.031266  | 3.445881  | 0.761526  |
| 7  | 1  | 0 | -0.253740 | 0.969720  | 2.101330  |
| 8  | 1  | 0 | -2.321091 | -0.574983 | 1.119790  |
| 9  | 1  | 0 | -0.514117 | 4.391600  | 0.728286  |
| 10 | 1  | 0 | 0.460738  | 3.331406  | 1.753313  |
| 11 | 35 | 0 | -1.430559 | -2.783896 | 0.219185  |
| 12 | 1  | 0 | -2.148765 | 3.064722  | -1.041479 |
| 13 | 6  | 0 | -3.694783 | 0.725958  | -0.982576 |
| 14 | 6  | 0 | -3.952888 | -0.554384 | -1.213456 |
| 15 | 1  | 0 | -4.268429 | 1.555359  | -1.375379 |
| 16 | 1  | 0 | -4.801680 | -0.808773 | -1.834596 |
| 17 | 1  | 0 | -3.343474 | -1.361146 | -0.796604 |
| 18 | 6  | 0 | 2.208560  | -1.769686 | -0.340245 |
| 19 | 6  | 0 | 3.586893  | -2.018166 | 0.095590  |
| 20 | 8  | 0 | 2.823984  | -0.937513 | 0.688660  |
| 21 | 1  | 0 | 2.057189  | -1.248419 | -1.281805 |
| 22 | 1  | 0 | 1.374527  | -2.372714 | 0.010971  |
| 23 | 1  | 0 | 3.737881  | -2.832003 | 0.801630  |
| 24 | 6  | 0 | 4.783266  | -1.629681 | -0.727989 |
| 25 | 1  | 0 | 5.622584  | -1.344349 | -0.086999 |
| 26 | 1  | 0 | 5.102630  | -2.477743 | -1.341648 |
| 27 | 1  | 0 | 4.544160  | -0.792856 | -1.387729 |
| 28 | 6  | 0 | 1.122425  | 3.431976  | -0.311312 |
| 29 | 1  | 0 | 1.829451  | 4.236785  | -0.080378 |
| 30 | 1  | 0 | 0.710892  | 3.643946  | -1.299484 |
| 31 | 6  | 0 | 1.913646  | 2.133489  | -0.417510 |
| 32 | 8  | 0 | 2.284404  | 1.680824  | -1.471577 |
| 33 | 8  | 0 | 2.149525  | 1.592875  | 0.781200  |
| 34 | 1  | 0 | 2.551381  | 0.681981  | 0.684298  |

---

Rotational constants (GHZ):      0.3146571      0.2650328      0.1587550

Standard basis: 6-311++G(d,p) (5D, 7F)

There are 538 symmetry adapted cartesian basis functions of A symmetry.

There are 519 symmetry adapted basis functions of A symmetry.

519 basis functions, 823 primitive gaussians, 538 cartesian basis functions

78 alpha electrons      78 beta electrons

nuclear repulsion energy      1567.9281827399 Hartrees.

NAtoms= 34 NActive= 34 NUniq= 34 SFac= 1.00D+00 NATFMM= 60 NAOKFM=F

Big=F

Integral buffers will be 131072 words long.

Raffenetti 2 integral format.

Two-electron integral symmetry is turned on.

One-electron integrals computed using PRISM.

NBasis= 519 RedAO= T EigKep= 4.92D-06 NBF= 519

NBsUse= 519 1.00D-06 EigRej= -1.00D+00 NBFU= 519

Initial guess from the checkpoint file: "./coohpo.chk"

B after Tr= 0.000000 0.000000 0.000000

Rot= 0.999909 0.000481 -0.001300 0.013394 Ang= 1.54 deg.

ExpMin= 3.50D-02 ExpMax= 4.40D+05 ExpMxC= 1.51D+04 IAcc=3 IRadAn= 5 AccDes= 0.00D+00

Harris functional with IExCor= 402 and IRadAn= 5 diagonalized for initial guess.

HarFok: IExCor= 402 AccDes= 0.00D+00 IRadAn= 5 IDoV= 1 UseB2=F ITyADJ=14

ICtDFT= 3500011 ScaDFX= 1.000000 1.000000 1.000000 1.000000

FoFCou: FMM=F IPFlag= 0 FMFlag= 100000 FMFlg1= 0

NFxFlg= 0 DoJE=T BraDBF=F KetDBF=T FulRan=T

wScrn= 0.000000 ICntrl= 500 IOpCl= 0 I1Cent= 200000004 NGrid=

0

NMat0= 1 NMatS0= 1 NMatT0= 0 NMatD0= 1 NMtDS0= 0

NMtDT0= 0

Petite list used in FoFCou.

Requested convergence on RMS density matrix=1.00D-08 within 128 cycles.

Requested convergence on MAX density matrix=1.00D-06.

Requested convergence on energy=1.00D-06.

No special actions if energy rises.

SCF Done: E(RB3LYP) = -3338.90208287 A.U. after 13 cycles

NFock= 13 Conv=0.19D-08 -V/T= 2.0019

Calling FoFJK, ICntrl= 2127 FMM=F ISym2X=0 I1Cent= 0 IOpClX= 0 NMat=1 NMatS=1 NMatT=0.

\*\*\*\*\* Axes restored to original set \*\*\*\*\*

```
-----
```

| Center | Atomic | Forces (Hartrees/Bohr) |              |              |
|--------|--------|------------------------|--------------|--------------|
| Number | Number | X                      | Y            | Z            |
| 1      | 6      | 0.000211223            | -0.000399639 | -0.000910407 |
| 2      | 6      | 0.000566052            | -0.000436198 | 0.001127474  |
| 3      | 7      | -0.002920697           | -0.001561863 | 0.000553693  |
| 4      | 6      | -0.000257688           | 0.000132053  | -0.000761145 |
| 5      | 7      | -0.000130616           | 0.000426818  | 0.001395825  |
| 6      | 6      | -0.000473207           | -0.000675803 | -0.001167151 |
| 7      | 1      | -0.000174852           | 0.000536278  | 0.000092992  |
| 8      | 1      | 0.001875911            | -0.000504637 | -0.000279659 |
| 9      | 1      | 0.000328719            | 0.000243604  | 0.000732624  |

```
-----
```

|    |    |              |              |              |
|----|----|--------------|--------------|--------------|
| 10 | 1  | 0.000263796  | 0.000364773  | 0.000632558  |
| 11 | 35 | -0.000582313 | 0.000231708  | 0.000423575  |
| 12 | 1  | -0.000120783 | 0.000172756  | 0.000087643  |
| 13 | 6  | 0.002444304  | 0.001504532  | -0.000285183 |
| 14 | 6  | -0.000760325 | 0.001822053  | 0.001896640  |
| 15 | 1  | 0.000118262  | -0.000429880 | -0.001226668 |
| 16 | 1  | -0.000289288 | -0.000433961 | 0.000053794  |
| 17 | 1  | 0.000149249  | -0.001098734 | -0.001572289 |
| 18 | 6  | -0.000567563 | -0.001004074 | 0.000166254  |
| 19 | 6  | -0.000236700 | 0.000568193  | 0.000165005  |
| 20 | 8  | -0.000654149 | 0.000438959  | 0.001221103  |
| 21 | 1  | -0.000225999 | 0.000064288  | 0.000324479  |
| 22 | 1  | 0.000507495  | 0.000087649  | -0.000840660 |
| 23 | 1  | 0.000290047  | 0.000081992  | -0.000118389 |
| 24 | 6  | -0.000062995 | -0.000077101 | -0.000351005 |
| 25 | 1  | -0.000114899 | -0.000017167 | 0.000027267  |
| 26 | 1  | -0.000022958 | 0.000029056  | 0.000033943  |
| 27 | 1  | 0.000064857  | -0.000032608 | 0.000039081  |
| 28 | 6  | 0.000170349  | 0.000212981  | -0.001472412 |
| 29 | 1  | -0.000130455 | -0.000145615 | 0.000178165  |
| 30 | 1  | 0.000211040  | 0.000004627  | -0.000127627 |
| 31 | 6  | 0.000498043  | 0.002427369  | 0.003159519  |
| 32 | 8  | 0.000471900  | -0.001710185 | -0.000934390 |
| 33 | 8  | -0.002381512 | -0.000452188 | -0.002123109 |
| 34 | 1  | 0.001935752  | -0.000370038 | -0.000141540 |

-----  
Cartesian Forces: Max 0.003159519 RMS 0.000932127

GradGradGradGradGradGradGradGradGradGradGradGradGradGradGradGradGradGradGrad  
Berny optimization.

Using GEDIIS/GDIIS optimizer.

FormGI is forming the generalized inverse of G from B-inverse, IUseBI=4.

GSVD: received Info= 1 from GESDD.

Internal Forces: Max 0.003718711 RMS 0.000721451

Search for a local minimum.

Step number 18 out of a maximum of 175

All quantities printed in internal units (Hartrees-Bohrs-Radians)

Mixed Optimization -- En-DIIS/RFO-DIIS

Swapping is turned off.

Update second derivatives using D2CorX and points 16 17 18

DE= -3.24D-04 DEPred=-2.68D-04 R= 1.21D+00

TightC=F SS= 1.41D+00 RLast= 2.70D-01 DXNew= 1.5637D+00 8.1047D-01

Trust test= 1.21D+00 RLast= 2.70D-01 DXMaxT set to 9.30D-01

ITU= 1 1 1 1 1 0 0-1 1 1 1 0 1 0-1 0 1 0

|                 |         |         |         |         |         |
|-----------------|---------|---------|---------|---------|---------|
| Eigenvalues --- | 0.00131 | 0.00350 | 0.00438 | 0.00642 | 0.00661 |
| Eigenvalues --- | 0.00699 | 0.01032 | 0.01420 | 0.01645 | 0.01748 |
| Eigenvalues --- | 0.01866 | 0.02086 | 0.02229 | 0.02340 | 0.02410 |
| Eigenvalues --- | 0.02456 | 0.02493 | 0.02725 | 0.03014 | 0.03137 |
| Eigenvalues --- | 0.03413 | 0.03480 | 0.03827 | 0.04145 | 0.04556 |
| Eigenvalues --- | 0.04829 | 0.04976 | 0.05289 | 0.05678 | 0.05772 |
| Eigenvalues --- | 0.05904 | 0.06204 | 0.07578 | 0.09524 | 0.09658 |
| Eigenvalues --- | 0.11440 | 0.12020 | 0.12718 | 0.12988 | 0.13550 |
| Eigenvalues --- | 0.14976 | 0.15365 | 0.15735 | 0.15922 | 0.15977 |
| Eigenvalues --- | 0.15999 | 0.16002 | 0.16004 | 0.16026 | 0.16038 |
| Eigenvalues --- | 0.16857 | 0.17240 | 0.20308 | 0.21558 | 0.22661 |
| Eigenvalues --- | 0.23013 | 0.23581 | 0.23858 | 0.24986 | 0.25700 |
| Eigenvalues --- | 0.28868 | 0.29156 | 0.29780 | 0.31667 | 0.31877 |
| Eigenvalues --- | 0.33107 | 0.34497 | 0.34536 | 0.34618 | 0.34764 |
| Eigenvalues --- | 0.34875 | 0.34938 | 0.34974 | 0.35113 | 0.35200 |
| Eigenvalues --- | 0.35363 | 0.35734 | 0.35792 | 0.36555 | 0.36831 |
| Eigenvalues --- | 0.36939 | 0.37242 | 0.37547 | 0.37789 | 0.40870 |
| Eigenvalues --- | 0.44460 | 0.46818 | 0.47841 | 0.49130 | 0.51950 |
| Eigenvalues --- | 0.53962 | 0.56216 | 0.56662 | 0.60576 | 0.91525 |
| Eigenvalues --- | 1.32078 |         |         |         |         |

En-DIIS/RFO-DIIS IScMMF= 0 using points: 18 17

RFO step: Lambda=-1.92994281D-04.

DidBck=F Rises=F RFO-DIIS coefs: 1.34977 -0.34977

Iteration 1 RMS(Cart)= 0.11905598 RMS(Int)= 0.00540574

Iteration 2 RMS(Cart)= 0.00969845 RMS(Int)= 0.00045879

Iteration 3 RMS(Cart)= 0.00006040 RMS(Int)= 0.00045725

Iteration 4 RMS(Cart)= 0.00000006 RMS(Int)= 0.00045725

| Variable | Old X   | -DE/DX   | Delta X<br>(Linear) | Delta X<br>(Quad) | Delta X<br>(Total) | New X   |
|----------|---------|----------|---------------------|-------------------|--------------------|---------|
| R1       | 2.57048 | 0.00045  | -0.00014            | -0.00153          | -0.00164           | 2.56884 |
| R2       | 2.61792 | -0.00035 | 0.00073             | 0.00168           | 0.00240            | 2.62031 |
| R3       | 2.03160 | 0.00012  | 0.00013             | 0.00103           | 0.00116            | 2.03276 |
| R4       | 2.61516 | 0.00193  | 0.00000             | 0.00296           | 0.00299            | 2.61816 |
| R5       | 2.04600 | 0.00032  | 0.00069             | 0.00679           | 0.00748            | 2.05349 |
| R6       | 2.53525 | 0.00048  | -0.00078            | -0.00279          | -0.00358           | 2.53167 |
| R7       | 2.71910 | -0.00177 | 0.00167             | 0.00760           | 0.00927            | 2.72836 |
| R8       | 2.52919 | -0.00004 | -0.00001            | 0.00044           | 0.00038            | 2.52957 |
| R9       | 2.03387 | 0.00001  | 0.00025             | 0.00073           | 0.00099            | 2.03485 |
| R10      | 2.78638 | 0.00020  | -0.00061            | -0.00544          | -0.00605           | 2.78034 |
| R11      | 2.06399 | -0.00035 | -0.00013            | -0.00070          | -0.00083           | 2.06316 |
| R12      | 2.05381 | 0.00077  | 0.00036             | 0.00312           | 0.00348            | 2.05728 |
| R13      | 2.89184 | 0.00039  | 0.00000             | -0.00084          | -0.00084           | 2.89100 |
| R14      | 4.81173 | -0.00052 | -0.01491            | -0.18843          | -0.20335           | 4.60839 |
| R15      | 2.50643 | -0.00024 | -0.00033            | -0.00156          | -0.00189           | 2.50454 |

|     |         |          |          |          |          |         |
|-----|---------|----------|----------|----------|----------|---------|
| R16 | 2.04516 | 0.00049  | -0.00003 | 0.00014  | 0.00011  | 2.04527 |
| R17 | 2.04490 | 0.00047  | -0.00028 | -0.00054 | -0.00083 | 2.04407 |
| R18 | 2.06665 | -0.00048 | -0.00074 | -0.00397 | -0.00470 | 2.06195 |
| R19 | 2.77185 | 0.00026  | -0.00022 | -0.00214 | -0.00406 | 2.76778 |
| R20 | 2.75790 | 0.00069  | 0.00053  | 0.00834  | 0.00954  | 2.76745 |
| R21 | 2.05378 | -0.00025 | 0.00025  | 0.00055  | 0.00080  | 2.05459 |
| R22 | 2.05503 | -0.00088 | 0.00029  | -0.00073 | -0.00044 | 2.05459 |
| R23 | 2.73950 | -0.00042 | 0.00062  | 0.00390  | 0.00556  | 2.74506 |
| R24 | 2.05592 | -0.00002 | -0.00008 | -0.00065 | -0.00074 | 2.05518 |
| R25 | 2.84120 | 0.00007  | -0.00012 | -0.00001 | -0.00013 | 2.84107 |
| R26 | 3.10346 | -0.00031 | 0.00174  | -0.02093 | -0.01919 | 3.08427 |
| R27 | 2.06727 | -0.00008 | -0.00004 | -0.00015 | -0.00020 | 2.06708 |
| R28 | 2.06818 | -0.00004 | -0.00004 | -0.00020 | -0.00023 | 2.06794 |
| R29 | 2.06379 | -0.00007 | 0.00004  | 0.00013  | 0.00018  | 2.06397 |
| R30 | 2.07090 | -0.00023 | -0.00034 | -0.00061 | -0.00094 | 2.06996 |
| R31 | 2.06212 | 0.00002  | -0.00009 | 0.00221  | 0.00212  | 2.06423 |
| R32 | 2.88044 | -0.00026 | -0.00044 | -0.00683 | -0.00727 | 2.87317 |
| R33 | 2.27822 | 0.00191  | 0.00002  | 0.00010  | 0.00011  | 2.27833 |
| R34 | 2.52461 | -0.00203 | 0.00163  | 0.00324  | 0.00487  | 2.52948 |
| R35 | 1.89030 | 0.00089  | -0.00020 | 0.00814  | 0.00794  | 1.89823 |
| A1  | 1.87661 | 0.00056  | -0.00057 | -0.00034 | -0.00087 | 1.87574 |
| A2  | 2.27538 | 0.00006  | 0.00040  | 0.00261  | 0.00295  | 2.27833 |
| A3  | 2.12933 | -0.00061 | 0.00022  | -0.00154 | -0.00138 | 2.12795 |
| A4  | 1.86295 | -0.00068 | 0.00009  | -0.00148 | -0.00151 | 1.86144 |
| A5  | 2.27906 | -0.00041 | 0.00038  | -0.00025 | -0.00018 | 2.27888 |
| A6  | 2.13636 | 0.00112  | -0.00112 | -0.00111 | -0.00253 | 2.13383 |
| A7  | 1.89924 | -0.00023 | 0.00047  | 0.00237  | 0.00289  | 1.90213 |
| A8  | 2.20513 | 0.00225  | -0.00130 | -0.00140 | -0.00275 | 2.20238 |
| A9  | 2.17856 | -0.00202 | 0.00089  | -0.00083 | 0.00002  | 2.17858 |
| A10 | 1.89484 | 0.00015  | -0.00031 | -0.00191 | -0.00232 | 1.89252 |
| A11 | 2.18963 | -0.00001 | 0.00031  | 0.00218  | 0.00241  | 2.19204 |
| A12 | 2.19861 | -0.00014 | -0.00003 | -0.00056 | -0.00066 | 2.19794 |
| A13 | 1.89114 | 0.00021  | 0.00032  | 0.00135  | 0.00165  | 1.89279 |
| A14 | 2.19348 | -0.00001 | -0.00035 | -0.00523 | -0.00558 | 2.18789 |
| A15 | 2.19831 | -0.00020 | 0.00012  | 0.00377  | 0.00389  | 2.20220 |
| A16 | 1.88196 | 0.00044  | 0.00068  | 0.01497  | 0.01566  | 1.89762 |
| A17 | 1.85915 | 0.00025  | 0.00038  | -0.00399 | -0.00363 | 1.85553 |
| A18 | 1.97083 | -0.00115 | 0.00020  | -0.01176 | -0.01156 | 1.95927 |
| A19 | 1.89262 | -0.00041 | 0.00002  | -0.00187 | -0.00185 | 1.89077 |
| A20 | 1.92046 | 0.00094  | -0.00213 | -0.00047 | -0.00256 | 1.91790 |
| A21 | 1.93589 | -0.00007 | 0.00093  | 0.00361  | 0.00450  | 1.94039 |
| A22 | 2.24694 | 0.00265  | 0.01171  | 0.15335  | 0.16506  | 2.41200 |
| A23 | 2.13230 | 0.00160  | -0.00066 | 0.00394  | 0.00328  | 2.13558 |
| A24 | 1.96936 | -0.00040 | 0.00018  | -0.00302 | -0.00283 | 1.96653 |

|     |          |          |          |          |          |          |
|-----|----------|----------|----------|----------|----------|----------|
| A25 | 2.18152  | -0.00120 | 0.00048  | -0.00092 | -0.00044 | 2.18107  |
| A26 | 2.07087  | -0.00040 | 0.00058  | -0.00083 | -0.00030 | 2.07057  |
| A27 | 2.13805  | 0.00122  | 0.00105  | 0.01309  | 0.01409  | 2.15214  |
| A28 | 2.07426  | -0.00081 | -0.00155 | -0.01225 | -0.01385 | 2.06041  |
| A29 | 2.05958  | -0.00031 | -0.00051 | -0.00245 | -0.00247 | 2.05711  |
| A30 | 2.13033  | 0.00059  | -0.00032 | 0.00195  | 0.00098  | 2.13131  |
| A31 | 1.97798  | -0.00007 | 0.00031  | -0.00200 | -0.00223 | 1.97575  |
| A32 | 1.99535  | 0.00046  | 0.00086  | 0.00719  | 0.00822  | 2.00357  |
| A33 | 2.02522  | -0.00026 | 0.00010  | -0.00190 | -0.00178 | 2.02344  |
| A34 | 2.03752  | 0.00028  | -0.00024 | 0.00038  | -0.00074 | 2.03678  |
| A35 | 2.14266  | -0.00036 | 0.00000  | -0.00154 | -0.00078 | 2.14188  |
| A36 | 1.94461  | 0.00013  | -0.00023 | -0.00133 | -0.00136 | 1.94325  |
| A37 | 2.03783  | -0.00027 | -0.00011 | -0.00137 | -0.00204 | 2.03580  |
| A38 | 2.02455  | 0.00002  | 0.00028  | 0.00105  | 0.00143  | 2.02598  |
| A39 | 2.08338  | -0.00019 | 0.00065  | -0.02812 | -0.03164 | 2.05174  |
| A40 | 2.53460  | -0.00099 | -0.01388 | -0.11515 | -0.12980 | 2.40480  |
| A41 | 1.93579  | -0.00012 | 0.00004  | -0.00083 | -0.00079 | 1.93499  |
| A42 | 1.91678  | -0.00002 | 0.00006  | 0.00067  | 0.00073  | 1.91751  |
| A43 | 1.93337  | 0.00008  | 0.00002  | 0.00006  | 0.00008  | 1.93345  |
| A44 | 1.88259  | 0.00006  | 0.00002  | 0.00025  | 0.00027  | 1.88286  |
| A45 | 1.89873  | 0.00001  | 0.00013  | 0.00104  | 0.00117  | 1.89990  |
| A46 | 1.89539  | -0.00001 | -0.00027 | -0.00119 | -0.00146 | 1.89392  |
| A47 | 1.88139  | 0.00074  | -0.00170 | -0.00864 | -0.01021 | 1.87118  |
| A48 | 1.94355  | 0.00136  | -0.00097 | 0.00087  | -0.00008 | 1.94347  |
| A49 | 2.01165  | -0.00372 | -0.00170 | -0.02490 | -0.02664 | 1.98501  |
| A50 | 1.86658  | -0.00047 | 0.00138  | 0.00896  | 0.01016  | 1.87674  |
| A51 | 1.88116  | 0.00118  | 0.00185  | 0.01917  | 0.02078  | 1.90194  |
| A52 | 1.87355  | 0.00110  | 0.00147  | 0.00757  | 0.00886  | 1.88240  |
| A53 | 2.14172  | 0.00099  | 0.00207  | 0.00280  | 0.00473  | 2.14646  |
| A54 | 1.95396  | -0.00159 | 0.00015  | 0.00078  | 0.00079  | 1.95475  |
| A55 | 2.18739  | 0.00062  | -0.00212 | -0.00323 | -0.00548 | 2.18190  |
| A56 | 1.93104  | 0.00136  | -0.00248 | -0.01291 | -0.01539 | 1.91565  |
| A57 | 2.87400  | -0.00101 | 0.00325  | 0.02387  | 0.02712  | 2.90112  |
| D1  | 0.00297  | -0.00017 | 0.00146  | -0.00248 | -0.00102 | 0.00194  |
| D2  | 3.03890  | 0.00013  | -0.00649 | -0.03362 | -0.04015 | 2.99875  |
| D3  | -3.07267 | -0.00023 | 0.00059  | -0.01524 | -0.01466 | -3.08732 |
| D4  | -0.03674 | 0.00007  | -0.00736 | -0.04638 | -0.05378 | -0.09052 |
| D5  | -0.00158 | 0.00011  | 0.00025  | 0.01001  | 0.01027  | 0.00869  |
| D6  | -3.11974 | 0.00036  | -0.00307 | 0.01518  | 0.01212  | -3.10762 |
| D7  | 3.08076  | 0.00018  | 0.00104  | 0.02166  | 0.02267  | 3.10343  |
| D8  | -0.03739 | 0.00043  | -0.00227 | 0.02683  | 0.02452  | -0.01287 |
| D9  | -0.00334 | 0.00018  | -0.00267 | -0.00592 | -0.00861 | -0.01194 |
| D10 | 3.11465  | 0.00004  | -0.00021 | 0.00068  | 0.00046  | 3.11511  |
| D11 | -3.04991 | 0.00001  | 0.00439  | 0.02202  | 0.02635  | -3.02357 |

|     |          |          |          |          |          |          |
|-----|----------|----------|----------|----------|----------|----------|
| D12 | 0.06807  | -0.00014 | 0.00686  | 0.02862  | 0.03542  | 0.10348  |
| D13 | -1.45740 | -0.00016 | 0.00414  | 0.05503  | 0.05916  | -1.39824 |
| D14 | 1.56428  | 0.00007  | -0.00482 | 0.01968  | 0.01488  | 1.57915  |
| D15 | 0.00239  | -0.00012 | 0.00287  | 0.01229  | 0.01515  | 0.01754  |
| D16 | 3.12859  | -0.00005 | 0.00018  | -0.00761 | -0.00744 | 3.12115  |
| D17 | -3.11604 | -0.00004 | 0.00049  | 0.00583  | 0.00628  | -3.10975 |
| D18 | 0.01016  | 0.00002  | -0.00219 | -0.01407 | -0.01631 | -0.00615 |
| D19 | -0.48069 | 0.00033  | 0.01510  | -0.03739 | -0.02228 | -0.50298 |
| D20 | 2.66341  | 0.00032  | 0.01367  | -0.03814 | -0.02446 | 2.63895  |
| D21 | 2.63368  | 0.00020  | 0.01793  | -0.02974 | -0.01181 | 2.62187  |
| D22 | -0.50540 | 0.00019  | 0.01650  | -0.03049 | -0.01399 | -0.51939 |
| D23 | -0.00051 | 0.00001  | -0.00193 | -0.01377 | -0.01570 | -0.01621 |
| D24 | 3.11756  | -0.00024 | 0.00138  | -0.01911 | -0.01773 | 3.09984  |
| D25 | -3.12661 | -0.00006 | 0.00077  | 0.00622  | 0.00696  | -3.11965 |
| D26 | -0.00854 | -0.00031 | 0.00409  | 0.00088  | 0.00493  | -0.00360 |
| D27 | -2.36974 | -0.00008 | -0.00954 | -0.05529 | -0.06485 | -2.43458 |
| D28 | -0.34117 | -0.00021 | -0.00899 | -0.05214 | -0.06115 | -0.40232 |
| D29 | 1.78795  | -0.00084 | -0.00746 | -0.05759 | -0.06501 | 1.72293  |
| D30 | 0.79934  | 0.00020  | -0.01343 | -0.04916 | -0.06261 | 0.73673  |
| D31 | 2.82791  | 0.00008  | -0.01288 | -0.04602 | -0.05892 | 2.76899  |
| D32 | -1.32616 | -0.00055 | -0.01135 | -0.05147 | -0.06278 | -1.38894 |
| D33 | -3.08740 | 0.00066  | 0.01067  | 0.04389  | 0.05448  | -3.03293 |
| D34 | 1.15349  | 0.00003  | 0.01056  | 0.03776  | 0.04838  | 1.20186  |
| D35 | -0.98594 | 0.00030  | 0.01068  | 0.04594  | 0.05667  | -0.92927 |
| D36 | 1.09212  | 0.00021  | 0.01116  | 0.03301  | 0.04408  | 1.13620  |
| D37 | -0.95018 | -0.00043 | 0.01106  | 0.02689  | 0.03798  | -0.91220 |
| D38 | -3.08960 | -0.00016 | 0.01117  | 0.03507  | 0.04627  | -3.04333 |
| D39 | -1.00204 | 0.00015  | 0.01193  | 0.03334  | 0.04518  | -0.95686 |
| D40 | -3.04434 | -0.00049 | 0.01182  | 0.02721  | 0.03908  | -3.00526 |
| D41 | 1.09942  | -0.00022 | 0.01194  | 0.03539  | 0.04737  | 1.14679  |
| D42 | 3.13712  | -0.00011 | -0.00075 | 0.00162  | 0.00087  | 3.13800  |
| D43 | 0.00031  | -0.00138 | 0.00929  | -0.00060 | 0.00870  | 0.00901  |
| D44 | -0.00729 | -0.00009 | 0.00086  | 0.00246  | 0.00332  | -0.00397 |
| D45 | 3.13908  | -0.00137 | 0.01090  | 0.00024  | 0.01115  | -3.13296 |
| D46 | -2.75092 | 0.00007  | 0.00062  | -0.00165 | -0.00083 | -2.75175 |
| D47 | -0.04166 | -0.00007 | 0.00079  | -0.00167 | -0.00073 | -0.04238 |
| D48 | -0.01283 | 0.00004  | -0.00145 | -0.00894 | -0.01041 | -0.02324 |
| D49 | 2.69643  | -0.00009 | -0.00128 | -0.00897 | -0.01030 | 2.68613  |
| D50 | 0.52460  | -0.00068 | -0.01565 | -0.12727 | -0.14267 | 0.38194  |
| D51 | -1.84936 | -0.00069 | -0.01707 | -0.12996 | -0.14644 | -1.99580 |
| D52 | 2.62797  | -0.00037 | -0.00497 | 0.01653  | 0.01061  | 2.63858  |
| D53 | 0.24595  | -0.00026 | -0.00501 | 0.01791  | 0.01216  | 0.25811  |
| D54 | 2.56312  | 0.00006  | 0.00026  | 0.00146  | 0.00196  | 2.56509  |
| D55 | -1.64081 | 0.00004  | 0.00035  | 0.00167  | 0.00227  | -1.63854 |



|     |          |          |          |          |          |          |
|-----|----------|----------|----------|----------|----------|----------|
| D56 | 0.45281  | 0.00007  | 0.00006  | 0.00066  | 0.00097  | 0.45378  |
| D57 | 1.33965  | -0.00009 | 0.00014  | -0.00125 | -0.00134 | 1.33831  |
| D58 | -2.86428 | -0.00011 | 0.00023  | -0.00104 | -0.00104 | -2.86532 |
| D59 | -0.77067 | -0.00008 | -0.00006 | -0.00205 | -0.00234 | -0.77300 |
| D60 | -1.00784 | -0.00002 | 0.00032  | 0.00128  | 0.00158  | -1.00627 |
| D61 | 1.07141  | -0.00003 | 0.00040  | 0.00150  | 0.00188  | 1.07329  |
| D62 | -3.11816 | 0.00000  | 0.00011  | 0.00049  | 0.00058  | -3.11758 |
| D63 | 1.33050  | 0.00005  | 0.02424  | 0.10795  | 0.13038  | 1.46088  |
| D64 | 2.72181  | -0.00044 | 0.02030  | 0.02764  | 0.04975  | 2.77156  |
| D65 | 2.49001  | -0.00009 | -0.02565 | -0.13135 | -0.15696 | 2.33306  |
| D66 | -0.66707 | 0.00064  | -0.02097 | -0.10780 | -0.12867 | -0.79574 |
| D67 | -1.69158 | -0.00070 | -0.02756 | -0.14449 | -0.17227 | -1.86386 |
| D68 | 1.43452  | 0.00004  | -0.02288 | -0.12094 | -0.14398 | 1.29053  |
| D69 | 0.31362  | -0.00012 | -0.02434 | -0.12087 | -0.14512 | 0.16851  |
| D70 | -2.84346 | 0.00062  | -0.01966 | -0.09732 | -0.11683 | -2.96029 |
| D71 | 2.99974  | -0.00052 | -0.00388 | -0.00067 | -0.00446 | 2.99528  |
| D72 | -0.15783 | 0.00024  | 0.00103  | 0.02368  | 0.02462  | -0.13321 |
| D73 | -1.94644 | -0.00044 | 0.00474  | -0.04063 | -0.03590 | -1.98234 |

| Item                 | Value    | Threshold | Converged? |
|----------------------|----------|-----------|------------|
| Maximum Force        | 0.003719 | 0.000450  | NO         |
| RMS Force            | 0.000721 | 0.000300  | NO         |
| Maximum Displacement | 0.535848 | 0.001800  | NO         |
| RMS Displacement     | 0.121727 | 0.001200  | NO         |

Predicted change in Energy=-5.210405D-04

GradGradGradGradGradGradGradGradGradGradGradGradGradGradGradGradGradGradGrad

Input orientation:

| Center Number | Atomic Number | Atomic Type | Coordinates (Angstroms) |           |           |
|---------------|---------------|-------------|-------------------------|-----------|-----------|
|               |               |             | X                       | Y         | Z         |
| 1             | 6             | 0           | -1.008581               | 1.681085  | 1.579031  |
| 2             | 6             | 0           | -1.749338               | 0.543811  | 1.655045  |
| 3             | 7             | 0           | -2.548453               | 0.514120  | 0.523647  |
| 4             | 6             | 0           | -2.308672               | 1.610372  | -0.208154 |
| 5             | 7             | 0           | -1.364245               | 2.332056  | 0.407525  |
| 6             | 6             | 0           | -0.771622               | 3.586090  | -0.083281 |
| 7             | 1             | 0           | -0.237535               | 2.057908  | 2.227572  |
| 8             | 1             | 0           | -1.690778               | -0.292917 | 2.345904  |
| 9             | 1             | 0           | -1.566431               | 4.212656  | -0.492755 |
| 10            | 1             | 0           | -0.353980               | 4.088367  | 0.787633  |
| 11            | 35            | 0           | -0.349163               | -2.306007 | 2.653411  |
| 12            | 1             | 0           | -2.771497               | 1.848222  | -1.150871 |
| 13            | 6             | 0           | -3.479671               | -0.529262 | 0.164880  |

|    |   |   |           |           |           |
|----|---|---|-----------|-----------|-----------|
| 14 | 6 | 0 | -3.308010 | -1.790750 | 0.533290  |
| 15 | 1 | 0 | -4.309863 | -0.162826 | -0.424952 |
| 16 | 1 | 0 | -4.045457 | -2.523189 | 0.233741  |
| 17 | 1 | 0 | -2.463563 | -2.129473 | 1.135580  |
| 18 | 6 | 0 | 2.756676  | -0.722310 | 1.141631  |
| 19 | 6 | 0 | 4.167887  | -0.361090 | 1.293925  |
| 20 | 8 | 0 | 3.137567  | 0.622356  | 1.579200  |
| 21 | 1 | 0 | 2.343502  | -0.744611 | 0.136205  |
| 22 | 1 | 0 | 2.227171  | -1.311312 | 1.886481  |
| 23 | 1 | 0 | 4.661605  | -0.692549 | 2.204502  |
| 24 | 6 | 0 | 5.065093  | -0.076837 | 0.121522  |
| 25 | 1 | 0 | 5.810043  | 0.682604  | 0.376097  |
| 26 | 1 | 0 | 5.598808  | -0.987353 | -0.167647 |
| 27 | 1 | 0 | 4.484309  | 0.271659  | -0.735304 |
| 28 | 6 | 0 | 0.299948  | 3.342948  | -1.147733 |
| 29 | 1 | 0 | 0.760699  | 4.311318  | -1.370915 |
| 30 | 1 | 0 | -0.138379 | 2.965765  | -2.074460 |
| 31 | 6 | 0 | 1.383277  | 2.368301  | -0.713995 |
| 32 | 8 | 0 | 1.773897  | 1.467339  | -1.413460 |
| 33 | 8 | 0 | 1.823984  | 2.626580  | 0.523245  |
| 34 | 1 | 0 | 2.433846  | 1.888641  | 0.827447  |

-----  
Distance matrix (angstroms):

|    |    | 1        | 2        | 3        | 4        | 5        |
|----|----|----------|----------|----------|----------|----------|
| 1  | C  | 0.000000 |          |          |          |          |
| 2  | C  | 1.359372 | 0.000000 |          |          |          |
| 3  | N  | 2.201556 | 1.385470 | 0.000000 |          |          |
| 4  | C  | 2.211168 | 2.218539 | 1.339700 | 0.000000 |          |
| 5  | N  | 1.386609 | 2.214142 | 2.172723 | 1.338592 | 0.000000 |
| 6  | C  | 2.539385 | 3.637742 | 3.600347 | 2.506308 | 1.471290 |
| 7  | H  | 1.075692 | 2.214910 | 3.259906 | 3.228414 | 2.158056 |
| 8  | H  | 2.224898 | 1.086660 | 2.169685 | 3.244613 | 3.279393 |
| 9  | H  | 3.318485 | 4.255223 | 3.959370 | 2.720992 | 2.094765 |
| 10 | H  | 2.617216 | 3.906828 | 4.202457 | 3.309511 | 2.061491 |
| 11 | Br | 4.181630 | 3.328467 | 4.162438 | 5.231277 | 5.252240 |
| 12 | H  | 3.253947 | 3.258751 | 2.152577 | 1.076799 | 2.154774 |
| 13 | C  | 3.604406 | 2.523119 | 1.443788 | 2.467474 | 3.566657 |
| 14 | C  | 4.293551 | 3.022906 | 2.426817 | 3.621608 | 4.559777 |
| 15 | H  | 4.279535 | 3.373723 | 2.112028 | 2.682537 | 3.948939 |
| 16 | H  | 5.358017 | 4.086411 | 3.398575 | 4.505333 | 5.549100 |
| 17 | H  | 4.102923 | 2.815388 | 2.714821 | 3.976941 | 4.652291 |
| 18 | C  | 4.488295 | 4.708590 | 5.482250 | 5.737689 | 5.181704 |
| 19 | C  | 5.572036 | 5.996900 | 6.816784 | 6.934602 | 6.216367 |
| 20 | O  | 4.279188 | 4.888125 | 5.784180 | 5.816556 | 4.956027 |

|    |    |          |          |          |          |          |
|----|----|----------|----------|----------|----------|----------|
| 21 | H  | 4.382033 | 4.551730 | 5.066137 | 5.225634 | 4.825649 |
| 22 | H  | 4.418038 | 4.394050 | 5.291135 | 5.787711 | 5.325384 |
| 23 | H  | 6.178703 | 6.552152 | 7.501085 | 7.727167 | 6.977696 |
| 24 | C  | 6.488770 | 7.012372 | 7.647027 | 7.571510 | 6.871750 |
| 25 | H  | 6.995545 | 7.668064 | 8.361496 | 8.192412 | 7.361527 |
| 26 | H  | 7.336827 | 7.724113 | 8.313253 | 8.323343 | 7.735205 |
| 27 | H  | 6.124906 | 6.681781 | 7.148671 | 6.943676 | 6.305306 |
| 28 | C  | 3.450982 | 4.459855 | 4.348467 | 3.269483 | 2.492041 |
| 29 | H  | 4.330203 | 5.445258 | 5.381317 | 4.250665 | 3.405248 |
| 30 | H  | 3.969339 | 4.729721 | 4.309198 | 3.167074 | 2.839821 |
| 31 | C  | 3.383965 | 4.330634 | 4.519762 | 3.802738 | 2.967827 |
| 32 | O  | 4.091806 | 4.762543 | 4.831534 | 4.259177 | 3.729833 |
| 33 | O  | 3.167344 | 4.288068 | 4.855996 | 4.318155 | 3.203895 |
| 34 | H  | 3.529626 | 4.471299 | 5.177345 | 4.862239 | 3.846874 |
|    |    | 6        | 7        | 8        | 9        | 10       |
| 6  | C  | 0.000000 |          |          |          |          |
| 7  | H  | 2.821459 | 0.000000 |          |          |          |
| 8  | H  | 4.668242 | 2.766279 | 0.000000 |          |          |
| 9  | H  | 1.091776 | 3.716057 | 5.326691 | 0.000000 |          |
| 10 | H  | 1.088667 | 2.491936 | 4.838480 | 1.767732 | 0.000000 |
| 11 | Br | 6.510359 | 4.386064 | 2.438652 | 7.339828 | 6.661019 |
| 12 | H  | 2.856472 | 4.228334 | 4.240267 | 2.734200 | 3.823667 |
| 13 | C  | 4.932671 | 4.632450 | 2.830700 | 5.155459 | 5.610727 |
| 14 | C  | 5.976942 | 5.206782 | 2.853859 | 6.334567 | 6.584451 |
| 15 | H  | 5.166263 | 5.343351 | 3.814993 | 5.164868 | 5.932286 |
| 16 | H  | 6.938429 | 6.281886 | 3.870383 | 7.214221 | 7.592527 |
| 17 | H  | 6.084074 | 4.866396 | 2.331313 | 6.609003 | 6.575176 |
| 18 | C  | 5.701895 | 4.227786 | 4.627581 | 6.761240 | 5.739696 |
| 19 | C  | 6.471141 | 5.111848 | 5.952753 | 7.549422 | 6.364061 |
| 20 | O  | 5.179702 | 3.724581 | 4.973779 | 6.269836 | 4.983042 |
| 21 | H  | 5.339209 | 4.346226 | 4.621928 | 6.344893 | 5.573010 |
| 22 | H  | 6.071019 | 4.188408 | 4.074129 | 7.111006 | 6.084927 |
| 23 | H  | 7.284275 | 5.618462 | 6.366513 | 8.374047 | 7.072537 |
| 24 | C  | 6.893926 | 6.091834 | 7.115923 | 7.921754 | 6.867239 |
| 25 | H  | 7.208298 | 6.472450 | 7.816271 | 8.223657 | 7.054343 |
| 26 | H  | 7.842567 | 7.005253 | 7.741979 | 8.859257 | 7.881064 |
| 27 | H  | 6.247832 | 5.853643 | 6.924182 | 7.225078 | 6.347885 |
| 28 | C  | 1.529849 | 3.651424 | 5.421070 | 2.160731 | 2.174606 |
| 29 | H  | 2.128841 | 4.361586 | 6.404956 | 2.489264 | 2.439579 |
| 30 | H  | 2.179586 | 4.397899 | 5.706888 | 2.468980 | 3.081930 |
| 31 | C  | 2.554290 | 3.372861 | 5.088702 | 3.485881 | 2.869072 |
| 32 | O  | 3.569054 | 4.201398 | 5.406967 | 4.420662 | 4.030193 |
| 33 | O  | 2.832967 | 2.734589 | 4.919258 | 3.878506 | 2.636332 |
| 34 | H  | 3.739757 | 3.020807 | 4.906876 | 4.811049 | 3.551387 |

|    |    | 11        | 12       | 13       | 14       | 15        |
|----|----|-----------|----------|----------|----------|-----------|
| 11 | Br | 0.000000  |          |          |          |           |
| 12 | H  | 6.131712  | 0.000000 |          |          |           |
| 13 | C  | 4.376036  | 2.808049 | 0.000000 |          |           |
| 14 | C  | 3.676299  | 4.045536 | 1.325347 | 0.000000 |           |
| 15 | H  | 5.454969  | 2.633979 | 1.082310 | 2.138241 | 0.000000  |
| 16 | H  | 4.423185  | 4.759135 | 2.073790 | 1.081678 | 2.464772  |
| 17 | H  | 2.608766  | 4.598342 | 2.129651 | 1.091136 | 3.116374  |
| 18 | C  | 3.799975  | 6.513363 | 6.315326 | 6.188057 | 7.259696  |
| 19 | C  | 5.102416  | 7.682001 | 7.732281 | 7.649282 | 8.652519  |
| 20 | O  | 4.678304  | 6.623675 | 6.863990 | 6.961499 | 7.752248  |
| 21 | H  | 4.003090  | 5.877292 | 5.827224 | 5.761221 | 6.702286  |
| 22 | H  | 2.866200  | 6.647921 | 6.011952 | 5.718322 | 7.028126  |
| 23 | H  | 5.283235  | 8.541959 | 8.394469 | 8.216676 | 9.363860  |
| 24 | C  | 6.379172  | 8.169270 | 8.556843 | 8.556629 | 9.391263  |
| 25 | H  | 7.214830  | 8.793925 | 9.370806 | 9.448866 | 10.186703 |
| 26 | H  | 6.713835  | 8.892087 | 9.096109 | 8.970404 | 9.946246  |
| 27 | H  | 6.441289  | 7.436731 | 8.054613 | 8.159847 | 8.810367  |
| 28 | C  | 6.839644  | 3.415843 | 5.567987 | 6.496002 | 5.836370  |
| 29 | H  | 7.824065  | 4.311805 | 6.615936 | 7.577309 | 6.828134  |
| 30 | H  | 7.084404  | 3.005865 | 5.328610 | 6.282623 | 5.469025  |
| 31 | C  | 6.015807  | 4.209927 | 5.728574 | 6.392308 | 6.237146  |
| 32 | O  | 5.940115  | 4.568876 | 5.837598 | 6.342772 | 6.375478  |
| 33 | O  | 5.795739  | 4.952469 | 6.181951 | 6.771282 | 6.804700  |
| 34 | H  | 5.354844  | 5.568749 | 6.423000 | 6.825932 | 7.159233  |
|    |    | 16        | 17       | 18       | 19       | 20        |
| 16 | H  | 0.000000  |          |          |          |           |
| 17 | H  | 1.862986  | 0.000000 |          |          |           |
| 18 | C  | 7.094818  | 5.406574 | 0.000000 |          |           |
| 19 | C  | 8.559070  | 6.865011 | 1.464647 | 0.000000 |           |
| 20 | O  | 7.956164  | 6.256358 | 1.464470 | 1.452621 | 0.000000  |
| 21 | H  | 6.632620  | 5.101418 | 1.087241 | 2.194489 | 2.140414  |
| 22 | H  | 6.598944  | 4.820397 | 1.087244 | 2.240630 | 2.159239  |
| 23 | H  | 9.113072  | 7.346793 | 2.181590 | 1.087555 | 2.107765  |
| 24 | C  | 9.433947  | 7.869071 | 2.605004 | 1.503431 | 2.515761  |
| 25 | H  | 10.364760 | 8.771382 | 3.447154 | 2.151367 | 2.931418  |
| 26 | H  | 9.774034  | 8.246494 | 3.140409 | 2.139142 | 3.420576  |
| 27 | H  | 9.028131  | 7.585418 | 2.737805 | 2.149014 | 2.700672  |
| 28 | C  | 7.429843  | 6.542010 | 5.272857 | 5.885791 | 4.784335  |
| 29 | H  | 8.507911  | 7.626413 | 5.969441 | 6.367236 | 5.287828  |
| 30 | H  | 7.121915  | 6.455408 | 5.685639 | 6.399836 | 5.438071  |
| 31 | C  | 7.368584  | 6.200732 | 3.857649 | 4.385815 | 3.374107  |
| 32 | O  | 7.245859  | 6.114796 | 3.505554 | 4.050218 | 3.395527  |
| 33 | O  | 7.813724  | 6.432578 | 3.530918 | 3.874790 | 2.618674  |

|    |   |          |          |          |          |          |
|----|---|----------|----------|----------|----------|----------|
| 34 | H | 7.861176 | 6.342302 | 2.649527 | 2.878505 | 1.632125 |
|    |   | 21       | 22       | 23       | 24       | 25       |
| 21 | H | 0.000000 |          |          |          |          |
| 22 | H | 1.843407 | 0.000000 |          |          |          |
| 23 | H | 3.107116 | 2.531892 | 0.000000 |          |          |
| 24 | C | 2.802355 | 3.562697 | 2.209233 | 0.000000 |          |
| 25 | H | 3.756514 | 4.369660 | 2.559886 | 1.093851 | 0.000000 |
| 26 | H | 3.278454 | 3.961354 | 2.567557 | 1.094307 | 1.768907 |
| 27 | H | 2.524953 | 3.804501 | 3.098966 | 1.092204 | 1.778105 |
| 28 | C | 4.746868 | 5.880713 | 6.822520 | 6.001045 | 6.305603 |
| 29 | H | 5.508094 | 6.661467 | 7.282813 | 6.325431 | 6.458753 |
| 30 | H | 4.981332 | 6.291127 | 7.398151 | 6.415285 | 6.826549 |
| 31 | C | 3.366764 | 4.584124 | 5.351062 | 4.498061 | 4.860672 |
| 32 | O | 2.760187 | 4.337738 | 5.108192 | 3.946216 | 4.484283 |
| 33 | O | 3.432875 | 4.186641 | 4.679245 | 4.239650 | 4.437269 |
| 34 | H | 2.723967 | 3.376976 | 3.677192 | 3.359300 | 3.613440 |
|    |   | 26       | 27       | 28       | 29       | 30       |
| 26 | H | 0.000000 |          |          |          |          |
| 27 | H | 1.774669 | 0.000000 |          |          |          |
| 28 | C | 6.913030 | 5.206899 | 0.000000 |          |          |
| 29 | H | 7.275374 | 5.530653 | 1.095374 | 0.000000 |          |
| 30 | H | 7.223461 | 5.515505 | 1.092346 | 1.764605 | 0.000000 |
| 31 | C | 5.415682 | 3.743363 | 1.520417 | 2.143470 | 2.126797 |
| 32 | O | 4.712483 | 3.039059 | 2.400218 | 3.019371 | 2.517738 |
| 33 | O | 5.271350 | 3.769208 | 2.372349 | 2.748956 | 3.273223 |
| 34 | H | 4.390733 | 3.043226 | 3.251133 | 3.674450 | 4.024624 |
|    |   | 31       | 32       | 33       | 34       |          |
| 31 | C | 0.000000 |          |          |          |          |
| 32 | O | 1.205640 | 0.000000 |          |          |          |
| 33 | O | 1.338542 | 2.257693 | 0.000000 |          |          |
| 34 | H | 1.926087 | 2.373750 | 1.004502 | 0.000000 |          |

Stoichiometry C<sub>11</sub>H<sub>17</sub>BrN<sub>2</sub>O<sub>3</sub>

Framework group C1[X(C<sub>11</sub>H<sub>17</sub>BrN<sub>2</sub>O<sub>3</sub>)]

Deg. of freedom 96

Full point group C1 NOp 1

Largest Abelian subgroup C1 NOp 1

Largest concise Abelian subgroup C1 NOp 1

Standard orientation:

| Center Number | Atomic Number | Atomic Type | Coordinates (Angstroms) |          |          |
|---------------|---------------|-------------|-------------------------|----------|----------|
|               |               |             | X                       | Y        | Z        |
| 1             | 6             | 0           | -0.721935               | 1.278839 | 1.296151 |
| 2             | 6             | 0           | -1.834024               | 0.666856 | 0.809709 |

|    |    |   |           |           |           |
|----|----|---|-----------|-----------|-----------|
| 3  | 7  | 0 | -2.338254 | 1.490717  | -0.183534 |
| 4  | 6  | 0 | -1.561540 | 2.577631  | -0.284185 |
| 5  | 7  | 0 | -0.561573 | 2.466517  | 0.598736  |
| 6  | 6  | 0 | 0.544544  | 3.419099  | 0.782548  |
| 7  | 1  | 0 | -0.014836 | 0.955904  | 2.039683  |
| 8  | 1  | 0 | -2.235224 | -0.324990 | 0.999736  |
| 9  | 1  | 0 | 0.143872  | 4.433825  | 0.740468  |
| 10 | 1  | 0 | 0.933930  | 3.245967  | 1.784346  |
| 11 | 35 | 0 | -1.839486 | -2.617084 | 0.267122  |
| 12 | 1  | 0 | -1.699538 | 3.383905  | -0.984453 |
| 13 | 6  | 0 | -3.499120 | 1.228359  | -1.000897 |
| 14 | 6  | 0 | -3.891929 | -0.001263 | -1.301359 |
| 15 | 1  | 0 | -3.992776 | 2.134437  | -1.327579 |
| 16 | 1  | 0 | -4.772901 | -0.128368 | -1.915979 |
| 17 | 1  | 0 | -3.377512 | -0.897215 | -0.950330 |
| 18 | 6  | 0 | 1.870653  | -2.020298 | -0.297265 |
| 19 | 6  | 0 | 3.251632  | -2.406415 | 0.001062  |
| 20 | 8  | 0 | 2.630813  | -1.321692 | 0.741376  |
| 21 | 1  | 0 | 1.692689  | -1.411611 | -1.180396 |
| 22 | 1  | 0 | 1.019558  | -2.590793 | 0.066429  |
| 23 | 1  | 0 | 3.388976  | -3.285056 | 0.627083  |
| 24 | 6  | 0 | 4.407752  | -2.040912 | -0.887814 |
| 25 | 1  | 0 | 5.314771  | -1.875654 | -0.299158 |
| 26 | 1  | 0 | 4.607568  | -2.854772 | -1.591529 |
| 27 | 1  | 0 | 4.187143  | -1.135807 | -1.457923 |
| 28 | 6  | 0 | 1.638587  | 3.247394  | -0.272927 |
| 29 | 1  | 0 | 2.463930  | 3.911908  | 0.004692  |
| 30 | 1  | 0 | 1.288754  | 3.552651  | -1.261691 |
| 31 | 6  | 0 | 2.164694  | 1.825168  | -0.383170 |
| 32 | 8  | 0 | 2.321960  | 1.263483  | -1.438322 |
| 33 | 8  | 0 | 2.409036  | 1.286461  | 0.817574  |
| 34 | 1  | 0 | 2.622016  | 0.310193  | 0.714791  |

-----  
Rotational constants (GHZ):      0.3177172      0.2685145      0.1613493

Standard basis: 6-311++G(d,p) (5D, 7F)

There are 538 symmetry adapted cartesian basis functions of A symmetry.

There are 519 symmetry adapted basis functions of A symmetry.

519 basis functions, 823 primitive gaussians, 538 cartesian basis functions

78 alpha electrons      78 beta electrons

nuclear repulsion energy      1575.5752878021 Hartrees.

NAtoms= 34 NActive= 34 NUniq= 34 SFac= 1.00D+00 NAtFMM= 60 NAOKFM=F

Big=F

Integral buffers will be 131072 words long.

Raffenetti 2 integral format.

Two-electron integral symmetry is turned on.

One-electron integrals computed using PRISM.

NBasis= 519 RedAO= T EigKep= 4.90D-06 NBF= 519

NBsUse= 519 1.00D-06 EigRej= -1.00D+00 NBFU= 519

Initial guess from the checkpoint file: "./coohpo.chk"

B after Tr= 0.000000 0.000000 0.000000

Rot= 0.997650 -0.002425 -0.003632 0.068375 Ang= -7.86 deg.

ExpMin= 3.50D-02 ExpMax= 4.40D+05 ExpMxC= 1.51D+04 IAcc=3 IRadAn= 5 AccDes= 0.00D+00

Harris functional with IExCor= 402 and IRadAn= 5 diagonalized for initial guess.

HarFok: IExCor= 402 AccDes= 0.00D+00 IRadAn= 5 IDoV= 1 UseB2=F ITyADJ=14

ICtDFT= 3500011 ScaDFX= 1.000000 1.000000 1.000000 1.000000

FoFCou: FMM=F IPFlag= 0 FMFlag= 100000 FMFlg1= 0

NfXFlg= 0 DoJE=T BraDBF=F KetDBF=T FulRan=T

wScrn= 0.000000 ICntrl= 500 IOpCl= 0 I1Cent= 200000004 NGrid=

0

NMat0= 1 NMatS0= 1 NMatT0= 0 NMatD0= 1 NMtDS0= 0

NMtDT0= 0

Petite list used in FoFCou.

Requested convergence on RMS density matrix=1.00D-08 within 128 cycles.

Requested convergence on MAX density matrix=1.00D-06.

Requested convergence on energy=1.00D-06.

No special actions if energy rises.

SCF Done: E(RB3LYP) = -3338.90250512 A.U. after 13 cycles

NFock= 13 Conv=0.55D-08 -V/T= 2.0019

Calling FoFJK, ICntrl= 2127 FMM=F ISym2X=0 I1Cent= 0 IOpClX= 0 NMat=1 NMatS=1

NMatT=0.

\*\*\*\*\* Axes restored to original set \*\*\*\*\*

```
-----
```

| Center | Atomic | Forces (Hartrees/Bohr) |              |              |
|--------|--------|------------------------|--------------|--------------|
| Number | Number | X                      | Y            | Z            |
| 1      | 6      | -0.000042261           | -0.000107539 | -0.001507890 |
| 2      | 6      | 0.000322340            | -0.001262069 | -0.000419289 |
| 3      | 7      | -0.005009460           | -0.004352870 | 0.001543812  |
| 4      | 6      | 0.001662707            | -0.000110456 | -0.001857447 |
| 5      | 7      | -0.003212179           | 0.001904194  | 0.002814248  |
| 6      | 6      | 0.000038703            | 0.000275313  | -0.000324022 |
| 7      | 1      | -0.000262629           | 0.000115133  | -0.000287764 |
| 8      | 1      | 0.001307398            | -0.000564130 | 0.001082333  |
| 9      | 1      | -0.000777230           | -0.000555409 | 0.001209835  |
| 10     | 1      | 0.000419070            | 0.000249538  | -0.000692852 |
| 11     | 35     | -0.000279813           | -0.000477225 | 0.000308322  |
| 12     | 1      | -0.000097768           | 0.000234905  | 0.000447322  |

```
-----
```

|    |   |              |              |              |
|----|---|--------------|--------------|--------------|
| 13 | 6 | 0.003732169  | 0.004039803  | -0.000061063 |
| 14 | 6 | -0.001170277 | 0.000408138  | 0.000868676  |
| 15 | 1 | 0.000050528  | -0.000513445 | -0.001168610 |
| 16 | 1 | -0.001061933 | -0.000302820 | -0.000250902 |
| 17 | 1 | 0.001455834  | 0.000052721  | 0.000057121  |
| 18 | 6 | -0.000615043 | -0.000868253 | -0.000685419 |
| 19 | 6 | 0.000280303  | 0.001006954  | 0.000181525  |
| 20 | 8 | -0.001121263 | -0.001522861 | 0.000624179  |
| 21 | 1 | -0.000173482 | 0.000142423  | 0.001021226  |
| 22 | 1 | 0.000099720  | 0.001237527  | -0.000652216 |
| 23 | 1 | 0.000489862  | 0.000256403  | 0.000026328  |
| 24 | 6 | -0.000044710 | 0.000029586  | -0.000477553 |
| 25 | 1 | 0.000031324  | 0.000001056  | 0.000025059  |
| 26 | 1 | 0.000063669  | -0.000057508 | 0.000141433  |
| 27 | 1 | 0.000088186  | -0.000155533 | 0.000110848  |
| 28 | 6 | -0.000140360 | 0.002311323  | -0.001523285 |
| 29 | 1 | 0.000943397  | -0.000665173 | -0.000482239 |
| 30 | 1 | 0.000726219  | -0.000042031 | 0.000886709  |
| 31 | 6 | 0.001174780  | 0.002530907  | 0.005111017  |
| 32 | 8 | 0.001243281  | -0.002218744 | -0.002139472 |
| 33 | 8 | -0.001911420 | -0.001609549 | -0.004910572 |
| 34 | 1 | 0.001790338  | 0.000589691  | 0.000980602  |

-----  
Cartesian Forces: Max 0.005111017 RMS 0.001482972

GradGradGradGradGradGradGradGradGradGradGradGradGradGradGradGradGradGradGrad

Berny optimization.

Using GEDIIS/GDIIS optimizer.

FormGI is forming the generalized inverse of G from B-inverse, IUseBI=4.

GSVD: received Info= 1 from GESDD.

Internal Forces: Max 0.004459664 RMS 0.000966866

Search for a local minimum.

Step number 19 out of a maximum of 175

All quantities printed in internal units (Hartrees-Bohrs-Radians)

Mixed Optimization -- En-DIIS/RFO-DIIS

Swapping is turned off.

Update second derivatives using D2CorX and points 18 19

DE= -4.22D-04 DEPred=-5.21D-04 R= 8.10D-01

TightC=F SS= 1.41D+00 RLast= 5.82D-01 DXNew= 1.5637D+00 1.7464D+00

Trust test= 8.10D-01 RLast= 5.82D-01 DXMaxT set to 1.56D+00

ITU= 1 1 1 1 1 1 0 0 -1 1 1 1 0 1 0 -1 0 1 0

Eigenvalues --- 0.00141 0.00364 0.00526 0.00580 0.00685

Eigenvalues --- 0.00700 0.01032 0.01376 0.01578 0.01773

Eigenvalues --- 0.01917 0.02097 0.02251 0.02344 0.02411



|                 |         |         |         |         |         |
|-----------------|---------|---------|---------|---------|---------|
| Eigenvalues --- | 0.02472 | 0.02707 | 0.02815 | 0.03085 | 0.03120 |
| Eigenvalues --- | 0.03481 | 0.03495 | 0.03847 | 0.04193 | 0.04621 |
| Eigenvalues --- | 0.04838 | 0.05020 | 0.05291 | 0.05644 | 0.05779 |
| Eigenvalues --- | 0.05902 | 0.06296 | 0.07527 | 0.09366 | 0.09570 |
| Eigenvalues --- | 0.11237 | 0.12023 | 0.12591 | 0.12791 | 0.13531 |
| Eigenvalues --- | 0.15119 | 0.15387 | 0.15826 | 0.15977 | 0.15996 |
| Eigenvalues --- | 0.15999 | 0.16003 | 0.16006 | 0.16016 | 0.16234 |
| Eigenvalues --- | 0.17050 | 0.17190 | 0.20476 | 0.21537 | 0.22640 |
| Eigenvalues --- | 0.23000 | 0.23624 | 0.23982 | 0.24980 | 0.25815 |
| Eigenvalues --- | 0.28657 | 0.29368 | 0.30354 | 0.31424 | 0.31863 |
| Eigenvalues --- | 0.32893 | 0.34497 | 0.34566 | 0.34626 | 0.34765 |
| Eigenvalues --- | 0.34877 | 0.34943 | 0.34969 | 0.35110 | 0.35156 |
| Eigenvalues --- | 0.35464 | 0.35746 | 0.35814 | 0.36556 | 0.36831 |
| Eigenvalues --- | 0.36950 | 0.37230 | 0.37647 | 0.38176 | 0.41071 |
| Eigenvalues --- | 0.43954 | 0.46377 | 0.47377 | 0.49096 | 0.51764 |
| Eigenvalues --- | 0.54057 | 0.56177 | 0.57171 | 0.60563 | 0.91346 |
| Eigenvalues --- | 1.33647 |         |         |         |         |

En-DIIS/RFO-DIIS IScMMF= 0 using points: 19 18 17

RFO step: Lambda=-2.49369388D-04.

DidBck=F Rises=F RFO-DIIS coefs: 0.81758 0.23297 -0.05055

Iteration 1 RMS(Cart)= 0.03393892 RMS(Int)= 0.00063550

Iteration 2 RMS(Cart)= 0.00101837 RMS(Int)= 0.00010887

Iteration 3 RMS(Cart)= 0.00000068 RMS(Int)= 0.00010887

| Variable | Old X   | -DE/DX   | Delta X<br>(Linear) | Delta X<br>(Quad) | Delta X<br>(Total) | New X   |
|----------|---------|----------|---------------------|-------------------|--------------------|---------|
| R1       | 2.56884 | 0.00159  | 0.00028             | 0.00108           | 0.00136            | 2.57020 |
| R2       | 2.62031 | -0.00011 | -0.00033            | -0.00017          | -0.00050           | 2.61981 |
| R3       | 2.03276 | -0.00032 | -0.00019            | -0.00003          | -0.00022           | 2.03254 |
| R4       | 2.61816 | 0.00095  | -0.00055            | 0.00380           | 0.00325            | 2.62141 |
| R5       | 2.05349 | 0.00174  | -0.00127            | 0.00481           | 0.00355            | 2.05703 |
| R6       | 2.53167 | 0.00169  | 0.00054             | 0.00069           | 0.00122            | 2.53289 |
| R7       | 2.72836 | -0.00446 | -0.00145            | -0.00541          | -0.00686           | 2.72151 |
| R8       | 2.52957 | 0.00000  | -0.00007            | -0.00017          | -0.00024           | 2.52933 |
| R9       | 2.03485 | -0.00030 | -0.00014            | -0.00008          | -0.00022           | 2.03463 |
| R10      | 2.78034 | 0.00236  | 0.00101             | 0.00065           | 0.00167            | 2.78200 |
| R11      | 2.06316 | -0.00021 | 0.00013             | -0.00078          | -0.00065           | 2.06251 |
| R12      | 2.05728 | -0.00028 | -0.00058            | 0.00118           | 0.00059            | 2.05788 |
| R13      | 2.89100 | 0.00310  | 0.00015             | 0.00469           | 0.00484            | 2.89584 |
| R14      | 4.60839 | 0.00028  | 0.03494             | -0.05005          | -0.01511           | 4.59328 |
| R15      | 2.50454 | -0.00007 | 0.00030             | -0.00044          | -0.00015           | 2.50440 |
| R16      | 2.04527 | 0.00043  | -0.00002            | 0.00063           | 0.00061            | 2.04588 |
| R17      | 2.04407 | 0.00100  | 0.00011             | 0.00126           | 0.00137            | 2.04544 |
| R18      | 2.06195 | 0.00114  | 0.00075             | -0.00114          | -0.00039           | 2.06156 |
| R19      | 2.76778 | 0.00089  | 0.00071             | 0.00106           | 0.00218            | 2.76996 |

|     |         |          |          |          |          |         |
|-----|---------|----------|----------|----------|----------|---------|
| R20 | 2.76745 | -0.00080 | -0.00166 | 0.00167  | -0.00016 | 2.76729 |
| R21 | 2.05459 | -0.00088 | -0.00011 | -0.00134 | -0.00145 | 2.05314 |
| R22 | 2.05459 | -0.00116 | 0.00012  | -0.00247 | -0.00235 | 2.05224 |
| R23 | 2.74506 | -0.00038 | -0.00092 | 0.00061  | -0.00056 | 2.74449 |
| R24 | 2.05518 | 0.00017  | 0.00012  | 0.00003  | 0.00015  | 2.05533 |
| R25 | 2.84107 | 0.00019  | 0.00001  | 0.00058  | 0.00059  | 2.84166 |
| R26 | 3.08427 | -0.00028 | 0.00375  | -0.00187 | 0.00189  | 3.08616 |
| R27 | 2.06708 | 0.00003  | 0.00003  | 0.00006  | 0.00009  | 2.06717 |
| R28 | 2.06794 | 0.00004  | 0.00004  | -0.00003 | 0.00001  | 2.06795 |
| R29 | 2.06397 | -0.00019 | -0.00003 | -0.00034 | -0.00037 | 2.06360 |
| R30 | 2.06996 | -0.00009 | 0.00012  | -0.00093 | -0.00080 | 2.06915 |
| R31 | 2.06423 | -0.00103 | -0.00040 | -0.00106 | -0.00146 | 2.06277 |
| R32 | 2.87317 | 0.00123  | 0.00126  | 0.00100  | 0.00226  | 2.87543 |
| R33 | 2.27833 | 0.00330  | -0.00002 | 0.00200  | 0.00198  | 2.28031 |
| R34 | 2.52948 | -0.00384 | -0.00065 | -0.00284 | -0.00349 | 2.52598 |
| R35 | 1.89823 | 0.00046  | -0.00148 | 0.00273  | 0.00125  | 1.89949 |
| A1  | 1.87574 | 0.00132  | 0.00008  | 0.00270  | 0.00275  | 1.87849 |
| A2  | 2.27833 | -0.00042 | -0.00048 | 0.00136  | 0.00084  | 2.27917 |
| A3  | 2.12795 | -0.00088 | 0.00028  | -0.00322 | -0.00297 | 2.12498 |
| A4  | 1.86144 | -0.00102 | 0.00029  | -0.00260 | -0.00231 | 1.85913 |
| A5  | 2.27888 | 0.00015  | 0.00009  | -0.00144 | -0.00134 | 2.27754 |
| A6  | 2.13383 | 0.00091  | 0.00030  | 0.00442  | 0.00474  | 2.13857 |
| A7  | 1.90213 | -0.00031 | -0.00046 | -0.00003 | -0.00051 | 1.90161 |
| A8  | 2.20238 | 0.00173  | 0.00031  | 0.00599  | 0.00631  | 2.20869 |
| A9  | 2.17858 | -0.00142 | 0.00013  | -0.00603 | -0.00590 | 2.17269 |
| A10 | 1.89252 | 0.00082  | 0.00038  | 0.00133  | 0.00169  | 1.89421 |
| A11 | 2.19204 | -0.00028 | -0.00039 | 0.00059  | 0.00020  | 2.19223 |
| A12 | 2.19794 | -0.00052 | 0.00012  | -0.00169 | -0.00158 | 2.19637 |
| A13 | 1.89279 | -0.00080 | -0.00025 | -0.00122 | -0.00151 | 1.89127 |
| A14 | 2.18789 | 0.00158  | 0.00097  | 0.00163  | 0.00255  | 2.19045 |
| A15 | 2.20220 | -0.00080 | -0.00069 | -0.00079 | -0.00152 | 2.20067 |
| A16 | 1.89762 | -0.00216 | -0.00276 | -0.00314 | -0.00591 | 1.89171 |
| A17 | 1.85553 | 0.00031  | 0.00072  | 0.00205  | 0.00277  | 1.85829 |
| A18 | 1.95927 | 0.00225  | 0.00214  | 0.00311  | 0.00524  | 1.96451 |
| A19 | 1.89077 | 0.00012  | 0.00034  | -0.00286 | -0.00251 | 1.88825 |
| A20 | 1.91790 | 0.00082  | 0.00016  | 0.00388  | 0.00404  | 1.92194 |
| A21 | 1.94039 | -0.00146 | -0.00069 | -0.00336 | -0.00404 | 1.93635 |
| A22 | 2.41200 | 0.00235  | -0.02842 | 0.04031  | 0.01189  | 2.42389 |
| A23 | 2.13558 | 0.00002  | -0.00069 | 0.00537  | 0.00467  | 2.14025 |
| A24 | 1.96653 | 0.00051  | 0.00054  | -0.00027 | 0.00027  | 1.96680 |
| A25 | 2.18107 | -0.00052 | 0.00015  | -0.00510 | -0.00495 | 2.17612 |
| A26 | 2.07057 | -0.00023 | 0.00014  | -0.00053 | -0.00042 | 2.07015 |
| A27 | 2.15214 | -0.00046 | -0.00242 | 0.00470  | 0.00225  | 2.15440 |
| A28 | 2.06041 | 0.00070  | 0.00230  | -0.00404 | -0.00177 | 2.05864 |

|     |          |          |          |          |          |          |
|-----|----------|----------|----------|----------|----------|----------|
| A29 | 2.05711  | 0.00019  | 0.00038  | 0.00098  | 0.00125  | 2.05836  |
| A30 | 2.13131  | 0.00039  | -0.00023 | 0.00478  | 0.00467  | 2.13598  |
| A31 | 1.97575  | 0.00039  | 0.00045  | -0.00059 | -0.00003 | 1.97572  |
| A32 | 2.00357  | -0.00061 | -0.00138 | -0.00127 | -0.00267 | 2.00090  |
| A33 | 2.02344  | -0.00028 | 0.00034  | -0.00350 | -0.00319 | 2.02025  |
| A34 | 2.03678  | 0.00033  | 0.00010  | 0.00313  | 0.00340  | 2.04018  |
| A35 | 2.14188  | 0.00003  | 0.00014  | -0.00203 | -0.00202 | 2.13986  |
| A36 | 1.94325  | -0.00026 | 0.00022  | -0.00081 | -0.00063 | 1.94262  |
| A37 | 2.03580  | 0.00075  | 0.00035  | 0.00149  | 0.00197  | 2.03777  |
| A38 | 2.02598  | -0.00035 | -0.00022 | -0.00123 | -0.00147 | 2.02450  |
| A39 | 2.05174  | -0.00048 | 0.00586  | 0.00539  | 0.01220  | 2.06394  |
| A40 | 2.40480  | -0.00058 | 0.02167  | -0.04532 | -0.02344 | 2.38136  |
| A41 | 1.93499  | 0.00000  | 0.00015  | 0.00003  | 0.00018  | 1.93517  |
| A42 | 1.91751  | -0.00018 | -0.00012 | -0.00081 | -0.00094 | 1.91657  |
| A43 | 1.93345  | 0.00005  | -0.00001 | 0.00053  | 0.00052  | 1.93397  |
| A44 | 1.88286  | 0.00002  | -0.00005 | -0.00029 | -0.00033 | 1.88252  |
| A45 | 1.89990  | 0.00004  | -0.00019 | 0.00082  | 0.00063  | 1.90052  |
| A46 | 1.89392  | 0.00006  | 0.00023  | -0.00029 | -0.00007 | 1.89386  |
| A47 | 1.87118  | 0.00109  | 0.00162  | -0.00162 | -0.00002 | 1.87116  |
| A48 | 1.94347  | -0.00009 | -0.00012 | 0.00105  | 0.00092  | 1.94439  |
| A49 | 1.98501  | 0.00027  | 0.00461  | -0.00963 | -0.00501 | 1.98000  |
| A50 | 1.87674  | -0.00007 | -0.00165 | 0.00566  | 0.00403  | 1.88076  |
| A51 | 1.90194  | -0.00115 | -0.00352 | 0.00430  | 0.00081  | 1.90275  |
| A52 | 1.88240  | -0.00010 | -0.00140 | 0.00117  | -0.00021 | 1.88219  |
| A53 | 2.14646  | 0.00077  | -0.00056 | 0.00215  | 0.00159  | 2.14805  |
| A54 | 1.95475  | -0.00182 | -0.00012 | -0.00153 | -0.00164 | 1.95311  |
| A55 | 2.18190  | 0.00105  | 0.00069  | -0.00076 | -0.00006 | 2.18185  |
| A56 | 1.91565  | 0.00379  | 0.00245  | 0.00609  | 0.00853  | 1.92419  |
| A57 | 2.90112  | -0.00192 | -0.00448 | -0.00067 | -0.00515 | 2.89597  |
| D1  | 0.00194  | 0.00008  | 0.00040  | 0.00604  | 0.00643  | 0.00838  |
| D2  | 2.99875  | 0.00048  | 0.00639  | 0.00944  | 0.01581  | 3.01456  |
| D3  | -3.08732 | -0.00024 | 0.00276  | -0.01272 | -0.00996 | -3.09729 |
| D4  | -0.09052 | 0.00016  | 0.00875  | -0.00931 | -0.00059 | -0.09111 |
| D5  | 0.00869  | -0.00047 | -0.00184 | -0.01091 | -0.01275 | -0.00406 |
| D6  | -3.10762 | -0.00002 | -0.00265 | 0.00521  | 0.00258  | -3.10503 |
| D7  | 3.10343  | -0.00017 | -0.00399 | 0.00602  | 0.00201  | 3.10545  |
| D8  | -0.01287 | 0.00027  | -0.00480 | 0.02215  | 0.01734  | 0.00447  |
| D9  | -0.01194 | 0.00034  | 0.00118  | 0.00090  | 0.00208  | -0.00986 |
| D10 | 3.11511  | 0.00004  | -0.00011 | -0.00408 | -0.00421 | 3.11090  |
| D11 | -3.02357 | 0.00004  | -0.00417 | -0.00163 | -0.00582 | -3.02938 |
| D12 | 0.10348  | -0.00026 | -0.00547 | -0.00661 | -0.01211 | 0.09137  |
| D13 | -1.39824 | -0.00054 | -0.01019 | -0.00447 | -0.01467 | -1.41291 |
| D14 | 1.57915  | -0.00024 | -0.00341 | -0.00119 | -0.00459 | 1.57456  |
| D15 | 0.01754  | -0.00062 | -0.00235 | -0.00773 | -0.01008 | 0.00746  |

|     |          |          |          |          |          |          |
|-----|----------|----------|----------|----------|----------|----------|
| D16 | 3.12115  | 0.00002  | 0.00138  | -0.00141 | -0.00001 | 3.12114  |
| D17 | -3.10975 | -0.00036 | -0.00108 | -0.00296 | -0.00407 | -3.11382 |
| D18 | -0.00615 | 0.00029  | 0.00266  | 0.00336  | 0.00600  | -0.00015 |
| D19 | -0.50298 | 0.00093  | 0.00625  | 0.07636  | 0.08260  | -0.42037 |
| D20 | 2.63895  | 0.00080  | 0.00644  | 0.08106  | 0.08750  | 2.72645  |
| D21 | 2.62187  | 0.00059  | 0.00475  | 0.07070  | 0.07545  | 2.69731  |
| D22 | -0.51939 | 0.00046  | 0.00494  | 0.07540  | 0.08034  | -0.43905 |
| D23 | -0.01621 | 0.00068  | 0.00258  | 0.01149  | 0.01407  | -0.00214 |
| D24 | 3.09984  | 0.00027  | 0.00343  | -0.00476 | -0.00130 | 3.09853  |
| D25 | -3.11965 | 0.00002  | -0.00116 | 0.00509  | 0.00391  | -3.11574 |
| D26 | -0.00360 | -0.00039 | -0.00031 | -0.01116 | -0.01145 | -0.01506 |
| D27 | -2.43458 | 0.00034  | 0.01045  | -0.02038 | -0.00994 | -2.44452 |
| D28 | -0.40232 | -0.00042 | 0.00986  | -0.02420 | -0.01435 | -0.41667 |
| D29 | 1.72293  | -0.00067 | 0.01078  | -0.02513 | -0.01435 | 1.70858  |
| D30 | 0.73673  | 0.00086  | 0.00948  | -0.00143 | 0.00805  | 0.74478  |
| D31 | 2.76899  | 0.00009  | 0.00889  | -0.00525 | 0.00364  | 2.77263  |
| D32 | -1.38894 | -0.00016 | 0.00981  | -0.00618 | 0.00364  | -1.38531 |
| D33 | -3.03293 | -0.00040 | -0.00840 | 0.00766  | -0.00072 | -3.03365 |
| D34 | 1.20186  | -0.00091 | -0.00730 | 0.00122  | -0.00608 | 1.19579  |
| D35 | -0.92927 | -0.00092 | -0.00879 | 0.00598  | -0.00281 | -0.93208 |
| D36 | 1.13620  | 0.00027  | -0.00643 | 0.00687  | 0.00045  | 1.13665  |
| D37 | -0.91220 | -0.00025 | -0.00533 | 0.00044  | -0.00491 | -0.91710 |
| D38 | -3.04333 | -0.00025 | -0.00683 | 0.00520  | -0.00164 | -3.04497 |
| D39 | -0.95686 | 0.00051  | -0.00652 | 0.01005  | 0.00354  | -0.95332 |
| D40 | -3.00526 | -0.00001 | -0.00542 | 0.00361  | -0.00182 | -3.00707 |
| D41 | 1.14679  | -0.00001 | -0.00692 | 0.00837  | 0.00145  | 1.14824  |
| D42 | 3.13800  | -0.00033 | -0.00027 | 0.00304  | 0.00277  | 3.14077  |
| D43 | 0.00901  | -0.00068 | -0.00024 | -0.01015 | -0.01040 | -0.00140 |
| D44 | -0.00397 | -0.00018 | -0.00048 | -0.00225 | -0.00272 | -0.00669 |
| D45 | -3.13296 | -0.00054 | -0.00046 | -0.01544 | -0.01589 | 3.13433  |
| D46 | -2.75175 | -0.00034 | 0.00024  | -0.00372 | -0.00353 | -2.75528 |
| D47 | -0.04238 | -0.00039 | 0.00025  | -0.00427 | -0.00405 | -0.04644 |
| D48 | -0.02324 | 0.00039  | 0.00169  | 0.00165  | 0.00334  | -0.01989 |
| D49 | 2.68613  | 0.00034  | 0.00170  | 0.00110  | 0.00282  | 2.68895  |
| D50 | 0.38194  | -0.00041 | 0.02376  | -0.05589 | -0.03216 | 0.34978  |
| D51 | -1.99580 | 0.00027  | 0.02425  | -0.04838 | -0.02426 | -2.02006 |
| D52 | 2.63858  | -0.00055 | -0.00265 | -0.03034 | -0.03280 | 2.60578  |
| D53 | 0.25811  | -0.00053 | -0.00294 | -0.02912 | -0.03193 | 0.22619  |
| D54 | 2.56509  | -0.00007 | -0.00032 | -0.00360 | -0.00398 | 2.56111  |
| D55 | -1.63854 | -0.00016 | -0.00036 | -0.00446 | -0.00488 | -1.64342 |
| D56 | 0.45378  | -0.00016 | -0.00017 | -0.00501 | -0.00524 | 0.44854  |
| D57 | 1.33831  | 0.00009  | 0.00026  | -0.00416 | -0.00384 | 1.33447  |
| D58 | -2.86532 | 0.00000  | 0.00022  | -0.00502 | -0.00474 | -2.87006 |
| D59 | -0.77300 | 0.00000  | 0.00042  | -0.00557 | -0.00510 | -0.77810 |

|     |          |          |          |          |          |          |
|-----|----------|----------|----------|----------|----------|----------|
| D60 | -1.00627 | 0.00003  | -0.00024 | -0.00315 | -0.00338 | -1.00965 |
| D61 | 1.07329  | -0.00005 | -0.00028 | -0.00400 | -0.00428 | 1.06900  |
| D62 | -3.11758 | -0.00005 | -0.00009 | -0.00456 | -0.00464 | -3.12222 |
| D63 | 1.46088  | -0.00049 | -0.02028 | 0.02089  | 0.00113  | 1.46201  |
| D64 | 2.77156  | -0.00017 | -0.00614 | 0.01506  | 0.00839  | 2.77995  |
| D65 | 2.33306  | -0.00023 | 0.02493  | -0.04788 | -0.02297 | 2.31009  |
| D66 | -0.79574 | -0.00048 | 0.02044  | -0.03630 | -0.01587 | -0.81161 |
| D67 | -1.86386 | 0.00051  | 0.02744  | -0.05312 | -0.02565 | -1.88951 |
| D68 | 1.29053  | 0.00027  | 0.02296  | -0.04154 | -0.01856 | 1.27198  |
| D69 | 0.16851  | -0.00023 | 0.02296  | -0.04351 | -0.02057 | 0.14793  |
| D70 | -2.96029 | -0.00048 | 0.01847  | -0.03193 | -0.01348 | -2.97376 |
| D71 | 2.99528  | -0.00036 | 0.00025  | -0.01411 | -0.01386 | 2.98142  |
| D72 | -0.13321 | -0.00061 | -0.00434 | -0.00227 | -0.00661 | -0.13982 |
| D73 | -1.98234 | -0.00069 | 0.00723  | 0.01910  | 0.02633  | -1.95600 |

| Item                 | Value    | Threshold | Converged? |
|----------------------|----------|-----------|------------|
| Maximum Force        | 0.004460 | 0.000450  | NO         |
| RMS Force            | 0.000967 | 0.000300  | NO         |
| Maximum Displacement | 0.179852 | 0.001800  | NO         |
| RMS Displacement     | 0.034180 | 0.001200  | NO         |

Predicted change in Energy=-3.162755D-04

GradGradGradGradGradGradGradGradGradGradGradGradGradGradGradGradGradGradGrad

Input orientation:

| Center Number | Atomic Number | Atomic Type | Coordinates (Angstroms) |           |           |
|---------------|---------------|-------------|-------------------------|-----------|-----------|
|               |               |             | X                       | Y         | Z         |
| 1             | 6             | 0           | -0.984646               | 1.651468  | 1.566227  |
| 2             | 6             | 0           | -1.729341               | 0.515777  | 1.640308  |
| 3             | 7             | 0           | -2.541380               | 0.502488  | 0.515715  |
| 4             | 6             | 0           | -2.301222               | 1.604964  | -0.207748 |
| 5             | 7             | 0           | -1.354720               | 2.321571  | 0.410389  |
| 6             | 6             | 0           | -0.762484               | 3.578555  | -0.075960 |
| 7             | 1             | 0           | -0.210206               | 2.023879  | 2.213074  |
| 8             | 1             | 0           | -1.669778               | -0.324862 | 2.329285  |
| 9             | 1             | 0           | -1.563274               | 4.206272  | -0.470844 |
| 10            | 1             | 0           | -0.337750               | 4.076781  | 0.794242  |
| 11            | 35            | 0           | -0.367076               | -2.354279 | 2.633462  |
| 12            | 1             | 0           | -2.771744               | 1.855736  | -1.143142 |
| 13            | 6             | 0           | -3.477976               | -0.527259 | 0.146301  |
| 14            | 6             | 0           | -3.364131               | -1.779903 | 0.563751  |
| 15            | 1             | 0           | -4.264409               | -0.163225 | -0.502614 |
| 16            | 1             | 0           | -4.106069               | -2.501388 | 0.246608  |
| 17            | 1             | 0           | -2.558736               | -2.126353 | 1.212938  |

|    |   |   |           |           |           |
|----|---|---|-----------|-----------|-----------|
| 18 | 6 | 0 | 2.763304  | -0.720548 | 1.162463  |
| 19 | 6 | 0 | 4.172548  | -0.341426 | 1.299851  |
| 20 | 8 | 0 | 3.132998  | 0.630549  | 1.589411  |
| 21 | 1 | 0 | 2.340011  | -0.752595 | 0.162353  |
| 22 | 1 | 0 | 2.242663  | -1.306427 | 1.914177  |
| 23 | 1 | 0 | 4.681053  | -0.658410 | 2.207535  |
| 24 | 6 | 0 | 5.054312  | -0.057022 | 0.115431  |
| 25 | 1 | 0 | 5.790386  | 0.716169  | 0.354148  |
| 26 | 1 | 0 | 5.598961  | -0.963008 | -0.167524 |
| 27 | 1 | 0 | 4.460665  | 0.272012  | -0.740023 |
| 28 | 6 | 0 | 0.305283  | 3.348138  | -1.150701 |
| 29 | 1 | 0 | 0.762136  | 4.319438  | -1.366968 |
| 30 | 1 | 0 | -0.135600 | 2.974015  | -2.076543 |
| 31 | 6 | 0 | 1.392529  | 2.372618  | -0.724594 |
| 32 | 8 | 0 | 1.768884  | 1.461145  | -1.420061 |
| 33 | 8 | 0 | 1.847227  | 2.638215  | 0.504006  |
| 34 | 1 | 0 | 2.450655  | 1.898629  | 0.819038  |

-----  
Distance matrix (angstroms):

|    |    | 1        | 2        | 3        | 4        | 5        |
|----|----|----------|----------|----------|----------|----------|
| 1  | C  | 0.000000 |          |          |          |          |
| 2  | C  | 1.360093 | 0.000000 |          |          |          |
| 3  | N  | 2.201625 | 1.387189 | 0.000000 |          |          |
| 4  | C  | 2.209644 | 2.220065 | 1.340347 | 0.000000 |          |
| 5  | N  | 1.386346 | 2.216739 | 2.174469 | 1.338463 | 0.000000 |
| 6  | C  | 2.541614 | 3.641565 | 3.602324 | 2.506022 | 1.472171 |
| 7  | H  | 1.075574 | 2.215898 | 3.260373 | 3.226177 | 2.155970 |
| 8  | H  | 2.226554 | 1.088536 | 2.175600 | 3.249537 | 3.284057 |
| 9  | H  | 3.318357 | 4.254914 | 3.955756 | 2.716724 | 2.090972 |
| 10 | H  | 2.626134 | 3.915751 | 4.208223 | 3.311962 | 2.064543 |
| 11 | Br | 4.191228 | 3.328565 | 4.168162 | 5.242996 | 5.270775 |
| 12 | H  | 3.252096 | 3.260321 | 2.153173 | 1.076680 | 2.153699 |
| 13 | C  | 3.602740 | 2.525412 | 1.440159 | 2.460991 | 3.562834 |
| 14 | C  | 4.294323 | 3.016896 | 2.426630 | 3.630745 | 4.569829 |
| 15 | H  | 4.281362 | 3.388175 | 2.109264 | 2.658485 | 3.933710 |
| 16 | H  | 5.360120 | 4.085892 | 3.397637 | 4.508441 | 5.554968 |
| 17 | H  | 4.107858 | 2.802033 | 2.719784 | 4.000923 | 4.677367 |
| 18 | C  | 4.453832 | 4.684089 | 5.482133 | 5.738895 | 5.174769 |
| 19 | C  | 5.535271 | 5.973524 | 6.812040 | 6.926109 | 6.199467 |
| 20 | O  | 4.242382 | 4.863960 | 5.776487 | 5.806033 | 4.938549 |
| 21 | H  | 4.336326 | 4.511401 | 5.052532 | 5.218822 | 4.812801 |
| 22 | H  | 4.391553 | 4.378612 | 5.302353 | 5.798764 | 5.325873 |
| 23 | H  | 6.151988 | 6.541682 | 7.508228 | 7.727135 | 6.967107 |
| 24 | C  | 6.441488 | 6.976481 | 7.626783 | 7.547882 | 6.842544 |

|    |    |          |          |          |          |          |
|----|----|----------|----------|----------|----------|----------|
| 25 | H  | 6.945860 | 7.631556 | 8.336072 | 8.159645 | 7.323457 |
| 26 | H  | 7.292823 | 7.691493 | 8.299377 | 8.307165 | 7.712077 |
| 27 | H  | 6.072322 | 6.636382 | 7.117488 | 6.912539 | 6.272387 |
| 28 | C  | 3.453159 | 4.466732 | 4.356393 | 3.274398 | 2.499290 |
| 29 | H  | 4.332777 | 5.451515 | 5.387656 | 4.253978 | 3.410507 |
| 30 | H  | 3.967340 | 4.732645 | 4.314630 | 3.171217 | 2.845482 |
| 31 | C  | 3.379184 | 4.334362 | 4.528951 | 3.807916 | 2.972907 |
| 32 | O  | 4.066457 | 4.743117 | 4.821269 | 4.249253 | 3.721261 |
| 33 | O  | 3.181429 | 4.311353 | 4.880711 | 4.334032 | 3.218928 |
| 34 | H  | 3.524298 | 4.478742 | 5.192459 | 4.870407 | 3.850553 |
|    |    | 6        | 7        | 8        | 9        | 10       |
| 6  | C  | 0.000000 |          |          |          |          |
| 7  | H  | 2.821650 | 0.000000 |          |          |          |
| 8  | H  | 4.673869 | 2.767750 | 0.000000 |          |          |
| 9  | H  | 1.091434 | 3.714438 | 5.327592 | 0.000000 |          |
| 10 | H  | 1.088982 | 2.498752 | 4.848208 | 1.766103 | 0.000000 |
| 11 | Br | 6.534205 | 4.401091 | 2.430657 | 7.355844 | 6.688956 |
| 12 | H  | 2.853789 | 4.225392 | 4.245832 | 2.727161 | 3.822412 |
| 13 | C  | 4.927576 | 4.632297 | 2.841824 | 5.143274 | 5.610529 |
| 14 | C  | 5.990899 | 5.209248 | 2.846944 | 6.336226 | 6.596428 |
| 15 | H  | 5.142609 | 5.347425 | 3.844202 | 5.137085 | 5.922680 |
| 16 | H  | 6.946172 | 6.286714 | 3.874316 | 7.209247 | 7.600818 |
| 17 | H  | 6.118313 | 4.872401 | 2.298227 | 6.627835 | 6.602042 |
| 18 | C  | 5.696241 | 4.180601 | 4.601116 | 6.757258 | 5.724202 |
| 19 | C  | 6.450864 | 5.063317 | 5.932351 | 7.531041 | 6.333955 |
| 20 | O  | 5.161296 | 3.675233 | 4.952463 | 6.251833 | 4.955290 |
| 21 | H  | 5.333022 | 4.291605 | 4.577877 | 6.342470 | 5.558107 |
| 22 | H  | 6.070799 | 4.146908 | 4.054995 | 7.110790 | 6.073856 |
| 23 | H  | 7.266244 | 5.578451 | 6.360750 | 8.356462 | 7.043281 |
| 24 | C  | 6.862154 | 6.037003 | 7.084228 | 7.893785 | 6.828136 |
| 25 | H  | 7.163682 | 6.416605 | 7.787102 | 8.181549 | 7.002960 |
| 26 | H  | 7.816787 | 6.952350 | 7.712060 | 8.838047 | 7.846592 |
| 27 | H  | 6.217354 | 5.797142 | 6.881805 | 7.199910 | 6.313083 |
| 28 | C  | 1.532411 | 3.651626 | 5.431583 | 2.165665 | 2.174216 |
| 29 | H  | 2.130746 | 4.362539 | 6.414517 | 2.494670 | 2.437102 |
| 30 | H  | 2.181922 | 4.394217 | 5.713809 | 2.476889 | 3.081942 |
| 31 | C  | 2.553251 | 3.364562 | 5.097088 | 3.487614 | 2.864420 |
| 32 | O  | 3.563405 | 4.175301 | 5.391829 | 4.420409 | 4.022760 |
| 33 | O  | 2.833936 | 2.744332 | 4.947807 | 3.878228 | 2.632078 |
| 34 | H  | 3.734626 | 3.006528 | 4.919627 | 4.806313 | 3.538385 |
|    |    | 11       | 12       | 13       | 14       | 15       |
| 11 | Br | 0.000000 |          |          |          |          |
| 12 | H  | 6.145681 | 0.000000 |          |          |          |
| 13 | C  | 4.381972 | 2.800016 | 0.000000 |          |          |

|    |   |           |          |          |          |           |
|----|---|-----------|----------|----------|----------|-----------|
| 14 | C | 3.687269  | 4.059837 | 1.325271 | 0.000000 |           |
| 15 | H | 5.461218  | 2.591240 | 1.082631 | 2.135716 | 0.000000  |
| 16 | H | 4.438331  | 4.764069 | 2.074065 | 1.082401 | 2.460368  |
| 17 | H | 2.621682  | 4.631794 | 2.130685 | 1.090932 | 3.115495  |
| 18 | C | 3.825205  | 6.526087 | 6.326415 | 6.247092 | 7.243745  |
| 19 | C | 5.141816  | 7.682378 | 7.739233 | 7.707956 | 8.629188  |
| 20 | O | 4.716965  | 6.620719 | 6.864989 | 7.005351 | 7.728408  |
| 21 | H | 4.000011  | 5.885384 | 5.822371 | 5.809795 | 6.663925  |
| 22 | H | 2.902775  | 6.670139 | 6.038063 | 5.786534 | 7.034898  |
| 23 | H | 5.342377  | 8.549395 | 8.416391 | 8.287627 | 9.360097  |
| 24 | C | 6.403852  | 8.154128 | 8.545292 | 8.604621 | 9.339798  |
| 25 | H | 7.248259  | 8.766445 | 9.353708 | 9.491021 | 10.129475 |
| 26 | H | 6.736079  | 8.886274 | 9.092808 | 9.029900 | 9.901415  |
| 27 | H | 6.448634  | 7.414744 | 8.027853 | 8.193754 | 8.739148  |
| 28 | C | 6.876737  | 3.419856 | 5.569018 | 6.534581 | 5.799290  |
| 29 | H | 7.862383  | 4.313727 | 6.615060 | 7.612866 | 6.790253  |
| 30 | H | 7.115367  | 3.011817 | 5.326485 | 6.324105 | 5.419095  |
| 31 | C | 6.059399  | 4.217052 | 5.734943 | 6.444306 | 6.203284  |
| 32 | O | 5.962452  | 4.566147 | 5.825529 | 6.386529 | 6.315134  |
| 33 | O | 5.861972  | 4.965911 | 6.205318 | 6.832393 | 6.798047  |
| 34 | H | 5.414699  | 5.579018 | 6.440976 | 6.885383 | 7.147733  |
|    |   | 16        | 17       | 18       | 19       | 20        |
| 16 | H | 0.000000  |          |          |          |           |
| 17 | H | 1.862440  | 0.000000 |          |          |           |
| 18 | C | 7.155310  | 5.504812 | 0.000000 |          |           |
| 19 | C | 8.620339  | 6.964460 | 1.465802 | 0.000000 |           |
| 20 | O | 8.001015  | 6.335462 | 1.464384 | 1.452323 | 0.000000  |
| 21 | H | 6.679619  | 5.195061 | 1.086474 | 2.195713 | 2.139722  |
| 22 | H | 6.671965  | 4.921123 | 1.086000 | 2.243452 | 2.156397  |
| 23 | H | 9.189957  | 7.453766 | 2.184902 | 1.087633 | 2.107122  |
| 24 | C | 9.481809  | 7.965247 | 2.604853 | 1.503744 | 2.517304  |
| 25 | H | 10.406923 | 8.861450 | 3.446847 | 2.151804 | 2.931708  |
| 26 | H | 9.834924  | 8.355063 | 3.141433 | 2.138740 | 3.421581  |
| 27 | H | 9.058372  | 7.670606 | 2.735993 | 2.149512 | 2.705089  |
| 28 | C | 7.458515  | 6.615092 | 5.286474 | 5.879951 | 4.784295  |
| 29 | H | 8.533857  | 7.696255 | 5.983658 | 6.361328 | 5.288579  |
| 30 | H | 7.151342  | 6.534985 | 5.704788 | 6.399400 | 5.441947  |
| 31 | C | 7.411730  | 6.293431 | 3.873976 | 4.380972 | 3.379151  |
| 32 | O | 7.279734  | 6.207345 | 3.523931 | 4.052750 | 3.406996  |
| 33 | O | 7.869149  | 6.528109 | 3.543170 | 3.862479 | 2.619549  |
| 34 | H | 7.916972  | 6.438139 | 2.660033 | 2.865997 | 1.633124  |
|    |   | 21        | 22       | 23       | 24       | 25        |
| 21 | H | 0.000000  |          |          |          |           |
| 22 | H | 1.839863  | 0.000000 |          |          |           |



|    |   |          |          |          |          |          |
|----|---|----------|----------|----------|----------|----------|
| 23 | H | 3.110003 | 2.540026 | 0.000000 |          |          |
| 24 | C | 2.802402 | 3.563969 | 2.208595 | 0.000000 |          |
| 25 | H | 3.754882 | 4.371604 | 2.560299 | 1.093899 | 0.000000 |
| 26 | H | 3.282355 | 3.964360 | 2.564419 | 1.094311 | 1.768734 |
| 27 | H | 2.522156 | 3.802075 | 3.098766 | 1.092008 | 1.778382 |
| 28 | C | 4.762377 | 5.900161 | 6.817443 | 5.979254 | 6.267231 |
| 29 | H | 5.527570 | 6.678940 | 7.274198 | 6.306638 | 6.420988 |
| 30 | H | 5.002892 | 6.316975 | 7.399188 | 6.397431 | 6.791423 |
| 31 | C | 3.383985 | 4.606650 | 5.347794 | 4.474086 | 4.821685 |
| 32 | O | 2.780443 | 4.359022 | 5.112014 | 3.931489 | 4.458170 |
| 33 | O | 3.443422 | 4.207750 | 4.669081 | 4.207218 | 4.389216 |
| 34 | H | 2.733580 | 3.393372 | 3.666203 | 3.331465 | 3.573253 |
|    |   | 26       | 27       | 28       | 29       | 30       |
| 26 | H | 0.000000 |          |          |          |          |
| 27 | H | 1.774471 | 0.000000 |          |          |          |
| 28 | C | 6.897510 | 5.186368 | 0.000000 |          |          |
| 29 | H | 7.262078 | 5.518499 | 1.094948 | 0.000000 |          |
| 30 | H | 7.213161 | 5.496613 | 1.091572 | 1.766236 | 0.000000 |
| 31 | C | 5.397296 | 3.718365 | 1.521614 | 2.144796 | 2.127116 |
| 32 | O | 4.702643 | 3.020293 | 2.403212 | 3.030875 | 2.519287 |
| 33 | O | 5.243593 | 3.738527 | 2.370577 | 2.739430 | 3.271635 |
| 34 | H | 4.367390 | 3.019386 | 3.253240 | 3.672879 | 4.028593 |
|    |   | 31       | 32       | 33       | 34       |          |
| 31 | C | 0.000000 |          |          |          |          |
| 32 | O | 1.206690 | 0.000000 |          |          |          |
| 33 | O | 1.336693 | 2.256915 | 0.000000 |          |          |
| 34 | H | 1.930569 | 2.381127 | 1.005166 | 0.000000 |          |

Stoichiometry C<sub>11</sub>H<sub>17</sub>BrN<sub>2</sub>O<sub>3</sub>

Framework group C1[X(C<sub>11</sub>H<sub>17</sub>BrN<sub>2</sub>O<sub>3</sub>)]

Deg. of freedom 96

Full point group C1 NOp 1

Largest Abelian subgroup C1 NOp 1

Largest concise Abelian subgroup C1 NOp 1

Standard orientation:

| Center<br>Number | Atomic<br>Number | Atomic<br>Type | Coordinates (Angstroms) |          |           |
|------------------|------------------|----------------|-------------------------|----------|-----------|
|                  |                  |                | X                       | Y        | Z         |
| 1                | 6                | 0              | -0.650276               | 1.283218 | 1.282124  |
| 2                | 6                | 0              | -1.789233               | 0.716372 | 0.801172  |
| 3                | 7                | 0              | -2.273759               | 1.572957 | -0.176474 |
| 4                | 6                | 0              | -1.456611               | 2.631095 | -0.272089 |
| 5                | 7                | 0              | -0.457772               | 2.477875 | 0.605594  |
| 6                | 6                | 0              | 0.683815                | 3.389359 | 0.787984  |

|    |    |   |           |           |           |
|----|----|---|-----------|-----------|-----------|
| 7  | 1  | 0 | 0.049654  | 0.930795  | 2.018842  |
| 8  | 1  | 0 | -2.226368 | -0.262313 | 0.990905  |
| 9  | 1  | 0 | 0.312965  | 4.415475  | 0.759984  |
| 10 | 1  | 0 | 1.076353  | 3.196878  | 1.785354  |
| 11 | 35 | 0 | -1.960316 | -2.561585 | 0.248841  |
| 12 | 1  | 0 | -1.571223 | 3.451482  | -0.959888 |
| 13 | 6  | 0 | -3.444633 | 1.370737  | -0.990242 |
| 14 | 6  | 0 | -3.942695 | 0.168146  | -1.239345 |
| 15 | 1  | 0 | -3.855312 | 2.298140  | -1.368864 |
| 16 | 1  | 0 | -4.826627 | 0.091466  | -1.859326 |
| 17 | 1  | 0 | -3.508088 | -0.754520 | -0.852128 |
| 18 | 6  | 0 | 1.799913  | -2.094364 | -0.275158 |
| 19 | 6  | 0 | 3.175807  | -2.509985 | 0.012507  |
| 20 | 8  | 0 | 2.585720  | -1.408609 | 0.752786  |
| 21 | 1  | 0 | 1.626157  | -1.485642 | -1.158160 |
| 22 | 1  | 0 | 0.937704  | -2.637091 | 0.100925  |
| 23 | 1  | 0 | 3.303181  | -3.386798 | 0.643316  |
| 24 | 6  | 0 | 4.329150  | -2.176209 | -0.892833 |
| 25 | 1  | 0 | 5.245769  | -2.022504 | -0.315946 |
| 26 | 1  | 0 | 4.505220  | -3.001960 | -1.589002 |
| 27 | 1  | 0 | 4.119842  | -1.273858 | -1.471134 |
| 28 | 6  | 0 | 1.769382  | 3.192022  | -0.275447 |
| 29 | 1  | 0 | 2.616500  | 3.826703  | 0.004700  |
| 30 | 1  | 0 | 1.424937  | 3.512153  | -1.260538 |
| 31 | 6  | 0 | 2.246439  | 1.751968  | -0.393644 |
| 32 | 8  | 0 | 2.359578  | 1.180365  | -1.450323 |
| 33 | 8  | 0 | 2.493899  | 1.208859  | 0.802411  |
| 34 | 1  | 0 | 2.661195  | 0.222169  | 0.708532  |

-----  
Rotational constants (GHZ): 0.3188553 0.2658546 0.1603439

Standard basis: 6-311++G(d,p) (5D, 7F)

There are 538 symmetry adapted cartesian basis functions of A symmetry.

There are 519 symmetry adapted basis functions of A symmetry.

519 basis functions, 823 primitive gaussians, 538 cartesian basis functions

78 alpha electrons 78 beta electrons

nuclear repulsion energy 1573.5464936766 Hartrees.

NAtoms= 34 NActive= 34 NUniq= 34 SFac= 1.00D+00 NATFMM= 60 NAOKFM=F

Big=F

Integral buffers will be 131072 words long.

Raffenetti 2 integral format.

Two-electron integral symmetry is turned on.

One-electron integrals computed using PRISM.

NBasis= 519 RedAO= T EigKep= 4.67D-06 NBF= 519

NBsUse= 519 1.00D-06 EigRej= -1.00D+00 NBFU= 519

Initial guess from the checkpoint file: "./coohpo.chk"

B after Tr= 0.000000 0.000000 0.000000

Rot= 0.999819 -0.001234 -0.001132 0.018969 Ang= -2.18 deg.

ExpMin= 3.50D-02 ExpMax= 4.40D+05 ExpMxC= 1.51D+04 IAcc=3 IRadAn= 5 AccDes= 0.00D+00

Harris functional with IExCor= 402 and IRadAn= 5 diagonalized for initial guess.

HarFok: IExCor= 402 AccDes= 0.00D+00 IRadAn= 5 IDoV= 1 UseB2=F ITyADJ=14

ICtDFT= 3500011 ScaDFX= 1.000000 1.000000 1.000000 1.000000

FoFCou: FMM=F IPFlag= 0 FMFlag= 100000 FMFlg1= 0

NFxFlg= 0 DoJE=T BraDBF=F KetDBF=T FulRan=T

wScrn= 0.000000 ICntrl= 500 IOpCl= 0 I1Cent= 200000004 NGrid=

0

NMat0= 1 NMatS0= 1 NMatT0= 0 NMatD0= 1 NMatDS0= 0

NMatDT0= 0

Petite list used in FoFCou.

Requested convergence on RMS density matrix=1.00D-08 within 128 cycles.

Requested convergence on MAX density matrix=1.00D-06.

Requested convergence on energy=1.00D-06.

No special actions if energy rises.

SCF Done: E(RB3LYP) = -3338.90295670 A.U. after 11 cycles

NFock= 11 Conv=0.99D-08 -V/T= 2.0019

Calling FoFJK, ICntrl= 2127 FMM=F ISym2X=0 I1Cent= 0 IOpClX= 0 NMat=1 NMatS=1

NMatT=0.

\*\*\*\*\* Axes restored to original set \*\*\*\*\*

| Center | Atomic | Forces (Hartrees/Bohr) |              |              |
|--------|--------|------------------------|--------------|--------------|
| Number | Number | X                      | Y            | Z            |
| 1      | 6      | -0.000782458           | 0.000341892  | -0.000389492 |
| 2      | 6      | -0.000001373           | -0.000641456 | -0.000630709 |
| 3      | 7      | -0.003384977           | -0.003453212 | 0.001161381  |
| 4      | 6      | 0.000728828            | 0.000554450  | -0.001120098 |
| 5      | 7      | -0.001403585           | 0.000635874  | 0.001505550  |
| 6      | 6      | 0.000246974            | 0.000421085  | -0.000360384 |
| 7      | 1      | -0.000195671           | -0.000113604 | -0.000068529 |
| 8      | 1      | 0.001503047            | -0.000191896 | 0.000014329  |
| 9      | 1      | -0.000548782           | -0.000268904 | 0.000623671  |
| 10     | 1      | 0.000205168            | -0.000173354 | -0.000593374 |
| 11     | 35     | -0.000333374           | -0.000273497 | 0.000346487  |
| 12     | 1      | -0.000204238           | 0.000134152  | 0.000384613  |
| 13     | 6      | 0.002941513            | 0.003184383  | 0.000076371  |
| 14     | 6      | -0.001359810           | -0.000438224 | 0.000898094  |
| 15     | 1      | 0.000222910            | -0.000334632 | -0.000789424 |
| 16     | 1      | -0.000638230           | 0.000085376  | -0.000212483 |

|    |   |              |              |              |
|----|---|--------------|--------------|--------------|
| 17 | 1 | 0.001512276  | 0.000092617  | -0.000101183 |
| 18 | 6 | -0.000277692 | 0.000016066  | -0.000480093 |
| 19 | 6 | -0.000117316 | 0.000493615  | 0.000266940  |
| 20 | 8 | -0.000800506 | -0.000781689 | 0.000163903  |
| 21 | 1 | -0.000106341 | 0.000055609  | 0.000466996  |
| 22 | 1 | 0.000134771  | 0.000462984  | -0.000096712 |
| 23 | 1 | 0.000254404  | 0.000019472  | -0.000033163 |
| 24 | 6 | -0.000081219 | 0.000043599  | -0.000296888 |
| 25 | 1 | -0.000016237 | 0.000004560  | 0.000024384  |
| 26 | 1 | 0.000039247  | -0.000043425 | 0.000132143  |
| 27 | 1 | 0.000045958  | -0.000058700 | 0.000029232  |
| 28 | 6 | -0.000462425 | 0.001433118  | -0.000260875 |
| 29 | 1 | 0.000802732  | -0.000456084 | -0.000555619 |
| 30 | 1 | 0.000530090  | -0.000017906 | 0.000477660  |
| 31 | 6 | 0.000891978  | 0.000813377  | 0.003828746  |
| 32 | 8 | 0.000776264  | -0.000925052 | -0.001547888 |
| 33 | 8 | -0.001443152 | -0.000987153 | -0.003148805 |
| 34 | 1 | 0.001321226  | 0.000366557  | 0.000285217  |

-----  
Cartesian Forces: Max 0.003828746 RMS 0.001011039

GradGradGradGradGradGradGradGradGradGradGradGradGradGradGradGradGradGradGrad

Berny optimization.

Using GEDIIS/GDIIS optimizer.

FormGI is forming the generalized inverse of G from B-inverse, IUseBI=4.

GSVD: received Info= 1 from GESDD.

Internal Forces: Max 0.003557052 RMS 0.000626760

Search for a local minimum.

Step number 20 out of a maximum of 175

All quantities printed in internal units (Hartrees-Bohrs-Radians)

Mixed Optimization -- En-DIIS/RFO-DIIS

Swapping is turned off.

Update second derivatives using D2CorX and points 19 20

DE= -4.52D-04 DEPred=-3.16D-04 R= 1.43D+00

TightC=F SS= 1.41D+00 RLast= 1.96D-01 DXNew= 2.6298D+00 5.8911D-01

Trust test= 1.43D+00 RLast= 1.96D-01 DXMaxT set to 1.56D+00

ITU= 1 1 1 1 1 1 1 0 0-1 1 1 1 0 1 0-1 0 1 0

Eigenvalues --- 0.00137 0.00366 0.00436 0.00573 0.00698

Eigenvalues --- 0.00709 0.00949 0.01223 0.01548 0.01770

Eigenvalues --- 0.01968 0.02046 0.02250 0.02335 0.02417

Eigenvalues --- 0.02443 0.02785 0.02929 0.03070 0.03120

Eigenvalues --- 0.03473 0.03553 0.04010 0.04191 0.04641

Eigenvalues --- 0.04872 0.05009 0.05322 0.05604 0.05779

Eigenvalues --- 0.05908 0.06345 0.07232 0.09226 0.09544

|                 |         |         |         |         |         |
|-----------------|---------|---------|---------|---------|---------|
| Eigenvalues --- | 0.11076 | 0.12009 | 0.12553 | 0.12694 | 0.13379 |
| Eigenvalues --- | 0.15062 | 0.15409 | 0.15729 | 0.15979 | 0.15998 |
| Eigenvalues --- | 0.16000 | 0.16005 | 0.16016 | 0.16035 | 0.16281 |
| Eigenvalues --- | 0.17127 | 0.17191 | 0.20279 | 0.21014 | 0.22804 |
| Eigenvalues --- | 0.23045 | 0.23348 | 0.23885 | 0.24979 | 0.25798 |
| Eigenvalues --- | 0.28053 | 0.29116 | 0.30055 | 0.30927 | 0.31861 |
| Eigenvalues --- | 0.32666 | 0.34497 | 0.34558 | 0.34619 | 0.34765 |
| Eigenvalues --- | 0.34877 | 0.34942 | 0.34980 | 0.35050 | 0.35136 |
| Eigenvalues --- | 0.35288 | 0.35713 | 0.35800 | 0.36553 | 0.36776 |
| Eigenvalues --- | 0.36982 | 0.37105 | 0.37439 | 0.37758 | 0.40300 |
| Eigenvalues --- | 0.41767 | 0.44700 | 0.47247 | 0.49093 | 0.51531 |
| Eigenvalues --- | 0.52917 | 0.55630 | 0.56245 | 0.60662 | 0.89990 |
| Eigenvalues --- | 1.36354 |         |         |         |         |

En-DIIS/RFO-DIIS IScMMF= 0 using points: 20 19 18 17

RFO step: Lambda=-1.72428880D-04.

DidBck=F Rises=F RFO-DIIS coefs: 2.15516 -0.95454 -0.67743 0.47680

Iteration 1 RMS(Cart)= 0.09573401 RMS(Int)= 0.00255739

Iteration 2 RMS(Cart)= 0.00412329 RMS(Int)= 0.00005918

Iteration 3 RMS(Cart)= 0.00000794 RMS(Int)= 0.00005906

Iteration 4 RMS(Cart)= 0.00000000 RMS(Int)= 0.00005906

| Variable | Old X   | -DE/DX   | Delta X<br>(Linear) | Delta X<br>(Quad) | Delta X<br>(Total) | New X   |
|----------|---------|----------|---------------------|-------------------|--------------------|---------|
| R1       | 2.57020 | 0.00032  | 0.00144             | -0.00065          | 0.00077            | 2.57097 |
| R2       | 2.61981 | -0.00018 | -0.00109            | 0.00047           | -0.00057           | 2.61924 |
| R3       | 2.03254 | -0.00022 | -0.00020            | -0.00045          | -0.00065           | 2.03189 |
| R4       | 2.62141 | 0.00006  | 0.00436             | 0.00059           | 0.00488            | 2.62629 |
| R5       | 2.05703 | 0.00065  | 0.00466             | 0.00480           | 0.00946            | 2.06649 |
| R6       | 2.53289 | 0.00137  | 0.00175             | 0.00136           | 0.00309            | 2.53597 |
| R7       | 2.72151 | -0.00356 | -0.00835            | -0.00652          | -0.01487           | 2.70664 |
| R8       | 2.52933 | 0.00002  | -0.00019            | 0.00031           | 0.00017            | 2.52950 |
| R9       | 2.03463 | -0.00021 | -0.00041            | -0.00006          | -0.00046           | 2.03417 |
| R10      | 2.78200 | 0.00125  | 0.00154             | 0.00173           | 0.00327            | 2.78527 |
| R11      | 2.06251 | 0.00002  | -0.00074            | 0.00022           | -0.00052           | 2.06199 |
| R12      | 2.05788 | -0.00047 | 0.00090             | -0.00147          | -0.00057           | 2.05730 |
| R13      | 2.89584 | 0.00148  | 0.00542             | 0.00375           | 0.00917            | 2.90500 |
| R14      | 4.59328 | 0.00009  | -0.03792            | -0.04185          | -0.07977           | 4.51351 |
| R15      | 2.50440 | 0.00038  | -0.00009            | 0.00085           | 0.00076            | 2.50515 |
| R16      | 2.04588 | 0.00020  | 0.00076             | 0.00042           | 0.00118            | 2.04705 |
| R17      | 2.04544 | 0.00044  | 0.00180             | 0.00027           | 0.00207            | 2.04751 |
| R18      | 2.06156 | 0.00102  | -0.00038            | 0.00310           | 0.00272            | 2.06428 |
| R19      | 2.76996 | 0.00030  | 0.00201             | -0.00108          | 0.00100            | 2.77096 |
| R20      | 2.76729 | -0.00058 | 0.00100             | 0.00207           | 0.00305            | 2.77033 |
| R21      | 2.05314 | -0.00039 | -0.00186            | -0.00022          | -0.00208           | 2.05106 |
| R22      | 2.05224 | -0.00038 | -0.00319            | 0.00006           | -0.00313           | 2.04911 |

|     |         |          |          |          |          |         |
|-----|---------|----------|----------|----------|----------|---------|
| R23 | 2.74449 | -0.00036 | -0.00039 | 0.00068  | 0.00025  | 2.74474 |
| R24 | 2.05533 | 0.00009  | 0.00014  | 0.00002  | 0.00015  | 2.05548 |
| R25 | 2.84166 | 0.00006  | 0.00082  | -0.00009 | 0.00072  | 2.84239 |
| R26 | 3.08616 | -0.00045 | -0.00404 | -0.01393 | -0.01797 | 3.06819 |
| R27 | 2.06717 | 0.00000  | 0.00012  | -0.00008 | 0.00004  | 2.06721 |
| R28 | 2.06795 | 0.00002  | 0.00001  | -0.00001 | 0.00000  | 2.06795 |
| R29 | 2.06360 | -0.00007 | -0.00045 | -0.00008 | -0.00053 | 2.06306 |
| R30 | 2.06915 | 0.00004  | -0.00066 | -0.00094 | -0.00160 | 2.06755 |
| R31 | 2.06277 | -0.00062 | -0.00114 | -0.00155 | -0.00268 | 2.06009 |
| R32 | 2.87543 | 0.00068  | 0.00175  | 0.00272  | 0.00448  | 2.87991 |
| R33 | 2.28031 | 0.00183  | 0.00229  | 0.00225  | 0.00455  | 2.28486 |
| R34 | 2.52598 | -0.00289 | -0.00528 | -0.00434 | -0.00962 | 2.51636 |
| R35 | 1.89949 | -0.00002 | 0.00332  | 0.00096  | 0.00427  | 1.90376 |
| A1  | 1.87849 | 0.00078  | 0.00378  | 0.00128  | 0.00506  | 1.88354 |
| A2  | 2.27917 | -0.00048 | 0.00102  | -0.00217 | -0.00125 | 2.27792 |
| A3  | 2.12498 | -0.00031 | -0.00401 | 0.00059  | -0.00353 | 2.12145 |
| A4  | 1.85913 | -0.00033 | -0.00309 | -0.00032 | -0.00337 | 1.85577 |
| A5  | 2.27754 | -0.00023 | -0.00211 | -0.00471 | -0.00673 | 2.27082 |
| A6  | 2.13857 | 0.00059  | 0.00649  | 0.00441  | 0.01101  | 2.14958 |
| A7  | 1.90161 | -0.00022 | -0.00065 | -0.00036 | -0.00106 | 1.90056 |
| A8  | 2.20869 | 0.00074  | 0.00850  | 0.00241  | 0.01092  | 2.21961 |
| A9  | 2.17269 | -0.00053 | -0.00803 | -0.00204 | -0.01005 | 2.16264 |
| A10 | 1.89421 | 0.00019  | 0.00191  | 0.00038  | 0.00235  | 1.89657 |
| A11 | 2.19223 | -0.00011 | 0.00029  | -0.00070 | -0.00044 | 2.19179 |
| A12 | 2.19637 | -0.00007 | -0.00191 | 0.00000  | -0.00195 | 2.19442 |
| A13 | 1.89127 | -0.00042 | -0.00185 | -0.00096 | -0.00296 | 1.88831 |
| A14 | 2.19045 | 0.00036  | 0.00231  | 0.00102  | 0.00298  | 2.19343 |
| A15 | 2.20067 | 0.00004  | -0.00115 | -0.00059 | -0.00208 | 2.19860 |
| A16 | 1.89171 | -0.00067 | -0.00462 | -0.00354 | -0.00819 | 1.88351 |
| A17 | 1.85829 | 0.00025  | 0.00196  | 0.00052  | 0.00248  | 1.86078 |
| A18 | 1.96451 | 0.00021  | 0.00346  | 0.00190  | 0.00535  | 1.96986 |
| A19 | 1.88825 | 0.00000  | -0.00330 | 0.00178  | -0.00150 | 1.88675 |
| A20 | 1.92194 | 0.00079  | 0.00705  | 0.00202  | 0.00909  | 1.93103 |
| A21 | 1.93635 | -0.00060 | -0.00503 | -0.00275 | -0.00778 | 1.92857 |
| A22 | 2.42389 | 0.00238  | 0.03089  | 0.07399  | 0.10488  | 2.52877 |
| A23 | 2.14025 | -0.00012 | 0.00695  | 0.00056  | 0.00751  | 2.14776 |
| A24 | 1.96680 | 0.00030  | -0.00051 | 0.00022  | -0.00029 | 1.96651 |
| A25 | 2.17612 | -0.00019 | -0.00647 | -0.00075 | -0.00722 | 2.16890 |
| A26 | 2.07015 | -0.00020 | -0.00133 | -0.00104 | -0.00240 | 2.06774 |
| A27 | 2.15440 | -0.00059 | 0.00399  | -0.00324 | 0.00073  | 2.15512 |
| A28 | 2.05864 | 0.00078  | -0.00271 | 0.00428  | 0.00154  | 2.06018 |
| A29 | 2.05836 | 0.00017  | 0.00165  | -0.00052 | 0.00116  | 2.05953 |
| A30 | 2.13598 | 0.00000  | 0.00602  | -0.00105 | 0.00494  | 2.14091 |
| A31 | 1.97572 | 0.00018  | -0.00091 | 0.00202  | 0.00108  | 1.97680 |

|     |          |          |          |          |          |          |
|-----|----------|----------|----------|----------|----------|----------|
| A32 | 2.00090  | -0.00028 | -0.00260 | 0.00351  | 0.00095  | 2.00185  |
| A33 | 2.02025  | -0.00006 | -0.00417 | -0.00110 | -0.00529 | 2.01496  |
| A34 | 2.04018  | 0.00016  | 0.00410  | -0.00026 | 0.00376  | 2.04393  |
| A35 | 2.13986  | 0.00002  | -0.00249 | -0.00102 | -0.00342 | 2.13644  |
| A36 | 1.94262  | -0.00004 | -0.00070 | 0.00147  | 0.00078  | 1.94340  |
| A37 | 2.03777  | 0.00030  | 0.00202  | 0.00055  | 0.00258  | 2.04034  |
| A38 | 2.02450  | -0.00017 | -0.00179 | -0.00021 | -0.00202 | 2.02249  |
| A39 | 2.06394  | -0.00021 | 0.00686  | -0.00700 | -0.00016 | 2.06377  |
| A40 | 2.38136  | -0.00023 | -0.03420 | -0.04661 | -0.08074 | 2.30062  |
| A41 | 1.93517  | -0.00004 | -0.00001 | -0.00053 | -0.00054 | 1.93463  |
| A42 | 1.91657  | -0.00016 | -0.00102 | -0.00189 | -0.00291 | 1.91366  |
| A43 | 1.93397  | 0.00007  | 0.00059  | 0.00112  | 0.00171  | 1.93568  |
| A44 | 1.88252  | 0.00005  | -0.00036 | -0.00015 | -0.00051 | 1.88202  |
| A45 | 1.90052  | 0.00002  | 0.00078  | 0.00097  | 0.00174  | 1.90227  |
| A46 | 1.89386  | 0.00006  | 0.00000  | 0.00049  | 0.00050  | 1.89435  |
| A47 | 1.87116  | 0.00103  | 0.00024  | 0.00712  | 0.00734  | 1.87850  |
| A48 | 1.94439  | 0.00019  | 0.00236  | -0.00200 | 0.00031  | 1.94469  |
| A49 | 1.98000  | -0.00042 | -0.00881 | 0.00124  | -0.00759 | 1.97241  |
| A50 | 1.88076  | -0.00021 | 0.00481  | 0.00004  | 0.00486  | 1.88563  |
| A51 | 1.90275  | -0.00049 | 0.00258  | -0.00411 | -0.00148 | 1.90127  |
| A52 | 1.88219  | -0.00011 | -0.00048 | -0.00240 | -0.00288 | 1.87931  |
| A53 | 2.14805  | 0.00015  | -0.00004 | 0.00043  | 0.00043  | 2.14848  |
| A54 | 1.95311  | -0.00110 | -0.00194 | -0.00072 | -0.00263 | 1.95048  |
| A55 | 2.18185  | 0.00095  | 0.00172  | 0.00037  | 0.00213  | 2.18397  |
| A56 | 1.92419  | 0.00169  | 0.01015  | 0.00238  | 0.01253  | 1.93671  |
| A57 | 2.89597  | -0.00227 | -0.00494 | 0.00529  | 0.00035  | 2.89633  |
| D1  | 0.00838  | -0.00027 | 0.00523  | -0.01187 | -0.00665 | 0.00173  |
| D2  | 3.01456  | -0.00001 | 0.01905  | -0.01668 | 0.00231  | 3.01687  |
| D3  | -3.09729 | -0.00003 | -0.01526 | -0.00212 | -0.01738 | -3.11467 |
| D4  | -0.09111 | 0.00024  | -0.00144 | -0.00694 | -0.00842 | -0.09953 |
| D5  | -0.00406 | 0.00022  | -0.01300 | 0.01980  | 0.00683  | 0.00277  |
| D6  | -3.10503 | 0.00055  | 0.00960  | 0.03376  | 0.04342  | -3.06161 |
| D7  | 3.10545  | 0.00000  | 0.00545  | 0.01103  | 0.01644  | 3.12189  |
| D8  | 0.00447  | 0.00032  | 0.02805  | 0.02499  | 0.05303  | 0.05751  |
| D9  | -0.00986 | 0.00024  | 0.00432  | -0.00010 | 0.00421  | -0.00565 |
| D10 | 3.11090  | -0.00001 | -0.00449 | 0.00031  | -0.00425 | 3.10664  |
| D11 | -3.02938 | 0.00007  | -0.00742 | 0.00507  | -0.00238 | -3.03176 |
| D12 | 0.09137  | -0.00017 | -0.01624 | 0.00549  | -0.01084 | 0.08054  |
| D13 | -1.41291 | -0.00037 | -0.01072 | -0.01900 | -0.02972 | -1.44263 |
| D14 | 1.57456  | -0.00014 | 0.00425  | -0.02494 | -0.02069 | 1.55387  |
| D15 | 0.00746  | -0.00010 | -0.01251 | 0.01253  | 0.00003  | 0.00749  |
| D16 | 3.12114  | -0.00005 | -0.00175 | 0.00048  | -0.00121 | 3.11993  |
| D17 | -3.11382 | 0.00012  | -0.00411 | 0.01206  | 0.00785  | -3.10597 |
| D18 | -0.00015 | 0.00017  | 0.00665  | 0.00001  | 0.00661  | 0.00646  |

|     |          |          |          |          |          |          |
|-----|----------|----------|----------|----------|----------|----------|
| D19 | -0.42037 | 0.00048  | 0.07036  | 0.04577  | 0.11611  | -0.30426 |
| D20 | 2.72645  | 0.00042  | 0.07753  | 0.03907  | 0.11660  | 2.84304  |
| D21 | 2.69731  | 0.00020  | 0.06034  | 0.04628  | 0.10662  | 2.80393  |
| D22 | -0.43905 | 0.00015  | 0.06751  | 0.03958  | 0.10710  | -0.33195 |
| D23 | -0.00214 | -0.00008 | 0.01573  | -0.01991 | -0.00420 | -0.00635 |
| D24 | 3.09853  | -0.00040 | -0.00695 | -0.03393 | -0.04079 | 3.05775  |
| D25 | -3.11574 | -0.00012 | 0.00487  | -0.00781 | -0.00299 | -3.11872 |
| D26 | -0.01506 | -0.00044 | -0.01781 | -0.02182 | -0.03957 | -0.05463 |
| D27 | -2.44452 | 0.00011  | -0.01149 | -0.00381 | -0.01533 | -2.45985 |
| D28 | -0.41667 | -0.00009 | -0.01658 | -0.00322 | -0.01983 | -0.43650 |
| D29 | 1.70858  | -0.00055 | -0.01945 | -0.00513 | -0.02458 | 1.68400  |
| D30 | 0.74478  | 0.00050  | 0.01504  | 0.01258  | 0.02763  | 0.77241  |
| D31 | 2.77263  | 0.00030  | 0.00995  | 0.01317  | 0.02313  | 2.79576  |
| D32 | -1.38531 | -0.00016 | 0.00708  | 0.01126  | 0.01838  | -1.36692 |
| D33 | -3.03365 | 0.00017  | -0.00444 | 0.01299  | 0.00859  | -3.02505 |
| D34 | 1.19579  | -0.00030 | -0.01171 | 0.00974  | -0.00196 | 1.19382  |
| D35 | -0.93208 | 0.00000  | -0.00643 | 0.01349  | 0.00707  | -0.92501 |
| D36 | 1.13665  | 0.00034  | -0.00585 | 0.01480  | 0.00895  | 1.14560  |
| D37 | -0.91710 | -0.00013 | -0.01312 | 0.01155  | -0.00160 | -0.91871 |
| D38 | -3.04497 | 0.00017  | -0.00784 | 0.01530  | 0.00743  | -3.03754 |
| D39 | -0.95332 | 0.00021  | -0.00310 | 0.01303  | 0.00995  | -0.94337 |
| D40 | -3.00707 | -0.00026 | -0.01038 | 0.00978  | -0.00061 | -3.00768 |
| D41 | 1.14824  | 0.00004  | -0.00510 | 0.01353  | 0.00843  | 1.15667  |
| D42 | 3.14077  | -0.00021 | 0.00440  | -0.01369 | -0.00930 | 3.13147  |
| D43 | -0.00140 | -0.00081 | -0.02294 | -0.00385 | -0.02679 | -0.02819 |
| D44 | -0.00669 | -0.00015 | -0.00365 | -0.00616 | -0.00981 | -0.01650 |
| D45 | 3.13433  | -0.00075 | -0.03099 | 0.00368  | -0.02731 | 3.10702  |
| D46 | -2.75528 | -0.00013 | -0.00509 | 0.00509  | 0.00000  | -2.75528 |
| D47 | -0.04644 | -0.00016 | -0.00591 | 0.00116  | -0.00475 | -0.05119 |
| D48 | -0.01989 | 0.00019  | 0.00375  | -0.00270 | 0.00106  | -0.01883 |
| D49 | 2.68895  | 0.00015  | 0.00293  | -0.00664 | -0.00369 | 2.68525  |
| D50 | 0.34978  | -0.00024 | -0.04443 | -0.05128 | -0.09568 | 0.25410  |
| D51 | -2.02006 | -0.00003 | -0.03413 | -0.05560 | -0.08972 | -2.10979 |
| D52 | 2.60578  | -0.00024 | -0.02899 | -0.00521 | -0.03427 | 2.57151  |
| D53 | 0.22619  | -0.00025 | -0.02761 | -0.00714 | -0.03483 | 0.19136  |
| D54 | 2.56111  | -0.00005 | -0.00456 | -0.00288 | -0.00744 | 2.55367  |
| D55 | -1.64342 | -0.00012 | -0.00565 | -0.00460 | -0.01026 | -1.65368 |
| D56 | 0.44854  | -0.00010 | -0.00593 | -0.00450 | -0.01044 | 0.43810  |
| D57 | 1.33447  | 0.00008  | -0.00490 | -0.00401 | -0.00890 | 1.32557  |
| D58 | -2.87006 | 0.00001  | -0.00600 | -0.00573 | -0.01172 | -2.88178 |
| D59 | -0.77810 | 0.00003  | -0.00628 | -0.00563 | -0.01190 | -0.79000 |
| D60 | -1.00965 | -0.00001 | -0.00402 | -0.00679 | -0.01081 | -1.02046 |
| D61 | 1.06900  | -0.00008 | -0.00512 | -0.00851 | -0.01363 | 1.05537  |
| D62 | -3.12222 | -0.00006 | -0.00540 | -0.00841 | -0.01381 | -3.13603 |



|     |          |          |          |          |          |          |
|-----|----------|----------|----------|----------|----------|----------|
| D63 | 1.46201  | -0.00053 | -0.00558 | -0.00181 | -0.00715 | 1.45485  |
| D64 | 2.77995  | -0.00031 | -0.00800 | -0.02318 | -0.03141 | 2.74854  |
| D65 | 2.31009  | -0.00020 | -0.02306 | -0.01373 | -0.03676 | 2.27333  |
| D66 | -0.81161 | -0.00031 | -0.01557 | -0.01799 | -0.03357 | -0.84518 |
| D67 | -1.88951 | 0.00049  | -0.02663 | -0.00678 | -0.03336 | -1.92287 |
| D68 | 1.27198  | 0.00038  | -0.01913 | -0.01104 | -0.03017 | 1.24181  |
| D69 | 0.14793  | -0.00008 | -0.01970 | -0.01024 | -0.02996 | 0.11797  |
| D70 | -2.97376 | -0.00019 | -0.01221 | -0.01450 | -0.02677 | -3.00054 |
| D71 | 2.98142  | -0.00083 | -0.01162 | -0.00966 | -0.02135 | 2.96007  |
| D72 | -0.13982 | -0.00093 | -0.00411 | -0.01402 | -0.01806 | -0.15788 |
| D73 | -1.95600 | -0.00071 | 0.01676  | -0.00994 | 0.00682  | -1.94918 |

| Item                 | Value    | Threshold | Converged? |
|----------------------|----------|-----------|------------|
| Maximum Force        | 0.003557 | 0.000450  | NO         |
| RMS Force            | 0.000627 | 0.000300  | NO         |
| Maximum Displacement | 0.442087 | 0.001800  | NO         |
| RMS Displacement     | 0.096501 | 0.001200  | NO         |

Predicted change in Energy=-4.425378D-04

GradGradGradGradGradGradGradGradGradGradGradGradGradGradGradGradGradGradGrad

Input orientation:

| Center Number | Atomic Number | Atomic Type | Coordinates (Angstroms) |           |           |
|---------------|---------------|-------------|-------------------------|-----------|-----------|
|               |               |             | X                       | Y         | Z         |
| 1             | 6             | 0           | -0.949224               | 1.639532  | 1.561686  |
| 2             | 6             | 0           | -1.662406               | 0.481990  | 1.610995  |
| 3             | 7             | 0           | -2.477746               | 0.477182  | 0.485533  |
| 4             | 6             | 0           | -2.262514               | 1.603371  | -0.211808 |
| 5             | 7             | 0           | -1.331018               | 2.327374  | 0.420537  |
| 6             | 6             | 0           | -0.735332               | 3.585233  | -0.064579 |
| 7             | 1             | 0           | -0.193199               | 2.022907  | 2.223175  |
| 8             | 1             | 0           | -1.576155               | -0.370211 | 2.290808  |
| 9             | 1             | 0           | -1.541258               | 4.211300  | -0.450775 |
| 10            | 1             | 0           | -0.307442               | 4.082443  | 0.804279  |
| 11            | 35            | 0           | -0.398094               | -2.398389 | 2.741743  |
| 12            | 1             | 0           | -2.739179               | 1.865673  | -1.140624 |
| 13            | 6             | 0           | -3.383837               | -0.554372 | 0.077664  |
| 14            | 6             | 0           | -3.326106               | -1.793747 | 0.544589  |
| 15            | 1             | 0           | -4.107918               | -0.210111 | -0.650780 |
| 16            | 1             | 0           | -4.055451               | -2.513156 | 0.191778  |
| 17            | 1             | 0           | -2.570675               | -2.135101 | 1.255977  |
| 18            | 6             | 0           | 2.705096                | -0.691580 | 1.284884  |
| 19            | 6             | 0           | 4.122177                | -0.314831 | 1.292973  |
| 20            | 8             | 0           | 3.115005                | 0.664482  | 1.661995  |

|    |   |   |           |           |           |
|----|---|---|-----------|-----------|-----------|
| 21 | 1 | 0 | 2.194696  | -0.734600 | 0.327973  |
| 22 | 1 | 0 | 2.247412  | -1.265061 | 2.083284  |
| 23 | 1 | 0 | 4.711460  | -0.620720 | 2.154540  |
| 24 | 6 | 0 | 4.894187  | -0.053879 | 0.028733  |
| 25 | 1 | 0 | 5.644887  | 0.726303  | 0.185041  |
| 26 | 1 | 0 | 5.416770  | -0.965130 | -0.277936 |
| 27 | 1 | 0 | 4.226722  | 0.252074  | -0.779195 |
| 28 | 6 | 0 | 0.339731  | 3.361145  | -1.140311 |
| 29 | 1 | 0 | 0.805201  | 4.328781  | -1.350243 |
| 30 | 1 | 0 | -0.096187 | 2.988046  | -2.067244 |
| 31 | 6 | 0 | 1.419421  | 2.376522  | -0.707515 |
| 32 | 8 | 0 | 1.773057  | 1.442681  | -1.389275 |
| 33 | 8 | 0 | 1.888508  | 2.660417  | 0.505960  |
| 34 | 1 | 0 | 2.472481  | 1.915144  | 0.850127  |

-----  
Distance matrix (angstroms):

|    |    | 1        | 2        | 3        | 4        | 5        |
|----|----|----------|----------|----------|----------|----------|
| 1  | C  | 0.000000 |          |          |          |          |
| 2  | C  | 1.360501 | 0.000000 |          |          |          |
| 3  | N  | 2.201259 | 1.389773 | 0.000000 |          |          |
| 4  | C  | 2.207107 | 2.222665 | 1.341980 | 0.000000 |          |
| 5  | N  | 1.386043 | 2.220912 | 2.177709 | 1.338554 | 0.000000 |
| 6  | C  | 2.544846 | 3.646524 | 3.605358 | 2.506339 | 1.473903 |
| 7  | H  | 1.075229 | 2.215346 | 3.260033 | 3.222920 | 2.153330 |
| 8  | H  | 2.227942 | 1.093540 | 2.188598 | 3.260246 | 3.291652 |
| 9  | H  | 3.318810 | 4.263019 | 3.961984 | 2.716360 | 2.086280 |
| 10 | H  | 2.636923 | 3.930646 | 4.220156 | 3.316705 | 2.067663 |
| 11 | Br | 4.242768 | 3.342702 | 4.205276 | 5.311649 | 5.347072 |
| 12 | H  | 3.249240 | 3.262733 | 2.154214 | 1.076435 | 2.152513 |
| 13 | C  | 3.597621 | 2.527543 | 1.432292 | 2.448880 | 3.554727 |
| 14 | C  | 4.297844 | 3.013984 | 2.424938 | 3.639200 | 4.580328 |
| 15 | H  | 4.277094 | 3.402228 | 2.102627 | 2.624296 | 3.911230 |
| 16 | H  | 5.363777 | 4.087999 | 3.393754 | 4.508137 | 5.559280 |
| 17 | H  | 4.119517 | 2.792876 | 2.725114 | 4.028093 | 4.706208 |
| 18 | C  | 4.343358 | 4.534169 | 5.372785 | 5.673098 | 5.113843 |
| 19 | C  | 5.441585 | 5.847859 | 6.696135 | 6.834336 | 6.122069 |
| 20 | O  | 4.180758 | 4.781167 | 5.718217 | 5.771513 | 4.906480 |
| 21 | H  | 4.128291 | 4.243050 | 4.829592 | 5.062035 | 4.670644 |
| 22 | H  | 4.350541 | 4.308354 | 5.283496 | 5.816767 | 5.336241 |
| 23 | H  | 6.124014 | 6.491346 | 7.461611 | 7.693016 | 6.943310 |
| 24 | C  | 6.273997 | 6.766064 | 7.405139 | 7.350014 | 6.676605 |
| 25 | H  | 6.797900 | 7.449132 | 8.132006 | 7.965785 | 7.161155 |
| 26 | H  | 7.119997 | 7.468396 | 8.061422 | 8.097714 | 7.540629 |
| 27 | H  | 5.847665 | 6.359850 | 6.826426 | 6.652677 | 6.052660 |

|    |    |          |          |          |          |          |
|----|----|----------|----------|----------|----------|----------|
| 28 | C  | 3.453426 | 4.457328 | 4.347273 | 3.274686 | 2.509250 |
| 29 | H  | 4.334674 | 5.445716 | 5.383551 | 4.258494 | 3.421217 |
| 30 | H  | 3.964252 | 4.718347 | 4.300340 | 3.170636 | 2.854881 |
| 31 | C  | 3.361980 | 4.296789 | 4.496527 | 3.794750 | 2.973185 |
| 32 | O  | 4.019669 | 4.661218 | 4.745146 | 4.206909 | 3.700457 |
| 33 | O  | 3.195230 | 4.309947 | 4.881711 | 4.343216 | 3.237833 |
| 34 | H  | 3.505759 | 4.441863 | 5.167728 | 4.862622 | 3.849816 |
|    |    | 6        | 7        | 8        | 9        | 10       |
| 6  | C  | 0.000000 |          |          |          |          |
| 7  | H  | 2.822869 | 0.000000 |          |          |          |
| 8  | H  | 4.679783 | 2.764807 | 0.000000 |          |          |
| 9  | H  | 1.091158 | 3.708954 | 5.339265 | 0.000000 |          |
| 10 | H  | 1.088679 | 2.503598 | 4.862667 | 1.764672 | 0.000000 |
| 11 | Br | 6.617621 | 4.456316 | 2.388446 | 7.428795 | 6.764848 |
| 12 | H  | 2.851345 | 4.221597 | 4.257526 | 2.722660 | 3.822311 |
| 13 | C  | 4.916415 | 4.628796 | 2.863500 | 5.136728 | 5.611793 |
| 14 | C  | 6.001385 | 5.215324 | 2.852730 | 6.343267 | 6.611307 |
| 15 | H  | 5.111027 | 5.345185 | 3.884378 | 5.116309 | 5.914966 |
| 16 | H  | 6.948327 | 6.294396 | 3.891663 | 7.207798 | 7.610824 |
| 17 | H  | 6.150982 | 4.886399 | 2.274815 | 6.652031 | 6.632052 |
| 18 | C  | 5.652320 | 4.080312 | 4.409566 | 6.714333 | 5.665479 |
| 19 | C  | 6.375644 | 4.995274 | 5.785303 | 7.456609 | 6.260700 |
| 20 | O  | 5.131952 | 3.620008 | 4.844892 | 6.222901 | 4.912359 |
| 21 | H  | 5.234512 | 4.110679 | 4.266710 | 6.247058 | 5.448987 |
| 22 | H  | 6.085674 | 4.097180 | 3.932364 | 7.125027 | 6.062914 |
| 23 | H  | 7.230634 | 5.572177 | 6.294078 | 8.320611 | 7.009444 |
| 24 | C  | 6.703978 | 5.916935 | 6.861660 | 7.735415 | 6.690857 |
| 25 | H  | 6.995926 | 6.318103 | 7.601319 | 8.011876 | 6.861294 |
| 26 | H  | 7.655043 | 6.830496 | 7.473511 | 8.674068 | 7.708163 |
| 27 | H  | 6.020183 | 5.629012 | 6.594357 | 7.003779 | 6.143106 |
| 28 | C  | 1.537262 | 3.658953 | 5.419061 | 2.176315 | 2.172679 |
| 29 | H  | 2.139868 | 4.368429 | 6.403799 | 2.515694 | 2.437338 |
| 30 | H  | 2.185361 | 4.398704 | 5.697439 | 2.489488 | 3.080255 |
| 31 | C  | 2.552901 | 3.363708 | 5.050540 | 3.492556 | 2.859674 |
| 32 | O  | 3.554906 | 4.153627 | 5.295924 | 4.419357 | 4.013538 |
| 33 | O  | 2.839953 | 2.772860 | 4.937032 | 3.883797 | 2.633125 |
| 34 | H  | 3.730408 | 3.000454 | 4.867224 | 4.803622 | 3.525231 |
|    |    | 11       | 12       | 13       | 14       | 15       |
| 11 | Br | 0.000000 |          |          |          |          |
| 12 | H  | 6.223799 | 0.000000 |          |          |          |
| 13 | C  | 4.405948 | 2.785036 | 0.000000 |          |          |
| 14 | C  | 3.710301 | 4.071336 | 1.325671 | 0.000000 |          |
| 15 | H  | 5.482751 | 2.534220 | 1.083254 | 2.132613 | 0.000000 |
| 16 | H  | 4.460016 | 4.762563 | 2.073866 | 1.083497 | 2.452891 |

|    |   |           |          |          |          |          |
|----|---|-----------|----------|----------|----------|----------|
| 17 | H | 2.645170  | 4.666721 | 2.132689 | 1.092371 | 3.115193 |
| 18 | C | 3.829546  | 6.485581 | 6.208970 | 6.175614 | 7.098997 |
| 19 | C | 5.183918  | 7.599684 | 7.607536 | 7.630478 | 8.457163 |
| 20 | O | 4.784235  | 6.600682 | 6.799313 | 6.984225 | 7.634425 |
| 21 | H | 3.913699  | 5.767263 | 5.587054 | 5.625653 | 6.399687 |
| 22 | H | 2.952406  | 6.712761 | 6.019846 | 5.806134 | 6.998445 |
| 23 | H | 5.441733  | 8.517762 | 8.357729 | 8.280725 | 9.263900 |
| 24 | C | 6.392605  | 7.957409 | 8.293285 | 8.418223 | 9.029067 |
| 25 | H | 7.267603  | 8.564352 | 9.119732 | 9.325163 | 9.833243 |
| 26 | H | 6.707111  | 8.676242 | 8.817361 | 8.820490 | 9.561838 |
| 27 | H | 6.388340  | 7.159477 | 7.700985 | 7.936183 | 8.348433 |
| 28 | C | 6.984767  | 3.422883 | 5.538925 | 6.546004 | 5.724953 |
| 29 | H | 7.965368  | 4.321282 | 6.590307 | 7.625185 | 6.725290 |
| 30 | H | 7.227114  | 3.017242 | 5.287532 | 6.334003 | 5.322458 |
| 31 | C | 6.164456  | 4.212185 | 5.681367 | 6.440414 | 6.102897 |
| 32 | O | 6.044256  | 4.538835 | 5.721336 | 6.341590 | 6.153288 |
| 33 | O | 5.984881  | 4.975776 | 6.189986 | 6.858082 | 6.747970 |
| 34 | H | 5.515885  | 5.579152 | 6.402474 | 6.890055 | 7.076092 |
|    |   | 16        | 17       | 18       | 19       | 20       |
| 16 | H | 0.000000  |          |          |          |          |
| 17 | H | 1.865477  | 0.000000 |          |          |          |
| 18 | C | 7.086467  | 5.469767 | 0.000000 |          |          |
| 19 | C | 8.539254  | 6.936066 | 1.466330 | 0.000000 |          |
| 20 | O | 7.979621  | 6.350549 | 1.465996 | 1.452456 | 0.000000 |
| 21 | H | 6.499704  | 5.052856 | 1.085374 | 2.196045 | 2.141031 |
| 22 | H | 6.697881  | 4.965417 | 1.084342 | 2.245501 | 2.157160 |
| 23 | H | 9.181093  | 7.492012 | 2.187880 | 1.087713 | 2.107845 |
| 24 | C | 9.282815  | 7.846132 | 2.603209 | 1.504127 | 2.519738 |
| 25 | H | 10.226959 | 8.765273 | 3.444186 | 2.151772 | 2.930106 |
| 26 | H | 9.609369  | 8.217116 | 3.141721 | 2.136964 | 3.423024 |
| 27 | H | 8.785424  | 7.486330 | 2.732444 | 2.150859 | 2.713928 |
| 28 | C | 7.456507  | 6.664937 | 5.282149 | 5.808663 | 4.777767 |
| 29 | H | 8.533221  | 7.744075 | 5.979759 | 6.289042 | 5.275970 |
| 30 | H | 7.144380  | 6.588894 | 5.711707 | 6.324133 | 5.442235 |
| 31 | C | 7.395397  | 6.334896 | 3.877611 | 4.306998 | 3.379447 |
| 32 | O | 7.219410  | 6.218190 | 3.546110 | 3.975132 | 3.422962 |
| 33 | O | 7.886395  | 6.591194 | 3.536867 | 3.802732 | 2.612368 |
| 34 | H | 7.915628  | 6.480944 | 2.652948 | 2.808986 | 1.623614 |
|    |   | 21        | 22       | 23       | 24       | 25       |
| 21 | H | 0.000000  |          |          |          |          |
| 22 | H | 1.834471  | 0.000000 |          |          |          |
| 23 | H | 3.111818  | 2.547898 | 0.000000 |          |          |
| 24 | C | 2.800032  | 3.562803 | 2.207658 | 0.000000 |          |
| 25 | H | 3.749465  | 4.371693 | 2.562164 | 1.093922 | 0.000000 |

|    |   |          |          |          |          |          |
|----|---|----------|----------|----------|----------|----------|
| 26 | H | 3.286644 | 3.963603 | 2.555978 | 1.094312 | 1.768426 |
| 27 | H | 2.515647 | 3.796466 | 3.098958 | 1.091726 | 1.779280 |
| 28 | C | 4.729893 | 5.952528 | 6.769291 | 5.811379 | 6.069896 |
| 29 | H | 5.512254 | 6.720130 | 7.213870 | 6.150536 | 6.225553 |
| 30 | H | 4.984306 | 6.388134 | 7.345755 | 6.208886 | 6.568730 |
| 31 | C | 3.369328 | 4.662108 | 5.292668 | 4.303825 | 4.623251 |
| 32 | O | 2.804867 | 4.428944 | 5.044845 | 3.740574 | 4.240606 |
| 33 | O | 3.413441 | 4.245721 | 4.631709 | 4.077898 | 4.237236 |
| 34 | H | 2.714951 | 3.418339 | 3.625621 | 3.227445 | 3.452513 |
|    |   | 26       | 27       | 28       | 29       | 30       |
| 26 | H | 0.000000 |          |          |          |          |
| 27 | H | 1.774559 | 0.000000 |          |          |          |
| 28 | C | 6.725821 | 4.990533 | 0.000000 |          |          |
| 29 | H | 7.102246 | 5.352797 | 1.094099 | 0.000000 |          |
| 30 | H | 7.015833 | 5.275619 | 1.090152 | 1.767530 | 0.000000 |
| 31 | C | 5.227808 | 3.521272 | 1.523983 | 2.145153 | 2.126003 |
| 32 | O | 4.506581 | 2.794676 | 2.407677 | 3.044313 | 2.518306 |
| 33 | O | 5.119347 | 3.594299 | 2.366419 | 2.720750 | 3.266149 |
| 34 | H | 4.270520 | 2.915108 | 3.255977 | 3.667028 | 4.032397 |
|    |   | 31       | 32       | 33       | 34       |          |
| 31 | C | 0.000000 |          |          |          |          |
| 32 | O | 1.209096 | 0.000000 |          |          |          |
| 33 | O | 1.331601 | 2.255687 | 0.000000 |          |          |
| 34 | H | 1.935989 | 2.393186 | 1.007426 | 0.000000 |          |

Stoichiometry C<sub>11</sub>H<sub>17</sub>BrN<sub>2</sub>O<sub>3</sub>

Framework group C1[X(C<sub>11</sub>H<sub>17</sub>BrN<sub>2</sub>O<sub>3</sub>)]

Deg. of freedom 96

Full point group C1 NOp 1

Largest Abelian subgroup C1 NOp 1

Largest concise Abelian subgroup C1 NOp 1

Standard orientation:

| Center<br>Number | Atomic<br>Number | Atomic<br>Type | Coordinates (Angstroms) |          |           |
|------------------|------------------|----------------|-------------------------|----------|-----------|
|                  |                  |                | X                       | Y        | Z         |
| 1                | 6                | 0              | -0.393814               | 1.343216 | 1.274316  |
| 2                | 6                | 0              | -1.590184               | 0.957772 | 0.753648  |
| 3                | 7                | 0              | -1.922257               | 1.906228 | -0.206366 |
| 4                | 6                | 0              | -0.954974               | 2.835301 | -0.252152 |
| 5                | 7                | 0              | -0.008529               | 2.512562 | 0.637684  |
| 6                | 6                | 0              | 1.271682                | 3.216197 | 0.833510  |
| 7                | 1                | 0              | 0.223871                | 0.880376 | 2.022888  |
| 8                | 1                | 0              | -2.166622               | 0.042583 | 0.914827  |
| 9                | 1                | 0              | 1.069557                | 4.288461 | 0.828687  |

|    |    |   |           |           |           |
|----|----|---|-----------|-----------|-----------|
| 10 | 1  | 0 | 1.628160  | 2.943620  | 1.825400  |
| 11 | 35 | 0 | -2.427646 | -2.241592 | 0.267461  |
| 12 | 1  | 0 | -0.931375 | 3.682716  | -0.915509 |
| 13 | 6  | 0 | -3.075340 | 1.910681  | -1.055980 |
| 14 | 6  | 0 | -3.818559 | 0.834407  | -1.271994 |
| 15 | 1  | 0 | -3.263328 | 2.880846  | -1.499691 |
| 16 | 1  | 0 | -4.681012 | 0.924122  | -1.921681 |
| 17 | 1  | 0 | -3.599110 | -0.145614 | -0.842257 |
| 18 | 6  | 0 | 1.371226  | -2.338743 | -0.206415 |
| 19 | 6  | 0 | 2.700362  | -2.935488 | -0.040833 |
| 20 | 8  | 0 | 2.308423  | -1.809748 | 0.789059  |
| 21 | 1  | 0 | 1.214346  | -1.668937 | -1.045930 |
| 22 | 1  | 0 | 0.473817  | -2.784442 | 0.208083  |
| 23 | 1  | 0 | 2.762898  | -3.852910 | 0.540154  |
| 24 | 6  | 0 | 3.816718  | -2.702011 | -1.021463 |
| 25 | 1  | 0 | 4.784582  | -2.682279 | -0.512036 |
| 26 | 1  | 0 | 3.839708  | -3.515352 | -1.753218 |
| 27 | 1  | 0 | 3.676418  | -1.759550 | -1.554331 |
| 28 | 6  | 0 | 2.319578  | 2.857510  | -0.232526 |
| 29 | 1  | 0 | 3.263496  | 3.327490  | 0.059348  |
| 30 | 1  | 0 | 2.038966  | 3.243858  | -1.212538 |
| 31 | 6  | 0 | 2.537352  | 1.355648  | -0.372201 |
| 32 | 8  | 0 | 2.520681  | 0.782224  | -1.436541 |
| 33 | 8  | 0 | 2.715321  | 0.770646  | 0.810703  |
| 34 | 1  | 0 | 2.689070  | -0.232717 | 0.724217  |

-----

Rotational constants (GHZ):      0.3232312      0.2620959      0.1608072

Standard basis: 6-311++G(d,p) (5D, 7F)

There are    538 symmetry adapted cartesian basis functions of A    symmetry.

There are    519 symmetry adapted basis functions of A    symmetry.

    519 basis functions,    823 primitive gaussians,    538 cartesian basis functions

    78 alpha electrons      78 beta electrons

        nuclear repulsion energy      1574.2211132834 Hartrees.

NAtoms=    34 NActive=    34 NUniq=    34 SFac= 1.00D+00 NAtFMM=    60 NAOKFM=F

Big=F

Integral buffers will be    131072 words long.

Raffenetti 2 integral format.

Two-electron integral symmetry is turned on.

One-electron integrals computed using PRISM.

NBasis=    519 RedAO= T EigKep= 4.21D-06 NBF=    519

NBsUse=    519 1.00D-06 EigRej= -1.00D+00 NBFU=    519

Initial guess from the checkpoint file: "./coohpo.chk"

B after Tr=      0.000000      0.000000      0.000000

        Rot=    0.996407    -0.003503    -0.000642    0.084615 Ang=   -9.72 deg.

ExpMin= 3.50D-02 ExpMax= 4.40D+05 ExpMxC= 1.51D+04 IAcc=3 IRadAn= 5 AccDes= 0.00D+00

Harris functional with IExCor= 402 and IRadAn= 5 diagonalized for initial guess.  
HarFok: IExCor= 402 AccDes= 0.00D+00 IRadAn= 5 IDoV= 1 UseB2=F ITyADJ=14  
ICtDFT= 3500011 ScaDFX= 1.000000 1.000000 1.000000 1.000000  
FoFCou: FMM=F IPFlag= 0 FMFlag= 100000 FMFlg1= 0  
NFxFlg= 0 DoJE=T BraDBF=F KetDBF=T FulRan=T  
wScr= 0.000000 ICntrl= 500 IOpCl= 0 l1Cent= 20000004 NGrid= 0  
NMat0= 1 NMatS0= 1 NMatT0= 0 NMatD0= 1 NMtDS0= 0

NMtDT0= 0

Petite list used in FoFCou.

Requested convergence on RMS density matrix=1.00D-08 within 128 cycles.

Requested convergence on MAX density matrix=1.00D-06.

Requested convergence on energy=1.00D-06.

No special actions if energy rises.

SCF Done: E(RB3LYP) = -3338.90348429 A.U. after 13 cycles

NFock= 13 Conv=0.44D-08 -V/T= 2.0019

Calling FoFJK, ICntrl= 2127 FMM=F ISym2X=0 l1Cent= 0 IOpClX= 0 NMat=1 NMatS=1 NMatT=0.

\*\*\*\*\* Axes restored to original set \*\*\*\*\*

| Center Number | Atomic Number | Forces (Hartrees/Bohr) |              |              |
|---------------|---------------|------------------------|--------------|--------------|
|               |               | X                      | Y            | Z            |
| 1             | 6             | -0.000168610           | -0.000048544 | -0.000102124 |
| 2             | 6             | -0.000681475           | 0.000412092  | -0.000390636 |
| 3             | 7             | 0.000429017            | -0.000064802 | 0.000469365  |
| 4             | 6             | 0.001227432            | 0.000107414  | -0.000715136 |
| 5             | 7             | -0.000596905           | -0.000131756 | 0.000324631  |
| 6             | 6             | 0.000380761            | 0.000839552  | -0.000194372 |
| 7             | 1             | 0.000447378            | -0.000442735 | 0.000099866  |
| 8             | 1             | 0.000640086            | 0.000185227  | -0.001146446 |
| 9             | 1             | 0.000094487            | 0.000265578  | -0.000292152 |
| 10            | 1             | -0.000127728           | -0.000354336 | -0.000024505 |
| 11            | 35            | -0.000536663           | -0.000002888 | 0.000153300  |
| 12            | 1             | -0.000221211           | -0.000073191 | 0.000104424  |
| 13            | 6             | -0.000032898           | 0.000649466  | 0.000398280  |
| 14            | 6             | -0.000419379           | -0.001400005 | 0.000743834  |
| 15            | 1             | 0.000150992            | -0.000159106 | 0.000041610  |
| 16            | 1             | 0.000418687            | 0.000344997  | -0.000186771 |
| 17            | 1             | 0.000101078            | 0.000373799  | -0.000133773 |
| 18            | 6             | 0.000332201            | 0.000947557  | -0.000283007 |
| 19            | 6             | -0.000035979           | -0.000481998 | 0.000127573  |

|    |   |              |              |              |
|----|---|--------------|--------------|--------------|
| 20 | 8 | -0.000755998 | -0.000357906 | -0.000473604 |
| 21 | 1 | -0.000082090 | -0.000093735 | -0.000147513 |
| 22 | 1 | 0.000047398  | 0.000027872  | 0.000632100  |
| 23 | 1 | -0.000091683 | -0.000054248 | 0.000045524  |
| 24 | 6 | 0.000049479  | -0.000015435 | -0.000159344 |
| 25 | 1 | 0.000069062  | 0.000002467  | -0.000001773 |
| 26 | 1 | 0.000039381  | -0.000021909 | 0.000138648  |
| 27 | 1 | 0.000038148  | 0.000070116  | 0.000069103  |
| 28 | 6 | -0.001251811 | -0.000819305 | 0.001274988  |
| 29 | 1 | 0.000201068  | 0.000157777  | -0.000235680 |
| 30 | 1 | -0.000004176 | 0.000095287  | -0.000330663 |
| 31 | 6 | 0.000311411  | -0.000764353 | 0.000451841  |
| 32 | 8 | -0.000315066 | 0.000930742  | -0.000085061 |
| 33 | 8 | -0.000472839 | -0.000024642 | 0.000030300  |
| 34 | 1 | 0.000816447  | -0.000099049 | -0.000202829 |

-----  
Cartesian Forces: Max 0.001400005 RMS 0.000453565

GradGradGradGradGradGradGradGradGradGradGradGradGradGradGradGradGradGradGrad

Berny optimization.

Using GEDIIS/GDIIS optimizer.

FormGI is forming the generalized inverse of G from B-inverse, IUseBI=4.

GSVD: received Info= 1 from GESDD.

Internal Forces: Max 0.002480949 RMS 0.000498530

Search for a local minimum.

Step number 21 out of a maximum of 175

All quantities printed in internal units (Hartrees-Bohrs-Radians)

Mixed Optimization -- En-DIIS/RFO-DIIS

Swapping is turned off.

Update second derivatives using D2CorX and points 19 20 21

DE= -5.28D-04 DEPred=-4.43D-04 R= 1.19D+00

TightC=F SS= 1.41D+00 RLast= 3.46D-01 DXNew= 2.6298D+00 1.0391D+00

Trust test= 1.19D+00 RLast= 3.46D-01 DXMaxT set to 1.56D+00

ITU= 1 1 1 1 1 1 1 1 0 0-1 1 1 1 0 1 0-1 0 1

ITU= 0

|                 |         |         |         |         |         |
|-----------------|---------|---------|---------|---------|---------|
| Eigenvalues --- | 0.00134 | 0.00367 | 0.00404 | 0.00576 | 0.00698 |
| Eigenvalues --- | 0.00709 | 0.00904 | 0.01196 | 0.01549 | 0.01767 |
| Eigenvalues --- | 0.01962 | 0.02088 | 0.02257 | 0.02327 | 0.02415 |
| Eigenvalues --- | 0.02425 | 0.02854 | 0.02975 | 0.03129 | 0.03209 |
| Eigenvalues --- | 0.03493 | 0.03593 | 0.04003 | 0.04186 | 0.04664 |
| Eigenvalues --- | 0.04836 | 0.05006 | 0.05319 | 0.05583 | 0.05769 |
| Eigenvalues --- | 0.05927 | 0.06383 | 0.06984 | 0.09137 | 0.09595 |
| Eigenvalues --- | 0.10867 | 0.11968 | 0.12551 | 0.12778 | 0.13435 |
| Eigenvalues --- | 0.14961 | 0.15370 | 0.15679 | 0.15976 | 0.15999 |



|                 |         |         |         |         |         |
|-----------------|---------|---------|---------|---------|---------|
| Eigenvalues --- | 0.16001 | 0.16006 | 0.16018 | 0.16045 | 0.16443 |
| Eigenvalues --- | 0.17254 | 0.17293 | 0.19969 | 0.21089 | 0.22755 |
| Eigenvalues --- | 0.23044 | 0.23675 | 0.23887 | 0.24944 | 0.25592 |
| Eigenvalues --- | 0.28890 | 0.29233 | 0.30094 | 0.31816 | 0.32161 |
| Eigenvalues --- | 0.32640 | 0.34497 | 0.34533 | 0.34614 | 0.34765 |
| Eigenvalues --- | 0.34877 | 0.34943 | 0.34976 | 0.35117 | 0.35255 |
| Eigenvalues --- | 0.35339 | 0.35709 | 0.35869 | 0.36549 | 0.36920 |
| Eigenvalues --- | 0.36943 | 0.37213 | 0.37721 | 0.37981 | 0.40771 |
| Eigenvalues --- | 0.41838 | 0.44615 | 0.48250 | 0.49185 | 0.51669 |
| Eigenvalues --- | 0.52825 | 0.55564 | 0.56317 | 0.60876 | 0.90576 |
| Eigenvalues --- | 1.38275 |         |         |         |         |

En-DIIS/RFO-DIIS IScMMF= 0 using points: 21 20 19 18 17

RFO step: Lambda=-8.09067462D-05.

DidBck=F Rises=F RFO-DIIS coefs: 0.89920 0.53353 -0.36939 -0.27760

0.21426

Iteration 1 RMS(Cart)= 0.03740734 RMS(Int)= 0.00032378

Iteration 2 RMS(Cart)= 0.00050812 RMS(Int)= 0.00004214

Iteration 3 RMS(Cart)= 0.00000014 RMS(Int)= 0.00004214

| Variable | Old X   | -DE/DX   | Delta X<br>(Linear) | Delta X<br>(Quad) | Delta X<br>(Total) | New X   |
|----------|---------|----------|---------------------|-------------------|--------------------|---------|
| R1       | 2.57097 | -0.00073 | 0.00050             | -0.00146          | -0.00097           | 2.57000 |
| R2       | 2.61924 | 0.00007  | -0.00046            | 0.00048           | 0.00006            | 2.61930 |
| R3       | 2.03189 | 0.00022  | -0.00004            | 0.00045           | 0.00041            | 2.03230 |
| R4       | 2.62629 | -0.00163 | 0.00110             | -0.00230          | -0.00123           | 2.62506 |
| R5       | 2.06649 | -0.00075 | 0.00063             | 0.00082           | 0.00145            | 2.06794 |
| R6       | 2.53597 | 0.00032  | 0.00047             | 0.00060           | 0.00106            | 2.53703 |
| R7       | 2.70664 | -0.00024 | -0.00191            | -0.00186          | -0.00377           | 2.70287 |
| R8       | 2.52950 | -0.00005 | -0.00009            | 0.00027           | 0.00020            | 2.52970 |
| R9       | 2.03417 | -0.00001 | -0.00014            | -0.00005          | -0.00020           | 2.03397 |
| R10      | 2.78527 | -0.00017 | 0.00038             | -0.00010          | 0.00028            | 2.78556 |
| R11      | 2.06199 | 0.00019  | -0.00020            | 0.00045           | 0.00025            | 2.06224 |
| R12      | 2.05730 | -0.00023 | 0.00032             | -0.00080          | -0.00049           | 2.05682 |
| R13      | 2.90500 | -0.00131 | 0.00112             | -0.00214          | -0.00102           | 2.90398 |
| R14      | 4.51351 | -0.00023 | -0.00224            | -0.03129          | -0.03353           | 4.47997 |
| R15      | 2.50515 | 0.00080  | -0.00006            | 0.00105           | 0.00099            | 2.50615 |
| R16      | 2.04705 | -0.00018 | 0.00017             | -0.00025          | -0.00008           | 2.04697 |
| R17      | 2.04751 | -0.00045 | 0.00050             | -0.00085          | -0.00035           | 2.04717 |
| R18      | 2.06428 | -0.00013 | -0.00029            | 0.00064           | 0.00036            | 2.06464 |
| R19      | 2.77096 | -0.00024 | 0.00072             | -0.00090          | -0.00007           | 2.77089 |
| R20      | 2.77033 | -0.00074 | -0.00010            | -0.00013          | -0.00027           | 2.77007 |
| R21      | 2.05106 | 0.00017  | -0.00052            | 0.00019           | -0.00033           | 2.05073 |
| R22      | 2.04911 | 0.00043  | -0.00090            | 0.00063           | -0.00027           | 2.04884 |
| R23      | 2.74474 | 0.00033  | -0.00030            | 0.00139           | 0.00103            | 2.74577 |
| R24      | 2.05548 | 0.00000  | 0.00005             | -0.00005          | 0.00001            | 2.05549 |

|     |         |          |          |          |          |         |
|-----|---------|----------|----------|----------|----------|---------|
| R25 | 2.84239 | 0.00007  | 0.00025  | 0.00019  | 0.00043  | 2.84282 |
| R26 | 3.06819 | -0.00022 | 0.00035  | -0.00827 | -0.00792 | 3.06027 |
| R27 | 2.06721 | 0.00005  | 0.00005  | 0.00012  | 0.00017  | 2.06738 |
| R28 | 2.06795 | -0.00001 | 0.00001  | -0.00003 | -0.00002 | 2.06793 |
| R29 | 2.06306 | -0.00005 | -0.00012 | -0.00018 | -0.00030 | 2.06277 |
| R30 | 2.06755 | 0.00027  | -0.00004 | 0.00033  | 0.00029  | 2.06784 |
| R31 | 2.06009 | 0.00025  | -0.00017 | 0.00041  | 0.00024  | 2.06032 |
| R32 | 2.87991 | -0.00006 | 0.00034  | 0.00052  | 0.00086  | 2.88077 |
| R33 | 2.28486 | -0.00076 | 0.00040  | -0.00014 | 0.00026  | 2.28512 |
| R34 | 2.51636 | -0.00022 | -0.00123 | -0.00166 | -0.00289 | 2.51347 |
| R35 | 1.90376 | 0.00019  | 0.00074  | 0.00225  | 0.00299  | 1.90675 |
| A1  | 1.88354 | -0.00030 | 0.00097  | -0.00073 | 0.00023  | 1.88377 |
| A2  | 2.27792 | -0.00023 | 0.00043  | -0.00175 | -0.00138 | 2.27654 |
| A3  | 2.12145 | 0.00053  | -0.00115 | 0.00255  | 0.00132  | 2.12278 |
| A4  | 1.85577 | 0.00056  | -0.00081 | 0.00122  | 0.00042  | 1.85618 |
| A5  | 2.27082 | 0.00066  | -0.00015 | 0.00213  | 0.00201  | 2.27283 |
| A6  | 2.14958 | -0.00122 | 0.00147  | -0.00363 | -0.00211 | 2.14747 |
| A7  | 1.90056 | 0.00018  | -0.00022 | 0.00025  | -0.00001 | 1.90055 |
| A8  | 2.21961 | -0.00165 | 0.00225  | -0.00368 | -0.00142 | 2.21818 |
| A9  | 2.16264 | 0.00146  | -0.00208 | 0.00344  | 0.00136  | 2.16400 |
| A10 | 1.89657 | -0.00049 | 0.00054  | -0.00097 | -0.00043 | 1.89614 |
| A11 | 2.19179 | 0.00006  | 0.00009  | -0.00042 | -0.00037 | 2.19143 |
| A12 | 2.19442 | 0.00044  | -0.00051 | 0.00164  | 0.00109  | 2.19551 |
| A13 | 1.88831 | 0.00004  | -0.00045 | 0.00028  | -0.00027 | 1.88805 |
| A14 | 2.19343 | -0.00050 | 0.00067  | -0.00212 | -0.00165 | 2.19178 |
| A15 | 2.19860 | 0.00044  | -0.00028 | 0.00077  | 0.00030  | 2.19889 |
| A16 | 1.88351 | 0.00109  | -0.00116 | 0.00373  | 0.00255  | 1.88607 |
| A17 | 1.86078 | 0.00022  | 0.00049  | -0.00108 | -0.00059 | 1.86018 |
| A18 | 1.96986 | -0.00195 | 0.00087  | -0.00598 | -0.00512 | 1.96474 |
| A19 | 1.88675 | -0.00018 | -0.00106 | 0.00180  | 0.00074  | 1.88749 |
| A20 | 1.93103 | 0.00024  | 0.00197  | 0.00050  | 0.00249  | 1.93352 |
| A21 | 1.92857 | 0.00065  | -0.00125 | 0.00132  | 0.00007  | 1.92863 |
| A22 | 2.52877 | 0.00192  | -0.00215 | 0.04546  | 0.04332  | 2.57209 |
| A23 | 2.14776 | -0.00060 | 0.00187  | -0.00136 | 0.00051  | 2.14827 |
| A24 | 1.96651 | 0.00039  | -0.00015 | 0.00146  | 0.00131  | 1.96782 |
| A25 | 2.16890 | 0.00021  | -0.00174 | -0.00010 | -0.00184 | 2.16706 |
| A26 | 2.06774 | 0.00003  | -0.00031 | -0.00046 | -0.00084 | 2.06690 |
| A27 | 2.15512 | -0.00041 | 0.00115  | -0.00217 | -0.00109 | 2.15404 |
| A28 | 2.06018 | 0.00038  | -0.00085 | 0.00260  | 0.00169  | 2.06187 |
| A29 | 2.05953 | 0.00045  | 0.00058  | 0.00078  | 0.00135  | 2.06088 |
| A30 | 2.14091 | -0.00067 | 0.00178  | -0.00208 | -0.00029 | 2.14062 |
| A31 | 1.97680 | 0.00012  | -0.00046 | 0.00180  | 0.00137  | 1.97818 |
| A32 | 2.00185 | -0.00045 | -0.00125 | 0.00001  | -0.00125 | 2.00060 |
| A33 | 2.01496 | 0.00020  | -0.00102 | 0.00003  | -0.00100 | 2.01396 |

|     |          |          |          |          |          |          |
|-----|----------|----------|----------|----------|----------|----------|
| A34 | 2.04393  | -0.00025 | 0.00119  | -0.00127 | -0.00004 | 2.04390  |
| A35 | 2.13644  | 0.00044  | -0.00058 | 0.00128  | 0.00067  | 2.13711  |
| A36 | 1.94340  | -0.00007 | -0.00030 | 0.00006  | -0.00024 | 1.94316  |
| A37 | 2.04034  | 0.00030  | 0.00053  | 0.00091  | 0.00147  | 2.04181  |
| A38 | 2.02249  | -0.00015 | -0.00051 | -0.00041 | -0.00093 | 2.02155  |
| A39 | 2.06377  | 0.00039  | 0.00289  | -0.00472 | -0.00159 | 2.06218  |
| A40 | 2.30062  | 0.00080  | -0.00172 | -0.01803 | -0.01972 | 2.28090  |
| A41 | 1.93463  | 0.00003  | 0.00006  | -0.00027 | -0.00021 | 1.93442  |
| A42 | 1.91366  | -0.00015 | -0.00010 | -0.00147 | -0.00157 | 1.91208  |
| A43 | 1.93568  | 0.00003  | 0.00005  | 0.00075  | 0.00080  | 1.93648  |
| A44 | 1.88202  | 0.00000  | -0.00009 | -0.00044 | -0.00053 | 1.88149  |
| A45 | 1.90227  | -0.00002 | 0.00009  | 0.00040  | 0.00049  | 1.90276  |
| A46 | 1.89435  | 0.00011  | 0.00000  | 0.00103  | 0.00102  | 1.89538  |
| A47 | 1.87850  | 0.00030  | -0.00036 | 0.00245  | 0.00208  | 1.88058  |
| A48 | 1.94469  | 0.00023  | 0.00095  | -0.00003 | 0.00089  | 1.94559  |
| A49 | 1.97241  | -0.00062 | -0.00205 | -0.00088 | -0.00293 | 1.96948  |
| A50 | 1.88563  | -0.00021 | 0.00105  | -0.00127 | -0.00021 | 1.88542  |
| A51 | 1.90127  | 0.00020  | 0.00068  | -0.00077 | -0.00006 | 1.90121  |
| A52 | 1.87931  | 0.00011  | -0.00014 | 0.00042  | 0.00029  | 1.87960  |
| A53 | 2.14848  | -0.00059 | -0.00033 | -0.00309 | -0.00340 | 2.14508  |
| A54 | 1.95048  | -0.00003 | -0.00049 | 0.00168  | 0.00122  | 1.95170  |
| A55 | 2.18397  | 0.00061  | 0.00071  | 0.00145  | 0.00218  | 2.18615  |
| A56 | 1.93671  | 0.00070  | 0.00297  | 0.00491  | 0.00789  | 1.94460  |
| A57 | 2.89633  | -0.00248 | -0.00254 | -0.00439 | -0.00692 | 2.88940  |
| D1  | 0.00173  | 0.00021  | 0.00249  | 0.00622  | 0.00872  | 0.01045  |
| D2  | 3.01687  | 0.00013  | 0.00804  | 0.00341  | 0.01141  | 3.02828  |
| D3  | -3.11467 | 0.00021  | -0.00385 | 0.00272  | -0.00112 | -3.11579 |
| D4  | -0.09953 | 0.00013  | 0.00169  | -0.00009 | 0.00157  | -0.09796 |
| D5  | 0.00277  | -0.00034 | -0.00571 | -0.01021 | -0.01591 | -0.01313 |
| D6  | -3.06161 | -0.00008 | -0.00061 | 0.00416  | 0.00355  | -3.05806 |
| D7  | 3.12189  | -0.00035 | 0.00001  | -0.00716 | -0.00716 | 3.11473  |
| D8  | 0.05751  | -0.00009 | 0.00510  | 0.00721  | 0.01230  | 0.06981  |
| D9  | -0.00565 | -0.00001 | 0.00157  | -0.00010 | 0.00147  | -0.00419 |
| D10 | 3.10664  | -0.00005 | -0.00124 | 0.00038  | -0.00090 | 3.10574  |
| D11 | -3.03176 | -0.00009 | -0.00330 | 0.00198  | -0.00134 | -3.03310 |
| D12 | 0.08054  | -0.00013 | -0.00611 | 0.00246  | -0.00371 | 0.07683  |
| D13 | -1.44263 | -0.00037 | -0.00214 | -0.00663 | -0.00877 | -1.45140 |
| D14 | 1.55387  | -0.00033 | 0.00399  | -0.00946 | -0.00546 | 1.54841  |
| D15 | 0.00749  | -0.00020 | -0.00516 | -0.00631 | -0.01147 | -0.00398 |
| D16 | 3.11993  | 0.00004  | -0.00046 | 0.00313  | 0.00268  | 3.12261  |
| D17 | -3.10597 | -0.00011 | -0.00246 | -0.00663 | -0.00914 | -3.11511 |
| D18 | 0.00646  | 0.00014  | 0.00224  | 0.00281  | 0.00501  | 0.01148  |
| D19 | -0.30426 | 0.00003  | 0.01338  | 0.02040  | 0.03377  | -0.27049 |
| D20 | 2.84304  | 0.00017  | 0.01619  | 0.02073  | 0.03693  | 2.87997  |

|     |          |          |          |          |          |          |
|-----|----------|----------|----------|----------|----------|----------|
| D21 | 2.80393  | -0.00004 | 0.01017  | 0.02088  | 0.03104  | 2.83497  |
| D22 | -0.33195 | 0.00010  | 0.01298  | 0.02121  | 0.03419  | -0.29775 |
| D23 | -0.00635 | 0.00034  | 0.00670  | 0.01016  | 0.01684  | 0.01049  |
| D24 | 3.05775  | 0.00002  | 0.00158  | -0.00443 | -0.00283 | 3.05491  |
| D25 | -3.11872 | 0.00010  | 0.00196  | 0.00074  | 0.00267  | -3.11605 |
| D26 | -0.05463 | -0.00021 | -0.00316 | -0.01385 | -0.01700 | -0.07163 |
| D27 | -2.45985 | -0.00038 | -0.00102 | -0.00916 | -0.01019 | -2.47004 |
| D28 | -0.43650 | 0.00006  | -0.00257 | -0.00580 | -0.00838 | -0.44488 |
| D29 | 1.68400  | -0.00018 | -0.00328 | -0.00852 | -0.01179 | 1.67221  |
| D30 | 0.77241  | -0.00005 | 0.00496  | 0.00777  | 0.01272  | 0.78513  |
| D31 | 2.79576  | 0.00039  | 0.00340  | 0.01113  | 0.01453  | 2.81029  |
| D32 | -1.36692 | 0.00016  | 0.00270  | 0.00841  | 0.01112  | -1.35580 |
| D33 | -3.02505 | 0.00036  | -0.00426 | 0.00814  | 0.00389  | -3.02116 |
| D34 | 1.19382  | 0.00030  | -0.00584 | 0.00819  | 0.00235  | 1.19617  |
| D35 | -0.92501 | 0.00044  | -0.00488 | 0.00830  | 0.00342  | -0.92159 |
| D36 | 1.14560  | 0.00014  | -0.00475 | 0.00712  | 0.00238  | 1.14798  |
| D37 | -0.91871 | 0.00008  | -0.00633 | 0.00718  | 0.00083  | -0.91787 |
| D38 | -3.03754 | 0.00021  | -0.00537 | 0.00728  | 0.00190  | -3.03564 |
| D39 | -0.94337 | -0.00021 | -0.00392 | 0.00370  | -0.00020 | -0.94358 |
| D40 | -3.00768 | -0.00027 | -0.00549 | 0.00375  | -0.00175 | -3.00943 |
| D41 | 1.15667  | -0.00013 | -0.00454 | 0.00386  | -0.00068 | 1.15599  |
| D42 | 3.13147  | 0.00036  | 0.00265  | 0.00344  | 0.00608  | 3.13755  |
| D43 | -0.02819 | 0.00002  | -0.00694 | 0.00104  | -0.00591 | -0.03410 |
| D44 | -0.01650 | 0.00020  | -0.00051 | 0.00307  | 0.00257  | -0.01393 |
| D45 | 3.10702  | -0.00014 | -0.01010 | 0.00067  | -0.00942 | 3.09760  |
| D46 | -2.75528 | -0.00003 | -0.00196 | 0.00280  | 0.00083  | -2.75445 |
| D47 | -0.05119 | 0.00004  | -0.00181 | 0.00165  | -0.00017 | -0.05136 |
| D48 | -0.01883 | -0.00002 | 0.00157  | -0.00079 | 0.00078  | -0.01805 |
| D49 | 2.68525  | 0.00005  | 0.00172  | -0.00194 | -0.00022 | 2.68504  |
| D50 | 0.25410  | 0.00026  | -0.00372 | -0.02019 | -0.02389 | 0.23021  |
| D51 | -2.10979 | 0.00030  | -0.00027 | -0.02221 | -0.02250 | -2.13229 |
| D52 | 2.57151  | 0.00009  | -0.00703 | 0.00175  | -0.00523 | 2.56628  |
| D53 | 0.19136  | 0.00007  | -0.00646 | 0.00132  | -0.00510 | 0.18625  |
| D54 | 2.55367  | -0.00002 | -0.00101 | 0.00015  | -0.00087 | 2.55279  |
| D55 | -1.65368 | -0.00009 | -0.00115 | -0.00149 | -0.00265 | -1.65633 |
| D56 | 0.43810  | -0.00003 | -0.00119 | -0.00068 | -0.00189 | 0.43621  |
| D57 | 1.32557  | 0.00009  | -0.00094 | -0.00051 | -0.00143 | 1.32414  |
| D58 | -2.88178 | 0.00002  | -0.00108 | -0.00215 | -0.00321 | -2.88499 |
| D59 | -0.79000 | 0.00008  | -0.00112 | -0.00135 | -0.00245 | -0.79245 |
| D60 | -1.02046 | 0.00002  | -0.00047 | -0.00119 | -0.00166 | -1.02212 |
| D61 | 1.05537  | -0.00005 | -0.00061 | -0.00283 | -0.00344 | 1.05194  |
| D62 | -3.13603 | 0.00001  | -0.00065 | -0.00203 | -0.00268 | -3.13871 |
| D63 | 1.45485  | -0.00046 | -0.00538 | 0.01276  | 0.00755  | 1.46240  |
| D64 | 2.74854  | 0.00008  | -0.00249 | 0.00272  | 0.00007  | 2.74861  |

|     |          |          |          |          |          |          |
|-----|----------|----------|----------|----------|----------|----------|
| D65 | 2.27333  | -0.00007 | -0.00047 | -0.01572 | -0.01617 | 2.25716  |
| D66 | -0.84518 | -0.00002 | 0.00121  | -0.01749 | -0.01628 | -0.86146 |
| D67 | -1.92287 | 0.00005  | -0.00177 | -0.01372 | -0.01546 | -1.93833 |
| D68 | 1.24181  | 0.00011  | -0.00009 | -0.01548 | -0.01557 | 1.22624  |
| D69 | 0.11797  | -0.00003 | -0.00017 | -0.01540 | -0.01558 | 0.10239  |
| D70 | -3.00054 | 0.00003  | 0.00151  | -0.01716 | -0.01569 | -3.01622 |
| D71 | 2.96007  | -0.00078 | -0.00175 | -0.00946 | -0.01124 | 2.94882  |
| D72 | -0.15788 | -0.00070 | -0.00011 | -0.01119 | -0.01127 | -0.16915 |
| D73 | -1.94918 | -0.00041 | 0.00553  | -0.01289 | -0.00735 | -1.95654 |

| Item                 | Value    | Threshold | Converged? |
|----------------------|----------|-----------|------------|
| Maximum Force        | 0.002481 | 0.000450  | NO         |
| RMS Force            | 0.000499 | 0.000300  | NO         |
| Maximum Displacement | 0.137196 | 0.001800  | NO         |
| RMS Displacement     | 0.037362 | 0.001200  | NO         |

Predicted change in Energy=-1.203839D-04

GradGradGradGradGradGradGradGradGradGradGradGradGradGradGradGradGradGrad

Input orientation:

| Center Number | Atomic Number | Atomic Type | Coordinates (Angstroms) |           |           |
|---------------|---------------|-------------|-------------------------|-----------|-----------|
|               |               |             | X                       | Y         | Z         |
| 1             | 6             | 0           | -0.917063               | 1.628621  | 1.548040  |
| 2             | 6             | 0           | -1.622301               | 0.466577  | 1.591119  |
| 3             | 7             | 0           | -2.444123               | 0.466125  | 0.471176  |
| 4             | 6             | 0           | -2.239165               | 1.599353  | -0.218894 |
| 5             | 7             | 0           | -1.318051               | 2.329672  | 0.421571  |
| 6             | 6             | 0           | -0.731850               | 3.595560  | -0.054592 |
| 7             | 1             | 0           | -0.160171               | 2.010153  | 2.209952  |
| 8             | 1             | 0           | -1.529644               | -0.391776 | 2.263542  |
| 9             | 1             | 0           | -1.541551               | 4.222961  | -0.430978 |
| 10            | 1             | 0           | -0.300563               | 4.085195  | 0.816562  |
| 11            | 35            | 0           | -0.414808               | -2.422570 | 2.766767  |
| 12            | 1             | 0           | -2.724810               | 1.866992  | -1.141394 |
| 13            | 6             | 0           | -3.343365               | -0.567942 | 0.061513  |
| 14            | 6             | 0           | -3.296449               | -1.801825 | 0.545380  |
| 15            | 1             | 0           | -4.052467               | -0.234376 | -0.686321 |
| 16            | 1             | 0           | -4.017500               | -2.525134 | 0.184162  |
| 17            | 1             | 0           | -2.550567               | -2.135837 | 1.270489  |
| 18            | 6             | 0           | 2.670346                | -0.669022 | 1.325644  |
| 19            | 6             | 0           | 4.091569                | -0.309493 | 1.296107  |
| 20            | 8             | 0           | 3.104422                | 0.686186  | 1.677385  |
| 21            | 1             | 0           | 2.136170                | -0.718145 | 0.382296  |
| 22            | 1             | 0           | 2.224957                | -1.226837 | 2.141707  |

|    |   |   |           |           |           |
|----|---|---|-----------|-----------|-----------|
| 23 | 1 | 0 | 4.697232  | -0.612451 | 2.147291  |
| 24 | 6 | 0 | 4.837963  | -0.073766 | 0.011421  |
| 25 | 1 | 0 | 5.600652  | 0.699806  | 0.140852  |
| 26 | 1 | 0 | 5.344169  | -0.995138 | -0.292427 |
| 27 | 1 | 0 | 4.156608  | 0.228341  | -0.786081 |
| 28 | 6 | 0 | 0.338615  | 3.379982  | -1.135860 |
| 29 | 1 | 0 | 0.805061  | 4.348301  | -1.341229 |
| 30 | 1 | 0 | -0.099969 | 3.013093  | -2.064160 |
| 31 | 6 | 0 | 1.418225  | 2.391138  | -0.710962 |
| 32 | 8 | 0 | 1.755550  | 1.452789  | -1.395037 |
| 33 | 8 | 0 | 1.904200  | 2.677063  | 0.493682  |
| 34 | 1 | 0 | 2.481750  | 1.928114  | 0.845266  |

-----  
Distance matrix (angstroms):

|    |    | 1        | 2        | 3        | 4        | 5        |
|----|----|----------|----------|----------|----------|----------|
| 1  | C  | 0.000000 |          |          |          |          |
| 2  | C  | 1.359985 | 0.000000 |          |          |          |
| 3  | N  | 2.200669 | 1.389124 | 0.000000 |          |          |
| 4  | C  | 2.207004 | 2.222578 | 1.342539 | 0.000000 |          |
| 5  | N  | 1.386073 | 2.220706 | 2.177913 | 1.338660 | 0.000000 |
| 6  | C  | 2.543930 | 3.645792 | 3.605783 | 2.506757 | 1.474053 |
| 7  | H  | 1.075444 | 2.214363 | 3.259417 | 3.223394 | 2.154318 |
| 8  | H  | 2.229171 | 1.094307 | 2.187429 | 3.260446 | 3.293009 |
| 9  | H  | 3.322213 | 4.266827 | 3.967660 | 2.723042 | 2.088381 |
| 10 | H  | 2.636265 | 3.929545 | 4.220404 | 3.318096 | 2.067163 |
| 11 | Br | 4.260247 | 3.344751 | 4.210988 | 5.330883 | 5.375834 |
| 12 | H  | 3.249281 | 3.262410 | 2.154436 | 1.076331 | 2.153115 |
| 13 | C  | 3.594661 | 2.524280 | 1.430299 | 2.448480 | 3.553548 |
| 14 | C  | 4.293572 | 3.006991 | 2.423957 | 3.642799 | 4.582429 |
| 15 | H  | 4.277135 | 3.403495 | 2.101730 | 2.620899 | 3.908810 |
| 16 | H  | 5.359715 | 4.082505 | 3.391979 | 4.509581 | 5.559903 |
| 17 | H  | 4.112969 | 2.781554 | 2.724049 | 4.033222 | 4.709621 |
| 18 | C  | 4.265926 | 4.448244 | 5.308151 | 5.624448 | 5.071175 |
| 19 | C  | 5.376445 | 5.773874 | 6.633051 | 6.783592 | 6.082269 |
| 20 | O  | 4.132464 | 4.732608 | 5.682405 | 5.743142 | 4.882252 |
| 21 | H  | 4.023494 | 4.122005 | 4.731753 | 4.987563 | 4.606775 |
| 22 | H  | 4.287000 | 4.239362 | 5.239953 | 5.786897 | 5.306649 |
| 23 | H  | 6.074687 | 6.435070 | 7.414287 | 7.655359 | 6.915044 |
| 24 | C  | 6.195131 | 6.672512 | 7.316532 | 7.275858 | 6.621272 |
| 25 | H  | 6.732272 | 7.370802 | 8.054944 | 7.899452 | 7.113629 |
| 26 | H  | 7.033809 | 7.363156 | 7.960897 | 8.015220 | 7.479928 |
| 27 | H  | 5.757694 | 6.253289 | 6.723607 | 6.565614 | 5.987145 |
| 28 | C  | 3.441993 | 4.446295 | 4.337829 | 3.264417 | 2.504653 |
| 29 | H  | 4.325535 | 5.436776 | 5.377109 | 4.252489 | 3.419054 |

|    |    |          |          |          |          |          |
|----|----|----------|----------|----------|----------|----------|
| 30 | H  | 3.953783 | 4.707792 | 4.290692 | 3.159086 | 2.851253 |
| 31 | C  | 3.337378 | 4.271804 | 4.474467 | 3.774329 | 2.962029 |
| 32 | O  | 3.979382 | 4.615151 | 4.700374 | 4.166838 | 3.676412 |
| 33 | O  | 3.189111 | 4.304280 | 4.878183 | 4.340127 | 3.241725 |
| 34 | H  | 3.483607 | 4.419911 | 5.151852 | 4.850521 | 3.844379 |
|    |    | 6        | 7        | 8        | 9        | 10       |
| 6  | C  | 0.000000 |          |          |          |          |
| 7  | H  | 2.822851 | 0.000000 |          |          |          |
| 8  | H  | 4.680712 | 2.765428 | 0.000000 |          |          |
| 9  | H  | 1.091290 | 3.712040 | 5.343817 | 0.000000 |          |
| 10 | H  | 1.088421 | 2.503407 | 4.862886 | 1.765046 | 0.000000 |
| 11 | Br | 6.654206 | 4.474809 | 2.370700 | 7.460442 | 6.794657 |
| 12 | H  | 2.853240 | 4.222487 | 4.257235 | 2.730455 | 3.825048 |
| 13 | C  | 4.916120 | 4.625482 | 2.858243 | 5.142162 | 5.610742 |
| 14 | C  | 6.005739 | 5.209435 | 2.839352 | 6.350668 | 6.611043 |
| 15 | H  | 5.108227 | 5.345678 | 3.884727 | 5.122280 | 5.915584 |
| 16 | H  | 6.950927 | 6.289009 | 3.881297 | 7.214257 | 7.609993 |
| 17 | H  | 6.157311 | 4.877071 | 2.251708 | 6.659385 | 6.630974 |
| 18 | C  | 5.627312 | 3.996474 | 4.312358 | 6.690088 | 5.629213 |
| 19 | C  | 6.351315 | 4.928810 | 5.704449 | 7.433572 | 6.231699 |
| 20 | O  | 5.116756 | 3.562877 | 4.793762 | 6.207982 | 4.887557 |
| 21 | H  | 5.198506 | 4.007134 | 4.133255 | 6.213017 | 5.403549 |
| 22 | H  | 6.068109 | 4.021392 | 3.848272 | 7.106728 | 6.029258 |
| 23 | H  | 7.213223 | 5.520539 | 6.231870 | 8.303680 | 6.986894 |
| 24 | C  | 6.670167 | 5.844451 | 6.761627 | 7.704270 | 6.659554 |
| 25 | H  | 6.965930 | 6.259814 | 7.519208 | 7.984402 | 6.836797 |
| 26 | H  | 7.618995 | 6.752144 | 7.358419 | 8.640653 | 7.674806 |
| 27 | H  | 5.980824 | 5.548482 | 6.482145 | 6.967933 | 6.108205 |
| 28 | C  | 1.536721 | 3.649614 | 5.410406 | 2.177727 | 2.172056 |
| 29 | H  | 2.141064 | 4.359989 | 6.396371 | 2.520091 | 2.438790 |
| 30 | H  | 2.185614 | 4.390621 | 5.689122 | 2.491831 | 3.080292 |
| 31 | C  | 2.550348 | 3.341890 | 5.028143 | 3.492025 | 2.856115 |
| 32 | O  | 3.546184 | 4.120266 | 5.251678 | 4.412951 | 4.006037 |
| 33 | O  | 2.844820 | 2.766222 | 4.933707 | 3.888187 | 2.635919 |
| 34 | H  | 3.730595 | 2.974701 | 4.846100 | 4.804380 | 3.520666 |
|    |    | 11       | 12       | 13       | 14       | 15       |
| 11 | Br | 0.000000 |          |          |          |          |
| 12 | H  | 6.245812 | 0.000000 |          |          |          |
| 13 | C  | 4.397100 | 2.785408 | 0.000000 |          |          |
| 14 | C  | 3.691035 | 4.078259 | 1.326197 | 0.000000 |          |
| 15 | H  | 5.472163 | 2.526957 | 1.083211 | 2.132029 | 0.000000 |
| 16 | H  | 4.433932 | 4.766436 | 2.073669 | 1.083313 | 2.450823 |
| 17 | H  | 2.623458 | 4.676557 | 2.132709 | 1.092559 | 3.114540 |
| 18 | C  | 3.830136 | 6.451771 | 6.145971 | 6.123291 | 7.030870 |

|    |   |           |          |          |          |          |
|----|---|-----------|----------|----------|----------|----------|
| 19 | C | 5.189930  | 7.559201 | 7.541172 | 7.574527 | 8.382183 |
| 20 | O | 4.820383  | 6.581776 | 6.764455 | 6.960086 | 7.593129 |
| 21 | H | 3.885647  | 5.712591 | 5.490972 | 5.542050 | 6.298825 |
| 22 | H | 2.964597  | 6.697068 | 5.980599 | 5.776227 | 6.956204 |
| 23 | H | 5.458318  | 8.488216 | 8.306844 | 8.238912 | 9.204865 |
| 24 | C | 6.379687  | 7.892469 | 8.196392 | 8.333064 | 8.919214 |
| 25 | H | 7.268453  | 8.504105 | 9.033766 | 9.250957 | 9.733427 |
| 26 | H | 6.675481  | 8.603543 | 8.705230 | 8.718541 | 9.435607 |
| 27 | H | 6.367723  | 7.082749 | 7.589603 | 7.838522 | 8.222710 |
| 28 | C | 7.033332  | 3.416686 | 5.529628 | 6.549152 | 5.705022 |
| 29 | H | 8.013015  | 4.319354 | 6.583811 | 7.629269 | 6.710098 |
| 30 | H | 7.278970  | 3.009126 | 5.278439 | 6.341185 | 5.297805 |
| 31 | C | 6.215013  | 4.198183 | 5.659118 | 6.433311 | 6.068146 |
| 32 | O | 6.086827  | 4.506609 | 5.674842 | 6.315096 | 6.089488 |
| 33 | O | 6.045740  | 4.975684 | 6.184963 | 6.863663 | 6.734298 |
| 34 | H | 5.568722  | 5.573044 | 6.385650 | 6.884037 | 7.051107 |
|    |   | 16        | 17       | 18       | 19       | 20       |
| 16 | H | 0.000000  |          |          |          |          |
| 17 | H | 1.866427  | 0.000000 |          |          |          |
| 18 | C | 7.033876  | 5.423331 | 0.000000 |          |          |
| 19 | C | 8.479534  | 6.888699 | 1.466291 | 0.000000 |          |
| 20 | O | 7.953871  | 6.333111 | 1.465855 | 1.453000 | 0.000000 |
| 21 | H | 6.416550  | 4.976369 | 1.085201 | 2.196733 | 2.141709 |
| 22 | H | 6.669769  | 4.938718 | 1.084199 | 2.245173 | 2.156087 |
| 23 | H | 9.135578  | 7.457887 | 2.187824 | 1.087716 | 2.108154 |
| 24 | C | 9.190118  | 7.773530 | 2.603857 | 1.504356 | 2.521532 |
| 25 | H | 10.144504 | 8.703983 | 3.444432 | 2.151890 | 2.931260 |
| 26 | H | 9.497835  | 8.128393 | 3.142266 | 2.136014 | 3.423956 |
| 27 | H | 8.679806  | 7.403041 | 2.733791 | 2.151511 | 2.717606 |
| 28 | C | 7.455776  | 6.675489 | 5.281137 | 5.797530 | 4.777089 |
| 29 | H | 8.533934  | 7.754055 | 5.980387 | 6.281060 | 5.273536 |
| 30 | H | 7.146605  | 6.605816 | 5.720436 | 6.316642 | 5.448099 |
| 31 | C | 7.383636  | 6.338057 | 3.883317 | 4.297500 | 3.384424 |
| 32 | O | 7.186505  | 6.206925 | 3.569458 | 3.975535 | 3.441935 |
| 33 | O | 7.888294  | 6.603968 | 3.532056 | 3.787873 | 2.608693 |
| 34 | H | 7.906246  | 6.482340 | 2.647914 | 2.793146 | 1.619423 |
|    |   | 21        | 22       | 23       | 24       | 25       |
| 21 | H | 0.000000  |          |          |          |          |
| 22 | H | 1.833625  | 0.000000 |          |          |          |
| 23 | H | 3.112141  | 2.547478 | 0.000000 |          |          |
| 24 | C | 2.802223  | 3.563073 | 2.207244 | 0.000000 |          |
| 25 | H | 3.751202  | 4.371578 | 2.562028 | 1.094011 | 0.000000 |
| 26 | H | 3.289868  | 3.963355 | 2.552881 | 1.094301 | 1.768148 |
| 27 | H | 2.518553  | 3.797467 | 3.099012 | 1.091569 | 1.779535 |



|    |   |          |          |          |          |          |
|----|---|----------|----------|----------|----------|----------|
| 28 | C | 4.725532 | 5.960161 | 6.761372 | 5.786948 | 6.041719 |
| 29 | H | 5.514641 | 6.725259 | 7.206097 | 6.135848 | 6.205302 |
| 30 | H | 4.990752 | 6.408713 | 7.341256 | 6.182225 | 6.535324 |
| 31 | C | 3.373174 | 4.677423 | 5.286119 | 4.276938 | 4.591175 |
| 32 | O | 2.831385 | 4.461983 | 5.046464 | 3.716149 | 4.208413 |
| 33 | O | 3.404946 | 4.249624 | 4.621294 | 4.050506 | 4.206874 |
| 34 | H | 2.708590 | 3.420588 | 3.613600 | 3.202275 | 3.425273 |
|    |   | 26       | 27       | 28       | 29       | 30       |
| 26 | H | 0.000000 |          |          |          |          |
| 27 | H | 1.775076 | 0.000000 |          |          |          |
| 28 | C | 6.701390 | 4.963090 | 0.000000 |          |          |
| 29 | H | 7.089134 | 5.339955 | 1.094253 | 0.000000 |          |
| 30 | H | 6.988819 | 5.244690 | 1.090277 | 1.767622 | 0.000000 |
| 31 | C | 5.201449 | 3.490283 | 1.524437 | 2.145622 | 2.126708 |
| 32 | O | 4.481772 | 2.763183 | 2.406024 | 3.048001 | 2.515000 |
| 33 | O | 5.092781 | 3.564740 | 2.366551 | 2.714414 | 3.266828 |
| 34 | H | 4.246551 | 2.890618 | 3.259725 | 3.667335 | 4.038218 |
|    |   | 31       | 32       | 33       | 34       |          |
| 31 | C | 0.000000 |          |          |          |          |
| 32 | O | 1.209233 | 0.000000 |          |          |          |
| 33 | O | 1.330073 | 2.255704 | 0.000000 |          |          |
| 34 | H | 1.940959 | 2.402552 | 1.009009 | 0.000000 |          |

Stoichiometry C<sub>11</sub>H<sub>17</sub>BrN<sub>2</sub>O<sub>3</sub>

Framework group C1[X(C<sub>11</sub>H<sub>17</sub>BrN<sub>2</sub>O<sub>3</sub>)]

Deg. of freedom 96

Full point group C1 NOp 1

Largest Abelian subgroup C1 NOp 1

Largest concise Abelian subgroup C1 NOp 1

Standard orientation:

| Center Number | Atomic Number | Atomic Type | Coordinates (Angstroms) |           |           |
|---------------|---------------|-------------|-------------------------|-----------|-----------|
|               |               |             | X                       | Y         | Z         |
| 1             | 6             | 0           | -0.258251               | 1.345505  | 1.259985  |
| 2             | 6             | 0           | -1.476876               | 1.052170  | 0.732283  |
| 3             | 7             | 0           | -1.738457               | 2.032525  | -0.216476 |
| 4             | 6             | 0           | -0.706685               | 2.890835  | -0.250554 |
| 5             | 7             | 0           | 0.205998                | 2.498599  | 0.646760  |
| 6             | 6             | 0           | 1.532898                | 3.105959  | 0.854807  |
| 7             | 1             | 0           | 0.321504                | 0.830476  | 2.005109  |
| 8             | 1             | 0           | -2.120091               | 0.179523  | 0.881514  |
| 9             | 1             | 0           | 1.411056                | 4.190390  | 0.863578  |
| 10            | 1             | 0           | 1.865657                | 2.794247  | 1.843123  |
| 11            | 35            | 0           | -2.627369               | -2.054524 | 0.271661  |

|    |   |   |           |           |           |
|----|---|---|-----------|-----------|-----------|
| 12 | 1 | 0 | -0.622786 | 3.743172  | -0.902453 |
| 13 | 6 | 0 | -2.884670 | 2.125972  | -1.066898 |
| 14 | 6 | 0 | -3.721279 | 1.116760  | -1.267836 |
| 15 | 1 | 0 | -2.984914 | 3.100449  | -1.529165 |
| 16 | 1 | 0 | -4.568353 | 1.272181  | -1.925010 |
| 17 | 1 | 0 | -3.586569 | 0.126490  | -0.826357 |
| 18 | 6 | 0 | 1.159918  | -2.414263 | -0.172169 |
| 19 | 6 | 0 | 2.442916  | -3.113990 | -0.052552 |
| 20 | 8 | 0 | 2.163195  | -1.971538 | 0.800540  |
| 21 | 1 | 0 | 1.029547  | -1.724373 | -0.999646 |
| 22 | 1 | 0 | 0.243468  | -2.794181 | 0.265174  |
| 23 | 1 | 0 | 2.450859  | -4.040636 | 0.517001  |
| 24 | 6 | 0 | 3.545293  | -2.956981 | -1.064086 |
| 25 | 1 | 0 | 4.526106  | -3.017510 | -0.583250 |
| 26 | 1 | 0 | 3.483688  | -3.763508 | -1.801117 |
| 27 | 1 | 0 | 3.463203  | -2.001662 | -1.585765 |
| 28 | 6 | 0 | 2.550738  | 2.680263  | -0.214910 |
| 29 | 1 | 0 | 3.529013  | 3.071010  | 0.081207  |
| 30 | 1 | 0 | 2.302084  | 3.097624  | -1.190966 |
| 31 | 6 | 0 | 2.648805  | 1.166858  | -0.369495 |
| 32 | 8 | 0 | 2.571058  | 0.609457  | -1.439778 |
| 33 | 8 | 0 | 2.798416  | 0.558632  | 0.803864  |
| 34 | 1 | 0 | 2.683458  | -0.440160 | 0.718444  |

-----

Rotational constants (GHZ):      0.3264294      0.2602966      0.1610590

Standard basis: 6-311++G(d,p) (5D, 7F)

There are    538 symmetry adapted cartesian basis functions of A    symmetry.

There are    519 symmetry adapted basis functions of A    symmetry.

519 basis functions,    823 primitive gaussians,    538 cartesian basis functions

78 alpha electrons      78 beta electrons

         nuclear repulsion energy      1575.5731972912 Hartrees.

NAtoms=    34 NActive=    34 NUniq=    34 SFac= 1.00D+00 NATFMM=    60 NAOKFM=F

Big=F

Integral buffers will be    131072 words long.

Raffenetti 2 integral format.

Two-electron integral symmetry is turned on.

One-electron integrals computed using PRISM.

NBasis=    519 RedAO= T EigKep= 4.04D-06 NBF=    519

NBsUse=    519 1.00D-06 EigRej= -1.00D+00 NBFU=    519

Initial guess from the checkpoint file: "./coohpo.chk"

B after Tr=    0.000000    0.000000    0.000000

         Rot=    0.999206    -0.001050    -0.000627    0.039830 Ang=    -4.57 deg.

ExpMin= 3.50D-02 ExpMax= 4.40D+05 ExpMxC= 1.51D+04 IAcc=3 IRadAn=      5 AccDes=

0.00D+00

Harris functional with IExCor= 402 and IRadAn= 5 diagonalized for initial guess.  
 HarFok: IExCor= 402 AccDes= 0.00D+00 IRadAn= 5 IDoV= 1 UseB2=F ITyADJ=14  
 ICtDFT= 3500011 ScaDFX= 1.000000 1.000000 1.000000 1.000000  
 FoFCou: FMM=F IPFlag= 0 FMFlag= 100000 FMFlg1= 0  
 NFxFlg= 0 DoJE=T BraDBF=F KetDBF=T FulRan=T  
 wScrn= 0.000000 ICntrl= 500 IOpCl= 0 I1Cent= 200000004 NGrid= 0  
 NMat0= 1 NMatS0= 1 NMatT0= 0 NMatD0= 1 NMtDS0= 0  
 NMtDT0= 0

Petite list used in FoFCou.

Requested convergence on RMS density matrix=1.00D-08 within 128 cycles.

Requested convergence on MAX density matrix=1.00D-06.

Requested convergence on energy=1.00D-06.

No special actions if energy rises.

SCF Done: E(RB3LYP) = -3338.90360779 A.U. after 12 cycles

NFock= 12 Conv=0.60D-08 -V/T= 2.0019

Calling FoFJK, ICntrl= 2127 FMM=F ISym2X=0 I1Cent= 0 IOpClX= 0 NMat=1 NMatS=1  
 NMatT=0.

\*\*\*\*\* Axes restored to original set \*\*\*\*\*

| Center<br>Number | Atomic<br>Number | Forces (Hartrees/Bohr) |              |              |
|------------------|------------------|------------------------|--------------|--------------|
|                  |                  | X                      | Y            | Z            |
| 1                | 6                | -0.000982645           | 0.000760965  | 0.000938586  |
| 2                | 6                | -0.000620615           | 0.000043293  | -0.000286334 |
| 3                | 7                | 0.001299366            | 0.000716911  | -0.000349327 |
| 4                | 6                | -0.000221617           | 0.000399986  | 0.000641315  |
| 5                | 7                | 0.000616092            | -0.000713732 | -0.000821636 |
| 6                | 6                | 0.000417877            | 0.000279535  | -0.000374798 |
| 7                | 1                | 0.000239771            | -0.000268055 | 0.000037779  |
| 8                | 1                | 0.000779779            | 0.000210258  | -0.000795996 |
| 9                | 1                | 0.000081615            | 0.000034525  | -0.000236675 |
| 10               | 1                | -0.000074472           | -0.000228808 | 0.000124792  |
| 11               | 35               | -0.000105857           | -0.000142346 | 0.000278992  |
| 12               | 1                | -0.000201278           | 0.000034019  | 0.000061704  |
| 13               | 6                | -0.000650206           | -0.000530249 | 0.000081969  |
| 14               | 6                | 0.000005411            | -0.000865550 | 0.000002317  |
| 15               | 1                | 0.000059358            | 0.000054533  | 0.000148421  |
| 16               | 1                | 0.000265414            | 0.000249669  | 0.000031887  |
| 17               | 1                | -0.000306403           | 0.000186999  | 0.000032683  |
| 18               | 6                | 0.000240887            | 0.000928577  | -0.000094201 |
| 19               | 6                | 0.000103154            | -0.000697485 | 0.000153137  |
| 20               | 8                | -0.000442814           | -0.000016878 | -0.000782648 |
| 21               | 1                | -0.000043436           | -0.000163472 | -0.000244548 |

|    |   |              |              |              |
|----|---|--------------|--------------|--------------|
| 22 | 1 | 0.000176959  | -0.000251321 | 0.000499046  |
| 23 | 1 | -0.000173441 | -0.000035745 | 0.000083465  |
| 24 | 6 | 0.000012709  | 0.000006404  | 0.000130934  |
| 25 | 1 | -0.000012915 | -0.000003758 | 0.000001113  |
| 26 | 1 | 0.000011070  | -0.000010454 | 0.000049668  |
| 27 | 1 | 0.000045347  | 0.000074562  | -0.000021232 |
| 28 | 6 | -0.000662993 | -0.000262837 | 0.001141485  |
| 29 | 1 | 0.000085320  | 0.000137336  | -0.000163205 |
| 30 | 1 | -0.000028136 | 0.000033300  | -0.000159754 |
| 31 | 6 | -0.000014101 | -0.000769260 | -0.000741493 |
| 32 | 8 | -0.000024460 | 0.000417211  | 0.000203818  |
| 33 | 8 | -0.000187238 | 0.000107110  | 0.001244421  |
| 34 | 1 | 0.000312499  | 0.000284756  | -0.000815687 |

-----  
Cartesian Forces: Max 0.001299366 RMS 0.000439515

GradGradGradGradGradGradGradGradGradGradGradGradGradGradGradGradGradGradGrad

Berny optimization.

Using GEDIIS/GDIIS optimizer.

FormGI is forming the generalized inverse of G from B-inverse, IUseBI=4.

Internal Forces: Max 0.001677766 RMS 0.000304186

Search for a local minimum.

Step number 22 out of a maximum of 175

All quantities printed in internal units (Hartrees-Bohrs-Radians)

Mixed Optimization -- En-DIIS/RFO-DIIS

Swapping is turned off.

Update second derivatives using D2CorX and points 20 21 22

DE= -1.24D-04 DEPred=-1.20D-04 R= 1.03D+00

TightC=F SS= 1.41D+00 RLast= 1.19D-01 DXNew= 2.6298D+00 3.5583D-01

Trust test= 1.03D+00 RLast= 1.19D-01 DXMaxT set to 1.56D+00

ITU= 1 1 1 1 1 1 1 1 1 0 0 -1 1 1 1 0 1 0 -1 0

ITU= 1 0

|                 |         |         |         |         |         |
|-----------------|---------|---------|---------|---------|---------|
| Eigenvalues --- | 0.00147 | 0.00337 | 0.00427 | 0.00617 | 0.00692 |
| Eigenvalues --- | 0.00702 | 0.00872 | 0.01237 | 0.01542 | 0.01755 |
| Eigenvalues --- | 0.01982 | 0.02082 | 0.02265 | 0.02328 | 0.02399 |
| Eigenvalues --- | 0.02418 | 0.02882 | 0.03098 | 0.03206 | 0.03337 |
| Eigenvalues --- | 0.03538 | 0.03622 | 0.04193 | 0.04578 | 0.04670 |
| Eigenvalues --- | 0.04955 | 0.05164 | 0.05359 | 0.05616 | 0.05760 |
| Eigenvalues --- | 0.05926 | 0.06338 | 0.06680 | 0.09034 | 0.09553 |
| Eigenvalues --- | 0.10736 | 0.11933 | 0.12532 | 0.12776 | 0.13377 |
| Eigenvalues --- | 0.14264 | 0.15326 | 0.15581 | 0.15975 | 0.16001 |
| Eigenvalues --- | 0.16005 | 0.16010 | 0.16024 | 0.16046 | 0.16235 |
| Eigenvalues --- | 0.16939 | 0.17474 | 0.19790 | 0.21287 | 0.22579 |
| Eigenvalues --- | 0.23055 | 0.23626 | 0.23879 | 0.25154 | 0.25401 |

|                 |         |         |         |         |         |
|-----------------|---------|---------|---------|---------|---------|
| Eigenvalues --- | 0.28862 | 0.29205 | 0.30172 | 0.31704 | 0.31982 |
| Eigenvalues --- | 0.32744 | 0.34498 | 0.34542 | 0.34618 | 0.34766 |
| Eigenvalues --- | 0.34877 | 0.34942 | 0.34980 | 0.35113 | 0.35229 |
| Eigenvalues --- | 0.35347 | 0.35710 | 0.35831 | 0.36553 | 0.36865 |
| Eigenvalues --- | 0.36950 | 0.37216 | 0.37724 | 0.37883 | 0.40974 |
| Eigenvalues --- | 0.43073 | 0.45314 | 0.48455 | 0.49165 | 0.51661 |
| Eigenvalues --- | 0.52804 | 0.55688 | 0.56249 | 0.60713 | 0.90575 |
| Eigenvalues --- | 1.37313 |         |         |         |         |

En-DIIS/RFO-DIIS IScMMF= 0 using points: 22 21 20 19 18

RFO step: Lambda=-3.51182456D-05.

DidBck=F Rises=F RFO-DIIS coefs: 1.01822 0.05598 -0.32515 0.08988

0.16106

|             |            |            |           |            |
|-------------|------------|------------|-----------|------------|
| Iteration 1 | RMS(Cart)= | 0.03884274 | RMS(Int)= | 0.00051654 |
| Iteration 2 | RMS(Cart)= | 0.00100428 | RMS(Int)= | 0.00006466 |
| Iteration 3 | RMS(Cart)= | 0.00000051 | RMS(Int)= | 0.00006466 |

| Variable | Old X   | -DE/DX   | Delta X<br>(Linear) | Delta X<br>(Quad) | Delta X<br>(Total) | New X   |
|----------|---------|----------|---------------------|-------------------|--------------------|---------|
| R1       | 2.57000 | -0.00038 | -0.00004            | -0.00045          | -0.00049           | 2.56951 |
| R2       | 2.61930 | -0.00003 | -0.00030            | 0.00008           | -0.00023           | 2.61906 |
| R3       | 2.03230 | 0.00009  | -0.00017            | 0.00037           | 0.00020            | 2.03249 |
| R4       | 2.62506 | -0.00049 | -0.00096            | -0.00016          | -0.00111           | 2.62396 |
| R5       | 2.06794 | -0.00032 | -0.00137            | 0.00005           | -0.00132           | 2.06662 |
| R6       | 2.53703 | -0.00006 | 0.00052             | 0.00056           | 0.00109            | 2.53812 |
| R7       | 2.70287 | 0.00097  | -0.00094            | 0.00024           | -0.00071           | 2.70217 |
| R8       | 2.52970 | -0.00015 | 0.00002             | -0.00027          | -0.00026           | 2.52944 |
| R9       | 2.03397 | 0.00005  | -0.00014            | 0.00012           | -0.00002           | 2.03395 |
| R10      | 2.78556 | -0.00020 | 0.00080             | 0.00006           | 0.00086            | 2.78642 |
| R11      | 2.06224 | 0.00004  | 0.00026             | -0.00013          | 0.00013            | 2.06237 |
| R12      | 2.05682 | -0.00003 | -0.00076            | 0.00033           | -0.00043           | 2.05639 |
| R13      | 2.90398 | -0.00077 | -0.00042            | -0.00141          | -0.00183           | 2.90215 |
| R14      | 4.47997 | 0.00013  | 0.03001             | -0.00059          | 0.02942            | 4.50940 |
| R15      | 2.50615 | 0.00041  | 0.00042             | 0.00069           | 0.00111            | 2.50726 |
| R16      | 2.04697 | -0.00012 | -0.00008            | 0.00004           | -0.00005           | 2.04692 |
| R17      | 2.04717 | -0.00035 | -0.00006            | -0.00062          | -0.00069           | 2.04648 |
| R18      | 2.06464 | -0.00025 | 0.00106             | -0.00139          | -0.00033           | 2.06431 |
| R19      | 2.77089 | -0.00037 | 0.00018             | -0.00002          | 0.00030            | 2.77119 |
| R20      | 2.77007 | -0.00029 | -0.00128            | -0.00107          | -0.00239           | 2.76768 |
| R21      | 2.05073 | 0.00024  | 0.00007             | 0.00029           | 0.00036            | 2.05109 |
| R22      | 2.04884 | 0.00044  | 0.00042             | 0.00054           | 0.00096            | 2.04980 |
| R23      | 2.74577 | 0.00037  | -0.00072            | 0.00079           | -0.00002           | 2.74575 |
| R24      | 2.05549 | -0.00002 | 0.00009             | 0.00001           | 0.00010            | 2.05559 |
| R25      | 2.84282 | -0.00012 | -0.00007            | -0.00003          | -0.00009           | 2.84273 |
| R26      | 3.06027 | 0.00001  | 0.00114             | -0.00383          | -0.00269           | 3.05758 |
| R27      | 2.06738 | -0.00001 | 0.00002             | -0.00002          | 0.00000            | 2.06738 |

|     |         |          |          |          |          |         |
|-----|---------|----------|----------|----------|----------|---------|
| R28 | 2.06793 | 0.00000  | 0.00004  | -0.00005 | -0.00001 | 2.06792 |
| R29 | 2.06277 | 0.00000  | 0.00002  | -0.00019 | -0.00017 | 2.06260 |
| R30 | 2.06784 | 0.00019  | 0.00024  | 0.00010  | 0.00034  | 2.06818 |
| R31 | 2.06032 | 0.00013  | -0.00017 | 0.00010  | -0.00007 | 2.06026 |
| R32 | 2.88077 | 0.00001  | 0.00095  | 0.00016  | 0.00111  | 2.88188 |
| R33 | 2.28512 | -0.00045 | -0.00017 | 0.00053  | 0.00036  | 2.28548 |
| R34 | 2.51347 | 0.00029  | -0.00067 | -0.00064 | -0.00131 | 2.51216 |
| R35 | 1.90675 | -0.00030 | -0.00122 | 0.00035  | -0.00088 | 1.90587 |
| A1  | 1.88377 | -0.00018 | -0.00017 | 0.00008  | -0.00009 | 1.88368 |
| A2  | 2.27654 | -0.00014 | -0.00080 | -0.00103 | -0.00178 | 2.27476 |
| A3  | 2.12278 | 0.00031  | 0.00073  | 0.00085  | 0.00163  | 2.12441 |
| A4  | 1.85618 | 0.00026  | 0.00058  | 0.00030  | 0.00086  | 1.85705 |
| A5  | 2.27283 | -0.00034 | -0.00010 | -0.00110 | -0.00121 | 2.27162 |
| A6  | 2.14747 | 0.00009  | 0.00000  | 0.00149  | 0.00149  | 2.14896 |
| A7  | 1.90055 | -0.00002 | -0.00042 | -0.00035 | -0.00076 | 1.89979 |
| A8  | 2.21818 | -0.00044 | -0.00036 | 0.00069  | 0.00033  | 2.21851 |
| A9  | 2.16400 | 0.00047  | 0.00076  | -0.00021 | 0.00054  | 2.16453 |
| A10 | 1.89614 | -0.00011 | 0.00011  | 0.00012  | 0.00022  | 1.89636 |
| A11 | 2.19143 | -0.00002 | -0.00048 | -0.00060 | -0.00108 | 2.19035 |
| A12 | 2.19551 | 0.00013  | 0.00038  | 0.00050  | 0.00089  | 2.19640 |
| A13 | 1.88805 | 0.00006  | -0.00011 | -0.00006 | -0.00016 | 1.88789 |
| A14 | 2.19178 | -0.00045 | 0.00045  | -0.00111 | -0.00060 | 2.19118 |
| A15 | 2.19889 | 0.00040  | -0.00039 | 0.00095  | 0.00063  | 2.19952 |
| A16 | 1.88607 | 0.00041  | -0.00160 | 0.00297  | 0.00137  | 1.88744 |
| A17 | 1.86018 | -0.00020 | 0.00006  | -0.00193 | -0.00186 | 1.85832 |
| A18 | 1.96474 | -0.00037 | 0.00085  | -0.00284 | -0.00199 | 1.96276 |
| A19 | 1.88749 | 0.00004  | 0.00083  | 0.00061  | 0.00143  | 1.88892 |
| A20 | 1.93352 | -0.00018 | 0.00012  | -0.00021 | -0.00009 | 1.93343 |
| A21 | 1.92863 | 0.00033  | -0.00029 | 0.00149  | 0.00121  | 1.92984 |
| A22 | 2.57209 | 0.00136  | -0.02100 | 0.01440  | -0.00659 | 2.56550 |
| A23 | 2.14827 | 0.00024  | -0.00113 | 0.00335  | 0.00222  | 2.15048 |
| A24 | 1.96782 | -0.00020 | 0.00039  | -0.00107 | -0.00068 | 1.96714 |
| A25 | 2.16706 | -0.00004 | 0.00075  | -0.00231 | -0.00156 | 2.16550 |
| A26 | 2.06690 | -0.00004 | -0.00004 | -0.00087 | -0.00090 | 2.06600 |
| A27 | 2.15404 | -0.00002 | -0.00280 | 0.00157  | -0.00122 | 2.15282 |
| A28 | 2.06187 | 0.00007  | 0.00282  | -0.00086 | 0.00196  | 2.06383 |
| A29 | 2.06088 | 0.00050  | 0.00019  | 0.00191  | 0.00205  | 2.06293 |
| A30 | 2.14062 | -0.00081 | -0.00097 | -0.00333 | -0.00424 | 2.13639 |
| A31 | 1.97818 | 0.00003  | 0.00047  | 0.00123  | 0.00180  | 1.97997 |
| A32 | 2.00060 | -0.00016 | -0.00061 | -0.00113 | -0.00180 | 1.99880 |
| A33 | 2.01396 | 0.00020  | 0.00068  | 0.00089  | 0.00157  | 2.01553 |
| A34 | 2.04390 | -0.00032 | -0.00045 | -0.00090 | -0.00113 | 2.04277 |
| A35 | 2.13711 | 0.00040  | 0.00039  | 0.00201  | 0.00219  | 2.13930 |
| A36 | 1.94316 | 0.00002  | 0.00043  | -0.00081 | -0.00041 | 1.94275 |

|     |          |          |          |          |          |          |
|-----|----------|----------|----------|----------|----------|----------|
| A37 | 2.04181  | 0.00001  | 0.00005  | 0.00053  | 0.00065  | 2.04247  |
| A38 | 2.02155  | -0.00004 | -0.00003 | -0.00055 | -0.00059 | 2.02097  |
| A39 | 2.06218  | 0.00059  | 0.00199  | 0.00433  | 0.00694  | 2.06912  |
| A40 | 2.28090  | 0.00110  | 0.02044  | 0.00540  | 0.02574  | 2.30663  |
| A41 | 1.93442  | -0.00004 | 0.00004  | -0.00060 | -0.00056 | 1.93386  |
| A42 | 1.91208  | -0.00007 | -0.00013 | -0.00072 | -0.00084 | 1.91124  |
| A43 | 1.93648  | 0.00010  | 0.00000  | 0.00095  | 0.00095  | 1.93742  |
| A44 | 1.88149  | 0.00002  | -0.00001 | -0.00026 | -0.00027 | 1.88122  |
| A45 | 1.90276  | -0.00004 | -0.00021 | -0.00015 | -0.00036 | 1.90240  |
| A46 | 1.89538  | 0.00003  | 0.00031  | 0.00077  | 0.00108  | 1.89646  |
| A47 | 1.88058  | -0.00010 | 0.00223  | 0.00203  | 0.00424  | 1.88482  |
| A48 | 1.94559  | -0.00004 | -0.00018 | 0.00055  | 0.00040  | 1.94598  |
| A49 | 1.96948  | 0.00039  | 0.00493  | -0.00138 | 0.00357  | 1.97306  |
| A50 | 1.88542  | -0.00002 | -0.00229 | -0.00110 | -0.00337 | 1.88205  |
| A51 | 1.90121  | -0.00003 | -0.00366 | 0.00036  | -0.00327 | 1.89794  |
| A52 | 1.87960  | -0.00022 | -0.00158 | -0.00048 | -0.00201 | 1.87760  |
| A53 | 2.14508  | 0.00001  | -0.00119 | 0.00046  | -0.00069 | 2.14439  |
| A54 | 1.95170  | 0.00001  | 0.00011  | 0.00000  | 0.00015  | 1.95184  |
| A55 | 2.18615  | -0.00002 | 0.00110  | -0.00050 | 0.00063  | 2.18679  |
| A56 | 1.94460  | -0.00051 | 0.00141  | -0.00026 | 0.00115  | 1.94576  |
| A57 | 2.88940  | -0.00168 | -0.00318 | -0.01350 | -0.01668 | 2.87272  |
| D1  | 0.01045  | -0.00028 | -0.00178 | -0.00426 | -0.00604 | 0.00441  |
| D2  | 3.02828  | -0.00024 | 0.00288  | 0.00221  | 0.00506  | 3.03333  |
| D3  | -3.11579 | 0.00016  | 0.00355  | 0.00329  | 0.00687  | -3.10892 |
| D4  | -0.09796 | 0.00020  | 0.00821  | 0.00977  | 0.01797  | -0.07999 |
| D5  | -0.01313 | 0.00044  | 0.00176  | 0.00586  | 0.00762  | -0.00552 |
| D6  | -3.05806 | 0.00030  | 0.00069  | 0.00822  | 0.00892  | -3.04914 |
| D7  | 3.11473  | 0.00004  | -0.00307 | -0.00091 | -0.00398 | 3.11075  |
| D8  | 0.06981  | -0.00010 | -0.00414 | 0.00145  | -0.00268 | 0.06712  |
| D9  | -0.00419 | 0.00002  | 0.00120  | 0.00120  | 0.00240  | -0.00178 |
| D10 | 3.10574  | 0.00012  | 0.00065  | 0.00554  | 0.00620  | 3.11194  |
| D11 | -3.03310 | 0.00002  | -0.00298 | -0.00447 | -0.00749 | -3.04059 |
| D12 | 0.07683  | 0.00013  | -0.00354 | -0.00014 | -0.00369 | 0.07314  |
| D13 | -1.45140 | -0.00002 | -0.00821 | -0.01803 | -0.02625 | -1.47765 |
| D14 | 1.54841  | 0.00003  | -0.00288 | -0.01073 | -0.01361 | 1.53480  |
| D15 | -0.00398 | 0.00026  | -0.00012 | 0.00245  | 0.00233  | -0.00165 |
| D16 | 3.12261  | 0.00003  | 0.00116  | 0.00359  | 0.00476  | 3.12737  |
| D17 | -3.11511 | 0.00018  | 0.00043  | -0.00174 | -0.00132 | -3.11643 |
| D18 | 0.01148  | -0.00005 | 0.00170  | -0.00060 | 0.00111  | 0.01258  |
| D19 | -0.27049 | -0.00001 | -0.00791 | 0.02108  | 0.01317  | -0.25732 |
| D20 | 2.87997  | 0.00002  | -0.00869 | 0.02426  | 0.01556  | 2.89553  |
| D21 | 2.83497  | 0.00010  | -0.00855 | 0.02603  | 0.01748  | 2.85245  |
| D22 | -0.29775 | 0.00013  | -0.00934 | 0.02921  | 0.01988  | -0.27788 |
| D23 | 0.01049  | -0.00043 | -0.00101 | -0.00510 | -0.00610 | 0.00439  |

|     |          |          |          |          |          |          |
|-----|----------|----------|----------|----------|----------|----------|
| D24 | 3.05491  | -0.00035 | 0.00010  | -0.00762 | -0.00749 | 3.04742  |
| D25 | -3.11605 | -0.00020 | -0.00228 | -0.00623 | -0.00851 | -3.12457 |
| D26 | -0.07163 | -0.00012 | -0.00117 | -0.00875 | -0.00991 | -0.08154 |
| D27 | -2.47004 | 0.00002  | 0.01161  | -0.00077 | 0.01084  | -2.45920 |
| D28 | -0.44488 | 0.00016  | 0.01183  | 0.00041  | 0.01223  | -0.43265 |
| D29 | 1.67221  | 0.00020  | 0.01203  | -0.00073 | 0.01130  | 1.68351  |
| D30 | 0.78513  | -0.00012 | 0.01035  | 0.00208  | 0.01243  | 0.79756  |
| D31 | 2.81029  | 0.00002  | 0.01056  | 0.00326  | 0.01382  | 2.82411  |
| D32 | -1.35580 | 0.00006  | 0.01077  | 0.00212  | 0.01289  | -1.34292 |
| D33 | -3.02116 | 0.00014  | -0.00789 | -0.00137 | -0.00924 | -3.03040 |
| D34 | 1.19617  | 0.00025  | -0.00637 | -0.00160 | -0.00798 | 1.18819  |
| D35 | -0.92159 | 0.00028  | -0.00783 | -0.00039 | -0.00823 | -0.92982 |
| D36 | 1.14798  | 0.00000  | -0.00651 | -0.00306 | -0.00955 | 1.13842  |
| D37 | -0.91787 | 0.00011  | -0.00499 | -0.00330 | -0.00830 | -0.92617 |
| D38 | -3.03564 | 0.00014  | -0.00645 | -0.00209 | -0.00854 | -3.04418 |
| D39 | -0.94358 | -0.00014 | -0.00743 | -0.00466 | -0.01208 | -0.95565 |
| D40 | -3.00943 | -0.00003 | -0.00592 | -0.00489 | -0.01082 | -3.02025 |
| D41 | 1.15599  | 0.00000  | -0.00738 | -0.00369 | -0.01107 | 1.14493  |
| D42 | 3.13755  | 0.00009  | -0.00141 | 0.00571  | 0.00430  | -3.14133 |
| D43 | -0.03410 | 0.00024  | -0.00089 | -0.00078 | -0.00166 | -0.03576 |
| D44 | -0.01393 | 0.00006  | -0.00053 | 0.00217  | 0.00164  | -0.01229 |
| D45 | 3.09760  | 0.00020  | 0.00000  | -0.00431 | -0.00432 | 3.09328  |
| D46 | -2.75445 | 0.00005  | 0.00103  | 0.00000  | 0.00100  | -2.75345 |
| D47 | -0.05136 | 0.00014  | 0.00078  | 0.00129  | 0.00203  | -0.04934 |
| D48 | -0.01805 | -0.00019 | 0.00093  | -0.00124 | -0.00032 | -0.01837 |
| D49 | 2.68504  | -0.00011 | 0.00067  | 0.00005  | 0.00070  | 2.68574  |
| D50 | 0.23021  | 0.00041  | 0.02351  | 0.00314  | 0.02664  | 0.25685  |
| D51 | -2.13229 | 0.00024  | 0.02261  | 0.00164  | 0.02421  | -2.10808 |
| D52 | 2.56628  | 0.00015  | 0.00388  | -0.00311 | 0.00101  | 2.56729  |
| D53 | 0.18625  | 0.00018  | 0.00338  | -0.00190 | 0.00168  | 0.18794  |
| D54 | 2.55279  | 0.00001  | 0.00011  | -0.00014 | -0.00007 | 2.55273  |
| D55 | -1.65633 | -0.00003 | 0.00005  | -0.00128 | -0.00127 | -1.65760 |
| D56 | 0.43621  | 0.00002  | 0.00035  | -0.00019 | 0.00013  | 0.43633  |
| D57 | 1.32414  | 0.00002  | 0.00049  | -0.00030 | 0.00022  | 1.32436  |
| D58 | -2.88499 | -0.00002 | 0.00043  | -0.00143 | -0.00098 | -2.88597 |
| D59 | -0.79245 | 0.00003  | 0.00073  | -0.00034 | 0.00042  | -0.79203 |
| D60 | -1.02212 | 0.00002  | -0.00024 | 0.00104  | 0.00081  | -1.02131 |
| D61 | 1.05194  | -0.00002 | -0.00030 | -0.00010 | -0.00039 | 1.05155  |
| D62 | -3.13871 | 0.00003  | 0.00000  | 0.00100  | 0.00100  | -3.13771 |
| D63 | 1.46240  | -0.00014 | -0.02168 | 0.03708  | 0.01541  | 1.47781  |
| D64 | 2.74861  | 0.00040  | -0.01245 | 0.04201  | 0.02956  | 2.77816  |
| D65 | 2.25716  | 0.00005  | 0.02802  | -0.00311 | 0.02490  | 2.28205  |
| D66 | -0.86146 | 0.00006  | 0.02192  | -0.00122 | 0.02067  | -0.84079 |
| D67 | -1.93833 | 0.00015  | 0.03143  | -0.00119 | 0.03027  | -1.90806 |



|     |          |          |          |          |          |          |
|-----|----------|----------|----------|----------|----------|----------|
| D68 | 1.22624  | 0.00017  | 0.02532  | 0.00070  | 0.02604  | 1.25229  |
| D69 | 0.10239  | -0.00001 | 0.02603  | -0.00256 | 0.02347  | 0.12586  |
| D70 | -3.01622 | 0.00001  | 0.01993  | -0.00067 | 0.01925  | -2.99698 |
| D71 | 2.94882  | -0.00007 | 0.00241  | -0.00658 | -0.00418 | 2.94464  |
| D72 | -0.16915 | -0.00006 | -0.00385 | -0.00466 | -0.00850 | -0.17765 |
| D73 | -1.95654 | 0.00020  | -0.00045 | 0.00015  | -0.00031 | -1.95685 |

| Item                 | Value    | Threshold | Converged? |
|----------------------|----------|-----------|------------|
| Maximum Force        | 0.001678 | 0.000450  | NO         |
| RMS Force            | 0.000304 | 0.000300  | NO         |
| Maximum Displacement | 0.172106 | 0.001800  | NO         |
| RMS Displacement     | 0.038959 | 0.001200  | NO         |

Predicted change in Energy=-5.924014D-05

GradGradGradGradGradGradGradGradGradGradGradGradGradGradGradGradGradGrad

Input orientation:

| Center Number | Atomic Number | Atomic Type | Coordinates (Angstroms) |           |           |
|---------------|---------------|-------------|-------------------------|-----------|-----------|
|               |               |             | X                       | Y         | Z         |
| 1             | 6             | 0           | -0.919196               | 1.637511  | 1.555201  |
| 2             | 6             | 0           | -1.615305               | 0.470170  | 1.595232  |
| 3             | 7             | 0           | -2.443319               | 0.469031  | 0.480587  |
| 4             | 6             | 0           | -2.248484               | 1.606905  | -0.205884 |
| 5             | 7             | 0           | -1.325961               | 2.338429  | 0.430875  |
| 6             | 6             | 0           | -0.741983               | 3.605065  | -0.047437 |
| 7             | 1             | 0           | -0.157669               | 2.016830  | 2.213229  |
| 8             | 1             | 0           | -1.517690               | -0.386401 | 2.268089  |
| 9             | 1             | 0           | -1.553772               | 4.238048  | -0.409924 |
| 10            | 1             | 0           | -0.296469               | 4.086729  | 0.820710  |
| 11            | 35            | 0           | -0.393547               | -2.435716 | 2.748606  |
| 12            | 1             | 0           | -2.744344               | 1.876666  | -1.122297 |
| 13            | 6             | 0           | -3.341738               | -0.566551 | 0.074266  |
| 14            | 6             | 0           | -3.300087               | -1.798640 | 0.564752  |
| 15            | 1             | 0           | -4.045821               | -0.237147 | -0.680089 |
| 16            | 1             | 0           | -4.018941               | -2.522102 | 0.200564  |
| 17            | 1             | 0           | -2.556905               | -2.130030 | 1.293562  |
| 18            | 6             | 0           | 2.663342                | -0.679591 | 1.271502  |
| 19            | 6             | 0           | 4.084916                | -0.321053 | 1.303907  |
| 20            | 8             | 0           | 3.081513                | 0.675465  | 1.637537  |
| 21            | 1             | 0           | 2.169847                | -0.733300 | 0.306280  |
| 22            | 1             | 0           | 2.185481                | -1.234825 | 2.071473  |
| 23            | 1             | 0           | 4.650904                | -0.621826 | 2.182792  |
| 24            | 6             | 0           | 4.890206                | -0.088602 | 0.054741  |
| 25            | 1             | 0           | 5.646492                | 0.684786  | 0.218324  |

|    |   |   |           |           |           |
|----|---|---|-----------|-----------|-----------|
| 26 | 1 | 0 | 5.409830  | -1.011053 | -0.221951 |
| 27 | 1 | 0 | 4.247683  | 0.212485  | -0.774620 |
| 28 | 6 | 0 | 0.311118  | 3.388371  | -1.144048 |
| 29 | 1 | 0 | 0.775424  | 4.355030  | -1.362609 |
| 30 | 1 | 0 | -0.141089 | 3.019354  | -2.064898 |
| 31 | 6 | 0 | 1.400997  | 2.401725  | -0.738583 |
| 32 | 8 | 0 | 1.744840  | 1.478719  | -1.440390 |
| 33 | 8 | 0 | 1.890428  | 2.673698  | 0.467127  |
| 34 | 1 | 0 | 2.472372  | 1.923536  | 0.807364  |

-----  
Distance matrix (angstroms):

|    |    | 1        | 2        | 3        | 4        | 5        |
|----|----|----------|----------|----------|----------|----------|
| 1  | C  | 0.000000 |          |          |          |          |
| 2  | C  | 1.359726 | 0.000000 |          |          |          |
| 3  | N  | 2.200702 | 1.388539 | 0.000000 |          |          |
| 4  | C  | 2.206664 | 2.221959 | 1.343115 | 0.000000 |          |
| 5  | N  | 1.385948 | 2.220324 | 2.178442 | 1.338521 | 0.000000 |
| 6  | C  | 2.543840 | 3.645356 | 3.606669 | 2.507448 | 1.474510 |
| 7  | H  | 1.075550 | 2.213319 | 3.259129 | 3.223609 | 2.155253 |
| 8  | H  | 2.227694 | 1.093608 | 2.187170 | 3.260041 | 3.291931 |
| 9  | H  | 3.320722 | 4.268646 | 3.973637 | 2.728950 | 2.089831 |
| 10 | H  | 2.631717 | 3.926667 | 4.220472 | 3.318703 | 2.066005 |
| 11 | Br | 4.276880 | 3.356656 | 4.216993 | 5.339718 | 5.388296 |
| 12 | H  | 3.249208 | 3.261583 | 2.154365 | 1.076318 | 2.153457 |
| 13 | C  | 3.594408 | 2.523628 | 1.429925 | 2.449000 | 3.553792 |
| 14 | C  | 4.296133 | 3.007969 | 2.425586 | 3.646571 | 4.585895 |
| 15 | H  | 4.276289 | 3.403643 | 2.100921 | 2.618361 | 3.907105 |
| 16 | H  | 5.361514 | 4.083657 | 3.392326 | 4.510921 | 5.561470 |
| 17 | H  | 4.116420 | 2.781844 | 2.725610 | 4.038334 | 4.714507 |
| 18 | C  | 4.275983 | 4.442249 | 5.293663 | 5.615761 | 5.072439 |
| 19 | C  | 5.379615 | 5.762242 | 6.627212 | 6.790321 | 6.092013 |
| 20 | O  | 4.115578 | 4.701493 | 5.648443 | 5.716175 | 4.862850 |
| 21 | H  | 4.089345 | 4.175778 | 4.770460 | 5.025985 | 4.655290 |
| 22 | H  | 4.260971 | 4.192826 | 5.182647 | 5.737755 | 5.271616 |
| 23 | H  | 6.043549 | 6.387727 | 7.376684 | 7.633778 | 6.896030 |
| 24 | C  | 6.243397 | 6.708727 | 7.367013 | 7.341905 | 6.683763 |
| 25 | H  | 6.767806 | 7.394298 | 8.096936 | 7.959957 | 7.169018 |
| 26 | H  | 7.087294 | 7.405991 | 8.022228 | 8.093438 | 7.550900 |
| 27 | H  | 5.844262 | 6.329078 | 6.812552 | 6.668437 | 6.085915 |
| 28 | C  | 3.444580 | 4.441920 | 4.330000 | 3.256584 | 2.502556 |
| 29 | H  | 4.332466 | 5.436594 | 5.372026 | 4.246673 | 3.420393 |
| 30 | H  | 3.952221 | 4.697680 | 4.275968 | 3.145164 | 2.845428 |
| 31 | C  | 3.350935 | 4.275006 | 4.472185 | 3.772826 | 2.967817 |
| 32 | O  | 4.011966 | 4.639262 | 4.717022 | 4.181756 | 3.697372 |

|    |    |          |          |          |          |          |
|----|----|----------|----------|----------|----------|----------|
| 33 | O  | 3.186154 | 4.291657 | 4.862314 | 4.326845 | 3.234019 |
| 34 | H  | 3.484796 | 4.409321 | 5.136768 | 4.838741 | 3.839429 |
|    |    | 6        | 7        | 8        | 9        | 10       |
| 6  | C  | 0.000000 |          |          |          |          |
| 7  | H  | 2.823920 | 0.000000 |          |          |          |
| 8  | H  | 4.679229 | 2.761917 | 0.000000 |          |          |
| 9  | H  | 1.091359 | 3.709965 | 5.344023 | 0.000000 |          |
| 10 | H  | 1.088193 | 2.498571 | 4.857486 | 1.765834 | 0.000000 |
| 11 | Br | 6.665606 | 4.490816 | 2.386271 | 7.474059 | 6.802095 |
| 12 | H  | 2.855194 | 4.223300 | 4.256861 | 2.738807 | 3.827760 |
| 13 | C  | 4.916902 | 4.624643 | 2.858752 | 5.149314 | 5.611048 |
| 14 | C  | 6.009883 | 5.210573 | 2.841252 | 6.359340 | 6.612473 |
| 15 | H  | 5.106680 | 5.345037 | 3.886576 | 5.129392 | 5.916582 |
| 16 | H  | 6.952850 | 6.289844 | 3.884859 | 7.221452 | 7.610389 |
| 17 | H  | 6.163079 | 4.878378 | 2.251647 | 6.667875 | 6.631836 |
| 18 | C  | 5.629753 | 4.014429 | 4.308153 | 6.692863 | 5.628632 |
| 19 | C  | 6.367063 | 4.928701 | 5.685343 | 7.451001 | 6.233663 |
| 20 | O  | 5.103021 | 3.552883 | 4.762124 | 6.194349 | 4.869773 |
| 21 | H  | 5.236916 | 4.076396 | 4.191297 | 6.252407 | 5.438753 |
| 22 | H  | 6.040229 | 4.010450 | 3.804203 | 7.077548 | 6.003617 |
| 23 | H  | 7.205814 | 5.485053 | 6.173674 | 8.296900 | 6.964356 |
| 24 | C  | 6.736110 | 5.879877 | 6.785921 | 7.775646 | 6.702365 |
| 25 | H  | 7.029316 | 6.280309 | 7.528246 | 8.053830 | 6.874218 |
| 26 | H  | 7.693101 | 6.789346 | 7.387897 | 8.722393 | 7.722459 |
| 27 | H  | 6.077431 | 5.620500 | 6.546470 | 7.070717 | 6.180951 |
| 28 | C  | 1.535752 | 3.656801 | 5.407043 | 2.176857 | 2.171898 |
| 29 | H  | 2.143514 | 4.373152 | 6.396992 | 2.519216 | 2.447003 |
| 30 | H  | 2.185012 | 4.394052 | 5.680578 | 2.493958 | 3.080611 |
| 31 | C  | 2.553052 | 3.360175 | 5.033136 | 3.494389 | 2.855174 |
| 32 | O  | 3.556116 | 4.154280 | 5.279734 | 4.422285 | 4.010142 |
| 33 | O  | 2.839333 | 2.770388 | 4.921680 | 3.883159 | 2.627583 |
| 34 | H  | 3.726970 | 2.983668 | 4.836334 | 4.800895 | 3.513696 |
|    |    | 11       | 12       | 13       | 14       | 15       |
| 11 | Br | 0.000000 |          |          |          |          |
| 12 | H  | 6.253540 | 0.000000 |          |          |          |
| 13 | C  | 4.397465 | 2.785310 | 0.000000 |          |          |
| 14 | C  | 3.690942 | 4.082016 | 1.326783 | 0.000000 |          |
| 15 | H  | 5.470718 | 2.521427 | 1.083186 | 2.131668 | 0.000000 |
| 16 | H  | 4.432094 | 4.766940 | 2.073338 | 1.082950 | 2.448937 |
| 17 | H  | 2.625017 | 4.682427 | 2.132396 | 1.092384 | 3.113708 |
| 18 | C  | 3.822353 | 6.442654 | 6.124307 | 6.108539 | 7.001238 |
| 19 | C  | 5.159030 | 7.573323 | 7.531765 | 7.567555 | 8.369717 |
| 20 | O  | 4.794785 | 6.557452 | 6.726409 | 6.927978 | 7.550042 |
| 21 | H  | 3.928634 | 5.744739 | 5.518986 | 5.578704 | 6.312972 |

|    |   |           |          |          |          |          |
|----|---|-----------|----------|----------|----------|----------|
| 22 | H | 2.924386  | 6.647158 | 5.914861 | 5.716603 | 6.884444 |
| 23 | H | 5.390438  | 8.476777 | 8.266272 | 8.198853 | 9.163901 |
| 24 | C | 6.378393  | 7.970825 | 8.245831 | 8.382436 | 8.967420 |
| 25 | H | 7.254098  | 8.580441 | 9.076061 | 9.291324 | 9.777425 |
| 26 | H | 6.673309  | 8.697131 | 8.767854 | 8.780765 | 9.498323 |
| 27 | H | 6.400555  | 7.195750 | 7.676380 | 7.925110 | 8.306221 |
| 28 | C | 7.040546  | 3.409043 | 5.519878 | 6.547204 | 5.687051 |
| 29 | H | 8.023890  | 4.311474 | 6.575531 | 7.628379 | 6.693155 |
| 30 | H | 7.279515  | 2.995191 | 5.261074 | 6.333040 | 5.269670 |
| 31 | C | 6.227496  | 4.196042 | 5.653753 | 6.437541 | 6.052676 |
| 32 | O | 6.119084  | 4.518000 | 5.687759 | 6.341369 | 6.087200 |
| 33 | O | 6.043823  | 4.964135 | 6.166775 | 6.852210 | 6.710303 |
| 34 | H | 5.566416  | 5.562366 | 6.367248 | 6.872753 | 7.026230 |
|    |   | 16        | 17       | 18       | 19       | 20       |
| 16 | H | 0.000000  |          |          |          |          |
| 17 | H | 1.867060  | 0.000000 |          |          |          |
| 18 | C | 7.013890  | 5.418047 | 0.000000 |          |          |
| 19 | C | 8.469621  | 6.883770 | 1.466449 | 0.000000 |          |
| 20 | O | 7.918697  | 6.307208 | 1.464591 | 1.452988 | 0.000000 |
| 21 | H | 6.442987  | 5.026705 | 1.085392 | 2.198340 | 2.141962 |
| 22 | H | 6.606983  | 4.888431 | 1.084707 | 2.243210 | 2.154154 |
| 23 | H | 9.094310  | 7.417406 | 2.187278 | 1.087771 | 2.107903 |
| 24 | C | 9.236671  | 7.820586 | 2.605513 | 1.504307 | 2.521986 |
| 25 | H | 10.183567 | 8.739282 | 3.445272 | 2.151446 | 2.931446 |
| 26 | H | 9.558426  | 8.186437 | 3.143798 | 2.135355 | 3.423901 |
| 27 | H | 8.761621  | 7.487801 | 2.737252 | 2.152075 | 2.718971 |
| 28 | C | 7.449233  | 6.679839 | 5.283574 | 5.830425 | 4.772019 |
| 29 | H | 8.527860  | 7.759876 | 5.987503 | 6.318924 | 5.278080 |
| 30 | H | 7.132867  | 6.605420 | 5.716519 | 6.353446 | 5.439393 |
| 31 | C | 7.382533  | 6.350701 | 3.889533 | 4.334594 | 3.383793 |
| 32 | O | 7.205586  | 6.245204 | 3.585569 | 4.030670 | 3.450442 |
| 33 | O | 7.873248  | 6.598300 | 3.533973 | 3.805852 | 2.604128 |
| 34 | H | 7.891074  | 6.477763 | 2.651069 | 2.808030 | 1.617999 |
|    |   | 21        | 22       | 23       | 24       | 25       |
| 21 | H | 0.000000  |          |          |          |          |
| 22 | H | 1.835123  | 0.000000 |          |          |          |
| 23 | H | 3.112774  | 2.542925 | 0.000000 |          |          |
| 24 | C | 2.807002  | 3.563225 | 2.206851 | 0.000000 |          |
| 25 | H | 3.755765  | 4.370088 | 2.560775 | 1.094010 | 0.000000 |
| 26 | H | 3.294490  | 3.963116 | 2.551520 | 1.094296 | 1.767971 |
| 27 | H | 2.525916  | 3.801003 | 3.099184 | 1.091480 | 1.779234 |
| 28 | C | 4.748315  | 5.935213 | 6.781097 | 5.873200 | 6.134464 |
| 29 | H | 5.533599  | 6.710265 | 7.235904 | 6.219822 | 6.300583 |
| 30 | H | 5.004530  | 6.373423 | 7.366427 | 6.282212 | 6.645254 |

|    |   |          |          |          |          |          |
|----|---|----------|----------|----------|----------|----------|
| 31 | C | 3.392824 | 4.662223 | 5.313961 | 4.359550 | 4.678438 |
| 32 | O | 2.850354 | 4.459895 | 5.097542 | 3.819063 | 4.313299 |
| 33 | O | 3.422219 | 4.235273 | 4.628630 | 4.098663 | 4.257428 |
| 34 | H | 2.720549 | 3.414018 | 3.621694 | 3.234356 | 3.457819 |
|    |   | 26       | 27       | 28       | 29       | 30       |
| 26 | H | 0.000000 |          |          |          |          |
| 27 | H | 1.775689 | 0.000000 |          |          |          |
| 28 | C | 6.797209 | 5.071417 | 0.000000 |          |          |
| 29 | H | 7.181481 | 5.437186 | 1.094431 | 0.000000 |          |
| 30 | H | 7.103051 | 5.366996 | 1.090242 | 1.765570 | 0.000000 |
| 31 | C | 5.290057 | 3.591336 | 1.525027 | 2.143863 | 2.125701 |
| 32 | O | 4.595183 | 2.882849 | 2.406273 | 3.036278 | 2.514020 |
| 33 | O | 5.141830 | 3.627142 | 2.366614 | 2.723609 | 3.264611 |
| 34 | H | 4.277845 | 2.929522 | 3.259566 | 3.674314 | 4.034958 |
|    |   | 31       | 32       | 33       | 34       |          |
| 31 | C | 0.000000 |          |          |          |          |
| 32 | O | 1.209423 | 0.000000 |          |          |          |
| 33 | O | 1.329379 | 2.255614 | 0.000000 |          |          |
| 34 | H | 1.940738 | 2.404073 | 1.008545 | 0.000000 |          |

Stoichiometry C<sub>11</sub>H<sub>17</sub>BrN<sub>2</sub>O<sub>3</sub>

Framework group C1[X(C<sub>11</sub>H<sub>17</sub>BrN<sub>2</sub>O<sub>3</sub>)]

Deg. of freedom 96

Full point group C1 NOp 1

Largest Abelian subgroup C1 NOp 1

Largest concise Abelian subgroup C1 NOp 1

Standard orientation:

| Center Number | Atomic Number | Atomic Type | Coordinates (Angstroms) |           |           |
|---------------|---------------|-------------|-------------------------|-----------|-----------|
|               |               |             | X                       | Y         | Z         |
| 1             | 6             | 0           | -0.253454               | 1.357451  | 1.269898  |
| 2             | 6             | 0           | -1.468526               | 1.059292  | 0.737399  |
| 3             | 7             | 0           | -1.730812               | 2.037230  | -0.212803 |
| 4             | 6             | 0           | -0.700420               | 2.898159  | -0.245293 |
| 5             | 7             | 0           | 0.212369                | 2.507463  | 0.652377  |
| 6             | 6             | 0           | 1.541790                | 3.111707  | 0.856608  |
| 7             | 1             | 0           | 0.326340                | 0.840600  | 2.013882  |
| 8             | 1             | 0           | -2.111908               | 0.188626  | 0.892249  |
| 9             | 1             | 0           | 1.423008                | 4.196444  | 0.873937  |
| 10            | 1             | 0           | 1.878978                | 2.790466  | 1.840108  |
| 11            | 35            | 0           | -2.627273               | -2.055500 | 0.265681  |
| 12            | 1             | 0           | -0.619759               | 3.752119  | -0.895451 |
| 13            | 6             | 0           | -2.877163               | 2.129112  | -1.062580 |
| 14            | 6             | 0           | -3.723966               | 1.125362  | -1.251697 |

|    |   |   |           |           |           |
|----|---|---|-----------|-----------|-----------|
| 15 | 1 | 0 | -2.968449 | 3.097935  | -1.538333 |
| 16 | 1 | 0 | -4.567172 | 1.281102  | -1.913157 |
| 17 | 1 | 0 | -3.596555 | 0.138994  | -0.799871 |
| 18 | 6 | 0 | 1.150317  | -2.403699 | -0.202247 |
| 19 | 6 | 0 | 2.409393  | -3.134146 | -0.024347 |
| 20 | 8 | 0 | 2.138653  | -1.955730 | 0.781390  |
| 21 | 1 | 0 | 1.058907  | -1.739546 | -1.055840 |
| 22 | 1 | 0 | 0.213942  | -2.746758 | 0.224487  |
| 23 | 1 | 0 | 2.374807  | -4.040309 | 0.576417  |
| 24 | 6 | 0 | 3.544057  | -3.043766 | -1.007865 |
| 25 | 1 | 0 | 4.508373  | -3.115694 | -0.496221 |
| 26 | 1 | 0 | 3.479452  | -3.874195 | -1.717581 |
| 27 | 1 | 0 | 3.505991  | -2.105360 | -1.563989 |
| 28 | 6 | 0 | 2.549506  | 2.691199  | -0.223306 |
| 29 | 1 | 0 | 3.531253  | 3.083832  | 0.059168  |
| 30 | 1 | 0 | 2.290096  | 3.109142  | -1.196270 |
| 31 | 6 | 0 | 2.654759  | 1.178436  | -0.385099 |
| 32 | 8 | 0 | 2.594401  | 0.627593  | -1.460102 |
| 33 | 8 | 0 | 2.794241  | 0.564521  | 0.785756  |
| 34 | 1 | 0 | 2.680208  | -0.433478 | 0.695433  |

-----

Rotational constants (GHZ):      0.3243674      0.2608176      0.1605694

Standard basis: 6-311++G(d,p) (5D, 7F)

There are    538 symmetry adapted cartesian basis functions of A    symmetry.

There are    519 symmetry adapted basis functions of A    symmetry.

519 basis functions,    823 primitive gaussians,    538 cartesian basis functions

78 alpha electrons      78 beta electrons

     nuclear repulsion energy      1574.2797723816 Hartrees.

NAtoms=    34 NActive=    34 NUniq=    34 SFac= 1.00D+00 NAtFMM=    60 NAOKFM=F

Big=F

Integral buffers will be    131072 words long.

Raffenetti 2 integral format.

Two-electron integral symmetry is turned on.

One-electron integrals computed using PRISM.

NBasis=    519 RedAO= T EigKep=    3.94D-06    NBF=    519

NBsUse=    519 1.00D-06 EigRej= -1.00D+00    NBFU=    519

Initial guess from the checkpoint file:    "/coohpo.chk"

B after Tr=      0.000000      0.000000      0.000000

     Rot=    0.999998    0.001097    0.000422    0.001453 Ang=    0.21 deg.

ExpMin= 3.50D-02 ExpMax= 4.40D+05 ExpMxC= 1.51D+04 IAcc=3 IRadAn=      5 AccDes=

0.00D+00

Harris functional with IExCor=    402 and IRadAn=      5 diagonalized for initial guess.

HarFok: IExCor=    402 AccDes= 0.00D+00 IRadAn=      5 IDoV= 1 UseB2=F ITyADJ=14

ICtDFT= 3500011 ScaDFX= 1.000000 1.000000 1.000000 1.000000

FoFCou: FMM=F IPFlag= 0 FMFlag= 100000 FMFlg1= 0  
 NFxFlg= 0 DoJE=T BraDBF=F KetDBF=T FulRan=T  
 wScrn= 0.000000 ICntrl= 500 IOpCl= 0 l1Cent= 200000004 NGrid=  
 0  
 NMat0= 1 NMatS0= 1 NMatT0= 0 NMatD0= 1 NMtDS0= 0  
 NMtDT0= 0

Petite list used in FoFCou.

Requested convergence on RMS density matrix=1.00D-08 within 128 cycles.

Requested convergence on MAX density matrix=1.00D-06.

Requested convergence on energy=1.00D-06.

No special actions if energy rises.

SCF Done: E(RB3LYP) = -3338.90368102 A.U. after 13 cycles

NFock= 13 Conv=0.16D-08 -V/T= 2.0019

Calling FoFJK, ICntrl= 2127 FMM=F ISym2X=0 l1Cent= 0 IOpClX= 0 NMat=1 NMatS=1

NMatT=0.

\*\*\*\*\* Axes restored to original set \*\*\*\*\*

| Center<br>Number | Atomic<br>Number | Forces (Hartrees/Bohr) |              |              |
|------------------|------------------|------------------------|--------------|--------------|
|                  |                  | X                      | Y            | Z            |
| 1                | 6                | -0.000030771           | 0.000284061  | 0.000467041  |
| 2                | 6                | -0.000939001           | 0.000187957  | 0.000620510  |
| 3                | 7                | 0.001145054            | 0.001073137  | -0.000326876 |
| 4                | 6                | -0.000240690           | -0.000222476 | 0.000480498  |
| 5                | 7                | 0.000301873            | -0.000369758 | -0.000473259 |
| 6                | 6                | 0.000260257            | 0.000120001  | -0.000284406 |
| 7                | 1                | 0.000124243            | -0.000104719 | -0.000049240 |
| 8                | 1                | 0.000862559            | -0.000141596 | -0.001032819 |
| 9                | 1                | 0.000030313            | -0.000019631 | -0.000130296 |
| 10               | 1                | -0.000022955           | 0.000020542  | 0.000101183  |
| 11               | 35               | -0.000357709           | 0.000182709  | 0.000236111  |
| 12               | 1                | -0.000030504           | 0.000008664  | -0.000034913 |
| 13               | 6                | -0.000862611           | -0.001061967 | -0.000061863 |
| 14               | 6                | 0.000434911            | 0.000136507  | -0.000224845 |
| 15               | 1                | 0.000023793            | 0.000104266  | 0.000159876  |
| 16               | 1                | 0.000105321            | 0.000066048  | 0.000114910  |
| 17               | 1                | -0.000311560           | -0.000022609 | 0.000062326  |
| 18               | 6                | 0.000281826            | 0.000255610  | 0.000295827  |
| 19               | 6                | -0.000044105           | -0.000480078 | 0.000094525  |
| 20               | 8                | -0.000062139           | 0.000247855  | -0.000668798 |
| 21               | 1                | 0.000071273            | 0.000036149  | -0.000330589 |
| 22               | 1                | 0.000033182            | -0.000317986 | 0.000260448  |
| 23               | 1                | -0.000192684           | -0.000046556 | 0.000023599  |
| 24               | 6                | 0.000002559            | 0.000035659  | 0.000515764  |

|    |   |              |              |              |
|----|---|--------------|--------------|--------------|
| 25 | 1 | -0.000038027 | 0.000016839  | -0.000064203 |
| 26 | 1 | -0.000046628 | 0.000019948  | -0.000116514 |
| 27 | 1 | -0.000074804 | 0.000059716  | -0.000183981 |
| 28 | 6 | -0.000110683 | -0.000467489 | 0.000689411  |
| 29 | 1 | -0.000126537 | 0.000253057  | 0.000125414  |
| 30 | 1 | -0.000163394 | 0.000034989  | -0.000209735 |
| 31 | 6 | -0.000021290 | -0.001071420 | -0.001538811 |
| 32 | 8 | -0.000146675 | 0.000623297  | 0.000631937  |
| 33 | 8 | -0.000135361 | 0.000279645  | 0.001667178  |
| 34 | 1 | 0.000280965  | 0.000279629  | -0.000815409 |

-----  
Cartesian Forces: Max 0.001667178 RMS 0.000443645

GradGradGradGradGradGradGradGradGradGradGradGradGradGradGradGradGradGradGrad

Berny optimization.

Using GEDIIS/GDIIS optimizer.

FormGI is forming the generalized inverse of G from B-inverse, IUseBI=4.

Internal Forces: Max 0.001681170 RMS 0.000275569

Search for a local minimum.

Step number 23 out of a maximum of 175

All quantities printed in internal units (Hartrees-Bohrs-Radians)

Mixed Optimization -- En-DIIS/RFO-DIIS

Swapping is turned off.

Update second derivatives using D2CorX and points 20 21 22 23

DE= -7.32D-05 DEPred=-5.92D-05 R= 1.24D+00

TightC=F SS= 1.41D+00 RLast= 1.14D-01 DXNew= 2.6298D+00 3.4098D-01

Trust test= 1.24D+00 RLast= 1.14D-01 DXMaxT set to 1.56D+00

ITU= 1 1 1 1 1 1 1 1 1 1 0 0-1 1 1 1 0 1 0-1

ITU= 0 1 0

|                 |         |         |         |         |         |
|-----------------|---------|---------|---------|---------|---------|
| Eigenvalues --- | 0.00150 | 0.00330 | 0.00429 | 0.00600 | 0.00698 |
| Eigenvalues --- | 0.00758 | 0.00953 | 0.01241 | 0.01535 | 0.01677 |
| Eigenvalues --- | 0.01993 | 0.02096 | 0.02255 | 0.02317 | 0.02397 |
| Eigenvalues --- | 0.02422 | 0.02815 | 0.03076 | 0.03131 | 0.03355 |
| Eigenvalues --- | 0.03518 | 0.03597 | 0.04196 | 0.04415 | 0.04675 |
| Eigenvalues --- | 0.04884 | 0.04960 | 0.05338 | 0.05577 | 0.05738 |
| Eigenvalues --- | 0.05965 | 0.06138 | 0.06604 | 0.09250 | 0.09524 |
| Eigenvalues --- | 0.09990 | 0.11816 | 0.12569 | 0.12620 | 0.13073 |
| Eigenvalues --- | 0.13455 | 0.15319 | 0.15519 | 0.15941 | 0.15994 |
| Eigenvalues --- | 0.16002 | 0.16010 | 0.16015 | 0.16035 | 0.16125 |
| Eigenvalues --- | 0.16907 | 0.17597 | 0.20320 | 0.21871 | 0.22202 |
| Eigenvalues --- | 0.23062 | 0.23586 | 0.23958 | 0.24835 | 0.25562 |
| Eigenvalues --- | 0.28938 | 0.29576 | 0.30282 | 0.31583 | 0.32195 |
| Eigenvalues --- | 0.33078 | 0.34498 | 0.34571 | 0.34629 | 0.34812 |
| Eigenvalues --- | 0.34877 | 0.34943 | 0.34986 | 0.35094 | 0.35180 |



Eigenvalues --- 0.35291 0.35723 0.35825 0.36559 0.36846  
 Eigenvalues --- 0.36954 0.37190 0.37727 0.38027 0.40617  
 Eigenvalues --- 0.43985 0.45392 0.49034 0.49686 0.51755  
 Eigenvalues --- 0.52990 0.56050 0.56477 0.61091 0.91058  
 Eigenvalues --- 1.40130  
 En-DIIS/RFO-DIIS IScMMF= 0 using points: 23 22 21 20 19  
 RFO step: Lambda=-2.93455943D-05.  
 DidBck=F Rises=F RFO-DIIS coefs: 1.32591 0.01915 -0.27905 -0.37289

0.30688

Iteration 1 RMS(Cart)= 0.02970660 RMS(Int)= 0.00032096  
 Iteration 2 RMS(Cart)= 0.00048926 RMS(Int)= 0.00004591  
 Iteration 3 RMS(Cart)= 0.00000027 RMS(Int)= 0.00004591

| Variable | Old X   | -DE/DX   | Delta X<br>(Linear) | Delta X<br>(Quad) | Delta X<br>(Total) | New X   |
|----------|---------|----------|---------------------|-------------------|--------------------|---------|
| R1       | 2.56951 | -0.00013 | -0.00086            | 0.00022           | -0.00065           | 2.56886 |
| R2       | 2.61906 | 0.00005  | 0.00006             | 0.00032           | 0.00037            | 2.61944 |
| R3       | 2.03249 | 0.00002  | 0.00023             | 0.00003           | 0.00026            | 2.03275 |
| R4       | 2.62396 | -0.00026 | -0.00146            | 0.00022           | -0.00124           | 2.62272 |
| R5       | 2.06662 | -0.00048 | -0.00039            | 0.00052           | 0.00013            | 2.06675 |
| R6       | 2.53812 | -0.00049 | 0.00055             | -0.00050          | 0.00005            | 2.53817 |
| R7       | 2.70217 | 0.00094  | -0.00041            | 0.00180           | 0.00139            | 2.70356 |
| R8       | 2.52944 | -0.00003 | 0.00007             | -0.00017          | -0.00010           | 2.52934 |
| R9       | 2.03395 | 0.00005  | -0.00004            | 0.00011           | 0.00007            | 2.03402 |
| R10      | 2.78642 | -0.00022 | 0.00008             | 0.00037           | 0.00045            | 2.78687 |
| R11      | 2.06237 | 0.00001  | 0.00029             | -0.00027          | 0.00003            | 2.06240 |
| R12      | 2.05639 | 0.00008  | -0.00053            | 0.00035           | -0.00018           | 2.05621 |
| R13      | 2.90215 | -0.00060 | -0.00183            | -0.00015          | -0.00198           | 2.90017 |
| R14      | 4.50940 | -0.00028 | -0.00261            | -0.02936          | -0.03198           | 4.47742 |
| R15      | 2.50726 | -0.00018 | 0.00080             | -0.00027          | 0.00053            | 2.50779 |
| R16      | 2.04692 | -0.00009 | -0.00015            | -0.00002          | -0.00017           | 2.04675 |
| R17      | 2.04648 | -0.00015 | -0.00063            | -0.00007          | -0.00069           | 2.04579 |
| R18      | 2.06431 | -0.00017 | 0.00031             | -0.00036          | -0.00004           | 2.06426 |
| R19      | 2.77119 | -0.00044 | -0.00053            | -0.00021          | -0.00092           | 2.77027 |
| R20      | 2.76768 | 0.00017  | -0.00062            | -0.00069          | -0.00124           | 2.76643 |
| R21      | 2.05109 | 0.00026  | 0.00031             | 0.00038           | 0.00069            | 2.05178 |
| R22      | 2.04980 | 0.00034  | 0.00073             | 0.00072           | 0.00145            | 2.05125 |
| R23      | 2.74575 | 0.00006  | 0.00054             | 0.00070           | 0.00134            | 2.74709 |
| R24      | 2.05559 | -0.00007 | 0.00000             | -0.00011          | -0.00011           | 2.05548 |
| R25      | 2.84273 | -0.00020 | -0.00001            | -0.00065          | -0.00066           | 2.84206 |
| R26      | 3.05758 | 0.00003  | -0.00538            | -0.00426          | -0.00964           | 3.04794 |
| R27      | 2.06738 | -0.00002 | 0.00003             | -0.00008          | -0.00005           | 2.06733 |
| R28      | 2.06792 | -0.00001 | -0.00001            | -0.00003          | -0.00004           | 2.06788 |
| R29      | 2.06260 | 0.00020  | -0.00008            | 0.00041           | 0.00033            | 2.06293 |
| R30      | 2.06818 | 0.00015  | 0.00035             | 0.00010           | 0.00045            | 2.06863 |

|     |         |          |          |          |          |         |
|-----|---------|----------|----------|----------|----------|---------|
| R31 | 2.06026 | 0.00023  | 0.00033  | -0.00012 | 0.00021  | 2.06047 |
| R32 | 2.88188 | -0.00008 | 0.00026  | 0.00019  | 0.00045  | 2.88234 |
| R33 | 2.28548 | -0.00089 | -0.00010 | 0.00024  | 0.00014  | 2.28562 |
| R34 | 2.51216 | 0.00076  | -0.00099 | 0.00051  | -0.00047 | 2.51169 |
| R35 | 1.90587 | -0.00028 | 0.00064  | -0.00018 | 0.00046  | 1.90634 |
| A1  | 1.88368 | -0.00029 | -0.00046 | 0.00025  | -0.00022 | 1.88347 |
| A2  | 2.27476 | 0.00010  | -0.00140 | -0.00046 | -0.00185 | 2.27291 |
| A3  | 2.12441 | 0.00019  | 0.00167  | 0.00005  | 0.00172  | 2.12612 |
| A4  | 1.85705 | 0.00015  | 0.00091  | -0.00029 | 0.00063  | 1.85767 |
| A5  | 2.27162 | 0.00005  | 0.00027  | -0.00144 | -0.00116 | 2.27046 |
| A6  | 2.14896 | -0.00020 | -0.00097 | 0.00113  | 0.00016  | 2.14912 |
| A7  | 1.89979 | 0.00012  | -0.00016 | -0.00002 | -0.00018 | 1.89961 |
| A8  | 2.21851 | -0.00044 | -0.00160 | 0.00026  | -0.00135 | 2.21717 |
| A9  | 2.16453 | 0.00032  | 0.00179  | -0.00013 | 0.00166  | 2.16619 |
| A10 | 1.89636 | -0.00008 | -0.00044 | 0.00056  | 0.00012  | 1.89648 |
| A11 | 2.19035 | 0.00004  | -0.00057 | -0.00020 | -0.00077 | 2.18959 |
| A12 | 2.19640 | 0.00005  | 0.00102  | -0.00035 | 0.00068  | 2.19707 |
| A13 | 1.88789 | 0.00011  | 0.00012  | -0.00050 | -0.00035 | 1.88754 |
| A14 | 2.19118 | -0.00026 | -0.00135 | -0.00038 | -0.00169 | 2.18949 |
| A15 | 2.19952 | 0.00016  | 0.00064  | 0.00057  | 0.00123  | 2.20075 |
| A16 | 1.88744 | 0.00006  | 0.00260  | -0.00098 | 0.00163  | 1.88907 |
| A17 | 1.85832 | -0.00022 | -0.00150 | 0.00004  | -0.00147 | 1.85685 |
| A18 | 1.96276 | 0.00027  | -0.00367 | 0.00087  | -0.00280 | 1.95995 |
| A19 | 1.88892 | 0.00006  | 0.00140  | 0.00010  | 0.00149  | 1.89042 |
| A20 | 1.93343 | -0.00025 | 0.00019  | -0.00056 | -0.00038 | 1.93305 |
| A21 | 1.92984 | 0.00007  | 0.00114  | 0.00051  | 0.00163  | 1.93147 |
| A22 | 2.56550 | 0.00168  | 0.01607  | 0.03121  | 0.04729  | 2.61278 |
| A23 | 2.15048 | -0.00012 | -0.00004 | 0.00116  | 0.00113  | 2.15161 |
| A24 | 1.96714 | -0.00005 | 0.00013  | -0.00100 | -0.00087 | 1.96628 |
| A25 | 2.16550 | 0.00017  | -0.00010 | -0.00017 | -0.00027 | 2.16523 |
| A26 | 2.06600 | -0.00002 | -0.00062 | -0.00087 | -0.00147 | 2.06453 |
| A27 | 2.15282 | 0.00017  | -0.00142 | 0.00203  | 0.00063  | 2.15345 |
| A28 | 2.06383 | -0.00014 | 0.00187  | -0.00094 | 0.00095  | 2.06478 |
| A29 | 2.06293 | 0.00004  | 0.00083  | 0.00049  | 0.00134  | 2.06427 |
| A30 | 2.13639 | -0.00029 | -0.00259 | -0.00211 | -0.00473 | 2.13166 |
| A31 | 1.97997 | -0.00024 | 0.00114  | -0.00040 | 0.00070  | 1.98067 |
| A32 | 1.99880 | 0.00022  | -0.00014 | -0.00107 | -0.00120 | 1.99760 |
| A33 | 2.01553 | 0.00017  | 0.00079  | 0.00170  | 0.00251  | 2.01804 |
| A34 | 2.04277 | -0.00019 | -0.00117 | -0.00111 | -0.00232 | 2.04045 |
| A35 | 2.13930 | 0.00004  | 0.00134  | 0.00168  | 0.00304  | 2.14234 |
| A36 | 1.94275 | 0.00014  | 0.00003  | -0.00114 | -0.00111 | 1.94164 |
| A37 | 2.04247 | -0.00038 | 0.00029  | -0.00106 | -0.00081 | 2.04165 |
| A38 | 2.02097 | 0.00016  | -0.00019 | 0.00064  | 0.00046  | 2.02143 |
| A39 | 2.06912 | 0.00035  | -0.00204 | 0.00149  | -0.00087 | 2.06825 |

|     |          |          |          |          |          |          |
|-----|----------|----------|----------|----------|----------|----------|
| A40 | 2.30663  | 0.00051  | 0.00345  | -0.00328 | 0.00006  | 2.30669  |
| A41 | 1.93386  | 0.00004  | -0.00034 | 0.00014  | -0.00020 | 1.93366  |
| A42 | 1.91124  | 0.00010  | -0.00072 | 0.00029  | -0.00043 | 1.91081  |
| A43 | 1.93742  | 0.00003  | 0.00054  | 0.00045  | 0.00098  | 1.93841  |
| A44 | 1.88122  | -0.00002 | -0.00020 | 0.00006  | -0.00014 | 1.88108  |
| A45 | 1.90240  | -0.00006 | -0.00002 | -0.00040 | -0.00043 | 1.90197  |
| A46 | 1.89646  | -0.00009 | 0.00076  | -0.00057 | 0.00019  | 1.89664  |
| A47 | 1.88482  | -0.00050 | 0.00259  | -0.00050 | 0.00209  | 1.88691  |
| A48 | 1.94598  | -0.00006 | 0.00018  | -0.00025 | -0.00006 | 1.94592  |
| A49 | 1.97306  | 0.00058  | 0.00119  | -0.00007 | 0.00112  | 1.97418  |
| A50 | 1.88205  | 0.00011  | -0.00209 | 0.00019  | -0.00189 | 1.88015  |
| A51 | 1.89794  | 0.00006  | -0.00143 | 0.00073  | -0.00072 | 1.89723  |
| A52 | 1.87760  | -0.00020 | -0.00068 | -0.00006 | -0.00074 | 1.87686  |
| A53 | 2.14439  | 0.00011  | -0.00186 | 0.00314  | 0.00128  | 2.14567  |
| A54 | 1.95184  | 0.00017  | 0.00080  | -0.00206 | -0.00126 | 1.95058  |
| A55 | 2.18679  | -0.00028 | 0.00112  | -0.00109 | 0.00002  | 2.18681  |
| A56 | 1.94576  | -0.00130 | 0.00131  | -0.00230 | -0.00099 | 1.94476  |
| A57 | 2.87272  | -0.00068 | -0.00622 | -0.00820 | -0.01443 | 2.85830  |
| D1  | 0.00441  | 0.00005  | -0.00137 | -0.00010 | -0.00148 | 0.00293  |
| D2  | 3.03333  | -0.00002 | 0.00089  | -0.00600 | -0.00507 | 3.02826  |
| D3  | -3.10892 | 0.00009  | 0.00376  | 0.00658  | 0.01031  | -3.09861 |
| D4  | -0.07999 | 0.00002  | 0.00602  | 0.00068  | 0.00671  | -0.07328 |
| D5  | -0.00552 | 0.00003  | 0.00136  | 0.00109  | 0.00245  | -0.00307 |
| D6  | -3.04914 | -0.00010 | 0.00621  | 0.00441  | 0.01058  | -3.03856 |
| D7  | 3.11075  | -0.00001 | -0.00330 | -0.00490 | -0.00821 | 3.10254  |
| D8  | 0.06712  | -0.00014 | 0.00155  | -0.00159 | -0.00007 | 0.06705  |
| D9  | -0.00178 | -0.00011 | 0.00093  | -0.00093 | 0.00000  | -0.00179 |
| D10 | 3.11194  | -0.00002 | 0.00272  | 0.00322  | 0.00595  | 3.11790  |
| D11 | -3.04059 | -0.00006 | -0.00128 | 0.00465  | 0.00339  | -3.03720 |
| D12 | 0.07314  | 0.00003  | 0.00052  | 0.00880  | 0.00935  | 0.08248  |
| D13 | -1.47765 | -0.00001 | -0.00904 | -0.00307 | -0.01211 | -1.48976 |
| D14 | 1.53480  | -0.00006 | -0.00628 | -0.00995 | -0.01623 | 1.51857  |
| D15 | -0.00165 | 0.00013  | -0.00010 | 0.00164  | 0.00154  | -0.00011 |
| D16 | 3.12737  | 0.00006  | 0.00240  | 0.00218  | 0.00455  | 3.13192  |
| D17 | -3.11643 | 0.00005  | -0.00182 | -0.00237 | -0.00415 | -3.12058 |
| D18 | 0.01258  | -0.00001 | 0.00069  | -0.00182 | -0.00113 | 0.01145  |
| D19 | -0.25732 | -0.00008 | -0.00174 | 0.01739  | 0.01566  | -0.24166 |
| D20 | 2.89553  | -0.00007 | -0.00134 | 0.01761  | 0.01627  | 2.91180  |
| D21 | 2.85245  | 0.00002  | 0.00029  | 0.02214  | 0.02243  | 2.87488  |
| D22 | -0.27788 | 0.00002  | 0.00069  | 0.02235  | 0.02304  | -0.25484 |
| D23 | 0.00439  | -0.00009 | -0.00077 | -0.00168 | -0.00245 | 0.00194  |
| D24 | 3.04742  | 0.00000  | -0.00571 | -0.00509 | -0.01086 | 3.03656  |
| D25 | -3.12457 | -0.00003 | -0.00325 | -0.00223 | -0.00547 | -3.13004 |
| D26 | -0.08154 | 0.00007  | -0.00819 | -0.00564 | -0.01388 | -0.09541 |

|     |          |          |          |          |          |          |
|-----|----------|----------|----------|----------|----------|----------|
| D27 | -2.45920 | 0.00010  | 0.00206  | -0.00378 | -0.00172 | -2.46092 |
| D28 | -0.43265 | 0.00008  | 0.00419  | -0.00412 | 0.00007  | -0.43258 |
| D29 | 1.68351  | 0.00019  | 0.00239  | -0.00295 | -0.00055 | 1.68296  |
| D30 | 0.79756  | -0.00005 | 0.00779  | 0.00019  | 0.00798  | 0.80554  |
| D31 | 2.82411  | -0.00006 | 0.00993  | -0.00015 | 0.00977  | 2.83388  |
| D32 | -1.34292 | 0.00005  | 0.00813  | 0.00102  | 0.00915  | -1.33377 |
| D33 | -3.03040 | 0.00001  | -0.00088 | 0.00870  | 0.00781  | -3.02258 |
| D34 | 1.18819  | 0.00023  | -0.00006 | 0.00892  | 0.00886  | 1.19705  |
| D35 | -0.92982 | 0.00012  | -0.00017 | 0.00923  | 0.00905  | -0.92076 |
| D36 | 1.13842  | -0.00007 | -0.00184 | 0.00976  | 0.00792  | 1.14635  |
| D37 | -0.92617 | 0.00014  | -0.00102 | 0.00998  | 0.00897  | -0.91720 |
| D38 | -3.04418 | 0.00003  | -0.00113 | 0.01029  | 0.00916  | -3.03502 |
| D39 | -0.95565 | -0.00004 | -0.00444 | 0.00967  | 0.00523  | -0.95043 |
| D40 | -3.02025 | 0.00018  | -0.00361 | 0.00988  | 0.00627  | -3.01398 |
| D41 | 1.14493  | 0.00007  | -0.00373 | 0.01019  | 0.00647  | 1.15139  |
| D42 | -3.14133 | -0.00003 | 0.00204  | 0.00025  | 0.00229  | -3.13904 |
| D43 | -0.03576 | 0.00020  | -0.00116 | 0.00747  | 0.00631  | -0.02945 |
| D44 | -0.01229 | -0.00003 | 0.00161  | 0.00001  | 0.00162  | -0.01067 |
| D45 | 3.09328  | 0.00019  | -0.00158 | 0.00722  | 0.00564  | 3.09892  |
| D46 | -2.75345 | 0.00004  | 0.00170  | -0.00156 | 0.00016  | -2.75329 |
| D47 | -0.04934 | 0.00013  | 0.00153  | 0.00171  | 0.00325  | -0.04608 |
| D48 | -0.01837 | -0.00013 | -0.00079 | -0.00091 | -0.00171 | -0.02008 |
| D49 | 2.68574  | -0.00004 | -0.00095 | 0.00235  | 0.00138  | 2.68712  |
| D50 | 0.25685  | 0.00024  | 0.00399  | -0.00526 | -0.00127 | 0.25558  |
| D51 | -2.10808 | 0.00001  | 0.00165  | -0.00629 | -0.00460 | -2.11268 |
| D52 | 2.56729  | 0.00014  | 0.00633  | -0.00240 | 0.00388  | 2.57117  |
| D53 | 0.18794  | 0.00013  | 0.00629  | -0.00093 | 0.00533  | 0.19326  |
| D54 | 2.55273  | -0.00002 | 0.00041  | -0.00099 | -0.00056 | 2.55216  |
| D55 | -1.65760 | 0.00004  | -0.00051 | -0.00064 | -0.00113 | -1.65873 |
| D56 | 0.43633  | 0.00001  | 0.00031  | -0.00088 | -0.00055 | 0.43578  |
| D57 | 1.32436  | -0.00003 | 0.00017  | -0.00051 | -0.00037 | 1.32399  |
| D58 | -2.88597 | 0.00003  | -0.00074 | -0.00016 | -0.00093 | -2.88690 |
| D59 | -0.79203 | 0.00000  | 0.00007  | -0.00040 | -0.00035 | -0.79239 |
| D60 | -1.02131 | -0.00001 | 0.00002  | 0.00183  | 0.00184  | -1.01947 |
| D61 | 1.05155  | 0.00005  | -0.00090 | 0.00218  | 0.00128  | 1.05283  |
| D62 | -3.13771 | 0.00002  | -0.00008 | 0.00194  | 0.00186  | -3.13585 |
| D63 | 1.47781  | 0.00009  | 0.00681  | 0.03351  | 0.04003  | 1.51784  |
| D64 | 2.77816  | 0.00021  | 0.00501  | 0.03353  | 0.03881  | 2.81698  |
| D65 | 2.28205  | 0.00022  | 0.00715  | -0.00654 | 0.00061  | 2.28266  |
| D66 | -0.84079 | 0.00024  | 0.00377  | -0.00562 | -0.00185 | -0.84264 |
| D67 | -1.90806 | 0.00001  | 0.01020  | -0.00672 | 0.00347  | -1.90458 |
| D68 | 1.25229  | 0.00003  | 0.00682  | -0.00580 | 0.00101  | 1.25330  |
| D69 | 0.12586  | 0.00006  | 0.00661  | -0.00614 | 0.00048  | 0.12634  |
| D70 | -2.99698 | 0.00008  | 0.00323  | -0.00522 | -0.00199 | -2.99897 |

|     |          |         |          |          |          |          |
|-----|----------|---------|----------|----------|----------|----------|
| D71 | 2.94464  | 0.00027 | -0.00240 | -0.00268 | -0.00507 | 2.93957  |
| D72 | -0.17765 | 0.00029 | -0.00582 | -0.00179 | -0.00762 | -0.18527 |
| D73 | -1.95685 | 0.00036 | -0.01027 | -0.00258 | -0.01285 | -1.96970 |

| Item                 | Value    | Threshold | Converged? |
|----------------------|----------|-----------|------------|
| Maximum Force        | 0.001681 | 0.000450  | NO         |
| RMS Force            | 0.000276 | 0.000300  | YES        |
| Maximum Displacement | 0.107378 | 0.001800  | NO         |
| RMS Displacement     | 0.029588 | 0.001200  | NO         |

Predicted change in Energy=-5.925712D-05

GradGradGradGradGradGradGradGradGradGradGradGradGradGradGradGradGradGrad

Input orientation:

| Center Number | Atomic Number | Atomic Type | Coordinates (Angstroms) |           |           |
|---------------|---------------|-------------|-------------------------|-----------|-----------|
|               |               |             | X                       | Y         | Z         |
| 1             | 6             | 0           | -0.905413               | 1.647222  | 1.555675  |
| 2             | 6             | 0           | -1.587261               | 0.471746  | 1.591179  |
| 3             | 7             | 0           | -2.419228               | 0.466630  | 0.480312  |
| 4             | 6             | 0           | -2.240894               | 1.610681  | -0.200403 |
| 5             | 7             | 0           | -1.323489               | 2.348995  | 0.435797  |
| 6             | 6             | 0           | -0.745995               | 3.618786  | -0.042757 |
| 7             | 1             | 0           | -0.140092               | 2.026440  | 2.209570  |
| 8             | 1             | 0           | -1.474035               | -0.388289 | 2.257249  |
| 9             | 1             | 0           | -1.560566               | 4.251380  | -0.399680 |
| 10            | 1             | 0           | -0.296092               | 4.097635  | 0.824564  |
| 11            | 35            | 0           | -0.402248               | -2.431594 | 2.795761  |
| 12            | 1             | 0           | -2.746902               | 1.880586  | -1.111255 |
| 13            | 6             | 0           | -3.311400               | -0.576418 | 0.076743  |
| 14            | 6             | 0           | -3.269669               | -1.804644 | 0.577558  |
| 15            | 1             | 0           | -4.010651               | -0.255659 | -0.685660 |
| 16            | 1             | 0           | -3.982733               | -2.532411 | 0.211659  |
| 17            | 1             | 0           | -2.534635               | -2.126947 | 1.318571  |
| 18            | 6             | 0           | 2.631815                | -0.687504 | 1.234523  |
| 19            | 6             | 0           | 4.053241                | -0.335599 | 1.303549  |
| 20            | 8             | 0           | 3.045188                | 0.663414  | 1.618250  |
| 21            | 1             | 0           | 2.160504                | -0.734633 | 0.257531  |
| 22            | 1             | 0           | 2.136514                | -1.246607 | 2.022140  |
| 23            | 1             | 0           | 4.594082                | -0.644386 | 2.195324  |
| 24            | 6             | 0           | 4.892387                | -0.095816 | 0.078714  |
| 25            | 1             | 0           | 5.646850                | 0.673113  | 0.269333  |
| 26            | 1             | 0           | 5.415980                | -1.018005 | -0.191206 |
| 27            | 1             | 0           | 4.274236                | 0.215025  | -0.765668 |
| 28            | 6             | 0           | 0.299205                | 3.403987  | -1.145814 |

|    |   |   |           |          |           |
|----|---|---|-----------|----------|-----------|
| 29 | 1 | 0 | 0.768374  | 4.368959 | -1.362639 |
| 30 | 1 | 0 | -0.160146 | 3.043822 | -2.066763 |
| 31 | 6 | 0 | 1.386511  | 2.408390 | -0.754672 |
| 32 | 8 | 0 | 1.722554  | 1.488855 | -1.464893 |
| 33 | 8 | 0 | 1.885335  | 2.671156 | 0.448952  |
| 34 | 1 | 0 | 2.461744  | 1.913400 | 0.782445  |

-----  
Distance matrix (angstroms):

|    |    | 1        | 2        | 3        | 4        | 5        |
|----|----|----------|----------|----------|----------|----------|
| 1  | C  | 0.000000 |          |          |          |          |
| 2  | C  | 1.359383 | 0.000000 |          |          |          |
| 3  | N  | 2.200418 | 1.387884 | 0.000000 |          |          |
| 4  | C  | 2.206504 | 2.221301 | 1.343141 | 0.000000 |          |
| 5  | N  | 1.386146 | 2.220034 | 2.178514 | 1.338466 | 0.000000 |
| 6  | C  | 2.543121 | 3.644357 | 3.606854 | 2.508399 | 1.474748 |
| 7  | H  | 1.075686 | 2.212189 | 3.258497 | 3.224004 | 2.156558 |
| 8  | H  | 2.226846 | 1.093676 | 2.186728 | 3.259449 | 3.291364 |
| 9  | H  | 3.321789 | 4.271987 | 3.979449 | 2.734200 | 2.091243 |
| 10 | H  | 2.628749 | 3.924524 | 4.220239 | 3.319301 | 2.065049 |
| 11 | Br | 4.292753 | 3.359264 | 4.222465 | 5.357014 | 5.410374 |
| 12 | H  | 3.249317 | 3.260790 | 2.154003 | 1.076357 | 2.153807 |
| 13 | C  | 3.594522 | 2.522860 | 1.430660 | 2.450754 | 3.555103 |
| 14 | C  | 4.296719 | 3.006639 | 2.427219 | 3.650759 | 4.589165 |
| 15 | H  | 4.276335 | 3.403812 | 2.100909 | 2.617391 | 3.906754 |
| 16 | H  | 5.361493 | 4.082440 | 3.392782 | 4.513203 | 5.563267 |
| 17 | H  | 4.117637 | 2.779395 | 2.728120 | 4.045173 | 4.720193 |
| 18 | C  | 4.250420 | 4.389951 | 5.235829 | 5.575300 | 5.050022 |
| 19 | C  | 5.346344 | 5.705243 | 6.573747 | 6.757664 | 6.072007 |
| 20 | O  | 4.071736 | 4.636491 | 5.585111 | 5.669874 | 4.829567 |
| 21 | H  | 4.093685 | 4.156887 | 4.739896 | 5.008244 | 4.656045 |
| 22 | H  | 4.224352 | 4.123707 | 5.105605 | 5.680273 | 5.236073 |
| 23 | H  | 5.992083 | 6.310288 | 7.304939 | 7.585626 | 6.861043 |
| 24 | C  | 6.231699 | 6.677987 | 7.344204 | 7.339873 | 6.688925 |
| 25 | H  | 6.748015 | 7.356642 | 8.071478 | 7.957147 | 7.170907 |
| 26 | H  | 7.079197 | 7.378458 | 8.002847 | 8.095542 | 7.559779 |
| 27 | H  | 5.853938 | 6.322799 | 6.813093 | 6.686875 | 6.109982 |
| 28 | C  | 3.440257 | 4.432598 | 4.319980 | 3.249900 | 2.499527 |
| 29 | H  | 4.327351 | 5.427921 | 5.365206 | 4.244359 | 3.419139 |
| 30 | H  | 3.953223 | 4.693908 | 4.270007 | 3.141131 | 2.845866 |
| 31 | C  | 3.342154 | 4.254048 | 4.447389 | 3.755212 | 2.960548 |
| 32 | O  | 4.006884 | 4.618329 | 4.688617 | 4.162055 | 3.691997 |
| 33 | O  | 3.171995 | 4.266264 | 4.836340 | 4.309529 | 3.224982 |
| 34 | H  | 3.465037 | 4.373426 | 5.099835 | 4.813776 | 3.825950 |
|    |    | 6        | 7        | 8        | 9        | 10       |

|    |    |          |          |          |          |          |
|----|----|----------|----------|----------|----------|----------|
| 6  | C  | 0.000000 |          |          |          |          |
| 7  | H  | 2.824121 | 0.000000 |          |          |          |
| 8  | H  | 4.677256 | 2.759093 | 0.000000 |          |          |
| 9  | H  | 1.091373 | 3.711643 | 5.347269 | 0.000000 |          |
| 10 | H  | 1.088097 | 2.496483 | 4.854241 | 1.766722 | 0.000000 |
| 11 | Br | 6.691969 | 4.504044 | 2.369350 | 7.497645 | 6.821123 |
| 12 | H  | 2.857736 | 4.224289 | 4.256149 | 2.744885 | 3.830036 |
| 13 | C  | 4.918874 | 4.623961 | 2.857605 | 5.157522 | 5.612316 |
| 14 | C  | 6.013927 | 5.209119 | 2.837556 | 6.368002 | 6.613628 |
| 15 | H  | 5.107115 | 5.345237 | 3.887508 | 5.137908 | 5.918606 |
| 16 | H  | 6.955460 | 6.288136 | 3.882687 | 7.229138 | 7.610814 |
| 17 | H  | 6.169756 | 4.876304 | 2.242525 | 6.677144 | 6.633290 |
| 18 | C  | 5.620070 | 3.999960 | 4.241875 | 6.681262 | 5.624790 |
| 19 | C  | 6.362576 | 4.897361 | 5.609198 | 7.446892 | 6.228939 |
| 20 | O  | 5.085886 | 3.514756 | 4.683778 | 6.177258 | 4.856744 |
| 21 | H  | 5.243107 | 4.089832 | 4.162776 | 6.256087 | 5.450432 |
| 22 | H  | 6.020358 | 3.991353 | 3.718609 | 7.054182 | 5.992719 |
| 23 | H  | 7.190275 | 5.435615 | 6.073834 | 8.281441 | 6.948348 |
| 24 | C  | 6.753101 | 5.862624 | 6.735197 | 7.795356 | 6.712796 |
| 25 | H  | 7.045769 | 6.251776 | 7.468962 | 8.074554 | 6.881438 |
| 26 | H  | 7.713093 | 6.775124 | 7.339195 | 8.745403 | 7.734942 |
| 27 | H  | 6.108266 | 5.623127 | 6.522625 | 7.104297 | 6.204143 |
| 28 | C  | 1.534703 | 3.653658 | 5.395051 | 2.175670 | 2.172076 |
| 29 | H  | 2.144332 | 4.367308 | 6.384621 | 2.522910 | 2.447562 |
| 30 | H  | 2.184125 | 4.395735 | 5.674748 | 2.489687 | 3.080385 |
| 31 | C  | 2.553324 | 3.356059 | 5.007575 | 3.493980 | 2.859840 |
| 32 | O  | 3.557079 | 4.154531 | 5.253208 | 4.420985 | 4.015256 |
| 33 | O  | 2.839661 | 2.760034 | 4.890349 | 3.884780 | 2.633353 |
| 34 | H  | 3.725438 | 2.969683 | 4.791991 | 4.800266 | 3.518283 |
|    |    | 11       | 12       | 13       | 14       | 15       |
| 11 | Br | 0.000000 |          |          |          |          |
| 12 | H  | 6.273522 | 0.000000 |          |          |          |
| 13 | C  | 4.392937 | 2.786910 | 0.000000 |          |          |
| 14 | C  | 3.679075 | 4.087334 | 1.327063 | 0.000000 |          |
| 15 | H  | 5.465853 | 2.518280 | 1.083096 | 2.131696 | 0.000000 |
| 16 | H  | 4.416743 | 4.769897 | 2.072389 | 1.082583 | 2.447357 |
| 17 | H  | 2.611891 | 4.691421 | 2.132988 | 1.092361 | 3.114045 |
| 18 | C  | 3.832082 | 6.405339 | 6.055956 | 6.042112 | 6.927911 |
| 19 | C  | 5.145025 | 7.548821 | 7.470006 | 7.504010 | 8.306004 |
| 20 | O  | 4.780211 | 6.517669 | 6.657299 | 6.859429 | 7.479141 |
| 21 | H  | 3.986225 | 5.726743 | 5.477176 | 5.543837 | 6.261165 |
| 22 | H  | 2.906544 | 6.591302 | 5.823529 | 5.623615 | 6.789830 |
| 23 | H  | 5.340220 | 8.437949 | 8.184720 | 8.111839 | 9.082543 |
| 24 | C  | 6.393071 | 7.980033 | 8.217852 | 8.353927 | 8.937219 |

|    |   |           |          |          |          |          |
|----|---|-----------|----------|----------|----------|----------|
| 25 | H | 7.253525  | 8.591804 | 9.047025 | 9.259514 | 9.748946 |
| 26 | H | 6.691187  | 8.710968 | 8.742652 | 8.755016 | 9.470323 |
| 27 | H | 6.446540  | 7.224258 | 7.673195 | 7.924256 | 8.298632 |
| 28 | C | 7.076867  | 3.405982 | 5.511328 | 6.544976 | 5.672707 |
| 29 | H | 8.056684  | 4.314204 | 6.570626 | 7.627813 | 6.684644 |
| 30 | H | 7.326863  | 2.992894 | 5.256534 | 6.337916 | 5.255512 |
| 31 | C | 6.263440  | 4.182204 | 5.627672 | 6.419074 | 6.019242 |
| 32 | O | 6.167485  | 4.500506 | 5.655324 | 6.319892 | 6.043192 |
| 33 | O | 6.064537  | 4.951451 | 6.139327 | 6.828132 | 6.679539 |
| 34 | H | 5.579863  | 5.542307 | 6.326642 | 6.834832 | 6.982267 |
|    |   | 16        | 17       | 18       | 19       | 20       |
| 16 | H | 0.000000  |          |          |          |          |
| 17 | H | 1.867255  | 0.000000 |          |          |          |
| 18 | C | 6.942779  | 5.363886 | 0.000000 |          |          |
| 19 | C | 8.402088  | 6.827099 | 1.465965 | 0.000000 |          |
| 20 | O | 7.847513  | 6.245826 | 1.463934 | 1.453697 | 0.000000 |
| 21 | H | 6.401052  | 5.010856 | 1.085757 | 2.199053 | 2.142138 |
| 22 | H | 6.509710  | 4.805169 | 1.085477 | 2.240570 | 2.153368 |
| 23 | H | 9.003405  | 7.333846 | 2.185289 | 1.087713 | 2.107706 |
| 24 | C | 9.204478  | 7.798935 | 2.606947 | 1.503955 | 2.521655 |
| 25 | H | 10.149264 | 8.710794 | 3.445766 | 2.150974 | 2.930583 |
| 26 | H | 9.528459  | 8.168321 | 3.145395 | 2.134719 | 3.423734 |
| 27 | H | 8.756775  | 7.495974 | 2.740962 | 2.152600 | 2.719316 |
| 28 | C | 7.444363  | 6.685437 | 5.277061 | 5.837523 | 4.763530 |
| 29 | H | 8.525276  | 7.765020 | 5.982097 | 6.327067 | 5.272632 |
| 30 | H | 7.134265  | 6.620840 | 5.711070 | 6.366484 | 5.433215 |
| 31 | C | 7.360305  | 6.343737 | 3.884873 | 4.344790 | 3.380372 |
| 32 | O | 7.178558  | 6.240621 | 3.584709 | 4.052777 | 3.454921 |
| 33 | O | 7.846505  | 6.581350 | 3.529158 | 3.804042 | 2.596834 |
| 34 | H | 7.849988  | 6.447918 | 2.645374 | 2.803999 | 1.612899 |
|    |   | 21        | 22       | 23       | 24       | 25       |
| 21 | H | 0.000000  |          |          |          |          |
| 22 | H | 1.837536  | 0.000000 |          |          |          |
| 23 | H | 3.112151  | 2.536198 | 0.000000 |          |          |
| 24 | C | 2.811271  | 3.563153 | 2.206797 | 0.000000 |          |
| 25 | H | 3.759853  | 4.368079 | 2.559993 | 1.093984 | 0.000000 |
| 26 | H | 3.298452  | 3.963087 | 2.551594 | 1.094276 | 1.767845 |
| 27 | H | 2.533111  | 3.805010 | 3.099736 | 1.091656 | 1.779084 |
| 28 | C | 4.749946  | 5.919431 | 6.782219 | 5.903000 | 6.169086 |
| 29 | H | 5.532597  | 6.697993 | 7.240771 | 6.246534 | 6.334204 |
| 30 | H | 5.006444  | 6.356221 | 7.373665 | 6.323644 | 6.693191 |
| 31 | C | 3.391492  | 4.651042 | 5.320754 | 4.388251 | 4.712777 |
| 32 | O | 2.846479  | 4.451237 | 5.117965 | 3.865454 | 4.367273 |
| 33 | O | 3.422245  | 4.229288 | 4.623845 | 4.103117 | 4.263031 |



|    |   |          |          |          |          |          |
|----|---|----------|----------|----------|----------|----------|
| 34 | H | 2.716314 | 3.410024 | 3.617369 | 3.231131 | 3.456370 |
|    |   | 26       | 27       | 28       | 29       | 30       |
| 26 | H | 0.000000 |          |          |          |          |
| 27 | H | 1.775936 | 0.000000 |          |          |          |
| 28 | C | 6.829837 | 5.110270 | 0.000000 |          |          |
| 29 | H | 7.210539 | 5.468328 | 1.094670 | 0.000000 |          |
| 30 | H | 7.149079 | 5.418365 | 1.090353 | 1.764633 | 0.000000 |
| 31 | C | 5.319239 | 3.626283 | 1.525267 | 2.143723 | 2.125442 |
| 32 | O | 4.641984 | 2.936433 | 2.407378 | 3.035773 | 2.514902 |
| 33 | O | 5.146374 | 3.635208 | 2.365613 | 2.722498 | 3.263693 |
| 34 | H | 4.274183 | 2.926818 | 3.258313 | 3.674052 | 4.033627 |
|    |   | 31       | 32       | 33       | 34       |          |
| 31 | C | 0.000000 |          |          |          |          |
| 32 | O | 1.209498 | 0.000000 |          |          |          |
| 33 | O | 1.329128 | 2.255468 | 0.000000 |          |          |
| 34 | H | 1.940069 | 2.403574 | 1.008791 | 0.000000 |          |

Stoichiometry C<sub>11</sub>H<sub>17</sub>BrN<sub>2</sub>O<sub>3</sub>

Framework group C1[X(C<sub>11</sub>H<sub>17</sub>BrN<sub>2</sub>O<sub>3</sub>)]

Deg. of freedom 96

Full point group C1 NOp 1

Largest Abelian subgroup C1 NOp 1

Largest concise Abelian subgroup C1 NOp 1

Standard orientation:

| Center<br>Number | Atomic<br>Number | Atomic<br>Type | Coordinates (Angstroms) |           |           |
|------------------|------------------|----------------|-------------------------|-----------|-----------|
|                  |                  |                | X                       | Y         | Z         |
| 1                | 6                | 0              | -0.164381               | 1.362673  | 1.269688  |
| 2                | 6                | 0              | -1.384379               | 1.121948  | 0.720527  |
| 3                | 7                | 0              | -1.591003               | 2.114267  | -0.227541 |
| 4                | 6                | 0              | -0.522926               | 2.928514  | -0.243007 |
| 5                | 7                | 0              | 0.361112                | 2.492510  | 0.662460  |
| 6                | 6                | 0              | 1.718873                | 3.026244  | 0.878087  |
| 7                | 1                | 0              | 0.384293                | 0.810839  | 2.012343  |
| 8                | 1                | 0              | -2.066022               | 0.278334  | 0.861260  |
| 9                | 1                | 0              | 1.657779                | 4.115643  | 0.902029  |
| 10               | 1                | 0              | 2.032526                | 2.679730  | 1.860688  |
| 11               | 35               | 0              | -2.757530               | -1.912016 | 0.279881  |
| 12               | 1                | 0              | -0.398604               | 3.783115  | -0.885459 |
| 13               | 6                | 0              | -2.725911               | 2.263125  | -1.085803 |
| 14               | 6                | 0              | -3.628357               | 1.308110  | -1.271905 |
| 15               | 1                | 0              | -2.757987               | 3.230887  | -1.571092 |
| 16               | 1                | 0              | -4.455026               | 1.506933  | -1.942034 |
| 17               | 1                | 0              | -3.564566               | 0.321920  | -0.806488 |

|    |   |   |          |           |           |
|----|---|---|----------|-----------|-----------|
| 18 | 6 | 0 | 1.002599 | -2.434017 | -0.243381 |
| 19 | 6 | 0 | 2.200024 | -3.252637 | -0.031044 |
| 20 | 8 | 0 | 1.996397 | -2.050712 | 0.760883  |
| 21 | 1 | 0 | 0.978446 | -1.771337 | -1.103114 |
| 22 | 1 | 0 | 0.035048 | -2.709598 | 0.164248  |
| 23 | 1 | 0 | 2.082880 | -4.148403 | 0.574763  |
| 24 | 6 | 0 | 3.364343 | -3.253335 | -0.983011 |
| 25 | 1 | 0 | 4.306289 | -3.392431 | -0.444317 |
| 26 | 1 | 0 | 3.257786 | -4.082357 | -1.689275 |
| 27 | 1 | 0 | 3.411766 | -2.318960 | -1.545511 |
| 28 | 6 | 0 | 2.705791 | 2.560451  | -0.200962 |
| 29 | 1 | 0 | 3.708240 | 2.890862  | 0.089258  |
| 30 | 1 | 0 | 2.477327 | 3.004996  | -1.170010 |
| 31 | 6 | 0 | 2.723429 | 1.046152  | -0.382693 |
| 32 | 8 | 0 | 2.638303 | 0.512626  | -1.464816 |
| 33 | 8 | 0 | 2.821857 | 0.411353  | 0.780889  |
| 34 | 1 | 0 | 2.645529 | -0.576545 | 0.677804  |

-----

Rotational constants (GHZ):      0.3259504      0.2598048      0.1607084

Standard basis: 6-311++G(d,p) (5D, 7F)

There are    538 symmetry adapted cartesian basis functions of A    symmetry.

There are    519 symmetry adapted basis functions of A    symmetry.

    519 basis functions,    823 primitive gaussians,    538 cartesian basis functions

    78 alpha electrons      78 beta electrons

    nuclear repulsion energy      1575.0558010356 Hartrees.

NAtoms=    34 NActive=    34 NUniq=    34 SFac= 1.00D+00 NAtFMM=    60 NAOKFM=F

Big=F

Integral buffers will be    131072 words long.

Raffenetti 2 integral format.

Two-electron integral symmetry is turned on.

One-electron integrals computed using PRISM.

NBasis=    519 RedAO= T EigKep= 3.81D-06 NBF=    519

NBsUse=    519 1.00D-06 EigRej= -1.00D+00 NBFU=    519

Initial guess from the checkpoint file: "/coohpo.chk"

B after Tr=    0.000000    0.000000    0.000000

    Rot=    0.999597    0.000088    0.000874    0.028369 Ang=    3.25 deg.

ExpMin= 3.50D-02 ExpMax= 4.40D+05 ExpMxC= 1.51D+04 IAcc=3 IRadAn=      5 AccDes=

0.00D+00

Harris functional with IExCor=    402 and IRadAn=      5 diagonalized for initial guess.

HarFok: IExCor=    402 AccDes= 0.00D+00 IRadAn=      5 IDoV= 1 UseB2=F ITyADJ=14

ICtDFT= 3500011 ScaDFX= 1.000000 1.000000 1.000000 1.000000

FoFCou: FMM=F IPFlag=            0 FMFlag=      100000 FMFlg1=      0

    NxFFlg=            0 DoJE=T BraDBF=F KetDBF=T FulRan=T

    wScrn= 0.000000 ICntrl=      500 IOpCl= 0 I1Cent=    200000004 NGrid=

0

NMat0= 1 NMatS0= 1 NMatT0= 0 NMatD0= 1 NMtDS0= 0

NMtDT0= 0

Petite list used in FoFCou.

Requested convergence on RMS density matrix=1.00D-08 within 128 cycles.

Requested convergence on MAX density matrix=1.00D-06.

Requested convergence on energy=1.00D-06.

No special actions if energy rises.

SCF Done: E(RB3LYP) = -3338.90370697 A.U. after 11 cycles

NFock= 11 Conv=0.70D-08 -V/T= 2.0019

Calling FoFJK, ICntrl= 2127 FMM=F ISym2X=0 l1Cent= 0 IOpClX= 0 NMat=1 NMatS=1

NMatT=0.

\*\*\*\*\* Axes restored to original set \*\*\*\*\*

```
-----
```

| Center<br>Number | Atomic<br>Number | Forces (Hartrees/Bohr) |              |              |
|------------------|------------------|------------------------|--------------|--------------|
|                  |                  | X                      | Y            | Z            |
| 1                | 6                | 0.000460547            | 0.000074095  | 0.000156029  |
| 2                | 6                | -0.000674375           | 0.000366856  | 0.000615147  |
| 3                | 7                | 0.000419086            | 0.000945501  | -0.000310740 |
| 4                | 6                | -0.000490889           | -0.000478057 | 0.000259428  |
| 5                | 7                | 0.000348902            | -0.000151532 | -0.000182923 |
| 6                | 6                | -0.000073486           | -0.000215969 | -0.000079082 |
| 7                | 1                | -0.000112609           | 0.000116830  | -0.000104736 |
| 8                | 1                | 0.000658085            | -0.000523727 | -0.000402960 |
| 9                | 1                | -0.000018133           | -0.000038630 | 0.000018126  |
| 10               | 1                | 0.000006240            | 0.000226143  | 0.000048976  |
| 11               | 35               | -0.000020231           | -0.000013926 | 0.000339587  |
| 12               | 1                | 0.000087308            | 0.000041378  | -0.000067094 |
| 13               | 6                | -0.000545344           | -0.000853807 | -0.000165244 |
| 14               | 6                | 0.000365430            | 0.000899319  | -0.000204854 |
| 15               | 1                | 0.000040571            | 0.000088908  | 0.000050605  |
| 16               | 1                | -0.000050915           | -0.000167909 | 0.000109318  |
| 17               | 1                | -0.000249382           | -0.000238587 | -0.000050567 |
| 18               | 6                | -0.000038988           | -0.000424486 | 0.000505920  |
| 19               | 6                | 0.000071868            | -0.000046799 | 0.000350444  |
| 20               | 8                | 0.000303852            | 0.000030834  | -0.000663332 |
| 21               | 1                | 0.000153142            | 0.000128435  | -0.000238607 |
| 22               | 1                | -0.000130743           | -0.000122462 | -0.000055194 |
| 23               | 1                | -0.000080033           | -0.000028359 | -0.000055335 |
| 24               | 6                | -0.000024066           | -0.000044521 | 0.000381615  |
| 25               | 1                | -0.000054045           | 0.000023037  | -0.000059593 |
| 26               | 1                | -0.000037631           | 0.000035095  | -0.000214954 |
| 27               | 1                | -0.000066486           | -0.000058861 | -0.000101475 |

```
-----
```

|    |   |              |              |              |
|----|---|--------------|--------------|--------------|
| 28 | 6 | 0.000383217  | -0.000477071 | -0.000232051 |
| 29 | 1 | -0.000205381 | 0.000177041  | 0.000288256  |
| 30 | 1 | -0.000246914 | -0.000005378 | -0.000145967 |
| 31 | 6 | 0.000074134  | -0.000589310 | -0.001526107 |
| 32 | 8 | -0.000336669 | 0.000595249  | 0.000712729  |
| 33 | 8 | -0.000140648 | 0.000194107  | 0.001458442  |
| 34 | 1 | 0.000224585  | 0.000536566  | -0.000433806 |

-----  
Cartesian Forces: Max 0.001526107 RMS 0.000382939

GradGradGradGradGradGradGradGradGradGradGradGradGradGradGradGradGradGradGrad

Berny optimization.

Using GEDIIS/GDIIS optimizer.

FormGI is forming the generalized inverse of G from B-inverse, IUseBI=4.

Internal Forces: Max 0.001284088 RMS 0.000252128

Search for a local minimum.

Step number 24 out of a maximum of 175

All quantities printed in internal units (Hartrees-Bohrs-Radians)

Mixed Optimization -- En-DIIS/RFO-DIIS

Swapping is turned off.

Update second derivatives using D2CorX and points 20 21 22 23 24

DE= -2.59D-05 DEPred=-5.93D-05 R= 4.38D-01

Trust test= 4.38D-01 RLast= 1.04D-01 DXMaxT set to 1.56D+00

ITU= 0 1 1 1 1 1 1 1 1 1 1 0 0 -1 1 1 1 0 1 0

ITU= -1 0 1 0

|                 |         |         |         |         |         |
|-----------------|---------|---------|---------|---------|---------|
| Eigenvalues --- | 0.00154 | 0.00322 | 0.00416 | 0.00577 | 0.00694 |
| Eigenvalues --- | 0.00716 | 0.00968 | 0.01233 | 0.01513 | 0.01653 |
| Eigenvalues --- | 0.02005 | 0.02074 | 0.02259 | 0.02270 | 0.02369 |
| Eigenvalues --- | 0.02422 | 0.02674 | 0.03006 | 0.03115 | 0.03387 |
| Eigenvalues --- | 0.03505 | 0.03584 | 0.04005 | 0.04208 | 0.04817 |
| Eigenvalues --- | 0.04831 | 0.04968 | 0.05338 | 0.05576 | 0.05725 |
| Eigenvalues --- | 0.05990 | 0.06134 | 0.06527 | 0.09050 | 0.09484 |
| Eigenvalues --- | 0.09584 | 0.11779 | 0.12578 | 0.12687 | 0.13148 |
| Eigenvalues --- | 0.13560 | 0.15351 | 0.15537 | 0.15907 | 0.15985 |
| Eigenvalues --- | 0.16007 | 0.16012 | 0.16016 | 0.16038 | 0.16295 |
| Eigenvalues --- | 0.16914 | 0.17632 | 0.20284 | 0.21647 | 0.22132 |
| Eigenvalues --- | 0.23094 | 0.23837 | 0.24046 | 0.25390 | 0.25500 |
| Eigenvalues --- | 0.29006 | 0.29483 | 0.30173 | 0.31728 | 0.32616 |
| Eigenvalues --- | 0.33395 | 0.34498 | 0.34577 | 0.34635 | 0.34811 |
| Eigenvalues --- | 0.34884 | 0.34947 | 0.34987 | 0.35039 | 0.35148 |
| Eigenvalues --- | 0.35281 | 0.35720 | 0.35894 | 0.36577 | 0.36942 |
| Eigenvalues --- | 0.37007 | 0.37302 | 0.37732 | 0.38090 | 0.40301 |
| Eigenvalues --- | 0.42950 | 0.45031 | 0.49048 | 0.51466 | 0.51688 |
| Eigenvalues --- | 0.54145 | 0.55881 | 0.57558 | 0.62917 | 0.91190 |

Eigenvalues --- 1.39539  
 En-DIIS/RFO-DIIS IScMMF= 0 using points: 24 23 22 21 20  
 RFO step: Lambda=-2.15761724D-05.  
 DidBck=F Rises=F RFO-DIIS coefs: 1.34270 -0.13665 -0.08457 -0.13073  
 0.00926

Iteration 1 RMS(Cart)= 0.02813540 RMS(Int)= 0.00024356  
 Iteration 2 RMS(Cart)= 0.00038024 RMS(Int)= 0.00000659  
 Iteration 3 RMS(Cart)= 0.00000024 RMS(Int)= 0.00000659

| Variable | Old X   | -DE/DX   | Delta X<br>(Linear) | Delta X<br>(Quad) | Delta X<br>(Total) | New X   |
|----------|---------|----------|---------------------|-------------------|--------------------|---------|
| R1       | 2.56886 | 0.00023  | -0.00045            | 0.00026           | -0.00019           | 2.56867 |
| R2       | 2.61944 | -0.00001 | 0.00009             | 0.00009           | 0.00019            | 2.61963 |
| R3       | 2.03275 | -0.00011 | 0.00019             | -0.00024          | -0.00006           | 2.03270 |
| R4       | 2.62272 | 0.00060  | -0.00085            | 0.00095           | 0.00010            | 2.62282 |
| R5       | 2.06675 | 0.00045  | -0.00014            | 0.00184           | 0.00170            | 2.06845 |
| R6       | 2.53817 | -0.00058 | 0.00034             | -0.00075          | -0.00042           | 2.53775 |
| R7       | 2.70356 | 0.00056  | 0.00001             | 0.00083           | 0.00084            | 2.70439 |
| R8       | 2.52934 | -0.00002 | -0.00007            | -0.00015          | -0.00021           | 2.52912 |
| R9       | 2.03402 | 0.00003  | 0.00000             | 0.00009           | 0.00009            | 2.03411 |
| R10      | 2.78687 | -0.00020 | 0.00034             | -0.00037          | -0.00003           | 2.78684 |
| R11      | 2.06240 | -0.00002 | 0.00007             | -0.00004          | 0.00003            | 2.06243 |
| R12      | 2.05621 | 0.00015  | -0.00020            | 0.00028           | 0.00008            | 2.05629 |
| R13      | 2.90017 | -0.00013 | -0.00127            | -0.00057          | -0.00183           | 2.89834 |
| R14      | 4.47742 | 0.00008  | -0.00823            | -0.00188          | -0.01011           | 4.46731 |
| R15      | 2.50779 | -0.00053 | 0.00052             | -0.00059          | -0.00007           | 2.50771 |
| R16      | 2.04675 | -0.00003 | -0.00009            | -0.00007          | -0.00016           | 2.04659 |
| R17      | 2.04579 | 0.00011  | -0.00044            | 0.00016           | -0.00028           | 2.04551 |
| R18      | 2.06426 | -0.00014 | -0.00006            | -0.00056          | -0.00063           | 2.06364 |
| R19      | 2.77027 | -0.00018 | -0.00027            | -0.00022          | -0.00050           | 2.76977 |
| R20      | 2.76643 | 0.00041  | -0.00098            | 0.00084           | -0.00013           | 2.76630 |
| R21      | 2.05178 | 0.00014  | 0.00029             | 0.00044           | 0.00073            | 2.05252 |
| R22      | 2.05125 | 0.00009  | 0.00069             | 0.00050           | 0.00119            | 2.05245 |
| R23      | 2.74709 | -0.00001 | 0.00058             | 0.00031           | 0.00089            | 2.74798 |
| R24      | 2.05548 | -0.00007 | -0.00002            | -0.00019          | -0.00021           | 2.05527 |
| R25      | 2.84206 | -0.00014 | -0.00020            | -0.00045          | -0.00065           | 2.84141 |
| R26      | 3.04794 | 0.00039  | -0.00465            | -0.00128          | -0.00594           | 3.04200 |
| R27      | 2.06733 | -0.00003 | 0.00000             | -0.00009          | -0.00008           | 2.06725 |
| R28      | 2.06788 | 0.00001  | -0.00002            | 0.00001           | -0.00001           | 2.06787 |
| R29      | 2.06293 | 0.00009  | 0.00005             | 0.00018           | 0.00023            | 2.06316 |
| R30      | 2.06863 | 0.00002  | 0.00027             | 0.00000           | 0.00028            | 2.06891 |
| R31      | 2.06047 | 0.00022  | 0.00011             | 0.00052           | 0.00063            | 2.06110 |
| R32      | 2.88234 | -0.00016 | 0.00045             | -0.00020          | 0.00025            | 2.88259 |
| R33      | 2.28562 | -0.00097 | 0.00011             | -0.00070          | -0.00059           | 2.28503 |
| R34      | 2.51169 | 0.00094  | -0.00069            | 0.00133           | 0.00063            | 2.51232 |

|     |         |          |          |          |          |         |
|-----|---------|----------|----------|----------|----------|---------|
| R35 | 1.90634 | 0.00000  | 0.00030  | 0.00063  | 0.00093  | 1.90727 |
| A1  | 1.88347 | -0.00011 | -0.00011 | -0.00007 | -0.00019 | 1.88328 |
| A2  | 2.27291 | 0.00020  | -0.00116 | 0.00036  | -0.00082 | 2.27208 |
| A3  | 2.12612 | -0.00009 | 0.00112  | -0.00033 | 0.00076  | 2.12688 |
| A4  | 1.85767 | -0.00021 | 0.00047  | -0.00051 | -0.00003 | 1.85764 |
| A5  | 2.27046 | -0.00030 | -0.00034 | -0.00256 | -0.00290 | 2.26756 |
| A6  | 2.14912 | 0.00051  | 0.00000  | 0.00259  | 0.00259  | 2.15171 |
| A7  | 1.89961 | 0.00011  | -0.00021 | 0.00037  | 0.00016  | 1.89977 |
| A8  | 2.21717 | 0.00046  | -0.00067 | 0.00155  | 0.00087  | 2.21804 |
| A9  | 2.16619 | -0.00057 | 0.00094  | -0.00187 | -0.00094 | 2.16525 |
| A10 | 1.89648 | 0.00005  | 0.00001  | -0.00011 | -0.00010 | 1.89638 |
| A11 | 2.18959 | 0.00006  | -0.00052 | 0.00031  | -0.00023 | 2.18936 |
| A12 | 2.19707 | -0.00011 | 0.00056  | -0.00021 | 0.00035  | 2.19742 |
| A13 | 1.88754 | 0.00017  | -0.00016 | 0.00032  | 0.00016  | 1.88770 |
| A14 | 2.18949 | -0.00003 | -0.00093 | 0.00004  | -0.00091 | 2.18858 |
| A15 | 2.20075 | -0.00013 | 0.00061  | -0.00037 | 0.00021  | 2.20096 |
| A16 | 1.88907 | -0.00010 | 0.00123  | -0.00031 | 0.00092  | 1.88999 |
| A17 | 1.85685 | -0.00005 | -0.00098 | 0.00081  | -0.00017 | 1.85668 |
| A18 | 1.95995 | 0.00028  | -0.00204 | 0.00012  | -0.00192 | 1.95804 |
| A19 | 1.89042 | -0.00001 | 0.00091  | -0.00058 | 0.00033  | 1.89075 |
| A20 | 1.93305 | -0.00006 | 0.00007  | -0.00038 | -0.00031 | 1.93274 |
| A21 | 1.93147 | -0.00007 | 0.00089  | 0.00034  | 0.00122  | 1.93269 |
| A22 | 2.61278 | 0.00128  | 0.01914  | 0.02313  | 0.04227  | 2.65506 |
| A23 | 2.15161 | 0.00020  | 0.00083  | 0.00133  | 0.00217  | 2.15378 |
| A24 | 1.96628 | -0.00020 | -0.00027 | -0.00119 | -0.00147 | 1.96481 |
| A25 | 2.16523 | 0.00001  | -0.00057 | -0.00015 | -0.00072 | 2.16451 |
| A26 | 2.06453 | -0.00002 | -0.00077 | -0.00050 | -0.00127 | 2.06326 |
| A27 | 2.15345 | 0.00034  | -0.00017 | 0.00222  | 0.00204  | 2.15549 |
| A28 | 2.06478 | -0.00032 | 0.00092  | -0.00164 | -0.00072 | 2.06405 |
| A29 | 2.06427 | -0.00007 | 0.00103  | -0.00151 | -0.00047 | 2.06380 |
| A30 | 2.13166 | 0.00000  | -0.00258 | 0.00038  | -0.00220 | 2.12945 |
| A31 | 1.98067 | -0.00024 | 0.00077  | -0.00075 | 0.00001  | 1.98068 |
| A32 | 1.99760 | 0.00026  | -0.00094 | 0.00083  | -0.00011 | 1.99749 |
| A33 | 2.01804 | 0.00005  | 0.00111  | 0.00083  | 0.00193  | 2.01997 |
| A34 | 2.04045 | 0.00000  | -0.00107 | -0.00040 | -0.00147 | 2.03898 |
| A35 | 2.14234 | -0.00021 | 0.00161  | -0.00058 | 0.00103  | 2.14337 |
| A36 | 1.94164 | 0.00015  | -0.00050 | 0.00024  | -0.00026 | 1.94138 |
| A37 | 2.04165 | -0.00037 | 0.00001  | -0.00069 | -0.00068 | 2.04097 |
| A38 | 2.02143 | 0.00019  | -0.00006 | 0.00083  | 0.00077  | 2.02220 |
| A39 | 2.06825 | 0.00023  | 0.00094  | 0.00066  | 0.00158  | 2.06983 |
| A40 | 2.30669 | 0.00040  | 0.00367  | 0.00372  | 0.00739  | 2.31408 |
| A41 | 1.93366 | 0.00003  | -0.00020 | 0.00024  | 0.00004  | 1.93370 |
| A42 | 1.91081 | 0.00024  | -0.00049 | 0.00126  | 0.00077  | 1.91158 |
| A43 | 1.93841 | -0.00008 | 0.00061  | -0.00057 | 0.00004  | 1.93845 |

|     |          |          |          |          |          |          |
|-----|----------|----------|----------|----------|----------|----------|
| A44 | 1.88108  | -0.00004 | -0.00016 | 0.00041  | 0.00025  | 1.88133  |
| A45 | 1.90197  | 0.00000  | -0.00018 | -0.00018 | -0.00036 | 1.90161  |
| A46 | 1.89664  | -0.00015 | 0.00041  | -0.00116 | -0.00076 | 1.89589  |
| A47 | 1.88691  | -0.00039 | 0.00178  | -0.00208 | -0.00030 | 1.88661  |
| A48 | 1.94592  | -0.00002 | 0.00017  | -0.00032 | -0.00015 | 1.94578  |
| A49 | 1.97418  | 0.00003  | 0.00084  | -0.00029 | 0.00054  | 1.97472  |
| A50 | 1.88015  | 0.00011  | -0.00141 | 0.00035  | -0.00107 | 1.87908  |
| A51 | 1.89723  | 0.00023  | -0.00091 | 0.00086  | -0.00006 | 1.89717  |
| A52 | 1.87686  | 0.00005  | -0.00060 | 0.00155  | 0.00095  | 1.87781  |
| A53 | 2.14567  | -0.00010 | -0.00012 | -0.00015 | -0.00027 | 2.14540  |
| A54 | 1.95058  | 0.00042  | -0.00023 | 0.00132  | 0.00108  | 1.95167  |
| A55 | 2.18681  | -0.00033 | 0.00038  | -0.00121 | -0.00083 | 2.18598  |
| A56 | 1.94476  | -0.00109 | 0.00074  | -0.00347 | -0.00273 | 1.94204  |
| A57 | 2.85830  | -0.00058 | -0.00922 | -0.00785 | -0.01708 | 2.84122  |
| D1  | 0.00293  | 0.00004  | -0.00063 | 0.00070  | 0.00007  | 0.00300  |
| D2  | 3.02826  | 0.00004  | 0.00067  | -0.00370 | -0.00302 | 3.02524  |
| D3  | -3.09861 | -0.00005 | 0.00497  | 0.00202  | 0.00697  | -3.09164 |
| D4  | -0.07328 | -0.00004 | 0.00627  | -0.00237 | 0.00388  | -0.06940 |
| D5  | -0.00307 | -0.00002 | 0.00041  | 0.00072  | 0.00114  | -0.00193 |
| D6  | -3.03856 | -0.00012 | 0.00549  | 0.00082  | 0.00631  | -3.03225 |
| D7  | 3.10254  | 0.00006  | -0.00465 | -0.00045 | -0.00512 | 3.09743  |
| D8  | 0.06705  | -0.00004 | 0.00043  | -0.00035 | 0.00005  | 0.06710  |
| D9  | -0.00179 | -0.00004 | 0.00063  | -0.00188 | -0.00125 | -0.00303 |
| D10 | 3.11790  | 0.00000  | 0.00325  | 0.00054  | 0.00379  | 3.12168  |
| D11 | -3.03720 | 0.00002  | -0.00052 | 0.00254  | 0.00202  | -3.03518 |
| D12 | 0.08248  | 0.00006  | 0.00209  | 0.00496  | 0.00706  | 0.08954  |
| D13 | -1.48976 | 0.00019  | -0.01035 | -0.00697 | -0.01732 | -1.50709 |
| D14 | 1.51857  | 0.00014  | -0.00884 | -0.01226 | -0.02110 | 1.49747  |
| D15 | -0.00011 | 0.00003  | -0.00039 | 0.00237  | 0.00198  | 0.00187  |
| D16 | 3.13192  | 0.00002  | 0.00288  | 0.00165  | 0.00452  | 3.13644  |
| D17 | -3.12058 | -0.00003 | -0.00288 | -0.00002 | -0.00289 | -3.12347 |
| D18 | 0.01145  | -0.00004 | 0.00039  | -0.00073 | -0.00035 | 0.01110  |
| D19 | -0.24166 | -0.00003 | 0.01111  | 0.00584  | 0.01695  | -0.22471 |
| D20 | 2.91180  | -0.00005 | 0.01219  | 0.00615  | 0.01833  | 2.93013  |
| D21 | 2.87488  | 0.00003  | 0.01407  | 0.00864  | 0.02272  | 2.89760  |
| D22 | -0.25484 | 0.00001  | 0.01515  | 0.00895  | 0.02410  | -0.23074 |
| D23 | 0.00194  | 0.00000  | -0.00001 | -0.00191 | -0.00192 | 0.00002  |
| D24 | 3.03656  | 0.00010  | -0.00523 | -0.00198 | -0.00723 | 3.02934  |
| D25 | -3.13004 | 0.00000  | -0.00328 | -0.00120 | -0.00447 | -3.13451 |
| D26 | -0.09541 | 0.00011  | -0.00850 | -0.00127 | -0.00978 | -0.10519 |
| D27 | -2.46092 | 0.00011  | 0.00055  | -0.00326 | -0.00271 | -2.46363 |
| D28 | -0.43258 | 0.00002  | 0.00171  | -0.00367 | -0.00196 | -0.43454 |
| D29 | 1.68296  | 0.00007  | 0.00093  | -0.00265 | -0.00171 | 1.68125  |
| D30 | 0.80554  | -0.00003 | 0.00659  | -0.00319 | 0.00339  | 0.80893  |

|     |          |          |          |          |          |          |
|-----|----------|----------|----------|----------|----------|----------|
| D31 | 2.83388  | -0.00011 | 0.00775  | -0.00360 | 0.00414  | 2.83802  |
| D32 | -1.33377 | -0.00006 | 0.00697  | -0.00258 | 0.00440  | -1.32937 |
| D33 | -3.02258 | -0.00002 | 0.00117  | 0.00480  | 0.00596  | -3.01662 |
| D34 | 1.19705  | 0.00010  | 0.00170  | 0.00584  | 0.00754  | 1.20459  |
| D35 | -0.92076 | 0.00003  | 0.00176  | 0.00427  | 0.00603  | -0.91474 |
| D36 | 1.14635  | -0.00004 | 0.00095  | 0.00538  | 0.00633  | 1.15268  |
| D37 | -0.91720 | 0.00007  | 0.00148  | 0.00642  | 0.00791  | -0.90930 |
| D38 | -3.03502 | 0.00000  | 0.00154  | 0.00485  | 0.00639  | -3.02862 |
| D39 | -0.95043 | 0.00006  | -0.00081 | 0.00613  | 0.00531  | -0.94512 |
| D40 | -3.01398 | 0.00017  | -0.00029 | 0.00717  | 0.00689  | -3.00709 |
| D41 | 1.15139  | 0.00010  | -0.00022 | 0.00560  | 0.00537  | 1.15676  |
| D42 | -3.13904 | -0.00006 | 0.00250  | -0.00047 | 0.00203  | -3.13701 |
| D43 | -0.02945 | 0.00003  | 0.00135  | 0.00238  | 0.00373  | -0.02572 |
| D44 | -0.01067 | -0.00004 | 0.00130  | -0.00082 | 0.00048  | -0.01019 |
| D45 | 3.09892  | 0.00005  | 0.00015  | 0.00203  | 0.00218  | 3.10110  |
| D46 | -2.75329 | -0.00002 | 0.00036  | 0.00043  | 0.00080  | -2.75249 |
| D47 | -0.04608 | -0.00002 | 0.00156  | 0.00027  | 0.00183  | -0.04425 |
| D48 | -0.02008 | -0.00004 | -0.00057 | -0.00025 | -0.00082 | -0.02090 |
| D49 | 2.68712  | -0.00004 | 0.00063  | -0.00042 | 0.00021  | 2.68733  |
| D50 | 0.25558  | 0.00033  | 0.00304  | 0.00553  | 0.00857  | 0.26415  |
| D51 | -2.11268 | 0.00023  | 0.00151  | 0.00417  | 0.00569  | -2.10700 |
| D52 | 2.57117  | -0.00001 | 0.00122  | 0.00124  | 0.00246  | 2.57364  |
| D53 | 0.19326  | -0.00007 | 0.00187  | 0.00043  | 0.00230  | 0.19556  |
| D54 | 2.55216  | -0.00003 | -0.00024 | -0.00138 | -0.00163 | 2.55054  |
| D55 | -1.65873 | 0.00008  | -0.00087 | 0.00007  | -0.00081 | -1.65954 |
| D56 | 0.43578  | 0.00000  | -0.00030 | -0.00092 | -0.00122 | 0.43456  |
| D57 | 1.32399  | -0.00005 | -0.00017 | -0.00126 | -0.00144 | 1.32256  |
| D58 | -2.88690 | 0.00007  | -0.00080 | 0.00018  | -0.00062 | -2.88752 |
| D59 | -0.79239 | -0.00001 | -0.00022 | -0.00081 | -0.00103 | -0.79342 |
| D60 | -1.01947 | -0.00008 | 0.00070  | -0.00182 | -0.00112 | -1.02059 |
| D61 | 1.05283  | 0.00004  | 0.00007  | -0.00037 | -0.00030 | 1.05252  |
| D62 | -3.13585 | -0.00004 | 0.00065  | -0.00136 | -0.00072 | -3.13657 |
| D63 | 1.51784  | -0.00009 | 0.01788  | -0.00551 | 0.01235  | 1.53020  |
| D64 | 2.81698  | 0.00000  | 0.01969  | -0.00430 | 0.01541  | 2.83238  |
| D65 | 2.28266  | 0.00006  | 0.00372  | -0.00041 | 0.00331  | 2.28597  |
| D66 | -0.84264 | 0.00027  | 0.00196  | 0.00243  | 0.00439  | -0.83825 |
| D67 | -1.90458 | -0.00025 | 0.00586  | -0.00262 | 0.00324  | -1.90135 |
| D68 | 1.25330  | -0.00004 | 0.00410  | 0.00021  | 0.00431  | 1.25761  |
| D69 | 0.12634  | 0.00002  | 0.00338  | -0.00093 | 0.00246  | 0.12879  |
| D70 | -2.99897 | 0.00023  | 0.00163  | 0.00190  | 0.00353  | -2.99543 |
| D71 | 2.93957  | -0.00003 | -0.00377 | 0.00026  | -0.00350 | 2.93607  |
| D72 | -0.18527 | 0.00018  | -0.00557 | 0.00316  | -0.00240 | -0.18768 |
| D73 | -1.96970 | 0.00008  | -0.00542 | -0.00642 | -0.01184 | -1.98154 |

Item Value Threshold Converged?



|                      |          |          |     |
|----------------------|----------|----------|-----|
| Maximum Force        | 0.001284 | 0.000450 | NO  |
| RMS Force            | 0.000252 | 0.000300 | YES |
| Maximum Displacement | 0.098111 | 0.001800 | NO  |
| RMS Displacement     | 0.028211 | 0.001200 | NO  |

Predicted change in Energy=-4.135728D-05

GradGradGradGradGradGradGradGradGradGradGradGradGradGradGradGradGradGrad

Input orientation:

| -----  |        |        |                         |           |           |
|--------|--------|--------|-------------------------|-----------|-----------|
| Center | Atomic | Atomic | Coordinates (Angstroms) |           |           |
| Number | Number | Type   | X                       | Y         | Z         |
| -----  |        |        |                         |           |           |
| 1      | 6      | 0      | -0.887609               | 1.654038  | 1.554411  |
| 2      | 6      | 0      | -1.555163               | 0.470408  | 1.586683  |
| 3      | 7      | 0      | -2.391390               | 0.460862  | 0.478981  |
| 4      | 6      | 0      | -2.230715               | 1.610747  | -0.195843 |
| 5      | 7      | 0      | -1.318702               | 2.356173  | 0.439582  |
| 6      | 6      | 0      | -0.752682               | 3.631335  | -0.038351 |
| 7      | 1      | 0      | -0.120353               | 2.036043  | 2.204354  |
| 8      | 1      | 0      | -1.424880               | -0.391703 | 2.248412  |
| 9      | 1      | 0      | -1.572811               | 4.259531  | -0.390331 |
| 10     | 1      | 0      | -0.301815               | 4.110858  | 0.828150  |
| 11     | 35     | 0      | -0.393803               | -2.435160 | 2.839723  |
| 12     | 1      | 0      | -2.746872               | 1.880585  | -1.101057 |
| 13     | 6      | 0      | -3.276420               | -0.588661 | 0.074902  |
| 14     | 6      | 0      | -3.236875               | -1.813852 | 0.583172  |
| 15     | 1      | 0      | -3.968420               | -0.274915 | -0.696856 |
| 16     | 1      | 0      | -3.944093               | -2.544725 | 0.212588  |
| 17     | 1      | 0      | -2.511481               | -2.131290 | 1.335211  |
| 18     | 6      | 0      | 2.596445                | -0.683501 | 1.215339  |
| 19     | 6      | 0      | 4.020381                | -0.347889 | 1.305061  |
| 20     | 8      | 0      | 3.018824                | 0.664059  | 1.600787  |
| 21     | 1      | 0      | 2.140096                | -0.729027 | 0.230766  |
| 22     | 1      | 0      | 2.084596                | -1.235331 | 1.998363  |
| 23     | 1      | 0      | 4.542480                | -0.660583 | 2.206458  |
| 24     | 6      | 0      | 4.881632                | -0.120369 | 0.093731  |
| 25     | 1      | 0      | 5.640714                | 0.641341  | 0.294471  |
| 26     | 1      | 0      | 5.399800                | -1.048478 | -0.166157 |
| 27     | 1      | 0      | 4.280595                | 0.194697  | -0.761525 |
| 28     | 6      | 0      | 0.287067                | 3.424247  | -1.146671 |
| 29     | 1      | 0      | 0.753771                | 4.391336  | -1.360101 |
| 30     | 1      | 0      | -0.176515               | 3.069942  | -2.068168 |
| 31     | 6      | 0      | 1.377943                | 2.427992  | -0.766786 |
| 32     | 8      | 0      | 1.713845                | 1.515475  | -1.485547 |

|    |   |   |          |          |          |
|----|---|---|----------|----------|----------|
| 33 | 8 | 0 | 1.879665 | 2.680183 | 0.438266 |
| 34 | 1 | 0 | 2.455818 | 1.917346 | 0.761970 |

-----  
Distance matrix (angstroms):

|    |    | 1        | 2        | 3        | 4        | 5        |
|----|----|----------|----------|----------|----------|----------|
| 1  | C  | 0.000000 |          |          |          |          |
| 2  | C  | 1.359282 | 0.000000 |          |          |          |
| 3  | N  | 2.200358 | 1.387938 | 0.000000 |          |          |
| 4  | C  | 2.206625 | 2.221293 | 1.342921 | 0.000000 |          |
| 5  | N  | 1.386247 | 2.219879 | 2.178168 | 1.338355 | 0.000000 |
| 6  | C  | 2.542597 | 3.643648 | 3.606230 | 2.508418 | 1.474733 |
| 7  | H  | 1.075656 | 2.211654 | 3.258177 | 3.224197 | 2.157068 |
| 8  | H  | 2.226062 | 1.094575 | 2.189040 | 3.260914 | 3.291499 |
| 9  | H  | 3.322668 | 4.273915 | 3.981917 | 2.736188 | 2.091913 |
| 10 | H  | 2.628037 | 3.924172 | 4.220274 | 3.319604 | 2.064937 |
| 11 | Br | 4.314789 | 3.370637 | 4.236791 | 5.381288 | 5.438105 |
| 12 | H  | 3.249568 | 3.260785 | 2.153718 | 1.076403 | 2.153932 |
| 13 | C  | 3.595144 | 2.523853 | 1.431103 | 2.450346 | 3.554954 |
| 14 | C  | 4.299839 | 3.008826 | 2.428997 | 3.653368 | 4.592289 |
| 15 | H  | 4.275565 | 3.404977 | 2.100234 | 2.612729 | 3.903219 |
| 16 | H  | 5.363971 | 4.084869 | 3.393436 | 4.513360 | 5.564441 |
| 17 | H  | 4.124769 | 2.783274 | 2.732546 | 4.052875 | 4.728869 |
| 18 | C  | 4.209238 | 4.324957 | 5.170134 | 5.527791 | 5.016950 |
| 19 | C  | 5.306435 | 5.642306 | 6.515158 | 6.720503 | 6.047049 |
| 20 | O  | 4.030190 | 4.578107 | 5.529028 | 5.628655 | 4.798518 |
| 21 | H  | 4.074068 | 4.114863 | 4.691675 | 4.975995 | 4.639541 |
| 22 | H  | 4.168879 | 4.040653 | 5.021956 | 5.615746 | 5.187594 |
| 23 | H  | 5.938730 | 6.232537 | 7.233282 | 7.536987 | 6.824670 |
| 24 | C  | 6.210173 | 6.634023 | 7.306373 | 7.325715 | 6.685582 |
| 25 | H  | 6.725475 | 7.312981 | 8.036250 | 7.946040 | 7.169043 |
| 26 | H  | 7.056590 | 7.331506 | 7.962220 | 8.080663 | 7.556245 |
| 27 | H  | 5.848382 | 6.296521 | 6.791545 | 6.687478 | 6.121010 |
| 28 | C  | 3.436474 | 4.426082 | 4.312601 | 3.245318 | 2.497093 |
| 29 | H  | 4.322188 | 5.421106 | 5.359373 | 4.241973 | 3.417000 |
| 30 | H  | 3.953925 | 4.692141 | 4.266256 | 3.139203 | 2.846554 |
| 31 | C  | 3.334619 | 4.239583 | 4.430508 | 3.743832 | 2.955059 |
| 32 | O  | 4.003512 | 4.606211 | 4.671673 | 4.151141 | 3.689069 |
| 33 | O  | 3.155402 | 4.242643 | 4.813414 | 4.294300 | 3.214737 |
| 34 | H  | 3.446128 | 4.343012 | 5.069206 | 4.793224 | 3.813594 |
|    |    | 6        | 7        | 8        | 9        | 10       |
| 6  | C  | 0.000000 |          |          |          |          |
| 7  | H  | 2.823919 | 0.000000 |          |          |          |
| 8  | H  | 4.676107 | 2.756390 | 0.000000 |          |          |
| 9  | H  | 1.091390 | 3.712940 | 5.349657 | 0.000000 |          |

|    |    |          |          |          |          |          |
|----|----|----------|----------|----------|----------|----------|
| 10 | H  | 1.088139 | 2.496341 | 4.852987 | 1.766983 | 0.000000 |
| 11 | Br | 6.724170 | 4.524393 | 2.363997 | 7.526101 | 6.848740 |
| 12 | H  | 2.858542 | 4.224750 | 4.257922 | 2.746441 | 3.830700 |
| 13 | C  | 4.918379 | 4.624327 | 2.862017 | 5.159815 | 5.612587 |
| 14 | C  | 6.017273 | 5.211779 | 2.842333 | 6.372033 | 6.616402 |
| 15 | H  | 5.102292 | 5.344639 | 3.893307 | 5.137519 | 5.916472 |
| 16 | H  | 6.956421 | 6.290593 | 3.889282 | 7.230795 | 7.611957 |
| 17 | H  | 6.179636 | 4.882579 | 2.245173 | 6.685895 | 6.641095 |
| 18 | C  | 5.604123 | 3.969264 | 4.162144 | 6.662915 | 5.615666 |
| 19 | C  | 6.357759 | 4.861845 | 5.526545 | 7.442208 | 6.228101 |
| 20 | O  | 5.071071 | 3.478659 | 4.613086 | 6.162393 | 4.848096 |
| 21 | H  | 5.239594 | 4.080477 | 4.110200 | 6.249572 | 5.453832 |
| 22 | H  | 5.990224 | 3.950459 | 3.618101 | 7.019686 | 5.970435 |
| 23 | H  | 7.176244 | 5.386447 | 5.973563 | 8.267263 | 6.937837 |
| 24 | C  | 6.770393 | 5.841634 | 6.669960 | 7.815221 | 6.731328 |
| 25 | H  | 7.065858 | 6.227579 | 7.403222 | 8.099087 | 6.901885 |
| 26 | H  | 7.731107 | 6.753198 | 7.268959 | 8.765987 | 7.753439 |
| 27 | H  | 6.137373 | 5.617414 | 6.477348 | 7.136038 | 6.233929 |
| 28 | C  | 1.533733 | 3.649995 | 5.386913 | 2.174603 | 2.172127 |
| 29 | H  | 2.143368 | 4.360829 | 6.375371 | 2.524046 | 2.445684 |
| 30 | H  | 2.183413 | 4.396197 | 5.672237 | 2.485941 | 3.080238 |
| 31 | C  | 2.553079 | 3.350549 | 4.989782 | 3.493308 | 2.863118 |
| 32 | O  | 3.557386 | 4.153389 | 5.237497 | 4.419440 | 4.018966 |
| 33 | O  | 2.839209 | 2.744823 | 4.861393 | 3.885937 | 2.637745 |
| 34 | H  | 3.724613 | 2.954863 | 4.754055 | 4.800362 | 3.524261 |
|    |    | 11       | 12       | 13       | 14       | 15       |
| 11 | Br | 0.000000 |          |          |          |          |
| 12 | H  | 6.300185 | 0.000000 |          |          |          |
| 13 | C  | 4.400372 | 2.785763 | 0.000000 |          |          |
| 14 | C  | 3.682541 | 4.089694 | 1.327025 | 0.000000 |          |
| 15 | H  | 5.472837 | 2.510326 | 1.083011 | 2.131187 | 0.000000 |
| 16 | H  | 4.417964 | 4.768896 | 2.071456 | 1.082435 | 2.445346 |
| 17 | H  | 2.615426 | 4.699570 | 2.133827 | 1.092029 | 3.114178 |
| 18 | C  | 3.827338 | 6.363274 | 5.983321 | 5.975362 | 6.849882 |
| 19 | C  | 5.118291 | 7.520054 | 7.403686 | 7.438947 | 8.236136 |
| 20 | O  | 4.773484 | 6.482526 | 6.597555 | 6.805098 | 7.415013 |
| 21 | H  | 4.017237 | 5.697919 | 5.420576 | 5.496623 | 6.195214 |
| 22 | H  | 2.879225 | 6.531341 | 5.732223 | 5.536742 | 6.695193 |
| 23 | H  | 5.283658 | 8.398324 | 8.104561 | 8.030160 | 9.000745 |
| 24 | C  | 6.381923 | 7.976553 | 8.171503 | 8.307683 | 8.886638 |
| 25 | H  | 7.235922 | 8.592719 | 9.004243 | 9.215363 | 9.703490 |
| 26 | H  | 6.672633 | 8.707566 | 8.691739 | 8.702842 | 9.415073 |
| 27 | H  | 6.460273 | 7.234832 | 7.643411 | 7.896508 | 8.262625 |
| 28 | C  | 7.119520 | 3.404374 | 5.504009 | 6.545855 | 5.656439 |

|    |   |           |          |          |          |          |
|----|---|-----------|----------|----------|----------|----------|
| 29 | H | 8.096696  | 4.315724 | 6.565215 | 7.629281 | 6.671797 |
| 30 | H | 7.378398  | 2.992759 | 5.252384 | 6.344041 | 5.238999 |
| 31 | C | 6.308426  | 4.174385 | 5.609967 | 6.411878 | 5.991176 |
| 32 | O | 6.225565  | 4.492119 | 5.636056 | 6.314559 | 6.009631 |
| 33 | O | 6.091173  | 4.941024 | 6.115766 | 6.811486 | 6.649903 |
| 34 | H | 5.601938  | 5.526319 | 6.293702 | 6.808859 | 6.942983 |
|    |   | 16        | 17       | 18       | 19       | 20       |
| 16 | H | 0.000000  |          |          |          |          |
| 17 | H | 1.866438  | 0.000000 |          |          |          |
| 18 | C | 6.873740  | 5.310496 | 0.000000 |          |          |
| 19 | C | 8.333813  | 6.771015 | 1.465701 | 0.000000 |          |
| 20 | O | 7.791381  | 6.202321 | 1.463863 | 1.454169 | 0.000000 |
| 21 | H | 6.349366  | 4.982300 | 1.086144 | 2.198828 | 2.142384 |
| 22 | H | 6.422507  | 4.729317 | 1.086109 | 2.239528 | 2.153725 |
| 23 | H | 8.918937  | 7.258128 | 2.184010 | 1.087604 | 2.107853 |
| 24 | C | 9.153417  | 7.761649 | 2.607144 | 1.503609 | 2.521229 |
| 25 | H | 10.100805 | 8.673460 | 3.445400 | 2.150662 | 2.929383 |
| 26 | H | 9.470509  | 8.124959 | 3.146513 | 2.134973 | 3.424022 |
| 27 | H | 8.723464  | 7.479226 | 2.741457 | 2.152415 | 2.718987 |
| 28 | C | 7.441702  | 6.697433 | 5.271234 | 5.846163 | 4.757064 |
| 29 | H | 8.523627  | 7.776325 | 5.981831 | 6.343034 | 5.271614 |
| 30 | H | 7.135894  | 6.639870 | 5.706054 | 6.377631 | 5.427679 |
| 31 | C | 7.349228  | 6.350832 | 3.885222 | 4.356666 | 3.377774 |
| 32 | O | 7.168064  | 6.253715 | 3.592946 | 4.071821 | 3.457360 |
| 33 | O | 7.827308  | 6.575481 | 3.525902 | 3.808309 | 2.591118 |
| 34 | H | 7.821174  | 6.433826 | 2.643809 | 2.806082 | 1.609757 |
|    |   | 21        | 22       | 23       | 24       | 25       |
| 21 | H | 0.000000  |          |          |          |          |
| 22 | H | 1.839517  | 0.000000 |          |          |          |
| 23 | H | 3.111188  | 2.532752 | 0.000000 |          |          |
| 24 | C | 2.811629  | 3.562888 | 2.206914 | 0.000000 |          |
| 25 | H | 3.759826  | 4.367050 | 2.560629 | 1.093940 | 0.000000 |
| 26 | H | 3.299283  | 3.963665 | 2.552404 | 1.094270 | 1.767967 |
| 27 | H | 2.533702  | 3.805834 | 3.099841 | 1.091776 | 1.778916 |
| 28 | C | 4.751919  | 5.902035 | 6.785120 | 5.934048 | 6.203466 |
| 29 | H | 5.538129  | 6.686536 | 7.252348 | 6.285567 | 6.378267 |
| 30 | H | 5.008388  | 6.339138 | 7.379578 | 6.358989 | 6.732037 |
| 31 | C | 3.397463  | 4.643850 | 5.328581 | 4.417066 | 4.742321 |
| 32 | O | 2.857483  | 4.454438 | 5.134911 | 3.899356 | 4.399191 |
| 33 | O | 3.425433  | 4.219852 | 4.623614 | 4.119903 | 4.280543 |
| 34 | H | 2.717563  | 3.406735 | 3.617517 | 3.237808 | 3.462703 |
|    |   | 26        | 27       | 28       | 29       | 30       |
| 26 | H | 0.000000  |          |          |          |          |
| 27 | H | 1.775546  | 0.000000 |          |          |          |

|    |   |          |          |          |          |          |
|----|---|----------|----------|----------|----------|----------|
| 28 | C | 6.863433 | 5.150398 | 0.000000 |          |          |
| 29 | H | 7.252770 | 5.514396 | 1.094817 | 0.000000 |          |
| 30 | H | 7.188485 | 5.462617 | 1.090687 | 1.764334 | 0.000000 |
| 31 | C | 5.349947 | 3.662380 | 1.525400 | 2.143906 | 2.126508 |
| 32 | O | 4.679841 | 2.976050 | 2.407061 | 3.034478 | 2.515805 |
| 33 | O | 5.163293 | 3.658088 | 2.366859 | 2.725767 | 3.265272 |
| 34 | H | 4.280720 | 2.935707 | 3.258395 | 3.677061 | 4.033279 |
|    |   | 31       | 32       | 33       | 34       |          |
| 31 | C | 0.000000 |          |          |          |          |
| 32 | O | 1.209188 | 0.000000 |          |          |          |
| 33 | O | 1.329464 | 2.255016 | 0.000000 |          |          |
| 34 | H | 1.938986 | 2.400700 | 1.009285 | 0.000000 |          |

Stoichiometry C<sub>11</sub>H<sub>17</sub>BrN<sub>2</sub>O<sub>3</sub>

Framework group C1[X(C<sub>11</sub>H<sub>17</sub>BrN<sub>2</sub>O<sub>3</sub>)]

Deg. of freedom 96

Full point group C1 NOp 1

Largest Abelian subgroup C1 NOp 1

Largest concise Abelian subgroup C1 NOp 1

Standard orientation:

| Center<br>Number | Atomic<br>Number | Atomic<br>Type | Coordinates (Angstroms) |           |           |
|------------------|------------------|----------------|-------------------------|-----------|-----------|
|                  |                  |                | X                       | Y         | Z         |
| 1                | 6                | 0              | -0.057142               | 1.362847  | 1.267071  |
| 2                | 6                | 0              | -1.283270               | 1.194622  | 0.704970  |
| 3                | 7                | 0              | -1.422696               | 2.200208  | -0.241459 |
| 4                | 6                | 0              | -0.310241               | 2.952458  | -0.242324 |
| 5                | 7                | 0              | 0.538530                | 2.462544  | 0.669139  |
| 6                | 6                | 0              | 1.925048                | 2.911211  | 0.895193  |
| 7                | 1                | 0              | 0.452880                | 0.774227  | 2.008987  |
| 8                | 1                | 0              | -2.011363               | 0.387893  | 0.835983  |
| 9                | 1                | 0              | 1.931714                | 4.002222  | 0.923162  |
| 10               | 1                | 0              | 2.210693                | 2.541902  | 1.878079  |
| 11               | 35               | 0              | -2.898100               | -1.735228 | 0.293265  |
| 12               | 1                | 0              | -0.132446               | 3.803068  | -0.877537 |
| 13               | 6                | 0              | -2.539945               | 2.420599  | -1.108199 |
| 14               | 6                | 0              | -3.508283               | 1.532072  | -1.292149 |
| 15               | 1                | 0              | -2.498512               | 3.382865  | -1.603417 |
| 16               | 1                | 0              | -4.312479               | 1.784745  | -1.971184 |
| 17               | 1                | 0              | -3.522878               | 0.549273  | -0.816313 |
| 18               | 6                | 0              | 0.818596                | -2.458800 | -0.264524 |
| 19               | 6                | 0              | 1.938154                | -3.377516 | -0.039067 |
| 20               | 8                | 0              | 1.835273                | -2.156824 | 0.744473  |
| 21               | 1                | 0              | 0.858348                | -1.802410 | -1.128978 |

|    |   |   |           |           |           |
|----|---|---|-----------|-----------|-----------|
| 22 | 1 | 0 | -0.172012 | -2.648668 | 0.138313  |
| 23 | 1 | 0 | 1.737561  | -4.255255 | 0.571030  |
| 24 | 6 | 0 | 3.105225  | -3.486116 | -0.980868 |
| 25 | 1 | 0 | 4.027226  | -3.702574 | -0.433358 |
| 26 | 1 | 0 | 2.933001  | -4.307119 | -1.683520 |
| 27 | 1 | 0 | 3.238383  | -2.563229 | -1.548779 |
| 28 | 6 | 0 | 2.885317  | 2.389663  | -0.181008 |
| 29 | 1 | 0 | 3.905586  | 2.650629  | 0.118281  |
| 30 | 1 | 0 | 2.694098  | 2.857378  | -1.147588 |
| 31 | 6 | 0 | 2.804074  | 0.878932  | -0.375778 |
| 32 | 8 | 0 | 2.694462  | 0.361439  | -1.463124 |
| 33 | 8 | 0 | 2.847117  | 0.228254  | 0.782773  |
| 34 | 1 | 0 | 2.602841  | -0.744029 | 0.665938  |

-----

Rotational constants (GHZ):      0.3274903      0.2585337      0.1607717

Standard basis: 6-311++G(d,p) (5D, 7F)

There are    538 symmetry adapted cartesian basis functions of A    symmetry.

There are    519 symmetry adapted basis functions of A    symmetry.

519 basis functions,    823 primitive gaussians,    538 cartesian basis functions

78 alpha electrons      78 beta electrons

         nuclear repulsion energy      1575.3799303983 Hartrees.

NAtoms=    34 NActive=    34 NUniq=    34 SFac= 1.00D+00 NAtFMM=    60 NAOKFM=F

Big=F

Integral buffers will be    131072 words long.

Raffenetti 2 integral format.

Two-electron integral symmetry is turned on.

One-electron integrals computed using PRISM.

NBasis=    519 RedAO= T EigKep=    3.69D-06 NBF=    519

NBsUse=    519 1.00D-06 EigRej= -1.00D+00 NBFU=    519

Initial guess from the checkpoint file: "./coohpo.chk"

B after Tr=    0.000000    0.000000    0.000000

         Rot=    0.999414    -0.000027    0.000573    0.034220 Ang=    -3.92 deg.

ExpMin= 3.50D-02 ExpMax= 4.40D+05 ExpMxC= 1.51D+04 IAcc=3 IRadAn=      5 AccDes=

0.00D+00

Harris functional with IExCor=    402 and IRadAn=      5 diagonalized for initial guess.

HarFok: IExCor=    402 AccDes= 0.00D+00 IRadAn=      5 IDoV= 1 UseB2=F ITyADJ=14

ICtDFT= 3500011 ScaDFX= 1.000000 1.000000 1.000000 1.000000

FoFCou: FMM=F IPFlag=            0 FMFlag=    100000 FMFlg1=            0

         NFXFlg=            0 DoJE=T BraDBF=F KetDBF=T FulRan=T

         wScrn= 0.000000 ICntrl=      500 IOpCl=    0 l1Cent=    200000004 NGrid=

0

         NMat0=    1 NMatS0=      1 NMatT0=    0 NMatD0=    1 NMtDS0=    0

NMtDT0=    0

Petite list used in FoFCou.

Requested convergence on RMS density matrix=1.00D-08 within 128 cycles.

Requested convergence on MAX density matrix=1.00D-06.

Requested convergence on energy=1.00D-06.

No special actions if energy rises.

SCF Done: E(RB3LYP) = -3338.90369953 A.U. after 11 cycles

NFock= 11 Conv=0.64D-08 -V/T= 2.0019

Calling FoFJK, ICntrl= 2127 FMM=F ISym2X=0 l1Cent= 0 IOpClX= 0 NMat=1 NMatS=1

NMatT=0.

\*\*\*\*\* Axes restored to original set \*\*\*\*\*

```
-----
```

| Center<br>Number | Atomic<br>Number | Forces (Hartrees/Bohr) |              |              |
|------------------|------------------|------------------------|--------------|--------------|
|                  |                  | X                      | Y            | Z            |
| 1                | 6                | 0.000489118            | -0.000151328 | -0.000159102 |
| 2                | 6                | -0.000148494           | 0.000209146  | 0.000657872  |
| 3                | 7                | -0.000177812           | 0.000552665  | -0.000030130 |
| 4                | 6                | -0.000409382           | -0.000524136 | 0.000217775  |
| 5                | 7                | 0.000384273            | 0.000091498  | 0.000128322  |
| 6                | 6                | -0.000346830           | -0.000248658 | 0.000158106  |
| 7                | 1                | -0.000248041           | 0.000245215  | -0.000081997 |
| 8                | 1                | 0.000253258            | -0.000698651 | -0.000400714 |
| 9                | 1                | -0.000055690           | -0.000040418 | 0.000090810  |
| 10               | 1                | -0.000010308           | 0.000283154  | -0.000021816 |
| 11               | 35               | -0.000168558           | 0.000160729  | 0.000222342  |
| 12               | 1                | 0.000167318            | 0.000017964  | -0.000089146 |
| 13               | 6                | -0.000261381           | -0.000533202 | -0.000241939 |
| 14               | 6                | 0.000296659            | 0.000990145  | -0.000149606 |
| 15               | 1                | -0.000014316           | 0.000056919  | 0.000018650  |
| 16               | 1                | -0.000125974           | -0.000257655 | 0.000097373  |
| 17               | 1                | -0.000059580           | -0.000238323 | 0.000043692  |
| 18               | 6                | -0.000185186           | -0.000730733 | 0.000506055  |
| 19               | 6                | -0.000094291           | 0.000138376  | 0.000505045  |
| 20               | 8                | 0.000478347            | -0.000217644 | -0.000632974 |
| 21               | 1                | 0.000186895            | 0.000161173  | -0.000019600 |
| 22               | 1                | -0.000119528           | -0.000024822 | -0.000272825 |
| 23               | 1                | 0.000049822            | -0.000002618 | -0.000039065 |
| 24               | 6                | 0.000015867            | -0.000040808 | 0.000083321  |
| 25               | 1                | -0.000018064           | 0.000010600  | -0.000066573 |
| 26               | 1                | -0.000032634           | 0.000023201  | -0.000142277 |
| 27               | 1                | -0.000038306           | -0.000026977 | -0.000038248 |
| 28               | 6                | 0.000778304            | -0.000143686 | -0.000690190 |
| 29               | 1                | -0.000161759           | 0.000098254  | 0.000286539  |
| 30               | 1                | -0.000079460           | -0.000034621 | 0.000048682  |
| 31               | 6                | -0.000031302           | -0.000261263 | -0.001131627 |

```
-----
```

|    |   |              |             |              |
|----|---|--------------|-------------|--------------|
| 32 | 8 | -0.000207898 | 0.000204016 | 0.000370222  |
| 33 | 8 | -0.000029870 | 0.000043626 | 0.000860776  |
| 34 | 1 | -0.000075198 | 0.000888861 | -0.000087752 |

-----  
Cartesian Forces: Max 0.001131627 RMS 0.000329224

GradGradGradGradGradGradGradGradGradGradGradGradGradGradGradGradGradGradGrad

Berny optimization.

Using GEDIIS/GDIIS optimizer.

FormGI is forming the generalized inverse of G from B-inverse, IUseBI=4.

Internal Forces: Max 0.001172586 RMS 0.000245412

Search for a local minimum.

Step number 25 out of a maximum of 175

All quantities printed in internal units (Hartrees-Bohrs-Radians)

Mixed Optimization -- En-DIIS/RFO-DIIS

Swapping is turned off.

Update second derivatives using D2CorX and points 20 21 22 23 24  
25

DE= 7.43D-06 DEPred=-4.14D-05 R=-1.80D-01

Trust test=-1.80D-01 RLast= 8.03D-02 DXMaxT set to 7.82D-01

ITU= -1 0 1 1 1 1 1 1 1 1 1 0 0-1 1 1 1 0 1

ITU= 0-1 0 1 0

|                 |         |         |         |         |         |
|-----------------|---------|---------|---------|---------|---------|
| Eigenvalues --- | 0.00145 | 0.00283 | 0.00417 | 0.00571 | 0.00692 |
| Eigenvalues --- | 0.00700 | 0.00963 | 0.01250 | 0.01594 | 0.01639 |
| Eigenvalues --- | 0.02004 | 0.02121 | 0.02266 | 0.02291 | 0.02406 |
| Eigenvalues --- | 0.02456 | 0.02614 | 0.02955 | 0.03119 | 0.03389 |
| Eigenvalues --- | 0.03460 | 0.03552 | 0.03792 | 0.04217 | 0.04821 |
| Eigenvalues --- | 0.04870 | 0.04973 | 0.05361 | 0.05635 | 0.05734 |
| Eigenvalues --- | 0.05981 | 0.06169 | 0.06976 | 0.08734 | 0.09354 |
| Eigenvalues --- | 0.09519 | 0.11779 | 0.12580 | 0.12741 | 0.13153 |
| Eigenvalues --- | 0.13593 | 0.15373 | 0.15504 | 0.15851 | 0.15984 |
| Eigenvalues --- | 0.16007 | 0.16013 | 0.16032 | 0.16041 | 0.16271 |
| Eigenvalues --- | 0.16961 | 0.17557 | 0.20390 | 0.21278 | 0.22364 |
| Eigenvalues --- | 0.23089 | 0.23922 | 0.24211 | 0.25306 | 0.25652 |
| Eigenvalues --- | 0.29017 | 0.29394 | 0.30750 | 0.31948 | 0.32891 |
| Eigenvalues --- | 0.33557 | 0.34499 | 0.34549 | 0.34621 | 0.34799 |
| Eigenvalues --- | 0.34885 | 0.34948 | 0.34988 | 0.35131 | 0.35266 |
| Eigenvalues --- | 0.35320 | 0.35714 | 0.36093 | 0.36586 | 0.36933 |
| Eigenvalues --- | 0.37059 | 0.37348 | 0.37727 | 0.38551 | 0.39923 |
| Eigenvalues --- | 0.42254 | 0.45019 | 0.49032 | 0.51169 | 0.51585 |
| Eigenvalues --- | 0.53404 | 0.55685 | 0.56830 | 0.61900 | 0.89992 |
| Eigenvalues --- | 1.48322 |         |         |         |         |

En-DIIS/RFO-DIIS IScMMF= 0 using points: 25 24 23 22 21

RFO step: Lambda=-1.70406621D-05.



DidBck=F Rises=F RFO-DIIS coefs: 1.35646 -0.10466 -0.45614 0.24649 -  
 0.04215

Iteration 1 RMS(Cart)= 0.02481191 RMS(Int)= 0.00023547  
 Iteration 2 RMS(Cart)= 0.00029650 RMS(Int)= 0.00000475  
 Iteration 3 RMS(Cart)= 0.00000007 RMS(Int)= 0.00000475

| Variable | Old X   | -DE/DX   | Delta X<br>(Linear) | Delta X<br>(Quad) | Delta X<br>(Total) | New X   |
|----------|---------|----------|---------------------|-------------------|--------------------|---------|
| R1       | 2.56867 | 0.00045  | -0.00017            | 0.00045           | 0.00027            | 2.56894 |
| R2       | 2.61963 | 0.00006  | 0.00021             | 0.00004           | 0.00025            | 2.61988 |
| R3       | 2.03270 | -0.00014 | 0.00002             | -0.00025          | -0.00023           | 2.03247 |
| R4       | 2.62282 | 0.00037  | -0.00010            | 0.00009           | -0.00001           | 2.62281 |
| R5       | 2.06845 | 0.00033  | 0.00097             | 0.00085           | 0.00182            | 2.07027 |
| R6       | 2.53775 | -0.00048 | -0.00031            | -0.00071          | -0.00102           | 2.53673 |
| R7       | 2.70439 | 0.00017  | 0.00063             | 0.00051           | 0.00114            | 2.70553 |
| R8       | 2.52912 | 0.00016  | -0.00004            | 0.00012           | 0.00008            | 2.52921 |
| R9       | 2.03411 | 0.00000  | 0.00005             | 0.00003           | 0.00008            | 2.03418 |
| R10      | 2.78684 | 0.00016  | -0.00006            | 0.00039           | 0.00032            | 2.78717 |
| R11      | 2.06243 | -0.00001 | 0.00000             | 0.00006           | 0.00006            | 2.06249 |
| R12      | 2.05629 | 0.00011  | 0.00005             | 0.00011           | 0.00016            | 2.05644 |
| R13      | 2.89834 | 0.00058  | -0.00082            | 0.00036           | -0.00046           | 2.89787 |
| R14      | 4.46731 | -0.00015 | -0.01908            | -0.01119          | -0.03027           | 4.43704 |
| R15      | 2.50771 | -0.00046 | -0.00008            | -0.00016          | -0.00024           | 2.50748 |
| R16      | 2.04659 | 0.00002  | -0.00009            | -0.00010          | -0.00019           | 2.04640 |
| R17      | 2.04551 | 0.00023  | -0.00015            | 0.00018           | 0.00003            | 2.04553 |
| R18      | 2.06364 | 0.00005  | -0.00015            | -0.00003          | -0.00019           | 2.06345 |
| R19      | 2.76977 | -0.00006 | -0.00047            | 0.00018           | -0.00029           | 2.76949 |
| R20      | 2.76630 | 0.00048  | 0.00012             | 0.00037           | 0.00048            | 2.76678 |
| R21      | 2.05252 | -0.00007 | 0.00035             | 0.00002           | 0.00037            | 2.05288 |
| R22      | 2.05245 | -0.00013 | 0.00058             | 0.00020           | 0.00079            | 2.05323 |
| R23      | 2.74798 | -0.00011 | 0.00070             | -0.00002          | 0.00068            | 2.74866 |
| R24      | 2.05527 | -0.00001 | -0.00012            | -0.00001          | -0.00013           | 2.05514 |
| R25      | 2.84141 | 0.00008  | -0.00036            | 0.00023           | -0.00014           | 2.84127 |
| R26      | 3.04200 | 0.00057  | -0.00433            | 0.00596           | 0.00163            | 3.04363 |
| R27      | 2.06725 | -0.00001 | -0.00003            | -0.00002          | -0.00005           | 2.06719 |
| R28      | 2.06787 | 0.00000  | -0.00001            | 0.00000           | -0.00002           | 2.06785 |
| R29      | 2.06316 | 0.00004  | 0.00019             | -0.00005          | 0.00014            | 2.06329 |
| R30      | 2.06891 | -0.00004 | 0.00016             | 0.00020           | 0.00036            | 2.06926 |
| R31      | 2.06110 | 0.00000  | 0.00030             | 0.00006           | 0.00036            | 2.06146 |
| R32      | 2.88259 | -0.00021 | 0.00001             | -0.00045          | -0.00044           | 2.88215 |
| R33      | 2.28503 | -0.00044 | -0.00024            | -0.00062          | -0.00085           | 2.28418 |
| R34      | 2.51232 | 0.00070  | 0.00025             | 0.00103           | 0.00129            | 2.51361 |
| R35      | 1.90727 | -0.00011 | 0.00075             | -0.00034          | 0.00042            | 1.90769 |
| A1       | 1.88328 | -0.00002 | -0.00010            | -0.00022          | -0.00030           | 1.88297 |
| A2       | 2.27208 | 0.00025  | -0.00045            | 0.00067           | 0.00022            | 2.27230 |

|     |         |          |          |          |          |         |
|-----|---------|----------|----------|----------|----------|---------|
| A3  | 2.12688 | -0.00022 | 0.00043  | -0.00048 | -0.00005 | 2.12683 |
| A4  | 1.85764 | -0.00020 | -0.00001 | -0.00006 | -0.00007 | 1.85757 |
| A5  | 2.26756 | 0.00029  | -0.00099 | 0.00058  | -0.00042 | 2.26714 |
| A6  | 2.15171 | -0.00008 | 0.00057  | -0.00029 | 0.00028  | 2.15198 |
| A7  | 1.89977 | 0.00009  | 0.00017  | 0.00011  | 0.00028  | 1.90005 |
| A8  | 2.21804 | 0.00018  | -0.00015 | -0.00016 | -0.00032 | 2.21772 |
| A9  | 2.16525 | -0.00027 | 0.00003  | 0.00006  | 0.00009  | 2.16534 |
| A10 | 1.89638 | 0.00019  | -0.00007 | 0.00018  | 0.00011  | 1.89650 |
| A11 | 2.18936 | 0.00001  | -0.00007 | 0.00019  | 0.00011  | 2.18947 |
| A12 | 2.19742 | -0.00020 | 0.00016  | -0.00036 | -0.00021 | 2.19721 |
| A13 | 1.88770 | -0.00006 | -0.00001 | 0.00000  | -0.00002 | 1.88768 |
| A14 | 2.18858 | 0.00046  | -0.00070 | 0.00135  | 0.00063  | 2.18921 |
| A15 | 2.20096 | -0.00038 | 0.00027  | -0.00063 | -0.00038 | 2.20058 |
| A16 | 1.88999 | -0.00052 | 0.00057  | -0.00081 | -0.00025 | 1.88974 |
| A17 | 1.85668 | -0.00016 | -0.00008 | 0.00026  | 0.00019  | 1.85687 |
| A18 | 1.95804 | 0.00112  | -0.00120 | 0.00198  | 0.00078  | 1.95882 |
| A19 | 1.89075 | 0.00007  | 0.00023  | -0.00090 | -0.00067 | 1.89008 |
| A20 | 1.93274 | -0.00024 | -0.00008 | -0.00058 | -0.00066 | 1.93208 |
| A21 | 1.93269 | -0.00029 | 0.00060  | -0.00002 | 0.00058  | 1.93327 |
| A22 | 2.65506 | 0.00117  | 0.03015  | 0.01493  | 0.04507  | 2.70013 |
| A23 | 2.15378 | -0.00020 | 0.00062  | -0.00029 | 0.00033  | 2.15411 |
| A24 | 1.96481 | 0.00005  | -0.00055 | -0.00007 | -0.00061 | 1.96420 |
| A25 | 2.16451 | 0.00015  | -0.00008 | 0.00037  | 0.00028  | 2.16480 |
| A26 | 2.06326 | 0.00008  | -0.00067 | 0.00020  | -0.00048 | 2.06278 |
| A27 | 2.15549 | 0.00021  | 0.00109  | 0.00098  | 0.00206  | 2.15755 |
| A28 | 2.06405 | -0.00029 | -0.00035 | -0.00116 | -0.00151 | 2.06254 |
| A29 | 2.06380 | -0.00013 | -0.00019 | -0.00130 | -0.00149 | 2.06230 |
| A30 | 2.12945 | 0.00017  | -0.00112 | 0.00009  | -0.00103 | 2.12842 |
| A31 | 1.98068 | -0.00026 | -0.00013 | -0.00036 | -0.00049 | 1.98019 |
| A32 | 1.99749 | 0.00033  | -0.00003 | 0.00107  | 0.00104  | 1.99852 |
| A33 | 2.01997 | -0.00002 | 0.00096  | 0.00066  | 0.00162  | 2.02159 |
| A34 | 2.03898 | 0.00006  | -0.00088 | -0.00023 | -0.00110 | 2.03788 |
| A35 | 2.14337 | -0.00023 | 0.00072  | -0.00047 | 0.00024  | 2.14361 |
| A36 | 1.94138 | 0.00017  | -0.00030 | 0.00044  | 0.00014  | 1.94152 |
| A37 | 2.04097 | -0.00037 | -0.00052 | -0.00022 | -0.00073 | 2.04024 |
| A38 | 2.02220 | 0.00014  | 0.00047  | 0.00040  | 0.00087  | 2.02306 |
| A39 | 2.06983 | 0.00019  | -0.00114 | 0.00417  | 0.00306  | 2.07289 |
| A40 | 2.31408 | 0.00021  | -0.00344 | 0.00810  | 0.00466  | 2.31874 |
| A41 | 1.93370 | 0.00007  | 0.00007  | 0.00042  | 0.00048  | 1.93418 |
| A42 | 1.91158 | 0.00016  | 0.00027  | 0.00056  | 0.00083  | 1.91241 |
| A43 | 1.93845 | -0.00008 | 0.00010  | -0.00034 | -0.00024 | 1.93821 |
| A44 | 1.88133 | -0.00004 | 0.00009  | 0.00012  | 0.00021  | 1.88154 |
| A45 | 1.90161 | -0.00002 | -0.00014 | -0.00037 | -0.00051 | 1.90109 |
| A46 | 1.89589 | -0.00009 | -0.00040 | -0.00039 | -0.00079 | 1.89510 |

|     |          |          |          |          |          |          |
|-----|----------|----------|----------|----------|----------|----------|
| A47 | 1.88661  | -0.00043 | -0.00036 | -0.00211 | -0.00246 | 1.88415  |
| A48 | 1.94578  | -0.00014 | -0.00011 | 0.00009  | -0.00002 | 1.94575  |
| A49 | 1.97472  | 0.00054  | -0.00038 | 0.00118  | 0.00080  | 1.97552  |
| A50 | 1.87908  | 0.00019  | -0.00018 | 0.00037  | 0.00019  | 1.87928  |
| A51 | 1.89717  | -0.00004 | 0.00047  | 0.00010  | 0.00057  | 1.89774  |
| A52 | 1.87781  | -0.00012 | 0.00057  | 0.00036  | 0.00094  | 1.87874  |
| A53 | 2.14540  | -0.00001 | 0.00022  | 0.00019  | 0.00041  | 2.14581  |
| A54 | 1.95167  | 0.00015  | 0.00009  | -0.00084 | -0.00075 | 1.95092  |
| A55 | 2.18598  | -0.00014 | -0.00033 | 0.00062  | 0.00030  | 2.18628  |
| A56 | 1.94204  | -0.00067 | -0.00113 | 0.00041  | -0.00072 | 1.94132  |
| A57 | 2.84122  | 0.00035  | -0.00660 | -0.00230 | -0.00890 | 2.83232  |
| D1  | 0.00300  | 0.00010  | 0.00125  | -0.00341 | -0.00216 | 0.00084  |
| D2  | 3.02524  | 0.00017  | -0.00291 | -0.00125 | -0.00414 | 3.02110  |
| D3  | -3.09164 | -0.00018 | 0.00363  | -0.00255 | 0.00108  | -3.09056 |
| D4  | -0.06940 | -0.00011 | -0.00053 | -0.00039 | -0.00091 | -0.07031 |
| D5  | -0.00193 | -0.00015 | -0.00121 | 0.00407  | 0.00287  | 0.00094  |
| D6  | -3.03225 | -0.00030 | 0.00324  | -0.00250 | 0.00073  | -3.03152 |
| D7  | 3.09743  | 0.00012  | -0.00338 | 0.00334  | -0.00003 | 3.09739  |
| D8  | 0.06710  | -0.00004 | 0.00107  | -0.00323 | -0.00217 | 0.06494  |
| D9  | -0.00303 | -0.00001 | -0.00087 | 0.00158  | 0.00070  | -0.00233 |
| D10 | 3.12168  | 0.00001  | 0.00154  | 0.00287  | 0.00441  | 3.12610  |
| D11 | -3.03518 | -0.00011 | 0.00305  | -0.00048 | 0.00258  | -3.03259 |
| D12 | 0.08954  | -0.00009 | 0.00547  | 0.00082  | 0.00629  | 0.09584  |
| D13 | -1.50709 | 0.00003  | -0.00423 | -0.00590 | -0.01013 | -1.51722 |
| D14 | 1.49747  | 0.00011  | -0.00906 | -0.00339 | -0.01244 | 1.48502  |
| D15 | 0.00187  | -0.00008 | 0.00013  | 0.00095  | 0.00108  | 0.00296  |
| D16 | 3.13644  | 0.00002  | 0.00190  | 0.00105  | 0.00294  | 3.13939  |
| D17 | -3.12347 | -0.00010 | -0.00219 | -0.00029 | -0.00248 | -3.12595 |
| D18 | 0.01110  | 0.00000  | -0.00043 | -0.00020 | -0.00063 | 0.01047  |
| D19 | -0.22471 | 0.00001  | 0.00872  | 0.00802  | 0.01674  | -0.20797 |
| D20 | 2.93013  | -0.00005 | 0.00901  | 0.00726  | 0.01627  | 2.94640  |
| D21 | 2.89760  | 0.00004  | 0.01148  | 0.00950  | 0.02098  | 2.91858  |
| D22 | -0.23074 | -0.00002 | 0.01177  | 0.00874  | 0.02051  | -0.21023 |
| D23 | 0.00002  | 0.00014  | 0.00065  | -0.00308 | -0.00242 | -0.00241 |
| D24 | 3.02934  | 0.00036  | -0.00390 | 0.00371  | -0.00019 | 3.02915  |
| D25 | -3.13451 | 0.00004  | -0.00112 | -0.00318 | -0.00430 | -3.13881 |
| D26 | -0.10519 | 0.00026  | -0.00567 | 0.00361  | -0.00206 | -0.10725 |
| D27 | -2.46363 | 0.00023  | -0.00405 | 0.00336  | -0.00068 | -2.46431 |
| D28 | -0.43454 | -0.00003 | -0.00354 | 0.00205  | -0.00149 | -0.43603 |
| D29 | 1.68125  | 0.00017  | -0.00355 | 0.00336  | -0.00019 | 1.68106  |
| D30 | 0.80893  | 0.00002  | 0.00121  | -0.00445 | -0.00323 | 0.80570  |
| D31 | 2.83802  | -0.00024 | 0.00172  | -0.00576 | -0.00404 | 2.83398  |
| D32 | -1.32937 | -0.00005 | 0.00171  | -0.00444 | -0.00274 | -1.33211 |
| D33 | -3.01662 | -0.00019 | 0.00614  | 0.00584  | 0.01199  | -3.00463 |

|     |          |          |          |          |          |          |
|-----|----------|----------|----------|----------|----------|----------|
| D34 | 1.20459  | -0.00007 | 0.00665  | 0.00665  | 0.01330  | 1.21789  |
| D35 | -0.91474 | -0.00020 | 0.00625  | 0.00526  | 0.01151  | -0.90322 |
| D36 | 1.15268  | -0.00013 | 0.00630  | 0.00593  | 0.01224  | 1.16491  |
| D37 | -0.90930 | 0.00000  | 0.00681  | 0.00674  | 0.01354  | -0.89575 |
| D38 | -3.02862 | -0.00014 | 0.00641  | 0.00535  | 0.01176  | -3.01687 |
| D39 | -0.94512 | 0.00014  | 0.00567  | 0.00746  | 0.01313  | -0.93199 |
| D40 | -3.00709 | 0.00027  | 0.00617  | 0.00827  | 0.01444  | -2.99265 |
| D41 | 1.15676  | 0.00013  | 0.00578  | 0.00688  | 0.01265  | 1.16942  |
| D42 | -3.13701 | -0.00010 | 0.00068  | 0.00016  | 0.00084  | -3.13617 |
| D43 | -0.02572 | -0.00003 | 0.00301  | 0.00060  | 0.00361  | -0.02212 |
| D44 | -0.01019 | -0.00004 | 0.00035  | 0.00101  | 0.00136  | -0.00883 |
| D45 | 3.10110  | 0.00003  | 0.00268  | 0.00144  | 0.00413  | 3.10523  |
| D46 | -2.75249 | -0.00003 | 0.00016  | 0.00084  | 0.00099  | -2.75150 |
| D47 | -0.04425 | -0.00006 | 0.00105  | 0.00015  | 0.00119  | -0.04306 |
| D48 | -0.02090 | 0.00001  | -0.00062 | -0.00055 | -0.00117 | -0.02207 |
| D49 | 2.68733  | -0.00002 | 0.00027  | -0.00124 | -0.00097 | 2.68636  |
| D50 | 0.26415  | 0.00023  | -0.00372 | 0.00966  | 0.00594  | 0.27009  |
| D51 | -2.10700 | 0.00018  | -0.00503 | 0.00786  | 0.00283  | -2.10416 |
| D52 | 2.57364  | -0.00014 | 0.00143  | -0.00239 | -0.00095 | 2.57269  |
| D53 | 0.19556  | -0.00015 | 0.00160  | -0.00328 | -0.00167 | 0.19390  |
| D54 | 2.55054  | 0.00000  | -0.00074 | 0.00068  | -0.00007 | 2.55047  |
| D55 | -1.65954 | 0.00008  | -0.00042 | 0.00143  | 0.00101  | -1.65853 |
| D56 | 0.43456  | 0.00003  | -0.00068 | 0.00110  | 0.00041  | 0.43497  |
| D57 | 1.32256  | -0.00004 | -0.00071 | 0.00079  | 0.00008  | 1.32263  |
| D58 | -2.88752 | 0.00005  | -0.00039 | 0.00154  | 0.00115  | -2.88636 |
| D59 | -0.79342 | -0.00001 | -0.00065 | 0.00120  | 0.00056  | -0.79286 |
| D60 | -1.02059 | -0.00005 | -0.00017 | -0.00015 | -0.00032 | -1.02090 |
| D61 | 1.05252  | 0.00003  | 0.00015  | 0.00061  | 0.00076  | 1.05328  |
| D62 | -3.13657 | -0.00002 | -0.00011 | 0.00027  | 0.00017  | -3.13640 |
| D63 | 1.53020  | -0.00004 | 0.01165  | -0.01720 | -0.00554 | 1.52466  |
| D64 | 2.83238  | 0.00003  | 0.00923  | -0.01133 | -0.00211 | 2.83027  |
| D65 | 2.28597  | 0.00012  | -0.00444 | 0.00032  | -0.00411 | 2.28186  |
| D66 | -0.83825 | 0.00011  | -0.00381 | 0.00186  | -0.00196 | -0.84021 |
| D67 | -1.90135 | -0.00012 | -0.00481 | -0.00151 | -0.00632 | -1.90767 |
| D68 | 1.25761  | -0.00012 | -0.00419 | 0.00002  | -0.00416 | 1.25345  |
| D69 | 0.12879  | 0.00002  | -0.00446 | -0.00084 | -0.00530 | 0.12350  |
| D70 | -2.99543 | 0.00002  | -0.00383 | 0.00070  | -0.00314 | -2.99857 |
| D71 | 2.93607  | 0.00035  | -0.00215 | 0.00047  | -0.00167 | 2.93439  |
| D72 | -0.18768 | 0.00034  | -0.00151 | 0.00206  | 0.00054  | -0.18713 |
| D73 | -1.98154 | 0.00014  | -0.00771 | -0.00456 | -0.01226 | -1.99381 |

| Item                 | Value    | Threshold | Converged? |
|----------------------|----------|-----------|------------|
| Maximum Force        | 0.001173 | 0.000450  | NO         |
| RMS Force            | 0.000245 | 0.000300  | YES        |
| Maximum Displacement | 0.100622 | 0.001800  | NO         |

RMS Displacement 0.024754 0.001200 NO

Predicted change in Energy=-3.081092D-05

GradGradGradGradGradGradGradGradGradGradGradGradGradGradGradGradGradGradGrad

Input orientation:

| Center<br>Number | Atomic<br>Number | Atomic<br>Type | Coordinates (Angstroms) |           |           |
|------------------|------------------|----------------|-------------------------|-----------|-----------|
|                  |                  |                | X                       | Y         | Z         |
| 1                | 6                | 0              | -0.875062               | 1.655947  | 1.552242  |
| 2                | 6                | 0              | -1.530358               | 0.465193  | 1.579305  |
| 3                | 7                | 0              | -2.366469               | 0.451944  | 0.471562  |
| 4                | 6                | 0              | -2.217377               | 1.605483  | -0.198589 |
| 5                | 7                | 0              | -1.311713               | 2.357056  | 0.438764  |
| 6                | 6                | 0              | -0.758386               | 3.639359  | -0.035444 |
| 7                | 1                | 0              | -0.111228               | 2.042828  | 2.203134  |
| 8                | 1                | 0              | -1.389521               | -0.399605 | 2.236947  |
| 9                | 1                | 0              | -1.584747               | 4.259455  | -0.387312 |
| 10               | 1                | 0              | -0.314665               | 4.122244  | 0.832980  |
| 11               | 35               | 0              | -0.411025               | -2.430660 | 2.892970  |
| 12               | 1                | 0              | -2.738164               | 1.874825  | -1.101344 |
| 13               | 6                | 0              | -3.244548               | -0.603553 | 0.065745  |
| 14               | 6                | 0              | -3.208852               | -1.824175 | 0.584849  |
| 15               | 1                | 0              | -3.927739               | -0.297439 | -0.716709 |
| 16               | 1                | 0              | -3.909687               | -2.559518 | 0.210956  |
| 17               | 1                | 0              | -2.495216               | -2.134796 | 1.350715  |
| 18               | 6                | 0              | 2.571084                | -0.676148 | 1.220764  |
| 19               | 6                | 0              | 3.998641                | -0.355181 | 1.303818  |
| 20               | 8                | 0              | 3.008734                | 0.670061  | 1.594698  |
| 21               | 1                | 0              | 2.112774                | -0.724191 | 0.237009  |
| 22               | 1                | 0              | 2.056816                | -1.218234 | 2.009566  |
| 23               | 1                | 0              | 4.519125                | -0.667623 | 2.206152  |
| 24               | 6                | 0              | 4.858684                | -0.144980 | 0.088598  |
| 25               | 1                | 0              | 5.626539                | 0.609882  | 0.281536  |
| 26               | 1                | 0              | 5.365778                | -1.080130 | -0.167837 |
| 27               | 1                | 0              | 4.258345                | 0.171170  | -0.766840 |
| 28               | 6                | 0              | 0.284764                | 3.447036  | -1.142889 |
| 29               | 1                | 0              | 0.748345                | 4.418808  | -1.342368 |
| 30               | 1                | 0              | -0.175698               | 3.103162  | -2.070109 |
| 31               | 6                | 0              | 1.377607                | 2.449929  | -0.771929 |
| 32               | 8                | 0              | 1.715092                | 1.544259  | -1.497814 |
| 33               | 8                | 0              | 1.877309                | 2.692367  | 0.436710  |
| 34               | 1                | 0              | 2.453893                | 1.926937  | 0.754152  |

## Distance matrix (angstroms):

|    |    | 1        | 2        | 3        | 4        | 5        |
|----|----|----------|----------|----------|----------|----------|
| 1  | C  | 0.000000 |          |          |          |          |
| 2  | C  | 1.359426 | 0.000000 |          |          |          |
| 3  | N  | 2.200406 | 1.387930 | 0.000000 |          |          |
| 4  | C  | 2.206755 | 2.221073 | 1.342380 | 0.000000 |          |
| 5  | N  | 1.386381 | 2.219862 | 2.177852 | 1.338398 | 0.000000 |
| 6  | C  | 2.543283 | 3.643993 | 3.605912 | 2.508370 | 1.474905 |
| 7  | H  | 1.075537 | 2.211792 | 3.258123 | 3.224191 | 2.157059 |
| 8  | H  | 2.226832 | 1.095538 | 2.190011 | 3.261528 | 3.292218 |
| 9  | H  | 3.323218 | 4.273988 | 3.980691 | 2.734850 | 2.091906 |
| 10 | H  | 2.629450 | 3.925422 | 4.220382 | 3.319418 | 2.065284 |
| 11 | Br | 4.325880 | 3.371140 | 4.242214 | 5.395470 | 5.454961 |
| 12 | H  | 3.249704 | 3.260634 | 2.153319 | 1.076443 | 2.153890 |
| 13 | C  | 3.595758 | 2.524189 | 1.431707 | 2.450468 | 3.555306 |
| 14 | C  | 4.300427 | 3.007904 | 2.429642 | 3.655045 | 4.593819 |
| 15 | H  | 4.275826 | 3.405983 | 2.100268 | 2.610535 | 3.901929 |
| 16 | H  | 5.364526 | 4.084417 | 3.393868 | 4.514296 | 5.565435 |
| 17 | H  | 4.127377 | 2.782650 | 2.735088 | 4.057983 | 4.733822 |
| 18 | C  | 4.174262 | 4.272357 | 5.119895 | 5.490880 | 4.988784 |
| 19 | C  | 5.278194 | 5.596314 | 6.469832 | 6.688820 | 6.025314 |
| 20 | O  | 4.007199 | 4.543739 | 5.495618 | 5.603849 | 4.780000 |
| 21 | H  | 4.040057 | 4.060641 | 4.637018 | 4.936329 | 4.611064 |
| 22 | H  | 4.131098 | 3.985833 | 4.971961 | 5.578356 | 5.157238 |
| 23 | H  | 5.909639 | 6.186474 | 7.188438 | 7.505349 | 6.802281 |
| 24 | C  | 6.185584 | 6.588959 | 7.259878 | 7.295015 | 6.667579 |
| 25 | H  | 6.706696 | 7.275048 | 7.996827 | 7.921412 | 7.156583 |
| 26 | H  | 7.028007 | 7.279919 | 7.908460 | 8.044732 | 7.534661 |
| 27 | H  | 5.825339 | 6.252994 | 6.745416 | 6.656962 | 6.103862 |
| 28 | C  | 3.437576 | 4.426782 | 4.313475 | 3.247111 | 2.497683 |
| 29 | H  | 4.318289 | 5.418462 | 5.359890 | 4.244824 | 3.415712 |
| 30 | H  | 3.962950 | 4.702362 | 4.276509 | 3.148664 | 2.853358 |
| 31 | C  | 3.332672 | 4.233644 | 4.422253 | 3.737074 | 2.950737 |
| 32 | O  | 4.003026 | 4.600652 | 4.661624 | 4.141986 | 3.684091 |
| 33 | O  | 3.145493 | 4.228241 | 4.798996 | 4.283851 | 3.206602 |
| 34 | H  | 3.433996 | 4.323405 | 5.048896 | 4.778265 | 3.803191 |
|    |    | 6        | 7        | 8        | 9        | 10       |
| 6  | C  | 0.000000 |          |          |          |          |
| 7  | H  | 2.824705 | 0.000000 |          |          |          |
| 8  | H  | 4.677106 | 2.756928 | 0.000000 |          |          |
| 9  | H  | 1.091422 | 3.714176 | 5.350859 | 0.000000 |          |
| 10 | H  | 1.088222 | 2.498536 | 4.855261 | 1.766649 | 0.000000 |
| 11 | Br | 6.748437 | 4.536281 | 2.347979 | 7.542912 | 6.869746 |
| 12 | H  | 2.858188 | 4.224759 | 4.258645 | 2.743478 | 3.829601 |

|    |    |          |          |          |          |          |
|----|----|----------|----------|----------|----------|----------|
| 13 | C  | 4.918693 | 4.624874 | 2.863013 | 5.158396 | 5.613023 |
| 14 | C  | 6.019946 | 5.212277 | 2.840562 | 6.371293 | 6.617990 |
| 15 | H  | 5.099734 | 5.344912 | 3.895777 | 5.134530 | 5.915187 |
| 16 | H  | 6.958267 | 6.291156 | 3.888586 | 7.229223 | 7.612952 |
| 17 | H  | 6.186992 | 4.884931 | 2.240281 | 6.688508 | 6.646307 |
| 18 | C  | 5.593481 | 3.943688 | 4.098230 | 6.649588 | 5.612708 |
| 19 | C  | 6.354469 | 4.842545 | 5.468545 | 7.438348 | 6.234872 |
| 20 | O  | 5.066092 | 3.462491 | 4.571795 | 6.157287 | 4.852088 |
| 21 | H  | 5.230522 | 4.058107 | 4.046131 | 6.236840 | 5.453034 |
| 22 | H  | 5.975252 | 3.920766 | 3.549520 | 7.000792 | 5.960619 |
| 23 | H  | 7.171260 | 5.365326 | 5.914801 | 8.261926 | 6.942187 |
| 24 | C  | 6.774075 | 5.827332 | 6.612133 | 7.819422 | 6.747359 |
| 25 | H  | 7.074283 | 6.218348 | 7.353080 | 8.109833 | 6.923777 |
| 26 | H  | 7.732819 | 6.735872 | 7.202789 | 8.767505 | 7.767481 |
| 27 | H  | 6.142546 | 5.605089 | 6.422376 | 7.141418 | 6.251626 |
| 28 | C  | 1.533487 | 3.650271 | 5.387316 | 2.173935 | 2.172390 |
| 29 | H  | 2.141455 | 4.353703 | 6.371740 | 2.526033 | 2.439278 |
| 30 | H  | 2.183321 | 4.403302 | 5.682735 | 2.480774 | 3.079896 |
| 31 | C  | 2.553355 | 3.351621 | 4.982989 | 3.492543 | 2.869870 |
| 32 | O  | 3.556131 | 4.157047 | 5.231221 | 4.415252 | 4.024739 |
| 33 | O  | 2.840178 | 2.737962 | 4.844927 | 3.888523 | 2.646947 |
| 34 | H  | 3.724861 | 2.948360 | 4.731100 | 4.801479 | 3.534190 |
|    |    | 11       | 12       | 13       | 14       | 15       |
| 11 | Br | 0.000000 |          |          |          |          |
| 12 | H  | 6.317224 | 0.000000 |          |          |          |
| 13 | C  | 4.400042 | 2.785836 | 0.000000 |          |          |
| 14 | C  | 3.677374 | 4.092358 | 1.326899 | 0.000000 |          |
| 15 | H  | 5.472448 | 2.506344 | 1.082908 | 2.131144 | 0.000000 |
| 16 | H  | 4.410265 | 4.770534 | 2.071061 | 1.082449 | 2.444973 |
| 17 | H  | 2.609586 | 4.706238 | 2.134795 | 1.091930 | 3.114842 |
| 18 | C  | 3.842859 | 6.331490 | 5.929664 | 5.927058 | 6.792048 |
| 19 | C  | 5.126224 | 7.492815 | 7.352435 | 7.390725 | 8.180058 |
| 20 | O  | 4.795283 | 6.461186 | 6.562265 | 6.774908 | 7.375182 |
| 21 | H  | 4.041748 | 5.663716 | 5.361417 | 5.445242 | 6.130212 |
| 22 | H  | 2.888013 | 6.498970 | 5.679853 | 5.488556 | 6.640432 |
| 23 | H  | 5.280758 | 8.370891 | 8.053575 | 7.980468 | 8.945930 |
| 24 | C  | 6.392079 | 7.950326 | 8.116230 | 8.255368 | 8.824568 |
| 25 | H  | 7.246839 | 8.572088 | 8.956293 | 9.169557 | 9.649039 |
| 26 | H  | 6.675622 | 8.676237 | 8.626669 | 8.639701 | 9.342555 |
| 27 | H  | 6.478175 | 7.208708 | 7.588597 | 7.846496 | 8.199639 |
| 28 | C  | 7.163769 | 3.407590 | 5.506733 | 6.555616 | 5.652247 |
| 29 | H  | 8.136181 | 4.322694 | 6.568872 | 7.638613 | 6.670846 |
| 30 | H  | 7.437118 | 3.002258 | 5.264927 | 6.366120 | 5.241526 |
| 31 | C  | 6.360098 | 4.168793 | 5.602658 | 6.414392 | 5.974761 |

|    |   |           |          |          |          |          |
|----|---|-----------|----------|----------|----------|----------|
| 32 | O | 6.292801  | 4.483074 | 5.626353 | 6.318945 | 5.986945 |
| 33 | O | 6.124957  | 4.933211 | 6.101977 | 6.803685 | 6.630829 |
| 34 | H | 5.636573  | 5.513895 | 6.272919 | 6.794570 | 6.916394 |
|    |   | 16        | 17       | 18       | 19       | 20       |
| 16 | H | 0.000000  |          |          |          |          |
| 17 | H | 1.865520  | 0.000000 |          |          |          |
| 18 | C | 6.824016  | 5.273703 | 0.000000 |          |          |
| 19 | C | 8.282215  | 6.733454 | 1.465549 | 0.000000 |          |
| 20 | O | 7.759476  | 6.182250 | 1.464118 | 1.454527 | 0.000000 |
| 21 | H | 6.295962  | 4.946081 | 1.086338 | 2.197895 | 2.142429 |
| 22 | H | 6.374417  | 4.689901 | 1.086525 | 2.239112 | 2.154976 |
| 23 | H | 8.865943  | 7.217018 | 2.183100 | 1.087534 | 2.108212 |
| 24 | C | 9.095565  | 7.722186 | 2.607116 | 1.503536 | 2.520902 |
| 25 | H | 10.049362 | 8.639405 | 3.445552 | 2.150921 | 2.929321 |
| 26 | H | 9.400337  | 8.075491 | 3.146702 | 2.135506 | 3.424231 |
| 27 | H | 8.667727  | 7.443931 | 2.741417 | 2.152235 | 2.717955 |
| 28 | C | 7.450168  | 6.715891 | 5.273970 | 5.851163 | 4.756678 |
| 29 | H | 8.532708  | 7.792503 | 5.987537 | 6.352771 | 5.271510 |
| 30 | H | 7.156248  | 6.672211 | 5.714704 | 6.385031 | 5.430598 |
| 31 | C | 7.349565  | 6.365853 | 3.894556 | 4.364308 | 3.380743 |
| 32 | O | 7.169311  | 6.275050 | 3.612976 | 4.083089 | 3.464298 |
| 33 | O | 7.818093  | 6.576920 | 3.527458 | 3.813067 | 2.590517 |
| 34 | H | 7.805030  | 6.430182 | 2.647170 | 2.810061 | 1.610621 |
|    |   | 21        | 22       | 23       | 24       | 25       |
| 21 | H | 0.000000  |          |          |          |          |
| 22 | H | 1.840969  | 0.000000 |          |          |          |
| 23 | H | 3.109863  | 2.530768 | 0.000000 |          |          |
| 24 | C | 2.810255  | 3.562647 | 2.207372 | 0.000000 |          |
| 25 | H | 3.758760  | 4.367038 | 2.561744 | 1.093912 | 0.000000 |
| 26 | H | 3.297367  | 3.963507 | 2.553979 | 1.094262 | 1.768070 |
| 27 | H | 2.532362  | 3.805996 | 3.100042 | 1.091848 | 1.778627 |
| 28 | C | 4.758664  | 5.902786 | 6.787953 | 5.944736 | 6.213935 |
| 29 | H | 5.550364  | 6.687585 | 7.258275 | 6.306403 | 6.398575 |
| 30 | H | 5.020810  | 6.348411 | 7.385567 | 6.368316 | 6.738889 |
| 31 | C | 3.410787  | 4.653328 | 5.334532 | 4.426281 | 4.748577 |
| 32 | O | 2.883337  | 4.477707 | 5.145327 | 3.905433 | 4.397563 |
| 33 | O | 3.430481  | 4.218874 | 4.625976 | 4.130414 | 4.291567 |
| 34 | H | 2.722550  | 3.409667 | 3.620114 | 3.243274 | 3.467518 |
|    |   | 26        | 27       | 28       | 29       | 30       |
| 26 | H | 0.000000  |          |          |          |          |
| 27 | H | 1.775096  | 0.000000 |          |          |          |
| 28 | C | 6.874785  | 5.163531 | 0.000000 |          |          |
| 29 | H | 7.275887  | 5.540195 | 1.095007 | 0.000000 |          |
| 30 | H | 7.199065  | 5.473191 | 1.090876 | 1.764762 | 0.000000 |



|    |   |          |          |          |          |          |
|----|---|----------|----------|----------|----------|----------|
| 31 | C | 5.360201 | 3.673067 | 1.525169 | 2.144261 | 2.127144 |
| 32 | O | 4.688685 | 2.981247 | 2.406735 | 3.036741 | 2.516503 |
| 33 | O | 5.173648 | 3.670736 | 2.366613 | 2.724018 | 3.266149 |
| 34 | H | 4.286210 | 2.941459 | 3.258004 | 3.676100 | 4.034192 |

31 32 33 34

|    |   |          |          |          |          |  |
|----|---|----------|----------|----------|----------|--|
| 31 | C | 0.000000 |          |          |          |  |
| 32 | O | 1.208737 | 0.000000 |          |          |  |
| 33 | O | 1.330145 | 2.255405 | 0.000000 |          |  |
| 34 | H | 1.939288 | 2.400755 | 1.009506 | 0.000000 |  |

Stoichiometry C<sub>11</sub>H<sub>17</sub>BrN<sub>2</sub>O<sub>3</sub>

Framework group C1[X(C<sub>11</sub>H<sub>17</sub>BrN<sub>2</sub>O<sub>3</sub>)]

Deg. of freedom 96

Full point group C1 NOp 1

Largest Abelian subgroup C1 NOp 1

Largest concise Abelian subgroup C1 NOp 1

Standard orientation:

| Center Number | Atomic Number | Atomic Type | Coordinates (Angstroms) |           |           |
|---------------|---------------|-------------|-------------------------|-----------|-----------|
|               |               |             | X                       | Y         | Z         |
| 1             | 6             | 0           | 0.019944                | 1.351695  | 1.260960  |
| 2             | 6             | 0           | -1.205354               | 1.237746  | 0.683292  |
| 3             | 7             | 0           | -1.289401               | 2.250445  | -0.262079 |
| 4             | 6             | 0           | -0.145815               | 2.953296  | -0.248069 |
| 5             | 7             | 0           | 0.670712                | 2.424345  | 0.671064  |
| 6             | 6             | 0           | 2.072987                | 2.811990  | 0.913340  |
| 7             | 1             | 0           | 0.495325                | 0.739729  | 2.006809  |
| 8             | 1             | 0           | -1.968872               | 0.461167  | 0.802322  |
| 9             | 1             | 0           | 2.126849                | 3.901721  | 0.941425  |
| 10            | 1             | 0           | 2.330649                | 2.431719  | 1.899865  |
| 11            | 35            | 0           | -3.011355               | -1.584188 | 0.309620  |
| 12            | 1             | 0           | 0.075390                | 3.798258  | -0.877224 |
| 13            | 6             | 0           | -2.387899               | 2.523614  | -1.138700 |
| 14            | 6             | 0           | -3.403653               | 1.689216  | -1.319492 |
| 15            | 1             | 0           | -2.289224               | 3.476657  | -1.643341 |
| 16            | 1             | 0           | -4.187603               | 1.979432  | -2.007164 |
| 17            | 1             | 0           | -3.480095               | 0.715217  | -0.831851 |
| 18            | 6             | 0           | 0.681635                | -2.474835 | -0.270150 |
| 19            | 6             | 0           | 1.745488                | -3.459670 | -0.055320 |
| 20            | 8             | 0           | 1.720007                | -2.238630 | 0.734655  |
| 21            | 1             | 0           | 0.757083                | -1.818486 | -1.132498 |
| 22            | 1             | 0           | -0.316892               | -2.609152 | 0.136593  |
| 23            | 1             | 0           | 1.494891                | -4.326761 | 0.551381  |
| 24            | 6             | 0           | 2.899590                | -3.632467 | -1.003375 |

|    |   |   |          |           |           |
|----|---|---|----------|-----------|-----------|
| 25 | 1 | 0 | 3.809818 | -3.906439 | -0.462018 |
| 26 | 1 | 0 | 2.675851 | -4.437056 | -1.710472 |
| 27 | 1 | 0 | 3.085004 | -2.715748 | -1.566741 |
| 28 | 6 | 0 | 3.022651 | 2.249599  | -0.151291 |
| 29 | 1 | 0 | 4.049159 | 2.456453  | 0.168915  |
| 30 | 1 | 0 | 2.872745 | 2.734783  | -1.116763 |
| 31 | 6 | 0 | 2.868185 | 0.746727  | -0.360225 |
| 32 | 8 | 0 | 2.746363 | 0.244007  | -1.452689 |
| 33 | 8 | 0 | 2.861506 | 0.086066  | 0.794231  |
| 34 | 1 | 0 | 2.568618 | -0.871438 | 0.665758  |

-----

Rotational constants (GHZ):      0.3297560      0.2559854      0.1606100

Standard basis: 6-311++G(d,p) (5D, 7F)

There are    538 symmetry adapted cartesian basis functions of A    symmetry.

There are    519 symmetry adapted basis functions of A    symmetry.

    519 basis functions,    823 primitive gaussians,    538 cartesian basis functions

    78 alpha electrons      78 beta electrons

        nuclear repulsion energy      1575.0058110852 Hartrees.

NAtoms=    34 NActive=    34 NUniq=    34 SFac= 1.00D+00 NAtFMM=    60 NAOKFM=F

Big=F

Integral buffers will be    131072 words long.

Raffenetti 2 integral format.

Two-electron integral symmetry is turned on.

One-electron integrals computed using PRISM.

NBasis=    519 RedAO= T EigKep=    3.57D-06    NBF=    519

NBsUse=    519 1.00D-06 EigRej= -1.00D+00 NBFU=    519

Initial guess from the checkpoint file:    "/coohpo.chk"

B after Tr=      0.000000      0.000000      0.000000

        Rot=    0.999654    -0.000151    0.000903    0.026277 Ang=    -3.01 deg.

ExpMin= 3.50D-02 ExpMax= 4.40D+05 ExpMxC= 1.51D+04 IAcc=3 IRadAn=      5 AccDes=

0.00D+00

Harris functional with IExCor=    402 and IRadAn=      5 diagonalized for initial guess.

HarFok: IExCor=    402 AccDes= 0.00D+00 IRadAn=      5 IDoV= 1 UseB2=F ITyADJ=14

ICtDFT= 3500011 ScaDFX= 1.000000 1.000000 1.000000 1.000000

FoFCou: FMM=F IPFlag=              0 FMFlag=      100000 FMFlg1=      0

        NFxFlg=              0 DoJE=T BraDBF=F KetDBF=T FulRan=T

        wScrn= 0.000000 ICntrl=      500 IOpCl= 0 I1Cent=    200000004 NGrid=

0

        NMat0=      1 NMatS0=      1 NMatT0=      0 NMatD0=      1 NMtDS0=      0

NMtDT0=    0

Petite list used in FoFCou.

Requested convergence on RMS density matrix=1.00D-08 within 128 cycles.

Requested convergence on MAX density matrix=1.00D-06.

Requested convergence on              energy=1.00D-06.

No special actions if energy rises.

SCF Done: E(RB3LYP) = -3338.90376014 A.U. after 11 cycles

NFock= 11 Conv=0.52D-08 -V/T= 2.0019

Calling FoFJK, ICntrl= 2127 FMM=F ISym2X=0 l1Cent= 0 IOpClX= 0 NMat=1 NMatS=1

NMatT=0.

\*\*\*\*\* Axes restored to original set \*\*\*\*\*

| Center<br>Number | Atomic<br>Number | Forces (Hartrees/Bohr) |              |              |
|------------------|------------------|------------------------|--------------|--------------|
|                  |                  | X                      | Y            | Z            |
| 1                | 6                | 0.000446851            | -0.000501172 | -0.000617831 |
| 2                | 6                | 0.000205074            | 0.000409973  | 0.000659169  |
| 3                | 7                | -0.000559008           | 0.000017973  | 0.000119230  |
| 4                | 6                | -0.000301176           | -0.000267678 | -0.000056398 |
| 5                | 7                | 0.000178596            | 0.000474369  | 0.000252932  |
| 6                | 6                | -0.000495835           | -0.000329813 | 0.000472056  |
| 7                | 1                | -0.000240663           | 0.000242085  | 0.000019922  |
| 8                | 1                | -0.000092574           | -0.000591599 | -0.000129367 |
| 9                | 1                | -0.000029366           | -0.000005744 | 0.000107227  |
| 10               | 1                | 0.000007492            | 0.000141304  | -0.000042715 |
| 11               | 35               | 0.000078137            | 0.000010110  | 0.000229818  |
| 12               | 1                | 0.000208666            | -0.000012149 | -0.000119392 |
| 13               | 6                | 0.000088563            | -0.000213051 | -0.000143303 |
| 14               | 6                | 0.000048507            | 0.000773286  | -0.000120297 |
| 15               | 1                | -0.000020511           | 0.000039852  | -0.000062226 |
| 16               | 1                | -0.000162763           | -0.000232628 | 0.000060302  |
| 17               | 1                | 0.000067808            | -0.000124131 | -0.000011709 |
| 18               | 6                | -0.000253133           | -0.000637318 | 0.000356795  |
| 19               | 6                | -0.000102743           | 0.000299459  | 0.000585432  |
| 20               | 8                | 0.000493508            | -0.000663828 | -0.000522064 |
| 21               | 1                | 0.000117496            | 0.000133800  | 0.000145404  |
| 22               | 1                | -0.000063101           | 0.000094970  | -0.000442027 |
| 23               | 1                | 0.000124795            | 0.000047535  | -0.000016183 |
| 24               | 6                | -0.000019483           | -0.000088138 | -0.000085814 |
| 25               | 1                | -0.000011646           | -0.000014135 | -0.000012228 |
| 26               | 1                | -0.000016529           | 0.000003726  | -0.000043142 |
| 27               | 1                | -0.000040237           | 0.000009408  | -0.000009417 |
| 28               | 6                | 0.000793404            | 0.000196301  | -0.000950835 |
| 29               | 1                | -0.000117016           | -0.000065754 | 0.000141862  |
| 30               | 1                | 0.000015404            | -0.000047252 | 0.000176282  |
| 31               | 6                | -0.000184589           | 0.000286927  | -0.000322238 |
| 32               | 8                | 0.000045653            | -0.000261885 | 0.000071314  |
| 33               | 8                | 0.000222783            | -0.000331338 | 0.000372281  |
| 34               | 1                | -0.000432365           | 0.001206535  | -0.000062841 |

-----  
Cartesian Forces: Max 0.001206535 RMS 0.000320712

GradGradGradGradGradGradGradGradGradGradGradGradGradGradGradGradGradGradGrad

Berny optimization.

Using GEDIIS/GDIIS optimizer.

FormGI is forming the generalized inverse of G from B-inverse, IUseBI=4.

Internal Forces: Max 0.000860344 RMS 0.000204555

Search for a local minimum.

Step number 26 out of a maximum of 175

All quantities printed in internal units (Hartrees-Bohrs-Radians)

Mixed Optimization -- En-DIIS/RFO-DIIS

Swapping is turned off.

Update second derivatives using D2CorX and points 21 22 23 24 25

26

DE= -6.06D-05 DEPred=-3.08D-05 R= 1.97D+00

TightC=F SS= 1.41D+00 RLast= 8.25D-02 DXNew= 1.3149D+00 2.4756D-01

Trust test= 1.97D+00 RLast= 8.25D-02 DXMaxT set to 7.82D-01

ITU= 1 -1 0 1 1 1 1 1 1 1 1 1 1 0 0 -1 1 1 1 0

ITU= 1 0 -1 0 1 0

|                 |         |         |         |         |         |
|-----------------|---------|---------|---------|---------|---------|
| Eigenvalues --- | 0.00154 | 0.00317 | 0.00416 | 0.00543 | 0.00698 |
| Eigenvalues --- | 0.00729 | 0.01055 | 0.01215 | 0.01514 | 0.01597 |
| Eigenvalues --- | 0.02021 | 0.02078 | 0.02227 | 0.02266 | 0.02368 |
| Eigenvalues --- | 0.02456 | 0.02577 | 0.02902 | 0.03124 | 0.03325 |
| Eigenvalues --- | 0.03430 | 0.03553 | 0.03759 | 0.04222 | 0.04808 |
| Eigenvalues --- | 0.04909 | 0.04992 | 0.05346 | 0.05636 | 0.05748 |
| Eigenvalues --- | 0.05954 | 0.06313 | 0.06896 | 0.08262 | 0.09322 |
| Eigenvalues --- | 0.09522 | 0.11802 | 0.12605 | 0.12835 | 0.13201 |
| Eigenvalues --- | 0.13637 | 0.15290 | 0.15556 | 0.15794 | 0.15985 |
| Eigenvalues --- | 0.16007 | 0.16013 | 0.16032 | 0.16101 | 0.16148 |
| Eigenvalues --- | 0.17016 | 0.17525 | 0.20479 | 0.20769 | 0.22460 |
| Eigenvalues --- | 0.23141 | 0.23912 | 0.24039 | 0.25402 | 0.25726 |
| Eigenvalues --- | 0.28955 | 0.29139 | 0.30872 | 0.31989 | 0.32649 |
| Eigenvalues --- | 0.33659 | 0.34499 | 0.34564 | 0.34622 | 0.34803 |
| Eigenvalues --- | 0.34887 | 0.34954 | 0.34990 | 0.35123 | 0.35262 |
| Eigenvalues --- | 0.35548 | 0.35721 | 0.36116 | 0.36554 | 0.36953 |
| Eigenvalues --- | 0.37064 | 0.37377 | 0.37782 | 0.39022 | 0.40285 |
| Eigenvalues --- | 0.42015 | 0.45140 | 0.49392 | 0.50948 | 0.51708 |
| Eigenvalues --- | 0.53648 | 0.55806 | 0.56428 | 0.61264 | 0.90405 |
| Eigenvalues --- | 1.42560 |         |         |         |         |

En-DIIS/RFO-DIIS IScMMF= 0 using points: 26 25 24 23 22

RFO step: Lambda=-1.32888959D-05.

DidBck=F Rises=F RFO-DIIS coefs: 1.31937 -0.07075 -0.46487 0.12131

0.09494

| Iteration 1 | RMS(Cart)= | 0.01625300 | RMS(Int)=           | 0.00009397        |                    |         |
|-------------|------------|------------|---------------------|-------------------|--------------------|---------|
| Iteration 2 | RMS(Cart)= | 0.00016618 | RMS(Int)=           | 0.00000477        |                    |         |
| Iteration 3 | RMS(Cart)= | 0.00000002 | RMS(Int)=           | 0.00000477        |                    |         |
| Variable    | Old X      | -DE/DX     | Delta X<br>(Linear) | Delta X<br>(Quad) | Delta X<br>(Total) | New X   |
| R1          | 2.56894    | 0.00019    | 0.00023             | -0.00009          | 0.00013            | 2.56908 |
| R2          | 2.61988    | -0.00001   | 0.00007             | -0.00004          | 0.00003            | 2.61991 |
| R3          | 2.03247    | -0.00007   | -0.00016            | -0.00011          | -0.00027           | 2.03220 |
| R4          | 2.62281    | 0.00056    | 0.00039             | 0.00024           | 0.00064            | 2.62344 |
| R5          | 2.07027    | 0.00052    | 0.00110             | 0.00032           | 0.00142            | 2.07169 |
| R6          | 2.53673    | 0.00000    | -0.00054            | -0.00003          | -0.00057           | 2.53616 |
| R7          | 2.70553    | -0.00010   | 0.00034             | 0.00055           | 0.00089            | 2.70642 |
| R8          | 2.52921    | 0.00019    | 0.00002             | 0.00034           | 0.00036            | 2.52957 |
| R9          | 2.03418    | -0.00001   | 0.00003             | 0.00006           | 0.00009            | 2.03427 |
| R10         | 2.78717    | 0.00006    | -0.00008            | 0.00024           | 0.00016            | 2.78733 |
| R11         | 2.06249    | -0.00002   | 0.00001             | 0.00004           | 0.00005            | 2.06254 |
| R12         | 2.05644    | 0.00003    | 0.00015             | -0.00015          | 0.00000            | 2.05644 |
| R13         | 2.89787    | 0.00082    | 0.00000             | 0.00151           | 0.00151            | 2.89938 |
| R14         | 4.43704    | 0.00009    | -0.00806            | 0.00145           | -0.00661           | 4.43043 |
| R15         | 2.50748    | -0.00040   | -0.00031            | -0.00028          | -0.00059           | 2.50688 |
| R16         | 2.04640    | 0.00007    | -0.00006            | 0.00009           | 0.00002            | 2.04642 |
| R17         | 2.04553    | 0.00024    | 0.00015             | 0.00029           | 0.00044            | 2.04597 |
| R18         | 2.06345    | 0.00007    | -0.00017            | 0.00046           | 0.00028            | 2.06373 |
| R19         | 2.76949    | 0.00005    | -0.00005            | 0.00035           | 0.00029            | 2.76977 |
| R20         | 2.76678    | 0.00030    | 0.00062             | -0.00038          | 0.00025            | 2.76703 |
| R21         | 2.05288    | -0.00018   | 0.00012             | -0.00019          | -0.00008           | 2.05281 |
| R22         | 2.05323    | -0.00034   | 0.00014             | -0.00016          | -0.00002           | 2.05322 |
| R23         | 2.74866    | -0.00026   | 0.00015             | -0.00077          | -0.00061           | 2.74805 |
| R24         | 2.05514    | 0.00003    | -0.00008            | 0.00009           | 0.00001            | 2.05515 |
| R25         | 2.84127    | 0.00008    | -0.00005            | 0.00006           | 0.00001            | 2.84128 |
| R26         | 3.04363    | 0.00065    | 0.00138             | 0.00683           | 0.00821            | 3.05185 |
| R27         | 2.06719    | -0.00002   | -0.00003            | -0.00007          | -0.00010           | 2.06709 |
| R28         | 2.06785    | 0.00000    | 0.00000             | -0.00003          | -0.00003           | 2.06783 |
| R29         | 2.06329    | 0.00004    | 0.00004             | 0.00019           | 0.00023            | 2.06353 |
| R30         | 2.06926    | -0.00013   | 0.00005             | -0.00020          | -0.00015           | 2.06912 |
| R31         | 2.06146    | -0.00015   | 0.00023             | -0.00053          | -0.00030           | 2.06116 |
| R32         | 2.88215    | -0.00017   | -0.00028            | -0.00037          | -0.00065           | 2.88150 |
| R33         | 2.28418    | 0.00016    | -0.00048            | 0.00014           | -0.00034           | 2.28384 |
| R34         | 2.51361    | 0.00024    | 0.00080             | 0.00064           | 0.00144            | 2.51505 |
| R35         | 1.90769    | -0.00048   | 0.00035             | -0.00200          | -0.00165           | 1.90604 |
| A1          | 1.88297    | 0.00027    | -0.00009            | 0.00063           | 0.00056            | 1.88353 |
| A2          | 2.27230    | 0.00005    | 0.00043             | -0.00004          | 0.00041            | 2.27271 |
| A3          | 2.12683    | -0.00031   | -0.00035            | -0.00046          | -0.00079           | 2.12604 |
| A4          | 1.85757    | -0.00028   | -0.00025            | -0.00039          | -0.00064           | 1.85693 |

|     |         |          |          |          |          |         |
|-----|---------|----------|----------|----------|----------|---------|
| A5  | 2.26714 | 0.00004  | -0.00049 | -0.00007 | -0.00055 | 2.26659 |
| A6  | 2.15198 | 0.00024  | 0.00056  | 0.00034  | 0.00089  | 2.15288 |
| A7  | 1.90005 | 0.00001  | 0.00024  | 0.00007  | 0.00031  | 1.90036 |
| A8  | 2.21772 | 0.00036  | 0.00037  | -0.00030 | 0.00008  | 2.21780 |
| A9  | 2.16534 | -0.00037 | -0.00061 | 0.00023  | -0.00038 | 2.16496 |
| A10 | 1.89650 | 0.00012  | -0.00004 | 0.00022  | 0.00019  | 1.89668 |
| A11 | 2.18947 | 0.00003  | 0.00025  | 0.00008  | 0.00033  | 2.18980 |
| A12 | 2.19721 | -0.00015 | -0.00021 | -0.00030 | -0.00051 | 2.19669 |
| A13 | 1.88768 | -0.00013 | 0.00012  | -0.00054 | -0.00042 | 1.88727 |
| A14 | 2.18921 | 0.00020  | 0.00040  | 0.00040  | 0.00080  | 2.19001 |
| A15 | 2.20058 | -0.00007 | -0.00040 | 0.00047  | 0.00008  | 2.20066 |
| A16 | 1.88974 | -0.00037 | -0.00033 | -0.00004 | -0.00038 | 1.88937 |
| A17 | 1.85687 | -0.00016 | 0.00051  | -0.00066 | -0.00015 | 1.85672 |
| A18 | 1.95882 | 0.00086  | 0.00057  | 0.00178  | 0.00235  | 1.96117 |
| A19 | 1.89008 | 0.00006  | -0.00059 | -0.00036 | -0.00095 | 1.88913 |
| A20 | 1.93208 | -0.00016 | -0.00020 | -0.00030 | -0.00050 | 1.93158 |
| A21 | 1.93327 | -0.00025 | 0.00002  | -0.00049 | -0.00047 | 1.93281 |
| A22 | 2.70013 | 0.00059  | 0.01530  | 0.00599  | 0.02130  | 2.72143 |
| A23 | 2.15411 | -0.00010 | 0.00019  | -0.00130 | -0.00111 | 2.15300 |
| A24 | 1.96420 | 0.00003  | -0.00031 | 0.00014  | -0.00017 | 1.96404 |
| A25 | 2.16480 | 0.00008  | 0.00012  | 0.00118  | 0.00130  | 2.16609 |
| A26 | 2.06278 | 0.00012  | -0.00007 | 0.00059  | 0.00053  | 2.06330 |
| A27 | 2.15755 | 0.00003  | 0.00115  | -0.00065 | 0.00050  | 2.15805 |
| A28 | 2.06254 | -0.00015 | -0.00105 | 0.00006  | -0.00099 | 2.06155 |
| A29 | 2.06230 | -0.00002 | -0.00108 | -0.00044 | -0.00151 | 2.06079 |
| A30 | 2.12842 | 0.00017  | 0.00055  | -0.00028 | 0.00026  | 2.12868 |
| A31 | 1.98019 | -0.00014 | -0.00047 | -0.00106 | -0.00154 | 1.97865 |
| A32 | 1.99852 | 0.00025  | 0.00073  | 0.00089  | 0.00163  | 2.00015 |
| A33 | 2.02159 | -0.00011 | 0.00031  | 0.00071  | 0.00102  | 2.02261 |
| A34 | 2.03788 | 0.00016  | -0.00011 | 0.00032  | 0.00021  | 2.03809 |
| A35 | 2.14361 | -0.00026 | -0.00053 | -0.00074 | -0.00127 | 2.14234 |
| A36 | 1.94152 | 0.00014  | 0.00026  | 0.00027  | 0.00053  | 1.94206 |
| A37 | 2.04024 | -0.00025 | -0.00029 | -0.00045 | -0.00074 | 2.03949 |
| A38 | 2.02306 | 0.00008  | 0.00043  | 0.00043  | 0.00085  | 2.02392 |
| A39 | 2.07289 | 0.00002  | 0.00090  | 0.00366  | 0.00453  | 2.07742 |
| A40 | 2.31874 | 0.00016  | 0.00087  | 0.01101  | 0.01187  | 2.33061 |
| A41 | 1.93418 | 0.00002  | 0.00026  | 0.00015  | 0.00041  | 1.93459 |
| A42 | 1.91241 | 0.00006  | 0.00063  | 0.00018  | 0.00081  | 1.91322 |
| A43 | 1.93821 | -0.00006 | -0.00037 | -0.00014 | -0.00051 | 1.93770 |
| A44 | 1.88154 | -0.00001 | 0.00018  | 0.00006  | 0.00024  | 1.88178 |
| A45 | 1.90109 | 0.00001  | -0.00013 | -0.00038 | -0.00051 | 1.90059 |
| A46 | 1.89510 | -0.00001 | -0.00058 | 0.00014  | -0.00044 | 1.89466 |
| A47 | 1.88415 | -0.00015 | -0.00172 | 0.00024  | -0.00148 | 1.88266 |
| A48 | 1.94575 | -0.00002 | -0.00007 | -0.00005 | -0.00012 | 1.94563 |

|     |          |          |          |          |          |          |
|-----|----------|----------|----------|----------|----------|----------|
| A49 | 1.97552  | 0.00007  | -0.00019 | -0.00028 | -0.00047 | 1.97505  |
| A50 | 1.87928  | 0.00008  | 0.00053  | 0.00019  | 0.00072  | 1.87999  |
| A51 | 1.89774  | 0.00005  | 0.00063  | 0.00049  | 0.00112  | 1.89886  |
| A52 | 1.87874  | -0.00003 | 0.00088  | -0.00054 | 0.00035  | 1.87909  |
| A53 | 2.14581  | 0.00009  | -0.00015 | 0.00168  | 0.00154  | 2.14734  |
| A54 | 1.95092  | 0.00017  | 0.00029  | -0.00107 | -0.00079 | 1.95013  |
| A55 | 2.18628  | -0.00026 | -0.00018 | -0.00063 | -0.00081 | 2.18547  |
| A56 | 1.94132  | -0.00068 | -0.00080 | -0.00229 | -0.00310 | 1.93822  |
| A57 | 2.83232  | 0.00038  | -0.00239 | -0.00193 | -0.00432 | 2.82800  |
| D1  | 0.00084  | 0.00014  | 0.00022  | 0.00162  | 0.00184  | 0.00268  |
| D2  | 3.02110  | 0.00020  | -0.00146 | 0.00056  | -0.00089 | 3.02021  |
| D3  | -3.09056 | -0.00020 | -0.00080 | -0.00151 | -0.00230 | -3.09287 |
| D4  | -0.07031 | -0.00013 | -0.00248 | -0.00256 | -0.00503 | -0.07534 |
| D5  | 0.00094  | -0.00021 | -0.00005 | -0.00209 | -0.00215 | -0.00121 |
| D6  | -3.03152 | -0.00029 | -0.00133 | -0.00533 | -0.00666 | -3.03818 |
| D7  | 3.09739  | 0.00011  | 0.00087  | 0.00073  | 0.00161  | 3.09901  |
| D8  | 0.06494  | 0.00002  | -0.00041 | -0.00250 | -0.00290 | 0.06204  |
| D9  | -0.00233 | -0.00002 | -0.00031 | -0.00059 | -0.00090 | -0.00323 |
| D10 | 3.12610  | -0.00002 | 0.00048  | -0.00055 | -0.00007 | 3.12602  |
| D11 | -3.03259 | -0.00007 | 0.00131  | 0.00041  | 0.00172  | -3.03087 |
| D12 | 0.09584  | -0.00007 | 0.00209  | 0.00044  | 0.00255  | 0.09838  |
| D13 | -1.51722 | 0.00014  | -0.00243 | -0.00157 | -0.00400 | -1.52122 |
| D14 | 1.48502  | 0.00019  | -0.00442 | -0.00283 | -0.00725 | 1.47777  |
| D15 | 0.00296  | -0.00011 | 0.00029  | -0.00071 | -0.00043 | 0.00253  |
| D16 | 3.13939  | -0.00002 | 0.00063  | -0.00106 | -0.00043 | 3.13896  |
| D17 | -3.12595 | -0.00011 | -0.00049 | -0.00074 | -0.00123 | -3.12719 |
| D18 | 0.01047  | -0.00002 | -0.00015 | -0.00109 | -0.00123 | 0.00925  |
| D19 | -0.20797 | 0.00003  | 0.00492  | 0.00203  | 0.00696  | -0.20102 |
| D20 | 2.94640  | -0.00003 | 0.00476  | -0.00019 | 0.00457  | 2.95097  |
| D21 | 2.91858  | 0.00003  | 0.00584  | 0.00207  | 0.00791  | 2.92649  |
| D22 | -0.21023 | -0.00003 | 0.00567  | -0.00015 | 0.00552  | -0.20471 |
| D23 | -0.00241 | 0.00019  | -0.00014 | 0.00172  | 0.00158  | -0.00083 |
| D24 | 3.02915  | 0.00030  | 0.00120  | 0.00498  | 0.00618  | 3.03533  |
| D25 | -3.13881 | 0.00011  | -0.00049 | 0.00206  | 0.00157  | -3.13723 |
| D26 | -0.10725 | 0.00021  | 0.00085  | 0.00532  | 0.00618  | -0.10108 |
| D27 | -2.46431 | 0.00017  | -0.00155 | 0.00193  | 0.00038  | -2.46393 |
| D28 | -0.43603 | -0.00003 | -0.00214 | 0.00116  | -0.00098 | -0.43701 |
| D29 | 1.68106  | 0.00007  | -0.00144 | 0.00118  | -0.00026 | 1.68080  |
| D30 | 0.80570  | 0.00008  | -0.00310 | -0.00181 | -0.00491 | 0.80079  |
| D31 | 2.83398  | -0.00012 | -0.00368 | -0.00259 | -0.00627 | 2.82771  |
| D32 | -1.33211 | -0.00002 | -0.00298 | -0.00257 | -0.00555 | -1.33766 |
| D33 | -3.00463 | -0.00007 | 0.00450  | 0.00231  | 0.00682  | -2.99781 |
| D34 | 1.21789  | -0.00007 | 0.00496  | 0.00196  | 0.00693  | 1.22482  |
| D35 | -0.90322 | -0.00007 | 0.00400  | 0.00291  | 0.00691  | -0.89631 |

|     |          |          |          |          |          |          |
|-----|----------|----------|----------|----------|----------|----------|
| D36 | 1.16491  | -0.00008 | 0.00467  | 0.00136  | 0.00603  | 1.17094  |
| D37 | -0.89575 | -0.00007 | 0.00514  | 0.00101  | 0.00614  | -0.88961 |
| D38 | -3.01687 | -0.00008 | 0.00417  | 0.00195  | 0.00613  | -3.01074 |
| D39 | -0.93199 | 0.00012  | 0.00553  | 0.00233  | 0.00786  | -0.92413 |
| D40 | -2.99265 | 0.00012  | 0.00599  | 0.00198  | 0.00797  | -2.98468 |
| D41 | 1.16942  | 0.00012  | 0.00503  | 0.00292  | 0.00795  | 1.17737  |
| D42 | -3.13617 | -0.00011 | -0.00013 | -0.00217 | -0.00231 | -3.13848 |
| D43 | -0.02212 | -0.00011 | 0.00087  | -0.00164 | -0.00077 | -0.02289 |
| D44 | -0.00883 | -0.00004 | 0.00005  | 0.00029  | 0.00034  | -0.00849 |
| D45 | 3.10523  | -0.00005 | 0.00105  | 0.00083  | 0.00188  | 3.10711  |
| D46 | -2.75150 | -0.00008 | 0.00038  | -0.00108 | -0.00070 | -2.75219 |
| D47 | -0.04306 | -0.00012 | -0.00006 | -0.00095 | -0.00101 | -0.04407 |
| D48 | -0.02207 | 0.00001  | -0.00018 | -0.00096 | -0.00114 | -0.02321 |
| D49 | 2.68636  | -0.00004 | -0.00062 | -0.00082 | -0.00144 | 2.68492  |
| D50 | 0.27009  | 0.00018  | 0.00177  | 0.01209  | 0.01386  | 0.28395  |
| D51 | -2.10416 | 0.00023  | 0.00102  | 0.01119  | 0.01221  | -2.09196 |
| D52 | 2.57269  | -0.00014 | -0.00063 | -0.00163 | -0.00227 | 2.57042  |
| D53 | 0.19390  | -0.00015 | -0.00127 | -0.00213 | -0.00340 | 0.19049  |
| D54 | 2.55047  | 0.00000  | -0.00030 | 0.00169  | 0.00140  | 2.55187  |
| D55 | -1.65853 | 0.00003  | 0.00048  | 0.00197  | 0.00246  | -1.65607 |
| D56 | 0.43497  | 0.00002  | -0.00006 | 0.00217  | 0.00211  | 0.43709  |
| D57 | 1.32263  | 0.00000  | -0.00027 | 0.00223  | 0.00196  | 1.32459  |
| D58 | -2.88636 | 0.00003  | 0.00051  | 0.00251  | 0.00302  | -2.88335 |
| D59 | -0.79286 | 0.00002  | -0.00004 | 0.00271  | 0.00267  | -0.79019 |
| D60 | -1.02090 | -0.00003 | -0.00086 | 0.00181  | 0.00095  | -1.01995 |
| D61 | 1.05328  | 0.00001  | -0.00007 | 0.00208  | 0.00201  | 1.05529  |
| D62 | -3.13640 | -0.00001 | -0.00062 | 0.00229  | 0.00166  | -3.13474 |
| D63 | 1.52466  | -0.00001 | -0.00882 | 0.00136  | -0.00748 | 1.51718  |
| D64 | 2.83027  | 0.00007  | -0.00804 | 0.00836  | 0.00033  | 2.83060  |
| D65 | 2.28186  | 0.00002  | -0.00299 | 0.00190  | -0.00109 | 2.28077  |
| D66 | -0.84021 | 0.00011  | -0.00110 | 0.00299  | 0.00190  | -0.83831 |
| D67 | -1.90767 | -0.00010 | -0.00484 | 0.00235  | -0.00249 | -1.91015 |
| D68 | 1.25345  | 0.00000  | -0.00295 | 0.00345  | 0.00050  | 1.25395  |
| D69 | 0.12350  | 0.00001  | -0.00341 | 0.00254  | -0.00087 | 0.12263  |
| D70 | -2.99857 | 0.00011  | -0.00152 | 0.00364  | 0.00212  | -2.99645 |
| D71 | 2.93439  | 0.00012  | 0.00009  | -0.00370 | -0.00361 | 2.93079  |
| D72 | -0.18713 | 0.00021  | 0.00203  | -0.00260 | -0.00058 | -0.18771 |
| D73 | -1.99381 | 0.00028  | -0.00405 | 0.00723  | 0.00318  | -1.99063 |

| Item                 | Value    | Threshold | Converged? |
|----------------------|----------|-----------|------------|
| Maximum Force        | 0.000860 | 0.000450  | NO         |
| RMS Force            | 0.000205 | 0.000300  | YES        |
| Maximum Displacement | 0.063365 | 0.001800  | NO         |
| RMS Displacement     | 0.016282 | 0.001200  | NO         |

Predicted change in Energy=-1.918498D-05



GradGradGradGradGradGradGradGradGradGradGradGradGradGradGradGradGradGradGrad

Input orientation:

| Center<br>Number | Atomic<br>Number | Atomic<br>Type | Coordinates (Angstroms) |           |           |
|------------------|------------------|----------------|-------------------------|-----------|-----------|
|                  |                  |                | X                       | Y         | Z         |
| 1                | 6                | 0              | -0.865957               | 1.654833  | 1.548922  |
| 2                | 6                | 0              | -1.518542               | 0.462571  | 1.578560  |
| 3                | 7                | 0              | -2.356354               | 0.446840  | 0.471713  |
| 4                | 6                | 0              | -2.211546               | 1.600215  | -0.199060 |
| 5                | 7                | 0              | -1.307326               | 2.355141  | 0.436783  |
| 6                | 6                | 0              | -0.763917               | 3.642515  | -0.035414 |
| 7                | 1                | 0              | -0.103357               | 2.045337  | 2.198858  |
| 8                | 1                | 0              | -1.372596               | -0.402246 | 2.236316  |
| 9                | 1                | 0              | -1.595389               | 4.256640  | -0.385792 |
| 10               | 1                | 0              | -0.324826               | 4.127740  | 0.834058  |
| 11               | 35               | 0              | -0.419326               | -2.429932 | 2.926501  |
| 12               | 1                | 0              | -2.734033               | 1.867832  | -1.101400 |
| 13               | 6                | 0              | -3.233227               | -0.610978 | 0.067674  |
| 14               | 6                | 0              | -3.198459               | -1.828317 | 0.593701  |
| 15               | 1                | 0              | -3.914961               | -0.307868 | -0.717235 |
| 16               | 1                | 0              | -3.898853               | -2.566221 | 0.223366  |
| 17               | 1                | 0              | -2.486937               | -2.134794 | 1.363408  |
| 18               | 6                | 0              | 2.556997                | -0.677113 | 1.201674  |
| 19               | 6                | 0              | 3.985119                | -0.363411 | 1.303350  |
| 20               | 8                | 0              | 2.997161                | 0.667018  | 1.580604  |
| 21               | 1                | 0              | 2.112632                | -0.721803 | 0.211429  |
| 22               | 1                | 0              | 2.029729                | -1.217448 | 1.983048  |
| 23               | 1                | 0              | 4.492398                | -0.678418 | 2.212295  |
| 24               | 6                | 0              | 4.860577                | -0.158308 | 0.098301  |
| 25               | 1                | 0              | 5.630943                | 0.591615  | 0.299981  |
| 26               | 1                | 0              | 5.364346                | -1.096411 | -0.153808 |
| 27               | 1                | 0              | 4.271807                | 0.162485  | -0.763584 |
| 28               | 6                | 0              | 0.281860                | 3.463500  | -1.143719 |
| 29               | 1                | 0              | 0.740298                | 4.439483  | -1.333881 |
| 30               | 1                | 0              | -0.176089               | 3.125008  | -2.073971 |
| 31               | 6                | 0              | 1.378145                | 2.468458  | -0.778843 |
| 32               | 8                | 0              | 1.720994                | 1.568742  | -1.509302 |
| 33               | 8                | 0              | 1.873054                | 2.703266  | 0.434103  |
| 34               | 1                | 0              | 2.448703                | 1.935745  | 0.745353  |

Distance matrix (angstroms):

1            2            3            4            5

|    |    |          |          |          |          |          |
|----|----|----------|----------|----------|----------|----------|
| 1  | C  | 0.000000 |          |          |          |          |
| 2  | C  | 1.359498 | 0.000000 |          |          |          |
| 3  | N  | 2.200206 | 1.388267 | 0.000000 |          |          |
| 4  | C  | 2.206589 | 2.221355 | 1.342080 | 0.000000 |          |
| 5  | N  | 1.386396 | 2.220380 | 2.177910 | 1.338590 | 0.000000 |
| 6  | C  | 2.543897 | 3.645053 | 3.606295 | 2.508665 | 1.474990 |
| 7  | H  | 1.075392 | 2.211937 | 3.257946 | 3.223756 | 2.156485 |
| 8  | H  | 2.227278 | 1.096290 | 2.191472 | 3.262628 | 3.293291 |
| 9  | H  | 3.323340 | 4.273119 | 3.978562 | 2.733334 | 2.091724 |
| 10 | H  | 2.630423 | 3.925902 | 4.219884 | 3.318950 | 2.065246 |
| 11 | Br | 4.333879 | 3.375173 | 4.248985 | 5.405854 | 5.466641 |
| 12 | H  | 3.249505 | 3.261037 | 2.153264 | 1.076489 | 2.153826 |
| 13 | C  | 3.596104 | 2.524961 | 1.432178 | 2.450378 | 3.555728 |
| 14 | C  | 4.299459 | 3.006698 | 2.429066 | 3.654764 | 4.593727 |
| 15 | H  | 4.275990 | 3.406915 | 2.100580 | 2.609772 | 3.901683 |
| 16 | H  | 5.364033 | 4.083627 | 3.394041 | 4.514934 | 5.566090 |
| 17 | H  | 4.125926 | 2.780357 | 2.734412 | 4.058009 | 4.733881 |
| 18 | C  | 4.156341 | 4.248640 | 5.092851 | 5.466926 | 4.971178 |
| 19 | C  | 5.259900 | 5.572097 | 6.446891 | 6.671710 | 6.012606 |
| 20 | O  | 3.987538 | 4.520329 | 5.471585 | 5.582892 | 4.763055 |
| 21 | H  | 4.038474 | 4.056748 | 4.626587 | 4.925320 | 4.605917 |
| 22 | H  | 4.101641 | 3.946682 | 4.928662 | 5.539786 | 5.127403 |
| 23 | H  | 5.881844 | 6.151006 | 7.155504 | 7.479951 | 6.781720 |
| 24 | C  | 6.179399 | 6.577979 | 7.251878 | 7.293541 | 6.668959 |
| 25 | H  | 6.700746 | 7.264059 | 7.990454 | 7.922812 | 7.160189 |
| 26 | H  | 7.020350 | 7.266751 | 7.898235 | 8.041640 | 7.534800 |
| 27 | H  | 5.828499 | 6.253306 | 6.748284 | 6.664805 | 6.113538 |
| 28 | C  | 3.440796 | 4.433714 | 4.320883 | 3.252888 | 2.500391 |
| 29 | H  | 4.317972 | 5.422222 | 5.365689 | 4.250017 | 3.416503 |
| 30 | H  | 3.970226 | 4.715054 | 4.290297 | 3.159648 | 2.859419 |
| 31 | C  | 3.334137 | 4.239307 | 4.426884 | 3.738432 | 2.949973 |
| 32 | O  | 4.006553 | 4.610109 | 4.669888 | 4.145189 | 3.684615 |
| 33 | O  | 3.137549 | 4.222963 | 4.793825 | 4.278034 | 3.199377 |
| 34 | H  | 3.422222 | 4.313178 | 5.037884 | 4.766803 | 3.791946 |
|    |    | 6        | 7        | 8        | 9        | 10       |
| 6  | C  | 0.000000 |          |          |          |          |
| 7  | H  | 2.824763 | 0.000000 |          |          |          |
| 8  | H  | 4.678818 | 2.757360 | 0.000000 |          |          |
| 9  | H  | 1.091449 | 3.714355 | 5.350730 | 0.000000 |          |
| 10 | H  | 1.088221 | 2.499626 | 4.856432 | 1.766063 | 0.000000 |
| 11 | Br | 6.765079 | 4.545034 | 2.344480 | 7.554115 | 6.884062 |
| 12 | H  | 2.857828 | 4.224176 | 4.259943 | 2.741351 | 3.828506 |
| 13 | C  | 4.919382 | 4.625369 | 2.865052 | 5.155759 | 5.612628 |
| 14 | C  | 6.021028 | 5.211657 | 2.840006 | 6.368355 | 6.617413 |

|    |    |          |          |          |          |          |
|----|----|----------|----------|----------|----------|----------|
| 15 | H  | 5.098969 | 5.345043 | 3.898203 | 5.130789 | 5.913560 |
| 16 | H  | 6.960114 | 6.290852 | 3.888023 | 7.226925 | 7.612866 |
| 17 | H  | 6.188925 | 4.883946 | 2.237285 | 6.686179 | 6.646373 |
| 18 | C  | 5.587311 | 3.934919 | 4.072805 | 6.641106 | 5.614861 |
| 19 | C  | 6.355554 | 4.829041 | 5.438478 | 7.439096 | 6.242299 |
| 20 | O  | 5.060712 | 3.448943 | 4.546214 | 6.151717 | 4.854846 |
| 21 | H  | 5.232851 | 4.064177 | 4.043401 | 6.236264 | 5.463235 |
| 22 | H  | 5.958010 | 3.904151 | 3.507779 | 6.979866 | 5.952743 |
| 23 | H  | 7.165996 | 5.342283 | 5.871542 | 8.256271 | 6.942935 |
| 24 | C  | 6.789629 | 5.823146 | 6.594168 | 7.836174 | 6.767566 |
| 25 | H  | 7.093286 | 6.212989 | 7.333943 | 8.131579 | 6.946985 |
| 26 | H  | 7.747712 | 6.730631 | 7.181988 | 8.783330 | 7.786804 |
| 27 | H  | 6.164362 | 5.609211 | 6.416978 | 7.164414 | 6.277320 |
| 28 | C  | 1.534286 | 3.651355 | 5.394984 | 2.174302 | 2.172759 |
| 29 | H  | 2.140990 | 4.350164 | 6.375968 | 2.527398 | 2.435494 |
| 30 | H  | 2.183820 | 4.407726 | 5.696642 | 2.478902 | 3.079647 |
| 31 | C  | 2.553336 | 3.352698 | 4.989860 | 3.491989 | 2.873113 |
| 32 | O  | 3.556355 | 4.160030 | 5.242590 | 4.414235 | 4.028050 |
| 33 | O  | 2.838354 | 2.730097 | 4.840085 | 3.887840 | 2.649485 |
| 34 | H  | 3.720697 | 2.938995 | 4.721387 | 4.797991 | 3.536265 |
|    |    | 11       | 12       | 13       | 14       | 15       |
| 11 | Br | 0.000000 |          |          |          |          |
| 12 | H  | 6.328715 | 0.000000 |          |          |          |
| 13 | C  | 4.404489 | 2.785755 | 0.000000 |          |          |
| 14 | C  | 3.677971 | 4.092747 | 1.326585 | 0.000000 |          |
| 15 | H  | 5.477173 | 2.505164 | 1.082921 | 2.131594 | 0.000000 |
| 16 | H  | 4.408244 | 4.772069 | 2.071297 | 1.082683 | 2.446456 |
| 17 | H  | 2.608712 | 4.707160 | 2.134922 | 1.092080 | 3.115443 |
| 18 | C  | 3.860816 | 6.306813 | 5.900595 | 5.900862 | 6.760532 |
| 19 | C  | 5.128769 | 7.477183 | 7.327530 | 7.365687 | 8.154576 |
| 20 | O  | 4.803636 | 6.440628 | 6.537581 | 6.751768 | 7.349006 |
| 21 | H  | 4.086579 | 5.649769 | 5.348939 | 5.438583 | 6.112743 |
| 22 | H  | 2.891037 | 6.459582 | 5.633398 | 5.444024 | 6.592283 |
| 23 | H  | 5.263357 | 8.347770 | 8.018056 | 7.943009 | 8.910844 |
| 24 | C  | 6.405963 | 7.951266 | 8.106510 | 8.245144 | 8.814620 |
| 25 | H  | 7.254937 | 8.577029 | 8.948391 | 9.159731 | 9.641996 |
| 26 | H  | 6.687111 | 8.675737 | 8.614114 | 8.626476 | 9.329780 |
| 27 | H  | 6.507233 | 7.218319 | 7.590439 | 7.849229 | 8.200400 |
| 28 | C  | 7.196589 | 3.412265 | 5.515857 | 6.567692 | 5.658481 |
| 29 | H  | 8.166054 | 4.328788 | 6.577264 | 7.649489 | 6.677501 |
| 30 | H  | 7.478051 | 3.011555 | 5.281130 | 6.386441 | 5.254002 |
| 31 | C  | 6.399586 | 4.168308 | 5.609301 | 6.425842 | 5.977353 |
| 32 | O  | 6.344030 | 4.483648 | 5.637583 | 6.337480 | 5.992748 |
| 33 | O  | 6.149534 | 4.927572 | 6.098573 | 6.803011 | 6.625226 |

|    |   |           |          |          |          |          |
|----|---|-----------|----------|----------|----------|----------|
| 34 | H | 5.660577  | 5.502350 | 6.263335 | 6.788342 | 6.904286 |
|    |   | 16        | 17       | 18       | 19       | 20       |
| 16 | H | 0.000000  |          |          |          |          |
| 17 | H | 1.865296  | 0.000000 |          |          |          |
| 18 | C | 6.797338  | 5.252833 | 0.000000 |          |          |
| 19 | C | 8.256861  | 6.710359 | 1.465701 | 0.000000 |          |
| 20 | O | 7.736338  | 6.162196 | 1.464248 | 1.454206 | 0.000000 |
| 21 | H | 6.288081  | 4.947689 | 1.086298 | 2.197031 | 2.141461 |
| 22 | H | 6.329593  | 4.650349 | 1.086516 | 2.239401 | 2.156177 |
| 23 | H | 8.827951  | 7.180025 | 2.183377 | 1.087540 | 2.108309 |
| 24 | C | 9.085224  | 7.713167 | 2.606352 | 1.503541 | 2.520060 |
| 25 | H | 10.039662 | 8.629262 | 3.445558 | 2.151177 | 2.929589 |
| 26 | H | 9.386664  | 8.063674 | 3.145529 | 2.136087 | 3.423658 |
| 27 | H | 8.670617  | 7.448638 | 2.740025 | 2.151969 | 2.715602 |
| 28 | C | 7.463566  | 6.729994 | 5.274637 | 5.860676 | 4.755535 |
| 29 | H | 8.545561  | 7.804584 | 5.992411 | 6.368017 | 5.274386 |
| 30 | H | 7.178218  | 6.694857 | 5.714521 | 6.394609 | 5.428366 |
| 31 | C | 7.362005  | 6.381068 | 3.899585 | 4.376223 | 3.381330 |
| 32 | O | 7.189071  | 6.298835 | 3.618309 | 4.095179 | 3.462547 |
| 33 | O | 7.818363  | 6.578750 | 3.533257 | 3.823730 | 2.593142 |
| 34 | H | 7.799463  | 6.427427 | 2.654616 | 2.821002 | 1.614967 |
|    |   | 21        | 22       | 23       | 24       | 25       |
| 21 | H | 0.000000  |          |          |          |          |
| 22 | H | 1.841513  | 0.000000 |          |          |          |
| 23 | H | 3.109443  | 2.531372 | 0.000000 |          |          |
| 24 | C | 2.807406  | 3.561986 | 2.207949 | 0.000000 |          |
| 25 | H | 3.756518  | 4.367398 | 2.562463 | 1.093857 | 0.000000 |
| 26 | H | 3.293536  | 3.962383 | 2.556063 | 1.094248 | 1.768171 |
| 27 | H | 2.528766  | 3.804618 | 3.100264 | 1.091972 | 1.778362 |
| 28 | C | 4.764968  | 5.894319 | 6.793155 | 5.968649 | 6.240568 |
| 29 | H | 5.559690  | 6.683227 | 7.269562 | 6.337786 | 6.433817 |
| 30 | H | 5.025859  | 6.338925 | 7.391408 | 6.392726 | 6.765749 |
| 31 | C | 3.420216  | 4.651721 | 5.343062 | 4.449339 | 4.772075 |
| 32 | O | 2.891521  | 4.478246 | 5.155647 | 3.927349 | 4.417690 |
| 33 | O | 3.440651  | 4.218504 | 4.632355 | 4.150501 | 4.312631 |
| 34 | H | 2.731406  | 3.413217 | 3.628010 | 3.258968 | 3.483059 |
|    |   | 26        | 27       | 28       | 29       | 30       |
| 26 | H | 0.000000  |          |          |          |          |
| 27 | H | 1.774904  | 0.000000 |          |          |          |
| 28 | C | 6.899593  | 5.192387 | 0.000000 |          |          |
| 29 | H | 7.308934  | 5.575796 | 1.094929 | 0.000000 |          |
| 30 | H | 7.225222  | 5.502494 | 1.090717 | 1.765033 | 0.000000 |
| 31 | C | 5.384121  | 3.700139 | 1.524823 | 2.144727 | 2.126983 |
| 32 | O | 4.713217  | 3.006710 | 2.407253 | 3.038698 | 2.517884 |

```

33 O 5.193486 3.693783 2.366301 2.724583 3.266082
34 H 4.301562 2.957203 3.255432 3.675672 4.031435
      31      32      33      34
31 C 0.000000
32 O 1.208554 0.000000
33 O 1.330905 2.255458 0.000000
34 H 1.937280 2.397440 1.008631 0.000000

```

Stoichiometry C11H17BrN2O3

Framework group C1[X(C11H17BrN2O3)]

Deg. of freedom 96

Full point group C1 NOp 1

Largest Abelian subgroup C1 NOp 1

Largest concise Abelian subgroup C1 NOp 1

Standard orientation:

| Center Number | Atomic Number | Atomic Type | Coordinates (Angstroms) |           |           |
|---------------|---------------|-------------|-------------------------|-----------|-----------|
|               |               |             | X                       | Y         | Z         |
| 1             | 6             | 0           | 0.058287                | 1.342782  | 1.253589  |
| 2             | 6             | 0           | -1.167648               | 1.257803  | 0.672129  |
| 3             | 7             | 0           | -1.224310               | 2.273155  | -0.272929 |
| 4             | 6             | 0           | -0.065184               | 2.949354  | -0.253963 |
| 5             | 7             | 0           | 0.735463                | 2.401587  | 0.668391  |
| 6             | 6             | 0           | 2.143188                | 2.762017  | 0.921364  |
| 7             | 1             | 0           | 0.516540                | 0.720933  | 2.001771  |
| 8             | 1             | 0           | -1.948755               | 0.497214  | 0.787149  |
| 9             | 1             | 0           | 2.217669                | 3.850567  | 0.949162  |
| 10            | 1             | 0           | 2.385140                | 2.378693  | 1.910681  |
| 11            | 35            | 0           | -3.068998               | -1.508436 | 0.319164  |
| 12            | 1             | 0           | 0.178313                | 3.789242  | -0.881759 |
| 13            | 6             | 0           | -2.313241               | 2.573197  | -1.153462 |
| 14            | 6             | 0           | -3.350842               | 1.766089  | -1.331753 |
| 15            | 1             | 0           | -2.187758               | 3.521934  | -1.660286 |
| 16            | 1             | 0           | -4.127023               | 2.074673  | -2.020608 |
| 17            | 1             | 0           | -3.454747               | 0.796503  | -0.840076 |
| 18            | 6             | 0           | 0.618663                | -2.474497 | -0.292219 |
| 19            | 6             | 0           | 1.643154                | -3.497072 | -0.061918 |
| 20            | 8             | 0           | 1.656691                | -2.271242 | 0.720306  |
| 21            | 1             | 0           | 0.728120                | -1.826945 | -1.157515 |
| 22            | 1             | 0           | -0.388200               | -2.569347 | 0.104958  |
| 23            | 1             | 0           | 1.355089                | -4.350680 | 0.547274  |
| 24            | 6             | 0           | 2.797740                | -3.717246 | -0.999515 |
| 25            | 1             | 0           | 3.692721                | -4.022786 | -0.449808 |
| 26            | 1             | 0           | 2.550160                | -4.515156 | -1.706214 |

|    |   |   |          |           |           |
|----|---|---|----------|-----------|-----------|
| 27 | 1 | 0 | 3.022164 | -2.810054 | -1.564352 |
| 28 | 6 | 0 | 3.093348 | 2.180893  | -0.133872 |
| 29 | 1 | 0 | 4.119637 | 2.363776  | 0.201023  |
| 30 | 1 | 0 | 2.966677 | 2.672469  | -1.099259 |
| 31 | 6 | 0 | 2.906409 | 0.682989  | -0.349329 |
| 32 | 8 | 0 | 2.785188 | 0.184876  | -1.443766 |
| 33 | 8 | 0 | 2.867737 | 0.020203  | 0.804157  |
| 34 | 1 | 0 | 2.550936 | -0.927514 | 0.667024  |

-----

Rotational constants (GHZ): 0.3307084 0.2541528 0.1601750  
Standard basis: 6-311++G(d,p) (5D, 7F)  
There are 538 symmetry adapted cartesian basis functions of A symmetry.  
There are 519 symmetry adapted basis functions of A symmetry.  
519 basis functions, 823 primitive gaussians, 538 cartesian basis functions  
78 alpha electrons 78 beta electrons  
nuclear repulsion energy 1573.9950146262 Hartrees.  
NAtoms= 34 NActive= 34 NUniq= 34 SFac= 1.00D+00 NAtFMM= 60 NAOKFM=F  
Big=F  
Integral buffers will be 131072 words long.  
Raffenetti 2 integral format.  
Two-electron integral symmetry is turned on.  
One-electron integrals computed using PRISM.  
NBasis= 519 RedAO= T EigKep= 3.54D-06 NBF= 519  
NBsUse= 519 1.00D-06 EigRej= -1.00D+00 NBFU= 519  
Initial guess from the checkpoint file: "./coohpo.chk"  
B after Tr= 0.000000 0.000000 0.000000  
Rot= 0.999914 0.000158 0.000774 0.013100 Ang= 1.50 deg.  
ExpMin= 3.50D-02 ExpMax= 4.40D+05 ExpMxC= 1.51D+04 IAcc=3 IRadAn= 5 AccDes= 0.00D+00  
Harris functional with IExCor= 402 and IRadAn= 5 diagonalized for initial guess.  
HarFok: IExCor= 402 AccDes= 0.00D+00 IRadAn= 5 IDoV= 1 UseB2=F ITyADJ=14  
ICtDFT= 3500011 ScaDFX= 1.000000 1.000000 1.000000 1.000000  
FoFCou: FMM=F IPFlag= 0 FMFlag= 100000 FMFlg1= 0  
NFxFlg= 0 DoJE=T BraDBF=F KetDBF=T FulRan=T  
wScrn= 0.000000 ICntrl= 500 IOpCl= 0 l1Cent= 200000004 NGrid= 0  
NMat0= 1 NMatS0= 1 NMatT0= 0 NMatD0= 1 NMtDS0= 0  
NMtDT0= 0  
Petite list used in FoFCou.  
Requested convergence on RMS density matrix=1.00D-08 within 128 cycles.  
Requested convergence on MAX density matrix=1.00D-06.  
Requested convergence on energy=1.00D-06.  
No special actions if energy rises.  
SCF Done: E(RB3LYP) = -3338.90381449 A.U. after 12 cycles

NFock= 12 Conv=0.24D-08 -V/T= 2.0019

Calling FoFJK, ICntrl= 2127 FMM=F ISym2X=0 l1Cent= 0 IOpClX= 0 NMat=1 NMatS=1  
NMatT=0.

\*\*\*\*\* Axes restored to original set \*\*\*\*\*

| Center<br>Number | Atomic<br>Number | Forces (Hartrees/Bohr) |              |              |
|------------------|------------------|------------------------|--------------|--------------|
|                  |                  | X                      | Y            | Z            |
| 1                | 6                | 0.000175281            | -0.000350757 | -0.000439282 |
| 2                | 6                | 0.000558279            | 0.000382798  | 0.000352461  |
| 3                | 7                | -0.000623864           | -0.000296379 | 0.000093035  |
| 4                | 6                | -0.000255737           | 0.000029293  | -0.000083285 |
| 5                | 7                | 0.000178808            | 0.000357853  | -0.000016640 |
| 6                | 6                | -0.000327495           | -0.000286918 | 0.000448774  |
| 7                | 1                | -0.000148495           | 0.000190665  | 0.000119215  |
| 8                | 1                | -0.000352274           | -0.000439750 | -0.000144423 |
| 9                | 1                | -0.000008913           | -0.000033405 | 0.000077342  |
| 10               | 1                | 0.000041438            | 0.000045597  | -0.000020971 |
| 11               | 35               | 0.000175977            | 0.000093075  | 0.000116058  |
| 12               | 1                | 0.000151575            | -0.000026983 | -0.000068656 |
| 13               | 6                | 0.000271181            | 0.000208798  | 0.000047442  |
| 14               | 6                | -0.000100127           | 0.000262252  | -0.000069975 |
| 15               | 1                | -0.000000929           | -0.000015673 | -0.000066708 |
| 16               | 1                | -0.000046853           | -0.000115088 | 0.000042357  |
| 17               | 1                | 0.000021809            | -0.000071460 | -0.000041111 |
| 18               | 6                | -0.000171975           | -0.000378289 | 0.000135197  |
| 19               | 6                | -0.000151588           | 0.000310927  | 0.000444357  |
| 20               | 8                | 0.000343716            | -0.000871082 | -0.000282502 |
| 21               | 1                | 0.000119340            | 0.000077927  | 0.000064862  |
| 22               | 1                | -0.000060145           | 0.000106632  | -0.000198124 |
| 23               | 1                | 0.000104095            | 0.000045786  | -0.000030676 |
| 24               | 6                | -0.000026664           | -0.000067028 | -0.000144861 |
| 25               | 1                | 0.000011762            | -0.000011497 | 0.000020881  |
| 26               | 1                | 0.000000841            | -0.000008410 | 0.000013640  |
| 27               | 1                | -0.000045788           | 0.000006704  | 0.000034972  |
| 28               | 6                | 0.000460331            | 0.000151317  | -0.000679655 |
| 29               | 1                | -0.000061799           | -0.000081669 | 0.000041606  |
| 30               | 1                | 0.000002235            | -0.000057411 | 0.000074391  |
| 31               | 6                | -0.000200327           | 0.000316563  | 0.000228787  |
| 32               | 8                | 0.000015561            | -0.000205341 | -0.000074527 |
| 33               | 8                | 0.000210025            | -0.000466526 | -0.000082733 |
| 34               | 1                | -0.000259282           | 0.001197477  | 0.000088750  |

Cartesian Forces: Max 0.001197477 RMS 0.000263825

GradGradGradGradGradGradGradGradGradGradGradGradGradGradGradGradGradGradGrad

Berny optimization.

Using GEDIIS/GDIIS optimizer.

FormGI is forming the generalized inverse of G from B-inverse, IUseBI=4.

Internal Forces: Max 0.000650368 RMS 0.000125038

Search for a local minimum.

Step number 27 out of a maximum of 175

All quantities printed in internal units (Hartrees-Bohrs-Radians)

Mixed Optimization -- En-DIIS/RFO-DIIS

Swapping is turned off.

Update second derivatives using D2CorX and points 21 22 23 24 25  
26 27

DE= -5.44D-05 DEPred=-1.92D-05 R= 2.83D+00

TightC=F SS= 1.41D+00 RLast= 4.77D-02 DXNew= 1.3149D+00 1.4296D-01

Trust test= 2.83D+00 RLast= 4.77D-02 DXMaxT set to 7.82D-01

ITU= 1 1 -1 0 1 1 1 1 1 1 1 1 1 0 0 -1 1 1 1

ITU= 0 1 0 -1 0 1 0

|                 |         |         |         |         |         |
|-----------------|---------|---------|---------|---------|---------|
| Eigenvalues --- | 0.00156 | 0.00291 | 0.00422 | 0.00567 | 0.00691 |
| Eigenvalues --- | 0.00782 | 0.00932 | 0.01185 | 0.01423 | 0.01611 |
| Eigenvalues --- | 0.02023 | 0.02094 | 0.02136 | 0.02265 | 0.02363 |
| Eigenvalues --- | 0.02422 | 0.02819 | 0.03027 | 0.03145 | 0.03214 |
| Eigenvalues --- | 0.03425 | 0.03566 | 0.03767 | 0.04213 | 0.04800 |
| Eigenvalues --- | 0.04896 | 0.05032 | 0.05345 | 0.05662 | 0.05745 |
| Eigenvalues --- | 0.05916 | 0.06324 | 0.06554 | 0.07804 | 0.09407 |
| Eigenvalues --- | 0.09538 | 0.11873 | 0.12617 | 0.12782 | 0.13196 |
| Eigenvalues --- | 0.13727 | 0.15099 | 0.15566 | 0.15783 | 0.15980 |
| Eigenvalues --- | 0.15996 | 0.16010 | 0.16030 | 0.16044 | 0.16177 |
| Eigenvalues --- | 0.17006 | 0.17624 | 0.20385 | 0.20890 | 0.22346 |
| Eigenvalues --- | 0.23111 | 0.23668 | 0.24008 | 0.25268 | 0.26009 |
| Eigenvalues --- | 0.28468 | 0.29173 | 0.30543 | 0.31573 | 0.32227 |
| Eigenvalues --- | 0.33694 | 0.34500 | 0.34571 | 0.34627 | 0.34805 |
| Eigenvalues --- | 0.34888 | 0.34956 | 0.34995 | 0.35105 | 0.35263 |
| Eigenvalues --- | 0.35338 | 0.35732 | 0.35783 | 0.36578 | 0.36947 |
| Eigenvalues --- | 0.37139 | 0.37485 | 0.37858 | 0.38393 | 0.40766 |
| Eigenvalues --- | 0.41261 | 0.45149 | 0.49150 | 0.50125 | 0.51592 |
| Eigenvalues --- | 0.53832 | 0.56032 | 0.56362 | 0.61098 | 0.90694 |
| Eigenvalues --- | 1.46585 |         |         |         |         |

En-DIIS/RFO-DIIS IScMMF= 0 using points: 27 26 25 24 23

RFO step: Lambda=-7.77004367D-06.

DidBck=F Rises=F RFO-DIIS coefs: 1.63709 -0.65092 0.09006 -0.32115

0.24492

Iteration 1 RMS(Cart)= 0.02554324 RMS(Int)= 0.00024727

Iteration 2 RMS(Cart)= 0.00049610 RMS(Int)= 0.00001680



| Iteration | 3 RMS(Cart)= | 0.00000016 | RMS(Int)= | 0.00001680 |          |         |
|-----------|--------------|------------|-----------|------------|----------|---------|
| Variable  | Old X        | -DE/DX     | Delta X   | Delta X    | Delta X  | New X   |
|           |              |            | (Linear)  | (Quad)     | (Total)  |         |
| R1        | 2.56908      | -0.00004   | 0.00023   | -0.00016   | 0.00006  | 2.56914 |
| R2        | 2.61991      | -0.00009   | -0.00006  | -0.00009   | -0.00015 | 2.61976 |
| R3        | 2.03220      | 0.00004    | -0.00024  | 0.00012    | -0.00012 | 2.03208 |
| R4        | 2.62344      | 0.00040    | 0.00072   | 0.00018    | 0.00090  | 2.62434 |
| R5        | 2.07169      | 0.00024    | 0.00098   | -0.00027   | 0.00071  | 2.07240 |
| R6        | 2.53616      | 0.00018    | -0.00039  | 0.00000    | -0.00040 | 2.53577 |
| R7        | 2.70642      | -0.00026   | 0.00028   | -0.00024   | 0.00004  | 2.70646 |
| R8        | 2.52957      | 0.00013    | 0.00024   | 0.00023    | 0.00047  | 2.53004 |
| R9        | 2.03427      | -0.00003   | 0.00004   | -0.00005   | -0.00001 | 2.03426 |
| R10       | 2.78733      | -0.00020   | -0.00001  | -0.00052   | -0.00053 | 2.78679 |
| R11       | 2.06254      | -0.00004   | 0.00003   | -0.00007   | -0.00004 | 2.06250 |
| R12       | 2.05644      | 0.00002    | 0.00005   | 0.00002    | 0.00007  | 2.05651 |
| R13       | 2.89938      | 0.00046    | 0.00131   | 0.00070    | 0.00201  | 2.90139 |
| R14       | 4.43043      | 0.00003    | 0.00327   | -0.01390   | -0.01063 | 4.41979 |
| R15       | 2.50688      | -0.00009   | -0.00051  | -0.00010   | -0.00061 | 2.50627 |
| R16       | 2.04642      | 0.00004    | 0.00005   | -0.00004   | 0.00001  | 2.04643 |
| R17       | 2.04597      | 0.00009    | 0.00043   | 0.00001    | 0.00044  | 2.04641 |
| R18       | 2.06373      | 0.00001    | 0.00015   | -0.00023   | -0.00009 | 2.06364 |
| R19       | 2.76977      | 0.00002    | 0.00037   | 0.00013    | 0.00044  | 2.77021 |
| R20       | 2.76703      | 0.00012    | 0.00044   | -0.00028   | 0.00019  | 2.76722 |
| R21       | 2.05281      | -0.00011   | -0.00017  | 0.00007    | -0.00010 | 2.05271 |
| R22       | 2.05322      | -0.00017   | -0.00029  | 0.00028    | -0.00001 | 2.05321 |
| R23       | 2.74805      | -0.00026   | -0.00066  | -0.00111   | -0.00173 | 2.74632 |
| R24       | 2.05515      | 0.00001    | 0.00002   | -0.00006   | -0.00004 | 2.05511 |
| R25       | 2.84128      | 0.00004    | 0.00012   | -0.00003   | 0.00009  | 2.84137 |
| R26       | 3.05185      | 0.00065    | 0.00712   | 0.01125    | 0.01837  | 3.07021 |
| R27       | 2.06709      | 0.00001    | -0.00006  | 0.00002    | -0.00004 | 2.06705 |
| R28       | 2.06783      | 0.00000    | -0.00001  | 0.00000    | 0.00000  | 2.06783 |
| R29       | 2.06353      | 0.00001    | 0.00008   | 0.00021    | 0.00030  | 2.06383 |
| R30       | 2.06912      | -0.00011   | -0.00019  | 0.00006    | -0.00012 | 2.06899 |
| R31       | 2.06116      | -0.00005   | -0.00020  | 0.00007    | -0.00013 | 2.06102 |
| R32       | 2.88150      | -0.00009   | -0.00050  | -0.00035   | -0.00085 | 2.88065 |
| R33       | 2.28384      | 0.00020    | -0.00029  | -0.00033   | -0.00062 | 2.28322 |
| R34       | 2.51505      | 0.00003    | 0.00106   | 0.00085    | 0.00191  | 2.51696 |
| R35       | 1.90604      | -0.00037   | -0.00110  | -0.00159   | -0.00269 | 1.90334 |
| A1        | 1.88353      | 0.00019    | 0.00040   | -0.00002   | 0.00038  | 1.88391 |
| A2        | 2.27271      | -0.00001   | 0.00065   | 0.00034    | 0.00099  | 2.27370 |
| A3        | 2.12604      | -0.00018   | -0.00087  | -0.00029   | -0.00116 | 2.12488 |
| A4        | 1.85693      | -0.00010   | -0.00056  | 0.00014    | -0.00043 | 1.85650 |
| A5        | 2.26659      | -0.00011   | -0.00028  | 0.00024    | -0.00004 | 2.26655 |
| A6        | 2.15288      | 0.00021    | 0.00072   | -0.00028   | 0.00045  | 2.15332 |

|     |         |          |          |          |          |         |
|-----|---------|----------|----------|----------|----------|---------|
| A7  | 1.90036 | -0.00008 | 0.00025  | -0.00013 | 0.00012  | 1.90049 |
| A8  | 2.21780 | 0.00032  | 0.00045  | -0.00008 | 0.00037  | 2.21817 |
| A9  | 2.16496 | -0.00024 | -0.00072 | 0.00019  | -0.00053 | 2.16443 |
| A10 | 1.89668 | 0.00001  | 0.00008  | -0.00001 | 0.00007  | 1.89675 |
| A11 | 2.18980 | 0.00004  | 0.00038  | 0.00023  | 0.00061  | 2.19041 |
| A12 | 2.19669 | -0.00006 | -0.00046 | -0.00022 | -0.00069 | 2.19601 |
| A13 | 1.88727 | -0.00002 | -0.00017 | 0.00003  | -0.00014 | 1.88712 |
| A14 | 2.19001 | -0.00010 | 0.00085  | -0.00035 | 0.00048  | 2.19049 |
| A15 | 2.20066 | 0.00012  | -0.00023 | 0.00070  | 0.00046  | 2.20112 |
| A16 | 1.88937 | -0.00008 | -0.00057 | -0.00035 | -0.00092 | 1.88845 |
| A17 | 1.85672 | 0.00002  | 0.00025  | 0.00012  | 0.00037  | 1.85709 |
| A18 | 1.96117 | 0.00009  | 0.00203  | -0.00002 | 0.00201  | 1.96318 |
| A19 | 1.88913 | 0.00000  | -0.00094 | 0.00004  | -0.00089 | 1.88824 |
| A20 | 1.93158 | 0.00006  | -0.00024 | 0.00052  | 0.00028  | 1.93186 |
| A21 | 1.93281 | -0.00008 | -0.00061 | -0.00034 | -0.00095 | 1.93186 |
| A22 | 2.72143 | -0.00006 | 0.00459  | 0.00242  | 0.00700  | 2.72843 |
| A23 | 2.15300 | 0.00013  | -0.00082 | 0.00012  | -0.00070 | 2.15231 |
| A24 | 1.96404 | -0.00005 | 0.00000  | -0.00001 | -0.00001 | 1.96403 |
| A25 | 2.16609 | -0.00008 | 0.00083  | -0.00012 | 0.00072  | 2.16681 |
| A26 | 2.06330 | 0.00008  | 0.00060  | 0.00063  | 0.00123  | 2.06454 |
| A27 | 2.15805 | 0.00002  | 0.00029  | 0.00040  | 0.00069  | 2.15874 |
| A28 | 2.06155 | -0.00010 | -0.00090 | -0.00104 | -0.00193 | 2.05962 |
| A29 | 2.06079 | -0.00002 | -0.00131 | -0.00147 | -0.00276 | 2.05803 |
| A30 | 2.12868 | 0.00009  | 0.00117  | 0.00046  | 0.00161  | 2.13029 |
| A31 | 1.97865 | -0.00004 | -0.00115 | -0.00101 | -0.00217 | 1.97647 |
| A32 | 2.00015 | 0.00009  | 0.00131  | -0.00028 | 0.00104  | 2.00119 |
| A33 | 2.02261 | -0.00003 | 0.00016  | 0.00144  | 0.00160  | 2.02420 |
| A34 | 2.03809 | 0.00014  | 0.00061  | 0.00058  | 0.00116  | 2.03925 |
| A35 | 2.14234 | -0.00020 | -0.00148 | -0.00115 | -0.00260 | 2.13974 |
| A36 | 1.94206 | 0.00006  | 0.00059  | 0.00035  | 0.00094  | 1.94300 |
| A37 | 2.03949 | -0.00011 | -0.00032 | -0.00047 | -0.00081 | 2.03869 |
| A38 | 2.02392 | 0.00003  | 0.00048  | 0.00047  | 0.00095  | 2.02487 |
| A39 | 2.07742 | -0.00001 | 0.00318  | 0.00439  | 0.00743  | 2.08485 |
| A40 | 2.33061 | 0.00012  | 0.00804  | 0.01022  | 0.01822  | 2.34882 |
| A41 | 1.93459 | 0.00000  | 0.00031  | 0.00034  | 0.00064  | 1.93523 |
| A42 | 1.91322 | 0.00001  | 0.00067  | 0.00035  | 0.00101  | 1.91423 |
| A43 | 1.93770 | -0.00008 | -0.00056 | -0.00062 | -0.00118 | 1.93652 |
| A44 | 1.88178 | 0.00000  | 0.00020  | 0.00010  | 0.00030  | 1.88208 |
| A45 | 1.90059 | 0.00004  | -0.00024 | -0.00014 | -0.00037 | 1.90021 |
| A46 | 1.89466 | 0.00004  | -0.00037 | -0.00001 | -0.00039 | 1.89427 |
| A47 | 1.88266 | 0.00006  | -0.00145 | -0.00047 | -0.00191 | 1.88075 |
| A48 | 1.94563 | 0.00009  | -0.00008 | 0.00020  | 0.00013  | 1.94576 |
| A49 | 1.97505 | -0.00036 | -0.00055 | -0.00084 | -0.00139 | 1.97366 |
| A50 | 1.87999 | -0.00001 | 0.00084  | 0.00030  | 0.00113  | 1.88112 |

|     |          |          |          |          |          |          |
|-----|----------|----------|----------|----------|----------|----------|
| A51 | 1.89886  | 0.00015  | 0.00088  | 0.00077  | 0.00164  | 1.90050  |
| A52 | 1.87909  | 0.00009  | 0.00046  | 0.00012  | 0.00058  | 1.87967  |
| A53 | 2.14734  | -0.00007 | 0.00064  | 0.00028  | 0.00091  | 2.14826  |
| A54 | 1.95013  | 0.00018  | -0.00010 | -0.00010 | -0.00021 | 1.94993  |
| A55 | 2.18547  | -0.00011 | -0.00059 | -0.00022 | -0.00081 | 2.18466  |
| A56 | 1.93822  | -0.00017 | -0.00193 | -0.00127 | -0.00320 | 1.93502  |
| A57 | 2.82800  | 0.00001  | -0.00040 | -0.00272 | -0.00311 | 2.82489  |
| D1  | 0.00268  | -0.00002 | 0.00157  | -0.00252 | -0.00095 | 0.00173  |
| D2  | 3.02021  | 0.00003  | 0.00050  | -0.00160 | -0.00110 | 3.01911  |
| D3  | -3.09287 | -0.00014 | -0.00348 | -0.00331 | -0.00679 | -3.09966 |
| D4  | -0.07534 | -0.00009 | -0.00454 | -0.00240 | -0.00694 | -0.08228 |
| D5  | -0.00121 | -0.00001 | -0.00192 | 0.00178  | -0.00014 | -0.00136 |
| D6  | -3.03818 | -0.00004 | -0.00636 | -0.00204 | -0.00840 | -3.04657 |
| D7  | 3.09901  | 0.00010  | 0.00265  | 0.00251  | 0.00516  | 3.10416  |
| D8  | 0.06204  | 0.00008  | -0.00179 | -0.00131 | -0.00310 | 0.05894  |
| D9  | -0.00323 | 0.00005  | -0.00068 | 0.00240  | 0.00172  | -0.00151 |
| D10 | 3.12602  | 0.00001  | -0.00128 | 0.00070  | -0.00057 | 3.12545  |
| D11 | -3.03087 | 0.00003  | 0.00038  | 0.00152  | 0.00190  | -3.02897 |
| D12 | 0.09838  | -0.00001 | -0.00022 | -0.00019 | -0.00040 | 0.09798  |
| D13 | -1.52122 | 0.00019  | -0.00076 | 0.00058  | -0.00018 | -1.52140 |
| D14 | 1.47777  | 0.00022  | -0.00208 | 0.00167  | -0.00042 | 1.47736  |
| D15 | 0.00253  | -0.00006 | -0.00051 | -0.00133 | -0.00185 | 0.00068  |
| D16 | 3.13896  | -0.00008 | -0.00108 | -0.00242 | -0.00350 | 3.13546  |
| D17 | -3.12719 | -0.00003 | 0.00005  | 0.00031  | 0.00036  | -3.12683 |
| D18 | 0.00925  | -0.00005 | -0.00052 | -0.00077 | -0.00130 | 0.00795  |
| D19 | -0.20102 | 0.00005  | 0.00166  | 0.00662  | 0.00828  | -0.19274 |
| D20 | 2.95097  | 0.00003  | 0.00010  | 0.00699  | 0.00709  | 2.95807  |
| D21 | 2.92649  | 0.00000  | 0.00098  | 0.00467  | 0.00566  | 2.93214  |
| D22 | -0.20471 | -0.00001 | -0.00057 | 0.00504  | 0.00447  | -0.20023 |
| D23 | -0.00083 | 0.00005  | 0.00149  | -0.00026 | 0.00123  | 0.00041  |
| D24 | 3.03533  | 0.00005  | 0.00605  | 0.00350  | 0.00955  | 3.04488  |
| D25 | -3.13723 | 0.00006  | 0.00206  | 0.00083  | 0.00289  | -3.13434 |
| D26 | -0.10108 | 0.00007  | 0.00662  | 0.00459  | 0.01121  | -0.08987 |
| D27 | -2.46393 | 0.00005  | 0.00047  | -0.00145 | -0.00098 | -2.46491 |
| D28 | -0.43701 | 0.00001  | -0.00077 | -0.00151 | -0.00228 | -0.43929 |
| D29 | 1.68080  | -0.00003 | -0.00016 | -0.00185 | -0.00201 | 1.67879  |
| D30 | 0.80079  | 0.00003  | -0.00478 | -0.00588 | -0.01066 | 0.79013  |
| D31 | 2.82771  | -0.00001 | -0.00602 | -0.00594 | -0.01196 | 2.81575  |
| D32 | -1.33766 | -0.00004 | -0.00540 | -0.00629 | -0.01169 | -1.34936 |
| D33 | -2.99781 | 0.00002  | 0.00272  | -0.00371 | -0.00099 | -2.99880 |
| D34 | 1.22482  | -0.00006 | 0.00263  | -0.00389 | -0.00126 | 1.22356  |
| D35 | -0.89631 | 0.00002  | 0.00248  | -0.00359 | -0.00110 | -0.89742 |
| D36 | 1.17094  | 0.00002  | 0.00222  | -0.00362 | -0.00140 | 1.16954  |
| D37 | -0.88961 | -0.00005 | 0.00213  | -0.00380 | -0.00167 | -0.89128 |



Input orientation:

| Center<br>Number | Atomic<br>Number | Atomic<br>Type | Coordinates (Angstroms) |           |           |
|------------------|------------------|----------------|-------------------------|-----------|-----------|
|                  |                  |                | X                       | Y         | Z         |
| 1                | 6                | 0              | -0.854215               | 1.647814  | 1.541399  |
| 2                | 6                | 0              | -1.509612               | 0.457218  | 1.576936  |
| 3                | 7                | 0              | -2.359696               | 0.445464  | 0.478837  |
| 4                | 6                | 0              | -2.217383               | 1.598235  | -0.193086 |
| 5                | 7                | 0              | -1.304685               | 2.350361  | 0.434429  |
| 6                | 6                | 0              | -0.769573               | 3.641286  | -0.036663 |
| 7                | 1                | 0              | -0.087383               | 2.038694  | 2.186002  |
| 8                | 1                | 0              | -1.358562               | -0.409033 | 2.232274  |
| 9                | 1                | 0              | -1.606191               | 4.251954  | -0.380713 |
| 10               | 1                | 0              | -0.329250               | 4.126851  | 0.832043  |
| 11               | 35               | 0              | -0.414846               | -2.435123 | 2.921181  |
| 12               | 1                | 0              | -2.745978               | 1.867606  | -1.091331 |
| 13               | 6                | 0              | -3.243646               | -0.609240 | 0.082064  |
| 14               | 6                | 0              | -3.211786               | -1.824571 | 0.612086  |
| 15               | 1                | 0              | -3.928255               | -0.304796 | -0.699826 |
| 16               | 1                | 0              | -3.917947               | -2.561222 | 0.249619  |
| 17               | 1                | 0              | -2.497059               | -2.132763 | 1.378062  |
| 18               | 6                | 0              | 2.555677                | -0.684840 | 1.162298  |
| 19               | 6                | 0              | 3.980133                | -0.370940 | 1.308417  |
| 20               | 8                | 0              | 2.984749                | 0.657980  | 1.558592  |
| 21               | 1                | 0              | 2.144051                | -0.724352 | 0.157843  |
| 22               | 1                | 0              | 2.003664                | -1.227758 | 1.924549  |
| 23               | 1                | 0              | 4.460876                | -0.688726 | 2.230696  |
| 24               | 6                | 0              | 4.888903                | -0.162780 | 0.128763  |
| 25               | 1                | 0              | 5.654578                | 0.585301  | 0.353701  |
| 26               | 1                | 0              | 5.397729                | -1.100522 | -0.114363 |
| 27               | 1                | 0              | 4.323563                | 0.162648  | -0.747157 |
| 28               | 6                | 0              | 0.273399                | 3.473074  | -1.150763 |
| 29               | 1                | 0              | 0.723036                | 4.453613  | -1.338098 |
| 30               | 1                | 0              | -0.185977               | 3.134287  | -2.080121 |
| 31               | 6                | 0              | 1.376916                | 2.484497  | -0.792042 |
| 32               | 8                | 0              | 1.724915                | 1.589729  | -1.525597 |
| 33               | 8                | 0              | 1.869319                | 2.715209  | 0.423819  |
| 34               | 1                | 0              | 2.443607                | 1.946558  | 0.730137  |

Distance matrix (angstroms):

|   |   | 1        | 2        | 3 | 4 | 5 |
|---|---|----------|----------|---|---|---|
| 1 | C | 0.000000 |          |   |   |   |
| 2 | C | 1.359532 | 0.000000 |   |   |   |

|    |    |          |          |          |          |          |
|----|----|----------|----------|----------|----------|----------|
| 3  | N  | 2.200263 | 1.388741 | 0.000000 |          |          |
| 4  | C  | 2.206608 | 2.221674 | 1.341870 | 0.000000 |          |
| 5  | N  | 1.386318 | 2.220655 | 2.177993 | 1.338837 | 0.000000 |
| 6  | C  | 2.543890 | 3.645497 | 3.606593 | 2.508920 | 1.474707 |
| 7  | H  | 1.075329 | 2.212411 | 3.258251 | 3.223501 | 2.155682 |
| 8  | H  | 2.227621 | 1.096665 | 2.192481 | 3.263291 | 3.293843 |
| 9  | H  | 3.322879 | 4.271035 | 3.974414 | 2.729649 | 2.090794 |
| 10 | H  | 2.631425 | 3.926108 | 4.219014 | 3.318107 | 2.065305 |
| 11 | Br | 4.332115 | 3.372112 | 4.247972 | 5.405162 | 5.465950 |
| 12 | H  | 3.249360 | 3.261509 | 2.153400 | 1.076484 | 2.153676 |
| 13 | C  | 3.596294 | 2.525638 | 1.432199 | 2.449871 | 3.555695 |
| 14 | C  | 4.298746 | 3.005809 | 2.428347 | 3.654140 | 4.593327 |
| 15 | H  | 4.276154 | 3.407953 | 2.100598 | 2.608716 | 3.901220 |
| 16 | H  | 5.363873 | 4.083237 | 3.394237 | 4.515417 | 5.566592 |
| 17 | H  | 4.125334 | 2.778957 | 2.733995 | 4.057964 | 4.733984 |
| 18 | C  | 4.148778 | 4.242970 | 5.089755 | 5.461831 | 4.964337 |
| 19 | C  | 5.244098 | 5.558349 | 6.445785 | 6.673932 | 6.008214 |
| 20 | O  | 3.964557 | 4.498880 | 5.456568 | 5.569078 | 4.746277 |
| 21 | H  | 4.065833 | 4.093798 | 4.664251 | 4.953752 | 4.628622 |
| 22 | H  | 4.072246 | 3.911916 | 4.891693 | 5.503440 | 5.095936 |
| 23 | H  | 5.846772 | 6.114516 | 7.132713 | 7.463514 | 6.760497 |
| 24 | C  | 6.185240 | 6.589582 | 7.282492 | 7.328305 | 6.691027 |
| 25 | H  | 6.701040 | 7.268997 | 8.016470 | 7.955676 | 7.180062 |
| 26 | H  | 7.027212 | 7.280000 | 7.932188 | 8.079568 | 7.558580 |
| 27 | H  | 5.852571 | 6.286024 | 6.800661 | 6.719514 | 6.153000 |
| 28 | C  | 3.442502 | 4.440141 | 4.330728 | 3.261312 | 2.502732 |
| 29 | H  | 4.318765 | 5.427090 | 5.373058 | 4.255619 | 3.417188 |
| 30 | H  | 3.971341 | 4.721523 | 4.301523 | 3.169696 | 2.861645 |
| 31 | C  | 3.335106 | 4.248995 | 4.442417 | 3.750093 | 2.951815 |
| 32 | O  | 4.007711 | 4.622819 | 4.691604 | 4.161415 | 3.687647 |
| 33 | O  | 3.131446 | 4.224379 | 4.799931 | 4.281277 | 3.194922 |
| 34 | H  | 3.409256 | 4.308496 | 5.038666 | 4.764294 | 3.781560 |
|    |    | 6        | 7        | 8        | 9        | 10       |
| 6  | C  | 0.000000 |          |          |          |          |
| 7  | H  | 2.823814 | 0.000000 |          |          |          |
| 8  | H  | 4.679751 | 2.758514 | 0.000000 |          |          |
| 9  | H  | 1.091428 | 3.713937 | 5.349189 | 0.000000 |          |
| 10 | H  | 1.088259 | 2.500421 | 4.857404 | 1.765505 | 0.000000 |
| 11 | Br | 6.767379 | 4.545630 | 2.338853 | 7.552404 | 6.887040 |
| 12 | H  | 2.857348 | 4.223542 | 4.260793 | 2.736641 | 3.826765 |
| 13 | C  | 4.919563 | 4.626024 | 2.866536 | 5.150401 | 5.611304 |
| 14 | C  | 6.021700 | 5.211901 | 2.839577 | 6.362998 | 6.616405 |
| 15 | H  | 5.097904 | 5.345301 | 3.900179 | 5.124235 | 5.910918 |
| 16 | H  | 6.961704 | 6.291425 | 3.887582 | 7.222251 | 7.612377 |

|    |    |          |          |          |          |          |
|----|----|----------|----------|----------|----------|----------|
| 17 | H  | 6.190743 | 4.884706 | 2.235419 | 6.682181 | 6.646826 |
| 18 | C  | 5.586606 | 3.930824 | 4.067209 | 6.638823 | 5.619986 |
| 19 | C  | 6.361360 | 4.808448 | 5.418176 | 7.445221 | 6.247226 |
| 20 | O  | 5.053701 | 3.426078 | 4.522911 | 6.144452 | 4.852168 |
| 21 | H  | 5.252221 | 4.089884 | 4.083012 | 6.254436 | 5.486887 |
| 22 | H  | 5.936732 | 3.887228 | 3.474129 | 6.955037 | 5.942044 |
| 23 | H  | 7.158737 | 5.303534 | 5.826156 | 8.248580 | 6.934790 |
| 24 | C  | 6.820310 | 5.817400 | 6.596682 | 7.869923 | 6.791513 |
| 25 | H  | 7.124685 | 6.199983 | 7.328156 | 8.167158 | 6.969761 |
| 26 | H  | 7.779871 | 6.725534 | 7.185565 | 8.819004 | 7.811491 |
| 27 | H  | 6.208522 | 5.619556 | 6.441302 | 7.212398 | 6.313275 |
| 28 | C  | 1.535351 | 3.649878 | 5.401758 | 2.175428 | 2.173046 |
| 29 | H  | 2.140441 | 4.348321 | 6.381687 | 2.526371 | 2.433843 |
| 30 | H  | 2.184801 | 4.405662 | 5.703230 | 2.480761 | 3.080002 |
| 31 | C  | 2.552680 | 3.348382 | 5.000185 | 3.491708 | 2.871582 |
| 32 | O  | 3.556442 | 4.154751 | 5.255899 | 4.415254 | 4.026791 |
| 33 | O  | 2.834328 | 2.718758 | 4.842584 | 3.884331 | 2.644444 |
| 34 | H  | 3.712763 | 2.921292 | 4.718232 | 4.790585 | 3.528852 |
|    |    | 11       | 12       | 13       | 14       | 15       |
| 11 | Br | 0.000000 |          |          |          |          |
| 12 | H  | 6.328341 | 0.000000 |          |          |          |
| 13 | C  | 4.404151 | 2.785551 | 0.000000 |          |          |
| 14 | C  | 3.677984 | 4.092771 | 1.326261 | 0.000000 |          |
| 15 | H  | 5.476681 | 2.504074 | 1.082926 | 2.131703 | 0.000000 |
| 16 | H  | 4.407365 | 4.773487 | 2.071954 | 1.082913 | 2.448063 |
| 17 | H  | 2.609262 | 4.707740 | 2.134977 | 1.092033 | 3.115671 |
| 18 | C  | 3.870551 | 6.300902 | 5.899557 | 5.904689 | 6.756724 |
| 19 | C  | 5.116414 | 7.484012 | 7.331010 | 7.370320 | 8.159658 |
| 20 | O  | 4.793869 | 6.428570 | 6.525250 | 6.742105 | 7.336008 |
| 21 | H  | 4.136512 | 5.673716 | 5.389459 | 5.486511 | 6.146911 |
| 22 | H  | 2.881006 | 6.421519 | 5.595675 | 5.411068 | 6.551860 |
| 23 | H  | 5.224876 | 8.337231 | 7.998912 | 7.923369 | 8.894542 |
| 24 | C  | 6.410217 | 7.993903 | 8.144928 | 8.283496 | 8.857144 |
| 25 | H  | 7.249332 | 8.619846 | 8.982154 | 9.191662 | 9.681574 |
| 26 | H  | 6.691914 | 8.722626 | 8.657558 | 8.670394 | 9.378162 |
| 27 | H  | 6.531281 | 7.280366 | 7.651540 | 7.910630 | 8.265182 |
| 28 | C  | 7.208411 | 3.420189 | 5.527635 | 6.581731 | 5.668292 |
| 29 | H  | 8.178686 | 4.333864 | 6.586646 | 7.661699 | 6.684635 |
| 30 | H  | 7.488907 | 3.022547 | 5.295128 | 6.402638 | 5.266607 |
| 31 | C  | 6.418808 | 4.179519 | 5.628931 | 6.449483 | 5.994456 |
| 32 | O  | 6.368033 | 4.500521 | 5.666272 | 6.371668 | 6.019091 |
| 33 | O  | 6.162803 | 4.931032 | 6.108287 | 6.816353 | 6.632863 |
| 34 | H  | 5.671909 | 5.500524 | 6.268727 | 6.798442 | 6.907533 |
|    |    | 16       | 17       | 18       | 19       | 20       |

|    |   |           |          |          |          |          |
|----|---|-----------|----------|----------|----------|----------|
| 16 | H | 0.000000  |          |          |          |          |
| 17 | H | 1.864372  | 0.000000 |          |          |          |
| 18 | C | 6.801588  | 5.260530 | 0.000000 |          |          |
| 19 | C | 8.264264  | 6.712889 | 1.465932 | 0.000000 |          |
| 20 | O | 7.728123  | 6.153946 | 1.464348 | 1.453290 | 0.000000 |
| 21 | H | 6.334851  | 5.001245 | 1.086245 | 2.195432 | 2.140026 |
| 22 | H | 6.296745  | 4.623222 | 1.086511 | 2.240577 | 2.156956 |
| 23 | H | 8.811105  | 7.157170 | 2.184324 | 1.087520 | 2.108148 |
| 24 | C | 9.128402  | 7.745580 | 2.604742 | 1.503588 | 2.518701 |
| 25 | H | 10.076938 | 8.653691 | 3.445326 | 2.151661 | 2.930022 |
| 26 | H | 9.436522  | 8.100650 | 3.143233 | 2.136860 | 3.422510 |
| 27 | H | 8.737020  | 7.503755 | 2.736727 | 2.151289 | 2.711872 |
| 28 | C | 7.479383  | 6.745057 | 5.277054 | 5.879106 | 4.755710 |
| 29 | H | 8.559642  | 7.818368 | 6.001188 | 6.394453 | 5.283274 |
| 30 | H | 7.196813  | 6.711330 | 5.711014 | 6.412899 | 5.424558 |
| 31 | C | 7.387822  | 6.405944 | 3.905588 | 4.397975 | 3.383308 |
| 32 | O | 7.226596  | 6.333502 | 3.617818 | 4.118478 | 3.459416 |
| 33 | O | 7.833487  | 6.593836 | 3.546375 | 3.842182 | 2.600786 |
| 34 | H | 7.811552  | 6.439786 | 2.669003 | 2.840090 | 1.624686 |
|    |   | 21        | 22       | 23       | 24       | 25       |
| 21 | H | 0.000000  |          |          |          |          |
| 22 | H | 1.842384  | 0.000000 |          |          |          |
| 23 | H | 3.108966  | 2.534200 | 0.000000 |          |          |
| 24 | C | 2.801860  | 3.561408 | 2.208608 | 0.000000 |          |
| 25 | H | 3.751980  | 4.368514 | 2.563431 | 1.093838 | 0.000000 |
| 26 | H | 3.286643  | 3.961443 | 2.558626 | 1.094246 | 1.768348 |
| 27 | H | 2.521124  | 3.801733 | 3.100209 | 1.092130 | 1.778236 |
| 28 | C | 4.778093  | 5.877855 | 6.803661 | 6.013277 | 6.289653 |
| 29 | H | 5.573907  | 6.675541 | 7.290499 | 6.388835 | 6.492005 |
| 30 | H | 5.032554  | 6.313426 | 7.402149 | 6.442377 | 6.821502 |
| 31 | C | 3.433291  | 4.642577 | 5.358833 | 4.493329 | 4.818512 |
| 32 | O | 2.892164  | 4.463120 | 5.175574 | 3.977312 | 4.470222 |
| 33 | O | 3.460751  | 4.221046 | 4.644108 | 4.181837 | 4.343916 |
| 34 | H | 2.747910  | 3.420008 | 3.642220 | 3.284878 | 3.507856 |
|    |   | 26        | 27       | 28       | 29       | 30       |
| 26 | H | 0.000000  |          |          |          |          |
| 27 | H | 1.774785  | 0.000000 |          |          |          |
| 28 | C | 6.946270  | 5.246489 | 0.000000 |          |          |
| 29 | H | 7.361977  | 5.632529 | 1.094863 | 0.000000 |          |
| 30 | H | 7.278433  | 5.562677 | 1.090646 | 1.765651 | 0.000000 |
| 31 | C | 5.429415  | 3.751762 | 1.524374 | 2.145496 | 2.126972 |
| 32 | O | 4.766403  | 3.065207 | 2.407154 | 3.039860 | 2.518862 |
| 33 | O | 5.224856  | 3.729619 | 2.366565 | 2.727703 | 3.266433 |
| 34 | H | 4.327206  | 2.983113 | 3.252359 | 3.677402 | 4.027774 |



|    |   |          |          |          |          |
|----|---|----------|----------|----------|----------|
|    |   | 31       | 32       | 33       | 34       |
| 31 | C | 0.000000 |          |          |          |
| 32 | O | 1.208228 | 0.000000 |          |          |
| 33 | O | 1.331918 | 2.255611 | 0.000000 |          |
| 34 | H | 1.935003 | 2.394197 | 1.007205 | 0.000000 |

Stoichiometry C11H17BrN2O3

Framework group C1[X(C11H17BrN2O3)]

Deg. of freedom 96

Full point group C1 NOp 1

Largest Abelian subgroup C1 NOp 1

Largest concise Abelian subgroup C1 NOp 1

Standard orientation:

| Center Number | Atomic Number | Atomic Type | Coordinates (Angstroms) |           |           |
|---------------|---------------|-------------|-------------------------|-----------|-----------|
|               |               |             | X                       | Y         | Z         |
| 1             | 6             | 0           | 0.064827                | 1.333823  | 1.243793  |
| 2             | 6             | 0           | -1.164157               | 1.251410  | 0.668352  |
| 3             | 7             | 0           | -1.226903               | 2.274313  | -0.268843 |
| 4             | 6             | 0           | -0.067906               | 2.950381  | -0.252282 |
| 5             | 7             | 0           | 0.738119                | 2.397107  | 0.662430  |
| 6             | 6             | 0           | 2.143612                | 2.763405  | 0.917720  |
| 7             | 1             | 0           | 0.526788                | 0.710890  | 1.988696  |
| 8             | 1             | 0           | -1.943712               | 0.488459  | 0.781817  |
| 9             | 1             | 0           | 2.212147                | 3.852278  | 0.947268  |
| 10            | 1             | 0           | 2.386044                | 2.380811  | 1.907244  |
| 11            | 35            | 0           | -3.071813               | -1.506974 | 0.317198  |
| 12            | 1             | 0           | 0.173166                | 3.793187  | -0.877086 |
| 13            | 6             | 0           | -2.320206               | 2.579855  | -1.142071 |
| 14            | 6             | 0           | -3.361311               | 1.776524  | -1.314489 |
| 15            | 1             | 0           | -2.194880               | 3.529477  | -1.647283 |
| 16            | 1             | 0           | -4.142622               | 2.088171  | -1.996494 |
| 17            | 1             | 0           | -3.464875               | 0.805749  | -0.825196 |
| 18            | 6             | 0           | 0.622757                | -2.467150 | -0.322630 |
| 19            | 6             | 0           | 1.625047                | -3.502156 | -0.052196 |
| 20            | 8             | 0           | 1.646523                | -2.261243 | 0.703929  |
| 21            | 1             | 0           | 0.762325                | -1.840669 | -1.198970 |
| 22            | 1             | 0           | -0.392946               | -2.534727 | 0.057220  |
| 23            | 1             | 0           | 1.312191                | -4.338321 | 0.568811  |
| 24            | 6             | 0           | 2.790741                | -3.759483 | -0.966371 |
| 25            | 1             | 0           | 3.671525                | -4.070195 | -0.397020 |
| 26            | 1             | 0           | 2.541244                | -4.564890 | -1.663826 |
| 27            | 1             | 0           | 3.039790                | -2.865876 | -1.542731 |
| 28            | 6             | 0           | 3.100922                | 2.188072  | -0.135776 |

|    |   |   |          |           |           |
|----|---|---|----------|-----------|-----------|
| 29 | 1 | 0 | 4.124327 | 2.378076  | 0.203731  |
| 30 | 1 | 0 | 2.973840 | 2.678876  | -1.101421 |
| 31 | 6 | 0 | 2.922406 | 0.689503  | -0.350581 |
| 32 | 8 | 0 | 2.808047 | 0.188973  | -1.444294 |
| 33 | 8 | 0 | 2.876868 | 0.027910  | 0.804506  |
| 34 | 1 | 0 | 2.558681 | -0.917368 | 0.664261  |

-----

Rotational constants (GHZ):      0.3303186      0.2537696      0.1596456  
Standard basis: 6-311++G(d,p) (5D, 7F)  
There are    538 symmetry adapted cartesian basis functions of A    symmetry.  
There are    519 symmetry adapted basis functions of A    symmetry.  
519 basis functions,    823 primitive gaussians,    538 cartesian basis functions  
78 alpha electrons      78 beta electrons  
nuclear repulsion energy      1573.1222749987 Hartrees.  
NAtoms=    34 NActive=    34 NUniq=    34 SFac= 1.00D+00 NATFMM=    60 NAOKFM=F  
Big=F  
Integral buffers will be    131072 words long.  
Raffenetti 2 integral format.  
Two-electron integral symmetry is turned on.  
One-electron integrals computed using PRISM.  
NBasis=    519 RedAO= T EigKep=    3.50D-06 NBF=    519  
NBsUse=    519 1.00D-06 EigRej= -1.00D+00 NBFU=    519  
Initial guess from the checkpoint file: "./coohpo.chk"  
B after Tr=    0.000000    0.000000    0.000000  
Rot=    1.000000    0.000240    0.000068    0.000587 Ang=    0.07 deg.  
ExpMin= 3.50D-02 ExpMax= 4.40D+05 ExpMxC= 1.51D+04 IAcc=3 IRadAn=      5 AccDes=  
0.00D+00  
Harris functional with IExCor=    402 and IRadAn=      5 diagonalized for initial guess.  
HarFok: IExCor=    402 AccDes= 0.00D+00 IRadAn=      5 IDoV= 1 UseB2=F ITyADJ=14  
ICtDFT= 3500011 ScaDFX= 1.000000 1.000000 1.000000 1.000000  
FoFCou: FMM=F IPFlag=      0 FMFlag=    100000 FMFlg1=      0  
NFXFlg=      0 DoJE=T BraDBF=F KetDBF=T FulRan=T  
wScrn= 0.000000 ICntrl=      500 IOpCl=    0 I1Cent=    200000004 NGrid=  
0  
NMat0=    1 NMatS0=      1 NMatT0=    0 NMatD0=    1 NMtDS0=    0  
NMtDT0=    0  
Petite list used in FoFCou.  
Requested convergence on RMS density matrix=1.00D-08 within 128 cycles.  
Requested convergence on MAX density matrix=1.00D-06.  
Requested convergence on      energy=1.00D-06.  
No special actions if energy rises.  
SCF Done: E(RB3LYP) = -3338.90384433      A.U. after    12 cycles  
NFOck= 12 Conv=0.35D-08      -V/T= 2.0019  
Calling FoFJK, ICntrl=      2127 FMM=F ISym2X=0 I1Cent= 0 IOpClX= 0 NMat=1 NMatS=1



Berny optimization.

Using GEDIIS/GDIIS optimizer.

FormGI is forming the generalized inverse of G from B-inverse, IUseBI=4.

Internal Forces: Max 0.000427431 RMS 0.000114624

Search for a local minimum.

Step number 28 out of a maximum of 175

All quantities printed in internal units (Hartrees-Bohrs-Radians)

Mixed Optimization -- En-DIIS/RFO-DIIS

Swapping is turned off.

Update second derivatives using D2CorX and points 21 22 23 24 25  
26 27 28

DE= -2.98D-05 DEPred=-2.04D-05 R= 1.46D+00

TightC=F SS= 1.41D+00 RLast= 6.22D-02 DXNew= 1.3149D+00 1.8657D-01

Trust test= 1.46D+00 RLast= 6.22D-02 DXMaxT set to 7.82D-01

ITU= 1 1 1 -1 0 1 1 1 1 1 1 1 1 1 0 0 -1 1 1

ITU= 1 0 1 0 -1 0 1 0

|                 |         |         |         |         |         |
|-----------------|---------|---------|---------|---------|---------|
| Eigenvalues --- | 0.00152 | 0.00333 | 0.00395 | 0.00571 | 0.00665 |
| Eigenvalues --- | 0.00725 | 0.00863 | 0.01161 | 0.01376 | 0.01646 |
| Eigenvalues --- | 0.01976 | 0.02087 | 0.02181 | 0.02264 | 0.02346 |
| Eigenvalues --- | 0.02410 | 0.02665 | 0.02821 | 0.03126 | 0.03197 |
| Eigenvalues --- | 0.03444 | 0.03549 | 0.03843 | 0.04246 | 0.04824 |
| Eigenvalues --- | 0.04898 | 0.05053 | 0.05392 | 0.05717 | 0.05878 |
| Eigenvalues --- | 0.05914 | 0.06070 | 0.06492 | 0.07653 | 0.09468 |
| Eigenvalues --- | 0.09577 | 0.11844 | 0.12618 | 0.12764 | 0.13250 |
| Eigenvalues --- | 0.13684 | 0.15160 | 0.15586 | 0.15872 | 0.15983 |
| Eigenvalues --- | 0.15992 | 0.16011 | 0.16034 | 0.16068 | 0.16254 |
| Eigenvalues --- | 0.17024 | 0.17680 | 0.20442 | 0.21791 | 0.22166 |
| Eigenvalues --- | 0.23102 | 0.23781 | 0.24303 | 0.25262 | 0.26198 |
| Eigenvalues --- | 0.28521 | 0.29397 | 0.30419 | 0.31450 | 0.32262 |
| Eigenvalues --- | 0.33663 | 0.34499 | 0.34577 | 0.34632 | 0.34824 |
| Eigenvalues --- | 0.34890 | 0.34959 | 0.34985 | 0.35108 | 0.35302 |
| Eigenvalues --- | 0.35406 | 0.35723 | 0.35862 | 0.36586 | 0.36952 |
| Eigenvalues --- | 0.37176 | 0.37551 | 0.37979 | 0.38481 | 0.40519 |
| Eigenvalues --- | 0.41737 | 0.45136 | 0.48972 | 0.50372 | 0.51667 |
| Eigenvalues --- | 0.54002 | 0.55984 | 0.56943 | 0.62137 | 0.90883 |
| Eigenvalues --- | 1.50855 |         |         |         |         |

En-DIIS/RFO-DIIS IScMMF= 0 using points: 28 27 26 25 24

RFO step: Lambda=-4.20278436D-06.

DidBck=F Rises=F RFO-DIIS coefs: 1.19749 -0.03499 -0.47317 0.39820 -  
0.08752

Iteration 1 RMS(Cart)= 0.01406884 RMS(Int)= 0.00006787

Iteration 2 RMS(Cart)= 0.00012986 RMS(Int)= 0.00000644

Iteration 3 RMS(Cart)= 0.00000001 RMS(Int)= 0.00000644

| Variable | Old X | -DE/DX | Delta X | Delta X | Delta X | New X |
|----------|-------|--------|---------|---------|---------|-------|
|----------|-------|--------|---------|---------|---------|-------|

|     |         |          | (Linear) | (Quad)   | (Total)  |         |
|-----|---------|----------|----------|----------|----------|---------|
| R1  | 2.56914 | -0.00014 | -0.00007 | 0.00001  | -0.00006 | 2.56909 |
| R2  | 2.61976 | -0.00001 | -0.00009 | 0.00008  | 0.00000  | 2.61976 |
| R3  | 2.03208 | 0.00007  | 0.00000  | 0.00010  | 0.00010  | 2.03218 |
| R4  | 2.62434 | 0.00013  | 0.00029  | 0.00011  | 0.00040  | 2.62474 |
| R5  | 2.07240 | 0.00025  | -0.00005 | 0.00070  | 0.00066  | 2.07305 |
| R6  | 2.53577 | 0.00031  | 0.00011  | 0.00023  | 0.00034  | 2.53611 |
| R7  | 2.70646 | -0.00025 | -0.00013 | -0.00033 | -0.00046 | 2.70601 |
| R8  | 2.53004 | -0.00009 | 0.00011  | -0.00008 | 0.00002  | 2.53006 |
| R9  | 2.03426 | -0.00002 | 0.00000  | -0.00001 | -0.00001 | 2.03425 |
| R10 | 2.78679 | -0.00019 | -0.00018 | -0.00049 | -0.00067 | 2.78612 |
| R11 | 2.06250 | -0.00003 | -0.00002 | -0.00007 | -0.00008 | 2.06242 |
| R12 | 2.05651 | -0.00001 | -0.00003 | 0.00012  | 0.00009  | 2.05660 |
| R13 | 2.90139 | 0.00003  | 0.00063  | 0.00038  | 0.00100  | 2.90240 |
| R14 | 4.41979 | 0.00017  | 0.00535  | 0.00067  | 0.00601  | 4.42580 |
| R15 | 2.50627 | 0.00023  | -0.00015 | 0.00027  | 0.00012  | 2.50639 |
| R16 | 2.04643 | 0.00003  | 0.00005  | 0.00008  | 0.00013  | 2.04656 |
| R17 | 2.04641 | -0.00005 | 0.00013  | -0.00006 | 0.00007  | 2.04648 |
| R18 | 2.06364 | 0.00002  | 0.00003  | 0.00002  | 0.00005  | 2.06369 |
| R19 | 2.77021 | 0.00001  | 0.00018  | 0.00019  | 0.00034  | 2.77056 |
| R20 | 2.76722 | -0.00007 | -0.00008 | 0.00013  | 0.00005  | 2.76727 |
| R21 | 2.05271 | 0.00004  | -0.00008 | 0.00021  | 0.00012  | 2.05283 |
| R22 | 2.05321 | 0.00004  | -0.00014 | 0.00024  | 0.00010  | 2.05330 |
| R23 | 2.74632 | -0.00020 | -0.00057 | -0.00083 | -0.00139 | 2.74493 |
| R24 | 2.05511 | 0.00000  | 0.00002  | -0.00001 | 0.00000  | 2.05512 |
| R25 | 2.84137 | 0.00004  | 0.00000  | 0.00020  | 0.00020  | 2.84157 |
| R26 | 3.07021 | 0.00032  | 0.00393  | 0.00444  | 0.00837  | 3.07858 |
| R27 | 2.06705 | 0.00001  | -0.00001 | 0.00000  | -0.00001 | 2.06704 |
| R28 | 2.06783 | 0.00000  | 0.00000  | -0.00002 | -0.00003 | 2.06780 |
| R29 | 2.06383 | -0.00004 | 0.00007  | -0.00007 | 0.00001  | 2.06384 |
| R30 | 2.06899 | -0.00008 | -0.00014 | -0.00032 | -0.00046 | 2.06854 |
| R31 | 2.06102 | -0.00004 | -0.00013 | -0.00010 | -0.00023 | 2.06079 |
| R32 | 2.88065 | 0.00006  | -0.00012 | -0.00021 | -0.00033 | 2.88032 |
| R33 | 2.28322 | 0.00029  | 0.00004  | 0.00017  | 0.00021  | 2.28343 |
| R34 | 2.51696 | -0.00018 | 0.00027  | 0.00045  | 0.00071  | 2.51768 |
| R35 | 1.90334 | -0.00043 | -0.00085 | -0.00103 | -0.00187 | 1.90147 |
| A1  | 1.88391 | 0.00013  | 0.00024  | 0.00016  | 0.00040  | 1.88432 |
| A2  | 2.27370 | -0.00011 | 0.00012  | 0.00007  | 0.00018  | 2.27388 |
| A3  | 2.12488 | -0.00002 | -0.00027 | -0.00014 | -0.00042 | 2.12446 |
| A4  | 1.85650 | -0.00003 | -0.00017 | -0.00012 | -0.00029 | 1.85622 |
| A5  | 2.26655 | -0.00015 | -0.00022 | 0.00066  | 0.00043  | 2.26698 |
| A6  | 2.15332 | 0.00017  | 0.00037  | -0.00059 | -0.00021 | 2.15311 |
| A7  | 1.90049 | -0.00008 | 0.00000  | -0.00001 | 0.00000  | 1.90048 |
| A8  | 2.21817 | 0.00023  | 0.00026  | 0.00028  | 0.00054  | 2.21871 |

|     |         |          |          |          |          |         |
|-----|---------|----------|----------|----------|----------|---------|
| A9  | 2.16443 | -0.00015 | -0.00028 | -0.00028 | -0.00055 | 2.16388 |
| A10 | 1.89675 | -0.00002 | 0.00000  | 0.00004  | 0.00003  | 1.89679 |
| A11 | 2.19041 | 0.00000  | 0.00012  | 0.00007  | 0.00019  | 2.19060 |
| A12 | 2.19601 | 0.00002  | -0.00012 | -0.00013 | -0.00026 | 2.19575 |
| A13 | 1.88712 | 0.00000  | -0.00008 | -0.00008 | -0.00015 | 1.88697 |
| A14 | 2.19049 | -0.00009 | -0.00005 | 0.00036  | 0.00031  | 2.19080 |
| A15 | 2.20112 | 0.00009  | 0.00024  | -0.00036 | -0.00012 | 2.20100 |
| A16 | 1.88845 | 0.00015  | -0.00008 | 0.00010  | 0.00001  | 1.88846 |
| A17 | 1.85709 | 0.00013  | -0.00002 | 0.00077  | 0.00075  | 1.85784 |
| A18 | 1.96318 | -0.00039 | 0.00037  | -0.00017 | 0.00020  | 1.96338 |
| A19 | 1.88824 | -0.00002 | -0.00009 | 0.00007  | -0.00002 | 1.88821 |
| A20 | 1.93186 | 0.00009  | 0.00015  | -0.00038 | -0.00023 | 1.93163 |
| A21 | 1.93186 | 0.00006  | -0.00034 | -0.00033 | -0.00067 | 1.93119 |
| A22 | 2.72843 | -0.00018 | -0.00546 | 0.00284  | -0.00261 | 2.72582 |
| A23 | 2.15231 | 0.00029  | -0.00023 | 0.00074  | 0.00051  | 2.15281 |
| A24 | 1.96403 | -0.00010 | 0.00003  | -0.00031 | -0.00028 | 1.96375 |
| A25 | 2.16681 | -0.00019 | 0.00020  | -0.00043 | -0.00023 | 2.16658 |
| A26 | 2.06454 | -0.00002 | 0.00037  | 0.00006  | 0.00042  | 2.06496 |
| A27 | 2.15874 | -0.00006 | -0.00024 | 0.00021  | -0.00003 | 2.15870 |
| A28 | 2.05962 | 0.00007  | -0.00014 | -0.00027 | -0.00041 | 2.05921 |
| A29 | 2.05803 | 0.00007  | -0.00037 | -0.00067 | -0.00103 | 2.05700 |
| A30 | 2.13029 | -0.00009 | 0.00049  | 0.00015  | 0.00063  | 2.13091 |
| A31 | 1.97647 | 0.00003  | -0.00053 | -0.00028 | -0.00082 | 1.97566 |
| A32 | 2.00119 | -0.00004 | 0.00014  | -0.00010 | 0.00004  | 2.00123 |
| A33 | 2.02420 | 0.00004  | 0.00015  | 0.00068  | 0.00083  | 2.02503 |
| A34 | 2.03925 | 0.00005  | 0.00048  | 0.00053  | 0.00099  | 2.04024 |
| A35 | 2.13974 | -0.00001 | -0.00070 | -0.00066 | -0.00136 | 2.13838 |
| A36 | 1.94300 | 0.00003  | 0.00021  | 0.00066  | 0.00087  | 1.94387 |
| A37 | 2.03869 | 0.00001  | -0.00011 | -0.00028 | -0.00040 | 2.03829 |
| A38 | 2.02487 | -0.00005 | 0.00012  | -0.00011 | 0.00002  | 2.02488 |
| A39 | 2.08485 | 0.00001  | 0.00139  | 0.00298  | 0.00432  | 2.08917 |
| A40 | 2.34882 | 0.00010  | 0.00472  | 0.00325  | 0.00796  | 2.35679 |
| A41 | 1.93523 | -0.00002 | 0.00005  | 0.00008  | 0.00012  | 1.93535 |
| A42 | 1.91423 | -0.00006 | 0.00014  | 0.00008  | 0.00022  | 1.91446 |
| A43 | 1.93652 | -0.00001 | -0.00024 | -0.00032 | -0.00055 | 1.93597 |
| A44 | 1.88208 | 0.00002  | 0.00006  | 0.00011  | 0.00016  | 1.88225 |
| A45 | 1.90021 | 0.00003  | -0.00003 | 0.00004  | 0.00001  | 1.90022 |
| A46 | 1.89427 | 0.00005  | 0.00003  | 0.00002  | 0.00005  | 1.89433 |
| A47 | 1.88075 | 0.00022  | 0.00012  | 0.00049  | 0.00061  | 1.88136 |
| A48 | 1.94576 | 0.00006  | 0.00000  | -0.00012 | -0.00012 | 1.94563 |
| A49 | 1.97366 | -0.00032 | -0.00055 | -0.00083 | -0.00138 | 1.97228 |
| A50 | 1.88112 | -0.00006 | 0.00019  | 0.00057  | 0.00076  | 1.88188 |
| A51 | 1.90050 | 0.00006  | 0.00033  | 0.00015  | 0.00048  | 1.90098 |
| A52 | 1.87967 | 0.00005  | -0.00004 | -0.00019 | -0.00023 | 1.87944 |

|     |          |          |          |          |          |          |
|-----|----------|----------|----------|----------|----------|----------|
| A53 | 2.14826  | -0.00009 | 0.00028  | 0.00028  | 0.00055  | 2.14881  |
| A54 | 1.94993  | 0.00011  | 0.00016  | -0.00017 | -0.00001 | 1.94992  |
| A55 | 2.18466  | -0.00001 | -0.00046 | -0.00006 | -0.00052 | 2.18414  |
| A56 | 1.93502  | 0.00022  | -0.00115 | 0.00002  | -0.00113 | 1.93390  |
| A57 | 2.82489  | -0.00037 | -0.00004 | -0.00333 | -0.00338 | 2.82151  |
| D1  | 0.00173  | -0.00002 | 0.00079  | 0.00117  | 0.00196  | 0.00369  |
| D2  | 3.01911  | -0.00003 | 0.00066  | 0.00067  | 0.00133  | 3.02044  |
| D3  | -3.09966 | 0.00000  | -0.00144 | -0.00160 | -0.00304 | -3.10270 |
| D4  | -0.08228 | -0.00001 | -0.00157 | -0.00210 | -0.00367 | -0.08595 |
| D5  | -0.00136 | 0.00005  | -0.00117 | -0.00017 | -0.00134 | -0.00270 |
| D6  | -3.04657 | 0.00011  | -0.00242 | 0.00066  | -0.00176 | -3.04833 |
| D7  | 3.10416  | 0.00004  | 0.00084  | 0.00232  | 0.00316  | 3.10732  |
| D8  | 0.05894  | 0.00009  | -0.00041 | 0.00315  | 0.00274  | 0.06168  |
| D9  | -0.00151 | -0.00003 | -0.00013 | -0.00177 | -0.00190 | -0.00341 |
| D10 | 3.12545  | -0.00002 | -0.00117 | -0.00222 | -0.00339 | 3.12206  |
| D11 | -3.02897 | 0.00001  | 0.00003  | -0.00141 | -0.00138 | -3.03036 |
| D12 | 0.09798  | 0.00002  | -0.00100 | -0.00187 | -0.00287 | 0.09512  |
| D13 | -1.52140 | 0.00023  | 0.00094  | 0.00282  | 0.00376  | -1.51764 |
| D14 | 1.47736  | 0.00020  | 0.00076  | 0.00228  | 0.00304  | 1.48040  |
| D15 | 0.00068  | 0.00006  | -0.00060 | 0.00169  | 0.00110  | 0.00178  |
| D16 | 3.13546  | -0.00003 | -0.00128 | -0.00134 | -0.00262 | 3.13284  |
| D17 | -3.12683 | 0.00005  | 0.00039  | 0.00212  | 0.00251  | -3.12432 |
| D18 | 0.00795  | -0.00005 | -0.00029 | -0.00091 | -0.00120 | 0.00675  |
| D19 | -0.19274 | -0.00002 | -0.00095 | 0.00104  | 0.00009  | -0.19265 |
| D20 | 2.95807  | -0.00001 | -0.00131 | 0.00156  | 0.00025  | 2.95832  |
| D21 | 2.93214  | -0.00001 | -0.00213 | 0.00053  | -0.00160 | 2.93055  |
| D22 | -0.20023 | 0.00000  | -0.00248 | 0.00105  | -0.00144 | -0.20167 |
| D23 | 0.00041  | -0.00007 | 0.00108  | -0.00094 | 0.00014  | 0.00055  |
| D24 | 3.04488  | -0.00014 | 0.00232  | -0.00173 | 0.00059  | 3.04547  |
| D25 | -3.13434 | 0.00002  | 0.00177  | 0.00210  | 0.00386  | -3.13048 |
| D26 | -0.08987 | -0.00004 | 0.00300  | 0.00131  | 0.00431  | -0.08556 |
| D27 | -2.46491 | -0.00009 | -0.00016 | -0.00491 | -0.00506 | -2.46998 |
| D28 | -0.43929 | 0.00002  | -0.00032 | -0.00439 | -0.00470 | -0.44400 |
| D29 | 1.67879  | -0.00006 | -0.00053 | -0.00439 | -0.00492 | 1.67387  |
| D30 | 0.79013  | -0.00002 | -0.00160 | -0.00396 | -0.00556 | 0.78457  |
| D31 | 2.81575  | 0.00010  | -0.00176 | -0.00343 | -0.00520 | 2.81055  |
| D32 | -1.34936 | 0.00002  | -0.00198 | -0.00343 | -0.00541 | -1.35477 |
| D33 | -2.99880 | 0.00005  | -0.00229 | 0.00169  | -0.00060 | -2.99940 |
| D34 | 1.22356  | -0.00004 | -0.00259 | 0.00076  | -0.00183 | 1.22173  |
| D35 | -0.89742 | 0.00007  | -0.00214 | 0.00170  | -0.00044 | -0.89786 |
| D36 | 1.16954  | 0.00006  | -0.00254 | 0.00196  | -0.00059 | 1.16895  |
| D37 | -0.89128 | -0.00003 | -0.00285 | 0.00103  | -0.00182 | -0.89310 |
| D38 | -3.01226 | 0.00008  | -0.00240 | 0.00196  | -0.00043 | -3.01269 |
| D39 | -0.92398 | -0.00001 | -0.00231 | 0.00233  | 0.00003  | -0.92395 |

|     |          |          |          |          |          |          |
|-----|----------|----------|----------|----------|----------|----------|
| D40 | -2.98480 | -0.00010 | -0.00261 | 0.00140  | -0.00121 | -2.98600 |
| D41 | 1.17741  | 0.00002  | -0.00216 | 0.00234  | 0.00018  | 1.17759  |
| D42 | -3.14019 | 0.00003  | -0.00080 | 0.00077  | -0.00003 | -3.14022 |
| D43 | -0.02501 | -0.00003 | -0.00134 | 0.00044  | -0.00090 | -0.02591 |
| D44 | -0.00889 | 0.00001  | -0.00040 | 0.00020  | -0.00021 | -0.00909 |
| D45 | 3.10630  | -0.00004 | -0.00095 | -0.00013 | -0.00108 | 3.10522  |
| D46 | -2.75315 | -0.00001 | -0.00054 | 0.00043  | -0.00010 | -2.75326 |
| D47 | -0.04602 | -0.00005 | -0.00076 | -0.00021 | -0.00097 | -0.04700 |
| D48 | -0.02260 | 0.00005  | 0.00023  | 0.00103  | 0.00126  | -0.02134 |
| D49 | 2.68453  | 0.00002  | 0.00001  | 0.00038  | 0.00039  | 2.68492  |
| D50 | 0.30591  | 0.00009  | 0.00549  | 0.00382  | 0.00931  | 0.31523  |
| D51 | -2.07120 | 0.00003  | 0.00570  | 0.00318  | 0.00889  | -2.06232 |
| D52 | 2.56482  | -0.00008 | -0.00096 | -0.00372 | -0.00470 | 2.56012  |
| D53 | 0.18321  | -0.00005 | -0.00127 | -0.00400 | -0.00528 | 0.17794  |
| D54 | 2.55397  | 0.00003  | 0.00052  | 0.00094  | 0.00146  | 2.55543  |
| D55 | -1.65256 | 0.00000  | 0.00071  | 0.00117  | 0.00188  | -1.65067 |
| D56 | 0.44003  | 0.00001  | 0.00069  | 0.00105  | 0.00174  | 0.44177  |
| D57 | 1.32747  | 0.00001  | 0.00074  | 0.00106  | 0.00179  | 1.32927  |
| D58 | -2.87906 | -0.00002 | 0.00093  | 0.00129  | 0.00221  | -2.87684 |
| D59 | -0.78647 | 0.00000  | 0.00090  | 0.00117  | 0.00207  | -0.78440 |
| D60 | -1.01878 | 0.00001  | 0.00039  | 0.00044  | 0.00083  | -1.01795 |
| D61 | 1.05788  | -0.00001 | 0.00057  | 0.00067  | 0.00125  | 1.05913  |
| D62 | -3.13272 | 0.00000  | 0.00055  | 0.00055  | 0.00111  | -3.13162 |
| D63 | 1.50876  | -0.00008 | -0.00008 | -0.00591 | -0.00601 | 1.50275  |
| D64 | 2.83527  | 0.00005  | 0.00298  | -0.00188 | 0.00113  | 2.83640  |
| D65 | 2.28235  | -0.00006 | 0.00170  | -0.00715 | -0.00545 | 2.27690  |
| D66 | -0.83223 | -0.00014 | 0.00250  | -0.00903 | -0.00653 | -0.83877 |
| D67 | -1.91074 | 0.00006  | 0.00173  | -0.00696 | -0.00523 | -1.91598 |
| D68 | 1.25786  | -0.00003 | 0.00252  | -0.00884 | -0.00632 | 1.25154  |
| D69 | 0.12455  | 0.00004  | 0.00210  | -0.00631 | -0.00421 | 0.12035  |
| D70 | -2.99003 | -0.00004 | 0.00290  | -0.00819 | -0.00529 | -2.99533 |
| D71 | 2.92306  | -0.00004 | -0.00190 | 0.00338  | 0.00148  | 2.92455  |
| D72 | -0.19085 | -0.00013 | -0.00109 | 0.00144  | 0.00035  | -0.19050 |
| D73 | -1.96857 | 0.00019  | 0.00764  | 0.01562  | 0.02326  | -1.94531 |

| Item                 | Value    | Threshold | Converged? |
|----------------------|----------|-----------|------------|
| Maximum Force        | 0.000427 | 0.000450  | YES        |
| RMS Force            | 0.000115 | 0.000300  | YES        |
| Maximum Displacement | 0.058576 | 0.001800  | NO         |
| RMS Displacement     | 0.014030 | 0.001200  | NO         |

Predicted change in Energy=-8.397139D-06

GradGradGradGradGradGradGradGradGradGradGradGradGradGradGradGradGradGrad

Input orientation:

-----



| Center<br>Number | Atomic<br>Number | Atomic<br>Type | Coordinates (Angstroms) |           |           |
|------------------|------------------|----------------|-------------------------|-----------|-----------|
|                  |                  |                | X                       | Y         | Z         |
| 1                | 6                | 0              | -0.850025               | 1.644284  | 1.537782  |
| 2                | 6                | 0              | -1.509318               | 0.455997  | 1.577175  |
| 3                | 7                | 0              | -2.366627               | 0.448008  | 0.484404  |
| 4                | 6                | 0              | -2.226143               | 1.601816  | -0.186488 |
| 5                | 7                | 0              | -1.306794               | 2.350331  | 0.435635  |
| 6                | 6                | 0              | -0.772454               | 3.640711  | -0.036708 |
| 7                | 1                | 0              | -0.079311               | 2.033425  | 2.178887  |
| 8                | 1                | 0              | -1.356964               | -0.411740 | 2.230825  |
| 9                | 1                | 0              | -1.609685               | 4.251896  | -0.378198 |
| 10               | 1                | 0              | -0.328749               | 4.126380  | 0.830278  |
| 11               | 35               | 0              | -0.408874               | -2.443121 | 2.908868  |
| 12               | 1                | 0              | -2.758181               | 1.873148  | -1.082098 |
| 13               | 6                | 0              | -3.254252               | -0.604170 | 0.090011  |
| 14               | 6                | 0              | -3.221222               | -1.821373 | 0.615804  |
| 15               | 1                | 0              | -3.943097               | -0.296240 | -0.686871 |
| 16               | 1                | 0              | -3.930656               | -2.555969 | 0.255458  |
| 17               | 1                | 0              | -2.501851               | -2.133514 | 1.375849  |
| 18               | 6                | 0              | 2.561270                | -0.687680 | 1.144358  |
| 19               | 6                | 0              | 3.982992                | -0.371570 | 1.312502  |
| 20               | 8                | 0              | 2.983052                | 0.655573  | 1.547057  |
| 21               | 1                | 0              | 2.166128                | -0.726943 | 0.133224  |
| 22               | 1                | 0              | 1.997623                | -1.230876 | 1.897921  |
| 23               | 1                | 0              | 4.450973                | -0.688685 | 2.241554  |
| 24               | 6                | 0              | 4.908180                | -0.162724 | 0.145663  |
| 25               | 1                | 0              | 5.670410                | 0.585541  | 0.381391  |
| 26               | 1                | 0              | 5.420488                | -1.100198 | -0.091040 |
| 27               | 1                | 0              | 4.354560                | 0.163015  | -0.737602 |
| 28               | 6                | 0              | 0.267392                | 3.472336  | -1.154431 |
| 29               | 1                | 0              | 0.716779                | 4.452359  | -1.343646 |
| 30               | 1                | 0              | -0.194783               | 3.132373  | -2.081828 |
| 31               | 6                | 0              | 1.370831                | 2.483346  | -0.797357 |
| 32               | 8                | 0              | 1.713433                | 1.584227  | -1.528306 |
| 33               | 8                | 0              | 1.871550                | 2.719602  | 0.414451  |
| 34               | 1                | 0              | 2.446397                | 1.952148  | 0.719462  |

Distance matrix (angstroms):

|     | 1        | 2        | 3        | 4        | 5 |
|-----|----------|----------|----------|----------|---|
| 1 C | 0.000000 |          |          |          |   |
| 2 C | 1.359502 | 0.000000 |          |          |   |
| 3 N | 2.200174 | 1.388953 | 0.000000 |          |   |
| 4 C | 2.206494 | 2.221992 | 1.342053 | 0.000000 |   |

|    |    |          |          |          |          |          |
|----|----|----------|----------|----------|----------|----------|
| 5  | N  | 1.386315 | 2.220953 | 2.178178 | 1.338849 | 0.000000 |
| 6  | C  | 2.543769 | 3.645544 | 3.606425 | 2.508534 | 1.474350 |
| 7  | H  | 1.075382 | 2.212523 | 3.258318 | 3.223380 | 2.155475 |
| 8  | H  | 2.228122 | 1.097013 | 2.192846 | 3.263937 | 3.294580 |
| 9  | H  | 3.323809 | 4.271113 | 3.973237 | 2.727581 | 2.090458 |
| 10 | H  | 2.633076 | 3.927252 | 4.219360 | 3.317731 | 2.065590 |
| 11 | Br | 4.333748 | 3.374800 | 4.250818 | 5.407885 | 5.468119 |
| 12 | H  | 3.249186 | 3.261856 | 2.153663 | 1.076476 | 2.153542 |
| 13 | C  | 3.596094 | 2.525946 | 1.431957 | 2.449455 | 3.555436 |
| 14 | C  | 4.299232 | 3.006870 | 2.428515 | 3.654049 | 4.593540 |
| 15 | H  | 4.275723 | 3.408085 | 2.100249 | 2.607859 | 3.900571 |
| 16 | H  | 5.364398 | 4.084330 | 3.394477 | 4.515291 | 5.566767 |
| 17 | H  | 4.126319 | 2.780508 | 2.734450 | 4.058276 | 4.734663 |
| 18 | C  | 4.150875 | 4.250296 | 5.099951 | 5.471039 | 4.969277 |
| 19 | C  | 5.241418 | 5.560610 | 6.455627 | 6.685401 | 6.013275 |
| 20 | O  | 3.958549 | 4.496902 | 5.458149 | 5.571021 | 4.744496 |
| 21 | H  | 4.085667 | 4.122286 | 4.695712 | 4.981705 | 4.649974 |
| 22 | H  | 4.062677 | 3.904748 | 4.885014 | 5.496281 | 5.087484 |
| 23 | H  | 5.834262 | 6.105470 | 7.131572 | 7.464962 | 6.756392 |
| 24 | C  | 6.193561 | 6.604265 | 7.308253 | 7.356799 | 6.710099 |
| 25 | H  | 6.706284 | 7.279778 | 8.038874 | 7.981908 | 7.197138 |
| 26 | H  | 7.035949 | 7.295677 | 7.960355 | 8.110547 | 7.578909 |
| 27 | H  | 5.870198 | 6.311029 | 6.837315 | 6.758663 | 6.181566 |
| 28 | C  | 3.440698 | 4.440345 | 4.332482 | 3.263966 | 2.503051 |
| 29 | H  | 4.317730 | 5.427487 | 5.374383 | 4.257394 | 3.417486 |
| 30 | H  | 3.968038 | 4.720094 | 4.302124 | 3.171962 | 2.861080 |
| 31 | C  | 3.330030 | 4.247799 | 4.444559 | 3.753463 | 2.950870 |
| 32 | O  | 3.996976 | 4.615521 | 4.689231 | 4.161856 | 3.683171 |
| 33 | O  | 3.134510 | 4.231560 | 4.809073 | 4.289716 | 3.199794 |
| 34 | H  | 3.410399 | 4.315301 | 5.048059 | 4.772433 | 3.784911 |
|    |    | 6        | 7        | 8        | 9        | 10       |
| 6  | C  | 0.000000 |          |          |          |          |
| 7  | H  | 2.823593 | 0.000000 |          |          |          |
| 8  | H  | 4.680355 | 2.759335 | 0.000000 |          |          |
| 9  | H  | 1.091384 | 3.715150 | 5.349801 | 0.000000 |          |
| 10 | H  | 1.088307 | 2.502284 | 4.859350 | 1.765493 | 0.000000 |
| 11 | Br | 6.769167 | 4.547631 | 2.342035 | 7.554469 | 6.890957 |
| 12 | H  | 2.856612 | 4.223275 | 4.261406 | 2.733671 | 3.825751 |
| 13 | C  | 4.918780 | 4.626074 | 2.867022 | 5.148319 | 5.611119 |
| 14 | C  | 6.021346 | 5.212898 | 2.840918 | 6.361579 | 6.617262 |
| 15 | H  | 5.096594 | 5.344974 | 3.900561 | 5.121096 | 5.909722 |
| 16 | H  | 6.961211 | 6.292454 | 3.888918 | 7.220488 | 7.613011 |
| 17 | H  | 6.190946 | 4.886405 | 2.237466 | 6.681774 | 6.648781 |
| 18 | C  | 5.589597 | 3.930309 | 4.075427 | 6.641871 | 5.623702 |

|    |    |          |          |          |          |          |
|----|----|----------|----------|----------|----------|----------|
| 19 | C  | 6.366556 | 4.799680 | 5.418493 | 7.450701 | 6.249416 |
| 20 | O  | 5.052048 | 3.416980 | 4.521331 | 6.142751 | 4.850598 |
| 21 | H  | 5.266929 | 4.104433 | 4.112355 | 6.269542 | 5.501367 |
| 22 | H  | 5.928615 | 3.879209 | 3.469159 | 6.946523 | 5.937344 |
| 23 | H  | 7.156698 | 5.285573 | 5.814546 | 8.246455 | 6.929811 |
| 24 | C  | 6.838785 | 5.816540 | 6.607718 | 7.889605 | 6.803714 |
| 25 | H  | 7.142784 | 6.195696 | 7.334778 | 8.186509 | 6.980612 |
| 26 | H  | 7.799468 | 6.724579 | 7.197145 | 8.840289 | 7.824300 |
| 27 | H  | 6.234733 | 5.627038 | 6.462461 | 7.240189 | 6.332447 |
| 28 | C  | 1.535882 | 3.647147 | 5.402271 | 2.175700 | 2.173068 |
| 29 | H  | 2.141185 | 4.346636 | 6.382532 | 2.526799 | 2.434202 |
| 30 | H  | 2.185092 | 4.401672 | 5.701787 | 2.481458 | 3.079993 |
| 31 | C  | 2.551813 | 3.341163 | 4.999227 | 3.490981 | 2.870074 |
| 32 | O  | 3.554381 | 4.142341 | 5.248074 | 4.413879 | 4.024421 |
| 33 | O  | 2.835973 | 2.718443 | 4.850548 | 3.885257 | 2.644476 |
| 34 | H  | 3.712686 | 2.918172 | 4.726282 | 4.790146 | 3.527180 |
|    |    | 11       | 12       | 13       | 14       | 15       |
| 11 | Br | 0.000000 |          |          |          |          |
| 12 | H  | 6.330658 | 0.000000 |          |          |          |
| 13 | C  | 4.407253 | 2.785144 | 0.000000 |          |          |
| 14 | C  | 3.681578 | 4.092281 | 1.326323 | 0.000000 |          |
| 15 | H  | 5.479888 | 2.503292 | 1.082993 | 2.131689 | 0.000000 |
| 16 | H  | 4.410926 | 4.772927 | 2.072297 | 1.082948 | 2.448370 |
| 17 | H  | 2.612768 | 4.707499 | 2.135037 | 1.092060 | 3.115699 |
| 18 | C  | 3.875154 | 6.309636 | 5.910915 | 5.916235 | 6.768561 |
| 19 | C  | 5.111575 | 7.497752 | 7.343452 | 7.381600 | 8.174721 |
| 20 | O  | 4.791826 | 6.430918 | 6.527932 | 6.745036 | 7.339477 |
| 21 | H  | 4.156934 | 5.699675 | 5.421943 | 5.518533 | 6.179053 |
| 22 | H  | 2.877981 | 6.413513 | 5.589588 | 5.406372 | 6.545750 |
| 23 | H  | 5.209747 | 8.341555 | 8.000423 | 7.923927 | 8.898881 |
| 24 | C  | 6.411440 | 8.026535 | 8.174550 | 8.310194 | 8.891346 |
| 25 | H  | 7.246974 | 8.651062 | 9.008324 | 9.214625 | 9.712787 |
| 26 | H  | 6.692111 | 8.758631 | 8.690796 | 8.700510 | 9.416905 |
| 27 | H  | 6.540565 | 7.323545 | 7.692043 | 7.947451 | 8.310511 |
| 28 | C  | 7.208354 | 3.422970 | 5.528879 | 6.582364 | 5.670008 |
| 29 | H  | 8.179158 | 4.335445 | 6.587332 | 7.662050 | 6.685431 |
| 30 | H  | 7.485921 | 3.025908 | 5.295185 | 6.401262 | 5.267936 |
| 31 | C  | 6.416660 | 4.183558 | 5.631302 | 6.450936 | 5.998011 |
| 32 | O  | 6.357061 | 4.503100 | 5.664443 | 6.367585 | 6.020008 |
| 33 | O  | 6.170588 | 4.938679 | 6.117725 | 6.826223 | 6.642163 |
| 34 | H  | 5.680181 | 5.508129 | 6.279201 | 6.809707 | 6.917995 |
|    |    | 16       | 17       | 18       | 19       | 20       |
| 16 | H  | 0.000000 |          |          |          |          |
| 17 | H  | 1.864196 | 0.000000 |          |          |          |

|    |   |           |          |          |          |          |
|----|---|-----------|----------|----------|----------|----------|
| 18 | C | 6.813644  | 5.270600 | 0.000000 |          |          |
| 19 | C | 8.277365  | 6.720242 | 1.466115 | 0.000000 |          |
| 20 | O | 7.731855  | 6.155687 | 1.464375 | 1.452556 | 0.000000 |
| 21 | H | 6.366400  | 5.031162 | 1.086311 | 2.194990 | 2.139542 |
| 22 | H | 6.292698  | 4.618721 | 1.086562 | 2.241164 | 2.157050 |
| 23 | H | 8.813797  | 7.153931 | 2.185135 | 1.087522 | 2.108114 |
| 24 | C | 9.157766  | 7.765689 | 2.604027 | 1.503696 | 2.517863 |
| 25 | H | 10.102743 | 8.669952 | 3.445281 | 2.151838 | 2.930115 |
| 26 | H | 9.470123  | 8.122990 | 3.141896 | 2.137107 | 3.421577 |
| 27 | H | 8.776322  | 7.533332 | 2.735205 | 2.150993 | 2.709855 |
| 28 | C | 7.480097  | 6.745115 | 5.277503 | 5.887874 | 4.754683 |
| 29 | H | 8.559933  | 7.818502 | 6.001027 | 6.402622 | 5.282779 |
| 30 | H | 7.195616  | 6.708775 | 5.709370 | 6.422842 | 5.422359 |
| 31 | C | 7.389782  | 6.405926 | 3.904203 | 4.407429 | 3.381758 |
| 32 | O | 7.223487  | 6.326479 | 3.608811 | 4.128708 | 3.454300 |
| 33 | O | 7.843629  | 6.603307 | 3.552189 | 3.849678 | 2.603546 |
| 34 | H | 7.823377  | 6.450476 | 2.676271 | 2.848242 | 1.629116 |
|    |   | 21        | 22       | 23       | 24       | 25       |
| 21 | H | 0.000000  |          |          |          |          |
| 22 | H | 1.842959  | 0.000000 |          |          |          |
| 23 | H | 3.109185  | 2.535938 | 0.000000 |          |          |
| 24 | C | 2.799525  | 3.561278 | 2.208717 | 0.000000 |          |
| 25 | H | 3.750226  | 4.369050 | 2.563374 | 1.093830 | 0.000000 |
| 26 | H | 3.283363  | 3.960941 | 2.559355 | 1.094233 | 1.768437 |
| 27 | H | 2.517855  | 3.800535 | 3.100009 | 1.092135 | 1.778240 |
| 28 | C | 4.785102  | 5.867773 | 6.808021 | 6.036623 | 6.315453 |
| 29 | H | 5.577359  | 6.666895 | 7.295766 | 6.409749 | 6.516633 |
| 30 | H | 5.037328  | 6.299444 | 7.407777 | 6.469900 | 6.852320 |
| 31 | C | 3.435757  | 4.631720 | 5.365074 | 4.517057 | 4.845357 |
| 32 | O | 2.882207  | 4.443489 | 5.183830 | 4.007545 | 4.505772 |
| 33 | O | 3.470524  | 4.221712 | 4.648456 | 4.195375 | 4.357367 |
| 34 | H | 2.756765  | 3.423713 | 3.648162 | 3.295801 | 3.517978 |
|    |   | 26        | 27       | 28       | 29       | 30       |
| 26 | H | 0.000000  |          |          |          |          |
| 27 | H | 1.774811  | 0.000000 |          |          |          |
| 28 | C | 6.970888  | 5.275443 | 0.000000 |          |          |
| 29 | H | 7.384091  | 5.656785 | 1.094622 | 0.000000 |          |
| 30 | H | 7.308157  | 5.596477 | 1.090525 | 1.765848 | 0.000000 |
| 31 | C | 5.453475  | 3.780230 | 1.524199 | 2.145515 | 2.126558 |
| 32 | O | 4.797304  | 3.101710 | 2.407442 | 3.041974 | 2.518816 |
| 33 | O | 5.238449  | 3.745491 | 2.366712 | 2.725225 | 3.266729 |
| 34 | H | 4.338081  | 2.994181 | 3.251232 | 3.674106 | 4.026908 |
|    |   | 31        | 32       | 33       | 34       |          |
| 31 | C | 0.000000  |          |          |          |          |

32 O 1.208337 0.000000  
 33 O 1.332296 2.255744 0.000000  
 34 H 1.933844 2.392710 1.006213 0.000000

Stoichiometry C11H17BrN2O3

Framework group C1[X(C11H17BrN2O3)]

Deg. of freedom 96

Full point group C1 NOp 1

Largest Abelian subgroup C1 NOP 1

Largest concise Abelian subgroup C1 NOp 1

Standard orientation:

| Center Number | Atomic Number | Atomic Type | Coordinates (Angstroms) |           |           |
|---------------|---------------|-------------|-------------------------|-----------|-----------|
|               |               |             | X                       | Y         | Z         |
| 1             | 6             | 0           | 0.061034                | 1.332047  | 1.240297  |
| 2             | 6             | 0           | -1.170677               | 1.245267  | 0.671437  |
| 3             | 7             | 0           | -1.244201               | 2.272382  | -0.260669 |
| 4             | 6             | 0           | -0.089596               | 2.956315  | -0.245530 |
| 5             | 7             | 0           | 0.724446                | 2.403306  | 0.662233  |
| 6             | 6             | 0           | 2.128030                | 2.778228  | 0.913420  |
| 7             | 1             | 0           | 0.529998                | 0.709858  | 1.981512  |
| 8             | 1             | 0           | -1.945539               | 0.477079  | 0.785078  |
| 9             | 1             | 0           | 2.189753                | 3.867446  | 0.943632  |
| 10            | 1             | 0           | 2.376819                | 2.396365  | 1.901699  |
| 11            | 35            | 0           | -3.060336               | -1.527846 | 0.313241  |
| 12            | 1             | 0           | 0.144240                | 3.802342  | -0.868714 |
| 13            | 6             | 0           | -2.341883               | 2.574203  | -1.129288 |
| 14            | 6             | 0           | -3.377833               | 1.764504  | -1.303435 |
| 15            | 1             | 0           | -2.224557               | 3.527280  | -1.630040 |
| 16            | 1             | 0           | -4.163244               | 2.073913  | -1.981796 |
| 17            | 1             | 0           | -3.473011               | 0.790094  | -0.819636 |
| 18            | 6             | 0           | 0.643935                | -2.464622 | -0.333013 |
| 19            | 6             | 0           | 1.643101                | -3.497453 | -0.042462 |
| 20            | 8             | 0           | 1.661523                | -2.247596 | 0.697428  |
| 21            | 1             | 0           | 0.791528                | -1.849780 | -1.216335 |
| 22            | 1             | 0           | -0.374413               | -2.525096 | 0.041055  |
| 23            | 1             | 0           | 1.325766                | -4.325849 | 0.586634  |
| 24            | 6             | 0           | 2.813805                | -3.766843 | -0.946885 |
| 25            | 1             | 0           | 3.690803                | -4.072497 | -0.369030 |
| 26            | 1             | 0           | 2.567183                | -4.579338 | -1.637084 |
| 27            | 1             | 0           | 3.067385                | -2.879762 | -1.531300 |
| 28            | 6             | 0           | 3.086254                | 2.209919  | -0.143824 |
| 29            | 1             | 0           | 4.109413                | 2.406439  | 0.191917  |
| 30            | 1             | 0           | 2.951780                | 2.699556  | -1.108924 |

|    |   |   |          |           |           |
|----|---|---|----------|-----------|-----------|
| 31 | 6 | 0 | 2.915737 | 0.710455  | -0.357637 |
| 32 | 8 | 0 | 2.795066 | 0.208910  | -1.450326 |
| 33 | 8 | 0 | 2.885964 | 0.047859  | 0.797825  |
| 34 | 1 | 0 | 2.574300 | -0.898751 | 0.659038  |

-----

Rotational constants (GHZ):      0.3293246      0.2540810      0.1593612

Standard basis: 6-311++G(d,p) (5D, 7F)

There are 538 symmetry adapted cartesian basis functions of A symmetry.

There are 519 symmetry adapted basis functions of A symmetry.

519 basis functions, 823 primitive gaussians, 538 cartesian basis functions

78 alpha electrons      78 beta electrons

nuclear repulsion energy      1572.5258892189 Hartrees.

NAtoms= 34 NActive= 34 NUniq= 34 SFac= 1.00D+00 NAtFMM= 60 NAOKFM=F

Big=F

Integral buffers will be 131072 words long.

Raffenetti 2 integral format.

Two-electron integral symmetry is turned on.

One-electron integrals computed using PRISM.

NBasis= 519 RedAO= T EigKep= 3.53D-06 NBF= 519

NBsUse= 519 1.00D-06 EigRej= -1.00D+00 NBFU= 519

Initial guess from the checkpoint file: "./coohpo.chk"

B after Tr= 0.000000 0.000000 0.000000

Rot= 0.999995 0.000054 -0.000398 -0.003002 Ang= 0.35 deg.

ExpMin= 3.50D-02 ExpMax= 4.40D+05 ExpMxC= 1.51D+04 IAcc=3 IRadAn= 5 AccDes= 0.00D+00

Harris functional with IExCor= 402 and IRadAn= 5 diagonalized for initial guess.

HarFok: IExCor= 402 AccDes= 0.00D+00 IRadAn= 5 IDoV= 1 UseB2=F ITyADJ=14

ICtDFT= 3500011 ScaDFX= 1.000000 1.000000 1.000000 1.000000

FoFCou: FMM=F IPFlag= 0 FMFlag= 100000 FMFlg1= 0

NFxFlg= 0 DoJE=T BraDBF=F KetDBF=T FulRan=T

wScrn= 0.000000 ICntrl= 500 IOpCl= 0 I1Cent= 200000004 NGrid=

0

NMat0= 1 NMatS0= 1 NMatT0= 0 NMatD0= 1 NMtDS0= 0

NMtDT0= 0

Petite list used in FoFCou.

Requested convergence on RMS density matrix=1.00D-08 within 128 cycles.

Requested convergence on MAX density matrix=1.00D-06.

Requested convergence on energy=1.00D-06.

No special actions if energy rises.

SCF Done: E(RB3LYP) = -3338.90385331 A.U. after 11 cycles

NFock= 11 Conv=0.28D-08 -V/T= 2.0019

Calling FoFJK, ICntrl= 2127 FMM=F ISym2X=0 I1Cent= 0 IOpClX= 0 NMat=1 NMatS=1

NMatT=0.

\*\*\*\*\* Axes restored to original set \*\*\*\*\*

| Center<br>Number | Atomic<br>Number | Forces (Hartrees/Bohr) |              |              |
|------------------|------------------|------------------------|--------------|--------------|
|                  |                  | X                      | Y            | Z            |
| 1                | 6                | -0.000088946           | 0.000044731  | 0.000073286  |
| 2                | 6                | 0.000416426            | 0.000223413  | 0.000014526  |
| 3                | 7                | -0.000103500           | -0.000283220 | -0.000004399 |
| 4                | 6                | 0.000095777            | 0.000190579  | -0.000043772 |
| 5                | 7                | -0.000141112           | -0.000057230 | -0.000104443 |
| 6                | 6                | 0.000101383            | 0.000038770  | -0.000020864 |
| 7                | 1                | 0.000027334            | -0.000047435 | 0.000061332  |
| 8                | 1                | -0.000434318           | -0.000164910 | -0.000308200 |
| 9                | 1                | 0.000008287            | -0.000026778 | -0.000035074 |
| 10               | 1                | 0.000005524            | -0.000045103 | -0.000013602 |
| 11               | 35               | 0.000182303            | 0.000093214  | 0.000072860  |
| 12               | 1                | -0.000035160           | -0.000021299 | 0.000032368  |
| 13               | 6                | 0.000169664            | 0.000379913  | 0.000105010  |
| 14               | 6                | -0.000135390           | -0.000373861 | 0.000023889  |
| 15               | 1                | -0.000030214           | -0.000060725 | 0.000011484  |
| 16               | 1                | 0.000034345            | 0.000109408  | -0.000047347 |
| 17               | 1                | 0.000038745            | 0.000089443  | 0.000012003  |
| 18               | 6                | 0.000029997            | 0.000118442  | -0.000177798 |
| 19               | 6                | -0.000194177           | 0.000061407  | 0.000156229  |
| 20               | 8                | -0.000108083           | -0.000493765 | -0.000069855 |
| 21               | 1                | -0.000050930           | -0.000005429 | -0.000006306 |
| 22               | 1                | 0.000064293            | -0.000001973 | 0.000173188  |
| 23               | 1                | 0.000043948            | -0.000016711 | -0.000020689 |
| 24               | 6                | 0.000019430            | 0.000008563  | -0.000087903 |
| 25               | 1                | 0.000019820            | -0.000006307 | 0.000028355  |
| 26               | 1                | -0.000003272           | -0.000011965 | 0.000046072  |
| 27               | 1                | 0.000030338            | -0.000013166 | 0.000027408  |
| 28               | 6                | -0.000192380           | 0.000035188  | 0.000114557  |
| 29               | 1                | 0.000060864            | 0.000000173  | -0.000061916 |
| 30               | 1                | 0.000007707            | -0.000020913 | -0.000034002 |
| 31               | 6                | 0.000030140            | -0.000088683 | 0.000472842  |
| 32               | 8                | -0.000045480           | 0.000092489  | -0.000062791 |
| 33               | 8                | 0.000002848            | -0.000415356 | -0.000525902 |
| 34               | 1                | 0.000173791            | 0.000669098  | 0.000199457  |

Cartesian Forces: Max 0.000669098 RMS 0.000167680

GradGradGradGradGradGradGradGradGradGradGradGradGradGradGradGradGradGradGrad  
 Berny optimization.  
 Using GEDIIS/GDIIS optimizer.

FormGI is forming the generalized inverse of G from B-inverse, IUseBI=4.

Internal Forces: Max 0.000568873 RMS 0.000113385

Search for a local minimum.

Step number 29 out of a maximum of 175

All quantities printed in internal units (Hartrees-Bohrs-Radians)

Mixed Optimization -- En-DIIS/RFO-DIIS

Swapping is turned off.

Update second derivatives using D2CorX and points 21 22 23 24 25  
26 27 28 29

DE= -8.98D-06 DEPred=-8.40D-06 R= 1.07D+00

TightC=F SS= 1.41D+00 RLast= 3.96D-02 DXNew= 1.3149D+00 1.1865D-01

Trust test= 1.07D+00 RLast= 3.96D-02 DXMaxT set to 7.82D-01

ITU= 1 1 1 1 -1 0 1 1 1 1 1 1 1 1 1 0 0 -1 1

ITU= 1 1 0 1 0 -1 0 1 0

|                 |         |         |         |         |         |
|-----------------|---------|---------|---------|---------|---------|
| Eigenvalues --- | 0.00152 | 0.00301 | 0.00355 | 0.00523 | 0.00619 |
| Eigenvalues --- | 0.00719 | 0.00803 | 0.01164 | 0.01328 | 0.01636 |
| Eigenvalues --- | 0.01989 | 0.02189 | 0.02245 | 0.02264 | 0.02395 |
| Eigenvalues --- | 0.02460 | 0.02673 | 0.02806 | 0.03131 | 0.03198 |
| Eigenvalues --- | 0.03430 | 0.03541 | 0.03891 | 0.04267 | 0.04818 |
| Eigenvalues --- | 0.04901 | 0.05005 | 0.05371 | 0.05726 | 0.05853 |
| Eigenvalues --- | 0.05940 | 0.06007 | 0.06545 | 0.07463 | 0.09364 |
| Eigenvalues --- | 0.09571 | 0.11815 | 0.12618 | 0.12798 | 0.13367 |
| Eigenvalues --- | 0.13862 | 0.15279 | 0.15590 | 0.15906 | 0.15990 |
| Eigenvalues --- | 0.16010 | 0.16032 | 0.16040 | 0.16131 | 0.16296 |
| Eigenvalues --- | 0.17012 | 0.17609 | 0.20469 | 0.21593 | 0.22514 |
| Eigenvalues --- | 0.23306 | 0.23924 | 0.24473 | 0.25515 | 0.25876 |
| Eigenvalues --- | 0.28802 | 0.29267 | 0.30820 | 0.31544 | 0.32636 |
| Eigenvalues --- | 0.33420 | 0.34499 | 0.34581 | 0.34637 | 0.34826 |
| Eigenvalues --- | 0.34893 | 0.34958 | 0.34993 | 0.35133 | 0.35304 |
| Eigenvalues --- | 0.35483 | 0.35720 | 0.36032 | 0.36578 | 0.37001 |
| Eigenvalues --- | 0.37151 | 0.37478 | 0.37760 | 0.39250 | 0.40481 |
| Eigenvalues --- | 0.41597 | 0.45258 | 0.49205 | 0.50722 | 0.51689 |
| Eigenvalues --- | 0.54210 | 0.55992 | 0.56832 | 0.61906 | 0.90977 |
| Eigenvalues --- | 1.52088 |         |         |         |         |

En-DIIS/RFO-DIIS IScMMF= 0 using points: 29 28 27 26 25

RFO step: Lambda=-3.30324637D-06.

DidBck=F Rises=F RFO-DIIS coefs: 1.67664 -0.46715 -0.62815 0.62351 -  
0.20485

Iteration 1 RMS(Cart)= 0.01595576 RMS(Int)= 0.00009278

Iteration 2 RMS(Cart)= 0.00015375 RMS(Int)= 0.00000386

Iteration 3 RMS(Cart)= 0.00000003 RMS(Int)= 0.00000386

| Variable | Old X   | -DE/DX   | Delta X<br>(Linear) | Delta X<br>(Quad) | Delta X<br>(Total) | New X   |
|----------|---------|----------|---------------------|-------------------|--------------------|---------|
| R1       | 2.56909 | -0.00018 | -0.00003            | -0.00015          | -0.00018           | 2.56891 |



|     |         |          |          |          |          |         |
|-----|---------|----------|----------|----------|----------|---------|
| R2  | 2.61976 | -0.00002 | 0.00001  | 0.00008  | 0.00009  | 2.61985 |
| R3  | 2.03218 | 0.00004  | 0.00011  | -0.00003 | 0.00008  | 2.03226 |
| R4  | 2.62474 | -0.00005 | 0.00019  | -0.00001 | 0.00018  | 2.62492 |
| R5  | 2.07305 | -0.00011 | 0.00037  | 0.00023  | 0.00060  | 2.07366 |
| R6  | 2.53611 | 0.00013  | 0.00018  | 0.00005  | 0.00023  | 2.53634 |
| R7  | 2.70601 | -0.00018 | -0.00044 | -0.00032 | -0.00076 | 2.70525 |
| R8  | 2.53006 | -0.00007 | -0.00002 | -0.00003 | -0.00006 | 2.53000 |
| R9  | 2.03425 | -0.00002 | -0.00003 | -0.00001 | -0.00004 | 2.03420 |
| R10 | 2.78612 | -0.00011 | -0.00057 | 0.00019  | -0.00038 | 2.78574 |
| R11 | 2.06242 | -0.00001 | -0.00007 | -0.00003 | -0.00010 | 2.06231 |
| R12 | 2.05660 | -0.00003 | 0.00011  | -0.00009 | 0.00002  | 2.05662 |
| R13 | 2.90240 | -0.00017 | 0.00037  | 0.00014  | 0.00051  | 2.90291 |
| R14 | 4.42580 | 0.00002  | -0.00159 | -0.00260 | -0.00420 | 4.42161 |
| R15 | 2.50639 | 0.00016  | 0.00015  | 0.00003  | 0.00018  | 2.50657 |
| R16 | 2.04656 | -0.00001 | 0.00004  | 0.00003  | 0.00007  | 2.04663 |
| R17 | 2.04648 | -0.00008 | -0.00004 | -0.00002 | -0.00006 | 2.04641 |
| R18 | 2.06369 | 0.00001  | -0.00014 | 0.00024  | 0.00009  | 2.06379 |
| R19 | 2.77056 | -0.00003 | 0.00015  | -0.00001 | 0.00012  | 2.77068 |
| R20 | 2.76727 | -0.00012 | 0.00007  | -0.00008 | 0.00000  | 2.76727 |
| R21 | 2.05283 | 0.00003  | 0.00017  | -0.00001 | 0.00016  | 2.05299 |
| R22 | 2.05330 | 0.00008  | 0.00023  | 0.00004  | 0.00027  | 2.05358 |
| R23 | 2.74493 | -0.00006 | -0.00091 | -0.00042 | -0.00132 | 2.74362 |
| R24 | 2.05512 | 0.00000  | -0.00004 | 0.00004  | 0.00000  | 2.05512 |
| R25 | 2.84157 | 0.00005  | 0.00012  | 0.00020  | 0.00033  | 2.84190 |
| R26 | 3.07858 | 0.00024  | 0.00641  | 0.00451  | 0.01092  | 3.08950 |
| R27 | 2.06704 | 0.00002  | 0.00001  | 0.00002  | 0.00003  | 2.06707 |
| R28 | 2.06780 | 0.00000  | -0.00001 | -0.00002 | -0.00004 | 2.06776 |
| R29 | 2.06384 | -0.00004 | 0.00000  | -0.00002 | -0.00002 | 2.06381 |
| R30 | 2.06854 | 0.00004  | -0.00020 | 0.00006  | -0.00014 | 2.06840 |
| R31 | 2.06079 | 0.00003  | 0.00002  | -0.00009 | -0.00008 | 2.06072 |
| R32 | 2.88032 | 0.00009  | -0.00022 | 0.00049  | 0.00027  | 2.88059 |
| R33 | 2.28343 | -0.00005 | -0.00002 | -0.00013 | -0.00015 | 2.28328 |
| R34 | 2.51768 | -0.00028 | 0.00055  | -0.00043 | 0.00011  | 2.51779 |
| R35 | 1.90147 | -0.00016 | -0.00105 | -0.00088 | -0.00194 | 1.89953 |
| A1  | 1.88432 | -0.00003 | 0.00006  | -0.00003 | 0.00003  | 1.88435 |
| A2  | 2.27388 | -0.00006 | 0.00021  | -0.00035 | -0.00014 | 2.27374 |
| A3  | 2.12446 | 0.00009  | -0.00021 | 0.00037  | 0.00017  | 2.12462 |
| A4  | 1.85622 | 0.00009  | -0.00003 | 0.00006  | 0.00003  | 1.85624 |
| A5  | 2.26698 | -0.00014 | 0.00043  | -0.00032 | 0.00011  | 2.26709 |
| A6  | 2.15311 | 0.00005  | -0.00037 | 0.00033  | -0.00004 | 2.15308 |
| A7  | 1.90048 | -0.00006 | -0.00005 | -0.00001 | -0.00006 | 1.90042 |
| A8  | 2.21871 | 0.00002  | 0.00034  | -0.00009 | 0.00025  | 2.21896 |
| A9  | 2.16388 | 0.00004  | -0.00031 | 0.00010  | -0.00021 | 2.16367 |
| A10 | 1.89679 | -0.00006 | -0.00002 | -0.00005 | -0.00006 | 1.89672 |

|     |         |          |          |          |          |         |
|-----|---------|----------|----------|----------|----------|---------|
| A11 | 2.19060 | -0.00001 | 0.00014  | -0.00011 | 0.00003  | 2.19062 |
| A12 | 2.19575 | 0.00007  | -0.00014 | 0.00016  | 0.00002  | 2.19577 |
| A13 | 1.88697 | 0.00006  | 0.00004  | 0.00003  | 0.00006  | 1.88704 |
| A14 | 2.19080 | -0.00023 | 0.00010  | -0.00022 | -0.00012 | 2.19068 |
| A15 | 2.20100 | 0.00016  | -0.00009 | -0.00001 | -0.00010 | 2.20090 |
| A16 | 1.88846 | 0.00023  | -0.00008 | -0.00019 | -0.00027 | 1.88819 |
| A17 | 1.85784 | 0.00012  | 0.00068  | 0.00010  | 0.00078  | 1.85862 |
| A18 | 1.96338 | -0.00057 | -0.00027 | -0.00019 | -0.00046 | 1.96292 |
| A19 | 1.88821 | -0.00005 | 0.00006  | 0.00018  | 0.00024  | 1.88845 |
| A20 | 1.93163 | 0.00014  | -0.00002 | 0.00005  | 0.00003  | 1.93166 |
| A21 | 1.93119 | 0.00014  | -0.00034 | 0.00007  | -0.00026 | 1.93092 |
| A22 | 2.72582 | -0.00022 | 0.00002  | 0.00702  | 0.00703  | 2.73285 |
| A23 | 2.15281 | 0.00010  | 0.00073  | -0.00033 | 0.00040  | 2.15321 |
| A24 | 1.96375 | 0.00002  | -0.00024 | 0.00054  | 0.00029  | 1.96405 |
| A25 | 2.16658 | -0.00012 | -0.00049 | -0.00020 | -0.00069 | 2.16589 |
| A26 | 2.06496 | -0.00005 | 0.00023  | -0.00031 | -0.00009 | 2.06488 |
| A27 | 2.15870 | -0.00007 | 0.00033  | -0.00057 | -0.00024 | 2.15846 |
| A28 | 2.05921 | 0.00013  | -0.00058 | 0.00091  | 0.00034  | 2.05955 |
| A29 | 2.05700 | 0.00013  | -0.00094 | 0.00108  | 0.00015  | 2.05715 |
| A30 | 2.13091 | -0.00019 | 0.00044  | -0.00161 | -0.00118 | 2.12974 |
| A31 | 1.97566 | 0.00004  | -0.00046 | -0.00044 | -0.00091 | 1.97475 |
| A32 | 2.00123 | -0.00008 | -0.00022 | 0.00034  | 0.00011  | 2.00135 |
| A33 | 2.02503 | 0.00006  | 0.00080  | 0.00049  | 0.00129  | 2.02632 |
| A34 | 2.04024 | -0.00002 | 0.00060  | -0.00008 | 0.00052  | 2.04076 |
| A35 | 2.13838 | 0.00010  | -0.00089 | 0.00025  | -0.00064 | 2.13774 |
| A36 | 1.94387 | 0.00002  | 0.00059  | 0.00052  | 0.00111  | 1.94498 |
| A37 | 2.03829 | 0.00006  | -0.00028 | 0.00015  | -0.00013 | 2.03816 |
| A38 | 2.02488 | -0.00008 | 0.00003  | -0.00044 | -0.00041 | 2.02447 |
| A39 | 2.08917 | 0.00007  | 0.00321  | 0.00196  | 0.00514  | 2.09431 |
| A40 | 2.35679 | 0.00013  | 0.00519  | 0.00307  | 0.00824  | 2.36503 |
| A41 | 1.93535 | -0.00002 | 0.00015  | 0.00000  | 0.00014  | 1.93550 |
| A42 | 1.91446 | -0.00005 | 0.00019  | -0.00027 | -0.00007 | 1.91438 |
| A43 | 1.93597 | 0.00004  | -0.00046 | 0.00045  | -0.00001 | 1.93595 |
| A44 | 1.88225 | 0.00001  | 0.00012  | -0.00006 | 0.00006  | 1.88231 |
| A45 | 1.90022 | 0.00000  | 0.00004  | -0.00003 | 0.00001  | 1.90023 |
| A46 | 1.89433 | 0.00002  | -0.00002 | -0.00011 | -0.00013 | 1.89420 |
| A47 | 1.88136 | 0.00017  | 0.00013  | 0.00043  | 0.00056  | 1.88192 |
| A48 | 1.94563 | 0.00006  | -0.00001 | -0.00023 | -0.00024 | 1.94539 |
| A49 | 1.97228 | -0.00030 | -0.00086 | 0.00009  | -0.00077 | 1.97151 |
| A50 | 1.88188 | -0.00005 | 0.00049  | 0.00008  | 0.00057  | 1.88245 |
| A51 | 1.90098 | 0.00010  | 0.00031  | -0.00009 | 0.00022  | 1.90120 |
| A52 | 1.87944 | 0.00004  | 0.00001  | -0.00027 | -0.00026 | 1.87918 |
| A53 | 2.14881 | -0.00016 | 0.00001  | 0.00007  | 0.00008  | 2.14889 |
| A54 | 1.94992 | 0.00008  | 0.00013  | -0.00002 | 0.00011  | 1.95002 |

|     |          |          |          |          |          |          |
|-----|----------|----------|----------|----------|----------|----------|
| A55 | 2.18414  | 0.00008  | -0.00012 | -0.00008 | -0.00020 | 2.18394  |
| A56 | 1.93390  | 0.00026  | -0.00028 | 0.00061  | 0.00033  | 1.93422  |
| A57 | 2.82151  | -0.00049 | -0.00295 | -0.00195 | -0.00491 | 2.81661  |
| D1  | 0.00369  | -0.00010 | -0.00009 | -0.00034 | -0.00043 | 0.00326  |
| D2  | 3.02044  | -0.00009 | 0.00019  | 0.00027  | 0.00046  | 3.02090  |
| D3  | -3.10270 | 0.00003  | -0.00229 | -0.00012 | -0.00241 | -3.10511 |
| D4  | -0.08595 | 0.00004  | -0.00202 | 0.00049  | -0.00152 | -0.08747 |
| D5  | -0.00270 | 0.00012  | 0.00055  | -0.00018 | 0.00037  | -0.00233 |
| D6  | -3.04833 | 0.00019  | -0.00001 | 0.00207  | 0.00206  | -3.04628 |
| D7  | 3.10732  | 0.00000  | 0.00253  | -0.00039 | 0.00214  | 3.10946  |
| D8  | 0.06168  | 0.00007  | 0.00197  | 0.00185  | 0.00383  | 0.06551  |
| D9  | -0.00341 | 0.00005  | -0.00041 | 0.00074  | 0.00034  | -0.00307 |
| D10 | 3.12206  | 0.00004  | -0.00148 | 0.00096  | -0.00052 | 3.12155  |
| D11 | -3.03036 | 0.00006  | -0.00073 | 0.00024  | -0.00049 | -3.03085 |
| D12 | 0.09512  | 0.00005  | -0.00180 | 0.00046  | -0.00135 | 0.09377  |
| D13 | -1.51764 | 0.00019  | 0.00211  | 0.00007  | 0.00217  | -1.51547 |
| D14 | 1.48040  | 0.00019  | 0.00246  | 0.00074  | 0.00320  | 1.48360  |
| D15 | 0.00178  | 0.00003  | 0.00076  | -0.00087 | -0.00011 | 0.00166  |
| D16 | 3.13284  | -0.00004 | -0.00172 | -0.00035 | -0.00207 | 3.13078  |
| D17 | -3.12432 | 0.00004  | 0.00178  | -0.00108 | 0.00070  | -3.12361 |
| D18 | 0.00675  | -0.00003 | -0.00070 | -0.00055 | -0.00125 | 0.00550  |
| D19 | -0.19265 | -0.00002 | 0.00231  | -0.00084 | 0.00147  | -0.19118 |
| D20 | 2.95832  | 0.00000  | 0.00308  | -0.00151 | 0.00156  | 2.95988  |
| D21 | 2.93055  | -0.00003 | 0.00109  | -0.00060 | 0.00050  | 2.93104  |
| D22 | -0.20167 | -0.00001 | 0.00186  | -0.00127 | 0.00059  | -0.20108 |
| D23 | 0.00055  | -0.00009 | -0.00080 | 0.00065  | -0.00016 | 0.00039  |
| D24 | 3.04547  | -0.00018 | -0.00023 | -0.00163 | -0.00186 | 3.04361  |
| D25 | -3.13048 | -0.00002 | 0.00168  | 0.00012  | 0.00180  | -3.12868 |
| D26 | -0.08556 | -0.00011 | 0.00226  | -0.00215 | 0.00010  | -0.08545 |
| D27 | -2.46998 | -0.00010 | -0.00393 | -0.00274 | -0.00667 | -2.47665 |
| D28 | -0.44400 | 0.00002  | -0.00356 | -0.00258 | -0.00613 | -0.45013 |
| D29 | 1.67387  | -0.00007 | -0.00368 | -0.00253 | -0.00621 | 1.66766  |
| D30 | 0.78457  | -0.00001 | -0.00460 | -0.00009 | -0.00469 | 0.77988  |
| D31 | 2.81055  | 0.00011  | -0.00422 | 0.00007  | -0.00415 | 2.80640  |
| D32 | -1.35477 | 0.00002  | -0.00435 | 0.00011  | -0.00424 | -1.35900 |
| D33 | -2.99940 | 0.00009  | -0.00101 | -0.00053 | -0.00154 | -3.00094 |
| D34 | 1.22173  | 0.00002  | -0.00168 | -0.00076 | -0.00244 | 1.21929  |
| D35 | -0.89786 | 0.00014  | -0.00107 | -0.00030 | -0.00136 | -0.89923 |
| D36 | 1.16895  | 0.00008  | -0.00071 | -0.00018 | -0.00089 | 1.16806  |
| D37 | -0.89310 | 0.00001  | -0.00138 | -0.00041 | -0.00179 | -0.89489 |
| D38 | -3.01269 | 0.00013  | -0.00077 | 0.00005  | -0.00071 | -3.01341 |
| D39 | -0.92395 | -0.00004 | -0.00055 | -0.00048 | -0.00103 | -0.92498 |
| D40 | -2.98600 | -0.00011 | -0.00122 | -0.00071 | -0.00193 | -2.98793 |
| D41 | 1.17759  | 0.00001  | -0.00061 | -0.00025 | -0.00086 | 1.17673  |

|     |          |          |          |          |          |          |
|-----|----------|----------|----------|----------|----------|----------|
| D42 | -3.14022 | 0.00003  | 0.00076  | -0.00081 | -0.00005 | -3.14028 |
| D43 | -0.02591 | 0.00001  | 0.00001  | 0.00026  | 0.00027  | -0.02563 |
| D44 | -0.00909 | 0.00002  | -0.00009 | -0.00006 | -0.00015 | -0.00925 |
| D45 | 3.10522  | 0.00000  | -0.00084 | 0.00101  | 0.00017  | 3.10540  |
| D46 | -2.75326 | 0.00000  | 0.00022  | -0.00045 | -0.00022 | -2.75348 |
| D47 | -0.04700 | -0.00003 | -0.00040 | -0.00126 | -0.00166 | -0.04866 |
| D48 | -0.02134 | 0.00003  | 0.00121  | -0.00041 | 0.00080  | -0.02054 |
| D49 | 2.68492  | 0.00000  | 0.00059  | -0.00123 | -0.00064 | 2.68428  |
| D50 | 0.31523  | 0.00000  | 0.00632  | 0.00166  | 0.00799  | 0.32321  |
| D51 | -2.06232 | -0.00004 | 0.00583  | 0.00103  | 0.00687  | -2.05545 |
| D52 | 2.56012  | -0.00004 | -0.00360 | -0.00157 | -0.00517 | 2.55496  |
| D53 | 0.17794  | 0.00000  | -0.00401 | -0.00164 | -0.00565 | 0.17228  |
| D54 | 2.55543  | 0.00003  | 0.00083  | 0.00107  | 0.00190  | 2.55733  |
| D55 | -1.65067 | 0.00000  | 0.00119  | 0.00083  | 0.00202  | -1.64866 |
| D56 | 0.44177  | 0.00001  | 0.00100  | 0.00080  | 0.00180  | 0.44357  |
| D57 | 1.32927  | 0.00001  | 0.00101  | 0.00085  | 0.00186  | 1.33112  |
| D58 | -2.87684 | -0.00002 | 0.00137  | 0.00061  | 0.00198  | -2.87487 |
| D59 | -0.78440 | -0.00001 | 0.00118  | 0.00058  | 0.00176  | -0.78264 |
| D60 | -1.01795 | 0.00001  | 0.00034  | 0.00035  | 0.00069  | -1.01726 |
| D61 | 1.05913  | -0.00002 | 0.00070  | 0.00011  | 0.00081  | 1.05993  |
| D62 | -3.13162 | -0.00001 | 0.00051  | 0.00008  | 0.00059  | -3.13103 |
| D63 | 1.50275  | -0.00014 | -0.00384 | -0.00498 | -0.00884 | 1.49391  |
| D64 | 2.83640  | 0.00001  | 0.00117  | -0.00203 | -0.00084 | 2.83556  |
| D65 | 2.27690  | -0.00010 | -0.00374 | -0.00591 | -0.00965 | 2.26726  |
| D66 | -0.83877 | -0.00007 | -0.00434 | -0.00484 | -0.00918 | -0.84795 |
| D67 | -1.91598 | -0.00001 | -0.00392 | -0.00537 | -0.00929 | -1.92526 |
| D68 | 1.25154  | 0.00002  | -0.00452 | -0.00430 | -0.00882 | 1.24272  |
| D69 | 0.12035  | 0.00000  | -0.00316 | -0.00547 | -0.00864 | 0.11171  |
| D70 | -2.99533 | 0.00003  | -0.00377 | -0.00441 | -0.00817 | -3.00350 |
| D71 | 2.92455  | -0.00026 | 0.00055  | -0.00345 | -0.00290 | 2.92165  |
| D72 | -0.19050 | -0.00021 | -0.00007 | -0.00236 | -0.00242 | -0.19292 |
| D73 | -1.94531 | 0.00007  | 0.01652  | 0.01463  | 0.03115  | -1.91416 |

| Item                 | Value    | Threshold | Converged? |
|----------------------|----------|-----------|------------|
| Maximum Force        | 0.000569 | 0.000450  | NO         |
| RMS Force            | 0.000113 | 0.000300  | YES        |
| Maximum Displacement | 0.061180 | 0.001800  | NO         |
| RMS Displacement     | 0.015928 | 0.001200  | NO         |

Predicted change in Energy=-7.181017D-06

GradGradGradGradGradGradGradGradGradGradGradGradGradGradGradGradGradGrad

Input orientation:

-----

| Center Number | Atomic Number | Atomic Type | Coordinates (Angstroms) |   |   |
|---------------|---------------|-------------|-------------------------|---|---|
|               |               |             | X                       | Y | Z |

---

|    |    |   |           |           |           |
|----|----|---|-----------|-----------|-----------|
| 1  | 6  | 0 | -0.841594 | 1.640218  | 1.532769  |
| 2  | 6  | 0 | -1.501083 | 0.452186  | 1.573348  |
| 3  | 7  | 0 | -2.369213 | 0.449498  | 0.489008  |
| 4  | 6  | 0 | -2.234372 | 1.606169  | -0.178347 |
| 5  | 7  | 0 | -1.308417 | 2.351255  | 0.438007  |
| 6  | 6  | 0 | -0.776213 | 3.642007  | -0.035104 |
| 7  | 1  | 0 | -0.065714 | 2.026777  | 2.169259  |
| 8  | 1  | 0 | -1.343290 | -0.418574 | 2.222206  |
| 9  | 1  | 0 | -1.615102 | 4.253458  | -0.371840 |
| 10 | 1  | 0 | -0.327726 | 4.126951  | 0.829837  |
| 11 | 35 | 0 | -0.399100 | -2.450231 | 2.897197  |
| 12 | 1  | 0 | -2.773659 | 1.881045  | -1.068496 |
| 13 | 6  | 0 | -3.260701 | -0.600209 | 0.098219  |
| 14 | 6  | 0 | -3.224323 | -1.819787 | 0.618504  |
| 15 | 1  | 0 | -3.956168 | -0.288998 | -0.671474 |
| 16 | 1  | 0 | -3.937581 | -2.552064 | 0.261100  |
| 17 | 1  | 0 | -2.498762 | -2.135569 | 1.371197  |
| 18 | 6  | 0 | 2.560695  | -0.687525 | 1.126475  |
| 19 | 6  | 0 | 3.979828  | -0.373074 | 1.318478  |
| 20 | 8  | 0 | 2.978226  | 0.655708  | 1.533643  |
| 21 | 1  | 0 | 2.182512  | -0.727009 | 0.108793  |
| 22 | 1  | 0 | 1.984403  | -1.228839 | 1.871993  |
| 23 | 1  | 0 | 4.432048  | -0.689743 | 2.255456  |
| 24 | 6  | 0 | 4.924758  | -0.168370 | 0.166600  |
| 25 | 1  | 0 | 5.685291  | 0.577954  | 0.413766  |
| 26 | 1  | 0 | 5.437986  | -1.107682 | -0.060547 |
| 27 | 1  | 0 | 4.386652  | 0.157777  | -0.726037 |
| 28 | 6  | 0 | 0.258045  | 3.474254  | -1.158464 |
| 29 | 1  | 0 | 0.706209  | 4.454231  | -1.350388 |
| 30 | 1  | 0 | -0.208874 | 3.133236  | -2.083044 |
| 31 | 6  | 0 | 1.363365  | 2.485398  | -0.806247 |
| 32 | 8  | 0 | 1.696152  | 1.580327  | -1.534248 |
| 33 | 8  | 0 | 1.877482  | 2.728860  | 0.398569  |
| 34 | 1  | 0 | 2.451315  | 1.962079  | 0.703801  |

---

Distance matrix (angstroms):

|   |   | 1        | 2        | 3        | 4        | 5        |
|---|---|----------|----------|----------|----------|----------|
| 1 | C | 0.000000 |          |          |          |          |
| 2 | C | 1.359408 | 0.000000 |          |          |          |
| 3 | N | 2.200198 | 1.389047 | 0.000000 |          |          |
| 4 | C | 2.206560 | 2.222122 | 1.342175 | 0.000000 |          |
| 5 | N | 1.386362 | 2.220941 | 2.178203 | 1.338819 | 0.000000 |
| 6 | C | 2.543552 | 3.645203 | 3.606169 | 2.508262 | 1.474149 |

|    |    |          |          |          |          |          |
|----|----|----------|----------|----------|----------|----------|
| 7  | H  | 1.075424 | 2.212404 | 3.258399 | 3.223545 | 2.155650 |
| 8  | H  | 2.228373 | 1.097333 | 2.193181 | 3.264394 | 3.294925 |
| 9  | H  | 3.324887 | 4.271584 | 3.972387 | 2.725633 | 2.090044 |
| 10 | H  | 2.634770 | 3.928546 | 4.219893 | 3.317541 | 2.066007 |
| 11 | Br | 4.334655 | 3.375050 | 4.253134 | 5.411245 | 5.470716 |
| 12 | H  | 3.249223 | 3.261967 | 2.153769 | 1.076454 | 2.153504 |
| 13 | C  | 3.595765 | 2.525826 | 1.431555 | 2.449071 | 3.554998 |
| 14 | C  | 4.299408 | 3.007182 | 2.428504 | 3.654059 | 4.593567 |
| 15 | H  | 4.275644 | 3.408228 | 2.100123 | 2.607569 | 3.900316 |
| 16 | H  | 5.364467 | 4.084610 | 3.394274 | 4.514968 | 5.566537 |
| 17 | H  | 4.126606 | 2.780774 | 2.734522 | 4.058521 | 4.734908 |
| 18 | C  | 4.142346 | 4.242249 | 5.099332 | 5.473231 | 4.967716 |
| 19 | C  | 5.229281 | 5.548549 | 6.455616 | 6.691350 | 6.013546 |
| 20 | O  | 3.944653 | 4.484106 | 5.452421 | 5.568254 | 4.738207 |
| 21 | H  | 4.095935 | 4.135733 | 4.716665 | 5.003501 | 4.665905 |
| 22 | H  | 4.041388 | 3.881191 | 4.866563 | 5.480805 | 5.071099 |
| 23 | H  | 5.810533 | 6.080404 | 7.118663 | 7.458938 | 6.745645 |
| 24 | C  | 6.195823 | 6.607228 | 7.327191 | 7.383842 | 6.728644 |
| 25 | H  | 6.706773 | 7.280413 | 8.055880 | 8.008051 | 7.215063 |
| 26 | H  | 7.037239 | 7.297498 | 7.979923 | 8.139037 | 7.597812 |
| 27 | H  | 5.885099 | 6.327659 | 6.870455 | 6.799687 | 6.212902 |
| 28 | C  | 3.437387 | 4.437366 | 4.331951 | 3.265350 | 2.502729 |
| 29 | H  | 4.315896 | 5.425563 | 5.373964 | 4.258186 | 3.417540 |
| 30 | H  | 3.962769 | 4.714555 | 4.299415 | 3.172135 | 2.859403 |
| 31 | C  | 3.323729 | 4.242816 | 4.444628 | 3.756463 | 2.950353 |
| 32 | O  | 3.981247 | 4.599148 | 4.679693 | 4.157902 | 3.675806 |
| 33 | O  | 3.140848 | 4.240054 | 4.820591 | 4.301234 | 3.208441 |
| 34 | H  | 3.410870 | 4.319414 | 5.056830 | 4.781267 | 3.789154 |
|    |    | 6        | 7        | 8        | 9        | 10       |
| 6  | C  | 0.000000 |          |          |          |          |
| 7  | H  | 2.823648 | 0.000000 |          |          |          |
| 8  | H  | 4.680314 | 2.759483 | 0.000000 |          |          |
| 9  | H  | 1.091329 | 3.716974 | 5.350780 | 0.000000 |          |
| 10 | H  | 1.088318 | 2.504681 | 4.861261 | 1.765608 | 0.000000 |
| 11 | Br | 6.771703 | 4.548037 | 2.339815 | 7.556766 | 6.894808 |
| 12 | H  | 2.856339 | 4.223418 | 4.261798 | 2.730554 | 3.824964 |
| 13 | C  | 4.918013 | 4.625819 | 2.867190 | 5.146556 | 5.611030 |
| 14 | C  | 6.020932 | 5.213224 | 2.841398 | 6.360399 | 6.618053 |
| 15 | H  | 5.096065 | 5.344924 | 3.900936 | 5.119011 | 5.909326 |
| 16 | H  | 6.960495 | 6.292711 | 3.889481 | 7.218702 | 7.613393 |
| 17 | H  | 6.190738 | 4.886896 | 2.237723 | 6.681220 | 6.650235 |
| 18 | C  | 5.588297 | 3.918272 | 4.063749 | 6.640447 | 5.622290 |
| 19 | C  | 6.369693 | 4.780117 | 5.399479 | 7.454208 | 6.248520 |
| 20 | O  | 5.047252 | 3.398442 | 4.505962 | 6.137860 | 4.845016 |

|    |    |          |          |          |          |          |
|----|----|----------|----------|----------|----------|----------|
| 21 | H  | 5.278547 | 4.108938 | 4.122247 | 6.281554 | 5.511997 |
| 22 | H  | 5.914656 | 3.858806 | 3.442777 | 6.931580 | 5.925918 |
| 23 | H  | 7.150993 | 5.255166 | 5.781795 | 8.240506 | 6.920142 |
| 24 | C  | 6.860083 | 5.808109 | 6.601253 | 7.912791 | 6.817496 |
| 25 | H  | 7.165259 | 6.185054 | 7.325603 | 8.211105 | 6.994631 |
| 26 | H  | 7.821538 | 6.714728 | 7.188291 | 8.864805 | 7.838213 |
| 27 | H  | 6.266771 | 5.630227 | 6.469663 | 7.274689 | 6.356133 |
| 28 | C  | 1.536154 | 3.643315 | 5.398825 | 2.175917 | 2.173127 |
| 29 | H  | 2.141788 | 4.344687 | 6.380290 | 2.527123 | 2.435060 |
| 30 | H  | 2.185127 | 4.396228 | 5.695386 | 2.482054 | 3.080012 |
| 31 | C  | 2.551510 | 3.332602 | 4.993052 | 3.490847 | 2.869016 |
| 32 | O  | 3.551133 | 4.125463 | 5.229221 | 4.411487 | 4.021227 |
| 33 | O  | 2.839720 | 2.721080 | 4.858536 | 3.887939 | 2.646430 |
| 34 | H  | 3.712826 | 2.913278 | 4.729914 | 4.789903 | 3.525000 |
|    |    | 11       | 12       | 13       | 14       | 15       |
| 11 | Br | 0.000000 |          |          |          |          |
| 12 | H  | 6.334446 | 0.000000 |          |          |          |
| 13 | C  | 4.409718 | 2.784791 | 0.000000 |          |          |
| 14 | C  | 3.683990 | 4.092093 | 1.326419 | 0.000000 |          |
| 15 | H  | 5.482615 | 2.503007 | 1.083030 | 2.131421 | 0.000000 |
| 16 | H  | 4.413640 | 4.772316 | 2.072302 | 1.082915 | 2.447756 |
| 17 | H  | 2.614626 | 4.707533 | 2.135030 | 1.092110 | 3.115503 |
| 18 | C  | 3.873367 | 6.314331 | 5.912156 | 5.916628 | 6.772071 |
| 19 | C  | 5.097249 | 7.509213 | 7.346148 | 7.381242 | 8.182116 |
| 20 | O  | 4.786697 | 6.430921 | 6.523954 | 6.740709 | 7.337631 |
| 21 | H  | 4.172459 | 5.722900 | 5.444700 | 5.539660 | 6.203552 |
| 22 | H  | 2.867739 | 6.399766 | 5.572482 | 5.389924 | 6.530153 |
| 23 | H  | 5.181809 | 8.341452 | 7.989998 | 7.910539 | 8.893238 |
| 24 | C  | 6.403633 | 8.061711 | 8.197128 | 8.327000 | 8.921198 |
| 25 | H  | 7.235823 | 8.686137 | 9.028755 | 9.228884 | 9.741000 |
| 26 | H  | 6.679989 | 8.796565 | 8.714923 | 8.718016 | 9.449529 |
| 27 | H  | 6.544689 | 7.372718 | 7.728903 | 7.977812 | 8.354952 |
| 28 | C  | 7.209698 | 3.426023 | 5.528298 | 6.581137 | 5.670875 |
| 29 | H  | 8.181398 | 4.337075 | 6.586517 | 7.660869 | 6.685574 |
| 30 | H  | 7.484255 | 3.029094 | 5.292464 | 6.397165 | 5.267488 |
| 31 | C  | 6.417337 | 4.189150 | 5.632142 | 6.450691 | 6.001073 |
| 32 | O  | 6.346115 | 4.504060 | 5.655977 | 6.356586 | 6.015603 |
| 33 | O  | 6.184574 | 4.950170 | 6.129751 | 6.838639 | 6.654618 |
| 34 | H  | 5.692480 | 5.517966 | 6.289609 | 6.820751 | 6.929255 |
|    |    | 16       | 17       | 18       | 19       | 20       |
| 16 | H  | 0.000000 |          |          |          |          |
| 17 | H  | 1.864399 | 0.000000 |          |          |          |
| 18 | C  | 6.815641 | 5.268285 | 0.000000 |          |          |
| 19 | C  | 8.279578 | 6.714261 | 1.466180 | 0.000000 |          |

|    |   |           |          |          |          |          |
|----|---|-----------|----------|----------|----------|----------|
| 20 | O | 7.729007  | 6.149391 | 1.464375 | 1.451859 | 0.000000 |
| 21 | H | 6.388236  | 5.048964 | 1.086397 | 2.195212 | 2.138986 |
| 22 | H | 6.278199  | 4.601274 | 1.086706 | 2.240633 | 2.157240 |
| 23 | H | 8.803203  | 7.135016 | 2.185535 | 1.087525 | 2.108282 |
| 24 | C | 9.177798  | 7.773647 | 2.603782 | 1.503868 | 2.517320 |
| 25 | H | 10.120276 | 8.675172 | 3.445648 | 2.152106 | 2.930592 |
| 26 | H | 9.491625  | 8.130093 | 3.140757 | 2.137190 | 3.420731 |
| 27 | H | 8.809684  | 7.554254 | 2.735042 | 2.151128 | 2.708828 |
| 28 | C | 7.478967  | 6.743092 | 5.276699 | 5.898207 | 4.753001 |
| 29 | H | 8.558612  | 7.816926 | 6.000968 | 6.414226 | 5.282846 |
| 30 | H | 7.191725  | 6.703408 | 5.706990 | 6.435043 | 5.419978 |
| 31 | C | 7.390216  | 6.403954 | 3.903391 | 4.419412 | 3.380921 |
| 32 | O | 7.213797  | 6.312432 | 3.601393 | 4.143549 | 3.451171 |
| 33 | O | 7.856336  | 6.615149 | 3.559258 | 3.858508 | 2.607295 |
| 34 | H | 7.835270  | 6.460604 | 2.685334 | 2.857817 | 1.634893 |
|    |   | 21        | 22       | 23       | 24       | 25       |
| 21 | H | 0.000000  |          |          |          |          |
| 22 | H | 1.843896  | 0.000000 |          |          |          |
| 23 | H | 3.109656  | 2.535475 | 0.000000 |          |          |
| 24 | C | 2.799167  | 3.560709 | 2.208600 | 0.000000 |          |
| 25 | H | 3.750386  | 4.368924 | 2.563102 | 1.093846 | 0.000000 |
| 26 | H | 3.282027  | 3.959372 | 2.559385 | 1.094214 | 1.768473 |
| 27 | H | 2.517542  | 3.800429 | 3.099944 | 1.092122 | 1.778247 |
| 28 | C | 4.791672  | 5.855174 | 6.812930 | 6.066524 | 6.349446 |
| 29 | H | 5.581570  | 6.656936 | 7.303728 | 6.439398 | 6.552024 |
| 30 | H | 5.042257  | 6.283349 | 7.414573 | 6.505050 | 6.892365 |
| 31 | C | 3.439166  | 4.621063 | 5.373301 | 4.546696 | 4.879121 |
| 32 | O | 2.874009  | 4.424588 | 5.196172 | 4.046569 | 4.551125 |
| 33 | O | 3.481385  | 4.224428 | 4.654104 | 4.211133 | 4.373332 |
| 34 | H | 2.767215  | 3.429962 | 3.655557 | 3.308371 | 3.529663 |
|    |   | 26        | 27       | 28       | 29       | 30       |
| 26 | H | 0.000000  |          |          |          |          |
| 27 | H | 1.774702  | 0.000000 |          |          |          |
| 28 | C | 7.002238  | 5.313323 | 0.000000 |          |          |
| 29 | H | 7.415407  | 5.691659 | 1.094550 | 0.000000 |          |
| 30 | H | 7.345944  | 5.640361 | 1.090484 | 1.766122 | 0.000000 |
| 31 | C | 5.483505  | 3.816348 | 1.524344 | 2.145750 | 2.126461 |
| 32 | O | 4.837200  | 3.148911 | 2.407555 | 3.045178 | 2.518298 |
| 33 | O | 5.254239  | 3.764457 | 2.366968 | 2.721697 | 3.267231 |
| 34 | H | 4.350616  | 3.007568 | 3.250406 | 3.670954 | 4.026750 |
|    |   | 31        | 32       | 33       | 34       |          |
| 31 | C | 0.000000  |          |          |          |          |
| 32 | O | 1.208257  | 0.000000 |          |          |          |
| 33 | O | 1.332356  | 2.255613 | 0.000000 |          |          |



34 H 1.933325 2.392669 1.005189 0.000000

Stoichiometry C11H17BrN2O3

Framework group C1[X(C11H17BrN2O3)]

Deg. of freedom 96

Full point group C1 NOp 1

Largest Abelian subgroup C1 NOp 1

Largest concise Abelian subgroup C1 NOp 1

Standard orientation:

| Center<br>Number | Atomic<br>Number | Atomic<br>Type | Coordinates (Angstroms) |           |           |
|------------------|------------------|----------------|-------------------------|-----------|-----------|
|                  |                  |                | X                       | Y         | Z         |
| 1                | 6                | 0              | 0.070539                | 1.326470  | 1.235648  |
| 2                | 6                | 0              | -1.162847               | 1.242872  | 0.670174  |
| 3                | 7                | 0              | -1.240796               | 2.277737  | -0.253098 |
| 4                | 6                | 0              | -0.086741               | 2.962798  | -0.236289 |
| 5                | 7                | 0              | 0.730939                | 2.403095  | 0.664027  |
| 6                | 6                | 0              | 2.135469                | 2.775911  | 0.911855  |
| 7                | 1                | 0              | 0.541897                | 0.699718  | 1.971543  |
| 8                | 1                | 0              | -1.936937               | 0.472960  | 0.780447  |
| 9                | 1                | 0              | 2.198070                | 3.864946  | 0.944745  |
| 10               | 1                | 0              | 2.387883                | 2.390978  | 1.898034  |
| 11               | 35               | 0              | -3.060352               | -1.524991 | 0.310485  |
| 12               | 1                | 0              | 0.144718                | 3.813149  | -0.854417 |
| 13               | 6                | 0              | -2.341024               | 2.585217  | -1.115829 |
| 14               | 6                | 0              | -3.377333               | 1.776498  | -1.293099 |
| 15               | 1                | 0              | -2.226025               | 3.541984  | -1.610124 |
| 16               | 1                | 0              | -4.164753               | 2.090898  | -1.966765 |
| 17               | 1                | 0              | -3.470723               | 0.798520  | -0.816085 |
| 18               | 6                | 0              | 0.641139                | -2.460779 | -0.342386 |
| 19               | 6                | 0              | 1.625059                | -3.502677 | -0.032492 |
| 20               | 8                | 0              | 1.656849                | -2.243691 | 0.689892  |
| 21               | 1                | 0              | 0.801798                | -1.859304 | -1.232709 |
| 22               | 1                | 0              | -0.379700               | -2.503801 | 0.027704  |
| 23               | 1                | 0              | 1.293833                | -4.318768 | 0.605469  |
| 24               | 6                | 0              | 2.796107                | -3.799728 | -0.928051 |
| 25               | 1                | 0              | 3.666099                | -4.110659 | -0.342444 |
| 26               | 1                | 0              | 2.541041                | -4.616980 | -1.609480 |
| 27               | 1                | 0              | 3.064879                | -2.923603 | -1.522103 |
| 28               | 6                | 0              | 3.089410                | 2.209637  | -0.150735 |
| 29               | 1                | 0              | 4.114121                | 2.405066  | 0.180647  |
| 30               | 1                | 0              | 2.950177                | 2.700829  | -1.114322 |
| 31               | 6                | 0              | 2.916816                | 0.710526  | -0.366379 |
| 32               | 8                | 0              | 2.781465                | 0.211885  | -1.458589 |

|    |   |   |          |           |          |
|----|---|---|----------|-----------|----------|
| 33 | 8 | 0 | 2.902675 | 0.044620  | 0.787546 |
| 34 | 1 | 0 | 2.587460 | -0.900064 | 0.651103 |

```

-----
Rotational constants (GHZ):      0.3286909      0.2544853      0.1592032
Standard basis: 6-311++G(d,p) (5D, 7F)
There are 538 symmetry adapted cartesian basis functions of A symmetry.
There are 519 symmetry adapted basis functions of A symmetry.
519 basis functions, 823 primitive gaussians, 538 cartesian basis functions
78 alpha electrons      78 beta electrons
nuclear repulsion energy      1572.3460511184 Hartrees.
NAtoms= 34 NActive= 34 NUniq= 34 SFac= 1.00D+00 NAtFMM= 60 NAOKFM=F
Big=F
Integral buffers will be 131072 words long.
Raffenetti 2 integral format.
Two-electron integral symmetry is turned on.
One-electron integrals computed using PRISM.
NBasis= 519 RedAO= T EigKep= 3.52D-06 NBF= 519
NBsUse= 519 1.00D-06 EigRej= -1.00D+00 NBFU= 519
Initial guess from the checkpoint file: "./coohpo.chk"
B after Tr= 0.000000 0.000000 0.000000
Rot= 0.999999 -0.000034 -0.000582 0.001112 Ang= -0.14 deg.
ExpMin= 3.50D-02 ExpMax= 4.40D+05 ExpMxC= 1.51D+04 IAcc=3 IRadAn= 5 AccDes=
0.00D+00
Harris functional with IExCor= 402 and IRadAn= 5 diagonalized for initial guess.
HarFok: IExCor= 402 AccDes= 0.00D+00 IRadAn= 5 IDoV= 1 UseB2=F ITyADJ=14
ICtDFT= 3500011 ScaDFX= 1.000000 1.000000 1.000000 1.000000
FoFCou: FMM=F IPFlag= 0 FMFlag= 100000 FMFlg1= 0
NFxFlg= 0 DoJE=T BraDBF=F KetDBF=T FulRan=T
wScrn= 0.000000 ICntrl= 500 IOpCl= 0 I1Cent= 200000004 NGrid=
0
NMat0= 1 NMatS0= 1 NMatT0= 0 NMatD0= 1 NMtDS0= 0
NMtDT0= 0
Petite list used in FoFCou.
Requested convergence on RMS density matrix=1.00D-08 within 128 cycles.
Requested convergence on MAX density matrix=1.00D-06.
Requested convergence on energy=1.00D-06.
No special actions if energy rises.
SCF Done: E(RB3LYP) = -3338.90386576 A.U. after 11 cycles
NFOck= 11 Conv=0.43D-08 -V/T= 2.0019
Calling FoFJK, ICntrl= 2127 FMM=F ISym2X=0 I1Cent= 0 IOpClX= 0 NMat=1 NMatS=1
NMatT=0.
**** Axes restored to original set ****

```

```

-----
Center      Atomic      Forces (Hartrees/Bohr)

```

| Number | Number | X            | Y            | Z            |
|--------|--------|--------------|--------------|--------------|
| 1      | 6      | -0.000079513 | 0.000102527  | 0.000102166  |
| 2      | 6      | 0.000314183  | 0.000079369  | 0.000029573  |
| 3      | 7      | 0.000107698  | -0.000059919 | -0.000036238 |
| 4      | 6      | 0.000176374  | 0.000063250  | -0.000004426 |
| 5      | 7      | -0.000147661 | -0.000074573 | -0.000032725 |
| 6      | 6      | 0.000184458  | 0.000087934  | -0.000168558 |
| 7      | 1      | 0.000067568  | -0.000066387 | 0.000016145  |
| 8      | 1      | -0.000490854 | -0.000072649 | -0.000313234 |
| 9      | 1      | 0.000009225  | 0.000017469  | -0.000042227 |
| 10     | 1      | -0.000024301 | -0.000062378 | 0.000016966  |
| 11     | 35     | 0.000162820  | 0.000072090  | 0.000071866  |
| 12     | 1      | -0.000069901 | -0.000000237 | 0.000044179  |
| 13     | 6      | -0.000001154 | 0.000120008  | 0.000062999  |
| 14     | 6      | -0.000036660 | -0.000261280 | 0.000036020  |
| 15     | 1      | -0.000014022 | -0.000026368 | 0.000035239  |
| 16     | 1      | 0.000035054  | 0.000086794  | -0.000041269 |
| 17     | 1      | -0.000010985 | 0.000077473  | 0.000012634  |
| 18     | 6      | 0.000080315  | 0.000176580  | -0.000185907 |
| 19     | 6      | -0.000091072 | -0.000031984 | -0.000113917 |
| 20     | 8      | -0.000210171 | -0.000240949 | 0.000071550  |
| 21     | 1      | -0.000046352 | -0.000062076 | 0.000037515  |
| 22     | 1      | 0.000055332  | -0.000005857 | 0.000167045  |
| 23     | 1      | 0.000002222  | -0.000012778 | 0.000004305  |
| 24     | 6      | 0.000022553  | 0.000007750  | 0.000017135  |
| 25     | 1      | 0.000006485  | -0.000002858 | 0.000018298  |
| 26     | 1      | 0.000008541  | -0.000013556 | 0.000025748  |
| 27     | 1      | 0.000025323  | -0.000011725 | 0.000013799  |
| 28     | 6      | -0.000127187 | -0.000049812 | 0.000204116  |
| 29     | 1      | 0.000034545  | 0.000042302  | -0.000030431 |
| 30     | 1      | -0.000008777 | -0.000012274 | -0.000043502 |
| 31     | 6      | 0.000001241  | -0.000204392 | 0.000290121  |
| 32     | 8      | -0.000066361 | 0.000136821  | -0.000070647 |
| 33     | 8      | -0.000119740 | -0.000090437 | -0.000307223 |
| 34     | 1      | 0.000250773  | 0.000292121  | 0.000112887  |

-----  
Cartesian Forces: Max 0.000490854 RMS 0.000122779

GradGradGradGradGradGradGradGradGradGradGradGradGradGradGradGradGradGradGradGrad

Berny optimization.

Using GEDIIS/GDIIS optimizer.

FormGI is forming the generalized inverse of G from B-inverse, IUseBI=4.

Internal Forces: Max 0.000367830 RMS 0.000080398

Search for a local minimum.

Step number 30 out of a maximum of 175

All quantities printed in internal units (Hartrees-Bohrs-Radians)

Mixed Optimization -- En-DIIS/RFO-DIIS

Swapping is turned off.

Update second derivatives using D2CorX and points 21 22 23 24 25  
26 27 28 29 30

DE= -1.24D-05 DEPred=-7.18D-06 R= 1.73D+00

TightC=F SS= 1.41D+00 RLast= 4.83D-02 DXNew= 1.3149D+00 1.4483D-01

Trust test= 1.73D+00 RLast= 4.83D-02 DXMaxT set to 7.82D-01

ITU= 1 1 1 1 1 -1 0 1 1 1 1 1 1 1 1 1 0 0 -1

ITU= 1 1 1 0 1 0 -1 0 1 0

|                 |         |         |         |         |         |
|-----------------|---------|---------|---------|---------|---------|
| Eigenvalues --- | 0.00156 | 0.00274 | 0.00346 | 0.00513 | 0.00675 |
| Eigenvalues --- | 0.00727 | 0.00847 | 0.01199 | 0.01275 | 0.01603 |
| Eigenvalues --- | 0.01991 | 0.02209 | 0.02249 | 0.02275 | 0.02363 |
| Eigenvalues --- | 0.02443 | 0.02616 | 0.02792 | 0.03124 | 0.03168 |
| Eigenvalues --- | 0.03426 | 0.03586 | 0.03960 | 0.04279 | 0.04816 |
| Eigenvalues --- | 0.04898 | 0.04971 | 0.05320 | 0.05687 | 0.05769 |
| Eigenvalues --- | 0.05887 | 0.05989 | 0.06457 | 0.07301 | 0.09278 |
| Eigenvalues --- | 0.09573 | 0.11797 | 0.12608 | 0.12831 | 0.13221 |
| Eigenvalues --- | 0.13916 | 0.15471 | 0.15650 | 0.15763 | 0.15986 |
| Eigenvalues --- | 0.16010 | 0.16034 | 0.16041 | 0.16099 | 0.16178 |
| Eigenvalues --- | 0.16987 | 0.17539 | 0.20364 | 0.20827 | 0.22451 |
| Eigenvalues --- | 0.23309 | 0.23774 | 0.24037 | 0.25481 | 0.25892 |
| Eigenvalues --- | 0.28776 | 0.29268 | 0.30705 | 0.31644 | 0.32582 |
| Eigenvalues --- | 0.33290 | 0.34500 | 0.34581 | 0.34627 | 0.34809 |
| Eigenvalues --- | 0.34891 | 0.34957 | 0.35015 | 0.35160 | 0.35290 |
| Eigenvalues --- | 0.35442 | 0.35719 | 0.35861 | 0.36570 | 0.36974 |
| Eigenvalues --- | 0.37179 | 0.37573 | 0.37865 | 0.39277 | 0.41015 |
| Eigenvalues --- | 0.41378 | 0.45227 | 0.49487 | 0.50714 | 0.51637 |
| Eigenvalues --- | 0.53897 | 0.56123 | 0.56475 | 0.61248 | 0.91408 |
| Eigenvalues --- | 1.43733 |         |         |         |         |

En-DIIS/RFO-DIIS IScMMF= 0 using points: 30 29 28 27 26

RFO step: Lambda=-1.91289586D-06.

DidBck=F Rises=F RFO-DIIS coefs: 1.40987 -0.30355 -0.32657 0.06270

0.15755

Iteration 1 RMS(Cart)= 0.00639300 RMS(Int)= 0.00001729

Iteration 2 RMS(Cart)= 0.00004519 RMS(Int)= 0.00001211

Iteration 3 RMS(Cart)= 0.00000000 RMS(Int)= 0.00001211

| Variable | Old X   | -DE/DX   | Delta X<br>(Linear) | Delta X<br>(Quad) | Delta X<br>(Total) | New X   |
|----------|---------|----------|---------------------|-------------------|--------------------|---------|
| R1       | 2.56891 | -0.00009 | -0.00011            | 0.00004           | -0.00007           | 2.56884 |
| R2       | 2.61985 | 0.00000  | 0.00006             | 0.00003           | 0.00009            | 2.61994 |
| R3       | 2.03226 | 0.00004  | 0.00011             | 0.00004           | 0.00016            | 2.03242 |

|     |         |          |          |          |          |         |
|-----|---------|----------|----------|----------|----------|---------|
| R4  | 2.62492 | -0.00015 | -0.00018 | -0.00026 | -0.00044 | 2.62448 |
| R5  | 2.07366 | -0.00019 | -0.00006 | -0.00045 | -0.00052 | 2.07314 |
| R6  | 2.53634 | 0.00003  | 0.00031  | -0.00010 | 0.00021  | 2.53655 |
| R7  | 2.70525 | -0.00001 | -0.00051 | 0.00008  | -0.00043 | 2.70481 |
| R8  | 2.53000 | -0.00007 | -0.00018 | -0.00002 | -0.00020 | 2.52980 |
| R9  | 2.03420 | 0.00000  | -0.00003 | 0.00000  | -0.00003 | 2.03417 |
| R10 | 2.78574 | -0.00002 | -0.00014 | 0.00006  | -0.00007 | 2.78566 |
| R11 | 2.06231 | 0.00002  | -0.00005 | 0.00005  | 0.00000  | 2.06231 |
| R12 | 2.05662 | -0.00002 | 0.00000  | -0.00002 | -0.00002 | 2.05660 |
| R13 | 2.90291 | -0.00025 | -0.00036 | -0.00038 | -0.00074 | 2.90217 |
| R14 | 4.42161 | 0.00003  | 0.00230  | 0.00088  | 0.00319  | 4.42479 |
| R15 | 2.50657 | 0.00010  | 0.00032  | -0.00007 | 0.00024  | 2.50681 |
| R16 | 2.04663 | -0.00003 | 0.00004  | -0.00006 | -0.00002 | 2.04661 |
| R17 | 2.04641 | -0.00007 | -0.00018 | -0.00002 | -0.00020 | 2.04621 |
| R18 | 2.06379 | -0.00002 | 0.00002  | -0.00008 | -0.00006 | 2.06373 |
| R19 | 2.77068 | -0.00005 | -0.00005 | -0.00018 | -0.00018 | 2.77049 |
| R20 | 2.76727 | -0.00011 | -0.00008 | 0.00000  | -0.00009 | 2.76718 |
| R21 | 2.05299 | -0.00001 | 0.00011  | -0.00018 | -0.00006 | 2.05293 |
| R22 | 2.05358 | 0.00008  | 0.00013  | 0.00001  | 0.00014  | 2.05372 |
| R23 | 2.74362 | 0.00006  | -0.00021 | -0.00007 | -0.00031 | 2.74331 |
| R24 | 2.05512 | 0.00001  | 0.00001  | 0.00003  | 0.00003  | 2.05516 |
| R25 | 2.84190 | 0.00000  | 0.00013  | -0.00004 | 0.00009  | 2.84199 |
| R26 | 3.08950 | 0.00011  | 0.00003  | 0.00361  | 0.00363  | 3.09313 |
| R27 | 2.06707 | 0.00001  | 0.00004  | 0.00001  | 0.00004  | 2.06711 |
| R28 | 2.06776 | 0.00001  | -0.00001 | 0.00004  | 0.00003  | 2.06779 |
| R29 | 2.06381 | -0.00002 | -0.00011 | 0.00000  | -0.00011 | 2.06370 |
| R30 | 2.06840 | 0.00006  | -0.00005 | 0.00015  | 0.00010  | 2.06850 |
| R31 | 2.06072 | 0.00004  | 0.00002  | 0.00011  | 0.00013  | 2.06084 |
| R32 | 2.88059 | -0.00002 | 0.00037  | -0.00024 | 0.00012  | 2.88071 |
| R33 | 2.28328 | -0.00008 | 0.00015  | -0.00023 | -0.00008 | 2.28320 |
| R34 | 2.51779 | -0.00016 | -0.00053 | 0.00003  | -0.00050 | 2.51729 |
| R35 | 1.89953 | 0.00002  | -0.00014 | -0.00018 | -0.00032 | 1.89921 |
| A1  | 1.88435 | -0.00005 | -0.00012 | -0.00018 | -0.00029 | 1.88406 |
| A2  | 2.27374 | -0.00004 | -0.00032 | 0.00000  | -0.00032 | 2.27343 |
| A3  | 2.12462 | 0.00009  | 0.00040  | 0.00018  | 0.00059  | 2.12521 |
| A4  | 1.85624 | 0.00008  | 0.00018  | 0.00013  | 0.00030  | 1.85655 |
| A5  | 2.26709 | -0.00006 | 0.00019  | 0.00038  | 0.00057  | 2.26766 |
| A6  | 2.15308 | -0.00002 | -0.00028 | -0.00044 | -0.00072 | 2.15235 |
| A7  | 1.90042 | -0.00002 | -0.00010 | 0.00002  | -0.00008 | 1.90035 |
| A8  | 2.21896 | -0.00009 | 0.00006  | -0.00051 | -0.00045 | 2.21851 |
| A9  | 2.16367 | 0.00011  | 0.00003  | 0.00049  | 0.00053  | 2.16420 |
| A10 | 1.89672 | -0.00003 | -0.00007 | -0.00003 | -0.00010 | 1.89663 |
| A11 | 2.19062 | -0.00002 | -0.00015 | -0.00004 | -0.00020 | 2.19042 |
| A12 | 2.19577 | 0.00005  | 0.00021  | 0.00008  | 0.00030  | 2.19606 |

|     |         |          |          |          |          |         |
|-----|---------|----------|----------|----------|----------|---------|
| A13 | 1.88704 | 0.00003  | 0.00011  | 0.00005  | 0.00016  | 1.88720 |
| A14 | 2.19068 | -0.00015 | -0.00025 | -0.00007 | -0.00032 | 2.19036 |
| A15 | 2.20090 | 0.00012  | -0.00017 | 0.00000  | -0.00016 | 2.20074 |
| A16 | 1.88819 | 0.00020  | 0.00015  | 0.00011  | 0.00027  | 1.88845 |
| A17 | 1.85862 | 0.00002  | 0.00034  | -0.00048 | -0.00014 | 1.85848 |
| A18 | 1.96292 | -0.00037 | -0.00098 | 0.00011  | -0.00087 | 1.96205 |
| A19 | 1.88845 | -0.00003 | 0.00044  | -0.00003 | 0.00041  | 1.88886 |
| A20 | 1.93166 | 0.00005  | 0.00000  | 0.00001  | 0.00001  | 1.93167 |
| A21 | 1.93092 | 0.00015  | 0.00010  | 0.00026  | 0.00036  | 1.93129 |
| A22 | 2.73285 | -0.00016 | -0.00229 | -0.00151 | -0.00381 | 2.72905 |
| A23 | 2.15321 | 0.00003  | 0.00055  | -0.00040 | 0.00015  | 2.15336 |
| A24 | 1.96405 | 0.00002  | 0.00012  | 0.00029  | 0.00041  | 1.96446 |
| A25 | 2.16589 | -0.00005 | -0.00067 | 0.00011  | -0.00056 | 2.16532 |
| A26 | 2.06488 | -0.00005 | -0.00035 | -0.00004 | -0.00039 | 2.06449 |
| A27 | 2.15846 | -0.00004 | -0.00033 | -0.00016 | -0.00049 | 2.15797 |
| A28 | 2.05955 | 0.00009  | 0.00068  | 0.00022  | 0.00090  | 2.06044 |
| A29 | 2.05715 | 0.00009  | 0.00080  | 0.00036  | 0.00114  | 2.05829 |
| A30 | 2.12974 | -0.00014 | -0.00081 | -0.00070 | -0.00150 | 2.12824 |
| A31 | 1.97475 | 0.00007  | 0.00026  | 0.00044  | 0.00072  | 1.97546 |
| A32 | 2.00135 | -0.00011 | -0.00043 | -0.00021 | -0.00064 | 2.00070 |
| A33 | 2.02632 | 0.00004  | 0.00010  | 0.00017  | 0.00027  | 2.02659 |
| A34 | 2.04076 | -0.00008 | 0.00003  | -0.00020 | -0.00015 | 2.04062 |
| A35 | 2.13774 | 0.00016  | 0.00037  | 0.00045  | 0.00080  | 2.13855 |
| A36 | 1.94498 | -0.00004 | 0.00026  | -0.00004 | 0.00021  | 1.94519 |
| A37 | 2.03816 | 0.00010  | 0.00020  | 0.00020  | 0.00041  | 2.03857 |
| A38 | 2.02447 | -0.00007 | -0.00051 | -0.00028 | -0.00080 | 2.02368 |
| A39 | 2.09431 | 0.00010  | 0.00022  | 0.00152  | 0.00183  | 2.09615 |
| A40 | 2.36503 | 0.00005  | -0.00166 | 0.00151  | -0.00011 | 2.36492 |
| A41 | 1.93550 | -0.00002 | -0.00013 | -0.00004 | -0.00017 | 1.93533 |
| A42 | 1.91438 | -0.00003 | -0.00036 | 0.00008  | -0.00028 | 1.91410 |
| A43 | 1.93595 | 0.00003  | 0.00028  | 0.00008  | 0.00036  | 1.93631 |
| A44 | 1.88231 | 0.00001  | -0.00006 | -0.00002 | -0.00008 | 1.88223 |
| A45 | 1.90023 | 0.00000  | 0.00017  | -0.00002 | 0.00014  | 1.90037 |
| A46 | 1.89420 | 0.00000  | 0.00011  | -0.00008 | 0.00002  | 1.89422 |
| A47 | 1.88192 | 0.00006  | 0.00095  | -0.00049 | 0.00046  | 1.88238 |
| A48 | 1.94539 | 0.00002  | -0.00012 | -0.00011 | -0.00023 | 1.94516 |
| A49 | 1.97151 | -0.00012 | -0.00008 | 0.00034  | 0.00026  | 1.97177 |
| A50 | 1.88245 | -0.00002 | -0.00005 | 0.00012  | 0.00008  | 1.88253 |
| A51 | 1.90120 | 0.00007  | -0.00040 | 0.00005  | -0.00034 | 1.90085 |
| A52 | 1.87918 | -0.00001 | -0.00031 | 0.00008  | -0.00023 | 1.87895 |
| A53 | 2.14889 | -0.00017 | -0.00035 | -0.00034 | -0.00069 | 2.14819 |
| A54 | 1.95002 | 0.00003  | 0.00021  | -0.00030 | -0.00008 | 1.94994 |
| A55 | 2.18394 | 0.00014  | 0.00017  | 0.00066  | 0.00083  | 2.18478 |
| A56 | 1.93422 | 0.00009  | 0.00121  | 0.00048  | 0.00168  | 1.93591 |

|     |          |          |          |          |          |          |
|-----|----------|----------|----------|----------|----------|----------|
| A57 | 2.81661  | -0.00030 | -0.00100 | 0.00049  | -0.00051 | 2.81609  |
| D1  | 0.00326  | -0.00004 | -0.00005 | 0.00030  | 0.00026  | 0.00351  |
| D2  | 3.02090  | -0.00003 | 0.00071  | 0.00088  | 0.00159  | 3.02249  |
| D3  | -3.10511 | 0.00005  | 0.00055  | 0.00025  | 0.00080  | -3.10431 |
| D4  | -0.08747 | 0.00006  | 0.00131  | 0.00083  | 0.00214  | -0.08534 |
| D5  | -0.00233 | 0.00006  | 0.00038  | -0.00058 | -0.00020 | -0.00253 |
| D6  | -3.04628 | 0.00011  | 0.00355  | -0.00037 | 0.00318  | -3.04309 |
| D7  | 3.10946  | -0.00002 | -0.00018 | -0.00054 | -0.00071 | 3.10875  |
| D8  | 0.06551  | 0.00002  | 0.00300  | -0.00033 | 0.00268  | 0.06819  |
| D9  | -0.00307 | 0.00001  | -0.00030 | 0.00008  | -0.00022 | -0.00329 |
| D10 | 3.12155  | 0.00003  | -0.00043 | 0.00036  | -0.00008 | 3.12147  |
| D11 | -3.03085 | 0.00001  | -0.00104 | -0.00052 | -0.00155 | -3.03240 |
| D12 | 0.09377  | 0.00003  | -0.00117 | -0.00024 | -0.00141 | 0.09236  |
| D13 | -1.51547 | 0.00016  | 0.00196  | 0.00254  | 0.00450  | -1.51097 |
| D14 | 1.48360  | 0.00017  | 0.00287  | 0.00325  | 0.00612  | 1.48972  |
| D15 | 0.00166  | 0.00003  | 0.00055  | -0.00045 | 0.00009  | 0.00176  |
| D16 | 3.13078  | 0.00001  | -0.00029 | 0.00055  | 0.00027  | 3.13104  |
| D17 | -3.12361 | 0.00001  | 0.00067  | -0.00070 | -0.00003 | -3.12364 |
| D18 | 0.00550  | -0.00001 | -0.00016 | 0.00030  | 0.00014  | 0.00564  |
| D19 | -0.19118 | -0.00002 | -0.00231 | -0.00247 | -0.00477 | -0.19595 |
| D20 | 2.95988  | -0.00001 | -0.00162 | -0.00275 | -0.00437 | 2.95551  |
| D21 | 2.93104  | 0.00000  | -0.00246 | -0.00216 | -0.00462 | 2.92643  |
| D22 | -0.20108 | 0.00001  | -0.00177 | -0.00245 | -0.00421 | -0.20529 |
| D23 | 0.00039  | -0.00005 | -0.00057 | 0.00064  | 0.00007  | 0.00046  |
| D24 | 3.04361  | -0.00012 | -0.00378 | 0.00042  | -0.00336 | 3.04025  |
| D25 | -3.12868 | -0.00003 | 0.00027  | -0.00037 | -0.00010 | -3.12878 |
| D26 | -0.08545 | -0.00010 | -0.00294 | -0.00059 | -0.00353 | -0.08898 |
| D27 | -2.47665 | -0.00005 | -0.00312 | -0.00024 | -0.00336 | -2.48001 |
| D28 | -0.45013 | 0.00002  | -0.00236 | -0.00046 | -0.00282 | -0.45295 |
| D29 | 1.66766  | -0.00001 | -0.00259 | -0.00040 | -0.00299 | 1.66467  |
| D30 | 0.77988  | 0.00001  | 0.00061  | 0.00001  | 0.00061  | 0.78049  |
| D31 | 2.80640  | 0.00008  | 0.00137  | -0.00022 | 0.00115  | 2.80755  |
| D32 | -1.35900 | 0.00005  | 0.00114  | -0.00015 | 0.00099  | -1.35802 |
| D33 | -3.00094 | 0.00007  | -0.00155 | -0.00016 | -0.00171 | -3.00265 |
| D34 | 1.21929  | 0.00005  | -0.00201 | 0.00005  | -0.00196 | 1.21734  |
| D35 | -0.89923 | 0.00013  | -0.00145 | -0.00022 | -0.00167 | -0.90089 |
| D36 | 1.16806  | 0.00004  | -0.00107 | -0.00039 | -0.00146 | 1.16660  |
| D37 | -0.89489 | 0.00002  | -0.00153 | -0.00017 | -0.00170 | -0.89659 |
| D38 | -3.01341 | 0.00010  | -0.00097 | -0.00044 | -0.00141 | -3.01482 |
| D39 | -0.92498 | -0.00005 | -0.00169 | -0.00053 | -0.00222 | -0.92720 |
| D40 | -2.98793 | -0.00007 | -0.00215 | -0.00031 | -0.00246 | -2.99039 |
| D41 | 1.17673  | 0.00001  | -0.00159 | -0.00058 | -0.00217 | 1.17456  |
| D42 | -3.14028 | 0.00003  | 0.00072  | -0.00017 | 0.00055  | -3.13973 |
| D43 | -0.02563 | 0.00004  | 0.00061  | 0.00084  | 0.00144  | -0.02419 |

|     |          |          |          |          |          |          |
|-----|----------|----------|----------|----------|----------|----------|
| D44 | -0.00925 | 0.00002  | -0.00005 | 0.00015  | 0.00010  | -0.00914 |
| D45 | 3.10540  | 0.00002  | -0.00016 | 0.00116  | 0.00100  | 3.10639  |
| D46 | -2.75348 | 0.00004  | 0.00022  | 0.00043  | 0.00065  | -2.75284 |
| D47 | -0.04866 | 0.00003  | -0.00020 | 0.00028  | 0.00008  | -0.04858 |
| D48 | -0.02054 | 0.00001  | 0.00051  | -0.00001 | 0.00050  | -0.02004 |
| D49 | 2.68428  | 0.00000  | 0.00009  | -0.00016 | -0.00006 | 2.68422  |
| D50 | 0.32321  | -0.00006 | -0.00276 | 0.00115  | -0.00161 | 0.32160  |
| D51 | -2.05545 | -0.00008 | -0.00273 | 0.00063  | -0.00213 | -2.05758 |
| D52 | 2.55496  | -0.00003 | -0.00103 | -0.00147 | -0.00247 | 2.55248  |
| D53 | 0.17228  | 0.00001  | -0.00074 | -0.00120 | -0.00192 | 0.17036  |
| D54 | 2.55733  | 0.00003  | 0.00025  | 0.00012  | 0.00036  | 2.55769  |
| D55 | -1.64866 | 0.00001  | -0.00013 | 0.00012  | -0.00002 | -1.64868 |
| D56 | 0.44357  | 0.00002  | -0.00006 | 0.00012  | 0.00005  | 0.44362  |
| D57 | 1.33112  | -0.00002 | 0.00001  | -0.00019 | -0.00017 | 1.33095  |
| D58 | -2.87487 | -0.00003 | -0.00038 | -0.00018 | -0.00055 | -2.87542 |
| D59 | -0.78264 | -0.00003 | -0.00030 | -0.00019 | -0.00048 | -0.78312 |
| D60 | -1.01726 | 0.00001  | -0.00004 | -0.00002 | -0.00006 | -1.01732 |
| D61 | 1.05993  | -0.00001 | -0.00042 | -0.00002 | -0.00044 | 1.05949  |
| D62 | -3.13103 | 0.00000  | -0.00035 | -0.00002 | -0.00036 | -3.13139 |
| D63 | 1.49391  | -0.00011 | -0.00123 | -0.00944 | -0.01062 | 1.48329  |
| D64 | 2.83556  | -0.00001 | -0.00131 | -0.00761 | -0.00898 | 2.82658  |
| D65 | 2.26726  | -0.00004 | -0.00471 | 0.00023  | -0.00448 | 2.26278  |
| D66 | -0.84795 | -0.00006 | -0.00610 | -0.00072 | -0.00681 | -0.85476 |
| D67 | -1.92526 | 0.00001  | -0.00384 | -0.00013 | -0.00397 | -1.92923 |
| D68 | 1.24272  | -0.00001 | -0.00523 | -0.00108 | -0.00630 | 1.23642  |
| D69 | 0.11171  | 0.00002  | -0.00427 | 0.00009  | -0.00419 | 0.10752  |
| D70 | -3.00350 | 0.00000  | -0.00566 | -0.00086 | -0.00652 | -3.01002 |
| D71 | 2.92165  | -0.00011 | 0.00124  | 0.00212  | 0.00336  | 2.92501  |
| D72 | -0.19292 | -0.00013 | -0.00017 | 0.00117  | 0.00100  | -0.19192 |
| D73 | -1.91416 | 0.00001  | 0.00988  | 0.00564  | 0.01553  | -1.89863 |

| Item                 | Value    | Threshold | Converged? |
|----------------------|----------|-----------|------------|
| Maximum Force        | 0.000368 | 0.000450  | YES        |
| RMS Force            | 0.000080 | 0.000300  | YES        |
| Maximum Displacement | 0.020512 | 0.001800  | NO         |
| RMS Displacement     | 0.006391 | 0.001200  | NO         |

Predicted change in Energy=-3.312781D-06

GradGradGradGradGradGradGradGradGradGradGradGradGradGradGradGradGrad

Input orientation:

| Center Number | Atomic Number | Atomic Type | Coordinates (Angstroms) |          |          |
|---------------|---------------|-------------|-------------------------|----------|----------|
|               |               |             | X                       | Y        | Z        |
| 1             | 6             | 0           | -0.843904               | 1.639526 | 1.532202 |



|    |    |   |           |           |           |
|----|----|---|-----------|-----------|-----------|
| 2  | 6  | 0 | -1.504545 | 0.452138  | 1.571651  |
| 3  | 7  | 0 | -2.374193 | 0.451843  | 0.488824  |
| 4  | 6  | 0 | -2.239492 | 1.609651  | -0.176808 |
| 5  | 7  | 0 | -1.312038 | 2.352802  | 0.439396  |
| 6  | 6  | 0 | -0.776769 | 3.641983  | -0.034418 |
| 7  | 1  | 0 | -0.066225 | 2.023658  | 2.168105  |
| 8  | 1  | 0 | -1.347971 | -0.419561 | 2.219080  |
| 9  | 1  | 0 | -1.614045 | 4.255595  | -0.371240 |
| 10 | 1  | 0 | -0.326371 | 4.125808  | 0.830143  |
| 11 | 35 | 0 | -0.397784 | -2.452916 | 2.886342  |
| 12 | 1  | 0 | -2.780176 | 1.886349  | -1.065522 |
| 13 | 6  | 0 | -3.266778 | -0.596723 | 0.098316  |
| 14 | 6  | 0 | -3.226924 | -1.818625 | 0.613187  |
| 15 | 1  | 0 | -3.966391 | -0.283327 | -0.666703 |
| 16 | 1  | 0 | -3.941305 | -2.549617 | 0.255719  |
| 17 | 1  | 0 | -2.497898 | -2.136295 | 1.361679  |
| 18 | 6  | 0 | 2.567189  | -0.686277 | 1.132487  |
| 19 | 6  | 0 | 3.986457  | -0.370310 | 1.320214  |
| 20 | 8  | 0 | 2.984837  | 0.658378  | 1.534633  |
| 21 | 1  | 0 | 2.185604  | -0.729615 | 0.116268  |
| 22 | 1  | 0 | 1.994259  | -1.225754 | 1.882024  |
| 23 | 1  | 0 | 4.441037  | -0.684230 | 2.256996  |
| 24 | 6  | 0 | 4.929544  | -0.168469 | 0.166259  |
| 25 | 1  | 0 | 5.690113  | 0.578871  | 0.410320  |
| 26 | 1  | 0 | 5.442921  | -1.108271 | -0.058581 |
| 27 | 1  | 0 | 4.390246  | 0.154667  | -0.726685 |
| 28 | 6  | 0 | 0.255933  | 3.469910  | -1.158021 |
| 29 | 1  | 0 | 0.706158  | 4.448449  | -1.352740 |
| 30 | 1  | 0 | -0.212663 | 3.127622  | -2.081363 |
| 31 | 6  | 0 | 1.359800  | 2.479603  | -0.805048 |
| 32 | 8  | 0 | 1.686477  | 1.570091  | -1.530206 |
| 33 | 8  | 0 | 1.881174  | 2.729547  | 0.395022  |
| 34 | 1  | 0 | 2.456793  | 1.965211  | 0.702455  |

-----  
Distance matrix (angstroms):

|   |   | 1        | 2        | 3        | 4        | 5        |
|---|---|----------|----------|----------|----------|----------|
| 1 | C | 0.000000 |          |          |          |          |
| 2 | C | 1.359371 | 0.000000 |          |          |          |
| 3 | N | 2.200230 | 1.388813 | 0.000000 |          |          |
| 4 | C | 2.206643 | 2.221957 | 1.342286 | 0.000000 |          |
| 5 | N | 1.386412 | 2.220717 | 2.178133 | 1.338713 | 0.000000 |
| 6 | C | 2.543352 | 3.644753 | 3.605904 | 2.508029 | 1.474110 |
| 7 | H | 1.075508 | 2.212283 | 3.258421 | 3.223835 | 2.156113 |
| 8 | H | 2.228390 | 1.097060 | 2.192319 | 3.263862 | 3.294627 |

|    |    |          |          |          |          |          |
|----|----|----------|----------|----------|----------|----------|
| 9  | H  | 3.325661 | 4.272364 | 3.973168 | 2.725803 | 2.090205 |
| 10 | H  | 2.634829 | 3.928584 | 4.219963 | 3.317383 | 2.065859 |
| 11 | Br | 4.333681 | 3.375303 | 4.253458 | 5.411029 | 5.469765 |
| 12 | H  | 3.249344 | 3.261729 | 2.153746 | 1.076435 | 2.153552 |
| 13 | C  | 3.595435 | 2.525132 | 1.431326 | 2.449306 | 3.554862 |
| 14 | C  | 4.299091 | 3.006927 | 2.428506 | 3.654066 | 4.593234 |
| 15 | H  | 4.275800 | 3.407612 | 2.100193 | 2.608743 | 3.901053 |
| 16 | H  | 5.363974 | 4.084117 | 3.393957 | 4.514728 | 5.566013 |
| 17 | H  | 4.125723 | 2.780436 | 2.734161 | 4.057811 | 4.733800 |
| 18 | C  | 4.147853 | 4.250632 | 5.111445 | 5.485410 | 4.976422 |
| 19 | C  | 5.236102 | 5.557944 | 6.467226 | 6.702519 | 6.022062 |
| 20 | O  | 3.952457 | 4.494269 | 5.464025 | 5.579208 | 4.746973 |
| 21 | H  | 4.098246 | 4.139068 | 4.725081 | 5.013934 | 4.673244 |
| 22 | H  | 4.048132 | 3.892722 | 4.882490 | 5.495722 | 5.081225 |
| 23 | H  | 5.818571 | 6.091877 | 7.131931 | 7.470928 | 6.754636 |
| 24 | C  | 6.202205 | 6.614966 | 7.337125 | 7.394220 | 6.737118 |
| 25 | H  | 6.713940 | 7.288886 | 8.065689 | 8.017847 | 7.223420 |
| 26 | H  | 7.043092 | 7.304780 | 7.990048 | 8.149880 | 7.606344 |
| 27 | H  | 5.890984 | 6.333987 | 6.879201 | 6.809755 | 6.221542 |
| 28 | C  | 3.434712 | 4.433659 | 4.328786 | 3.263508 | 2.501640 |
| 29 | H  | 4.314584 | 5.423077 | 5.371478 | 4.256576 | 3.417104 |
| 30 | H  | 3.958629 | 4.708681 | 4.293934 | 3.168532 | 2.857130 |
| 31 | C  | 3.320358 | 4.238370 | 4.441691 | 3.755849 | 2.950159 |
| 32 | O  | 3.973159 | 4.588459 | 4.670760 | 4.152888 | 3.671928 |
| 33 | O  | 3.147599 | 4.246662 | 4.827513 | 4.308253 | 3.215667 |
| 34 | H  | 3.418940 | 4.328636 | 5.066986 | 4.791098 | 3.797830 |
|    |    | 6        | 7        | 8        | 9        | 10       |
| 6  | C  | 0.000000 |          |          |          |          |
| 7  | H  | 2.823997 | 0.000000 |          |          |          |
| 8  | H  | 4.679815 | 2.759491 | 0.000000 |          |          |
| 9  | H  | 1.091329 | 3.718274 | 5.351414 | 0.000000 |          |
| 10 | H  | 1.088306 | 2.505364 | 4.861398 | 1.765863 | 0.000000 |
| 11 | Br | 6.769214 | 4.545933 | 2.341501 | 7.556139 | 6.892942 |
| 12 | H  | 2.856408 | 4.223829 | 4.261108 | 2.730424 | 3.824903 |
| 13 | C  | 4.917763 | 4.625361 | 2.865458 | 5.147523 | 5.611048 |
| 14 | C  | 6.020041 | 5.212575 | 2.840201 | 6.361338 | 6.617897 |
| 15 | H  | 5.097208 | 5.345055 | 3.899029 | 5.120804 | 5.910225 |
| 16 | H  | 6.959482 | 6.291925 | 3.888098 | 7.219427 | 7.613082 |
| 17 | H  | 6.188689 | 4.885547 | 2.237106 | 6.681351 | 6.649209 |
| 18 | C  | 5.592634 | 3.918051 | 4.071891 | 6.645751 | 5.623189 |
| 19 | C  | 6.373526 | 4.782701 | 5.409853 | 7.458259 | 6.249458 |
| 20 | O  | 5.051089 | 3.402095 | 4.517039 | 6.141826 | 4.845974 |
| 21 | H  | 5.282919 | 4.106250 | 4.123604 | 6.287075 | 5.513145 |
| 22 | H  | 5.919984 | 3.858253 | 3.454570 | 6.938461 | 5.927140 |

|    |    |          |          |          |          |          |
|----|----|----------|----------|----------|----------|----------|
| 23 | H  | 7.154872 | 5.258894 | 5.795179 | 8.244604 | 6.921022 |
| 24 | C  | 6.864533 | 5.811241 | 6.609411 | 7.917057 | 6.819545 |
| 25 | H  | 7.169450 | 6.189721 | 7.335060 | 8.214613 | 6.996791 |
| 26 | H  | 7.826240 | 6.716978 | 7.195712 | 8.869587 | 7.840289 |
| 27 | H  | 6.272053 | 5.633211 | 6.475678 | 7.279797 | 6.359256 |
| 28 | C  | 1.535762 | 3.641229 | 5.394933 | 2.175578 | 2.173034 |
| 29 | H  | 2.141829 | 4.344253 | 6.377685 | 2.526633 | 2.436225 |
| 30 | H  | 2.184666 | 4.392967 | 5.689046 | 2.482078 | 3.079963 |
| 31 | C  | 2.551455 | 3.328825 | 4.988239 | 3.490858 | 2.868277 |
| 32 | O  | 3.549324 | 4.117668 | 5.217637 | 4.410054 | 4.019265 |
| 33 | O  | 2.842819 | 2.726622 | 4.865332 | 3.890056 | 2.648042 |
| 34 | H  | 3.716244 | 2.918418 | 4.739570 | 4.792744 | 3.525689 |
|    |    | 11       | 12       | 13       | 14       | 15       |
| 11 | Br | 0.000000 |          |          |          |          |
| 12 | H  | 6.334212 | 0.000000 |          |          |          |
| 13 | C  | 4.410178 | 2.785130 | 0.000000 |          |          |
| 14 | C  | 3.684236 | 4.092002 | 1.326546 | 0.000000 |          |
| 15 | H  | 5.483266 | 2.504727 | 1.083019 | 2.131213 | 0.000000 |
| 16 | H  | 4.414303 | 4.771970 | 2.072091 | 1.082808 | 2.446950 |
| 17 | H  | 2.614445 | 4.706660 | 2.134841 | 1.092078 | 3.115172 |
| 18 | C  | 3.871444 | 6.328030 | 5.925597 | 5.926519 | 6.788749 |
| 19 | C  | 5.100154 | 7.521407 | 7.358921 | 7.391236 | 8.197755 |
| 20 | O  | 4.790552 | 6.442367 | 6.536129 | 6.750599 | 7.352024 |
| 21 | H  | 4.161366 | 5.735753 | 5.454031 | 5.543314 | 6.217657 |
| 22 | H  | 2.869921 | 6.416264 | 5.590689 | 5.405756 | 6.550842 |
| 23 | H  | 5.190232 | 8.354215 | 8.004871 | 7.923799 | 8.910307 |
| 24 | C  | 6.402965 | 8.073372 | 8.207784 | 8.333710 | 8.935585 |
| 25 | H  | 7.237741 | 8.696747 | 9.039097 | 9.235946 | 9.754560 |
| 26 | H  | 6.677909 | 8.809143 | 8.726119 | 8.724797 | 9.464961 |
| 27 | H  | 6.540541 | 7.384340 | 7.737908 | 7.981880 | 8.368322 |
| 28 | C  | 7.201672 | 3.425518 | 5.524978 | 6.575414 | 5.670643 |
| 29 | H  | 8.174187 | 4.336055 | 6.583581 | 7.655731 | 6.685287 |
| 30 | H  | 7.473604 | 3.027344 | 5.286716 | 6.388406 | 5.265577 |
| 31 | C  | 6.406653 | 4.190370 | 5.628950 | 6.443927 | 6.001769 |
| 32 | O  | 6.327291 | 4.501881 | 5.646406 | 6.341848 | 6.011298 |
| 33 | O  | 6.185325 | 4.957051 | 6.136247 | 6.842963 | 6.663234 |
| 34 | H  | 5.695420 | 5.527912 | 6.299822 | 6.828618 | 6.941744 |
|    |    | 16       | 17       | 18       | 19       | 20       |
| 16 | H  | 0.000000 |          |          |          |          |
| 17 | H  | 1.864781 | 0.000000 |          |          |          |
| 18 | C  | 6.826511 | 5.273536 | 0.000000 |          |          |
| 19 | C  | 8.290473 | 6.720660 | 1.466083 | 0.000000 |          |
| 20 | O  | 7.739399 | 6.156337 | 1.464326 | 1.451695 | 0.000000 |
| 21 | H  | 6.393033 | 5.046284 | 1.086364 | 2.195828 | 2.139407 |

|    |   |           |          |          |          |          |
|----|---|-----------|----------|----------|----------|----------|
| 22 | H | 6.295109  | 4.612951 | 1.086779 | 2.239702 | 2.156822 |
| 23 | H | 8.817507  | 7.145551 | 2.185367 | 1.087542 | 2.108298 |
| 24 | C | 9.185305  | 7.776134 | 2.604313 | 1.503917 | 2.517541 |
| 25 | H | 10.127959 | 8.678752 | 3.445981 | 2.152045 | 2.930686 |
| 26 | H | 9.499472  | 8.132071 | 3.141107 | 2.137042 | 3.420754 |
| 27 | H | 8.814364  | 7.553561 | 2.736283 | 2.151381 | 2.709697 |
| 28 | C | 7.473297  | 6.735132 | 5.278468 | 5.899640 | 4.754158 |
| 29 | H | 8.553303  | 7.809795 | 6.000434 | 6.412915 | 5.281471 |
| 30 | H | 7.183020  | 6.692208 | 5.709837 | 6.437303 | 5.421863 |
| 31 | C | 7.383766  | 6.393986 | 3.903156 | 4.420189 | 3.381082 |
| 32 | O | 7.199545  | 6.293591 | 3.599553 | 4.144871 | 3.451115 |
| 33 | O | 7.860677  | 6.617183 | 3.561225 | 3.859703 | 2.608932 |
| 34 | H | 7.843399  | 6.465747 | 2.688402 | 2.859398 | 1.636815 |
|    |   | 21        | 22       | 23       | 24       | 25       |
| 21 | H | 0.000000  |          |          |          |          |
| 22 | H | 1.844088  | 0.000000 |          |          |          |
| 23 | H | 3.109945  | 2.533885 | 0.000000 |          |          |
| 24 | C | 2.801177  | 3.560561 | 2.208128 | 0.000000 |          |
| 25 | H | 3.752358  | 4.368286 | 2.562387 | 1.093869 | 0.000000 |
| 26 | H | 3.283910  | 3.958916 | 2.558413 | 1.094228 | 1.768451 |
| 27 | H | 2.520510  | 3.801536 | 3.099787 | 1.092066 | 1.778310 |
| 28 | C | 4.794106  | 5.857723 | 6.814273 | 6.069115 | 6.352017 |
| 29 | H | 5.582033  | 6.657288 | 7.302322 | 6.438966 | 6.551475 |
| 30 | H | 5.045745  | 6.287355 | 7.416771 | 6.508327 | 6.895462 |
| 31 | C | 3.439456  | 4.620884 | 5.374009 | 4.549593 | 4.882777 |
| 32 | O | 2.872046  | 4.422080 | 5.197351 | 4.051921 | 4.558208 |
| 33 | O | 3.483703  | 4.227100 | 4.655504 | 4.212290 | 4.374204 |
| 34 | H | 2.771146  | 3.433305 | 3.656960 | 3.309772 | 3.530105 |
|    |   | 26        | 27       | 28       | 29       | 30       |
| 26 | H | 0.000000  |          |          |          |          |
| 27 | H | 1.774683  | 0.000000 |          |          |          |
| 28 | C | 7.005237  | 5.316900 | 0.000000 |          |          |
| 29 | H | 7.415450  | 5.692189 | 1.094604 | 0.000000 |          |
| 30 | H | 7.349835  | 5.644501 | 1.090552 | 1.766269 | 0.000000 |
| 31 | C | 5.486522  | 3.820349 | 1.524408 | 2.145593 | 2.126394 |
| 32 | O | 4.842538  | 3.155857 | 2.407133 | 3.045893 | 2.517223 |
| 33 | O | 5.255534  | 3.766121 | 2.366747 | 2.718448 | 3.267277 |
| 34 | H | 4.352290  | 3.009776 | 3.251042 | 3.668109 | 4.028255 |
|    |   | 31        | 32       | 33       | 34       |          |
| 31 | C | 0.000000  |          |          |          |          |
| 32 | O | 1.208215  | 0.000000 |          |          |          |
| 33 | O | 1.332093  | 2.255825 | 0.000000 |          |          |
| 34 | H | 1.934052  | 2.394636 | 1.005018 | 0.000000 |          |

Stoichiometry C11H17BrN2O3

Framework group C1[X(C11H17BrN2O3)]

Deg. of freedom 96

Full point group C1 NOp 1

Largest Abelian subgroup C1 NOp 1

Largest concise Abelian subgroup C1 NOp 1

Standard orientation:

| Center<br>Number | Atomic<br>Number | Atomic<br>Type | Coordinates (Angstroms) |           |           |
|------------------|------------------|----------------|-------------------------|-----------|-----------|
|                  |                  |                | X                       | Y         | Z         |
| 1                | 6                | 0              | 0.058922                | 1.328888  | 1.236178  |
| 2                | 6                | 0              | -1.174407               | 1.235579  | 0.672189  |
| 3                | 7                | 0              | -1.262995               | 2.271149  | -0.248978 |
| 4                | 6                | 0              | -0.115062               | 2.966641  | -0.232416 |
| 5                | 7                | 0              | 0.708708                | 2.412618  | 0.665700  |
| 6                | 6                | 0              | 2.111309                | 2.795055  | 0.909528  |
| 7                | 1                | 0              | 0.536724                | 0.704283  | 1.969862  |
| 8                | 1                | 0              | -1.942220               | 0.459798  | 0.782488  |
| 9                | 1                | 0              | 2.166743                | 3.884470  | 0.942725  |
| 10               | 1                | 0              | 2.369323                | 2.410964  | 1.894573  |
| 11               | 35               | 0              | -3.043012               | -1.551587 | 0.307920  |
| 12               | 1                | 0              | 0.107609                | 3.820271  | -0.849218 |
| 13               | 6                | 0              | -2.367347               | 2.569691  | -1.109195 |
| 14               | 6                | 0              | -3.394037               | 1.749396  | -1.290168 |
| 15               | 1                | 0              | -2.264576               | 3.530126  | -1.599024 |
| 16               | 1                | 0              | -4.185117               | 2.057956  | -1.962072 |
| 17               | 1                | 0              | -3.475433               | 0.768481  | -0.817079 |
| 18               | 6                | 0              | 0.664643                | -2.462119 | -0.334191 |
| 19               | 6                | 0              | 1.661180                | -3.493008 | -0.028281 |
| 20               | 8                | 0              | 1.683169                | -2.233181 | 0.692670  |
| 21               | 1                | 0              | 0.813145                | -1.859455 | -1.225779 |
| 22               | 1                | 0              | -0.353474               | -2.517047 | 0.041988  |
| 23               | 1                | 0              | 1.341713                | -4.312076 | 0.611888  |
| 24               | 6                | 0              | 2.831082                | -3.779446 | -0.928864 |
| 25               | 1                | 0              | 3.706761                | -4.080804 | -0.346698 |
| 26               | 1                | 0              | 2.581003                | -4.600421 | -1.607683 |
| 27               | 1                | 0              | 3.088360                | -2.901787 | -1.525631 |
| 28               | 6                | 0              | 3.064664                | 2.235821  | -0.156745 |
| 29               | 1                | 0              | 4.089512                | 2.439066  | 0.169652  |
| 30               | 1                | 0              | 2.917061                | 2.725508  | -1.119929 |
| 31               | 6                | 0              | 2.902911                | 0.735287  | -0.371349 |
| 32               | 8                | 0              | 2.762305                | 0.236552  | -1.462806 |
| 33               | 8                | 0              | 2.907387                | 0.068951  | 0.782101  |
| 34               | 1                | 0              | 2.602264                | -0.879450 | 0.649825  |

```

-----
Rotational constants (GHZ):      0.3279281      0.2549611      0.1591747
Standard basis: 6-311++G(d,p) (5D, 7F)
There are 538 symmetry adapted cartesian basis functions of A symmetry.
There are 519 symmetry adapted basis functions of A symmetry.
519 basis functions, 823 primitive gaussians, 538 cartesian basis functions
78 alpha electrons      78 beta electrons
nuclear repulsion energy      1572.2077314013 Hartrees.
NAtoms= 34 NActive= 34 NUniq= 34 SFac= 1.00D+00 NAtFMM= 60 NAOKFM=F
Big=F
Integral buffers will be 131072 words long.
Raffenetti 2 integral format.
Two-electron integral symmetry is turned on.
One-electron integrals computed using PRISM.
NBasis= 519 RedAO= T EigKep= 3.55D-06 NBF= 519
NBsUse= 519 1.00D-06 EigRej= -1.00D+00 NBFU= 519
Initial guess from the checkpoint file: "./coohpo.chk"
B after Tr= 0.000000 0.000000 0.000000
Rot= 0.999990 -0.000019 -0.000403 -0.004502 Ang= -0.52 deg.
ExpMin= 3.50D-02 ExpMax= 4.40D+05 ExpMxC= 1.51D+04 IAcc=3 IRadAn= 5 AccDes=
0.00D+00
Harris functional with IExCor= 402 and IRadAn= 5 diagonalized for initial guess.
HarFok: IExCor= 402 AccDes= 0.00D+00 IRadAn= 5 IDoV= 1 UseB2=F ITyADJ=14
ICtDFT= 3500011 ScaDFX= 1.000000 1.000000 1.000000 1.000000
FoFCou: FMM=F IPFlag= 0 FMFlag= 100000 FMFlg1= 0
NFxFlg= 0 DoJE=T BraDBF=F KetDBF=T FulRan=T
wScrn= 0.000000 ICntrl= 500 IOpCl= 0 I1Cent= 200000004 NGrid=
0
NMat0= 1 NMatS0= 1 NMatT0= 0 NMatD0= 1 NMtDS0= 0
NMtDT0= 0
Petite list used in FoFCou.
Requested convergence on RMS density matrix=1.00D-08 within 128 cycles.
Requested convergence on MAX density matrix=1.00D-06.
Requested convergence on energy=1.00D-06.
No special actions if energy rises.
SCF Done: E(RB3LYP) = -3338.90386462 A.U. after 10 cycles
NFock= 10 Conv=0.69D-08 -V/T= 2.0019
Calling FoFJK, ICntrl= 2127 FMM=F ISym2X=0 I1Cent= 0 IOpClX= 0 NMat=1 NMatS=1
NMatT=0.
***** Axes restored to original set *****

```

```

-----
Center      Atomic      Forces (Hartrees/Bohr)
Number      Number      X          Y          Z
-----

```

|    |    |              |              |              |
|----|----|--------------|--------------|--------------|
| 1  | 6  | -0.000049279 | 0.000082855  | 0.000094159  |
| 2  | 6  | 0.000272943  | 0.000031527  | 0.000108051  |
| 3  | 7  | 0.000086384  | 0.000127264  | -0.000024036 |
| 4  | 6  | 0.000086352  | -0.000091753 | 0.000019121  |
| 5  | 7  | -0.000047986 | -0.000064181 | 0.000003252  |
| 6  | 6  | 0.000103585  | 0.000061720  | -0.000087342 |
| 7  | 1  | 0.000021776  | -0.000022826 | -0.000037773 |
| 8  | 1  | -0.000338173 | -0.000126626 | -0.000250247 |
| 9  | 1  | -0.000002075 | 0.000013854  | -0.000003325 |
| 10 | 1  | -0.000021735 | 0.000006571  | 0.000011970  |
| 11 | 35 | 0.000129851  | 0.000093413  | 0.000082716  |
| 12 | 1  | -0.000042848 | 0.000016493  | 0.000022870  |
| 13 | 6  | -0.000112538 | -0.000085342 | -0.000030117 |
| 14 | 6  | -0.000000289 | 0.000005597  | 0.000023317  |
| 15 | 1  | 0.000005688  | 0.000013120  | 0.000012755  |
| 16 | 1  | 0.000002347  | 0.000010845  | -0.000014094 |
| 17 | 1  | -0.000009077 | -0.000012216 | 0.000018629  |
| 18 | 6  | 0.000029969  | 0.000079736  | -0.000027780 |
| 19 | 6  | 0.000065235  | -0.000035084 | -0.000128251 |
| 20 | 8  | -0.000204362 | -0.000096586 | 0.000048067  |
| 21 | 1  | -0.000027321 | -0.000038335 | 0.000052868  |
| 22 | 1  | -0.000000445 | 0.000021170  | -0.000011776 |
| 23 | 1  | -0.000013494 | -0.000009707 | 0.000024868  |
| 24 | 6  | 0.000018183  | -0.000018129 | 0.000065697  |
| 25 | 1  | -0.000003993 | -0.000001749 | 0.000001073  |
| 26 | 1  | 0.000004053  | -0.000002444 | 0.000010338  |
| 27 | 1  | -0.000005578 | -0.000004989 | -0.000011364 |
| 28 | 6  | -0.000028200 | -0.000032043 | 0.000045005  |
| 29 | 1  | 0.000005961  | 0.000020067  | 0.000002040  |
| 30 | 1  | 0.000001182  | 0.000002144  | -0.000001612 |
| 31 | 6  | 0.000026823  | -0.000055335 | -0.000032454 |
| 32 | 8  | -0.000013119 | 0.000010133  | 0.000029289  |
| 33 | 8  | -0.000054011 | -0.000004736 | 0.000019151  |
| 34 | 1  | 0.000114190  | 0.000105572  | -0.000035068 |

-----  
Cartesian Forces: Max 0.000338173 RMS 0.000074269

GradGradGradGradGradGradGradGradGradGradGradGradGradGradGradGradGradGradGradGrad

Berny optimization.

Using GEDIIS/GDIIS optimizer.

FormGI is forming the generalized inverse of G from B-inverse, IUseBI=4.

Internal Forces: Max 0.000316249 RMS 0.000067608

Search for a local minimum.

Step number 31 out of a maximum of 175

All quantities printed in internal units (Hartrees-Bohrs-Radians)

Mixed Optimization -- En-DIIS/RFO-DIIS

Swapping is turned off.

Update second derivatives using D2CorX and points

|    |    |    |    |    |    |
|----|----|----|----|----|----|
| 21 | 22 | 23 | 24 | 25 |    |
|    | 26 | 27 | 28 | 29 | 30 |
|    |    | 31 |    |    |    |

DE= 1.15D-06 DEPred=-3.31D-06 R=-3.46D-01

Trust test=-3.46D-01 RLast= 3.11D-02 DXMaxT set to 3.91D-01

ITU= -1 1 1 1 1 1 -1 0 1 1 1 1 1 1 1 1 1 1 0 0

ITU= -1 1 1 1 0 1 0 -1 0 1 0

|                 |         |         |         |         |         |
|-----------------|---------|---------|---------|---------|---------|
| Eigenvalues --- | 0.00114 | 0.00224 | 0.00373 | 0.00513 | 0.00661 |
| Eigenvalues --- | 0.00723 | 0.00853 | 0.01199 | 0.01272 | 0.01568 |
| Eigenvalues --- | 0.01986 | 0.02118 | 0.02251 | 0.02269 | 0.02395 |
| Eigenvalues --- | 0.02424 | 0.02751 | 0.02881 | 0.03098 | 0.03239 |
| Eigenvalues --- | 0.03451 | 0.03677 | 0.03966 | 0.04271 | 0.04819 |
| Eigenvalues --- | 0.04912 | 0.05144 | 0.05446 | 0.05704 | 0.05738 |
| Eigenvalues --- | 0.05921 | 0.06032 | 0.06567 | 0.07292 | 0.09286 |
| Eigenvalues --- | 0.09578 | 0.11773 | 0.12571 | 0.12850 | 0.13105 |
| Eigenvalues --- | 0.13755 | 0.15085 | 0.15620 | 0.15805 | 0.15967 |
| Eigenvalues --- | 0.16005 | 0.16013 | 0.16040 | 0.16053 | 0.16226 |
| Eigenvalues --- | 0.17044 | 0.17559 | 0.20138 | 0.21311 | 0.22275 |
| Eigenvalues --- | 0.23299 | 0.23618 | 0.23966 | 0.25392 | 0.26416 |
| Eigenvalues --- | 0.28461 | 0.29436 | 0.30720 | 0.31581 | 0.32359 |
| Eigenvalues --- | 0.33270 | 0.34500 | 0.34579 | 0.34625 | 0.34817 |
| Eigenvalues --- | 0.34889 | 0.34961 | 0.35009 | 0.35135 | 0.35287 |
| Eigenvalues --- | 0.35487 | 0.35720 | 0.35834 | 0.36578 | 0.37007 |
| Eigenvalues --- | 0.37214 | 0.37682 | 0.38157 | 0.39000 | 0.40777 |
| Eigenvalues --- | 0.43961 | 0.45430 | 0.49313 | 0.50391 | 0.51951 |
| Eigenvalues --- | 0.53889 | 0.56077 | 0.56890 | 0.61341 | 0.91651 |
| Eigenvalues --- | 1.38470 |         |         |         |         |

En-DIIS/RFO-DIIS IScMMF= 0 using points: 31 30 29 28 27

RFO step: Lambda=-1.22121076D-06.

DidBck=T Rises=F RFO-DIIS coefs: 0.72458 0.88288 -0.65312 -0.11823

0.16388

Iteration 1 RMS(Cart)= 0.00864713 RMS(Int)= 0.00002821

Iteration 2 RMS(Cart)= 0.00004487 RMS(Int)= 0.00000385

Iteration 3 RMS(Cart)= 0.00000000 RMS(Int)= 0.00000385

| Variable | Old X   | -DE/DX   | Delta X<br>(Linear) | Delta X<br>(Quad) | Delta X<br>(Total) | New X   |
|----------|---------|----------|---------------------|-------------------|--------------------|---------|
| R1       | 2.56884 | -0.00005 | -0.00010            | 0.00006           | -0.00004           | 2.56880 |
| R2       | 2.61994 | -0.00003 | 0.00005             | 0.00005           | 0.00010            | 2.62004 |
| R3       | 2.03242 | -0.00001 | 0.00002             | 0.00000           | 0.00002            | 2.03244 |
| R4       | 2.62448 | 0.00001  | 0.00006             | -0.00020          | -0.00013           | 2.62434 |
| R5       | 2.07314 | -0.00010 | 0.00036             | -0.00034          | 0.00003            | 2.07317 |



|     |         |          |          |          |          |         |
|-----|---------|----------|----------|----------|----------|---------|
| R6  | 2.53655 | -0.00001 | 0.00013  | -0.00009 | 0.00004  | 2.53660 |
| R7  | 2.70481 | 0.00012  | -0.00033 | 0.00023  | -0.00010 | 2.70471 |
| R8  | 2.52980 | -0.00001 | -0.00006 | 0.00000  | -0.00006 | 2.52974 |
| R9  | 2.03417 | 0.00000  | -0.00001 | 0.00002  | 0.00000  | 2.03417 |
| R10 | 2.78566 | 0.00005  | -0.00009 | 0.00021  | 0.00011  | 2.78578 |
| R11 | 2.06231 | 0.00001  | -0.00005 | 0.00005  | 0.00000  | 2.06231 |
| R12 | 2.05660 | 0.00001  | 0.00000  | -0.00001 | -0.00001 | 2.05659 |
| R13 | 2.90217 | -0.00008 | 0.00014  | -0.00024 | -0.00010 | 2.90207 |
| R14 | 4.42479 | 0.00000  | -0.00196 | 0.00027  | -0.00169 | 4.42311 |
| R15 | 2.50681 | 0.00001  | 0.00014  | -0.00002 | 0.00011  | 2.50692 |
| R16 | 2.04661 | -0.00001 | 0.00004  | -0.00005 | -0.00001 | 2.04660 |
| R17 | 2.04621 | 0.00000  | -0.00006 | 0.00000  | -0.00006 | 2.04615 |
| R18 | 2.06373 | 0.00001  | 0.00009  | -0.00006 | 0.00003  | 2.06375 |
| R19 | 2.77049 | 0.00002  | 0.00004  | -0.00007 | -0.00002 | 2.77048 |
| R20 | 2.76718 | -0.00006 | -0.00001 | -0.00016 | -0.00017 | 2.76700 |
| R21 | 2.05293 | -0.00004 | 0.00013  | -0.00017 | -0.00004 | 2.05289 |
| R22 | 2.05372 | -0.00002 | 0.00012  | 0.00003  | 0.00015  | 2.05387 |
| R23 | 2.74331 | 0.00007  | -0.00037 | 0.00014  | -0.00024 | 2.74307 |
| R24 | 2.05516 | 0.00002  | 0.00000  | 0.00004  | 0.00004  | 2.05520 |
| R25 | 2.84199 | -0.00003 | 0.00015  | -0.00012 | 0.00003  | 2.84202 |
| R26 | 3.09313 | 0.00002  | 0.00224  | 0.00175  | 0.00399  | 3.09712 |
| R27 | 2.06711 | 0.00000  | 0.00001  | -0.00001 | 0.00001  | 2.06712 |
| R28 | 2.06779 | 0.00000  | -0.00003 | 0.00003  | 0.00000  | 2.06780 |
| R29 | 2.06370 | 0.00001  | -0.00003 | 0.00003  | -0.00001 | 2.06370 |
| R30 | 2.06850 | 0.00002  | -0.00007 | 0.00005  | -0.00002 | 2.06848 |
| R31 | 2.06084 | 0.00000  | -0.00005 | 0.00001  | -0.00004 | 2.06080 |
| R32 | 2.88071 | -0.00004 | 0.00029  | -0.00028 | 0.00001  | 2.88072 |
| R33 | 2.28320 | -0.00003 | 0.00002  | -0.00008 | -0.00006 | 2.28314 |
| R34 | 2.51729 | -0.00005 | -0.00014 | 0.00012  | -0.00002 | 2.51727 |
| R35 | 1.89921 | -0.00004 | -0.00056 | -0.00016 | -0.00072 | 1.89849 |
| A1  | 1.88406 | 0.00001  | 0.00002  | -0.00006 | -0.00004 | 1.88402 |
| A2  | 2.27343 | -0.00001 | -0.00017 | -0.00002 | -0.00018 | 2.27325 |
| A3  | 2.12521 | 0.00000  | 0.00015  | 0.00006  | 0.00021  | 2.12542 |
| A4  | 1.85655 | 0.00000  | 0.00002  | 0.00007  | 0.00008  | 1.85663 |
| A5  | 2.26766 | -0.00011 | -0.00011 | 0.00014  | 0.00003  | 2.26769 |
| A6  | 2.15235 | 0.00011  | 0.00011  | -0.00014 | -0.00002 | 2.15233 |
| A7  | 1.90035 | -0.00001 | -0.00003 | -0.00002 | -0.00005 | 1.90030 |
| A8  | 2.21851 | 0.00000  | 0.00019  | -0.00029 | -0.00010 | 2.21841 |
| A9  | 2.16420 | 0.00001  | -0.00016 | 0.00032  | 0.00016  | 2.16436 |
| A10 | 1.89663 | -0.00001 | -0.00003 | 0.00008  | 0.00006  | 1.89668 |
| A11 | 2.19042 | -0.00001 | -0.00004 | -0.00009 | -0.00013 | 2.19029 |
| A12 | 2.19606 | 0.00001  | 0.00005  | 0.00003  | 0.00008  | 2.19614 |
| A13 | 1.88720 | 0.00000  | 0.00003  | -0.00008 | -0.00005 | 1.88714 |
| A14 | 2.19036 | -0.00021 | -0.00008 | -0.00008 | -0.00016 | 2.19020 |

|     |         |          |          |          |          |         |
|-----|---------|----------|----------|----------|----------|---------|
| A15 | 2.20074 | 0.00020  | -0.00009 | 0.00012  | 0.00003  | 2.20076 |
| A16 | 1.88845 | 0.00014  | -0.00009 | 0.00023  | 0.00014  | 1.88859 |
| A17 | 1.85848 | -0.00004 | 0.00042  | -0.00043 | -0.00001 | 1.85847 |
| A18 | 1.96205 | -0.00017 | -0.00038 | 0.00013  | -0.00025 | 1.96180 |
| A19 | 1.88886 | -0.00003 | 0.00018  | -0.00014 | 0.00004  | 1.88890 |
| A20 | 1.93167 | 0.00002  | -0.00002 | -0.00009 | -0.00011 | 1.93156 |
| A21 | 1.93129 | 0.00008  | -0.00007 | 0.00028  | 0.00021  | 1.93149 |
| A22 | 2.72905 | -0.00005 | 0.00429  | 0.00038  | 0.00468  | 2.73372 |
| A23 | 2.15336 | 0.00003  | 0.00030  | -0.00010 | 0.00019  | 2.15355 |
| A24 | 1.96446 | -0.00003 | 0.00008  | -0.00005 | 0.00003  | 1.96449 |
| A25 | 2.16532 | 0.00000  | -0.00037 | 0.00015  | -0.00022 | 2.16510 |
| A26 | 2.06449 | -0.00003 | -0.00017 | -0.00012 | -0.00029 | 2.06420 |
| A27 | 2.15797 | 0.00003  | -0.00012 | 0.00015  | 0.00002  | 2.15800 |
| A28 | 2.06044 | 0.00000  | 0.00029  | -0.00002 | 0.00027  | 2.06071 |
| A29 | 2.05829 | 0.00003  | 0.00027  | 0.00022  | 0.00049  | 2.05877 |
| A30 | 2.12824 | -0.00001 | -0.00060 | -0.00028 | -0.00088 | 2.12736 |
| A31 | 1.97546 | 0.00004  | -0.00036 | 0.00047  | 0.00012  | 1.97558 |
| A32 | 2.00070 | -0.00004 | 0.00008  | -0.00065 | -0.00057 | 2.00013 |
| A33 | 2.02659 | -0.00003 | 0.00041  | 0.00010  | 0.00051  | 2.02710 |
| A34 | 2.04062 | -0.00003 | 0.00012  | -0.00025 | -0.00012 | 2.04050 |
| A35 | 2.13855 | 0.00006  | -0.00012 | 0.00051  | 0.00038  | 2.13893 |
| A36 | 1.94519 | -0.00003 | 0.00042  | -0.00026 | 0.00016  | 1.94536 |
| A37 | 2.03857 | 0.00006  | -0.00004 | 0.00025  | 0.00021  | 2.03877 |
| A38 | 2.02368 | -0.00002 | -0.00019 | -0.00017 | -0.00036 | 2.02332 |
| A39 | 2.09615 | 0.00001  | 0.00120  | 0.00117  | 0.00241  | 2.09856 |
| A40 | 2.36492 | 0.00000  | 0.00169  | 0.00058  | 0.00227  | 2.36719 |
| A41 | 1.93533 | 0.00000  | 0.00002  | -0.00001 | 0.00001  | 1.93534 |
| A42 | 1.91410 | 0.00000  | -0.00014 | 0.00011  | -0.00004 | 1.91407 |
| A43 | 1.93631 | 0.00000  | 0.00011  | -0.00003 | 0.00009  | 1.93640 |
| A44 | 1.88223 | 0.00000  | 0.00000  | -0.00001 | -0.00001 | 1.88221 |
| A45 | 1.90037 | 0.00000  | 0.00003  | -0.00001 | 0.00001  | 1.90039 |
| A46 | 1.89422 | 0.00000  | -0.00003 | -0.00005 | -0.00007 | 1.89415 |
| A47 | 1.88238 | 0.00001  | 0.00050  | -0.00016 | 0.00033  | 1.88271 |
| A48 | 1.94516 | 0.00008  | -0.00010 | -0.00008 | -0.00018 | 1.94497 |
| A49 | 1.97177 | -0.00017 | -0.00025 | -0.00004 | -0.00029 | 1.97148 |
| A50 | 1.88253 | -0.00002 | 0.00010  | 0.00010  | 0.00021  | 1.88273 |
| A51 | 1.90085 | 0.00014  | -0.00006 | 0.00018  | 0.00012  | 1.90097 |
| A52 | 1.87895 | -0.00002 | -0.00018 | 0.00002  | -0.00016 | 1.87879 |
| A53 | 2.14819 | -0.00003 | 0.00006  | 0.00001  | 0.00007  | 2.14826 |
| A54 | 1.94994 | 0.00008  | 0.00012  | -0.00031 | -0.00019 | 1.94975 |
| A55 | 2.18478 | -0.00004 | -0.00019 | 0.00032  | 0.00012  | 2.18490 |
| A56 | 1.93591 | -0.00032 | 0.00031  | -0.00025 | 0.00006  | 1.93597 |
| A57 | 2.81609 | -0.00029 | -0.00218 | -0.00062 | -0.00279 | 2.81330 |
| D1  | 0.00351 | -0.00004 | -0.00026 | 0.00030  | 0.00004  | 0.00355 |

|     |          |          |          |          |          |          |
|-----|----------|----------|----------|----------|----------|----------|
| D2  | 3.02249  | -0.00001 | -0.00004 | 0.00093  | 0.00089  | 3.02338  |
| D3  | -3.10431 | 0.00002  | -0.00043 | 0.00080  | 0.00037  | -3.10394 |
| D4  | -0.08534 | 0.00005  | -0.00021 | 0.00143  | 0.00123  | -0.08411 |
| D5  | -0.00253 | 0.00004  | 0.00037  | -0.00054 | -0.00018 | -0.00271 |
| D6  | -3.04309 | 0.00005  | 0.00183  | -0.00016 | 0.00167  | -3.04143 |
| D7  | 3.10875  | -0.00001 | 0.00051  | -0.00099 | -0.00048 | 3.10827  |
| D8  | 0.06819  | 0.00000  | 0.00197  | -0.00061 | 0.00136  | 0.06955  |
| D9  | -0.00329 | 0.00002  | 0.00007  | 0.00004  | 0.00011  | -0.00318 |
| D10 | 3.12147  | 0.00004  | -0.00004 | 0.00087  | 0.00082  | 3.12229  |
| D11 | -3.03240 | 0.00002  | -0.00012 | -0.00056 | -0.00068 | -3.03308 |
| D12 | 0.09236  | 0.00003  | -0.00023 | 0.00027  | 0.00004  | 0.09240  |
| D13 | -1.51097 | 0.00015  | -0.00006 | 0.00083  | 0.00077  | -1.51020 |
| D14 | 1.48972  | 0.00017  | 0.00019  | 0.00157  | 0.00176  | 1.49148  |
| D15 | 0.00176  | 0.00000  | 0.00016  | -0.00038 | -0.00022 | 0.00154  |
| D16 | 3.13104  | 0.00000  | -0.00064 | 0.00104  | 0.00040  | 3.13145  |
| D17 | -3.12364 | -0.00001 | 0.00026  | -0.00117 | -0.00091 | -3.12455 |
| D18 | 0.00564  | -0.00001 | -0.00053 | 0.00025  | -0.00028 | 0.00536  |
| D19 | -0.19595 | 0.00000  | 0.00085  | 0.00002  | 0.00086  | -0.19509 |
| D20 | 2.95551  | 0.00000  | 0.00098  | -0.00014 | 0.00084  | 2.95635  |
| D21 | 2.92643  | 0.00002  | 0.00072  | 0.00096  | 0.00167  | 2.92810  |
| D22 | -0.20529 | 0.00002  | 0.00085  | 0.00080  | 0.00165  | -0.20364 |
| D23 | 0.00046  | -0.00003 | -0.00032 | 0.00057  | 0.00025  | 0.00070  |
| D24 | 3.04025  | -0.00006 | -0.00180 | 0.00017  | -0.00163 | 3.03863  |
| D25 | -3.12878 | -0.00003 | 0.00047  | -0.00086 | -0.00038 | -3.12916 |
| D26 | -0.08898 | -0.00006 | -0.00100 | -0.00125 | -0.00225 | -0.09123 |
| D27 | -2.48001 | 0.00001  | -0.00274 | -0.00127 | -0.00401 | -2.48402 |
| D28 | -0.45295 | 0.00002  | -0.00236 | -0.00154 | -0.00390 | -0.45685 |
| D29 | 1.66467  | 0.00000  | -0.00240 | -0.00140 | -0.00380 | 1.66087  |
| D30 | 0.78049  | 0.00004  | -0.00102 | -0.00081 | -0.00183 | 0.77866  |
| D31 | 2.80755  | 0.00005  | -0.00064 | -0.00108 | -0.00173 | 2.80582  |
| D32 | -1.35802 | 0.00002  | -0.00068 | -0.00094 | -0.00163 | -1.35964 |
| D33 | -3.00265 | 0.00011  | -0.00027 | 0.00121  | 0.00094  | -3.00172 |
| D34 | 1.21734  | 0.00009  | -0.00065 | 0.00124  | 0.00059  | 1.21792  |
| D35 | -0.90089 | 0.00018  | -0.00017 | 0.00130  | 0.00113  | -0.89976 |
| D36 | 1.16660  | 0.00003  | 0.00012  | 0.00089  | 0.00101  | 1.16761  |
| D37 | -0.89659 | 0.00001  | -0.00026 | 0.00092  | 0.00066  | -0.89593 |
| D38 | -3.01482 | 0.00010  | 0.00022  | 0.00098  | 0.00121  | -3.01361 |
| D39 | -0.92720 | 0.00000  | -0.00004 | 0.00094  | 0.00090  | -0.92630 |
| D40 | -2.99039 | -0.00002 | -0.00042 | 0.00097  | 0.00055  | -2.98984 |
| D41 | 1.17456  | 0.00007  | 0.00006  | 0.00103  | 0.00110  | 1.17566  |
| D42 | -3.13973 | 0.00001  | 0.00010  | 0.00036  | 0.00046  | -3.13927 |
| D43 | -0.02419 | 0.00001  | 0.00016  | 0.00054  | 0.00069  | -0.02350 |
| D44 | -0.00914 | 0.00001  | -0.00005 | 0.00054  | 0.00049  | -0.00865 |
| D45 | 3.10639  | 0.00001  | 0.00001  | 0.00071  | 0.00073  | 3.10712  |

|     |          |          |          |          |          |          |
|-----|----------|----------|----------|----------|----------|----------|
| D46 | -2.75284 | 0.00001  | -0.00015 | 0.00029  | 0.00013  | -2.75270 |
| D47 | -0.04858 | 0.00001  | -0.00067 | 0.00046  | -0.00021 | -0.04879 |
| D48 | -0.02004 | -0.00001 | 0.00019  | 0.00040  | 0.00059  | -0.01945 |
| D49 | 2.68422  | 0.00000  | -0.00033 | 0.00058  | 0.00025  | 2.68447  |
| D50 | 0.32160  | -0.00003 | 0.00127  | 0.00030  | 0.00157  | 0.32317  |
| D51 | -2.05758 | 0.00002  | 0.00095  | 0.00034  | 0.00128  | -2.05630 |
| D52 | 2.55248  | 0.00002  | -0.00133 | -0.00132 | -0.00264 | 2.54985  |
| D53 | 0.17036  | 0.00002  | -0.00147 | -0.00102 | -0.00249 | 0.16787  |
| D54 | 2.55769  | 0.00000  | 0.00064  | -0.00048 | 0.00016  | 2.55785  |
| D55 | -1.64868 | -0.00001 | 0.00057  | -0.00044 | 0.00013  | -1.64855 |
| D56 | 0.44362  | -0.00001 | 0.00052  | -0.00045 | 0.00007  | 0.44369  |
| D57 | 1.33095  | 0.00000  | 0.00062  | -0.00066 | -0.00004 | 1.33091  |
| D58 | -2.87542 | 0.00000  | 0.00055  | -0.00062 | -0.00007 | -2.87549 |
| D59 | -0.78312 | 0.00000  | 0.00050  | -0.00063 | -0.00013 | -0.78325 |
| D60 | -1.01732 | 0.00000  | 0.00020  | -0.00033 | -0.00012 | -1.01744 |
| D61 | 1.05949  | 0.00000  | 0.00013  | -0.00028 | -0.00015 | 1.05934  |
| D62 | -3.13139 | 0.00000  | 0.00008  | -0.00029 | -0.00021 | -3.13160 |
| D63 | 1.48329  | 0.00000  | -0.00079 | -0.00013 | -0.00091 | 1.48238  |
| D64 | 2.82658  | 0.00001  | 0.00114  | 0.00110  | 0.00223  | 2.82881  |
| D65 | 2.26278  | -0.00004 | -0.00464 | -0.00091 | -0.00555 | 2.25723  |
| D66 | -0.85476 | 0.00010  | -0.00440 | -0.00128 | -0.00568 | -0.86044 |
| D67 | -1.92923 | -0.00005 | -0.00421 | -0.00102 | -0.00523 | -1.93446 |
| D68 | 1.23642  | 0.00009  | -0.00397 | -0.00139 | -0.00536 | 1.23105  |
| D69 | 0.10752  | -0.00001 | -0.00422 | -0.00079 | -0.00501 | 0.10251  |
| D70 | -3.01002 | 0.00013  | -0.00398 | -0.00116 | -0.00514 | -3.01516 |
| D71 | 2.92501  | -0.00021 | -0.00149 | 0.00025  | -0.00124 | 2.92378  |
| D72 | -0.19192 | -0.00007 | -0.00125 | -0.00013 | -0.00137 | -0.19330 |
| D73 | -1.89863 | 0.00013  | 0.00997  | 0.00580  | 0.01577  | -1.88286 |

| Item                 | Value    | Threshold | Converged? |
|----------------------|----------|-----------|------------|
| Maximum Force        | 0.000316 | 0.000450  | YES        |
| RMS Force            | 0.000068 | 0.000300  | YES        |
| Maximum Displacement | 0.037652 | 0.001800  | NO         |
| RMS Displacement     | 0.008645 | 0.001200  | NO         |

Predicted change in Energy=-2.641986D-06

GradGradGradGradGradGradGradGradGradGradGradGradGradGradGradGradGradGradGrad

Input orientation:

| Center Number | Atomic Number | Atomic Type | Coordinates (Angstroms) |          |          |
|---------------|---------------|-------------|-------------------------|----------|----------|
|               |               |             | X                       | Y        | Z        |
| 1             | 6             | 0           | -0.839277               | 1.638370 | 1.529673 |
| 2             | 6             | 0           | -1.499417               | 0.450741 | 1.569558 |
| 3             | 7             | 0           | -2.373929               | 0.452422 | 0.490748 |

|    |    |   |           |           |           |
|----|----|---|-----------|-----------|-----------|
| 4  | 6  | 0 | -2.242459 | 1.611636  | -0.173129 |
| 5  | 7  | 0 | -1.312603 | 2.353865  | 0.440492  |
| 6  | 6  | 0 | -0.778399 | 3.643290  | -0.034049 |
| 7  | 1  | 0 | -0.058626 | 2.021067  | 2.162814  |
| 8  | 1  | 0 | -1.340185 | -0.422054 | 2.214882  |
| 9  | 1  | 0 | -1.616298 | 4.256941  | -0.369243 |
| 10 | 1  | 0 | -0.326405 | 4.126948  | 0.829767  |
| 11 | 35 | 0 | -0.393048 | -2.455151 | 2.884131  |
| 12 | 1  | 0 | -2.787528 | 1.890064  | -1.058620 |
| 13 | 6  | 0 | -3.268550 | -0.595280 | 0.102785  |
| 14 | 6  | 0 | -3.227481 | -1.817818 | 0.616205  |
| 15 | 1  | 0 | -3.971047 | -0.280823 | -0.659145 |
| 16 | 1  | 0 | -3.943544 | -2.547849 | 0.260239  |
| 17 | 1  | 0 | -2.496144 | -2.136610 | 1.361981  |
| 18 | 6  | 0 | 2.565494  | -0.688133 | 1.120185  |
| 19 | 6  | 0 | 3.982824  | -0.372185 | 1.321978  |
| 20 | 8  | 0 | 2.979114  | 0.656090  | 1.527575  |
| 21 | 1  | 0 | 2.193302  | -0.730588 | 0.100476  |
| 22 | 1  | 0 | 1.986019  | -1.228179 | 1.864377  |
| 23 | 1  | 0 | 4.428280  | -0.687182 | 2.262798  |
| 24 | 6  | 0 | 4.937512  | -0.169193 | 0.177784  |
| 25 | 1  | 0 | 5.695599  | 0.577884  | 0.430245  |
| 26 | 1  | 0 | 5.453122  | -1.108790 | -0.042772 |
| 27 | 1  | 0 | 4.407322  | 0.154774  | -0.720294 |
| 28 | 6  | 0 | 0.251975  | 3.471270  | -1.159725 |
| 29 | 1  | 0 | 0.702767  | 4.449457  | -1.354852 |
| 30 | 1  | 0 | -0.218771 | 3.129680  | -2.082205 |
| 31 | 6  | 0 | 1.355440  | 2.479600  | -0.809314 |
| 32 | 8  | 0 | 1.676249  | 1.566949  | -1.533098 |
| 33 | 8  | 0 | 1.883683  | 2.732603  | 0.387096  |
| 34 | 1  | 0 | 2.458082  | 1.967896  | 0.694645  |

-----  
Distance matrix (angstroms):

|    |   | 1        | 2        | 3        | 4        | 5        |
|----|---|----------|----------|----------|----------|----------|
| 1  | C | 0.000000 |          |          |          |          |
| 2  | C | 1.359352 | 0.000000 |          |          |          |
| 3  | N | 2.200226 | 1.388742 | 0.000000 |          |          |
| 4  | C | 2.206619 | 2.221879 | 1.342310 | 0.000000 |          |
| 5  | N | 1.386465 | 2.220714 | 2.178170 | 1.338681 | 0.000000 |
| 6  | C | 2.543351 | 3.644693 | 3.605934 | 2.508073 | 1.474170 |
| 7  | H | 1.075519 | 2.212183 | 3.258386 | 3.223878 | 2.156295 |
| 8  | H | 2.228400 | 1.097073 | 2.192252 | 3.263830 | 3.294685 |
| 9  | H | 3.326643 | 4.273144 | 3.973405 | 2.725467 | 2.090358 |
| 10 | H | 2.635513 | 3.929090 | 4.220122 | 3.317206 | 2.065901 |

|    |    |          |          |          |          |          |
|----|----|----------|----------|----------|----------|----------|
| 11 | Br | 4.334812 | 3.375850 | 4.255132 | 5.413494 | 5.472074 |
| 12 | H  | 3.249353 | 3.261625 | 2.153700 | 1.076437 | 2.153567 |
| 13 | C  | 3.595354 | 2.524959 | 1.431273 | 2.449381 | 3.554888 |
| 14 | C  | 4.299206 | 3.006900 | 2.428637 | 3.654377 | 4.593536 |
| 15 | H  | 4.275770 | 3.407530 | 2.100165 | 2.608761 | 3.901040 |
| 16 | H  | 5.363988 | 4.084069 | 3.393885 | 4.514733 | 5.566071 |
| 17 | H  | 4.125992 | 2.780457 | 2.734423 | 4.058358 | 4.734372 |
| 18 | C  | 4.144003 | 4.245287 | 5.108321 | 5.484342 | 4.975477 |
| 19 | C  | 5.228588 | 5.549186 | 6.463685 | 6.702614 | 6.020791 |
| 20 | O  | 3.942714 | 4.483432 | 5.456332 | 5.574073 | 4.741628 |
| 21 | H  | 4.105010 | 4.146072 | 4.734070 | 5.023629 | 4.681970 |
| 22 | H  | 4.038741 | 3.879942 | 4.870361 | 5.485983 | 5.073401 |
| 23 | H  | 5.804552 | 6.075610 | 7.121018 | 7.464386 | 6.747333 |
| 24 | C  | 6.202111 | 6.614787 | 7.344489 | 7.405841 | 6.745278 |
| 25 | H  | 6.711034 | 7.285770 | 8.070729 | 8.027793 | 7.229738 |
| 26 | H  | 7.043704 | 7.305446 | 7.999047 | 8.163314 | 7.615679 |
| 27 | H  | 5.898323 | 6.341970 | 6.894968 | 6.829453 | 6.237065 |
| 28 | C  | 3.432669 | 4.431698 | 4.328149 | 3.264018 | 2.501438 |
| 29 | H  | 4.312841 | 5.421394 | 5.371088 | 4.257235 | 3.417087 |
| 30 | H  | 3.956601 | 4.706606 | 4.293309 | 3.169281 | 2.856984 |
| 31 | C  | 3.315918 | 4.233853 | 4.439348 | 3.755393 | 2.948946 |
| 32 | O  | 3.964031 | 4.577908 | 4.662838 | 4.148227 | 3.667088 |
| 33 | O  | 3.149181 | 4.248584 | 4.830861 | 4.312246 | 3.219090 |
| 34 | H  | 3.417373 | 4.327704 | 5.068191 | 4.793228 | 3.798899 |
|    |    | 6        | 7        | 8        | 9        | 10       |
| 6  | C  | 0.000000 |          |          |          |          |
| 7  | H  | 2.824161 | 0.000000 |          |          |          |
| 8  | H  | 4.679777 | 2.759339 | 0.000000 |          |          |
| 9  | H  | 1.091328 | 3.719783 | 5.352283 | 0.000000 |          |
| 10 | H  | 1.088303 | 2.506682 | 4.862069 | 1.765885 | 0.000000 |
| 11 | Br | 6.771651 | 4.546281 | 2.340608 | 7.558635 | 6.895570 |
| 12 | H  | 2.856596 | 4.223944 | 4.261045 | 2.729308 | 3.824498 |
| 13 | C  | 4.917829 | 4.625214 | 2.865231 | 5.147503 | 5.611075 |
| 14 | C  | 6.020342 | 5.212550 | 2.840036 | 6.361580 | 6.618315 |
| 15 | H  | 5.097294 | 5.345016 | 3.898898 | 5.120565 | 5.910053 |
| 16 | H  | 6.959522 | 6.291850 | 3.888072 | 7.219244 | 7.613211 |
| 17 | H  | 6.189248 | 4.885603 | 2.236824 | 6.681973 | 6.650052 |
| 18 | C  | 5.592414 | 3.913162 | 4.064909 | 6.645264 | 5.624271 |
| 19 | C  | 6.374331 | 4.771580 | 5.397610 | 7.459169 | 6.249314 |
| 20 | O  | 5.047865 | 3.390362 | 4.504568 | 6.138556 | 4.843578 |
| 21 | H  | 5.289604 | 4.110478 | 4.129339 | 6.293579 | 5.520548 |
| 22 | H  | 5.914155 | 3.850615 | 3.440396 | 6.931975 | 5.924112 |
| 23 | H  | 7.151084 | 5.241844 | 5.774753 | 8.240687 | 6.916390 |
| 24 | C  | 6.873975 | 5.805082 | 6.604785 | 7.927315 | 6.825740 |

|    |    |          |          |          |          |          |
|----|----|----------|----------|----------|----------|----------|
| 25 | H  | 7.178087 | 6.180264 | 7.327145 | 8.224261 | 7.001428 |
| 26 | H  | 7.836721 | 6.711183 | 7.191498 | 8.881124 | 7.847115 |
| 27 | H  | 6.287478 | 5.633831 | 6.479339 | 7.296233 | 6.370952 |
| 28 | C  | 1.535711 | 3.638520 | 5.392672 | 2.175451 | 2.173135 |
| 29 | H  | 2.142027 | 4.341747 | 6.375600 | 2.527163 | 2.436343 |
| 30 | H  | 2.184472 | 4.390313 | 5.686593 | 2.481539 | 3.079888 |
| 31 | C  | 2.551172 | 3.323158 | 4.983147 | 3.490535 | 2.868614 |
| 32 | O  | 3.547342 | 4.108014 | 5.205992 | 4.408115 | 4.018377 |
| 33 | O  | 2.844889 | 2.726173 | 4.866825 | 3.891725 | 2.650404 |
| 34 | H  | 3.716551 | 2.914132 | 4.738123 | 4.792928 | 3.526065 |
|    |    | 11       | 12       | 13       | 14       | 15       |
| 11 | Br | 0.000000 |          |          |          |          |
| 12 | H  | 6.337169 | 0.000000 |          |          |          |
| 13 | C  | 4.411748 | 2.785171 | 0.000000 |          |          |
| 14 | C  | 3.685606 | 4.092308 | 1.326607 | 0.000000 |          |
| 15 | H  | 5.484941 | 2.504606 | 1.083015 | 2.131141 | 0.000000 |
| 16 | H  | 4.415815 | 4.771880 | 2.071940 | 1.082776 | 2.446513 |
| 17 | H  | 2.615611 | 4.707263 | 2.134921 | 1.092092 | 3.115162 |
| 18 | C  | 3.871282 | 6.328439 | 5.922819 | 5.923574 | 6.786625 |
| 19 | C  | 5.091888 | 7.524805 | 7.356536 | 7.387588 | 8.197393 |
| 20 | O  | 4.784510 | 6.439353 | 6.529108 | 6.743340 | 7.346039 |
| 21 | H  | 4.172776 | 5.746303 | 5.463528 | 5.552741 | 6.227240 |
| 22 | H  | 2.864493 | 6.407348 | 5.578016 | 5.393161 | 6.538523 |
| 23 | H  | 5.172714 | 8.351162 | 7.994704 | 7.912033 | 8.902335 |
| 24 | C  | 6.400374 | 8.089838 | 8.217458 | 8.341300 | 8.948482 |
| 25 | H  | 7.231354 | 8.712174 | 9.046519 | 9.240958 | 9.765664 |
| 26 | H  | 6.675115 | 8.827990 | 8.737988 | 8.734406 | 9.480528 |
| 27 | H  | 6.545773 | 7.408885 | 7.756227 | 7.997973 | 8.389908 |
| 28 | C  | 7.203561 | 3.427684 | 5.524930 | 6.575332 | 5.671217 |
| 29 | H  | 8.175781 | 4.338249 | 6.583724 | 7.655759 | 6.686112 |
| 30 | H  | 7.475641 | 3.030328 | 5.286838 | 6.388387 | 5.266518 |
| 31 | C  | 6.407068 | 4.192123 | 5.627441 | 6.442288 | 6.001163 |
| 32 | O  | 6.322277 | 4.500538 | 5.639359 | 6.334249 | 6.005831 |
| 33 | O  | 6.191242 | 4.961872 | 6.140125 | 6.847102 | 6.667325 |
| 34 | H  | 5.699661 | 5.531403 | 6.301942 | 6.831061 | 6.944291 |
|    |    | 16       | 17       | 18       | 19       | 20       |
| 16 | H  | 0.000000 |          |          |          |          |
| 17 | H  | 1.864918 | 0.000000 |          |          |          |
| 18 | C  | 6.823901 | 5.270363 | 0.000000 |          |          |
| 19 | C  | 8.287829 | 6.715045 | 1.466072 | 0.000000 |          |
| 20 | O  | 7.732694 | 6.148581 | 1.464234 | 1.451569 | 0.000000 |
| 21 | H  | 6.402253 | 5.055611 | 1.086341 | 2.196112 | 2.139390 |
| 22 | H  | 6.282874 | 4.600808 | 1.086859 | 2.239230 | 2.156418 |
| 23 | H  | 8.806801 | 7.131617 | 2.185300 | 1.087565 | 2.108320 |

|    |   |           |          |          |          |          |
|----|---|-----------|----------|----------|----------|----------|
| 24 | C | 9.194452  | 7.780250 | 2.604590 | 1.503933 | 2.517608 |
| 25 | H | 10.134702 | 8.679934 | 3.446212 | 2.152072 | 2.930791 |
| 26 | H | 9.511049  | 8.137603 | 3.141309 | 2.137032 | 3.420747 |
| 27 | H | 8.831907  | 7.565987 | 2.736821 | 2.151455 | 2.709984 |
| 28 | C | 7.473183  | 6.734945 | 5.277403 | 5.903408 | 4.752274 |
| 29 | H | 8.553304  | 7.809641 | 5.999199 | 6.416574 | 5.280131 |
| 30 | H | 7.182988  | 6.691985 | 5.708163 | 6.442431 | 5.419929 |
| 31 | C | 7.382305  | 6.392075 | 3.901504 | 4.424729 | 3.379728 |
| 32 | O | 7.192335  | 6.285435 | 3.593892 | 4.151142 | 3.448890 |
| 33 | O | 7.864848  | 6.621369 | 3.564228 | 3.862656 | 2.610090 |
| 34 | H | 7.846112  | 6.468127 | 2.692046 | 2.862580 | 1.638928 |
|    |   | 21        | 22       | 23       | 24       | 25       |
| 21 | H | 0.000000  |          |          |          |          |
| 22 | H | 1.844427  | 0.000000 |          |          |          |
| 23 | H | 3.110088  | 2.532993 | 0.000000 |          |          |
| 24 | C | 2.802111  | 3.560528 | 2.207921 | 0.000000 |          |
| 25 | H | 3.753256  | 4.368018 | 2.562175 | 1.093873 | 0.000000 |
| 26 | H | 3.284811  | 3.958823 | 2.558068 | 1.094231 | 1.768448 |
| 27 | H | 2.521788  | 3.802077 | 3.099704 | 1.092062 | 1.778319 |
| 28 | C | 4.797131  | 5.851232 | 6.815270 | 6.082446 | 6.366531 |
| 29 | H | 5.583237  | 6.651745 | 7.304238 | 6.450889 | 6.565365 |
| 30 | H | 5.048154  | 6.279135 | 7.419068 | 6.525133 | 6.914032 |
| 31 | C | 3.440209  | 4.614529 | 5.376684 | 4.563081 | 4.897959 |
| 32 | O | 2.866109  | 4.410389 | 5.202269 | 4.071503 | 4.581281 |
| 33 | O | 3.488798  | 4.228549 | 4.657055 | 4.217832 | 4.378970 |
| 34 | H | 2.775781  | 3.435987 | 3.659266 | 3.313890 | 3.533207 |
|    |   | 26        | 27       | 28       | 29       | 30       |
| 26 | H | 0.000000  |          |          |          |          |
| 27 | H | 1.774635  | 0.000000 |          |          |          |
| 28 | C | 7.019719  | 5.334712 | 0.000000 |          |          |
| 29 | H | 7.428428  | 5.707074 | 1.094595 | 0.000000 |          |
| 30 | H | 7.368466  | 5.666181 | 1.090530 | 1.766376 | 0.000000 |
| 31 | C | 5.500466  | 3.837542 | 1.524411 | 2.145677 | 2.126263 |
| 32 | O | 4.862656  | 3.180196 | 2.407156 | 3.047670 | 2.516893 |
| 33 | O | 5.261367  | 3.773628 | 2.366591 | 2.715977 | 3.267327 |
| 34 | H | 4.356610  | 3.014797 | 3.250496 | 3.666021 | 4.028173 |
|    |   | 31        | 32       | 33       | 34       |          |
| 31 | C | 0.000000  |          |          |          |          |
| 32 | O | 1.208186  | 0.000000 |          |          |          |
| 33 | O | 1.332084  | 2.255864 | 0.000000 |          |          |
| 34 | H | 1.933792  | 2.394756 | 1.004638 | 0.000000 |          |

Stoichiometry C<sub>11</sub>H<sub>17</sub>BrN<sub>2</sub>O<sub>3</sub>

Framework group C1[X(C<sub>11</sub>H<sub>17</sub>BrN<sub>2</sub>O<sub>3</sub>)]

Deg. of freedom 96



Full point group C1 NOp 1  
 Largest Abelian subgroup C1 NOp 1  
 Largest concise Abelian subgroup C1 NOp 1

Standard orientation:

| Center<br>Number | Atomic<br>Number | Atomic<br>Type | Coordinates (Angstroms) |           |           |
|------------------|------------------|----------------|-------------------------|-----------|-----------|
|                  |                  |                | X                       | Y         | Z         |
| 1                | 6                | 0              | 0.067191                | 1.325953  | 1.233899  |
| 2                | 6                | 0              | -1.166692               | 1.236539  | 0.670539  |
| 3                | 7                | 0              | -1.254626               | 2.275631  | -0.246609 |
| 4                | 6                | 0              | -0.105635               | 2.969377  | -0.228448 |
| 5                | 7                | 0              | 0.718040                | 2.410994  | 0.667005  |
| 6                | 6                | 0              | 2.122022                | 2.789253  | 0.909766  |
| 7                | 1                | 0              | 0.544635                | 0.697601  | 1.964626  |
| 8                | 1                | 0              | -1.935835               | 0.461804  | 0.779039  |
| 9                | 1                | 0              | 2.180738                | 3.878468  | 0.943825  |
| 10               | 1                | 0              | 2.379937                | 2.403520  | 1.894192  |
| 11               | 35               | 0              | -3.047089               | -1.543532 | 0.307666  |
| 12               | 1                | 0              | 0.117494                | 3.825203  | -0.842038 |
| 13               | 6                | 0              | -2.359677               | 2.579345  | -1.104024 |
| 14               | 6                | 0              | -3.388758               | 1.762151  | -1.285887 |
| 15               | 1                | 0              | -2.255507               | 3.541006  | -1.591136 |
| 16               | 1                | 0              | -4.179751               | 2.074841  | -1.955931 |
| 17               | 1                | 0              | -3.472176               | 0.780227  | -0.815215 |
| 18               | 6                | 0              | 0.657265                | -2.460428 | -0.343406 |
| 19               | 6                | 0              | 1.642999                | -3.497924 | -0.025134 |
| 20               | 8                | 0              | 1.672142                | -2.233605 | 0.687398  |
| 21               | 1                | 0              | 0.815523                | -1.864785 | -1.238002 |
| 22               | 1                | 0              | -0.363115               | -2.504544 | 0.028265  |
| 23               | 1                | 0              | 1.312665                | -4.309912 | 0.618567  |
| 24               | 6                | 0              | 2.815331                | -3.801168 | -0.917040 |
| 25               | 1                | 0              | 3.684933                | -4.106440 | -0.327838 |
| 26               | 1                | 0              | 2.561601                | -4.624524 | -1.591611 |
| 27               | 1                | 0              | 3.083980                | -2.930094 | -1.518419 |
| 28               | 6                | 0              | 3.072361                | 2.228282  | -0.158211 |
| 29               | 1                | 0              | 4.098348                | 2.427164  | 0.167266  |
| 30               | 1                | 0              | 2.925267                | 2.719867  | -1.120481 |
| 31               | 6                | 0              | 2.904508                | 0.728716  | -0.374906 |
| 32               | 8                | 0              | 2.755407                | 0.232655  | -1.466422 |
| 33               | 8                | 0              | 2.914388                | 0.060154  | 0.777212  |
| 34               | 1                | 0              | 2.604475                | -0.886358 | 0.645423  |

Rotational constants (GHZ): 0.3277840 0.2551505 0.1591393

Standard basis: 6-311++G(d,p) (5D, 7F)  
 There are 538 symmetry adapted cartesian basis functions of A symmetry.  
 There are 519 symmetry adapted basis functions of A symmetry.  
 519 basis functions, 823 primitive gaussians, 538 cartesian basis functions  
 78 alpha electrons 78 beta electrons  
 nuclear repulsion energy 1572.2579302549 Hartrees.  
 NAToms= 34 NActive= 34 NUniq= 34 SFac= 1.00D+00 NATFMM= 60 NAOKFM=F  
 Big=F  
 Integral buffers will be 131072 words long.  
 Raffenetti 2 integral format.  
 Two-electron integral symmetry is turned on.  
 One-electron integrals computed using PRISM.  
 NBasis= 519 RedAO= T EigKep= 3.54D-06 NBF= 519  
 NBsUse= 519 1.00D-06 EigRej= -1.00D+00 NBFU= 519  
 Initial guess from the checkpoint file: "./coohpo.chk"  
 B after Tr= 0.000000 0.000000 0.000000  
 Rot= 0.999999 -0.000016 -0.000221 0.001712 Ang= -0.20 deg.  
 ExpMin= 3.50D-02 ExpMax= 4.40D+05 ExpMxC= 1.51D+04 IAcc=3 IRadAn= 5 AccDes=  
 0.00D+00  
 Harris functional with IExCor= 402 and IRadAn= 5 diagonalized for initial guess.  
 HarFok: IExCor= 402 AccDes= 0.00D+00 IRadAn= 5 IDoV= 1 UseB2=F ITyADJ=14  
 ICtDFT= 3500011 ScaDFX= 1.000000 1.000000 1.000000 1.000000  
 FoFCou: FMM=F IPFlag= 0 FMFlag= 100000 FMFlg1= 0  
 NFXFlg= 0 DoJE=T BraDBF=F KetDBF=T FulRan=T  
 wScrn= 0.000000 ICntrl= 500 IOpCl= 0 I1Cent= 200000004 NGrid=  
 0  
 NMat0= 1 NMatS0= 1 NMatT0= 0 NMatD0= 1 NMtDS0= 0  
 NMtDT0= 0  
 Petite list used in FoFCou.  
 Requested convergence on RMS density matrix=1.00D-08 within 128 cycles.  
 Requested convergence on MAX density matrix=1.00D-06.  
 Requested convergence on energy=1.00D-06.  
 No special actions if energy rises.  
 SCF Done: E(RB3LYP) = -3338.90386948 A.U. after 11 cycles  
 NFock= 11 Conv=0.17D-08 -V/T= 2.0019  
 Calling FoFJK, ICntrl= 2127 FMM=F ISym2X=0 I1Cent= 0 IOpClX= 0 NMat=1 NMatS=1  
 NMatT=0.

\*\*\*\*\* Axes restored to original set \*\*\*\*\*

```

-----
Center      Atomic      Forces (Hartrees/Bohr)
Number      Number      X           Y           Z
-----
1           6           -0.000044968  0.000065083  0.000083643
2           6           0.000289245  0.000046989  0.000127413

```

|    |    |              |              |              |
|----|----|--------------|--------------|--------------|
| 3  | 7  | 0.000073079  | 0.000182062  | -0.000011697 |
| 4  | 6  | 0.000011999  | -0.000114410 | 0.000006697  |
| 5  | 7  | 0.000009721  | -0.000058350 | -0.000015108 |
| 6  | 6  | 0.000068747  | 0.000039072  | -0.000052178 |
| 7  | 1  | 0.000012181  | -0.000003583 | -0.000031886 |
| 8  | 1  | -0.000342887 | -0.000149288 | -0.000207427 |
| 9  | 1  | -0.000012045 | 0.000003277  | 0.000017226  |
| 10 | 1  | -0.000011269 | 0.000012924  | 0.000016305  |
| 11 | 35 | 0.000118216  | 0.000083592  | 0.000071208  |
| 12 | 1  | -0.000026328 | 0.000021547  | 0.000015016  |
| 13 | 6  | -0.000119608 | -0.000154261 | -0.000040578 |
| 14 | 6  | 0.000031419  | 0.000100789  | 0.000006267  |
| 15 | 1  | 0.000015316  | 0.000017340  | 0.000001000  |
| 16 | 1  | -0.000011024 | -0.000015588 | 0.000009593  |
| 17 | 1  | -0.000013697 | -0.000024928 | 0.000001578  |
| 18 | 6  | 0.000020557  | 0.000045924  | 0.000039457  |
| 19 | 6  | 0.000101219  | -0.000062232 | -0.000101333 |
| 20 | 8  | -0.000162681 | 0.000013514  | 0.000019264  |
| 21 | 1  | -0.000023372 | -0.000015990 | 0.000019742  |
| 22 | 1  | 0.000000862  | -0.000011629 | -0.000012638 |
| 23 | 1  | -0.000026321 | -0.000004783 | 0.000018623  |
| 24 | 6  | -0.000010867 | -0.000013432 | 0.000065928  |
| 25 | 1  | -0.000010919 | 0.000000762  | -0.000001611 |
| 26 | 1  | 0.000000171  | 0.000000980  | 0.000002537  |
| 27 | 1  | -0.000000347 | -0.000005415 | -0.000020183 |
| 28 | 6  | 0.000025466  | -0.000069709 | -0.000014865 |
| 29 | 1  | -0.000012771 | 0.000025424  | 0.000021918  |
| 30 | 1  | -0.000015549 | 0.000004175  | -0.000009071 |
| 31 | 6  | 0.000034170  | -0.000022739 | -0.000132228 |
| 32 | 8  | -0.000022286 | 0.000016007  | 0.000052009  |
| 33 | 8  | -0.000064194 | 0.000102855  | 0.000108264  |
| 34 | 1  | 0.000118766  | -0.000055979 | -0.000052885 |

-----  
Cartesian Forces: Max 0.000342887 RMS 0.000075725

GradGradGradGradGradGradGradGradGradGradGradGradGradGradGradGradGradGradGrad

Berny optimization.

Using GEDIIS/GDIIS optimizer.

FormGI is forming the generalized inverse of G from B-inverse, IUseBI=4.

Internal Forces: Max 0.000290686 RMS 0.000052243

Search for a local minimum.

Step number 32 out of a maximum of 175

All quantities printed in internal units (Hartrees-Bohrs-Radians)

Mixed Optimization -- En-DIIS/RFO-DIIS



|     |         |          |          |          |          |         |
|-----|---------|----------|----------|----------|----------|---------|
| R7  | 2.70471 | 0.00013  | 0.00006  | 0.00018  | 0.00024  | 2.70495 |
| R8  | 2.52974 | 0.00002  | -0.00002 | 0.00003  | 0.00001  | 2.52975 |
| R9  | 2.03417 | 0.00000  | 0.00001  | 0.00002  | 0.00002  | 2.03419 |
| R10 | 2.78578 | 0.00003  | 0.00014  | 0.00003  | 0.00017  | 2.78595 |
| R11 | 2.06231 | 0.00001  | 0.00001  | 0.00000  | 0.00002  | 2.06233 |
| R12 | 2.05659 | 0.00002  | -0.00001 | 0.00004  | 0.00002  | 2.05662 |
| R13 | 2.90207 | -0.00002 | -0.00016 | 0.00005  | -0.00012 | 2.90196 |
| R14 | 4.42311 | 0.00000  | -0.00125 | 0.00068  | -0.00056 | 4.42255 |
| R15 | 2.50692 | -0.00004 | 0.00001  | -0.00002 | -0.00001 | 2.50692 |
| R16 | 2.04660 | -0.00001 | -0.00002 | 0.00001  | -0.00001 | 2.04659 |
| R17 | 2.04615 | 0.00002  | -0.00002 | 0.00003  | 0.00001  | 2.04616 |
| R18 | 2.06375 | 0.00000  | 0.00000  | -0.00001 | -0.00001 | 2.06374 |
| R19 | 2.77048 | 0.00000  | -0.00005 | -0.00002 | -0.00007 | 2.77041 |
| R20 | 2.76700 | -0.00001 | -0.00007 | 0.00001  | -0.00006 | 2.76694 |
| R21 | 2.05289 | -0.00001 | -0.00004 | 0.00001  | -0.00002 | 2.05286 |
| R22 | 2.05387 | -0.00001 | 0.00003  | 0.00001  | 0.00004  | 2.05391 |
| R23 | 2.74307 | 0.00007  | 0.00015  | 0.00011  | 0.00026  | 2.74333 |
| R24 | 2.05520 | 0.00000  | 0.00001  | 0.00001  | 0.00003  | 2.05523 |
| R25 | 2.84202 | -0.00004 | -0.00003 | -0.00009 | -0.00012 | 2.84190 |
| R26 | 3.09712 | -0.00001 | -0.00015 | 0.00002  | -0.00014 | 3.09699 |
| R27 | 2.06712 | -0.00001 | 0.00000  | -0.00001 | -0.00001 | 2.06711 |
| R28 | 2.06780 | 0.00000  | 0.00001  | -0.00001 | -0.00001 | 2.06779 |
| R29 | 2.06370 | 0.00002  | 0.00000  | 0.00003  | 0.00003  | 2.06373 |
| R30 | 2.06848 | 0.00001  | 0.00005  | -0.00005 | 0.00000  | 2.06849 |
| R31 | 2.06080 | 0.00001  | 0.00001  | 0.00000  | 0.00001  | 2.06081 |
| R32 | 2.88072 | -0.00004 | 0.00003  | -0.00009 | -0.00006 | 2.88066 |
| R33 | 2.28314 | -0.00005 | -0.00004 | 0.00002  | -0.00002 | 2.28312 |
| R34 | 2.51727 | 0.00003  | -0.00009 | 0.00014  | 0.00006  | 2.51733 |
| R35 | 1.89849 | 0.00006  | 0.00007  | 0.00000  | 0.00006  | 1.89855 |
| A1  | 1.88402 | 0.00000  | -0.00006 | -0.00002 | -0.00008 | 1.88394 |
| A2  | 2.27325 | 0.00001  | -0.00008 | 0.00004  | -0.00004 | 2.27321 |
| A3  | 2.12542 | -0.00001 | 0.00011  | -0.00003 | 0.00008  | 2.12551 |
| A4  | 1.85663 | -0.00001 | 0.00006  | -0.00001 | 0.00005  | 1.85668 |
| A5  | 2.26769 | -0.00005 | -0.00006 | 0.00017  | 0.00011  | 2.26780 |
| A6  | 2.15233 | 0.00007  | 0.00004  | -0.00011 | -0.00007 | 2.15226 |
| A7  | 1.90030 | 0.00001  | -0.00001 | 0.00006  | 0.00005  | 1.90035 |
| A8  | 2.21841 | -0.00001 | -0.00010 | -0.00013 | -0.00023 | 2.21818 |
| A9  | 2.16436 | 0.00000  | 0.00012  | 0.00006  | 0.00019  | 2.16454 |
| A10 | 1.89668 | -0.00002 | 0.00002  | -0.00008 | -0.00006 | 1.89662 |
| A11 | 2.19029 | 0.00001  | -0.00007 | 0.00006  | 0.00000  | 2.19029 |
| A12 | 2.19614 | 0.00001  | 0.00005  | 0.00002  | 0.00007  | 2.19622 |
| A13 | 1.88714 | 0.00002  | -0.00001 | 0.00005  | 0.00005  | 1.88719 |
| A14 | 2.19020 | -0.00014 | -0.00008 | -0.00005 | -0.00014 | 2.19007 |
| A15 | 2.20076 | 0.00013  | 0.00003  | 0.00002  | 0.00005  | 2.20082 |

|     |         |          |          |          |          |         |
|-----|---------|----------|----------|----------|----------|---------|
| A16 | 1.88859 | 0.00008  | 0.00005  | -0.00011 | -0.00005 | 1.88854 |
| A17 | 1.85847 | -0.00004 | -0.00013 | 0.00000  | -0.00012 | 1.85834 |
| A18 | 1.96180 | -0.00009 | -0.00008 | 0.00007  | 0.00000  | 1.96180 |
| A19 | 1.88890 | -0.00002 | 0.00000  | -0.00011 | -0.00011 | 1.88879 |
| A20 | 1.93156 | 0.00001  | -0.00001 | -0.00012 | -0.00013 | 1.93143 |
| A21 | 1.93149 | 0.00006  | 0.00016  | 0.00025  | 0.00041  | 1.93190 |
| A22 | 2.73372 | -0.00006 | 0.00179  | -0.00016 | 0.00163  | 2.73535 |
| A23 | 2.15355 | -0.00002 | -0.00001 | -0.00007 | -0.00008 | 2.15347 |
| A24 | 1.96449 | -0.00001 | 0.00002  | -0.00009 | -0.00007 | 1.96442 |
| A25 | 2.16510 | 0.00003  | -0.00001 | 0.00016  | 0.00015  | 2.16525 |
| A26 | 2.06420 | 0.00000  | -0.00015 | 0.00004  | -0.00011 | 2.06409 |
| A27 | 2.15800 | 0.00003  | 0.00003  | 0.00009  | 0.00013  | 2.15812 |
| A28 | 2.06071 | -0.00003 | 0.00011  | -0.00013 | -0.00001 | 2.06070 |
| A29 | 2.05877 | 0.00001  | 0.00027  | 0.00013  | 0.00039  | 2.05917 |
| A30 | 2.12736 | 0.00001  | -0.00031 | -0.00012 | -0.00042 | 2.12694 |
| A31 | 1.97558 | 0.00000  | 0.00017  | 0.00000  | 0.00017  | 1.97575 |
| A32 | 2.00013 | 0.00000  | -0.00020 | 0.00007  | -0.00013 | 2.00000 |
| A33 | 2.02710 | -0.00002 | 0.00002  | -0.00005 | -0.00004 | 2.02706 |
| A34 | 2.04050 | -0.00004 | -0.00018 | -0.00013 | -0.00031 | 2.04019 |
| A35 | 2.13893 | 0.00004  | 0.00031  | 0.00014  | 0.00046  | 2.13939 |
| A36 | 1.94536 | -0.00001 | -0.00010 | -0.00006 | -0.00016 | 1.94520 |
| A37 | 2.03877 | 0.00002  | 0.00012  | -0.00003 | 0.00010  | 2.03887 |
| A38 | 2.02332 | 0.00001  | -0.00010 | 0.00003  | -0.00007 | 2.02325 |
| A39 | 2.09856 | 0.00003  | 0.00007  | 0.00049  | 0.00057  | 2.09913 |
| A40 | 2.36719 | -0.00001 | -0.00052 | -0.00022 | -0.00073 | 2.36646 |
| A41 | 1.93534 | 0.00000  | -0.00001 | -0.00005 | -0.00006 | 1.93528 |
| A42 | 1.91407 | 0.00000  | -0.00003 | -0.00002 | -0.00005 | 1.91402 |
| A43 | 1.93640 | 0.00001  | 0.00009  | 0.00008  | 0.00018  | 1.93657 |
| A44 | 1.88221 | 0.00000  | -0.00003 | 0.00002  | 0.00000  | 1.88221 |
| A45 | 1.90039 | -0.00001 | 0.00000  | -0.00002 | -0.00002 | 1.90037 |
| A46 | 1.89415 | -0.00001 | -0.00003 | -0.00002 | -0.00005 | 1.89410 |
| A47 | 1.88271 | -0.00002 | 0.00001  | -0.00010 | -0.00009 | 1.88263 |
| A48 | 1.94497 | 0.00004  | -0.00004 | -0.00005 | -0.00008 | 1.94489 |
| A49 | 1.97148 | -0.00011 | 0.00010  | -0.00014 | -0.00005 | 1.97143 |
| A50 | 1.88273 | -0.00001 | -0.00005 | 0.00000  | -0.00004 | 1.88269 |
| A51 | 1.90097 | 0.00011  | -0.00002 | 0.00014  | 0.00013  | 1.90110 |
| A52 | 1.87879 | -0.00001 | -0.00001 | 0.00015  | 0.00014  | 1.87893 |
| A53 | 2.14826 | -0.00003 | -0.00003 | 0.00011  | 0.00008  | 2.14834 |
| A54 | 1.94975 | 0.00008  | -0.00007 | 0.00001  | -0.00006 | 1.94969 |
| A55 | 2.18490 | -0.00006 | 0.00010  | -0.00013 | -0.00004 | 2.18486 |
| A56 | 1.93597 | -0.00029 | 0.00011  | -0.00034 | -0.00023 | 1.93574 |
| A57 | 2.81330 | -0.00021 | -0.00036 | -0.00053 | -0.00090 | 2.81240 |
| D1  | 0.00355 | -0.00003 | -0.00022 | -0.00004 | -0.00026 | 0.00329 |
| D2  | 3.02338 | 0.00000  | 0.00010  | 0.00040  | 0.00050  | 3.02388 |

|     |          |          |          |          |          |          |
|-----|----------|----------|----------|----------|----------|----------|
| D3  | -3.10394 | 0.00001  | 0.00060  | 0.00022  | 0.00082  | -3.10312 |
| D4  | -0.08411 | 0.00003  | 0.00091  | 0.00066  | 0.00158  | -0.08253 |
| D5  | -0.00271 | 0.00003  | 0.00009  | 0.00017  | 0.00026  | -0.00245 |
| D6  | -3.04143 | 0.00003  | 0.00066  | -0.00001 | 0.00065  | -3.04077 |
| D7  | 3.10827  | 0.00000  | -0.00064 | -0.00007 | -0.00071 | 3.10756  |
| D8  | 0.06955  | -0.00001 | -0.00007 | -0.00024 | -0.00032 | 0.06923  |
| D9  | -0.00318 | 0.00001  | 0.00027  | -0.00010 | 0.00017  | -0.00301 |
| D10 | 3.12229  | 0.00002  | 0.00074  | 0.00006  | 0.00080  | 3.12310  |
| D11 | -3.03308 | 0.00000  | -0.00001 | -0.00053 | -0.00054 | -3.03362 |
| D12 | 0.09240  | 0.00001  | 0.00046  | -0.00037 | 0.00009  | 0.09249  |
| D13 | -1.51020 | 0.00013  | -0.00038 | 0.00103  | 0.00065  | -1.50955 |
| D14 | 1.49148  | 0.00015  | -0.00002 | 0.00155  | 0.00153  | 1.49302  |
| D15 | 0.00154  | 0.00001  | -0.00021 | 0.00021  | -0.00001 | 0.00153  |
| D16 | 3.13145  | 0.00001  | 0.00055  | 0.00048  | 0.00103  | 3.13247  |
| D17 | -3.12455 | 0.00000  | -0.00067 | 0.00005  | -0.00061 | -3.12516 |
| D18 | 0.00536  | 0.00000  | 0.00010  | 0.00032  | 0.00042  | 0.00578  |
| D19 | -0.19509 | 0.00001  | 0.00034  | -0.00044 | -0.00010 | -0.19519 |
| D20 | 2.95635  | 0.00000  | 0.00030  | -0.00055 | -0.00025 | 2.95609  |
| D21 | 2.92810  | 0.00002  | 0.00088  | -0.00025 | 0.00063  | 2.92873  |
| D22 | -0.20364 | 0.00001  | 0.00084  | -0.00037 | 0.00047  | -0.20317 |
| D23 | 0.00070  | -0.00002 | 0.00008  | -0.00023 | -0.00016 | 0.00054  |
| D24 | 3.03863  | -0.00004 | -0.00050 | -0.00006 | -0.00056 | 3.03807  |
| D25 | -3.12916 | -0.00002 | -0.00069 | -0.00050 | -0.00119 | -3.13035 |
| D26 | -0.09123 | -0.00004 | -0.00127 | -0.00033 | -0.00160 | -0.09283 |
| D27 | -2.48402 | 0.00004  | -0.00045 | 0.00068  | 0.00023  | -2.48379 |
| D28 | -0.45685 | 0.00003  | -0.00049 | 0.00050  | 0.00001  | -0.45684 |
| D29 | 1.66087  | 0.00003  | -0.00042 | 0.00085  | 0.00043  | 1.66130  |
| D30 | 0.77866  | 0.00004  | 0.00022  | 0.00047  | 0.00069  | 0.77934  |
| D31 | 2.80582  | 0.00003  | 0.00018  | 0.00029  | 0.00047  | 2.80629  |
| D32 | -1.35964 | 0.00003  | 0.00025  | 0.00064  | 0.00089  | -1.35875 |
| D33 | -3.00172 | 0.00007  | 0.00051  | -0.00055 | -0.00004 | -3.00176 |
| D34 | 1.21792  | 0.00006  | 0.00058  | -0.00047 | 0.00011  | 1.21804  |
| D35 | -0.89976 | 0.00012  | 0.00055  | -0.00053 | 0.00003  | -0.89973 |
| D36 | 1.16761  | 0.00002  | 0.00050  | -0.00038 | 0.00012  | 1.16773  |
| D37 | -0.89593 | 0.00002  | 0.00058  | -0.00030 | 0.00027  | -0.89566 |
| D38 | -3.01361 | 0.00008  | 0.00055  | -0.00036 | 0.00019  | -3.01343 |
| D39 | -0.92630 | 0.00000  | 0.00041  | -0.00033 | 0.00008  | -0.92622 |
| D40 | -2.98984 | 0.00000  | 0.00048  | -0.00025 | 0.00023  | -2.98961 |
| D41 | 1.17566  | 0.00006  | 0.00045  | -0.00031 | 0.00015  | 1.17580  |
| D42 | -3.13927 | -0.00001 | 0.00016  | -0.00027 | -0.00011 | -3.13938 |
| D43 | -0.02350 | -0.00001 | 0.00032  | -0.00015 | 0.00017  | -0.02333 |
| D44 | -0.00865 | 0.00000  | 0.00021  | -0.00015 | 0.00006  | -0.00859 |
| D45 | 3.10712  | 0.00000  | 0.00036  | -0.00002 | 0.00034  | 3.10746  |
| D46 | -2.75270 | 0.00000  | 0.00006  | -0.00005 | 0.00000  | -2.75270 |

|     |          |          |          |          |          |          |
|-----|----------|----------|----------|----------|----------|----------|
| D47 | -0.04879 | 0.00002  | 0.00012  | 0.00007  | 0.00018  | -0.04860 |
| D48 | -0.01945 | -0.00002 | 0.00001  | -0.00018 | -0.00017 | -0.01962 |
| D49 | 2.68447  | -0.00001 | 0.00007  | -0.00007 | 0.00001  | 2.68448  |
| D50 | 0.32317  | -0.00004 | -0.00090 | -0.00056 | -0.00146 | 0.32171  |
| D51 | -2.05630 | -0.00001 | -0.00089 | -0.00055 | -0.00145 | -2.05774 |
| D52 | 2.54985  | 0.00000  | -0.00009 | -0.00063 | -0.00072 | 2.54913  |
| D53 | 0.16787  | -0.00001 | 0.00005  | -0.00058 | -0.00053 | 0.16734  |
| D54 | 2.55785  | -0.00001 | -0.00021 | -0.00052 | -0.00073 | 2.55712  |
| D55 | -1.64855 | -0.00001 | -0.00027 | -0.00053 | -0.00080 | -1.64935 |
| D56 | 0.44369  | -0.00001 | -0.00027 | -0.00051 | -0.00078 | 0.44291  |
| D57 | 1.33091  | 0.00000  | -0.00031 | -0.00053 | -0.00084 | 1.33007  |
| D58 | -2.87549 | 0.00000  | -0.00037 | -0.00054 | -0.00091 | -2.87640 |
| D59 | -0.78325 | 0.00000  | -0.00037 | -0.00053 | -0.00089 | -0.78414 |
| D60 | -1.01744 | -0.00001 | -0.00018 | -0.00044 | -0.00061 | -1.01805 |
| D61 | 1.05934  | 0.00000  | -0.00023 | -0.00045 | -0.00068 | 1.05866  |
| D62 | -3.13160 | 0.00000  | -0.00023 | -0.00043 | -0.00066 | -3.13226 |
| D63 | 1.48238  | -0.00003 | 0.00103  | -0.00012 | 0.00092  | 1.48330  |
| D64 | 2.82881  | -0.00002 | 0.00089  | 0.00020  | 0.00108  | 2.82989  |
| D65 | 2.25723  | -0.00004 | -0.00080 | -0.00144 | -0.00224 | 2.25499  |
| D66 | -0.86044 | 0.00008  | -0.00068 | -0.00082 | -0.00150 | -0.86194 |
| D67 | -1.93446 | -0.00006 | -0.00074 | -0.00155 | -0.00229 | -1.93675 |
| D68 | 1.23105  | 0.00006  | -0.00062 | -0.00093 | -0.00155 | 1.22950  |
| D69 | 0.10251  | -0.00001 | -0.00081 | -0.00139 | -0.00220 | 0.10031  |
| D70 | -3.01516 | 0.00011  | -0.00069 | -0.00077 | -0.00146 | -3.01662 |
| D71 | 2.92378  | -0.00018 | -0.00058 | -0.00067 | -0.00125 | 2.92253  |
| D72 | -0.19330 | -0.00006 | -0.00046 | -0.00003 | -0.00049 | -0.19379 |
| D73 | -1.88286 | 0.00002  | 0.00109  | 0.00167  | 0.00276  | -1.88010 |

| Item                 | Value    | Threshold | Converged? |
|----------------------|----------|-----------|------------|
| Maximum Force        | 0.000291 | 0.000450  | YES        |
| RMS Force            | 0.000052 | 0.000300  | YES        |
| Maximum Displacement | 0.007182 | 0.001800  | NO         |
| RMS Displacement     | 0.001714 | 0.001200  | NO         |

Predicted change in Energy=-5.990851D-07

GradGradGradGradGradGradGradGradGradGradGradGradGradGradGradGradGradGradGrad

Input orientation:

| Center Number | Atomic Number | Atomic Type | Coordinates (Angstroms) |          |           |
|---------------|---------------|-------------|-------------------------|----------|-----------|
|               |               |             | X                       | Y        | Z         |
| 1             | 6             | 0           | -0.838481               | 1.638488 | 1.529840  |
| 2             | 6             | 0           | -1.497877               | 0.450448 | 1.569147  |
| 3             | 7             | 0           | -2.372440               | 0.452089 | 0.490439  |
| 4             | 6             | 0           | -2.241665               | 1.611574 | -0.173037 |



|    |    |   |           |           |           |
|----|----|---|-----------|-----------|-----------|
| 5  | 7  | 0 | -1.312145 | 2.354043  | 0.440811  |
| 6  | 6  | 0 | -0.778070 | 3.643682  | -0.033572 |
| 7  | 1  | 0 | -0.057572 | 2.021037  | 2.162747  |
| 8  | 1  | 0 | -1.338580 | -0.422337 | 2.214339  |
| 9  | 1  | 0 | -1.616126 | 4.257387  | -0.368307 |
| 10 | 1  | 0 | -0.326021 | 4.127101  | 0.830366  |
| 11 | 35 | 0 | -0.392599 | -2.454467 | 2.887108  |
| 12 | 1  | 0 | -2.787620 | 1.890376  | -1.057878 |
| 13 | 6  | 0 | -3.267045 | -0.595911 | 0.102782  |
| 14 | 6  | 0 | -3.225556 | -1.818345 | 0.616403  |
| 15 | 1  | 0 | -3.969843 | -0.281561 | -0.658904 |
| 16 | 1  | 0 | -3.941656 | -2.548503 | 0.260753  |
| 17 | 1  | 0 | -2.494108 | -2.136916 | 1.362155  |
| 18 | 6  | 0 | 2.563273  | -0.688028 | 1.118273  |
| 19 | 6  | 0 | 3.980483  | -0.372730 | 1.321673  |
| 20 | 8  | 0 | 2.976819  | 0.655953  | 1.526413  |
| 21 | 1  | 0 | 2.191800  | -0.730257 | 0.098305  |
| 22 | 1  | 0 | 1.983144  | -1.228118 | 1.861954  |
| 23 | 1  | 0 | 4.424479  | -0.688204 | 2.263041  |
| 24 | 6  | 0 | 4.936938  | -0.169636 | 0.179057  |
| 25 | 1  | 0 | 5.694469  | 0.577571  | 0.432776  |
| 26 | 1  | 0 | 5.453074  | -1.109163 | -0.040553 |
| 27 | 1  | 0 | 4.408298  | 0.154180  | -0.720005 |
| 28 | 6  | 0 | 0.251683  | 3.472004  | -1.159784 |
| 29 | 1  | 0 | 0.702351  | 4.450280  | -1.354754 |
| 30 | 1  | 0 | -0.219652 | 3.130877  | -2.082142 |
| 31 | 6  | 0 | 1.355190  | 2.480123  | -0.810238 |
| 32 | 8  | 0 | 1.674108  | 1.566333  | -1.533405 |
| 33 | 8  | 0 | 1.885233  | 2.733840  | 0.385258  |
| 34 | 1  | 0 | 2.458785  | 1.968503  | 0.692926  |

-----  
Distance matrix (angstroms):

|    |    | 1        | 2        | 3        | 4        | 5        |
|----|----|----------|----------|----------|----------|----------|
| 1  | C  | 0.000000 |          |          |          |          |
| 2  | C  | 1.359333 | 0.000000 |          |          |          |
| 3  | N  | 2.200210 | 1.388695 | 0.000000 |          |          |
| 4  | C  | 2.206681 | 2.221855 | 1.342277 | 0.000000 |          |
| 5  | N  | 1.386492 | 2.220655 | 2.178100 | 1.338685 | 0.000000 |
| 6  | C  | 2.543366 | 3.644663 | 3.605949 | 2.508191 | 1.474260 |
| 7  | H  | 1.075516 | 2.212145 | 3.258347 | 3.223943 | 2.156365 |
| 8  | H  | 2.228371 | 1.096997 | 2.192103 | 3.263728 | 3.294599 |
| 9  | H  | 3.326608 | 4.273229 | 3.973631 | 2.725757 | 2.090405 |
| 10 | H  | 2.635350 | 3.928971 | 4.220082 | 3.317286 | 2.065896 |
| 11 | Br | 4.335121 | 3.375973 | 4.255803 | 5.414446 | 5.472815 |

|    |    |          |          |          |          |          |
|----|----|----------|----------|----------|----------|----------|
| 12 | H  | 3.249442 | 3.261608 | 2.153678 | 1.076448 | 2.153621 |
| 13 | C  | 3.595408 | 2.524886 | 1.431398 | 2.449586 | 3.555015 |
| 14 | C  | 4.299092 | 3.006663 | 2.428692 | 3.654532 | 4.593561 |
| 15 | H  | 4.275818 | 3.407443 | 2.100222 | 2.608952 | 3.901173 |
| 16 | H  | 5.363877 | 4.083829 | 3.393928 | 4.514907 | 5.566122 |
| 17 | H  | 4.125881 | 2.780247 | 2.734527 | 4.058537 | 4.734409 |
| 18 | C  | 4.141738 | 4.241739 | 5.104440 | 5.481157 | 4.973129 |
| 19 | C  | 5.225968 | 5.545384 | 6.459946 | 6.699757 | 6.018564 |
| 20 | O  | 3.939785 | 4.479616 | 5.452465 | 5.570810 | 4.738908 |
| 21 | H  | 4.104004 | 4.143809 | 4.731173 | 5.021296 | 4.680582 |
| 22 | H  | 4.036001 | 3.875672 | 4.865724 | 5.482158 | 5.070548 |
| 23 | H  | 5.800848 | 6.070611 | 7.116214 | 7.460626 | 6.744230 |
| 24 | C  | 6.200758 | 6.612390 | 7.342378 | 7.404663 | 6.744517 |
| 25 | H  | 6.708840 | 7.282674 | 8.068091 | 8.026107 | 7.228316 |
| 26 | H  | 7.042683 | 7.303371 | 7.997382 | 8.162657 | 7.615359 |
| 27 | H  | 5.898615 | 6.341205 | 6.894369 | 6.829728 | 6.237816 |
| 28 | C  | 3.432829 | 4.431458 | 4.327718 | 3.263687 | 2.501459 |
| 29 | H  | 4.312913 | 5.421148 | 5.370717 | 4.256987 | 3.417083 |
| 30 | H  | 3.956840 | 4.706428 | 4.292851 | 3.168832 | 2.856974 |
| 31 | C  | 3.316098 | 4.233325 | 4.438458 | 3.754700 | 2.948846 |
| 32 | O  | 3.962547 | 4.575206 | 4.659617 | 4.145591 | 3.665477 |
| 33 | O  | 3.150949 | 4.249812 | 4.831690 | 4.313057 | 3.220334 |
| 34 | H  | 3.417791 | 4.327519 | 5.067667 | 4.792862 | 3.798962 |
|    |    | 6        | 7        | 8        | 9        | 10       |
| 6  | C  | 0.000000 |          |          |          |          |
| 7  | H  | 2.824166 | 0.000000 |          |          |          |
| 8  | H  | 4.679721 | 2.759297 | 0.000000 |          |          |
| 9  | H  | 1.091338 | 3.719757 | 5.352280 | 0.000000 |          |
| 10 | H  | 1.088316 | 2.506553 | 4.861897 | 1.765833 | 0.000000 |
| 11 | Br | 6.772472 | 4.546105 | 2.340310 | 7.559347 | 6.895771 |
| 12 | H  | 2.856848 | 4.224057 | 4.260958 | 2.729587 | 3.824641 |
| 13 | C  | 4.918103 | 4.625212 | 2.864922 | 5.148005 | 5.611225 |
| 14 | C  | 6.020498 | 5.212308 | 2.839528 | 6.361952 | 6.618264 |
| 15 | H  | 5.097646 | 5.345048 | 3.898575 | 5.121180 | 5.910302 |
| 16 | H  | 6.959746 | 6.291612 | 3.887555 | 7.219691 | 7.613210 |
| 17 | H  | 6.189358 | 4.885307 | 2.236346 | 6.682249 | 6.649910 |
| 18 | C  | 5.590620 | 3.911367 | 4.061578 | 6.643375 | 5.622844 |
| 19 | C  | 6.372761 | 4.769006 | 5.393676 | 7.457617 | 6.247866 |
| 20 | O  | 5.045718 | 3.387611 | 4.500958 | 6.136403 | 4.841704 |
| 21 | H  | 5.288560 | 4.109893 | 4.127469 | 6.292426 | 5.519897 |
| 22 | H  | 5.912002 | 3.848638 | 3.436177 | 6.929616 | 5.922398 |
| 23 | H  | 7.148859 | 5.238209 | 5.769395 | 8.238433 | 6.914259 |
| 24 | C  | 6.873713 | 5.803379 | 6.602149 | 7.927219 | 6.825313 |
| 25 | H  | 7.177205 | 6.177570 | 7.323767 | 8.223599 | 7.000253 |

|    |    |          |          |          |          |          |
|----|----|----------|----------|----------|----------|----------|
| 26 | H  | 7.836883 | 6.709687 | 7.189077 | 8.881490 | 7.846967 |
| 27 | H  | 6.288579 | 5.633774 | 6.478376 | 7.297512 | 6.371932 |
| 28 | C  | 1.535649 | 3.638703 | 5.392544 | 2.175310 | 2.173383 |
| 29 | H  | 2.141907 | 4.341834 | 6.375439 | 2.526978 | 2.436543 |
| 30 | H  | 2.184362 | 4.390569 | 5.686570 | 2.481208 | 3.080013 |
| 31 | C  | 2.551055 | 3.323447 | 4.982844 | 3.490371 | 2.868900 |
| 32 | O  | 3.546556 | 4.106947 | 5.203526 | 4.407365 | 4.018142 |
| 33 | O  | 2.845420 | 2.728012 | 4.868260 | 3.892117 | 2.651215 |
| 34 | H  | 3.716350 | 2.914651 | 4.738227 | 4.792714 | 3.526128 |
|    |    | 11       | 12       | 13       | 14       | 15       |
| 11 | Br | 0.000000 |          |          |          |          |
| 12 | H  | 6.338509 | 0.000000 |          |          |          |
| 13 | C  | 4.412385 | 2.785427 | 0.000000 |          |          |
| 14 | C  | 3.685973 | 4.092629 | 1.326602 | 0.000000 |          |
| 15 | H  | 5.485654 | 2.504824 | 1.083008 | 2.131215 | 0.000000 |
| 16 | H  | 4.416151 | 4.772235 | 2.071876 | 1.082782 | 2.446546 |
| 17 | H  | 2.615848 | 4.707631 | 2.134982 | 1.092085 | 3.115255 |
| 18 | C  | 3.871210 | 6.325809 | 5.918811 | 5.919462 | 6.782712 |
| 19 | C  | 5.089996 | 7.522707 | 7.352698 | 7.383373 | 8.193820 |
| 20 | O  | 4.783219 | 6.436701 | 6.525315 | 6.739416 | 7.342389 |
| 21 | H  | 4.174859 | 5.744484 | 5.460500 | 5.549785 | 6.224190 |
| 22 | H  | 2.863394 | 6.403953 | 5.573048 | 5.387979 | 6.533664 |
| 23 | H  | 5.168500 | 8.348170 | 7.989667 | 7.906432 | 8.897627 |
| 24 | C  | 6.399841 | 8.089651 | 8.215405 | 8.338814 | 8.946813 |
| 25 | H  | 7.229758 | 8.711563 | 9.044042 | 9.238018 | 9.763647 |
| 26 | H  | 6.674799 | 8.828432 | 8.736387 | 8.732305 | 9.479380 |
| 27 | H  | 6.547131 | 7.410112 | 7.755676 | 7.997035 | 8.389687 |
| 28 | C  | 7.205241 | 3.427724 | 5.524803 | 6.575243 | 5.671104 |
| 29 | H  | 8.177276 | 4.338334 | 6.583658 | 7.655689 | 6.686100 |
| 30 | H  | 7.477929 | 3.030251 | 5.286723 | 6.388458 | 5.266334 |
| 31 | C  | 6.409003 | 4.191897 | 5.626780 | 6.441690 | 6.000482 |
| 32 | O  | 6.322898 | 4.498683 | 5.636258 | 6.331226 | 6.002804 |
| 33 | O  | 6.194054 | 4.962824 | 6.141091 | 6.848064 | 6.668196 |
| 34 | H  | 5.701534 | 5.531382 | 6.301557 | 6.830652 | 6.943882 |
|    |    | 16       | 17       | 18       | 19       | 20       |
| 16 | H  | 0.000000 |          |          |          |          |
| 17 | H  | 1.864909 | 0.000000 |          |          |          |
| 18 | C  | 6.819883 | 5.266484 | 0.000000 |          |          |
| 19 | C  | 8.283708 | 6.710761 | 1.466038 | 0.000000 |          |
| 20 | O  | 7.728890 | 6.144765 | 1.464201 | 1.451705 | 0.000000 |
| 21 | H  | 6.399351 | 5.053092 | 1.086329 | 2.196324 | 2.139469 |
| 22 | H  | 6.277780 | 4.595813 | 1.086880 | 2.238963 | 2.156317 |
| 23 | H  | 8.801255 | 7.125812 | 2.185081 | 1.087580 | 2.108340 |
| 24 | C  | 9.192122 | 7.777554 | 2.604831 | 1.503870 | 2.517744 |

|                  |   |                     |          |          |          |          |
|------------------|---|---------------------|----------|----------|----------|----------|
| 25               | H | 10.131970           | 8.676691 | 3.446162 | 2.151966 | 2.930496 |
| 26               | H | 9.509123            | 8.135205 | 3.141844 | 2.136941 | 3.420943 |
| 27               | H | 8.831087            | 7.564900 | 2.737279 | 2.151536 | 2.710591 |
| 28               | C | 7.473187            | 6.734948 | 5.276254 | 5.902843 | 4.751018 |
| 29               | H | 8.553340            | 7.809615 | 5.998425 | 6.416451 | 5.279323 |
| 30               | H | 7.183163            | 6.692232 | 5.707133 | 6.442231 | 5.418888 |
| 31               | C | 7.381780            | 6.391669 | 3.900744 | 4.424474 | 3.378937 |
| 32               | O | 7.189414            | 6.282702 | 3.592235 | 4.150999 | 3.447946 |
| 33               | O | 7.865830            | 6.622478 | 3.564580 | 3.862347 | 2.609868 |
| 34               | H | 7.845748            | 6.467880 | 2.692396 | 2.862212 | 1.638855 |
|                  |   | 21                  | 22       | 23       | 24       | 25       |
| 21               | H | 0.000000            |          |          |          |          |
| 22               | H | 1.844414            | 0.000000 |          |          |          |
| 23               | H | 3.110097            | 2.532290 | 0.000000 |          |          |
| 24               | C | 2.802963            | 3.560538 | 2.207831 | 0.000000 |          |
| 25               | H | 3.753794            | 4.367722 | 2.562212 | 1.093867 | 0.000000 |
| 26               | H | 3.286146            | 3.959052 | 2.557686 | 1.094228 | 1.768440 |
| 27               | H | 2.522840            | 3.802451 | 3.099748 | 1.092076 | 1.778313 |
| 28               | C | 4.796440            | 5.849787 | 6.814345 | 6.083228 | 6.366939 |
| 29               | H | 5.582813            | 6.650703 | 7.303883 | 6.451971 | 6.566154 |
| 30               | H | 5.047554            | 6.277662 | 7.418487 | 6.526625 | 6.915273 |
| 31               | C | 3.439754            | 4.613675 | 5.376232 | 4.563863 | 4.898380 |
| 32               | O | 2.864403            | 4.408279 | 5.201969 | 4.073349 | 4.583319 |
| 33               | O | 3.489454            | 4.229342 | 4.656633 | 4.217297 | 4.377446 |
| 34               | H | 2.776357            | 3.436750 | 3.658867 | 3.313147 | 3.531575 |
|                  |   | 26                  | 27       | 28       | 29       | 30       |
| 26               | H | 0.000000            |          |          |          |          |
| 27               | H | 1.774612            | 0.000000 |          |          |          |
| 28               | C | 7.020985            | 5.336554 | 0.000000 |          |          |
| 29               | H | 7.429933            | 5.709065 | 1.094596 | 0.000000 |          |
| 30               | H | 7.370606            | 5.668691 | 1.090535 | 1.766354 | 0.000000 |
| 31               | C | 5.501639            | 3.839221 | 1.524382 | 2.145744 | 2.126346 |
| 32               | O | 4.864922            | 3.183015 | 2.407170 | 3.048505 | 2.516990 |
| 33               | O | 5.261128            | 3.773871 | 2.366543 | 2.715330 | 3.267451 |
| 34               | H | 4.356120            | 3.014754 | 3.250285 | 3.665689 | 4.028168 |
|                  |   | 31                  | 32       | 33       | 34       |          |
| 31               | C | 0.000000            |          |          |          |          |
| 32               | O | 1.208177            | 0.000000 |          |          |          |
| 33               | O | 1.332113            | 2.255861 | 0.000000 |          |          |
| 34               | H | 1.933696            | 2.394579 | 1.004670 | 0.000000 |          |
| Stoichiometry    |   | C11H17BrN2O3        |          |          |          |          |
| Framework group  |   | C1[X(C11H17BrN2O3)] |          |          |          |          |
| Deg. of freedom  |   | 96                  |          |          |          |          |
| Full point group |   | C1                  | NOp      | 1        |          |          |

Largest Abelian subgroup C1 NOp 1

Largest concise Abelian subgroup C1 NOp 1

Standard orientation:

| Center<br>Number | Atomic<br>Number | Atomic<br>Type | Coordinates (Angstroms) |           |           |
|------------------|------------------|----------------|-------------------------|-----------|-----------|
|                  |                  |                | X                       | Y         | Z         |
| 1                | 6                | 0              | 0.071381                | 1.325015  | 1.233898  |
| 2                | 6                | 0              | -1.162183               | 1.238895  | 0.669373  |
| 3                | 7                | 0              | -1.246682               | 2.278411  | -0.247545 |
| 4                | 6                | 0              | -0.095945               | 2.969168  | -0.228362 |
| 5                | 7                | 0              | 0.725560                | 2.408396  | 0.667598  |
| 6                | 6                | 0              | 2.130628                | 2.782431  | 0.911168  |
| 7                | 1                | 0              | 0.546767                | 0.694846  | 1.964396  |
| 8                | 1                | 0              | -1.933658               | 0.466515  | 0.777352  |
| 9                | 1                | 0              | 2.192459                | 3.871463  | 0.945873  |
| 10               | 1                | 0              | 2.386820                | 2.395517  | 1.895595  |
| 11               | 35               | 0              | -3.052379               | -1.534966 | 0.308752  |
| 12               | 1                | 0              | 0.129513                | 3.825111  | -0.840956 |
| 13               | 6                | 0              | -2.350809               | 2.585439  | -1.105179 |
| 14               | 6                | 0              | -3.382106               | 1.771117  | -1.287335 |
| 15               | 1                | 0              | -2.243847               | 3.546975  | -1.591918 |
| 16               | 1                | 0              | -4.172130               | 2.086242  | -1.957390 |
| 17               | 1                | 0              | -3.468495               | 0.789400  | -0.816782 |
| 18               | 6                | 0              | 0.649330                | -2.459818 | -0.345662 |
| 19               | 6                | 0              | 1.630568                | -3.501150 | -0.026185 |
| 20               | 8                | 0              | 1.664029                | -2.236621 | 0.686062  |
| 21               | 1                | 0              | 0.810434                | -1.864884 | -1.240207 |
| 22               | 1                | 0              | -0.371527               | -2.500185 | 0.025188  |
| 23               | 1                | 0              | 1.296077                | -4.311473 | 0.617495  |
| 24               | 6                | 0              | 2.802757                | -3.809713 | -0.916346 |
| 25               | 1                | 0              | 3.670455                | -4.117660 | -0.325743 |
| 26               | 1                | 0              | 2.546698                | -4.632837 | -1.590316 |
| 27               | 1                | 0              | 3.075525                | -2.940377 | -1.518412 |
| 28               | 6                | 0              | 3.079686                | 2.219561  | -0.156860 |
| 29               | 1                | 0              | 4.106093                | 2.415305  | 0.169196  |
| 30               | 1                | 0              | 2.934371                | 2.712445  | -1.118742 |
| 31               | 6                | 0              | 2.907501                | 0.720689  | -0.374743 |
| 32               | 8                | 0              | 2.755083                | 0.226041  | -1.466431 |
| 33               | 8                | 0              | 2.916846                | 0.051090  | 0.776811  |
| 34               | 1                | 0              | 2.603065                | -0.894112 | 0.644530  |

Rotational constants (GHZ): 0.3279480 0.2550895 0.1591665

Standard basis: 6-311++G(d,p) (5D, 7F)

There are 538 symmetry adapted cartesian basis functions of A symmetry.  
 There are 519 symmetry adapted basis functions of A symmetry.  
 519 basis functions, 823 primitive gaussians, 538 cartesian basis functions  
 78 alpha electrons 78 beta electrons  
 nuclear repulsion energy 1572.3323432367 Hartrees.  
 NAToms= 34 NActive= 34 NUniq= 34 SFac= 1.00D+00 NATFMM= 60 NAOKFM=F  
 Big=F  
 Integral buffers will be 131072 words long.  
 Raffenetti 2 integral format.  
 Two-electron integral symmetry is turned on.  
 One-electron integrals computed using PRISM.  
 NBasis= 519 RedAO= T EigKep= 3.53D-06 NBF= 519  
 NBsUse= 519 1.00D-06 EigRej= -1.00D+00 NBFU= 519  
 Initial guess from the checkpoint file: "./coohpo.chk"  
 B after Tr= 0.000000 0.000000 0.000000  
 Rot= 0.999999 -0.000025 0.000004 0.001514 Ang= -0.17 deg.  
 Requested convergence on RMS density matrix=1.00D-08 within 128 cycles.  
 Requested convergence on MAX density matrix=1.00D-06.  
 Requested convergence on energy=1.00D-06.  
 No special actions if energy rises.  
 SCF Done: E(RB3LYP) = -3338.90387220 A.U. after 9 cycles  
 NFock= 9 Conv=0.49D-08 -V/T= 2.0019  
 Calling FoFJK, ICntrl= 2127 FMM=F ISym2X=0 l1Cent= 0 IOpCIX= 0 NMat=1 NMatS=1  
 NMatT=0.  
 \*\*\*\*\* Axes restored to original set \*\*\*\*\*

| Center<br>Number | Atomic<br>Number | Forces (Hartrees/Bohr) |              |              |
|------------------|------------------|------------------------|--------------|--------------|
|                  |                  | X                      | Y            | Z            |
| 1                | 6                | -0.000006023           | 0.000030694  | 0.000000082  |
| 2                | 6                | 0.000265744            | 0.000088361  | 0.000137247  |
| 3                | 7                | -0.000000291           | 0.000110210  | -0.000000726 |
| 4                | 6                | -0.000006437           | -0.000092451 | 0.000015965  |
| 5                | 7                | 0.000046167            | -0.000002926 | -0.000016982 |
| 6                | 6                | -0.000016031           | 0.000013419  | -0.000016132 |
| 7                | 1                | 0.000002319            | 0.000013121  | -0.000012782 |
| 8                | 1                | -0.000325362           | -0.000187076 | -0.000169168 |
| 9                | 1                | -0.000012288           | 0.000003824  | 0.000020145  |
| 10               | 1                | 0.000014386            | 0.000003577  | -0.000007090 |
| 11               | 35               | 0.000119029            | 0.000076106  | 0.000064842  |
| 12               | 1                | 0.000002268            | 0.000011635  | 0.000003751  |
| 13               | 6                | -0.000064041           | -0.000093547 | -0.000024156 |
| 14               | 6                | 0.000007119            | 0.000100707  | -0.000011687 |
| 15               | 1                | 0.000014179            | 0.000006755  | -0.000006408 |

|    |   |              |              |              |
|----|---|--------------|--------------|--------------|
| 16 | 1 | -0.000007053 | -0.000018592 | 0.000012696  |
| 17 | 1 | -0.000005968 | -0.000021807 | 0.000003236  |
| 18 | 6 | -0.000001861 | 0.000015783  | 0.000057312  |
| 19 | 6 | 0.000074900  | -0.000035564 | -0.000037913 |
| 20 | 8 | -0.000104429 | -0.000014549 | 0.000002995  |
| 21 | 1 | -0.000004119 | 0.000000231  | 0.000001484  |
| 22 | 1 | -0.000006689 | -0.000011452 | -0.000012127 |
| 23 | 1 | -0.000018569 | 0.000003237  | 0.000006692  |
| 24 | 6 | -0.000020840 | -0.000010577 | 0.000027027  |
| 25 | 1 | -0.000006056 | 0.000001255  | -0.000000960 |
| 26 | 1 | 0.000002609  | -0.000000077 | -0.000000077 |
| 27 | 1 | -0.000000947 | -0.000006256 | -0.000007340 |
| 28 | 6 | 0.000063895  | -0.000028418 | -0.000048925 |
| 29 | 1 | -0.000009890 | 0.000025711  | 0.000023430  |
| 30 | 1 | -0.000011829 | -0.000005232 | -0.000002312 |
| 31 | 6 | -0.000016000 | -0.000045971 | -0.000052699 |
| 32 | 8 | -0.000004577 | 0.000019968  | 0.000018884  |
| 33 | 8 | -0.000052351 | 0.000094054  | 0.000078284  |
| 34 | 1 | 0.000089034  | -0.000044151 | -0.000046589 |

-----  
Cartesian Forces: Max 0.000325362 RMS 0.000063559

GradGradGradGradGradGradGradGradGradGradGradGradGradGradGradGradGradGradGrad

Berny optimization.

Using GEDIIS/GDIIS optimizer.

FormGI is forming the generalized inverse of G from B-inverse, IUseBI=4.

Internal Forces: Max 0.000236343 RMS 0.000045835

Search for a local minimum.

Step number 33 out of a maximum of 175

All quantities printed in internal units (Hartrees-Bohrs-Radians)

Mixed Optimization -- En-DIIS/RFO-DIIS

Swapping is turned off.

Update second derivatives using D2CorX and points

|    |    |    |    |    |    |    |  |  |  |
|----|----|----|----|----|----|----|--|--|--|
| 21 | 22 | 23 | 24 | 25 |    |    |  |  |  |
|    |    | 26 | 27 | 28 | 29 | 30 |  |  |  |
|    |    | 31 | 32 | 33 |    |    |  |  |  |

DE= -2.72D-06 DEPred=-5.99D-07 R= 4.54D+00

TightC=F SS= 1.41D+00 RLast= 8.19D-03 DXNew= 6.5746D-01 2.4571D-02

Trust test= 4.54D+00 RLast= 8.19D-03 DXMaxT set to 3.91D-01

ITU= 1 1 -1 1 1 1 1 1 -1 0 1 1 1 1 1 1 1 1 1 1

ITU= 0 0 -1 1 1 1 0 1 0 -1 0 1 0

|                 |         |         |         |         |         |
|-----------------|---------|---------|---------|---------|---------|
| Eigenvalues --- | 0.00174 | 0.00247 | 0.00386 | 0.00488 | 0.00605 |
| Eigenvalues --- | 0.00749 | 0.00937 | 0.01166 | 0.01284 | 0.01437 |
| Eigenvalues --- | 0.01785 | 0.02051 | 0.02223 | 0.02281 | 0.02376 |
| Eigenvalues --- | 0.02428 | 0.02802 | 0.02869 | 0.03095 | 0.03214 |

|                 |         |         |         |         |         |
|-----------------|---------|---------|---------|---------|---------|
| Eigenvalues --- | 0.03439 | 0.03889 | 0.04096 | 0.04368 | 0.04634 |
| Eigenvalues --- | 0.04852 | 0.05022 | 0.05353 | 0.05613 | 0.05737 |
| Eigenvalues --- | 0.05954 | 0.06219 | 0.06416 | 0.07529 | 0.09366 |
| Eigenvalues --- | 0.09584 | 0.11800 | 0.12447 | 0.12874 | 0.12966 |
| Eigenvalues --- | 0.13491 | 0.14945 | 0.15606 | 0.15742 | 0.15954 |
| Eigenvalues --- | 0.16004 | 0.16013 | 0.16036 | 0.16067 | 0.16190 |
| Eigenvalues --- | 0.17143 | 0.17558 | 0.19745 | 0.20880 | 0.22016 |
| Eigenvalues --- | 0.23312 | 0.23835 | 0.24161 | 0.25081 | 0.25790 |
| Eigenvalues --- | 0.28567 | 0.29187 | 0.30330 | 0.31432 | 0.31988 |
| Eigenvalues --- | 0.33283 | 0.34498 | 0.34573 | 0.34633 | 0.34794 |
| Eigenvalues --- | 0.34828 | 0.34929 | 0.34965 | 0.35084 | 0.35303 |
| Eigenvalues --- | 0.35507 | 0.35717 | 0.35741 | 0.35891 | 0.36591 |
| Eigenvalues --- | 0.37019 | 0.37273 | 0.37738 | 0.38925 | 0.39326 |
| Eigenvalues --- | 0.41206 | 0.45258 | 0.49196 | 0.50735 | 0.51532 |
| Eigenvalues --- | 0.54336 | 0.55876 | 0.56655 | 0.61628 | 0.90889 |
| Eigenvalues --- | 1.19670 |         |         |         |         |

En-DIIS/RFO-DIIS IScMMF= 0 using points: 33 32 31 30 29  
RFO step: Lambda=-5.79313113D-07.

DidBck=F Rises=F RFO-DIIS coefs: 1.99713 -0.87822 -0.09061 -0.14669  
0.11840

Iteration 1 RMS(Cart)= 0.00198820 RMS(Int)= 0.00000184  
Iteration 2 RMS(Cart)= 0.00000216 RMS(Int)= 0.00000119  
Iteration 3 RMS(Cart)= 0.00000000 RMS(Int)= 0.00000119

| Variable | Old X   | -DE/DX   | Delta X<br>(Linear) | Delta X<br>(Quad) | Delta X<br>(Total) | New X   |
|----------|---------|----------|---------------------|-------------------|--------------------|---------|
| R1       | 2.56877 | -0.00001 | -0.00002            | 0.00003           | 0.00001            | 2.56878 |
| R2       | 2.62009 | -0.00003 | 0.00005             | -0.00002          | 0.00004            | 2.62013 |
| R3       | 2.03243 | 0.00000  | -0.00001            | 0.00002           | 0.00001            | 2.03244 |
| R4       | 2.62425 | 0.00006  | -0.00014            | 0.00004           | -0.00010           | 2.62415 |
| R5       | 2.07302 | 0.00000  | -0.00023            | -0.00002          | -0.00025           | 2.07277 |
| R6       | 2.53654 | -0.00003 | -0.00008            | -0.00003          | -0.00011           | 2.53643 |
| R7       | 2.70495 | 0.00007  | 0.00030             | 0.00005           | 0.00035            | 2.70530 |
| R8       | 2.52975 | 0.00001  | 0.00000             | 0.00003           | 0.00003            | 2.52978 |
| R9       | 2.03419 | 0.00000  | 0.00003             | -0.00002          | 0.00001            | 2.03420 |
| R10      | 2.78595 | -0.00001 | 0.00023             | -0.00003          | 0.00020            | 2.78614 |
| R11      | 2.06233 | 0.00001  | 0.00003             | 0.00002           | 0.00005            | 2.06238 |
| R12      | 2.05662 | 0.00000  | 0.00002             | -0.00002          | 0.00000            | 2.05662 |
| R13      | 2.90196 | -0.00001 | -0.00021            | 0.00004           | -0.00017           | 2.90178 |
| R14      | 4.42255 | 0.00000  | -0.00018            | 0.00000           | -0.00018           | 4.42237 |
| R15      | 2.50692 | -0.00005 | -0.00001            | -0.00006          | -0.00007           | 2.50684 |
| R16      | 2.04659 | 0.00000  | -0.00002            | -0.00001          | -0.00003           | 2.04656 |
| R17      | 2.04616 | 0.00001  | 0.00001             | 0.00002           | 0.00002            | 2.04618 |
| R18      | 2.06374 | 0.00001  | -0.00002            | -0.00001          | -0.00003           | 2.06371 |
| R19      | 2.77041 | 0.00000  | -0.00009            | -0.00002          | -0.00010           | 2.77031 |



|     |         |          |          |          |          |         |
|-----|---------|----------|----------|----------|----------|---------|
| R20 | 2.76694 | 0.00000  | -0.00009 | -0.00002 | -0.00011 | 2.76683 |
| R21 | 2.05286 | 0.00000  | -0.00005 | 0.00004  | -0.00001 | 2.05286 |
| R22 | 2.05391 | 0.00000  | 0.00003  | 0.00003  | 0.00006  | 2.05397 |
| R23 | 2.74333 | 0.00004  | 0.00038  | 0.00005  | 0.00043  | 2.74375 |
| R24 | 2.05523 | -0.00001 | 0.00003  | -0.00001 | 0.00002  | 2.05525 |
| R25 | 2.84190 | -0.00002 | -0.00015 | -0.00002 | -0.00018 | 2.84173 |
| R26 | 3.09699 | 0.00001  | -0.00085 | 0.00062  | -0.00024 | 3.09675 |
| R27 | 2.06711 | 0.00000  | -0.00001 | 0.00001  | -0.00001 | 2.06710 |
| R28 | 2.06779 | 0.00000  | 0.00000  | 0.00000  | 0.00000  | 2.06779 |
| R29 | 2.06373 | 0.00001  | 0.00003  | 0.00001  | 0.00003  | 2.06376 |
| R30 | 2.06849 | 0.00001  | 0.00002  | 0.00001  | 0.00003  | 2.06852 |
| R31 | 2.06081 | 0.00001  | 0.00002  | 0.00002  | 0.00004  | 2.06085 |
| R32 | 2.88066 | -0.00004 | -0.00008 | -0.00004 | -0.00013 | 2.88054 |
| R33 | 2.28312 | -0.00003 | -0.00001 | -0.00004 | -0.00005 | 2.28308 |
| R34 | 2.51733 | 0.00002  | 0.00003  | 0.00009  | 0.00012  | 2.51745 |
| R35 | 1.89855 | 0.00006  | 0.00020  | 0.00002  | 0.00021  | 1.89877 |
| A1  | 1.88394 | 0.00002  | -0.00010 | 0.00001  | -0.00009 | 1.88385 |
| A2  | 2.27321 | 0.00001  | -0.00005 | 0.00007  | 0.00002  | 2.27323 |
| A3  | 2.12551 | -0.00002 | 0.00011  | -0.00008 | 0.00003  | 2.12553 |
| A4  | 1.85668 | -0.00002 | 0.00006  | -0.00001 | 0.00005  | 1.85673 |
| A5  | 2.26780 | -0.00004 | 0.00011  | 0.00019  | 0.00031  | 2.26811 |
| A6  | 2.15226 | 0.00007  | -0.00009 | -0.00015 | -0.00024 | 2.15202 |
| A7  | 1.90035 | 0.00000  | 0.00005  | -0.00001 | 0.00004  | 1.90039 |
| A8  | 2.21818 | 0.00001  | -0.00028 | -0.00002 | -0.00030 | 2.21789 |
| A9  | 2.16454 | -0.00002 | 0.00024  | 0.00002  | 0.00027  | 2.16481 |
| A10 | 1.89662 | 0.00000  | -0.00005 | 0.00002  | -0.00003 | 1.89659 |
| A11 | 2.19029 | 0.00001  | -0.00003 | 0.00004  | 0.00001  | 2.19031 |
| A12 | 2.19622 | -0.00001 | 0.00009  | -0.00006 | 0.00003  | 2.19625 |
| A13 | 1.88719 | 0.00001  | 0.00004  | -0.00001 | 0.00003  | 1.88721 |
| A14 | 2.19007 | -0.00012 | -0.00015 | 0.00001  | -0.00014 | 2.18993 |
| A15 | 2.20082 | 0.00012  | 0.00006  | 0.00003  | 0.00010  | 2.20091 |
| A16 | 1.88854 | 0.00008  | 0.00000  | -0.00002 | -0.00001 | 1.88853 |
| A17 | 1.85834 | -0.00002 | -0.00022 | -0.00002 | -0.00024 | 1.85810 |
| A18 | 1.96180 | -0.00011 | 0.00000  | 0.00004  | 0.00004  | 1.96183 |
| A19 | 1.88879 | -0.00002 | -0.00012 | -0.00001 | -0.00013 | 1.88866 |
| A20 | 1.93143 | 0.00003  | -0.00015 | 0.00018  | 0.00004  | 1.93146 |
| A21 | 1.93190 | 0.00003  | 0.00047  | -0.00018 | 0.00029  | 1.93219 |
| A22 | 2.73535 | -0.00008 | 0.00124  | -0.00085 | 0.00039  | 2.73575 |
| A23 | 2.15347 | -0.00001 | -0.00010 | -0.00006 | -0.00016 | 2.15331 |
| A24 | 1.96442 | -0.00001 | -0.00009 | 0.00000  | -0.00009 | 1.96433 |
| A25 | 2.16525 | 0.00002  | 0.00019  | 0.00006  | 0.00025  | 2.16550 |
| A26 | 2.06409 | 0.00001  | -0.00014 | 0.00011  | -0.00003 | 2.06406 |
| A27 | 2.15812 | 0.00002  | 0.00014  | 0.00005  | 0.00019  | 2.15831 |
| A28 | 2.06070 | -0.00003 | 0.00000  | -0.00016 | -0.00015 | 2.06055 |

|     |          |          |          |          |          |          |
|-----|----------|----------|----------|----------|----------|----------|
| A29 | 2.05917  | -0.00002 | 0.00047  | -0.00002 | 0.00045  | 2.05962  |
| A30 | 2.12694  | 0.00002  | -0.00043 | -0.00004 | -0.00047 | 2.12648  |
| A31 | 1.97575  | -0.00001 | 0.00031  | -0.00015 | 0.00016  | 1.97592  |
| A32 | 2.00000  | 0.00001  | -0.00023 | 0.00008  | -0.00015 | 1.99985  |
| A33 | 2.02706  | -0.00001 | -0.00012 | 0.00006  | -0.00006 | 2.02701  |
| A34 | 2.04019  | -0.00002 | -0.00039 | -0.00002 | -0.00040 | 2.03979  |
| A35 | 2.13939  | 0.00000  | 0.00060  | -0.00002 | 0.00058  | 2.13996  |
| A36 | 1.94520  | -0.00001 | -0.00026 | -0.00002 | -0.00029 | 1.94491  |
| A37 | 2.03887  | 0.00000  | 0.00015  | -0.00006 | 0.00009  | 2.03896  |
| A38 | 2.02325  | 0.00002  | -0.00009 | 0.00007  | -0.00001 | 2.02323  |
| A39 | 2.09913  | 0.00002  | 0.00030  | 0.00071  | 0.00102  | 2.10015  |
| A40 | 2.36646  | -0.00002 | -0.00144 | -0.00005 | -0.00148 | 2.36498  |
| A41 | 1.93528  | 0.00000  | -0.00008 | -0.00002 | -0.00010 | 1.93518  |
| A42 | 1.91402  | 0.00001  | -0.00005 | 0.00003  | -0.00002 | 1.91400  |
| A43 | 1.93657  | 0.00000  | 0.00020  | 0.00004  | 0.00024  | 1.93681  |
| A44 | 1.88221  | 0.00000  | -0.00001 | 0.00000  | -0.00001 | 1.88220  |
| A45 | 1.90037  | 0.00000  | -0.00001 | -0.00002 | -0.00004 | 1.90033  |
| A46 | 1.89410  | -0.00001 | -0.00004 | -0.00003 | -0.00007 | 1.89402  |
| A47 | 1.88263  | -0.00001 | -0.00010 | -0.00013 | -0.00024 | 1.88239  |
| A48 | 1.94489  | 0.00005  | -0.00008 | -0.00001 | -0.00010 | 1.94479  |
| A49 | 1.97143  | -0.00015 | 0.00002  | -0.00013 | -0.00011 | 1.97132  |
| A50 | 1.88269  | -0.00001 | -0.00008 | 0.00008  | -0.00001 | 1.88268  |
| A51 | 1.90110  | 0.00012  | 0.00010  | 0.00012  | 0.00023  | 1.90133  |
| A52 | 1.87893  | 0.00000  | 0.00015  | 0.00009  | 0.00024  | 1.87917  |
| A53 | 2.14834  | -0.00004 | 0.00006  | -0.00006 | 0.00000  | 2.14834  |
| A54 | 1.94969  | 0.00008  | -0.00009 | 0.00009  | 0.00000  | 1.94969  |
| A55 | 2.18486  | -0.00004 | 0.00003  | -0.00003 | 0.00000  | 2.18486  |
| A56 | 1.93574  | -0.00024 | -0.00021 | -0.00014 | -0.00035 | 1.93538  |
| A57 | 2.81240  | -0.00016 | -0.00066 | -0.00025 | -0.00091 | 2.81150  |
| D1  | 0.00329  | -0.00002 | -0.00020 | 0.00002  | -0.00017 | 0.00312  |
| D2  | 3.02388  | 0.00000  | 0.00059  | 0.00033  | 0.00093  | 3.02481  |
| D3  | -3.10312 | 0.00000  | 0.00117  | -0.00007 | 0.00110  | -3.10202 |
| D4  | -0.08253 | 0.00001  | 0.00196  | 0.00024  | 0.00220  | -0.08033 |
| D5  | -0.00245 | 0.00002  | 0.00019  | -0.00012 | 0.00007  | -0.00237 |
| D6  | -3.04077 | 0.00002  | 0.00069  | -0.00042 | 0.00028  | -3.04050 |
| D7  | 3.10756  | 0.00000  | -0.00104 | -0.00003 | -0.00107 | 3.10649  |
| D8  | 0.06923  | 0.00000  | -0.00053 | -0.00033 | -0.00087 | 0.06837  |
| D9  | -0.00301 | 0.00001  | 0.00013  | 0.00008  | 0.00021  | -0.00280 |
| D10 | 3.12310  | 0.00001  | 0.00096  | -0.00017 | 0.00079  | 3.12389  |
| D11 | -3.03362 | 0.00001  | -0.00061 | -0.00023 | -0.00084 | -3.03446 |
| D12 | 0.09249  | 0.00001  | 0.00022  | -0.00048 | -0.00026 | 0.09222  |
| D13 | -1.50955 | 0.00013  | 0.00061  | 0.00189  | 0.00250  | -1.50704 |
| D14 | 1.49302  | 0.00014  | 0.00153  | 0.00226  | 0.00380  | 1.49681  |
| D15 | 0.00153  | 0.00000  | -0.00002 | -0.00016 | -0.00017 | 0.00136  |

|     |          |          |          |          |          |          |
|-----|----------|----------|----------|----------|----------|----------|
| D16 | 3.13247  | 0.00000  | 0.00132  | 0.00016  | 0.00148  | 3.13396  |
| D17 | -3.12516 | 0.00000  | -0.00080 | 0.00008  | -0.00072 | -3.12588 |
| D18 | 0.00578  | -0.00001 | 0.00054  | 0.00040  | 0.00093  | 0.00672  |
| D19 | -0.19519 | 0.00001  | -0.00030 | -0.00018 | -0.00048 | -0.19567 |
| D20 | 2.95609  | 0.00001  | -0.00046 | -0.00008 | -0.00054 | 2.95555  |
| D21 | 2.92873  | 0.00002  | 0.00063  | -0.00046 | 0.00017  | 2.92890  |
| D22 | -0.20317 | 0.00001  | 0.00048  | -0.00036 | 0.00011  | -0.20306 |
| D23 | 0.00054  | -0.00001 | -0.00011 | 0.00017  | 0.00006  | 0.00061  |
| D24 | 3.03807  | -0.00003 | -0.00063 | 0.00047  | -0.00016 | 3.03791  |
| D25 | -3.13035 | -0.00001 | -0.00145 | -0.00015 | -0.00160 | -3.13195 |
| D26 | -0.09283 | -0.00002 | -0.00197 | 0.00015  | -0.00182 | -0.09465 |
| D27 | -2.48379 | 0.00003  | 0.00044  | 0.00079  | 0.00123  | -2.48256 |
| D28 | -0.45684 | 0.00004  | 0.00019  | 0.00076  | 0.00095  | -0.45589 |
| D29 | 1.66130  | 0.00001  | 0.00063  | 0.00054  | 0.00117  | 1.66247  |
| D30 | 0.77934  | 0.00004  | 0.00104  | 0.00044  | 0.00148  | 0.78082  |
| D31 | 2.80629  | 0.00005  | 0.00079  | 0.00041  | 0.00119  | 2.80749  |
| D32 | -1.35875 | 0.00001  | 0.00122  | 0.00020  | 0.00142  | -1.35733 |
| D33 | -3.00176 | 0.00007  | 0.00020  | -0.00006 | 0.00015  | -3.00161 |
| D34 | 1.21804  | 0.00006  | 0.00042  | -0.00006 | 0.00036  | 1.21839  |
| D35 | -0.89973 | 0.00013  | 0.00028  | -0.00008 | 0.00020  | -0.89953 |
| D36 | 1.16773  | 0.00002  | 0.00030  | -0.00019 | 0.00011  | 1.16785  |
| D37 | -0.89566 | 0.00001  | 0.00052  | -0.00019 | 0.00032  | -0.89533 |
| D38 | -3.01343 | 0.00008  | 0.00038  | -0.00021 | 0.00017  | -3.01326 |
| D39 | -0.92622 | 0.00000  | 0.00024  | -0.00018 | 0.00006  | -0.92616 |
| D40 | -2.98961 | -0.00001 | 0.00046  | -0.00018 | 0.00028  | -2.98934 |
| D41 | 1.17580  | 0.00006  | 0.00032  | -0.00020 | 0.00012  | 1.17592  |
| D42 | -3.13938 | -0.00001 | -0.00003 | -0.00014 | -0.00018 | -3.13955 |
| D43 | -0.02333 | -0.00001 | 0.00026  | 0.00006  | 0.00032  | -0.02300 |
| D44 | -0.00859 | 0.00000  | 0.00014  | -0.00025 | -0.00011 | -0.00870 |
| D45 | 3.10746  | 0.00000  | 0.00044  | -0.00005 | 0.00039  | 3.10785  |
| D46 | -2.75270 | 0.00000  | 0.00006  | -0.00019 | -0.00013 | -2.75283 |
| D47 | -0.04860 | 0.00001  | 0.00036  | -0.00010 | 0.00026  | -0.04835 |
| D48 | -0.01962 | -0.00001 | -0.00018 | -0.00016 | -0.00035 | -0.01997 |
| D49 | 2.68448  | 0.00000  | 0.00011  | -0.00007 | 0.00004  | 2.68452  |
| D50 | 0.32171  | -0.00002 | -0.00226 | -0.00031 | -0.00257 | 0.31914  |
| D51 | -2.05774 | -0.00001 | -0.00216 | -0.00033 | -0.00250 | -2.06024 |
| D52 | 2.54913  | -0.00001 | -0.00049 | -0.00103 | -0.00152 | 2.54761  |
| D53 | 0.16734  | -0.00003 | -0.00021 | -0.00106 | -0.00127 | 0.16607  |
| D54 | 2.55712  | -0.00001 | -0.00093 | -0.00064 | -0.00157 | 2.55555  |
| D55 | -1.64935 | -0.00001 | -0.00103 | -0.00064 | -0.00166 | -1.65101 |
| D56 | 0.44291  | -0.00001 | -0.00099 | -0.00063 | -0.00161 | 0.44130  |
| D57 | 1.33007  | 0.00000  | -0.00107 | -0.00059 | -0.00166 | 1.32842  |
| D58 | -2.87640 | 0.00000  | -0.00117 | -0.00058 | -0.00175 | -2.87815 |
| D59 | -0.78414 | 0.00000  | -0.00113 | -0.00057 | -0.00170 | -0.78584 |

|     |          |          |          |          |          |          |
|-----|----------|----------|----------|----------|----------|----------|
| D60 | -1.01805 | -0.00001 | -0.00071 | -0.00057 | -0.00128 | -1.01933 |
| D61 | 1.05866  | 0.00000  | -0.00081 | -0.00056 | -0.00137 | 1.05729  |
| D62 | -3.13226 | 0.00000  | -0.00077 | -0.00056 | -0.00132 | -3.13359 |
| D63 | 1.48330  | -0.00003 | 0.00156  | -0.00178 | -0.00022 | 1.48308  |
| D64 | 2.82989  | -0.00003 | 0.00119  | -0.00117 | 0.00001  | 2.82990  |
| D65 | 2.25499  | -0.00002 | -0.00188 | 0.00078  | -0.00109 | 2.25390  |
| D66 | -0.86194 | 0.00006  | -0.00127 | 0.00059  | -0.00068 | -0.86263 |
| D67 | -1.93675 | -0.00005 | -0.00192 | 0.00062  | -0.00131 | -1.93806 |
| D68 | 1.22950  | 0.00004  | -0.00132 | 0.00042  | -0.00090 | 1.22860  |
| D69 | 0.10031  | 0.00001  | -0.00189 | 0.00082  | -0.00107 | 0.09925  |
| D70 | -3.01662 | 0.00009  | -0.00128 | 0.00063  | -0.00066 | -3.01728 |
| D71 | 2.92253  | -0.00015 | -0.00095 | 0.00018  | -0.00077 | 2.92176  |
| D72 | -0.19379 | -0.00006 | -0.00034 | -0.00002 | -0.00035 | -0.19414 |
| D73 | -1.88010 | -0.00002 | 0.00138  | 0.00151  | 0.00290  | -1.87720 |

| Item                 | Value    | Threshold | Converged? |
|----------------------|----------|-----------|------------|
| Maximum Force        | 0.000236 | 0.000450  | YES        |
| RMS Force            | 0.000046 | 0.000300  | YES        |
| Maximum Displacement | 0.009949 | 0.001800  | NO         |
| RMS Displacement     | 0.001989 | 0.001200  | NO         |

Predicted change in Energy=-9.015805D-07

GradGradGradGradGradGradGradGradGradGradGradGradGradGradGradGradGradGradGrad

Input orientation:

| Center Number | Atomic Number | Atomic Type | Coordinates (Angstroms) |           |           |
|---------------|---------------|-------------|-------------------------|-----------|-----------|
|               |               |             | X                       | Y         | Z         |
| 1             | 6             | 0           | -0.838460               | 1.639248  | 1.530509  |
| 2             | 6             | 0           | -1.497100               | 0.450766  | 1.569260  |
| 3             | 7             | 0           | -2.370644               | 0.451700  | 0.489796  |
| 4             | 6             | 0           | -2.239923               | 1.611042  | -0.173827 |
| 5             | 7             | 0           | -1.311505               | 2.354253  | 0.440825  |
| 6             | 6             | 0           | -0.777476               | 3.644113  | -0.033330 |
| 7             | 1             | 0           | -0.057775               | 2.022011  | 2.163569  |
| 8             | 1             | 0           | -1.338691               | -0.421585 | 2.215033  |
| 9             | 1             | 0           | -1.615613               | 4.257880  | -0.367835 |
| 10            | 1             | 0           | -0.325678               | 4.127261  | 0.830894  |
| 11            | 35            | 0           | -0.391983               | -2.451751 | 2.892373  |
| 12            | 1             | 0           | -2.786161               | 1.889860  | -1.058492 |
| 13            | 6             | 0           | -3.264786               | -0.596974 | 0.102214  |
| 14            | 6             | 0           | -3.222890               | -1.819045 | 0.616568  |
| 15            | 1             | 0           | -3.967359               | -0.283176 | -0.659884 |
| 16            | 1             | 0           | -3.938610               | -2.549715 | 0.261168  |
| 17            | 1             | 0           | -2.491861               | -2.136906 | 1.363007  |

|    |   |   |           |           |           |
|----|---|---|-----------|-----------|-----------|
| 18 | 6 | 0 | 2.560759  | -0.688967 | 1.116705  |
| 19 | 6 | 0 | 3.977873  | -0.373807 | 1.320585  |
| 20 | 8 | 0 | 2.973880  | 0.654754  | 1.525927  |
| 21 | 1 | 0 | 2.189037  | -0.730602 | 0.096806  |
| 22 | 1 | 0 | 1.980938  | -1.229798 | 1.860135  |
| 23 | 1 | 0 | 4.421281  | -0.689993 | 2.262005  |
| 24 | 6 | 0 | 4.935055  | -0.169458 | 0.178924  |
| 25 | 1 | 0 | 5.691378  | 0.578683  | 0.433481  |
| 26 | 1 | 0 | 5.452614  | -1.108314 | -0.040201 |
| 27 | 1 | 0 | 4.407042  | 0.153733  | -0.720752 |
| 28 | 6 | 0 | 0.252176  | 3.472800  | -1.159565 |
| 29 | 1 | 0 | 0.702730  | 4.451248  | -1.354027 |
| 30 | 1 | 0 | -0.219332 | 3.132206  | -2.082056 |
| 31 | 6 | 0 | 1.355497  | 2.480721  | -0.810285 |
| 32 | 8 | 0 | 1.673601  | 1.566493  | -1.533216 |
| 33 | 8 | 0 | 1.886091  | 2.734518  | 0.385019  |
| 34 | 1 | 0 | 2.458966  | 1.968515  | 0.692658  |

-----  
Distance matrix (angstroms):

|    |    | 1        | 2        | 3        | 4        | 5        |
|----|----|----------|----------|----------|----------|----------|
| 1  | C  | 0.000000 |          |          |          |          |
| 2  | C  | 1.359337 | 0.000000 |          |          |          |
| 3  | N  | 2.200214 | 1.388641 | 0.000000 |          |          |
| 4  | C  | 2.206729 | 2.221796 | 1.342221 | 0.000000 |          |
| 5  | N  | 1.386512 | 2.220602 | 2.178045 | 1.338700 | 0.000000 |
| 6  | C  | 2.543383 | 3.644670 | 3.606015 | 2.508359 | 1.474364 |
| 7  | H  | 1.075519 | 2.212165 | 3.258336 | 3.223986 | 2.156402 |
| 8  | H  | 2.228416 | 1.096865 | 2.191802 | 3.263502 | 3.294515 |
| 9  | H  | 3.326396 | 4.273230 | 3.973991 | 2.726380 | 2.090504 |
| 10 | H  | 2.634885 | 3.928617 | 4.219951 | 3.317402 | 2.065809 |
| 11 | Br | 4.334776 | 3.375872 | 4.256466 | 5.415049 | 5.472959 |
| 12 | H  | 3.249503 | 3.261556 | 2.153637 | 1.076451 | 2.153653 |
| 13 | C  | 3.595521 | 2.524816 | 1.431582 | 2.449874 | 3.555237 |
| 14 | C  | 4.298905 | 3.006329 | 2.428720 | 3.654648 | 4.593550 |
| 15 | H  | 4.275926 | 3.407335 | 2.100311 | 2.609282 | 3.901430 |
| 16 | H  | 5.363727 | 4.083498 | 3.394007 | 4.515159 | 5.566225 |
| 17 | H  | 4.125667 | 2.779952 | 2.734606 | 4.058626 | 4.734360 |
| 18 | C  | 4.140834 | 4.239105 | 5.100281 | 5.477413 | 4.971160 |
| 19 | C  | 5.224320 | 5.542300 | 6.455644 | 6.695810 | 6.016129 |
| 20 | O  | 3.937409 | 4.475841 | 5.447820 | 5.566632 | 4.736061 |
| 21 | H  | 4.103344 | 4.141420 | 4.726835 | 5.017193 | 4.678512 |
| 22 | H  | 4.035974 | 3.873713 | 4.862256 | 5.479329 | 5.069521 |
| 23 | H  | 5.798735 | 6.066998 | 7.111570 | 7.456519 | 6.741585 |
| 24 | C  | 6.199329 | 6.609866 | 7.338646 | 7.401008 | 6.742198 |

|    |    |          |          |          |          |          |
|----|----|----------|----------|----------|----------|----------|
| 25 | H  | 6.705747 | 7.278775 | 8.063218 | 8.021229 | 7.224477 |
| 26 | H  | 7.042289 | 7.302028 | 7.994867 | 8.160139 | 7.614070 |
| 27 | H  | 5.898323 | 6.339659 | 6.891389 | 6.826787 | 6.236452 |
| 28 | C  | 3.433351 | 4.431607 | 4.327426 | 3.263185 | 2.501499 |
| 29 | H  | 4.313138 | 5.421136 | 5.370446 | 4.256624 | 3.417021 |
| 30 | H  | 3.957634 | 4.706901 | 4.292746 | 3.168290 | 2.857093 |
| 31 | C  | 3.316752 | 4.233233 | 4.437484 | 3.753460 | 2.948588 |
| 32 | O  | 3.962594 | 4.574226 | 4.657387 | 4.143137 | 3.664459 |
| 33 | O  | 3.151974 | 4.250168 | 4.831358 | 4.312597 | 3.220611 |
| 34 | H  | 3.418103 | 4.326945 | 5.066262 | 4.791465 | 3.798509 |
|    |    | 6        | 7        | 8        | 9        | 10       |
| 6  | C  | 0.000000 |          |          |          |          |
| 7  | H  | 2.824102 | 0.000000 |          |          |          |
| 8  | H  | 4.679744 | 2.759449 | 0.000000 |          |          |
| 9  | H  | 1.091364 | 3.719405 | 5.352129 | 0.000000 |          |
| 10 | H  | 1.088318 | 2.505968 | 4.861486 | 1.765770 | 0.000000 |
| 11 | Br | 6.772585 | 4.545041 | 2.340217 | 7.559456 | 6.894744 |
| 12 | H  | 2.857127 | 4.224125 | 4.260741 | 2.730331 | 3.824882 |
| 13 | C  | 4.918527 | 4.625277 | 2.864368 | 5.148818 | 5.611393 |
| 14 | C  | 6.020674 | 5.211994 | 2.838695 | 6.362500 | 6.618031 |
| 15 | H  | 5.098188 | 5.345149 | 3.897973 | 5.122225 | 5.910687 |
| 16 | H  | 6.960101 | 6.291318 | 3.886657 | 7.220478 | 7.613138 |
| 17 | H  | 6.189431 | 4.884901 | 2.235637 | 6.682582 | 6.649457 |
| 18 | C  | 5.589453 | 3.911783 | 4.059991 | 6.642081 | 5.622211 |
| 19 | C  | 6.371037 | 4.768335 | 5.391491 | 7.455895 | 6.246596 |
| 20 | O  | 5.043831 | 3.386283 | 4.497960 | 6.134517 | 4.840295 |
| 21 | H  | 5.287275 | 4.110542 | 4.126408 | 6.290962 | 5.519195 |
| 22 | H  | 5.911774 | 3.850024 | 3.434982 | 6.929188 | 5.922660 |
| 23 | H  | 7.147036 | 5.237041 | 5.766414 | 8.236601 | 6.912860 |
| 24 | C  | 6.871783 | 5.802561 | 6.600697 | 7.925372 | 6.823648 |
| 25 | H  | 7.173622 | 6.174881 | 7.320951 | 8.220141 | 6.996807 |
| 26 | H  | 7.835792 | 6.709689 | 7.188845 | 8.880496 | 7.845935 |
| 27 | H  | 6.287649 | 5.634214 | 6.477907 | 7.296639 | 6.371433 |
| 28 | C  | 1.535558 | 3.639242 | 5.393052 | 2.175275 | 2.173513 |
| 29 | H  | 2.141663 | 4.342010 | 6.375743 | 2.526793 | 2.436487 |
| 30 | H  | 2.184228 | 4.391351 | 5.687475 | 2.480987 | 3.080052 |
| 31 | C  | 2.550827 | 3.324389 | 4.983431 | 3.490208 | 2.868956 |
| 32 | O  | 3.545976 | 4.107478 | 5.203434 | 4.406881 | 4.017918 |
| 33 | O  | 2.845517 | 2.729381 | 4.869205 | 3.892217 | 2.651501 |
| 34 | H  | 3.716080 | 2.915549 | 4.738397 | 4.792498 | 3.526122 |
|    |    | 11       | 12       | 13       | 14       | 15       |
| 11 | Br | 0.000000 |          |          |          |          |
| 12 | H  | 6.339638 | 0.000000 |          |          |          |
| 13 | C  | 4.413409 | 2.785797 | 0.000000 |          |          |

|    |   |           |          |          |          |          |
|----|---|-----------|----------|----------|----------|----------|
| 14 | C | 3.686956  | 4.092986 | 1.326564 | 0.000000 |          |
| 15 | H | 5.486762  | 2.505235 | 1.082992 | 2.131304 | 0.000000 |
| 16 | H | 4.417171  | 4.772784 | 2.071835 | 1.082793 | 2.446704 |
| 17 | H | 2.616787  | 4.707984 | 2.135041 | 1.092067 | 3.115364 |
| 18 | C | 3.870282  | 6.322292 | 5.913935 | 5.914204 | 6.777702 |
| 19 | C | 5.087633  | 7.519066 | 7.347812 | 7.378031 | 8.188845 |
| 20 | O | 4.779810  | 6.432945 | 6.520333 | 6.733987 | 7.337458 |
| 21 | H | 4.176029  | 5.740569 | 5.455463 | 5.544711 | 6.218841 |
| 22 | H | 2.861720  | 6.401241 | 5.568517 | 5.382704 | 6.529075 |
| 23 | H | 5.164171  | 8.344373 | 7.984296 | 7.900353 | 8.892256 |
| 24 | C | 6.399141  | 8.086357 | 8.211337 | 8.334551 | 8.942567 |
| 25 | H | 7.227514  | 8.707114 | 9.039070 | 9.232919 | 9.758557 |
| 26 | H | 6.675637  | 8.826289 | 8.733545 | 8.729310 | 9.476325 |
| 27 | H | 6.547814  | 7.407454 | 7.752276 | 7.993506 | 8.386011 |
| 28 | C | 7.206487  | 3.427449 | 5.524869 | 6.575284 | 5.671112 |
| 29 | H | 8.178124  | 4.338250 | 6.583797 | 7.655738 | 6.686280 |
| 30 | H | 7.480329  | 3.029805 | 5.287023 | 6.388961 | 5.266413 |
| 31 | C | 6.410354  | 4.190949 | 5.626000 | 6.440926 | 5.999545 |
| 32 | O | 6.324457  | 4.496599 | 5.634082 | 6.329223 | 6.000367 |
| 33 | O | 6.194661  | 4.962570 | 6.140875 | 6.847644 | 6.667921 |
| 34 | H | 5.701351  | 5.530287 | 6.300135 | 6.828975 | 6.942416 |
|    |   | 16        | 17       | 18       | 19       | 20       |
| 16 | H | 0.000000  |          |          |          |          |
| 17 | H | 1.864817  | 0.000000 |          |          |          |
| 18 | C | 6.814405  | 5.261763 | 0.000000 |          |          |
| 19 | C | 8.278142  | 6.705801 | 1.465983 | 0.000000 |          |
| 20 | O | 7.723390  | 6.139563 | 1.464145 | 1.451931 | 0.000000 |
| 21 | H | 6.394079  | 5.048936 | 1.086326 | 2.196559 | 2.139528 |
| 22 | H | 6.272155  | 4.590851 | 1.086912 | 2.238656 | 2.156193 |
| 23 | H | 8.794867  | 7.119921 | 2.184778 | 1.087592 | 2.108347 |
| 24 | C | 9.187726  | 7.773801 | 2.605112 | 1.503778 | 2.517926 |
| 25 | H | 10.126856 | 8.672014 | 3.445941 | 2.151811 | 2.929849 |
| 26 | H | 9.505974  | 8.132753 | 3.142787 | 2.136844 | 3.421299 |
| 27 | H | 8.827384  | 7.562006 | 2.737728 | 2.151637 | 2.711557 |
| 28 | C | 7.473410  | 6.735125 | 5.275535 | 5.901555 | 4.749834 |
| 29 | H | 8.553618  | 7.809703 | 5.998217 | 6.415704 | 5.278790 |
| 30 | H | 7.183867  | 6.693010 | 5.706342 | 6.441011 | 5.417740 |
| 31 | C | 7.381115  | 6.391231 | 3.900368 | 4.423324 | 3.378047 |
| 32 | O | 7.187481  | 6.281269 | 3.591133 | 4.149532 | 3.446788 |
| 33 | O | 7.865468  | 6.622211 | 3.565220 | 3.861673 | 2.609669 |
| 34 | H | 7.844078  | 6.466416 | 2.693026 | 2.861440 | 1.638731 |
|    |   | 21        | 22       | 23       | 24       | 25       |
| 21 | H | 0.000000  |          |          |          |          |
| 22 | H | 1.844405  | 0.000000 |          |          |          |

|    |   |          |          |          |          |          |
|----|---|----------|----------|----------|----------|----------|
| 23 | H | 3.110088 | 2.531435 | 0.000000 |          |          |
| 24 | C | 2.803969 | 3.560561 | 2.207747 | 0.000000 |          |
| 25 | H | 3.754193 | 4.367299 | 2.562457 | 1.093864 | 0.000000 |
| 26 | H | 3.288217 | 3.959617 | 2.557106 | 1.094227 | 1.768428 |
| 27 | H | 2.523885 | 3.802777 | 3.099825 | 1.092093 | 1.778301 |
| 28 | C | 4.795674 | 5.849926 | 6.813034 | 6.081691 | 6.363853 |
| 29 | H | 5.582615 | 6.651236 | 7.303128 | 6.450848 | 6.563425 |
| 30 | H | 5.046679 | 6.277670 | 7.417234 | 6.525391 | 6.912662 |
| 31 | C | 3.439506 | 4.614138 | 5.375075 | 4.562370 | 4.895362 |
| 32 | O | 2.863440 | 4.407781 | 5.200498 | 4.072105 | 4.581070 |
| 33 | O | 3.490258 | 4.230929 | 4.655915 | 4.215654 | 4.373807 |
| 34 | H | 2.777253 | 3.438127 | 3.658031 | 3.311475 | 3.528071 |
|    |   | 26       | 27       | 28       | 29       | 30       |
| 26 | H | 0.000000 |          |          |          |          |
| 27 | H | 1.774580 | 0.000000 |          |          |          |
| 28 | C | 7.020266 | 5.335886 | 0.000000 |          |          |
| 29 | H | 7.429418 | 5.708905 | 1.094612 | 0.000000 |          |
| 30 | H | 7.370356 | 5.668138 | 1.090556 | 1.766380 | 0.000000 |
| 31 | C | 5.500960 | 3.838595 | 1.524315 | 2.145865 | 2.126481 |
| 32 | O | 4.864630 | 3.182403 | 2.407088 | 3.049018 | 2.517117 |
| 33 | O | 5.260062 | 3.773377 | 2.366533 | 2.715103 | 3.267632 |
| 34 | H | 4.354983 | 3.014326 | 3.250159 | 3.665686 | 4.028213 |
|    |   | 31       | 32       | 33       | 34       |          |
| 31 | C | 0.000000 |          |          |          |          |
| 32 | O | 1.208152 | 0.000000 |          |          |          |
| 33 | O | 1.332176 | 2.255894 | 0.000000 |          |          |
| 34 | H | 1.933608 | 2.394355 | 1.004783 | 0.000000 |          |

Stoichiometry C11H17BrN2O3

Framework group C1[X(C11H17BrN2O3)]

Deg. of freedom 96

Full point group C1 NOp 1

Largest Abelian subgroup C1 NOp 1

Largest concise Abelian subgroup C1 NOp 1

Standard orientation:

| Center<br>Number | Atomic<br>Number | Atomic<br>Type | Coordinates (Angstroms) |          |           |
|------------------|------------------|----------------|-------------------------|----------|-----------|
|                  |                  |                | X                       | Y        | Z         |
| 1                | 6                | 0              | 0.075138                | 1.324680 | 1.234242  |
| 2                | 6                | 0              | -1.157925               | 1.242252 | 0.668063  |
| 3                | 7                | 0              | -1.237824               | 2.281424 | -0.249575 |
| 4                | 6                | 0              | -0.084854               | 2.968312 | -0.229497 |
| 5                | 7                | 0              | 0.733629                | 2.405477 | 0.667956  |
| 6                | 6                | 0              | 2.139802                | 2.774771 | 0.913006  |



|    |    |   |           |           |           |
|----|----|---|-----------|-----------|-----------|
| 7  | 1  | 0 | 0.547813  | 0.692899  | 1.965113  |
| 8  | 1  | 0 | -1.932536 | 0.473190  | 0.775930  |
| 9  | 1  | 0 | 2.205176  | 3.863602  | 0.948369  |
| 10 | 1  | 0 | 2.393509  | 2.386630  | 1.897595  |
| 11 | 35 | 0 | -3.057698 | -1.525363 | 0.310726  |
| 12 | 1  | 0 | 0.143710  | 3.823886  | -0.841460 |
| 13 | 6  | 0 | -2.340501 | 2.591730  | -1.108203 |
| 14 | 6  | 0 | -3.374202 | 1.780577  | -1.290595 |
| 15 | 1  | 0 | -2.230024 | 3.552738  | -1.595162 |
| 16 | 1  | 0 | -4.162896 | 2.097952  | -1.961174 |
| 17 | 1  | 0 | -3.464277 | 0.799476  | -0.819494 |
| 18 | 6  | 0 | 0.639731  | -2.459649 | -0.348982 |
| 19 | 6  | 0 | 1.616873  | -3.504533 | -0.028801 |
| 20 | 8  | 0 | 1.653539  | -2.240356 | 0.684373  |
| 21 | 1  | 0 | 0.803736  | -1.864470 | -1.242833 |
| 22 | 1  | 0 | -0.381761 | -2.497252 | 0.020502  |
| 23 | 1  | 0 | 1.278314  | -4.313852 | 0.614034  |
| 24 | 6  | 0 | 2.789592  | -3.816978 | -0.916751 |
| 25 | 1  | 0 | 3.655404  | -4.126868 | -0.324403 |
| 26 | 1  | 0 | 2.532377  | -4.639957 | -1.590455 |
| 27 | 1  | 0 | 3.065917  | -2.948986 | -1.519164 |
| 28 | 6  | 0 | 3.087954  | 2.209355  | -0.154351 |
| 29 | 1  | 0 | 4.114619  | 2.401547  | 0.173058  |
| 30 | 1  | 0 | 2.945334  | 2.703510  | -1.116007 |
| 31 | 6  | 0 | 2.910744  | 0.711279  | -0.373215 |
| 32 | 8  | 0 | 2.756587  | 0.217889  | -1.465201 |
| 33 | 8  | 0 | 2.917442  | 0.040907  | 0.777980  |
| 34 | 1  | 0 | 2.599725  | -0.902969 | 0.644777  |

-----  
Rotational constants (GHZ): 0.3281596 0.2550461 0.1592318

Standard basis: 6-311++G(d,p) (5D, 7F)

There are 538 symmetry adapted cartesian basis functions of A symmetry.

There are 519 symmetry adapted basis functions of A symmetry.

519 basis functions, 823 primitive gaussians, 538 cartesian basis functions

78 alpha electrons 78 beta electrons

nuclear repulsion energy 1572.4671800277 Hartrees.

NAtoms= 34 NActive= 34 NUniq= 34 SFac= 1.00D+00 NATFMM= 60 NAOKFM=F

Big=F

Integral buffers will be 131072 words long.

Raffenetti 2 integral format.

Two-electron integral symmetry is turned on.

One-electron integrals computed using PRISM.

NBasis= 519 RedAO= T EigKep= 3.53D-06 NBF= 519

NBsUse= 519 1.00D-06 EigRej= -1.00D+00 NBFU= 519

Initial guess from the checkpoint file: "./coohpo.chk"

B after Tr= 0.000000 0.000000 0.000000

Rot= 0.999999 -0.000014 0.000077 0.001670 Ang= -0.19 deg.

Requested convergence on RMS density matrix=1.00D-08 within 128 cycles.

Requested convergence on MAX density matrix=1.00D-06.

Requested convergence on energy=1.00D-06.

No special actions if energy rises.

SCF Done: E(RB3LYP) = -3338.90387512 A.U. after 11 cycles

NFock= 11 Conv=0.15D-08 -V/T= 2.0019

Calling FoFJK, ICntrl= 2127 FMM=F ISym2X=0 l1Cent= 0 IOpClX= 0 NMat=1 NMatS=1

NMatT=0.

\*\*\*\*\* Axes restored to original set \*\*\*\*\*

```
-----
```

| Center | Atomic | Forces (Hartrees/Bohr) |              |              |
|--------|--------|------------------------|--------------|--------------|
| Number | Number | X                      | Y            | Z            |
| 1      | 6      | 0.000029482            | -0.000018888 | -0.000070602 |
| 2      | 6      | 0.000221904            | 0.000153589  | 0.000145881  |
| 3      | 7      | -0.000079324           | 0.000012218  | 0.000009346  |
| 4      | 6      | -0.000056671           | -0.000026531 | 0.000026822  |
| 5      | 7      | 0.000085200            | 0.000026109  | -0.000035329 |
| 6      | 6      | -0.000110694           | -0.000014372 | 0.000042471  |
| 7      | 1      | -0.000020508           | 0.000023958  | 0.000012191  |
| 8      | 1      | -0.000265386           | -0.000227632 | -0.000124091 |
| 9      | 1      | -0.000003238           | -0.000004804 | 0.000016806  |
| 10     | 1      | 0.000037572            | 0.000000794  | -0.000024396 |
| 11     | 35     | 0.000106031            | 0.000059372  | 0.000055416  |
| 12     | 1      | 0.000034447            | -0.000003717 | -0.000020147 |
| 13     | 6      | 0.000026534            | 0.000021335  | -0.000012850 |
| 14     | 6      | -0.000034889           | 0.000057249  | -0.000006082 |
| 15     | 1      | 0.000007561            | -0.000006954 | -0.000016542 |
| 16     | 1      | -0.000002204           | -0.000014691 | 0.000008926  |
| 17     | 1      | 0.000013781            | -0.000011655 | 0.000002074  |
| 18     | 6      | -0.000042359           | -0.000019602 | 0.000071298  |
| 19     | 6      | 0.000030310            | 0.000018967  | 0.000048977  |
| 20     | 8      | -0.000014808           | -0.000058873 | -0.000021914 |
| 21     | 1      | 0.000022376            | 0.000012924  | -0.000013344 |
| 22     | 1      | -0.000021728           | 0.000005411  | -0.000018146 |
| 23     | 1      | -0.000001963           | 0.000009228  | -0.000007399 |
| 24     | 6      | -0.000022204           | -0.000005525 | -0.000028424 |
| 25     | 1      | 0.000001740            | -0.000001227 | 0.000000083  |
| 26     | 1      | 0.000003451            | -0.000001862 | 0.000000155  |
| 27     | 1      | -0.000004020           | -0.000003263 | 0.000010397  |
| 28     | 6      | 0.000057695            | 0.000030840  | -0.000069767 |

```
-----
```

|    |   |              |              |              |
|----|---|--------------|--------------|--------------|
| 29 | 1 | 0.000002363  | 0.000008738  | 0.000014785  |
| 30 | 1 | 0.000007926  | -0.000012899 | 0.000008846  |
| 31 | 6 | -0.000021411 | -0.000021394 | 0.000027457  |
| 32 | 8 | 0.000017804  | -0.000010440 | -0.000015967 |
| 33 | 8 | -0.000023778 | 0.000037289  | 0.000023095  |
| 34 | 1 | 0.000019007  | -0.000013692 | -0.000040028 |

-----  
Cartesian Forces: Max 0.000265386 RMS 0.000057524

GradGradGradGradGradGradGradGradGradGradGradGradGradGradGradGradGradGradGradGrad

Berny optimization.

Using GEDIIS/GDIIS optimizer.

FormGI is forming the generalized inverse of G from B-inverse, IUseBI=4.

Internal Forces: Max 0.000142079 RMS 0.000037592

Search for a local minimum.

Step number 34 out of a maximum of 175

All quantities printed in internal units (Hartrees-Bohrs-Radians)

Mixed Optimization -- En-DIIS/RFO-DIIS

Swapping is turned off.

Update second derivatives using D2CorX and points

|    |    |    |    |    |    |    |  |  |  |
|----|----|----|----|----|----|----|--|--|--|
| 21 | 22 | 23 | 24 | 25 |    |    |  |  |  |
|    |    | 26 | 27 | 28 | 29 | 30 |  |  |  |
|    |    | 31 | 32 | 33 | 34 |    |  |  |  |

DE= -2.92D-06 DEPred=-9.02D-07 R= 3.24D+00

TightC=F SS= 1.41D+00 RLast= 1.06D-02 DXNew= 6.5746D-01 3.1744D-02

Trust test= 3.24D+00 RLast= 1.06D-02 DXMaxT set to 3.91D-01

ITU= 1 1 1 -1 1 1 1 1 1 -1 0 1 1 1 1 1 1 1 1 1 1

ITU= 1 0 0 -1 1 1 1 0 1 0 -1 0 1 0

|                 |         |         |         |         |         |
|-----------------|---------|---------|---------|---------|---------|
| Eigenvalues --- | 0.00174 | 0.00262 | 0.00381 | 0.00456 | 0.00573 |
| Eigenvalues --- | 0.00744 | 0.00932 | 0.01147 | 0.01280 | 0.01347 |
| Eigenvalues --- | 0.01711 | 0.02108 | 0.02200 | 0.02284 | 0.02363 |
| Eigenvalues --- | 0.02440 | 0.02766 | 0.02925 | 0.03058 | 0.03148 |
| Eigenvalues --- | 0.03438 | 0.03845 | 0.04001 | 0.04351 | 0.04650 |
| Eigenvalues --- | 0.04850 | 0.05015 | 0.05327 | 0.05611 | 0.05737 |
| Eigenvalues --- | 0.05941 | 0.06189 | 0.06415 | 0.07723 | 0.09281 |
| Eigenvalues --- | 0.09701 | 0.11746 | 0.12551 | 0.12871 | 0.13262 |
| Eigenvalues --- | 0.13552 | 0.14915 | 0.15246 | 0.15663 | 0.15945 |
| Eigenvalues --- | 0.16004 | 0.16013 | 0.16035 | 0.16063 | 0.16174 |
| Eigenvalues --- | 0.17014 | 0.17667 | 0.19301 | 0.20352 | 0.21947 |
| Eigenvalues --- | 0.23314 | 0.23645 | 0.24092 | 0.25289 | 0.26126 |
| Eigenvalues --- | 0.28387 | 0.28765 | 0.29912 | 0.31821 | 0.31991 |
| Eigenvalues --- | 0.32944 | 0.34358 | 0.34508 | 0.34607 | 0.34668 |
| Eigenvalues --- | 0.34837 | 0.34902 | 0.34965 | 0.35053 | 0.35188 |
| Eigenvalues --- | 0.35309 | 0.35590 | 0.35741 | 0.35901 | 0.36590 |
| Eigenvalues --- | 0.37025 | 0.37261 | 0.37753 | 0.38905 | 0.39548 |

|                                  |                         |            |           |            |          |         |
|----------------------------------|-------------------------|------------|-----------|------------|----------|---------|
| Eigenvalues ---                  | 0.42001                 | 0.45380    | 0.49222   | 0.50613    | 0.51086  |         |
| Eigenvalues ---                  | 0.54126                 | 0.55913    | 0.56311   | 0.61075    | 0.90974  |         |
| Eigenvalues ---                  | 1.14667                 |            |           |            |          |         |
| En-DIIS/RFO-DIIS IScMMF=         | 0 using points:         |            | 34        | 33         | 32       | 31 30   |
| RFO step:                        | Lambda=-4.10094873D-07. |            |           |            |          |         |
| DidBck=F Rises=F RFO-DIIS coefs: | 2.05728                 | -1.52676   |           | 0.27160    |          | 0.18184 |
| 0.01604                          |                         |            |           |            |          |         |
| Iteration 1                      | RMS(Cart)=              | 0.00372062 | RMS(Int)= | 0.00000381 |          |         |
| Iteration 2                      | RMS(Cart)=              | 0.00000555 | RMS(Int)= | 0.00000031 |          |         |
| Iteration 3                      | RMS(Cart)=              | 0.00000000 | RMS(Int)= | 0.00000031 |          |         |
| Variable                         | Old X                   | -DE/DX     | Delta X   | Delta X    | Delta X  | New X   |
|                                  |                         |            | (Linear)  | (Quad)     | (Total)  |         |
| R1                               | 2.56878                 | -0.00001   | 0.00003   | -0.00001   | 0.00002  | 2.56880 |
| R2                               | 2.62013                 | -0.00002   | 0.00000   | 0.00004    | 0.00003  | 2.62016 |
| R3                               | 2.03244                 | 0.00000    | 0.00000   | -0.00001   | -0.00001 | 2.03243 |
| R4                               | 2.62415                 | 0.00007    | -0.00003  | 0.00006    | 0.00002  | 2.62417 |
| R5                               | 2.07277                 | 0.00007    | -0.00019  | 0.00010    | -0.00009 | 2.07268 |
| R6                               | 2.53643                 | 0.00000    | -0.00010  | -0.00001   | -0.00011 | 2.53632 |
| R7                               | 2.70530                 | -0.00003   | 0.00028   | -0.00005   | 0.00023  | 2.70553 |
| R8                               | 2.52978                 | 0.00001    | 0.00004   | 0.00000    | 0.00004  | 2.52982 |
| R9                               | 2.03420                 | 0.00000    | 0.00000   | 0.00002    | 0.00001  | 2.03421 |
| R10                              | 2.78614                 | -0.00005   | 0.00011   | -0.00002   | 0.00008  | 2.78623 |
| R11                              | 2.06238                 | -0.00001   | 0.00004   | -0.00003   | 0.00002  | 2.06240 |
| R12                              | 2.05662                 | 0.00000    | -0.00001  | 0.00001    | 0.00000  | 2.05662 |
| R13                              | 2.90178                 | 0.00003    | -0.00010  | 0.00012    | 0.00003  | 2.90181 |
| R14                              | 4.42237                 | 0.00001    | 0.00036   | -0.00058   | -0.00022 | 4.42215 |
| R15                              | 2.50684                 | -0.00002   | -0.00010  | 0.00002    | -0.00008 | 2.50677 |
| R16                              | 2.04656                 | 0.00000    | -0.00002  | 0.00001    | -0.00001 | 2.04655 |
| R17                              | 2.04618                 | 0.00001    | 0.00003   | 0.00000    | 0.00004  | 2.04622 |
| R18                              | 2.06371                 | 0.00002    | -0.00003  | 0.00004    | 0.00000  | 2.06371 |
| R19                              | 2.77031                 | 0.00002    | -0.00007  | 0.00008    | 0.00001  | 2.77032 |
| R20                              | 2.76683                 | 0.00000    | -0.00005  | -0.00005   | -0.00010 | 2.76673 |
| R21                              | 2.05286                 | 0.00001    | 0.00001   | -0.00002   | -0.00001 | 2.05285 |
| R22                              | 2.05397                 | -0.00001   | 0.00001   | -0.00004   | -0.00003 | 2.05394 |
| R23                              | 2.74375                 | -0.00003   | 0.00038   | -0.00006   | 0.00032  | 2.74407 |
| R24                              | 2.05525                 | -0.00001   | 0.00000   | -0.00001   | -0.00001 | 2.05525 |
| R25                              | 2.84173                 | 0.00001    | -0.00014  | 0.00004    | -0.00010 | 2.84163 |
| R26                              | 3.09675                 | 0.00002    | -0.00103  | 0.00035    | -0.00068 | 3.09607 |
| R27                              | 2.06710                 | 0.00000    | 0.00000   | 0.00001    | 0.00001  | 2.06711 |
| R28                              | 2.06779                 | 0.00000    | 0.00000   | 0.00001    | 0.00001  | 2.06779 |
| R29                              | 2.06376                 | 0.00000    | 0.00002   | -0.00001   | 0.00001  | 2.06377 |
| R30                              | 2.06852                 | 0.00001    | 0.00003   | -0.00003   | 0.00000  | 2.06852 |
| R31                              | 2.06085                 | -0.00001   | 0.00004   | -0.00004   | 0.00000  | 2.06085 |
| R32                              | 2.88054                 | -0.00002   | -0.00011  | -0.00001   | -0.00012 | 2.88042 |

|     |         |          |          |          |          |         |
|-----|---------|----------|----------|----------|----------|---------|
| R33 | 2.28308 | 0.00002  | -0.00003 | 0.00004  | 0.00001  | 2.28309 |
| R34 | 2.51745 | -0.00002 | 0.00011  | -0.00004 | 0.00007  | 2.51752 |
| R35 | 1.89877 | 0.00001  | 0.00034  | -0.00014 | 0.00021  | 1.89897 |
| A1  | 1.88385 | 0.00003  | -0.00005 | 0.00001  | -0.00003 | 1.88382 |
| A2  | 2.27323 | 0.00000  | 0.00008  | 0.00000  | 0.00008  | 2.27331 |
| A3  | 2.12553 | -0.00003 | -0.00006 | 0.00000  | -0.00006 | 2.12547 |
| A4  | 1.85673 | -0.00003 | 0.00001  | -0.00005 | -0.00004 | 1.85669 |
| A5  | 2.26811 | -0.00002 | 0.00026  | 0.00022  | 0.00048  | 2.26858 |
| A6  | 2.15202 | 0.00005  | -0.00020 | -0.00019 | -0.00039 | 2.15163 |
| A7  | 1.90039 | 0.00000  | 0.00003  | 0.00006  | 0.00008  | 1.90047 |
| A8  | 2.21789 | 0.00003  | -0.00018 | -0.00005 | -0.00023 | 2.21766 |
| A9  | 2.16481 | -0.00004 | 0.00015  | -0.00001 | 0.00014  | 2.16495 |
| A10 | 1.89659 | 0.00000  | -0.00001 | -0.00004 | -0.00005 | 1.89654 |
| A11 | 2.19031 | 0.00001  | 0.00005  | 0.00005  | 0.00010  | 2.19040 |
| A12 | 2.19625 | -0.00001 | -0.00003 | -0.00001 | -0.00004 | 2.19621 |
| A13 | 1.88721 | 0.00000  | 0.00001  | 0.00002  | 0.00003  | 1.88725 |
| A14 | 2.18993 | -0.00007 | -0.00005 | 0.00011  | 0.00006  | 2.18998 |
| A15 | 2.20091 | 0.00007  | 0.00007  | -0.00009 | -0.00002 | 2.20090 |
| A16 | 1.88853 | 0.00007  | -0.00002 | -0.00001 | -0.00003 | 1.88850 |
| A17 | 1.85810 | 0.00001  | -0.00019 | 0.00006  | -0.00013 | 1.85798 |
| A18 | 1.96183 | -0.00011 | 0.00010  | 0.00007  | 0.00017  | 1.96200 |
| A19 | 1.88866 | -0.00001 | -0.00010 | 0.00003  | -0.00007 | 1.88859 |
| A20 | 1.93146 | 0.00004  | 0.00012  | -0.00004 | 0.00008  | 1.93155 |
| A21 | 1.93219 | 0.00000  | 0.00007  | -0.00011 | -0.00004 | 1.93215 |
| A22 | 2.73575 | -0.00009 | -0.00121 | -0.00001 | -0.00122 | 2.73452 |
| A23 | 2.15331 | -0.00001 | -0.00017 | -0.00005 | -0.00022 | 2.15309 |
| A24 | 1.96433 | 0.00001  | -0.00007 | 0.00004  | -0.00003 | 1.96430 |
| A25 | 2.16550 | 0.00000  | 0.00024  | 0.00001  | 0.00025  | 2.16575 |
| A26 | 2.06406 | 0.00002  | 0.00008  | 0.00005  | 0.00013  | 2.06419 |
| A27 | 2.15831 | 0.00000  | 0.00015  | -0.00002 | 0.00012  | 2.15844 |
| A28 | 2.06055 | -0.00002 | -0.00022 | -0.00003 | -0.00025 | 2.06029 |
| A29 | 2.05962 | -0.00004 | 0.00017  | -0.00025 | -0.00008 | 2.05954 |
| A30 | 2.12648 | 0.00005  | -0.00010 | 0.00034  | 0.00025  | 2.12672 |
| A31 | 1.97592 | -0.00002 | 0.00005  | 0.00003  | 0.00009  | 1.97600 |
| A32 | 1.99985 | 0.00002  | 0.00003  | -0.00016 | -0.00013 | 1.99972 |
| A33 | 2.02701 | 0.00000  | -0.00015 | -0.00001 | -0.00016 | 2.02685 |
| A34 | 2.03979 | 0.00001  | -0.00026 | 0.00009  | -0.00016 | 2.03963 |
| A35 | 2.13996 | -0.00004 | 0.00031  | -0.00011 | 0.00019  | 2.14015 |
| A36 | 1.94491 | 0.00000  | -0.00027 | 0.00002  | -0.00024 | 1.94467 |
| A37 | 2.03896 | -0.00002 | 0.00000  | -0.00002 | -0.00002 | 2.03894 |
| A38 | 2.02323 | 0.00002  | 0.00010  | 0.00003  | 0.00013  | 2.02336 |
| A39 | 2.10015 | -0.00001 | 0.00031  | 0.00040  | 0.00071  | 2.10086 |
| A40 | 2.36498 | -0.00004 | -0.00167 | -0.00046 | -0.00212 | 2.36285 |
| A41 | 1.93518 | 0.00001  | -0.00008 | 0.00003  | -0.00005 | 1.93513 |

|     |          |          |          |          |          |          |
|-----|----------|----------|----------|----------|----------|----------|
| A42 | 1.91400  | 0.00001  | 0.00001  | 0.00003  | 0.00005  | 1.91405  |
| A43 | 1.93681  | -0.00001 | 0.00015  | -0.00008 | 0.00007  | 1.93688  |
| A44 | 1.88220  | -0.00001 | -0.00001 | -0.00002 | -0.00003 | 1.88217  |
| A45 | 1.90033  | 0.00000  | -0.00004 | 0.00000  | -0.00003 | 1.90029  |
| A46 | 1.89402  | 0.00000  | -0.00004 | 0.00003  | 0.00000  | 1.89402  |
| A47 | 1.88239  | 0.00002  | -0.00028 | 0.00006  | -0.00022 | 1.88217  |
| A48 | 1.94479  | 0.00005  | -0.00002 | 0.00006  | 0.00004  | 1.94483  |
| A49 | 1.97132  | -0.00014 | -0.00004 | -0.00010 | -0.00015 | 1.97117  |
| A50 | 1.88268  | -0.00001 | -0.00003 | 0.00007  | 0.00004  | 1.88273  |
| A51 | 1.90133  | 0.00009  | 0.00016  | -0.00001 | 0.00015  | 1.90147  |
| A52 | 1.87917  | 0.00000  | 0.00022  | -0.00008 | 0.00014  | 1.87931  |
| A53 | 2.14834  | -0.00002 | -0.00004 | 0.00012  | 0.00008  | 2.14842  |
| A54 | 1.94969  | 0.00004  | 0.00006  | -0.00012 | -0.00006 | 1.94963  |
| A55 | 2.18486  | -0.00002 | -0.00002 | -0.00001 | -0.00003 | 2.18483  |
| A56 | 1.93538  | -0.00014 | -0.00031 | -0.00012 | -0.00042 | 1.93496  |
| A57 | 2.81150  | -0.00011 | 0.00002  | -0.00004 | -0.00002 | 2.81147  |
| D1  | 0.00312  | -0.00001 | -0.00007 | 0.00004  | -0.00003 | 0.00309  |
| D2  | 3.02481  | -0.00001 | 0.00054  | -0.00015 | 0.00040  | 3.02521  |
| D3  | -3.10202 | -0.00001 | 0.00069  | -0.00027 | 0.00042  | -3.10160 |
| D4  | -0.08033 | -0.00001 | 0.00131  | -0.00047 | 0.00084  | -0.07949 |
| D5  | -0.00237 | 0.00001  | -0.00001 | 0.00009  | 0.00008  | -0.00229 |
| D6  | -3.04050 | 0.00001  | -0.00039 | -0.00027 | -0.00067 | -3.04117 |
| D7  | 3.10649  | 0.00001  | -0.00069 | 0.00038  | -0.00032 | 3.10618  |
| D8  | 0.06837  | 0.00001  | -0.00108 | 0.00001  | -0.00107 | 0.06730  |
| D9  | -0.00280 | 0.00000  | 0.00013  | -0.00017 | -0.00004 | -0.00283 |
| D10 | 3.12389  | 0.00000  | 0.00030  | -0.00039 | -0.00009 | 3.12379  |
| D11 | -3.03446 | 0.00001  | -0.00047 | -0.00002 | -0.00050 | -3.03496 |
| D12 | 0.09222  | 0.00000  | -0.00031 | -0.00025 | -0.00055 | 0.09167  |
| D13 | -1.50704 | 0.00012  | 0.00212  | 0.00269  | 0.00481  | -1.50223 |
| D14 | 1.49681  | 0.00011  | 0.00285  | 0.00249  | 0.00533  | 1.50214  |
| D15 | 0.00136  | 0.00000  | -0.00014 | 0.00023  | 0.00009  | 0.00145  |
| D16 | 3.13396  | -0.00002 | 0.00100  | -0.00024 | 0.00076  | 3.13472  |
| D17 | -3.12588 | 0.00001  | -0.00029 | 0.00044  | 0.00015  | -3.12573 |
| D18 | 0.00672  | -0.00001 | 0.00085  | -0.00002 | 0.00082  | 0.00754  |
| D19 | -0.19567 | 0.00002  | -0.00056 | -0.00025 | -0.00080 | -0.19648 |
| D20 | 2.95555  | 0.00002  | -0.00055 | -0.00029 | -0.00084 | 2.95471  |
| D21 | 2.92890  | 0.00001  | -0.00037 | -0.00050 | -0.00087 | 2.92803  |
| D22 | -0.20306 | 0.00001  | -0.00036 | -0.00055 | -0.00091 | -0.20397 |
| D23 | 0.00061  | -0.00001 | 0.00009  | -0.00020 | -0.00011 | 0.00050  |
| D24 | 3.03791  | -0.00002 | 0.00047  | 0.00019  | 0.00066  | 3.03856  |
| D25 | -3.13195 | 0.00002  | -0.00105 | 0.00027  | -0.00078 | -3.13274 |
| D26 | -0.09465 | 0.00001  | -0.00067 | 0.00066  | -0.00002 | -0.09467 |
| D27 | -2.48256 | 0.00002  | 0.00204  | 0.00098  | 0.00303  | -2.47953 |
| D28 | -0.45589 | 0.00005  | 0.00181  | 0.00105  | 0.00287  | -0.45303 |

|     |          |          |          |          |          |          |
|-----|----------|----------|----------|----------|----------|----------|
| D29 | 1.66247  | 0.00000  | 0.00184  | 0.00099  | 0.00283  | 1.66530  |
| D30 | 0.78082  | 0.00003  | 0.00160  | 0.00054  | 0.00214  | 0.78296  |
| D31 | 2.80749  | 0.00005  | 0.00137  | 0.00061  | 0.00198  | 2.80946  |
| D32 | -1.35733 | 0.00000  | 0.00139  | 0.00055  | 0.00194  | -1.35539 |
| D33 | -3.00161 | 0.00006  | 0.00002  | 0.00008  | 0.00010  | -3.00152 |
| D34 | 1.21839  | 0.00003  | 0.00024  | -0.00009 | 0.00015  | 1.21855  |
| D35 | -0.89953 | 0.00010  | 0.00000  | 0.00004  | 0.00004  | -0.89950 |
| D36 | 1.16785  | 0.00002  | -0.00011 | 0.00007  | -0.00004 | 1.16780  |
| D37 | -0.89533 | 0.00000  | 0.00011  | -0.00009 | 0.00001  | -0.89532 |
| D38 | -3.01326 | 0.00006  | -0.00013 | 0.00003  | -0.00010 | -3.01336 |
| D39 | -0.92616 | 0.00001  | -0.00011 | 0.00013  | 0.00002  | -0.92614 |
| D40 | -2.98934 | -0.00002 | 0.00011  | -0.00004 | 0.00007  | -2.98926 |
| D41 | 1.17592  | 0.00005  | -0.00013 | 0.00009  | -0.00004 | 1.17588  |
| D42 | -3.13955 | 0.00000  | -0.00024 | 0.00005  | -0.00018 | -3.13974 |
| D43 | -0.02300 | -0.00001 | 0.00010  | -0.00012 | -0.00002 | -0.02302 |
| D44 | -0.00870 | 0.00000  | -0.00025 | 0.00010  | -0.00014 | -0.00884 |
| D45 | 3.10785  | -0.00001 | 0.00009  | -0.00007 | 0.00002  | 3.10788  |
| D46 | -2.75283 | -0.00001 | -0.00017 | 0.00012  | -0.00006 | -2.75288 |
| D47 | -0.04835 | 0.00000  | 0.00023  | 0.00014  | 0.00037  | -0.04798 |
| D48 | -0.01997 | 0.00000  | -0.00041 | 0.00035  | -0.00006 | -0.02003 |
| D49 | 2.68452  | 0.00001  | -0.00001 | 0.00037  | 0.00036  | 2.68488  |
| D50 | 0.31914  | 0.00001  | -0.00232 | -0.00031 | -0.00263 | 0.31651  |
| D51 | -2.06024 | 0.00001  | -0.00218 | -0.00016 | -0.00234 | -2.06258 |
| D52 | 2.54761  | -0.00002 | -0.00071 | -0.00088 | -0.00159 | 2.54602  |
| D53 | 0.16607  | -0.00004 | -0.00057 | -0.00092 | -0.00149 | 0.16458  |
| D54 | 2.55555  | -0.00001 | -0.00135 | -0.00026 | -0.00161 | 2.55394  |
| D55 | -1.65101 | -0.00001 | -0.00140 | -0.00024 | -0.00165 | -1.65266 |
| D56 | 0.44130  | -0.00001 | -0.00135 | -0.00023 | -0.00158 | 0.43972  |
| D57 | 1.32842  | 0.00001  | -0.00134 | -0.00018 | -0.00152 | 1.32689  |
| D58 | -2.87815 | 0.00001  | -0.00140 | -0.00017 | -0.00156 | -2.87971 |
| D59 | -0.78584 | 0.00001  | -0.00135 | -0.00015 | -0.00150 | -0.78733 |
| D60 | -1.01933 | -0.00001 | -0.00104 | -0.00022 | -0.00125 | -1.02059 |
| D61 | 1.05729  | 0.00000  | -0.00109 | -0.00020 | -0.00129 | 1.05599  |
| D62 | -3.13359 | 0.00000  | -0.00104 | -0.00019 | -0.00123 | -3.13481 |
| D63 | 1.48308  | -0.00004 | -0.00031 | -0.00136 | -0.00167 | 1.48141  |
| D64 | 2.82990  | -0.00004 | -0.00079 | -0.00108 | -0.00187 | 2.82802  |
| D65 | 2.25390  | -0.00002 | 0.00107  | -0.00098 | 0.00008  | 2.25398  |
| D66 | -0.86263 | 0.00003  | 0.00121  | -0.00070 | 0.00052  | -0.86211 |
| D67 | -1.93806 | -0.00003 | 0.00079  | -0.00098 | -0.00019 | -1.93824 |
| D68 | 1.22860  | 0.00002  | 0.00094  | -0.00069 | 0.00025  | 1.22885  |
| D69 | 0.09925  | 0.00001  | 0.00097  | -0.00094 | 0.00002  | 0.09927  |
| D70 | -3.01728 | 0.00006  | 0.00111  | -0.00066 | 0.00046  | -3.01682 |
| D71 | 2.92176  | -0.00012 | -0.00004 | -0.00027 | -0.00031 | 2.92144  |
| D72 | -0.19414 | -0.00007 | 0.00011  | 0.00002  | 0.00013  | -0.19401 |

D73            -1.87720   -0.00006   -0.00161   0.00179   0.00019   -1.87701

| Item                 | Value    | Threshold | Converged? |
|----------------------|----------|-----------|------------|
| Maximum Force        | 0.000142 | 0.000450  | YES        |
| RMS Force            | 0.000038 | 0.000300  | YES        |
| Maximum Displacement | 0.014519 | 0.001800  | NO         |
| RMS Displacement     | 0.003722 | 0.001200  | NO         |

Predicted change in Energy=-6.589916D-07

GradGradGradGradGradGradGradGradGradGradGradGradGradGradGradGradGradGradGrad

Input orientation:

| Center Number | Atomic Number | Atomic Type | Coordinates (Angstroms) |           |           |
|---------------|---------------|-------------|-------------------------|-----------|-----------|
|               |               |             | X                       | Y         | Z         |
| 1             | 6             | 0           | -0.840212               | 1.640495  | 1.532431  |
| 2             | 6             | 0           | -1.498450               | 0.451758  | 1.570652  |
| 3             | 7             | 0           | -2.369019               | 0.451201  | 0.488772  |
| 4             | 6             | 0           | -2.237060               | 1.609835  | -0.175723 |
| 5             | 7             | 0           | -1.310578               | 2.354085  | 0.440641  |
| 6             | 6             | 0           | -0.776382               | 3.644087  | -0.033073 |
| 7             | 1             | 0           | -0.061197               | 2.024208  | 2.166965  |
| 8             | 1             | 0           | -1.342067               | -0.419905 | 2.217764  |
| 9             | 1             | 0           | -1.614428               | 4.257861  | -0.367821 |
| 10            | 1             | 0           | -0.325151               | 4.127065  | 0.831543  |
| 11            | 35            | 0           | -0.392579               | -2.446976 | 2.900057  |
| 12            | 1             | 0           | -2.781452               | 1.887789  | -1.061804 |
| 13            | 6             | 0           | -3.261555               | -0.598560 | 0.099980  |
| 14            | 6             | 0           | -3.219486               | -1.820144 | 0.615371  |
| 15            | 1             | 0           | -3.962809               | -0.285803 | -0.663750 |
| 16            | 1             | 0           | -3.933833               | -2.551865 | 0.259312  |
| 17            | 1             | 0           | -2.489695               | -2.136816 | 1.363525  |
| 18            | 6             | 0           | 2.558547                | -0.689555 | 1.118742  |
| 19            | 6             | 0           | 3.976218                | -0.374440 | 1.318818  |
| 20            | 8             | 0           | 2.972534                | 0.653993  | 1.527472  |
| 21            | 1             | 0           | 2.184097                | -0.730865 | 0.099832  |
| 22            | 1             | 0           | 1.980573                | -1.230601 | 1.863431  |
| 23            | 1             | 0           | 4.422047                | -0.690929 | 2.258988  |
| 24            | 6             | 0           | 4.930334                | -0.169237 | 0.174814  |
| 25            | 1             | 0           | 5.686291                | 0.579965  | 0.427344  |
| 26            | 1             | 0           | 5.448622                | -1.107466 | -0.045278 |
| 27            | 1             | 0           | 4.399792                | 0.153019  | -0.723718 |
| 28            | 6             | 0           | 0.253999                | 3.473255  | -1.158733 |
| 29            | 1             | 0           | 0.704393                | 4.451924  | -1.352459 |
| 30            | 1             | 0           | -0.216857               | 3.132918  | -2.081651 |



|    |   |   |          |          |           |
|----|---|---|----------|----------|-----------|
| 31 | 6 | 0 | 1.357154 | 2.481298 | -0.808846 |
| 32 | 8 | 0 | 1.676022 | 1.567257 | -1.531684 |
| 33 | 8 | 0 | 1.886385 | 2.734640 | 0.387199  |
| 34 | 1 | 0 | 2.458875 | 1.968221 | 0.694879  |

-----  
Distance matrix (angstroms):

|    |    | 1        | 2        | 3        | 4        | 5        |
|----|----|----------|----------|----------|----------|----------|
| 1  | C  | 0.000000 |          |          |          |          |
| 2  | C  | 1.359350 | 0.000000 |          |          |          |
| 3  | N  | 2.200204 | 1.388653 | 0.000000 |          |          |
| 4  | C  | 2.206789 | 2.221827 | 1.342163 | 0.000000 |          |
| 5  | N  | 1.386528 | 2.220600 | 2.177976 | 1.338723 | 0.000000 |
| 6  | C  | 2.543474 | 3.644760 | 3.606014 | 2.508408 | 1.474407 |
| 7  | H  | 1.075515 | 2.212212 | 3.258332 | 3.224015 | 2.156378 |
| 8  | H  | 2.228629 | 1.096817 | 2.191545 | 3.263379 | 3.294568 |
| 9  | H  | 3.325804 | 4.272885 | 3.974144 | 2.727015 | 2.090526 |
| 10 | H  | 2.634305 | 3.928204 | 4.219818 | 3.317593 | 2.065752 |
| 11 | Br | 4.333381 | 3.375341 | 4.256764 | 5.414818 | 5.471895 |
| 12 | H  | 3.249558 | 3.261611 | 2.153642 | 1.076457 | 2.153658 |
| 13 | C  | 3.595578 | 2.524794 | 1.431704 | 2.450022 | 3.555343 |
| 14 | C  | 4.298600 | 3.006006 | 2.428647 | 3.654551 | 4.593326 |
| 15 | H  | 4.276032 | 3.407289 | 2.100392 | 2.609564 | 3.901668 |
| 16 | H  | 5.363507 | 4.083192 | 3.394068 | 4.515312 | 5.566209 |
| 17 | H  | 4.125215 | 2.779602 | 2.734517 | 4.058387 | 4.733943 |
| 18 | C  | 4.141477 | 4.238636 | 5.096969 | 5.473635 | 4.969275 |
| 19 | C  | 5.225284 | 5.542383 | 6.452340 | 6.691474 | 6.013839 |
| 20 | O  | 3.938304 | 4.475763 | 5.445384 | 5.563666 | 4.734613 |
| 21 | H  | 4.101479 | 4.138002 | 4.720108 | 5.010134 | 4.673951 |
| 22 | H  | 4.038512 | 3.875520 | 4.861800 | 5.478564 | 5.070107 |
| 23 | H  | 5.801275 | 6.068923 | 7.110324 | 7.454197 | 6.741030 |
| 24 | C  | 6.198181 | 6.607818 | 7.332398 | 7.393207 | 6.736972 |
| 25 | H  | 6.703818 | 7.276269 | 8.056573 | 8.012729 | 7.218300 |
| 26 | H  | 7.042009 | 7.300973 | 7.989378 | 8.152941 | 7.609549 |
| 27 | H  | 5.895798 | 6.335821 | 6.883011 | 6.816921 | 6.229667 |
| 28 | C  | 3.434920 | 4.432839 | 4.327506 | 3.262517 | 2.501688 |
| 29 | H  | 4.314224 | 5.422030 | 5.370454 | 4.256092 | 3.417052 |
| 30 | H  | 3.959481 | 4.708547 | 4.293074 | 3.167580 | 2.857406 |
| 31 | C  | 3.319179 | 4.235034 | 4.437282 | 3.752155 | 2.948592 |
| 32 | O  | 3.965552 | 4.576691 | 4.657272 | 4.141577 | 3.664553 |
| 33 | O  | 3.153259 | 4.250790 | 4.830411 | 4.311017 | 3.219977 |
| 34 | H  | 3.419485 | 4.327477 | 5.064819 | 4.789384 | 3.797671 |
|    |    | 6        | 7        | 8        | 9        | 10       |
| 6  | C  | 0.000000 |          |          |          |          |
| 7  | H  | 2.824122 | 0.000000 |          |          |          |

|    |    |          |          |          |          |          |
|----|----|----------|----------|----------|----------|----------|
| 8  | H  | 4.679989 | 2.759872 | 0.000000 |          |          |
| 9  | H  | 1.091373 | 3.718450 | 5.351722 | 0.000000 |          |
| 10 | H  | 1.088319 | 2.505001 | 4.861138 | 1.765734 | 0.000000 |
| 11 | Br | 6.771381 | 4.542986 | 2.340100 | 7.558226 | 6.892119 |
| 12 | H  | 2.857127 | 4.224139 | 4.260616 | 2.731446 | 3.825249 |
| 13 | C  | 4.918723 | 4.625324 | 2.863802 | 5.149435 | 5.611522 |
| 14 | C  | 6.020553 | 5.211648 | 2.837788 | 6.362784 | 6.617643 |
| 15 | H  | 5.098539 | 5.345248 | 3.897358 | 5.123216 | 5.911164 |
| 16 | H  | 6.960230 | 6.291017 | 3.885620 | 7.221170 | 7.613024 |
| 17 | H  | 6.189085 | 4.884387 | 2.234851 | 6.682480 | 6.648643 |
| 18 | C  | 5.588281 | 3.914887 | 4.061446 | 6.640822 | 5.621212 |
| 19 | C  | 6.368938 | 4.772168 | 5.393916 | 7.453743 | 6.245219 |
| 20 | O  | 5.042850 | 3.389685 | 4.499504 | 6.133532 | 4.839553 |
| 21 | H  | 5.284156 | 4.111546 | 4.125065 | 6.287676 | 5.516449 |
| 22 | H  | 5.912708 | 3.854185 | 3.438418 | 6.930060 | 5.923322 |
| 23 | H  | 7.146298 | 5.242129 | 5.770629 | 8.235878 | 6.912782 |
| 24 | C  | 6.866678 | 5.804761 | 6.601476 | 7.920073 | 6.819796 |
| 25 | H  | 7.167076 | 6.176223 | 7.321418 | 8.213386 | 6.991619 |
| 26 | H  | 7.831225 | 6.712638 | 7.190796 | 8.875666 | 7.842550 |
| 27 | H  | 6.281507 | 5.635407 | 6.476843 | 7.290215 | 6.366864 |
| 28 | C  | 1.535572 | 3.641339 | 5.394891 | 2.175355 | 2.173495 |
| 29 | H  | 2.141512 | 4.343532 | 6.377241 | 2.526678 | 2.436259 |
| 30 | H  | 2.184270 | 4.393655 | 5.689782 | 2.481112 | 3.080058 |
| 31 | C  | 2.550663 | 3.328078 | 4.986295 | 3.490126 | 2.868724 |
| 32 | O  | 3.545891 | 4.111781 | 5.207306 | 4.406925 | 4.017730 |
| 33 | O  | 2.845005 | 2.732280 | 4.870834 | 3.891780 | 2.650883 |
| 34 | H  | 3.715553 | 2.919064 | 4.740199 | 4.792033 | 3.525633 |
|    |    | 11       | 12       | 13       | 14       | 15       |
| 11 | Br | 0.000000 |          |          |          |          |
| 12 | H  | 6.339814 | 0.000000 |          |          |          |
| 13 | C  | 4.414532 | 2.786068 | 0.000000 |          |          |
| 14 | C  | 3.688376 | 4.093111 | 1.326523 | 0.000000 |          |
| 15 | H  | 5.487981 | 2.505704 | 1.082986 | 2.131404 | 0.000000 |
| 16 | H  | 4.418711 | 4.773244 | 2.071894 | 1.082813 | 2.447023 |
| 17 | H  | 2.618210 | 4.707950 | 2.135075 | 1.092068 | 3.115471 |
| 18 | C  | 3.869206 | 6.317679 | 5.909292 | 5.909084 | 6.772620 |
| 19 | C  | 5.087447 | 7.513398 | 7.343102 | 7.373131 | 8.183312 |
| 20 | O  | 4.777445 | 6.429227 | 6.516938 | 6.730111 | 7.333734 |
| 21 | H  | 4.174393 | 5.732663 | 5.447259 | 5.536337 | 6.210120 |
| 22 | H  | 2.861120 | 6.399863 | 5.566789 | 5.380133 | 6.527104 |
| 23 | H  | 5.164813 | 8.340735 | 7.981703 | 7.897445 | 8.888889 |
| 24 | C  | 6.399097 | 8.076647 | 8.203472 | 8.327013 | 8.933351 |
| 25 | H  | 7.226987 | 8.696588 | 9.031059 | 9.225440 | 9.749112 |
| 26 | H  | 6.677493 | 8.816972 | 8.726240 | 8.722412 | 9.467453 |

|    |   |           |          |          |          |          |
|----|---|-----------|----------|----------|----------|----------|
| 27 | H | 6.546643  | 7.395539 | 7.742065 | 7.983729 | 8.374321 |
| 28 | C | 7.207009  | 3.425939 | 5.524776 | 6.575151 | 5.670714 |
| 29 | H | 8.178145  | 4.337093 | 6.583745 | 7.655587 | 6.686041 |
| 30 | H | 7.482213  | 3.027802 | 5.287119 | 6.389251 | 5.265952 |
| 31 | C | 6.411350  | 4.188592 | 5.625296 | 6.440220 | 5.998325 |
| 32 | O | 6.327204  | 4.493618 | 5.633184 | 6.328533 | 5.998630 |
| 33 | O | 6.193325  | 4.960390 | 6.139543 | 6.846023 | 6.666381 |
| 34 | H | 5.699787  | 5.527516 | 6.298062 | 6.826553 | 6.940067 |
|    |   | 16        | 17       | 18       | 19       | 20       |
| 16 | H | 0.000000  |          |          |          |          |
| 17 | H | 1.864695  | 0.000000 |          |          |          |
| 18 | C | 6.808657  | 5.257302 | 0.000000 |          |          |
| 19 | C | 8.272402  | 6.701940 | 1.465988 | 0.000000 |          |
| 20 | O | 7.719045  | 6.136077 | 1.464092 | 1.452099 | 0.000000 |
| 21 | H | 6.385181  | 5.041622 | 1.086323 | 2.196512 | 2.139537 |
| 22 | H | 6.268902  | 4.588510 | 1.086898 | 2.238798 | 2.156050 |
| 23 | H | 8.791048  | 7.117908 | 2.184673 | 1.087589 | 2.108322 |
| 24 | C | 9.179189  | 7.767962 | 2.605207 | 1.503725 | 2.518009 |
| 25 | H | 10.118467 | 8.666261 | 3.445649 | 2.151735 | 2.929204 |
| 26 | H | 9.497869  | 8.127802 | 3.143585 | 2.136834 | 3.421592 |
| 27 | H | 8.816578  | 7.554135 | 2.737658 | 2.151645 | 2.712175 |
| 28 | C | 7.473343  | 6.735172 | 5.275113 | 5.898977 | 4.749144 |
| 29 | H | 8.553596  | 7.809626 | 5.998293 | 6.413606 | 5.278517 |
| 30 | H | 7.184204  | 6.693663 | 5.705846 | 6.437905 | 5.416923 |
| 31 | C | 7.380260  | 6.390964 | 3.900417 | 4.420598 | 3.377407 |
| 32 | O | 7.186467  | 6.281369 | 3.591213 | 4.145655 | 3.445784 |
| 33 | O | 7.863741  | 6.620753 | 3.565398 | 3.860271 | 2.609412 |
| 34 | H | 7.841404  | 6.464268 | 2.693208 | 2.860016 | 1.638369 |
|    |   | 21        | 22       | 23       | 24       | 25       |
| 21 | H | 0.000000  |          |          |          |          |
| 22 | H | 1.844300  | 0.000000 |          |          |          |
| 23 | H | 3.109980  | 2.531503 | 0.000000 |          |          |
| 24 | C | 2.804080  | 3.560760 | 2.207782 | 0.000000 |          |
| 25 | H | 3.753785  | 4.367247 | 2.562890 | 1.093868 | 0.000000 |
| 26 | H | 3.289378  | 3.960517 | 2.556756 | 1.094229 | 1.768413 |
| 27 | H | 2.523646  | 3.802679 | 3.099883 | 1.092100 | 1.778288 |
| 28 | C | 4.794151  | 5.851564 | 6.811305 | 6.075705 | 6.355829 |
| 29 | H | 5.582111  | 6.652945 | 7.301537 | 6.445639 | 6.555843 |
| 30 | H | 5.045023  | 6.279544 | 7.415011 | 6.518392 | 6.903606 |
| 31 | C | 3.439116  | 4.616050 | 5.372914 | 4.556373 | 4.887194 |
| 32 | O | 2.863800  | 4.409941 | 5.197043 | 4.064245 | 4.571083 |
| 33 | O | 3.490119  | 4.232171 | 4.654858 | 4.212271 | 4.368469 |
| 34 | H | 2.777526  | 3.439005 | 3.656715 | 3.308671 | 3.523499 |
|    |   | 26        | 27       | 28       | 29       | 30       |

|    |   |          |          |          |          |          |
|----|---|----------|----------|----------|----------|----------|
| 26 | H | 0.000000 |          |          |          |          |
| 27 | H | 1.774584 | 0.000000 |          |          |          |
| 28 | C | 7.014762 | 5.329240 | 0.000000 |          |          |
| 29 | H | 7.424503 | 5.703672 | 1.094613 | 0.000000 |          |
| 30 | H | 7.363784 | 5.660144 | 1.090556 | 1.766408 | 0.000000 |
| 31 | C | 5.495669 | 3.832203 | 1.524254 | 2.145921 | 2.126535 |
| 32 | O | 4.857577 | 3.173610 | 2.407087 | 3.049178 | 2.517290 |
| 33 | O | 5.257219 | 3.770426 | 2.366462 | 2.715249 | 3.267640 |
| 34 | H | 4.352731 | 3.012396 | 3.249997 | 3.665867 | 4.028049 |
|    |   | 31       | 32       | 33       | 34       |          |
| 31 | C | 0.000000 |          |          |          |          |
| 32 | O | 1.208157 | 0.000000 |          |          |          |
| 33 | O | 1.332213 | 2.255914 | 0.000000 |          |          |
| 34 | H | 1.933449 | 2.393995 | 1.004893 | 0.000000 |          |

Stoichiometry C11H17BrN2O3

Framework group C1[X(C11H17BrN2O3)]

Deg. of freedom 96

Full point group C1 NOp 1

Largest Abelian subgroup C1 NOp 1

Largest concise Abelian subgroup C1 NOp 1

Standard orientation:

| Center<br>Number | Atomic<br>Number | Atomic<br>Type | Coordinates (Angstroms) |           |           |
|------------------|------------------|----------------|-------------------------|-----------|-----------|
|                  |                  |                | X                       | Y         | Z         |
| 1                | 6                | 0              | 0.075792                | 1.325339  | 1.235443  |
| 2                | 6                | 0              | -1.156552               | 1.245751  | 0.667266  |
| 3                | 7                | 0              | -1.231391               | 2.283263  | -0.252693 |
| 4                | 6                | 0              | -0.076304               | 2.966453  | -0.232047 |
| 5                | 7                | 0              | 0.738800                | 2.402776  | 0.667983  |
| 6                | 6                | 0              | 2.145549                | 2.768546  | 0.915259  |
| 7                | 1                | 0              | 0.545309                | 0.693414  | 1.968217  |
| 8                | 1                | 0              | -1.934277               | 0.479937  | 0.775332  |
| 9                | 1                | 0              | 2.213497                | 3.857211  | 0.951158  |
| 10               | 1                | 0              | 2.396680                | 2.379481  | 1.900144  |
| 11               | 35               | 0              | -3.061648               | -1.518008 | 0.313467  |
| 12               | 1                | 0              | 0.155931                | 3.820399  | -0.844911 |
| 13               | 6                | 0              | -2.331731               | 2.595115  | -1.113957 |
| 14               | 6                | 0              | -3.367038               | 1.786192  | -1.296848 |
| 15               | 1                | 0              | -2.217831               | 3.555089  | -1.602153 |
| 16               | 1                | 0              | -4.153927               | 2.104323  | -1.969219 |
| 17               | 1                | 0              | -3.460448               | 0.806072  | -0.824354 |
| 18               | 6                | 0              | 0.631999                | -2.459872 | -0.350320 |
| 19               | 6                | 0              | 1.608276                | -3.506445 | -0.033002 |

|    |   |   |           |           |           |
|----|---|---|-----------|-----------|-----------|
| 20 | 8 | 0 | 1.645751  | -2.244132 | 0.683765  |
| 21 | 1 | 0 | 0.796543  | -1.862461 | -1.242577 |
| 22 | 1 | 0 | -0.389552 | -2.497386 | 0.018967  |
| 23 | 1 | 0 | 1.268912  | -4.317108 | 0.607707  |
| 24 | 6 | 0 | 2.781000  | -3.817361 | -0.921393 |
| 25 | 1 | 0 | 3.646805  | -4.128108 | -0.329476 |
| 26 | 1 | 0 | 2.523934  | -4.639318 | -1.596404 |
| 27 | 1 | 0 | 3.057334  | -2.948413 | -1.522434 |
| 28 | 6 | 0 | 3.094132  | 2.201121  | -0.150668 |
| 29 | 1 | 0 | 4.120625  | 2.390810  | 0.178737  |
| 30 | 1 | 0 | 2.954426  | 2.695922  | -1.112419 |
| 31 | 6 | 0 | 2.913525  | 0.703591  | -0.370063 |
| 32 | 8 | 0 | 2.760006  | 0.210667  | -1.462354 |
| 33 | 8 | 0 | 2.916017  | 0.033141  | 0.781146  |
| 34 | 1 | 0 | 2.595787  | -0.909846 | 0.646840  |

-----

Rotational constants (GHZ):      0.3284108          0.2549576          0.1593275

Standard basis: 6-311++G(d,p) (5D, 7F)

There are    538 symmetry adapted cartesian basis functions of A    symmetry.

There are    519 symmetry adapted basis functions of A    symmetry.

    519 basis functions,    823 primitive gaussians,    538 cartesian basis functions

    78 alpha electrons          78 beta electrons

        nuclear repulsion energy          1572.6024552496 Hartrees.

NAtoms=    34 NActive=    34 NUniq=    34 SFac= 1.00D+00 NAtFMM=    60 NAOKFM=F

Big=F

Integral buffers will be    131072 words long.

Raffenetti 2 integral format.

Two-electron integral symmetry is turned on.

One-electron integrals computed using PRISM.

NBasis=    519 RedAO= T EigKep= 3.53D-06 NBF=    519

NBsUse=    519 1.00D-06 EigRej= -1.00D+00 NBFU=    519

Initial guess from the checkpoint file: "./coohpo.chk"

B after Tr=      0.000000      0.000000      0.000000

        Rot=    0.999999    -0.000009    0.000172    0.001185 Ang=    -0.14 deg.

Requested convergence on RMS density matrix=1.00D-08 within 128 cycles.

Requested convergence on MAX density matrix=1.00D-06.

Requested convergence on                  energy=1.00D-06.

No special actions if energy rises.

SCF Done: E(RB3LYP) = -3338.90387747      A.U. after    11 cycles

        NFock= 11 Conv=0.18D-08    -V/T= 2.0019

Calling FoFJK, ICntrl=                  2127 FMM=F ISym2X=0 I1Cent= 0 IOpClX= 0 NMat=1 NMatS=1

NMatT=0.

\*\*\*\*\* Axes restored to original set \*\*\*\*\*

-----

| Center<br>Number | Atomic<br>Number | Forces (Hartrees/Bohr) |              |              |
|------------------|------------------|------------------------|--------------|--------------|
|                  |                  | X                      | Y            | Z            |
| 1                | 6                | 0.000046264            | -0.000036597 | -0.000110834 |
| 2                | 6                | 0.000161681            | 0.000169819  | 0.000113802  |
| 3                | 7                | -0.000125826           | -0.000065235 | 0.000017520  |
| 4                | 6                | -0.000048361           | 0.000028717  | 0.000027691  |
| 5                | 7                | 0.000081464            | 0.000038586  | -0.000037725 |
| 6                | 6                | -0.000128150           | -0.000018033 | 0.000059594  |
| 7                | 1                | -0.000024169           | 0.000021822  | 0.000028547  |
| 8                | 1                | -0.000193855           | -0.000207818 | -0.000100289 |
| 9                | 1                | 0.000003424            | -0.000003626 | 0.000006297  |
| 10               | 1                | 0.000040500            | -0.000006281 | -0.000030938 |
| 11               | 35               | 0.000086148            | 0.000040570  | 0.000043395  |
| 12               | 1                | 0.000049320            | -0.000019039 | -0.000030444 |
| 13               | 6                | 0.000084164            | 0.000110650  | 0.000007312  |
| 14               | 6                | -0.000054434           | -0.000017597 | 0.000005130  |
| 15               | 1                | 0.000002178            | -0.000020659 | -0.000017034 |
| 16               | 1                | 0.000002401            | 0.000001847  | 0.000001454  |
| 17               | 1                | 0.000015249            | 0.000009475  | 0.000001079  |
| 18               | 6                | -0.000056304           | -0.000009873 | 0.000050855  |
| 19               | 6                | -0.000025238           | 0.000048404  | 0.000128279  |
| 20               | 8                | 0.000056086            | -0.000086457 | -0.000053611 |
| 21               | 1                | 0.000025909            | 0.000020424  | -0.000021787 |
| 22               | 1                | -0.000014921           | -0.000000496 | -0.000008868 |
| 23               | 1                | 0.000013657            | 0.000007708  | -0.000014613 |
| 24               | 6                | -0.000016645           | -0.000004726 | -0.000061229 |
| 25               | 1                | 0.000005547            | -0.000005971 | 0.000004602  |
| 26               | 1                | 0.000000234            | -0.000003073 | 0.000003853  |
| 27               | 1                | -0.000005540           | 0.000002041  | 0.000017966  |
| 28               | 6                | 0.000023803            | 0.000055366  | -0.000054516 |
| 29               | 1                | 0.000011051            | 0.000001515  | 0.000001266  |
| 30               | 1                | 0.000013097            | -0.000012403 | 0.000006138  |
| 31               | 6                | -0.000030655           | -0.000017117 | 0.000111259  |
| 32               | 8                | 0.000026571            | -0.000012385 | -0.000040873 |
| 33               | 8                | -0.000001532           | -0.000016099 | -0.000041906 |
| 34               | 1                | -0.000023119           | 0.000006540  | -0.000011376 |

-----  
Cartesian Forces: Max 0.000207818 RMS 0.000058011

GradGradGradGradGradGradGradGradGradGradGradGradGradGradGradGradGradGradGrad

Berny optimization.

Using GEDIIS/GDIIS optimizer.

FormGI is forming the generalized inverse of G from B-inverse, IUseBI=4.

Internal Forces: Max 0.000157720 RMS 0.000036477

Search for a local minimum.

Step number 35 out of a maximum of 175

All quantities printed in internal units (Hartrees-Bohrs-Radians)

Mixed Optimization -- En-DIIS/RFO-DIIS

Swapping is turned off.

Update second derivatives using D2CorX and points

|    |    |    |    |    |    |    |  |  |  |
|----|----|----|----|----|----|----|--|--|--|
| 21 | 22 | 23 | 24 | 25 |    |    |  |  |  |
|    |    | 26 | 27 | 28 | 29 | 30 |  |  |  |
|    |    | 31 | 32 | 33 | 34 | 35 |  |  |  |

DE= -2.35D-06 DEPred=-6.59D-07 R= 3.56D+00

TightC=F SS= 1.41D+00 RLast= 1.23D-02 DXNew= 6.5746D-01 3.6809D-02

Trust test= 3.56D+00 RLast= 1.23D-02 DXMaxT set to 3.91D-01

ITU= 1 1 1 1-1 1 1 1 1 1-1 0 1 1 1 1 1 1 1 1

ITU= 1 1 0 0-1 1 1 1 0 1 0-1 0 1 0

|                 |         |         |         |         |         |
|-----------------|---------|---------|---------|---------|---------|
| Eigenvalues --- | 0.00173 | 0.00257 | 0.00367 | 0.00439 | 0.00546 |
| Eigenvalues --- | 0.00738 | 0.00915 | 0.01034 | 0.01184 | 0.01305 |
| Eigenvalues --- | 0.01655 | 0.02112 | 0.02180 | 0.02281 | 0.02323 |
| Eigenvalues --- | 0.02459 | 0.02538 | 0.02866 | 0.03058 | 0.03128 |
| Eigenvalues --- | 0.03456 | 0.03696 | 0.03964 | 0.04360 | 0.04657 |
| Eigenvalues --- | 0.04854 | 0.05027 | 0.05335 | 0.05634 | 0.05736 |
| Eigenvalues --- | 0.05889 | 0.06054 | 0.06159 | 0.07496 | 0.09349 |
| Eigenvalues --- | 0.09737 | 0.11741 | 0.12594 | 0.12863 | 0.13147 |
| Eigenvalues --- | 0.13663 | 0.14804 | 0.15588 | 0.15908 | 0.15939 |
| Eigenvalues --- | 0.16003 | 0.16022 | 0.16040 | 0.16151 | 0.16212 |
| Eigenvalues --- | 0.16633 | 0.17683 | 0.19763 | 0.20881 | 0.21902 |
| Eigenvalues --- | 0.23314 | 0.23531 | 0.24114 | 0.25271 | 0.26983 |
| Eigenvalues --- | 0.27895 | 0.29218 | 0.29765 | 0.31772 | 0.32210 |
| Eigenvalues --- | 0.32979 | 0.34290 | 0.34505 | 0.34607 | 0.34722 |
| Eigenvalues --- | 0.34872 | 0.34900 | 0.34965 | 0.35049 | 0.35163 |
| Eigenvalues --- | 0.35310 | 0.35592 | 0.35765 | 0.35882 | 0.36598 |
| Eigenvalues --- | 0.37035 | 0.37257 | 0.37820 | 0.39072 | 0.39653 |
| Eigenvalues --- | 0.42670 | 0.45607 | 0.49228 | 0.50327 | 0.50696 |
| Eigenvalues --- | 0.54310 | 0.56049 | 0.56487 | 0.61308 | 0.91057 |
| Eigenvalues --- | 1.10483 |         |         |         |         |

En-DIIS/RFO-DIIS IScMMF= 0 using points: 35 34 33 32 31

RFO step: Lambda=-3.99079464D-07.

DidBck=F Rises=F RFO-DIIS coefs: 2.54406 -1.62350 -0.87481 1.06399 -  
0.10974

Iteration 1 RMS(Cart)= 0.00607849 RMS(Int)= 0.00000947

Iteration 2 RMS(Cart)= 0.00001442 RMS(Int)= 0.00000020

Iteration 3 RMS(Cart)= 0.00000000 RMS(Int)= 0.00000020

| Variable | Old X   | -DE/DX   | Delta X<br>(Linear) | Delta X<br>(Quad) | Delta X<br>(Total) | New X   |
|----------|---------|----------|---------------------|-------------------|--------------------|---------|
| R1       | 2.56880 | -0.00001 | 0.00007             | -0.00004          | 0.00003            | 2.56883 |

|     |         |          |          |          |          |         |
|-----|---------|----------|----------|----------|----------|---------|
| R2  | 2.62016 | -0.00002 | 0.00001  | -0.00001 | 0.00000  | 2.62016 |
| R3  | 2.03243 | 0.00001  | 0.00000  | -0.00001 | -0.00001 | 2.03242 |
| R4  | 2.62417 | 0.00005  | 0.00011  | -0.00002 | 0.00010  | 2.62427 |
| R5  | 2.07268 | 0.00009  | 0.00002  | 0.00009  | 0.00011  | 2.07279 |
| R6  | 2.53632 | 0.00003  | -0.00010 | 0.00002  | -0.00007 | 2.53625 |
| R7  | 2.70553 | -0.00009 | 0.00009  | -0.00012 | -0.00004 | 2.70549 |
| R8  | 2.52982 | 0.00000  | 0.00005  | 0.00000  | 0.00005  | 2.52987 |
| R9  | 2.03421 | -0.00001 | 0.00000  | 0.00000  | 0.00000  | 2.03421 |
| R10 | 2.78623 | -0.00007 | -0.00004 | -0.00002 | -0.00006 | 2.78616 |
| R11 | 2.06240 | -0.00001 | 0.00000  | -0.00001 | -0.00001 | 2.06239 |
| R12 | 2.05662 | -0.00001 | -0.00002 | 0.00000  | -0.00002 | 2.05660 |
| R13 | 2.90181 | 0.00000  | 0.00016  | -0.00005 | 0.00010  | 2.90191 |
| R14 | 4.42215 | 0.00002  | 0.00002  | -0.00095 | -0.00093 | 4.42122 |
| R15 | 2.50677 | 0.00001  | -0.00009 | 0.00006  | -0.00003 | 2.50674 |
| R16 | 2.04655 | 0.00000  | 0.00000  | -0.00001 | -0.00001 | 2.04653 |
| R17 | 2.04622 | 0.00000  | 0.00004  | -0.00002 | 0.00002  | 2.04624 |
| R18 | 2.06371 | 0.00001  | 0.00002  | -0.00006 | -0.00004 | 2.06367 |
| R19 | 2.77032 | 0.00001  | 0.00008  | 0.00001  | 0.00009  | 2.77041 |
| R20 | 2.76673 | -0.00001 | -0.00010 | -0.00007 | -0.00017 | 2.76656 |
| R21 | 2.05285 | 0.00001  | 0.00001  | 0.00003  | 0.00004  | 2.05289 |
| R22 | 2.05394 | 0.00000  | -0.00007 | 0.00001  | -0.00006 | 2.05388 |
| R23 | 2.74407 | -0.00007 | 0.00018  | -0.00010 | 0.00009  | 2.74416 |
| R24 | 2.05525 | -0.00001 | -0.00003 | 0.00000  | -0.00003 | 2.05522 |
| R25 | 2.84163 | 0.00003  | -0.00002 | 0.00002  | 0.00000  | 2.84163 |
| R26 | 3.09607 | 0.00002  | -0.00047 | -0.00011 | -0.00058 | 3.09549 |
| R27 | 2.06711 | 0.00000  | 0.00002  | -0.00001 | 0.00002  | 2.06713 |
| R28 | 2.06779 | 0.00000  | 0.00001  | -0.00001 | 0.00000  | 2.06779 |
| R29 | 2.06377 | -0.00001 | -0.00001 | 0.00003  | 0.00002  | 2.06379 |
| R30 | 2.06852 | 0.00001  | 0.00000  | 0.00001  | 0.00001  | 2.06853 |
| R31 | 2.06085 | -0.00001 | -0.00002 | 0.00002  | 0.00000  | 2.06086 |
| R32 | 2.88042 | 0.00001  | -0.00011 | 0.00011  | 0.00000  | 2.88042 |
| R33 | 2.28309 | 0.00004  | 0.00003  | -0.00001 | 0.00002  | 2.28311 |
| R34 | 2.51752 | -0.00005 | 0.00004  | -0.00006 | -0.00002 | 2.51750 |
| R35 | 1.89897 | -0.00001 | 0.00016  | 0.00001  | 0.00018  | 1.89915 |
| A1  | 1.88382 | 0.00003  | 0.00003  | -0.00001 | 0.00002  | 1.88384 |
| A2  | 2.27331 | -0.00002 | 0.00013  | -0.00006 | 0.00007  | 2.27339 |
| A3  | 2.12547 | -0.00002 | -0.00015 | 0.00007  | -0.00008 | 2.12539 |
| A4  | 1.85669 | -0.00002 | -0.00009 | 0.00002  | -0.00008 | 1.85662 |
| A5  | 2.26858 | -0.00001 | 0.00061  | 0.00016  | 0.00077  | 2.26935 |
| A6  | 2.15163 | 0.00003  | -0.00052 | -0.00019 | -0.00071 | 2.15092 |
| A7  | 1.90047 | -0.00001 | 0.00007  | 0.00000  | 0.00007  | 1.90054 |
| A8  | 2.21766 | 0.00003  | -0.00012 | -0.00010 | -0.00022 | 2.21744 |
| A9  | 2.16495 | -0.00002 | 0.00004  | 0.00010  | 0.00014  | 2.16509 |
| A10 | 1.89654 | 0.00000  | -0.00001 | -0.00002 | -0.00003 | 1.89651 |



|     |         |          |          |          |          |         |
|-----|---------|----------|----------|----------|----------|---------|
| A11 | 2.19040 | 0.00001  | 0.00014  | -0.00002 | 0.00012  | 2.19052 |
| A12 | 2.19621 | -0.00001 | -0.00013 | 0.00004  | -0.00009 | 2.19612 |
| A13 | 1.88725 | 0.00000  | 0.00000  | 0.00001  | 0.00002  | 1.88726 |
| A14 | 2.18998 | -0.00006 | 0.00021  | -0.00002 | 0.00019  | 2.19018 |
| A15 | 2.20090 | 0.00006  | -0.00008 | 0.00002  | -0.00006 | 2.20083 |
| A16 | 1.88850 | 0.00008  | 0.00002  | 0.00002  | 0.00004  | 1.88853 |
| A17 | 1.85798 | 0.00003  | -0.00006 | 0.00005  | -0.00001 | 1.85796 |
| A18 | 1.96200 | -0.00015 | 0.00023  | -0.00018 | 0.00006  | 1.96206 |
| A19 | 1.88859 | -0.00001 | 0.00001  | 0.00003  | 0.00004  | 1.88863 |
| A20 | 1.93155 | 0.00005  | 0.00024  | 0.00000  | 0.00024  | 1.93178 |
| A21 | 1.93215 | 0.00000  | -0.00045 | 0.00009  | -0.00036 | 1.93178 |
| A22 | 2.73452 | -0.00008 | -0.00297 | 0.00136  | -0.00161 | 2.73291 |
| A23 | 2.15309 | 0.00000  | -0.00023 | 0.00008  | -0.00015 | 2.15294 |
| A24 | 1.96430 | 0.00002  | 0.00003  | 0.00006  | 0.00009  | 1.96438 |
| A25 | 2.16575 | -0.00002 | 0.00020  | -0.00014 | 0.00006  | 2.16582 |
| A26 | 2.06419 | 0.00001  | 0.00027  | -0.00005 | 0.00022  | 2.06441 |
| A27 | 2.15844 | -0.00002 | 0.00006  | -0.00001 | 0.00005  | 2.15849 |
| A28 | 2.06029 | 0.00001  | -0.00033 | 0.00006  | -0.00027 | 2.06003 |
| A29 | 2.05954 | -0.00003 | -0.00048 | -0.00002 | -0.00050 | 2.05904 |
| A30 | 2.12672 | 0.00003  | 0.00072  | -0.00014 | 0.00058  | 2.12730 |
| A31 | 1.97600 | -0.00002 | -0.00003 | -0.00013 | -0.00016 | 1.97584 |
| A32 | 1.99972 | 0.00003  | -0.00012 | 0.00028  | 0.00016  | 1.99988 |
| A33 | 2.02685 | 0.00001  | -0.00015 | 0.00007  | -0.00008 | 2.02677 |
| A34 | 2.03963 | 0.00004  | 0.00006  | 0.00008  | 0.00014  | 2.03977 |
| A35 | 2.14015 | -0.00006 | -0.00014 | -0.00019 | -0.00033 | 2.13983 |
| A36 | 1.94467 | 0.00002  | -0.00018 | 0.00022  | 0.00004  | 1.94471 |
| A37 | 2.03894 | -0.00003 | -0.00010 | -0.00011 | -0.00022 | 2.03873 |
| A38 | 2.02336 | 0.00002  | 0.00022  | 0.00004  | 0.00026  | 2.02362 |
| A39 | 2.10086 | -0.00003 | 0.00073  | 0.00007  | 0.00080  | 2.10167 |
| A40 | 2.36285 | -0.00002 | -0.00222 | 0.00006  | -0.00216 | 2.36070 |
| A41 | 1.93513 | 0.00000  | 0.00000  | -0.00002 | -0.00002 | 1.93511 |
| A42 | 1.91405 | 0.00001  | 0.00011  | -0.00001 | 0.00010  | 1.91415 |
| A43 | 1.93688 | -0.00002 | -0.00007 | -0.00001 | -0.00008 | 1.93680 |
| A44 | 1.88217 | 0.00000  | -0.00005 | 0.00000  | -0.00005 | 1.88212 |
| A45 | 1.90029 | 0.00001  | -0.00003 | 0.00000  | -0.00003 | 1.90026 |
| A46 | 1.89402 | 0.00001  | 0.00004  | 0.00005  | 0.00009  | 1.89411 |
| A47 | 1.88217 | 0.00004  | -0.00020 | 0.00007  | -0.00013 | 1.88204 |
| A48 | 1.94483 | 0.00005  | 0.00013  | 0.00007  | 0.00020  | 1.94504 |
| A49 | 1.97117 | -0.00016 | -0.00020 | -0.00005 | -0.00026 | 1.97091 |
| A50 | 1.88273 | -0.00002 | 0.00013  | -0.00009 | 0.00004  | 1.88277 |
| A51 | 1.90147 | 0.00008  | 0.00010  | -0.00004 | 0.00007  | 1.90154 |
| A52 | 1.87931 | 0.00001  | 0.00005  | 0.00004  | 0.00009  | 1.87940 |
| A53 | 2.14842 | -0.00002 | 0.00006  | -0.00007 | -0.00001 | 2.14841 |
| A54 | 1.94963 | 0.00003  | -0.00006 | 0.00008  | 0.00002  | 1.94965 |

|     |          |          |          |          |          |          |
|-----|----------|----------|----------|----------|----------|----------|
| A55 | 2.18483  | -0.00001 | 0.00000  | -0.00002 | -0.00001 | 2.18482  |
| A56 | 1.93496  | -0.00003 | -0.00040 | 0.00017  | -0.00024 | 1.93472  |
| A57 | 2.81147  | -0.00008 | 0.00058  | -0.00039 | 0.00019  | 2.81166  |
| D1  | 0.00309  | -0.00001 | 0.00022  | -0.00008 | 0.00014  | 0.00323  |
| D2  | 3.02521  | -0.00002 | 0.00016  | -0.00021 | -0.00005 | 3.02516  |
| D3  | -3.10160 | -0.00001 | -0.00018 | -0.00021 | -0.00039 | -3.10199 |
| D4  | -0.07949 | -0.00003 | -0.00024 | -0.00033 | -0.00057 | -0.08006 |
| D5  | -0.00229 | 0.00001  | -0.00015 | -0.00005 | -0.00020 | -0.00249 |
| D6  | -3.04117 | 0.00001  | -0.00149 | -0.00016 | -0.00165 | -3.04282 |
| D7  | 3.10618  | 0.00001  | 0.00022  | 0.00006  | 0.00028  | 3.10645  |
| D8  | 0.06730  | 0.00002  | -0.00113 | -0.00005 | -0.00118 | 0.06612  |
| D9  | -0.00283 | 0.00001  | -0.00022 | 0.00019  | -0.00003 | -0.00286 |
| D10 | 3.12379  | -0.00001 | -0.00088 | 0.00006  | -0.00082 | 3.12297  |
| D11 | -3.03496 | 0.00002  | -0.00026 | 0.00027  | 0.00002  | -3.03494 |
| D12 | 0.09167  | 0.00001  | -0.00092 | 0.00015  | -0.00077 | 0.09090  |
| D13 | -1.50223 | 0.00010  | 0.00669  | 0.00129  | 0.00798  | -1.49425 |
| D14 | 1.50214  | 0.00008  | 0.00666  | 0.00117  | 0.00783  | 1.50997  |
| D15 | 0.00145  | 0.00000  | 0.00013  | -0.00023 | -0.00009 | 0.00135  |
| D16 | 3.13472  | -0.00003 | 0.00012  | -0.00037 | -0.00024 | 3.13447  |
| D17 | -3.12573 | 0.00001  | 0.00077  | -0.00010 | 0.00067  | -3.12506 |
| D18 | 0.00754  | -0.00002 | 0.00076  | -0.00024 | 0.00052  | 0.00806  |
| D19 | -0.19648 | 0.00002  | -0.00101 | 0.00143  | 0.00042  | -0.19606 |
| D20 | 2.95471  | 0.00002  | -0.00093 | 0.00130  | 0.00038  | 2.95508  |
| D21 | 2.92803  | 0.00001  | -0.00177 | 0.00129  | -0.00048 | 2.92755  |
| D22 | -0.20397 | 0.00001  | -0.00168 | 0.00116  | -0.00053 | -0.20450 |
| D23 | 0.00050  | 0.00000  | 0.00001  | 0.00017  | 0.00018  | 0.00068  |
| D24 | 3.03856  | -0.00002 | 0.00139  | 0.00028  | 0.00166  | 3.04023  |
| D25 | -3.13274 | 0.00003  | 0.00002  | 0.00031  | 0.00033  | -3.13241 |
| D26 | -0.09467 | 0.00001  | 0.00139  | 0.00042  | 0.00181  | -0.09286 |
| D27 | -2.47953 | 0.00000  | 0.00392  | 0.00075  | 0.00467  | -2.47486 |
| D28 | -0.45303 | 0.00004  | 0.00391  | 0.00082  | 0.00474  | -0.44829 |
| D29 | 1.66530  | -0.00002 | 0.00345  | 0.00086  | 0.00431  | 1.66961  |
| D30 | 0.78296  | 0.00001  | 0.00233  | 0.00063  | 0.00295  | 0.78591  |
| D31 | 2.80946  | 0.00006  | 0.00232  | 0.00070  | 0.00302  | 2.81248  |
| D32 | -1.35539 | -0.00001 | 0.00186  | 0.00073  | 0.00259  | -1.35280 |
| D33 | -3.00152 | 0.00006  | 0.00028  | 0.00025  | 0.00053  | -3.00099 |
| D34 | 1.21855  | 0.00002  | 0.00016  | 0.00028  | 0.00045  | 1.21899  |
| D35 | -0.89950 | 0.00009  | 0.00014  | 0.00022  | 0.00036  | -0.89913 |
| D36 | 1.16780  | 0.00003  | -0.00008 | 0.00036  | 0.00028  | 1.16808  |
| D37 | -0.89532 | -0.00001 | -0.00019 | 0.00039  | 0.00019  | -0.89513 |
| D38 | -3.01336 | 0.00005  | -0.00021 | 0.00032  | 0.00011  | -3.01325 |
| D39 | -0.92614 | 0.00000  | 0.00004  | 0.00026  | 0.00031  | -0.92584 |
| D40 | -2.98926 | -0.00003 | -0.00007 | 0.00029  | 0.00022  | -2.98904 |
| D41 | 1.17588  | 0.00003  | -0.00009 | 0.00023  | 0.00014  | 1.17602  |

|     |          |          |          |          |          |          |
|-----|----------|----------|----------|----------|----------|----------|
| D42 | -3.13974 | 0.00000  | -0.00012 | -0.00012 | -0.00024 | -3.13998 |
| D43 | -0.02302 | -0.00001 | -0.00014 | -0.00013 | -0.00027 | -0.02329 |
| D44 | -0.00884 | 0.00000  | -0.00021 | 0.00002  | -0.00019 | -0.00903 |
| D45 | 3.10788  | -0.00001 | -0.00024 | 0.00002  | -0.00022 | 3.10765  |
| D46 | -2.75288 | -0.00001 | -0.00006 | 0.00007  | 0.00001  | -2.75288 |
| D47 | -0.04798 | -0.00001 | 0.00035  | -0.00009 | 0.00026  | -0.04771 |
| D48 | -0.02003 | 0.00001  | 0.00016  | -0.00018 | -0.00001 | -0.02004 |
| D49 | 2.68488  | 0.00001  | 0.00058  | -0.00034 | 0.00024  | 2.68512  |
| D50 | 0.31651  | 0.00003  | -0.00229 | 0.00004  | -0.00226 | 0.31425  |
| D51 | -2.06258 | 0.00001  | -0.00189 | -0.00023 | -0.00213 | -2.06471 |
| D52 | 2.54602  | -0.00002 | -0.00194 | -0.00011 | -0.00205 | 2.54397  |
| D53 | 0.16458  | -0.00004 | -0.00196 | -0.00030 | -0.00226 | 0.16233  |
| D54 | 2.55394  | -0.00001 | -0.00164 | 0.00035  | -0.00129 | 2.55265  |
| D55 | -1.65266 | -0.00001 | -0.00163 | 0.00033  | -0.00130 | -1.65396 |
| D56 | 0.43972  | -0.00001 | -0.00156 | 0.00038  | -0.00118 | 0.43854  |
| D57 | 1.32689  | 0.00002  | -0.00142 | 0.00048  | -0.00094 | 1.32595  |
| D58 | -2.87971 | 0.00002  | -0.00141 | 0.00046  | -0.00095 | -2.88067 |
| D59 | -0.78733 | 0.00002  | -0.00134 | 0.00050  | -0.00083 | -0.78817 |
| D60 | -1.02059 | 0.00000  | -0.00127 | 0.00021  | -0.00106 | -1.02165 |
| D61 | 1.05599  | 0.00000  | -0.00125 | 0.00018  | -0.00107 | 1.05492  |
| D62 | -3.13481 | 0.00000  | -0.00118 | 0.00023  | -0.00095 | -3.13576 |
| D63 | 1.48141  | -0.00004 | -0.00354 | -0.00039 | -0.00393 | 1.47748  |
| D64 | 2.82802  | -0.00004 | -0.00368 | -0.00025 | -0.00392 | 2.82410  |
| D65 | 2.25398  | -0.00002 | 0.00174  | 0.00001  | 0.00175  | 2.25573  |
| D66 | -0.86211 | 0.00000  | 0.00166  | 0.00013  | 0.00178  | -0.86033 |
| D67 | -1.93824 | -0.00001 | 0.00143  | 0.00003  | 0.00146  | -1.93678 |
| D68 | 1.22885  | 0.00001  | 0.00135  | 0.00015  | 0.00150  | 1.23034  |
| D69 | 0.09927  | 0.00001  | 0.00167  | -0.00008 | 0.00159  | 0.10086  |
| D70 | -3.01682 | 0.00004  | 0.00159  | 0.00004  | 0.00163  | -3.01519 |
| D71 | 2.92144  | -0.00009 | 0.00063  | -0.00032 | 0.00032  | 2.92176  |
| D72 | -0.19401 | -0.00007 | 0.00054  | -0.00019 | 0.00035  | -0.19366 |
| D73 | -1.87701 | -0.00008 | -0.00085 | -0.00042 | -0.00127 | -1.87829 |

| Item                 | Value    | Threshold | Converged? |
|----------------------|----------|-----------|------------|
| Maximum Force        | 0.000158 | 0.000450  | YES        |
| RMS Force            | 0.000036 | 0.000300  | YES        |
| Maximum Displacement | 0.023111 | 0.001800  | NO         |
| RMS Displacement     | 0.006080 | 0.001200  | NO         |

Predicted change in Energy=-7.634787D-07

GradGradGradGradGradGradGradGradGradGradGradGradGradGradGradGradGradGradGrad

Input orientation:

| Center Number | Atomic Number | Atomic Type | Coordinates (Angstroms) |   |   |
|---------------|---------------|-------------|-------------------------|---|---|
|               |               |             | X                       | Y | Z |
| -----         |               |             |                         |   |   |

---

|    |    |   |           |           |           |
|----|----|---|-----------|-----------|-----------|
| 1  | 6  | 0 | -0.842830 | 1.642452  | 1.535115  |
| 2  | 6  | 0 | -1.500480 | 0.453355  | 1.572754  |
| 3  | 7  | 0 | -2.366515 | 0.450363  | 0.487177  |
| 4  | 6  | 0 | -2.232533 | 1.607853  | -0.178828 |
| 5  | 7  | 0 | -1.309184 | 2.353851  | 0.440176  |
| 6  | 6  | 0 | -0.775337 | 3.644291  | -0.032636 |
| 7  | 1  | 0 | -0.066940 | 2.028010  | 2.172343  |
| 8  | 1  | 0 | -1.346779 | -0.417535 | 2.221648  |
| 9  | 1  | 0 | -1.613435 | 4.257774  | -0.367774 |
| 10 | 1  | 0 | -0.324953 | 4.127131  | 0.832483  |
| 11 | 35 | 0 | -0.392805 | -2.439504 | 2.911098  |
| 12 | 1  | 0 | -2.773175 | 1.883878  | -1.067800 |
| 13 | 6  | 0 | -3.256005 | -0.601143 | 0.096201  |
| 14 | 6  | 0 | -3.214558 | -1.821740 | 0.613934  |
| 15 | 1  | 0 | -3.954314 | -0.290613 | -0.671119 |
| 16 | 1  | 0 | -3.926410 | -2.555162 | 0.256347  |
| 17 | 1  | 0 | -2.487514 | -2.136215 | 1.365654  |
| 18 | 6  | 0 | 2.555541  | -0.690258 | 1.122875  |
| 19 | 6  | 0 | 3.974207  | -0.375407 | 1.316579  |
| 20 | 8  | 0 | 2.971496  | 0.653047  | 1.530075  |
| 21 | 1  | 0 | 2.176942  | -0.731164 | 0.105463  |
| 22 | 1  | 0 | 1.980381  | -1.231338 | 1.869668  |
| 23 | 1  | 0 | 4.424384  | -0.692116 | 2.254584  |
| 24 | 6  | 0 | 4.922706  | -0.169867 | 0.167973  |
| 25 | 1  | 0 | 5.679210  | 0.580092  | 0.416627  |
| 26 | 1  | 0 | 5.440807  | -1.107694 | -0.054264 |
| 27 | 1  | 0 | 4.387562  | 0.151672  | -0.728094 |
| 28 | 6  | 0 | 0.256388  | 3.474495  | -1.157295 |
| 29 | 1  | 0 | 0.706624  | 4.453488  | -1.349775 |
| 30 | 1  | 0 | -0.213125 | 3.134538  | -2.081039 |
| 31 | 6  | 0 | 1.359411  | 2.482754  | -0.806383 |
| 32 | 8  | 0 | 1.680691  | 1.570144  | -1.529979 |
| 33 | 8  | 0 | 1.885539  | 2.734436  | 0.391369  |
| 34 | 1  | 0 | 2.458077  | 1.967843  | 0.698836  |

---

Distance matrix (angstroms):

|   |   | 1        | 2        | 3        | 4        | 5        |
|---|---|----------|----------|----------|----------|----------|
| 1 | C | 0.000000 |          |          |          |          |
| 2 | C | 1.359365 | 0.000000 |          |          |          |
| 3 | N | 2.200196 | 1.388705 | 0.000000 |          |          |
| 4 | C | 2.206824 | 2.221893 | 1.342124 | 0.000000 |          |
| 5 | N | 1.386530 | 2.220634 | 2.177940 | 1.338751 | 0.000000 |
| 6 | C | 2.543572 | 3.644885 | 3.605999 | 2.508361 | 1.474375 |

|    |    |          |          |          |          |          |
|----|----|----------|----------|----------|----------|----------|
| 7  | H  | 1.075509 | 2.212257 | 3.258343 | 3.224024 | 2.156326 |
| 8  | H  | 2.229089 | 1.096876 | 2.191232 | 3.263287 | 3.294789 |
| 9  | H  | 3.324865 | 4.272238 | 3.974223 | 2.727832 | 2.090520 |
| 10 | H  | 2.633537 | 3.927658 | 4.219696 | 3.317887 | 2.065705 |
| 11 | Br | 4.331076 | 3.374424 | 4.257024 | 5.414180 | 5.470051 |
| 12 | H  | 3.249567 | 3.261699 | 2.153670 | 1.076455 | 2.153634 |
| 13 | C  | 3.595498 | 2.524686 | 1.431684 | 2.450061 | 3.555337 |
| 14 | C  | 4.298174 | 3.005571 | 2.428518 | 3.654443 | 4.593060 |
| 15 | H  | 4.276159 | 3.407309 | 2.100429 | 2.609799 | 3.901907 |
| 16 | H  | 5.363178 | 4.082798 | 3.394074 | 4.515450 | 5.566155 |
| 17 | H  | 4.124564 | 2.779029 | 2.734365 | 4.058139 | 4.733463 |
| 18 | C  | 4.142512 | 4.238107 | 5.092324 | 5.468217 | 4.966767 |
| 19 | C  | 5.227175 | 5.542984 | 6.447834 | 6.685296 | 6.010919 |
| 20 | O  | 3.940563 | 4.476636 | 5.442709 | 5.560029 | 4.733374 |
| 21 | H  | 4.098412 | 4.132730 | 4.710065 | 4.999529 | 4.667164 |
| 22 | H  | 4.042415 | 3.878497 | 4.861574 | 5.477772 | 5.071318 |
| 23 | H  | 5.806152 | 6.072974 | 7.109522 | 7.451571 | 6.741201 |
| 24 | C  | 6.196369 | 6.604479 | 7.322522 | 7.380922 | 6.729019 |
| 25 | H  | 6.701988 | 7.273283 | 8.047081 | 8.000410 | 7.210023 |
| 26 | H  | 7.040847 | 7.298324 | 7.979660 | 8.140630 | 7.601917 |
| 27 | H  | 5.890802 | 6.328820 | 6.869036 | 6.800575 | 6.218308 |
| 28 | C  | 3.437111 | 4.434754 | 4.327734 | 3.261362 | 2.501753 |
| 29 | H  | 4.315707 | 5.423427 | 5.370623 | 4.255280 | 3.416999 |
| 30 | H  | 3.962249 | 4.711288 | 4.293905 | 3.166573 | 2.857856 |
| 31 | C  | 3.322437 | 4.237656 | 4.436940 | 3.749845 | 2.948206 |
| 32 | O  | 3.970918 | 4.581923 | 4.658617 | 4.140091 | 3.665386 |
| 33 | O  | 3.153503 | 4.250192 | 4.827643 | 4.307301 | 3.217683 |
| 34 | H  | 3.420707 | 4.327538 | 5.062039 | 4.785574 | 3.795809 |
|    |    | 6        | 7        | 8        | 9        | 10       |
| 6  | C  | 0.000000 |          |          |          |          |
| 7  | H  | 2.824203 | 0.000000 |          |          |          |
| 8  | H  | 4.680468 | 2.760636 | 0.000000 |          |          |
| 9  | H  | 1.091369 | 3.716946 | 5.351142 | 0.000000 |          |
| 10 | H  | 1.088306 | 2.503619 | 4.860854 | 1.765749 | 0.000000 |
| 11 | Br | 6.769377 | 4.539893 | 2.339608 | 7.556088 | 6.888102 |
| 12 | H  | 2.856917 | 4.224099 | 4.260467 | 2.733206 | 3.825840 |
| 13 | C  | 4.918742 | 4.625251 | 2.862931 | 5.149989 | 5.611573 |
| 14 | C  | 6.020411 | 5.211210 | 2.836395 | 6.363005 | 6.617148 |
| 15 | H  | 5.098728 | 5.345368 | 3.896594 | 5.124408 | 5.911814 |
| 16 | H  | 6.960316 | 6.290629 | 3.884116 | 7.221875 | 7.612849 |
| 17 | H  | 6.188782 | 4.883718 | 2.233353 | 6.682207 | 6.647590 |
| 18 | C  | 5.587331 | 3.920175 | 4.063223 | 6.639685 | 5.620393 |
| 19 | C  | 6.366830 | 4.779081 | 5.397575 | 7.451520 | 6.244196 |
| 20 | O  | 5.042654 | 3.396340 | 4.502435 | 6.133309 | 4.839677 |

|    |    |          |          |          |          |          |
|----|----|----------|----------|----------|----------|----------|
| 21 | H  | 5.280117 | 4.113398 | 4.122282 | 6.283344 | 5.512810 |
| 22 | H  | 5.914770 | 3.860892 | 3.443277 | 6.931956 | 5.924822 |
| 23 | H  | 7.146531 | 5.251461 | 5.777786 | 8.236105 | 6.914024 |
| 24 | C  | 6.859719 | 5.809022 | 6.601921 | 7.912785 | 6.814961 |
| 25 | H  | 7.159074 | 6.180393 | 7.322424 | 8.205078 | 6.986016 |
| 26 | H  | 7.824467 | 6.717567 | 7.192178 | 8.868419 | 7.837966 |
| 27 | H  | 6.271967 | 5.637000 | 6.473611 | 7.280238 | 6.359833 |
| 28 | C  | 1.535625 | 3.644632 | 5.397712 | 2.175571 | 2.173271 |
| 29 | H  | 2.141463 | 4.345879 | 6.379529 | 2.526916 | 2.435757 |
| 30 | H  | 2.184464 | 4.397389 | 5.693462 | 2.481492 | 3.079993 |
| 31 | C  | 2.550490 | 3.333778 | 4.990402 | 3.490112 | 2.868264 |
| 32 | O  | 3.546293 | 4.119593 | 5.214513 | 4.407418 | 4.017713 |
| 33 | O  | 2.843920 | 2.735522 | 4.871624 | 3.890974 | 2.649615 |
| 34 | H  | 3.714902 | 2.924134 | 4.741932 | 4.791519 | 3.525003 |
|    |    | 11       | 12       | 13       | 14       | 15       |
| 11 | Br | 0.000000 |          |          |          |          |
| 12 | H  | 6.339513 | 0.000000 |          |          |          |
| 13 | C  | 4.416008 | 2.786280 | 0.000000 |          |          |
| 14 | C  | 3.690649 | 4.093245 | 1.326507 | 0.000000 |          |
| 15 | H  | 5.489476 | 2.506164 | 1.082979 | 2.131419 | 0.000000 |
| 16 | H  | 4.421249 | 4.773720 | 2.072023 | 1.082825 | 2.447274 |
| 17 | H  | 2.620723 | 4.707915 | 2.135073 | 1.092049 | 3.115476 |
| 18 | C  | 3.866568 | 6.310345 | 5.902208 | 5.901975 | 6.764343 |
| 19 | C  | 5.086628 | 7.504452 | 7.335955 | 7.366406 | 8.174324 |
| 20 | O  | 4.773848 | 6.423795 | 6.512354 | 6.725411 | 7.328205 |
| 21 | H  | 4.170565 | 5.720022 | 5.434510 | 5.524144 | 6.195923 |
| 22 | H  | 2.859415 | 6.397624 | 5.564356 | 5.377065 | 6.523891 |
| 23 | H  | 5.166207 | 8.335397 | 7.978425 | 7.894379 | 8.883891 |
| 24 | C  | 6.397707 | 8.060496 | 8.190388 | 8.315205 | 8.917406 |
| 25 | H  | 7.225629 | 8.680220 | 9.018651 | 9.214491 | 9.733761 |
| 26 | H  | 6.678183 | 8.800356 | 8.712851 | 8.710436 | 9.450736 |
| 27 | H  | 6.542922 | 7.375100 | 7.724656 | 7.967912 | 8.353787 |
| 28 | C  | 7.207541 | 3.422912 | 5.524399 | 6.575319 | 5.669428 |
| 29 | H  | 8.177844 | 4.334906 | 6.583508 | 7.655738 | 6.685164 |
| 30 | H  | 7.484896 | 3.024014 | 5.287231 | 6.390319 | 5.264602 |
| 31 | C  | 6.412375 | 4.183928 | 5.623801 | 6.439500 | 5.995459 |
| 32 | O  | 6.332443 | 4.488760 | 5.632932 | 6.329669 | 5.996110 |
| 33 | O  | 6.189470 | 4.955426 | 6.135853 | 6.842461 | 6.662108 |
| 34 | H  | 5.696169 | 5.522142 | 6.293933 | 6.822532 | 6.935139 |
|    |    | 16       | 17       | 18       | 19       | 20       |
| 16 | H  | 0.000000 |          |          |          |          |
| 17 | H  | 1.864538 | 0.000000 |          |          |          |
| 18 | C  | 6.800325 | 5.251870 | 0.000000 |          |          |
| 19 | C  | 8.264089 | 6.697514 | 1.466038 | 0.000000 |          |

|    |   |           |          |          |          |          |
|----|---|-----------|----------|----------|----------|----------|
| 20 | O | 7.713372  | 6.132521 | 1.464001 | 1.452146 | 0.000000 |
| 21 | H | 6.371863  | 5.031839 | 1.086342 | 2.196253 | 2.139364 |
| 22 | H | 6.264622  | 4.586384 | 1.086865 | 2.239167 | 2.156048 |
| 23 | H | 8.786334  | 7.116879 | 2.184799 | 1.087574 | 2.108379 |
| 24 | C | 9.165386  | 7.759661 | 2.605018 | 1.503727 | 2.517882 |
| 25 | H | 10.105615 | 8.658774 | 3.445270 | 2.151727 | 2.928618 |
| 26 | H | 9.483480  | 8.119871 | 3.143990 | 2.136907 | 3.421672 |
| 27 | H | 8.798762  | 7.542207 | 2.737012 | 2.151596 | 2.712185 |
| 28 | C | 7.473349  | 6.736048 | 5.275456 | 5.896098 | 4.749140 |
| 29 | H | 8.553702  | 7.810267 | 5.999218 | 6.411300 | 5.278876 |
| 30 | H | 7.185023  | 6.695774 | 5.706105 | 6.434071 | 5.416618 |
| 31 | C | 7.379018  | 6.391515 | 3.901381 | 4.417376 | 3.377230 |
| 32 | O | 7.186703  | 6.284563 | 3.593385 | 4.141048 | 3.445457 |
| 33 | O | 7.859824  | 6.617860 | 3.565464 | 3.858713 | 2.609240 |
| 34 | H | 7.836776  | 6.461178 | 2.693475 | 2.858509 | 1.638061 |
|    |   | 21        | 22       | 23       | 24       | 25       |
| 21 | H | 0.000000  |          |          |          |          |
| 22 | H | 1.844242  | 0.000000 |          |          |          |
| 23 | H | 3.109863  | 2.532208 | 0.000000 |          |          |
| 24 | C | 2.803246  | 3.560866 | 2.207944 | 0.000000 |          |
| 25 | H | 3.752613  | 4.367373 | 2.563432 | 1.093876 | 0.000000 |
| 26 | H | 3.289393  | 3.961231 | 2.556677 | 1.094230 | 1.768388 |
| 27 | H | 2.522114  | 3.802053 | 3.099952 | 1.092109 | 1.778282 |
| 28 | C | 4.792770  | 5.854871 | 6.809827 | 6.067308 | 6.345219 |
| 29 | H | 5.582130  | 6.656164 | 7.300027 | 6.438503 | 6.545991 |
| 30 | H | 5.043497  | 6.283345 | 7.412651 | 6.507988 | 6.890802 |
| 31 | C | 3.439345  | 4.619668 | 5.370604 | 4.547839 | 4.876121 |
| 32 | O | 2.866524  | 4.415396 | 5.193129 | 4.052325 | 4.556055 |
| 33 | O | 3.489562  | 4.233406 | 4.653876 | 4.208237 | 4.362772 |
| 34 | H | 2.777727  | 3.440029 | 3.655420 | 3.305452 | 3.518692 |
|    |   | 26        | 27       | 28       | 29       | 30       |
| 26 | H | 0.000000  |          |          |          |          |
| 27 | H | 1.774648  | 0.000000 |          |          |          |
| 28 | C | 7.006520  | 5.319018 | 0.000000 |          |          |
| 29 | H | 7.417384  | 5.695736 | 1.094619 | 0.000000 |          |
| 30 | H | 7.353319  | 5.647501 | 1.090558 | 1.766441 | 0.000000 |
| 31 | C | 5.487695  | 3.822273 | 1.524252 | 2.145972 | 2.126602 |
| 32 | O | 4.846342  | 3.159467 | 2.407090 | 3.048762 | 2.517446 |
| 33 | O | 5.253616  | 3.766163 | 2.366470 | 2.715983 | 3.267610 |
| 34 | H | 4.350030  | 3.009570 | 3.250024 | 3.666446 | 4.027928 |
|    |   | 31        | 32       | 33       | 34       |          |
| 31 | C | 0.000000  |          |          |          |          |
| 32 | O | 1.208168  | 0.000000 |          |          |          |
| 33 | O | 1.332203  | 2.255907 | 0.000000 |          |          |

34 H 1.933361 2.393764 1.004988 0.000000

Stoichiometry C11H17BrN2O3

Framework group C1[X(C11H17BrN2O3)]

Deg. of freedom 96

Full point group C1 NOp 1

Largest Abelian subgroup C1 NOp 1

Largest concise Abelian subgroup C1 NOp 1

Standard orientation:

| Center<br>Number | Atomic<br>Number | Atomic<br>Type | Coordinates (Angstroms) |           |           |
|------------------|------------------|----------------|-------------------------|-----------|-----------|
|                  |                  |                | X                       | Y         | Z         |
| 1                | 6                | 0              | 0.077160                | 1.326483  | 1.237058  |
| 2                | 6                | 0              | -1.154221               | 1.251474  | 0.666139  |
| 3                | 7                | 0              | -1.221265               | 2.286335  | -0.257480 |
| 4                | 6                | 0              | -0.062688               | 2.963496  | -0.236273 |
| 5                | 7                | 0              | 0.747175                | 2.398603  | 0.667758  |
| 6                | 6                | 0              | 2.154595                | 2.759180  | 0.918624  |
| 7                | 1                | 0              | 0.541505                | 0.694792  | 1.973312  |
| 8                | 1                | 0              | -1.936709               | 0.490444  | 0.774226  |
| 9                | 1                | 0              | 2.226428                | 3.847571  | 0.955123  |
| 10               | 1                | 0              | 2.401901                | 2.368775  | 1.903933  |
| 11               | 35               | 0              | -3.067434               | -1.506203 | 0.317473  |
| 12               | 1                | 0              | 0.175729                | 3.814022  | -0.851510 |
| 13               | 6                | 0              | -2.317589               | 2.600352  | -1.123035 |
| 14               | 6                | 0              | -3.356215               | 1.795691  | -1.305791 |
| 15               | 1                | 0              | -2.197711               | 3.557948  | -1.614444 |
| 16               | 1                | 0              | -4.139933               | 2.114928  | -1.981352 |
| 17               | 1                | 0              | -3.455547               | 0.817719  | -0.830107 |
| 18               | 6                | 0              | 0.619271                | -2.460810 | -0.351316 |
| 19               | 6                | 0              | 1.594177                | -3.510225 | -0.038981 |
| 20               | 8                | 0              | 1.633761                | -2.250973 | 0.683130  |
| 21               | 1                | 0              | 0.784680                | -1.860125 | -1.241234 |
| 22               | 1                | 0              | -0.402235               | -2.497824 | 0.018052  |
| 23               | 1                | 0              | 1.254086                | -4.323155 | 0.598437  |
| 24               | 6                | 0              | 2.765991                | -3.818543 | -0.929479 |
| 25               | 1                | 0              | 3.632125                | -4.131874 | -0.339394 |
| 26               | 1                | 0              | 2.508028                | -4.637928 | -1.607271 |
| 27               | 1                | 0              | 3.042279                | -2.947488 | -1.527500 |
| 28               | 6                | 0              | 3.103895                | 2.188327  | -0.144908 |
| 29               | 1                | 0              | 4.130172                | 2.373836  | 0.187552  |
| 30               | 1                | 0              | 2.968958                | 2.683857  | -1.106968 |
| 31               | 6                | 0              | 2.917770                | 0.691568  | -0.364942 |
| 32               | 8                | 0              | 2.766918                | 0.199186  | -1.457862 |



|    |   |   |          |           |          |
|----|---|---|----------|-----------|----------|
| 33 | 8 | 0 | 2.912252 | 0.021238  | 0.786315 |
| 34 | 1 | 0 | 2.588754 | -0.920500 | 0.650377 |

-----  
Rotational constants (GHZ): 0.3287477 0.2548589 0.1594782  
Standard basis: 6-311++G(d,p) (5D, 7F)  
There are 538 symmetry adapted cartesian basis functions of A symmetry.  
There are 519 symmetry adapted basis functions of A symmetry.  
519 basis functions, 823 primitive gaussians, 538 cartesian basis functions  
78 alpha electrons 78 beta electrons  
nuclear repulsion energy 1572.8193178675 Hartrees.  
NAtoms= 34 NActive= 34 NUniq= 34 SFac= 1.00D+00 NATFMM= 60 NAOKFM=F  
Big=F  
Integral buffers will be 131072 words long.  
Raffenetti 2 integral format.  
Two-electron integral symmetry is turned on.  
One-electron integrals computed using PRISM.  
NBasis= 519 RedAO= T EigKep= 3.53D-06 NBF= 519  
NBsUse= 519 1.00D-06 EigRej= -1.00D+00 NBFU= 519  
Initial guess from the checkpoint file: "./coohpo.chk"  
B after Tr= 0.000000 0.000000 0.000000  
Rot= 0.999998 -0.000006 0.000271 0.001907 Ang= -0.22 deg.  
ExpMin= 3.50D-02 ExpMax= 4.40D+05 ExpMxC= 1.51D+04 IAcc=3 IRadAn= 5 AccDes=  
0.00D+00  
Harris functional with IExCor= 402 and IRadAn= 5 diagonalized for initial guess.  
HarFok: IExCor= 402 AccDes= 0.00D+00 IRadAn= 5 IDoV= 1 UseB2=F ITyADJ=14  
ICtDFT= 3500011 ScaDFX= 1.000000 1.000000 1.000000 1.000000  
FoFCou: FMM=F IPFlag= 0 FMFlag= 100000 FMFlg1= 0  
NFxFlg= 0 DoJE=T BraDBF=F KetDBF=T FulRan=T  
wScrn= 0.000000 ICntrl= 500 IOpCl= 0 I1Cent= 200000004 NGrid=  
0  
NMat0= 1 NMatS0= 1 NMatT0= 0 NMatD0= 1 NMtDS0= 0  
NMtDT0= 0  
Petite list used in FoFCou.  
Requested convergence on RMS density matrix=1.00D-08 within 128 cycles.  
Requested convergence on MAX density matrix=1.00D-06.  
Requested convergence on energy=1.00D-06.  
No special actions if energy rises.  
SCF Done: E(RB3LYP) = -3338.90388098 A.U. after 11 cycles  
NFock= 11 Conv=0.22D-08 -V/T= 2.0019  
Calling FoFJK, ICntrl= 2127 FMM=F ISym2X=0 I1Cent= 0 IOpClX= 0 NMat=1 NMatS=1  
NMatT=0.  
\*\*\*\*\* Axes restored to original set \*\*\*\*\*

-----  
Center Atomic Forces (Hartrees/Bohr)

| Number | Number | X            | Y            | Z            |
|--------|--------|--------------|--------------|--------------|
| 1      | 6      | 0.000027040  | -0.000032202 | -0.000083462 |
| 2      | 6      | 0.000081257  | 0.000118565  | 0.000065824  |
| 3      | 7      | -0.000081315 | -0.000092309 | 0.000002585  |
| 4      | 6      | -0.000037417 | 0.000080106  | 0.000027118  |
| 5      | 7      | 0.000040086  | 0.000007848  | -0.000028657 |
| 6      | 6      | -0.000074612 | -0.000011507 | 0.000030116  |
| 7      | 1      | -0.000014438 | 0.000007319  | 0.000032668  |
| 8      | 1      | -0.000106011 | -0.000109588 | -0.000079925 |
| 9      | 1      | 0.000009921  | 0.000004874  | -0.000007332 |
| 10     | 1      | 0.000021345  | -0.000017371 | -0.000018432 |
| 11     | 35     | 0.000050212  | 0.000009716  | 0.000029266  |
| 12     | 1      | 0.000037054  | -0.000024067 | -0.000029749 |
| 13     | 6      | 0.000085173  | 0.000127405  | 0.000023279  |
| 14     | 6      | -0.000055489 | -0.000075029 | 0.000023070  |
| 15     | 1      | -0.000003050 | -0.000022375 | -0.000015411 |
| 16     | 1      | 0.000006412  | 0.000019140  | -0.000011671 |
| 17     | 1      | 0.000015139  | 0.000026845  | -0.000001227 |
| 18     | 6      | -0.000034165 | 0.000013585  | -0.000006672 |
| 19     | 6      | -0.000071877 | 0.000048729  | 0.000118809  |
| 20     | 8      | 0.000099389  | -0.000075395 | -0.000037481 |
| 21     | 1      | 0.000015961  | 0.000004478  | -0.000011641 |
| 22     | 1      | -0.000012228 | 0.000007161  | 0.000013248  |
| 23     | 1      | 0.000017547  | 0.000008500  | -0.000010079 |
| 24     | 6      | 0.000001074  | 0.000000231  | -0.000061848 |
| 25     | 1      | 0.000009653  | -0.000009932 | 0.000007499  |
| 26     | 1      | -0.000002888 | -0.000005995 | 0.000006117  |
| 27     | 1      | -0.000000231 | 0.000004874  | 0.000025366  |
| 28     | 6      | -0.000007841 | 0.000058742  | -0.000001522 |
| 29     | 1      | 0.000015005  | -0.000008575 | -0.000015552 |
| 30     | 1      | 0.000015500  | -0.000007546 | 0.000006348  |
| 31     | 6      | -0.000017265 | 0.000009208  | 0.000133555  |
| 32     | 8      | 0.000024742  | -0.000028915 | -0.000055036 |
| 33     | 8      | 0.000012986  | -0.000044501 | -0.000085679 |
| 34     | 1      | -0.000066666 | 0.000007983  | 0.000016509  |

-----  
Cartesian Forces: Max 0.000133555 RMS 0.000047284

GradGradGradGradGradGradGradGradGradGradGradGradGradGradGradGradGradGradGrad

Berny optimization.

Using GEDIIS/GDIIS optimizer.

FormGI is forming the generalized inverse of G from B-inverse, IUseBI=4.

Internal Forces: Max 0.000116118 RMS 0.000026507

Search for a local minimum.

Step number 36 out of a maximum of 175

All quantities printed in internal units (Hartrees-Bohrs-Radians)

Mixed Optimization -- En-DIIS/RFO-DIIS

Swapping is turned off.

Update second derivatives using D2CorX and points

|    |    |    |    |    |    |    |  |  |  |
|----|----|----|----|----|----|----|--|--|--|
| 21 | 22 | 23 | 24 | 25 |    |    |  |  |  |
|    |    | 26 | 27 | 28 | 29 | 30 |  |  |  |
|    |    | 31 | 32 | 33 | 34 | 35 |  |  |  |
|    |    |    | 36 |    |    |    |  |  |  |

DE= -3.51D-06 DEPred=-7.63D-07 R= 4.59D+00

TightC=F SS= 1.41D+00 RLast= 1.78D-02 DXNew= 6.5746D-01 5.3432D-02

Trust test= 4.59D+00 RLast= 1.78D-02 DXMaxT set to 3.91D-01

ITU= 1 1 1 1 1 -1 1 1 1 1 1 -1 0 1 1 1 1 1 1 1

ITU= 1 1 1 0 0 -1 1 1 1 0 1 0 -1 0 1 0

|                 |         |         |         |         |         |
|-----------------|---------|---------|---------|---------|---------|
| Eigenvalues --- | 0.00166 | 0.00248 | 0.00361 | 0.00429 | 0.00539 |
| Eigenvalues --- | 0.00733 | 0.00842 | 0.00947 | 0.01181 | 0.01348 |
| Eigenvalues --- | 0.01639 | 0.01995 | 0.02174 | 0.02273 | 0.02288 |
| Eigenvalues --- | 0.02430 | 0.02471 | 0.02889 | 0.02974 | 0.03144 |
| Eigenvalues --- | 0.03458 | 0.03663 | 0.03965 | 0.04311 | 0.04636 |
| Eigenvalues --- | 0.04865 | 0.05031 | 0.05344 | 0.05672 | 0.05737 |
| Eigenvalues --- | 0.05775 | 0.05981 | 0.06160 | 0.07510 | 0.09409 |
| Eigenvalues --- | 0.09679 | 0.11784 | 0.12508 | 0.12861 | 0.13022 |
| Eigenvalues --- | 0.13590 | 0.14909 | 0.15632 | 0.15944 | 0.15978 |
| Eigenvalues --- | 0.16002 | 0.16032 | 0.16045 | 0.16133 | 0.16449 |
| Eigenvalues --- | 0.16807 | 0.17667 | 0.19799 | 0.21648 | 0.22071 |
| Eigenvalues --- | 0.23319 | 0.23673 | 0.24131 | 0.25278 | 0.26753 |
| Eigenvalues --- | 0.28298 | 0.29477 | 0.30007 | 0.31707 | 0.32145 |
| Eigenvalues --- | 0.33306 | 0.34456 | 0.34511 | 0.34613 | 0.34773 |
| Eigenvalues --- | 0.34890 | 0.34951 | 0.34970 | 0.35103 | 0.35306 |
| Eigenvalues --- | 0.35540 | 0.35625 | 0.35877 | 0.35940 | 0.36631 |
| Eigenvalues --- | 0.37047 | 0.37258 | 0.38053 | 0.39188 | 0.39653 |
| Eigenvalues --- | 0.41489 | 0.45567 | 0.49243 | 0.50314 | 0.50883 |
| Eigenvalues --- | 0.54536 | 0.55981 | 0.57009 | 0.61973 | 0.91419 |
| Eigenvalues --- | 1.03763 |         |         |         |         |

En-DIIS/RFO-DIIS IScMMF= 0 using points: 36 35 34 33 32

RFO step: Lambda=-2.05856678D-07.

DidBck=F Rises=F RFO-DIIS coefs: 1.61940 -0.41360 -0.75661 0.56139 -  
0.01058

Iteration 1 RMS(Cart)= 0.00509428 RMS(Int)= 0.00000792

Iteration 2 RMS(Cart)= 0.00001164 RMS(Int)= 0.00000028

Iteration 3 RMS(Cart)= 0.00000000 RMS(Int)= 0.00000028

| Variable | Old X   | -DE/DX   | Delta X<br>(Linear) | Delta X<br>(Quad) | Delta X<br>(Total) | New X   |
|----------|---------|----------|---------------------|-------------------|--------------------|---------|
| R1       | 2.56883 | -0.00002 | 0.00002             | -0.00002          | 0.00000            | 2.56882 |

|     |         |          |          |          |          |         |
|-----|---------|----------|----------|----------|----------|---------|
| R2  | 2.62016 | -0.00001 | -0.00001 | 0.00000  | -0.00001 | 2.62015 |
| R3  | 2.03242 | 0.00001  | -0.00001 | 0.00002  | 0.00001  | 2.03243 |
| R4  | 2.62427 | 0.00000  | 0.00012  | -0.00007 | 0.00005  | 2.62432 |
| R5  | 2.07279 | 0.00005  | 0.00019  | -0.00011 | 0.00007  | 2.07287 |
| R6  | 2.53625 | 0.00004  | -0.00001 | 0.00003  | 0.00002  | 2.53627 |
| R7  | 2.70549 | -0.00009 | -0.00016 | -0.00005 | -0.00021 | 2.70528 |
| R8  | 2.52987 | -0.00001 | 0.00003  | -0.00002 | 0.00000  | 2.52988 |
| R9  | 2.03421 | 0.00000  | 0.00000  | 0.00000  | 0.00000  | 2.03420 |
| R10 | 2.78616 | -0.00004 | -0.00013 | 0.00006  | -0.00007 | 2.78610 |
| R11 | 2.06239 | 0.00000  | -0.00003 | 0.00002  | -0.00001 | 2.06238 |
| R12 | 2.05660 | -0.00001 | -0.00002 | -0.00002 | -0.00004 | 2.05657 |
| R13 | 2.90191 | -0.00001 | 0.00016  | -0.00016 | 0.00000  | 2.90191 |
| R14 | 4.42122 | 0.00002  | -0.00053 | 0.00041  | -0.00012 | 4.42110 |
| R15 | 2.50674 | 0.00004  | 0.00001  | 0.00004  | 0.00004  | 2.50678 |
| R16 | 2.04653 | 0.00000  | 0.00001  | 0.00000  | 0.00001  | 2.04654 |
| R17 | 2.04624 | -0.00001 | 0.00001  | -0.00003 | -0.00002 | 2.04622 |
| R18 | 2.06367 | 0.00000  | 0.00000  | -0.00002 | -0.00003 | 2.06365 |
| R19 | 2.77041 | 0.00001  | 0.00012  | -0.00003 | 0.00009  | 2.77050 |
| R20 | 2.76656 | -0.00003 | -0.00007 | -0.00007 | -0.00013 | 2.76643 |
| R21 | 2.05289 | 0.00001  | 0.00002  | -0.00001 | 0.00001  | 2.05290 |
| R22 | 2.05388 | 0.00001  | -0.00008 | 0.00001  | -0.00006 | 2.05381 |
| R23 | 2.74416 | -0.00008 | -0.00011 | -0.00004 | -0.00015 | 2.74401 |
| R24 | 2.05522 | -0.00001 | -0.00003 | 0.00001  | -0.00002 | 2.05519 |
| R25 | 2.84163 | 0.00004  | 0.00008  | 0.00003  | 0.00011  | 2.84174 |
| R26 | 3.09549 | 0.00000  | -0.00037 | -0.00026 | -0.00064 | 3.09485 |
| R27 | 2.06713 | 0.00000  | 0.00001  | 0.00000  | 0.00002  | 2.06714 |
| R28 | 2.06779 | 0.00000  | 0.00000  | 0.00000  | 0.00000  | 2.06780 |
| R29 | 2.06379 | -0.00002 | 0.00000  | -0.00002 | -0.00002 | 2.06377 |
| R30 | 2.06853 | 0.00000  | -0.00001 | 0.00002  | 0.00001  | 2.06854 |
| R31 | 2.06086 | -0.00001 | -0.00002 | 0.00002  | 0.00000  | 2.06085 |
| R32 | 2.88042 | 0.00002  | 0.00004  | 0.00004  | 0.00009  | 2.88050 |
| R33 | 2.28311 | 0.00006  | 0.00004  | 0.00002  | 0.00006  | 2.28317 |
| R34 | 2.51750 | -0.00007 | -0.00006 | -0.00012 | -0.00019 | 2.51731 |
| R35 | 1.89915 | -0.00003 | 0.00004  | 0.00005  | 0.00009  | 1.89924 |
| A1  | 1.88384 | 0.00002  | 0.00006  | -0.00004 | 0.00001  | 1.88385 |
| A2  | 2.27339 | -0.00002 | 0.00005  | -0.00007 | -0.00003 | 2.27336 |
| A3  | 2.12539 | 0.00001  | -0.00008 | 0.00011  | 0.00004  | 2.12543 |
| A4  | 1.85662 | 0.00000  | -0.00008 | 0.00004  | -0.00004 | 1.85658 |
| A5  | 2.26935 | 0.00000  | 0.00041  | 0.00015  | 0.00056  | 2.26991 |
| A6  | 2.15092 | 0.00000  | -0.00039 | -0.00019 | -0.00058 | 2.15034 |
| A7  | 1.90054 | -0.00001 | 0.00004  | 0.00000  | 0.00004  | 1.90058 |
| A8  | 2.21744 | 0.00000  | -0.00002 | -0.00018 | -0.00020 | 2.21724 |
| A9  | 2.16509 | 0.00001  | -0.00003 | 0.00018  | 0.00015  | 2.16524 |
| A10 | 1.89651 | -0.00001 | -0.00002 | -0.00004 | -0.00005 | 1.89645 |

|     |         |          |          |          |          |         |
|-----|---------|----------|----------|----------|----------|---------|
| A11 | 2.19052 | 0.00000  | 0.00009  | -0.00004 | 0.00004  | 2.19056 |
| A12 | 2.19612 | 0.00001  | -0.00008 | 0.00008  | 0.00000  | 2.19612 |
| A13 | 1.88726 | 0.00000  | 0.00000  | 0.00004  | 0.00004  | 1.88730 |
| A14 | 2.19018 | -0.00002 | 0.00021  | -0.00008 | 0.00013  | 2.19030 |
| A15 | 2.20083 | 0.00002  | -0.00010 | 0.00002  | -0.00007 | 2.20076 |
| A16 | 1.88853 | 0.00006  | 0.00002  | 0.00013  | 0.00015  | 1.88868 |
| A17 | 1.85796 | 0.00003  | 0.00010  | -0.00016 | -0.00006 | 1.85790 |
| A18 | 1.96206 | -0.00012 | 0.00005  | -0.00013 | -0.00008 | 1.96198 |
| A19 | 1.88863 | -0.00001 | 0.00009  | 0.00003  | 0.00011  | 1.88875 |
| A20 | 1.93178 | 0.00003  | 0.00014  | 0.00004  | 0.00018  | 1.93196 |
| A21 | 1.93178 | 0.00001  | -0.00039 | 0.00010  | -0.00029 | 1.93149 |
| A22 | 2.73291 | -0.00004 | -0.00145 | -0.00027 | -0.00172 | 2.73119 |
| A23 | 2.15294 | 0.00000  | -0.00005 | -0.00002 | -0.00007 | 2.15287 |
| A24 | 1.96438 | 0.00002  | 0.00010  | 0.00010  | 0.00020  | 1.96458 |
| A25 | 2.16582 | -0.00003 | -0.00004 | -0.00008 | -0.00013 | 2.16569 |
| A26 | 2.06441 | 0.00000  | 0.00018  | -0.00010 | 0.00007  | 2.06449 |
| A27 | 2.15849 | -0.00003 | -0.00005 | -0.00007 | -0.00012 | 2.15837 |
| A28 | 2.06003 | 0.00003  | -0.00013 | 0.00018  | 0.00004  | 2.06007 |
| A29 | 2.05904 | 0.00000  | -0.00057 | 0.00014  | -0.00042 | 2.05862 |
| A30 | 2.12730 | 0.00000  | 0.00066  | -0.00010 | 0.00056  | 2.12786 |
| A31 | 1.97584 | 0.00000  | -0.00017 | 0.00014  | -0.00003 | 1.97582 |
| A32 | 1.99988 | 0.00000  | 0.00015  | -0.00009 | 0.00006  | 1.99994 |
| A33 | 2.02677 | 0.00001  | -0.00005 | -0.00005 | -0.00010 | 2.02667 |
| A34 | 2.03977 | 0.00004  | 0.00027  | 0.00002  | 0.00030  | 2.04006 |
| A35 | 2.13983 | -0.00004 | -0.00048 | 0.00006  | -0.00041 | 2.13941 |
| A36 | 1.94471 | 0.00001  | 0.00013  | 0.00001  | 0.00014  | 1.94485 |
| A37 | 2.03873 | -0.00001 | -0.00019 | 0.00005  | -0.00014 | 2.03859 |
| A38 | 2.02362 | 0.00000  | 0.00019  | -0.00008 | 0.00011  | 2.02373 |
| A39 | 2.10167 | -0.00003 | 0.00009  | -0.00030 | -0.00022 | 2.10145 |
| A40 | 2.36070 | 0.00001  | -0.00096 | -0.00017 | -0.00114 | 2.35956 |
| A41 | 1.93511 | 0.00001  | 0.00003  | 0.00000  | 0.00003  | 1.93514 |
| A42 | 1.91415 | 0.00000  | 0.00008  | -0.00003 | 0.00005  | 1.91420 |
| A43 | 1.93680 | -0.00002 | -0.00017 | 0.00001  | -0.00016 | 1.93664 |
| A44 | 1.88212 | 0.00000  | -0.00003 | -0.00002 | -0.00005 | 1.88207 |
| A45 | 1.90026 | 0.00000  | -0.00001 | 0.00001  | 0.00001  | 1.90027 |
| A46 | 1.89411 | 0.00001  | 0.00009  | 0.00003  | 0.00012  | 1.89423 |
| A47 | 1.88204 | 0.00005  | 0.00000  | 0.00013  | 0.00013  | 1.88217 |
| A48 | 1.94504 | 0.00002  | 0.00019  | -0.00005 | 0.00014  | 1.94518 |
| A49 | 1.97091 | -0.00009 | -0.00013 | 0.00003  | -0.00010 | 1.97081 |
| A50 | 1.88277 | -0.00001 | 0.00004  | -0.00008 | -0.00004 | 1.88273 |
| A51 | 1.90154 | 0.00003  | -0.00005 | -0.00003 | -0.00008 | 1.90146 |
| A52 | 1.87940 | 0.00001  | -0.00004 | -0.00001 | -0.00005 | 1.87935 |
| A53 | 2.14841 | -0.00001 | 0.00001  | -0.00008 | -0.00006 | 2.14834 |
| A54 | 1.94965 | -0.00002 | 0.00000  | -0.00004 | -0.00004 | 1.94961 |

|     |          |          |          |          |          |          |
|-----|----------|----------|----------|----------|----------|----------|
| A55 | 2.18482  | 0.00003  | -0.00001 | 0.00012  | 0.00011  | 2.18492  |
| A56 | 1.93472  | 0.00008  | -0.00004 | 0.00030  | 0.00025  | 1.93498  |
| A57 | 2.81166  | -0.00002 | 0.00061  | 0.00024  | 0.00085  | 2.81251  |
| D1  | 0.00323  | -0.00001 | 0.00017  | 0.00006  | 0.00023  | 0.00346  |
| D2  | 3.02516  | -0.00002 | -0.00045 | 0.00011  | -0.00035 | 3.02481  |
| D3  | -3.10199 | -0.00001 | -0.00075 | 0.00019  | -0.00056 | -3.10255 |
| D4  | -0.08006 | -0.00002 | -0.00138 | 0.00023  | -0.00114 | -0.08120 |
| D5  | -0.00249 | 0.00001  | -0.00014 | 0.00000  | -0.00014 | -0.00263 |
| D6  | -3.04282 | 0.00002  | -0.00131 | 0.00019  | -0.00111 | -3.04393 |
| D7  | 3.10645  | 0.00001  | 0.00069  | -0.00012 | 0.00057  | 3.10702  |
| D8  | 0.06612  | 0.00002  | -0.00047 | 0.00007  | -0.00040 | 0.06572  |
| D9  | -0.00286 | 0.00000  | -0.00014 | -0.00011 | -0.00025 | -0.00311 |
| D10 | 3.12297  | 0.00000  | -0.00095 | 0.00007  | -0.00088 | 3.12209  |
| D11 | -3.03494 | 0.00002  | 0.00037  | -0.00017 | 0.00019  | -3.03475 |
| D12 | 0.09090  | 0.00001  | -0.00045 | 0.00000  | -0.00044 | 0.09046  |
| D13 | -1.49425 | 0.00006  | 0.00456  | 0.00164  | 0.00620  | -1.48805 |
| D14 | 1.50997  | 0.00004  | 0.00387  | 0.00171  | 0.00558  | 1.51555  |
| D15 | 0.00135  | 0.00000  | 0.00006  | 0.00011  | 0.00016  | 0.00152  |
| D16 | 3.13447  | -0.00003 | -0.00080 | -0.00006 | -0.00086 | 3.13361  |
| D17 | -3.12506 | 0.00001  | 0.00084  | -0.00006 | 0.00078  | -3.12428 |
| D18 | 0.00806  | -0.00002 | -0.00002 | -0.00023 | -0.00025 | 0.00781  |
| D19 | -0.19606 | 0.00002  | 0.00036  | -0.00016 | 0.00020  | -0.19586 |
| D20 | 2.95508  | 0.00002  | 0.00036  | -0.00013 | 0.00023  | 2.95531  |
| D21 | 2.92755  | 0.00001  | -0.00057 | 0.00004  | -0.00053 | 2.92702  |
| D22 | -0.20450 | 0.00001  | -0.00057 | 0.00008  | -0.00049 | -0.20500 |
| D23 | 0.00068  | 0.00000  | 0.00005  | -0.00007 | -0.00002 | 0.00066  |
| D24 | 3.04023  | -0.00002 | 0.00125  | -0.00027 | 0.00098  | 3.04121  |
| D25 | -3.13241 | 0.00002  | 0.00091  | 0.00010  | 0.00101  | -3.13140 |
| D26 | -0.09286 | 0.00001  | 0.00211  | -0.00010 | 0.00201  | -0.09085 |
| D27 | -2.47486 | -0.00001 | 0.00284  | 0.00074  | 0.00358  | -2.47128 |
| D28 | -0.44829 | 0.00002  | 0.00300  | 0.00075  | 0.00376  | -0.44453 |
| D29 | 1.66961  | -0.00001 | 0.00261  | 0.00069  | 0.00330  | 1.67291  |
| D30 | 0.78591  | 0.00000  | 0.00146  | 0.00096  | 0.00243  | 0.78834  |
| D31 | 2.81248  | 0.00003  | 0.00162  | 0.00098  | 0.00260  | 2.81508  |
| D32 | -1.35280 | 0.00000  | 0.00123  | 0.00091  | 0.00214  | -1.35066 |
| D33 | -3.00099 | 0.00003  | 0.00027  | -0.00013 | 0.00013  | -3.00085 |
| D34 | 1.21899  | 0.00000  | 0.00011  | -0.00009 | 0.00002  | 1.21902  |
| D35 | -0.89913 | 0.00004  | 0.00012  | -0.00006 | 0.00006  | -0.89907 |
| D36 | 1.16808  | 0.00001  | 0.00010  | -0.00024 | -0.00013 | 1.16795  |
| D37 | -0.89513 | -0.00001 | -0.00005 | -0.00019 | -0.00024 | -0.89537 |
| D38 | -3.01325 | 0.00003  | -0.00004 | -0.00016 | -0.00021 | -3.01346 |
| D39 | -0.92584 | -0.00001 | 0.00016  | -0.00036 | -0.00020 | -0.92604 |
| D40 | -2.98904 | -0.00003 | 0.00000  | -0.00031 | -0.00031 | -2.98935 |
| D41 | 1.17602  | 0.00001  | 0.00001  | -0.00029 | -0.00027 | 1.17575  |

|     |          |          |          |          |          |          |
|-----|----------|----------|----------|----------|----------|----------|
| D42 | -3.13998 | 0.00001  | -0.00009 | 0.00011  | 0.00002  | -3.13995 |
| D43 | -0.02329 | 0.00000  | -0.00035 | 0.00008  | -0.00027 | -0.02356 |
| D44 | -0.00903 | 0.00001  | -0.00009 | 0.00007  | -0.00001 | -0.00904 |
| D45 | 3.10765  | 0.00000  | -0.00035 | 0.00004  | -0.00030 | 3.10735  |
| D46 | -2.75288 | -0.00001 | 0.00006  | 0.00010  | 0.00016  | -2.75272 |
| D47 | -0.04771 | -0.00001 | 0.00010  | 0.00008  | 0.00018  | -0.04754 |
| D48 | -0.02004 | 0.00001  | 0.00017  | 0.00006  | 0.00022  | -0.01982 |
| D49 | 2.68512  | 0.00001  | 0.00020  | 0.00004  | 0.00024  | 2.68536  |
| D50 | 0.31425  | 0.00004  | -0.00054 | -0.00022 | -0.00076 | 0.31349  |
| D51 | -2.06471 | 0.00001  | -0.00044 | -0.00020 | -0.00064 | -2.06535 |
| D52 | 2.54397  | -0.00001 | -0.00077 | 0.00036  | -0.00041 | 2.54356  |
| D53 | 0.16233  | -0.00001 | -0.00101 | 0.00043  | -0.00059 | 0.16174  |
| D54 | 2.55265  | 0.00000  | -0.00027 | 0.00049  | 0.00022  | 2.55287  |
| D55 | -1.65396 | 0.00000  | -0.00024 | 0.00045  | 0.00021  | -1.65375 |
| D56 | 0.43854  | 0.00000  | -0.00017 | 0.00047  | 0.00029  | 0.43883  |
| D57 | 1.32595  | 0.00001  | 0.00001  | 0.00046  | 0.00047  | 1.32642  |
| D58 | -2.88067 | 0.00001  | 0.00004  | 0.00042  | 0.00046  | -2.88020 |
| D59 | -0.78817 | 0.00001  | 0.00010  | 0.00044  | 0.00054  | -0.78762 |
| D60 | -1.02165 | 0.00000  | -0.00022 | 0.00049  | 0.00028  | -1.02137 |
| D61 | 1.05492  | 0.00000  | -0.00018 | 0.00045  | 0.00027  | 1.05520  |
| D62 | -3.13576 | 0.00000  | -0.00012 | 0.00047  | 0.00035  | -3.13541 |
| D63 | 1.47748  | -0.00003 | -0.00265 | -0.00065 | -0.00330 | 1.47418  |
| D64 | 2.82410  | -0.00002 | -0.00281 | -0.00097 | -0.00378 | 2.82033  |
| D65 | 2.25573  | -0.00002 | 0.00168  | -0.00021 | 0.00147  | 2.25720  |
| D66 | -0.86033 | -0.00003 | 0.00157  | -0.00034 | 0.00123  | -0.85909 |
| D67 | -1.93678 | 0.00000  | 0.00156  | -0.00004 | 0.00152  | -1.93526 |
| D68 | 1.23034  | -0.00001 | 0.00146  | -0.00017 | 0.00128  | 1.23163  |
| D69 | 0.10086  | 0.00001  | 0.00156  | -0.00016 | 0.00140  | 0.10226  |
| D70 | -3.01519 | 0.00000  | 0.00145  | -0.00029 | 0.00116  | -3.01403 |
| D71 | 2.92176  | -0.00004 | 0.00054  | 0.00029  | 0.00084  | 2.92260  |
| D72 | -0.19366 | -0.00005 | 0.00043  | 0.00016  | 0.00060  | -0.19306 |
| D73 | -1.87829 | -0.00007 | -0.00232 | -0.00041 | -0.00272 | -1.88101 |

| Item                 | Value    | Threshold | Converged? |
|----------------------|----------|-----------|------------|
| Maximum Force        | 0.000116 | 0.000450  | YES        |
| RMS Force            | 0.000027 | 0.000300  | YES        |
| Maximum Displacement | 0.019976 | 0.001800  | NO         |
| RMS Displacement     | 0.005095 | 0.001200  | NO         |

Predicted change in Energy=-4.822146D-07

GradGradGradGradGradGradGradGradGradGradGradGradGradGradGradGradGradGrad

Input orientation:

-----

| Center Number | Atomic Number | Atomic Type | Coordinates (Angstroms) |   |   |
|---------------|---------------|-------------|-------------------------|---|---|
|               |               |             | X                       | Y | Z |

---

|    |    |   |           |           |           |
|----|----|---|-----------|-----------|-----------|
| 1  | 6  | 0 | -0.845615 | 1.643865  | 1.537254  |
| 2  | 6  | 0 | -1.503009 | 0.454608  | 1.574269  |
| 3  | 7  | 0 | -2.365329 | 0.449907  | 0.485713  |
| 4  | 6  | 0 | -2.229668 | 1.606670  | -0.181238 |
| 5  | 7  | 0 | -1.308660 | 2.353757  | 0.439943  |
| 6  | 6  | 0 | -0.774696 | 3.644391  | -0.032095 |
| 7  | 1  | 0 | -0.072344 | 2.030705  | 2.176893  |
| 8  | 1  | 0 | -1.351384 | -0.415856 | 2.224286  |
| 9  | 1  | 0 | -1.612556 | 4.258014  | -0.367552 |
| 10 | 1  | 0 | -0.324746 | 4.126841  | 0.833443  |
| 11 | 35 | 0 | -0.393330 | -2.434405 | 2.917865  |
| 12 | 1  | 0 | -2.766848 | 1.881072  | -1.072806 |
| 13 | 6  | 0 | -3.252274 | -0.602861 | 0.092774  |
| 14 | 6  | 0 | -3.211285 | -1.822863 | 0.612004  |
| 15 | 1  | 0 | -3.948291 | -0.294080 | -0.677334 |
| 16 | 1  | 0 | -3.921032 | -2.557516 | 0.252794  |
| 17 | 1  | 0 | -2.486313 | -2.135652 | 1.366404  |
| 18 | 6  | 0 | 2.554531  | -0.689733 | 1.128315  |
| 19 | 6  | 0 | 3.974269  | -0.375393 | 1.315225  |
| 20 | 8  | 0 | 2.973025  | 0.653513  | 1.532844  |
| 21 | 1  | 0 | 2.171609  | -0.731042 | 0.112530  |
| 22 | 1  | 0 | 1.982107  | -1.229949 | 1.877781  |
| 23 | 1  | 0 | 4.428968  | -0.691688 | 2.251172  |
| 24 | 6  | 0 | 4.917040  | -0.170931 | 0.161645  |
| 25 | 1  | 0 | 5.675277  | 0.578685  | 0.406056  |
| 26 | 1  | 0 | 5.433469  | -1.109146 | -0.062853 |
| 27 | 1  | 0 | 4.377381  | 0.150592  | -0.731702 |
| 28 | 6  | 0 | 0.257990  | 3.474957  | -1.155927 |
| 29 | 1  | 0 | 0.708423  | 4.453975  | -1.347862 |
| 30 | 1  | 0 | -0.210573 | 3.135127  | -2.080197 |
| 31 | 6  | 0 | 1.360790  | 2.483199  | -0.804172 |
| 32 | 8  | 0 | 1.683746  | 1.571612  | -1.528364 |
| 33 | 8  | 0 | 1.884707  | 2.733810  | 0.394665  |
| 34 | 1  | 0 | 2.457694  | 1.967527  | 0.702217  |

---

Distance matrix (angstroms):

|   |   | 1        | 2        | 3        | 4        | 5        |
|---|---|----------|----------|----------|----------|----------|
| 1 | C | 0.000000 |          |          |          |          |
| 2 | C | 1.359363 | 0.000000 |          |          |          |
| 3 | N | 2.200182 | 1.388730 | 0.000000 |          |          |
| 4 | C | 2.206853 | 2.221955 | 1.342136 | 0.000000 |          |
| 5 | N | 1.386524 | 2.220638 | 2.177909 | 1.338753 | 0.000000 |
| 6 | C | 2.543618 | 3.644936 | 3.605963 | 2.508285 | 1.474339 |



|    |    |          |          |          |          |          |
|----|----|----------|----------|----------|----------|----------|
| 7  | H  | 1.075514 | 2.212247 | 3.258341 | 3.224071 | 2.156347 |
| 8  | H  | 2.229409 | 1.096914 | 2.190951 | 3.263210 | 3.294914 |
| 9  | H  | 3.324193 | 4.271834 | 3.974469 | 2.728583 | 2.090597 |
| 10 | H  | 2.632836 | 3.927139 | 4.219566 | 3.318067 | 2.065613 |
| 11 | Br | 4.329311 | 3.373876 | 4.257159 | 5.413582 | 5.468494 |
| 12 | H  | 3.249587 | 3.261763 | 2.153702 | 1.076453 | 2.153637 |
| 13 | C  | 3.595317 | 2.524480 | 1.431570 | 2.450068 | 3.555243 |
| 14 | C  | 4.297753 | 3.005168 | 2.428389 | 3.654381 | 4.592792 |
| 15 | H  | 4.276286 | 3.407295 | 2.100468 | 2.610101 | 3.902179 |
| 16 | H  | 5.362801 | 4.082405 | 3.393974 | 4.515478 | 5.565979 |
| 17 | H  | 4.123812 | 2.778407 | 2.734112 | 4.057837 | 4.732863 |
| 18 | C  | 4.144141 | 4.239342 | 5.090849 | 5.465981 | 4.965977 |
| 19 | C  | 5.230486 | 5.545861 | 6.446682 | 6.682575 | 6.010301 |
| 20 | O  | 3.944974 | 4.480642 | 5.443892 | 5.560089 | 4.734774 |
| 21 | H  | 4.095566 | 4.128591 | 4.702947 | 4.992237 | 4.662130 |
| 22 | H  | 4.046082 | 3.882768 | 4.864151 | 5.479508 | 5.073408 |
| 23 | H  | 5.812548 | 6.079518 | 7.112141 | 7.452281 | 6.743564 |
| 24 | C  | 6.196288 | 6.603320 | 7.315966 | 7.372440 | 6.723901 |
| 25 | H  | 6.703450 | 7.273782 | 8.042032 | 7.993111 | 7.206067 |
| 26 | H  | 7.040334 | 7.296590 | 7.972002 | 8.131011 | 7.596104 |
| 27 | H  | 5.887080 | 6.323679 | 6.858267 | 6.787950 | 6.209489 |
| 28 | C  | 3.438614 | 4.435943 | 4.327553 | 3.260208 | 2.501656 |
| 29 | H  | 4.316903 | 5.424409 | 5.370523 | 4.254473 | 3.416985 |
| 30 | H  | 3.963975 | 4.712823 | 4.293865 | 3.165276 | 2.857874 |
| 31 | C  | 3.324903 | 4.239517 | 4.436445 | 3.748031 | 2.947972 |
| 32 | O  | 3.975035 | 4.585786 | 4.659371 | 4.138935 | 3.666125 |
| 33 | O  | 3.154068 | 4.250040 | 4.825692 | 4.304670 | 3.216222 |
| 34 | H  | 3.422557 | 4.328576 | 5.060791 | 4.783521 | 3.795179 |
|    |    | 6        | 7        | 8        | 9        | 10       |
| 6  | C  | 0.000000 |          |          |          |          |
| 7  | H  | 2.824342 | 0.000000 |          |          |          |
| 8  | H  | 4.680751 | 2.761131 | 0.000000 |          |          |
| 9  | H  | 1.091363 | 3.715825 | 5.350784 | 0.000000 |          |
| 10 | H  | 1.088288 | 2.502469 | 4.860507 | 1.765800 | 0.000000 |
| 11 | Br | 6.767531 | 4.537541 | 2.339543 | 7.554400 | 6.884728 |
| 12 | H  | 2.856754 | 4.224131 | 4.260309 | 2.734890 | 3.826373 |
| 13 | C  | 4.918652 | 4.625059 | 2.862114 | 5.150600 | 5.611515 |
| 14 | C  | 6.020191 | 5.210740 | 2.835199 | 6.363373 | 6.616655 |
| 15 | H  | 5.098979 | 5.345484 | 3.895915 | 5.125737 | 5.912450 |
| 16 | H  | 6.960190 | 6.290177 | 3.882858 | 7.222558 | 7.612560 |
| 17 | H  | 6.188241 | 4.882895 | 2.231977 | 6.681992 | 6.646446 |
| 18 | C  | 5.587033 | 3.924382 | 4.065997 | 6.639460 | 5.619304 |
| 19 | C  | 6.366051 | 4.786111 | 5.402833 | 7.450692 | 6.243697 |
| 20 | O  | 5.043788 | 3.403781 | 4.508009 | 6.134450 | 4.840295 |

|    |    |          |          |          |          |          |
|----|----|----------|----------|----------|----------|----------|
| 21 | H  | 5.276935 | 4.113899 | 4.119506 | 6.280212 | 5.509132 |
| 22 | H  | 5.916653 | 3.865501 | 3.448909 | 6.934037 | 5.925151 |
| 23 | H  | 7.147938 | 5.261060 | 5.786991 | 8.237553 | 6.915633 |
| 24 | C  | 6.854932 | 5.813982 | 6.603606 | 7.907669 | 6.811644 |
| 25 | H  | 7.154906 | 6.187033 | 7.325915 | 8.200515 | 6.983720 |
| 26 | H  | 7.819103 | 6.722284 | 7.193461 | 8.862602 | 7.834280 |
| 27 | H  | 6.264182 | 5.638688 | 6.471281 | 7.272061 | 6.353757 |
| 28 | C  | 1.535626 | 3.647283 | 5.399477 | 2.175697 | 2.173046 |
| 29 | H  | 2.141567 | 4.348072 | 6.381089 | 2.527124 | 2.435682 |
| 30 | H  | 2.184561 | 4.400190 | 5.695569 | 2.481851 | 3.079908 |
| 31 | C  | 2.550445 | 3.338469 | 4.993192 | 3.490185 | 2.867817 |
| 32 | O  | 3.546713 | 4.125960 | 5.219619 | 4.407930 | 4.017632 |
| 33 | O  | 2.843186 | 2.738748 | 4.872390 | 3.890376 | 2.648536 |
| 34 | H  | 3.714759 | 2.929122 | 4.744079 | 4.791417 | 3.524462 |
|    |    | 11       | 12       | 13       | 14       | 15       |
| 11 | Br | 0.000000 |          |          |          |          |
| 12 | H  | 6.338958 | 0.000000 |          |          |          |
| 13 | C  | 4.416928 | 2.786421 | 0.000000 |          |          |
| 14 | C  | 3.692134 | 4.093317 | 1.326531 | 0.000000 |          |
| 15 | H  | 5.490373 | 2.506689 | 1.082983 | 2.131372 | 0.000000 |
| 16 | H  | 4.422945 | 4.773932 | 2.072081 | 1.082815 | 2.447249 |
| 17 | H  | 2.622377 | 4.707709 | 2.135013 | 1.092036 | 3.115387 |
| 18 | C  | 3.864745 | 6.306429 | 5.899058 | 5.898745 | 6.760444 |
| 19 | C  | 5.087623 | 7.499132 | 7.332739 | 7.363551 | 8.169692 |
| 20 | O  | 4.773454 | 6.422028 | 6.512037 | 6.725033 | 7.327170 |
| 21 | H  | 4.165364 | 5.711087 | 5.425433 | 5.515169 | 6.186113 |
| 22 | H  | 2.859228 | 6.398202 | 5.565809 | 5.378202 | 6.524882 |
| 23 | H  | 5.170696 | 8.333528 | 7.979226 | 7.895561 | 8.883282 |
| 24 | C  | 6.396882 | 8.048399 | 8.181015 | 8.306707 | 8.905793 |
| 25 | H  | 7.226056 | 8.669067 | 9.010847 | 9.207651 | 9.723606 |
| 26 | H  | 6.677767 | 8.786729 | 8.701878 | 8.700379 | 9.437125 |
| 27 | H  | 6.539207 | 7.358731 | 7.710972 | 7.955371 | 8.337716 |
| 28 | C  | 7.206980 | 3.420091 | 5.523569 | 6.574827 | 5.668111 |
| 29 | H  | 8.176801 | 4.332781 | 6.582868 | 7.655317 | 6.684207 |
| 30 | H  | 7.485567 | 3.020270 | 5.286427 | 6.390140 | 5.262891 |
| 31 | C  | 6.411968 | 4.179966 | 5.622156 | 6.438291 | 5.992971 |
| 32 | O  | 6.334933 | 4.484538 | 5.632115 | 6.329689 | 5.993738 |
| 33 | O  | 6.185987 | 4.951524 | 6.132951 | 6.839564 | 6.658916 |
| 34 | H  | 5.693369 | 5.518517 | 6.291428 | 6.820009 | 6.932148 |
|    |    | 16       | 17       | 18       | 19       | 20       |
| 16 | H  | 0.000000 |          |          |          |          |
| 17 | H  | 1.864542 | 0.000000 |          |          |          |
| 18 | C  | 6.796181 | 5.249521 | 0.000000 |          |          |
| 19 | C  | 8.259916 | 6.696286 | 1.466084 | 0.000000 |          |

|    |   |           |          |          |          |          |
|----|---|-----------|----------|----------|----------|----------|
| 20 | O | 7.712150  | 6.132822 | 1.463930 | 1.452066 | 0.000000 |
| 21 | H | 6.362072  | 5.024078 | 1.086349 | 2.196030 | 2.139288 |
| 22 | H | 6.264988  | 4.587873 | 1.086832 | 2.239519 | 2.155999 |
| 23 | H | 8.786201  | 7.119617 | 2.185023 | 1.087561 | 2.108396 |
| 24 | C | 9.155087  | 7.753787 | 2.604814 | 1.503786 | 2.517756 |
| 25 | H | 10.096950 | 8.654562 | 3.445228 | 2.151809 | 2.928723 |
| 26 | H | 9.471225  | 8.112918 | 3.143735 | 2.136997 | 3.421550 |
| 27 | H | 8.784461  | 7.532546 | 2.736529 | 2.151528 | 2.711700 |
| 28 | C | 7.472580  | 6.735895 | 5.276031 | 5.894279 | 4.749889 |
| 29 | H | 8.553068  | 7.810043 | 5.999775 | 6.409413 | 5.279242 |
| 30 | H | 7.184466  | 6.696206 | 5.707005 | 6.431605 | 5.417358 |
| 31 | C | 7.377237  | 6.391039 | 3.902182 | 4.415164 | 3.377676 |
| 32 | O | 7.185803  | 6.285927 | 3.595816 | 4.138034 | 3.446178 |
| 33 | O | 7.856517  | 6.615266 | 3.564765 | 3.857570 | 2.609123 |
| 34 | H | 7.833655  | 6.459136 | 2.692948 | 2.857456 | 1.637724 |
|    |   | 21        | 22       | 23       | 24       | 25       |
| 21 | H | 0.000000  |          |          |          |          |
| 22 | H | 1.844161  | 0.000000 |          |          |          |
| 23 | H | 3.109825  | 2.533037 | 0.000000 |          |          |
| 24 | C | 2.802415  | 3.560966 | 2.208060 | 0.000000 |          |
| 25 | H | 3.751964  | 4.367681 | 2.563511 | 1.093885 | 0.000000 |
| 26 | H | 3.288382  | 3.961383 | 2.556952 | 1.094232 | 1.768367 |
| 27 | H | 2.521000  | 3.801662 | 3.099941 | 1.092098 | 1.778283 |
| 28 | C | 4.791801  | 5.857654 | 6.809282 | 6.060961 | 6.338390 |
| 29 | H | 5.581941  | 6.658381 | 7.298860 | 6.432793 | 6.539399 |
| 30 | H | 5.042827  | 6.287076 | 7.411519 | 6.499869 | 6.881866 |
| 31 | C | 3.439349  | 4.622378 | 5.369242 | 4.541380 | 4.868945 |
| 32 | O | 2.869279  | 4.420361 | 5.190729 | 4.043115 | 4.545350 |
| 33 | O | 3.488139  | 4.233262 | 4.653377 | 4.205576 | 4.360403 |
| 34 | H | 2.777023  | 3.439766 | 3.654669 | 3.303575 | 3.517020 |
|    |   | 26        | 27       | 28       | 29       | 30       |
| 26 | H | 0.000000  |          |          |          |          |
| 27 | H | 1.774717  | 0.000000 |          |          |          |
| 28 | C | 6.999600  | 5.310438 | 0.000000 |          |          |
| 29 | H | 7.411182  | 5.688586 | 1.094626 | 0.000000 |          |
| 30 | H | 7.344300  | 5.636950 | 1.090555 | 1.766417 | 0.000000 |
| 31 | C | 5.480986  | 3.813939 | 1.524298 | 2.145959 | 2.126601 |
| 32 | O | 4.836798  | 3.147958 | 2.407117 | 3.048254 | 2.517447 |
| 33 | O | 5.250842  | 3.762332 | 2.366399 | 2.716434 | 3.267445 |
| 34 | H | 4.348159  | 3.007087 | 3.250192 | 3.666769 | 4.027998 |
|    |   | 31        | 32       | 33       | 34       |          |
| 31 | C | 0.000000  |          |          |          |          |
| 32 | O | 1.208199  | 0.000000 |          |          |          |
| 33 | O | 1.332105  | 2.255910 | 0.000000 |          |          |

34 H 1.933475 2.394001 1.005033 0.000000

Stoichiometry C11H17BrN2O3

Framework group C1[X(C11H17BrN2O3)]

Deg. of freedom 96

Full point group C1 NOp 1

Largest Abelian subgroup C1 NOp 1

Largest concise Abelian subgroup C1 NOp 1

Standard orientation:

| Center<br>Number | Atomic<br>Number | Atomic<br>Type | Coordinates (Angstroms) |           |           |
|------------------|------------------|----------------|-------------------------|-----------|-----------|
|                  |                  |                | X                       | Y         | Z         |
| 1                | 6                | 0              | 0.075864                | 1.328005  | 1.238540  |
| 2                | 6                | 0              | -1.154759               | 1.254768  | 0.665765  |
| 3                | 7                | 0              | -1.217430               | 2.287352  | -0.260742 |
| 4                | 6                | 0              | -0.057179               | 2.961654  | -0.239192 |
| 5                | 7                | 0              | 0.749607                | 2.396968  | 0.667719  |
| 6                | 6                | 0              | 2.157109                | 2.755429  | 0.920935  |
| 7                | 1                | 0              | 0.537089                | 0.697298  | 1.977601  |
| 8                | 1                | 0              | -1.939664               | 0.496172  | 0.773819  |
| 9                | 1                | 0              | 2.230605                | 3.843684  | 0.957984  |
| 10               | 1                | 0              | 2.402285                | 2.364129  | 1.906401  |
| 11               | 35               | 0              | -3.069301               | -1.501677 | 0.319971  |
| 12               | 1                | 0              | 0.184840                | 3.809467  | -0.856761 |
| 13               | 6                | 0              | -2.311110               | 2.601173  | -1.129519 |
| 14               | 6                | 0              | -3.351010               | 1.798101  | -1.312191 |
| 15               | 1                | 0              | -2.188313               | 3.557066  | -1.623525 |
| 16               | 1                | 0              | -4.132638               | 2.116906  | -1.990357 |
| 17               | 1                | 0              | -3.453140               | 0.821640  | -0.834032 |
| 18               | 6                | 0              | 0.613951                | -2.461851 | -0.349336 |
| 19               | 6                | 0              | 1.590335                | -3.511672 | -0.042819 |
| 20               | 8                | 0              | 1.630242                | -2.255161 | 0.683874  |
| 21               | 1                | 0              | 0.777467                | -1.858016 | -1.237481 |
| 22               | 1                | 0              | -0.406845               | -2.500458 | 0.021727  |
| 23               | 1                | 0              | 1.252423                | -4.327400 | 0.592156  |
| 24               | 6                | 0              | 2.760559                | -3.815226 | -0.937136 |
| 25               | 1                | 0              | 3.628260                | -4.130245 | -0.350244 |
| 26               | 1                | 0              | 2.501928                | -4.632009 | -1.617812 |
| 27               | 1                | 0              | 3.034710                | -2.941330 | -1.531968 |
| 28               | 6                | 0              | 3.107217                | 2.183231  | -0.141153 |
| 29               | 1                | 0              | 4.133307                | 2.366960  | 0.192895  |
| 30               | 1                | 0              | 2.974680                | 2.678986  | -1.103427 |
| 31               | 6                | 0              | 2.918986                | 0.686749  | -0.361592 |
| 32               | 8                | 0              | 2.770534                | 0.194578  | -1.454970 |

|    |   |   |          |           |          |
|----|---|---|----------|-----------|----------|
| 33 | 8 | 0 | 2.909044 | 0.016622  | 0.789640 |
| 34 | 1 | 0 | 2.584973 | -0.924869 | 0.653025 |

-----

Rotational constants (GHZ):      0.3288778      0.2548144      0.1595775

Standard basis: 6-311++G(d,p) (5D, 7F)

There are 538 symmetry adapted cartesian basis functions of A symmetry.

There are 519 symmetry adapted basis functions of A symmetry.

519 basis functions, 823 primitive gaussians, 538 cartesian basis functions

78 alpha electrons      78 beta electrons

nuclear repulsion energy      1572.9244102830 Hartrees.

NAtoms= 34 NActive= 34 NUniq= 34 SFac= 1.00D+00 NATFMM= 60 NAOKFM=F

Big=F

Integral buffers will be 131072 words long.

Raffenetti 2 integral format.

Two-electron integral symmetry is turned on.

One-electron integrals computed using PRISM.

NBasis= 519 RedAO= T EigKep= 3.53D-06 NBF= 519

NBsUse= 519 1.00D-06 EigRej= -1.00D+00 NBFU= 519

Initial guess from the checkpoint file: "./coohpo.chk"

B after Tr= 0.000000 0.000000 0.000000

Rot= 1.000000 -0.000006 0.000172 0.000666 Ang= -0.08 deg.

Requested convergence on RMS density matrix=1.00D-08 within 128 cycles.

Requested convergence on MAX density matrix=1.00D-06.

Requested convergence on energy=1.00D-06.

No special actions if energy rises.

SCF Done: E(RB3LYP) = -3338.90388232 A.U. after 11 cycles

NFock= 11 Conv=0.13D-08 -V/T= 2.0019

Calling FoFJK, ICntrl= 2127 FMM=F ISym2X=0 I1Cent= 0 IOpClX= 0 NMat=1 NMatS=1

NMatT=0.

\*\*\*\*\* Axes restored to original set \*\*\*\*\*

-----

| Center<br>Number | Atomic<br>Number | Forces (Hartrees/Bohr) |              |              |
|------------------|------------------|------------------------|--------------|--------------|
|                  |                  | X                      | Y            | Z            |
| 1                | 6                | 0.000004132            | -0.000013508 | -0.000038064 |
| 2                | 6                | 0.000038472            | 0.000048442  | 0.000020322  |
| 3                | 7                | -0.000039030           | -0.000049164 | -0.000001827 |
| 4                | 6                | -0.000006512           | 0.000054332  | 0.000015604  |
| 5                | 7                | -0.000000389           | 0.000002315  | -0.000014460 |
| 6                | 6                | -0.000012465           | -0.000004168 | 0.000011515  |
| 7                | 1                | -0.000004333           | 0.000000296  | 0.000017749  |
| 8                | 1                | -0.000040659           | -0.000030764 | -0.000058468 |
| 9                | 1                | 0.000008571            | 0.000005489  | -0.000010685 |
| 10               | 1                | 0.000004757            | -0.000010096 | -0.000006115 |

|    |    |              |              |              |
|----|----|--------------|--------------|--------------|
| 11 | 35 | 0.000022558  | -0.000000948 | 0.000019317  |
| 12 | 1  | 0.000017726  | -0.000015947 | -0.000017846 |
| 13 | 6  | 0.000037101  | 0.000071437  | 0.000018339  |
| 14 | 6  | -0.000032873 | -0.000061812 | 0.000019385  |
| 15 | 1  | 0.000001621  | -0.000010950 | -0.000010684 |
| 16 | 1  | 0.000004946  | 0.000017237  | -0.000009969 |
| 17 | 1  | 0.000002636  | 0.000018655  | -0.000001609 |
| 18 | 6  | -0.000017805 | 0.000021993  | -0.000028290 |
| 19 | 6  | -0.000058045 | 0.000023230  | 0.000072977  |
| 20 | 8  | 0.000089974  | -0.000022135 | -0.000023087 |
| 21 | 1  | 0.000003431  | -0.000004933 | -0.000001659 |
| 22 | 1  | -0.000002529 | -0.000001131 | 0.000013406  |
| 23 | 1  | 0.000008554  | 0.000003480  | -0.000000258 |
| 24 | 6  | 0.000009854  | -0.000001354 | -0.000028412 |
| 25 | 1  | 0.000005828  | -0.000010779 | 0.000009096  |
| 26 | 1  | -0.000005660 | -0.000006510 | 0.000006705  |
| 27 | 1  | 0.000000494  | 0.000004457  | 0.000016704  |
| 28 | 6  | -0.000007312 | 0.000036430  | 0.000007785  |
| 29 | 1  | 0.000007061  | -0.000010964 | -0.000014067 |
| 30 | 1  | 0.000010160  | -0.000001699 | 0.000002145  |
| 31 | 6  | -0.000020157 | 0.000017882  | 0.000082125  |
| 32 | 8  | 0.000018747  | -0.000027516 | -0.000034635 |
| 33 | 8  | 0.000024521  | -0.000034928 | -0.000053621 |
| 34 | 1  | -0.000073374 | -0.000006366 | 0.000020582  |

-----  
Cartesian Forces: Max 0.000089974 RMS 0.000027877

GradGradGradGradGradGradGradGradGradGradGradGradGradGradGradGradGradGradGradGrad

Berny optimization.

Using GEDIIS/GDIIS optimizer.

FormGI is forming the generalized inverse of G from B-inverse, IUseBI=4.

Internal Forces: Max 0.000073461 RMS 0.000016572

Search for a local minimum.

Step number 37 out of a maximum of 175

All quantities printed in internal units (Hartrees-Bohrs-Radians)

Mixed Optimization -- En-DIIS/RFO-DIIS

Swapping is turned off.

Update second derivatives using D2CorX and points

|    |    |    |    |    |    |    |  |  |  |
|----|----|----|----|----|----|----|--|--|--|
| 21 | 22 | 23 | 24 | 25 |    |    |  |  |  |
|    |    | 26 | 27 | 28 | 29 | 30 |  |  |  |
|    |    | 31 | 32 | 33 | 34 | 35 |  |  |  |
|    |    | 36 | 37 |    |    |    |  |  |  |

DE= -1.34D-06 DEPred=-4.82D-07 R= 2.78D+00

TightC=F SS= 1.41D+00 RLast= 1.39D-02 DXNew= 6.5746D-01 4.1661D-02

Trust test= 2.78D+00 RLast= 1.39D-02 DXMaxT set to 3.91D-01

ITU= 1 1 1 1 1 1 -1 1 1 1 1 1 -1 0 1 1 1 1 1 1

ITU= 1 1 1 1 0 0 -1 1 1 1 0 1 0 -1 0 1 0

|                 |         |         |         |         |         |
|-----------------|---------|---------|---------|---------|---------|
| Eigenvalues --- | 0.00167 | 0.00263 | 0.00395 | 0.00450 | 0.00524 |
| Eigenvalues --- | 0.00653 | 0.00869 | 0.00926 | 0.01183 | 0.01329 |
| Eigenvalues --- | 0.01532 | 0.01929 | 0.02166 | 0.02244 | 0.02284 |
| Eigenvalues --- | 0.02396 | 0.02467 | 0.02850 | 0.03033 | 0.03143 |
| Eigenvalues --- | 0.03460 | 0.03633 | 0.03971 | 0.04263 | 0.04628 |
| Eigenvalues --- | 0.04869 | 0.05037 | 0.05334 | 0.05536 | 0.05733 |
| Eigenvalues --- | 0.05837 | 0.05963 | 0.06182 | 0.07469 | 0.09384 |
| Eigenvalues --- | 0.09608 | 0.11795 | 0.12510 | 0.12869 | 0.13019 |
| Eigenvalues --- | 0.13556 | 0.14897 | 0.15629 | 0.15909 | 0.15959 |
| Eigenvalues --- | 0.16004 | 0.16021 | 0.16044 | 0.16069 | 0.16323 |
| Eigenvalues --- | 0.17182 | 0.17557 | 0.19742 | 0.21351 | 0.22082 |
| Eigenvalues --- | 0.23334 | 0.23826 | 0.24112 | 0.25276 | 0.26202 |
| Eigenvalues --- | 0.28382 | 0.29119 | 0.29979 | 0.31348 | 0.31979 |
| Eigenvalues --- | 0.33172 | 0.34442 | 0.34511 | 0.34617 | 0.34755 |
| Eigenvalues --- | 0.34871 | 0.34908 | 0.34967 | 0.35082 | 0.35313 |
| Eigenvalues --- | 0.35449 | 0.35645 | 0.35816 | 0.35925 | 0.36624 |
| Eigenvalues --- | 0.37040 | 0.37261 | 0.37827 | 0.38281 | 0.39384 |
| Eigenvalues --- | 0.40411 | 0.45329 | 0.49230 | 0.50339 | 0.50865 |
| Eigenvalues --- | 0.54466 | 0.55909 | 0.56691 | 0.61589 | 0.91066 |
| Eigenvalues --- | 0.96871 |         |         |         |         |

En-DIIS/RFO-DIIS IScMMF= 0 using points: 37 36 35 34 33

RFO step: Lambda=-9.27129495D-08.

DidBck=F Rises=F RFO-DIIS coefs: 1.68603 -0.63402 -0.86749 1.06527 -

0.24980

Iteration 1 RMS(Cart)= 0.00153362 RMS(Int)= 0.00000108

Iteration 2 RMS(Cart)= 0.00000160 RMS(Int)= 0.00000018

Iteration 3 RMS(Cart)= 0.00000000 RMS(Int)= 0.00000018

| Variable | Old X   | -DE/DX   | Delta X<br>(Linear) | Delta X<br>(Quad) | Delta X<br>(Total) | New X   |
|----------|---------|----------|---------------------|-------------------|--------------------|---------|
| R1       | 2.56882 | -0.00002 | -0.00002            | -0.00002          | -0.00004           | 2.56878 |
| R2       | 2.62015 | -0.00001 | -0.00002            | 0.00000           | -0.00002           | 2.62013 |
| R3       | 2.03243 | 0.00001  | 0.00001             | 0.00000           | 0.00001            | 2.03244 |
| R4       | 2.62432 | -0.00001 | -0.00001            | 0.00001           | 0.00000            | 2.62432 |
| R5       | 2.07287 | 0.00000  | 0.00007             | -0.00001          | 0.00006            | 2.07293 |
| R6       | 2.53627 | 0.00003  | 0.00007             | 0.00001           | 0.00008            | 2.53635 |
| R7       | 2.70528 | -0.00004 | -0.00025            | 0.00003           | -0.00022           | 2.70505 |
| R8       | 2.52988 | -0.00001 | -0.00002            | 0.00001           | -0.00001           | 2.52987 |
| R9       | 2.03420 | 0.00000  | -0.00001            | 0.00001           | 0.00000            | 2.03420 |
| R10      | 2.78610 | -0.00002 | -0.00007            | 0.00003           | -0.00003           | 2.78606 |
| R11      | 2.06238 | 0.00000  | -0.00001            | 0.00000           | -0.00001           | 2.06237 |
| R12      | 2.05657 | -0.00001 | -0.00003            | 0.00000           | -0.00002           | 2.05654 |
| R13      | 2.90191 | -0.00002 | -0.00006            | 0.00004           | -0.00002           | 2.90189 |

|     |         |          |          |          |          |         |
|-----|---------|----------|----------|----------|----------|---------|
| R14 | 4.42110 | 0.00002  | 0.00000  | -0.00034 | -0.00034 | 4.42076 |
| R15 | 2.50678 | 0.00003  | 0.00007  | 0.00001  | 0.00008  | 2.50686 |
| R16 | 2.04654 | 0.00000  | 0.00000  | 0.00000  | 0.00001  | 2.04655 |
| R17 | 2.04622 | -0.00001 | -0.00004 | 0.00000  | -0.00004 | 2.04619 |
| R18 | 2.06365 | 0.00000  | -0.00003 | 0.00000  | -0.00003 | 2.06362 |
| R19 | 2.77050 | 0.00000  | 0.00003  | 0.00000  | 0.00003  | 2.77052 |
| R20 | 2.76643 | -0.00001 | -0.00005 | 0.00001  | -0.00004 | 2.76639 |
| R21 | 2.05290 | 0.00000  | 0.00002  | 0.00000  | 0.00002  | 2.05292 |
| R22 | 2.05381 | 0.00001  | -0.00001 | 0.00002  | 0.00001  | 2.05383 |
| R23 | 2.74401 | -0.00004 | -0.00025 | -0.00002 | -0.00027 | 2.74374 |
| R24 | 2.05519 | 0.00000  | -0.00001 | 0.00000  | -0.00001 | 2.05518 |
| R25 | 2.84174 | 0.00002  | 0.00011  | 0.00000  | 0.00011  | 2.84186 |
| R26 | 3.09485 | 0.00000  | 0.00003  | -0.00008 | -0.00005 | 3.09480 |
| R27 | 2.06714 | 0.00000  | 0.00000  | 0.00000  | 0.00000  | 2.06714 |
| R28 | 2.06780 | 0.00000  | 0.00000  | 0.00000  | 0.00000  | 2.06780 |
| R29 | 2.06377 | -0.00001 | -0.00002 | 0.00000  | -0.00002 | 2.06375 |
| R30 | 2.06854 | -0.00001 | 0.00002  | -0.00002 | -0.00001 | 2.06854 |
| R31 | 2.06085 | -0.00001 | 0.00001  | -0.00001 | -0.00001 | 2.06085 |
| R32 | 2.88050 | 0.00001  | 0.00012  | -0.00004 | 0.00009  | 2.88059 |
| R33 | 2.28317 | 0.00004  | 0.00002  | 0.00002  | 0.00005  | 2.28321 |
| R34 | 2.51731 | -0.00004 | -0.00016 | 0.00001  | -0.00015 | 2.51717 |
| R35 | 1.89924 | -0.00002 | -0.00005 | -0.00005 | -0.00009 | 1.89914 |
| A1  | 1.88385 | 0.00001  | 0.00001  | 0.00002  | 0.00003  | 1.88389 |
| A2  | 2.27336 | -0.00002 | -0.00007 | -0.00002 | -0.00009 | 2.27327 |
| A3  | 2.12543 | 0.00001  | 0.00008  | 0.00000  | 0.00008  | 2.12551 |
| A4  | 1.85658 | 0.00001  | 0.00001  | -0.00001 | 0.00000  | 1.85658 |
| A5  | 2.26991 | -0.00001 | 0.00011  | 0.00001  | 0.00013  | 2.27004 |
| A6  | 2.15034 | 0.00000  | -0.00017 | 0.00000  | -0.00017 | 2.15017 |
| A7  | 1.90058 | -0.00001 | -0.00003 | 0.00001  | -0.00002 | 1.90056 |
| A8  | 2.21724 | -0.00001 | -0.00004 | -0.00004 | -0.00008 | 2.21716 |
| A9  | 2.16524 | 0.00002  | 0.00006  | 0.00004  | 0.00010  | 2.16534 |
| A10 | 1.89645 | 0.00000  | 0.00000  | -0.00001 | -0.00002 | 1.89644 |
| A11 | 2.19056 | 0.00000  | -0.00004 | 0.00000  | -0.00004 | 2.19052 |
| A12 | 2.19612 | 0.00001  | 0.00004  | 0.00001  | 0.00005  | 2.19617 |
| A13 | 1.88730 | 0.00000  | 0.00001  | -0.00001 | 0.00000  | 1.88730 |
| A14 | 2.19030 | -0.00002 | 0.00002  | -0.00004 | -0.00003 | 2.19028 |
| A15 | 2.20076 | 0.00002  | -0.00002 | 0.00005  | 0.00004  | 2.20080 |
| A16 | 1.88868 | 0.00003  | 0.00013  | 0.00001  | 0.00014  | 1.88882 |
| A17 | 1.85790 | 0.00002  | 0.00000  | -0.00004 | -0.00004 | 1.85786 |
| A18 | 1.96198 | -0.00007 | -0.00018 | 0.00002  | -0.00017 | 1.96181 |
| A19 | 1.88875 | -0.00001 | 0.00010  | -0.00001 | 0.00009  | 1.88884 |
| A20 | 1.93196 | 0.00001  | 0.00008  | 0.00000  | 0.00007  | 1.93204 |
| A21 | 1.93149 | 0.00001  | -0.00011 | 0.00002  | -0.00009 | 1.93140 |
| A22 | 2.73119 | -0.00001 | -0.00017 | 0.00079  | 0.00062  | 2.73182 |



|     |          |          |          |          |          |          |
|-----|----------|----------|----------|----------|----------|----------|
| A23 | 2.15287  | 0.00001  | 0.00008  | 0.00001  | 0.00009  | 2.15296  |
| A24 | 1.96458  | 0.00000  | 0.00014  | -0.00003 | 0.00011  | 1.96469  |
| A25 | 2.16569  | -0.00002 | -0.00023 | 0.00003  | -0.00020 | 2.16549  |
| A26 | 2.06449  | -0.00001 | -0.00005 | 0.00000  | -0.00005 | 2.06443  |
| A27 | 2.15837  | -0.00001 | -0.00014 | 0.00004  | -0.00010 | 2.15827  |
| A28 | 2.06007  | 0.00002  | 0.00018  | -0.00004 | 0.00014  | 2.06021  |
| A29 | 2.05862  | 0.00002  | -0.00014 | -0.00007 | -0.00021 | 2.05841  |
| A30 | 2.12786  | -0.00002 | 0.00010  | 0.00002  | 0.00012  | 2.12798  |
| A31 | 1.97582  | 0.00001  | -0.00006 | 0.00007  | 0.00001  | 1.97583  |
| A32 | 1.99994  | 0.00000  | 0.00012  | -0.00002 | 0.00009  | 2.00003  |
| A33 | 2.02667  | 0.00000  | 0.00004  | 0.00002  | 0.00006  | 2.02673  |
| A34 | 2.04006  | 0.00002  | 0.00024  | -0.00002 | 0.00023  | 2.04029  |
| A35 | 2.13941  | -0.00002 | -0.00031 | 0.00000  | -0.00032 | 2.13909  |
| A36 | 1.94485  | 0.00001  | 0.00022  | -0.00004 | 0.00019  | 1.94503  |
| A37 | 2.03859  | 0.00000  | -0.00007 | 0.00003  | -0.00004 | 2.03854  |
| A38 | 2.02373  | -0.00001 | -0.00002 | 0.00002  | 0.00000  | 2.02373  |
| A39 | 2.10145  | -0.00002 | -0.00043 | -0.00019 | -0.00063 | 2.10082  |
| A40 | 2.35956  | 0.00003  | 0.00047  | 0.00072  | 0.00119  | 2.36075  |
| A41 | 1.93514  | 0.00000  | 0.00003  | 0.00003  | 0.00006  | 1.93520  |
| A42 | 1.91420  | -0.00001 | 0.00000  | 0.00001  | 0.00001  | 1.91421  |
| A43 | 1.93664  | -0.00001 | -0.00011 | -0.00004 | -0.00015 | 1.93649  |
| A44 | 1.88207  | 0.00000  | -0.00001 | 0.00001  | 0.00000  | 1.88207  |
| A45 | 1.90027  | 0.00000  | 0.00002  | 0.00000  | 0.00002  | 1.90028  |
| A46 | 1.89423  | 0.00001  | 0.00007  | 0.00000  | 0.00007  | 1.89430  |
| A47 | 1.88217  | 0.00003  | 0.00020  | 0.00005  | 0.00025  | 1.88242  |
| A48 | 1.94518  | 0.00001  | 0.00005  | 0.00000  | 0.00005  | 1.94523  |
| A49 | 1.97081  | -0.00005 | 0.00001  | -0.00003 | -0.00002 | 1.97080  |
| A50 | 1.88273  | -0.00001 | -0.00007 | -0.00003 | -0.00009 | 1.88263  |
| A51 | 1.90146  | 0.00001  | -0.00012 | 0.00003  | -0.00009 | 1.90137  |
| A52 | 1.87935  | 0.00001  | -0.00009 | -0.00002 | -0.00011 | 1.87924  |
| A53 | 2.14834  | 0.00000  | -0.00011 | 0.00007  | -0.00004 | 2.14831  |
| A54 | 1.94961  | -0.00002 | 0.00002  | -0.00006 | -0.00004 | 1.94957  |
| A55 | 2.18492  | 0.00001  | 0.00010  | -0.00002 | 0.00008  | 2.18500  |
| A56 | 1.93498  | 0.00007  | 0.00042  | -0.00008 | 0.00034  | 1.93532  |
| A57 | 2.81251  | 0.00001  | 0.00038  | -0.00009 | 0.00030  | 2.81281  |
| D1  | 0.00346  | -0.00001 | 0.00015  | -0.00007 | 0.00008  | 0.00354  |
| D2  | 3.02481  | -0.00001 | -0.00033 | -0.00002 | -0.00036 | 3.02445  |
| D3  | -3.10255 | 0.00000  | -0.00047 | 0.00000  | -0.00047 | -3.10302 |
| D4  | -0.08120 | -0.00001 | -0.00095 | 0.00004  | -0.00091 | -0.08211 |
| D5  | -0.00263 | 0.00001  | -0.00016 | 0.00008  | -0.00007 | -0.00270 |
| D6  | -3.04393 | 0.00001  | -0.00024 | 0.00007  | -0.00017 | -3.04410 |
| D7  | 3.10702  | 0.00000  | 0.00040  | 0.00002  | 0.00042  | 3.10744  |
| D8  | 0.06572  | 0.00001  | 0.00032  | 0.00001  | 0.00032  | 0.06604  |
| D9  | -0.00311 | 0.00001  | -0.00009 | 0.00003  | -0.00006 | -0.00317 |

|     |          |          |          |          |          |          |
|-----|----------|----------|----------|----------|----------|----------|
| D10 | 3.12209  | 0.00000  | -0.00037 | 0.00007  | -0.00031 | 3.12179  |
| D11 | -3.03475 | 0.00001  | 0.00033  | -0.00001 | 0.00032  | -3.03443 |
| D12 | 0.09046  | 0.00001  | 0.00004  | 0.00002  | 0.00007  | 0.09052  |
| D13 | -1.48805 | 0.00003  | 0.00137  | 0.00036  | 0.00173  | -1.48631 |
| D14 | 1.51555  | 0.00002  | 0.00084  | 0.00041  | 0.00125  | 1.51680  |
| D15 | 0.00152  | 0.00000  | -0.00001 | 0.00002  | 0.00001  | 0.00153  |
| D16 | 3.13361  | -0.00002 | -0.00085 | -0.00012 | -0.00097 | 3.13264  |
| D17 | -3.12428 | 0.00000  | 0.00027  | -0.00001 | 0.00025  | -3.12403 |
| D18 | 0.00781  | -0.00001 | -0.00058 | -0.00015 | -0.00073 | 0.00708  |
| D19 | -0.19586 | 0.00001  | 0.00069  | 0.00059  | 0.00128  | -0.19457 |
| D20 | 2.95531  | 0.00001  | 0.00073  | 0.00067  | 0.00140  | 2.95671  |
| D21 | 2.92702  | 0.00001  | 0.00037  | 0.00063  | 0.00100  | 2.92802  |
| D22 | -0.20500 | 0.00001  | 0.00040  | 0.00071  | 0.00111  | -0.20388 |
| D23 | 0.00066  | 0.00000  | 0.00010  | -0.00006 | 0.00004  | 0.00070  |
| D24 | 3.04121  | -0.00001 | 0.00018  | -0.00005 | 0.00013  | 3.04134  |
| D25 | -3.13140 | 0.00001  | 0.00095  | 0.00008  | 0.00103  | -3.13037 |
| D26 | -0.09085 | 0.00000  | 0.00103  | 0.00009  | 0.00112  | -0.08973 |
| D27 | -2.47128 | -0.00002 | 0.00054  | 0.00047  | 0.00101  | -2.47026 |
| D28 | -0.44453 | 0.00000  | 0.00072  | 0.00045  | 0.00117  | -0.44337 |
| D29 | 1.67291  | -0.00001 | 0.00047  | 0.00046  | 0.00093  | 1.67385  |
| D30 | 0.78834  | 0.00000  | 0.00044  | 0.00046  | 0.00091  | 0.78924  |
| D31 | 2.81508  | 0.00001  | 0.00063  | 0.00043  | 0.00106  | 2.81614  |
| D32 | -1.35066 | 0.00000  | 0.00038  | 0.00045  | 0.00082  | -1.34983 |
| D33 | -3.00085 | 0.00001  | 0.00008  | 0.00010  | 0.00018  | -3.00067 |
| D34 | 1.21902  | 0.00000  | 0.00000  | 0.00010  | 0.00011  | 1.21913  |
| D35 | -0.89907 | 0.00002  | 0.00008  | 0.00015  | 0.00023  | -0.89884 |
| D36 | 1.16795  | 0.00001  | -0.00002 | 0.00008  | 0.00006  | 1.16801  |
| D37 | -0.89537 | -0.00001 | -0.00009 | 0.00008  | -0.00001 | -0.89538 |
| D38 | -3.01346 | 0.00001  | -0.00001 | 0.00013  | 0.00012  | -3.01334 |
| D39 | -0.92604 | -0.00001 | -0.00012 | 0.00008  | -0.00004 | -0.92608 |
| D40 | -2.98935 | -0.00002 | -0.00019 | 0.00008  | -0.00011 | -2.98946 |
| D41 | 1.17575  | 0.00000  | -0.00012 | 0.00013  | 0.00001  | 1.17576  |
| D42 | -3.13995 | 0.00001  | 0.00011  | 0.00010  | 0.00021  | -3.13975 |
| D43 | -0.02356 | 0.00000  | -0.00010 | -0.00006 | -0.00016 | -0.02373 |
| D44 | -0.00904 | 0.00001  | 0.00007  | 0.00001  | 0.00008  | -0.00896 |
| D45 | 3.10735  | 0.00000  | -0.00014 | -0.00015 | -0.00029 | 3.10706  |
| D46 | -2.75272 | 0.00000  | 0.00012  | 0.00009  | 0.00021  | -2.75251 |
| D47 | -0.04754 | -0.00001 | -0.00010 | 0.00007  | -0.00003 | -0.04757 |
| D48 | -0.01982 | 0.00000  | 0.00012  | 0.00002  | 0.00013  | -0.01969 |
| D49 | 2.68536  | -0.00001 | -0.00011 | 0.00000  | -0.00010 | 2.68526  |
| D50 | 0.31349  | 0.00003  | 0.00086  | 0.00103  | 0.00189  | 0.31539  |
| D51 | -2.06535 | 0.00002  | 0.00074  | 0.00095  | 0.00168  | -2.06367 |
| D52 | 2.54356  | 0.00001  | 0.00053  | 0.00052  | 0.00105  | 2.54461  |
| D53 | 0.16174  | 0.00001  | 0.00038  | 0.00050  | 0.00088  | 0.16262  |

|     |          |          |          |          |          |          |
|-----|----------|----------|----------|----------|----------|----------|
| D54 | 2.55287  | 0.00000  | 0.00100  | 0.00050  | 0.00150  | 2.55437  |
| D55 | -1.65375 | 0.00000  | 0.00100  | 0.00054  | 0.00154  | -1.65221 |
| D56 | 0.43883  | 0.00000  | 0.00102  | 0.00051  | 0.00154  | 0.44037  |
| D57 | 1.32642  | 0.00001  | 0.00110  | 0.00048  | 0.00158  | 1.32799  |
| D58 | -2.88020 | 0.00001  | 0.00111  | 0.00051  | 0.00162  | -2.87859 |
| D59 | -0.78762 | 0.00001  | 0.00113  | 0.00049  | 0.00162  | -0.78600 |
| D60 | -1.02137 | 0.00000  | 0.00084  | 0.00048  | 0.00132  | -1.02005 |
| D61 | 1.05520  | 0.00000  | 0.00084  | 0.00052  | 0.00136  | 1.05655  |
| D62 | -3.13541 | 0.00000  | 0.00086  | 0.00049  | 0.00136  | -3.13405 |
| D63 | 1.47418  | -0.00001 | -0.00116 | 0.00078  | -0.00038 | 1.47380  |
| D64 | 2.82033  | 0.00000  | -0.00127 | 0.00088  | -0.00039 | 2.81994  |
| D65 | 2.25720  | -0.00001 | 0.00076  | -0.00015 | 0.00061  | 2.25781  |
| D66 | -0.85909 | -0.00002 | 0.00035  | 0.00001  | 0.00036  | -0.85873 |
| D67 | -1.93526 | 0.00001  | 0.00094  | -0.00009 | 0.00086  | -1.93441 |
| D68 | 1.23163  | 0.00000  | 0.00053  | 0.00007  | 0.00061  | 1.23223  |
| D69 | 0.10226  | 0.00001  | 0.00076  | -0.00011 | 0.00064  | 0.10290  |
| D70 | -3.01403 | 0.00000  | 0.00034  | 0.00005  | 0.00039  | -3.01364 |
| D71 | 2.92260  | -0.00001 | 0.00065  | -0.00013 | 0.00052  | 2.92312  |
| D72 | -0.19306 | -0.00002 | 0.00023  | 0.00003  | 0.00027  | -0.19280 |
| D73 | -1.88101 | -0.00003 | -0.00136 | -0.00092 | -0.00229 | -1.88330 |

| Item                 | Value    | Threshold | Converged? |
|----------------------|----------|-----------|------------|
| Maximum Force        | 0.000073 | 0.000450  | YES        |
| RMS Force            | 0.000017 | 0.000300  | YES        |
| Maximum Displacement | 0.006396 | 0.001800  | NO         |
| RMS Displacement     | 0.001533 | 0.001200  | NO         |

Predicted change in Energy=-1.249335D-07

GradGradGradGradGradGradGradGradGradGradGradGradGradGradGradGradGradGradGrad

Input orientation:

| Center Number | Atomic Number | Atomic Type | Coordinates (Angstroms) |           |           |
|---------------|---------------|-------------|-------------------------|-----------|-----------|
|               |               |             | X                       | Y         | Z         |
| 1             | 6             | 0           | -0.846218               | 1.644364  | 1.537690  |
| 2             | 6             | 0           | -1.503144               | 0.454863  | 1.574381  |
| 3             | 7             | 0           | -2.364722               | 0.449698  | 0.485238  |
| 4             | 6             | 0           | -2.229108               | 1.606520  | -0.181706 |
| 5             | 7             | 0           | -1.308847               | 2.354025  | 0.440070  |
| 6             | 6             | 0           | -0.775197               | 3.644927  | -0.031534 |
| 7             | 1             | 0           | -0.073807               | 2.031658  | 2.178105  |
| 8             | 1             | 0           | -1.351469               | -0.415700 | 2.224305  |
| 9             | 1             | 0           | -1.613121               | 4.258643  | -0.366644 |
| 10            | 1             | 0           | -0.325067               | 4.127002  | 0.834103  |
| 11            | 35            | 0           | -0.392851               | -2.433117 | 2.919791  |

|    |   |   |           |           |           |
|----|---|---|-----------|-----------|-----------|
| 12 | 1 | 0 | -2.765202 | 1.880248  | -1.074133 |
| 13 | 6 | 0 | -3.250610 | -0.603588 | 0.091732  |
| 14 | 6 | 0 | -3.210120 | -1.823249 | 0.611911  |
| 15 | 1 | 0 | -3.945480 | -0.295778 | -0.679804 |
| 16 | 1 | 0 | -3.918964 | -2.558357 | 0.251907  |
| 17 | 1 | 0 | -2.486154 | -2.135244 | 1.367583  |
| 18 | 6 | 0 | 2.554199  | -0.688916 | 1.129208  |
| 19 | 6 | 0 | 3.974276  | -0.375546 | 1.315284  |
| 20 | 8 | 0 | 2.974061  | 0.654219  | 1.532613  |
| 21 | 1 | 0 | 2.171025  | -0.730652 | 0.113526  |
| 22 | 1 | 0 | 1.981574  | -1.228164 | 1.879227  |
| 23 | 1 | 0 | 4.429382  | -0.691562 | 2.251120  |
| 24 | 6 | 0 | 4.916409  | -0.172816 | 0.160796  |
| 25 | 1 | 0 | 5.676353  | 0.575301  | 0.404502  |
| 26 | 1 | 0 | 5.430782  | -1.112020 | -0.064288 |
| 27 | 1 | 0 | 4.376414  | 0.149856  | -0.731920 |
| 28 | 6 | 0 | 0.257383  | 3.475869  | -1.155505 |
| 29 | 1 | 0 | 0.707996  | 4.454827  | -1.347309 |
| 30 | 1 | 0 | -0.211208 | 3.136332  | -2.079865 |
| 31 | 6 | 0 | 1.360153  | 2.483850  | -0.804200 |
| 32 | 8 | 0 | 1.683381  | 1.572882  | -1.529089 |
| 33 | 8 | 0 | 1.883803  | 2.733698  | 0.394828  |
| 34 | 1 | 0 | 2.457172  | 1.967640  | 0.702068  |

-----  
Distance matrix (angstroms):

|    |    | 1        | 2        | 3        | 4        | 5        |
|----|----|----------|----------|----------|----------|----------|
| 1  | C  | 0.000000 |          |          |          |          |
| 2  | C  | 1.359342 | 0.000000 |          |          |          |
| 3  | N  | 2.200166 | 1.388731 | 0.000000 |          |          |
| 4  | C  | 2.206839 | 2.221976 | 1.342178 | 0.000000 |          |
| 5  | N  | 1.386511 | 2.220637 | 2.177928 | 1.338749 | 0.000000 |
| 6  | C  | 2.543572 | 3.644911 | 3.605985 | 2.508288 | 1.474320 |
| 7  | H  | 1.075522 | 2.212186 | 3.258325 | 3.224092 | 2.156388 |
| 8  | H  | 2.229481 | 1.096945 | 2.190879 | 3.263207 | 3.294950 |
| 9  | H  | 3.324016 | 4.271816 | 3.974754 | 2.728992 | 2.090679 |
| 10 | H  | 2.632513 | 3.926892 | 4.219533 | 3.318142 | 2.065559 |
| 11 | Br | 4.329157 | 3.373916 | 4.257458 | 5.413852 | 5.468528 |
| 12 | H  | 3.249578 | 3.261769 | 2.153716 | 1.076452 | 2.153658 |
| 13 | C  | 3.595160 | 2.524322 | 1.431452 | 2.450064 | 3.555173 |
| 14 | C  | 4.297608 | 3.004981 | 2.428381 | 3.654522 | 4.592819 |
| 15 | H  | 4.276313 | 3.407318 | 2.100442 | 2.610129 | 3.902231 |
| 16 | H  | 5.362636 | 4.082232 | 3.393893 | 4.515511 | 5.565933 |
| 17 | H  | 4.123562 | 2.778081 | 2.734083 | 4.057977 | 4.732851 |
| 18 | C  | 4.144140 | 4.238920 | 5.089884 | 5.465122 | 4.965635 |

|    |    |          |          |          |          |          |
|----|----|----------|----------|----------|----------|----------|
| 19 | C  | 5.231316 | 5.546066 | 6.446154 | 6.682181 | 6.010653 |
| 20 | O  | 3.946511 | 4.481836 | 5.444394 | 5.560462 | 4.735641 |
| 21 | H  | 4.095449 | 4.127840 | 4.701531 | 4.991063 | 4.661692 |
| 22 | H  | 4.045303 | 3.881852 | 4.862995 | 5.478387 | 5.072487 |
| 23 | H  | 5.813561 | 6.080060 | 7.112008 | 7.452201 | 6.744092 |
| 24 | C  | 6.197245 | 6.603246 | 7.314892 | 7.371686 | 6.724339 |
| 25 | H  | 6.706038 | 7.275183 | 8.042460 | 7.993958 | 7.208200 |
| 26 | H  | 7.040221 | 7.295182 | 7.969367 | 8.128847 | 7.595422 |
| 27 | H  | 5.887323 | 6.323073 | 6.856696 | 6.786569 | 6.209196 |
| 28 | C  | 3.438844 | 4.436013 | 4.327260 | 3.259661 | 2.501494 |
| 29 | H  | 4.317118 | 5.424493 | 5.370371 | 4.254182 | 3.416980 |
| 30 | H  | 3.964329 | 4.713054 | 4.293643 | 3.164687 | 2.857776 |
| 31 | C  | 3.325245 | 4.239446 | 4.435663 | 3.746998 | 2.947647 |
| 32 | O  | 3.976068 | 4.586440 | 4.658990 | 4.138133 | 3.666224 |
| 33 | O  | 3.153695 | 4.249216 | 4.824395 | 4.303365 | 3.215464 |
| 34 | H  | 3.422741 | 4.328224 | 5.059824 | 4.782539 | 3.794843 |
|    |    | 6        | 7        | 8        | 9        | 10       |
| 6  | C  | 0.000000 |          |          |          |          |
| 7  | H  | 2.824374 | 0.000000 |          |          |          |
| 8  | H  | 4.680769 | 2.761181 | 0.000000 |          |          |
| 9  | H  | 1.091358 | 3.715467 | 5.350791 | 0.000000 |          |
| 10 | H  | 1.088275 | 2.501987 | 4.860279 | 1.765844 | 0.000000 |
| 11 | Br | 6.767506 | 4.537191 | 2.339363 | 7.554427 | 6.884029 |
| 12 | H  | 2.856785 | 4.224166 | 4.260248 | 2.735799 | 3.826687 |
| 13 | C  | 4.918611 | 4.624883 | 2.861801 | 5.150997 | 5.611452 |
| 14 | C  | 6.020284 | 5.210540 | 2.834711 | 6.363756 | 6.616524 |
| 15 | H  | 5.099030 | 5.345508 | 3.895783 | 5.126473 | 5.912723 |
| 16 | H  | 6.960197 | 6.289969 | 3.882443 | 7.222950 | 7.612429 |
| 17 | H  | 6.188319 | 4.882565 | 2.231214 | 6.682180 | 6.646099 |
| 18 | C  | 5.586985 | 3.925319 | 4.065481 | 6.639464 | 5.618749 |
| 19 | C  | 6.366759 | 4.788118 | 5.402916 | 7.451416 | 6.244104 |
| 20 | O  | 5.044584 | 3.406391 | 4.509255 | 6.135250 | 4.840701 |
| 21 | H  | 5.277022 | 4.114865 | 4.118562 | 6.280398 | 5.508767 |
| 22 | H  | 5.915895 | 3.865277 | 3.447950 | 6.933313 | 5.923740 |
| 23 | H  | 7.148656 | 5.263076 | 5.787492 | 8.238268 | 6.916016 |
| 24 | C  | 6.856131 | 5.816485 | 6.603284 | 7.908905 | 6.812844 |
| 25 | H  | 7.157879 | 6.191202 | 7.326940 | 8.203542 | 6.986858 |
| 26 | H  | 7.819449 | 6.723953 | 7.191763 | 8.862957 | 7.834810 |
| 27 | H  | 6.264595 | 5.640381 | 6.470531 | 7.272557 | 6.354057 |
| 28 | C  | 1.535615 | 3.648067 | 5.399615 | 2.175735 | 2.172962 |
| 29 | H  | 2.141743 | 4.348737 | 6.381212 | 2.527405 | 2.435826 |
| 30 | H  | 2.184585 | 4.401078 | 5.695877 | 2.481949 | 3.079871 |
| 31 | C  | 2.550457 | 3.339889 | 4.993208 | 3.490230 | 2.867744 |
| 32 | O  | 3.546921 | 4.128132 | 5.220416 | 4.408120 | 4.017720 |

|    |    |           |          |          |          |          |
|----|----|-----------|----------|----------|----------|----------|
| 33 | O  | 2.842957  | 2.739557 | 4.871620 | 3.890215 | 2.648276 |
| 34 | H  | 3.714791  | 2.930638 | 4.743761 | 4.791464 | 3.524363 |
|    |    | 11        | 12       | 13       | 14       | 15       |
| 11 | Br | 0.000000  |          |          |          |          |
| 12 | H  | 6.339132  | 0.000000 |          |          |          |
| 13 | C  | 4.417225  | 2.786450 | 0.000000 |          |          |
| 14 | C  | 3.692594  | 4.093481 | 1.326574 | 0.000000 |          |
| 15 | H  | 5.490580  | 2.506719 | 1.082987 | 2.131303 | 0.000000 |
| 16 | H  | 4.423433  | 4.773967 | 2.072070 | 1.082796 | 2.447049 |
| 17 | H  | 2.622974  | 4.707868 | 2.134985 | 1.092020 | 3.115295 |
| 18 | C  | 3.864393  | 6.304867 | 5.897410 | 5.897600 | 6.758174 |
| 19 | C  | 5.087224  | 7.497899 | 7.331307 | 7.362481 | 8.167575 |
| 20 | O  | 4.774097  | 6.421636 | 6.511892 | 6.725298 | 7.326482 |
| 21 | H  | 4.164969  | 5.709086 | 5.423167 | 5.513517 | 6.183051 |
| 22 | H  | 2.858773  | 6.396596 | 5.564259 | 5.377165 | 6.522880 |
| 23 | H  | 5.170500  | 8.332679 | 7.978280 | 7.894916 | 8.881738 |
| 24 | C  | 6.396034  | 8.046568 | 8.178663 | 8.304692 | 8.902517 |
| 25 | H  | 7.225821  | 8.668857 | 9.009898 | 9.206816 | 9.721840 |
| 26 | H  | 6.675681  | 8.783370 | 8.697666 | 8.696452 | 9.431829 |
| 27 | H  | 6.538550  | 7.356224 | 7.708279 | 7.953271 | 8.333980 |
| 28 | C  | 7.207424  | 3.418867 | 5.523005 | 6.574800 | 5.667070 |
| 29 | H  | 8.177028  | 4.331996 | 6.582474 | 7.655352 | 6.683461 |
| 30 | H  | 7.486542  | 3.018630 | 5.285905 | 6.390350 | 5.261591 |
| 31 | C  | 6.412308  | 4.178008 | 5.620862 | 6.437691 | 5.990956 |
| 32 | O  | 6.336505  | 4.482337 | 5.631016 | 6.329608 | 5.991432 |
| 33 | O  | 6.185028  | 4.949693 | 6.131193 | 6.838197 | 6.656808 |
| 34 | H  | 5.692766  | 5.516857 | 6.289872 | 6.818883 | 6.930122 |
|    |    | 16        | 17       | 18       | 19       | 20       |
| 16 | H  | 0.000000  |          |          |          |          |
| 17 | H  | 1.864592  | 0.000000 |          |          |          |
| 18 | C  | 6.794580  | 5.249177 | 0.000000 |          |          |
| 19 | C  | 8.258249  | 6.696002 | 1.466098 | 0.000000 |          |
| 20 | O  | 7.711981  | 6.133702 | 1.463910 | 1.451922 | 0.000000 |
| 21 | H  | 6.359844  | 5.023431 | 1.086359 | 2.195914 | 2.139286 |
| 22 | H  | 6.263700  | 4.587502 | 1.086838 | 2.239610 | 2.156047 |
| 23 | H  | 8.785024  | 7.119655 | 2.185177 | 1.087555 | 2.108397 |
| 24 | C  | 9.152209  | 7.752768 | 2.604653 | 1.503846 | 2.517654 |
| 25 | H  | 10.095207 | 8.654542 | 3.445473 | 2.151905 | 2.929376 |
| 26 | H  | 9.466235  | 8.110186 | 3.142956 | 2.137059 | 3.421282 |
| 27 | H  | 8.781550  | 7.531563 | 2.736385 | 2.151466 | 2.710919 |
| 28 | C  | 7.472253  | 6.736288 | 5.276431 | 5.895209 | 4.750582 |
| 29 | H  | 8.552836  | 7.810396 | 5.999975 | 6.410186 | 5.279548 |
| 30 | H  | 7.184294  | 6.696999 | 5.707727 | 6.432620 | 5.418193 |
| 31 | C  | 7.376197  | 6.391146 | 3.902596 | 4.416106 | 3.378304 |

|    |   |          |          |          |          |          |
|----|---|----------|----------|----------|----------|----------|
| 32 | O | 7.185078 | 6.286966 | 3.597305 | 4.139448 | 3.447291 |
| 33 | O | 7.854831 | 6.614331 | 3.564131 | 3.858071 | 2.609109 |
| 34 | H | 7.832139 | 6.458564 | 2.692425 | 2.857999 | 1.637698 |
|    |   | 21       | 22       | 23       | 24       | 25       |
| 21 | H | 0.000000 |          |          |          |          |
| 22 | H | 1.844210 | 0.000000 |          |          |          |
| 23 | H | 3.109825 | 2.533379 | 0.000000 |          |          |
| 24 | C | 2.801883 | 3.560901 | 2.208109 | 0.000000 |          |
| 25 | H | 3.752000 | 4.367916 | 2.563177 | 1.093885 | 0.000000 |
| 26 | H | 3.286803 | 3.960779 | 2.557479 | 1.094233 | 1.768367 |
| 27 | H | 2.520677 | 3.801616 | 3.099890 | 1.092087 | 1.778285 |
| 28 | C | 4.792420 | 5.857505 | 6.810151 | 6.062349 | 6.341305 |
| 29 | H | 5.582445 | 6.657997 | 7.299502 | 6.434299 | 6.542487 |
| 30 | H | 5.043765 | 6.287410 | 7.412508 | 6.501037 | 6.884354 |
| 31 | C | 3.439877 | 4.622336 | 5.370138 | 4.542691 | 4.871663 |
| 32 | O | 2.870932 | 4.421696 | 5.192129 | 4.044211 | 4.547281 |
| 33 | O | 3.487599 | 4.231944 | 4.653837 | 4.207053 | 4.363738 |
| 34 | H | 2.776517 | 3.438759 | 3.655206 | 3.304901 | 3.519983 |
|    |   | 26       | 27       | 28       | 29       | 30       |
| 26 | H | 0.000000 |          |          |          |          |
| 27 | H | 1.774755 | 0.000000 |          |          |          |
| 28 | C | 7.000252 | 5.311139 | 0.000000 |          |          |
| 29 | H | 7.412195 | 5.689356 | 1.094623 | 0.000000 |          |
| 30 | H | 7.344596 | 5.637576 | 1.090552 | 1.766354 | 0.000000 |
| 31 | C | 5.481584 | 3.814522 | 1.524343 | 2.145933 | 2.126554 |
| 32 | O | 4.837081 | 3.148477 | 2.407155 | 3.047955 | 2.517379 |
| 33 | O | 5.251799 | 3.762833 | 2.366346 | 2.716588 | 3.267306 |
| 34 | H | 4.349019 | 3.007349 | 3.250293 | 3.666833 | 4.028057 |
|    |   | 31       | 32       | 33       | 34       |          |
| 31 | C | 0.000000 |          |          |          |          |
| 32 | O | 1.208223 | 0.000000 |          |          |          |
| 33 | O | 1.332029 | 2.255908 | 0.000000 |          |          |
| 34 | H | 1.933589 | 2.394295 | 1.004984 | 0.000000 |          |

Stoichiometry C<sub>11</sub>H<sub>17</sub>BrN<sub>2</sub>O<sub>3</sub>

Framework group C1[X(C<sub>11</sub>H<sub>17</sub>BrN<sub>2</sub>O<sub>3</sub>)]

Deg. of freedom 96

Full point group C1 NOp 1

Largest Abelian subgroup C1 NOp 1

Largest concise Abelian subgroup C1 NOp 1

Standard orientation:

-----

| Center Number | Atomic Number | Atomic Type | Coordinates (Angstroms) |   |   |
|---------------|---------------|-------------|-------------------------|---|---|
|               |               |             | X                       | Y | Z |

-----

|    |    |   |           |           |           |
|----|----|---|-----------|-----------|-----------|
| 1  | 6  | 0 | 0.076943  | 1.328377  | 1.238839  |
| 2  | 6  | 0 | -1.153384 | 1.256449  | 0.665313  |
| 3  | 7  | 0 | -1.214072 | 2.288571  | -0.261841 |
| 4  | 6  | 0 | -0.052917 | 2.961385  | -0.239863 |
| 5  | 7  | 0 | 0.752478  | 2.396148  | 0.667934  |
| 6  | 6  | 0 | 2.160213  | 2.752953  | 0.922084  |
| 7  | 1  | 0 | 0.536619  | 0.697653  | 1.978860  |
| 8  | 1  | 0 | -1.939333 | 0.498829  | 0.772939  |
| 9  | 1  | 0 | 2.235037  | 3.841095  | 0.959626  |
| 10 | 1  | 0 | 2.404403  | 2.360850  | 1.907462  |
| 11 | 35 | 0 | -3.071179 | -1.497940 | 0.320767  |
| 12 | 1  | 0 | 0.190921  | 3.807995  | -0.858365 |
| 13 | 6  | 0 | -2.306606 | 2.603012  | -1.131642 |
| 14 | 6  | 0 | -3.347974 | 1.801632  | -1.313692 |
| 15 | 1  | 0 | -2.181817 | 3.557826  | -1.627240 |
| 16 | 1  | 0 | -4.128453 | 2.120846  | -1.992957 |
| 17 | 1  | 0 | -3.452096 | 0.826072  | -0.834163 |
| 18 | 6  | 0 | 0.610589  | -2.462216 | -0.348775 |
| 19 | 6  | 0 | 1.585353  | -3.513874 | -0.043334 |
| 20 | 8  | 0 | 1.628063  | -2.257817 | 0.683697  |
| 21 | 1  | 0 | 0.774663  | -1.858538 | -1.236935 |
| 22 | 1  | 0 | -0.410027 | -2.499028 | 0.022982  |
| 23 | 1  | 0 | 1.246659  | -4.329379 | 0.591501  |
| 24 | 6  | 0 | 2.754202  | -3.818954 | -0.939030 |
| 25 | 1  | 0 | 3.621568  | -4.137110 | -0.353336 |
| 26 | 1  | 0 | 2.493009  | -4.633959 | -1.620860 |
| 27 | 1  | 0 | 3.030026  | -2.944708 | -1.532553 |
| 28 | 6  | 0 | 3.110101  | 2.179924  | -0.139737 |
| 29 | 1  | 0 | 4.136355  | 2.362028  | 0.194688  |
| 30 | 1  | 0 | 2.978710  | 2.676163  | -1.101916 |
| 31 | 6  | 0 | 2.919915  | 0.683753  | -0.360918 |
| 32 | 8  | 0 | 2.771979  | 0.192210  | -1.454675 |
| 33 | 8  | 0 | 2.908000  | 0.013286  | 0.790008  |
| 34 | 1  | 0 | 2.583217  | -0.927856 | 0.653041  |

-----  
Rotational constants (GHZ):      0.3288448      0.2548041      0.1595911

Standard basis: 6-311++G(d,p) (5D, 7F)

There are    538 symmetry adapted cartesian basis functions of A    symmetry.

There are    519 symmetry adapted basis functions of A    symmetry.

519 basis functions,    823 primitive gaussians,    538 cartesian basis functions

78 alpha electrons      78 beta electrons

nuclear repulsion energy      1572.9161977284 Hartrees.

NAtoms=    34 NActive=    34 NUniq=    34 SFac= 1.00D+00 NAtFMM=    60 NAOKFM=F

Big=F



Integral buffers will be 131072 words long.  
 Raffenetti 2 integral format.  
 Two-electron integral symmetry is turned on.  
 One-electron integrals computed using PRISM.  
 NBasis= 519 RedAO= T EigKep= 3.53D-06 NBF= 519  
 NBsUse= 519 1.00D-06 EigRej= -1.00D+00 NBFU= 519  
 Initial guess from the checkpoint file: "/.coohpo.chk"  
 B after Tr= 0.000000 0.000000 0.000000  
 Rot= 1.000000 0.000010 0.000037 0.000633 Ang= 0.07 deg.  
 Requested convergence on RMS density matrix=1.00D-08 within 128 cycles.  
 Requested convergence on MAX density matrix=1.00D-06.  
 Requested convergence on energy=1.00D-06.  
 No special actions if energy rises.

SCF Done: E(RB3LYP) = -3338.90388357 A.U. after 9 cycles  
 NFock= 9 Conv=0.41D-08 -V/T= 2.0019

Calling FoFJK, ICntrl= 2127 FMM=F ISym2X=0 l1Cent= 0 IOpClX= 0 NMat=1 NMatS=1  
 NMatT=0.

\*\*\*\*\* Axes restored to original set \*\*\*\*\*

| Center<br>Number | Atomic<br>Number | Forces (Hartrees/Bohr) |              |              |
|------------------|------------------|------------------------|--------------|--------------|
|                  |                  | X                      | Y            | Z            |
| 1                | 6                | -0.000006628           | 0.000002806  | 0.000004358  |
| 2                | 6                | 0.000033009            | 0.000010310  | 0.000005819  |
| 3                | 7                | 0.000006538            | 0.000007586  | -0.000008069 |
| 4                | 6                | 0.000003335            | 0.000006398  | 0.000004569  |
| 5                | 7                | -0.000016986           | 0.000001632  | -0.000005890 |
| 6                | 6                | 0.000020145            | -0.000004952 | -0.000005762 |
| 7                | 1                | 0.000001245            | -0.000000719 | 0.000002160  |
| 8                | 1                | -0.000037902           | -0.000004447 | -0.000038311 |
| 9                | 1                | 0.000004675            | 0.000003724  | -0.000007085 |
| 10               | 1                | -0.000002138           | -0.000003136 | 0.000000837  |
| 11               | 35               | 0.000015726            | 0.000001857  | 0.000014161  |
| 12               | 1                | -0.000001158           | -0.000000959 | -0.000003453 |
| 13               | 6                | -0.000009672           | -0.000003616 | 0.000002277  |
| 14               | 6                | -0.000007082           | -0.000005589 | 0.000001242  |
| 15               | 1                | 0.000004199            | 0.000001469  | -0.000005975 |
| 16               | 1                | -0.000000707           | 0.000005772  | -0.000003219 |
| 17               | 1                | -0.000004430           | 0.000003950  | 0.000000211  |
| 18               | 6                | -0.000001334           | 0.000008004  | -0.000020054 |
| 19               | 6                | -0.000016220           | -0.000008127 | 0.000007078  |
| 20               | 8                | 0.000042099            | 0.000020073  | -0.000002429 |
| 21               | 1                | -0.000007901           | -0.000004330 | 0.000005915  |
| 22               | 1                | 0.000003698            | -0.000003935 | 0.000010364  |

|    |   |              |              |              |
|----|---|--------------|--------------|--------------|
| 23 | 1 | -0.000003137 | 0.000000622  | 0.000007997  |
| 24 | 6 | 0.000007036  | -0.000000590 | 0.000007762  |
| 25 | 1 | 0.000000407  | -0.000007198 | 0.000007584  |
| 26 | 1 | -0.000004626 | -0.000005114 | 0.000005277  |
| 27 | 1 | 0.000003402  | -0.000000249 | 0.000005990  |
| 28 | 6 | 0.000009119  | 0.000007565  | -0.000004885 |
| 29 | 1 | -0.000001569 | -0.000003998 | -0.000002174 |
| 30 | 1 | 0.000001327  | 0.000000298  | -0.000000021 |
| 31 | 6 | -0.000014819 | 0.000011841  | 0.000013014  |
| 32 | 8 | 0.000006128  | -0.000013023 | -0.000004914 |
| 33 | 8 | 0.000019428  | -0.000003018 | -0.000010146 |
| 34 | 1 | -0.000045203 | -0.000020907 | 0.000015772  |

-----  
Cartesian Forces: Max 0.000045203 RMS 0.000011725

GradGradGradGradGradGradGradGradGradGradGradGradGradGradGradGradGradGradGrad

Berny optimization.

Using GEDIIS/GDIIS optimizer.

FormGI is forming the generalized inverse of G from B-inverse, IUseBI=4.

Internal Forces: Max 0.000037512 RMS 0.000007725

Search for a local minimum.

Step number 38 out of a maximum of 175

All quantities printed in internal units (Hartrees-Bohrs-Radians)

Mixed Optimization -- En-DIIS/RFO-DIIS

Swapping is turned off.

Update second derivatives using D2CorX and points

|    |    |    |    |    |    |    |  |  |  |
|----|----|----|----|----|----|----|--|--|--|
| 21 | 22 | 23 | 24 | 25 |    |    |  |  |  |
|    |    | 26 | 27 | 28 | 29 | 30 |  |  |  |
|    |    | 31 | 32 | 33 | 34 | 35 |  |  |  |
|    |    | 36 | 37 | 38 |    |    |  |  |  |

DE= -1.25D-06 DEPred=-1.25D-07 R= 1.00D+01

TightC=F SS= 1.41D+00 RLast= 7.88D-03 DXNew= 6.5746D-01 2.3636D-02

Trust test= 1.00D+01 RLast= 7.88D-03 DXMaxT set to 3.91D-01

ITU= 1 1 1 1 1 1 1 -1 1 1 1 1 1 -1 0 1 1 1 1 1

ITU= 1 1 1 1 1 0 0 -1 1 1 1 0 1 0 -1 0 1 0

|                 |         |         |         |         |         |
|-----------------|---------|---------|---------|---------|---------|
| Eigenvalues --- | 0.00168 | 0.00277 | 0.00344 | 0.00426 | 0.00480 |
| Eigenvalues --- | 0.00563 | 0.00875 | 0.00980 | 0.01169 | 0.01311 |
| Eigenvalues --- | 0.01432 | 0.01995 | 0.02145 | 0.02202 | 0.02285 |
| Eigenvalues --- | 0.02377 | 0.02473 | 0.02715 | 0.02975 | 0.03136 |
| Eigenvalues --- | 0.03435 | 0.03631 | 0.03927 | 0.04296 | 0.04612 |
| Eigenvalues --- | 0.04860 | 0.05035 | 0.05235 | 0.05394 | 0.05743 |
| Eigenvalues --- | 0.05866 | 0.05959 | 0.06247 | 0.07422 | 0.09328 |
| Eigenvalues --- | 0.09628 | 0.11750 | 0.12565 | 0.12876 | 0.13353 |
| Eigenvalues --- | 0.13533 | 0.14250 | 0.15139 | 0.15666 | 0.15965 |
| Eigenvalues --- | 0.16006 | 0.16010 | 0.16043 | 0.16062 | 0.16227 |

|                 |         |         |         |         |         |
|-----------------|---------|---------|---------|---------|---------|
| Eigenvalues --- | 0.16694 | 0.17797 | 0.19368 | 0.20868 | 0.22052 |
| Eigenvalues --- | 0.23323 | 0.23690 | 0.23936 | 0.25350 | 0.26279 |
| Eigenvalues --- | 0.28225 | 0.28861 | 0.29834 | 0.31447 | 0.32083 |
| Eigenvalues --- | 0.33329 | 0.34346 | 0.34507 | 0.34608 | 0.34721 |
| Eigenvalues --- | 0.34862 | 0.34896 | 0.34967 | 0.35074 | 0.35240 |
| Eigenvalues --- | 0.35322 | 0.35650 | 0.35764 | 0.35915 | 0.36604 |
| Eigenvalues --- | 0.37051 | 0.37263 | 0.37807 | 0.38515 | 0.39529 |
| Eigenvalues --- | 0.40796 | 0.45457 | 0.49288 | 0.50353 | 0.50904 |
| Eigenvalues --- | 0.54534 | 0.56019 | 0.56616 | 0.61242 | 0.90608 |
| Eigenvalues --- | 0.96948 |         |         |         |         |

En-DIIS/RFO-DIIS IScMMF= 0 using points: 38 37 36 35 34

RFO step: Lambda=-3.49321468D-08.

DidBck=F Rises=F RFO-DIIS coefs: 1.42732 -0.07284 -0.65526 0.47011 -  
0.16934

Iteration 1 RMS(Cart)= 0.00142386 RMS(Int)= 0.00000099

Iteration 2 RMS(Cart)= 0.00000130 RMS(Int)= 0.00000010

Iteration 3 RMS(Cart)= 0.00000000 RMS(Int)= 0.00000010

| Variable | Old X   | -DE/DX   | Delta X<br>(Linear) | Delta X<br>(Quad) | Delta X<br>(Total) | New X   |
|----------|---------|----------|---------------------|-------------------|--------------------|---------|
| R1       | 2.56878 | -0.00001 | -0.00002            | -0.00001          | -0.00003           | 2.56876 |
| R2       | 2.62013 | 0.00000  | -0.00001            | 0.00000           | -0.00001           | 2.62011 |
| R3       | 2.03244 | 0.00000  | 0.00001             | 0.00000           | 0.00001            | 2.03245 |
| R4       | 2.62432 | 0.00000  | -0.00001            | -0.00002          | -0.00003           | 2.62429 |
| R5       | 2.07293 | -0.00001 | 0.00000             | -0.00006          | -0.00006           | 2.07287 |
| R6       | 2.53635 | 0.00000  | 0.00005             | 0.00000           | 0.00004            | 2.53639 |
| R7       | 2.70505 | 0.00001  | -0.00012            | 0.00003           | -0.00009           | 2.70496 |
| R8       | 2.52987 | 0.00000  | -0.00001            | 0.00000           | -0.00001           | 2.52986 |
| R9       | 2.03420 | 0.00000  | 0.00000             | 0.00000           | 0.00000            | 2.03420 |
| R10      | 2.78606 | 0.00000  | -0.00001            | 0.00001           | 0.00001            | 2.78607 |
| R11      | 2.06237 | 0.00000  | 0.00000             | 0.00000           | 0.00000            | 2.06237 |
| R12      | 2.05654 | 0.00000  | -0.00002            | 0.00000           | -0.00002           | 2.05653 |
| R13      | 2.90189 | -0.00001 | -0.00003            | -0.00003          | -0.00006           | 2.90183 |
| R14      | 4.42076 | 0.00001  | 0.00005             | 0.00006           | 0.00011            | 4.42087 |
| R15      | 2.50686 | 0.00000  | 0.00005             | 0.00000           | 0.00004            | 2.50691 |
| R16      | 2.04655 | 0.00000  | 0.00001             | -0.00001          | 0.00000            | 2.04655 |
| R17      | 2.04619 | 0.00000  | -0.00002            | 0.00000           | -0.00002           | 2.04616 |
| R18      | 2.06362 | 0.00000  | -0.00001            | -0.00002          | -0.00003           | 2.06359 |
| R19      | 2.77052 | 0.00000  | 0.00002             | -0.00002          | -0.00001           | 2.77052 |
| R20      | 2.76639 | 0.00000  | -0.00003            | 0.00002           | -0.00001           | 2.76638 |
| R21      | 2.05292 | 0.00000  | 0.00000             | 0.00000           | 0.00000            | 2.05292 |
| R22      | 2.05383 | 0.00000  | 0.00000             | 0.00000           | 0.00000            | 2.05382 |
| R23      | 2.74374 | 0.00000  | -0.00014            | 0.00004           | -0.00010           | 2.74363 |
| R24      | 2.05518 | 0.00000  | -0.00001            | 0.00001           | 0.00000            | 2.05518 |
| R25      | 2.84186 | 0.00000  | 0.00007             | -0.00003          | 0.00004            | 2.84190 |

|     |         |          |          |          |          |         |
|-----|---------|----------|----------|----------|----------|---------|
| R26 | 3.09480 | 0.00000  | -0.00019 | -0.00003 | -0.00022 | 3.09458 |
| R27 | 2.06714 | 0.00000  | 0.00000  | -0.00001 | -0.00001 | 2.06714 |
| R28 | 2.06780 | 0.00000  | 0.00000  | 0.00000  | 0.00000  | 2.06780 |
| R29 | 2.06375 | 0.00000  | -0.00002 | 0.00001  | -0.00001 | 2.06373 |
| R30 | 2.06854 | 0.00000  | 0.00000  | 0.00000  | 0.00000  | 2.06853 |
| R31 | 2.06085 | 0.00000  | -0.00001 | 0.00001  | 0.00001  | 2.06085 |
| R32 | 2.88059 | 0.00000  | 0.00005  | 0.00000  | 0.00005  | 2.88064 |
| R33 | 2.28321 | 0.00001  | 0.00004  | -0.00001 | 0.00003  | 2.28324 |
| R34 | 2.51717 | 0.00000  | -0.00011 | 0.00002  | -0.00010 | 2.51707 |
| R35 | 1.89914 | 0.00000  | -0.00003 | 0.00003  | 0.00000  | 1.89914 |
| A1  | 1.88389 | 0.00000  | 0.00001  | -0.00001 | 0.00000  | 1.88389 |
| A2  | 2.27327 | 0.00000  | -0.00006 | 0.00000  | -0.00006 | 2.27321 |
| A3  | 2.12551 | 0.00000  | 0.00006  | 0.00000  | 0.00006  | 2.12557 |
| A4  | 1.85658 | 0.00000  | 0.00000  | 0.00002  | 0.00002  | 1.85660 |
| A5  | 2.27004 | -0.00002 | 0.00010  | 0.00002  | 0.00012  | 2.27016 |
| A6  | 2.15017 | 0.00001  | -0.00013 | -0.00002 | -0.00015 | 2.15002 |
| A7  | 1.90056 | 0.00000  | 0.00000  | -0.00001 | -0.00001 | 1.90055 |
| A8  | 2.21716 | 0.00000  | -0.00008 | -0.00004 | -0.00012 | 2.21704 |
| A9  | 2.16534 | 0.00000  | 0.00008  | 0.00005  | 0.00013  | 2.16547 |
| A10 | 1.89644 | 0.00000  | -0.00002 | 0.00001  | -0.00002 | 1.89642 |
| A11 | 2.19052 | 0.00000  | -0.00002 | -0.00001 | -0.00003 | 2.19049 |
| A12 | 2.19617 | 0.00000  | 0.00004  | 0.00000  | 0.00005  | 2.19622 |
| A13 | 1.88730 | 0.00000  | 0.00002  | -0.00001 | 0.00001  | 1.88731 |
| A14 | 2.19028 | -0.00001 | -0.00002 | -0.00007 | -0.00009 | 2.19019 |
| A15 | 2.20080 | 0.00001  | 0.00001  | 0.00006  | 0.00007  | 2.20086 |
| A16 | 1.88882 | 0.00001  | 0.00010  | 0.00000  | 0.00010  | 1.88893 |
| A17 | 1.85786 | 0.00000  | -0.00006 | -0.00001 | -0.00007 | 1.85779 |
| A18 | 1.96181 | -0.00002 | -0.00009 | -0.00005 | -0.00014 | 1.96167 |
| A19 | 1.88884 | 0.00000  | 0.00005  | 0.00000  | 0.00005  | 1.88889 |
| A20 | 1.93204 | 0.00000  | 0.00004  | 0.00002  | 0.00006  | 1.93209 |
| A21 | 1.93140 | 0.00001  | -0.00004 | 0.00004  | 0.00000  | 1.93140 |
| A22 | 2.73182 | -0.00001 | -0.00007 | -0.00038 | -0.00045 | 2.73137 |
| A23 | 2.15296 | 0.00001  | 0.00002  | 0.00000  | 0.00002  | 2.15298 |
| A24 | 1.96469 | -0.00001 | 0.00009  | -0.00002 | 0.00007  | 1.96476 |
| A25 | 2.16549 | 0.00000  | -0.00011 | 0.00002  | -0.00009 | 2.16540 |
| A26 | 2.06443 | 0.00000  | -0.00004 | 0.00001  | -0.00004 | 2.06440 |
| A27 | 2.15827 | 0.00000  | -0.00008 | 0.00003  | -0.00005 | 2.15822 |
| A28 | 2.06021 | 0.00000  | 0.00011  | -0.00003 | 0.00008  | 2.06029 |
| A29 | 2.05841 | 0.00002  | -0.00010 | 0.00016  | 0.00006  | 2.05846 |
| A30 | 2.12798 | -0.00002 | 0.00012  | -0.00016 | -0.00005 | 2.12794 |
| A31 | 1.97583 | 0.00001  | 0.00006  | -0.00003 | 0.00002  | 1.97585 |
| A32 | 2.00003 | -0.00001 | -0.00001 | 0.00006  | 0.00006  | 2.00009 |
| A33 | 2.02673 | 0.00000  | -0.00001 | -0.00002 | -0.00003 | 2.02670 |
| A34 | 2.04029 | 0.00000  | 0.00013  | -0.00007 | 0.00007  | 2.04036 |

|     |          |          |          |          |          |          |
|-----|----------|----------|----------|----------|----------|----------|
| A35 | 2.13909  | 0.00001  | -0.00015 | 0.00009  | -0.00007 | 2.13903  |
| A36 | 1.94503  | 0.00000  | 0.00008  | -0.00001 | 0.00006  | 1.94510  |
| A37 | 2.03854  | 0.00000  | -0.00001 | 0.00004  | 0.00004  | 2.03858  |
| A38 | 2.02373  | -0.00001 | -0.00002 | -0.00003 | -0.00005 | 2.02368  |
| A39 | 2.10082  | 0.00000  | -0.00047 | -0.00021 | -0.00068 | 2.10014  |
| A40 | 2.36075  | 0.00003  | 0.00040  | 0.00021  | 0.00061  | 2.36136  |
| A41 | 1.93520  | 0.00000  | 0.00004  | -0.00002 | 0.00002  | 1.93522  |
| A42 | 1.91421  | 0.00000  | 0.00000  | -0.00003 | -0.00003 | 1.91418  |
| A43 | 1.93649  | 0.00000  | -0.00008 | 0.00004  | -0.00004 | 1.93645  |
| A44 | 1.88207  | 0.00000  | -0.00001 | 0.00001  | 0.00000  | 1.88207  |
| A45 | 1.90028  | 0.00000  | 0.00001  | 0.00001  | 0.00003  | 1.90031  |
| A46 | 1.89430  | 0.00000  | 0.00005  | -0.00001 | 0.00003  | 1.89433  |
| A47 | 1.88242  | 0.00001  | 0.00016  | -0.00004 | 0.00012  | 1.88254  |
| A48 | 1.94523  | 0.00000  | 0.00002  | -0.00001 | 0.00000  | 1.94523  |
| A49 | 1.97080  | -0.00002 | 0.00001  | -0.00003 | -0.00002 | 1.97078  |
| A50 | 1.88263  | 0.00000  | -0.00006 | 0.00000  | -0.00006 | 1.88258  |
| A51 | 1.90137  | 0.00001  | -0.00006 | 0.00003  | -0.00002 | 1.90135  |
| A52 | 1.87924  | 0.00001  | -0.00007 | 0.00004  | -0.00003 | 1.87921  |
| A53 | 2.14831  | 0.00000  | -0.00002 | -0.00003 | -0.00005 | 2.14826  |
| A54 | 1.94957  | 0.00000  | -0.00005 | 0.00005  | 0.00001  | 1.94958  |
| A55 | 2.18500  | 0.00000  | 0.00007  | -0.00002 | 0.00005  | 2.18505  |
| A56 | 1.93532  | 0.00003  | 0.00023  | 0.00004  | 0.00027  | 1.93559  |
| A57 | 2.81281  | 0.00004  | 0.00037  | 0.00033  | 0.00069  | 2.81350  |
| D1  | 0.00354  | -0.00001 | 0.00007  | -0.00004 | 0.00003  | 0.00357  |
| D2  | 3.02445  | 0.00000  | -0.00019 | 0.00011  | -0.00009 | 3.02436  |
| D3  | -3.10302 | 0.00000  | -0.00021 | 0.00010  | -0.00011 | -3.10314 |
| D4  | -0.08211 | 0.00000  | -0.00048 | 0.00025  | -0.00023 | -0.08234 |
| D5  | -0.00270 | 0.00001  | -0.00001 | -0.00003 | -0.00004 | -0.00274 |
| D6  | -3.04410 | 0.00001  | -0.00008 | 0.00018  | 0.00009  | -3.04401 |
| D7  | 3.10744  | 0.00000  | 0.00024  | -0.00016 | 0.00009  | 3.10753  |
| D8  | 0.06604  | 0.00000  | 0.00017  | 0.00005  | 0.00022  | 0.06626  |
| D9  | -0.00317 | 0.00001  | -0.00011 | 0.00010  | -0.00001 | -0.00318 |
| D10 | 3.12179  | 0.00001  | -0.00021 | 0.00012  | -0.00009 | 3.12170  |
| D11 | -3.03443 | 0.00001  | 0.00011  | -0.00004 | 0.00007  | -3.03436 |
| D12 | 0.09052  | 0.00001  | 0.00001  | -0.00001 | 0.00000  | 0.09052  |
| D13 | -1.48631 | 0.00002  | 0.00135  | 0.00069  | 0.00204  | -1.48427 |
| D14 | 1.51680  | 0.00002  | 0.00106  | 0.00086  | 0.00192  | 1.51873  |
| D15 | 0.00153  | 0.00000  | 0.00011  | -0.00012 | -0.00001 | 0.00152  |
| D16 | 3.13264  | 0.00000  | -0.00052 | 0.00005  | -0.00047 | 3.13217  |
| D17 | -3.12403 | 0.00000  | 0.00021  | -0.00014 | 0.00007  | -3.12396 |
| D18 | 0.00708  | 0.00000  | -0.00042 | 0.00002  | -0.00039 | 0.00668  |
| D19 | -0.19457 | 0.00001  | 0.00036  | 0.00009  | 0.00044  | -0.19413 |
| D20 | 2.95671  | 0.00000  | 0.00042  | 0.00010  | 0.00052  | 2.95723  |
| D21 | 2.92802  | 0.00001  | 0.00024  | 0.00011  | 0.00035  | 2.92837  |

|     |          |          |          |          |          |          |
|-----|----------|----------|----------|----------|----------|----------|
| D22 | -0.20388 | 0.00001  | 0.00030  | 0.00013  | 0.00043  | -0.20345 |
| D23 | 0.00070  | 0.00000  | -0.00006 | 0.00009  | 0.00003  | 0.00073  |
| D24 | 3.04134  | -0.00001 | 0.00001  | -0.00013 | -0.00011 | 3.04122  |
| D25 | -3.13037 | 0.00000  | 0.00057  | -0.00007 | 0.00049  | -3.12988 |
| D26 | -0.08973 | -0.00001 | 0.00064  | -0.00029 | 0.00035  | -0.08938 |
| D27 | -2.47026 | -0.00001 | 0.00081  | 0.00003  | 0.00084  | -2.46942 |
| D28 | -0.44337 | 0.00000  | 0.00089  | 0.00002  | 0.00092  | -0.44245 |
| D29 | 1.67385  | 0.00000  | 0.00075  | 0.00004  | 0.00079  | 1.67464  |
| D30 | 0.78924  | 0.00000  | 0.00072  | 0.00028  | 0.00100  | 0.79024  |
| D31 | 2.81614  | 0.00000  | 0.00080  | 0.00027  | 0.00107  | 2.81721  |
| D32 | -1.34983 | 0.00000  | 0.00066  | 0.00029  | 0.00095  | -1.34888 |
| D33 | -3.00067 | 0.00000  | -0.00002 | 0.00006  | 0.00004  | -3.00063 |
| D34 | 1.21913  | 0.00000  | -0.00005 | 0.00009  | 0.00004  | 1.21916  |
| D35 | -0.89884 | 0.00000  | 0.00002  | 0.00006  | 0.00008  | -0.89876 |
| D36 | 1.16801  | 0.00000  | -0.00011 | 0.00008  | -0.00003 | 1.16798  |
| D37 | -0.89538 | 0.00000  | -0.00015 | 0.00011  | -0.00004 | -0.89541 |
| D38 | -3.01334 | 0.00000  | -0.00007 | 0.00008  | 0.00001  | -3.01333 |
| D39 | -0.92608 | 0.00000  | -0.00018 | 0.00004  | -0.00013 | -0.92621 |
| D40 | -2.98946 | 0.00000  | -0.00021 | 0.00007  | -0.00014 | -2.98960 |
| D41 | 1.17576  | 0.00000  | -0.00014 | 0.00005  | -0.00009 | 1.17567  |
| D42 | -3.13975 | 0.00000  | 0.00014  | -0.00006 | 0.00008  | -3.13967 |
| D43 | -0.02373 | 0.00000  | -0.00009 | 0.00002  | -0.00007 | -0.02380 |
| D44 | -0.00896 | 0.00000  | 0.00006  | -0.00008 | -0.00001 | -0.00897 |
| D45 | 3.10706  | 0.00000  | -0.00016 | 0.00001  | -0.00015 | 3.10690  |
| D46 | -2.75251 | 0.00000  | 0.00013  | -0.00010 | 0.00004  | -2.75247 |
| D47 | -0.04757 | 0.00000  | 0.00003  | -0.00013 | -0.00010 | -0.04766 |
| D48 | -0.01969 | 0.00000  | 0.00013  | -0.00015 | -0.00002 | -0.01971 |
| D49 | 2.68526  | -0.00001 | 0.00003  | -0.00019 | -0.00016 | 2.68510  |
| D50 | 0.31539  | 0.00001  | 0.00077  | 0.00009  | 0.00087  | 0.31625  |
| D51 | -2.06367 | 0.00001  | 0.00074  | 0.00008  | 0.00082  | -2.06285 |
| D52 | 2.54461  | 0.00001  | 0.00065  | 0.00047  | 0.00112  | 2.54573  |
| D53 | 0.16262  | 0.00002  | 0.00060  | 0.00048  | 0.00108  | 0.16370  |
| D54 | 2.55437  | 0.00000  | 0.00083  | 0.00031  | 0.00114  | 2.55551  |
| D55 | -1.65221 | 0.00000  | 0.00084  | 0.00029  | 0.00114  | -1.65107 |
| D56 | 0.44037  | 0.00000  | 0.00085  | 0.00028  | 0.00113  | 0.44150  |
| D57 | 1.32799  | 0.00000  | 0.00086  | 0.00026  | 0.00112  | 1.32912  |
| D58 | -2.87859 | 0.00000  | 0.00088  | 0.00024  | 0.00112  | -2.87747 |
| D59 | -0.78600 | 0.00000  | 0.00088  | 0.00023  | 0.00111  | -0.78489 |
| D60 | -1.02005 | 0.00000  | 0.00077  | 0.00027  | 0.00104  | -1.01901 |
| D61 | 1.05655  | 0.00000  | 0.00078  | 0.00025  | 0.00103  | 1.05758  |
| D62 | -3.13405 | 0.00000  | 0.00078  | 0.00024  | 0.00103  | -3.13302 |
| D63 | 1.47380  | -0.00001 | -0.00043 | 0.00026  | -0.00017 | 1.47363  |
| D64 | 2.81994  | 0.00000  | -0.00064 | 0.00012  | -0.00052 | 2.81942  |
| D65 | 2.25781  | 0.00000  | 0.00027  | -0.00006 | 0.00021  | 2.25802  |

|     |          |          |          |          |          |          |
|-----|----------|----------|----------|----------|----------|----------|
| D66 | -0.85873 | -0.00001 | 0.00014  | -0.00013 | 0.00001  | -0.85872 |
| D67 | -1.93441 | 0.00000  | 0.00043  | -0.00010 | 0.00033  | -1.93408 |
| D68 | 1.23223  | -0.00001 | 0.00030  | -0.00017 | 0.00013  | 1.23236  |
| D69 | 0.10290  | 0.00000  | 0.00029  | -0.00006 | 0.00023  | 0.10314  |
| D70 | -3.01364 | 0.00000  | 0.00017  | -0.00013 | 0.00004  | -3.01361 |
| D71 | 2.92312  | 0.00001  | 0.00037  | 0.00036  | 0.00073  | 2.92385  |
| D72 | -0.19280 | 0.00000  | 0.00024  | 0.00029  | 0.00053  | -0.19227 |
| D73 | -1.88330 | -0.00002 | -0.00153 | -0.00065 | -0.00218 | -1.88548 |

| Item                 | Value    | Threshold | Converged? |
|----------------------|----------|-----------|------------|
| Maximum Force        | 0.000038 | 0.000450  | YES        |
| RMS Force            | 0.000008 | 0.000300  | YES        |
| Maximum Displacement | 0.004863 | 0.001800  | NO         |
| RMS Displacement     | 0.001424 | 0.001200  | NO         |

Predicted change in Energy=-1.310127D-07

GradGradGradGradGradGradGradGradGradGradGradGradGradGradGradGradGradGradGrad

Input orientation:

| Center<br>Number | Atomic<br>Number | Atomic<br>Type | Coordinates (Angstroms) |           |           |
|------------------|------------------|----------------|-------------------------|-----------|-----------|
|                  |                  |                | X                       | Y         | Z         |
| 1                | 6                | 0              | -0.847467               | 1.644912  | 1.538202  |
| 2                | 6                | 0              | -1.504104               | 0.455257  | 1.574487  |
| 3                | 7                | 0              | -2.364728               | 0.449689  | 0.484611  |
| 4                | 6                | 0              | -2.228852               | 1.606475  | -0.182389 |
| 5                | 7                | 0              | -1.309348               | 2.354307  | 0.440104  |
| 6                | 6                | 0              | -0.775476               | 3.645237  | -0.031180 |
| 7                | 1                | 0              | -0.075779               | 2.032489  | 2.179328  |
| 8                | 1                | 0              | -1.352806               | -0.415251 | 2.224524  |
| 9                | 1                | 0              | -1.613213               | 4.259214  | -0.366280 |
| 10               | 1                | 0              | -0.325329               | 4.126982  | 0.834622  |
| 11               | 35               | 0              | -0.392426               | -2.431568 | 2.920970  |
| 12               | 1                | 0              | -2.763962               | 1.879729  | -1.075550 |
| 13               | 6                | 0              | -3.249831               | -0.603999 | 0.090591  |
| 14               | 6                | 0              | -3.209607               | -1.823439 | 0.611368  |
| 15               | 1                | 0              | -3.943884               | -0.296833 | -0.681935 |
| 16               | 1                | 0              | -3.917796               | -2.558885 | 0.250804  |
| 17               | 1                | 0              | -2.486377               | -2.134866 | 1.367954  |
| 18               | 6                | 0              | 2.554767                | -0.688363 | 1.130840  |
| 19               | 6                | 0              | 3.975186                | -0.375485 | 1.315091  |
| 20               | 8                | 0              | 2.975708                | 0.654780  | 1.533072  |
| 21               | 1                | 0              | 2.170325                | -0.730453 | 0.115652  |
| 22               | 1                | 0              | 1.982859                | -1.227058 | 1.881800  |
| 23               | 1                | 0              | 4.431334                | -0.691236 | 2.250511  |

|    |   |   |           |           |           |
|----|---|---|-----------|-----------|-----------|
| 24 | 6 | 0 | 4.916009  | -0.173841 | 0.159315  |
| 25 | 1 | 0 | 5.677265  | 0.573253  | 0.402047  |
| 26 | 1 | 0 | 5.428838  | -1.113701 | -0.066559 |
| 27 | 1 | 0 | 4.375167  | 0.149626  | -0.732592 |
| 28 | 6 | 0 | 0.257208  | 3.476061  | -1.154993 |
| 29 | 1 | 0 | 0.708160  | 4.454878  | -1.346712 |
| 30 | 1 | 0 | -0.211324 | 3.136734  | -2.079464 |
| 31 | 6 | 0 | 1.359663  | 2.483674  | -0.803630 |
| 32 | 8 | 0 | 1.682864  | 1.572843  | -1.528729 |
| 33 | 8 | 0 | 1.883162  | 2.733194  | 0.395476  |
| 34 | 1 | 0 | 2.456865  | 1.967355  | 0.702634  |

-----  
Distance matrix (angstroms):

|    |    | 1        | 2        | 3        | 4        | 5        |
|----|----|----------|----------|----------|----------|----------|
| 1  | C  | 0.000000 |          |          |          |          |
| 2  | C  | 1.359327 | 0.000000 |          |          |          |
| 3  | N  | 2.200157 | 1.388716 | 0.000000 |          |          |
| 4  | C  | 2.206838 | 2.221976 | 1.342201 | 0.000000 |          |
| 5  | N  | 1.386504 | 2.220619 | 2.177929 | 1.338745 | 0.000000 |
| 6  | C  | 2.543510 | 3.644865 | 3.606007 | 2.508330 | 1.474323 |
| 7  | H  | 1.075528 | 2.212150 | 3.258313 | 3.224115 | 2.156423 |
| 8  | H  | 2.229502 | 1.096915 | 2.190754 | 3.263136 | 3.294919 |
| 9  | H  | 3.323852 | 4.271835 | 3.975081 | 2.729442 | 2.090756 |
| 10 | H  | 2.632170 | 3.926636 | 4.219494 | 3.318232 | 2.065505 |
| 11 | Br | 4.328603 | 3.373811 | 4.257635 | 5.413786 | 5.468093 |
| 12 | H  | 3.249583 | 3.261757 | 2.153719 | 1.076451 | 2.153679 |
| 13 | C  | 3.595070 | 2.524189 | 1.431404 | 2.450124 | 3.555166 |
| 14 | C  | 4.297463 | 3.004795 | 2.428374 | 3.654619 | 4.592807 |
| 15 | H  | 4.276351 | 3.407287 | 2.100443 | 2.610261 | 3.902345 |
| 16 | H  | 5.362483 | 4.082046 | 3.393849 | 4.515575 | 5.565905 |
| 17 | H  | 4.123316 | 2.777814 | 2.734048 | 4.058019 | 4.732756 |
| 18 | C  | 4.145516 | 4.240179 | 5.090599 | 5.465698 | 4.966522 |
| 19 | C  | 5.233523 | 5.547976 | 6.447102 | 6.682866 | 6.011961 |
| 20 | O  | 3.949311 | 4.484445 | 5.446246 | 5.562012 | 4.737582 |
| 21 | H  | 4.095494 | 4.127413 | 4.700592 | 4.990272 | 4.661452 |
| 22 | H  | 4.046852 | 3.883753 | 4.864682 | 5.479807 | 5.073785 |
| 23 | H  | 5.816417 | 6.082835 | 7.113830 | 7.453627 | 6.745987 |
| 24 | C  | 6.198938 | 6.604265 | 7.314624 | 7.371249 | 6.724986 |
| 25 | H  | 6.709055 | 7.277403 | 8.043366 | 7.994735 | 7.210157 |
| 26 | H  | 7.041108 | 7.295228 | 7.967914 | 8.127299 | 7.595192 |
| 27 | H  | 5.887978 | 6.323121 | 6.855495 | 6.785145 | 6.208828 |
| 28 | C  | 3.438999 | 4.435938 | 4.326867 | 3.259111 | 2.501353 |
| 29 | H  | 4.317246 | 5.424434 | 5.370095 | 4.253832 | 3.416935 |
| 30 | H  | 3.964557 | 4.713063 | 4.293232 | 3.164017 | 2.857634 |



|    |    |          |          |          |          |          |
|----|----|----------|----------|----------|----------|----------|
| 31 | C  | 3.325525 | 4.239231 | 4.434833 | 3.746046 | 2.947411 |
| 32 | O  | 3.976660 | 4.586470 | 4.658112 | 4.137062 | 3.666104 |
| 33 | O  | 3.153809 | 4.248839 | 4.823578 | 4.302566 | 3.215224 |
| 34 | H  | 3.423558 | 4.328492 | 5.059506 | 4.782201 | 3.795131 |
|    |    | 6        | 7        | 8        | 9        | 10       |
| 6  | C  | 0.000000 |          |          |          |          |
| 7  | H  | 2.824337 | 0.000000 |          |          |          |
| 8  | H  | 4.680713 | 2.761209 | 0.000000 |          |          |
| 9  | H  | 1.091358 | 3.715121 | 5.350766 | 0.000000 |          |
| 10 | H  | 1.088266 | 2.501481 | 4.859981 | 1.765870 | 0.000000 |
| 11 | Br | 6.766792 | 4.536310 | 2.339424 | 7.553999 | 6.882726 |
| 12 | H  | 2.856887 | 4.224203 | 4.260138 | 2.736647 | 3.826988 |
| 13 | C  | 4.918665 | 4.624769 | 2.861467 | 5.151513 | 5.611458 |
| 14 | C  | 6.020322 | 5.210332 | 2.834250 | 6.364192 | 6.616374 |
| 15 | H  | 5.099236 | 5.345540 | 3.895537 | 5.127303 | 5.913038 |
| 16 | H  | 6.960232 | 6.289755 | 3.881998 | 7.223460 | 7.612324 |
| 17 | H  | 6.188243 | 4.882229 | 2.230643 | 6.682383 | 6.645698 |
| 18 | C  | 5.587566 | 3.927102 | 4.066923 | 6.640176 | 5.618740 |
| 19 | C  | 6.367688 | 4.791197 | 5.405197 | 7.452359 | 6.244797 |
| 20 | O  | 5.045900 | 3.409883 | 4.512107 | 6.136586 | 4.841577 |
| 21 | H  | 5.276928 | 4.115530 | 4.118149 | 6.280461 | 5.508165 |
| 22 | H  | 5.916685 | 3.866673 | 3.450095 | 6.934319 | 5.923686 |
| 23 | H  | 7.149964 | 5.266670 | 5.790780 | 8.239606 | 6.917067 |
| 24 | C  | 6.856722 | 5.819475 | 6.604650 | 7.909422 | 6.813570 |
| 25 | H  | 7.159793 | 6.195612 | 7.329425 | 8.205347 | 6.989081 |
| 26 | H  | 7.819351 | 6.726316 | 7.192190 | 8.862761 | 7.835006 |
| 27 | H  | 6.264216 | 5.642284 | 6.470958 | 7.272111 | 6.353754 |
| 28 | C  | 1.535582 | 3.648627 | 5.399592 | 2.175747 | 2.172929 |
| 29 | H  | 2.141803 | 4.349194 | 6.381180 | 2.527510 | 2.435947 |
| 30 | H  | 2.184562 | 4.401708 | 5.695954 | 2.481986 | 3.079852 |
| 31 | C  | 2.550437 | 3.340973 | 4.993092 | 3.490246 | 2.867670 |
| 32 | O  | 3.546957 | 4.129622 | 5.220605 | 4.408174 | 4.017697 |
| 33 | O  | 2.842923 | 2.740540 | 4.871305 | 3.890199 | 2.648193 |
| 34 | H  | 3.715078 | 2.932432 | 4.744108 | 4.791736 | 3.524488 |
|    |    | 11       | 12       | 13       | 14       | 15       |
| 11 | Br | 0.000000 |          |          |          |          |
| 12 | H  | 6.339056 | 0.000000 |          |          |          |
| 13 | C  | 4.417671 | 2.786549 | 0.000000 |          |          |
| 14 | C  | 3.693317 | 4.093622 | 1.326598 | 0.000000 |          |
| 15 | H  | 5.490980 | 2.506905 | 1.082985 | 2.131272 | 0.000000 |
| 16 | H  | 4.424277 | 4.774080 | 2.072059 | 1.082783 | 2.446949 |
| 17 | H  | 2.623836 | 4.707944 | 2.134965 | 1.092004 | 3.115243 |
| 18 | C  | 3.863842 | 6.304929 | 5.897676 | 5.897987 | 6.758099 |
| 19 | C  | 5.087471 | 7.497818 | 7.331609 | 7.362951 | 8.167372 |

|    |   |           |          |          |          |          |
|----|---|-----------|----------|----------|----------|----------|
| 20 | O | 4.774529  | 6.422556 | 6.513264 | 6.726755 | 7.327522 |
| 21 | H | 4.163087  | 5.707819 | 5.421688 | 5.512170 | 6.181239 |
| 22 | H | 2.858793  | 6.397683 | 5.565759 | 5.378789 | 6.524135 |
| 23 | H | 5.171744  | 8.333357 | 7.979546 | 7.896370 | 8.882515 |
| 24 | C | 6.395588  | 8.045122 | 8.177450 | 8.303683 | 8.900591 |
| 25 | H | 7.225999  | 8.668592 | 9.009770 | 9.206760 | 9.721038 |
| 26 | H | 6.674520  | 8.780698 | 8.695044 | 8.694023 | 9.428355 |
| 27 | H | 6.537662  | 7.353778 | 7.706242 | 7.951604 | 8.331176 |
| 28 | C | 7.206634  | 3.417903 | 5.522471 | 6.574461 | 5.666365 |
| 29 | H | 8.176034  | 4.331345 | 6.582079 | 7.655079 | 6.682978 |
| 30 | H | 7.486196  | 3.017262 | 5.285333 | 6.390117 | 5.260654 |
| 31 | C | 6.411089  | 4.176479 | 5.619679 | 6.436744 | 5.989461 |
| 32 | O | 6.335768  | 4.480381 | 5.629592 | 6.328587 | 5.989410 |
| 33 | O | 6.183137  | 4.948543 | 6.130042 | 6.837090 | 6.655549 |
| 34 | H | 5.691221  | 5.516036 | 6.289104 | 6.818163 | 6.929153 |
|    |   | 16        | 17       | 18       | 19       | 20       |
| 16 | H | 0.000000  |          |          |          |          |
| 17 | H | 1.864612  | 0.000000 |          |          |          |
| 18 | C | 6.794659  | 5.249926 | 0.000000 |          |          |
| 19 | C | 8.258276  | 6.697015 | 1.466094 | 0.000000 |          |
| 20 | O | 7.713123  | 6.135451 | 1.463904 | 1.451867 | 0.000000 |
| 21 | H | 6.358195  | 5.022500 | 1.086359 | 2.195947 | 2.139297 |
| 22 | H | 6.265113  | 4.589359 | 1.086836 | 2.239577 | 2.156078 |
| 23 | H | 8.786064  | 7.121636 | 2.185218 | 1.087557 | 2.108393 |
| 24 | C | 9.150569  | 7.752531 | 2.604622 | 1.503870 | 2.517655 |
| 25 | H | 10.094472 | 8.655168 | 3.445694 | 2.151935 | 2.929893 |
| 26 | H | 9.463026  | 8.108713 | 3.142445 | 2.137059 | 3.421139 |
| 27 | H | 8.779313  | 7.530736 | 2.736506 | 2.151449 | 2.710517 |
| 28 | C | 7.471781  | 6.736099 | 5.276953 | 5.895684 | 4.751375 |
| 29 | H | 8.552450  | 7.810199 | 6.000095 | 6.410231 | 5.279742 |
| 30 | H | 7.183883  | 6.697039 | 5.708649 | 6.433161 | 5.419197 |
| 31 | C | 7.375013  | 6.390517 | 3.902853 | 4.416416 | 3.378851 |
| 32 | O | 7.183684  | 6.286529 | 3.598135 | 4.139811 | 3.448030 |
| 33 | O | 7.853543  | 6.613364 | 3.563546 | 3.858257 | 2.609136 |
| 34 | H | 7.831175  | 6.458058 | 2.691799 | 2.858199 | 1.637583 |
|    |   | 21        | 22       | 23       | 24       | 25       |
| 21 | H | 0.000000  |          |          |          |          |
| 22 | H | 1.844191  | 0.000000 |          |          |          |
| 23 | H | 3.109876  | 2.533394 | 0.000000 |          |          |
| 24 | C | 2.801875  | 3.560841 | 2.208100 | 0.000000 |          |
| 25 | H | 3.752373  | 4.368000 | 2.562829 | 1.093883 | 0.000000 |
| 26 | H | 3.286029  | 3.960268 | 2.557792 | 1.094235 | 1.768367 |
| 27 | H | 2.520989  | 3.801768 | 3.099856 | 1.092080 | 1.778293 |
| 28 | C | 4.792631  | 5.858269 | 6.810811 | 6.062475 | 6.342530 |

|    |   |          |          |          |          |          |
|----|---|----------|----------|----------|----------|----------|
| 29 | H | 5.582480 | 6.658269 | 7.299625 | 6.434217 | 6.543484 |
| 30 | H | 5.044395 | 6.288778 | 7.413253 | 6.500891 | 6.885116 |
| 31 | C | 3.439892 | 4.622709 | 5.370567 | 4.542822 | 4.872889 |
| 32 | O | 2.871720 | 4.422799 | 5.192571 | 4.043961 | 4.547782 |
| 33 | O | 3.486777 | 4.231157 | 4.654144 | 4.207705 | 4.365846 |
| 34 | H | 2.775755 | 3.437933 | 3.655483 | 3.305646 | 3.522051 |
|    |   | 26       | 27       | 28       | 29       | 30       |
| 26 | H | 0.000000 |          |          |          |          |
| 27 | H | 1.774772 | 0.000000 |          |          |          |
| 28 | C | 6.999740 | 5.310478 | 0.000000 |          |          |
| 29 | H | 7.411657 | 5.688522 | 1.094621 | 0.000000 |          |
| 30 | H | 7.343665 | 5.636735 | 1.090555 | 1.766318 | 0.000000 |
| 31 | C | 5.481109 | 3.813934 | 1.524368 | 2.145936 | 2.126556 |
| 32 | O | 4.836091 | 3.147678 | 2.407158 | 3.047836 | 2.517342 |
| 33 | O | 5.252037 | 3.762639 | 2.366333 | 2.716624 | 3.267268 |
| 34 | H | 4.349389 | 3.007307 | 3.250456 | 3.666819 | 4.028244 |
|    |   | 31       | 32       | 33       | 34       |          |
| 31 | C | 0.000000 |          |          |          |          |
| 32 | O | 1.208238 | 0.000000 |          |          |          |
| 33 | O | 1.331978 | 2.255903 | 0.000000 |          |          |
| 34 | H | 1.933719 | 2.394514 | 1.004983 | 0.000000 |          |

Stoichiometry C<sub>11</sub>H<sub>17</sub>BrN<sub>2</sub>O<sub>3</sub>

Framework group C1[X(C<sub>11</sub>H<sub>17</sub>BrN<sub>2</sub>O<sub>3</sub>)]

Deg. of freedom 96

Full point group C1 NOp 1

Largest Abelian subgroup C1 NOp 1

Largest concise Abelian subgroup C1 NOp 1

Standard orientation:

| Center Number | Atomic Number | Atomic Type | Coordinates (Angstroms) |           |           |
|---------------|---------------|-------------|-------------------------|-----------|-----------|
|               |               |             | X                       | Y         | Z         |
| 1             | 6             | 0           | 0.075588                | 1.329354  | 1.239316  |
| 2             | 6             | 0           | -1.154387               | 1.256940  | 0.665132  |
| 3             | 7             | 0           | -1.214638               | 2.288408  | -0.262756 |
| 4             | 6             | 0           | -0.053537               | 2.961355  | -0.240560 |
| 5             | 7             | 0           | 0.751354                | 2.396805  | 0.668105  |
| 6             | 6             | 0           | 2.158955                | 2.753736  | 0.922836  |
| 7             | 1             | 0           | 0.534801                | 0.699185  | 1.980107  |
| 8             | 1             | 0           | -1.940357               | 0.499370  | 0.772655  |
| 9             | 1             | 0           | 2.233734                | 3.841872  | 0.960660  |
| 10            | 1             | 0           | 2.402798                | 2.361359  | 1.908181  |
| 11            | 35            | 0           | -3.070117               | -1.498860 | 0.321413  |
| 12            | 1             | 0           | 0.190706                | 3.807306  | -0.859801 |

|    |   |   |           |           |           |
|----|---|---|-----------|-----------|-----------|
| 13 | 6 | 0 | -2.306718 | 2.601950  | -1.133371 |
| 14 | 6 | 0 | -3.348061 | 1.800419  | -1.315074 |
| 15 | 1 | 0 | -2.181690 | 3.556183  | -1.630023 |
| 16 | 1 | 0 | -4.128137 | 2.118955  | -1.995101 |
| 17 | 1 | 0 | -3.452389 | 0.825367  | -0.834595 |
| 18 | 6 | 0 | 0.611261  | -2.462704 | -0.347711 |
| 19 | 6 | 0 | 1.586893  | -3.514066 | -0.044043 |
| 20 | 8 | 0 | 1.629610  | -2.258632 | 0.683954  |
| 21 | 1 | 0 | 0.774120  | -1.858174 | -1.235515 |
| 22 | 1 | 0 | -0.408991 | -2.500463 | 0.024943  |
| 23 | 1 | 0 | 1.249299  | -4.330331 | 0.590402  |
| 24 | 6 | 0 | 2.754998  | -3.817769 | -0.941217 |
| 25 | 1 | 0 | 3.622812  | -4.137008 | -0.356780 |
| 26 | 1 | 0 | 2.493134  | -4.631604 | -1.624188 |
| 27 | 1 | 0 | 3.030391  | -2.942539 | -1.533474 |
| 28 | 6 | 0 | 3.109118  | 2.180927  | -0.138811 |
| 29 | 1 | 0 | 4.135322  | 2.362927  | 0.195816  |
| 30 | 1 | 0 | 2.977977  | 2.677332  | -1.100941 |
| 31 | 6 | 0 | 2.918955  | 0.684779  | -0.360341 |
| 32 | 8 | 0 | 2.771528  | 0.193478  | -1.454292 |
| 33 | 8 | 0 | 2.906685  | 0.014106  | 0.790403  |
| 34 | 1 | 0 | 2.582591  | -0.927254 | 0.653304  |

-----

Rotational constants (GHZ):      0.3287417      0.2548547      0.1596103

Standard basis: 6-311++G(d,p) (5D, 7F)

There are    538 symmetry adapted cartesian basis functions of A    symmetry.

There are    519 symmetry adapted basis functions of A    symmetry.

519 basis functions,    823 primitive gaussians,    538 cartesian basis functions

78 alpha electrons      78 beta electrons

nuclear repulsion energy      1572.9077503193 Hartrees.

NAtoms=    34 NActive=    34 NUniq=    34 SFac= 1.00D+00 NAtFMM=    60 NAOKFM=F

Big=F

Integral buffers will be    131072 words long.

Raffenetti 2 integral format.

Two-electron integral symmetry is turned on.

One-electron integrals computed using PRISM.

NBasis=    519 RedAO= T EigKep=    3.53D-06    NBF=    519

NBsUse=    519 1.00D-06 EigRej= -1.00D+00    NBFU=    519

Initial guess from the checkpoint file:    "/coohpo.chk"

B after Tr=    0.000000    0.000000    0.000000

Rot=    1.000000    0.000005    0.000017    -0.000167 Ang=    0.02 deg.

Requested convergence on RMS density matrix=1.00D-08 within 128 cycles.

Requested convergence on MAX density matrix=1.00D-06.

Requested convergence on      energy=1.00D-06.

No special actions if energy rises.

SCF Done: E(RB3LYP) = -3338.90388346 A.U. after 9 cycles

NFock= 9 Conv=0.40D-08 -V/T= 2.0019

Calling FoFJK, ICntrl= 2127 FMM=F ISym2X=0 l1Cent= 0 IOpClX= 0 NMat=1 NMatS=1

NMatT=0.

\*\*\*\*\* Axes restored to original set \*\*\*\*\*

| Center<br>Number | Atomic<br>Number | Forces (Hartrees/Bohr) |              |              |
|------------------|------------------|------------------------|--------------|--------------|
|                  |                  | X                      | Y            | Z            |
| 1                | 6                | -0.000007084           | 0.000006334  | 0.000022093  |
| 2                | 6                | 0.000016564            | -0.000002373 | 0.000000201  |
| 3                | 7                | 0.000021992            | 0.000031106  | -0.000008496 |
| 4                | 6                | 0.000002175            | -0.000018146 | -0.000003853 |
| 5                | 7                | -0.000016478           | 0.000003464  | 0.000001998  |
| 6                | 6                | 0.000020784            | -0.000011963 | -0.000009463 |
| 7                | 1                | 0.000000698            | 0.000000972  | -0.000006954 |
| 8                | 1                | -0.000015668           | -0.000000028 | -0.000017222 |
| 9                | 1                | 0.000002927            | 0.000001059  | -0.000004795 |
| 10               | 1                | -0.000002900           | 0.000004470  | 0.000002464  |
| 11               | 35               | 0.000002347            | 0.000001826  | 0.000009902  |
| 12               | 1                | -0.000008574           | 0.000007564  | 0.000002505  |
| 13               | 6                | -0.000025302           | -0.000031408 | -0.000008415 |
| 14               | 6                | 0.000003337            | 0.000025114  | -0.000004620 |
| 15               | 1                | 0.000004034            | 0.000007096  | -0.000004629 |
| 16               | 1                | -0.000002809           | -0.000002390 | -0.000000278 |
| 17               | 1                | -0.000005252           | -0.000004550 | -0.000000383 |
| 18               | 6                | 0.000000100            | -0.000005871 | -0.000004702 |
| 19               | 6                | 0.000008487            | -0.000016079 | -0.000028303 |
| 20               | 8                | 0.000014609            | 0.000036567  | 0.000010289  |
| 21               | 1                | -0.000003297           | -0.000006034 | 0.000006878  |
| 22               | 1                | -0.000002317           | 0.000002475  | 0.000000828  |
| 23               | 1                | -0.000010384           | -0.000000618 | 0.000010906  |
| 24               | 6                | 0.000005564            | -0.000001840 | 0.000025552  |
| 25               | 1                | -0.000001258           | -0.000003415 | 0.000004744  |
| 26               | 1                | -0.000002485           | -0.000003626 | 0.000004200  |
| 27               | 1                | 0.000001403            | -0.000003919 | 0.000000306  |
| 28               | 6                | 0.000019359            | -0.000001767 | -0.000014308 |
| 29               | 1                | -0.000002906           | -0.000001736 | 0.000003940  |
| 30               | 1                | 0.000000706            | -0.000000169 | 0.000001324  |
| 31               | 6                | -0.000003200           | 0.000008505  | -0.000025696 |
| 32               | 8                | 0.000000697            | -0.000010045 | 0.000008698  |
| 33               | 8                | 0.000014327            | 0.000013129  | 0.000017943  |
| 34               | 1                | -0.000030195           | -0.000023702 | 0.000007346  |

-----  
Cartesian Forces: Max 0.000036567 RMS 0.000012050

GradGradGradGradGradGradGradGradGradGradGradGradGradGradGradGradGradGradGrad

Berny optimization.

Using GEDIIS/GDIIS optimizer.

FormGI is forming the generalized inverse of G from B-inverse, IUseBI=4.

Internal Forces: Max 0.000032753 RMS 0.000006733

Search for a local minimum.

Step number 39 out of a maximum of 175

All quantities printed in internal units (Hartrees-Bohrs-Radians)

Mixed Optimization -- En-DIIS/RFO-DIIS

Swapping is turned off.

Update second derivatives using D2CorX and points

|    |    |    |    |    |    |    |  |  |  |
|----|----|----|----|----|----|----|--|--|--|
| 21 | 22 | 23 | 24 | 25 |    |    |  |  |  |
|    |    | 26 | 27 | 28 | 29 | 30 |  |  |  |
|    |    | 31 | 32 | 33 | 34 | 35 |  |  |  |
|    |    | 36 | 37 | 38 | 39 |    |  |  |  |

DE= 1.05D-07 DEPred=-1.31D-07 R=-8.01D-01

Trust test=-8.01D-01 RLast= 6.13D-03 DXMaxT set to 1.95D-01

ITU= -1 1 1 1 1 1 1 1 -1 1 1 1 1 1 -1 0 1 1 1 1

ITU= 1 1 1 1 1 1 0 0 -1 1 1 1 0 1 0 -1 0 1 0

|                 |         |         |         |         |         |
|-----------------|---------|---------|---------|---------|---------|
| Eigenvalues --- | 0.00176 | 0.00258 | 0.00375 | 0.00404 | 0.00452 |
| Eigenvalues --- | 0.00554 | 0.00833 | 0.00952 | 0.01189 | 0.01240 |
| Eigenvalues --- | 0.01403 | 0.02015 | 0.02044 | 0.02209 | 0.02287 |
| Eigenvalues --- | 0.02377 | 0.02469 | 0.02632 | 0.03028 | 0.03146 |
| Eigenvalues --- | 0.03406 | 0.03613 | 0.03851 | 0.04333 | 0.04567 |
| Eigenvalues --- | 0.04865 | 0.05026 | 0.05281 | 0.05480 | 0.05732 |
| Eigenvalues --- | 0.05796 | 0.05964 | 0.06207 | 0.07490 | 0.09389 |
| Eigenvalues --- | 0.09634 | 0.11733 | 0.12580 | 0.12878 | 0.13114 |
| Eigenvalues --- | 0.13611 | 0.13981 | 0.15123 | 0.15665 | 0.15984 |
| Eigenvalues --- | 0.16005 | 0.16008 | 0.16043 | 0.16064 | 0.16203 |
| Eigenvalues --- | 0.16525 | 0.17660 | 0.19455 | 0.21238 | 0.22188 |
| Eigenvalues --- | 0.23307 | 0.23662 | 0.24042 | 0.25363 | 0.26513 |
| Eigenvalues --- | 0.28196 | 0.29098 | 0.29850 | 0.31538 | 0.32095 |
| Eigenvalues --- | 0.33359 | 0.34369 | 0.34507 | 0.34607 | 0.34747 |
| Eigenvalues --- | 0.34892 | 0.34902 | 0.34967 | 0.35088 | 0.35292 |
| Eigenvalues --- | 0.35332 | 0.35659 | 0.35794 | 0.35923 | 0.36619 |
| Eigenvalues --- | 0.37047 | 0.37263 | 0.38018 | 0.38585 | 0.39614 |
| Eigenvalues --- | 0.40808 | 0.45412 | 0.49307 | 0.50349 | 0.51037 |
| Eigenvalues --- | 0.54576 | 0.56036 | 0.56825 | 0.61442 | 0.90899 |
| Eigenvalues --- | 0.97604 |         |         |         |         |

En-DIIS/RFO-DIIS IScMMF= 0 using points: 39 38 37 36 35

RFO step: Lambda=-1.70639101D-08.

DidBck=F Rises=F RFO-DIIS coefs: 1.34594 -0.24565 -0.34324 0.28410 -

0.04115

| Iteration | 1 | RMS(Cart)= | 0.00079446 | RMS(Int)=           | 0.00000022        |                    |         |
|-----------|---|------------|------------|---------------------|-------------------|--------------------|---------|
| Iteration | 2 | RMS(Cart)= | 0.00000033 | RMS(Int)=           | 0.00000008        |                    |         |
| Variable  |   | Old X      | -DE/DX     | Delta X<br>(Linear) | Delta X<br>(Quad) | Delta X<br>(Total) | New X   |
| R1        |   | 2.56876    | 0.00000    | -0.00001            | 0.00000           | -0.00001           | 2.56874 |
| R2        |   | 2.62011    | 0.00000    | 0.00000             | 0.00002           | 0.00002            | 2.62013 |
| R3        |   | 2.03245    | 0.00000    | 0.00000             | 0.00000           | 0.00000            | 2.03246 |
| R4        |   | 2.62429    | 0.00001    | -0.00002            | 0.00000           | -0.00001           | 2.62428 |
| R5        |   | 2.07287    | 0.00000    | -0.00003            | 0.00002           | 0.00000            | 2.07287 |
| R6        |   | 2.53639    | -0.00001   | 0.00001             | -0.00002          | -0.00001           | 2.53638 |
| R7        |   | 2.70496    | 0.00003    | 0.00000             | 0.00003           | 0.00002            | 2.70499 |
| R8        |   | 2.52986    | 0.00000    | 0.00000             | 0.00000           | 0.00000            | 2.52986 |
| R9        |   | 2.03420    | 0.00000    | 0.00000             | 0.00000           | 0.00000            | 2.03420 |
| R10       |   | 2.78607    | 0.00001    | 0.00001             | 0.00000           | 0.00001            | 2.78608 |
| R11       |   | 2.06237    | 0.00000    | 0.00000             | 0.00000           | 0.00000            | 2.06237 |
| R12       |   | 2.05653    | 0.00000    | 0.00000             | 0.00000           | 0.00000            | 2.05653 |
| R13       |   | 2.90183    | 0.00001    | -0.00002            | 0.00002           | 0.00000            | 2.90183 |
| R14       |   | 4.42087    | 0.00001    | 0.00000             | -0.00010          | -0.00010           | 4.42077 |
| R15       |   | 2.50691    | -0.00001   | 0.00001             | -0.00002          | 0.00000            | 2.50690 |
| R16       |   | 2.04655    | 0.00000    | 0.00000             | 0.00000           | 0.00000            | 2.04654 |
| R17       |   | 2.04616    | 0.00000    | -0.00001            | 0.00001           | 0.00000            | 2.04616 |
| R18       |   | 2.06359    | 0.00000    | -0.00001            | 0.00000           | 0.00000            | 2.06358 |
| R19       |   | 2.77052    | 0.00000    | -0.00002            | 0.00000           | -0.00002           | 2.77050 |
| R20       |   | 2.76638    | 0.00001    | 0.00002             | 0.00001           | 0.00003            | 2.76641 |
| R21       |   | 2.05292    | 0.00000    | 0.00000             | 0.00000           | 0.00000            | 2.05292 |
| R22       |   | 2.05382    | 0.00000    | 0.00001             | 0.00000           | 0.00001            | 2.05383 |
| R23       |   | 2.74363    | 0.00002    | -0.00002            | 0.00002           | -0.00001           | 2.74362 |
| R24       |   | 2.05518    | 0.00000    | 0.00000             | 0.00000           | 0.00000            | 2.05519 |
| R25       |   | 2.84190    | -0.00001   | 0.00000             | -0.00001          | -0.00001           | 2.84189 |
| R26       |   | 3.09458    | -0.00001   | 0.00005             | -0.00003          | 0.00002            | 3.09461 |
| R27       |   | 2.06714    | 0.00000    | -0.00001            | 0.00000           | -0.00001           | 2.06713 |
| R28       |   | 2.06780    | 0.00000    | 0.00000             | 0.00000           | 0.00000            | 2.06781 |
| R29       |   | 2.06373    | 0.00000    | 0.00000             | 0.00000           | 0.00000            | 2.06373 |
| R30       |   | 2.06853    | 0.00000    | 0.00000             | -0.00001          | -0.00001           | 2.06852 |
| R31       |   | 2.06085    | 0.00000    | 0.00000             | -0.00001          | -0.00001           | 2.06085 |
| R32       |   | 2.88064    | -0.00001   | 0.00000             | -0.00003          | -0.00003           | 2.88061 |
| R33       |   | 2.28324    | 0.00000    | 0.00000             | 0.00000           | 0.00000            | 2.28324 |
| R34       |   | 2.51707    | 0.00002    | 0.00000             | 0.00002           | 0.00001            | 2.51709 |
| R35       |   | 1.89914    | 0.00000    | -0.00002            | -0.00002          | -0.00004           | 1.89910 |
| A1        |   | 1.88389    | 0.00000    | 0.00000             | -0.00001          | -0.00001           | 1.88387 |
| A2        |   | 2.27321    | 0.00001    | -0.00002            | 0.00001           | -0.00001           | 2.27320 |
| A3        |   | 2.12557    | 0.00000    | 0.00002             | 0.00000           | 0.00002            | 2.12558 |
| A4        |   | 1.85660    | 0.00000    | 0.00001             | -0.00001          | 0.00000            | 1.85660 |

|     |         |          |          |          |          |         |
|-----|---------|----------|----------|----------|----------|---------|
| A5  | 2.27016 | -0.00001 | -0.00005 | 0.00007  | 0.00002  | 2.27018 |
| A6  | 2.15002 | 0.00001  | 0.00004  | -0.00006 | -0.00001 | 2.15001 |
| A7  | 1.90055 | 0.00000  | -0.00001 | 0.00003  | 0.00002  | 1.90057 |
| A8  | 2.21704 | 0.00001  | -0.00001 | -0.00005 | -0.00006 | 2.21698 |
| A9  | 2.16547 | -0.00001 | 0.00002  | 0.00002  | 0.00004  | 2.16551 |
| A10 | 1.89642 | 0.00000  | 0.00000  | -0.00002 | -0.00002 | 1.89640 |
| A11 | 2.19049 | 0.00000  | -0.00002 | 0.00002  | 0.00000  | 2.19049 |
| A12 | 2.19622 | 0.00000  | 0.00002  | 0.00000  | 0.00002  | 2.19624 |
| A13 | 1.88731 | 0.00000  | -0.00001 | 0.00002  | 0.00001  | 1.88732 |
| A14 | 2.19019 | 0.00000  | -0.00006 | 0.00000  | -0.00006 | 2.19013 |
| A15 | 2.20086 | 0.00000  | 0.00004  | -0.00002 | 0.00003  | 2.20089 |
| A16 | 1.88893 | -0.00001 | 0.00001  | 0.00001  | 0.00002  | 1.88895 |
| A17 | 1.85779 | -0.00001 | -0.00001 | -0.00002 | -0.00004 | 1.85776 |
| A18 | 1.96167 | 0.00002  | -0.00004 | 0.00006  | 0.00001  | 1.96169 |
| A19 | 1.88889 | 0.00000  | 0.00000  | -0.00001 | -0.00001 | 1.88888 |
| A20 | 1.93209 | -0.00001 | -0.00001 | -0.00001 | -0.00002 | 1.93207 |
| A21 | 1.93140 | 0.00000  | 0.00005  | -0.00002 | 0.00003  | 1.93143 |
| A22 | 2.73137 | 0.00001  | 0.00026  | 0.00022  | 0.00048  | 2.73185 |
| A23 | 2.15298 | 0.00000  | 0.00003  | -0.00006 | -0.00003 | 2.15295 |
| A24 | 1.96476 | -0.00001 | -0.00001 | 0.00001  | 0.00000  | 1.96476 |
| A25 | 2.16540 | 0.00001  | -0.00002 | 0.00005  | 0.00003  | 2.16543 |
| A26 | 2.06440 | 0.00000  | -0.00003 | 0.00002  | 0.00000  | 2.06439 |
| A27 | 2.15822 | 0.00001  | 0.00001  | 0.00000  | 0.00001  | 2.15823 |
| A28 | 2.06029 | -0.00001 | 0.00002  | -0.00003 | -0.00001 | 2.06029 |
| A29 | 2.05846 | 0.00001  | 0.00008  | -0.00002 | 0.00006  | 2.05852 |
| A30 | 2.12794 | -0.00001 | -0.00012 | 0.00005  | -0.00007 | 2.12787 |
| A31 | 1.97585 | 0.00001  | 0.00001  | 0.00003  | 0.00004  | 1.97589 |
| A32 | 2.00009 | -0.00001 | 0.00002  | -0.00007 | -0.00005 | 2.00004 |
| A33 | 2.02670 | 0.00000  | 0.00002  | 0.00000  | 0.00002  | 2.02672 |
| A34 | 2.04036 | -0.00001 | -0.00002 | -0.00003 | -0.00006 | 2.04030 |
| A35 | 2.13903 | 0.00001  | 0.00003  | 0.00005  | 0.00008  | 2.13910 |
| A36 | 1.94510 | -0.00001 | 0.00001  | -0.00007 | -0.00006 | 1.94503 |
| A37 | 2.03858 | 0.00001  | 0.00003  | 0.00004  | 0.00007  | 2.03865 |
| A38 | 2.02368 | 0.00000  | -0.00003 | 0.00000  | -0.00003 | 2.02365 |
| A39 | 2.10014 | 0.00000  | -0.00021 | -0.00013 | -0.00034 | 2.09980 |
| A40 | 2.36136 | 0.00001  | 0.00052  | 0.00023  | 0.00075  | 2.36211 |
| A41 | 1.93522 | 0.00000  | 0.00000  | 0.00002  | 0.00002  | 1.93524 |
| A42 | 1.91418 | 0.00000  | -0.00002 | 0.00000  | -0.00002 | 1.91416 |
| A43 | 1.93645 | 0.00000  | 0.00000  | 0.00000  | 0.00000  | 1.93645 |
| A44 | 1.88207 | 0.00000  | 0.00001  | 0.00001  | 0.00001  | 1.88208 |
| A45 | 1.90031 | 0.00000  | 0.00001  | 0.00000  | 0.00001  | 1.90032 |
| A46 | 1.89433 | 0.00000  | -0.00001 | -0.00002 | -0.00003 | 1.89430 |
| A47 | 1.88254 | -0.00001 | 0.00003  | -0.00004 | -0.00001 | 1.88253 |
| A48 | 1.94523 | 0.00000  | -0.00002 | -0.00002 | -0.00004 | 1.94519 |



|     |          |          |          |          |          |          |
|-----|----------|----------|----------|----------|----------|----------|
| A49 | 1.97078  | 0.00000  | 0.00001  | -0.00006 | -0.00005 | 1.97072  |
| A50 | 1.88258  | 0.00000  | -0.00002 | 0.00005  | 0.00004  | 1.88261  |
| A51 | 1.90135  | 0.00000  | 0.00000  | 0.00005  | 0.00005  | 1.90140  |
| A52 | 1.87921  | 0.00000  | 0.00000  | 0.00002  | 0.00002  | 1.87923  |
| A53 | 2.14826  | 0.00001  | -0.00001 | 0.00004  | 0.00003  | 2.14829  |
| A54 | 1.94958  | 0.00000  | 0.00001  | -0.00005 | -0.00004 | 1.94954  |
| A55 | 2.18505  | -0.00001 | 0.00000  | 0.00001  | 0.00000  | 2.18505  |
| A56 | 1.93559  | -0.00001 | 0.00006  | -0.00006 | 0.00000  | 1.93558  |
| A57 | 2.81350  | 0.00003  | 0.00007  | 0.00016  | 0.00023  | 2.81373  |
| D1  | 0.00357  | 0.00000  | -0.00003 | -0.00001 | -0.00004 | 0.00353  |
| D2  | 3.02436  | 0.00000  | 0.00002  | 0.00002  | 0.00004  | 3.02440  |
| D3  | -3.10314 | 0.00000  | 0.00003  | 0.00003  | 0.00006  | -3.10308 |
| D4  | -0.08234 | 0.00001  | 0.00008  | 0.00005  | 0.00014  | -0.08221 |
| D5  | -0.00274 | 0.00000  | 0.00001  | 0.00008  | 0.00009  | -0.00265 |
| D6  | -3.04401 | 0.00000  | 0.00022  | 0.00010  | 0.00032  | -3.04369 |
| D7  | 3.10753  | 0.00000  | -0.00005 | 0.00005  | 0.00000  | 3.10753  |
| D8  | 0.06626  | 0.00000  | 0.00016  | 0.00007  | 0.00023  | 0.06649  |
| D9  | -0.00318 | 0.00000  | 0.00005  | -0.00007 | -0.00002 | -0.00320 |
| D10 | 3.12170  | 0.00001  | 0.00012  | 0.00000  | 0.00011  | 3.12181  |
| D11 | -3.03436 | 0.00000  | 0.00001  | -0.00011 | -0.00009 | -3.03445 |
| D12 | 0.09052  | 0.00000  | 0.00008  | -0.00004 | 0.00004  | 0.09056  |
| D13 | -1.48427 | 0.00000  | -0.00030 | 0.00064  | 0.00035  | -1.48392 |
| D14 | 1.51873  | 0.00001  | -0.00024 | 0.00068  | 0.00044  | 1.51916  |
| D15 | 0.00152  | 0.00000  | -0.00005 | 0.00012  | 0.00008  | 0.00159  |
| D16 | 3.13217  | 0.00001  | -0.00006 | 0.00010  | 0.00004  | 3.13221  |
| D17 | -3.12396 | 0.00000  | -0.00011 | 0.00006  | -0.00005 | -3.12402 |
| D18 | 0.00668  | 0.00000  | -0.00013 | 0.00004  | -0.00009 | 0.00659  |
| D19 | -0.19413 | 0.00000  | 0.00025  | -0.00003 | 0.00023  | -0.19391 |
| D20 | 2.95723  | 0.00000  | 0.00028  | -0.00003 | 0.00025  | 2.95748  |
| D21 | 2.92837  | 0.00001  | 0.00033  | 0.00005  | 0.00038  | 2.92875  |
| D22 | -0.20345 | 0.00000  | 0.00036  | 0.00004  | 0.00040  | -0.20305 |
| D23 | 0.00073  | 0.00000  | 0.00003  | -0.00012 | -0.00010 | 0.00063  |
| D24 | 3.04122  | 0.00000  | -0.00020 | -0.00015 | -0.00034 | 3.04088  |
| D25 | -3.12988 | -0.00001 | 0.00004  | -0.00010 | -0.00006 | -3.12994 |
| D26 | -0.08938 | -0.00001 | -0.00018 | -0.00013 | -0.00031 | -0.08969 |
| D27 | -2.46942 | 0.00000  | -0.00029 | 0.00008  | -0.00021 | -2.46963 |
| D28 | -0.44245 | -0.00001 | -0.00028 | 0.00006  | -0.00022 | -0.44267 |
| D29 | 1.67464  | 0.00000  | -0.00026 | 0.00005  | -0.00021 | 1.67443  |
| D30 | 0.79024  | 0.00000  | -0.00003 | 0.00010  | 0.00007  | 0.79031  |
| D31 | 2.81721  | -0.00001 | -0.00003 | 0.00009  | 0.00006  | 2.81727  |
| D32 | -1.34888 | 0.00000  | 0.00000  | 0.00008  | 0.00007  | -1.34881 |
| D33 | -3.00063 | 0.00000  | 0.00002  | 0.00006  | 0.00008  | -3.00055 |
| D34 | 1.21916  | 0.00000  | 0.00004  | 0.00003  | 0.00007  | 1.21923  |
| D35 | -0.89876 | -0.00001 | 0.00005  | 0.00006  | 0.00011  | -0.89865 |

|     |          |          |          |          |          |          |
|-----|----------|----------|----------|----------|----------|----------|
| D36 | 1.16798  | 0.00000  | 0.00004  | 0.00002  | 0.00006  | 1.16804  |
| D37 | -0.89541 | 0.00000  | 0.00005  | -0.00001 | 0.00004  | -0.89537 |
| D38 | -3.01333 | 0.00000  | 0.00007  | 0.00002  | 0.00009  | -3.01324 |
| D39 | -0.92621 | 0.00000  | 0.00001  | 0.00005  | 0.00006  | -0.92614 |
| D40 | -2.98960 | 0.00000  | 0.00003  | 0.00002  | 0.00005  | -2.98955 |
| D41 | 1.17567  | 0.00000  | 0.00004  | 0.00005  | 0.00009  | 1.17576  |
| D42 | -3.13967 | 0.00000  | 0.00003  | 0.00000  | 0.00003  | -3.13964 |
| D43 | -0.02380 | 0.00000  | 0.00001  | -0.00001 | 0.00001  | -0.02379 |
| D44 | -0.00897 | 0.00000  | 0.00000  | 0.00001  | 0.00000  | -0.00897 |
| D45 | 3.10690  | 0.00000  | -0.00002 | 0.00000  | -0.00002 | 3.10688  |
| D46 | -2.75247 | 0.00000  | 0.00000  | -0.00002 | -0.00003 | -2.75250 |
| D47 | -0.04766 | 0.00000  | -0.00007 | 0.00002  | -0.00005 | -0.04771 |
| D48 | -0.01971 | 0.00000  | -0.00005 | 0.00004  | -0.00001 | -0.01972 |
| D49 | 2.68510  | 0.00000  | -0.00011 | 0.00008  | -0.00003 | 2.68507  |
| D50 | 0.31625  | 0.00000  | 0.00058  | 0.00035  | 0.00093  | 0.31718  |
| D51 | -2.06285 | 0.00001  | 0.00052  | 0.00039  | 0.00091  | -2.06193 |
| D52 | 2.54573  | 0.00001  | 0.00051  | 0.00028  | 0.00078  | 2.54651  |
| D53 | 0.16370  | 0.00001  | 0.00051  | 0.00031  | 0.00082  | 0.16452  |
| D54 | 2.55551  | 0.00000  | 0.00044  | 0.00007  | 0.00051  | 2.55603  |
| D55 | -1.65107 | 0.00000  | 0.00044  | 0.00009  | 0.00053  | -1.65054 |
| D56 | 0.44150  | 0.00000  | 0.00043  | 0.00006  | 0.00049  | 0.44199  |
| D57 | 1.32912  | 0.00000  | 0.00039  | 0.00003  | 0.00043  | 1.32955  |
| D58 | -2.87747 | 0.00000  | 0.00040  | 0.00005  | 0.00045  | -2.87702 |
| D59 | -0.78489 | 0.00000  | 0.00038  | 0.00002  | 0.00040  | -0.78449 |
| D60 | -1.01901 | 0.00000  | 0.00038  | 0.00010  | 0.00048  | -1.01853 |
| D61 | 1.05758  | 0.00000  | 0.00038  | 0.00012  | 0.00050  | 1.05809  |
| D62 | -3.13302 | 0.00000  | 0.00037  | 0.00009  | 0.00046  | -3.13257 |
| D63 | 1.47363  | 0.00001  | 0.00054  | 0.00049  | 0.00103  | 1.47466  |
| D64 | 2.81942  | 0.00001  | 0.00054  | 0.00044  | 0.00098  | 2.82039  |
| D65 | 2.25802  | 0.00000  | -0.00015 | -0.00045 | -0.00061 | 2.25742  |
| D66 | -0.85872 | 0.00000  | -0.00019 | -0.00030 | -0.00049 | -0.85921 |
| D67 | -1.93408 | -0.00001 | -0.00011 | -0.00051 | -0.00062 | -1.93469 |
| D68 | 1.23236  | 0.00000  | -0.00014 | -0.00035 | -0.00050 | 1.23187  |
| D69 | 0.10314  | 0.00000  | -0.00013 | -0.00041 | -0.00054 | 0.10260  |
| D70 | -3.01361 | 0.00000  | -0.00016 | -0.00025 | -0.00042 | -3.01402 |
| D71 | 2.92385  | 0.00001  | 0.00011  | -0.00009 | 0.00002  | 2.92387  |
| D72 | -0.19227 | 0.00001  | 0.00008  | 0.00006  | 0.00014  | -0.19213 |
| D73 | -1.88548 | 0.00001  | -0.00037 | -0.00020 | -0.00058 | -1.88605 |

| Item                 | Value    | Threshold | Converged? |
|----------------------|----------|-----------|------------|
| Maximum Force        | 0.000033 | 0.000450  | YES        |
| RMS Force            | 0.000007 | 0.000300  | YES        |
| Maximum Displacement | 0.003845 | 0.001800  | NO         |
| RMS Displacement     | 0.000794 | 0.001200  | YES        |

Predicted change in Energy=-3.839943D-08

GradGradGradGradGradGradGradGradGradGradGradGradGradGradGradGradGradGradGrad

Input orientation:

| Center<br>Number | Atomic<br>Number | Atomic<br>Type | Coordinates (Angstroms) |           |           |
|------------------|------------------|----------------|-------------------------|-----------|-----------|
|                  |                  |                | X                       | Y         | Z         |
| 1                | 6                | 0              | -0.847435               | 1.644891  | 1.538082  |
| 2                | 6                | 0              | -1.503926               | 0.455158  | 1.574248  |
| 3                | 7                | 0              | -2.364854               | 0.449770  | 0.484621  |
| 4                | 6                | 0              | -2.229334               | 1.606740  | -0.182123 |
| 5                | 7                | 0              | -1.309682               | 2.354485  | 0.440256  |
| 6                | 6                | 0              | -0.775771               | 3.645406  | -0.031031 |
| 7                | 1                | 0              | -0.075574               | 2.032365  | 2.179064  |
| 8                | 1                | 0              | -1.352405               | -0.415483 | 2.224052  |
| 9                | 1                | 0              | -1.613501               | 4.259515  | -0.365911 |
| 10               | 1                | 0              | -0.325419               | 4.127008  | 0.834746  |
| 11               | 35               | 0              | -0.392144               | -2.431663 | 2.920885  |
| 12               | 1                | 0              | -2.764768               | 1.880163  | -1.075041 |
| 13               | 6                | 0              | -3.250027               | -0.603920 | 0.090717  |
| 14               | 6                | 0              | -3.209710               | -1.823350 | 0.611506  |
| 15               | 1                | 0              | -3.944171               | -0.296754 | -0.681726 |
| 16               | 1                | 0              | -3.917926               | -2.558817 | 0.251037  |
| 17               | 1                | 0              | -2.486374               | -2.134763 | 1.367994  |
| 18               | 6                | 0              | 2.555029                | -0.688123 | 1.130024  |
| 19               | 6                | 0              | 3.975382                | -0.375563 | 1.315246  |
| 20               | 8                | 0              | 2.976018                | 0.654988  | 1.532373  |
| 21               | 1                | 0              | 2.171253                | -0.730293 | 0.114589  |
| 22               | 1                | 0              | 1.982504                | -1.226555 | 1.880711  |
| 23               | 1                | 0              | 4.430723                | -0.691277 | 2.251073  |
| 24               | 6                | 0              | 4.917182                | -0.174373 | 0.160196  |
| 25               | 1                | 0              | 5.678747                | 0.572195  | 0.403563  |
| 26               | 1                | 0              | 5.429549                | -1.114548 | -0.065425 |
| 27               | 1                | 0              | 4.377202                | 0.149531  | -0.732075 |
| 28               | 6                | 0              | 0.256665                | 3.476238  | -1.155076 |
| 29               | 1                | 0              | 0.707722                | 4.455013  | -1.346730 |
| 30               | 1                | 0              | -0.212135               | 3.137108  | -2.079480 |
| 31               | 6                | 0              | 1.358971                | 2.483595  | -0.804025 |
| 32               | 8                | 0              | 1.681497                | 1.572426  | -1.529002 |
| 33               | 8                | 0              | 1.883081                | 2.733253  | 0.394792  |
| 34               | 1                | 0              | 2.456702                | 1.967345  | 0.701861  |

Distance matrix (angstroms):

1            2            3            4            5

|    |    |          |          |          |          |          |
|----|----|----------|----------|----------|----------|----------|
| 1  | C  | 0.000000 |          |          |          |          |
| 2  | C  | 1.359321 | 0.000000 |          |          |          |
| 3  | N  | 2.200149 | 1.388710 | 0.000000 |          |          |
| 4  | C  | 2.206854 | 2.221981 | 1.342197 | 0.000000 |          |
| 5  | N  | 1.386513 | 2.220611 | 2.177911 | 1.338745 | 0.000000 |
| 6  | C  | 2.543484 | 3.644834 | 3.605991 | 2.508353 | 1.474330 |
| 7  | H  | 1.075529 | 2.212142 | 3.258304 | 3.224134 | 2.156440 |
| 8  | H  | 2.229504 | 1.096913 | 2.190739 | 3.263138 | 3.294917 |
| 9  | H  | 3.323899 | 4.271926 | 3.975184 | 2.729513 | 2.090777 |
| 10 | H  | 2.632126 | 3.926605 | 4.219474 | 3.318232 | 2.065486 |
| 11 | Br | 4.328709 | 3.373903 | 4.257890 | 5.414114 | 5.468328 |
| 12 | H  | 3.249604 | 3.261763 | 2.153718 | 1.076453 | 2.153690 |
| 13 | C  | 3.595061 | 2.524160 | 1.431417 | 2.450158 | 3.555177 |
| 14 | C  | 4.297392 | 3.004691 | 2.428365 | 3.654655 | 4.592792 |
| 15 | H  | 4.276366 | 3.407285 | 2.100454 | 2.610279 | 3.902364 |
| 16 | H  | 5.362421 | 4.081951 | 3.393846 | 4.515621 | 5.565903 |
| 17 | H  | 4.123206 | 2.777667 | 2.734031 | 4.058051 | 4.732721 |
| 18 | C  | 4.145627 | 4.240229 | 5.090835 | 5.466101 | 4.966813 |
| 19 | C  | 5.233685 | 5.547972 | 6.447458 | 6.683573 | 6.012543 |
| 20 | O  | 3.949523 | 4.484594 | 5.446541 | 5.562465 | 4.737957 |
| 21 | H  | 4.096377 | 4.128297 | 4.701674 | 4.991485 | 4.662491 |
| 22 | H  | 4.046128 | 3.882946 | 4.864017 | 5.479272 | 5.073189 |
| 23 | H  | 5.815926 | 6.082143 | 7.113523 | 7.453703 | 6.745960 |
| 24 | C  | 6.199927 | 6.605034 | 7.315931 | 7.373075 | 6.726618 |
| 25 | H  | 6.710354 | 7.278392 | 8.044941 | 7.996940 | 7.212214 |
| 26 | H  | 7.041751 | 7.295586 | 7.968837 | 8.128808 | 7.596521 |
| 27 | H  | 5.889528 | 6.324571 | 6.857537 | 6.787653 | 6.211025 |
| 28 | C  | 3.438891 | 4.435744 | 4.326717 | 3.259119 | 2.501371 |
| 29 | H  | 4.317110 | 5.424237 | 5.369967 | 4.253854 | 3.416937 |
| 30 | H  | 3.964476 | 4.712888 | 4.293087 | 3.164030 | 2.857652 |
| 31 | C  | 3.325225 | 4.238741 | 4.434403 | 3.745874 | 2.947306 |
| 32 | O  | 3.975896 | 4.585343 | 4.657036 | 4.136407 | 3.665616 |
| 33 | O  | 3.153944 | 4.248841 | 4.823621 | 4.302769 | 3.215473 |
| 34 | H  | 3.423531 | 4.328319 | 5.059410 | 4.782300 | 3.795255 |
|    |    | 6        | 7        | 8        | 9        | 10       |
| 6  | C  | 0.000000 |          |          |          |          |
| 7  | H  | 2.824304 | 0.000000 |          |          |          |
| 8  | H  | 4.680676 | 2.761210 | 0.000000 |          |          |
| 9  | H  | 1.091359 | 3.715146 | 5.350858 | 0.000000 |          |
| 10 | H  | 1.088268 | 2.501428 | 4.859948 | 1.765868 | 0.000000 |
| 11 | Br | 6.766960 | 4.536305 | 2.339372 | 7.554244 | 6.882775 |
| 12 | H  | 2.856947 | 4.224230 | 4.260138 | 2.736712 | 3.827012 |
| 13 | C  | 4.918693 | 4.624753 | 2.861398 | 5.151672 | 5.611470 |
| 14 | C  | 6.020316 | 5.210238 | 2.834074 | 6.364312 | 6.616323 |

|    |    |          |          |          |          |          |
|----|----|----------|----------|----------|----------|----------|
| 15 | H  | 5.099293 | 5.345554 | 3.895497 | 5.127509 | 5.913097 |
| 16 | H  | 6.960250 | 6.289666 | 3.881825 | 7.223617 | 7.612297 |
| 17 | H  | 6.188197 | 4.882083 | 2.230391 | 6.682448 | 6.645588 |
| 18 | C  | 5.587643 | 3.927036 | 4.066850 | 6.640300 | 5.618688 |
| 19 | C  | 6.368211 | 4.791090 | 5.404890 | 7.452909 | 6.245071 |
| 20 | O  | 5.046063 | 3.409926 | 4.512158 | 6.136756 | 4.841600 |
| 21 | H  | 5.277584 | 4.116135 | 4.118871 | 6.281196 | 5.508663 |
| 22 | H  | 5.915982 | 3.865910 | 3.449252 | 6.933651 | 5.922937 |
| 23 | H  | 7.149994 | 5.265941 | 5.789763 | 8.239636 | 6.916845 |
| 24 | C  | 6.858352 | 5.820063 | 6.604949 | 7.911129 | 6.814819 |
| 25 | H  | 7.162004 | 6.196508 | 7.329855 | 8.207636 | 6.990896 |
| 26 | H  | 7.820764 | 6.726602 | 7.192030 | 8.864276 | 7.836062 |
| 27 | H  | 6.266238 | 5.643316 | 6.471964 | 7.274240 | 6.355305 |
| 28 | C  | 1.535585 | 3.648512 | 5.399362 | 2.175735 | 2.172951 |
| 29 | H  | 2.141794 | 4.349023 | 6.380936 | 2.527510 | 2.435941 |
| 30 | H  | 2.184536 | 4.401625 | 5.695744 | 2.481924 | 3.079846 |
| 31 | C  | 2.550382 | 3.340711 | 4.992541 | 3.490190 | 2.867673 |
| 32 | O  | 3.546735 | 4.128994 | 5.219363 | 4.407974 | 4.017575 |
| 33 | O  | 2.843035 | 2.740657 | 4.871252 | 3.890274 | 2.648318 |
| 34 | H  | 3.715091 | 2.932367 | 4.743862 | 4.791736 | 3.524486 |
|    |    | 11       | 12       | 13       | 14       | 15       |
| 11 | Br | 0.000000 |          |          |          |          |
| 12 | H  | 6.339449 | 0.000000 |          |          |          |
| 13 | C  | 4.417917 | 2.786600 | 0.000000 |          |          |
| 14 | C  | 3.693501 | 4.093706 | 1.326596 | 0.000000 |          |
| 15 | H  | 5.491224 | 2.506922 | 1.082985 | 2.131286 | 0.000000 |
| 16 | H  | 4.424409 | 4.774180 | 2.072055 | 1.082783 | 2.446971 |
| 17 | H  | 2.624008 | 4.708031 | 2.134966 | 1.092001 | 3.115254 |
| 18 | C  | 3.864317 | 6.305446 | 5.897960 | 5.898289 | 6.758344 |
| 19 | C  | 5.087328 | 7.498760 | 7.331996 | 7.363212 | 8.167829 |
| 20 | O  | 4.774924 | 6.423106 | 6.513591 | 6.727064 | 7.327828 |
| 21 | H  | 4.164248 | 5.709115 | 5.422805 | 5.513298 | 6.182272 |
| 22 | H  | 2.858881 | 6.397246 | 5.565172 | 5.378302 | 6.523503 |
| 23 | H  | 5.170845 | 8.333693 | 7.979267 | 7.895947 | 8.882332 |
| 24 | C  | 6.395757 | 8.047315 | 8.178792 | 8.304768 | 8.902100 |
| 25 | H  | 7.226049 | 8.671216 | 9.011333 | 9.207960 | 9.722833 |
| 26 | H  | 6.674200 | 8.782622 | 8.695986 | 8.694678 | 9.429488 |
| 27 | H  | 6.538604 | 7.356660 | 7.708392 | 7.953534 | 8.333484 |
| 28 | C  | 7.206782 | 3.418028 | 5.522371 | 6.574360 | 5.666265 |
| 29 | H  | 8.176096 | 4.331496 | 6.582009 | 7.654986 | 6.682936 |
| 30 | H  | 7.486472 | 3.017407 | 5.285247 | 6.390071 | 5.260534 |
| 31 | C  | 6.411016 | 4.176458 | 5.619269 | 6.436331 | 5.989042 |
| 32 | O  | 6.335156 | 4.479961 | 5.628490 | 6.327478 | 5.988310 |
| 33 | O  | 6.183377 | 4.948805 | 6.130089 | 6.837113 | 6.655577 |

|    |   |           |          |          |          |          |
|----|---|-----------|----------|----------|----------|----------|
| 34 | H | 5.691332  | 5.516224 | 6.289011 | 6.818046 | 6.929043 |
|    |   | 16        | 17       | 18       | 19       | 20       |
| 16 | H | 0.000000  |          |          |          |          |
| 17 | H | 1.864607  | 0.000000 |          |          |          |
| 18 | C | 6.794944  | 5.250251 | 0.000000 |          |          |
| 19 | C | 8.258538  | 6.697153 | 1.466085 | 0.000000 |          |
| 20 | O | 7.713419  | 6.135752 | 1.463920 | 1.451863 | 0.000000 |
| 21 | H | 6.359262  | 5.023648 | 1.086357 | 2.195973 | 2.139337 |
| 22 | H | 6.264650  | 4.588964 | 1.086841 | 2.239531 | 2.156064 |
| 23 | H | 8.785658  | 7.121075 | 2.185175 | 1.087559 | 2.108347 |
| 24 | C | 9.151664  | 7.753356 | 2.604663 | 1.503863 | 2.517702 |
| 25 | H | 10.095673 | 8.656034 | 3.445832 | 2.151943 | 2.930155 |
| 26 | H | 9.463686  | 8.109091 | 3.142260 | 2.137043 | 3.421115 |
| 27 | H | 8.781276  | 7.532394 | 2.736675 | 2.151443 | 2.710448 |
| 28 | C | 7.471697  | 6.735984 | 5.276937 | 5.896416 | 4.751496 |
| 29 | H | 8.552385  | 7.810065 | 5.999892 | 6.410786 | 5.279639 |
| 30 | H | 7.183854  | 6.697004 | 5.708809 | 6.434153 | 5.419476 |
| 31 | C | 7.374600  | 6.390116 | 3.902678 | 4.417205 | 3.378965 |
| 32 | O | 7.182565  | 6.285458 | 3.597716 | 4.140811 | 3.448114 |
| 33 | O | 7.853557  | 6.613383 | 3.563410 | 3.858716 | 2.609173 |
| 34 | H | 7.831045  | 6.457942 | 2.691561 | 2.858644 | 1.637596 |
|    |   | 21        | 22       | 23       | 24       | 25       |
| 21 | H | 0.000000  |          |          |          |          |
| 22 | H | 1.844204  | 0.000000 |          |          |          |
| 23 | H | 3.109871  | 2.533272 | 0.000000 |          |          |
| 24 | C | 2.802009  | 3.560841 | 2.208076 | 0.000000 |          |
| 25 | H | 3.752665  | 4.368028 | 2.562659 | 1.093879 | 0.000000 |
| 26 | H | 3.285811  | 3.960064 | 2.557924 | 1.094236 | 1.768375 |
| 27 | H | 2.521337  | 3.801952 | 3.099838 | 1.092080 | 1.778296 |
| 28 | C | 4.792974  | 5.857541 | 6.811227 | 6.064431 | 6.345218 |
| 29 | H | 5.582542  | 6.657451 | 7.299947 | 6.435961 | 6.546059 |
| 30 | H | 5.044924  | 6.288172 | 7.413930 | 6.503226 | 6.888161 |
| 31 | C | 3.439874  | 4.621884 | 5.371136 | 4.544819 | 4.875672 |
| 32 | O | 2.871196  | 4.421656 | 5.193416 | 4.046524 | 4.551184 |
| 33 | O | 3.486790  | 4.230593 | 4.654424 | 4.208930 | 4.367759 |
| 34 | H | 2.775539  | 3.437375 | 3.655830 | 3.306708 | 3.523776 |
|    |   | 26        | 27       | 28       | 29       | 30       |
| 26 | H | 0.000000  |          |          |          |          |
| 27 | H | 1.774754  | 0.000000 |          |          |          |
| 28 | C | 7.001528  | 5.312696 | 0.000000 |          |          |
| 29 | H | 7.413326  | 5.690348 | 1.094616 | 0.000000 |          |
| 30 | H | 7.345855  | 5.639426 | 1.090553 | 1.766334 | 0.000000 |
| 31 | C | 5.482861  | 3.816117 | 1.524354 | 2.145959 | 2.126555 |
| 32 | O | 4.838366  | 3.150643 | 2.407170 | 3.048076 | 2.517359 |

```

33 O  5.253075  3.763786  2.366295  2.716400  3.267270
34 H  4.350242  3.008146  3.250406  3.666626  4.028262
      31      32      33      34
31 C  0.000000
32 O  1.208240  0.000000
33 O  1.331985  2.255912  0.000000
34 H  1.933706  2.394504  1.004961  0.000000

```

Stoichiometry C11H17BrN2O3

Framework group C1[X(C11H17BrN2O3)]

Deg. of freedom 96

Full point group C1 NOp 1

Largest Abelian subgroup C1 NOp 1

Largest concise Abelian subgroup C1 NOp 1

Standard orientation:

| Center<br>Number | Atomic<br>Number | Atomic<br>Type | Coordinates (Angstroms) |           |           |
|------------------|------------------|----------------|-------------------------|-----------|-----------|
|                  |                  |                | X                       | Y         | Z         |
| 1                | 6                | 0              | 0.075624                | 1.329366  | 1.239226  |
| 2                | 6                | 0              | -1.154275               | 1.256795  | 0.664913  |
| 3                | 7                | 0              | -1.214702               | 2.288485  | -0.262707 |
| 4                | 6                | 0              | -0.053794               | 2.961746  | -0.240230 |
| 5                | 7                | 0              | 0.751185                | 2.397113  | 0.668305  |
| 6                | 6                | 0              | 2.158802                | 2.754035  | 0.923001  |
| 7                | 1                | 0              | 0.534941                | 0.699085  | 1.979859  |
| 8                | 1                | 0              | -1.940101               | 0.499045  | 0.772204  |
| 9                | 1                | 0              | 2.233576                | 3.842165  | 0.961038  |
| 10               | 1                | 0              | 2.402691                | 2.361470  | 1.908262  |
| 11               | 35               | 0              | -3.069978               | -1.499170 | 0.321456  |
| 12               | 1                | 0              | 0.190262                | 3.807946  | -0.859208 |
| 13               | 6                | 0              | -2.306885               | 2.601999  | -1.133224 |
| 14               | 6                | 0              | -3.348164               | 1.800376  | -1.314869 |
| 15               | 1                | 0              | -2.181959               | 3.556263  | -1.629842 |
| 16               | 1                | 0              | -4.128318               | 2.118858  | -1.994831 |
| 17               | 1                | 0              | -3.452363               | 0.825293  | -0.834429 |
| 18               | 6                | 0              | 0.611928                | -2.462591 | -0.348121 |
| 19               | 6                | 0              | 1.586915                | -3.514334 | -0.043751 |
| 20               | 8                | 0              | 1.630243                | -2.258557 | 0.683610  |
| 21               | 1                | 0              | 0.775208                | -1.858597 | -1.236210 |
| 22               | 1                | 0              | -0.408386               | -2.499630 | 0.024453  |
| 23               | 1                | 0              | 1.248719                | -4.330032 | 0.591107  |
| 24               | 6                | 0              | 2.754972                | -3.819303 | -0.940546 |
| 25               | 1                | 0              | 3.622347                | -4.139217 | -0.355835 |
| 26               | 1                | 0              | 2.492515                | -4.633029 | -1.623422 |

|    |   |   |          |           |           |
|----|---|---|----------|-----------|-----------|
| 27 | 1 | 0 | 3.031310 | -2.944460 | -1.532936 |
| 28 | 6 | 0 | 3.108917 | 2.181471  | -0.138825 |
| 29 | 1 | 0 | 4.135129 | 2.363369  | 0.195818  |
| 30 | 1 | 0 | 2.977714 | 2.678131  | -1.100812 |
| 31 | 6 | 0 | 2.918632 | 0.685402  | -0.360691 |
| 32 | 8 | 0 | 2.770517 | 0.194395  | -1.454683 |
| 33 | 8 | 0 | 2.906954 | 0.014437  | 0.789897  |
| 34 | 1 | 0 | 2.582809 | -0.926872 | 0.652727  |

-----  
Rotational constants (GHZ): 0.3286683 0.2548718 0.1595970  
Standard basis: 6-311++G(d,p) (5D, 7F)  
There are 538 symmetry adapted cartesian basis functions of A symmetry.  
There are 519 symmetry adapted basis functions of A symmetry.  
519 basis functions, 823 primitive gaussians, 538 cartesian basis functions  
78 alpha electrons 78 beta electrons  
nuclear repulsion energy 1572.8728623223 Hartrees.  
NAtoms= 34 NActive= 34 NUniq= 34 SFac= 1.00D+00 NAtFMM= 60 NAOKFM=F  
Big=F

Integral buffers will be 131072 words long.  
Raffenetti 2 integral format.  
Two-electron integral symmetry is turned on.  
One-electron integrals computed using PRISM.  
NBasis= 519 RedAO= T EigKep= 3.52D-06 NBF= 519  
NBsUse= 519 1.00D-06 EigRej= -1.00D+00 NBFU= 519  
Initial guess from the checkpoint file: "./coohpo.chk"  
B after Tr= 0.000000 0.000000 0.000000  
Rot= 1.000000 0.000003 -0.000019 -0.000031 Ang= 0.00 deg.  
Requested convergence on RMS density matrix=1.00D-08 within 128 cycles.  
Requested convergence on MAX density matrix=1.00D-06.  
Requested convergence on energy=1.00D-06.  
No special actions if energy rises.  
SCF Done: E(RB3LYP) = -3338.90388354 A.U. after 9 cycles  
NFock= 9 Conv=0.22D-08 -V/T= 2.0019  
Calling FoFJK, ICntrl= 2127 FMM=F ISym2X=0 l1Cent= 0 IOpCIX= 0 NMat=1 NMatS=1  
NMatT=0.

\*\*\*\*\* Axes restored to original set \*\*\*\*\*

| Center | Atomic | Forces (Hartrees/Bohr) |              |              |
|--------|--------|------------------------|--------------|--------------|
| Number | Number | X                      | Y            | Z            |
| 1      | 6      | -0.000002622           | 0.000002624  | 0.000010627  |
| 2      | 6      | 0.000014421            | -0.000000353 | -0.000000040 |
| 3      | 7      | 0.000003686            | 0.000022572  | -0.000003190 |
| 4      | 6      | 0.000011353            | -0.000023526 | -0.000008326 |



|    |    |              |              |              |
|----|----|--------------|--------------|--------------|
| 5  | 7  | -0.000010067 | 0.000013105  | 0.000003983  |
| 6  | 6  | 0.000010577  | -0.000008852 | -0.000001749 |
| 7  | 1  | -0.000000192 | 0.000002556  | -0.000007345 |
| 8  | 1  | -0.000013304 | -0.000002095 | -0.000009936 |
| 9  | 1  | 0.000001833  | -0.000000242 | -0.000003771 |
| 10 | 1  | -0.000000856 | 0.000006553  | -0.000000601 |
| 11 | 35 | 0.000002190  | 0.000005105  | 0.000006279  |
| 12 | 1  | -0.000005515 | 0.000007279  | 0.000002645  |
| 13 | 6  | -0.000017056 | -0.000021328 | -0.000008021 |
| 14 | 6  | 0.000001764  | 0.000022431  | -0.000007987 |
| 15 | 1  | 0.000003176  | 0.000005764  | -0.000003717 |
| 16 | 1  | -0.000002810 | -0.000002768 | 0.000000531  |
| 17 | 1  | -0.000005512 | -0.000005792 | 0.000000310  |
| 18 | 6  | -0.000004156 | -0.000007713 | 0.000005305  |
| 19 | 6  | 0.000012239  | -0.000014378 | -0.000014815 |
| 20 | 8  | 0.000002967  | 0.000031663  | -0.000000199 |
| 21 | 1  | -0.000002685 | -0.000000332 | 0.000004142  |
| 22 | 1  | 0.000000367  | -0.000003450 | 0.000000143  |
| 23 | 1  | -0.000008007 | -0.000003263 | 0.000008051  |
| 24 | 6  | -0.000000234 | -0.000002264 | 0.000020268  |
| 25 | 1  | -0.000002885 | -0.000001968 | 0.000004601  |
| 26 | 1  | -0.000000874 | -0.000002599 | 0.000005146  |
| 27 | 1  | 0.000001554  | -0.000004753 | -0.000000335 |
| 28 | 6  | 0.000015251  | -0.000003927 | -0.000017886 |
| 29 | 1  | -0.000001665 | -0.000000370 | 0.000003648  |
| 30 | 1  | 0.000001360  | -0.000000285 | -0.000000900 |
| 31 | 6  | -0.000005613 | 0.000000075  | -0.000019404 |
| 32 | 8  | 0.000001268  | -0.000001347 | 0.000010126  |
| 33 | 8  | 0.000010075  | 0.000012768  | 0.000013588  |
| 34 | 1  | -0.000010030 | -0.000020894 | 0.000008833  |

-----  
Cartesian Forces: Max 0.000031663 RMS 0.000009248

GradGradGradGradGradGradGradGradGradGradGradGradGradGradGradGradGradGradGrad

Berny optimization.

Using GEDIIS/GDIIS optimizer.

FormGI is forming the generalized inverse of G from B-inverse, IUseBI=4.

Internal Forces: Max 0.000019535 RMS 0.000005168

Search for a local minimum.

Step number 40 out of a maximum of 175

All quantities printed in internal units (Hartrees-Bohrs-Radians)

Mixed Optimization -- En-DIIS/RFO-DIIS

Swapping is turned off.

Update second derivatives using D2CorX and points 21 22 23 24 25

26 27 28 29 30  
 31 32 33 34 35  
 36 37 38 39 40

DE= -7.27D-08 DEPred=-3.84D-08 R= 1.89D+00

Trust test= 1.89D+00 RLast= 3.39D-03 DXMaxT set to 1.95D-01

ITU= 0 -1 1 1 1 1 1 1 1 -1 1 1 1 1 1 -1 0 1 1 1

ITU= 1 1 1 1 1 1 1 0 0 -1 1 1 1 0 1 0 -1 0 1 0

Eigenvalues --- 0.00162 0.00266 0.00356 0.00413 0.00471  
 Eigenvalues --- 0.00562 0.00892 0.00918 0.01068 0.01201  
 Eigenvalues --- 0.01402 0.01760 0.02053 0.02212 0.02289  
 Eigenvalues --- 0.02364 0.02401 0.02643 0.03010 0.03144  
 Eigenvalues --- 0.03390 0.03661 0.03813 0.04309 0.04456  
 Eigenvalues --- 0.04923 0.05029 0.05272 0.05503 0.05696  
 Eigenvalues --- 0.05789 0.05957 0.06188 0.07310 0.09350  
 Eigenvalues --- 0.09605 0.11776 0.12499 0.12756 0.12901  
 Eigenvalues --- 0.13578 0.14340 0.15001 0.15672 0.15881  
 Eigenvalues --- 0.16000 0.16007 0.16040 0.16050 0.16107  
 Eigenvalues --- 0.16356 0.17722 0.19454 0.21173 0.21991  
 Eigenvalues --- 0.23298 0.23725 0.24151 0.25358 0.26305  
 Eigenvalues --- 0.28409 0.28991 0.29975 0.31406 0.32016  
 Eigenvalues --- 0.33396 0.34386 0.34506 0.34608 0.34749  
 Eigenvalues --- 0.34879 0.34909 0.34969 0.35096 0.35333  
 Eigenvalues --- 0.35464 0.35682 0.35815 0.35920 0.36643  
 Eigenvalues --- 0.36995 0.37265 0.37835 0.38408 0.39664  
 Eigenvalues --- 0.40393 0.45352 0.49188 0.50482 0.50976  
 Eigenvalues --- 0.54751 0.55914 0.56886 0.61366 0.91079  
 Eigenvalues --- 0.97009

En-DIIS/RFO-DIIS IScMMF= 0 using points: 40 39 38 37 36

RFO step: Lambda=-1.04322298D-08.

DidBck=F Rises=F RFO-DIIS coefs: 1.56704 -0.32960 -0.40320 0.10966

0.05611

Iteration 1 RMS(Cart)= 0.00069128 RMS(Int)= 0.00000016

Iteration 2 RMS(Cart)= 0.00000027 RMS(Int)= 0.00000002

| Variable | Old X   | -DE/DX   | Delta X<br>(Linear) | Delta X<br>(Quad) | Delta X<br>(Total) | New X   |
|----------|---------|----------|---------------------|-------------------|--------------------|---------|
| R1       | 2.56874 | 0.00000  | -0.00001            | 0.00000           | -0.00001           | 2.56874 |
| R2       | 2.62013 | 0.00000  | 0.00001             | 0.00000           | 0.00001            | 2.62014 |
| R3       | 2.03246 | 0.00000  | 0.00000             | 0.00000           | 0.00000            | 2.03245 |
| R4       | 2.62428 | 0.00001  | -0.00002            | 0.00001           | 0.00000            | 2.62428 |
| R5       | 2.07287 | 0.00000  | -0.00003            | 0.00002           | -0.00001           | 2.07286 |
| R6       | 2.53638 | -0.00001 | -0.00001            | -0.00001          | -0.00002           | 2.53637 |
| R7       | 2.70499 | 0.00002  | 0.00004             | 0.00001           | 0.00005            | 2.70504 |
| R8       | 2.52986 | 0.00000  | 0.00000             | 0.00001           | 0.00001            | 2.52987 |
| R9       | 2.03420 | 0.00000  | 0.00000             | 0.00000           | 0.00000            | 2.03420 |

|     |         |          |          |          |          |         |
|-----|---------|----------|----------|----------|----------|---------|
| R10 | 2.78608 | 0.00000  | 0.00002  | -0.00001 | 0.00000  | 2.78608 |
| R11 | 2.06237 | 0.00000  | 0.00000  | 0.00000  | 0.00000  | 2.06237 |
| R12 | 2.05653 | 0.00000  | 0.00000  | 0.00000  | 0.00001  | 2.05654 |
| R13 | 2.90183 | 0.00001  | -0.00001 | 0.00004  | 0.00003  | 2.90187 |
| R14 | 4.42077 | 0.00000  | 0.00003  | -0.00036 | -0.00033 | 4.42044 |
| R15 | 2.50690 | -0.00001 | -0.00001 | 0.00000  | -0.00001 | 2.50689 |
| R16 | 2.04654 | 0.00000  | 0.00000  | 0.00000  | 0.00000  | 2.04654 |
| R17 | 2.04616 | 0.00000  | 0.00000  | 0.00000  | 0.00000  | 2.04617 |
| R18 | 2.06358 | 0.00000  | 0.00000  | -0.00001 | -0.00001 | 2.06357 |
| R19 | 2.77050 | 0.00000  | -0.00002 | 0.00000  | -0.00002 | 2.77047 |
| R20 | 2.76641 | 0.00001  | 0.00003  | 0.00002  | 0.00005  | 2.76646 |
| R21 | 2.05292 | 0.00000  | -0.00001 | 0.00000  | 0.00000  | 2.05292 |
| R22 | 2.05383 | 0.00000  | 0.00001  | 0.00000  | 0.00001  | 2.05384 |
| R23 | 2.74362 | 0.00002  | 0.00002  | 0.00002  | 0.00004  | 2.74367 |
| R24 | 2.05519 | 0.00000  | 0.00001  | 0.00000  | 0.00001  | 2.05519 |
| R25 | 2.84189 | -0.00001 | -0.00002 | -0.00002 | -0.00004 | 2.84185 |
| R26 | 3.09461 | -0.00001 | 0.00001  | -0.00003 | -0.00003 | 3.09458 |
| R27 | 2.06713 | 0.00000  | -0.00001 | 0.00000  | -0.00001 | 2.06712 |
| R28 | 2.06781 | 0.00000  | 0.00000  | 0.00000  | 0.00000  | 2.06781 |
| R29 | 2.06373 | 0.00000  | 0.00000  | 0.00001  | 0.00001  | 2.06374 |
| R30 | 2.06852 | 0.00000  | -0.00001 | -0.00001 | -0.00001 | 2.06851 |
| R31 | 2.06085 | 0.00000  | 0.00000  | 0.00000  | 0.00000  | 2.06084 |
| R32 | 2.88061 | 0.00000  | -0.00002 | -0.00001 | -0.00003 | 2.88058 |
| R33 | 2.28324 | -0.00001 | 0.00000  | 0.00000  | 0.00000  | 2.28324 |
| R34 | 2.51709 | 0.00002  | 0.00002  | 0.00002  | 0.00004  | 2.51713 |
| R35 | 1.89910 | 0.00001  | -0.00001 | 0.00001  | -0.00001 | 1.89909 |
| A1  | 1.88387 | 0.00000  | -0.00001 | 0.00001  | 0.00000  | 1.88387 |
| A2  | 2.27320 | 0.00000  | 0.00000  | 0.00002  | 0.00002  | 2.27322 |
| A3  | 2.12558 | 0.00000  | 0.00001  | -0.00003 | -0.00002 | 2.12556 |
| A4  | 1.85660 | 0.00000  | 0.00001  | 0.00000  | 0.00001  | 1.85660 |
| A5  | 2.27018 | -0.00001 | -0.00001 | 0.00002  | 0.00001  | 2.27018 |
| A6  | 2.15001 | 0.00001  | 0.00002  | -0.00001 | 0.00000  | 2.15002 |
| A7  | 1.90057 | 0.00000  | 0.00001  | -0.00001 | 0.00000  | 1.90057 |
| A8  | 2.21698 | 0.00002  | -0.00004 | 0.00002  | -0.00002 | 2.21696 |
| A9  | 2.16551 | -0.00001 | 0.00003  | -0.00001 | 0.00002  | 2.16553 |
| A10 | 1.89640 | 0.00000  | -0.00001 | 0.00002  | 0.00001  | 1.89641 |
| A11 | 2.19049 | 0.00000  | 0.00000  | 0.00001  | 0.00001  | 2.19050 |
| A12 | 2.19624 | 0.00000  | 0.00001  | -0.00002 | -0.00001 | 2.19622 |
| A13 | 1.88732 | 0.00000  | 0.00001  | -0.00002 | -0.00001 | 1.88731 |
| A14 | 2.19013 | 0.00000  | -0.00006 | 0.00000  | -0.00005 | 2.19007 |
| A15 | 2.20089 | 0.00000  | 0.00003  | 0.00001  | 0.00003  | 2.20092 |
| A16 | 1.88895 | 0.00000  | 0.00000  | -0.00001 | 0.00000  | 1.88894 |
| A17 | 1.85776 | 0.00000  | -0.00003 | 0.00003  | 0.00000  | 1.85776 |
| A18 | 1.96169 | 0.00001  | 0.00001  | 0.00001  | 0.00001  | 1.96170 |

|     |          |          |          |          |          |          |
|-----|----------|----------|----------|----------|----------|----------|
| A19 | 1.88888  | 0.00000  | -0.00001 | -0.00001 | -0.00003 | 1.88886  |
| A20 | 1.93207  | 0.00000  | -0.00002 | 0.00000  | -0.00002 | 1.93205  |
| A21 | 1.93143  | 0.00000  | 0.00005  | -0.00001 | 0.00003  | 1.93146  |
| A22 | 2.73185  | 0.00000  | 0.00016  | 0.00030  | 0.00046  | 2.73230  |
| A23 | 2.15295  | 0.00001  | -0.00002 | 0.00003  | 0.00000  | 2.15296  |
| A24 | 1.96476  | -0.00001 | -0.00001 | -0.00003 | -0.00004 | 1.96472  |
| A25 | 2.16543  | 0.00000  | 0.00004  | 0.00000  | 0.00003  | 2.16546  |
| A26 | 2.06439  | 0.00000  | -0.00001 | 0.00002  | 0.00001  | 2.06441  |
| A27 | 2.15823  | 0.00001  | 0.00002  | 0.00004  | 0.00006  | 2.15829  |
| A28 | 2.06029  | -0.00001 | -0.00001 | -0.00006 | -0.00007 | 2.06022  |
| A29 | 2.05852  | 0.00001  | 0.00010  | -0.00001 | 0.00009  | 2.05861  |
| A30 | 2.12787  | -0.00001 | -0.00010 | -0.00003 | -0.00013 | 2.12774  |
| A31 | 1.97589  | 0.00000  | 0.00003  | -0.00003 | -0.00001 | 1.97589  |
| A32 | 2.00004  | 0.00000  | -0.00003 | 0.00006  | 0.00003  | 2.00006  |
| A33 | 2.02672  | 0.00000  | 0.00000  | 0.00002  | 0.00002  | 2.02673  |
| A34 | 2.04030  | -0.00001 | -0.00007 | -0.00003 | -0.00010 | 2.04020  |
| A35 | 2.13910  | 0.00001  | 0.00010  | 0.00001  | 0.00012  | 2.13922  |
| A36 | 1.94503  | 0.00000  | -0.00006 | 0.00000  | -0.00007 | 1.94497  |
| A37 | 2.03865  | 0.00000  | 0.00006  | -0.00001 | 0.00006  | 2.03871  |
| A38 | 2.02365  | 0.00000  | -0.00003 | 0.00002  | -0.00002 | 2.02363  |
| A39 | 2.09980  | 0.00001  | -0.00024 | 0.00003  | -0.00021 | 2.09959  |
| A40 | 2.36211  | 0.00001  | 0.00043  | 0.00012  | 0.00056  | 2.36267  |
| A41 | 1.93524  | 0.00000  | 0.00001  | 0.00000  | 0.00000  | 1.93524  |
| A42 | 1.91416  | 0.00000  | -0.00002 | 0.00000  | -0.00002 | 1.91414  |
| A43 | 1.93645  | 0.00000  | 0.00002  | 0.00001  | 0.00004  | 1.93648  |
| A44 | 1.88208  | 0.00000  | 0.00001  | 0.00001  | 0.00002  | 1.88210  |
| A45 | 1.90032  | 0.00000  | 0.00001  | -0.00001 | 0.00000  | 1.90032  |
| A46 | 1.89430  | 0.00000  | -0.00003 | -0.00001 | -0.00004 | 1.89426  |
| A47 | 1.88253  | -0.00001 | -0.00003 | -0.00002 | -0.00005 | 1.88248  |
| A48 | 1.94519  | 0.00000  | -0.00004 | 0.00000  | -0.00003 | 1.94516  |
| A49 | 1.97072  | 0.00000  | -0.00003 | -0.00005 | -0.00007 | 1.97065  |
| A50 | 1.88261  | 0.00000  | 0.00002  | 0.00003  | 0.00005  | 1.88266  |
| A51 | 1.90140  | 0.00000  | 0.00004  | 0.00004  | 0.00008  | 1.90149  |
| A52 | 1.87923  | 0.00000  | 0.00002  | 0.00001  | 0.00003  | 1.87926  |
| A53 | 2.14829  | 0.00000  | 0.00002  | 0.00001  | 0.00002  | 2.14832  |
| A54 | 1.94954  | 0.00001  | -0.00001 | 0.00003  | 0.00002  | 1.94956  |
| A55 | 2.18505  | -0.00001 | -0.00001 | -0.00004 | -0.00004 | 2.18501  |
| A56 | 1.93558  | -0.00001 | -0.00001 | -0.00008 | -0.00008 | 1.93550  |
| A57 | 2.81373  | 0.00002  | 0.00020  | 0.00001  | 0.00021  | 2.81394  |
| D1  | 0.00353  | 0.00000  | -0.00004 | 0.00000  | -0.00004 | 0.00348  |
| D2  | 3.02440  | 0.00000  | 0.00008  | 0.00003  | 0.00011  | 3.02451  |
| D3  | -3.10308 | 0.00000  | 0.00012  | -0.00002 | 0.00010  | -3.10298 |
| D4  | -0.08221 | 0.00000  | 0.00024  | 0.00001  | 0.00025  | -0.08196 |
| D5  | -0.00265 | 0.00000  | 0.00006  | -0.00007 | -0.00001 | -0.00266 |

|     |          |          |          |          |          |          |
|-----|----------|----------|----------|----------|----------|----------|
| D6  | -3.04369 | 0.00000  | 0.00029  | 0.00003  | 0.00033  | -3.04336 |
| D7  | 3.10753  | 0.00000  | -0.00008 | -0.00005 | -0.00013 | 3.10739  |
| D8  | 0.06649  | 0.00000  | 0.00015  | 0.00005  | 0.00020  | 0.06669  |
| D9  | -0.00320 | 0.00000  | 0.00001  | 0.00007  | 0.00008  | -0.00312 |
| D10 | 3.12181  | 0.00000  | 0.00014  | 0.00001  | 0.00015  | 3.12197  |
| D11 | -3.03445 | 0.00000  | -0.00010 | 0.00004  | -0.00006 | -3.03451 |
| D12 | 0.09056  | 0.00000  | 0.00004  | -0.00002 | 0.00001  | 0.09058  |
| D13 | -1.48392 | 0.00001  | 0.00005  | 0.00042  | 0.00047  | -1.48345 |
| D14 | 1.51916  | 0.00001  | 0.00018  | 0.00046  | 0.00065  | 1.51981  |
| D15 | 0.00159  | 0.00000  | 0.00003  | -0.00011 | -0.00008 | 0.00151  |
| D16 | 3.13221  | 0.00000  | 0.00012  | 0.00006  | 0.00018  | 3.13239  |
| D17 | -3.12402 | 0.00000  | -0.00010 | -0.00005 | -0.00016 | -3.12417 |
| D18 | 0.00659  | 0.00000  | -0.00001 | 0.00012  | 0.00011  | 0.00670  |
| D19 | -0.19391 | 0.00000  | 0.00001  | 0.00033  | 0.00034  | -0.19357 |
| D20 | 2.95748  | 0.00000  | 0.00002  | 0.00035  | 0.00037  | 2.95785  |
| D21 | 2.92875  | 0.00000  | 0.00016  | 0.00026  | 0.00043  | 2.92917  |
| D22 | -0.20305 | 0.00000  | 0.00017  | 0.00028  | 0.00046  | -0.20259 |
| D23 | 0.00063  | 0.00000  | -0.00006 | 0.00011  | 0.00006  | 0.00068  |
| D24 | 3.04088  | 0.00000  | -0.00030 | 0.00001  | -0.00029 | 3.04060  |
| D25 | -3.12994 | -0.00001 | -0.00015 | -0.00006 | -0.00021 | -3.13015 |
| D26 | -0.08969 | -0.00001 | -0.00039 | -0.00016 | -0.00055 | -0.09024 |
| D27 | -2.46963 | 0.00000  | -0.00029 | -0.00014 | -0.00042 | -2.47005 |
| D28 | -0.44267 | 0.00000  | -0.00031 | -0.00014 | -0.00045 | -0.44313 |
| D29 | 1.67443  | 0.00000  | -0.00027 | -0.00013 | -0.00040 | 1.67403  |
| D30 | 0.79031  | 0.00000  | -0.00001 | -0.00002 | -0.00003 | 0.79028  |
| D31 | 2.81727  | 0.00000  | -0.00004 | -0.00002 | -0.00006 | 2.81721  |
| D32 | -1.34881 | 0.00000  | 0.00001  | -0.00001 | 0.00000  | -1.34882 |
| D33 | -3.00055 | 0.00000  | 0.00002  | 0.00018  | 0.00020  | -3.00035 |
| D34 | 1.21923  | 0.00000  | 0.00003  | 0.00016  | 0.00018  | 1.21941  |
| D35 | -0.89865 | 0.00000  | 0.00004  | 0.00018  | 0.00022  | -0.89843 |
| D36 | 1.16804  | 0.00000  | 0.00002  | 0.00018  | 0.00021  | 1.16825  |
| D37 | -0.89537 | 0.00000  | 0.00003  | 0.00016  | 0.00019  | -0.89518 |
| D38 | -3.01324 | 0.00000  | 0.00004  | 0.00019  | 0.00023  | -3.01301 |
| D39 | -0.92614 | 0.00000  | 0.00002  | 0.00021  | 0.00023  | -0.92591 |
| D40 | -2.98955 | 0.00000  | 0.00003  | 0.00019  | 0.00022  | -2.98934 |
| D41 | 1.17576  | 0.00000  | 0.00004  | 0.00021  | 0.00026  | 1.17601  |
| D42 | -3.13964 | 0.00000  | 0.00000  | 0.00001  | 0.00001  | -3.13963 |
| D43 | -0.02379 | 0.00000  | 0.00003  | 0.00000  | 0.00003  | -0.02376 |
| D44 | -0.00897 | 0.00000  | -0.00001 | -0.00001 | -0.00002 | -0.00899 |
| D45 | 3.10688  | 0.00000  | 0.00002  | -0.00002 | 0.00000  | 3.10688  |
| D46 | -2.75250 | 0.00000  | -0.00005 | -0.00002 | -0.00007 | -2.75257 |
| D47 | -0.04771 | 0.00000  | -0.00006 | -0.00002 | -0.00008 | -0.04779 |
| D48 | -0.01972 | 0.00000  | -0.00005 | -0.00008 | -0.00013 | -0.01984 |
| D49 | 2.68507  | 0.00000  | -0.00005 | -0.00008 | -0.00013 | 2.68493  |

|     |          |         |          |          |          |          |
|-----|----------|---------|----------|----------|----------|----------|
| D50 | 0.31718  | 0.00000 | 0.00046  | 0.00013  | 0.00059  | 0.31777  |
| D51 | -2.06193 | 0.00000 | 0.00047  | 0.00007  | 0.00054  | -2.06139 |
| D52 | 2.54651  | 0.00001 | 0.00056  | 0.00003  | 0.00059  | 2.54710  |
| D53 | 0.16452  | 0.00001 | 0.00061  | 0.00002  | 0.00063  | 0.16515  |
| D54 | 2.55603  | 0.00000 | 0.00030  | -0.00012 | 0.00018  | 2.55621  |
| D55 | -1.65054 | 0.00000 | 0.00031  | -0.00012 | 0.00019  | -1.65035 |
| D56 | 0.44199  | 0.00000 | 0.00027  | -0.00012 | 0.00015  | 0.44214  |
| D57 | 1.32955  | 0.00000 | 0.00022  | -0.00013 | 0.00009  | 1.32964  |
| D58 | -2.87702 | 0.00000 | 0.00023  | -0.00012 | 0.00010  | -2.87691 |
| D59 | -0.78449 | 0.00000 | 0.00019  | -0.00013 | 0.00007  | -0.78442 |
| D60 | -1.01853 | 0.00000 | 0.00028  | -0.00013 | 0.00015  | -1.01838 |
| D61 | 1.05809  | 0.00000 | 0.00029  | -0.00013 | 0.00016  | 1.05825  |
| D62 | -3.13257 | 0.00000 | 0.00026  | -0.00013 | 0.00013  | -3.13244 |
| D63 | 1.47466  | 0.00000 | 0.00079  | 0.00031  | 0.00110  | 1.47576  |
| D64 | 2.82039  | 0.00000 | 0.00071  | 0.00037  | 0.00107  | 2.82147  |
| D65 | 2.25742  | 0.00000 | -0.00048 | -0.00027 | -0.00075 | 2.25667  |
| D66 | -0.85921 | 0.00000 | -0.00040 | -0.00026 | -0.00066 | -0.85987 |
| D67 | -1.93469 | 0.00000 | -0.00050 | -0.00030 | -0.00080 | -1.93549 |
| D68 | 1.23187  | 0.00000 | -0.00042 | -0.00029 | -0.00071 | 1.23116  |
| D69 | 0.10260  | 0.00000 | -0.00043 | -0.00025 | -0.00068 | 0.10192  |
| D70 | -3.01402 | 0.00000 | -0.00036 | -0.00023 | -0.00059 | -3.01461 |
| D71 | 2.92387  | 0.00000 | 0.00005  | -0.00002 | 0.00003  | 2.92390  |
| D72 | -0.19213 | 0.00000 | 0.00013  | 0.00000  | 0.00012  | -0.19200 |
| D73 | -1.88605 | 0.00000 | -0.00031 | -0.00011 | -0.00042 | -1.88647 |

| Item                 | Value    | Threshold | Converged? |
|----------------------|----------|-----------|------------|
| Maximum Force        | 0.000020 | 0.000450  | YES        |
| RMS Force            | 0.000005 | 0.000300  | YES        |
| Maximum Displacement | 0.003299 | 0.001800  | NO         |
| RMS Displacement     | 0.000691 | 0.001200  | YES        |

Predicted change in Energy=-2.757522D-08

GradGradGradGradGradGradGradGradGradGradGradGradGradGradGradGradGradGradGrad

Input orientation:

| Center Number | Atomic Number | Atomic Type | Coordinates (Angstroms) |          |           |
|---------------|---------------|-------------|-------------------------|----------|-----------|
|               |               |             | X                       | Y        | Z         |
| 1             | 6             | 0           | -0.847311               | 1.644847 | 1.537863  |
| 2             | 6             | 0           | -1.503640               | 0.455026 | 1.573935  |
| 3             | 7             | 0           | -2.364941               | 0.449815 | 0.484602  |
| 4             | 6             | 0           | -2.229725               | 1.606930 | -0.181933 |
| 5             | 7             | 0           | -1.309982               | 2.354655 | 0.440346  |
| 6             | 6             | 0           | -0.776068               | 3.645572 | -0.030957 |
| 7             | 1             | 0           | -0.075226               | 2.032228 | 2.178627  |

|    |    |   |           |           |           |
|----|----|---|-----------|-----------|-----------|
| 8  | 1  | 0 | -1.351877 | -0.415720 | 2.223533  |
| 9  | 1  | 0 | -1.613808 | 4.259710  | -0.365764 |
| 10 | 1  | 0 | -0.325664 | 4.127161  | 0.834805  |
| 11 | 35 | 0 | -0.391631 | -2.431555 | 2.920803  |
| 12 | 1  | 0 | -2.765592 | 1.880580  | -1.074522 |
| 13 | 6  | 0 | -3.250249 | -0.603851 | 0.090839  |
| 14 | 6  | 0 | -3.209977 | -1.823252 | 0.611687  |
| 15 | 1  | 0 | -3.944407 | -0.296646 | -0.681573 |
| 16 | 1  | 0 | -3.918275 | -2.558696 | 0.251328  |
| 17 | 1  | 0 | -2.486639 | -2.134726 | 1.368139  |
| 18 | 6  | 0 | 2.555257  | -0.688038 | 1.129286  |
| 19 | 6  | 0 | 3.975532  | -0.375671 | 1.315338  |
| 20 | 8  | 0 | 2.976189  | 0.655074  | 1.531789  |
| 21 | 1  | 0 | 2.171988  | -0.730212 | 0.113660  |
| 22 | 1  | 0 | 1.982337  | -1.226418 | 1.879716  |
| 23 | 1  | 0 | 4.430165  | -0.691398 | 2.251510  |
| 24 | 6  | 0 | 4.918183  | -0.174725 | 0.160967  |
| 25 | 1  | 0 | 5.679788  | 0.571616  | 0.404884  |
| 26 | 1  | 0 | 5.430421  | -1.115052 | -0.064313 |
| 27 | 1  | 0 | 4.378948  | 0.149334  | -0.731703 |
| 28 | 6  | 0 | 0.256271  | 3.476417  | -1.155117 |
| 29 | 1  | 0 | 0.707448  | 4.455163  | -1.346598 |
| 30 | 1  | 0 | -0.212681 | 3.137511  | -2.079523 |
| 31 | 6  | 0 | 1.358357  | 2.483494  | -0.804229 |
| 32 | 8  | 0 | 1.680184  | 1.571908  | -1.528987 |
| 33 | 8  | 0 | 1.883111  | 2.733341  | 0.394292  |
| 34 | 1  | 0 | 2.456588  | 1.967290  | 0.701260  |

-----  
Distance matrix (angstroms):

|    |    | 1        | 2        | 3        | 4        | 5        |
|----|----|----------|----------|----------|----------|----------|
| 1  | C  | 0.000000 |          |          |          |          |
| 2  | C  | 1.359317 | 0.000000 |          |          |          |
| 3  | N  | 2.200150 | 1.388708 | 0.000000 |          |          |
| 4  | C  | 2.206853 | 2.221971 | 1.342188 | 0.000000 |          |
| 5  | N  | 1.386519 | 2.220612 | 2.177915 | 1.338750 | 0.000000 |
| 6  | C  | 2.543456 | 3.644807 | 3.605992 | 2.508380 | 1.474332 |
| 7  | H  | 1.075528 | 2.212146 | 3.258305 | 3.224126 | 2.156433 |
| 8  | H  | 2.229500 | 1.096909 | 2.190737 | 3.263127 | 3.294919 |
| 9  | H  | 3.323976 | 4.272024 | 3.975252 | 2.729540 | 2.090779 |
| 10 | H  | 2.632164 | 3.926642 | 4.219498 | 3.318248 | 2.065492 |
| 11 | Br | 4.328651 | 3.373866 | 4.258088 | 5.414325 | 5.468441 |
| 12 | H  | 3.249604 | 3.261756 | 2.153713 | 1.076454 | 2.153688 |
| 13 | C  | 3.595085 | 2.524171 | 1.431445 | 2.450190 | 3.555215 |
| 14 | C  | 4.297406 | 3.004672 | 2.428388 | 3.654706 | 4.592847 |

|    |    |          |          |          |          |          |
|----|----|----------|----------|----------|----------|----------|
| 15 | H  | 4.276365 | 3.407297 | 2.100449 | 2.610245 | 3.902345 |
| 16 | H  | 5.362440 | 4.081945 | 3.393877 | 4.515679 | 5.565963 |
| 17 | H  | 4.123272 | 2.777671 | 2.734099 | 4.058167 | 4.732850 |
| 18 | C  | 4.145692 | 4.240160 | 5.091038 | 5.466464 | 4.967162 |
| 19 | C  | 5.233720 | 5.547815 | 6.447723 | 6.684140 | 6.013065 |
| 20 | O  | 3.949537 | 4.484492 | 5.446687 | 5.562770 | 4.738258 |
| 21 | H  | 4.097002 | 4.128854 | 4.702529 | 4.992462 | 4.663394 |
| 22 | H  | 4.045730 | 3.882369 | 4.863632 | 5.479025 | 5.072991 |
| 23 | H  | 5.815418 | 6.081401 | 7.113212 | 7.453729 | 6.745965 |
| 24 | C  | 6.200613 | 6.605519 | 7.317013 | 7.374582 | 6.727991 |
| 25 | H  | 6.711072 | 7.278868 | 8.046046 | 7.998539 | 7.213694 |
| 26 | H  | 7.042296 | 7.295903 | 7.969804 | 8.130243 | 7.597801 |
| 27 | H  | 5.890779 | 6.325682 | 6.859280 | 6.789800 | 6.212976 |
| 28 | C  | 3.438704 | 4.435518 | 4.326633 | 3.259179 | 2.501400 |
| 29 | H  | 4.316858 | 5.423976 | 5.369887 | 4.253923 | 3.416918 |
| 30 | H  | 3.964377 | 4.712755 | 4.293096 | 3.164173 | 2.857739 |
| 31 | C  | 3.324710 | 4.238086 | 4.433947 | 3.745657 | 2.947135 |
| 32 | O  | 3.974811 | 4.583917 | 4.655821 | 4.135598 | 3.664978 |
| 33 | O  | 3.154010 | 4.248807 | 4.823752 | 4.303051 | 3.215800 |
| 34 | H  | 3.423394 | 4.328038 | 5.059329 | 4.782407 | 3.795416 |
|    |    | 6        | 7        | 8        | 9        | 10       |
| 6  | C  | 0.000000 |          |          |          |          |
| 7  | H  | 2.824238 | 0.000000 |          |          |          |
| 8  | H  | 4.680638 | 2.761215 | 0.000000 |          |          |
| 9  | H  | 1.091361 | 3.715217 | 5.350955 | 0.000000 |          |
| 10 | H  | 1.088272 | 2.501464 | 4.859985 | 1.765856 | 0.000000 |
| 11 | Br | 6.766989 | 4.536110 | 2.339198 | 7.554354 | 6.882768 |
| 12 | H  | 2.856996 | 4.224222 | 4.260135 | 2.736641 | 3.826997 |
| 13 | C  | 4.918740 | 4.624776 | 2.861397 | 5.151762 | 5.611521 |
| 14 | C  | 6.020376 | 5.210249 | 2.834030 | 6.364400 | 6.616378 |
| 15 | H  | 5.099290 | 5.345556 | 3.895514 | 5.127554 | 5.913102 |
| 16 | H  | 6.960322 | 6.289682 | 3.881796 | 7.223713 | 7.612358 |
| 17 | H  | 6.188325 | 4.882143 | 2.230328 | 6.682594 | 6.645712 |
| 18 | C  | 5.587850 | 3.926883 | 4.066600 | 6.640519 | 5.618947 |
| 19 | C  | 6.368721 | 4.790812 | 5.404415 | 7.453427 | 6.245534 |
| 20 | O  | 5.046255 | 3.409705 | 4.511903 | 6.136952 | 4.841839 |
| 21 | H  | 5.278203 | 4.116447 | 4.119234 | 6.281832 | 5.509300 |
| 22 | H  | 5.915720 | 3.865448 | 3.448539 | 6.933400 | 5.922796 |
| 23 | H  | 7.150092 | 5.265168 | 5.788678 | 8.239733 | 6.916897 |
| 24 | C  | 6.859737 | 5.820286 | 6.604991 | 7.912557 | 6.816026 |
| 25 | H  | 7.163605 | 6.196752 | 7.329845 | 8.209292 | 6.992295 |
| 26 | H  | 7.822094 | 6.726686 | 7.191862 | 8.865669 | 7.837201 |
| 27 | H  | 6.268087 | 5.644021 | 6.472639 | 7.276141 | 6.356920 |
| 28 | C  | 1.535602 | 3.648208 | 5.399088 | 2.175735 | 2.172994 |



|    |    |           |          |          |          |          |
|----|----|-----------|----------|----------|----------|----------|
| 29 | H  | 2.141768  | 4.348609 | 6.380608 | 2.527541 | 2.435861 |
| 30 | H  | 2.184526  | 4.401408 | 5.695570 | 2.481825 | 3.079851 |
| 31 | C  | 2.550322  | 3.340095 | 4.991809 | 3.490123 | 2.867752 |
| 32 | O  | 3.546457  | 4.127925 | 5.217803 | 4.407693 | 4.017494 |
| 33 | O  | 2.843279  | 2.740528 | 4.871125 | 3.890492 | 2.648674 |
| 34 | H  | 3.715217  | 2.932049 | 4.743465 | 4.791853 | 3.524742 |
|    |    | 11        | 12       | 13       | 14       | 15       |
| 11 | Br | 0.000000  |          |          |          |          |
| 12 | H  | 6.339781  | 0.000000 |          |          |          |
| 13 | C  | 4.418246  | 2.786640 | 0.000000 |          |          |
| 14 | C  | 3.693931  | 4.093794 | 1.326590 | 0.000000 |          |
| 15 | H  | 5.491555  | 2.506857 | 1.082982 | 2.131299 | 0.000000 |
| 16 | H  | 4.424871  | 4.774278 | 2.072060 | 1.082785 | 2.447010 |
| 17 | H  | 2.624487  | 4.708194 | 2.134988 | 1.091995 | 3.115276 |
| 18 | C  | 3.864393  | 6.306029 | 5.898251 | 5.898691 | 6.758553 |
| 19 | C  | 5.086873  | 7.499657 | 7.332351 | 7.363569 | 8.168190 |
| 20 | O  | 4.774814  | 6.423611 | 6.513814 | 6.727358 | 7.327988 |
| 21 | H  | 4.164944  | 5.710316 | 5.423757 | 5.514374 | 6.183095 |
| 22 | H  | 2.858660  | 6.397170 | 5.564856 | 5.378125 | 6.523110 |
| 23 | H  | 5.169701  | 8.334055 | 7.979031 | 7.895688 | 8.882132 |
| 24 | C  | 6.395631  | 8.049292 | 8.179997 | 8.305888 | 8.903384 |
| 25 | H  | 7.225718  | 8.673320 | 9.012542 | 9.209022 | 9.724166 |
| 26 | H  | 6.673858  | 8.784587 | 8.697094 | 8.695689 | 9.430705 |
| 27 | H  | 6.539129  | 7.359293 | 7.710286 | 7.955349 | 8.335445 |
| 28 | C  | 7.206736  | 3.418311 | 5.522380 | 6.574418 | 5.666211 |
| 29 | H  | 8.175914  | 4.331802 | 6.582038 | 7.655037 | 6.682941 |
| 30 | H  | 7.486640  | 3.017823 | 5.285365 | 6.390271 | 5.260559 |
| 31 | C  | 6.410619  | 4.176544 | 5.618906 | 6.436036 | 5.988617 |
| 32 | O  | 6.334096  | 4.479592 | 5.627339 | 6.326395 | 5.987122 |
| 33 | O  | 6.183353  | 4.949247 | 6.130279 | 6.837349 | 6.655695 |
| 34 | H  | 5.691095  | 5.516529 | 6.288989 | 6.818079 | 6.928952 |
|    |    | 16        | 17       | 18       | 19       | 20       |
| 16 | H  | 0.000000  |          |          |          |          |
| 17 | H  | 1.864564  | 0.000000 |          |          |          |
| 18 | C  | 6.795351  | 5.250779 | 0.000000 |          |          |
| 19 | C  | 8.258929  | 6.697515 | 1.466072 | 0.000000 |          |
| 20 | O  | 7.713724  | 6.136144 | 1.463948 | 1.451886 | 0.000000 |
| 21 | H  | 6.360315  | 5.024856 | 1.086356 | 2.196019 | 2.139357 |
| 22 | H  | 6.264490  | 4.588952 | 1.086847 | 2.239446 | 2.156110 |
| 23 | H  | 8.785442  | 7.120795 | 2.185103 | 1.087562 | 2.108324 |
| 24 | C  | 9.152840  | 7.754370 | 2.604717 | 1.503843 | 2.517749 |
| 25 | H  | 10.096794 | 8.656944 | 3.445893 | 2.151922 | 2.930243 |
| 26 | H  | 9.464769  | 8.109963 | 3.142226 | 2.137013 | 3.421132 |
| 27 | H  | 8.783148  | 7.534093 | 2.736844 | 2.151453 | 2.710517 |

|    |   |          |          |          |          |          |
|----|---|----------|----------|----------|----------|----------|
| 28 | C | 7.471782 | 6.736120 | 5.276980 | 5.897002 | 4.751568 |
| 29 | H | 8.552479 | 7.810162 | 5.999743 | 6.411181 | 5.279486 |
| 30 | H | 7.184085 | 6.697294 | 5.709007 | 6.434956 | 5.419683 |
| 31 | C | 7.374329 | 6.389925 | 3.902521 | 4.417805 | 3.378977 |
| 32 | O | 7.181515 | 6.284496 | 3.597155 | 4.141482 | 3.447980 |
| 33 | O | 7.853800 | 6.613711 | 3.563402 | 3.859081 | 2.609198 |
| 34 | H | 7.831084 | 6.458077 | 2.691414 | 2.858977 | 1.637582 |
|    |   | 21       | 22       | 23       | 24       | 25       |
| 21 | H | 0.000000 |          |          |          |          |
| 22 | H | 1.844218 | 0.000000 |          |          |          |
| 23 | H | 3.109867 | 2.533050 | 0.000000 |          |          |
| 24 | C | 2.802212 | 3.560808 | 2.208049 | 0.000000 |          |
| 25 | H | 3.752896 | 4.367975 | 2.562574 | 1.093875 | 0.000000 |
| 26 | H | 3.285904 | 3.959916 | 2.557935 | 1.094237 | 1.768382 |
| 27 | H | 2.521688 | 3.802098 | 3.099840 | 1.092084 | 1.778296 |
| 28 | C | 4.793276 | 5.857147 | 6.811547 | 6.065998 | 6.347126 |
| 29 | H | 5.582593 | 6.656937 | 7.300143 | 6.437306 | 6.547809 |
| 30 | H | 5.045392 | 6.287889 | 7.414473 | 6.505111 | 6.890376 |
| 31 | C | 3.439829 | 4.621294 | 5.371544 | 4.546437 | 4.877705 |
| 32 | O | 2.870526 | 4.420541 | 5.193949 | 4.048618 | 4.553819 |
| 33 | O | 3.486890 | 4.230369 | 4.654630 | 4.209863 | 4.368973 |
| 34 | H | 2.775390 | 3.437069 | 3.656077 | 3.307506 | 3.524878 |
|    |   | 26       | 27       | 28       | 29       | 30       |
| 26 | H | 0.000000 |          |          |          |          |
| 27 | H | 1.774732 | 0.000000 |          |          |          |
| 28 | C | 7.003090 | 5.314624 | 0.000000 |          |          |
| 29 | H | 7.414717 | 5.691940 | 1.094609 | 0.000000 |          |
| 30 | H | 7.347786 | 5.641709 | 1.090550 | 1.766359 | 0.000000 |
| 31 | C | 5.484407 | 3.818054 | 1.524340 | 2.146002 | 2.126563 |
| 32 | O | 4.840382 | 3.153205 | 2.407170 | 3.048384 | 2.517368 |
| 33 | O | 5.253937 | 3.764859 | 2.366313 | 2.716165 | 3.267331 |
| 34 | H | 4.350933 | 3.008956 | 3.250384 | 3.666432 | 4.028296 |
|    |   | 31       | 32       | 33       | 34       |          |
| 31 | C | 0.000000 |          |          |          |          |
| 32 | O | 1.208237 | 0.000000 |          |          |          |
| 33 | O | 1.332007 | 2.255905 | 0.000000 |          |          |
| 34 | H | 1.933670 | 2.394397 | 1.004958 | 0.000000 |          |

Stoichiometry C11H17BrN2O3

Framework group C1[X(C11H17BrN2O3)]

Deg. of freedom 96

Full point group C1 NOp 1

Largest Abelian subgroup C1 NOp 1

Largest concise Abelian subgroup C1 NOp 1

Standard orientation:

| Center<br>Number | Atomic<br>Number | Atomic<br>Type | Coordinates (Angstroms) |           |           |
|------------------|------------------|----------------|-------------------------|-----------|-----------|
|                  |                  |                | X                       | Y         | Z         |
| 1                | 6                | 0              | 0.075655                | 1.329339  | 1.239033  |
| 2                | 6                | 0              | -1.154178               | 1.256553  | 0.664615  |
| 3                | 7                | 0              | -1.214886               | 2.288519  | -0.262678 |
| 4                | 6                | 0              | -0.054172               | 2.962089  | -0.239978 |
| 5                | 7                | 0              | 0.750929                | 2.397461  | 0.668459  |
| 6                | 6                | 0              | 2.158539                | 2.754454  | 0.923108  |
| 7                | 1                | 0              | 0.535170                | 0.698934  | 1.979436  |
| 8                | 1                | 0              | -1.939814               | 0.498584  | 0.771700  |
| 9                | 1                | 0              | 2.233246                | 3.842589  | 0.961199  |
| 10               | 1                | 0              | 2.402491                | 2.361877  | 1.908352  |
| 11               | 35               | 0              | -3.069551               | -1.499646 | 0.321566  |
| 12               | 1                | 0              | 0.189603                | 3.808651  | -0.858574 |
| 13               | 6                | 0              | -2.307219               | 2.602042  | -1.133049 |
| 14               | 6                | 0              | -3.348493               | 1.800399  | -1.314594 |
| 15               | 1                | 0              | -2.182340               | 3.556322  | -1.629643 |
| 16               | 1                | 0              | -4.128752               | 2.118873  | -1.994443 |
| 17               | 1                | 0              | -3.452665               | 0.825300  | -0.834195 |
| 18               | 6                | 0              | 0.612475                | -2.462485 | -0.348624 |
| 19               | 6                | 0              | 1.586994                | -3.514465 | -0.043636 |
| 20               | 8                | 0              | 1.630702                | -2.258382 | 0.683219  |
| 21               | 1                | 0              | 0.776084                | -1.858855 | -1.236900 |
| 22               | 1                | 0              | -0.407921               | -2.499139 | 0.023778  |
| 23               | 1                | 0              | 1.248283                | -4.329705 | 0.591541  |
| 24               | 6                | 0              | 2.755101                | -3.820419 | -0.939996 |
| 25               | 1                | 0              | 3.622140                | -4.140596 | -0.354939 |
| 26               | 1                | 0              | 2.492349                | -4.634248 | -1.622637 |
| 27               | 1                | 0              | 3.032096                | -2.945978 | -1.532680 |
| 28               | 6                | 0              | 3.108663                | 2.182034  | -0.138812 |
| 29               | 1                | 0              | 4.134850                | 2.363823  | 0.195942  |
| 30               | 1                | 0              | 2.977488                | 2.678903  | -1.100693 |
| 31               | 6                | 0              | 2.918187                | 0.686041  | -0.360927 |
| 32               | 8                | 0              | 2.769286                | 0.195294  | -1.454926 |
| 33               | 8                | 0              | 2.907191                | 0.014763  | 0.789511  |
| 34               | 1                | 0              | 2.582946                | -0.926487 | 0.652209  |

Rotational constants (GHZ): 0.3286020 0.2549077 0.1595917

Standard basis: 6-311++G(d,p) (5D, 7F)

There are 538 symmetry adapted cartesian basis functions of A symmetry.

There are 519 symmetry adapted basis functions of A symmetry.

519 basis functions, 823 primitive gaussians, 538 cartesian basis functions

78 alpha electrons            78 beta electrons  
nuclear repulsion energy        1572.8597848832 Hartrees.  
NAtoms=    34 NActive=    34 NUniq=    34 SFac= 1.00D+00 NAtFMM=    60 NAOKFM=F  
Big=F  
Integral buffers will be    131072 words long.  
Raffenetti 2 integral format.  
Two-electron integral symmetry is turned on.  
One-electron integrals computed using PRISM.  
NBasis=    519 RedAO= T EigKep=    3.52D-06    NBF=    519  
NBsUse=    519 1.00D-06 EigRej= -1.00D+00    NBFU=    519  
Initial guess from the checkpoint file:    "/coohpo.chk"  
B after Tr=    0.000000    0.000000    0.000000  
          Rot=    1.000000    -0.000003    -0.000026    -0.000052 Ang=    -0.01 deg.  
Requested convergence on RMS density matrix=1.00D-08 within 128 cycles.  
Requested convergence on MAX density matrix=1.00D-06.  
Requested convergence on                    energy=1.00D-06.  
No special actions if energy rises.  
SCF Done:    E(RB3LYP) = -3338.90388354        A.U. after    9 cycles  
          NFock=    9    Conv=0.22D-08        -V/T= 2.0019  
Calling FoFJK, ICntrl=            2127 FMM=F ISym2X=0 I1Cent= 0 IOpClX= 0 NMat=1 NMatS=1  
NMatT=0.  
\*\*\*\*\* Axes restored to original set \*\*\*\*\*

```
-----
```

| Center<br>Number | Atomic<br>Number | Forces (Hartrees/Bohr) |              |              |
|------------------|------------------|------------------------|--------------|--------------|
|                  |                  | X                      | Y            | Z            |
| 1                | 6                | 0.000001324            | -0.000000794 | 0.000002563  |
| 2                | 6                | 0.000005746            | 0.000007636  | 0.000003043  |
| 3                | 7                | -0.000001579           | 0.000006476  | -0.000002238 |
| 4                | 6                | 0.000000759            | -0.000007814 | -0.000008230 |
| 5                | 7                | 0.000000394            | 0.000004321  | -0.000001015 |
| 6                | 6                | -0.000000507           | -0.000006011 | -0.000001827 |
| 7                | 1                | -0.000001494           | 0.000002529  | -0.000003194 |
| 8                | 1                | -0.000010095           | -0.000007157 | -0.000003149 |
| 9                | 1                | 0.000001986            | -0.000000921 | -0.000003327 |
| 10               | 1                | 0.000001534            | 0.000003986  | -0.000002631 |
| 11               | 35               | -0.000001182           | 0.000002628  | 0.000003883  |
| 12               | 1                | -0.000001120           | 0.000004560  | -0.000000631 |
| 13               | 6                | -0.000000123           | -0.000001317 | -0.000005779 |
| 14               | 6                | -0.000001130           | 0.000011790  | -0.000004471 |
| 15               | 1                | 0.000000031            | 0.000002139  | -0.000003487 |
| 16               | 1                | -0.000003094           | 0.000000028  | -0.000001589 |
| 17               | 1                | -0.000000989           | -0.000000037 | -0.000000342 |
| 18               | 6                | -0.000003292           | -0.000008579 | 0.000009121  |

```
-----
```

|    |   |              |              |              |
|----|---|--------------|--------------|--------------|
| 19 | 6 | 0.000006218  | -0.000005482 | -0.000001871 |
| 20 | 8 | -0.000003137 | 0.000010569  | -0.000003377 |
| 21 | 1 | 0.000000794  | 0.000001949  | 0.000002111  |
| 22 | 1 | -0.000003912 | 0.000001710  | 0.000000960  |
| 23 | 1 | -0.000004134 | -0.000002681 | 0.000004625  |
| 24 | 6 | -0.000002529 | -0.000002348 | 0.000009197  |
| 25 | 1 | -0.000001392 | -0.000000644 | 0.000004020  |
| 26 | 1 | 0.000001109  | -0.000002005 | 0.000005953  |
| 27 | 1 | 0.000000817  | -0.000004839 | 0.000002520  |
| 28 | 6 | 0.000007518  | -0.000002690 | -0.000009212 |
| 29 | 1 | 0.000002543  | -0.000000057 | 0.000001213  |
| 30 | 1 | 0.000002673  | -0.000001533 | -0.000001363 |
| 31 | 6 | 0.000004249  | -0.000000923 | -0.000004639 |
| 32 | 8 | -0.000000175 | -0.000000046 | 0.000003197  |
| 33 | 8 | 0.000000683  | 0.000007061  | -0.000001828 |
| 34 | 1 | 0.000001505  | -0.000011504 | 0.000011794  |

-----  
Cartesian Forces: Max 0.000011794 RMS 0.000004451

GradGradGradGradGradGradGradGradGradGradGradGradGradGradGradGradGrad

Berny optimization.

Using GEDIIS/GDIIS optimizer.

FormGI is forming the generalized inverse of G from B-inverse, IUseBI=4.

Internal Forces: Max 0.000008992 RMS 0.000002344

Search for a local minimum.

Step number 41 out of a maximum of 175

All quantities printed in internal units (Hartrees-Bohrs-Radians)

Mixed Optimization -- En-DIIS/RFO-DIIS

Swapping is turned off.

Update second derivatives using D2CorX and points

|    |    |    |    |    |    |    |  |  |  |
|----|----|----|----|----|----|----|--|--|--|
| 21 | 22 | 23 | 24 | 25 |    |    |  |  |  |
|    |    | 26 | 27 | 28 | 29 | 30 |  |  |  |
|    |    | 31 | 32 | 33 | 34 | 35 |  |  |  |
|    |    | 36 | 37 | 38 | 39 | 40 |  |  |  |
|    |    |    |    | 41 |    |    |  |  |  |

DE= -7.99D-09 DEPred=-2.76D-08 R= 2.90D-01

Trust test= 2.90D-01 RLast= 3.31D-03 DXMaxT set to 1.95D-01

ITU= 0 0 -1 1 1 1 1 1 1 1 -1 1 1 1 1 -1 0 1 1

ITU= 1 1 1 1 1 1 1 1 0 0 -1 1 1 1 0 1 0 -1 0 1

ITU= 0

|                 |         |         |         |         |         |
|-----------------|---------|---------|---------|---------|---------|
| Eigenvalues --- | 0.00156 | 0.00274 | 0.00338 | 0.00412 | 0.00489 |
| Eigenvalues --- | 0.00566 | 0.00784 | 0.00926 | 0.01034 | 0.01219 |
| Eigenvalues --- | 0.01399 | 0.01682 | 0.02024 | 0.02215 | 0.02289 |
| Eigenvalues --- | 0.02337 | 0.02389 | 0.02634 | 0.03008 | 0.03151 |
| Eigenvalues --- | 0.03404 | 0.03710 | 0.03820 | 0.04301 | 0.04441 |

|                 |         |         |         |         |         |
|-----------------|---------|---------|---------|---------|---------|
| Eigenvalues --- | 0.04927 | 0.05031 | 0.05270 | 0.05444 | 0.05726 |
| Eigenvalues --- | 0.05849 | 0.05958 | 0.06210 | 0.07361 | 0.09233 |
| Eigenvalues --- | 0.09602 | 0.11778 | 0.12588 | 0.12871 | 0.13030 |
| Eigenvalues --- | 0.13572 | 0.14283 | 0.14890 | 0.15566 | 0.15694 |
| Eigenvalues --- | 0.16004 | 0.16009 | 0.16025 | 0.16048 | 0.16118 |
| Eigenvalues --- | 0.16352 | 0.17490 | 0.19450 | 0.20702 | 0.21870 |
| Eigenvalues --- | 0.23309 | 0.23733 | 0.24324 | 0.25300 | 0.26452 |
| Eigenvalues --- | 0.28237 | 0.28899 | 0.29927 | 0.31314 | 0.32045 |
| Eigenvalues --- | 0.33346 | 0.34380 | 0.34506 | 0.34610 | 0.34737 |
| Eigenvalues --- | 0.34856 | 0.34900 | 0.34972 | 0.35093 | 0.35317 |
| Eigenvalues --- | 0.35352 | 0.35681 | 0.35749 | 0.35930 | 0.36604 |
| Eigenvalues --- | 0.36976 | 0.37264 | 0.37377 | 0.38576 | 0.39750 |
| Eigenvalues --- | 0.40517 | 0.45477 | 0.49117 | 0.50481 | 0.50848 |
| Eigenvalues --- | 0.54392 | 0.55778 | 0.56416 | 0.61037 | 0.90613 |
| Eigenvalues --- | 0.96982 |         |         |         |         |

En-DIIS/RFO-DIIS IScMMF= 0 using points: 41 40 39 38 37

RFO step: Lambda=-2.18813497D-09.

DidBck=F Rises=F RFO-DIIS coefs: 1.02048 0.11420 -0.08235 -0.17323

0.12090

Iteration 1 RMS(Cart)= 0.00016723 RMS(Int)= 0.00000003

Iteration 2 RMS(Cart)= 0.00000002 RMS(Int)= 0.00000002

| Variable | Old X   | -DE/DX   | Delta X  |          |          | New X   |
|----------|---------|----------|----------|----------|----------|---------|
|          |         |          | (Linear) | (Quad)   | (Total)  |         |
| R1       | 2.56874 | 0.00000  | 0.00000  | 0.00000  | 0.00000  | 2.56874 |
| R2       | 2.62014 | 0.00000  | 0.00000  | 0.00001  | 0.00001  | 2.62015 |
| R3       | 2.03245 | 0.00000  | 0.00000  | 0.00000  | 0.00000  | 2.03245 |
| R4       | 2.62428 | 0.00001  | 0.00000  | 0.00001  | 0.00000  | 2.62428 |
| R5       | 2.07286 | 0.00001  | -0.00001 | 0.00002  | 0.00001  | 2.07286 |
| R6       | 2.53637 | -0.00001 | -0.00001 | -0.00001 | -0.00002 | 2.53635 |
| R7       | 2.70504 | 0.00000  | 0.00003  | -0.00001 | 0.00002  | 2.70505 |
| R8       | 2.52987 | 0.00000  | 0.00000  | 0.00000  | 0.00000  | 2.52987 |
| R9       | 2.03420 | 0.00000  | 0.00000  | 0.00000  | 0.00000  | 2.03420 |
| R10      | 2.78608 | 0.00000  | 0.00001  | -0.00001 | -0.00001 | 2.78608 |
| R11      | 2.06237 | 0.00000  | 0.00000  | 0.00000  | 0.00000  | 2.06237 |
| R12      | 2.05654 | 0.00000  | 0.00000  | 0.00000  | 0.00000  | 2.05654 |
| R13      | 2.90187 | 0.00000  | 0.00000  | 0.00002  | 0.00002  | 2.90188 |
| R14      | 4.42044 | 0.00000  | 0.00003  | -0.00004 | -0.00001 | 4.42043 |
| R15      | 2.50689 | -0.00001 | -0.00001 | 0.00000  | -0.00001 | 2.50688 |
| R16      | 2.04654 | 0.00000  | 0.00000  | 0.00000  | 0.00000  | 2.04654 |
| R17      | 2.04617 | 0.00000  | 0.00000  | 0.00000  | 0.00001  | 2.04617 |
| R18      | 2.06357 | 0.00000  | 0.00000  | 0.00000  | 0.00000  | 2.06358 |
| R19      | 2.77047 | 0.00000  | -0.00001 | 0.00001  | 0.00000  | 2.77047 |
| R20      | 2.76646 | 0.00000  | 0.00001  | 0.00000  | 0.00001  | 2.76647 |
| R21      | 2.05292 | 0.00000  | 0.00000  | 0.00000  | 0.00000  | 2.05291 |

|     |         |          |          |          |          |         |
|-----|---------|----------|----------|----------|----------|---------|
| R22 | 2.05384 | 0.00000  | 0.00000  | 0.00000  | 0.00000  | 2.05384 |
| R23 | 2.74367 | 0.00000  | 0.00003  | 0.00000  | 0.00003  | 2.74370 |
| R24 | 2.05519 | 0.00000  | 0.00000  | 0.00000  | 0.00000  | 2.05520 |
| R25 | 2.84185 | 0.00000  | -0.00001 | 0.00000  | -0.00002 | 2.84183 |
| R26 | 3.09458 | -0.00001 | 0.00000  | -0.00005 | -0.00005 | 3.09453 |
| R27 | 2.06712 | 0.00000  | 0.00000  | 0.00000  | 0.00000  | 2.06712 |
| R28 | 2.06781 | 0.00000  | 0.00000  | 0.00000  | 0.00000  | 2.06781 |
| R29 | 2.06374 | 0.00000  | 0.00000  | 0.00000  | 0.00000  | 2.06374 |
| R30 | 2.06851 | 0.00000  | 0.00000  | 0.00000  | 0.00000  | 2.06851 |
| R31 | 2.06084 | 0.00000  | 0.00000  | 0.00000  | 0.00000  | 2.06084 |
| R32 | 2.88058 | 0.00000  | -0.00001 | 0.00000  | -0.00001 | 2.88057 |
| R33 | 2.28324 | 0.00000  | 0.00000  | 0.00000  | 0.00000  | 2.28323 |
| R34 | 2.51713 | 0.00000  | 0.00002  | 0.00000  | 0.00001  | 2.51714 |
| R35 | 1.89909 | 0.00001  | 0.00001  | 0.00001  | 0.00001  | 1.89911 |
| A1  | 1.88387 | 0.00000  | -0.00001 | 0.00000  | -0.00001 | 1.88386 |
| A2  | 2.27322 | 0.00000  | 0.00001  | 0.00001  | 0.00002  | 2.27324 |
| A3  | 2.12556 | 0.00000  | 0.00000  | -0.00001 | -0.00001 | 2.12555 |
| A4  | 1.85660 | 0.00000  | 0.00000  | -0.00001 | 0.00000  | 1.85660 |
| A5  | 2.27018 | 0.00000  | -0.00001 | 0.00005  | 0.00004  | 2.27023 |
| A6  | 2.15002 | 0.00000  | 0.00001  | -0.00004 | -0.00003 | 2.14998 |
| A7  | 1.90057 | 0.00000  | 0.00000  | 0.00001  | 0.00002  | 1.90059 |
| A8  | 2.21696 | 0.00000  | 0.00000  | -0.00002 | -0.00002 | 2.21694 |
| A9  | 2.16553 | -0.00001 | 0.00000  | 0.00000  | 0.00001  | 2.16554 |
| A10 | 1.89641 | 0.00000  | 0.00000  | -0.00001 | -0.00001 | 1.89640 |
| A11 | 2.19050 | 0.00000  | 0.00000  | 0.00002  | 0.00002  | 2.19052 |
| A12 | 2.19622 | 0.00000  | 0.00000  | -0.00001 | -0.00001 | 2.19622 |
| A13 | 1.88731 | 0.00000  | 0.00000  | 0.00001  | 0.00001  | 1.88732 |
| A14 | 2.19007 | 0.00001  | -0.00001 | 0.00002  | 0.00001  | 2.19008 |
| A15 | 2.20092 | -0.00001 | 0.00000  | -0.00002 | -0.00002 | 2.20090 |
| A16 | 1.88894 | 0.00000  | -0.00001 | -0.00001 | -0.00002 | 1.88892 |
| A17 | 1.85776 | 0.00000  | 0.00000  | 0.00002  | 0.00001  | 1.85777 |
| A18 | 1.96170 | 0.00001  | 0.00001  | 0.00002  | 0.00003  | 1.96173 |
| A19 | 1.88886 | 0.00000  | -0.00001 | 0.00000  | -0.00001 | 1.88884 |
| A20 | 1.93205 | 0.00000  | -0.00001 | 0.00000  | -0.00001 | 1.93204 |
| A21 | 1.93146 | 0.00000  | 0.00002  | -0.00002 | 0.00000  | 1.93146 |
| A22 | 2.73230 | 0.00000  | -0.00002 | 0.00003  | 0.00000  | 2.73231 |
| A23 | 2.15296 | 0.00000  | -0.00001 | -0.00002 | -0.00003 | 2.15293 |
| A24 | 1.96472 | 0.00000  | -0.00001 | 0.00001  | 0.00000  | 1.96472 |
| A25 | 2.16546 | 0.00000  | 0.00002  | 0.00000  | 0.00003  | 2.16549 |
| A26 | 2.06441 | 0.00000  | 0.00000  | 0.00001  | 0.00002  | 2.06442 |
| A27 | 2.15829 | 0.00000  | 0.00001  | -0.00001 | 0.00001  | 2.15829 |
| A28 | 2.06022 | 0.00000  | -0.00002 | -0.00001 | -0.00002 | 2.06020 |
| A29 | 2.05861 | 0.00000  | 0.00004  | -0.00003 | 0.00001  | 2.05862 |
| A30 | 2.12774 | 0.00000  | -0.00003 | 0.00003  | 0.00001  | 2.12774 |

|     |          |         |          |          |          |          |
|-----|----------|---------|----------|----------|----------|----------|
| A31 | 1.97589  | 0.00000 | 0.00000  | -0.00003 | -0.00002 | 1.97587  |
| A32 | 2.00006  | 0.00000 | -0.00001 | 0.00000  | -0.00002 | 2.00005  |
| A33 | 2.02673  | 0.00000 | -0.00001 | 0.00001  | 0.00000  | 2.02673  |
| A34 | 2.04020  | 0.00000 | -0.00003 | 0.00000  | -0.00003 | 2.04017  |
| A35 | 2.13922  | 0.00000 | 0.00005  | -0.00001 | 0.00004  | 2.13926  |
| A36 | 1.94497  | 0.00000 | -0.00003 | 0.00000  | -0.00003 | 1.94494  |
| A37 | 2.03871  | 0.00000 | 0.00002  | -0.00001 | 0.00001  | 2.03872  |
| A38 | 2.02363  | 0.00000 | -0.00001 | 0.00001  | 0.00000  | 2.02364  |
| A39 | 2.09959  | 0.00000 | -0.00001 | 0.00001  | 0.00000  | 2.09960  |
| A40 | 2.36267  | 0.00000 | 0.00000  | 0.00001  | 0.00001  | 2.36268  |
| A41 | 1.93524  | 0.00000 | 0.00000  | 0.00000  | 0.00000  | 1.93524  |
| A42 | 1.91414  | 0.00000 | -0.00001 | 0.00001  | 0.00000  | 1.91415  |
| A43 | 1.93648  | 0.00000 | 0.00002  | 0.00000  | 0.00001  | 1.93650  |
| A44 | 1.88210  | 0.00000 | 0.00000  | 0.00000  | 0.00000  | 1.88210  |
| A45 | 1.90032  | 0.00000 | 0.00000  | 0.00000  | 0.00000  | 1.90032  |
| A46 | 1.89426  | 0.00000 | -0.00001 | 0.00000  | -0.00001 | 1.89425  |
| A47 | 1.88248  | 0.00000 | -0.00003 | -0.00002 | -0.00005 | 1.88243  |
| A48 | 1.94516  | 0.00000 | -0.00001 | 0.00000  | -0.00001 | 1.94515  |
| A49 | 1.97065  | 0.00000 | -0.00001 | -0.00003 | -0.00003 | 1.97062  |
| A50 | 1.88266  | 0.00000 | 0.00001  | 0.00002  | 0.00004  | 1.88270  |
| A51 | 1.90149  | 0.00000 | 0.00002  | 0.00001  | 0.00003  | 1.90152  |
| A52 | 1.87926  | 0.00000 | 0.00002  | 0.00001  | 0.00002  | 1.87928  |
| A53 | 2.14832  | 0.00000 | 0.00001  | 0.00000  | 0.00000  | 2.14832  |
| A54 | 1.94956  | 0.00000 | 0.00000  | 0.00000  | 0.00000  | 1.94955  |
| A55 | 2.18501  | 0.00000 | -0.00001 | 0.00001  | 0.00000  | 2.18501  |
| A56 | 1.93550  | 0.00000 | -0.00003 | 0.00001  | -0.00002 | 1.93548  |
| A57 | 2.81394  | 0.00001 | 0.00004  | 0.00008  | 0.00011  | 2.81405  |
| D1  | 0.00348  | 0.00000 | -0.00001 | 0.00001  | 0.00000  | 0.00348  |
| D2  | 3.02451  | 0.00000 | 0.00005  | 0.00001  | 0.00006  | 3.02457  |
| D3  | -3.10298 | 0.00000 | 0.00006  | -0.00003 | 0.00003  | -3.10295 |
| D4  | -0.08196 | 0.00000 | 0.00012  | -0.00003 | 0.00009  | -0.08187 |
| D5  | -0.00266 | 0.00000 | 0.00002  | -0.00001 | 0.00001  | -0.00265 |
| D6  | -3.04336 | 0.00000 | 0.00008  | -0.00003 | 0.00004  | -3.04332 |
| D7  | 3.10739  | 0.00000 | -0.00005 | 0.00003  | -0.00002 | 3.10738  |
| D8  | 0.06669  | 0.00000 | 0.00001  | 0.00001  | 0.00002  | 0.06670  |
| D9  | -0.00312 | 0.00000 | 0.00001  | -0.00001 | -0.00001 | -0.00313 |
| D10 | 3.12197  | 0.00000 | 0.00005  | -0.00005 | 0.00000  | 3.12197  |
| D11 | -3.03451 | 0.00000 | -0.00005 | -0.00002 | -0.00007 | -3.03458 |
| D12 | 0.09058  | 0.00000 | 0.00000  | -0.00006 | -0.00006 | 0.09051  |
| D13 | -1.48345 | 0.00000 | -0.00005 | 0.00046  | 0.00041  | -1.48304 |
| D14 | 1.51981  | 0.00000 | 0.00002  | 0.00046  | 0.00048  | 1.52029  |
| D15 | 0.00151  | 0.00000 | 0.00001  | 0.00001  | 0.00001  | 0.00152  |
| D16 | 3.13239  | 0.00000 | 0.00010  | 0.00004  | 0.00014  | 3.13252  |
| D17 | -3.12417 | 0.00000 | -0.00004 | 0.00004  | 0.00001  | -3.12417 |



|     |          |         |          |          |          |          |
|-----|----------|---------|----------|----------|----------|----------|
| D18 | 0.00670  | 0.00000 | 0.00006  | 0.00008  | 0.00013  | 0.00684  |
| D19 | -0.19357 | 0.00000 | -0.00009 | 0.00000  | -0.00009 | -0.19366 |
| D20 | 2.95785  | 0.00000 | -0.00010 | -0.00001 | -0.00011 | 2.95774  |
| D21 | 2.92917  | 0.00000 | -0.00004 | -0.00004 | -0.00009 | 2.92909  |
| D22 | -0.20259 | 0.00000 | -0.00005 | -0.00006 | -0.00011 | -0.20270 |
| D23 | 0.00068  | 0.00000 | -0.00002 | 0.00000  | -0.00001 | 0.00067  |
| D24 | 3.04060  | 0.00000 | -0.00007 | 0.00003  | -0.00005 | 3.04055  |
| D25 | -3.13015 | 0.00000 | -0.00011 | -0.00003 | -0.00014 | -3.13029 |
| D26 | -0.09024 | 0.00000 | -0.00017 | 0.00000  | -0.00017 | -0.09041 |
| D27 | -2.47005 | 0.00000 | -0.00012 | 0.00000  | -0.00011 | -2.47016 |
| D28 | -0.44313 | 0.00000 | -0.00013 | 0.00000  | -0.00013 | -0.44326 |
| D29 | 1.67403  | 0.00000 | -0.00011 | 0.00000  | -0.00011 | 1.67392  |
| D30 | 0.79028  | 0.00000 | -0.00005 | -0.00003 | -0.00008 | 0.79021  |
| D31 | 2.81721  | 0.00000 | -0.00007 | -0.00003 | -0.00009 | 2.81712  |
| D32 | -1.34882 | 0.00000 | -0.00004 | -0.00003 | -0.00007 | -1.34889 |
| D33 | -3.00035 | 0.00000 | 0.00000  | 0.00005  | 0.00005  | -3.00030 |
| D34 | 1.21941  | 0.00000 | 0.00000  | 0.00004  | 0.00004  | 1.21945  |
| D35 | -0.89843 | 0.00000 | 0.00000  | 0.00004  | 0.00004  | -0.89839 |
| D36 | 1.16825  | 0.00000 | 0.00000  | 0.00006  | 0.00006  | 1.16831  |
| D37 | -0.89518 | 0.00000 | 0.00001  | 0.00004  | 0.00005  | -0.89513 |
| D38 | -3.01301 | 0.00000 | 0.00000  | 0.00004  | 0.00005  | -3.01297 |
| D39 | -0.92591 | 0.00000 | 0.00001  | 0.00007  | 0.00008  | -0.92583 |
| D40 | -2.98934 | 0.00000 | 0.00002  | 0.00005  | 0.00007  | -2.98926 |
| D41 | 1.17601  | 0.00000 | 0.00001  | 0.00006  | 0.00007  | 1.17608  |
| D42 | -3.13963 | 0.00000 | -0.00002 | -0.00002 | -0.00004 | -3.13967 |
| D43 | -0.02376 | 0.00000 | 0.00002  | -0.00001 | 0.00001  | -0.02375 |
| D44 | -0.00899 | 0.00000 | -0.00001 | 0.00000  | -0.00001 | -0.00901 |
| D45 | 3.10688  | 0.00000 | 0.00002  | 0.00001  | 0.00003  | 3.10691  |
| D46 | -2.75257 | 0.00000 | -0.00003 | -0.00002 | -0.00005 | -2.75262 |
| D47 | -0.04779 | 0.00000 | -0.00001 | -0.00001 | -0.00002 | -0.04781 |
| D48 | -0.01984 | 0.00000 | -0.00002 | 0.00002  | -0.00001 | -0.01985 |
| D49 | 2.68493  | 0.00000 | 0.00000  | 0.00003  | 0.00003  | 2.68496  |
| D50 | 0.31777  | 0.00000 | -0.00005 | 0.00003  | -0.00001 | 0.31776  |
| D51 | -2.06139 | 0.00000 | -0.00003 | 0.00006  | 0.00003  | -2.06136 |
| D52 | 2.54710  | 0.00000 | 0.00005  | -0.00002 | 0.00003  | 2.54713  |
| D53 | 0.16515  | 0.00000 | 0.00007  | -0.00002 | 0.00006  | 0.16521  |
| D54 | 2.55621  | 0.00000 | -0.00005 | -0.00017 | -0.00022 | 2.55599  |
| D55 | -1.65035 | 0.00000 | -0.00005 | -0.00016 | -0.00021 | -1.65056 |
| D56 | 0.44214  | 0.00000 | -0.00006 | -0.00016 | -0.00022 | 0.44193  |
| D57 | 1.32964  | 0.00000 | -0.00007 | -0.00016 | -0.00023 | 1.32941  |
| D58 | -2.87691 | 0.00000 | -0.00007 | -0.00015 | -0.00023 | -2.87714 |
| D59 | -0.78442 | 0.00000 | -0.00008 | -0.00015 | -0.00023 | -0.78465 |
| D60 | -1.01838 | 0.00000 | -0.00004 | -0.00015 | -0.00019 | -1.01857 |
| D61 | 1.05825  | 0.00000 | -0.00004 | -0.00015 | -0.00019 | 1.05807  |

|     |          |         |          |          |          |          |
|-----|----------|---------|----------|----------|----------|----------|
| D62 | -3.13244 | 0.00000 | -0.00005 | -0.00015 | -0.00019 | -3.13263 |
| D63 | 1.47576  | 0.00000 | 0.00020  | -0.00002 | 0.00018  | 1.47594  |
| D64 | 2.82147  | 0.00000 | 0.00017  | 0.00000  | 0.00017  | 2.82164  |
| D65 | 2.25667  | 0.00000 | -0.00016 | -0.00012 | -0.00028 | 2.25639  |
| D66 | -0.85987 | 0.00000 | -0.00012 | -0.00009 | -0.00021 | -0.86008 |
| D67 | -1.93549 | 0.00000 | -0.00019 | -0.00016 | -0.00034 | -1.93583 |
| D68 | 1.23116  | 0.00000 | -0.00015 | -0.00012 | -0.00027 | 1.23089  |
| D69 | 0.10192  | 0.00000 | -0.00015 | -0.00012 | -0.00027 | 0.10165  |
| D70 | -3.01461 | 0.00000 | -0.00011 | -0.00008 | -0.00020 | -3.01481 |
| D71 | 2.92390  | 0.00000 | -0.00002 | -0.00003 | -0.00005 | 2.92385  |
| D72 | -0.19200 | 0.00000 | 0.00002  | 0.00000  | 0.00002  | -0.19199 |
| D73 | -1.88647 | 0.00000 | 0.00008  | 0.00004  | 0.00011  | -1.88636 |

| Item                 | Value    | Threshold | Converged? |
|----------------------|----------|-----------|------------|
| Maximum Force        | 0.000009 | 0.000450  | YES        |
| RMS Force            | 0.000002 | 0.000300  | YES        |
| Maximum Displacement | 0.000747 | 0.001800  | YES        |
| RMS Displacement     | 0.000167 | 0.001200  | YES        |

Predicted change in Energy=-6.089297D-09

Optimization completed.

-- Stationary point found.

-----  
! Optimized Parameters !  
! (Angstroms and Degrees) !

| ! Name | Definition | Value  | Derivative Info. | ! |
|--------|------------|--------|------------------|---|
| ! R1   | R(1,2)     | 1.3593 | -DE/DX = 0.0     | ! |
| ! R2   | R(1,5)     | 1.3865 | -DE/DX = 0.0     | ! |
| ! R3   | R(1,7)     | 1.0755 | -DE/DX = 0.0     | ! |
| ! R4   | R(2,3)     | 1.3887 | -DE/DX = 0.0     | ! |
| ! R5   | R(2,8)     | 1.0969 | -DE/DX = 0.0     | ! |
| ! R6   | R(3,4)     | 1.3422 | -DE/DX = 0.0     | ! |
| ! R7   | R(3,13)    | 1.4314 | -DE/DX = 0.0     | ! |
| ! R8   | R(4,5)     | 1.3387 | -DE/DX = 0.0     | ! |
| ! R9   | R(4,12)    | 1.0765 | -DE/DX = 0.0     | ! |
| ! R10  | R(5,6)     | 1.4743 | -DE/DX = 0.0     | ! |
| ! R11  | R(6,9)     | 1.0914 | -DE/DX = 0.0     | ! |
| ! R12  | R(6,10)    | 1.0883 | -DE/DX = 0.0     | ! |
| ! R13  | R(6,28)    | 1.5356 | -DE/DX = 0.0     | ! |
| ! R14  | R(8,11)    | 2.3392 | -DE/DX = 0.0     | ! |
| ! R15  | R(13,14)   | 1.3266 | -DE/DX = 0.0     | ! |
| ! R16  | R(13,15)   | 1.083  | -DE/DX = 0.0     | ! |
| ! R17  | R(14,16)   | 1.0828 | -DE/DX = 0.0     | ! |
| ! R18  | R(14,17)   | 1.092  | -DE/DX = 0.0     | ! |

|       |             |          |          |     |   |
|-------|-------------|----------|----------|-----|---|
| ! R19 | R(18,19)    | 1.4661   | -DE/DX = | 0.0 | ! |
| ! R20 | R(18,20)    | 1.4639   | -DE/DX = | 0.0 | ! |
| ! R21 | R(18,21)    | 1.0864   | -DE/DX = | 0.0 | ! |
| ! R22 | R(18,22)    | 1.0868   | -DE/DX = | 0.0 | ! |
| ! R23 | R(19,20)    | 1.4519   | -DE/DX = | 0.0 | ! |
| ! R24 | R(19,23)    | 1.0876   | -DE/DX = | 0.0 | ! |
| ! R25 | R(19,24)    | 1.5038   | -DE/DX = | 0.0 | ! |
| ! R26 | R(20,34)    | 1.6376   | -DE/DX = | 0.0 | ! |
| ! R27 | R(24,25)    | 1.0939   | -DE/DX = | 0.0 | ! |
| ! R28 | R(24,26)    | 1.0942   | -DE/DX = | 0.0 | ! |
| ! R29 | R(24,27)    | 1.0921   | -DE/DX = | 0.0 | ! |
| ! R30 | R(28,29)    | 1.0946   | -DE/DX = | 0.0 | ! |
| ! R31 | R(28,30)    | 1.0906   | -DE/DX = | 0.0 | ! |
| ! R32 | R(28,31)    | 1.5243   | -DE/DX = | 0.0 | ! |
| ! R33 | R(31,32)    | 1.2082   | -DE/DX = | 0.0 | ! |
| ! R34 | R(31,33)    | 1.332    | -DE/DX = | 0.0 | ! |
| ! R35 | R(33,34)    | 1.005    | -DE/DX = | 0.0 | ! |
| ! A1  | A(2,1,5)    | 107.938  | -DE/DX = | 0.0 | ! |
| ! A2  | A(2,1,7)    | 130.2459 | -DE/DX = | 0.0 | ! |
| ! A3  | A(5,1,7)    | 121.7859 | -DE/DX = | 0.0 | ! |
| ! A4  | A(1,2,3)    | 106.3756 | -DE/DX = | 0.0 | ! |
| ! A5  | A(1,2,8)    | 130.0719 | -DE/DX = | 0.0 | ! |
| ! A6  | A(3,2,8)    | 123.1869 | -DE/DX = | 0.0 | ! |
| ! A7  | A(2,3,4)    | 108.8946 | -DE/DX = | 0.0 | ! |
| ! A8  | A(2,3,13)   | 127.0225 | -DE/DX = | 0.0 | ! |
| ! A9  | A(4,3,13)   | 124.0757 | -DE/DX = | 0.0 | ! |
| ! A10 | A(3,4,5)    | 108.6563 | -DE/DX = | 0.0 | ! |
| ! A11 | A(3,4,12)   | 125.5062 | -DE/DX = | 0.0 | ! |
| ! A12 | A(5,4,12)   | 125.8343 | -DE/DX = | 0.0 | ! |
| ! A13 | A(1,5,4)    | 108.1351 | -DE/DX = | 0.0 | ! |
| ! A14 | A(1,5,6)    | 125.4818 | -DE/DX = | 0.0 | ! |
| ! A15 | A(4,5,6)    | 126.1036 | -DE/DX = | 0.0 | ! |
| ! A16 | A(5,6,9)    | 108.2285 | -DE/DX = | 0.0 | ! |
| ! A17 | A(5,6,10)   | 106.4418 | -DE/DX = | 0.0 | ! |
| ! A18 | A(5,6,28)   | 112.3972 | -DE/DX = | 0.0 | ! |
| ! A19 | A(9,6,10)   | 108.2235 | -DE/DX = | 0.0 | ! |
| ! A20 | A(9,6,28)   | 110.6982 | -DE/DX = | 0.0 | ! |
| ! A21 | A(10,6,28)  | 110.6647 | -DE/DX = | 0.0 | ! |
| ! A22 | A(2,8,11)   | 156.5495 | -DE/DX = | 0.0 | ! |
| ! A23 | A(3,13,14)  | 123.3554 | -DE/DX = | 0.0 | ! |
| ! A24 | A(3,13,15)  | 112.5702 | -DE/DX = | 0.0 | ! |
| ! A25 | A(14,13,15) | 124.0719 | -DE/DX = | 0.0 | ! |
| ! A26 | A(13,14,16) | 118.2818 | -DE/DX = | 0.0 | ! |
| ! A27 | A(13,14,17) | 123.6608 | -DE/DX = | 0.0 | ! |

|       |             |           |          |     |   |
|-------|-------------|-----------|----------|-----|---|
| ! A28 | A(16,14,17) | 118.0417  | -DE/DX = | 0.0 | ! |
| ! A29 | A(19,18,21) | 117.9497  | -DE/DX = | 0.0 | ! |
| ! A30 | A(19,18,22) | 121.9104  | -DE/DX = | 0.0 | ! |
| ! A31 | A(20,18,21) | 113.21    | -DE/DX = | 0.0 | ! |
| ! A32 | A(20,18,22) | 114.5951  | -DE/DX = | 0.0 | ! |
| ! A33 | A(21,18,22) | 116.1232  | -DE/DX = | 0.0 | ! |
| ! A34 | A(18,19,23) | 116.895   | -DE/DX = | 0.0 | ! |
| ! A35 | A(18,19,24) | 122.5682  | -DE/DX = | 0.0 | ! |
| ! A36 | A(20,19,23) | 111.4384  | -DE/DX = | 0.0 | ! |
| ! A37 | A(20,19,24) | 116.8094  | -DE/DX = | 0.0 | ! |
| ! A38 | A(23,19,24) | 115.9457  | -DE/DX = | 0.0 | ! |
| ! A39 | A(18,20,34) | 120.2979  | -DE/DX = | 0.0 | ! |
| ! A40 | A(19,20,34) | 135.3709  | -DE/DX = | 0.0 | ! |
| ! A41 | A(19,24,25) | 110.8811  | -DE/DX = | 0.0 | ! |
| ! A42 | A(19,24,26) | 109.6724  | -DE/DX = | 0.0 | ! |
| ! A43 | A(19,24,27) | 110.9523  | -DE/DX = | 0.0 | ! |
| ! A44 | A(25,24,26) | 107.8365  | -DE/DX = | 0.0 | ! |
| ! A45 | A(25,24,27) | 108.8803  | -DE/DX = | 0.0 | ! |
| ! A46 | A(26,24,27) | 108.5333  | -DE/DX = | 0.0 | ! |
| ! A47 | A(6,28,29)  | 107.8582  | -DE/DX = | 0.0 | ! |
| ! A48 | A(6,28,30)  | 111.4496  | -DE/DX = | 0.0 | ! |
| ! A49 | A(6,28,31)  | 112.91    | -DE/DX = | 0.0 | ! |
| ! A50 | A(29,28,30) | 107.8686  | -DE/DX = | 0.0 | ! |
| ! A51 | A(29,28,31) | 108.9471  | -DE/DX = | 0.0 | ! |
| ! A52 | A(30,28,31) | 107.6734  | -DE/DX = | 0.0 | ! |
| ! A53 | A(28,31,32) | 123.0895  | -DE/DX = | 0.0 | ! |
| ! A54 | A(28,31,33) | 111.7014  | -DE/DX = | 0.0 | ! |
| ! A55 | A(32,31,33) | 125.192   | -DE/DX = | 0.0 | ! |
| ! A56 | A(31,33,34) | 110.8961  | -DE/DX = | 0.0 | ! |
| ! A57 | A(20,34,33) | 161.2269  | -DE/DX = | 0.0 | ! |
| ! D1  | D(5,1,2,3)  | 0.1996    | -DE/DX = | 0.0 | ! |
| ! D2  | D(5,1,2,8)  | 173.2915  | -DE/DX = | 0.0 | ! |
| ! D3  | D(7,1,2,3)  | -177.7876 | -DE/DX = | 0.0 | ! |
| ! D4  | D(7,1,2,8)  | -4.6957   | -DE/DX = | 0.0 | ! |
| ! D5  | D(2,1,5,4)  | -0.1521   | -DE/DX = | 0.0 | ! |
| ! D6  | D(2,1,5,6)  | -174.3718 | -DE/DX = | 0.0 | ! |
| ! D7  | D(7,1,5,4)  | 178.0406  | -DE/DX = | 0.0 | ! |
| ! D8  | D(7,1,5,6)  | 3.8209    | -DE/DX = | 0.0 | ! |
| ! D9  | D(1,2,3,4)  | -0.1789   | -DE/DX = | 0.0 | ! |
| ! D10 | D(1,2,3,13) | 178.8755  | -DE/DX = | 0.0 | ! |
| ! D11 | D(8,2,3,4)  | -173.8647 | -DE/DX = | 0.0 | ! |
| ! D12 | D(8,2,3,13) | 5.1897    | -DE/DX = | 0.0 | ! |
| ! D13 | D(1,2,8,11) | -84.9956  | -DE/DX = | 0.0 | ! |
| ! D14 | D(3,2,8,11) | 87.0787   | -DE/DX = | 0.0 | ! |

|       |                |           |          |     |   |
|-------|----------------|-----------|----------|-----|---|
| ! D15 | D(2,3,4,5)     | 0.0865    | -DE/DX = | 0.0 | ! |
| ! D16 | D(2,3,4,12)    | 179.4725  | -DE/DX = | 0.0 | ! |
| ! D17 | D(13,3,4,5)    | -179.002  | -DE/DX = | 0.0 | ! |
| ! D18 | D(13,3,4,12)   | 0.384     | -DE/DX = | 0.0 | ! |
| ! D19 | D(2,3,13,14)   | -11.0906  | -DE/DX = | 0.0 | ! |
| ! D20 | D(2,3,13,15)   | 169.4725  | -DE/DX = | 0.0 | ! |
| ! D21 | D(4,3,13,14)   | 167.8293  | -DE/DX = | 0.0 | ! |
| ! D22 | D(4,3,13,15)   | -11.6076  | -DE/DX = | 0.0 | ! |
| ! D23 | D(3,4,5,1)     | 0.0392    | -DE/DX = | 0.0 | ! |
| ! D24 | D(3,4,5,6)     | 174.2133  | -DE/DX = | 0.0 | ! |
| ! D25 | D(12,4,5,1)    | -179.3442 | -DE/DX = | 0.0 | ! |
| ! D26 | D(12,4,5,6)    | -5.1702   | -DE/DX = | 0.0 | ! |
| ! D27 | D(1,5,6,9)     | -141.5234 | -DE/DX = | 0.0 | ! |
| ! D28 | D(1,5,6,10)    | -25.3892  | -DE/DX = | 0.0 | ! |
| ! D29 | D(1,5,6,28)    | 95.9151   | -DE/DX = | 0.0 | ! |
| ! D30 | D(4,5,6,9)     | 45.28     | -DE/DX = | 0.0 | ! |
| ! D31 | D(4,5,6,10)    | 161.4141  | -DE/DX = | 0.0 | ! |
| ! D32 | D(4,5,6,28)    | -77.2815  | -DE/DX = | 0.0 | ! |
| ! D33 | D(5,6,28,29)   | -171.9076 | -DE/DX = | 0.0 | ! |
| ! D34 | D(5,6,28,30)   | 69.867    | -DE/DX = | 0.0 | ! |
| ! D35 | D(5,6,28,31)   | -51.4761  | -DE/DX = | 0.0 | ! |
| ! D36 | D(9,6,28,29)   | 66.9355   | -DE/DX = | 0.0 | ! |
| ! D37 | D(9,6,28,30)   | -51.2899  | -DE/DX = | 0.0 | ! |
| ! D38 | D(9,6,28,31)   | -172.633  | -DE/DX = | 0.0 | ! |
| ! D39 | D(10,6,28,29)  | -53.0509  | -DE/DX = | 0.0 | ! |
| ! D40 | D(10,6,28,30)  | -171.2763 | -DE/DX = | 0.0 | ! |
| ! D41 | D(10,6,28,31)  | 67.3806   | -DE/DX = | 0.0 | ! |
| ! D42 | D(3,13,14,16)  | -179.8876 | -DE/DX = | 0.0 | ! |
| ! D43 | D(3,13,14,17)  | -1.3612   | -DE/DX = | 0.0 | ! |
| ! D44 | D(15,13,14,16) | -0.5153   | -DE/DX = | 0.0 | ! |
| ! D45 | D(15,13,14,17) | 178.0111  | -DE/DX = | 0.0 | ! |
| ! D46 | D(21,18,19,23) | -157.7106 | -DE/DX = | 0.0 | ! |
| ! D47 | D(21,18,19,24) | -2.7383   | -DE/DX = | 0.0 | ! |
| ! D48 | D(22,18,19,23) | -1.137    | -DE/DX = | 0.0 | ! |
| ! D49 | D(22,18,19,24) | 153.8353  | -DE/DX = | 0.0 | ! |
| ! D50 | D(21,18,20,34) | 18.2071   | -DE/DX = | 0.0 | ! |
| ! D51 | D(22,18,20,34) | -118.1087 | -DE/DX = | 0.0 | ! |
| ! D52 | D(23,19,20,34) | 145.9381  | -DE/DX = | 0.0 | ! |
| ! D53 | D(24,19,20,34) | 9.4624    | -DE/DX = | 0.0 | ! |
| ! D54 | D(18,19,24,25) | 146.4598  | -DE/DX = | 0.0 | ! |
| ! D55 | D(18,19,24,26) | -94.558   | -DE/DX = | 0.0 | ! |
| ! D56 | D(18,19,24,27) | 25.333    | -DE/DX = | 0.0 | ! |
| ! D57 | D(20,19,24,25) | 76.1828   | -DE/DX = | 0.0 | ! |
| ! D58 | D(20,19,24,26) | -164.835  | -DE/DX = | 0.0 | ! |

|       |                |           |          |     |   |
|-------|----------------|-----------|----------|-----|---|
| ! D59 | D(20,19,24,27) | -44.944   | -DE/DX = | 0.0 | ! |
| ! D60 | D(23,19,24,25) | -58.3488  | -DE/DX = | 0.0 | ! |
| ! D61 | D(23,19,24,26) | 60.6334   | -DE/DX = | 0.0 | ! |
| ! D62 | D(23,19,24,27) | -179.4756 | -DE/DX = | 0.0 | ! |
| ! D63 | D(18,20,34,33) | 84.555    | -DE/DX = | 0.0 | ! |
| ! D64 | D(19,20,34,33) | 161.6582  | -DE/DX = | 0.0 | ! |
| ! D65 | D(6,28,31,32)  | 129.2976  | -DE/DX = | 0.0 | ! |
| ! D66 | D(6,28,31,33)  | -49.2667  | -DE/DX = | 0.0 | ! |
| ! D67 | D(29,28,31,32) | -110.8954 | -DE/DX = | 0.0 | ! |
| ! D68 | D(29,28,31,33) | 70.5403   | -DE/DX = | 0.0 | ! |
| ! D69 | D(30,28,31,32) | 5.8397    | -DE/DX = | 0.0 | ! |
| ! D70 | D(30,28,31,33) | -172.7246 | -DE/DX = | 0.0 | ! |
| ! D71 | D(28,31,33,34) | 167.5271  | -DE/DX = | 0.0 | ! |
| ! D72 | D(32,31,33,34) | -11.001   | -DE/DX = | 0.0 | ! |
| ! D73 | D(31,33,34,20) | -108.087  | -DE/DX = | 0.0 | ! |

-----  
GradGradGradGradGradGradGradGradGradGradGradGradGradGradGradGradGradGradGrad

Input orientation:

| Center<br>Number | Atomic<br>Number | Atomic<br>Type | Coordinates (Angstroms) |           |           |
|------------------|------------------|----------------|-------------------------|-----------|-----------|
|                  |                  |                | X                       | Y         | Z         |
| 1                | 6                | 0              | -0.847311               | 1.644847  | 1.537863  |
| 2                | 6                | 0              | -1.503640               | 0.455026  | 1.573935  |
| 3                | 7                | 0              | -2.364941               | 0.449815  | 0.484602  |
| 4                | 6                | 0              | -2.229725               | 1.606930  | -0.181933 |
| 5                | 7                | 0              | -1.309982               | 2.354655  | 0.440346  |
| 6                | 6                | 0              | -0.776068               | 3.645572  | -0.030957 |
| 7                | 1                | 0              | -0.075226               | 2.032228  | 2.178627  |
| 8                | 1                | 0              | -1.351877               | -0.415720 | 2.223533  |
| 9                | 1                | 0              | -1.613808               | 4.259710  | -0.365764 |
| 10               | 1                | 0              | -0.325664               | 4.127161  | 0.834805  |
| 11               | 35               | 0              | -0.391631               | -2.431555 | 2.920803  |
| 12               | 1                | 0              | -2.765592               | 1.880580  | -1.074522 |
| 13               | 6                | 0              | -3.250249               | -0.603851 | 0.090839  |
| 14               | 6                | 0              | -3.209977               | -1.823252 | 0.611687  |
| 15               | 1                | 0              | -3.944407               | -0.296646 | -0.681573 |
| 16               | 1                | 0              | -3.918275               | -2.558696 | 0.251328  |
| 17               | 1                | 0              | -2.486639               | -2.134726 | 1.368139  |
| 18               | 6                | 0              | 2.555257                | -0.688038 | 1.129286  |
| 19               | 6                | 0              | 3.975532                | -0.375671 | 1.315338  |
| 20               | 8                | 0              | 2.976189                | 0.655074  | 1.531789  |
| 21               | 1                | 0              | 2.171988                | -0.730212 | 0.113660  |

|    |   |   |           |           |           |
|----|---|---|-----------|-----------|-----------|
| 22 | 1 | 0 | 1.982337  | -1.226418 | 1.879716  |
| 23 | 1 | 0 | 4.430165  | -0.691398 | 2.251510  |
| 24 | 6 | 0 | 4.918183  | -0.174725 | 0.160967  |
| 25 | 1 | 0 | 5.679788  | 0.571616  | 0.404884  |
| 26 | 1 | 0 | 5.430421  | -1.115052 | -0.064313 |
| 27 | 1 | 0 | 4.378948  | 0.149334  | -0.731703 |
| 28 | 6 | 0 | 0.256271  | 3.476417  | -1.155117 |
| 29 | 1 | 0 | 0.707448  | 4.455163  | -1.346598 |
| 30 | 1 | 0 | -0.212681 | 3.137511  | -2.079523 |
| 31 | 6 | 0 | 1.358357  | 2.483494  | -0.804229 |
| 32 | 8 | 0 | 1.680184  | 1.571908  | -1.528987 |
| 33 | 8 | 0 | 1.883111  | 2.733341  | 0.394292  |
| 34 | 1 | 0 | 2.456588  | 1.967290  | 0.701260  |

-----  
Distance matrix (angstroms):

|    |    | 1        | 2        | 3        | 4        | 5        |
|----|----|----------|----------|----------|----------|----------|
| 1  | C  | 0.000000 |          |          |          |          |
| 2  | C  | 1.359317 | 0.000000 |          |          |          |
| 3  | N  | 2.200150 | 1.388708 | 0.000000 |          |          |
| 4  | C  | 2.206853 | 2.221971 | 1.342188 | 0.000000 |          |
| 5  | N  | 1.386519 | 2.220612 | 2.177915 | 1.338750 | 0.000000 |
| 6  | C  | 2.543456 | 3.644807 | 3.605992 | 2.508380 | 1.474332 |
| 7  | H  | 1.075528 | 2.212146 | 3.258305 | 3.224126 | 2.156433 |
| 8  | H  | 2.229500 | 1.096909 | 2.190737 | 3.263127 | 3.294919 |
| 9  | H  | 3.323976 | 4.272024 | 3.975252 | 2.729540 | 2.090779 |
| 10 | H  | 2.632164 | 3.926642 | 4.219498 | 3.318248 | 2.065492 |
| 11 | Br | 4.328651 | 3.373866 | 4.258088 | 5.414325 | 5.468441 |
| 12 | H  | 3.249604 | 3.261756 | 2.153713 | 1.076454 | 2.153688 |
| 13 | C  | 3.595085 | 2.524171 | 1.431445 | 2.450190 | 3.555215 |
| 14 | C  | 4.297406 | 3.004672 | 2.428388 | 3.654706 | 4.592847 |
| 15 | H  | 4.276365 | 3.407297 | 2.100449 | 2.610245 | 3.902345 |
| 16 | H  | 5.362440 | 4.081945 | 3.393877 | 4.515679 | 5.565963 |
| 17 | H  | 4.123272 | 2.777671 | 2.734099 | 4.058167 | 4.732850 |
| 18 | C  | 4.145692 | 4.240160 | 5.091038 | 5.466464 | 4.967162 |
| 19 | C  | 5.233720 | 5.547815 | 6.447723 | 6.684140 | 6.013065 |
| 20 | O  | 3.949537 | 4.484492 | 5.446687 | 5.562770 | 4.738258 |
| 21 | H  | 4.097002 | 4.128854 | 4.702529 | 4.992462 | 4.663394 |
| 22 | H  | 4.045730 | 3.882369 | 4.863632 | 5.479025 | 5.072991 |
| 23 | H  | 5.815418 | 6.081401 | 7.113212 | 7.453729 | 6.745965 |
| 24 | C  | 6.200613 | 6.605519 | 7.317013 | 7.374582 | 6.727991 |
| 25 | H  | 6.711072 | 7.278868 | 8.046046 | 7.998539 | 7.213694 |
| 26 | H  | 7.042296 | 7.295903 | 7.969804 | 8.130243 | 7.597801 |
| 27 | H  | 5.890779 | 6.325682 | 6.859280 | 6.789800 | 6.212976 |
| 28 | C  | 3.438704 | 4.435518 | 4.326633 | 3.259179 | 2.501400 |

|    |    |          |          |          |          |          |
|----|----|----------|----------|----------|----------|----------|
| 29 | H  | 4.316858 | 5.423976 | 5.369887 | 4.253923 | 3.416918 |
| 30 | H  | 3.964377 | 4.712755 | 4.293096 | 3.164173 | 2.857739 |
| 31 | C  | 3.324710 | 4.238086 | 4.433947 | 3.745657 | 2.947135 |
| 32 | O  | 3.974811 | 4.583917 | 4.655821 | 4.135598 | 3.664978 |
| 33 | O  | 3.154010 | 4.248807 | 4.823752 | 4.303051 | 3.215800 |
| 34 | H  | 3.423394 | 4.328038 | 5.059329 | 4.782407 | 3.795416 |
|    |    | 6        | 7        | 8        | 9        | 10       |
| 6  | C  | 0.000000 |          |          |          |          |
| 7  | H  | 2.824238 | 0.000000 |          |          |          |
| 8  | H  | 4.680638 | 2.761215 | 0.000000 |          |          |
| 9  | H  | 1.091361 | 3.715217 | 5.350955 | 0.000000 |          |
| 10 | H  | 1.088272 | 2.501464 | 4.859985 | 1.765856 | 0.000000 |
| 11 | Br | 6.766989 | 4.536110 | 2.339198 | 7.554354 | 6.882768 |
| 12 | H  | 2.856996 | 4.224222 | 4.260135 | 2.736641 | 3.826997 |
| 13 | C  | 4.918740 | 4.624776 | 2.861397 | 5.151762 | 5.611521 |
| 14 | C  | 6.020376 | 5.210249 | 2.834030 | 6.364400 | 6.616378 |
| 15 | H  | 5.099290 | 5.345556 | 3.895514 | 5.127554 | 5.913102 |
| 16 | H  | 6.960322 | 6.289682 | 3.881796 | 7.223713 | 7.612358 |
| 17 | H  | 6.188325 | 4.882143 | 2.230328 | 6.682594 | 6.645712 |
| 18 | C  | 5.587850 | 3.926883 | 4.066600 | 6.640519 | 5.618947 |
| 19 | C  | 6.368721 | 4.790812 | 5.404415 | 7.453427 | 6.245534 |
| 20 | O  | 5.046255 | 3.409705 | 4.511903 | 6.136952 | 4.841839 |
| 21 | H  | 5.278203 | 4.116447 | 4.119234 | 6.281832 | 5.509300 |
| 22 | H  | 5.915720 | 3.865448 | 3.448539 | 6.933400 | 5.922796 |
| 23 | H  | 7.150092 | 5.265168 | 5.788678 | 8.239733 | 6.916897 |
| 24 | C  | 6.859737 | 5.820286 | 6.604991 | 7.912557 | 6.816026 |
| 25 | H  | 7.163605 | 6.196752 | 7.329845 | 8.209292 | 6.992295 |
| 26 | H  | 7.822094 | 6.726686 | 7.191862 | 8.865669 | 7.837201 |
| 27 | H  | 6.268087 | 5.644021 | 6.472639 | 7.276141 | 6.356920 |
| 28 | C  | 1.535602 | 3.648208 | 5.399088 | 2.175735 | 2.172994 |
| 29 | H  | 2.141768 | 4.348609 | 6.380608 | 2.527541 | 2.435861 |
| 30 | H  | 2.184526 | 4.401408 | 5.695570 | 2.481825 | 3.079851 |
| 31 | C  | 2.550322 | 3.340095 | 4.991809 | 3.490123 | 2.867752 |
| 32 | O  | 3.546457 | 4.127925 | 5.217803 | 4.407693 | 4.017494 |
| 33 | O  | 2.843279 | 2.740528 | 4.871125 | 3.890492 | 2.648674 |
| 34 | H  | 3.715217 | 2.932049 | 4.743465 | 4.791853 | 3.524742 |
|    |    | 11       | 12       | 13       | 14       | 15       |
| 11 | Br | 0.000000 |          |          |          |          |
| 12 | H  | 6.339781 | 0.000000 |          |          |          |
| 13 | C  | 4.418246 | 2.786640 | 0.000000 |          |          |
| 14 | C  | 3.693931 | 4.093794 | 1.326590 | 0.000000 |          |
| 15 | H  | 5.491555 | 2.506857 | 1.082982 | 2.131299 | 0.000000 |
| 16 | H  | 4.424871 | 4.774278 | 2.072060 | 1.082785 | 2.447010 |
| 17 | H  | 2.624487 | 4.708194 | 2.134988 | 1.091995 | 3.115276 |



|    |   |           |          |          |          |          |
|----|---|-----------|----------|----------|----------|----------|
| 18 | C | 3.864393  | 6.306029 | 5.898251 | 5.898691 | 6.758553 |
| 19 | C | 5.086873  | 7.499657 | 7.332351 | 7.363569 | 8.168190 |
| 20 | O | 4.774814  | 6.423611 | 6.513814 | 6.727358 | 7.327988 |
| 21 | H | 4.164944  | 5.710316 | 5.423757 | 5.514374 | 6.183095 |
| 22 | H | 2.858660  | 6.397170 | 5.564856 | 5.378125 | 6.523110 |
| 23 | H | 5.169701  | 8.334055 | 7.979031 | 7.895688 | 8.882132 |
| 24 | C | 6.395631  | 8.049292 | 8.179997 | 8.305888 | 8.903384 |
| 25 | H | 7.225718  | 8.673320 | 9.012542 | 9.209022 | 9.724166 |
| 26 | H | 6.673858  | 8.784587 | 8.697094 | 8.695689 | 9.430705 |
| 27 | H | 6.539129  | 7.359293 | 7.710286 | 7.955349 | 8.335445 |
| 28 | C | 7.206736  | 3.418311 | 5.522380 | 6.574418 | 5.666211 |
| 29 | H | 8.175914  | 4.331802 | 6.582038 | 7.655037 | 6.682941 |
| 30 | H | 7.486640  | 3.017823 | 5.285365 | 6.390271 | 5.260559 |
| 31 | C | 6.410619  | 4.176544 | 5.618906 | 6.436036 | 5.988617 |
| 32 | O | 6.334096  | 4.479592 | 5.627339 | 6.326395 | 5.987122 |
| 33 | O | 6.183353  | 4.949247 | 6.130279 | 6.837349 | 6.655695 |
| 34 | H | 5.691095  | 5.516529 | 6.288989 | 6.818079 | 6.928952 |
|    |   | 16        | 17       | 18       | 19       | 20       |
| 16 | H | 0.000000  |          |          |          |          |
| 17 | H | 1.864564  | 0.000000 |          |          |          |
| 18 | C | 6.795351  | 5.250779 | 0.000000 |          |          |
| 19 | C | 8.258929  | 6.697515 | 1.466072 | 0.000000 |          |
| 20 | O | 7.713724  | 6.136144 | 1.463948 | 1.451886 | 0.000000 |
| 21 | H | 6.360315  | 5.024856 | 1.086356 | 2.196019 | 2.139357 |
| 22 | H | 6.264490  | 4.588952 | 1.086847 | 2.239446 | 2.156110 |
| 23 | H | 8.785442  | 7.120795 | 2.185103 | 1.087562 | 2.108324 |
| 24 | C | 9.152840  | 7.754370 | 2.604717 | 1.503843 | 2.517749 |
| 25 | H | 10.096794 | 8.656944 | 3.445893 | 2.151922 | 2.930243 |
| 26 | H | 9.464769  | 8.109963 | 3.142226 | 2.137013 | 3.421132 |
| 27 | H | 8.783148  | 7.534093 | 2.736844 | 2.151453 | 2.710517 |
| 28 | C | 7.471782  | 6.736120 | 5.276980 | 5.897002 | 4.751568 |
| 29 | H | 8.552479  | 7.810162 | 5.999743 | 6.411181 | 5.279486 |
| 30 | H | 7.184085  | 6.697294 | 5.709007 | 6.434956 | 5.419683 |
| 31 | C | 7.374329  | 6.389925 | 3.902521 | 4.417805 | 3.378977 |
| 32 | O | 7.181515  | 6.284496 | 3.597155 | 4.141482 | 3.447980 |
| 33 | O | 7.853800  | 6.613711 | 3.563402 | 3.859081 | 2.609198 |
| 34 | H | 7.831084  | 6.458077 | 2.691414 | 2.858977 | 1.637582 |
|    |   | 21        | 22       | 23       | 24       | 25       |
| 21 | H | 0.000000  |          |          |          |          |
| 22 | H | 1.844218  | 0.000000 |          |          |          |
| 23 | H | 3.109867  | 2.533050 | 0.000000 |          |          |
| 24 | C | 2.802212  | 3.560808 | 2.208049 | 0.000000 |          |
| 25 | H | 3.752896  | 4.367975 | 2.562574 | 1.093875 | 0.000000 |
| 26 | H | 3.285904  | 3.959916 | 2.557935 | 1.094237 | 1.768382 |

|    |   |          |          |          |          |          |
|----|---|----------|----------|----------|----------|----------|
| 27 | H | 2.521688 | 3.802098 | 3.099840 | 1.092084 | 1.778296 |
| 28 | C | 4.793276 | 5.857147 | 6.811547 | 6.065998 | 6.347126 |
| 29 | H | 5.582593 | 6.656937 | 7.300143 | 6.437306 | 6.547809 |
| 30 | H | 5.045392 | 6.287889 | 7.414473 | 6.505111 | 6.890376 |
| 31 | C | 3.439829 | 4.621294 | 5.371544 | 4.546437 | 4.877705 |
| 32 | O | 2.870526 | 4.420541 | 5.193949 | 4.048618 | 4.553819 |
| 33 | O | 3.486890 | 4.230369 | 4.654630 | 4.209863 | 4.368973 |
| 34 | H | 2.775390 | 3.437069 | 3.656077 | 3.307506 | 3.524878 |
|    |   | 26       | 27       | 28       | 29       | 30       |
| 26 | H | 0.000000 |          |          |          |          |
| 27 | H | 1.774732 | 0.000000 |          |          |          |
| 28 | C | 7.003090 | 5.314624 | 0.000000 |          |          |
| 29 | H | 7.414717 | 5.691940 | 1.094609 | 0.000000 |          |
| 30 | H | 7.347786 | 5.641709 | 1.090550 | 1.766359 | 0.000000 |
| 31 | C | 5.484407 | 3.818054 | 1.524340 | 2.146002 | 2.126563 |
| 32 | O | 4.840382 | 3.153205 | 2.407170 | 3.048384 | 2.517368 |
| 33 | O | 5.253937 | 3.764859 | 2.366313 | 2.716165 | 3.267331 |
| 34 | H | 4.350933 | 3.008956 | 3.250384 | 3.666432 | 4.028296 |
|    |   | 31       | 32       | 33       | 34       |          |
| 31 | C | 0.000000 |          |          |          |          |
| 32 | O | 1.208237 | 0.000000 |          |          |          |
| 33 | O | 1.332007 | 2.255905 | 0.000000 |          |          |
| 34 | H | 1.933670 | 2.394397 | 1.004958 | 0.000000 |          |

Stoichiometry C<sub>11</sub>H<sub>17</sub>BrN<sub>2</sub>O<sub>3</sub>

Framework group C1[X(C<sub>11</sub>H<sub>17</sub>BrN<sub>2</sub>O<sub>3</sub>)]

Deg. of freedom 96

Full point group C1 NOp 1

Largest Abelian subgroup C1 NOp 1

Largest concise Abelian subgroup C1 NOp 1

Standard orientation:

| Center<br>Number | Atomic<br>Number | Atomic<br>Type | Coordinates (Angstroms) |          |           |
|------------------|------------------|----------------|-------------------------|----------|-----------|
|                  |                  |                | X                       | Y        | Z         |
| 1                | 6                | 0              | 0.075655                | 1.329339 | 1.239033  |
| 2                | 6                | 0              | -1.154178               | 1.256553 | 0.664615  |
| 3                | 7                | 0              | -1.214886               | 2.288519 | -0.262678 |
| 4                | 6                | 0              | -0.054172               | 2.962089 | -0.239978 |
| 5                | 7                | 0              | 0.750929                | 2.397461 | 0.668459  |
| 6                | 6                | 0              | 2.158539                | 2.754454 | 0.923108  |
| 7                | 1                | 0              | 0.535170                | 0.698934 | 1.979436  |
| 8                | 1                | 0              | -1.939814               | 0.498584 | 0.771700  |
| 9                | 1                | 0              | 2.233246                | 3.842589 | 0.961199  |
| 10               | 1                | 0              | 2.402491                | 2.361877 | 1.908352  |

|    |    |   |           |           |           |
|----|----|---|-----------|-----------|-----------|
| 11 | 35 | 0 | -3.069551 | -1.499646 | 0.321566  |
| 12 | 1  | 0 | 0.189603  | 3.808651  | -0.858574 |
| 13 | 6  | 0 | -2.307219 | 2.602042  | -1.133049 |
| 14 | 6  | 0 | -3.348493 | 1.800399  | -1.314594 |
| 15 | 1  | 0 | -2.182340 | 3.556322  | -1.629643 |
| 16 | 1  | 0 | -4.128752 | 2.118873  | -1.994443 |
| 17 | 1  | 0 | -3.452665 | 0.825300  | -0.834195 |
| 18 | 6  | 0 | 0.612475  | -2.462485 | -0.348624 |
| 19 | 6  | 0 | 1.586994  | -3.514465 | -0.043636 |
| 20 | 8  | 0 | 1.630702  | -2.258382 | 0.683219  |
| 21 | 1  | 0 | 0.776084  | -1.858855 | -1.236900 |
| 22 | 1  | 0 | -0.407921 | -2.499139 | 0.023778  |
| 23 | 1  | 0 | 1.248283  | -4.329705 | 0.591541  |
| 24 | 6  | 0 | 2.755101  | -3.820419 | -0.939996 |
| 25 | 1  | 0 | 3.622140  | -4.140596 | -0.354939 |
| 26 | 1  | 0 | 2.492349  | -4.634248 | -1.622637 |
| 27 | 1  | 0 | 3.032096  | -2.945978 | -1.532680 |
| 28 | 6  | 0 | 3.108663  | 2.182034  | -0.138812 |
| 29 | 1  | 0 | 4.134850  | 2.363823  | 0.195942  |
| 30 | 1  | 0 | 2.977488  | 2.678903  | -1.100693 |
| 31 | 6  | 0 | 2.918187  | 0.686041  | -0.360927 |
| 32 | 8  | 0 | 2.769286  | 0.195294  | -1.454926 |
| 33 | 8  | 0 | 2.907191  | 0.014763  | 0.789511  |
| 34 | 1  | 0 | 2.582946  | -0.926487 | 0.652209  |

-----  
Rotational constants (GHZ):      0.3286020      0.2549077      0.1595917

\*\*\*\*\*

Population analysis using the SCF density.

\*\*\*\*\*

Orbital symmetries:

Occupied (A)  
(A) (A) (A) (A) (A) (A) (A) (A) (A) (A) (A) (A)  
(A) (A) (A) (A) (A) (A) (A) (A) (A) (A) (A) (A)  
(A) (A) (A) (A) (A) (A) (A) (A) (A) (A) (A) (A)  
(A) (A) (A) (A) (A) (A) (A) (A) (A) (A) (A) (A)  
(A) (A) (A) (A) (A) (A) (A) (A) (A) (A) (A) (A)  
(A) (A) (A) (A) (A) (A)  
Virtual (A)  
(A) (A) (A) (A) (A) (A) (A) (A) (A) (A) (A) (A)  
(A) (A) (A) (A) (A) (A) (A) (A) (A) (A) (A) (A)



|                            |          |          |          |          |          |
|----------------------------|----------|----------|----------|----------|----------|
| Alpha occ. eigenvalues --  | -0.62043 | -0.60176 | -0.58595 | -0.55391 | -0.54000 |
| Alpha occ. eigenvalues --  | -0.52917 | -0.51323 | -0.51104 | -0.50580 | -0.49963 |
| Alpha occ. eigenvalues --  | -0.49451 | -0.48914 | -0.47691 | -0.46811 | -0.46479 |
| Alpha occ. eigenvalues --  | -0.44128 | -0.43415 | -0.42329 | -0.41303 | -0.41231 |
| Alpha occ. eigenvalues --  | -0.40422 | -0.39412 | -0.38207 | -0.37151 | -0.34399 |
| Alpha occ. eigenvalues --  | -0.32048 | -0.30845 | -0.30223 | -0.29364 | -0.29321 |
| Alpha occ. eigenvalues --  | -0.18407 | -0.18030 | -0.17848 |          |          |
| Alpha virt. eigenvalues -- | -0.08562 | -0.04544 | -0.03785 | -0.03177 | -0.01806 |
| Alpha virt. eigenvalues -- | -0.00767 | -0.00685 | 0.00109  | 0.00361  | 0.01142  |
| Alpha virt. eigenvalues -- | 0.01376  | 0.02098  | 0.02755  | 0.02929  | 0.03567  |
| Alpha virt. eigenvalues -- | 0.03760  | 0.04206  | 0.04652  | 0.05114  | 0.05486  |
| Alpha virt. eigenvalues -- | 0.05888  | 0.06322  | 0.06586  | 0.07150  | 0.07322  |
| Alpha virt. eigenvalues -- | 0.07568  | 0.07971  | 0.08135  | 0.08394  | 0.09014  |
| Alpha virt. eigenvalues -- | 0.09176  | 0.09759  | 0.10034  | 0.10185  | 0.10628  |
| Alpha virt. eigenvalues -- | 0.10798  | 0.10917  | 0.11064  | 0.11389  | 0.11760  |
| Alpha virt. eigenvalues -- | 0.11826  | 0.12144  | 0.12654  | 0.12695  | 0.12822  |
| Alpha virt. eigenvalues -- | 0.13097  | 0.13655  | 0.14113  | 0.14373  | 0.14492  |
| Alpha virt. eigenvalues -- | 0.14850  | 0.14910  | 0.15331  | 0.15568  | 0.15816  |
| Alpha virt. eigenvalues -- | 0.16445  | 0.16588  | 0.16985  | 0.17116  | 0.17581  |
| Alpha virt. eigenvalues -- | 0.17685  | 0.17767  | 0.18070  | 0.18366  | 0.18869  |
| Alpha virt. eigenvalues -- | 0.19365  | 0.19526  | 0.19796  | 0.20217  | 0.20303  |
| Alpha virt. eigenvalues -- | 0.20843  | 0.21305  | 0.21896  | 0.22227  | 0.22427  |
| Alpha virt. eigenvalues -- | 0.22528  | 0.23110  | 0.23433  | 0.23849  | 0.24392  |
| Alpha virt. eigenvalues -- | 0.24664  | 0.24879  | 0.25160  | 0.25706  | 0.25999  |
| Alpha virt. eigenvalues -- | 0.26372  | 0.26745  | 0.27101  | 0.27491  | 0.27833  |
| Alpha virt. eigenvalues -- | 0.28099  | 0.28625  | 0.28972  | 0.29223  | 0.29639  |
| Alpha virt. eigenvalues -- | 0.30187  | 0.30911  | 0.31190  | 0.31892  | 0.32639  |
| Alpha virt. eigenvalues -- | 0.32932  | 0.33427  | 0.33814  | 0.34250  | 0.34905  |
| Alpha virt. eigenvalues -- | 0.35086  | 0.35253  | 0.35501  | 0.35985  | 0.36570  |
| Alpha virt. eigenvalues -- | 0.37529  | 0.38132  | 0.38960  | 0.39707  | 0.40529  |
| Alpha virt. eigenvalues -- | 0.40761  | 0.41776  | 0.42778  | 0.43564  | 0.44086  |
| Alpha virt. eigenvalues -- | 0.46143  | 0.47362  | 0.47787  | 0.49569  | 0.50470  |
| Alpha virt. eigenvalues -- | 0.50830  | 0.51428  | 0.52471  | 0.53083  | 0.53536  |
| Alpha virt. eigenvalues -- | 0.53942  | 0.54720  | 0.54988  | 0.55980  | 0.56266  |
| Alpha virt. eigenvalues -- | 0.57633  | 0.58740  | 0.58915  | 0.59240  | 0.59887  |
| Alpha virt. eigenvalues -- | 0.60329  | 0.61752  | 0.62046  | 0.62660  | 0.62778  |
| Alpha virt. eigenvalues -- | 0.63603  | 0.64083  | 0.64800  | 0.64965  | 0.65560  |
| Alpha virt. eigenvalues -- | 0.66571  | 0.66683  | 0.66838  | 0.67818  | 0.68236  |
| Alpha virt. eigenvalues -- | 0.68314  | 0.69099  | 0.69765  | 0.70123  | 0.70282  |
| Alpha virt. eigenvalues -- | 0.71238  | 0.71970  | 0.72404  | 0.72622  | 0.73626  |
| Alpha virt. eigenvalues -- | 0.74253  | 0.74777  | 0.75636  | 0.76450  | 0.76561  |
| Alpha virt. eigenvalues -- | 0.77644  | 0.78025  | 0.78474  | 0.78682  | 0.79973  |
| Alpha virt. eigenvalues -- | 0.81550  | 0.83035  | 0.84060  | 0.85035  | 0.86574  |
| Alpha virt. eigenvalues -- | 0.88010  | 0.89270  | 0.89701  | 0.90545  | 0.92145  |

|                            |         |         |         |         |         |
|----------------------------|---------|---------|---------|---------|---------|
| Alpha virt. eigenvalues -- | 0.93215 | 0.94245 | 0.95700 | 0.96415 | 0.97496 |
| Alpha virt. eigenvalues -- | 0.98133 | 0.99725 | 1.00647 | 1.00795 | 1.03894 |
| Alpha virt. eigenvalues -- | 1.03921 | 1.05331 | 1.05380 | 1.06934 | 1.07341 |
| Alpha virt. eigenvalues -- | 1.08352 | 1.10203 | 1.11368 | 1.12081 | 1.13312 |
| Alpha virt. eigenvalues -- | 1.15056 | 1.15757 | 1.16748 | 1.18224 | 1.18894 |
| Alpha virt. eigenvalues -- | 1.20300 | 1.21988 | 1.22258 | 1.24610 | 1.25449 |
| Alpha virt. eigenvalues -- | 1.27504 | 1.28485 | 1.29753 | 1.31105 | 1.32582 |
| Alpha virt. eigenvalues -- | 1.34093 | 1.34691 | 1.36344 | 1.37755 | 1.42976 |
| Alpha virt. eigenvalues -- | 1.43551 | 1.45521 | 1.47183 | 1.47973 | 1.48256 |
| Alpha virt. eigenvalues -- | 1.49595 | 1.50845 | 1.51203 | 1.52914 | 1.53192 |
| Alpha virt. eigenvalues -- | 1.54108 | 1.55345 | 1.56375 | 1.56577 | 1.57913 |
| Alpha virt. eigenvalues -- | 1.58589 | 1.59227 | 1.59613 | 1.60064 | 1.60613 |
| Alpha virt. eigenvalues -- | 1.61787 | 1.62597 | 1.62992 | 1.63393 | 1.64185 |
| Alpha virt. eigenvalues -- | 1.65713 | 1.66473 | 1.67085 | 1.68543 | 1.69808 |
| Alpha virt. eigenvalues -- | 1.70920 | 1.71324 | 1.72693 | 1.73039 | 1.73609 |
| Alpha virt. eigenvalues -- | 1.75107 | 1.75978 | 1.77057 | 1.78592 | 1.79415 |
| Alpha virt. eigenvalues -- | 1.80191 | 1.82083 | 1.83155 | 1.83939 | 1.85380 |
| Alpha virt. eigenvalues -- | 1.86443 | 1.87961 | 1.89105 | 1.90939 | 1.91067 |
| Alpha virt. eigenvalues -- | 1.92421 | 1.94473 | 1.96340 | 1.97896 | 1.98701 |
| Alpha virt. eigenvalues -- | 2.03252 | 2.04509 | 2.05842 | 2.07973 | 2.08274 |
| Alpha virt. eigenvalues -- | 2.09305 | 2.11208 | 2.12256 | 2.12983 | 2.14624 |
| Alpha virt. eigenvalues -- | 2.15966 | 2.16741 | 2.17192 | 2.17812 | 2.18686 |
| Alpha virt. eigenvalues -- | 2.19607 | 2.21804 | 2.23408 | 2.24220 | 2.26300 |
| Alpha virt. eigenvalues -- | 2.26742 | 2.29335 | 2.31157 | 2.34008 | 2.36606 |
| Alpha virt. eigenvalues -- | 2.37600 | 2.39876 | 2.41976 | 2.44913 | 2.47212 |
| Alpha virt. eigenvalues -- | 2.47883 | 2.48376 | 2.49187 | 2.51255 | 2.51883 |
| Alpha virt. eigenvalues -- | 2.52676 | 2.54422 | 2.54840 | 2.55412 | 2.57450 |
| Alpha virt. eigenvalues -- | 2.57724 | 2.59244 | 2.60506 | 2.61327 | 2.62444 |
| Alpha virt. eigenvalues -- | 2.64552 | 2.65928 | 2.67364 | 2.69059 | 2.69853 |
| Alpha virt. eigenvalues -- | 2.71468 | 2.72497 | 2.74159 | 2.74994 | 2.76634 |
| Alpha virt. eigenvalues -- | 2.77036 | 2.77267 | 2.77791 | 2.80026 | 2.80556 |
| Alpha virt. eigenvalues -- | 2.81748 | 2.82530 | 2.83689 | 2.84118 | 2.84841 |
| Alpha virt. eigenvalues -- | 2.85451 | 2.87434 | 2.88321 | 2.88645 | 2.89674 |
| Alpha virt. eigenvalues -- | 2.92299 | 2.94439 | 2.95147 | 2.96340 | 2.99109 |
| Alpha virt. eigenvalues -- | 3.01637 | 3.06577 | 3.07331 | 3.11255 | 3.12355 |
| Alpha virt. eigenvalues -- | 3.13052 | 3.15219 | 3.19678 | 3.21000 | 3.23583 |
| Alpha virt. eigenvalues -- | 3.26855 | 3.27791 | 3.30728 | 3.36008 | 3.37206 |
| Alpha virt. eigenvalues -- | 3.40888 | 3.50028 | 3.54626 | 3.56473 | 3.58987 |
| Alpha virt. eigenvalues -- | 3.62655 | 3.64570 | 3.70328 | 3.70518 | 3.74674 |
| Alpha virt. eigenvalues -- | 3.75058 | 3.77446 | 3.78396 | 3.79569 | 3.81060 |
| Alpha virt. eigenvalues -- | 3.83529 | 3.84209 | 3.85606 | 3.86102 | 3.90509 |
| Alpha virt. eigenvalues -- | 3.93505 | 4.05739 | 4.06383 | 4.09535 | 4.10310 |
| Alpha virt. eigenvalues -- | 4.11057 | 4.22376 | 4.29164 | 4.30653 | 4.32742 |
| Alpha virt. eigenvalues -- | 4.37239 | 4.42110 | 4.50654 | 4.68346 | 4.89285 |

Alpha virt. eigenvalues -- 5.01806 5.07276 5.09263 5.10528 5.21312  
 Alpha virt. eigenvalues -- 5.22343 5.41177 5.47325 5.56146 5.67401  
 Alpha virt. eigenvalues -- 5.88666 6.77704 7.70331 7.74064 7.75100  
 Alpha virt. eigenvalues -- 23.71502 23.75831 23.78153 23.83740 23.85063  
 Alpha virt. eigenvalues -- 23.86846 23.88806 23.90427 23.97661 24.14618  
 Alpha virt. eigenvalues -- 24.23889 35.42752 35.56722 48.06289 49.88984  
 Alpha virt. eigenvalues -- 49.92609 49.99768 289.91119 289.95143 289.95930  
 Alpha virt. eigenvalues -- 1020.84877

Condensed to atoms (all electrons):

|    |    | 1         | 2         | 3         | 4         | 5         | 6         |
|----|----|-----------|-----------|-----------|-----------|-----------|-----------|
| 1  | C  | 12.829203 | -6.404773 | 0.675441  | 0.078430  | -1.052887 | -0.084375 |
| 2  | C  | -6.404773 | 12.524082 | -0.452972 | -0.454945 | 1.124762  | -0.184628 |
| 3  | N  | 0.675441  | -0.452972 | 6.713383  | 0.470953  | -0.373304 | -0.069058 |
| 4  | C  | 0.078430  | -0.454945 | 0.470953  | 5.718018  | 0.343425  | -0.193752 |
| 5  | N  | -1.052887 | 1.124762  | -0.373304 | 0.343425  | 7.106674  | 0.119434  |
| 6  | C  | -0.084375 | -0.184628 | -0.069058 | -0.193752 | 0.119434  | 6.358964  |
| 7  | H  | 0.662921  | -0.201748 | 0.058758  | 0.021398  | -0.132944 | -0.025577 |
| 8  | H  | -0.431142 | 0.255726  | -0.155312 | -0.099075 | 0.057061  | 0.041509  |
| 9  | H  | -0.023570 | 0.024328  | -0.000536 | -0.011170 | -0.053527 | 0.395222  |
| 10 | H  | 0.052359  | -0.031097 | -0.007314 | -0.010988 | -0.064715 | 0.512260  |
| 11 | Br | -0.213679 | 0.063617  | -0.010778 | -0.040682 | 0.002829  | -0.001828 |
| 12 | H  | 0.107703  | -0.093483 | -0.036937 | 0.446076  | -0.061901 | -0.001009 |
| 13 | C  | 0.641864  | -0.739580 | 0.120192  | 0.037809  | -0.125923 | -0.029992 |
| 14 | C  | -0.550350 | 0.558936  | -0.044884 | -0.147994 | 0.015060  | -0.047003 |
| 15 | H  | -0.005322 | 0.007116  | -0.107104 | 0.044623  | 0.005181  | 0.005184  |
| 16 | H  | -0.012472 | 0.004283  | 0.028701  | 0.004420  | -0.001099 | -0.000760 |
| 17 | H  | 0.055226  | -0.028900 | -0.024885 | -0.032974 | 0.019330  | 0.003054  |
| 18 | C  | -0.018127 | -0.008585 | -0.010861 | -0.021233 | -0.002254 | -0.001165 |
| 19 | C  | 0.075772  | -0.074338 | 0.012592  | 0.018594  | 0.006736  | -0.006073 |
| 20 | O  | -0.018860 | 0.024188  | -0.000163 | -0.007617 | -0.000765 | 0.009554  |
| 21 | H  | 0.025343  | -0.029929 | 0.005051  | 0.007491  | 0.002746  | -0.003685 |
| 22 | H  | -0.074893 | 0.081684  | -0.001051 | 0.005735  | -0.001969 | 0.004215  |
| 23 | H  | -0.002001 | -0.000018 | 0.000197  | 0.000316  | 0.000688  | -0.000502 |
| 24 | C  | -0.000449 | 0.009763  | -0.000899 | -0.002863 | -0.002799 | -0.005003 |
| 25 | H  | 0.000922  | -0.001208 | 0.000055  | 0.000127  | -0.000005 | 0.000837  |
| 26 | H  | -0.000687 | 0.000900  | -0.000064 | -0.000140 | -0.000074 | -0.000257 |
| 27 | H  | 0.000556  | -0.000289 | -0.000192 | -0.000077 | -0.001069 | 0.001921  |
| 28 | C  | -0.231197 | 0.318382  | -0.038841 | -0.110532 | 0.056452  | -0.429429 |
| 29 | H  | 0.002882  | 0.009388  | -0.004176 | -0.018572 | 0.012741  | -0.057851 |
| 30 | H  | 0.012767  | -0.007796 | 0.000104  | -0.001784 | -0.009546 | 0.021877  |
| 31 | C  | 0.001771  | -0.084243 | 0.034890  | 0.131195  | -0.089905 | -0.079966 |
| 32 | O  | -0.067680 | 0.042152  | -0.000061 | -0.001849 | 0.007990  | -0.007161 |
| 33 | O  | -0.072625 | 0.087171  | -0.005479 | -0.050272 | -0.033015 | 0.036949  |
| 34 | H  | -0.007687 | 0.018932  | -0.000774 | -0.000092 | 0.007141  | -0.030955 |

|    |    | 7         | 8         | 9         | 10        | 11        | 12        |
|----|----|-----------|-----------|-----------|-----------|-----------|-----------|
| 1  | C  | 0.662921  | -0.431142 | -0.023570 | 0.052359  | -0.213679 | 0.107703  |
| 2  | C  | -0.201748 | 0.255726  | 0.024328  | -0.031097 | 0.063617  | -0.093483 |
| 3  | N  | 0.058758  | -0.155312 | -0.000536 | -0.007314 | -0.010778 | -0.036937 |
| 4  | C  | 0.021398  | -0.099075 | -0.011170 | -0.010988 | -0.040682 | 0.446076  |
| 5  | N  | -0.132944 | 0.057061  | -0.053527 | -0.064715 | 0.002829  | -0.061901 |
| 6  | C  | -0.025577 | 0.041509  | 0.395222  | 0.512260  | -0.001828 | -0.001009 |
| 7  | H  | 0.477346  | -0.073971 | 0.002938  | -0.006077 | -0.009154 | -0.000582 |
| 8  | H  | -0.073971 | 1.378669  | 0.001662  | 0.002247  | 0.283658  | -0.002410 |
| 9  | H  | 0.002938  | 0.001662  | 0.547154  | -0.028658 | 0.000351  | -0.012923 |
| 10 | H  | -0.006077 | 0.002247  | -0.028658 | 0.487741  | -0.000907 | 0.004964  |
| 11 | Br | -0.009154 | 0.283658  | 0.000351  | -0.000907 | 35.656404 | -0.002734 |
| 12 | H  | -0.000582 | -0.002410 | -0.012923 | 0.004964  | -0.002734 | 0.492175  |
| 13 | C  | 0.026269  | -0.192723 | 0.002487  | -0.002993 | -0.080994 | -0.000523 |
| 14 | C  | -0.010724 | -0.023086 | 0.000300  | -0.001987 | -0.054847 | -0.007434 |
| 15 | H  | 0.000685  | -0.001722 | 0.000370  | 0.000084  | -0.000203 | 0.000027  |
| 16 | H  | -0.000118 | 0.002635  | -0.000105 | 0.000067  | -0.011732 | 0.001067  |
| 17 | H  | -0.001951 | 0.018347  | 0.000319  | -0.000496 | 0.149139  | -0.004740 |
| 18 | C  | -0.015333 | 0.057429  | -0.000082 | 0.000022  | -0.046608 | -0.001164 |
| 19 | C  | 0.002997  | -0.037467 | -0.001057 | 0.001465  | -0.017229 | 0.000998  |
| 20 | O  | 0.002892  | -0.002086 | 0.000847  | -0.000819 | 0.003109  | -0.000510 |
| 21 | H  | -0.000050 | -0.008563 | -0.000328 | 0.000038  | -0.000456 | 0.000982  |
| 22 | H  | -0.000138 | -0.010864 | 0.000046  | 0.001097  | 0.055488  | 0.000525  |
| 23 | H  | -0.001272 | 0.000927  | -0.000048 | -0.000096 | 0.000074  | 0.000001  |
| 24 | C  | 0.000846  | 0.000673  | 0.000238  | -0.001201 | 0.001638  | -0.000135 |
| 25 | H  | 0.000363  | -0.000249 | 0.000004  | 0.000164  | -0.000374 | 0.000010  |
| 26 | H  | -0.000192 | 0.000285  | -0.000002 | -0.000013 | 0.000181  | 0.000000  |
| 27 | H  | 0.000621  | 0.000736  | 0.000026  | -0.000430 | 0.000300  | -0.000026 |
| 28 | C  | 0.013427  | 0.010656  | -0.008761 | -0.048396 | 0.003436  | -0.022730 |
| 29 | H  | -0.003940 | 0.001912  | -0.014410 | -0.000033 | 0.000032  | 0.003521  |
| 30 | H  | 0.001907  | -0.001813 | -0.009016 | 0.007679  | -0.000105 | -0.003329 |
| 31 | C  | -0.013387 | -0.017638 | -0.025026 | -0.063417 | -0.007929 | 0.018065  |
| 32 | O  | -0.000118 | -0.001210 | 0.001927  | -0.001436 | 0.000772  | 0.000379  |
| 33 | O  | -0.001251 | 0.009745  | 0.010855  | -0.025131 | 0.001729  | -0.002961 |
| 34 | H  | -0.006108 | 0.002568  | 0.000301  | 0.000528  | 0.001963  | -0.000503 |
|    |    | 13        | 14        | 15        | 16        | 17        | 18        |
| 1  | C  | 0.641864  | -0.550350 | -0.005322 | -0.012472 | 0.055226  | -0.018127 |
| 2  | C  | -0.739580 | 0.558936  | 0.007116  | 0.004283  | -0.028900 | -0.008585 |
| 3  | N  | 0.120192  | -0.044884 | -0.107104 | 0.028701  | -0.024885 | -0.010861 |
| 4  | C  | 0.037809  | -0.147994 | 0.044623  | 0.004420  | -0.032974 | -0.021233 |
| 5  | N  | -0.125923 | 0.015060  | 0.005181  | -0.001099 | 0.019330  | -0.002254 |
| 6  | C  | -0.029992 | -0.047003 | 0.005184  | -0.000760 | 0.003054  | -0.001165 |
| 7  | H  | 0.026269  | -0.010724 | 0.000685  | -0.000118 | -0.001951 | -0.015333 |
| 8  | H  | -0.192723 | -0.023086 | -0.001722 | 0.002635  | 0.018347  | 0.057429  |



|    |    |           |           |           |           |           |           |
|----|----|-----------|-----------|-----------|-----------|-----------|-----------|
| 9  | H  | 0.002487  | 0.000300  | 0.000370  | -0.000105 | 0.000319  | -0.000082 |
| 10 | H  | -0.002993 | -0.001987 | 0.000084  | 0.000067  | -0.000496 | 0.000022  |
| 11 | Br | -0.080994 | -0.054847 | -0.000203 | -0.011732 | 0.149139  | -0.046608 |
| 12 | H  | -0.000523 | -0.007434 | 0.000027  | 0.001067  | -0.004740 | -0.001164 |
| 13 | C  | 6.043201  | -0.006226 | 0.443410  | -0.102370 | -0.126170 | -0.002596 |
| 14 | C  | -0.006226 | 5.999497  | -0.078499 | 0.448966  | 0.225410  | -0.010618 |
| 15 | H  | 0.443410  | -0.078499 | 0.545414  | -0.011636 | 0.006185  | 0.000296  |
| 16 | H  | -0.102370 | 0.448966  | -0.011636 | 0.490976  | -0.037470 | -0.000924 |
| 17 | H  | -0.126170 | 0.225410  | 0.006185  | -0.037470 | 0.707290  | 0.016107  |
| 18 | C  | -0.002596 | -0.010618 | 0.000296  | -0.000924 | 0.016107  | 7.801773  |
| 19 | C  | -0.001390 | 0.002553  | -0.000246 | -0.000046 | 0.001494  | -2.513045 |
| 20 | O  | -0.000015 | 0.000029  | -0.000013 | -0.000033 | 0.000585  | 0.219445  |
| 21 | H  | -0.004395 | 0.006012  | -0.000370 | 0.000224  | 0.000271  | 0.217302  |
| 22 | H  | 0.008612  | 0.009270  | -0.000103 | 0.001407  | -0.028010 | 0.312367  |
| 23 | H  | -0.000292 | 0.000158  | -0.000001 | -0.000002 | 0.000178  | -0.023722 |
| 24 | C  | 0.000529  | -0.000618 | 0.000028  | -0.000059 | 0.001078  | 0.443995  |
| 25 | H  | 0.000041  | -0.000026 | 0.000001  | 0.000001  | -0.000026 | 0.012846  |
| 26 | H  | -0.000033 | 0.000025  | -0.000002 | 0.000001  | -0.000029 | 0.022596  |
| 27 | H  | -0.000109 | -0.000114 | 0.000004  | -0.000012 | 0.000136  | -0.073898 |
| 28 | C  | -0.021384 | -0.009090 | 0.001285  | 0.000622  | -0.006426 | 0.016939  |
| 29 | H  | -0.002497 | -0.000536 | -0.000123 | -0.000003 | 0.000013  | 0.002583  |
| 30 | H  | 0.000389  | -0.001383 | 0.000761  | 0.000072  | -0.000229 | -0.002045 |
| 31 | C  | 0.018471  | 0.020366  | -0.002461 | -0.000513 | 0.007228  | -0.111964 |
| 32 | O  | -0.001529 | 0.001545  | -0.000175 | 0.000032  | -0.000278 | 0.005332  |
| 33 | O  | 0.000113  | 0.000425  | -0.000039 | -0.000034 | 0.000498  | 0.100181  |
| 34 | H  | -0.000511 | 0.001238  | 0.000009  | -0.000010 | 0.000307  | 0.010872  |
|    |    | 19        | 20        | 21        | 22        | 23        | 24        |
| 1  | C  | 0.075772  | -0.018860 | 0.025343  | -0.074893 | -0.002001 | -0.000449 |
| 2  | C  | -0.074338 | 0.024188  | -0.029929 | 0.081684  | -0.000018 | 0.009763  |
| 3  | N  | 0.012592  | -0.000163 | 0.005051  | -0.001051 | 0.000197  | -0.000899 |
| 4  | C  | 0.018594  | -0.007617 | 0.007491  | 0.005735  | 0.000316  | -0.002863 |
| 5  | N  | 0.006736  | -0.000765 | 0.002746  | -0.001969 | 0.000688  | -0.002799 |
| 6  | C  | -0.006073 | 0.009554  | -0.003685 | 0.004215  | -0.000502 | -0.005003 |
| 7  | H  | 0.002997  | 0.002892  | -0.000050 | -0.000138 | -0.001272 | 0.000846  |
| 8  | H  | -0.037467 | -0.002086 | -0.008563 | -0.010864 | 0.000927  | 0.000673  |
| 9  | H  | -0.001057 | 0.000847  | -0.000328 | 0.000046  | -0.000048 | 0.000238  |
| 10 | H  | 0.001465  | -0.000819 | 0.000038  | 0.001097  | -0.000096 | -0.001201 |
| 11 | Br | -0.017229 | 0.003109  | -0.000456 | 0.055488  | 0.000074  | 0.001638  |
| 12 | H  | 0.000998  | -0.000510 | 0.000982  | 0.000525  | 0.000001  | -0.000135 |
| 13 | C  | -0.001390 | -0.000015 | -0.004395 | 0.008612  | -0.000292 | 0.000529  |
| 14 | C  | 0.002553  | 0.000029  | 0.006012  | 0.009270  | 0.000158  | -0.000618 |
| 15 | H  | -0.000246 | -0.000013 | -0.000370 | -0.000103 | -0.000001 | 0.000028  |
| 16 | H  | -0.000046 | -0.000033 | 0.000224  | 0.001407  | -0.000002 | -0.000059 |
| 17 | H  | 0.001494  | 0.000585  | 0.000271  | -0.028010 | 0.000178  | 0.001078  |

|    |    |           |           |           |           |           |           |
|----|----|-----------|-----------|-----------|-----------|-----------|-----------|
| 18 | C  | -2.513045 | 0.219445  | 0.217302  | 0.312367  | -0.023722 | 0.443995  |
| 19 | C  | 8.614836  | -0.134918 | 0.222681  | -0.015070 | 0.380821  | -0.627295 |
| 20 | O  | -0.134918 | 8.322064  | -0.091672 | -0.013651 | -0.006089 | -0.049654 |
| 21 | H  | 0.222681  | -0.091672 | 0.576024  | -0.044402 | 0.006862  | -0.059862 |
| 22 | H  | -0.015070 | -0.013651 | -0.044402 | 0.562333  | -0.003479 | -0.032196 |
| 23 | H  | 0.380821  | -0.006089 | 0.006862  | -0.003479 | 0.488878  | -0.052584 |
| 24 | C  | -0.627295 | -0.049654 | -0.059862 | -0.032196 | -0.052584 | 5.762484  |
| 25 | H  | -0.008075 | -0.015229 | -0.005350 | 0.005312  | -0.004044 | 0.353573  |
| 26 | H  | -0.105632 | 0.017198  | -0.004625 | 0.002952  | -0.005767 | 0.440959  |
| 27 | H  | 0.038047  | -0.005711 | 0.006770  | -0.000409 | 0.006719  | 0.380815  |
| 28 | C  | -0.022924 | 0.042325  | -0.012883 | 0.018586  | -0.001660 | -0.024889 |
| 29 | H  | -0.002842 | -0.000093 | -0.000650 | -0.000296 | 0.000012  | 0.002011  |
| 30 | H  | 0.001145  | 0.000979  | 0.000651  | 0.000513  | 0.000027  | -0.001675 |
| 31 | C  | 0.185565  | -0.078193 | 0.025030  | -0.017315 | 0.004798  | -0.061956 |
| 32 | O  | 0.005634  | 0.012618  | -0.003724 | 0.005497  | -0.001226 | -0.032833 |
| 33 | O  | -0.134609 | 0.055549  | -0.020585 | -0.001065 | -0.002558 | 0.056092  |
| 34 | H  | 0.009710  | -0.022646 | 0.007588  | -0.005978 | 0.005934  | 0.007069  |
|    |    | 25        | 26        | 27        | 28        | 29        | 30        |
| 1  | C  | 0.000922  | -0.000687 | 0.000556  | -0.231197 | 0.002882  | 0.012767  |
| 2  | C  | -0.001208 | 0.000900  | -0.000289 | 0.318382  | 0.009388  | -0.007796 |
| 3  | N  | 0.000055  | -0.000064 | -0.000192 | -0.038841 | -0.004176 | 0.000104  |
| 4  | C  | 0.000127  | -0.000140 | -0.000077 | -0.110532 | -0.018572 | -0.001784 |
| 5  | N  | -0.000005 | -0.000074 | -0.001069 | 0.056452  | 0.012741  | -0.009546 |
| 6  | C  | 0.000837  | -0.000257 | 0.001921  | -0.429429 | -0.057851 | 0.021877  |
| 7  | H  | 0.000363  | -0.000192 | 0.000621  | 0.013427  | -0.003940 | 0.001907  |
| 8  | H  | -0.000249 | 0.000285  | 0.000736  | 0.010656  | 0.001912  | -0.001813 |
| 9  | H  | 0.000004  | -0.000002 | 0.000026  | -0.008761 | -0.014410 | -0.009016 |
| 10 | H  | 0.000164  | -0.000013 | -0.000430 | -0.048396 | -0.000033 | 0.007679  |
| 11 | Br | -0.000374 | 0.000181  | 0.000300  | 0.003436  | 0.000032  | -0.000105 |
| 12 | H  | 0.000010  | 0.000000  | -0.000026 | -0.022730 | 0.003521  | -0.003329 |
| 13 | C  | 0.000041  | -0.000033 | -0.000109 | -0.021384 | -0.002497 | 0.000389  |
| 14 | C  | -0.000026 | 0.000025  | -0.000114 | -0.009090 | -0.000536 | -0.001383 |
| 15 | H  | 0.000001  | -0.000002 | 0.000004  | 0.001285  | -0.000123 | 0.000761  |
| 16 | H  | 0.000001  | 0.000001  | -0.000012 | 0.000622  | -0.000003 | 0.000072  |
| 17 | H  | -0.000026 | -0.000029 | 0.000136  | -0.006426 | 0.000013  | -0.000229 |
| 18 | C  | 0.012846  | 0.022596  | -0.073898 | 0.016939  | 0.002583  | -0.002045 |
| 19 | C  | -0.008075 | -0.105632 | 0.038047  | -0.022924 | -0.002842 | 0.001145  |
| 20 | O  | -0.015229 | 0.017198  | -0.005711 | 0.042325  | -0.000093 | 0.000979  |
| 21 | H  | -0.005350 | -0.004625 | 0.006770  | -0.012883 | -0.000650 | 0.000651  |
| 22 | H  | 0.005312  | 0.002952  | -0.000409 | 0.018586  | -0.000296 | 0.000513  |
| 23 | H  | -0.004044 | -0.005767 | 0.006719  | -0.001660 | 0.000012  | 0.000027  |
| 24 | C  | 0.353573  | 0.440959  | 0.380815  | -0.024889 | 0.002011  | -0.001675 |
| 25 | H  | 0.574765  | -0.032987 | -0.032054 | 0.003686  | -0.000189 | 0.000153  |
| 26 | H  | -0.032987 | 0.550359  | -0.035789 | -0.000317 | 0.000068  | -0.000077 |

|    |    |           |           |           |           |           |           |
|----|----|-----------|-----------|-----------|-----------|-----------|-----------|
| 27 | H  | -0.032054 | -0.035789 | 0.549710  | -0.012615 | 0.000156  | -0.000132 |
| 28 | C  | 0.003686  | -0.000317 | -0.012615 | 8.039436  | 0.333392  | 0.465215  |
| 29 | H  | -0.000189 | 0.000068  | 0.000156  | 0.333392  | 0.526002  | -0.019746 |
| 30 | H  | 0.000153  | -0.000077 | -0.000132 | 0.465215  | -0.019746 | 0.491838  |
| 31 | C  | 0.003653  | -0.000917 | 0.008797  | -1.508485 | 0.012437  | -0.164648 |
| 32 | O  | 0.002673  | -0.000814 | 0.007222  | -0.098857 | -0.005368 | -0.005776 |
| 33 | O  | -0.004142 | 0.001648  | -0.005099 | -0.378508 | 0.021431  | 0.002030  |
| 34 | H  | -0.004187 | -0.000226 | -0.001316 | -0.008435 | 0.000977  | 0.000939  |
|    |    | 31        | 32        | 33        | 34        |           |           |
| 1  | C  | 0.001771  | -0.067680 | -0.072625 | -0.007687 |           |           |
| 2  | C  | -0.084243 | 0.042152  | 0.087171  | 0.018932  |           |           |
| 3  | N  | 0.034890  | -0.000061 | -0.005479 | -0.000774 |           |           |
| 4  | C  | 0.131195  | -0.001849 | -0.050272 | -0.000092 |           |           |
| 5  | N  | -0.089905 | 0.007990  | -0.033015 | 0.007141  |           |           |
| 6  | C  | -0.079966 | -0.007161 | 0.036949  | -0.030955 |           |           |
| 7  | H  | -0.013387 | -0.000118 | -0.001251 | -0.006108 |           |           |
| 8  | H  | -0.017638 | -0.001210 | 0.009745  | 0.002568  |           |           |
| 9  | H  | -0.025026 | 0.001927  | 0.010855  | 0.000301  |           |           |
| 10 | H  | -0.063417 | -0.001436 | -0.025131 | 0.000528  |           |           |
| 11 | Br | -0.007929 | 0.000772  | 0.001729  | 0.001963  |           |           |
| 12 | H  | 0.018065  | 0.000379  | -0.002961 | -0.000503 |           |           |
| 13 | C  | 0.018471  | -0.001529 | 0.000113  | -0.000511 |           |           |
| 14 | C  | 0.020366  | 0.001545  | 0.000425  | 0.001238  |           |           |
| 15 | H  | -0.002461 | -0.000175 | -0.000039 | 0.000009  |           |           |
| 16 | H  | -0.000513 | 0.000032  | -0.000034 | -0.000010 |           |           |
| 17 | H  | 0.007228  | -0.000278 | 0.000498  | 0.000307  |           |           |
| 18 | C  | -0.111964 | 0.005332  | 0.100181  | 0.010872  |           |           |
| 19 | C  | 0.185565  | 0.005634  | -0.134609 | 0.009710  |           |           |
| 20 | O  | -0.078193 | 0.012618  | 0.055549  | -0.022646 |           |           |
| 21 | H  | 0.025030  | -0.003724 | -0.020585 | 0.007588  |           |           |
| 22 | H  | -0.017315 | 0.005497  | -0.001065 | -0.005978 |           |           |
| 23 | H  | 0.004798  | -0.001226 | -0.002558 | 0.005934  |           |           |
| 24 | C  | -0.061956 | -0.032833 | 0.056092  | 0.007069  |           |           |
| 25 | H  | 0.003653  | 0.002673  | -0.004142 | -0.004187 |           |           |
| 26 | H  | -0.000917 | -0.000814 | 0.001648  | -0.000226 |           |           |
| 27 | H  | 0.008797  | 0.007222  | -0.005099 | -0.001316 |           |           |
| 28 | C  | -1.508485 | -0.098857 | -0.378508 | -0.008435 |           |           |
| 29 | H  | 0.012437  | -0.005368 | 0.021431  | 0.000977  |           |           |
| 30 | H  | -0.164648 | -0.005776 | 0.002030  | 0.000939  |           |           |
| 31 | C  | 7.152810  | 0.574116  | 0.258588  | 0.001260  |           |           |
| 32 | O  | 0.574116  | 7.902070  | -0.153458 | -0.000176 |           |           |
| 33 | O  | 0.258588  | -0.153458 | 8.239421  | 0.227509  |           |           |
| 34 | H  | 0.001260  | -0.000176 | 0.227509  | 0.288956  |           |           |

Mulliken charges:

1  
1 C 0.049617  
2 C -0.356876  
3 N 0.225325  
4 C -0.122000  
5 N 0.119451  
6 C -0.250953  
7 H 0.231267  
8 H -0.067113  
9 H 0.199844  
10 H 0.225492  
11 Br -0.724480  
12 H 0.179542  
13 C 0.098857  
14 C -0.294373  
15 H 0.147356  
16 H 0.195924  
17 H 0.080387  
18 C -0.375860  
19 C 0.120612  
20 O -0.262643  
21 H 0.180465  
22 H 0.175248  
23 H 0.208770  
24 C -0.504821  
25 H 0.148960  
26 H 0.151469  
27 H 0.166806  
28 C -0.327482  
29 H 0.201767  
30 H 0.220054  
31 C -0.131078  
32 O -0.186227  
33 O -0.219106  
34 H 0.495802

Sum of Mulliken charges = 0.00000

Mulliken charges with hydrogens summed into heavy atoms:

1  
1 C 0.280883  
2 C -0.423989  
3 N 0.225325  
4 C 0.057542  
5 N 0.119451  
6 C 0.174383

11 Br -0.724480  
 13 C 0.246213  
 14 C -0.018062  
 18 C -0.020147  
 19 C 0.329382  
 20 O -0.262643  
 24 C -0.037586  
 28 C 0.094338  
 31 C -0.131078  
 32 O -0.186227  
 33 O 0.276696

Electronic spatial extent (au):  $\langle R^{**2} \rangle =$  6544.9449

Charge= 0.0000 electrons

Dipole moment (field-independent basis, Debye):

X= 9.0187 Y= 11.0861 Z= -0.8715

Tot= 14.3178

Quadrupole moment (field-independent basis, Debye-Ang):

XX= -136.3779 YY= -85.6770 ZZ= -118.6333  
 XY= -14.9106 XZ= 12.1220 YZ= 0.7080

Traceless Quadrupole moment (field-independent basis, Debye-Ang):

XX= -22.8151 YY= 27.8857 ZZ= -5.0705  
 XY= -14.9106 XZ= 12.1220 YZ= 0.7080

Octapole moment (field-independent basis, Debye-Ang\*\*2):

XXX= 51.1078 YYY= 11.8870 ZZZ= 16.8316  
 XYY= 52.9308  
 XXY= 75.3734 XXZ= -16.8366 XZZ= -26.9010  
 YZZ= 0.4681  
 YYZ= -22.6375 XYZ= 17.8614

Hexadecapole moment (field-independent basis, Debye-Ang\*\*3):

XXXX= -4216.9963 YYYY= -3128.1183 ZZZZ= -606.5419  
 XXXY= -44.3205  
 XXXZ= 124.7661 YYYYX= 37.5695 YYYZ= -67.1554  
 ZZZX= 21.3652  
 ZZZY= -12.5568 XXYX= -1216.1277 XXZZ= -797.6426  
 YYZZ= -666.9699  
 XXYZ= -10.5733 YYXZ= 37.6402 ZZXY= 17.3418

N-N= 1.572859784883D+03 E-N=-1.108474563616D+04 KE= 3.332709436656D+03

1\1\GINC-CN006\FOpt\RB3LYP\6-311++G(d,p)\C11H17Br1N2O3\SYWANG\22-Jul-2

024\0\# opt b3lyp/6-311++g(d,p)\coohpo\0,1\C,-0.8473113188,1.644847

0169,1.5378626721\C,-1.5036403253,0.4550261588,1.5739350025\N,-2.36494

05488,0.4498145661,0.4846024934\C,-2.2297245399,1.6069297005,-0.181933

1931\N,-1.309982433,2.3546552269,0.4403460422\C,-0.7760682968,3.645571

5354,-0.030957103\H,-0.0752256777,2.0322284323,2.1786274193\H,-1.35187

72295,-0.4157204074,2.2235330025\H,-1.6138078998,4.2597098857,-0.36576

39865\H,-0.3256640451,4.1271610513,0.8348046797\Br,-0.3916305249,-2.43  
15546497,2.9208034678\H,-2.7655919679,1.8805803089,-1.0745221418\C,-3.  
2502494446,-0.6038514381,0.0908387157\C,-3.2099773485,-1.8232517208,0.  
6116873796\H,-3.9444071483,-0.2966464168,-0.6815733425\H,-3.9182751755  
, -2.5586963258,0.2513279606\H,-2.4866390523,-2.1347261204,1.3681391868  
\C,2.5552573383,-0.6880378458,1.1292860005\C,3.9755316084,-0.375671180  
7,1.3153381403\O,2.976189347,0.6550744813,1.5317890526\H,2.1719878245,  
-0.7302119131,0.1136602597\H,1.9823365025,-1.226417764,1.8797161452\H,  
4.4301649847,-0.6913975604,2.2515096398\C,4.9181828609,-0.1747246447,0  
.1609670646\H,5.679788022,0.5716156961,0.4048837379\H,5.43042095,-1.11  
5051765,-0.0643130183\H,4.3789479432,0.1493336747,-0.7317027025\C,0.25  
62710218,3.4764172818,-1.1551172158\H,0.7074476585,4.4551633018,-1.346  
5976041\H,-0.2126809716,3.1375108963,-2.0795231411\C,1.3583568377,2.48  
34942412,-0.8042294316\O,1.6801844203,1.5719076898,-1.5289874234\O,1.8  
831105591,2.7333409892,0.394291525\H,2.4565881393,1.9672903276,0.70126  
04057\\Version=EM64L-G09RevD.01\State=1-A\HF=-3338.9038835\RMSD=2.213e  
-09\RMSF=4.451e-06\Dipole=-1.4467819,4.4728195,-3.1035413\Quadrupole=1  
8.1851231,-5.0684789,-13.1166442,-9.8376761,11.8518119,8.2953664\PG=CO  
1 [X(C11H17Br1N2O3)]\@

ADAM SMITH SAID, "THE REAL PRICE OF ANYTHING IS THE TOIL AND TROUBLE  
OF ACQUIRING IT." BUT IN ALL UNDERTAKINGS WITH NATURE WE SHOULD FIRST  
READ CAREFULLY THE SMALL PRINT IN THE CONTRACT. THIS MIGHT DISCLOSE  
THAT THE REAL PRICE IS TO BE PAID BY THOSE WHO INHERIT THE DEPLETION  
AND DESPOILATION THAT FOLLOWS.

-- E. R. HARRISON IN "COSMOLOGY" (1980)

Job cpu time: 1 days 2 hours 5 minutes 20.9 seconds.  
File lengths (MBytes): RWF= 160 Int= 0 D2E= 0 Chk= 19 Scr= 1  
Normal termination of Gaussian 09 at Mon Jul 22 20:37:19 2024.

Entering Gaussian System, Link 0=g09

Input=cooh.gif

Output=cooh.log

Initial command:

/apps/gaussian/09\_D01/g09/l1.exe "/scr/tmp/sywang/91539/Gau-26321.inp" -  
screddir="/scr/tmp/sywang/91539/"

Entering Link 1 = /apps/gaussian/09\_D01/g09/l1.exe PID= 26322.

Copyright (c) 1988,1990,1992,1993,1995,1998,2003,2009,2013,  
Gaussian, Inc. All Rights Reserved.

This is part of the Gaussian(R) 09 program. It is based on  
the Gaussian(R) 03 system (copyright 2003, Gaussian, Inc.),

the Gaussian(R) 98 system (copyright 1998, Gaussian, Inc.),  
the Gaussian(R) 94 system (copyright 1995, Gaussian, Inc.),  
the Gaussian 92(TM) system (copyright 1992, Gaussian, Inc.),  
the Gaussian 90(TM) system (copyright 1990, Gaussian, Inc.),  
the Gaussian 88(TM) system (copyright 1988, Gaussian, Inc.),  
the Gaussian 86(TM) system (copyright 1986, Carnegie Mellon  
University), and the Gaussian 82(TM) system (copyright 1983,  
Carnegie Mellon University). Gaussian is a federally registered  
trademark of Gaussian, Inc.

This software contains proprietary and confidential information,  
including trade secrets, belonging to Gaussian, Inc.

This software is provided under written license and may be  
used, copied, transmitted, or stored only in accord with that  
written license.

The following legend is applicable only to US Government  
contracts under FAR:

#### RESTRICTED RIGHTS LEGEND

Use, reproduction and disclosure by the US Government is  
subject to restrictions as set forth in subparagraphs (a)  
and (c) of the Commercial Computer Software - Restricted  
Rights clause in FAR 52.227-19.

Gaussian, Inc.  
340 Quinnipiac St., Bldg. 40, Wallingford CT 06492

-----  
Warning -- This program may not be used in any manner that  
competes with the business of Gaussian, Inc. or will provide  
assistance to any competitor of Gaussian, Inc. The licensee  
of this program is prohibited from giving any competitor of  
Gaussian, Inc. access to this program. By using this program,  
the user acknowledges that Gaussian, Inc. is engaged in the  
business of creating and licensing software in the field of  
computational chemistry and represents and warrants to the  
licensee that it is not a competitor of Gaussian, Inc. and that  
it will not use this program in any manner prohibited above.  
-----

Cite this work as:

Gaussian 09, Revision D.01,

M. J. Frisch, G. W. Trucks, H. B. Schlegel, G. E. Scuseria,  
M. A. Robb, J. R. Cheeseman, G. Scalmani, V. Barone, B. Mennucci,  
G. A. Petersson, H. Nakatsuji, M. Caricato, X. Li, H. P. Hratchian,  
A. F. Izmaylov, J. Bloino, G. Zheng, J. L. Sonnenberg, M. Hada,  
M. Ehara, K. Toyota, R. Fukuda, J. Hasegawa, M. Ishida, T. Nakajima,  
Y. Honda, O. Kitao, H. Nakai, T. Vreven, J. A. Montgomery, Jr.,  
J. E. Peralta, F. Ogliaro, M. Bearpark, J. J. Heyd, E. Brothers,  
K. N. Kudin, V. N. Staroverov, T. Keith, R. Kobayashi, J. Normand,  
K. Raghavachari, A. Rendell, J. C. Burant, S. S. Iyengar, J. Tomasi,  
M. Cossi, N. Rega, J. M. Millam, M. Klene, J. E. Knox, J. B. Cross,  
V. Bakken, C. Adamo, J. Jaramillo, R. Gomperts, R. E. Stratmann,  
O. Yazyev, A. J. Austin, R. Cammi, C. Pomelli, J. W. Ochterski,  
R. L. Martin, K. Morokuma, V. G. Zakrzewski, G. A. Voth,  
P. Salvador, J. J. Dannenberg, S. Dapprich, A. D. Daniels,  
O. Farkas, J. B. Foresman, J. V. Ortiz, J. Cioslowski,  
and D. J. Fox, Gaussian, Inc., Wallingford CT, 2013.

\*\*\*\*\*

Gaussian 09: EM64L-G09RevD.01 24-Apr-2013

22-Jul-2024

\*\*\*\*\*

%chk=./cooh.chk

%mem=40000MB

%nprocl=1

Will use up to 1 processors via Linda.

%nprocs=28

Will use up to 28 processors via shared memory.

-----

# opt b3lyp/6-311++g(d,p)

-----

1/14=-1,18=20,19=15,26=3,38=1/1,3;

2/9=110,12=2,17=6,18=5,40=1/2;

3/5=4,6=6,7=1111,11=2,16=1,25=1,30=1,71=1,74=-5/1,2,3;

4//1;

5/5=2,38=5/2;

6/7=2,8=2,9=2,10=2,28=1/1;

7//1,2,3,16;

1/14=-1,18=20,19=15,26=3/3(2);

2/9=110/2;

99//99;

2/9=110/2;





Initialization pass.

-----  
! Initial Parameters !  
! (Angstroms and Degrees) !  
-----

| ! Name | Definition | Value    | Derivative Info. | ! |
|--------|------------|----------|------------------|---|
| ! R1   | R(1,2)     | 1.3506   | estimate D2E/DX2 | ! |
| ! R2   | R(1,5)     | 1.3919   | estimate D2E/DX2 | ! |
| ! R3   | R(1,7)     | 1.0751   | estimate D2E/DX2 | ! |
| ! R4   | R(2,3)     | 1.3958   | estimate D2E/DX2 | ! |
| ! R5   | R(2,8)     | 1.0746   | estimate D2E/DX2 | ! |
| ! R6   | R(3,4)     | 1.3536   | estimate D2E/DX2 | ! |
| ! R7   | R(3,13)    | 1.416    | estimate D2E/DX2 | ! |
| ! R8   | R(4,5)     | 1.3493   | estimate D2E/DX2 | ! |
| ! R9   | R(4,11)    | 2.7298   | estimate D2E/DX2 | ! |
| ! R10  | R(4,12)    | 1.0722   | estimate D2E/DX2 | ! |
| ! R11  | R(5,6)     | 1.4543   | estimate D2E/DX2 | ! |
| ! R12  | R(6,9)     | 1.0878   | estimate D2E/DX2 | ! |
| ! R13  | R(6,10)    | 1.0937   | estimate D2E/DX2 | ! |
| ! R14  | R(6,18)    | 1.54     | estimate D2E/DX2 | ! |
| ! R15  | R(11,12)   | 2.6758   | estimate D2E/DX2 | ! |
| ! R16  | R(11,20)   | 2.7159   | estimate D2E/DX2 | ! |
| ! R17  | R(13,14)   | 1.3282   | estimate D2E/DX2 | ! |
| ! R18  | R(13,15)   | 1.0841   | estimate D2E/DX2 | ! |
| ! R19  | R(14,16)   | 1.0813   | estimate D2E/DX2 | ! |
| ! R20  | R(14,17)   | 1.0835   | estimate D2E/DX2 | ! |
| ! R21  | R(18,19)   | 1.07     | estimate D2E/DX2 | ! |
| ! R22  | R(18,20)   | 1.07     | estimate D2E/DX2 | ! |
| ! R23  | R(18,21)   | 1.54     | estimate D2E/DX2 | ! |
| ! R24  | R(21,22)   | 1.2303   | estimate D2E/DX2 | ! |
| ! R25  | R(21,23)   | 1.357    | estimate D2E/DX2 | ! |
| ! R26  | R(23,24)   | 0.9712   | estimate D2E/DX2 | ! |
| ! A1   | A(2,1,5)   | 107.4226 | estimate D2E/DX2 | ! |
| ! A2   | A(2,1,7)   | 130.5964 | estimate D2E/DX2 | ! |
| ! A3   | A(5,1,7)   | 121.9243 | estimate D2E/DX2 | ! |
| ! A4   | A(1,2,3)   | 107.3029 | estimate D2E/DX2 | ! |
| ! A5   | A(1,2,8)   | 130.7724 | estimate D2E/DX2 | ! |
| ! A6   | A(3,2,8)   | 121.8658 | estimate D2E/DX2 | ! |
| ! A7   | A(2,3,4)   | 108.46   | estimate D2E/DX2 | ! |
| ! A8   | A(2,3,13)  | 127.5178 | estimate D2E/DX2 | ! |
| ! A9   | A(4,3,13)  | 123.4142 | estimate D2E/DX2 | ! |
| ! A10  | A(3,4,5)   | 107.6994 | estimate D2E/DX2 | ! |
| ! A11  | A(3,4,11)  | 106.4677 | estimate D2E/DX2 | ! |

|       |             |           |                  |   |
|-------|-------------|-----------|------------------|---|
| ! A12 | A(3,4,12)   | 124.6299  | estimate D2E/DX2 | ! |
| ! A13 | A(5,4,11)   | 107.3506  | estimate D2E/DX2 | ! |
| ! A14 | A(5,4,12)   | 124.7372  | estimate D2E/DX2 | ! |
| ! A15 | A(1,5,4)    | 108.6932  | estimate D2E/DX2 | ! |
| ! A16 | A(1,5,6)    | 126.7524  | estimate D2E/DX2 | ! |
| ! A17 | A(4,5,6)    | 123.6127  | estimate D2E/DX2 | ! |
| ! A18 | A(5,6,9)    | 108.9722  | estimate D2E/DX2 | ! |
| ! A19 | A(5,6,10)   | 108.9833  | estimate D2E/DX2 | ! |
| ! A20 | A(5,6,18)   | 115.8866  | estimate D2E/DX2 | ! |
| ! A21 | A(9,6,10)   | 107.9978  | estimate D2E/DX2 | ! |
| ! A22 | A(9,6,18)   | 106.9843  | estimate D2E/DX2 | ! |
| ! A23 | A(10,6,18)  | 107.7537  | estimate D2E/DX2 | ! |
| ! A24 | A(4,11,20)  | 74.1685   | estimate D2E/DX2 | ! |
| ! A25 | A(12,11,20) | 82.2162   | estimate D2E/DX2 | ! |
| ! A26 | A(3,13,14)  | 123.8076  | estimate D2E/DX2 | ! |
| ! A27 | A(3,13,15)  | 112.2115  | estimate D2E/DX2 | ! |
| ! A28 | A(14,13,15) | 123.9327  | estimate D2E/DX2 | ! |
| ! A29 | A(13,14,16) | 119.5254  | estimate D2E/DX2 | ! |
| ! A30 | A(13,14,17) | 122.9387  | estimate D2E/DX2 | ! |
| ! A31 | A(16,14,17) | 117.5355  | estimate D2E/DX2 | ! |
| ! A32 | A(6,18,19)  | 109.4712  | estimate D2E/DX2 | ! |
| ! A33 | A(6,18,20)  | 109.4712  | estimate D2E/DX2 | ! |
| ! A34 | A(6,18,21)  | 109.4712  | estimate D2E/DX2 | ! |
| ! A35 | A(19,18,20) | 109.4712  | estimate D2E/DX2 | ! |
| ! A36 | A(19,18,21) | 109.4713  | estimate D2E/DX2 | ! |
| ! A37 | A(20,18,21) | 109.4712  | estimate D2E/DX2 | ! |
| ! A38 | A(11,20,18) | 141.9723  | estimate D2E/DX2 | ! |
| ! A39 | A(18,21,22) | 130.0733  | estimate D2E/DX2 | ! |
| ! A40 | A(18,21,23) | 112.2947  | estimate D2E/DX2 | ! |
| ! A41 | A(22,21,23) | 117.632   | estimate D2E/DX2 | ! |
| ! A42 | A(21,23,24) | 110.6079  | estimate D2E/DX2 | ! |
| ! D1  | D(5,1,2,3)  | 0.3774    | estimate D2E/DX2 | ! |
| ! D2  | D(5,1,2,8)  | 177.5633  | estimate D2E/DX2 | ! |
| ! D3  | D(7,1,2,3)  | -176.8652 | estimate D2E/DX2 | ! |
| ! D4  | D(7,1,2,8)  | 0.3208    | estimate D2E/DX2 | ! |
| ! D5  | D(2,1,5,4)  | -4.2823   | estimate D2E/DX2 | ! |
| ! D6  | D(2,1,5,6)  | -173.4144 | estimate D2E/DX2 | ! |
| ! D7  | D(7,1,5,4)  | 173.251   | estimate D2E/DX2 | ! |
| ! D8  | D(7,1,5,6)  | 4.1189    | estimate D2E/DX2 | ! |
| ! D9  | D(1,2,3,4)  | 3.6377    | estimate D2E/DX2 | ! |
| ! D10 | D(1,2,3,13) | 174.8521  | estimate D2E/DX2 | ! |
| ! D11 | D(8,2,3,4)  | -173.8533 | estimate D2E/DX2 | ! |
| ! D12 | D(8,2,3,13) | -2.6388   | estimate D2E/DX2 | ! |
| ! D13 | D(2,3,4,5)  | -6.2906   | estimate D2E/DX2 | ! |

|       |                |           |                  |   |
|-------|----------------|-----------|------------------|---|
| ! D14 | D(2,3,4,11)    | 108.592   | estimate D2E/DX2 | ! |
| ! D15 | D(2,3,4,12)    | -167.6072 | estimate D2E/DX2 | ! |
| ! D16 | D(13,3,4,5)    | -177.9455 | estimate D2E/DX2 | ! |
| ! D17 | D(13,3,4,11)   | -63.0629  | estimate D2E/DX2 | ! |
| ! D18 | D(13,3,4,12)   | 20.7378   | estimate D2E/DX2 | ! |
| ! D19 | D(2,3,13,14)   | 31.6646   | estimate D2E/DX2 | ! |
| ! D20 | D(2,3,13,15)   | -145.8955 | estimate D2E/DX2 | ! |
| ! D21 | D(4,3,13,14)   | -158.3307 | estimate D2E/DX2 | ! |
| ! D22 | D(4,3,13,15)   | 24.1093   | estimate D2E/DX2 | ! |
| ! D23 | D(3,4,5,1)     | 6.5387    | estimate D2E/DX2 | ! |
| ! D24 | D(3,4,5,6)     | 176.0875  | estimate D2E/DX2 | ! |
| ! D25 | D(11,4,5,1)    | -107.7574 | estimate D2E/DX2 | ! |
| ! D26 | D(11,4,5,6)    | 61.7914   | estimate D2E/DX2 | ! |
| ! D27 | D(12,4,5,1)    | 167.8302  | estimate D2E/DX2 | ! |
| ! D28 | D(12,4,5,6)    | -22.621   | estimate D2E/DX2 | ! |
| ! D29 | D(3,4,11,20)   | -129.4861 | estimate D2E/DX2 | ! |
| ! D30 | D(5,4,11,20)   | -14.3674  | estimate D2E/DX2 | ! |
| ! D31 | D(1,5,6,9)     | -168.2008 | estimate D2E/DX2 | ! |
| ! D32 | D(1,5,6,10)    | -50.5692  | estimate D2E/DX2 | ! |
| ! D33 | D(1,5,6,18)    | 71.1238   | estimate D2E/DX2 | ! |
| ! D34 | D(4,5,6,9)     | 24.183    | estimate D2E/DX2 | ! |
| ! D35 | D(4,5,6,10)    | 141.8145  | estimate D2E/DX2 | ! |
| ! D36 | D(4,5,6,18)    | -96.4925  | estimate D2E/DX2 | ! |
| ! D37 | D(5,6,18,19)   | -63.4253  | estimate D2E/DX2 | ! |
| ! D38 | D(5,6,18,20)   | 56.5747   | estimate D2E/DX2 | ! |
| ! D39 | D(5,6,18,21)   | 176.5747  | estimate D2E/DX2 | ! |
| ! D40 | D(9,6,18,19)   | 174.8344  | estimate D2E/DX2 | ! |
| ! D41 | D(9,6,18,20)   | -65.1656  | estimate D2E/DX2 | ! |
| ! D42 | D(9,6,18,21)   | 54.8344   | estimate D2E/DX2 | ! |
| ! D43 | D(10,6,18,19)  | 58.9206   | estimate D2E/DX2 | ! |
| ! D44 | D(10,6,18,20)  | 178.9206  | estimate D2E/DX2 | ! |
| ! D45 | D(10,6,18,21)  | -61.0794  | estimate D2E/DX2 | ! |
| ! D46 | D(4,11,20,18)  | -2.569    | estimate D2E/DX2 | ! |
| ! D47 | D(12,11,20,18) | 19.307    | estimate D2E/DX2 | ! |
| ! D48 | D(3,13,14,16)  | -177.0315 | estimate D2E/DX2 | ! |
| ! D49 | D(3,13,14,17)  | 2.7322    | estimate D2E/DX2 | ! |
| ! D50 | D(15,13,14,16) | 0.2458    | estimate D2E/DX2 | ! |
| ! D51 | D(15,13,14,17) | -179.9906 | estimate D2E/DX2 | ! |
| ! D52 | D(6,18,20,11)  | -15.523   | estimate D2E/DX2 | ! |
| ! D53 | D(19,18,20,11) | 104.4769  | estimate D2E/DX2 | ! |
| ! D54 | D(21,18,20,11) | -135.523  | estimate D2E/DX2 | ! |
| ! D55 | D(6,18,21,22)  | -38.1824  | estimate D2E/DX2 | ! |
| ! D56 | D(6,18,21,23)  | 141.8207  | estimate D2E/DX2 | ! |
| ! D57 | D(19,18,21,22) | -158.1824 | estimate D2E/DX2 | ! |

|       |                |          |                  |   |
|-------|----------------|----------|------------------|---|
| ! D58 | D(19,18,21,23) | 21.8207  | estimate D2E/DX2 | ! |
| ! D59 | D(20,18,21,22) | 81.8176  | estimate D2E/DX2 | ! |
| ! D60 | D(20,18,21,23) | -98.1793 | estimate D2E/DX2 | ! |
| ! D61 | D(18,21,23,24) | 179.9996 | estimate D2E/DX2 | ! |
| ! D62 | D(22,21,23,24) | 0.0023   | estimate D2E/DX2 | ! |

-----  
Trust Radius=3.00D-01 FncErr=1.00D-07 GrdErr=1.00D-06

Number of steps in this run= 140 maximum allowed number of steps= 144.

GradGradGradGradGradGradGradGradGradGradGradGradGradGradGradGradGradGradGrad

Input orientation:

| Center<br>Number | Atomic<br>Number | Atomic<br>Type | Coordinates (Angstroms) |           |           |
|------------------|------------------|----------------|-------------------------|-----------|-----------|
|                  |                  |                | X                       | Y         | Z         |
| 1                | 6                | 0              | -0.327286               | -2.138046 | -0.473515 |
| 2                | 6                | 0              | -1.597914               | -1.734205 | -0.689175 |
| 3                | 7                | 0              | -1.848474               | -0.670522 | 0.179118  |
| 4                | 6                | 0              | -0.708208               | -0.388612 | 0.851768  |
| 5                | 7                | 0              | 0.201498                | -1.331948 | 0.530492  |
| 6                | 6                | 0              | 1.578618                | -1.314572 | 0.997655  |
| 7                | 1                | 0              | 0.259653                | -2.893236 | -0.964483 |
| 8                | 1                | 0              | -2.330681               | -2.071776 | -1.399070 |
| 9                | 1                | 0              | 1.632276                | -0.738780 | 1.919003  |
| 10               | 1                | 0              | 1.891689                | -2.338537 | 1.220372  |
| 11               | 35               | 0              | 0.202751                | 1.989331  | -0.131890 |
| 12               | 1                | 0              | -0.650055               | 0.248241  | 1.712324  |
| 13               | 6                | 0              | -3.010509               | 0.136241  | 0.241716  |
| 14               | 6                | 0              | -4.230567               | -0.301418 | -0.048384 |
| 15               | 1                | 0              | -2.783692               | 1.161283  | 0.512286  |
| 16               | 1                | 0              | -5.063604               | 0.387460  | -0.023902 |
| 17               | 1                | 0              | -4.439067               | -1.330186 | -0.316808 |
| 18               | 6                | 0              | 2.610017                | -0.708624 | 0.027787  |
| 19               | 1                | 0              | 2.654857                | -1.301919 | -0.861533 |
| 20               | 1                | 0              | 2.319276                | 0.289890  | -0.223886 |
| 21               | 6                | 0              | 3.995327                | -0.685890 | 0.700095  |
| 22               | 8                | 0              | 4.305684                | -0.448999 | 1.866767  |
| 23               | 8                | 0              | 4.994679                | -0.978562 | -0.169991 |
| 24               | 1                | 0              | 5.855704                | -0.957388 | 0.278727  |

-----  
Distance matrix (angstroms):

|   |   |          |          |   |   |   |
|---|---|----------|----------|---|---|---|
|   |   | 1        | 2        | 3 | 4 | 5 |
| 1 | C | 0.000000 |          |   |   |   |
| 2 | C | 1.350590 | 0.000000 |   |   |   |

|    |    |          |          |          |          |          |
|----|----|----------|----------|----------|----------|----------|
| 3  | N  | 2.212141 | 1.395756 | 0.000000 |          |          |
| 4  | C  | 2.227554 | 2.230852 | 1.353565 | 0.000000 |          |
| 5  | N  | 1.391918 | 2.210720 | 2.182506 | 1.349321 | 0.000000 |
| 6  | C  | 2.544587 | 3.621028 | 3.581866 | 2.471489 | 1.454305 |
| 7  | H  | 1.075109 | 2.206740 | 3.269936 | 3.241707 | 2.162395 |
| 8  | H  | 2.207858 | 1.074641 | 2.164882 | 3.245263 | 3.268407 |
| 9  | H  | 3.394403 | 4.269378 | 3.891976 | 2.596050 | 2.080129 |
| 10 | H  | 2.798803 | 4.023545 | 4.225554 | 3.270710 | 2.084683 |
| 11 | Br | 4.175271 | 4.173450 | 3.373287 | 2.729843 | 3.386687 |
| 12 | H  | 3.252144 | 3.255108 | 2.151988 | 1.072157 | 2.149155 |
| 13 | C  | 3.589376 | 2.522013 | 1.416019 | 2.438898 | 3.543439 |
| 14 | C  | 4.334690 | 3.065021 | 2.421232 | 3.636604 | 4.586970 |
| 15 | H  | 4.229812 | 3.351631 | 2.083541 | 2.612481 | 3.889459 |
| 16 | H  | 5.386375 | 4.117652 | 3.390812 | 4.509829 | 5.566419 |
| 17 | H  | 4.193321 | 2.893793 | 2.718873 | 4.021373 | 4.717284 |
| 18 | C  | 3.304890 | 4.390049 | 4.461221 | 3.433943 | 2.538150 |
| 19 | H  | 3.121353 | 4.278159 | 4.664934 | 3.883264 | 2.820923 |
| 20 | H  | 3.600205 | 4.433715 | 4.295922 | 3.283756 | 2.772080 |
| 21 | C  | 4.708620 | 5.857762 | 5.866998 | 4.715360 | 3.852180 |
| 22 | O  | 5.458407 | 6.560264 | 6.385209 | 5.115954 | 4.405630 |
| 23 | O  | 5.455258 | 6.656037 | 6.858973 | 5.823654 | 4.856968 |
| 24 | H  | 6.339495 | 7.556236 | 7.710161 | 6.613382 | 5.672189 |
|    |    | 6        | 7        | 8        | 9        | 10       |
| 6  | C  | 0.000000 |          |          |          |          |
| 7  | H  | 2.842857 | 0.000000 |          |          |          |
| 8  | H  | 4.647609 | 2.751998 | 0.000000 |          |          |
| 9  | H  | 1.087795 | 3.852307 | 5.337744 | 0.000000 |          |
| 10 | H  | 1.093673 | 2.782952 | 4.976047 | 1.764824 | 0.000000 |
| 11 | Br | 3.752953 | 4.953374 | 4.951425 | 3.700310 | 4.838550 |
| 12 | H  | 2.814271 | 4.226315 | 4.229392 | 2.495188 | 3.659768 |
| 13 | C  | 4.872000 | 4.618074 | 2.833670 | 5.013423 | 5.577978 |
| 14 | C  | 5.988932 | 5.264868 | 2.927129 | 6.199583 | 6.575836 |
| 15 | H  | 5.039364 | 5.280333 | 3.783011 | 5.008978 | 5.882968 |
| 16 | H  | 6.932503 | 6.323348 | 3.925277 | 7.062443 | 7.573333 |
| 17 | H  | 6.159593 | 4.994054 | 2.483252 | 6.496908 | 6.592281 |
| 18 | C  | 1.540000 | 3.358770 | 5.320206 | 2.129222 | 2.143565 |
| 19 | H  | 2.148263 | 2.877480 | 5.073186 | 3.015656 | 2.447720 |
| 20 | H  | 2.148263 | 3.863007 | 5.346085 | 2.474288 | 3.029412 |
| 21 | C  | 2.514809 | 4.647414 | 6.807757 | 2.659425 | 2.725293 |
| 22 | O  | 2.990228 | 5.510049 | 7.572347 | 2.689575 | 3.132978 |
| 23 | O  | 3.625710 | 5.168913 | 7.507773 | 3.965746 | 3.662129 |
| 24 | H  | 4.351770 | 6.050526 | 8.430526 | 4.536038 | 4.302056 |
|    |    | 11       | 12       | 13       | 14       | 15       |
| 11 | Br | 0.000000 |          |          |          |          |

|    |   |           |           |          |           |          |
|----|---|-----------|-----------|----------|-----------|----------|
| 12 | H | 2.675780  | 0.000000  |          |           |          |
| 13 | C | 3.728078  | 2.783339  | 0.000000 |           |          |
| 14 | C | 4.990873  | 4.027690  | 1.328249 | 0.000000  |          |
| 15 | H | 3.165354  | 2.612689  | 1.084143 | 2.132438  | 0.000000 |
| 16 | H | 5.505647  | 4.744816  | 2.085393 | 1.081251  | 2.466637 |
| 17 | H | 5.709629  | 4.578801  | 2.122059 | 1.083461  | 3.104043 |
| 18 | C | 3.619308  | 3.792272  | 5.687695 | 6.853116  | 5.729170 |
| 19 | H | 4.168637  | 4.466563  | 5.948263 | 7.005090  | 6.126382 |
| 20 | H | 2.715924  | 3.545077  | 5.352289 | 6.578821  | 5.228915 |
| 21 | C | 4.715150  | 4.845284  | 7.068787 | 8.268819  | 7.028685 |
| 22 | O | 5.174373  | 5.006930  | 7.517312 | 8.749695  | 7.395058 |
| 23 | O | 5.636702  | 6.075457  | 8.092918 | 9.250863  | 8.096141 |
| 24 | H | 6.388086  | 6.770055  | 8.933484 | 10.112871 | 8.898454 |
|    |   | 16        | 17        | 18       | 19        | 20       |
| 16 | H | 0.000000  |           |          |           |          |
| 17 | H | 1.850986  | 0.000000  |          |           |          |
| 18 | C | 7.751679  | 7.084819  | 0.000000 |           |          |
| 19 | H | 7.945456  | 7.114864  | 1.070000 | 0.000000  |          |
| 20 | H | 7.386232  | 6.950430  | 1.070000 | 1.747303  | 0.000000 |
| 21 | C | 9.150983  | 8.519871  | 1.540000 | 2.148263  | 2.148263 |
| 22 | O | 9.594678  | 9.056222  | 2.514864 | 3.300958  | 2.977012 |
| 23 | O | 10.151670 | 9.441438  | 2.408028 | 2.461211  | 2.961360 |
| 24 | H | 11.005975 | 10.318719 | 3.264865 | 3.415307  | 3.783470 |
|    |   | 21        | 22        | 23       | 24        |          |
| 21 | C | 0.000000  |           |          |           |          |
| 22 | O | 1.230269  | 0.000000  |          |           |          |
| 23 | O | 1.356986  | 2.214392  | 0.000000 |           |          |
| 24 | H | 1.926724  | 2.276596  | 0.971165 | 0.000000  |          |

Stoichiometry C8H11BrN2O2

Framework group C1[X(C8H11BrN2O2)]

Deg. of freedom 66

Full point group C1 NOp 1

Largest Abelian subgroup C1 NOp 1

Largest concise Abelian subgroup C1 NOp 1

Standard orientation:

| Center<br>Number | Atomic<br>Number | Atomic<br>Type | Coordinates (Angstroms) |           |           |
|------------------|------------------|----------------|-------------------------|-----------|-----------|
|                  |                  |                | X                       | Y         | Z         |
| 1                | 6                | 0              | -0.669700               | -2.116625 | -0.687753 |
| 2                | 6                | 0              | -1.988414               | -1.833413 | -0.757585 |
| 3                | 7                | 0              | -2.247846               | -0.830947 | 0.178305  |
| 4                | 6                | 0              | -1.076147               | -0.461175 | 0.746221  |
| 5                | 7                | 0              | -0.118999               | -1.297821 | 0.293942  |

|    |    |   |           |           |           |
|----|----|---|-----------|-----------|-----------|
| 6  | 6  | 0 | 1.291112  | -1.160423 | 0.622139  |
| 7  | 1  | 0 | -0.067543 | -2.792208 | -1.268144 |
| 8  | 1  | 0 | -2.755210 | -2.216833 | -1.405555 |
| 9  | 1  | 0 | 1.384741  | -0.614847 | 1.558556  |
| 10 | 1  | 0 | 1.721428  | -2.155493 | 0.766309  |
| 11 | 35 | 0 | -0.501906 | 2.028417  | -0.215143 |
| 12 | 1  | 0 | -0.990154 | 0.147703  | 1.624511  |
| 13 | 6  | 0 | -3.468579 | -0.146050 | 0.392401  |
| 14 | 6  | 0 | -4.664935 | -0.692046 | 0.205675  |
| 15 | 1  | 0 | -3.313472 | 0.886295  | 0.684926  |
| 16 | 1  | 0 | -5.552664 | -0.090428 | 0.343859  |
| 17 | 1  | 0 | -4.801330 | -1.726355 | -0.086705 |
| 18 | 6  | 0 | 2.154450  | -0.421545 | -0.417239 |
| 19 | 1  | 0 | 2.163318  | -0.975887 | -1.332404 |
| 20 | 1  | 0 | 1.745670  | 0.551445  | -0.593558 |
| 21 | 6  | 0 | 3.593365  | -0.285208 | 0.114304  |
| 22 | 8  | 0 | 3.998719  | -0.059819 | 1.253799  |
| 23 | 8  | 0 | 4.520700  | -0.446647 | -0.863140 |
| 24 | 1  | 0 | 5.417562  | -0.355986 | -0.501781 |

-----

Rotational constants (GHZ):      0.8622240      0.3207182      0.2531844

Standard basis: 6-311++G(d,p) (5D, 7F)

There are 404 symmetry adapted cartesian basis functions of A symmetry.

There are 389 symmetry adapted basis functions of A symmetry.

389 basis functions, 625 primitive gaussians, 404 cartesian basis functions

62 alpha electrons      62 beta electrons

nuclear repulsion energy      1075.2182428292 Hartrees.

NAtoms= 24 NActive= 24 NUniq= 24 SFac= 1.00D+00 NAtFMM= 60 NAOKFM=F

Big=F

Integral buffers will be 131072 words long.

Raffenetti 2 integral format.

Two-electron integral symmetry is turned on.

One-electron integrals computed using PRISM.

NBasis= 389 RedAO= T EigKep= 6.28D-06 NBF= 389

NBsUse= 389 1.00D-06 EigRej= -1.00D+00 NBFU= 389

ExpMin= 3.50D-02 ExpMax= 4.40D+05 ExpMxC= 1.51D+04 IAcc=3 IRadAn= 5 AccDes=

0.00D+00

Harris functional with IExCor= 402 and IRadAn= 5 diagonalized for initial guess.

HarFok: IExCor= 402 AccDes= 0.00D+00 IRadAn= 5 IDoV= 1 UseB2=F ITyADJ=14

ICtDFT= 3500011 ScaDFX= 1.000000 1.000000 1.000000 1.000000

FoFCou: FMM=F IPFlag= 0 FMFlag= 100000 FMFlg1= 0

NFxFlg= 0 DoJE=T BraDBF=F KetDBF=T FulRan=T

wScrn= 0.000000 ICntrl= 500 IOpCl= 0 I1Cent= 200000004 NGrid=

0





(A)  
 (A) (A) (A) (A) (A) (A) (A) (A) (A) (A) (A) (A)  
 (A) (A) (A) (A) (A) (A) (A) (A) (A) (A) (A) (A)  
 (A) (A) (A) (A) (A) (A) (A) (A) (A) (A) (A) (A)  
 (A) (A) (A) (A) (A) (A) (A) (A) (A) (A) (A) (A)  
 (A) (A) (A) (A) (A) (A) (A) (A) (A) (A) (A) (A)  
 (A) (A) (A) (A) (A) (A) (A) (A) (A) (A) (A) (A)  
 (A) (A) (A)

The electronic state is 1-A.

|       |                      |            |           |           |           |           |
|-------|----------------------|------------|-----------|-----------|-----------|-----------|
| Alpha | occ. eigenvalues --  | -482.71591 | -62.36923 | -56.18742 | -56.18674 | -56.18666 |
| Alpha | occ. eigenvalues --  | -19.18309  | -19.12999 | -14.42793 | -14.42384 | -10.32983 |
| Alpha | occ. eigenvalues --  | -10.30323  | -10.25656 | -10.25541 | -10.25408 | -10.25137 |
| Alpha | occ. eigenvalues --  | -10.20622  | -10.20560 | -8.57833  | -6.40277  | -6.40050  |
| Alpha | occ. eigenvalues --  | -6.40014   | -2.51491  | -2.51437  | -2.51407  | -2.51228  |
| Alpha | occ. eigenvalues --  | -2.51228   | -1.12241  | -1.09728  | -1.02432  | -0.98774  |
| Alpha | occ. eigenvalues --  | -0.84997   | -0.81553  | -0.80179  | -0.73105  | -0.69487  |
| Alpha | occ. eigenvalues --  | -0.66265   | -0.65061  | -0.63372  | -0.61857  | -0.57690  |
| Alpha | occ. eigenvalues --  | -0.54318   | -0.52280  | -0.51082  | -0.50706  | -0.50070  |
| Alpha | occ. eigenvalues --  | -0.49552   | -0.48981  | -0.47349  | -0.46698  | -0.45511  |
| Alpha | occ. eigenvalues --  | -0.42751   | -0.41961  | -0.40674  | -0.39270  | -0.36835  |
| Alpha | occ. eigenvalues --  | -0.33642   | -0.30859  | -0.29829  | -0.29267  | -0.21266  |
| Alpha | occ. eigenvalues --  | -0.20988   | -0.20722  |           |           |           |
| Alpha | virt. eigenvalues -- | -0.06520   | -0.03688  | -0.02534  | -0.02191  | -0.01381  |
| Alpha | virt. eigenvalues -- | -0.00450   | -0.00379  | 0.00162   | 0.01015   | 0.01585   |
| Alpha | virt. eigenvalues -- | 0.02751    | 0.03221   | 0.03798   | 0.04482   | 0.05244   |
| Alpha | virt. eigenvalues -- | 0.05536    | 0.06379   | 0.06652   | 0.06825   | 0.07876   |
| Alpha | virt. eigenvalues -- | 0.08295    | 0.08822   | 0.08927   | 0.09216   | 0.09380   |
| Alpha | virt. eigenvalues -- | 0.09873    | 0.10185   | 0.10394   | 0.10878   | 0.11218   |
| Alpha | virt. eigenvalues -- | 0.11666    | 0.11980   | 0.12179   | 0.12612   | 0.12984   |
| Alpha | virt. eigenvalues -- | 0.13264    | 0.13635   | 0.13902   | 0.14086   | 0.14971   |
| Alpha | virt. eigenvalues -- | 0.15192    | 0.15386   | 0.16111   | 0.16687   | 0.17074   |
| Alpha | virt. eigenvalues -- | 0.17238    | 0.17914   | 0.18233   | 0.18612   | 0.19135   |
| Alpha | virt. eigenvalues -- | 0.20002    | 0.20401   | 0.20517   | 0.21299   | 0.21473   |
| Alpha | virt. eigenvalues -- | 0.22021    | 0.22314   | 0.22687   | 0.23362   | 0.23632   |
| Alpha | virt. eigenvalues -- | 0.24353    | 0.24667   | 0.24904   | 0.25621   | 0.26976   |
| Alpha | virt. eigenvalues -- | 0.27288    | 0.28256   | 0.28397   | 0.28802   | 0.29011   |
| Alpha | virt. eigenvalues -- | 0.29804    | 0.30598   | 0.31319   | 0.31581   | 0.32276   |
| Alpha | virt. eigenvalues -- | 0.32718    | 0.33209   | 0.33552   | 0.33877   | 0.34801   |
| Alpha | virt. eigenvalues -- | 0.35160    | 0.36060   | 0.36681   | 0.38044   | 0.38554   |
| Alpha | virt. eigenvalues -- | 0.39319    | 0.40968   | 0.41751   | 0.42797   | 0.46097   |
| Alpha | virt. eigenvalues -- | 0.46426    | 0.47556   | 0.47868   | 0.49167   | 0.49446   |
| Alpha | virt. eigenvalues -- | 0.50781    | 0.51725   | 0.52607   | 0.54338   | 0.55514   |
| Alpha | virt. eigenvalues -- | 0.56040    | 0.56639   | 0.57563   | 0.59215   | 0.59650   |
| Alpha | virt. eigenvalues -- | 0.60434    | 0.61699   | 0.62197   | 0.62940   | 0.63874   |

|                            |           |            |          |           |           |
|----------------------------|-----------|------------|----------|-----------|-----------|
| Alpha virt. eigenvalues -- | 0.64011   | 0.65296    | 0.66573  | 0.67788   | 0.67809   |
| Alpha virt. eigenvalues -- | 0.69057   | 0.69542    | 0.70467  | 0.71144   | 0.71946   |
| Alpha virt. eigenvalues -- | 0.72834   | 0.73674    | 0.73786  | 0.74587   | 0.76314   |
| Alpha virt. eigenvalues -- | 0.76862   | 0.77299    | 0.78304  | 0.79103   | 0.80931   |
| Alpha virt. eigenvalues -- | 0.82417   | 0.83704    | 0.83724  | 0.86135   | 0.87291   |
| Alpha virt. eigenvalues -- | 0.87462   | 0.89365    | 0.91437  | 0.92478   | 0.94747   |
| Alpha virt. eigenvalues -- | 0.95601   | 0.97693    | 0.98406  | 1.01022   | 1.02497   |
| Alpha virt. eigenvalues -- | 1.03086   | 1.04773    | 1.06620  | 1.08405   | 1.09345   |
| Alpha virt. eigenvalues -- | 1.10937   | 1.11621    | 1.12797  | 1.14104   | 1.15916   |
| Alpha virt. eigenvalues -- | 1.18080   | 1.19467    | 1.20563  | 1.21497   | 1.22958   |
| Alpha virt. eigenvalues -- | 1.24319   | 1.27026    | 1.29652  | 1.30696   | 1.34312   |
| Alpha virt. eigenvalues -- | 1.35283   | 1.39526    | 1.41249  | 1.45035   | 1.45845   |
| Alpha virt. eigenvalues -- | 1.46875   | 1.48302    | 1.50589  | 1.51757   | 1.53051   |
| Alpha virt. eigenvalues -- | 1.53502   | 1.53997    | 1.56452  | 1.57825   | 1.58597   |
| Alpha virt. eigenvalues -- | 1.60011   | 1.60534    | 1.61982  | 1.62728   | 1.64977   |
| Alpha virt. eigenvalues -- | 1.65574   | 1.68220    | 1.68727  | 1.69874   | 1.70965   |
| Alpha virt. eigenvalues -- | 1.72769   | 1.73607    | 1.75409  | 1.76610   | 1.78372   |
| Alpha virt. eigenvalues -- | 1.79156   | 1.79904    | 1.80609  | 1.83674   | 1.87491   |
| Alpha virt. eigenvalues -- | 1.88772   | 1.91492    | 1.93375  | 1.96078   | 1.97323   |
| Alpha virt. eigenvalues -- | 2.01056   | 2.02398    | 2.03088  | 2.05086   | 2.07463   |
| Alpha virt. eigenvalues -- | 2.09444   | 2.11054    | 2.11316  | 2.11926   | 2.12514   |
| Alpha virt. eigenvalues -- | 2.13547   | 2.18681    | 2.19967  | 2.21086   | 2.22439   |
| Alpha virt. eigenvalues -- | 2.23730   | 2.28082    | 2.32365  | 2.35228   | 2.37200   |
| Alpha virt. eigenvalues -- | 2.40127   | 2.42826    | 2.47072  | 2.48124   | 2.49871   |
| Alpha virt. eigenvalues -- | 2.51919   | 2.52987    | 2.55177  | 2.55888   | 2.58679   |
| Alpha virt. eigenvalues -- | 2.59326   | 2.60244    | 2.60471  | 2.61604   | 2.62796   |
| Alpha virt. eigenvalues -- | 2.63665   | 2.69298    | 2.70940  | 2.72140   | 2.73032   |
| Alpha virt. eigenvalues -- | 2.73947   | 2.75568    | 2.77403  | 2.78402   | 2.80787   |
| Alpha virt. eigenvalues -- | 2.81941   | 2.83264    | 2.85616  | 2.86283   | 2.87272   |
| Alpha virt. eigenvalues -- | 2.88235   | 2.91910    | 2.92662  | 2.97393   | 2.98391   |
| Alpha virt. eigenvalues -- | 3.00037   | 3.03431    | 3.06318  | 3.11048   | 3.14754   |
| Alpha virt. eigenvalues -- | 3.16085   | 3.16385    | 3.25237  | 3.30518   | 3.34388   |
| Alpha virt. eigenvalues -- | 3.39669   | 3.50301    | 3.55173  | 3.56561   | 3.58875   |
| Alpha virt. eigenvalues -- | 3.60523   | 3.63330    | 3.67575  | 3.73125   | 3.76127   |
| Alpha virt. eigenvalues -- | 3.77981   | 3.78861    | 3.84283  | 3.88909   | 3.90041   |
| Alpha virt. eigenvalues -- | 3.92646   | 4.05088    | 4.05611  | 4.08496   | 4.10560   |
| Alpha virt. eigenvalues -- | 4.19885   | 4.27118    | 4.29112  | 4.32596   | 4.34649   |
| Alpha virt. eigenvalues -- | 4.48482   | 4.69583    | 4.94758  | 4.97355   | 5.02660   |
| Alpha virt. eigenvalues -- | 5.05051   | 5.17073    | 5.20846  | 5.35299   | 5.54499   |
| Alpha virt. eigenvalues -- | 5.83728   | 6.77996    | 7.67905  | 7.72958   | 7.76784   |
| Alpha virt. eigenvalues -- | 23.71206  | 23.73760   | 23.75018 | 23.84379  | 23.86555  |
| Alpha virt. eigenvalues -- | 23.92430  | 24.17309   | 24.23182 | 35.46307  | 35.57225  |
| Alpha virt. eigenvalues -- | 48.06168  | 49.84663   | 49.98337 | 289.88566 | 289.93675 |
| Alpha virt. eigenvalues -- | 289.97127 | 1020.85690 |          |           |           |

## Condensed to atoms (all electrons):

|    |    | 1         | 2         | 3         | 4         | 5         | 6         |
|----|----|-----------|-----------|-----------|-----------|-----------|-----------|
| 1  | C  | 7.626355  | -1.903659 | 0.239146  | -0.068078 | -0.173921 | -0.017657 |
| 2  | C  | -1.903659 | 7.692729  | 0.006223  | -0.034777 | 0.318888  | -0.286461 |
| 3  | N  | 0.239146  | 0.006223  | 6.619636  | 0.246667  | -0.168637 | -0.114322 |
| 4  | C  | -0.068078 | -0.034777 | 0.246667  | 5.970167  | 0.423645  | -0.648354 |
| 5  | N  | -0.173921 | 0.318888  | -0.168637 | 0.423645  | 6.722181  | 0.007711  |
| 6  | C  | -0.017657 | -0.286461 | -0.114322 | -0.648354 | 0.007711  | 8.163472  |
| 7  | H  | 0.610011  | -0.221332 | 0.052224  | -0.002725 | -0.093340 | -0.019166 |
| 8  | H  | -0.101863 | 0.494865  | -0.075799 | 0.003167  | 0.030558  | 0.007211  |
| 9  | H  | 0.012672  | -0.004578 | 0.014240  | 0.049679  | -0.043433 | 0.222642  |
| 10 | H  | -0.019157 | -0.012528 | -0.016775 | -0.018043 | -0.051703 | 0.600094  |
| 11 | Br | 0.034993  | -0.012525 | -0.026164 | -0.060549 | -0.033472 | 0.385996  |
| 12 | H  | -0.047857 | 0.074003  | -0.053236 | 0.435634  | -0.037793 | -0.017110 |
| 13 | C  | 0.285192  | -0.373613 | 0.154979  | -0.060024 | -0.043744 | -0.130806 |
| 14 | C  | -0.131632 | 0.200425  | -0.069728 | -0.156935 | -0.019463 | -0.058503 |
| 15 | H  | 0.017604  | -0.042131 | -0.089232 | 0.045804  | 0.000367  | -0.031032 |
| 16 | H  | -0.009662 | 0.014285  | 0.026740  | -0.006980 | 0.000836  | 0.000147  |
| 17 | H  | 0.019741  | -0.021213 | -0.035849 | 0.010603  | -0.000623 | -0.001527 |
| 18 | C  | 0.030517  | 0.066083  | 0.055373  | 0.226499  | -0.031229 | -1.712723 |
| 19 | H  | 0.041998  | -0.033949 | 0.004464  | -0.003054 | -0.016344 | -0.064530 |
| 20 | H  | -0.003228 | 0.001103  | -0.002218 | -0.025544 | 0.026402  | 0.046607  |
| 21 | C  | -0.199914 | 0.155535  | -0.010052 | -0.021864 | 0.012285  | 0.344706  |
| 22 | O  | 0.004996  | -0.003190 | 0.000044  | -0.006531 | 0.003007  | 0.035070  |
| 23 | O  | -0.002741 | 0.000605  | 0.000068  | -0.001055 | -0.002257 | -0.010469 |
| 24 | H  | -0.001593 | 0.000949  | -0.000026 | 0.000202  | 0.000205  | 0.005798  |
|    |    | 7         | 8         | 9         | 10        | 11        | 12        |
| 1  | C  | 0.610011  | -0.101863 | 0.012672  | -0.019157 | 0.034993  | -0.047857 |
| 2  | C  | -0.221332 | 0.494865  | -0.004578 | -0.012528 | -0.012525 | 0.074003  |
| 3  | N  | 0.052224  | -0.075799 | 0.014240  | -0.016775 | -0.026164 | -0.053236 |
| 4  | C  | -0.002725 | 0.003167  | 0.049679  | -0.018043 | -0.060549 | 0.435634  |
| 5  | N  | -0.093340 | 0.030558  | -0.043433 | -0.051703 | -0.033472 | -0.037793 |
| 6  | C  | -0.019166 | 0.007211  | 0.222642  | 0.600094  | 0.385996  | -0.017110 |
| 7  | H  | 0.516247  | -0.010389 | 0.002895  | -0.007688 | 0.002053  | -0.003667 |
| 8  | H  | -0.010389 | 0.495233  | 0.000213  | 0.000182  | 0.000407  | 0.000728  |
| 9  | H  | 0.002895  | 0.000213  | 0.525164  | -0.049737 | -0.026162 | -0.009960 |
| 10 | H  | -0.007688 | 0.000182  | -0.049737 | 0.554326  | 0.009203  | 0.006952  |
| 11 | Br | 0.002053  | 0.000407  | -0.026162 | 0.009203  | 35.576519 | -0.076935 |
| 12 | H  | -0.003667 | 0.000728  | -0.009960 | 0.006952  | -0.076935 | 0.487031  |
| 13 | C  | 0.017223  | -0.014416 | 0.008492  | -0.010823 | -0.046145 | -0.032999 |
| 14 | C  | -0.005615 | 0.000230  | 0.000888  | -0.000632 | 0.001942  | 0.032399  |
| 15 | H  | 0.001460  | -0.001307 | 0.005236  | -0.002166 | 0.061555  | -0.032659 |
| 16 | H  | -0.000087 | 0.001547  | -0.000088 | 0.000021  | 0.001912  | 0.000002  |
| 17 | H  | 0.000262  | -0.004945 | 0.000053  | 0.000004  | -0.001323 | 0.000667  |

|    |    |           |           |           |           |           |           |
|----|----|-----------|-----------|-----------|-----------|-----------|-----------|
| 18 | C  | 0.016925  | -0.000142 | 0.116543  | -0.196086 | -0.317789 | -0.033799 |
| 19 | H  | 0.001886  | 0.000351  | 0.013953  | -0.016771 | -0.007785 | -0.000392 |
| 20 | H  | -0.000093 | 0.000077  | -0.019736 | 0.011732  | 0.081630  | 0.009242  |
| 21 | C  | -0.020291 | 0.000725  | -0.040490 | 0.012775  | 0.017615  | 0.015610  |
| 22 | O  | 0.000701  | -0.000051 | 0.000242  | 0.001605  | -0.000092 | 0.001275  |
| 23 | O  | 0.000089  | 0.000001  | -0.000071 | 0.002628  | 0.000227  | 0.000392  |
| 24 | H  | -0.000267 | 0.000000  | 0.000799  | -0.001426 | -0.000133 | 0.000114  |
|    |    | 13        | 14        | 15        | 16        | 17        | 18        |
| 1  | C  | 0.285192  | -0.131632 | 0.017604  | -0.009662 | 0.019741  | 0.030517  |
| 2  | C  | -0.373613 | 0.200425  | -0.042131 | 0.014285  | -0.021213 | 0.066083  |
| 3  | N  | 0.154979  | -0.069728 | -0.089232 | 0.026740  | -0.035849 | 0.055373  |
| 4  | C  | -0.060024 | -0.156935 | 0.045804  | -0.006980 | 0.010603  | 0.226499  |
| 5  | N  | -0.043744 | -0.019463 | 0.000367  | 0.000836  | -0.000623 | -0.031229 |
| 6  | C  | -0.130806 | -0.058503 | -0.031032 | 0.000147  | -0.001527 | -1.712723 |
| 7  | H  | 0.017223  | -0.005615 | 0.001460  | -0.000087 | 0.000262  | 0.016925  |
| 8  | H  | -0.014416 | 0.000230  | -0.001307 | 0.001547  | -0.004945 | -0.000142 |
| 9  | H  | 0.008492  | 0.000888  | 0.005236  | -0.000088 | 0.000053  | 0.116543  |
| 10 | H  | -0.010823 | -0.000632 | -0.002166 | 0.000021  | 0.000004  | -0.196086 |
| 11 | Br | -0.046145 | 0.001942  | 0.061555  | 0.001912  | -0.001323 | -0.317789 |
| 12 | H  | -0.032999 | 0.032399  | -0.032659 | 0.000002  | 0.000667  | -0.033799 |
| 13 | C  | 5.784920  | -0.035377 | 0.449636  | -0.082564 | 0.046547  | 0.051576  |
| 14 | C  | -0.035377 | 5.905951  | -0.079336 | 0.437403  | 0.333355  | 0.006106  |
| 15 | H  | 0.449636  | -0.079336 | 0.522711  | -0.009577 | 0.004896  | 0.023150  |
| 16 | H  | -0.082564 | 0.437403  | -0.009577 | 0.495089  | -0.029032 | -0.000221 |
| 17 | H  | 0.046547  | 0.333355  | 0.004896  | -0.029032 | 0.541702  | 0.000472  |
| 18 | C  | 0.051576  | 0.006106  | 0.023150  | -0.000221 | 0.000472  | 8.079069  |
| 19 | H  | 0.000660  | -0.000159 | 0.000062  | -0.000045 | 0.000018  | 0.489434  |
| 20 | H  | -0.003888 | 0.000262  | -0.007256 | 0.000162  | -0.000077 | 0.225278  |
| 21 | C  | -0.009443 | 0.002541  | -0.002962 | 0.000104  | -0.000231 | -1.004415 |
| 22 | O  | -0.000465 | -0.000024 | -0.000026 | 0.000000  | -0.000001 | -0.063925 |
| 23 | O  | -0.000137 | 0.000001  | -0.000027 | 0.000001  | -0.000003 | -0.156856 |
| 24 | H  | -0.000064 | 0.000004  | -0.000017 | 0.000000  | -0.000001 | -0.075266 |
|    |    | 19        | 20        | 21        | 22        | 23        | 24        |
| 1  | C  | 0.041998  | -0.003228 | -0.199914 | 0.004996  | -0.002741 | -0.001593 |
| 2  | C  | -0.033949 | 0.001103  | 0.155535  | -0.003190 | 0.000605  | 0.000949  |
| 3  | N  | 0.004464  | -0.002218 | -0.010052 | 0.000044  | 0.000068  | -0.000026 |
| 4  | C  | -0.003054 | -0.025544 | -0.021864 | -0.006531 | -0.001055 | 0.000202  |
| 5  | N  | -0.016344 | 0.026402  | 0.012285  | 0.003007  | -0.002257 | 0.000205  |
| 6  | C  | -0.064530 | 0.046607  | 0.344706  | 0.035070  | -0.010469 | 0.005798  |
| 7  | H  | 0.001886  | -0.000093 | -0.020291 | 0.000701  | 0.000089  | -0.000267 |
| 8  | H  | 0.000351  | 0.000077  | 0.000725  | -0.000051 | 0.000001  | 0.000000  |
| 9  | H  | 0.013953  | -0.019736 | -0.040490 | 0.000242  | -0.000071 | 0.000799  |
| 10 | H  | -0.016771 | 0.011732  | 0.012775  | 0.001605  | 0.002628  | -0.001426 |
| 11 | Br | -0.007785 | 0.081630  | 0.017615  | -0.000092 | 0.000227  | -0.000133 |

|    |   |           |           |           |           |           |           |
|----|---|-----------|-----------|-----------|-----------|-----------|-----------|
| 12 | H | -0.000392 | 0.009242  | 0.015610  | 0.001275  | 0.000392  | 0.000114  |
| 13 | C | 0.000660  | -0.003888 | -0.009443 | -0.000465 | -0.000137 | -0.000064 |
| 14 | C | -0.000159 | 0.000262  | 0.002541  | -0.000024 | 0.000001  | 0.000004  |
| 15 | H | 0.000062  | -0.007256 | -0.002962 | -0.000026 | -0.000027 | -0.000017 |
| 16 | H | -0.000045 | 0.000162  | 0.000104  | 0.000000  | 0.000001  | 0.000000  |
| 17 | H | 0.000018  | -0.000077 | -0.000231 | -0.000001 | -0.000003 | -0.000001 |
| 18 | C | 0.489434  | 0.225278  | -1.004415 | -0.063925 | -0.156856 | -0.075266 |
| 19 | H | 0.567126  | -0.025521 | -0.119696 | 0.000720  | -0.020220 | 0.003051  |
| 20 | H | -0.025521 | 0.505764  | -0.020527 | -0.000352 | -0.004822 | -0.000036 |
| 21 | C | -0.119696 | -0.020527 | 6.378316  | 0.376812  | 0.215901  | 0.079039  |
| 22 | O | 0.000720  | -0.000352 | 0.376812  | 8.073579  | -0.137211 | -0.006456 |
| 23 | O | -0.020220 | -0.004822 | 0.215901  | -0.137211 | 8.022937  | 0.244826  |
| 24 | H | 0.003051  | -0.000036 | 0.079039  | -0.006456 | 0.244826  | 0.462623  |

Mulliken charges:

|    |    | 1         |
|----|----|-----------|
| 1  | C  | -0.242264 |
| 2  | C  | -0.075738 |
| 3  | N  | 0.242233  |
| 4  | C  | -0.297554 |
| 5  | N  | 0.169871  |
| 6  | C  | -0.706796 |
| 7  | H  | 0.162688  |
| 8  | H  | 0.173418  |
| 9  | H  | 0.220546  |
| 10 | H  | 0.204011  |
| 11 | Br | -0.564979 |
| 12 | H  | 0.282358  |
| 13 | C  | 0.045284  |
| 14 | C  | -0.364105 |
| 15 | H  | 0.165246  |
| 16 | H  | 0.160006  |
| 17 | H  | 0.136504  |
| 18 | C  | 0.205425  |
| 19 | H  | 0.184745  |
| 20 | H  | 0.205040  |
| 21 | C  | -0.162079 |
| 22 | O  | -0.279727 |
| 23 | O  | -0.151808 |
| 24 | H  | 0.287677  |

Sum of Mulliken charges = 0.00000

Mulliken charges with hydrogens summed into heavy atoms:

|   |   | 1         |
|---|---|-----------|
| 1 | C | -0.079576 |
| 2 | C | 0.097680  |

3 N 0.242233  
 4 C -0.015197  
 5 N 0.169871  
 6 C -0.282239  
 11 Br -0.564979  
 13 C 0.210531  
 14 C -0.067596  
 18 C 0.595209  
 21 C -0.162079  
 22 O -0.279727  
 23 O 0.135868

Electronic spatial extent (au):  $\langle R^2 \rangle =$  4109.9235

Charge= 0.0000 electrons

Dipole moment (field-independent basis, Debye):

X= -2.4678 Y= -8.8466 Z= -0.1826

Tot= 9.1862

Quadrupole moment (field-independent basis, Debye-Ang):

XX= -71.2779 YY= -97.6478 ZZ= -94.2160  
 XY= 3.1249 XZ= -6.2496 YZ= 5.4927

Traceless Quadrupole moment (field-independent basis, Debye-Ang):

XX= 16.4360 YY= -9.9339 ZZ= -6.5021  
 XY= 3.1249 XZ= -6.2496 YZ= 5.4927

Octapole moment (field-independent basis, Debye-Ang<sup>2</sup>):

XXX= -4.1096 YYY= 5.4972 ZZZ= -4.3353  
 XYY= 8.4768  
 XXY= -0.1303 XXZ= -30.6398 XZZ= -13.1663  
 YZZ= 10.7590  
 YYZ= -10.6412 XYZ= -14.2714

Hexadecapole moment (field-independent basis, Debye-Ang<sup>3</sup>):

XXXX= -2932.8804 YYYY= -1141.4315 ZZZZ= -323.4114  
 XXXY= -28.9663  
 XXXZ= -121.4415 YYYY= -16.5268 YYYZ= 22.4962  
 ZZZX= -3.2578  
 ZZZY= 1.5313 XXYY= -781.3160 XXZZ= -794.4060  
 YYYZ= -228.7172  
 XXYZ= 21.2425 YYXZ= 17.8909 ZZXY= -6.2633

N-N= 1.075218242829D+03 E-N=-9.638283007715D+03 KE= 3.140286911055D+03

Calling FoFJK, ICntrl= 2127 FMM=F ISym2X=0 I1Cent= 0 IOpClX= 0 NMat=1 NMatS=1

NMatT=0.

\*\*\*\*\* Axes restored to original set \*\*\*\*\*

```

-----
Center      Atomic      Forces (Hartrees/Bohr)
Number      Number      X              Y              Z
-----
  
```

|    |    |              |              |              |
|----|----|--------------|--------------|--------------|
| 1  | 6  | 0.002148022  | 0.002359798  | 0.000502463  |
| 2  | 6  | -0.001725076 | 0.001226309  | -0.000409685 |
| 3  | 7  | 0.000207225  | -0.001103507 | -0.001158102 |
| 4  | 6  | 0.000702062  | -0.003535154 | 0.000305259  |
| 5  | 7  | -0.000152932 | 0.004603076  | -0.001551498 |
| 6  | 6  | 0.014975340  | -0.001536042 | 0.007369878  |
| 7  | 1  | -0.000135814 | -0.001181894 | 0.000306103  |
| 8  | 1  | -0.000168435 | -0.000027726 | 0.000056249  |
| 9  | 1  | -0.004196699 | -0.001518618 | 0.002757625  |
| 10 | 1  | -0.004862554 | -0.000325070 | 0.002356527  |
| 11 | 35 | -0.000413979 | 0.001775478  | -0.001519076 |
| 12 | 1  | 0.000236806  | -0.000072791 | -0.000083835 |
| 13 | 6  | -0.000514726 | 0.000022765  | -0.000120896 |
| 14 | 6  | 0.000134216  | 0.000129406  | 0.000020867  |
| 15 | 1  | -0.000254833 | 0.000023327  | 0.000154089  |
| 16 | 1  | -0.000003686 | 0.000015655  | 0.000021889  |
| 17 | 1  | -0.000012047 | 0.000027703  | 0.000045063  |
| 18 | 6  | 0.009635268  | -0.011670756 | 0.021720154  |
| 19 | 1  | 0.004623826  | -0.005011219 | -0.013540280 |
| 20 | 1  | -0.003536651 | 0.017149172  | -0.004177389 |
| 21 | 6  | 0.027271936  | 0.004191110  | 0.025435527  |
| 22 | 8  | -0.028802157 | -0.004966493 | -0.026770272 |
| 23 | 8  | -0.008754949 | -0.003520405 | -0.016034291 |
| 24 | 1  | -0.006400163 | 0.002945876  | 0.004313629  |

-----  
Cartesian Forces: Max 0.028802157 RMS 0.008373277

GradGradGradGradGradGradGradGradGradGradGradGradGradGradGradGradGradGradGradGrad  
Berny optimization.

FormGI is forming the generalized inverse of G from B-inverse, IUseBI=4.

Internal Forces: Max 0.033610117 RMS 0.005473375

Search for a local minimum.

Step number 1 out of a maximum of 140

All quantities printed in internal units (Hartrees-Bohrs-Radians)

Mixed Optimization -- RFO/linear search

Second derivative matrix not updated -- first step.

ITU= 0

|                 |         |         |         |         |         |
|-----------------|---------|---------|---------|---------|---------|
| Eigenvalues --- | 0.00237 | 0.00377 | 0.00640 | 0.00809 | 0.01480 |
| Eigenvalues --- | 0.01761 | 0.01964 | 0.02032 | 0.02123 | 0.02207 |
| Eigenvalues --- | 0.02261 | 0.02317 | 0.02348 | 0.02435 | 0.03021 |
| Eigenvalues --- | 0.03038 | 0.03038 | 0.03376 | 0.03700 | 0.04440 |
| Eigenvalues --- | 0.05097 | 0.05603 | 0.06628 | 0.07629 | 0.09834 |
| Eigenvalues --- | 0.11054 | 0.12467 | 0.14721 | 0.15757 | 0.15969 |
| Eigenvalues --- | 0.15982 | 0.15992 | 0.16000 | 0.16000 | 0.16000 |



|                 |         |         |         |         |         |
|-----------------|---------|---------|---------|---------|---------|
| Eigenvalues --- | 0.17619 | 0.18474 | 0.20652 | 0.22002 | 0.22812 |
| Eigenvalues --- | 0.24474 | 0.25000 | 0.25000 | 0.27824 | 0.28519 |
| Eigenvalues --- | 0.34392 | 0.35069 | 0.35498 | 0.35579 | 0.35613 |
| Eigenvalues --- | 0.35844 | 0.35939 | 0.36592 | 0.36627 | 0.36650 |
| Eigenvalues --- | 0.37230 | 0.41289 | 0.43066 | 0.43842 | 0.47825 |
| Eigenvalues --- | 0.52364 | 0.53140 | 0.53562 | 0.54471 | 0.59921 |
| Eigenvalues --- | 0.90974 |         |         |         |         |

RFO step: Lambda=-1.27208050D-02 EMin= 2.36824093D-03

Linear search not attempted -- first point.

Iteration 1 RMS(Cart)= 0.04764848 RMS(Int)= 0.00107642

Iteration 2 RMS(Cart)= 0.00162624 RMS(Int)= 0.00030124

Iteration 3 RMS(Cart)= 0.00000253 RMS(Int)= 0.00030123

Iteration 4 RMS(Cart)= 0.00000000 RMS(Int)= 0.00030123

| Variable | Old X   | -DE/DX   | Delta X<br>(Linear) | Delta X<br>(Quad) | Delta X<br>(Total) | New X   |
|----------|---------|----------|---------------------|-------------------|--------------------|---------|
| R1       | 2.55224 | 0.00152  | 0.00000             | 0.00245           | 0.00247            | 2.55472 |
| R2       | 2.63034 | -0.00062 | 0.00000             | -0.00131          | -0.00132           | 2.62902 |
| R3       | 2.03166 | 0.00062  | 0.00000             | 0.00163           | 0.00163            | 2.03329 |
| R4       | 2.63760 | -0.00154 | 0.00000             | -0.00338          | -0.00336           | 2.63424 |
| R5       | 2.03078 | 0.00009  | 0.00000             | 0.00023           | 0.00023            | 2.03101 |
| R6       | 2.55787 | 0.00077  | 0.00000             | 0.00154           | 0.00154            | 2.55941 |
| R7       | 2.67589 | 0.00066  | 0.00000             | 0.00149           | 0.00149            | 2.67738 |
| R8       | 2.54985 | -0.00010 | 0.00000             | -0.00134          | -0.00125           | 2.54860 |
| R9       | 5.15866 | 0.00087  | 0.00000             | 0.01376           | 0.01391            | 5.17257 |
| R10      | 2.02608 | -0.00001 | 0.00000             | -0.00026          | -0.00023           | 2.02586 |
| R11      | 2.74824 | 0.00206  | 0.00000             | 0.00346           | 0.00342            | 2.75166 |
| R12      | 2.05563 | 0.00132  | 0.00000             | 0.00364           | 0.00364            | 2.05927 |
| R13      | 2.06674 | -0.00061 | 0.00000             | -0.00170          | -0.00170           | 2.06504 |
| R14      | 2.91018 | 0.00214  | 0.00000             | 0.00770           | 0.00780            | 2.91798 |
| R15      | 5.05649 | 0.00085  | 0.00000             | 0.01545           | 0.01528            | 5.07177 |
| R16      | 5.13235 | -0.00108 | 0.00000             | -0.00531          | -0.00540           | 5.12695 |
| R17      | 2.51003 | -0.00018 | 0.00000             | -0.00030          | -0.00030           | 2.50972 |
| R18      | 2.04873 | 0.00001  | 0.00000             | 0.00002           | 0.00002            | 2.04875 |
| R19      | 2.04327 | 0.00001  | 0.00000             | 0.00003           | 0.00003            | 2.04330 |
| R20      | 2.04744 | -0.00003 | 0.00000             | -0.00009          | -0.00009           | 2.04735 |
| R21      | 2.02201 | 0.01423  | 0.00000             | 0.03695           | 0.03695            | 2.05896 |
| R22      | 2.02201 | 0.01743  | 0.00000             | 0.04767           | 0.04762            | 2.06962 |
| R23      | 2.91018 | -0.02073 | 0.00000             | -0.06959          | -0.06959           | 2.84059 |
| R24      | 2.32487 | -0.03361 | 0.00000             | -0.03644          | -0.03644           | 2.28844 |
| R25      | 2.56433 | -0.00352 | 0.00000             | -0.00642          | -0.00642           | 2.55791 |
| R26      | 1.83524 | -0.00362 | 0.00000             | -0.00665          | -0.00665           | 1.82859 |
| A1       | 1.87488 | 0.00092  | 0.00000             | 0.00389           | 0.00384            | 1.87872 |
| A2       | 2.27934 | -0.00062 | 0.00000             | -0.00270          | -0.00274           | 2.27660 |
| A3       | 2.12798 | -0.00027 | 0.00000             | -0.00052          | -0.00055           | 2.12743 |

|     |          |          |         |          |          |          |
|-----|----------|----------|---------|----------|----------|----------|
| A4  | 1.87279  | -0.00054 | 0.00000 | -0.00269 | -0.00268 | 1.87011  |
| A5  | 2.28241  | 0.00040  | 0.00000 | 0.00222  | 0.00218  | 2.28459  |
| A6  | 2.12696  | 0.00017  | 0.00000 | 0.00096  | 0.00093  | 2.12789  |
| A7  | 1.89298  | -0.00012 | 0.00000 | -0.00022 | -0.00020 | 1.89278  |
| A8  | 2.22561  | 0.00004  | 0.00000 | -0.00030 | -0.00030 | 2.22531  |
| A9  | 2.15398  | 0.00009  | 0.00000 | 0.00051  | 0.00049  | 2.15447  |
| A10 | 1.87971  | 0.00084  | 0.00000 | 0.00255  | 0.00247  | 1.88218  |
| A11 | 1.85821  | -0.00317 | 0.00000 | -0.00917 | -0.00897 | 1.84924  |
| A12 | 2.17520  | -0.00035 | 0.00000 | -0.00147 | -0.00148 | 2.17373  |
| A13 | 1.87362  | 0.00319  | 0.00000 | 0.00739  | 0.00746  | 1.88109  |
| A14 | 2.17708  | -0.00059 | 0.00000 | -0.00121 | -0.00116 | 2.17591  |
| A15 | 1.89705  | -0.00118 | 0.00000 | -0.00429 | -0.00423 | 1.89283  |
| A16 | 2.21225  | -0.00192 | 0.00000 | -0.00952 | -0.00950 | 2.20274  |
| A17 | 2.15745  | 0.00324  | 0.00000 | 0.01551  | 0.01539  | 2.17284  |
| A18 | 1.90192  | -0.00109 | 0.00000 | -0.01626 | -0.01576 | 1.88617  |
| A19 | 1.90212  | -0.00062 | 0.00000 | -0.01753 | -0.01671 | 1.88541  |
| A20 | 2.02260  | -0.00788 | 0.00000 | -0.04841 | -0.04800 | 1.97460  |
| A21 | 1.88492  | -0.00220 | 0.00000 | -0.00609 | -0.00784 | 1.87708  |
| A22 | 1.86723  | 0.00613  | 0.00000 | 0.04582  | 0.04509  | 1.91232  |
| A23 | 1.88066  | 0.00600  | 0.00000 | 0.04576  | 0.04465  | 1.92531  |
| A24 | 1.29449  | -0.00196 | 0.00000 | -0.01273 | -0.01287 | 1.28161  |
| A25 | 1.43494  | -0.00104 | 0.00000 | -0.00736 | -0.00753 | 1.42741  |
| A26 | 2.16085  | 0.00009  | 0.00000 | 0.00041  | 0.00041  | 2.16126  |
| A27 | 1.95846  | 0.00020  | 0.00000 | 0.00128  | 0.00128  | 1.95974  |
| A28 | 2.16303  | -0.00029 | 0.00000 | -0.00157 | -0.00158 | 2.16146  |
| A29 | 2.08611  | -0.00003 | 0.00000 | -0.00017 | -0.00017 | 2.08594  |
| A30 | 2.14569  | 0.00003  | 0.00000 | 0.00016  | 0.00016  | 2.14585  |
| A31 | 2.05138  | 0.00000  | 0.00000 | 0.00001  | 0.00001  | 2.05139  |
| A32 | 1.91063  | 0.00502  | 0.00000 | 0.04936  | 0.04936  | 1.95999  |
| A33 | 1.91063  | 0.00083  | 0.00000 | 0.00627  | 0.00610  | 1.91674  |
| A34 | 1.91063  | -0.00302 | 0.00000 | -0.01190 | -0.01195 | 1.89868  |
| A35 | 1.91063  | -0.00186 | 0.00000 | -0.01185 | -0.01270 | 1.89793  |
| A36 | 1.91063  | -0.00125 | 0.00000 | -0.01452 | -0.01460 | 1.89604  |
| A37 | 1.91063  | 0.00028  | 0.00000 | -0.01736 | -0.01735 | 1.89328  |
| A38 | 2.47788  | 0.00003  | 0.00000 | 0.00435  | 0.00417  | 2.48205  |
| A39 | 2.27021  | -0.02084 | 0.00000 | -0.07934 | -0.07935 | 2.19086  |
| A40 | 1.95991  | -0.00702 | 0.00000 | -0.02673 | -0.02674 | 1.93317  |
| A41 | 2.05307  | 0.02787  | 0.00000 | 0.10606  | 0.10605  | 2.15911  |
| A42 | 1.93047  | -0.01341 | 0.00000 | -0.07764 | -0.07764 | 1.85283  |
| D1  | 0.00659  | -0.00044 | 0.00000 | -0.00400 | -0.00403 | 0.00256  |
| D2  | 3.09906  | 0.00043  | 0.00000 | 0.00773  | 0.00771  | 3.10678  |
| D3  | -3.08688 | -0.00118 | 0.00000 | -0.02026 | -0.02022 | -3.10710 |
| D4  | 0.00560  | -0.00030 | 0.00000 | -0.00854 | -0.00849 | -0.00289 |
| D5  | -0.07474 | 0.00000  | 0.00000 | -0.00035 | -0.00032 | -0.07506 |

|     |          |          |         |          |          |          |
|-----|----------|----------|---------|----------|----------|----------|
| D6  | -3.02665 | -0.00113 | 0.00000 | -0.01195 | -0.01182 | -3.03847 |
| D7  | 3.02380  | 0.00064  | 0.00000 | 0.01411  | 0.01411  | 3.03791  |
| D8  | 0.07189  | -0.00049 | 0.00000 | 0.00251  | 0.00261  | 0.07450  |
| D9  | 0.06349  | 0.00074  | 0.00000 | 0.00702  | 0.00702  | 0.07051  |
| D10 | 3.05175  | 0.00080  | 0.00000 | 0.00695  | 0.00698  | 3.05872  |
| D11 | -3.03431 | -0.00005 | 0.00000 | -0.00349 | -0.00349 | -3.03780 |
| D12 | -0.04606 | 0.00001  | 0.00000 | -0.00356 | -0.00353 | -0.04959 |
| D13 | -0.10979 | -0.00084 | 0.00000 | -0.00756 | -0.00756 | -0.11735 |
| D14 | 1.89529  | 0.00168  | 0.00000 | -0.00233 | -0.00221 | 1.89308  |
| D15 | -2.92530 | -0.00047 | 0.00000 | -0.00700 | -0.00693 | -2.93222 |
| D16 | -3.10574 | -0.00089 | 0.00000 | -0.00741 | -0.00744 | -3.11318 |
| D17 | -1.10066 | 0.00163  | 0.00000 | -0.00218 | -0.00209 | -1.10274 |
| D18 | 0.36194  | -0.00052 | 0.00000 | -0.00685 | -0.00681 | 0.35514  |
| D19 | 0.55265  | -0.00002 | 0.00000 | -0.00030 | -0.00032 | 0.55233  |
| D20 | -2.54636 | -0.00012 | 0.00000 | -0.00318 | -0.00320 | -2.54955 |
| D21 | -2.76339 | 0.00002  | 0.00000 | -0.00045 | -0.00043 | -2.76382 |
| D22 | 0.42079  | -0.00008 | 0.00000 | -0.00333 | -0.00331 | 0.41748  |
| D23 | 0.11412  | 0.00048  | 0.00000 | 0.00475  | 0.00472  | 0.11884  |
| D24 | 3.07331  | 0.00091  | 0.00000 | 0.01267  | 0.01273  | 3.08603  |
| D25 | -1.88072 | 0.00216  | 0.00000 | 0.01049  | 0.01023  | -1.87049 |
| D26 | 1.07846  | 0.00259  | 0.00000 | 0.01841  | 0.01824  | 1.09670  |
| D27 | 2.92919  | 0.00016  | 0.00000 | 0.00413  | 0.00401  | 2.93320  |
| D28 | -0.39481 | 0.00059  | 0.00000 | 0.01205  | 0.01202  | -0.38280 |
| D29 | -2.25996 | 0.00226  | 0.00000 | 0.01347  | 0.01342  | -2.24654 |
| D30 | -0.25076 | 0.00320  | 0.00000 | 0.01546  | 0.01539  | -0.23536 |
| D31 | -2.93566 | 0.00183  | 0.00000 | 0.01076  | 0.01085  | -2.92480 |
| D32 | -0.88260 | -0.00178 | 0.00000 | -0.01575 | -0.01615 | -0.89874 |
| D33 | 1.24134  | 0.00008  | 0.00000 | -0.00334 | -0.00356 | 1.23778  |
| D34 | 0.42207  | 0.00109  | 0.00000 | 0.00009  | 0.00015  | 0.42222  |
| D35 | 2.47513  | -0.00252 | 0.00000 | -0.02643 | -0.02685 | 2.44828  |
| D36 | -1.68411 | -0.00066 | 0.00000 | -0.01402 | -0.01426 | -1.69837 |
| D37 | -1.10698 | -0.00089 | 0.00000 | -0.00404 | -0.00435 | -1.11133 |
| D38 | 0.98741  | 0.00041  | 0.00000 | 0.01551  | 0.01539  | 1.00280  |
| D39 | 3.08181  | -0.00059 | 0.00000 | -0.00920 | -0.00932 | 3.07249  |
| D40 | 3.05144  | 0.00105  | 0.00000 | 0.01409  | 0.01461  | 3.06604  |
| D41 | -1.13735 | 0.00236  | 0.00000 | 0.03365  | 0.03435  | -1.10301 |
| D42 | 0.95704  | 0.00136  | 0.00000 | 0.00894  | 0.00963  | 0.96668  |
| D43 | 1.02836  | -0.00245 | 0.00000 | -0.02460 | -0.02556 | 1.00280  |
| D44 | 3.12275  | -0.00115 | 0.00000 | -0.00504 | -0.00582 | 3.11693  |
| D45 | -1.06604 | -0.00214 | 0.00000 | -0.02975 | -0.03053 | -1.09657 |
| D46 | -0.04484 | -0.00043 | 0.00000 | 0.00898  | 0.00903  | -0.03581 |
| D47 | 0.33697  | -0.00073 | 0.00000 | 0.00646  | 0.00649  | 0.34346  |
| D48 | -3.08978 | -0.00008 | 0.00000 | -0.00215 | -0.00215 | -3.09194 |
| D49 | 0.04769  | -0.00003 | 0.00000 | -0.00085 | -0.00084 | 0.04684  |

|     |          |          |         |          |          |          |
|-----|----------|----------|---------|----------|----------|----------|
| D50 | 0.00429  | 0.00004  | 0.00000 | 0.00113  | 0.00113  | 0.00542  |
| D51 | -3.14143 | 0.00010  | 0.00000 | 0.00244  | 0.00244  | -3.13899 |
| D52 | -0.27093 | -0.00409 | 0.00000 | -0.03844 | -0.03846 | -0.30939 |
| D53 | 1.82347  | 0.00143  | 0.00000 | 0.01860  | 0.01819  | 1.84165  |
| D54 | -2.36532 | -0.00107 | 0.00000 | -0.01707 | -0.01708 | -2.38240 |
| D55 | -0.66641 | 0.00200  | 0.00000 | 0.05964  | 0.05965  | -0.60676 |
| D56 | 2.47524  | 0.00220  | 0.00000 | 0.06983  | 0.06955  | 2.54479  |
| D57 | -2.76080 | -0.00153 | 0.00000 | 0.01537  | 0.01557  | -2.74523 |
| D58 | 0.38084  | -0.00134 | 0.00000 | 0.02555  | 0.02547  | 0.40631  |
| D59 | 1.42799  | 0.00135  | 0.00000 | 0.04941  | 0.04963  | 1.47762  |
| D60 | -1.71355 | 0.00154  | 0.00000 | 0.05959  | 0.05953  | -1.65403 |
| D61 | 3.14159  | -0.00122 | 0.00000 | -0.03655 | -0.03700 | 3.10459  |
| D62 | 0.00004  | -0.00105 | 0.00000 | -0.02775 | -0.02731 | -0.02727 |

| Item                 | Value    | Threshold | Converged? |
|----------------------|----------|-----------|------------|
| Maximum Force        | 0.033610 | 0.000450  | NO         |
| RMS Force            | 0.005473 | 0.000300  | NO         |
| Maximum Displacement | 0.222496 | 0.001800  | NO         |
| RMS Displacement     | 0.047764 | 0.001200  | NO         |

Predicted change in Energy=-6.838759D-03

GradGradGradGradGradGradGradGradGradGradGradGradGradGradGradGradGradGrad

Input orientation:

| Center Number | Atomic Number | Atomic Type | Coordinates (Angstroms) |           |           |
|---------------|---------------|-------------|-------------------------|-----------|-----------|
|               |               |             | X                       | Y         | Z         |
| 1             | 6             | 0           | -0.296910               | -2.130076 | -0.451852 |
| 2             | 6             | 0           | -1.564337               | -1.723094 | -0.687690 |
| 3             | 7             | 0           | -1.824150               | -0.663801 | 0.180397  |
| 4             | 6             | 0           | -0.690011               | -0.382968 | 0.865387  |
| 5             | 7             | 0           | 0.222216                | -1.328019 | 0.559436  |
| 6             | 6             | 0           | 1.594746                | -1.337370 | 1.045591  |
| 7             | 1             | 0           | 0.289728                | -2.896801 | -0.926934 |
| 8             | 1             | 0           | -2.290374               | -2.061879 | -1.404076 |
| 9             | 1             | 0           | 1.628607                | -0.766725 | 1.973334  |
| 10            | 1             | 0           | 1.862069                | -2.369803 | 1.283861  |
| 11            | 35            | 0           | 0.214921                | 2.003452  | -0.123747 |
| 12            | 1             | 0           | -0.641316               | 0.256121  | 1.724722  |
| 13            | 6             | 0           | -2.988356               | 0.141877  | 0.233850  |
| 14            | 6             | 0           | -4.204932               | -0.295647 | -0.070021 |
| 15            | 1             | 0           | -2.767203               | 1.165906  | 0.512853  |
| 16            | 1             | 0           | -5.038939               | 0.392217  | -0.049615 |
| 17            | 1             | 0           | -4.409945               | -1.323389 | -0.344786 |
| 18            | 6             | 0           | 2.600177                | -0.742756 | 0.035699  |

|    |   |   |          |           |           |
|----|---|---|----------|-----------|-----------|
| 19 | 1 | 0 | 2.657701 | -1.326194 | -0.882678 |
| 20 | 1 | 0 | 2.310593 | 0.282908  | -0.216519 |
| 21 | 6 | 0 | 3.962342 | -0.710749 | 0.670531  |
| 22 | 8 | 0 | 4.187944 | -0.504185 | 1.842251  |
| 23 | 8 | 0 | 4.927141 | -0.934204 | -0.252201 |
| 24 | 1 | 0 | 5.770257 | -0.865599 | 0.217678  |

-----  
Distance matrix (angstroms):

|    |    | 1        | 2        | 3        | 4        | 5        |
|----|----|----------|----------|----------|----------|----------|
| 1  | C  | 0.000000 |          |          |          |          |
| 2  | C  | 1.351897 | 0.000000 |          |          |          |
| 3  | N  | 2.209562 | 1.393979 | 0.000000 |          |          |
| 4  | C  | 2.223068 | 2.229895 | 1.354382 | 0.000000 |          |
| 5  | N  | 1.391220 | 2.214313 | 2.184598 | 1.348660 | 0.000000 |
| 6  | C  | 2.539504 | 3.623928 | 3.590419 | 2.482634 | 1.456116 |
| 7  | H  | 1.075971 | 2.207348 | 3.268172 | 3.239082 | 2.162159 |
| 8  | H  | 2.210267 | 1.074762 | 2.163918 | 3.245052 | 3.272161 |
| 9  | H  | 3.383470 | 4.265042 | 3.891882 | 2.598231 | 2.071737 |
| 10 | H  | 2.780532 | 4.005685 | 4.209072 | 3.261249 | 2.073457 |
| 11 | Br | 4.177999 | 4.167846 | 3.371135 | 2.737205 | 3.400808 |
| 12 | H  | 3.248081 | 3.254073 | 2.151812 | 1.072037 | 2.147808 |
| 13 | C  | 3.588293 | 2.520949 | 1.416810 | 2.440634 | 3.546037 |
| 14 | C  | 4.334001 | 3.064614 | 2.422059 | 3.638308 | 4.589297 |
| 15 | H  | 4.230426 | 3.351792 | 2.085115 | 2.614961 | 3.893387 |
| 16 | H  | 5.386149 | 4.117589 | 3.391600 | 4.511244 | 5.568654 |
| 17 | H  | 4.192763 | 2.893929 | 2.719781 | 4.023285 | 4.719592 |
| 18 | C  | 3.248919 | 4.339070 | 4.427396 | 3.412208 | 2.504302 |
| 19 | H  | 3.092178 | 4.245134 | 4.653588 | 3.892631 | 2.830421 |
| 20 | H  | 3.560469 | 4.388751 | 4.260270 | 3.258456 | 2.749275 |
| 21 | C  | 4.627684 | 5.780466 | 5.807403 | 4.667954 | 3.792348 |
| 22 | O  | 5.293425 | 6.401178 | 6.239593 | 4.976284 | 4.248684 |
| 23 | O  | 5.362898 | 6.553723 | 6.770539 | 5.753717 | 4.790633 |
| 24 | H  | 6.233593 | 7.439843 | 7.597179 | 6.510570 | 5.577759 |
|    |    | 6        | 7        | 8        | 9        | 10       |
| 6  | C  | 0.000000 |          |          |          |          |
| 7  | H  | 2.832976 | 0.000000 |          |          |          |
| 8  | H  | 4.649725 | 2.753486 | 0.000000 |          |          |
| 9  | H  | 1.089720 | 3.839450 | 5.333173 | 0.000000 |          |
| 10 | H  | 1.092773 | 2.763620 | 4.956068 | 1.760607 | 0.000000 |
| 11 | Br | 3.798995 | 4.966204 | 4.943953 | 3.751019 | 4.880555 |
| 12 | H  | 2.828499 | 4.223629 | 4.228699 | 2.502114 | 3.654692 |
| 13 | C  | 4.883843 | 4.618097 | 2.833112 | 5.016744 | 5.562166 |
| 14 | C  | 5.997169 | 5.263294 | 2.926570 | 6.198983 | 6.553138 |
| 15 | H  | 5.057351 | 5.284260 | 3.784254 | 5.019085 | 5.875871 |

|    |    |           |           |          |          |          |
|----|----|-----------|-----------|----------|----------|----------|
| 16 | H  | 6.942387  | 6.323134  | 3.925782 | 7.063402 | 7.551876 |
| 17 | H  | 6.163575  | 4.990135  | 2.481943 | 6.492123 | 6.563965 |
| 18 | C  | 1.544130  | 3.302233  | 5.265978 | 2.167706 | 2.179448 |
| 19 | H  | 2.201867  | 2.841841  | 5.029567 | 3.086882 | 2.532990 |
| 20 | H  | 2.175007  | 3.833945  | 5.298794 | 2.522358 | 3.080452 |
| 21 | C  | 2.477666  | 4.562763  | 6.725028 | 2.673340 | 2.745865 |
| 22 | O  | 2.837876  | 5.346876  | 7.411724 | 2.576105 | 3.033484 |
| 23 | O  | 3.598842  | 5.080615  | 7.395336 | 3.982635 | 3.716866 |
| 24 | H  | 4.282861  | 5.955847  | 8.308727 | 4.499485 | 4.321262 |
|    |    | 11        | 12        | 13       | 14       | 15       |
| 11 | Br | 0.000000  |           |          |          |          |
| 12 | H  | 2.683868  | 0.000000  |          |          |          |
| 13 | C  | 3.722140  | 2.782868  | 0.000000 |          |          |
| 14 | C  | 4.982353  | 4.028016  | 1.328089 | 0.000000 |          |
| 15 | H  | 3.162248  | 2.610696  | 1.084152 | 2.131418 | 0.000000 |
| 16 | H  | 5.495873  | 4.744037  | 2.085165 | 1.081269 | 2.464903 |
| 17 | H  | 5.701413  | 4.580424  | 2.121965 | 1.083411 | 3.103342 |
| 18 | C  | 3.640951  | 3.789172  | 5.661585 | 6.820600 | 5.716593 |
| 19 | H  | 4.198773  | 4.492858  | 5.939683 | 6.987000 | 6.130877 |
| 20 | H  | 2.713065  | 3.533115  | 5.319924 | 6.542802 | 5.205352 |
| 21 | C  | 4.694777  | 4.820770  | 7.016400 | 8.211278 | 6.988095 |
| 22 | O  | 5.092967  | 4.890157  | 7.382658 | 8.610496 | 7.275341 |
| 23 | O  | 5.554399  | 6.027671  | 8.003081 | 9.156184 | 8.012410 |
| 24 | H  | 6.261772  | 6.681146  | 8.816382 | 9.995599 | 8.780796 |
|    |    | 16        | 17        | 18       | 19       | 20       |
| 16 | H  | 0.000000  |           |          |          |          |
| 17 | H  | 1.850963  | 0.000000  |          |          |          |
| 18 | C  | 7.723440  | 7.044409  | 0.000000 |          |          |
| 19 | H  | 7.930019  | 7.088085  | 1.089553 | 0.000000 |          |
| 20 | H  | 7.352240  | 6.911025  | 1.095198 | 1.775798 | 0.000000 |
| 21 | C  | 9.097154  | 8.455849  | 1.503173 | 2.119744 | 2.121906 |
| 22 | O  | 9.461399  | 8.909429  | 2.416930 | 3.231498 | 2.895254 |
| 23 | O  | 10.056003 | 9.345652  | 2.352510 | 2.387784 | 2.885993 |
| 24 | H  | 10.885416 | 10.206000 | 3.177675 | 3.333307 | 3.671086 |
|    |    | 21        | 22        | 23       | 24       |          |
| 21 | C  | 0.000000  |           |          |          |          |
| 22 | O  | 1.210988  | 0.000000  |          |          |          |
| 23 | O  | 1.353590  | 2.262313  | 0.000000 |          |          |
| 24 | H  | 1.870190  | 2.296426  | 0.967646 | 0.000000 |          |

Stoichiometry C8H11BrN2O2

Framework group C1[X(C8H11BrN2O2)]

Deg. of freedom 66

Full point group C1 NOp 1

Largest Abelian subgroup C1 NOp 1

Largest concise Abelian subgroup C1 NOp 1

Standard orientation:

| Center<br>Number | Atomic<br>Number | Atomic<br>Type | Coordinates (Angstroms) |           |           |
|------------------|------------------|----------------|-------------------------|-----------|-----------|
|                  |                  |                | X                       | Y         | Z         |
| 1                | 6                | 0              | -0.622043               | -2.107808 | -0.683712 |
| 2                | 6                | 0              | -1.941234               | -1.827523 | -0.777535 |
| 3                | 7                | 0              | -2.219112               | -0.837708 | 0.163862  |
| 4                | 6                | 0              | -1.056682               | -0.466902 | 0.751749  |
| 5                | 7                | 0              | -0.088625               | -1.297247 | 0.313257  |
| 6                | 6                | 0              | 1.319331                | -1.181540 | 0.666168  |
| 7                | 1                | 0              | -0.011117               | -2.788436 | -1.250482 |
| 8                | 1                | 0              | -2.696948               | -2.211592 | -1.438217 |
| 9                | 1                | 0              | 1.387452                | -0.648693 | 1.614283  |
| 10               | 1                | 0              | 1.711932                | -2.188848 | 0.825378  |
| 11               | 35               | 0              | -0.500286               | 2.039875  | -0.196294 |
| 12               | 1                | 0              | -0.987592               | 0.138297  | 1.633919  |
| 13               | 6                | 0              | -3.447632               | -0.162154 | 0.368105  |
| 14               | 6                | 0              | -4.637944               | -0.712834 | 0.158990  |
| 15               | 1                | 0              | -3.304409               | 0.867296  | 0.676498  |
| 16               | 1                | 0              | -5.530984               | -0.118169 | 0.293136  |
| 17               | 1                | 0              | -4.764394               | -1.744443 | -0.146907 |
| 18               | 6                | 0              | 2.154138                | -0.443643 | -0.402918 |
| 19               | 1                | 0              | 2.178704                | -0.979945 | -1.351022 |
| 20               | 1                | 0              | 1.738798                | 0.555157  | -0.574230 |
| 21               | 6                | 0              | 3.562438                | -0.293980 | 0.100890  |
| 22               | 8                | 0              | 3.881399                | -0.112575 | 1.254947  |
| 23               | 8                | 0              | 4.448324                | -0.376739 | -0.919190 |
| 24               | 1                | 0              | 5.322718                | -0.238750 | -0.528379 |

Rotational constants (GHZ): 0.8538422 0.3284617 0.2577587

Standard basis: 6-311++G(d,p) (5D, 7F)

There are 404 symmetry adapted cartesian basis functions of A symmetry.

There are 389 symmetry adapted basis functions of A symmetry.

389 basis functions, 625 primitive gaussians, 404 cartesian basis functions

62 alpha electrons 62 beta electrons

nuclear repulsion energy 1079.3291599661 Hartrees.

NAtoms= 24 NActive= 24 NUniq= 24 SFac= 1.00D+00 NAtFMM= 60 NAOKFM=F

Big=F

Integral buffers will be 131072 words long.

Raffenetti 2 integral format.

Two-electron integral symmetry is turned on.

One-electron integrals computed using PRISM.

NBasis= 389 RedAO= T EigKep= 6.23D-06 NBF= 389  
 NBsUse= 389 1.00D-06 EigRej= -1.00D+00 NBFU= 389  
 Initial guess from the checkpoint file: "./cooh.chk"  
 B after Tr= 0.000000 0.000000 0.000000  
 Rot= 0.999985 -0.005028 0.001005 -0.001711 Ang= -0.62 deg.  
 ExpMin= 3.50D-02 ExpMax= 4.40D+05 ExpMxC= 1.51D+04 IAcc=3 IRadAn= 5 AccDes=  
 0.00D+00  
 Harris functional with IExCor= 402 and IRadAn= 5 diagonalized for initial guess.  
 HarFok: IExCor= 402 AccDes= 0.00D+00 IRadAn= 5 IDoV= 1 UseB2=F ITyADJ=14  
 ICtDFT= 3500011 ScaDFX= 1.000000 1.000000 1.000000 1.000000  
 FoFCou: FMM=F IPFlag= 0 FMFlag= 100000 FMFlg1= 0  
 NFxFlg= 0 DoJE=T BraDBF=F KetDBF=T FulRan=T  
 wScrn= 0.000000 ICntrl= 500 IOpCl= 0 l1Cent= 200000004 NGrid=  
 0  
 NMat0= 1 NMatS0= 1 NMatT0= 0 NMatD0= 1 NMtDS0= 0  
 NMtDT0= 0  
 Petite list used in FoFCou.  
 Keep R1 ints in memory in canonical form, NReq=2910765817.  
 Requested convergence on RMS density matrix=1.00D-08 within 128 cycles.  
 Requested convergence on MAX density matrix=1.00D-06.  
 Requested convergence on energy=1.00D-06.  
 No special actions if energy rises.  
 SCF Done: E(RB3LYP) = -3145.73012479 A.U. after 13 cycles  
 NFock= 13 Conv=0.48D-08 -V/T= 2.0017  
 Calling FoFJK, ICntrl= 2127 FMM=F ISym2X=0 l1Cent= 0 IOpClX= 0 NMat=1 NMatS=1  
 NMatT=0.

\*\*\*\*\* Axes restored to original set \*\*\*\*\*

| Center<br>Number | Atomic<br>Number | Forces (Hartrees/Bohr) |              |              |
|------------------|------------------|------------------------|--------------|--------------|
|                  |                  | X                      | Y            | Z            |
| 1                | 6                | 0.001347054            | 0.000727614  | -0.000239425 |
| 2                | 6                | -0.000487444           | 0.000101073  | 0.000355180  |
| 3                | 7                | 0.000203941            | 0.000484071  | -0.001080679 |
| 4                | 6                | 0.000915845            | -0.003952013 | 0.001749388  |
| 5                | 7                | -0.005759257           | 0.002357219  | -0.002001749 |
| 6                | 6                | 0.005706208            | 0.001275699  | -0.001088823 |
| 7                | 1                | -0.000234576           | -0.000374700 | 0.000271372  |
| 8                | 1                | 0.000046703            | 0.000039427  | -0.000009179 |
| 9                | 1                | -0.000033812           | -0.000002232 | -0.000814071 |
| 10               | 1                | -0.000780651           | 0.000057159  | 0.000346232  |
| 11               | 35               | -0.000014289           | 0.001677181  | -0.001370463 |
| 12               | 1                | 0.000248513            | 0.000224560  | -0.000100282 |
| 13               | 6                | 0.000127438            | 0.000124695  | 0.000039314  |



|    |   |              |              |              |
|----|---|--------------|--------------|--------------|
| 14 | 6 | 0.000033491  | -0.000061896 | 0.000023176  |
| 15 | 1 | -0.000070010 | -0.000026672 | 0.000028018  |
| 16 | 1 | 0.000010858  | 0.000011011  | 0.000002281  |
| 17 | 1 | -0.000015645 | 0.000014204  | -0.000023342 |
| 18 | 6 | -0.002631985 | -0.005370618 | 0.006746027  |
| 19 | 1 | -0.002302050 | 0.000126415  | -0.001249352 |
| 20 | 1 | -0.002136210 | 0.001270835  | -0.000407513 |
| 21 | 6 | -0.001523567 | 0.003055227  | 0.002591365  |
| 22 | 8 | 0.001461541  | -0.003085585 | -0.008208852 |
| 23 | 8 | 0.002068770  | 0.000904707  | 0.005281338  |
| 24 | 1 | 0.003819134  | 0.000422618  | -0.000839960 |

-----  
Cartesian Forces: Max 0.008208852 RMS 0.002200841

GradGradGradGradGradGradGradGradGradGradGradGradGradGradGradGradGradGradGradGrad  
Berny optimization.

Using GEDIIS/GDIIS optimizer.

FormGI is forming the generalized inverse of G from B-inverse, IUseBI=4.

Internal Forces: Max 0.008199739 RMS 0.001524577

Search for a local minimum.

Step number 2 out of a maximum of 140

All quantities printed in internal units (Hartrees-Bohrs-Radians)

Mixed Optimization -- RFO/linear search

Update second derivatives using D2CorX and points 1 2

DE= -5.99D-03 DEPred=-6.84D-03 R= 8.76D-01

TightC=F SS= 1.41D+00 RLast= 2.69D-01 DXNew= 5.0454D-01 8.0833D-01

Trust test= 8.76D-01 RLast= 2.69D-01 DXMaxT set to 5.05D-01

ITU= 1 0

Use linear search instead of GDIIS.

|                 |         |         |         |         |         |
|-----------------|---------|---------|---------|---------|---------|
| Eigenvalues --- | 0.00235 | 0.00383 | 0.00727 | 0.00817 | 0.01480 |
| Eigenvalues --- | 0.01759 | 0.01963 | 0.02027 | 0.02122 | 0.02204 |
| Eigenvalues --- | 0.02254 | 0.02317 | 0.02346 | 0.02432 | 0.03038 |
| Eigenvalues --- | 0.03038 | 0.03068 | 0.03382 | 0.03712 | 0.04443 |
| Eigenvalues --- | 0.04961 | 0.05552 | 0.06690 | 0.07887 | 0.09603 |
| Eigenvalues --- | 0.10788 | 0.12340 | 0.14714 | 0.15767 | 0.15983 |
| Eigenvalues --- | 0.15991 | 0.15993 | 0.16000 | 0.16000 | 0.16527 |
| Eigenvalues --- | 0.17712 | 0.18072 | 0.20661 | 0.22002 | 0.22820 |
| Eigenvalues --- | 0.24112 | 0.24475 | 0.27079 | 0.27870 | 0.32861 |
| Eigenvalues --- | 0.34388 | 0.35069 | 0.35196 | 0.35498 | 0.35579 |
| Eigenvalues --- | 0.35764 | 0.35844 | 0.36496 | 0.36596 | 0.36650 |
| Eigenvalues --- | 0.37593 | 0.41372 | 0.43066 | 0.43825 | 0.47837 |
| Eigenvalues --- | 0.52379 | 0.53367 | 0.53732 | 0.54481 | 0.59921 |
| Eigenvalues --- | 0.86643 |         |         |         |         |

RFO step: Lambda=-1.84727891D-03 EMin= 2.35200581D-03

Quartic linear search produced a step of -0.06087.

Iteration 1 RMS(Cart)= 0.06288918 RMS(Int)= 0.00372824  
 Iteration 2 RMS(Cart)= 0.00523158 RMS(Int)= 0.00005054  
 Iteration 3 RMS(Cart)= 0.00002036 RMS(Int)= 0.00004832  
 Iteration 4 RMS(Cart)= 0.00000000 RMS(Int)= 0.00004832

| Variable | Old X   | -DE/DX   | Delta X<br>(Linear) | Delta X<br>(Quad) | Delta X<br>(Total) | New X   |
|----------|---------|----------|---------------------|-------------------|--------------------|---------|
| R1       | 2.55472 | 0.00022  | -0.00015            | 0.00082           | 0.00068            | 2.55539 |
| R2       | 2.62902 | -0.00052 | 0.00008             | -0.00122          | -0.00114           | 2.62788 |
| R3       | 2.03329 | 0.00002  | -0.00010            | 0.00030           | 0.00020            | 2.03349 |
| R4       | 2.63424 | -0.00040 | 0.00020             | -0.00126          | -0.00105           | 2.63319 |
| R5       | 2.03101 | -0.00004 | -0.00001            | -0.00006          | -0.00007           | 2.03093 |
| R6       | 2.55941 | 0.00009  | -0.00009            | 0.00032           | 0.00023            | 2.55964 |
| R7       | 2.67738 | -0.00003 | -0.00009            | 0.00015           | 0.00006            | 2.67745 |
| R8       | 2.54860 | -0.00162 | 0.00008             | -0.00364          | -0.00356           | 2.54504 |
| R9       | 5.17257 | 0.00081  | -0.00085            | 0.01780           | 0.01698            | 5.18955 |
| R10      | 2.02586 | 0.00023  | 0.00001             | 0.00027           | 0.00028            | 2.02613 |
| R11      | 2.75166 | 0.00412  | -0.00021            | 0.01118           | 0.01097            | 2.76263 |
| R12      | 2.05927 | -0.00070 | -0.00022            | -0.00129          | -0.00151           | 2.05777 |
| R13      | 2.06504 | -0.00017 | 0.00010             | -0.00072          | -0.00061           | 2.06443 |
| R14      | 2.91798 | -0.00337 | -0.00048            | -0.00976          | -0.01024           | 2.90775 |
| R15      | 5.07177 | 0.00034  | -0.00093            | 0.01317           | 0.01222            | 5.08400 |
| R16      | 5.12695 | -0.00006 | 0.00033             | 0.00781           | 0.00813            | 5.13508 |
| R17      | 2.50972 | -0.00002 | 0.00002             | -0.00007          | -0.00005           | 2.50967 |
| R18      | 2.04875 | -0.00003 | 0.00000             | -0.00008          | -0.00008           | 2.04867 |
| R19      | 2.04330 | 0.00000  | 0.00000             | 0.00000           | 0.00000            | 2.04330 |
| R20      | 2.04735 | 0.00000  | 0.00001             | -0.00003          | -0.00002           | 2.04733 |
| R21      | 2.05896 | 0.00086  | -0.00225            | 0.00783           | 0.00558            | 2.06454 |
| R22      | 2.06962 | 0.00231  | -0.00290            | 0.01397           | 0.01106            | 2.08068 |
| R23      | 2.84059 | 0.00480  | 0.00424             | 0.00485           | 0.00909            | 2.84967 |
| R24      | 2.28844 | -0.00820 | 0.00222             | -0.01393          | -0.01171           | 2.27673 |
| R25      | 2.55791 | 0.00096  | 0.00039             | 0.00067           | 0.00107            | 2.55898 |
| R26      | 1.82859 | 0.00295  | 0.00040             | 0.00413           | 0.00454            | 1.83312 |
| A1       | 1.87872 | -0.00022 | -0.00023            | 0.00019           | -0.00006           | 1.87866 |
| A2       | 2.27660 | 0.00000  | 0.00017             | -0.00071          | -0.00056           | 2.27604 |
| A3       | 2.12743 | 0.00022  | 0.00003             | 0.00085           | 0.00087            | 2.12830 |
| A4       | 1.87011 | -0.00024 | 0.00016             | -0.00088          | -0.00071           | 1.86940 |
| A5       | 2.28459 | 0.00011  | -0.00013            | 0.00051           | 0.00038            | 2.28497 |
| A6       | 2.12789 | 0.00013  | -0.00006            | 0.00041           | 0.00036            | 2.12824 |
| A7       | 1.89278 | -0.00002 | 0.00001             | 0.00017           | 0.00018            | 1.89296 |
| A8       | 2.22531 | 0.00016  | 0.00002             | 0.00051           | 0.00053            | 2.22584 |
| A9       | 2.15447 | -0.00012 | -0.00003            | -0.00026          | -0.00029           | 2.15418 |
| A10      | 1.88218 | 0.00001  | -0.00015            | 0.00069           | 0.00051            | 1.88269 |
| A11      | 1.84924 | -0.00078 | 0.00055             | -0.00870          | -0.00812           | 1.84112 |

|     |          |          |          |          |          |          |
|-----|----------|----------|----------|----------|----------|----------|
| A12 | 2.17373  | 0.00008  | 0.00009  | 0.00101  | 0.00107  | 2.17479  |
| A13 | 1.88109  | 0.00056  | -0.00045 | -0.00102 | -0.00147 | 1.87961  |
| A14 | 2.17591  | 0.00007  | 0.00007  | 0.00228  | 0.00233  | 2.17825  |
| A15 | 1.89283  | 0.00051  | 0.00026  | 0.00056  | 0.00084  | 1.89367  |
| A16 | 2.20274  | -0.00074 | 0.00058  | -0.00472 | -0.00410 | 2.19864  |
| A17 | 2.17284  | 0.00025  | -0.00094 | 0.00518  | 0.00417  | 2.17701  |
| A18 | 1.88617  | -0.00011 | 0.00096  | -0.00285 | -0.00196 | 1.88421  |
| A19 | 1.88541  | 0.00003  | 0.00102  | -0.00591 | -0.00485 | 1.88056  |
| A20 | 1.97460  | -0.00061 | 0.00292  | -0.01202 | -0.00913 | 1.96547  |
| A21 | 1.87708  | -0.00007 | 0.00048  | 0.00046  | 0.00099  | 1.87806  |
| A22 | 1.91232  | 0.00009  | -0.00274 | 0.00574  | 0.00304  | 1.91536  |
| A23 | 1.92531  | 0.00067  | -0.00272 | 0.01465  | 0.01194  | 1.93725  |
| A24 | 1.28161  | -0.00117 | 0.00078  | -0.00907 | -0.00829 | 1.27333  |
| A25 | 1.42741  | -0.00119 | 0.00046  | -0.00864 | -0.00817 | 1.41924  |
| A26 | 2.16126  | -0.00007 | -0.00002 | -0.00020 | -0.00023 | 2.16103  |
| A27 | 1.95974  | 0.00009  | -0.00008 | 0.00071  | 0.00063  | 1.96037  |
| A28 | 2.16146  | -0.00003 | 0.00010  | -0.00044 | -0.00034 | 2.16111  |
| A29 | 2.08594  | -0.00004 | 0.00001  | -0.00023 | -0.00022 | 2.08573  |
| A30 | 2.14585  | 0.00004  | -0.00001 | 0.00025  | 0.00024  | 2.14609  |
| A31 | 2.05139  | 0.00000  | 0.00000  | -0.00002 | -0.00002 | 2.05137  |
| A32 | 1.95999  | -0.00063 | -0.00300 | 0.00374  | 0.00041  | 1.96040  |
| A33 | 1.91674  | -0.00103 | -0.00037 | -0.00783 | -0.00817 | 1.90857  |
| A34 | 1.89868  | 0.00252  | 0.00073  | 0.01820  | 0.01880  | 1.91748  |
| A35 | 1.89793  | -0.00055 | 0.00077  | -0.01822 | -0.01745 | 1.88048  |
| A36 | 1.89604  | 0.00040  | 0.00089  | 0.01336  | 0.01408  | 1.91012  |
| A37 | 1.89328  | -0.00071 | 0.00106  | -0.00950 | -0.00831 | 1.88498  |
| A38 | 2.48205  | 0.00197  | -0.00025 | 0.01192  | 0.01162  | 2.49367  |
| A39 | 2.19086  | 0.00003  | 0.00483  | -0.01218 | -0.00737 | 2.18349  |
| A40 | 1.93317  | 0.00712  | 0.00163  | 0.02216  | 0.02377  | 1.95694  |
| A41 | 2.15911  | -0.00715 | -0.00646 | -0.01006 | -0.01653 | 2.14258  |
| A42 | 1.85283  | 0.00458  | 0.00473  | 0.01422  | 0.01895  | 1.87178  |
| D1  | 0.00256  | -0.00009 | 0.00025  | 0.00123  | 0.00147  | 0.00402  |
| D2  | 3.10678  | -0.00007 | -0.00047 | 0.00266  | 0.00219  | 3.10897  |
| D3  | -3.10710 | -0.00020 | 0.00123  | -0.01081 | -0.00957 | -3.11667 |
| D4  | -0.00289 | -0.00017 | 0.00052  | -0.00937 | -0.00884 | -0.01173 |
| D5  | -0.07506 | 0.00022  | 0.00002  | 0.00221  | 0.00224  | -0.07282 |
| D6  | -3.03847 | 0.00006  | 0.00072  | -0.00454 | -0.00380 | -3.04227 |
| D7  | 3.03791  | 0.00031  | -0.00086 | 0.01297  | 0.01211  | 3.05002  |
| D8  | 0.07450  | 0.00015  | -0.00016 | 0.00622  | 0.00608  | 0.08058  |
| D9  | 0.07051  | -0.00013 | -0.00043 | -0.00435 | -0.00477 | 0.06574  |
| D10 | 3.05872  | 0.00001  | -0.00042 | -0.00137 | -0.00178 | 3.05695  |
| D11 | -3.03780 | -0.00016 | 0.00021  | -0.00564 | -0.00542 | -3.04323 |
| D12 | -0.04959 | -0.00002 | 0.00021  | -0.00265 | -0.00243 | -0.05201 |
| D13 | -0.11735 | 0.00026  | 0.00046  | 0.00566  | 0.00612  | -0.11123 |

|     |          |          |          |          |          |          |
|-----|----------|----------|----------|----------|----------|----------|
| D14 | 1.89308  | 0.00052  | 0.00013  | 0.00055  | 0.00072  | 1.89380  |
| D15 | -2.93222 | -0.00025 | 0.00042  | -0.00701 | -0.00657 | -2.93879 |
| D16 | -3.11318 | 0.00010  | 0.00045  | 0.00274  | 0.00319  | -3.10999 |
| D17 | -1.10274 | 0.00036  | 0.00013  | -0.00237 | -0.00222 | -1.10496 |
| D18 | 0.35514  | -0.00041 | 0.00041  | -0.00993 | -0.00950 | 0.34563  |
| D19 | 0.55233  | -0.00009 | 0.00002  | -0.00237 | -0.00236 | 0.54997  |
| D20 | -2.54955 | -0.00012 | 0.00019  | -0.00418 | -0.00398 | -2.55354 |
| D21 | -2.76382 | 0.00008  | 0.00003  | 0.00107  | 0.00110  | -2.76272 |
| D22 | 0.41748  | 0.00005  | 0.00020  | -0.00073 | -0.00052 | 0.41695  |
| D23 | 0.11884  | -0.00030 | -0.00029 | -0.00490 | -0.00519 | 0.11365  |
| D24 | 3.08603  | -0.00026 | -0.00077 | 0.00047  | -0.00029 | 3.08574  |
| D25 | -1.87049 | 0.00033  | -0.00062 | 0.00536  | 0.00469  | -1.86580 |
| D26 | 1.09670  | 0.00036  | -0.00111 | 0.01073  | 0.00960  | 1.10630  |
| D27 | 2.93320  | 0.00021  | -0.00024 | 0.00749  | 0.00724  | 2.94044  |
| D28 | -0.38280 | 0.00025  | -0.00073 | 0.01286  | 0.01214  | -0.37066 |
| D29 | -2.24654 | -0.00015 | -0.00082 | 0.00255  | 0.00176  | -2.24479 |
| D30 | -0.23536 | -0.00026 | -0.00094 | -0.00139 | -0.00227 | -0.23764 |
| D31 | -2.92480 | -0.00036 | -0.00066 | -0.00672 | -0.00742 | -2.93222 |
| D32 | -0.89874 | -0.00048 | 0.00098  | -0.01076 | -0.00980 | -0.90854 |
| D33 | 1.23778  | -0.00001 | 0.00022  | -0.00424 | -0.00406 | 1.23372  |
| D34 | 0.42222  | -0.00055 | -0.00001 | -0.01383 | -0.01388 | 0.40835  |
| D35 | 2.44828  | -0.00067 | 0.00163  | -0.01787 | -0.01626 | 2.43203  |
| D36 | -1.69837 | -0.00020 | 0.00087  | -0.01135 | -0.01052 | -1.70889 |
| D37 | -1.11133 | 0.00076  | 0.00026  | 0.03124  | 0.03150  | -1.07983 |
| D38 | 1.00280  | -0.00108 | -0.00094 | 0.00513  | 0.00415  | 1.00695  |
| D39 | 3.07249  | -0.00104 | 0.00057  | -0.00012 | 0.00040  | 3.07288  |
| D40 | 3.06604  | 0.00124  | -0.00089 | 0.03882  | 0.03791  | 3.10396  |
| D41 | -1.10301 | -0.00060 | -0.00209 | 0.01270  | 0.01056  | -1.09245 |
| D42 | 0.96668  | -0.00057 | -0.00059 | 0.00746  | 0.00681  | 0.97349  |
| D43 | 1.00280  | 0.00087  | 0.00156  | 0.02593  | 0.02750  | 1.03030  |
| D44 | 3.11693  | -0.00097 | 0.00035  | -0.00019 | 0.00015  | 3.11709  |
| D45 | -1.09657 | -0.00094 | 0.00186  | -0.00543 | -0.00360 | -1.10016 |
| D46 | -0.03581 | -0.00076 | -0.00055 | 0.01212  | 0.01160  | -0.02421 |
| D47 | 0.34346  | -0.00066 | -0.00040 | 0.01137  | 0.01101  | 0.35447  |
| D48 | -3.09194 | -0.00003 | 0.00013  | -0.00126 | -0.00113 | -3.09306 |
| D49 | 0.04684  | -0.00004 | 0.00005  | -0.00137 | -0.00132 | 0.04552  |
| D50 | 0.00542  | 0.00001  | -0.00007 | 0.00077  | 0.00070  | 0.00612  |
| D51 | -3.13899 | 0.00000  | -0.00015 | 0.00066  | 0.00051  | -3.13848 |
| D52 | -0.30939 | 0.00027  | 0.00234  | -0.02013 | -0.01785 | -0.32725 |
| D53 | 1.84165  | -0.00153 | -0.00111 | -0.03242 | -0.03352 | 1.80813  |
| D54 | -2.38240 | -0.00176 | 0.00104  | -0.03197 | -0.03094 | -2.41334 |
| D55 | -0.60676 | 0.00111  | -0.00363 | 0.18552  | 0.18198  | -0.42477 |
| D56 | 2.54479  | 0.00120  | -0.00423 | 0.19548  | 0.19136  | 2.73615  |
| D57 | -2.74523 | 0.00008  | -0.00095 | 0.16145  | 0.16035  | -2.58488 |

|     |          |          |          |          |          |          |
|-----|----------|----------|----------|----------|----------|----------|
| D58 | 0.40631  | 0.00016  | -0.00155 | 0.17141  | 0.16974  | 0.57605  |
| D59 | 1.47762  | 0.00092  | -0.00302 | 0.18107  | 0.17806  | 1.65568  |
| D60 | -1.65403 | 0.00100  | -0.00362 | 0.19103  | 0.18745  | -1.46658 |
| D61 | 3.10459  | -0.00065 | 0.00225  | -0.03474 | -0.03244 | 3.07215  |
| D62 | -0.02727 | -0.00061 | 0.00166  | -0.02498 | -0.02336 | -0.05063 |

| Item                 | Value    | Threshold | Converged? |
|----------------------|----------|-----------|------------|
| Maximum Force        | 0.008200 | 0.000450  | NO         |
| RMS Force            | 0.001525 | 0.000300  | NO         |
| Maximum Displacement | 0.379578 | 0.001800  | NO         |
| RMS Displacement     | 0.062159 | 0.001200  | NO         |

Predicted change in Energy=-1.131935D-03

GradGradGradGradGradGradGradGradGradGradGradGradGradGradGradGradGradGradGrad

Input orientation:

| -----  |        |        |                         |           |           |  |
|--------|--------|--------|-------------------------|-----------|-----------|--|
| Center | Atomic | Atomic | Coordinates (Angstroms) |           |           |  |
| Number | Number | Type   | X                       | Y         | Z         |  |
| -----  |        |        |                         |           |           |  |
| 1      | 6      | 0      | -0.305220               | -2.143205 | -0.430883 |  |
| 2      | 6      | 0      | -1.569043               | -1.729643 | -0.676469 |  |
| 3      | 7      | 0      | -1.824114               | -0.660310 | 0.179741  |  |
| 4      | 6      | 0      | -0.692274               | -0.384950 | 0.870969  |  |
| 5      | 7      | 0      | 0.214203                | -1.336139 | 0.575424  |  |
| 6      | 6      | 0      | 1.589941                | -1.357927 | 1.069463  |  |
| 7      | 1      | 0      | 0.274931                | -2.924160 | -0.890747 |  |
| 8      | 1      | 0      | -2.294785               | -2.070680 | -1.392027 |  |
| 9      | 1      | 0      | 1.626400                | -0.772922 | 1.987174  |  |
| 10     | 1      | 0      | 1.835250                | -2.391047 | 1.326234  |  |
| 11     | 35     | 0      | 0.229751                | 1.992354  | -0.148766 |  |
| 12     | 1      | 0      | -0.641331               | 0.265799  | 1.721562  |  |
| 13     | 6      | 0      | -2.981297               | 0.156244  | 0.219894  |  |
| 14     | 6      | 0      | -4.199736               | -0.272787 | -0.088469 |  |
| 15     | 1      | 0      | -2.753484               | 1.180025  | 0.494237  |  |
| 16     | 1      | 0      | -5.027758               | 0.422481  | -0.077394 |  |
| 17     | 1      | 0      | -4.412158               | -1.300375 | -0.358092 |  |
| 18     | 6      | 0      | 2.593484                | -0.789836 | 0.050733  |  |
| 19     | 1      | 0      | 2.618748                | -1.369994 | -0.874656 |  |
| 20     | 1      | 0      | 2.307010                | 0.241458  | -0.207486 |  |
| 21     | 6      | 0      | 3.973560                | -0.752133 | 0.657347  |  |
| 22     | 8      | 0      | 4.210512                | -0.704233 | 1.837637  |  |
| 23     | 8      | 0      | 4.945387                | -0.754061 | -0.285669 |  |
| 24     | 1      | 0      | 5.793993                | -0.664735 | 0.175716  |  |

-----  
Distance matrix (angstroms):

|    |    | 1        | 2        | 3        | 4        | 5        |
|----|----|----------|----------|----------|----------|----------|
| 1  | C  | 0.000000 |          |          |          |          |
| 2  | C  | 1.352255 | 0.000000 |          |          |          |
| 3  | N  | 2.208818 | 1.393424 | 0.000000 |          |          |
| 4  | C  | 2.221731 | 2.229683 | 1.354504 | 0.000000 |          |
| 5  | N  | 1.390614 | 2.214057 | 2.183586 | 1.346777 | 0.000000 |
| 6  | C  | 2.541523 | 3.628448 | 3.596394 | 2.488893 | 1.461919 |
| 7  | H  | 1.076077 | 2.207493 | 3.267561 | 3.238320 | 2.162211 |
| 8  | H  | 2.210752 | 1.074723 | 2.163592 | 3.245131 | 3.271915 |
| 9  | H  | 3.384646 | 4.268625 | 3.896863 | 2.602438 | 2.074742 |
| 10 | H  | 2.780377 | 4.004683 | 4.207237 | 3.258845 | 2.074690 |
| 11 | Br | 4.179549 | 4.167420 | 3.370890 | 2.746190 | 3.406399 |
| 12 | H  | 3.247967 | 3.254687 | 2.152641 | 1.072184 | 2.147505 |
| 13 | C  | 3.587808 | 2.520813 | 1.416844 | 2.440578 | 3.544691 |
| 14 | C  | 4.333932 | 3.064102 | 2.421919 | 3.638048 | 4.588500 |
| 15 | H  | 4.230095 | 3.352554 | 2.085538 | 2.615275 | 3.891637 |
| 16 | H  | 5.386099 | 4.117431 | 3.391443 | 4.510849 | 5.567501 |
| 17 | H  | 4.193161 | 2.892911 | 2.719727 | 4.023199 | 4.719740 |
| 18 | C  | 3.235127 | 4.328821 | 4.421379 | 3.410708 | 2.496944 |
| 19 | H  | 3.056858 | 4.207876 | 4.621086 | 3.870451 | 2.808152 |
| 20 | H  | 3.544047 | 4.373668 | 4.246095 | 3.248255 | 2.735252 |
| 21 | C  | 4.628961 | 5.784033 | 5.818038 | 4.685132 | 3.805330 |
| 22 | O  | 5.254394 | 6.385566 | 6.258375 | 5.007364 | 4.238275 |
| 23 | O  | 5.433201 | 6.598658 | 6.786128 | 5.766912 | 4.844006 |
| 24 | H  | 6.305096 | 7.488294 | 7.618110 | 6.529419 | 5.634235 |
|    |    | 6        | 7        | 8        | 9        | 10       |
| 6  | C  | 0.000000 |          |          |          |          |
| 7  | H  | 2.832802 | 0.000000 |          |          |          |
| 8  | H  | 4.653821 | 2.753752 | 0.000000 |          |          |
| 9  | H  | 1.088923 | 3.838844 | 5.336559 | 0.000000 |          |
| 10 | H  | 1.092449 | 2.762935 | 4.954671 | 1.760337 | 0.000000 |
| 11 | Br | 3.815570 | 4.972392 | 4.942390 | 3.762927 | 4.895656 |
| 12 | H  | 2.835542 | 4.223687 | 4.229359 | 2.508405 | 3.653570 |
| 13 | C  | 4.889858 | 4.617948 | 2.833510 | 5.021703 | 5.559839 |
| 14 | C  | 6.003224 | 5.262706 | 2.925837 | 6.205021 | 6.550532 |
| 15 | H  | 5.063342 | 5.285245 | 3.786222 | 5.022574 | 5.873777 |
| 16 | H  | 6.948315 | 6.322979 | 3.925972 | 7.068893 | 7.548973 |
| 17 | H  | 6.169799 | 4.988908 | 2.479044 | 6.499435 | 6.561755 |
| 18 | C  | 1.538713 | 3.288984 | 5.255216 | 2.164565 | 2.183048 |
| 19 | H  | 2.199588 | 2.812325 | 4.990134 | 3.087284 | 2.549575 |
| 20 | H  | 2.168598 | 3.823262 | 5.284471 | 2.511719 | 3.083007 |
| 21 | C  | 2.493684 | 4.560060 | 6.725373 | 2.697783 | 2.775935 |
| 22 | O  | 2.807988 | 5.278348 | 7.390317 | 2.589346 | 2.957827 |
| 23 | O  | 3.668794 | 5.185423 | 7.441612 | 4.022667 | 3.866640 |

|    |    |           |           |          |           |          |
|----|----|-----------|-----------|----------|-----------|----------|
| 24 | H  | 4.353544  | 6.058250  | 8.358398 | 4.545538  | 4.469394 |
|    |    | 11        | 12        | 13       | 14        | 15       |
| 11 | Br | 0.000000  |           |          |           |          |
| 12 | H  | 2.690334  | 0.000000  |          |           |          |
| 13 | C  | 3.717262  | 2.782526  | 0.000000 |           |          |
| 14 | C  | 4.975425  | 4.028465  | 1.328062 | 0.000000  |          |
| 15 | H  | 3.158009  | 2.608318  | 1.084108 | 2.131162  | 0.000000 |
| 16 | H  | 5.487348  | 4.743577  | 2.085009 | 1.081268  | 2.464336 |
| 17 | H  | 5.695015  | 4.582247  | 2.122067 | 1.083400  | 3.103232 |
| 18 | C  | 3.656174  | 3.790787  | 5.657020 | 6.814291  | 5.715516 |
| 19 | H  | 4.188032  | 4.477085  | 5.906603 | 6.950804  | 6.102241 |
| 20 | H  | 2.717368  | 3.523427  | 5.306234 | 6.528121  | 5.194413 |
| 21 | C  | 4.711489  | 4.844168  | 7.027557 | 8.221239  | 7.000926 |
| 22 | O  | 5.202291  | 4.949224  | 7.421566 | 8.638767  | 7.338419 |
| 23 | O  | 5.458824  | 6.023330  | 7.994784 | 9.159901  | 7.976312 |
| 24 | H  | 6.174642  | 6.683482  | 8.813721 | 10.004901 | 8.750084 |
|    |    | 16        | 17        | 18       | 19        | 20       |
| 16 | H  | 0.000000  |           |          |           |          |
| 17 | H  | 1.850943  | 0.000000  |          |           |          |
| 18 | C  | 7.718125  | 7.036107  | 0.000000 |           |          |
| 19 | H  | 7.894153  | 7.050200  | 1.092505 | 0.000000  |          |
| 20 | H  | 7.338155  | 6.895444  | 1.101050 | 1.771743  | 0.000000 |
| 21 | C  | 9.107320  | 8.464747  | 1.507982 | 2.136422  | 2.124275 |
| 22 | O  | 9.501708  | 8.917794  | 2.411459 | 3.214574  | 2.949606 |
| 23 | O  | 10.044463 | 9.373758  | 2.376109 | 2.477807  | 2.821028 |
| 24 | H  | 10.879172 | 10.239849 | 3.205390 | 3.418019  | 3.623131 |
|    |    | 21        | 22        | 23       | 24        |          |
| 21 | C  | 0.000000  |           |          |           |          |
| 22 | O  | 1.204793  | 0.000000  |          |           |          |
| 23 | O  | 1.354153  | 2.247433  | 0.000000 |           |          |
| 24 | H  | 1.885095  | 2.295856  | 0.970045 | 0.000000  |          |

Stoichiometry C<sub>8</sub>H<sub>11</sub>BrN<sub>2</sub>O<sub>2</sub>

Framework group C1[X(C<sub>8</sub>H<sub>11</sub>BrN<sub>2</sub>O<sub>2</sub>)]

Deg. of freedom 66

Full point group C1 NOp 1

Largest Abelian subgroup C1 NOp 1

Largest concise Abelian subgroup C1 NOp 1

Standard orientation:

| Center<br>Number | Atomic<br>Number | Atomic<br>Type | Coordinates (Angstroms) |           |           |
|------------------|------------------|----------------|-------------------------|-----------|-----------|
|                  |                  |                | X                       | Y         | Z         |
| 1                | 6                | 0              | -0.631539               | -2.095860 | -0.715908 |
| 2                | 6                | 0              | -1.949008               | -1.806246 | -0.810740 |

|    |    |   |           |           |           |
|----|----|---|-----------|-----------|-----------|
| 3  | 7  | 0 | -2.224828 | -0.833115 | 0.147680  |
| 4  | 6  | 0 | -1.063603 | -0.484901 | 0.751819  |
| 5  | 7  | 0 | -0.099132 | -1.308936 | 0.299524  |
| 6  | 6  | 0 | 1.314056  | -1.215137 | 0.661889  |
| 7  | 1  | 0 | -0.023755 | -2.775185 | -1.287797 |
| 8  | 1  | 0 | -2.704021 | -2.173698 | -1.481534 |
| 9  | 1  | 0 | 1.382159  | -0.694824 | 1.616032  |
| 10 | 1  | 0 | 1.687481  | -2.230750 | 0.811982  |
| 11 | 35 | 0 | -0.494283 | 2.043701  | -0.155708 |
| 12 | 1  | 0 | -0.994536 | 0.106846  | 1.643246  |
| 13 | 6  | 0 | -3.449225 | -0.152129 | 0.358767  |
| 14 | 6  | 0 | -4.642378 | -0.688754 | 0.130369  |
| 15 | 1  | 0 | -3.300453 | 0.868814  | 0.691681  |
| 16 | 1  | 0 | -5.531536 | -0.090194 | 0.272724  |
| 17 | 1  | 0 | -4.775058 | -1.712125 | -0.199576 |
| 18 | 6  | 0 | 2.148074  | -0.471799 | -0.396175 |
| 19 | 1  | 0 | 2.139806  | -0.980056 | -1.363219 |
| 20 | 1  | 0 | 1.733944  | 0.537623  | -0.544072 |
| 21 | 6  | 0 | 3.570729  | -0.326358 | 0.082270  |
| 22 | 8  | 0 | 3.918057  | -0.335075 | 1.235878  |
| 23 | 8  | 0 | 4.438845  | -0.156979 | -0.943116 |
| 24 | 1  | 0 | 5.315721  | -0.008099 | -0.555930 |

-----

Rotational constants (GHZ):      0.8529748      0.3275554      0.2570662

Standard basis: 6-311++G(d,p) (5D, 7F)

There are    404 symmetry adapted cartesian basis functions of A    symmetry.

There are    389 symmetry adapted basis functions of A    symmetry.

    389 basis functions,    625 primitive gaussians,    404 cartesian basis functions

    62 alpha electrons      62 beta electrons

    nuclear repulsion energy      1078.3771609217 Hartrees.

NAtoms=    24 NActive=    24 NUniq=    24 SFac= 1.00D+00 NAtFMM=    60 NAOKFM=F

Big=F

Integral buffers will be    131072 words long.

Raffenetti 2 integral format.

Two-electron integral symmetry is turned on.

One-electron integrals computed using PRISM.

NBasis=    389 RedAO= T EigKep= 6.21D-06 NBF=    389

NBsUse=    389 1.00D-06 EigRej= -1.00D+00 NBFU=    389

Initial guess from the checkpoint file: "./cooh.chk"

B after Tr=    0.000000    0.000000    0.000000

    Rot=    0.999883    -0.015240    -0.000550    0.000933 Ang=    -1.75 deg.

ExpMin= 3.50D-02 ExpMax= 4.40D+05 ExpMxC= 1.51D+04 IAcc=3 IRadAn=      5 AccDes=

0.00D+00

Harris functional with IExCor=    402 and IRadAn=      5 diagonalized for initial guess.



HarFok: IExCor= 402 AccDes= 0.00D+00 IRadAn= 5 IDoV= 1 UseB2=F ITyADJ=14  
 ICtDFT= 3500011 ScaDFX= 1.000000 1.000000 1.000000 1.000000  
 FoFCou: FMM=F IPFlag= 0 FMFlag= 100000 FMFlg1= 0  
 NFxFlg= 0 DoJE=T BraDBF=F KetDBF=T FulRan=T  
 wScrn= 0.000000 ICntrl= 500 IOpCl= 0 l1Cent= 200000004 NGrid= 0  
 NMat0= 1 NMatS0= 1 NMatT0= 0 NMatD0= 1 NMtDS0= 0  
 NMtDT0= 0

Petite list used in FoFCou.

Keep R1 ints in memory in canonical form, NReq=2910765817.

Requested convergence on RMS density matrix=1.00D-08 within 128 cycles.

Requested convergence on MAX density matrix=1.00D-06.

Requested convergence on energy=1.00D-06.

No special actions if energy rises.

SCF Done: E(RB3LYP) = -3145.73138015 A.U. after 13 cycles

NFock= 13 Conv=0.57D-08 -V/T= 2.0017

Calling FoFJK, ICntrl= 2127 FMM=F ISym2X=0 l1Cent= 0 IOpClX= 0 NMat=1 NMatS=1  
 NMatT=0.

\*\*\*\*\* Axes restored to original set \*\*\*\*\*

| Center Number | Atomic Number | Forces (Hartrees/Bohr) |              |              |
|---------------|---------------|------------------------|--------------|--------------|
|               |               | X                      | Y            | Z            |
| 1             | 6             | 0.000777045            | 0.000197116  | -0.000255280 |
| 2             | 6             | -0.000123760           | 0.000180762  | 0.000274351  |
| 3             | 7             | 0.000255358            | 0.000505349  | -0.000513199 |
| 4             | 6             | 0.000294940            | -0.003167741 | 0.001431026  |
| 5             | 7             | -0.002710600           | 0.001450317  | -0.001280767 |
| 6             | 6             | 0.003046222            | 0.000224674  | -0.000896762 |
| 7             | 1             | -0.000170099           | -0.000121800 | 0.000180739  |
| 8             | 1             | 0.000064251            | 0.000062353  | -0.000060926 |
| 9             | 1             | -0.000107881           | -0.000095371 | -0.000282632 |
| 10            | 1             | -0.000021321           | 0.000302901  | 0.000350582  |
| 11            | 35            | 0.000283542            | 0.001554689  | -0.001118861 |
| 12            | 1             | 0.000281286            | 0.000237015  | -0.000276087 |
| 13            | 6             | -0.000106245           | 0.000071456  | 0.000178774  |
| 14            | 6             | 0.000042690            | -0.000034697 | 0.000014293  |
| 15            | 1             | 0.000036796            | -0.000024051 | -0.000060168 |
| 16            | 1             | 0.000005262            | 0.000007379  | -0.000023314 |
| 17            | 1             | -0.000018720           | 0.000013319  | -0.000013027 |
| 18            | 6             | 0.000112697            | -0.001091080 | 0.002025999  |
| 19            | 1             | -0.000745071           | 0.000535255  | 0.000202045  |
| 20            | 1             | -0.000816452           | -0.001479440 | -0.000144354 |
| 21            | 6             | -0.000475049           | 0.001107492  | -0.003655594 |

|    |   |              |              |              |
|----|---|--------------|--------------|--------------|
| 22 | 8 | 0.001318458  | -0.000791946 | 0.003574282  |
| 23 | 8 | -0.000786170 | 0.000392897  | 0.000578688  |
| 24 | 1 | -0.000437178 | -0.000036849 | -0.000229808 |

-----  
Cartesian Forces: Max 0.003655594 RMS 0.001051510

GradGradGradGradGradGradGradGradGradGradGradGradGradGradGradGradGradGradGrad

Berny optimization.

Using GEDIIS/GDIIS optimizer.

FormGI is forming the generalized inverse of G from B-inverse, IUseBI=4.

Internal Forces: Max 0.003724307 RMS 0.000581578

Search for a local minimum.

Step number 3 out of a maximum of 140

All quantities printed in internal units (Hartrees-Bohrs-Radians)

Mixed Optimization -- En-DIIS/RFO-DIIS

Update second derivatives using D2CorX and points 2 3

DE= -1.26D-03 DEPred=-1.13D-03 R= 1.11D+00

TightC=F SS= 1.41D+00 RLast= 4.52D-01 DXNew= 8.4853D-01 1.3567D+00

Trust test= 1.11D+00 RLast= 4.52D-01 DXMaxT set to 8.49D-01

ITU= 1 1 0

Use linear search instead of GDIIS.

|                 |         |         |         |         |         |
|-----------------|---------|---------|---------|---------|---------|
| Eigenvalues --- | 0.00195 | 0.00385 | 0.00731 | 0.00815 | 0.01480 |
| Eigenvalues --- | 0.01758 | 0.01962 | 0.02025 | 0.02120 | 0.02196 |
| Eigenvalues --- | 0.02256 | 0.02312 | 0.02346 | 0.02427 | 0.03038 |
| Eigenvalues --- | 0.03038 | 0.03077 | 0.03289 | 0.03689 | 0.04372 |
| Eigenvalues --- | 0.04699 | 0.05545 | 0.06591 | 0.08028 | 0.09569 |
| Eigenvalues --- | 0.10574 | 0.12271 | 0.14790 | 0.15808 | 0.15984 |
| Eigenvalues --- | 0.15993 | 0.15995 | 0.16000 | 0.16000 | 0.16546 |
| Eigenvalues --- | 0.17027 | 0.18005 | 0.20649 | 0.22002 | 0.22825 |
| Eigenvalues --- | 0.24479 | 0.24959 | 0.27288 | 0.27654 | 0.34251 |
| Eigenvalues --- | 0.34386 | 0.35110 | 0.35498 | 0.35571 | 0.35580 |
| Eigenvalues --- | 0.35844 | 0.35995 | 0.36481 | 0.36599 | 0.36650 |
| Eigenvalues --- | 0.37237 | 0.41322 | 0.43067 | 0.43826 | 0.47745 |
| Eigenvalues --- | 0.52339 | 0.53329 | 0.54461 | 0.54609 | 0.59921 |
| Eigenvalues --- | 0.94003 |         |         |         |         |

RFO step: Lambda=-6.15153476D-04 EMin= 1.95421343D-03

Quartic linear search produced a step of 0.44619.

Iteration 1 RMS(Cart)= 0.06218259 RMS(Int)= 0.00569535

Iteration 2 RMS(Cart)= 0.00644933 RMS(Int)= 0.00009330

Iteration 3 RMS(Cart)= 0.00007896 RMS(Int)= 0.00005348

Iteration 4 RMS(Cart)= 0.00000001 RMS(Int)= 0.00005348

| Variable | Old X   | -DE/DX  | Delta X<br>(Linear) | Delta X<br>(Quad) | Delta X<br>(Total) | New X   |
|----------|---------|---------|---------------------|-------------------|--------------------|---------|
| R1       | 2.55539 | 0.00010 | 0.00030             | 0.00042           | 0.00071            | 2.55611 |

|     |         |          |          |          |          |         |
|-----|---------|----------|----------|----------|----------|---------|
| R2  | 2.62788 | -0.00028 | -0.00051 | -0.00064 | -0.00116 | 2.62672 |
| R3  | 2.03349 | -0.00008 | 0.00009  | -0.00031 | -0.00022 | 2.03327 |
| R4  | 2.63319 | -0.00020 | -0.00047 | -0.00027 | -0.00073 | 2.63246 |
| R5  | 2.03093 | -0.00002 | -0.00003 | -0.00006 | -0.00010 | 2.03084 |
| R6  | 2.55964 | -0.00022 | 0.00010  | -0.00074 | -0.00063 | 2.55901 |
| R7  | 2.67745 | 0.00005  | 0.00003  | 0.00019  | 0.00022  | 2.67767 |
| R8  | 2.54504 | -0.00101 | -0.00159 | -0.00250 | -0.00409 | 2.54095 |
| R9  | 5.18955 | 0.00081  | 0.00758  | 0.03051  | 0.03809  | 5.22764 |
| R10 | 2.02613 | 0.00003  | 0.00012  | -0.00010 | 0.00002  | 2.02615 |
| R11 | 2.76263 | 0.00175  | 0.00489  | 0.00433  | 0.00921  | 2.77183 |
| R12 | 2.05777 | -0.00030 | -0.00067 | -0.00075 | -0.00142 | 2.05634 |
| R13 | 2.06443 | -0.00021 | -0.00027 | -0.00075 | -0.00102 | 2.06341 |
| R14 | 2.90775 | -0.00243 | -0.00457 | -0.00941 | -0.01397 | 2.89377 |
| R15 | 5.08400 | 0.00042  | 0.00545  | 0.01245  | 0.01790  | 5.10189 |
| R16 | 5.13508 | -0.00019 | 0.00363  | -0.00582 | -0.00218 | 5.13290 |
| R17 | 2.50967 | -0.00002 | -0.00002 | -0.00004 | -0.00006 | 2.50961 |
| R18 | 2.04867 | -0.00003 | -0.00004 | -0.00010 | -0.00014 | 2.04853 |
| R19 | 2.04330 | 0.00000  | 0.00000  | 0.00000  | 0.00000  | 2.04330 |
| R20 | 2.04733 | -0.00001 | -0.00001 | -0.00002 | -0.00003 | 2.04730 |
| R21 | 2.06454 | -0.00047 | 0.00249  | -0.00201 | 0.00047  | 2.06501 |
| R22 | 2.08068 | -0.00087 | 0.00493  | -0.00380 | 0.00115  | 2.08183 |
| R23 | 2.84967 | -0.00023 | 0.00405  | -0.00480 | -0.00074 | 2.84893 |
| R24 | 2.27673 | 0.00372  | -0.00522 | 0.00723  | 0.00201  | 2.27874 |
| R25 | 2.55898 | -0.00111 | 0.00048  | -0.00325 | -0.00277 | 2.55621 |
| R26 | 1.83312 | -0.00050 | 0.00202  | -0.00242 | -0.00040 | 1.83272 |
| A1  | 1.87866 | -0.00026 | -0.00003 | -0.00111 | -0.00117 | 1.87749 |
| A2  | 2.27604 | 0.00007  | -0.00025 | 0.00025  | -0.00001 | 2.27603 |
| A3  | 2.12830 | 0.00018  | 0.00039  | 0.00091  | 0.00129  | 2.12959 |
| A4  | 1.86940 | -0.00005 | -0.00032 | 0.00052  | 0.00021  | 1.86961 |
| A5  | 2.28497 | 0.00000  | 0.00017  | -0.00044 | -0.00027 | 2.28470 |
| A6  | 2.12824 | 0.00004  | 0.00016  | -0.00015 | 0.00001  | 2.12825 |
| A7  | 1.89296 | -0.00010 | 0.00008  | -0.00079 | -0.00069 | 1.89227 |
| A8  | 2.22584 | 0.00017  | 0.00024  | 0.00088  | 0.00111  | 2.22695 |
| A9  | 2.15418 | -0.00006 | -0.00013 | -0.00015 | -0.00029 | 2.15388 |
| A10 | 1.88269 | 0.00013  | 0.00023  | 0.00087  | 0.00104  | 1.88373 |
| A11 | 1.84112 | -0.00063 | -0.00362 | -0.00562 | -0.00918 | 1.83194 |
| A12 | 2.17479 | -0.00001 | 0.00048  | 0.00151  | 0.00187  | 2.17666 |
| A13 | 1.87961 | 0.00032  | -0.00066 | -0.00079 | -0.00147 | 1.87815 |
| A14 | 2.17825 | 0.00004  | 0.00104  | 0.00256  | 0.00351  | 2.18176 |
| A15 | 1.89367 | 0.00030  | 0.00038  | 0.00089  | 0.00132  | 1.89498 |
| A16 | 2.19864 | -0.00022 | -0.00183 | 0.00007  | -0.00173 | 2.19691 |
| A17 | 2.17701 | -0.00008 | 0.00186  | -0.00095 | 0.00082  | 2.17783 |
| A18 | 1.88421 | 0.00004  | -0.00087 | -0.00181 | -0.00273 | 1.88148 |
| A19 | 1.88056 | 0.00041  | -0.00216 | 0.00512  | 0.00303  | 1.88360 |

|     |          |          |          |          |          |          |
|-----|----------|----------|----------|----------|----------|----------|
| A20 | 1.96547  | -0.00076 | -0.00407 | -0.00527 | -0.00936 | 1.95611  |
| A21 | 1.87806  | -0.00020 | 0.00044  | -0.00155 | -0.00115 | 1.87691  |
| A22 | 1.91536  | 0.00020  | 0.00136  | -0.00007 | 0.00126  | 1.91662  |
| A23 | 1.93725  | 0.00032  | 0.00533  | 0.00363  | 0.00893  | 1.94618  |
| A24 | 1.27333  | -0.00107 | -0.00370 | -0.00740 | -0.01110 | 1.26223  |
| A25 | 1.41924  | -0.00110 | -0.00365 | -0.00825 | -0.01191 | 1.40733  |
| A26 | 2.16103  | 0.00001  | -0.00010 | 0.00012  | 0.00002  | 2.16105  |
| A27 | 1.96037  | -0.00004 | 0.00028  | -0.00048 | -0.00020 | 1.96016  |
| A28 | 2.16111  | 0.00003  | -0.00015 | 0.00030  | 0.00014  | 2.16126  |
| A29 | 2.08573  | -0.00002 | -0.00010 | -0.00012 | -0.00021 | 2.08551  |
| A30 | 2.14609  | 0.00003  | 0.00011  | 0.00023  | 0.00033  | 2.14642  |
| A31 | 2.05137  | -0.00001 | -0.00001 | -0.00011 | -0.00012 | 2.05125  |
| A32 | 1.96040  | -0.00015 | 0.00018  | -0.00195 | -0.00205 | 1.95835  |
| A33 | 1.90857  | -0.00011 | -0.00364 | 0.00411  | 0.00048  | 1.90905  |
| A34 | 1.91748  | 0.00086  | 0.00839  | 0.00741  | 0.01567  | 1.93315  |
| A35 | 1.88048  | -0.00041 | -0.00779 | -0.01100 | -0.01883 | 1.86165  |
| A36 | 1.91012  | -0.00002 | 0.00628  | 0.00013  | 0.00628  | 1.91640  |
| A37 | 1.88498  | -0.00020 | -0.00371 | 0.00107  | -0.00261 | 1.88237  |
| A38 | 2.49367  | 0.00145  | 0.00518  | 0.00824  | 0.01344  | 2.50711  |
| A39 | 2.18349  | 0.00141  | -0.00329 | 0.00756  | 0.00407  | 2.18757  |
| A40 | 1.95694  | -0.00147 | 0.01061  | -0.01367 | -0.00326 | 1.95369  |
| A41 | 2.14258  | 0.00007  | -0.00737 | 0.00680  | -0.00077 | 2.14181  |
| A42 | 1.87178  | 0.00000  | 0.00846  | -0.00606 | 0.00240  | 1.87418  |
| D1  | 0.00402  | -0.00006 | 0.00065  | -0.00010 | 0.00056  | 0.00458  |
| D2  | 3.10897  | -0.00009 | 0.00098  | -0.00224 | -0.00126 | 3.10771  |
| D3  | -3.11667 | -0.00006 | -0.00427 | -0.00300 | -0.00726 | -3.12393 |
| D4  | -0.01173 | -0.00010 | -0.00395 | -0.00514 | -0.00907 | -0.02081 |
| D5  | -0.07282 | 0.00013  | 0.00100  | 0.00187  | 0.00288  | -0.06994 |
| D6  | -3.04227 | 0.00011  | -0.00169 | 0.00187  | 0.00020  | -3.04206 |
| D7  | 3.05002  | 0.00014  | 0.00540  | 0.00447  | 0.00988  | 3.05990  |
| D8  | 0.08058  | 0.00012  | 0.00271  | 0.00447  | 0.00721  | 0.08778  |
| D9  | 0.06574  | -0.00007 | -0.00213 | -0.00179 | -0.00392 | 0.06182  |
| D10 | 3.05695  | -0.00003 | -0.00079 | -0.00228 | -0.00307 | 3.05388  |
| D11 | -3.04323 | -0.00004 | -0.00242 | 0.00013  | -0.00229 | -3.04551 |
| D12 | -0.05201 | 0.00000  | -0.00108 | -0.00037 | -0.00144 | -0.05345 |
| D13 | -0.11123 | 0.00015  | 0.00273  | 0.00293  | 0.00567  | -0.10556 |
| D14 | 1.89380  | 0.00026  | 0.00032  | -0.00030 | 0.00004  | 1.89384  |
| D15 | -2.93879 | -0.00036 | -0.00293 | -0.01336 | -0.01628 | -2.95507 |
| D16 | -3.10999 | 0.00009  | 0.00142  | 0.00328  | 0.00471  | -3.10528 |
| D17 | -1.10496 | 0.00020  | -0.00099 | 0.00006  | -0.00091 | -1.10587 |
| D18 | 0.34563  | -0.00042 | -0.00424 | -0.01300 | -0.01723 | 0.32840  |
| D19 | 0.54997  | -0.00001 | -0.00105 | 0.00159  | 0.00054  | 0.55051  |
| D20 | -2.55354 | 0.00001  | -0.00178 | 0.00346  | 0.00168  | -2.55186 |
| D21 | -2.76272 | 0.00003  | 0.00049  | 0.00100  | 0.00150  | -2.76122 |

|     |          |          |          |          |          |          |
|-----|----------|----------|----------|----------|----------|----------|
| D22 | 0.41695  | 0.00006  | -0.00023 | 0.00286  | 0.00264  | 0.41959  |
| D23 | 0.11365  | -0.00016 | -0.00232 | -0.00288 | -0.00520 | 0.10845  |
| D24 | 3.08574  | -0.00015 | -0.00013 | -0.00275 | -0.00288 | 3.08286  |
| D25 | -1.86580 | 0.00035  | 0.00209  | 0.00360  | 0.00563  | -1.86017 |
| D26 | 1.10630  | 0.00036  | 0.00428  | 0.00372  | 0.00795  | 1.11425  |
| D27 | 2.94044  | 0.00034  | 0.00323  | 0.01321  | 0.01645  | 2.95688  |
| D28 | -0.37066 | 0.00034  | 0.00542  | 0.01333  | 0.01877  | -0.35189 |
| D29 | -2.24479 | -0.00020 | 0.00078  | -0.00075 | 0.00006  | -2.24473 |
| D30 | -0.23764 | -0.00021 | -0.00101 | -0.00282 | -0.00380 | -0.24143 |
| D31 | -2.93222 | -0.00011 | -0.00331 | -0.00301 | -0.00633 | -2.93855 |
| D32 | -0.90854 | -0.00012 | -0.00437 | -0.00311 | -0.00751 | -0.91606 |
| D33 | 1.23372  | 0.00009  | -0.00181 | 0.00165  | -0.00021 | 1.23351  |
| D34 | 0.40835  | -0.00017 | -0.00619 | -0.00321 | -0.00940 | 0.39895  |
| D35 | 2.43203  | -0.00018 | -0.00725 | -0.00331 | -0.01059 | 2.42144  |
| D36 | -1.70889 | 0.00003  | -0.00469 | 0.00145  | -0.00329 | -1.71218 |
| D37 | -1.07983 | 0.00017  | 0.01405  | 0.01122  | 0.02524  | -1.05459 |
| D38 | 1.00695  | -0.00052 | 0.00185  | -0.00106 | 0.00075  | 1.00769  |
| D39 | 3.07288  | -0.00032 | 0.00018  | 0.00711  | 0.00727  | 3.08015  |
| D40 | 3.10396  | 0.00048  | 0.01692  | 0.01702  | 0.03394  | 3.13789  |
| D41 | -1.09245 | -0.00021 | 0.00471  | 0.00475  | 0.00944  | -1.08301 |
| D42 | 0.97349  | -0.00001 | 0.00304  | 0.01292  | 0.01596  | 0.98945  |
| D43 | 1.03030  | 0.00040  | 0.01227  | 0.01673  | 0.02896  | 1.05927  |
| D44 | 3.11709  | -0.00029 | 0.00007  | 0.00445  | 0.00446  | 3.12155  |
| D45 | -1.10016 | -0.00009 | -0.00160 | 0.01262  | 0.01099  | -1.08918 |
| D46 | -0.02421 | -0.00045 | 0.00518  | 0.00251  | 0.00770  | -0.01651 |
| D47 | 0.35447  | -0.00039 | 0.00491  | 0.00146  | 0.00641  | 0.36089  |
| D48 | -3.09306 | 0.00003  | -0.00050 | 0.00168  | 0.00118  | -3.09189 |
| D49 | 0.04552  | 0.00001  | -0.00059 | 0.00092  | 0.00033  | 0.04585  |
| D50 | 0.00612  | 0.00000  | 0.00031  | -0.00042 | -0.00010 | 0.00602  |
| D51 | -3.13848 | -0.00002 | 0.00023  | -0.00117 | -0.00094 | -3.13942 |
| D52 | -0.32725 | 0.00006  | -0.00797 | -0.00393 | -0.01197 | -0.33921 |
| D53 | 1.80813  | -0.00045 | -0.01496 | -0.01063 | -0.02561 | 1.78252  |
| D54 | -2.41334 | -0.00080 | -0.01380 | -0.01583 | -0.02961 | -2.44294 |
| D55 | -0.42477 | 0.00059  | 0.08120  | 0.14317  | 0.22444  | -0.20033 |
| D56 | 2.73615  | 0.00038  | 0.08538  | 0.10328  | 0.18872  | 2.92487  |
| D57 | -2.58488 | 0.00021  | 0.07155  | 0.14058  | 0.21203  | -2.37285 |
| D58 | 0.57605  | 0.00001  | 0.07573  | 0.10070  | 0.17631  | 0.75236  |
| D59 | 1.65568  | 0.00083  | 0.07945  | 0.15302  | 0.23253  | 1.88821  |
| D60 | -1.46658 | 0.00062  | 0.08364  | 0.11314  | 0.19681  | -1.26977 |
| D61 | 3.07215  | 0.00010  | -0.01447 | 0.02462  | 0.01011  | 3.08226  |
| D62 | -0.05063 | -0.00012 | -0.01042 | -0.01420 | -0.02459 | -0.07522 |

|  | Item          | Value    | Threshold | Converged? |
|--|---------------|----------|-----------|------------|
|  | Maximum Force | 0.003724 | 0.000450  | NO         |
|  | RMS Force     | 0.000582 | 0.000300  | NO         |

Maximum Displacement 0.455355 0.001800 NO  
 RMS Displacement 0.064307 0.001200 NO

Predicted change in Energy=-5.015641D-04

GradGradGradGradGradGradGradGradGradGradGradGradGradGradGradGradGradGrad

Input orientation:

| Center Number | Atomic Number | Atomic Type | Coordinates (Angstroms) |           |           |
|---------------|---------------|-------------|-------------------------|-----------|-----------|
|               |               |             | X                       | Y         | Z         |
| 1             | 6             | 0           | -0.308368               | -2.158893 | -0.408536 |
| 2             | 6             | 0           | -1.568512               | -1.738997 | -0.664151 |
| 3             | 7             | 0           | -1.820292               | -0.659759 | 0.179887  |
| 4             | 6             | 0           | -0.691181               | -0.389064 | 0.876746  |
| 5             | 7             | 0           | 0.210133                | -1.345453 | 0.592253  |
| 6             | 6             | 0           | 1.588175                | -1.372371 | 1.093999  |
| 7             | 1             | 0           | 0.266302                | -2.952081 | -0.853848 |
| 8             | 1             | 0           | -2.292564               | -2.081350 | -1.380714 |
| 9             | 1             | 0           | 1.623374                | -0.773629 | 2.001955  |
| 10            | 1             | 0           | 1.825431                | -2.401994 | 1.369411  |
| 11            | 35            | 0           | 0.248552                | 1.987926  | -0.181318 |
| 12            | 1             | 0           | -0.635360               | 0.279490  | 1.713119  |
| 13            | 6             | 0           | -2.970089               | 0.167951  | 0.205267  |
| 14            | 6             | 0           | -4.190581               | -0.252566 | -0.106544 |
| 15            | 1             | 0           | -2.734004               | 1.192234  | 0.470299  |
| 16            | 1             | 0           | -5.011749               | 0.450870  | -0.108077 |
| 17            | 1             | 0           | -4.411402               | -1.280584 | -0.367580 |
| 18            | 6             | 0           | 2.584428                | -0.821342 | 0.069897  |
| 19            | 1             | 0           | 2.583822                | -1.397854 | -0.858407 |
| 20            | 1             | 0           | 2.301127                | 0.209028  | -0.197926 |
| 21            | 6             | 0           | 3.976969                | -0.782786 | 0.646236  |
| 22            | 8             | 0           | 4.255672                | -0.945196 | 1.808146  |
| 23            | 8             | 0           | 4.911893                | -0.560181 | -0.305669 |
| 24            | 1             | 0           | 5.770195                | -0.494171 | 0.141029  |

Distance matrix (angstroms):

|   |   | 1        | 2        | 3        | 4        | 5        |
|---|---|----------|----------|----------|----------|----------|
| 1 | C | 0.000000 |          |          |          |          |
| 2 | C | 1.352633 | 0.000000 |          |          |          |
| 3 | N | 2.208973 | 1.393036 | 0.000000 |          |          |
| 4 | C | 2.220539 | 2.228541 | 1.354172 | 0.000000 |          |
| 5 | N | 1.390002 | 2.212918 | 2.182395 | 1.344613 | 0.000000 |
| 6 | C | 2.544229 | 3.631829 | 3.600148 | 2.491898 | 1.466790 |
| 7 | H | 1.075963 | 2.207737 | 3.267602 | 3.237405 | 2.162318 |

|    |    |          |          |          |          |          |
|----|----|----------|----------|----------|----------|----------|
| 8  | H  | 2.210922 | 1.074672 | 2.163201 | 3.244131 | 3.270724 |
| 9  | H  | 3.385417 | 4.269449 | 3.897658 | 2.602144 | 2.076413 |
| 10 | H  | 2.788062 | 4.011707 | 4.212084 | 3.260053 | 2.080731 |
| 11 | Br | 4.190214 | 4.174303 | 3.379470 | 2.766347 | 3.422178 |
| 12 | H  | 3.248701 | 3.255223 | 2.153382 | 1.072194 | 2.147472 |
| 13 | C  | 3.588275 | 2.521260 | 1.416961 | 2.440199 | 3.543157 |
| 14 | C  | 4.335535 | 3.065232 | 2.422007 | 3.637484 | 4.587919 |
| 15 | H  | 4.229198 | 3.352232 | 2.085446 | 2.615115 | 3.888788 |
| 16 | H  | 5.387293 | 4.118327 | 3.391433 | 4.510285 | 5.566443 |
| 17 | H  | 4.196188 | 2.894844 | 2.720110 | 4.022835 | 4.720601 |
| 18 | C  | 3.222764 | 4.315997 | 4.409055 | 3.401100 | 2.486931 |
| 19 | H  | 3.024289 | 4.170850 | 4.584655 | 3.841101 | 2.782366 |
| 20 | H  | 3.529996 | 4.357325 | 4.228904 | 3.235204 | 2.722692 |
| 21 | C  | 4.622805 | 5.777873 | 5.817289 | 4.690392 | 3.809011 |
| 22 | O  | 5.217011 | 6.376794 | 6.296828 | 5.064400 | 4.243229 |
| 23 | O  | 5.460548 | 6.596497 | 6.750408 | 5.729034 | 4.850719 |
| 24 | H  | 6.326313 | 7.486957 | 7.592392 | 6.503976 | 5.642922 |
|    |    | 6        | 7        | 8        | 9        | 10       |
| 6  | C  | 0.000000 |          |          |          |          |
| 7  | H  | 2.834950 | 0.000000 |          |          |          |
| 8  | H  | 4.656930 | 2.753826 | 0.000000 |          |          |
| 9  | H  | 1.088170 | 3.839649 | 5.337336 | 0.000000 |          |
| 10 | H  | 1.091909 | 2.770624 | 4.962246 | 1.758554 | 0.000000 |
| 11 | Br | 3.835703 | 4.985607 | 4.945182 | 3.779286 | 4.915557 |
| 12 | H  | 2.838320 | 4.224378 | 4.229857 | 2.508858 | 3.655679 |
| 13 | C  | 4.892873 | 4.618501 | 2.834383 | 5.021411 | 5.563889 |
| 14 | C  | 6.007436 | 5.263996 | 2.927529 | 6.206396 | 6.556744 |
| 15 | H  | 5.064330 | 5.284936 | 3.786485 | 5.019695 | 5.874975 |
| 16 | H  | 6.951848 | 6.324087 | 3.927558 | 7.069405 | 7.554392 |
| 17 | H  | 6.175724 | 4.991120 | 2.481359 | 6.503094 | 6.570601 |
| 18 | C  | 1.531319 | 3.281320 | 5.241845 | 2.158413 | 2.182492 |
| 19 | H  | 2.191769 | 2.790437 | 4.951677 | 3.081199 | 2.558637 |
| 20 | H  | 2.162914 | 3.816197 | 5.267525 | 2.502886 | 3.082251 |
| 21 | C  | 2.500888 | 4.552487 | 6.715790 | 2.716149 | 2.788177 |
| 22 | O  | 2.794285 | 5.198930 | 7.371504 | 2.644993 | 2.867197 |
| 23 | O  | 3.696732 | 5.253875 | 7.441363 | 4.023065 | 3.965403 |
| 24 | H  | 4.378205 | 6.109332 | 8.357207 | 4.553819 | 4.550810 |
|    |    | 11       | 12       | 13       | 14       | 15       |
| 11 | Br | 0.000000 |          |          |          |          |
| 12 | H  | 2.699805 | 0.000000 |          |          |          |
| 13 | C  | 3.717715 | 2.781550 | 0.000000 |          |          |
| 14 | C  | 4.973057 | 4.029126 | 1.328029 | 0.000000 |          |
| 15 | H  | 3.154897 | 2.604230 | 1.084036 | 2.131152 | 0.000000 |
| 16 | H  | 5.480755 | 4.743301 | 2.084851 | 1.081268 | 2.464195 |

|    |   |           |           |          |          |          |
|----|---|-----------|-----------|----------|----------|----------|
| 17 | H | 5.695000  | 4.584936  | 2.122214 | 1.083385 | 3.103310 |
| 18 | C | 3.662159  | 3.778762  | 5.643552 | 6.801131 | 5.700923 |
| 19 | H | 4.168385  | 4.448524  | 5.867629 | 6.911549 | 6.062449 |
| 20 | H | 2.716213  | 3.504285  | 5.286773 | 6.508740 | 5.173564 |
| 21 | C | 4.718345  | 4.851829  | 7.025665 | 8.219287 | 6.997773 |
| 22 | O | 5.349596  | 5.042924  | 7.484647 | 8.688209 | 7.430614 |
| 23 | O | 5.315549  | 5.962598  | 7.932016 | 9.109847 | 7.882439 |
| 24 | H | 6.062445  | 6.640870  | 8.765563 | 9.966781 | 8.676046 |
|    |   | 16        | 17        | 18       | 19       | 20       |
| 16 | H | 0.000000  |           |          |          |          |
| 17 | H | 1.850862  | 0.000000  |          |          |          |
| 18 | C | 7.704031  | 7.024523  | 0.000000 |          |          |
| 19 | H | 7.853246  | 7.013403  | 1.092756 | 0.000000 |          |
| 20 | H | 7.317426  | 6.877920  | 1.101658 | 1.760177 | 0.000000 |
| 21 | C | 9.104282  | 8.464065  | 1.507589 | 2.140822 | 2.122440 |
| 22 | O | 9.565877  | 8.942285  | 2.414520 | 3.179700 | 3.029324 |
| 23 | O | 9.976971  | 9.351292  | 2.371993 | 2.535179 | 2.723856 |
| 24 | H | 10.826147 | 10.224580 | 3.203313 | 3.459550 | 3.555813 |
|    |   | 21        | 22        | 23       | 24       |          |
| 21 | C | 0.000000  |           |          |          |          |
| 22 | O | 1.205856  | 0.000000  |          |          |          |
| 23 | O | 1.352686  | 2.246571  | 0.000000 |          |          |
| 24 | H | 1.885256  | 2.297060  | 0.969834 | 0.000000 |          |

Stoichiometry C8H11BrN2O2

Framework group C1[X(C8H11BrN2O2)]

Deg. of freedom 66

Full point group C1 NOp 1

Largest Abelian subgroup C1 NOp 1

Largest concise Abelian subgroup C1 NOp 1

Standard orientation:

| Center<br>Number | Atomic<br>Number | Atomic<br>Type | Coordinates (Angstroms) |           |           |
|------------------|------------------|----------------|-------------------------|-----------|-----------|
|                  |                  |                | X                       | Y         | Z         |
| 1                | 6                | 0              | -0.632855               | -2.085246 | -0.752572 |
| 2                | 6                | 0              | -1.949134               | -1.788046 | -0.845829 |
| 3                | 7                | 0              | -2.225000               | -0.836223 | 0.133191  |
| 4                | 6                | 0              | -1.065475               | -0.510862 | 0.752402  |
| 5                | 7                | 0              | -0.103128               | -1.324166 | 0.282925  |
| 6                | 6                | 0              | 1.313880                | -1.244634 | 0.653380  |
| 7                | 1                | 0              | -0.026905               | -2.758160 | -1.333698 |
| 8                | 1                | 0              | -2.702426               | -2.135993 | -1.528766 |
| 9                | 1                | 0              | 1.378315                | -0.741417 | 1.616050  |
| 10               | 1                | 0              | 1.683376                | -2.263124 | 0.789093  |



|    |    |   |           |           |           |
|----|----|---|-----------|-----------|-----------|
| 11 | 35 | 0 | -0.489408 | 2.053172  | -0.111631 |
| 12 | 1  | 0 | -0.995120 | 0.070990  | 1.650231  |
| 13 | 6  | 0 | -3.446036 | -0.152042 | 0.353974  |
| 14 | 6  | 0 | -4.641502 | -0.675114 | 0.107157  |
| 15 | 1  | 0 | -3.292006 | 0.860126  | 0.710236  |
| 16 | 1  | 0 | -5.527196 | -0.073504 | 0.257997  |
| 17 | 1  | 0 | -4.779639 | -1.689640 | -0.246933 |
| 18 | 6  | 0 | 2.138891  | -0.482081 | -0.387201 |
| 19 | 1  | 0 | 2.104319  | -0.957310 | -1.370602 |
| 20 | 1  | 0 | 1.724527  | 0.531119  | -0.511208 |
| 21 | 6  | 0 | 3.570987  | -0.343790 | 0.063134  |
| 22 | 8  | 0 | 3.981055  | -0.590852 | 1.169883  |
| 23 | 8  | 0 | 4.376714  | 0.079850  | -0.937412 |
| 24 | 1  | 0 | 5.264254  | 0.197517  | -0.564579 |

-----

Rotational constants (GHZ): 0.8467129 0.3286671 0.2565192  
Standard basis: 6-311++G(d,p) (5D, 7F)  
There are 404 symmetry adapted cartesian basis functions of A symmetry.  
There are 389 symmetry adapted basis functions of A symmetry.  
389 basis functions, 625 primitive gaussians, 404 cartesian basis functions  
62 alpha electrons 62 beta electrons  
nuclear repulsion energy 1077.5686100860 Hartrees.  
NAtoms= 24 NActive= 24 NUniq= 24 SFac= 1.00D+00 NAtFMM= 60 NAOKFM=F  
Big=F  
Integral buffers will be 131072 words long.  
Raffenetti 2 integral format.  
Two-electron integral symmetry is turned on.  
One-electron integrals computed using PRISM.  
NBasis= 389 RedAO= T EigKep= 6.23D-06 NBF= 389  
NBsUse= 389 1.00D-06 EigRej= -1.00D+00 NBFU= 389  
Initial guess from the checkpoint file: "./cooh.chk"  
B after Tr= 0.000000 0.000000 0.000000  
Rot= 0.999855 -0.016991 -0.001386 0.000265 Ang= -1.95 deg.  
ExpMin= 3.50D-02 ExpMax= 4.40D+05 ExpMxC= 1.51D+04 IAcc=3 IRadAn= 5 AccDes=  
0.00D+00  
Harris functional with IExCor= 402 and IRadAn= 5 diagonalized for initial guess.  
HarFok: IExCor= 402 AccDes= 0.00D+00 IRadAn= 5 IDoV= 1 UseB2=F ITyADJ=14  
ICtDFT= 3500011 ScaDFX= 1.000000 1.000000 1.000000 1.000000  
FoFCou: FMM=F IPFlag= 0 FMFlag= 100000 FMFlg1= 0  
NFxFlg= 0 DoJE=T BraDBF=F KetDBF=T FulRan=T  
wScrn= 0.000000 ICntrl= 500 IOpCl= 0 l1Cent= 20000004 NGrid=  
0  
NMat0= 1 NMatS0= 1 NMatT0= 0 NMatD0= 1 NMtDS0= 0  
NMtDT0= 0



Using GEDIIS/GDIIS optimizer.

FormGI is forming the generalized inverse of G from B-inverse, IUseBI=4.

GSVD: received Info= 1 from GESDD.

Internal Forces: Max 0.002916373 RMS 0.000462695

Search for a local minimum.

Step number 4 out of a maximum of 140

All quantities printed in internal units (Hartrees-Bohrs-Radians)

Mixed Optimization -- En-DIIS/RFO-DIIS

Swapping is turned off.

Update second derivatives using D2CorX and points 3 4

DE= -4.83D-04 DEPred=-5.02D-04 R= 9.62D-01

TightC=F SS= 1.41D+00 RLast= 5.16D-01 DXNew= 1.4270D+00 1.5474D+00

Trust test= 9.62D-01 RLast= 5.16D-01 DXMaxT set to 1.43D+00

ITU= 1 1 1 0

|                 |         |         |         |         |         |
|-----------------|---------|---------|---------|---------|---------|
| Eigenvalues --- | 0.00120 | 0.00387 | 0.00809 | 0.01319 | 0.01482 |
| Eigenvalues --- | 0.01759 | 0.01962 | 0.02033 | 0.02119 | 0.02196 |
| Eigenvalues --- | 0.02279 | 0.02315 | 0.02346 | 0.02421 | 0.02983 |
| Eigenvalues --- | 0.03038 | 0.03038 | 0.03106 | 0.03672 | 0.04474 |
| Eigenvalues --- | 0.04822 | 0.05562 | 0.06526 | 0.08235 | 0.09535 |
| Eigenvalues --- | 0.10709 | 0.12424 | 0.14918 | 0.15891 | 0.15981 |
| Eigenvalues --- | 0.15991 | 0.15997 | 0.16000 | 0.16000 | 0.16330 |
| Eigenvalues --- | 0.16735 | 0.17993 | 0.20666 | 0.22003 | 0.22838 |
| Eigenvalues --- | 0.24484 | 0.24700 | 0.27326 | 0.27650 | 0.34243 |
| Eigenvalues --- | 0.34378 | 0.35140 | 0.35462 | 0.35499 | 0.35579 |
| Eigenvalues --- | 0.35844 | 0.35930 | 0.36581 | 0.36600 | 0.36651 |
| Eigenvalues --- | 0.37451 | 0.41314 | 0.43073 | 0.43812 | 0.47671 |
| Eigenvalues --- | 0.52329 | 0.53314 | 0.54459 | 0.54478 | 0.59922 |
| Eigenvalues --- | 0.91957 |         |         |         |         |

En-DIIS/RFO-DIIS IScMMF= 0 using points: 4 3

RFO step: Lambda=-9.54660338D-05.

DidBck=F Rises=F RFO-DIIS coefs: 1.10295 -0.10295

Iteration 1 RMS(Cart)= 0.06528669 RMS(Int)= 0.02207655

Iteration 2 RMS(Cart)= 0.03822911 RMS(Int)= 0.00175043

Iteration 3 RMS(Cart)= 0.00231333 RMS(Int)= 0.00082330

Iteration 4 RMS(Cart)= 0.00000398 RMS(Int)= 0.00082330

Iteration 5 RMS(Cart)= 0.00000001 RMS(Int)= 0.00082330

| Variable | Old X   | -DE/DX   | Delta X<br>(Linear) | Delta X<br>(Quad) | Delta X<br>(Total) | New X   |
|----------|---------|----------|---------------------|-------------------|--------------------|---------|
| R1       | 2.55611 | 0.00008  | 0.00007             | 0.00105           | 0.00109            | 2.55719 |
| R2       | 2.62672 | -0.00004 | -0.00012            | -0.00121          | -0.00135           | 2.62538 |
| R3       | 2.03327 | -0.00003 | -0.00002            | -0.00031          | -0.00033           | 2.03294 |
| R4       | 2.63246 | -0.00022 | -0.00008            | -0.00108          | -0.00117           | 2.63129 |
| R5       | 2.03084 | 0.00003  | -0.00001            | -0.00002          | -0.00003           | 2.03081 |
| R6       | 2.55901 | -0.00040 | -0.00006            | -0.00156          | -0.00159           | 2.55742 |

|     |         |          |          |          |          |         |
|-----|---------|----------|----------|----------|----------|---------|
| R7  | 2.67767 | 0.00021  | 0.00002  | 0.00074  | 0.00076  | 2.67843 |
| R8  | 2.54095 | -0.00048 | -0.00042 | -0.00517 | -0.00561 | 2.53534 |
| R9  | 5.22764 | 0.00072  | 0.00392  | 0.06458  | 0.06841  | 5.29605 |
| R10 | 2.02615 | -0.00006 | 0.00000  | -0.00007 | -0.00007 | 2.02608 |
| R11 | 2.77183 | -0.00017 | 0.00095  | 0.00844  | 0.00937  | 2.78120 |
| R12 | 2.05634 | 0.00032  | -0.00015 | -0.00042 | -0.00057 | 2.05577 |
| R13 | 2.06341 | -0.00019 | -0.00011 | -0.00157 | -0.00168 | 2.06173 |
| R14 | 2.89377 | 0.00007  | -0.00144 | -0.01326 | -0.01466 | 2.87911 |
| R15 | 5.10189 | 0.00033  | 0.00184  | 0.02310  | 0.02497  | 5.12686 |
| R16 | 5.13290 | -0.00007 | -0.00022 | -0.00442 | -0.00459 | 5.12831 |
| R17 | 2.50961 | -0.00011 | -0.00001 | -0.00026 | -0.00027 | 2.50934 |
| R18 | 2.04853 | 0.00003  | -0.00001 | -0.00004 | -0.00005 | 2.04848 |
| R19 | 2.04330 | 0.00000  | 0.00000  | 0.00001  | 0.00001  | 2.04331 |
| R20 | 2.04730 | 0.00001  | 0.00000  | 0.00000  | 0.00000  | 2.04730 |
| R21 | 2.06501 | -0.00009 | 0.00005  | 0.00001  | 0.00006  | 2.06507 |
| R22 | 2.08183 | -0.00102 | 0.00012  | -0.00190 | -0.00171 | 2.08012 |
| R23 | 2.84893 | -0.00113 | -0.00008 | -0.00403 | -0.00410 | 2.84483 |
| R24 | 2.27874 | 0.00292  | 0.00021  | 0.00536  | 0.00557  | 2.28430 |
| R25 | 2.55621 | -0.00092 | -0.00029 | -0.00443 | -0.00471 | 2.55150 |
| R26 | 1.83272 | -0.00051 | -0.00004 | -0.00121 | -0.00126 | 1.83146 |
| A1  | 1.87749 | -0.00006 | -0.00012 | -0.00127 | -0.00142 | 1.87607 |
| A2  | 2.27603 | 0.00003  | 0.00000  | 0.00004  | 0.00004  | 2.27607 |
| A3  | 2.12959 | 0.00003  | 0.00013  | 0.00132  | 0.00145  | 2.13104 |
| A4  | 1.86961 | -0.00009 | 0.00002  | 0.00022  | 0.00022  | 1.86983 |
| A5  | 2.28470 | 0.00003  | -0.00003 | -0.00036 | -0.00038 | 2.28432 |
| A6  | 2.12825 | 0.00005  | 0.00000  | 0.00004  | 0.00004  | 2.12829 |
| A7  | 1.89227 | 0.00001  | -0.00007 | -0.00097 | -0.00100 | 1.89127 |
| A8  | 2.22695 | 0.00003  | 0.00011  | 0.00134  | 0.00143  | 2.22838 |
| A9  | 2.15388 | -0.00003 | -0.00003 | -0.00028 | -0.00034 | 2.15355 |
| A10 | 1.88373 | 0.00023  | 0.00011  | 0.00212  | 0.00210  | 1.88583 |
| A11 | 1.83194 | -0.00053 | -0.00095 | -0.01266 | -0.01351 | 1.81843 |
| A12 | 2.17666 | -0.00002 | 0.00019  | 0.00343  | 0.00328  | 2.17994 |
| A13 | 1.87815 | 0.00021  | -0.00015 | -0.00126 | -0.00148 | 1.87666 |
| A14 | 2.18176 | -0.00007 | 0.00036  | 0.00483  | 0.00489  | 2.18665 |
| A15 | 1.89498 | -0.00007 | 0.00014  | 0.00103  | 0.00125  | 1.89623 |
| A16 | 2.19691 | 0.00015  | -0.00018 | -0.00013 | -0.00029 | 2.19662 |
| A17 | 2.17783 | -0.00008 | 0.00008  | -0.00061 | -0.00062 | 2.17721 |
| A18 | 1.88148 | -0.00013 | -0.00028 | -0.00592 | -0.00621 | 1.87527 |
| A19 | 1.88360 | 0.00014  | 0.00031  | 0.00437  | 0.00472  | 1.88832 |
| A20 | 1.95611 | -0.00044 | -0.00096 | -0.01082 | -0.01176 | 1.94435 |
| A21 | 1.87691 | -0.00021 | -0.00012 | -0.00268 | -0.00283 | 1.87408 |
| A22 | 1.91662 | 0.00045  | 0.00013  | 0.00499  | 0.00504  | 1.92167 |
| A23 | 1.94618 | 0.00018  | 0.00092  | 0.00981  | 0.01072  | 1.95690 |
| A24 | 1.26223 | -0.00063 | -0.00114 | -0.01534 | -0.01647 | 1.24575 |

|     |          |          |          |          |          |          |
|-----|----------|----------|----------|----------|----------|----------|
| A25 | 1.40733  | -0.00067 | -0.00123 | -0.01659 | -0.01788 | 1.38945  |
| A26 | 2.16105  | -0.00006 | 0.00000  | -0.00031 | -0.00031 | 2.16074  |
| A27 | 1.96016  | -0.00005 | -0.00002 | -0.00060 | -0.00062 | 1.95955  |
| A28 | 2.16126  | 0.00011  | 0.00001  | 0.00083  | 0.00085  | 2.16211  |
| A29 | 2.08551  | -0.00001 | -0.00002 | -0.00028 | -0.00030 | 2.08521  |
| A30 | 2.14642  | 0.00001  | 0.00003  | 0.00038  | 0.00041  | 2.14683  |
| A31 | 2.05125  | 0.00000  | -0.00001 | -0.00011 | -0.00012 | 2.05113  |
| A32 | 1.95835  | 0.00043  | -0.00021 | -0.00359 | -0.00382 | 1.95452  |
| A33 | 1.90905  | -0.00022 | 0.00005  | 0.00460  | 0.00453  | 1.91357  |
| A34 | 1.93315  | -0.00029 | 0.00161  | 0.01379  | 0.01522  | 1.94837  |
| A35 | 1.86165  | -0.00006 | -0.00194 | -0.01979 | -0.02174 | 1.83991  |
| A36 | 1.91640  | -0.00073 | 0.00065  | -0.00713 | -0.00641 | 1.90999  |
| A37 | 1.88237  | 0.00091  | -0.00027 | 0.01161  | 0.01112  | 1.89349  |
| A38 | 2.50711  | 0.00097  | 0.00138  | 0.01748  | 0.01906  | 2.52617  |
| A39 | 2.18757  | 0.00049  | 0.00042  | 0.00739  | 0.00241  | 2.18998  |
| A40 | 1.95369  | -0.00136 | -0.00034 | -0.00703 | -0.01273 | 1.94096  |
| A41 | 2.14181  | 0.00089  | -0.00008 | 0.00248  | -0.00300 | 2.13882  |
| A42 | 1.87418  | -0.00022 | 0.00025  | 0.00229  | 0.00254  | 1.87672  |
| D1  | 0.00458  | -0.00002 | 0.00006  | 0.00017  | 0.00024  | 0.00482  |
| D2  | 3.10771  | -0.00007 | -0.00013 | -0.00296 | -0.00309 | 3.10462  |
| D3  | -3.12393 | 0.00002  | -0.00075 | -0.00745 | -0.00818 | -3.13211 |
| D4  | -0.02081 | -0.00003 | -0.00093 | -0.01058 | -0.01150 | -0.03231 |
| D5  | -0.06994 | 0.00010  | 0.00030  | 0.00543  | 0.00573  | -0.06421 |
| D6  | -3.04206 | 0.00012  | 0.00002  | 0.00361  | 0.00365  | -3.03841 |
| D7  | 3.05990  | 0.00006  | 0.00102  | 0.01227  | 0.01329  | 3.07319  |
| D8  | 0.08778  | 0.00009  | 0.00074  | 0.01044  | 0.01120  | 0.09899  |
| D9  | 0.06182  | -0.00006 | -0.00040 | -0.00581 | -0.00622 | 0.05560  |
| D10 | 3.05388  | -0.00005 | -0.00032 | -0.00524 | -0.00556 | 3.04832  |
| D11 | -3.04551 | -0.00002 | -0.00024 | -0.00301 | -0.00324 | -3.04876 |
| D12 | -0.05345 | -0.00001 | -0.00015 | -0.00244 | -0.00259 | -0.05604 |
| D13 | -0.10556 | 0.00010  | 0.00058  | 0.00908  | 0.00970  | -0.09587 |
| D14 | 1.89384  | 0.00019  | 0.00000  | 0.00254  | 0.00251  | 1.89635  |
| D15 | -2.95507 | -0.00036 | -0.00168 | -0.02761 | -0.02930 | -2.98437 |
| D16 | -3.10528 | 0.00009  | 0.00049  | 0.00837  | 0.00889  | -3.09639 |
| D17 | -1.10587 | 0.00018  | -0.00009 | 0.00182  | 0.00170  | -1.10417 |
| D18 | 0.32840  | -0.00037 | -0.00177 | -0.02832 | -0.03011 | 0.29829  |
| D19 | 0.55051  | 0.00005  | 0.00006  | 0.00484  | 0.00489  | 0.55540  |
| D20 | -2.55186 | 0.00006  | 0.00017  | 0.00682  | 0.00699  | -2.54487 |
| D21 | -2.76122 | 0.00006  | 0.00015  | 0.00546  | 0.00562  | -2.75560 |
| D22 | 0.41959  | 0.00008  | 0.00027  | 0.00744  | 0.00772  | 0.42731  |
| D23 | 0.10845  | -0.00012 | -0.00054 | -0.00887 | -0.00944 | 0.09901  |
| D24 | 3.08286  | -0.00012 | -0.00030 | -0.00701 | -0.00735 | 3.07551  |
| D25 | -1.86017 | 0.00028  | 0.00058  | 0.00535  | 0.00587  | -1.85430 |
| D26 | 1.11425  | 0.00028  | 0.00082  | 0.00720  | 0.00796  | 1.12221  |



Input orientation:

| Center<br>Number | Atomic<br>Number | Atomic<br>Type | Coordinates (Angstroms) |           |           |
|------------------|------------------|----------------|-------------------------|-----------|-----------|
|                  |                  |                | X                       | Y         | Z         |
| 1                | 6                | 0              | -0.321695               | -2.194297 | -0.379702 |
| 2                | 6                | 0              | -1.574697               | -1.757119 | -0.644342 |
| 3                | 7                | 0              | -1.809524               | -0.660713 | 0.181234  |
| 4                | 6                | 0              | -0.679666               | -0.403808 | 0.880462  |
| 5                | 7                | 0              | 0.207022                | -1.373244 | 0.608456  |
| 6                | 6                | 0              | 1.589184                | -1.411367 | 1.112658  |
| 7                | 1                | 0              | 0.237584                | -3.008214 | -0.806395 |
| 8                | 1                | 0              | -2.302163               | -2.097265 | -1.358473 |
| 9                | 1                | 0              | 1.626476                | -0.795940 | 2.008937  |
| 10               | 1                | 0              | 1.814624                | -2.436170 | 1.411465  |
| 11               | 35               | 0              | 0.296828                | 1.971832  | -0.240735 |
| 12               | 1                | 0              | -0.605186               | 0.294006  | 1.691034  |
| 13               | 6                | 0              | -2.942019               | 0.191536  | 0.188387  |
| 14               | 6                | 0              | -4.170163               | -0.209317 | -0.118632 |
| 15               | 1                | 0              | -2.684048               | 1.215602  | 0.432960  |
| 16               | 1                | 0              | -4.976141               | 0.511266  | -0.136376 |
| 17               | 1                | 0              | -4.412277               | -1.237264 | -0.360342 |
| 18               | 6                | 0              | 2.574026                | -0.886298 | 0.075533  |
| 19               | 1                | 0              | 2.537258                | -1.462652 | -0.852181 |
| 20               | 1                | 0              | 2.300289                | 0.141623  | -0.207485 |
| 21               | 6                | 0              | 3.983714                | -0.876697 | 0.603711  |
| 22               | 8                | 0              | 4.315528                | -1.188960 | 1.723351  |
| 23               | 8                | 0              | 4.825046                | -0.269957 | -0.260608 |
| 24               | 1                | 0              | 5.681970                | -0.177361 | 0.182559  |

Distance matrix (angstroms):

|    |    | 1        | 2        | 3        | 4        | 5        |
|----|----|----------|----------|----------|----------|----------|
| 1  | C  | 0.000000 |          |          |          |          |
| 2  | C  | 1.353208 | 0.000000 |          |          |          |
| 3  | N  | 2.209110 | 1.392418 | 0.000000 |          |          |
| 4  | C  | 2.218560 | 2.226557 | 1.353329 | 0.000000 |          |
| 5  | N  | 1.389290 | 2.211648 | 2.180981 | 1.341645 | 0.000000 |
| 6  | C  | 2.547857 | 3.635482 | 3.603089 | 2.493345 | 1.471748 |
| 7  | H  | 1.075788 | 2.208135 | 3.267541 | 3.235701 | 2.162374 |
| 8  | H  | 2.211258 | 1.074658 | 2.162654 | 3.242395 | 3.269407 |
| 9  | H  | 3.384726 | 4.267465 | 3.894211 | 2.597213 | 2.075928 |
| 10 | H  | 2.798328 | 4.021809 | 4.219025 | 3.260973 | 2.087826 |
| 11 | Br | 4.214085 | 4.191728 | 3.397804 | 2.802551 | 3.452351 |
| 12 | H  | 3.249611 | 3.255925 | 2.154395 | 1.072156 | 2.147413 |

|    |    |          |          |          |          |          |
|----|----|----------|----------|----------|----------|----------|
| 13 | C  | 3.589014 | 2.521957 | 1.417365 | 2.439599 | 3.541392 |
| 14 | C  | 4.338088 | 3.067329 | 2.422043 | 3.635874 | 4.587279 |
| 15 | H  | 4.227120 | 3.350867 | 2.085357 | 2.615395 | 3.884741 |
| 16 | H  | 5.389170 | 4.119882 | 3.391441 | 4.508993 | 5.565190 |
| 17 | H  | 4.201090 | 2.898753 | 2.720302 | 4.020775 | 4.721757 |
| 18 | C  | 3.209875 | 4.299820 | 4.390624 | 3.386329 | 2.474638 |
| 19 | H  | 2.988670 | 4.127720 | 4.539335 | 3.804182 | 2.751627 |
| 20 | H  | 3.515818 | 4.337232 | 4.205402 | 3.218890 | 2.709677 |
| 21 | C  | 4.608656 | 5.764435 | 5.812636 | 4.695458 | 3.809197 |
| 22 | O  | 5.190122 | 6.373658 | 6.338251 | 5.126294 | 4.261076 |
| 23 | O  | 5.496017 | 6.581459 | 6.660738 | 5.623328 | 4.826868 |
| 24 | H  | 6.358314 | 7.472523 | 7.507071 | 6.403808 | 5.620194 |
|    |    | 6        | 7        | 8        | 9        | 10       |
| 6  | C  | 0.000000 |          |          |          |          |
| 7  | H  | 2.838927 | 0.000000 |          |          |          |
| 8  | H  | 4.660421 | 2.754075 | 0.000000 |          |          |
| 9  | H  | 1.087868 | 3.840478 | 5.335457 | 0.000000 |          |
| 10 | H  | 1.091022 | 2.780862 | 4.973465 | 1.755769 | 0.000000 |
| 11 | Br | 3.866251 | 5.012419 | 4.955971 | 3.806514 | 4.946105 |
| 12 | H  | 2.838675 | 4.225171 | 4.230532 | 2.503869 | 3.658893 |
| 13 | C  | 4.894423 | 4.619293 | 2.835631 | 5.016040 | 5.570136 |
| 14 | C  | 6.010913 | 5.266410 | 2.931037 | 6.202556 | 6.566410 |
| 15 | H  | 5.061963 | 5.283233 | 3.785520 | 5.011050 | 5.876305 |
| 16 | H  | 6.954142 | 6.326025 | 3.930409 | 7.064397 | 7.562915 |
| 17 | H  | 6.182037 | 4.995641 | 2.487659 | 6.501907 | 6.584146 |
| 18 | C  | 1.523562 | 3.277085 | 5.224944 | 2.155009 | 2.182546 |
| 19 | H  | 2.182216 | 2.771165 | 4.907041 | 3.075715 | 2.567884 |
| 20 | H  | 2.158756 | 3.812469 | 5.245947 | 2.499115 | 3.082513 |
| 21 | C  | 2.505728 | 4.534893 | 6.697178 | 2.745496 | 2.790944 |
| 22 | O  | 2.802742 | 5.132146 | 7.356391 | 2.732585 | 2.811996 |
| 23 | O  | 3.695874 | 5.370358 | 7.439185 | 3.957062 | 4.068285 |
| 24 | H  | 4.374786 | 6.215553 | 8.355069 | 4.490582 | 4.644221 |
|    |    | 11       | 12       | 13       | 14       | 15       |
| 11 | Br | 0.000000 |          |          |          |          |
| 12 | H  | 2.713017 | 0.000000 |          |          |          |
| 13 | C  | 3.720716 | 2.780151 | 0.000000 |          |          |
| 14 | C  | 4.972558 | 4.029551 | 1.327886 | 0.000000 |          |
| 15 | H  | 3.148233 | 2.598799 | 1.084009 | 2.131475 | 0.000000 |
| 16 | H  | 5.472509 | 4.742561 | 2.084551 | 1.081275 | 2.464534 |
| 17 | H  | 5.699849 | 4.587688 | 2.122318 | 1.083383 | 3.103652 |
| 18 | C  | 3.668047 | 3.756375 | 5.621496 | 6.780862 | 5.673895 |
| 19 | H  | 4.145970 | 4.407804 | 5.817352 | 6.862829 | 6.007217 |
| 20 | H  | 2.713784 | 3.474101 | 5.257470 | 6.480571 | 5.138795 |
| 21 | C  | 4.735012 | 4.859096 | 7.019928 | 8.212970 | 6.990416 |



|    |   |           |           |          |          |          |
|----|---|-----------|-----------|----------|----------|----------|
| 22 | O | 5.477060  | 5.139421  | 7.545453 | 8.738395 | 7.512728 |
| 23 | O | 5.052798  | 5.797791  | 7.793707 | 8.996533 | 7.685988 |
| 24 | H | 5.813601  | 6.482747  | 8.631877 | 9.856787 | 8.484886 |
|    |   | 16        | 17        | 18       | 19       | 20       |
| 16 | H | 0.000000  |           |          |          |          |
| 17 | H | 1.850800  | 0.000000  |          |          |          |
| 18 | C | 7.681349  | 7.008681  | 0.000000 |          |          |
| 19 | H | 7.801275  | 6.970562  | 1.092790 | 0.000000 |          |
| 20 | H | 7.286160  | 6.854432  | 1.100752 | 1.745132 | 0.000000 |
| 21 | C | 9.096877  | 8.458846  | 1.505418 | 2.134292 | 2.128130 |
| 22 | O | 9.627277  | 8.973221  | 2.416554 | 3.141738 | 3.091888 |
| 23 | O | 9.833057  | 9.288367  | 2.357956 | 2.646971 | 2.558636 |
| 24 | H | 10.685095 | 10.164249 | 3.189570 | 3.551320 | 3.419013 |
|    |   | 21        | 22        | 23       | 24       |          |
| 21 | C | 0.000000  |           |          |          |          |
| 22 | O | 1.208802  | 0.000000  |          |          |          |
| 23 | O | 1.350193  | 2.245055  | 0.000000 |          |          |
| 24 | H | 1.884281  | 2.294458  | 0.969169 | 0.000000 |          |

Stoichiometry C8H11BrN2O2

Framework group C1[X(C8H11BrN2O2)]

Deg. of freedom 66

Full point group C1 NOp 1

Largest Abelian subgroup C1 NOp 1

Largest concise Abelian subgroup C1 NOp 1

Standard orientation:

| Center Number | Atomic Number | Atomic Type | Coordinates (Angstroms) |           |           |
|---------------|---------------|-------------|-------------------------|-----------|-----------|
|               |               |             | X                       | Y         | Z         |
| 1             | 6             | 0           | -0.657436               | -2.086680 | -0.787664 |
| 2             | 6             | 0           | -1.969103               | -1.765016 | -0.872733 |
| 3             | 7             | 0           | -2.227890               | -0.830382 | 0.126424  |
| 4             | 6             | 0           | -1.063910               | -0.545027 | 0.755091  |
| 5             | 7             | 0           | -0.115882               | -1.357044 | 0.263276  |
| 6             | 6             | 0           | 1.307648                | -1.305055 | 0.633279  |
| 7             | 1             | 0           | -0.065202               | -2.762021 | -1.379688 |
| 8             | 1             | 0           | -2.728009               | -2.083423 | -1.563796 |
| 9             | 1             | 0           | 1.374458                | -0.821701 | 1.605576  |
| 10            | 1             | 0           | 1.666109                | -2.328544 | 0.752882  |
| 11            | 35            | 0           | -0.455979               | 2.061820  | -0.075007 |
| 12            | 1             | 0           | -0.977571               | 0.035705  | 1.652206  |
| 13            | 6             | 0           | -3.434553               | -0.124855 | 0.361201  |
| 14            | 6             | 0           | -4.640542               | -0.618323 | 0.105540  |
| 15            | 1             | 0           | -3.258466               | 0.877571  | 0.734309  |

|    |   |   |           |           |           |
|----|---|---|-----------|-----------|-----------|
| 16 | 1 | 0 | -5.513297 | -0.000861 | 0.267385  |
| 17 | 1 | 0 | -4.800249 | -1.623129 | -0.266722 |
| 18 | 6 | 0 | 2.121260  | -0.528606 | -0.394536 |
| 19 | 1 | 0 | 2.047733  | -0.969059 | -1.391924 |
| 20 | 1 | 0 | 1.716329  | 0.490124  | -0.493903 |
| 21 | 6 | 0 | 3.569637  | -0.429872 | 0.003886  |
| 22 | 8 | 0 | 4.045551  | -0.855893 | 1.030148  |
| 23 | 8 | 0 | 4.250799  | 0.385915  | -0.828899 |
| 24 | 1 | 0 | 5.135019  | 0.514063  | -0.453367 |

-----

Rotational constants (GHZ):      0.8371659      0.3333551      0.2564918

Standard basis: 6-311++G(d,p) (5D, 7F)

There are    404 symmetry adapted cartesian basis functions of A    symmetry.

There are    389 symmetry adapted basis functions of A    symmetry.

    389 basis functions,    625 primitive gaussians,    404 cartesian basis functions

    62 alpha electrons      62 beta electrons

        nuclear repulsion energy      1077.2388817761 Hartrees.

NAtoms=    24 NActive=    24 NUniq=    24 SFac= 1.00D+00 NatFMM=    60 NAOKFM=F

Big=F

Integral buffers will be    131072 words long.

Raffenetti 2 integral format.

Two-electron integral symmetry is turned on.

One-electron integrals computed using PRISM.

NBasis=    389 RedAO= T EigKep= 6.15D-06 NBF=    389

NBsUse=    389 1.00D-06 EigRej= -1.00D+00 NBFU=    389

Initial guess from the checkpoint file: "./cooh.chk"

B after Tr=    0.000000    0.000000    0.000000

        Rot=    0.999836    -0.017732    -0.002274    0.002723 Ang=    -2.07 deg.

ExpMin= 3.50D-02 ExpMax= 4.40D+05 ExpMxC= 1.51D+04 IAcc=3 IRadAn=      5 AccDes=

0.00D+00

Harris functional with IExCor=    402 and IRadAn=      5 diagonalized for initial guess.

HarFok: IExCor=    402 AccDes= 0.00D+00 IRadAn=      5 IDoV= 1 UseB2=F ITyADJ=14

ICtDFT= 3500011 ScaDFX= 1.000000 1.000000 1.000000 1.000000

FoFCou: FMM=F IPFlag=      0 FMFlag=      100000 FMFlg1=      0

        NFxFlg=      0 DoJE=T BraDBF=F KetDBF=T FulRan=T

        wScrn= 0.000000 ICntrl=      500 IOpCl= 0 I1Cent=    200000004 NGrid=

0

        NMat0=    1 NMatS0=      1 NMatT0=    0 NMatD0=    1 NMtDS0=    0

NMtDT0=    0

Petite list used in FoFCou.

Keep R1 ints in memory in canonical form, NReq=2910765817.

Requested convergence on RMS density matrix=1.00D-08 within 128 cycles.

Requested convergence on MAX density matrix=1.00D-06.

Requested convergence on                    energy=1.00D-06.

No special actions if energy rises.

SCF Done: E(RB3LYP) = -3145.73030746 A.U. after 15 cycles

NFock= 15 Conv=0.42D-08 -V/T= 2.0017

Calling FoFJK, ICntrl= 2127 FMM=F ISym2X=0 l1Cent= 0 IOpClX= 0 NMat=1 NMatS=1

NMatT=0.

\*\*\*\*\* Axes restored to original set \*\*\*\*\*

| Center<br>Number | Atomic<br>Number | Forces (Hartrees/Bohr) |              |              |
|------------------|------------------|------------------------|--------------|--------------|
|                  |                  | X                      | Y            | Z            |
| 1                | 6                | -0.000574811           | -0.000023188 | 0.000055084  |
| 2                | 6                | -0.000008795           | 0.000260967  | -0.000191292 |
| 3                | 7                | 0.000985141            | -0.000047968 | 0.000220242  |
| 4                | 6                | -0.001275191           | -0.000992224 | 0.000267018  |
| 5                | 7                | 0.002507302            | -0.000925529 | 0.001119818  |
| 6                | 6                | -0.002745850           | -0.001831248 | 0.000811234  |
| 7                | 1                | 0.000135462            | 0.000045306  | -0.000068421 |
| 8                | 1                | -0.000075129           | -0.000067152 | 0.000013530  |
| 9                | 1                | -0.000264241           | 0.000342492  | 0.000782635  |
| 10               | 1                | -0.000071030           | -0.000180997 | -0.000201676 |
| 11               | 35               | 0.000024040            | 0.000616025  | -0.000136553 |
| 12               | 1                | 0.000336982            | 0.000333785  | -0.000344348 |
| 13               | 6                | -0.000675409           | 0.000333030  | -0.000067483 |
| 14               | 6                | 0.000211048            | -0.000079304 | 0.000057442  |
| 15               | 1                | 0.000175688            | 0.000086067  | -0.000092267 |
| 16               | 1                | -0.000006539           | 0.000010433  | 0.000021005  |
| 17               | 1                | 0.000012090            | -0.000038275 | -0.000019733 |
| 18               | 6                | 0.001178401            | -0.001149318 | -0.005770019 |
| 19               | 1                | 0.000033931            | -0.001619047 | -0.000676573 |
| 20               | 1                | 0.000642239            | -0.001020501 | 0.001377926  |
| 21               | 6                | -0.002983952           | 0.020034694  | 0.008594147  |
| 22               | 8                | 0.000511301            | -0.007533867 | -0.002442918 |
| 23               | 8                | 0.001657454            | -0.005658549 | -0.003128972 |
| 24               | 1                | 0.000269866            | -0.000895630 | -0.000179826 |

Cartesian Forces: Max 0.020034694 RMS 0.003031001

GradGradGradGradGradGradGradGradGradGradGradGradGradGradGradGradGradGradGrad

Berny optimization.

Using GEDIIS/GDIIS optimizer.

FormGI is forming the generalized inverse of G from B-inverse, IUseBI=4.

GSVD: received Info= 1 from GESDD.

Internal Forces: Max 0.005265062 RMS 0.001187115

Search for a local minimum.

Step number 5 out of a maximum of 140

All quantities printed in internal units (Hartrees-Bohrs-Radians)

Mixed Optimization -- RFO/linear search

Update second derivatives using D2CorX and points 3 5 4

DE= 1.56D-03 DEPred=-4.62D-04 R=-3.37D+00

Trust test=-3.37D+00 RLast= 6.89D-01 DXMaxT set to 7.14D-01

ITU= -1 1 1 1 0

Use linear search instead of GDIIIS.

Energy rises -- skip Quadratic/GDIIIS search.

Quartic linear search produced a step of -0.80866.

Iteration 1 RMS(Cart)= 0.05897749 RMS(Int)= 0.01259790

Iteration 2 RMS(Cart)= 0.02166986 RMS(Int)= 0.00053834

Iteration 3 RMS(Cart)= 0.00077519 RMS(Int)= 0.00012672

Iteration 4 RMS(Cart)= 0.00000046 RMS(Int)= 0.00012672

| Variable | Old X   | -DE/DX   | Delta X<br>(Linear) | Delta X<br>(Quad) | Delta X<br>(Total) | New X   |
|----------|---------|----------|---------------------|-------------------|--------------------|---------|
| R1       | 2.55719 | 0.00002  | -0.00088            | 0.00000           | -0.00087           | 2.55632 |
| R2       | 2.62538 | 0.00020  | 0.00109             | 0.00000           | 0.00109            | 2.62647 |
| R3       | 2.03294 | 0.00006  | 0.00027             | 0.00000           | 0.00027            | 2.03321 |
| R4       | 2.63129 | -0.00010 | 0.00094             | 0.00000           | 0.00095            | 2.63223 |
| R5       | 2.03081 | 0.00006  | 0.00002             | 0.00000           | 0.00002            | 2.03083 |
| R6       | 2.55742 | -0.00062 | 0.00129             | 0.00000           | 0.00128            | 2.55870 |
| R7       | 2.67843 | 0.00041  | -0.00062            | 0.00000           | -0.00062           | 2.67782 |
| R8       | 2.53534 | 0.00026  | 0.00454             | 0.00000           | 0.00454            | 2.53988 |
| R9       | 5.29605 | 0.00062  | -0.05532            | 0.00000           | -0.05531           | 5.24074 |
| R10      | 2.02608 | -0.00008 | 0.00006             | 0.00000           | 0.00006            | 2.02614 |
| R11      | 2.78120 | -0.00203 | -0.00758            | 0.00000           | -0.00757           | 2.77363 |
| R12      | 2.05577 | 0.00083  | 0.00046             | 0.00000           | 0.00046            | 2.05623 |
| R13      | 2.06173 | 0.00010  | 0.00136             | 0.00000           | 0.00136            | 2.06309 |
| R14      | 2.87911 | 0.00290  | 0.01185             | 0.00000           | 0.01185            | 2.89096 |
| R15      | 5.12686 | 0.00008  | -0.02019            | 0.00000           | -0.02019           | 5.10667 |
| R16      | 5.12831 | 0.00015  | 0.00371             | 0.00000           | 0.00370            | 5.13201 |
| R17      | 2.50934 | -0.00018 | 0.00022             | 0.00000           | 0.00022            | 2.50956 |
| R18      | 2.04848 | 0.00010  | 0.00004             | 0.00000           | 0.00004            | 2.04852 |
| R19      | 2.04331 | 0.00001  | -0.00001            | 0.00000           | -0.00001           | 2.04330 |
| R20      | 2.04730 | 0.00004  | 0.00000             | 0.00000           | 0.00000            | 2.04730 |
| R21      | 2.06507 | 0.00143  | -0.00005            | 0.00000           | -0.00005           | 2.06502 |
| R22      | 2.08012 | -0.00143 | 0.00139             | 0.00000           | 0.00137            | 2.08149 |
| R23      | 2.84483 | 0.00051  | 0.00332             | 0.00000           | 0.00332            | 2.84814 |
| R24      | 2.28430 | -0.00018 | -0.00450            | 0.00000           | -0.00450           | 2.27980 |
| R25      | 2.55150 | 0.00039  | 0.00381             | 0.00000           | 0.00381            | 2.55531 |
| R26      | 1.83146 | 0.00007  | 0.00102             | 0.00000           | 0.00102            | 1.83248 |
| A1       | 1.87607 | 0.00005  | 0.00115             | 0.00000           | 0.00116            | 1.87723 |
| A2       | 2.27607 | 0.00005  | -0.00003            | 0.00000           | -0.00003           | 2.27604 |

|     |          |          |          |         |          |          |
|-----|----------|----------|----------|---------|----------|----------|
| A3  | 2.13104  | -0.00010 | -0.00117 | 0.00000 | -0.00117 | 2.12987  |
| A4  | 1.86983  | -0.00007 | -0.00018 | 0.00000 | -0.00017 | 1.86965  |
| A5  | 2.28432  | 0.00004  | 0.00030  | 0.00000 | 0.00030  | 2.28462  |
| A6  | 2.12829  | 0.00003  | -0.00004 | 0.00000 | -0.00004 | 2.12826  |
| A7  | 1.89127  | 0.00015  | 0.00081  | 0.00000 | 0.00080  | 1.89207  |
| A8  | 2.22838  | -0.00014 | -0.00116 | 0.00000 | -0.00115 | 2.22723  |
| A9  | 2.15355  | -0.00001 | 0.00027  | 0.00000 | 0.00028  | 2.15382  |
| A10 | 1.88583  | 0.00019  | -0.00170 | 0.00000 | -0.00168 | 1.88415  |
| A11 | 1.81843  | -0.00020 | 0.01092  | 0.00000 | 0.01091  | 1.82934  |
| A12 | 2.17994  | 0.00007  | -0.00265 | 0.00000 | -0.00260 | 2.17734  |
| A13 | 1.87666  | 0.00011  | 0.00120  | 0.00000 | 0.00121  | 1.87787  |
| A14 | 2.18665  | -0.00018 | -0.00396 | 0.00000 | -0.00391 | 2.18274  |
| A15 | 1.89623  | -0.00032 | -0.00101 | 0.00000 | -0.00102 | 1.89521  |
| A16 | 2.19662  | 0.00063  | 0.00024  | 0.00000 | 0.00023  | 2.19685  |
| A17 | 2.17721  | -0.00033 | 0.00050  | 0.00000 | 0.00051  | 2.17773  |
| A18 | 1.87527  | -0.00008 | 0.00502  | 0.00000 | 0.00502  | 1.88030  |
| A19 | 1.88832  | -0.00017 | -0.00382 | 0.00000 | -0.00382 | 1.88449  |
| A20 | 1.94435  | 0.00000  | 0.00951  | 0.00000 | 0.00951  | 1.95386  |
| A21 | 1.87408  | 0.00003  | 0.00229  | 0.00000 | 0.00229  | 1.87637  |
| A22 | 1.92167  | 0.00008  | -0.00408 | 0.00000 | -0.00406 | 1.91760  |
| A23 | 1.95690  | 0.00013  | -0.00867 | 0.00000 | -0.00866 | 1.94824  |
| A24 | 1.24575  | 0.00021  | 0.01332  | 0.00000 | 0.01332  | 1.25907  |
| A25 | 1.38945  | 0.00011  | 0.01446  | 0.00000 | 0.01447  | 1.40392  |
| A26 | 2.16074  | -0.00019 | 0.00025  | 0.00000 | 0.00025  | 2.16099  |
| A27 | 1.95955  | -0.00005 | 0.00050  | 0.00000 | 0.00050  | 1.96005  |
| A28 | 2.16211  | 0.00023  | -0.00069 | 0.00000 | -0.00069 | 2.16142  |
| A29 | 2.08521  | 0.00000  | 0.00024  | 0.00000 | 0.00024  | 2.08545  |
| A30 | 2.14683  | -0.00002 | -0.00033 | 0.00000 | -0.00033 | 2.14650  |
| A31 | 2.05113  | 0.00002  | 0.00010  | 0.00000 | 0.00010  | 2.05123  |
| A32 | 1.95452  | -0.00045 | 0.00309  | 0.00000 | 0.00309  | 1.95762  |
| A33 | 1.91357  | 0.00041  | -0.00366 | 0.00000 | -0.00364 | 1.90993  |
| A34 | 1.94837  | -0.00118 | -0.01231 | 0.00000 | -0.01228 | 1.93609  |
| A35 | 1.83991  | 0.00059  | 0.01758  | 0.00000 | 0.01758  | 1.85749  |
| A36 | 1.90999  | 0.00045  | 0.00519  | 0.00000 | 0.00517  | 1.91516  |
| A37 | 1.89349  | 0.00031  | -0.00900 | 0.00000 | -0.00896 | 1.88453  |
| A38 | 2.52617  | -0.00047 | -0.01541 | 0.00000 | -0.01544 | 2.51073  |
| A39 | 2.18998  | -0.00105 | -0.00195 | 0.00000 | -0.00112 | 2.18886  |
| A40 | 1.94096  | 0.00181  | 0.01029  | 0.00000 | 0.01112  | 1.95208  |
| A41 | 2.13882  | 0.00060  | 0.00242  | 0.00000 | 0.00325  | 2.14207  |
| A42 | 1.87672  | -0.00025 | -0.00205 | 0.00000 | -0.00205 | 1.87467  |
| D1  | 0.00482  | 0.00004  | -0.00019 | 0.00000 | -0.00019 | 0.00462  |
| D2  | 3.10462  | 0.00000  | 0.00250  | 0.00000 | 0.00250  | 3.10712  |
| D3  | -3.13211 | 0.00013  | 0.00661  | 0.00000 | 0.00661  | -3.12550 |
| D4  | -0.03231 | 0.00009  | 0.00930  | 0.00000 | 0.00930  | -0.02301 |

|     |          |          |          |         |          |          |
|-----|----------|----------|----------|---------|----------|----------|
| D5  | -0.06421 | 0.00001  | -0.00464 | 0.00000 | -0.00464 | -0.06885 |
| D6  | -3.03841 | 0.00018  | -0.00295 | 0.00000 | -0.00295 | -3.04137 |
| D7  | 3.07319  | -0.00007 | -0.01074 | 0.00000 | -0.01075 | 3.06244  |
| D8  | 0.09899  | 0.00010  | -0.00906 | 0.00000 | -0.00906 | 0.08993  |
| D9  | 0.05560  | -0.00005 | 0.00503  | 0.00000 | 0.00503  | 0.06063  |
| D10 | 3.04832  | -0.00007 | 0.00450  | 0.00000 | 0.00450  | 3.05282  |
| D11 | -3.04876 | -0.00002 | 0.00262  | 0.00000 | 0.00262  | -3.04614 |
| D12 | -0.05604 | -0.00003 | 0.00209  | 0.00000 | 0.00209  | -0.05395 |
| D13 | -0.09587 | 0.00004  | -0.00784 | 0.00000 | -0.00784 | -0.10371 |
| D14 | 1.89635  | 0.00015  | -0.00203 | 0.00000 | -0.00203 | 1.89432  |
| D15 | -2.98437 | -0.00027 | 0.02369  | 0.00000 | 0.02370  | -2.96067 |
| D16 | -3.09639 | 0.00007  | -0.00719 | 0.00000 | -0.00719 | -3.10358 |
| D17 | -1.10417 | 0.00018  | -0.00138 | 0.00000 | -0.00137 | -1.10554 |
| D18 | 0.29829  | -0.00024 | 0.02435  | 0.00000 | 0.02435  | 0.32264  |
| D19 | 0.55540  | 0.00009  | -0.00396 | 0.00000 | -0.00396 | 0.55145  |
| D20 | -2.54487 | 0.00011  | -0.00565 | 0.00000 | -0.00565 | -2.55052 |
| D21 | -2.75560 | 0.00008  | -0.00454 | 0.00000 | -0.00455 | -2.76015 |
| D22 | 0.42731  | 0.00010  | -0.00624 | 0.00000 | -0.00624 | 0.42107  |
| D23 | 0.09901  | -0.00004 | 0.00763  | 0.00000 | 0.00764  | 0.10664  |
| D24 | 3.07551  | -0.00009 | 0.00594  | 0.00000 | 0.00595  | 3.08146  |
| D25 | -1.85430 | 0.00005  | -0.00474 | 0.00000 | -0.00473 | -1.85903 |
| D26 | 1.12221  | 0.00000  | -0.00644 | 0.00000 | -0.00643 | 1.11578  |
| D27 | 2.98629  | 0.00032  | -0.02378 | 0.00000 | -0.02379 | 2.96250  |
| D28 | -0.32039 | 0.00027  | -0.02547 | 0.00000 | -0.02548 | -0.34587 |
| D29 | -2.24415 | -0.00011 | -0.00047 | 0.00000 | -0.00048 | -2.24463 |
| D30 | -0.24543 | 0.00006  | 0.00323  | 0.00000 | 0.00323  | -0.24220 |
| D31 | -2.94149 | 0.00022  | 0.00238  | 0.00000 | 0.00237  | -2.93912 |
| D32 | -0.92310 | 0.00012  | 0.00569  | 0.00000 | 0.00570  | -0.91740 |
| D33 | 1.23555  | 0.00017  | -0.00165 | 0.00000 | -0.00164 | 1.23390  |
| D34 | 0.39342  | 0.00039  | 0.00447  | 0.00000 | 0.00446  | 0.39788  |
| D35 | 2.41182  | 0.00029  | 0.00778  | 0.00000 | 0.00778  | 2.41960  |
| D36 | -1.71272 | 0.00034  | 0.00044  | 0.00000 | 0.00045  | -1.71228 |
| D37 | -1.02873 | -0.00035 | -0.02091 | 0.00000 | -0.02091 | -1.04964 |
| D38 | 1.00717  | 0.00037  | 0.00042  | 0.00000 | 0.00042  | 1.00760  |
| D39 | 3.10591  | 0.00027  | -0.02083 | 0.00000 | -0.02084 | 3.08508  |
| D40 | -3.10744 | -0.00031 | -0.03061 | 0.00000 | -0.03061 | -3.13805 |
| D41 | -1.07153 | 0.00041  | -0.00928 | 0.00000 | -0.00928 | -1.08081 |
| D42 | 1.02721  | 0.00031  | -0.03053 | 0.00000 | -0.03054 | 0.99667  |
| D43 | 1.09046  | -0.00048 | -0.02523 | 0.00000 | -0.02522 | 1.06524  |
| D44 | 3.12637  | 0.00024  | -0.00390 | 0.00000 | -0.00389 | 3.12248  |
| D45 | -1.05808 | 0.00014  | -0.02515 | 0.00000 | -0.02515 | -1.08323 |
| D46 | -0.01104 | 0.00030  | -0.00442 | 0.00000 | -0.00442 | -0.01546 |
| D47 | 0.36392  | 0.00027  | -0.00245 | 0.00000 | -0.00245 | 0.36146  |
| D48 | -3.09068 | -0.00001 | -0.00098 | 0.00000 | -0.00098 | -3.09166 |

|     |          |          |          |         |          |          |
|-----|----------|----------|----------|---------|----------|----------|
| D49 | 0.04673  | 0.00001  | -0.00071 | 0.00000 | -0.00071 | 0.04602  |
| D50 | 0.00486  | -0.00003 | 0.00094  | 0.00000 | 0.00094  | 0.00580  |
| D51 | -3.14092 | -0.00001 | 0.00121  | 0.00000 | 0.00121  | -3.13971 |
| D52 | -0.34928 | -0.00002 | 0.00814  | 0.00000 | 0.00814  | -0.34114 |
| D53 | 1.75760  | 0.00000  | 0.02015  | 0.00000 | 0.02015  | 1.77775  |
| D54 | -2.48112 | 0.00099  | 0.03087  | 0.00000 | 0.03088  | -2.45024 |
| D55 | -0.04951 | 0.00349  | -0.12197 | 0.00000 | -0.12194 | -0.17145 |
| D56 | -3.01855 | -0.00524 | -0.27476 | 0.00000 | -0.27475 | 2.98989  |
| D57 | -2.22318 | 0.00457  | -0.12103 | 0.00000 | -0.12102 | -2.34420 |
| D58 | 1.09097  | -0.00415 | -0.27382 | 0.00000 | -0.27383 | 0.81714  |
| D59 | 2.06098  | 0.00346  | -0.13971 | 0.00000 | -0.13972 | 1.92126  |
| D60 | -0.90806 | -0.00527 | -0.29250 | 0.00000 | -0.29253 | -1.20059 |
| D61 | 2.99967  | 0.00494  | 0.06679  | 0.00000 | 0.06674  | 3.06641  |
| D62 | 0.02472  | -0.00329 | -0.08082 | 0.00000 | -0.08077 | -0.05605 |

| Item                 | Value    | Threshold | Converged? |
|----------------------|----------|-----------|------------|
| Maximum Force        | 0.005265 | 0.000450  | NO         |
| RMS Force            | 0.001187 | 0.000300  | NO         |
| Maximum Displacement | 0.479296 | 0.001800  | NO         |
| RMS Displacement     | 0.078193 | 0.001200  | NO         |

Predicted change in Energy=-1.225580D-04

GradGradGradGradGradGradGradGradGradGradGradGradGradGradGradGradGradGradGrad

Input orientation:

| Center<br>Number | Atomic<br>Number | Atomic<br>Type | Coordinates (Angstroms) |           |           |
|------------------|------------------|----------------|-------------------------|-----------|-----------|
|                  |                  |                | X                       | Y         | Z         |
| 1                | 6                | 0              | -0.311143               | -2.166063 | -0.402143 |
| 2                | 6                | 0              | -1.569766               | -1.742725 | -0.660162 |
| 3                | 7                | 0              | -1.818587               | -0.659937 | 0.180004  |
| 4                | 6                | 0              | -0.689600               | -0.391895 | 0.877771  |
| 5                | 7                | 0              | 0.208939                | -1.350993 | 0.596308  |
| 6                | 6                | 0              | 1.587538                | -1.380134 | 1.099180  |
| 7                | 1                | 0              | 0.260720                | -2.963450 | -0.843473 |
| 8                | 1                | 0              | -2.294179               | -2.084721 | -1.376527 |
| 9                | 1                | 0              | 1.622769                | -0.777986 | 2.004809  |
| 10               | 1                | 0              | 1.822240                | -2.408859 | 1.379418  |
| 11               | 35               | 0              | 0.257960                | 1.984644  | -0.192406 |
| 12               | 1                | 0              | -0.630574               | 0.282552  | 1.709168  |
| 13               | 6                | 0              | -2.965014               | 0.172682  | 0.201197  |
| 14               | 6                | 0              | -4.186909               | -0.243994 | -0.110159 |
| 15               | 1                | 0              | -2.724732               | 1.197018  | 0.462199  |
| 16               | 1                | 0              | -5.005104               | 0.462882  | -0.115318 |
| 17               | 1                | 0              | -4.411817               | -1.272089 | -0.367374 |

|    |   |   |          |           |           |
|----|---|---|----------|-----------|-----------|
| 18 | 6 | 0 | 2.582194 | -0.834433 | 0.072897  |
| 19 | 1 | 0 | 2.575029 | -1.411195 | -0.855233 |
| 20 | 1 | 0 | 2.301019 | 0.195470  | -0.198206 |
| 21 | 6 | 0 | 3.977948 | -0.801379 | 0.640656  |
| 22 | 8 | 0 | 4.267300 | -0.992354 | 1.796187  |
| 23 | 8 | 0 | 4.898417 | -0.502821 | -0.303839 |
| 24 | 1 | 0 | 5.757321 | -0.430994 | 0.140521  |

-----  
Distance matrix (angstroms):

|    |    | 1        | 2        | 3        | 4        | 5        |
|----|----|----------|----------|----------|----------|----------|
| 1  | C  | 0.000000 |          |          |          |          |
| 2  | C  | 1.352746 | 0.000000 |          |          |          |
| 3  | N  | 2.209004 | 1.392918 | 0.000000 |          |          |
| 4  | C  | 2.220153 | 2.228154 | 1.354008 | 0.000000 |          |
| 5  | N  | 1.389867 | 2.212683 | 2.182139 | 1.344046 | 0.000000 |
| 6  | C  | 2.544925 | 3.632537 | 3.600729 | 2.492186 | 1.467741 |
| 7  | H  | 1.075929 | 2.207816 | 3.267597 | 3.237079 | 2.162330 |
| 8  | H  | 2.210989 | 1.074669 | 2.163096 | 3.243793 | 3.270479 |
| 9  | H  | 3.385291 | 4.269083 | 3.897022 | 2.601217 | 2.076325 |
| 10 | H  | 2.790024 | 4.013643 | 4.213424 | 3.260235 | 2.082086 |
| 11 | Br | 4.194787 | 4.177639 | 3.382979 | 2.773281 | 3.427965 |
| 12 | H  | 3.248906 | 3.255388 | 2.153602 | 1.072187 | 2.147489 |
| 13 | C  | 3.588423 | 2.521397 | 1.417039 | 2.440084 | 3.542835 |
| 14 | C  | 4.336031 | 3.065637 | 2.422014 | 3.637176 | 4.587812 |
| 15 | H  | 4.228808 | 3.351974 | 2.085429 | 2.615169 | 3.888029 |
| 16 | H  | 5.387661 | 4.118629 | 3.391434 | 4.510038 | 5.566219 |
| 17 | H  | 4.197133 | 2.895596 | 2.720146 | 4.022441 | 4.720837 |
| 18 | C  | 3.220294 | 4.312904 | 4.405541 | 3.398278 | 2.484578 |
| 19 | H  | 3.017467 | 4.162607 | 4.576021 | 3.834068 | 2.776505 |
| 20 | H  | 3.527296 | 4.353503 | 4.224443 | 3.232108 | 2.720220 |
| 21 | C  | 4.620183 | 5.775412 | 5.816529 | 4.691471 | 3.809129 |
| 22 | O  | 5.212714 | 6.377151 | 6.305598 | 5.076898 | 4.247190 |
| 23 | O  | 5.469511 | 6.595583 | 6.736239 | 5.712655 | 4.849830 |
| 24 | H  | 6.334919 | 7.486517 | 7.579469 | 6.489056 | 5.642577 |
|    |    | 6        | 7        | 8        | 9        | 10       |
| 6  | C  | 0.000000 |          |          |          |          |
| 7  | H  | 2.835707 | 0.000000 |          |          |          |
| 8  | H  | 4.657605 | 2.753873 | 0.000000 |          |          |
| 9  | H  | 1.088112 | 3.839810 | 5.336991 | 0.000000 |          |
| 10 | H  | 1.091739 | 2.772573 | 4.964393 | 1.758024 | 0.000000 |
| 11 | Br | 3.841575 | 4.990744 | 4.947251 | 3.784519 | 4.921430 |
| 12 | H  | 2.838420 | 4.224560 | 4.230021 | 2.507927 | 3.656327 |
| 13 | C  | 4.893193 | 4.618660 | 2.834625 | 5.020412 | 5.565102 |
| 14 | C  | 6.008123 | 5.264465 | 2.928206 | 6.205690 | 6.558609 |



|    |    |           |           |          |          |          |
|----|----|-----------|-----------|----------|----------|----------|
| 15 | H  | 5.063904  | 5.284619  | 3.786304 | 5.018072 | 5.875253 |
| 16 | H  | 6.952311  | 6.324465  | 3.928109 | 7.068478 | 7.556041 |
| 17 | H  | 6.176950  | 4.991991  | 2.482570 | 6.502893 | 6.573203 |
| 18 | C  | 1.529832  | 3.280501  | 5.238612 | 2.157770 | 2.182509 |
| 19 | H  | 2.189939  | 2.786694  | 4.943134 | 3.080194 | 2.560409 |
| 20 | H  | 2.162127  | 3.815490  | 5.263417 | 2.502183 | 3.082314 |
| 21 | C  | 2.501851  | 4.549172  | 6.712344 | 2.721825 | 2.788698 |
| 22 | O  | 2.795947  | 5.187071  | 7.369693 | 2.661395 | 2.856309 |
| 23 | O  | 3.701359  | 5.277701  | 7.442210 | 4.016894 | 3.991140 |
| 24 | H  | 4.382577  | 6.131411  | 8.358402 | 4.548681 | 4.575115 |
|    |    | 11        | 12        | 13       | 14       | 15       |
| 11 | Br | 0.000000  |           |          |          |          |
| 12 | H  | 2.702331  | 0.000000  |          |          |          |
| 13 | C  | 3.718292  | 2.781305  | 0.000000 |          |          |
| 14 | C  | 4.972972  | 4.029233  | 1.328002 | 0.000000 |          |
| 15 | H  | 3.153619  | 2.603205  | 1.084031 | 2.131214 | 0.000000 |
| 16 | H  | 5.479192  | 4.743182  | 2.084793 | 1.081269 | 2.464260 |
| 17 | H  | 5.695941  | 4.585492  | 2.122234 | 1.083385 | 3.103376 |
| 18 | C  | 3.663283  | 3.774508  | 5.639349 | 6.797270 | 5.695771 |
| 19 | H  | 4.164117  | 4.440813  | 5.858053 | 6.902267 | 6.051931 |
| 20 | H  | 2.715745  | 3.498556  | 5.281207 | 6.503391 | 5.166953 |
| 21 | C  | 4.721676  | 4.853359  | 7.024716 | 8.218228 | 6.996524 |
| 22 | O  | 5.375112  | 5.061831  | 7.497178 | 8.698727 | 7.447240 |
| 23 | O  | 5.266283  | 5.936223  | 7.908534 | 9.091075 | 7.847844 |
| 24 | H  | 6.015739  | 6.616267  | 8.743410 | 9.949146 | 8.642865 |
|    |    | 16        | 17        | 18       | 19       | 20       |
| 16 | H  | 0.000000  |           |          |          |          |
| 17 | H  | 1.850850  | 0.000000  |          |          |          |
| 18 | C  | 7.699710  | 7.021507  | 0.000000 |          |          |
| 19 | H  | 7.843344  | 7.005239  | 1.092763 | 0.000000 |          |
| 20 | H  | 7.311485  | 6.873465  | 1.101479 | 1.757310 | 0.000000 |
| 21 | C  | 9.103025  | 8.463205  | 1.507173 | 2.139565 | 2.123555 |
| 22 | O  | 9.578572  | 8.949096  | 2.415420 | 3.173206 | 3.042169 |
| 23 | O  | 9.952278  | 9.342176  | 2.369976 | 2.554860 | 2.691698 |
| 24 | H  | 10.802511 | 10.216494 | 3.201370 | 3.475529 | 3.528911 |
|    |    | 21        | 22        | 23       | 24       |          |
| 21 | C  | 0.000000  |           |          |          |          |
| 22 | O  | 1.206420  | 0.000000  |          |          |          |
| 23 | O  | 1.352209  | 2.246788  | 0.000000 |          |          |
| 24 | H  | 1.885070  | 2.297067  | 0.969707 | 0.000000 |          |

Stoichiometry C8H11BrN2O2

Framework group C1[X(C8H11BrN2O2)]

Deg. of freedom 66

Full point group C1 NOp 1

Largest Abelian subgroup C1 NOp 1

Largest concise Abelian subgroup C1 NOp 1

Standard orientation:

| Center<br>Number | Atomic<br>Number | Atomic<br>Type | Coordinates (Angstroms) |           |           |
|------------------|------------------|----------------|-------------------------|-----------|-----------|
|                  |                  |                | X                       | Y         | Z         |
| 1                | 6                | 0              | -0.638307               | -2.084967 | -0.760713 |
| 2                | 6                | 0              | -1.953563               | -1.782420 | -0.852845 |
| 3                | 7                | 0              | -2.226234               | -0.834575 | 0.130752  |
| 4                | 6                | 0              | -1.065970               | -0.517890 | 0.752712  |
| 5                | 7                | 0              | -0.106472               | -1.331006 | 0.278722  |
| 6                | 6                | 0              | 1.311663                | -1.257677 | 0.649908  |
| 7                | 1                | 0              | -0.034966               | -2.758128 | -1.344201 |
| 8                | 1                | 0              | -2.707770               | -2.123814 | -1.538071 |
| 9                | 1                | 0              | 1.376312                | -0.759118 | 1.614920  |
| 10               | 1                | 0              | 1.678534                | -2.277431 | 0.781830  |
| 11               | 35               | 0              | -0.482363               | 2.054906  | -0.102399 |
| 12               | 1                | 0              | -0.992777               | 0.062965  | 1.650952  |
| 13               | 6                | 0              | -3.444376               | -0.145941 | 0.354157  |
| 14               | 6                | 0              | -4.641995               | -0.662647 | 0.104533  |
| 15               | 1                | 0              | -3.285864               | 0.864038  | 0.714625  |
| 16               | 1                | 0              | -5.525060               | -0.057724 | 0.257531  |
| 17               | 1                | 0              | -4.784523               | -1.674998 | -0.254010 |
| 18               | 6                | 0              | 2.135314                | -0.491916 | -0.387201 |
| 19               | 1                | 0              | 2.093532                | -0.959719 | -1.373885 |
| 20               | 1                | 0              | 1.723267                | 0.522679  | -0.505820 |
| 21               | 6                | 0              | 3.570591                | -0.362383 | 0.054129  |
| 22               | 8                | 0              | 3.993925                | -0.645400 | 1.147810  |
| 23               | 8                | 0              | 4.354652                | 0.141867  | -0.925387 |
| 24               | 1                | 0              | 5.242205                | 0.261927  | -0.553681 |

Rotational constants (GHZ): 0.8449103 0.3293854 0.2565044

Standard basis: 6-311++G(d,p) (5D, 7F)

There are 404 symmetry adapted cartesian basis functions of A symmetry.

There are 389 symmetry adapted basis functions of A symmetry.

389 basis functions, 625 primitive gaussians, 404 cartesian basis functions

62 alpha electrons 62 beta electrons

nuclear repulsion energy 1077.4263942086 Hartrees.

NAtoms= 24 NActive= 24 NUniq= 24 SFac= 1.00D+00 NAtFMM= 60 NAOKFM=F

Big=F

Integral buffers will be 131072 words long.

Raffenetti 2 integral format.

Two-electron integral symmetry is turned on.

One-electron integrals computed using PRISM.

NBasis= 389 RedAO= T EigKep= 6.22D-06 NBF= 389

NBsUse= 389 1.00D-06 EigRej= -1.00D+00 NBFU= 389

Lowest energy guess from the checkpoint file: "./cooh.chk"

B after Tr= 0.000000 0.000000 0.000000

Rot= 0.999992 -0.003872 -0.000419 0.000650 Ang= -0.45 deg.

B after Tr= 0.000000 0.000000 0.000000

Rot= 0.999899 0.013917 0.001859 -0.002068 Ang= 1.63 deg.

Keep R1 ints in memory in canonical form, NReq=2910765817.

Requested convergence on RMS density matrix=1.00D-08 within 128 cycles.

Requested convergence on MAX density matrix=1.00D-06.

Requested convergence on energy=1.00D-06.

No special actions if energy rises.

SCF Done: E(RB3LYP) = -3145.73195190 A.U. after 11 cycles

NFock= 11 Conv=0.47D-08 -V/T= 2.0017

Calling FoFJK, ICntrl= 2127 FMM=F ISym2X=0 l1Cent= 0 IOpClX= 0 NMat=1 NMatS=1

NMatT=0.

\*\*\*\*\* Axes restored to original set \*\*\*\*\*

| Center | Atomic | Forces (Hartrees/Bohr) |              |              |
|--------|--------|------------------------|--------------|--------------|
| Number | Number | X                      | Y            | Z            |
| 1      | 6      | 0.000002962            | 0.000081683  | -0.000039050 |
| 2      | 6      | -0.000095530           | 0.000254280  | 0.000016457  |
| 3      | 7      | 0.000692225            | 0.000216428  | -0.000140650 |
| 4      | 6      | -0.000608370           | -0.002166252 | 0.000881491  |
| 5      | 7      | 0.000468989            | 0.000208960  | 0.000067287  |
| 6      | 6      | -0.000094053           | -0.000672413 | 0.000026656  |
| 7      | 1      | -0.000016374           | -0.000021686 | 0.000051264  |
| 8      | 1      | -0.000011148           | -0.000000455 | -0.000040211 |
| 9      | 1      | -0.000412632           | 0.000000934  | 0.000514337  |
| 10     | 1      | -0.000020597           | 0.000168911  | 0.000100932  |
| 11     | 35     | 0.000231233            | 0.001125208  | -0.000594435 |
| 12     | 1      | 0.000324963            | 0.000282250  | -0.000346104 |
| 13     | 6      | -0.000443507           | 0.000184128  | 0.000045072  |
| 14     | 6      | 0.000150685            | -0.000043988 | 0.000027679  |
| 15     | 1      | 0.000110737            | 0.000042586  | -0.000085083 |
| 16     | 1      | -0.000002465           | 0.000006683  | 0.000009957  |
| 17     | 1      | -0.000000948           | -0.000011066 | -0.000011272 |
| 18     | 6      | 0.000778298            | 0.002893565  | -0.000642062 |
| 19     | 1      | 0.000764128            | -0.000399456 | 0.000017419  |
| 20     | 1      | -0.000718877           | -0.001445956 | 0.000191326  |
| 21     | 6      | -0.000079590           | 0.000268067  | -0.002120017 |
| 22     | 8      | 0.000184463            | -0.000579830 | 0.002124492  |

|    |   |              |              |              |
|----|---|--------------|--------------|--------------|
| 23 | 8 | -0.000843046 | 0.000128828  | 0.000085410  |
| 24 | 1 | -0.000361544 | -0.000521411 | -0.000140894 |

-----  
Cartesian Forces: Max 0.002893565 RMS 0.000680344

GradGradGradGradGradGradGradGradGradGradGradGradGradGradGradGradGradGradGrad

Berny optimization.

Using GEDIIS/GDIIS optimizer.

FormGI is forming the generalized inverse of G from B-inverse, IUseBI=4.

GSVD: received Info= 1 from GESDD.

Internal Forces: Max 0.002163776 RMS 0.000368384

Search for a local minimum.

Step number 6 out of a maximum of 140

All quantities printed in internal units (Hartrees-Bohrs-Radians)

Mixed Optimization -- En-DIIS/RFO-DIIS

Update second derivatives using D2CorX and points 5 4 6

ITU= 0 -1 1 1 1 0

Use linear search instead of GDIIS.

|                 |         |         |         |         |         |
|-----------------|---------|---------|---------|---------|---------|
| Eigenvalues --- | 0.00197 | 0.00387 | 0.00808 | 0.01479 | 0.01754 |
| Eigenvalues --- | 0.01960 | 0.02030 | 0.02117 | 0.02192 | 0.02274 |
| Eigenvalues --- | 0.02278 | 0.02346 | 0.02418 | 0.02820 | 0.03038 |
| Eigenvalues --- | 0.03038 | 0.03104 | 0.03586 | 0.04444 | 0.04650 |
| Eigenvalues --- | 0.04980 | 0.05593 | 0.06523 | 0.08303 | 0.09509 |
| Eigenvalues --- | 0.10667 | 0.12404 | 0.14960 | 0.15913 | 0.15979 |
| Eigenvalues --- | 0.15991 | 0.15996 | 0.16000 | 0.16000 | 0.16254 |
| Eigenvalues --- | 0.16730 | 0.17957 | 0.20664 | 0.22003 | 0.22837 |
| Eigenvalues --- | 0.24485 | 0.24718 | 0.27384 | 0.27731 | 0.34214 |
| Eigenvalues --- | 0.34377 | 0.35130 | 0.35435 | 0.35499 | 0.35579 |
| Eigenvalues --- | 0.35844 | 0.35902 | 0.36375 | 0.36592 | 0.36650 |
| Eigenvalues --- | 0.37449 | 0.41317 | 0.43069 | 0.43792 | 0.47639 |
| Eigenvalues --- | 0.52334 | 0.53307 | 0.54332 | 0.54462 | 0.59921 |
| Eigenvalues --- | 0.91231 |         |         |         |         |

RFO step: Lambda=-1.54902734D-04 EMin= 1.97033827D-03

Quartic linear search produced a step of -0.00369.

Iteration 1 RMS(Cart)= 0.01191707 RMS(Int)= 0.00022196

Iteration 2 RMS(Cart)= 0.00019934 RMS(Int)= 0.00001624

Iteration 3 RMS(Cart)= 0.00000011 RMS(Int)= 0.00001624

| Variable | Old X   | -DE/DX   | Delta X<br>(Linear) | Delta X<br>(Quad) | Delta X<br>(Total) | New X   |
|----------|---------|----------|---------------------|-------------------|--------------------|---------|
| R1       | 2.55632 | 0.00006  | 0.00000             | 0.00047           | 0.00046            | 2.55678 |
| R2       | 2.62647 | 0.00000  | 0.00000             | -0.00018          | -0.00018           | 2.62629 |
| R3       | 2.03321 | -0.00001 | 0.00000             | -0.00007          | -0.00007           | 2.03314 |
| R4       | 2.63223 | -0.00021 | 0.00000             | -0.00054          | -0.00054           | 2.63169 |
| R5       | 2.03083 | 0.00003  | 0.00000             | 0.00009           | 0.00009            | 2.03092 |

|     |         |          |          |          |          |         |
|-----|---------|----------|----------|----------|----------|---------|
| R6  | 2.55870 | -0.00045 | 0.00000  | -0.00120 | -0.00119 | 2.55752 |
| R7  | 2.67782 | 0.00025  | 0.00000  | 0.00070  | 0.00070  | 2.67851 |
| R8  | 2.53988 | -0.00036 | 0.00000  | -0.00166 | -0.00166 | 2.53822 |
| R9  | 5.24074 | 0.00071  | -0.00005 | 0.03428  | 0.03421  | 5.27496 |
| R10 | 2.02614 | -0.00007 | 0.00000  | -0.00007 | -0.00006 | 2.02608 |
| R11 | 2.77363 | -0.00052 | -0.00001 | 0.00020  | 0.00019  | 2.77382 |
| R12 | 2.05623 | 0.00041  | 0.00000  | 0.00107  | 0.00107  | 2.05731 |
| R13 | 2.06309 | -0.00014 | 0.00000  | -0.00064 | -0.00064 | 2.06245 |
| R14 | 2.89096 | 0.00059  | 0.00001  | 0.00020  | 0.00022  | 2.89118 |
| R15 | 5.10667 | 0.00028  | -0.00002 | 0.00732  | 0.00731  | 5.11397 |
| R16 | 5.13201 | -0.00005 | 0.00000  | -0.00244 | -0.00243 | 5.12958 |
| R17 | 2.50956 | -0.00013 | 0.00000  | -0.00026 | -0.00026 | 2.50930 |
| R18 | 2.04852 | 0.00004  | 0.00000  | 0.00013  | 0.00013  | 2.04865 |
| R19 | 2.04330 | 0.00001  | 0.00000  | 0.00002  | 0.00002  | 2.04332 |
| R20 | 2.04730 | 0.00001  | 0.00000  | 0.00004  | 0.00004  | 2.04734 |
| R21 | 2.06502 | 0.00019  | 0.00000  | 0.00059  | 0.00059  | 2.06561 |
| R22 | 2.08149 | -0.00106 | 0.00000  | -0.00277 | -0.00276 | 2.07874 |
| R23 | 2.84814 | -0.00106 | 0.00000  | -0.00277 | -0.00277 | 2.84537 |
| R24 | 2.27980 | 0.00216  | 0.00000  | 0.00249  | 0.00249  | 2.28229 |
| R25 | 2.55531 | -0.00085 | 0.00000  | -0.00198 | -0.00198 | 2.55333 |
| R26 | 1.83248 | -0.00043 | 0.00000  | -0.00049 | -0.00049 | 1.83199 |
| A1  | 1.87723 | -0.00004 | 0.00000  | -0.00014 | -0.00014 | 1.87708 |
| A2  | 2.27604 | 0.00003  | 0.00000  | 0.00004  | 0.00004  | 2.27608 |
| A3  | 2.12987 | 0.00001  | 0.00000  | 0.00011  | 0.00011  | 2.12998 |
| A4  | 1.86965 | -0.00009 | 0.00000  | -0.00006 | -0.00006 | 1.86959 |
| A5  | 2.28462 | 0.00004  | 0.00000  | -0.00005 | -0.00005 | 2.28457 |
| A6  | 2.12826 | 0.00005  | 0.00000  | 0.00006  | 0.00007  | 2.12832 |
| A7  | 1.89207 | 0.00004  | 0.00000  | -0.00031 | -0.00029 | 1.89177 |
| A8  | 2.22723 | 0.00000  | 0.00000  | 0.00033  | 0.00032  | 2.22755 |
| A9  | 2.15382 | -0.00003 | 0.00000  | -0.00003 | -0.00003 | 2.15379 |
| A10 | 1.88415 | 0.00022  | 0.00000  | 0.00138  | 0.00135  | 1.88550 |
| A11 | 1.82934 | -0.00046 | 0.00001  | -0.00510 | -0.00507 | 1.82426 |
| A12 | 2.17734 | 0.00000  | 0.00000  | 0.00210  | 0.00201  | 2.17935 |
| A13 | 1.87787 | 0.00019  | 0.00000  | 0.00022  | 0.00021  | 1.87809 |
| A14 | 2.18274 | -0.00010 | 0.00000  | 0.00192  | 0.00184  | 2.18457 |
| A15 | 1.89521 | -0.00011 | 0.00000  | -0.00028 | -0.00027 | 1.89494 |
| A16 | 2.19685 | 0.00025  | 0.00000  | 0.00153  | 0.00153  | 2.19838 |
| A17 | 2.17773 | -0.00014 | 0.00000  | -0.00131 | -0.00132 | 2.17641 |
| A18 | 1.88030 | -0.00013 | 0.00000  | -0.00384 | -0.00383 | 1.87646 |
| A19 | 1.88449 | 0.00008  | 0.00000  | 0.00093  | 0.00093  | 1.88542 |
| A20 | 1.95386 | -0.00035 | 0.00001  | -0.00243 | -0.00240 | 1.95145 |
| A21 | 1.87637 | -0.00017 | 0.00000  | -0.00150 | -0.00151 | 1.87487 |
| A22 | 1.91760 | 0.00039  | 0.00000  | 0.00410  | 0.00409  | 1.92169 |
| A23 | 1.94824 | 0.00017  | -0.00001 | 0.00248  | 0.00247  | 1.95071 |

|     |          |          |          |          |          |          |
|-----|----------|----------|----------|----------|----------|----------|
| A24 | 1.25907  | -0.00046 | 0.00001  | -0.00586 | -0.00585 | 1.25322  |
| A25 | 1.40392  | -0.00052 | 0.00001  | -0.00668 | -0.00669 | 1.39723  |
| A26 | 2.16099  | -0.00009 | 0.00000  | -0.00049 | -0.00049 | 2.16051  |
| A27 | 1.96005  | -0.00005 | 0.00000  | -0.00043 | -0.00043 | 1.95961  |
| A28 | 2.16142  | 0.00013  | 0.00000  | 0.00088  | 0.00088  | 2.16230  |
| A29 | 2.08545  | -0.00001 | 0.00000  | -0.00010 | -0.00010 | 2.08536  |
| A30 | 2.14650  | 0.00000  | 0.00000  | 0.00008  | 0.00008  | 2.14657  |
| A31 | 2.05123  | 0.00000  | 0.00000  | 0.00002  | 0.00002  | 2.05125  |
| A32 | 1.95762  | 0.00028  | 0.00000  | -0.00267 | -0.00269 | 1.95493  |
| A33 | 1.90993  | -0.00010 | 0.00000  | 0.00448  | 0.00446  | 1.91439  |
| A34 | 1.93609  | -0.00038 | -0.00001 | -0.00016 | -0.00025 | 1.93584  |
| A35 | 1.85749  | 0.00006  | 0.00002  | -0.00197 | -0.00192 | 1.85557  |
| A36 | 1.91516  | -0.00055 | 0.00000  | -0.01110 | -0.01110 | 1.90406  |
| A37 | 1.88453  | 0.00073  | -0.00001 | 0.01206  | 0.01204  | 1.89656  |
| A38 | 2.51073  | 0.00068  | -0.00001 | 0.00587  | 0.00588  | 2.51661  |
| A39 | 2.18886  | 0.00013  | 0.00000  | 0.00159  | 0.00157  | 2.19043  |
| A40 | 1.95208  | -0.00108 | 0.00001  | -0.00287 | -0.00288 | 1.94920  |
| A41 | 2.14207  | 0.00096  | 0.00000  | 0.00146  | 0.00144  | 2.14351  |
| A42 | 1.87467  | -0.00024 | 0.00000  | 0.00143  | 0.00143  | 1.87610  |
| D1  | 0.00462  | -0.00001 | 0.00000  | -0.00013 | -0.00013 | 0.00449  |
| D2  | 3.10712  | -0.00005 | 0.00000  | -0.00161 | -0.00161 | 3.10551  |
| D3  | -3.12550 | 0.00004  | 0.00001  | -0.00108 | -0.00108 | -3.12658 |
| D4  | -0.02301 | 0.00000  | 0.00001  | -0.00256 | -0.00255 | -0.02556 |
| D5  | -0.06885 | 0.00009  | 0.00000  | 0.00312  | 0.00311  | -0.06573 |
| D6  | -3.04137 | 0.00014  | 0.00000  | 0.00366  | 0.00365  | -3.03771 |
| D7  | 3.06244  | 0.00004  | -0.00001 | 0.00397  | 0.00396  | 3.06641  |
| D8  | 0.08993  | 0.00009  | -0.00001 | 0.00451  | 0.00450  | 0.09443  |
| D9  | 0.06063  | -0.00006 | 0.00000  | -0.00289 | -0.00288 | 0.05775  |
| D10 | 3.05282  | -0.00005 | 0.00000  | -0.00297 | -0.00297 | 3.04985  |
| D11 | -3.04614 | -0.00002 | 0.00000  | -0.00156 | -0.00156 | -3.04770 |
| D12 | -0.05395 | -0.00001 | 0.00000  | -0.00165 | -0.00165 | -0.05560 |
| D13 | -0.10371 | 0.00009  | -0.00001 | 0.00474  | 0.00474  | -0.09897 |
| D14 | 1.89432  | 0.00019  | 0.00000  | 0.00317  | 0.00316  | 1.89748  |
| D15 | -2.96067 | -0.00034 | 0.00002  | -0.01474 | -0.01473 | -2.97541 |
| D16 | -3.10358 | 0.00008  | -0.00001 | 0.00478  | 0.00479  | -3.09880 |
| D17 | -1.10554 | 0.00018  | 0.00000  | 0.00321  | 0.00320  | -1.10234 |
| D18 | 0.32264  | -0.00035 | 0.00002  | -0.01470 | -0.01469 | 0.30795  |
| D19 | 0.55145  | 0.00006  | 0.00000  | 0.00517  | 0.00517  | 0.55662  |
| D20 | -2.55052 | 0.00007  | 0.00000  | 0.00603  | 0.00603  | -2.54449 |
| D21 | -2.76015 | 0.00007  | 0.00000  | 0.00506  | 0.00506  | -2.75509 |
| D22 | 0.42107  | 0.00008  | -0.00001 | 0.00592  | 0.00592  | 0.42698  |
| D23 | 0.10664  | -0.00011 | 0.00001  | -0.00483 | -0.00483 | 0.10182  |
| D24 | 3.08146  | -0.00011 | 0.00001  | -0.00502 | -0.00502 | 3.07644  |
| D25 | -1.85903 | 0.00023  | 0.00000  | 0.00030  | 0.00028  | -1.85875 |



Input orientation:

| Center<br>Number | Atomic<br>Number | Atomic<br>Type | Coordinates (Angstroms) |           |           |
|------------------|------------------|----------------|-------------------------|-----------|-----------|
|                  |                  |                | X                       | Y         | Z         |
| 1                | 6                | 0              | -0.308663               | -2.169372 | -0.397186 |
| 2                | 6                | 0              | -1.566983               | -1.746182 | -0.658179 |
| 3                | 7                | 0              | -1.817368               | -0.662875 | 0.180378  |
| 4                | 6                | 0              | -0.691201               | -0.397028 | 0.882311  |
| 5                | 7                | 0              | 0.209253                | -1.353260 | 0.601408  |
| 6                | 6                | 0              | 1.587560                | -1.377184 | 1.105647  |
| 7                | 1                | 0              | 0.263790                | -2.967672 | -0.835996 |
| 8                | 1                | 0              | -2.289510               | -2.088084 | -1.376562 |
| 9                | 1                | 0              | 1.614652                | -0.777300 | 2.013738  |
| 10               | 1                | 0              | 1.827056                | -2.404568 | 1.385432  |
| 11               | 35               | 0              | 0.256170                | 1.997523  | -0.194930 |
| 12               | 1                | 0              | -0.629294               | 0.286757  | 1.705790  |
| 13               | 6                | 0              | -2.962461               | 0.172312  | 0.196713  |
| 14               | 6                | 0              | -4.184494               | -0.243854 | -0.114195 |
| 15               | 1                | 0              | -2.719838               | 1.197430  | 0.452706  |
| 16               | 1                | 0              | -5.001573               | 0.464286  | -0.123315 |
| 17               | 1                | 0              | -4.410818               | -1.272825 | -0.366712 |
| 18               | 6                | 0              | 2.577912                | -0.823039 | 0.079552  |
| 19               | 1                | 0              | 2.570749                | -1.399216 | -0.849305 |
| 20               | 1                | 0              | 2.294127                | 0.204480  | -0.191960 |
| 21               | 6                | 0              | 3.976354                | -0.805286 | 0.637402  |
| 22               | 8                | 0              | 4.277422                | -1.039875 | 1.783242  |
| 23               | 8                | 0              | 4.886134                | -0.477788 | -0.306360 |
| 24               | 1                | 0              | 5.752996                | -0.438152 | 0.125854  |

Distance matrix (angstroms):

|    |    | 1        | 2        | 3        | 4        | 5        |
|----|----|----------|----------|----------|----------|----------|
| 1  | C  | 0.000000 |          |          |          |          |
| 2  | C  | 1.352988 | 0.000000 |          |          |          |
| 3  | N  | 2.208914 | 1.392633 | 0.000000 |          |          |
| 4  | C  | 2.219156 | 2.227178 | 1.353379 | 0.000000 |          |
| 5  | N  | 1.389772 | 2.212683 | 2.181992 | 1.343170 | 0.000000 |
| 6  | C  | 2.545925 | 3.632959 | 3.599985 | 2.490650 | 1.467842 |
| 7  | H  | 1.075890 | 2.208028 | 3.267464 | 3.236170 | 2.162274 |
| 8  | H  | 2.211230 | 1.074716 | 2.162915 | 3.242957 | 3.270496 |
| 9  | H  | 3.383720 | 4.266225 | 3.892693 | 2.596477 | 2.074018 |
| 10 | H  | 2.791835 | 4.016133 | 4.215148 | 3.259597 | 2.082602 |
| 11 | Br | 4.209864 | 4.189728 | 3.393838 | 2.791386 | 3.444431 |



|    |    |          |          |          |          |          |
|----|----|----------|----------|----------|----------|----------|
| 12 | H  | 3.249290 | 3.255834 | 2.154112 | 1.072153 | 2.147668 |
| 13 | C  | 3.588710 | 2.521670 | 1.417407 | 2.439839 | 3.542728 |
| 14 | C  | 4.337023 | 3.066638 | 2.421908 | 3.635874 | 4.587797 |
| 15 | H  | 4.227462 | 3.350820 | 2.085510 | 2.615765 | 3.886863 |
| 16 | H  | 5.388373 | 4.119303 | 3.391443 | 4.509152 | 5.566094 |
| 17 | H  | 4.199095 | 2.897657 | 2.719804 | 4.020277 | 4.721100 |
| 18 | C  | 3.220591 | 4.310058 | 4.399352 | 3.393082 | 2.482743 |
| 19 | H  | 3.014725 | 4.156651 | 4.567058 | 3.826643 | 2.771885 |
| 20 | H  | 3.528712 | 4.350933 | 4.218451 | 3.229250 | 2.720788 |
| 21 | C  | 4.614377 | 5.769957 | 5.813464 | 4.691772 | 3.806918 |
| 22 | O  | 5.202135 | 6.373106 | 6.313300 | 5.090397 | 4.247934 |
| 23 | O  | 5.464030 | 6.585995 | 6.723698 | 5.703169 | 4.843936 |
| 24 | H  | 6.325694 | 7.477149 | 7.573894 | 6.488574 | 5.638853 |
|    |    | 6        | 7        | 8        | 9        | 10       |
| 6  | C  | 0.000000 |          |          |          |          |
| 7  | H  | 2.837604 | 0.000000 |          |          |          |
| 8  | H  | 4.658155 | 2.754128 | 0.000000 |          |          |
| 9  | H  | 1.088679 | 3.839732 | 5.334301 | 0.000000 |          |
| 10 | H  | 1.091402 | 2.774100 | 4.967382 | 1.757238 | 0.000000 |
| 11 | Br | 3.853926 | 5.006414 | 4.956705 | 3.797806 | 4.933927 |
| 12 | H  | 2.836073 | 4.224877 | 4.230494 | 2.502468 | 3.657803 |
| 13 | C  | 4.891809 | 4.618948 | 2.835039 | 5.015308 | 5.567122 |
| 14 | C  | 6.007417 | 5.265682 | 2.930140 | 6.200223 | 6.561730 |
| 15 | H  | 5.060499 | 5.283073 | 3.784971 | 5.012403 | 5.875255 |
| 16 | H  | 6.951117 | 6.325369 | 3.929441 | 7.062787 | 7.558890 |
| 17 | H  | 6.177319 | 4.994466 | 2.486844 | 6.497567 | 6.577380 |
| 18 | C  | 1.529949 | 3.285246 | 5.235685 | 2.161258 | 2.184111 |
| 19 | H  | 2.188375 | 2.789676 | 4.937070 | 3.081869 | 2.560832 |
| 20 | H  | 2.164412 | 3.820942 | 5.260120 | 2.508123 | 3.084389 |
| 21 | C  | 2.500532 | 4.542020 | 6.705421 | 2.733628 | 2.781499 |
| 22 | O  | 2.794328 | 5.165854 | 7.362587 | 2.685595 | 2.832831 |
| 23 | O  | 3.699091 | 5.276941 | 7.431571 | 4.021835 | 3.991567 |
| 24 | H  | 4.380940 | 6.120050 | 8.346342 | 4.561252 | 4.567968 |
|    |    | 11       | 12       | 13       | 14       | 15       |
| 11 | Br | 0.000000 |          |          |          |          |
| 12 | H  | 2.706198 | 0.000000 |          |          |          |
| 13 | C  | 3.720802 | 2.781022 | 0.000000 |          |          |
| 14 | C  | 4.974916 | 4.029062 | 1.327864 | 0.000000 |          |
| 15 | H  | 3.149001 | 2.601907 | 1.084097 | 2.131641 | 0.000000 |
| 16 | H  | 5.477208 | 4.742780 | 2.084621 | 1.081279 | 2.464876 |
| 17 | H  | 5.701357 | 4.585573 | 2.122170 | 1.083406 | 3.103711 |
| 18 | C  | 3.663522 | 3.763305 | 5.630291 | 6.789928 | 5.682226 |
| 19 | H  | 4.162129 | 4.428464 | 5.846390 | 6.892645 | 6.035571 |
| 20 | H  | 2.714457 | 3.486347 | 5.271036 | 6.494581 | 5.151834 |

|    |   |           |           |          |          |          |
|----|---|-----------|-----------|----------|----------|----------|
| 21 | C | 4.731626  | 4.852423  | 7.021187 | 8.214594 | 6.991708 |
| 22 | O | 5.413817  | 5.083485  | 7.510152 | 8.708498 | 7.465756 |
| 23 | O | 5.251299  | 5.920577  | 7.891525 | 9.075679 | 7.825174 |
| 24 | H | 6.020839  | 6.614780  | 8.737098 | 9.942288 | 8.635443 |
|    |   | 16        | 17        | 18       | 19       | 20       |
| 16 | H | 0.000000  |           |          |          |          |
| 17 | H | 1.850889  | 0.000000  |          |          |          |
| 18 | C | 7.690705  | 7.017393  | 0.000000 |          |          |
| 19 | H | 7.831971  | 6.999368  | 1.093072 | 0.000000 |          |
| 20 | H | 7.300647  | 6.867988  | 1.100021 | 1.755125 | 0.000000 |
| 21 | C | 9.099103  | 8.459994  | 1.505707 | 2.130440 | 2.130107 |
| 22 | O | 9.591517  | 8.953328  | 2.416177 | 3.157873 | 3.063217 |
| 23 | O | 9.934172  | 9.331080  | 2.365591 | 2.550456 | 2.682737 |
| 24 | H | 10.795241 | 10.209917 | 3.198663 | 3.464285 | 3.532386 |
|    |   | 21        | 22        | 23       | 24       |          |
| 21 | C | 0.000000  |           |          |          |          |
| 22 | O | 1.207735  | 0.000000  |          |          |          |
| 23 | O | 1.351163  | 2.247868  | 0.000000 |          |          |
| 24 | H | 1.884920  | 2.299201  | 0.969448 | 0.000000 |          |

Stoichiometry C8H11BrN2O2

Framework group C1[X(C8H11BrN2O2)]

Deg. of freedom 66

Full point group C1 NOp 1

Largest Abelian subgroup C1 NOp 1

Largest concise Abelian subgroup C1 NOp 1

Standard orientation:

| Center Number | Atomic Number | Atomic Type | Coordinates (Angstroms) |           |           |
|---------------|---------------|-------------|-------------------------|-----------|-----------|
|               |               |             | X                       | Y         | Z         |
| 1             | 6             | 0           | -0.629892               | -2.088834 | -0.764051 |
| 2             | 6             | 0           | -1.945762               | -1.788462 | -0.858060 |
| 3             | 7             | 0           | -2.222224               | -0.844496 | 0.127801  |
| 4             | 6             | 0           | -1.064787               | -0.530758 | 0.755132  |
| 5             | 7             | 0           | -0.101918               | -1.337033 | 0.278784  |
| 6             | 6             | 0           | 1.315347                | -1.257211 | 0.652347  |
| 7             | 1             | 0           | -0.024181               | -2.759583 | -1.347789 |
| 8             | 1             | 0           | -2.697573               | -2.128238 | -1.546788 |
| 9             | 1             | 0           | 1.371348                | -0.765723 | 1.622155  |
| 10            | 1             | 0           | 1.688905                | -2.274762 | 0.779632  |
| 11            | 35            | 0           | -0.489344               | 2.065101  | -0.094701 |
| 12            | 1             | 0           | -0.991788               | 0.057216  | 1.648703  |
| 13            | 6             | 0           | -3.441263               | -0.156044 | 0.349213  |
| 14            | 6             | 0           | -4.637931               | -0.673853 | 0.098051  |

|    |   |   |           |           |           |
|----|---|---|-----------|-----------|-----------|
| 15 | 1 | 0 | -3.283160 | 0.854477  | 0.708539  |
| 16 | 1 | 0 | -5.521700 | -0.069551 | 0.249492  |
| 17 | 1 | 0 | -4.779151 | -1.686670 | -0.259759 |
| 18 | 6 | 0 | 2.132304  | -0.477906 | -0.380130 |
| 19 | 1 | 0 | 2.091409  | -0.941312 | -1.369266 |
| 20 | 1 | 0 | 1.715762  | 0.533664  | -0.495309 |
| 21 | 6 | 0 | 3.570551  | -0.360727 | 0.049830  |
| 22 | 8 | 0 | 4.009629  | -0.687647 | 1.126379  |
| 23 | 8 | 0 | 4.340046  | 0.176177  | -0.922412 |
| 24 | 1 | 0 | 5.237357  | 0.267210  | -0.566919 |

-----

Rotational constants (GHZ):      0.8384115      0.3298318      0.2559545

Standard basis: 6-311++G(d,p) (5D, 7F)

There are    404 symmetry adapted cartesian basis functions of A    symmetry.

There are    389 symmetry adapted basis functions of A    symmetry.

    389 basis functions,    625 primitive gaussians,    404 cartesian basis functions

    62 alpha electrons      62 beta electrons

        nuclear repulsion energy      1076.5183507765 Hartrees.

NAtoms=    24 NActive=    24 NUniq=    24 SFac= 1.00D+00 NAtFMM=    60 NAOKFM=F

Big=F

Integral buffers will be    131072 words long.

Raffenetti 2 integral format.

Two-electron integral symmetry is turned on.

One-electron integrals computed using PRISM.

NBasis=    389 RedAO= T EigKep= 6.23D-06 NBF=    389

NBsUse=    389 1.00D-06 EigRej= -1.00D+00 NBFU=    389

Initial guess from the checkpoint file: "./cooh.chk"

B after Tr=    0.000000    0.000000    0.000000

        Rot=    0.999996    -0.002697    -0.000274    -0.000951 Ang=    -0.33 deg.

ExpMin= 3.50D-02 ExpMax= 4.40D+05 ExpMxC= 1.51D+04 IAcc=3 IRadAn=            5 AccDes=

0.00D+00

Harris functional with IExCor=    402 and IRadAn=            5 diagonalized for initial guess.

HarFok: IExCor=    402 AccDes= 0.00D+00 IRadAn=            5 IDoV= 1 UseB2=F ITyADJ=14

ICtDFT= 3500011 ScaDFX= 1.000000 1.000000 1.000000 1.000000

FoFCou: FMM=F IPFlag=            0 FMFlag=            100000 FMFlg1=            0

        NFxFlg=            0 DoJE=T BraDBF=F KetDBF=T FulRan=T

        wScrn= 0.000000 ICntrl=            500 IOpCl= 0 I1Cent=    200000004 NGrid=

0

        NMat0=    1 NMatS0=            1 NMatT0=    0 NMatD0=    1 NMtDS0=    0

NMtDT0=    0

Petite list used in FoFCou.

Keep R1 ints in memory in canonical form, NReq=2910765817.

Requested convergence on RMS density matrix=1.00D-08 within 128 cycles.

Requested convergence on MAX density matrix=1.00D-06.

Requested convergence on energy=1.00D-06.

No special actions if energy rises.

SCF Done: E(RB3LYP) = -3145.73206461 A.U. after 11 cycles

NFock= 11 Conv=0.49D-08 -V/T= 2.0017

Calling FoFJK, ICntrl= 2127 FMM=F ISym2X=0 l1Cent= 0 IOpClX= 0 NMat=1 NMatS=1

NMatT=0.

\*\*\*\*\* Axes restored to original set \*\*\*\*\*

| Center<br>Number | Atomic<br>Number | Forces (Hartrees/Bohr) |              |              |
|------------------|------------------|------------------------|--------------|--------------|
|                  |                  | X                      | Y            | Z            |
| 1                | 6                | -0.000019593           | 0.000034670  | -0.000051230 |
| 2                | 6                | -0.000008083           | 0.000227476  | -0.000044808 |
| 3                | 7                | 0.000806063            | 0.000140235  | 0.000001966  |
| 4                | 6                | -0.000705597           | -0.001709147 | 0.000562308  |
| 5                | 7                | 0.000163181            | 0.000102440  | -0.000012368 |
| 6                | 6                | -0.000487497           | -0.000104995 | 0.000308496  |
| 7                | 1                | 0.000016160            | -0.000021156 | 0.000021043  |
| 8                | 1                | -0.000018632           | -0.000025970 | 0.000016877  |
| 9                | 1                | 0.000008764            | -0.000033215 | 0.000155954  |
| 10               | 1                | 0.000129664            | 0.000041404  | -0.000086241 |
| 11               | 35               | 0.000127282            | 0.000819806  | -0.000385346 |
| 12               | 1                | 0.000285873            | 0.000314208  | -0.000318379 |
| 13               | 6                | -0.000466907           | 0.000273708  | 0.000028493  |
| 14               | 6                | 0.000124161            | -0.000080843 | 0.000061962  |
| 15               | 1                | 0.000109826            | 0.000038023  | -0.000080841 |
| 16               | 1                | -0.000001162           | 0.000010960  | -0.000014192 |
| 17               | 1                | 0.000004745            | -0.000009939 | -0.000011416 |
| 18               | 6                | 0.000505221            | 0.001251129  | -0.000585614 |
| 19               | 1                | 0.000267489            | -0.000372741 | -0.000103224 |
| 20               | 1                | -0.000636583           | -0.000614513 | 0.000442993  |
| 21               | 6                | 0.000450530            | -0.000033624 | -0.000215080 |
| 22               | 8                | -0.000187591           | -0.000103037 | 0.000331353  |
| 23               | 8                | -0.000267665           | 0.000049424  | -0.000068451 |
| 24               | 1                | -0.000199651           | -0.000194302 | 0.000045745  |

Cartesian Forces: Max 0.001709147 RMS 0.000377945

GradGradGradGradGradGradGradGradGradGradGradGradGradGradGradGradGradGradGrad

Berny optimization.

Using GEDIIS/GDIIS optimizer.

FormGI is forming the generalized inverse of G from B-inverse, IUseBI=4.

Internal Forces: Max 0.000573743 RMS 0.000169569

Search for a local minimum.

Step number 7 out of a maximum of 140

All quantities printed in internal units (Hartrees-Bohrs-Radians)

Mixed Optimization -- En-DIIS/RFO-DIIS

Swapping is turned off.

Update second derivatives using D2CorX and points 5 4 6 7

DE= -1.13D-04 DEPred=-7.83D-05 R= 1.44D+00

TightC=F SS= 1.41D+00 RLast= 1.04D-01 DXNew= 1.2000D+00 3.1335D-01

Trust test= 1.44D+00 RLast= 1.04D-01 DXMaxT set to 7.14D-01

ITU= 1 0 -1 1 1 1 0

|                 |         |         |         |         |         |
|-----------------|---------|---------|---------|---------|---------|
| Eigenvalues --- | 0.00195 | 0.00387 | 0.00810 | 0.01291 | 0.01616 |
| Eigenvalues --- | 0.01796 | 0.01978 | 0.02038 | 0.02129 | 0.02197 |
| Eigenvalues --- | 0.02314 | 0.02346 | 0.02416 | 0.02485 | 0.03038 |
| Eigenvalues --- | 0.03038 | 0.03158 | 0.03668 | 0.04335 | 0.04598 |
| Eigenvalues --- | 0.05040 | 0.05579 | 0.06541 | 0.08447 | 0.09862 |
| Eigenvalues --- | 0.10513 | 0.12251 | 0.15045 | 0.15461 | 0.15975 |
| Eigenvalues --- | 0.15992 | 0.15996 | 0.16000 | 0.16000 | 0.16085 |
| Eigenvalues --- | 0.16777 | 0.17863 | 0.20670 | 0.21999 | 0.22833 |
| Eigenvalues --- | 0.24484 | 0.25089 | 0.27319 | 0.27701 | 0.34303 |
| Eigenvalues --- | 0.34389 | 0.35139 | 0.35390 | 0.35502 | 0.35579 |
| Eigenvalues --- | 0.35843 | 0.35869 | 0.36306 | 0.36597 | 0.36650 |
| Eigenvalues --- | 0.37238 | 0.41323 | 0.43053 | 0.43696 | 0.47518 |
| Eigenvalues --- | 0.52410 | 0.53288 | 0.54007 | 0.54601 | 0.59914 |
| Eigenvalues --- | 0.93017 |         |         |         |         |

En-DIIS/RFO-DIIS IScMMF= 0 using points: 7 6

RFO step: Lambda=-1.54389816D-05.

DidBck=F Rises=F RFO-DIIS coefs: 1.84219 -0.84219

Iteration 1 RMS(Cart)= 0.01163542 RMS(Int)= 0.00017470

Iteration 2 RMS(Cart)= 0.00015795 RMS(Int)= 0.00004356

Iteration 3 RMS(Cart)= 0.00000007 RMS(Int)= 0.00004356

| Variable | Old X   | -DE/DX   | Delta X  | Delta X  | Delta X  | New X   |
|----------|---------|----------|----------|----------|----------|---------|
|          |         |          | (Linear) | (Quad)   | (Total)  |         |
| R1       | 2.55678 | 0.00000  | 0.00039  | 0.00017  | 0.00053  | 2.55730 |
| R2       | 2.62629 | -0.00002 | -0.00015 | -0.00005 | -0.00022 | 2.62607 |
| R3       | 2.03314 | 0.00001  | -0.00006 | 0.00008  | 0.00002  | 2.03316 |
| R4       | 2.63169 | -0.00012 | -0.00045 | -0.00027 | -0.00074 | 2.63096 |
| R5       | 2.03092 | 0.00001  | 0.00007  | -0.00002 | 0.00006  | 2.03098 |
| R6       | 2.55752 | -0.00055 | -0.00100 | -0.00163 | -0.00261 | 2.55491 |
| R7       | 2.67851 | 0.00032  | 0.00059  | 0.00108  | 0.00167  | 2.68018 |
| R8       | 2.53822 | -0.00022 | -0.00140 | -0.00083 | -0.00221 | 2.53601 |
| R9       | 5.27496 | 0.00057  | 0.02881  | 0.02098  | 0.04975  | 5.32471 |
| R10      | 2.02608 | -0.00002 | -0.00005 | 0.00014  | 0.00010  | 2.02617 |
| R11      | 2.77382 | -0.00023 | 0.00016  | 0.00048  | 0.00063  | 2.77445 |
| R12      | 2.05731 | 0.00011  | 0.00090  | -0.00015 | 0.00076  | 2.05806 |
| R13      | 2.06245 | -0.00003 | -0.00054 | -0.00004 | -0.00058 | 2.06187 |

|     |         |          |          |          |          |         |
|-----|---------|----------|----------|----------|----------|---------|
| R14 | 2.89118 | 0.00031  | 0.00019  | 0.00034  | 0.00054  | 2.89172 |
| R15 | 5.11397 | 0.00010  | 0.00615  | -0.00225 | 0.00392  | 5.11789 |
| R16 | 5.12958 | -0.00001 | -0.00205 | 0.00115  | -0.00089 | 5.12869 |
| R17 | 2.50930 | -0.00010 | -0.00022 | -0.00021 | -0.00043 | 2.50887 |
| R18 | 2.04865 | 0.00004  | 0.00011  | 0.00014  | 0.00025  | 2.04889 |
| R19 | 2.04332 | 0.00001  | 0.00001  | 0.00003  | 0.00005  | 2.04337 |
| R20 | 2.04734 | 0.00001  | 0.00003  | 0.00004  | 0.00007  | 2.04741 |
| R21 | 2.06561 | 0.00029  | 0.00049  | 0.00123  | 0.00172  | 2.06733 |
| R22 | 2.07874 | -0.00039 | -0.00232 | 0.00006  | -0.00224 | 2.07650 |
| R23 | 2.84537 | -0.00017 | -0.00233 | 0.00100  | -0.00133 | 2.84404 |
| R24 | 2.28229 | 0.00028  | 0.00209  | -0.00071 | 0.00139  | 2.28368 |
| R25 | 2.55333 | -0.00032 | -0.00166 | -0.00041 | -0.00208 | 2.55125 |
| R26 | 1.83199 | -0.00017 | -0.00041 | -0.00013 | -0.00054 | 1.83145 |
| A1  | 1.87708 | -0.00009 | -0.00012 | -0.00030 | -0.00044 | 1.87664 |
| A2  | 2.27608 | 0.00007  | 0.00004  | 0.00030  | 0.00035  | 2.27643 |
| A3  | 2.12998 | 0.00003  | 0.00009  | 0.00000  | 0.00010  | 2.13008 |
| A4  | 1.86959 | -0.00005 | -0.00005 | 0.00008  | 0.00001  | 1.86960 |
| A5  | 2.28457 | 0.00003  | -0.00004 | -0.00003 | -0.00007 | 2.28450 |
| A6  | 2.12832 | 0.00003  | 0.00006  | -0.00004 | 0.00002  | 2.12835 |
| A7  | 1.89177 | 0.00006  | -0.00025 | -0.00011 | -0.00032 | 1.89145 |
| A8  | 2.22755 | -0.00004 | 0.00027  | 0.00000  | 0.00025  | 2.22780 |
| A9  | 2.15379 | -0.00002 | -0.00003 | 0.00013  | 0.00009  | 2.15388 |
| A10 | 1.88550 | 0.00015  | 0.00114  | 0.00102  | 0.00206  | 1.88755 |
| A11 | 1.82426 | -0.00029 | -0.00427 | -0.00307 | -0.00729 | 1.81697 |
| A12 | 2.17935 | 0.00001  | 0.00169  | 0.00148  | 0.00289  | 2.18224 |
| A13 | 1.87809 | 0.00017  | 0.00018  | 0.00050  | 0.00067  | 1.87875 |
| A14 | 2.18457 | -0.00006 | 0.00155  | 0.00147  | 0.00275  | 2.18733 |
| A15 | 1.89494 | -0.00005 | -0.00023 | -0.00023 | -0.00041 | 1.89454 |
| A16 | 2.19838 | 0.00015  | 0.00129  | 0.00052  | 0.00182  | 2.20020 |
| A17 | 2.17641 | -0.00011 | -0.00111 | -0.00032 | -0.00149 | 2.17491 |
| A18 | 1.87646 | 0.00006  | -0.00323 | 0.00238  | -0.00086 | 1.87560 |
| A19 | 1.88542 | 0.00013  | 0.00078  | 0.00062  | 0.00139  | 1.88681 |
| A20 | 1.95145 | -0.00016 | -0.00202 | 0.00066  | -0.00133 | 1.95012 |
| A21 | 1.87487 | -0.00003 | -0.00127 | -0.00006 | -0.00133 | 1.87354 |
| A22 | 1.92169 | 0.00007  | 0.00344  | -0.00068 | 0.00275  | 1.92444 |
| A23 | 1.95071 | -0.00006 | 0.00208  | -0.00274 | -0.00066 | 1.95004 |
| A24 | 1.25322 | -0.00033 | -0.00493 | -0.00388 | -0.00879 | 1.24444 |
| A25 | 1.39723 | -0.00038 | -0.00563 | -0.00460 | -0.01030 | 1.38693 |
| A26 | 2.16051 | -0.00013 | -0.00041 | -0.00091 | -0.00132 | 2.15919 |
| A27 | 1.95961 | -0.00003 | -0.00036 | -0.00033 | -0.00070 | 1.95892 |
| A28 | 2.16230 | 0.00016  | 0.00074  | 0.00120  | 0.00194  | 2.16425 |
| A29 | 2.08536 | 0.00000  | -0.00008 | 0.00000  | -0.00008 | 2.08528 |
| A30 | 2.14657 | -0.00001 | 0.00006  | -0.00006 | 0.00001  | 2.14658 |
| A31 | 2.05125 | 0.00001  | 0.00002  | 0.00005  | 0.00007  | 2.05132 |

|     |          |          |          |          |          |          |
|-----|----------|----------|----------|----------|----------|----------|
| A32 | 1.95493  | 0.00011  | -0.00227 | -0.00081 | -0.00313 | 1.95180  |
| A33 | 1.91439  | -0.00020 | 0.00375  | -0.00054 | 0.00319  | 1.91758  |
| A34 | 1.93584  | -0.00025 | -0.00021 | -0.00208 | -0.00243 | 1.93341  |
| A35 | 1.85557  | 0.00012  | -0.00162 | 0.00235  | 0.00079  | 1.85636  |
| A36 | 1.90406  | -0.00015 | -0.00935 | 0.00022  | -0.00915 | 1.89491  |
| A37 | 1.89656  | 0.00040  | 0.01014  | 0.00111  | 0.01123  | 1.90779  |
| A38 | 2.51661  | 0.00053  | 0.00495  | 0.00537  | 0.01036  | 2.52697  |
| A39 | 2.19043  | -0.00020 | 0.00132  | -0.00154 | -0.00023 | 2.19020  |
| A40 | 1.94920  | -0.00021 | -0.00242 | 0.00088  | -0.00156 | 1.94764  |
| A41 | 2.14351  | 0.00041  | 0.00121  | 0.00062  | 0.00182  | 2.14533  |
| A42 | 1.87610  | -0.00030 | 0.00121  | -0.00211 | -0.00091 | 1.87519  |
| D1  | 0.00449  | -0.00001 | -0.00011 | 0.00064  | 0.00054  | 0.00503  |
| D2  | 3.10551  | -0.00001 | -0.00136 | 0.00082  | -0.00054 | 3.10497  |
| D3  | -3.12658 | 0.00003  | -0.00091 | -0.00004 | -0.00094 | -3.12752 |
| D4  | -0.02556 | 0.00002  | -0.00215 | 0.00013  | -0.00202 | -0.02758 |
| D5  | -0.06573 | 0.00007  | 0.00262  | 0.00192  | 0.00454  | -0.06119 |
| D6  | -3.03771 | 0.00011  | 0.00308  | 0.00216  | 0.00525  | -3.03247 |
| D7  | 3.06641  | 0.00003  | 0.00334  | 0.00254  | 0.00587  | 3.07228  |
| D8  | 0.09443  | 0.00008  | 0.00379  | 0.00278  | 0.00658  | 0.10100  |
| D9  | 0.05775  | -0.00005 | -0.00243 | -0.00294 | -0.00538 | 0.05237  |
| D10 | 3.04985  | -0.00003 | -0.00250 | -0.00275 | -0.00525 | 3.04459  |
| D11 | -3.04770 | -0.00004 | -0.00132 | -0.00310 | -0.00441 | -3.05211 |
| D12 | -0.05560 | -0.00002 | -0.00139 | -0.00290 | -0.00429 | -0.05989 |
| D13 | -0.09897 | 0.00007  | 0.00399  | 0.00409  | 0.00811  | -0.09086 |
| D14 | 1.89748  | 0.00019  | 0.00266  | 0.00364  | 0.00629  | 1.90377  |
| D15 | -2.97541 | -0.00026 | -0.01241 | -0.01139 | -0.02383 | -2.99923 |
| D16 | -3.09880 | 0.00006  | 0.00403  | 0.00392  | 0.00797  | -3.09082 |
| D17 | -1.10234 | 0.00018  | 0.00270  | 0.00347  | 0.00615  | -1.09619 |
| D18 | 0.30795  | -0.00027 | -0.01237 | -0.01157 | -0.02396 | 0.28399  |
| D19 | 0.55662  | 0.00006  | 0.00435  | 0.00674  | 0.01109  | 0.56771  |
| D20 | -2.54449 | 0.00007  | 0.00508  | 0.00786  | 0.01293  | -2.53156 |
| D21 | -2.75509 | 0.00008  | 0.00426  | 0.00694  | 0.01121  | -2.74388 |
| D22 | 0.42698  | 0.00010  | 0.00498  | 0.00806  | 0.01304  | 0.44003  |
| D23 | 0.10182  | -0.00008 | -0.00407 | -0.00369 | -0.00778 | 0.09404  |
| D24 | 3.07644  | -0.00010 | -0.00423 | -0.00383 | -0.00807 | 3.06837  |
| D25 | -1.85875 | 0.00010  | 0.00024  | -0.00088 | -0.00065 | -1.85940 |
| D26 | 1.11588  | 0.00008  | 0.00008  | -0.00101 | -0.00095 | 1.11493  |
| D27 | 2.97725  | 0.00027  | 0.01243  | 0.01185  | 0.02430  | 3.00156  |
| D28 | -0.33131 | 0.00025  | 0.01226  | 0.01172  | 0.02401  | -0.30730 |
| D29 | -2.24464 | -0.00012 | -0.00001 | -0.00093 | -0.00088 | -2.24552 |
| D30 | -0.24297 | -0.00002 | -0.00065 | -0.00100 | -0.00168 | -0.24464 |
| D31 | -2.93484 | 0.00003  | 0.00360  | 0.00336  | 0.00697  | -2.92787 |
| D32 | -0.91638 | 0.00010  | 0.00086  | 0.00482  | 0.00568  | -0.91070 |
| D33 | 1.23711  | 0.00001  | 0.00270  | 0.00224  | 0.00494  | 1.24206  |

|     |          |          |          |          |          |          |
|-----|----------|----------|----------|----------|----------|----------|
| D34 | 0.40263  | 0.00008  | 0.00399  | 0.00361  | 0.00761  | 0.41024  |
| D35 | 2.42109  | 0.00014  | 0.00125  | 0.00507  | 0.00632  | 2.42741  |
| D36 | -1.70861 | 0.00005  | 0.00309  | 0.00249  | 0.00558  | -1.70303 |
| D37 | -1.04944 | -0.00012 | 0.00017  | -0.00226 | -0.00210 | -1.05154 |
| D38 | 1.00664  | -0.00004 | -0.00081 | -0.00019 | -0.00100 | 1.00564  |
| D39 | 3.10174  | 0.00017  | 0.01403  | -0.00048 | 0.01354  | 3.11528  |
| D40 | -3.13421 | -0.00014 | 0.00324  | -0.00523 | -0.00199 | -3.13620 |
| D41 | -1.07813 | -0.00005 | 0.00226  | -0.00316 | -0.00089 | -1.07902 |
| D42 | 1.01697  | 0.00016  | 0.01710  | -0.00345 | 0.01365  | 1.03062  |
| D43 | 1.06669  | -0.00011 | 0.00122  | -0.00294 | -0.00172 | 1.06497  |
| D44 | 3.12277  | -0.00002 | 0.00024  | -0.00087 | -0.00062 | 3.12215  |
| D45 | -1.06532 | 0.00019  | 0.01508  | -0.00116 | 0.01392  | -1.05140 |
| D46 | -0.01589 | 0.00003  | -0.00036 | 0.00273  | 0.00237  | -0.01353 |
| D47 | 0.35977  | 0.00004  | -0.00142 | 0.00227  | 0.00079  | 0.36056  |
| D48 | -3.09180 | 0.00002  | -0.00012 | 0.00134  | 0.00123  | -3.09057 |
| D49 | 0.04648  | 0.00001  | 0.00038  | 0.00061  | 0.00099  | 0.04747  |
| D50 | 0.00466  | -0.00001 | -0.00095 | 0.00006  | -0.00090 | 0.00377  |
| D51 | -3.14025 | -0.00001 | -0.00045 | -0.00068 | -0.00113 | -3.14138 |
| D52 | -0.34085 | -0.00003 | 0.00024  | -0.00222 | -0.00197 | -0.34282 |
| D53 | 1.77615  | 0.00006  | -0.00134 | -0.00209 | -0.00346 | 1.77269  |
| D54 | -2.45974 | 0.00015  | -0.00800 | -0.00003 | -0.00808 | -2.46783 |
| D55 | -0.14372 | 0.00003  | 0.02335  | -0.00254 | 0.02082  | -0.12290 |
| D56 | 3.00731  | -0.00009 | 0.01467  | 0.00219  | 0.01687  | 3.02419  |
| D57 | -2.30510 | 0.00016  | 0.03293  | -0.00027 | 0.03260  | -2.27250 |
| D58 | 0.84593  | 0.00005  | 0.02425  | 0.00446  | 0.02866  | 0.87459  |
| D59 | 1.96197  | -0.00011 | 0.03429  | -0.00378 | 0.03056  | 1.99253  |
| D60 | -1.17018 | -0.00023 | 0.02561  | 0.00095  | 0.02661  | -1.14357 |
| D61 | 3.08980  | 0.00019  | 0.01970  | -0.00191 | 0.01779  | 3.10758  |
| D62 | -0.04265 | 0.00008  | 0.01129  | 0.00268  | 0.01397  | -0.02868 |

| Item                 | Value    | Threshold | Converged? |
|----------------------|----------|-----------|------------|
| Maximum Force        | 0.000574 | 0.000450  | NO         |
| RMS Force            | 0.000170 | 0.000300  | YES        |
| Maximum Displacement | 0.074039 | 0.001800  | NO         |
| RMS Displacement     | 0.011654 | 0.001200  | NO         |

Predicted change in Energy=-5.172143D-05

GradGradGradGradGradGradGradGradGradGradGradGradGradGradGradGradGradGrad

Input orientation:

| Center Number | Atomic Number | Atomic Type | Coordinates (Angstroms) |           |           |
|---------------|---------------|-------------|-------------------------|-----------|-----------|
|               |               |             | X                       | Y         | Z         |
| 1             | 6             | 0           | -0.308369               | -2.176327 | -0.392983 |
| 2             | 6             | 0           | -1.566149               | -1.751795 | -0.655834 |



|    |    |   |           |           |           |
|----|----|---|-----------|-----------|-----------|
| 3  | 7  | 0 | -1.815790 | -0.667134 | 0.180547  |
| 4  | 6  | 0 | -0.692954 | -0.406572 | 0.887125  |
| 5  | 7  | 0 | 0.208915  | -1.359523 | 0.605214  |
| 6  | 6  | 0 | 1.587881  | -1.377920 | 1.108858  |
| 7  | 1  | 0 | 0.263435  | -2.976492 | -0.829264 |
| 8  | 1  | 0 | -2.288142 | -2.093365 | -1.374958 |
| 9  | 1  | 0 | 1.610567  | -0.783660 | 2.021237  |
| 10 | 1  | 0 | 1.835033  | -2.404644 | 1.383154  |
| 11 | 35 | 0 | 0.255135  | 2.014612  | -0.198466 |
| 12 | 1  | 0 | -0.623931 | 0.292066  | 1.697533  |
| 13 | 6  | 0 | -2.957766 | 0.173897  | 0.190909  |
| 14 | 6  | 0 | -4.181387 | -0.241170 | -0.114200 |
| 15 | 1  | 0 | -2.709040 | 1.200577  | 0.435066  |
| 16 | 1  | 0 | -4.995911 | 0.469824  | -0.130141 |
| 17 | 1  | 0 | -4.411613 | -1.271990 | -0.355558 |
| 18 | 6  | 0 | 2.573185  | -0.812607 | 0.083573  |
| 19 | 1  | 0 | 2.567240  | -1.388264 | -0.846687 |
| 20 | 1  | 0 | 2.284938  | 0.213097  | -0.185289 |
| 21 | 6  | 0 | 3.973443  | -0.807625 | 0.635195  |
| 22 | 8  | 0 | 4.280620  | -1.079055 | 1.772017  |
| 23 | 8  | 0 | 4.875818  | -0.450109 | -0.303193 |
| 24 | 1  | 0 | 5.746813  | -0.436596 | 0.121618  |

-----  
Distance matrix (angstroms):

|    |    | 1        | 2        | 3        | 4        | 5        |
|----|----|----------|----------|----------|----------|----------|
| 1  | C  | 0.000000 |          |          |          |          |
| 2  | C  | 1.353267 | 0.000000 |          |          |          |
| 3  | N  | 2.208828 | 1.392244 | 0.000000 |          |          |
| 4  | C  | 2.217795 | 2.225493 | 1.352001 | 0.000000 |          |
| 5  | N  | 1.389658 | 2.212459 | 2.181553 | 1.341997 | 0.000000 |
| 6  | C  | 2.547301 | 3.633432 | 3.598882 | 2.488954 | 1.468177 |
| 7  | H  | 1.075901 | 2.208470 | 3.267419 | 3.234990 | 2.162241 |
| 8  | H  | 2.211483 | 1.074747 | 2.162602 | 3.241437 | 3.270305 |
| 9  | H  | 3.383829 | 4.265621 | 3.891226 | 2.595114 | 2.073974 |
| 10 | H  | 2.793020 | 4.018921 | 4.218259 | 3.260223 | 2.083681 |
| 11 | Br | 4.233125 | 4.208573 | 3.409421 | 2.817714 | 3.468837 |
| 12 | H  | 3.250046 | 3.256298 | 2.154493 | 1.072203 | 2.148148 |
| 13 | C  | 3.589399 | 2.522272 | 1.418291 | 2.439473 | 3.542723 |
| 14 | C  | 4.338528 | 3.068358 | 2.421646 | 3.633066 | 4.587267 |
| 15 | H  | 4.225206 | 3.348546 | 2.085910 | 2.617611 | 3.885553 |
| 16 | H  | 5.389272 | 4.120098 | 3.391514 | 4.507587 | 5.565741 |
| 17 | H  | 4.201886 | 2.901214 | 2.718742 | 4.015176 | 4.720172 |
| 18 | C  | 3.223381 | 4.308466 | 4.392456 | 3.387953 | 2.482136 |
| 19 | H  | 3.015960 | 4.153732 | 4.559187 | 3.820823 | 2.769574 |

|    |    |          |          |          |          |          |
|----|----|----------|----------|----------|----------|----------|
| 20 | H  | 3.532382 | 4.348918 | 4.210062 | 3.225198 | 2.721746 |
| 21 | C  | 4.611334 | 5.765873 | 5.808757 | 4.690370 | 3.804887 |
| 22 | O  | 5.191344 | 6.366455 | 6.314164 | 5.096244 | 4.244864 |
| 23 | O  | 5.464767 | 6.581617 | 6.712580 | 5.694732 | 4.840684 |
| 24 | H  | 6.321131 | 7.470850 | 7.566345 | 6.485175 | 5.635066 |
|    |    | 6        | 7        | 8        | 9        | 10       |
| 6  | C  | 0.000000 |          |          |          |          |
| 7  | H  | 2.840054 | 0.000000 |          |          |          |
| 8  | H  | 4.658836 | 2.754676 | 0.000000 |          |          |
| 9  | H  | 1.089080 | 3.840395 | 5.333798 | 0.000000 |          |
| 10 | H  | 1.091093 | 2.773395 | 4.970376 | 1.756452 | 0.000000 |
| 11 | Br | 3.872284 | 5.030814 | 4.972712 | 3.820289 | 4.952517 |
| 12 | H  | 2.833285 | 4.225587 | 4.230848 | 2.500991 | 3.663002 |
| 13 | C  | 4.890160 | 4.619722 | 2.835632 | 5.013649 | 5.571466 |
| 14 | C  | 6.006040 | 5.267802 | 2.933345 | 6.196864 | 6.566581 |
| 15 | H  | 5.056300 | 5.280344 | 3.781983 | 5.011202 | 5.877507 |
| 16 | H  | 6.949503 | 6.326656 | 3.930842 | 7.060114 | 7.564021 |
| 17 | H  | 6.176541 | 4.998580 | 2.494587 | 6.492633 | 6.582295 |
| 18 | C  | 1.530233 | 3.294026 | 5.234515 | 2.163797 | 2.183658 |
| 19 | H  | 2.187100 | 2.798265 | 4.934670 | 3.083141 | 2.557606 |
| 20 | H  | 2.166112 | 3.830751 | 5.258150 | 2.513376 | 3.084639 |
| 21 | C  | 2.498099 | 4.540130 | 6.700842 | 2.739502 | 2.771771 |
| 22 | O  | 2.789255 | 5.148272 | 7.353972 | 2.697879 | 2.808790 |
| 23 | O  | 3.696654 | 5.285209 | 7.427738 | 4.021952 | 3.988778 |
| 24 | H  | 4.376922 | 6.117408 | 8.339371 | 4.564815 | 4.557051 |
|    |    | 11       | 12       | 13       | 14       | 15       |
| 11 | Br | 0.000000 |          |          |          |          |
| 12 | H  | 2.708271 | 0.000000 |          |          |          |
| 13 | C  | 3.723248 | 2.780407 | 0.000000 |          |          |
| 14 | C  | 4.977789 | 4.027680 | 1.327637 | 0.000000 |          |
| 15 | H  | 3.138527 | 2.601325 | 1.084227 | 2.132635 | 0.000000 |
| 16 | H  | 5.473986 | 4.741961 | 2.084390 | 1.081303 | 2.466422 |
| 17 | H  | 5.710076 | 4.583447 | 2.122001 | 1.083442 | 3.104420 |
| 18 | C  | 3.666888 | 3.747895 | 5.619263 | 6.781584 | 5.663776 |
| 19 | H  | 4.164803 | 4.413630 | 5.834607 | 6.884499 | 6.015323 |
| 20 | H  | 2.713988 | 3.465945 | 5.256330 | 6.482652 | 5.128331 |
| 21 | C  | 4.741923 | 4.844970 | 7.014444 | 8.208758 | 6.980581 |
| 22 | O  | 5.445926 | 5.093146 | 7.514254 | 8.710076 | 7.472583 |
| 23 | O  | 5.237989 | 5.899234 | 7.873916 | 9.061585 | 7.797426 |
| 24 | H  | 6.022408 | 6.603092 | 8.726235 | 9.932922 | 8.618586 |
|    |    | 16       | 17       | 18       | 19       | 20       |
| 16 | H  | 0.000000 |          |          |          |          |
| 17 | H  | 1.850981 | 0.000000 |          |          |          |
| 18 | C  | 7.679942 | 7.013649 | 0.000000 |          |          |

|    |   |           |           |          |          |          |
|----|---|-----------|-----------|----------|----------|----------|
| 19 | H | 7.820945  | 6.997079  | 1.093983 | 0.000000 |          |
| 20 | H | 7.285583  | 6.861361  | 1.098837 | 1.755420 | 0.000000 |
| 21 | C | 9.092135  | 8.456145  | 1.505003 | 2.123799 | 2.136847 |
| 22 | O | 9.595377  | 8.950906  | 2.416025 | 3.144661 | 3.079521 |
| 23 | O | 9.916010  | 9.323873  | 2.362861 | 2.550501 | 2.677014 |
| 24 | H | 10.783835 | 10.203881 | 3.196052 | 3.457307 | 3.535657 |
|    |   | 21        | 22        | 23       | 24       |          |
| 21 | C | 0.000000  |           |          |          |          |
| 22 | O | 1.208469  | 0.000000  |          |          |          |
| 23 | O | 1.350063  | 2.248629  | 0.000000 |          |          |
| 24 | H | 1.883153  | 2.299194  | 0.969164 | 0.000000 |          |

Stoichiometry C8H11BrN2O2

Framework group C1[X(C8H11BrN2O2)]

Deg. of freedom 66

Full point group C1 NOp 1

Largest Abelian subgroup C1 NOp 1

Largest concise Abelian subgroup C1 NOp 1

Standard orientation:

| Center<br>Number | Atomic<br>Number | Atomic<br>Type | Coordinates (Angstroms) |           |           |
|------------------|------------------|----------------|-------------------------|-----------|-----------|
|                  |                  |                | X                       | Y         | Z         |
| 1                | 6                | 0              | -0.624238               | -2.097510 | -0.767732 |
| 2                | 6                | 0              | -1.940397               | -1.797278 | -0.862155 |
| 3                | 7                | 0              | -2.217796               | -0.855558 | 0.125041  |
| 4                | 6                | 0              | -1.062994               | -0.548363 | 0.757473  |
| 5                | 7                | 0              | -0.097997               | -1.347910 | 0.277409  |
| 6                | 6                | 0              | 1.319209                | -1.261576 | 0.651060  |
| 7                | 1                | 0              | -0.017763               | -2.767451 | -1.351626 |
| 8                | 1                | 0              | -2.691382               | -2.135328 | -1.552681 |
| 9                | 1                | 0              | 1.371296                | -0.779999 | 1.626491  |
| 10               | 1                | 0              | 1.701334                | -2.276777 | 0.768672  |
| 11               | 35               | 0              | -0.494788               | 2.078709  | -0.088190 |
| 12               | 1                | 0              | -0.986639               | 0.053590  | 1.641465  |
| 13               | 6                | 0              | -3.436027               | -0.162983 | 0.343675  |
| 14               | 6                | 0              | -4.633020               | -0.681572 | 0.096909  |
| 15               | 1                | 0              | -3.274790               | 0.850165  | 0.694508  |
| 16               | 1                | 0              | -5.516187               | -0.075286 | 0.244044  |
| 17               | 1                | 0              | -4.775233               | -1.696936 | -0.253319 |
| 18               | 6                | 0              | 2.128643                | -0.467026 | -0.376130 |
| 19               | 1                | 0              | 2.089302                | -0.926178 | -1.368315 |
| 20               | 1                | 0              | 1.706538                | 0.541657  | -0.484883 |
| 21               | 6                | 0              | 3.569308                | -0.360744 | 0.046035  |
| 22               | 8                | 0              | 4.018157                | -0.725311 | 1.107178  |

|    |   |   |          |          |           |
|----|---|---|----------|----------|-----------|
| 23 | 8 | 0 | 4.327794 | 0.208890 | -0.914634 |
| 24 | 1 | 0 | 5.231149 | 0.275685 | -0.570008 |

-----

Rotational constants (GHZ):      0.8294984      0.3305261      0.2552823

Standard basis: 6-311++G(d,p) (5D, 7F)

There are 404 symmetry adapted cartesian basis functions of A symmetry.

There are 389 symmetry adapted basis functions of A symmetry.

389 basis functions, 625 primitive gaussians, 404 cartesian basis functions

62 alpha electrons      62 beta electrons

nuclear repulsion energy      1075.2453694523 Hartrees.

NAtoms= 24 NActive= 24 NUniq= 24 SFac= 1.00D+00 NATFMM= 60 NAOKFM=F

Big=F

Integral buffers will be 131072 words long.

Raffenetti 2 integral format.

Two-electron integral symmetry is turned on.

One-electron integrals computed using PRISM.

NBasis= 389 RedAO= T EigKep= 6.27D-06 NBF= 389

NBsUse= 389 1.00D-06 EigRej= -1.00D+00 NBFU= 389

Initial guess from the checkpoint file: "./cooh.chk"

B after Tr= 0.000000 0.000000 0.000000

Rot= 0.999997 -0.002463 -0.000246 -0.000737 Ang= -0.30 deg.

ExpMin= 3.50D-02 ExpMax= 4.40D+05 ExpMxC= 1.51D+04 IAcc=3 IRadAn= 5 AccDes=

0.00D+00

Harris functional with IExCor= 402 and IRadAn= 5 diagonalized for initial guess.

HarFok: IExCor= 402 AccDes= 0.00D+00 IRadAn= 5 IDoV= 1 UseB2=F ITyADJ=14

ICtDFT= 3500011 ScaDFX= 1.000000 1.000000 1.000000 1.000000

FoFCou: FMM=F IPFlag= 0 FMFlag= 100000 FMFlg1= 0

NFxFlg= 0 DoJE=T BraDBF=F KetDBF=T FulRan=T

wScrn= 0.000000 ICntrl= 500 IOpCl= 0 I1Cent= 200000004 NGrid=

0

NMat0= 1 NMatS0= 1 NMatT0= 0 NMatD0= 1 NMtDS0= 0

NMtDT0= 0

Petite list used in FoFCou.

Keep R1 ints in memory in canonical form, NReq=2910765817.

Requested convergence on RMS density matrix=1.00D-08 within 128 cycles.

Requested convergence on MAX density matrix=1.00D-06.

Requested convergence on energy=1.00D-06.

No special actions if energy rises.

SCF Done: E(RB3LYP) = -3145.73213043 A.U. after 11 cycles

NFock= 11 Conv=0.79D-08 -V/T= 2.0017

Calling FoFJK, ICntrl= 2127 FMM=F ISym2X=0 I1Cent= 0 IOpClX= 0 NMat=1 NMatS=1

NMatT=0.

\*\*\*\*\* Axes restored to original set \*\*\*\*\*

-----

| Center<br>Number | Atomic<br>Number | Forces (Hartrees/Bohr) |              |              |
|------------------|------------------|------------------------|--------------|--------------|
|                  |                  | X                      | Y            | Z            |
| 1                | 6                | 0.000010375            | -0.000062714 | 0.000001869  |
| 2                | 6                | 0.000042837            | 0.000181055  | -0.000206371 |
| 3                | 7                | 0.000579188            | -0.000053893 | 0.000145657  |
| 4                | 6                | -0.000438360           | -0.000869097 | 0.000255049  |
| 5                | 7                | 0.000086137            | 0.000108941  | 0.000095866  |
| 6                | 6                | -0.000508053           | 0.000050272  | 0.000330584  |
| 7                | 1                | 0.000020404            | 0.000002285  | 0.000005783  |
| 8                | 1                | -0.000031056           | -0.000031191 | 0.000044757  |
| 9                | 1                | 0.000096956            | -0.000017841 | -0.000146214 |
| 10               | 1                | 0.000028458            | -0.000108246 | -0.000123377 |
| 11               | 35               | 0.000030027            | 0.000456611  | -0.000145679 |
| 12               | 1                | 0.000220788            | 0.000258242  | -0.000267343 |
| 13               | 6                | -0.000390285           | 0.000276183  | -0.000038435 |
| 14               | 6                | 0.000081505            | -0.000086279 | 0.000056594  |
| 15               | 1                | 0.000102930            | 0.000023946  | -0.000053802 |
| 16               | 1                | -0.000008220           | 0.000007640  | -0.000006694 |
| 17               | 1                | 0.000011290            | -0.000012891 | -0.000003975 |
| 18               | 6                | 0.000266158            | -0.000580935 | -0.000677422 |
| 19               | 1                | -0.000172786           | 0.000022304  | 0.000052956  |
| 20               | 1                | -0.000437160           | 0.000076333  | 0.000488145  |
| 21               | 6                | 0.000143320            | 0.000431225  | 0.000860351  |
| 22               | 8                | -0.000132026           | 0.000039792  | -0.000636417 |
| 23               | 8                | 0.000244866            | -0.000242824 | -0.000125665 |
| 24               | 1                | 0.000152708            | 0.000131084  | 0.000093784  |

-----  
Cartesian Forces: Max 0.000869097 RMS 0.000276004

GradGradGradGradGradGradGradGradGradGradGradGradGradGradGradGradGradGradGrad

Berny optimization.

Using GEDIIS/GDIIS optimizer.

FormGI is forming the generalized inverse of G from B-inverse, IUseBI=4.

Internal Forces: Max 0.000647687 RMS 0.000136268

Search for a local minimum.

Step number 8 out of a maximum of 140

All quantities printed in internal units (Hartrees-Bohrs-Radians)

Mixed Optimization -- En-DIIS/RFO-DIIS

Swapping is turned off.

Update second derivatives using D2CorX and points 5 4 6 7 8

DE= -6.58D-05 DEPred=-5.17D-05 R= 1.27D+00

TightC=F SS= 1.41D+00 RLast= 1.11D-01 DXNew= 1.2000D+00 3.3239D-01

Trust test= 1.27D+00 RLast= 1.11D-01 DXMaxT set to 7.14D-01

ITU= 1 1 0-1 1 1 1 0

|                 |         |         |         |         |         |
|-----------------|---------|---------|---------|---------|---------|
| Eigenvalues --- | 0.00197 | 0.00388 | 0.00808 | 0.00854 | 0.01591 |
| Eigenvalues --- | 0.01777 | 0.01979 | 0.02034 | 0.02127 | 0.02197 |
| Eigenvalues --- | 0.02347 | 0.02364 | 0.02430 | 0.02484 | 0.03038 |
| Eigenvalues --- | 0.03039 | 0.03156 | 0.03790 | 0.04388 | 0.04755 |
| Eigenvalues --- | 0.05010 | 0.05680 | 0.06506 | 0.08481 | 0.09828 |
| Eigenvalues --- | 0.10717 | 0.12214 | 0.15005 | 0.15319 | 0.15972 |
| Eigenvalues --- | 0.15994 | 0.15997 | 0.16000 | 0.16002 | 0.16067 |
| Eigenvalues --- | 0.16743 | 0.17859 | 0.20753 | 0.21987 | 0.22835 |
| Eigenvalues --- | 0.24484 | 0.25018 | 0.27191 | 0.27714 | 0.34360 |
| Eigenvalues --- | 0.34531 | 0.35189 | 0.35493 | 0.35579 | 0.35618 |
| Eigenvalues --- | 0.35843 | 0.36070 | 0.36590 | 0.36650 | 0.37082 |
| Eigenvalues --- | 0.37632 | 0.41323 | 0.43011 | 0.43654 | 0.47491 |
| Eigenvalues --- | 0.52391 | 0.53327 | 0.54229 | 0.55130 | 0.59908 |
| Eigenvalues --- | 0.95179 |         |         |         |         |

En-DIIS/RFO-DIIS IScMMF= 0 using points: 8 7 6

RFO step: Lambda=-6.68589574D-06.

DidBck=F Rises=F RFO-DIIS coefs: 1.56428 -0.78088 0.21659

Iteration 1 RMS(Cart)= 0.00717002 RMS(Int)= 0.00004091

Iteration 2 RMS(Cart)= 0.00004626 RMS(Int)= 0.00002369

Iteration 3 RMS(Cart)= 0.00000000 RMS(Int)= 0.00002369

| Variable | Old X   | -DE/DX   | Delta X  | Delta X  | Delta X  | New X   |
|----------|---------|----------|----------|----------|----------|---------|
|          |         |          | (Linear) | (Quad)   | (Total)  |         |
| R1       | 2.55730 | 0.00000  | 0.00020  | 0.00018  | 0.00036  | 2.55767 |
| R2       | 2.62607 | -0.00001 | -0.00008 | 0.00000  | -0.00009 | 2.62598 |
| R3       | 2.03316 | 0.00001  | 0.00003  | -0.00003 | 0.00000  | 2.03316 |
| R4       | 2.63096 | 0.00000  | -0.00030 | -0.00009 | -0.00039 | 2.63057 |
| R5       | 2.03098 | 0.00000  | 0.00001  | 0.00002  | 0.00003  | 2.03101 |
| R6       | 2.55491 | -0.00035 | -0.00121 | -0.00080 | -0.00199 | 2.55292 |
| R7       | 2.68018 | 0.00029  | 0.00079  | 0.00079  | 0.00158  | 2.68176 |
| R8       | 2.53601 | -0.00006 | -0.00089 | -0.00053 | -0.00142 | 2.53459 |
| R9       | 5.32471 | 0.00037  | 0.02066  | 0.01351  | 0.03416  | 5.35887 |
| R10      | 2.02617 | 0.00001  | 0.00007  | 0.00002  | 0.00009  | 2.02626 |
| R11      | 2.77445 | -0.00021 | 0.00032  | -0.00051 | -0.00020 | 2.77425 |
| R12      | 2.05806 | -0.00013 | 0.00020  | -0.00026 | -0.00006 | 2.05800 |
| R13      | 2.06187 | 0.00008  | -0.00019 | 0.00013  | -0.00006 | 2.06181 |
| R14      | 2.89172 | 0.00017  | 0.00025  | 0.00086  | 0.00111  | 2.89283 |
| R15      | 5.11789 | -0.00007 | 0.00063  | -0.00364 | -0.00300 | 5.11489 |
| R16      | 5.12869 | -0.00002 | 0.00003  | -0.00034 | -0.00031 | 5.12839 |
| R17      | 2.50887 | -0.00006 | -0.00019 | -0.00015 | -0.00033 | 2.50854 |
| R18      | 2.04889 | 0.00003  | 0.00011  | 0.00012  | 0.00023  | 2.04913 |
| R19      | 2.04337 | 0.00001  | 0.00002  | 0.00004  | 0.00006  | 2.04343 |
| R20      | 2.04741 | 0.00001  | 0.00003  | 0.00004  | 0.00007  | 2.04748 |
| R21      | 2.06733 | -0.00005 | 0.00084  | -0.00040 | 0.00045  | 2.06778 |

|     |         |          |          |          |          |         |
|-----|---------|----------|----------|----------|----------|---------|
| R22 | 2.07650 | 0.00015  | -0.00067 | 0.00047  | -0.00019 | 2.07631 |
| R23 | 2.84404 | 0.00044  | -0.00015 | 0.00069  | 0.00054  | 2.84458 |
| R24 | 2.28368 | -0.00065 | 0.00024  | -0.00016 | 0.00009  | 2.28376 |
| R25 | 2.55125 | 0.00027  | -0.00075 | 0.00023  | -0.00051 | 2.55074 |
| R26 | 1.83145 | 0.00018  | -0.00020 | 0.00030  | 0.00011  | 1.83156 |
| A1  | 1.87664 | -0.00008 | -0.00022 | -0.00010 | -0.00033 | 1.87632 |
| A2  | 2.27643 | 0.00006  | 0.00019  | 0.00016  | 0.00035  | 2.27678 |
| A3  | 2.13008 | 0.00002  | 0.00004  | -0.00007 | -0.00003 | 2.13005 |
| A4  | 1.86960 | -0.00004 | 0.00002  | -0.00015 | -0.00014 | 1.86945 |
| A5  | 2.28450 | 0.00004  | -0.00003 | 0.00021  | 0.00019  | 2.28469 |
| A6  | 2.12835 | 0.00001  | 0.00000  | 0.00001  | 0.00001  | 2.12836 |
| A7  | 1.89145 | 0.00008  | -0.00012 | 0.00007  | -0.00003 | 1.89143 |
| A8  | 2.22780 | -0.00007 | 0.00007  | -0.00022 | -0.00016 | 2.22764 |
| A9  | 2.15388 | -0.00001 | 0.00006  | 0.00002  | 0.00007  | 2.15395 |
| A10 | 1.88755 | 0.00002  | 0.00087  | 0.00039  | 0.00120  | 1.88876 |
| A11 | 1.81697 | -0.00012 | -0.00302 | -0.00179 | -0.00478 | 1.81219 |
| A12 | 2.18224 | 0.00004  | 0.00120  | 0.00101  | 0.00204  | 2.18428 |
| A13 | 1.87875 | 0.00020  | 0.00033  | 0.00122  | 0.00154  | 1.88030 |
| A14 | 2.18733 | -0.00002 | 0.00116  | 0.00089  | 0.00188  | 2.18921 |
| A15 | 1.89454 | 0.00003  | -0.00017 | -0.00003 | -0.00017 | 1.89436 |
| A16 | 2.20020 | 0.00001  | 0.00069  | -0.00013 | 0.00057  | 2.20076 |
| A17 | 2.17491 | -0.00004 | -0.00056 | 0.00026  | -0.00033 | 2.17458 |
| A18 | 1.87560 | 0.00006  | 0.00035  | -0.00084 | -0.00050 | 1.87511 |
| A19 | 1.88681 | 0.00007  | 0.00058  | -0.00045 | 0.00013  | 1.88695 |
| A20 | 1.95012 | -0.00008 | -0.00023 | -0.00038 | -0.00061 | 1.94951 |
| A21 | 1.87354 | 0.00006  | -0.00043 | 0.00067  | 0.00025  | 1.87378 |
| A22 | 1.92444 | -0.00009 | 0.00067  | 0.00005  | 0.00072  | 1.92516 |
| A23 | 1.95004 | 0.00000  | -0.00091 | 0.00092  | 0.00001  | 1.95006 |
| A24 | 1.24444 | -0.00025 | -0.00369 | -0.00339 | -0.00707 | 1.23737 |
| A25 | 1.38693 | -0.00026 | -0.00436 | -0.00389 | -0.00829 | 1.37864 |
| A26 | 2.15919 | -0.00014 | -0.00064 | -0.00070 | -0.00134 | 2.15785 |
| A27 | 1.95892 | -0.00002 | -0.00030 | -0.00038 | -0.00068 | 1.95824 |
| A28 | 2.16425 | 0.00016  | 0.00090  | 0.00109  | 0.00200  | 2.16624 |
| A29 | 2.08528 | 0.00001  | -0.00002 | 0.00007  | 0.00005  | 2.08532 |
| A30 | 2.14658 | -0.00002 | -0.00001 | -0.00013 | -0.00015 | 2.14644 |
| A31 | 2.05132 | 0.00001  | 0.00004  | 0.00007  | 0.00010  | 2.05142 |
| A32 | 1.95180 | -0.00004 | -0.00118 | 0.00037  | -0.00081 | 1.95099 |
| A33 | 1.91758 | -0.00021 | 0.00084  | -0.00006 | 0.00079  | 1.91837 |
| A34 | 1.93341 | 0.00006  | -0.00132 | 0.00017  | -0.00114 | 1.93227 |
| A35 | 1.85636 | 0.00009  | 0.00086  | 0.00009  | 0.00094  | 1.85730 |
| A36 | 1.89491 | 0.00016  | -0.00276 | 0.00152  | -0.00125 | 1.89366 |
| A37 | 1.90779 | -0.00006 | 0.00373  | -0.00215 | 0.00158  | 1.90938 |
| A38 | 2.52697 | 0.00038  | 0.00457  | 0.00492  | 0.00949  | 2.53646 |
| A39 | 2.19020 | -0.00017 | -0.00047 | -0.00020 | -0.00067 | 2.18953 |

|     |          |          |          |          |          |          |
|-----|----------|----------|----------|----------|----------|----------|
| A40 | 1.94764  | 0.00040  | -0.00026 | 0.00071  | 0.00045  | 1.94810  |
| A41 | 2.14533  | -0.00023 | 0.00071  | -0.00049 | 0.00023  | 2.14556  |
| A42 | 1.87519  | 0.00005  | -0.00082 | 0.00104  | 0.00022  | 1.87541  |
| D1  | 0.00503  | -0.00003 | 0.00033  | -0.00149 | -0.00116 | 0.00387  |
| D2  | 3.10497  | 0.00002  | 0.00004  | 0.00048  | 0.00052  | 3.10549  |
| D3  | -3.12752 | 0.00000  | -0.00030 | -0.00116 | -0.00146 | -3.12898 |
| D4  | -0.02758 | 0.00005  | -0.00059 | 0.00081  | 0.00022  | -0.02736 |
| D5  | -0.06119 | 0.00004  | 0.00189  | 0.00223  | 0.00411  | -0.05708 |
| D6  | -3.03247 | 0.00006  | 0.00217  | 0.00159  | 0.00376  | -3.02870 |
| D7  | 3.07228  | 0.00001  | 0.00246  | 0.00193  | 0.00438  | 3.07666  |
| D8  | 0.10100  | 0.00004  | 0.00274  | 0.00129  | 0.00403  | 0.10504  |
| D9  | 0.05237  | 0.00002  | -0.00241 | 0.00026  | -0.00215 | 0.05022  |
| D10 | 3.04459  | 0.00002  | -0.00232 | -0.00067 | -0.00300 | 3.04160  |
| D11 | -3.05211 | -0.00003 | -0.00215 | -0.00150 | -0.00365 | -3.05576 |
| D12 | -0.05989 | -0.00002 | -0.00207 | -0.00243 | -0.00450 | -0.06439 |
| D13 | -0.09086 | 0.00000  | 0.00355  | 0.00110  | 0.00466  | -0.08621 |
| D14 | 1.90377  | 0.00017  | 0.00286  | 0.00180  | 0.00466  | 1.90843  |
| D15 | -2.99923 | -0.00016 | -0.01025 | -0.00909 | -0.01935 | -3.01859 |
| D16 | -3.09082 | 0.00000  | 0.00346  | 0.00201  | 0.00549  | -3.08534 |
| D17 | -1.09619 | 0.00018  | 0.00278  | 0.00271  | 0.00548  | -1.09071 |
| D18 | 0.28399  | -0.00015 | -0.01034 | -0.00818 | -0.01853 | 0.26546  |
| D19 | 0.56771  | 0.00007  | 0.00514  | 0.00716  | 0.01230  | 0.58002  |
| D20 | -2.53156 | 0.00007  | 0.00599  | 0.00687  | 0.01286  | -2.51870 |
| D21 | -2.74388 | 0.00008  | 0.00523  | 0.00610  | 0.01133  | -2.73255 |
| D22 | 0.44003  | 0.00008  | 0.00608  | 0.00581  | 0.01188  | 0.45191  |
| D23 | 0.09404  | -0.00002 | -0.00334 | -0.00204 | -0.00539 | 0.08865  |
| D24 | 3.06837  | -0.00004 | -0.00347 | -0.00146 | -0.00494 | 3.06343  |
| D25 | -1.85940 | 0.00002  | -0.00043 | -0.00074 | -0.00118 | -1.86059 |
| D26 | 1.11493  | 0.00000  | -0.00056 | -0.00017 | -0.00073 | 1.11420  |
| D27 | 3.00156  | 0.00015  | 0.01052  | 0.00821  | 0.01874  | 3.02029  |
| D28 | -0.30730 | 0.00013  | 0.01039  | 0.00878  | 0.01919  | -0.28811 |
| D29 | -2.24552 | -0.00002 | -0.00050 | -0.00069 | -0.00114 | -2.24666 |
| D30 | -0.24464 | 0.00002  | -0.00078 | -0.00056 | -0.00136 | -0.24600 |
| D31 | -2.92787 | -0.00007 | 0.00301  | 0.00322  | 0.00622  | -2.92164 |
| D32 | -0.91070 | 0.00006  | 0.00299  | 0.00334  | 0.00632  | -0.90437 |
| D33 | 1.24206  | 0.00006  | 0.00209  | 0.00393  | 0.00603  | 1.24809  |
| D34 | 0.41024  | -0.00005 | 0.00327  | 0.00252  | 0.00579  | 0.41602  |
| D35 | 2.42741  | 0.00008  | 0.00324  | 0.00264  | 0.00588  | 2.43329  |
| D36 | -1.70303 | 0.00008  | 0.00235  | 0.00323  | 0.00559  | -1.69743 |
| D37 | -1.05154 | 0.00001  | -0.00123 | -0.00246 | -0.00370 | -1.05524 |
| D38 | 1.00564  | -0.00004 | -0.00036 | -0.00216 | -0.00252 | 1.00312  |
| D39 | 3.11528  | -0.00021 | 0.00403  | -0.00478 | -0.00075 | 3.11452  |
| D40 | -3.13620 | 0.00005  | -0.00196 | -0.00120 | -0.00315 | -3.13935 |
| D41 | -1.07902 | 0.00000  | -0.00108 | -0.00089 | -0.00198 | -1.08100 |



|     |          |          |          |          |          |          |
|-----|----------|----------|----------|----------|----------|----------|
| D42 | 1.03062  | -0.00016 | 0.00330  | -0.00351 | -0.00021 | 1.03041  |
| D43 | 1.06497  | 0.00004  | -0.00128 | -0.00267 | -0.00395 | 1.06102  |
| D44 | 3.12215  | -0.00001 | -0.00041 | -0.00236 | -0.00277 | 3.11938  |
| D45 | -1.05140 | -0.00017 | 0.00398  | -0.00498 | -0.00100 | -1.05240 |
| D46 | -0.01353 | 0.00001  | 0.00143  | 0.00111  | 0.00256  | -0.01097 |
| D47 | 0.36056  | 0.00002  | 0.00081  | 0.00090  | 0.00167  | 0.36224  |
| D48 | -3.09057 | 0.00000  | 0.00072  | -0.00051 | 0.00021  | -3.09036 |
| D49 | 0.04747  | 0.00001  | 0.00046  | 0.00015  | 0.00061  | 0.04808  |
| D50 | 0.00377  | 0.00000  | -0.00026 | -0.00022 | -0.00048 | 0.00329  |
| D51 | -3.14138 | 0.00001  | -0.00052 | 0.00044  | -0.00008 | -3.14146 |
| D52 | -0.34282 | -0.00001 | -0.00117 | -0.00027 | -0.00146 | -0.34428 |
| D53 | 1.77269  | -0.00013 | -0.00161 | 0.00019  | -0.00143 | 1.77127  |
| D54 | -2.46783 | 0.00008  | -0.00250 | 0.00093  | -0.00157 | -2.46940 |
| D55 | -0.12290 | 0.00013  | 0.00574  | -0.00426 | 0.00149  | -0.12142 |
| D56 | 3.02419  | 0.00003  | 0.00575  | -0.00722 | -0.00147 | 3.02271  |
| D57 | -2.27250 | 0.00004  | 0.00993  | -0.00585 | 0.00408  | -2.26842 |
| D58 | 0.87459  | -0.00006 | 0.00993  | -0.00882 | 0.00112  | 0.87571  |
| D59 | 1.99253  | -0.00012 | 0.00843  | -0.00564 | 0.00278  | 1.99531  |
| D60 | -1.14357 | -0.00023 | 0.00843  | -0.00860 | -0.00018 | -1.14374 |
| D61 | 3.10758  | -0.00006 | 0.00497  | -0.00172 | 0.00325  | 3.11084  |
| D62 | -0.02868 | -0.00016 | 0.00498  | -0.00460 | 0.00038  | -0.02829 |

| Item                 | Value    | Threshold | Converged? |
|----------------------|----------|-----------|------------|
| Maximum Force        | 0.000648 | 0.000450  | NO         |
| RMS Force            | 0.000136 | 0.000300  | YES        |
| Maximum Displacement | 0.029066 | 0.001800  | NO         |
| RMS Displacement     | 0.007191 | 0.001200  | NO         |

Predicted change in Energy=-1.811842D-05

GradGradGradGradGradGradGradGradGradGradGradGradGradGradGradGradGradGradGrad

Input orientation:

| Center<br>Number | Atomic<br>Number | Atomic<br>Type | Coordinates (Angstroms) |           |           |
|------------------|------------------|----------------|-------------------------|-----------|-----------|
|                  |                  |                | X                       | Y         | Z         |
| 1                | 6                | 0              | -0.310031               | -2.182812 | -0.392012 |
| 2                | 6                | 0              | -1.566615               | -1.755072 | -0.656370 |
| 3                | 7                | 0              | -1.814316               | -0.670004 | 0.179714  |
| 4                | 6                | 0              | -0.693296               | -0.414366 | 0.888952  |
| 5                | 7                | 0              | 0.208254                | -1.366177 | 0.605737  |
| 6                | 6                | 0              | 1.587538                | -1.383800 | 1.108228  |
| 7                | 1                | 0              | 0.260152                | -2.985051 | -0.826598 |
| 8                | 1                | 0              | -2.289244               | -2.095561 | -1.375392 |
| 9                | 1                | 0              | 1.608746                | -0.794836 | 2.024031  |
| 10               | 1                | 0              | 1.837853                | -2.411403 | 1.376170  |

|    |    |   |           |           |           |
|----|----|---|-----------|-----------|-----------|
| 11 | 35 | 0 | 0.256020  | 2.025928  | -0.199843 |
| 12 | 1  | 0 | -0.617462 | 0.295341  | 1.689134  |
| 13 | 6  | 0 | -2.953374 | 0.176412  | 0.186528  |
| 14 | 6  | 0 | -4.179096 | -0.237891 | -0.110307 |
| 15 | 1  | 0 | -2.698599 | 1.204296  | 0.419685  |
| 16 | 1  | 0 | -4.991620 | 0.475332  | -0.130420 |
| 17 | 1  | 0 | -4.413118 | -1.270458 | -0.340448 |
| 18 | 6  | 0 | 2.570245  | -0.809585 | 0.084520  |
| 19 | 1  | 0 | 2.566848  | -1.382851 | -0.847506 |
| 20 | 1  | 0 | 2.277907  | 0.215831  | -0.180582 |
| 21 | 6  | 0 | 3.970733  | -0.803387 | 0.636325  |
| 22 | 8  | 0 | 4.278079  | -1.081555 | 1.771521  |
| 23 | 8  | 0 | 4.872533  | -0.440046 | -0.299988 |
| 24 | 1  | 0 | 5.743834  | -0.429057 | 0.124395  |

-----  
Distance matrix (angstroms):

|    |    | 1        | 2        | 3        | 4        | 5        |
|----|----|----------|----------|----------|----------|----------|
| 1  | C  | 0.000000 |          |          |          |          |
| 2  | C  | 1.353459 | 0.000000 |          |          |          |
| 3  | N  | 2.208695 | 1.392036 | 0.000000 |          |          |
| 4  | C  | 2.217016 | 2.224454 | 1.350946 | 0.000000 |          |
| 5  | N  | 1.389609 | 2.212309 | 2.181041 | 1.341248 | 0.000000 |
| 6  | C  | 2.547529 | 3.633225 | 3.597812 | 2.487988 | 1.468071 |
| 7  | H  | 1.075900 | 2.208825 | 3.267342 | 3.234284 | 2.162182 |
| 8  | H  | 2.211772 | 1.074765 | 2.162435 | 3.240482 | 3.270224 |
| 9  | H  | 3.383111 | 4.264916 | 3.890300 | 2.594717 | 2.073491 |
| 10 | H  | 2.791438 | 4.019003 | 4.219278 | 3.260713 | 2.083664 |
| 11 | Br | 4.250980 | 4.222129 | 3.420293 | 2.835791 | 3.486777 |
| 12 | H  | 3.250680 | 3.256758 | 2.154692 | 1.072253 | 2.148534 |
| 13 | C  | 3.589973 | 2.522738 | 1.419127 | 2.439338 | 3.542768 |
| 14 | C  | 4.339556 | 3.070029 | 2.421368 | 3.630491 | 4.586348 |
| 15 | H  | 4.223341 | 3.346212 | 2.086275 | 2.619450 | 3.884808 |
| 16 | H  | 5.389938 | 4.120920 | 3.391642 | 4.506248 | 5.565228 |
| 17 | H  | 4.203614 | 2.904692 | 2.717515 | 4.010161 | 4.718210 |
| 18 | C  | 3.226271 | 4.307723 | 4.387815 | 3.384377 | 2.482028 |
| 19 | H  | 3.020571 | 4.154588 | 4.556088 | 3.818611 | 2.770408 |
| 20 | H  | 3.534914 | 4.346399 | 4.202476 | 3.220108 | 2.721123 |
| 21 | C  | 4.613592 | 5.765326 | 5.804574 | 4.687038 | 3.804461 |
| 22 | O  | 5.190799 | 6.364647 | 6.310349 | 5.092999 | 4.243058 |
| 23 | O  | 5.468516 | 6.581711 | 6.707976 | 5.691457 | 4.840822 |
| 24 | H  | 6.323892 | 7.470647 | 7.562191 | 6.482391 | 5.634938 |
|    |    | 6        | 7        | 8        | 9        | 10       |
| 6  | C  | 0.000000 |          |          |          |          |
| 7  | H  | 2.840688 | 0.000000 |          |          |          |

|    |    |           |           |          |          |          |
|----|----|-----------|-----------|----------|----------|----------|
| 8  | H  | 4.658799  | 2.755320  | 0.000000 |          |          |
| 9  | H  | 1.089046  | 3.839509  | 5.333131 | 0.000000 |          |
| 10 | H  | 1.091062  | 2.769548  | 4.970289 | 1.756559 | 0.000000 |
| 11 | Br | 3.887188  | 5.050024  | 4.984672 | 3.838254 | 4.967485 |
| 12 | H  | 2.831782  | 4.226119  | 4.231145 | 2.501328 | 3.667830 |
| 13 | C  | 4.889138  | 4.620392  | 2.835935 | 5.013250 | 5.573857 |
| 14 | C  | 6.004332  | 5.269430  | 2.936481 | 6.193925 | 6.567910 |
| 15 | H  | 5.054038  | 5.278073  | 3.778747 | 5.012352 | 5.879416 |
| 16 | H  | 6.948088  | 6.327719  | 3.932211 | 7.058315 | 7.566026 |
| 17 | H  | 6.174089  | 5.001562  | 2.502548 | 6.486896 | 6.582033 |
| 18 | C  | 1.530822  | 3.301411  | 5.234473 | 2.164809 | 2.184165 |
| 19 | H  | 2.187224  | 2.808617  | 4.936421 | 3.083739 | 2.556187 |
| 20 | H  | 2.167132  | 3.838531  | 5.256327 | 2.515858 | 3.085366 |
| 21 | C  | 2.497838  | 4.546230  | 6.701047 | 2.739487 | 2.771690 |
| 22 | O  | 2.787530  | 5.149491  | 7.352619 | 2.696537 | 2.807045 |
| 23 | O  | 3.696612  | 5.294188  | 7.428881 | 4.022343 | 3.988112 |
| 24 | H  | 4.376558  | 6.124398  | 8.340080 | 4.565234 | 4.555581 |
|    |    | 11        | 12        | 13       | 14       | 15       |
| 11 | Br | 0.000000  |           |          |          |          |
| 12 | H  | 2.706684  | 0.000000  |          |          |          |
| 13 | C  | 3.724272  | 2.780009  | 0.000000 |          |          |
| 14 | C  | 4.980277  | 4.025862  | 1.327462 | 0.000000 |          |
| 15 | H  | 3.128685  | 2.601698  | 1.084351 | 2.133698 | 0.000000 |
| 16 | H  | 5.472376  | 4.740931  | 2.084288 | 1.081335 | 2.468187 |
| 17 | H  | 5.717236  | 4.580167  | 2.121790 | 1.083478 | 3.105122 |
| 18 | C  | 3.671053  | 3.735924  | 5.611859 | 6.776312 | 5.650555 |
| 19 | H  | 4.168833  | 4.403488  | 5.828669 | 6.882018 | 6.002003 |
| 20 | H  | 2.713825  | 3.447510  | 5.244294 | 6.473306 | 5.109109 |
| 21 | C  | 4.743763  | 4.833958  | 7.007538 | 8.203473 | 6.968337 |
| 22 | O  | 5.451576  | 5.086153  | 7.509234 | 8.704991 | 7.465026 |
| 23 | O  | 5.234810  | 5.885358  | 7.865210 | 9.055873 | 7.780991 |
| 24 | H  | 6.020646  | 6.590845  | 8.718478 | 9.927546 | 8.604051 |
|    |    | 16        | 17        | 18       | 19       | 20       |
| 16 | H  | 0.000000  |           |          |          |          |
| 17 | H  | 1.851097  | 0.000000  |          |          |          |
| 18 | C  | 7.673266  | 7.011445  | 0.000000 |          |          |
| 19 | H  | 7.816489  | 6.999262  | 1.094221 | 0.000000 |          |
| 20 | H  | 7.274330  | 6.855978  | 1.098736 | 1.756149 | 0.000000 |
| 21 | C  | 9.085527  | 8.453473  | 1.505289 | 2.123306 | 2.138178 |
| 22 | O  | 9.590026  | 8.946117  | 2.415913 | 3.142992 | 3.081332 |
| 23 | O  | 9.907985  | 9.322796  | 2.363246 | 2.550459 | 2.678902 |
| 24 | H  | 10.776493 | 10.202338 | 3.196569 | 3.456523 | 3.538579 |
|    |    | 21        | 22        | 23       | 24       |          |
| 21 | C  | 0.000000  |           |          |          |          |

22 O 1.208516 0.000000  
 23 O 1.349793 2.248568 0.000000  
 24 H 1.883103 2.299394 0.969220 0.000000

Stoichiometry C8H11BrN2O2

Framework group C1[X(C8H11BrN2O2)]

Deg. of freedom 66

Full point group C1 NOp 1

Largest Abelian subgroup C1 NOP 1

Largest concise Abelian subgroup C1 NOp 1

Standard orientation:

| Center Number | Atomic Number | Atomic Type | Coordinates (Angstroms) |           |           |
|---------------|---------------|-------------|-------------------------|-----------|-----------|
|               |               |             | X                       | Y         | Z         |
| 1             | 6             | 0           | -0.625153               | -2.106201 | -0.769029 |
| 2             | 6             | 0           | -1.940633               | -1.802296 | -0.863928 |
| 3             | 7             | 0           | -2.215739               | -0.860614 | 0.123652  |
| 4             | 6             | 0           | -1.061676               | -0.559378 | 0.758042  |
| 5             | 7             | 0           | -0.097499               | -1.357418 | 0.275920  |
| 6             | 6             | 0           | 1.319965                | -1.270554 | 0.648050  |
| 7             | 1             | 0           | -0.020162               | -2.778203 | -1.352091 |
| 8             | 1             | 0           | -2.692635               | -2.138787 | -1.554134 |
| 9             | 1             | 0           | 1.371907                | -0.795504 | 1.626647  |
| 10            | 1             | 0           | 1.704611                | -2.285617 | 0.758102  |
| 11            | 35            | 0           | -0.494690               | 2.087631  | -0.086694 |
| 12            | 1             | 0           | -0.980435               | 0.054841  | 1.633176  |
| 13            | 6             | 0           | -3.431879               | -0.162014 | 0.340176  |
| 14            | 6             | 0           | -4.630322               | -0.680785 | 0.101921  |
| 15            | 1             | 0           | -3.265692               | 0.854061  | 0.680456  |
| 16            | 1             | 0           | -5.512066               | -0.071598 | 0.245817  |
| 17            | 1             | 0           | -4.775175               | -1.699372 | -0.237818 |
| 18            | 6             | 0           | 2.125741                | -0.467036 | -0.375912 |
| 19            | 1             | 0           | 2.088078                | -0.922582 | -1.370085 |
| 20            | 1             | 0           | 1.700058                | 0.540553  | -0.479727 |
| 21            | 6             | 0           | 3.566687                | -0.359994 | 0.046121  |
| 22            | 8             | 0           | 4.016609                | -0.731819 | 1.104339  |
| 23            | 8             | 0           | 4.323895                | 0.215711  | -0.911553 |
| 24            | 1             | 0           | 5.227910                | 0.279764  | -0.567983 |

Rotational constants (GHZ): 0.8234172 0.3310278 0.2549279

Standard basis: 6-311++G(d,p) (5D, 7F)

There are 404 symmetry adapted cartesian basis functions of A symmetry.

There are 389 symmetry adapted basis functions of A symmetry.

389 basis functions, 625 primitive gaussians, 404 cartesian basis functions

62 alpha electrons            62 beta electrons  
nuclear repulsion energy        1074.3522779495 Hartrees.  
NAtoms= 24 NActive= 24 NUniq= 24 SFac= 1.00D+00 NAtFMM= 60 NAOKFM=F  
Big=F  
Integral buffers will be 131072 words long.  
Raffenetti 2 integral format.  
Two-electron integral symmetry is turned on.  
One-electron integrals computed using PRISM.  
NBasis= 389 RedAO= T EigKep= 6.33D-06 NBF= 389  
NBsUse= 389 1.00D-06 EigRej= -1.00D+00 NBFU= 389  
Initial guess from the checkpoint file: "./cooh.chk"  
B after Tr= 0.000000 0.000000 0.000000  
Rot= 1.000000 -0.000609 -0.000097 0.000001 Ang= -0.07 deg.  
ExpMin= 3.50D-02 ExpMax= 4.40D+05 ExpMxC= 1.51D+04 IAcc=3 IRadAn= 5 AccDes=  
0.00D+00  
Harris functional with IExCor= 402 and IRadAn= 5 diagonalized for initial guess.  
HarFok: IExCor= 402 AccDes= 0.00D+00 IRadAn= 5 IDoV= 1 UseB2=F ITyADJ=14  
ICtDFT= 3500011 ScaDFX= 1.000000 1.000000 1.000000 1.000000  
FoFCou: FMM=F IPFlag= 0 FMFlag= 100000 FMFlg1= 0  
NFXFlg= 0 DoJE=T BraDBF=F KetDBF=T FulRan=T  
wScrn= 0.000000 ICntrl= 500 IOpCl= 0 I1Cent= 200000004 NGrid=  
0  
NMat0= 1 NMatS0= 1 NMatT0= 0 NMatD0= 1 NMtDS0= 0  
NMtDT0= 0  
Petite list used in FoFCou.  
Keep R1 ints in memory in canonical form, NReq=2910765817.  
Requested convergence on RMS density matrix=1.00D-08 within 128 cycles.  
Requested convergence on MAX density matrix=1.00D-06.  
Requested convergence on energy=1.00D-06.  
No special actions if energy rises.  
SCF Done: E(RB3LYP) = -3145.73216317 A.U. after 11 cycles  
NFOck= 11 Conv=0.63D-08 -V/T= 2.0017  
Calling FoFJK, ICntrl= 2127 FMM=F ISym2X=0 I1Cent= 0 IOpClX= 0 NMat=1 NMatS=1  
NMatT=0.  
\*\*\*\*\* Axes restored to original set \*\*\*\*\*

```

-----
Center      Atomic      Forces (Hartrees/Bohr)
Number      Number      X           Y           Z
-----
1           6           0.000033128 -0.000024408 -0.000045941
2           6           0.000024909 0.000041733 -0.000112922
3           7           0.000300625 -0.000070014 0.000055879
4           6           -0.000150798 -0.000339881 0.000064068
5           7           -0.000081866 0.000000202 0.000041863

```

|    |    |              |              |              |
|----|----|--------------|--------------|--------------|
| 6  | 6  | -0.000255399 | 0.000157442  | 0.000192988  |
| 7  | 1  | 0.000033001  | 0.000020137  | -0.000017998 |
| 8  | 1  | -0.000039419 | -0.000020268 | 0.000052211  |
| 9  | 1  | 0.000190522  | -0.000006543 | -0.000140981 |
| 10 | 1  | 0.000016787  | -0.000088425 | -0.000110301 |
| 11 | 35 | -0.000008970 | 0.000249900  | -0.000022582 |
| 12 | 1  | 0.000151231  | 0.000176365  | -0.000176749 |
| 13 | 6  | -0.000247116 | 0.000215607  | -0.000046611 |
| 14 | 6  | 0.000040946  | -0.000066902 | 0.000065026  |
| 15 | 1  | 0.000068733  | 0.000021390  | -0.000040370 |
| 16 | 1  | -0.000004954 | 0.000005882  | -0.000017762 |
| 17 | 1  | 0.000017486  | -0.000012355 | -0.000009713 |
| 18 | 6  | 0.000334000  | -0.000942633 | -0.000499443 |
| 19 | 1  | -0.000242117 | 0.000171950  | 0.000126074  |
| 20 | 1  | -0.000479478 | 0.000184736  | 0.000460614  |
| 21 | 6  | -0.000022564 | 0.000171961  | 0.000865994  |
| 22 | 8  | -0.000085590 | 0.000151333  | -0.000607185 |
| 23 | 8  | 0.000311052  | -0.000166096 | -0.000169466 |
| 24 | 1  | 0.000095851  | 0.000168884  | 0.000093306  |

-----  
Cartesian Forces: Max 0.000942633 RMS 0.000234601

GradGradGradGradGradGradGradGradGradGradGradGradGradGradGradGradGradGradGrad

Berny optimization.

Using GEDIIS/GDIIS optimizer.

FormGI is forming the generalized inverse of G from B-inverse, IUseBI=4.

GSVD: received Info= 1 from GESDD.

Internal Forces: Max 0.000633132 RMS 0.000125430

Search for a local minimum.

Step number 9 out of a maximum of 140

All quantities printed in internal units (Hartrees-Bohrs-Radians)

Mixed Optimization -- En-DIIS/RFO-DIIS

Swapping is turned off.

Update second derivatives using D2CorX and points 5 4 6 7 8

9

DE= -3.27D-05 DEPred=-1.81D-05 R= 1.81D+00

TightC=F SS= 1.41D+00 RLast= 6.39D-02 DXNew= 1.2000D+00 1.9164D-01

Trust test= 1.81D+00 RLast= 6.39D-02 DXMaxT set to 7.14D-01

ITU= 1 1 1 0-1 1 1 1 0

|                 |         |         |         |         |         |
|-----------------|---------|---------|---------|---------|---------|
| Eigenvalues --- | 0.00217 | 0.00378 | 0.00394 | 0.00828 | 0.01608 |
| Eigenvalues --- | 0.01769 | 0.01978 | 0.02032 | 0.02146 | 0.02215 |
| Eigenvalues --- | 0.02338 | 0.02350 | 0.02424 | 0.02547 | 0.03038 |
| Eigenvalues --- | 0.03039 | 0.03151 | 0.03647 | 0.04418 | 0.04934 |
| Eigenvalues --- | 0.05303 | 0.05602 | 0.06497 | 0.08207 | 0.09737 |

|                 |         |         |         |         |         |
|-----------------|---------|---------|---------|---------|---------|
| Eigenvalues --- | 0.11026 | 0.12185 | 0.14492 | 0.15394 | 0.15957 |
| Eigenvalues --- | 0.15984 | 0.15996 | 0.16000 | 0.16001 | 0.16051 |
| Eigenvalues --- | 0.16708 | 0.17865 | 0.20771 | 0.21951 | 0.22839 |
| Eigenvalues --- | 0.24477 | 0.24951 | 0.27412 | 0.27940 | 0.34337 |
| Eigenvalues --- | 0.34390 | 0.35157 | 0.35493 | 0.35523 | 0.35579 |
| Eigenvalues --- | 0.35843 | 0.36041 | 0.36589 | 0.36649 | 0.36866 |
| Eigenvalues --- | 0.38221 | 0.41324 | 0.42790 | 0.43731 | 0.47609 |
| Eigenvalues --- | 0.52317 | 0.53400 | 0.54381 | 0.54839 | 0.59902 |
| Eigenvalues --- | 0.94015 |         |         |         |         |

En-DIIS/RFO-DIIS IScMMF= 0 using points: 9 8 7 6

RFO step: Lambda=-6.60968092D-06.

DidBck=F Rises=F RFO-DIIS coefs: 2.80954 -1.71897 -0.63982 0.54925

Iteration 1 RMS(Cart)= 0.01630739 RMS(Int)= 0.00015104

Iteration 2 RMS(Cart)= 0.00022341 RMS(Int)= 0.00004907

Iteration 3 RMS(Cart)= 0.00000003 RMS(Int)= 0.00004907

| Variable | Old X   | -DE/DX   | Delta X<br>(Linear) | Delta X<br>(Quad) | Delta X<br>(Total) | New X   |
|----------|---------|----------|---------------------|-------------------|--------------------|---------|
| R1       | 2.55767 | 0.00001  | 0.00045             | 0.00016           | 0.00058            | 2.55825 |
| R2       | 2.62598 | 0.00000  | -0.00009            | 0.00005           | -0.00006           | 2.62592 |
| R3       | 2.03316 | 0.00001  | 0.00004             | -0.00001          | 0.00003            | 2.03319 |
| R4       | 2.63057 | 0.00003  | -0.00048            | -0.00005          | -0.00053           | 2.63004 |
| R5       | 2.03101 | 0.00000  | 0.00002             | 0.00002           | 0.00004            | 2.03105 |
| R6       | 2.55292 | -0.00014 | -0.00319            | 0.00005           | -0.00311           | 2.54980 |
| R7       | 2.68176 | 0.00020  | 0.00263             | 0.00040           | 0.00303            | 2.68479 |
| R8       | 2.53459 | 0.00003  | -0.00185            | -0.00018          | -0.00203           | 2.53256 |
| R9       | 5.35887 | 0.00020  | 0.04753             | 0.00537           | 0.05287            | 5.41174 |
| R10      | 2.02626 | 0.00003  | 0.00021             | 0.00006           | 0.00029            | 2.02656 |
| R11      | 2.77425 | 0.00000  | -0.00041            | 0.00042           | 0.00000            | 2.77425 |
| R12      | 2.05800 | -0.00012 | -0.00064            | 0.00022           | -0.00041           | 2.05759 |
| R13      | 2.06181 | 0.00006  | 0.00019             | -0.00011          | 0.00009            | 2.06190 |
| R14      | 2.89283 | -0.00013 | 0.00194             | -0.00118          | 0.00077            | 2.89360 |
| R15      | 5.11489 | -0.00014 | -0.00909            | -0.00538          | -0.01446           | 5.10044 |
| R16      | 5.12839 | -0.00003 | 0.00070             | -0.00202          | -0.00131           | 5.12708 |
| R17      | 2.50854 | -0.00004 | -0.00050            | -0.00010          | -0.00059           | 2.50795 |
| R18      | 2.04913 | 0.00003  | 0.00038             | 0.00011           | 0.00049            | 2.04961 |
| R19      | 2.04343 | 0.00001  | 0.00011             | 0.00002           | 0.00012            | 2.04355 |
| R20      | 2.04748 | 0.00001  | 0.00011             | 0.00004           | 0.00015            | 2.04763 |
| R21      | 2.06778 | -0.00019 | 0.00065             | -0.00113          | -0.00048           | 2.06729 |
| R22      | 2.07631 | 0.00026  | 0.00096             | 0.00029           | 0.00128            | 2.07759 |
| R23      | 2.84458 | 0.00034  | 0.00238             | -0.00105          | 0.00133            | 2.84591 |
| R24      | 2.28376 | -0.00063 | -0.00108            | 0.00043           | -0.00065           | 2.28311 |
| R25      | 2.55074 | 0.00034  | -0.00003            | 0.00017           | 0.00015            | 2.55088 |
| R26      | 1.83156 | 0.00012  | 0.00041             | -0.00013          | 0.00028            | 1.83184 |
| A1       | 1.87632 | -0.00005 | -0.00055            | 0.00004           | -0.00053           | 1.87578 |

|     |          |          |          |          |          |          |
|-----|----------|----------|----------|----------|----------|----------|
| A2  | 2.27678  | 0.00005  | 0.00065  | 0.00015  | 0.00080  | 2.27758  |
| A3  | 2.13005  | 0.00000  | -0.00010 | -0.00017 | -0.00025 | 2.12980  |
| A4  | 1.86945  | -0.00001 | -0.00023 | -0.00008 | -0.00032 | 1.86913  |
| A5  | 2.28469  | 0.00004  | 0.00037  | 0.00035  | 0.00072  | 2.28541  |
| A6  | 2.12836  | -0.00002 | -0.00001 | -0.00034 | -0.00035 | 2.12801  |
| A7  | 1.89143  | 0.00005  | 0.00009  | 0.00010  | 0.00023  | 1.89166  |
| A8  | 2.22764  | -0.00005 | -0.00044 | -0.00010 | -0.00057 | 2.22707  |
| A9  | 2.15395  | 0.00000  | 0.00015  | 0.00011  | 0.00025  | 2.15419  |
| A10 | 1.88876  | -0.00003 | 0.00162  | 0.00012  | 0.00164  | 1.89040  |
| A11 | 1.81219  | -0.00004 | -0.00652 | -0.00069 | -0.00715 | 1.80504  |
| A12 | 2.18428  | 0.00004  | 0.00284  | 0.00041  | 0.00293  | 2.18720  |
| A13 | 1.88030  | 0.00018  | 0.00273  | 0.00183  | 0.00454  | 1.88483  |
| A14 | 2.18921  | 0.00001  | 0.00265  | 0.00045  | 0.00280  | 2.19201  |
| A15 | 1.89436  | 0.00004  | -0.00020 | -0.00009 | -0.00023 | 1.89414  |
| A16 | 2.20076  | -0.00002 | 0.00035  | -0.00023 | 0.00015  | 2.20092  |
| A17 | 2.17458  | -0.00003 | -0.00001 | 0.00028  | 0.00018  | 2.17476  |
| A18 | 1.87511  | 0.00012  | 0.00113  | 0.00072  | 0.00184  | 1.87694  |
| A19 | 1.88695  | 0.00007  | -0.00014 | -0.00035 | -0.00048 | 1.88647  |
| A20 | 1.94951  | -0.00009 | 0.00010  | -0.00110 | -0.00102 | 1.94849  |
| A21 | 1.87378  | 0.00005  | 0.00115  | -0.00007 | 0.00109  | 1.87487  |
| A22 | 1.92516  | -0.00014 | -0.00070 | -0.00029 | -0.00098 | 1.92418  |
| A23 | 1.95006  | 0.00001  | -0.00139 | 0.00111  | -0.00027 | 1.94978  |
| A24 | 1.23737  | -0.00024 | -0.01038 | -0.00316 | -0.01350 | 1.22387  |
| A25 | 1.37864  | -0.00023 | -0.01227 | -0.00342 | -0.01579 | 1.36284  |
| A26 | 2.15785  | -0.00012 | -0.00228 | -0.00065 | -0.00293 | 2.15492  |
| A27 | 1.95824  | 0.00000  | -0.00106 | -0.00003 | -0.00109 | 1.95715  |
| A28 | 2.16624  | 0.00012  | 0.00331  | 0.00067  | 0.00397  | 2.17022  |
| A29 | 2.08532  | 0.00002  | 0.00013  | 0.00015  | 0.00027  | 2.08559  |
| A30 | 2.14644  | -0.00003 | -0.00030 | -0.00026 | -0.00057 | 2.14587  |
| A31 | 2.05142  | 0.00001  | 0.00018  | 0.00011  | 0.00029  | 2.05172  |
| A32 | 1.95099  | -0.00003 | -0.00028 | 0.00074  | 0.00053  | 1.95151  |
| A33 | 1.91837  | -0.00022 | -0.00073 | -0.00106 | -0.00175 | 1.91663  |
| A34 | 1.93227  | 0.00011  | -0.00214 | 0.00058  | -0.00147 | 1.93080  |
| A35 | 1.85730  | 0.00005  | 0.00284  | -0.00080 | 0.00197  | 1.85927  |
| A36 | 1.89366  | 0.00019  | 0.00301  | 0.00125  | 0.00428  | 1.89794  |
| A37 | 1.90938  | -0.00010 | -0.00273 | -0.00077 | -0.00348 | 1.90590  |
| A38 | 2.53646  | 0.00040  | 0.01488  | 0.00554  | 0.02041  | 2.55686  |
| A39 | 2.18953  | -0.00007 | -0.00210 | 0.00094  | -0.00114 | 2.18838  |
| A40 | 1.94810  | 0.00032  | 0.00226  | -0.00096 | 0.00131  | 1.94941  |
| A41 | 2.14556  | -0.00025 | -0.00021 | 0.00002  | -0.00017 | 2.14539  |
| A42 | 1.87541  | 0.00003  | -0.00047 | 0.00039  | -0.00008 | 1.87533  |
| D1  | 0.00387  | 0.00002  | -0.00198 | 0.00446  | 0.00249  | 0.00636  |
| D2  | 3.10549  | 0.00004  | 0.00178  | 0.00221  | 0.00399  | 3.10947  |
| D3  | -3.12898 | 0.00001  | -0.00213 | 0.00172  | -0.00040 | -3.12938 |



|     |          |          |          |          |          |          |
|-----|----------|----------|----------|----------|----------|----------|
| D4  | -0.02736 | 0.00003  | 0.00162  | -0.00052 | 0.00109  | -0.02626 |
| D5  | -0.05708 | -0.00002 | 0.00614  | -0.00306 | 0.00308  | -0.05400 |
| D6  | -3.02870 | 0.00000  | 0.00528  | -0.00286 | 0.00243  | -3.02628 |
| D7  | 3.07666  | -0.00001 | 0.00629  | -0.00060 | 0.00568  | 3.08234  |
| D8  | 0.10504  | 0.00001  | 0.00542  | -0.00040 | 0.00503  | 0.11006  |
| D9  | 0.05022  | 0.00000  | -0.00279 | -0.00433 | -0.00714 | 0.04308  |
| D10 | 3.04160  | 0.00001  | -0.00427 | -0.00347 | -0.00775 | 3.03385  |
| D11 | -3.05576 | -0.00003 | -0.00615 | -0.00235 | -0.00850 | -3.06427 |
| D12 | -0.06439 | -0.00001 | -0.00762 | -0.00148 | -0.00911 | -0.07350 |
| D13 | -0.08621 | -0.00001 | 0.00656  | 0.00244  | 0.00902  | -0.07719 |
| D14 | 1.90843  | 0.00017  | 0.00726  | 0.00424  | 0.01147  | 1.91989  |
| D15 | -3.01859 | -0.00006 | -0.02909 | -0.00247 | -0.03157 | -3.05016 |
| D16 | -3.08534 | -0.00002 | 0.00802  | 0.00164  | 0.00968  | -3.07566 |
| D17 | -1.09071 | 0.00016  | 0.00872  | 0.00344  | 0.01213  | -1.07858 |
| D18 | 0.26546  | -0.00007 | -0.02763 | -0.00327 | -0.03091 | 0.23456  |
| D19 | 0.58002  | 0.00005  | 0.02043  | 0.00431  | 0.02474  | 0.60476  |
| D20 | -2.51870 | 0.00005  | 0.02113  | 0.00454  | 0.02567  | -2.49304 |
| D21 | -2.73255 | 0.00007  | 0.01874  | 0.00529  | 0.02403  | -2.70852 |
| D22 | 0.45191  | 0.00007  | 0.01944  | 0.00552  | 0.02496  | 0.47687  |
| D23 | 0.08865  | 0.00002  | -0.00780 | 0.00034  | -0.00748 | 0.08117  |
| D24 | 3.06343  | 0.00000  | -0.00691 | 0.00009  | -0.00684 | 3.05660  |
| D25 | -1.86059 | -0.00001 | -0.00235 | 0.00019  | -0.00219 | -1.86277 |
| D26 | 1.11420  | -0.00003 | -0.00146 | -0.00006 | -0.00154 | 1.11265  |
| D27 | 3.02029  | 0.00007  | 0.02800  | 0.00526  | 0.03327  | 3.05356  |
| D28 | -0.28811 | 0.00005  | 0.02890  | 0.00500  | 0.03391  | -0.25420 |
| D29 | -2.24666 | 0.00001  | -0.00214 | -0.00095 | -0.00298 | -2.24965 |
| D30 | -0.24600 | 0.00003  | -0.00218 | -0.00038 | -0.00258 | -0.24857 |
| D31 | -2.92164 | -0.00010 | 0.00955  | 0.00233  | 0.01187  | -2.90977 |
| D32 | -0.90437 | 0.00005  | 0.01140  | 0.00245  | 0.01385  | -0.89053 |
| D33 | 1.24809  | 0.00005  | 0.00960  | 0.00289  | 0.01250  | 1.26059  |
| D34 | 0.41602  | -0.00008 | 0.00855  | 0.00260  | 0.01115  | 0.42717  |
| D35 | 2.43329  | 0.00007  | 0.01041  | 0.00272  | 0.01312  | 2.44641  |
| D36 | -1.69743 | 0.00007  | 0.00861  | 0.00316  | 0.01178  | -1.68565 |
| D37 | -1.05524 | 0.00006  | -0.00699 | -0.00141 | -0.00843 | -1.06366 |
| D38 | 1.00312  | -0.00004 | -0.00412 | -0.00263 | -0.00678 | 0.99634  |
| D39 | 3.11452  | -0.00024 | -0.00929 | -0.00392 | -0.01322 | 3.10131  |
| D40 | -3.13935 | 0.00006  | -0.00800 | -0.00142 | -0.00942 | 3.13441  |
| D41 | -1.08100 | -0.00004 | -0.00513 | -0.00263 | -0.00777 | -1.08877 |
| D42 | 1.03041  | -0.00024 | -0.01030 | -0.00392 | -0.01421 | 1.01619  |
| D43 | 1.06102  | 0.00009  | -0.00810 | -0.00186 | -0.00996 | 1.05106  |
| D44 | 3.11938  | -0.00001 | -0.00523 | -0.00307 | -0.00831 | 3.11107  |
| D45 | -1.05240 | -0.00021 | -0.01039 | -0.00436 | -0.01475 | -1.06715 |
| D46 | -0.01097 | -0.00001 | 0.00508  | 0.00054  | 0.00570  | -0.00527 |
| D47 | 0.36224  | 0.00000  | 0.00403  | 0.00072  | 0.00468  | 0.36691  |

|     |          |          |          |          |          |          |
|-----|----------|----------|----------|----------|----------|----------|
| D48 | -3.09036 | 0.00001  | 0.00058  | 0.00065  | 0.00122  | -3.08913 |
| D49 | 0.04808  | 0.00000  | 0.00095  | -0.00008 | 0.00087  | 0.04895  |
| D50 | 0.00329  | 0.00001  | -0.00033 | 0.00037  | 0.00003  | 0.00332  |
| D51 | -3.14146 | 0.00000  | 0.00004  | -0.00036 | -0.00032 | 3.14140  |
| D52 | -0.34428 | -0.00003 | -0.00298 | -0.00011 | -0.00315 | -0.34744 |
| D53 | 1.77127  | -0.00017 | -0.00202 | -0.00029 | -0.00232 | 1.76895  |
| D54 | -2.46940 | 0.00004  | 0.00163  | 0.00035  | 0.00200  | -2.46740 |
| D55 | -0.12142 | 0.00010  | -0.01065 | -0.00970 | -0.02036 | -0.14178 |
| D56 | 3.02271  | 0.00012  | -0.01071 | -0.00920 | -0.01993 | 3.00279  |
| D57 | -2.26842 | -0.00006 | -0.01114 | -0.01183 | -0.02293 | -2.29135 |
| D58 | 0.87571  | -0.00003 | -0.01120 | -0.01134 | -0.02250 | 0.85321  |
| D59 | 1.99531  | -0.00017 | -0.01455 | -0.01116 | -0.02574 | 1.96957  |
| D60 | -1.14374 | -0.00015 | -0.01461 | -0.01067 | -0.02531 | -1.16905 |
| D61 | 3.11084  | -0.00016 | -0.00535 | -0.00194 | -0.00729 | 3.10355  |
| D62 | -0.02829 | -0.00014 | -0.00541 | -0.00146 | -0.00687 | -0.03516 |

| Item                 | Value    | Threshold | Converged? |
|----------------------|----------|-----------|------------|
| Maximum Force        | 0.000633 | 0.000450  | NO         |
| RMS Force            | 0.000125 | 0.000300  | YES        |
| Maximum Displacement | 0.068250 | 0.001800  | NO         |
| RMS Displacement     | 0.016400 | 0.001200  | NO         |

Predicted change in Energy=-2.096037D-05

GradGradGradGradGradGradGradGradGradGradGradGradGradGradGradGradGradGradGrad

Input orientation:

| Center Number | Atomic Number | Atomic Type | Coordinates (Angstroms) |           |           |
|---------------|---------------|-------------|-------------------------|-----------|-----------|
|               |               |             | X                       | Y         | Z         |
| 1             | 6             | 0           | -0.314378               | -2.194415 | -0.394756 |
| 2             | 6             | 0           | -1.569826               | -1.761695 | -0.657985 |
| 3             | 7             | 0           | -1.811214               | -0.674492 | 0.176702  |
| 4             | 6             | 0           | -0.692262               | -0.428526 | 0.889480  |
| 5             | 7             | 0           | 0.207026                | -1.380035 | 0.603169  |
| 6             | 6             | 0           | 1.587134                | -1.400441 | 1.103288  |
| 7             | 1             | 0           | 0.252307                | -2.999795 | -0.828146 |
| 8             | 1             | 0           | -2.295924               | -2.100547 | -1.374311 |
| 9             | 1             | 0           | 1.610245                | -0.823409 | 2.026350  |
| 10            | 1             | 0           | 1.840671                | -2.431174 | 1.355924  |
| 11            | 35            | 0           | 0.258921                | 2.043824  | -0.198592 |
| 12            | 1             | 0           | -0.603098               | 0.299425  | 1.671911  |
| 13            | 6             | 0           | -2.944134               | 0.182811  | 0.177850  |
| 14            | 6             | 0           | -4.174716               | -0.230149 | -0.098654 |
| 15            | 1             | 0           | -2.676882               | 1.213001  | 0.386804  |
| 16            | 1             | 0           | -4.983335               | 0.487319  | -0.127000 |

|    |   |   |           |           |           |
|----|---|---|-----------|-----------|-----------|
| 17 | 1 | 0 | -4.416417 | -1.266187 | -0.304332 |
| 18 | 6 | 0 | 2.565747  | -0.809738 | 0.084445  |
| 19 | 1 | 0 | 2.568432  | -1.375441 | -0.851895 |
| 20 | 1 | 0 | 2.263895  | 0.216148  | -0.170800 |
| 21 | 6 | 0 | 3.964574  | -0.790183 | 0.642039  |
| 22 | 8 | 0 | 4.266918  | -1.051168 | 1.782280  |
| 23 | 8 | 0 | 4.870082  | -0.436221 | -0.294397 |
| 24 | 1 | 0 | 5.738208  | -0.409687 | 0.136098  |

-----  
Distance matrix (angstroms):

|    |    | 1        | 2        | 3        | 4        | 5        |
|----|----|----------|----------|----------|----------|----------|
| 1  | C  | 0.000000 |          |          |          |          |
| 2  | C  | 1.353767 | 0.000000 |          |          |          |
| 3  | N  | 2.208449 | 1.391755 | 0.000000 |          |          |
| 4  | C  | 2.215947 | 2.223084 | 1.349297 | 0.000000 |          |
| 5  | N  | 1.389579 | 2.212097 | 2.180128 | 1.340173 | 0.000000 |
| 6  | C  | 2.547602 | 3.633040 | 3.596433 | 2.487163 | 1.468071 |
| 7  | H  | 1.075917 | 2.209528 | 3.267243 | 3.233245 | 2.162021 |
| 8  | H  | 2.212434 | 1.074785 | 2.161995 | 3.239157 | 3.270218 |
| 9  | H  | 3.383133 | 4.266015 | 3.892269 | 2.598066 | 2.074681 |
| 10 | H  | 2.786606 | 4.016904 | 4.220517 | 3.262503 | 2.083346 |
| 11 | Br | 4.281334 | 4.247038 | 3.437375 | 2.863767 | 3.516863 |
| 12 | H  | 3.251723 | 3.257482 | 2.154926 | 1.072409 | 2.149208 |
| 13 | C  | 3.590918 | 2.523578 | 1.420731 | 2.439483 | 3.543048 |
| 14 | C  | 4.341454 | 3.073099 | 2.420621 | 3.625362 | 4.584153 |
| 15 | H  | 4.219329 | 3.341552 | 2.087140 | 2.624121 | 3.884273 |
| 16 | H  | 5.390969 | 4.122142 | 3.391812 | 4.503922 | 5.564172 |
| 17 | H  | 4.206722 | 2.910959 | 2.714513 | 3.999524 | 4.713040 |
| 18 | C  | 3.231421 | 4.308176 | 4.380022 | 3.377577 | 2.481507 |
| 19 | H  | 3.031549 | 4.160765 | 4.553091 | 3.815909 | 2.773710 |
| 20 | H  | 3.536730 | 4.341270 | 4.185750 | 3.206035 | 2.716162 |
| 21 | C  | 4.621281 | 5.767450 | 5.795658 | 4.677408 | 3.803762 |
| 22 | O  | 5.199497 | 6.366107 | 6.297893 | 5.077228 | 4.240422 |
| 23 | O  | 5.475395 | 6.584945 | 6.702121 | 5.686942 | 4.841540 |
| 24 | H  | 6.332525 | 7.474347 | 7.554174 | 6.474480 | 5.635043 |
|    |    | 6        | 7        | 8        | 9        | 10       |
| 6  | C  | 0.000000 |          |          |          |          |
| 7  | H  | 2.840798 | 0.000000 |          |          |          |
| 8  | H  | 4.659054 | 2.756887 | 0.000000 |          |          |
| 9  | H  | 1.088828 | 3.837813 | 5.334205 | 0.000000 |          |
| 10 | H  | 1.091108 | 2.759782 | 4.967386 | 1.757122 | 0.000000 |
| 11 | Br | 3.914333 | 5.082762 | 5.008529 | 3.872656 | 4.994403 |
| 12 | H  | 2.830193 | 4.226920 | 4.231429 | 2.507044 | 3.678047 |
| 13 | C  | 4.888303 | 4.621498 | 2.836036 | 5.017151 | 5.578094 |

|    |    |           |           |          |          |          |
|----|----|-----------|-----------|----------|----------|----------|
| 14 | C  | 6.001097  | 5.272725  | 2.942031 | 6.191396 | 6.568500 |
| 15 | H  | 5.052253  | 5.272940  | 3.771771 | 5.021408 | 5.884513 |
| 16 | H  | 6.946100  | 6.329575  | 3.933829 | 7.059053 | 7.568601 |
| 17 | H  | 6.167823  | 5.007671  | 2.517440 | 6.476789 | 6.577599 |
| 18 | C  | 1.531227  | 3.313785  | 5.237366 | 2.164294 | 2.184365 |
| 19 | H  | 2.187764  | 2.829050  | 4.945771 | 3.083368 | 2.553169 |
| 20 | H  | 2.166718  | 3.849789  | 5.254280 | 2.517023 | 3.085177 |
| 21 | C  | 2.497476  | 4.563415  | 6.706456 | 2.731352 | 2.777310 |
| 22 | O  | 2.786443  | 5.169968  | 7.357728 | 2.677565 | 2.823627 |
| 23 | O  | 3.696079  | 5.308545  | 7.435580 | 4.020239 | 3.985064 |
| 24 | H  | 4.375897  | 6.142763  | 8.347912 | 4.558980 | 4.556883 |
|    |    | 11        | 12        | 13       | 14       | 15       |
| 11 | Br | 0.000000  |           |          |          |          |
| 12 | H  | 2.699034  | 0.000000  |          |          |          |
| 13 | C  | 3.723525  | 2.779616  | 0.000000 |          |          |
| 14 | C  | 4.983782  | 4.021418  | 1.327148 | 0.000000 |          |
| 15 | H  | 3.106750  | 2.605130  | 1.084609 | 2.135851 | 0.000000 |
| 16 | H  | 5.468920  | 4.738972  | 2.084227 | 1.081401 | 2.471909 |
| 17 | H  | 5.729410  | 4.571441  | 2.121252 | 1.083557 | 3.106448 |
| 18 | C  | 3.680268  | 3.713741  | 5.599345 | 6.767813 | 5.627437 |
| 19 | H  | 4.177562  | 4.385587  | 5.820387 | 6.881069 | 5.978940 |
| 20 | H  | 2.713133  | 3.409130  | 5.219792 | 6.454463 | 5.071086 |
| 21 | C  | 4.740265  | 4.807443  | 6.992312 | 8.192088 | 6.941673 |
| 22 | O  | 5.437542  | 5.055031  | 7.489738 | 8.687530 | 7.435736 |
| 23 | O  | 5.236660  | 5.862017  | 7.852910 | 9.049263 | 7.755040 |
| 24 | H  | 6.012846  | 6.563058  | 8.702636 | 9.917329 | 8.573781 |
|    |    | 16        | 17        | 18       | 19       | 20       |
| 16 | H  | 0.000000  |           |          |          |          |
| 17 | H  | 1.851384  | 0.000000  |          |          |          |
| 18 | C  | 7.662617  | 7.007861  | 0.000000 |          |          |
| 19 | H  | 7.811820  | 7.007131  | 1.093965 | 0.000000 |          |
| 20 | H  | 7.252434  | 6.844101  | 1.099412 | 1.757780 | 0.000000 |
| 21 | C  | 9.071301  | 8.447675  | 1.505992 | 2.126870 | 2.136754 |
| 22 | O  | 9.569716  | 8.933112  | 2.415557 | 3.151013 | 3.071272 |
| 23 | O  | 9.898019  | 9.323520  | 2.364952 | 2.547653 | 2.689438 |
| 24 | H  | 10.762218 | 10.200196 | 3.198003 | 3.457788 | 3.543545 |
|    |    | 21        | 22        | 23       | 24       |          |
| 21 | C  | 0.000000  |           |          |          |          |
| 22 | O  | 1.208170  | 0.000000  |          |          |          |
| 23 | O  | 1.349870  | 2.248234  | 0.000000 |          |          |
| 24 | H  | 1.883224  | 2.299154  | 0.969367 | 0.000000 |          |

Stoichiometry C8H11BrN2O2

Framework group C1[X(C8H11BrN2O2)]

Deg. of freedom 66

Full point group C1 NOp 1  
 Largest Abelian subgroup C1 NOp 1  
 Largest concise Abelian subgroup C1 NOp 1

Standard orientation:

| Center Number | Atomic Number | Atomic Type | Coordinates (Angstroms) |           |           |
|---------------|---------------|-------------|-------------------------|-----------|-----------|
|               |               |             | X                       | Y         | Z         |
| 1             | 6             | 0           | -0.632278               | -2.123035 | -0.770112 |
| 2             | 6             | 0           | -1.946634               | -1.812223 | -0.862577 |
| 3             | 7             | 0           | -2.213323               | -0.865346 | 0.121945  |
| 4             | 6             | 0           | -1.058793               | -0.575084 | 0.757093  |
| 5             | 7             | 0           | -0.099002               | -1.375162 | 0.272592  |
| 6             | 6             | 0           | 1.319840                | -1.292344 | 0.640372  |
| 7             | 1             | 0           | -0.031985               | -2.800701 | -1.351502 |
| 8             | 1             | 0           | -2.703208               | -2.147797 | -1.548250 |
| 9             | 1             | 0           | 1.377432                | -0.828048 | 1.623559  |
| 10            | 1             | 0           | 1.704866                | -2.308770 | 0.736020  |
| 11            | 35            | 0           | -0.489758               | 2.101249  | -0.088248 |
| 12            | 1             | 0           | -0.966224               | 0.062159  | 1.614655  |
| 13            | 6             | 0           | -3.423752               | -0.152256 | 0.333699  |
| 14            | 6             | 0           | -4.626133               | -0.671086 | 0.118253  |
| 15            | 1             | 0           | -3.245955               | 0.870695  | 0.647288  |
| 16            | 1             | 0           | -5.504164               | -0.054598 | 0.254020  |
| 17            | 1             | 0           | -4.777706               | -1.697201 | -0.195133 |
| 18            | 6             | 0           | 2.120622                | -0.476737 | -0.378544 |
| 19            | 1             | 0           | 2.085986                | -0.925299 | -1.375715 |
| 20            | 1             | 0           | 1.688047                | 0.529569  | -0.473056 |
| 21            | 6             | 0           | 3.559719                | -0.359014 | 0.049420  |
| 22            | 8             | 0           | 4.003868                | -0.713939 | 1.115457  |
| 23            | 8             | 0           | 4.321546                | 0.204956  | -0.911676 |
| 24            | 1             | 0           | 5.221870                | 0.282378  | -0.560828 |

Rotational constants (GHZ): 0.8137773 0.3319735 0.2545739

Standard basis: 6-311++G(d,p) (5D, 7F)

There are 404 symmetry adapted cartesian basis functions of A symmetry.

There are 389 symmetry adapted basis functions of A symmetry.

389 basis functions, 625 primitive gaussians, 404 cartesian basis functions

62 alpha electrons 62 beta electrons

nuclear repulsion energy 1073.0064174807 Hartrees.

NAtoms= 24 NActive= 24 NUniq= 24 SFac= 1.00D+00 NAtFMM= 60 NAOKFM=F

Big=F

Integral buffers will be 131072 words long.

Raffenetti 2 integral format.

Two-electron integral symmetry is turned on.  
 One-electron integrals computed using PRISM.  
 NBasis= 389 RedAO= T EigKep= 6.43D-06 NBF= 389  
 NBsUse= 389 1.00D-06 EigRej= -1.00D+00 NBFU= 389  
 Initial guess from the checkpoint file: "./cooh.chk"  
 B after Tr= 0.000000 0.000000 0.000000  
 Rot= 1.000000 0.000608 -0.000104 0.000624 Ang= 0.10 deg.  
 ExpMin= 3.50D-02 ExpMax= 4.40D+05 ExpMxC= 1.51D+04 IAcc=3 IRadAn= 5 AccDes= 0.00D+00  
 Harris functional with IExCor= 402 and IRadAn= 5 diagonalized for initial guess.  
 HarFok: IExCor= 402 AccDes= 0.00D+00 IRadAn= 5 IDoV= 1 UseB2=F ITyADJ=14  
 ICtDFT= 3500011 ScaDFX= 1.000000 1.000000 1.000000 1.000000  
 FoFCou: FMM=F IPFlag= 0 FMFlag= 100000 FMFlg1= 0  
 NFxFlg= 0 DoJE=T BraDBF=F KetDBF=T FulRan=T  
 wScrn= 0.000000 ICntrl= 500 IOpCl= 0 l1Cent= 200000004 NGrid= 0  
 NMat0= 1 NMatS0= 1 NMatT0= 0 NMatD0= 1 NMtDS0= 0  
 NMtDT0= 0  
 Petite list used in FoFCou.  
 Keep R1 ints in memory in canonical form, NReq=2910765817.  
 Requested convergence on RMS density matrix=1.00D-08 within 128 cycles.  
 Requested convergence on MAX density matrix=1.00D-06.  
 Requested convergence on energy=1.00D-06.  
 No special actions if energy rises.  
 SCF Done: E(RB3LYP) = -3145.73220634 A.U. after 12 cycles  
 NFock= 12 Conv=0.50D-08 -V/T= 2.0017  
 Calling FoFJK, ICntrl= 2127 FMM=F ISym2X=0 l1Cent= 0 IOpClX= 0 NMat=1 NMatS=1  
 NMatT=0.

\*\*\*\*\* Axes restored to original set \*\*\*\*\*

```

-----
Center      Atomic      Forces (Hartrees/Bohr)
Number      Number      X            Y            Z
-----
  1         6      -0.000069551 -0.000228185  0.000183289
  2         6       0.000128299  0.000106368 -0.000163277
  3         7      -0.000304743 -0.000198337  0.000096564
  4         6       0.000378681  0.000465280 -0.000240379
  5         7      -0.000152334 -0.000037316 -0.000086019
  6         6       0.000179735  0.000139548 -0.000119012
  7         1       0.000007754  0.000006200 -0.000013223
  8         1       0.000000129  0.000038372 -0.000017641
  9         1       0.000060405 -0.000023572 -0.000022088
 10         1      -0.000061996 -0.000046522  0.000002048
 11        35      -0.000023509  0.000000458  0.000104826
-----

```

|    |   |              |              |              |
|----|---|--------------|--------------|--------------|
| 12 | 1 | 0.000027754  | -0.000003985 | 0.000016019  |
| 13 | 6 | 0.000040123  | -0.000001598 | -0.000052077 |
| 14 | 6 | -0.000044974 | 0.000004675  | 0.000004719  |
| 15 | 1 | 0.000028050  | 0.000004559  | 0.000007958  |
| 16 | 1 | -0.000003764 | -0.000005260 | -0.000006385 |
| 17 | 1 | 0.000006143  | -0.000007950 | -0.000002722 |
| 18 | 6 | 0.000492637  | -0.000577288 | -0.000136453 |
| 19 | 1 | -0.000095679 | 0.000223460  | 0.000099542  |
| 20 | 1 | -0.000523852 | 0.000024016  | 0.000302737  |
| 21 | 6 | -0.000272009 | -0.000057000 | 0.000210362  |
| 22 | 8 | 0.000047990  | 0.000094538  | -0.000076128 |
| 23 | 8 | 0.000179725  | -0.000003162 | -0.000115217 |
| 24 | 1 | -0.000025015 | 0.000082700  | 0.000022558  |

-----  
Cartesian Forces: Max 0.000577288 RMS 0.000169032

GradGradGradGradGradGradGradGradGradGradGradGradGradGradGradGradGradGradGrad

Berny optimization.

Using GEDIIS/GDIIS optimizer.

FormGI is forming the generalized inverse of G from B-inverse, IUseBI=4.

GSVD: received Info= 1 from GESDD.

Internal Forces: Max 0.000442686 RMS 0.000088236

Search for a local minimum.

Step number 10 out of a maximum of 140

All quantities printed in internal units (Hartrees-Bohrs-Radians)

Mixed Optimization -- En-DIIS/RFO-DIIS

Swapping is turned off.

Update second derivatives using D2CorX and points 5 4 6 7 8  
9 10

DE= -4.32D-05 DEPred=-2.10D-05 R= 2.06D+00

TightC=F SS= 1.41D+00 RLast= 1.30D-01 DXNew= 1.2000D+00 3.9058D-01

Trust test= 2.06D+00 RLast= 1.30D-01 DXMaxT set to 7.14D-01

ITU= 1 1 1 1 0 -1 1 1 1 0

|                 |         |         |         |         |         |
|-----------------|---------|---------|---------|---------|---------|
| Eigenvalues --- | 0.00181 | 0.00324 | 0.00391 | 0.00844 | 0.01606 |
| Eigenvalues --- | 0.01788 | 0.01999 | 0.02049 | 0.02173 | 0.02231 |
| Eigenvalues --- | 0.02281 | 0.02353 | 0.02418 | 0.02569 | 0.03038 |
| Eigenvalues --- | 0.03039 | 0.03105 | 0.03480 | 0.04404 | 0.04891 |
| Eigenvalues --- | 0.05082 | 0.05497 | 0.06444 | 0.07928 | 0.09626 |
| Eigenvalues --- | 0.10795 | 0.12176 | 0.14193 | 0.15555 | 0.15956 |
| Eigenvalues --- | 0.15983 | 0.15995 | 0.16000 | 0.16001 | 0.16051 |
| Eigenvalues --- | 0.16689 | 0.17885 | 0.20774 | 0.21982 | 0.22848 |
| Eigenvalues --- | 0.24475 | 0.25033 | 0.27535 | 0.27966 | 0.34353 |
| Eigenvalues --- | 0.34372 | 0.35132 | 0.35445 | 0.35492 | 0.35579 |
| Eigenvalues --- | 0.35843 | 0.35999 | 0.36497 | 0.36601 | 0.36651 |

|                                   |            |                 |                     |                   |                    |         |
|-----------------------------------|------------|-----------------|---------------------|-------------------|--------------------|---------|
| Eigenvalues ---                   | 0.37606    | 0.41326         | 0.42887             | 0.43882           | 0.47723            |         |
| Eigenvalues ---                   | 0.52330    | 0.53375         | 0.54251             | 0.54583           | 0.59916            |         |
| Eigenvalues ---                   | 0.92108    |                 |                     |                   |                    |         |
| En-DIIS/RFO-DIIS IScMMF=          |            | 0 using points: | 10                  | 9                 | 8                  | 7 6     |
| RFO step: Lambda=-3.19920370D-06. |            |                 |                     |                   |                    |         |
| DidBck=F Rises=F RFO-DIIS coefs:  |            | 1.12034         |                     | 0.57001           | -0.90161           | 0.08852 |
| 0.12274                           |            |                 |                     |                   |                    |         |
| Iteration 1                       | RMS(Cart)= | 0.00917715      | RMS(Int)=           | 0.00004871        |                    |         |
| Iteration 2                       | RMS(Cart)= | 0.00006633      | RMS(Int)=           | 0.00001903        |                    |         |
| Iteration 3                       | RMS(Cart)= | 0.00000000      | RMS(Int)=           | 0.00001903        |                    |         |
| Variable                          | Old X      | -DE/DX          | Delta X<br>(Linear) | Delta X<br>(Quad) | Delta X<br>(Total) | New X   |
| R1                                | 2.55825    | 0.00002         | 0.00015             | 0.00007           | 0.00022            | 2.55846 |
| R2                                | 2.62592    | 0.00000         | 0.00000             | 0.00000           | -0.00001           | 2.62591 |
| R3                                | 2.03319    | 0.00000         | 0.00001             | 0.00001           | 0.00002            | 2.03321 |
| R4                                | 2.63004    | 0.00004         | -0.00011            | -0.00004          | -0.00015           | 2.62989 |
| R5                                | 2.03105    | 0.00000         | 0.00000             | 0.00001           | 0.00001            | 2.03106 |
| R6                                | 2.54980    | 0.00020         | -0.00106            | 0.00020           | -0.00084           | 2.54896 |
| R7                                | 2.68479    | -0.00002        | 0.00102             | 0.00015           | 0.00117            | 2.68596 |
| R8                                | 2.53256    | 0.00012         | -0.00055            | -0.00002          | -0.00058           | 2.53198 |
| R9                                | 5.41174    | -0.00004        | 0.01523             | 0.00176           | 0.01698            | 5.42871 |
| R10                               | 2.02656    | 0.00004         | 0.00009             | 0.00010           | 0.00020            | 2.02676 |
| R11                               | 2.77425    | 0.00013         | -0.00030            | 0.00055           | 0.00024            | 2.77449 |
| R12                               | 2.05759    | -0.00003        | -0.00039            | 0.00019           | -0.00020           | 2.05739 |
| R13                               | 2.06190    | 0.00003         | 0.00017             | -0.00006          | 0.00012            | 2.06201 |
| R14                               | 2.89360    | -0.00021        | 0.00072             | -0.00084          | -0.00011           | 2.89349 |
| R15                               | 5.10044    | -0.00015        | -0.00553            | -0.00474          | -0.01028           | 5.09015 |
| R16                               | 5.12708    | -0.00006        | 0.00012             | -0.00258          | -0.00245           | 5.12463 |
| R17                               | 2.50795    | 0.00004         | -0.00018            | 0.00001           | -0.00017           | 2.50778 |
| R18                               | 2.04961    | 0.00001         | 0.00015             | 0.00009           | 0.00024            | 2.04985 |
| R19                               | 2.04355    | 0.00000         | 0.00005             | 0.00000           | 0.00005            | 2.04360 |
| R20                               | 2.04763    | 0.00001         | 0.00005             | 0.00003           | 0.00008            | 2.04770 |
| R21                               | 2.06729    | -0.00020        | -0.00018            | -0.00050          | -0.00068           | 2.06661 |
| R22                               | 2.07759    | 0.00013         | 0.00083             | 0.00013           | 0.00097            | 2.07856 |
| R23                               | 2.84591    | -0.00006        | 0.00115             | -0.00099          | 0.00016            | 2.84607 |
| R24                               | 2.28311    | -0.00009        | -0.00062            | 0.00027           | -0.00035           | 2.28276 |
| R25                               | 2.55088    | 0.00020         | 0.00035             | 0.00007           | 0.00042            | 2.55130 |
| R26                               | 1.83184    | -0.00002        | 0.00028             | -0.00022          | 0.00006            | 1.83190 |
| A1                                | 1.87578    | -0.00001        | -0.00018            | -0.00010          | -0.00029           | 1.87549 |
| A2                                | 2.27758    | 0.00001         | 0.00026             | 0.00011           | 0.00038            | 2.27796 |
| A3                                | 2.12980    | 0.00000         | -0.00008            | -0.00002          | -0.00010           | 2.12971 |
| A4                                | 1.86913    | 0.00005         | -0.00013            | 0.00013           | 0.00000            | 1.86913 |
| A5                                | 2.28541    | 0.00000         | 0.00024             | 0.00017           | 0.00041            | 2.28582 |
| A6                                | 2.12801    | -0.00005        | -0.00005            | -0.00025          | -0.00030           | 2.12771 |



|     |          |          |          |          |          |          |
|-----|----------|----------|----------|----------|----------|----------|
| A7  | 1.89166  | -0.00001 | 0.00011  | -0.00011 | 0.00002  | 1.89168  |
| A8  | 2.22707  | 0.00002  | -0.00027 | -0.00002 | -0.00030 | 2.22677  |
| A9  | 2.15419  | -0.00001 | 0.00006  | -0.00008 | -0.00003 | 2.15417  |
| A10 | 1.89040  | -0.00009 | 0.00043  | -0.00002 | 0.00038  | 1.89078  |
| A11 | 1.80504  | 0.00002  | -0.00200 | -0.00034 | -0.00231 | 1.80274  |
| A12 | 2.18720  | 0.00005  | 0.00090  | 0.00021  | 0.00099  | 2.18820  |
| A13 | 1.88483  | 0.00017  | 0.00144  | 0.00208  | 0.00350  | 1.88834  |
| A14 | 2.19201  | 0.00003  | 0.00083  | 0.00011  | 0.00083  | 2.19284  |
| A15 | 1.89414  | 0.00006  | -0.00003 | 0.00016  | 0.00016  | 1.89430  |
| A16 | 2.20092  | -0.00002 | -0.00016 | -0.00001 | -0.00015 | 2.20076  |
| A17 | 2.17476  | -0.00005 | 0.00027  | 0.00006  | 0.00028  | 2.17504  |
| A18 | 1.87694  | 0.00005  | 0.00053  | 0.00040  | 0.00092  | 1.87786  |
| A19 | 1.88647  | 0.00002  | -0.00037 | -0.00019 | -0.00055 | 1.88591  |
| A20 | 1.94849  | -0.00011 | 0.00003  | -0.00053 | -0.00051 | 1.94798  |
| A21 | 1.87487  | -0.00002 | 0.00077  | -0.00037 | 0.00039  | 1.87527  |
| A22 | 1.92418  | -0.00005 | -0.00071 | -0.00025 | -0.00095 | 1.92323  |
| A23 | 1.94978  | 0.00012  | -0.00019 | 0.00094  | 0.00075  | 1.95053  |
| A24 | 1.22387  | -0.00022 | -0.00393 | -0.00245 | -0.00636 | 1.21751  |
| A25 | 1.36284  | -0.00020 | -0.00463 | -0.00271 | -0.00739 | 1.35545  |
| A26 | 2.15492  | 0.00001  | -0.00094 | -0.00016 | -0.00110 | 2.15382  |
| A27 | 1.95715  | -0.00003 | -0.00040 | -0.00025 | -0.00065 | 1.95650  |
| A28 | 2.17022  | 0.00002  | 0.00134  | 0.00040  | 0.00174  | 2.17196  |
| A29 | 2.08559  | 0.00001  | 0.00009  | 0.00011  | 0.00020  | 2.08580  |
| A30 | 2.14587  | -0.00002 | -0.00018 | -0.00014 | -0.00032 | 2.14555  |
| A31 | 2.05172  | 0.00000  | 0.00009  | 0.00004  | 0.00012  | 2.05184  |
| A32 | 1.95151  | 0.00004  | 0.00049  | 0.00081  | 0.00132  | 1.95284  |
| A33 | 1.91663  | -0.00024 | -0.00089 | -0.00146 | -0.00233 | 1.91429  |
| A34 | 1.93080  | 0.00018  | -0.00042 | 0.00056  | 0.00014  | 1.93095  |
| A35 | 1.85927  | 0.00002  | 0.00096  | -0.00038 | 0.00055  | 1.85982  |
| A36 | 1.89794  | 0.00003  | 0.00295  | 0.00052  | 0.00349  | 1.90142  |
| A37 | 1.90590  | -0.00003 | -0.00317 | -0.00008 | -0.00325 | 1.90264  |
| A38 | 2.55686  | 0.00044  | 0.00610  | 0.00502  | 0.01112  | 2.56798  |
| A39 | 2.18838  | 0.00010  | -0.00075 | 0.00060  | -0.00014 | 2.18824  |
| A40 | 1.94941  | -0.00002 | 0.00115  | -0.00081 | 0.00034  | 1.94975  |
| A41 | 2.14539  | -0.00009 | -0.00042 | 0.00021  | -0.00021 | 2.14518  |
| A42 | 1.87533  | 0.00000  | 0.00016  | -0.00029 | -0.00013 | 1.87520  |
| D1  | 0.00636  | -0.00010 | -0.00060 | -0.00302 | -0.00361 | 0.00274  |
| D2  | 3.10947  | -0.00002 | 0.00115  | -0.00138 | -0.00023 | 3.10924  |
| D3  | -3.12938 | -0.00004 | -0.00072 | -0.00086 | -0.00157 | -3.13095 |
| D4  | -0.02626 | 0.00004  | 0.00103  | 0.00078  | 0.00181  | -0.02446 |
| D5  | -0.05400 | 0.00005  | 0.00187  | 0.00280  | 0.00467  | -0.04933 |
| D6  | -3.02628 | 0.00004  | 0.00133  | 0.00147  | 0.00281  | -3.02347 |
| D7  | 3.08234  | 0.00000  | 0.00198  | 0.00086  | 0.00284  | 3.08519  |
| D8  | 0.11006  | -0.00001 | 0.00145  | -0.00047 | 0.00099  | 0.11105  |

|     |          |          |          |          |          |          |
|-----|----------|----------|----------|----------|----------|----------|
| D9  | 0.04308  | 0.00012  | -0.00085 | 0.00220  | 0.00134  | 0.04442  |
| D10 | 3.03385  | 0.00008  | -0.00153 | 0.00062  | -0.00091 | 3.03294  |
| D11 | -3.06427 | 0.00005  | -0.00242 | 0.00073  | -0.00169 | -3.06596 |
| D12 | -0.07350 | 0.00001  | -0.00309 | -0.00085 | -0.00394 | -0.07744 |
| D13 | -0.07719 | -0.00008 | 0.00201  | -0.00046 | 0.00156  | -0.07563 |
| D14 | 1.91989  | 0.00008  | 0.00288  | 0.00173  | 0.00459  | 1.92448  |
| D15 | -3.05016 | 0.00003  | -0.01032 | -0.00235 | -0.01268 | -3.06284 |
| D16 | -3.07566 | -0.00005 | 0.00268  | 0.00103  | 0.00372  | -3.07193 |
| D17 | -1.07858 | 0.00012  | 0.00355  | 0.00322  | 0.00675  | -1.07182 |
| D18 | 0.23456  | 0.00006  | -0.00965 | -0.00086 | -0.01051 | 0.22404  |
| D19 | 0.60476  | 0.00004  | 0.00849  | 0.00391  | 0.01240  | 0.61716  |
| D20 | -2.49304 | 0.00003  | 0.00849  | 0.00394  | 0.01244  | -2.48060 |
| D21 | -2.70852 | 0.00000  | 0.00773  | 0.00211  | 0.00984  | -2.69869 |
| D22 | 0.47687  | -0.00001 | 0.00773  | 0.00215  | 0.00987  | 0.48674  |
| D23 | 0.08117  | 0.00002  | -0.00238 | -0.00142 | -0.00381 | 0.07736  |
| D24 | 3.05660  | 0.00003  | -0.00191 | -0.00013 | -0.00204 | 3.05456  |
| D25 | -1.86277 | -0.00004 | -0.00098 | -0.00202 | -0.00302 | -1.86579 |
| D26 | 1.11265  | -0.00003 | -0.00050 | -0.00072 | -0.00125 | 1.11141  |
| D27 | 3.05356  | -0.00009 | 0.00999  | 0.00050  | 0.01049  | 3.06405  |
| D28 | -0.25420 | -0.00008 | 0.01047  | 0.00179  | 0.01226  | -0.24194 |
| D29 | -2.24965 | 0.00004  | -0.00096 | -0.00103 | -0.00195 | -2.25160 |
| D30 | -0.24857 | 0.00002  | -0.00080 | -0.00036 | -0.00116 | -0.24974 |
| D31 | -2.90977 | 0.00000  | 0.00373  | 0.00470  | 0.00842  | -2.90135 |
| D32 | -0.89053 | 0.00001  | 0.00471  | 0.00437  | 0.00907  | -0.88146 |
| D33 | 1.26059  | 0.00010  | 0.00423  | 0.00507  | 0.00930  | 1.26990  |
| D34 | 0.42717  | -0.00002 | 0.00315  | 0.00315  | 0.00630  | 0.43347  |
| D35 | 2.44641  | -0.00001 | 0.00412  | 0.00283  | 0.00695  | 2.45336  |
| D36 | -1.68565 | 0.00008  | 0.00365  | 0.00353  | 0.00718  | -1.67847 |
| D37 | -1.06366 | 0.00004  | -0.00315 | -0.00153 | -0.00469 | -1.06835 |
| D38 | 0.99634  | -0.00008 | -0.00223 | -0.00244 | -0.00469 | 0.99166  |
| D39 | 3.10131  | -0.00016 | -0.00702 | -0.00313 | -0.01016 | 3.09115  |
| D40 | 3.13441  | 0.00008  | -0.00336 | -0.00151 | -0.00488 | 3.12953  |
| D41 | -1.08877 | -0.00003 | -0.00244 | -0.00243 | -0.00488 | -1.09365 |
| D42 | 1.01619  | -0.00011 | -0.00723 | -0.00312 | -0.01035 | 1.00584  |
| D43 | 1.05106  | 0.00007  | -0.00374 | -0.00149 | -0.00523 | 1.04583  |
| D44 | 3.11107  | -0.00005 | -0.00282 | -0.00240 | -0.00523 | 3.10584  |
| D45 | -1.06715 | -0.00013 | -0.00761 | -0.00309 | -0.01070 | -1.07785 |
| D46 | -0.00527 | -0.00004 | 0.00201  | 0.00070  | 0.00274  | -0.00253 |
| D47 | 0.36691  | -0.00002 | 0.00176  | 0.00102  | 0.00274  | 0.36966  |
| D48 | -3.08913 | 0.00000  | 0.00005  | 0.00030  | 0.00035  | -3.08878 |
| D49 | 0.04895  | 0.00000  | 0.00026  | 0.00016  | 0.00043  | 0.04938  |
| D50 | 0.00332  | 0.00001  | 0.00000  | 0.00024  | 0.00024  | 0.00356  |
| D51 | 3.14140  | 0.00001  | 0.00021  | 0.00010  | 0.00031  | -3.14147 |
| D52 | -0.34744 | 0.00000  | -0.00101 | -0.00015 | -0.00118 | -0.34862 |

|     |          |          |          |          |          |          |
|-----|----------|----------|----------|----------|----------|----------|
| D53 | 1.76895  | -0.00008 | -0.00034 | -0.00023 | -0.00057 | 1.76837  |
| D54 | -2.46740 | -0.00005 | 0.00203  | 0.00013  | 0.00216  | -2.46524 |
| D55 | -0.14178 | 0.00008  | -0.00922 | -0.00700 | -0.01624 | -0.15801 |
| D56 | 3.00279  | 0.00015  | -0.00912 | -0.00501 | -0.01414 | 2.98865  |
| D57 | -2.29135 | -0.00011 | -0.01163 | -0.00872 | -0.02034 | -2.31170 |
| D58 | 0.85321  | -0.00003 | -0.01152 | -0.00673 | -0.01824 | 0.83497  |
| D59 | 1.96957  | -0.00013 | -0.01263 | -0.00851 | -0.02114 | 1.94843  |
| D60 | -1.16905 | -0.00005 | -0.01252 | -0.00652 | -0.01904 | -1.18809 |
| D61 | 3.10355  | -0.00011 | -0.00526 | -0.00125 | -0.00652 | 3.09703  |
| D62 | -0.03516 | -0.00003 | -0.00516 | 0.00068  | -0.00448 | -0.03964 |

| Item                 | Value    | Threshold | Converged? |
|----------------------|----------|-----------|------------|
| Maximum Force        | 0.000443 | 0.000450  | YES        |
| RMS Force            | 0.000088 | 0.000300  | YES        |
| Maximum Displacement | 0.047898 | 0.001800  | NO         |
| RMS Displacement     | 0.009194 | 0.001200  | NO         |

Predicted change in Energy=-9.651970D-06

GradGradGradGradGradGradGradGradGradGradGradGradGradGradGradGradGradGradGrad

Input orientation:

| Center Number | Atomic Number | Atomic Type | Coordinates (Angstroms) |           |           |
|---------------|---------------|-------------|-------------------------|-----------|-----------|
|               |               |             | X                       | Y         | Z         |
| 1             | 6             | 0           | -0.317705               | -2.201869 | -0.394961 |
| 2             | 6             | 0           | -1.571068               | -1.763912 | -0.660045 |
| 3             | 7             | 0           | -1.809572               | -0.676498 | 0.175064  |
| 4             | 6             | 0           | -0.690721               | -0.434563 | 0.888538  |
| 5             | 7             | 0           | 0.206586                | -1.387202 | 0.601208  |
| 6             | 6             | 0           | 1.587254                | -1.410382 | 1.100034  |
| 7             | 1             | 0           | 0.246378                | -3.009869 | -0.826894 |
| 8             | 1             | 0           | -2.298548               | -2.100750 | -1.375927 |
| 9             | 1             | 0           | 1.611974                | -0.839475 | 2.026734  |
| 10            | 1             | 0           | 1.841005                | -2.442957 | 1.345087  |
| 11            | 35            | 0           | 0.260013                | 2.049741  | -0.196375 |
| 12            | 1             | 0           | -0.595654               | 0.300013  | 1.664198  |
| 13            | 6             | 0           | -2.939261               | 0.186074  | 0.173949  |
| 14            | 6             | 0           | -4.172370               | -0.225336 | -0.093011 |
| 15            | 1             | 0           | -2.665846               | 1.216874  | 0.372315  |
| 16            | 1             | 0           | -4.978888               | 0.494398  | -0.124579 |
| 17            | 1             | 0           | -4.418123               | -1.262603 | -0.287602 |
| 18            | 6             | 0           | 2.564014                | -0.811656 | 0.084191  |
| 19            | 1             | 0           | 2.570373                | -1.372364 | -0.854710 |
| 20            | 1             | 0           | 2.256132                | 0.214365  | -0.165473 |
| 21            | 6             | 0           | 3.961334                | -0.781819 | 0.645325  |

|    |   |   |          |           |           |
|----|---|---|----------|-----------|-----------|
| 22 | 8 | 0 | 4.260703 | -1.025821 | 1.789908  |
| 23 | 8 | 0 | 4.869069 | -0.437415 | -0.292840 |
| 24 | 1 | 0 | 5.734894 | -0.397748 | 0.141339  |

-----  
Distance matrix (angstroms):

|    |    | 1        | 2        | 3        | 4        | 5        |
|----|----|----------|----------|----------|----------|----------|
| 1  | C  | 0.000000 |          |          |          |          |
| 2  | C  | 1.353881 | 0.000000 |          |          |          |
| 3  | N  | 2.208473 | 1.391676 | 0.000000 |          |          |
| 4  | C  | 2.215825 | 2.222676 | 1.348853 | 0.000000 |          |
| 5  | N  | 1.389574 | 2.211950 | 2.179815 | 1.339866 | 0.000000 |
| 6  | C  | 2.547613 | 3.632885 | 3.596190 | 2.487192 | 1.468199 |
| 7  | H  | 1.075928 | 2.209832 | 3.267334 | 3.233120 | 2.161968 |
| 8  | H  | 2.212748 | 1.074790 | 2.161750 | 3.238686 | 3.270154 |
| 9  | H  | 3.382955 | 4.266746 | 3.893870 | 2.600356 | 2.075391 |
| 10 | H  | 2.783149 | 4.015457 | 4.220905 | 3.263697 | 2.083098 |
| 11 | Br | 4.295275 | 4.255796 | 3.442896 | 2.872751 | 3.528679 |
| 12 | H  | 3.252200 | 3.257810 | 2.155155 | 1.072515 | 2.149473 |
| 13 | C  | 3.591447 | 2.523875 | 1.421348 | 2.439623 | 3.543177 |
| 14 | C  | 4.342383 | 3.074982 | 2.420376 | 3.623408 | 4.583353 |
| 15 | H  | 4.217852 | 3.339070 | 2.087335 | 2.625804 | 3.883872 |
| 16 | H  | 5.391622 | 4.123096 | 3.391953 | 4.503082 | 5.563840 |
| 17 | H  | 4.207989 | 2.914746 | 2.713322 | 3.995307 | 4.710991 |
| 18 | C  | 3.235211 | 4.308084 | 4.376618 | 3.373793 | 2.481135 |
| 19 | H  | 3.039810 | 4.164461 | 4.552866 | 3.814855 | 2.776222 |
| 20 | H  | 3.537724 | 4.336548 | 4.176070 | 3.196247 | 2.711726 |
| 21 | C  | 4.626977 | 5.768533 | 5.790993 | 4.671334 | 3.803495 |
| 22 | O  | 5.207549 | 6.368407 | 6.291104 | 5.067412 | 4.240221 |
| 23 | O  | 5.479631 | 6.585575 | 6.699279 | 5.683918 | 4.841504 |
| 24 | H  | 6.338488 | 7.475674 | 7.549690 | 6.469018 | 5.634953 |
|    |    | 6        | 7        | 8        | 9        | 10       |
| 6  | C  | 0.000000 |          |          |          |          |
| 7  | H  | 2.840661 | 0.000000 |          |          |          |
| 8  | H  | 4.659017 | 2.757641 | 0.000000 |          |          |
| 9  | H  | 1.088724 | 3.836490 | 5.334894 | 0.000000 |          |
| 10 | H  | 1.091169 | 2.753493 | 4.965573 | 1.757342 | 0.000000 |
| 11 | Br | 3.926156 | 5.098764 | 5.016389 | 3.888134 | 5.005994 |
| 12 | H  | 2.829986 | 4.227278 | 4.231533 | 2.510675 | 3.682801 |
| 13 | C  | 4.888317 | 4.622125 | 2.835876 | 5.019791 | 5.579813 |
| 14 | C  | 6.000079 | 5.274234 | 2.945209 | 6.191051 | 6.568610 |
| 15 | H  | 5.051822 | 5.271101 | 3.768008 | 5.026471 | 5.886624 |
| 16 | H  | 6.945652 | 6.330603 | 3.935084 | 7.060228 | 7.569604 |
| 17 | H  | 6.165381 | 5.010124 | 2.525775 | 6.472809 | 6.575377 |
| 18 | C  | 1.531166 | 3.321695 | 5.238150 | 2.163476 | 2.184890 |

|    |    |           |           |          |          |          |
|----|----|-----------|-----------|----------|----------|----------|
| 19 | H  | 2.188376  | 2.843088  | 4.950617 | 3.083053 | 2.552891 |
| 20 | H  | 2.165343  | 3.856459  | 5.250721 | 2.516206 | 3.084717 |
| 21 | C  | 2.497621  | 4.575209  | 6.709036 | 2.726006 | 2.782956 |
| 22 | O  | 2.787678  | 5.186416  | 7.362185 | 2.665817 | 2.839204 |
| 23 | O  | 3.695547  | 5.317142  | 7.437371 | 4.018798 | 3.984240 |
| 24 | H  | 4.375779  | 6.155035  | 8.350958 | 4.555031 | 4.560073 |
|    |    | 11        | 12        | 13       | 14       | 15       |
| 11 | Br | 0.000000  |           |          |          |          |
| 12 | H  | 2.693594  | 0.000000  |          |          |          |
| 13 | C  | 3.720988  | 2.779626  | 0.000000 |          |          |
| 14 | C  | 4.983240  | 4.019536  | 1.327058 | 0.000000 |          |
| 15 | H  | 3.094790  | 2.606777  | 1.084736 | 2.136846 | 0.000000 |
| 16 | H  | 5.465375  | 4.738169  | 2.084288 | 1.081428 | 2.473669 |
| 17 | H  | 5.732792  | 4.567555  | 2.121021 | 1.083597 | 3.107052 |
| 18 | C  | 3.684390  | 3.703476  | 5.593707 | 6.764173 | 5.616883 |
| 19 | H  | 4.181145  | 4.377838  | 5.817468 | 6.881892 | 5.968896 |
| 20 | H  | 2.711836  | 3.389354  | 5.206546 | 6.443929 | 5.051743 |
| 21 | C  | 4.735607  | 4.793183  | 6.984070 | 8.186083 | 6.927397 |
| 22 | O  | 5.423092  | 5.035657  | 7.477935 | 8.677723 | 7.417299 |
| 23 | O  | 5.238192  | 5.851238  | 7.847079 | 9.046133 | 7.742999 |
| 24 | H  | 6.006545  | 6.548420  | 8.693842 | 9.911535 | 8.557615 |
|    |    | 16        | 17        | 18       | 19       | 20       |
| 16 | H  | 0.000000  |           |          |          |          |
| 17 | H  | 1.851510  | 0.000000  |          |          |          |
| 18 | C  | 7.657985  | 7.006556  | 0.000000 |          |          |
| 19 | H  | 7.810840  | 7.012327  | 1.093604 | 0.000000 |          |
| 20 | H  | 7.240553  | 6.836815  | 1.099928 | 1.758267 | 0.000000 |
| 21 | C  | 9.063611  | 8.444928  | 1.506076 | 2.129230 | 2.134828 |
| 22 | O  | 9.557529  | 8.927157  | 2.415387 | 3.157739 | 3.062659 |
| 23 | O  | 9.893373  | 9.323781  | 2.365478 | 2.544372 | 2.696011 |
| 24 | H  | 10.754150 | 10.198810 | 3.198291 | 3.457771 | 3.545504 |
|    |    | 21        | 22        | 23       | 24       |          |
| 21 | C  | 0.000000  |           |          |          |          |
| 22 | O  | 1.207986  | 0.000000  |          |          |          |
| 23 | O  | 1.350092  | 2.248148  | 0.000000 |          |          |
| 24 | H  | 1.883355  | 2.299020  | 0.969401 | 0.000000 |          |

Stoichiometry C8H11BrN2O2

Framework group C1[X(C8H11BrN2O2)]

Deg. of freedom 66

Full point group C1 NOp 1

Largest Abelian subgroup C1 NOp 1

Largest concise Abelian subgroup C1 NOp 1

Standard orientation:

-----

| Center Number | Atomic Number | Atomic Type | Coordinates (Angstroms) |           |           |
|---------------|---------------|-------------|-------------------------|-----------|-----------|
|               |               |             | X                       | Y         | Z         |
| 1             | 6             | 0           | -0.637761               | -2.133307 | -0.767832 |
| 2             | 6             | 0           | -1.950441               | -1.815362 | -0.861508 |
| 3             | 7             | 0           | -2.212498               | -0.865840 | 0.121597  |
| 4             | 6             | 0           | -1.056856               | -0.579958 | 0.755764  |
| 5             | 7             | 0           | -0.100307               | -1.383381 | 0.271239  |
| 6             | 6             | 0           | 1.319551                | -1.304229 | 0.636407  |
| 7             | 1             | 0           | -0.040810               | -2.815864 | -1.346957 |
| 8             | 1             | 0           | -2.709354               | -2.149452 | -1.545328 |
| 9             | 1             | 0           | 1.380885                | -0.844474 | 1.621385  |
| 10            | 1             | 0           | 1.702945                | -2.321892 | 0.725972  |
| 11            | 35            | 0           | -0.486218               | 2.105464  | -0.090158 |
| 12            | 1             | 0           | -0.958544               | 0.066741  | 1.605708  |
| 13            | 6             | 0           | -3.419479               | -0.144978 | 0.330839  |
| 14            | 6             | 0           | -4.624313               | -0.662522 | 0.126864  |
| 15            | 1             | 0           | -3.235262               | 0.880847  | 0.631503  |
| 16            | 1             | 0           | -5.499969               | -0.041811 | 0.258890  |
| 17            | 1             | 0           | -4.780106               | -1.691970 | -0.173383 |
| 18            | 6             | 0           | 2.118461                | -0.484169 | -0.380312 |
| 19            | 1             | 0           | 2.085549                | -0.928874 | -1.378872 |
| 20            | 1             | 0           | 1.681722                | 0.521312  | -0.470365 |
| 21            | 6             | 0           | 3.555755                | -0.357939 | 0.051565  |
| 22            | 8             | 0           | 3.995786                | -0.695553 | 1.124699  |
| 23            | 8             | 0           | 4.320783                | 0.194308  | -0.914097 |
| 24            | 1             | 0           | 5.218145                | 0.283493  | -0.558393 |

Rotational constants (GHZ): 0.8103532 0.3324543 0.2545697

Standard basis: 6-311++G(d,p) (5D, 7F)

There are 404 symmetry adapted cartesian basis functions of A symmetry.

There are 389 symmetry adapted basis functions of A symmetry.

389 basis functions, 625 primitive gaussians, 404 cartesian basis functions

62 alpha electrons 62 beta electrons

nuclear repulsion energy 1072.5928609784 Hartrees.

NAtoms= 24 NActive= 24 NUniq= 24 SFac= 1.00D+00 NAtFMM= 60 NAOKFM=F

Big=F

Integral buffers will be 131072 words long.

Raffenetti 2 integral format.

Two-electron integral symmetry is turned on.

One-electron integrals computed using PRISM.

NBasis= 389 RedAO= T EigKep= 6.51D-06 NBF= 389

NBsUse= 389 1.00D-06 EigRej= -1.00D+00 NBFU= 389

Initial guess from the checkpoint file: "./cooh.chk"

B after Tr= 0.000000 0.000000 0.000000  
 Rot= 1.000000 0.000831 -0.000047 0.000454 Ang= 0.11 deg.  
 ExpMin= 3.50D-02 ExpMax= 4.40D+05 ExpMxC= 1.51D+04 IAcc=3 IRadAn= 5 AccDes=  
 0.00D+00  
 Harris functional with IExCor= 402 and IRadAn= 5 diagonalized for initial guess.  
 HarFok: IExCor= 402 AccDes= 0.00D+00 IRadAn= 5 IDoV= 1 UseB2=F ITyADJ=14  
 ICtDFT= 3500011 ScaDFX= 1.000000 1.000000 1.000000 1.000000  
 FoFCou: FMM=F IPFlag= 0 FMFlag= 100000 FMFlg1= 0  
 NFxFlg= 0 DoJE=T BraDBF=F KetDBF=T FulRan=T  
 wScrn= 0.000000 ICntrl= 500 IOpCl= 0 I1Cent= 200000004 NGrid=  
 0  
 NMat0= 1 NMatS0= 1 NMatT0= 0 NMatD0= 1 NMtDS0= 0  
 NMtDT0= 0

Petite list used in FoFCou.

Keep R1 ints in memory in canonical form, NReq=2910765817.

Requested convergence on RMS density matrix=1.00D-08 within 128 cycles.

Requested convergence on MAX density matrix=1.00D-06.

Requested convergence on energy=1.00D-06.

No special actions if energy rises.

SCF Done: E(RB3LYP) = -3145.73221779 A.U. after 11 cycles

NFock= 11 Conv=0.73D-08 -V/T= 2.0017

Calling FoFJK, ICntrl= 2127 FMM=F ISym2X=0 I1Cent= 0 IOpClX= 0 NMat=1 NMatS=1  
 NMatT=0.

\*\*\*\*\* Axes restored to original set \*\*\*\*\*

| Center<br>Number | Atomic<br>Number | Forces (Hartrees/Bohr) |              |              |
|------------------|------------------|------------------------|--------------|--------------|
|                  |                  | X                      | Y            | Z            |
| 1                | 6                | 0.000033018            | 0.000022021  | -0.000042286 |
| 2                | 6                | -0.000035037           | -0.000143604 | 0.000126517  |
| 3                | 7                | -0.000337388           | -0.000061789 | -0.000076780 |
| 4                | 6                | 0.000515308            | 0.000645267  | -0.000332338 |
| 5                | 7                | -0.000206427           | -0.000236938 | 0.000091520  |
| 6                | 6                | 0.000222355            | 0.000072138  | -0.000149899 |
| 7                | 1                | 0.000018155            | 0.000032226  | -0.000041746 |
| 8                | 1                | -0.000007384           | 0.000016101  | -0.000012575 |
| 9                | 1                | -0.000001467           | -0.000038765 | 0.000049994  |
| 10               | 1                | -0.000063818           | -0.000020318 | 0.000021242  |
| 11               | 35               | 0.000006548            | -0.000046216 | 0.000112183  |
| 12               | 1                | -0.000033697           | -0.000094766 | 0.000081863  |
| 13               | 6                | 0.000148579            | -0.000051701 | -0.000059840 |
| 14               | 6                | -0.000039570           | 0.000015867  | -0.000013152 |
| 15               | 1                | -0.000009992           | 0.000005887  | 0.000022016  |
| 16               | 1                | 0.000001085            | -0.000003685 | 0.000000548  |

|    |   |              |              |              |
|----|---|--------------|--------------|--------------|
| 17 | 1 | 0.000004001  | -0.000003194 | -0.000008102 |
| 18 | 6 | 0.000431993  | -0.000145112 | 0.000017457  |
| 19 | 1 | 0.000002646  | 0.000125285  | 0.000036800  |
| 20 | 1 | -0.000488181 | -0.000099397 | 0.000192296  |
| 21 | 6 | -0.000239534 | -0.000061825 | -0.000103993 |
| 22 | 8 | 0.000070285  | 0.000012928  | 0.000145022  |
| 23 | 8 | 0.000053513  | 0.000045893  | -0.000052827 |
| 24 | 1 | -0.000044988 | 0.000013697  | -0.000003919 |

-----  
Cartesian Forces: Max 0.000645267 RMS 0.000159638

GradGradGradGradGradGradGradGradGradGradGradGradGradGradGradGradGradGradGrad

Berny optimization.

Using GEDIIS/GDIIS optimizer.

FormGI is forming the generalized inverse of G from B-inverse, IUseBI=4.

GSVD: received Info= 1 from GESDD.

Internal Forces: Max 0.000407971 RMS 0.000077470

Search for a local minimum.

Step number 11 out of a maximum of 140

All quantities printed in internal units (Hartrees-Bohrs-Radians)

Mixed Optimization -- En-DIIS/RFO-DIIS

Swapping is turned off.

Update second derivatives using D2CorX and points 5 4 6 7 8  
9 10 11

DE= -1.15D-05 DEPred=-9.65D-06 R= 1.19D+00

TightC=F SS= 1.41D+00 RLast= 6.98D-02 DXNew= 1.2000D+00 2.0927D-01

Trust test= 1.19D+00 RLast= 6.98D-02 DXMaxT set to 7.14D-01

ITU= 1 1 1 1 1 0-1 1 1 1 0

|                 |         |         |         |         |         |
|-----------------|---------|---------|---------|---------|---------|
| Eigenvalues --- | 0.00142 | 0.00287 | 0.00391 | 0.00842 | 0.01597 |
| Eigenvalues --- | 0.01787 | 0.01986 | 0.02043 | 0.02124 | 0.02192 |
| Eigenvalues --- | 0.02353 | 0.02410 | 0.02485 | 0.02789 | 0.03038 |
| Eigenvalues --- | 0.03040 | 0.03086 | 0.03510 | 0.04329 | 0.04452 |
| Eigenvalues --- | 0.04948 | 0.05451 | 0.06441 | 0.07722 | 0.09668 |
| Eigenvalues --- | 0.10446 | 0.12131 | 0.13469 | 0.15599 | 0.15976 |
| Eigenvalues --- | 0.15987 | 0.15996 | 0.16000 | 0.16001 | 0.16062 |
| Eigenvalues --- | 0.16693 | 0.17856 | 0.20634 | 0.21983 | 0.22847 |
| Eigenvalues --- | 0.24459 | 0.25079 | 0.27391 | 0.27766 | 0.34364 |
| Eigenvalues --- | 0.34449 | 0.35160 | 0.35492 | 0.35579 | 0.35585 |
| Eigenvalues --- | 0.35843 | 0.36077 | 0.36516 | 0.36604 | 0.36652 |
| Eigenvalues --- | 0.37258 | 0.41328 | 0.43007 | 0.43818 | 0.47579 |
| Eigenvalues --- | 0.52393 | 0.53214 | 0.54050 | 0.54732 | 0.59910 |
| Eigenvalues --- | 0.92914 |         |         |         |         |

En-DIIS/RFO-DIIS IScMMF= 0 using points: 11 10 9 8 7

RFO step: Lambda=-2.31961220D-06.



DidBck=F Rises=F RFO-DIIS coefs: 1.35286 -0.00594 -1.00066 0.72451 -  
 0.07078

Iteration 1 RMS(Cart)= 0.00819367 RMS(Int)= 0.00003575  
 Iteration 2 RMS(Cart)= 0.00004859 RMS(Int)= 0.00001768  
 Iteration 3 RMS(Cart)= 0.00000000 RMS(Int)= 0.00001768

| Variable | Old X   | -DE/DX   | Delta X<br>(Linear) | Delta X<br>(Quad) | Delta X<br>(Total) | New X   |
|----------|---------|----------|---------------------|-------------------|--------------------|---------|
| R1       | 2.55846 | 0.00001  | 0.00008             | 0.00003           | 0.00012            | 2.55859 |
| R2       | 2.62591 | 0.00000  | 0.00002             | -0.00004          | -0.00001           | 2.62590 |
| R3       | 2.03321 | 0.00000  | 0.00002             | -0.00001          | 0.00001            | 2.03322 |
| R4       | 2.62989 | 0.00002  | -0.00003            | -0.00003          | -0.00006           | 2.62982 |
| R5       | 2.03106 | 0.00000  | 0.00000             | 0.00002           | 0.00002            | 2.03108 |
| R6       | 2.54896 | 0.00026  | -0.00026            | 0.00022           | -0.00005           | 2.54891 |
| R7       | 2.68596 | -0.00010 | 0.00055             | -0.00003          | 0.00052            | 2.68648 |
| R8       | 2.53198 | 0.00012  | -0.00014            | 0.00000           | -0.00015           | 2.53183 |
| R9       | 5.42871 | -0.00008 | 0.00552             | 0.00078           | 0.00632            | 5.43503 |
| R10      | 2.02676 | 0.00001  | 0.00012             | 0.00002           | 0.00013            | 2.02690 |
| R11      | 2.77449 | 0.00011  | 0.00026             | 0.00009           | 0.00035            | 2.77485 |
| R12      | 2.05739 | 0.00003  | -0.00012            | 0.00005           | -0.00007           | 2.05732 |
| R13      | 2.06201 | 0.00001  | 0.00007             | 0.00005           | 0.00012            | 2.06213 |
| R14      | 2.89349 | -0.00015 | -0.00046            | 0.00017           | -0.00029           | 2.89320 |
| R15      | 5.09015 | -0.00012 | -0.00641            | -0.00324          | -0.00966           | 5.08050 |
| R16      | 5.12463 | -0.00010 | -0.00118            | -0.00466          | -0.00584           | 5.11879 |
| R17      | 2.50778 | 0.00003  | -0.00008            | 0.00002           | -0.00006           | 2.50771 |
| R18      | 2.04985 | 0.00001  | 0.00012             | 0.00007           | 0.00019            | 2.05004 |
| R19      | 2.04360 | 0.00000  | 0.00002             | 0.00000           | 0.00003            | 2.04363 |
| R20      | 2.04770 | 0.00000  | 0.00004             | 0.00002           | 0.00006            | 2.04776 |
| R21      | 2.06661 | -0.00009 | -0.00058            | -0.00003          | -0.00061           | 2.06600 |
| R22      | 2.07856 | 0.00000  | 0.00075             | 0.00000           | 0.00076            | 2.07932 |
| R23      | 2.84607 | -0.00017 | 0.00007             | -0.00045          | -0.00038           | 2.84569 |
| R24      | 2.28276 | 0.00015  | -0.00031            | 0.00016           | -0.00015           | 2.28261 |
| R25      | 2.55130 | 0.00007  | 0.00039             | 0.00007           | 0.00045            | 2.55176 |
| R26      | 1.83190 | -0.00005 | 0.00001             | -0.00001          | 0.00000            | 1.83190 |
| A1       | 1.87549 | 0.00002  | -0.00011            | -0.00005          | -0.00015           | 1.87535 |
| A2       | 2.27796 | -0.00001 | 0.00020             | 0.00004           | 0.00024            | 2.27820 |
| A3       | 2.12971 | -0.00001 | -0.00010            | 0.00001           | -0.00009           | 2.12962 |
| A4       | 1.86913 | 0.00003  | -0.00002            | 0.00003           | 0.00001            | 1.86914 |
| A5       | 2.28582 | 0.00000  | 0.00027             | 0.00002           | 0.00029            | 2.28611 |
| A6       | 2.12771 | -0.00003 | -0.00023            | -0.00008          | -0.00031           | 2.12740 |
| A7       | 1.89168 | -0.00001 | 0.00008             | 0.00004           | 0.00009            | 1.89177 |
| A8       | 2.22677 | 0.00002  | -0.00018            | 0.00000           | -0.00017           | 2.22660 |
| A9       | 2.15417 | -0.00001 | 0.00004             | -0.00011          | -0.00006           | 2.15410 |
| A10      | 1.89078 | -0.00010 | 0.00006             | -0.00015          | -0.00005           | 1.89073 |
| A11      | 1.80274 | 0.00005  | -0.00068            | 0.00014           | -0.00056           | 1.80218 |

|     |          |          |          |          |          |          |
|-----|----------|----------|----------|----------|----------|----------|
| A12 | 2.18820  | 0.00003  | 0.00024  | 0.00004  | 0.00040  | 2.18860  |
| A13 | 1.88834  | 0.00014  | 0.00185  | 0.00229  | 0.00414  | 1.89248  |
| A14 | 2.19284  | 0.00005  | 0.00023  | 0.00007  | 0.00042  | 2.19326  |
| A15 | 1.89430  | 0.00004  | 0.00006  | 0.00012  | 0.00017  | 1.89447  |
| A16 | 2.20076  | 0.00000  | -0.00024 | -0.00009 | -0.00032 | 2.20044  |
| A17 | 2.17504  | -0.00005 | 0.00027  | -0.00007 | 0.00022  | 2.17526  |
| A18 | 1.87786  | 0.00002  | 0.00123  | -0.00080 | 0.00043  | 1.87829  |
| A19 | 1.88591  | 0.00001  | -0.00035 | -0.00038 | -0.00072 | 1.88519  |
| A20 | 1.94798  | -0.00011 | -0.00023 | -0.00033 | -0.00057 | 1.94742  |
| A21 | 1.87527  | -0.00004 | 0.00026  | -0.00022 | 0.00004  | 1.87530  |
| A22 | 1.92323  | 0.00001  | -0.00095 | 0.00041  | -0.00053 | 1.92270  |
| A23 | 1.95053  | 0.00012  | 0.00011  | 0.00123  | 0.00134  | 1.95188  |
| A24 | 1.21751  | -0.00019 | -0.00293 | -0.00200 | -0.00494 | 1.21256  |
| A25 | 1.35545  | -0.00016 | -0.00339 | -0.00236 | -0.00574 | 1.34971  |
| A26 | 2.15382  | 0.00002  | -0.00062 | 0.00000  | -0.00062 | 2.15320  |
| A27 | 1.95650  | 0.00000  | -0.00021 | -0.00020 | -0.00041 | 1.95609  |
| A28 | 2.17196  | -0.00002 | 0.00082  | 0.00023  | 0.00105  | 2.17301  |
| A29 | 2.08580  | 0.00000  | 0.00013  | 0.00002  | 0.00015  | 2.08595  |
| A30 | 2.14555  | -0.00001 | -0.00021 | -0.00003 | -0.00024 | 2.14530  |
| A31 | 2.05184  | 0.00000  | 0.00008  | 0.00001  | 0.00010  | 2.05193  |
| A32 | 1.95284  | 0.00005  | 0.00096  | 0.00052  | 0.00147  | 1.95431  |
| A33 | 1.91429  | -0.00020 | -0.00172 | -0.00064 | -0.00236 | 1.91193  |
| A34 | 1.93095  | 0.00014  | 0.00011  | 0.00085  | 0.00093  | 1.93188  |
| A35 | 1.85982  | 0.00001  | 0.00032  | -0.00042 | -0.00010 | 1.85973  |
| A36 | 1.90142  | -0.00005 | 0.00288  | -0.00026 | 0.00262  | 1.90404  |
| A37 | 1.90264  | 0.00004  | -0.00260 | -0.00011 | -0.00271 | 1.89993  |
| A38 | 2.56798  | 0.00041  | 0.00553  | 0.00457  | 0.01011  | 2.57810  |
| A39 | 2.18824  | 0.00011  | -0.00002 | 0.00023  | 0.00020  | 2.18844  |
| A40 | 1.94975  | -0.00012 | 0.00017  | -0.00024 | -0.00007 | 1.94968  |
| A41 | 2.14518  | 0.00001  | -0.00015 | 0.00002  | -0.00014 | 2.14504  |
| A42 | 1.87520  | -0.00001 | -0.00028 | 0.00024  | -0.00005 | 1.87515  |
| D1  | 0.00274  | 0.00006  | 0.00038  | 0.00091  | 0.00129  | 0.00403  |
| D2  | 3.10924  | 0.00003  | 0.00092  | 0.00005  | 0.00097  | 3.11021  |
| D3  | -3.13095 | 0.00001  | 0.00019  | 0.00052  | 0.00071  | -3.13024 |
| D4  | -0.02446 | -0.00001 | 0.00073  | -0.00034 | 0.00039  | -0.02407 |
| D5  | -0.04933 | -0.00009 | 0.00035  | -0.00088 | -0.00053 | -0.04985 |
| D6  | -3.02347 | -0.00006 | -0.00025 | -0.00069 | -0.00094 | -3.02441 |
| D7  | 3.08519  | -0.00005 | 0.00052  | -0.00053 | 0.00000  | 3.08518  |
| D8  | 0.11105  | -0.00002 | -0.00008 | -0.00034 | -0.00042 | 0.11063  |
| D9  | 0.04442  | -0.00001 | -0.00098 | -0.00063 | -0.00161 | 0.04281  |
| D10 | 3.03294  | -0.00001 | -0.00142 | -0.00121 | -0.00263 | 3.03030  |
| D11 | -3.06596 | 0.00001  | -0.00147 | 0.00013  | -0.00134 | -3.06730 |
| D12 | -0.07744 | 0.00001  | -0.00191 | -0.00045 | -0.00236 | -0.07980 |
| D13 | -0.07563 | -0.00004 | 0.00121  | 0.00010  | 0.00130  | -0.07433 |

|     |          |          |          |          |          |          |
|-----|----------|----------|----------|----------|----------|----------|
| D14 | 1.92448  | 0.00011  | 0.00300  | 0.00269  | 0.00569  | 1.93017  |
| D15 | -3.06284 | 0.00011  | -0.00446 | 0.00038  | -0.00407 | -3.06690 |
| D16 | -3.07193 | -0.00005 | 0.00165  | 0.00063  | 0.00228  | -3.06965 |
| D17 | -1.07182 | 0.00010  | 0.00344  | 0.00323  | 0.00667  | -1.06515 |
| D18 | 0.22404  | 0.00011  | -0.00402 | 0.00092  | -0.00309 | 0.22096  |
| D19 | 0.61716  | 0.00000  | 0.00570  | 0.00203  | 0.00773  | 0.62489  |
| D20 | -2.48060 | -0.00001 | 0.00580  | 0.00157  | 0.00738  | -2.47322 |
| D21 | -2.69869 | 0.00000  | 0.00519  | 0.00139  | 0.00658  | -2.69210 |
| D22 | 0.48674  | -0.00001 | 0.00530  | 0.00093  | 0.00623  | 0.49297  |
| D23 | 0.07736  | 0.00008  | -0.00097 | 0.00048  | -0.00049 | 0.07687  |
| D24 | 3.05456  | 0.00005  | -0.00044 | 0.00028  | -0.00015 | 3.05441  |
| D25 | -1.86579 | 0.00000  | -0.00110 | -0.00072 | -0.00182 | -1.86761 |
| D26 | 1.11141  | -0.00002 | -0.00057 | -0.00091 | -0.00148 | 1.10992  |
| D27 | 3.06405  | -0.00008 | 0.00472  | 0.00018  | 0.00489  | 3.06895  |
| D28 | -0.24194 | -0.00010 | 0.00525  | -0.00001 | 0.00523  | -0.23670 |
| D29 | -2.25160 | 0.00004  | -0.00104 | -0.00149 | -0.00256 | -2.25416 |
| D30 | -0.24974 | 0.00001  | -0.00054 | -0.00066 | -0.00118 | -0.25092 |
| D31 | -2.90135 | 0.00002  | 0.00351  | 0.00449  | 0.00799  | -2.89336 |
| D32 | -0.88146 | -0.00002 | 0.00427  | 0.00362  | 0.00789  | -0.87357 |
| D33 | 1.26990  | 0.00006  | 0.00403  | 0.00470  | 0.00871  | 1.27861  |
| D34 | 0.43347  | 0.00004  | 0.00285  | 0.00469  | 0.00753  | 0.44101  |
| D35 | 2.45336  | 0.00001  | 0.00361  | 0.00383  | 0.00743  | 2.46079  |
| D36 | -1.67847 | 0.00009  | 0.00336  | 0.00490  | 0.00825  | -1.67022 |
| D37 | -1.06835 | 0.00001  | -0.00231 | -0.00257 | -0.00488 | -1.07323 |
| D38 | 0.99166  | -0.00008 | -0.00243 | -0.00318 | -0.00561 | 0.98604  |
| D39 | 3.09115  | -0.00006 | -0.00672 | -0.00319 | -0.00991 | 3.08124  |
| D40 | 3.12953  | 0.00006  | -0.00307 | -0.00163 | -0.00470 | 3.12483  |
| D41 | -1.09365 | -0.00003 | -0.00319 | -0.00224 | -0.00543 | -1.09909 |
| D42 | 1.00584  | -0.00002 | -0.00748 | -0.00225 | -0.00973 | 0.99611  |
| D43 | 1.04583  | 0.00002  | -0.00284 | -0.00242 | -0.00526 | 1.04057  |
| D44 | 3.10584  | -0.00006 | -0.00296 | -0.00303 | -0.00600 | 3.09984  |
| D45 | -1.07785 | -0.00005 | -0.00725 | -0.00304 | -0.01029 | -1.08814 |
| D46 | -0.00253 | -0.00004 | 0.00144  | 0.00086  | 0.00229  | -0.00025 |
| D47 | 0.36966  | -0.00003 | 0.00155  | 0.00121  | 0.00279  | 0.37244  |
| D48 | -3.08878 | -0.00001 | 0.00050  | -0.00063 | -0.00014 | -3.08892 |
| D49 | 0.04938  | 0.00000  | 0.00012  | 0.00008  | 0.00020  | 0.04957  |
| D50 | 0.00356  | 0.00000  | 0.00035  | -0.00013 | 0.00022  | 0.00378  |
| D51 | -3.14147 | 0.00001  | -0.00003 | 0.00058  | 0.00056  | -3.14092 |
| D52 | -0.34862 | 0.00001  | -0.00069 | 0.00026  | -0.00041 | -0.34903 |
| D53 | 1.76837  | -0.00004 | -0.00032 | 0.00028  | -0.00004 | 1.76833  |
| D54 | -2.46524 | -0.00007 | 0.00191  | -0.00031 | 0.00159  | -2.46365 |
| D55 | -0.15801 | 0.00006  | -0.01229 | -0.00039 | -0.01268 | -0.17070 |
| D56 | 2.98865  | 0.00010  | -0.00974 | -0.00098 | -0.01072 | 2.97793  |
| D57 | -2.31170 | -0.00007 | -0.01549 | -0.00143 | -0.01693 | -2.32863 |

|     |          |          |          |          |          |          |
|-----|----------|----------|----------|----------|----------|----------|
| D58 | 0.83497  | -0.00002 | -0.01294 | -0.00201 | -0.01497 | 0.82000  |
| D59 | 1.94843  | -0.00007 | -0.01605 | -0.00072 | -0.01676 | 1.93167  |
| D60 | -1.18809 | -0.00003 | -0.01350 | -0.00131 | -0.01480 | -1.20289 |
| D61 | 3.09703  | -0.00003 | -0.00570 | 0.00060  | -0.00509 | 3.09194  |
| D62 | -0.03964 | 0.00001  | -0.00322 | 0.00004  | -0.00319 | -0.04282 |

| Item                 | Value    | Threshold | Converged? |
|----------------------|----------|-----------|------------|
| Maximum Force        | 0.000408 | 0.000450  | YES        |
| RMS Force            | 0.000077 | 0.000300  | YES        |
| Maximum Displacement | 0.040215 | 0.001800  | NO         |
| RMS Displacement     | 0.008203 | 0.001200  | NO         |

Predicted change in Energy=-6.099434D-06

GradGradGradGradGradGradGradGradGradGradGradGradGradGradGradGradGradGrad

Input orientation:

| Center Number | Atomic Number | Atomic Type | Coordinates (Angstroms) |           |           |
|---------------|---------------|-------------|-------------------------|-----------|-----------|
|               |               |             | X                       | Y         | Z         |
| 1             | 6             | 0           | -0.320561               | -2.207771 | -0.395800 |
| 2             | 6             | 0           | -1.573348               | -1.767376 | -0.659888 |
| 3             | 7             | 0           | -1.808038               | -0.677742 | 0.173352  |
| 4             | 6             | 0           | -0.688297               | -0.438175 | 0.886177  |
| 5             | 7             | 0           | 0.206354                | -1.393282 | 0.599122  |
| 6             | 6             | 0           | 1.587460                | -1.419891 | 1.097115  |
| 7             | 1             | 0           | 0.241378                | -3.017557 | -0.827200 |
| 8             | 1             | 0           | -2.302813               | -2.103561 | -1.374074 |
| 9             | 1             | 0           | 1.613235                | -0.855005 | 2.027426  |
| 10            | 1             | 0           | 1.840407                | -2.454325 | 1.335343  |
| 11            | 35            | 0           | 0.261585                | 2.052017  | -0.194833 |
| 12            | 1             | 0           | -0.589256               | 0.299800  | 1.658205  |
| 13            | 6             | 0           | -2.934648               | 0.189294  | 0.170059  |
| 14            | 6             | 0           | -4.170080               | -0.220209 | -0.088807 |
| 15            | 1             | 0           | -2.656092               | 1.220468  | 0.359675  |
| 16            | 1             | 0           | -4.974543               | 0.501732  | -0.122804 |
| 17            | 1             | 0           | -4.419699               | -1.258297 | -0.274040 |
| 18            | 6             | 0           | 2.562898                | -0.813871 | 0.084562  |
| 19            | 1             | 0           | 2.573154                | -1.369744 | -0.856799 |
| 20            | 1             | 0           | 2.249060                | 0.211893  | -0.160463 |
| 21            | 6             | 0           | 3.958649                | -0.774252 | 0.648454  |
| 22            | 8             | 0           | 4.256168                | -1.004540 | 1.796271  |
| 23            | 8             | 0           | 4.867508                | -0.435747 | -0.291112 |
| 24            | 1             | 0           | 5.731490                | -0.384634 | 0.145533  |

Distance matrix (angstroms):

|    |    | 1        | 2        | 3        | 4        | 5        |
|----|----|----------|----------|----------|----------|----------|
| 1  | C  | 0.000000 |          |          |          |          |
| 2  | C  | 1.353945 | 0.000000 |          |          |          |
| 3  | N  | 2.208508 | 1.391643 | 0.000000 |          |          |
| 4  | C  | 2.215890 | 2.222703 | 1.348826 | 0.000000 |          |
| 5  | N  | 1.389568 | 2.211875 | 2.179691 | 1.339788 | 0.000000 |
| 6  | C  | 2.547566 | 3.632976 | 3.596321 | 2.487434 | 1.468386 |
| 7  | H  | 1.075935 | 2.210018 | 3.267406 | 3.233137 | 2.161918 |
| 8  | H  | 2.212963 | 1.074803 | 2.161548 | 3.238659 | 3.270155 |
| 9  | H  | 3.382538 | 4.267129 | 3.895397 | 2.602546 | 2.075839 |
| 10 | H  | 2.779825 | 4.013300 | 4.221093 | 3.265112 | 2.082778 |
| 11 | Br | 4.304077 | 4.262748 | 3.445357 | 2.876094 | 3.536029 |
| 12 | H  | 3.252545 | 3.258099 | 2.155413 | 1.072587 | 2.149693 |
| 13 | C  | 3.591597 | 2.523986 | 1.421624 | 2.439803 | 3.543238 |
| 14 | C  | 4.343207 | 3.076178 | 2.420187 | 3.622281 | 4.582851 |
| 15 | H  | 4.216428 | 3.337522 | 2.087370 | 2.626884 | 3.883635 |
| 16 | H  | 5.392168 | 4.123764 | 3.391994 | 4.502596 | 5.563627 |
| 17 | H  | 4.209425 | 2.917148 | 2.712560 | 3.992752 | 4.709671 |
| 18 | C  | 3.238525 | 4.309514 | 4.373957 | 3.369571 | 2.480683 |
| 19 | H  | 3.047687 | 4.170176 | 4.553561 | 3.813509 | 2.778849 |
| 20 | H  | 3.537387 | 4.333328 | 4.166884 | 3.185296 | 2.706696 |
| 21 | C  | 4.632179 | 5.770706 | 5.787030 | 4.665144 | 3.803334 |
| 22 | O  | 5.215303 | 6.371647 | 6.286116 | 5.059325 | 4.240905 |
| 23 | O  | 5.483346 | 6.587401 | 6.696058 | 5.679171 | 4.841048 |
| 24 | H  | 6.343830 | 7.478057 | 7.545274 | 6.462591 | 5.634735 |
|    |    | 6        | 7        | 8        | 9        | 10       |
| 6  | C  | 0.000000 |          |          |          |          |
| 7  | H  | 2.840328 | 0.000000 |          |          |          |
| 8  | H  | 4.659227 | 2.758146 | 0.000000 |          |          |
| 9  | H  | 1.088687 | 3.835038 | 5.335215 | 0.000000 |          |
| 10 | H  | 1.091233 | 2.747858 | 4.962887 | 1.757387 | 0.000000 |
| 11 | Br | 3.934618 | 5.108902 | 5.023503 | 3.900791 | 5.014104 |
| 12 | H  | 2.830239 | 4.227535 | 4.231683 | 2.514134 | 3.686830 |
| 13 | C  | 4.888596 | 4.622290 | 2.835621 | 5.022312 | 5.581019 |
| 14 | C  | 5.999576 | 5.275542 | 2.947136 | 6.190972 | 6.568518 |
| 15 | H  | 5.052034 | 5.269237 | 3.765615 | 5.031514 | 5.888509 |
| 16 | H  | 6.945553 | 6.331461 | 3.935908 | 7.061377 | 7.570205 |
| 17 | H  | 6.163776 | 5.012646 | 2.530959 | 6.469597 | 6.573396 |
| 18 | C  | 1.531014 | 3.328213 | 5.240808 | 2.162931 | 2.185758 |
| 19 | H  | 2.189038 | 2.855406 | 4.957935 | 3.083043 | 2.553179 |
| 20 | H  | 2.163777 | 3.860657 | 5.249165 | 2.515830 | 3.084339 |
| 21 | C  | 2.498136 | 4.585639 | 6.712942 | 2.721957 | 2.789518 |
| 22 | O  | 2.789863 | 5.201286 | 7.367439 | 2.657233 | 2.854861 |
| 23 | O  | 3.695190 | 5.324868 | 7.440962 | 4.017672 | 3.985392 |

|    |    |           |           |          |          |          |
|----|----|-----------|-----------|----------|----------|----------|
| 24 | H  | 4.376099  | 6.166021  | 8.355473 | 4.552229 | 4.565062 |
|    |    | 11        | 12        | 13       | 14       | 15       |
| 11 | Br | 0.000000  |           |          |          |          |
| 12 | H  | 2.688484  | 0.000000  |          |          |          |
| 13 | C  | 3.717363  | 2.779866  | 0.000000 |          |          |
| 14 | C  | 4.981356  | 4.018054  | 1.327025 | 0.000000 |          |
| 15 | H  | 3.084120  | 2.608758  | 1.084834 | 2.137485 | 0.000000 |
| 16 | H  | 5.461283  | 4.737458  | 2.084360 | 1.081441 | 2.474789 |
| 17 | H  | 5.734011  | 4.564376  | 2.120878 | 1.083628 | 3.107439 |
| 18 | C  | 3.686112  | 3.694956  | 5.588978 | 6.761323 | 5.608216 |
| 19 | H  | 4.182105  | 4.371895  | 5.815576 | 6.883491 | 5.961042 |
| 20 | H  | 2.708745  | 3.372139  | 5.194284 | 6.434066 | 5.034708 |
| 21 | C  | 4.729399  | 4.780860  | 6.976735 | 8.180877 | 6.914991 |
| 22 | O  | 5.409596  | 5.019811  | 7.468443 | 8.670083 | 7.402284 |
| 23 | O  | 5.235720  | 5.840988  | 7.840727 | 9.042421 | 7.731179 |
| 24 | H  | 5.997748  | 6.535171  | 8.685156 | 9.905707 | 8.542467 |
|    |    | 16        | 17        | 18       | 19       | 20       |
| 16 | H  | 0.000000  |           |          |          |          |
| 17 | H  | 1.851601  | 0.000000  |          |          |          |
| 18 | C  | 7.654204  | 7.005910  | 0.000000 |          |          |
| 19 | H  | 7.810820  | 7.017979  | 1.093279 | 0.000000 |          |
| 20 | H  | 7.229514  | 6.829840  | 1.100329 | 1.758265 | 0.000000 |
| 21 | C  | 9.056759  | 8.442868  | 1.505877 | 2.130726 | 2.132961 |
| 22 | O  | 9.547655  | 8.923074  | 2.415256 | 3.163019 | 3.055650 |
| 23 | O  | 9.888031  | 9.323578  | 2.365446 | 2.540947 | 2.700514 |
| 24 | H  | 10.746012 | 10.197351 | 3.198114 | 3.456905 | 3.546377 |
|    |    | 21        | 22        | 23       | 24       |          |
| 21 | C  | 0.000000  |           |          |          |          |
| 22 | O  | 1.207904  | 0.000000  |          |          |          |
| 23 | O  | 1.350332  | 2.248206  | 0.000000 |          |          |
| 24 | H  | 1.883533  | 2.299085  | 0.969400 | 0.000000 |          |

Stoichiometry C<sub>8</sub>H<sub>11</sub>BrN<sub>2</sub>O<sub>2</sub>

Framework group C1[X(C<sub>8</sub>H<sub>11</sub>BrN<sub>2</sub>O<sub>2</sub>)]

Deg. of freedom 66

Full point group C1 NOp 1

Largest Abelian subgroup C1 NOp 1

Largest concise Abelian subgroup C1 NOp 1

Standard orientation:

| Center | Atomic | Atomic | Coordinates (Angstroms) |           |           |
|--------|--------|--------|-------------------------|-----------|-----------|
| Number | Number | Type   | X                       | Y         | Z         |
| 1      | 6      | 0      | -0.643592               | -2.140649 | -0.766632 |
| 2      | 6      | 0      | -1.955460               | -1.818647 | -0.858738 |

|    |    |   |           |           |           |
|----|----|---|-----------|-----------|-----------|
| 3  | 7  | 0 | -2.212271 | -0.864606 | 0.121325  |
| 4  | 6  | 0 | -1.054809 | -0.581639 | 0.753419  |
| 5  | 7  | 0 | -0.102006 | -1.389811 | 0.269624  |
| 6  | 6  | 0 | 1.318870  | -1.315380 | 0.632571  |
| 7  | 1  | 0 | -0.049811 | -2.826880 | -1.344686 |
| 8  | 1  | 0 | -2.717088 | -2.152375 | -1.539728 |
| 9  | 1  | 0 | 1.383452  | -0.860621 | 1.619618  |
| 10 | 1  | 0 | 1.699587  | -2.334605 | 0.716380  |
| 11 | 35 | 0 | -0.481974 | 2.107119  | -0.091779 |
| 12 | 1  | 0 | -0.951898 | 0.070283  | 1.598907  |
| 13 | 6  | 0 | -3.415766 | -0.136782 | 0.328421  |
| 14 | 6  | 0 | -4.623087 | -0.652226 | 0.134289  |
| 15 | 1  | 0 | -3.225812 | 0.891137  | 0.618533  |
| 16 | 1  | 0 | -5.496248 | -0.027436 | 0.263677  |
| 17 | 1  | 0 | -4.783252 | -1.684174 | -0.154986 |
| 18 | 6  | 0 | 2.116613  | -0.491124 | -0.381436 |
| 19 | 1  | 0 | 2.085607  | -0.931629 | -1.381563 |
| 20 | 1  | 0 | 1.675835  | 0.513382  | -0.467492 |
| 21 | 6  | 0 | 3.552067  | -0.357148 | 0.053518  |
| 22 | 8  | 0 | 3.989360  | -0.680975 | 1.131917  |
| 23 | 8  | 0 | 4.318868  | 0.187203  | -0.915550 |
| 24 | 1  | 0 | 5.213824  | 0.286425  | -0.556461 |

-----  
Rotational constants (GHZ): 0.8085345 0.3329069 0.2546721

Standard basis: 6-311++G(d,p) (5D, 7F)

There are 404 symmetry adapted cartesian basis functions of A symmetry.

There are 389 symmetry adapted basis functions of A symmetry.

389 basis functions, 625 primitive gaussians, 404 cartesian basis functions

62 alpha electrons 62 beta electrons

nuclear repulsion energy 1072.4596187701 Hartrees.

NAtoms= 24 NActive= 24 NUniq= 24 SFac= 1.00D+00 NAtFMM= 60 NAOKFM=F

Big=F

Integral buffers will be 131072 words long.

Raffenetti 2 integral format.

Two-electron integral symmetry is turned on.

One-electron integrals computed using PRISM.

NBasis= 389 RedAO= T EigKep= 6.53D-06 NBF= 389

NBsUse= 389 1.00D-06 EigRej= -1.00D+00 NBFU= 389

Initial guess from the checkpoint file: "./cooh.chk"

B after Tr= 0.000000 0.000000 0.000000

Rot= 1.000000 0.000682 -0.000072 0.000530 Ang= 0.10 deg.

ExpMin= 3.50D-02 ExpMax= 4.40D+05 ExpMxC= 1.51D+04 IAcc=3 IRadAn= 5 AccDes=

0.00D+00

Harris functional with IExCor= 402 and IRadAn= 5 diagonalized for initial guess.

HarFok: IExCor= 402 AccDes= 0.00D+00 IRadAn= 5 IDoV= 1 UseB2=F ITyADJ=14  
 ICtDFT= 3500011 ScaDFX= 1.000000 1.000000 1.000000 1.000000  
 FoFCou: FMM=F IPFlag= 0 FMFlag= 100000 FMFlg1= 0  
 NFxFlg= 0 DoJE=T BraDBF=F KetDBF=T FulRan=T  
 wScrn= 0.000000 ICntrl= 500 IOpCl= 0 l1Cent= 200000004 NGrid= 0  
 NMat0= 1 NMatS0= 1 NMatT0= 0 NMatD0= 1 NMtDS0= 0  
 NMtDT0= 0

Petite list used in FoFCou.

Keep R1 ints in memory in canonical form, NReq=2910765817.

Requested convergence on RMS density matrix=1.00D-08 within 128 cycles.

Requested convergence on MAX density matrix=1.00D-06.

Requested convergence on energy=1.00D-06.

No special actions if energy rises.

SCF Done: E(RB3LYP) = -3145.73222559 A.U. after 10 cycles

NFock= 10 Conv=0.74D-08 -V/T= 2.0017

Calling FoFJK, ICntrl= 2127 FMM=F ISym2X=0 l1Cent= 0 IOpClX= 0 NMat=1 NMatS=1  
 NMatT=0.

\*\*\*\*\* Axes restored to original set \*\*\*\*\*

| Center<br>Number | Atomic<br>Number | Forces (Hartrees/Bohr) |              |              |
|------------------|------------------|------------------------|--------------|--------------|
|                  |                  | X                      | Y            | Z            |
| 1                | 6                | -0.000045635           | -0.000036953 | 0.000037511  |
| 2                | 6                | -0.000008401           | -0.000066859 | 0.000072213  |
| 3                | 7                | -0.000278726           | -0.000053751 | -0.000021873 |
| 4                | 6                | 0.000436624            | 0.000592307  | -0.000343506 |
| 5                | 7                | -0.000104610           | -0.000205113 | 0.000059156  |
| 6                | 6                | 0.000147407            | 0.000031453  | -0.000142270 |
| 7                | 1                | 0.000006378            | 0.000014337  | -0.000024137 |
| 8                | 1                | 0.000012989            | 0.000022725  | -0.000035901 |
| 9                | 1                | -0.000011181           | -0.000040200 | 0.000082578  |
| 10               | 1                | -0.000027231           | 0.000009611  | -0.000002469 |
| 11               | 35               | 0.000037037            | -0.000032690 | 0.000076827  |
| 12               | 1                | -0.000059972           | -0.000158946 | 0.000103357  |
| 13               | 6                | 0.000140436            | -0.000081694 | -0.000020863 |
| 14               | 6                | -0.000027605           | 0.000021701  | -0.000015996 |
| 15               | 1                | -0.000020303           | -0.000002459 | 0.000026417  |
| 16               | 1                | 0.000005159            | -0.000000858 | -0.000007052 |
| 17               | 1                | -0.000002233           | 0.000002223  | -0.000013720 |
| 18               | 6                | 0.000294664            | 0.000227224  | 0.000093430  |
| 19               | 1                | 0.000056538            | -0.000009441 | -0.000015256 |
| 20               | 1                | -0.000421026           | -0.000163268 | 0.000108333  |
| 21               | 6                | -0.000088195           | -0.000048968 | -0.000239403 |



|    |   |              |              |              |
|----|---|--------------|--------------|--------------|
| 22 | 8 | 0.000049377  | -0.000041492 | 0.000213252  |
| 23 | 8 | -0.000050284 | 0.000058090  | 0.000017662  |
| 24 | 1 | -0.000041208 | -0.000036978 | -0.000008290 |

-----  
Cartesian Forces: Max 0.000592307 RMS 0.000141286

GradGradGradGradGradGradGradGradGradGradGradGradGradGradGradGradGradGradGrad

Berny optimization.

Using GEDIIS/GDIIS optimizer.

FormGI is forming the generalized inverse of G from B-inverse, IUseBI=4.

GSVD: received Info= 1 from GESDD.

Internal Forces: Max 0.000326055 RMS 0.000063369

Search for a local minimum.

Step number 12 out of a maximum of 140

All quantities printed in internal units (Hartrees-Bohrs-Radians)

Mixed Optimization -- En-DIIS/RFO-DIIS

Swapping is turned off.

Update second derivatives using D2CorX and points 4 6 7 8 9  
10 11 12

DE= -7.80D-06 DEPred=-6.10D-06 R= 1.28D+00

TightC=F SS= 1.41D+00 RLast= 5.44D-02 DXNew= 1.2000D+00 1.6315D-01

Trust test= 1.28D+00 RLast= 5.44D-02 DXMaxT set to 7.14D-01

ITU= 1 1 1 1 1 1 0-1 1 1 1 0

|                 |         |         |         |         |         |
|-----------------|---------|---------|---------|---------|---------|
| Eigenvalues --- | 0.00138 | 0.00255 | 0.00390 | 0.00764 | 0.01591 |
| Eigenvalues --- | 0.01687 | 0.01826 | 0.02004 | 0.02157 | 0.02338 |
| Eigenvalues --- | 0.02366 | 0.02430 | 0.02500 | 0.02923 | 0.03039 |
| Eigenvalues --- | 0.03042 | 0.03121 | 0.03723 | 0.04019 | 0.04423 |
| Eigenvalues --- | 0.04966 | 0.05376 | 0.06420 | 0.07470 | 0.09682 |
| Eigenvalues --- | 0.09936 | 0.11956 | 0.12715 | 0.15604 | 0.15945 |
| Eigenvalues --- | 0.15991 | 0.15997 | 0.16000 | 0.16002 | 0.16038 |
| Eigenvalues --- | 0.16703 | 0.17840 | 0.20494 | 0.21979 | 0.22860 |
| Eigenvalues --- | 0.24451 | 0.25007 | 0.27261 | 0.27757 | 0.34365 |
| Eigenvalues --- | 0.34431 | 0.35167 | 0.35493 | 0.35579 | 0.35624 |
| Eigenvalues --- | 0.35843 | 0.36071 | 0.36589 | 0.36649 | 0.36972 |
| Eigenvalues --- | 0.37440 | 0.41331 | 0.42887 | 0.43552 | 0.47371 |
| Eigenvalues --- | 0.52361 | 0.53281 | 0.54079 | 0.54750 | 0.59903 |
| Eigenvalues --- | 0.93976 |         |         |         |         |

En-DIIS/RFO-DIIS IScMMF= 0 using points: 12 11 10 9 8

RFO step: Lambda=-1.72187117D-06.

DidBck=F Rises=F RFO-DIIS coefs: 2.53945 -1.50964 -0.55485 1.05383 -  
0.52879

|             |            |            |           |            |
|-------------|------------|------------|-----------|------------|
| Iteration 1 | RMS(Cart)= | 0.01002892 | RMS(Int)= | 0.00003431 |
| Iteration 2 | RMS(Cart)= | 0.00005717 | RMS(Int)= | 0.00000762 |
| Iteration 3 | RMS(Cart)= | 0.00000000 | RMS(Int)= | 0.00000762 |

| Variable | Old X   | -DE/DX   | Delta X<br>(Linear) | Delta X<br>(Quad) | Delta X<br>(Total) | New X   |
|----------|---------|----------|---------------------|-------------------|--------------------|---------|
| R1       | 2.55859 | -0.00001 | 0.00008             | -0.00003          | 0.00004            | 2.55862 |
| R2       | 2.62590 | 0.00001  | -0.00003            | 0.00004           | 0.00000            | 2.62591 |
| R3       | 2.03322 | 0.00000  | 0.00000             | 0.00001           | 0.00002            | 2.03324 |
| R4       | 2.62982 | 0.00001  | -0.00003            | -0.00004          | -0.00007           | 2.62976 |
| R5       | 2.03108 | 0.00000  | 0.00003             | 0.00001           | 0.00004            | 2.03112 |
| R6       | 2.54891 | 0.00018  | 0.00048             | -0.00007          | 0.00042            | 2.54933 |
| R7       | 2.68648 | -0.00011 | 0.00008             | 0.00004           | 0.00013            | 2.68661 |
| R8       | 2.53183 | 0.00009  | 0.00007             | 0.00001           | 0.00009            | 2.53192 |
| R9       | 5.43503 | -0.00007 | 0.00053             | 0.00081           | 0.00133            | 5.43636 |
| R10      | 2.02690 | -0.00002 | 0.00011             | -0.00017          | -0.00006           | 2.02683 |
| R11      | 2.77485 | 0.00006  | 0.00044             | 0.00016           | 0.00060            | 2.77545 |
| R12      | 2.05732 | 0.00005  | 0.00007             | 0.00011           | 0.00018            | 2.05750 |
| R13      | 2.06213 | -0.00002 | 0.00011             | -0.00011          | 0.00000            | 2.06213 |
| R14      | 2.89320 | -0.00009 | -0.00026            | -0.00048          | -0.00074           | 2.89246 |
| R15      | 5.08050 | -0.00005 | -0.00917            | -0.00088          | -0.01004           | 5.07046 |
| R16      | 5.11879 | -0.00010 | -0.00854            | -0.00535          | -0.01389           | 5.10489 |
| R17      | 2.50771 | 0.00002  | 0.00004             | -0.00005          | -0.00002           | 2.50770 |
| R18      | 2.05004 | 0.00000  | 0.00016             | 0.00001           | 0.00017            | 2.05021 |
| R19      | 2.04363 | 0.00000  | 0.00001             | 0.00000           | 0.00001            | 2.04364 |
| R20      | 2.04776 | 0.00000  | 0.00005             | 0.00001           | 0.00005            | 2.04781 |
| R21      | 2.06600 | 0.00002  | -0.00047            | 0.00015           | -0.00032           | 2.06568 |
| R22      | 2.07932 | -0.00008 | 0.00042             | 0.00005           | 0.00048            | 2.07980 |
| R23      | 2.84569 | -0.00014 | -0.00099            | 0.00016           | -0.00083           | 2.84487 |
| R24      | 2.28261 | 0.00022  | 0.00014             | -0.00002          | 0.00012            | 2.28273 |
| R25      | 2.55176 | -0.00005 | 0.00036             | -0.00011          | 0.00026            | 2.55201 |
| R26      | 1.83190 | -0.00005 | -0.00009            | 0.00000           | -0.00009           | 1.83181 |
| A1       | 1.87535 | 0.00003  | -0.00013            | 0.00004           | -0.00009           | 1.87525 |
| A2       | 2.27820 | -0.00001 | 0.00014             | 0.00005           | 0.00020            | 2.27840 |
| A3       | 2.12962 | -0.00001 | -0.00002            | -0.00010          | -0.00011           | 2.12951 |
| A4       | 1.86914 | 0.00002  | 0.00011             | -0.00005          | 0.00006            | 1.86920 |
| A5       | 2.28611 | -0.00001 | 0.00018             | 0.00000           | 0.00018            | 2.28630 |
| A6       | 2.12740 | -0.00001 | -0.00030            | 0.00004           | -0.00026           | 2.12714 |
| A7       | 1.89177 | 0.00000  | 0.00001             | 0.00007           | 0.00009            | 1.89186 |
| A8       | 2.22660 | 0.00002  | -0.00006            | -0.00005          | -0.00012           | 2.22648 |
| A9       | 2.15410 | -0.00002 | -0.00019            | -0.00003          | -0.00022           | 2.15388 |
| A10      | 1.89073 | -0.00007 | -0.00029            | 0.00000           | -0.00031           | 1.89041 |
| A11      | 1.80218 | 0.00002  | 0.00029             | 0.00000           | 0.00031            | 1.80248 |
| A12      | 2.18860 | 0.00002  | 0.00019             | -0.00003          | 0.00012            | 2.18872 |
| A13      | 1.89248 | 0.00011  | 0.00491             | 0.00175           | 0.00664            | 1.89912 |
| A14      | 2.19326 | 0.00003  | 0.00020             | -0.00011          | 0.00006            | 2.19332 |
| A15      | 1.89447 | 0.00002  | 0.00029             | -0.00004          | 0.00026            | 1.89472 |
| A16      | 2.20044 | 0.00003  | -0.00028            | 0.00009           | -0.00020           | 2.20024 |

|     |          |          |          |          |          |          |
|-----|----------|----------|----------|----------|----------|----------|
| A17 | 2.17526  | -0.00005 | 0.00008  | -0.00008 | -0.00001 | 2.17525  |
| A18 | 1.87829  | 0.00002  | -0.00054 | 0.00127  | 0.00073  | 1.87903  |
| A19 | 1.88519  | 0.00002  | -0.00081 | -0.00001 | -0.00081 | 1.88438  |
| A20 | 1.94742  | -0.00009 | -0.00067 | -0.00027 | -0.00096 | 1.94646  |
| A21 | 1.87530  | -0.00004 | -0.00037 | -0.00001 | -0.00038 | 1.87492  |
| A22 | 1.92270  | 0.00002  | 0.00005  | -0.00030 | -0.00024 | 1.92245  |
| A23 | 1.95188  | 0.00008  | 0.00224  | -0.00060 | 0.00165  | 1.95352  |
| A24 | 1.21256  | -0.00015 | -0.00445 | -0.00146 | -0.00593 | 1.20663  |
| A25 | 1.34971  | -0.00013 | -0.00515 | -0.00168 | -0.00685 | 1.34286  |
| A26 | 2.15320  | 0.00004  | -0.00016 | -0.00012 | -0.00028 | 2.15291  |
| A27 | 1.95609  | 0.00000  | -0.00045 | 0.00001  | -0.00043 | 1.95566  |
| A28 | 2.17301  | -0.00004 | 0.00064  | 0.00007  | 0.00071  | 2.17372  |
| A29 | 2.08595  | -0.00001 | 0.00012  | -0.00006 | 0.00006  | 2.08601  |
| A30 | 2.14530  | 0.00001  | -0.00017 | 0.00003  | -0.00014 | 2.14517  |
| A31 | 2.05193  | 0.00000  | 0.00005  | 0.00002  | 0.00007  | 2.05201  |
| A32 | 1.95431  | 0.00004  | 0.00160  | -0.00071 | 0.00088  | 1.95519  |
| A33 | 1.91193  | -0.00014 | -0.00237 | -0.00023 | -0.00258 | 1.90936  |
| A34 | 1.93188  | 0.00007  | 0.00161  | -0.00028 | 0.00134  | 1.93322  |
| A35 | 1.85973  | 0.00002  | -0.00067 | 0.00044  | -0.00024 | 1.85949  |
| A36 | 1.90404  | -0.00009 | 0.00123  | -0.00006 | 0.00116  | 1.90520  |
| A37 | 1.89993  | 0.00010  | -0.00161 | 0.00092  | -0.00068 | 1.89925  |
| A38 | 2.57810  | 0.00033  | 0.01020  | 0.00356  | 0.01376  | 2.59186  |
| A39 | 2.18844  | 0.00006  | 0.00055  | -0.00015 | 0.00040  | 2.18884  |
| A40 | 1.94968  | -0.00012 | -0.00055 | 0.00009  | -0.00046 | 1.94922  |
| A41 | 2.14504  | 0.00006  | -0.00001 | 0.00006  | 0.00005  | 2.14509  |
| A42 | 1.87515  | -0.00002 | 0.00009  | -0.00022 | -0.00013 | 1.87502  |
| D1  | 0.00403  | 0.00000  | -0.00004 | -0.00014 | -0.00018 | 0.00385  |
| D2  | 3.11021  | 0.00000  | -0.00033 | -0.00017 | -0.00051 | 3.10970  |
| D3  | -3.13024 | 0.00000  | 0.00049  | 0.00007  | 0.00056  | -3.12968 |
| D4  | -0.02407 | 0.00000  | 0.00020  | 0.00004  | 0.00023  | -0.02383 |
| D5  | -0.04985 | -0.00003 | -0.00011 | 0.00033  | 0.00022  | -0.04964 |
| D6  | -3.02441 | -0.00001 | -0.00065 | 0.00055  | -0.00010 | -3.02451 |
| D7  | 3.08518  | -0.00003 | -0.00059 | 0.00014  | -0.00045 | 3.08474  |
| D8  | 0.11063  | 0.00000  | -0.00112 | 0.00035  | -0.00076 | 0.10987  |
| D9  | 0.04281  | 0.00003  | 0.00017  | -0.00009 | 0.00007  | 0.04288  |
| D10 | 3.03030  | 0.00002  | -0.00160 | -0.00014 | -0.00174 | 3.02857  |
| D11 | -3.06730 | 0.00003  | 0.00042  | -0.00006 | 0.00035  | -3.06694 |
| D12 | -0.07980 | 0.00002  | -0.00135 | -0.00011 | -0.00146 | -0.08126 |
| D13 | -0.07433 | -0.00004 | -0.00023 | 0.00030  | 0.00008  | -0.07425 |
| D14 | 1.93017  | 0.00007  | 0.00534  | 0.00229  | 0.00762  | 1.93779  |
| D15 | -3.06690 | 0.00009  | -0.00029 | 0.00130  | 0.00100  | -3.06590 |
| D16 | -3.06965 | -0.00004 | 0.00144  | 0.00035  | 0.00179  | -3.06786 |
| D17 | -1.06515 | 0.00007  | 0.00700  | 0.00233  | 0.00933  | -1.05582 |
| D18 | 0.22096  | 0.00010  | 0.00137  | 0.00135  | 0.00271  | 0.22367  |

|     |          |          |          |          |          |          |
|-----|----------|----------|----------|----------|----------|----------|
| D19 | 0.62489  | -0.00002 | 0.00579  | -0.00044 | 0.00536  | 0.63025  |
| D20 | -2.47322 | -0.00001 | 0.00505  | 0.00047  | 0.00552  | -2.46770 |
| D21 | -2.69210 | -0.00003 | 0.00380  | -0.00048 | 0.00332  | -2.68878 |
| D22 | 0.49297  | -0.00002 | 0.00306  | 0.00043  | 0.00348  | 0.49645  |
| D23 | 0.07687  | 0.00004  | 0.00021  | -0.00039 | -0.00019 | 0.07669  |
| D24 | 3.05441  | 0.00003  | 0.00069  | -0.00058 | 0.00010  | 3.05451  |
| D25 | -1.86761 | 0.00000  | -0.00237 | -0.00125 | -0.00364 | -1.87125 |
| D26 | 1.10992  | -0.00001 | -0.00189 | -0.00144 | -0.00335 | 1.10658  |
| D27 | 3.06895  | -0.00009 | 0.00028  | -0.00139 | -0.00111 | 3.06784  |
| D28 | -0.23670 | -0.00010 | 0.00076  | -0.00158 | -0.00082 | -0.23752 |
| D29 | -2.25416 | 0.00002  | -0.00304 | -0.00090 | -0.00395 | -2.25811 |
| D30 | -0.25092 | 0.00000  | -0.00122 | -0.00017 | -0.00139 | -0.25231 |
| D31 | -2.89336 | 0.00004  | 0.00961  | 0.00427  | 0.01388  | -2.87947 |
| D32 | -0.87357 | 0.00001  | 0.00849  | 0.00491  | 0.01340  | -0.86017 |
| D33 | 1.27861  | 0.00006  | 0.01031  | 0.00398  | 0.01429  | 1.29290  |
| D34 | 0.44101  | 0.00006  | 0.00899  | 0.00451  | 0.01350  | 0.45450  |
| D35 | 2.46079  | 0.00003  | 0.00786  | 0.00515  | 0.01302  | 2.47381  |
| D36 | -1.67022 | 0.00008  | 0.00969  | 0.00421  | 0.01390  | -1.65631 |
| D37 | -1.07323 | -0.00001 | -0.00518 | -0.00216 | -0.00733 | -1.08056 |
| D38 | 0.98604  | -0.00006 | -0.00655 | -0.00220 | -0.00875 | 0.97729  |
| D39 | 3.08124  | 0.00002  | -0.00902 | -0.00138 | -0.01040 | 3.07085  |
| D40 | 3.12483  | 0.00001  | -0.00410 | -0.00338 | -0.00747 | 3.11736  |
| D41 | -1.09909 | -0.00004 | -0.00547 | -0.00342 | -0.00889 | -1.10797 |
| D42 | 0.99611  | 0.00004  | -0.00794 | -0.00260 | -0.01054 | 0.98558  |
| D43 | 1.04057  | -0.00001 | -0.00511 | -0.00278 | -0.00790 | 1.03267  |
| D44 | 3.09984  | -0.00005 | -0.00649 | -0.00282 | -0.00931 | 3.09053  |
| D45 | -1.08814 | 0.00003  | -0.00895 | -0.00200 | -0.01096 | -1.09910 |
| D46 | -0.00025 | -0.00004 | 0.00197  | 0.00039  | 0.00236  | 0.00212  |
| D47 | 0.37244  | -0.00003 | 0.00280  | 0.00056  | 0.00337  | 0.37582  |
| D48 | -3.08892 | 0.00001  | -0.00073 | 0.00145  | 0.00072  | -3.08819 |
| D49 | 0.04957  | 0.00000  | 0.00018  | 0.00015  | 0.00033  | 0.04990  |
| D50 | 0.00378  | 0.00000  | 0.00008  | 0.00043  | 0.00051  | 0.00429  |
| D51 | -3.14092 | 0.00000  | 0.00099  | -0.00087 | 0.00011  | -3.14080 |
| D52 | -0.34903 | 0.00001  | 0.00021  | 0.00020  | 0.00041  | -0.34862 |
| D53 | 1.76833  | -0.00001 | 0.00039  | -0.00052 | -0.00013 | 1.76821  |
| D54 | -2.46365 | -0.00005 | 0.00063  | 0.00011  | 0.00076  | -2.46289 |
| D55 | -0.17070 | 0.00004  | -0.00853 | 0.00107  | -0.00746 | -0.17816 |
| D56 | 2.97793  | 0.00004  | -0.00724 | 0.00070  | -0.00654 | 2.97139  |
| D57 | -2.32863 | 0.00000  | -0.01248 | 0.00220  | -0.01027 | -2.33889 |
| D58 | 0.82000  | 0.00000  | -0.01118 | 0.00183  | -0.00935 | 0.81065  |
| D59 | 1.93167  | -0.00003 | -0.01144 | 0.00120  | -0.01024 | 1.92143  |
| D60 | -1.20289 | -0.00003 | -0.01015 | 0.00083  | -0.00933 | -1.21221 |
| D61 | 3.09194  | 0.00003  | -0.00249 | 0.00055  | -0.00194 | 3.09000  |
| D62 | -0.04282 | 0.00003  | -0.00123 | 0.00018  | -0.00105 | -0.04387 |

| Item                 | Value    | Threshold | Converged? |
|----------------------|----------|-----------|------------|
| Maximum Force        | 0.000326 | 0.000450  | YES        |
| RMS Force            | 0.000063 | 0.000300  | YES        |
| Maximum Displacement | 0.038628 | 0.001800  | NO         |
| RMS Displacement     | 0.010034 | 0.001200  | NO         |

Predicted change in Energy=-3.909131D-06

GradGradGradGradGradGradGradGradGradGradGradGradGradGradGradGradGradGrad

Input orientation:

| Center Number | Atomic Number | Atomic Type | Coordinates (Angstroms) |           |           |
|---------------|---------------|-------------|-------------------------|-----------|-----------|
|               |               |             | X                       | Y         | Z         |
| 1             | 6             | 0           | -0.325079               | -2.217198 | -0.393506 |
| 2             | 6             | 0           | -1.576444               | -1.772740 | -0.657636 |
| 3             | 7             | 0           | -1.805825               | -0.679227 | 0.171934  |
| 4             | 6             | 0           | -0.684136               | -0.441333 | 0.882670  |
| 5             | 7             | 0           | 0.206295                | -1.401059 | 0.597685  |
| 6             | 6             | 0           | 1.588231                | -1.431570 | 1.094083  |
| 7             | 1             | 0           | 0.233427                | -3.030435 | -0.822894 |
| 8             | 1             | 0           | -2.308172               | -2.108254 | -1.369852 |
| 9             | 1             | 0           | 1.615467                | -0.875446 | 2.029726  |
| 10            | 1             | 0           | 1.840994                | -2.468232 | 1.322631  |
| 11            | 35            | 0           | 0.263465                | 2.052526  | -0.193752 |
| 12            | 1             | 0           | -0.581477               | 0.298415  | 1.652481  |
| 13            | 6             | 0           | -2.928219               | 0.193352  | 0.165444  |
| 14            | 6             | 0           | -4.166300               | -0.212347 | -0.086613 |
| 15            | 1             | 0           | -2.643527               | 1.224527  | 0.346258  |
| 16            | 1             | 0           | -4.967441               | 0.513096  | -0.124422 |
| 17            | 1             | 0           | -4.421201               | -1.250747 | -0.262854 |
| 18            | 6             | 0           | 2.560852                | -0.815013 | 0.085781  |
| 19            | 1             | 0           | 2.576000                | -1.365503 | -0.858474 |
| 20            | 1             | 0           | 2.238112                | 0.209508  | -0.153952 |
| 21            | 6             | 0           | 3.955237                | -0.765164 | 0.651070  |
| 22            | 8             | 0           | 4.253076                | -0.988864 | 1.800174  |
| 23            | 8             | 0           | 4.862858                | -0.424314 | -0.289039 |
| 24            | 1             | 0           | 5.725777                | -0.364752 | 0.148531  |

Distance matrix (angstroms):

|     | 1        | 2        | 3        | 4        | 5 |
|-----|----------|----------|----------|----------|---|
| 1 C | 0.000000 |          |          |          |   |
| 2 C | 1.353966 | 0.000000 |          |          |   |
| 3 N | 2.208549 | 1.391608 | 0.000000 |          |   |
| 4 C | 2.216133 | 2.222926 | 1.349047 | 0.000000 |   |

|    |    |          |          |          |          |          |
|----|----|----------|----------|----------|----------|----------|
| 5  | N  | 1.389569 | 2.211818 | 2.179664 | 1.339835 | 0.000000 |
| 6  | C  | 2.547722 | 3.633192 | 3.596664 | 2.487753 | 1.468703 |
| 7  | H  | 1.075945 | 2.210145 | 3.267478 | 3.233314 | 2.161862 |
| 8  | H  | 2.213092 | 1.074824 | 2.161383 | 3.238823 | 3.270149 |
| 9  | H  | 3.382022 | 4.267944 | 3.898093 | 2.606216 | 2.076722 |
| 10 | H  | 2.774890 | 4.010493 | 4.221840 | 3.267747 | 2.082461 |
| 11 | Br | 4.314723 | 4.270025 | 3.446472 | 2.876797 | 3.543571 |
| 12 | H  | 3.252708 | 3.258263 | 2.155651 | 1.072555 | 2.149741 |
| 13 | C  | 3.591589 | 2.523940 | 1.421691 | 2.439907 | 3.543184 |
| 14 | C  | 4.343799 | 3.077051 | 2.420054 | 3.621796 | 4.582672 |
| 15 | H  | 4.215202 | 3.336177 | 2.087202 | 2.627173 | 3.883092 |
| 16 | H  | 5.392442 | 4.124102 | 3.391942 | 4.502429 | 5.563539 |
| 17 | H  | 4.210619 | 2.919070 | 2.712170 | 3.991620 | 4.709229 |
| 18 | C  | 3.244139 | 4.311279 | 4.369637 | 3.362233 | 2.479805 |
| 19 | H  | 3.059058 | 4.177196 | 4.553362 | 3.809745 | 2.781576 |
| 20 | H  | 3.537829 | 4.328261 | 4.153249 | 3.168234 | 2.699474 |
| 21 | C  | 4.639035 | 5.772991 | 5.781591 | 4.656424 | 3.802865 |
| 22 | O  | 5.223078 | 6.374841 | 6.281507 | 5.051501 | 4.241736 |
| 23 | O  | 5.489994 | 6.589289 | 6.689456 | 5.669421 | 4.839824 |
| 24 | H  | 6.351237 | 7.480292 | 7.538201 | 6.452271 | 5.633857 |
|    |    | 6        | 7        | 8        | 9        | 10       |
| 6  | C  | 0.000000 |          |          |          |          |
| 7  | H  | 2.840187 | 0.000000 |          |          |          |
| 8  | H  | 4.659488 | 2.758497 | 0.000000 |          |          |
| 9  | H  | 1.088781 | 3.832943 | 5.335905 | 0.000000 |          |
| 10 | H  | 1.091234 | 2.739274 | 4.959297 | 1.757218 | 0.000000 |
| 11 | Br | 3.943660 | 5.121837 | 5.030767 | 3.917242 | 5.022477 |
| 12 | H  | 2.830598 | 4.227622 | 4.231787 | 2.519290 | 3.692086 |
| 13 | C  | 4.888871 | 4.622296 | 2.835310 | 5.026227 | 5.582876 |
| 14 | C  | 5.999597 | 5.276488 | 2.948526 | 6.192529 | 6.569822 |
| 15 | H  | 5.051917 | 5.267683 | 3.763632 | 5.038152 | 5.890730 |
| 16 | H  | 6.945740 | 6.331943 | 3.936278 | 7.064211 | 7.572124 |
| 17 | H  | 6.163379 | 5.014628 | 2.534888 | 6.468240 | 6.573516 |
| 18 | C  | 1.530623 | 3.339265 | 5.243923 | 2.162481 | 2.186579 |
| 19 | H  | 2.189185 | 2.874180 | 4.966721 | 3.082933 | 2.552149 |
| 20 | H  | 2.161729 | 3.868265 | 5.245867 | 2.516596 | 3.083552 |
| 21 | C  | 2.498615 | 4.599554 | 6.717016 | 2.717973 | 2.796687 |
| 22 | O  | 2.792124 | 5.215945 | 7.372386 | 2.650008 | 2.869620 |
| 23 | O  | 3.694696 | 5.339335 | 7.444963 | 4.015687 | 3.988326 |
| 24 | H  | 4.376237 | 6.181864 | 8.360001 | 4.549104 | 4.571069 |
|    |    | 11       | 12       | 13       | 14       | 15       |
| 11 | Br | 0.000000 |          |          |          |          |
| 12 | H  | 2.683172 | 0.000000 |          |          |          |
| 13 | C  | 3.711118 | 2.780200 | 0.000000 |          |          |

|    |   |           |           |          |          |          |
|----|---|-----------|-----------|----------|----------|----------|
| 14 | C | 4.976339  | 4.016999  | 1.327015 | 0.000000 |          |
| 15 | H | 3.070472  | 2.610738  | 1.084926 | 2.137948 | 0.000000 |
| 16 | H | 5.453167  | 4.737103  | 2.084391 | 1.081445 | 2.475530 |
| 17 | H | 5.732581  | 4.562005  | 2.120815 | 1.083656 | 3.107752 |
| 18 | C | 3.684957  | 3.683544  | 5.581491 | 6.756293 | 5.595814 |
| 19 | H | 4.180024  | 4.363849  | 5.811614 | 6.883614 | 5.950050 |
| 20 | H | 2.701394  | 3.349803  | 5.176219 | 6.418643 | 5.011075 |
| 21 | C | 4.720412  | 4.766109  | 6.966818 | 8.173686 | 6.898947 |
| 22 | O | 5.398407  | 5.005178  | 7.459288 | 8.663073 | 7.387564 |
| 23 | O | 5.224771  | 5.825171  | 7.828725 | 9.033914 | 7.711556 |
| 24 | H | 5.983079  | 6.517906  | 8.671989 | 9.896044 | 8.521159 |
|    |   | 16        | 17        | 18       | 19       | 20       |
| 16 | H | 0.000000  |           |          |          |          |
| 17 | H | 1.851670  | 0.000000  |          |          |          |
| 18 | C | 7.647434  | 7.004318  | 0.000000 |          |          |
| 19 | H | 7.808422  | 7.023443  | 1.093109 | 0.000000 |          |
| 20 | H | 7.212005  | 6.818405  | 1.100580 | 1.758175 | 0.000000 |
| 21 | C | 9.047072  | 8.440128  | 1.505439 | 2.131063 | 2.132268 |
| 22 | O | 9.538233  | 8.920075  | 2.415158 | 3.165889 | 3.052013 |
| 23 | O | 9.876265  | 9.320806  | 2.364819 | 2.537679 | 2.703567 |
| 24 | H | 10.732661 | 10.193889 | 3.197408 | 3.454947 | 3.547545 |
|    |   | 21        | 22        | 23       | 24       |          |
| 21 | C | 0.000000  |           |          |          |          |
| 22 | O | 1.207969  | 0.000000  |          |          |          |
| 23 | O | 1.350467  | 2.248414  | 0.000000 |          |          |
| 24 | H | 1.883530  | 2.299193  | 0.969352 | 0.000000 |          |

Stoichiometry C8H11BrN2O2

Framework group C1[X(C8H11BrN2O2)]

Deg. of freedom 66

Full point group C1 NOp 1

Largest Abelian subgroup C1 NOp 1

Largest concise Abelian subgroup C1 NOp 1

Standard orientation:

| Center<br>Number | Atomic<br>Number | Atomic<br>Type | Coordinates (Angstroms) |           |           |
|------------------|------------------|----------------|-------------------------|-----------|-----------|
|                  |                  |                | X                       | Y         | Z         |
| 1                | 6                | 0              | -0.651296               | -2.150851 | -0.763988 |
| 2                | 6                | 0              | -1.961691               | -1.822505 | -0.854968 |
| 3                | 7                | 0              | -2.211680               | -0.862645 | 0.121119  |
| 4                | 6                | 0              | -1.051393               | -0.582481 | 0.749743  |
| 5                | 7                | 0              | -0.103814               | -1.397801 | 0.267555  |
| 6                | 6                | 0              | 1.318502                | -1.329151 | 0.627268  |
| 7                | 1                | 0              | -0.061946               | -2.842427 | -1.340223 |

|    |    |   |           |           |           |
|----|----|---|-----------|-----------|-----------|
| 8  | 1  | 0 | -2.726489 | -2.155138 | -1.532970 |
| 9  | 1  | 0 | 1.387469  | -0.883042 | 1.618063  |
| 10 | 1  | 0 | 1.696585  | -2.350096 | 0.701540  |
| 11 | 35 | 0 | -0.476785 | 2.107677  | -0.092184 |
| 12 | 1  | 0 | -0.943580 | 0.072143  | 1.592487  |
| 13 | 6  | 0 | -3.410505 | -0.126363 | 0.325842  |
| 14 | 6  | 0 | -4.621132 | -0.637185 | 0.140337  |
| 15 | 1  | 0 | -3.213446 | 0.903081  | 0.605978  |
| 16 | 1  | 0 | -5.490602 | -0.006584 | 0.266386  |
| 17 | 1  | 0 | -4.787511 | -1.670939 | -0.138912 |
| 18 | 6  | 0 | 2.113483  | -0.497206 | -0.382027 |
| 19 | 1  | 0 | 2.084984  | -0.932024 | -1.384528 |
| 20 | 1  | 0 | 1.666211  | 0.505172  | -0.462424 |
| 21 | 6  | 0 | 3.547253  | -0.355629 | 0.054557  |
| 22 | 8  | 0 | 3.984589  | -0.673200 | 1.134870  |
| 23 | 8  | 0 | 4.312735  | 0.189122  | -0.915517 |
| 24 | 1  | 0 | 5.206321  | 0.295146  | -0.555090 |

-----

Rotational constants (GHZ):      0.8070445      0.3336174      0.2548708

Standard basis: 6-311++G(d,p) (5D, 7F)

There are    404 symmetry adapted cartesian basis functions of A    symmetry.

There are    389 symmetry adapted basis functions of A    symmetry.

     389 basis functions,    625 primitive gaussians,    404 cartesian basis functions

     62 alpha electrons      62 beta electrons

     nuclear repulsion energy      1072.5087004791 Hartrees.

NAtoms=    24 NActive=    24 NUniq=    24 SFac= 1.00D+00 NAtFMM=    60 NAOKFM=F

Big=F

Integral buffers will be    131072 words long.

Raffenetti 2 integral format.

Two-electron integral symmetry is turned on.

One-electron integrals computed using PRISM.

NBasis=    389 RedAO= T EigKep=    6.55D-06    NBF=    389

NBsUse=    389 1.00D-06 EigRej= -1.00D+00    NBFU=    389

Initial guess from the checkpoint file:    "/cooh.chk"

B after Tr=    0.000000    0.000000    0.000000

     Rot=    1.000000    0.000290    -0.000182    0.000625 Ang=    0.08 deg.

ExpMin= 3.50D-02 ExpMax= 4.40D+05 ExpMxC= 1.51D+04 IAcc=3 IRadAn=      5 AccDes=

0.00D+00

Harris functional with IExCor=    402 and IRadAn=      5 diagonalized for initial guess.

HarFok: IExCor=    402 AccDes= 0.00D+00 IRadAn=      5 IDoV= 1 UseB2=F ITyADJ=14

ICtDFT= 3500011 ScaDFX= 1.000000 1.000000 1.000000 1.000000

FoFCou: FMM=F IPFlag=                    0 FMFlag=      100000 FMFlg1=      0

     NxFFlg=                    0 DoJE=T BraDBF=F KetDBF=T FulRan=T

     wScrn= 0.000000 ICntrl=            500 IOpCl= 0 I1Cent=    200000004 NGrid=



0

NMat0= 1 NMatS0= 1 NMatT0= 0 NMatD0= 1 NMtDS0= 0  
NMtDT0= 0

Petite list used in FoFCou.

Keep R1 ints in memory in canonical form, NReq=2910765817.

Requested convergence on RMS density matrix=1.00D-08 within 128 cycles.

Requested convergence on MAX density matrix=1.00D-06.

Requested convergence on energy=1.00D-06.

No special actions if energy rises.

SCF Done: E(RB3LYP) = -3145.73223531 A.U. after 10 cycles

NFock= 10 Conv=0.75D-08 -V/T= 2.0017

Calling FoFJK, ICntrl= 2127 FMM=F ISym2X=0 l1Cent= 0 IOpClX= 0 NMat=1 NMatS=1

NMatT=0.

\*\*\*\*\* Axes restored to original set \*\*\*\*\*

| Center<br>Number | Atomic<br>Number | Forces (Hartrees/Bohr) |              |              |
|------------------|------------------|------------------------|--------------|--------------|
|                  |                  | X                      | Y            | Z            |
| 1                | 6                | -0.000020467           | -0.000001167 | -0.000014396 |
| 2                | 6                | -0.000040438           | -0.000059842 | 0.000077635  |
| 3                | 7                | -0.000073720           | 0.000044830  | 0.000000368  |
| 4                | 6                | 0.000180088            | 0.000304747  | -0.000263346 |
| 5                | 7                | 0.000023304            | -0.000171222 | 0.000151638  |
| 6                | 6                | -0.000036869           | -0.000033791 | -0.000021789 |
| 7                | 1                | 0.000006761            | 0.000007895  | -0.000017428 |
| 8                | 1                | 0.000020632            | 0.000008666  | -0.000027101 |
| 9                | 1                | -0.000048497           | -0.000050245 | 0.000047067  |
| 10               | 1                | 0.000012675            | 0.000007880  | -0.000035123 |
| 11               | 35               | 0.000063846            | 0.000021020  | 0.000012728  |
| 12               | 1                | -0.000057736           | -0.000141693 | 0.000107713  |
| 13               | 6                | 0.000075972            | -0.000048636 | -0.000016549 |
| 14               | 6                | -0.000009505           | 0.000009122  | -0.000048602 |
| 15               | 1                | -0.000022453           | -0.000009636 | 0.000037687  |
| 16               | 1                | 0.000000288            | -0.000001228 | 0.000014006  |
| 17               | 1                | -0.000008267           | 0.000006522  | -0.000009882 |
| 18               | 6                | 0.000093750            | 0.000374590  | 0.000016957  |
| 19               | 1                | 0.000054862            | -0.000084997 | -0.000044888 |
| 20               | 1                | -0.000226021           | -0.000112757 | 0.000019553  |
| 21               | 6                | 0.000091094            | -0.000011431 | -0.000190647 |
| 22               | 8                | 0.000004257            | -0.000046851 | 0.000101477  |
| 23               | 8                | -0.000092511           | 0.000026893  | 0.000101908  |
| 24               | 1                | 0.000008954            | -0.000038667 | 0.000001015  |

Cartesian Forces: Max 0.000374590 RMS 0.000094090

GradGradGradGradGradGradGradGradGradGradGradGradGradGradGradGradGradGradGrad

Berny optimization.

Using GEDIIS/GDIIS optimizer.

FormGI is forming the generalized inverse of G from B-inverse, IUseBI=4.

GSVD: received Info= 1 from GESDD.

Internal Forces: Max 0.000147481 RMS 0.000037177

Search for a local minimum.

Step number 13 out of a maximum of 140

All quantities printed in internal units (Hartrees-Bohrs-Radians)

Mixed Optimization -- En-DIIS/RFO-DIIS

Swapping is turned off.

Update second derivatives using D2CorX and points 4 6 7 8 9  
10 11 12 13

DE= -9.72D-06 DEPred=-3.91D-06 R= 2.49D+00

TightC=F SS= 1.41D+00 RLast= 5.75D-02 DXNew= 1.2000D+00 1.7239D-01

Trust test= 2.49D+00 RLast= 5.75D-02 DXMaxT set to 7.14D-01

ITU= 1 1 1 1 1 1 1 0-1 1 1 1 0

|                 |         |         |         |         |         |
|-----------------|---------|---------|---------|---------|---------|
| Eigenvalues --- | 0.00137 | 0.00247 | 0.00386 | 0.00564 | 0.01343 |
| Eigenvalues --- | 0.01617 | 0.01815 | 0.02007 | 0.02169 | 0.02303 |
| Eigenvalues --- | 0.02358 | 0.02421 | 0.02619 | 0.02959 | 0.03039 |
| Eigenvalues --- | 0.03048 | 0.03140 | 0.03648 | 0.04215 | 0.04628 |
| Eigenvalues --- | 0.05017 | 0.05306 | 0.06381 | 0.07192 | 0.09551 |
| Eigenvalues --- | 0.09723 | 0.11276 | 0.12664 | 0.15591 | 0.15892 |
| Eigenvalues --- | 0.15992 | 0.15994 | 0.16000 | 0.16003 | 0.16014 |
| Eigenvalues --- | 0.16705 | 0.17880 | 0.20559 | 0.21930 | 0.22856 |
| Eigenvalues --- | 0.24433 | 0.25030 | 0.27497 | 0.27977 | 0.34378 |
| Eigenvalues --- | 0.34520 | 0.35169 | 0.35439 | 0.35496 | 0.35579 |
| Eigenvalues --- | 0.35843 | 0.36024 | 0.36583 | 0.36648 | 0.36722 |
| Eigenvalues --- | 0.37891 | 0.41329 | 0.42567 | 0.43540 | 0.47335 |
| Eigenvalues --- | 0.52342 | 0.53553 | 0.54182 | 0.54491 | 0.59901 |
| Eigenvalues --- | 0.92940 |         |         |         |         |

En-DIIS/RFO-DIIS IScMMF= 0 using points: 13 12 11 10 9

RFO step: Lambda=-8.21935289D-07.

DidBck=F Rises=F RFO-DIIS coefs: 2.38058 -2.15848 0.40168 0.54831 -

0.17209

Iteration 1 RMS(Cart)= 0.00905450 RMS(Int)= 0.00002757

Iteration 2 RMS(Cart)= 0.00003818 RMS(Int)= 0.00001369

Iteration 3 RMS(Cart)= 0.00000000 RMS(Int)= 0.00001369

| Variable | Old X   | -DE/DX  | Delta X<br>(Linear) | Delta X<br>(Quad) | Delta X<br>(Total) | New X   |
|----------|---------|---------|---------------------|-------------------|--------------------|---------|
| R1       | 2.55862 | 0.00000 | -0.00002            | 0.00003           | 0.00000            | 2.55863 |
| R2       | 2.62591 | 0.00000 | 0.00000             | 0.00000           | 0.00000            | 2.62590 |
| R3       | 2.03324 | 0.00000 | 0.00001             | 0.00001           | 0.00003            | 2.03327 |

|     |         |          |          |          |          |         |
|-----|---------|----------|----------|----------|----------|---------|
| R4  | 2.62976 | 0.00001  | -0.00008 | 0.00007  | -0.00001 | 2.62975 |
| R5  | 2.03112 | 0.00000  | 0.00004  | -0.00004 | 0.00000  | 2.03113 |
| R6  | 2.54933 | 0.00004  | 0.00039  | -0.00004 | 0.00037  | 2.54970 |
| R7  | 2.68661 | -0.00005 | -0.00015 | 0.00007  | -0.00008 | 2.68653 |
| R8  | 2.53192 | 0.00006  | 0.00011  | 0.00017  | 0.00028  | 2.53220 |
| R9  | 5.43636 | -0.00001 | -0.00037 | 0.00112  | 0.00074  | 5.43710 |
| R10 | 2.02683 | -0.00002 | -0.00021 | 0.00010  | -0.00012 | 2.02672 |
| R11 | 2.77545 | -0.00006 | 0.00046  | -0.00033 | 0.00013  | 2.77558 |
| R12 | 2.05750 | 0.00002  | 0.00030  | -0.00015 | 0.00016  | 2.05765 |
| R13 | 2.06213 | -0.00002 | -0.00012 | 0.00004  | -0.00008 | 2.06206 |
| R14 | 2.89246 | 0.00008  | -0.00062 | 0.00077  | 0.00016  | 2.89262 |
| R15 | 5.07046 | 0.00003  | -0.00497 | 0.00123  | -0.00374 | 5.06672 |
| R16 | 5.10489 | -0.00008 | -0.01394 | -0.00326 | -0.01719 | 5.08771 |
| R17 | 2.50770 | 0.00002  | -0.00001 | 0.00007  | 0.00005  | 2.50775 |
| R18 | 2.05021 | -0.00001 | 0.00009  | 0.00000  | 0.00009  | 2.05030 |
| R19 | 2.04364 | 0.00000  | -0.00001 | 0.00001  | 0.00000  | 2.04364 |
| R20 | 2.04781 | 0.00000  | 0.00003  | -0.00001 | 0.00002  | 2.04783 |
| R21 | 2.06568 | 0.00009  | 0.00021  | 0.00001  | 0.00022  | 2.06589 |
| R22 | 2.07980 | -0.00008 | -0.00008 | 0.00006  | -0.00001 | 2.07979 |
| R23 | 2.84487 | 0.00000  | -0.00068 | 0.00035  | -0.00033 | 2.84454 |
| R24 | 2.28273 | 0.00010  | 0.00031  | -0.00007 | 0.00024  | 2.28297 |
| R25 | 2.55201 | -0.00012 | -0.00013 | -0.00011 | -0.00024 | 2.55177 |
| R26 | 1.83181 | 0.00000  | -0.00010 | 0.00006  | -0.00003 | 1.83178 |
| A1  | 1.87525 | 0.00001  | 0.00001  | -0.00007 | -0.00007 | 1.87519 |
| A2  | 2.27840 | 0.00000  | 0.00008  | 0.00009  | 0.00018  | 2.27857 |
| A3  | 2.12951 | -0.00001 | -0.00009 | -0.00002 | -0.00011 | 2.12940 |
| A4  | 1.86920 | 0.00002  | 0.00002  | 0.00011  | 0.00013  | 1.86933 |
| A5  | 2.28630 | -0.00002 | 0.00000  | -0.00012 | -0.00012 | 2.28617 |
| A6  | 2.12714 | 0.00001  | -0.00006 | 0.00002  | -0.00004 | 2.12710 |
| A7  | 1.89186 | -0.00001 | 0.00009  | -0.00009 | 0.00001  | 1.89188 |
| A8  | 2.22648 | 0.00001  | -0.00002 | 0.00001  | -0.00001 | 2.22646 |
| A9  | 2.15388 | 0.00000  | -0.00021 | 0.00013  | -0.00009 | 2.15379 |
| A10 | 1.89041 | -0.00001 | -0.00025 | 0.00004  | -0.00024 | 1.89017 |
| A11 | 1.80248 | 0.00000  | 0.00050  | 0.00000  | 0.00052  | 1.80301 |
| A12 | 2.18872 | 0.00000  | -0.00002 | -0.00004 | -0.00015 | 2.18857 |
| A13 | 1.89912 | 0.00005  | 0.00542  | 0.00081  | 0.00621  | 1.90533 |
| A14 | 2.19332 | 0.00000  | -0.00008 | -0.00015 | -0.00031 | 2.19301 |
| A15 | 1.89472 | 0.00000  | 0.00013  | 0.00000  | 0.00015  | 1.89487 |
| A16 | 2.20024 | 0.00003  | 0.00006  | -0.00022 | -0.00015 | 2.20009 |
| A17 | 2.17525 | -0.00002 | -0.00026 | 0.00011  | -0.00018 | 2.17507 |
| A18 | 1.87903 | -0.00001 | 0.00065  | -0.00060 | 0.00005  | 1.87907 |
| A19 | 1.88438 | 0.00002  | -0.00043 | -0.00004 | -0.00046 | 1.88392 |
| A20 | 1.94646 | -0.00005 | -0.00087 | 0.00018  | -0.00070 | 1.94576 |
| A21 | 1.87492 | -0.00002 | -0.00052 | 0.00012  | -0.00040 | 1.87452 |

|     |          |          |          |          |          |          |
|-----|----------|----------|----------|----------|----------|----------|
| A22 | 1.92245  | 0.00004  | 0.00026  | 0.00042  | 0.00069  | 1.92314  |
| A23 | 1.95352  | 0.00002  | 0.00090  | -0.00011 | 0.00079  | 1.95431  |
| A24 | 1.20663  | -0.00006 | -0.00426 | -0.00044 | -0.00471 | 1.20193  |
| A25 | 1.34286  | -0.00005 | -0.00493 | -0.00057 | -0.00553 | 1.33733  |
| A26 | 2.15291  | 0.00004  | 0.00000  | 0.00011  | 0.00011  | 2.15303  |
| A27 | 1.95566  | 0.00000  | -0.00022 | -0.00009 | -0.00031 | 1.95535  |
| A28 | 2.17372  | -0.00003 | 0.00019  | 0.00002  | 0.00021  | 2.17393  |
| A29 | 2.08601  | -0.00001 | -0.00006 | -0.00002 | -0.00009 | 2.08592  |
| A30 | 2.14517  | 0.00002  | 0.00003  | 0.00008  | 0.00011  | 2.14527  |
| A31 | 2.05201  | -0.00001 | 0.00003  | -0.00005 | -0.00002 | 2.05199  |
| A32 | 1.95519  | 0.00001  | -0.00034 | -0.00010 | -0.00043 | 1.95476  |
| A33 | 1.90936  | -0.00005 | -0.00114 | 0.00031  | -0.00083 | 1.90853  |
| A34 | 1.93322  | -0.00002 | 0.00082  | -0.00033 | 0.00050  | 1.93372  |
| A35 | 1.85949  | 0.00002  | -0.00012 | 0.00004  | -0.00010 | 1.85939  |
| A36 | 1.90520  | -0.00005 | -0.00101 | 0.00020  | -0.00080 | 1.90440  |
| A37 | 1.89925  | 0.00010  | 0.00180  | -0.00010 | 0.00170  | 1.90095  |
| A38 | 2.59186  | 0.00015  | 0.01046  | 0.00143  | 0.01190  | 2.60376  |
| A39 | 2.18884  | -0.00002 | 0.00026  | -0.00019 | 0.00006  | 2.18890  |
| A40 | 1.94922  | 0.00000  | -0.00048 | 0.00040  | -0.00008 | 1.94914  |
| A41 | 2.14509  | 0.00002  | 0.00023  | -0.00021 | 0.00002  | 2.14511  |
| A42 | 1.87502  | 0.00001  | -0.00011 | 0.00016  | 0.00005  | 1.87507  |
| D1  | 0.00385  | 0.00002  | 0.00054  | -0.00004 | 0.00049  | 0.00435  |
| D2  | 3.10970  | 0.00001  | -0.00068 | 0.00011  | -0.00058 | 3.10913  |
| D3  | -3.12968 | 0.00001  | 0.00075  | 0.00002  | 0.00077  | -3.12891 |
| D4  | -0.02383 | -0.00001 | -0.00047 | 0.00017  | -0.00030 | -0.02413 |
| D5  | -0.04964 | -0.00003 | -0.00052 | -0.00001 | -0.00052 | -0.05016 |
| D6  | -3.02451 | 0.00000  | -0.00005 | 0.00070  | 0.00066  | -3.02385 |
| D7  | 3.08474  | -0.00002 | -0.00071 | -0.00006 | -0.00077 | 3.08397  |
| D8  | 0.10987  | 0.00001  | -0.00024 | 0.00064  | 0.00041  | 0.11027  |
| D9  | 0.04288  | 0.00000  | -0.00038 | 0.00008  | -0.00030 | 0.04258  |
| D10 | 3.02857  | 0.00000  | -0.00134 | 0.00044  | -0.00091 | 3.02766  |
| D11 | -3.06694 | 0.00001  | 0.00070  | -0.00005 | 0.00065  | -3.06629 |
| D12 | -0.08126 | 0.00002  | -0.00026 | 0.00030  | 0.00004  | -0.08122 |
| D13 | -0.07425 | -0.00001 | 0.00007  | -0.00009 | -0.00001 | -0.07426 |
| D14 | 1.93779  | 0.00004  | 0.00634  | 0.00085  | 0.00718  | 1.94497  |
| D15 | -3.06590 | 0.00006  | 0.00389  | 0.00097  | 0.00485  | -3.06105 |
| D16 | -3.06786 | -0.00002 | 0.00096  | -0.00041 | 0.00056  | -3.06730 |
| D17 | -1.05582 | 0.00003  | 0.00723  | 0.00053  | 0.00775  | -1.04807 |
| D18 | 0.22367  | 0.00005  | 0.00478  | 0.00064  | 0.00542  | 0.22909  |
| D19 | 0.63025  | -0.00003 | 0.00097  | -0.00085 | 0.00012  | 0.63037  |
| D20 | -2.46770 | -0.00003 | 0.00162  | -0.00202 | -0.00040 | -2.46810 |
| D21 | -2.68878 | -0.00002 | -0.00010 | -0.00047 | -0.00057 | -2.68935 |
| D22 | 0.49645  | -0.00003 | 0.00055  | -0.00163 | -0.00109 | 0.49537  |
| D23 | 0.07669  | 0.00003  | 0.00027  | 0.00006  | 0.00033  | 0.07701  |

|     |          |          |          |          |          |          |
|-----|----------|----------|----------|----------|----------|----------|
| D24 | 3.05451  | 0.00001  | -0.00015 | -0.00067 | -0.00083 | 3.05368  |
| D25 | -1.87125 | 0.00001  | -0.00285 | -0.00036 | -0.00323 | -1.87448 |
| D26 | 1.10658  | -0.00001 | -0.00327 | -0.00109 | -0.00438 | 1.10219  |
| D27 | 3.06784  | -0.00005 | -0.00356 | -0.00098 | -0.00453 | 3.06331  |
| D28 | -0.23752 | -0.00007 | -0.00398 | -0.00171 | -0.00569 | -0.24321 |
| D29 | -2.25811 | 0.00001  | -0.00324 | -0.00044 | -0.00366 | -2.26177 |
| D30 | -0.25231 | 0.00001  | -0.00101 | -0.00005 | -0.00107 | -0.25337 |
| D31 | -2.87947 | 0.00004  | 0.01182  | 0.00224  | 0.01406  | -2.86542 |
| D32 | -0.86017 | 0.00003  | 0.01133  | 0.00205  | 0.01338  | -0.84679 |
| D33 | 1.29290  | 0.00003  | 0.01160  | 0.00201  | 0.01360  | 1.30650  |
| D34 | 0.45450  | 0.00007  | 0.01232  | 0.00307  | 0.01539  | 0.46989  |
| D35 | 2.47381  | 0.00005  | 0.01183  | 0.00288  | 0.01471  | 2.48852  |
| D36 | -1.65631 | 0.00006  | 0.01210  | 0.00284  | 0.01493  | -1.64138 |
| D37 | -1.08056 | -0.00003 | -0.00602 | -0.00152 | -0.00755 | -1.08811 |
| D38 | 0.97729  | -0.00003 | -0.00711 | -0.00134 | -0.00846 | 0.96883  |
| D39 | 3.07085  | 0.00005  | -0.00510 | -0.00147 | -0.00657 | 3.06427  |
| D40 | 3.11736  | -0.00001 | -0.00645 | -0.00116 | -0.00761 | 3.10975  |
| D41 | -1.10797 | -0.00001 | -0.00754 | -0.00098 | -0.00853 | -1.11650 |
| D42 | 0.98558  | 0.00007  | -0.00553 | -0.00111 | -0.00663 | 0.97894  |
| D43 | 1.03267  | -0.00002 | -0.00655 | -0.00152 | -0.00808 | 1.02460  |
| D44 | 3.09053  | -0.00003 | -0.00765 | -0.00134 | -0.00900 | 3.08153  |
| D45 | -1.09910 | 0.00005  | -0.00564 | -0.00147 | -0.00710 | -1.10621 |
| D46 | 0.00212  | -0.00001 | 0.00143  | 0.00041  | 0.00186  | 0.00397  |
| D47 | 0.37582  | -0.00001 | 0.00226  | 0.00045  | 0.00270  | 0.37852  |
| D48 | -3.08819 | -0.00002 | 0.00118  | -0.00200 | -0.00081 | -3.08900 |
| D49 | 0.04990  | 0.00000  | 0.00029  | -0.00016 | 0.00013  | 0.05003  |
| D50 | 0.00429  | -0.00001 | 0.00045  | -0.00069 | -0.00024 | 0.00405  |
| D51 | -3.14080 | 0.00001  | -0.00045 | 0.00114  | 0.00070  | -3.14011 |
| D52 | -0.34862 | 0.00001  | 0.00079  | 0.00017  | 0.00095  | -0.34767 |
| D53 | 1.76821  | 0.00001  | -0.00033 | 0.00025  | -0.00008 | 1.76812  |
| D54 | -2.46289 | 0.00000  | -0.00066 | 0.00045  | -0.00021 | -2.46310 |
| D55 | -0.17816 | 0.00001  | 0.00217  | -0.00072 | 0.00144  | -0.17672 |
| D56 | 2.97139  | -0.00001 | 0.00120  | -0.00029 | 0.00090  | 2.97229  |
| D57 | -2.33889 | 0.00004  | 0.00271  | -0.00051 | 0.00220  | -2.33669 |
| D58 | 0.81065  | 0.00002  | 0.00173  | -0.00008 | 0.00165  | 0.81231  |
| D59 | 1.92143  | 0.00000  | 0.00242  | -0.00061 | 0.00182  | 1.92324  |
| D60 | -1.21221 | -0.00002 | 0.00144  | -0.00018 | 0.00127  | -1.21094 |
| D61 | 3.09000  | 0.00005  | 0.00248  | -0.00038 | 0.00210  | 3.09210  |
| D62 | -0.04387 | 0.00003  | 0.00153  | 0.00003  | 0.00157  | -0.04230 |

|  | Item                 | Value    | Threshold | Converged? |
|--|----------------------|----------|-----------|------------|
|  | Maximum Force        | 0.000147 | 0.000450  | YES        |
|  | RMS Force            | 0.000037 | 0.000300  | YES        |
|  | Maximum Displacement | 0.036487 | 0.001800  | NO         |
|  | RMS Displacement     | 0.009053 | 0.001200  | NO         |

Predicted change in Energy=-2.378377D-06

GradGradGradGradGradGradGradGradGradGradGradGradGradGradGradGradGradGradGrad

Input orientation:

| Center<br>Number | Atomic<br>Number | Atomic<br>Type | Coordinates (Angstroms) |           |           |
|------------------|------------------|----------------|-------------------------|-----------|-----------|
|                  |                  |                | X                       | Y         | Z         |
| 1                | 6                | 0              | -0.329452               | -2.226470 | -0.389168 |
| 2                | 6                | 0              | -1.579570               | -1.778586 | -0.653429 |
| 3                | 7                | 0              | -1.803712               | -0.680295 | 0.171239  |
| 4                | 6                | 0              | -0.680061               | -0.443285 | 0.879537  |
| 5                | 7                | 0              | 0.206224                | -1.407992 | 0.597770  |
| 6                | 6                | 0              | 1.589047                | -1.440991 | 1.091735  |
| 7                | 1                | 0              | 0.225716                | -3.043396 | -0.815908 |
| 8                | 1                | 0              | -2.313274               | -2.114274 | -1.363529 |
| 9                | 1                | 0              | 1.616974                | -0.893443 | 2.032498  |
| 10               | 1                | 0              | 1.843021                | -2.479357 | 1.310823  |
| 11               | 35               | 0              | 0.266213                | 2.052173  | -0.195389 |
| 12               | 1                | 0              | -0.575003               | 0.296875  | 1.648542  |
| 13               | 6                | 0              | -2.922423               | 0.196903  | 0.161564  |
| 14               | 6                | 0              | -4.162481               | -0.204671 | -0.087511 |
| 15               | 1                | 0              | -2.633000               | 1.227601  | 0.337798  |
| 16               | 1                | 0              | -4.960597               | 0.523997  | -0.127286 |
| 17               | 1                | 0              | -4.422121               | -1.242778 | -0.258532 |
| 18               | 6                | 0              | 2.558485                | -0.814042 | 0.086653  |
| 19               | 1                | 0              | 2.577763                | -1.361078 | -0.859665 |
| 20               | 1                | 0              | 2.227950                | 0.208818  | -0.149508 |
| 21               | 6                | 0              | 3.952375                | -0.758120 | 0.652134  |
| 22               | 8                | 0              | 4.251875                | -0.986457 | 1.800027  |
| 23               | 8                | 0              | 4.857565                | -0.406462 | -0.286151 |
| 24               | 1                | 0              | 5.720458                | -0.345444 | 0.151229  |

Distance matrix (angstroms):

|   |   | 1        | 2        | 3        | 4        | 5        |
|---|---|----------|----------|----------|----------|----------|
| 1 | C | 0.000000 |          |          |          |          |
| 2 | C | 1.353967 | 0.000000 |          |          |          |
| 3 | N | 2.208655 | 1.391603 | 0.000000 |          |          |
| 4 | C | 2.216368 | 2.223090 | 1.349241 | 0.000000 |          |
| 5 | N | 1.389569 | 2.211763 | 2.179751 | 1.339984 | 0.000000 |
| 6 | C | 2.547684 | 3.633140 | 3.596775 | 2.487831 | 1.468772 |
| 7 | H | 1.075959 | 2.210249 | 3.267612 | 3.233504 | 2.161807 |
| 8 | H | 2.213033 | 1.074826 | 2.161356 | 3.238971 | 3.270076 |
| 9 | H | 3.380829 | 4.267971 | 3.900104 | 2.609278 | 2.076878 |

|    |    |          |          |          |          |          |
|----|----|----------|----------|----------|----------|----------|
| 10 | H  | 2.770120 | 4.007929 | 4.223025 | 3.270710 | 2.082155 |
| 11 | Br | 4.324251 | 4.276847 | 3.447519 | 2.877187 | 3.550414 |
| 12 | H  | 3.252665 | 3.258184 | 2.155693 | 1.072494 | 2.149654 |
| 13 | C  | 3.591593 | 2.523891 | 1.421648 | 2.439982 | 3.543218 |
| 14 | C  | 4.344051 | 3.077158 | 2.420116 | 3.622067 | 4.582923 |
| 15 | H  | 4.214904 | 3.336076 | 2.086990 | 2.626654 | 3.882671 |
| 16 | H  | 5.392694 | 4.124326 | 3.391955 | 4.502479 | 5.563662 |
| 17 | H  | 4.211253 | 2.919441 | 2.712408 | 3.992168 | 4.709791 |
| 18 | C  | 3.249852 | 4.312953 | 4.365067 | 3.354744 | 2.479344 |
| 19 | H  | 3.069556 | 4.183332 | 4.552314 | 3.805337 | 2.783975 |
| 20 | H  | 3.539543 | 4.324455 | 4.140978 | 3.152887 | 2.694415 |
| 21 | C  | 4.644826 | 5.774795 | 5.776665 | 4.648688 | 3.802491 |
| 22 | O  | 5.226735 | 6.375944 | 6.278281 | 5.046417 | 4.241509 |
| 23 | O  | 5.498017 | 6.591989 | 6.682575 | 5.659107 | 4.839354 |
| 24 | H  | 6.358593 | 7.482765 | 7.531645 | 6.442566 | 5.633399 |
|    |    | 6        | 7        | 8        | 9        | 10       |
| 6  | C  | 0.000000 |          |          |          |          |
| 7  | H  | 2.839978 | 0.000000 |          |          |          |
| 8  | H  | 4.659372 | 2.758555 | 0.000000 |          |          |
| 9  | H  | 1.088864 | 3.830315 | 5.335755 | 0.000000 |          |
| 10 | H  | 1.091194 | 2.730714 | 4.955828 | 1.756996 | 0.000000 |
| 11 | Br | 3.950794 | 5.133372 | 5.037616 | 3.932517 | 5.028892 |
| 12 | H  | 2.830782 | 4.227538 | 4.231761 | 2.523696 | 3.697074 |
| 13 | C  | 4.888894 | 4.622312 | 2.835226 | 5.029451 | 5.585035 |
| 14 | C  | 5.999933 | 5.276855 | 2.948622 | 6.194429 | 6.572335 |
| 15 | H  | 5.051286 | 5.267325 | 3.763624 | 5.043126 | 5.892629 |
| 16 | H  | 6.945865 | 6.332325 | 3.936634 | 7.066700 | 7.574795 |
| 17 | H  | 6.164143 | 5.015505 | 2.535303 | 6.468503 | 6.576018 |
| 18 | C  | 1.530707 | 3.350589 | 5.246681 | 2.163113 | 2.187179 |
| 19 | H  | 2.189043 | 2.892099 | 4.974277 | 3.083246 | 2.549786 |
| 20 | H  | 2.161192 | 3.876845 | 5.243407 | 2.519805 | 3.083345 |
| 21 | C  | 2.498976 | 4.611466 | 6.720149 | 2.716213 | 2.801053 |
| 22 | O  | 2.792656 | 5.223415 | 7.374363 | 2.646771 | 2.875873 |
| 23 | O  | 3.694865 | 5.356126 | 7.449718 | 4.014313 | 3.991828 |
| 24 | H  | 4.376452 | 6.197297 | 8.364455 | 4.547313 | 4.575233 |
|    |    | 11       | 12       | 13       | 14       | 15       |
| 11 | Br | 0.000000 |          |          |          |          |
| 12 | H  | 2.681193 | 0.000000 |          |          |          |
| 13 | C  | 3.706324 | 2.780554 | 0.000000 |          |          |
| 14 | C  | 4.971751 | 4.016893 | 1.327044 | 0.000000 |          |
| 15 | H  | 3.060987 | 2.611447 | 1.084971 | 2.138130 | 0.000000 |
| 16 | H  | 5.446054 | 4.736939 | 2.084366 | 1.081447 | 2.475696 |
| 17 | H  | 5.730721 | 4.561555 | 2.120910 | 1.083664 | 3.107947 |
| 18 | C  | 3.680930 | 3.673198 | 5.573865 | 6.750782 | 5.584165 |

|    |   |           |           |          |          |          |
|----|---|-----------|-----------|----------|----------|----------|
| 19 | H | 4.175501  | 4.356587  | 5.807087 | 6.882180 | 5.940306 |
| 20 | H | 2.692299  | 3.331258  | 5.159772 | 6.404094 | 4.990413 |
| 21 | C | 4.712094  | 4.754261  | 6.958130 | 8.167268 | 6.885424 |
| 22 | O | 5.394484  | 4.996863  | 7.453552 | 8.658832 | 7.378460 |
| 23 | O | 5.208996  | 5.809519  | 7.816183 | 9.024490 | 7.692076 |
| 24 | H | 5.968040  | 6.502873  | 8.659887 | 9.886825 | 8.502326 |
|    |   | 16        | 17        | 18       | 19       | 20       |
| 16 | H | 0.000000  |           |          |          |          |
| 17 | H | 1.851669  | 0.000000  |          |          |          |
| 18 | C | 7.640204  | 7.002273  | 0.000000 |          |          |
| 19 | H | 7.804919  | 7.026645  | 1.093224 | 0.000000 |          |
| 20 | H | 7.195487  | 6.807530  | 1.100576 | 1.758200 | 0.000000 |
| 21 | C | 9.038384  | 8.437795  | 1.505266 | 2.130411 | 2.133364 |
| 22 | O | 9.532347  | 8.918608  | 2.415149 | 3.164957 | 3.053791 |
| 23 | O | 9.863433  | 9.317337  | 2.364503 | 2.537264 | 2.704093 |
| 24 | H | 10.720002 | 10.190438 | 3.197160 | 3.453976 | 3.548981 |
|    |   | 21        | 22        | 23       | 24       |          |
| 21 | C | 0.000000  |           |          |          |          |
| 22 | O | 1.208096  | 0.000000  |          |          |          |
| 23 | O | 1.350337  | 2.248420  | 0.000000 |          |          |
| 24 | H | 1.883435  | 2.299167  | 0.969334 | 0.000000 |          |

Stoichiometry C8H11BrN2O2

Framework group C1[X(C8H11BrN2O2)]

Deg. of freedom 66

Full point group C1 NOp 1

Largest Abelian subgroup C1 NOp 1

Largest concise Abelian subgroup C1 NOp 1

Standard orientation:

| Center Number | Atomic Number | Atomic Type | Coordinates (Angstroms) |           |           |
|---------------|---------------|-------------|-------------------------|-----------|-----------|
|               |               |             | X                       | Y         | Z         |
| 1             | 6             | 0           | -0.658370               | -2.159623 | -0.762160 |
| 2             | 6             | 0           | -1.967465               | -1.825737 | -0.851694 |
| 3             | 7             | 0           | -2.211206               | -0.860774 | 0.120930  |
| 4             | 6             | 0           | -1.048317               | -0.583390 | 0.746389  |
| 5             | 7             | 0           | -0.105520               | -1.405277 | 0.265566  |
| 6             | 6             | 0           | 1.318005                | -1.341182 | 0.621600  |
| 7             | 1             | 0           | -0.073073               | -2.855708 | -1.337121 |
| 8             | 1             | 0           | -2.734920               | -2.157116 | -1.527306 |
| 9             | 1             | 0           | 1.390359                | -0.905284 | 1.616779  |
| 10            | 1             | 0           | 1.695028                | -2.363222 | 0.684778  |
| 11            | 35            | 0           | -0.471687               | 2.108153  | -0.091049 |
| 12            | 1             | 0           | -0.936737               | 0.070877  | 1.588842  |



|    |   |   |           |           |           |
|----|---|---|-----------|-----------|-----------|
| 13 | 6 | 0 | -3.405970 | -0.117657 | 0.324397  |
| 14 | 6 | 0 | -4.619513 | -0.622996 | 0.142770  |
| 15 | 1 | 0 | -3.202981 | 0.911758  | 0.600555  |
| 16 | 1 | 0 | -5.485514 | 0.012465  | 0.268311  |
| 17 | 1 | 0 | -4.791751 | -1.657022 | -0.131917 |
| 18 | 6 | 0 | 2.109672  | -0.499697 | -0.382508 |
| 19 | 1 | 0 | 2.083394  | -0.929223 | -1.387474 |
| 20 | 1 | 0 | 1.656627  | 0.500506  | -0.457414 |
| 21 | 6 | 0 | 3.542870  | -0.354783 | 0.054262  |
| 22 | 8 | 0 | 3.982449  | -0.678480 | 1.131985  |
| 23 | 8 | 0 | 4.305205  | 0.200159  | -0.912328 |
| 24 | 1 | 0 | 5.198997  | 0.305931  | -0.552389 |

-----

Rotational constants (GHZ):      0.8057873      0.3343358      0.2550237

Standard basis: 6-311++G(d,p) (5D, 7F)

There are    404 symmetry adapted cartesian basis functions of A    symmetry.

There are    389 symmetry adapted basis functions of A    symmetry.

    389 basis functions,    625 primitive gaussians,    404 cartesian basis functions

    62 alpha electrons      62 beta electrons

    nuclear repulsion energy      1072.5851121388 Hartrees.

NAtoms=    24 NActive=    24 NUniq=    24 SFac= 1.00D+00 NAtFMM=    60 NAOKFM=F

Big=F

Integral buffers will be    131072 words long.

Raffenetti 2 integral format.

Two-electron integral symmetry is turned on.

One-electron integrals computed using PRISM.

NBasis=    389 RedAO= T EigKep=    6.54D-06    NBF=    389

NBsUse=    389 1.00D-06 EigRej= -1.00D+00    NBFU=    389

Initial guess from the checkpoint file:    "/cooh.chk"

B after Tr=    0.000000    0.000000    0.000000

    Rot=    1.000000    -0.000400    -0.000207    0.000589 Ang=    -0.08 deg.

ExpMin= 3.50D-02 ExpMax= 4.40D+05 ExpMxC= 1.51D+04 IAcc=3 IRadAn=      5 AccDes=

0.00D+00

Harris functional with IExCor=    402 and IRadAn=      5 diagonalized for initial guess.

HarFok: IExCor=    402 AccDes= 0.00D+00 IRadAn=      5 IDoV= 1 UseB2=F ITyADJ=14

ICtDFT=    3500011 ScaDFX=    1.000000    1.000000    1.000000    1.000000

FoFCou: FMM=F IPFlag=      0 FMFlag=      100000 FMFlg1=      0

    NFxFlg=      0 DoJE=T BraDBF=F KetDBF=T FulRan=T

    wScrn=    0.000000 ICntrl=      500 IOPCl=    0 I1Cent=    200000004 NGrid=

0

    NMat0=    1 NMatS0=      1 NMatT0=    0 NMatD0=    1 NMtDS0=    0

NMtDT0=    0

Petite list used in FoFCou.

Keep R1 ints in memory in canonical form, NReq=2910765817.

Requested convergence on RMS density matrix=1.00D-08 within 128 cycles.

Requested convergence on MAX density matrix=1.00D-06.

Requested convergence on energy=1.00D-06.

No special actions if energy rises.

SCF Done: E(RB3LYP) = -3145.73224199 A.U. after 11 cycles

NFock= 11 Conv=0.50D-08 -V/T= 2.0017

Calling FoFJK, ICntrl= 2127 FMM=F ISym2X=0 l1Cent= 0 IOpClX= 0 NMat=1 NMatS=1

NMatT=0.

\*\*\*\*\* Axes restored to original set \*\*\*\*\*

| Center<br>Number | Atomic<br>Number | Forces (Hartrees/Bohr) |              |              |
|------------------|------------------|------------------------|--------------|--------------|
|                  |                  | X                      | Y            | Z            |
| 1                | 6                | -0.000023798           | 0.000022196  | -0.000018940 |
| 2                | 6                | -0.000038912           | -0.000018423 | 0.000004029  |
| 3                | 7                | 0.000068072            | 0.000060426  | -0.000038981 |
| 4                | 6                | -0.000037118           | 0.000009252  | -0.000084304 |
| 5                | 7                | 0.000046269            | -0.000079548 | 0.000093000  |
| 6                | 6                | -0.000071617           | 0.000007594  | 0.000019813  |
| 7                | 1                | 0.000003656            | 0.000006262  | -0.000012111 |
| 8                | 1                | 0.000010250            | 0.000003048  | -0.000020452 |
| 9                | 1                | 0.000013343            | -0.000029424 | 0.000004249  |
| 10               | 1                | 0.000026316            | 0.000002540  | -0.000046010 |
| 11               | 35               | 0.000038838            | 0.000041930  | -0.000016639 |
| 12               | 1                | -0.000019356           | -0.000057048 | 0.000060739  |
| 13               | 6                | -0.000004322           | -0.000028187 | 0.000045626  |
| 14               | 6                | 0.000011249            | -0.000001151 | -0.000000686 |
| 15               | 1                | -0.000012748           | -0.000015475 | 0.000019974  |
| 16               | 1                | 0.000005412            | 0.000001414  | -0.000013730 |
| 17               | 1                | -0.000003581           | 0.000008166  | -0.000021545 |
| 18               | 6                | -0.000004483           | 0.000110192  | -0.000013227 |
| 19               | 1                | -0.000004647           | -0.000039648 | -0.000014794 |
| 20               | 1                | -0.000040996           | 0.000006254  | 0.000003567  |
| 21               | 6                | 0.000095138            | 0.000030073  | -0.000022389 |
| 22               | 8                | -0.000023559           | -0.000026857 | -0.000011043 |
| 23               | 8                | -0.000050345           | -0.000011771 | 0.000068341  |
| 24               | 1                | 0.000016939            | -0.000001816 | 0.000015516  |

Cartesian Forces: Max 0.000110192 RMS 0.000037274

GradGradGradGradGradGradGradGradGradGradGradGradGradGradGradGradGradGradGrad

Berny optimization.

Using GEDIIS/GDIIS optimizer.

FormGI is forming the generalized inverse of G from B-inverse, IUseBI=4.

GSVD: received Info= 1 from GESDD.  
 Internal Forces: Max 0.000071391 RMS 0.000017440  
 Search for a local minimum.  
 Step number 14 out of a maximum of 140  
 All quantities printed in internal units (Hartrees-Bohrs-Radians)  
 Mixed Optimization -- En-DIIS/RFO-DIIS  
 Swapping is turned off.  
 Update second derivatives using D2CorX and points 4 6 7 8 9  
 10 11 12 13 14

DE= -6.67D-06 DEPred=-2.38D-06 R= 2.81D+00  
 TightC=F SS= 1.41D+00 RLast= 5.13D-02 DXNew= 1.2000D+00 1.5401D-01  
 Trust test= 2.81D+00 RLast= 5.13D-02 DXMaxT set to 7.14D-01

ITU= 1 1 1 1 1 1 1 1 0-1 1 1 1 0  
 Eigenvalues --- 0.00135 0.00221 0.00379 0.00459 0.01214  
 Eigenvalues --- 0.01642 0.01812 0.02012 0.02174 0.02229  
 Eigenvalues --- 0.02364 0.02414 0.02568 0.02968 0.03042  
 Eigenvalues --- 0.03053 0.03119 0.03520 0.04279 0.04484  
 Eigenvalues --- 0.05057 0.05248 0.06337 0.07186 0.09688  
 Eigenvalues --- 0.09988 0.10923 0.12754 0.15579 0.15854  
 Eigenvalues --- 0.15981 0.15992 0.15999 0.16001 0.16010  
 Eigenvalues --- 0.16701 0.17900 0.20636 0.21901 0.22873  
 Eigenvalues --- 0.24430 0.25134 0.27530 0.27906 0.34372  
 Eigenvalues --- 0.34487 0.35170 0.35420 0.35506 0.35580  
 Eigenvalues --- 0.35843 0.36014 0.36549 0.36611 0.36652  
 Eigenvalues --- 0.37637 0.41327 0.42622 0.43623 0.47373  
 Eigenvalues --- 0.52367 0.53423 0.54137 0.54407 0.59908  
 Eigenvalues --- 0.92554

En-DIIS/RFO-DIIS IScMMF= 0 using points: 14 13 12 11 10

RFO step: Lambda=-1.51448551D-07.

DidBck=F Rises=F RFO-DIIS coefs: 1.38761 -0.52806 0.03908 0.13616 -  
 0.03479

Iteration 1 RMS(Cart)= 0.00247359 RMS(Int)= 0.00000233  
 Iteration 2 RMS(Cart)= 0.00000290 RMS(Int)= 0.00000103  
 Iteration 3 RMS(Cart)= 0.00000000 RMS(Int)= 0.00000103

| Variable | Old X   | -DE/DX   | Delta X<br>(Linear) | Delta X<br>(Quad) | Delta X<br>(Total) | New X   |
|----------|---------|----------|---------------------|-------------------|--------------------|---------|
| R1       | 2.55863 | 0.00000  | -0.00001            | 0.00001           | 0.00000            | 2.55862 |
| R2       | 2.62590 | 0.00001  | 0.00000             | 0.00004           | 0.00004            | 2.62595 |
| R3       | 2.03327 | 0.00000  | 0.00001             | -0.00001          | 0.00000            | 2.03327 |
| R4       | 2.62975 | 0.00000  | 0.00001             | -0.00002          | -0.00001           | 2.62974 |
| R5       | 2.03113 | 0.00000  | -0.00001            | 0.00001           | 0.00001            | 2.03113 |
| R6       | 2.54970 | -0.00003 | 0.00006             | -0.00005          | 0.00001            | 2.54971 |
| R7       | 2.68653 | -0.00002 | -0.00006            | -0.00001          | -0.00007           | 2.68645 |
| R8       | 2.53220 | 0.00001  | 0.00009             | 0.00001           | 0.00010            | 2.53231 |

|     |         |          |          |          |          |         |
|-----|---------|----------|----------|----------|----------|---------|
| R9  | 5.43710 | 0.00003  | 0.00005  | 0.00123  | 0.00129  | 5.43838 |
| R10 | 2.02672 | 0.00000  | -0.00004 | 0.00005  | 0.00000  | 2.02672 |
| R11 | 2.77558 | -0.00003 | -0.00006 | 0.00004  | -0.00002 | 2.77555 |
| R12 | 2.05765 | 0.00000  | 0.00004  | -0.00002 | 0.00002  | 2.05767 |
| R13 | 2.06206 | -0.00001 | -0.00004 | -0.00002 | -0.00006 | 2.06200 |
| R14 | 2.89262 | 0.00003  | 0.00019  | -0.00005 | 0.00014  | 2.89276 |
| R15 | 5.06672 | 0.00005  | 0.00058  | 0.00079  | 0.00137  | 5.06809 |
| R16 | 5.08771 | -0.00003 | -0.00420 | -0.00122 | -0.00543 | 5.08228 |
| R17 | 2.50775 | -0.00001 | 0.00002  | -0.00003 | -0.00001 | 2.50774 |
| R18 | 2.05030 | -0.00001 | 0.00000  | -0.00003 | -0.00003 | 2.05027 |
| R19 | 2.04364 | 0.00000  | 0.00000  | -0.00001 | -0.00001 | 2.04363 |
| R20 | 2.04783 | 0.00000  | 0.00000  | -0.00001 | -0.00001 | 2.04781 |
| R21 | 2.06589 | 0.00004  | 0.00017  | -0.00002 | 0.00015  | 2.06604 |
| R22 | 2.07979 | -0.00001 | -0.00011 | 0.00009  | -0.00002 | 2.07976 |
| R23 | 2.84454 | 0.00004  | 0.00003  | 0.00004  | 0.00007  | 2.84461 |
| R24 | 2.28297 | -0.00002 | 0.00008  | -0.00002 | 0.00005  | 2.28302 |
| R25 | 2.55177 | -0.00007 | -0.00016 | -0.00007 | -0.00023 | 2.55154 |
| R26 | 1.83178 | 0.00002  | 0.00000  | 0.00002  | 0.00002  | 1.83179 |
| A1  | 1.87519 | 0.00001  | -0.00001 | 0.00012  | 0.00011  | 1.87529 |
| A2  | 2.27857 | 0.00000  | 0.00003  | -0.00003 | 0.00000  | 2.27858 |
| A3  | 2.12940 | -0.00001 | -0.00002 | -0.00009 | -0.00011 | 2.12928 |
| A4  | 1.86933 | -0.00002 | 0.00004  | -0.00012 | -0.00008 | 1.86926 |
| A5  | 2.28617 | 0.00000  | -0.00009 | 0.00003  | -0.00006 | 2.28611 |
| A6  | 2.12710 | 0.00002  | 0.00004  | 0.00009  | 0.00013  | 2.12723 |
| A7  | 1.89188 | 0.00001  | -0.00002 | 0.00009  | 0.00008  | 1.89195 |
| A8  | 2.22646 | 0.00000  | 0.00002  | 0.00000  | 0.00002  | 2.22648 |
| A9  | 2.15379 | -0.00001 | 0.00000  | -0.00002 | -0.00002 | 2.15377 |
| A10 | 1.89017 | 0.00001  | -0.00003 | 0.00003  | 0.00000  | 1.89017 |
| A11 | 1.80301 | -0.00001 | 0.00014  | -0.00017 | -0.00003 | 1.80297 |
| A12 | 2.18857 | 0.00000  | -0.00008 | 0.00005  | -0.00003 | 2.18853 |
| A13 | 1.90533 | 0.00000  | 0.00118  | 0.00025  | 0.00143  | 1.90676 |
| A14 | 2.19301 | -0.00001 | -0.00014 | -0.00006 | -0.00021 | 2.19280 |
| A15 | 1.89487 | -0.00002 | 0.00001  | -0.00011 | -0.00010 | 1.89477 |
| A16 | 2.20009 | 0.00002  | 0.00000  | -0.00003 | -0.00004 | 2.20005 |
| A17 | 2.17507 | 0.00000  | -0.00008 | 0.00004  | -0.00003 | 2.17504 |
| A18 | 1.87907 | 0.00002  | -0.00010 | 0.00047  | 0.00037  | 1.87945 |
| A19 | 1.88392 | 0.00001  | -0.00001 | -0.00008 | -0.00009 | 1.88383 |
| A20 | 1.94576 | 0.00000  | -0.00010 | 0.00006  | -0.00003 | 1.94573 |
| A21 | 1.87452 | 0.00001  | -0.00009 | 0.00001  | -0.00008 | 1.87444 |
| A22 | 1.92314 | 0.00000  | 0.00032  | -0.00010 | 0.00022  | 1.92336 |
| A23 | 1.95431 | -0.00002 | -0.00004 | -0.00033 | -0.00037 | 1.95394 |
| A24 | 1.20193 | 0.00000  | -0.00071 | -0.00028 | -0.00099 | 1.20094 |
| A25 | 1.33733 | 0.00000  | -0.00086 | -0.00034 | -0.00119 | 1.33614 |
| A26 | 2.15303 | 0.00001  | 0.00011  | 0.00000  | 0.00011  | 2.15314 |

|     |          |          |          |          |          |          |
|-----|----------|----------|----------|----------|----------|----------|
| A27 | 1.95535  | 0.00000  | -0.00004 | -0.00003 | -0.00007 | 1.95528  |
| A28 | 2.17393  | -0.00001 | -0.00006 | -0.00001 | -0.00007 | 2.17386  |
| A29 | 2.08592  | -0.00001 | -0.00005 | -0.00004 | -0.00009 | 2.08583  |
| A30 | 2.14527  | 0.00001  | 0.00007  | 0.00005  | 0.00012  | 2.14540  |
| A31 | 2.05199  | 0.00000  | -0.00002 | -0.00001 | -0.00003 | 2.05196  |
| A32 | 1.95476  | -0.00001 | -0.00039 | -0.00014 | -0.00053 | 1.95423  |
| A33 | 1.90853  | 0.00001  | 0.00020  | 0.00007  | 0.00027  | 1.90879  |
| A34 | 1.93372  | -0.00004 | -0.00008 | -0.00021 | -0.00030 | 1.93343  |
| A35 | 1.85939  | 0.00000  | 0.00002  | 0.00005  | 0.00007  | 1.85947  |
| A36 | 1.90440  | 0.00001  | -0.00062 | 0.00029  | -0.00033 | 1.90407  |
| A37 | 1.90095  | 0.00003  | 0.00092  | -0.00004 | 0.00087  | 1.90183  |
| A38 | 2.60376  | 0.00000  | 0.00204  | 0.00065  | 0.00269  | 2.60644  |
| A39 | 2.18890  | -0.00004 | -0.00006 | -0.00011 | -0.00016 | 2.18874  |
| A40 | 1.94914  | 0.00004  | 0.00005  | 0.00008  | 0.00013  | 1.94927  |
| A41 | 2.14511  | 0.00000  | 0.00001  | 0.00003  | 0.00004  | 2.14515  |
| A42 | 1.87507  | 0.00001  | 0.00004  | 0.00000  | 0.00004  | 1.87510  |
| D1  | 0.00435  | 0.00001  | -0.00004 | 0.00034  | 0.00030  | 0.00464  |
| D2  | 3.10913  | 0.00000  | -0.00026 | 0.00025  | -0.00001 | 3.10912  |
| D3  | -3.12891 | 0.00000  | 0.00009  | 0.00013  | 0.00022  | -3.12869 |
| D4  | -0.02413 | 0.00000  | -0.00013 | 0.00004  | -0.00009 | -0.02422 |
| D5  | -0.05016 | 0.00000  | -0.00002 | -0.00020 | -0.00021 | -0.05037 |
| D6  | -3.02385 | 0.00001  | 0.00046  | 0.00042  | 0.00088  | -3.02297 |
| D7  | 3.08397  | 0.00000  | -0.00014 | -0.00001 | -0.00014 | 3.08382  |
| D8  | 0.11027  | 0.00002  | 0.00034  | 0.00061  | 0.00095  | 0.11123  |
| D9  | 0.04258  | -0.00001 | 0.00008  | -0.00036 | -0.00028 | 0.04231  |
| D10 | 3.02766  | 0.00000  | 0.00013  | 0.00015  | 0.00028  | 3.02793  |
| D11 | -3.06629 | 0.00000  | 0.00028  | -0.00028 | 0.00000  | -3.06629 |
| D12 | -0.08122 | 0.00001  | 0.00032  | 0.00023  | 0.00055  | -0.08067 |
| D13 | -0.07426 | 0.00000  | -0.00009 | 0.00023  | 0.00014  | -0.07412 |
| D14 | 1.94497  | 0.00001  | 0.00130  | 0.00045  | 0.00174  | 1.94672  |
| D15 | -3.06105 | 0.00001  | 0.00171  | 0.00012  | 0.00183  | -3.05922 |
| D16 | -3.06730 | -0.00001 | -0.00014 | -0.00025 | -0.00039 | -3.06769 |
| D17 | -1.04807 | 0.00000  | 0.00125  | -0.00004 | 0.00122  | -1.04685 |
| D18 | 0.22909  | 0.00000  | 0.00167  | -0.00037 | 0.00130  | 0.23039  |
| D19 | 0.63037  | -0.00004 | -0.00106 | -0.00170 | -0.00276 | 0.62761  |
| D20 | -2.46810 | -0.00002 | -0.00124 | -0.00085 | -0.00209 | -2.47019 |
| D21 | -2.68935 | -0.00002 | -0.00101 | -0.00111 | -0.00213 | -2.69147 |
| D22 | 0.49537  | -0.00001 | -0.00120 | -0.00026 | -0.00146 | 0.49391  |
| D23 | 0.07701  | 0.00000  | 0.00007  | -0.00003 | 0.00004  | 0.07705  |
| D24 | 3.05368  | -0.00002 | -0.00039 | -0.00064 | -0.00104 | 3.05265  |
| D25 | -1.87448 | 0.00001  | -0.00066 | 0.00003  | -0.00063 | -1.87511 |
| D26 | 1.10219  | -0.00001 | -0.00112 | -0.00058 | -0.00170 | 1.10049  |
| D27 | 3.06331  | -0.00001 | -0.00173 | 0.00010  | -0.00164 | 3.06167  |
| D28 | -0.24321 | -0.00002 | -0.00219 | -0.00052 | -0.00271 | -0.24592 |

|     |          |          |          |          |          |          |
|-----|----------|----------|----------|----------|----------|----------|
| D29 | -2.26177 | 0.00000  | -0.00067 | -0.00004 | -0.00070 | -2.26248 |
| D30 | -0.25337 | 0.00001  | -0.00014 | 0.00002  | -0.00012 | -0.25349 |
| D31 | -2.86542 | 0.00000  | 0.00298  | 0.00048  | 0.00347  | -2.86195 |
| D32 | -0.84679 | 0.00002  | 0.00282  | 0.00070  | 0.00352  | -0.84327 |
| D33 | 1.30650  | 0.00000  | 0.00271  | 0.00027  | 0.00298  | 1.30947  |
| D34 | 0.46989  | 0.00002  | 0.00352  | 0.00121  | 0.00473  | 0.47462  |
| D35 | 2.48852  | 0.00004  | 0.00336  | 0.00142  | 0.00478  | 2.49331  |
| D36 | -1.64138 | 0.00002  | 0.00325  | 0.00099  | 0.00424  | -1.63714 |
| D37 | -1.08811 | 0.00000  | -0.00156 | -0.00019 | -0.00175 | -1.08986 |
| D38 | 0.96883  | 0.00000  | -0.00165 | -0.00017 | -0.00181 | 0.96702  |
| D39 | 3.06427  | 0.00002  | -0.00044 | -0.00031 | -0.00075 | 3.06353  |
| D40 | 3.10975  | -0.00002 | -0.00159 | -0.00075 | -0.00234 | 3.10740  |
| D41 | -1.11650 | -0.00001 | -0.00168 | -0.00073 | -0.00240 | -1.11890 |
| D42 | 0.97894  | 0.00001  | -0.00047 | -0.00087 | -0.00134 | 0.97760  |
| D43 | 1.02460  | 0.00000  | -0.00167 | -0.00048 | -0.00215 | 1.02244  |
| D44 | 3.08153  | 0.00000  | -0.00175 | -0.00046 | -0.00221 | 3.07932  |
| D45 | -1.10621 | 0.00002  | -0.00054 | -0.00060 | -0.00114 | -1.10735 |
| D46 | 0.00397  | 0.00000  | 0.00025  | 0.00047  | 0.00073  | 0.00470  |
| D47 | 0.37852  | 0.00000  | 0.00039  | 0.00044  | 0.00083  | 0.37935  |
| D48 | -3.08900 | 0.00002  | -0.00039 | 0.00132  | 0.00093  | -3.08807 |
| D49 | 0.05003  | 0.00000  | 0.00000  | 0.00010  | 0.00010  | 0.05013  |
| D50 | 0.00405  | 0.00001  | -0.00018 | 0.00036  | 0.00018  | 0.00423  |
| D51 | -3.14011 | -0.00002 | 0.00021  | -0.00086 | -0.00065 | -3.14076 |
| D52 | -0.34767 | 0.00000  | 0.00031  | -0.00046 | -0.00015 | -0.34782 |
| D53 | 1.76812  | -0.00001 | -0.00003 | -0.00056 | -0.00059 | 1.76753  |
| D54 | -2.46310 | 0.00002  | -0.00027 | -0.00021 | -0.00049 | -2.46359 |
| D55 | -0.17672 | 0.00000  | 0.00233  | -0.00056 | 0.00177  | -0.17495 |
| D56 | 2.97229  | -0.00002 | 0.00186  | -0.00059 | 0.00127  | 2.97356  |
| D57 | -2.33669 | 0.00003  | 0.00330  | -0.00044 | 0.00286  | -2.33383 |
| D58 | 0.81231  | 0.00002  | 0.00284  | -0.00047 | 0.00237  | 0.81467  |
| D59 | 1.92324  | 0.00000  | 0.00311  | -0.00064 | 0.00247  | 1.92571  |
| D60 | -1.21094 | -0.00001 | 0.00264  | -0.00067 | 0.00198  | -1.20897 |
| D61 | 3.09210  | 0.00002  | 0.00138  | -0.00033 | 0.00105  | 3.09315  |
| D62 | -0.04230 | 0.00000  | 0.00092  | -0.00036 | 0.00057  | -0.04174 |

| Item                 | Value    | Threshold | Converged? |
|----------------------|----------|-----------|------------|
| Maximum Force        | 0.000071 | 0.000450  | YES        |
| RMS Force            | 0.000017 | 0.000300  | YES        |
| Maximum Displacement | 0.010192 | 0.001800  | NO         |
| RMS Displacement     | 0.002473 | 0.001200  | NO         |

Predicted change in Energy=-5.185221D-07

GradGradGradGradGradGradGradGradGradGradGradGradGradGradGradGradGradGradGrad

Input orientation:

-----

| Center<br>Number | Atomic<br>Number | Atomic<br>Type | Coordinates (Angstroms) |           |           |
|------------------|------------------|----------------|-------------------------|-----------|-----------|
|                  |                  |                | X                       | Y         | Z         |
| 1                | 6                | 0              | -0.330673               | -2.228861 | -0.387127 |
| 2                | 6                | 0              | -1.580492               | -1.780224 | -0.651509 |
| 3                | 7                | 0              | -1.803180               | -0.680540 | 0.171685  |
| 4                | 6                | 0              | -0.679120               | -0.443735 | 0.879414  |
| 5                | 7                | 0              | 0.206165                | -1.409738 | 0.598676  |
| 6                | 6                | 0              | 1.589427                | -1.442805 | 1.091366  |
| 7                | 1                | 0              | 0.223635                | -3.046808 | -0.813031 |
| 8                | 1                | 0              | -2.314676               | -2.116173 | -1.360995 |
| 9                | 1                | 0              | 1.618109                | -0.897623 | 2.033491  |
| 10               | 1                | 0              | 1.844370                | -2.481500 | 1.307589  |
| 11               | 35               | 0              | 0.267146                | 2.052204  | -0.196222 |
| 12               | 1                | 0              | -0.573602               | 0.296340  | 1.648440  |
| 13               | 6                | 0              | -2.921150               | 0.197532  | 0.161508  |
| 14               | 6                | 0              | -4.161320               | -0.202740 | -0.089073 |
| 15               | 1                | 0              | -2.630942               | 1.227930  | 0.338097  |
| 16               | 1                | 0              | -4.958531               | 0.526852  | -0.129946 |
| 17               | 1                | 0              | -4.421869               | -1.240458 | -0.261021 |
| 18               | 6                | 0              | 2.557581                | -0.813160 | 0.086620  |
| 19               | 1                | 0              | 2.577301                | -1.359732 | -0.860047 |
| 20               | 1                | 0              | 2.225328                | 0.209300  | -0.148798 |
| 21               | 6                | 0              | 3.951629                | -0.756660 | 0.651754  |
| 22               | 8                | 0              | 4.251787                | -0.988216 | 1.798860  |
| 23               | 8                | 0              | 4.855976                | -0.401069 | -0.285687 |
| 24               | 1                | 0              | 5.719073                | -0.340891 | 0.151429  |

Distance matrix (angstroms):

|    |    | 1        | 2        | 3        | 4        | 5        |
|----|----|----------|----------|----------|----------|----------|
| 1  | C  | 0.000000 |          |          |          |          |
| 2  | C  | 1.353965 | 0.000000 |          |          |          |
| 3  | N  | 2.208585 | 1.391597 | 0.000000 |          |          |
| 4  | C  | 2.216352 | 2.223150 | 1.349246 | 0.000000 |          |
| 5  | N  | 1.389591 | 2.211869 | 2.179797 | 1.340039 | 0.000000 |
| 6  | C  | 2.547667 | 3.633160 | 3.596754 | 2.487845 | 1.468759 |
| 7  | H  | 1.075960 | 2.210249 | 3.267548 | 3.233470 | 2.161764 |
| 8  | H  | 2.213003 | 1.074829 | 2.161430 | 3.239061 | 3.270167 |
| 9  | H  | 3.380730 | 4.268402 | 3.901110 | 2.610588 | 2.077148 |
| 10 | H  | 2.768881 | 4.007435 | 4.223547 | 3.271670 | 2.082054 |
| 11 | Br | 4.326817 | 4.278849 | 3.448114 | 2.877868 | 3.552551 |
| 12 | H  | 3.252566 | 3.258176 | 2.155681 | 1.072495 | 2.149591 |
| 13 | C  | 3.591512 | 2.523862 | 1.421609 | 2.439940 | 3.543237 |
| 14 | C  | 4.343716 | 3.076600 | 2.420148 | 3.622397 | 4.583096 |

|    |    |          |          |          |          |          |
|----|----|----------|----------|----------|----------|----------|
| 15 | H  | 4.215044 | 3.336429 | 2.086898 | 2.626232 | 3.882572 |
| 16 | H  | 5.392325 | 4.123806 | 3.391905 | 4.502689 | 5.563754 |
| 17 | H  | 4.210787 | 2.918433 | 2.712614 | 3.992934 | 4.710247 |
| 18 | C  | 3.251255 | 4.313200 | 4.363606 | 3.352795 | 2.479368 |
| 19 | H  | 3.071701 | 4.184201 | 4.551306 | 3.803821 | 2.784360 |
| 20 | H  | 3.540420 | 4.323793 | 4.138043 | 3.149523 | 2.693886 |
| 21 | C  | 4.645940 | 5.774992 | 5.775299 | 4.646890 | 3.802345 |
| 22 | O  | 5.226536 | 6.375505 | 6.277339 | 5.045363 | 4.240894 |
| 23 | O  | 5.500222 | 6.592724 | 6.680692 | 5.656551 | 4.839448 |
| 24 | H  | 6.360337 | 7.483317 | 7.529944 | 6.440296 | 5.633349 |
|    |    | 6        | 7        | 8        | 9        | 10       |
| 6  | C  | 0.000000 |          |          |          |          |
| 7  | H  | 2.839885 | 0.000000 |          |          |          |
| 8  | H  | 4.659347 | 2.758508 | 0.000000 |          |          |
| 9  | H  | 1.088873 | 3.829653 | 5.336121 | 0.000000 |          |
| 10 | H  | 1.091163 | 2.728257 | 4.955044 | 1.756927 | 0.000000 |
| 11 | Br | 3.952391 | 5.136368 | 5.039629 | 3.936775 | 5.030264 |
| 12 | H  | 2.830839 | 4.227419 | 4.231814 | 2.525353 | 3.698535 |
| 13 | C  | 4.888829 | 4.622245 | 2.835323 | 5.030761 | 5.585776 |
| 14 | C  | 6.000191 | 5.276426 | 2.947729 | 6.195962 | 6.573563 |
| 15 | H  | 5.050916 | 5.267551 | 3.764301 | 5.044479 | 5.893064 |
| 16 | H  | 6.946000 | 6.331864 | 3.935865 | 7.068365 | 7.576025 |
| 17 | H  | 6.164866 | 5.014810 | 2.533196 | 6.470212 | 6.577725 |
| 18 | C  | 1.530781 | 3.353485 | 5.247125 | 2.163341 | 2.186960 |
| 19 | H  | 2.188792 | 2.896236 | 4.975398 | 3.083205 | 2.548372 |
| 20 | H  | 2.161442 | 3.879462 | 5.242984 | 2.521186 | 3.083278 |
| 21 | C  | 2.498810 | 4.613926 | 6.720566 | 2.715581 | 2.801024 |
| 22 | O  | 2.792017 | 5.223580 | 7.373968 | 2.645660 | 2.875222 |
| 23 | O  | 3.694839 | 5.360655 | 7.450914 | 4.013594 | 3.992054 |
| 24 | H  | 4.376262 | 6.200968 | 8.365415 | 4.546428 | 4.575176 |
|    |    | 11       | 12       | 13       | 14       | 15       |
| 11 | Br | 0.000000 |          |          |          |          |
| 12 | H  | 2.681919 | 0.000000 |          |          |          |
| 13 | C  | 3.705807 | 2.780595 | 0.000000 |          |          |
| 14 | C  | 4.970670 | 4.017431 | 1.327038 | 0.000000 |          |
| 15 | H  | 3.060038 | 2.611035 | 1.084954 | 2.138072 | 0.000000 |
| 16 | H  | 5.444152 | 4.737446 | 2.084303 | 1.081443 | 2.475530 |
| 17 | H  | 5.729981 | 4.562559 | 2.120967 | 1.083656 | 3.107942 |
| 18 | C  | 3.679185 | 3.670774 | 5.571679 | 6.748861 | 5.581224 |
| 19 | H  | 4.173582 | 4.354684 | 5.805309 | 6.880556 | 5.937789 |
| 20 | H  | 2.689427 | 3.327409 | 5.155838 | 6.400205 | 4.985783 |
| 21 | C  | 4.710010 | 4.751832 | 6.955998 | 8.165513 | 6.882384 |
| 22 | O  | 5.394615 | 4.995707 | 7.452379 | 8.658039 | 7.376794 |
| 23 | O  | 5.204221 | 5.805820 | 7.812938 | 9.021620 | 7.687437 |



|    |   |           |           |          |          |          |
|----|---|-----------|-----------|----------|----------|----------|
| 24 | H | 5.964166  | 6.499605  | 8.656989 | 9.884285 | 8.498164 |
|    |   | 16        | 17        | 18       | 19       | 20       |
| 16 | H | 0.000000  |           |          |          |          |
| 17 | H | 1.851640  | 0.000000  |          |          |          |
| 18 | C | 7.637701  | 7.001154  | 0.000000 |          |          |
| 19 | H | 7.802629  | 7.025769  | 1.093302 | 0.000000 |          |
| 20 | H | 7.190899  | 6.804382  | 1.100563 | 1.758301 | 0.000000 |
| 21 | C | 9.036006  | 8.436983  | 1.505303 | 2.130262 | 2.134029 |
| 22 | O | 9.531300  | 8.918466  | 2.415107 | 3.164130 | 3.055152 |
| 23 | O | 9.859506  | 9.315771  | 2.364540 | 2.537969 | 2.703997 |
| 24 | H | 10.716500 | 10.189113 | 3.197228 | 3.454251 | 3.549521 |
|    |   | 21        | 22        | 23       | 24       |          |
| 21 | C | 0.000000  |           |          |          |          |
| 22 | O | 1.208125  | 0.000000  |          |          |          |
| 23 | O | 1.350217  | 2.248360  | 0.000000 |          |          |
| 24 | H | 1.883361  | 2.299128  | 0.969344 | 0.000000 |          |

Stoichiometry C8H11BrN2O2

Framework group C1[X(C8H11BrN2O2)]

Deg. of freedom 66

Full point group C1 NOp 1

Largest Abelian subgroup C1 NOp 1

Largest concise Abelian subgroup C1 NOp 1

Standard orientation:

| Center<br>Number | Atomic<br>Number | Atomic<br>Type | Coordinates (Angstroms) |           |           |
|------------------|------------------|----------------|-------------------------|-----------|-----------|
|                  |                  |                | X                       | Y         | Z         |
| 1                | 6                | 0              | -0.660086               | -2.161751 | -0.761469 |
| 2                | 6                | 0              | -1.968873               | -1.826584 | -0.850701 |
| 3                | 7                | 0              | -2.211039               | -0.860449 | 0.121143  |
| 4                | 6                | 0              | -1.047625               | -0.583937 | 0.746023  |
| 5                | 7                | 0              | -0.105907               | -1.407340 | 0.265524  |
| 6                | 6                | 0              | 1.317985                | -1.343814 | 0.620133  |
| 7                | 1                | 0              | -0.075747               | -2.858867 | -1.336157 |
| 8                | 1                | 0              | -2.736896               | -2.157665 | -1.525819 |
| 9                | 1                | 0              | 1.391717                | -0.910977 | 1.616556  |
| 10               | 1                | 0              | 1.695366                | -2.365907 | 0.679664  |
| 11               | 35               | 0              | -0.470325               | 2.108498  | -0.090420 |
| 12               | 1                | 0              | -0.935269               | 0.069727  | 1.588844  |
| 13               | 6                | 0              | -3.404941               | -0.116062 | 0.324757  |
| 14               | 6                | 0              | -4.619069               | -0.619438 | 0.141632  |
| 15               | 1                | 0              | -3.200736               | 0.912862  | 0.601782  |
| 16               | 1                | 0              | -5.484156               | 0.017370  | 0.266616  |
| 17               | 1                | 0              | -4.792714               | -1.652843 | -0.134471 |

|    |   |   |          |           |           |
|----|---|---|----------|-----------|-----------|
| 18 | 6 | 0 | 2.108320 | -0.499478 | -0.382742 |
| 19 | 1 | 0 | 2.082144 | -0.927813 | -1.388304 |
| 20 | 1 | 0 | 1.654016 | 0.500253  | -0.456125 |
| 21 | 6 | 0 | 3.541676 | -0.354686 | 0.053676  |
| 22 | 8 | 0 | 3.982153 | -0.682223 | 1.129904  |
| 23 | 8 | 0 | 4.302956 | 0.204305  | -0.911242 |
| 24 | 1 | 0 | 5.197080 | 0.308776  | -0.551720 |

-----

Rotational constants (GHZ):      0.8053793      0.3345388      0.2550521

Standard basis: 6-311++G(d,p) (5D, 7F)

There are    404 symmetry adapted cartesian basis functions of A    symmetry.

There are    389 symmetry adapted basis functions of A    symmetry.

    389 basis functions,    625 primitive gaussians,    404 cartesian basis functions

    62 alpha electrons      62 beta electrons

        nuclear repulsion energy      1072.5930464611 Hartrees.

NAtoms=    24 NActive=    24 NUniq=    24 SFac= 1.00D+00 NAtFMM=    60 NAOKFM=F

Big=F

Integral buffers will be    131072 words long.

Raffenetti 2 integral format.

Two-electron integral symmetry is turned on.

One-electron integrals computed using PRISM.

NBasis=    389 RedAO= T EigKep= 6.52D-06 NBF=    389

NBsUse=    389 1.00D-06 EigRej= -1.00D+00 NBFU=    389

Initial guess from the checkpoint file: "/cooh.chk"

B after Tr=    0.000000    0.000000    0.000000

        Rot=    1.000000    -0.000227    -0.000060    0.000148 Ang=    -0.03 deg.

Keep R1 ints in memory in canonical form, NReq=2910765817.

Requested convergence on RMS density matrix=1.00D-08 within 128 cycles.

Requested convergence on MAX density matrix=1.00D-06.

Requested convergence on                    energy=1.00D-06.

No special actions if energy rises.

SCF Done: E(RB3LYP) = -3145.73224323      A.U. after    10 cycles

        NFock= 10 Conv=0.57D-08    -V/T= 2.0017

Calling FoFJK, ICntrl=                    2127 FMM=F ISym2X=0 l1Cent= 0 IOpCIX= 0 NMat=1 NMatS=1

NMatT=0.

\*\*\*\*\* Axes restored to original set \*\*\*\*\*

-----

| Center | Atomic | Forces (Hartrees/Bohr) |              |              |
|--------|--------|------------------------|--------------|--------------|
| Number | Number | X                      | Y            | Z            |
| 1      | 6      | 0.000003168            | -0.000003624 | -0.000015842 |
| 2      | 6      | 0.000004280            | 0.000007313  | -0.000001294 |
| 3      | 7      | 0.000032743            | 0.000055058  | -0.000012934 |
| 4      | 6      | -0.000048198           | -0.000043808 | -0.000006140 |

|    |    |              |              |              |
|----|----|--------------|--------------|--------------|
| 5  | 7  | 0.000008990  | -0.000016522 | 0.000038578  |
| 6  | 6  | -0.000027846 | -0.000003306 | -0.000005786 |
| 7  | 1  | 0.000004219  | 0.000004013  | -0.000016088 |
| 8  | 1  | 0.000011703  | 0.000009269  | -0.000015446 |
| 9  | 1  | -0.000007639 | -0.000017118 | -0.000006219 |
| 10 | 1  | 0.000007278  | -0.000011464 | -0.000021103 |
| 11 | 35 | 0.000013291  | 0.000023776  | -0.000004831 |
| 12 | 1  | -0.000006839 | -0.000021090 | 0.000021202  |
| 13 | 6  | 0.000007681  | -0.000022386 | 0.000009201  |
| 14 | 6  | 0.000002923  | 0.000005701  | -0.000033071 |
| 15 | 1  | -0.000009910 | -0.000008969 | 0.000027841  |
| 16 | 1  | -0.000002638 | -0.000003422 | 0.000015699  |
| 17 | 1  | -0.000004423 | 0.000003232  | -0.000009098 |
| 18 | 6  | -0.000006870 | -0.000004003 | -0.000019074 |
| 19 | 1  | -0.000006795 | 0.000006045  | -0.000002309 |
| 20 | 1  | 0.000003240  | 0.000028053  | 0.000016539  |
| 21 | 6  | 0.000028257  | 0.000021020  | 0.000003580  |
| 22 | 8  | -0.000008586 | -0.000011953 | -0.000008742 |
| 23 | 8  | -0.000005843 | -0.000005247 | 0.000031103  |
| 24 | 1  | 0.000007814  | 0.000009431  | 0.000014233  |

-----  
Cartesian Forces: Max 0.000055058 RMS 0.000017743

GradGradGradGradGradGradGradGradGradGradGradGradGradGradGradGradGradGradGradGrad

Berny optimization.

Using GEDIIS/GDIIS optimizer.

FormGI is forming the generalized inverse of G from B-inverse, IUseBI=4.

GSVD: received Info= 1 from GESDD.

Internal Forces: Max 0.000032885 RMS 0.000009040

Search for a local minimum.

Step number 15 out of a maximum of 140

All quantities printed in internal units (Hartrees-Bohrs-Radians)

Mixed Optimization -- En-DIIS/RFO-DIIS

Swapping is turned off.

Update second derivatives using D2CorX and points 4 6 7 8 9  
10 11 12 13 14  
15

DE= -1.25D-06 DEPred=-5.19D-07 R= 2.40D+00

TightC=F SS= 1.41D+00 RLast= 1.59D-02 DXNew= 1.2000D+00 4.7686D-02

Trust test= 2.40D+00 RLast= 1.59D-02 DXMaxT set to 7.14D-01

ITU= 1 1 1 1 1 1 1 1 1 0-1 1 1 1 0

|                 |         |         |         |         |         |
|-----------------|---------|---------|---------|---------|---------|
| Eigenvalues --- | 0.00127 | 0.00217 | 0.00389 | 0.00428 | 0.01116 |
| Eigenvalues --- | 0.01617 | 0.01803 | 0.01901 | 0.02123 | 0.02201 |
| Eigenvalues --- | 0.02366 | 0.02405 | 0.02430 | 0.02988 | 0.03041 |

|                 |         |         |         |         |         |
|-----------------|---------|---------|---------|---------|---------|
| Eigenvalues --- | 0.03111 | 0.03148 | 0.03601 | 0.04094 | 0.04358 |
| Eigenvalues --- | 0.05097 | 0.05265 | 0.06395 | 0.07180 | 0.09630 |
| Eigenvalues --- | 0.09820 | 0.10895 | 0.12704 | 0.15567 | 0.15846 |
| Eigenvalues --- | 0.15952 | 0.15992 | 0.15995 | 0.16001 | 0.16003 |
| Eigenvalues --- | 0.16702 | 0.17848 | 0.20521 | 0.21881 | 0.23019 |
| Eigenvalues --- | 0.24440 | 0.24991 | 0.27349 | 0.27787 | 0.34331 |
| Eigenvalues --- | 0.34409 | 0.35160 | 0.35453 | 0.35490 | 0.35578 |
| Eigenvalues --- | 0.35843 | 0.36036 | 0.36468 | 0.36602 | 0.36656 |
| Eigenvalues --- | 0.37300 | 0.41339 | 0.42671 | 0.43560 | 0.47368 |
| Eigenvalues --- | 0.52340 | 0.53036 | 0.54047 | 0.54494 | 0.59917 |
| Eigenvalues --- | 0.92599 |         |         |         |         |

En-DIIS/RFO-DIIS IScMMF= 0 using points: 15 14 13 12 11

RFO step: Lambda=-3.66488620D-08.

DidBck=F Rises=F RFO-DIIS coefs: 1.19771 -0.09683 -0.26157 0.20091 -

0.04021

Iteration 1 RMS(Cart)= 0.00080918 RMS(Int)= 0.00000135

Iteration 2 RMS(Cart)= 0.00000058 RMS(Int)= 0.00000127

| Variable | Old X   | -DE/DX   | Delta X<br>(Linear) | Delta X<br>(Quad) | Delta X<br>(Total) | New X   |
|----------|---------|----------|---------------------|-------------------|--------------------|---------|
| R1       | 2.55862 | 0.00000  | 0.00000             | -0.00001          | -0.00001           | 2.55861 |
| R2       | 2.62595 | -0.00001 | 0.00001             | -0.00001          | 0.00000            | 2.62595 |
| R3       | 2.03327 | 0.00000  | 0.00000             | 0.00001           | 0.00001            | 2.03328 |
| R4       | 2.62974 | 0.00001  | 0.00001             | 0.00001           | 0.00001            | 2.62975 |
| R5       | 2.03113 | 0.00000  | 0.00000             | -0.00001          | -0.00002           | 2.03112 |
| R6       | 2.54971 | -0.00003 | -0.00003            | -0.00003          | -0.00006           | 2.54965 |
| R7       | 2.68645 | -0.00001 | -0.00002            | -0.00004          | -0.00006           | 2.68639 |
| R8       | 2.53231 | 0.00000  | 0.00003             | 0.00002           | 0.00005            | 2.53236 |
| R9       | 5.43838 | 0.00002  | 0.00037             | 0.00027           | 0.00064            | 5.43903 |
| R10      | 2.02672 | 0.00000  | 0.00000             | 0.00001           | 0.00001            | 2.02673 |
| R11      | 2.77555 | -0.00002 | -0.00007            | 0.00000           | -0.00007           | 2.77548 |
| R12      | 2.05767 | -0.00001 | -0.00001            | -0.00001          | -0.00002           | 2.05765 |
| R13      | 2.06200 | 0.00000  | -0.00001            | 0.00001           | 0.00000            | 2.06200 |
| R14      | 2.89276 | 0.00002  | 0.00015             | -0.00002          | 0.00013            | 2.89289 |
| R15      | 5.06809 | 0.00002  | 0.00112             | 0.00043           | 0.00155            | 5.06965 |
| R16      | 5.08228 | -0.00001 | -0.00081            | -0.00056          | -0.00137           | 5.08091 |
| R17      | 2.50774 | 0.00000  | 0.00000             | 0.00001           | 0.00001            | 2.50775 |
| R18      | 2.05027 | 0.00000  | -0.00002            | -0.00001          | -0.00003           | 2.05024 |
| R19      | 2.04363 | 0.00000  | 0.00000             | 0.00000           | 0.00000            | 2.04363 |
| R20      | 2.04781 | 0.00000  | -0.00001            | 0.00000           | -0.00001           | 2.04780 |
| R21      | 2.06604 | 0.00000  | 0.00008             | -0.00003          | 0.00005            | 2.06609 |
| R22      | 2.07976 | 0.00001  | -0.00005            | 0.00006           | 0.00001            | 2.07977 |
| R23      | 2.84461 | 0.00002  | 0.00010             | 0.00001           | 0.00010            | 2.84471 |
| R24      | 2.28302 | -0.00001 | 0.00001             | 0.00000           | 0.00000            | 2.28303 |
| R25      | 2.55154 | -0.00002 | -0.00009            | 0.00000           | -0.00010           | 2.55144 |

|     |         |          |          |          |          |         |
|-----|---------|----------|----------|----------|----------|---------|
| R26 | 1.83179 | 0.00001  | 0.00001  | 0.00000  | 0.00002  | 1.83181 |
| A1  | 1.87529 | -0.00001 | 0.00002  | -0.00002 | 0.00000  | 1.87530 |
| A2  | 2.27858 | 0.00001  | 0.00000  | 0.00002  | 0.00001  | 2.27859 |
| A3  | 2.12928 | 0.00000  | -0.00002 | 0.00000  | -0.00002 | 2.12927 |
| A4  | 1.86926 | 0.00001  | -0.00001 | 0.00003  | 0.00002  | 1.86928 |
| A5  | 2.28611 | -0.00001 | -0.00004 | -0.00004 | -0.00008 | 2.28603 |
| A6  | 2.12723 | 0.00000  | 0.00005  | 0.00001  | 0.00006  | 2.12730 |
| A7  | 1.89195 | -0.00001 | 0.00001  | -0.00002 | -0.00002 | 1.89194 |
| A8  | 2.22648 | 0.00001  | 0.00002  | 0.00007  | 0.00009  | 2.22657 |
| A9  | 2.15377 | 0.00000  | 0.00002  | -0.00002 | 0.00000  | 2.15378 |
| A10 | 1.89017 | 0.00001  | 0.00002  | 0.00001  | 0.00003  | 1.89020 |
| A11 | 1.80297 | -0.00001 | -0.00003 | -0.00014 | -0.00017 | 1.80280 |
| A12 | 2.18853 | 0.00000  | -0.00002 | 0.00001  | -0.00002 | 2.18851 |
| A13 | 1.90676 | 0.00000  | 0.00001  | 0.00007  | 0.00008  | 1.90684 |
| A14 | 2.19280 | -0.00001 | -0.00007 | -0.00002 | -0.00008 | 2.19271 |
| A15 | 1.89477 | 0.00000  | -0.00004 | 0.00001  | -0.00003 | 1.89474 |
| A16 | 2.20005 | -0.00001 | 0.00000  | -0.00008 | -0.00009 | 2.19996 |
| A17 | 2.17504 | 0.00001  | -0.00001 | 0.00004  | 0.00003  | 2.17506 |
| A18 | 1.87945 | -0.00001 | -0.00002 | 0.00004  | 0.00002  | 1.87946 |
| A19 | 1.88383 | 0.00000  | 0.00004  | -0.00004 | 0.00000  | 1.88383 |
| A20 | 1.94573 | 0.00001  | 0.00006  | 0.00006  | 0.00012  | 1.94584 |
| A21 | 1.87444 | 0.00000  | 0.00001  | 0.00002  | 0.00002  | 1.87447 |
| A22 | 1.92336 | 0.00000  | 0.00013  | -0.00004 | 0.00008  | 1.92344 |
| A23 | 1.95394 | -0.00001 | -0.00020 | -0.00003 | -0.00024 | 1.95371 |
| A24 | 1.20094 | 0.00001  | 0.00008  | -0.00006 | 0.00003  | 1.20097 |
| A25 | 1.33614 | 0.00000  | 0.00008  | -0.00009 | -0.00001 | 1.33614 |
| A26 | 2.15314 | 0.00002  | 0.00005  | 0.00009  | 0.00014  | 2.15328 |
| A27 | 1.95528 | 0.00000  | 0.00001  | -0.00001 | 0.00000  | 1.95528 |
| A28 | 2.17386 | -0.00001 | -0.00006 | -0.00007 | -0.00014 | 2.17373 |
| A29 | 2.08583 | 0.00000  | -0.00003 | -0.00002 | -0.00005 | 2.08578 |
| A30 | 2.14540 | 0.00001  | 0.00005  | 0.00004  | 0.00009  | 2.14549 |
| A31 | 2.05196 | 0.00000  | -0.00002 | -0.00002 | -0.00004 | 2.05192 |
| A32 | 1.95423 | -0.00001 | -0.00023 | 0.00003  | -0.00019 | 1.95403 |
| A33 | 1.90879 | 0.00001  | 0.00029  | -0.00004 | 0.00025  | 1.90904 |
| A34 | 1.93343 | -0.00001 | -0.00019 | 0.00001  | -0.00018 | 1.93325 |
| A35 | 1.85947 | 0.00000  | 0.00004  | -0.00001 | 0.00003  | 1.85949 |
| A36 | 1.90407 | 0.00001  | -0.00023 | 0.00018  | -0.00005 | 1.90402 |
| A37 | 1.90183 | 0.00000  | 0.00034  | -0.00017 | 0.00017  | 1.90200 |
| A38 | 2.60644 | -0.00001 | -0.00007 | 0.00022  | 0.00015  | 2.60659 |
| A39 | 2.18874 | -0.00002 | -0.00008 | -0.00003 | -0.00011 | 2.18863 |
| A40 | 1.94927 | 0.00003  | 0.00009  | 0.00003  | 0.00012  | 1.94940 |
| A41 | 2.14515 | -0.00001 | 0.00000  | -0.00001 | -0.00001 | 2.14514 |
| A42 | 1.87510 | 0.00001  | 0.00003  | 0.00000  | 0.00003  | 1.87514 |
| D1  | 0.00464 | 0.00000  | 0.00019  | -0.00029 | -0.00010 | 0.00454 |

|     |          |          |          |          |          |          |
|-----|----------|----------|----------|----------|----------|----------|
| D2  | 3.10912  | 0.00000  | 0.00006  | -0.00008 | -0.00002 | 3.10910  |
| D3  | -3.12869 | 0.00000  | 0.00006  | -0.00010 | -0.00004 | -3.12873 |
| D4  | -0.02422 | 0.00000  | -0.00007 | 0.00011  | 0.00004  | -0.02417 |
| D5  | -0.05037 | 0.00001  | -0.00015 | 0.00026  | 0.00011  | -0.05026 |
| D6  | -3.02297 | 0.00001  | 0.00022  | 0.00048  | 0.00070  | -3.02227 |
| D7  | 3.08382  | 0.00000  | -0.00003 | 0.00009  | 0.00005  | 3.08388  |
| D8  | 0.11123  | 0.00001  | 0.00034  | 0.00031  | 0.00064  | 0.11187  |
| D9  | 0.04231  | 0.00000  | -0.00016 | 0.00022  | 0.00006  | 0.04237  |
| D10 | 3.02793  | 0.00001  | 0.00014  | 0.00045  | 0.00059  | 3.02852  |
| D11 | -3.06629 | 0.00000  | -0.00005 | 0.00004  | -0.00001 | -3.06630 |
| D12 | -0.08067 | 0.00000  | 0.00025  | 0.00027  | 0.00052  | -0.08015 |
| D13 | -0.07412 | 0.00000  | 0.00007  | -0.00006 | 0.00000  | -0.07412 |
| D14 | 1.94672  | 0.00000  | 0.00007  | -0.00005 | 0.00003  | 1.94675  |
| D15 | -3.05922 | 0.00000  | 0.00053  | -0.00003 | 0.00049  | -3.05873 |
| D16 | -3.06769 | 0.00000  | -0.00022 | -0.00029 | -0.00050 | -3.06819 |
| D17 | -1.04685 | -0.00001 | -0.00021 | -0.00027 | -0.00048 | -1.04733 |
| D18 | 0.23039  | -0.00001 | 0.00024  | -0.00026 | -0.00001 | 0.23038  |
| D19 | 0.62761  | -0.00001 | -0.00108 | -0.00096 | -0.00204 | 0.62556  |
| D20 | -2.47019 | -0.00002 | -0.00104 | -0.00120 | -0.00224 | -2.47244 |
| D21 | -2.69147 | -0.00001 | -0.00075 | -0.00070 | -0.00145 | -2.69292 |
| D22 | 0.49391  | -0.00001 | -0.00071 | -0.00094 | -0.00165 | 0.49227  |
| D23 | 0.07705  | -0.00001 | 0.00005  | -0.00012 | -0.00007 | 0.07698  |
| D24 | 3.05265  | -0.00001 | -0.00031 | -0.00035 | -0.00066 | 3.05199  |
| D25 | -1.87511 | 0.00001  | 0.00006  | 0.00001  | 0.00007  | -1.87503 |
| D26 | 1.10049  | 0.00000  | -0.00030 | -0.00022 | -0.00052 | 1.09997  |
| D27 | 3.06167  | 0.00000  | -0.00041 | -0.00014 | -0.00055 | 3.06112  |
| D28 | -0.24592 | 0.00000  | -0.00077 | -0.00038 | -0.00114 | -0.24706 |
| D29 | -2.26248 | 0.00000  | 0.00002  | -0.00002 | 0.00000  | -2.26247 |
| D30 | -0.25349 | 0.00000  | 0.00005  | -0.00005 | -0.00001 | -0.25350 |
| D31 | -2.86195 | 0.00000  | 0.00019  | 0.00013  | 0.00033  | -2.86162 |
| D32 | -0.84327 | 0.00000  | 0.00021  | 0.00015  | 0.00036  | -0.84290 |
| D33 | 1.30947  | 0.00000  | 0.00001  | 0.00013  | 0.00014  | 1.30962  |
| D34 | 0.47462  | 0.00001  | 0.00062  | 0.00039  | 0.00102  | 0.47564  |
| D35 | 2.49331  | 0.00001  | 0.00064  | 0.00041  | 0.00105  | 2.49436  |
| D36 | -1.63714 | 0.00001  | 0.00044  | 0.00039  | 0.00083  | -1.63631 |
| D37 | -1.08986 | 0.00000  | -0.00013 | 0.00004  | -0.00008 | -1.08994 |
| D38 | 0.96702  | 0.00000  | -0.00003 | 0.00002  | -0.00001 | 0.96701  |
| D39 | 3.06353  | 0.00000  | 0.00046  | -0.00021 | 0.00025  | 3.06377  |
| D40 | 3.10740  | 0.00000  | -0.00022 | -0.00002 | -0.00023 | 3.10717  |
| D41 | -1.11890 | 0.00000  | -0.00013 | -0.00004 | -0.00016 | -1.11907 |
| D42 | 0.97760  | 0.00000  | 0.00037  | -0.00027 | 0.00010  | 0.97770  |
| D43 | 1.02244  | 0.00000  | -0.00018 | 0.00001  | -0.00017 | 1.02228  |
| D44 | 3.07932  | 0.00000  | -0.00009 | -0.00001 | -0.00009 | 3.07923  |
| D45 | -1.10735 | 0.00000  | 0.00040  | -0.00024 | 0.00016  | -1.10719 |

|     |          |          |          |          |          |          |
|-----|----------|----------|----------|----------|----------|----------|
| D46 | 0.00470  | 0.00001  | 0.00004  | 0.00050  | 0.00054  | 0.00524  |
| D47 | 0.37935  | 0.00000  | 0.00001  | 0.00050  | 0.00050  | 0.37985  |
| D48 | -3.08807 | -0.00002 | -0.00002 | -0.00047 | -0.00049 | -3.08856 |
| D49 | 0.05013  | 0.00000  | -0.00001 | -0.00005 | -0.00007 | 0.05006  |
| D50 | 0.00423  | -0.00001 | -0.00006 | -0.00020 | -0.00027 | 0.00396  |
| D51 | -3.14076 | 0.00001  | -0.00005 | 0.00022  | 0.00016  | -3.14060 |
| D52 | -0.34782 | 0.00000  | -0.00002 | -0.00051 | -0.00052 | -0.34834 |
| D53 | 1.76753  | 0.00000  | -0.00011 | -0.00049 | -0.00060 | 1.76693  |
| D54 | -2.46359 | 0.00001  | -0.00017 | -0.00038 | -0.00056 | -2.46414 |
| D55 | -0.17495 | 0.00000  | 0.00118  | -0.00071 | 0.00047  | -0.17447 |
| D56 | 2.97356  | -0.00001 | 0.00096  | -0.00068 | 0.00029  | 2.97384  |
| D57 | -2.33383 | 0.00000  | 0.00176  | -0.00088 | 0.00088  | -2.33296 |
| D58 | 0.81467  | 0.00000  | 0.00153  | -0.00085 | 0.00069  | 0.81536  |
| D59 | 1.92571  | 0.00000  | 0.00164  | -0.00086 | 0.00078  | 1.92649  |
| D60 | -1.20897 | 0.00000  | 0.00142  | -0.00083 | 0.00059  | -1.20837 |
| D61 | 3.09315  | 0.00000  | 0.00052  | -0.00029 | 0.00023  | 3.09338  |
| D62 | -0.04174 | 0.00000  | 0.00031  | -0.00026 | 0.00005  | -0.04168 |

| Item                 | Value    | Threshold | Converged? |
|----------------------|----------|-----------|------------|
| Maximum Force        | 0.000033 | 0.000450  | YES        |
| RMS Force            | 0.000009 | 0.000300  | YES        |
| Maximum Displacement | 0.005464 | 0.001800  | NO         |
| RMS Displacement     | 0.000809 | 0.001200  | YES        |

Predicted change in Energy=-1.302153D-07

GradGradGradGradGradGradGradGradGradGradGradGradGradGradGradGradGradGradGrad

Input orientation:

| Center Number | Atomic Number | Atomic Type | Coordinates (Angstroms) |           |           |
|---------------|---------------|-------------|-------------------------|-----------|-----------|
|               |               |             | X                       | Y         | Z         |
| 1             | 6             | 0           | -0.330836               | -2.229295 | -0.386309 |
| 2             | 6             | 0           | -1.580512               | -1.780440 | -0.650966 |
| 3             | 7             | 0           | -1.803090               | -0.680508 | 0.171937  |
| 4             | 6             | 0           | -0.679075               | -0.443746 | 0.879689  |
| 5             | 7             | 0           | 0.206103                | -1.409981 | 0.599280  |
| 6             | 6             | 0           | 1.589519                | -1.442772 | 1.091447  |
| 7             | 1             | 0           | 0.223347                | -3.047485 | -0.811919 |
| 8             | 1             | 0           | -2.314639               | -2.116490 | -1.360450 |
| 9             | 1             | 0           | 1.618397                | -0.897850 | 2.033702  |
| 10            | 1             | 0           | 1.844859                | -2.481454 | 1.307256  |
| 11            | 35            | 0           | 0.267435                | 2.052103  | -0.196854 |
| 12            | 1             | 0           | -0.573629               | 0.296219  | 1.648839  |
| 13            | 6             | 0           | -2.921108               | 0.197455  | 0.161915  |
| 14            | 6             | 0           | -4.161085               | -0.202422 | -0.090281 |

|    |   |   |           |           |           |
|----|---|---|-----------|-----------|-----------|
| 15 | 1 | 0 | -2.631180 | 1.227604  | 0.340311  |
| 16 | 1 | 0 | -4.958262 | 0.527245  | -0.130409 |
| 17 | 1 | 0 | -4.421616 | -1.239858 | -0.263912 |
| 18 | 6 | 0 | 2.557337  | -0.812802 | 0.086476  |
| 19 | 1 | 0 | 2.576829  | -1.359459 | -0.860178 |
| 20 | 1 | 0 | 2.225039  | 0.209655  | -0.148915 |
| 21 | 6 | 0 | 3.951551  | -0.756541 | 0.651368  |
| 22 | 8 | 0 | 4.251862  | -0.988939 | 1.798267  |
| 23 | 8 | 0 | 4.855766  | -0.400380 | -0.285911 |
| 24 | 1 | 0 | 5.718959  | -0.340632 | 0.151091  |

-----  
Distance matrix (angstroms):

|    |    | 1        | 2        | 3        | 4        | 5        |
|----|----|----------|----------|----------|----------|----------|
| 1  | C  | 0.000000 |          |          |          |          |
| 2  | C  | 1.353959 | 0.000000 |          |          |          |
| 3  | N  | 2.208599 | 1.391603 | 0.000000 |          |          |
| 4  | C  | 2.216350 | 2.223116 | 1.349214 | 0.000000 |          |
| 5  | N  | 1.389592 | 2.211865 | 2.179819 | 1.340067 | 0.000000 |
| 6  | C  | 2.547576 | 3.633059 | 3.596712 | 2.487853 | 1.468721 |
| 7  | H  | 1.075964 | 2.210253 | 3.267568 | 3.233475 | 2.161759 |
| 8  | H  | 2.212950 | 1.074821 | 2.161466 | 3.239038 | 3.270143 |
| 9  | H  | 3.380638 | 4.268422 | 3.901280 | 2.610812 | 2.077118 |
| 10 | H  | 2.768645 | 4.007396 | 4.223729 | 3.271897 | 2.082019 |
| 11 | Br | 4.327145 | 4.278961 | 3.448223 | 2.878209 | 3.552973 |
| 12 | H  | 3.252537 | 3.258132 | 2.155646 | 1.072501 | 2.149576 |
| 13 | C  | 3.591542 | 2.523894 | 1.421578 | 2.439887 | 3.543246 |
| 14 | C  | 4.343576 | 3.076339 | 2.420220 | 3.622633 | 4.583233 |
| 15 | H  | 4.215413 | 3.336894 | 2.086858 | 2.625843 | 3.882538 |
| 16 | H  | 5.392315 | 4.123782 | 3.391930 | 4.502728 | 5.563808 |
| 17 | H  | 4.210517 | 2.917861 | 2.712843 | 3.993524 | 4.710608 |
| 18 | C  | 3.251388 | 4.312996 | 4.363271 | 3.352574 | 2.479494 |
| 19 | H  | 3.071755 | 4.183836 | 4.550816 | 3.803496 | 2.784405 |
| 20 | H  | 3.540809 | 4.323743 | 4.137772 | 3.149418 | 2.694275 |
| 21 | C  | 4.645925 | 5.774787 | 5.775079 | 4.646791 | 3.802378 |
| 22 | O  | 5.226086 | 6.375092 | 6.277143 | 5.045311 | 4.240638 |
| 23 | O  | 5.500532 | 6.592686 | 6.680454 | 5.656410 | 4.839651 |
| 24 | H  | 6.360493 | 7.483223 | 7.529753 | 6.440212 | 5.633468 |
|    |    | 6        | 7        | 8        | 9        | 10       |
| 6  | C  | 0.000000 |          |          |          |          |
| 7  | H  | 2.839777 | 0.000000 |          |          |          |
| 8  | H  | 4.659200 | 2.758443 | 0.000000 |          |          |
| 9  | H  | 1.088861 | 3.829446 | 5.336115 | 0.000000 |          |
| 10 | H  | 1.091161 | 2.727745 | 4.954924 | 1.756932 | 0.000000 |
| 11 | Br | 3.952439 | 5.136735 | 5.039665 | 3.937347 | 5.030283 |



|    |    |           |           |          |          |          |
|----|----|-----------|-----------|----------|----------|----------|
| 12 | H  | 2.830898  | 4.227394  | 4.231796 | 2.525649 | 3.698815 |
| 13 | C  | 4.888776  | 4.622292  | 2.835444 | 5.030943 | 5.585947 |
| 14 | C  | 6.000366  | 5.276209  | 2.947261 | 6.196559 | 6.574074 |
| 15 | H  | 5.050684  | 5.268050  | 3.765070 | 5.044208 | 5.892964 |
| 16 | H  | 6.946030  | 6.331842  | 3.935871 | 7.068714 | 7.576385 |
| 17 | H  | 6.165381  | 5.014331  | 2.531844 | 6.471304 | 6.578666 |
| 18 | C  | 1.530850  | 3.353868  | 5.246841 | 2.163454 | 2.186854 |
| 19 | H  | 2.188736  | 2.896660  | 4.974919 | 3.083216 | 2.548024 |
| 20 | H  | 2.161689  | 3.880117  | 5.242846 | 2.521587 | 3.083349 |
| 21 | C  | 2.498756  | 4.614016  | 6.720269 | 2.715589 | 2.800655 |
| 22 | O  | 2.791707  | 5.222989  | 7.373452 | 2.645537 | 2.874432 |
| 23 | O  | 3.694871  | 5.361265  | 7.450797 | 4.013557 | 3.991819 |
| 24 | H  | 4.376215  | 6.201306  | 8.365233 | 4.546353 | 4.574767 |
|    |    | 11        | 12        | 13       | 14       | 15       |
| 11 | Br | 0.000000  |           |          |          |          |
| 12 | H  | 2.682741  | 0.000000  |          |          |          |
| 13 | C  | 3.706108  | 2.780531  | 0.000000 |          |          |
| 14 | C  | 4.970516  | 4.017837  | 1.327044 | 0.000000 |          |
| 15 | H  | 3.061096  | 2.610218  | 1.084938 | 2.137988 | 0.000000 |
| 16 | H  | 5.444035  | 4.737520  | 2.084277 | 1.081441 | 2.475357 |
| 17 | H  | 5.729634  | 4.563458  | 2.121019 | 1.083650 | 3.107912 |
| 18 | C  | 3.678533  | 3.670676  | 5.571326 | 6.748407 | 5.581075 |
| 19 | H  | 4.172776  | 4.354518  | 5.804823 | 6.879750 | 5.937797 |
| 20 | H  | 2.688704  | 3.327455  | 5.155540 | 6.399673 | 4.985822 |
| 21 | C  | 4.709636  | 4.751896  | 6.955797 | 8.165289 | 6.882292 |
| 22 | O  | 5.394822  | 4.995931  | 7.452294 | 8.658112 | 7.376650 |
| 23 | O  | 5.203401  | 5.805760  | 7.812664 | 9.021145 | 7.687447 |
| 24 | H  | 5.963671  | 6.499654  | 8.656813 | 9.883958 | 8.498235 |
|    |    | 16        | 17        | 18       | 19       | 20       |
| 16 | H  | 0.000000  |           |          |          |          |
| 17 | H  | 1.851611  | 0.000000  |          |          |          |
| 18 | C  | 7.637211  | 7.000782  | 0.000000 |          |          |
| 19 | H  | 7.801911  | 7.024819  | 1.093328 | 0.000000 |          |
| 20 | H  | 7.190342  | 6.803847  | 1.100567 | 1.758343 | 0.000000 |
| 21 | C  | 9.035710  | 8.436899  | 1.505358 | 2.130292 | 2.134205 |
| 22 | O  | 9.531264  | 8.918788  | 2.415092 | 3.163914 | 3.055512 |
| 23 | O  | 9.858997  | 9.315312  | 2.364644 | 2.538340 | 2.704004 |
| 24 | H  | 10.716133 | 10.188823 | 3.197339 | 3.454512 | 3.549690 |
|    |    | 21        | 22        | 23       | 24       |          |
| 21 | C  | 0.000000  |           |          |          |          |
| 22 | O  | 1.208127  | 0.000000  |          |          |          |
| 23 | O  | 1.350166  | 2.248310  | 0.000000 |          |          |
| 24 | H  | 1.883345  | 2.299100  | 0.969352 | 0.000000 |          |

Stoichiometry C8H11BrN2O2

Framework group C1[X(C8H11BrN2O2)]  
 Deg. of freedom 66  
 Full point group C1 NOp 1  
 Largest Abelian subgroup C1 NOp 1  
 Largest concise Abelian subgroup C1 NOp 1

Standard orientation:

| Center<br>Number | Atomic<br>Number | Atomic<br>Type | Coordinates (Angstroms) |           |           |
|------------------|------------------|----------------|-------------------------|-----------|-----------|
|                  |                  |                | X                       | Y         | Z         |
| 1                | 6                | 0              | -0.660249               | -2.162022 | -0.761203 |
| 2                | 6                | 0              | -1.968932               | -1.826519 | -0.850591 |
| 3                | 7                | 0              | -2.211013               | -0.860385 | 0.121284  |
| 4                | 6                | 0              | -1.047629               | -0.584159 | 0.746276  |
| 5                | 7                | 0              | -0.105987               | -1.407727 | 0.265831  |
| 6                | 6                | 0              | 1.317975                | -1.344011 | 0.619967  |
| 7                | 1                | 0              | -0.076002               | -2.859268 | -1.335834 |
| 8                | 1                | 0              | -2.736898               | -2.157455 | -1.525832 |
| 9                | 1                | 0              | 1.391953                | -0.911736 | 1.616604  |
| 10               | 1                | 0              | 1.695668                | -2.366032 | 0.678738  |
| 11               | 35               | 0              | -0.470074               | 2.108558  | -0.090259 |
| 12               | 1                | 0              | -0.935301               | 0.069108  | 1.589415  |
| 13               | 6                | 0              | -3.404909               | -0.116149 | 0.325268  |
| 14               | 6                | 0              | -4.619072               | -0.618827 | 0.140419  |
| 15               | 1                | 0              | -3.200731               | 0.912195  | 0.604394  |
| 16               | 1                | 0              | -5.484032               | 0.017965  | 0.266341  |
| 17               | 1                | 0              | -4.792942               | -1.651665 | -0.137634 |
| 18               | 6                | 0              | 2.107956                | -0.499083 | -0.382794 |
| 19               | 1                | 0              | 2.081552                | -0.927215 | -1.388464 |
| 20               | 1                | 0              | 1.653648                | 0.500676  | -0.455837 |
| 21               | 6                | 0              | 3.541479                | -0.354667 | 0.053391  |
| 22               | 8                | 0              | 3.982152                | -0.683344 | 1.129193  |
| 23               | 8                | 0              | 4.302612                | 0.205125  | -0.911108 |
| 24               | 1                | 0              | 5.196864                | 0.309052  | -0.551726 |

Rotational constants (GHZ): 0.8053305 0.3345684 0.2550566

Standard basis: 6-311++G(d,p) (5D, 7F)

There are 404 symmetry adapted cartesian basis functions of A symmetry.

There are 389 symmetry adapted basis functions of A symmetry.

389 basis functions, 625 primitive gaussians, 404 cartesian basis functions

62 alpha electrons 62 beta electrons

nuclear repulsion energy 1072.5915901237 Hartrees.

NAtoms= 24 NActive= 24 NUniq= 24 SFac= 1.00D+00 NAtFMM= 60 NAOKFM=F

Big=F

Integral buffers will be 131072 words long.  
 Raffenetti 2 integral format.  
 Two-electron integral symmetry is turned on.  
 One-electron integrals computed using PRISM.  
 NBasis= 389 RedAO= T EigKep= 6.51D-06 NBF= 389  
 NBsUse= 389 1.00D-06 EigRej= -1.00D+00 NBFU= 389  
 Initial guess from the checkpoint file: "/cooh.chk"  
 B after Tr= 0.000000 0.000000 0.000000  
 Rot= 1.000000 -0.000070 -0.000007 0.000023 Ang= -0.01 deg.  
 Keep R1 ints in memory in canonical form, NReq=2910765817.  
 Requested convergence on RMS density matrix=1.00D-08 within 128 cycles.  
 Requested convergence on MAX density matrix=1.00D-06.  
 Requested convergence on energy=1.00D-06.  
 No special actions if energy rises.  
 SCF Done: E(RB3LYP) = -3145.73224366 A.U. after 8 cycles  
 NFock= 8 Conv=0.83D-08 -V/T= 2.0017  
 Calling FoFJK, ICntrl= 2127 FMM=F ISym2X=0 l1Cent= 0 IOpClX= 0 NMat=1 NMatS=1  
 NMatT=0.

\*\*\*\*\* Axes restored to original set \*\*\*\*\*

| Center Number | Atomic Number | Forces (Hartrees/Bohr) |              |              |
|---------------|---------------|------------------------|--------------|--------------|
|               |               | X                      | Y            | Z            |
| 1             | 6             | 0.00007022             | 0.000013444  | -0.000024427 |
| 2             | 6             | -0.000003435           | -0.000001229 | 0.000000401  |
| 3             | 7             | 0.000011071            | 0.000033535  | -0.000036965 |
| 4             | 6             | -0.000013354           | -0.000037178 | 0.000019346  |
| 5             | 7             | -0.000009424           | 0.000000091  | 0.000012756  |
| 6             | 6             | 0.000004646            | -0.000000872 | -0.000010817 |
| 7             | 1             | 0.000003675            | 0.000008835  | -0.000019080 |
| 8             | 1             | 0.000005103            | 0.000009676  | -0.000015884 |
| 9             | 1             | -0.000002438           | -0.000012186 | -0.000000756 |
| 10            | 1             | -0.000002015           | -0.000010764 | -0.000009992 |
| 11            | 35            | 0.000001604            | 0.000008590  | 0.000008664  |
| 12            | 1             | -0.000000124           | -0.000008337 | 0.000004224  |
| 13            | 6             | 0.000010045            | -0.000021645 | 0.000023469  |
| 14            | 6             | 0.000000289            | 0.000003568  | -0.000007407 |
| 15            | 1             | -0.000009017           | -0.000007130 | 0.000016286  |
| 16            | 1             | 0.000000443            | -0.000001966 | 0.000000867  |
| 17            | 1             | -0.000000880           | 0.000001840  | -0.000014571 |
| 18            | 6             | 0.000005326            | -0.000030703 | -0.000011919 |
| 19            | 1             | -0.000002635           | 0.000021753  | 0.000003518  |
| 20            | 1             | -0.000000367           | 0.000020306  | 0.000026650  |
| 21            | 6             | -0.000011728           | 0.000001205  | 0.000008681  |

|    |   |              |              |             |
|----|---|--------------|--------------|-------------|
| 22 | 8 | 0.000000074  | -0.000006484 | 0.000007058 |
| 23 | 8 | 0.000007520  | 0.000006134  | 0.000006272 |
| 24 | 1 | -0.000001400 | 0.000009518  | 0.000013626 |

-----  
 Cartesian Forces: Max 0.000037178 RMS 0.000013162

GradGradGradGradGradGradGradGradGradGradGradGradGradGradGradGradGradGradGradGrad

Berny optimization.

Using GEDIIS/GDIIS optimizer.

FormGI is forming the generalized inverse of G from B-inverse, IUseBI=4.

GSVD: received Info= 1 from GESDD.

Internal Forces: Max 0.000013183 RMS 0.000003985

Search for a local minimum.

Step number 16 out of a maximum of 140

All quantities printed in internal units (Hartrees-Bohrs-Radians)

Mixed Optimization -- En-DIIS/RFO-DIIS

Swapping is turned off.

Update second derivatives using D2CorX and points

|   |    |    |    |    |
|---|----|----|----|----|
| 4 | 6  | 7  | 8  | 9  |
|   | 10 | 11 | 12 | 13 |
|   | 14 | 15 | 16 |    |

DE= -4.27D-07 DEPred=-1.30D-07 R= 3.28D+00

Trust test= 3.28D+00 RLast= 5.61D-03 DXMaxT set to 7.14D-01

ITU= 0 1 1 1 1 1 1 1 1 1 0 -1 1 1 1 0

|                 |         |         |         |         |         |
|-----------------|---------|---------|---------|---------|---------|
| Eigenvalues --- | 0.00136 | 0.00224 | 0.00345 | 0.00399 | 0.00914 |
| Eigenvalues --- | 0.01346 | 0.01793 | 0.01842 | 0.02144 | 0.02228 |
| Eigenvalues --- | 0.02361 | 0.02419 | 0.02459 | 0.03026 | 0.03051 |
| Eigenvalues --- | 0.03149 | 0.03318 | 0.03558 | 0.04163 | 0.04407 |
| Eigenvalues --- | 0.05158 | 0.05277 | 0.06379 | 0.07161 | 0.09598 |
| Eigenvalues --- | 0.09756 | 0.10901 | 0.12734 | 0.15560 | 0.15826 |
| Eigenvalues --- | 0.15916 | 0.15993 | 0.15996 | 0.16001 | 0.16012 |
| Eigenvalues --- | 0.16714 | 0.17858 | 0.20429 | 0.21800 | 0.23097 |
| Eigenvalues --- | 0.24416 | 0.25073 | 0.27411 | 0.27818 | 0.34380 |
| Eigenvalues --- | 0.34454 | 0.35177 | 0.35286 | 0.35499 | 0.35578 |
| Eigenvalues --- | 0.35843 | 0.36032 | 0.36521 | 0.36607 | 0.36658 |
| Eigenvalues --- | 0.37493 | 0.41344 | 0.42650 | 0.43468 | 0.47325 |
| Eigenvalues --- | 0.52422 | 0.53227 | 0.54055 | 0.54455 | 0.59923 |
| Eigenvalues --- | 0.93015 |         |         |         |         |

En-DIIS/RFO-DIIS IScMMF= 0 using points: 16 15 14 13 12

RFO step: Lambda=-1.04367538D-08.

DidBck=F Rises=F RFO-DIIS coefs: 1.53041 -0.40575 -0.24454 0.18330 -  
 0.06342

Iteration 1 RMS(Cart)= 0.00069405 RMS(Int)= 0.00000050

Iteration 2 RMS(Cart)= 0.00000059 RMS(Int)= 0.00000030

|          |       |        |         |         |         |       |
|----------|-------|--------|---------|---------|---------|-------|
| Variable | Old X | -DE/DX | Delta X | Delta X | Delta X | New X |
|----------|-------|--------|---------|---------|---------|-------|

|     |         |          | (Linear) | (Quad)   | (Total)  |         |
|-----|---------|----------|----------|----------|----------|---------|
| R1  | 2.55861 | 0.00000  | 0.00000  | 0.00000  | -0.00001 | 2.55860 |
| R2  | 2.62595 | 0.00000  | 0.00001  | 0.00000  | 0.00001  | 2.62595 |
| R3  | 2.03328 | 0.00000  | 0.00000  | 0.00000  | 0.00000  | 2.03328 |
| R4  | 2.62975 | 0.00000  | 0.00000  | -0.00001 | 0.00000  | 2.62974 |
| R5  | 2.03112 | 0.00000  | -0.00001 | 0.00000  | -0.00001 | 2.03111 |
| R6  | 2.54965 | -0.00001 | -0.00005 | 0.00001  | -0.00004 | 2.54961 |
| R7  | 2.68639 | -0.00001 | -0.00002 | -0.00005 | -0.00007 | 2.68632 |
| R8  | 2.53236 | -0.00001 | 0.00001  | -0.00001 | 0.00000  | 2.53236 |
| R9  | 5.43903 | 0.00001  | 0.00050  | -0.00008 | 0.00042  | 5.43944 |
| R10 | 2.02673 | 0.00000  | 0.00002  | -0.00001 | 0.00001  | 2.02674 |
| R11 | 2.77548 | 0.00000  | -0.00002 | -0.00001 | -0.00002 | 2.77546 |
| R12 | 2.05765 | 0.00000  | -0.00002 | 0.00000  | -0.00001 | 2.05764 |
| R13 | 2.06200 | 0.00000  | 0.00000  | 0.00001  | 0.00001  | 2.06201 |
| R14 | 2.89289 | 0.00000  | 0.00002  | 0.00001  | 0.00003  | 2.89292 |
| R15 | 5.06965 | 0.00001  | 0.00081  | 0.00016  | 0.00097  | 5.07061 |
| R16 | 5.08091 | 0.00000  | -0.00022 | -0.00029 | -0.00051 | 5.08040 |
| R17 | 2.50775 | 0.00000  | 0.00000  | 0.00001  | 0.00000  | 2.50775 |
| R18 | 2.05024 | 0.00000  | -0.00002 | -0.00001 | -0.00003 | 2.05020 |
| R19 | 2.04363 | 0.00000  | 0.00000  | 0.00000  | -0.00001 | 2.04362 |
| R20 | 2.04780 | 0.00000  | -0.00001 | 0.00000  | -0.00001 | 2.04779 |
| R21 | 2.06609 | -0.00001 | 0.00000  | -0.00001 | -0.00002 | 2.06608 |
| R22 | 2.07977 | 0.00001  | 0.00003  | 0.00001  | 0.00005  | 2.07982 |
| R23 | 2.84471 | 0.00000  | 0.00005  | -0.00002 | 0.00003  | 2.84475 |
| R24 | 2.28303 | 0.00000  | -0.00001 | 0.00001  | 0.00000  | 2.28302 |
| R25 | 2.55144 | 0.00001  | -0.00003 | 0.00002  | -0.00002 | 2.55143 |
| R26 | 1.83181 | 0.00000  | 0.00001  | 0.00000  | 0.00001  | 1.83182 |
| A1  | 1.87530 | 0.00000  | 0.00002  | 0.00000  | 0.00002  | 1.87532 |
| A2  | 2.27859 | 0.00000  | 0.00000  | 0.00000  | 0.00000  | 2.27859 |
| A3  | 2.12927 | 0.00000  | -0.00002 | 0.00000  | -0.00001 | 2.12926 |
| A4  | 1.86928 | 0.00000  | -0.00001 | 0.00000  | -0.00001 | 1.86926 |
| A5  | 2.28603 | 0.00000  | -0.00002 | -0.00002 | -0.00004 | 2.28599 |
| A6  | 2.12730 | 0.00000  | 0.00004  | 0.00001  | 0.00005  | 2.12735 |
| A7  | 1.89194 | 0.00000  | 0.00000  | 0.00000  | 0.00000  | 1.89194 |
| A8  | 2.22657 | 0.00001  | 0.00004  | 0.00004  | 0.00009  | 2.22666 |
| A9  | 2.15378 | 0.00000  | 0.00000  | 0.00000  | -0.00001 | 2.15377 |
| A10 | 1.89020 | 0.00000  | 0.00003  | 0.00000  | 0.00002  | 1.89022 |
| A11 | 1.80280 | -0.00001 | -0.00014 | -0.00007 | -0.00021 | 1.80259 |
| A12 | 2.18851 | 0.00000  | 0.00001  | -0.00001 | 0.00000  | 2.18852 |
| A13 | 1.90684 | 0.00000  | -0.00010 | -0.00002 | -0.00013 | 1.90672 |
| A14 | 2.19271 | 0.00000  | -0.00003 | 0.00001  | -0.00002 | 2.19269 |
| A15 | 1.89474 | 0.00000  | -0.00003 | -0.00001 | -0.00004 | 1.89470 |
| A16 | 2.19996 | 0.00000  | -0.00005 | -0.00004 | -0.00008 | 2.19988 |
| A17 | 2.17506 | 0.00000  | 0.00003  | 0.00002  | 0.00005  | 2.17511 |

|     |          |          |          |          |          |          |
|-----|----------|----------|----------|----------|----------|----------|
| A18 | 1.87946  | 0.00000  | 0.00010  | -0.00008 | 0.00001  | 1.87948  |
| A19 | 1.88383  | 0.00000  | -0.00001 | -0.00001 | -0.00002 | 1.88381  |
| A20 | 1.94584  | 0.00000  | 0.00008  | -0.00001 | 0.00007  | 1.94591  |
| A21 | 1.87447  | 0.00000  | 0.00003  | 0.00000  | 0.00002  | 1.87449  |
| A22 | 1.92344  | 0.00000  | -0.00003 | 0.00003  | 0.00000  | 1.92344  |
| A23 | 1.95371  | 0.00000  | -0.00016 | 0.00008  | -0.00008 | 1.95362  |
| A24 | 1.20097  | 0.00000  | 0.00008  | 0.00001  | 0.00009  | 1.20105  |
| A25 | 1.33614  | 0.00000  | 0.00008  | -0.00003 | 0.00004  | 1.33618  |
| A26 | 2.15328  | 0.00001  | 0.00006  | 0.00005  | 0.00011  | 2.15339  |
| A27 | 1.95528  | 0.00000  | 0.00000  | 0.00002  | 0.00002  | 1.95531  |
| A28 | 2.17373  | -0.00001 | -0.00006 | -0.00008 | -0.00014 | 2.17358  |
| A29 | 2.08578  | 0.00000  | -0.00002 | -0.00002 | -0.00004 | 2.08574  |
| A30 | 2.14549  | 0.00000  | 0.00004  | 0.00003  | 0.00007  | 2.14556  |
| A31 | 2.05192  | 0.00000  | -0.00002 | -0.00001 | -0.00003 | 2.05188  |
| A32 | 1.95403  | 0.00000  | -0.00006 | 0.00007  | 0.00001  | 1.95404  |
| A33 | 1.90904  | 0.00000  | 0.00010  | -0.00004 | 0.00006  | 1.90910  |
| A34 | 1.93325  | 0.00000  | -0.00011 | 0.00004  | -0.00006 | 1.93318  |
| A35 | 1.85949  | 0.00000  | 0.00002  | -0.00002 | 0.00000  | 1.85949  |
| A36 | 1.90402  | 0.00000  | 0.00010  | 0.00002  | 0.00012  | 1.90414  |
| A37 | 1.90200  | 0.00000  | -0.00005 | -0.00008 | -0.00013 | 1.90187  |
| A38 | 2.60659  | 0.00000  | -0.00014 | 0.00006  | -0.00008 | 2.60651  |
| A39 | 2.18863  | 0.00000  | -0.00006 | 0.00002  | -0.00004 | 2.18859  |
| A40 | 1.94940  | 0.00000  | 0.00006  | 0.00000  | 0.00006  | 1.94945  |
| A41 | 2.14514  | 0.00000  | 0.00000  | -0.00002 | -0.00002 | 2.14512  |
| A42 | 1.87514  | 0.00000  | 0.00001  | 0.00000  | 0.00001  | 1.87515  |
| D1  | 0.00454  | 0.00000  | -0.00009 | 0.00027  | 0.00018  | 0.00472  |
| D2  | 3.10910  | 0.00000  | 0.00002  | 0.00013  | 0.00015  | 3.10925  |
| D3  | -3.12873 | 0.00000  | -0.00005 | 0.00008  | 0.00003  | -3.12870 |
| D4  | -0.02417 | 0.00000  | 0.00006  | -0.00006 | 0.00000  | -0.02417 |
| D5  | -0.05026 | 0.00000  | 0.00011  | -0.00027 | -0.00016 | -0.05042 |
| D6  | -3.02227 | 0.00000  | 0.00040  | -0.00010 | 0.00030  | -3.02197 |
| D7  | 3.08388  | 0.00000  | 0.00007  | -0.00010 | -0.00002 | 3.08385  |
| D8  | 0.11187  | 0.00000  | 0.00036  | 0.00007  | 0.00043  | 0.11230  |
| D9  | 0.04237  | 0.00000  | 0.00004  | -0.00018 | -0.00014 | 0.04223  |
| D10 | 3.02852  | 0.00000  | 0.00034  | 0.00012  | 0.00046  | 3.02898  |
| D11 | -3.06630 | 0.00000  | -0.00006 | -0.00006 | -0.00012 | -3.06641 |
| D12 | -0.08015 | 0.00000  | 0.00025  | 0.00024  | 0.00049  | -0.07966 |
| D13 | -0.07412 | 0.00000  | 0.00003  | 0.00002  | 0.00005  | -0.07407 |
| D14 | 1.94675  | 0.00000  | -0.00014 | -0.00004 | -0.00019 | 1.94656  |
| D15 | -3.05873 | 0.00000  | -0.00003 | 0.00005  | 0.00003  | -3.05871 |
| D16 | -3.06819 | 0.00000  | -0.00027 | -0.00027 | -0.00054 | -3.06873 |
| D17 | -1.04733 | -0.00001 | -0.00044 | -0.00033 | -0.00077 | -1.04810 |
| D18 | 0.23038  | -0.00001 | -0.00032 | -0.00023 | -0.00056 | 0.22982  |
| D19 | 0.62556  | -0.00001 | -0.00110 | -0.00087 | -0.00198 | 0.62359  |

|     |          |          |          |          |          |          |
|-----|----------|----------|----------|----------|----------|----------|
| D20 | -2.47244 | -0.00001 | -0.00105 | -0.00080 | -0.00185 | -2.47429 |
| D21 | -2.69292 | -0.00001 | -0.00075 | -0.00053 | -0.00129 | -2.69421 |
| D22 | 0.49227  | 0.00000  | -0.00070 | -0.00046 | -0.00116 | 0.49110  |
| D23 | 0.07698  | 0.00000  | -0.00008 | 0.00015  | 0.00007  | 0.07705  |
| D24 | 3.05199  | -0.00001 | -0.00037 | -0.00002 | -0.00040 | 3.05159  |
| D25 | -1.87503 | 0.00001  | 0.00012  | 0.00024  | 0.00036  | -1.87467 |
| D26 | 1.09997  | 0.00000  | -0.00017 | 0.00007  | -0.00010 | 1.09987  |
| D27 | 3.06112  | 0.00001  | -0.00002 | 0.00011  | 0.00009  | 3.06121  |
| D28 | -0.24706 | 0.00000  | -0.00031 | -0.00006 | -0.00037 | -0.24743 |
| D29 | -2.26247 | 0.00000  | 0.00010  | -0.00010 | 0.00000  | -2.26247 |
| D30 | -0.25350 | 0.00000  | 0.00002  | -0.00015 | -0.00013 | -0.25363 |
| D31 | -2.86162 | -0.00001 | -0.00020 | -0.00015 | -0.00035 | -2.86197 |
| D32 | -0.84290 | -0.00001 | -0.00012 | -0.00020 | -0.00032 | -0.84323 |
| D33 | 1.30962  | 0.00000  | -0.00028 | -0.00012 | -0.00040 | 1.30922  |
| D34 | 0.47564  | 0.00000  | 0.00014  | 0.00005  | 0.00019  | 0.47583  |
| D35 | 2.49436  | 0.00000  | 0.00022  | 0.00000  | 0.00021  | 2.49457  |
| D36 | -1.63631 | 0.00000  | 0.00006  | 0.00008  | 0.00014  | -1.63617 |
| D37 | -1.08994 | 0.00000  | 0.00018  | 0.00006  | 0.00023  | -1.08971 |
| D38 | 0.96701  | 0.00000  | 0.00023  | 0.00005  | 0.00027  | 0.96728  |
| D39 | 3.06377  | -0.00001 | 0.00017  | -0.00005 | 0.00011  | 3.06389  |
| D40 | 3.10717  | 0.00000  | 0.00002  | 0.00015  | 0.00017  | 3.10734  |
| D41 | -1.11907 | 0.00000  | 0.00007  | 0.00014  | 0.00021  | -1.11885 |
| D42 | 0.97770  | 0.00000  | 0.00001  | 0.00004  | 0.00005  | 0.97775  |
| D43 | 1.02228  | 0.00000  | 0.00011  | 0.00009  | 0.00020  | 1.02247  |
| D44 | 3.07923  | 0.00000  | 0.00016  | 0.00008  | 0.00024  | 3.07947  |
| D45 | -1.10719 | -0.00001 | 0.00010  | -0.00002 | 0.00008  | -1.10711 |
| D46 | 0.00524  | 0.00000  | 0.00031  | 0.00050  | 0.00081  | 0.00605  |
| D47 | 0.37985  | 0.00000  | 0.00026  | 0.00052  | 0.00078  | 0.38064  |
| D48 | -3.08856 | 0.00000  | 0.00000  | 0.00004  | 0.00004  | -3.08852 |
| D49 | 0.05006  | 0.00000  | -0.00002 | -0.00002 | -0.00004 | 0.05002  |
| D50 | 0.00396  | 0.00000  | -0.00006 | -0.00004 | -0.00009 | 0.00387  |
| D51 | -3.14060 | 0.00000  | -0.00007 | -0.00010 | -0.00017 | -3.14077 |
| D52 | -0.34834 | 0.00000  | -0.00038 | -0.00049 | -0.00087 | -0.34921 |
| D53 | 1.76693  | 0.00000  | -0.00039 | -0.00044 | -0.00083 | 1.76610  |
| D54 | -2.46414 | 0.00000  | -0.00028 | -0.00047 | -0.00075 | -2.46490 |
| D55 | -0.17447 | 0.00000  | -0.00017 | -0.00037 | -0.00055 | -0.17502 |
| D56 | 2.97384  | 0.00000  | -0.00021 | -0.00028 | -0.00049 | 2.97335  |
| D57 | -2.33296 | -0.00001 | -0.00009 | -0.00051 | -0.00060 | -2.33356 |
| D58 | 0.81536  | 0.00000  | -0.00013 | -0.00042 | -0.00055 | 0.81482  |
| D59 | 1.92649  | 0.00000  | -0.00015 | -0.00045 | -0.00059 | 1.92590  |
| D60 | -1.20837 | 0.00000  | -0.00018 | -0.00036 | -0.00054 | -1.20891 |
| D61 | 3.09338  | 0.00000  | -0.00012 | -0.00010 | -0.00022 | 3.09316  |
| D62 | -0.04168 | 0.00000  | -0.00016 | -0.00001 | -0.00017 | -0.04185 |

Item Value Threshold Converged?

|                      |  |          |          |     |
|----------------------|--|----------|----------|-----|
| Maximum Force        |  | 0.000013 | 0.000450 | YES |
| RMS Force            |  | 0.000004 | 0.000300 | YES |
| Maximum Displacement |  | 0.005002 | 0.001800 | NO  |
| RMS Displacement     |  | 0.000694 | 0.001200 | YES |

Predicted change in Energy=-5.071642D-08

GradGradGradGradGradGradGradGradGradGradGradGradGradGradGradGradGradGrad

Input orientation:

| Center Number | Atomic Number | Atomic Type | Coordinates (Angstroms) |           |           |
|---------------|---------------|-------------|-------------------------|-----------|-----------|
|               |               |             | X                       | Y         | Z         |
| 1             | 6             | 0           | -0.330800               | -2.229219 | -0.385986 |
| 2             | 6             | 0           | -1.580487               | -1.780413 | -0.650649 |
| 3             | 7             | 0           | -1.803061               | -0.680439 | 0.172194  |
| 4             | 6             | 0           | -0.679112               | -0.443730 | 0.880031  |
| 5             | 7             | 0           | 0.206069                | -1.409990 | 0.599716  |
| 6             | 6             | 0           | 1.589577                | -1.442625 | 1.091594  |
| 7             | 1             | 0           | 0.223402                | -3.047408 | -0.811576 |
| 8             | 1             | 0           | -2.314580               | -2.116539 | -1.360128 |
| 9             | 1             | 0           | 1.618618                | -0.897636 | 2.033797  |
| 10            | 1             | 0           | 1.845039                | -2.481283 | 1.307402  |
| 11            | 35            | 0           | 0.267552                | 2.051963  | -0.197329 |
| 12            | 1             | 0           | -0.573691               | 0.296243  | 1.649184  |
| 13            | 6             | 0           | -2.921257               | 0.197244  | 0.162582  |
| 14            | 6             | 0           | -4.160989               | -0.202427 | -0.091152 |
| 15            | 1             | 0           | -2.631736               | 1.227210  | 0.342585  |
| 16            | 1             | 0           | -4.958199               | 0.527224  | -0.130839 |
| 17            | 1             | 0           | -4.421313               | -1.239612 | -0.266559 |
| 18            | 6             | 0           | 2.557233                | -0.812724 | 0.086398  |
| 19            | 1             | 0           | 2.576438                | -1.359340 | -0.860275 |
| 20            | 1             | 0           | 2.225062                | 0.209824  | -0.148891 |
| 21            | 6             | 0           | 3.951544                | -0.756528 | 0.651107  |
| 22            | 8             | 0           | 4.251882                | -0.988399 | 1.798102  |
| 23            | 8             | 0           | 4.855787                | -0.401052 | -0.286394 |
| 24            | 1             | 0           | 5.718995                | -0.341120 | 0.150560  |

Distance matrix (angstroms):

|   |   | 1        | 2        | 3        | 4        | 5        |
|---|---|----------|----------|----------|----------|----------|
| 1 | C | 0.000000 |          |          |          |          |
| 2 | C | 1.353954 | 0.000000 |          |          |          |
| 3 | N | 2.208583 | 1.391601 | 0.000000 |          |          |
| 4 | C | 2.216324 | 2.223102 | 1.349195 | 0.000000 |          |
| 5 | N | 1.389595 | 2.211879 | 2.179822 | 1.340067 | 0.000000 |



|    |    |          |          |          |          |          |
|----|----|----------|----------|----------|----------|----------|
| 6  | C  | 2.547514 | 3.633018 | 3.596696 | 2.487871 | 1.468709 |
| 7  | H  | 1.075964 | 2.210247 | 3.267552 | 3.233451 | 2.161755 |
| 8  | H  | 2.212923 | 1.074818 | 2.161492 | 3.239037 | 3.270148 |
| 9  | H  | 3.380636 | 4.268469 | 3.901363 | 2.610895 | 2.077111 |
| 10 | H  | 2.768641 | 4.007419 | 4.223786 | 3.271943 | 2.081997 |
| 11 | Br | 4.326908 | 4.278767 | 3.448188 | 2.878430 | 3.553051 |
| 12 | H  | 3.252518 | 3.258124 | 2.155634 | 1.072506 | 2.149567 |
| 13 | C  | 3.591534 | 2.523913 | 1.421542 | 2.439835 | 3.543227 |
| 14 | C  | 4.343404 | 3.076047 | 2.420262 | 3.622829 | 4.583306 |
| 15 | H  | 4.215688 | 3.337279 | 2.086830 | 2.625572 | 3.882535 |
| 16 | H  | 5.392207 | 4.123630 | 3.391927 | 4.502798 | 5.563827 |
| 17 | H  | 4.210211 | 2.917239 | 2.713010 | 3.994016 | 4.710852 |
| 18 | C  | 3.251206 | 4.312817 | 4.363144 | 3.352602 | 2.479555 |
| 19 | H  | 3.071429 | 4.183452 | 4.550485 | 3.803369 | 2.784383 |
| 20 | H  | 3.540844 | 4.323773 | 4.137806 | 3.149610 | 2.694540 |
| 21 | C  | 4.645735 | 5.774624 | 5.775000 | 4.646851 | 3.802399 |
| 22 | O  | 5.225978 | 6.374966 | 6.277002 | 5.045218 | 4.240574 |
| 23 | O  | 5.500254 | 6.592491 | 6.680465 | 5.656631 | 4.839733 |
| 24 | H  | 6.360254 | 7.483044 | 7.529737 | 6.440375 | 5.633523 |

6 7 8 9 10

|    |    |          |          |          |          |          |
|----|----|----------|----------|----------|----------|----------|
| 6  | C  | 0.000000 |          |          |          |          |
| 7  | H  | 2.839686 | 0.000000 |          |          |          |
| 8  | H  | 4.659136 | 2.758401 | 0.000000 |          |          |
| 9  | H  | 1.088854 | 3.829399 | 5.336150 | 0.000000 |          |
| 10 | H  | 1.091167 | 2.727685 | 4.954914 | 1.756945 | 0.000000 |
| 11 | Br | 3.952368 | 5.136421 | 5.039435 | 3.937440 | 5.030208 |
| 12 | H  | 2.830954 | 4.227375 | 4.231804 | 2.525766 | 3.698882 |
| 13 | C  | 4.888748 | 4.622297 | 2.835541 | 5.030972 | 5.585937 |
| 14 | C  | 6.000499 | 5.275965 | 2.946752 | 6.196982 | 6.574306 |
| 15 | H  | 5.050596 | 5.268421 | 3.765697 | 5.043876 | 5.892818 |
| 16 | H  | 6.946079 | 6.331696 | 3.935651 | 7.068974 | 7.576522 |
| 17 | H  | 6.165760 | 5.013836 | 2.530459 | 6.472199 | 6.579230 |
| 18 | C  | 1.530866 | 3.353645 | 5.246611 | 2.163463 | 2.186816 |
| 19 | H  | 2.188750 | 2.896329 | 4.974460 | 3.083220 | 2.548043 |
| 20 | H  | 2.161766 | 3.880123 | 5.242843 | 2.521581 | 3.083386 |
| 21 | C  | 2.498729 | 4.613742 | 6.720045 | 2.715564 | 2.800512 |
| 22 | O  | 2.791655 | 5.222890 | 7.373299 | 2.645348 | 2.874436 |
| 23 | O  | 3.694841 | 5.360783 | 7.450500 | 4.013619 | 3.991510 |
| 24 | H  | 4.376180 | 6.200907 | 8.364964 | 4.546359 | 4.574508 |

11 12 13 14 15

|    |    |          |          |          |          |  |
|----|----|----------|----------|----------|----------|--|
| 11 | Br | 0.000000 |          |          |          |  |
| 12 | H  | 2.683253 | 0.000000 |          |          |  |
| 13 | C  | 3.706483 | 2.780441 | 0.000000 |          |  |
| 14 | C  | 4.970465 | 4.018227 | 1.327047 | 0.000000 |  |

|    |   |           |           |          |          |          |
|----|---|-----------|-----------|----------|----------|----------|
| 15 | H | 3.062286  | 2.609492  | 1.084921 | 2.137897 | 0.000000 |
| 16 | H | 5.444053  | 4.737693  | 2.084254 | 1.081439 | 2.475185 |
| 17 | H | 5.729285  | 4.564331  | 2.121057 | 1.083645 | 3.107869 |
| 18 | C | 3.678256  | 3.670803  | 5.571328 | 6.748221 | 5.581430 |
| 19 | H | 4.172222  | 4.354498  | 5.804640 | 6.879165 | 5.938198 |
| 20 | H | 2.688432  | 3.327696  | 5.155752 | 6.399604 | 4.986493 |
| 21 | C | 4.709486  | 4.752078  | 6.955842 | 8.165241 | 6.882586 |
| 22 | O | 5.394481  | 4.995862  | 7.452154 | 8.658142 | 7.376426 |
| 23 | O | 5.203567  | 5.806196  | 7.812935 | 9.021076 | 7.688293 |
| 24 | H | 5.963732  | 6.500000  | 8.657017 | 9.883913 | 8.498897 |
|    |   | 16        | 17        | 18       | 19       | 20       |
| 16 | H | 0.000000  |           |          |          |          |
| 17 | H | 1.851587  | 0.000000  |          |          |          |
| 18 | C | 7.637039  | 7.000494  | 0.000000 |          |          |
| 19 | H | 7.801407  | 7.023913  | 1.093320 | 0.000000 |          |
| 20 | H | 7.190292  | 6.803603  | 1.100592 | 1.758354 | 0.000000 |
| 21 | C | 9.035650  | 8.436837  | 1.505376 | 2.130393 | 2.134145 |
| 22 | O | 9.531186  | 8.919094  | 2.415083 | 3.164124 | 3.055245 |
| 23 | O | 9.859016  | 9.314943  | 2.364698 | 2.538323 | 2.704217 |
| 24 | H | 10.716141 | 10.188578 | 3.197384 | 3.454595 | 3.549758 |
|    |   | 21        | 22        | 23       | 24       |          |
| 21 | C | 0.000000  |           |          |          |          |
| 22 | O | 1.208125  | 0.000000  |          |          |          |
| 23 | O | 1.350157  | 2.248288  | 0.000000 |          |          |
| 24 | H | 1.883346  | 2.299084  | 0.969356 | 0.000000 |          |

Stoichiometry C8H11BrN2O2

Framework group C1[X(C8H11BrN2O2)]

Deg. of freedom 66

Full point group C1 NOp 1

Largest Abelian subgroup C1 NOp 1

Largest concise Abelian subgroup C1 NOp 1

Standard orientation:

| Center Number | Atomic Number | Atomic Type | Coordinates (Angstroms) |           |           |
|---------------|---------------|-------------|-------------------------|-----------|-----------|
|               |               |             | X                       | Y         | Z         |
| 1             | 6             | 0           | -0.660216               | -2.161829 | -0.761128 |
| 2             | 6             | 0           | -1.968900               | -1.826345 | -0.850504 |
| 3             | 7             | 0           | -2.210999               | -0.860318 | 0.121469  |
| 4             | 6             | 0           | -1.047677               | -0.584276 | 0.746617  |
| 5             | 7             | 0           | -0.106019               | -1.407811 | 0.266148  |
| 6             | 6             | 0           | 1.317983                | -1.343971 | 0.620053  |
| 7             | 1             | 0           | -0.075942               | -2.858986 | -1.335841 |
| 8             | 1             | 0           | -2.736812               | -2.157235 | -1.525823 |

|    |    |   |           |           |           |
|----|----|---|-----------|-----------|-----------|
| 9  | 1  | 0 | 1.392091  | -0.911769 | 1.616703  |
| 10 | 1  | 0 | 1.695781  | -2.365968 | 0.678656  |
| 11 | 35 | 0 | -0.469992 | 2.108528  | -0.090308 |
| 12 | 1  | 0 | -0.935386 | 0.068857  | 1.589870  |
| 13 | 6  | 0 | -3.404997 | -0.116446 | 0.325934  |
| 14 | 6  | 0 | -4.619101 | -0.618673 | 0.139459  |
| 15 | 1  | 0 | -3.201030 | 0.911439  | 0.606832  |
| 16 | 1  | 0 | -5.484041 | 0.018038  | 0.265901  |
| 17 | 1  | 0 | -4.792982 | -1.650987 | -0.140508 |
| 18 | 6  | 0 | 2.107818  | -0.498948 | -0.382768 |
| 19 | 1  | 0 | 2.081142  | -0.926906 | -1.388496 |
| 20 | 1  | 0 | 1.653649  | 0.500920  | -0.455559 |
| 21 | 6  | 0 | 3.541416  | -0.354651 | 0.053274  |
| 22 | 8  | 0 | 3.982045  | -0.682997 | 1.129192  |
| 23 | 8  | 0 | 4.302648  | 0.204641  | -0.911424 |
| 24 | 1  | 0 | 5.196885  | 0.308690  | -0.552030 |

-----

Rotational constants (GHZ):      0.8053590      0.3345668      0.2550647

Standard basis: 6-311++G(d,p) (5D, 7F)

There are    404 symmetry adapted cartesian basis functions of A    symmetry.

There are    389 symmetry adapted basis functions of A    symmetry.

    389 basis functions,    625 primitive gaussians,    404 cartesian basis functions

    62 alpha electrons      62 beta electrons

        nuclear repulsion energy      1072.5938979982 Hartrees.

NAtoms=    24 NActive=    24 NUniq=    24 SFac= 1.00D+00 NAtFMM=    60 NAOKFM=F

Big=F

Integral buffers will be    131072 words long.

Raffenetti 2 integral format.

Two-electron integral symmetry is turned on.

One-electron integrals computed using PRISM.

NBasis=    389 RedAO= T EigKep=    6.50D-06    NBF=    389

NBsUse=    389 1.00D-06 EigRej= -1.00D+00    NBFU=    389

Initial guess from the checkpoint file:    "/cooh.chk"

B after Tr=      0.000000      0.000000      0.000000

        Rot=      1.000000      0.000006      0.000002      0.000006 Ang=    0.00 deg.

Keep R1 ints in memory in canonical form, NReq=2910765817.

Requested convergence on RMS density matrix=1.00D-08 within 128 cycles.

Requested convergence on MAX density matrix=1.00D-06.

Requested convergence on                    energy=1.00D-06.

No special actions if energy rises.

SCF Done:    E(RB3LYP) =    -3145.73224388      A.U. after    8 cycles

        NFock=    8    Conv=0.45D-08      -V/T= 2.0017

Calling FoFJK, ICntrl=                    2127 FMM=F ISym2X=0 I1Cent= 0 IOpClX= 0 NMat=1 NMatS=1

NMatT=0.

\*\*\*\*\* Axes restored to original set \*\*\*\*\*

| Center<br>Number | Atomic<br>Number | Forces (Hartrees/Bohr) |              |              |
|------------------|------------------|------------------------|--------------|--------------|
|                  |                  | X                      | Y            | Z            |
| 1                | 6                | 0.000000958            | 0.000001879  | -0.000012543 |
| 2                | 6                | 0.000003564            | 0.000007302  | -0.000008647 |
| 3                | 7                | -0.000012921           | 0.000013492  | -0.000022880 |
| 4                | 6                | 0.000005762            | -0.000020341 | 0.000025675  |
| 5                | 7                | -0.000006710           | 0.000011310  | -0.000018691 |
| 6                | 6                | 0.000014678            | -0.000003633 | -0.000010082 |
| 7                | 1                | 0.000003080            | 0.000009227  | -0.000019618 |
| 8                | 1                | 0.000005058            | 0.000012337  | -0.000017749 |
| 9                | 1                | -0.000001878           | -0.000011282 | 0.000003255  |
| 10               | 1                | -0.000005077           | -0.000008159 | -0.000006422 |
| 11               | 35               | -0.000003273           | -0.000001369 | 0.000018604  |
| 12               | 1                | 0.000000877            | -0.000005690 | -0.000000541 |
| 13               | 6                | 0.000013147            | -0.000018584 | 0.000011991  |
| 14               | 6                | -0.000002331           | 0.000003070  | -0.000006529 |
| 15               | 1                | -0.000006990           | -0.000004856 | 0.000014472  |
| 16               | 1                | -0.000000392           | -0.000002196 | 0.000002933  |
| 17               | 1                | 0.000000362            | 0.000000659  | -0.000012518 |
| 18               | 6                | 0.000012966            | -0.000013790 | -0.000004567 |
| 19               | 1                | 0.000003421            | 0.000020177  | 0.000003000  |
| 20               | 1                | -0.000008338           | 0.000006192  | 0.000028227  |
| 21               | 6                | -0.000021058           | -0.000007559 | 0.000006499  |
| 22               | 8                | 0.000001986            | -0.000007409 | 0.000015455  |
| 23               | 8                | 0.000008131            | 0.000013182  | -0.000002203 |
| 24               | 1                | -0.000005022           | 0.000006041  | 0.000012878  |

Cartesian Forces: Max 0.000028227 RMS 0.000011162

GradGradGradGradGradGradGradGradGradGradGradGradGradGradGradGradGradGradGrad

Berny optimization.

Using GEDIIS/GDIIS optimizer.

FormGI is forming the generalized inverse of G from B-inverse, IUseBI=4.

Internal Forces: Max 0.000013048 RMS 0.000003992

Search for a local minimum.

Step number 17 out of a maximum of 140

All quantities printed in internal units (Hartrees-Bohrs-Radians)

Mixed Optimization -- En-DIIS/RFO-DIIS

Swapping is turned off.

Update second derivatives using D2CorX and points 4 6 7 8 9  
10 11 12 13 14

DE= -2.20D-07 DEPred=-5.07D-08 R= 4.34D+00

Trust test= 4.34D+00 RLast= 4.53D-03 DXMaxT set to 7.14D-01

ITU= 0 0 1 1 1 1 1 1 1 1 1 0 -1 1 1 1 0

|                 |         |         |         |         |         |
|-----------------|---------|---------|---------|---------|---------|
| Eigenvalues --- | 0.00133 | 0.00206 | 0.00273 | 0.00385 | 0.00803 |
| Eigenvalues --- | 0.01226 | 0.01816 | 0.01847 | 0.02164 | 0.02197 |
| Eigenvalues --- | 0.02413 | 0.02433 | 0.02493 | 0.03033 | 0.03067 |
| Eigenvalues --- | 0.03146 | 0.03320 | 0.03608 | 0.04185 | 0.04382 |
| Eigenvalues --- | 0.05134 | 0.05253 | 0.06321 | 0.07215 | 0.09725 |
| Eigenvalues --- | 0.10222 | 0.10990 | 0.12754 | 0.15572 | 0.15771 |
| Eigenvalues --- | 0.15906 | 0.15991 | 0.15997 | 0.16001 | 0.16025 |
| Eigenvalues --- | 0.16722 | 0.17915 | 0.20457 | 0.21705 | 0.23137 |
| Eigenvalues --- | 0.24387 | 0.25224 | 0.27508 | 0.27928 | 0.34368 |
| Eigenvalues --- | 0.34537 | 0.35183 | 0.35449 | 0.35577 | 0.35646 |
| Eigenvalues --- | 0.35843 | 0.36098 | 0.36584 | 0.36652 | 0.36758 |
| Eigenvalues --- | 0.37773 | 0.41346 | 0.42710 | 0.43491 | 0.47341 |
| Eigenvalues --- | 0.52596 | 0.53598 | 0.54138 | 0.54490 | 0.59929 |
| Eigenvalues --- | 0.93583 |         |         |         |         |

En-DIIS/RFO-DIIS IScMMF= 0 using points: 17 16 15 14 13

RFO step: Lambda=-5.82023818D-09.

DidBck=F Rises=F RFO-DIIS coefs: 1.71507 -0.75936 -0.07679 0.15152 -

0.03043

Iteration 1 RMS(Cart)= 0.00049959 RMS(Int)= 0.00000029

Iteration 2 RMS(Cart)= 0.00000031 RMS(Int)= 0.00000019

| Variable | Old X   | -DE/DX   | Delta X<br>(Linear) | Delta X<br>(Quad) | Delta X<br>(Total) | New X   |
|----------|---------|----------|---------------------|-------------------|--------------------|---------|
| R1       | 2.55860 | 0.00000  | -0.00001            | 0.00000           | -0.00001           | 2.55860 |
| R2       | 2.62595 | 0.00000  | 0.00000             | 0.00001           | 0.00001            | 2.62596 |
| R3       | 2.03328 | 0.00000  | 0.00000             | 0.00000           | 0.00000            | 2.03328 |
| R4       | 2.62974 | 0.00000  | 0.00000             | -0.00001          | -0.00001           | 2.62973 |
| R5       | 2.03111 | 0.00000  | 0.00000             | 0.00000           | 0.00000            | 2.03111 |
| R6       | 2.54961 | 0.00001  | -0.00001            | 0.00002           | 0.00000            | 2.54961 |
| R7       | 2.68632 | -0.00001 | -0.00004            | -0.00003          | -0.00007           | 2.68625 |
| R8       | 2.53236 | -0.00001 | -0.00001            | -0.00001          | -0.00002           | 2.53234 |
| R9       | 5.43944 | 0.00000  | 0.00014             | -0.00002          | 0.00012            | 5.43956 |
| R10      | 2.02674 | 0.00000  | 0.00000             | 0.00000           | 0.00000            | 2.02675 |
| R11      | 2.77546 | 0.00001  | -0.00001            | 0.00003           | 0.00002            | 2.77548 |
| R12      | 2.05764 | 0.00000  | -0.00001            | 0.00001           | 0.00000            | 2.05764 |
| R13      | 2.06201 | 0.00000  | 0.00001             | -0.00001          | 0.00001            | 2.06201 |
| R14      | 2.89292 | -0.00001 | 0.00000             | -0.00004          | -0.00004           | 2.89288 |
| R15      | 5.07061 | 0.00000  | 0.00034             | -0.00004          | 0.00031            | 5.07092 |
| R16      | 5.08040 | 0.00000  | -0.00017            | -0.00019          | -0.00036           | 5.08004 |
| R17      | 2.50775 | 0.00000  | 0.00001             | 0.00000           | 0.00001            | 2.50776 |
| R18      | 2.05020 | 0.00000  | -0.00002            | -0.00001          | -0.00002           | 2.05018 |

|     |         |          |          |          |          |         |
|-----|---------|----------|----------|----------|----------|---------|
| R19 | 2.04362 | 0.00000  | 0.00000  | 0.00000  | 0.00000  | 2.04362 |
| R20 | 2.04779 | 0.00000  | 0.00000  | 0.00000  | -0.00001 | 2.04779 |
| R21 | 2.06608 | -0.00001 | -0.00002 | -0.00001 | -0.00003 | 2.06605 |
| R22 | 2.07982 | 0.00000  | 0.00004  | 0.00000  | 0.00003  | 2.07985 |
| R23 | 2.84475 | -0.00001 | 0.00000  | -0.00004 | -0.00003 | 2.84471 |
| R24 | 2.28302 | 0.00001  | 0.00000  | 0.00001  | 0.00000  | 2.28303 |
| R25 | 2.55143 | 0.00001  | 0.00001  | 0.00001  | 0.00002  | 2.55145 |
| R26 | 1.83182 | 0.00000  | 0.00000  | 0.00000  | 0.00000  | 1.83181 |
| A1  | 1.87532 | 0.00000  | 0.00000  | 0.00001  | 0.00001  | 1.87532 |
| A2  | 2.27859 | 0.00000  | 0.00000  | -0.00001 | -0.00001 | 2.27858 |
| A3  | 2.12926 | 0.00000  | 0.00000  | 0.00000  | 0.00000  | 2.12925 |
| A4  | 1.86926 | 0.00000  | 0.00000  | -0.00001 | 0.00000  | 1.86926 |
| A5  | 2.28599 | 0.00000  | -0.00002 | 0.00000  | -0.00002 | 2.28597 |
| A6  | 2.12735 | 0.00000  | 0.00002  | 0.00001  | 0.00003  | 2.12738 |
| A7  | 1.89194 | 0.00000  | 0.00000  | 0.00000  | 0.00000  | 1.89194 |
| A8  | 2.22666 | 0.00000  | 0.00005  | 0.00001  | 0.00007  | 2.22673 |
| A9  | 2.15377 | 0.00000  | 0.00000  | 0.00000  | -0.00001 | 2.15376 |
| A10 | 1.89022 | 0.00000  | 0.00001  | 0.00000  | 0.00001  | 1.89023 |
| A11 | 1.80259 | 0.00000  | -0.00012 | -0.00007 | -0.00020 | 1.80240 |
| A12 | 2.18852 | 0.00000  | 0.00000  | 0.00001  | 0.00001  | 2.18853 |
| A13 | 1.90672 | 0.00000  | -0.00008 | -0.00002 | -0.00010 | 1.90662 |
| A14 | 2.19269 | 0.00000  | 0.00000  | 0.00001  | 0.00001  | 2.19270 |
| A15 | 1.89470 | 0.00000  | -0.00001 | 0.00000  | -0.00001 | 1.89469 |
| A16 | 2.19988 | 0.00000  | -0.00006 | 0.00003  | -0.00003 | 2.19985 |
| A17 | 2.17511 | 0.00000  | 0.00003  | -0.00001 | 0.00002  | 2.17513 |
| A18 | 1.87948 | 0.00000  | -0.00004 | 0.00005  | 0.00001  | 1.87949 |
| A19 | 1.88381 | 0.00000  | -0.00002 | -0.00001 | -0.00003 | 1.88378 |
| A20 | 1.94591 | 0.00000  | 0.00003  | -0.00002 | 0.00000  | 1.94592 |
| A21 | 1.87449 | 0.00000  | 0.00001  | -0.00002 | -0.00001 | 1.87448 |
| A22 | 1.92344 | 0.00000  | -0.00001 | -0.00003 | -0.00004 | 1.92340 |
| A23 | 1.95362 | 0.00000  | 0.00002  | 0.00003  | 0.00005  | 1.95368 |
| A24 | 1.20105 | 0.00000  | 0.00004  | -0.00004 | 0.00000  | 1.20106 |
| A25 | 1.33618 | 0.00000  | 0.00001  | -0.00008 | -0.00007 | 1.33611 |
| A26 | 2.15339 | 0.00001  | 0.00006  | 0.00003  | 0.00009  | 2.15349 |
| A27 | 1.95531 | 0.00000  | 0.00002  | 0.00001  | 0.00003  | 1.95534 |
| A28 | 2.17358 | -0.00001 | -0.00008 | -0.00004 | -0.00012 | 2.17346 |
| A29 | 2.08574 | 0.00000  | -0.00002 | -0.00001 | -0.00002 | 2.08571 |
| A30 | 2.14556 | 0.00000  | 0.00003  | 0.00001  | 0.00005  | 2.14560 |
| A31 | 2.05188 | 0.00000  | -0.00002 | 0.00000  | -0.00002 | 2.05186 |
| A32 | 1.95404 | 0.00000  | 0.00007  | 0.00002  | 0.00008  | 1.95413 |
| A33 | 1.90910 | -0.00001 | -0.00002 | -0.00008 | -0.00010 | 1.90900 |
| A34 | 1.93318 | 0.00001  | 0.00001  | 0.00001  | 0.00003  | 1.93321 |
| A35 | 1.85949 | 0.00000  | -0.00002 | 0.00001  | 0.00000  | 1.85949 |
| A36 | 1.90414 | 0.00000  | 0.00011  | -0.00001 | 0.00010  | 1.90424 |

|     |          |          |          |          |          |          |
|-----|----------|----------|----------|----------|----------|----------|
| A37 | 1.90187  | 0.00000  | -0.00015 | 0.00004  | -0.00011 | 1.90175  |
| A38 | 2.60651  | 0.00001  | -0.00002 | 0.00013  | 0.00011  | 2.60662  |
| A39 | 2.18859  | 0.00001  | 0.00000  | 0.00002  | 0.00002  | 2.18861  |
| A40 | 1.94945  | -0.00001 | 0.00002  | -0.00003 | -0.00001 | 1.94944  |
| A41 | 2.14512  | 0.00000  | -0.00002 | 0.00001  | 0.00000  | 2.14512  |
| A42 | 1.87515  | 0.00000  | 0.00000  | -0.00002 | -0.00002 | 1.87513  |
| D1  | 0.00472  | 0.00000  | 0.00011  | -0.00016 | -0.00005 | 0.00468  |
| D2  | 3.10925  | 0.00000  | 0.00009  | -0.00009 | 0.00000  | 3.10926  |
| D3  | -3.12870 | 0.00000  | 0.00002  | -0.00006 | -0.00003 | -3.12873 |
| D4  | -0.02417 | 0.00000  | 0.00000  | 0.00001  | 0.00002  | -0.02415 |
| D5  | -0.05042 | 0.00000  | -0.00011 | 0.00015  | 0.00004  | -0.05038 |
| D6  | -3.02197 | 0.00000  | 0.00010  | 0.00006  | 0.00015  | -3.02182 |
| D7  | 3.08385  | 0.00000  | -0.00003 | 0.00006  | 0.00003  | 3.08389  |
| D8  | 0.11230  | 0.00000  | 0.00018  | -0.00004 | 0.00014  | 0.11244  |
| D9  | 0.04223  | 0.00000  | -0.00008 | 0.00012  | 0.00004  | 0.04226  |
| D10 | 3.02898  | 0.00000  | 0.00024  | 0.00020  | 0.00044  | 3.02942  |
| D11 | -3.06641 | 0.00000  | -0.00006 | 0.00005  | -0.00001 | -3.06642 |
| D12 | -0.07966 | 0.00000  | 0.00026  | 0.00014  | 0.00040  | -0.07926 |
| D13 | -0.07407 | 0.00000  | 0.00001  | -0.00002 | -0.00001 | -0.07408 |
| D14 | 1.94656  | 0.00000  | -0.00013 | -0.00009 | -0.00021 | 1.94634  |
| D15 | -3.05871 | 0.00000  | -0.00008 | -0.00015 | -0.00023 | -3.05893 |
| D16 | -3.06873 | 0.00000  | -0.00030 | -0.00010 | -0.00040 | -3.06913 |
| D17 | -1.04810 | 0.00000  | -0.00044 | -0.00017 | -0.00061 | -1.04871 |
| D18 | 0.22982  | -0.00001 | -0.00039 | -0.00023 | -0.00062 | 0.22920  |
| D19 | 0.62359  | 0.00000  | -0.00099 | -0.00035 | -0.00134 | 0.62225  |
| D20 | -2.47429 | 0.00000  | -0.00098 | -0.00032 | -0.00130 | -2.47559 |
| D21 | -2.69421 | 0.00000  | -0.00062 | -0.00026 | -0.00087 | -2.69508 |
| D22 | 0.49110  | 0.00000  | -0.00061 | -0.00022 | -0.00083 | 0.49027  |
| D23 | 0.07705  | 0.00000  | 0.00006  | -0.00008 | -0.00002 | 0.07703  |
| D24 | 3.05159  | 0.00000  | -0.00015 | 0.00002  | -0.00014 | 3.05145  |
| D25 | -1.87467 | 0.00000  | 0.00023  | 0.00002  | 0.00025  | -1.87442 |
| D26 | 1.09987  | 0.00000  | 0.00002  | 0.00012  | 0.00014  | 1.10001  |
| D27 | 3.06121  | 0.00000  | 0.00015  | 0.00005  | 0.00020  | 3.06141  |
| D28 | -0.24743 | 0.00000  | -0.00006 | 0.00014  | 0.00008  | -0.24735 |
| D29 | -2.26247 | 0.00000  | -0.00002 | -0.00011 | -0.00013 | -2.26260 |
| D30 | -0.25363 | 0.00000  | -0.00011 | -0.00015 | -0.00026 | -0.25389 |
| D31 | -2.86197 | 0.00000  | -0.00025 | 0.00012  | -0.00014 | -2.86211 |
| D32 | -0.84323 | 0.00000  | -0.00027 | 0.00011  | -0.00015 | -0.84338 |
| D33 | 1.30922  | 0.00000  | -0.00024 | 0.00013  | -0.00010 | 1.30912  |
| D34 | 0.47583  | 0.00000  | -0.00001 | 0.00001  | -0.00001 | 0.47582  |
| D35 | 2.49457  | -0.00001 | -0.00003 | 0.00000  | -0.00002 | 2.49455  |
| D36 | -1.63617 | 0.00000  | 0.00001  | 0.00002  | 0.00003  | -1.63614 |
| D37 | -1.08971 | 0.00000  | 0.00015  | 0.00003  | 0.00018  | -1.08953 |
| D38 | 0.96728  | 0.00000  | 0.00016  | 0.00001  | 0.00017  | 0.96745  |

|     |          |          |          |          |          |          |
|-----|----------|----------|----------|----------|----------|----------|
| D39 | 3.06389  | 0.00000  | -0.00004 | 0.00002  | -0.00002 | 3.06387  |
| D40 | 3.10734  | 0.00000  | 0.00019  | 0.00000  | 0.00019  | 3.10753  |
| D41 | -1.11885 | 0.00000  | 0.00019  | -0.00002 | 0.00017  | -1.11868 |
| D42 | 0.97775  | 0.00000  | -0.00001 | -0.00001 | -0.00002 | 0.97774  |
| D43 | 1.02247  | 0.00000  | 0.00016  | 0.00002  | 0.00019  | 1.02266  |
| D44 | 3.07947  | 0.00000  | 0.00017  | 0.00000  | 0.00017  | 3.07964  |
| D45 | -1.10711 | 0.00000  | -0.00003 | 0.00001  | -0.00002 | -1.10713 |
| D46 | 0.00605  | 0.00000  | 0.00052  | 0.00040  | 0.00093  | 0.00698  |
| D47 | 0.38064  | 0.00000  | 0.00052  | 0.00043  | 0.00095  | 0.38159  |
| D48 | -3.08852 | 0.00000  | -0.00009 | 0.00004  | -0.00005 | -3.08857 |
| D49 | 0.05002  | 0.00000  | -0.00003 | -0.00001 | -0.00004 | 0.04999  |
| D50 | 0.00387  | 0.00000  | -0.00008 | 0.00000  | -0.00009 | 0.00378  |
| D51 | -3.14077 | 0.00000  | -0.00003 | -0.00005 | -0.00008 | -3.14085 |
| D52 | -0.34921 | 0.00000  | -0.00055 | -0.00038 | -0.00093 | -0.35014 |
| D53 | 1.76610  | 0.00000  | -0.00050 | -0.00039 | -0.00089 | 1.76521  |
| D54 | -2.46490 | -0.00001 | -0.00046 | -0.00037 | -0.00083 | -2.46572 |
| D55 | -0.17502 | 0.00000  | -0.00058 | -0.00007 | -0.00065 | -0.17567 |
| D56 | 2.97335  | 0.00000  | -0.00049 | -0.00007 | -0.00056 | 2.97279  |
| D57 | -2.33356 | -0.00001 | -0.00075 | -0.00010 | -0.00084 | -2.33440 |
| D58 | 0.81482  | 0.00000  | -0.00066 | -0.00010 | -0.00076 | 0.81406  |
| D59 | 1.92590  | 0.00000  | -0.00070 | -0.00013 | -0.00083 | 1.92506  |
| D60 | -1.20891 | 0.00000  | -0.00061 | -0.00013 | -0.00075 | -1.20966 |
| D61 | 3.09316  | 0.00000  | -0.00023 | 0.00003  | -0.00020 | 3.09296  |
| D62 | -0.04185 | 0.00000  | -0.00014 | 0.00003  | -0.00011 | -0.04196 |

| Item                 | Value    | Threshold | Converged? |
|----------------------|----------|-----------|------------|
| Maximum Force        | 0.000013 | 0.000450  | YES        |
| RMS Force            | 0.000004 | 0.000300  | YES        |
| Maximum Displacement | 0.003399 | 0.001800  | NO         |
| RMS Displacement     | 0.000500 | 0.001200  | YES        |

Predicted change in Energy=-2.237803D-08

GradGradGradGradGradGradGradGradGradGradGradGradGradGradGradGradGradGradGrad

Input orientation:

| Center Number | Atomic Number | Atomic Type | Coordinates (Angstroms) |           |           |
|---------------|---------------|-------------|-------------------------|-----------|-----------|
|               |               |             | X                       | Y         | Z         |
| 1             | 6             | 0           | -0.330797               | -2.229188 | -0.385818 |
| 2             | 6             | 0           | -1.580448               | -1.780329 | -0.650546 |
| 3             | 7             | 0           | -1.803030               | -0.680382 | 0.172322  |
| 4             | 6             | 0           | -0.679097               | -0.443717 | 0.880205  |
| 5             | 7             | 0           | 0.206073                | -1.409978 | 0.599906  |
| 6             | 6             | 0           | 1.589627                | -1.442591 | 1.091693  |
| 7             | 1             | 0           | 0.223389                | -3.047399 | -0.811385 |



|    |    |   |           |           |           |
|----|----|---|-----------|-----------|-----------|
| 8  | 1  | 0 | -2.314504 | -2.116447 | -1.360063 |
| 9  | 1  | 0 | 1.618753  | -0.897541 | 2.033861  |
| 10 | 1  | 0 | 1.845061  | -2.481247 | 1.307560  |
| 11 | 35 | 0 | 0.267555  | 2.051761  | -0.197828 |
| 12 | 1  | 0 | -0.573618 | 0.296360  | 1.649253  |
| 13 | 6  | 0 | -2.921355 | 0.197079  | 0.163077  |
| 14 | 6  | 0 | -4.160929 | -0.202440 | -0.091681 |
| 15 | 1  | 0 | -2.632143 | 1.226911  | 0.344265  |
| 16 | 1  | 0 | -4.958178 | 0.527190  | -0.130924 |
| 17 | 1  | 0 | -4.421114 | -1.239441 | -0.268358 |
| 18 | 6  | 0 | 2.557201  | -0.812732 | 0.086424  |
| 19 | 1  | 0 | 2.576268  | -1.359206 | -0.860317 |
| 20 | 1  | 0 | 2.225017  | 0.209872  | -0.148681 |
| 21 | 6  | 0 | 3.951541  | -0.756470 | 0.651009  |
| 22 | 8  | 0 | 4.251914  | -0.987649 | 1.798138  |
| 23 | 8  | 0 | 4.855786  | -0.401695 | -0.286772 |
| 24 | 1  | 0 | 5.718999  | -0.341495 | 0.150133  |

-----  
Distance matrix (angstroms):

|    |    | 1        | 2        | 3        | 4        | 5        |
|----|----|----------|----------|----------|----------|----------|
| 1  | C  | 0.000000 |          |          |          |          |
| 2  | C  | 1.353951 | 0.000000 |          |          |          |
| 3  | N  | 2.208572 | 1.391595 | 0.000000 |          |          |
| 4  | C  | 2.216311 | 2.223097 | 1.349197 | 0.000000 |          |
| 5  | N  | 1.389599 | 2.211887 | 2.179824 | 1.340057 | 0.000000 |
| 6  | C  | 2.547508 | 3.633020 | 3.596710 | 2.487888 | 1.468721 |
| 7  | H  | 1.075964 | 2.210240 | 3.267540 | 3.233437 | 2.161756 |
| 8  | H  | 2.212908 | 1.074816 | 2.161503 | 3.239040 | 3.270151 |
| 9  | H  | 3.380661 | 4.268517 | 3.901420 | 2.610937 | 2.077133 |
| 10 | H  | 2.768650 | 4.007440 | 4.223796 | 3.271932 | 2.081989 |
| 11 | Br | 4.326649 | 4.278432 | 3.448034 | 2.878493 | 3.552998 |
| 12 | H  | 3.252517 | 3.258131 | 2.155644 | 1.072509 | 2.149566 |
| 13 | C  | 3.591525 | 2.523917 | 1.421504 | 2.439797 | 3.543198 |
| 14 | C  | 4.343287 | 3.075865 | 2.420293 | 3.622973 | 4.583355 |
| 15 | H  | 4.215902 | 3.337544 | 2.086806 | 2.625379 | 3.882525 |
| 16 | H  | 5.392146 | 4.123555 | 3.391924 | 4.502840 | 5.563831 |
| 17 | H  | 4.209999 | 2.916849 | 2.713136 | 3.994378 | 4.711031 |
| 18 | C  | 3.251137 | 4.312715 | 4.363085 | 3.352595 | 2.479551 |
| 19 | H  | 3.071325 | 4.183256 | 4.550318 | 3.803280 | 2.784359 |
| 20 | H  | 3.540824 | 4.323694 | 4.137724 | 3.149551 | 2.694520 |
| 21 | C  | 4.645677 | 5.774532 | 5.774947 | 4.646843 | 3.802396 |
| 22 | O  | 5.226118 | 6.375016 | 6.276944 | 5.045129 | 4.240631 |
| 23 | O  | 5.500016 | 6.592273 | 6.680439 | 5.656725 | 4.839697 |
| 24 | H  | 6.360083 | 7.482864 | 7.529691 | 6.440426 | 5.633499 |

|    |    |          |          |          |          |          |
|----|----|----------|----------|----------|----------|----------|
|    |    | 6        | 7        | 8        | 9        | 10       |
| 6  | C  | 0.000000 |          |          |          |          |
| 7  | H  | 2.839669 | 0.000000 |          |          |          |
| 8  | H  | 4.659123 | 2.758373 | 0.000000 |          |          |
| 9  | H  | 1.088857 | 3.829406 | 5.336194 | 0.000000 |          |
| 10 | H  | 1.091170 | 2.727687 | 4.954925 | 1.756945 | 0.000000 |
| 11 | Br | 3.952371 | 5.136130 | 5.039026 | 3.937582 | 5.030198 |
| 12 | H  | 2.830981 | 4.227373 | 4.231821 | 2.525829 | 3.698901 |
| 13 | C  | 4.888743 | 4.622297 | 2.835600 | 5.030964 | 5.585875 |
| 14 | C  | 6.000604 | 5.275794 | 2.946439 | 6.197243 | 6.574402 |
| 15 | H  | 5.050567 | 5.268710 | 3.766122 | 5.043624 | 5.892685 |
| 16 | H  | 6.946119 | 6.331614 | 3.935557 | 7.069099 | 7.576542 |
| 17 | H  | 6.166037 | 5.013481 | 2.529578 | 6.472796 | 6.579555 |
| 18 | C  | 1.530846 | 3.353576 | 5.246476 | 2.163421 | 2.186838 |
| 19 | H  | 2.188779 | 2.896278 | 4.974214 | 3.083218 | 2.548201 |
| 20 | H  | 2.161686 | 3.880143 | 5.242754 | 2.521391 | 3.083363 |
| 21 | C  | 2.498720 | 4.613682 | 6.719916 | 2.715525 | 2.800566 |
| 22 | O  | 2.791739 | 5.223140 | 7.373348 | 2.645226 | 2.874794 |
| 23 | O  | 3.694783 | 5.360417 | 7.450194 | 4.013675 | 3.991352 |
| 24 | H  | 4.376147 | 6.200658 | 8.364707 | 4.546387 | 4.574447 |
|    |    | 11       | 12       | 13       | 14       | 15       |
| 11 | Br | 0.000000 |          |          |          |          |
| 12 | H  | 2.683415 | 0.000000 |          |          |          |
| 13 | C  | 3.706648 | 2.780367 | 0.000000 |          |          |
| 14 | C  | 4.970328 | 4.018514 | 1.327050 | 0.000000 |          |
| 15 | H  | 3.063085 | 2.608916 | 1.084908 | 2.137822 | 0.000000 |
| 16 | H  | 5.443994 | 4.737792 | 2.084240 | 1.081436 | 2.475046 |
| 17 | H  | 5.728926 | 4.564990 | 2.121085 | 1.083643 | 3.107831 |
| 18 | C  | 3.678125 | 3.670770 | 5.571371 | 6.748145 | 5.581749 |
| 19 | H  | 4.171780 | 4.354380 | 5.804585 | 6.878861 | 5.938565 |
| 20 | H  | 2.688239 | 3.327523 | 5.155822 | 6.399497 | 4.986920 |
| 21 | C  | 4.709399 | 4.752053 | 6.955863 | 8.165213 | 6.882788 |
| 22 | O  | 5.394165 | 4.995659 | 7.452032 | 8.658169 | 7.376195 |
| 23 | O  | 5.203770 | 5.806368 | 7.813118 | 9.021027 | 7.688930 |
| 24 | H  | 5.963807 | 6.500096 | 8.657133 | 9.883865 | 8.499362 |
|    |    | 16       | 17       | 18       | 19       | 20       |
| 16 | H  | 0.000000 |          |          |          |          |
| 17 | H  | 1.851569 | 0.000000 |          |          |          |
| 18 | C  | 7.636986 | 7.000345 | 0.000000 |          |          |
| 19 | H  | 7.801177 | 7.023397 | 1.093305 | 0.000000 |          |
| 20 | H  | 7.190222 | 6.803373 | 1.100609 | 1.758354 | 0.000000 |
| 21 | C  | 9.035612 | 8.436814 | 1.505358 | 2.130440 | 2.134058 |
| 22 | O  | 9.531096 | 8.919372 | 2.415079 | 3.164368 | 3.054909 |
| 23 | O  | 9.859057 | 9.314667 | 2.364681 | 2.538107 | 2.704446 |

|    |   |           |           |          |          |          |
|----|---|-----------|-----------|----------|----------|----------|
| 24 | H | 10.716142 | 10.188392 | 3.197356 | 3.454491 | 3.549817 |
|    |   | 21        | 22        | 23       | 24       |          |
| 21 | C | 0.000000  |           |          |          |          |
| 22 | O | 1.208127  | 0.000000  |          |          |          |
| 23 | O | 1.350170  | 2.248300  | 0.000000 |          |          |
| 24 | H | 1.883345  | 2.299081  | 0.969354 | 0.000000 |          |

Stoichiometry C8H11BrN2O2

Framework group C1[X(C8H11BrN2O2)]

Deg. of freedom 66

Full point group C1 NOp 1

Largest Abelian subgroup C1 NOp 1

Largest concise Abelian subgroup C1 NOp 1

Standard orientation:

| Center<br>Number | Atomic<br>Number | Atomic<br>Type | Coordinates (Angstroms) |           |           |
|------------------|------------------|----------------|-------------------------|-----------|-----------|
|                  |                  |                | X                       | Y         | Z         |
| 1                | 6                | 0              | -0.660206               | -2.161676 | -0.761139 |
| 2                | 6                | 0              | -1.968864               | -1.826109 | -0.850532 |
| 3                | 7                | 0              | -2.210963               | -0.860248 | 0.121599  |
| 4                | 6                | 0              | -1.047649               | -0.584353 | 0.746830  |
| 5                | 7                | 0              | -0.106003               | -1.407828 | 0.266265  |
| 6                | 6                | 0              | 1.318032                | -1.344010 | 0.620092  |
| 7                | 1                | 0              | -0.075946               | -2.858782 | -1.335927 |
| 8                | 1                | 0              | -2.736745               | -2.156882 | -1.525941 |
| 9                | 1                | 0              | 1.392214                | -0.911876 | 1.616769  |
| 10               | 1                | 0              | 1.695803                | -2.366026 | 0.678613  |
| 11               | 35               | 0              | -0.470006               | 2.108432  | -0.090402 |
| 12               | 1                | 0              | -0.935320               | 0.068782  | 1.590081  |
| 13               | 6                | 0              | -3.405024               | -0.116673 | 0.326511  |
| 14               | 6                | 0              | -4.619098               | -0.618580 | 0.138955  |
| 15               | 1                | 0              | -3.201219               | 0.910867  | 0.608738  |
| 16               | 1                | 0              | -5.484023               | 0.018041  | 0.265923  |
| 17               | 1                | 0              | -4.792997               | -1.650510 | -0.142402 |
| 18               | 6                | 0              | 2.107791                | -0.498893 | -0.382677 |
| 19               | 1                | 0              | 2.080958                | -0.926575 | -1.388501 |
| 20               | 1                | 0              | 1.653630                | 0.501021  | -0.455137 |
| 21               | 6                | 0              | 3.541397                | -0.354583 | 0.053274  |
| 22               | 8                | 0              | 3.982002                | -0.682412 | 1.129363  |
| 23               | 8                | 0              | 4.302679                | 0.204182  | -0.911707 |
| 24               | 1                | 0              | 5.196888                | 0.308445  | -0.552311 |

Rotational constants (GHZ): 0.8054144 0.3345616 0.2550745

Standard basis: 6-311++G(d,p) (5D, 7F)

There are 404 symmetry adapted cartesian basis functions of A symmetry.  
 There are 389 symmetry adapted basis functions of A symmetry.  
 389 basis functions, 625 primitive gaussians, 404 cartesian basis functions  
 62 alpha electrons 62 beta electrons  
 nuclear repulsion energy 1072.6014735930 Hartrees.  
 NAToms= 24 NActive= 24 NUniq= 24 SFac= 1.00D+00 NATFMM= 60 NAOKFM=F  
 Big=F  
 Integral buffers will be 131072 words long.  
 Raffenetti 2 integral format.  
 Two-electron integral symmetry is turned on.  
 One-electron integrals computed using PRISM.  
 NBasis= 389 RedAO= T EigKep= 6.50D-06 NBF= 389  
 NBsUse= 389 1.00D-06 EigRej= -1.00D+00 NBFU= 389  
 Initial guess from the checkpoint file: "./cooh.chk"  
 B after Tr= 0.000000 0.000000 0.000000  
 Rot= 1.000000 0.000013 0.000000 -0.000002 Ang= 0.00 deg.  
 Keep R1 ints in memory in canonical form, NReq=2910765817.  
 Requested convergence on RMS density matrix=1.00D-08 within 128 cycles.  
 Requested convergence on MAX density matrix=1.00D-06.  
 Requested convergence on energy=1.00D-06.  
 No special actions if energy rises.  
 SCF Done: E(RB3LYP) = -3145.73224403 A.U. after 8 cycles  
 NFock= 8 Conv=0.67D-08 -V/T= 2.0017  
 Calling FoFJK, ICntrl= 2127 FMM=F ISym2X=0 l1Cent= 0 IOpClX= 0 NMat=1 NMatS=1  
 NMatT=0.

\*\*\*\*\* Axes restored to original set \*\*\*\*\*

| Center Number | Atomic Number | Forces (Hartrees/Bohr) |              |              |
|---------------|---------------|------------------------|--------------|--------------|
|               |               | X                      | Y            | Z            |
| 1             | 6             | 0.000004133            | 0.000005417  | -0.000015470 |
| 2             | 6             | 0.000001751            | 0.000003615  | -0.000004386 |
| 3             | 7             | -0.000012500           | 0.000004488  | -0.000012666 |
| 4             | 6             | 0.000006244            | -0.000007471 | 0.000015802  |
| 5             | 7             | -0.000000999           | 0.000005362  | -0.000020538 |
| 6             | 6             | 0.000004998            | -0.000009752 | -0.000000914 |
| 7             | 1             | 0.000004279            | 0.000010081  | -0.000021043 |
| 8             | 1             | 0.000004416            | 0.000011886  | -0.000016672 |
| 9             | 1             | -0.000004043           | -0.000013107 | 0.000002854  |
| 10            | 1             | -0.000003108           | -0.000007670 | -0.000008711 |
| 11            | 35            | -0.000002719           | -0.000002957 | 0.000023404  |
| 12            | 1             | -0.000000992           | -0.000008244 | 0.000001747  |
| 13            | 6             | 0.000008751            | -0.000010043 | 0.000005314  |
| 14            | 6             | -0.000002588           | 0.000000394  | -0.000003049 |

|    |   |              |              |              |
|----|---|--------------|--------------|--------------|
| 15 | 1 | -0.000004909 | -0.000003293 | 0.000012341  |
| 16 | 1 | -0.000000437 | -0.000001856 | 0.000002141  |
| 17 | 1 | 0.000001410  | -0.000000088 | -0.000012115 |
| 18 | 6 | 0.000008973  | 0.000004658  | -0.000002547 |
| 19 | 1 | 0.000004538  | 0.000014273  | 0.000000371  |
| 20 | 1 | -0.000007669 | 0.000001492  | 0.000021206  |
| 21 | 6 | -0.000011820 | -0.000006625 | 0.000007239  |
| 22 | 8 | -0.000000012 | -0.000008392 | 0.000009558  |
| 23 | 8 | 0.000004773  | 0.000012977  | 0.000003652  |
| 24 | 1 | -0.000002468 | 0.000004857  | 0.000012481  |

-----  
Cartesian Forces: Max 0.000023404 RMS 0.000008937

GradGradGradGradGradGradGradGradGradGradGradGradGradGradGradGradGradGradGradGrad

Berny optimization.

Using GEDIIS/GDIIS optimizer.

FormGI is forming the generalized inverse of G from B-inverse, IUseBI=4.

GSVD: received Info= 1 from GESDD.

Internal Forces: Max 0.000008265 RMS 0.000002353

Search for a local minimum.

Step number 18 out of a maximum of 140

All quantities printed in internal units (Hartrees-Bohrs-Radians)

Mixed Optimization -- En-DIIS/RFO-DIIS

Swapping is turned off.

Update second derivatives using D2CorX and points

|   |   |    |    |    |    |    |  |  |
|---|---|----|----|----|----|----|--|--|
| 4 | 6 | 7  | 8  | 9  |    |    |  |  |
|   |   | 10 | 11 | 12 | 13 | 14 |  |  |
|   |   | 15 | 16 | 17 | 18 |    |  |  |

DE= -1.49D-07 DEPred=-2.24D-08 R= 6.64D+00

Trust test= 6.64D+00 RLast= 3.83D-03 DXMaxT set to 7.14D-01

ITU= 0 0 0 1 1 1 1 1 1 1 1 1 0-1 1 1 1 0

|                 |         |         |         |         |         |
|-----------------|---------|---------|---------|---------|---------|
| Eigenvalues --- | 0.00124 | 0.00182 | 0.00249 | 0.00385 | 0.00858 |
| Eigenvalues --- | 0.01181 | 0.01819 | 0.01850 | 0.02100 | 0.02197 |
| Eigenvalues --- | 0.02394 | 0.02429 | 0.02471 | 0.03032 | 0.03103 |
| Eigenvalues --- | 0.03143 | 0.03337 | 0.03717 | 0.04048 | 0.04353 |
| Eigenvalues --- | 0.05088 | 0.05260 | 0.06347 | 0.07165 | 0.09718 |
| Eigenvalues --- | 0.09899 | 0.11022 | 0.12689 | 0.15573 | 0.15700 |
| Eigenvalues --- | 0.15929 | 0.15987 | 0.15996 | 0.16001 | 0.16014 |
| Eigenvalues --- | 0.16704 | 0.17833 | 0.20456 | 0.21666 | 0.23165 |
| Eigenvalues --- | 0.24405 | 0.25038 | 0.27337 | 0.27836 | 0.34328 |
| Eigenvalues --- | 0.34452 | 0.35178 | 0.35458 | 0.35577 | 0.35647 |
| Eigenvalues --- | 0.35843 | 0.36110 | 0.36584 | 0.36651 | 0.36767 |
| Eigenvalues --- | 0.37183 | 0.41350 | 0.42417 | 0.43574 | 0.47358 |
| Eigenvalues --- | 0.52526 | 0.53014 | 0.54093 | 0.54530 | 0.59926 |
| Eigenvalues --- | 0.93033 |         |         |         |         |

En-DIIS/RFO-DIIS IScMMF= 0 using points: 18 17 16 15 14  
 RFO step: Lambda=-2.04003476D-09.  
 DidBck=F Rises=F RFO-DIIS coefs: 1.47846 -0.50958 -0.09727 0.14102 -  
 0.01263

Iteration 1 RMS(Cart)= 0.00018354 RMS(Int)= 0.00000004  
 Iteration 2 RMS(Cart)= 0.00000005 RMS(Int)= 0.00000002

| Variable | Old X   | -DE/DX   | Delta X<br>(Linear) | Delta X<br>(Quad) | Delta X<br>(Total) | New X   |
|----------|---------|----------|---------------------|-------------------|--------------------|---------|
| R1       | 2.55860 | 0.00000  | 0.00000             | 0.00000           | 0.00000            | 2.55859 |
| R2       | 2.62596 | 0.00000  | 0.00000             | -0.00001          | 0.00000            | 2.62596 |
| R3       | 2.03328 | 0.00000  | 0.00000             | 0.00000           | 0.00000            | 2.03328 |
| R4       | 2.62973 | 0.00000  | -0.00001            | 0.00000           | -0.00001           | 2.62973 |
| R5       | 2.03111 | 0.00000  | 0.00000             | 0.00000           | 0.00000            | 2.03111 |
| R6       | 2.54961 | 0.00001  | 0.00001             | 0.00001           | 0.00002            | 2.54963 |
| R7       | 2.68625 | -0.00001 | -0.00003            | -0.00001          | -0.00004           | 2.68621 |
| R8       | 2.53234 | 0.00000  | -0.00002            | 0.00001           | -0.00001           | 2.53233 |
| R9       | 5.43956 | 0.00000  | -0.00002            | -0.00010          | -0.00012           | 5.43944 |
| R10      | 2.02675 | 0.00000  | 0.00000             | 0.00000           | 0.00000            | 2.02675 |
| R11      | 2.77548 | 0.00000  | 0.00002             | 0.00000           | 0.00002            | 2.77550 |
| R12      | 2.05764 | 0.00000  | 0.00001             | 0.00000           | 0.00001            | 2.05765 |
| R13      | 2.06201 | 0.00000  | 0.00000             | 0.00000           | 0.00000            | 2.06202 |
| R14      | 2.89288 | 0.00000  | -0.00003            | 0.00002           | -0.00002           | 2.89286 |
| R15      | 5.07092 | 0.00000  | -0.00007            | -0.00002          | -0.00008           | 5.07084 |
| R16      | 5.08004 | 0.00000  | -0.00005            | -0.00015          | -0.00020           | 5.07983 |
| R17      | 2.50776 | 0.00000  | 0.00000             | 0.00000           | 0.00001            | 2.50777 |
| R18      | 2.05018 | 0.00000  | -0.00001            | 0.00000           | -0.00001           | 2.05017 |
| R19      | 2.04362 | 0.00000  | 0.00000             | 0.00000           | 0.00000            | 2.04362 |
| R20      | 2.04779 | 0.00000  | 0.00000             | 0.00000           | 0.00000            | 2.04779 |
| R21      | 2.06605 | 0.00000  | -0.00002            | 0.00000           | -0.00002           | 2.06603 |
| R22      | 2.07985 | 0.00000  | 0.00001             | -0.00001          | 0.00001            | 2.07986 |
| R23      | 2.84471 | -0.00001 | -0.00003            | 0.00000           | -0.00003           | 2.84468 |
| R24      | 2.28303 | 0.00000  | 0.00000             | 0.00000           | 0.00000            | 2.28303 |
| R25      | 2.55145 | 0.00001  | 0.00002             | 0.00000           | 0.00003            | 2.55148 |
| R26      | 1.83181 | 0.00000  | 0.00000             | 0.00000           | 0.00000            | 1.83181 |
| A1       | 1.87532 | 0.00000  | 0.00000             | -0.00001          | -0.00001           | 1.87532 |
| A2       | 2.27858 | 0.00000  | 0.00000             | 0.00001           | 0.00000            | 2.27858 |
| A3       | 2.12925 | 0.00000  | 0.00000             | 0.00001           | 0.00001            | 2.12926 |
| A4       | 1.86926 | 0.00000  | -0.00001            | 0.00002           | 0.00001            | 1.86927 |
| A5       | 2.28597 | 0.00000  | 0.00000             | -0.00002          | -0.00002           | 2.28595 |
| A6       | 2.12738 | 0.00000  | 0.00001             | 0.00000           | 0.00000            | 2.12738 |
| A7       | 1.89194 | 0.00000  | 0.00000             | -0.00001          | -0.00001           | 1.89193 |
| A8       | 2.22673 | 0.00000  | 0.00002             | 0.00001           | 0.00003            | 2.22675 |
| A9       | 2.15376 | 0.00000  | 0.00000             | 0.00001           | 0.00001            | 2.15377 |
| A10      | 1.89023 | 0.00000  | 0.00000             | 0.00000           | 0.00000            | 1.89023 |

|     |          |          |          |          |          |          |
|-----|----------|----------|----------|----------|----------|----------|
| A11 | 1.80240  | 0.00000  | -0.00007 | 0.00000  | -0.00007 | 1.80233  |
| A12 | 2.18853  | 0.00000  | 0.00001  | -0.00001 | 0.00000  | 2.18853  |
| A13 | 1.90662  | 0.00000  | -0.00004 | -0.00002 | -0.00006 | 1.90656  |
| A14 | 2.19270  | 0.00000  | 0.00001  | 0.00001  | 0.00002  | 2.19272  |
| A15 | 1.89469  | 0.00000  | 0.00000  | 0.00001  | 0.00001  | 1.89470  |
| A16 | 2.19985  | 0.00000  | 0.00000  | 0.00000  | 0.00000  | 2.19985  |
| A17 | 2.17513  | 0.00000  | 0.00001  | 0.00000  | 0.00000  | 2.17514  |
| A18 | 1.87949  | 0.00000  | 0.00001  | -0.00003 | -0.00002 | 1.87947  |
| A19 | 1.88378  | 0.00000  | -0.00001 | 0.00000  | -0.00001 | 1.88377  |
| A20 | 1.94592  | 0.00000  | -0.00002 | -0.00001 | -0.00002 | 1.94589  |
| A21 | 1.87448  | 0.00000  | -0.00001 | 0.00000  | -0.00001 | 1.87447  |
| A22 | 1.92340  | 0.00000  | -0.00002 | 0.00001  | -0.00001 | 1.92339  |
| A23 | 1.95368  | 0.00000  | 0.00005  | 0.00002  | 0.00007  | 1.95375  |
| A24 | 1.20106  | 0.00000  | -0.00002 | 0.00000  | -0.00002 | 1.20104  |
| A25 | 1.33611  | 0.00000  | -0.00005 | -0.00003 | -0.00008 | 1.33602  |
| A26 | 2.15349  | 0.00000  | 0.00002  | 0.00001  | 0.00004  | 2.15353  |
| A27 | 1.95534  | 0.00000  | 0.00001  | 0.00001  | 0.00002  | 1.95536  |
| A28 | 2.17346  | 0.00000  | -0.00004 | -0.00002 | -0.00006 | 2.17340  |
| A29 | 2.08571  | 0.00000  | -0.00001 | 0.00000  | -0.00001 | 2.08571  |
| A30 | 2.14560  | 0.00000  | 0.00001  | 0.00000  | 0.00001  | 2.14562  |
| A31 | 2.05186  | 0.00000  | -0.00001 | 0.00000  | -0.00001 | 2.05186  |
| A32 | 1.95413  | 0.00000  | 0.00006  | 0.00000  | 0.00006  | 1.95418  |
| A33 | 1.90900  | 0.00000  | -0.00008 | -0.00002 | -0.00010 | 1.90890  |
| A34 | 1.93321  | 0.00000  | 0.00003  | 0.00000  | 0.00004  | 1.93324  |
| A35 | 1.85949  | 0.00000  | 0.00000  | 0.00000  | 0.00000  | 1.85949  |
| A36 | 1.90424  | 0.00000  | 0.00005  | -0.00002 | 0.00003  | 1.90427  |
| A37 | 1.90175  | 0.00000  | -0.00006 | 0.00004  | -0.00003 | 1.90173  |
| A38 | 2.60662  | 0.00001  | 0.00007  | 0.00005  | 0.00012  | 2.60674  |
| A39 | 2.18861  | 0.00000  | 0.00002  | 0.00000  | 0.00003  | 2.18863  |
| A40 | 1.94944  | -0.00001 | -0.00002 | 0.00000  | -0.00002 | 1.94942  |
| A41 | 2.14512  | 0.00000  | 0.00000  | 0.00000  | 0.00000  | 2.14511  |
| A42 | 1.87513  | 0.00000  | -0.00001 | 0.00000  | -0.00001 | 1.87512  |
| D1  | 0.00468  | 0.00000  | -0.00001 | 0.00008  | 0.00006  | 0.00474  |
| D2  | 3.10926  | 0.00000  | 0.00000  | 0.00001  | 0.00001  | 3.10926  |
| D3  | -3.12873 | 0.00000  | -0.00001 | 0.00004  | 0.00003  | -3.12871 |
| D4  | -0.02415 | 0.00000  | 0.00000  | -0.00003 | -0.00003 | -0.02419 |
| D5  | -0.05038 | 0.00000  | 0.00001  | -0.00007 | -0.00006 | -0.05044 |
| D6  | -3.02182 | 0.00000  | -0.00001 | -0.00014 | -0.00015 | -3.02197 |
| D7  | 3.08389  | 0.00000  | 0.00001  | -0.00004 | -0.00003 | 3.08386  |
| D8  | 0.11244  | 0.00000  | -0.00002 | -0.00010 | -0.00012 | 0.11233  |
| D9  | 0.04226  | 0.00000  | 0.00001  | -0.00006 | -0.00005 | 0.04222  |
| D10 | 3.02942  | 0.00000  | 0.00013  | 0.00001  | 0.00013  | 3.02955  |
| D11 | -3.06642 | 0.00000  | 0.00000  | 0.00001  | 0.00001  | -3.06641 |
| D12 | -0.07926 | 0.00000  | 0.00012  | 0.00007  | 0.00019  | -0.07908 |

|     |          |         |          |          |          |          |
|-----|----------|---------|----------|----------|----------|----------|
| D13 | -0.07408 | 0.00000 | 0.00000  | 0.00001  | 0.00001  | -0.07407 |
| D14 | 1.94634  | 0.00000 | -0.00008 | -0.00002 | -0.00010 | 1.94625  |
| D15 | -3.05893 | 0.00000 | -0.00015 | 0.00003  | -0.00012 | -3.05906 |
| D16 | -3.06913 | 0.00000 | -0.00012 | -0.00005 | -0.00016 | -3.06930 |
| D17 | -1.04871 | 0.00000 | -0.00019 | -0.00008 | -0.00027 | -1.04898 |
| D18 | 0.22920  | 0.00000 | -0.00026 | -0.00003 | -0.00029 | 0.22891  |
| D19 | 0.62225  | 0.00000 | -0.00035 | -0.00012 | -0.00047 | 0.62178  |
| D20 | -2.47559 | 0.00000 | -0.00030 | -0.00017 | -0.00048 | -2.47606 |
| D21 | -2.69508 | 0.00000 | -0.00022 | -0.00005 | -0.00027 | -2.69535 |
| D22 | 0.49027  | 0.00000 | -0.00017 | -0.00010 | -0.00027 | 0.49000  |
| D23 | 0.07703  | 0.00000 | 0.00000  | 0.00004  | 0.00003  | 0.07706  |
| D24 | 3.05145  | 0.00000 | 0.00002  | 0.00010  | 0.00012  | 3.05157  |
| D25 | -1.87442 | 0.00000 | 0.00009  | 0.00005  | 0.00014  | -1.87427 |
| D26 | 1.10001  | 0.00000 | 0.00011  | 0.00012  | 0.00023  | 1.10024  |
| D27 | 3.06141  | 0.00000 | 0.00014  | 0.00002  | 0.00016  | 3.06157  |
| D28 | -0.24735 | 0.00000 | 0.00016  | 0.00009  | 0.00025  | -0.24710 |
| D29 | -2.26260 | 0.00000 | -0.00007 | -0.00012 | -0.00019 | -2.26279 |
| D30 | -0.25389 | 0.00000 | -0.00012 | -0.00013 | -0.00025 | -0.25414 |
| D31 | -2.86211 | 0.00000 | -0.00005 | 0.00011  | 0.00005  | -2.86205 |
| D32 | -0.84338 | 0.00000 | -0.00007 | 0.00009  | 0.00003  | -0.84336 |
| D33 | 1.30912  | 0.00000 | -0.00002 | 0.00012  | 0.00010  | 1.30921  |
| D34 | 0.47582  | 0.00000 | -0.00008 | 0.00003  | -0.00005 | 0.47577  |
| D35 | 2.49455  | 0.00000 | -0.00009 | 0.00002  | -0.00008 | 2.49447  |
| D36 | -1.63614 | 0.00000 | -0.00004 | 0.00004  | -0.00001 | -1.63614 |
| D37 | -1.08953 | 0.00000 | 0.00007  | -0.00005 | 0.00002  | -1.08950 |
| D38 | 0.96745  | 0.00000 | 0.00005  | -0.00006 | -0.00001 | 0.96744  |
| D39 | 3.06387  | 0.00000 | -0.00006 | -0.00002 | -0.00008 | 3.06379  |
| D40 | 3.10753  | 0.00000 | 0.00009  | -0.00002 | 0.00007  | 3.10760  |
| D41 | -1.11868 | 0.00000 | 0.00007  | -0.00003 | 0.00004  | -1.11864 |
| D42 | 0.97774  | 0.00000 | -0.00004 | 0.00001  | -0.00003 | 0.97771  |
| D43 | 1.02266  | 0.00000 | 0.00008  | -0.00004 | 0.00004  | 1.02271  |
| D44 | 3.07964  | 0.00000 | 0.00006  | -0.00004 | 0.00001  | 3.07965  |
| D45 | -1.10713 | 0.00000 | -0.00005 | -0.00001 | -0.00006 | -1.10719 |
| D46 | 0.00698  | 0.00000 | 0.00036  | 0.00025  | 0.00061  | 0.00759  |
| D47 | 0.38159  | 0.00000 | 0.00038  | 0.00027  | 0.00065  | 0.38224  |
| D48 | -3.08857 | 0.00000 | 0.00005  | -0.00008 | -0.00003 | -3.08861 |
| D49 | 0.04999  | 0.00000 | -0.00001 | -0.00001 | -0.00002 | 0.04997  |
| D50 | 0.00378  | 0.00000 | 0.00000  | -0.00003 | -0.00003 | 0.00375  |
| D51 | -3.14085 | 0.00000 | -0.00006 | 0.00005  | -0.00001 | -3.14086 |
| D52 | -0.35014 | 0.00000 | -0.00035 | -0.00019 | -0.00054 | -0.35068 |
| D53 | 1.76521  | 0.00000 | -0.00033 | -0.00020 | -0.00053 | 1.76469  |
| D54 | -2.46572 | 0.00000 | -0.00031 | -0.00020 | -0.00051 | -2.46623 |
| D55 | -0.17567 | 0.00000 | -0.00033 | 0.00002  | -0.00031 | -0.17599 |
| D56 | 2.97279  | 0.00000 | -0.00027 | 0.00001  | -0.00026 | 2.97252  |



|     |          |         |          |         |          |          |
|-----|----------|---------|----------|---------|----------|----------|
| D57 | -2.33440 | 0.00000 | -0.00046 | 0.00003 | -0.00043 | -2.33483 |
| D58 | 0.81406  | 0.00000 | -0.00040 | 0.00002 | -0.00038 | 0.81368  |
| D59 | 1.92506  | 0.00000 | -0.00045 | 0.00002 | -0.00043 | 1.92464  |
| D60 | -1.20966 | 0.00000 | -0.00039 | 0.00001 | -0.00038 | -1.21004 |
| D61 | 3.09296  | 0.00000 | -0.00010 | 0.00005 | -0.00005 | 3.09291  |
| D62 | -0.04196 | 0.00000 | -0.00005 | 0.00004 | -0.00001 | -0.04197 |

| Item                 | Value    | Threshold | Converged? |
|----------------------|----------|-----------|------------|
| Maximum Force        | 0.000008 | 0.000450  | YES        |
| RMS Force            | 0.000002 | 0.000300  | YES        |
| Maximum Displacement | 0.001050 | 0.001800  | YES        |
| RMS Displacement     | 0.000184 | 0.001200  | YES        |

Predicted change in Energy=-6.675148D-09

Optimization completed.

-- Stationary point found.

-----  
! Optimized Parameters !  
! (Angstroms and Degrees) !

| ! Name | Definition | Value  | Derivative Info. | ! |
|--------|------------|--------|------------------|---|
| ! R1   | R(1,2)     | 1.354  | -DE/DX = 0.0     | ! |
| ! R2   | R(1,5)     | 1.3896 | -DE/DX = 0.0     | ! |
| ! R3   | R(1,7)     | 1.076  | -DE/DX = 0.0     | ! |
| ! R4   | R(2,3)     | 1.3916 | -DE/DX = 0.0     | ! |
| ! R5   | R(2,8)     | 1.0748 | -DE/DX = 0.0     | ! |
| ! R6   | R(3,4)     | 1.3492 | -DE/DX = 0.0     | ! |
| ! R7   | R(3,13)    | 1.4215 | -DE/DX = 0.0     | ! |
| ! R8   | R(4,5)     | 1.3401 | -DE/DX = 0.0     | ! |
| ! R9   | R(4,11)    | 2.8785 | -DE/DX = 0.0     | ! |
| ! R10  | R(4,12)    | 1.0725 | -DE/DX = 0.0     | ! |
| ! R11  | R(5,6)     | 1.4687 | -DE/DX = 0.0     | ! |
| ! R12  | R(6,9)     | 1.0889 | -DE/DX = 0.0     | ! |
| ! R13  | R(6,10)    | 1.0912 | -DE/DX = 0.0     | ! |
| ! R14  | R(6,18)    | 1.5308 | -DE/DX = 0.0     | ! |
| ! R15  | R(11,12)   | 2.6834 | -DE/DX = 0.0     | ! |
| ! R16  | R(11,20)   | 2.6882 | -DE/DX = 0.0     | ! |
| ! R17  | R(13,14)   | 1.3271 | -DE/DX = 0.0     | ! |
| ! R18  | R(13,15)   | 1.0849 | -DE/DX = 0.0     | ! |
| ! R19  | R(14,16)   | 1.0814 | -DE/DX = 0.0     | ! |
| ! R20  | R(14,17)   | 1.0836 | -DE/DX = 0.0     | ! |
| ! R21  | R(18,19)   | 1.0933 | -DE/DX = 0.0     | ! |
| ! R22  | R(18,20)   | 1.1006 | -DE/DX = 0.0     | ! |
| ! R23  | R(18,21)   | 1.5054 | -DE/DX = 0.0     | ! |
| ! R24  | R(21,22)   | 1.2081 | -DE/DX = 0.0     | ! |

|       |             |          |          |     |   |
|-------|-------------|----------|----------|-----|---|
| ! R25 | R(21,23)    | 1.3502   | -DE/DX = | 0.0 | ! |
| ! R26 | R(23,24)    | 0.9694   | -DE/DX = | 0.0 | ! |
| ! A1  | A(2,1,5)    | 107.4481 | -DE/DX = | 0.0 | ! |
| ! A2  | A(2,1,7)    | 130.5529 | -DE/DX = | 0.0 | ! |
| ! A3  | A(5,1,7)    | 121.9973 | -DE/DX = | 0.0 | ! |
| ! A4  | A(1,2,3)    | 107.1006 | -DE/DX = | 0.0 | ! |
| ! A5  | A(1,2,8)    | 130.9763 | -DE/DX = | 0.0 | ! |
| ! A6  | A(3,2,8)    | 121.8898 | -DE/DX = | 0.0 | ! |
| ! A7  | A(2,3,4)    | 108.4001 | -DE/DX = | 0.0 | ! |
| ! A8  | A(2,3,13)   | 127.582  | -DE/DX = | 0.0 | ! |
| ! A9  | A(4,3,13)   | 123.4015 | -DE/DX = | 0.0 | ! |
| ! A10 | A(3,4,5)    | 108.3025 | -DE/DX = | 0.0 | ! |
| ! A11 | A(3,4,11)   | 103.2698 | -DE/DX = | 0.0 | ! |
| ! A12 | A(3,4,12)   | 125.3933 | -DE/DX = | 0.0 | ! |
| ! A13 | A(5,4,11)   | 109.2411 | -DE/DX = | 0.0 | ! |
| ! A14 | A(5,4,12)   | 125.6325 | -DE/DX = | 0.0 | ! |
| ! A15 | A(1,5,4)    | 108.5578 | -DE/DX = | 0.0 | ! |
| ! A16 | A(1,5,6)    | 126.0418 | -DE/DX = | 0.0 | ! |
| ! A17 | A(4,5,6)    | 124.626  | -DE/DX = | 0.0 | ! |
| ! A18 | A(5,6,9)    | 107.6868 | -DE/DX = | 0.0 | ! |
| ! A19 | A(5,6,10)   | 107.9325 | -DE/DX = | 0.0 | ! |
| ! A20 | A(5,6,18)   | 111.4928 | -DE/DX = | 0.0 | ! |
| ! A21 | A(9,6,10)   | 107.3999 | -DE/DX = | 0.0 | ! |
| ! A22 | A(9,6,18)   | 110.2029 | -DE/DX = | 0.0 | ! |
| ! A23 | A(10,6,18)  | 111.9376 | -DE/DX = | 0.0 | ! |
| ! A24 | A(4,11,20)  | 68.8154  | -DE/DX = | 0.0 | ! |
| ! A25 | A(12,11,20) | 76.5533  | -DE/DX = | 0.0 | ! |
| ! A26 | A(3,13,14)  | 123.3858 | -DE/DX = | 0.0 | ! |
| ! A27 | A(3,13,15)  | 112.0325 | -DE/DX = | 0.0 | ! |
| ! A28 | A(14,13,15) | 124.5302 | -DE/DX = | 0.0 | ! |
| ! A29 | A(13,14,16) | 119.5027 | -DE/DX = | 0.0 | ! |
| ! A30 | A(13,14,17) | 122.9341 | -DE/DX = | 0.0 | ! |
| ! A31 | A(16,14,17) | 117.563  | -DE/DX = | 0.0 | ! |
| ! A32 | A(6,18,19)  | 111.9632 | -DE/DX = | 0.0 | ! |
| ! A33 | A(6,18,20)  | 109.3777 | -DE/DX = | 0.0 | ! |
| ! A34 | A(6,18,21)  | 110.7646 | -DE/DX = | 0.0 | ! |
| ! A35 | A(19,18,20) | 106.5408 | -DE/DX = | 0.0 | ! |
| ! A36 | A(19,18,21) | 109.105  | -DE/DX = | 0.0 | ! |
| ! A37 | A(20,18,21) | 108.9625 | -DE/DX = | 0.0 | ! |
| ! A38 | A(11,20,18) | 149.3482 | -DE/DX = | 0.0 | ! |
| ! A39 | A(18,21,22) | 125.398  | -DE/DX = | 0.0 | ! |
| ! A40 | A(18,21,23) | 111.6946 | -DE/DX = | 0.0 | ! |
| ! A41 | A(22,21,23) | 122.9062 | -DE/DX = | 0.0 | ! |
| ! A42 | A(21,23,24) | 107.4372 | -DE/DX = | 0.0 | ! |

|       |               |           |          |     |   |
|-------|---------------|-----------|----------|-----|---|
| ! D1  | D(5,1,2,3)    | 0.2679    | -DE/DX = | 0.0 | ! |
| ! D2  | D(5,1,2,8)    | 178.1473  | -DE/DX = | 0.0 | ! |
| ! D3  | D(7,1,2,3)    | -179.2633 | -DE/DX = | 0.0 | ! |
| ! D4  | D(7,1,2,8)    | -1.3839   | -DE/DX = | 0.0 | ! |
| ! D5  | D(2,1,5,4)    | -2.8863   | -DE/DX = | 0.0 | ! |
| ! D6  | D(2,1,5,6)    | -173.1374 | -DE/DX = | 0.0 | ! |
| ! D7  | D(7,1,5,4)    | 176.6936  | -DE/DX = | 0.0 | ! |
| ! D8  | D(7,1,5,6)    | 6.4426    | -DE/DX = | 0.0 | ! |
| ! D9  | D(1,2,3,4)    | 2.4215    | -DE/DX = | 0.0 | ! |
| ! D10 | D(1,2,3,13)   | 173.5731  | -DE/DX = | 0.0 | ! |
| ! D11 | D(8,2,3,4)    | -175.693  | -DE/DX = | 0.0 | ! |
| ! D12 | D(8,2,3,13)   | -4.5414   | -DE/DX = | 0.0 | ! |
| ! D13 | D(2,3,4,5)    | -4.2445   | -DE/DX = | 0.0 | ! |
| ! D14 | D(2,3,4,11)   | 111.5173  | -DE/DX = | 0.0 | ! |
| ! D15 | D(2,3,4,12)   | -175.264  | -DE/DX = | 0.0 | ! |
| ! D16 | D(13,3,4,5)   | -175.8483 | -DE/DX = | 0.0 | ! |
| ! D17 | D(13,3,4,11)  | -60.0865  | -DE/DX = | 0.0 | ! |
| ! D18 | D(13,3,4,12)  | 13.1322   | -DE/DX = | 0.0 | ! |
| ! D19 | D(2,3,13,14)  | 35.6522   | -DE/DX = | 0.0 | ! |
| ! D20 | D(2,3,13,15)  | -141.8407 | -DE/DX = | 0.0 | ! |
| ! D21 | D(4,3,13,14)  | -154.4167 | -DE/DX = | 0.0 | ! |
| ! D22 | D(4,3,13,15)  | 28.0904   | -DE/DX = | 0.0 | ! |
| ! D23 | D(3,4,5,1)    | 4.4133    | -DE/DX = | 0.0 | ! |
| ! D24 | D(3,4,5,6)    | 174.8353  | -DE/DX = | 0.0 | ! |
| ! D25 | D(11,4,5,1)   | -107.3962 | -DE/DX = | 0.0 | ! |
| ! D26 | D(11,4,5,6)   | 63.0257   | -DE/DX = | 0.0 | ! |
| ! D27 | D(12,4,5,1)   | 175.4058  | -DE/DX = | 0.0 | ! |
| ! D28 | D(12,4,5,6)   | -14.1722  | -DE/DX = | 0.0 | ! |
| ! D29 | D(3,4,11,20)  | -129.6377 | -DE/DX = | 0.0 | ! |
| ! D30 | D(5,4,11,20)  | -14.5469  | -DE/DX = | 0.0 | ! |
| ! D31 | D(1,5,6,9)    | -163.9867 | -DE/DX = | 0.0 | ! |
| ! D32 | D(1,5,6,10)   | -48.3223  | -DE/DX = | 0.0 | ! |
| ! D33 | D(1,5,6,18)   | 75.0068   | -DE/DX = | 0.0 | ! |
| ! D34 | D(4,5,6,9)    | 27.2626   | -DE/DX = | 0.0 | ! |
| ! D35 | D(4,5,6,10)   | 142.9271  | -DE/DX = | 0.0 | ! |
| ! D36 | D(4,5,6,18)   | -93.7439  | -DE/DX = | 0.0 | ! |
| ! D37 | D(5,6,18,19)  | -62.4252  | -DE/DX = | 0.0 | ! |
| ! D38 | D(5,6,18,20)  | 55.4308   | -DE/DX = | 0.0 | ! |
| ! D39 | D(5,6,18,21)  | 175.5466  | -DE/DX = | 0.0 | ! |
| ! D40 | D(9,6,18,19)  | 178.0484  | -DE/DX = | 0.0 | ! |
| ! D41 | D(9,6,18,20)  | -64.0955  | -DE/DX = | 0.0 | ! |
| ! D42 | D(9,6,18,21)  | 56.0202   | -DE/DX = | 0.0 | ! |
| ! D43 | D(10,6,18,19) | 58.5943   | -DE/DX = | 0.0 | ! |
| ! D44 | D(10,6,18,20) | 176.4503  | -DE/DX = | 0.0 | ! |

|       |                |           |          |     |   |
|-------|----------------|-----------|----------|-----|---|
| ! D45 | D(10,6,18,21)  | -63.434   | -DE/DX = | 0.0 | ! |
| ! D46 | D(4,11,20,18)  | 0.3999    | -DE/DX = | 0.0 | ! |
| ! D47 | D(12,11,20,18) | 21.8635   | -DE/DX = | 0.0 | ! |
| ! D48 | D(3,13,14,16)  | -176.9621 | -DE/DX = | 0.0 | ! |
| ! D49 | D(3,13,14,17)  | 2.864     | -DE/DX = | 0.0 | ! |
| ! D50 | D(15,13,14,16) | 0.2167    | -DE/DX = | 0.0 | ! |
| ! D51 | D(15,13,14,17) | -179.9572 | -DE/DX = | 0.0 | ! |
| ! D52 | D(6,18,20,11)  | -20.0618  | -DE/DX = | 0.0 | ! |
| ! D53 | D(19,18,20,11) | 101.1392  | -DE/DX = | 0.0 | ! |
| ! D54 | D(21,18,20,11) | -141.2756 | -DE/DX = | 0.0 | ! |
| ! D55 | D(6,18,21,22)  | -10.0653  | -DE/DX = | 0.0 | ! |
| ! D56 | D(6,18,21,23)  | 170.3282  | -DE/DX = | 0.0 | ! |
| ! D57 | D(19,18,21,22) | -133.7514 | -DE/DX = | 0.0 | ! |
| ! D58 | D(19,18,21,23) | 46.6422   | -DE/DX = | 0.0 | ! |
| ! D59 | D(20,18,21,22) | 110.298   | -DE/DX = | 0.0 | ! |
| ! D60 | D(20,18,21,23) | -69.3084  | -DE/DX = | 0.0 | ! |
| ! D61 | D(18,21,23,24) | 177.2136  | -DE/DX = | 0.0 | ! |
| ! D62 | D(22,21,23,24) | -2.4043   | -DE/DX = | 0.0 | ! |

-----  
GradGradGradGradGradGradGradGradGradGradGradGradGradGradGradGradGradGradGrad

Input orientation:

| Center<br>Number | Atomic<br>Number | Atomic<br>Type | Coordinates (Angstroms) |           |           |
|------------------|------------------|----------------|-------------------------|-----------|-----------|
|                  |                  |                | X                       | Y         | Z         |
| 1                | 6                | 0              | -0.330797               | -2.229188 | -0.385818 |
| 2                | 6                | 0              | -1.580448               | -1.780329 | -0.650546 |
| 3                | 7                | 0              | -1.803030               | -0.680382 | 0.172322  |
| 4                | 6                | 0              | -0.679097               | -0.443717 | 0.880205  |
| 5                | 7                | 0              | 0.206073                | -1.409978 | 0.599906  |
| 6                | 6                | 0              | 1.589627                | -1.442591 | 1.091693  |
| 7                | 1                | 0              | 0.223389                | -3.047399 | -0.811385 |
| 8                | 1                | 0              | -2.314504               | -2.116447 | -1.360063 |
| 9                | 1                | 0              | 1.618753                | -0.897541 | 2.033861  |
| 10               | 1                | 0              | 1.845061                | -2.481247 | 1.307560  |
| 11               | 35               | 0              | 0.267555                | 2.051761  | -0.197828 |
| 12               | 1                | 0              | -0.573618               | 0.296360  | 1.649253  |
| 13               | 6                | 0              | -2.921355               | 0.197079  | 0.163077  |
| 14               | 6                | 0              | -4.160929               | -0.202440 | -0.091681 |
| 15               | 1                | 0              | -2.632143               | 1.226911  | 0.344265  |
| 16               | 1                | 0              | -4.958178               | 0.527190  | -0.130924 |
| 17               | 1                | 0              | -4.421114               | -1.239441 | -0.268358 |
| 18               | 6                | 0              | 2.557201                | -0.812732 | 0.086424  |

|    |   |   |          |           |           |
|----|---|---|----------|-----------|-----------|
| 19 | 1 | 0 | 2.576268 | -1.359206 | -0.860317 |
| 20 | 1 | 0 | 2.225017 | 0.209872  | -0.148681 |
| 21 | 6 | 0 | 3.951541 | -0.756470 | 0.651009  |
| 22 | 8 | 0 | 4.251914 | -0.987649 | 1.798138  |
| 23 | 8 | 0 | 4.855786 | -0.401695 | -0.286772 |
| 24 | 1 | 0 | 5.718999 | -0.341495 | 0.150133  |

-----  
Distance matrix (angstroms):

|    |    | 1        | 2        | 3        | 4        | 5        |
|----|----|----------|----------|----------|----------|----------|
| 1  | C  | 0.000000 |          |          |          |          |
| 2  | C  | 1.353951 | 0.000000 |          |          |          |
| 3  | N  | 2.208572 | 1.391595 | 0.000000 |          |          |
| 4  | C  | 2.216311 | 2.223097 | 1.349197 | 0.000000 |          |
| 5  | N  | 1.389599 | 2.211887 | 2.179824 | 1.340057 | 0.000000 |
| 6  | C  | 2.547508 | 3.633020 | 3.596710 | 2.487888 | 1.468721 |
| 7  | H  | 1.075964 | 2.210240 | 3.267540 | 3.233437 | 2.161756 |
| 8  | H  | 2.212908 | 1.074816 | 2.161503 | 3.239040 | 3.270151 |
| 9  | H  | 3.380661 | 4.268517 | 3.901420 | 2.610937 | 2.077133 |
| 10 | H  | 2.768650 | 4.007440 | 4.223796 | 3.271932 | 2.081989 |
| 11 | Br | 4.326649 | 4.278432 | 3.448034 | 2.878493 | 3.552998 |
| 12 | H  | 3.252517 | 3.258131 | 2.155644 | 1.072509 | 2.149566 |
| 13 | C  | 3.591525 | 2.523917 | 1.421504 | 2.439797 | 3.543198 |
| 14 | C  | 4.343287 | 3.075865 | 2.420293 | 3.622973 | 4.583355 |
| 15 | H  | 4.215902 | 3.337544 | 2.086806 | 2.625379 | 3.882525 |
| 16 | H  | 5.392146 | 4.123555 | 3.391924 | 4.502840 | 5.563831 |
| 17 | H  | 4.209999 | 2.916849 | 2.713136 | 3.994378 | 4.711031 |
| 18 | C  | 3.251137 | 4.312715 | 4.363085 | 3.352595 | 2.479551 |
| 19 | H  | 3.071325 | 4.183256 | 4.550318 | 3.803280 | 2.784359 |
| 20 | H  | 3.540824 | 4.323694 | 4.137724 | 3.149551 | 2.694520 |
| 21 | C  | 4.645677 | 5.774532 | 5.774947 | 4.646843 | 3.802396 |
| 22 | O  | 5.226118 | 6.375016 | 6.276944 | 5.045129 | 4.240631 |
| 23 | O  | 5.500016 | 6.592273 | 6.680439 | 5.656725 | 4.839697 |
| 24 | H  | 6.360083 | 7.482864 | 7.529691 | 6.440426 | 5.633499 |
|    |    | 6        | 7        | 8        | 9        | 10       |
| 6  | C  | 0.000000 |          |          |          |          |
| 7  | H  | 2.839669 | 0.000000 |          |          |          |
| 8  | H  | 4.659123 | 2.758373 | 0.000000 |          |          |
| 9  | H  | 1.088857 | 3.829406 | 5.336194 | 0.000000 |          |
| 10 | H  | 1.091170 | 2.727687 | 4.954925 | 1.756945 | 0.000000 |
| 11 | Br | 3.952371 | 5.136130 | 5.039026 | 3.937582 | 5.030198 |
| 12 | H  | 2.830981 | 4.227373 | 4.231821 | 2.525829 | 3.698901 |
| 13 | C  | 4.888743 | 4.622297 | 2.835600 | 5.030964 | 5.585875 |
| 14 | C  | 6.000604 | 5.275794 | 2.946439 | 6.197243 | 6.574402 |
| 15 | H  | 5.050567 | 5.268710 | 3.766122 | 5.043624 | 5.892685 |

|    |    |           |           |          |          |          |
|----|----|-----------|-----------|----------|----------|----------|
| 16 | H  | 6.946119  | 6.331614  | 3.935557 | 7.069099 | 7.576542 |
| 17 | H  | 6.166037  | 5.013481  | 2.529578 | 6.472796 | 6.579555 |
| 18 | C  | 1.530846  | 3.353576  | 5.246476 | 2.163421 | 2.186838 |
| 19 | H  | 2.188779  | 2.896278  | 4.974214 | 3.083218 | 2.548201 |
| 20 | H  | 2.161686  | 3.880143  | 5.242754 | 2.521391 | 3.083363 |
| 21 | C  | 2.498720  | 4.613682  | 6.719916 | 2.715525 | 2.800566 |
| 22 | O  | 2.791739  | 5.223140  | 7.373348 | 2.645226 | 2.874794 |
| 23 | O  | 3.694783  | 5.360417  | 7.450194 | 4.013675 | 3.991352 |
| 24 | H  | 4.376147  | 6.200658  | 8.364707 | 4.546387 | 4.574447 |
|    |    | 11        | 12        | 13       | 14       | 15       |
| 11 | Br | 0.000000  |           |          |          |          |
| 12 | H  | 2.683415  | 0.000000  |          |          |          |
| 13 | C  | 3.706648  | 2.780367  | 0.000000 |          |          |
| 14 | C  | 4.970328  | 4.018514  | 1.327050 | 0.000000 |          |
| 15 | H  | 3.063085  | 2.608916  | 1.084908 | 2.137822 | 0.000000 |
| 16 | H  | 5.443994  | 4.737792  | 2.084240 | 1.081436 | 2.475046 |
| 17 | H  | 5.728926  | 4.564990  | 2.121085 | 1.083643 | 3.107831 |
| 18 | C  | 3.678125  | 3.670770  | 5.571371 | 6.748145 | 5.581749 |
| 19 | H  | 4.171780  | 4.354380  | 5.804585 | 6.878861 | 5.938565 |
| 20 | H  | 2.688239  | 3.327523  | 5.155822 | 6.399497 | 4.986920 |
| 21 | C  | 4.709399  | 4.752053  | 6.955863 | 8.165213 | 6.882788 |
| 22 | O  | 5.394165  | 4.995659  | 7.452032 | 8.658169 | 7.376195 |
| 23 | O  | 5.203770  | 5.806368  | 7.813118 | 9.021027 | 7.688930 |
| 24 | H  | 5.963807  | 6.500096  | 8.657133 | 9.883865 | 8.499362 |
|    |    | 16        | 17        | 18       | 19       | 20       |
| 16 | H  | 0.000000  |           |          |          |          |
| 17 | H  | 1.851569  | 0.000000  |          |          |          |
| 18 | C  | 7.636986  | 7.000345  | 0.000000 |          |          |
| 19 | H  | 7.801177  | 7.023397  | 1.093305 | 0.000000 |          |
| 20 | H  | 7.190222  | 6.803373  | 1.100609 | 1.758354 | 0.000000 |
| 21 | C  | 9.035612  | 8.436814  | 1.505358 | 2.130440 | 2.134058 |
| 22 | O  | 9.531096  | 8.919372  | 2.415079 | 3.164368 | 3.054909 |
| 23 | O  | 9.859057  | 9.314667  | 2.364681 | 2.538107 | 2.704446 |
| 24 | H  | 10.716142 | 10.188392 | 3.197356 | 3.454491 | 3.549817 |
|    |    | 21        | 22        | 23       | 24       |          |
| 21 | C  | 0.000000  |           |          |          |          |
| 22 | O  | 1.208127  | 0.000000  |          |          |          |
| 23 | O  | 1.350170  | 2.248300  | 0.000000 |          |          |
| 24 | H  | 1.883345  | 2.299081  | 0.969354 | 0.000000 |          |

Stoichiometry C<sub>8</sub>H<sub>11</sub>BrN<sub>2</sub>O<sub>2</sub>

Framework group C1[X(C<sub>8</sub>H<sub>11</sub>BrN<sub>2</sub>O<sub>2</sub>)]

Deg. of freedom 66

Full point group C1 NOp 1

Largest Abelian subgroup C1 NOp 1

Largest concise Abelian subgroup C1      NOp   1

Standard orientation:

| Center Number | Atomic Number | Atomic Type | Coordinates (Angstroms) |           |           |
|---------------|---------------|-------------|-------------------------|-----------|-----------|
|               |               |             | X                       | Y         | Z         |
| 1             | 6             | 0           | -0.660206               | -2.161676 | -0.761139 |
| 2             | 6             | 0           | -1.968864               | -1.826109 | -0.850532 |
| 3             | 7             | 0           | -2.210963               | -0.860248 | 0.121599  |
| 4             | 6             | 0           | -1.047649               | -0.584353 | 0.746830  |
| 5             | 7             | 0           | -0.106003               | -1.407828 | 0.266265  |
| 6             | 6             | 0           | 1.318032                | -1.344010 | 0.620092  |
| 7             | 1             | 0           | -0.075946               | -2.858782 | -1.335927 |
| 8             | 1             | 0           | -2.736745               | -2.156882 | -1.525941 |
| 9             | 1             | 0           | 1.392214                | -0.911876 | 1.616769  |
| 10            | 1             | 0           | 1.695803                | -2.366026 | 0.678613  |
| 11            | 35            | 0           | -0.470006               | 2.108432  | -0.090402 |
| 12            | 1             | 0           | -0.935320               | 0.068782  | 1.590081  |
| 13            | 6             | 0           | -3.405024               | -0.116673 | 0.326511  |
| 14            | 6             | 0           | -4.619098               | -0.618580 | 0.138955  |
| 15            | 1             | 0           | -3.201219               | 0.910867  | 0.608738  |
| 16            | 1             | 0           | -5.484023               | 0.018041  | 0.265923  |
| 17            | 1             | 0           | -4.792997               | -1.650510 | -0.142402 |
| 18            | 6             | 0           | 2.107791                | -0.498893 | -0.382677 |
| 19            | 1             | 0           | 2.080958                | -0.926575 | -1.388501 |
| 20            | 1             | 0           | 1.653630                | 0.501021  | -0.455137 |
| 21            | 6             | 0           | 3.541397                | -0.354583 | 0.053274  |
| 22            | 8             | 0           | 3.982002                | -0.682412 | 1.129363  |
| 23            | 8             | 0           | 4.302679                | 0.204182  | -0.911707 |
| 24            | 1             | 0           | 5.196888                | 0.308445  | -0.552311 |

Rotational constants (GHZ):      0.8054144      0.3345616      0.2550745

\*\*\*\*\*

Population analysis using the SCF density.

\*\*\*\*\*

Orbital symmetries:

Occupied (A)  
(A) (A) (A) (A) (A) (A) (A) (A) (A) (A) (A) (A)  
(A) (A) (A) (A) (A) (A) (A) (A) (A) (A) (A) (A)  
(A) (A) (A) (A) (A) (A) (A) (A) (A) (A) (A) (A)





|                            |          |          |          |          |          |
|----------------------------|----------|----------|----------|----------|----------|
| Alpha virt. eigenvalues -- | -0.06707 | -0.03758 | -0.02475 | -0.01663 | -0.01318 |
| Alpha virt. eigenvalues -- | -0.00753 | -0.00463 | 0.00023  | 0.01075  | 0.01454  |
| Alpha virt. eigenvalues -- | 0.02486  | 0.03071  | 0.03578  | 0.04474  | 0.05291  |
| Alpha virt. eigenvalues -- | 0.05387  | 0.06358  | 0.06516  | 0.07045  | 0.07715  |
| Alpha virt. eigenvalues -- | 0.08180  | 0.08794  | 0.09009  | 0.09096  | 0.09599  |
| Alpha virt. eigenvalues -- | 0.09808  | 0.10018  | 0.10296  | 0.10806  | 0.11123  |
| Alpha virt. eigenvalues -- | 0.11437  | 0.12123  | 0.12439  | 0.12630  | 0.12731  |
| Alpha virt. eigenvalues -- | 0.13087  | 0.13367  | 0.13902  | 0.14388  | 0.14981  |
| Alpha virt. eigenvalues -- | 0.15260  | 0.15390  | 0.16281  | 0.16673  | 0.16813  |
| Alpha virt. eigenvalues -- | 0.17220  | 0.17700  | 0.18114  | 0.18225  | 0.19317  |
| Alpha virt. eigenvalues -- | 0.19723  | 0.20001  | 0.20640  | 0.20761  | 0.21470  |
| Alpha virt. eigenvalues -- | 0.22308  | 0.22547  | 0.22790  | 0.23300  | 0.23815  |
| Alpha virt. eigenvalues -- | 0.24365  | 0.24900  | 0.25089  | 0.25920  | 0.26818  |
| Alpha virt. eigenvalues -- | 0.27020  | 0.27865  | 0.28460  | 0.28717  | 0.29027  |
| Alpha virt. eigenvalues -- | 0.29614  | 0.29976  | 0.30822  | 0.31632  | 0.31804  |
| Alpha virt. eigenvalues -- | 0.32183  | 0.33489  | 0.33814  | 0.34394  | 0.34663  |
| Alpha virt. eigenvalues -- | 0.35116  | 0.36613  | 0.37495  | 0.38082  | 0.38968  |
| Alpha virt. eigenvalues -- | 0.40531  | 0.40946  | 0.42353  | 0.43062  | 0.45910  |
| Alpha virt. eigenvalues -- | 0.47169  | 0.47940  | 0.48461  | 0.49111  | 0.50070  |
| Alpha virt. eigenvalues -- | 0.50341  | 0.51651  | 0.52597  | 0.53613  | 0.55213  |
| Alpha virt. eigenvalues -- | 0.55913  | 0.56633  | 0.57527  | 0.59478  | 0.60278  |
| Alpha virt. eigenvalues -- | 0.61065  | 0.62573  | 0.62659  | 0.62767  | 0.64108  |
| Alpha virt. eigenvalues -- | 0.64309  | 0.65432  | 0.66400  | 0.66896  | 0.67105  |
| Alpha virt. eigenvalues -- | 0.68402  | 0.68644  | 0.69972  | 0.71253  | 0.71424  |
| Alpha virt. eigenvalues -- | 0.72032  | 0.72911  | 0.74001  | 0.75443  | 0.76203  |
| Alpha virt. eigenvalues -- | 0.76710  | 0.77629  | 0.78488  | 0.79376  | 0.80361  |
| Alpha virt. eigenvalues -- | 0.81664  | 0.83521  | 0.84359  | 0.85784  | 0.87051  |
| Alpha virt. eigenvalues -- | 0.87112  | 0.90660  | 0.91815  | 0.93158  | 0.94227  |
| Alpha virt. eigenvalues -- | 0.95950  | 0.98919  | 1.00177  | 1.00773  | 1.02537  |
| Alpha virt. eigenvalues -- | 1.04361  | 1.04715  | 1.05926  | 1.06849  | 1.09495  |
| Alpha virt. eigenvalues -- | 1.09911  | 1.11877  | 1.13205  | 1.14074  | 1.14885  |
| Alpha virt. eigenvalues -- | 1.16059  | 1.18045  | 1.20316  | 1.21393  | 1.22785  |
| Alpha virt. eigenvalues -- | 1.23696  | 1.25455  | 1.26752  | 1.29497  | 1.35024  |
| Alpha virt. eigenvalues -- | 1.37625  | 1.39013  | 1.41195  | 1.43479  | 1.45052  |
| Alpha virt. eigenvalues -- | 1.47709  | 1.48566  | 1.50340  | 1.52143  | 1.52797  |
| Alpha virt. eigenvalues -- | 1.53647  | 1.54326  | 1.56208  | 1.56647  | 1.57654  |
| Alpha virt. eigenvalues -- | 1.59111  | 1.60121  | 1.60892  | 1.62474  | 1.64770  |
| Alpha virt. eigenvalues -- | 1.65576  | 1.66758  | 1.68447  | 1.68974  | 1.69867  |
| Alpha virt. eigenvalues -- | 1.73398  | 1.73519  | 1.75274  | 1.75998  | 1.78785  |
| Alpha virt. eigenvalues -- | 1.79278  | 1.80028  | 1.81640  | 1.85348  | 1.88222  |
| Alpha virt. eigenvalues -- | 1.90443  | 1.91140  | 1.95108  | 1.95801  | 1.96914  |
| Alpha virt. eigenvalues -- | 2.01414  | 2.02138  | 2.04034  | 2.05525  | 2.07092  |
| Alpha virt. eigenvalues -- | 2.09726  | 2.10675  | 2.11189  | 2.11462  | 2.12588  |
| Alpha virt. eigenvalues -- | 2.13972  | 2.18977  | 2.19770  | 2.21225  | 2.23289  |

|                            |           |            |          |           |           |
|----------------------------|-----------|------------|----------|-----------|-----------|
| Alpha virt. eigenvalues -- | 2.25325   | 2.26371    | 2.31024  | 2.32143   | 2.36539   |
| Alpha virt. eigenvalues -- | 2.39364   | 2.42967    | 2.46476  | 2.47683   | 2.49543   |
| Alpha virt. eigenvalues -- | 2.50862   | 2.52370    | 2.54863  | 2.55854   | 2.56760   |
| Alpha virt. eigenvalues -- | 2.58543   | 2.59370    | 2.60791  | 2.62220   | 2.62779   |
| Alpha virt. eigenvalues -- | 2.63686   | 2.68929    | 2.69862  | 2.71479   | 2.72556   |
| Alpha virt. eigenvalues -- | 2.73734   | 2.75554    | 2.77129  | 2.78537   | 2.80650   |
| Alpha virt. eigenvalues -- | 2.81672   | 2.84221    | 2.86543  | 2.87667   | 2.89368   |
| Alpha virt. eigenvalues -- | 2.91500   | 2.92316    | 2.93986  | 2.97046   | 2.97612   |
| Alpha virt. eigenvalues -- | 2.98650   | 3.05134    | 3.11163  | 3.12676   | 3.15902   |
| Alpha virt. eigenvalues -- | 3.16189   | 3.21197    | 3.24997  | 3.35003   | 3.35847   |
| Alpha virt. eigenvalues -- | 3.38708   | 3.50120    | 3.54351  | 3.55989   | 3.58123   |
| Alpha virt. eigenvalues -- | 3.61951   | 3.65675    | 3.67559  | 3.73350   | 3.76010   |
| Alpha virt. eigenvalues -- | 3.78193   | 3.79189    | 3.81146  | 3.85777   | 3.88994   |
| Alpha virt. eigenvalues -- | 3.91532   | 4.04714    | 4.05309  | 4.08528   | 4.09772   |
| Alpha virt. eigenvalues -- | 4.26681   | 4.27360    | 4.29449  | 4.31117   | 4.35006   |
| Alpha virt. eigenvalues -- | 4.46339   | 4.69357    | 4.92402  | 4.95516   | 5.01509   |
| Alpha virt. eigenvalues -- | 5.04947   | 5.17840    | 5.22724  | 5.39031   | 5.58904   |
| Alpha virt. eigenvalues -- | 5.83991   | 6.77561    | 7.68166  | 7.73304   | 7.76403   |
| Alpha virt. eigenvalues -- | 23.71219  | 23.74714   | 23.79698 | 23.83987  | 23.87781  |
| Alpha virt. eigenvalues -- | 23.90762  | 24.16064   | 24.23373 | 35.45389  | 35.57727  |
| Alpha virt. eigenvalues -- | 48.05951  | 49.85920   | 49.98654 | 289.88907 | 289.94041 |
| Alpha virt. eigenvalues -- | 289.96651 | 1020.85160 |          |           |           |

Condensed to atoms (all electrons):

|    |    | 1         | 2         | 3         | 4         | 5         | 6         |
|----|----|-----------|-----------|-----------|-----------|-----------|-----------|
| 1  | C  | 7.692146  | -2.015096 | 0.190440  | -0.059118 | -0.229129 | 0.200819  |
| 2  | C  | -2.015096 | 7.826860  | 0.099039  | -0.088445 | 0.377599  | -0.528450 |
| 3  | N  | 0.190440  | 0.099039  | 6.596981  | 0.245684  | -0.176130 | -0.155178 |
| 4  | C  | -0.059118 | -0.088445 | 0.245684  | 5.853363  | 0.446992  | -0.382003 |
| 5  | N  | -0.229129 | 0.377599  | -0.176130 | 0.446992  | 6.751533  | -0.156690 |
| 6  | C  | 0.200819  | -0.528450 | -0.155178 | -0.382003 | -0.156690 | 8.585312  |
| 7  | H  | 0.596537  | -0.207204 | 0.049654  | -0.001225 | -0.092610 | -0.016323 |
| 8  | H  | -0.119174 | 0.518539  | -0.073244 | 0.003411  | 0.030724  | 0.001447  |
| 9  | H  | 0.012914  | -0.009161 | 0.011728  | 0.022745  | -0.040997 | 0.272245  |
| 10 | H  | -0.017016 | -0.015696 | -0.013438 | -0.004765 | -0.046794 | 0.568456  |
| 11 | Br | 0.058807  | -0.063579 | -0.027723 | -0.018658 | -0.057346 | 0.351315  |
| 12 | H  | -0.016396 | 0.031689  | -0.053889 | 0.443155  | -0.027461 | -0.009021 |
| 13 | C  | 0.347517  | -0.381524 | 0.172534  | -0.105704 | -0.060332 | -0.110155 |
| 14 | C  | -0.169666 | 0.211829  | -0.080308 | -0.147202 | 0.006331  | -0.074792 |
| 15 | H  | 0.036405  | -0.060199 | -0.083926 | 0.024393  | -0.006538 | -0.025588 |
| 16 | H  | -0.012700 | 0.018340  | 0.027311  | -0.008531 | 0.000711  | -0.000181 |
| 17 | H  | 0.022983  | -0.026895 | -0.034886 | 0.010464  | -0.000477 | -0.001785 |
| 18 | C  | -0.115694 | 0.183562  | 0.061796  | 0.064061  | 0.045522  | -1.853898 |
| 19 | H  | 0.017978  | -0.015420 | -0.000579 | -0.010473 | -0.012934 | -0.081389 |
| 20 | H  | -0.031204 | 0.025418  | 0.000398  | -0.009328 | 0.031211  | -0.056828 |

|    |    |           |           |           |           |           |           |
|----|----|-----------|-----------|-----------|-----------|-----------|-----------|
| 21 | C  | -0.169969 | 0.172469  | 0.005544  | 0.046589  | 0.038760  | 0.119214  |
| 22 | O  | 0.011421  | -0.002048 | 0.000074  | -0.000460 | 0.011566  | 0.020981  |
| 23 | O  | 0.002080  | 0.002257  | 0.000075  | 0.001603  | 0.000217  | 0.010265  |
| 24 | H  | -0.001115 | 0.001384  | 0.000067  | 0.001129  | 0.000994  | -0.008566 |
|    |    | 7         | 8         | 9         | 10        | 11        | 12        |
| 1  | C  | 0.596537  | -0.119174 | 0.012914  | -0.017016 | 0.058807  | -0.016396 |
| 2  | C  | -0.207204 | 0.518539  | -0.009161 | -0.015696 | -0.063579 | 0.031689  |
| 3  | N  | 0.049654  | -0.073244 | 0.011728  | -0.013438 | -0.027723 | -0.053889 |
| 4  | C  | -0.001225 | 0.003411  | 0.022745  | -0.004765 | -0.018658 | 0.443155  |
| 5  | N  | -0.092610 | 0.030724  | -0.040997 | -0.046794 | -0.057346 | -0.027461 |
| 6  | C  | -0.016323 | 0.001447  | 0.272245  | 0.568456  | 0.351315  | -0.009021 |
| 7  | H  | 0.510472  | -0.011471 | 0.003621  | -0.008069 | 0.001543  | -0.002091 |
| 8  | H  | -0.011471 | 0.492106  | 0.000198  | 0.000345  | -0.000651 | 0.000223  |
| 9  | H  | 0.003621  | 0.000198  | 0.524828  | -0.043330 | -0.014900 | -0.009641 |
| 10 | H  | -0.008069 | 0.000345  | -0.043330 | 0.527363  | 0.006182  | 0.004915  |
| 11 | Br | 0.001543  | -0.000651 | -0.014900 | 0.006182  | 35.601568 | -0.035034 |
| 12 | H  | -0.002091 | 0.000223  | -0.009641 | 0.004915  | -0.035034 | 0.432590  |
| 13 | C  | 0.020074  | -0.023874 | 0.004525  | -0.008292 | -0.060260 | -0.018879 |
| 14 | C  | -0.005594 | 0.009011  | 0.002324  | -0.002224 | -0.007207 | 0.008760  |
| 15 | H  | 0.002422  | -0.004388 | 0.005220  | -0.001703 | 0.088645  | -0.019682 |
| 16 | H  | -0.000193 | 0.002360  | -0.000182 | 0.000014  | 0.000575  | -0.000385 |
| 17 | H  | 0.000378  | -0.006636 | 0.000141  | -0.000065 | -0.001021 | 0.001377  |
| 18 | C  | 0.011230  | -0.000114 | 0.131851  | -0.145978 | -0.294428 | -0.016311 |
| 19 | H  | -0.005120 | 0.000302  | 0.008788  | -0.007811 | -0.001501 | 0.001070  |
| 20 | H  | -0.004046 | 0.000482  | -0.028850 | 0.012767  | 0.080271  | 0.010884  |
| 21 | C  | -0.015946 | 0.000314  | -0.059674 | -0.016653 | 0.008361  | 0.008700  |
| 22 | O  | 0.000945  | -0.000042 | -0.009075 | -0.005322 | 0.000667  | 0.001280  |
| 23 | O  | -0.000351 | 0.000018  | -0.003496 | -0.000877 | 0.002740  | 0.000324  |
| 24 | H  | -0.000164 | -0.000003 | -0.000881 | -0.001369 | -0.000559 | 0.000028  |
|    |    | 13        | 14        | 15        | 16        | 17        | 18        |
| 1  | C  | 0.347517  | -0.169666 | 0.036405  | -0.012700 | 0.022983  | -0.115694 |
| 2  | C  | -0.381524 | 0.211829  | -0.060199 | 0.018340  | -0.026895 | 0.183562  |
| 3  | N  | 0.172534  | -0.080308 | -0.083926 | 0.027311  | -0.034886 | 0.061796  |
| 4  | C  | -0.105704 | -0.147202 | 0.024393  | -0.008531 | 0.010464  | 0.064061  |
| 5  | N  | -0.060332 | 0.006331  | -0.006538 | 0.000711  | -0.000477 | 0.045522  |
| 6  | C  | -0.110155 | -0.074792 | -0.025588 | -0.000181 | -0.001785 | -1.853898 |
| 7  | H  | 0.020074  | -0.005594 | 0.002422  | -0.000193 | 0.000378  | 0.011230  |
| 8  | H  | -0.023874 | 0.009011  | -0.004388 | 0.002360  | -0.006636 | -0.000114 |
| 9  | H  | 0.004525  | 0.002324  | 0.005220  | -0.000182 | 0.000141  | 0.131851  |
| 10 | H  | -0.008292 | -0.002224 | -0.001703 | 0.000014  | -0.000065 | -0.145978 |
| 11 | Br | -0.060260 | -0.007207 | 0.088645  | 0.000575  | -0.001021 | -0.294428 |
| 12 | H  | -0.018879 | 0.008760  | -0.019682 | -0.000385 | 0.001377  | -0.016311 |
| 13 | C  | 5.773766  | 0.021964  | 0.371920  | -0.070577 | 0.033705  | 0.030935  |
| 14 | C  | 0.021964  | 5.800603  | -0.015562 | 0.428942  | 0.345586  | 0.029294  |

|    |    |           |           |           |           |           |           |
|----|----|-----------|-----------|-----------|-----------|-----------|-----------|
| 15 | H  | 0.371920  | -0.015562 | 0.535276  | -0.012846 | 0.004942  | 0.023082  |
| 16 | H  | -0.070577 | 0.428942  | -0.012846 | 0.494477  | -0.029124 | -0.000152 |
| 17 | H  | 0.033705  | 0.345586  | 0.004942  | -0.029124 | 0.540702  | 0.001048  |
| 18 | C  | 0.030935  | 0.029294  | 0.023082  | -0.000152 | 0.001048  | 8.616299  |
| 19 | H  | -0.002627 | 0.000994  | -0.000616 | -0.000048 | 0.000088  | 0.488764  |
| 20 | H  | 0.000076  | 0.001724  | -0.014122 | 0.000484  | -0.000142 | 0.174172  |
| 21 | C  | 0.001487  | 0.003599  | -0.003044 | 0.000205  | -0.000248 | -1.258033 |
| 22 | O  | -0.000335 | -0.000020 | -0.000017 | 0.000000  | -0.000001 | 0.014804  |
| 23 | O  | -0.000054 | 0.000008  | -0.000043 | 0.000001  | -0.000002 | -0.155268 |
| 24 | H  | 0.000042  | 0.000014  | -0.000014 | 0.000001  | -0.000001 | -0.091752 |
|    |    | 19        | 20        | 21        | 22        | 23        | 24        |
| 1  | C  | 0.017978  | -0.031204 | -0.169969 | 0.011421  | 0.002080  | -0.001115 |
| 2  | C  | -0.015420 | 0.025418  | 0.172469  | -0.002048 | 0.002257  | 0.001384  |
| 3  | N  | -0.000579 | 0.000398  | 0.005544  | 0.000074  | 0.000075  | 0.000067  |
| 4  | C  | -0.010473 | -0.009328 | 0.046589  | -0.000460 | 0.001603  | 0.001129  |
| 5  | N  | -0.012934 | 0.031211  | 0.038760  | 0.011566  | 0.000217  | 0.000994  |
| 6  | C  | -0.081389 | -0.056828 | 0.119214  | 0.020981  | 0.010265  | -0.008566 |
| 7  | H  | -0.005120 | -0.004046 | -0.015946 | 0.000945  | -0.000351 | -0.000164 |
| 8  | H  | 0.000302  | 0.000482  | 0.000314  | -0.000042 | 0.000018  | -0.000003 |
| 9  | H  | 0.008788  | -0.028850 | -0.059674 | -0.009075 | -0.003496 | -0.000881 |
| 10 | H  | -0.007811 | 0.012767  | -0.016653 | -0.005322 | -0.000877 | -0.001369 |
| 11 | Br | -0.001501 | 0.080271  | 0.008361  | 0.000667  | 0.002740  | -0.000559 |
| 12 | H  | 0.001070  | 0.010884  | 0.008700  | 0.001280  | 0.000324  | 0.000028  |
| 13 | C  | -0.002627 | 0.000076  | 0.001487  | -0.000335 | -0.000054 | 0.000042  |
| 14 | C  | 0.000994  | 0.001724  | 0.003599  | -0.000020 | 0.000008  | 0.000014  |
| 15 | H  | -0.000616 | -0.014122 | -0.003044 | -0.000017 | -0.000043 | -0.000014 |
| 16 | H  | -0.000048 | 0.000484  | 0.000205  | 0.000000  | 0.000001  | 0.000001  |
| 17 | H  | 0.000088  | -0.000142 | -0.000248 | -0.000001 | -0.000002 | -0.000001 |
| 18 | C  | 0.488764  | 0.174172  | -1.258033 | 0.014804  | -0.155268 | -0.091752 |
| 19 | H  | 0.564308  | -0.027102 | -0.094486 | 0.001057  | -0.008838 | 0.001871  |
| 20 | H  | -0.027102 | 0.583524  | 0.049023  | -0.015810 | -0.023626 | 0.005402  |
| 21 | C  | -0.094486 | 0.049023  | 6.597633  | 0.309282  | 0.219890  | 0.101521  |
| 22 | O  | 0.001057  | -0.015810 | 0.309282  | 8.058538  | -0.119930 | -0.009301 |
| 23 | O  | -0.008838 | -0.023626 | 0.219890  | -0.119930 | 7.981737  | 0.234848  |
| 24 | H  | 0.001871  | 0.005402  | 0.101521  | -0.009301 | 0.234848  | 0.472588  |

Mulliken charges:

| 1 |             |
|---|-------------|
| 1 | C -0.233771 |
| 2 | C -0.055270 |
| 3 | N 0.237973  |
| 4 | C -0.327677 |
| 5 | N 0.165277  |
| 6 | C -0.669209 |
| 7 | H 0.173530  |

|    |    |           |
|----|----|-----------|
| 8  | H  | 0.180115  |
| 9  | H  | 0.219062  |
| 10 | H  | 0.219360  |
| 11 | Br | -0.617807 |
| 12 | H  | 0.263795  |
| 13 | C  | 0.064068  |
| 14 | C  | -0.368406 |
| 15 | H  | 0.155982  |
| 16 | H  | 0.161498  |
| 17 | H  | 0.139869  |
| 18 | C  | 0.055206  |
| 19 | H  | 0.183721  |
| 20 | H  | 0.235221  |
| 21 | C  | -0.064537 |
| 22 | O  | -0.268255 |
| 23 | O  | -0.143579 |
| 24 | H  | 0.293837  |

Sum of Mulliken charges = 0.00000

Mulliken charges with hydrogens summed into heavy atoms:

|    |    |           |
|----|----|-----------|
| 1  |    |           |
| 1  | C  | -0.060240 |
| 2  | C  | 0.124844  |
| 3  | N  | 0.237973  |
| 4  | C  | -0.063882 |
| 5  | N  | 0.165277  |
| 6  | C  | -0.230787 |
| 11 | Br | -0.617807 |
| 13 | C  | 0.220050  |
| 14 | C  | -0.067040 |
| 18 | C  | 0.474148  |
| 21 | C  | -0.064537 |
| 22 | O  | -0.268255 |
| 23 | O  | 0.150257  |

Electronic spatial extent (au):  $\langle R^{*2} \rangle = 4065.5161$

Charge= 0.0000 electrons

Dipole moment (field-independent basis, Debye):

|    |         |    |         |    |         |
|----|---------|----|---------|----|---------|
| X= | -2.5110 | Y= | -9.0557 | Z= | -0.4936 |
|----|---------|----|---------|----|---------|

Tot= 9.4104

Quadrupole moment (field-independent basis, Debye-Ang):

|     |          |     |          |     |          |
|-----|----------|-----|----------|-----|----------|
| XX= | -70.7828 | YY= | -99.5349 | ZZ= | -92.8805 |
| XY= | 7.6436   | XZ= | -5.3126  | YZ= | 7.2187   |

Traceless Quadrupole moment (field-independent basis, Debye-Ang):

|     |         |     |          |     |         |
|-----|---------|-----|----------|-----|---------|
| XX= | 16.9500 | YY= | -11.8022 | ZZ= | -5.1478 |
| XY= | 7.6436  | XZ= | -5.3126  | YZ= | 7.2187  |

Octapole moment (field-independent basis, Debye-Ang\*\*2):

|      |          |      |          |      |         |
|------|----------|------|----------|------|---------|
| XXX= | -14.6564 | YYY= | -1.1499  | ZZZ= | -1.0982 |
| XYX= | 7.8507   |      |          |      |         |
| XXY= | 25.7759  | XXZ= | -33.0671 | XZZ= | -9.7458 |
| YZZ= | 9.8654   |      |          |      |         |
| YYZ= | -12.7268 | XYZ= | -3.1392  |      |         |

Hexadecapole moment (field-independent basis, Debye-Ang\*\*3):

|       |            |       |            |       |           |
|-------|------------|-------|------------|-------|-----------|
| XXXX= | -2872.9767 | YYYY= | -1245.4216 | ZZZZ= | -311.0309 |
| XXXZ= | -126.7524  | YYXZ= | -13.8260   | YYYZ= | 24.1618   |
| ZZZX= | 0.4426     |       |            |       |           |
| ZZZY= | 6.8513     | XXYY= | -781.0231  | XXZZ= | -748.4499 |
| YYZZ= | -242.4813  |       |            |       |           |
| XXYZ= | 61.1997    | YYXZ= | 10.4775    | ZZXY= | 1.2080    |

N-N= 1.072601473593D+03 E-N=-9.633210176906D+03 KE= 3.140362840949D+03  
 1\1\GINC-CN003\FOpt\RB3LYP\6-311++G(d,p)\C8H11Br1N2O2\SYWANG\22-Jul-20  
 24\0\#\# opt b3lyp/6-311++g(d,p)\cooh\0,1\C,-0.3307965149,-2.22918751  
 7,-0.3858182472\C,-1.5804476468,-1.7803288331,-0.6505456\N,-1.80302963  
 37,-0.6803816202,0.1723221565\C,-0.6790974587,-0.4437172452,0.88020534  
 05\N,0.2060726151,-1.4099776208,0.5999064931\C,1.589627061,-1.44259126  
 98,1.0916928601\H,0.2233887755,-3.0473985274,-0.8113850176\H,-2.314504  
 2817,-2.1164470233,-1.3600631179\H,1.6187527064,-0.8975409873,2.033860  
 8217\H,1.8450613056,-2.4812474962,1.3075597346\Br,0.2675548825,2.05176  
 13989,-0.1978281271\H,-0.573618272,0.2963599471,1.6492530543\C,-2.9213  
 547578,0.1970793561,0.1630770763\C,-4.1609292611,-0.202440088,-0.09168  
 11051\H,-2.6321425984,1.2269111782,0.3442648651\H,-4.9581775221,0.5271  
 897216,-0.1309244141\H,-4.4211135019,-1.2394409113,-0.2683575715\C,2.5  
 572014749,-0.8127324488,0.0864238411\H,2.5762676044,-1.3592062152,-0.8  
 603169045\H,2.2250174505,0.20987228,-0.148681209\C,3.9515405256,-0.756  
 4701607,0.6510091616\O,4.2519135813,-0.9876493976,1.7981375257\O,4.855  
 7861074,-0.4016954602,-0.2867718662\H,5.718999059,-0.34149547,0.150133  
 4596\\Version=EM64L-G09RevD.01\State=1-A\HF=-3145.732244\RMSD=6.747e-0  
 9\RMSF=8.937e-06\Dipole=-1.3535622,-3.4440401,0.1169047\Quadrupole=14.  
 0563106,-8.1579631,-5.8983474,2.404104,-1.9913804,6.535815\PG=C01 [X(C  
 8H11Br1N2O2)]\@\@

BLACK HOLES SUCK.

Job cpu time: 0 days 4 hours 13 minutes 24.6 seconds.

File lengths (MBytes): RWF= 68 Int= 0 D2E= 0 Chk= 12 Scr= 1

Normal termination of Gaussian 09 at Mon Jul 22 20:04:44 2024.
